# Supplementary material for: Identification of Combinatorial Patterns of Post-Translational Modifications on Individual Histones in the Mouse Brain
Source: PubMed Central journal article supplement (PMC3365036; doi:10.1371/journal.pone.0036980), 2012-05-31
Supplement: pone.0036980.s005.pdf [file pone.0036980.s005.pdf]

# sp | P15864 | H12\_MOUSE

AS<sup>Acetyl</sup> 42.01 GPPVSELITK

- ▶ fragmentation table for charge state 1+
- ▶ specType=cid
- ▶ score=73.84
- ▶ F090600.dat
- ▶ query=q18312\_p1
- ▶ precursor=620.843560
- ▶ chargePrecursor=2
- ▶ itol=0.5

| AA    | a        | a'       | a+b      | b              | b'       | b+c            | c               | c'       | AA    |
|-------|----------|----------|----------|----------------|----------|----------------|-----------------|----------|-------|
| A[1]  | 44.020   | 0.000    | 135.244  | 72.244         | 0.000    | 1.000          | 1241.611        | 1322.592 | A[10] |
| S[2]  | 112.000  | 0.000    | 135.244  | 205.244        | 0.000    | 183.028        | 1139.611        | 1152.611 | S[11] |
| G[3]  | 130.114  | 0.000    | 214.103  | 258.103        | 0.000    | 240.008        | <b>1040.398</b> | 1103.372 | G[10] |
| T[4]  | 137.000  | 0.000    | 168.128  | 169.128        | 0.000    | 137.011        | <b>851.377</b>  | 868.128  | T[9]  |
| F[5]  | 124.210  | 0.000    | 442.124  | 442.124        | 0.000    | 434.205        | <b>886.524</b>  | 888.488  | F[8]  |
| V[6]  | 121.203  | 0.000    | 159.217  | <b>151.282</b> | 0.000    | 131.212        | <b>799.472</b>  | 772.441  | V[7]  |
| S[7]  | 101.251  | 0.000    | 162.260  | 168.264        | 0.000    | 162.264        | <b>636.462</b>  | 642.264  | S[6]  |
| L[8]  | 116.262  | 0.000    | 122.262  | 127.261        | 0.000    | 116.261        | <b>601.371</b>  | 595.261  | L[5]  |
| L[9]  | 102.446  | 0.000    | 114.441  | <b>100.441</b> | 0.000    | <b>102.431</b> | <b>474.329</b>  | 487.303  | L[4]  |
| D[10] | 105.530  | 0.000    | 147.525  | <b>101.525</b> | 0.000    | <b>102.515</b> | <b>381.245</b>  | 384.210  | D[3]  |
| I[11] | 106.510  | 0.000    | 104.511  | <b>104.511</b> | 0.000    | <b>102.511</b> | <b>238.169</b>  | 233.129  | I[2]  |
| R[12] | 1104.012 | 1137.020 | 1175.042 | 1122.042       | 1109.041 | 1104.041       | 117.113         | 130.041  | R[1]  |



# sp | P15864 | H12\_MOUSE

KASGPPVS Acetyl ELITK  
42.01

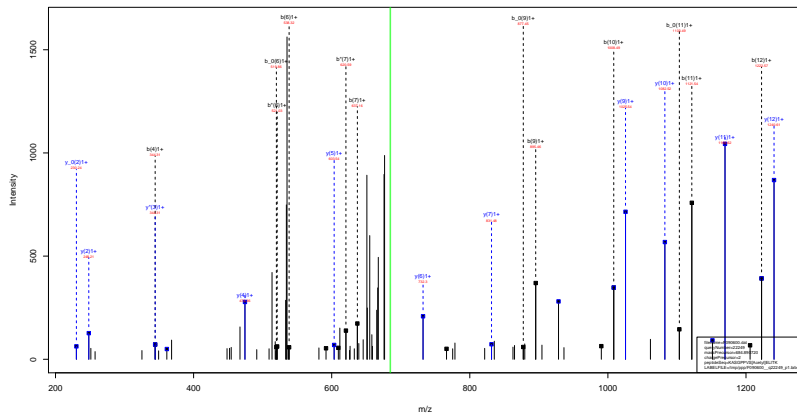

# sp | P15864 | H12\_MOUSE

KASGPPVS<sup>Acetyl</sup> ELITK  
42.01

- ▶ fragmentation table for charge state 1+
- ▶ specType=cid
- ▶ score=81.97
- ▶ F090600.dat
- ▶ query=q22249\_p1
- ▶ precursor=684.890720
- ▶ chargePrecursor=2
- ▶ itol=0.5

| AA | x              | x*       | a,β            | b               | b*              | b,β             | y               | y*              | y,β             | AA |
|----|----------------|----------|----------------|-----------------|-----------------|-----------------|-----------------|-----------------|-----------------|----|
| K  | 101.100        | 144.050  | 0.000          | 130.000         | 112.000         | 0.000           | 1100.770        | 1181.920        | 1300.060        | K  |
| A  | 172.100        | 155.110  | 0.000          | 200.130         | 183.110         | 0.000           | <b>1240.670</b> | 1223.050        | <b>1222.660</b> | A  |
| S  | 209.110        | 240.100  | 241.000        | 211.110         | 270.100         | 200.100         | <b>1160.640</b> | 1120.010        | <b>1151.630</b> | S  |
| G  | 116.100        | 200.170  | 200.180        | <b>344.190</b>  | 327.100         | 320.110         | <b>1082.600</b> | 1065.560        | 1064.500        | G  |
| P  | 113.100        | 100.200  | 100.200        | 114.200         | 100.200         | 100.200         | <b>1020.500</b> | <b>1008.560</b> | 1000.570        | P  |
| T  | 110.110        | 101.210  | 100.210        | <b>530.210</b>  | <b>511.210</b>  | <b>520.200</b>  | <b>920.530</b>  | 911.500         | 910.520         | T  |
| V  | <b>909.370</b> | 922.340  | <b>591.360</b> | <b>637.360</b>  | <b>620.340</b>  | 700.350         | <b>831.480</b>  | 824.450         | 815.450         | V  |
| S  | 130.410        | 121.100  | 120.400        | <b>704.400</b>  | 684.100         | 680.100         | <b>732.410</b>  | 710.100         | 714.400         | S  |
| E  | 107.400        | 100.410  | 100.400        | <b>805.450</b>  | 788.420         | <b>877.440</b>  | <b>663.370</b>  | 660.340         | 660.360         | E  |
| L  | 100.410        | 99.920   | 99.910         | <b>1000.530</b> | 984.900         | <b>960.520</b>  | <b>474.290</b>  | 469.260         | 469.300         | L  |
| K  | 100.400        | 100.100  | 100.100        | <b>1121.620</b> | 1104.100        | <b>1103.610</b> | <b>361.240</b>  | <b>344.210</b>  | 343.200         | K  |
| I  | 1104.010       | 1117.040 | 1116.000       | <b>1222.660</b> | <b>1205.640</b> | 1204.000        | <b>248.160</b>  | 244.130         | <b>230.150</b>  | I  |
| A  | 1120.100       | 1100.740 | 1104.700       | 1100.700        | 1100.700        | 1100.700        | 447.810         | 430.000         | 430.000         | A  |

# sp | P70696 | H2B1A\_MOUSE

HAVS<sup>Acetyl</sup> EGTK  
42.01

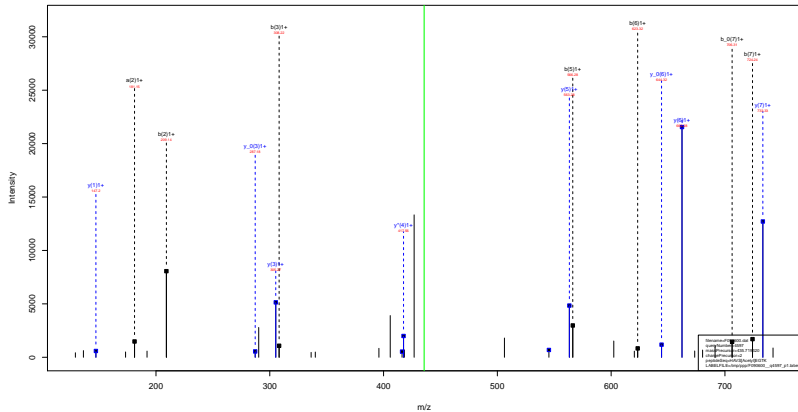

# sp | P70696 | H2B1A\_MOUSE

HAVS<sup>Acetyl</sup> EGTK  
42.01

- ▶ fragmentation table for charge state 1+
- ▶ specType=cid
- ▶ score=40.15
- ▶ F090600.dat
- ▶ query=q4597.p1
- ▶ precursor=435.719320
- ▶ chargePrecursor=2
- ▶ itol=0.5

| AA         | a              | a*      | a $\beta$ | b              | b*      | b $\beta$      | y              | y*             | y $\beta$      | AA          |
|------------|----------------|---------|-----------|----------------|---------|----------------|----------------|----------------|----------------|-------------|
| <b>H</b> 1 | 110.074        | 0.000   | 0.000     | 136.099        | 0.000   | 0.000          | 417.438        | 353.466        | 354.941        | <b>H</b> 9  |
| <b>A</b> 2 | <b>181.108</b> | 0.000   | 0.000     | <b>209.103</b> | 0.000   | 0.000          | <b>733.373</b> | 715.348        | 715.362        | <b>A</b> 7  |
| <b>V</b> 3 | 288.177        | 0.000   | 0.000     | <b>308.172</b> | 0.000   | 0.000          | <b>662.336</b> | 645.309        | <b>644.325</b> | <b>V</b> 6  |
| <b>S</b> 4 | 409.219        | 0.000   | 391.209   | 437.214        | 0.000   | 430.204        | <b>563.267</b> | 546.241        | <b>545.257</b> | <b>S</b> 5  |
| <b>E</b> 5 | 538.262        | 0.000   | 520.251   | <b>566.257</b> | 0.000   | 548.246        | 439.225        | <b>417.198</b> | <b>416.214</b> | <b>E</b> 4  |
| <b>G</b> 6 | 659.303        | 0.000   | 577.277   | <b>623.278</b> | 0.000   | 605.269        | <b>305.182</b> | 288.155        | <b>287.171</b> | <b>G</b> 3  |
| <b>T</b> 7 | 896.331        | 0.000   | 845.321   | <b>724.326</b> | 0.000   | <b>706.315</b> | 348.160        | 231.134        | 230.150        | <b>T</b> 2  |
| <b>K</b> 8 | 924.426        | 897.400 | 808.418   | 852.421        | 825.394 | 834.410        | <b>147.113</b> | 130.088        | 0.000          | <b>K</b> 10 |



# sp | P27661 | H2AX\_MOUSE

AS<sup>Acetyl</sup> QASQEY  
42.01

- ▶ fragmentation table for charge state 1+
- ▶ specType=cid
- ▶ score=44.68
- ▶ F090600.dat
- ▶ query=q6420\_p1
- ▶ precursor=463.198450
- ▶ chargePrecursor=2
- ▶ itol=0.5

| AA | a              | a*             | a:0     | b              | b*             | b:0            | y              | y*             | y:0            | AA |
|----|----------------|----------------|---------|----------------|----------------|----------------|----------------|----------------|----------------|----|
| A  | 44.046         | 0.000          | 0.000   | 72.044         | 0.000          | 0.000          | 925.101        | 906.953        | 907.319        | A  |
| S  | 77.006         | 0.000          | 129.001 | 201.001        | 0.000          | 183.016        | 904.193        | 937.209        | 936.362        | S  |
| Q  | 301.151        | 284.124        | 283.140 | <b>329.146</b> | 312.119        | <b>311.135</b> | 725.110        | 708.284        | 707.209        | Q  |
| A  | <b>372.188</b> | 355.161        | 354.177 | <b>400.183</b> | 383.156        | <b>382.172</b> | <b>597.251</b> | 580.225        | 579.241        | A  |
| S  | 450.220        | <b>442.193</b> | 441.209 | <b>487.215</b> | 470.188        | <b>469.204</b> | <b>526.214</b> | <b>509.188</b> | <b>508.204</b> | S  |
| Q  | 589.218        | 572.191        | 570.206 | <b>615.211</b> | 598.184        | <b>597.200</b> | <b>439.182</b> | <b>422.156</b> | 421.172        | Q  |
| E  | 716.221        | 699.204        | 698.219 | <b>744.216</b> | <b>727.209</b> | <b>726.205</b> | <b>311.124</b> | 0.000          | <b>293.113</b> | E  |
| V  | 879.284        | 862.258        | 861.274 | <b>907.279</b> | 890.253        | <b>889.269</b> | <b>182.081</b> | 0.000          | 0.000          | V  |

# sp | P10922 | H10\_MOUSE

[Acetyl]MTENSTAPAAKPK

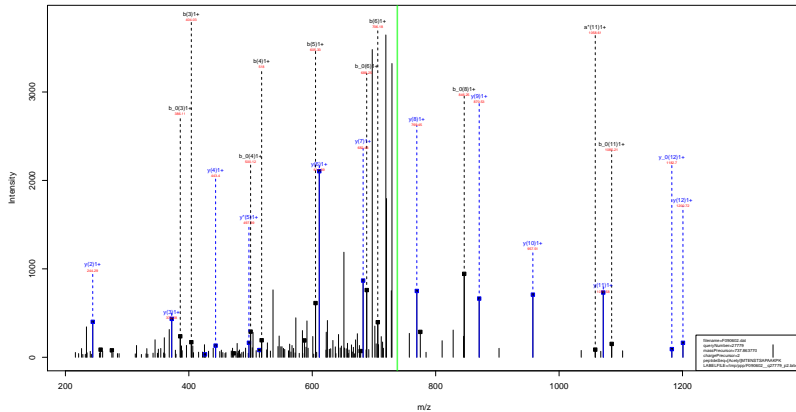

# sp | P10922 | H10\_MOUSE

[Acetyl]MTENSTAPAAKPK

- ▶ fragmentation table for charge state 1+
- ▶ specType=cid
- ▶ score=59.60
- ▶ F090602.dat
- ▶ query=q27779\_p2
- ▶ precursor=737.863770
- ▶ chargePrecursor=2
- ▶ itol=0.5

| AA | a              | a*              | aΔ             | b              | b*       | bΔ              | y               | y*             | yΔ              | AA |
|----|----------------|-----------------|----------------|----------------|----------|-----------------|-----------------|----------------|-----------------|----|
| M  | 145.05.3       | 0.000           | 0.000          | 174.020        | 0.000    | 0.000           | 1474.721        | 1457.694       | 1456.710        | M  |
| T  | 187.10.3       | 0.000           | 236.100        | <b>275.106</b> | 0.000    | <b>257.095</b>  | 1305.620        | 1296.643       | 1300.609        | T  |
| E  | 176.15.4       | 0.000           | 355.141        | <b>404.140</b> | 0.000    | <b>386.135</b>  | <b>1200.672</b> | 1183.695       | <b>1182.611</b> | E  |
| N  | 180.10.3       | 47.8.110        | <b>472.186</b> | <b>518.192</b> | 101.100  | <b>500.181</b>  | <b>1071.570</b> | 1054.553       | 1053.568        | N  |
| S  | 119.0.0        | 600.000         | 160.723        | <b>605.224</b> | 100.100  | <b>587.213</b>  | <b>951.536</b>  | 946.530        | 949.500         | S  |
| I  | <b>578.276</b> | 151.230         | 600.200        | <b>706.271</b> | 109.200  | <b>688.261</b>  | <b>870.504</b>  | 853.470        | 852.494         | I  |
| S  | 163.10.0       | 100.000         | 197.200        | <b>315.313</b> | 175.200  | <b>297.293</b>  | <b>760.457</b>  | 752.430        | 753.446         | S  |
| A  | 176.10.1       | 124.112         | 110.120        | 104.044        | 167.124  | <b>640.320</b>  | <b>682.422</b>  | 100.300        | 100.000         | A  |
| P  | 133.10.0       | 115.112         | 975.200        | 101.100        | 164.100  | 953.200         | <b>611.300</b>  | 194.301        | 0.000           | P  |
| A  | 104.4.0        | 687.400         | 886.4.0        | 1032.400       | 1035.404 | 1034.4.0        | <b>514.315</b>  | <b>497.300</b> | 0.000           | A  |
| A  | 111.4.0        | <b>1036.446</b> | 1027.400       | 1103.400       | 1029.441 | <b>1085.457</b> | <b>643.290</b>  | <b>426.271</b> | 0.000           | A  |
| K  | 120.10.0       | 1100.100        | 1100.000       | 1100.000       | 1114.100 | 1113.100        | <b>372.201</b>  | 100.104        | 0.000           | K  |
| P  | 130.0.0        | 1203.100        | 1203.0.0       | 1203.0.0       | 1311.100 | 1310.0.0        | <b>244.100</b>  | 227.100        | 0.000           | P  |
| K  | 143.11.5       | 1411.000        | 1410.100       | 1406.710       | 1408.000 | 1408.000        | 147.111         | 130.000        | 0.000           | K  |



# sp | P43277 | H13\_MOUSE

[Acetyl]S<sub>42.01</sub> ETAPAAPAAPAPVEKTPVK

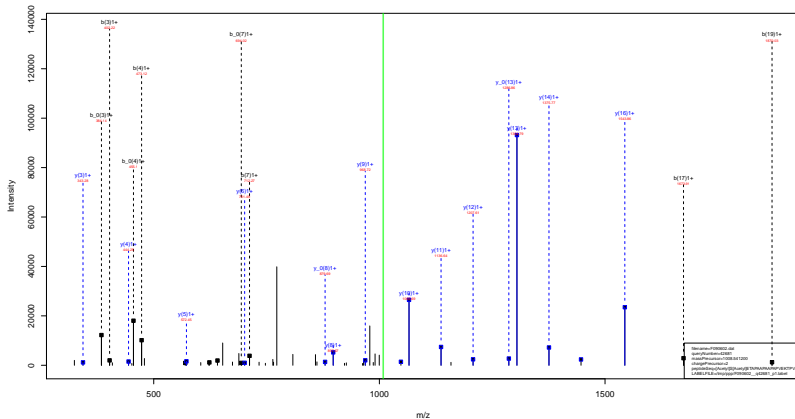

# sp | P43277 | H13\_MOUSE

[Acetyl]S<sub>42.01</sub> ETAPAAPAAPAPVEKTPVK

- ▶ fragmentation table for charge state 1+
- ▶ specType=cid
- ▶ score=105.69
- ▶ F090602.dat
- ▶ query=q42681\_p1
- ▶ precursor=1008.541200
- ▶ chargePrecursor=2
- ▶ itol=0.5

| AA              | a        | a*       | a <sub>0</sub> | b               | b*       | b <sub>0</sub> | r               | s*       | v <sub>0</sub>  | AA              |
|-----------------|----------|----------|----------------|-----------------|----------|----------------|-----------------|----------|-----------------|-----------------|
| S <sub>1</sub>  | 144.069  | 0.000    | 149.069        | 112.069         | 0.000    | 144.069        | 20.00           | 0.000    | 144.069         | S <sub>1</sub>  |
| E <sub>2</sub>  | 274.108  | 0.000    | 255.068        | 368.108         | 0.000    | 353.052        | 1846.012        | 2827.985 | 1827.001        | E <sub>2</sub>  |
| T <sub>3</sub>  | 374.158  | 0.000    | 358.141        | <b>402.151</b>  | 0.000    | <b>386.140</b> | 1710.990        | 2088.941 | 1987.908        | T <sub>3</sub>  |
| A <sub>4</sub>  | 445.191  | 0.000    | 427.182        | <b>472.188</b>  | 0.000    | <b>455.177</b> | 1314.972        | 1597.895 | 1546.811        | A <sub>4</sub>  |
| P <sub>5</sub>  | 592.266  | 0.000    | 574.259        | <b>570.241</b>  | 0.000    | 569.242        | <b>1541.824</b> | 1749.858 | 1726.814        | P <sub>5</sub>  |
| A <sub>6</sub>  | 613.289  | 0.000    | 588.272        | <b>641.278</b>  | 0.000    | <b>623.267</b> | <b>1446.831</b> | 1629.805 | 1626.811        | A <sub>6</sub>  |
| A <sub>7</sub>  | 684.320  | 0.000    | 666.303        | <b>712.315</b>  | 0.000    | <b>694.304</b> | <b>1375.794</b> | 1558.768 | 1507.759        | A <sub>7</sub>  |
| T <sub>8</sub>  | 783.370  | 0.000    | 765.360        | <b>808.368</b>  | 0.000    | 807.367        | <b>1304.757</b> | 1527.745 | <b>1306.747</b> | T <sub>8</sub>  |
| A <sub>9</sub>  | 852.410  | 0.000    | 834.398        | <b>888.402</b>  | 0.000    | 882.394        | <b>1207.705</b> | 1482.692 | 1480.684        | A <sub>9</sub>  |
| A <sub>10</sub> | 921.441  | 0.000    | 902.429        | <b>953.442</b>  | 0.000    | 943.430        | <b>1136.667</b> | 1419.641 | 1418.637        | A <sub>10</sub> |
| P <sub>11</sub> | 1020.502 | 0.000    | 1002.490       | <b>1048.495</b> | 0.000    | 1042.482       | <b>1045.636</b> | 1342.584 | <b>1047.628</b> | P <sub>11</sub> |
| A <sub>12</sub> | 1091.532 | 0.000    | 1071.520       | <b>1123.532</b> | 0.000    | 1113.522       | <b>965.578</b>  | 1301.521 | 1299.507        | A <sub>12</sub> |
| P <sub>13</sub> | 1188.566 | 0.000    | 1168.554       | <b>1208.564</b> | 0.000    | 1198.554       | <b>897.540</b>  | 1260.514 | <b>879.530</b>  | P <sub>13</sub> |
| V <sub>14</sub> | 1287.605 | 0.000    | 1268.593       | <b>1319.603</b> | 0.000    | 1307.602       | 800.480         | 1213.461 | 1212.417        | V <sub>14</sub> |
| E <sub>15</sub> | 1376.645 | 0.000    | 1358.630       | <b>1444.640</b> | 0.000    | 1426.629       | <b>701.419</b>  | 1164.393 | 1163.400        | E <sub>15</sub> |
| R <sub>16</sub> | 1444.706 | 1437.700 | 1426.690       | <b>1527.700</b> | 1556.704 | 1504.700       | <b>572.377</b>  | 1095.300 | 1044.368        | R <sub>16</sub> |
| T <sub>17</sub> | 1543.745 | 1528.737 | 1527.733       | <b>1673.838</b> | 1688.832 | 1681.828       | <b>444.382</b>  | 1027.250 | 1026.211        | T <sub>17</sub> |
| P <sub>18</sub> | 1642.784 | 1627.776 | 1626.772       | <b>1778.931</b> | 1783.924 | 1782.920       | <b>343.234</b>  | 1006.200 | 1005.160        | P <sub>18</sub> |
| V <sub>19</sub> | 1741.824 | 1724.816 | 1723.812       | <b>1866.955</b> | 1882.950 | 1881.946       | 249.153         | 1005.150 | 1004.110        | V <sub>19</sub> |
| K <sub>20</sub> | 1870.869 | 1853.861 | 1852.856       | <b>1988.954</b> | 1981.950 | 1980.944       | 147.111         | 1.53088  | 0.000           | K <sub>20</sub> |

# sp | P27661 | H2AX\_MOUSE

KAS Phospho QASQEQ  
79.97

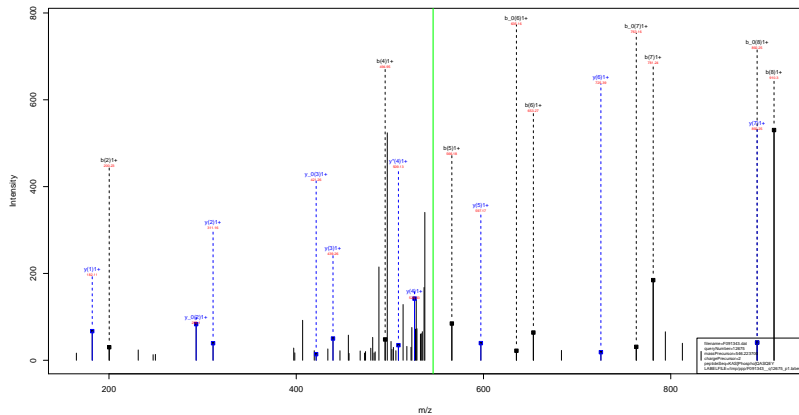

# sp | P27661 | H2AX\_MOUSE

KAS<sup>Phospho</sup> 79.97 QASQEY

- ▶ fragmentation table for charge state 1+
- ▶ specType=cid
- ▶ score=59.60
- ▶ F091343.dat
- ▶ query=q12675\_p1
- ▶ precursor=546.223700
- ▶ chargePrecursor=2
- ▶ itol=0.5

| AA | a        | a*       | a+b      | b              | b*       | b+a            | y              | y*             | a+b            | AA |
|----|----------|----------|----------|----------------|----------|----------------|----------------|----------------|----------------|----|
| R  | 101.07   | 14.60    | 115.67   | 126.10         | 112.07   | 0.00           | 100.44         | 1074.43        | 1074.43        | R  |
| A  | 172.144  | 155.118  | 0.00     | <b>200.130</b> | 181.111  | 0.00           | 853.588        | 846.510        | 945.559        | A  |
| S  | 139.143  | 102.118  | 121.132  | <b>100.130</b> | 100.111  | 149.127        | <b>492.308</b> | 671.261        | 674.260        | S  |
| Q  | 187.010  | 450.117  | 449.118  | <b>445.109</b> | 108.118  | 177.108        | <b>723.319</b> | 102.281        | 107.280        | Q  |
| A  | 534.238  | 521.232  | 520.233  | <b>506.233</b> | 549.237  | 548.235        | <b>597.251</b> | 580.235        | 579.241        | A  |
| S  | 625.271  | 608.264  | 607.265  | <b>653.265</b> | 635.259  | <b>635.255</b> | <b>526.214</b> | <b>509.188</b> | 509.204        | S  |
| Q  | 751.520  | 736.513  | 735.511  | <b>781.524</b> | 784.520  | <b>763.513</b> | <b>439.182</b> | 422.155        | <b>431.172</b> | Q  |
| T  | 103.112  | 635.305  | 669.305  | <b>916.304</b> | 869.300  | <b>892.306</b> | 311.124        | 0.00           | <b>391.113</b> | T  |
| Y  | 1345.436 | 1339.438 | 1337.434 | 1313.430       | 1356.431 | 1351.419       | <b>182.081</b> | 0.00           | 1341.431       | Y  |



# sp | P27661 | H2AX\_MOUSE

KASQAS<sup>Phospho</sup> QEY  
79.97

- ▶ fragmentation table for charge state 1+
- ▶ specType=cid
- ▶ score=35.79
- ▶ F091343.dat
- ▶ query=q12678\_p1
- ▶ precursor=546.224520
- ▶ chargePrecursor=2
- ▶ itol=0.5

| AA | a        | a*       | aΔ       | b              | b*             | bΔ    | y              | y*             | yΔ      | AA             |
|----|----------|----------|----------|----------------|----------------|-------|----------------|----------------|---------|----------------|
| R  | 101.07   | 144.06   | 11.99    | 126.10         | 112.076        | 0.000 | 100.44         | 1074.43        | 1074.43 | R              |
| A  | 172.144  | 155.118  | 0.000    | 200.150        | <b>183.113</b> | 0.000 | 883.588        | 846.570        | 846.570 | A              |
| S  | 259.176  | 182.130  | 24.100   | 221.171        | 210.145        | 0.000 | <b>892.308</b> | 871.281        | 874.280 | S              |
| Q  | 387.218  | 170.049  | 289.220  | <b>415.230</b> | <b>398.204</b> | 0.019 | 852.318        | 788.291        | 787.289 | Q              |
| A  | 358.212  | 441.200  | 440.200  | <b>488.267</b> | 460.250        | 0.000 | <b>608.257</b> | <b>677.218</b> | 680.218 | A              |
| S  | 625.271  | 608.264  | 607.260  | 653.263        | 635.250        | 0.000 | <b>606.181</b> | 588.154        | 588.170 | S              |
| Q  | 751.320  | 738.303  | 736.310  | <b>781.324</b> | 764.297        | 0.013 | 653.313        | 422.150        | 421.172 | Q              |
| T  | 883.372  | 635.368  | 668.368  | <b>918.367</b> | 883.360        | 0.000 | <b>692.356</b> | <b>311.134</b> | 0.000   | <b>201.113</b> |
| Y  | 1045.426 | 1028.408 | 1027.424 | 1073.428       | 1056.401       | 0.000 | 1055.419       | <b>182.081</b> | 0.000   | 1055.419       |



# sp | P43274 | H14\_MOUSE

KAPKS <sup>Phospho</sup> PAKAK  
79.97

- ▶ fragmentation table for charge state 1+
- ▶ specType=cid
- ▶ score=47.55
- ▶ F091343.dat
- ▶ query=q13266\_p1
- ▶ precursor=553.310050
- ▶ chargePrecursor=2
- ▶ itol=0.5

| AA   | a        | a*       | a <sub>0</sub> | b              | b*       | b <sub>0</sub> | y              | y*       | y <sub>0</sub> | AA   |
|------|----------|----------|----------------|----------------|----------|----------------|----------------|----------|----------------|------|
| R1   | 101.407  | 94.001   | 0.000          | 229.102        | 112.076  | 0.000          | 1109.613       | 1088.988 | 1097.602       | K10D |
| A2   | 172.144  | 126.218  | 0.000          | <b>206.139</b> | 118.113  | 0.000          | <b>977.518</b> | 969.493  | <b>959.507</b> | A0   |
| T3   | 219.017  | 202.313  | 0.000          | <b>297.192</b> | 209.166  | 0.000          | <b>906.481</b> | 899.454  | <b>888.470</b> | T10  |
| R4   | 397.292  | 380.296  | 0.000          | <b>425.267</b> | 408.261  | 0.000          | 859.423        | 792.402  | 779.418        | K17  |
| S5   | 414.211  | 387.205  | 146.100        | 500.319        | 375.259  | 174.271        | <b>861.191</b> | 854.201  | <b>843.121</b> | S0   |
| T6   | 481.252  | 464.247  | 94.313         | <b>648.138</b> | 474.114  | 174.262        | <b>514.325</b> | 497.292  | 0.000          | T10  |
| A7   | 732.280  | 715.254  | 744.371        | <b>768.375</b> | 743.249  | 742.303        | 441.269        | 429.250  | 0.000          | A0   |
| R8   | 860.476  | 843.449  | 842.450        | <b>888.470</b> | 871.444  | 870.469        | 948.265        | 929.218  | 0.000          | R0   |
| A9   | 1011.512 | 1014.488 | 1011.502       | <b>959.507</b> | 942.481  | <b>941.497</b> | <b>218.150</b> | 201.123  | 0.000          | A0   |
| K10D | 1019.607 | 1049.581 | 1044.560       | 1091.602       | 1070.576 | 1069.582       | 147.113        | 439.088  | 0.000          | K10  |



# sp | P43274 | H14\_MOUSE

AKKAPKS Phospho PAK  
79.97

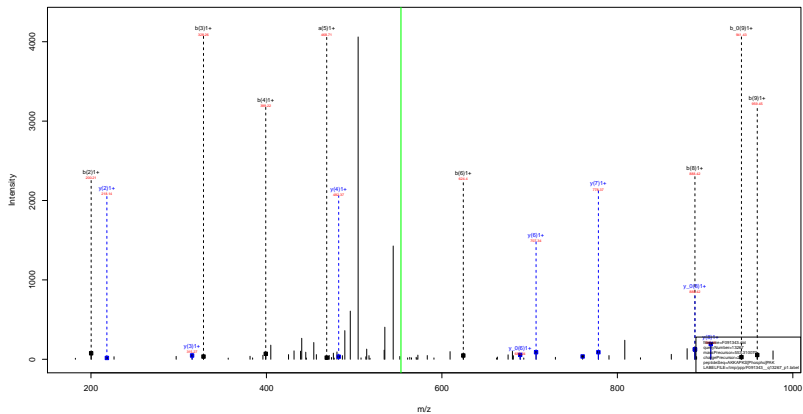

# sp | P43274 | H14\_MOUSE

AKKAPKS<sup>Phospho</sup> PAK  
79.97

- ▶ fragmentation table for charge state 1+
- ▶ specType=cid
- ▶ score=44.95
- ▶ F091343.dat
- ▶ query=q13267\_p1
- ▶ precursor=553.310070
- ▶ chargePrecursor=2
- ▶ itol=0.5

| AA  | a              | a*       | a <sub>0</sub> Δ | b              | b*       | b <sub>0</sub> Δ | y              | y*       | y <sub>0</sub> Δ | AA  |
|-----|----------------|----------|------------------|----------------|----------|------------------|----------------|----------|------------------|-----|
| A   | 44.040         | 0.000    | 0.000            | 72.044         | 0.000    | 0.000            | 1109.613       | 1109.608 | 0.007            | A10 |
| K   | 17.2144        | 126.118  | 0.000            | <b>206.139</b> | 1183.113 | 0.000            | 3034.920       | 1117.949 | 2116.971         | K10 |
| R   | 100.079        | 203.213  | 0.000            | <b>126.234</b> | 111.208  | 0.000            | <b>906.481</b> | 1089.494 | <b>388.976</b>   | R10 |
| A   | 371.277        | 354.230  | 0.000            | <b>390.271</b> | 382.245  | 0.000            | <b>378.386</b> | 761.301  | <b>760.375</b>   | A19 |
| P   | <b>468.329</b> | 631.303  | 0.000            | 369.329        | 479.258  | 0.000            | <b>707.140</b> | 3699.324 | <b>689.138</b>   | P16 |
| K   | 196.224        | 379.267  | 0.000            | <b>624.419</b> | 607.294  | 0.000            | 83.700         | 362.269  | 104.282          | K10 |
| S   | 735.923        | 736.306  | 140.412          | 734.213        | 774.391  | 772.407          | <b>482.201</b> | 4679.174 | 462.100          | S14 |
| P   | 840.470        | 843.489  | 842.485          | <b>888.470</b> | 871.444  | 870.489          | <b>315.201</b> | 308.178  | 0.000            | P16 |
| A   | 911.512        | 914.498  | 913.502          | <b>959.507</b> | 942.461  | <b>941.497</b>   | <b>218.150</b> | 201.123  | 0.000            | A15 |
| R10 | 1039.607       | 1042.581 | 1041.590         | 1039.602       | 1079.676 | 1078.688         | 147.130        | 130.088  | 0.000            | R10 |

# sp | P43274 | H14\_MOUSE

KAPKS<sup>Phospho</sup> PAKAK  
79.97

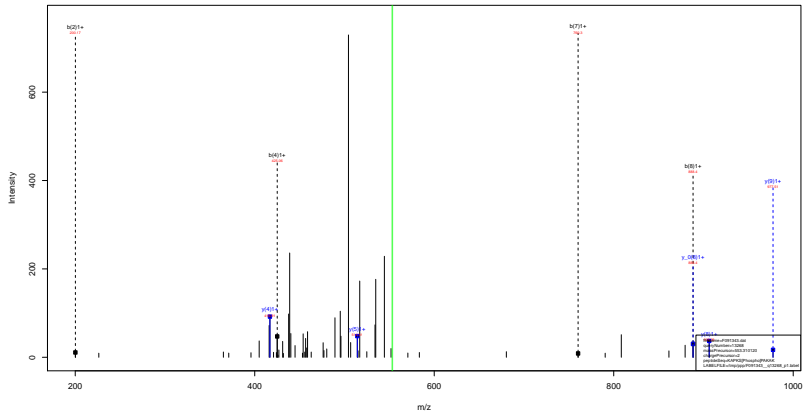

# sp | P43274 | H14\_MOUSE

KAPKS<sup>Phospho</sup> PAKAK  
79.97

- ▶ fragmentation table for charge state 1+
- ▶ specType=cid
- ▶ score=25.93
- ▶ F091343.dat
- ▶ query=q13268\_p1
- ▶ precursor=553.310120
- ▶ chargePrecursor=2
- ▶ itol=0.5

| AA  | a       | a*       | a <sub>0</sub> | b              | b*       | b <sub>0</sub> | y              | y*       | y <sub>0</sub> | AA  |
|-----|---------|----------|----------------|----------------|----------|----------------|----------------|----------|----------------|-----|
| R1  | 101-107 | 94-101   | 0.000          | 129-132        | 112-109  | 0.000          | 1109-813       | 1088-938 | 1097-802       | K10 |
| A2  | 172-144 | 125-118  | 0.000          | <b>206-139</b> | 183-113  | 0.000          | <b>977-518</b> | 968-491  | 959-507        | A9  |
| T3  | 109-107 | 202-111  | 0.000          | 119-119        | 200-106  | 0.000          | <b>505-481</b> | 509-454  | <b>538-470</b> | Y18 |
| R4  | 107-202 | 200-200  | 0.000          | <b>425-287</b> | 408-281  | 0.000          | 859-425        | 782-402  | 170-418        | K19 |
| S5  | 104-101 | 187-205  | 146-190        | 162-203        | 175-202  | 1074-201       | 181-131        | 169-101  | 103-111        | S10 |
| T6  | 101-104 | 184-117  | 183-111        | 180-110        | 174-114  | 1874-101       | <b>515-335</b> | 497-200  | 0.000          | Y19 |
| A7  | 132-200 | 115-104  | 144-101        | 143-101        | 143-101  | 142-101        | <b>417-282</b> | 403-200  | 0.000          | A10 |
| R8  | 160-476 | 163-489  | 162-489        | <b>188-470</b> | 187-464  | 181-460        | 949-200        | 529-218  | 0.000          | K18 |
| A9  | 111-512 | 114-408  | 113-507        | 959-507        | 962-461  | 961-407        | 218-150        | 201-123  | 0.000          | A10 |
| K10 | 109-107 | 1049-101 | 1044-100       | 1087-101       | 1070-101 | 1088-101       | 147-111        | 130-088  | 0.000          | K10 |

# sp | P43274 | H14\_MOUSE

KAPKS Phospho PAKAK  
79.97

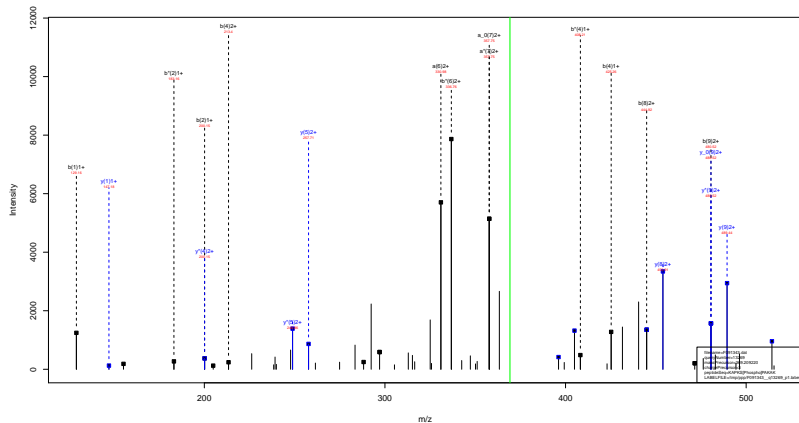

# sp | P43274 | H14\_MOUSE

KAPKS <sup>Phospho</sup> PAKAK  
79.97

- ▶ fragmentation table for charge state 1+
- ▶ specType=cid
- ▶ score=37.29
- ▶ F091343.dat
- ▶ query=q13269\_p1
- ▶ precursor=369.209220
- ▶ chargePrecursor=3
- ▶ itol=0.5

| AA  | a        | a*             | a <sub>0</sub> | b              | b*             | b <sub>0</sub> | y              | y*       | y <sub>0</sub> | AA   |
|-----|----------|----------------|----------------|----------------|----------------|----------------|----------------|----------|----------------|------|
| R1  | 101-107  | 94-101         | 0.000          | <b>126-102</b> | 112-076        | 0.000          | 1109-813       | 1088-788 | 1087-802       | K10D |
| A1  | 172-144  | <b>155-118</b> | 0.000          | <b>206-139</b> | <b>183-113</b> | 0.000          | 977-511        | 969-491  | 959-507        | A0   |
| T1  | 319-317  | 253-313        | 0.000          | <b>297-192</b> | 276-166        | 0.000          | 908-461        | 899-454  | 898-470        | Y10  |
| R1  | 397-292  | 280-226        | 0.000          | <b>425-287</b> | <b>408-261</b> | 0.000          | 859-423        | 792-402  | 770-418        | K17  |
| S1  | 104-071  | 147-105        | 146-100        | 352-233        | 375-252        | 374-271        | 681-131        | 659-101  | 683-121        | S0   |
| T1  | 161-043  | 164-117        | 143-111        | 559-328        | 574-314        | 574-314        | <b>514-325</b> | 497-268  | 0.000          | T0   |
| A1  | 732-280  | 715-254        | 724-371        | 750-375        | 743-349        | 742-303        | 411-203        | 403-200  | 0.000          | A0   |
| R1  | 860-476  | 843-449        | 842-450        | 889-470        | 871-444        | 870-409        | 946-265        | 929-218  | 0.000          | K18  |
| A1  | 111-512  | 114-408        | 113-507        | 958-507        | 942-461        | 941-407        | 218-150        | 201-123  | 0.000          | A0   |
| R10 | 1019-617 | 1049-591       | 1044-590       | 1087-602       | 1070-576       | 1068-591       | <b>147-113</b> | 133-088  | 0.000          | K10  |

# sp | P43274 | H14\_MOUSE

KAPKS <sup>Phospho</sup> PAKAK  
79.97

- ▶ fragmentation table for charge state 2+
- ▶ specType=cid
- ▶ score=37.29
- ▶ F091343.dat
- ▶ query=q13269\_p1
- ▶ precursor=369.209220
- ▶ chargePrecursor=3
- ▶ itol=0.5

| AA | a              | a*             | a,Δ            | b              | b*             | b,Δ            | γ              | γ*             | γ,Δ            | AA   |
|----|----------------|----------------|----------------|----------------|----------------|----------------|----------------|----------------|----------------|------|
| R  | 31.897         | 42.544         | 0.500          | 89.050         | 96.941         | 0.504          | 320.130        | 344.797        | 344.302        | K[D] |
| A  | 80.576         | 178.053        | 0.500          | 108.573        | 92.690         | 0.504          | <b>489.363</b> | <b>480.749</b> | <b>480.257</b> | A[V] |
| P  | 176.302        | 128.568        | 0.500          | 148.100        | 148.588        | 0.500          | <b>483.941</b> | <b>448.231</b> | <b>444.719</b> | P[B] |
| R  | 190.150        | 190.835        | 0.500          | <b>213.147</b> | <b>204.634</b> | 0.504          | <b>405.218</b> | 368.704        | <b>396.212</b> | K[F] |
| S  | 202.849        | 217.130        | 273.640        | <b>296.646</b> | <b>288.133</b> | 287.841        | 140.170        | 132.819        | 132.185        | S[b] |
| P  | <b>331.175</b> | 327.650        | 328.170        | 245.172        | <b>316.659</b> | 326.157        | <b>257.671</b> | <b>248.158</b> | 0.504          | P[S] |
| A  | 358.094        | <b>358.181</b> | <b>357.680</b> | 328.901        | 317.818        | 311.868        | 269.142        | <b>300.811</b> | 0.504          | A[A] |
| R  | 430.741        | 422.200        | 424.730        | <b>444.739</b> | 436.208        | 436.713        | 173.620        | 165.113        | 0.504          | K[D] |
| A  | 464.262        | 467.707        | 467.250        | <b>480.257</b> | <b>471.744</b> | <b>471.252</b> | 169.570        | 161.060        | 0.504          | A[D] |
| K  | 530.007        | 521.704        | 524.302        | 544.303        | 535.782        | 535.302        | 74.080         | 69.547         | 0.504          | K[D] |





# sp | P43274 | H14\_MOUSE

AKKAPKS<sup>Phospho</sup> PAK  
79.97

- ▶ fragmentation table for charge state 1+
- ▶ specType=cid
- ▶ score=40.95
- ▶ F091343.dat
- ▶ query=q13271\_p1
- ▶ precursor=553.310300
- ▶ chargePrecursor=2
- ▶ itol=0.5

| AA | a              | a*       | a <sub>0</sub> Δ | b              | b*       | b <sub>0</sub> Δ | y              | y*             | y <sub>0</sub> Δ | AA  |
|----|----------------|----------|------------------|----------------|----------|------------------|----------------|----------------|------------------|-----|
| A  | 44.040         | 0.000    | 0.000            | 72.044         | 0.000    | 0.000            | 1109.613       | 1109.608       | 0.007            | A10 |
| K  | 172.144        | 126.118  | 0.000            | <b>206.139</b> | 183.113  | 0.000            | 3034.920       | 3117.949       | 83.029           | K10 |
| R  | 169.079        | 203.213  | 0.000            | <b>226.234</b> | 111.208  | 0.000            | <b>906.481</b> | 889.494        | <b>168.987</b>   | R10 |
| A  | <b>371.277</b> | 354.230  | 0.000            | <b>399.271</b> | 382.245  | 0.000            | <b>778.386</b> | 761.350        | <b>170.037</b>   | A19 |
| P  | <b>468.329</b> | 451.303  | 0.000            | <b>496.324</b> | 479.298  | 0.000            | <b>767.149</b> | 750.123        | <b>169.026</b>   | P19 |
| K  | 156.224        | 179.207  | 0.000            | <b>424.419</b> | 407.393  | 0.000            | 83.700         | 783.290        | 50.590           | K19 |
| S  | 175.923        | 176.306  | 140.412          | 191.413        | 174.394  | 174.400          | <b>482.201</b> | <b>465.174</b> | 17.027           | S19 |
| P  | 340.470        | 343.449  | 342.450          | <b>388.470</b> | 371.444  | 370.440          | <b>315.203</b> | 308.178        | 0.000            | P19 |
| A  | 311.512        | 314.490  | 313.500          | <b>359.507</b> | 342.481  | 341.480          | 218.150        | 211.123        | 0.000            | A19 |
| R  | 1259.607       | 1249.581 | 1244.560         | 1261.602       | 1250.576 | 1249.580         | 147.130        | 130.088        | 0.000            | R19 |

# sp | P43274 | H14\_MOUSE

KAPKS<sup>Phospho</sup> PAKAK  
79.97

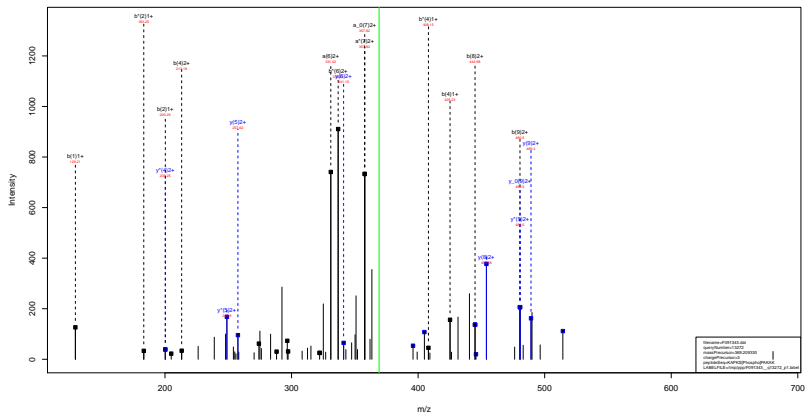

# sp | P43274 | H14\_MOUSE

KAPKS <sup>Phospho</sup> PAKAK  
79.97

- ▶ fragmentation table for charge state 1+
- ▶ specType=cid
- ▶ score=25.03
- ▶ F091343.dat
- ▶ query=q13272\_p1
- ▶ precursor=369.209330
- ▶ chargePrecursor=3
- ▶ itol=0.5

| AA  | a       | a*       | a <sub>0</sub> | b              | b*             | b <sub>0</sub> | y              | y*       | y <sub>0</sub> | AA   |
|-----|---------|----------|----------------|----------------|----------------|----------------|----------------|----------|----------------|------|
| R1  | 101-107 | 94-101   | 0.000          | <b>126-182</b> | 112-1076       | 0.000          | 1109-813       | 1088-938 | 1057-802       | K10D |
| A2  | 172-144 | 125-118  | 0.000          | <b>206-139</b> | <b>183-113</b> | 0.000          | 97-511         | 969-491  | 959-507        | AK   |
| T3  | 109-107 | 202-111  | 0.000          | <b>297-192</b> | 208-106        | 0.000          | 906-461        | 889-454  | 888-470        | Y18  |
| R4  | 197-202 | 280-226  | 0.000          | <b>425-287</b> | <b>408-261</b> | 0.000          | 859-423        | 792-462  | 179-418        | K17  |
| S5  | 104-101 | 187-205  | 146-190        | 316-219        | 375-219        | 1074-211       | 681-131        | 169-101  | 883-111        | S0   |
| T6  | 101-101 | 184-117  | 943-111        | 589-119        | 1074-114       | 1074-114       | <b>514-125</b> | 497-202  | 0.000          | T10  |
| A7  | 132-100 | 115-104  | 174-111        | 750-119        | 743-109        | 742-101        | 411-200        | 403-200  | 0.000          | AK   |
| R8  | 160-175 | 163-149  | 162-150        | 889-170        | 1071-164       | 1010-160       | 946-205        | 529-218  | 0.000          | K18  |
| A9  | 111-112 | 114-108  | 111-107        | 959-107        | 962-101        | 961-107        | 218-150        | 201-121  | 0.000          | AK   |
| K10 | 109-107 | 1049-101 | 1044-100       | 1081-101       | 1070-119       | 1068-101       | 147-111        | 133-088  | 0.000          | K10  |

# sp | P43274 | H14\_MOUSE

KAPKS <sup>Phospho</sup> PAKAK  
79.97

- ▶ fragmentation table for charge state 2+
- ▶ specType=cid
- ▶ score=25.03
- ▶ F091343.dat
- ▶ query=q13272\_p1
- ▶ precursor=369.209330
- ▶ chargePrecursor=3
- ▶ itol=0.5

| AA | a              | a*             | a.d            | b              | b*             | b.d     | y              | y*             | y.d            | AA |
|----|----------------|----------------|----------------|----------------|----------------|---------|----------------|----------------|----------------|----|
| R  | 51.057         | 62.544         | 0.509          | 89.055         | 56.941         | 0.509   | 359.110        | 944.797        | 674.302        | K  |
| A  | 88.516         | 178.263        | 0.504          | 108.573        | 92.093         | 0.504   | <b>409.363</b> | <b>480.749</b> | <b>480.257</b> | A  |
| F  | 178.366        | 178.366        | 0.509          | 149.139        | 146.369        | 0.509   | <b>633.744</b> | <b>445.211</b> | <b>444.739</b> | F  |
| R  | 190.150        | 190.835        | 0.504          | <b>213.147</b> | <b>204.634</b> | 0.509   | <b>405.218</b> | 395.704        | <b>396.212</b> | K  |
| S  | 202.849        | <b>274.136</b> | 293.649        | <b>296.646</b> | <b>288.133</b> | 297.641 | <b>341.170</b> | 332.047        | 332.105        | S  |
| F  | <b>331.175</b> | <b>322.662</b> | <b>322.170</b> | 345.173        | <b>336.650</b> | 345.167 | <b>257.671</b> | <b>248.158</b> | 0.504          | F  |
| A  | 358.044        | <b>358.181</b> | <b>357.689</b> | 369.043        | 374.318        | 373.820 | 369.143        | <b>200.811</b> | 0.504          | A  |
| R  | 430.741        | 422.228        | 421.736        | <b>444.739</b> | 436.226        | 435.733 | 373.626        | 685.113        | 0.504          | K  |
| A  | 466.262        | 467.317        | 467.250        | <b>480.257</b> | 471.744        | 471.252 | 399.370        | 111.049        | 0.504          | A  |
| K  | 530.307        | 521.794        | 521.302        | 544.805        | 535.292        | 534.800 | 74.860         | 65.547         | 0.504          | K  |

# sp | P43274 | H14\_MOUSE

KAPKS<sup>Phospho</sup> PAKAK  
79.97

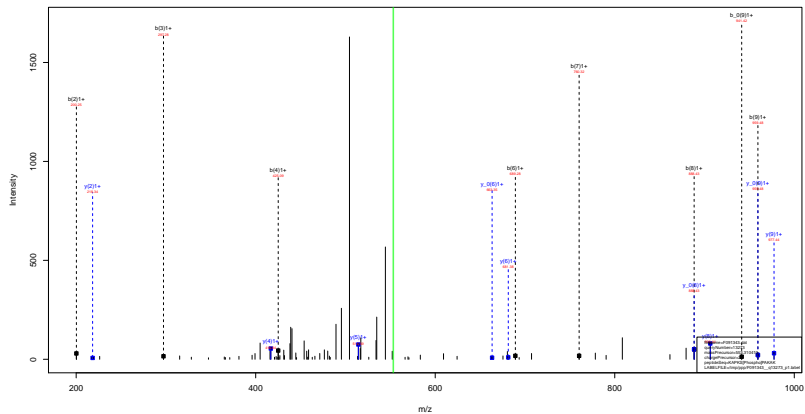

# sp | P43274 | H14\_MOUSE

KAPKS <sup>Phospho</sup> PAKAK  
79.97

- ▶ fragmentation table for charge state 1+
- ▶ specType=cid
- ▶ score=45.71
- ▶ F091343.dat
- ▶ query=q13273\_p1
- ▶ precursor=553.310410
- ▶ chargePrecursor=2
- ▶ itol=0.5

| AA  | a        | a*       | a <sub>0</sub> | b              | b*       | b <sub>0</sub> | y              | y*       | y <sub>0</sub> | AA  |
|-----|----------|----------|----------------|----------------|----------|----------------|----------------|----------|----------------|-----|
| R1  | 101.407  | 94.001   | 0.000          | 229.102        | 112.076  | 0.000          | 1109.613       | 1088.988 | 1097.602       | K10 |
| A2  | 172.144  | 155.218  | 0.000          | <b>206.139</b> | 118.113  | 0.000          | <b>977.518</b> | 969.493  | <b>959.507</b> | A0  |
| T3  | 219.017  | 202.313  | 0.000          | <b>297.192</b> | 209.166  | 0.000          | <b>906.481</b> | 899.454  | <b>888.470</b> | T0  |
| R4  | 397.292  | 380.296  | 0.000          | <b>425.287</b> | 408.291  | 0.000          | 859.422        | 792.402  | 779.418        | K17 |
| S5  | 414.211  | 397.205  | 146.100        | <b>502.319</b> | 375.219  | 1074.211       | <b>861.331</b> | 854.301  | <b>843.321</b> | S0  |
| T6  | 481.242  | 464.217  | 464.212        | <b>608.338</b> | 474.214  | 4674.242       | <b>513.338</b> | 497.268  | 0.000          | T0  |
| A7  | 732.280  | 715.254  | 714.271        | <b>768.375</b> | 743.249  | 742.280        | <b>417.282</b> | 403.255  | 0.000          | A0  |
| R8  | 860.476  | 843.449  | 842.459        | <b>888.470</b> | 871.444  | 870.469        | 949.265        | 939.218  | 0.000          | K8  |
| A9  | 1011.512 | 1014.498 | 1013.502       | <b>959.507</b> | 962.481  | <b>961.497</b> | <b>218.150</b> | 201.123  | 0.000          | A0  |
| K10 | 1019.607 | 1049.591 | 1048.595       | 1091.602       | 1070.576 | 1069.601       | 147.111        | 139.088  | 0.000          | K10 |

# sp | P43274 | H14\_MOUSE

KAPKS<sup>Phospho</sup> PAKAK  
79.97

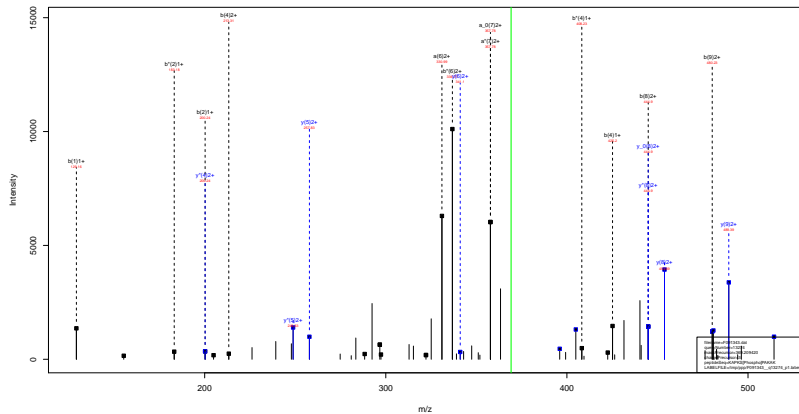

# sp | P43274 | H14\_MOUSE

KAPKS <sup>Phospho</sup> PAKAK  
79.97

- ▶ fragmentation table for charge state 1+
- ▶ specType=cid
- ▶ score=26.65
- ▶ F091343.dat
- ▶ query=q13274\_p1
- ▶ precursor=369.209420
- ▶ chargePrecursor=3
- ▶ itol=0.5

| AA  | a        | a*             | a <sub>0</sub> | b              | b*             | b <sub>0</sub> | y              | y*       | y <sub>0</sub> | AA   |
|-----|----------|----------------|----------------|----------------|----------------|----------------|----------------|----------|----------------|------|
| R1  | 101-107  | 94-101         | 0.000          | <b>126-102</b> | 112-076        | 0.000          | 1109-613       | 1088-588 | 1097-602       | K10D |
| A2  | 172-144  | <b>155-118</b> | 0.000          | <b>206-139</b> | <b>183-113</b> | 0.000          | 977-511        | 969-491  | 979-507        | A9   |
| T1  | 219-217  | 223-213        | 0.000          | <b>297-192</b> | 286-186        | 0.000          | 906-461        | 899-454  | 908-470        | Y18  |
| R4  | 397-292  | 390-290        | 0.000          | <b>425-287</b> | <b>408-261</b> | 0.000          | 859-423        | 792-402  | 770-418        | K17  |
| S3  | 104-101  | 107-105        | 146-100        | 352-219        | 375-219        | 1074-271       | 681-131        | 669-101  | 683-111        | S10  |
| T6  | 161-154  | 164-147        | 943-131        | 659-129        | 1074-114       | 1074-114       | <b>514-325</b> | 497-269  | 0.000          | T10  |
| A1  | 732-280  | 715-254        | 734-371        | 750-370        | 743-249        | 742-203        | 411-200        | 403-200  | 0.000          | A10  |
| R8  | 860-476  | 843-449        | 842-450        | 889-470        | 871-444        | 870-400        | 946-265        | 929-218  | 0.000          | K18  |
| A9  | 101-512  | 114-408        | 913-507        | 959-507        | 942-461        | 941-407        | 218-150        | 201-123  | 0.000          | A10  |
| K10 | 1019-607 | 1049-591       | 1044-590       | 1087-601       | 1070-576       | 1068-591       | 147-111        | 133-088  | 0.000          | K10  |



# sp | P43274 | H14\_MOUSE

KAPKS <sup>Phospho</sup> PAKAK  
79.97

- ▶ fragmentation table for charge state 2+
- ▶ specType=cid
- ▶ score=26.65
- ▶ F091343.dat
- ▶ query=q13274\_p1
- ▶ precursor=369.209420
- ▶ chargePrecursor=3
- ▶ itol=0.5

| AA | a              | a*             | a.d            | b              | b*             | b.d     | y              | y*             | y.d            | AA |
|----|----------------|----------------|----------------|----------------|----------------|---------|----------------|----------------|----------------|----|
| R  | 51.057         | 62.544         | 0.509          | 69.055         | 76.941         | 0.509   | 359.110        | 344.797        | 374.302        | K  |
| A  | 80.516         | 78.053         | -0.504         | 108.573        | 92.090         | -0.504  | <b>409.363</b> | <b>400.749</b> | <b>400.257</b> | A  |
| T  | 178.166        | 178.968        | 0.802          | 149.100        | 146.969        | -0.801  | <b>633.744</b> | <b>645.211</b> | <b>644.739</b> | T  |
| R  | 190.150        | 190.835        | 0.504          | <b>213.141</b> | <b>204.634</b> | 0.509   | <b>405.218</b> | 395.704        | <b>396.212</b> | K  |
| S  | 202.849        | 2174.030       | 213.640        | <b>296.646</b> | <b>288.133</b> | 297.641 | <b>341.170</b> | 332.047        | 332.335        | S  |
| F  | <b>331.175</b> | <b>322.663</b> | <b>322.170</b> | 345.173        | <b>336.650</b> | 345.167 | <b>257.671</b> | <b>248.158</b> | 0.504          | F  |
| A  | 358.044        | <b>358.181</b> | <b>357.689</b> | 369.693        | 374.318        | 371.690 | 369.143        | <b>350.811</b> | 0.504          | A  |
| R  | 430.741        | <b>422.228</b> | 421.736        | <b>444.739</b> | 436.226        | 435.733 | 371.626        | 365.113        | 0.504          | K  |
| A  | 466.262        | 467.311        | 467.250        | <b>480.257</b> | 471.744        | 471.252 | 399.370        | 393.045        | 0.504          | A  |
| K  | 530.307        | 521.794        | 521.302        | 544.805        | 535.792        | 535.303 | 74.860         | 65.547         | 0.504          | K  |



# sp | Q6ZWY9 | H2B1C\_MOUSE

PEPAKS <sup>Phospho</sup> APAPK  
79.97

- ▶ fragmentation table for charge state 1+
- ▶ specType=cid
- ▶ score=41.29
- ▶ F091343.dat
- ▶ query=q15781\_p1
- ▶ precursor=586.789280
- ▶ chargePrecursor=2
- ▶ itol=0.5

| AA  | a              | y <sup>m</sup> | a,β      | b              | b <sup>m</sup> | b,β            | y              | y <sup>m</sup> | y,β            | AA    |     |
|-----|----------------|----------------|----------|----------------|----------------|----------------|----------------|----------------|----------------|-------|-----|
| P1  | 161.071        | 0.000          | 0.000    | 98.293         | 0.000          | 0.000          | 112.237        | 1128.245       | 1134.561       | P111  |     |
| P1  | <b>199.108</b> | 0.000          | 103.000  | <b>227.193</b> | 0.000          | 0.000          | 119.113        | 1198.412       | 1202.908       | P110  |     |
| P1  | 206.100        | 0.000          | 276.150  | 324.025        | 0.000          | 306.149        | <b>946.476</b> | <b>929.448</b> | <b>928.465</b> | P10   |     |
| A1  | 287.110        | 0.000          | 169.100  | <b>395.193</b> | 0.000          | 377.202        | 898.423        | 812.100        | <b>811.412</b> | A10   |     |
| P1  | 316.014        | 0.000          | 417.000  | <b>523.287</b> | 0.000          | <b>505.297</b> | 718.380        | 789.288        | 788.288        | K17   |     |
| S10 | 350.014        | 0.000          | 644.000  | 768.287        | 0.000          | 750.299        | <b>650.291</b> | 679.294        | 678.288        | S10   |     |
| A1  | 473.020        | 0.000          | 716.010  | 761.323        | 0.000          | 744.336        | <b>483.293</b> | 466.294        | 0.000          | A10   |     |
| P1  | 630.081        | 0.000          | 812.070  | 823.370        | 0.000          | 804.349        | 846.205        | <b>412.255</b> | <b>395.228</b> | 0.000 | P10 |
| A1  | 801.018        | 0.000          | 983.000  | <b>929.413</b> | 0.000          | 911.406        | 913.293        | 908.119        | 0.000          | A10   |     |
| P10 | 998.071        | 0.000          | 980.000  | 1029.000       | 0.000          | 1008.015       | <b>244.166</b> | <b>227.138</b> | 0.000          | P10   |     |
| K11 | 1120.066       | 1.000          | 1108.000 | 1104.063       | 11.37          | 1138.010       | 187.110        | 1.00000        | 0.000          | K11   |     |

# sp | Q6ZWY9 | H2B1C\_MOUSE

PEPAKS<sup>Phospho</sup> APAPK  
79.97

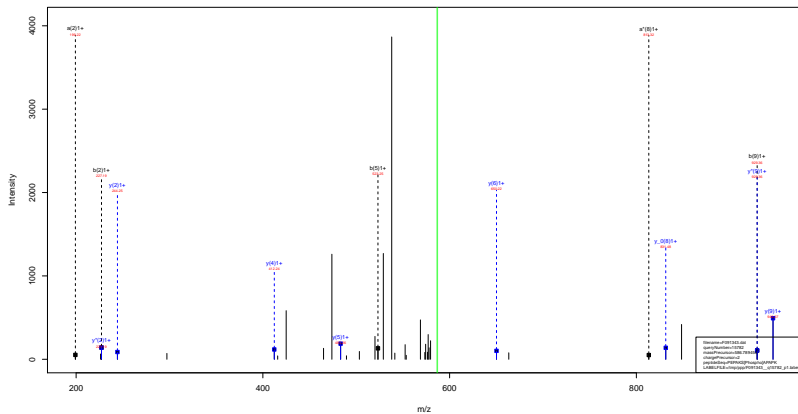

# sp | Q6ZWY9 | H2B1C\_MOUSE

PEPAKS<sup>Phospho</sup> APAPK  
79.97

- ▶ fragmentation table for charge state 1+
- ▶ specType=cid
- ▶ score=38.67
- ▶ F091343.dat
- ▶ query=q15782\_p1
- ▶ precursor=586.789450
- ▶ chargePrecursor=2
- ▶ itol=0.5

| AA  | a              | y <sup>a</sup> | a $\beta$ | b              | b <sup>a</sup> | b $\beta$ | y              | y <sup>a</sup> | y $\beta$      | AA   |
|-----|----------------|----------------|-----------|----------------|----------------|-----------|----------------|----------------|----------------|------|
| P1  | 161.091        | 0.000          | 0.000     | 98.795         | 0.000          | 0.000     | 112.237        | 1136.245       | 1134.061       | P111 |
| P12 | <b>199.108</b> | 0.000          | 101.000   | <b>227.183</b> | 0.000          | 0.000     | 1129.111       | 1129.412       | 1202.908       | P110 |
| P13 | 206.100        | 0.000          | 276.150   | 324.155        | 0.000          | 306.149   | <b>946.476</b> | <b>929.448</b> | 928.466        | P10  |
| A14 | 287.100        | 0.000          | 349.150   |                | 0.000          | 377.150   | 898.421        | 812.100        | <b>811.412</b> | A10  |
| P15 | 316.094        | 470.267        | 417.267   | <b>523.267</b> | 458.267        | 459.271   | 718.100        | 718.100        | 718.100        | K17  |
| S16 | 350.094        | 840.264        | 844.264   | 988.264        | 873.259        | 872.272   | <b>650.291</b> | 679.264        | 1032.267       | S10  |
| A17 | 435.090        | 1020.261       | 1161.101  | 1611.261       | 1441.260       | 1411.271  | <b>483.293</b> | 488.261        | 0.000          | A10  |
| P18 | 530.081        | <b>813.354</b> | 812.370   | 953.370        | 864.149        | 846.205   | <b>412.355</b> | 389.230        | 0.000          | P14  |
| A19 | 601.418        | 818.363        | 963.401   | <b>929.413</b> | 913.366        | 911.400   | 718.293        | 298.110        | 0.000          | A10  |
| P10 | 696.471        | 981.484        | 980.492   | 1029.492       | 1000.430       | 1008.415  | <b>244.166</b> | <b>227.138</b> | 0.000          | P12  |
| K11 | 1120.566       | 1100.539       | 1100.550  | 1114.563       | 1117.534       | 1130.510  | 187.110        | 1.50000        | 0.000          | K11  |

# sp | Q9D2U9 | H2B3A\_MOUSE

PEPSRS Phospho TPAK  
79.97

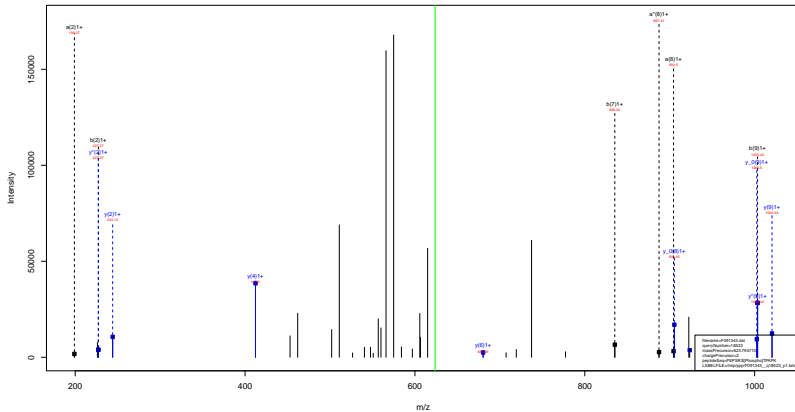

# sp | Q9D2U9 | H2B3A\_MOUSE

PEPSRS<sup>Phospho</sup> TPAPK  
79.97

- ▶ fragmentation table for charge state 1+
- ▶ specType=cid
- ▶ score=32.51
- ▶ F091343.dat
- ▶ query=q18523\_p1
- ▶ precursor=623.794710
- ▶ chargePrecursor=2
- ▶ itol=0.5

| AA  | a              | a*             | a:β      | b               | b*       | b:β      | y               | y*              | y:β             | AA  |
|-----|----------------|----------------|----------|-----------------|----------|----------|-----------------|-----------------|-----------------|-----|
| P11 | 1152.07        | 0.000          | 0.000    | 96.287          | 0.000    | 0.000    | 1346.363        | 2229.559        | 3238.512        | P11 |
| E12 | <b>138.108</b> | 0.000          | 131.989  | <b>227.103</b>  | 0.000    | 228.999  | 1249.133        | 1119.909        | 2133.503        | E12 |
| P13 | 256.159        | 0.000          | 256.159  | 324.155         | 0.000    | 326.145  | <b>1020.481</b> | <b>1003.461</b> | <b>1007.477</b> | P13 |
| S14 | 383.193        | 0.000          | 383.182  | 411.187         | 0.000    | 393.177  | <b>921.435</b>  | 950.430         | <b>905.424</b>  | S14 |
| T15 | 510.228        | 0.000          | 510.209  | 589.209         | 0.000    | 590.210  | 848.467         | 819.470         | 888.466         | T15 |
| S16 | 736.262        | 0.000          | 736.261  | 734.267         | 0.000    | 716.270  | <b>680.301</b>  | 683.295         | 683.293         | S16 |
| T17 | 863.293        | 0.000          | 863.293  | <b>835.335</b>  | 0.000    | 817.338  | 516.310         | 666.317         | 446.313         | T17 |
| P18 | <b>904.292</b> | <b>887.368</b> | 888.362  | 916.387         | 935.381  | 916.371  | <b>412.255</b>  | 588.250         | 0.000           | P18 |
| A19 | 1130.328       | 914.363        | 914.319  | <b>1003.424</b> | 936.376  | 936.419  | 313.293         | 268.319         | 0.000           | A19 |
| P20 | 1312.402       | 1005.409       | 1004.472 | 1106.477        | 1081.491 | 1080.469 | <b>244.168</b>  | <b>227.139</b>  | 0.000           | P20 |
| R11 | 1500.517       | 1183.551       | 1183.567 | 1228.572        | 1211.516 | 1210.592 | 147.111         | 130.089         | 0.000           | R11 |

# sp | Q9D2U9 | H2B3A\_MOUSE

PEPSRST Phospho PAK  
79.97

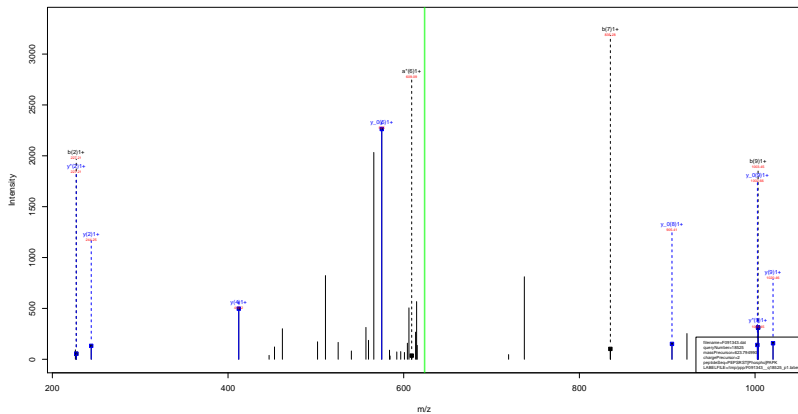



# sp | Q9D2U9 | H2B3A\_MOUSE

PEPSRST<sup>Phospho</sup> PAKK  
79.97

- ▶ fragmentation table for charge state 1+
- ▶ specType=cid
- ▶ score=34.46
- ▶ F091343.dat
- ▶ query=q18525\_p1
- ▶ precursor=623.794990
- ▶ chargePrecursor=2
- ▶ itol=0.5

| AA  | a        | a*             | a,β      | b               | b*       | b,β      | y              | y*              | y,β             | AA              |     |
|-----|----------|----------------|----------|-----------------|----------|----------|----------------|-----------------|-----------------|-----------------|-----|
| P1  | 301.055  | 0.000          | 0.000    | 96.297          | 0.000    | 0.000    | 1345.387       | 2229.599        | 3238.572        | P11             |     |
| E12 | 309.100  | 0.000          | 131.969  | <b>227.103</b>  | 0.000    | 0.000    | 229.599        | 1119.909        | 2133.500        | E10             |     |
| P1  | 309.100  | 0.000          | 229.100  | 324.100         | 0.000    | 0.000    | 300.140        | <b>1020.487</b> | <b>1003.461</b> | <b>1007.477</b> | P10 |
| S14 | 313.145  | 0.000          | 305.142  | 411.147         | 0.000    | 301.177  | 323.471        | 600.400         | <b>905.424</b>  | S0              |     |
| T15 | 319.190  | 347.261        | 321.289  | 109.289         | 309.262  | 349.219  | 388.446        | 319.379         | 388.386         | T07             |     |
| S16 | 326.235  | <b>609.259</b> | 609.255  | 694.257         | 537.264  | 630.231  | 680.261        | 1083.293        | 683.291         | S04             |     |
| T17 | 337.330  | 180.310        | 189.329  | <b>635.335</b>  | 334.349  | 317.320  | 393.269        | 319.243         | <b>575.269</b>  | T13             |     |
| P18 | 354.382  | 387.380        | 389.382  | 476.387         | 335.381  | 414.371  | <b>412.255</b> | 369.250         | 369.250         | P14             |     |
| A19 | 371.434  | 924.431        | 927.433  | <b>1003.424</b> | 369.436  | 909.419  | 101.291        | 269.370         | 0.000           | A11             |     |
| P10 | 372.482  | 305.479        | 1094.477 | 1100.477        | 1081.491 | 1092.480 | <b>244.168</b> | <b>227.139</b>  | 0.000           | P12             |     |
| K11 | 1200.577 | 1183.551       | 1183.567 | 1228.572        | 1211.546 | 1210.562 | 147.511        | 130.089         | 0.000           | K11             |     |



# sp | Q9D2U9 | H2B3A\_MOUSE

PEPSRS<sup>Phospho</sup> TPAPK  
79.97

- ▶ fragmentation table for charge state 1+
- ▶ specType=cid
- ▶ score=31.78
- ▶ F091343.dat
- ▶ query=q18530\_p1
- ▶ precursor=623.795470
- ▶ chargePrecursor=2
- ▶ itol=0.5

| AA  | a              | a*        | a:β       | b               | b*             | b:β            | y               | y*              | y:β             | AA   |
|-----|----------------|-----------|-----------|-----------------|----------------|----------------|-----------------|-----------------|-----------------|------|
| P1  | 301.055        | 0.000     | 0.000     | 96.287          | 0.000          | 0.000          | 1.245.387       | 2.229.559       | 3.208.512       | P111 |
| T12 | 309.100        | 0.000     | 1.81.989  | <b>297.103</b>  | 0.000          | 0.000          | 2.09.559        | 1.119.909       | 2.133.510       | K10  |
| P1  | 309.100        | 0.000     | 2.95.193  | 3.04.155        | 0.000          | 0.000          | <b>1020.487</b> | <b>1003.461</b> | <b>1007.477</b> | P10  |
| S14 | 313.110        | 0.000     | 3.05.182  | 4.11.187        | 0.000          | 0.000          | <b>921.435</b>  | 959.400         | <b>905.424</b>  | S10  |
| T12 | 319.219        | 0.000     | 3.21.209  | 1.09.209        | <b>106.202</b> | 0.000          | 2.09.559        | 2.09.559        | 2.09.559        | T10  |
| S14 | 319.219        | 0.000     | 3.05.201  | 7.94.207        | 1.12.202       | 0.000          | 1.05.270        | 1.05.270        | 1.05.270        | S10  |
| T12 | 319.219        | 0.000     | 1.09.209  | <b>835.135</b>  | 1.01.189       | <b>817.139</b> | 1.10.170        | 1.09.217        | <b>495.201</b>  | T10  |
| P10 | <b>304.202</b> | 0.000     | 0.000     | 1.10.207        | 0.000          | 0.000          | <b>412.255</b>  | 3.05.255        | 0.000           | P10  |
| A11 | 317.419        | 0.000     | 0.000     | <b>1003.424</b> | 0.000          | 0.000          | 1.11.271        | 2.09.170        | 0.000           | A11  |
| P10 | 317.420        | 0.000     | 1.094.477 | <b>1108.477</b> | 1.081.493      | 0.000          | <b>244.168</b>  | <b>237.139</b>  | 0.000           | P10  |
| K11 | 1200.137       | 1.033.551 | 1.034.567 | 3.208.512       | 1.211.516      | 3.210.562      | 147.111         | 1.93.089        | 0.000           | K11  |

# sp | Q9D2U9 | H2B3A\_MOUSE

PEPSRS Phospho TPAPK  
79.97

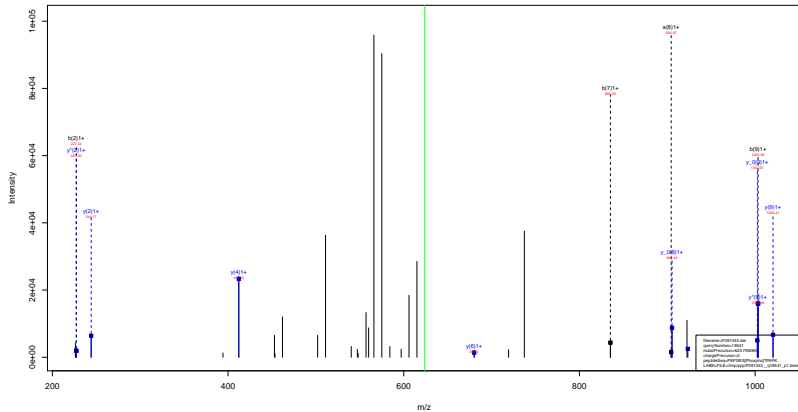

# sp | Q9D2U9 | H2B3A\_MOUSE

PEPSRS<sup>Phospho</sup> TPAPK  
79.97

- ▶ fragmentation table for charge state 1+
- ▶ specType=cid
- ▶ score=40.78
- ▶ F091343.dat
- ▶ query=q18541\_p1
- ▶ precursor=623.796060
- ▶ chargePrecursor=2
- ▶ itol=0.5

| AA   | a              | a*        | a:β       | b               | b*        | b:β       | y              | y*              | y:β             | AA              |      |
|------|----------------|-----------|-----------|-----------------|-----------|-----------|----------------|-----------------|-----------------|-----------------|------|
| P11  | 301.055        | 0.000     | 0.000     | 96.287          | 0.000     | 0.000     | 1.245.383      | 2.229.599       | 3.213.512       | P111            |      |
| E12  | 309.100        | 0.000     | 1.81.989  | <b>227.103</b>  | 0.000     | 0.000     | 2.009.599      | 1.119.769       | 2.119.769       | E120            |      |
| P13  | 309.100        | 0.000     | 2.05.193  | 3.04.193        | 0.000     | 0.000     | 3.00.149       | <b>1020.481</b> | <b>1003.461</b> | <b>1007.477</b> | P130 |
| S14  | 313.110        | 0.000     | 3.05.182  | 4.11.187        | 0.000     | 3.01.177  | <b>921.435</b> | 9.00.400        | <b>905.424</b>  | S140            |      |
| R15  | 319.114        | 0.000     | 3.21.209  | 1.01.209        | 0.000     | 3.01.210  | 2.00.210       | 2.00.210        | 2.00.210        | R150            |      |
| S16  | 326.212        | 0.000.250 | 1.00.261  | 7.94.267        | 3.17.262  | 3.15.270  | <b>600.301</b> | 1.05.275        | 1.05.270        | S160            |      |
| T17  | 327.343        | 1.00.110  | 1.00.329  | <b>835.335</b>  | 3.01.309  | 3.17.310  | 1.10.310       | 1.00.312        | 1.00.310        | T170            |      |
| L18  | <b>304.202</b> | 0.00.300  | 0.00.300  | 1.10.307        | 0.00.301  | 0.10.311  | <b>412.255</b> | 0.00.250        | 0.00.250        | L180            |      |
| A19  | 317.410        | 0.00.410  | 0.01.410  | <b>1003.424</b> | 0.00.410  | 0.00.410  | 1.10.410       | 2.00.410        | 0.00.410        | A190            |      |
| P100 | 337.400        | 0.00.400  | 1.004.477 | 11.00.477       | 1.001.401 | 0.000.400 | <b>244.168</b> | <b>237.139</b>  | 0.00.000        | P100            |      |
| R111 | 1200.117       | 1.001.110 | 1.001.967 | 12.00.972       | 1.011.110 | 12.10.110 | 147.111        | 1.00.000        | 0.00.000        | R111            |      |

# sp | P70696 | H2B1A\_MOUSE

HAVSEGT<sup>Phospho</sup> KAVTK  
79.97

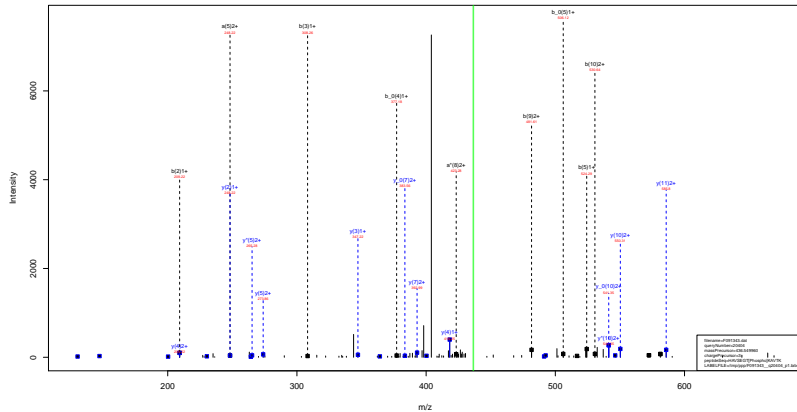

# sp | P70696 | H2B1A\_MOUSE

HAVSEGT<sup>Phospho</sup> KAVTK  
79.97

- ▶ fragmentation table for charge state 1+
- ▶ specType=cid
- ▶ score=37.84
- ▶ F091343.dat
- ▶ query=q20404\_p1
- ▶ precursor=436.549960
- ▶ chargePrecursor=3
- ▶ itol=0.5

| AA  | a        | a'        | a <sub>0</sub> | b              | b'        | b <sub>0</sub> | y              | y'             | y <sub>0</sub> | AA  |
|-----|----------|-----------|----------------|----------------|-----------|----------------|----------------|----------------|----------------|-----|
| R11 | 110.074  | 0.000     | 0.000          | 1.38100        | 0.000     | 0.000          | 1.38743        | 0.000000       | 2.00000        | R12 |
| A2  | 181.438  | 0.000     | 0.000          | <b>206.163</b> | 0.000     | 0.000          | 1.170.577      | 0.153.500      | 1.152.968      | A11 |
| V3  | 200.577  | 0.000     | 0.000          | <b>308.172</b> | 0.000     | 0.000          | 1.000.530      | 0.082.313      | 0.081.529      | V10 |
| S4  | 383.009  | 0.000     | 1.69.130       | <b>399.228</b> | 0.000     | <b>377.183</b> | 1.000.411      | 0.89.448       | 0.890.000      | S5  |
| E5  | 496.251  | 0.000     | 470.241        | <b>524.246</b> | 0.000     | <b>506.236</b> | 903.430        | 0.000.413      | 0.000.430      | E10 |
| G6  | 613.473  | 0.000     | 530.262        | <b>581.246</b> | 0.000     | 563.207        | 104.300        | 0.19.370       | 0.196.300      | G17 |
| T7  | 724.697  | 0.000     | 720.210        | <b>762.262</b> | 0.000     | 759.214        | 127.370        | 0.10.240       | 0.100.264      | T8  |
| R8  | 832.922  | 0.000     | 800.211        | <b>806.214</b> | 0.000     | 814.202        | <b>946.361</b> | 0.000.374      | 0.000.370      | R9  |
| A9  | 933.432  | 0.00      | 920.400        | 960.414        | 0.00      | 963.403        | <b>410.266</b> | 401.230        | <b>400.255</b> | A10 |
| V10 | 1032.467 | 0.015.401 | 1024.477       | 1000.480       | 0.043.406 | 1002.472       | <b>347.229</b> | 330.202        | 320.210        | V15 |
| T11 | 1133.630 | 0.000.000 | 1120.200       | 1100.200       | 0.046.000 | 1100.000       | <b>240.160</b> | 231.120        | <b>230.150</b> | T16 |
| R12 | 1201.030 | 0.000.000 | 1243.630       | 0.000.000      | 1272.000  | 1271.014       | <b>147.113</b> | <b>130.000</b> | 0.000          | R11 |

# sp | P70696 | H2B1A\_MOUSE

HAVSEGT<sup>Phospho</sup> KAVTK  
79.97

- ▶ fragmentation table for charge state 2+
- ▶ specType=cid
- ▶ score=37.84
- ▶ F091343.dat
- ▶ query=q20404\_p1
- ▶ precursor=436.549960
- ▶ chargePrecursor=3
- ▶ itol=0.5

| AA   | a              | a*             | a $\rho$ | b              | b*             | b $\rho$       | y              | y*             | y $\rho$       | AA   |
|------|----------------|----------------|----------|----------------|----------------|----------------|----------------|----------------|----------------|------|
| H 1  | 55.939         | 0.504          | 0.504    | 69.937         | 0.504          | 0.504          | 654.321        | 645.808        | 546.518        | H 12 |
| A 2  | 91.9748        | 0.504          | 0.504    | 125.955        | 0.504          | 0.504          | <b>585.792</b> | 577.279        | 576.707        | A 11 |
| V 3  | 140.992        | 0.504          | 0.504    | 154.989        | 0.504          | 0.504          | <b>558.273</b> | <b>541.760</b> | <b>541.268</b> | V 10 |
| S 4  | 198.988        | 0.504          | 1.75.124 | 198.988        | 0.504          | 1.99.130       | 568.744        | <b>492.255</b> | <b>491.134</b> | S 9  |
| E 5  | <b>248.629</b> | 0.504          | 239.624  | 262.627        | 0.504          | 253.622        | 497.221        | 448.710        | 448.218        | E 8  |
| G 6  | 277.140        | 0.504          | 268.135  | 291.138        | 0.504          | 282.137        | <b>392.702</b> | 384.189        | <b>383.697</b> | G 7  |
| T 7  | 287.647        | 0.504          | 358.642  | 381.645        | 0.504          | 372.639        | <b>364.191</b> | 355.178        | 354.186        | T 6  |
| R 8  | 311.695        | <b>423.181</b> | 423.689  | 448.692        | 0.504          | 438.687        | <b>275.685</b> | <b>265.171</b> | <b>264.679</b> | R 5  |
| A 9  | 467.213        | 458.709        | 458.208  | <b>481.211</b> | 472.207        | 472.205        | <b>209.637</b> | 201.123        | <b>200.631</b> | A 4  |
| V 10 | <b>516.747</b> | 509.215        | 507.742  | <b>530.745</b> | 522.232        | 521.740        | 174.118        | 165.605        | 165.113        | V 3  |
| T 11 | 567.271        | 558.758        | 558.264  | <b>581.269</b> | <b>572.755</b> | <b>572.263</b> | 134.584        | 116.071        | 115.579        | T 2  |
| R 12 | 611.319        | 602.805        | 602.311  | 648.314        | 599.801        | 600.311        | 74.658         | 65.541         | 0.504          | R 1  |



# sp | P68433 | H31\_MOUSE

Y<sup>Phospho</sup> QKSTELLIR  
79.97

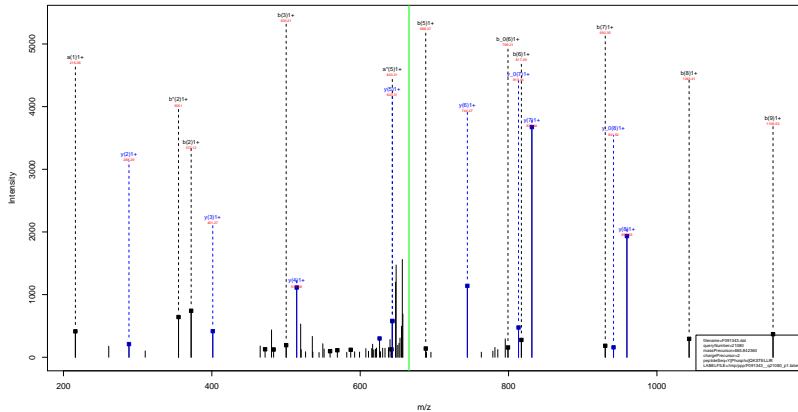

# sp | P68433 | H31\_MOUSE

Y<sup>Phospho</sup><sub>79.97</sub> QKSTELLIR

- ▶ fragmentation table for charge state 1+
- ▶ specType=cid
- ▶ score=49.73
- ▶ F091343.dat
- ▶ query=q21080\_p1
- ▶ precursor=665.842360
- ▶ chargePrecursor=2
- ▶ itol=0.5

| AA | a  | a*             | a <sub>0</sub> | b              | b*              | b <sub>0</sub> | y              | y*             | y <sub>0</sub> | AA              |   |
|----|----|----------------|----------------|----------------|-----------------|----------------|----------------|----------------|----------------|-----------------|---|
| V  | 1  | <b>216.042</b> | 0.000          | 0.000          | 344.013         | 0.000          | 0.000          | 1130.677       | 1113.690       | 113.7466        | V |
| Q  | 2  | 244.152        | 127.074        | 0.000          | <b>372.096</b>  | <b>355.069</b> | 0.000          | 1097.243       | 1070.256       | 109.9730        | Q |
| T  | 3  | <b>412.196</b> | 420.228        | 0.000          | <b>506.190</b>  | <b>483.164</b> | 0.000          | <b>959.589</b> | 944.766        | <b>941.5745</b> | T |
| S  | 4  | <b>558.228</b> | 542.253        | 543.213        | <b>587.223</b>  | 570.195        | <b>569.212</b> | <b>831.493</b> | 816.461        | <b>813.483</b>  | S |
| T  | 5  | 693.271        | <b>643.249</b> | <b>642.265</b> | <b>648.270</b>  | 611.244        | 613.203        | <b>748.491</b> | 729.437        | 728.431         | T |
| E  | 6  | 789.314        | 772.287        | 774.262        | <b>817.312</b>  | 784.286        | <b>799.262</b> | <b>843.434</b> | <b>826.387</b> | 824.434         | E |
| L  | 7  | 892.402        | 876.373        | 878.351        | <b>930.397</b>  | 914.370        | 916.329        | <b>914.371</b> | 898.341        | 897.331         | L |
| L  | 8  | 1015.488       | 988.459        | 987.473        | <b>1043.481</b> | 1026.454       | 1025.419       | <b>401.287</b> | 384.261        | 0.000           | L |
| I  | 9  | 1138.575       | 1111.544       | 1110.559       | <b>1156.565</b> | 1139.538       | 1138.504       | <b>288.283</b> | 273.170        | 0.000           | I |
| H  | 10 | 1264.612       | 1237.580       | 1236.595       | 1312.648        | 1295.620       | 1294.585       | 175.133        | 158.062        | 0.000           | H |



# sp | P68433 | H31\_MOUSE

YQKST<sup>Phospho</sup> ELLIR  
79.97

- ▶ fragmentation table for charge state 1+
- ▶ specType=cid
- ▶ score=56.00
- ▶ F091343.dat
- ▶ query=q21081\_p1
- ▶ precursor=665.843230
- ▶ chargePrecursor=2
- ▶ itol=0.5

| AA  | a        | a'             | a <sub>0</sub> | b               | b'             | b <sub>0</sub> | y               | y'             | y <sub>0</sub>  | AA   |
|-----|----------|----------------|----------------|-----------------|----------------|----------------|-----------------|----------------|-----------------|------|
| V1  | 136.070  | 0.000          | 0.000          | 104.071         | 0.000          | 0.000          | 130.071         | 111.066        | 111.066         | V120 |
| Q2  | 264.136  | 267.103        | 0.000          | <b>202.139</b>  | <b>275.103</b> | 0.000          | 277.103         | 1150.507       | 1149.503        | Q20  |
| R12 | 170.070  | 170.000        | 0.000          | <b>426.224</b>  | 418.070        | 0.000          | <b>1078.255</b> | 1079.208       | <b>1071.244</b> | R10  |
| S4  | 476.201  | <b>482.205</b> | 461.201        | <b>507.200</b>  | 490.200        | 480.200        | <b>911.400</b>  | 894.401        | <b>893.400</b>  | S7   |
| T1  | 485.201  | <b>441.200</b> | 442.201        | <b>688.210</b>  | 671.204        | 661.200        | <b>826.420</b>  | 809.415        | <b>808.417</b>  | T10  |
| E0  | 288.202  | 282.200        | 272.200        | <b>617.313</b>  | 604.200        | 591.200        | <b>943.414</b>  | <b>926.381</b> | <b>925.403</b>  | E20  |
| L12 | 602.402  | 605.370        | 600.370        | <b>935.307</b>  | 915.200        | 903.200        | <b>514.371</b>  | 499.261        | 0.000           | L14  |
| L1  | 611.400  | 606.400        | 591.411        | <b>1043.461</b> | 1026.404       | 1005.410       | <b>401.287</b>  | 384.261        | 0.000           | L11  |
| I0  | 1126.539 | 1111.504       | 1100.503       | <b>1154.565</b> | 1139.538       | 1120.551       | <b>200.203</b>  | 272.176        | 0.000           | I05  |
| R10 | 204.014  | 1127.490       | 1120.000       | 1115.000        | 1105.000       | 1100.000       | 176.110         | 1100.000       | 0.000           | R01  |

# sp | Q64475 | H2B1B\_MOUSE

KES Phospho YSVYVYK  
79.97

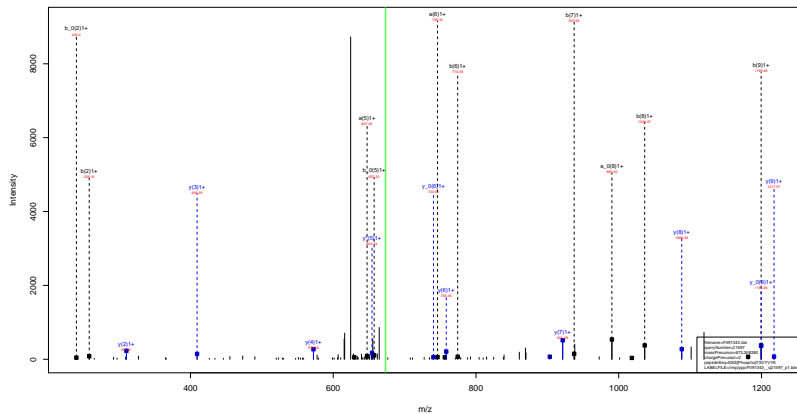

# sp | Q64475 | H2B1B\_MOUSE

KES<sup>Phospho</sup> YSVYVYK  
79.97

- ▶ fragmentation table for charge state 1+
- ▶ specType=cid
- ▶ score=46.16
- ▶ F091343.dat
- ▶ query=q21597\_p1
- ▶ precursor=673.308280
- ▶ chargePrecursor=2
- ▶ itol=0.5

| AA | a  | a*             | a,0      | b              | b*              | b,0      | y               | y*              | y,0      | AA   |
|----|----|----------------|----------|----------------|-----------------|----------|-----------------|-----------------|----------|------|
| K  | 1  | 100.059        | 100.059  | 126.084        | 127.099         | 0.000    | 1146.858        | 1128.881        | 1127.866 | K(2) |
| E  | 2  | 130.137        | 131.152  | 212.139        | <b>258.145</b>  | 261.118  | <b>240.134</b>  | <b>1217.513</b> | 1208.488 | E(2) |
| S  | 3  | 160.214        | 161.229  | 293.136        | 329.142         | 332.115  | 607.121         | <b>1088.419</b> | 1079.393 | S(2) |
| V  | 4  | 190.292        | 191.307  | 374.203        | 388.207         | 371.180  | 370.180         | <b>821.472</b>  | 804.445  | V(2) |
| S  | 5  | <b>807.204</b> | 130.139  | <b>626.213</b> | 679.219         | 682.192  | <b>657.228</b>  | <b>758.408</b>  | 749.382  | S(2) |
| V  | 6  | <b>196.312</b> | 120.200  | 128.203        | <b>174.207</b>  | 154.220  | <b>758.206</b>  | <b>854.201</b>  | 845.175  | V(2) |
| V  | 7  | 198.319        | 199.249  | 401.265        | <b>857.378</b>  | 858.344  | 859.319         | <b>572.308</b>  | 563.282  | V(2) |
| V  | 8  | 198.444        | 199.411  | <b>901.433</b> | <b>1036.439</b> | 1037.413 | <b>1018.428</b> | <b>408.245</b>  | 399.219  | V(2) |
| V  | 9  | 1171.207       | 1134.482 | 2153.497       | <b>1199.502</b> | 1120.475 | <b>1181.481</b> | <b>316.176</b>  | 293.150  | V(2) |
| K  | 10 | 1259.668       | 1220.939 | 2191.952       | 2197.967        | 2199.940 | 1309.948        | 140.111         | 130.085  | K(2) |

# sp|P15864|H12\_MOUSE

GTGAS<sup>Phospho</sup><sub>79.97</sub> GSFKLNKK

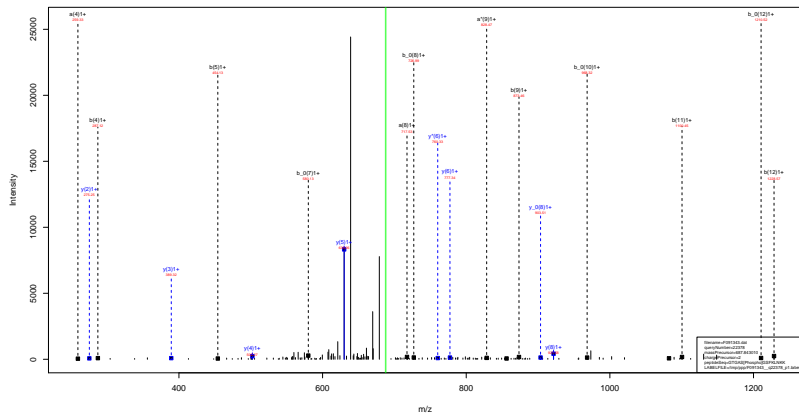

# sp | P15864 | H12\_MOUSE

GTGAS<sup>Phospho</sup> GSFKLNKK  
79.97

- ▶ fragmentation table for charge state 1+
- ▶ specType=cid
- ▶ score=37.74
- ▶ F091343.dat
- ▶ query=q22378\_p1
- ▶ precursor=687.843010
- ▶ chargePrecursor=2
- ▶ itol=0.5

| AA    | a              | a*             | aΔ      | b               | b*             | bΔ              | y              | y*             | yΔ             | AA    |
|-------|----------------|----------------|---------|-----------------|----------------|-----------------|----------------|----------------|----------------|-------|
| G(1)  | 361034         | 0.000          | 0.000   | 590024          | 0.000          | 0.000           | 1174.630       | 1107.630       | 1066.667       | G(13) |
| T(2)  | 1311092        | 0.000          | 1141071 | 1191076         | 0.000          | 1411099         | 1117.630       | 1300.630       | 1209.646       | T(12) |
| G(3)  | 1108111        | 0.000          | 1191092 | 1191098         | 0.000          | 1101107         | 1119.630       | 1119.630       | 1106.666       | G(11) |
| A(4)  | <b>759 140</b> | 0.000          | 1451110 | <b>287 133</b>  | 0.000          | 1091124         | 1119.630       | 1142.643       | 1141.577       | A(10) |
| S(5)  | 1121110        | 0.000          | 1091124 | <b>454 133</b>  | 0.000          | 1136122         | 1119.630       | 1112.521       | 1111.520       | S(9)  |
| G(6)  | 1011110        | 0.000          | 1091124 | 1111110         | 0.000          | 1111114         | <b>971 302</b> | 1011.521       | <b>101 341</b> | G(8)  |
| S(7)  | 1019110        | 0.000          | 1019110 | 1019110         | 0.000          | <b>580 176</b>  | 1015.510       | 1017.509       | 1009.500       | S(7)  |
| F(8)  | <b>717 260</b> | 0.000          | 1009110 | 1009110         | 0.000          | <b>727 245</b>  | <b>717 490</b> | <b>760 472</b> | 0.000          | F(6)  |
| K(9)  | 1041105        | <b>626 320</b> | 1041105 | <b>873 300</b>  | <b>856 324</b> | 1001100         | <b>636 430</b> | 1011.492       | 0.000          | K(5)  |
| L(10) | 1011109        | 1011111        | 1011111 | 1011111         | 1011111        | <b>906 424</b>  | <b>302 353</b> | 1011.492       | 0.000          | L(4)  |
| N(11) | 1107102        | 1005100        | 1004102 | <b>1100 477</b> | 1001101        | <b>1002 467</b> | <b>303 291</b> | 1011.492       | 0.000          | N(3)  |
| K(12) | 1100107        | 1100101        | 1100101 | <b>1228 572</b> | 1111100        | <b>1210 562</b> | <b>275 208</b> | 1011.492       | 0.000          | K(2)  |
| K(13) | 1100107        | 1100100        | 1100100 | 1100100         | 1100100        | 1100100         | 1011.492       | 1100100        | 0.000          | K(1)  |



# sp | P15864 | H12\_MOUSE

KAS Phospho GPPVSELITK  
79.97

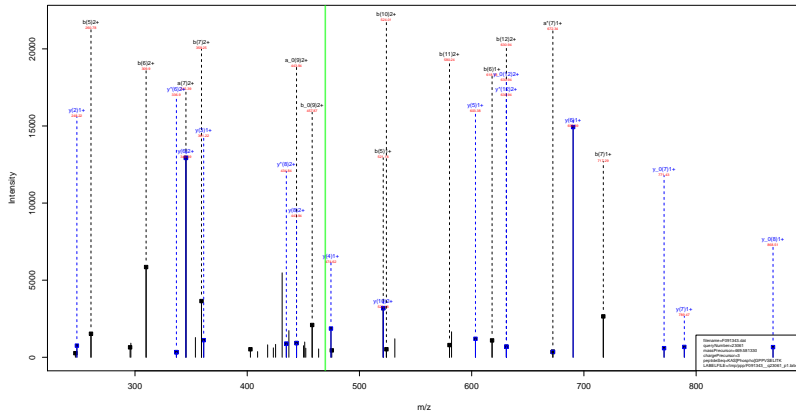

# sp | P15864 | H12\_MOUSE

KAS Phospho 79.97 GPPVSELITK

- ▶ fragmentation table for charge state 1+
- ▶ specType=cid
- ▶ score=54.88
- ▶ F091343.dat
- ▶ query=q23061\_p1
- ▶ precursor=469.581330
- ▶ chargePrecursor=3
- ▶ itol=0.5

| AA  | a        | a*             | a $\Delta$     | b              | b*       | b $\Delta$ | y              | y*       | y $\Delta$     | AA  |
|-----|----------|----------------|----------------|----------------|----------|------------|----------------|----------|----------------|-----|
| R1  | 691.407  | 694.001        | 0.000          | 1299.310       | 1312.076 | 0.000      | 2466.720       | 2469.723 | 1398.739       | R13 |
| A2  | 672.244  | 1205.218       | 522.974        | 2061.399       | 1881.113 | 0.000      | 2210.634       | 2207.608 | 1280.024       | A12 |
| S3  | 678.184  | 622.118        | 556.066        | 381.150        | 400.114  | 688.964    | 3207.909       | 3198.916 | 2108.988       | S13 |
| G4  | 596.164  | 379.138        | 217.026        | 424.163        | 407.131  | 406.149    | 1040.959       | 1023.972 | 2022.988       | G10 |
| P5  | 693.217  | 476.190        | <b>475.206</b> | <b>521.212</b> | 204.181  | 601.201    | 661.217        | 666.211  | 666.211        | P10 |
| T6  | 690.218  | 673.241        | 316.229        | <b>618.205</b> | 601.208  | 602.214    | 660.211        | 669.208  | <b>668.214</b> | T10 |
| V7  | 699.208  | <b>672.332</b> | 671.320        | <b>717.333</b> | 700.327  | 699.323    | <b>699.472</b> | 722.445  | <b>771.461</b> | V10 |
| S8  | 676.470  | 759.454        | 758.981        | 804.561        | 787.439  | 406.401    | <b>690.403</b> | 673.371  | <b>672.383</b> | S10 |
| E9  | 695.413  | 688.398        | 687.402        | 913.408        | 916.381  | 615.397    | <b>663.371</b> | 588.343  | 585.341        | E10 |
| L10 | 1218.609 | 621.470        | 3009.499       | 4449.492       | 2209.466 | 3128.481   | <b>474.329</b> | 497.326  | 456.316        | L10 |
| I11 | 1131.581 | 1114.554       | 1113.570       | 1119.576       | 1142.548 | 1141.565   | <b>361.245</b> | 344.238  | 343.234        | I10 |
| H12 | 1212.629 | 1211.602       | 1210.618       | 1210.624       | 1243.597 | 1242.613   | <b>248.160</b> | 231.134  | 230.130        | H10 |
| K13 | 1386.224 | 1343.661       | 1342.712       | 1389.719       | 1371.662 | 1370.708   | 347.111        | 1.30888  | 0.000          | K10 |

# sp | P15864 | H12\_MOUSE

KAS<sup>Phospho</sup> 79.97 GPPVSELITK

- ▶ fragmentation table for charge state 2+
- ▶ specType=cid
- ▶ score=54.88
- ▶ F091343.dat
- ▶ query=q23061\_p1
- ▶ precursor=469.581330
- ▶ chargePrecursor=3
- ▶ itol=0.5

| AA | a              | a <sup>+</sup> | a+0            | b              | b <sup>+</sup> | b+0            | y              | y <sup>+</sup> | y+0            | AA   |
|----|----------------|----------------|----------------|----------------|----------------|----------------|----------------|----------------|----------------|------|
| K  | 51.057         | 42.514         | 0.503          | 65.055         | 56.541         | 0.504          | 701.850        | 706.325        | 694.893        | K113 |
| A  | 86.976         | 78.463         | 0.504          | 102.971        | 92.280         | 0.505          | 438.821        | <b>431.307</b> | <b>630.815</b> | A127 |
| S  | 170.075        | 161.562        | 161.070        | 184.072        | 175.559        | 175.067        | 604.301        | 595.787        | 595.297        | S111 |
| G  | 188.986        | 180.472        | 180.980        | 212.981        | 204.470        | 203.978        | <b>520.803</b> | 511.289        | 511.798        | G100 |
| P  | <b>247.112</b> | 238.599        | 238.107        | <b>261.110</b> | 252.596        | 252.104        | 467.207        | 467.719        | 463.207        | P109 |
| T  | <b>295.159</b> | 287.645        | 288.153        | <b>306.158</b> | 297.643        | 297.151        | <b>443.766</b> | <b>435.253</b> | <b>434.761</b> | T100 |
| V  | <b>345.173</b> | <b>336.659</b> | 336.167        | <b>359.170</b> | 350.657        | 350.165        | 492.170        | 488.169        | 488.174        | V109 |
| S  | 388.689        | 380.175        | 379.683        | <b>402.686</b> | 394.171        | 393.681        | <b>345.705</b> | <b>337.192</b> | <b>336.700</b> | S10  |
| E  | 453.210        | 444.697        | <b>444.205</b> | 469.202        | 458.684        | <b>458.202</b> | 387.180        | 201.676        | 203.184        | E10  |
| L  | 659.752        | 651.239        | 650.747        | <b>523.750</b> | 515.237        | 514.745        | 237.660        | 228.158        | 228.667        | L100 |
| I  | 596.294        | 587.781        | 587.289        | <b>580.292</b> | 571.778        | 571.286        | 181.126        | 177.613        | 172.121        | I10  |
| T  | 616.816        | 608.303        | 607.811        | <b>630.815</b> | 622.302        | 621.810        | 124.588        | 116.071        | 115.579        | T10  |
| K  | 680.885        | <b>672.352</b> | <b>671.860</b> | 694.863        | 686.350        | 685.858        | 74.060         | 65.547         | 0.504          | K11  |

# sp | P15864 | H12\_MOUSE

KAS Phospho GPPVSELITK  
79.97

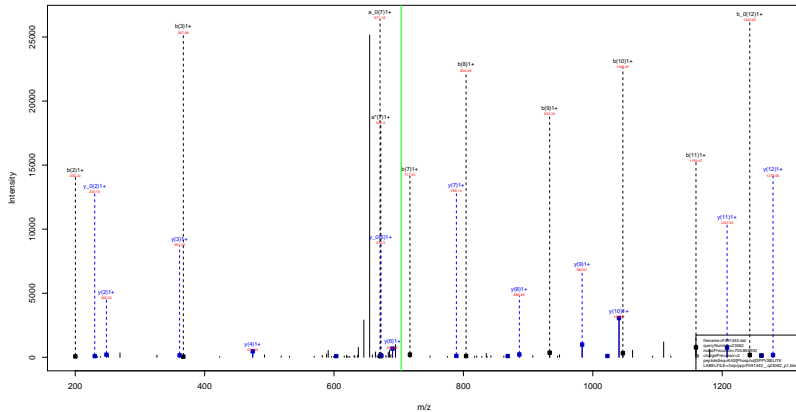

# sp | P15864 | H12\_MOUSE

KAS Phospho 79.97 GPPVSELITK

- ▶ fragmentation table for charge state 1+
- ▶ specType=cid
- ▶ score=82.96
- ▶ F091343.dat
- ▶ query=q23062.p1
- ▶ precursor=703.868930
- ▶ chargePrecursor=2
- ▶ itol=0.5

| AA  | a   | a'  | a'' | b   | b'  | b'' | y   | y'  | y'' | AA  |
|-----|-----|-----|-----|-----|-----|-----|-----|-----|-----|-----|
| K1  | 101 | 100 | 98  | 99  | 100 | 112 | 0   | 0   | 0   | K12 |
| A2  | 172 | 174 | 150 | 151 | 0   | 0   | 0   | 0   | 0   | A12 |
| S3  | 330 | 333 | 300 | 311 | 311 | 330 | 333 | 300 | 311 | S11 |
| G4  | 356 | 354 | 330 | 330 | 330 | 354 | 356 | 330 | 330 | G10 |
| P5  | 403 | 411 | 430 | 430 | 430 | 403 | 403 | 411 | 430 | P10 |
| T6  | 480 | 478 | 444 | 444 | 480 | 480 | 480 | 478 | 444 | T10 |
| V7  | 539 | 536 | 512 | 512 | 539 | 539 | 539 | 512 | 512 | V11 |
| S8  | 574 | 571 | 550 | 548 | 550 | 574 | 574 | 550 | 548 | S10 |
| E9  | 605 | 613 | 600 | 600 | 605 | 605 | 605 | 613 | 600 | E10 |
| L10 | 618 | 618 | 611 | 611 | 618 | 618 | 618 | 611 | 611 | L10 |
| D11 | 633 | 630 | 614 | 609 | 611 | 633 | 633 | 614 | 609 | D10 |
| I12 | 632 | 626 | 613 | 602 | 614 | 632 | 632 | 613 | 602 | I10 |
| K13 | 630 | 624 | 618 | 613 | 630 | 630 | 630 | 618 | 613 | K10 |

# sp | P68433 | H31\_MOUSE

EIAQDFKT <sup>Phospho</sup> DLR  
79.97

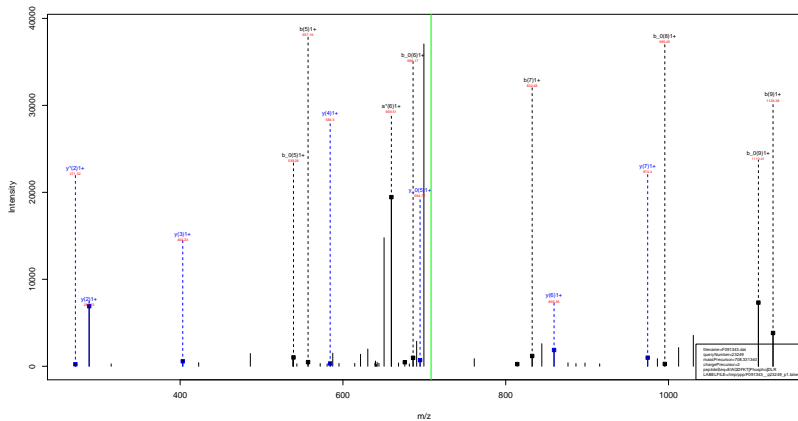

# sp | P68433 | H31\_MOUSE

EIAQDFKT<sup>Phospho</sup> DLR  
79.97

- ▶ fragmentation table for charge state 1+
- ▶ specType=cid
- ▶ score=30.41
- ▶ F091343.dat
- ▶ query=q23249\_p1
- ▶ precursor=708.331340
- ▶ chargePrecursor=2
- ▶ itol=0.5

| AA    | a              | a*             | a,Δ      | b               | b*       | b,Δ             | y               | y*             | y,Δ            | AA    |
|-------|----------------|----------------|----------|-----------------|----------|-----------------|-----------------|----------------|----------------|-------|
| E[1]  | 102.055        | 0.000          | 84.044   | 4.38383         | 0.000    | 4.12439         | 143.667         | 1.996530       | 1.97048        | E[1]  |
| T[2]  | 173.330        | 0.000          | 139.329  | 343.134         | 0.000    | 226.373         | 1288.844        | 1328.820       | 2284.803       | T[2]  |
| A[3]  | 209.176        | 0.000          | 208.345  | 314.173         | 0.000    | 206.150         | 1173.520        | 1176.500       | 1105.519       | A[3]  |
| Q[4]  | 314.230        | 387.200        | 390.224  | 537.257         | 472.303  | 459.098         | 1280.464        | 1280.464       | 1044.842       | Q[4]  |
| D[5]  | 429.012        | 612.200        | 511.281  | 757.293         | 628.767  | 579.246         | 1681.488        | 1681.488       | 1288.424       | D[5]  |
| F[6]  | <b>676.330</b> | <b>654.304</b> | 656.320  | 1097.323        | 1097.268 | <b>686.314</b>  | <b>859.487</b>  | 842.320        | 841.397        | F[6]  |
| K[7]  | 804.420        | 807.300        | 786.414  | <b>812.428</b>  | 815.361  | <b>814.409</b>  | 812.339         | 806.112        | <b>694.328</b> | K[7]  |
| T[8]  | 985.439        | 985.412        | 987.428  | 1171.419        | 1098.407 | <b>995.423</b>  | <b>1341.264</b> | 987.212        | 985.211        | T[8]  |
| L[9]  | 1100.466       | 1074.439       | 1092.450 | <b>1128.463</b> | 1114.454 | <b>1110.450</b> | <b>483.230</b>  | 985.260        | 982.219        | L[9]  |
| L[10] | 1313.500       | 1186.520       | 1198.531 | 1247.543        | 1224.518 | 1223.534        | <b>288.203</b>  | <b>271.176</b> | 0.000          | L[10] |
| R[11] | 1389.031       | 1382.620       | 1334.641 | 1339.646        | 1380.620 | 1319.636        | 176.110         | 158.000        | 0.000          | R[11] |

# sp | P68433 | H31\_MOUSE

EIAQDFKT <sup>Phospho</sup> DLR  
79.97

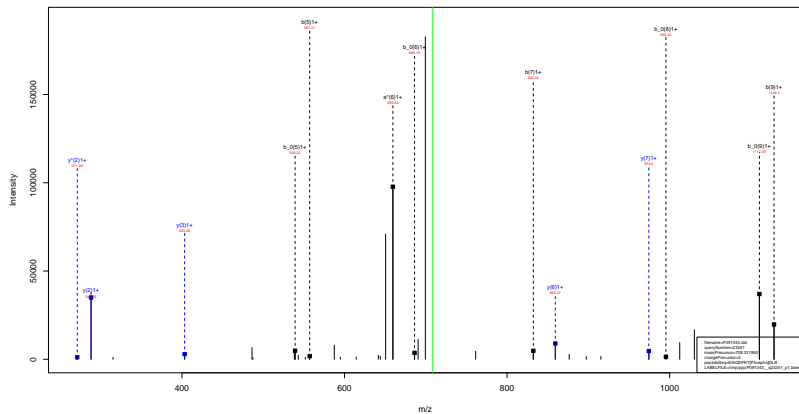

Sequence: P68433\_001  
 Query: RunSet=23251  
 Method: PhosphoScan-705210005  
 Charge: PhosphoScan2  
 MS/MS: MS/MS (20000) PhosphoScan2  
 LMB: P68433\_001 (PhosphoScan2)



# sp | P68433 | H31\_MOUSE

EIAQDFKT<sup>Phospho</sup>DLR  
79.97

- ▶ fragmentation table for charge state 1+
- ▶ specType=cid
- ▶ score=47.14
- ▶ F091343.dat
- ▶ query=q23251\_p1
- ▶ precursor=708.331950
- ▶ chargePrecursor=2
- ▶ itol=0.5

| AA  | a        | a*             | a,Δ      | b               | b*       | b,Δ             | y              | y*             | y,Δ      | AA      |     |
|-----|----------|----------------|----------|-----------------|----------|-----------------|----------------|----------------|----------|---------|-----|
| E L | 102.095  | 0.000          | 84.044   | 4.38388         | 0.000    | 4.12439         | 145.667        | 1.99650        | 1.99748  | E L     |     |
| H D | 215.330  | 0.000          | 139.128  | 243.134         | 0.000    | 226.313         | 1288.844       | 1289.828       | 1289.803 | H D     |     |
| A S | 269.176  | 0.000          | 208.348  | 314.173         | 0.000    | 296.150         | 1113.530       | 1116.500       | 1115.519 | A D     |     |
| Q G | 314.280  | 387.200        | 398.224  | 467.257         | 0.20311  | 476.201         | 1099.498       | 1100.468       | 1104.432 | Q G     |     |
| D T | 429.424  | 612.200        | 511.268  | 587.293         | 0.68268  | 598.236         | 874.424        | 881.400        | 889.424  | D T     |     |
| F I | 574.528  | <b>654.304</b> | 658.252  | 729.283         | 0.97248  | 738.226         | <b>638.316</b> | <b>659.487</b> | 662.350  | 641.397 | F I |
| K Y | 604.432  | 687.380        | 706.414  | <b>812.428</b>  | 0.315381 | 814.402         | 614.359        | 666.112        | 664.310  | K G     |     |
| L E | 665.436  | 685.412        | 687.428  | 775.419         | 0.668407 | <b>805.423</b>  | 524.254        | 587.112        | 585.211  | L G     |     |
| V Q | 1100.468 | 1074.430       | 1076.456 | <b>1128.461</b> | 0.111414 | <b>1110.450</b> | <b>403.230</b> | 395.260        | 392.219  | V S     |     |
| L D | 1313.500 | 1186.520       | 1188.536 | 1241.541        | 0.224518 | 1223.534        | <b>288.203</b> | <b>271.176</b> | 0.000    | L D     |     |
| R I | 1389.031 | 1362.620       | 1354.641 | 1339.646        | 0.000000 | 1319.636        | 176.110        | 158.000        | 0.000    | R I     |     |



# sp | P62806 | H4\_MOUSE

RIS<sup>Phospho</sup> GLIYEETR  
79.97

- ▶ fragmentation table for charge state 1+
- ▶ specType=cid
- ▶ score=78.91
- ▶ F091343.dat
- ▶ query=q23272\_p1
- ▶ precursor=708.846040
- ▶ chargePrecursor=2
- ▶ itol=0.5

| AA    | a              | a*       | a <sup>+</sup> | b               | b*       | b <sup>+</sup>  | y               | y*       | y <sup>+</sup> | AA    |
|-------|----------------|----------|----------------|-----------------|----------|-----------------|-----------------|----------|----------------|-------|
| R(1)  | 120.113        | 112.087  | 0.000          | 277.192         | 140.087  | 0.000           | 1428.888        | 1369.862 | 1368.878       | R(11) |
| T(2)  | 282.302        | 278.174  | 0.000          | <b>276.192</b>  | 278.174  | 0.000           | 1388.787        | 1349.760 | 1348.777       | Y(8)  |
| S(3)  | 309.106        | 302.100  | 385.100        | 427.591         | 420.104  | 418.100         | <b>1147.503</b> | 1130.471 | 1129.461       | S(9)  |
| G(4)  | 339.481        | 330.120  | 440.200        | 497.591         | 477.180  | 476.200         | <b>880.505</b>  | 863.470  | <b>862.404</b> | G(8)  |
| L(5)  | <b>378.301</b> | 368.270  | 580.200        | <b>607.200</b>  | 589.270  | 588.200         | <b>821.463</b>  | 804.431  | 803.471        | L(7)  |
| V(6)  | 352.762        | 345.333  | 474.325        | <b>720.385</b>  | 703.324  | 702.325         | <b>810.399</b>  | 793.373  | 792.388        | V(6)  |
| V(7)  | 303.430        | 298.427  | 317.430        | <b>881.444</b>  | 864.411  | 863.431         | <b>607.315</b>  | 600.290  | <b>679.305</b> | V(6)  |
| E(8)  | 384.451        | 382.480  | 388.480        | <b>1012.486</b> | 990.450  | 989.470         | <b>524.252</b>  | 517.225  | 516.241        | E(8)  |
| D(9)  | 1113.524       | 1099.500 | 1099.524       | <b>1141.528</b> | 1124.500 | 1123.510        | <b>405.209</b>  | 398.181  | <b>387.199</b> | D(9)  |
| T(10) | 1314.580       | 1287.550 | 1288.571       | 1342.571        | 1325.550 | <b>1224.566</b> | <b>276.187</b>  | 269.140  | 268.151        | T(10) |
| R(11) | 1310.603       | 1283.600 | 1284.621       | 1308.621        | 1281.603 | 1280.600        | 176.118         | 168.091  | 0.000          | R(11) |



# sp | P62806 | H4\_MOUSE

RIS Phospho  
79.97 GLIYEETR

- ▶ fragmentation table for charge state 1+
- ▶ specType=cid
- ▶ score=75.45
- ▶ F091343.dat
- ▶ query=q23273\_p1
- ▶ precursor=708.846960
- ▶ chargePrecursor=2
- ▶ itol=0.5

| AA    | a              | a*       | a,0      | b               | b*       | b,0      | y               | y*       | y,0            | AA    |
|-------|----------------|----------|----------|-----------------|----------|----------|-----------------|----------|----------------|-------|
| R[1]  | 130.111        | 112.087  | 0.000    | 112.087         | 140.082  | 0.000    | 140.080         | 1399.992 | 1398.018       | R[1]  |
| T[2]  | 282.302        | 229.191  | 0.000    | <b>270.192</b>  | 295.186  | 0.000    | 299.191         | 1243.986 | 1242.997       | Y[2]  |
| S[3]  | 309.109        | 190.100  | 395.101  | 410.101         | 420.104  | 419.100  | <b>1147.503</b> | 1130.471 | 1129.461       | S[3]  |
| Q[4]  | 399.499        | 481.101  | 440.201  | 410.101         | 410.104  | 419.100  | <b>863.505</b>  | 862.471  | 862.004        | Q[4]  |
| L[5]  | <b>378.301</b> | 682.201  | 580.201  | <b>607.206</b>  | 616.210  | 609.205  | <b>821.463</b>  | 806.461  | 806.011        | L[5]  |
| V[6]  | 552.202        | 675.203  | 674.203  | <b>720.300</b>  | 720.304  | 720.290  | <b>810.390</b>  | 793.373  | 792.369        | V[6]  |
| V[7]  | 655.433        | 680.427  | 677.416  | <b>861.444</b>  | 866.417  | 865.411  | <b>697.315</b>  | 680.291  | 679.301        | V[7]  |
| E[8]  | 684.401        | 585.403  | 585.403  | <b>1012.466</b> | 1006.460 | 1004.418 | <b>534.252</b>  | 517.225  | 516.241        | E[8]  |
| E[9]  | 1113.204       | 670.201  | 670.201  | <b>1141.525</b> | 1146.500 | 1123.510 | <b>405.200</b>  | 388.181  | <b>387.193</b> | E[9]  |
| T[10] | 1314.202       | 1187.200 | 1186.211 | 1242.211        | 1225.202 | 1224.109 | <b>276.187</b>  | 258.141  | 258.101        | T[10] |
| R[11] | 1310.001       | 1353.000 | 1352.011 | 1356.010        | 1361.001 | 1360.000 | 135.110         | 158.000  | 0.000          | R[11] |



# sp | P43274 | H14\_MOUSE

KTS Phospho 79.97 GPPVSELITK

- ▶ fragmentation table for charge state 1+
- ▶ specType=cid
- ▶ score=46.84
- ▶ F091343.dat
- ▶ query=q23782\_p1
- ▶ precursor=479.584590
- ▶ chargePrecursor=3
- ▶ itol=0.5

| AA    | a              | a*             | a,Δ      | b              | b*       | b,Δ      | y              | y*       | y,Δ            | AA    |
|-------|----------------|----------------|----------|----------------|----------|----------|----------------|----------|----------------|-------|
| R(1)  | 491.207        | 494.001        | 0.000    | 129.101        | 132.076  | 0.000    | 2436.146       | 2419.713 | 16.433         | R(13) |
| T(2)  | 492.027        | 495.238        | 184.742  | <b>230.150</b> | 233.123  | 217.139  | 1300.065       | 1291.618 | 8.447          | T(12) |
| S(3)  | <b>369.153</b> | 372.127        | 351.243  | 399.149        | 400.122  | 479.139  | 1227.500       | 1139.376 | 88.124         | S(13) |
| G(4)  | 426.575        | 430.138        | 406.101  | <b>454.170</b> | 437.143  | 436.139  | 1040.559       | 1023.572 | 16.987         | G(10) |
| P(5)  | 412.228        | 416.217        | 350.217  | <b>351.222</b> | 354.186  | 333.212  | 863.517        | 866.513  | -2.996         | P(10) |
| F(6)  | 432.009        | <b>601.234</b> | 460.219  | <b>448.275</b> | 451.249  | 432.273  | 980.301        | 899.498  | 80.803         | F(14) |
| V(7)  | 419.249        | 422.222        | 350.230  | <b>747.345</b> | 730.317  | 729.313  | <b>739.472</b> | 732.445  | <b>771.461</b> | V(11) |
| S(8)  | 406.481        | <b>789.354</b> | 748.331  | 824.370        | 817.349  | 816.309  | <b>690.403</b> | 673.371  | 17.032         | S(6)  |
| E(9)  | 425.423        | 428.207        | 417.413  | 963.419        | 946.392  | 845.408  | <b>603.371</b> | 586.345  | 17.026         | E(5)  |
| L(10) | 434.507        | 437.481        | 420.491  | 1079.503       | 1069.476 | 1058.490 | 654.303        | 497.305  | 169.998        | L(6)  |
| I(11) | 1161.892       | 1144.505       | 1143.501 | 1109.580       | 1112.560 | 1111.576 | <b>361.245</b> | 344.218  | 17.027         | I(1)  |
| H(12) | 102.839        | 106.613        | 1248.620 | 1250.134       | 1271.638 | 1272.624 | <b>248.160</b> | 231.134  | <b>230.150</b> | H(2)  |
| K(13) | 1080.124       | 1073.108       | 1127.224 | 1418.729       | 1401.703 | 1400.719 | 347.111        | 1.30088  | 0.000          | K(1)  |

# sp | P43274 | H14\_MOUSE

KTS<sup>Phospho</sup> GPPVSELITK  
79.97

- ▶ fragmentation table for charge state 2+
- ▶ specType=cid
- ▶ score=46.84
- ▶ F091343.dat
- ▶ query=q23782\_p1
- ▶ precursor=479.584590
- ▶ chargePrecursor=3
- ▶ itol=0.5

| AA | a  | a*             | a.Δ     | b       | b*             | b.Δ            | y              | y*             | y.Δ            | AA             |   |
|----|----|----------------|---------|---------|----------------|----------------|----------------|----------------|----------------|----------------|---|
| K  | 1  | 51.057         | 42.544  | 0.504   | 65.055         | 56.541         | 0.504          | 710.073        | 710.205        | 709.868        | K |
| V  | 2  | 110.581        | 93.068  | 92.576  | 115.579        | 107.065        | 106.581        | 694.028        | <b>646.313</b> | <b>645.821</b> | V |
| S  | 3  | 195.090        | 176.587 | 176.095 | 199.078        | 190.565        | 190.078        | 605.302        | <b>595.789</b> | <b>595.297</b> | S |
| G  | 4  | 271.591        | 255.088 | 254.596 | 277.589        | 269.076        | 268.591        | 520.031        | <b>512.290</b> | <b>511.798</b> | G |
| P  | 5  | 350.117        | 333.614 | 333.122 | <b>376.115</b> | 367.602        | 367.110        | 460.207        | 463.779        | 463.287        | P |
| T  | 6  | <b>310.644</b> | 300.141 | 300.639 | <b>324.641</b> | <b>316.128</b> | <b>315.636</b> | <b>443.766</b> | <b>435.253</b> | <b>434.761</b> | T |
| V  | 7  | <b>360.178</b> | 351.675 | 351.173 | <b>374.175</b> | 365.662        | 365.170        | 395.226        | 386.713        | 386.214        | V |
| S  | 8  | 403.684        | 395.181 | 394.689 | <b>417.691</b> | 409.178        | 408.686        | <b>345.705</b> | 337.192        | 336.700        | S |
| E  | 9  | <b>468.215</b> | 459.712 | 459.210 | <b>482.213</b> | <b>473.700</b> | 473.208        | 302.197        | 293.676        | 293.184        | E |
| L  | 10 | 524.727        | 516.224 | 515.722 | <b>538.725</b> | 530.212        | 529.720        | 237.688        | 229.168        | 228.676        | L |
| I  | 11 | 581.299        | 572.796 | 572.294 | <b>595.297</b> | 586.784        | 586.292        | 183.126        | 174.605        | 174.113        | I |
| T  | 12 | 631.821        | 623.318 | 622.816 | <b>645.821</b> | <b>637.307</b> | <b>636.815</b> | 124.588        | 116.071        | 115.579        | T |
| K  | 13 | 695.871        | 687.368 | 686.866 | 700.868        | 701.355        | 700.863        | 74.060         | 65.547         | 65.044         | K |



# sp | P43274 | H14\_MOUSE

KTS Phospho GPPVSELITK  
79.97

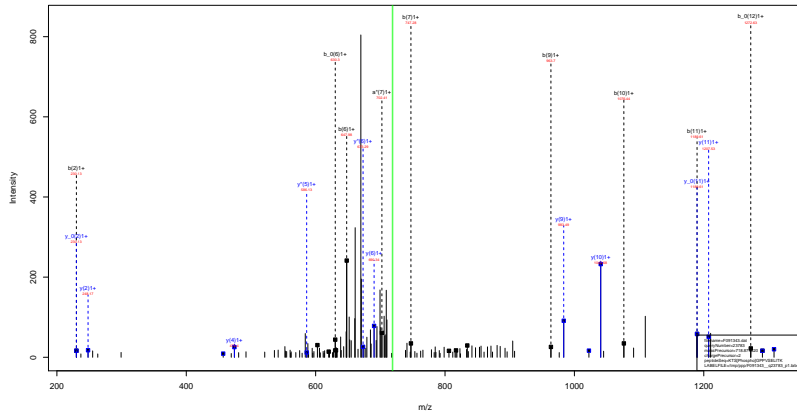

# sp | P43274 | H14\_MOUSE

KTS Phospho 79.97 GPPVSELITK

- ▶ fragmentation table for charge state 1+
- ▶ specType=cid
- ▶ score=70.19
- ▶ F091343.dat
- ▶ query=q23783\_p1
- ▶ precursor=718.874620
- ▶ chargePrecursor=2
- ▶ itol=0.5

| AA | a   | a'  | a <sub>0</sub> | b   | b'  | b <sub>0</sub> | y   | y'  | y <sub>0</sub> | AA |
|----|-----|-----|----------------|-----|-----|----------------|-----|-----|----------------|----|
| K  | 101 | 102 | 98             | 100 | 120 | 112            | 100 | 143 | 140            | K  |
| T  | 103 | 105 | 100            | 104 | 126 | 118            | 104 | 145 | 142            | T  |
| S  | 104 | 106 | 101            | 105 | 127 | 119            | 105 | 146 | 143            | S  |
| G  | 105 | 107 | 102            | 106 | 128 | 120            | 106 | 147 | 144            | G  |
| P  | 106 | 108 | 103            | 107 | 129 | 121            | 107 | 148 | 145            | P  |
| T  | 107 | 109 | 104            | 108 | 130 | 122            | 108 | 149 | 146            | T  |
| I  | 108 | 110 | 105            | 109 | 131 | 123            | 109 | 150 | 147            | I  |
| V  | 109 | 111 | 106            | 110 | 132 | 124            | 110 | 151 | 148            | V  |
| S  | 110 | 112 | 107            | 111 | 133 | 125            | 111 | 152 | 149            | S  |
| E  | 111 | 113 | 108            | 112 | 134 | 126            | 112 | 153 | 150            | E  |
| D  | 112 | 114 | 109            | 113 | 135 | 127            | 113 | 154 | 151            | D  |
| N  | 113 | 115 | 110            | 114 | 136 | 128            | 114 | 155 | 152            | N  |
| K  | 114 | 116 | 111            | 115 | 137 | 129            | 115 | 156 | 153            | K  |
| T  | 115 | 117 | 112            | 116 | 138 | 130            | 116 | 157 | 154            | T  |
| S  | 116 | 118 | 113            | 117 | 139 | 131            | 117 | 158 | 155            | S  |
| G  | 117 | 119 | 114            | 118 | 140 | 132            | 118 | 159 | 156            | G  |
| P  | 118 | 120 | 115            | 119 | 141 | 133            | 119 | 160 | 157            | P  |
| T  | 119 | 121 | 116            | 120 | 142 | 134            | 120 | 161 | 158            | T  |
| I  | 120 | 122 | 117            | 121 | 143 | 135            | 121 | 162 | 159            | I  |
| V  | 121 | 123 | 118            | 122 | 144 | 136            | 122 | 163 | 160            | V  |
| S  | 122 | 124 | 119            | 123 | 145 | 137            | 123 | 164 | 161            | S  |
| E  | 123 | 125 | 120            | 124 | 146 | 138            | 124 | 165 | 162            | E  |
| D  | 124 | 126 | 121            | 125 | 147 | 139            | 125 | 166 | 163            | D  |
| N  | 125 | 127 | 122            | 126 | 148 | 140            | 126 | 167 | 164            | N  |
| K  | 126 | 128 | 123            | 127 | 149 | 141            | 127 | 168 | 165            | K  |
| T  | 127 | 129 | 124            | 128 | 150 | 142            | 128 | 169 | 166            | T  |
| S  | 128 | 130 | 125            | 129 | 151 | 143            | 129 | 170 | 167            | S  |
| G  | 129 | 131 | 126            | 130 | 152 | 144            | 130 | 171 | 168            | G  |
| P  | 130 | 132 | 127            | 131 | 153 | 145            | 131 | 172 | 169            | P  |
| T  | 131 | 133 | 128            | 132 | 154 | 146            | 132 | 173 | 170            | T  |
| I  | 132 | 134 | 129            | 133 | 155 | 147            | 133 | 174 | 171            | I  |
| V  | 133 | 135 | 130            | 134 | 156 | 148            | 134 | 175 | 172            | V  |
| S  | 134 | 136 | 131            | 135 | 157 | 149            | 135 | 176 | 173            | S  |
| E  | 135 | 137 | 132            | 136 | 158 | 150            | 136 | 177 | 174            | E  |
| D  | 136 | 138 | 133            | 137 | 159 | 151            | 137 | 178 | 175            | D  |
| N  | 137 | 139 | 134            | 138 | 160 | 152            | 138 | 179 | 176            | N  |
| K  | 138 | 140 | 135            | 139 | 161 | 153            | 139 | 180 | 177            | K  |
| T  | 139 | 141 | 136            | 140 | 162 | 154            | 140 | 181 | 178            | T  |
| S  | 140 | 142 | 137            | 141 | 163 | 155            | 141 | 182 | 179            | S  |
| G  | 141 | 143 | 138            | 142 | 164 | 156            | 142 | 183 | 180            | G  |
| P  | 142 | 144 | 139            | 143 | 165 | 157            | 143 | 184 | 181            | P  |
| T  | 143 | 145 | 140            | 144 | 166 | 158            | 144 | 185 | 182            | T  |
| I  | 144 | 146 | 141            | 145 | 167 | 159            | 145 | 186 | 183            | I  |
| V  | 145 | 147 | 142            | 146 | 168 | 160            | 146 | 187 | 184            | V  |
| S  | 146 | 148 | 143            | 147 | 169 | 161            | 147 | 188 | 185            | S  |
| E  | 147 | 149 | 144            | 148 | 170 | 162            | 148 | 189 | 186            | E  |
| D  | 148 | 150 | 145            | 149 | 171 | 163            | 149 | 190 | 187            | D  |
| N  | 149 | 151 | 146            | 150 | 172 | 164            | 150 | 191 | 188            | N  |
| K  | 150 | 152 | 147            | 151 | 173 | 165            | 151 | 192 | 189            | K  |
| T  | 151 | 153 | 148            | 152 | 174 | 166            | 152 | 193 | 190            | T  |
| S  | 152 | 154 | 149            | 153 | 175 | 167            | 153 | 194 | 191            | S  |
| G  | 153 | 155 | 150            | 154 | 176 | 168            | 154 | 195 | 192            | G  |
| P  | 154 | 156 | 151            | 155 | 177 | 169            | 155 | 196 | 193            | P  |
| T  | 155 | 157 | 152            | 156 | 178 | 170            | 156 | 197 | 194            | T  |
| I  | 156 | 158 | 153            | 157 | 179 | 171            | 157 | 198 | 195            | I  |
| V  | 157 | 159 | 154            | 158 | 180 | 172            | 158 | 199 | 196            | V  |
| S  | 158 | 160 | 155            | 159 | 181 | 173            | 159 | 200 | 197            | S  |
| E  | 159 | 161 | 156            | 160 | 182 | 174            | 160 | 201 | 198            | E  |
| D  | 160 | 162 | 157            | 161 | 183 | 175            | 161 | 202 | 199            | D  |
| N  | 161 | 163 | 158            | 162 | 184 | 176            | 162 | 203 | 200            | N  |
| K  | 162 | 164 | 159            | 163 | 185 | 177            | 163 | 204 | 201            | K  |
| T  | 163 | 165 | 160            | 164 | 186 | 178            | 164 | 205 | 202            | T  |
| S  | 164 | 166 | 161            | 165 | 187 | 179            | 165 | 206 | 203            | S  |
| G  | 165 | 167 | 162            | 166 | 188 | 180            | 166 | 207 | 204            | G  |
| P  | 166 | 168 | 163            | 167 | 189 | 181            | 167 | 208 | 205            | P  |
| T  | 167 | 169 | 164            | 168 | 190 | 182            | 168 | 209 | 206            | T  |
| I  | 168 | 170 | 165            | 169 | 191 | 183            | 169 | 210 | 207            | I  |
| V  | 169 | 171 | 166            | 170 | 192 | 184            | 170 | 211 | 208            | V  |
| S  | 170 | 172 | 167            | 171 | 193 | 185            | 171 | 212 | 209            | S  |
| E  | 171 | 173 | 168            | 172 | 194 | 186            | 172 | 213 | 210            | E  |
| D  | 172 | 174 | 169            | 173 | 195 | 187            | 173 | 214 | 211            | D  |
| N  | 173 | 175 | 170            | 174 | 196 | 188            | 174 | 215 | 212            | N  |
| K  | 174 | 176 | 171            | 175 | 197 | 189            | 175 | 216 | 213            | K  |
| T  | 175 | 177 | 172            | 176 | 198 | 190            | 176 | 217 | 214            | T  |
| S  | 176 | 178 | 173            | 177 | 199 | 191            | 177 | 218 | 215            | S  |
| G  | 177 | 179 | 174            | 178 | 200 | 192            | 178 | 219 | 216            | G  |
| P  | 178 | 180 | 175            | 179 | 201 | 193            | 179 | 220 | 217            | P  |
| T  | 179 | 181 | 176            | 180 | 202 | 194            | 180 | 221 | 218            | T  |
| I  | 180 | 182 | 177            | 181 | 203 | 195            | 181 | 222 | 219            | I  |
| V  | 181 | 183 | 178            | 182 | 204 | 196            | 182 | 223 | 220            | V  |
| S  | 182 | 184 | 179            | 183 | 205 | 197            | 183 | 224 | 221            | S  |
| E  | 183 | 185 | 180            | 184 | 206 | 198            | 184 | 225 | 222            | E  |
| D  | 184 | 186 | 181            | 185 | 207 | 199            | 185 | 226 | 223            | D  |
| N  | 185 | 187 | 182            | 186 | 208 | 200            | 186 | 227 | 224            | N  |
| K  | 186 | 188 | 183            | 187 | 209 | 201            | 187 | 228 | 225            | K  |
| T  | 187 | 189 | 184            | 188 | 210 | 202            | 188 | 229 | 226            | T  |
| S  | 188 | 190 | 185            | 189 | 211 | 203            | 189 | 230 | 227            | S  |
| G  | 189 | 191 | 186            | 190 | 212 | 204            | 190 | 231 | 228            | G  |
| P  | 190 | 192 | 187            | 191 | 213 | 205            | 191 | 232 | 229            | P  |
| T  | 191 | 193 | 188            | 192 | 214 | 206            | 192 | 233 | 230            | T  |
| I  | 192 | 194 | 189            | 193 | 215 | 207            | 193 | 234 | 231            | I  |
| V  | 193 | 195 | 190            | 194 | 216 | 208            | 194 | 235 | 232            | V  |
| S  | 194 | 196 | 191            | 195 | 217 | 209            | 195 | 236 | 233            | S  |
| E  | 195 | 197 | 192            | 196 | 218 | 210            | 196 | 237 | 234            | E  |
| D  | 196 | 198 | 193            | 197 | 219 | 211            | 197 | 238 | 235            | D  |
| N  | 197 | 199 | 194            | 198 | 220 | 212            | 198 | 239 | 236            | N  |
| K  | 198 | 200 | 195            | 199 | 221 | 213            | 199 | 240 | 237            | K  |
| T  | 199 | 201 | 196            | 200 | 222 | 214            | 200 | 241 | 238            | T  |
| S  | 200 | 202 | 197            | 201 | 223 | 215            | 201 | 242 | 239            | S  |
| G  | 201 | 203 | 198            | 202 | 224 | 216            | 202 | 243 | 240            | G  |
| P  | 202 | 204 | 199            | 203 | 225 | 217            | 203 | 244 | 241            | P  |
| T  | 203 | 205 | 200            | 204 | 226 | 218            | 204 | 245 | 242            | T  |
| I  | 204 | 206 | 201            | 205 | 227 | 219            | 205 | 246 | 243            | I  |
| V  | 205 | 207 | 202            | 206 | 228 | 220            | 206 | 247 | 244            | V  |
| S  | 206 | 208 | 203            | 207 | 229 | 221            | 207 | 248 | 245            | S  |
| E  | 207 | 209 | 204            | 208 | 230 | 222            | 208 | 249 | 246            | E  |
| D  | 208 | 210 | 205            | 209 | 231 | 223            | 209 | 250 | 247            | D  |
| N  | 209 | 211 | 206            | 210 | 232 | 224            | 210 | 251 | 248            | N  |
| K  | 210 | 212 | 207            | 211 | 233 | 225            | 211 | 252 | 249            | K  |
| T  | 211 | 213 | 208            | 212 | 234 | 226            | 212 | 253 | 250            | T  |
| S  | 212 | 214 | 209            | 213 | 235 | 227            | 213 | 254 | 251            | S  |
| G  | 213 | 215 | 210            | 214 | 236 | 228            | 214 | 255 | 252            | G  |
| P  | 214 | 216 | 211            | 215 | 237 | 229            | 215 | 256 | 253            | P  |
| T  | 215 | 217 | 212            | 216 | 238 | 230            | 216 | 257 | 254            | T  |
| I  | 216 | 218 | 213            | 217 | 239 | 231            | 217 | 258 | 255            | I  |
| V  | 217 | 219 | 214            | 218 | 240 | 232            | 218 | 259 | 256            | V  |
| S  | 218 | 220 | 215            | 219 | 241 | 233            | 219 | 260 | 257            | S  |
| E  | 219 | 221 | 216            | 220 | 242 | 234            | 220 | 261 | 258            | E  |
| D  | 220 | 222 | 217            | 221 | 243 | 235            | 221 | 262 | 259            | D  |
| N  | 221 | 223 | 218            | 222 | 244 | 236            | 222 | 263 |                |    |

# sp | P70696 | H2B1A\_MOUSE

IAS Phospho EASR  
79.97

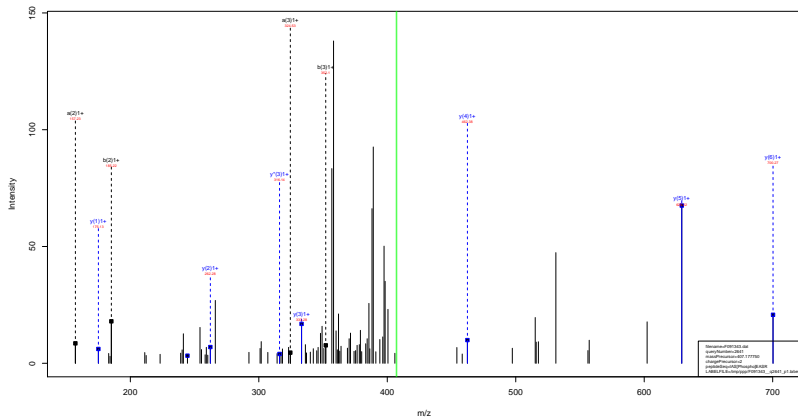

- ▶ fragmentation table for charge state 1+
- ▶ specType=cid
- ▶ score=32.32
- ▶ F091343.dat
- ▶ query=q2641.p1
- ▶ precursor=407.177750
- ▶ chargePrecursor=2
- ▶ itol=0.5

| AA | a              | a*      | a <sub>0</sub> | b              | b*      | b <sub>0</sub> | y              | y*             | y <sub>0</sub> | AA |
|----|----------------|---------|----------------|----------------|---------|----------------|----------------|----------------|----------------|----|
| H  | 96.096         | 0.000   | 0.000          | 114.091        | 0.000   | 0.000          | 81.636         | 796.134        | 795.940        | H  |
| A  | <b>157.134</b> | 0.000   | 0.000          | <b>185.128</b> | 0.000   | 0.000          | <b>700.366</b> | 683.240        | 682.256        | A  |
| S  | <b>324.132</b> | 0.000   | 368.121        | <b>352.127</b> | 0.000   | 138.131        | <b>629.229</b> | 612.200        | 611.216        | S  |
| E  | 453.174        | 0.000   | 435.160        | 461.161        | 0.000   | 463.159        | <b>462.231</b> | 445.206        | 444.220        | E  |
| A  | 524.212        | 0.000   | 506.201        | 562.207        | 0.000   | 134.199        | <b>331.188</b> | <b>316.162</b> | 315.176        | A  |
| S  | 611.244        | 0.000   | 593.233        | 630.239        | 0.000   | 621.238        | <b>262.151</b> | 245.124        | <b>244.140</b> | S  |
| R  | 787.285        | 750.278 | 749.284        | 795.282        | 778.273 | 777.280        | <b>175.119</b> | 158.092        | 0.000          | R  |



- ▶ fragmentation table for charge state 1+
- ▶ specType=cid
- ▶ score=44.48
- ▶ F091343.dat
- ▶ query=q2642.p1
- ▶ precursor=407.178160
- ▶ chargePrecursor=2
- ▶ itol=0.5

| AA | a              | a*      | a,0     | b              | b*      | b,0     | y              | y*      | y,0            | AA |
|----|----------------|---------|---------|----------------|---------|---------|----------------|---------|----------------|----|
| H  | 96.096         | 0.000   | 0.000   | 114.501        | 0.000   | 0.000   | 813.850        | 796.324 | 795.940        | H  |
| A  | <b>157.134</b> | 0.000   | 0.000   | <b>185.128</b> | 0.000   | 0.000   | <b>700.266</b> | 683.240 | 682.250        | A  |
| S  | 154.124        | 0.000   | 308.121 | <b>352.127</b> | 0.000   | 534.115 | <b>623.229</b> | 612.202 | <b>611.218</b> | S  |
| E  | 453.174        | 0.000   | 435.162 | 481.159        | 0.000   | 463.150 | <b>462.231</b> | 445.204 | 444.230        | E  |
| A  | 524.212        | 0.000   | 506.201 | 552.201        | 0.000   | 534.186 | <b>333.188</b> | 316.162 | 315.178        | A  |
| S  | <b>611.244</b> | 0.000   | 593.233 | 622.229        | 0.000   | 601.220 | <b>262.151</b> | 245.124 | 244.140        | S  |
| R  | 787.345        | 750.318 | 749.332 | 795.340        | 778.313 | 777.320 | <b>175.119</b> | 158.092 | 0.000          | R  |

# sp | P70696 | H2B1A\_MOUSE

STITSR<sup>(Phospho)</sup> EIQTAVR  
(79.97)

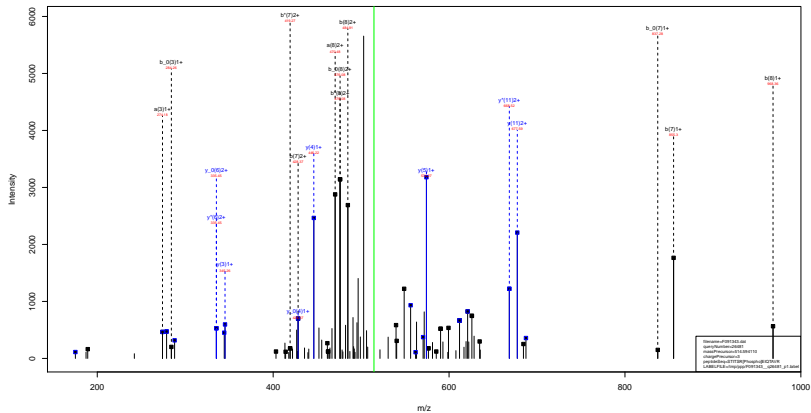

# sp | P70696 | H2B1A\_MOUSE

STITSR<sup>(Phospho)</sup> EIQTAVR  
(79.97)

- ▶ fragmentation table for charge state 1+
- ▶ specType=cid
- ▶ score=49.54
- ▶ F091343.dat
- ▶ query=q26481\_p1
- ▶ precursor=514.594110
- ▶ chargePrecursor=3
- ▶ itol=0.5

| AA    | a              | a'    | a <sub>0</sub> | b              | b'    | b <sub>0</sub> | y        | y'             | y <sub>0</sub> | AA             |       |
|-------|----------------|-------|----------------|----------------|-------|----------------|----------|----------------|----------------|----------------|-------|
| S(1)  | 92.664         | 0.000 | 42.030         | 88.039         | 0.000 | 10.000         | 1541.700 | 1824.742       | 1624.702       | S(1)           |       |
| T(2)  | 181.192        | 0.000 | 143.082        | <b>189.087</b> | 0.000 | 171.000        | 1454.720 | 1437.720       | 1436.720       | T(2)           |       |
| T(3)  | <b>274.176</b> | 0.000 | 258.180        | 306.171        | 0.000 | <b>264.160</b> | 1331.680 | 1336.680       | 1335.680       | T(3)           |       |
| T(4)  | 375.224        | 0.000 | 357.213        | <b>403.219</b> | 0.000 | 365.208        | 1240.600 | 1223.570       | 1222.584       | T(4)           |       |
| S(5)  | <b>462.256</b> | 0.000 | 446.240        | 486.251        | 0.000 | 472.240        | 1130.550 | 1123.530       | 1121.546       | S(5)           |       |
| R(6)  | 558.272        | 0.000 | 540.261        | 578.270        | 0.000 | 568.260        | 1036.500 | 1028.480       | 1024.514       | R(6)           |       |
| S(7)  | 657.308        | 0.000 | 639.292        | <b>655.301</b> | 0.000 | <b>637.300</b> | 937.450  | 929.430        | 928.447        | S(7)           |       |
| T(8)  | 740.450        | 0.000 | 722.439        | <b>768.445</b> | 0.000 | 750.434        | 847.415  | 839.388        | 838.404        | T(8)           |       |
| Q(9)  | 828.500        | 0.000 | 810.480        | 828.490        | 0.000 | 810.477        | 757.403  | <b>774.331</b> | <b>757.324</b> | Q(9)           |       |
| T(10) | 919.550        | 0.000 | 901.540        | 919.531        | 0.000 | 901.528        | 679.403  | <b>445.272</b> | 429.240        | <b>428.262</b> | T(10) |
| A(11) | 1040.593       | 0.000 | 1022.581       | 1040.568       | 0.000 | 1022.562       | 590.578  | <b>345.224</b> | 325.198        | 324.214        | A(11) |
| V(12) | 1130.602       | 0.000 | 1112.591       | 1130.571       | 0.000 | 1112.560       | 509.600  | <b>274.187</b> | 257.164        | 256.180        | V(12) |
| R(13) | 1245.653       | 0.000 | 1227.642       | 1247.632       | 0.000 | 1229.621       | 430.711  | <b>175.119</b> | 158.092        | 157.107        | R(13) |



# sp | P70696 | H2B1A\_MOUSE

STITSR<sup>(Phospho)</sup> EIQTAVR  
(79.97)

- ▶ fragmentation table for charge state 2+
- ▶ specType=cid
- ▶ score=49.54
- ▶ F091343.dat
- ▶ query=q26481\_p1
- ▶ precursor=514.594110
- ▶ chargePrecursor=3
- ▶ itol=0.5

| AA    | a      | a*    | aΔ     | b      | b*    | bΔ     | y       | y*      | yΔ      | AA    |
|-------|--------|-------|--------|--------|-------|--------|---------|---------|---------|-------|
| S[1]  | 30.926 | 0.504 | 29.421 | 44.523 | 0.504 | 45.027 | 178.880 | 162.875 | 162.880 | S[13] |
| T[2]  | 31.430 | 0.504 | 30.926 | 45.027 | 0.504 | 45.531 | 179.384 | 163.379 | 163.384 | T[12] |
| T[3]  | 31.934 | 0.504 | 31.430 | 45.531 | 0.504 | 46.035 | 179.888 | 163.883 | 163.888 | T[11] |
| I[4]  | 32.438 | 0.504 | 31.934 | 46.035 | 0.504 | 46.539 | 180.392 | 164.387 | 164.392 | I[10] |
| S[5]  | 32.942 | 0.504 | 32.438 | 46.539 | 0.504 | 47.043 | 180.896 | 164.891 | 164.896 | S[9]  |
| R[6]  | 33.446 | 0.504 | 32.942 | 47.043 | 0.504 | 47.547 | 181.400 | 165.395 | 165.400 | R[8]  |
| E[7]  | 33.950 | 0.504 | 33.446 | 47.547 | 0.504 | 48.051 | 181.904 | 165.899 | 165.904 | E[7]  |
| I[9]  | 34.454 | 0.504 | 33.950 | 48.051 | 0.504 | 48.555 | 182.408 | 166.403 | 166.408 | I[6]  |
| Q[9]  | 34.958 | 0.504 | 34.454 | 48.555 | 0.504 | 49.059 | 182.912 | 166.907 | 166.912 | Q[6]  |
| T[10] | 35.462 | 0.504 | 34.958 | 49.059 | 0.504 | 49.563 | 183.416 | 167.411 | 167.416 | T[5]  |
| A[11] | 35.966 | 0.504 | 35.462 | 49.563 | 0.504 | 50.067 | 183.920 | 167.915 | 167.920 | A[4]  |
| V[12] | 36.470 | 0.504 | 35.966 | 50.067 | 0.504 | 50.571 | 184.424 | 168.419 | 168.424 | V[3]  |
| R[13] | 36.974 | 0.504 | 36.470 | 50.571 | 0.504 | 51.075 | 184.928 | 168.923 | 168.928 | R[2]  |

# sp | P70696 | H2B1A\_MOUSE

STITS (Phospho)  
(79.97) REIQTAVR

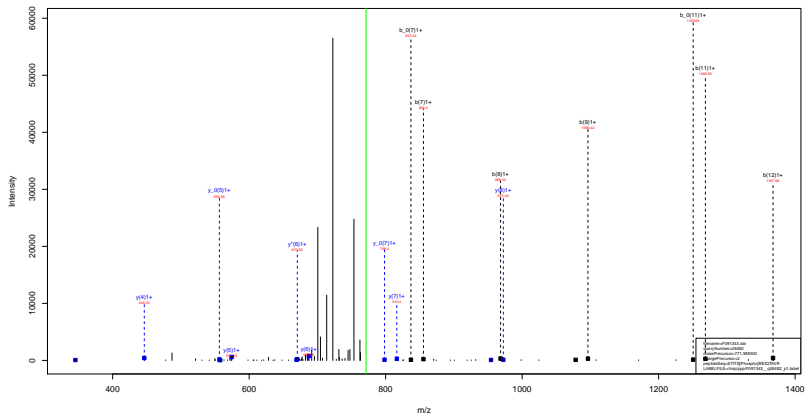

# sp | P70696 | H2B1A\_MOUSE

STITS (Phospho)  
(79.97) REIQTAVR

- ▶ fragmentation table for charge state 1+
- ▶ specType=cid
- ▶ score=38.58
- ▶ F091343.dat
- ▶ query=q26482\_p1
- ▶ precursor=771.388300
- ▶ chargePrecursor=2
- ▶ itol=0.5

| AA | a        | a*       | a <sub>0</sub> | b        | b*       | b <sub>0</sub> | y        | y*       | y <sub>0</sub> | AA    |
|----|----------|----------|----------------|----------|----------|----------------|----------|----------|----------------|-------|
| S  | 607.669  | 0.000    | 43.074         | 86.004   | 0.000    | 607.669        | 1341.710 | 1324.730 | 1324.730       | S(1)  |
| T  | 181.202  | 0.000    | 143.080        | 188.080  | 0.000    | 171.076        | 1454.730 | 1437.750 | 1436.726       | T(2)  |
| I  | 378.710  | 0.000    | 288.080        | 388.174  | 0.000    | 358.710        | 1325.840 | 1308.860 | 1307.836       | I(3)  |
| I  | 376.204  | 0.000    | 357.213        | 405.213  | 0.000    | 365.208        | 1370.850 | 1353.870 | 1352.846       | I(4)  |
| S  | 642.222  | 0.000    | 328.212        | 378.212  | 0.000    | 632.202        | 1322.930 | 1305.950 | 1304.926       | S(5)  |
| R  | 658.212  | 0.000    | 680.212        | 730.212  | 0.000    | 648.202        | 1372.940 | 1355.960 | 1354.936       | R(6)  |
| E  | 437.208  | 0.000    | 600.208        | 650.208  | 0.000    | 427.208        | 1317.950 | 1300.970 | 1299.946       | E(7)  |
| I  | 340.400  | 831.421  | 927.430        | 968.443  | 361.418  | 350.434        | 687.415  | 670.388  | 669.404        | I(8)  |
| Q  | 1050.509 | 3051.451 | 1100.488       | 1096.503 | 1019.477 | 1078.493       | 574.331  | 557.304  | 556.320        | Q(9)  |
| V  | 1378.800 | 1329.800 | 1333.800       | 1338.800 | 1333.800 | 1338.800       | 448.292  | 448.292  | 448.292        | V(10) |
| A  | 1380.501 | 1223.501 | 1223.501       | 1263.508 | 1251.504 | 1258.578       | 345.224  | 345.198  | 345.198        | A(11) |
| V  | 1339.503 | 1327.503 | 1334.503       | 1367.557 | 1354.531 | 1361.605       | 274.181  | 267.155  | 267.155        | V(12) |
| R  | 1435.101 | 1418.100 | 1417.100       | 1424.108 | 1418.100 | 1425.147       | 175.110  | 158.082  | 158.082        | R(13) |

# sp | P43274 | H14\_MOUSE

S<sup>Phospho</sup> ETAPAAPAAPAPAEK  
79.97

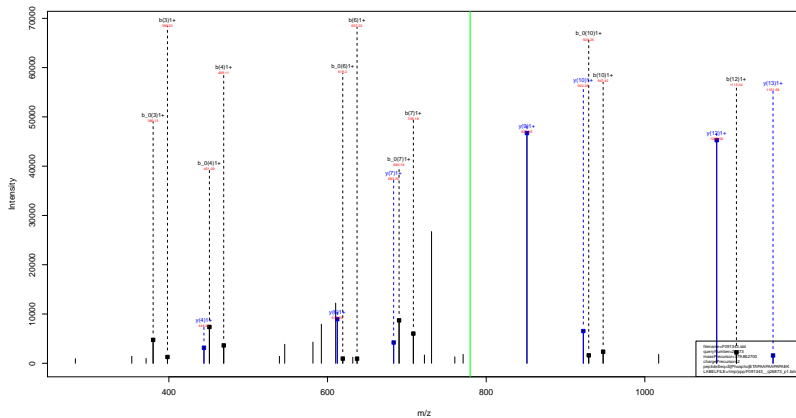

# sp | P43274 | H14\_MOUSE

S<sup>Phospho</sup><sub>79.97</sub> ETAPAAPAAPAPAEK

- ▶ fragmentation table for charge state 1+
- ▶ specType=cid
- ▶ score=59.59
- ▶ F091343.dat
- ▶ query=q26873\_p1
- ▶ precursor=779.862700
- ▶ chargePrecursor=2
- ▶ itol=0.5

| AA | a        | a*       | aΔ       | b               | b*       | bΔ             | y               | y*       | yΔ       | AA    |
|----|----------|----------|----------|-----------------|----------|----------------|-----------------|----------|----------|-------|
| S  | 190.011  | 0.000    | 122.090  | 169.099         | 0.000    | 169.099        | 190.011         | 1341.000 | 190.010  | S[20] |
| E  | 269.051  | 0.000    | 202.042  | 202.042         | 0.000    | 202.042        | 269.051         | 1367.000 | 269.049  | E[15] |
| T  | 379.100  | 0.000    | 292.090  | <b>300.090</b>  | 0.000    | <b>300.090</b> | 379.100         | 1393.000 | 379.099  | T[4]  |
| A  | 441.130  | 0.000    | 435.133  | <b>469.133</b>  | 0.000    | <b>451.132</b> | <b>1161.626</b> | 1164.000 | 1143.616 | A[13] |
| P  | 530.180  | 0.000    | 530.180  | 530.180         | 0.000    | 530.180        | <b>1090.580</b> | 1073.580 | 1072.579 | P[12] |
| A  | 600.230  | 0.000    | 599.227  | <b>637.227</b>  | 0.000    | <b>619.227</b> | 600.230         | 1099.500 | 1099.500 | A[11] |
| A  | 700.280  | 0.000    | 692.275  | <b>708.269</b>  | 0.000    | <b>690.269</b> | <b>922.490</b>  | 905.473  | 904.469  | A[10] |
| P  | 777.310  | 0.000    | 779.309  | 809.313         | 0.000    | 807.309        | <b>851.492</b>  | 834.476  | 833.472  | P[9]  |
| A  | 894.350  | 0.000    | 882.344  | 878.349         | 0.000    | 878.349        | 894.350         | 1127.500 | 1127.500 | A[8]  |
| A  | 919.360  | 0.000    | 905.352  | <b>947.367</b>  | 0.000    | <b>929.376</b> | <b>661.372</b>  | 654.355  | 653.352  | A[7]  |
| P  | 1010.440 | 0.000    | 998.434  | 1044.441        | 0.000    | 1032.437       | <b>612.335</b>  | 595.318  | 594.315  | P[6]  |
| A  | 1097.490 | 0.000    | 1098.471 | <b>1115.477</b> | 0.000    | 1097.468       | 1115.477        | 660.350  | 660.272  | A[6]  |
| T  | 1198.530 | 0.000    | 1195.520 | 1197.530        | 0.000    | 1194.519       | <b>444.283</b>  | 427.265  | 426.265  | T[6]  |
| A  | 1200.570 | 0.000    | 1217.561 | 1203.561        | 0.000    | 1205.550       | 1200.570        | 500.180  | 500.180  | A[5]  |
| E  | 1384.614 | 0.000    | 1390.604 | 1412.609        | 0.000    | 1394.599       | 1384.614        | 269.120  | 269.140  | E[2]  |
| R  | 1512.700 | 1498.681 | 1494.699 | 1540.704        | 1522.676 | 1542.699       | 1512.700        | 1307.000 | 0.000    | R[2]  |

# sp | P15864 | H12\_MOUSE

RKAS<sup>Phospho</sup> 79.97 GPPVSELITK

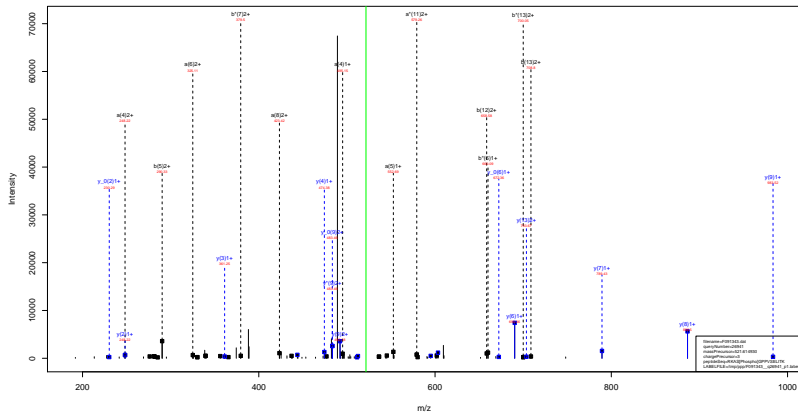

# sp | P15864 | H12\_MOUSE

RKAS<sup>Phospho</sup> 79.97 GPPVSELITK

- ▶ fragmentation table for charge state 1+
- ▶ specType=cid
- ▶ score=59.08
- ▶ F091343.dat
- ▶ query=q26941\_p1
- ▶ precursor=521.614930
- ▶ chargePrecursor=3
- ▶ itol=0.5

| AA  | a              | a*       | a,d            | b              | b*             | b,d      | y              | y*       | y,d            | AA  |
|-----|----------------|----------|----------------|----------------|----------------|----------|----------------|----------|----------------|-----|
| R1  | 126.113        | 112.087  | 0.000          | 114.206        | 141.064        | 0.000    | 126.113        | 1549.808 | 1264.826       | R14 |
| R2  | 257.208        | 240.152  | 0.000          | <b>285.203</b> | 258.177        | 0.000    | 4466.723       | 1589.703 | 1588.749       | R13 |
| A3  | 438.246        | 411.219  | 0.000          | <b>356.240</b> | <b>339.214</b> | 0.000    | 3279.634       | 1361.608 | 1260.624       | A62 |
| S4  | <b>495.244</b> | 478.217  | <b>477.233</b> | <b>522.239</b> | 506.212        | 005.226  | 1287.597       | 1190.570 | 1189.586       | S13 |
| G5  | <b>552.245</b> | 535.218  | 534.232        | <b>588.240</b> | 569.214        | 568.228  | 1094.569       | 1022.572 | 1022.588       | G19 |
| F6  | 646.271        | 625.245  | 626.260        | <b>719.269</b> | 701.242        | 699.257  | <b>601.577</b> | 968.551  | 866.567        | F18 |
| V6  | 695.269        | 675.242  | 677.257        | 742.262        | 724.235        | 723.249  | <b>781.472</b> | 772.445  | 771.461        | V17 |
| S9  | 852.311        | 835.285  | 834.299        | 905.295        | 884.268        | 882.282  | <b>690.401</b> | 674.374  | <b>672.393</b> | S20 |
| E00 | 1161.614       | 1044.607 | 1043.593       | 1089.609       | 1072.602       | 1071.608 | <b>603.371</b> | 588.345  | 588.361        | E10 |
| L11 | 1174.568       | 1157.571 | 1156.567       | 1202.593       | 1185.566       | 1184.562 | <b>474.329</b> | 463.302  | 462.318        | L16 |
| T12 | 1387.602       | 1270.605 | 1269.611       | 1315.617       | 1298.600       | 1297.606 | <b>361.245</b> | 346.218  | 345.234        | T11 |
| I13 | 1398.730       | 1271.733 | 1270.732       | 1416.725       | 1399.698       | 1398.714 | <b>248.160</b> | 231.134  | <b>230.150</b> | I12 |
| K14 | 1611.622       | 1499.609 | 1498.616       | 1544.620       | 1527.613       | 1526.619 | 147.111        | 130.088  | 0.000          | K12 |

# sp | P15864 | H12\_MOUSE

RKAS <sup>Phospho</sup> 79.97 GPPVSELITK

- ▶ fragmentation table for charge state 2+
- ▶ specType=cid
- ▶ score=59.08
- ▶ F091343.dat
- ▶ query=q26941\_p1
- ▶ precursor=521.614930
- ▶ chargePrecursor=3
- ▶ itol=0.5

| AA    | a              | a*             | aΔ             | b              | b*             | bΔ             | y              | y*             | yΔ             | AA    |
|-------|----------------|----------------|----------------|----------------|----------------|----------------|----------------|----------------|----------------|-------|
| R[1]  | 85.899         | 86.541         | 0.500          | 78.008         | 78.545         | 0.500          | 181.017        | 177.888        | 172.819        | R[14] |
| R[2]  | 130.108        | 130.595        | 0.500          | 145.105        | 134.592        | 0.500          | <b>703.868</b> | 665.355        | 594.893        | K[13] |
| A[3]  | 154.626        | 158.113        | 0.500          | 179.624        | 176.111        | 0.500          | 639.821        | 651.307        | 630.816        | A[12] |
| S[4]  | <b>248.126</b> | 239.613        | -2.000         | 262.123        | 253.610        | -2.000         | 604.361        | 595.847        | <b>595.297</b> | S[11] |
| G[5]  | <b>276.636</b> | 288.123        | 2.000          | <b>290.634</b> | <b>282.121</b> | <b>-2.018</b>  | 569.861        | <b>512.290</b> | <b>511.708</b> | G[10] |
| P[6]  | <b>325.163</b> | 316.649        | -2.000         | <b>330.160</b> | <b>330.647</b> | <b>330.155</b> | <b>492.292</b> | <b>483.779</b> | <b>483.287</b> | P[9]  |
| P[7]  | 371.689        | <b>365.176</b> | -2.000         | 384.686        | 387.673        | <b>379.173</b> | 598.881        | <b>443.766</b> | 435.253        | P[8]  |
| V[8]  | <b>423.223</b> | 414.710        | -2.000         | <b>437.221</b> | 428.707        | -2.000         | 565.730        | 586.726        | 586.234        | V[7]  |
| S[9]  | 468.741        | 469.228        | 0.500          | 486.731        | 477.218        | -2.000         | 549.760        | 531.156        | 536.706        | S[6]  |
| E[10] | 513.261        | 502.747        | -2.000         | <b>545.259</b> | <b>536.745</b> | <b>536.233</b> | 600.180        | 509.676        | 503.184        | E[9]  |
| L[11] | 567.803        | <b>579.289</b> | <b>578.797</b> | <b>601.800</b> | 593.287        | -2.000         | 237.680        | 229.150        | 228.663        | L[8]  |
| I[12] | 614.345        | 605.831        | -2.000         | <b>656.342</b> | 647.829        | -2.000         | 581.128        | 442.613        | 442.121        | I[7]  |
| T[13] | 694.869        | 686.355        | -2.000         | <b>708.866</b> | <b>700.353</b> | <b>699.861</b> | 524.584        | 516.071        | 515.576        | T[6]  |
| R[14] | 758.916        | 760.403        | 2.000          | 772.913        | 764.400        | -2.000         | 583.608        | 58.000         | 65.547         | R[11] |





# sp | P15864 | H12\_MOUSE

RKAS<sup>Phospho</sup> 79.97 GPPVSELITK

- ▶ fragmentation table for charge state 1+
- ▶ specType=cid
- ▶ score=40.66
- ▶ F091343.dat
- ▶ query=q26942\_p1
- ▶ precursor=781.920130
- ▶ chargePrecursor=2
- ▶ itol=0.5

| AA    | a        | a*       | a <sup>2</sup> | b        | b*       | b <sup>2</sup> | r     | r*       | r <sup>2</sup> | AA    |
|-------|----------|----------|----------------|----------|----------|----------------|-------|----------|----------------|-------|
| R[1]  | 129.133  | 112.087  | 12563          | 157.268  | 140.882  | 19852          | 0.182 | 162.832  | 26518          | R[14] |
| R[2]  | 257.266  | 224.173  | 50252          | 314.536  | 281.764  | 79008          | 0.363 | 325.664  | 53036          | R[13] |
| A[3]  | 385.399  | 331.259  | 110000         | 471.804  | 424.248  | 180000         | 0.545 | 376.608  | 138024         | A[12] |
| S[4]  | 513.532  | 448.342  | 201000         | 629.072  | 566.504  | 320400         | 0.707 | 502.512  | 252024         | S[11] |
| G[5]  | 641.665  | 557.451  | 310800         | 786.340  | 703.976  | 501600         | 0.869 | 638.424  | 409644         | G[10] |
| P[6]  | 769.798  | 676.582  | 457800         | 943.608  | 841.120  | 705600         | 1.031 | 804.384  | 557088         | P[9]  |
| F[7]  | 897.931  | 784.715  | 615600         | 1100.876 | 988.240  | 976800         | 1.193 | 924.648  | 756524         | F[8]  |
| V[8]  | 1026.064 | 902.848  | 813600         | 1258.144 | 1126.480 | 1268160        | 1.355 | 1064.832 | 1045744        | V[7]  |
| S[9]  | 1154.197 | 1011.031 | 1028400        | 1415.412 | 1264.716 | 1552800        | 1.517 | 1205.040 | 1452084        | S[6]  |
| E[10] | 1282.330 | 1119.164 | 1249800        | 1572.680 | 1409.400 | 1950000        | 1.679 | 1345.248 | 1795344        | E[5]  |
| L[11] | 1410.463 | 1227.297 | 1491600        | 1729.948 | 1551.680 | 2320800        | 1.841 | 1485.456 | 2183884        | L[4]  |
| I[12] | 1538.596 | 1335.430 | 1784400        | 1887.216 | 1708.960 | 2762400        | 2.003 | 1625.664 | 2669344        | I[3]  |
| T[13] | 1666.729 | 1443.563 | 2077200        | 2044.484 | 1861.240 | 3284400        | 2.165 | 1765.872 | 3139884        | T[2]  |
| K[14] | 1794.862 | 1551.696 | 2370000        | 2199.752 | 1973.520 | 3891600        | 2.327 | 1906.080 | 3649884        | K[1]  |

# sp | P43277 | H13\_MOUSE

S<sup>Phospho</sup><sub>79.97</sub> ETAPAAPAAPAPVEK

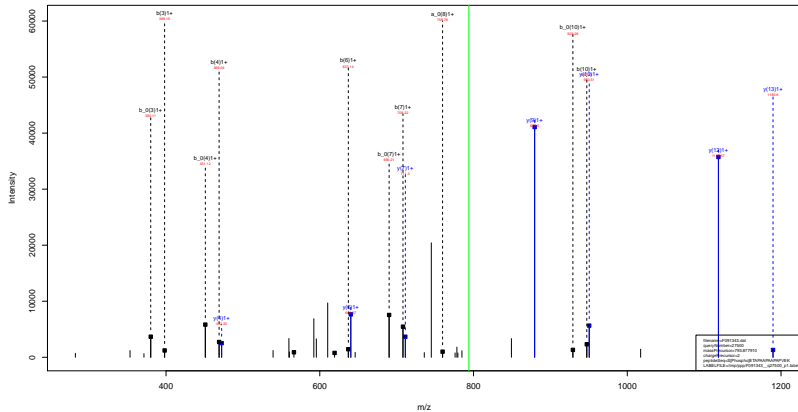

# sp | P43277 | H13\_MOUSE

S<sup>Phospho</sup><sub>79.97</sub> ETAPAAPAAPAPVEK

- ▶ fragmentation table for charge state 1+
- ▶ specType=cid
- ▶ score=60.10
- ▶ F091343.dat
- ▶ query=q27500\_p1
- ▶ precursor=793.877910
- ▶ chargePrecursor=2
- ▶ itol=0.5

| AA | a        | a*       | a <sub>0</sub> | b              | b*       | b <sub>0</sub> | y               | y*       | y <sub>0</sub> | AA   |
|----|----------|----------|----------------|----------------|----------|----------------|-----------------|----------|----------------|------|
| S  | 140.071  | 0.000    | 122.000        | 168.000        | 0.000    | 049.000        | 150.740         | 150.740  | 150.740        | S108 |
| E  | 209.051  | 0.000    | 242.043        | 207.040        | 0.000    | 79.000         | 242.740         | 242.740  | 242.740        | E113 |
| T  | 179.074  | 0.000    | 350.000        | <b>398.006</b> | 0.000    | <b>300.085</b> | 170.170         | 172.074  | 172.074        | T114 |
| A  | 84.130   | 0.000    | 423.130        | <b>466.133</b> | 0.000    | <b>451.122</b> | <b>1189.658</b> | 1172.613 | 1171.647       | A113 |
| P  | 53.0191  | 0.000    | 520.180        | <b>566.186</b> | 0.000    | <b>516.133</b> | <b>1116.620</b> | 1100.504 | 1100.610       | P112 |
| A  | 609.070  | 0.000    | 569.070        | <b>617.023</b> | 0.000    | <b>619.212</b> | 100.000         | 100.000  | 100.000        | A111 |
| A  | 986.000  | 0.000    | 642.000        | <b>708.260</b> | 0.000    | <b>650.249</b> | 935.504         | 932.500  | 932.500        | A110 |
| P  | 772.018  | 0.000    | <b>758.307</b> | 809.313        | 0.000    | 807.300        | <b>879.493</b>  | 862.493  | 861.493        | P109 |
| A  | 846.025  | 0.000    | 832.044        | 878.260        | 0.000    | 877.247        | 70.444          | 70.444   | 70.444         | A108 |
| A  | 919.392  | 0.000    | 903.380        | <b>947.387</b> | 0.000    | <b>929.376</b> | <b>711.404</b>  | 699.371  | 698.370        | A107 |
| P  | 1010.445 | 0.000    | 988.431        | 1044.440       | 0.000    | 1038.429       | <b>640.306</b>  | 628.301  | 627.301        | P106 |
| A  | 1087.462 | 0.000    | 1069.470       | 1115.477       | 0.000    | 1107.466       | 543.334         | 536.287  | 535.303        | A105 |
| T  | 1184.478 | 0.000    | 1166.504       | 1222.500       | 0.000    | 1204.493       | <b>472.237</b>  | 459.250  | 454.266        | T104 |
| V  | 1203.003 | 0.000    | 1205.903       | 1311.908       | 0.000    | 1293.500       | 375.220         | 358.193  | 357.233        | V103 |
| E  | 1312.046 | 0.000    | 1304.030       | 1444.043       | 0.000    | 1422.030       | 270.130         | 259.120  | 258.140        | E102 |
| R  | 1540.141 | 1323.724 | 1522.730       | 1508.730       | 1351.700 | 1500.720       | 147.113         | 130.000  | 0.000          | R101 |

# sp | P43274 | H14\_MOUSE

RKT<sup>Phospho</sup>SGPPVSELITK  
79.97

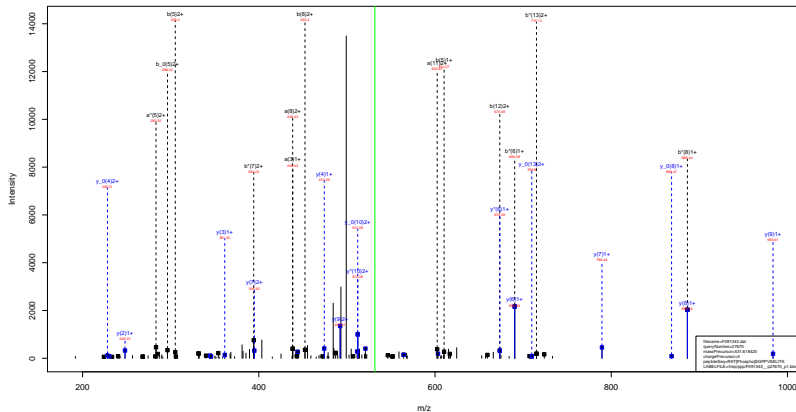

# sp | P43274 | H14\_MOUSE

RKT<sup>Phospho</sup> SGPPVSELITK  
79.97

- ▶ fragmentation table for charge state 1+
- ▶ specType=cid
- ▶ score=41.45
- ▶ F091343.dat
- ▶ query=q27670\_p1
- ▶ precursor=531.618420
- ▶ chargePrecursor=3
- ▶ itol=0.5

| AA  | a              | a*             | aΔ             | b              | b*             | bΔ      | y        | y*             | yΔ             | AA    |     |
|-----|----------------|----------------|----------------|----------------|----------------|---------|----------|----------------|----------------|-------|-----|
| R1  | 126.113        | 127.087        | 0.974          | 131.208        | 141.824        | 10.616  | 1507.465 | 1519.484       | 1214.856       | K14   |     |
| R2  | 257.208        | <b>256.182</b> | -0.955         | <b>285.203</b> | <b>268.177</b> | -17.026 | 1456.745 | 1419.715       | 1418.729       | K13   |     |
| T3  | <b>438.222</b> | 431.196        | -7.026         | 440.212        | 466.211        | 26.000  | 1368.645 | 1301.618       | 1290.634       | T12   |     |
| S4  | 525.254        | 538.238        | <b>567.244</b> | 533.249        | 536.223        | 3.000   | 1127.631 | 1110.604       | 1110.620       | S11   |     |
| T5  | 632.276        | 635.260        | <b>564.265</b> | <b>616.271</b> | 609.244        | -6.999  | 1060.569 | 1023.572       | 1022.588       | G19   |     |
| F6  | 676.290        | 682.282        | 663.282        | <b>707.324</b> | <b>696.297</b> | -11.027 | 889.513  | <b>601.577</b> | 566.555        | P16   |     |
| F7  | 776.301        | 682.282        | 194.111        | 804.319        | 817.292        | 13.000  | 889.505  | <b>886.524</b> | 869.508        | K18   |     |
| V8  | 876.302        | 878.287        | 1.985          | 902.325        | <b>886.318</b> | -16.007 | 825.514  | <b>781.472</b> | 772.445        | V17   |     |
| S9  | 952.302        | 948.285        | -4.017         | 955.317        | 973.302        | 18.000  | 672.505  | <b>670.481</b> | <b>671.377</b> | S20   |     |
| E10 | 1061.324       | 1074.309       | 13.000         | 1073.314       | 1119.319       | 46.000  | 1101.509 | <b>603.371</b> | 588.343        | E10   |     |
| L11 | 1204.309       | 1207.302       | 3.000          | 1206.306       | 1232.303       | 26.000  | 1214.503 | <b>474.329</b> | 469.302        | L16   |     |
| T12 | 1317.309       | 1320.302       | 3.000          | 1349.308       | 1326.305       | -23.000 | 1307.503 | <b>361.245</b> | <b>344.218</b> | T12   |     |
| T13 | 1418.340       | 1431.314       | 13.000         | 1448.325       | 1426.309       | -22.000 | 1426.725 | <b>248.160</b> | 231.131        | T13   |     |
| K14 | 1546.310       | 1539.309       | -7.000         | 1574.320       | 1557.304       | -17.000 | 1459.609 | 147.111        | 139.088        | 0.000 | K14 |

# sp | P43274 | H14\_MOUSE

RKT<sup>Phospho</sup> SGPPVSELITK  
79.97

- ▶ fragmentation table for charge state 2+
- ▶ specType=cid
- ▶ score=41.45
- ▶ F091343.dat
- ▶ query=q27670\_p1
- ▶ precursor=531.618420
- ▶ chargePrecursor=3
- ▶ itol=0.5

| AA    | a              | a*             | a.D            | b              | b*             | b.D            | y              | y*             | y.D            | AA    |
|-------|----------------|----------------|----------------|----------------|----------------|----------------|----------------|----------------|----------------|-------|
| R[1]  | 85.869         | 86.541         | 87.300         | 78.028         | 78.245         | 0.300          | 195.621        | 198.811        | 191.819        | R[14] |
| R[2]  | 129.108        | 130.595        | 0.500          | 143.105        | 134.592        | 0.500          | 318.873        | 310.360        | <b>709.868</b> | K[3]  |
| T[3]  | 219.615        | 221.100        | 220.610        | <b>233.612</b> | 225.099        | <b>224.607</b> | 354.230        | 346.313        | 345.821        | T[12] |
| S[4]  | 263.131        | 264.616        | 264.126        | <b>277.129</b> | <b>268.615</b> | <b>268.123</b> | <b>364.319</b> | 355.806        | 355.314        | S[11] |
| G[5]  | 293.648        | <b>281.138</b> | <b>282.630</b> | <b>305.639</b> | 297.126        | <b>296.634</b> | <b>520.881</b> | <b>512.290</b> | <b>511.798</b> | G[10] |
| P[6]  | <b>348.168</b> | <b>331.655</b> | <b>331.163</b> | <b>354.165</b> | <b>345.652</b> | <b>345.160</b> | <b>492.292</b> | 483.779        | 483.287        | P[9]  |
| P[7]  | 388.684        | 390.169        | 389.680        | 402.650        | <b>394.179</b> | 393.687        | <b>443.766</b> | 435.253        | 434.761        | P[8]  |
| V[8]  | <b>438.229</b> | 439.715        | 439.220        | <b>452.226</b> | <b>443.713</b> | <b>443.221</b> | <b>395.239</b> | 386.726        | 386.234        | V[7]  |
| S[9]  | 473.745        | 475.230        | <b>472.230</b> | 484.724        | <b>487.220</b> | <b>486.727</b> | <b>345.705</b> | 337.192        | 336.700        | S[6]  |
| E[10] | <b>546.266</b> | 547.751        | 547.250        | 560.263        | <b>551.750</b> | <b>551.258</b> | 300.140        | 291.626        | 291.134        | E[9]  |
| L[11] | <b>602.808</b> | 594.295        | 593.800        | <b>616.805</b> | 608.292        | 607.800        | 237.680        | 229.165        | <b>228.663</b> | L[8]  |
| I[12] | <b>658.350</b> | 659.835        | 659.340        | <b>673.347</b> | 664.834        | 664.342        | 181.120        | 172.605        | 172.113        | I[7]  |
| T[13] | <b>709.874</b> | 701.359        | 700.860        | <b>723.871</b> | <b>715.358</b> | <b>714.866</b> | 126.560        | 118.045        | 117.553        | T[6]  |
| R[14] | 773.921        | 765.406        | 764.910        | 787.919        | 779.405        | 778.913        | 74.000         | 65.485         | 64.993         | K[1]  |

# sp | P43274 | H14\_MOUSE

RKT<sup>Phospho</sup>SGPPVSELITK  
79.97

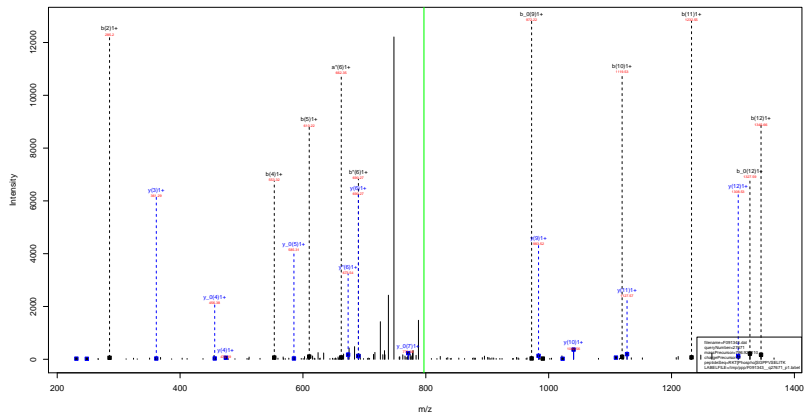



# sp | P43274 | H14\_MOUSE

RKT<sup>Phospho</sup> SGPPVSELITK  
79.97

- ▶ fragmentation table for charge state 1+
- ▶ specType=cid
- ▶ score=42.92
- ▶ F091343.dat
- ▶ query=q27671.p1
- ▶ precursor=796.925110
- ▶ chargePrecursor=2
- ▶ itol=0.5

| AA    | a       | a*             | a:Δ     | b               | b*             | b:Δ            | y               | y*              | y:Δ             | AA    |
|-------|---------|----------------|---------|-----------------|----------------|----------------|-----------------|-----------------|-----------------|-------|
| R[1]  | 129.113 | 112.080        | 0.000   | 137.108         | 140.050        | 0.000          | 150.841         | 1379.814        | 1374.830        | R[14] |
| K[2]  | 137.108 | 120.180        | 0.000   | <b>205.203</b>  | 138.100        | 0.000          | 1439.749        | 1410.713        | 1428.729        | K[13] |
| T[3]  | 138.100 | 121.180        | 0.000   | 140.100         | 140.100        | 0.000          | <b>1308.645</b> | 1307.619        | 1308.634        | T[12] |
| S[4]  | 138.100 | 120.200        | 109.244 | <b>553.249</b>  | 138.200        | 108.200        | <b>1127.831</b> | 1119.804        | <b>1109.820</b> | S[11] |
| Q[5]  | 138.100 | 120.200        | 108.200 | <b>510.277</b>  | 138.200        | 108.200        | <b>1045.599</b> | 1039.599        | <b>1022.568</b> | Q[10] |
| P[6]  | 138.100 | <b>662.302</b> | 108.138 | 139.104         | <b>698.297</b> | 108.138        | <b>883.577</b>  | 1083.551        | 1083.567        | P[9]  |
| R[7]  | 138.100 | 120.180        | 119.113 | 104.100         | 107.100        | 108.100        | 108.100         | 108.100         | 108.100         | R[8]  |
| V[8]  | 138.100 | 120.180        | 107.100 | 104.100         | 104.100        | 104.100        | 104.100         | 104.100         | 104.100         | V[7]  |
| S[9]  | 138.100 | 120.180        | 104.100 | <b>990.477</b>  | 111.100        | <b>972.466</b> | <b>690.403</b>  | <b>673.377</b>  | <b>731.461</b>  | S[8]  |
| E[10] | 138.100 | 120.180        | 107.100 | <b>1119.519</b> | 110.100        | 110.100        | 691.311         | 688.341         | <b>385.361</b>  | E[9]  |
| L[11] | 138.100 | 118.100        | 118.100 | 110.100         | 110.100        | 110.100        | <b>474.328</b>  | 467.302         | <b>456.318</b>  | L[10] |
| I[12] | 138.100 | 118.100        | 110.100 | <b>1232.463</b> | 110.100        | 110.100        | <b>1327.817</b> | <b>1311.205</b> | 1311.214        | I[9]  |
| T[13] | 138.100 | 118.100        | 110.100 | 110.100         | 110.100        | 110.100        | <b>248.100</b>  | <b>231.134</b>  | 230.150         | T[12] |
| K[14] | 138.100 | 118.100        | 110.100 | 110.100         | 110.100        | 110.100        | 147.111         | 130.088         | 0.000           | K[11] |



# sp | P27661 | H2AX\_MOUSE

APAVGKKAS<sup>Phospho</sup> QASQEY  
79.97

- ▶ fragmentation table for charge state 1+
- ▶ specType=cid
- ▶ score=71.15
- ▶ F091343.dat
- ▶ query=q28169\_p1
- ▶ precursor=807.880590
- ▶ chargePrecursor=2
- ▶ itol=0.5

| AA  | a               | a*             | aΔ       | b               | b*       | bΔ              | y               | y*             | yΔ             | AA  |
|-----|-----------------|----------------|----------|-----------------|----------|-----------------|-----------------|----------------|----------------|-----|
| A1  | 44.000          | 0.000          | 0.000    | 72.044          | 0.000    | 0.000           | 1014.502        | 1202.720       | 1326.762       | A10 |
| P1  | 141.102         | 0.000          | 0.000    | 188.001         | 0.000    | 0.000           | 1383.715        | 1528.681       | 1528.705       | P14 |
| A3  | 112.130         | 0.000          | 0.000    | <b>246.134</b>  | 0.000    | 0.000           | 1446.602        | 1420.830       | 1420.852       | A13 |
| V4  | <b>311.208</b>  | 0.000          | 0.000    | <b>330.201</b>  | 0.000    | 0.000           | 1378.426        | 1328.808       | 1328.830       | V15 |
| G5  | 306.524         | 0.000          | 0.000    | <b>306.224</b>  | 0.000    | 0.000           | <b>1276.537</b> | 1359.531       | 1359.546       | G11 |
| K6  | <b>496.324</b>  | 0.000          | 0.000    | <b>524.319</b>  | 0.000    | 0.000           | 1219.538        | 1202.500       | 1202.522       | K10 |
| R7  | <b>624.419</b>  | <b>807.382</b> | 0.000    | <b>624.414</b>  | 0.000    | 0.000           | 1002.442        | 1014.411       | 1014.428       | R18 |
| A8  | 708.430         | <b>878.430</b> | 0.000    | <b>725.451</b>  | 0.000    | 0.000           | <b>963.346</b>  | 955.310        | 945.325        | A81 |
| S9  | 882.450         | 882.449        | 886.444  | <b>886.450</b>  | 887.421  | 872.433         | 882.449         | 870.401        | 874.240        | S17 |
| G10 | 880.513         | <b>873.487</b> | 872.503  | <b>1018.508</b> | 1003.462 | 1000.444        | 726.343         | <b>708.264</b> | 687.280        | G16 |
| A11 | 694.708         | 694.707        | 695.749  | <b>1008.545</b> | 1002.518 | 977.510         | <b>587.251</b>  | 600.249        | <b>579.241</b> | A21 |
| S12 | 1148.581        | 1131.596       | 1130.577 | <b>1176.577</b> | 1150.561 | <b>1158.567</b> | <b>636.214</b>  | 608.181        | 608.204        | S14 |
| Q13 | <b>1276.641</b> | 1259.614       | 1258.630 | 1304.639        | 1287.609 | 1286.625        | <b>438.182</b>  | 422.150        | <b>421.172</b> | Q13 |
| E14 | 1405.668        | 1388.663       | 1387.679 | 1424.678        | 1416.662 | 1415.668        | <b>311.124</b>  | 0.000          | <b>281.113</b> | E18 |
| V15 | 1508.747        | 1501.739       | 1500.738 | 1506.742        | 1478.711 | 1478.711        | 302.113         | 0.000          | 302.113        | V11 |

# sp | P43274 | H14\_MOUSE

S<sup>Phospho</sup><sub>79.97</sub> ET<sup>Phospho</sup><sub>79.97</sub> APAAPAAPAAEK

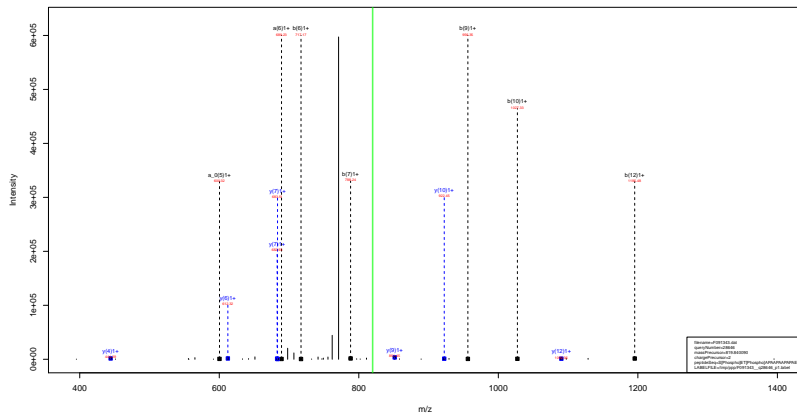

# sp | P43274 | H14\_MOUSE

S<sup>Phospho</sup> 79.97 ET<sup>Phospho</sup> 79.97 APAAPAAPAPAEK

- ▶ fragmentation table for charge state 1+
- ▶ specType=cid
- ▶ score=34.27
- ▶ F091343.dat
- ▶ query=q28646\_p1
- ▶ precursor=819.840090
- ▶ chargePrecursor=2
- ▶ itol=0.5

| AA  | a              | a*       | aΔ             | b               | b*       | bΔ       | y               | y*       | yΔ       | AA   |
|-----|----------------|----------|----------------|-----------------|----------|----------|-----------------|----------|----------|------|
| S1  | 490.011        | 0.000    | 122.000        | 168.000         | 0.000    | 499.999  | 468.000         | 121.999  | 32.011   | S109 |
| E2  | 269.051        | 0.000    | 261.041        | 207.040         | 0.000    | 278.038  | 347.038         | 1454.000 | 1463.047 | E115 |
| T3  | 474.070        | 0.000    | 472.061        | 473.061         | 0.000    | 469.062  | 120.740         | 1329.041 | 1328.070 | T14  |
| A4  | 512.104        | 0.000    | 505.084        | 549.080         | 0.000    | 511.080  | 1181.830        | 1184.000 | 1141.830 | A113 |
| P5  | 618.134        | 0.000    | <b>608.147</b> | 618.139         | 0.000    | 628.132  | <b>1090.580</b> | 1073.580 | 1072.519 | P112 |
| A6  | <b>608.134</b> | 0.000    | 597.104        | <b>717.105</b>  | 0.000    | 609.113  | 69.133          | 109.100  | 109.100  | A111 |
| A7  | 100.211        | 0.000    | 742.211        | <b>768.225</b>  | 0.000    | 770.216  | <b>622.490</b>  | 965.473  | 964.480  | A100 |
| P8  | 407.034        | 0.000    | 409.274        | <b>506.318</b>  | 0.000    | 407.280  | <b>651.492</b>  | 134.430  | 133.432  | P10  |
| A9  | 404.074        | 0.000    | 440.074        | <b>506.318</b>  | 0.000    | 413.074  | 74.074          | 122.060  | 120.060  | A10  |
| A10 | 399.250        | 0.000    | 397.250        | <b>1027.353</b> | 0.000    | 399.249  | <b>661.372</b>  | 695.249  | 692.302  | A107 |
| P11 | 1090.411       | 0.000    | 1078.401       | 1114.400        | 0.000    | 1106.399 | <b>612.335</b>  | 598.330  | 594.330  | P10  |
| A12 | 1107.440       | 0.000    | 1148.430       | <b>1195.443</b> | 0.000    | 1177.433 | 113.430         | 488.350  | 487.212  | A10  |
| T13 | 1308.400       | 0.000    | 1349.400       | 1390.400        | 0.000    | 1344.400 | <b>444.283</b>  | 427.210  | 426.210  | T10  |
| A14 | 1319.510       | 0.000    | 1317.510       | 1363.510        | 0.000    | 1345.510 | 381.100         | 330.100  | 328.102  | A10  |
| E15 | 1084.030       | 0.000    | 1040.030       | 1480.030        | 0.000    | 1074.028 | 278.100         | 259.120  | 258.140  | E10  |
| R16 | 1312.010       | 1018.040 | 1314.000       | 1620.010        | 1021.004 | 1302.000 | 147.110         | 130.000  | 0.000    | R10  |

# sp | P43274 | H14\_MOUSE

S<sup>Phospho</sup> ET<sup>Phospho</sup> APAAPAAPAPAEK  
79.97 79.97

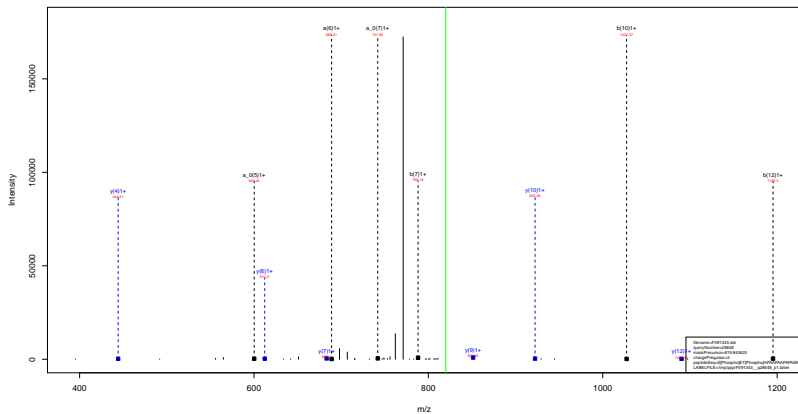

# sp | P43274 | H14\_MOUSE

S<sup>Phospho</sup> 79.97 ET<sup>Phospho</sup> 79.97 APAAPAAPAPAEK

- ▶ fragmentation table for charge state 1+
- ▶ specType=cid
- ▶ score=32.59
- ▶ F091343.dat
- ▶ query=q28648\_p1
- ▶ precursor=819.840620
- ▶ chargePrecursor=2
- ▶ itol=0.5

| AA | a       | a*             | aΔ             | b              | b*              | bΔ       | y               | y*             | yΔ       | AA      |      |
|----|---------|----------------|----------------|----------------|-----------------|----------|-----------------|----------------|----------|---------|------|
| S  | 190.011 | 0.000          | 122.000        | 168.000        | 0.000           | 199.999  | 168.000         | 122.000        | 190.011  | S 20    |      |
| E  | 209.051 | 0.000          | 201.041        | 207.040        | 0.000           | 278.958  | 207.040         | 1454.050       | 1461.047 | E 15    |      |
| T  | 224.070 | 0.000          | 472.061        | 473.061        | 0.000           | 469.062  | 159.740         | 1329.041       | 1324.039 | T 4     |      |
| A  | 331.104 | 0.000          | 505.094        | 549.090        | 0.000           | 511.090  | 1581.830        | 1184.000       | 1141.810 | A 13    |      |
| P  | 518.134 | 0.000          | <b>608.147</b> | 646.151        | 0.000           | 628.142  | <b>1090.580</b> | 1073.583       | 1072.579 | P 12    |      |
| A  | 6       | <b>610.134</b> | 0.000          | 597.135        | 717.130         | 0.000    | 609.131         | 691.131        | 698.130  | A 11    |      |
| A  | 7       | 700.211        | 0.000          | <b>742.221</b> | <b>768.226</b>  | 0.000    | 770.216         | <b>922.490</b> | 905.473  | 904.480 | A 10 |
| P  | 8       | 807.204        | 0.000          | 839.271        | 899.274         | 0.000    | 897.269         | <b>851.492</b> | 834.430  | 833.432 | P 9  |
| A  | 9       | 894.271        | 0.000          | 940.311        | 999.314         | 0.000    | 979.312         | 74.747         | 747.301  | A 8     |      |
| A  | 10      | 999.250        | 0.000          | 985.249        | <b>1027.353</b> | 0.000    | 1026.349        | <b>661.372</b> | 660.362  | A 7     |      |
| P  | 11      | 1096.411       | 0.000          | 1078.401       | 1114.404        | 0.000    | 1106.398        | <b>612.335</b> | 598.326  | 594.326 | P 6  |
| A  | 12      | 1197.440       | 0.000          | 1148.430       | <b>1195.443</b> | 0.000    | 1177.433        | 53.330         | 488.350  | 487.272 | A 5  |
| T  | 13      | 1304.400       | 0.000          | 1249.400       | 1304.400        | 0.000    | 1274.400        | <b>444.283</b> | 427.273  | 426.276 | T 3  |
| A  | 14      | 1319.530       | 0.000          | 1317.520       | 1363.511        | 0.000    | 1345.510        | 381.130        | 330.160  | 328.162 | A 3  |
| E  | 15      | 1384.530       | 0.000          | 1446.510       | 1482.510        | 0.000    | 1474.508        | 276.130        | 259.120  | 258.140 | E 2  |
| R  | 16      | 1532.510       | 1078.940       | 1514.000       | 1620.971        | 1031.044 | 1602.960        | 147.110        | 130.000  | 0.000   | R 1  |

# sp | P43274 | H14\_MOUSE

S<sup>Phospho</sup> ET<sup>Phospho</sup> APAAPAAPAPAEK  
79.97 79.97

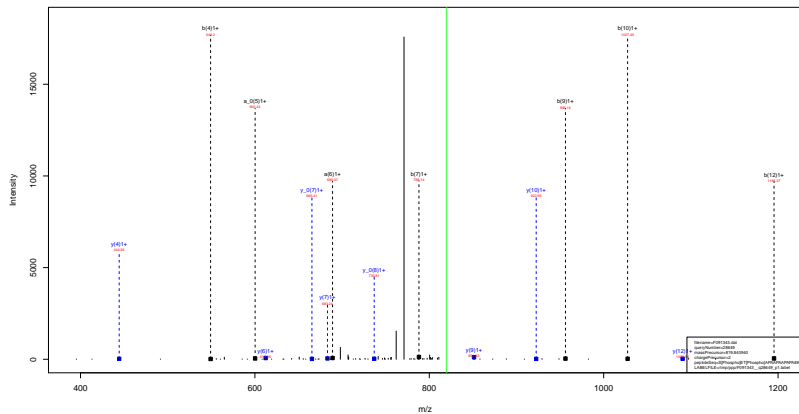



# sp | P43274 | H14\_MOUSE

S<sup>Phospho</sup> 79.97 ET<sup>Phospho</sup> 79.97 APAAPAAPAPAEK

- ▶ fragmentation table for charge state 1+
- ▶ specType=cid
- ▶ score=32.71
- ▶ F091343.dat
- ▶ query=q28649\_p1
- ▶ precursor=819.840940
- ▶ chargePrecursor=2
- ▶ itol=0.5

| AA  | a              | a*     | aΔ             | b               | b*     | bΔ       | y               | y*       | yΔ             | AA   |
|-----|----------------|--------|----------------|-----------------|--------|----------|-----------------|----------|----------------|------|
| S1  | 190.011        | 0.000  | 120.000        | 160.000         | 0.000  | 199.999  | 160.000         | 120.000  | 190.011        | S104 |
| E2  | 209.051        | 0.000  | 201.041        | 200.040         | 0.000  | 209.950  | 149.000         | 149.000  | 209.051        | E115 |
| T3  | 204.000        | 0.000  | 474.001        | 473.001         | 0.000  | 400.000  | 150.000         | 150.000  | 204.000        | T14  |
| A4  | 332.104        | 0.000  | 505.004        | <b>549.009</b>  | 0.000  | 331.000  | 134.000         | 134.000  | 332.104        | A113 |
| P5  | 610.134        | 0.000  | <b>608.147</b> | 646.151         | 0.000  | 608.148  | <b>1090.586</b> | 1073.583 | 610.134        | P112 |
| A6  | <b>608.134</b> | 0.000  | 507.134        | 510.130         | 0.000  | 609.133  | 60.000          | 60.000   | <b>608.134</b> | A111 |
| A7  | 700.211        | 0.000  | 740.211        | <b>768.258</b>  | 0.000  | 710.210  | <b>822.499</b>  | 805.473  | 700.211        | A100 |
| P8  | 807.204        | 0.000  | 830.210        | <b>858.218</b>  | 0.000  | 807.200  | <b>851.492</b>  | 834.470  | 807.204        | P109 |
| A9  | 808.211        | 0.000  | 840.211        | <b>858.218</b>  | 0.000  | 810.211  | 74.000          | 74.000   | 808.211        | A10  |
| A10 | 999.250        | 0.000  | 985.250        | <b>1027.353</b> | 0.000  | 999.249  | <b>661.372</b>  | 655.350  | 999.250        | A107 |
| P11 | 1096.411       | 0.000  | 1078.401       | 1114.406        | 0.000  | 1096.400 | <b>612.335</b>  | 598.330  | 1096.411       | P106 |
| A12 | 1107.440       | 0.000  | 1148.430       | <b>1195.443</b> | 0.000  | 1127.433 | 53.000          | 480.000  | 1107.440       | A105 |
| T13 | 1308.400       | 0.000  | 1340.400       | 1378.400        | 0.000  | 1314.400 | <b>444.283</b>  | 427.270  | 1308.400       | T108 |
| A14 | 1330.530       | 0.000  | 1317.530       | 1363.533        | 0.000  | 1345.530 | 39.100          | 330.100  | 1330.530       | A103 |
| E15 | 1384.532       | 0.000  | 1440.510       | 1480.510        | 0.000  | 1474.508 | 276.100         | 259.120  | 1384.532       | E102 |
| R16 | 1582.616       | 10.000 | 1574.600       | 1620.611        | 10.000 | 1582.600 | 147.100         | 130.000  | 1582.616       | R101 |

# sp | P43276 | H15\_MOUSE

S<sup>(Phospho)</sup> ETAPAETAAPAPVEK  
(79.97)

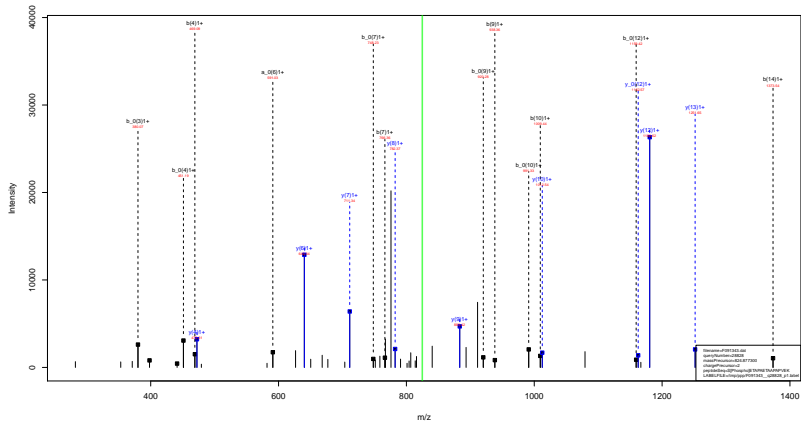

# sp | P43276 | H15\_MOUSE

S<sup>(Phospho)</sup><sub>(79.97)</sub> ETAPAETAAPAPVEK

- ▶ fragmentation table for charge state 1+
- ▶ specType=cid
- ▶ score=73.84
- ▶ F091343.dat
- ▶ query=q28828.p1
- ▶ precursor=824.877300
- ▶ chargePrecursor=2
- ▶ itol=0.5

| AA    | a              | a'       | a+2      | b               | b'       | b+2             | y               | y'       | y+2             | AA    |
|-------|----------------|----------|----------|-----------------|----------|-----------------|-----------------|----------|-----------------|-------|
| S(1)  | 1460.011       | 0.000    | 1222.000 | 1488.000        | 0.000    | 149.000         | 1440.740        | 1011.250 | 1030.750        | S(10) |
| E(2)  | 1380.020       | 0.000    | 251.043  | 207.000         | 0.000    | 207.000         | 1481.740        | 1484.720 | 1483.730        | E(15) |
| T(3)  | 1370.110       | 0.000    | 382.000  | <b>306.000</b>  | 0.000    | <b>301.000</b>  | 1330.730        | 1330.070 | 1328.000        | T(14) |
| A(4)  | <b>441.138</b> | 0.000    | 425.120  | <b>460.133</b>  | 0.000    | <b>451.132</b>  | <b>1251.658</b> | 1224.001 | 1231.047        | A(13) |
| P(5)  | 1338.101       | 0.000    | 320.180  | 348.180         | 0.000    | 348.170         | <b>1180.621</b> | 1183.584 | <b>1182.610</b> | P(12) |
| A(6)  | 1097.000       | 0.000    | 1097.000 | 1097.000        | 0.000    | 1097.000        | 1097.000        | 1097.000 | 1097.000        | A(11) |
| E(7)  | 1308.212       | 0.000    | 1240.200 | <b>706.203</b>  | 0.000    | <b>740.255</b>  | <b>1012.531</b> | 995.504  | 994.520         | E(10) |
| T(8)  | 1308.110       | 0.000    | 1021.500 | 1071.110        | 0.000    | 1071.101        | <b>881.680</b>  | 1064.463 | 1061.470        | T(9)  |
| A(9)  | 1030.105       | 0.000    | 1030.105 | <b>930.100</b>  | 0.000    | <b>920.100</b>  | <b>782.481</b>  | 785.414  | 784.430         | A(8)  |
| A(10) | 1011.100       | 0.000    | 1011.100 | <b>1000.107</b> | 0.000    | <b>991.117</b>  | <b>711.404</b>  | 708.371  | 707.351         | A(7)  |
| P(11) | 1011.100       | 0.000    | 1011.100 | 1011.100        | 0.000    | 1011.100        | <b>640.306</b>  | 1011.100 | 1011.100        | P(6)  |
| A(12) | 1140.400       | 0.000    | 1131.472 | 1177.477        | 0.000    | <b>1159.467</b> | 1159.467        | 1159.467 | 1159.467        | A(5)  |
| T(13) | 1240.700       | 0.000    | 1220.700 | 1214.700        | 0.000    | 1214.700        | <b>472.271</b>  | 470.250  | 469.260         | T(4)  |
| V(14) | 1240.004       | 0.000    | 1237.000 | <b>1173.500</b> | 0.000    | 1205.500        | 125.220         | 365.197  | 367.213         | V(1)  |
| E(15) | 1474.040       | 0.000    | 1456.030 | 1502.041        | 0.000    | 1484.030        | 200.150         | 250.110  | 248.145         | E(3)  |
| K(16) | 1502.741       | 1500.730 | 1504.731 | 1530.730        | 1531.730 | 1532.730        | 147.111         | 130.000  | 0.000           | K(1)  |

# sp | P62806 | H4\_MOUSE

RIS Phospho  
79.97 GLIYEETRGVLK

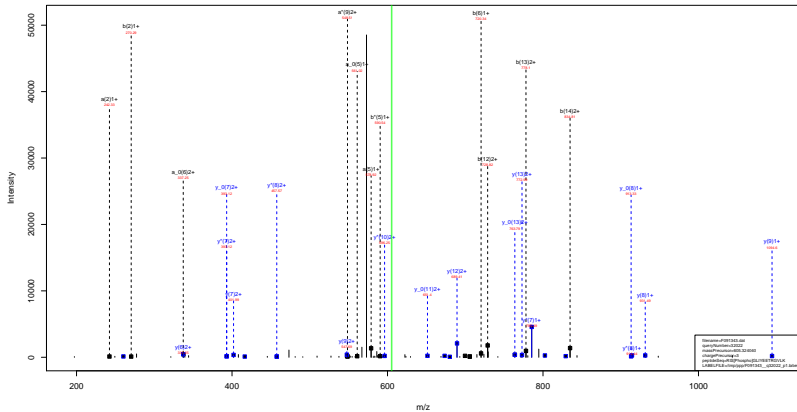

# sp | P62806 | H4\_MOUSE

RIS Phospho  
79.97 GLIYEETRGVLK

- ▶ fragmentation table for charge state 1+
- ▶ specType=cid
- ▶ score=44.32
- ▶ F091343.dat
- ▶ query=q32022\_p1
- ▶ precursor=605.324040
- ▶ chargePrecursor=3
- ▶ itol=0.5

| AA   | x              | a*       | x <sub>0</sub> | b              | b*             | b <sub>0</sub> | y               | y*             | x <sub>0</sub> | AA    |      |
|------|----------------|----------|----------------|----------------|----------------|----------------|-----------------|----------------|----------------|-------|------|
| R1   | 129 113        | 112 289  | 0 000          | 157 108        | 146 082        | 0 000          | 1813 970        | 1798 951       | 1795 947       | R120  |      |
| I12  | <b>242 196</b> | 228 171  | 0 000          | <b>270 182</b> | 255 166        | 0 000          | 1687 850        | 1649 830       | 1639 846       | I144  |      |
| S13  | 409 156        | 392 158  | 395 180        | 437 191        | 420 194        | 419 180        | 1544 772        | 1527 749       | 1526 761       | S111  |      |
| G14  | 498 111        | 489 101  | 449 200        | 494 212        | 477 208        | 476 200        | 1377 714        | 1366 714       | 1368 701       | G120  |      |
| L15  | <b>579 301</b> | 562 270  | <b>541 291</b> | <b>607 300</b> | <b>590 270</b> | 589 280        | 1150 750        | 1103 735       | 1102 742       | L111  |      |
| I16  | 692 280        | 675 280  | 674 270        | <b>720 300</b> | 702 294        | 692 280        |                 |                |                | I100  |      |
| V17  | 832 418        | 815 412  | 811 410        | 863 444        | 846 411        | 845 410        | <b>1091 384</b> | 1077 388       | 1076 375       | V106  |      |
| E18  | 954 494        | 937 485  | 936 480        | 1012 505       | 996 490        | 994 470        | <b>831 521</b>  | <b>814 498</b> | <b>813 510</b> | E101  |      |
| E19  | 1113 574       | 1098 567 | 1096 570       | 1141 579       | 1124 560       | 1123 551       | <b>802 478</b>  | <b>785 452</b> | 784 460        | E117  |      |
| I100 | 1214 562       | 1197 555 | 1196 570       | 1242 577       | 1226 559       | 1224 550       | <b>673 436</b>  | 656 420        | 655 425        | I100  |      |
| R111 | 1319 638       | 1301 630 | 1300 620       | 1356 636       | 1339 618       | 1338 609       |                 | 939 589        | 939 581        | R100  |      |
| G121 | 1437 704       | 1418 698 | 1419 691       | 1465 699       | 1438 672       | 1437 659       | <b>416 287</b>  | 399 265        | 0 000          | G100  |      |
| V115 | 1526 773       | 1508 768 | 1508 760       | 1554 769       | 1537 741       | 1536 731       |                 | 369 260        | 342 230        | 0 000 | V108 |
| L114 | 1619 837       | 1602 830 | 1601 840       | 1659 827       | 1642 820       | 1641 811       | <b>296 197</b>  | 281 210        | 0 000          | L100  |      |
| R101 | 1709 952       | 1700 926 | 1749 941       | 1795 947       | 1778 920       | 1777 920       |                 | 191 111        | 150 080        | 0 000 | R101 |

# sp | P62806 | H4\_MOUSE

RIS<sup>Phospho</sup> 79.97 GLIYEETRGVLK

- ▶ fragmentation table for charge state 2+
- ▶ specType=cid
- ▶ score=44.32
- ▶ F091343.dat
- ▶ query=q32022.p1
- ▶ precursor=605.324040
- ▶ chargePrecursor=3
- ▶ itol=0.5

| AA | a              | a*             | a,β            | b              | b*      | b,β     | y              | y*             | y,β            | AA |
|----|----------------|----------------|----------------|----------------|---------|---------|----------------|----------------|----------------|----|
| R  | 65.000         | 54.549         | 0.504          | 79.050         | 70.545  | 0.504   | 907.482        | 808.999        | 898.477        | R  |
| I  | 121.402        | 113.089        | 0.504          | 135.000        | 127.087 | 0.504   | <b>829.432</b> | 830.918        | 831.236        | I  |
| S  | 155.104        | 138.988        | 1.001          | 213.000        | 211.000 | 1.001   | <b>722.509</b> | 724.976        | <b>763.864</b> | S  |
| G  | 223.912        | 225.999        | 224.997        | 247.610        | 239.997 | 238.974 | <b>685.359</b> | 688.977        | <b>688.385</b> | G  |
| L  | 250.154        | 251.841        | 251.149        | 304.150        | 295.839 | 295.147 | 668.888        | 652.369        | <b>661.874</b> | L  |
| I  | 346.096        | 338.183        | <b>337.691</b> | 360.054        | 352.181 | 351.686 | 608.338        | <b>595.824</b> | 595.332        | I  |
| V  | 428.908        | 419.918        | 419.223        | 442.259        | 433.912 | 433.220 | <b>547.796</b> | 539.799        | 539.900        | V  |
| E  | 492.740        | 484.526        | 483.744        | 526.742        | 498.424 | 497.743 | 495.255        | <b>457.751</b> | <b>457.259</b> | E  |
| E  | 557.271        | <b>548.757</b> | <b>548.265</b> | 573.260        | 562.750 | 562.261 | <b>401.743</b> | <b>393.229</b> | <b>392.737</b> | E  |
| T  | 607.704        | 599.281        | 598.705        | 629.707        | 611.279 | 611.291 | <b>337.221</b> | 338.708        | 338.216        | T  |
| R  | 688.848        | 677.813        | 676.843        | <b>699.843</b> | 691.819 | 690.837 | 388.988        | 378.144        | 378.004        | R  |
| G  | 714.356        | <b>705.842</b> | <b>705.350</b> | <b>728.353</b> | 719.840 | 719.350 | 258.643        | 259.134        | 0.504          | G  |
| V  | <b>763.890</b> | 755.977        | 754.895        | <b>777.887</b> | 766.874 | 766.889 | 188.138        | 171.823        | 0.504          | V  |
| L  | 830.432        | 811.919        | 811.427        | <b>834.429</b> | 825.916 | 825.424 | 130.602        | 122.089        | 0.504          | L  |
| K  | 884.419        | 873.988        | 873.414        | 896.417        | 889.954 | 889.412 | 74.080         | 58.547         | 0.504          | K  |



# sp | P70696 | H2B1A\_MOUSE

HAVSEGT<sup>Phospho</sup><sub>79.97</sub> KAVTKYTSSK

- ▶ fragmentation table for charge state 1+
- ▶ specType=cid
- ▶ score=33.74
- ▶ F091343.dat
- ▶ query=q33020\_p1
- ▶ precursor=625.306860
- ▶ chargePrecursor=3
- ▶ itol=0.5

| AA          | a        | a*       | aΔ             | b              | b*       | bΔ             | y              | y*       | yΔ             | AA          |
|-------------|----------|----------|----------------|----------------|----------|----------------|----------------|----------|----------------|-------------|
| <b>T</b> 1  | 1100.7   | 0.000    | 0.000          | 110.000        | 0.000    | 0.000          | 1001.700       | 1000.070 | 0.000          | <b>T</b> 12 |
| <b>A</b> 2  | 101.000  | 0.000    | <b>209.103</b> | 0.000          | 0.000    | 0.000          | 1100.000       | 1119.925 | 21.000         | <b>A</b> 26 |
| <b>V</b> 3  | 100.000  | 0.000    | <b>208.172</b> | 0.000          | 0.000    | 0.000          | 1000.000       | 1049.103 | 104.700        | <b>V</b> 15 |
| <b>S</b> 4  | 100.000  | 0.000    | 140.100        | 0.000          | 0.000    | <b>317.103</b> | 1000.000       | 1049.173 | 2048.715       | <b>S</b> 14 |
| <b>E</b> 5  | 100.000  | 0.000    | 139.243        | 0.000          | 0.000    | <b>306.216</b> | 1000.000       | 1049.103 | 1049.000       | <b>E</b> 13 |
| <b>G</b> 6  | 100.000  | 0.000    | 139.200        | 0.000          | 0.000    | <b>305.217</b> | 1000.000       | 1049.043 | 1049.000       | <b>G</b> 12 |
| <b>T</b> 7  | 114.200  | 0.000    | 120.200        | <b>762.282</b> | 0.000    | <b>744.271</b> | 1201.000       | 1219.012 | 1275.014       | <b>T</b> 11 |
| <b>D</b> 8  | 100.000  | 0.000    | 140.200        | <b>806.277</b> | 0.000    | 807.200        | 1101.000       | 1099.000 | 1099.000       | <b>D</b> 10 |
| <b>A</b> 9  | 100.000  | 0.000    | 140.200        | 140.200        | 0.000    | 803.000        | <b>804.536</b> | 1075.000 | <b>806.525</b> | <b>A</b> 11 |
| <b>V</b> 10 | 100.000  | 0.000    | 140.200        | 140.200        | 0.000    | 1002.000       | <b>811.499</b> | 1008.000 | <b>805.488</b> | <b>V</b> 10 |
| <b>T</b> 11 | 110.000  | 0.000    | 110.000        | 110.000        | 0.000    | 1100.000       | <b>814.431</b> | 1007.000 | <b>796.420</b> | <b>T</b> 17 |
| <b>T</b> 12 | 110.000  | 0.000    | 110.000        | 110.000        | 0.000    | 1100.000       | <b>711.383</b> | 1006.000 | <b>605.172</b> | <b>T</b> 18 |
| <b>V</b> 13 | 114.000  | 0.000    | 140.000        | 140.000        | 0.000    | 1144.000       | 1144.000       | 1006.000 | <b>567.277</b> | <b>V</b> 13 |
| <b>L</b> 14 | 110.000  | 0.000    | 110.000        | 110.000        | 0.000    | 1100.000       | <b>422.225</b> | 1006.000 | 1006.000       | <b>L</b> 16 |
| <b>S</b> 15 | 110.000  | 0.000    | 110.000        | 110.000        | 0.000    | 1100.000       | <b>321.177</b> | 1006.000 | 1006.000       | <b>S</b> 15 |
| <b>S</b> 16 | 1000.000 | 1000.000 | 1000.000       | 1000.000       | 1000.000 | 1000.000       | 1000.000       | 1000.000 | 1000.000       | <b>S</b> 16 |
| <b>K</b> 17 | 100.000  | 0.000    | 100.000        | 100.000        | 0.000    | 1000.000       | 100.000        | 100.000  | 0.000          | <b>K</b> 17 |



# sp | P70696 | H2B1A\_MOUSE

HAVSEGT<sup>Phospho</sup><sub>79.97</sub> KAVTKYTSSK

- ▶ fragmentation table for charge state 2+
- ▶ specType=cid
- ▶ score=33.74
- ▶ F091343.dat
- ▶ query=q33020\_p1
- ▶ precursor=625.306860
- ▶ chargePrecursor=3
- ▶ itol=0.5

| AA | a              | a*             | aΔ             | b              | b*             | bΔ             | c              | c*             | cΔ             | AA    |
|----|----------------|----------------|----------------|----------------|----------------|----------------|----------------|----------------|----------------|-------|
| H  | 35.537         | 0.504          | 0.504          | 66.537         | 0.504          | 0.504          | 637.453        | 626.949        | 608.951        | H(L)Y |
| A  | 91.058         | 0.504          | 0.504          | 109.955        | 0.504          | 0.504          | <b>868.927</b> | <b>860.414</b> | <b>858.927</b> | A(L)S |
| V  | 140.502        | 0.504          | 0.504          | 154.509        | 0.504          | 0.504          | <b>831.408</b> | <b>824.895</b> | <b>824.403</b> | V(L)S |
| S  | 184.066        | 0.504          | 0.504          | 199.069        | 0.504          | 0.504          | 809.392        | 801.891        | 774.369        | S(L)A |
| E  | 248.829        | 0.504          | 0.504          | 259.829        | 0.504          | 0.504          | 253.822        | 240.321        | 231.321        | E(L)I |
| G  | 277.440        | 0.504          | 0.504          | 286.138        | 0.504          | 0.504          | 284.138        | <b>675.837</b> | 661.334        | G(L)I |
| T  | 327.647        | 0.504          | 0.504          | 350.649        | 0.504          | 0.504          | 372.639        | 367.135        | 358.633        | T(L)I |
| T  | 331.959        | <b>423.181</b> | <b>422.680</b> | 349.959        | 431.179        | 430.678        | <b>556.819</b> | 549.318        | <b>547.814</b> | T(L)S |
| A  | <b>467.213</b> | 458.712        | 458.212        | <b>481.211</b> | <b>472.697</b> | 472.195        | <b>492.772</b> | 484.270        | 458.768        | A(L)S |
| V  | 532.747        | <b>568.234</b> | 567.742        | <b>530.745</b> | 522.232        | 521.730        | 497.225        | 448.740        | 440.240        | V(L)S |
| I  | <b>567.271</b> | <b>558.758</b> | 558.256        | <b>581.269</b> | 572.755        | <b>572.253</b> | <b>407.719</b> | 399.206        | 388.714        | I(L)Y |
| T  | 613.119        | 607.615        | 607.113        | <b>645.316</b> | <b>636.803</b> | <b>636.311</b> | 601.143        | 588.622        | 580.120        | T(L)S |
| V  | <b>712.850</b> | 704.337        | 703.842        | <b>726.848</b> | <b>718.335</b> | <b>717.842</b> | 293.140        | 284.634        | 284.142        | V(L)S |
| I  | 763.274        | 754.691        | 754.189        | 777.372        | 768.856        | 768.354        | 211.616        | 203.103        | 202.611        | I(L)A |
| S  | 806.930        | 798.337        | 797.835        | 820.939        | 812.374        | 811.862        | 181.092        | 152.579        | 152.087        | S(L)S |
| S  | 859.896        | 841.893        | 841.400        | <b>864.404</b> | 855.899        | 855.398        | 131.926        | 106.065        | 106.011        | S(L)S |
| R  | 914.494        | 905.980        | 905.485        | 925.451        | 916.936        | 916.446        | 74.680         | 65.947         | 0.504          | R(L)I |

# sp | P43274 | H14\_MOUSE

S<sup>Phospho</sup> ETAPAAPAAPAPAEEKTPVK  
79.97

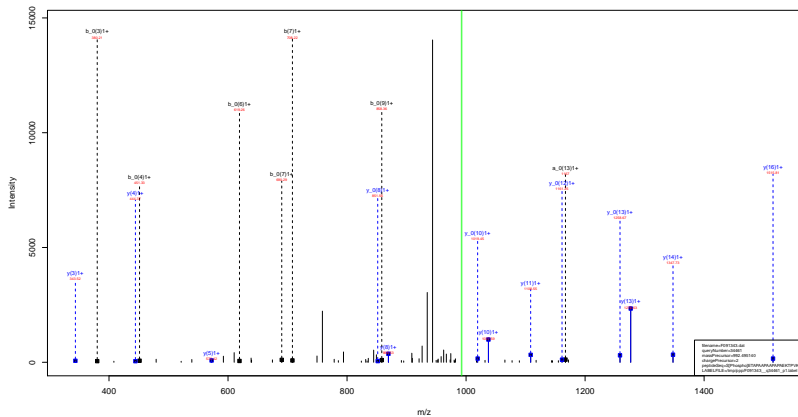

# sp | P43274 | H14\_MOUSE

S<sup>Phospho</sup><sub>79.97</sub> ETAPAAPAAPAPAEKTPVK

- ▶ fragmentation table for charge state 1+
- ▶ specType=cid
- ▶ score=55.80
- ▶ F091343.dat
- ▶ query=q34461.p1
- ▶ precursor=992.495140
- ▶ chargePrecursor=2
- ▶ itol=0.5

| AA | a        | a*       | aΔ              | b              | b*       | bΔ             | r               | r*       | rΔ              | AA |
|----|----------|----------|-----------------|----------------|----------|----------------|-----------------|----------|-----------------|----|
| S  | 1401.111 | 0.000    | 1401.111        | 100.000        | 0.000    | 1401.111       | 1001.111        | 0.000    | 1001.111        | S  |
| E  | 209.053  | 0.000    | 209.053         | 207.045        | 0.000    | 279.039        | 1818.959        | 2199.954 | 1700.979        | E  |
| I  | 970.101  | 0.000    | 970.097         | 309.090        | 0.000    | <b>300.085</b> | 1607.030        | 2070.911 | 1909.927        | I  |
| A  | 441.136  | 0.000    | 423.120         | 400.113        | 0.000    | <b>451.122</b> | 1300.000        | 1500.984 | 1500.980        | A  |
| P  | 938.101  | 0.000    | 920.100         | 900.100        | 0.000    | 900.100        | <b>1515.853</b> | 1740.926 | 2007.924        | P  |
| A  | 309.258  | 0.000    | 300.211         | 307.215        | 0.000    | <b>610.212</b> | 1410.893        | 1400.978 | 1400.970        | A  |
| A  | 380.205  | 0.000    | 382.205         | <b>700.200</b> | 0.000    | <b>690.249</b> | <b>1347.763</b> | 1330.737 | 1330.737        | A  |
| T  | 177.033  | 0.000    | 169.000         | 169.033        | 0.000    | 169.033        | <b>1275.728</b> | 1270.989 | <b>1356.715</b> | T  |
| A  | 946.350  | 0.000    | 830.344         | 895.300        | 0.000    | <b>858.339</b> | 1110.612        | 1162.947 | <b>1161.963</b> | A  |
| A  | 919.302  | 0.000    | 901.300         | 949.300        | 0.000    | 901.300        | <b>1100.630</b> | 1070.610 | 1070.610        | A  |
| P  | 1019.450 | 0.000    | 990.450         | 1044.440       | 0.000    | 1020.420       | <b>1037.599</b> | 1030.512 | <b>1030.508</b> | P  |
| A  | 1207.492 | 0.000    | 1009.411        | 1122.477       | 0.000    | 1077.460       | 900.540         | 921.520  | 922.500         | A  |
| P  | 1184.430 | 0.000    | <b>1166.524</b> | 1121.510       | 0.000    | 1184.430       | <b>800.500</b>  | 801.461  | <b>851.499</b>  | P  |
| A  | 1055.572 | 0.000    | 1227.581        | 1203.567       | 0.000    | 1205.550       | 772.450         | 759.430  | 754.446         | A  |
| E  | 1304.614 | 0.000    | 1300.600        | 1312.600       | 0.000    | 1309.590       | 701.430         | 684.393  | 683.400         | E  |
| R  | 1012.109 | 1480.053 | 1494.958        | 1540.904       | 1520.878 | 1522.858       | <b>572.371</b>  | 595.300  | 594.304         | R  |
| I  | 1013.109 | 1500.731 | 1500.740        | 1541.702       | 1524.770 | 1521.741       | <b>644.262</b>  | 627.200  | 626.211         | I  |
| T  | 1110.103 | 1601.731 | 1601.740        | 1578.209       | 1572.218 | 1570.741       | <b>343.234</b>  | 326.200  | 326.200         | T  |
| V  | 1004.616 | 1750.852 | 1751.860        | 1837.875       | 1820.947 | 1819.851       | 240.811         | 225.155  | 0.000           | V  |
| K  | 1017.671 | 1820.849 | 1819.860        | 1865.864       | 1848.882 | 1847.878       | 147.111         | 1.50000  | 0.000           | K  |

# sp | P43276 | H15\_MOUSE

SETAPAETAAPAPVEKS <sup>Phospho</sup> PAK  
79.97

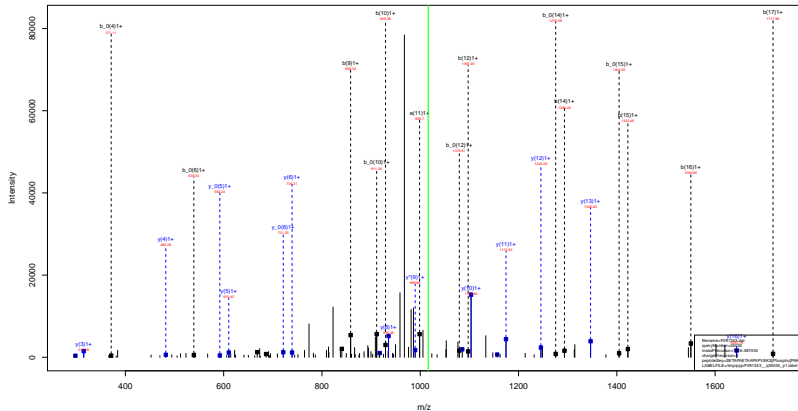

# sp | P43276 | H15\_MOUSE

SETAPAETAAPAPVEKS<sup>Phospho</sup> PAK  
79.97

- ▶ fragmentation table for charge state 1+
- ▶ specType=cid
- ▶ score=64.11
- ▶ F091343.dat
- ▶ query=q35035\_p1
- ▶ precursor=1016.487000
- ▶ chargePrecursor=2
- ▶ itol=0.5

| AA  | a              | a'       | a <sup>2</sup> | a,2             | b        | b'              | b,2             | y               | y'              | y,2             | AA  |
|-----|----------------|----------|----------------|-----------------|----------|-----------------|-----------------|-----------------|-----------------|-----------------|-----|
| S1  | 160.064        | 0.000    | 40.026         | 36.026          | 0.000    | 0.000           | 244.160         | 244.160         | 244.160         | 244.160         | S1  |
| E2  | 139.070        | 0.000    | 171.670        | 171.670         | 0.000    | 0.000           | 191.011         | 194.470         | 192.920         | 232.561         | E16 |
| T13 | 290.130        | 0.000    | 272.130        | 118.130         | 0.000    | 0.000           | 365.115         | 183.880         | 1768.862        | 1797.876        | T18 |
| A4  | 363.172        | 0.000    | 343.181        | 389.187         | 0.000    | 0.000           | <b>371.156</b>  | 374.861         | 1287.813        | 1398.811        | A17 |
| F15 | 438.225        | 0.000    | 448.214        | 408.219         | 0.000    | 0.000           | 603.233         | <b>1643.804</b> | 1626.771        | 1626.763        | F16 |
| A6  | 529.260        | 0.000    | 511.261        | 581.267         | 0.000    | 0.000           | <b>930.246</b>  | 1346.791        | 1526.725        | 1538.741        | A15 |
| E7  | 558.268        | 0.000    | 548.269        | <b>588.269</b>  | 0.000    | 0.000           | <b>648.288</b>  | 1343.671        | 1458.888        | 1457.704        | E14 |
| T16 | 578.310        | 0.000    | 543.341        | 593.347         | 0.000    | 0.000           | 709.357         | <b>1248.612</b> | 1229.845        | 1338.860        | T13 |
| A9  | 636.366        | 0.000    | 613.370        | <b>658.384</b>  | 0.000    | 0.000           | <b>840.373</b>  | <b>1245.624</b> | 1228.587        | 1227.613        | A12 |
| A10 | 661.420        | 0.000    | 634.416        | <b>679.421</b>  | 0.000    | 0.000           | <b>611.411</b>  | <b>1176.587</b> | 1113.540        | <b>1156.576</b> | A11 |
| F11 | <b>668.479</b> | 0.000    | 662.480        | 612.474         | 0.000    | 0.000           | 1011.500        | 1103.588        | 1041.512        | <b>1085.539</b> | F10 |
| A12 | 693.533        | 0.000    | 691.525        | <b>1097.511</b> | 0.000    | 0.000           | <b>1079.500</b> | 1006.460        | <b>1089.470</b> | 988.488         | A8  |
| F13 | 1164.569       | 0.000    | 1148.558       | 1034.564        | 0.000    | 1178.561        | <b>935.460</b>  | 918.451         | <b>917.449</b>  | F18             |     |
| V14 | 1205.637       | 0.000    | 1247.622       | <b>1293.632</b> | 0.000    | <b>1275.622</b> | 830.400         | 821.385         | 827.390         | V17             |     |
| E15 | 1334.680       | 0.000    | 1376.666       | <b>1322.676</b> | 0.000    | <b>1408.684</b> | <b>738.339</b>  | 722.312         | <b>741.328</b>  | E18             |     |
| K16 | 1522.719       | 1058.740 | 1504.704       | <b>1550.719</b> | 1533.743 | 1532.739        | <b>610.296</b>  | 583.260         | <b>582.285</b>  | K13             |     |
| S17 | 1680.773       | 1812.740 | 1671.763       | <b>1717.768</b> | 1700.741 | 1699.737        | <b>482.201</b>  | 468.170         | 464.130         | S14             |     |
| F18 | 1788.826       | 1938.790 | 1768.810       | 1817.825        | 1780.804 | 1779.800        | 370.200         | <b>315.203</b>  | <b>298.176</b>  | F19             |     |
| A19 | 1857.883       | 1840.830 | 1839.862       | 1881.868        | 1858.831 | 1857.827        | 245.150         | 261.113         | 0.000           | A13             |     |
| K20 | 1885.938       | 1888.830 | 1887.847       | 1911.851        | 1888.838 | 1887.834        | 147.110         | 130.880         | 0.000           | K11             |     |

sp | P43276 | H15\_MOUSE

SETAPAETAAPAPVEKS <sup>Phospho</sup>PAK  
79.97

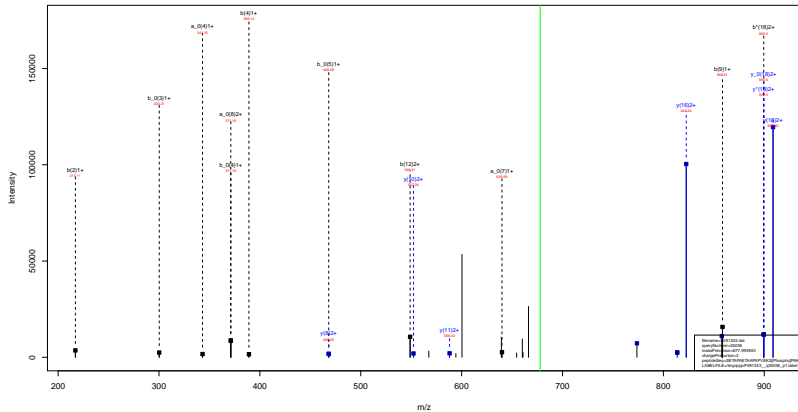

# sp | P43276 | H15\_MOUSE

SETAPAETAAPAPVEKS <sup>Phospho</sup> PAK  
79.97

- ▶ fragmentation table for charge state 1+
- ▶ specType=cid
- ▶ score=38.38
- ▶ F091343.dat
- ▶ query=q35036\_p1
- ▶ precursor=677.993940
- ▶ chargePrecursor=3
- ▶ itol=0.5

| AA  | a        | a'    | aΔD            | b              | b'       | bΔD            | y        | y'       | yΔD      | AA  |
|-----|----------|-------|----------------|----------------|----------|----------------|----------|----------|----------|-----|
| E1  | 88.004   | 0.000 | -4.890         | 88.010         | 0.000    | 0.000          | 2031.301 | 2034.191 | 2033.939 | S20 |
| E2  | 139.007  | 0.000 | 171.070        | <b>217.082</b> | 0.000    | 199.071        | 1044.932 | 1097.905 | 1045.921 | E19 |
| T3  | 190.010  | 0.000 | 147.130        | 190.120        | 0.000    | <b>300.119</b> | 1033.880 | 1178.862 | 1197.878 | T18 |
| K4  | 241.013  | 0.000 | <b>342.101</b> | <b>389.167</b> | 0.000    | <b>371.156</b> | 1734.888 | 1897.875 | 1898.814 | A17 |
| P5  | 292.016  | 0.000 | 430.212        | 492.213        | 0.000    | <b>468.209</b> | 1054.924 | 1025.977 | 1025.943 | P16 |
| A6  | 343.019  | 0.000 | 511.251        | 567.251        | 0.000    | 559.246        | 1046.931 | 1050.728 | 1028.741 | A25 |
| E7  | 394.022  | 0.000 | <b>640.254</b> | 696.250        | 0.000    | 688.239        | 1475.711 | 1458.689 | 1467.704 | E14 |
| T8  | 445.025  | 0.000 | 741.285        | 797.284        | 0.000    | 789.269        | 1366.663 | 1325.845 | 1328.869 | T13 |
| A9  | 496.028  | 0.000 | 832.310        | <b>858.304</b> | 0.000    | 840.293        | 1045.624 | 1128.597 | 1227.633 | A22 |
| A10 | 547.031  | 0.000 | 883.330        | 939.329        | 0.000    | 931.311        | 1174.590 | 1115.560 | 1126.576 | A11 |
| P11 | 598.034  | 0.000 | 980.400        | 1036.397       | 0.000    | 1028.381       | 1111.520 | 1088.521 | 1085.534 | P10 |
| A12 | 649.037  | 0.000 | 1027.421       | 1087.414       | 0.000    | 1079.392       | 1050.497 | 1069.474 | 1066.492 | A8  |
| P13 | 1146.069 | 0.000 | 1146.550       | 1104.564       | 0.000    | 1116.553       | 926.480  | 918.433  | 917.448  | P18 |
| V14 | 1245.637 | 0.000 | 1247.620       | 1263.632       | 0.000    | 1275.622       | 838.493  | 851.380  | 852.396  | V19 |
| E15 | 1344.660 | 0.000 | 1336.660       | 1422.678       | 0.000    | 1404.664       | 730.330  | 722.312  | 723.328  | E11 |
| R16 | 1532.715 | 0.000 | 1508.700       | 1508.700       | 1555.713 | 1552.706       | 631.280  | 543.268  | 592.285  | R20 |
| S17 | 1630.772 | 0.000 | 1617.767       | 1617.767       | 1600.781 | 1607.767       | 687.280  | 465.174  | 464.190  | S16 |
| P18 | 1730.820 | 0.000 | 1700.790       | 1700.820       | 1707.824 | 1708.810       | 513.280  | 508.170  | 507.000  | P15 |
| A19 | 1737.819 | 0.000 | 1737.819       | 1737.819       | 1737.819 | 1737.819       | 487.481  | 218.130  | 201.124  | A20 |
| R20 | 1805.958 | 0.000 | 1807.940       | 1803.953       | 1866.926 | 1869.942       | 147.113  | 133.080  | 0.000    | R11 |

# sp | P43276 | H15\_MOUSE

SETAPAETAAPAPVEKS <sup>Phospho</sup> PAK  
79.97

- ▶ fragmentation table for charge state 2+
- ▶ specType=cid
- ▶ score=38.38
- ▶ F091343.dat
- ▶ query=q35036.p1
- ▶ precursor=677.993940
- ▶ chargePrecursor=3
- ▶ itol=0.5

| AA    | a       | a*    | a,0            | b              | b*             | b,0      | y              | y*             | y,0            | AA    |
|-------|---------|-------|----------------|----------------|----------------|----------|----------------|----------------|----------------|-------|
| S[1]  | 30.526  | 0.504 | 21.021         | 44.023         | 0.504          | 35.518   | 1018.465       | 1007.972       | 1009.488       | S[26] |
| E[2]  | 25.047  | 0.504 | 35.042         | 100.045        | 0.504          | 100.039  | 072.959        | 104.436        | 103.954        | E[19] |
| T[3]  | 145.571 | 0.504 | 1.36.566       | 130.568        | 0.504          | 130.562  | <b>908.448</b> | <b>899.935</b> | <b>896.443</b> | T[18] |
| A[4]  | 133.000 | 0.504 | 172.004        | 109.007        | 0.504          | 109.002  | <b>857.924</b> | 799.414        | 798.919        | A[17] |
| P[5]  | 229.616 | 0.504 | 200.611        | 243.613        | 0.504          | 234.608  | <b>822.406</b> | <b>813.892</b> | <b>813.400</b> | P[16] |
| A[6]  | 205.134 | 0.504 | 236.139        | 279.132        | 0.504          | 270.127  | <b>773.879</b> | 795.368        | 794.874        | A[15] |
| E[7]  | 129.656 | 0.504 | 100.651        | 143.653        | 0.504          | 134.648  | 738.361        | 720.847        | 720.352        | E[14] |
| T[8]  | 300.180 | 0.504 | <b>371.174</b> | 394.176        | 0.504          | 385.171  | 613.839        | 606.326        | 604.834        | T[13] |
| A[9]  | 415.698 | 0.504 | 406.693        | 420.696        | 0.504          | 420.690  | 623.318        | 614.802        | 614.310        | A[12] |
| A[10] | 431.217 | 0.504 | 442.211        | 495.214        | 0.504          | 456.209  | <b>587.797</b> | 579.284        | 578.792        | A[11] |
| F[11] | 499.743 | 0.504 | 490.738        | 533.741        | 0.504          | 524.735  | <b>552.278</b> | 543.765        | 543.273        | F[10] |
| A[12] | 535.262 | 0.504 | 526.256        | <b>540.259</b> | 0.504          | 540.254  | 514.735        | 496.228        | 495.734        | A[10] |
| P[13] | 583.780 | 0.504 | 574.775        | 597.778        | 0.504          | 588.773  | <b>468.234</b> | 458.720        | 458.228        | P[8]  |
| V[14] | 613.322 | 0.504 | 604.317        | 647.320        | 0.504          | 638.314  | 419.707        | 411.194        | 410.702        | V[7]  |
| E[15] | 627.844 | 0.504 | 588.839        | 731.841        | 0.504          | 702.835  | 310.173        | 303.660        | 303.168        | E[6]  |
| K[16] | 614.893 | 0.504 | 625.888        | 678.891        | 0.504          | 679.885  | 305.652        | 297.139        | 296.646        | K[9]  |
| S[17] | 645.389 | 0.504 | 636.384        | 659.386        | 0.504          | 659.380  | 243.604        | 235.091        | 234.599        | S[5]  |
| P[18] | 683.917 | 0.504 | 674.912        | 697.914        | <b>699.401</b> | 699.395  | 158.105        | 149.592        | 149.094        | P[3]  |
| A[19] | 624.431 | 0.504 | 624.426        | 643.428        | 0.504          | 643.422  | 109.579        | 101.066        | 100.574        | A[8]  |
| K[20] | 663.453 | 0.504 | 664.447        | 1007.450       | 0.504          | 1007.444 | 74.560         | 65.047         | 64.554         | K[1]  |



# sp | P43274 | H14\_MOUSE

S<sup>Phospho</sup> ET<sup>Phospho</sup> APAAPAAPAPAEKTPVK  
79.97 79.97

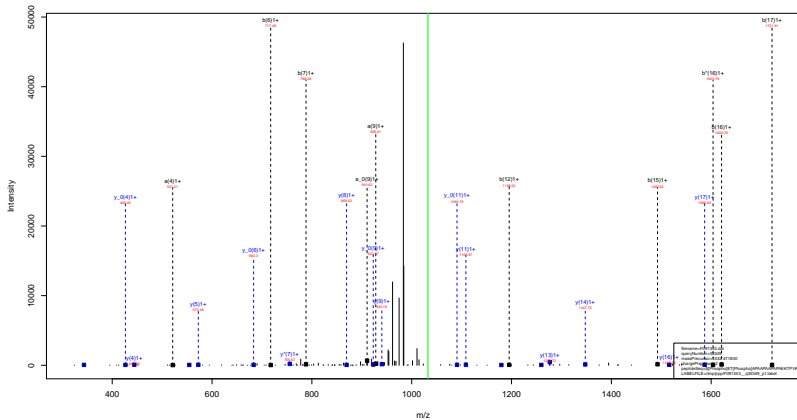

# sp | P43274 | H14\_MOUSE

S<sup>Phospho</sup> 79.97 ET<sup>Phospho</sup> 79.97 APAAPAAPAPAEKTPVK

- ▶ fragmentation table for charge state 1+
- ▶ specType=cid
- ▶ score=38.12
- ▶ F091343.dat
- ▶ query=q35349\_p1
- ▶ precursor=1032.471800
- ▶ chargePrecursor=2
- ▶ itol=0.5

| AA    | a              | a*        | a <sub>0</sub> | b               | b*              | b <sub>0</sub> | y               | y*              | y <sub>0</sub>  | AA    |
|-------|----------------|-----------|----------------|-----------------|-----------------|----------------|-----------------|-----------------|-----------------|-------|
| S[1]  | 1261.033       | 0.000     | 122.030        | 1388.060        | 0.000           | 140.000        | 2463.093        | 2349.063        | 2349.064        | S[2]  |
| S[2]  | 1261.033       | 0.000     | 204.041        | 1390.074        | 0.000           | 170.020        | 1899.954        | 1819.940        | 1819.938        | T[16] |
| T[1]  | 950.089        | 0.000     | 4.321051       | 476.062         | 0.000           | 480.000        | 1767.090        | 1770.078        | 1749.084        | T[18] |
| A[4]  | <b>571.104</b> | 0.000     | 503.094        | 546.090         | 0.000           | 531.080        | <b>1588.090</b> | 1589.084        | 1588.080        | A[17] |
| T[3]  | 1311.055       | 0.000     | 608.147        | 1469.113        | 0.000           | 620.140        | <b>1513.053</b> | 1469.028        | 1467.042        | P[10] |
| A[6]  | 889.184        | 0.000     | 675.084        | <b>717.089</b>  | 0.000           | 690.170        | 1418.080        | 1401.774        | 1400.792        | A[25] |
| A[7]  | 1302.111       | 0.000     | 742.121        | <b>788.276</b>  | 0.000           | 770.210        | <b>1347.783</b> | 1339.753        | 1329.753        | A[14] |
| P[8]  | 889.040        | 0.000     | 839.044        | 1020.070        | 0.000           | 889.200        | <b>1278.735</b> | <b>1259.699</b> | 1269.749        | P[13] |
| A[9]  | <b>928.321</b> | 0.000     | <b>910.311</b> | 956.316         | 0.000           | 938.320        | <b>1178.673</b> | 1162.941        | 1161.663        | A[12] |
| A[20] | 889.300        | 0.000     | 889.348        | 1027.013        | 0.000           | 1000.300       | <b>1108.636</b> | 1099.319        | <b>1090.626</b> | A[11] |
| A[12] | 1091.414       | 0.000     | 1178.461       | 1274.466        | 0.000           | 1285.500       | 1090.300        | 1084.572        | 1079.588        | P[16] |
| A[15] | 1157.440       | 0.000     | 1149.438       | <b>1193.443</b> | 0.000           | 1177.430       | <b>940.546</b>  | 925.525         | <b>922.536</b>  | A[18] |
| P[15] | 1184.400       | 0.000     | 1148.400       | 1282.400        | 0.000           | 1274.400       | <b>860.509</b>  | 854.481         | 851.499         | P[19] |
| A[14] | 1195.518       | 0.000     | 1157.508       | 1215.513        | 0.000           | 1245.520       | 772.490         | <b>755.430</b>  | 748.440         | A[17] |
| T[12] | 1254.400       | 0.000     | 1248.400       | <b>1292.576</b> | 0.000           | 1274.500       | 689.410         | 684.391         | <b>681.409</b>  | T[6]  |
| K[16] | 1362.010       | 1.076.040 | 1074.005       | <b>1020.071</b> | <b>1003.044</b> | 1000.000       | 572.377         | 568.393         | <b>554.368</b>  | K[10] |
| T[17] | 1093.723       | 1.076.087 | 1078.713       | <b>1071.718</b> | 1074.000        | 1103.700       | <b>444.382</b>  | 447.200         | <b>436.271</b>  | T[4]  |
| T[18] | 1190.445       | 1.179.750 | 1172.704       | 1166.717        | 1001.740        | 1000.700       | <b>343.234</b>  | 334.200         | 334.200         | P[8]  |
| V[10] | 1009.040       | 1.072.831 | 1007.034       | 1011.040        | 1000.010        | 1000.020       | 226.100         | 226.100         | 0.000           | V[2]  |
| K[20] | 1317.040       | 1.000.010 | 1009.029       | 1048.014        | 1003.000        | 1007.020       | 147.111         | 130.000         | 0.000           | K[1]  |

# sp | P43277 | H13\_MOUSE

S<sup>Phospho</sup> ET<sup>Phospho</sup> APAAPAAPAPVEKTPVK  
79.97 79.97

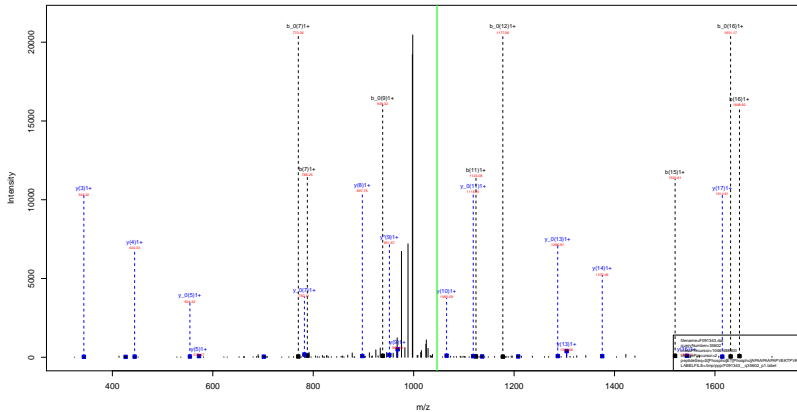

# sp | P43277 | H13\_MOUSE

S<sup>Phospho</sup> 79.97 ET<sup>Phospho</sup> 79.97 APAAPAAPAPVEKTPVK

- ▶ fragmentation table for charge state 1+
- ▶ specType=cid
- ▶ score=55.02
- ▶ F091343.dat
- ▶ query=q35602\_p1
- ▶ precursor=1046.488900
- ▶ chargePrecursor=2
- ▶ itol=0.5

| AA  | a       | a'       | a,2      | b               | b'       | b,2             | y               | y'             | y,2             | AA  |
|-----|---------|----------|----------|-----------------|----------|-----------------|-----------------|----------------|-----------------|-----|
| S1  | 140.051 | 0.000    | 122.050  | 268.050         | 0.000    | 149.050         | 208.050         | 207.050        | 207.050         | S20 |
| E2  | 150.053 | 0.000    | 213.053  | 363.053         | 0.000    | 219.053         | 124.053         | 120.053        | 120.053         | E19 |
| T3  | 150.050 | 0.000    | 433.051  | 478.052         | 0.000    | 460.052         | 176.050         | 177.050        | 177.050         | T18 |
| A4  | 151.104 | 0.000    | 303.094  | 549.099         | 0.000    | 331.093         | <b>1614.921</b> | 1367.899       | 1369.911        | A17 |
| F5  | 151.107 | 0.000    | 600.147  | 646.152         | 0.000    | 628.152         | <b>1543.504</b> | 1526.899       | 1526.899        | F16 |
| A6  | 169.104 | 0.000    | 397.104  | 717.104         | 0.000    | 399.119         | 1430.101        | 1429.800       | 1428.901        | A15 |
| A7  | 169.103 | 0.000    | 742.201  | <b>788.226</b>  | 0.000    | <b>770.216</b>  | <b>1375.794</b> | 1358.789       | 1357.789        | A14 |
| F8  | 187.104 | 0.000    | 338.204  | 658.204         | 0.000    | 341.203         | <b>1304.737</b> | 1287.733       | <b>1286.747</b> | F15 |
| A9  | 196.101 | 0.000    | 910.311  | 956.310         | 0.000    | <b>938.306</b>  | <b>1207.705</b> | 1190.676       | 1189.684        | A13 |
| A10 | 196.100 | 0.000    | 383.200  | 703.200         | 0.000    | 385.201         | <b>1136.667</b> | 1119.643       | <b>1118.657</b> | A12 |
| F11 | 196.101 | 0.000    | 1018.411 | 1064.410        | 0.000    | 1021.410        | <b>1065.638</b> | 1048.634       | 1047.634        | F10 |
| A12 | 197.140 | 0.000    | 1149.430 | <b>1124.406</b> | 0.000    | <b>1177.433</b> | <b>958.578</b>  | <b>951.551</b> | 950.567         | A11 |
| F13 | 198.100 | 0.000    | 324.400  | 644.400         | 0.000    | 327.401         | <b>897.540</b>  | 880.514        | 879.510         | F12 |
| V14 | 199.109 | 0.000    | 249.109  | 569.109         | 0.000    | 252.104         | 800.000         | 783.461        | <b>782.477</b>  | V17 |
| E15 | 199.110 | 0.000    | 1174.600 | <b>1520.607</b> | 0.000    | 1202.600        | <b>781.419</b>  | 764.389        | 763.389         | E16 |
| K16 | 199.107 | 1000.000 | 1060.606 | <b>1648.707</b> | 1000.000 | <b>1630.691</b> | <b>572.377</b>  | 565.360        | <b>554.366</b>  | K19 |
| T17 | 197.120 | 1104.720 | 1103.744 | 1149.750        | 1132.723 | 1151.730        | <b>444.262</b>  | 437.250        | <b>426.271</b>  | T16 |
| F18 | 198.100 | 1000.100 | 1000.700 | 1046.800        | 1029.675 | 1000.900        | <b>343.234</b>  | 336.200        | 335.200         | F18 |
| V19 | 197.100 | 1000.000 | 1041.871 | 1028.844        | 1027.800 | 1000.000        | 246.101         | 245.101        | 0.000           | V12 |
| K20 | 194.101 | 1000.000 | 1000.000 | 1000.000        | 1000.000 | 1000.000        | 147.110         | 130.000        | 0.000           | K13 |

# sp | P43276 | H15\_MOUSE

S<sup>Phospho</sup> ET<sup>Phospho</sup> APAETAAPAPVEKSPAK  
79.97 79.97

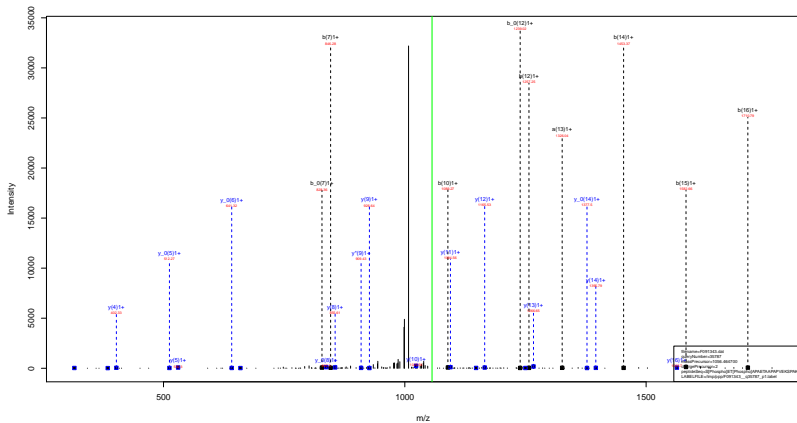

# sp | P43276 | H15\_MOUSE

S<sup>Phospho</sup> 79.97 ET<sup>Phospho</sup> 79.97 APAETAAPAPVEKSPA K

- ▶ fragmentation table for charge state 1+
- ▶ specType=cid
- ▶ score=40.68
- ▶ F091343.dat
- ▶ query=q35787\_p1
- ▶ precursor=1056.464700
- ▶ chargePrecursor=2
- ▶ itol=0.5

| AA  | a               | a'       | a,2'     | b               | b'       | b,2'            | y               | y'              | y,2'            | AA  |
|-----|-----------------|----------|----------|-----------------|----------|-----------------|-----------------|-----------------|-----------------|-----|
| S1  | 1481.611        | 0.000    | 122.000  | 188.000         | 0.000    | 149.000         | 2111.930        | 2094.930        | 2093.930        | S20 |
| T2  | 1390.913        | 0.000    | 793.143  | 297.043         | 0.000    | 279.000         | 1344.930        | 1627.930        | 1326.930        | T18 |
| T13 | 430.967         | 0.000    | 434.967  | 436.967         | 0.000    | 460.967         | 1819.960        | 1798.960        | 1797.960        | T18 |
| A4  | 611.034         | 0.000    | 503.034  | 540.030         | 0.000    | 551.030         | 1254.930        | 1617.940        | 1618.940        | A17 |
| T15 | 616.157         | 0.000    | 608.147  | 606.953         | 0.000    | 628.947         | <b>1563.630</b> | 1544.911        | 1545.937        | T16 |
| A6  | 388.134         | 0.000    | 375.134  | 377.080         | 0.000    | 389.110         | 1455.930        | 1448.930        | 1448.930        | A20 |
| E7  | 618.977         | 0.000    | 389.920  | <b>946.232</b>  | 0.000    | <b>628.221</b>  | <b>1395.740</b> | <b>1319.720</b> | <b>1377.737</b> | E14 |
| T18 | 399.989         | 0.000    | 389.979  | 389.989         | 0.000    | 401.989         | <b>1506.700</b> | <b>1476.970</b> | 1476.980        | T19 |
| A9  | 390.322         | 0.000    | 392.311  | 393.917         | 0.000    | 399.330         | <b>1165.650</b> | 1148.930        | <b>1147.847</b> | A12 |
| A10 | 393.498         | 0.000    | 1143.790 | <b>1089.354</b> | 0.000    | 1097.390        | <b>1094.620</b> | 1077.930        | 1078.910        | A13 |
| P11 | 1220.414        | 0.000    | 1148.403 | 1188.400        | 0.000    | 1188.400        | <b>1024.580</b> | 1004.930        | 1005.910        | P10 |
| A12 | 1220.449        | 0.000    | 1213.430 | <b>1257.444</b> | 0.000    | <b>1239.433</b> | <b>655.531</b>  | <b>605.504</b>  | 605.520         | A11 |
| P13 | <b>1326.501</b> | 0.000    | 1328.490 | 1329.480        | 0.000    | 1330.480        | <b>855.493</b>  | 838.940         | <b>837.863</b>  | P12 |
| V14 | 1424.930        | 0.000    | 1407.920 | <b>1353.505</b> | 0.000    | 1407.920        | 744.930         | 742.414         | 742.414         | V17 |
| D15 | 1714.914        | 0.000    | 1329.900 | <b>1382.607</b> | 0.000    | 1329.900        | <b>659.372</b>  | 650.360         | <b>641.362</b>  | D16 |
| K16 | 1661.907        | 1061.891 | 1064.901 | <b>1748.762</b> | 1064.900 | 1065.890        | <b>536.130</b>  | 518.901         | <b>517.319</b>  | K15 |
| S17 | 1769.730        | 1762.713 | 1763.720 | 1767.734        | 1766.720 | 1769.724        | <b>402.235</b>  | 389.700         | <b>384.224</b>  | S14 |
| P18 | 1866.910        | 1869.900 | 1868.910 | 1869.910        | 1867.900 | 1867.910        | <b>315.203</b>  | 298.910         | 298.910         | P19 |
| A19 | 1637.830        | 1630.800 | 1631.810 | 1630.824        | 1634.760 | 1647.814        | 310.911         | 301.121         | 300.910         | A18 |
| K20 | 1687.624        | 1688.600 | 1687.614 | 1689.610        | 1686.600 | 1686.600        | 147.111         | 130.600         | 130.610         | K11 |

# sp | P43274 | H14\_MOUSE

S<sup>Phospho</sup> ETAPAAPAAPAPAEKTPVKK  
79.97

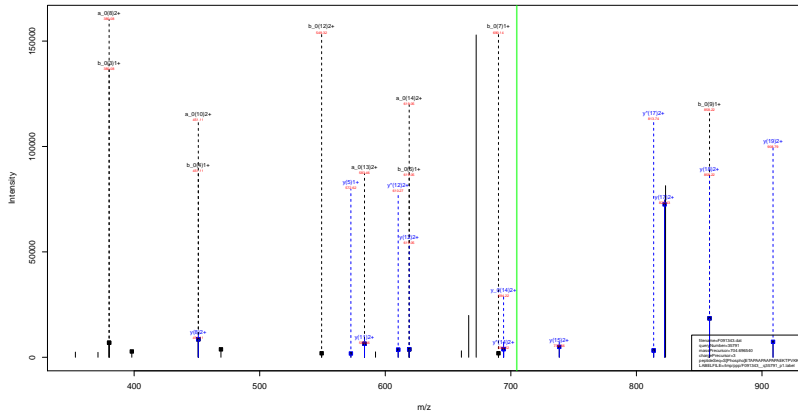

# sp | P43274 | H14\_MOUSE

S<sup>Phospho</sup><sub>79.97</sub> ETAPAAPAAPAPAEKTPVKK

- ▶ fragmentation table for charge state 1+
- ▶ specType=cid
- ▶ score=46.18
- ▶ F091343.dat
- ▶ query=q35791\_p1
- ▶ precursor=704.696540
- ▶ chargePrecursor=3
- ▶ itol=0.5

| AA    | a        | a'       | a <sub>0</sub> | b              | b'       | b <sub>0</sub> | y              | y'       | y <sub>0</sub> | AA    |
|-------|----------|----------|----------------|----------------|----------|----------------|----------------|----------|----------------|-------|
| S[1]  | 140.031  | 0.000    | 122.000        | 168.000        | 0.000    | 149.000        | 2112.070       | 2006.047 | 2004.061       | S[2]  |
| E[1]  | 138.053  | 0.000    | 251.043        | 220.000        | 0.000    | 210.000        | 1945.051       | 1920.040 | 1917.005       | E[2]  |
| T[5]  | 170.011  | 0.000    | 180.000        | <b>748.006</b> | 0.000    | <b>201.000</b> | 1838.031       | 1799.000 | 1786.022       | T[6]  |
| A[4]  | 141.136  | 0.000    | 423.120        | <b>468.133</b> | 0.000    | <b>451.122</b> | 1714.950       | 1697.958 | 1686.974       | A[5]  |
| P[5]  | 130.031  | 0.000    | 130.180        | 166.180        | 0.000    | 169.173        | 1643.040       | 1626.923 | 1625.917       | P[12] |
| A[6]  | 169.228  | 0.000    | 160.217        | 167.213        | 0.000    | <b>618.212</b> | 1526.800       | 1520.800 | 1520.800       | A[16] |
| A[7]  | 160.200  | 0.000    | 160.200        | 160.200        | 0.000    | <b>600.200</b> | 1476.810       | 1476.810 | 1467.811       | A[15] |
| P[8]  | 177.318  | 0.000    | 170.301        | 165.313        | 0.000    | 167.303        | 1404.821       | 1367.794 | 1368.810       | P[14] |
| A[9]  | 146.152  | 0.000    | 130.140        | 170.150        | 0.000    | <b>858.139</b> | 1307.760       | 1250.742 | 1260.718       | A[13] |
| A[10] | 119.104  | 0.000    | 160.100        | 161.101        | 0.000    | 162.101        | 1238.710       | 1219.700 | 1218.700       | A[12] |
| P[11] | 1310.949 | 0.000    | 100.430        | 1044.440       | 0.000    | 1020.420       | 1100.691       | 1148.687 | 1147.683       | P[11] |
| A[12] | 100.402  | 0.000    | 100.411        | 1115.411       | 0.000    | 100.400        | 1068.641       | 1051.613 | 1050.611       | A[10] |
| P[13] | 1184.535 | 0.000    | 1180.524       | 1212.530       | 0.000    | 1184.510       | 987.604        | 988.572  | 979.593        | P[13] |
| A[14] | 1205.872 | 0.000    | 1212.861       | 1205.861       | 0.000    | 1205.860       | 900.760        | 889.720  | 882.741        | A[14] |
| E[2]  | 1184.614 | 0.000    | 1186.604       | 1411.600       | 0.000    | 1384.590       | 820.514        | 812.488  | 811.504        | E[7]  |
| K[16] | 1112.100 | 1400.000 | 1148.000       | 1140.100       | 1261.010 | 1102.010       | <b>810.490</b> | 813.440  | 802.411        | K[6]  |
| T[7]  | 1112.117 | 1400.000 | 1148.100       | 1141.100       | 1261.100 | 1102.100       | <b>572.317</b> | 569.700  | 564.680        | T[8]  |
| P[10] | 1110.010 | 1000.010 | 1050.100       | 1120.000       | 1121.000 | 1120.010       | 471.930        | 454.300  | 0.000          | P[4]  |
| V[16] | 100.010  | 1100.000 | 1100.000       | 101.010        | 100.000  | 101.010        | 374.200        | 361.200  | 0.000          | V[6]  |
| K[20] | 1017.073 | 1020.047 | 1010.063       | 1005.068       | 1048.042 | 1047.035       | 275.200        | 268.181  | 0.000          | K[5]  |
| K[21] | 1006.058 | 1048.042 | 1048.000       | 1004.063       | 1017.037 | 1016.053       | 147.110        | 430.000  | 0.000          | K[1]  |



# sp | P43274 | H14\_MOUSE

S<sup>Phospho</sup><sub>79.97</sub> ETAPAAPAAPAPAEKTPVKK

- ▶ fragmentation table for charge state 2+
- ▶ specType=cid
- ▶ score=46.18
- ▶ F091343.dat
- ▶ query=q35791\_p1
- ▶ precursor=704.696540
- ▶ chargePrecursor=3
- ▶ itol=0.5

| AA    | a         | a*    | a.0            | b        | b*    | b.0            | y              | y*             | y.0            | AA    |
|-------|-----------|-------|----------------|----------|-------|----------------|----------------|----------------|----------------|-------|
| S[1]  | 80.609    | 0.504 | 81.509         | 84.509   | 0.504 | 79.510         | 309.540        | 1040.070       | 1047.531       | S[2]  |
| E[2]  | 11.30.700 | 0.504 | 120.050        | 144.020  | 0.504 | 140.020        | 97.150         | 964.520        | 1047.020       | E[3]  |
| T[3]  | 110.054   | 0.504 | 120.040        | 109.760  | 0.504 | 109.760        | <b>904.520</b> | 969.070        | 1047.020       | T[4]  |
| A[4]  | 211.019   | 0.504 | 212.000        | 225.000  | 0.504 | 225.000        | <b>857.000</b> | 949.481        | 1046.981       | A[5]  |
| P[5]  | 260.000   | 0.504 | 260.000        | 263.000  | 0.504 | 263.000        | <b>822.470</b> | <b>813.964</b> | <b>813.472</b> | P[17] |
| A[6]  | 300.110   | 0.504 | 300.112        | 304.112  | 0.504 | 304.110        | 711.011        | 708.430        | 704.040        | A[16] |
| A[7]  | 340.000   | 0.504 | 331.011        | 304.014  | 0.504 | 303.000        | <b>710.431</b> | 729.010        | 729.010        | A[15] |
| P[8]  | 380.101   | 0.504 | <b>380.157</b> | 403.100  | 0.504 | 394.100        | 702.014        | <b>694.401</b> | <b>693.909</b> | P[14] |
| A[9]  | 424.001   | 0.504 | 411.011        | 430.010  | 0.504 | 429.010        | 610.010        | 608.000        | 608.000        | A[13] |
| A[10] | 460.000   | 0.504 | <b>461.194</b> | 474.000  | 0.504 | 469.000        | <b>610.000</b> | <b>610.350</b> | <b>609.364</b> | A[12] |
| P[11] | 500.000   | 0.504 | 499.010        | 525.014  | 0.504 | 511.010        | <b>583.351</b> | 583.351        | 583.351        | P[11] |
| A[12] | 544.000   | 0.504 | 530.000        | 558.000  | 0.504 | <b>540.237</b> | 538.004        | 538.011        | 525.010        | A[10] |
| P[13] | 582.011   | 0.504 | <b>583.766</b> | 606.000  | 0.504 | 597.000        | 499.000        | 499.792        | 499.300        | P[16] |
| A[14] | 620.000   | 0.504 | <b>613.204</b> | 642.000  | 0.504 | 633.000        | <b>493.739</b> | 442.000        | 441.714        | A[8]  |
| E[5]  | 660.011   | 0.504 | 650.000        | 668.000  | 0.504 | 667.000        | 415.000        | 408.747        | 408.250        | E[7]  |
| K[16] | 710.000   | 1.008 | 717.000        | 710.000  | 1.008 | 712.000        | 361.000        | 362.700        | 342.200        | K[6]  |
| T[17] | 807.000   | 1.008 | 811.000        | 811.000  | 1.008 | 812.000        | 212.000        | 210.000        | 210.000        | T[8]  |
| P[18] | 850.000   | 1.008 | 849.000        | 850.000  | 1.008 | 850.000        | 230.000        | 227.000        | 227.000        | P[4]  |
| V[19] | 890.000   | 1.008 | 886.000        | 890.000  | 1.008 | 890.000        | 187.000        | 187.000        | 178.000        | V[5]  |
| K[20] | 940.000   | 1.008 | 940.000        | 940.000  | 1.008 | 940.000        | 130.000        | 130.000        | 130.000        | K[5]  |
| K[21] | 1010.000  | 1.008 | 1010.000       | 1010.000 | 1.008 | 1010.000       | 74.000         | 69.000         | 69.000         | K[3]  |



# sp | P43276 | H15\_MOUSE

## SETAPAETAAPAPVEKS<sup>Phospho</sup> PAKK<sub>79.97</sub>

- ▶ fragmentation table for charge state 1+
- ▶ specType=cid
- ▶ score=46.26
- ▶ F091343.dat
- ▶ query=q36231\_p1
- ▶ precursor=720.691490
- ▶ chargePrecursor=3
- ▶ itol=0.5

| AA   | a        | a'       | a <sub>0</sub> | b              | b'       | b <sub>0</sub> | y              | y'       | y <sub>0</sub> | AA   |
|------|----------|----------|----------------|----------------|----------|----------------|----------------|----------|----------------|------|
| S[1] | 86.844   | 0.000    | 42.034         | 89.070         | 0.000    | 70.000         | 2030.050       | 2043.070 | 2143.048       | S[2] |
| E[1] | 118.187  | 0.000    | 171.050        | <b>717.082</b> | 0.000    | 200.000        | 2073.020       | 2096.000 | 2003.018       | E[2] |
| T[1] | 109.734  | 0.000    | 203.120        | <b>718.130</b> | 0.000    | <b>206.110</b> | 1984.990       | 1998.990 | 2002.972       | T[2] |
| A[1] | 251.512  | 0.000    | <b>343.181</b> | <b>385.167</b> | 0.000    | <b>371.156</b> | 1852.930       | 1825.930 | 1824.928       | A[2] |
| P[1] | 436.470  | 0.000    | 440.734        | 466.710        | 0.000    | 469.200        | 1771.890       | 1754.872 | 1753.880       | P[2] |
| A[1] | 626.262  | 0.000    | 541.951        | 587.267        | 0.000    | 607.200        | 1674.840       | 1667.820 | 1668.816       | A[2] |
| E[1] | 438.304  | 0.000    | 440.260        | 466.260        | 0.000    | <b>468.200</b> | 1653.830       | 1636.770 | 1635.768       | E[2] |
| T[1] | 156.352  | 0.000    | 141.551        | 167.347        | 0.000    | 169.330        | 1474.770       | 1457.740 | 1466.736       | T[2] |
| A[1] | 130.380  | 0.000    | 122.150        | 158.364        | 0.000    | 160.320        | 1371.720       | 1356.692 | 1365.708       | A[2] |
| A[1] | 892.426  | 0.000    | 881.431        | 926.423        | 0.000    | 912.411        | 1301.680       | 1286.659 | 1284.671       | A[2] |
| P[1] | 1068.919 | 0.000    | 1060.480       | 1020.474       | 0.000    | 1006.463       | 1231.640       | 1214.635 | 1213.634       | P[2] |
| A[1] | 1096.616 | 0.000    | 1081.505       | 1067.511       | 0.000    | 1079.500       | 1138.590       | 1111.569 | 1110.581       | A[2] |
| P[1] | 1146.569 | 0.000    | 1140.550       | 1104.564       | 0.000    | 1176.553       | 1063.520       | 1046.520 | 1045.544       | P[2] |
| V[1] | 1285.837 | 0.000    | 1245.820       | 1239.835       | 0.000    | 1219.820       | 966.500        | 949.475  | 948.491        | V[2] |
| E[1] | 1194.680 | 0.000    | 1176.680       | 1142.675       | 0.000    | 1164.664       | 897.434        | 880.407  | 884.421        | E[2] |
| R[1] | 1122.773 | 1000.700 | 1108.760       | 1100.770       | 1000.743 | 1002.700       | <b>718.301</b> | 721.304  | 720.300        | R[2] |
| S[1] | 1099.113 | 897.147  | 1071.760       | 1177.169       | 1104.174 | 1099.117       | <b>611.206</b> | 581.209  | 582.200        | S[2] |
| P[1] | 1178.626 | 1166.790 | 1160.810       | 1114.821       | 1107.794 | 1106.810       | 443.200        | 426.201  | 0.000          | P[2] |
| A[1] | 1037.683 | 1040.639 | 1030.650       | 1000.664       | 1000.611 | 1007.607       | 346.240        | 329.213  | 0.000          | A[2] |
| R[2] | 1045.958 | 1048.911 | 1047.947       | 1013.953       | 1006.926 | 1005.923       | 276.200        | 268.181  | 0.000          | R[3] |
| R[2] | 1114.053 | 1097.050 | 1096.040       | 1142.048       | 1135.011 | 1134.010       | 147.110        | 130.080  | 0.000          | R[3] |

# sp | P43276 | H15\_MOUSE

## SETAPAETAAPAPVEKS<sup>Phospho</sup> PAKK 79.97

- ▶ fragmentation table for charge state 2+
- ▶ specType=cid
- ▶ score=46.26
- ▶ F091343.dat
- ▶ query=q36231\_p1
- ▶ precursor=720.691490
- ▶ chargePrecursor=3
- ▶ itol=0.5

| AA    | a        | a'    | a.β            | b              | b'    | b.β            | y              | y'             | y.β            | AA    |
|-------|----------|-------|----------------|----------------|-------|----------------|----------------|----------------|----------------|-------|
| S[1]  | 86.6267  | 0.504 | 21.521         | 44.921         | 0.504 | 35.518         | 1060.535       | 1072.035       | 1077.535       | S[2]  |
| E[2]  | 85.947   | 0.504 | 80.047         | 100.047        | 0.504 | 100.039        | 2072.072       | 2075.947       | 2080.072       | E[3]  |
| T[3]  | 148.911  | 0.504 | 138.909        | 139.909        | 0.504 | 139.913        | <b>971.406</b> | <b>983.362</b> | <b>983.406</b> | T[4]  |
| A[4]  | 131.090  | 0.504 | 172.090        | 195.087        | 0.504 | 195.081        | <b>921.972</b> | <b>933.928</b> | <b>934.000</b> | A[5]  |
| P[5]  | 270.616  | 0.504 | 230.611        | 243.613        | 0.504 | 234.609        | <b>886.451</b> | <b>877.346</b> | <b>877.448</b> | P[12] |
| A[6]  | 266.134  | 0.504 | <b>256.129</b> | 270.132        | 0.504 | 270.127        | <b>837.927</b> | 856.412        | 856.921        | A[16] |
| E[7]  | 179.056  | 0.504 | 169.053        | <b>141.053</b> | 0.504 | 154.048        | <b>802.408</b> | 793.009        | 793.009        | E[13] |
| T[8]  | 186.180  | 0.504 | <b>371.174</b> | 384.177        | 0.504 | 385.172        | <b>717.897</b> | 726.374        | 726.883        | T[14] |
| A[9]  | 112.898  | 0.504 | 486.893        | 429.898        | 0.504 | 429.898        | <b>667.363</b> | 676.370        | 676.370        | A[13] |
| A[10] | 412.117  | 0.504 | 442.111        | 466.114        | 0.504 | 466.109        | <b>641.843</b> | <b>643.331</b> | <b>642.839</b> | A[17] |
| P[11] | 398.743  | 0.504 | 480.739        | 513.743        | 0.504 | 504.735        | 616.313        | 607.813        | 607.813        | P[11] |
| A[12] | 530.282  | 0.504 | 536.280        | 549.281        | 0.504 | 549.274        | 567.808        | 559.308        | 559.308        | A[10] |
| P[13] | 583.788  | 0.504 | 574.783        | 587.783        | 0.504 | 588.788        | 532.282        | 523.788        | 523.776        | P[6]  |
| V[14] | 433.272  | 0.504 | 424.269        | 447.270        | 0.504 | 447.264        | 483.769        | 475.264        | 474.769        | V[8]  |
| E[15] | 597.844  | 0.504 | <b>688.838</b> | 711.841        | 0.504 | <b>702.836</b> | 434.232        | 425.732        | 425.232        | E[7]  |
| K[16] | 171.881  | 0.504 | 162.878        | 175.880        | 0.504 | 175.873        | 406.881        | 398.380        | 398.380        | K[6]  |
| S[17] | 146.766  | 0.504 | 137.763        | 150.765        | 0.504 | 150.759        | 388.766        | 381.265        | 380.764        | S[7]  |
| P[18] | 339.917  | 0.504 | 330.913        | 343.914        | 0.504 | 343.908        | 222.152        | 213.652        | 213.652        | P[4]  |
| A[19] | 630.430  | 0.504 | 621.427        | 634.429        | 0.504 | 634.422        | 178.430        | 169.929        | 169.428        | A[8]  |
| K[20] | 593.483  | 0.504 | 584.479        | 597.481        | 0.504 | 597.475        | 136.133        | 127.634        | 127.133        | K[5]  |
| K[21] | 1079.638 | 0.504 | 1070.635       | 1083.637       | 0.504 | 1083.631       | 93.638         | 85.137         | 84.637         | K[1]  |



# sp | Q9QZQ8-1 | H2AY\_MOUSE

AASADSTTEGT<sup>Phospho</sup>PTDGFTVLSTK  
79.97

- ▶ fragmentation table for charge state 1+
- ▶ specType=cid
- ▶ score=48.04
- ▶ F091343.dat
- ▶ query=q36854.p1
- ▶ precursor=1118.994800
- ▶ chargePrecursor=2
- ▶ itol=0.5

| AA  | a        | a'      | a,β      | b               | b'      | b,β             | y               | y'             | y,β             | AA  |
|-----|----------|---------|----------|-----------------|---------|-----------------|-----------------|----------------|-----------------|-----|
| A1  | 44.000   | 0.000   | 0.000    | 72.044          | 0.000   | 0.000           | 22.000          | 22.000         | 22.000          | A22 |
| A2  | 133.007  | 0.000   | 0.000    | 143.004         | 0.000   | 0.000           | 240.000         | 240.000        | 240.000         | A20 |
| S3  | 600.410  | 0.000   | 1.000    | 230.144         | 0.000   | 214.100         | 2004.000        | 2007.000       | 2007.000        | S20 |
| A4  | 273.250  | 0.000   | 200.140  | 301.151         | 0.000   | 383.140         | 2007.000        | 1.000          | 1.000           | A10 |
| D5  | 308.105  | 0.000   | 370.172  | 416.170         | 0.000   | 300.100         | 330.042         | 330.042        | 330.042         | D30 |
| S6  | 470.270  | 0.000   | 487.266  | 503.260         | 0.000   | 400.100         | 1813.000        | 1804.700       | <b>1803.200</b> | S27 |
| T1  | 376.200  | 0.000   | 300.200  | 304.202         | 0.000   | 300.200         | <b>1734.700</b> | 1737.700       | 1737.700        | T10 |
| T10 | 377.200  | 0.000   | 300.200  | <b>700.200</b>  | 0.000   | <b>687.204</b>  | <b>1633.726</b> | 1633.700       | 1633.700        | T10 |
| T16 | 300.200  | 0.000   | 300.200  | <b>454.248</b>  | 0.000   | <b>810.237</b>  | 1633.700        | 1633.700       | <b>1634.077</b> | T14 |
| G10 | 303.174  | 0.000   | 300.200  | <b>801.369</b>  | 0.000   | 313.200         | <b>1401.645</b> | 1388.033       | <b>1385.035</b> | G15 |
| T11 | 304.200  | 0.000   | 300.200  | 307.200         | 0.000   | 304.200         | <b>1160.624</b> | 1150.600       | 1150.613        | T12 |
| F14 | 341.414  | 0.000   | 344.410  | 339.410         | 0.000   | 341.414         | <b>1165.610</b> | 1140.500       | <b>1147.500</b> | F11 |
| T12 | 1262.400 | 0.000   | 1224.470 | 1170.400        | 0.000   | 1252.473        | 960.500         | 950.500        | 950.500         | T10 |
| G14 | 1307.510 | 0.000   | 1310.500 | <b>1100.510</b> | 0.000   | <b>1367.500</b> | <b>967.500</b>  | <b>950.483</b> | 949.400         | G10 |
| G15 | 1414.537 | 0.000   | 1360.520 | 1442.532        | 0.000   | 1424.520        | <b>852.483</b>  | 830.450        | <b>834.472</b>  | G10 |
| F16 | 1303.600 | 0.000   | 1344.500 | 1300.600        | 0.000   | <b>1311.500</b> | <b>781.461</b>  | 770.430        | 770.430         | F17 |
| T17 | 1302.600 | 0.000   | 1344.643 | 1300.640        | 0.000   | 1302.600        | <b>640.393</b>  | 631.360        | 630.381         | T10 |
| V18 | 1301.700 | 0.000   | 1343.711 | <b>1300.710</b> | 0.000   | 1317.700        | <b>547.345</b>  | 530.310        | 520.310         | V10 |
| T19 | 1304.800 | 0.000   | 1300.700 | <b>1302.800</b> | 0.000   | <b>1304.700</b> | <b>440.271</b>  | 431.260        | <b>430.260</b>  | T14 |
| S20 | 1301.800 | 0.000   | 1343.807 | 1300.800        | 0.000   | <b>1071.822</b> | <b>335.193</b>  | 310.180        | 317.182         | S10 |
| T21 | 1302.800 | 0.000   | 1344.870 | 1300.800        | 0.000   | 1072.800        | 240.100         | 231.100        | 230.100         | T10 |
| K22 | 1300.800 | 217.800 | 1217.800 | 1218.870        | 200.800 | 200.800         | 147.110         | 130.000        | 130.000         | K10 |

# sp | P43276 | H15\_MOUSE

S<sup>Phospho</sup> 79.97 ETAPAETAAPAPVEKS <sup>Phospho</sup> 79.97 PAKK

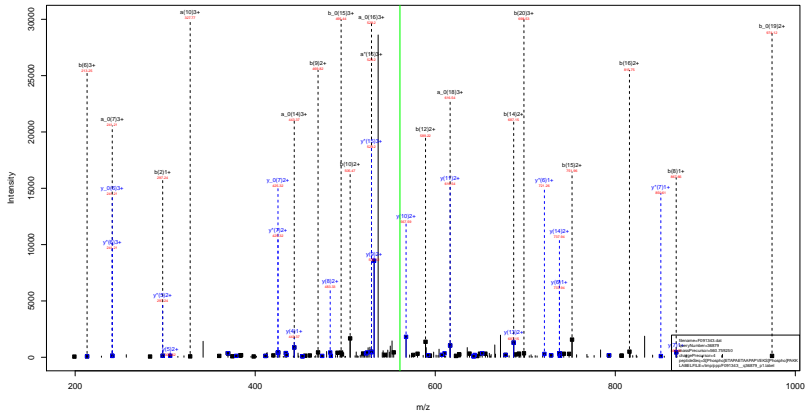

# sp | P43276 | H15\_MOUSE

S<sup>Phospho</sup><sub>79.97</sub> ETAPAETAAPAPVEKS <sup>Phospho</sup> PAKK<sub>79.97</sub>

- ▶ fragmentation table for charge state 1+
- ▶ specType=cid
- ▶ score=38.95
- ▶ F091343.dat
- ▶ query=q36879\_p1
- ▶ precursor=560.759250
- ▶ chargePrecursor=4
- ▶ itol=0.5

| AA    | a              | a'    | a <sub>0</sub> | b              | b'    | b <sub>0</sub> | y              | y'             | y <sub>0</sub> | AA    |
|-------|----------------|-------|----------------|----------------|-------|----------------|----------------|----------------|----------------|-------|
| S[1]  | 1401.011       | 0.000 | 122.000        | 389.000        | 0.000 | 149.000        | 2040.000       | 2222.014       |                | S[2]  |
| E[2]  | 1097.053       | 0.000 | 251.043        | <b>797.048</b> | 0.000 | 379.038        | 2073.038       | 2056.000       | 2035.016       | E[3]  |
| T[5]  | <b>378.181</b> | 0.000 | 181.000        | <b>398.000</b> | 0.000 | 380.000        | 1945.000       | 1926.000       | 2020.017       | T[6]  |
| A[4]  | 374.176        | 0.000 | 423.126        |                | 0.000 | 451.122        | 1852.000       | 1825.000       | 1824.026       | A[5]  |
| P[5]  | 630.091        | 0.000 | <b>520.180</b> | 566.180        | 0.000 | 569.175        | 1771.000       | 1754.072       | 1753.000       | P[12] |
| A[6]  | 600.048        | 0.000 | 580.217        | 607.217        | 0.000 | 612.212        | 1674.000       | 1657.000       | 1656.036       | A[16] |
| E[7]  | <b>738.271</b> | 0.000 | 720.260        | 766.260        | 0.000 | <b>748.255</b> | 1603.000       | 1586.000       | 1585.000       | E[13] |
| T[8]  | 630.018        | 0.000 | 621.000        | <b>867.313</b> | 0.000 | 869.313        | 1474.000       | 1457.000       | 1456.036       | T[14] |
| A[9]  | 612.052        | 0.000 | 592.140        | 638.140        | 0.000 | 633.140        | 1371.000       | 1356.000       | 1355.000       | A[15] |
| A[10] | 600.004        | 0.000 | 581.000        | 629.000        | 0.000 | 612.000        | 1301.000       | 1286.000       | 1284.017       | A[17] |
| P[11] | 1078.949       | 0.000 | 1060.450       | 1105.440       | 0.000 | 1099.430       | 1231.000       | 1214.000       | 1213.034       | P[11] |
| A[12] | 1140.402       | 0.000 | 1131.432       | 1177.432       | 0.000 | 1169.407       | 1138.000       | 1117.000       | 1116.001       | A[10] |
| P[13] | 1246.535       | 0.000 | 1226.525       | 1274.530       | 0.000 | 1256.518       | 1063.000       | 1046.000       | 1045.544       | P[16] |
| V[4]  | 1348.004       | 0.000 | 1327.000       | 1373.000       | 0.000 | 1355.000       | 969.000        | 949.000        | 948.001        | V[8]  |
| E[15] | 1474.846       | 0.000 | 1456.830       | 1502.841       | 0.000 | 1484.830       | <b>867.434</b> | <b>850.407</b> | 849.421        | E[7]  |
| R[16] | 1602.741       | 0.000 | 1585.730       | 1631.730       | 0.000 | 1613.710       | 817.000        | <b>738.301</b> | <b>721.364</b> | R[20] |
| S[17] | 1709.739       | 0.000 | 1701.729       | 1747.730       | 0.000 | 1739.714       |                | <b>611.206</b> | <b>592.265</b> | S[17] |
| P[18] | 1808.702       | 0.000 | 1800.690       | 1846.701       | 0.000 | 1837.683       |                | <b>411.200</b> | 420.211        | P[14] |
| A[19] | 1837.620       | 0.000 | 1819.610       | 1865.624       | 0.000 | 1846.600       | 1067.000       | 1046.000       | 1045.000       | A[15] |
| R[20] | 2085.624       | 0.000 | 2047.614       | 2093.619       | 0.000 | 2075.599       | 275.000        | 268.000        | 267.000        | R[25] |
| R[21] | 2194.619       | 0.000 | 2176.609       | 2222.614       | 0.000 | 2204.594       | 147.000        | 139.000        | 138.000        | R[21] |



# sp | P43276 | H15\_MOUSE

S<sup>Phospho</sup><sub>79.97</sub> ETAPAETAAPAPVEKS <sup>Phospho</sup> PAKK<sub>79.97</sub>

- ▶ fragmentation table for charge state 2+
- ▶ specType=cid
- ▶ score=38.95
- ▶ F091343.dat
- ▶ query=q36879\_p1
- ▶ precursor=560.759250
- ▶ chargePrecursor=4
- ▶ itol=0.5

| AA    | a              | a'             | a <sub>0</sub> | b              | b'             | b <sub>0</sub> | y              | y'             | y <sub>0</sub> | AA    |
|-------|----------------|----------------|----------------|----------------|----------------|----------------|----------------|----------------|----------------|-------|
| S(1)  | 86.569         | 0.569          | 81.559         | 84.569         | 0.564          | 79.521         | 117.039        | 112.039        | 111.511        | S(2)  |
| E(2)  | 11.35.570      | 0.570          | 120.050        | 120.050        | 0.564          | 140.022        | 1037.017       | 1028.504       | 1102.512       | E(3)  |
| T(3)  | 110.054        | 0.564          | 120.540        | <b>198.552</b> | 0.564          | 100.548        | 101.548        | 100.500        | 100.000        | T(4)  |
| A(4)  | 211.013        | 0.564          | 212.000        | <b>283.567</b> | 0.564          | 220.185        | 921.972        | 915.458        | 1012.968       | A(5)  |
| P(5)  | 260.599        | 0.564          | 260.599        | <b>283.567</b> | 0.564          | 274.201        | 680.451        | 377.940        | 407.440        | P(12) |
| A(6)  | 300.118        | 0.564          | 290.112        | 310.112        | 0.564          | 301.112        | 837.027        | 808.411        | 1000.027       | A(16) |
| E(7)  | <b>369.639</b> | 0.564          | 369.639        | <b>401.636</b> | 0.564          | <b>374.631</b> | 602.619        | 793.609        | <b>728.403</b> | E(13) |
| T(8)  | <b>420.163</b> | 0.564          | <b>411.157</b> | <b>434.160</b> | 0.564          | <b>425.155</b> | <b>737.807</b> | 728.374        | <b>728.403</b> | T(14) |
| A(9)  | <b>455.681</b> | 0.564          | 440.670        | <b>460.679</b> | 0.564          | <b>466.673</b> | <b>687.363</b> | <b>678.358</b> | <b>678.358</b> | A(13) |
| A(10) | <b>491.200</b> | 0.564          | 481.200        | <b>506.197</b> | 0.564          | <b>496.192</b> | <b>661.845</b> | <b>643.331</b> | <b>642.859</b> | A(17) |
| P(11) | 530.739        | 0.564          | 530.721        | <b>553.724</b> | 0.564          | 544.712        | <b>616.326</b> | 1007.011       | <b>600.321</b> | P(11) |
| A(12) | <b>575.245</b> | 0.564          | 560.740        | <b>580.242</b> | 0.564          | <b>580.237</b> | <b>567.800</b> | 569.288        | 560.784        | A(10) |
| P(13) | 622.771        | 0.564          | 614.760        | <b>637.769</b> | 0.564          | 629.253        | <b>512.781</b> | <b>523.768</b> | <b>523.276</b> | P(16) |
| V(14) | 678.309        | 0.564          | 668.300        | <b>689.303</b> | 0.564          | <b>678.298</b> | <b>481.765</b> | 479.255        | <b>674.749</b> | V(8)  |
| E(15) | <b>737.827</b> | 0.564          | <b>728.821</b> | <b>751.824</b> | 0.564          | <b>742.819</b> | <b>414.220</b> | <b>425.707</b> | <b>425.215</b> | E(7)  |
| P(16) | 811.074        | <b>793.361</b> | <b>792.860</b> | <b>815.872</b> | <b>807.358</b> | <b>806.866</b> | <b>369.890</b> | 369.890        | 369.890        | P(16) |
| S(17) | 860.013        | 870.000        | 870.000        | 880.017        | 880.000        | 880.000        | 890.012        | <b>306.851</b> | <b>291.130</b> | S(17) |
| P(18) | 933.000        | 925.380        | 924.820        | 947.007        | 939.384        | 933.202        | 922.132        | <b>213.639</b> | 0.564          | P(14) |
| A(19) | 980.410        | 980.000        | 980.410        | 983.416        | 974.962        | <b>974.410</b> | 114.626        | 108.111        | 0.564          | A(8)  |
| K(20) | 1033.466       | 1024.053       | 1024.481       | 1047.463       | 1038.050       | 1038.455       | 130.130        | 120.594        | 0.564          | K(2)  |
| K(21) | 1089.013       | 1080.000       | 1080.000       | 1111.013       | 1102.000       | 1102.000       | 14.000         | 40.541         | 0.564          | K(3)  |

# sp | P43276 | H15\_MOUSE

S<sup>Phospho</sup><sub>79.97</sub> ETAPAETAAPAPVEKS <sup>Phospho</sup>PAKK<sub>79.97</sub>

- ▶ fragmentation table for charge state 3+
- ▶ specType=cid
- ▶ score=38.95
- ▶ F091343.dat
- ▶ query=q36879\_p1
- ▶ precursor=560.759250
- ▶ chargePrecursor=4
- ▶ itol=0.5

| AA    | a              | a*             | a:Δ            | b              | b*             | b:Δ            | y              | y*             | y:Δ            | AA    |
|-------|----------------|----------------|----------------|----------------|----------------|----------------|----------------|----------------|----------------|-------|
| S[1]  | 41.342         | 0.672          | 41.338         | 36.873         | 0.672          | 36.880         | 147.140        | 141.071        | 141.343        | S[21] |
| E[3]  | 36.956         | 0.672          | 36.952         | 39.680         | 0.672          | 39.684         | 460.640        | 456.955        | 457.977        | E[5]  |
| T[3]  | 134.019        | 0.672          | 133.870        | 133.972        | 0.672          | 137.307        | 456.660        | <b>642.901</b> | <b>642.663</b> | T[10] |
| A[4]  | 147.718        | 0.672          | 141.714        | 157.040        | 0.672          | 151.046        | 614.900        | 609.309        | 608.980        | A[16] |
| P[5]  | 130.068        | 0.672          | 124.063        | 149.040        | 0.672          | 143.307        | 591.100        | 585.620        | 585.301        | P[17] |
| A[5]  | 203.748        | 0.672          | 200.744        | <b>213.079</b> | 0.672          | 207.074        | 596.900        | 592.214        | 592.944        | A[16] |
| E[7]  | 246.192        | 0.672          | <b>240.758</b> | 250.103        | 0.672          | 250.000        | 535.270        | <b>529.599</b> | <b>529.271</b> | E[15] |
| T[8]  | 380.444        | 0.672          | 274.441        | 289.770        | 0.672          | 283.772        | 492.240        | 486.585        | 486.251        | T[14] |
| A[9]  | 389.223        | 0.672          | 288.120        | 313.450        | 0.672          | 307.451        | 488.530        | <b>452.902</b> | <b>452.574</b> | A[15] |
| A[10] | <b>327.802</b> | 0.672          | 321.769        | 331.138        | 0.672          | 331.000        | <b>424.409</b> | 424.224        | 424.899        | A[12] |
| P[11] | <b>308.153</b> | 0.672          | 304.150        | <b>309.485</b> | 0.672          | 303.481        | <b>411.230</b> | 405.544        | 405.216        | P[11] |
| A[12] | <b>383.832</b> | 0.672          | 377.829        | 381.344        | 0.672          | 381.180        | <b>378.660</b> | 373.193        | 372.865        | A[10] |
| P[13] | 416.181        | 0.672          | 410.180        | <b>425.515</b> | 0.672          | 419.511        | 395.190        | 349.514        | 349.186        | P[13] |
| V[14] | 449.208        | 0.672          | <b>443.203</b> | 458.538        | 0.672          | <b>452.534</b> | 320.830        | 311.183        | 310.835        | V[18] |
| E[15] | 492.220        | 0.672          | 486.217        | 501.562        | 0.672          | <b>495.548</b> | 269.810        | 264.141        | 263.813        | E[17] |
| K[16] | 534.919        | <b>529.243</b> | <b>528.915</b> | <b>544.250</b> | 0.672          | 538.246        | 146.000        | <b>241.126</b> | <b>240.798</b> | K[16] |
| S[17] | 599.685        | 594.658        | 594.591        | 599.910        | <b>594.241</b> | <b>593.913</b> | 204.104        | 198.426        | 198.100        | S[15] |
| P[18] | <b>622.936</b> | 617.908        | <b>616.932</b> | 622.269        | <b>616.592</b> | <b>616.264</b> | 148.430        | 142.755        | 142.431        | P[14] |
| A[19] | <b>646.615</b> | 640.939        | 640.611        | <b>655.946</b> | 650.271        | <b>649.943</b> | 115.080        | 110.411        | 110.172        | A[13] |
| P[20] | <b>609.313</b> | 603.637        | 603.309        | <b>608.645</b> | <b>602.969</b> | <b>602.641</b> | 92.400         | 89.712         | 89.472         | P[12] |
| K[21] | 732.011        | 726.335        | 726.008        | 741.343        | 735.667        | 735.339        | 49.700         | 44.014         | 43.772         | K[11] |



# sp | P43274 | H14\_MOUSE

SETAPAAPAAPAEKT<sup>Phospho</sup> PVKKK  
79.97

- ▶ fragmentation table for charge state 1+
- ▶ specType=cid
- ▶ score=35.68
- ▶ F091343.dat
- ▶ query=q36886.p1
- ▶ precursor=560.797670
- ▶ chargePrecursor=4
- ▶ itol=0.5

| AA  | a        | a*    | a <sub>0</sub> | b              | b*    | b <sub>0</sub> | r        | r*        | r <sub>0</sub> | AA       |     |
|-----|----------|-------|----------------|----------------|-------|----------------|----------|-----------|----------------|----------|-----|
| S1  | 80.044   | 0.000 | 82.034         | 85.039         | 0.000 | 70.029         | 2940.180 | 2223.143  | 2222.138       | S20      |     |
| E2  | 109.087  | 0.000 | 110.000        | <b>117.063</b> | 0.000 | 109.041        | 2535.131 | 61.96.120 | 61.96.126      | E20      |     |
| T3  | 200.130  | 0.000 | 212.124        | 215.119        | 0.000 | <b>300.119</b> | 2024.094 | 2007.083  | 2008.083       | T20      |     |
| A4  | 281.172  | 0.000 | 283.161        | <b>289.147</b> | 0.000 | <b>371.156</b> | 1623.040 | 1606.029  | 1603.038       | A10      |     |
| P5  | 356.224  | 0.000 | 440.214        | 449.212        | 0.000 | 356.224        | 2021.000 | 62.96.061 | 62.96.061      | P10      |     |
| A6  | 529.262  | 0.000 | 531.251        | 557.257        | 0.000 | <b>539.246</b> | 1934.950 | 1937.930  | 1938.948       | A17      |     |
| A7  | 600.260  | 0.000 | 582.260        | <b>638.294</b> | 0.000 | <b>616.283</b> | 1683.939 | 1666.933  | 1665.926       | A16      |     |
| P8  | 667.302  | 0.000 | 670.341        | 725.346        | 0.000 | 667.302        | 1812.882 | 1509.859  | 1504.872       | P15      |     |
| A9  | 716.304  | 0.000 | 700.300        | 706.308        | 0.000 | <b>718.313</b> | 1333.800 | 1448.800  | 1449.819       | A14      |     |
| A10 | 830.426  | 0.000 | 821.432        | 867.421        | 0.000 | <b>869.410</b> | 1444.762 | 1427.760  | 1426.762       | A13      |     |
| P11 | 938.478  | 0.000 | 938.460        | 964.471        | 0.000 | 960.463        | 1118.150 | 1109.129  | 1105.145       | P12      |     |
| A12 | 1007.514 | 0.000 | 989.500        | 1009.511       | 0.000 | 1017.504       | 1218.160 | 1209.876  | 1208.884       | A11      |     |
| P13 | 1104.528 | 0.000 | 1090.520       | 1132.503       | 0.000 | 1114.503       | 1200.800 | 1109.830  | 1107.830       | P10      |     |
| A14 | 1135.606 | 0.000 | 1157.600       | 1203.600       | 0.000 | 1185.599       | 1108.611 | 1091.588  | 1090.602       | A10      |     |
| E15 | 1304.648 | 0.000 | 1280.630       | 1332.643       | 0.000 | 1314.632       | 1037.525 | 1020.549  | 1019.565       | E10      |     |
| T16 | 1432.693 | 0.000 | 1418.670       | 1460.678       | 0.000 | 1448.671       | 1042.670 | 1001.631  | 1000.608       | T10      |     |
| T17 | 1513.757 | 0.000 | 1505.742       | 1545.762       | 0.000 | 1523.741       | 1004.638 | 963.411   | 962.427        | T16      |     |
| P18 | 1710.810 | 0.000 | 1697.790       | 1739.803       | 0.000 | 1721.778       | 1101.604 | 1097.634  | 1096.609       | P10      |     |
| V19 | 1800.816 | 0.000 | 1782.802       | 1792.800       | 0.000 | 1807.807       | 1020.647 | 1019.603  | <b>502.371</b> | 1488.340 | V10 |
| K20 | 1917.874 | 0.000 | 1910.861       | 1920.864       | 0.000 | 1944.864       | 1067.608 | 1061.601  | 1060.276       | K10      |     |
| K21 | 2068.968 | 0.000 | 2048.950       | 2094.963       | 0.000 | 2077.937       | 1076.603 | 1076.200  | 1076.183       | K10      |     |
| K22 | 2134.983 | 0.000 | 2117.970       | 2122.978       | 0.000 | 2138.979       | 147.113  | 130.000   | 0.000          | K10      |     |

# sp | P43274 | H14\_MOUSE

SETAPAAPAAPAPAEKT<sup>Phospho</sup> PVKKK  
79.97

- ▶ fragmentation table for charge state 2+
- ▶ specType=cid
- ▶ score=35.68
- ▶ F091343.dat
- ▶ query=q36886\_p1
- ▶ precursor=560.797670
- ▶ chargePrecursor=4
- ▶ itol=0.5

| AA    | a        | a*    | a $\beta$ | b        | b*    | b $\beta$ | r        | y*       | y $\beta$ | AA    |
|-------|----------|-------|-----------|----------|-------|-----------|----------|----------|-----------|-------|
| S(1)  | 30.626   | 0.504 | 21.521    | 44.523   | 0.504 | 35.518    | 1120.580 | 1112.079 | 1111.583  | S(2)  |
| E(2)  | 35.397   | 0.504 | 60.049    | 109.044  | 0.504 | 130.048   | 1070.579 | 1069.578 | 1068.578  | E(3)  |
| T(3)  | 149.571  | 0.504 | 136.569   | 199.565  | 0.504 | 150.563   | 1012.551 | 1004.031 | 1003.545  | T(20) |
| A(4)  | 131.080  | 0.504 | 127.080   | 139.081  | 0.504 | 109.082   | 892.549  | 893.534  | 893.022   | A(19) |
| P(5)  | 229.616  | 0.504 | 228.611   | 243.613  | 0.504 | 234.614   | 826.508  | 817.999  | 812.029   | P(16) |
| A(6)  | 205.134  | 0.504 | 206.132   | 219.132  | 0.504 | 210.127   | 817.502  | 809.495  | 808.777   | A(17) |
| A(7)  | 340.651  | 0.504 | 291.649   | 314.650  | 0.504 | 305.648   | 842.483  | 833.963  | 831.438   | A(16) |
| P(8)  | 349.179  | 0.504 | 340.174   | 363.177  | 0.504 | 354.172   | 806.945  | 798.431  | 797.939   | P(15) |
| A(9)  | 354.869  | 0.504 | 339.866   | 398.865  | 0.504 | 388.860   | 735.418  | 749.909  | 749.413   | A(14) |
| A(10) | 420.217  | 0.504 | 411.211   | 434.214  | 0.504 | 425.209   | 722.900  | 714.387  | 713.895   | A(13) |
| P(11) | 468.373  | 0.504 | 459.370   | 482.374  | 0.504 | 477.370   | 687.381  | 679.869  | 678.378   | P(12) |
| A(12) | 454.161  | 0.504 | 449.158   | 464.160  | 0.504 | 460.154   | 638.853  | 632.342  | 632.000   | A(11) |
| P(13) | 552.708  | 0.504 | 543.701   | 566.703  | 0.504 | 557.698   | 601.130  | 599.621  | 599.131   | P(10) |
| A(14) | 548.306  | 0.504 | 539.301   | 562.304  | 0.504 | 561.299   | 554.839  | 548.291  | 545.805   | A(10) |
| E(15) | 652.828  | 0.504 | 643.822   | 666.825  | 0.504 | 657.820   | 519.261  | 510.750  | 510.260   | E(8)  |
| T(16) | 719.679  | 0.504 | 709.673   | 732.677  | 0.504 | 722.669   | 451.681  | 448.131  | 448.639   | T(9)  |
| T(17) | 807.382  | 0.504 | 796.376   | 821.380  | 0.504 | 812.374   | 391.121  | 382.265  | 381.717   | T(8)  |
| P(18) | 874.609  | 0.504 | 866.601   | 889.604  | 0.504 | 881.601   | 300.216  | 293.702  | 293.047   | P(6)  |
| V(19) | 895.443  | 0.504 | 886.437   | 909.440  | 0.504 | 901.435   | 241.004  | 242.178  | 242.004   | V(4)  |
| K(20) | 899.409  | 0.504 | 890.402   | 913.405  | 0.504 | 904.401   | 194.462  | 202.159  | 193.842   | K(3)  |
| R(21) | 1333.638 | 0.504 | 1324.632  | 1347.635 | 0.504 | 1338.632  | 1038.539 | 1030.109 | 1029.544  | R(2)  |
| K(22) | 1097.585 | 0.504 | 1088.579  | 1111.583 | 0.504 | 1103.577  | 1102.577 | 74.000   | 85.547    | K(1)  |

# sp | P43274 | H14\_MOUSE

SETAPAAPAAPAPAEKT<sup>Phospho</sup> PVKKK  
79.97

- ▶ fragmentation table for charge state 3+
- ▶ specType=cid
- ▶ score=35.68
- ▶ F091343.dat
- ▶ query=q36886.p1
- ▶ precursor=560.797670
- ▶ chargePrecursor=4
- ▶ itol=0.5

| AA           | a              | a*           | a+b            | b              | b*           | b+a            | y              | y*             | y+b            | AA           |
|--------------|----------------|--------------|----------------|----------------|--------------|----------------|----------------|----------------|----------------|--------------|
| S[1]         | 20.889         | 0.672        | 14.468         | 38.038         | 0.672        | 28.674         | 147.391        | 141.719        | 141.389        | S[2]         |
| E[2]         | 63.701         | 0.672        | 57.660         | 73.022         | 0.672        | 87.229         | 718.384        | 712.708        | 712.380        | E[3]         |
| T[3]         | 97.383         | 0.672        | 89.380         | 106.715        | 0.672        | 100.711        | <b>675.370</b> | <b>669.694</b> | <b>669.366</b> | T[20]        |
| A[4]         | 121.092        | 0.672        | 115.050        | 130.364        | 0.672        | 124.360        | <b>641.887</b> | <b>636.011</b> | <b>635.683</b> | A[19]        |
| P[5]         | 153.813        | 0.672        | 147.421        | 162.765        | 0.672        | 156.411        | <b>618.088</b> | <b>612.322</b> | <b>612.004</b> | P[18]        |
| A[6]         | 177.092        | 0.672        | 171.080        | 186.424        | 0.672        | 180.420        | <b>585.657</b> | <b>579.981</b> | <b>579.653</b> | A[17]        |
| A[7]         | 200.771        | 0.672        | 194.759        | 210.133        | 0.672        | 204.099        | <b>561.970</b> | <b>556.302</b> | <b>555.974</b> | A[16]        |
| T[8]         | 223.122        | 0.672        | 217.110        | 242.454        | 0.672        | 236.450        | <b>538.299</b> | <b>532.621</b> | <b>532.295</b> | T[15]        |
| A[9]         | 256.004        | 0.672        | 250.199        | 266.333        | 0.672        | 260.129        | <b>516.941</b> | <b>511.272</b> | <b>510.944</b> | A[14]        |
| A[10]        | 280.480        | 0.672        | 274.471        | 289.812        | 0.672        | 283.830        | <b>482.269</b> | <b>476.593</b> | <b>476.265</b> | A[13]        |
| P[11]        | 312.811        | 0.672        | 306.820        | 322.143        | 0.672        | 316.139        | <b>458.590</b> | <b>452.914</b> | <b>452.586</b> | P[12]        |
| A[12]        | 336.510        | 0.672        | 330.501        | 345.342        | 0.672        | 339.828        | <b>426.232</b> | <b>420.561</b> | <b>420.235</b> | A[11]        |
| P[13]        | 368.894        | 0.672        | <b>362.857</b> | 378.393        | 0.672        | 372.120        | <b>402.566</b> | <b>396.884</b> | <b>396.506</b> | P[10]        |
| A[14]        | 392.540        | 0.672        | 386.511        | 401.872        | 0.672        | 395.880        | <b>370.200</b> | <b>364.514</b> | <b>364.206</b> | A[9]         |
| E[15]        | 415.254        | 0.672        | 409.251        | 444.888        | 0.672        | 438.887        | <b>346.530</b> | <b>340.854</b> | <b>340.526</b> | E[8]         |
| K[16]        | 438.223        | 0.672        | 432.240        | 467.888        | 0.672        | 461.761        | <b>313.515</b> | <b>307.840</b> | <b>307.512</b> | K[17]        |
| <b>T[17]</b> | <b>538.591</b> | <b>0.672</b> | <b>532.588</b> | <b>547.922</b> | <b>0.672</b> | <b>541.910</b> |                |                |                | <b>T[17]</b> |
| P[18]        | 570.941        | 0.672        | 564.918        | 580.771        | 0.672        | 574.566        | <b>474.410</b> | <b>468.410</b> | <b>468.104</b> | P[16]        |
| V[19]        | <b>603.964</b> | 0.672        | 597.960        | 611.230        | 0.672        | 607.292        | <b>196.120</b> | <b>192.451</b> | <b>192.121</b> | V[4]         |
| K[20]        | 646.092        | 0.672        | 640.090        | 653.044        | 0.672        | 647.011        | <b>126.100</b> | <b>122.429</b> | <b>122.101</b> | K[19]        |
| K[21]        | 688.184        | 0.672        | 682.221        | 693.601        | 0.672        | 692.230        | <b>92.401</b>  | <b>88.732</b>  | <b>88.402</b>  | K[18]        |
| R[22]        | 732.058        | 0.672        | 726.054        | 741.361        | 0.672        | 735.187        | <b>48.700</b>  | <b>44.034</b>  | <b>43.702</b>  | R[1]         |



# sp | P43274 | H14\_MOUSE

SETAPAAPAAPAEKT<sup>Phospho</sup> PVKKK  
79.97

- ▶ fragmentation table for charge state 1+
- ▶ specType=cid
- ▶ score=36.54
- ▶ F091343.dat
- ▶ query=q36887\_p1
- ▶ precursor=747.394760
- ▶ chargePrecursor=3
- ▶ itol=0.5

| AA  | a              | a*    | a $\Delta$     | b              | b*    | b $\Delta$     | r        | r*       | r $\Delta$ | AA  |
|-----|----------------|-------|----------------|----------------|-------|----------------|----------|----------|------------|-----|
| S1  | 80.044         | 0.000 | 82.034         | 88.039         | 0.000 | 70.029         | 2940.180 | 2223.143 | 2222.138   | S23 |
| E2  | 109.007        | 0.000 | 110.000        | 111.005        | 0.000 | 109.000        | 2535.131 | 2178.119 | 2178.119   | E23 |
| T3  | 190.130        | 0.000 | 192.120        | <b>118.110</b> | 0.000 | <b>306.110</b> | 2624.094 | 2601.083 | 2600.083   | T20 |
| A4  | 181.172        | 0.000 | <b>345.161</b> | <b>189.167</b> | 0.000 | <b>371.156</b> | 1821.040 | 1808.030 | 1807.030   | A19 |
| P5  | 158.225        | 0.000 | 160.215        | 161.210        | 0.000 | 158.210        | 2821.000 | 2529.983 | 2528.983   | P16 |
| A6  | 104.262        | 0.000 | 111.251        | 107.257        | 0.000 | <b>510.246</b> | 1974.955 | 1737.930 | 1738.948   | A17 |
| A7  | 800.260        | 0.000 | 802.250        | <b>638.204</b> | 0.000 | <b>616.283</b> | 1681.919 | 1668.913 | 1669.926   | A16 |
| P8  | <b>607.252</b> | 0.000 | 670.241        | 725.246        | 0.000 | 707.236        | 1812.882 | 1509.858 | 1508.872   | P15 |
| A9  | 176.289        | 0.000 | 180.279        | 186.288        | 0.000 | 176.283        | 1338.893 | 1448.893 | 1449.919   | A14 |
| A10 | 830.426        | 0.000 | 831.412        | 107.421        | 0.000 | 109.410        | 1444.742 | 1427.705 | 1426.782   | A13 |
| P11 | 178.478        | 0.000 | 181.468        | 184.473        | 0.000 | 180.463        | 1174.710 | 1159.710 | 1158.745   | P12 |
| A12 | 1007.414       | 0.000 | 1009.400       | 1009.411       | 0.000 | 1017.404       | 1218.700 | 1209.678 | 1208.694   | A11 |
| P13 | 1104.528       | 0.000 | 1090.520       | 1132.521       | 0.000 | 1114.503       | 1200.695 | 1108.676 | 1107.655   | P10 |
| A14 | 1170.606       | 0.000 | 1157.600       | 1263.600       | 0.000 | 1185.590       | 1108.611 | 1091.588 | 1090.602   | A10 |
| E15 | 1104.648       | 0.000 | 1200.630       | 1332.643       | 0.000 | 1314.612       | 1037.575 | 1020.549 | 1019.565   | E11 |
| T16 | 1432.674       | 0.000 | 1418.670       | 1460.678       | 0.000 | 1448.671       | 1042.670 | 1008.631 | 1009.658   | T17 |
| T17 | 1511.751       | 0.000 | 1506.741       | 1545.742       | 0.000 | 1524.745       | 1023.741 | 1001.638 | 1003.611   | T18 |
| P18 | 1710.810       | 0.000 | 1697.800       | 1710.805       | 0.000 | 1711.778       | 1191.804 | 1091.624 | 1092.699   | P18 |
| V19 | 1600.818       | 0.000 | 1592.802       | 1592.800       | 0.000 | 1603.804       | 1019.803 | 1002.771 | 1003.745   | V19 |
| K20 | 1217.874       | 0.000 | 1212.861       | 1205.864       | 0.000 | 1207.862       | 1017.868 | 1001.801 | 1002.776   | K18 |
| K21 | 1066.868       | 0.000 | 1062.852       | 1064.861       | 0.000 | 1077.857       | 1016.853 | 1001.801 | 1002.776   | K19 |
| K22 | 1214.883       | 0.000 | 1210.867       | 1202.868       | 0.000 | 1208.862       | 1017.868 | 1001.801 | 1002.776   | K19 |



# sp | P43274 | H14\_MOUSE

SETAPAAPAAPAEKT<sup>Phospho</sup> PVKKK  
79.97

- ▶ fragmentation table for charge state 2+
- ▶ specType=cid
- ▶ score=36.54
- ▶ F091343.dat
- ▶ query=q36887\_p1
- ▶ precursor=747.394760
- ▶ chargePrecursor=3
- ▶ itol=0.5

| AA  | a              | a*             | aΔ       | b        | b*       | bΔ             | y               | y*             | yΔ             | AA  |
|-----|----------------|----------------|----------|----------|----------|----------------|-----------------|----------------|----------------|-----|
| S1  | 30.526         | 0.504          | 29.521   | 44.503   | 0.504    | 35.533         | 1140.580        | 1112.075       | 1111.581       | S22 |
| T2  | 30.527         | 0.504          | 30.243   | 339.543  | 0.504    | 330.039        | 1059.277        | 1056.559       | 1056.057       | T21 |
| T3  | 149.574        | 0.504          | 139.585  | 139.585  | 0.504    | 139.585        | <b>1012.551</b> | 1009.051       | 1008.549       | T30 |
| A4  | 131.050        | 0.504          | 122.084  | 135.087  | 0.504    | 135.087        | <b>962.027</b>  | 959.514        | 959.022        | A19 |
| P5  | 229.616        | 0.504          | 240.613  | 243.513  | 0.504    | 244.008        | <b>926.508</b>  | <b>917.995</b> | <b>917.503</b> | P16 |
| A6  | 208.134        | 0.504          | 209.129  | 219.131  | 0.504    | 219.131        | <b>871.012</b>  | 869.497        | 868.997        | A17 |
| A7  | 300.653        | 0.504          | 293.648  | 314.650  | 0.504    | 316.645        | <b>842.483</b>  | 838.970        | 838.468        | A16 |
| P8  | 349.179        | 0.504          | 349.174  | 363.177  | 0.504    | 364.172        | <b>806.945</b>  | 798.431        | 797.930        | P15 |
| A9  | 334.699        | 0.504          | 335.693  | 346.696  | 0.504    | <b>360.690</b> | <b>756.418</b>  | 749.905        | 749.412        | A14 |
| A10 | 330.217        | 0.504          | 413.211  | 434.214  | 0.504    | 435.210        | <b>714.387</b>  | <b>713.895</b> | A13            |     |
| P11 | 468.713        | 0.504          | 469.707  | 482.710  | 0.504    | 483.705        | <b>687.381</b>  | 679.868        | 679.370        | P12 |
| A12 | 454.211        | 0.504          | 449.205  | 512.209  | 0.504    | 513.204        | 648.864         | 638.349        | <b>629.850</b> | A11 |
| P13 | 512.730        | 0.504          | 453.721  | 505.723  | 0.504    | 507.718        | 603.329         | 599.821        | 599.320        | P10 |
| A14 | 588.300        | 0.504          | 579.301  | 601.304  | 0.504    | 603.300        | 554.809         | 548.297        | 547.802        | A10 |
| E15 | 672.826        | 0.504          | 643.822  | 668.825  | 0.504    | 657.820        | 519.261         | 510.750        | 510.260        | E11 |
| T16 | 718.876        | <b>746.382</b> | 100.899  | 709.878  | 0.223    | 721.889        | 458.770         | 448.253        | 448.000        | T17 |
| T17 | <b>807.382</b> | 109.899        | 746.571  | 801.580  | 0.122    | 812.596        | 352.374         | 350.723        | 350.250        | T18 |
| P18 | 813.909        | 887.389        | 646.520  | 869.930  | 881.393  | 880.901        | <b>300.216</b>  | 299.702        | 0.504          | P19 |
| V19 | 950.443        | 889.939        | 886.430  | 1019.440 | 1018.927 | 1018.435       | 243.009         | 242.496        | 0.504          | V16 |
| K20 | 999.999        | 999.999        | 999.999  | 983.998  | 978.977  | 974.962        | 202.112         | 199.974        | 0.504          | K18 |
| K21 | 1113.538       | 1041.499       | 1048.431 | 1047.430 | 1036.952 | 1046.431       | 146.110         | 149.584        | 0.504          | K12 |
| K22 | 1097.585       | 1089.022       | 1088.508 | 1111.583 | 1103.059 | 1102.510       | 74.000          | 69.547         | 0.504          | K11 |

# sp | P43276 | H15\_MOUSE

SETAPAETAAPAPVEKS<sup>Phospho</sup> PAKKK  
79.97

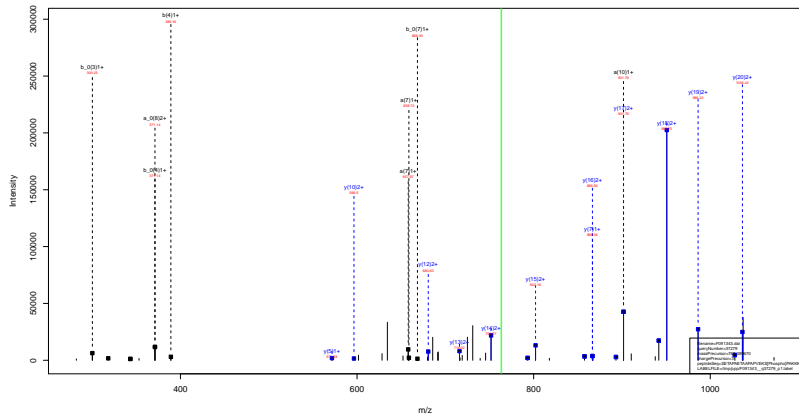

# sp | P43276 | H15\_MOUSE

SETAPAETAAPAPVEKS<sup>Phospho</sup> PAKKK  
79.97

- ▶ fragmentation table for charge state 1+
- ▶ specType=cid
- ▶ score=56.09
- ▶ F091343.dat
- ▶ query=q37279\_p1
- ▶ precursor=763.389670
- ▶ chargePrecursor=3
- ▶ itol=0.5

| AA    | a              | a*    | a $\beta$      | b              | b*    | b $\beta$      | y         | y*             | y $\beta$ | AA    |
|-------|----------------|-------|----------------|----------------|-------|----------------|-----------|----------------|-----------|-------|
| S(1)  | 80.044         | 0.000 | 42.034         | 88.039         | 0.000 | 70.029         | 2286.153  | 2271.127       | 2270.143  | S(2)  |
| E(2)  | 109.087        | 0.000 | 131.000        | 211.005        | 0.000 | 139.041        | 2551.120  | 2164.009       | 2163.113  | E(3)  |
| T(3)  | 200.130        | 0.000 | 272.124        | <b>318.130</b> | 0.000 | <b>300.119</b> | 2672.079  | 2695.062       | 2694.088  | T(20) |
| A(4)  | 301.172        | 0.000 | <b>345.161</b> | <b>389.167</b> | 0.000 | <b>371.156</b> | 3191.030  | 3194.029       | 3193.021  | A(19) |
| P(5)  | 402.214        | 0.000 | 446.214        | 489.214        | 0.000 | 426.212        | 3709.980  | 3702.967       | 3702.043  | P(16) |
| A(6)  | 503.257        | 0.000 | 547.251        | 587.257        | 0.000 | 539.246        | 4222.941  | 4195.935       | 4194.931  | A(17) |
| E(7)  | <b>604.304</b> | 0.000 | 648.298        | 688.304        | 0.000 | <b>644.289</b> | 4731.904  | 4714.878       | 4713.884  | E(18) |
| T(8)  | 705.347        | 0.000 | 741.341        | 781.347        | 0.000 | 709.336        | 5242.861  | 5209.839       | 5204.811  | T(15) |
| A(9)  | 806.389        | 0.000 | 842.383        | 882.389        | 0.000 | 800.373        | 5755.814  | 5698.787       | 5697.800  | A(14) |
| A(10) | <b>901.426</b> | 0.000 | 935.420        | 975.426        | 0.000 | 911.411        | 6267.777  | 6213.750       | 6212.760  | A(13) |
| P(11) | 1002.469       | 0.000 | 1040.460       | 1078.469       | 0.000 | 1008.461       | 6780.740  | 6740.713       | 6741.729  | P(12) |
| A(12) | 1103.514       | 0.000 | 1142.508       | 1180.514       | 0.000 | 1079.504       | 7292.693  | 7249.666       | 7244.676  | A(11) |
| P(13) | 1204.559       | 0.000 | 1244.550       | 1284.554       | 0.000 | 1176.543       | 7804.650  | 7749.623       | 7747.639  | P(10) |
| V(14) | 1305.607       | 0.000 | 1347.601       | 1387.607       | 0.000 | 1275.602       | 8314.609  | 8207.579       | 8206.588  | V(9)  |
| E(15) | 1394.660       | 0.000 | 1376.660       | 1422.670       | 0.000 | 1404.654       | 8822.520  | 8718.500       | 8717.518  | E(8)  |
| T(16) | 1493.719       | 0.000 | 1509.700       | 1550.719       | 0.000 | 1513.714       | 9332.480  | <b>946.416</b> | 949.429   | T(6)  |
| S(17) | 1598.773       | 0.000 | 1671.761       | 1711.768       | 0.000 | 1700.761       | 9899.421  | 9711.364       | 9700.380  | S(6)  |
| P(18) | 1700.820       | 0.000 | 1769.810       | 1814.820       | 0.000 | 1799.814       | 10491.400 | <b>371.191</b> | 354.369   | P(8)  |
| A(19) | 1801.863       | 0.000 | 1850.852       | 1899.860       | 0.000 | 1868.851       | 11071.367 | 473.242        | 467.213   | A(4)  |
| K(20) | 1902.908       | 0.000 | 1951.891       | 2011.903       | 0.000 | 1959.892       | 11651.342 | 603.313        | 599.276   | K(2)  |
| K(21) | 214.051        | 0.000 | 2096.042       | 2143.048       | 0.000 | 2125.021       | 2124.019  | 276.209        | 268.181   | K(2)  |
| K(22) | 2242.148       | 0.000 | 2228.131       | 2228.139       | 0.000 | 2220.143       | 2252.119  | 147.113        | 130.088   | K(1)  |

# sp | P43276 | H15\_MOUSE

SETAPAETAAPAPVEKS<sup>Phospho</sup> PAKKK  
79.97

- ▶ fragmentation table for charge state 2+
- ▶ specType=cid
- ▶ score=56.09
- ▶ F091343.dat
- ▶ query=q37279.p1
- ▶ precursor=763.389670
- ▶ chargePrecursor=3
- ▶ itol=0.5

| AA | a       | a*    | a <sub>0</sub> | b              | b*    | b <sub>0</sub> | y               | y*              | y <sub>0</sub>  | AA   |
|----|---------|-------|----------------|----------------|-------|----------------|-----------------|-----------------|-----------------|------|
| S  | 102420  | 0.504 | 29.523         | 48.922         | 0.504 | 36.517         | 1144.389        | 1139.887        | 1139.376        | S(2) |
| E  | 894747  | 0.504 | 89.542         | 109.946        | 0.504 | 100.228        | 1199.704        | 1194.202        | 1193.691        | E(2) |
| T  | 1451514 | 0.504 | 135.960        | 159.958        | 0.504 | 150.521        | <b>1035.543</b> | <b>1028.030</b> | <b>1027.518</b> | T(2) |
| A  | 1811030 | 0.504 | 171.984        | 195.687        | 0.504 | 186.180        | <b>986.019</b>  | 977.509         | 977.014         | A(2) |
| P  | 2291545 | 0.504 | 220.993        | 242.611        | 0.504 | 234.402        | <b>956.501</b>  | <b>941.987</b>  | <b>941.495</b>  | P(2) |
| A  | 2651128 | 0.504 | 256.144        | 278.114        | 0.504 | 269.347        | <b>911.975</b>  | <b>891.461</b>  | <b>891.000</b>  | A(2) |
| E  | 3291059 | 0.504 | 310.660        | <b>343.653</b> | 0.504 | 324.443        | <b>846.456</b>  | <b>827.942</b>  | <b>827.450</b>  | E(2) |
| T  | 3891180 | 0.504 | <b>371.174</b> | 394.177        | 0.504 | 385.177        | <b>801.054</b>  | <b>781.421</b>  | <b>780.929</b>  | T(2) |
| A  | 4131888 | 0.504 | 406.389        | 429.869        | 0.504 | 420.168        | <b>751.411</b>  | 744.387         | 743.929         | A(2) |
| A  | 4511217 | 0.504 | 442.311        | 466.214        | 0.504 | 455.209        | <b>715.892</b>  | 707.376         | 706.887         | A(2) |
| P  | 4891241 | 0.504 | 480.799        | 513.171        | 0.504 | 504.179        | <b>680.373</b>  | 671.860         | 671.388         | P(2) |
| A  | 5291262 | 0.504 | 516.289        | 549.250        | 0.504 | 540.254        | 647.847         | 637.334         | 636.844         | A(2) |
| P  | 5611168 | 0.504 | 549.162        | 589.706        | 0.504 | 580.192        | <b>598.328</b>  | 587.823         | 587.321         | P(2) |
| V  | 6111102 | 0.504 | 614.311        | 647.430        | 0.504 | 638.114        | 547.803         | 536.289         | 535.791         | V(2) |
| E  | 6591204 | 0.504 | 648.838        | 711.941        | 0.504 | 692.830        | 488.269         | 486.755         | 486.261         | E(2) |
| R  | 7011061 | 0.504 | 713.193        | 753.889        | 0.504 | 737.193        | 398.681         | 413.144         | 412.613         | R(2) |
| S  | 7451109 | 0.504 | 737.305        | 809.388        | 0.504 | 793.303        | 349.949         | 363.389         | 362.944         | S(2) |
| P  | 7811117 | 0.504 | 764.811        | 807.614        | 0.504 | 800.209        | 299.209         | 277.627         | 276.104         | P(2) |
| A  | 8291118 | 0.504 | 820.488        | 864.613        | 0.504 | 848.421        | 237.674         | 229.109         | 228.614         | A(2) |
| R  | 8691013 | 0.504 | 864.471        | 930.960        | 0.504 | 900.473        | 202.155         | 193.643         | 193.154         | R(2) |
| K  | 9071031 | 0.499 | 904.721        | 971.630        | 0.499 | 940.724        | 160.521         | 156.109         | 155.644         | K(2) |
| K  | 9291116 | 0.504 | 917.872        | 1006.076       | 0.504 | 976.870        | 116.870         | 94.880          | 94.547          | K(2) |

# sp | P15864 | H12\_MOUSE

GTGASGS (Phospho) FK  
(79.97)

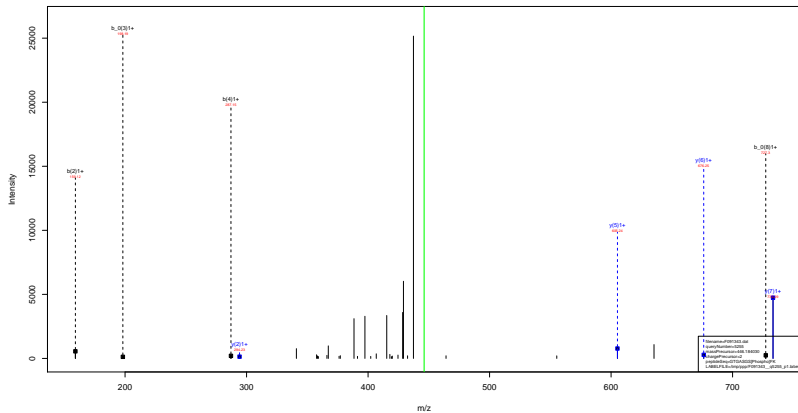

# sp | P15864 | H12\_MOUSE

GTGASGS<sup>(Phospho)</sup> FK  
(79.97)

- ▶ fragmentation table for charge state 1+
- ▶ specType=cid
- ▶ score=29.16
- ▶ F091343.dat
- ▶ query=q5255\_p1
- ▶ precursor=446.184030
- ▶ chargePrecursor=2
- ▶ itol=0.5

| AA         | a       | a*      | a,0     | b              | b*      | b,0            | y              | y*      | y,0     | AA         |
|------------|---------|---------|---------|----------------|---------|----------------|----------------|---------|---------|------------|
| <b>C</b> 1 | 30.034  | 0.000   | 0.000   | 58.026         | 0.000   | 0.000          | 891.301        | 874.331 | 873.859 | <b>C</b> 9 |
| <b>T</b> 2 | 131.082 | 0.000   | 113.073 | <b>159.076</b> | 0.000   | 141.066        | 834.439        | 817.313 | 816.329 | <b>T</b> 8 |
| <b>C</b> 3 | 188.103 | 0.000   | 170.092 | 218.089        | 0.000   | <b>198.087</b> | <b>733.292</b> | 716.253 | 715.261 | <b>C</b> 7 |
| <b>A</b> 4 | 259.140 | 0.000   | 241.130 | <b>287.135</b> | 0.000   | 269.124        | <b>436.276</b> | 420.243 | 419.260 | <b>A</b> 6 |
| <b>S</b> 5 | 336.172 | 0.000   | 328.162 | 374.151        | 0.000   | 356.146        | <b>605.233</b> | 589.200 | 588.223 | <b>S</b> 3 |
| <b>G</b> 6 | 403.194 | 0.000   | 385.183 | 431.168        | 0.000   | 413.176        | 538.201        | 501.174 | 500.193 | <b>G</b> 4 |
| <b>S</b> 7 | 470.192 | 0.000   | 452.181 | 508.167        | 0.000   | 490.170        | 481.180        | 444.151 | 443.169 | <b>S</b> 2 |
| <b>F</b> 8 | 537.260 | 0.000   | 699.250 | 745.255        | 0.000   | <b>737.245</b> | <b>294.181</b> | 277.155 | 0.000   | <b>F</b> 2 |
| <b>K</b> 9 | 604.335 | 0.00320 | 827.349 | 873.350        | 0.00324 | 855.340        | 147.133        | 130.080 | 0.000   | <b>K</b> 1 |

# sp | P43274 | H14\_MOUSE

KAPKS<sup>Phospho</sup> PAK  
79.97

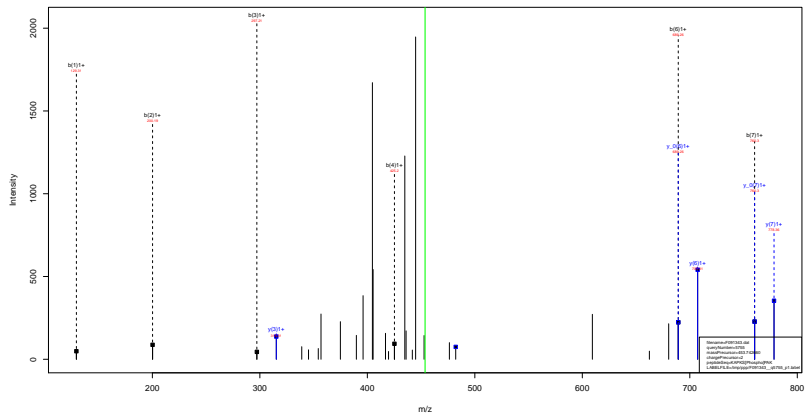

# sp | P43274 | H14\_MOUSE

KAPKS<sup>Phospho</sup> PAK  
79.97

- ▶ fragmentation table for charge state 1+
- ▶ specType=cid
- ▶ score=45.10
- ▶ F091343.dat
- ▶ query=q5755\_p1
- ▶ precursor=453.742660
- ▶ chargePrecursor=2
- ▶ itol=0.5

| AA | a        | a*      | aΔ      | b              | b*      | bΔ      | y              | y*      | yΔ             | AA  |
|----|----------|---------|---------|----------------|---------|---------|----------------|---------|----------------|-----|
| K1 | 1101.227 | 88.183  | 0.000   | <b>129.102</b> | 112.076 | -0.083  | 260.401        | 189.454 | 111.479        | K10 |
| A1 | 112.144  | 155.133 | 0.000   | <b>200.135</b> | 163.113 | -0.000  | <b>778.358</b> | 761.950 | <b>760.375</b> | A17 |
| F1 | 269.197  | 250.111 | 0.000   | <b>297.192</b> | 280.166 | 0.000   | <b>707.349</b> | 690.322 | <b>689.338</b> | F16 |
| K1 | 107.292  | 880.259 | 0.000   | <b>425.287</b> | 408.261 | 0.000   | 610.290        | 593.269 | 592.285        | K15 |
| S1 | 354.291  | 347.258 | 546.288 | 390.285        | 375.259 | 374.275 | <b>482.301</b> | 465.174 | 464.190        | S14 |
| F1 | 693.313  | 648.317 | 643.331 | <b>649.338</b> | 592.312 | 611.328 | <b>315.203</b> | 298.176 | 0.000          | F13 |
| A1 | 732.980  | 715.358 | 714.370 | <b>760.375</b> | 743.949 | 742.935 | 218.150        | 201.123 | 0.000          | A12 |
| K1 | 880.470  | 843.449 | 842.465 | 888.470        | 871.444 | 870.480 | 147.113        | 130.086 | 0.000          | K11 |





# sp | P43274 | H14\_MOUSE

KAPKS Phospho PAK  
79.97

- ▶ fragmentation table for charge state 1+
- ▶ specType=cid
- ▶ score=27.72
- ▶ F091343.dat
- ▶ query=q5758\_p1
- ▶ precursor=453.743700
- ▶ chargePrecursor=2
- ▶ itol=0.5

| AA | a        | a*      | aΔ      | b              | b*      | bΔ      | y              | y*      | yΔ             | AA  |
|----|----------|---------|---------|----------------|---------|---------|----------------|---------|----------------|-----|
| K1 | 1101.227 | 88.183  | 0.000   | 120.212        | 112.076 | -0.083  | 300.401        | 389.434 | 118.479        | K10 |
| A1 | 112.144  | 155.133 | 0.000   | <b>200.139</b> | 163.113 | 0.000   | <b>778.388</b> | 761.950 | <b>760.375</b> | A17 |
| F3 | 209.197  | 250.111 | 0.000   | 207.192        | 280.166 | 0.000   | <b>707.349</b> | 690.322 | <b>689.338</b> | F16 |
| K4 | 107.292  | 380.259 | 0.000   | <b>425.287</b> | 408.261 | 0.000   | 610.290        | 593.269 | 592.285        | K15 |
| S5 | 354.291  | 347.258 | 546.288 | 390.285        | 375.259 | 374.275 | <b>482.301</b> | 465.174 | <b>464.190</b> | S14 |
| F6 | 603.313  | 604.317 | 643.331 | <b>649.338</b> | 692.312 | 611.328 | <b>315.203</b> | 308.176 | 0.000          | F13 |
| A7 | 732.980  | 715.358 | 714.370 | <b>760.375</b> | 743.949 | 742.935 | 218.150        | 201.123 | 0.000          | A12 |
| K8 | 880.470  | 843.449 | 842.465 | 888.470        | 871.444 | 870.480 | 147.113        | 133.086 | 0.000          | K11 |



# sp | P43274 | H14\_MOUSE

KAPKS<sup>Phospho</sup> PAK  
79.97

- ▶ fragmentation table for charge state 1+
- ▶ specType=cid
- ▶ score=41.67
- ▶ F091343.dat
- ▶ query=q5759\_p1
- ▶ precursor=453.743930
- ▶ chargePrecursor=2
- ▶ itol=0.5

| AA | a        | a*      | aΔ      | b              | b*      | bΔ      | y              | y*      | yΔ             | AA  |
|----|----------|---------|---------|----------------|---------|---------|----------------|---------|----------------|-----|
| K1 | 1101.227 | 88.183  | 0.000   | <b>129.102</b> | 112.076 | -0.083  | 900.401        | 889.834 | 1101.227       | K10 |
| A1 | 112.144  | 155.133 | 0.000   | <b>200.135</b> | 163.113 | -0.000  | <b>778.358</b> | 761.950 | <b>760.375</b> | A17 |
| F3 | 269.197  | 250.111 | 0.000   | 297.192        | 280.166 | 0.000   | <b>707.349</b> | 690.322 | <b>689.338</b> | F16 |
| K4 | 107.292  | 880.259 | 0.000   | <b>425.287</b> | 408.261 | 0.000   | <b>610.296</b> | 593.269 | 592.285        | K15 |
| S5 | 354.291  | 347.258 | 546.288 | 391.283        | 375.259 | 374.275 | <b>482.301</b> | 465.174 | 464.190        | S14 |
| F6 | 603.313  | 604.317 | 643.331 | <b>649.338</b> | 642.312 | 611.328 | <b>315.203</b> | 298.176 | 0.000          | F13 |
| A7 | 732.980  | 715.358 | 714.370 | <b>760.375</b> | 743.949 | 742.935 | 218.150        | 201.123 | 0.000          | A12 |
| K8 | 880.470  | 843.449 | 842.465 | 888.470        | 871.444 | 870.460 | 147.113        | 130.086 | 0.000          | K11 |



# sp | P70696 | H2B1A\_MOUSE

HAVS <sup>Phospho</sup>EGTK  
79.97

- ▶ fragmentation table for charge state 1+
- ▶ specType=cid
- ▶ score=33.15
- ▶ F091343.dat
- ▶ query=q5834.p1
- ▶ precursor=454.697130
- ▶ chargePrecursor=2
- ▶ itol=0.5

| AA         | a       | a <sup>+</sup> | a,b     | b              | b <sup>+</sup> | b,y     | y              | y <sup>+</sup> | y,b            | AA          |
|------------|---------|----------------|---------|----------------|----------------|---------|----------------|----------------|----------------|-------------|
| <b>R</b> 1 | 110.074 | 0.000          | 0.000   | 116.095        | 0.000          | 0.000   | 308.367        | 394.388        | 466.377        | <b>R</b> 2  |
| <b>A</b> 2 | 161.938 | 0.000          | 0.000   | <b>209.103</b> | 0.000          | 0.000   | <b>771.328</b> | 756.302        | 753.138        | <b>A</b> 7  |
| <b>V</b> 3 | 280.177 | 0.000          | 0.000   | <b>308.172</b> | 0.000          | 0.000   | <b>700.291</b> | 685.265        | 682.081        | <b>V</b> 6  |
| <b>S</b> 4 | 447.175 | 0.000          | 429.185 | 475.170        | 0.000          | 457.160 | <b>601.223</b> | 584.195        | 583.212        | <b>S</b> 5  |
| <b>E</b> 5 | 576.218 | 0.000          | 558.207 | 604.211        | 0.000          | 586.202 | <b>434.225</b> | 427.189        | <b>416.214</b> | <b>E</b> 4  |
| <b>G</b> 6 | 633.239 | 0.000          | 615.229 | 663.234        | 0.000          | 645.224 | <b>305.182</b> | <b>288.155</b> | <b>287.171</b> | <b>G</b> 3  |
| <b>T</b> 7 | 734.287 | 0.000          | 716.276 | 762.282        | 0.000          | 744.271 | 248.160        | 231.134        | 230.150        | <b>T</b> 2  |
| <b>K</b> 8 | 802.302 | 845.300        | 844.371 | 890.377        | 871.360        | 872.369 | 147.111        | 130.088        | 0.000          | <b>K</b> 11 |

# sp | P70696 | H2B1A\_MOUSE

HAVS<sup>Phospho</sup> EGTK  
79.97

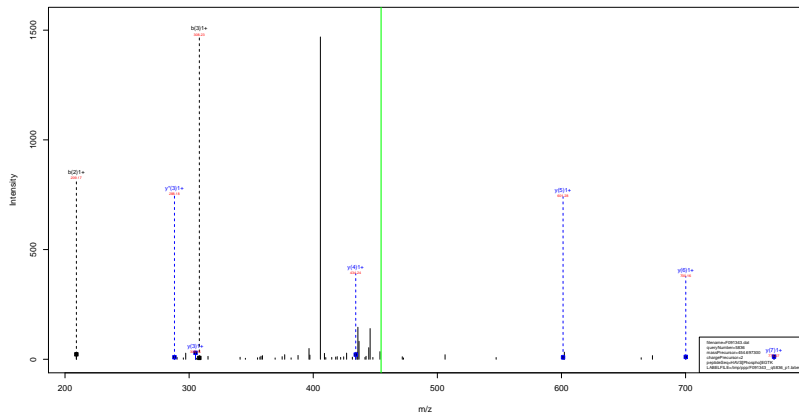

# sp | P70696 | H2B1A\_MOUSE

HAVS <sup>Phospho</sup>EGTK  
79.97

- ▶ fragmentation table for charge state 1+
- ▶ specType=cid
- ▶ score=30.50
- ▶ F091343.dat
- ▶ query=q5836\_p1
- ▶ precursor=454.697300
- ▶ chargePrecursor=2
- ▶ itol=0.5

| AA         | a       | a*      | aΔ      | b              | b*      | bΔ      | y              | y*             | yΔ      | AA          |
|------------|---------|---------|---------|----------------|---------|---------|----------------|----------------|---------|-------------|
| <b>R</b> 1 | 130.071 | 0.000   | 0.000   | 130.071        | 0.000   | 0.000   | 260.142        | 260.142        | 260.142 | <b>R</b> 0  |
| <b>A</b> 2 | 153.108 | 0.000   | 0.000   | <b>209.103</b> | 0.000   | 0.000   | <b>771.328</b> | 771.328        | 771.328 | <b>A</b> 7  |
| <b>V</b> 3 | 289.177 | 0.000   | 0.000   | <b>308.172</b> | 0.000   | 0.000   | <b>700.291</b> | 988.265        | 988.265 | <b>V</b> 6  |
| <b>S</b> 4 | 447.175 | 0.000   | 429.185 | 475.170        | 0.000   | 457.160 | <b>601.223</b> | 584.190        | 583.212 | <b>S</b> 5  |
| <b>E</b> 5 | 576.210 | 0.000   | 558.207 | 604.213        | 0.000   | 586.202 | <b>434.225</b> | 417.210        | 416.214 | <b>E</b> 4  |
| <b>G</b> 6 | 633.239 | 0.000   | 615.229 | 661.236        | 0.000   | 643.224 | <b>305.182</b> | <b>288.155</b> | 289.171 | <b>G</b> 3  |
| <b>T</b> 7 | 734.287 | 0.000   | 716.276 | 762.282        | 0.000   | 744.271 | 348.160        | 231.131        | 230.150 | <b>T</b> 2  |
| <b>K</b> 8 | 892.302 | 846.159 | 844.371 | 890.377        | 871.350 | 872.308 | 147.111        | 130.080        | 0.000   | <b>K</b> 11 |





# sp | P70696 | H2B1A\_MOUSE

HAVS <sup>Phospho</sup>EGTK  
79.97

- ▶ fragmentation table for charge state 1+
- ▶ specType=cid
- ▶ score=42.55
- ▶ F091343.dat
- ▶ query=q5838.p1
- ▶ precursor=454.697360
- ▶ chargePrecursor=2
- ▶ itol=0.5

| AA         | a              | a*      | a,β     | b              | b*      | b,β            | γ              | γ*             | γ,β            | AA          |
|------------|----------------|---------|---------|----------------|---------|----------------|----------------|----------------|----------------|-------------|
| <b>H</b> 1 | 1110.714       | 0.000   | 0.000   | 136.999        | 0.000   | 0.000          | 906.100        | 904.361        | 904.377        | <b>H</b> 10 |
| <b>A</b> 2 | <b>181.108</b> | 0.000   | 0.000   | <b>209.103</b> | 0.000   | 0.000          | <b>771.328</b> | 755.324        | 753.319        | <b>A</b> 7  |
| <b>V</b> 3 | 286.177        | 0.000   | 0.000   | <b>308.172</b> | 0.000   | 0.000          | <b>700.291</b> | 683.285        | <b>682.281</b> | <b>V</b> 6  |
| <b>S</b> 4 | 447.275        | 0.000   | 429.185 | 475.170        | 0.000   | 497.180        | <b>601.223</b> | <b>584.196</b> | 583.212        | <b>S</b> 5  |
| <b>E</b> 5 | 576.218        | 0.000   | 556.201 | 604.212        | 0.000   | 585.202        | <b>434.225</b> | 417.195        | 416.214        | <b>E</b> 4  |
| <b>G</b> 6 | 633.239        | 0.000   | 613.220 | 664.234        | 0.000   | 643.224        | <b>305.182</b> | <b>288.155</b> | 289.171        | <b>G</b> 3  |
| <b>T</b> 7 | 734.287        | 0.000   | 715.278 | 762.282        | 0.000   | <b>744.271</b> | 348.180        | 231.134        | 230.150        | <b>T</b> 2  |
| <b>K</b> 8 | 894.382        | 846.359 | 844.378 | 896.377        | 871.350 | 872.369        | 147.113        | 150.088        | 0.000          | <b>K</b> 9  |



# sp | P43274 | H14\_MOUSE

APKS<sup>Phospho</sup> PAKAK  
79.97

- ▶ fragmentation table for charge state 1+
- ▶ specType=cid
- ▶ score=27.56
- ▶ F091343.dat
- ▶ query=q8400.p1
- ▶ precursor=489.262560
- ▶ chargePrecursor=2
- ▶ itol=0.5

| AA | a       | a*      | a,0            | b              | b*      | b,0     | y              | y*             | y,0     | AA |
|----|---------|---------|----------------|----------------|---------|---------|----------------|----------------|---------|----|
| A  | 44.099  | 0.000   | 0.000          | 22.044         | 0.000   | 0.000   | 977.519        | 966.491        | 959.567 | A  |
| F  | 141.102 | 0.000   | 0.000          | 169.507        | 0.000   | 0.000   | 906.481        | 899.454        | 888.476 | F  |
| K  | 269.197 | 252.171 | 0.000          | <b>297.192</b> | 280.166 | 0.000   | <b>809.428</b> | 792.402        | 791.418 | K  |
| S  | 439.136 | 419.169 | <b>418.185</b> | 468.199        | 447.164 | 446.180 | <b>641.323</b> | 646.307        | 645.323 | S  |
| P  | 533.248 | 515.221 | 515.235        | 561.243        | 544.217 | 543.233 | <b>514.335</b> | <b>497.308</b> | 0.000   | P  |
| A  | 604.285 | 587.259 | 586.275        | 633.289        | 615.254 | 614.270 | 417.287        | 400.256        | 0.000   | A  |
| K  | 712.330 | 711.354 | 714.370        | <b>760.375</b> | 743.349 | 742.365 | 348.245        | 329.218        | 0.000   | K  |
| A  | 801.418 | 785.761 | 785.407        | 831.412        | 814.386 | 813.402 | <b>218.150</b> | 201.123        | 0.000   | A  |
| K  | 911.512 | 914.486 | 913.500        | 959.510        | 952.484 | 951.497 | 147.111        | 130.084        | 0.000   | K  |

# sp | Q6GSS7 | H2A2A\_MOUSE

LNKLLGK <sup>Dimethyl</sup> 28.03 VTIAQGGVLPNIQAVLLPK <sup>Dimethyl</sup> 14.02 TE

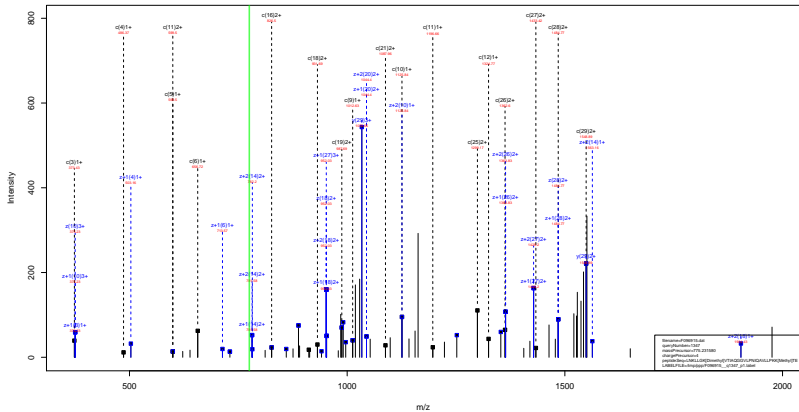

# sp | Q6GSS7 | H2A2A\_MOUSE

LNKLLGK <sup>Dimethyl</sup> 28.03 VTIAQGGVLPNIQAVLLPKK <sup>Methyl</sup> 14.02 TE

- ▶ fragmentation table for charge state 1+
- ▶ specType=etd
- ▶ score=49.66
- ▶ F096915.dat
- ▶ query=q1347\_p1
- ▶ precursor=775.231580
- ▶ chargePrecursor=4
- ▶ itol=0.6

| AA     | c               | y               | z+1            | z+2             | z              | AA     |
|--------|-----------------|-----------------|----------------|-----------------|----------------|--------|
| L[1]   | 131.118         | 3097.908        | 3081.889       | 0.000           | 3080.881       | L[29]  |
| N[2]   | 345.161         | 2984.823        | 2968.805       | 2969.813        | 2967.797       | N[28]  |
| K[3]   | <b>373.256</b>  | 2878.781        | 2854.762       | 2855.770        | 2853.754       | K[27]  |
| L[4]   | <b>486.340</b>  | 2742.680        | 2726.667       | 2727.675        | 2725.659       | L[26]  |
| L[5]   | <b>599.424</b>  | 2620.603        | 2603.583       | 2604.591        | 2602.575       | L[25]  |
| Q[6]   | <b>656.445</b>  | 2519.517        | 2500.499       | 2501.507        | 2499.491       | Q[24]  |
| K[7]   | 812.572         | 2459.466        | 2443.477       | 2444.485        | 2442.469       | K[23]  |
| V[8]   | <b>911.640</b>  | 2303.370        | 2287.351       | 2288.359        | 2286.343       | V[22]  |
| T[9]   | <b>1012.688</b> | 2204.303        | 2188.283       | 2189.290        | 2187.275       | T[21]  |
| I[10]  | <b>1125.772</b> | 2103.254        | 2087.235       | 2088.243        | 2086.227       | I[20]  |
| A[11]  | <b>1196.809</b> | 1995.170        | 1974.151       | 1975.159        | 1973.143       | A[19]  |
| Q[12]  | <b>1324.867</b> | 1919.132        | 1903.114       | <b>1904.122</b> | 1902.106       | Q[18]  |
| Q[13]  | 1381.889        | 1793.074        | 1775.055       | 1776.063        | 1774.047       | Q[17]  |
| G[14]  | 1438.910        | 1734.052        | 1718.034       | 1719.041        | 1717.026       | G[16]  |
| V[15]  | 1537.879        | 1677.031        | 1661.012       | 1662.020        | 1660.004       | V[15]  |
| L[16]  | 1651.063        | 1577.963        | 1561.944       | <b>1562.952</b> | 1560.936       | L[14]  |
| F[17]  | 1748.116        | 1464.878        | 1448.860       | 1449.868        | 1447.852       | F[13]  |
| Tu[18] | 1892.159        | 1397.829        | 1381.809       | <b>1382.815</b> | 1380.799       | Tu[12] |
| I[19]  | 1975.243        | 1253.783        | 1237.764       | 1238.772        | 1236.756       | I[11]  |
| Q[20]  | 2103.301        | 1140.699        | 1124.680       | <b>1125.688</b> | 1123.672       | Q[10]  |
| A[21]  | 2174.338        | <b>1012.640</b> | <b>996.621</b> | 997.629         | 995.614        | A[9]   |
| V[22]  | 2273.407        | <b>941.603</b>  | 925.584        | 926.592         | 924.576        | V[8]   |
| L[23]  | 2386.491        | 842.535         | <b>826.516</b> | 827.524         | 825.508        | L[7]   |
| L[24]  | 2499.575        | 729.481         | <b>713.432</b> | 714.440         | 712.424        | L[6]   |
| P[25]  | 2596.626        | 615.360         | 600.340        | 601.356         | <b>599.340</b> | P[5]   |
| K[26]  | 2724.723        | 519.314         | <b>503.295</b> | 504.303         | 502.287        | K[4]   |
| K[27]  | 3866.831        | 391.210         | <b>375.200</b> | 376.208         | 374.193        | K[3]   |
| T[28]  | 2067.881        | 249.108         | 233.089        | 234.097         | 232.082        | T[2]   |
| E[29]  | 3096.923        | 148.060         | 132.042        | 133.050         | 131.034        | E[1]   |

# sp | Q6GSS7 | H2A2A\_MOUSE

LNKLLGK <sup>Dimethyl</sup> 28.03 VTIAQGGVLPNIQAVLLPKK <sup>Methyl</sup> 14.02 TE

- ▶ fragmentation table for charge state 2+
- ▶ specType=etd
- ▶ score=49.66
- ▶ F096915.dat
- ▶ query=q1347\_p1
- ▶ precursor=775.231580
- ▶ chargePrecursor=4
- ▶ itol=0.6

| AA     | c               | y               | z+1             | z+2             | z               | AA   |
|--------|-----------------|-----------------|-----------------|-----------------|-----------------|------|
| L   1  | 66.093          | <b>1549.457</b> | 1541.448        | 9.504           | 1540.944        | L 20 |
| N   2  | 123.084         | 1492.915        | <b>1494.906</b> | 1485.410        | <b>1484.402</b> | N 20 |
| K   3  | 187.132         | 1435.894        | <b>1427.885</b> | <b>1428.388</b> | 1427.381        | K 27 |
| L   4  | 243.674         | 1371.846        | <b>1363.837</b> | <b>1364.341</b> | <b>1363.333</b> | L 26 |
| L   5  | 300.216         | 1315.304        | 1307.295        | 1307.799        | 1308.791        | L 25 |
| G   6  | 358.700         | 1258.762        | 1250.753        | <b>1251.257</b> | 1250.249        | G 24 |
| K   7  | 406.790         | 1202.220        | 1222.242        | 1222.746        | 1221.738        | K 23 |
| V   8  | 456.324         | 1152.188        | 1144.179        | 1144.683        | 1143.675        | V 22 |
| T   9  | 506.840         | 1102.654        | 1094.645        | 1095.149        | 1094.141        | T 21 |
| T   10 | 563.390         | 1052.120        | <b>1044.121</b> | <b>1044.625</b> | 1043.617        | T 20 |
| A   11 | <b>598.908</b>  | 995.588         | <b>987.579</b>  | <b>988.083</b>  | 987.075         | A 19 |
| Q   12 | 662.977         | 960.070         | <b>951.060</b>  | <b>952.564</b>  | <b>951.557</b>  | Q 18 |
| G   13 | 691.448         | 908.041         | <b>898.031</b>  | <b>898.535</b>  | 897.527         | G 17 |
| G   14 | 719.959         | 867.530         | 859.520         | <b>860.024</b>  | 859.017         | G 16 |
| V   15 | 769.493         | 819.019         | 811.010         | 811.514         | 810.506         | V 15 |
| L   16 | <b>826.035</b>  | 759.495         | <b>751.476</b>  | <b>751.979</b>  | 750.972         | L 14 |
| F   17 | 874.561         | 722.943         | 724.933         | 724.937         | 724.430         | F 13 |
| N   18 | <b>931.583</b>  | 684.416         | 676.407         | 676.911         | 675.903         | N 12 |
| I   19 | <b>988.125</b>  | 627.995         | 619.986         | 619.990         | 618.982         | I 11 |
| Q   20 | 1052.154        | 670.853         | 662.844         | 663.348         | 662.340         | Q 10 |
| A   21 | <b>1087.673</b> | 508.824         | 498.814         | 499.318         | 498.310         | A 0  |
| V   22 | 1127.207        | 471.305         | 463.296         | 463.800         | 462.792         | V 0  |
| L   23 | 1193.700        | 429.771         | 419.762         | 419.266         | 418.258         | L 1  |
| L   24 | 1256.291        | 385.228         | 375.220         | 375.723         | 374.715         | L 0  |
| P   25 | <b>1298.817</b> | 308.687         | 300.678         | 301.181         | 300.174         | P 5  |
| K   26 | <b>1362.865</b> | 260.160         | 252.151         | 252.655         | 251.647         | K 4  |
| K   27 | <b>1433.920</b> | 196.113         | 188.104         | 188.608         | 187.600         | K 3  |
| T   28 | <b>1484.444</b> | 125.058         | 117.048         | 117.552         | 116.544         | T 2  |
| E   29 | <b>1548.965</b> | 74.534          | 66.524          | 67.028          | 66.021          | E 1  |

# sp | Q6GSS7 | H2A2A\_MOUSE

LNKLLGK <sup>Dimethyl</sup> 28.03 VTIAQGGVLPNIQAVLLPKK <sup>Methyl</sup> 14.02 TE

- ▶ fragmentation table for charge state 3+
- ▶ specType=etd
- ▶ score=49.66
- ▶ F096915.dat
- ▶ query=q1347\_p1
- ▶ precursor=775.231580
- ▶ chargePrecursor=4
- ▶ itol=0.6

| AA |    | c        | y               | z+1            | z+2            | z              | AA |
|----|----|----------|-----------------|----------------|----------------|----------------|----|
| L  | 1  | 44.377   | <b>1033.307</b> | 1027.968       | 0.672          | 1027.632       | L  |
| N  | 2  | 82.392   | 995.613         | 990.273        | <b>990.609</b> | 989.937        | N  |
| K  | 3  | 125.090  | 997.598         | <b>952.259</b> | <b>952.595</b> | <b>951.923</b> | K  |
| L  | 4  | 162.795  | 974.902         | 969.562        | 969.896        | 969.225        | L  |
| L  | 5  | 200.479  | 877.205         | 871.866        | 872.202        | 871.530        | L  |
| G  | 6  | 219.487  | 839.511         | 834.171        | 834.507        | 833.835        | G  |
| K  | 7  | 271.529  | 820.504         | 815.164        | 815.500        | 814.828        | K  |
| V  | 8  | 304.552  | 768.461         | 763.122        | 763.458        | 762.786        | V  |
| T  | 9  | 338.234  | 735.439         | <b>730.099</b> | <b>730.435</b> | 729.763        | T  |
| I  | 10 | 375.929  | 701.756         | 696.416        | 696.752        | 696.081        | I  |
| A  | 11 | 399.698  | 664.061         | 658.722        | 659.058        | 658.386        | A  |
| Q  | 12 | 442.294  | 640.381         | 635.041        | 635.379        | 634.707        | Q  |
| G  | 13 | 461.301  | 597.696         | 592.357        | 592.693        | 592.021        | G  |
| G  | 14 | 480.308  | 578.689         | 573.349        | 573.685        | 573.013        | G  |
| V  | 15 | 513.331  | 559.682         | 554.342        | 554.678        | 554.006        | V  |
| L  | 16 | 551.026  | 526.659         | 521.319        | 521.655        | 520.984        | L  |
| P  | 17 | 583.377  | 488.964         | 483.625        | 483.961        | 483.289        | P  |
| N  | 18 | 621.391  | 456.813         | 451.474        | 451.810        | 451.138        | N  |
| I  | 19 | 659.688  | 418.599         | 413.259        | 413.595        | 412.924        | I  |
| Q  | 20 | 701.772  | 380.904         | <b>375.565</b> | 375.901        | <b>375.229</b> | Q  |
| A  | 21 | 725.451  | 338.210         | 332.870        | 333.206        | 332.534        | A  |
| V  | 22 | 758.474  | 314.539         | 309.200        | 309.536        | 308.864        | V  |
| L  | 23 | 796.168  | 281.516         | 276.177        | 276.513        | 275.841        | L  |
| L  | 24 | 833.861  | 243.822         | 238.482        | 238.818        | 238.146        | L  |
| P  | 25 | 866.214  | 206.127         | 200.787        | 201.123        | 200.451        | P  |
| K  | 26 | 908.912  | 173.776         | 168.437        | 168.772        | 168.101        | K  |
| K  | 27 | 956.283  | 131.077         | 125.738        | 126.074        | 125.402        | K  |
| T  | 28 | 989.965  | 83.700          | 78.360         | 78.704         | 78.032         | T  |
| E  | 29 | 1032.979 | 50.025          | 44.685         | 45.021         | 44.349         | E  |





# sp | P43277 | H13\_MOUSE

KNNSRIKLGLKSLVSKGTLVQTKGTGASGSFKLNKK <sup>Dimethyl</sup> 28.03 <sup>AAS</sup> <sup>Acetyl</sup> 42.01 <sup>GE</sup>

- ▶ fragmentation table for charge state 1+
- ▶ specType=etd
- ▶ score=116.85
- ▶ F097391.dat
- ▶ query=q2781\_p1
- ▶ precursor=713.083680
- ▶ chargePrecursor=6
- ▶ itol=0.8

| AA    | c               | y              | z+1             | z+2             | z               | AA    |
|-------|-----------------|----------------|-----------------|-----------------|-----------------|-------|
| K[1]  | 146.129         | 4373.435       | 4257.417        | 4256.425        | 4256.400        | K[41] |
| N[2]  | <b>260.172</b>  | 4146.340       | 4129.322        | 4130.330        | 4128.314        | N[40] |
| N[3]  | <b>374.215</b>  | 4031.398       | 4015.279        | 4016.287        | 4014.271        | N[39] |
| S[4]  | <b>461.247</b>  | 3917.255       | 3901.239        | 3902.244        | 3900.228        | S[38] |
| K[5]  | <b>617.348</b>  | 3830.223       | 3814.204        | 3815.212        | 3813.196        | K[37] |
| T[6]  | 710.432         | 3674.324       | 3658.302        | 3659.311        | 3657.295        | T[36] |
| K[7]  | <b>858.537</b>  | 3563.037       | 3545.011        | 3546.027        | 3544.011        | K[35] |
| L[8]  | <b>971.611</b>  | 3432.942       | 3416.924        | 3417.932        | 3415.916        | L[34] |
| G[9]  | <b>1028.632</b> | 3319.858       | 3303.840        | 3304.847        | 3302.831        | G[33] |
| L[10] | <b>1141.716</b> | 3202.837       | 3186.818        | 3187.826        | 3185.810        | L[32] |
| K[11] | 1269.811        | 3149.753       | 3133.733        | 3134.742        | 3132.726        | K[31] |
| S[12] | 1359.843        | 3071.658       | 3055.639        | 3056.647        | 3054.631        | S[30] |
| L[13] | 1409.827        | 2934.620       | 2918.600        | 2919.615        | 2917.599        | L[29] |
| V[14] | 1568.996        | 2821.542       | 2805.521        | 2806.531        | 2804.515        | V[28] |
| S[15] | 1656.028        | 2722.473       | 2706.455        | 2707.462        | 2705.447        | S[27] |
| K[16] | 1784.123        | 2635.441       | 2619.421        | 2620.430        | 2618.413        | K[26] |
| G[17] | 1841.144        | 2507.348       | 2491.328        | 2492.336        | 2490.320        | G[25] |
| T[18] | 1962.192        | 2400.325       | 2384.305        | 2385.314        | 2383.298        | T[24] |
| L[19] | 2055.276        | 2349.277       | 2333.259        | 2334.266        | 2332.251        | L[23] |
| V[20] | 2154.344        | 2236.193       | 2220.174        | 2221.182        | 2219.167        | V[22] |
| Q[21] | 2292.403        | 2137.125       | 2121.106        | 2122.114        | 2120.099        | Q[21] |
| T[22] | 2383.451        | 2030.066       | 1993.047        | 1994.055        | 1992.040        | T[20] |
| K[23] | 2413.546        | 1936.019       | 1899.000        | 1900.008        | 1898.992        | K[19] |
| G[24] | 2468.567        | 1779.024       | <b>1763.905</b> | 1764.913        | <b>1762.897</b> | G[18] |
| T[25] | 2669.615        | 1722.002       | 1706.983        | 1707.991        | 1705.975        | T[17] |
| G[26] | 2726.636        | 1621.954       | 1605.936        | 1606.944        | 1604.928        | G[16] |
| A[27] | 2797.673        | 1504.833       | 1488.814        | <b>1498.822</b> | 1497.806        | A[15] |
| S[28] | 2884.705        | 1463.796       | 1447.777        | <b>1478.785</b> | 1476.769        | S[14] |
| G[29] | 2941.727        | 1426.764       | <b>1398.745</b> | 1399.753        | 1397.737        | G[13] |
| S[30] | 3028.759        | 1349.742       | 1333.723        | <b>1334.731</b> | 1332.715        | S[12] |
| F[31] | 3175.827        | 1262.710       | <b>1246.692</b> | 1247.699        | 1245.684        | F[11] |
| K[32] | 3303.922        | 1115.642       | 1099.623        | 1100.631        | 1098.615        | K[10] |
| L[33] | 3417.006        | 987.547        | <b>971.528</b>  | 972.536         | 970.520         | L[9]  |
| N[34] | 3531.049        | <b>874.463</b> | <b>858.444</b>  | 859.452         | <b>857.436</b>  | N[8]  |
| K[35] | 3659.144        | 750.420        | <b>744.401</b>  | 745.409         | 743.393         | K[7]  |
| K[36] | 3815.271        | 632.325        | <b>616.306</b>  | <b>617.314</b>  | 615.298         | K[6]  |
| A[37] | 3896.308        | 476.199        | 460.180         | <b>461.188</b>  | 459.172         | A[5]  |
| A[38] | 3957.345        | 405.162        | 389.143         | 390.151         | 388.135         | A[4]  |
| S[39] | 4096.387        | 334.124        | 318.105         | 319.114         | 317.098         | S[3]  |
| G[40] | 4143.409        | 205.082        | 189.063         | 190.071         | 188.055         | G[2]  |
| E[41] | 4272.451        | 148.050        | 132.043         | 133.050         | 131.034         | E[1]  |

# sp | P43277 | H13\_MOUSE

KNNSRIKLGLKSLVSKGTLVQTKGTGASGSFKLNKK <sup>Dimethyl</sup> 28.03 <sup>Acetyl</sup> AAS <sup>GE</sup> 42.01

- ▶ fragmentation table for charge state 2+
- ▶ specType=etd
- ▶ score=116.85
- ▶ F097391.dat
- ▶ query=q2781\_p1
- ▶ precursor=713.083680
- ▶ chargePrecursor=6
- ▶ itol=0.8

| AA | c  | y               | #+1             | #+2             | z               | AA              |       |
|----|----|-----------------|-----------------|-----------------|-----------------|-----------------|-------|
| R  | 1  | 713.080         | 2137.224        | 2129.777        | 2129.768        | 2128.705        | K(4)  |
| N  | 2  | 130.580         | 2073.174        | 2065.105        | 2065.668        | 2064.661        | N(40) |
| N  | 3  | 187.611         | 2016.152        | 2008.143        | 2008.647        | 2007.630        | N(30) |
| S  | 4  | 231.127         | 1959.131        | <b>1951.122</b> | <b>1951.625</b> | <b>1950.618</b> | S(38) |
| R  | 5  | 309.176         | 1915.615        | 1907.606        | 1908.109        | 1907.102        | R(37) |
| T  | 6  | 367.629         | 1857.564        | <b>1829.555</b> | <b>1830.059</b> | 1829.051        | K(6)  |
| K  | 7  | <b>429.707</b>  | 1794.022        | 1787.013        | 1787.519        | 1786.506        | K(5)  |
| L  | 8  | <b>486.309</b>  | 1735.075        | <b>1708.965</b> | <b>1709.469</b> | <b>1708.462</b> | L(34) |
| G  | 9  | <b>514.820</b>  | 1660.433        | <b>1652.423</b> | <b>1652.927</b> | 1651.920        | G(33) |
| L  | 10 | <b>571.362</b>  | 1601.922        | <b>1623.913</b> | <b>1624.417</b> | 1623.409        | L(32) |
| K  | 11 | <b>635.409</b>  | 1539.390        | <b>1567.371</b> | <b>1567.875</b> | 1566.867        | K(31) |
| S  | 12 | <b>618.925</b>  | <b>1511.333</b> | 1504.323        | <b>1503.827</b> | 1502.819        | S(30) |
| L  | 13 | 735.457         | <b>1467.817</b> | <b>1459.807</b> | <b>1460.311</b> | <b>1459.303</b> | L(28) |
| V  | 14 | 785.002         | <b>1411.275</b> | <b>1403.265</b> | 1403.769        | <b>1402.761</b> | V(28) |
| S  | 15 | 808.510         | 1361.740        | <b>1353.731</b> | <b>1354.235</b> | <b>1353.227</b> | S(27) |
| K  | 16 | <b>892.565</b>  | <b>1318.224</b> | 1310.215        | <b>1310.719</b> | 1309.711        | K(26) |
| G  | 17 | <b>921.076</b>  | 1254.777        | <b>1246.767</b> | <b>1246.271</b> | 1245.263        | G(25) |
| T  | 18 | <b>971.600</b>  | <b>1225.666</b> | <b>1217.657</b> | <b>1218.161</b> | 1217.153        | T(24) |
| L  | 19 | <b>1028.142</b> | 1175.142        | <b>1167.133</b> | <b>1167.637</b> | <b>1166.629</b> | L(23) |
| V  | 20 | <b>1077.676</b> | 1118.600        | <b>1110.591</b> | <b>1111.095</b> | <b>1110.087</b> | V(22) |
| Q  | 21 | <b>1141.705</b> | <b>1069.066</b> | <b>1061.057</b> | <b>1061.561</b> | <b>1060.553</b> | Q(21) |
| T  | 22 | <b>1192.229</b> | <b>1005.037</b> | <b>997.027</b>  | <b>997.531</b>  | <b>996.523</b>  | T(20) |
| N  | 23 | 1236.676        | <b>954.513</b>  | <b>946.504</b>  | <b>947.007</b>  | 946.000         | N(19) |
| G  | 24 | 1284.782        | <b>890.465</b>  | <b>882.456</b>  | <b>882.960</b>  | <b>881.952</b>  | G(18) |
| T  | 25 | <b>1335.311</b> | 831.955         | 823.945         | 824.448         | <b>853.441</b>  | T(17) |
| G  | 26 | <b>1363.822</b> | 811.431         | 803.421         | 803.925         | 802.918         | G(16) |
| A  | 27 | <b>1399.340</b> | <b>782.920</b>  | <b>774.911</b>  | <b>775.415</b>  | <b>774.407</b>  | A(15) |
| S  | 28 | <b>1452.870</b> | 747.402         | <b>739.392</b>  | <b>739.896</b>  | 738.888         | S(14) |
| G  | 29 | <b>1471.367</b> | 703.889         | <b>695.878</b>  | <b>696.380</b>  | <b>695.372</b>  | G(13) |
| S  | 30 | <b>1514.883</b> | 675.375         | <b>667.365</b>  | <b>667.869</b>  | <b>666.862</b>  | S(12) |
| F  | 31 | <b>1568.417</b> | 631.859         | <b>623.849</b>  | <b>624.353</b>  | <b>623.346</b>  | F(11) |
| K  | 32 | <b>1652.465</b> | 538.325         | <b>550.315</b>  | <b>550.819</b>  | <b>549.811</b>  | K(10) |
| L  | 33 | <b>1709.007</b> | 494.277         | <b>486.268</b>  | <b>486.772</b>  | <b>485.764</b>  | L(9)  |
| N  | 34 | 1765.078        | 468.756         | <b>429.725</b>  | <b>430.230</b>  | <b>429.222</b>  | N(8)  |
| K  | 35 | <b>1830.076</b> | 408.714         | <b>372.704</b>  | <b>373.208</b>  | 372.200         | K(7)  |
| K  | 36 | 1908.139        | 316.666         | 308.657         | 309.161         | 308.153         | K(6)  |
| A  | 37 | <b>1943.657</b> | 238.601         | 230.594         | 231.098         | 230.090         | A(5)  |
| A  | 38 | 1978.176        | 203.084         | 195.075         | 195.579         | 194.571         | A(4)  |
| S  | 39 | 2043.697        | 167.566         | 159.557         | 160.060         | 159.052         | S(3)  |
| G  | 40 | 2072.208        | 103.045         | 95.035          | 95.539          | 94.531          | G(2)  |
| E  | 41 | 2136.729        | 74.534          | 66.524          | 67.028          | 66.021          | E(1)  |

# sp | P43277 | H13\_MOUSE

KNNSRIKLGLKSLVSKGTLVQTKGTGASGSFKLNKK <sup>Dimethyl</sup>28.03 <sup>AAS</sup> <sup>Acetyl</sup>42.01 <sup>GE</sup>

- ▶ fragmentation table for charge state 3+
- ▶ specType=etd
- ▶ score=116.85
- ▶ F097391.dat
- ▶ query=q2781\_p1
- ▶ precursor=713.083680
- ▶ chargePrecursor=6
- ▶ itol=0.8

| AA | c  | y               | ±1              | ±2              | ±2              | AA              |       |
|----|----|-----------------|-----------------|-----------------|-----------------|-----------------|-------|
| R  | 1  | 49.361          | <b>1425.130</b> | <b>1419.810</b> | <b>1420.146</b> | <b>1419.474</b> | R(4)  |
| N  | 2  | 87.395          | 1382.452        | <b>1377.112</b> | <b>1377.448</b> | 1376.776        | N(40) |
| N  | 3  | 125.410         | 1344.437        | <b>1339.090</b> | <b>1339.434</b> | 1338.762        | N(30) |
| S  | 4  | 154.420         | 1306.423        | 1301.083        | <b>1301.419</b> | 1300.748        | S(8)  |
| R  | 5  | 206.454         | <b>1277.412</b> | <b>1272.073</b> | <b>1272.409</b> | <b>1271.737</b> | R(37) |
| I  | 6  | 244.149         | <b>1225.379</b> | <b>1220.039</b> | <b>1220.375</b> | <b>1219.703</b> | I(6)  |
| K  | 7  | 288.687         | 1187.064        | 1181.724        | 1181.059        | 1180.388        | K(5)  |
| L  | 8  | 324.542         | 1144.088        | <b>1139.646</b> | <b>1139.982</b> | 1139.310        | L(34) |
| G  | 9  | 343.549         | 1107.291        | <b>1101.951</b> | <b>1102.287</b> | 1101.615        | G(53) |
| L  | 10 | 381.244         | 1068.284        | <b>1062.944</b> | <b>1063.280</b> | 1062.608        | L(32) |
| K  | 11 | 423.642         | <b>1050.589</b> | <b>1045.250</b> | <b>1045.586</b> | <b>1044.914</b> | K(31) |
| S  | 12 | 483.959         | <b>1007.591</b> | <b>1002.251</b> | <b>1002.587</b> | <b>1001.915</b> | S(30) |
| L  | 13 | 490.647         | 978.585         | 973.245         | 973.577         | 972.905         | L(28) |
| V  | 14 | 523.670         | 941.185         | 935.846         | 936.182         | 935.510         | V(38) |
| S  | 15 | 552.681         | 908.163         | 902.823         | 903.159         | 902.487         | S(27) |
| K  | 16 | 595.379         | <b>879.152</b>  | <b>873.812</b>  | <b>874.148</b>  | <b>873.476</b>  | K(26) |
| G  | 17 | <b>614.386</b>  | 836.454         | 831.114         | 831.450         | 830.778         | G(25) |
| T  | 18 | 645.959         | 797.446         | <b>792.107</b>  | <b>792.443</b>  | <b>791.771</b>  | T(24) |
| L  | 19 | 685.704         | <b>783.764</b>  | <b>778.424</b>  | <b>778.760</b>  | <b>778.088</b>  | L(23) |
| V  | 20 | 718.786         | <b>746.069</b>  | <b>740.730</b>  | 741.066         | <b>740.394</b>  | V(22) |
| Q  | 21 | <b>761.473</b>  | 713.046         | <b>707.707</b>  | <b>708.043</b>  | <b>707.371</b>  | Q(21) |
| T  | 22 | 795.155         | <b>670.360</b>  | 665.021         | 665.357         | 664.685         | T(20) |
| K  | 23 | <b>837.853</b>  | 638.078         | 632.738         | 633.074         | 632.402         | K(19) |
| G  | 24 | <b>856.861</b>  | 593.976         | 588.636         | 588.972         | 588.300         | G(18) |
| T  | 25 | <b>890.543</b>  | 574.972         | 569.633         | 569.969         | 569.297         | T(17) |
| G  | 26 | <b>909.550</b>  | 541.200         | 535.860         | 536.196         | 535.524         | G(16) |
| A  | 27 | <b>933.229</b>  | 522.282         | 516.943         | 517.279         | 516.607         | A(15) |
| S  | 28 | <b>962.240</b>  | 498.001         | 492.661         | 493.000         | 492.328         | S(14) |
| G  | 29 | <b>981.247</b>  | 469.593         | 464.253         | 464.589         | 463.917         | G(13) |
| S  | 30 | <b>1010.258</b> | 450.586         | 445.246         | 445.582         | 444.910         | S(12) |
| F  | 31 | <b>1059.281</b> | 421.575         | 416.235         | 416.571         | 415.899         | F(11) |
| K  | 32 | <b>1101.979</b> | 372.552         | 367.213         | 367.549         | 366.877         | K(10) |
| L  | 33 | <b>1139.674</b> | 329.854         | 324.514         | 324.850         | 324.178         | L(9)  |
| N  | 34 | <b>1177.688</b> | 282.159         | 276.819         | 277.156         | 276.484         | N(8)  |
| K  | 35 | <b>1220.386</b> | 254.145         | 248.805         | 249.141         | 248.469         | K(7)  |
| K  | 36 | <b>1272.428</b> | 211.447         | 206.107         | 206.443         | 205.771         | K(6)  |
| A  | 37 | <b>1296.107</b> | 159.404         | 154.064         | 154.401         | 153.729         | A(5)  |
| A  | 38 | <b>1319.786</b> | 135.725         | 130.386         | 130.722         | 130.050         | A(4)  |
| S  | 39 | <b>1362.861</b> | 112.046         | 106.707         | 107.043         | 106.371         | S(3)  |
| G  | 40 | 1383.258        | 99.132          | 93.793          | 94.129          | 93.457          | G(2)  |
| E  | 41 | <b>1424.822</b> | 50.025          | 44.685          | 45.021          | 44.349          | E(1)  |

# sp | P43277 | H13\_MOUSE

KNNSRIKLGLKSLVSKGTLVQTKGTGASGSFKLNKK <sup>Dimethyl</sup> 28.03 <sup>AAS</sup> <sup>Acetyl</sup> 42.01 <sup>GE</sup>

- ▶ fragmentation table for charge state 4+
- ▶ specType=etd
- ▶ score=116.85
- ▶ F097391.dat
- ▶ query=q2781\_p1
- ▶ precursor=713.083680
- ▶ chargePrecursor=6
- ▶ itol=0.8

| AA | c               | y               | s+1             | s+2             | z               | AA   |
|----|-----------------|-----------------|-----------------|-----------------|-----------------|------|
| R  | 37.200          | <b>1068.114</b> | <b>1065.110</b> | <b>1065.362</b> | <b>1064.858</b> | K(4) |
| N  | 65.798          | 1037.091        | 1033.088        | 1033.338        | 1032.834        | N(4) |
| N  | 94.309          | <b>1008.580</b> | <b>1004.575</b> | <b>1004.827</b> | <b>1004.323</b> | N(3) |
| S  | 118.007         | 980.069         | <b>976.064</b>  | <b>976.316</b>  | <b>975.812</b>  | S(3) |
| R  | 155.002         | 958.311         | <b>954.306</b>  | <b>954.558</b>  | 954.054         | R(3) |
| I  | 183.263         | 939.295         | 935.283         | <b>935.533</b>  | 935.029         | I(3) |
| K  | 215.397         | <b>891.015</b>  | 887.013         | 887.263         | 886.759         | K(5) |
| L  | 243.658         | <b>858.991</b>  | 854.989         | <b>855.238</b>  | 854.734         | L(3) |
| G  | 257.614         | 830.720         | <b>826.715</b>  | <b>826.967</b>  | <b>826.463</b>  | G(3) |
| L  | 288.125         | <b>816.465</b>  | <b>812.460</b>  | <b>812.712</b>  | <b>812.208</b>  | L(3) |
| K  | 318.208         | <b>788.194</b>  | 784.189         | 784.441         | <b>783.937</b>  | K(3) |
| S  | 339.666         | <b>756.170</b>  | 752.165         | 752.417         | 751.913         | S(3) |
| L  | 368.237         | 734.432         | 730.407         | 730.659         | 730.155         | L(2) |
| V  | 393.004         | 706.141         | 702.136         | 702.388         | 701.884         | V(3) |
| S  | 414.702         | 681.374         | 677.369         | 677.621         | 677.117         | S(2) |
| K  | 446.708         | 659.610         | 655.611         | 655.863         | 655.359         | K(2) |
| G  | <b>461.042</b>  | <b>627.592</b>  | <b>623.587</b>  | <b>623.839</b>  | <b>623.335</b>  | G(2) |
| T  | <b>486.303</b>  | <b>613.337</b>  | 609.332         | 609.584         | 609.080         | T(2) |
| L  | 514.574         | 588.075         | 584.070         | 584.322         | 583.818         | L(2) |
| V  | 539.342         | 559.804         | 555.799         | 556.051         | 555.547         | V(2) |
| Q  | <b>571.356</b>  | 535.037         | 531.032         | 531.284         | 530.780         | Q(2) |
| T  | 595.618         | 503.227         | 499.017         | 499.269         | 498.765         | T(2) |
| K  | 628.842         | 477.760         | 473.743         | 474.007         | 473.503         | K(1) |
| G  | 642.597         | 445.126         | 441.732         | 441.984         | 441.480         | G(1) |
| T  | <b>668.159</b>  | 431.481         | 427.474         | 427.726         | 427.224         | T(1) |
| G  | 682.415         | 406.219         | 402.214         | 402.466         | 401.962         | G(1) |
| A  | 706.174         | 381.964         | 387.958         | 388.211         | 387.707         | A(1) |
| S  | 721.924         | <b>374.204</b>  | 370.203         | 370.452         | 369.948         | S(1) |
| G  | 738.137         | 352.446         | 348.442         | 348.694         | 348.190         | G(1) |
| S  | 757.945         | 330.191         | 334.186         | 334.438         | 333.934         | S(1) |
| F  | 794.712         | 316.433         | 312.428         | 312.680         | 312.176         | F(1) |
| K  | <b>826.736</b>  | 279.666         | 275.661         | 275.913         | 275.409         | K(1) |
| L  | 855.007         | 247.642         | 243.638         | 243.889         | 243.385         | L(1) |
| N  | <b>883.518</b>  | 218.871         | 218.369         | 218.618         | 218.114         | N(1) |
| K  | <b>915.542</b>  | 192.886         | 188.885         | 189.136         | 188.632         | K(1) |
| K  | <b>954.573</b>  | 158.877         | 154.872         | 155.084         | 154.580         | K(1) |
| A  | 972.332         | 119.809         | 115.800         | 116.052         | 115.548         | A(1) |
| A  | 990.002         | 102.846         | 98.041          | 98.293          | 97.789          | A(1) |
| S  | 1022.252        | 84.287          | 80.282          | 80.534          | 80.030          | S(1) |
| G  | 1038.008        | 82.026          | 82.011          | 82.011          | 82.011          | G(1) |
| E  | <b>1068.868</b> | 37.771          | 33.766          | 34.018          | 33.514          | E(1) |

# sp | P43277 | H13\_MOUSE

KNNSRIKLGLKSLVSKGTLVQTKGTGASGSFKLNKK <sup>Dimethyl</sup> 28.03 <sup>AAS</sup> <sup>Acetyl</sup> 42.01 <sup>GE</sup>

- ▶ fragmentation table for charge state 5+
- ▶ specType=etd
- ▶ score=116.85
- ▶ F097391.dat
- ▶ query=q2781.p1
- ▶ precursor=713.083680
- ▶ chargePrecursor=6
- ▶ itol=0.8

| AA | c  | y              | z+1            | z#2            | z              | AA             |       |
|----|----|----------------|----------------|----------------|----------------|----------------|-------|
| K  | 1  | 80.032         | <b>855.493</b> | <b>852.289</b> | <b>852.491</b> | <b>852.088</b> | K[41] |
| N  | 2  | 52.840         | 829.874        | <b>826.670</b> | <b>826.874</b> | <b>826.469</b> | N[40] |
| N  | 3  | 75.649         | <b>807.065</b> | 803.862        | 804.063        | 803.660        | N[39] |
| S  | 4  | 93.055         | 784.257        | 781.053        | 781.255        | 780.851        | S[38] |
| K  | 5  | 124.275        | 766.850        | 763.647        | 763.846        | 763.445        | K[37] |
| T  | 6  | 146.892        | 735.630        | 732.426        | 732.626        | 732.225        | T[36] |
| K  | 7  | 172.511        | 713.013        | 709.810        | 710.011        | 709.608        | K[35] |
| L  | 8  | 195.128        | 687.394        | 684.191        | 684.392        | 683.989        | L[34] |
| G  | 9  | 208.332        | 664.777        | 661.573        | 661.775        | 661.372        | G[33] |
| L  | 10 | 229.149        | 653.373        | 650.169        | 650.371        | 649.968        | L[32] |
| K  | 11 | 254.768        | 630.756        | 627.553        | 627.754        | 627.351        | K[31] |
| S  | 12 | 272.174        | 605.137        | 601.934        | 602.135        | 601.732        | S[30] |
| L  | 13 | 294.791        | 587.731        | 584.527        | 584.729        | 584.326        | L[29] |
| V  | 14 | 314.605        | 565.114        | 561.910        | 562.112        | 561.709        | V[28] |
| S  | 15 | 332.011        | 545.300        | 542.097        | 542.298        | 541.895        | S[27] |
| K  | 16 | 357.630        | 527.894        | 524.690        | 524.892        | 524.489        | K[26] |
| G  | 17 | 368.035        | 502.275        | 499.071        | 499.273        | 498.870        | G[25] |
| T  | 18 | 389.244        | 490.871        | 487.667        | 487.869        | 487.465        | T[24] |
| L  | 19 | 411.861        | 470.661        | 467.456        | 467.659        | 467.256        | L[23] |
| V  | 20 | 431.675        | 448.044        | 444.841        | 445.042        | 444.639        | V[22] |
| Q  | 21 | 457.286        | 428.231        | 425.027        | 425.229        | 424.825        | Q[21] |
| T  | 22 | 477.496        | 402.619        | 399.415        | 399.617        | 399.214        | T[20] |
| K  | 23 | 503.115        | 382.410        | 379.206        | 379.407        | 379.004        | K[19] |
| G  | 24 | 514.519        | 356.791        | 353.587        | 353.788        | 353.385        | G[18] |
| T  | 25 | 534.729        | 345.389        | 342.183        | 342.384        | 341.981        | T[17] |
| G  | 26 | 546.133        | 325.177        | 321.973        | 322.175        | 321.771        | G[16] |
| A  | 27 | 560.341        | 313.772        | 310.568        | 310.770        | 310.367        | A[15] |
| S  | 28 | 577.747        | 299.565        | 296.361        | 296.563        | 296.160        | S[14] |
| G  | 29 | 589.151        | 282.150        | 278.955        | 279.156        | 278.753        | G[13] |
| S  | 30 | 606.558        | 270.754        | 267.551        | 267.752        | 267.349        | S[12] |
| F  | 31 | <b>635.971</b> | 253.348        | 250.144        | 250.346        | 249.943        | F[11] |
| K  | 32 | 661.590        | 223.934        | 220.730        | 220.932        | 220.529        | K[10] |
| L  | 33 | 684.207        | 198.515        | 195.311        | 195.513        | 194.910        | L[9]  |
| N  | 34 | 707.016        | 175.698        | 172.495        | 172.696        | 172.293        | N[8]  |
| K  | 35 | 732.635        | 152.890        | 149.686        | 149.888        | 149.484        | K[7]  |
| K  | 36 | 763.860        | 127.271        | 124.067        | 124.269        | 123.866        | K[6]  |
| A  | 37 | <b>778.067</b> | 96.046         | 92.842         | 93.043         | 92.640         | A[5]  |
| A  | 38 | 792.275        | 81.838         | 78.634         | 78.836         | 78.433         | A[4]  |
| S  | 39 | 818.083        | 67.631         | 64.427         | 64.629         | 64.225         | S[3]  |
| G  | 40 | 829.488        | 41.822         | 38.618         | 38.820         | 38.417         | G[2]  |
| E  | 41 | <b>855.296</b> | 30.418         | 27.214         | 27.416         | 27.013         | E[1]  |



# sp | P43277 | H13\_MOUSE

KNNSRIKLGLKSLVSKGTLVQTKGTGASGSFKLNKK <sup>Dimethyl</sup> AAS <sup>Acetyl</sup> GE  
28.03 42.01

- ▶ fragmentation table for charge state 1+
- ▶ specType=etd
- ▶ score=57.60
- ▶ F097391.dat
- ▶ query=q2782\_p1
- ▶ precursor=611.358590
- ▶ chargePrecursor=7
- ▶ itol=0.8

| AA   | c               | y              | z+1             | z+2             | z        | AA   |
|------|-----------------|----------------|-----------------|-----------------|----------|------|
| K 1  | 148.120         | 4273.435       | 4257.417        | 4258.425        | 4259.406 | K 41 |
| N 2  | <b>260.172</b>  | 4145.340       | 4129.322        | 4130.330        | 4128.314 | N 40 |
| N 3  | <b>374.215</b>  | 4031.298       | 4015.279        | 4016.287        | 4014.271 | N 39 |
| S 4  | <b>461.247</b>  | 3917.255       | 3901.236        | 3902.244        | 3900.228 | S 38 |
| R 5  | 617.276         | 3803.212       | 3813.204        | 3814.212        | 3813.196 | R 37 |
| L 6  | <b>730.432</b>  | 3674.171       | 3658.153        | 3659.161        | 3657.155 | L 36 |
| K 7  | <b>858.527</b>  | 3561.137       | 3545.119        | 3546.127        | 3544.111 | K 35 |
| L 8  | <b>971.611</b>  | 3432.092       | 3416.074        | 3417.082        | 3415.066 | L 34 |
| G 9  | <b>1028.632</b> | 3319.058       | 3303.040        | 3304.047        | 3302.032 | G 33 |
| L 10 | <b>1141.716</b> | 3202.837       | 3186.818        | 3187.826        | 3185.810 | L 32 |
| K 11 | <b>1269.811</b> | 3146.753       | 3133.734        | 3134.742        | 3132.726 | K 31 |
| S 12 | 1359.843        | 3071.698       | 3055.679        | 3056.687        | 3054.671 | S 30 |
| L 13 | 1469.927        | 2934.626       | 2918.607        | 2919.615        | 2917.599 | L 29 |
| V 14 | 1568.996        | 2821.542       | 2805.523        | 2806.531        | 2804.515 | V 28 |
| S 15 | 1656.026        | 2722.473       | 2706.455        | 2707.462        | 2705.447 | S 27 |
| K 16 | 1784.123        | 2635.441       | 2619.423        | 2620.430        | 2618.415 | K 26 |
| G 17 | 1841.144        | 2507.346       | 2491.328        | 2492.335        | 2490.320 | G 25 |
| T 18 | 1942.102        | 2450.325       | 2434.307        | 2435.314        | 2433.299 | T 24 |
| L 19 | 2055.276        | 2349.277       | 2333.259        | 2334.266        | 2332.251 | L 23 |
| V 20 | 2134.344        | 2236.193       | 2220.174        | 2221.182        | 2219.167 | V 22 |
| Q 21 | 2262.403        | 2137.125       | 2121.106        | 2122.114        | 2120.099 | Q 21 |
| T 22 | 2321.451        | 2020.060       | 1993.047        | 1994.055        | 1992.040 | T 20 |
| K 23 | 2511.546        | 1908.019       | 1892.000        | 1893.008        | 1890.992 | K 19 |
| G 24 | 2568.587        | 1779.924       | 1763.905        | 1764.913        | 1762.897 | G 18 |
| V 25 | 2669.615        | 1722.902       | 1706.883        | 1707.891        | 1705.875 | V 17 |
| G 26 | 2726.636        | 1621.854       | 1605.835        | 1606.844        | 1604.828 | G 16 |
| A 27 | 2797.673        | 1564.833       | 1548.814        | 1549.822        | 1547.806 | A 15 |
| S 28 | 2884.705        | 1493.790       | <b>1477.777</b> | 1478.785        | 1476.769 | S 14 |
| G 29 | 2941.727        | 1408.764       | <b>1390.745</b> | <b>1391.753</b> | 1389.737 | G 13 |
| S 30 | 3008.769        | 1349.742       | 1333.723        | 1334.731        | 1332.715 | S 12 |
| F 31 | 3175.827        | 1262.710       | 1246.692        | <b>1247.699</b> | 1245.684 | F 11 |
| K 32 | 3301.922        | 1115.642       | <b>1099.623</b> | 1100.631        | 1098.615 | K 10 |
| L 33 | 3417.006        | <b>987.547</b> | <b>971.528</b>  | 972.536         | 970.520  | L 9  |
| N 34 | 3511.049        | <b>874.463</b> | <b>858.444</b>  | <b>859.452</b>  | 857.436  | N 8  |
| K 35 | 3659.144        | 760.420        | <b>744.401</b>  | 745.409         | 743.393  | K 7  |
| K 36 | 3815.211        | 632.305        | <b>616.306</b>  | 617.314         | 615.298  | K 6  |
| A 37 | 3886.308        | 476.199        | 460.180         | <b>461.188</b>  | 459.172  | A 5  |
| A 38 | 3957.345        | 405.162        | 389.143         | 390.151         | 388.135  | A 4  |
| S 39 | 4086.387        | 334.124        | 318.106         | 319.114         | 317.099  | S 3  |
| G 40 | 4143.409        | 205.082        | 189.063         | 190.071         | 188.055  | G 2  |
| E 41 | 4272.451        | 148.060        | 132.042         | 133.050         | 131.034  | E 1  |



# sp | P43277 | H13\_MOUSE

KNNSRIKLGLKSLVSKGTLVQTKGTGASGSFKLNKK <sup>Dimethyl</sup> 28.03 <sup>Acetyl</sup> AAS <sup>GE</sup> 42.01

- ▶ fragmentation table for charge state 2+
- ▶ specType=etd
- ▶ score=57.60
- ▶ F097391.dat
- ▶ query=q2782\_p1
- ▶ precursor=611.358590
- ▶ chargePrecursor=7
- ▶ itol=0.8

| AA   | c               | y               | s+1             | s+2             | z               | AA    |
|------|-----------------|-----------------|-----------------|-----------------|-----------------|-------|
| R 3  | 715.90          | 2137.224        | 2129.217        | 2129.768        | 2128.707        | K(4)  |
| N 2  | 130.589         | 2073.174        | 2065.165        | 2065.666        | 2064.661        | N(40) |
| N 3  | 187.611         | 2016.152        | 2008.143        | 2008.644        | 2007.639        | N(30) |
| S 4  | 231.127         | 1959.131        | 1951.122        | <b>1951.625</b> | 1950.618        | S(38) |
| R 5  | 309.176         | 1915.615        | 1907.606        | 1908.107        | 1907.102        | R(37) |
| T 6  | 367.629         | 1857.564        | 1849.555        | 1850.056        | 1849.051        | T(36) |
| R 7  | <b>429.707</b>  | 1794.022        | 1777.013        | 1778.514        | 1777.509        | R(5)  |
| L 8  | <b>486.309</b>  | 1719.075        | <b>1708.965</b> | <b>1709.469</b> | <b>1708.462</b> | L(34) |
| G 9  | <b>514.820</b>  | 1660.433        | 1652.423        | <b>1652.927</b> | 1651.920        | G(33) |
| L 10 | <b>571.362</b>  | 1611.922        | 1623.913        | 1624.414        | 1623.409        | L(32) |
| K 11 | <b>635.409</b>  | 1579.395        | <b>1567.371</b> | <b>1567.875</b> | <b>1566.867</b> | K(31) |
| S 12 | <b>678.925</b>  | <b>1511.333</b> | 1503.323        | <b>1503.827</b> | 1502.821        | S(30) |
| L 13 | 735.457         | 1467.817        | 1459.807        | 1460.311        | 1459.304        | L(29) |
| V 14 | <b>785.002</b>  | <b>1411.275</b> | 1403.265        | 1403.769        | 1402.761        | V(28) |
| S 15 | <b>828.518</b>  | 1361.740        | 1353.730        | 1354.235        | 1353.227        | S(27) |
| K 16 | 892.565         | 1318.224        | 1310.215        | 1310.719        | 1309.711        | K(26) |
| G 17 | <b>921.076</b>  | 1258.777        | 1246.767        | 1246.271        | 1245.264        | G(25) |
| T 18 | <b>971.600</b>  | <b>1225.666</b> | 1217.657        | 1218.161        | 1217.153        | T(24) |
| L 19 | <b>1028.142</b> | 1175.142        | <b>1167.133</b> | <b>1167.637</b> | 1166.629        | L(23) |
| V 20 | <b>1077.676</b> | 1118.600        | <b>1110.591</b> | <b>1111.095</b> | 1110.087        | V(22) |
| Q 21 | <b>1141.705</b> | <b>1069.066</b> | 1061.057        | 1061.561        | <b>1060.553</b> | Q(21) |
| T 22 | <b>1192.229</b> | <b>1005.037</b> | <b>997.027</b>  | <b>997.531</b>  | 996.523         | T(20) |
| L 23 | 1252.576        | 954.511         | <b>946.504</b>  | <b>947.007</b>  | <b>946.000</b>  | L(19) |
| G 24 | <b>1284.787</b> | <b>890.465</b>  | 882.456         | 882.960         | 881.952         | G(18) |
| T 25 | 1336.311        | 861.955         | 853.945         | <b>854.449</b>  | <b>853.441</b>  | T(17) |
| G 26 | <b>1363.822</b> | 811.431         | <b>803.421</b>  | <b>803.925</b>  | 802.918         | G(16) |
| A 27 | 1399.340        | 762.920         | <b>774.911</b>  | <b>775.415</b>  | 774.407         | A(15) |
| S 28 | 1442.856        | 714.402         | <b>726.392</b>  | <b>726.896</b>  | <b>726.888</b>  | S(14) |
| G 29 | 1471.808        | <b>703.886</b>  | <b>695.876</b>  | <b>696.380</b>  | 695.373         | G(13) |
| S 30 | <b>1514.883</b> | 675.375         | <b>667.365</b>  | <b>667.869</b>  | <b>666.862</b>  | S(12) |
| F 31 | <b>1568.417</b> | <b>631.859</b>  | <b>623.849</b>  | <b>624.353</b>  | 623.346         | F(11) |
| K 32 | 1632.465        | <b>558.325</b>  | <b>550.315</b>  | <b>550.819</b>  | <b>549.811</b>  | K(10) |
| L 33 | <b>1709.007</b> | 494.277         | <b>486.268</b>  | <b>486.772</b>  | 485.764         | L(9)  |
| N 34 | 1766.020        | 447.756         | <b>439.726</b>  | <b>439.230</b>  | <b>439.222</b>  | N(8)  |
| K 35 | 1830.079        | 389.724         | 381.714         | 382.218         | 381.211         | K(7)  |
| K 36 | 1908.139        | 316.666         | 308.657         | 309.161         | 308.153         | K(6)  |
| A 37 | 1943.657        | 238.603         | 230.594         | 231.098         | 230.090         | A(5)  |
| A 38 | 1978.176        | <b>203.084</b>  | 195.075         | 195.579         | 194.571         | A(4)  |
| S 39 | 2043.697        | 167.566         | 159.557         | 160.060         | 159.053         | S(3)  |
| G 40 | 2072.208        | 103.045         | 95.035          | 95.539          | 94.531          | G(2)  |
| E 41 | 2136.729        | 74.534          | 66.524          | 67.028          | 66.021          | E(1)  |

# sp | P43277 | H13\_MOUSE

KNNSRIKLGLKSLVSKGTLVQTKGTGASGSFKLNKK <sup>Dimethyl</sup> 28.03 <sup>AAS</sup> <sup>Acetyl</sup> GE 42.01

- ▶ fragmentation table for charge state 3+
- ▶ specType=etd
- ▶ score=57.60
- ▶ F097391.dat
- ▶ query=q2782\_p1
- ▶ precursor=611.358590
- ▶ chargePrecursor=7
- ▶ itol=0.8

| AA | c  | p               | s+1             | s+2             | z               | AA              |      |
|----|----|-----------------|-----------------|-----------------|-----------------|-----------------|------|
| R  | 3  | 49.361          | <b>1425.150</b> | 1419.810        | 1420.468        | 1419.414        | R(4) |
| N  | 2  | 87.395          | <b>1382.452</b> | 1377.112        | 1377.448        | 1376.776        | N(4) |
| N  | 3  | 128.410         | 1344.437        | 1339.088        | <b>1339.434</b> | 1338.762        | N(3) |
| S  | 4  | 154.420         | 1306.423        | <b>1301.083</b> | <b>1301.419</b> | <b>1300.748</b> | S(3) |
| R  | 5  | 206.454         | 1277.412        | <b>1272.073</b> | <b>1272.409</b> | <b>1271.737</b> | R(3) |
| I  | 6  | 264.149         | <b>1225.379</b> | <b>1220.039</b> | <b>1220.375</b> | <b>1219.703</b> | I(3) |
| R  | 7  | 288.647         | 1187.394        | 1182.044        | 1182.380        | 1181.708        | R(5) |
| L  | 8  | 324.542         | 1144.088        | <b>1139.646</b> | <b>1139.982</b> | <b>1139.310</b> | L(4) |
| G  | 9  | 343.549         | 1107.291        | <b>1101.951</b> | <b>1102.287</b> | <b>1101.615</b> | G(3) |
| L  | 10 | 381.244         | 1038.284        | <b>1082.944</b> | <b>1083.280</b> | <b>1082.608</b> | L(3) |
| K  | 11 | 423.642         | <b>1050.589</b> | <b>1045.250</b> | <b>1045.586</b> | <b>1044.914</b> | K(3) |
| S  | 12 | 482.959         | <b>1007.391</b> | <b>1002.551</b> | <b>1002.287</b> | 1002.215        | S(3) |
| L  | 13 | 490.647         | <b>978.880</b>  | 1002.543        | 973.277         | 973.205         | L(2) |
| V  | 14 | 523.670         | 941.125         | 935.846         | 936.182         | 935.510         | V(3) |
| S  | 15 | 552.681         | 908.163         | <b>902.823</b>  | <b>903.159</b>  | <b>902.487</b>  | S(2) |
| K  | 16 | 595.379         | <b>879.152</b>  | <b>873.812</b>  | <b>874.148</b>  | <b>873.476</b>  | K(2) |
| G  | 17 | 614.368         | 836.454         | 831.114         | 831.450         | 830.778         | G(2) |
| T  | 18 | <b>648.069</b>  | 797.446         | <b>812.107</b>  | <b>812.443</b>  | <b>811.771</b>  | T(2) |
| L  | 19 | <b>685.764</b>  | 783.764         | <b>778.424</b>  | <b>778.760</b>  | 778.088         | L(2) |
| V  | 20 | 718.786         | <b>746.069</b>  | <b>740.730</b>  | <b>741.066</b>  | <b>740.394</b>  | V(2) |
| Q  | 21 | <b>761.473</b>  | <b>713.046</b>  | <b>707.707</b>  | <b>708.043</b>  | <b>707.371</b>  | Q(2) |
| T  | 22 | <b>795.155</b>  | 670.360         | <b>665.021</b>  | <b>665.357</b>  | <b>664.685</b>  | T(2) |
| K  | 23 | <b>837.853</b>  | 636.878         | <b>631.338</b>  | <b>631.674</b>  | <b>631.002</b>  | K(1) |
| G  | 24 | 858.294         | 593.975         | 588.640         | 588.976         | 588.304         | G(1) |
| T  | 25 | <b>890.543</b>  | 574.972         | 569.633         | 569.969         | 569.297         | T(1) |
| G  | 26 | <b>909.550</b>  | 541.200         | <b>535.950</b>  | <b>536.286</b>  | 535.614         | G(1) |
| A  | 27 | <b>933.229</b>  | 522.282         | 516.943         | 517.279         | <b>516.607</b>  | A(1) |
| S  | 28 | <b>962.240</b>  | 498.603         | 493.264         | 493.600         | 492.928         | S(1) |
| G  | 29 | <b>981.247</b>  | 469.593         | 464.253         | 464.589         | 463.917         | G(1) |
| S  | 30 | <b>1010.258</b> | 450.586         | 445.246         | 445.582         | 444.910         | S(1) |
| F  | 31 | <b>1059.281</b> | 421.575         | 416.235         | 416.571         | 415.899         | F(1) |
| K  | 32 | <b>1101.979</b> | 372.552         | 367.213         | 367.549         | 366.877         | K(1) |
| L  | 33 | <b>1139.674</b> | 329.854         | 324.514         | 324.850         | 324.178         | L(1) |
| N  | 34 | <b>1177.688</b> | 292.159         | 286.819         | 287.156         | 286.484         | N(1) |
| K  | 35 | <b>1220.386</b> | 254.145         | 248.805         | 249.141         | 248.469         | K(1) |
| K  | 36 | <b>1272.428</b> | 211.447         | 206.107         | 206.443         | 205.771         | K(1) |
| A  | 37 | 1298.107        | 159.404         | 154.064         | 154.401         | 153.729         | A(1) |
| A  | 38 | 1319.786        | 135.725         | 130.386         | 130.722         | 130.050         | A(1) |
| S  | 39 | 1362.801        | 112.046         | 106.707         | 107.043         | 106.371         | S(1) |
| G  | 40 | 1391.808        | 99.132          | 93.793          | 94.129          | 93.457          | G(1) |
| E  | 41 | 1424.822        | 50.025          | 44.685          | 45.021          | 44.349          | E(1) |

# sp | P43277 | H13\_MOUSE

KNNSRIKLGLKSLVSKGTLVQTKGTGASGSFKLNKK <sup>Dimethyl</sup> 28.03 <sup>AAS</sup> <sup>Acetyl</sup> 42.01 <sup>GE</sup>

- ▶ fragmentation table for charge state 4+
- ▶ specType=etd
- ▶ score=57.60
- ▶ F097391.dat
- ▶ query=q2782\_p1
- ▶ precursor=611.358590
- ▶ chargePrecursor=7
- ▶ itol=0.8

| AA | c  | y               | #s1             | #s2             | #s              | AA              |       |
|----|----|-----------------|-----------------|-----------------|-----------------|-----------------|-------|
| R  | 1  | 37.280          | <b>1069.114</b> | <b>1065.110</b> | <b>1065.362</b> | <b>1064.858</b> | K(4)  |
| N  | 2  | 65.798          | 1037.091        | 1033.088        | <b>1033.338</b> | 1032.834        | N(40) |
| N  | 3  | 94.309          | <b>1008.580</b> | <b>1004.575</b> | <b>1004.827</b> | <b>1004.323</b> | N(30) |
| S  | 4  | 118.007         | 980.069         | <b>976.064</b>  | <b>976.316</b>  | 975.812         | S(8)  |
| R  | 5  | 155.002         | <b>958.311</b>  | 954.308         | <b>954.558</b>  | 954.054         | R(37) |
| I  | 6  | 183.269         | 927.295         | 915.283         | 915.531         | 915.029         | I(6)  |
| R  | 7  | 215.387         | <b>891.015</b>  | 887.013         | 887.262         | 886.759         | R(5)  |
| L  | 8  | 243.658         | <b>858.991</b>  | <b>854.986</b>  | <b>855.238</b>  | <b>854.734</b>  | L(34) |
| G  | 9  | 257.614         | 830.720         | <b>826.715</b>  | <b>826.967</b>  | <b>826.463</b>  | G(33) |
| L  | 10 | 286.125         | <b>816.465</b>  | <b>812.460</b>  | <b>812.712</b>  | <b>812.208</b>  | L(32) |
| K  | 11 | 318.208         | 788.198         | 784.195         | <b>784.441</b>  | 783.937         | K(31) |
| S  | 12 | 359.666         | <b>756.170</b>  | <b>752.165</b>  | <b>752.417</b>  | <b>751.913</b>  | S(20) |
| L  | 13 | 398.237         | 734.432         | <b>730.407</b>  | <b>730.659</b>  | <b>730.155</b>  | L(28) |
| V  | 14 | 393.004         | <b>706.141</b>  | <b>702.136</b>  | <b>702.388</b>  | <b>701.884</b>  | V(28) |
| S  | 15 | 414.702         | 681.374         | <b>677.369</b>  | <b>677.621</b>  | <b>677.117</b>  | S(27) |
| K  | 16 | 446.708         | 659.616         | <b>655.611</b>  | <b>655.863</b>  | <b>655.359</b>  | K(26) |
| G  | 17 | <b>461.042</b>  | 629.392         | <b>623.587</b>  | <b>623.839</b>  | 623.335         | G(25) |
| T  | 18 | <b>486.303</b>  | <b>613.337</b>  | 609.333         | 609.584         | 609.080         | T(24) |
| L  | 19 | <b>514.574</b>  | 588.075         | 584.070         | 584.322         | 583.818         | L(23) |
| V  | 20 | 539.342         | 558.804         | 555.799         | 556.051         | 555.547         | V(22) |
| Q  | 21 | <b>571.356</b>  | 535.037         | 531.032         | 531.284         | 530.780         | Q(21) |
| T  | 22 | 596.618         | 503.022         | 499.017         | 499.269         | 498.765         | T(20) |
| K  | 23 | 628.643         | 477.766         | 473.763         | 474.007         | 473.503         | K(19) |
| G  | 24 | <b>642.897</b>  | 445.739         | 441.732         | 441.984         | 441.480         | G(18) |
| T  | 25 | <b>668.159</b>  | 413.481         | 409.474         | 409.726         | 409.222         | T(17) |
| G  | 26 | <b>682.415</b>  | 406.219         | 402.214         | 402.466         | 401.962         | G(16) |
| A  | 27 | 700.174         | 391.964         | 387.958         | 388.211         | 387.707         | A(15) |
| S  | 28 | <b>721.932</b>  | <b>374.204</b>  | 370.200         | 370.452         | 369.948         | S(14) |
| G  | 29 | 735.174         | 357.446         | 353.442         | 353.694         | 353.190         | G(13) |
| S  | 30 | <b>757.945</b>  | 338.191         | 334.186         | 334.438         | 333.934         | S(12) |
| F  | 31 | <b>794.712</b>  | 316.433         | 312.428         | 312.680         | 312.176         | F(11) |
| K  | 32 | <b>826.736</b>  | 279.666         | 275.661         | 275.913         | 275.409         | K(10) |
| L  | 33 | <b>855.007</b>  | 247.642         | 243.638         | 243.889         | 243.385         | L(9)  |
| N  | 34 | <b>883.518</b>  | 219.371         | 215.367         | 215.618         | 215.114         | N(8)  |
| K  | 35 | 915.542         | 192.886         | 188.882         | 189.134         | 188.630         | K(7)  |
| K  | 36 | <b>954.573</b>  | 158.877         | 154.872         | 155.084         | 154.580         | K(6)  |
| A  | 37 | <b>972.332</b>  | 119.809         | 115.804         | 116.056         | 115.554         | A(5)  |
| A  | 38 | 990.002         | 102.846         | 98.841          | 99.203          | 97.799          | A(4)  |
| S  | 39 | 1022.252        | 84.287          | 80.282          | 80.534          | 80.030          | S(3)  |
| G  | 40 | 1038.008        | 82.026          | 78.021          | 78.273          | 77.769          | G(2)  |
| E  | 41 | <b>1066.868</b> | 37.771          | 33.766          | 34.018          | 33.514          | E(1)  |

# sp | P43277 | H13\_MOUSE

KNNSRIKLGLKSLVSKGTLVQTKGTGASGSFKLNKK <sup>Dimethyl</sup>28.03 <sup>AAS</sup> <sup>Acetyl</sup>42.01 <sup>GE</sup>

- ▶ fragmentation table for charge state 5+
- ▶ specType=etd
- ▶ score=57.60
- ▶ F097391.dat
- ▶ query=q2782\_p1
- ▶ precursor=611.358590
- ▶ chargePrecursor=7
- ▶ itol=0.8

| AA | c  | y              | z+1            | z#2            | z              | AA             |       |
|----|----|----------------|----------------|----------------|----------------|----------------|-------|
| K  | 1  | 30.032         | <b>855.493</b> | <b>852.289</b> | <b>852.491</b> | 852.089        | K[41] |
| N  | 2  | 52.840         | 829.874        | <b>826.670</b> | <b>826.872</b> | <b>826.469</b> | N[40] |
| N  | 3  | 75.649         | <b>807.065</b> | <b>803.862</b> | <b>804.063</b> | <b>803.660</b> | N[39] |
| S  | 4  | 93.055         | 784.257        | <b>781.053</b> | <b>781.255</b> | <b>780.851</b> | S[38] |
| R  | 5  | 124.275        | 766.650        | <b>763.447</b> | <b>763.848</b> | <b>763.445</b> | R[37] |
| T  | 6  | 146.392        | 735.630        | <b>732.426</b> | <b>732.628</b> | <b>732.225</b> | T[36] |
| K  | 7  | 172.511        | <b>713.013</b> | 709.810        | 710.011        | 709.608        | K[35] |
| L  | 8  | 195.128        | 687.394        | 684.191        | 684.392        | 683.989        | L[34] |
| G  | 9  | 208.532        | <b>664.777</b> | <b>661.574</b> | <b>661.775</b> | 661.372        | G[33] |
| L  | 10 | 229.149        | 653.373        | 650.169        | 650.371        | 649.968        | L[32] |
| K  | 11 | 254.768        | <b>630.756</b> | 627.553        | 627.754        | 627.351        | K[31] |
| S  | 12 | 272.174        | 605.137        | 601.934        | 602.135        | 601.732        | S[30] |
| L  | 13 | 294.791        | 587.731        | 584.527        | 584.729        | 584.326        | L[29] |
| V  | 14 | 314.605        | 565.114        | 561.910        | 562.112        | 561.709        | V[28] |
| S  | 15 | 332.011        | 545.300        | 542.097        | 542.298        | 541.895        | S[27] |
| K  | 16 | 357.630        | 527.894        | 524.690        | 524.892        | 524.489        | K[26] |
| G  | 17 | 368.035        | 502.275        | 499.071        | 499.273        | 498.870        | G[25] |
| T  | 18 | 389.244        | 490.871        | 487.667        | 487.869        | 487.465        | T[24] |
| L  | 19 | 411.861        | 470.661        | 467.456        | 467.659        | 467.256        | L[23] |
| V  | 20 | 431.675        | 448.044        | 444.841        | 445.042        | 444.639        | V[22] |
| Q  | 21 | 457.286        | 428.231        | 425.027        | 425.229        | 424.825        | Q[21] |
| T  | 22 | 477.496        | 402.619        | 399.415        | 399.617        | 399.214        | T[20] |
| K  | 23 | 503.115        | 382.410        | 379.206        | 379.407        | 379.004        | K[19] |
| G  | 24 | <b>514.519</b> | 356.791        | 353.587        | 353.788        | 353.385        | G[18] |
| T  | 25 | 534.729        | 345.389        | 342.183        | 342.384        | 341.981        | T[17] |
| G  | 26 | 546.133        | 325.177        | 321.973        | 322.175        | 321.771        | G[16] |
| A  | 27 | 560.341        | 313.772        | 310.568        | 310.770        | 310.367        | A[15] |
| S  | 28 | 577.747        | 299.565        | 296.361        | 296.563        | 296.160        | S[14] |
| G  | 29 | 589.151        | 282.150        | 278.955        | 279.156        | 278.753        | G[13] |
| S  | 30 | 606.558        | 270.754        | 267.551        | 267.752        | 267.349        | S[12] |
| F  | 31 | <b>635.971</b> | 253.348        | 250.144        | 250.346        | 249.943        | F[11] |
| K  | 32 | <b>661.590</b> | 223.934        | 220.730        | 220.932        | 220.529        | K[10] |
| L  | 33 | 684.207        | 198.515        | 195.311        | 195.513        | 194.910        | L[9]  |
| N  | 34 | <b>707.016</b> | 175.698        | 172.495        | 172.696        | 172.293        | N[8]  |
| K  | 35 | <b>732.635</b> | 152.890        | 149.686        | 149.888        | 149.484        | K[7]  |
| K  | 36 | <b>763.860</b> | 127.271        | 124.067        | 124.269        | 123.866        | K[6]  |
| A  | 37 | 778.067        | 96.046         | 92.842         | 93.043         | 92.640         | A[5]  |
| A  | 38 | 792.275        | 81.838         | 78.634         | 78.836         | 78.433         | A[4]  |
| S  | 39 | 818.083        | 67.631         | 64.427         | 64.629         | 64.225         | S[3]  |
| G  | 40 | <b>829.488</b> | 41.822         | 38.618         | 38.820         | 38.417         | G[2]  |
| E  | 41 | <b>855.296</b> | 30.418         | 27.214         | 27.416         | 27.013         | E[1]  |

# sp | P43277 | H13\_MOUSE

KNNSRIKLGLKSLVSKGTLVQTKGTGASGSFKLNKK <sup>Dimethyl</sup>28.03 AAS <sup>Acetyl</sup>42.01 GE

- ▶ fragmentation table for charge state 6+
- ▶ specType=etd
- ▶ score=57.60
- ▶ F097391.dat
- ▶ query=q2782.p1
- ▶ precursor=611.358590
- ▶ chargePrecursor=7
- ▶ itol=0.8

| AA | c  | y              | z+1            | z#2            | z              | AA             |       |
|----|----|----------------|----------------|----------------|----------------|----------------|-------|
| K  | 1  | 25.194         | <b>713.079</b> | 710.409        | 710.577        | 710.241        | K[41] |
| N  | 2  | 44.201         | 691.720        | 689.060        | 689.228        | 688.892        | N[40] |
| N  | 3  | 63.209         | 672.722        | 670.053        | 670.221        | 669.885        | N[39] |
| S  | 4  | 77.714         | 653.715        | 651.045        | <b>651.213</b> | 650.877        | S[38] |
| K  | 5  | 103.731        | 639.210        | 636.540        | 636.708        | <b>636.372</b> | K[37] |
| T  | 6  | 122.578        | <b>613.193</b> | 610.523        | 610.691        | 610.355        | T[36] |
| K  | 7  | 143.927        | 594.346        | 591.676        | 591.844        | 591.508        | K[35] |
| L  | 8  | 162.775        | 572.996        | 570.327        | 570.495        | 570.159        | L[34] |
| G  | 9  | 172.278        | 554.149        | 551.479        | 551.647        | <b>551.311</b> | G[33] |
| L  | 10 | 191.125        | 534.640        | 531.970        | 532.138        | 531.802        | L[32] |
| K  | 11 | 212.475        | 525.798        | 523.128        | 523.296        | 522.960        | K[31] |
| S  | 12 | 226.980        | 504.449        | 501.779        | 501.947        | 501.611        | S[30] |
| L  | 13 | 245.827        | 489.944        | <b>487.274</b> | 487.442        | <b>487.106</b> | L[29] |
| V  | 14 | 262.339        | 471.096        | 468.427        | 468.595        | 468.259        | V[28] |
| S  | 15 | 276.844        | 454.585        | 451.915        | 452.083        | 451.747        | S[27] |
| K  | 16 | 298.193        | 440.080        | 437.410        | 437.578        | 437.242        | K[26] |
| G  | 17 | 307.697        | 418.730        | 416.061        | 416.229        | 415.893        | G[25] |
| T  | 18 | 324.538        | 400.227        | 408.557        | 408.725        | 408.389        | T[24] |
| L  | 19 | 343.385        | 392.366        | 389.710        | 389.884        | 389.548        | L[23] |
| V  | 20 | 359.897        | <b>373.538</b> | 370.868        | 371.036        | 370.701        | V[22] |
| Q  | 21 | 381.240        | 357.027        | 354.357        | 354.525        | 354.189        | Q[21] |
| T  | 22 | 398.081        | 335.684        | 333.014        | 333.182        | 332.846        | T[20] |
| K  | 23 | 419.430        | 318.842        | 316.173        | 316.341        | 316.005        | K[19] |
| G  | 24 | 428.934        | 297.493        | 294.824        | 294.992        | 294.656        | G[18] |
| T  | 25 | 445.775        | 287.990        | 285.320        | 285.488        | 285.152        | T[17] |
| G  | 26 | 455.279        | 271.148        | 268.479        | 268.647        | 268.311        | G[16] |
| A  | 27 | 467.118        | 251.645        | 258.975        | 259.143        | 258.807        | A[15] |
| S  | 28 | 481.624        | 249.805        | 247.136        | 247.304        | 246.968        | S[14] |
| G  | 29 | 491.127        | 235.300        | 232.630        | 232.798        | 232.462        | G[13] |
| S  | 30 | 505.633        | 225.796        | 223.127        | 223.295        | 222.959        | S[12] |
| F  | 31 | 530.144        | 211.291        | 208.621        | 208.789        | 208.453        | F[11] |
| K  | 32 | 551.493        | 186.780        | 184.110        | 184.278        | 183.942        | K[10] |
| L  | 33 | 570.340        | 165.431        | 162.761        | 162.929        | 162.593        | L[9]  |
| N  | 34 | 589.348        | 146.583        | 143.913        | 144.081        | 143.745        | N[8]  |
| K  | 35 | 610.697        | 127.576        | 124.906        | 125.074        | 124.738        | K[7]  |
| K  | 36 | 636.716        | 106.227        | 103.557        | 103.725        | 103.389        | K[6]  |
| A  | 37 | <b>648.557</b> | 80.206         | 77.536         | 77.704         | 77.368         | A[5]  |
| A  | 38 | 660.397        | 68.366         | 65.697         | 65.865         | 65.529         | A[4]  |
| S  | 39 | 681.904        | 56.527         | 53.857         | 54.025         | 53.689         | S[3]  |
| G  | 40 | 691.408        | 35.020         | 32.350         | 32.518         | 32.182         | G[2]  |
| E  | 41 | <b>712.915</b> | 25.516         | 22.846         | 23.014         | 22.678         | E[1]  |



# sp | P43277 | H13\_MOUSE

KNNSRIKLGLKSLVSKGTLVQTKGTGASGSFKLNK (Dimethyl) K (Trimethyl) AASGE  
 (28.03) (42.05)

- ▶ fragmentation table for charge state 1+
- ▶ specType=etd
- ▶ score=53.36
- ▶ F097392.dat
- ▶ query=q2784\_p1
- ▶ precursor=1069.123000
- ▶ chargePrecursor=4
- ▶ itol=0.8

| AA | c   | y               | z=1             | z=2             | z               | AA              |       |
|----|-----|-----------------|-----------------|-----------------|-----------------|-----------------|-------|
| R  | 180 | 129             | 4273.492        | 4267.453        | 4236.401        | 4209.446        | R(41) |
| N  | 260 | 172             | 4148.371        | 4129.338        | 4130.366        | 4129.360        | N(40) |
| N  | 3   | <b>374.215</b>  | 4031.334        | 4015.315        | 4016.323        | 4014.307        | N(39) |
| S  | 4   | 461.247         | 3917.291        | 3901.272        | 3902.280        | 3900.264        | S(38) |
| R  | 5   | <b>617.348</b>  | 3830.259        | 3814.240        | 3815.248        | 3813.232        | R(37) |
| I  | 6   | 730.432         | 3674.158        | 3658.139        | 3659.147        | 3657.131        | I(36) |
| T  | 7   | 832.597         | 3561.074        | 3545.055        | 3546.063        | 3544.047        | T(35) |
| L  | 8   | <b>971.611</b>  | 3432.978        | 3416.959        | 3417.968        | 3415.952        | L(34) |
| G  | 9   | 1028.632        | 3319.895        | 3303.876        | 3304.884        | 3302.868        | G(33) |
| L  | 10  | <b>1141.716</b> | 3202.873        | 3186.853        | 3187.862        | 3185.846        | L(32) |
| K  | 11  | 1269.811        | 3149.789        | 3133.771        | 3134.778        | 3132.763        | K(31) |
| S  | 12  | 1356.843        | 3021.694        | 3005.675        | 3006.683        | 3004.666        | S(30) |
| L  | 13  | 1469.872        | 2934.662        | 2918.644        | 2919.651        | 2917.635        | L(29) |
| V  | 14  | 1568.906        | 2821.578        | 2805.559        | 2806.567        | 2804.552        | V(28) |
| S  | 15  | 1656.028        | 2722.510        | 2706.491        | 2707.499        | 2705.484        | S(27) |
| K  | 16  | 1784.123        | 2635.478        | 2619.459        | 2620.467        | 2618.451        | K(26) |
| G  | 17  | 1841.144        | 2507.383        | 2491.364        | 2492.372        | 2490.356        | G(25) |
| T  | 18  | 1942.192        | 2450.301        | 2434.283        | 2435.290        | 2433.274        | T(24) |
| L  | 19  | 2055.276        | 2340.314        | 2324.295        | 2324.303        | 2322.287        | L(23) |
| V  | 20  | 2194.344        | 2236.230        | 2220.211        | 2221.219        | 2219.203        | V(22) |
| Q  | 21  | 2262.403        | 2137.161        | 2121.142        | 2122.150        | 2120.134        | Q(21) |
| T  | 22  | 2381.451        | 2009.103        | 1993.084        | <b>1994.092</b> | 1992.076        | T(20) |
| K  | 23  | 2511.540        | <b>1908.055</b> | 1892.036        |                 | 1891.020        | K(19) |
| G  | 24  | 2608.567        | 1779.966        | 1763.947        | <b>1764.949</b> | 1762.933        | G(18) |
| T  | 25  | 2699.615        | 1722.938        | 1706.920        | 1707.928        | 1705.912        | T(17) |
| G  | 26  | 2726.636        | <b>1621.891</b> | 1605.872        | 1606.880        | 1604.864        | G(16) |
| A  | 27  | 2787.673        | 1564.869        | 1548.851        | 1549.858        | 1547.843        | A(15) |
| S  | 28  | 2884.705        | 1493.832        | 1477.813        | 1478.821        | 1476.805        | S(14) |
| Q  | 29  | 2912.727        | <b>1406.800</b> | 1390.781        | 1391.789        | 1389.773        | Q(13) |
| S  | 30  | 3026.759        | 1349.772        | 1333.753        | <b>1334.768</b> | 1332.752        | S(12) |
| F  | 31  | 3175.827        | <b>1262.747</b> | <b>1246.728</b> | <b>1247.736</b> | <b>1245.720</b> | F(11) |
| K  | 32  | 3381.922        | 1115.678        | 1099.660        | <b>1100.667</b> | 1098.652        | K(10) |
| L  | 33  | 3417.006        | 987.583         | <b>971.565</b>  | <b>972.572</b>  | 970.557         | L(9)  |
| N  | 34  | 3531.049        | 874.499         | 858.481         | <b>859.488</b>  | 857.473         | N(8)  |
| K  | 35  | 3627.176        | 760.405         | 744.387         | <b>745.445</b>  | 743.430         | K(7)  |
| K  | 36  | 3857.317        | 604.330         | 588.311         | 589.319         | 587.304         | K(6)  |
| A  | 37  | 3938.355        | 434.188         | 418.169         | 419.177         | 417.162         | A(5)  |
| A  | 38  | 3999.392        | 303.151         | 287.132         | 288.140         | 286.124         | A(4)  |
| S  | 39  | 4086.424        | 292.114         | 276.095         | 277.103         | 275.087         | S(3)  |
| G  | 40  | 4133.446        | 205.082         | 189.063         | 189.071         | 188.055         | G(2)  |
| E  | 41  | 4272.488        | 148.060         | 132.042         | 133.050         | 131.034         | E(1)  |

# sp | P43277 | H13\_MOUSE

KNNSRIKLGLKSLVSKGTLVQTKGTGASGSFKLNK (Dimethyl) K (Trimethyl) AASGE (28.03) (42.05)

- ▶ fragmentation table for charge state 2+
- ▶ specType=etd
- ▶ score=53.36
- ▶ F097392.dat
- ▶ query=q2784\_p1
- ▶ precursor=1069.123000
- ▶ chargePrecursor=4
- ▶ itol=0.8

| AA | c  | x               | y               | z=1             | z=2             | z               | AA    |
|----|----|-----------------|-----------------|-----------------|-----------------|-----------------|-------|
| R  | 13 | 235.988         | 2237.240        | 2229.230        | 2129.734        | 2128.728        | R(41) |
| N  | 21 | 130.599         | 2073.182        | 2066.181        | 2065.987        | 2064.679        | N(40) |
| N  | 3  | 197.611         | 2016.171        | 2008.161        | 2008.066        | 2007.057        | N(39) |
| S  | 4  | 231.127         | 1959.149        | 1951.140        | 1951.044        | 1950.036        | S(38) |
| R  | 5  | 309.178         | 1915.633        | 1907.623        | <b>1908.126</b> | 1907.120        | R(37) |
| I  | 6  | 365.720         | 1837.583        | <b>1829.573</b> | 1830.077        | <b>1829.069</b> | I(36) |
| R  | 7  | 429.267         | 1761.041        | 1773.031        | 1773.235        | 1772.227        | R(35) |
| L  | 8  | 486.309         | 1716.993        | <b>1708.984</b> | <b>1709.488</b> | <b>1708.480</b> | L(34) |
| G  | 9  | 514.820         | 1660.451        | <b>1652.442</b> | <b>1652.946</b> | 1651.938        | G(33) |
| L  | 10 | 571.362         | 1613.946        | 1623.931        | 1624.435        | 1623.427        | L(32) |
| K  | 11 | 635.400         | 1575.399        | 1587.389        | 1587.893        | 1586.885        | K(31) |
| S  | 12 | 678.625         | 1511.351        | 1503.341        | 1503.845        | 1502.838        | S(30) |
| L  | 13 | 728.467         | 1469.835        | 1469.835        | 1469.339        | 1469.331        | L(29) |
| V  | 14 | 785.002         | 1411.293        | 1403.283        | 1403.787        | 1402.779        | V(28) |
| S  | 15 | 838.518         | 1361.759        | 1353.749        | 1354.251        | 1353.245        | S(27) |
| K  | 16 | 892.505         | <b>1318.243</b> | <b>1310.233</b> | <b>1310.737</b> | 1309.729        | K(26) |
| G  | 17 | 951.076         | 1254.195        | <b>1246.186</b> | <b>1246.690</b> | <b>1245.682</b> | G(25) |
| T  | 18 | <b>971.600</b>  | 1205.064        | 1217.053        | 1217.557        | <b>1217.171</b> | T(24) |
| L  | 19 | 1028.142        | 1175.160        | 1187.151        | <b>1187.655</b> | 1186.647        | L(23) |
| V  | 20 | <b>1077.676</b> | 1118.618        | 1110.609        | 1111.113        | 1110.105        | V(22) |
| Q  | 21 | <b>1141.705</b> | 1069.084        | 1061.075        | 1061.579        | 1060.571        | Q(21) |
| T  | 22 | <b>1192.229</b> | 1005.055        | 997.046         | 997.549         | 996.542         | T(20) |
| K  | 23 | <b>1256.276</b> | 946.511         | 946.523         | 947.026         | 946.018         | K(19) |
| G  | 24 | 1264.787        | <b>890.484</b>  | 882.474         | 882.978         | 881.970         | G(18) |
| T  | 25 | <b>1335.311</b> | 801.973         | 851.964         | 854.467         | 853.460         | T(17) |
| G  | 26 | 1363.822        | 811.449         | 803.440         | 803.944         | 802.936         | G(16) |
| A  | 27 | 1399.340        | 782.939         | 774.929         | 775.433         | 774.425         | A(15) |
| S  | 28 | 1422.859        | 747.420         | 739.410         | 739.914         | 738.906         | S(14) |
| G  | 29 | <b>1471.367</b> | 683.904         | 685.903         | 686.906         | 685.909         | G(13) |
| S  | 30 | <b>1514.883</b> | 675.391         | 667.384         | 667.888         | 666.880         | S(12) |
| F  | 31 | <b>1588.417</b> | 631.877         | 623.868         | 624.372         | 623.364         | F(11) |
| K  | 32 | <b>1652.465</b> | 558.343         | 550.333         | 550.837         | 549.830         | K(10) |
| L  | 33 | <b>1709.007</b> | 494.295         | 486.286         | 486.790         | 485.782         | L(9)  |
| N  | 34 | 1766.029        | 437.757         | 429.744         | 430.248         | 429.240         | N(8)  |
| R  | 35 | 1844.093        | 380.732         | 372.722         | 373.226         | 372.219         | R(7)  |
| K  | 36 | 1928.162        | 302.666         | 294.659         | 295.163         | 294.155         | K(6)  |
| A  | 37 | 1984.681        | 217.598         | 209.588         | 210.092         | 209.084         | A(5)  |
| A  | 38 | 2000.199        | 182.079         | 174.070         | 174.574         | 173.566         | A(4)  |
| S  | 39 | 2043.716        | 146.561         | 138.551         | 139.055         | 138.047         | S(3)  |
| G  | 40 | 2072.226        | 103.045         | 95.036          | 95.539          | 94.531          | G(2)  |
| E  | 41 | 2136.748        | 74.534          | 66.524          | 67.028          | 66.021          | E(1)  |



# sp | P43277 | H13\_MOUSE

KNNSRIKLGLKSLVSKGTLVQTKGTGASGSFKLNK (Dimethyl) K (Trimethyl) AASGE (28.03) (42.05)

- ▶ fragmentation table for charge state 3+
- ▶ specType=etd
- ▶ score=53.36
- ▶ F097392.dat
- ▶ query=q2784\_p1
- ▶ precursor=1069.123000
- ▶ chargePrecursor=4
- ▶ itol=0.8

| AA | c  | y               | #=1             | #=2             | z               | AA              |       |
|----|----|-----------------|-----------------|-----------------|-----------------|-----------------|-------|
| R  | 1  | 491.301         | <b>1425.102</b> | <b>1415.923</b> | <b>1426.158</b> | <b>1419.487</b> | R[41] |
| N  | 2  | 87.306          | 1322.654        | 1317.354        | 1377.666        | 1376.780        | N[40] |
| N  | 3  | 125.410         | 1344.045        | <b>1339.110</b> | <b>1339.446</b> | <b>1338.774</b> | N[39] |
| S  | 4  | 154.420         | 1308.435        | 1301.096        | 1301.432        | 1309.760        | S[38] |
| R  | 5  | 206.454         | 1277.425        | 1272.085        | 1272.421        | 1271.740        | R[37] |
| I  | 6  | 244.149         | 1225.391        | 1220.051        | 1220.387        | 1219.715        | I[36] |
| R  | 7  | 288.987         | 1187.696        | 1182.357        | 1182.692        | 1182.022        | R[35] |
| L  | 8  | 324.542         | 1144.955        | 1139.658        | 1139.994        | 1139.322        | L[34] |
| G  | 9  | 343.549         | 1107.303        | 1101.964        | 1102.299        | <b>1101.628</b> | G[33] |
| L  | 10 | 381.244         | 1068.296        | 1062.956        | 1063.292        | 1062.620        | L[32] |
| K  | 11 | 423.942         | 1030.601        | 1025.262        | 1025.598        | 1024.926        | K[31] |
| S  | 12 | 452.953         | 1007.903        | 1002.563        | 1002.899        | 1002.227        | S[30] |
| L  | 13 | 499.647         | 978.862         | 973.523         | 973.859         | <b>973.217</b>  | L[29] |
| V  | 14 | 523.670         | 941.198         | 935.858         | 936.194         | 935.522         | V[28] |
| S  | 15 | 552.681         | 908.175         | 902.835         | 903.171         | 902.499         | S[27] |
| K  | 16 | 595.179         | 879.164         | 873.825         | 874.160         | 873.489         | K[26] |
| G  | 17 | 614.366         | 836.466         | 831.126         | 831.462         | 830.790         | G[25] |
| T  | 18 | 648.059         | 817.455         | 812.115         | 812.451         | 811.780         | T[24] |
| L  | 19 | 685.764         | 783.776         | 778.436         | 778.772         | 778.101         | L[23] |
| V  | 20 | 718.786         | <b>746.081</b>  | 740.742         | 741.078         | 740.406         | V[22] |
| Q  | 21 | 761.473         | 713.059         | 707.719         | 708.055         | 707.383         | Q[21] |
| T  | 22 | 795.115         | 670.372         | 665.033         | 665.369         | 664.697         | T[20] |
| K  | 23 | 837.853         | 636.690         | 631.350         | 631.686         | 631.014         | K[19] |
| G  | 24 | 854.913         | 593.991         | 588.652         | 588.988         | 588.316         | G[18] |
| T  | 25 | <b>890.543</b>  | 574.084         | 568.745         | 569.081         | 568.409         | T[17] |
| G  | 26 | 909.550         | 541.302         | 535.962         | 536.298         | 535.626         | G[16] |
| A  | 27 | 933.229         | 522.299         | 516.959         | 517.295         | 516.619         | A[15] |
| S  | 28 | 982.240         | 498.616         | 493.276         | 493.612         | 492.940         | S[14] |
| Q  | 29 | 983.249         | 469.805         | 464.465         | 464.801         | 464.129         | Q[13] |
| S  | 30 | 1010.258        | 450.599         | 445.258         | 445.594         | 444.922         | S[12] |
| F  | 31 | 1059.261        | 421.587         | 416.248         | 416.583         | 415.911         | F[11] |
| K  | 32 | 1101.979        | 372.564         | 367.225         | 367.561         | 366.889         | K[10] |
| L  | 33 | 1139.674        | 329.866         | 324.526         | 324.862         | 324.190         | L[9]  |
| N  | 34 | 1177.688        | 292.171         | 286.832         | 287.168         | 286.496         | N[8]  |
| R  | 35 | 1229.710        | 254.151         | 248.811         | 249.147         | 248.475         | R[7]  |
| K  | 36 | <b>1286.444</b> | 202.115         | 196.775         | 197.111         | 196.439         | K[6]  |
| A  | 37 | <b>1310.123</b> | 145.401         | 140.061         | 140.397         | 139.725         | A[5]  |
| A  | 38 | 1333.802        | 121.722         | 116.382         | 116.718         | 116.046         | A[4]  |
| S  | 39 | 1362.813        | 98.043          | 92.703          | 93.039          | 92.367          | S[3]  |
| G  | 40 | 1381.820        | 69.325          | 63.985          | 64.321          | 63.649          | G[2]  |
| E  | 41 | 1424.834        | 50.025          | 44.685          | 45.021          | 44.349          | E[1]  |

# sp | P62806 | H4\_MOUSE

[Acetyl]S<sub>42.01</sub> GRGKGGKGLGKGGAK Acetyl<sub>42.01</sub> RHRK Dimethyl<sub>28.03</sub> VLRD

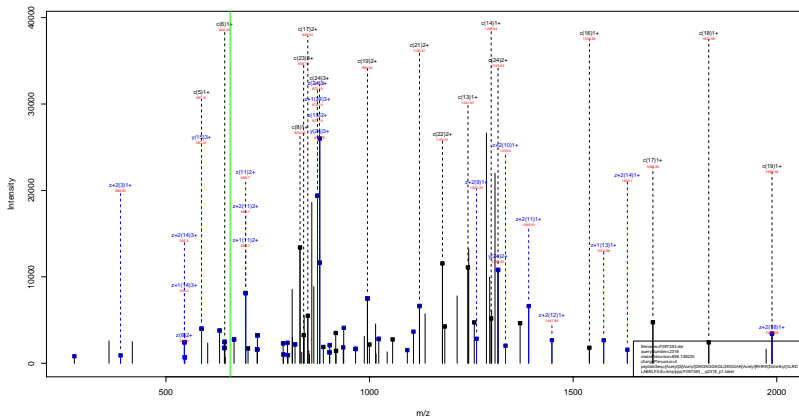

# sp | P62806 | H4\_MOUSE

[Acetyl]S<sub>42.01</sub> Acetyl GRGKGGKGLGKGGAK<sub>42.01</sub> Acetyl RHRK<sub>42.01</sub> Dimethyl VLRD<sub>28.03</sub>

- ▶ fragmentation table for charge state 1+
- ▶ specType=etd
- ▶ score=92.84
- ▶ F097393.dat
- ▶ query=q2318\_p1
- ▶ precursor=658.138230
- ▶ chargePrecursor=4
- ▶ itol=0.8

| AA    | c               | y               | z+1             | z+2             | z        | AA    |
|-------|-----------------|-----------------|-----------------|-----------------|----------|-------|
| S[1]  | 189.087         | 2629.523        | 2613.505        | 0.000           | 2612.497 | S[24] |
| G[2]  | 286.108         | 2458.470        | 2442.451        | 0.000           | 2441.444 | G[23] |
| R[3]  | 402.210         | 2401.440        | 2385.430        | 2386.438        | 2384.422 | R[22] |
| G[4]  | 459.231         | 2245.340        | 2229.330        | 2230.337        | 2228.321 | G[21] |
| K[5]  | <b>587.326</b>  | 2185.328        | 2172.307        | 2173.315        | 2171.305 | K[20] |
| G[6]  | <b>644.347</b>  | 2060.231        | 2044.212        | 2045.220        | 2043.205 | G[19] |
| G[7]  | <b>701.369</b>  | 2003.210        | 1987.191        | <b>1988.199</b> | 1986.181 | G[18] |
| K[8]  | <b>829.464</b>  | 1946.189        | 1930.170        | 1931.177        | 1929.162 | K[17] |
| G[9]  | <b>886.485</b>  | 1818.083        | 1802.075        | 1803.082        | 1801.067 | G[16] |
| L[10] | <b>959.569</b>  | 1761.072        | 1745.063        | 1746.061        | 1744.045 | L[15] |
| Q[11] | <b>1056.591</b> | 1647.985        | 1631.969        | <b>1632.977</b> | 1630.961 | Q[14] |
| K[12] | <b>1184.686</b> | 1590.966        | <b>1574.948</b> | 1575.955        | 1573.940 | K[13] |
| G[13] | <b>1241.707</b> | 1462.871        | 1446.853        | <b>1447.860</b> | 1445.845 | G[12] |
| G[14] | <b>1298.729</b> | 1405.850        | 1389.831        | <b>1390.839</b> | 1388.821 | G[11] |
| A[15] | <b>1369.766</b> | 1348.828        | 1332.810        | <b>1333.818</b> | 1331.802 | A[10] |
| R[16] | <b>1539.871</b> | 1277.793        | 1261.775        | <b>1262.780</b> | 1260.765 | R[9]  |
| R[17] | <b>1695.973</b> | <b>1107.686</b> | 1091.667        | <b>1092.675</b> | 1090.659 | R[8]  |
| H[18] | <b>1833.031</b> | 951.585         | <b>935.566</b>  | <b>936.574</b>  | 934.558  | H[7]  |
| R[19] | <b>1989.133</b> | 814.526         | <b>798.507</b>  | <b>799.515</b>  | 797.499  | R[6]  |
| K[20] | 2145.250        | 658.425         | 642.406         | <b>643.414</b>  | 641.399  | K[5]  |
| V[21] | 2244.227        | 502.366         | 486.348         | 487.357         | 485.272  | V[4]  |
| L[22] | 2367.413        | 463.339         | 447.311         | <b>448.319</b>  | 446.201  | L[3]  |
| R[23] | 2513.512        | 290.146         | 274.127         | <b>275.135</b>  | 273.119  | R[2]  |
| D[24] | 2628.539        | 134.045         | 118.026         | 119.034         | 117.018  | D[1]  |

# sp | P62806 | H4\_MOUSE

[Acetyl]S<sub>42.01</sub> Acetyl GRGKGGKGLGKGGAK<sub>42.01</sub> RHRK<sub>42.01</sub> Dimethyl VLRD<sub>28.03</sub>

- ▶ fragmentation table for charge state 2+
- ▶ specType=etd
- ▶ score=92.84
- ▶ F097393.dat
- ▶ query=q2318\_p1
- ▶ precursor=658.138230
- ▶ chargePrecursor=4
- ▶ itol=0.8

| AA    | c               | y               | z+1             | z+2             | z               | AA    |
|-------|-----------------|-----------------|-----------------|-----------------|-----------------|-------|
| S[1]  | 46.047          | <b>1315.265</b> | 1307.266        | 0.504           | 1306.752        | S[24] |
| G[2]  | 123.558         | 1229.739        | 1221.720        | 0.504           | 1221.225        | G[23] |
| K[3]  | 261.606         | 1204.299        | 1193.219        | 1193.723        | 1192.715        | K[22] |
| G[4]  | 230.119         | <b>1123.177</b> | 1115.188        | 1115.972        | 1114.666        | G[21] |
| K[5]  | 294.157         | 1094.561        | 1085.571        | 1087.161        | 1086.151        | K[20] |
| G[6]  | 322.677         | 1030.619        | <b>1022.610</b> | <b>1023.114</b> | <b>1022.106</b> | G[10] |
| G[7]  | 351.188         | 1002.108        | <b>994.099</b>  | <b>994.603</b>  | 993.595         | G[18] |
| K[8]  | 415.236         | 973.590         | <b>965.588</b>  | <b>966.092</b>  | <b>965.084</b>  | K[17] |
| G[9]  | 443.746         | 949.550         | <b>901.541</b>  | <b>902.045</b>  | <b>901.037</b>  | G[16] |
| L[10] | 509.298         | 893.040         | 873.033         | 873.534         | <b>872.526</b>  | L[15] |
| G[11] | 538.799         | 824.468         | <b>816.488</b>  | <b>816.992</b>  | 815.984         | G[14] |
| K[12] | 592.847         | 795.987         | <b>787.977</b>  | <b>788.481</b>  | <b>787.474</b>  | K[13] |
| G[13] | 621.357         | 731.939         | <b>723.930</b>  | <b>724.434</b>  | <b>723.426</b>  | G[12] |
| G[14] | 649.865         | 703.429         | <b>695.419</b>  | <b>695.923</b>  | <b>694.915</b>  | G[11] |
| A[15] | 685.389         | 674.919         | <b>666.908</b>  | <b>667.412</b>  | 666.404         | A[10] |
| R[16] | 770.439         | 639.399         | <b>631.390</b>  | <b>631.894</b>  | 630.886         | R[9]  |
| R[17] | <b>848.490</b>  | 554.347         | <b>546.337</b>  | <b>546.841</b>  | <b>545.833</b>  | R[6]  |
| H[18] | <b>917.019</b>  | 476.296         | 468.287         | 468.791         | 467.783         | H[7]  |
| R[19] | <b>995.070</b>  | 407.767         | 399.757         | 400.261         | 399.253         | R[6]  |
| K[20] | 1071.133        | 329.746         | 321.737         | 322.241         | 321.233         | K[5]  |
| V[21] | <b>1122.667</b> | 252.693         | 243.683         | 244.187         | 243.180         | V[4]  |
| L[22] | <b>1179.209</b> | 202.119         | 194.109         | 194.613         | 193.605         | L[3]  |
| R[23] | <b>1257.260</b> | 145.577         | 137.567         | 138.071         | 137.063         | R[2]  |
| D[24] | <b>1314.773</b> | 67.526          | 59.517          | 60.021          | 59.013          | D[1]  |

# sp | P62806 | H4\_MOUSE

[Acetyl]S<sub>42.01</sub> GRGKGGKGLGKGGAK<sub>42.01</sub> RHRK<sub>28.03</sub> [Dimethyl]VLRD

- ▶ fragmentation table for charge state 3+
- ▶ specType=etd
- ▶ score=92.84
- ▶ F097393.dat
- ▶ query=q2318\_p1
- ▶ precursor=658.138230
- ▶ chargePrecursor=4
- ▶ itol=0.8

| AA    | c              | y              | z+1            | z+2            | z              | AA    |
|-------|----------------|----------------|----------------|----------------|----------------|-------|
| S[1]  | 63.701         | <b>877.175</b> | <b>871.840</b> | 0.672          | <b>871.504</b> | S[24] |
| G[2]  | 92.708         | 820.162        | 814.827        | 0.672          | 814.466        | G[23] |
| R[3]  | 134.741        | 801.154        | 795.819        | 796.151        | 795.479        | R[22] |
| G[4]  | 153.749        | 749.121        | 743.781        | 744.117        | 743.445        | G[21] |
| K[5]  | 196.447        | 730.114        | <b>724.774</b> | <b>725.110</b> | <b>724.438</b> | K[20] |
| G[6]  | 215.454        | 687.415        | 682.076        | 682.412        | 681.740        | G[19] |
| G[7]  | 234.461        | 668.408        | 663.069        | 663.404        | 662.733        | G[18] |
| K[8]  | 277.159        | 649.401        | <b>644.061</b> | <b>644.397</b> | <b>643.725</b> | K[17] |
| G[9]  | 286.167        | 636.703        | 631.363        | 631.699        | 631.027        | G[16] |
| L[10] | 333.884        | <b>587.695</b> | 582.356        | 582.692        | 582.020        | L[15] |
| G[11] | 352.888        | 550.011        | <b>544.661</b> | <b>544.997</b> | 544.325        | G[14] |
| K[12] | 395.567        | 530.994        | 525.654        | 525.990        | 525.318        | K[13] |
| G[13] | 414.574        | 488.295        | 482.956        | 483.292        | 482.620        | G[12] |
| G[14] | 433.581        | 469.288        | 463.949        | 464.285        | 463.613        | G[11] |
| A[15] | 457.260        | 450.281        | 444.941        | 445.277        | 444.605        | A[10] |
| K[16] | 513.962        | 426.602        | 421.262        | 421.598        | 420.926        | K[9]  |
| R[17] | 565.996        | 369.900        | 364.561        | 364.896        | 364.225        | R[8]  |
| H[18] | 611.682        | 317.896        | 312.527        | 312.863        | 312.191        | H[7]  |
| R[19] | 663.716        | 272.180        | 266.841        | 267.176        | 266.505        | R[6]  |
| K[20] | 715.758        | 220.146        | 214.807        | 215.143        | 214.471        | K[5]  |
| V[21] | 748.781        | 168.104        | 162.765        | 163.101        | 162.429        | V[4]  |
| L[22] | 786.475        | 135.082        | 129.742        | 130.078        | 129.406        | L[3]  |
| R[23] | <b>838.509</b> | 97.387         | 92.047         | 92.383         | 91.711         | R[2]  |
| D[24] | <b>876.851</b> | 45.353         | 40.014         | 40.349         | 39.678         | D[1]  |



# sp | Q64525 | H2B2B\_MOUSE

PDKASAPAPKKGS <sup>Acetyl</sup>42.01 KKAVTK <sup>Acetyl</sup>42.01 VQKKD

- ▶ fragmentation table for charge state 1+
- ▶ specType=etd
- ▶ score=93.99
- ▶ F097393.dat
- ▶ query=q2413\_p1
- ▶ precursor=672.893890
- ▶ chargePrecursor=4
- ▶ itol=0.8

| AA | c  | y               | a+1            | a+2             | z               | AA              |       |
|----|----|-----------------|----------------|-----------------|-----------------|-----------------|-------|
| P  | 1  | 115.087         | 2688.541       | 2672.522        | 0.000           | 2671.514        | P[25] |
| D  | 3  | 230.114         | 2391.408       | 2375.400        | 0.000           | 2374.401        | D[24] |
| P  | 3  | 327.168         | 2476.461       | 2460.441        | 0.000           | 2459.434        | P[23] |
| A  | 4  | 398.203         | 2379.408       | 2363.389        | 0.000           | 2362.382        | A[22] |
| K  | 5  | <b>526.298</b>  | 2308.371       | 2292.352        | 2291.360        | 2291.345        | K[21] |
| S  | 6  | 613.330         | 2180.276       | 2164.257        | 2165.265        | 2163.250        | S[20] |
| A  | 7  | 684.366         | 2093.244       | 2077.225        | 2078.233        | 2078.216        | A[19] |
| P  | 8  | <b>781.420</b>  | 2022.207       | 2006.189        | 2007.196        | 2006.180        | P[18] |
| A  | 9  | 852.457         | 1925.154       | <b>1909.135</b> | <b>1910.143</b> | <b>1908.128</b> | A[17] |
| P  | 10 | <b>949.510</b>  | 1854.117       | 1838.098        | 1839.106        | 1837.091        | P[16] |
| K  | 11 | <b>1077.605</b> | 1757.064       | 1741.046        | <b>1742.053</b> | 1740.038        | K[15] |
| K  | 12 | <b>1265.700</b> | 1628.969       | <b>1612.951</b> | 1613.958        | 1611.943        | K[14] |
| Q  | 13 | <b>1262.722</b> | 1520.874       | 1485.850        | <b>1485.864</b> | 1483.846        | Q[13] |
| S  | 14 | 1393.104        | 1443.853       | 1427.834        | 1428.842        | 1426.826        | S[12] |
| K  | 15 | <b>1519.859</b> | 1314.810       | 1298.792        | 1299.799        | 1297.784        | K[11] |
| K  | 16 | <b>1647.954</b> | 1186.715       | <b>1170.697</b> | <b>1171.705</b> | 1169.689        | K[10] |
| A  | 17 | 1728.991        | 1058.620       | <b>1042.602</b> | 1043.610        | 1041.594        | A[9]  |
| V  | 18 | 1818.060        | 987.583        | 971.565         | 972.572         | 970.557         | V[8]  |
| T  | 19 | <b>1919.107</b> | <b>868.515</b> | 852.498         | <b>873.504</b>  | <b>871.488</b>  | T[7]  |
| K  | 20 | 2009.213        | 787.467        | <b>771.449</b>  | <b>772.456</b>  | 770.441         | K[6]  |
| V  | 21 | 2188.281        | 617.362        | <b>601.343</b>  | <b>602.351</b>  | 600.335         | V[5]  |
| Q  | 22 | 2316.340        | 518.293        | <b>502.275</b>  | <b>503.282</b>  | 501.267         | Q[4]  |
| K  | 23 | 2444.435        | 390.235        | <b>374.216</b>  | 375.224         | 373.209         | K[3]  |
| K  | 24 | 2572.530        | 262.140        | 246.121         | 247.129         | 245.113         | K[2]  |
| D  | 25 | 2687.557        | 134.045        | 118.026         | 119.034         | 117.016         | D[1]  |

# sp | Q64525 | H2B2B\_MOUSE

PDKASAPAPKKGS<sup>Acetyl</sup> KKAVTK<sup>Acetyl</sup> VQKKD<sup>42.01</sup>

- ▶ fragmentation table for charge state 2+
- ▶ specType=etd
- ▶ score=93.99
- ▶ F097393.dat
- ▶ query=q2413\_p1
- ▶ precursor=672.893890
- ▶ chargePrecursor=4
- ▶ itol=0.8

| AA |    | c               | y               | z+1             | z+2             | z               | AA    |
|----|----|-----------------|-----------------|-----------------|-----------------|-----------------|-------|
| P  | 1  | 58.047          | 1344.774        | <b>1336.765</b> | 0.504           | 1339.261        | P[25] |
| D  | 3  | 115.560         | 1096.249        | <b>1206.238</b> | 0.504           | <b>1287.734</b> | D[3]  |
| F  | 3  | 194.097         | <b>1238.734</b> | 1232.238        | 0.504           | 1236.239        | F[3]  |
| A  | 4  | 199.605         | 1190.208        | <b>1182.198</b> | 0.504           | <b>1181.694</b> | A[22] |
| K  | 5  | 263.653         | 1154.689        | <b>1146.680</b> | <b>1147.184</b> | 1146.176        | K[21] |
| S  | 6  | 307.109         | 1030.642        | <b>1082.632</b> | <b>1083.136</b> | 1082.129        | S[20] |
| A  | 7  | 342.667         | 1047.126        | 1039.126        | 1039.620        | 1038.612        | A[19] |
| F  | 8  | 392.214         | 1011.607        | 1002.599        | 1004.102        | 1003.094        | F[18] |
| A  | 9  | 426.732         | 983.081         | <b>955.071</b>  | <b>955.575</b>  | 954.567         | A[17] |
| P  | 10 | 475.259         | 927.562         | 919.553         | 920.057         | 919.049         | P[16] |
| K  | 11 | 539.306         | 879.036         | <b>871.026</b>  | <b>871.530</b>  | 870.523         | K[15] |
| K  | 12 | <b>603.354</b>  | 814.988         | <b>806.979</b>  | <b>807.483</b>  | <b>806.475</b>  | K[14] |
| G  | 13 | 613.864         | 790.941         | <b>742.931</b>  | <b>743.435</b>  | <b>742.428</b>  | G[13] |
| S  | 14 | 698.398         | 722.420         | <b>714.421</b>  | <b>714.925</b>  | <b>713.917</b>  | S[12] |
| K  | 15 | <b>760.413</b>  | 657.005         | 649.999         | 650.403         | 649.396         | K[11] |
| K  | 16 | <b>824.481</b>  | 593.861         | 585.852         | 586.356         | 585.348         | K[10] |
| A  | 17 | <b>859.999</b>  | 529.014         | 521.004         | 522.308         | 521.301         | A[9]  |
| V  | 18 | <b>909.533</b>  | 494.295         | 486.286         | 486.790         | 485.782         | V[8]  |
| T  | 19 | <b>960.057</b>  | 444.763         | 436.753         | 437.256         | 436.249         | T[7]  |
| K  | 20 | <b>1045.110</b> | 394.237         | 386.228         | 386.732         | 385.724         | K[6]  |
| V  | 21 | <b>1094.644</b> | 309.184         | 301.175         | 301.679         | 300.671         | V[5]  |
| Q  | 22 | <b>1158.674</b> | 259.650         | 251.641         | 252.145         | 251.137         | Q[4]  |
| K  | 23 | <b>1222.721</b> | 195.621         | 187.612         | 188.116         | 187.109         | K[3]  |
| K  | 24 | <b>1286.768</b> | 131.574         | 123.564         | 124.068         | 123.060         | K[2]  |
| D  | 25 | 1344.252        | 67.526          | 59.517          | 60.021          | 59.013          | D[1]  |



# sp | Q64525 | H2B2B\_MOUSE

PDKASAPAPKKGS<sup>Acetyl</sup> KKAVTK<sup>Acetyl</sup> VQKKD  
42.01 42.01

- ▶ fragmentation table for charge state 3+
- ▶ specType=etd
- ▶ score=93.99
- ▶ F097393.dat
- ▶ query=q2413\_p1
- ▶ precursor=672.893890
- ▶ chargePrecursor=4
- ▶ itol=0.8

| AA    | c              | y              | z+1            | z+2     | z              | AA    |
|-------|----------------|----------------|----------------|---------|----------------|-------|
| P[1]  | 39.034         | <b>896.052</b> | 891.512        | 0.672   | 891.176        | P[25] |
| D[2]  | 77.376         | 864.501        | <b>859.161</b> | 0.672   | <b>858.825</b> | D[24] |
| P[3]  | 109.727        | 826.159        | 820.819        | 0.672   | 820.483        | P[23] |
| A[4]  | 133.406        | 793.808        | 788.468        | 0.672   | 788.132        | A[22] |
| K[5]  | 178.104        | 770.129        | 764.789        | 765.125 | 764.453        | K[21] |
| S[6]  | 305.115        | 727.435        | 722.095        | 722.427 | 721.755        | S[20] |
| A[7]  | 228.794        | 698.420        | 693.080        | 693.416 | 692.744        | A[19] |
| P[8]  | 261.145        | 674.741        | 669.401        | 669.737 | 669.065        | P[18] |
| A[9]  | 284.824        | 642.390        | 637.050        | 637.386 | 636.714        | A[17] |
| P[10] | 317.175        | 618.711        | 613.371        | 613.707 | 613.035        | P[16] |
| K[11] | 359.873        | 586.360        | 581.020        | 581.356 | 580.684        | K[15] |
| K[12] | 402.572        | 543.661        | 538.322        | 538.658 | 537.986        | K[14] |
| G[13] | 421.579        | 500.963        | 495.623        | 495.959 | 495.287        | G[13] |
| S[14] | 464.963        | 481.956        | 476.616        | 476.952 | 476.280        | S[12] |
| K[15] | 507.291        | 438.942        | 433.602        | 433.938 | 433.266        | K[11] |
| K[16] | 549.990        | 396.243        | 390.904        | 391.240 | 390.568        | K[10] |
| A[17] | 573.669        | 353.545        | 348.205        | 348.541 | 347.869        | A[9]  |
| V[18] | 606.691        | 329.866        | 324.526        | 324.862 | 324.190        | V[8]  |
| T[19] | 640.374        | 296.843        | 291.504        | 291.840 | 291.168        | T[7]  |
| K[20] | 697.076        | 263.161        | 257.821        | 258.157 | 257.485        | K[6]  |
| V[21] | <b>730.099</b> | 206.459        | 201.119        | 201.455 | 200.783        | V[5]  |
| Q[22] | <b>772.785</b> | 173.436        | 168.096        | 168.432 | 167.760        | Q[4]  |
| K[23] | 815.483        | 130.750        | 125.410        | 125.746 | 125.074        | K[3]  |
| K[24] | <b>858.181</b> | 88.051         | 82.712         | 83.048  | 82.376         | K[2]  |
| D[25] | 896.524        | 45.353         | 40.014         | 40.349  | 39.678         | D[1]  |



# sp | P70696 | H2B1A\_MOUSE

LAK<sup>Acetyl</sup> 42.01 HAVSE

- ▶ fragmentation table for charge state 1+
- ▶ specType=etd
- ▶ score=31.20
- ▶ F097400.dat
- ▶ query=q140\_p1
- ▶ precursor=448.745530
- ▶ chargePrecursor=2
- ▶ itol=0.8

| AA   | c              | y              | z+1            | z+2            | z              | AA   |
|------|----------------|----------------|----------------|----------------|----------------|------|
| L[1] | 131.118        | <b>896.484</b> | <b>880.465</b> | 0.000          | 879.457        | L[8] |
| A[2] | 202.155        | 783.400        | <b>767.381</b> | 0.000          | <b>766.373</b> | A[7] |
| R[3] | 372.261        | 712.362        | <b>696.344</b> | <b>697.352</b> | 699.336        | R[6] |
| H[4] | <b>509.319</b> | 542.257        | <b>526.238</b> | <b>527.246</b> | 525.230        | H[5] |
| A[5] | 580.357        | 405.198        | 389.179        | 390.187        | 388.171        | A[4] |
| V[6] | <b>679.425</b> | 334.161        | 318.142        | 319.150        | 317.134        | V[3] |
| S[7] | <b>766.457</b> | 235.092        | 219.074        | 220.082        | 218.066        | S[2] |
| E[8] | 899.500        | 148.060        | 132.042        | 133.050        | 131.034        | E[1] |



# sp | Q64525 | H2B2B\_MOUSE

PDKASAPAPKKGS<sup>Acetyl</sup> KKAVTK<sup>Acetyl</sup> VQKKD<sup>42.01</sup>

- ▶ fragmentation table for charge state 1+
- ▶ specType=etd
- ▶ score=70.44
- ▶ F097403.dat
- ▶ query=q1881\_p1
- ▶ precursor=448.930050
- ▶ chargePrecursor=6
- ▶ itol=0.8

| AA | c  | y               | a+1            | a+2             | z               | AA              |   |    |
|----|----|-----------------|----------------|-----------------|-----------------|-----------------|---|----|
| P  | 1  | 115.087         | 2688.541       | 2672.522        | 0.000           | 2671.514        | P | 25 |
| D  | 3  | 239.114         | 2391.488       | 2375.469        | 0.000           | 2374.461        | D | 24 |
| P  | 3  | <b>327.166</b>  | 2676.461       | 2460.441        | 0.000           | 2459.434        | P | 23 |
| A  | 4  | <b>398.203</b>  | 2379.408       | 2363.389        | 0.000           | 2362.382        | A | 22 |
| K  | 5  | <b>526.298</b>  | 2308.371       | 2292.352        | 2291.360        | 2291.345        | K | 21 |
| S  | 6  | <b>613.330</b>  | 2180.276       | 2164.257        | 2165.265        | 2163.250        | S | 20 |
| A  | 7  | <b>684.368</b>  | 2093.244       | 2077.225        | 2078.233        | 2078.216        | A | 19 |
| P  | 8  | <b>781.420</b>  | 2022.207       | 2006.189        | 2007.196        | 2006.180        | P | 18 |
| A  | 9  | <b>852.457</b>  | 1925.154       | 1909.135        | 1910.143        | 1908.128        | A | 17 |
| P  | 10 | <b>949.510</b>  | 1854.117       | 1838.098        | 1839.106        | 1837.091        | P | 16 |
| K  | 11 | <b>1077.605</b> | 1757.064       | 1741.046        | 1742.053        | 1740.038        | K | 15 |
| K  | 12 | 1205.700        | 1628.969       | 1612.951        | 1613.958        | 1611.943        | K | 14 |
| Q  | 13 | <b>1262.722</b> | 1500.874       | 1484.856        | 1485.864        | 1483.849        | Q | 13 |
| S  | 14 | 1361.764        | 1443.853       | 1427.834        | <b>1428.842</b> | 1426.826        | S | 12 |
| K  | 15 | 1519.859        | 1314.810       | 1298.792        | 1299.799        | 1297.784        | K | 11 |
| K  | 16 | 1647.954        | 1186.715       | <b>1170.697</b> | 1171.705        | <b>1169.689</b> | K | 10 |
| A  | 17 | 1728.991        | 1058.620       | <b>1042.602</b> | 1043.610        | 1041.594        | A | 9  |
| V  | 18 | 1818.060        | 987.583        | 971.565         | 972.572         | <b>970.557</b>  | V | 8  |
| T  | 19 | 2019.107        | <b>888.515</b> | <b>872.496</b>  | 873.504         | <b>871.488</b>  | T | 7  |
| K  | 20 | 2099.213        | 757.469        | <b>771.449</b>  | <b>772.456</b>  | 770.441         | K | 6  |
| V  | 21 | 2188.281        | 617.362        | <b>601.343</b>  | <b>602.351</b>  | 600.335         | V | 5  |
| Q  | 22 | 2316.340        | 518.293        | <b>502.275</b>  | 503.282         | 501.267         | Q | 4  |
| K  | 23 | 2444.435        | 390.235        | <b>374.216</b>  | 375.224         | 373.209         | K | 3  |
| K  | 24 | 2572.530        | 262.140        | <b>246.121</b>  | 247.129         | 245.113         | K | 2  |
| D  | 25 | 2687.557        | 134.045        | 135.053         | 136.061         | 135.046         | D | 1  |

# sp | Q64525 | H2B2B\_MOUSE

PDKASAPAPKKGS<sup>Acetyl</sup> KKAVTK<sup>Acetyl</sup> VQKKD  
42.01 42.01

- ▶ fragmentation table for charge state 2+
- ▶ specType=etd
- ▶ score=70.44
- ▶ F097403.dat
- ▶ query=q1881\_p1
- ▶ precursor=448.930050
- ▶ chargePrecursor=6
- ▶ itol=0.8

| AA |    | c               | y              | z+1             | z+2             | z               | AA    |
|----|----|-----------------|----------------|-----------------|-----------------|-----------------|-------|
| P  | 1  | 58.047          | 1344.774       | 1336.765        | 0.504           | 1338.261        | P[25] |
| D  | 3  | 115.560         | 1236.248       | <b>1288.238</b> | 0.504           | <b>1287.734</b> | D[24] |
| P  | 3  | 104.087         | 1238.734       | 1230.725        | 0.504           | 1232.221        | P[23] |
| A  | 4  | 199.605         | 1190.208       | <b>1182.198</b> | 0.504           | 1181.694        | A[22] |
| K  | 5  | 263.653         | 1154.689       | 1146.680        | 1147.184        | 1146.178        | K[21] |
| S  | 6  | 307.169         | 1090.642       | 1082.632        | 1083.136        | 1082.128        | S[20] |
| A  | 7  | 352.687         | 1047.126       | 1039.116        | <b>1039.620</b> | 1038.612        | A[19] |
| P  | 8  | <b>391.214</b>  | 1011.609       | 1003.599        | 1004.102        | <b>1003.094</b> | P[18] |
| A  | 9  | <b>426.732</b>  | <b>963.081</b> | 955.071         | <b>955.575</b>  | 954.567         | A[17] |
| P  | 10 | 475.259         | 927.563        | 919.553         | 920.057         | 919.049         | P[16] |
| K  | 11 | <b>539.306</b>  | 879.036        | <b>871.026</b>  | <b>871.530</b>  | 870.522         | K[15] |
| K  | 12 | <b>603.354</b>  | 814.988        | <b>806.979</b>  | <b>807.483</b>  | <b>806.475</b>  | K[14] |
| Q  | 13 | <b>631.864</b>  | 750.941        | <b>742.931</b>  | <b>743.435</b>  | <b>742.428</b>  | Q[13] |
| S  | 14 | 688.398         | <b>722.430</b> | <b>714.421</b>  | <b>714.925</b>  | <b>713.917</b>  | S[12] |
| K  | 15 | <b>760.433</b>  | <b>657.909</b> | 649.899         | 650.403         | <b>649.396</b>  | K[11] |
| K  | 16 | <b>824.481</b>  | <b>593.861</b> | <b>585.852</b>  | <b>586.356</b>  | <b>585.348</b>  | K[10] |
| A  | 17 | <b>859.999</b>  | 529.814        | <b>521.804</b>  | <b>522.308</b>  | <b>521.301</b>  | A[9]  |
| V  | 18 | <b>909.533</b>  | 464.765        | <b>486.286</b>  | <b>486.790</b>  | <b>485.782</b>  | V[8]  |
| T  | 19 | <b>960.057</b>  | 414.781        | <b>436.752</b>  | <b>437.256</b>  | 436.248         | T[7]  |
| K  | 20 | <b>1045.110</b> | <b>394.237</b> | <b>386.228</b>  | <b>386.732</b>  | <b>385.724</b>  | K[6]  |
| V  | 21 | <b>1094.644</b> | 309.184        | <b>301.175</b>  | <b>301.679</b>  | <b>300.671</b>  | V[5]  |
| Q  | 22 | 1158.674        | 269.650        | <b>251.641</b>  | <b>252.145</b>  | 251.137         | Q[4]  |
| K  | 23 | 1222.721        | 195.621        | 187.612         | 188.116         | 187.108         | K[3]  |
| K  | 24 | 1286.768        | 131.574        | 123.564         | 124.068         | 123.060         | K[2]  |
| D  | 25 | 1344.282        | 87.528         | 89.517          | 89.021          | 89.013          | D[1]  |

# sp | Q64525 | H2B2B\_MOUSE

PDKASAPAPKKGS<sup>Acetyl</sup> KKAVTK<sup>Acetyl</sup> VQKKD  
42.01 42.01

- ▶ fragmentation table for charge state 3+
- ▶ specType=etd
- ▶ score=70.44
- ▶ F097403.dat
- ▶ query=q1881\_p1
- ▶ precursor=448.930050
- ▶ chargePrecursor=6
- ▶ itol=0.8

| AA |    | c              | y              | z+1            | z+2            | z              | AA    |
|----|----|----------------|----------------|----------------|----------------|----------------|-------|
| P  | 1  | 30.034         | <b>896.852</b> | 891.512        | 0.672          | <b>891.176</b> | P[25] |
| D  | 2  | 77.376         | 864.501        | <b>859.161</b> | 0.672          | <b>858.825</b> | D[24] |
| P  | 3  | 109.727        | <b>826.159</b> | 820.819        | 0.672          | 820.483        | P[23] |
| A  | 4  | 133.406        | 793.808        | <b>788.468</b> | 0.672          | <b>788.132</b> | A[22] |
| K  | 5  | 176.104        | 770.129        | <b>764.789</b> | <b>765.125</b> | <b>764.453</b> | K[21] |
| S  | 6  | 205.115        | 727.436        | <b>722.091</b> | <b>722.427</b> | 721.759        | S[20] |
| A  | 7  | 228.794        | 698.420        | 691.560        | 693.416        | 692.744        | A[19] |
| P  | 8  | 291.145        | <b>674.741</b> | <b>669.401</b> | <b>669.737</b> | <b>669.105</b> | P[18] |
| A  | 9  | <b>284.824</b> | 642.890        | <b>637.050</b> | <b>637.386</b> | <b>636.714</b> | A[17] |
| P  | 10 | 317.175        | 618.711        | <b>613.371</b> | <b>613.707</b> | <b>613.035</b> | P[16] |
| K  | 11 | 359.873        | <b>586.360</b> | <b>581.020</b> | <b>581.356</b> | <b>580.684</b> | K[15] |
| K  | 12 | <b>402.572</b> | 543.061        | <b>538.322</b> | <b>538.658</b> | <b>537.986</b> | K[14] |
| G  | 13 | <b>421.579</b> | 500.963        | <b>495.623</b> | <b>495.959</b> | <b>495.287</b> | G[13] |
| S  | 14 | 468.593        | 481.956        | <b>476.616</b> | <b>476.952</b> | <b>476.280</b> | S[12] |
| K  | 15 | <b>507.291</b> | 438.942        | <b>433.602</b> | <b>433.938</b> | <b>433.266</b> | K[11] |
| K  | 16 | <b>549.990</b> | 396.243        | <b>390.904</b> | <b>391.240</b> | 390.568        | K[10] |
| A  | 17 | <b>573.669</b> | 353.545        | 348.205        | 348.541        | 347.869        | A[9]  |
| V  | 18 | <b>606.691</b> | 320.866        | 324.526        | 324.862        | 324.190        | V[8]  |
| T  | 19 | <b>640.374</b> | 296.843        | 291.504        | 291.840        | 291.168        | T[7]  |
| K  | 20 | <b>697.076</b> | 263.161        | 257.821        | 258.157        | 257.485        | K[6]  |
| V  | 21 | <b>730.099</b> | 206.459        | 201.119        | 201.455        | 200.783        | V[5]  |
| Q  | 22 | <b>772.785</b> | 173.436        | 168.096        | 168.432        | 167.760        | Q[4]  |
| K  | 23 | <b>815.483</b> | 130.750        | 125.410        | 125.746        | 125.074        | K[3]  |
| K  | 24 | <b>858.181</b> | 88.051         | 82.712         | 83.048         | 82.376         | K[2]  |
| D  | 25 | <b>896.524</b> | 45.353         | 40.014         | 40.349         | 39.678         | D[1]  |

# sp | Q64525 | H2B2B\_MOUSE

PDKASAPAPKKGS<sup>Acetyl</sup> KKAVTK<sup>Acetyl</sup> VQKKD  
42.01 42.01

- ▶ fragmentation table for charge state 4+
- ▶ specType=etd
- ▶ score=70.44
- ▶ F097403.dat
- ▶ query=q1881\_p1
- ▶ precursor=448.930050
- ▶ chargePrecursor=6
- ▶ itol=0.8

| AA    | c              | y              | z+1            | z+2            | z              | AA    |
|-------|----------------|----------------|----------------|----------------|----------------|-------|
| P[1]  | 29.527         | <b>672.891</b> | <b>668.886</b> | 0.755          | <b>668.634</b> | P[25] |
| D[2]  | 58.284         | <b>648.627</b> | <b>644.623</b> | 0.755          | <b>644.371</b> | D[24] |
| P[3]  | 82.547         | <b>619.871</b> | <b>615.866</b> | 0.755          | <b>615.614</b> | P[23] |
| A[4]  | 100.306        | 595.608        | <b>591.603</b> | 0.755          | <b>591.351</b> | A[22] |
| K[5]  | 132.130        | <b>577.848</b> | <b>573.844</b> | <b>574.096</b> | <b>573.592</b> | K[21] |
| S[6]  | 154.088        | 549.324        | 541.820        | 542.072        | 541.568        | S[20] |
| A[7]  | 171.947        | 524.056        | 520.052        | 520.314        | 519.810        | A[19] |
| P[8]  | 196.111        | 506.307        | <b>502.303</b> | <b>502.554</b> | <b>502.051</b> | P[18] |
| A[9]  | 213.870        | 482.044        | 478.039        | 478.291        | 477.787        | A[17] |
| P[10] | 236.133        | 464.285        | 460.280        | 460.532        | 460.028        | P[16] |
| K[11] | 270.157        | 440.022        | 436.017        | <b>436.269</b> | 435.765        | K[15] |
| K[12] | 302.180        | 407.998        | 403.993        | 404.245        | 403.741        | K[14] |
| G[13] | 316.436        | 375.974        | 371.969        | 372.221        | 371.717        | G[13] |
| S[14] | 348.696        | 361.719        | 357.714        | 357.966        | 357.462        | S[12] |
| K[15] | 389.720        | 329.458        | 325.453        | 325.705        | 325.201        | K[11] |
| K[16] | <b>412.744</b> | 297.434        | 293.430        | 293.682        | 293.178        | K[10] |
| A[17] | 430.503        | 265.411        | 261.406        | 261.658        | 261.154        | A[9]  |
| V[18] | 455.270        | 247.651        | 243.647        | 243.899        | 243.395        | V[8]  |
| T[19] | <b>480.532</b> | 222.884        | <b>218.880</b> | 219.131        | <b>218.628</b> | T[7]  |
| K[20] | 523.059        | 197.622        | 193.618        | 193.870        | 193.366        | K[6]  |
| V[21] | <b>547.826</b> | 155.096        | 151.091        | 151.343        | 150.839        | V[5]  |
| Q[22] | <b>579.840</b> | 130.329        | 126.324        | 126.576        | 126.072        | Q[4]  |
| K[23] | <b>611.864</b> | 98.314         | 94.309         | 94.561         | 94.057         | K[3]  |
| K[24] | <b>643.888</b> | 66.290         | 62.285         | 62.538         | 62.034         | K[2]  |
| D[25] | 672.045        | 34.261         | 30.253         | 30.514         | 30.010         | D[1]  |



# sp | Q64525 | H2B2B\_MOUSE

PDKAKSAPAPKKGS <sup>Acetyl</sup>42.01 KKAVTK <sup>Acetyl</sup>42.01 VQKKD

- ▶ fragmentation table for charge state 5+
- ▶ specType=etd
- ▶ score=70.44
- ▶ F097403.dat
- ▶ query=q1881\_p1
- ▶ precursor=448.930050
- ▶ chargePrecursor=6
- ▶ itol=0.8

| AA    | c              | y              | z+1            | z+2            | z              | AA    |
|-------|----------------|----------------|----------------|----------------|----------------|-------|
| P[1]  | 23.623         | <b>538.514</b> | <b>535.310</b> | 0.806          | 535.109        | P[25] |
| D[2]  | 46.629         | 519.103        | <b>515.900</b> | 0.806          | <b>515.698</b> | D[24] |
| F[3]  | 66.239         | <b>496.098</b> | <b>492.894</b> | 0.806          | <b>492.693</b> | F[23] |
| A[4]  | 80.447         | <b>476.687</b> | 473.484        | 0.806          | 473.282        | A[22] |
| K[5]  | 106.065        | 462.480        | 459.276        | 459.478        | 459.075        | K[21] |
| S[6]  | 123.472        | <b>436.861</b> | <b>433.657</b> | <b>433.859</b> | <b>433.056</b> | S[20] |
| A[7]  | 137.079        | 419.652        | <b>416.251</b> | 419.652        | <b>416.049</b> | A[19] |
| F[8]  | 157.090        | 405.247        | <b>402.043</b> | <b>402.245</b> | <b>401.842</b> | F[18] |
| A[9]  | 171.297        | <b>385.837</b> | 382.633        | 382.834        | 382.431        | A[17] |
| P[10] | 190.708        | 371.629        | 368.425        | 368.627        | 368.224        | P[16] |
| K[11] | 216.327        | 352.219        | 349.015        | 349.217        | 348.813        | K[15] |
| K[12] | 241.946        | <b>326.600</b> | 323.396        | 323.598        | 323.194        | K[14] |
| G[13] | 253.350        | <b>300.981</b> | 297.777        | 297.979        | 297.575        | G[13] |
| S[14] | 279.159        | 289.576        | 286.373        | 286.574        | 286.171        | S[12] |
| K[15] | 304.778        | 283.768        | 280.564        | 280.766        | 280.363        | K[11] |
| K[16] | 330.397        | 278.149        | 274.945        | 275.147        | 274.744        | K[10] |
| A[17] | 344.604        | 272.530        | 269.326        | 269.528        | 269.125        | A[9]  |
| V[18] | 364.418        | 198.122        | 195.119        | 195.320        | 194.917        | V[8]  |
| T[19] | 384.627        | 178.509        | 175.305        | 175.507        | 175.103        | T[7]  |
| K[20] | 418.648        | 158.299        | 155.096        | 155.297        | 154.894        | K[6]  |
| V[21] | 438.462        | 124.278        | 121.074        | 121.276        | 120.873        | V[5]  |
| Q[22] | 464.074        | 104.464        | 101.261        | 101.462        | 101.059        | Q[4]  |
| K[23] | 489.693        | 78.853         | 75.649         | 75.851         | 75.447         | K[3]  |
| K[24] | <b>515.312</b> | 53.234         | 50.030         | 50.232         | 49.828         | K[2]  |
| D[25] | <b>538.317</b> | 27.613         | 24.411         | 24.613         | 24.209         | D[1]  |

# sp | Q64525 | H2B2B\_MOUSE

PDKASAPAPKKGS <sup>Acetyl</sup>KKAVTK <sup>Acetyl</sup>VQKKD  
42.01 42.01

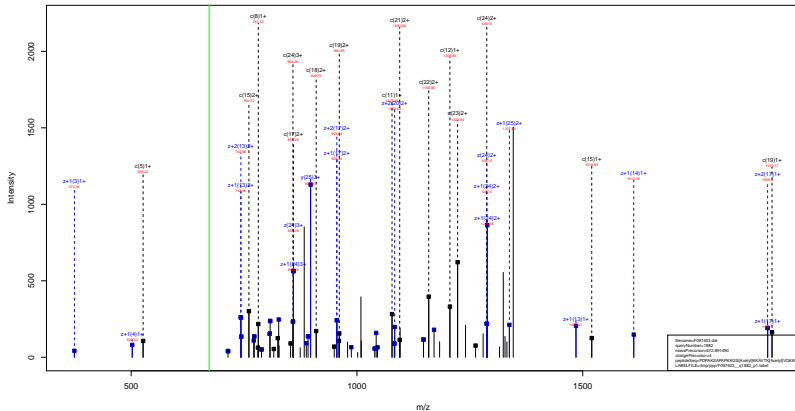

# sp | Q64525 | H2B2B\_MOUSE

PDKASAPAPKKGS<sup>Acetyl</sup>42.01 KKAVTK<sup>Acetyl</sup>42.01 VQKKD

- ▶ fragmentation table for charge state 1+
- ▶ specType=etd
- ▶ score=80.75
- ▶ F097403.dat
- ▶ query=q1882\_p1
- ▶ precursor=672.891490
- ▶ chargePrecursor=4
- ▶ itol=0.8

| AA | c               | y              | z+1             | z+2             | z        | AA  |
|----|-----------------|----------------|-----------------|-----------------|----------|-----|
| P  | 115.087         | 2688.541       | 2672.522        | 0.000           | 2671.514 | P25 |
| D  | 210.114         | 2591.488       | 2575.469        | 0.000           | 2574.461 | D24 |
| P  | 327.106         | 2476.461       | 2460.442        | 0.000           | 2459.434 | P23 |
| A  | 398.203         | 2379.408       | 2363.389        | 0.000           | 2362.382 | A22 |
| K  | <b>526.298</b>  | 2308.371       | 2292.352        | 2293.360        | 2291.345 | K21 |
| S  | 613.330         | 2180.276       | 2164.257        | 2165.265        | 2163.250 | S20 |
| A  | 664.368         | 2093.244       | 2077.225        | 2078.233        | 2076.218 | A19 |
| P  | <b>781.420</b>  | 2022.201       | 2006.182        | 2007.190        | 2005.169 | P18 |
| A  | <b>852.457</b>  | 1925.154       | <b>1909.135</b> | <b>1910.143</b> | 1908.128 | A17 |
| P  | <b>949.510</b>  | 1854.117       | 1838.098        | 1839.106        | 1837.091 | P16 |
| K  | <b>1077.605</b> | 1757.064       | 1741.045        | 1742.053        | 1740.038 | K15 |
| K  | <b>1205.700</b> | 1628.969       | <b>1612.951</b> | 1613.958        | 1611.943 | K14 |
| G  | <b>1262.722</b> | 1530.874       | <b>1484.856</b> | 1485.864        | 1483.848 | G13 |
| S  | 1391.954        | 1443.831       | 1427.812        | 1428.820        | 1426.805 | S12 |
| K  | <b>1519.859</b> | 1314.810       | 1298.792        | 1299.799        | 1297.784 | K11 |
| K  | 1647.954        | 1186.715       | <b>1170.697</b> | 1171.705        | 1169.689 | K10 |
| A  | 1718.991        | 1058.620       | <b>1042.602</b> | 1043.610        | 1041.594 | A09 |
| V  | 1818.060        | <b>987.583</b> | 971.565         | 972.572         | 970.557  | V08 |
| T  | <b>1919.107</b> | <b>888.515</b> | 872.496         | 873.504         | 871.488  | T07 |
| R  | 2039.213        | 759.489        | <b>741.469</b>  | <b>742.456</b>  | 740.441  | R06 |
| V  | 2188.281        | 617.362        | 601.343         | 602.351         | 600.335  | V05 |
| Q  | 2316.340        | 518.293        | <b>502.275</b>  | 503.282         | 501.267  | Q04 |
| K  | 2444.435        | 390.235        | <b>374.216</b>  | 375.224         | 373.208  | K03 |
| K  | 2572.530        | 262.140        | 246.121         | 247.129         | 245.113  | K02 |
| D  | 2687.557        | 134.045        | 118.028         | 119.034         | 117.018  | D01 |

# sp | Q64525 | H2B2B\_MOUSE

PDKASAPAPKKGS <sup>Acetyl</sup>42.01 KKAVTK <sup>Acetyl</sup>42.01 VQKKD

- ▶ fragmentation table for charge state 2+
- ▶ specType=etd
- ▶ score=80.75
- ▶ F097403.dat
- ▶ query=q1882\_p1
- ▶ precursor=672.891490
- ▶ chargePrecursor=4
- ▶ itol=0.8

| AA |    | c               | y        | a+1             | a+2             | z               | AA    |
|----|----|-----------------|----------|-----------------|-----------------|-----------------|-------|
| P  | 1  | 58.047          | 1344.774 | <b>1336.765</b> | 0.504           | 138.261         | P[25] |
| D  | 3  | 115.560         | 1296.248 | <b>1288.238</b> | 0.504           | <b>1387.734</b> | D[24] |
| P  | 3  | 104.087         | 1238.734 | 1230.725        | 0.504           | 1232.221        | P[23] |
| A  | 4  | 199.605         | 1190.208 | 1182.199        | 0.504           | 1181.694        | A[22] |
| K  | 5  | 263.653         | 1154.689 | <b>1146.680</b> | <b>1147.184</b> | 1146.178        | K[21] |
| S  | 6  | 307.169         | 1090.642 | <b>1082.632</b> | <b>1083.136</b> | <b>1082.128</b> | S[20] |
| A  | 7  | 362.697         | 1047.126 | <b>1039.116</b> | <b>1039.620</b> | 1038.612        | A[19] |
| P  | 8  | 393.214         | 911.609  | 1003.599        | 1004.102        | 1003.094        | P[18] |
| A  | 9  | 426.732         | 963.081  | <b>955.071</b>  | <b>955.575</b>  | 954.567         | A[17] |
| P  | 10 | 475.259         | 927.563  | 919.553         | 920.057         | 919.049         | P[16] |
| K  | 11 | 539.306         | 879.036  | 871.026         | 871.530         | 870.523         | K[15] |
| K  | 12 | 603.354         | 814.988  | <b>806.979</b>  | <b>807.483</b>  | <b>806.475</b>  | K[14] |
| Q  | 13 | 633.384         | 750.941  | <b>742.931</b>  | <b>743.435</b>  | <b>742.428</b>  | Q[13] |
| S  | 14 | 696.398         | 722.430  | <b>714.421</b>  | <b>714.925</b>  | <b>713.917</b>  | S[12] |
| K  | 15 | <b>760.433</b>  | 657.909  | 649.899         | 650.403         | 649.396         | K[11] |
| K  | 16 | <b>824.481</b>  | 593.861  | 585.852         | 586.356         | 585.348         | K[10] |
| A  | 17 | <b>859.999</b>  | 529.814  | 521.804         | 522.308         | 521.301         | A[9]  |
| V  | 18 | <b>909.533</b>  | 464.795  | 456.785         | 457.289         | 456.282         | V[8]  |
| T  | 19 | <b>960.057</b>  | 404.761  | 436.752         | 437.256         | 436.249         | T[7]  |
| K  | 20 | <b>1045.110</b> | 394.727  | 386.720         | 387.224         | 386.217         | K[6]  |
| V  | 21 | <b>1094.644</b> | 309.184  | 301.175         | 301.679         | 300.671         | V[5]  |
| Q  | 22 | <b>1158.674</b> | 259.650  | 251.641         | 252.145         | 251.137         | Q[4]  |
| K  | 23 | <b>1222.721</b> | 195.621  | 187.612         | 188.116         | 187.108         | K[3]  |
| K  | 24 | <b>1286.766</b> | 131.574  | 123.564         | 124.068         | 123.060         | K[2]  |
| D  | 25 | 1344.282        | 87.528   | 89.537          | 89.021          | 89.013          | D[1]  |

# sp | Q64525 | H2B2B\_MOUSE

PDKASAPAPKKGS<sup>Acetyl</sup>42.01 KKAVTK<sup>Acetyl</sup>42.01 VQKKD

- ▶ fragmentation table for charge state 3+
- ▶ specType=etd
- ▶ score=80.75
- ▶ F097403.dat
- ▶ query=q1882\_p1
- ▶ precursor=672.891490
- ▶ chargePrecursor=4
- ▶ itol=0.8

| AA    | c              | y              | z+1            | z+2     | z              | AA    |
|-------|----------------|----------------|----------------|---------|----------------|-------|
| P[1]  | 39.034         | <b>896.052</b> | <b>891.512</b> | 0.672   | <b>891.176</b> | P[25] |
| D[2]  | 77.376         | 864.501        | <b>859.161</b> | 0.672   | <b>858.825</b> | D[24] |
| P[3]  | 109.727        | <b>826.159</b> | 820.819        | 0.672   | 820.483        | P[23] |
| A[4]  | 133.406        | 793.808        | <b>788.468</b> | 0.672   | <b>788.132</b> | A[22] |
| K[5]  | 178.104        | 770.129        | 764.789        | 765.125 | 764.453        | K[21] |
| S[6]  | 205.115        | 727.435        | 722.001        | 722.437 | 721.795        | S[20] |
| A[7]  | 228.794        | 698.420        | 693.080        | 693.416 | 692.744        | A[19] |
| P[8]  | 261.145        | 674.741        | 669.401        | 669.737 | 669.065        | P[18] |
| A[9]  | 284.824        | 642.390        | 637.050        | 637.386 | 636.714        | A[17] |
| P[10] | 317.175        | 618.711        | 613.371        | 613.707 | 613.035        | P[16] |
| K[11] | 359.873        | 586.360        | 581.020        | 581.356 | 580.684        | K[15] |
| K[12] | 402.572        | 543.661        | 538.322        | 538.658 | 537.986        | K[14] |
| G[13] | 421.579        | 500.963        | 495.623        | 495.959 | 495.287        | G[13] |
| S[14] | 464.963        | 481.956        | 476.616        | 476.952 | 476.280        | S[12] |
| K[15] | 507.291        | 438.942        | 433.602        | 433.938 | 433.266        | K[11] |
| K[16] | 549.990        | 396.243        | 390.904        | 391.240 | 390.568        | K[10] |
| A[17] | 573.669        | 353.543        | 348.204        | 348.541 | 347.869        | A[9]  |
| V[18] | 606.691        | 329.866        | 324.526        | 324.862 | 324.190        | V[8]  |
| T[19] | 640.374        | 296.843        | 291.504        | 291.840 | 291.168        | T[7]  |
| K[20] | 697.076        | 263.161        | 257.821        | 258.157 | 257.485        | K[6]  |
| V[21] | 730.099        | 206.459        | 201.119        | 201.455 | 200.783        | V[5]  |
| Q[22] | <b>772.785</b> | 173.438        | 168.098        | 168.432 | 167.760        | Q[4]  |
| K[23] | <b>815.483</b> | 130.750        | 125.410        | 125.746 | 125.074        | K[3]  |
| K[24] | <b>858.181</b> | 88.051         | 82.712         | 83.048  | 82.376         | K[2]  |
| D[25] | 896.524        | 45.353         | 40.014         | 40.349  | 39.678         | D[1]  |

sp | P62806 | H4\_MOUSE

[Acetyl]SGRGKGGKGL

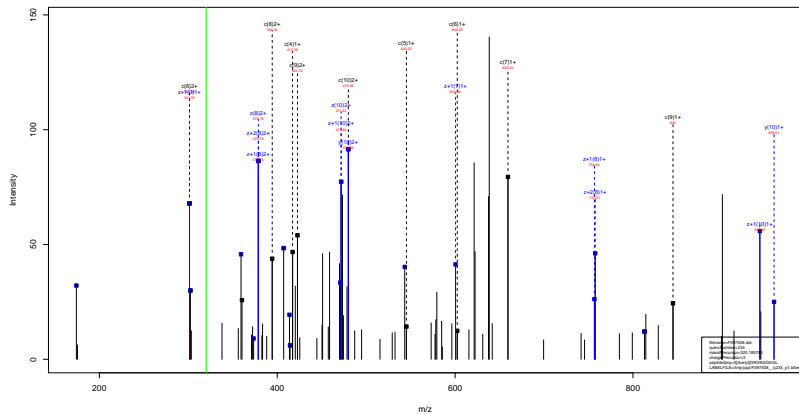

# sp | P62806 | H4\_MOUSE

[Acetyl]SGRGKGGKGL

- ▶ fragmentation table for charge state 1+
- ▶ specType=etd
- ▶ score=36.06
- ▶ F097408.dat
- ▶ query=q234\_p1
- ▶ precursor=320.185780
- ▶ chargePrecursor=3
- ▶ itol=0.8

| AA    | c              | y              | z+1            | z+2            | z              | AA    |
|-------|----------------|----------------|----------------|----------------|----------------|-------|
| S[1]  | 147.076        | <b>958.543</b> | <b>942.524</b> | 0.000          | 941.516        | S[10] |
| G[2]  | 204.098        | 829.500        | <b>813.482</b> | 0.000          | <b>812.474</b> | G[9]  |
| R[3]  | <b>360.199</b> | 772.479        | <b>756.460</b> | <b>757.468</b> | 755.452        | R[8]  |
| Q[4]  | <b>417.220</b> | 616.378        | <b>600.359</b> | 601.367        | 599.351        | Q[7]  |
| K[5]  | <b>545.315</b> | 559.356        | <b>543.337</b> | 544.345        | 542.330        | K[6]  |
| G[6]  | <b>602.337</b> | 431.261        | <b>415.243</b> | 416.250        | <b>414.235</b> | G[5]  |
| G[7]  | <b>659.358</b> | <b>374.240</b> | 358.221        | <b>359.229</b> | 357.213        | G[4]  |
| K[8]  | 797.453        | 317.218        | <b>301.200</b> | <b>302.207</b> | 300.192        | K[3]  |
| G[9]  | <b>844.475</b> | 389.123        | 373.105        | <b>374.112</b> | 372.097        | G[2]  |
| L[10] | 957.559        | 132.102        | 116.083        | 117.091        | 115.075        | L[1]  |

# sp | P62806 | H4\_MOUSE

[Acetyl]SGRGKGGKGL

- ▶ fragmentation table for charge state 2+
- ▶ specType=etd
- ▶ score=36.06
- ▶ F097408.dat
- ▶ query=q234\_p1
- ▶ precursor=320.185780
- ▶ chargePrecursor=3
- ▶ itol=0.8

| AA    | c              | y              | z+1            | z+2            | z              | AA    |
|-------|----------------|----------------|----------------|----------------|----------------|-------|
| S[1]  | 74.042         | <b>479.775</b> | <b>471.766</b> | 0.504          | <b>471.262</b> | S[10] |
| G[2]  | 102.553        | 415.254        | <b>407.244</b> | 0.504          | <b>406.740</b> | G[9]  |
| R[3]  | 180.603        | 386.743        | <b>378.734</b> | <b>379.238</b> | <b>378.230</b> | R[8]  |
| Q[4]  | 209.114        | 308.092        | <b>300.683</b> | <b>301.187</b> | 300.179        | Q[7]  |
| K[5]  | 273.161        | 280.182        | 272.172        | 272.676        | 271.668        | K[6]  |
| G[6]  | <b>301.672</b> | 216.134        | 208.125        | 208.629        | 207.621        | G[5]  |
| G[7]  | 330.183        | 187.624        | 179.614        | 180.118        | 179.110        | G[4]  |
| K[8]  | <b>394.230</b> | 139.114        | 131.103        | 131.607        | 130.600        | K[3]  |
| G[9]  | <b>422.741</b> | 95.065         | 87.056         | 87.560         | 86.552         | G[2]  |
| L[10] | <b>479.283</b> | 56.555         | 58.545         | 59.049         | 58.041         | L[1]  |





# sp | P15864 | H12\_MOUSE

[Acetyl]SEAAPAAPAAAPPAEKAPAKKKAAKKPAGVRRKASGPPVSEL

- ▶ fragmentation table for charge state 1+
- ▶ specType=etd
- ▶ score=37.87
- ▶ F097409.dat
- ▶ query=q3967\_p1
- ▶ precursor=823.675610
- ▶ chargePrecursor=5
- ▶ itol=0.8

| AA | c  | y               | z+1            | z+2             | z               | AA              |       |
|----|----|-----------------|----------------|-----------------|-----------------|-----------------|-------|
| S  | 1  | 147.079         | 4114.325       | 4098.306        | 0.000           | 4097.206        | S[42] |
| E  | 2  | 276.119         | 3985.282       | 3969.263        | 0.000           | 3968.258        | E[41] |
| A  | 3  | 347.156         | 3856.240       | 3840.221        | 0.000           | 3839.213        | A[40] |
| A  | 4  | 418.193         | 3727.198       | 3711.179        | 0.000           | 3710.174        | A[39] |
| P  | 5  | 515.246         | 3714.165       | 3698.147        | 0.000           | 3697.139        | P[38] |
| A  | 6  | 586.283         | 3617.133       | 3601.094        | 0.000           | 3600.086        | A[37] |
| A  | 7  | 657.320         | 3546.075       | 3530.057        | 0.000           | 3529.049        | A[36] |
| P  | 8  | 754.373         | 3475.038       | 3459.020        | 0.000           | 3458.013        | P[35] |
| A  | 9  | 825.410         | 3377.998       | 3361.967        | 0.000           | 3360.959        | A[34] |
| A  | 10 | 896.447         | 3306.948       | 3290.930        | 0.000           | 3289.922        | A[33] |
| A  | 11 | 967.484         | 3235.911       | 3219.893        | 0.000           | 3218.885        | A[32] |
| P  | 12 | 1064.537        | 3164.874       | 3148.856        | 0.000           | 3147.848        | P[31] |
| P  | 13 | 1161.590        | 3093.837       | 3077.819        | 0.000           | 3076.811        | P[30] |
| A  | 14 | 1232.627        | 2970.769       | 2954.750        | 0.000           | 2953.742        | A[29] |
| E  | 15 | <b>1361.676</b> | 2899.732       | 2883.713        | 0.000           | 2882.705        | E[28] |
| R  | 16 | <b>1489.765</b> | 2770.689       | 2754.670        | 2738.678        | 2737.669        | R[27] |
| A  | 17 | 1586.802        | 2642.594       | 2626.575        | 2627.583        | 2625.568        | A[26] |
| P  | 18 | 1657.854        | 2571.557       | 2555.538        | 2556.546        | 2554.530        | P[25] |
| A  | 19 | 1728.892        | 2474.504       | 2458.485        | 2459.493        | 2457.478        | A[24] |
| K  | 20 | 1856.988        | 2403.467       | 2387.448        | 2388.456        | 2386.441        | K[23] |
| K  | 21 | 1985.084        | 2275.392       | 2259.373        | 2260.381        | 2258.366        | K[22] |
| K  | 22 | 2113.178        | 2147.317       | 2131.298        | 2132.306        | 2130.291        | K[21] |
| A  | 23 | 2184.214        | 2019.182       | 2003.163        | 2004.171        | 2002.156        | A[20] |
| A  | 24 | 2255.251        | 1948.145       | 1932.126        | 1933.134        | 1931.119        | A[19] |
| K  | 25 | 2383.346        | 1877.108       | 1861.089        | 1862.097        | 1860.082        | K[18] |
| K  | 26 | 2511.441        | 1749.013       | 1733.994        | <b>1734.002</b> | <b>1731.986</b> | K[17] |
| P  | 27 | 2639.536        | 1620.938       | 1604.919        | 1605.927        | 1603.912        | P[16] |
| A  | 28 | 2678.573        | 1551.899       | 1535.880        | 1536.888        | 1534.873        | A[15] |
| G  | 29 | 2736.552        | 1452.828       | 1436.809        | 1437.817        | 1435.802        | G[14] |
| V  | 30 | 2835.620        | 1395.807       | 1379.788        | <b>1380.796</b> | <b>1378.780</b> | V[13] |
| R  | 31 | 2991.721        | 1296.738       | <b>1280.720</b> | <b>1281.727</b> | 1279.712        | R[12] |
| R  | 32 | 3147.823        | 1140.637       | <b>1124.618</b> | 1125.626        | 1123.611        | R[11] |
| R  | 33 | 3275.918        | 894.536        | <b>968.517</b>  | <b>969.525</b>  | 967.509         | R[10] |
| A  | 34 | 3366.955        | 856.441        |                 | 941.420         | 939.413         | A[9]  |
| S  | 35 | 3433.987        | 795.404        | 799.385         | 770.393         | 768.377         | S[8]  |
| G  | 36 | 3491.008        | 696.372        | 682.353         | 683.361         | 681.345         | G[7]  |
| P  | 37 | 3588.001        | <b>641.350</b> | 625.332         | 626.340         | 624.324         | P[6]  |
| P  | 38 | 3685.114        | 544.288        | 538.270         | 539.287         | 537.271         | P[5]  |
| V  | 39 | 3784.182        | 447.245        | 441.226         | 432.234         | 430.218         | V[4]  |
| S  | 40 | 3871.214        | 348.177        | 332.158         | 333.166         | 331.150         | S[3]  |
| E  | 41 | 4000.257        | 261.144        | 245.126         | 246.134         | 244.118         | E[2]  |
| L  | 42 | 4113.341        | 132.022        | 118.003         | 117.001         | 115.075         | L[1]  |

# sp | P15864 | H12\_MOUSE

[Acetyl]SEAAPAAPAAAPPAEKAPAKKKAACKKPAGVRRKASGPPVSEL

- ▶ fragmentation table for charge state 2+
- ▶ specType=etd
- ▶ score=37.87
- ▶ F097409.dat
- ▶ query=q3967\_p1
- ▶ precursor=823.675610
- ▶ chargePrecursor=5
- ▶ itol=0.8

| AA | c  | y               | z+1             | z+2             | z               | AA              |       |
|----|----|-----------------|-----------------|-----------------|-----------------|-----------------|-------|
| S  | 1  | 74.042          | 2057.666        | 2049.657        | 0.504           | 2049.153        | S(42) |
| E  | 2  | 138.563         | 1093.145        | 1085.135        | 0.504           | 1084.631        | E(41) |
| A  | 3  | 174.082         | 1028.623        | 1020.614        | 0.504           | 1020.110        | A(40) |
| A  | 4  | 209.600         | 1043.705        | 1035.695        | 0.504           | 1034.592        | A(39) |
| F  | 5  | 298.127         | <b>1857.586</b> | 1849.577        | 0.504           | 1849.073        | F(38) |
| A  | 6  | 293.645         | 1859.060        | 1851.051        | 0.504           | 1850.547        | A(37) |
| A  | 7  | 338.164         | 1773.541        | 1765.532        | 0.504           | 1765.028        | A(36) |
| F  | 8  | 377.690         | <b>1738.023</b> | 1730.013        | 0.504           | 1729.510        | F(35) |
| A  | 9  | 413.209         | 1689.496        | 1681.487        | 0.504           | 1680.983        | A(34) |
| A  | 10 | 448.727         | 1653.976        | <b>1645.969</b> | 0.504           | <b>1645.465</b> | A(33) |
| A  | 11 | 484.246         | 1618.455        | <b>1610.450</b> | 0.504           | <b>1609.946</b> | A(32) |
| F  | 12 | 532.772         | 1582.941        | <b>1574.931</b> | 0.504           | <b>1574.427</b> | F(31) |
| F  | 13 | 581.290         | 1534.414        | 1526.405        | 0.504           | 1525.901        | F(30) |
| A  | 14 | 616.817         | 1485.888        | 1477.879        | 0.504           | 1477.375        | A(29) |
| E  | 15 | 661.336         | 1450.369        | 1442.360        | 0.504           | 1441.856        | E(28) |
| R  | 16 | 745.386         | 1386.846        | 1377.839        | <b>1378.343</b> | 1377.338        | R(27) |
| A  | 17 | 780.904         | 1321.801        | <b>1313.791</b> | <b>1314.295</b> | 1313.287        | A(26) |
| F  | 18 | 829.431         | 1286.282        | 1278.273        | 1278.777        | 1277.769        | F(25) |
| A  | 19 | 864.949         | 1237.756        | 1229.746        | 1230.250        | 1229.242        | A(24) |
| K  | 20 | <b>928.997</b>  | 1202.227        | 1194.218        | 1194.732        | 1193.724        | K(23) |
| K  | 21 | <b>993.044</b>  | <b>1138.190</b> | <b>1130.180</b> | <b>1130.684</b> | 1129.676        | K(22) |
| R  | 22 | <b>1057.092</b> | <b>1074.142</b> | <b>1066.133</b> | <b>1066.637</b> | 1065.629        | R(21) |
| A  | 23 | <b>1092.100</b> | 1010.095        | <b>1002.085</b> | <b>1002.589</b> | 1001.581        | A(20) |
| A  | 24 | <b>1128.129</b> | 974.576         | 966.567         | 967.071         | 966.063         | A(19) |
| K  | 25 | <b>1192.176</b> | 939.058         | 931.048         | 931.552         | 930.544         | K(18) |
| K  | 26 | 1259.228        | 875.010         | <b>867.001</b>  | <b>867.505</b>  | <b>866.497</b>  | K(17) |
| F  | 27 | <b>1304.740</b> | 810.963         | 802.953         | 803.457         | 802.449         | F(16) |
| A  | 28 | <b>1340.269</b> | 762.435         | 754.427         | 754.931         | 753.923         | A(15) |
| G  | 29 | 1388.780        | 726.918         | 718.908         | <b>719.412</b>  | 718.404         | G(14) |
| V  | 30 | <b>1418.314</b> | 698.407         | <b>690.398</b>  | <b>690.902</b>  | <b>689.894</b>  | V(13) |
| R  | 31 | <b>1496.364</b> | 648.873         | <b>640.863</b>  | <b>641.367</b>  | <b>640.359</b>  | R(12) |
| R  | 32 | <b>1574.415</b> | 610.822         | 602.813         | 603.317         | 602.309         | R(11) |
| R  | 33 | 1633.442        | 602.772         | 604.762         | 605.266         | 604.258         | R(10) |
| A  | 34 | 1673.961        | 428.724         | 420.715         | 421.219         | 420.211         | A(9)  |
| S  | 35 | 1717.497        | 391.206         | 383.196         | 383.700         | 382.692         | S(8)  |
| G  | 36 | 1746.028        | 349.690         | 341.680         | 342.184         | 341.176         | G(7)  |
| F  | 37 | 1784.534        | 321.179         | 313.170         | 313.673         | 312.665         | F(6)  |
| F  | 38 | 1843.680        | 272.652         | 264.643         | 265.147         | 264.139         | F(5)  |
| V  | 39 | 1892.595        | 224.120         | 216.111         | 216.621         | 215.612         | V(4)  |
| S  | 40 | 1936.111        | 174.592         | 166.583         | 167.086         | 166.078         | S(3)  |
| E  | 41 | 2000.632        | 131.076         | 123.067         | 123.570         | 122.562         | E(2)  |
| L  | 42 | 2057.174        | 66.555          | 58.545          | 59.049          | 58.041          | L(1)  |

# sp | P15864 | H12\_MOUSE

[Acetyl]SEAAPAAPAAAPPAEKAPAKKKAAKKPAGVRRKASGPPVSEL

- ▶ fragmentation table for charge state 3+
- ▶ specType=etd
- ▶ score=37.87
- ▶ F097409.dat
- ▶ query=q3967\_p1
- ▶ precursor=823.675610
- ▶ chargePrecursor=5
- ▶ itol=0.8

| AA | c  | y               | z+1             | z+2             | z              | AA              |       |
|----|----|-----------------|-----------------|-----------------|----------------|-----------------|-------|
| S  | 1  | 49.697          | 1372.113        | <b>1366.774</b> | 0.672          | 1366.436        | S[42] |
| E  | 2  | 92.711          | <b>1329.099</b> | <b>1323.759</b> | 0.672          | 1323.421        | E[41] |
| A  | 3  | 126.390         | 1236.955        | <b>1260.745</b> | 0.672          | 1260.409        | A[40] |
| A  | 4  | 140.059         | <b>1267.406</b> | <b>1257.064</b> | 0.672          | <b>1256.730</b> | A[39] |
| P  | 5  | 172.420         | <b>1238.727</b> | 1233.357        | 0.672          | 1233.051        | P[38] |
| A  | 6  | 196.099         | 1206.376        | 1201.036        | 0.672          | 1200.700        | A[37] |
| A  | 7  | 219.778         | <b>1182.697</b> | <b>1177.357</b> | 0.672          | <b>1177.021</b> | A[36] |
| P  | 8  | 252.129         | <b>1159.018</b> | 1153.676        | 0.672          | 1153.342        | P[35] |
| A  | 9  | 275.808         | 1126.667        | 1121.327        | 0.672          | 1120.990        | A[34] |
| A  | 10 | 299.487         | 1094.316        | 1088.976        | 0.672          | 1088.641        | A[33] |
| A  | 11 | 323.166         | 1061.965        | 1056.625        | 0.672          | 1056.289        | A[32] |
| P  | 12 | 355.517         | <b>1055.630</b> | <b>1050.290</b> | 0.672          | <b>1049.954</b> | P[31] |
| P  | 13 | 387.868         | 1023.270        | 1017.929        | 0.672          | 1017.603        | P[30] |
| A  | 14 | 411.547         | 990.920         | <b>985.588</b>  | 0.672          | 985.252         | A[29] |
| E  | 15 | 454.201         | 967.249         | 961.909         | 0.672          | 961.573         | E[28] |
| R  | 16 | 497.260         | 924.233         | <b>918.895</b>  | <b>918.231</b> | <b>918.559</b>  | R[27] |
| A  | 17 | 520.939         | 881.530         | <b>876.197</b>  | <b>876.533</b> | <b>875.861</b>  | A[26] |
| P  | 18 | 553.290         | 857.857         | 852.518         | 852.854        | 852.182         | P[25] |
| A  | 19 | 576.969         | 825.506         | 820.167         | 820.503        | 819.831         | A[24] |
| K  | 20 | 619.667         | 801.827         | 796.488         | 796.824        | 796.152         | K[23] |
| K  | 21 | 662.265         | 779.129         | 773.789         | 774.125        | 773.453         | K[22] |
| K  | 22 | 705.064         | 736.431         | 731.091         | 731.427        | 730.755         | K[21] |
| A  | 23 | 728.743         | 673.732         | 668.393         | 668.729        | 668.057         | A[20] |
| A  | 24 | 752.422         | 650.053         | 644.714         | 645.050        | 644.378         | A[19] |
| K  | 25 | 795.120         | 626.374         | 621.035         | 621.371        | 620.699         | K[18] |
| K  | 26 | 837.818         | 583.676         | 578.336         | 578.672        | 578.000         | K[17] |
| P  | 27 | <b>870.169</b>  | 540.976         | 535.636         | 535.974        | 535.302         | P[16] |
| K  | 28 | 893.148         | 508.927         | 503.587         | 503.923        | 503.251         | K[15] |
| G  | 29 | <b>912.855</b>  | 484.940         | 479.600         | 479.944        | 479.272         | G[14] |
| V  | 30 | 945.878         | 465.940         | 460.601         | 460.937        | 460.265         | V[13] |
| R  | 31 | <b>997.912</b>  | 432.918         | 427.578         | 427.914        | 427.242         | R[12] |
| R  | 32 | <b>1049.946</b> | 380.884         | 375.544         | 375.880        | 375.208         | R[11] |
| K  | 33 | <b>1092.644</b> | 328.850         | 323.511         | 323.847        | 323.175         | K[10] |
| A  | 34 | 1115.619        | 286.152         | 280.812         | 281.148        | 280.476         | A[9]  |
| S  | 35 | <b>1145.334</b> | 262.473         | 257.133         | 257.469        | 256.797         | S[8]  |
| G  | 36 | 1164.341        | 233.462         | 228.123         | 228.459        | 227.787         | G[7]  |
| P  | 37 | 1196.692        | 214.455         | 209.115         | 209.451        | 208.779         | P[6]  |
| P  | 38 | 1229.043        | 182.104         | 176.765         | 177.100        | 176.429         | P[5]  |
| V  | 39 | <b>1262.666</b> | 149.753         | 144.414         | 144.750        | 144.078         | V[4]  |
| S  | 40 | <b>1291.676</b> | 116.780         | 111.441         | 111.777        | 111.105         | S[3]  |
| E  | 41 | 1334.030        | 87.220          | 82.380          | 82.716         | 82.044          | E[2]  |
| L  | 42 | 1371.785        | 44.705          | 39.366          | 39.702         | 39.030          | L[1]  |

# sp | P15864 | H12\_MOUSE

[Acetyl]SEAAPAAPAAAPPAEKAPAKKKAACKKPAGVRRKASGPPVSEL

- ▶ fragmentation table for charge state 4+
- ▶ specType=etd
- ▶ score=37.87
- ▶ F097409.dat
- ▶ query=q3967\_p1
- ▶ precursor=823.675610
- ▶ chargePrecursor=5
- ▶ itol=0.8

| AA | c  | y               | z+1             | z+2             | z              | AA              |       |
|----|----|-----------------|-----------------|-----------------|----------------|-----------------|-------|
| S  | 1  | 37.525          | <b>1029.337</b> | <b>1025.332</b> | 0.755          | <b>1025.080</b> | S[42] |
| E  | 2  | 69.785          | 997.070         | <b>993.071</b>  | 0.755          | <b>992.819</b>  | E[41] |
| A  | 3  | 67.544          | 968.315         | 960.811         | 0.755          | 960.550         | A[40] |
| A  | 4  | 105.304         | <b>947.056</b>  | 943.051         | 0.755          | 942.790         | A[39] |
| P  | 5  | 129.567         | <b>929.297</b>  | 925.292         | 0.755          | 925.040         | P[38] |
| A  | 6  | 147.836         | 905.034         | 901.029         | 0.755          | 900.777         | A[37] |
| A  | 7  | 165.696         | 887.274         | 883.270         | 0.755          | 883.010         | A[36] |
| P  | 8  | 189.349         | <b>869.515</b>  | 865.510         | 0.755          | 865.250         | P[35] |
| A  | 9  | 207.108         | 845.252         | 841.247         | 0.755          | 840.990         | A[34] |
| A  | 10 | 224.867         | 827.491         | 823.486         | 0.755          | 823.230         | A[33] |
| A  | 11 | 242.627         | 809.733         | 805.729         | 0.755          | 805.477         | A[32] |
| P  | 12 | 266.890         | 791.974         | 787.969         | 0.755          | 787.711         | P[31] |
| P  | 13 | 291.153         | 767.711         | 763.706         | 0.755          | 763.454         | P[30] |
| A  | 14 | 308.912         | 743.448         | 739.443         | 0.755          | 739.191         | A[29] |
| E  | 15 | 341.173         | 725.688         | 721.684         | 0.755          | 721.432         | E[28] |
| R  | 16 | 373.197         | 693.421         | 689.423         | 0.699          | 689.171         | R[27] |
| A  | 17 | 390.956         | 661.404         | 657.399         | 0.657          | 657.147         | A[26] |
| P  | 18 | 415.219         | 643.645         | <b>639.640</b>  | <b>639.892</b> | 639.380         | P[25] |
| A  | 19 | 432.978         | 619.381         | 615.377         | 615.629        | 615.125         | A[24] |
| K  | 20 | 465.002         | 601.622         | 597.618         | 597.869        | 597.366         | K[23] |
| K  | 21 | 497.026         | 589.598         | 585.594         | 585.846        | 585.342         | K[22] |
| K  | 22 | 529.050         | 577.575         | 573.570         | 573.822        | 573.318         | K[21] |
| A  | 23 | 546.809         | 555.551         | 551.546         | 551.798        | 551.294         | A[20] |
| A  | 24 | 564.568         | 487.792         | 483.787         | 484.039        | 483.535         | A[19] |
| K  | 25 | 596.592         | 470.037         | 466.028         | 466.280        | 465.776         | K[18] |
| K  | 26 | 628.616         | 438.000         | 434.004         | 434.256        | 433.752         | K[17] |
| P  | 27 | 652.879         | 405.985         | 401.980         | 402.232        | <b>401.728</b>  | P[16] |
| K  | 28 | 670.638         | 381.721         | 377.717         | 377.969        | 377.465         | K[15] |
| G  | 29 | 684.893         | 363.962         | 359.958         | 360.210        | 359.706         | G[14] |
| V  | 30 | 709.661         | 349.707         | 345.702         | 345.954        | 345.450         | V[13] |
| R  | 31 | 748.686         | 324.940         | 320.935         | 321.187        | 320.683         | R[12] |
| R  | 32 | 787.711         | 285.915         | 281.910         | 282.162        | 281.658         | R[11] |
| K  | 33 | 819.735         | 246.889         | 242.885         | 243.137        | 242.633         | K[10] |
| A  | 34 | 837.494         | 214.866         | 210.863         | 211.113        | 210.609         | A[9]  |
| S  | 35 | 859.252         | 197.106         | 193.102         | 193.354        | 192.850         | S[8]  |
| G  | 36 | 873.507         | 175.348         | 171.344         | 171.596        | 171.092         | G[7]  |
| P  | 37 | 897.771         | 161.097         | 157.088         | 157.340        | 156.836         | P[6]  |
| P  | 38 | 922.034         | 136.830         | 132.825         | 133.077        | 132.573         | P[5]  |
| V  | 39 | <b>945.801</b>  | 112.567         | 108.562         | 108.814        | 108.310         | V[4]  |
| S  | 40 | <b>968.559</b>  | 87.800          | 83.795          | 84.047         | 83.543          | S[3]  |
| E  | 41 | 1000.820        | 65.042          | 62.037          | 62.289         | 61.785          | E[2]  |
| L  | 42 | <b>1029.091</b> | 33.781          | 29.776          | 30.028         | 29.524          | L[1]  |



# sp | P62806 | H4\_MOUSE

GKGGAK <sup>Acetyl</sup>42.01 RHRK <sup>Dimethyl</sup>28.03 VL

- ▶ fragmentation table for charge state 1+
- ▶ specType=etd
- ▶ score=31.96
- ▶ F097410.dat
- ▶ query=q1729\_p1
- ▶ precursor=459.625100
- ▶ chargePrecursor=3
- ▶ itol=0.8

| AA   | c               | y               | z+1             | z+2             | z               | AA   |
|------|-----------------|-----------------|-----------------|-----------------|-----------------|------|
| G 1  | 75.055          | <b>1376.860</b> | 1360.841        | 0.000           | <b>1359.833</b> | G 12 |
| K 2  | 263.150         | 1319.836        | <b>1303.820</b> | 1304.857        | 1302.812        | K 11 |
| G 3  | <b>266.172</b>  | 1192.743        | 1175.725        | <b>1176.732</b> | 1174.711        | G 10 |
| G 4  | <b>317.193</b>  | 1134.722        | <b>1118.703</b> | 1119.711        | 1117.695        | G 9  |
| A 5  | <b>388.230</b>  | 1077.700        | <b>1061.682</b> | 1062.689        | 1060.674        | A 8  |
| K 6  | <b>558.336</b>  | <b>1006.663</b> | <b>990.645</b>  | 991.652         | 989.637         | K 7  |
| R 7  | <b>714.437</b>  | 836.559         | <b>820.539</b>  | 821.547         | 819.531         | R 6  |
| H 8  | <b>851.496</b>  | <b>680.457</b>  | <b>664.438</b>  | 665.446         | 663.431         | H 5  |
| R 9  | <b>1007.597</b> | 543.395         | <b>527.379</b>  | 528.387         | 526.371         | R 4  |
| K 10 | <b>1163.723</b> | 387.297         | 371.278         | <b>372.286</b>  | 370.270         | K 3  |
| V 11 | 1262.792        | 231.170         | 215.152         | 216.159         | 214.144         | V 2  |
| L 12 | 1375.876        | 132.102         | 116.083         | 117.091         | 115.075         | L 1  |

# sp | P62806 | H4\_MOUSE

GKGGAK<sup>Acetyl</sup> RHRK<sup>Dimethyl</sup> VL<sup>28.03</sup>  
42.01

- ▶ fragmentation table for charge state 2+
- ▶ specType=etd
- ▶ score=31.96
- ▶ F097410.dat
- ▶ query=q1729\_p1
- ▶ precursor=459.625100
- ▶ chargePrecursor=3
- ▶ itol=0.8

| AA    | c              | y              | z+1            | z+2            | z              | AA    |
|-------|----------------|----------------|----------------|----------------|----------------|-------|
| G[1]  | 38.031         | <b>688.933</b> | <b>680.924</b> | 0.504          | <b>680.420</b> | G[12] |
| K[2]  | 102.079        | <b>660.423</b> | <b>652.413</b> | <b>652.917</b> | <b>651.309</b> | K[11] |
| G[3]  | 130.589        | 596.175        | <b>588.366</b> | <b>588.870</b> | 587.862        | G[10] |
| G[4]  | 159.100        | 567.805        | <b>559.855</b> | <b>560.359</b> | 559.351        | G[9]  |
| A[5]  | 194.619        | 539.354        | 511.344        | 511.848        | 510.841        | A[8]  |
| K[6]  | 279.672        | <b>503.835</b> | 495.820        | 496.330        | 495.322        | K[7]  |
| R[7]  | 357.722        | 418.782        | 410.773        | 411.277        | 410.269        | R[6]  |
| H[8]  | 426.252        | 340.732        | 332.723        | 333.226        | 332.219        | H[5]  |
| K[9]  | <b>504.302</b> | 272.202        | 264.193        | 264.697        | 263.689        | K[4]  |
| K[10] | <b>582.365</b> | 194.152        | 186.143        | 186.646        | 185.639        | K[3]  |
| V[11] | <b>631.899</b> | 116.089        | 108.079        | 108.583        | 107.576        | V[2]  |
| L[12] | <b>688.441</b> | 06.555         | 58.545         | 59.048         | 58.041         | L[1]  |



# sp | P62806 | H4\_MOUSE

[Acetyl]SGR<sup>Acetyl</sup>RGK  
42.01 GGKGL

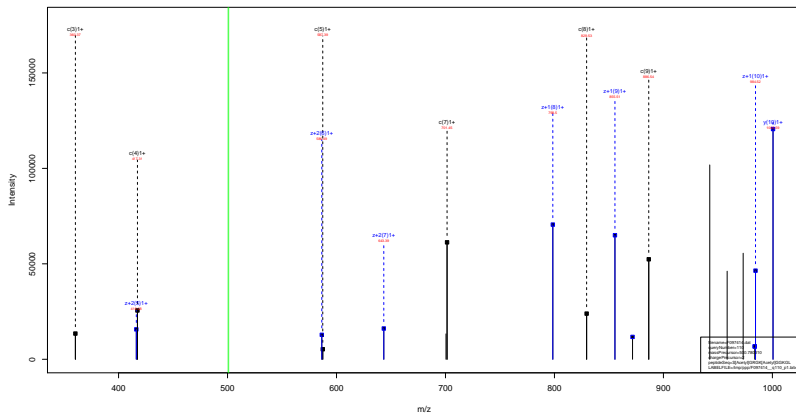

# sp | P62806 | H4\_MOUSE

[Acetyl]SGR<sup>Acetyl</sup>RGK<sub>42.01</sub> GGKGL

- ▶ fragmentation table for charge state 1+
- ▶ specType=etd
- ▶ score=49.48
- ▶ F097414.dat
- ▶ query=q110-p1
- ▶ precursor=500.780310
- ▶ chargePrecursor=2
- ▶ itol=0.8

| AA |    | c              | y               | z+1            | z+2            | z              | AA |    |
|----|----|----------------|-----------------|----------------|----------------|----------------|----|----|
| S  | 1  | 147.076        | <b>1000.553</b> | <b>984.535</b> | 0.000          | <b>983.527</b> | S  | 10 |
| G  | 2  | 204.098        | <b>871.511</b>  | <b>855.492</b> | 0.000          | 854.484        | G  | 9  |
| R  | 3  | <b>360.199</b> | 814.489         | <b>798.471</b> | 799.478        | 797.463        | R  | 8  |
| G  | 4  | <b>417.220</b> | 658.388         | 642.370        | <b>643.377</b> | 641.362        | G  | 7  |
| K  | 5  | <b>587.326</b> | 601.367         | 585.348        | <b>586.356</b> | 584.340        | K  | 6  |
| G  | 6  | 644.347        | 431.261         | 415.243        | <b>416.250</b> | 414.235        | G  | 5  |
| G  | 7  | <b>701.369</b> | 374.240         | 358.221        | 359.229        | 357.213        | G  | 4  |
| K  | 8  | <b>823.464</b> | 317.218         | 301.200        | 302.207        | 300.192        | K  | 3  |
| G  | 9  | <b>886.485</b> | 189.123         | 173.105        | 174.112        | 172.090        | G  | 2  |
| L  | 10 | 959.509        | 132.102         | 116.083        | 117.091        | 115.075        | L  | 1  |



# sp | P62806 | H4\_MOUSE

[Acetyl]SGRGKGGKGLGKGGAKRHRK <sup>Dimethyl</sup> 28.03 VLR

- ▶ fragmentation table for charge state 1+
- ▶ specType=etd
- ▶ score=148.32
- ▶ F097416.dat
- ▶ query=q1564\_p1
- ▶ precursor=608.378550
- ▶ chargePrecursor=4
- ▶ itol=0.8

| AA    | c               | y        | z+1             | z+2             | z               | AA    |
|-------|-----------------|----------|-----------------|-----------------|-----------------|-------|
| S[1]  | 147.076         | 2430.475 | 2414.457        | 0.000           | 2413.449        | S[23] |
| G[2]  | 204.098         | 2301.433 | 2285.414        | 0.000           | 2284.406        | G[22] |
| R[3]  | <b>360.199</b>  | 2244.411 | 2228.392        | 2229.400        | 2227.385        | R[21] |
| G[4]  | <b>417.220</b>  | 2088.310 | 2072.291        | 2073.299        | 2071.284        | G[20] |
| K[5]  | <b>545.315</b>  | 2031.289 | 2015.270        | 2016.278        | 2014.262        | K[19] |
| G[6]  | <b>602.337</b>  | 1973.184 | <b>1887.175</b> | <b>1888.183</b> | 1889.167        | G[18] |
| G[7]  | <b>659.358</b>  | 1846.172 | 1830.153        | <b>1831.161</b> | 1829.146        | G[17] |
| K[8]  | <b>787.453</b>  | 1789.151 | 1773.132        | <b>1774.140</b> | 1772.124        | K[16] |
| G[9]  | <b>844.475</b>  | 1661.056 | 1645.037        | <b>1646.045</b> | 1644.029        | G[15] |
| L[10] | <b>957.559</b>  | 1604.034 | 1588.015        | <b>1589.023</b> | 1587.008        | L[14] |
| G[11] | <b>1014.580</b> | 1490.950 | 1474.932        | <b>1475.939</b> | 1473.924        | G[13] |
| R[12] | <b>1142.675</b> | 1433.929 | 1417.910        | <b>1418.918</b> | 1416.903        | R[12] |
| G[13] | <b>1199.697</b> | 1305.834 | 1289.815        | <b>1290.823</b> | <b>1288.807</b> | G[11] |
| G[14] | <b>1256.718</b> | 1248.812 | <b>1232.794</b> | <b>1233.801</b> | <b>1231.786</b> | G[10] |
| A[15] | <b>1327.755</b> | 1191.791 | 1175.772        | <b>1176.780</b> | 1174.764        | A[9]  |
| K[16] | <b>1455.850</b> | 1120.754 | 1104.735        | <b>1105.743</b> | 1103.727        | K[8]  |
| R[17] | <b>1611.951</b> | 860.659  | 875.648         | <b>977.646</b>  | 975.632         | R[7]  |
| R[18] | <b>1749.010</b> | 638.558  | <b>620.539</b>  | 621.547         | 619.533         | R[6]  |
| R[19] | <b>1905.111</b> | 609.499  | <b>681.480</b>  | 684.488         | 682.472         | R[5]  |
| K[20] | 2061.238        | 543.398  | <b>527.379</b>  | <b>528.387</b>  | 526.371         | K[4]  |
| V[21] | 2169.306        | 407.271  | <b>371.253</b>  | <b>372.261</b>  | 370.245         | V[3]  |
| L[22] | 2273.390        | 388.203  | <b>272.184</b>  | 273.192         | 271.176         | L[2]  |
| R[23] | 2429.491        | 175.119  | 199.100         | 199.108         | 198.092         | R[1]  |

# sp | P62806 | H4\_MOUSE

[Acetyl]SGRGKGGKGLGKGGAKRHRK<sup>Dimethyl</sup> VLR<sub>28.03</sub>

- ▶ fragmentation table for charge state 2+
- ▶ specType=etd
- ▶ score=148.32
- ▶ F097416.dat
- ▶ query=q1564\_p1
- ▶ precursor=608.378550
- ▶ chargePrecursor=4
- ▶ itol=0.8

| AA   | c               | y               | z+1             | z+2             | z               | AA   |
|------|-----------------|-----------------|-----------------|-----------------|-----------------|------|
| S 1  | 74.042          | <b>1215.741</b> | <b>1207.732</b> | 0.904           | 1207.220        | S 21 |
| G 2  | 102.553         | 1151.220        | <b>1143.211</b> | 0.904           | <b>1142.707</b> | G 22 |
| R 3  | 180.603         | <b>1122.709</b> | <b>1114.700</b> | <b>1115.204</b> | 1114.190        | R 21 |
| G 4  | 209.114         | 1044.659        | <b>1036.649</b> | <b>1037.153</b> | 1036.143        | G 20 |
| K 5  | 273.161         | 1016.148        | <b>1008.139</b> | <b>1008.643</b> | 1007.633        | K 19 |
| G 6  | 301.672         | 952.300         | <b>944.001</b>  | <b>944.505</b>  | <b>943.597</b>  | G 18 |
| G 7  | 330.183         | 923.590         | <b>915.580</b>  | <b>916.084</b>  | <b>915.076</b>  | G 17 |
| K 8  | 394.230         | 895.079         | <b>887.070</b>  | <b>887.574</b>  | <b>886.566</b>  | K 16 |
| G 9  | 422.741         | 831.053         | <b>823.022</b>  | <b>823.526</b>  | <b>822.518</b>  | G 15 |
| L 10 | 479.283         | 802.521         | 794.511         | 795.015         | 794.000         | L 14 |
| G 11 | 507.794         | 748.979         | <b>737.969</b>  | <b>738.473</b>  | 737.463         | G 13 |
| K 12 | 571.844         | 717.460         | <b>709.459</b>  | <b>709.963</b>  | <b>708.955</b>  | K 12 |
| G 13 | 600.352         | 651.421         | <b>645.411</b>  | <b>645.915</b>  | 644.907         | G 11 |
| G 14 | 638.863         | 624.910         | <b>616.900</b>  | <b>617.404</b>  | 616.397         | G 10 |
| A 15 | 664.301         | 590.399         | <b>588.390</b>  | <b>588.894</b>  | <b>587.886</b>  | A 9  |
| K 16 | <b>728.429</b>  | 560.881         | <b>552.871</b>  | <b>553.375</b>  | <b>552.367</b>  | K 8  |
| R 17 | <b>806.479</b>  | 498.833         | <b>488.824</b>  | <b>489.328</b>  | 488.320         | R 7  |
| H 18 | <b>875.009</b>  | 418.782         | 410.773         | 411.277         | 410.269         | H 6  |
| R 19 | <b>953.059</b>  | 350.253         | 342.244         | 342.748         | 341.740         | R 5  |
| K 20 | <b>1031.122</b> | <b>272.202</b>  | 264.193         | 264.697         | 263.689         | K 4  |
| V 21 | <b>1080.657</b> | 194.139         | 186.130         | 186.634         | 185.626         | V 3  |
| L 22 | 1137.209        | 144.605         | 136.596         | 137.100         | 136.092         | L 1  |
| R 23 | <b>1215.249</b> | 98.051          | 89.044          | 89.548          | 79.540          | R 1  |

# sp | P62806 | H4\_MOUSE

[Acetyl]SGRGKGGKGLGKGGAKRHRK<sup>Dimethyl</sup>VLR<sub>28.03</sub>

- ▶ fragmentation table for charge state 3+
- ▶ specType=etd
- ▶ score=148.32
- ▶ F097416.dat
- ▶ query=q1564\_p1
- ▶ precursor=608.378550
- ▶ chargePrecursor=4
- ▶ itol=0.8

| AA |      | c              | y              | z+1            | z+2            | z              | AA    |
|----|------|----------------|----------------|----------------|----------------|----------------|-------|
| S  | [1]  | 49.697         | <b>810.830</b> | <b>805.490</b> | 0.672          | <b>805.154</b> | S[23] |
| G  | [2]  | 68.704         | 767.816        | <b>762.476</b> | 0.672          | 762.140        | G[22] |
| E  | [3]  | 120.738        | 748.805        | <b>743.469</b> | <b>743.805</b> | <b>743.133</b> | E[21] |
| G  | [4]  | 139.743        | 696.775        | 693.437        | 693.771        | 691.599        | G[20] |
| K  | [5]  | 182.443        | 677.765        | 672.428        | 672.764        | 672.092        | K[19] |
| G  | [6]  | 201.450        | 635.069        | 629.730        | 630.066        | 629.394        | G[18] |
| G  | [7]  | 220.458        | 616.062        | 610.723        | 611.059        | 610.387        | G[17] |
| K  | [8]  | 263.156        | 597.055        | 591.716        | 592.051        | 591.380        | K[16] |
| G  | [9]  | 282.163        | <b>554.357</b> | 549.017        | 549.353        | 548.681        | G[15] |
| L  | [10] | 319.658        | 535.350        | 530.010        | 530.346        | 529.674        | L[14] |
| G  | [11] | 338.665        | 497.655        | 492.313        | 492.651        | 491.979        | G[13] |
| K  | [12] | 381.363        | 478.648        | 473.308        | 473.644        | 472.972        | K[12] |
| G  | [13] | 400.370        | 435.949        | 430.610        | 430.946        | 430.274        | G[11] |
| G  | [14] | 419.378        | <b>416.942</b> | 411.603        | 411.939        | 411.267        | G[10] |
| A  | [15] | 443.257        | 397.935        | 392.596        | 392.932        | 392.260        | A[9]  |
| K  | [16] | 485.955        | 374.256        | 368.917        | 369.252        | 368.581        | K[8]  |
| R  | [17] | 537.689        | 351.558        | 326.218        | 326.554        | 325.882        | R[7]  |
| H  | [18] | 583.675        | 279.524        | 274.185        | 274.520        | 273.849        | H[6]  |
| R  | [19] | 635.709        | 233.838        | 228.498        | 228.834        | 228.162        | R[5]  |
| K  | [20] | 687.751        | 181.804        | 176.463        | 176.800        | 176.129        | K[4]  |
| V  | [21] | 720.774        | 129.762        | 124.422        | 124.758        | 124.086        | V[3]  |
| L  | [22] | 753.808        | 96.739         | 91.400         | 91.736         | 91.064         | L[2]  |
| R  | [23] | <b>810.502</b> | 59.043         | 53.703         | 54.041         | 53.369         | R[1]  |

# sp | Q6ZWY9 | H2B1C\_MOUSE

PEPAKSAPAPKKGS Acetyl 42.01 K Acetyl 42.01 KAVT Acetyl 42.01 KAQKK

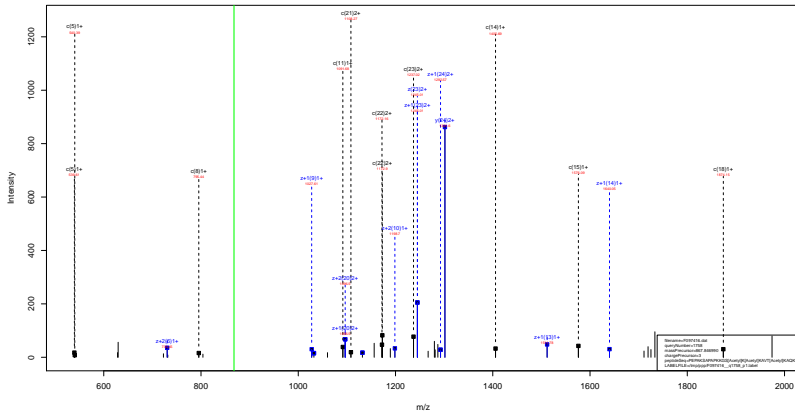

# sp | Q6ZWY9 | H2B1C\_MOUSE

PEPAKSAPAPKKGS <sup>Acetyl</sup>42.01 K <sup>Acetyl</sup>42.01 KAVT <sup>Acetyl</sup>42.01 KAQKK

- ▶ fragmentation table for charge state 1+
- ▶ specType=etd
- ▶ score=30.31
- ▶ F097416.dat
- ▶ query=q1758\_p1
- ▶ precursor=867.846990
- ▶ chargePrecursor=3
- ▶ itol=0.8

| AA  | c               | y        | z+1             | z+2             | z        | AA  |
|-----|-----------------|----------|-----------------|-----------------|----------|-----|
| P1  | 115.097         | 2601.509 | 2585.490        | 0.000           | 2584.482 | P24 |
| E2  | 244.129         | 2504.456 | 2488.437        | 0.000           | 2487.429 | E23 |
| P3  | 341.182         | 2376.412 | 2359.395        | 0.000           | 2358.387 | P22 |
| A4  | 412.319         | 2278.361 | 2262.342        | 0.000           | 2261.334 | A21 |
| K5  | <b>540.314</b>  | 2207.323 | 2191.305        | 2192.313        | 2190.297 | K20 |
| S6  | 627.346         | 2079.228 | 2063.210        | 2064.218        | 2062.202 | S19 |
| A7  | 698.393         | 1992.196 | 1976.178        | 1977.186        | 1975.170 | A18 |
| P8  | <b>795.436</b>  | 1921.159 | 1905.141        | 1906.148        | 1904.133 | P17 |
| A9  | 866.471         | 1824.107 | 1808.088        | 1809.096        | 1807.080 | A16 |
| P10 | 903.526         | 1753.066 | 1737.051        | 1738.059        | 1736.041 | P15 |
| K11 | <b>1091.621</b> | 1656.017 | <b>1639.998</b> | 1641.006        | 1638.990 | K14 |
| K12 | 1219.718        | 1527.922 | <b>1511.903</b> | 1512.911        | 1510.895 | K13 |
| G13 | 1276.737        | 1399.827 | 1383.808        | 1384.816        | 1382.800 | G12 |
| S14 | <b>1405.780</b> | 1342.805 | 1326.787        | 1327.794        | 1325.779 | S11 |
| K15 | <b>1575.885</b> | 1213.763 | 1197.744        | <b>1198.752</b> | 1196.736 | K10 |
| K16 | 1703.980        | 1043.697 | <b>1027.638</b> | 1028.646        | 1026.631 | K9  |
| A17 | 1775.017        | 915.562  | 899.543         | 900.551         | 898.536  | A8  |
| V18 | <b>1874.086</b> | 844.525  | 828.506         | 829.514         | 827.499  | V7  |
| T19 | 3017.144        | 745.457  | 729.438         | <b>730.446</b>  | 728.430  | T6  |
| K20 | 2145.239        | 602.398  | 586.380         | 587.388         | 585.372  | K5  |
| A21 | 2216.276        | 474.303  | 458.285         | 459.293         | 457.277  | A4  |
| Q22 | 2344.315        | 403.266  | 387.248         | 388.256         | 386.240  | Q3  |
| K23 | 2472.430        | 275.208  | 259.190         | 260.197         | 258.181  | K2  |
| K24 | 3000.525        | 147.113  | 131.094         | 132.102         | 130.086  | K1  |



# sp | Q6ZWY9 | H2B1C\_MOUSE

PEPAKSAPAPKKGS <sup>Acetyl</sup>42.01 K <sup>Acetyl</sup>42.01 KAVT <sup>Acetyl</sup>42.01 KAQKK

- ▶ fragmentation table for charge state 2+
- ▶ specType=etd
- ▶ score=30.31
- ▶ F097416.dat
- ▶ query=q1758\_p1
- ▶ precursor=867.846990
- ▶ chargePrecursor=3
- ▶ itol=0.8

| AA   | c               | y               | z+1             | z+2             | z               | AA   |
|------|-----------------|-----------------|-----------------|-----------------|-----------------|------|
| F 1  | 58.047          | <b>1301.258</b> | <b>1293.249</b> | 0.504           | <b>1292.745</b> | P 20 |
| E 2  | 122.568         | 1252.732        | <b>1244.722</b> | 0.504           | <b>1244.218</b> | E 23 |
| F 3  | 171.095         | 1188.210        | 1195.201        | 0.504           | 1179.697        | F 22 |
| A 4  | 258.611         | 1139.689        | <b>1131.675</b> | 0.504           | <b>1131.171</b> | A 21 |
| R 5  | 270.663         | 1104.185        | <b>1096.156</b> | <b>1096.660</b> | 1095.655        | R 20 |
| S 6  | 314.177         | 1040.118        | <b>1032.109</b> | <b>1032.612</b> | <b>1031.605</b> | S 19 |
| A 7  | 349.695         | 996.602         | 988.592         | 989.696         | 988.080         | A 18 |
| F 8  | 398.222         | 951.083         | 953.074         | 953.578         | 952.570         | F 17 |
| A 9  | 433.740         | 912.597         | 904.588         | 905.051         | 904.044         | A 16 |
| T 10 | 482.287         | 877.036         | 869.029         | 869.533         | 868.525         | T 15 |
| R 11 | 546.314         | 828.512         | 820.503         | 821.007         | 819.999         | R 14 |
| K 12 | 610.362         | 764.464         | 756.455         | 756.959         | 755.951         | K 13 |
| G 13 | 638.672         | 700.417         | 692.408         | 692.912         | 691.904         | G 12 |
| S 14 | 703.294         | 671.908         | 663.897         | 664.401         | 663.393         | S 11 |
| K 15 | 788.406         | 609.385         | 601.376         | 601.880         | 600.872         | K 10 |
| R 16 | 852.498         | 522.332         | 514.323         | 514.827         | 513.819         | R 9  |
| A 17 | 888.012         | 458.285         | 450.275         | 450.779         | 449.771         | A 8  |
| V 18 | 937.547         | 422.766         | 414.757         | 415.261         | 414.253         | V 7  |
| T 19 | 1009.076        | 373.232         | 365.223         | 365.727         | 364.719         | T 6  |
| K 20 | 1071.123        | 301.703         | 293.693         | 294.197         | 293.190         | K 5  |
| A 21 | <b>1108.642</b> | 239.655         | 229.646         | 230.150         | 229.142         | A 4  |
| Q 22 | <b>1172.671</b> | 202.137         | 194.127         | 194.631         | 193.623         | Q 3  |
| K 23 | <b>1236.718</b> | 138.108         | 130.098         | 130.602         | 129.594         | K 2  |
| K 24 | 1300.766        | 74.060          | 66.051          | 66.555          | 65.547          | K 1  |

# sp | Q8R1M2 | H2AJ\_MOUSE

DEELNKLLGRVTIAQGGVLPNIQAVLLPKKTESQKVKSK Acetyl 42.01

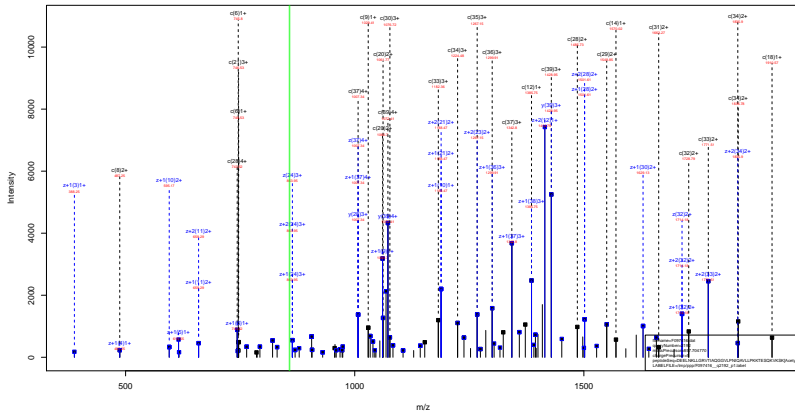

# sp | Q8R1M2 | H2AJ\_MOUSE

DEELNKLLGRVTIAQGGVLPNIQAVLLPKKTESQKVKSK Acetyl  
42.01

- ▶ fragmentation table for charge state 1+
- ▶ specType=etd
- ▶ score=97.18
- ▶ F097416.dat
- ▶ query=q2192.p1
- ▶ precursor=857.704770
- ▶ chargePrecursor=5
- ▶ itol=0.8

| AA    | c               | y               | z+1             | z+2             | z        | AA    |
|-------|-----------------|-----------------|-----------------|-----------------|----------|-------|
| D[1]  | 133.061         | 4294.465        | 4286.447        | 0.000           | 4267.439 | D[39] |
| E[2]  | 262.103         | 4169.438        | 4153.420        | 0.000           | 4152.412 | E[38] |
| E[3]  | 391.146         | 4040.396        | 4024.377        | 0.000           | 4023.369 | E[37] |
| L[4]  | 524.230         | 3911.351        | 3895.334        | 0.000           | 3894.327 | L[36] |
| N[5]  | 618.273         | 3786.260        | 3762.250        | 3783.258        | 3781.241 | N[35] |
| K[6]  | <b>746.368</b>  | 3684.226        | 3668.207        | 3669.215        | 3667.200 | K[34] |
| L[7]  | 859.452         | 3556.131        | 3540.113        | 3541.120        | 3539.105 | L[33] |
| L[8]  | <b>972.536</b>  | 3443.047        | 3427.028        | 3428.036        | 3426.021 | L[32] |
| G[9]  | <b>1029.558</b> | 3329.963        | 3313.944        | 3314.952        | 3312.937 | G[31] |
| R[10] | 1185.869        | 3222.942        | 3206.923        | 3207.931        | 3205.916 | R[30] |
| V[11] | 1284.727        | 3115.843        | 3100.822        | 3101.830        | 3099.814 | V[29] |
| T[12] | <b>1385.775</b> | 3017.772        | 3001.753        | 3002.761        | 3000.746 | T[28] |
| I[13] | 1468.859        | 2916.724        | 2900.706        | 2901.714        | 2899.699 | I[27] |
| A[14] | <b>1569.896</b> | 2803.640        | 2787.622        | 2788.629        | 2786.614 | A[26] |
| Q[15] | 1667.954        | 2732.603        | 2716.585        | 2717.592        | 2715.577 | Q[25] |
| G[16] | 1754.976        | 2604.543        | 2588.526        | 2589.534        | 2587.519 | G[24] |
| G[17] | 1811.997        | 2547.523        | 2531.505        | 2532.512        | 2530.497 | G[23] |
| V[18] | <b>1911.066</b> | 2460.502        | 2474.483        | 2475.491        | 2473.475 | V[22] |
| L[19] | 2024.150        | 2391.433        | 2375.415        | 2376.422        | 2374.407 | L[21] |
| P[20] | 2121.203        | 2278.340        | 2262.321        | 2263.328        | 2261.313 | P[20] |
| R[21] | 2235.246        | 2181.297        | 2165.278        | 2166.286        | 2164.270 | R[19] |
| L[22] | 2488.333        | 2091.254        | 2075.235        | 2076.243        | 2074.227 | L[18] |
| Q[23] | 2476.388        | 1954.170        | 1938.151        | 1939.159        | 1937.143 | Q[17] |
| A[24] | 2547.425        | 1826.111        | 1810.092        | 1811.100        | 1809.084 | A[16] |
| V[25] | 2646.494        | 1755.074        | 1739.055        | 1740.063        | 1738.047 | V[15] |
| L[26] | 2759.578        | 1656.005        | 1639.987        | <b>1640.995</b> | 1638.979 | L[14] |
| L[27] | 2872.660        | 1542.921        | 1526.903        | <b>1527.910</b> | 1525.895 | L[13] |
| P[28] | 2969.715        | 1429.837        | 1413.819        | <b>1414.826</b> | 1412.811 | P[12] |
| K[29] | 3097.810        | 1332.785        | <b>1316.766</b> | 1317.774        | 1315.758 | K[11] |
| K[30] | 3225.905        | 1204.660        | <b>1188.671</b> | 1189.679        | 1187.663 | K[10] |
| T[31] | 3326.952        | <b>1076.595</b> | <b>1060.576</b> | <b>1061.584</b> | 1059.568 | T[0]  |
| E[32] | 3455.995        | 975.547         | <b>959.528</b>  | 960.536         | 958.520  | E[8]  |
| S[33] | 3643.027        | 848.509         | <b>830.486</b>  | 831.493         | 829.477  | S[7]  |
| G[34] | 3871.065        | 759.472         | <b>743.454</b>  | <b>744.461</b>  | 742.446  | G[6]  |
| K[35] | 3799.180        | 631.414         | <b>615.395</b>  | <b>616.403</b>  | 614.387  | K[5]  |
| V[36] | 3898.249        | 503.319         | <b>487.300</b>  | 488.308         | 486.292  | V[4]  |
| K[37] | 4026.344        | 404.250         | <b>388.232</b>  | 389.239         | 387.224  | K[3]  |
| S[38] | 4113.376        | 276.195         | 260.137         | 261.144         | 259.129  | S[2]  |
| K[39] | 4283.481        | 189.123         | 173.105         | 174.112         | 172.097  | K[1]  |

# sp | Q8R1M2 | H2AJ\_MOUSE

DEELNKLLGRVTIAQGGVLPNIQAVLLPKKTESQKVKSK Acetyl  
42.01

- ▶ fragmentation table for charge state 2+
- ▶ specType=etd
- ▶ score=97.18
- ▶ F097416.dat
- ▶ query=q2192.p1
- ▶ precursor=857.704770
- ▶ chargePrecursor=5
- ▶ itol=0.8

| AA   | c               | y               | z+1             | z+2             | z               | AA   |
|------|-----------------|-----------------|-----------------|-----------------|-----------------|------|
| D 1  | 67.034          | 2142.738        | 2134.737        | 0.504           | 2134.223        | D 30 |
| E 2  | 181.955         | 2085.223        | 2077.213        | 0.504           | 2076.710        | E 38 |
| E 3  | 196.077         | 2020.702        | 2012.692        | 0.504           | 2012.189        | E 37 |
| L 4  | 252.619         | 1956.180        | 1948.171        | 0.504           | 1947.667        | L 36 |
| W 5  | 309.649         | 1899.636        | 1891.629        | 1092.333        | 1891.125        | W 25 |
| K 6  | 373.688         | 1842.617        | 1834.607        | <b>1835.111</b> | 1834.103        | K 34 |
| L 7  | 436.230         | 1778.569        | 1770.560        | <b>1771.064</b> | 1770.056        | L 33 |
| L 8  | <b>486.772</b>  | 1722.027        | <b>1714.018</b> | <b>1714.522</b> | <b>1713.514</b> | L 32 |
| G 9  | 515.262         | 1665.485        | <b>1657.476</b> | <b>1657.980</b> | 1656.972        | G 31 |
| R 10 | 593.333         | 1608.974        | <b>1623.965</b> | <b>1629.960</b> | <b>1628.461</b> | R 30 |
| V 11 | 642.967         | 1558.924        | 1550.915        | 1551.418        | <b>1550.411</b> | V 29 |
| T 12 | 693.391         | 1509.900        | <b>1501.380</b> | <b>1501.884</b> | <b>1500.876</b> | T 28 |
| L 13 | 749.933         | 1458.866        | 1450.857        | <b>1451.360</b> | 1450.353        | L 27 |
| A 14 | <b>785.452</b>  | 1402.324        | <b>1394.314</b> | <b>1394.818</b> | <b>1393.811</b> | A 26 |
| Q 15 | 849.401         | 1346.805        | <b>1358.796</b> | <b>1359.300</b> | 1358.292        | Q 25 |
| G 16 | 877.694         | 1302.776        | 1294.767        | 1295.271        | 1294.263        | G 24 |
| G 17 | <b>906.502</b>  | <b>1274.265</b> | 1266.256        | <b>1266.760</b> | 1265.752        | G 23 |
| V 18 | <b>956.037</b>  | 1245.755        | <b>1237.745</b> | <b>1238.249</b> | 1237.241        | V 22 |
| L 19 | 1012.579        | 1196.220        | <b>1188.211</b> | <b>1188.715</b> | <b>1187.707</b> | L 21 |
| P 20 | <b>1061.105</b> | 1139.678        | 1131.669        | 1132.173        | 1131.165        | P 20 |
| N 21 | 1138.129        | 1092.163        | <b>1083.143</b> | <b>1083.646</b> | <b>1082.639</b> | N 19 |
| I 22 | 1174.668        | <b>1034.130</b> | 1026.121        | 1026.625        | 1025.617        | I 18 |
| Q 23 | <b>1238.698</b> | 977.588         | 969.579         | 970.083         | 969.075         | Q 17 |
| A 24 | <b>1274.216</b> | 913.959         | <b>905.550</b>  | <b>906.054</b>  | 905.046         | A 16 |
| V 25 | <b>1323.751</b> | <b>878.041</b>  | <b>870.031</b>  | <b>870.535</b>  | <b>869.527</b>  | V 15 |
| L 26 | 1389.293        | 826.506         | <b>820.497</b>  | <b>821.001</b>  | <b>819.993</b>  | L 14 |
| L 27 | 1438.836        | 773.964         | <b>763.955</b>  | <b>764.459</b>  | <b>763.451</b>  | L 13 |
| P 28 | <b>1485.361</b> | 715.422         | 707.413         | 707.917         | 706.909         | P 12 |
| K 29 | <b>1549.408</b> | 666.896         | <b>658.887</b>  | <b>659.390</b>  | 658.383         | K 11 |
| K 30 | 1613.456        | 602.848         | <b>594.839</b>  | <b>595.343</b>  | 594.335         | K 10 |
| T 31 | <b>1663.980</b> | 538.801         | 530.792         | 531.295         | 530.288         | T 9  |
| E 32 | <b>1728.501</b> | 488.277         | 480.268         | 480.772         | 479.764         | E 8  |
| S 33 | <b>1772.017</b> | 423.756         | 415.746         | 416.250         | 415.243         | S 7  |
| Q 34 | <b>1836.046</b> | 360.240         | 352.230         | 352.734         | 351.727         | Q 6  |
| K 35 | 1908.094        | 316.211         | 308.201         | 308.705         | 307.697         | K 5  |
| V 36 | 1948.628        | 252.163         | 244.154         | 244.658         | 243.650         | V 4  |
| K 37 | 2023.676        | 202.629         | 194.619         | 195.123         | 194.115         | K 3  |
| S 38 | 2097.692        | 138.581         | 130.572         | 131.076         | 130.068         | S 2  |
| K 39 | 2142.244        | 85.065          | 87.056          | 87.560          | 86.552          | K 1  |

# sp | Q8R1M2 | H2AJ\_MOUSE

DEELNKLLGRVTIAQGGVLPNIQAVLLPKKTESQKVKSK Acetyl  
42.01

- ▶ fragmentation table for charge state 3+
- ▶ specType=etd
- ▶ score=97.18
- ▶ F097416.dat
- ▶ query=q2192.p1
- ▶ precursor=857.704770
- ▶ chargePrecursor=5
- ▶ itol=0.8

| AA   | c               | y               | z+1             | z+2             | z               | AA   |
|------|-----------------|-----------------|-----------------|-----------------|-----------------|------|
| D 1  | 45.025          | <b>1428.827</b> | 1423.487        | 0.672           | 1423.351        | D 30 |
| E 2  | 88.639          | <b>1390.484</b> | <b>1385.145</b> | 0.672           | 1384.809        | E 38 |
| E 3  | 131.054         | 1347.470        | <b>1342.131</b> | 0.672           | 1341.793        | E 37 |
| L 4  | 168.748         | <b>1304.456</b> | <b>1299.116</b> | 0.672           | 1298.760        | L 36 |
| W 5  | 208.763         | <b>1256.761</b> | 1251.423        | 1.361           | 1251.386        | W 35 |
| K 6  | 249.461         | 1235.747        | 1231.407        | <b>1223.743</b> | 1223.071        | K 34 |
| L 7  | 287.156         | 1188.049        | 1180.709        | 1181.048        | 1180.373        | L 33 |
| L 8  | 324.850         | 1148.354        | <b>1143.014</b> | <b>1143.350</b> | <b>1142.678</b> | L 32 |
| G 9  | 343.857         | 1110.659        | <b>1105.320</b> | <b>1105.656</b> | <b>1104.984</b> | G 31 |
| K 10 | 385.804         | 1091.852        | 1088.132        | 1088.548        | 1087.977        | K 30 |
| V 11 | 428.914         | <b>1039.618</b> | <b>1034.279</b> | 1034.015        | <b>1033.943</b> | V 29 |
| T 12 | 462.596         | <b>1006.596</b> | 1001.256        | 1001.592        | 1000.920        | T 28 |
| I 13 | 500.201         | <b>972.913</b>  | <b>967.573</b>  | <b>967.909</b>  | <b>967.237</b>  | I 27 |
| A 14 | 523.970         | 935.218         | <b>929.879</b>  | <b>930.215</b>  | <b>929.543</b>  | A 26 |
| Q 15 | 568.656         | 911.539         | <b>906.200</b>  | <b>906.536</b>  | <b>905.864</b>  | Q 25 |
| C 16 | 589.669         | 898.933         | <b>893.514</b>  | <b>893.849</b>  | <b>893.178</b>  | C 24 |
| C 17 | 604.671         | 849.846         | 844.506         | 844.842         | 844.170         | C 23 |
| V 18 | 637.693         | <b>830.839</b>  | 825.499         | 825.835         | 825.163         | V 22 |
| L 19 | 675.388         | 797.816         | <b>792.476</b>  | <b>792.812</b>  | 792.140         | L 21 |
| P 20 | 707.739         | 760.121         | 754.782         | 755.118         | 754.446         | P 20 |
| N 21 | <b>745.763</b>  | 727.776         | 722.437         | 722.767         | 722.095         | N 19 |
| I 22 | 753.448         | 689.756         | 684.416         | 684.752         | 684.081         | I 18 |
| Q 23 | 826.114         | 652.061         | 646.722         | 647.058         | 646.386         | Q 17 |
| A 24 | 849.813         | 609.375         | 604.036         | 604.372         | 603.700         | A 16 |
| V 25 | 882.836         | 585.696         | 580.357         | 580.692         | 580.021         | V 15 |
| L 26 | 920.531         | 552.672         | 547.334         | 547.670         | 546.998         | L 14 |
| L 27 | 958.226         | 514.976         | 509.637         | 509.973         | 509.301         | L 13 |
| P 28 | 995.576         | 477.284         | 471.944         | 472.280         | 471.608         | P 12 |
| K 29 | <b>1033.275</b> | 444.933         | 439.593         | 439.929         | 439.258         | K 11 |
| K 30 | <b>1075.973</b> | 402.235         | 396.895         | 397.231         | 396.559         | K 10 |
| T 31 | 1109.656        | 359.536         | 354.197         | 354.533         | 353.861         | T 9  |
| E 32 | <b>1152.670</b> | 325.854         | 320.514         | 320.850         | 320.178         | E 8  |
| S 33 | <b>1181.680</b> | 282.846         | 277.506         | 277.842         | 277.169         | S 7  |
| Q 34 | <b>1224.367</b> | 251.829         | 246.489         | 246.825         | 246.153         | Q 6  |
| K 35 | <b>1267.065</b> | 211.143         | 205.803         | 206.139         | 205.466         | K 5  |
| V 36 | <b>1300.088</b> | 168.444         | 163.104         | 163.441         | 162.769         | V 4  |
| K 37 | <b>1342.796</b> | 135.422         | 130.082         | 130.418         | 129.746         | K 3  |
| S 38 | <b>1371.797</b> | 92.221          | 87.881          | 88.217          | 87.545          | S 2  |
| K 39 | <b>1428.499</b> | 63.713          | 58.373          | 58.709          | 58.037          | K 1  |

# sp | Q8R1M2 | H2AJ\_MOUSE

DEELNKLLGRVTIAQGGVLPNIQAVLLPKKTESQKVKSK Acetyl  
42.01

- ▶ fragmentation table for charge state 4+
- ▶ specType=etd
- ▶ score=97.18
- ▶ F097416.dat
- ▶ query=q2192\_p1
- ▶ precursor=857.704770
- ▶ chargePrecursor=5
- ▶ itol=0.8

| AA   | c               | y               | z+1             | z+2            | z               | AA   |
|------|-----------------|-----------------|-----------------|----------------|-----------------|------|
| D 1  | 34.021          | <b>1071.872</b> | <b>1067.867</b> | 0.755          | <b>1067.615</b> | D 30 |
| E 2  | 66.281          | <b>1043.115</b> | <b>1039.110</b> | 0.735          | 1038.858        | E 38 |
| E 3  | 98.542          | 1010.854        | <b>1006.850</b> | 0.755          | <b>1006.598</b> | E 37 |
| L 4  | 136.813         | 978.594         | <b>974.589</b>  | 0.755          | <b>974.337</b>  | L 36 |
| N 5  | 155.324         | 950.323         | 946.318         | 946.570        | 946.056         | N 35 |
| K 6  | 187.347         | 921.812         | 917.807         | 918.059        | 917.555         | K 34 |
| L 7  | 215.618         | 899.789         | 895.784         | 896.036        | 895.531         | L 33 |
| L 8  | 243.889         | 861.517         | 857.513         | 857.765        | 857.261         | L 32 |
| G 9  | 258.145         | 833.246         | 829.242         | 829.494        | 828.990         | G 31 |
| R 10 | 297.370         | 818.591         | 814.686         | 815.238        | 814.736         | R 30 |
| V 11 | 321.937         | 779.960         | 775.961         | 776.213        | 775.705         | V 29 |
| T 12 | 347.199         | 755.188         | 751.194         | 751.446        | 750.943         | T 28 |
| I 13 | 375.470         | 729.937         | 725.932         | 726.184        | 725.680         | I 27 |
| A 14 | 393.229         | 701.660         | 697.661         | 697.913        | 697.409         | A 26 |
| Q 15 | 425.244         | 683.905         | 679.902         | 680.154        | 679.650         | Q 25 |
| G 16 | 439.499         | 651.391         | 647.387         | 648.139        | 647.635         | G 24 |
| G 17 | 453.755         | 637.630         | 633.632         | 633.884        | 633.380         | G 23 |
| V 18 | 479.522         | 623.381         | 619.376         | 619.628        | 619.124         | V 22 |
| L 19 | 506.793         | 598.614         | <b>594.609</b>  | <b>594.861</b> | 594.357         | L 21 |
| P 20 | 531.056         | 570.343         | 566.338         | 566.590        | 566.086         | P 20 |
| R 21 | 559.307         | 546.080         | 542.075         | 542.327        | 541.823         | R 19 |
| T 22 | 587.838         | 517.560         | 513.564         | 513.816        | 513.312         | T 18 |
| Q 23 | 619.853         | 488.298         | 485.293         | 485.545        | 485.041         | Q 17 |
| A 24 | 637.612         | 457.283         | 453.279         | 453.530        | 453.027         | A 16 |
| V 25 | 662.379         | 439.324         | 435.319         | 435.771        | 435.267         | V 15 |
| L 26 | 690.850         | 414.757         | 410.752         | 411.004        | 410.500         | L 14 |
| L 27 | 718.018         | 386.485         | 382.481         | 382.733        | 382.229         | L 13 |
| P 28 | <b>743.184</b>  | 358.215         | 354.210         | 354.462        | 353.958         | P 12 |
| K 29 | 775.208         | 333.952         | 329.947         | 330.199        | 329.695         | K 11 |
| R 30 | 807.232         | 301.928         | 297.923         | 298.175        | 297.671         | R 10 |
| T 31 | 832.494         | 269.904         | 265.899         | 266.151        | 265.647         | T 9  |
| E 32 | 864.754         | 244.642         | 240.636         | 240.889        | 240.385         | E 8  |
| S 33 | 886.512         | 212.362         | 208.357         | 208.609        | 208.125         | S 7  |
| Q 34 | 918.527         | 190.624         | 186.619         | 186.871        | 186.367         | Q 6  |
| K 35 | 950.551         | 158.609         | 154.604         | 154.856        | 154.352         | K 5  |
| V 36 | 975.318         | 126.585         | 122.580         | 122.832        | 122.328         | V 4  |
| K 37 | <b>1007.341</b> | 101.810         | 97.813          | 98.065         | 97.561          | K 3  |
| S 38 | <b>1029.099</b> | 69.794          | 65.790          | 66.042         | 65.538          | S 3  |
| K 39 | <b>1071.626</b> | 48.030          | 44.032          | 44.284         | 43.780          | K 1  |

# sp | Q6GSS7 | H2A2A\_MOUSE

DEELNKLLGK <sup>Dimethyl</sup>VTIAQGGVLPNIQAVLLPKKTESHKAKGK  
28.03

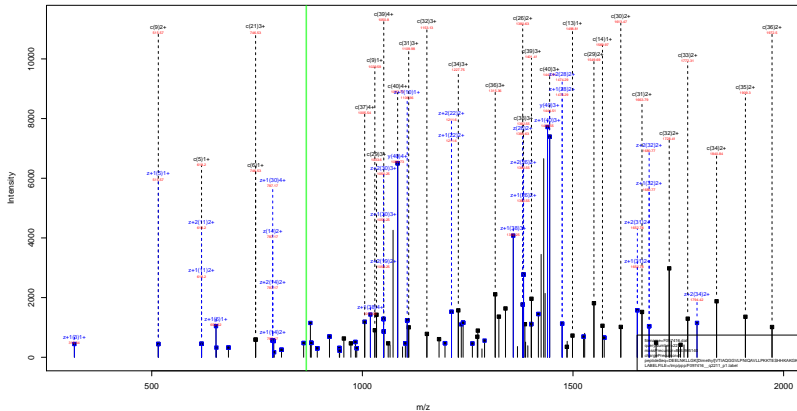

# sp | Q6GSS7 | H2A2A\_MOUSE

DEELNKLLGK <sup>Dimethyl</sup> <sub>28.03</sub> VTIAQGGVLPNIQAVLLPKKTESHKAKGK

- ▶ fragmentation table for charge state 1+
- ▶ specType=etd
- ▶ score=100.64
- ▶ F097416.dat
- ▶ query=q2211\_p1
- ▶ precursor=866.905140
- ▶ chargePrecursor=5
- ▶ itol=0.8

| AA  | c               | y              | z+1             | z+2             | z               | AA  |
|-----|-----------------|----------------|-----------------|-----------------|-----------------|-----|
| D 1 | 133.061         | 4330.497       | 4314.479        | 0.000           | 4313.477        | D40 |
| E 2 | 262.003         | 4315.476       | 4199.452        | 0.000           | 4198.444        | E39 |
| E 3 | 391.148         | 4308.428       | 4079.420        | 0.000           | 4059.401        | E38 |
| L 4 | 504.230         | 3957.385       | 3941.366        | 0.000           | 3940.359        | L37 |
| N 5 | <b>618.273</b>  | 3844.301       | 3828.282        | 3820.290        | 3817.275        | N36 |
| K 6 | <b>746.368</b>  | 3730.258       | 3714.239        | 3715.247        | 3713.232        | K35 |
| L 7 | 859.452         | 3602.183       | 3586.144        | 3587.152        | 3585.137        | L34 |
| L 8 | <b>972.536</b>  | 3489.079       | 3473.060        | 3474.068        | 3472.051        | L33 |
| G 9 | <b>1029.558</b> | 3375.095       | 3359.076        | 3360.084        | 3358.069        | G32 |
| K10 | 1185.684        | 3318.974       | 3302.955        | 3303.963        | 3301.947        | K31 |
| V11 | 1284.752        | 3162.847       | 3146.829        | 3147.836        | 3145.821        | V30 |
| T12 | <b>1385.800</b> | 3063.779       | 3047.760        | 3048.768        | 3046.752        | T29 |
| L13 | <b>1498.884</b> | 2962.731       | 2946.713        | 2947.720        | 2945.705        | L28 |
| A14 | <b>1569.921</b> | 2849.647       | 2833.629        | 2834.636        | 2832.621        | A27 |
| Q15 | <b>1697.980</b> | 2778.610       | 2762.591        | 2763.599        | 2761.584        | Q26 |
| G16 | <b>1755.001</b> | 2650.552       | 2634.533        | 2635.541        | 2633.525        | G25 |
| G17 | 1812.023        | 2503.530       | 2487.511        | 2488.519        | 2486.504        | G24 |
| V18 | 1911.091        | 2536.509       | 2520.490        | 2521.498        | 2519.482        | V23 |
| L19 | 2024.175        | 2431.440       | 2421.421        | 2422.429        | 2420.413        | L22 |
| P20 | 2113.228        | 2324.366       | 2308.347        | 2309.345        | 2307.330        | P21 |
| N21 | 2235.271        | 2227.303       | 2211.284        | 2212.292        | 2210.277        | N20 |
| I22 | 2348.355        | 2113.260       | 2097.242        | 2098.250        | 2096.234        | I19 |
| Q23 | 2476.413        | 2000.176       | 1984.158        | 1985.165        | 1983.150        | Q18 |
| A24 | 2547.450        | 1872.118       | 1856.099        | 1857.107        | 1855.091        | A17 |
| V25 | 2656.519        | 1803.081       | 1785.062        | 1786.070        | 1784.054        | V16 |
| L26 | 2759.603        | 1702.012       | 1685.994        | 1687.001        | 1684.985        | L15 |
| L27 | 2872.687        | 1588.929       | 1572.909        | <b>1573.917</b> | 1571.902        | L14 |
| F28 | 2069.740        | 1475.844       | 1459.825        | 1460.833        | 1458.818        | F13 |
| K29 | 3097.835        | 1378.791       | 1362.773        | 1363.780        | 1361.765        | K12 |
| K30 | 3225.930        | 1250.696       | <b>1234.678</b> | 1235.685        | 1233.670        | K11 |
| I31 | 3358.977        | 1122.601       | <b>1106.583</b> | 1107.591        | <b>1105.575</b> | I10 |
| E32 | 3456.020        | 1071.554       | <b>1005.535</b> | 1006.543        | 1004.527        | E9  |
| S33 | 3543.052        | <b>892.511</b> | <b>876.492</b>  | 877.500         | 875.485         | S8  |
| H34 | 3680.111        | 805.479        | <b>789.460</b>  | <b>790.468</b>  | 788.453         | H7  |
| H35 | 3817.170        | 698.420        | <b>652.401</b>  | <b>653.409</b>  | 651.394         | H6  |
| K36 | 3945.265        | 531.361        | <b>515.343</b>  | <b>516.350</b>  | 514.335         | K5  |
| A37 | 4019.302        | 403.306        | 387.247         | 388.254         | 386.240         | A4  |
| K38 | 4144.397        | 332.229        | <b>316.211</b>  | 317.218         | 315.202         | K3  |
| G39 | 4201.418        | 204.134        | 188.116         | 189.123         | 187.108         | G2  |
| K40 | 4329.513        | 147.113        | 133.094         | 132.102         | 130.089         | K1  |



# sp | Q6GSS7 | H2A2A\_MOUSE

DEELNKLLGK<sup>Dimethyl</sup>VTIAQGGVLPNIQAVLLPKKTESHKAKGK<sup>28.03</sup>

- ▶ fragmentation table for charge state 2+
- ▶ specType=etd
- ▶ score=100.64
- ▶ F097416.dat
- ▶ query=q2211\_p1
- ▶ precursor=866.905140
- ▶ chargePrecursor=5
- ▶ itol=0.8

| AA    | c               | y        | z+1             | z+2             | z               | AA    |
|-------|-----------------|----------|-----------------|-----------------|-----------------|-------|
| D[1]  | 67.034          | 2165.752 | 2157.743        | 0.504           | 2157.239        | Q[40] |
| E[2]  | 133.955         | 2158.239 | 2150.229        | 0.504           | 2099.720        | E[30] |
| E[3]  | 198.077         | 2043.718 | 2035.709        | 0.504           | 2035.200        | E[38] |
| L[4]  | 252.619         | 1979.199 | 1971.187        | 0.504           | 1970.683        | L[37] |
| N[5]  | 309.640         | 1922.654 | 1914.645        | 1915.149        | 1914.141        | N[36] |
| K[6]  | 373.688         | 1895.633 | 1887.623        | 1888.127        | 1887.119        | K[35] |
| L[7]  | 430.230         | 1861.585 | 1793.570        | <b>1794.080</b> | 1793.072        | L[34] |
| L[8]  | 489.772         | 1745.043 | 1737.034        | 1737.536        | 1736.530        | L[33] |
| G[9]  | <b>515.282</b>  | 1688.501 | <b>1680.492</b> | <b>1680.996</b> | <b>1679.988</b> | G[32] |
| K[10] | 591.346         | 1659.990 | <b>1651.981</b> | <b>1652.485</b> | 1651.477        | K[31] |
| V[11] | 642.880         | 1581.927 | <b>1573.918</b> | <b>1574.422</b> | <b>1573.414</b> | V[30] |
| T[12] | 693.404         | 1532.393 | <b>1524.384</b> | <b>1524.888</b> | 1523.880        | T[29] |
| L[13] | 749.946         | 1451.899 | <b>1473.860</b> | <b>1474.364</b> | 1473.356        | L[28] |
| A[14] | 785.464         | 1425.327 | <b>1417.318</b> | <b>1417.822</b> | 1416.814        | A[27] |
| Q[15] | 849.493         | 1389.809 | <b>1381.799</b> | <b>1382.303</b> | <b>1381.295</b> | Q[26] |
| G[16] | <b>878.004</b>  | 1325.779 | 1317.770        | 1318.274        | 1317.266        | G[25] |
| G[17] | 906.515         | 1297.269 | 1289.259        | <b>1289.763</b> | 1288.755        | G[24] |
| V[18] | <b>956.049</b>  | 1268.758 | <b>1260.749</b> | <b>1261.252</b> | 1260.245        | V[23] |
| L[19] | 1027.397        | 1219.244 | <b>1211.214</b> | <b>1211.718</b> | 1210.710        | L[22] |
| P[20] | <b>1061.118</b> | 1192.662 | 1184.652        | 1185.156        | 1184.149        | P[21] |
| N[21] | 1118.139        | 1114.155 | <b>1106.146</b> | <b>1106.650</b> | <b>1105.642</b> | N[20] |
| I[22] | 1174.681        | 1057.134 | 1049.124        | <b>1049.628</b> | 1048.621        | I[19] |
| Q[23] | <b>1238.710</b> | 1000.592 | 992.582         | 993.086         | 992.079         | Q[18] |
| A[24] | <b>1274.229</b> | 936.563  | 928.553         | 929.057         | 928.049         | A[17] |
| V[25] | <b>1323.763</b> | 891.044  | <b>893.035</b>  | <b>893.539</b>  | <b>892.531</b>  | V[16] |
| L[26] | <b>1380.305</b> | 853.510  | 845.500         | 846.004         | 845.000         | L[15] |
| L[27] | 1438.847        | 794.968  | <b>786.958</b>  | <b>787.462</b>  | <b>786.454</b>  | L[14] |
| P[28] | <b>1485.374</b> | 738.426  | 730.416         | 730.920         | 729.912         | P[13] |
| K[29] | <b>1549.421</b> | 699.899  | <b>681.890</b>  | <b>682.394</b>  | <b>681.386</b>  | K[12] |
| K[30] | <b>1613.468</b> | 635.852  | <b>617.842</b>  | <b>618.346</b>  | 617.339         | K[11] |
| I[31] | <b>1663.992</b> | 581.804  | 573.795         | 574.299         | 573.291         | I[10] |
| E[32] | <b>1728.514</b> | 511.281  | 503.271         | 503.775         | 502.767         | E[9]  |
| S[33] | <b>1772.030</b> | 446.759  | 438.750         | 439.254         | 438.246         | S[8]  |
| H[34] | <b>1840.559</b> | 403.243  | 395.234         | 395.738         | 394.730         | H[7]  |
| H[35] | <b>1909.089</b> | 334.714  | 326.704         | 327.208         | 326.200         | H[6]  |
| K[36] | <b>1973.136</b> | 286.184  | 278.175         | 278.679         | 277.671         | K[5]  |
| A[37] | 2009.655        | 202.139  | 194.129         | 194.633         | 193.625         | A[4]  |
| K[38] | 2072.702        | 168.618  | 158.609         | 159.113         | 158.105         | K[3]  |
| G[39] | 2101.213        | 102.571  | 94.561          | 95.065          | 94.057          | G[2]  |
| K[40] | 2165.260        | 74.060   | 66.051          | 66.555          | 65.547          | K[1]  |

# sp | Q6GSS7 | H2A2A\_MOUSE

DEELNKLLGK<sup>Dimethyl</sup>VTIAQGGVLPNIQAVLLPKKTESHHKAKGK<sup>28.03</sup>

- ▶ fragmentation table for charge state 3+
- ▶ specType=etd
- ▶ score=100.64
- ▶ F097416.dat
- ▶ query=q2211\_p1
- ▶ precursor=866.905140
- ▶ chargePrecursor=5
- ▶ itol=0.8

| AA   | c               | y               | z=1             | z=2             | z               | AA   |
|------|-----------------|-----------------|-----------------|-----------------|-----------------|------|
| D 1  | 45.025          | <b>1444.171</b> | <b>1438.831</b> | 0.672           | 1439.493        | D 40 |
| E 2  | 68.039          | 1405.628        | <b>1400.489</b> | 0.672           | <b>1400.153</b> | E 39 |
| E 3  | 113.654         | 1362.874        | <b>1357.475</b> | 0.672           | 1357.139        | E 38 |
| L 4  | 158.748         | 1319.800        | 1314.400        | 0.672           | 1314.124        | L 37 |
| N 5  | 206.762         | 1282.105        | 1276.706        | 1277.102        | 1276.430        | N 36 |
| K 6  | 249.401         | 1244.091        | <b>1238.751</b> | <b>1239.087</b> | <b>1238.415</b> | K 35 |
| L 7  | 287.156         | 1201.393        | <b>1196.053</b> | <b>1196.389</b> | <b>1195.717</b> | L 34 |
| L 8  | 324.860         | 1163.098        | 1156.703        | 1156.994        | 1156.622        | L 33 |
| G 9  | 343.352         | 1126.001        | 1120.604        | 1121.000        | 1120.629        | G 32 |
| K 10 | 395.899         | <b>1106.996</b> | <b>1101.656</b> | <b>1101.992</b> | <b>1101.321</b> | K 31 |
| V 11 | 438.602         | 1054.954        | <b>1049.614</b> | <b>1049.950</b> | 1049.277        | V 30 |
| T 12 | 482.605         | 1021.931        | 1016.592        | 1016.938        | 1016.250        | T 29 |
| L 13 | 500.299         | 988.249         | <b>982.969</b>  | <b>983.245</b>  | 982.573         | L 28 |
| A 14 | 523.979         | 956.554         | <b>945.214</b>  | <b>945.550</b>  | <b>944.878</b>  | A 27 |
| Q 15 | 566.695         | 920.875         | <b>921.535</b>  | <b>921.871</b>  | <b>921.199</b>  | Q 26 |
| G 16 | 585.672         | 884.189         | <b>878.849</b>  | <b>879.185</b>  | <b>878.513</b>  | G 25 |
| G 17 | 604.679         | 805.182         | <b>859.842</b>  | <b>860.178</b>  | 859.500         | G 24 |
| V 18 | 637.702         | 846.174         | 840.835         | 841.171         | 840.497         | V 23 |
| L 19 | 675.397         | 813.152         | <b>807.812</b>  | <b>808.148</b>  | <b>807.476</b>  | L 22 |
| F 20 | 707.747         | 775.821         | 770.117         | 770.853         | 769.181         | F 21 |
| N 21 | <b>745.762</b>  | 743.106         | 737.766         | 738.102         | 737.430         | N 20 |
| I 22 | 781.456         | 705.002         | 699.152         | 700.488         | 699.411         | I 19 |
| Q 23 | 826.143         | 667.397         | 662.057         | 662.393         | 661.721         | Q 18 |
| A 24 | 849.827         | 624.711         | 619.371         | 619.707         | 619.035         | A 17 |
| V 25 | 882.844         | 603.016         | 598.662         | 598.998         | 598.326         | V 16 |
| L 26 | 920.539         | 568.009         | 562.669         | 563.005         | 562.333         | L 15 |
| L 27 | 958.234         | 530.314         | 524.975         | 525.311         | 524.639         | L 14 |
| F 28 | 990.505         | 492.620         | 487.280         | 487.616         | 486.944         | F 13 |
| K 29 | <b>1033.283</b> | 460.269         | 454.929         | 455.265         | 454.593         | K 12 |
| K 30 | 1075.981        | 427.570         | 422.231         | 422.567         | 421.895         | K 11 |
| T 31 | <b>1109.664</b> | 374.872         | 369.532         | 369.868         | 369.196         | T 10 |
| E 32 | <b>1152.678</b> | 341.180         | 335.840         | 336.186         | 335.514         | E 9  |
| S 33 | <b>1181.689</b> | 298.175         | 292.836         | 293.172         | 292.500         | S 8  |
| H 34 | <b>1227.375</b> | 269.165         | 263.825         | 264.161         | 263.489         | H 7  |
| H 35 | <b>1273.061</b> | 223.478         | 218.139         | 218.475         | 217.803         | H 6  |
| K 36 | <b>1315.760</b> | 177.762         | 172.423         | 172.768         | 172.110         | K 5  |
| A 37 | <b>1339.439</b> | 135.094         | 129.754         | 130.090         | 129.414         | A 4  |
| K 38 | <b>1382.137</b> | 111.415         | 106.075         | 106.411         | 105.739         | K 3  |
| G 39 | <b>1461.144</b> | 68.716          | 63.377          | 63.713          | 63.041          | G 2  |
| K 40 | <b>1443.843</b> | 49.709          | 44.370          | 44.705          | 44.034          | K 1  |

# sp | Q6GSS7 | H2A2A\_MOUSE

DEELNKLLGK <sup>Dimethyl</sup> <sub>28.03</sub> VTIAQGGVLPNIQAVLLPKKTESHKAKGK

- ▶ fragmentation table for charge state 4+
- ▶ specType=etd
- ▶ score=100.64
- ▶ F097416.dat
- ▶ query=q2211\_p1
- ▶ precursor=866.905140
- ▶ chargePrecursor=5
- ▶ itol=0.8

| AA | c  | y               | a=1             | a=2             | z              | AA              |       |
|----|----|-----------------|-----------------|-----------------|----------------|-----------------|-------|
| D  | 1  | 34.621          | <b>1083.369</b> | 1079.375        | 0.755          | 1079.712        | L(40) |
| E  | 2  | 66.281          | 1054.921        | <b>1050.618</b> | 0.755          | <b>1050.366</b> | L(39) |
| E  | 3  | 98.542          | 1022.362        | <b>1018.358</b> | 0.755          | 1018.105        | L(38) |
| L  | 4  | 126.813         | 990.102         | <b>986.097</b>  | 0.755          | <b>985.045</b>  | L(37) |
| N  | 5  | 155.324         | 961.831         | 957.820         | 958.076        | 957.574         | N(36) |
| K  | 6  | 187.347         | 933.320         | 929.315         | 929.567        | 929.063         | K(35) |
| L  | 7  | 215.818         | 901.296         | 897.292         | 897.544        | 897.040         | L(34) |
| L  | 8  | 243.889         | 873.025         | 869.021         | 869.273        | 868.769         | L(33) |
| G  | 9  | 258.145         | 844.754         | 840.750         | 841.002        | 840.498         | G(32) |
| K  | 10 | 297.176         | 830.490         | 826.484         | 826.746        | 826.242         | K(31) |
| V  | 11 | 321.944         | 791.467         | <b>787.463</b>  | <b>787.715</b> | <b>787.211</b>  | V(30) |
| T  | 12 | 347.205         | 766.700         | 762.696         | 762.947        | 762.444         | T(29) |
| I  | 13 | 375.476         | 741.438         | 737.434         | 737.686        | 737.182         | I(28) |
| A  | 14 | 392.236         | 713.167         | 709.163         | 709.415        | 708.911         | A(27) |
| Q  | 15 | 425.250         | 695.408         | 691.403         | 691.655        | 691.151         | Q(26) |
| G  | 16 | 439.506         | 663.381         | 659.389         | 659.641        | 659.137         | G(25) |
| G  | 17 | 453.761         | 649.138         | 645.133         | 645.385        | 644.881         | G(24) |
| V  | 18 | 478.528         | 634.883         | 630.878         | 631.130        | 630.626         | V(23) |
| L  | 19 | 506.799         | 610.116         | 606.111         | 606.363        | 605.859         | L(22) |
| P  | 20 | 531.062         | 581.844         | 577.840         | 578.092        | 577.588         | P(21) |
| N  | 21 | 559.573         | 557.581         | 553.577         | 553.829        | 553.325         | N(20) |
| I  | 22 | 587.844         | 529.071         | 525.066         | 525.318        | 524.814         | I(19) |
| Q  | 23 | 619.859         | 500.800         | 496.795         | 497.047        | 496.543         | Q(18) |
| A  | 24 | 637.618         | 468.785         | 464.780         | 465.032        | 464.528         | A(17) |
| V  | 25 | 662.385         | 451.020         | 447.021         | 447.273        | 446.769         | V(16) |
| L  | 26 | 689.656         | 426.759         | 422.754         | 422.999        | 422.500         | L(15) |
| L  | 27 | 718.927         | 397.865         | 393.863         | 394.135        | 393.731         | L(14) |
| P  | 28 | 743.190         | 369.710         | 365.712         | 365.964        | 365.460         | P(13) |
| K  | 29 | 775.214         | 345.453         | 341.449         | 341.701        | 341.197         | K(12) |
| K  | 30 | 807.238         | 313.430         | 309.425         | 309.677        | 309.173         | K(11) |
| T  | 31 | 832.500         | 281.406         | 277.401         | 277.653        | 277.149         | T(10) |
| E  | 32 | 854.768         | 256.144         | 252.139         | 252.391        | 251.887         | E(9)  |
| S  | 33 | 886.518         | 223.883         | 219.879         | 220.131        | 219.627         | S(8)  |
| H  | 34 | 920.783         | 202.125         | 198.121         | 198.373        | 197.869         | H(7)  |
| H  | 35 | 955.046         | 167.861         | 163.856         | 164.108        | 163.604         | H(6)  |
| K  | 36 | <b>987.072</b>  | 133.590         | 129.591         | 129.843        | 129.339         | K(5)  |
| A  | 37 | <b>1004.831</b> | 101.573         | 97.569          | 97.821         | 97.317          | A(4)  |
| K  | 38 | 1036.855        | 83.811          | 79.808          | 80.060         | 79.556          | K(3)  |
| G  | 39 | <b>1051.110</b> | 51.789          | 47.784          | 48.036         | 47.532          | G(2)  |
| K  | 40 | <b>1083.134</b> | 37.534          | 33.529          | 33.781         | 33.277          | K(1)  |



# sp | Q6GSS7 | H2A2A\_MOUSE

DEELNKLLGK <sup>Dimethyl</sup>VTIAQGGVLPNIQAVLLPKKTESHKAKGK <sub>28.03</sub>

- ▶ fragmentation table for charge state 1+
- ▶ specType=etd
- ▶ score=47.59
- ▶ F097416.dat
- ▶ query=q2212\_p1
- ▶ precursor=722.589010
- ▶ chargePrecursor=6
- ▶ itol=0.8

| AA  | c               | y              | z+1             | z+2             | z               | AA  |
|-----|-----------------|----------------|-----------------|-----------------|-----------------|-----|
| D1  | 133.061         | 4330.497       | 4314.479        | 0.000           | 4313.477        | D40 |
| E2  | 362.103         | 4315.476       | 4199.452        | 0.000           | 4198.444        | E39 |
| E3  | 391.148         | 4088.428       | 4070.420        | 0.000           | 4069.407        | E38 |
| L4  | <b>504.230</b>  | 3957.385       | 3941.366        | 0.000           | 3940.350        | L37 |
| N5  | <b>618.273</b>  | 3844.301       | 3828.282        | 3820.290        | 3827.275        | N36 |
| K6  | <b>746.368</b>  | 3730.258       | 3714.239        | 3715.247        | 3713.232        | K35 |
| L7  | 859.452         | 3602.183       | 3586.144        | 3587.152        | 3585.137        | L34 |
| L8  | 872.536         | 3499.078       | 3473.060        | 3474.068        | 3472.051        | L33 |
| G9  | 1029.558        | 3375.095       | 3359.076        | 3360.084        | 3358.069        | G32 |
| K10 | <b>1185.684</b> | 3318.974       | 3302.955        | 3303.963        | 3301.947        | K31 |
| V11 | <b>1284.752</b> | 3102.847       | 3146.829        | 3147.836        | 3145.821        | V30 |
| T12 | <b>1385.800</b> | 3063.779       | 3047.760        | 3048.768        | 3046.752        | T29 |
| L13 | 1498.884        | 2962.731       | 2946.713        | 2947.720        | 2945.705        | L28 |
| A14 | 1589.021        | 2949.647       | 2833.628        | 2834.636        | 2832.621        | A27 |
| Q15 | 1697.980        | 2778.630       | 2762.591        | 2763.599        | 2761.584        | Q26 |
| G16 | 1755.001        | 2650.552       | 2634.533        | 2635.541        | 2633.525        | G25 |
| G17 | 1812.023        | 2501.530       | 2477.511        | 2478.519        | 2476.504        | G24 |
| V18 | <b>1911.091</b> | 2536.509       | 2520.490        | 2521.498        | 2519.482        | V23 |
| L19 | 2024.175        | 2431.440       | 2421.421        | 2422.429        | 2420.413        | L22 |
| P20 | 2111.228        | 2324.366       | 2308.337        | 2309.345        | 2307.330        | P21 |
| N21 | 2235.271        | 2227.303       | 2211.284        | 2212.292        | 2210.277        | N20 |
| I22 | 2348.355        | 2113.260       | 2097.242        | 2098.250        | 2096.234        | I19 |
| Q23 | 2476.413        | 2000.176       | 1984.158        | 1985.165        | 1983.150        | Q18 |
| A24 | 2547.450        | 1872.118       | 1856.099        | 1857.107        | 1855.091        | A17 |
| V25 | 2646.519        | 1801.081       | 1785.062        | 1786.070        | 1784.054        | V16 |
| L26 | 2759.603        | 1702.012       | 1685.994        | 1687.001        | 1684.985        | L15 |
| L27 | 2872.687        | 1588.928       | 1572.909        | 1573.917        | 1571.902        | L14 |
| P28 | 2069.740        | 1475.844       | 1459.825        | 1460.833        | 1458.818        | P13 |
| K29 | 3097.835        | 1378.791       | <b>1362.773</b> | 1363.780        | 1361.765        | K12 |
| K30 | 3225.930        | 1250.696       | <b>1234.678</b> | <b>1235.685</b> | 1233.670        | K11 |
| I31 | 3358.977        | 1122.601       | 1106.582        | 1107.591        | 1105.575        | I10 |
| E32 | 3456.020        | 1031.554       | <b>1005.535</b> | 1006.543        | <b>1004.527</b> | E9  |
| S33 | 3543.052        | <b>892.511</b> | <b>876.492</b>  | 877.500         | 875.485         | S8  |
| H34 | 3680.111        | 805.479        | 789.460         | 790.468         | <b>788.453</b>  | H7  |
| H35 | 3817.170        | <b>668.420</b> | <b>652.401</b>  | <b>653.409</b>  | 651.394         | H6  |
| K36 | 3945.205        | 531.361        | <b>515.343</b>  | 516.350         | 514.335         | K5  |
| A37 | 4019.202        | 403.306        | <b>387.248</b>  | <b>388.244</b>  | <b>386.240</b>  | A4  |
| K38 | 4144.397        | 332.229        | <b>316.211</b>  | 317.218         | 315.202         | K3  |
| G39 | 4201.418        | 204.134        | 188.116         | 189.123         | 187.108         | G2  |
| K40 | 4329.513        | 147.113        | 133.094         | 132.102         | 130.089         | K1  |

# sp | Q6GSS7 | H2A2A\_MOUSE

DEELNKLLGK <sup>Dimethyl</sup>VTIAQGGVLPNIQAVLLPKKTESHKAKGK <sub>28.03</sub>

- ▶ fragmentation table for charge state 2+
- ▶ specType=etd
- ▶ score=47.59
- ▶ F097416.dat
- ▶ query=q2212.p1
- ▶ precursor=722.589010
- ▶ chargePrecursor=6
- ▶ itol=0.8

| AA | c  | y               | z+1             | z+2             | z               | AA              |       |
|----|----|-----------------|-----------------|-----------------|-----------------|-----------------|-------|
| D  | 1  | 67.034          | 2165.752        | 2157.743        | 0.504           | 2157.239        | D[40] |
| E  | 2  | 131.555         | 2108.239        | 2100.229        | 0.504           | 2099.726        | E[39] |
| E  | 3  | 188.077         | 2043.718        | 2035.708        | 0.504           | 2035.204        | E[38] |
| L  | 4  | 252.619         | 1979.196        | 1971.187        | 0.504           | 1970.683        | L[37] |
| N  | 5  | 309.640         | 1922.654        | 1914.645        | 1915.140        | 1914.141        | N[36] |
| K  | 6  | 374.668         | 1865.633        | 1857.623        | 1858.127        | 1857.119        | K[35] |
| L  | 7  | 430.230         | 1801.585        | 1793.576        | 1794.080        | 1793.072        | L[34] |
| L  | 8  | 486.772         | 1748.043        | 1740.034        | 1737.538        | 1738.530        | L[33] |
| C  | 9  | <b>515.282</b>  | 1708.501        | 1699.492        | 1699.996        | 1699.988        | C[32] |
| K  | 10 | 593.348         | 1659.990        | 1651.981        | 1652.485        | 1651.477        | K[31] |
| V  | 11 | 642.880         | 1581.927        | 1573.918        | 1574.422        | 1573.414        | V[30] |
| T  | 12 | 693.404         | 1532.393        | 1524.384        | 1524.888        | 1523.880        | T[29] |
| L  | 13 | 748.946         | 1481.869        | 1473.860        | 1474.364        | 1473.356        | L[28] |
| A  | 14 | 785.488         | 1428.327        | <b>1417.318</b> | <b>1417.822</b> | 1418.814        | A[27] |
| Q  | 15 | 849.493         | 1389.805        | 1381.797        | 1382.301        | <b>1381.295</b> | Q[26] |
| G  | 16 | <b>878.004</b>  | <b>1325.779</b> | 1317.770        | 1318.274        | 1317.266        | G[25] |
| G  | 17 | <b>906.515</b>  | 1297.266        | 1289.259        | 1289.763        | 1288.755        | G[24] |
| V  | 18 | <b>956.049</b>  | 1268.758        | 1260.749        | 1261.252        | 1260.245        | V[23] |
| L  | 19 | 1025.591        | 1219.224        | <b>1211.214</b> | <b>1211.718</b> | <b>1210.710</b> | L[22] |
| P  | 20 | <b>1061.118</b> | <b>1162.682</b> | 1154.673        | 1155.176        | 1154.168        | P[21] |
| N  | 21 | 1118.139        | 1114.155        | 1106.146        | 1106.650        | 1105.642        | N[20] |
| I  | 22 | 1174.681        | 1057.134        | 1049.124        | 1049.628        | 1048.621        | I[19] |
| Q  | 23 | <b>1238.710</b> | 1000.592        | 992.582         | 993.086         | 992.079         | Q[18] |
| A  | 24 | <b>1274.229</b> | 936.563         | <b>928.553</b>  | <b>929.057</b>  | 928.049         | A[17] |
| V  | 25 | 1323.753        | 889.044         | <b>883.035</b>  | 883.539         | <b>882.531</b>  | V[16] |
| L  | 26 | <b>1380.305</b> | 851.510         | <b>843.500</b>  | <b>844.004</b>  | 843.996         | L[15] |
| L  | 27 | 1438.847        | <b>794.968</b>  | <b>786.958</b>  | <b>787.462</b>  | 786.454         | L[14] |
| P  | 28 | <b>1485.374</b> | <b>738.426</b>  | 730.416         | 730.920         | 729.912         | P[13] |
| K  | 29 | <b>1549.421</b> | 689.899         | <b>681.890</b>  | <b>682.394</b>  | <b>681.386</b>  | K[12] |
| K  | 30 | 1613.668        | <b>625.852</b>  | <b>617.842</b>  | <b>618.346</b>  | 617.338         | K[11] |
| T  | 31 | <b>1663.992</b> | 553.804         | <b>553.795</b>  | <b>554.299</b>  | <b>553.291</b>  | T[10] |
| E  | 32 | <b>1728.514</b> | 511.261         | <b>503.271</b>  | <b>503.775</b>  | <b>502.767</b>  | E[9]  |
| S  | 33 | <b>1772.030</b> | 446.759         | 438.750         | 439.254         | 438.246         | S[8]  |
| H  | 34 | <b>1840.559</b> | 403.243         | <b>395.234</b>  | <b>395.738</b>  | <b>394.730</b>  | H[7]  |
| H  | 35 | 1899.089        | 334.714         | 326.704         | 327.208         | 326.200         | H[6]  |
| K  | 36 | <b>1973.136</b> | 266.184         | 260.175         | 259.679         | 257.671         | K[5]  |
| A  | 37 | 2028.655        | 202.137         | 194.127         | 194.631         | 193.624         | A[4]  |
| K  | 38 | 2072.702        | 166.618         | 158.609         | 159.113         | 158.105         | K[3]  |
| G  | 39 | 2101.211        | 102.571         | 94.561          | 95.065          | 94.057          | G[2]  |
| K  | 40 | 2185.260        | 74.060          | 66.051          | 66.555          | 65.547          | K[1]  |

# sp | Q6GSS7 | H2A2A\_MOUSE

DEELNKLLGK <sup>Dimethyl</sup>VTIAQGGVLPNIQAVLLPKKTESHHKAKGK <sub>28.03</sub>

- ▶ fragmentation table for charge state 3+
- ▶ specType=etd
- ▶ score=47.59
- ▶ F097416.dat
- ▶ query=q2212.p1
- ▶ precursor=722.589010
- ▶ chargePrecursor=6
- ▶ itol=0.8

| AA | c  | y               | z+1             | z+2             | z               | AA              |       |
|----|----|-----------------|-----------------|-----------------|-----------------|-----------------|-------|
| D  | 1  | 45.025          | 1444.171        | <b>1438.831</b> | 0.672           | <b>1438.495</b> | D[40] |
| E  | 2  | 68.039          | 1898.028        | 1745.483        | 0.672           | 1740.161        | E[39] |
| E  | 3  | 113.054         | <b>1362.814</b> | <b>1357.475</b> | 0.672           | <b>1357.139</b> | E[38] |
| L  | 4  | 158.748         | 1319.805        | <b>1314.460</b> | 0.672           | 1314.123        | L[37] |
| N  | 5  | 206.762         | 1282.105        | 1276.766        | 1277.102        | 1276.430        | N[36] |
| K  | 6  | 249.401         | 1244.091        | <b>1238.751</b> | <b>1239.087</b> | <b>1238.415</b> | K[35] |
| L  | 7  | 287.156         | 1201.393        | <b>1196.053</b> | <b>1196.389</b> | <b>1195.717</b> | L[34] |
| L  | 8  | 324.850         | 1163.099        | <b>1158.358</b> | <b>1158.694</b> | <b>1158.022</b> | L[33] |
| Q  | 9  | 353.357         | 1126.003        | 1123.668        | 1121.000        | 1120.663        | Q[32] |
| K  | 10 | <b>395.899</b>  | 1100.996        | <b>1101.656</b> | <b>1101.992</b> | <b>1101.321</b> | K[31] |
| V  | 11 | 438.622         | 1054.954        | 1049.614        | 1049.950        | 1049.277        | V[30] |
| T  | 12 | 482.605         | 1021.933        | 1018.592        | 1018.928        | 1018.250        | T[29] |
| L  | 13 | 500.259         | <b>988.249</b>  | <b>982.909</b>  | <b>983.245</b>  | <b>982.573</b>  | L[28] |
| A  | 14 | 523.979         | 959.556         | <b>945.214</b>  | <b>945.550</b>  | 944.877         | A[27] |
| Q  | 15 | 566.695         | 926.875         | <b>921.535</b>  | <b>921.871</b>  | <b>921.199</b>  | Q[26] |
| G  | 16 | 585.672         | <b>884.189</b>  | <b>878.849</b>  | <b>879.185</b>  | <b>878.513</b>  | G[25] |
| G  | 17 | 604.679         | 865.182         | 859.842         | 860.178         | 859.500         | G[24] |
| V  | 18 | 637.702         | 846.174         | <b>840.835</b>  | <b>841.171</b>  | <b>840.499</b>  | V[23] |
| L  | 19 | 678.397         | 813.153         | <b>807.812</b>  | <b>808.148</b>  | <b>807.476</b>  | L[22] |
| F  | 20 | 707.747         | <b>775.457</b>  | <b>770.117</b>  | <b>770.453</b>  | 769.781         | F[21] |
| N  | 21 | <b>745.762</b>  | 743.108         | <b>737.766</b>  | <b>738.102</b>  | 737.430         | N[20] |
| I  | 22 | 781.456         | 705.002         | 699.752         | 700.088         | 699.411         | I[19] |
| Q  | 23 | 826.143         | 667.397         | 662.057         | 662.393         | 661.721         | Q[18] |
| A  | 24 | 849.827         | 634.711         | <b>618.371</b>  | <b>619.707</b>  | <b>619.035</b>  | A[17] |
| V  | 25 | 882.848         | 603.032         | 598.692         | 599.028         | 598.356         | V[16] |
| L  | 26 | <b>920.539</b>  | 568.009         | 562.669         | 563.005         | 562.333         | L[15] |
| L  | 27 | 958.234         | 530.314         | 524.975         | 525.311         | 524.639         | L[14] |
| F  | 28 | 990.505         | 492.620         | 487.280         | 487.616         | 486.944         | F[13] |
| K  | 29 | <b>1033.283</b> | 460.269         | 454.929         | 455.265         | 454.593         | K[12] |
| K  | 30 | 1075.981        | 429.576         | 424.236         | 424.572         | 423.900         | K[11] |
| T  | 31 | <b>1109.664</b> | 374.872         | 369.532         | 369.868         | 369.196         | T[10] |
| E  | 32 | <b>1152.678</b> | 341.180         | 335.840         | 336.176         | 335.514         | E[9]  |
| S  | 33 | <b>1181.689</b> | 298.175         | 292.835         | 293.172         | 292.500         | S[8]  |
| H  | 34 | <b>1227.375</b> | 269.185         | 263.845         | 264.181         | 263.509         | H[7]  |
| H  | 35 | <b>1273.061</b> | 223.478         | <b>218.139</b>  | <b>218.475</b>  | <b>217.803</b>  | H[6]  |
| K  | 36 | <b>1315.760</b> | 177.762         | 172.422         | 172.758         | 172.110         | K[5]  |
| A  | 37 | <b>1339.439</b> | 135.094         | 129.754         | 130.090         | 129.411         | A[4]  |
| K  | 38 | 1382.137        | 111.415         | 106.075         | 106.411         | 105.739         | K[3]  |
| G  | 39 | <b>1461.144</b> | 68.716          | 63.377          | 63.713          | 63.041          | G[2]  |
| K  | 40 | 1443.843        | 49.709          | 44.370          | 44.705          | 44.034          | K[1]  |

# sp | Q6GSS7 | H2A2A\_MOUSE

DEELNKLLGK <sup>Dimethyl</sup> <sub>28.03</sub> VTIAQGGVLPNIQAVLLPKKTESHKAKGK

- ▶ fragmentation table for charge state 4+
- ▶ specType=etd
- ▶ score=47.59
- ▶ F097416.dat
- ▶ query=q2212\_p1
- ▶ precursor=722.589010
- ▶ chargePrecursor=6
- ▶ itol=0.8

| AA | c  | y               | a+1             | a+2             | z              | AA              |     |
|----|----|-----------------|-----------------|-----------------|----------------|-----------------|-----|
| D  | 1  | 34.621          | <b>1083.380</b> | <b>1079.375</b> | 0.755          | <b>1079.123</b> | L40 |
| E  | 2  | 66.281          | 1084.131        | <b>1050.618</b> | 0.755          | 1050.369        | L39 |
| E  | 3  | 98.542          | <b>1022.362</b> | <b>1018.358</b> | 0.755          | 1018.109        | E38 |
| L  | 4  | 126.813         | 990.102         | 988.097         | 0.755          | 985.848         | L37 |
| N  | 5  | 155.324         | 961.831         | 957.826         | 958.076        | 957.574         | N36 |
| K  | 6  | 187.347         | 933.320         | <b>929.315</b>  | <b>929.567</b> | <b>929.063</b>  | K35 |
| L  | 7  | 215.818         | 901.296         | 897.292         | 897.544        | 897.040         | L34 |
| L  | 8  | 243.889         | 873.026         | 869.021         | 869.273        | 868.769         | L33 |
| G  | 9  | 258.145         | <b>844.754</b>  | <b>840.750</b>  | <b>841.002</b> | <b>840.498</b>  | G32 |
| K  | 10 | 297.176         | 830.499         | 826.494         | 826.746        | 826.242         | K31 |
| V  | 11 | 321.944         | 791.467         | <b>787.463</b>  | <b>787.715</b> | <b>787.211</b>  | V30 |
| T  | 12 | 347.205         | 766.700         | <b>762.696</b>  | <b>762.947</b> | <b>762.444</b>  | T29 |
| L  | 13 | 375.476         | 741.438         | 737.434         | 737.686        | 737.182         | L28 |
| A  | 14 | 392.236         | 713.167         | 709.163         | 709.415        | 708.911         | A27 |
| Q  | 15 | 425.250         | 695.408         | 691.403         | 691.655        | 691.151         | Q26 |
| G  | 16 | 439.506         | 663.381         | 659.376         | 659.628        | 659.124         | G25 |
| G  | 17 | 453.761         | 649.138         | 645.133         | 645.385        | 644.881         | G24 |
| V  | 18 | 478.528         | 634.883         | 630.878         | <b>631.130</b> | 630.626         | V23 |
| L  | 19 | 506.799         | 610.116         | 606.111         | 606.363        | 605.859         | L22 |
| P  | 20 | 531.062         | 581.844         | 577.840         | 578.092        | 577.588         | P21 |
| N  | 21 | 559.573         | 557.581         | <b>553.577</b>  | <b>553.829</b> | <b>553.325</b>  | N20 |
| I  | 22 | 587.844         | 529.071         | 525.066         | 525.318        | 524.814         | I19 |
| Q  | 23 | <b>619.859</b>  | 500.800         | 496.795         | 497.047        | 496.543         | Q18 |
| A  | 24 | 637.618         | 468.785         | 464.780         | 465.032        | 464.528         | A17 |
| V  | 25 | 662.385         | 451.020         | 447.021         | 447.273        | 446.769         | V16 |
| L  | 26 | 689.656         | 426.751         | 422.754         | 422.999        | 422.495         | L15 |
| L  | 27 | 718.927         | 397.985         | 393.983         | 394.235        | 393.731         | L14 |
| P  | 28 | 743.190         | 369.716         | 365.712         | 365.964        | 365.460         | P13 |
| K  | 29 | <b>775.214</b>  | 345.453         | 341.449         | 341.701        | 341.197         | K12 |
| K  | 30 | 807.238         | 313.430         | 309.425         | 309.677        | 309.173         | K11 |
| T  | 31 | 832.500         | 281.406         | 277.401         | 277.653        | 277.149         | T10 |
| E  | 32 | 854.768         | 256.144         | 252.139         | 252.391        | 251.887         | E9  |
| S  | 33 | 886.518         | 223.883         | 219.879         | 220.131        | <b>219.627</b>  | S8  |
| H  | 34 | <b>920.783</b>  | 202.125         | 198.121         | 198.373        | 197.869         | H7  |
| H  | 35 | <b>955.048</b>  | 167.861         | 163.856         | 164.108        | 163.604         | H6  |
| K  | 36 | <b>987.072</b>  | 133.590         | 129.591         | 129.843        | 129.339         | K5  |
| A  | 37 | <b>1004.831</b> | 101.373         | 97.367          | 97.619         | 97.115          | A4  |
| K  | 38 | <b>1036.855</b> | 83.811          | 79.808          | 80.060         | 79.556          | K3  |
| G  | 39 | <b>1051.110</b> | 51.789          | 47.784          | 48.036         | 47.532          | G2  |
| K  | 40 | 1083.134        | 37.534          | 33.529          | 33.781         | 33.277          | K1  |



# sp | Q6GSS7 | H2A2A\_MOUSE

DEELNKLLGK<sup>Dimethyl</sup>VTIAQGGVLPNIQAVLLPKKTESHKAKGK  
28.03

- ▶ fragmentation table for charge state 5+
- ▶ specType=etd
- ▶ score=47.59
- ▶ F097416.dat
- ▶ query=q2212\_p1
- ▶ precursor=722.589010
- ▶ chargePrecursor=6
- ▶ itol=0.8

| AA    | c              | y              | z+1            | z+2            | z              | AA    |
|-------|----------------|----------------|----------------|----------------|----------------|-------|
| D[1]  | 27.418         | <b>866.905</b> | 863.702        | 0.806          | 863.900        | D[40] |
| E[2]  | 83.226         | <b>843.900</b> | <b>840.696</b> | 0.806          | <b>840.495</b> | E[39] |
| E[3]  | 79.035         | 818.091        | 814.888        | 0.806          | 814.085        | E[38] |
| L[4]  | 101.052        | 792.261        | 789.079        | 0.806          | <b>788.878</b> | L[37] |
| N[5]  | 124.460        | 769.666        | 766.462        | 766.664        | 766.261        | N[36] |
| K[6]  | 150.079        | <b>746.857</b> | 743.654        | 743.855        | 743.452        | K[35] |
| L[7]  | 172.696        | 721.238        | 718.035        | 718.236        | 717.833        | L[34] |
| L[8]  | 198.313        | 698.622        | 695.419        | 695.619        | 695.216        | L[33] |
| G[9]  | 206.717        | 676.005        | 672.801        | 673.003        | 672.600        | G[32] |
| K[10] | 237.943        | 664.601        | 661.397        | 661.598        | 661.195        | K[31] |
| V[11] | 257.756        | 633.375        | 630.172        | 630.373        | 629.970        | V[30] |
| V[12] | 277.966        | 613.562        | 610.358        | 610.559        | 610.156        | V[29] |
| I[13] | 300.583        | 593.352        | 590.148        | 590.350        | 589.947        | I[28] |
| A[14] | 314.790        | 570.735        | 567.532        | 567.733        | 567.330        | A[27] |
| Q[15] | 340.402        | 556.528        | <b>553.324</b> | <b>551.526</b> | 553.123        | Q[26] |
| G[16] | 351.806        | 530.916        | 527.712        | 527.914        | 527.511        | G[25] |
| G[17] | 363.210        | 519.512        | <b>516.308</b> | 516.510        | <b>516.107</b> | G[24] |
| V[18] | 383.024        | 508.108        | <b>504.904</b> | 505.105        | <b>504.702</b> | V[23] |
| L[19] | 405.641        | 488.294        | 485.090        | 485.292        | 484.889        | L[22] |
| P[20] | 425.051        | 465.677        | 462.473        | 462.675        | 462.272        | P[21] |
| N[21] | 447.890        | 446.266        | 443.063        | 443.264        | 442.861        | N[20] |
| L[22] | 470.477        | 423.458        | 420.254        | 420.456        | 420.053        | L[19] |
| Q[23] | 496.088        | 400.841        | 397.637        | 397.839        | 397.436        | Q[18] |
| A[24] | 510.296        | 375.228        | 372.026        | 372.227        | 371.824        | A[17] |
| V[25] | 530.110        | 361.022        | 357.819        | 358.020        | 357.617        | V[16] |
| L[26] | 552.726        | 341.208        | 338.005        | 338.206        | 337.803        | L[15] |
| L[27] | 575.343        | 318.591        | 315.388        | <b>315.589</b> | 315.186        | L[14] |
| P[28] | 594.754        | 295.975        | 292.771        | 292.972        | 292.569        | P[13] |
| K[29] | <b>620.373</b> | 276.564        | 273.360        | 273.562        | 273.159        | K[12] |
| K[30] | 645.992        | 250.945        | 247.741        | 247.943        | 247.540        | K[11] |
| F[31] | 668.201        | 229.326        | 226.122        | 226.324        | 225.921        | F[10] |
| E[32] | 692.010        | 205.117        | 201.913        | 202.114        | 201.711        | E[9]  |
| S[33] | 709.416        | 179.308        | 176.104        | 176.306        | 175.903        | S[8]  |
| H[34] | 736.828        | 161.902        | 158.699        | 158.899        | 158.496        | H[7]  |
| H[35] | 764.240        | 134.490        | 131.286        | 131.488        | 131.085        | H[6]  |
| K[36] | 789.859        | 107.078        | 103.874        | 104.076        | 103.673        | K[5]  |
| A[37] | 804.066        | 81.459         | 78.255         | 78.457         | 78.054         | A[4]  |
| K[38] | 829.685        | 67.252         | 64.048         | 64.249         | 63.846         | K[3]  |
| G[39] | <b>841.089</b> | 41.633         | 38.429         | 38.630         | 38.227         | G[2]  |
| K[40] | <b>866.708</b> | 30.228         | 27.025         | 27.226         | 26.823         | K[1]  |

# sp | Q6GSS7 | H2A2A\_MOUSE

DEELNKLLGK <sup>Dimethyl</sup> VTIAQGGVLPNIQAVLLPKKTESHKAKGK <sub>28.03</sub>

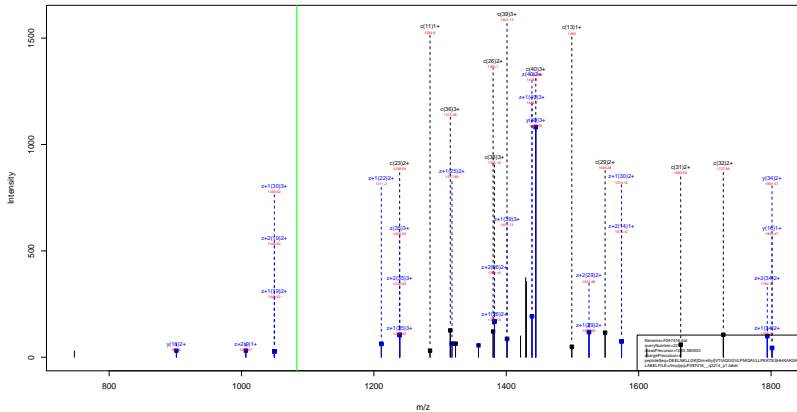

# sp | Q6GSS7 | H2A2A\_MOUSE

DEELNKLLGK <sup>Dimethyl</sup> <sub>28.03</sub> VTIAQGGVLPNIQAVLLPKKTESHKAKGK

- ▶ fragmentation table for charge state 1+
- ▶ specType=etd
- ▶ score=47.35
- ▶ F097416.dat
- ▶ query=q2214\_p1
- ▶ precursor=1083.380000
- ▶ chargePrecursor=4
- ▶ itol=0.8

| AA   | c               | y               | z=1      | z=2             | z        | AA   |
|------|-----------------|-----------------|----------|-----------------|----------|------|
| D1   | 133.085         | 4339.497        | 4314.479 | 0.000           | 4313.477 | D140 |
| E1   | 282.103         | 4215.470        | 4190.452 | 0.000           | 4189.444 | E130 |
| E13  | 391.146         | 4086.428        | 4070.409 | 0.000           | 4069.401 | E138 |
| L14  | 594.230         | 3957.385        | 3941.366 | 0.000           | 3940.359 | L137 |
| N15  | 618.273         | 3844.301        | 3828.282 | 3829.290        | 3827.273 | N136 |
| K16  | 746.368         | 3730.258        | 3714.239 | 3715.247        | 3713.231 | K135 |
| L17  | 858.452         | 3602.163        | 3586.144 | 3587.152        | 3585.134 | L134 |
| L18  | 974.536         | 3489.079        | 3473.060 | 3474.068        | 3472.051 | L133 |
| G19  | 1029.558        | 3375.995        | 3359.976 | 3360.984        | 3358.969 | G132 |
| K10  | 1185.684        | 3118.974        | 3102.955 | 3103.963        | 3101.947 | K131 |
| V111 | <b>1284.752</b> | 3162.847        | 3146.829 | 3147.836        | 3145.821 | V130 |
| T112 | 1385.900        | 3063.770        | 3047.750 | 3048.758        | 3046.752 | T129 |
| I113 | <b>1498.884</b> | 2962.731        | 2946.713 | 2947.720        | 2945.705 | I128 |
| A114 | 1599.911        | 2849.647        | 2833.628 | 2834.636        | 2832.621 | A127 |
| Q115 | 1697.980        | 2778.610        | 2762.591 | 2763.599        | 2761.584 | Q126 |
| G116 | 1755.001        | 2650.552        | 2634.533 | 2635.541        | 2633.525 | G125 |
| G117 | 1812.023        | 2593.530        | 2577.511 | 2578.519        | 2576.504 | G124 |
| V118 | 1911.091        | 2516.500        | 2500.480 | 2521.498        | 2519.482 | V123 |
| L119 | 2024.175        | 2437.440        | 2421.421 | 2422.429        | 2420.414 | L122 |
| T120 | 2117.228        | 2324.356        | 2308.337 | 2309.345        | 2307.330 | T121 |
| N121 | 2235.271        | 2227.303        | 2211.285 | 2212.292        | 2210.277 | N120 |
| I122 | 2348.355        | 2113.260        | 2097.242 | 2098.250        | 2096.234 | I119 |
| Q123 | 2476.413        | 2000.176        | 1984.158 | 1985.165        | 1983.150 | Q118 |
| A124 | 2547.450        | 1872.118        | 1856.099 | 1857.107        | 1855.091 | A117 |
| V125 | 2646.519        | <b>1801.081</b> | 1785.062 | 1786.070        | 1784.054 | V116 |
| L126 | 2759.603        | 1702.013        | 1686.004 | 1687.001        | 1684.989 | L115 |
| L127 | 2872.687        | 1588.952        | 1572.900 | <b>1573.917</b> | 1571.902 | L114 |
| P128 | 2969.740        | 1475.844        | 1459.835 | 1460.833        | 1458.818 | P113 |
| K129 | 3097.835        | 1378.791        | 1362.773 | 1363.780        | 1361.765 | K112 |
| K130 | 3225.930        | 1250.690        | 1234.678 | 1235.685        | 1233.670 | K111 |
| T131 | 3326.977        | 1122.601        | 1106.583 | 1107.591        | 1105.575 | T110 |
| E132 | 3459.030        | 1012.551        | 1005.535 | <b>1006.543</b> | 1004.527 | E109 |
| S133 | 3543.052        | 892.511         | 876.492  | 877.500         | 875.485  | S108 |
| H134 | 3680.111        | 805.470         | 789.460  | 790.468         | 788.453  | H107 |
| H135 | 3817.170        | 668.420         | 652.401  | 653.409         | 651.394  | H106 |
| K136 | 3945.205        | 531.361         | 515.343  | 516.350         | 514.335  | K105 |
| A137 | 4016.302        | 403.266         | 387.258  | 388.255         | 386.240  | A104 |
| K138 | 4144.397        | 312.229         | 312.213  | 311.218         | 310.203  | K103 |
| G139 | 4201.418        | 204.134         | 188.116  | 188.123         | 187.105  | G102 |
| K140 | 4329.513        | 147.113         | 131.094  | 132.102         | 130.080  | K101 |

# sp | Q6GSS7 | H2A2A\_MOUSE

DEELNKLLGK<sup>Dimethyl</sup>VTIAQGGVLPNIQAVLLPKKTESHKAKGK<sup>28.03</sup>

- ▶ fragmentation table for charge state 2+
- ▶ specType=etd
- ▶ score=47.35
- ▶ F097416.dat
- ▶ query=q2214.p1
- ▶ precursor=1083.380000
- ▶ chargePrecursor=4
- ▶ itol=0.8

| AA | c  | y               | z=1             | z=2             | z               | AA              |       |
|----|----|-----------------|-----------------|-----------------|-----------------|-----------------|-------|
| D  | 1  | 87.034          | 2165.752        | 2157.743        | 0.504           | 2157.239        | D[40] |
| E  | 2  | 131.555         | 2108.239        | 2100.229        | 0.504           | 2099.726        | E[39] |
| E  | 3  | 188.077         | 2043.715        | 2035.705        | 0.504           | 2035.201        | E[38] |
| L  | 4  | 252.619         | 1979.190        | 1971.187        | 0.504           | 1970.683        | L[37] |
| N  | 5  | 309.640         | 1922.654        | 1914.645        | 1915.140        | 1914.141        | N[36] |
| K  | 6  | 374.668         | 1865.633        | 1857.623        | 1858.127        | 1857.119        | K[35] |
| L  | 7  | 430.210         | <b>1801.585</b> | <b>1793.576</b> | <b>1794.080</b> | 1793.072        | L[34] |
| L  | 8  | 486.772         | 1745.043        | 1737.034        | 1737.538        | 1736.530        | L[33] |
| G  | 9  | 515.292         | 1688.561        | 1680.552        | 1680.956        | 1679.950        | G[32] |
| K  | 10 | 593.346         | 1630.990        | 1621.981        | 1622.485        | 1621.477        | K[31] |
| V  | 11 | 642.880         | 1581.027        | <b>1573.918</b> | <b>1574.422</b> | <b>1573.414</b> | V[30] |
| T  | 12 | 693.404         | 1532.393        | <b>1524.384</b> | <b>1524.888</b> | 1523.880        | T[29] |
| L  | 13 | 740.946         | 1481.869        | 1473.860        | 1474.364        | 1473.356        | L[28] |
| A  | 14 | 785.484         | 1438.327        | 1431.318        | 1431.822        | 1430.814        | A[27] |
| Q  | 15 | 849.493         | 1389.805        | <b>1381.799</b> | <b>1382.303</b> | 1381.295        | Q[26] |
| G  | 16 | 878.004         | 1332.779        | <b>1317.770</b> | <b>1318.274</b> | <b>1317.266</b> | G[25] |
| G  | 17 | 906.515         | 1297.266        | 1289.259        | 1289.763        | 1288.755        | G[24] |
| V  | 18 | 956.049         | 1266.758        | 1258.749        | 1259.252        | 1258.245        | V[23] |
| L  | 19 | 1012.597        | 1219.224        | <b>1211.214</b> | <b>1211.718</b> | <b>1210.710</b> | L[22] |
| F  | 20 | 1081.118        | 1162.682        | 1155.673        | 1156.176        | 1155.169        | F[21] |
| N  | 21 | 1118.139        | 1114.155        | 1106.146        | 1106.650        | 1105.642        | N[20] |
| I  | 22 | 1174.681        | 1057.134        | <b>1049.124</b> | <b>1049.628</b> | 1048.621        | I[19] |
| Q  | 23 | <b>1238.710</b> | 1000.592        | 992.582         | 993.086         | 992.079         | Q[18] |
| A  | 24 | 1274.229        | 938.563         | 928.553         | 929.057         | 928.049         | A[17] |
| V  | 25 | <b>1323.763</b> | <b>901.044</b>  | 891.035         | 891.539         | 890.531         | V[16] |
| L  | 26 | <b>1380.305</b> | 851.510         | 841.500         | 842.004         | 841.000         | L[15] |
| L  | 27 | 1436.847        | 794.968         | 784.958         | 785.462         | 784.454         | L[14] |
| F  | 28 | 1465.374        | 738.426         | 730.416         | 730.920         | 729.912         | F[13] |
| K  | 29 | <b>1549.421</b> | 689.899         | 681.890         | 682.394         | 681.389         | K[12] |
| K  | 30 | 1613.468        | 628.363         | 617.353         | 618.356         | 617.350         | K[11] |
| T  | 31 | <b>1663.992</b> | 563.894         | 553.785         | 554.289         | 553.291         | T[10] |
| E  | 32 | <b>1728.514</b> | 511.261         | 501.211         | 501.715         | 500.717         | E[9]  |
| S  | 33 | 1772.030        | 446.759         | 436.750         | 437.254         | 436.248         | S[8]  |
| H  | 34 | 1840.559        | 403.243         | 393.234         | 393.738         | 392.730         | H[7]  |
| H  | 35 | 1899.069        | 334.714         | 324.704         | 325.208         | 324.200         | H[6]  |
| K  | 36 | 1973.138        | 266.184         | 256.175         | 256.679         | 255.671         | K[5]  |
| A  | 37 | 2058.655        | 202.137         | 194.127         | 194.631         | 193.624         | A[4]  |
| K  | 38 | 2072.702        | 166.618         | 158.609         | 159.113         | 158.105         | K[3]  |
| G  | 39 | 2161.211        | 102.571         | 94.561          | 95.065          | 94.057          | G[2]  |
| K  | 40 | 2185.260        | 74.060          | 66.051          | 66.555          | 65.547          | K[1]  |

# sp | Q6GSS7 | H2A2A\_MOUSE

DEELNKLLGK<sup>Dimethyl</sup>VTIAQGGVLPNIQAVLLPKKTESHKAKGK<sup>28.03</sup>

- ▶ fragmentation table for charge state 3+
- ▶ specType=etd
- ▶ score=47.35
- ▶ F097416.dat
- ▶ query=q2214.p1
- ▶ precursor=1083.380000
- ▶ chargePrecursor=4
- ▶ itol=0.8

| AA   | c               | y               | z=1             | z=2             | z               | AA   |
|------|-----------------|-----------------|-----------------|-----------------|-----------------|------|
| D 1  | 45.025          | <b>1444.171</b> | <b>1438.831</b> | 0.672           | <b>1438.495</b> | D 40 |
| E 2  | 68.039          | 1405.028        | <b>1400.489</b> | 0.672           | 1400.153        | E 39 |
| E 3  | 113.654         | 1362.874        | <b>1357.475</b> | 0.672           | 1357.139        | E 38 |
| L 4  | 158.748         | 1319.800        | 1314.400        | 0.672           | 1314.124        | L 37 |
| N 5  | 206.762         | 1282.105        | 1276.706        | 1.277           | 1276.430        | N 36 |
| K 6  | 249.401         | 1244.091        | <b>1238.751</b> | <b>1239.087</b> | <b>1238.415</b> | K 35 |
| L 7  | 287.156         | 1201.393        | 1196.053        | 1196.389        | 1195.717        | L 34 |
| L 8  | 324.850         | 1163.098        | 1158.708        | 1158.894        | 1158.622        | L 33 |
| G 9  | 343.357         | 1126.003        | 1120.604        | 1121.008        | 1120.520        | G 32 |
| K 10 | 395.899         | 1106.996        | 1101.656        | 1101.992        | 1101.321        | K 31 |
| V 11 | 438.602         | 1054.954        | <b>1049.614</b> | <b>1049.950</b> | <b>1049.278</b> | V 30 |
| T 12 | 482.605         | 1021.931        | 1016.592        | 1016.928        | 1016.256        | T 29 |
| L 13 | 500.299         | 988.249         | 982.909         | 983.246         | 982.573         | L 28 |
| A 14 | 523.979         | 950.554         | 945.214         | 945.550         | 944.877         | A 27 |
| Q 15 | 566.695         | 926.875         | 921.535         | 921.871         | 921.199         | Q 26 |
| G 16 | 585.672         | 884.189         | 878.849         | 879.185         | 878.513         | G 25 |
| G 17 | 604.679         | 845.182         | 839.842         | 840.178         | 839.500         | G 24 |
| V 18 | 637.702         | 846.174         | 840.835         | 841.171         | 840.499         | V 23 |
| L 19 | 678.397         | 813.152         | 807.812         | 808.148         | 807.471         | L 22 |
| F 20 | 707.747         | 775.481         | 770.141         | 770.483         | 769.761         | F 21 |
| N 21 | 748.762         | 743.106         | 737.766         | 738.102         | 737.430         | N 20 |
| I 22 | 781.496         | 705.092         | 699.752         | 700.088         | 699.411         | I 19 |
| Q 23 | 826.143         | 667.397         | 662.057         | 662.393         | 661.721         | Q 18 |
| A 24 | 849.827         | 624.711         | 619.371         | 619.707         | 619.035         | A 17 |
| V 25 | 882.844         | 603.035         | 598.695         | 599.030         | 598.358         | V 16 |
| L 26 | 920.539         | 568.009         | 562.669         | 563.005         | 562.333         | L 15 |
| L 27 | 958.234         | 530.314         | 524.975         | 525.311         | 524.639         | L 14 |
| F 28 | 990.505         | 492.620         | 487.280         | 487.616         | 486.944         | F 13 |
| K 29 | 1033.283        | 460.289         | 454.929         | 455.265         | 454.593         | K 12 |
| K 30 | 1075.983        | 427.570         | 422.231         | 422.567         | 421.895         | K 11 |
| T 31 | 1109.664        | 374.872         | 369.532         | 369.868         | 369.196         | T 10 |
| E 32 | 1152.678        | 341.180         | 335.850         | 336.186         | 335.514         | E 9  |
| S 33 | 1181.689        | 298.175         | 292.836         | 293.172         | 292.500         | S 8  |
| H 34 | 1227.375        | 269.185         | 263.825         | 264.161         | 263.489         | H 7  |
| H 35 | 1277.063        | 223.478         | 218.139         | 218.475         | 217.803         | H 6  |
| K 36 | <b>1315.760</b> | 177.762         | 172.483         | 172.768         | 172.110         | K 5  |
| A 37 | 1339.439        | 135.094         | 129.754         | 130.090         | 129.414         | A 4  |
| K 38 | <b>1382.137</b> | 111.415         | 106.075         | 106.411         | 105.739         | K 3  |
| G 39 | <b>1461.144</b> | 68.716          | 63.377          | 63.713          | 63.041          | G 2  |
| K 40 | <b>1443.843</b> | 49.709          | 44.370          | 44.705          | 44.034          | K 1  |

# sp | Q6GSS7 | H2A2A\_MOUSE

DEELNKLLGK <sup>Dimethyl</sup> V<sub>28.03</sub>VTIAQGGVLPNIQAVLLPKKTESHHKAKGK

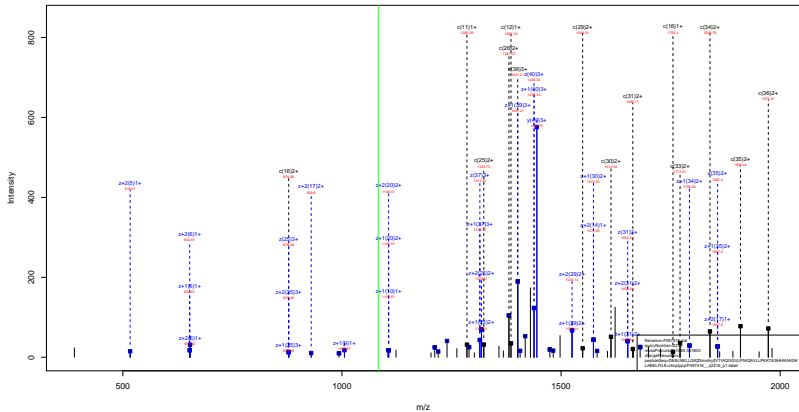

# sp | Q6GSS7 | H2A2A\_MOUSE

DEELNKLLGK<sup>Dimethyl 28.03</sup>VTIAQGGVLPNIQAVLLPKKTESHKAKGK

- ▶ fragmentation table for charge state 1+
- ▶ specType=etd
- ▶ score=75.08
- ▶ F097416.dat
- ▶ query=q2216\_p1
- ▶ precursor=1083.381800
- ▶ chargePrecursor=4
- ▶ itol=0.8

| AA   | c               | y        | z=1             | z=2             | z        | AA   |
|------|-----------------|----------|-----------------|-----------------|----------|------|
| D1   | 133.085         | 4330.497 | 4318.479        | 0.000           | 4313.471 | D140 |
| E12  | 282.103         | 4215.470 | 4199.452        | 0.000           | 4188.444 | E130 |
| E13  | 391.146         | 4086.428 | 4070.409        | 0.000           | 4069.401 | E138 |
| L14  | 594.230         | 3957.385 | 3944.366        | 0.000           | 3940.359 | L137 |
| N15  | 618.273         | 3844.301 | 3828.282        | 3829.290        | 3827.275 | N136 |
| K16  | 746.368         | 3730.259 | 3714.239        | 3715.247        | 3713.231 | K135 |
| L17  | 858.452         | 3602.163 | 3586.144        | 3587.152        | 3585.131 | L134 |
| L18  | 974.538         | 3469.079 | 3451.060        | 3474.068        | 3472.051 | L133 |
| G19  | 1029.558        | 3375.095 | 3359.076        | 3360.084        | 3358.069 | G132 |
| K10  | 1185.684        | 3318.974 | 3302.955        | 3303.963        | 3301.947 | K131 |
| V111 | <b>1284.752</b> | 3102.847 | 3146.829        | 3147.836        | 3145.821 | V130 |
| T112 | <b>1385.800</b> | 3063.779 | 3047.760        | 3048.768        | 3046.752 | T129 |
| L113 | 1468.884        | 2982.731 | 2946.713        | 2947.720        | 2945.705 | L128 |
| A114 | 1569.921        | 2848.641 | 2833.628        | 2834.636        | 2832.621 | A127 |
| Q115 | 1697.980        | 2778.610 | 2762.591        | 2763.599        | 2761.584 | Q126 |
| G116 | <b>1755.001</b> | 2650.562 | 2634.533        | 2635.541        | 2633.525 | G125 |
| G117 | 1812.023        | 2593.530 | 2577.511        | 2578.519        | 2576.504 | G124 |
| V118 | 1911.061        | 2536.509 | 2520.490        | 2521.498        | 2519.482 | V123 |
| L119 | 2024.175        | 2437.440 | 2421.421        | 2422.429        | 2420.414 | L122 |
| T120 | 2112.228        | 2324.395 | 2308.377        | 2309.385        | 2307.370 | T121 |
| N121 | 2235.271        | 2227.363 | 2211.345        | 2212.352        | 2210.337 | N120 |
| I122 | 2348.355        | 2113.260 | 2097.242        | 2098.250        | 2096.234 | I119 |
| Q123 | 2476.411        | 2000.176 | 1984.158        | 1985.165        | 1983.150 | Q118 |
| A124 | 2547.450        | 1872.118 | 1856.099        | <b>1857.107</b> | 1855.091 | A117 |
| V125 | 2646.519        | 1801.081 | 1785.062        | 1786.070        | 1784.054 | V116 |
| L126 | 2759.603        | 1702.012 | 1686.994        | 1687.991        | 1686.980 | L115 |
| L127 | 2872.687        | 1598.935 | 1572.900        | <b>1573.917</b> | 1571.902 | L114 |
| P128 | 2969.740        | 1475.844 | 1459.825        | 1460.833        | 1458.818 | P113 |
| K129 | 3097.835        | 1378.791 | 1362.773        | 1363.780        | 1361.765 | K112 |
| K130 | 3225.930        | 1250.695 | 1234.678        | 1235.685        | 1233.670 | K111 |
| T131 | 3326.977        | 1122.601 | <b>1106.583</b> | 1107.591        | 1105.575 | T110 |
| E132 | 3459.020        | 1011.554 | <b>1005.535</b> | 1006.543        | 1004.527 | E109 |
| S133 | 3543.052        | 892.511  | 876.492         | 877.500         | 875.485  | S108 |
| H134 | 3680.111        | 805.479  | 789.460         | 790.468         | 788.453  | H107 |
| H135 | 3817.170        | 668.420  | <b>652.401</b>  | <b>653.409</b>  | 651.394  | H106 |
| K136 | 3945.205        | 531.301  | 515.283         | <b>516.290</b>  | 514.275  | K105 |
| A137 | 4016.302        | 403.266  | 387.248         | 388.255         | 386.240  | A104 |
| K138 | 4144.397        | 332.229  | 316.211         | 317.218         | 315.203  | K103 |
| G139 | 4201.418        | 204.134  | 188.116         | 189.123         | 187.105  | G102 |
| K140 | 4329.513        | 147.113  | 131.094         | 132.102         | 130.086  | K101 |

# sp | Q6GSS7 | H2A2A\_MOUSE

DEELNKLLGK<sup>Dimethyl</sup>VTIAQGGVLPNIQAVLLPKKTESHKAKGK<sup>28.03</sup>

- ▶ fragmentation table for charge state 2+
- ▶ specType=etd
- ▶ score=75.08
- ▶ F097416.dat
- ▶ query=q2216.p1
- ▶ precursor=1083.381800
- ▶ chargePrecursor=4
- ▶ itol=0.8

| AA | c  | y               | z+1             | z+2             | z               | AA              |       |
|----|----|-----------------|-----------------|-----------------|-----------------|-----------------|-------|
| D  | 1  | 67.034          | 2165.752        | 2157.743        | 0.504           | 2157.239        | D[40] |
| E  | 2  | 131.555         | 2108.239        | 2100.229        | 0.504           | 2099.726        | E[39] |
| E  | 3  | 188.077         | 2043.718        | 2035.708        | 0.504           | 2035.204        | E[38] |
| L  | 4  | 252.619         | 1979.196        | 1971.187        | 0.504           | 1970.683        | L[37] |
| N  | 5  | 309.640         | 1922.654        | 1914.645        | 1915.140        | 1914.141        | N[36] |
| K  | 6  | 374.668         | 1865.613        | <b>1857.623</b> | 1858.127        | <b>1857.119</b> | K[35] |
| L  | 7  | 430.210         | 1801.585        | <b>1793.576</b> | 1794.080        | <b>1793.072</b> | L[34] |
| L  | 8  | 486.772         | 1743.043        | 1735.034        | 1737.538        | 1738.533        | L[33] |
| G  | 9  | 515.292         | 1708.501        | <b>1680.492</b> | <b>1680.996</b> | <b>1679.988</b> | G[32] |
| K  | 10 | 593.346         | 1659.990        | <b>1651.981</b> | <b>1652.485</b> | <b>1651.477</b> | K[31] |
| V  | 11 | 642.880         | <b>1581.927</b> | <b>1573.918</b> | <b>1574.422</b> | <b>1573.414</b> | V[30] |
| T  | 12 | 693.404         | 1532.393        | <b>1524.384</b> | <b>1524.888</b> | 1523.880        | T[29] |
| L  | 13 | 740.946         | <b>1461.869</b> | <b>1473.860</b> | <b>1474.364</b> | 1473.356        | L[28] |
| A  | 14 | 785.468         | 1426.327        | 1418.318        | <b>1417.822</b> | 1418.814        | A[27] |
| G  | 15 | 849.493         | 1389.805        | <b>1381.799</b> | 1382.303        | <b>1381.295</b> | G[26] |
| Q  | 16 | <b>878.004</b>  | 1325.779        | <b>1317.770</b> | <b>1318.274</b> | 1317.266        | Q[25] |
| G  | 17 | 906.515         | 1297.269        | <b>1289.259</b> | <b>1289.763</b> | 1288.755        | G[24] |
| V  | 18 | 956.049         | 1268.752        | 1260.743        | 1261.252        | 1260.245        | V[23] |
| L  | 19 | 1012.597        | <b>1219.224</b> | <b>1211.214</b> | <b>1211.718</b> | 1210.710        | L[22] |
| F  | 20 | 1081.118        | 1192.568        | 1184.559        | 1185.076        | 1184.167        | F[21] |
| N  | 21 | 1118.139        | 1114.155        | <b>1106.146</b> | <b>1106.650</b> | 1105.642        | N[20] |
| I  | 22 | 1174.681        | 1057.134        | 1049.124        | 1049.628        | 1048.621        | I[19] |
| Q  | 23 | 1238.710        | 1000.592        | <b>992.582</b>  | <b>993.086</b>  | 992.079         | Q[18] |
| A  | 24 | 1294.229        | 936.563         | 928.553         | <b>929.057</b>  | 928.049         | A[17] |
| V  | 25 | <b>1323.763</b> | 893.044         | 885.035         | 885.539         | 884.531         | V[16] |
| L  | 26 | <b>1380.305</b> | 851.510         | 843.500         | 844.004         | 843.000         | L[15] |
| L  | 27 | 1436.847        | 794.968         | 786.958         | 787.462         | 786.454         | L[14] |
| F  | 28 | 1469.374        | 738.426         | 730.416         | 730.920         | 729.912         | F[13] |
| K  | 29 | <b>1549.421</b> | 699.899         | 691.890         | 692.394         | 691.386         | K[12] |
| K  | 30 | <b>1613.468</b> | 626.362         | 618.352         | 618.856         | 617.848         | K[11] |
| T  | 31 | <b>1663.992</b> | 563.894         | 555.885         | 556.389         | 555.381         | T[10] |
| E  | 32 | 1728.514        | 511.261         | 503.251         | 503.755         | 502.747         | E[9]  |
| S  | 33 | <b>1772.030</b> | 446.759         | 438.750         | 439.254         | 438.246         | S[8]  |
| H  | 34 | <b>1840.559</b> | 403.243         | 395.234         | 395.738         | 394.730         | H[7]  |
| H  | 35 | <b>1909.089</b> | 334.714         | 326.704         | 327.208         | 326.200         | H[6]  |
| K  | 36 | <b>1971.136</b> | 266.184         | 258.175         | 258.679         | 257.671         | K[5]  |
| A  | 37 | 2038.655        | 202.137         | 194.127         | 194.631         | 193.624         | A[4]  |
| K  | 38 | 2072.702        | 166.618         | 158.609         | 159.113         | 158.105         | K[3]  |
| G  | 39 | 2101.211        | 102.571         | 94.561          | 95.065          | 94.057          | G[2]  |
| K  | 40 | 2185.260        | 74.060          | 66.051          | 66.555          | 65.547          | K[1]  |



# sp | Q6GSS7 | H2A2A\_MOUSE

DEELNKLLGK <sup>Dimethyl</sup> <sub>28.03</sub> VTIAQGGVLPNIQAVLLPKKTESHKAKGK

- ▶ fragmentation table for charge state 3+
- ▶ specType=etd
- ▶ score=75.08
- ▶ F097416.dat
- ▶ query=q2216.p1
- ▶ precursor=1083.381800
- ▶ chargePrecursor=4
- ▶ itol=0.8

| AA | c  | y               | z=1             | z=2             | z               | AA              |       |
|----|----|-----------------|-----------------|-----------------|-----------------|-----------------|-------|
| D  | 1  | 45.025          | <b>1444.171</b> | <b>1438.831</b> | 0.672           | <b>1438.495</b> | D[40] |
| E  | 2  | 68.039          | <b>1405.828</b> | <b>1400.489</b> | 0.672           | 1400.153        | E[39] |
| E  | 3  | 113.654         | 1362.874        | 1357.477        | 0.672           | 1357.139        | E[38] |
| L  | 4  | 158.748         | 1319.880        | <b>1314.460</b> | 0.672           | <b>1314.124</b> | L[37] |
| N  | 5  | 206.762         | 1282.105        | 1276.706        | 1.277           | 1276.430        | N[36] |
| K  | 6  | 249.401         | 1244.091        | 1238.751        | <b>1239.087</b> | 1238.415        | K[35] |
| L  | 7  | 287.156         | 1201.393        | 1196.053        | 1196.389        | 1195.717        | L[34] |
| L  | 8  | 324.869         | 1163.099        | 1158.788        | 1158.894        | 1158.622        | L[33] |
| G  | 9  | 343.357         | 1128.003        | 1123.694        | 1121.008        | 1120.520        | G[32] |
| K  | 10 | 395.899         | <b>1106.996</b> | 1101.636        | 1101.992        | 1101.321        | K[31] |
| V  | 11 | 438.922         | 1054.954        | 1049.614        | 1049.950        | 1049.277        | V[30] |
| T  | 12 | 482.605         | 1021.931        | 1016.592        | 1016.928        | 1016.256        | T[29] |
| L  | 13 | 500.299         | 988.249         | 982.909         | 983.246         | 982.573         | L[28] |
| A  | 14 | 523.979         | 950.554         | 945.214         | 945.550         | 944.877         | A[27] |
| Q  | 15 | 566.695         | 926.875         | 921.535         | 921.871         | 921.199         | Q[26] |
| G  | 16 | 585.672         | 884.189         | <b>878.849</b>  | <b>879.185</b>  | <b>878.513</b>  | G[25] |
| G  | 17 | 604.679         | 845.182         | 839.842         | 839.178         | 838.506         | G[24] |
| V  | 18 | 637.702         | 846.174         | 840.835         | 841.171         | 840.499         | V[23] |
| L  | 19 | 678.397         | 813.152         | 807.812         | 808.148         | 807.475         | L[22] |
| F  | 20 | 707.747         | 775.821         | 770.481         | 770.817         | 769.141         | F[21] |
| N  | 21 | 748.762         | 743.106         | 737.766         | 738.102         | 737.430         | N[20] |
| I  | 22 | 781.456         | 705.002         | 699.662         | 700.000         | 699.411         | I[19] |
| Q  | 23 | 826.143         | 667.397         | 662.057         | 662.393         | 661.721         | Q[18] |
| A  | 24 | 849.827         | 624.711         | 619.371         | 619.707         | 619.035         | A[17] |
| V  | 25 | 882.844         | 603.035         | 597.695         | 598.032         | 597.360         | V[16] |
| L  | 26 | 920.539         | 568.009         | 562.669         | 563.005         | 562.333         | L[15] |
| L  | 27 | 958.234         | 530.314         | 524.975         | 525.311         | 524.639         | L[14] |
| F  | 28 | 990.505         | 492.620         | 487.280         | 487.616         | 486.944         | F[13] |
| K  | 29 | 1033.283        | 460.289         | 454.929         | 455.265         | 454.593         | K[12] |
| K  | 30 | 1075.983        | 427.570         | 422.230         | 422.567         | 421.895         | K[11] |
| T  | 31 | 1109.664        | 374.872         | 369.532         | 369.868         | 369.196         | T[10] |
| E  | 32 | 1152.678        | 341.188         | 335.850         | 336.186         | 335.514         | E[9]  |
| S  | 33 | 1181.689        | 298.175         | 292.836         | 293.172         | 292.500         | S[8]  |
| H  | 34 | 1227.375        | 269.185         | 263.825         | 264.161         | 263.489         | H[7]  |
| H  | 35 | 1273.061        | 223.478         | 218.139         | 218.475         | 217.803         | H[6]  |
| K  | 36 | 1318.760        | 177.762         | 172.423         | 172.760         | 172.110         | K[5]  |
| A  | 37 | 1339.439        | 135.094         | 129.754         | 130.090         | 129.418         | A[4]  |
| K  | 38 | 1382.137        | 111.415         | 106.075         | 106.411         | 105.739         | K[3]  |
| G  | 39 | <b>1461.144</b> | 68.716          | 63.377          | 63.713          | 63.041          | G[2]  |
| K  | 40 | 1443.843        | 49.709          | 44.370          | 44.705          | 44.034          | K[1]  |

# sp | Q6GSS7 | H2A2A\_MOUSE

DEELNKLLGK <sup>Dimethyl</sup> 28.03 VTIAQGGVLPNIQAVLLPKKTESHKAKGK <sup>Acetyl</sup> 42.01

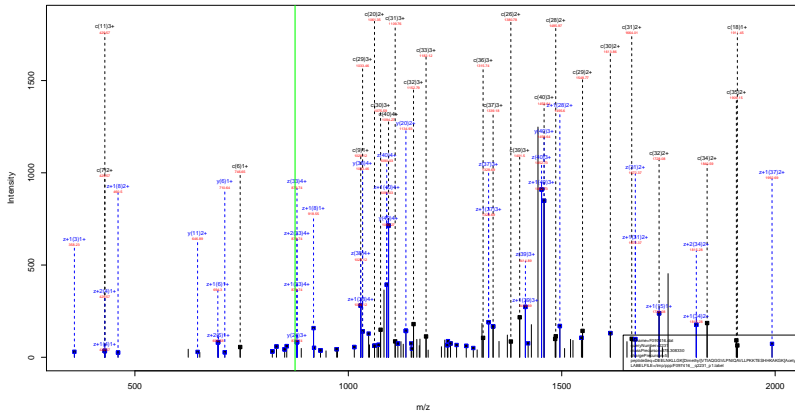

# sp | Q6GSS7 | H2A2A\_MOUSE

DEELNKLLGK <sup>Dimethyl</sup> 28.03 VTIAQGGVLPNIQAVLLPKKTESHKAKGK <sup>Acetyl</sup> 42.01

- ▶ fragmentation table for charge state 1+
- ▶ specType=etd
- ▶ score=43.77
- ▶ F097416.dat
- ▶ query=q2231\_p1
- ▶ precursor=875.308330
- ▶ chargePrecursor=5
- ▶ itol=0.8

| AA  | c               | y               | z+1             | z+2            | z               | AA  |
|-----|-----------------|-----------------|-----------------|----------------|-----------------|-----|
| D 1 | 133.061         | 4372.508        | 4385.489        | 0.000          | 4355.481        | D40 |
| E 2 | 362.003         | 4257.481        | 4281.482        | 0.000          | 4240.484        | E30 |
| E 3 | 391.148         | 4120.435        | 4132.420        | 0.000          | 4111.412        | E38 |
| L 4 | 504.230         | 3999.396        | 3983.377        | 0.000          | 3982.369        | L37 |
| N 5 | 618.273         | 3898.311        | 3870.293        | 3871.301       | 3869.285        | N36 |
| K 6 | <b>746.368</b>  | 3772.259        | 3758.250        | 3757.258       | 3755.242        | K35 |
| L 7 | 859.452         | 3644.174        | 3628.155        | 3629.163       | 3627.147        | L34 |
| L 8 | <b>972.536</b>  | 3531.090        | 3523.071        | 3518.079       | 3514.063        | L33 |
| G 9 | <b>1029.558</b> | 3418.006        | 3401.987        | 3402.995       | 3400.979        | G32 |
| K10 | 1185.684        | 3300.984        | 3284.965        | 3285.973       | 3283.958        | K31 |
| V11 | 1284.752        | 3204.858        | 3188.839        | 3189.847       | 3187.831        | V30 |
| T12 | 1385.800        | 3105.790        | 3089.771        | 3090.779       | 3088.763        | T29 |
| L13 | 1498.884        | 3004.742        | 2985.723        | 2989.731       | 2987.715        | L28 |
| A14 | 1589.921        | 2901.658        | 2875.639        | 2878.647       | 2874.631        | A27 |
| Q15 | 1697.980        | 2820.623        | 2804.602        | 2805.610       | 2803.594        | Q26 |
| G16 | 1755.001        | 2692.582        | 2676.543        | 2677.551       | 2675.538        | G25 |
| G17 | 1812.023        | 2639.541        | 2619.522        | 2620.530       | 2618.514        | G24 |
| V18 | <b>1911.091</b> | 2578.519        | 2562.500        | 2563.508       | 2561.493        | V23 |
| L19 | 2024.175        | 2479.451        | 2463.432        | 2464.440       | 2462.425        | L22 |
| P20 | 2121.228        | 2366.361        | 2350.348        | 2351.356       | 2349.340        | P21 |
| N21 | 2235.271        | 2269.314        | 2253.295        | 2254.303       | 2252.287        | N20 |
| I22 | 2348.355        | 2155.271        | 2139.252        | 2140.260       | 2138.244        | I19 |
| Q23 | 2476.413        | 2042.181        | 2026.168        | 2027.176       | 2025.160        | Q18 |
| A24 | 2547.450        | 1914.126        | 1898.110        | 1899.117       | 1897.102        | A17 |
| V25 | 2649.519        | 1843.061        | 1827.043        | 1828.050       | 1826.035        | V16 |
| L26 | 2754.603        | 1744.022        | <b>1728.004</b> | 1729.012       | 1726.996        | L15 |
| L27 | 2872.687        | 1630.939        | 1614.920        | 1615.928       | <b>1613.912</b> | L14 |
| P28 | 2969.740        | 1517.855        | 1501.836        | 1502.844       | 1500.828        | P13 |
| K29 | 3097.835        | <b>1420.802</b> | 1404.783        | 1405.791       | 1403.775        | K12 |
| K30 | 3225.930        | <b>1292.707</b> | <b>1276.688</b> | 1277.696       | <b>1275.680</b> | K11 |
| I31 | 3338.977        | 1194.712        | <b>1148.593</b> | 1149.601       | <b>1147.585</b> | I10 |
| E32 | 3456.020        | 1063.564        | <b>1047.546</b> | 1048.553       | 1046.538        | E9  |
| S33 | 3543.052        | <b>934.522</b>  | <b>918.503</b>  | <b>919.511</b> | 917.495         | S8  |
| H34 | 3680.111        | 847.406         | <b>831.471</b>  | <b>832.479</b> | 830.463         | H7  |
| H35 | 3817.170        | <b>710.431</b>  | <b>694.412</b>  | <b>695.420</b> | 693.404         | H6  |
| K36 | 3945.265        | 573.372         | 557.353         | 558.361        | 556.345         | K5  |
| A37 | 4019.302        | 448.317         | <b>429.258</b>  | <b>430.266</b> | 428.250         | A4  |
| K38 | 4144.397        | 374.240         | <b>358.221</b>  | 359.229        | 357.212         | K3  |
| G39 | 4201.418        | 246.145         | 230.126         | 231.134        | 229.118         | G2  |
| K40 | 4371.524        | 189.123         | 173.105         | 174.112        | 172.097         | K1  |

# sp | Q6GSS7 | H2A2A\_MOUSE

DEELNKLLGK <sup>Dimethyl</sup> 28.03 VTIAQGGVLPNIQAVLLPKKTESHHKAKGK <sup>Acetyl</sup> 42.01

- ▶ fragmentation table for charge state 2+
- ▶ specType=etd
- ▶ score=43.77
- ▶ F097416.dat
- ▶ query=q2231\_p1
- ▶ precursor=875.308330
- ▶ chargePrecursor=5
- ▶ itol=0.8

| AA | c  | y               | z+1             | z+2             | z               | AA              |       |
|----|----|-----------------|-----------------|-----------------|-----------------|-----------------|-------|
| D  | 1  | 87.034          | 2189.758        | 2178.748        | 0.504           | 2178.244        | D[40] |
| E  | 2  | 131.555         | 2129.244        | 2121.235        | 0.504           | 2120.731        | E[39] |
| E  | 3  | 188.077         | 2064.721        | 2056.713        | 0.504           | 2056.210        | E[38] |
| L  | 4  | 252.619         | 2000.202        | <b>1992.192</b> | 0.504           | 1991.688        | L[37] |
| N  | 5  | 309.640         | 1941.659        | 1935.650        | 1936.154        | 1935.146        | N[36] |
| K  | 6  | 374.668         | 1889.638        | 1879.629        | 1879.133        | 1878.125        | K[35] |
| L  | 7  | <b>430.230</b>  | 1822.591        | <b>1814.581</b> | <b>1815.085</b> | 1814.077        | L[34] |
| L  | 8  | 489.772         | 1766.049        | 1758.039        | 1758.543        | 1757.535        | L[33] |
| Q  | 9  | 535.292         | 1709.559        | 1701.550        | 1702.051        | 1700.991        | Q[32] |
| K  | 10 | 593.346         | 1660.999        | <b>1672.986</b> | 1673.490        | <b>1672.482</b> | K[31] |
| V  | 11 | 642.880         | 1602.933        | 1594.923        | 1595.427        | 1594.411        | V[30] |
| T  | 12 | 693.404         | 1553.398        | <b>1545.389</b> | <b>1545.893</b> | 1544.885        | T[29] |
| L  | 13 | 749.946         | 1502.875        | <b>1494.865</b> | <b>1495.369</b> | 1494.361        | L[28] |
| A  | 14 | 785.464         | 1446.333        | 1438.323        | 1438.827        | 1437.821        | A[27] |
| Q  | 15 | 849.493         | 1410.814        | 1402.805        | 1403.309        | 1402.301        | Q[26] |
| G  | 16 | 878.004         | 1346.785        | <b>1338.775</b> | <b>1339.279</b> | 1338.271        | G[25] |
| G  | 17 | 906.515         | 1318.274        | 1310.265        | 1310.768        | 1309.761        | G[24] |
| V  | 18 | 956.049         | 1269.193        | 1261.184        | 1262.188        | 1261.180        | V[23] |
| L  | 19 | 1012.591        | <b>1240.229</b> | <b>1232.220</b> | <b>1232.724</b> | <b>1231.716</b> | L[22] |
| P  | 20 | <b>1061.118</b> | 1183.081        | 1175.071        | 1175.575        | 1174.567        | P[21] |
| N  | 21 | 1118.139        | <b>1135.161</b> | 1127.151        | 1127.655        | 1126.647        | N[20] |
| I  | 22 | 1174.681        | 1078.178        | <b>1070.130</b> | <b>1070.634</b> | 1069.626        | I[19] |
| Q  | 23 | <b>1238.710</b> | 1021.597        | <b>1013.588</b> | <b>1014.092</b> | 1013.084        | Q[18] |
| A  | 24 | 1274.229        | 957.568         | 949.558         | 950.062         | 949.055         | A[17] |
| V  | 25 | 1323.763        | 922.049         | 914.040         | 914.544         | 913.536         | V[16] |
| L  | 26 | <b>1380.305</b> | 872.515         | 864.506         | 865.010         | 864.002         | L[15] |
| L  | 27 | 1436.847        | 815.973         | 807.964         | 808.468         | 807.460         | L[14] |
| P  | 28 | <b>1485.374</b> | 759.431         | 751.422         | 751.926         | 750.918         | P[13] |
| K  | 29 | <b>1549.421</b> | <b>710.905</b>  | 702.895         | 703.399         | 702.391         | K[12] |
| K  | 30 | <b>1613.468</b> | <b>646.957</b>  | 638.948         | 639.452         | 638.444         | K[11] |
| T  | 31 | <b>1663.992</b> | 582.016         | 574.007         | 575.304         | 574.296         | T[10] |
| E  | 32 | <b>1728.514</b> | 532.086         | 524.076         | 524.780         | 523.773         | E[9]  |
| S  | 33 | 1772.030        | 467.705         | <b>459.755</b>  | <b>460.259</b>  | 459.251         | S[8]  |
| H  | 34 | <b>1840.559</b> | 424.248         | 416.239         | 416.743         | 415.735         | H[7]  |
| H  | 35 | <b>1909.089</b> | 356.719         | 347.710         | 348.214         | 347.206         | H[6]  |
| K  | 36 | 1973.138        | 287.186         | 279.180         | 279.884         | 278.876         | K[5]  |
| A  | 37 | 2058.655        | 223.142         | 215.133         | 215.637         | 214.629         | A[4]  |
| K  | 38 | 2072.702        | 187.624         | 179.614         | 180.118         | 179.110         | K[3]  |
| G  | 39 | 2161.211        | 123.576         | 115.567         | 116.071         | 115.063         | G[2]  |
| K  | 40 | 2186.266        | 95.065          | 87.056          | 87.560          | 86.552          | K[1]  |

# sp | Q6GSS7 | H2A2A\_MOUSE

DEELNKLLGK <sup>Dimethyl</sup> 28.03 VTIAQGGVLPNIQAVLLPKKTESHHKAKGK <sup>Acetyl</sup> 42.01

- ▶ fragmentation table for charge state 3+
- ▶ specType=etd
- ▶ score=43.77
- ▶ F097416.dat
- ▶ query=q2231\_p1
- ▶ precursor=875.308330
- ▶ chargePrecursor=5
- ▶ itol=0.8

| AA | c  | y               | z+1             | z+2             | z               | AA              |          |       |
|----|----|-----------------|-----------------|-----------------|-----------------|-----------------|----------|-------|
| D  | 1  | 45.025          | <b>1458.174</b> | <b>1452.835</b> | 0.672           | <b>1452.499</b> | D[40]    |       |
| E  | 2  | 68.039          | 1419.812        | <b>1414.492</b> | 0.672           | <b>1414.156</b> | E[39]    |       |
| E  | 3  | 133.054         | 1376.816        | 1371.473        | 0.672           | 1371.145        | E[38]    |       |
| L  | 4  | 198.748         | 1333.803        | <b>1328.464</b> | 0.672           | <b>1328.128</b> | L[37]    |       |
| N  | 5  | 266.762         | 1296.109        | 1290.769        | 1.201           | 1290.433        | N[36]    |       |
| K  | 6  | 349.401         | 1258.004        | 1252.755        | <b>1253.091</b> | 1.252           | 1252.419 | K[35] |
| L  | 7  | 287.156         | 1215.996        | 1210.057        | 1.210           | 1209.721        | L[34]    |       |
| L  | 8  | 354.850         | 1177.701        | 1172.282        | 1.172           | 1172.029        | L[33]    |       |
| G  | 9  | 413.352         | 1140.001        | <b>1134.667</b> | <b>1135.003</b> | <b>1134.331</b> | G[32]    |       |
| K  | 10 | 395.899         | 1121.000        | <b>1115.660</b> | <b>1115.996</b> | 1.115           | 1115.324 | K[31] |
| V  | 11 | <b>428.922</b>  | 1088.951        | 1083.618        | 1.083           | 1083.954        | V[30]    |       |
| T  | 12 | 462.605         | 1035.935        | 1030.595        | 1.030           | 1030.250        | T[29]    |       |
| L  | 13 | 500.299         | 1002.252        | 996.913         | 997.248         | 996.517         | L[28]    |       |
| A  | 14 | 523.979         | 964.551         | 959.213         | 959.554         | 958.982         | A[27]    |       |
| Q  | 15 | 566.695         | 940.875         | <b>935.539</b>  | 935.875         | <b>935.203</b>  | Q[26]    |       |
| G  | 16 | 585.672         | 898.192         | 892.853         | 893.189         | 892.517         | G[25]    |       |
| G  | 17 | 604.670         | <b>879.185</b>  | 873.845         | 874.181         | 873.510         | G[24]    |       |
| V  | 18 | 637.702         | 860.179         | 854.838         | <b>855.174</b>  | 854.502         | V[23]    |       |
| L  | 19 | 675.307         | 827.155         | <b>821.816</b>  | <b>822.151</b>  | <b>821.480</b>  | L[22]    |       |
| F  | 20 | 707.747         | 789.480         | 784.143         | 784.483         | 783.782         | F[21]    |       |
| N  | 21 | 748.762         | 757.108         | 751.770         | 752.106         | 751.434         | N[20]    |       |
| I  | 22 | 783.496         | 716.095         | 710.756         | 711.092         | 710.420         | I[19]    |       |
| Q  | 23 | 826.143         | 681.400         | 676.061         | 676.397         | 675.725         | Q[18]    |       |
| A  | 24 | 849.827         | 638.714         | 633.375         | 633.711         | 633.039         | A[17]    |       |
| V  | 25 | 882.844         | 615.035         | 609.696         | 610.032         | 609.360         | V[16]    |       |
| L  | 26 | 920.539         | 582.012         | 576.673         | 577.009         | 576.337         | L[15]    |       |
| L  | 27 | 958.234         | 544.318         | 538.978         | 539.314         | 538.642         | L[14]    |       |
| F  | 28 | 990.505         | 506.623         | 501.284         | 501.619         | 500.946         | F[13]    |       |
| K  | 29 | <b>1033.283</b> | 474.272         | 468.933         | 469.269         | 468.597         | K[12]    |       |
| K  | 30 | <b>1075.981</b> | 431.374         | 426.035         | 426.370         | 425.698         | K[11]    |       |
| T  | 31 | <b>1109.664</b> | 388.876         | 383.536         | 383.872         | 383.200         | T[10]    |       |
| E  | 32 | <b>1152.678</b> | 355.183         | 349.843         | 350.189         | 349.517         | E[9]     |       |
| S  | 33 | <b>1181.689</b> | 312.179         | 306.839         | 307.175         | 306.503         | S[8]     |       |
| H  | 34 | 1227.375        | 283.168         | 277.829         | 278.164         | 277.493         | H[7]     |       |
| H  | 35 | 1273.063        | 237.462         | 232.123         | 232.458         | 231.806         | H[6]     |       |
| K  | 36 | <b>1315.760</b> | 194.795         | 189.455         | 189.792         | 189.120         | K[5]     |       |
| A  | 37 | <b>1339.439</b> | 149.097         | 143.758         | 144.094         | 143.422         | A[4]     |       |
| K  | 38 | 1382.137        | 125.418         | 120.079         | 120.414         | 119.743         | K[3]     |       |
| G  | 39 | <b>1461.144</b> | 82.720          | 77.380          | 77.716          | 77.044          | G[2]     |       |
| K  | 40 | <b>1457.846</b> | 63.713          | 58.373          | 58.709          | 58.037          | K[1]     |       |

# sp | Q6GSS7 | H2A2A\_MOUSE

DEELNKLLGK <sup>Dimethyl</sup> 28.03 VTIAQGGVLPNIQAVLLPKKTESHKAKGK <sup>Acetyl</sup> 42.01

- ▶ fragmentation table for charge state 4+
- ▶ specType=etd
- ▶ score=43.77
- ▶ F097416.dat
- ▶ query=q2231\_p1
- ▶ precursor=875.308330
- ▶ chargePrecursor=5
- ▶ itol=0.8

| AA  | c               | y               | z=1             | z=2            | z               | AA  |
|-----|-----------------|-----------------|-----------------|----------------|-----------------|-----|
| D1  | 34.621          | <b>1093.882</b> | <b>1089.878</b> | 0.755          | <b>1089.626</b> | L40 |
| E1  | 66.281          | 1088.131        | <b>1061.121</b> | 0.755          | <b>1060.869</b> | L39 |
| E3  | 98.542          | <b>1032.865</b> | <b>1028.860</b> | 0.755          | <b>1028.608</b> | L38 |
| L4  | 126.813         | 1000.604        | 996.600         | 0.755          | 996.348         | L37 |
| N5  | 155.324         | <b>972.333</b>  | 968.329         | 968.581        | 968.077         | N36 |
| K6  | 187.347         | 943.823         | 939.818         | 940.070        | 939.566         | K35 |
| L7  | 215.818         | 911.790         | 907.794         | 908.046        | 907.543         | L34 |
| L8  | 243.889         | 883.529         | <b>879.523</b>  | <b>879.775</b> | <b>879.271</b>  | L33 |
| G9  | 258.145         | <b>855.257</b>  | <b>851.252</b>  | <b>851.504</b> | <b>851.000</b>  | G32 |
| K10 | 297.176         | 841.002         | 836.997         | 837.249        | 836.745         | K31 |
| V11 | 321.944         | 801.970         | 797.965         | 798.217        | 797.713         | V30 |
| T12 | 347.205         | 777.303         | 773.198         | 773.450        | 772.946         | T29 |
| L13 | 375.476         | 751.943         | 747.838         | 748.188        | 747.686         | L28 |
| A14 | 392.236         | 723.870         | 719.665         | 719.917        | 719.413         | A27 |
| Q15 | 425.290         | 705.911         | 701.906         | 702.158        | 701.654         | Q26 |
| G16 | 439.506         | 673.886         | 669.891         | 670.143        | 669.639         | G25 |
| G17 | 453.761         | 659.641         | 655.636         | 655.888        | 655.384         | G24 |
| V18 | 478.526         | 645.395         | 641.381         | 641.633        | 641.129         | V23 |
| L19 | 506.790         | 620.610         | 616.613         | 616.865        | 616.362         | L22 |
| T20 | 531.062         | 592.341         | 588.342         | 588.594        | 588.090         | T21 |
| N21 | 559.573         | 568.084         | 564.079         | 564.331        | 563.827         | N20 |
| I22 | 587.844         | 539.573         | 535.569         | 535.820        | 535.317         | I19 |
| Q23 | 619.859         | 511.307         | 507.298         | 507.549        | 507.044         | Q18 |
| A24 | 637.618         | 479.288         | 475.283         | 475.535        | 475.031         | A17 |
| V25 | 662.385         | 461.520         | 457.524         | 457.776        | 457.272         | V16 |
| L26 | 690.656         | 439.761         | 432.756         | 433.008        | 432.505         | L15 |
| L27 | 718.927         | 408.490         | 404.485         | 404.737        | 404.234         | L14 |
| F28 | 743.190         | 380.210         | 376.214         | 376.466        | 375.963         | F13 |
| K29 | 775.214         | 355.950         | 351.951         | 352.203        | 351.699         | K12 |
| K30 | 807.238         | 323.937         | 319.928         | 320.179        | 319.676         | K11 |
| T31 | 832.500         | 291.968         | 287.964         | 288.156        | 287.652         | T10 |
| E32 | 854.768         | 260.541         | 252.642         | 252.804        | 252.301         | E9  |
| S33 | 886.518         | 234.380         | 230.381         | 230.633        | 230.129         | S8  |
| H34 | 920.783         | 212.628         | 208.623         | 208.875        | 208.371         | H7  |
| H35 | 955.046         | 179.363         | 174.358         | 174.610        | 174.107         | H6  |
| K36 | 987.072         | 144.090         | 140.094         | 140.346        | 139.842         | K5  |
| A37 | 1024.811        | 112.2075        | 108.070         | 108.322        | 107.818         | A4  |
| K38 | 1036.855        | 94.315          | 90.311          | 90.563         | 90.060          | K3  |
| G39 | 1051.110        | 62.292          | 58.287          | 58.539         | 58.035          | G2  |
| K40 | <b>1093.636</b> | 48.030          | 44.032          | 44.284         | 43.780          | K1  |

# sp | P62806 | H4\_MOUSE

[Acetyl]SGRGKGGKGLGKGGAKRHRK Trimethyl VLRD  
42.05

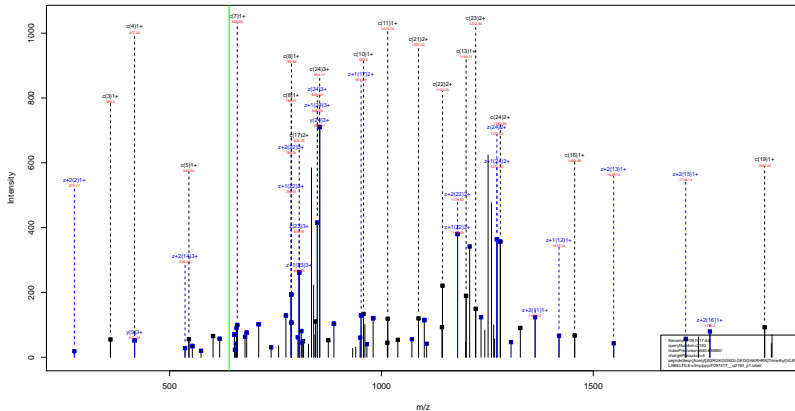

# sp | P62806 | H4\_MOUSE

[Acetyl]SGRGKGGKGLGKGGAKRHRK<sup>Trimethyl</sup>VLRD  
42.05

- ▶ fragmentation table for charge state 1+
- ▶ specType=etd
- ▶ score=96.08
- ▶ F097417.dat
- ▶ query=q2193\_p1
- ▶ precursor=640.638860
- ▶ chargePrecursor=4
- ▶ itol=0.8

| AA    | c               | y              | z+1             | z+2             | z        | AA    |
|-------|-----------------|----------------|-----------------|-----------------|----------|-------|
| S[1]  | 147.076         | 2509.518       | 2543.409        | 0.000           | 2542.491 | S[24] |
| G[2]  | 204.098         | 2430.475       | 2414.457        | 0.000           | 2413.449 | G[23] |
| R[3]  | <b>368.199</b>  | 2373.494       | 2367.435        | 2358.443        | 2366.427 | R[22] |
| G[4]  | <b>417.230</b>  | 2217.953       | 2201.334        | 2202.342        | 2200.328 | G[21] |
| K[5]  | <b>545.315</b>  | 2160.331       | 2144.313        | 2145.320        | 2143.305 | K[20] |
| G[6]  | <b>602.337</b>  | 2032.236       | 2016.218        | 2017.225        | 2015.210 | G[19] |
| G[7]  | <b>659.358</b>  | 1975.215       | 1959.196        | 1960.204        | 1958.188 | G[18] |
| K[8]  | <b>787.453</b>  | 1918.193       | 1902.175        | 1903.182        | 1901.167 | K[17] |
| G[9]  | <b>844.475</b>  | 1790.098       | 1774.080        | <b>1775.087</b> | 1773.072 | G[16] |
| L[10] | <b>927.559</b>  | 1733.077       | 1717.058        | <b>1718.066</b> | 1716.050 | L[15] |
| G[11] | <b>1014.580</b> | 1619.993       | 1603.974        | 1604.982        | 1602.966 | G[14] |
| K[12] | <b>1142.675</b> | 1562.971       | 1546.953        | <b>1547.960</b> | 1545.945 | K[13] |
| G[13] | <b>1199.697</b> | 1434.876       | <b>1418.858</b> | 1419.866        | 1417.850 | G[12] |
| G[14] | 1256.718        | 1377.855       | 1361.836        | <b>1362.844</b> | 1360.828 | G[11] |
| A[15] | <b>1327.795</b> | 1320.833       | 1304.815        | <b>1305.823</b> | 1303.807 | A[10] |
| R[16] | <b>1435.930</b> | 1249.796       | 1233.778        | <b>1234.785</b> | 1232.770 | R[9]  |
| R[17] | 1611.951        | 1121.701       | 1105.683        | <b>1106.691</b> | 1104.675 | R[8]  |
| H[18] | 1749.010        | <b>965.600</b> | <b>949.582</b>  | 950.589         | 948.574  | H[7]  |
| R[19] | <b>1905.111</b> | 838.541        | <b>812.523</b>  | 813.530         | 811.515  | R[6]  |
| K[20] | 2075.253        | 672.440        | <b>656.422</b>  | <b>657.429</b>  | 655.414  | K[5]  |
| V[21] | 2174.322        | 502.298        | 486.280         | 487.287         | 485.272  | V[4]  |
| L[22] | 2287.406        | 403.230        | 387.211         | 388.219         | 386.203  | L[3]  |
| R[23] | 2443.507        | 296.146        | 274.127         | <b>275.135</b>  | 273.119  | R[2]  |
| D[24] | 2598.534        | 134.045        | 118.026         | 119.034         | 117.018  | D[1]  |



# sp | P62806 | H4\_MOUSE

[Acetyl]SGRGKGGKGLGKGGAKRHRK<sup>Trimethyl</sup>VLRD  
42.05

- ▶ fragmentation table for charge state 2+
- ▶ specType=etd
- ▶ score=96.08
- ▶ F097417.dat
- ▶ query=q2193\_p1
- ▶ precursor=640.638860
- ▶ chargePrecursor=4
- ▶ itol=0.8

| AA | c  | y               | z+1             | z+2             | z               | AA              |       |
|----|----|-----------------|-----------------|-----------------|-----------------|-----------------|-------|
| S  | 1  | 74.642          | <b>1280.263</b> | <b>1272.253</b> | 0.504           | <b>1271.749</b> | S[24] |
| G  | 2  | 102.553         | 1215.741        | <b>1207.732</b> | 0.504           | 1207.228        | G[23] |
| K  | 3  | 180.603         | 1187.231        | <b>1179.221</b> | <b>1179.725</b> | 1179.717        | K[22] |
| G  | 4  | 259.114         | 1109.180        | <b>1101.171</b> | <b>1101.675</b> | <b>1100.567</b> | G[21] |
| K  | 5  | 273.153         | 1080.669        | 1074.500        | 1073.084        | <b>1072.155</b> | K[20] |
| G  | 6  | 301.672         | 1036.622        | 1008.612        | 1009.116        | 1008.100        | G[19] |
| G  | 7  | 330.183         | 988.111         | <b>980.102</b>  | <b>980.606</b>  | <b>979.598</b>  | G[18] |
| K  | 8  | 394.230         | 959.600         | <b>951.591</b>  | <b>952.095</b>  | <b>951.087</b>  | K[17] |
| G  | 9  | 422.741         | 895.553         | <b>887.543</b>  | <b>888.047</b>  | <b>887.040</b>  | G[16] |
| L  | 10 | 479.283         | 867.042         | 860.033         | 859.537         | 858.530         | L[15] |
| G  | 11 | 507.794         | <b>810.500</b>  | <b>802.491</b>  | <b>802.995</b>  | 801.987         | G[14] |
| K  | 12 | 571.841         | 781.989         | <b>773.980</b>  | <b>774.484</b>  | 773.476         | K[13] |
| G  | 13 | 600.352         | 717.943         | <b>709.932</b>  | <b>710.436</b>  | <b>709.429</b>  | G[12] |
| G  | 14 | 638.863         | 699.431         | <b>681.422</b>  | <b>681.926</b>  | 680.919         | G[11] |
| A  | 15 | 684.381         | 660.920         | <b>652.911</b>  | <b>653.415</b>  | <b>652.407</b>  | A[10] |
| R  | 16 | 739.439         | 625.462         | <b>617.392</b>  | <b>617.896</b>  | 616.889         | R[9]  |
| R  | 17 | <b>806.479</b>  | 561.954         | <b>553.345</b>  | <b>553.849</b>  | <b>552.841</b>  | R[8]  |
| H  | 18 | <b>875.009</b>  | 483.304         | 475.294         | 475.798         | 474.791         | H[7]  |
| R  | 19 | 953.059         | 414.774         | 406.765         | 407.269         | 406.261         | R[6]  |
| K  | 20 | <b>1038.130</b> | 336.724         | 328.714         | 329.218         | 328.211         | K[5]  |
| V  | 21 | <b>1087.665</b> | 251.033         | 243.023         | 244.527         | 243.520         | V[4]  |
| L  | 22 | <b>1144.207</b> | 202.110         | 194.100         | 194.613         | 193.605         | L[3]  |
| R  | 23 | <b>1222.257</b> | 145.577         | 137.567         | 138.071         | 137.063         | R[2]  |
| D  | 24 | <b>1279.771</b> | 67.526          | 59.517          | 60.021          | 59.013          | D[1]  |

# sp | P62806 | H4\_MOUSE

[Acetyl]SGRGKGGKGLGKGGAKRHRK<sup>Trimethyl</sup>VLRD  
42.05

- ▶ fragmentation table for charge state 3+
- ▶ specType=etd
- ▶ score=96.08
- ▶ F097417.dat
- ▶ query=q2193\_p1
- ▶ precursor=640.638860
- ▶ chargePrecursor=4
- ▶ itol=0.8

| AA    | c              | y              | z+1            | z+2            | z              | AA                   |
|-------|----------------|----------------|----------------|----------------|----------------|----------------------|
| S[1]  | 49.697         | <b>853.844</b> | <b>848.505</b> |                | 0.672          | <b>848.169</b> S[24] |
| G[2]  | 58.704         | <b>810.830</b> | <b>805.490</b> |                | 0.672          | <b>805.154</b> G[23] |
| R[3]  | 150.738        | 791.821        | <b>786.483</b> | <b>786.819</b> |                | <b>786.147</b> R[22] |
| G[4]  | 139.745        | <b>739.789</b> | 734.450        | 734.785        |                | 734.114 G[21]        |
| K[5]  | 182.443        | 720.782        | 715.442        | 715.778        | 715.106        | K[20]                |
| G[6]  | 201.450        | <b>678.084</b> | 672.744        | 673.080        | 672.408        | G[19]                |
| G[7]  | 220.458        | <b>659.076</b> | <b>653.737</b> | <b>654.073</b> | <b>653.401</b> | G[18]                |
| K[8]  | 263.156        | 640.069        | 634.730        | 635.066        | 634.394        | K[17]                |
| G[9]  | 282.163        | 597.371        | 592.031        | 592.367        | 591.695        | G[16]                |
| L[10] | 319.858        | 578.364        | 573.024        | <b>573.360</b> | 572.688        | L[15]                |
| G[11] | 338.865        | 540.660        | 535.320        | <b>535.666</b> | 534.994        | G[14]                |
| K[12] | 381.563        | 521.662        | 516.322        | 516.658        | 515.986        | K[13]                |
| G[13] | 400.570        | 478.964        | 473.624        | 473.960        | 473.288        | G[12]                |
| G[14] | 419.578        | 459.957        | 454.617        | 454.953        | 454.281        | G[11]                |
| A[15] | 443.257        | 440.949        | 435.610        | 435.946        | 435.274        | A[10]                |
| K[16] | 485.955        | <b>417.270</b> | 411.931        | 412.267        | 411.595        | K[9]                 |
| R[17] | 537.989        | 374.572        | 369.232        | 369.568        | 368.896        | R[8]                 |
| H[18] | 583.675        | 322.538        | 317.199        | 317.535        | 316.863        | H[7]                 |
| R[19] | 635.709        | 276.852        | 271.512        | 271.848        | 271.176        | R[6]                 |
| K[20] | 692.423        | 224.818        | 219.478        | 219.815        | 219.143        | K[5]                 |
| V[21] | 725.445        | 168.104        | 162.764        | 163.101        | 162.429        | V[4]                 |
| L[22] | 763.140        | 135.082        | 129.742        | 130.078        | 129.406        | L[3]                 |
| R[23] | <b>815.174</b> | 97.387         | 92.047         | 92.383         | 91.711         | R[2]                 |
| D[24] | <b>853.516</b> | 45.353         | 40.014         | 40.349         | 39.678         | D[1]                 |



# sp | P62806 | H4\_MOUSE

SGR<sup>Trimethyl</sup><sub>42.05</sub> GKGGKGLGKGGAK<sup>Acetyl</sup><sub>42.01</sub> RHRK<sup>Acetyl</sup><sub>42.01</sub> VLRLD

- ▶ fragmentation table for charge state 1+
- ▶ specType=etd
- ▶ score=137.05
- ▶ F097417.dat
- ▶ query=q2274\_p1
- ▶ precursor=651.140540
- ▶ chargePrecursor=4
- ▶ itol=0.8

| AA | c  | y               | z+1            | z+2             | z               | AA       |       |
|----|----|-----------------|----------------|-----------------|-----------------|----------|-------|
| S  | 1  | 105.006         | 2601.528       | 2585.510        | 0.000           | 2584.502 | S[24] |
| G  | 2  | 162.087         | 2514.496       | 2498.478        | 0.000           | 2497.470 | G[23] |
| R  | 3  | <b>350.235</b>  | 2457.475       | 2441.455        | 2442.464        | 2440.440 | R[22] |
| G  | 4  | <b>417.757</b>  | 2399.527       | 2283.308        | 2244.316        | 2242.300 | G[21] |
| K  | 5  | <b>545.352</b>  | 2202.305       | 2186.287        | 2187.295        | 2185.279 | K[20] |
| G  | 6  | <b>602.373</b>  | 2074.210       | 2058.192        | 2059.200        | 2057.184 | G[19] |
| G  | 7  | <b>659.395</b>  | 2017.189       | 2001.170        | 2002.178        | 2000.162 | G[18] |
| K  | 8  | <b>787.490</b>  | 1960.168       | 1944.149        | 1945.157        | 1943.141 | K[17] |
| G  | 9  | <b>844.511</b>  | 1832.072       | <b>1816.054</b> | <b>1817.062</b> | 1815.046 | G[16] |
| L  | 10 | <b>927.590</b>  | 1775.061       | 1759.022        | <b>1760.040</b> | 1758.025 | L[15] |
| G  | 11 | <b>1014.617</b> | 1661.967       | 1645.948        | 1646.956        | 1644.940 | G[14] |
| K  | 12 | <b>1142.712</b> | 1604.946       | <b>1588.927</b> | 1589.935        | 1587.919 | K[13] |
| G  | 13 | <b>1199.733</b> | 1476.851       | <b>1460.832</b> | 1461.840        | 1459.824 | G[12] |
| G  | 14 | <b>1256.755</b> | 1419.829       | 1403.810        | <b>1404.818</b> | 1402.803 | G[11] |
| A  | 15 | <b>1327.792</b> | 1362.808       | 1346.789        | <b>1347.797</b> | 1345.781 | A[10] |
| R  | 16 | <b>1407.897</b> | 1298.772       | 1279.732        | 1278.760        | 1274.744 | R[9]  |
| R  | 17 | <b>1653.998</b> | 1121.665       | 1105.646        | <b>1106.654</b> | 1104.638 | R[8]  |
| H  | 18 | <b>1791.057</b> | 985.564        | 949.545         | <b>950.553</b>  | 948.537  | H[7]  |
| R  | 19 | <b>1947.158</b> | <b>828.505</b> | 812.486         | <b>813.494</b>  | 811.478  | R[6]  |
| K  | 20 | 2117.264        | 672.404        | <b>656.385</b>  | <b>657.393</b>  | 655.377  | K[5]  |
| V  | 21 | 2216.332        | 502.298        | 486.280         | 487.287         | 485.272  | V[4]  |
| L  | 22 | 2329.416        | 403.230        | 387.211         | 388.219         | 386.203  | L[3]  |
| R  | 23 | 2485.517        | 280.146        | 274.127         | 275.135         | 273.119  | R[2]  |
| D  | 24 | 2600.544        | 134.045        | 118.026         | 119.034         | 117.018  | D[1]  |

# sp | P62806 | H4\_MOUSE

SGR<sup>Trimethyl</sup><sub>42.05</sub> GKGGKGLGKGGAK<sup>Acetyl</sup><sub>42.01</sub> RHRK<sup>Acetyl</sup><sub>42.01</sub> VLRLD

- ▶ fragmentation table for charge state 2+
- ▶ specType=etd
- ▶ score=137.05
- ▶ F097417.dat
- ▶ query=q2274\_p1
- ▶ precursor=651.140540
- ▶ chargePrecursor=4
- ▶ itol=0.8

| AA | c  | y               | z+1             | z+2             | z               | AA              |       |
|----|----|-----------------|-----------------|-----------------|-----------------|-----------------|-------|
| S  | 1  | 61.017          | <b>1301.268</b> | <b>1291.258</b> | 0.504           | <b>1292.755</b> | S[24] |
| G  | 2  | 61.547          | <b>1257.752</b> | 1249.742        | 0.504           | 1249.230        | G[23] |
| R  | 3  | 180.621         | <b>1279.241</b> | 1271.232        | 12.1738         | 1220.720        | R[22] |
| G  | 4  | 299.132         | <b>1139.761</b> | <b>1122.158</b> | <b>1132.662</b> | 1121.656        | G[21] |
| K  | 5  | 273.180         | <b>1101.656</b> | 1093.647        | <b>1094.151</b> | 1093.141        | K[20] |
| G  | 6  | 301.690         | 1037.609        | 1029.600        | 1030.103        | 1029.600        | G[19] |
| G  | 7  | 330.201         | 1009.098        | <b>1001.089</b> | <b>1001.593</b> | 1000.585        | G[18] |
| K  | 8  | 394.248         | 930.587         | <b>972.578</b>  | <b>973.082</b>  | 972.074         | K[17] |
| G  | 9  | 422.759         | 916.540         | <b>908.531</b>  | <b>908.034</b>  | 908.031         | G[16] |
| L  | 10 | 479.304         | 868.029         | <b>880.020</b>  | <b>880.524</b>  | <b>879.516</b>  | L[15] |
| G  | 11 | 507.812         | 831.487         | <b>823.478</b>  | <b>823.982</b>  | 822.974         | G[14] |
| K  | 12 | 571.859         | 802.976         | <b>794.967</b>  | <b>795.471</b>  | 794.463         | K[13] |
| G  | 13 | 600.370         | 738.929         | <b>730.920</b>  | <b>731.423</b>  | 730.416         | G[12] |
| G  | 14 | 628.881         | 710.418         | <b>702.409</b>  | <b>702.913</b>  | 701.905         | G[11] |
| A  | 15 | 684.399         | 681.907         | 673.898         | 674.402         | 673.395         | A[10] |
| R  | 16 | 749.432         | 646.395         | <b>638.380</b>  | <b>638.883</b>  | 637.871         | R[9]  |
| R  | 17 | <b>827.503</b>  | 561.338         | <b>553.327</b>  | <b>553.831</b>  | 552.821         | R[8]  |
| H  | 18 | 866.032         | 483.289         | 475.278         | 475.780         | 474.772         | H[7]  |
| R  | 19 | <b>974.083</b>  | 414.750         | 406.747         | 407.251         | 406.243         | R[6]  |
| K  | 20 | <b>1059.136</b> | 336.706         | 328.695         | 329.200         | 328.192         | K[5]  |
| V  | 21 | <b>1105.670</b> | 252.653         | 243.643         | 244.147         | 243.140         | V[4]  |
| L  | 22 | <b>1165.212</b> | 202.119         | 194.109         | 194.613         | 193.605         | L[3]  |
| R  | 23 | <b>1243.262</b> | 145.577         | 137.567         | 138.071         | 137.063         | R[2]  |
| D  | 24 | <b>1300.776</b> | 67.526          | 59.517          | 60.021          | 59.013          | D[1]  |

# sp | P62806 | H4\_MOUSE

SGR<sup>Trimethyl</sup><sub>42.05</sub> GKGGKGLGKGGAK<sup>Acetyl</sup><sub>42.01</sub> RHRK<sup>Acetyl</sup><sub>42.01</sub> VLRD

- ▶ fragmentation table for charge state 3+
- ▶ specType=etd
- ▶ score=137.05
- ▶ F097417.dat
- ▶ query=q2274\_p1
- ▶ precursor=651.140540
- ▶ chargePrecursor=4
- ▶ itol=0.8

| AA    | c              | y              | z+1            | z+2     | z              | AA    |
|-------|----------------|----------------|----------------|---------|----------------|-------|
| S[1]  | 95.693         | <b>867.848</b> | <b>862.508</b> | 0.672   | <b>862.172</b> | S[24] |
| G[2]  | 54.701         | 838.837        | 833.497        | 0.672   | 833.161        | G[23] |
| R[3]  | 130.750        | <b>819.830</b> | <b>814.490</b> | 814.826 | <b>814.154</b> | R[22] |
| G[4]  | 139.757        | 753.780        | 748.441        | 748.777 | 748.105        | G[21] |
| K[5]  | 182.495        | 734.773        | 729.434        | 729.770 | 729.098        | K[20] |
| G[6]  | 201.463        | 692.075        | 686.735        | 687.071 | 686.399        | G[19] |
| G[7]  | 220.470        | 673.068        | 667.728        | 668.064 | 667.392        | G[18] |
| K[8]  | 263.168        | 654.061        | 648.721        | 649.057 | 648.385        | K[17] |
| G[9]  | 282.175        | 631.362        | 626.023        | 626.359 | 625.687        | G[16] |
| L[10] | 319.670        | 592.355        | 587.015        | 587.352 | 586.680        | L[15] |
| G[11] | 338.677        | 554.661        | 549.321        | 549.657 | 548.985        | G[14] |
| K[12] | 381.575        | 535.653        | 530.314        | 530.650 | 529.978        | K[13] |
| G[13] | 400.583        | 492.955        | 487.615        | 487.951 | 487.280        | G[12] |
| G[14] | 419.590        | 473.948        | 468.608        | 468.944 | 468.272        | G[11] |
| A[15] | 443.269        | 454.941        | 449.601        | 449.937 | 449.265        | A[10] |
| K[16] | 499.971        | 431.262        | 425.922        | 426.258 | 425.586        | K[9]  |
| R[17] | 552.004        | 374.960        | 369.620        | 369.956 | 368.884        | R[8]  |
| H[18] | 597.691        | 322.526        | 317.187        | 317.523 | 316.851        | H[7]  |
| R[19] | 649.724        | 276.840        | 271.500        | 271.836 | 271.164        | R[6]  |
| K[20] | 706.426        | 234.906        | 219.487        | 219.803 | 219.131        | K[5]  |
| V[21] | 739.449        | 188.104        | 182.765        | 183.101 | 182.429        | V[4]  |
| L[22] | 777.144        | 136.082        | 129.742        | 130.078 | 129.406        | L[3]  |
| R[23] | <b>829.177</b> | 97.387         | 92.047         | 92.383  | 91.711         | R[2]  |
| D[24] | 867.520        | 45.353         | 40.014         | 40.349  | 39.678         | D[1]  |

# sp | P62806 | H4\_MOUSE

[Acetyl]SGRGKGGK Acetyl 42.01 GLGK Acetyl 42.01 GGAK Acetyl 42.01 RHRK Methyl 14.02 VLRD

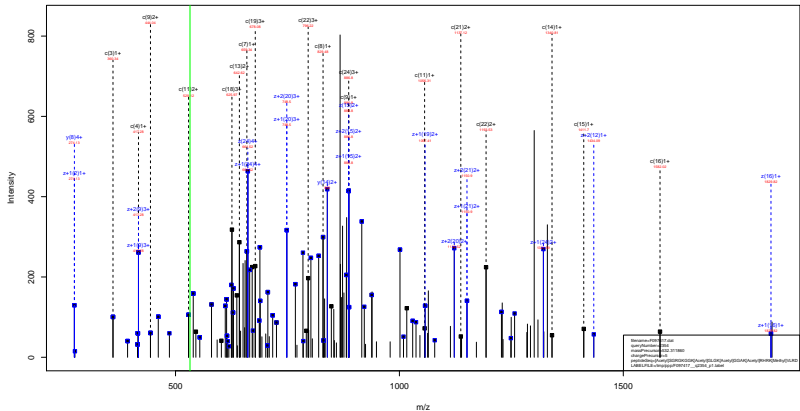

# sp | P62806 | H4\_MOUSE

[Acetyl]SGRGKGGK <sup>Acetyl</sup><sub>42.01</sub> GLGK <sup>Acetyl</sup><sub>42.01</sub> GGAK <sup>Acetyl</sup><sub>42.01</sub> RHRK <sup>Methyl</sup><sub>14.02</sub> VLRD

- ▶ fragmentation table for charge state 1+
- ▶ specType=etd
- ▶ score=92.99
- ▶ F097417.dat
- ▶ query=q2354\_p1
- ▶ precursor=532.311860
- ▶ chargePrecursor=5
- ▶ itol=0.8

| AA | c               | y              | z+1             | z+2             | z               | AA    |
|----|-----------------|----------------|-----------------|-----------------|-----------------|-------|
| S  | 147.076         | 267.518        | 264.500         | 0.000           | 2640.492        | S[24] |
| G  | 204.098         | 2528.476       | 2512.457        | 0.000           | 2511.449        | G[23] |
| R  | <b>360.199</b>  | 2471.434       | 2455.435        | 2456.443        | 2454.428        | R[22] |
| G  | <b>417.220</b>  | 2315.383       | 2299.339        | 2300.342        | 2298.327        | G[21] |
| K  | <b>545.315</b>  | 2258.332       | 2242.313        | 2243.321        | 2241.305        | K[20] |
| G  | <b>602.337</b>  | 2130.237       | 2114.218        | 2115.226        | 2113.210        | G[19] |
| G  | <b>659.358</b>  | 2073.215       | 2057.190        | 2058.204        | 2056.189        | G[18] |
| K  | <b>829.464</b>  | 2016.194       | 2000.175        | 2001.183        | 1999.167        | K[17] |
| G  | <b>886.485</b>  | 1846.088       | <b>1830.069</b> | 1831.077        | <b>1829.062</b> | G[16] |
| L  | 909.459         | 1739.067       | 1723.048        | 1724.056        | 1722.041        | L[15] |
| Q  | <b>1056.591</b> | 1875.983       | 1859.964        | 1860.972        | 1858.956        | Q[14] |
| K  | 1226.696        | 1818.961       | 1802.942        | 1803.950        | 1801.935        | K[13] |
| G  | 1283.718        | 1448.856       | 1432.837        | <b>1433.845</b> | 1431.829        | G[12] |
| G  | <b>1340.739</b> | 1391.834       | 1375.815        | 1376.823        | 1374.808        | G[11] |
| A  | <b>1411.776</b> | 1334.812       | 1318.793        | 1319.802        | 1317.786        | A[10] |
| R  | <b>1501.882</b> | 1283.718       | 1267.699        | <b>1268.705</b> | 1266.689        | R[9]  |
| R  | 1737.883        | 1093.670       | 1077.651        | <b>1078.659</b> | 1076.644        | R[8]  |
| H  | 1875.042        | <b>937.569</b> | <b>921.550</b>  | 922.558         | 920.542         | H[7]  |
| R  | 2031.143        | 800.510        | <b>784.491</b>  | <b>785.499</b>  | 783.484         | R[6]  |
| K  | 2175.254        | 644.409        | <b>628.390</b>  | <b>629.398</b>  | 627.382         | K[5]  |
| V  | 2272.222        | 602.398        | <b>486.280</b>  | 487.287         | 485.272         | V[4]  |
| L  | 2385.408        | 493.230        | 382.411         | 383.419         | 381.403         | L[3]  |
| R  | 2541.507        | 390.148        | <b>274.127</b>  | <b>275.135</b>  | 273.119         | R[2]  |
| D  | 2656.534        | 134.045        | 118.028         | 119.034         | 117.018         | D[1]  |



# sp | P62806 | H4\_MOUSE

[Acetyl]SGRGKGGK <sup>Acetyl</sup><sub>42.01</sub> GLGK <sup>Acetyl</sup><sub>42.01</sub> GGAK <sup>Acetyl</sup><sub>42.01</sub> RHRK <sup>Methyl</sup><sub>14.02</sub> VLRD

- ▶ fragmentation table for charge state 2+
- ▶ specType=etd
- ▶ score=92.99
- ▶ F097417.dat
- ▶ query=q2354\_p1
- ▶ precursor=532.311860
- ▶ chargePrecursor=5
- ▶ itol=0.8

| AA    | c               | y               | z+1             | z+2             | z               | AA    |
|-------|-----------------|-----------------|-----------------|-----------------|-----------------|-------|
| S[1]  | 74.642          | 1129.263        | <b>1321.253</b> | 0.504           | 1320.749        | S[24] |
| G[2]  | 102.553         | 1264.741        | <b>1256.732</b> | 0.504           | 1256.228        | G[23] |
| R[3]  | 180.603         | 1236.231        | <b>1228.221</b> | 1128.726        | <b>1227.717</b> | R[22] |
| G[4]  | 289.114         | 1158.189        | <b>1150.171</b> | <b>1150.975</b> | 1149.667        | G[21] |
| K[5]  | 273.163         | 1129.669        | 1121.659        | <b>1122.164</b> | 1121.156        | K[20] |
| G[6]  | 303.672         | 1065.622        | <b>1057.613</b> | <b>1058.117</b> | <b>1057.109</b> | G[19] |
| G[7]  | 330.183         | <b>1037.111</b> | <b>1029.102</b> | <b>1029.606</b> | 1028.599        | G[18] |
| K[8]  | <b>415.236</b>  | <b>1008.601</b> | <b>1000.591</b> | <b>1001.095</b> | 1000.587        | K[17] |
| G[9]  | <b>443.746</b>  | 921.546         | <b>915.538</b>  | <b>916.042</b>  | 915.534         | G[16] |
| L[10] | 609.656         | 899.037         | <b>897.029</b>  | <b>897.532</b>  | <b>896.524</b>  | L[15] |
| G[11] | <b>528.799</b>  | <b>838.495</b>  | <b>830.486</b>  | <b>830.990</b>  | <b>829.982</b>  | G[14] |
| K[12] | <b>613.852</b>  | 809.984         | <b>801.975</b>  | <b>802.479</b>  | 801.471         | K[13] |
| G[13] | <b>642.363</b>  | <b>724.931</b>  | <b>716.922</b>  | <b>717.426</b>  | <b>716.418</b>  | G[12] |
| G[14] | <b>670.873</b>  | 696.421         | <b>688.411</b>  | <b>688.915</b>  | <b>687.907</b>  | G[11] |
| A[15] | <b>708.392</b>  | 689.910         | <b>685.901</b>  | 683.905         | <b>689.397</b>  | A[10] |
| R[16] | <b>791.445</b>  | 632.391         | <b>624.382</b>  | <b>624.886</b>  | 623.877         | R[9]  |
| R[17] | 869.495         | 547.339         | <b>539.329</b>  | <b>539.833</b>  | <b>538.825</b>  | R[6]  |
| H[18] | <b>938.025</b>  | 469.288         | <b>461.279</b>  | <b>461.783</b>  | <b>460.775</b>  | H[7]  |
| R[19] | <b>1016.075</b> | 400.759         | <b>392.749</b>  | <b>393.253</b>  | <b>392.245</b>  | R[6]  |
| K[20] | 1057.128        | 322.708         | 314.699         | 315.203         | 314.195         | K[5]  |
| V[21] | <b>1136.665</b> | 293.683         | 283.673         | 284.177         | 283.169         | V[4]  |
| L[22] | <b>1193.207</b> | 202.139         | 194.130         | 194.633         | 193.625         | L[3]  |
| R[23] | 1271.257        | 148.577         | 137.567         | 138.071         | 137.063         | R[2]  |
| D[24] | 1328.771        | 67.526          | 59.517          | 60.021          | 59.013          | D[1]  |

# sp | P62806 | H4\_MOUSE

[Acetyl]SGRGKGGK <sup>Acetyl</sup><sub>42.01</sub> GLGK <sup>Acetyl</sup><sub>42.01</sub> GGAK <sup>Acetyl</sup><sub>42.01</sub> RHRK <sup>Methyl</sup><sub>14.02</sub> VLRD

- ▶ fragmentation table for charge state 3+
- ▶ specType=etd
- ▶ score=92.99
- ▶ F097417.dat
- ▶ query=q2354\_p1
- ▶ precursor=532.311860
- ▶ chargePrecursor=5
- ▶ itol=0.8

| AA    | c              | y              | z+1            | z+2            | z              | AA    |
|-------|----------------|----------------|----------------|----------------|----------------|-------|
| S[1]  | 49.697         | <b>886.511</b> | <b>881.171</b> | 0.672          | <b>880.835</b> | S[24] |
| G[2]  | 58.704         | 843.497        | 838.157        | 0.672          | 837.821        | G[23] |
| R[3]  | 150.738        | 824.490        | <b>819.150</b> | <b>819.486</b> | 818.814        | R[22] |
| G[4]  | 139.745        | 772.456        | <b>767.116</b> | <b>767.452</b> | 766.780        | G[21] |
| K[5]  | 182.443        | 793.449        | <b>748.109</b> | <b>748.445</b> | <b>747.773</b> | K[20] |
| G[6]  | 201.450        | 710.750        | <b>705.411</b> | <b>705.747</b> | <b>705.075</b> | G[19] |
| G[7]  | 220.458        | 691.743        | <b>686.404</b> | <b>686.740</b> | 686.068        | G[18] |
| K[8]  | 277.159        | <b>672.736</b> | 667.397        | 667.732        | 667.061        | K[17] |
| G[9]  | 296.167        | <b>616.034</b> | <b>610.695</b> | <b>611.031</b> | <b>610.359</b> | G[16] |
| L[10] | 313.681        | 597.027        | 591.688        | 592.023        | 591.352        | L[15] |
| G[11] | 352.968        | 559.137        | <b>553.993</b> | <b>554.329</b> | <b>553.657</b> | G[14] |
| K[12] | 409.570        | <b>540.325</b> | 534.988        | 535.322        | 534.650        | K[13] |
| G[13] | 428.577        | 483.623        | 478.284        | 478.620        | 477.948        | G[12] |
| G[14] | 447.585        | 464.616        | 459.277        | 459.613        | 458.941        | G[11] |
| A[15] | 471.264        | 445.609        | 440.270        | 440.605        | 439.934        | A[10] |
| K[16] | 527.966        | 421.930        | <b>416.590</b> | <b>416.926</b> | <b>416.255</b> | K[9]  |
| R[17] | <b>579.999</b> | 365.226        | <b>359.889</b> | <b>360.225</b> | <b>359.553</b> | R[8]  |
| H[18] | <b>625.686</b> | 313.195        | 307.855        | 308.191        | 307.519        | H[7]  |
| R[19] | <b>677.719</b> | 297.508        | 292.169        | 292.505        | 291.833        | R[6]  |
| K[20] | <b>725.089</b> | 215.475        | 210.137        | 210.471        | 209.799        | K[5]  |
| V[21] | 758.112        | 168.104        | 162.765        | 163.101        | 162.429        | V[4]  |
| L[22] | <b>795.807</b> | 135.082        | 129.742        | 130.078        | 129.406        | L[3]  |
| R[23] | <b>847.841</b> | 97.387         | 92.047         | 92.383         | 91.711         | R[2]  |
| D[24] | <b>886.183</b> | 45.353         | 40.014         | 40.349         | 39.678         | D[1]  |

# sp | P62806 | H4\_MOUSE

[Acetyl]SGRGKGGK<sup>Acetyl</sup><sub>42.01</sub> GLGK<sup>Acetyl</sup><sub>42.01</sub> GGAK<sup>Acetyl</sup><sub>42.01</sub> RHRK<sup>Methyl</sup><sub>14.02</sub> VLRL

- ▶ fragmentation table for charge state 4+
- ▶ specType=etd
- ▶ score=92.99
- ▶ F097417.dat
- ▶ query=q2354\_p1
- ▶ precursor=532.311860
- ▶ chargePrecursor=5
- ▶ itol=0.8

| AA    | c              | y              | z+1            | z+2            | z              | AA    |
|-------|----------------|----------------|----------------|----------------|----------------|-------|
| S[1]  | 37.525         | <b>665.135</b> | <b>661.130</b> | 0.755          | <b>660.078</b> | S[24] |
| G[2]  | 51.780         | 532.874        | <b>626.870</b> | 0.755          | <b>626.618</b> | G[23] |
| R[3]  | 90.805         | <b>618.619</b> | <b>614.614</b> | <b>614.866</b> | <b>614.362</b> | R[22] |
| G[4]  | 105.061        | <b>579.594</b> | 575.589        | 575.841        | 575.337        | G[21] |
| K[5]  | 137.084        | 565.338        | 561.334        | 561.586        | 561.082        | K[20] |
| G[6]  | 151.340        | 533.315        | <b>529.310</b> | <b>529.562</b> | <b>529.058</b> | G[19] |
| G[7]  | 165.595        | 519.059        | 515.055        | 515.307        | 514.803        | G[18] |
| K[8]  | 208.121        | 504.804        | 500.799        | 501.051        | 500.547        | K[17] |
| G[9]  | 222.377        | <b>462.278</b> | 458.273        | 458.525        | 458.021        | G[16] |
| L[10] | 250.048        | 448.022        | <b>444.017</b> | <b>444.269</b> | <b>443.766</b> | L[15] |
| G[11] | 264.303        | 419.751        | <b>415.746</b> | <b>415.998</b> | <b>415.494</b> | G[14] |
| K[12] | 307.430        | 405.496        | 401.491        | 401.743        | 401.239        | K[13] |
| G[13] | 321.685        | 362.969        | 358.965        | 359.217        | 358.713        | G[12] |
| G[14] | 335.940        | 348.714        | 344.709        | 344.961        | 344.457        | G[11] |
| A[15] | 353.700        | 334.459        | 330.454        | 330.706        | 330.202        | A[10] |
| K[16] | 396.226        | 316.699        | 312.695        | 312.947        | 312.443        | K[9]  |
| R[17] | 435.251        | <b>274.173</b> | 270.168        | 270.420        | 269.916        | R[8]  |
| H[18] | 469.516        | 235.146        | 231.143        | 231.395        | 230.891        | H[7]  |
| R[19] | 503.541        | 200.883        | 196.879        | 197.130        | 196.626        | R[6]  |
| K[20] | 544.069        | 161.858        | 157.853        | 158.105        | 157.601        | K[5]  |
| V[21] | 568.836        | 126.330        | 122.325        | 122.577        | 122.073        | V[4]  |
| L[22] | 597.107        | 101.563        | 97.558         | 97.810         | 97.306         | L[3]  |
| R[23] | <b>636.132</b> | 73.292         | 69.287         | 69.539         | 69.035         | R[2]  |
| D[24] | <b>664.889</b> | 34.267         | 30.262         | 30.514         | 30.010         | D[1]  |

# sp | P62806 | H4\_MOUSE

[Acetyl]SGRGKGGKGLGKGGAKRHRK Methyl VLRLD  
14.02

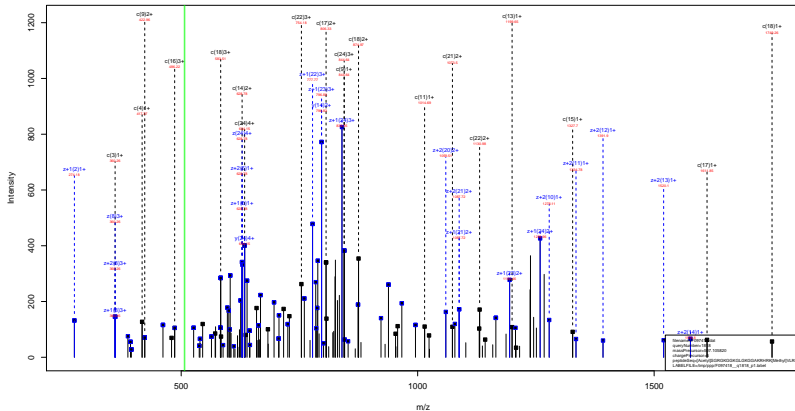

# sp | P62806 | H4\_MOUSE

[Acetyl]SGRGKGGKGLGKGGAKRHRK<sup>Methyl</sup> VLRD  
14.02

- ▶ fragmentation table for charge state 1+
- ▶ specType=etd
- ▶ score=119.64
- ▶ F097418.dat
- ▶ query=q1818\_p1
- ▶ precursor=507.105820
- ▶ chargePrecursor=5
- ▶ itol=0.8

| AA    | c               | y              | z+1            | z+2             | z        | AA    |
|-------|-----------------|----------------|----------------|-----------------|----------|-------|
| S[1]  | 167.076         | 2531.487       | 2515.468       | 0.000           | 2514.460 | S[24] |
| G[2]  | 224.598         | 2402.444       | 2386.425       | 0.000           | 2385.417 | G[23] |
| H[3]  | <b>360.199</b>  | 2348.423       | 2332.404       | 2330.412        | 2328.396 | H[22] |
| G[4]  | <b>417.220</b>  | 2189.321       | 2174.303       | 2174.310        | 2172.295 | G[21] |
| K[5]  | <b>545.115</b>  | 2132.300       | 2116.281       | 2117.289        | 2115.273 | K[20] |
| G[6]  | <b>602.137</b>  | 2004.205       | 1988.186       | 1989.194        | 1987.178 | G[19] |
| G[7]  | <b>659.158</b>  | 1947.184       | 1931.165       | 1932.173        | 1930.157 | G[18] |
| K[8]  | <b>787.453</b>  | 1890.162       | 1874.143       | 1875.151        | 1873.135 | K[17] |
| G[9]  | <b>844.475</b>  | 1782.067       | 1746.048       | 1747.056        | 1745.041 | G[16] |
| L[10] | <b>937.559</b>  | 1705.046       | 1689.027       | 1690.035        | 1688.019 | L[15] |
| G[11] | <b>1014.580</b> | 1591.962       | 1575.943       | <b>1576.951</b> | 1574.935 | G[14] |
| K[12] | <b>1142.675</b> | 1534.940       | 1518.921       | <b>1519.929</b> | 1517.914 | K[13] |
| G[13] | <b>1199.697</b> | 1406.845       | 1390.826       | <b>1391.834</b> | 1389.819 | G[12] |
| G[14] | 1256.718        | 1349.824       | 1333.805       | <b>1334.813</b> | 1332.797 | G[11] |
| A[15] | <b>1327.755</b> | 1292.802       | 1276.783       | <b>1277.791</b> | 1275.776 | A[10] |
| K[16] | 1403.807        | 1224.705       | 1208.686       | <b>1208.754</b> | 1206.739 | K[9]  |
| R[17] | <b>1611.951</b> | 1093.630       | 1077.611       | <b>1078.659</b> | 1076.644 | R[8]  |
| H[18] | <b>1749.010</b> | <b>937.569</b> | 921.550        | <b>922.558</b>  | 920.542  | H[7]  |
| R[19] | 1905.111        | <b>800.510</b> | <b>784.491</b> | <b>785.499</b>  | 783.484  | R[6]  |
| K[20] | 2047.222        | <b>644.409</b> | <b>628.390</b> | <b>629.398</b>  | 627.382  | K[5]  |
| V[21] | 2146.290        | 602.298        | <b>486.280</b> | 487.287         | 485.272  | V[4]  |
| L[22] | 2259.274        | 460.236        | <b>387.211</b> | 388.219         | 386.203  | L[3]  |
| D[23] | 2419.476        | 390.140        | <b>274.127</b> | 275.135         | 273.119  | D[2]  |
| D[24] | 2530.503        | 194.045        | 118.026        | 119.034         | 117.018  | D[1]  |

# sp | P62806 | H4\_MOUSE

[Acetyl]SGRGKGGKGLGKGGAKRHRK<sup>Methyl</sup> VLRD  
14.02

- ▶ fragmentation table for charge state 2+
- ▶ specType=etd
- ▶ score=119.64
- ▶ F097418.dat
- ▶ query=q1818\_p1
- ▶ precursor=507.105820
- ▶ chargePrecursor=5
- ▶ itol=0.8

| AA    | c               | y              | z+1             | z+2             | z               | AA    |
|-------|-----------------|----------------|-----------------|-----------------|-----------------|-------|
| S[1]  | 74.042          | 1256.247       | <b>1258.238</b> | 0.504           | 1257.734        | S[24] |
| G[2]  | 102.553         | 1201.726       | <b>1193.716</b> | 0.504           | 1193.212        | G[23] |
| R[3]  | 180.603         | 1173.215       | <b>1165.206</b> | <b>1165.709</b> | <b>1164.702</b> | R[22] |
| G[4]  | 269.114         | 1095.164       | <b>1087.155</b> | <b>1087.659</b> | 1086.651        | G[21] |
| K[5]  | 273.161         | 1058.694       | 1058.694        | <b>1059.148</b> | 1055.140        | K[20] |
| G[6]  | 301.672         | 1002.606       | <b>994.597</b>  | <b>995.101</b>  | 994.093         | G[19] |
| G[7]  | 330.183         | 974.695        | <b>966.086</b>  | <b>966.590</b>  | 965.582         | G[18] |
| K[8]  | <b>394.230</b>  | 945.985        | <b>937.575</b>  | <b>938.079</b>  | 937.071         | K[17] |
| G[9]  | <b>422.741</b>  | 893.537        | <b>875.528</b>  | <b>874.832</b>  | 873.026         | G[16] |
| L[10] | <b>479.283</b>  | <b>853.026</b> | <b>845.017</b>  | <b>845.521</b>  | <b>844.513</b>  | L[15] |
| Q[11] | 507.794         | <b>796.484</b> | <b>788.475</b>  | <b>788.979</b>  | <b>787.971</b>  | Q[14] |
| K[12] | <b>571.841</b>  | 767.974        | <b>759.964</b>  | <b>760.468</b>  | 759.460         | K[13] |
| G[13] | <b>600.352</b>  | 703.026        | <b>695.917</b>  | <b>696.421</b>  | 695.413         | G[12] |
| G[14] | <b>628.863</b>  | 675.415        | <b>667.406</b>  | <b>667.910</b>  | 666.902         | G[11] |
| A[15] | <b>664.381</b>  | 646.905        | <b>638.895</b>  | <b>639.399</b>  | 638.391         | A[10] |
| R[16] | <b>728.429</b>  | <b>611.386</b> | <b>603.377</b>  | <b>603.881</b>  | <b>602.873</b>  | R[9]  |
| R[17] | <b>866.479</b>  | 547.139        | <b>539.129</b>  | <b>539.633</b>  | <b>538.625</b>  | R[8]  |
| H[18] | <b>875.009</b>  | 469.288        | <b>461.279</b>  | <b>461.783</b>  | <b>460.775</b>  | H[7]  |
| R[19] | <b>953.059</b>  | 400.759        | <b>392.749</b>  | <b>393.253</b>  | <b>392.245</b>  | R[6]  |
| R[20] | <b>1024.115</b> | 322.708        | 314.699         | 315.203         | 314.195         | R[5]  |
| V[21] | <b>1073.649</b> | 251.692        | 243.683         | 244.187         | 243.180         | V[4]  |
| L[22] | <b>1130.191</b> | 202.119        | 194.109         | 194.613         | 193.605         | L[3]  |
| R[23] | <b>1208.241</b> | 145.577        | 137.567         | 138.071         | 137.063         | R[2]  |
| D[24] | 1265.755        | 67.526         | 59.517          | 60.021          | 59.013          | D[1]  |

# sp | P62806 | H4\_MOUSE

[Acetyl]SGRGKGGKGLGKGGAKRHRK <sup>Methyl</sup> VLRD  
14.02

- ▶ fragmentation table for charge state 3+
- ▶ specType=etd
- ▶ score=119.64
- ▶ F097418.dat
- ▶ query=q1818\_p1
- ▶ precursor=507.105820
- ▶ chargePrecursor=5
- ▶ itol=0.8

| AA    | c              | y              | z+1            | z+2            | z              | AA      |       |
|-------|----------------|----------------|----------------|----------------|----------------|---------|-------|
| S[1]  | 49.697         | <b>844.500</b> | <b>839.161</b> |                | 0.672          | 838.825 | S[24] |
| G[2]  | 58.704         | <b>801.486</b> | <b>796.147</b> |                | 0.672          | 795.811 | G[23] |
| R[3]  | 120.738        | 782.470        | <b>777.139</b> | <b>777.475</b> |                | 776.804 | R[22] |
| G[4]  | 139.745        | 730.445        | <b>725.106</b> | <b>725.442</b> | <b>724.770</b> |         | G[21] |
| K[5]  | 182.443        | 711.438        | <b>706.099</b> | <b>706.435</b> | <b>705.763</b> |         | K[20] |
| G[6]  | 201.450        | 668.740        | <b>663.400</b> | <b>663.736</b> | <b>663.064</b> |         | G[19] |
| G[7]  | 220.458        | 649.733        | <b>644.393</b> | <b>644.729</b> | <b>644.057</b> |         | G[18] |
| K[8]  | 263.156        | <b>630.726</b> | <b>625.386</b> | <b>625.722</b> | <b>625.050</b> |         | K[17] |
| G[9]  | 282.163        | <b>588.027</b> | <b>582.688</b> | <b>583.024</b> | <b>582.352</b> |         | G[16] |
| L[10] | 319.858        | 609.020        | <b>563.600</b> | <b>564.016</b> | <b>563.345</b> |         | L[15] |
| G[11] | 338.865        | 531.925        | <b>525.986</b> | <b>526.322</b> | <b>525.650</b> |         | G[14] |
| K[12] | 381.563        | 512.918        | 505.979        | 507.315        | 506.643        |         | K[13] |
| G[13] | 400.570        | 469.620        | 464.280        | 464.616        | 463.944        |         | G[12] |
| G[14] | 419.578        | 450.613        | 445.273        | 445.609        | 444.937        |         | G[11] |
| A[15] | 443.257        | 431.606        | 426.266        | 426.602        | 425.930        |         | A[10] |
| K[16] | <b>485.955</b> | 407.927        | 402.587        | 402.923        | 402.251        |         | K[9]  |
| R[17] | <b>537.989</b> | 365.226        | <b>359.889</b> | <b>360.225</b> | <b>359.553</b> |         | R[8]  |
| H[18] | <b>583.675</b> | 313.195        | 307.855        | 308.191        | 307.519        |         | H[7]  |
| R[19] | <b>633.709</b> | 297.508        | 292.168        | 292.504        | 291.833        |         | R[6]  |
| K[20] | <b>683.079</b> | 215.475        | 210.135        | 210.471        | 209.799        |         | K[5]  |
| V[21] | <b>716.102</b> | 168.104        | 162.764        | 163.101        | 162.429        |         | V[4]  |
| L[22] | <b>753.796</b> | 135.082        | 129.742        | 130.078        | 129.406        |         | L[3]  |
| R[23] | <b>805.830</b> | 97.387         | 92.047         | 92.383         | 91.711         |         | R[2]  |
| D[24] | <b>844.172</b> | 45.353         | 40.014         | 40.349         | 39.678         |         | D[1]  |

# sp | P62806 | H4\_MOUSE

[Acetyl]SGRGKGGKGLGKGGAKRHRK <sup>Methyl</sup> VLRD  
14.02

- ▶ fragmentation table for charge state 4+
- ▶ specType=etd
- ▶ score=119.64
- ▶ F097418.dat
- ▶ query=q1818\_p1
- ▶ precursor=507.105820
- ▶ chargePrecursor=5
- ▶ itol=0.8

| AA    | c              | y              | z+1            | z+2            | z              | AA    |
|-------|----------------|----------------|----------------|----------------|----------------|-------|
| S[1]  | 37.525         | <b>633.627</b> | <b>629.622</b> | 0.755          | <b>629.170</b> | S[24] |
| G[2]  | 51.780         | <b>601.366</b> | <b>597.362</b> | 0.755          | <b>597.110</b> | G[23] |
| R[3]  | 90.805         | 597.111        | <b>583.106</b> | <b>581.358</b> | <b>582.854</b> | R[22] |
| G[4]  | 105.061        | 548.086        | 544.081        | 544.333        | 543.829        | G[21] |
| K[5]  | 137.084        | 533.830        | 529.826        | 530.078        | 529.574        | K[20] |
| G[6]  | 151.340        | 501.807        | 497.802        | 498.054        | 497.550        | G[19] |
| G[7]  | 165.595        | 487.551        | 483.547        | 483.799        | 483.295        | G[18] |
| K[8]  | 197.619        | 473.296        | 469.291        | 469.543        | 469.039        | K[17] |
| G[9]  | 211.874        | 461.272        | 457.268        | 457.520        | 457.016        | G[16] |
| L[10] | 380.148        | 427.017        | <b>423.012</b> | <b>423.264</b> | <b>422.760</b> | L[15] |
| G[11] | 254.401        | 398.740        | <b>394.741</b> | <b>394.993</b> | <b>394.489</b> | G[14] |
| K[12] | 286.424        | 384.490        | 380.486        | 380.738        | 380.234        | K[13] |
| G[13] | 300.680        | 352.467        | 348.462        | 348.714        | 348.210        | G[12] |
| G[14] | 314.935        | 338.211        | 334.207        | 334.459        | 333.955        | G[11] |
| A[15] | 332.694        | 323.956        | 319.951        | 320.203        | 319.699        | A[10] |
| K[16] | 364.718        | 306.197        | 302.192        | 302.444        | 301.940        | K[9]  |
| R[17] | 403.743        | <b>274.173</b> | 270.168        | 270.420        | 269.916        | R[8]  |
| H[18] | 438.008        | 235.148        | 231.143        | 231.395        | 230.891        | H[7]  |
| R[19] | 477.033        | 200.883        | 196.878        | 197.130        | 196.626        | R[6]  |
| K[20] | 512.561        | 161.858        | 157.853        | 158.105        | 157.601        | K[5]  |
| V[21] | <b>537.328</b> | 126.330        | 122.325        | 122.577        | 122.073        | V[4]  |
| L[22] | 565.599        | 101.563        | 97.558         | 97.810         | 97.306         | L[3]  |
| R[23] | 604.624        | 73.292         | 69.287         | 69.539         | 69.035         | R[2]  |
| D[24] | <b>633.381</b> | 34.267         | 30.262         | 30.514         | 30.010         | D[1]  |





# sp | P62806 | H4\_MOUSE

[Acetyl]SGRGKGGKGLGKGGAKRHRK <sup>Methyl</sup> VLRD  
14.02

- ▶ fragmentation table for charge state 1+
- ▶ specType=etd
- ▶ score=128.04
- ▶ F097418.dat
- ▶ query=q1819\_p1
- ▶ precursor=633.630640
- ▶ chargePrecursor=4
- ▶ itol=0.8

| AA    | c               | y              | z+1             | z+2             | z        | AA    |
|-------|-----------------|----------------|-----------------|-----------------|----------|-------|
| S[1]  | 347.676         | 2531.487       | 2515.468        | 0.000           | 2514.460 | S[24] |
| G[2]  | 204.008         | 2402.444       | 2386.425        | 0.000           | 2385.417 | G[23] |
| R[3]  | <b>368.199</b>  | 2346.421       | 2329.404        | 2130.412        | 2328.396 | R[22] |
| G[4]  | <b>417.230</b>  | 2189.321       | 2173.303        | 2174.310        | 2172.295 | G[21] |
| K[5]  | <b>545.315</b>  | 2132.300       | 2116.281        | 2117.289        | 2115.273 | K[20] |
| G[6]  | <b>602.337</b>  | 2084.205       | 1986.186        | 1989.194        | 1987.178 | G[19] |
| G[7]  | <b>659.358</b>  | 1947.184       | <b>1931.165</b> | 1932.173        | 1930.157 | G[18] |
| K[8]  | <b>787.453</b>  | 1890.162       | 1874.143        | 1875.151        | 1873.135 | K[17] |
| G[9]  | <b>844.475</b>  | 1762.067       | 1746.048        | <b>1747.056</b> | 1745.041 | G[16] |
| L[10] | <b>927.559</b>  | 1705.046       | <b>1689.027</b> | 1690.035        | 1688.019 | L[15] |
| G[11] | <b>1014.580</b> | 1591.962       | 1575.943        | <b>1576.951</b> | 1574.935 | G[14] |
| K[12] | <b>1142.675</b> | 1534.940       | 1518.921        | <b>1519.929</b> | 1517.914 | K[13] |
| G[13] | <b>1199.697</b> | 1406.845       | 1390.826        | <b>1391.834</b> | 1389.819 | G[12] |
| G[14] | 1256.718        | 1349.824       | 1333.805        | <b>1334.813</b> | 1332.797 | G[11] |
| A[15] | <b>1327.795</b> | 1292.802       | 1276.783        | 1277.791        | 1275.776 | A[10] |
| R[16] | <b>1435.850</b> | 1235.785       | 1220.766        | 1206.784        | 1204.769 | R[9]  |
| R[17] | <b>1611.951</b> | 1093.670       | 1077.651        | <b>1078.659</b> | 1076.644 | R[8]  |
| H[18] | 1749.030        | <b>937.569</b> | <b>921.550</b>  | <b>922.558</b>  | 920.542  | H[7]  |
| R[19] | 1905.111        | 800.510        | <b>784.491</b>  | 785.499         | 783.484  | R[6]  |
| K[20] | 2047.222        | 644.409        | 628.390         | <b>629.398</b>  | 627.382  | K[5]  |
| V[21] | 2146.290        | 502.298        | 486.280         | <b>487.287</b>  | 485.272  | V[4]  |
| L[22] | 2259.374        | 403.230        | 387.211         | <b>388.219</b>  | 386.203  | L[3]  |
| R[23] | 2415.476        | 290.146        | 274.127         | 275.135         | 273.119  | R[2]  |
| D[24] | 2530.503        | 134.045        | 118.026         | 119.034         | 117.018  | D[1]  |

# sp | P62806 | H4\_MOUSE

[Acetyl]SGRGKGGKGLGKGGAKRHRK<sup>Methyl</sup> VLRD  
14.02

- ▶ fragmentation table for charge state 2+
- ▶ specType=etd
- ▶ score=128.04
- ▶ F097418.dat
- ▶ query=q1819\_p1
- ▶ precursor=633.630640
- ▶ chargePrecursor=4
- ▶ itol=0.8

| AA    | c               | y               | z+1             | z+2             | z               | AA    |
|-------|-----------------|-----------------|-----------------|-----------------|-----------------|-------|
| S[1]  | 74.042          | <b>1266.247</b> | <b>1258.238</b> | 0.504           | 1257.736        | S[24] |
| G[2]  | 102.553         | 1201.726        | <b>1193.716</b> | 0.504           | 1193.212        | G[23] |
| R[3]  | 180.603         | 1173.215        | <b>1165.206</b> | <b>1165.709</b> | 1164.702        | R[22] |
| G[4]  | 259.114         | 1095.164        | <b>1087.155</b> | <b>1087.659</b> | <b>1086.651</b> | G[21] |
| K[5]  | 273.163         | 1056.654        | <b>1058.644</b> | <b>1059.148</b> | 1055.140        | K[20] |
| G[6]  | 303.672         | 1002.606        | 994.597         | 995.101         | 994.093         | G[19] |
| G[7]  | 330.183         | 974.095         | <b>966.086</b>  | <b>966.590</b>  | <b>965.582</b>  | G[18] |
| K[8]  | 394.230         | 945.585         | <b>937.575</b>  | <b>938.079</b>  | <b>937.071</b>  | K[17] |
| G[9]  | 422.741         | 881.537         | <b>873.528</b>  | <b>874.032</b>  | <b>873.024</b>  | G[16] |
| L[10] | 479.289         | 853.026         | <b>845.017</b>  | <b>845.521</b>  | <b>844.513</b>  | L[15] |
| G[11] | 507.799         | <b>796.484</b>  | <b>788.475</b>  | <b>788.979</b>  | <b>787.971</b>  | G[14] |
| K[12] | 571.841         | 767.974         | <b>759.964</b>  | <b>760.468</b>  | <b>759.460</b>  | K[13] |
| G[13] | 600.352         | 703.926         | <b>695.917</b>  | <b>696.421</b>  | 695.413         | G[12] |
| G[14] | <b>628.863</b>  | 675.415         | <b>667.406</b>  | <b>667.910</b>  | <b>666.902</b>  | G[11] |
| A[15] | 664.364         | 646.905         | 638.895         | 639.399         | 638.391         | A[10] |
| R[16] | 728.430         | 611.386         | <b>603.377</b>  | <b>603.881</b>  | <b>602.873</b>  | R[9]  |
| R[17] | <b>806.479</b>  | 547.339         | <b>539.329</b>  | <b>539.833</b>  | <b>538.825</b>  | R[8]  |
| H[18] | <b>875.009</b>  | 469.289         | 461.279         | 461.783         | 460.775         | H[7]  |
| R[19] | 953.059         | 400.759         | 392.749         | 393.253         | 392.245         | R[6]  |
| K[20] | <b>1024.115</b> | 322.706         | 314.696         | 315.200         | 314.192         | K[5]  |
| V[21] | <b>1073.649</b> | 253.653         | 245.643         | 246.147         | 245.140         | V[4]  |
| L[22] | <b>1130.191</b> | 202.119         | 194.109         | 194.613         | 193.605         | L[3]  |
| R[23] | <b>1208.241</b> | 145.577         | 137.567         | 138.071         | 137.063         | R[2]  |
| D[24] | <b>1265.755</b> | 67.526          | 59.517          | 60.021          | 59.013          | D[1]  |

# sp | P62806 | H4\_MOUSE

[Acetyl]SGRGKGGKGLGKGGAKRHRK<sup>Methyl</sup>VLRD  
14.02

- ▶ fragmentation table for charge state 3+
- ▶ specType=etd
- ▶ score=128.04
- ▶ F097418.dat
- ▶ query=q1819\_p1
- ▶ precursor=633.630640
- ▶ chargePrecursor=4
- ▶ itol=0.8

| AA    | c              | y              | z+1            | z+2            | z              | AA    |
|-------|----------------|----------------|----------------|----------------|----------------|-------|
| S[1]  | 49.697         | <b>844.500</b> | <b>639.161</b> | 0.672          | <b>838.825</b> | S[24] |
| G[2]  | 58.704         | 301.485        | <b>796.147</b> | 0.672          | <b>795.811</b> | G[23] |
| R[3]  | 150.738        | 782.476        | <b>777.139</b> | <b>777.475</b> | <b>776.804</b> | R[22] |
| G[4]  | 139.745        | 730.445        | 725.106        | 725.442        | 724.770        | G[21] |
| K[5]  | 182.443        | 711.438        | 706.099        | 706.435        | 705.763        | K[20] |
| G[6]  | 201.450        | <b>668.740</b> | 663.400        | 663.736        | 663.064        | G[19] |
| G[7]  | 220.458        | 649.733        | 644.393        | 644.729        | 644.057        | G[18] |
| K[8]  | 263.156        | 630.726        | 625.386        | 625.722        | 625.050        | K[17] |
| G[9]  | 282.163        | 598.021        | 592.681        | 593.017        | 592.352        | G[16] |
| L[10] | 319.858        | 569.020        | 563.680        | 564.016        | 563.345        | L[15] |
| G[11] | 338.865        | 531.325        | 525.985        | 526.322        | 525.650        | G[14] |
| K[12] | 381.563        | 512.318        | 506.979        | 507.315        | 506.643        | K[13] |
| G[13] | 400.570        | 469.620        | 464.280        | 464.616        | 463.944        | G[12] |
| G[14] | 419.578        | 450.613        | 445.273        | 445.609        | 444.937        | G[11] |
| A[15] | 443.257        | 431.606        | 426.266        | 426.602        | 425.930        | A[10] |
| K[16] | 485.955        | 407.927        | 402.587        | 402.923        | 402.251        | K[9]  |
| R[17] | 537.989        | 365.226        | <b>359.889</b> | <b>360.225</b> | <b>359.553</b> | R[8]  |
| H[18] | 583.675        | 313.195        | 307.855        | 308.191        | 307.519        | H[7]  |
| R[19] | 635.709        | 297.508        | 292.168        | 292.504        | 291.833        | R[6]  |
| K[20] | 663.079        | 215.475        | 210.135        | 210.471        | 209.799        | K[5]  |
| V[21] | 716.102        | 168.104        | 162.764        | 163.101        | 162.429        | V[4]  |
| L[22] | 753.796        | 135.082        | 129.742        | 130.078        | 129.406        | L[3]  |
| R[23] | <b>805.830</b> | 97.387         | 92.047         | 92.383         | 91.711         | R[2]  |
| D[24] | <b>844.172</b> | 45.353         | 40.014         | 40.349         | 39.678         | D[1]  |



# sp | P62806 | H4\_MOUSE

[Acetyl]SGR<sup>Methyl</sup><sub>14.02</sub> GKGKGLGKGGAKRHR<sup>Dimethyl</sup><sub>28.03</sub> KVLRD

- ▶ fragmentation table for charge state 1+
- ▶ specType=etd
- ▶ score=108.76
- ▶ F097418.dat
- ▶ query=q1855\_p1
- ▶ precursor=512.710470
- ▶ chargePrecursor=5
- ▶ itol=0.8

| AA    | c               | y               | z+1             | z+2             | z              | AA    |
|-------|-----------------|-----------------|-----------------|-----------------|----------------|-------|
| S[1]  | 147.076         | 2559.518        | 2543.469        | 0.000           | 2542.491       | S[24] |
| G[2]  | 204.098         | 2430.473        | 2414.427        | 0.000           | 2413.449       | G[23] |
| R[3]  | <b>374.215</b>  | 2371.454        | 2357.435        | 2358.441        | 2356.427       | R[22] |
| G[4]  | <b>431.236</b>  | 2203.337        | 2187.318        | 2188.326        | 2186.310       | G[21] |
| K[5]  | <b>559.331</b>  | 2146.318        | 2130.297        | 2131.305        | 2129.289       | K[20] |
| G[6]  | <b>616.353</b>  | 2018.221        | 2002.202        | 2003.210        | 2001.194       | G[19] |
| G[7]  | <b>673.374</b>  | 1961.199        | 1945.180        | 1946.188        | 1944.171       | G[18] |
| K[8]  | <b>801.469</b>  | 1904.178        | 1888.159        | 1889.167        | 1887.151       | K[17] |
| G[9]  | <b>858.490</b>  | 1776.083        | 1760.064        | 1761.072        | 1759.056       | G[16] |
| L[10] | <b>915.514</b>  | 1719.061        | 1703.043        | <b>1704.050</b> | 1702.035       | L[15] |
| Q[11] | <b>1028.596</b> | 1655.977        | 1589.958        | <b>1590.966</b> | 1588.951       | Q[14] |
| K[12] | <b>1156.691</b> | 1548.956        | <b>1532.937</b> | <b>1533.945</b> | 1531.929       | K[13] |
| G[13] | 1213.712        | 1420.861        | 1404.842        | 1405.850        | 1403.834       | G[12] |
| G[14] | <b>1270.734</b> | 1363.839        | 1347.821        | <b>1348.828</b> | 1346.813       | G[11] |
| A[15] | <b>1341.771</b> | 1306.817        | <b>1290.799</b> | 1291.807        | 1289.791       | A[10] |
| R[16] | 1409.856        | <b>1235.781</b> | 1220.763        | <b>1220.770</b> | 1218.755       | R[9]  |
| R[17] | 1625.967        | 1107.688        | 1091.667        | 1092.675        | 1090.659       | R[8]  |
| H[18] | <b>1763.026</b> | <b>951.585</b>  | <b>935.566</b>  | <b>936.574</b>  | 934.558        | H[7]  |
| R[19] | 1967.158        | 814.526         | 798.507         | <b>799.515</b>  | 797.499        | R[6]  |
| K[20] | 2075.253        | <b>630.393</b>  | 614.375         | 615.382         | <b>613.367</b> | K[5]  |
| V[21] | 2174.322        | 502.265         | <b>485.260</b>  | <b>487.267</b>  | 485.252        | V[4]  |
| L[22] | 2267.408        | 463.139         | <b>387.211</b>  | <b>388.219</b>  | 386.203        | L[3]  |
| R[23] | 2443.507        | 290.146         | <b>274.127</b>  | 275.135         | 273.119        | R[2]  |
| D[24] | 2558.534        | 134.045         | 138.026         | 139.034         | 137.018        | D[1]  |

# sp | P62806 | H4\_MOUSE

[Acetyl]SGR<sup>Methyl</sup><sub>14.02</sub> GKGGKGLGKGGAKRHR<sup>Dimethyl</sup><sub>28.03</sub> KVLRD

- ▶ fragmentation table for charge state 2+
- ▶ specType=etd
- ▶ score=108.76
- ▶ F097418.dat
- ▶ query=q1855\_p1
- ▶ precursor=512.710470
- ▶ chargePrecursor=5
- ▶ itol=0.8

| AA    | c               | y               | z+1             | z+2             | z               | AA    |
|-------|-----------------|-----------------|-----------------|-----------------|-----------------|-------|
| S[1]  | 74.642          | <b>1280.263</b> | 1272.263        | 0.504           | <b>1271.749</b> | S[24] |
| G[2]  | 102.553         | 1215.741        | <b>1207.732</b> | 0.504           | 1207.228        | G[23] |
| K[3]  | 187.611         | 1187.231        | <b>1179.221</b> | <b>1179.725</b> | 1178.717        | K[22] |
| G[4]  | 238.322         | 1102.172        | <b>1094.163</b> | <b>1094.667</b> | 1093.659        | G[21] |
| K[5]  | 280.159         | 1073.661        | <b>1065.652</b> | <b>1066.156</b> | <b>1065.148</b> | K[20] |
| G[6]  | 308.680         | 1009.614        | <b>1001.605</b> | <b>1002.108</b> | 1001.101        | G[19] |
| G[7]  | <b>337.191</b>  | 981.103         | <b>973.094</b>  | <b>973.598</b>  | 972.590         | G[18] |
| K[8]  | <b>401.238</b>  | <b>952.592</b>  | 944.583         | <b>945.087</b>  | 944.079         | K[17] |
| G[9]  | <b>429.749</b>  | <b>888.545</b>  | 880.536         | <b>881.040</b>  | 880.032         | G[16] |
| L[10] | <b>486.291</b>  | 860.036         | 852.027         | 853.529         | 852.521         | L[15] |
| G[11] | <b>514.802</b>  | 803.482         | <b>795.483</b>  | <b>795.987</b>  | 794.979         | G[14] |
| K[12] | <b>578.849</b>  | <b>774.982</b>  | <b>766.972</b>  | <b>767.476</b>  | <b>766.468</b>  | K[13] |
| G[13] | <b>607.360</b>  | <b>710.934</b>  | <b>702.925</b>  | <b>703.429</b>  | 702.421         | G[12] |
| G[14] | <b>635.871</b>  | 682.423         | <b>674.414</b>  | <b>674.918</b>  | <b>673.910</b>  | G[11] |
| A[15] | <b>671.389</b>  | 653.914         | <b>645.903</b>  | <b>646.407</b>  | <b>645.399</b>  | A[10] |
| K[16] | <b>735.437</b>  | <b>618.394</b>  | <b>610.385</b>  | <b>610.889</b>  | 609.881         | K[9]  |
| R[17] | <b>813.487</b>  | 554.347         | <b>546.337</b>  | <b>546.841</b>  | <b>545.833</b>  | R[8]  |
| H[18] | <b>882.017</b>  | 476.296         | <b>468.287</b>  | <b>468.791</b>  | <b>467.783</b>  | H[7]  |
| R[19] | <b>974.083</b>  | 407.767         | <b>399.757</b>  | <b>400.261</b>  | <b>399.253</b>  | R[6]  |
| K[20] | <b>1038.130</b> | 315.700         | 307.691         | 308.195         | 307.187         | K[5]  |
| V[21] | <b>1087.665</b> | 252.683         | 244.673         | 245.177         | 244.169         | V[4]  |
| L[22] | <b>1144.207</b> | 202.119         | 194.109         | 194.613         | 193.605         | L[3]  |
| R[23] | 1222.257        | 148.577         | 137.567         | 138.071         | 137.063         | R[2]  |
| D[24] | 1279.771        | 87.526          | 59.517          | 60.021          | 59.013          | D[1]  |

# sp | P62806 | H4\_MOUSE

[Acetyl]SGR<sup>Methyl</sup><sub>14.02</sub> GKGGKGLGKGGAKRHR<sup>Dimethyl</sup><sub>28.03</sub> KVLRD

- ▶ fragmentation table for charge state 3+
- ▶ specType=etd
- ▶ score=108.76
- ▶ F097418.dat
- ▶ query=q1855.p1
- ▶ precursor=512.710470
- ▶ chargePrecursor=5
- ▶ itol=0.8

| AA    | c              | y              | z+1            | z+2            | z              | AA                   |
|-------|----------------|----------------|----------------|----------------|----------------|----------------------|
| S[1]  | 49.697         | <b>853.844</b> | <b>848.505</b> |                | 0.672          | <b>848.169</b> S[24] |
| G[2]  | 58.704         | 310.830        | <b>905.490</b> |                | 0.672          | <b>805.154</b> G[23] |
| R[3]  | 125.410        | 791.821        | <b>786.483</b> | <b>786.819</b> |                | 786.147 R[22]        |
| G[4]  | 144.417        | <b>735.117</b> | <b>725.778</b> | <b>730.114</b> |                | <b>729.442</b> G[21] |
| K[5]  | 187.115        | <b>716.110</b> | <b>710.770</b> | <b>711.106</b> |                | <b>710.435</b> K[20] |
| G[6]  | 206.122        | <b>673.412</b> | 668.072        | 668.408        | 667.736        | G[19]                |
| G[7]  | 225.130        | 654.405        | <b>649.065</b> | <b>649.401</b> | 648.729        | G[18]                |
| K[8]  | 267.828        | 635.397        | <b>630.058</b> | <b>630.394</b> | <b>629.722</b> | K[17]                |
| G[9]  | 286.835        | <b>592.695</b> | <b>587.360</b> | <b>587.695</b> |                | <b>587.024</b> G[16] |
| L[10] | 324.330        | <b>573.692</b> | <b>568.352</b> | <b>568.688</b> |                | 568.016 L[15]        |
| G[11] | 343.337        | 535.957        | 530.657        | 530.994        | 530.327        | G[14]                |
| K[12] | 386.235        | 516.960        | <b>511.651</b> | <b>511.986</b> |                | <b>511.315</b> K[13] |
| G[13] | 405.242        | 474.292        | <b>468.952</b> | 469.288        | <b>468.616</b> | G[12]                |
| G[14] | 424.249        | 455.285        | 449.945        | 450.281        | 449.609        | G[11]                |
| A[15] | 447.959        | 436.277        | <b>430.938</b> | <b>431.274</b> | <b>430.602</b> | A[10]                |
| K[16] | <b>490.627</b> | 412.598        | 407.259        | 407.595        | 406.923        | K[9]                 |
| R[17] | 542.661        | 369.900        | 364.561        | 364.896        | 364.225        | R[8]                 |
| H[18] | <b>588.347</b> | 317.866        | 312.527        | 312.863        | 312.191        | H[7]                 |
| R[19] | <b>649.724</b> | 272.180        | 266.841        | 267.176        | 266.505        | R[6]                 |
| K[20] | <b>692.423</b> | 210.803        | 205.463        | 205.799        | 205.127        | K[5]                 |
| V[21] | <b>725.445</b> | 168.104        | 162.765        | 163.101        | 162.429        | V[4]                 |
| L[22] | <b>763.140</b> | 135.082        | 129.742        | 130.078        | 129.406        | L[3]                 |
| R[23] | 815.174        | 97.387         | 92.047         | 92.383         | 91.711         | R[2]                 |
| D[24] | <b>853.516</b> | 45.353         | 40.014         | 40.349         | 39.678         | D[1]                 |



# sp | P62806 | H4\_MOUSE

[Acetyl]SGR<sup>Methyl</sup><sub>14.02</sub> GKGGKGLGKGGAKRHR<sup>Dimethyl</sup><sub>28.03</sub> KVLRD

- ▶ fragmentation table for charge state 4+
- ▶ specType=etd
- ▶ score=108.76
- ▶ F097418.dat
- ▶ query=q1855\_p1
- ▶ precursor=512.710470
- ▶ chargePrecursor=5
- ▶ itol=0.8

| AA    | c              | y              | z+1            | z+2            | z              | AA    |
|-------|----------------|----------------|----------------|----------------|----------------|-------|
| S[1]  | 37.525         | <b>640.635</b> | <b>636.630</b> | 0.755          | <b>636.378</b> | S[24] |
| G[2]  | 51.780         | <b>608.374</b> | <b>604.370</b> | 0.755          | <b>604.118</b> | G[23] |
| R[3]  | 94.309         | 594.110        | <b>590.114</b> | <b>590.366</b> | <b>589.862</b> | R[22] |
| G[4]  | 108.564        | 551.590        | 547.585        | 547.837        | <b>547.333</b> | G[21] |
| K[5]  | 140.588        | 537.334        | 533.330        | 533.582        | 533.078        | K[20] |
| G[6]  | 154.844        | 505.311        | 501.306        | 501.558        | 501.054        | G[19] |
| G[7]  | 169.099        | <b>491.055</b> | <b>487.051</b> | <b>487.303</b> | <b>486.799</b> | G[18] |
| K[8]  | 201.123        | 476.800        | 472.795        | 473.047        | 472.543        | K[17] |
| G[9]  | 215.378        | 454.776        | 449.771        | 449.923        | 449.520        | G[16] |
| L[10] | 253.049        | <b>430.521</b> | 426.516        | 426.768        | 426.264        | L[15] |
| G[11] | 257.904        | <b>402.250</b> | 398.245        | 398.497        | 397.993        | G[14] |
| K[12] | 289.028        | <b>387.994</b> | 383.989        | 384.242        | 383.738        | K[13] |
| G[13] | 304.184        | 355.971        | 351.966        | 352.218        | 351.714        | G[12] |
| G[14] | 318.439        | 341.715        | <b>337.711</b> | <b>337.963</b> | <b>337.459</b> | G[11] |
| A[15] | 336.198        | 327.460        | 323.455        | 323.707        | 323.203        | A[10] |
| K[16] | 368.222        | 309.701        | 305.696        | 305.948        | 305.444        | K[9]  |
| R[17] | 407.247        | -177.877       | <b>273.672</b> | <b>273.924</b> | <b>273.420</b> | R[8]  |
| H[18] | 441.512        | 238.652        | 234.647        | 234.899        | 234.395        | H[7]  |
| R[19] | <b>487.545</b> | 204.397        | 200.392        | 200.644        | 200.140        | R[6]  |
| K[20] | 511.569        | 158.354        | 154.349        | 154.601        | 154.097        | K[5]  |
| V[21] | <b>544.336</b> | 126.330        | 122.325        | 122.577        | 122.073        | V[4]  |
| L[22] | 572.607        | 101.563        | 97.558         | 97.810         | 97.306         | L[3]  |
| R[23] | <b>611.632</b> | 73.292         | 69.287         | 69.539         | 69.035         | R[2]  |
| D[24] | <b>640.389</b> | 34.267         | 30.262         | 30.514         | 30.010         | D[1]  |

# sp | P62806 | H4\_MOUSE

[Acetyl]SGR<sup>Methyl</sup> 14.02 GKGKGLGKGGAKRHRK<sup>Dimethyl</sup> VLRD 28.03

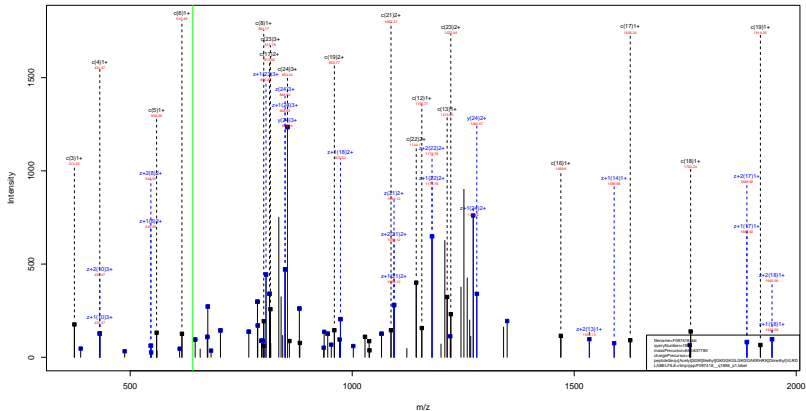

# sp | P62806 | H4\_MOUSE

[Acetyl]SGR<sup>Methyl</sup><sub>14.02</sub> GKGGKGLGKGGAKRHRK<sup>Dimethyl</sup><sub>28.03</sub> VLRD

- ▶ fragmentation table for charge state 1+
- ▶ specType=etd
- ▶ score=105.94
- ▶ F097418.dat
- ▶ query=q1856\_p1
- ▶ precursor=640.637780
- ▶ chargePrecursor=4
- ▶ itol=0.8

| AA | c  | y               | z+1            | z+2             | z               | AA       |       |
|----|----|-----------------|----------------|-----------------|-----------------|----------|-------|
| S  | 1  | 147.076         | 2509.518       | 2543.499        | 0.000           | 2542.491 | S[24] |
| G  | 2  | 204.098         | 2430.475       | 2414.457        | 0.000           | 2413.449 | G[23] |
| R  | 3  | <b>374.215</b>  | 2373.494       | 2367.435        | 2358.443        | 2366.427 | R[22] |
| G  | 4  | <b>431.236</b>  | 2203.537       | 2187.333        | 2188.326        | 2186.311 | G[21] |
| K  | 5  | <b>559.331</b>  | 2146.316       | 2130.297        | 2131.305        | 2129.289 | K[20] |
| G  | 6  | <b>616.353</b>  | 2018.221       | 2002.200        | 2003.210        | 2001.194 | G[19] |
| G  | 7  | <b>673.374</b>  | 1961.199       | <b>1945.180</b> | <b>1946.188</b> | 1944.173 | G[18] |
| K  | 8  | <b>801.469</b>  | 1904.178       | <b>1889.159</b> | <b>1889.167</b> | 1887.151 | K[17] |
| G  | 9  | <b>858.490</b>  | 1776.083       | <b>1760.064</b> | 1761.072        | 1759.056 | G[16] |
| L  | 10 | <b>915.514</b>  | 1719.061       | 1703.043        | 1704.050        | 1702.035 | L[15] |
| G  | 11 | <b>1028.596</b> | 1605.977       | <b>1589.958</b> | 1590.966        | 1588.951 | G[14] |
| K  | 12 | <b>1156.691</b> | 1548.956       | 1532.937        | <b>1533.945</b> | 1531.929 | K[13] |
| G  | 13 | <b>1213.712</b> | 1420.861       | 1404.840        | 1405.850        | 1403.834 | G[12] |
| G  | 14 | 1270.734        | 1363.839       | 1347.821        | <b>1348.828</b> | 1346.813 | G[11] |
| A  | 15 | 1341.771        | 1306.818       | 1290.799        | 1291.807        | 1289.791 | A[10] |
| R  | 16 | <b>1409.866</b> | 1238.781       | 1219.762        | <b>1220.770</b> | 1218.754 | R[9]  |
| R  | 17 | <b>1625.967</b> | 1107.680       | 1091.667        | 1092.675        | 1090.659 | R[8]  |
| H  | 18 | <b>1763.026</b> | 951.585        | <b>935.566</b>  | <b>936.574</b>  | 934.558  | H[7]  |
| R  | 19 | <b>1919.127</b> | <b>814.526</b> | <b>798.507</b>  | <b>799.515</b>  | 797.499  | R[6]  |
| K  | 20 | 2075.253        | 658.425        | 642.406         | 643.414         | 641.398  | K[5]  |
| V  | 21 | 2174.322        | 502.298        | 486.280         | <b>487.287</b>  | 485.272  | V[4]  |
| L  | 22 | 2287.406        | 403.230        | 387.211         | <b>388.219</b>  | 386.203  | L[3]  |
| R  | 23 | 2443.507        | 290.146        | 274.127         | 275.135         | 273.119  | R[2]  |
| D  | 24 | 2598.534        | 134.045        | 118.026         | 119.034         | 117.018  | D[1]  |

# sp | P62806 | H4\_MOUSE

[Acetyl]SGR<sup>Methyl</sup><sub>14.02</sub> GKGGKGLGKGGAKRHRK<sup>Dimethyl</sup><sub>28.03</sub> VLRD

- ▶ fragmentation table for charge state 2+
- ▶ specType=etd
- ▶ score=105.94
- ▶ F097418.dat
- ▶ query=q1856\_p1
- ▶ precursor=640.637780
- ▶ chargePrecursor=4
- ▶ itol=0.8

| AA | c  | y               | z+1             | z+2             | z               | AA              |       |
|----|----|-----------------|-----------------|-----------------|-----------------|-----------------|-------|
| S  | 1  | 74.042          | <b>1280.263</b> | <b>1272.253</b> | 0.504           | 1271.740        | S[24] |
| G  | 2  | 102.553         | 1215.741        | 1207.732        | 0.504           | 1207.228        | G[23] |
| R  | 3  | 187.611         | 1187.231        | <b>1179.221</b> | <b>1179.725</b> | 1178.717        | R[22] |
| G  | 4  | 238.122         | 1102.172        | <b>1094.163</b> | <b>1094.667</b> | <b>1093.559</b> | G[21] |
| K  | 5  | 290.159         | 1073.661        | <b>1065.652</b> | <b>1066.156</b> | 1065.148        | K[20] |
| G  | 6  | 308.680         | 1009.614        | 1001.605        | <b>1002.108</b> | 1001.101        | G[19] |
| G  | 7  | 357.191         | 981.103         | <b>973.094</b>  | <b>973.598</b>  | 972.590         | G[18] |
| K  | 8  | 401.210         | <b>952.592</b>  | <b>944.583</b>  | <b>945.087</b>  | <b>944.079</b>  | K[17] |
| G  | 9  | 429.749         | 898.545         | <b>880.536</b>  | <b>881.040</b>  | 880.032         | G[16] |
| L  | 10 | 489.293         | 860.036         | 852.027         | 852.529         | 851.521         | L[15] |
| G  | 11 | 514.802         | 803.492         | <b>795.483</b>  | <b>795.987</b>  | <b>794.979</b>  | G[14] |
| K  | 12 | 578.849         | 774.982         | <b>766.972</b>  | <b>767.476</b>  | <b>766.468</b>  | K[13] |
| G  | 13 | 607.390         | 710.934         | <b>702.925</b>  | <b>703.429</b>  | 702.421         | G[12] |
| G  | 14 | 635.971         | <b>682.423</b>  | <b>674.414</b>  | <b>674.918</b>  | <b>673.910</b>  | G[11] |
| A  | 15 | 691.389         | 653.913         | <b>645.903</b>  | <b>646.407</b>  | 645.399         | A[10] |
| R  | 16 | 736.437         | 618.394         | 610.385         | <b>610.889</b>  | 609.881         | R[9]  |
| R  | 17 | <b>813.487</b>  | 554.347         | <b>546.337</b>  | <b>546.841</b>  | <b>545.833</b>  | R[8]  |
| H  | 18 | <b>882.017</b>  | 476.290         | 468.281         | 468.781         | 467.783         | H[7]  |
| R  | 19 | <b>960.067</b>  | 407.767         | 399.757         | 400.261         | 399.253         | R[6]  |
| K  | 20 | <b>1038.130</b> | 329.716         | 321.707         | 322.211         | 321.203         | K[5]  |
| V  | 21 | <b>1087.665</b> | 251.663         | 243.653         | 244.157         | 243.149         | V[4]  |
| L  | 22 | <b>1144.207</b> | 202.119         | 194.109         | 194.613         | 193.605         | L[3]  |
| R  | 23 | <b>1222.257</b> | 145.577         | 137.567         | 138.071         | 137.063         | R[2]  |
| D  | 24 | 1279.771        | 87.526          | 89.517          | 90.021          | 89.013          | D[1]  |

# sp | P62806 | H4\_MOUSE

[Acetyl]SGR<sup>Methyl</sup><sub>14.02</sub> GKGGKGLGKGGAKRHRK<sup>Dimethyl</sup><sub>28.03</sub> VLRD

- ▶ fragmentation table for charge state 3+
- ▶ specType=etd
- ▶ score=105.94
- ▶ F097418.dat
- ▶ query=q1856.p1
- ▶ precursor=640.637780
- ▶ chargePrecursor=4
- ▶ itol=0.8

| AA    | c              | y              | z+1            | z+2            | z              | AA    |
|-------|----------------|----------------|----------------|----------------|----------------|-------|
| S[1]  | 49.697         | <b>853.844</b> | <b>848.505</b> | 0.672          | <b>848.169</b> | S[24] |
| G[2]  | 58.704         | 310.830        | <b>905.490</b> | 0.672          | <b>805.154</b> | G[23] |
| R[3]  | 125.410        | 791.821        | <b>786.483</b> | <b>786.819</b> | <b>786.147</b> | R[22] |
| G[4]  | 144.417        | 735.117        | 729.778        | 730.114        | 729.442        | G[21] |
| K[5]  | 187.115        | 716.110        | 710.770        | 711.106        | 710.435        | K[20] |
| G[6]  | 206.122        | <b>673.412</b> | 668.072        | 668.408        | 667.736        | G[19] |
| G[7]  | 225.130        | 654.405        | 649.065        | 649.401        | 648.729        | G[18] |
| K[8]  | 267.828        | 635.397        | 630.058        | 630.394        | 629.722        | K[17] |
| G[9]  | 286.835        | 592.699        | 587.360        | 587.696        | 587.024        | G[16] |
| L[10] | 324.530        | 574.692        | 568.352        | 568.688        | 568.016        | L[15] |
| G[11] | 343.537        | 538.997        | 530.658        | 530.994        | 530.322        | G[14] |
| K[12] | 386.235        | 516.990        | 511.651        | 511.986        | 511.315        | K[13] |
| G[13] | 405.242        | 474.292        | 468.952        | 469.288        | 468.616        | G[12] |
| G[14] | 424.249        | 455.285        | 449.945        | 450.281        | 449.609        | G[11] |
| A[15] | 447.959        | 436.277        | <b>430.938</b> | <b>431.274</b> | 430.602        | A[10] |
| K[16] | 490.627        | 412.598        | 407.259        | 407.595        | 406.923        | K[9]  |
| R[17] | 542.661        | 369.900        | 364.561        | 364.896        | 364.225        | R[8]  |
| H[18] | 588.347        | 317.866        | 312.527        | 312.863        | 312.191        | H[7]  |
| R[19] | 640.381        | 272.180        | 266.841        | 267.176        | 266.505        | R[6]  |
| K[20] | 692.423        | 220.140        | 214.807        | 215.143        | 214.471        | K[5]  |
| V[21] | 725.445        | 168.104        | 162.765        | 163.101        | 162.429        | V[4]  |
| L[22] | 763.140        | 135.082        | 129.742        | 130.078        | 129.406        | L[3]  |
| R[23] | <b>815.174</b> | 97.387         | 92.047         | 92.383         | 91.711         | R[2]  |
| D[24] | <b>853.516</b> | 45.353         | 40.014         | 40.349         | 39.678         | D[1]  |

# sp | P62806 | H4\_MOUSE

[Acetyl]SGRGKGGKGLGKGGAK Acetyl 42.01 RHRK Methyl 14.02 VLRD

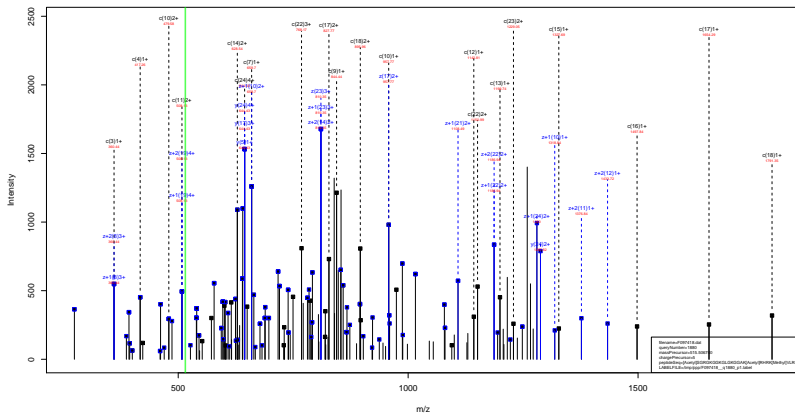

# sp | P62806 | H4\_MOUSE

[Acetyl]SGRGKGGKGLGKGGAK<sup>Acetyl</sup> RHRK<sup>Methyl</sup> VLRD<sup>14.02</sup>  
42.01

- ▶ fragmentation table for charge state 1+
- ▶ specType=etd
- ▶ score=112.71
- ▶ F097418.dat
- ▶ query=q1880\_p1
- ▶ precursor=515.506740
- ▶ chargePrecursor=5
- ▶ itol=0.8

| AA    | c               | y              | z+1             | z+2             | z        | AA    |
|-------|-----------------|----------------|-----------------|-----------------|----------|-------|
| S[1]  | 147.076         | 2573.497       | 2557.478        | 0.000           | 2556.471 | S[24] |
| G[2]  | 204.098         | 2444.455       | 2428.438        | 0.000           | 2427.429 | G[23] |
| R[3]  | <b>350.199</b>  | 2387.433       | 2371.414        | 2472.432        | 2370.407 | R[22] |
| G[4]  | <b>417.230</b>  | 2213.332       | 2215.313        | 2216.321        | 2214.309 | G[21] |
| K[5]  | <b>545.315</b>  | 2174.310       | 2158.292        | 2159.300        | 2157.284 | K[20] |
| G[6]  | <b>602.337</b>  | 2046.216       | 2030.197        | 2031.205        | 2029.189 | G[19] |
| G[7]  | <b>659.358</b>  | 1989.194       | 1973.175        | 1974.183        | 1972.168 | G[18] |
| K[8]  | <b>787.453</b>  | 1932.173       | 1916.154        | 1917.162        | 1915.146 | K[17] |
| G[9]  | <b>844.475</b>  | 1894.078       | 1788.059        | 1789.067        | 1787.051 | G[16] |
| L[10] | <b>927.559</b>  | 1747.056       | 1731.037        | 1732.045        | 1730.030 | L[15] |
| G[11] | 1014.580        | 1633.972       | 1617.953        | 1618.961        | 1616.946 | G[14] |
| K[12] | <b>1142.675</b> | 1576.951       | 1560.932        | 1561.940        | 1559.924 | K[13] |
| G[13] | <b>1199.697</b> | 1446.926       | 1430.907        | <b>1433.845</b> | 1431.829 | G[12] |
| G[14] | 1256.718        | 1391.834       | 1375.815        | <b>1376.823</b> | 1374.808 | G[11] |
| A[15] | <b>1327.756</b> | 1334.812       | <b>1318.794</b> | 1319.802        | 1317.786 | A[10] |
| R[16] | <b>1459.861</b> | 1283.776       | <b>1247.757</b> | <b>1248.765</b> | 1246.749 | R[9]  |
| R[17] | <b>1653.962</b> | 1093.670       | 1077.651        | <b>1078.659</b> | 1076.644 | R[8]  |
| H[18] | <b>1791.021</b> | <b>937.569</b> | <b>921.550</b>  | <b>922.558</b>  | 920.542  | H[7]  |
| R[19] | 1947.122        | 800.510        | <b>784.491</b>  | 785.499         | 783.484  | R[6]  |
| K[20] | 2089.233        | <b>644.409</b> | <b>628.390</b>  | <b>629.398</b>  | 627.382  | K[5]  |
| V[21] | 2188.301        | 502.298        | <b>486.280</b>  | 487.287         | 485.272  | V[4]  |
| L[22] | 2301.388        | 403.230        | <b>387.211</b>  | 388.219         | 386.203  | L[3]  |
| R[23] | 2457.488        | 290.146        | <b>274.127</b>  | 275.135         | 273.119  | R[2]  |
| D[24] | 2572.513        | 134.045        | 118.026         | 119.034         | 117.018  | D[1]  |

# sp | P62806 | H4\_MOUSE

[Acetyl]SGRGKGGKGLGKGGAK<sup>Acetyl</sup> RHRK<sup>Methyl</sup> VLRD<sup>14.02</sup>  
42.01 14.02

- ▶ fragmentation table for charge state 2+
- ▶ specType=etd
- ▶ score=112.71
- ▶ F097418.dat
- ▶ query=q1880\_p1
- ▶ precursor=515.506740
- ▶ chargePrecursor=5
- ▶ itol=0.8

| AA    | c               | y               | z+1             | z+2             | z               | AA    |
|-------|-----------------|-----------------|-----------------|-----------------|-----------------|-------|
| S[1]  | 74.642          | <b>1287.252</b> | <b>1279.243</b> | 0.504           | 1278.739        | S[24] |
| G[2]  | 102.553         | <b>1222.731</b> | 1214.722        | 0.504           | 1214.218        | G[23] |
| R[3]  | 180.603         | <b>1194.220</b> | <b>1186.211</b> | <b>1186.715</b> | 1185.707        | R[22] |
| G[4]  | 259.114         | 1158.170        | <b>1108.160</b> | <b>1108.664</b> | 1107.656        | G[21] |
| K[5]  | 274.151         | 1087.659        | <b>1079.650</b> | <b>1080.153</b> | <b>1079.146</b> | K[20] |
| G[6]  | 301.672         | 1023.611        | <b>1015.602</b> | <b>1016.106</b> | <b>1015.098</b> | G[19] |
| G[7]  | 330.183         | 995.101         | <b>987.091</b>  | <b>987.595</b>  | 986.587         | G[18] |
| K[8]  | <b>394.230</b>  | 956.590         | <b>958.581</b>  | <b>959.084</b>  | <b>958.077</b>  | K[17] |
| G[9]  | <b>422.741</b>  | <b>902.542</b>  | <b>894.533</b>  | <b>895.037</b>  | 894.030         | G[16] |
| L[10] | 479.293         | <b>874.032</b>  | <b>866.022</b>  | <b>866.526</b>  | <b>865.518</b>  | L[15] |
| G[11] | <b>507.794</b>  | 817.490         | 809.480         | <b>809.984</b>  | 808.976         | G[14] |
| K[12] | <b>571.841</b>  | <b>788.979</b>  | <b>780.970</b>  | <b>781.474</b>  | <b>780.466</b>  | K[13] |
| G[13] | <b>600.352</b>  | 724.931         | <b>716.922</b>  | <b>717.426</b>  | <b>716.418</b>  | G[12] |
| G[14] | <b>628.863</b>  | <b>696.421</b>  | <b>688.411</b>  | <b>688.915</b>  | <b>687.907</b>  | G[11] |
| A[15] | <b>664.391</b>  | <b>667.910</b>  | 659.901         | <b>660.905</b>  | <b>659.897</b>  | A[10] |
| R[16] | <b>749.434</b>  | 612.351         | <b>624.302</b>  | <b>624.806</b>  | <b>623.878</b>  | R[9]  |
| R[17] | <b>827.485</b>  | 547.339         | <b>539.329</b>  | <b>539.833</b>  | <b>538.825</b>  | R[8]  |
| H[18] | <b>896.014</b>  | <b>469.288</b>  | <b>461.279</b>  | <b>461.783</b>  | <b>460.775</b>  | H[7]  |
| R[19] | <b>974.065</b>  | <b>400.759</b>  | <b>392.749</b>  | <b>393.253</b>  | <b>392.245</b>  | R[6]  |
| K[20] | 1042.129        | 322.706         | 314.699         | 315.203         | 314.195         | K[5]  |
| V[21] | <b>1094.654</b> | 258.683         | 249.673         | 249.177         | 248.169         | V[4]  |
| L[22] | <b>1151.196</b> | 202.119         | 194.109         | 194.613         | 193.605         | L[3]  |
| R[23] | <b>1229.247</b> | 145.577         | 137.567         | 138.071         | 137.063         | R[2]  |
| D[24] | 1286.700        | 67.526          | 59.517          | 60.021          | 59.013          | D[1]  |



# sp | P62806 | H4\_MOUSE

[Acetyl]SGRGKGGKGLGKGGAK<sup>Acetyl</sup> RHRK<sup>Methyl</sup> VLRD<sup>14.02</sup>

- ▶ fragmentation table for charge state 3+
- ▶ specType=etd
- ▶ score=112.71
- ▶ F097418.dat
- ▶ query=q1880\_p1
- ▶ precursor=515.506740
- ▶ chargePrecursor=5
- ▶ itol=0.8

| AA    | c              | y              | z+1            | z+2            | z              | AA                   |
|-------|----------------|----------------|----------------|----------------|----------------|----------------------|
| S[1]  | 49.697         | <b>858.504</b> | <b>853.164</b> |                | 0.672          | <b>852.828</b> S[24] |
| G[2]  | 58.704         | 315.490        | <b>810.150</b> |                | 0.672          | <b>809.814</b> G[23] |
| R[3]  | 150.738        | 796.481        | <b>791.143</b> | <b>791.479</b> | <b>790.807</b> | R[22]                |
| G[4]  | 139.745        | 784.449        | <b>739.109</b> | <b>739.445</b> | <b>738.773</b> | G[21]                |
| K[5]  | 182.443        | 725.442        | <b>720.102</b> | <b>720.438</b> | <b>719.766</b> | K[20]                |
| G[6]  | 201.450        | <b>682.743</b> | <b>677.404</b> | <b>677.740</b> | <b>677.068</b> | G[19]                |
| G[7]  | 220.458        | <b>663.736</b> | 658.397        | 658.733        | 658.061        | G[18]                |
| K[8]  | 263.156        | <b>644.729</b> | <b>639.389</b> | <b>639.725</b> | <b>639.054</b> | K[17]                |
| G[9]  | 282.163        | <b>602.031</b> | <b>596.691</b> | <b>597.027</b> | <b>596.355</b> | G[16]                |
| L[10] | 319.958        | 931.024        | <b>577.664</b> | <b>578.020</b> | <b>577.348</b> | L[15]                |
| G[11] | 338.965        | <b>545.329</b> | <b>539.989</b> | <b>540.325</b> | <b>539.653</b> | G[14]                |
| K[12] | 381.563        | <b>526.322</b> | 520.987        | 521.318        | 520.646        | K[13]                |
| G[13] | <b>400.570</b> | 483.623        | 478.284        | 478.620        | 477.948        | G[12]                |
| G[14] | 419.578        | 464.616        | 459.277        | 459.613        | 458.941        | G[11]                |
| A[15] | 443.257        | 445.609        | 440.270        | 440.605        | 439.934        | A[10]                |
| K[16] | 469.958        | 421.930        | <b>416.590</b> | <b>416.926</b> | 416.255        | K[9]                 |
| R[17] | <b>551.992</b> | 365.228        | <b>359.889</b> | <b>360.225</b> | 359.553        | R[8]                 |
| H[18] | <b>597.678</b> | 313.195        | 307.855        | 308.191        | 307.519        | H[7]                 |
| R[19] | <b>649.712</b> | 297.508        | 292.169        | 292.505        | 291.833        | R[6]                 |
| K[20] | <b>697.082</b> | 215.475        | 210.137        | 210.471        | 209.799        | K[5]                 |
| V[21] | <b>730.105</b> | 168.104        | 162.765        | 163.101        | 162.429        | V[4]                 |
| L[22] | <b>767.800</b> | 135.082        | 129.742        | 130.078        | 129.406        | L[3]                 |
| R[23] | <b>819.834</b> | 97.387         | 92.047         | 92.383         | 91.711         | R[2]                 |
| D[24] | <b>858.176</b> | 45.353         | 40.014         | 40.349         | 39.678         | D[1]                 |

# sp | P62806 | H4\_MOUSE

[Acetyl]SGRGKGGKGLGKGGAK<sup>Acetyl</sup>RHRK<sup>Methyl</sup>VLRD<sup>14.02</sup>  
42.01 14.02

- ▶ fragmentation table for charge state 4+
- ▶ specType=etd
- ▶ score=112.71
- ▶ F097418.dat
- ▶ query=q1880\_p1
- ▶ precursor=515.506740
- ▶ chargePrecursor=5
- ▶ itol=0.8

| AA    | c              | y              | z+1            | z+2            | z              | AA    |
|-------|----------------|----------------|----------------|----------------|----------------|-------|
| S[1]  | 37.525         | <b>644.130</b> | <b>640.125</b> | 0.755          | <b>639.073</b> | S[24] |
| G[2]  | 51.780         | <b>611.869</b> | <b>607.864</b> | 0.755          | <b>607.612</b> | G[23] |
| R[3]  | 90.805         | <b>597.614</b> | <b>593.609</b> | <b>591.861</b> | <b>593.357</b> | R[22] |
| G[4]  | 105.061        | 558.588        | 554.584        | 554.836        | 554.332        | G[21] |
| K[5]  | 137.084        | 544.333        | <b>540.328</b> | <b>540.580</b> | <b>540.076</b> | K[20] |
| G[6]  | 151.340        | 512.309        | <b>508.305</b> | <b>508.557</b> | <b>508.053</b> | G[19] |
| G[7]  | 165.595        | 498.054        | 494.049        | 494.301        | 493.797        | G[18] |
| K[8]  | 197.619        | 483.799        | <b>479.794</b> | <b>480.046</b> | <b>479.542</b> | K[17] |
| G[9]  | 211.874        | 469.544        | 465.539        | 465.792        | 465.288        | G[16] |
| L[10] | 280.148        | 437.520        | 433.515        | 433.767        | 433.263        | L[15] |
| G[11] | 294.403        | 409.245        | 405.241        | 405.496        | 404.992        | G[14] |
| K[12] | 286.424        | <b>394.993</b> | 390.988        | 391.240        | 390.736        | K[13] |
| G[13] | 300.680        | 362.969        | 358.965        | 359.217        | 358.713        | G[12] |
| G[14] | 314.935        | 348.714        | 344.709        | 344.961        | 344.457        | G[11] |
| A[15] | 332.694        | 334.459        | 330.454        | 330.706        | 330.202        | A[10] |
| K[16] | 375.221        | 316.699        | 312.695        | 312.947        | 312.443        | K[9]  |
| R[17] | 414.246        | <b>274.173</b> | 270.168        | 270.420        | 269.916        | R[8]  |
| H[18] | 448.511        | 235.146        | 231.141        | 231.393        | 230.891        | H[7]  |
| R[19] | 487.536        | 200.883        | 196.878        | 197.130        | 196.626        | R[6]  |
| K[20] | 523.064        | 161.858        | 157.853        | 158.105        | 157.601        | K[5]  |
| V[21] | 547.831        | 126.330        | 122.325        | 122.577        | 122.073        | V[4]  |
| L[22] | 576.102        | 101.563        | 97.558         | 97.810         | 97.306         | L[3]  |
| R[23] | <b>615.127</b> | 73.292         | 69.287         | 69.539         | 69.035         | R[2]  |
| D[24] | <b>643.884</b> | 34.267         | 30.262         | 30.514         | 30.010         | D[1]  |



# sp | P62806 | H4\_MOUSE

[Acetyl]SGR<sup>Methyl</sup><sub>14.02</sub> GKGGKGLGKGGAK<sup>Acetyl</sup><sub>42.01</sub> RHRK<sup>(Dimethyl)</sup><sub>(28.03)</sub> VLRD

- ▶ fragmentation table for charge state 1+
- ▶ specType=etd
- ▶ score=58.22
- ▶ F097418.dat
- ▶ query=q1907\_p1
- ▶ precursor=867.852510
- ▶ chargePrecursor=3
- ▶ itol=0.8

| AA |    | c               | y        | z+1             | z+2             | z        | AA    |
|----|----|-----------------|----------|-----------------|-----------------|----------|-------|
| S  | 1  | 147.076         | 2601.526 | 2585.510        | 0.000           | 2584.502 | S[24] |
| G  | 2  | 204.098         | 2472.485 | 2456.467        | 0.000           | 2455.459 | G[23] |
| R  | 3  | <b>374.215</b>  | 2415.464 | 2399.446        | 2400.453        | 2398.438 | R[22] |
| G  | 4  | <b>431.236</b>  | 2345.348 | 2329.330        | 2330.337        | 2328.321 | G[21] |
| K  | 5  | <b>559.331</b>  | 2188.526 | 2173.507        | 2173.515        | 2171.500 | K[20] |
| G  | 6  | <b>616.353</b>  | 2090.291 | 2044.212        | 2045.220        | 2043.205 | G[19] |
| G  | 7  | <b>673.374</b>  | 2003.210 | 1987.191        | <b>1988.199</b> | 1986.183 | G[18] |
| K  | 8  | <b>801.469</b>  | 1946.188 | <b>1930.170</b> | 1931.177        | 1929.162 | K[17] |
| G  | 9  | <b>858.490</b>  | 1818.093 | <b>1802.075</b> | 1803.082        | 1801.067 | G[16] |
| L  | 10 | <b>973.574</b>  | 1781.072 | 1745.053        | 1746.061        | 1744.045 | L[15] |
| K  | 11 | <b>1028.596</b> | 1647.985 | <b>1631.969</b> | 1632.977        | 1630.961 | K[14] |
| R  | 12 | 1156.691        | 1590.966 | <b>1574.948</b> | <b>1575.955</b> | 1573.940 | R[13] |
| G  | 13 | 1213.712        | 1462.871 | <b>1446.853</b> | 1447.860        | 1445.845 | G[12] |
| G  | 14 | 1270.734        | 1405.850 | <b>1389.831</b> | <b>1390.839</b> | 1388.823 | G[11] |
| A  | 15 | 1341.771        | 1348.828 | 1332.810        | 1333.818        | 1331.802 | A[10] |
| R  | 16 | 1511.876        | 1277.791 | 1261.773        | <b>1262.780</b> | 1260.765 | R[9]  |
| R  | 17 | 1667.978        | 1197.686 | 1091.667        | 1092.675        | 1090.659 | R[8]  |
| H  | 18 | <b>1805.037</b> | 951.585  | 635.566         | <b>916.574</b>  | 934.558  | H[7]  |
| R  | 19 | 1961.138        | 814.526  | <b>798.507</b>  | 799.515         | 797.499  | R[6]  |
| R  | 20 | 2117.204        | 658.425  | 642.406         | 643.414         | 641.399  | R[5]  |
| V  | 21 | 2216.332        | 502.298  | 486.280         | 487.287         | 485.272  | V[4]  |
| L  | 22 | 2429.416        | 403.230  | 387.211         | 388.219         | 386.203  | L[3]  |
| D  | 23 | 2469.517        | 299.146  | 274.127         | 275.135         | 273.119  | D[2]  |
| D  | 24 | 2600.544        | 134.045  | 118.026         | 119.034         | 117.018  | D[1]  |

# sp | P62806 | H4\_MOUSE

[Acetyl]SGR<sup>Methyl</sup><sub>14.02</sub> GKGGKGLGKGGAK<sup>Acetyl</sup><sub>42.01</sub> RHRK<sup>Dimethyl</sup><sub>28.03</sub> VLRD

- ▶ fragmentation table for charge state 2+
- ▶ specType=etd
- ▶ score=58.22
- ▶ F097418.dat
- ▶ query=q1907\_p1
- ▶ precursor=867.852510
- ▶ chargePrecursor=3
- ▶ itol=0.8

| AA    | c               | y               | z+1             | z+2             | z               | AA    |
|-------|-----------------|-----------------|-----------------|-----------------|-----------------|-------|
| S[1]  | 74.042          | <b>1301.268</b> | <b>1291.258</b> | 0.504           | <b>1292.755</b> | S[24] |
| G[2]  | 102.553         | 1236.747        | <b>1228.737</b> | 0.504           | <b>1228.233</b> | G[23] |
| R[3]  | 187.611         | 1208.236        | <b>1200.226</b> | <b>1200.730</b> | 1199.721        | R[22] |
| G[4]  | 238.322         | 1123.177        | 1115.168        | 1115.972        | 1114.666        | G[21] |
| K[5]  | 290.159         | 1094.667        | 1086.657        | 1087.161        | 1086.151        | K[20] |
| G[6]  | 308.680         | 1030.619        | 1022.610        | 1023.114        | 1022.106        | G[19] |
| G[7]  | 337.191         | 1002.108        | 994.099         | 994.603         | 993.595         | G[18] |
| K[8]  | 401.218         | 973.590         | 965.588         | 966.092         | 965.084         | K[17] |
| G[9]  | 429.749         | 950.550         | 941.541         | 942.045         | 941.037         | G[16] |
| L[10] | 489.293         | 893.040         | 873.030         | 873.534         | 872.526         | L[15] |
| G[11] | 514.802         | 824.468         | 816.458         | 816.962         | 815.954         | G[14] |
| K[12] | 578.849         | 795.987         | 787.977         | 788.481         | 787.474         | K[13] |
| G[13] | 607.360         | 731.939         | 723.930         | 724.434         | 723.426         | G[12] |
| G[14] | 635.871         | 703.429         | 695.419         | 695.923         | 694.915         | G[11] |
| A[15] | 671.389         | 674.918         | 665.908         | 667.412         | 666.404         | A[10] |
| R[16] | 736.442         | 639.399         | 631.390         | 631.894         | 630.886         | R[9]  |
| R[17] | 834.492         | 554.347         | 546.337         | 546.841         | 545.831         | R[8]  |
| H[18] | 963.022         | 476.290         | 468.280         | 468.781         | 467.783         | H[7]  |
| R[19] | 981.072         | 407.767         | 399.757         | 400.261         | 399.253         | R[6]  |
| K[20] | 1059.126        | 329.716         | 321.707         | 322.211         | 321.203         | K[5]  |
| V[21] | <b>1108.670</b> | 251.653         | 243.643         | 244.147         | 243.140         | V[4]  |
| L[22] | <b>1165.212</b> | 202.119         | 194.109         | 194.613         | 193.605         | L[3]  |
| R[23] | 1243.262        | 145.577         | 137.567         | 138.071         | 137.063         | R[2]  |
| D[24] | 1300.776        | 67.526          | 59.517          | 60.021          | 59.013          | D[1]  |

# sp | P62806 | H4\_MOUSE

[Acetyl]SGR<sup>Methyl</sup> 14.02 GKGKGLGKGGAK<sup>Acetyl</sup> RHRK<sup>Trimethyl</sup> VLRD 42.05

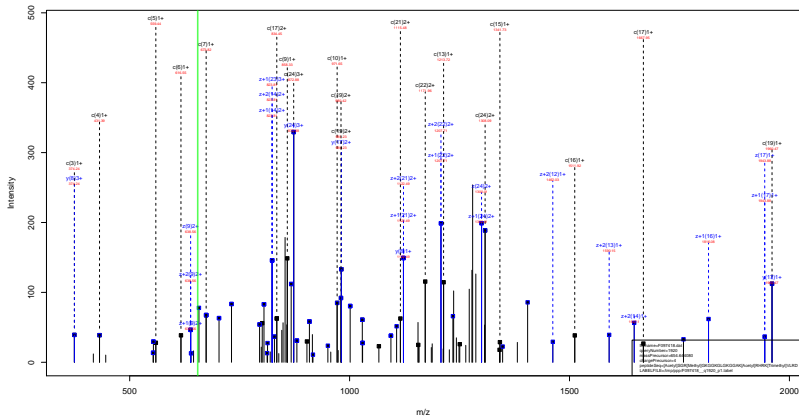

# sp | P62806 | H4\_MOUSE

[Acetyl]SGR<sup>Methyl</sup><sub>14.02</sub> GKGGKGLGKGGAK<sup>Acetyl</sup><sub>42.01</sub> RHRK<sup>Trimethyl</sup><sub>42.05</sub> VLRLD

- ▶ fragmentation table for charge state 1+
- ▶ specType=etd
- ▶ score=101.54
- ▶ F097418.dat
- ▶ query=q1920\_p1
- ▶ precursor=654.644080
- ▶ chargePrecursor=4
- ▶ itol=0.8

| AA    | c               | y               | z+1             | z+2             | z               | AA    |
|-------|-----------------|-----------------|-----------------|-----------------|-----------------|-------|
| S[1]  | 147.070         | 2615.544        | 2599.526        | 0.000           | 2599.518        | S[24] |
| G[2]  | 204.008         | 2436.501        | 2470.483        | 0.000           | 2469.475        | G[23] |
| R[3]  | <b>374.215</b>  | 2420.480        | 2413.461        | 2414.469        | 2412.451        | R[22] |
| G[4]  | <b>431.236</b>  | 2259.363        | 2243.363        | 2244.352        | 2242.331        | G[21] |
| K[5]  | <b>559.311</b>  | 2002.342        | 2186.323        | 2187.331        | 2185.315        | K[20] |
| G[6]  | <b>616.353</b>  | 2074.247        | 2058.228        | 2059.236        | 2057.220        | G[19] |
| G[7]  | <b>673.374</b>  | 2017.225        | 2001.207        | 2002.214        | 2000.199        | G[18] |
| K[8]  | <b>801.469</b>  | <b>1960.204</b> | <b>1944.185</b> | 1945.193        | <b>1943.177</b> | K[17] |
| G[9]  | <b>858.490</b>  | 1832.109        | <b>1816.090</b> | 1817.098        | 1815.082        | G[16] |
| L[10] | <b>915.514</b>  | 1775.087        | <b>1759.069</b> | 1760.077        | 1758.061        | L[15] |
| G[11] | <b>1028.596</b> | 1662.003        | 1645.985        | <b>1646.993</b> | 1644.977        | G[14] |
| K[12] | <b>1156.691</b> | 1604.982        | 1588.963        | <b>1589.971</b> | 1587.955        | K[13] |
| G[13] | <b>1213.712</b> | 1476.867        | 1460.860        | <b>1461.876</b> | 1459.860        | G[12] |
| G[14] | 1270.734        | 1419.866        | 1403.847        | <b>1404.855</b> | 1402.839        | G[11] |
| A[15] | <b>1341.771</b> | 1362.844        | 1346.825        | <b>1347.833</b> | 1345.817        | A[10] |
| R[16] | <b>1511.876</b> | 1291.807        | 1275.788        | 1276.796        | 1274.780        | R[9]  |
| R[17] | <b>1667.978</b> | <b>1121.701</b> | 1105.683        | <b>1106.691</b> | 1104.675        | R[8]  |
| H[18] | 1805.037        | 965.600         | 949.582         | <b>950.589</b>  | 948.574         | H[7]  |
| R[19] | <b>1961.138</b> | <b>828.541</b>  | <b>812.523</b>  | <b>813.530</b>  | 811.513         | R[6]  |
| K[20] | 2131.260        | 672.440         | 656.422         | <b>657.429</b>  | 655.414         | K[5]  |
| V[21] | 2230.348        | 502.290         | 486.269         | 487.267         | 485.277         | V[4]  |
| L[22] | 2343.432        | 403.230         | 387.211         | 388.219         | 386.203         | L[3]  |
| R[23] | 2490.513        | 290.146         | 274.127         | 275.135         | 273.119         | R[2]  |
| D[24] | 2614.560        | 134.045         | 118.020         | 119.034         | 117.018         | D[1]  |

# sp | P62806 | H4\_MOUSE

[Acetyl]SGR<sup>Methyl</sup><sub>14.02</sub> GKGGKGLGKGGAK<sup>Acetyl</sup><sub>42.01</sub> RHRK<sup>Trimethyl</sup><sub>42.05</sub> VLRLD

- ▶ fragmentation table for charge state 2+
- ▶ specType=etd
- ▶ score=101.54
- ▶ F097418.dat
- ▶ query=q1920\_p1
- ▶ precursor=654.644080
- ▶ chargePrecursor=4
- ▶ itol=0.8

| AA    | c               | y               | z+1             | z+2             | z               | AA    |
|-------|-----------------|-----------------|-----------------|-----------------|-----------------|-------|
| S[1]  | 74.042          | <b>1308.276</b> | <b>1300.266</b> | 0.504           | <b>1299.762</b> | S[24] |
| G[2]  | 102.553         | 1243.754        | 1235.745        | 0.504           | <b>1235.241</b> | G[23] |
| R[3]  | 187.611         | 1215.244        | <b>1207.234</b> | <b>1207.738</b> | 1206.730        | R[22] |
| G[4]  | 238.122         | 1130.105        | <b>1122.118</b> | <b>1122.680</b> | 1121.672        | G[21] |
| K[5]  | 290.159         | 1101.675        | <b>1093.665</b> | <b>1094.169</b> | <b>1093.161</b> | K[20] |
| G[6]  | 308.680         | 1037.627        | <b>1029.618</b> | <b>1030.122</b> | <b>1029.114</b> | G[19] |
| G[7]  | 357.191         | 1009.116        | <b>1001.107</b> | <b>1001.611</b> | <b>1000.603</b> | G[18] |
| K[8]  | 401.218         | <b>980.606</b>  | 972.596         | 973.100         | <b>972.092</b>  | K[17] |
| G[9]  | 429.749         | <b>916.558</b>  | <b>908.549</b>  | <b>909.053</b>  | <b>908.045</b>  | G[16] |
| L[10] | 489.273         | 858.041         | <b>850.033</b>  | <b>850.542</b>  | <b>849.534</b>  | L[15] |
| G[11] | 514.802         | 831.505         | <b>823.496</b>  | <b>824.000</b>  | 822.992         | G[14] |
| K[12] | 578.849         | 802.995         | <b>794.985</b>  | <b>795.489</b>  | 794.481         | K[13] |
| G[13] | 607.360         | 738.947         | <b>730.938</b>  | <b>731.442</b>  | 730.434         | G[12] |
| G[14] | 635.871         | 710.430         | <b>702.427</b>  | <b>702.931</b>  | 701.923         | G[11] |
| A[15] | 691.389         | 681.905         | <b>673.918</b>  | <b>674.420</b>  | <b>673.412</b>  | A[10] |
| R[16] | 736.442         | 646.407         | <b>638.398</b>  | <b>638.902</b>  | <b>637.894</b>  | R[9]  |
| R[17] | <b>834.492</b>  | 561.354         | <b>553.345</b>  | <b>553.849</b>  | <b>552.841</b>  | R[8]  |
| H[18] | <b>903.022</b>  | 483.304         | 475.294         | 475.798         | 474.791         | H[7]  |
| R[19] | <b>981.072</b>  | 414.774         | 406.765         | 407.269         | 406.261         | R[6]  |
| K[20] | <b>1066.143</b> | 336.724         | 328.714         | 329.218         | 328.211         | K[5]  |
| V[21] | <b>1115.678</b> | 252.653         | 243.643         | 244.147         | 243.140         | V[4]  |
| L[22] | <b>1172.220</b> | 202.119         | 194.109         | 194.613         | 193.605         | L[3]  |
| R[23] | <b>1250.270</b> | 145.577         | 137.567         | 138.071         | 137.063         | R[2]  |
| D[24] | <b>1307.784</b> | 67.526          | 59.517          | 60.021          | 59.013          | D[1]  |



# sp | P62806 | H4\_MOUSE

[Acetyl]SGR<sup>Methyl</sup><sub>14.02</sub> GKGGKGLGKGGAK<sup>Acetyl</sup><sub>42.01</sub> RHRK<sup>Trimethyl</sup><sub>42.05</sub> VLRLD

- ▶ fragmentation table for charge state 3+
- ▶ specType=etd
- ▶ score=101.54
- ▶ F097418.dat
- ▶ query=q1920\_p1
- ▶ precursor=654.644080
- ▶ chargePrecursor=4
- ▶ itol=0.8

| AA    | c              | y              | z+1            | z+2            | z              | AA    |
|-------|----------------|----------------|----------------|----------------|----------------|-------|
| S[1]  | 49.697         | <b>872.520</b> | <b>867.180</b> | 0.672          | <b>866.844</b> | S[24] |
| G[2]  | 58.704         | <b>829.505</b> | <b>824.166</b> | 0.672          | <b>823.830</b> | G[23] |
| R[3]  | 125.410        | 810.498        | <b>805.159</b> | <b>805.495</b> | <b>804.823</b> | R[22] |
| G[4]  | 144.417        | 753.793        | 748.453        | 748.789        | 748.117        | G[21] |
| K[5]  | 187.115        | 734.785        | 729.446        | 729.782        | 729.110        | K[20] |
| G[6]  | 206.122        | 692.087        | 686.748        | 687.083        | 686.412        | G[19] |
| G[7]  | 225.130        | <b>673.080</b> | 667.740        | 668.076        | 667.404        | G[18] |
| K[8]  | 267.828        | 654.073        | 648.733        | 649.069        | 648.397        | K[17] |
| G[9]  | 286.835        | 611.374        | 606.035        | 606.371        | 605.699        | G[16] |
| L[10] | 324.930        | 592.367        | 587.028        | 587.364        | 586.692        | L[15] |
| G[11] | 363.937        | <b>554.673</b> | 549.333        | 549.669        | 548.997        | G[14] |
| K[12] | 388.235        | 535.666        | 530.326        | 530.662        | 529.990        | K[13] |
| G[13] | 405.242        | 492.967        | 487.628        | 487.964        | 487.292        | G[12] |
| G[14] | 424.249        | 473.960        | 468.620        | 468.956        | 468.285        | G[11] |
| A[15] | 447.929        | 454.953        | 449.613        | 449.949        | 449.277        | A[10] |
| K[16] | 504.630        | <b>431.274</b> | 425.934        | 426.270        | 425.598        | K[9]  |
| R[17] | 556.664        | <b>374.572</b> | 369.232        | 369.568        | 368.896        | R[8]  |
| H[18] | 602.350        | 322.538        | 317.199        | 317.535        | 316.863        | H[7]  |
| R[19] | 654.384        | 276.852        | 271.512        | 271.848        | 271.176        | R[6]  |
| K[20] | 711.098        | 224.818        | 219.478        | 219.815        | 219.143        | K[5]  |
| V[21] | 744.121        | 168.104        | 162.765        | 163.101        | 162.429        | V[4]  |
| L[22] | 781.816        | 135.082        | 129.742        | 130.078        | 129.406        | L[3]  |
| R[23] | <b>833.849</b> | 97.387         | 92.047         | 92.383         | 91.711         | R[2]  |
| D[24] | <b>872.192</b> | 45.353         | 40.014         | 40.349         | 39.678         | D[1]  |



# sp | P62806 | H4\_MOUSE

[Acetyl]SGRGKGGKGLGKGGAKRHRK<sup>Trimethyl</sup>VLRD  
42.05

- ▶ fragmentation table for charge state 1+
- ▶ specType=etd
- ▶ score=76.65
- ▶ F104891.dat
- ▶ query=q2742\_p1
- ▶ precursor=512.709490
- ▶ chargePrecursor=5
- ▶ itol=0.8

| AA    | c               | y              | z+1            | z+2             | z        | AA    |
|-------|-----------------|----------------|----------------|-----------------|----------|-------|
| S[1]  | 167.076         | 2559.518       | 2543.490       | 0.000           | 2542.491 | S[24] |
| G[2]  | 224.598         | 2430.475       | 2414.457       | 0.000           | 2413.449 | G[23] |
| H[3]  | <b>300.199</b>  | 2373.454       | 2357.438       | 2356.443        | 2356.427 | H[22] |
| G[4]  | <b>417.220</b>  | 2217.353       | 2201.334       | 2202.342        | 2200.325 | G[21] |
| K[5]  | <b>545.115</b>  | 2160.331       | 2144.311       | 2145.320        | 2143.305 | K[20] |
| G[6]  | <b>602.337</b>  | 2032.238       | 2016.218       | 2017.225        | 2015.210 | G[19] |
| G[7]  | <b>659.358</b>  | 1975.215       | 1959.190       | 1960.204        | 1958.189 | G[18] |
| K[8]  | <b>787.453</b>  | 1918.193       | 1902.173       | 1903.182        | 1901.167 | K[17] |
| G[9]  | <b>844.475</b>  | 1790.090       | 1774.080       | <b>1775.087</b> | 1773.072 | G[16] |
| L[10] | <b>957.559</b>  | 1733.071       | 1717.059       | 1718.066        | 1716.056 | L[15] |
| G[11] | <b>1014.580</b> | 1619.993       | 1603.974       | <b>1604.982</b> | 1602.968 | G[14] |
| K[12] | <b>1142.675</b> | 1562.971       | 1546.953       | 1547.960        | 1545.945 | K[13] |
| G[13] | <b>1199.697</b> | 1434.878       | 1418.859       | 1419.866        | 1417.850 | G[12] |
| G[14] | 1256.718        | 1327.855       | 1301.830       | <b>1302.844</b> | 1300.828 | G[11] |
| A[15] | <b>1327.755</b> | 1200.833       | 1204.813       | 1305.823        | 1303.807 | A[10] |
| K[16] | 1403.860        | 1049.795       | 1233.773       | 1234.789        | 1232.773 | K[9]  |
| R[17] | <b>1611.951</b> | 1121.791       | 1105.663       | <b>1106.691</b> | 1104.675 | R[8]  |
| H[18] | <b>1749.010</b> | <b>905.600</b> | 949.582        | 950.589         | 948.574  | H[7]  |
| R[19] | <b>1905.111</b> | 828.541        | 812.523        | 813.530         | 811.515  | R[6]  |
| K[20] | 2075.253        | <b>672.440</b> | <b>656.422</b> | 657.429         | 655.414  | K[5]  |
| V[21] | 2174.322        | 602.298        | 486.280        | 487.287         | 485.272  | V[4]  |
| L[22] | 2287.406        | 461.236        | <b>387.211</b> | 388.219         | 386.203  | L[3]  |
| L[23] | 2433.507        | 390.140        | 374.123        | <b>275.135</b>  | 273.119  | L[2]  |
| D[24] | 2558.534        | 134.045        | 118.026        | 119.034         | 117.018  | D[1]  |

# sp | P62806 | H4\_MOUSE

[Acetyl]SGRGKGGKGLGKGGAKRHRK<sup>Trimethyl</sup>VLRD  
42.05

- ▶ fragmentation table for charge state 2+
- ▶ specType=etd
- ▶ score=76.65
- ▶ F104891.dat
- ▶ query=q2742\_p1
- ▶ precursor=512.709490
- ▶ chargePrecursor=5
- ▶ itol=0.8

| AA    | c               | y               | z+1             | z+2             | z               | AA    |
|-------|-----------------|-----------------|-----------------|-----------------|-----------------|-------|
| S[1]  | 74.042          | 1080.263        | 1272.263        | 0.504           | 1271.740        | S[24] |
| G[2]  | 102.553         | 1215.741        | 1207.732        | 0.504           | 1207.228        | G[23] |
| K[3]  | 180.603         | <b>1187.231</b> | <b>1179.221</b> | <b>1179.725</b> | 1178.717        | K[22] |
| G[4]  | 259.114         | 1109.165        | <b>1101.171</b> | <b>1101.675</b> | 1100.666        | G[21] |
| K[5]  | 273.163         | 1080.699        | <b>1072.660</b> | <b>1073.164</b> | <b>1072.156</b> | K[20] |
| G[6]  | 301.672         | <b>1016.622</b> | <b>1008.612</b> | <b>1009.116</b> | <b>1008.108</b> | G[19] |
| G[7]  | 330.183         | 988.111         | <b>980.102</b>  | <b>980.606</b>  | 979.599         | G[18] |
| K[8]  | 394.230         | 959.600         | <b>951.591</b>  | <b>952.095</b>  | 951.087         | K[17] |
| G[9]  | 422.741         | 895.553         | 887.543         | <b>888.047</b>  | 887.040         | G[16] |
| L[10] | <b>479.283</b>  | 867.042         | 859.033         | 859.537         | 858.529         | L[15] |
| G[11] | 507.794         | <b>810.500</b>  | <b>802.491</b>  | <b>802.995</b>  | 801.987         | G[14] |
| K[12] | <b>571.841</b>  | <b>781.989</b>  | <b>773.980</b>  | <b>774.484</b>  | <b>773.476</b>  | K[13] |
| G[13] | <b>600.352</b>  | 717.043         | <b>709.032</b>  | <b>710.436</b>  | 709.429         | G[12] |
| G[14] | <b>628.863</b>  | 699.431         | <b>681.422</b>  | <b>681.926</b>  | 680.918         | G[11] |
| A[15] | <b>664.381</b>  | 669.926         | <b>651.911</b>  | <b>653.315</b>  | 652.307         | A[10] |
| K[16] | <b>728.429</b>  | <b>625.402</b>  | <b>617.392</b>  | <b>617.896</b>  | <b>616.889</b>  | K[9]  |
| R[17] | <b>806.479</b>  | <b>561.354</b>  | <b>553.345</b>  | <b>553.849</b>  | <b>552.841</b>  | R[8]  |
| H[18] | <b>875.009</b>  | 483.304         | <b>475.294</b>  | <b>475.798</b>  | <b>474.791</b>  | H[7]  |
| R[19] | 963.059         | 414.774         | <b>406.765</b>  | <b>407.269</b>  | 406.261         | R[6]  |
| K[20] | <b>1038.130</b> | 336.724         | 328.714         | 329.218         | 328.211         | K[5]  |
| V[21] | <b>1087.665</b> | 252.033         | 243.023         | 244.527         | 243.520         | V[4]  |
| L[22] | <b>1144.207</b> | 202.119         | 194.109         | 194.613         | 193.605         | L[3]  |
| R[23] | 1222.257        | 145.577         | 137.567         | 138.071         | 137.063         | R[2]  |
| D[24] | 1279.771        | 67.526          | 59.517          | 60.021          | 59.013          | D[1]  |

# sp | P62806 | H4\_MOUSE

[Acetyl]SGRGKGGKGLGKGGAKRHRK<sup>Trimethyl</sup>VLRD  
42.05

- ▶ fragmentation table for charge state 3+
- ▶ specType=etd
- ▶ score=76.65
- ▶ F104891.dat
- ▶ query=q2742\_p1
- ▶ precursor=512.709490
- ▶ chargePrecursor=5
- ▶ itol=0.8

| AA    | c              | y              | z+1            | z+2            | z              | AA    |
|-------|----------------|----------------|----------------|----------------|----------------|-------|
| S[1]  | 49.697         | <b>853.844</b> | <b>848.505</b> | 0.672          | 848.109        | S[24] |
| G[2]  | 58.704         | <b>810.830</b> | 805.491        | 0.672          | 805.154        | G[23] |
| R[3]  | 120.738        | 791.823        | 786.483        | <b>786.819</b> | 786.147        | R[22] |
| G[4]  | 139.745        | 739.789        | <b>734.450</b> | <b>734.785</b> | 734.114        | G[21] |
| K[5]  | 182.443        | 720.782        | <b>715.442</b> | <b>715.778</b> | <b>715.106</b> | K[20] |
| G[6]  | 201.450        | <b>678.084</b> | <b>672.744</b> | <b>673.080</b> | <b>672.408</b> | G[19] |
| G[7]  | 220.458        | <b>659.076</b> | <b>653.737</b> | <b>654.073</b> | <b>653.401</b> | G[18] |
| K[8]  | 263.156        | <b>640.069</b> | 634.730        | <b>635.066</b> | 634.398        | K[17] |
| G[9]  | 282.163        | <b>597.371</b> | <b>592.031</b> | <b>592.367</b> | <b>591.695</b> | G[16] |
| L[10] | 319.858        | 578.364        | <b>573.024</b> | <b>573.360</b> | <b>572.688</b> | L[15] |
| G[11] | 338.865        | <b>540.669</b> | <b>535.330</b> | <b>535.666</b> | <b>534.994</b> | G[14] |
| K[12] | 381.563        | 521.662        | <b>516.322</b> | <b>516.658</b> | <b>515.986</b> | K[13] |
| G[13] | 400.570        | <b>478.964</b> | 473.624        | 473.960        | 473.288        | G[12] |
| G[14] | 419.578        | 459.957        | 454.617        | 454.953        | 454.281        | G[11] |
| A[15] | 443.257        | 440.949        | 435.610        | 435.946        | 435.274        | A[10] |
| K[16] | 485.955        | <b>417.270</b> | 411.931        | 412.267        | 411.595        | K[9]  |
| R[17] | <b>537.989</b> | 374.572        | 369.232        | 369.568        | 368.896        | R[8]  |
| H[18] | <b>583.675</b> | 322.538        | 317.199        | 317.535        | 316.863        | H[7]  |
| R[19] | <b>633.709</b> | 276.852        | 271.512        | 271.848        | 271.176        | R[6]  |
| K[20] | <b>692.423</b> | 224.818        | 219.478        | 219.815        | 219.143        | K[5]  |
| V[21] | <b>725.445</b> | 168.104        | 162.765        | 163.101        | 162.429        | V[4]  |
| L[22] | <b>763.140</b> | 135.082        | 129.742        | 130.078        | 129.406        | L[3]  |
| R[23] | <b>815.174</b> | 97.387         | 92.047         | 92.383         | 91.711         | R[2]  |
| D[24] | <b>853.516</b> | 45.353         | 40.014         | 40.349         | 39.678         | D[1]  |

# sp | P62806 | H4\_MOUSE

[Acetyl]SGRGKGGKGLGKGGAKRHRK<sup>Trimethyl</sup>VLRD  
42.05

- ▶ fragmentation table for charge state 4+
- ▶ specType=etd
- ▶ score=76.65
- ▶ F104891.dat
- ▶ query=q2742\_p1
- ▶ precursor=512.709490
- ▶ chargePrecursor=5
- ▶ itol=0.8

| AA    | c              | y              | z+1            | z+2            | z              | AA    |
|-------|----------------|----------------|----------------|----------------|----------------|-------|
| S[1]  | 57.525         | <b>640.635</b> | <b>636.630</b> | 0.755          | <b>636.178</b> | S[24] |
| G[2]  | 51.780         | <b>608.374</b> | 604.370        | 0.755          | 604.118        | G[23] |
| R[3]  | 90.805         | 594.110        | <b>590.114</b> | <b>590.366</b> | 589.862        | R[22] |
| G[4]  | 105.061        | <b>555.094</b> | 551.089        | 551.341        | 550.837        | G[21] |
| K[5]  | 137.084        | <b>540.838</b> | 536.834        | <b>537.086</b> | 536.582        | K[20] |
| G[6]  | 151.340        | 508.815        | 504.810        | 505.062        | 504.558        | G[19] |
| G[7]  | 165.595        | 494.559        | 490.554        | 490.806        | 490.303        | G[18] |
| K[8]  | 197.619        | <b>480.304</b> | <b>476.299</b> | 476.551        | <b>476.047</b> | K[17] |
| G[9]  | 211.874        | 446.280        | 442.275        | 442.527        | 442.023        | G[16] |
| L[10] | 280.148        | 434.025        | 430.020        | 430.272        | 429.768        | L[15] |
| G[11] | 254.401        | 405.754        | 401.749        | 402.001        | 401.497        | G[14] |
| K[12] | 286.424        | 391.498        | <b>387.494</b> | <b>387.746</b> | <b>387.242</b> | K[13] |
| G[13] | 300.680        | 359.475        | 355.470        | 355.722        | 355.218        | G[12] |
| G[14] | 314.935        | 345.219        | 341.215        | 341.466        | 340.963        | G[11] |
| A[15] | 332.694        | 330.964        | 326.959        | 327.211        | 326.707        | A[10] |
| K[16] | 364.718        | 313.205        | 309.200        | 309.452        | 308.948        | K[9]  |
| R[17] | 403.743        | 281.181        | 277.176        | 277.428        | 276.924        | R[8]  |
| H[18] | 438.008        | 242.156        | 238.151        | 238.403        | 237.899        | H[7]  |
| R[19] | 477.033        | 207.891        | 203.886        | 204.138        | 203.634        | R[6]  |
| K[20] | 519.569        | 168.866        | 164.861        | 165.113        | 164.609        | K[5]  |
| V[21] | 544.336        | 126.330        | 122.325        | 122.577        | 122.073        | V[4]  |
| L[22] | <b>572.607</b> | 101.563        | 97.558         | 97.810         | 97.306         | L[3]  |
| R[23] | <b>611.632</b> | 73.292         | 69.287         | 69.539         | 69.035         | R[2]  |
| D[24] | <b>640.389</b> | 34.267         | 30.262         | 30.514         | 30.010         | D[1]  |

# sp | P62806 | H4\_MOUSE

[Acetyl]SGR<sup>Methyl</sup> GK<sup>Acetyl</sup> GGKGL  
14.02 42.01

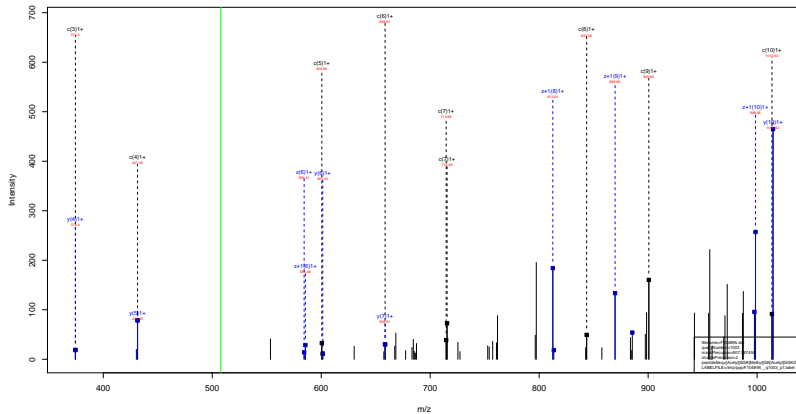

# sp | P62806 | H4\_MOUSE

[Acetyl]SGR<sup>Methyl</sup> 14.02 GK<sup>Acetyl</sup> 42.01 GGKGL

- ▶ fragmentation table for charge state 1+
- ▶ specType=etd
- ▶ score=45.40
- ▶ F104895.dat
- ▶ query=q1003\_p1
- ▶ precursor=507.787450
- ▶ chargePrecursor=2
- ▶ itol=0.8

| AA    | c               | y               | z+1            | z+2            | z              | AA    |
|-------|-----------------|-----------------|----------------|----------------|----------------|-------|
| S[1]  | 147.076         | <b>1014.569</b> | <b>998.550</b> | 0.000          | <b>997.543</b> | S[10] |
| G[2]  | 204.088         | <b>885.526</b>  | <b>869.508</b> | 0.000          | 868.500        | G[9]  |
| R[3]  | <b>374.215</b>  | 828.505         | <b>812.486</b> | <b>813.494</b> | 811.478        | R[8]  |
| G[4]  | <b>431.236</b>  | <b>658.388</b>  | 642.370        | 643.377        | 641.362        | G[7]  |
| K[5]  | <b>601.342</b>  | <b>601.367</b>  | <b>585.348</b> | 586.356        | <b>584.340</b> | K[6]  |
| G[6]  | <b>658.363</b>  | <b>431.261</b>  | 415.243        | 416.250        | 414.239        | G[5]  |
| G[7]  | <b>715.385</b>  | <b>374.240</b>  | 358.221        | 359.229        | 357.213        | G[4]  |
| K[8]  | <b>843.460</b>  | 317.213         | 301.200        | 302.207        | 300.192        | K[3]  |
| G[9]  | <b>900.501</b>  | 189.123         | 173.105        | 174.112        | 172.097        | G[2]  |
| L[10] | <b>1013.585</b> | 132.102         | 116.083        | 117.091        | 115.075        | L[1]  |



# sp | P62806 | H4\_MOUSE

[Acetyl]SGR<sup>Methyl</sup> 14.02 GKGKGL

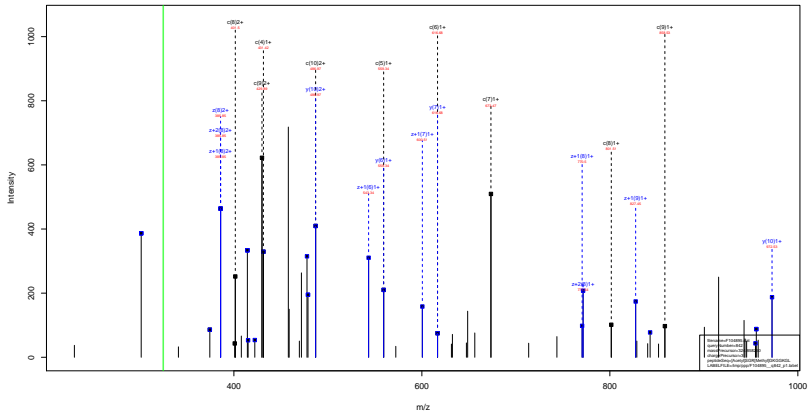

# sp | P62806 | H4\_MOUSE

[Acetyl]SGR<sup>Methyl</sup><sub>14.02</sub> GKGGKGL

- ▶ fragmentation table for charge state 1+
- ▶ specType=etd
- ▶ score=44.07
- ▶ F104895.dat
- ▶ query=q842\_p1
- ▶ precursor=324.858250
- ▶ chargePrecursor=3
- ▶ itol=0.8

| AA    | c              | y              | z+1            | z+2            | z              | AA      |      |
|-------|----------------|----------------|----------------|----------------|----------------|---------|------|
| S[1]  | 147.076        | <b>972.559</b> | <b>956.540</b> | 0.000          | <b>955.532</b> | S[10]   |      |
| G[2]  | 204.098        | <b>843.516</b> | <b>827.497</b> | 0.000          | 826.489        | G[9]    |      |
| R[3]  | <b>374.215</b> | 786.494        | <b>770.476</b> | <b>771.484</b> | 769.468        | R[8]    |      |
| Q[4]  | <b>431.236</b> | <b>616.378</b> | <b>600.359</b> | 601.367        | 599.351        | Q[7]    |      |
| K[5]  | <b>559.331</b> | <b>559.356</b> | <b>543.337</b> | 544.345        | 542.330        | K[6]    |      |
| G[6]  | <b>616.353</b> | <b>431.261</b> | <b>415.243</b> | 416.250        | <b>414.235</b> | G[5]    |      |
| G[7]  | <b>673.374</b> | <b>374.240</b> |                | 358.221        | 359.229        | 357.213 | G[4] |
| K[8]  | <b>801.469</b> | 317.218        | <b>301.200</b> | 302.207        | 300.192        | K[3]    |      |
| G[9]  | <b>858.490</b> | 189.123        | 173.105        | 174.112        | 172.097        | G[2]    |      |
| L[10] | 974.574        | 132.102        | 116.083        | 117.091        | 115.075        | L[1]    |      |

# sp | P62806 | H4\_MOUSE

[Acetyl]SGR<sup>Methyl</sup><sub>14.02</sub> GKGGKGL

- ▶ fragmentation table for charge state 2+
- ▶ specType=etd
- ▶ score=44.07
- ▶ F104895.dat
- ▶ query=q842-p1
- ▶ precursor=324.858250
- ▶ chargePrecursor=3
- ▶ itol=0.8

| AA    | c              | y              | z+1            | z+2            | z              | AA    |
|-------|----------------|----------------|----------------|----------------|----------------|-------|
| S[1]  | 74.042         | <b>486.783</b> | <b>478.774</b> | 0.504          | <b>478.270</b> | S[10] |
| G[2]  | 102.553        | <b>422.262</b> | <b>414.252</b> | 0.504          | <b>413.748</b> | G[9]  |
| R[3]  | 187.611        | 393.751        | <b>385.742</b> | <b>386.245</b> | <b>385.238</b> | R[8]  |
| Q[4]  | 216.122        | 308.692        | <b>300.683</b> | <b>301.187</b> | 300.179        | Q[7]  |
| K[5]  | 280.169        | 280.182        | 272.172        | 272.676        | 271.668        | K[6]  |
| G[6]  | 308.680        | 216.134        | 208.125        | 208.629        | 207.621        | G[5]  |
| G[7]  | 337.191        | 187.624        | 179.614        | 180.118        | 179.110        | G[4]  |
| K[8]  | <b>481.238</b> | 139.114        | 131.103        | 131.607        | 130.600        | K[3]  |
| G[9]  | <b>429.749</b> | 95.965         | 87.956         | 87.960         | 86.952         | G[2]  |
| L[10] | <b>486.291</b> | 66.555         | 58.545         | 59.049         | 58.041         | L[1]  |

# sp | P62806 | H4\_MOUSE

[Acetyl]SGR<sup>Methyl</sup> 14.02 GKGGK<sup>Acetyl</sup> 42.01 GL

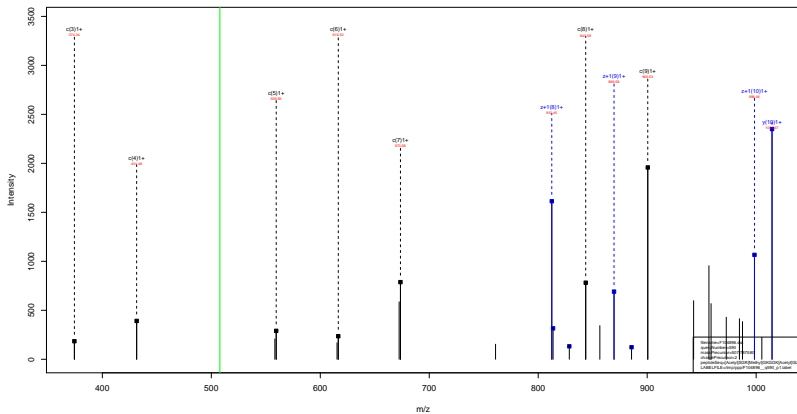

# sp | P62806 | H4\_MOUSE

[Acetyl]SGR<sup>Methyl</sup> 14.02 GKGGK<sup>Acetyl</sup> 42.01 GL

- ▶ fragmentation table for charge state 1+
- ▶ specType=etd
- ▶ score=52.77
- ▶ F104896.dat
- ▶ query=q590\_p1
- ▶ precursor=507.787580
- ▶ chargePrecursor=2
- ▶ itol=0.8

| AA    | c              | y               | z+1            | z+2            | z       | AA    |
|-------|----------------|-----------------|----------------|----------------|---------|-------|
| S[1]  | 147.076        | <b>1014.569</b> | <b>958.550</b> | 0.000          | 997.543 | S[10] |
| G[2]  | 204.098        | <b>885.526</b>  | <b>869.508</b> | 0.000          | 868.500 | G[9]  |
| R[3]  | <b>374.215</b> | <b>628.505</b>  | <b>812.486</b> | <b>813.494</b> | 811.478 | R[8]  |
| G[4]  | <b>431.236</b> | 658.388         | 642.370        | 643.377        | 641.362 | G[7]  |
| K[5]  | <b>559.331</b> | 601.367         | 585.348        | 586.356        | 584.340 | K[6]  |
| G[6]  | <b>616.353</b> | 473.272         | 457.253        | 458.261        | 456.245 | G[5]  |
| G[7]  | <b>673.374</b> | 416.250         | 400.232        | 401.239        | 399.224 | G[4]  |
| K[8]  | <b>843.480</b> | 399.129         | 383.210        | 384.218        | 382.202 | K[3]  |
| G[9]  | <b>900.501</b> | 389.123         | 373.105        | 374.112        | 372.097 | G[2]  |
| L[10] | 1013.585       | 132.102         | 116.083        | 117.091        | 115.075 | L[1]  |



# sp | P62806 | H4\_MOUSE

[Acetyl]SGRGKGGKGLGKGGAKRHRK<sup>Trimethyl</sup>VLR<sub>42.05</sub>

- ▶ fragmentation table for charge state 1+
- ▶ specType=etd
- ▶ score=119.32
- ▶ F104900.dat
- ▶ query=q1578\_p1
- ▶ precursor=611.881670
- ▶ chargePrecursor=4
- ▶ itol=0.8

| AA    | c               | y        | z+1            | z+2             | z        | AA    |
|-------|-----------------|----------|----------------|-----------------|----------|-------|
| S[1]  | 147.076         | 2444.491 | 2438.472       | 0.000           | 2427.464 | S[23] |
| G[2]  | 204.098         | 2315.448 | 2299.430       | 0.000           | 2298.422 | G[22] |
| R[3]  | <b>360.199</b>  | 2258.427 | 2242.408       | 2243.416        | 2241.400 | R[21] |
| G[4]  | <b>417.220</b>  | 2102.326 | 2086.307       | 2087.315        | 2085.299 | G[20] |
| K[5]  | <b>545.315</b>  | 2046.304 | 2029.286       | 2030.293        | 2028.276 | K[19] |
| G[6]  | <b>602.337</b>  | 1917.299 | 1901.281       | 1902.288        | 1900.263 | G[18] |
| G[7]  | <b>659.358</b>  | 1860.188 | 1844.169       | <b>1845.177</b> | 1843.161 | G[17] |
| K[8]  | <b>787.453</b>  | 1803.168 | 1787.149       | 1788.156        | 1786.140 | K[16] |
| G[9]  | <b>844.475</b>  | 1675.071 | 1659.053       | <b>1660.061</b> | 1658.045 | G[15] |
| L[10] | <b>957.559</b>  | 1618.050 | 1602.031       | 1603.039        | 1601.023 | L[14] |
| G[11] | 1014.580        | 1504.966 | 1488.947       | 1489.955        | 1487.939 | G[13] |
| R[12] | <b>1142.675</b> | 1447.844 | 1431.825       | <b>1432.834</b> | 1430.818 | R[12] |
| G[13] | 1199.697        | 1319.840 | 1303.831       | <b>1304.839</b> | 1302.823 | G[11] |
| G[14] | 1256.718        | 1262.828 | 1246.809       | <b>1247.817</b> | 1245.801 | G[10] |
| A[15] | <b>1327.755</b> | 1205.807 | 1189.788       | 1190.796        | 1188.780 | A[9]  |
| K[16] | <b>1455.850</b> | 1134.769 | 1118.751       | <b>1119.759</b> | 1117.743 | K[8]  |
| R[17] | 1611.951        | 1006.674 | <b>990.656</b> | <b>991.664</b>  | 989.648  | R[7]  |
| R[18] | <b>1749.010</b> | 890.573  | <b>874.555</b> | 875.562         | 873.547  | R[6]  |
| R[19] | <b>1905.111</b> | 713.514  | <b>697.496</b> | <b>698.504</b>  | 696.489  | R[5]  |
| K[20] | 2075.253        | 557.413  | <b>541.395</b> | <b>542.402</b>  | 540.387  | K[4]  |
| V[21] | 2174.322        | 387.271  | 371.253        | 372.261         | 370.245  | V[3]  |
| L[22] | 2287.406        | 288.203  | 272.184        | 273.192         | 271.176  | L[2]  |
| R[23] | 2443.507        | 175.119  | 159.100        | 160.108         | 158.092  | R[1]  |

# sp | P62806 | H4\_MOUSE

[Acetyl]SGRGKGGKGLGKGGAKRHRK<sup>Trimethyl</sup>VLR  
42.05

- ▶ fragmentation table for charge state 2+
- ▶ specType=etd
- ▶ score=119.32
- ▶ F104900.dat
- ▶ query=q1578\_p1
- ▶ precursor=611.881670
- ▶ chargePrecursor=4
- ▶ itol=0.8

| AA   | c               | y               | z+1             | z+2             | z               | AA   |
|------|-----------------|-----------------|-----------------|-----------------|-----------------|------|
| S 1  | 74.042          | <b>1222.749</b> | <b>1214.740</b> | 0.504           | 1214.230        | S 21 |
| G 2  | 102.553         | 1150.228        | <b>1150.218</b> | 0.504           | 1149.715        | G 22 |
| R 3  | 180.603         | <b>1129.717</b> | <b>1121.708</b> | <b>1122.212</b> | 1121.204        | R 21 |
| G 4  | 209.114         | 1051.667        | <b>1043.657</b> | <b>1044.161</b> | <b>1043.153</b> | G 20 |
| K 5  | 273.161         | <b>1023.156</b> | 1015.145        | <b>1015.650</b> | 1014.643        | K 19 |
| G 6  | 301.672         | 959.109         | 951.100         | 951.603         | 950.595         | G 18 |
| G 7  | 330.183         | 930.598         | <b>922.588</b>  | <b>923.092</b>  | <b>922.084</b>  | G 17 |
| K 8  | 394.230         | 902.087         | <b>894.077</b>  | <b>894.581</b>  | 893.574         | K 16 |
| G 9  | 422.741         | 838.039         | <b>830.030</b>  | <b>830.534</b>  | <b>829.526</b>  | G 15 |
| L 10 | 479.283         | 809.529         | <b>801.519</b>  | <b>802.023</b>  | 801.015         | L 14 |
| G 11 | 507.794         | 754.067         | <b>744.977</b>  | <b>745.481</b>  | 744.473         | G 13 |
| K 12 | 571.844         | 724.870         | <b>716.466</b>  | <b>716.970</b>  | 715.963         | K 12 |
| G 13 | 600.352         | 660.428         | <b>652.419</b>  | <b>652.923</b>  | 651.915         | G 11 |
| G 14 | 638.863         | 631.918         | <b>623.908</b>  | <b>624.412</b>  | 623.404         | G 10 |
| A 15 | 664.371         | 603.407         | 595.398         | 595.901         | 594.894         | A 9  |
| K 16 | 728.420         | 567.888         | <b>559.879</b>  | <b>560.383</b>  | <b>559.375</b>  | K 8  |
| R 17 | 699.478         | 503.841         | <b>495.832</b>  | <b>496.335</b>  | <b>495.328</b>  | R 7  |
| H 18 | <b>875.809</b>  | 425.790         | <b>417.781</b>  | 418.285         | <b>417.277</b>  | H 6  |
| R 19 | <b>953.059</b>  | 357.261         | 349.252         | 349.755         | 348.748         | R 5  |
| K 20 | 1038.130        | 279.210         | 271.201         | 271.705         | 270.697         | K 4  |
| V 21 | <b>1087.665</b> | 194.139         | 186.130         | 186.634         | 185.626         | V 3  |
| L 22 | <b>1144.207</b> | 144.065         | 136.056         | 137.060         | 136.052         | L 1  |
| R 23 | 1222.257        | 98.051          | 90.044          | 90.548          | 89.540          | R 1  |



# sp | P62806 | H4\_MOUSE

[Acetyl]SGRGKGGKGLGKGGAKRHRK<sup>Trimethyl</sup>VLR<sub>42.05</sub>

- ▶ fragmentation table for charge state 3+
- ▶ specType=etd
- ▶ score=119.32
- ▶ F104900.dat
- ▶ query=q1578\_p1
- ▶ precursor=611.881670
- ▶ chargePrecursor=4
- ▶ itol=0.8

| AA    | c       | y              | z+1            | z+2            | z              | AA    |
|-------|---------|----------------|----------------|----------------|----------------|-------|
| S[1]  | 49.697  | <b>815.502</b> | <b>810.162</b> | 0.672          | 809.826        | S[23] |
| G[2]  | 68.704  | 772.488        | <b>767.148</b> | 0.677          | 766.812        | G[22] |
| R[3]  | 120.738 | 753.480        | <b>748.141</b> | <b>743.477</b> | 747.805        | R[21] |
| G[4]  | 159.745 | 701.447        | 696.107        | 695.443        | 695.771        | G[20] |
| K[5]  | 182.443 | 682.440        | 677.100        | 677.436        | 676.764        | K[19] |
| G[6]  | 201.450 | 639.741        | 634.402        | 634.738        | 634.066        | G[18] |
| G[7]  | 220.458 | 620.734        | 615.395        | 615.731        | 615.059        | G[17] |
| K[8]  | 263.156 | <b>601.727</b> | 596.387        | 596.723        | 596.051        | K[16] |
| G[9]  | 282.163 | 559.029        | 553.689        | 554.025        | 553.353        | G[15] |
| L[10] | 319.858 | 540.022        | 534.682        | 535.018        | 534.346        | L[14] |
| G[11] | 338.865 | 502.327        | <b>496.987</b> | <b>497.323</b> | <b>496.651</b> | G[13] |
| K[12] | 381.563 | 483.320        | 477.980        | 478.316        | 477.644        | K[12] |
| G[13] | 400.570 | 440.621        | 435.282        | 435.618        | 434.946        | G[11] |
| G[14] | 419.578 | 421.614        | 416.275        | <b>416.611</b> | 415.939        | G[10] |
| A[15] | 443.257 | 402.607        | 397.267        | 397.603        | 396.932        | A[9]  |
| K[16] | 485.955 | 378.928        | 373.588        | 373.924        | 373.252        | K[8]  |
| R[17] | 537.989 | 336.230        | 330.890        | 331.226        | 330.554        | R[7]  |
| H[18] | 583.675 | 284.196        | 278.856        | 279.192        | 278.520        | H[6]  |
| R[19] | 635.709 | 238.510        | 233.170        | 233.506        | 232.834        | R[5]  |
| K[20] | 692.423 | 186.476        | 181.136        | 181.472        | 180.800        | K[4]  |
| V[21] | 726.445 | 159.762        | 154.422        | 154.758        | 154.086        | V[3]  |
| L[22] | 763.140 | 96.739         | 91.400         | 91.736         | 91.064         | L[2]  |
| R[23] | 815.174 | 59.045         | 53.705         | 54.041         | 53.369         | R[1]  |

# sp | P62806 | H4\_MOUSE

[Acetyl]SGR<sup>Methyl</sup> 14.02 GKGKGLGKGGAKRHRK<sup>Trimethyl</sup> VLR 42.05

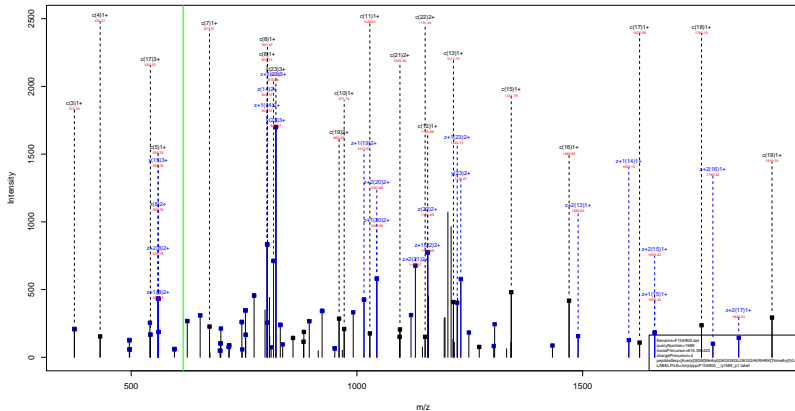

# sp | P62806 | H4\_MOUSE

[Acetyl]SGR<sup>Methyl</sup><sub>14.02</sub> GKGGKGLGKGGAKRHRK<sup>Trimethyl</sup><sub>42.05</sub> VLR

- ▶ fragmentation table for charge state 1+
- ▶ specType=etd
- ▶ score=130.12
- ▶ F104900.dat
- ▶ query=q1589\_p1
- ▶ precursor=615.386420
- ▶ chargePrecursor=4
- ▶ itol=0.8

| AA    | c               | y        | z+1             | z+2             | z               | AA    |
|-------|-----------------|----------|-----------------|-----------------|-----------------|-------|
| S[1]  | 147.076         | 2458.507 | 2442.480        | 0.000           | 2441.480        | S[23] |
| G[2]  | 204.098         | 2329.464 | 2313.445        | 0.000           | 2312.437        | G[22] |
| R[3]  | <b>374.215</b>  | 2272.643 | 2256.424        | 2257.432        | 2255.416        | R[21] |
| G[4]  | <b>431.236</b>  | 2102.125 | 2086.307        | 2087.315        | 2085.299        | G[20] |
| K[5]  | <b>559.331</b>  | 2045.304 | 2029.285        | 2030.293        | 2028.276        | K[19] |
| G[6]  | 614.353         | 1917.209 | 1901.191        | 1902.198        | 1900.181        | G[18] |
| G[7]  | <b>713.374</b>  | 1860.188 | 1844.169        | <b>1845.177</b> | 1843.161        | G[17] |
| K[8]  | <b>801.469</b>  | 1803.166 | 1787.148        | <b>1788.156</b> | 1786.140        | K[16] |
| G[9]  | <b>858.490</b>  | 1675.071 | <b>1659.053</b> | <b>1660.061</b> | 1658.045        | G[15] |
| L[10] | <b>971.574</b>  | 1618.050 | <b>1602.031</b> | 1603.039        | 1601.023        | L[14] |
| G[11] | <b>1028.596</b> | 1524.960 | 1488.947        | <b>1489.955</b> | 1487.939        | G[13] |
| R[12] | <b>1158.691</b> | 1447.844 | 1431.826        | <b>1432.834</b> | 1430.810        | R[12] |
| G[13] | <b>1213.712</b> | 1319.849 | 1303.831        | <b>1304.839</b> | <b>1302.823</b> | G[11] |
| G[14] | <b>1270.734</b> | 1262.828 | 1246.809        | <b>1247.817</b> | 1245.801        | G[10] |
| A[15] | <b>1341.771</b> | 1205.807 | 1189.789        | 1190.796        | 1188.780        | A[9]  |
| K[16] | <b>1469.866</b> | 1134.769 | 1118.751        | <b>1119.759</b> | 1117.743        | K[8]  |
| R[17] | <b>1625.967</b> | 1030.674 | 995.658         | <b>991.664</b>  | 989.648         | R[7]  |
| R[18] | <b>1763.058</b> | 926.578  | 891.561         | <b>835.562</b>  | 833.546         | R[6]  |
| R[19] | <b>1919.127</b> | 713.514  | <b>697.496</b>  | <b>698.504</b>  | <b>696.488</b>  | R[5]  |
| K[20] | 2089.269        | 557.413  | <b>541.395</b>  | <b>542.402</b>  | 540.387         | K[4]  |
| V[21] | 2188.337        | 407.271  | 371.253         | 372.261         | 370.245         | V[3]  |
| L[22] | 2301.421        | 288.203  | 272.184         | 273.192         | 271.176         | L[2]  |
| R[23] | 2497.523        | 175.119  | 159.100         | 160.108         | 158.092         | R[1]  |

# sp | P62806 | H4\_MOUSE

[Acetyl]SGR<sup>Methyl</sup><sub>14.02</sub> GKGGKGLGKGGAKRHRK<sup>Trimethyl</sup><sub>42.05</sub> VLR

- ▶ fragmentation table for charge state 2+
- ▶ specType=etd
- ▶ score=130.12
- ▶ F104900.dat
- ▶ query=q1589\_p1
- ▶ precursor=615.386420
- ▶ chargePrecursor=4
- ▶ itol=0.8

| AA | c  | y               | z+1             | z+2             | z               | AA              |      |
|----|----|-----------------|-----------------|-----------------|-----------------|-----------------|------|
| S  | 1  | 74.042          | <b>1229.757</b> | <b>1221.748</b> | 0.904           | 1221.964        | S(2) |
| G  | 2  | 102.553         | 1165.238        | <b>1157.226</b> | 0.904           | <b>1156.722</b> | G(2) |
| R  | 3  | 187.611         | 1136.725        | 1126.716        | <b>1129.219</b> | 1128.212        | R(2) |
| G  | 4  | 218.122         | 1051.667        | <b>1043.657</b> | <b>1044.161</b> | 1043.153        | G(2) |
| K  | 5  | 280.169         | 1023.156        | <b>1015.146</b> | <b>1015.650</b> | 1014.643        | K(2) |
| G  | 6  | 388.680         | 959.205         | <b>951.099</b>  | <b>951.603</b>  | <b>950.595</b>  | G(2) |
| G  | 7  | 337.191         | 0.93595         | <b>922.588</b>  | <b>923.092</b>  | <b>922.084</b>  | G(2) |
| K  | 8  | 401.238         | 902.087         | <b>894.077</b>  | <b>894.581</b>  | 893.574         | K(2) |
| G  | 9  | 429.749         | 0.98039         | <b>830.030</b>  | <b>830.534</b>  | <b>829.526</b>  | G(2) |
| L  | 10 | 486.291         | <b>809.529</b>  | <b>801.519</b>  | <b>802.023</b>  | <b>801.015</b>  | L(2) |
| G  | 11 | 514.802         | <b>752.987</b>  | <b>744.977</b>  | <b>745.481</b>  | <b>744.473</b>  | G(2) |
| K  | 12 | 578.550         | 724.936         | <b>716.466</b>  | <b>716.970</b>  | <b>715.963</b>  | K(2) |
| G  | 13 | 607.360         | 660.425         | <b>652.419</b>  | <b>652.923</b>  | 651.915         | G(2) |
| G  | 14 | 635.871         | 631.918         | <b>623.908</b>  | <b>624.412</b>  | 623.404         | G(2) |
| A  | 15 | 671.389         | 603.407         | <b>595.398</b>  | <b>595.901</b>  | 594.894         | A(2) |
| K  | 16 | 735.437         | 567.895         | <b>559.879</b>  | <b>560.383</b>  | <b>559.375</b>  | K(2) |
| R  | 17 | 813.487         | 503.841         | <b>495.832</b>  | <b>496.335</b>  | <b>495.328</b>  | R(2) |
| H  | 18 | <b>882.017</b>  | 425.790         | 417.783         | 418.285         | 417.277         | H(2) |
| R  | 19 | <b>900.067</b>  | 357.261         | 349.252         | 349.755         | 348.748         | R(2) |
| K  | 20 | 1045.138        | 279.210         | 271.203         | 271.705         | 270.697         | K(2) |
| V  | 21 | <b>1094.672</b> | 194.139         | 186.130         | 186.634         | 185.626         | V(2) |
| L  | 22 | <b>1151.214</b> | 144.605         | 136.595         | 137.098         | 136.090         | L(2) |
| R  | 23 | 1229.265        | 98.053          | 89.044          | 89.546          | 79.538          | R(2) |

# sp | P62806 | H4\_MOUSE

[Acetyl]SGR<sup>Methyl</sup><sub>14.02</sub> GKGGKGLGKGGAKRHRK<sup>Trimethyl</sup><sub>42.05</sub> VLR

- ▶ fragmentation table for charge state 3+
- ▶ specType=etd
- ▶ score=130.12
- ▶ F104900.dat
- ▶ query=q1589\_p1
- ▶ precursor=615.386420
- ▶ chargePrecursor=4
- ▶ itol=0.8

| AA |      | c              | y              | z+1            | z+2            | z              | AA    |
|----|------|----------------|----------------|----------------|----------------|----------------|-------|
| S  | [1]  | 49.697         | <b>820.174</b> | <b>814.834</b> | 0.672          | <b>814.498</b> | S[2]  |
| G  | [2]  | 68.704         | 777.160        | <b>771.820</b> | 0.672          | <b>771.484</b> | G[22] |
| R  | [3]  | 125.410        | 758.152        | <b>752.813</b> | <b>753.149</b> | <b>752.477</b> | R[21] |
| G  | [4]  | 144.417        | 701.441        | 696.107        | <b>696.443</b> | 695.771        | G[25] |
| K  | [5]  | 187.115        | 682.440        | 677.100        | 677.236        | 676.764        | K[19] |
| G  | [6]  | 206.122        | 630.741        | 634.402        | 634.738        | 634.066        | G[18] |
| G  | [7]  | 225.130        | 620.734        | 615.395        | 615.731        | 615.059        | G[17] |
| K  | [8]  | 267.626        | 601.727        | <b>596.387</b> | 596.723        | <b>596.051</b> | K[16] |
| G  | [9]  | 286.635        | <b>559.029</b> | 553.689        | 554.025        | 553.353        | G[15] |
| L  | [10] | 324.530        | 540.022        | 534.682        | 535.018        | 534.346        | L[14] |
| G  | [11] | 343.537        | 502.327        | <b>496.987</b> | <b>497.323</b> | <b>496.651</b> | G[13] |
| K  | [12] | 386.235        | 483.320        | 477.980        | 478.316        | 477.644        | K[12] |
| G  | [13] | 405.242        | 440.621        | 435.282        | 435.618        | 434.946        | G[11] |
| G  | [14] | 424.249        | 421.614        | 415.275        | 415.611        | 415.039        | G[10] |
| A  | [15] | 447.929        | 402.607        | 397.257        | 397.593        | 396.922        | A[9]  |
| K  | [16] | 490.627        | 378.928        | <b>373.588</b> | <b>373.924</b> | 373.252        | K[8]  |
| R  | [17] | <b>542.661</b> | 336.230        | 330.890        | 331.226        | 330.554        | R[7]  |
| H  | [18] | 588.347        | 284.196        | 278.856        | 279.192        | 278.520        | H[6]  |
| R  | [19] | 640.361        | 238.510        | 233.170        | 233.506        | 232.834        | R[5]  |
| K  | [20] | <b>697.095</b> | 186.476        | 181.136        | 181.472        | 180.800        | K[4]  |
| V  | [21] | 730.117        | 129.762        | 124.422        | 124.758        | 124.086        | V[9]  |
| L  | [22] | 797.812        | 96.739         | 91.400         | 91.736         | 91.064         | L[8]  |
| R  | [23] | <b>819.846</b> | 59.045         | 53.705         | 54.041         | 53.369         | R[1]  |



# sp | P62806 | H4\_MOUSE

[Acetyl]SGR<sup>Methyl</sup><sub>14.02</sub> GKGGKGLGKGGAK<sup>Acetyl</sup><sub>42.01</sub> RHRK<sup>Trimethyl</sup><sub>42.05</sub> VLR

- ▶ fragmentation table for charge state 1+
- ▶ specType=etd
- ▶ score=94.51
- ▶ F104900.dat
- ▶ query=q1636\_p1
- ▶ precursor=500.911550
- ▶ chargePrecursor=5
- ▶ itol=0.8

| AA    | c               | y              | z+1             | z+2             | z              | AA    |
|-------|-----------------|----------------|-----------------|-----------------|----------------|-------|
| S[1]  | 147.076         | 2500.517       | 2484.488        | 0.000           | 2483.491       | S[23] |
| G[2]  | 304.098         | 2371.475       | 2355.456        | 0.000           | 2354.448       | G[22] |
| R[3]  | <b>374.215</b>  | 2314.453       | 2298.434        | 2299.442        | 2297.427       | R[21] |
| G[4]  | <b>431.236</b>  | 2144.338       | 2128.318        | 2129.325        | 2127.310       | G[20] |
| K[5]  | <b>559.331</b>  | 2087.315       | 2071.295        | 2072.304        | 2070.288       | K[19] |
| G[6]  | <b>616.353</b>  | 1959.220       | 1943.201        | 1944.209        | 1942.193       | G[18] |
| G[7]  | <b>673.374</b>  | 1902.198       | 1886.180        | 1887.188        | 1885.172       | G[17] |
| K[8]  | <b>801.469</b>  | 1845.177       | 1829.158        | <b>1830.166</b> | 1828.150       | K[16] |
| G[9]  | <b>858.490</b>  | 1737.082       | 1701.063        | 1702.071        | 1700.055       | G[15] |
| L[10] | <b>971.574</b>  | 1660.061       | 1644.042        | 1645.050        | 1643.034       | L[14] |
| G[11] | <b>1028.596</b> | 1546.976       | 1530.958        | 1531.966        | 1529.950       | G[13] |
| K[12] | <b>1156.691</b> | 1489.955       | 1473.938        | 1474.944        | 1472.928       | K[12] |
| G[13] | 1233.712        | 1361.860       | 1345.841        | <b>1346.849</b> | 1344.833       | G[11] |
| G[14] | <b>1270.734</b> | 1304.839       | <b>1288.820</b> | 1289.828        | 1287.812       | G[10] |
| A[15] | <b>1341.771</b> | 1247.817       | 1231.798        | 1232.806        | 1230.791       | A[9]  |
| K[16] | <b>1511.876</b> | 1176.780       | <b>1160.761</b> | <b>1161.769</b> | 1159.753       | K[8]  |
| R[17] | <b>1667.978</b> | 1036.674       | 990.656         | <b>991.664</b>  | 989.648        | R[7]  |
| T[18] | 1829.937        | <b>850.573</b> | <b>834.555</b>  | 835.562         | 833.547        | T[6]  |
| R[19] | <b>1961.138</b> | 713.514        | 687.496         | <b>698.504</b>  | <b>696.488</b> | R[5]  |
| K[20] | 2131.280        | <b>557.413</b> | <b>541.395</b>  | <b>542.402</b>  | <b>540.387</b> | K[4]  |
| V[21] | 2230.348        | 387.271        | <b>371.253</b>  | <b>372.261</b>  | 370.245        | V[3]  |
| L[22] | 2343.432        | 288.203        | <b>272.184</b>  | 273.192         | 271.176        | L[2]  |
| R[23] | 2499.533        | 178.119        | 159.100         | 160.108         | 158.092        | R[1]  |

# sp | P62806 | H4\_MOUSE

[Acetyl]SGR<sup>Methyl</sup><sub>14.02</sub> GKGGKGLGKGGAK<sup>Acetyl</sup><sub>42.01</sub> RHRK<sup>Trimethyl</sup><sub>42.05</sub> VLR

- ▶ fragmentation table for charge state 2+
- ▶ specType=etd
- ▶ score=94.51
- ▶ F104900.dat
- ▶ query=q1636\_p1
- ▶ precursor=500.911550
- ▶ chargePrecursor=5
- ▶ itol=0.8

| AA    | c               | y               | z+1             | z+2             | z              | AA    |
|-------|-----------------|-----------------|-----------------|-----------------|----------------|-------|
| S[1]  | 74.062          | 1250.762        | <b>1242.753</b> | 0.504           | 1242.249       | S[2]  |
| G[2]  | 102.563         | <b>1186.241</b> | 1178.232        | 0.504           | 1177.728       | G[22] |
| R[3]  | 167.611         | <b>1157.730</b> | <b>1149.721</b> | <b>1150.225</b> | 1149.217       | R[21] |
| G[4]  | 216.122         | 1072.672        | <b>1064.662</b> | <b>1065.166</b> | 1064.159       | G[20] |
| K[5]  | 260.169         | 1044.161        | <b>1036.152</b> | <b>1036.656</b> | 1035.648       | K[19] |
| G[6]  | 309.689         | 990.134         | <b>972.104</b>  | 972.598         | <b>971.600</b> | G[18] |
| G[7]  | 337.191         | 951.683         | <b>943.593</b>  | <b>944.097</b>  | 943.050        | G[17] |
| K[8]  | <b>401.238</b>  | <b>923.092</b>  | <b>915.083</b>  | <b>915.587</b>  | <b>914.579</b> | K[16] |
| G[9]  | 429.749         | <b>859.045</b>  | <b>851.035</b>  | <b>851.539</b>  | <b>850.531</b> | G[15] |
| L[10] | <b>486.291</b>  | 830.534         | 822.525         | 823.029         | 822.021        | L[14] |
| G[11] | <b>514.302</b>  | 773.023         | <b>765.013</b>  | <b>766.486</b>  | <b>765.479</b> | G[13] |
| R[12] | <b>578.848</b>  | <b>745.481</b>  | <b>737.472</b>  | <b>737.976</b>  | <b>736.968</b> | R[12] |
| G[13] | <b>607.360</b>  | 681.454         | <b>673.424</b>  | <b>673.928</b>  | <b>672.920</b> | G[11] |
| G[14] | <b>635.871</b>  | 652.923         | <b>644.914</b>  | <b>645.417</b>  | <b>644.410</b> | G[10] |
| A[15] | <b>671.389</b>  | 624.412         | <b>616.403</b>  | <b>616.907</b>  | <b>615.899</b> | A[9]  |
| K[16] | <b>756.442</b>  | 588.894         | <b>580.884</b>  | <b>581.388</b>  | 580.380        | K[8]  |
| R[17] | <b>834.492</b>  | 503.843         | <b>495.832</b>  | <b>496.335</b>  | <b>495.328</b> | R[7]  |
| R[18] | <b>903.022</b>  | 428.793         | <b>417.781</b>  | <b>418.285</b>  | 417.277        | R[6]  |
| R[19] | <b>981.072</b>  | 357.261         | <b>349.252</b>  | <b>349.755</b>  | <b>348.748</b> | R[5]  |
| K[20] | 1066.143        | 279.210         | 271.201         | <b>271.705</b>  | 270.697        | K[4]  |
| V[21] | <b>1115.678</b> | 194.139         | 186.130         | 186.634         | 185.626        | V[3]  |
| L[22] | 1172.220        | 144.605         | 136.596         | 137.100         | 136.092        | L[2]  |
| R[23] | 1250.270        | 88.063          | 80.054          | 80.558          | 79.550         | R[1]  |



# sp | P62806 | H4\_MOUSE

[Acetyl]SGR<sup>Methyl</sup><sub>14.02</sub> GKGGKGLGKGGAK<sup>Acetyl</sup><sub>42.01</sub> RHRK<sup>Trimethyl</sup><sub>42.05</sub> VLR

- ▶ fragmentation table for charge state 3+
- ▶ specType=etd
- ▶ score=94.51
- ▶ F104900.dat
- ▶ query=q1636\_p1
- ▶ precursor=500.911550
- ▶ chargePrecursor=5
- ▶ itol=0.8

| AA |      | c              | y              | z+1            | z+2            | z              | AA    |
|----|------|----------------|----------------|----------------|----------------|----------------|-------|
| S  | [1]  | 49.697         | <b>834.177</b> | <b>828.838</b> | 0.672          | <b>628.502</b> | S[23] |
| G  | [2]  | 68.704         | 791.163        | <b>785.823</b> | 0.672          | <b>785.488</b> | G[22] |
| R  | [3]  | 125.410        | <b>772.156</b> | <b>766.816</b> | <b>767.152</b> | <b>764.480</b> | R[21] |
| G  | [4]  | 144.617        | <b>715.450</b> | <b>710.111</b> | <b>710.447</b> | <b>709.775</b> | G[20] |
| K  | [5]  | 187.115        | <b>696.443</b> | <b>691.104</b> | <b>691.440</b> | <b>690.768</b> | K[19] |
| G  | [6]  | 206.122        | <b>653.745</b> | <b>648.405</b> | <b>648.741</b> | <b>648.069</b> | G[18] |
| G  | [7]  | 225.130        | 634.738        | 629.399        | <b>629.734</b> | 629.062        | G[17] |
| K  | [8]  | 267.620        | <b>615.731</b> | <b>610.391</b> | <b>610.727</b> | <b>610.055</b> | K[16] |
| G  | [9]  | 286.635        | <b>573.032</b> | <b>567.693</b> | <b>568.029</b> | <b>567.357</b> | G[15] |
| L  | [10] | 324.530        | 554.025        | <b>548.685</b> | <b>549.021</b> | <b>548.350</b> | L[14] |
| G  | [11] | 343.537        | 516.130        | <b>510.991</b> | <b>511.327</b> | <b>510.655</b> | G[13] |
| K  | [12] | 386.235        | 497.323        | 491.984        | 492.320        | 491.648        | K[12] |
| G  | [13] | 405.242        | 434.025        | 449.287        | 449.621        | 448.949        | G[11] |
| G  | [14] | 424.249        | 435.618        | 430.279        | <b>430.614</b> | 429.942        | G[10] |
| A  | [15] | 447.929        | 416.611        | <b>411.271</b> | <b>411.607</b> | <b>410.935</b> | A[9]  |
| K  | [16] | 504.630        | 392.932        | 387.592        | 387.928        | 387.256        | K[8]  |
| R  | [17] | <b>556.664</b> | 336.230        | 330.890        | 331.226        | 330.554        | R[7]  |
| H  | [18] | <b>602.350</b> | 284.196        | 278.856        | 279.192        | 278.520        | H[6]  |
| R  | [19] | <b>654.384</b> | 238.510        | 233.170        | 233.506        | 232.834        | R[5]  |
| K  | [20] | <b>711.098</b> | 186.476        | 181.136        | 181.472        | 180.800        | K[4]  |
| V  | [21] | 744.121        | 129.762        | 124.422        | 124.758        | 124.086        | V[3]  |
| L  | [22] | 783.810        | 96.739         | 91.400         | 91.736         | 91.064         | L[2]  |
| R  | [23] | 831.849        | 59.043         | 53.703         | 54.041         | 53.369         | R[1]  |

# sp | P62806 | H4\_MOUSE

[Acetyl]SGR<sup>Methyl</sup><sub>14.02</sub> GKGGKGLGKGGAK<sup>Acetyl</sup><sub>42.01</sub> RHRK<sup>Trimethyl</sup><sub>42.05</sub> VLR

- ▶ fragmentation table for charge state 4+
- ▶ specType=etd
- ▶ score=94.51
- ▶ F104900.dat
- ▶ query=q1636\_p1
- ▶ precursor=500.911550
- ▶ chargePrecursor=5
- ▶ itol=0.8

| AA |      | c              | y              | z+1            | z+2            | z              | AA    |
|----|------|----------------|----------------|----------------|----------------|----------------|-------|
| S  | [1]  | 37.525         | <b>625.885</b> | <b>621.880</b> | 0.755          | <b>621.628</b> | S[23] |
| G  | [2]  | 51.780         | 593.624        | <b>589.619</b> | 0.755          | <b>589.367</b> | G[22] |
| R  | [3]  | 94.309         | <b>579.369</b> | <b>575.364</b> | <b>575.616</b> | <b>575.112</b> | R[21] |
| G  | [4]  | 108.564        | 536.840        | 532.837        | 533.087        | 532.583        | G[20] |
| K  | [5]  | 140.588        | 522.584        | 518.579        | 518.831        | 518.328        | K[19] |
| G  | [6]  | 154.844        | 490.560        | <b>486.556</b> | <b>486.806</b> | <b>486.304</b> | G[18] |
| G  | [7]  | 169.099        | 476.305        | 472.300        | 472.552        | 472.048        | G[17] |
| K  | [8]  | 201.123        | 462.050        | 458.045        | 458.297        | 457.793        | K[16] |
| G  | [9]  | 215.378        | 430.026        | 426.021        | 426.273        | 425.769        | G[15] |
| L  | [10] | 243.649        | 415.771        | 411.766        | 412.018        | <b>411.514</b> | L[14] |
| G  | [11] | 257.904        | 387.500        | 383.495        | 383.747        | 383.243        | G[13] |
| K  | [12] | 289.928        | 373.244        | 369.240        | 369.491        | 368.988        | K[12] |
| G  | [13] | 304.184        | 341.220        | 337.215        | 337.466        | 336.964        | G[11] |
| G  | [14] | 318.439        | 326.965        | 322.960        | 323.212        | 322.708        | G[10] |
| A  | [15] | 336.198        | 312.710        | 308.705        | 308.957        | 308.453        | A[9]  |
| K  | [16] | 378.725        | 294.950        | 290.946        | 291.198        | 290.694        | K[8]  |
| R  | [17] | <b>417.750</b> | 252.424        | 248.419        | 248.671        | 248.167        | R[7]  |
| H  | [18] | 452.015        | 213.399        | 209.394        | 209.646        | 209.142        | H[6]  |
| R  | [19] | 491.040        | 179.134        | 175.129        | 175.381        | 174.877        | R[5]  |
| K  | [20] | 533.575        | 140.109        | 136.104        | 136.356        | 135.852        | K[4]  |
| V  | [21] | 558.342        | 97.573         | 93.569         | 93.821         | 93.317         | V[3]  |
| L  | [22] | 589.513        | 72.306         | 68.302         | 68.553         | 68.050         | L[2]  |
| R  | [23] | <b>625.639</b> | 44.535         | 40.531         | 40.782         | 40.279         | R[1]  |

# sp | P62806 | H4\_MOUSE

[Acetyl]SGR<sup>Methyl</sup> 14.02 GKGKGLGKGGAK<sup>Acetyl</sup> 42.01 RHRK<sup>Methyl</sup> 14.02 VLR<sup>Dimethyl</sup> 28.03

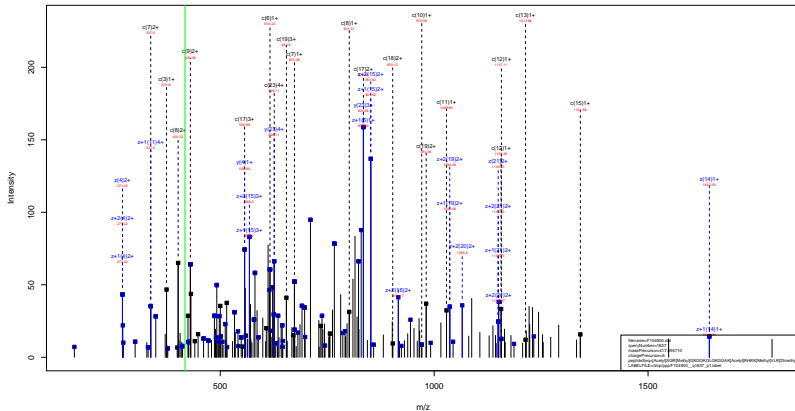

# sp | P62806 | H4\_MOUSE

[Acetyl]SGR<sup>Methyl</sup><sub>14.02</sub> GKGGKGLGKGGAK<sup>Acetyl</sup><sub>42.01</sub> RHRK<sup>Methyl</sup><sub>14.02</sub> VLR<sup>Dimethyl</sup><sub>28.03</sub>

- ▶ fragmentation table for charge state 1+
- ▶ specType=etd
- ▶ score=68.83
- ▶ F104900.dat
- ▶ query=q1637\_p1
- ▶ precursor=417.594710
- ▶ chargePrecursor=6
- ▶ itol=0.8

| AA    | c               | y              | z+1             | z+2             | z               | AA    |
|-------|-----------------|----------------|-----------------|-----------------|-----------------|-------|
| S[1]  | 147.076         | 2500.517       | 2484.488        | 0.000           | 2483.491        | S[23] |
| G[2]  | 204.098         | 2371.475       | 2355.456        | 0.000           | 2354.448        | G[22] |
| R[3]  | <b>374.215</b>  | 2314.653       | 2298.434        | 2299.442        | 2297.427        | R[21] |
| G[4]  | <b>431.236</b>  | 2144.335       | 2128.318        | 2129.325        | 2127.310        | G[20] |
| K[5]  | <b>559.331</b>  | 2087.315       | 2071.298        | 2072.304        | 2070.288        | K[19] |
| G[6]  | <b>618.353</b>  | 1939.220       | 1943.201        | 1944.209        | 1942.191        | G[18] |
| G[7]  | <b>673.374</b>  | 1902.198       | 1886.180        | 1887.188        | 1885.172        | G[17] |
| K[8]  | <b>801.469</b>  | 1846.177       | 1829.158        | 1830.166        | 1828.150        | K[16] |
| G[9]  | <b>858.490</b>  | 1717.082       | 1701.063        | 1702.071        | 1700.055        | G[15] |
| L[10] | <b>971.574</b>  | 1660.061       | <b>1644.042</b> | 1645.050        | <b>1643.034</b> | L[14] |
| G[11] | <b>1028.596</b> | 1546.976       | 1530.958        | 1531.966        | 1529.950        | G[13] |
| R[12] | <b>1156.691</b> | 1409.856       | 1473.838        | 1474.844        | 1472.828        | R[12] |
| G[13] | <b>1213.712</b> | 1301.800       | 1345.841        | 1346.849        | 1344.833        | G[11] |
| G[14] | 1270.734        | 1304.839       | 1288.820        | 1289.828        | 1287.812        | G[10] |
| A[15] | <b>1341.771</b> | 1247.817       | 1231.799        | <b>1232.806</b> | 1230.791        | A[9]  |
| K[16] | 1511.876        | 1176.780       | 1160.761        | 1161.769        | 1159.753        | K[8]  |
| R[17] | 1667.078        | 1036.674       | 999.655         | <b>991.664</b>  | 989.648         | R[7]  |
| R[18] | 1805.037        | 890.573        | <b>834.555</b>  | 835.563         | 833.547         | R[6]  |
| R[19] | 1981.138        | 713.514        | <b>697.496</b>  | <b>698.504</b>  | <b>696.488</b>  | R[5]  |
| K[20] | 2103.248        | <b>557.413</b> | <b>541.395</b>  | <b>542.402</b>  | 540.387         | K[4]  |
| V[21] | 2202.317        | 415.303        | <b>399.284</b>  | 400.292         | 398.276         | V[3]  |
| L[22] | 2315.401        | 316.234        | <b>300.216</b>  | <b>301.223</b>  | 299.208         | L[2]  |
| R[23] | 2499.533        | 203.150        | 187.132         | 188.139         | 186.124         | R[1]  |

# sp | P62806 | H4\_MOUSE

[Acetyl]SGR<sup>Methyl</sup><sub>14.02</sub> GKGGKGLGKGGAK<sup>Acetyl</sup><sub>42.01</sub> RHRK<sup>Methyl</sup><sub>14.02</sub> VLR<sup>Dimethyl</sup><sub>28.03</sub>

- ▶ fragmentation table for charge state 2+
- ▶ specType=etd
- ▶ score=68.83
- ▶ F104900.dat
- ▶ query=q1637\_p1
- ▶ precursor=417.594710
- ▶ chargePrecursor=6
- ▶ itol=0.8

| AA    | c              | y               | z+1             | z+2             | z               | AA    |
|-------|----------------|-----------------|-----------------|-----------------|-----------------|-------|
| S[1]  | 74.042         | 1250.762        | 1242.753        | 0.504           | 1242.249        | S[23] |
| G[2]  | 102.553        | <b>1106.241</b> | 1178.232        | 0.504           | 1177.728        | G[22] |
| R[3]  | 187.611        | <b>1157.730</b> | <b>1149.721</b> | <b>1150.225</b> | <b>1149.217</b> | R[21] |
| G[4]  | 216.123        | 1072.672        | 1054.663        | <b>1065.166</b> | 1064.159        | G[20] |
| K[5]  | 280.169        | <b>1044.161</b> | <b>1036.152</b> | <b>1036.656</b> | 1035.649        | K[19] |
| G[6]  | 308.680        | 958.114         | 972.104         | 972.608         | <b>971.600</b>  | G[18] |
| G[7]  | <b>337.191</b> | 951.603         | 943.593         | <b>944.097</b>  | 943.090         | G[17] |
| K[8]  | <b>401.230</b> | <b>923.092</b>  | 915.083         | <b>915.587</b>  | 914.579         | K[16] |
| G[9]  | <b>429.749</b> | <b>859.045</b>  | <b>851.035</b>  | <b>851.539</b>  | 850.531         | G[15] |
| L[10] | <b>486.291</b> | 830.534         | <b>822.525</b>  | <b>823.028</b>  | 822.021         | L[14] |
| G[11] | <b>514.802</b> | 773.022         | <b>765.013</b>  | <b>766.486</b>  | 765.479         | G[13] |
| R[12] | <b>578.849</b> | <b>745.481</b>  | <b>737.472</b>  | <b>737.976</b>  | 736.969         | R[12] |
| G[13] | <b>607.360</b> | <b>681.434</b>  | <b>673.424</b>  | <b>673.928</b>  | <b>672.920</b>  | G[11] |
| G[14] | <b>635.871</b> | 652.923         | <b>644.914</b>  | <b>645.417</b>  | <b>644.410</b>  | G[10] |
| A[15] | <b>671.389</b> | <b>624.412</b>  | <b>616.403</b>  | <b>616.907</b>  | <b>615.899</b>  | A[9]  |
| K[16] | <b>750.442</b> | <b>588.894</b>  | <b>580.884</b>  | <b>581.388</b>  | <b>580.380</b>  | K[8]  |
| R[17] | <b>834.492</b> | <b>563.841</b>  | <b>495.832</b>  | <b>496.335</b>  | 495.328         | R[7]  |
| R[18] | <b>903.022</b> | <b>425.790</b>  | 431.780         | 418.768         | 417.771         | R[6]  |
| R[19] | <b>981.072</b> | 357.261         | <b>349.252</b>  | <b>349.755</b>  | <b>348.748</b>  | R[5]  |
| K[20] | 1052.138       | 279.210         | <b>271.201</b>  | <b>271.705</b>  | <b>270.697</b>  | K[4]  |
| V[21] | 1101.662       | 208.155         | 200.140         | 200.650         | 199.642         | V[3]  |
| L[22] | 1158.204       | <b>156.621</b>  | 150.611         | 151.115         | 150.108         | L[2]  |
| R[23] | 1250.219       | 102.079         | 94.069          | 94.573          | 93.565          | R[1]  |

# sp | P62806 | H4\_MOUSE

[Acetyl]SGR<sup>Methyl</sup><sub>14.02</sub> GKGGKGLGKGGAK<sup>Acetyl</sup><sub>42.01</sub> RHRK<sup>Methyl</sup><sub>14.02</sub> VLR<sup>Dimethyl</sup><sub>28.03</sub>

- ▶ fragmentation table for charge state 3+
- ▶ specType=etd
- ▶ score=68.83
- ▶ F104900.dat
- ▶ query=q1637\_p1
- ▶ precursor=417.594710
- ▶ chargePrecursor=6
- ▶ itol=0.8

| AA |      | c              | y              | z+1            | z+2            | z              | AA    |
|----|------|----------------|----------------|----------------|----------------|----------------|-------|
| S  | [1]  | 49.697         | <b>834.177</b> | <b>828.838</b> | 0.672          | 828.902        | S[23] |
| G  | [2]  | 68.704         | <b>791.163</b> | <b>785.823</b> | 0.672          | 785.488        | G[22] |
| R  | [3]  | 125.410        | 772.196        | <b>766.816</b> | <b>767.152</b> | <b>766.480</b> | R[21] |
| G  | [4]  | 144.417        | 715.490        | <b>710.111</b> | <b>710.447</b> | 639.775        | G[20] |
| K  | [5]  | 187.115        | <b>696.443</b> | <b>691.104</b> | <b>691.440</b> | <b>690.768</b> | K[19] |
| G  | [6]  | 206.122        | 653.745        | 648.405        | 648.741        | 648.069        | G[18] |
| G  | [7]  | 225.130        | <b>634.738</b> | <b>629.398</b> | <b>629.734</b> | <b>629.062</b> | G[17] |
| K  | [8]  | 267.828        | <b>615.731</b> | 610.391        | 610.727        | 610.055        | K[16] |
| G  | [9]  | 286.835        | 573.032        | <b>567.693</b> | <b>568.029</b> | 567.357        | G[15] |
| L  | [10] | 324.530        | 554.025        | <b>548.685</b> | <b>549.021</b> | <b>548.350</b> | L[14] |
| G  | [11] | 343.537        | <b>516.330</b> | <b>510.991</b> | <b>511.327</b> | 510.655        | G[13] |
| K  | [12] | 386.235        | <b>497.323</b> | <b>491.984</b> | <b>492.320</b> | <b>491.648</b> | K[12] |
| G  | [13] | 405.242        | 454.525        | 449.255        | 449.591        | 448.949        | G[11] |
| G  | [14] | <b>424.249</b> | 435.618        | <b>430.278</b> | <b>430.614</b> | <b>429.942</b> | G[10] |
| A  | [15] | <b>447.929</b> | 416.611        | <b>411.271</b> | <b>411.607</b> | <b>410.935</b> | A[9]  |
| K  | [16] | <b>504.630</b> | 392.932        | 387.592        | 387.928        | 387.256        | K[8]  |
| R  | [17] | <b>556.664</b> | 336.230        | <b>330.890</b> | <b>331.226</b> | <b>330.554</b> | R[7]  |
| H  | [18] | 602.350        | 284.196        | 278.856        | 279.192        | 278.520        | H[6]  |
| R  | [19] | <b>654.384</b> | 238.510        | 233.170        | 233.506        | 232.834        | R[5]  |
| K  | [20] | 701.754        | 186.476        | 181.136        | 181.472        | 180.800        | K[4]  |
| V  | [21] | <b>734.777</b> | 139.106        | 133.766        | 134.102        | 133.430        | V[3]  |
| L  | [22] | 772.472        | 106.063        | 100.743        | 101.079        | 100.407        | L[2]  |
| K  | [23] | 811.949        | 88.388         | 83.040         | 83.385         | 82.713         | K[1]  |

# sp | P62806 | H4\_MOUSE

[Acetyl]SGR<sup>Methyl</sup><sub>14.02</sub> GKGGKGLGKGGAK<sup>Acetyl</sup><sub>42.01</sub> RHRK<sup>Methyl</sup><sub>14.02</sub> VLR<sup>Dimethyl</sup><sub>28.03</sub>

- ▶ fragmentation table for charge state 4+
- ▶ specType=etd
- ▶ score=68.83
- ▶ F104900.dat
- ▶ query=q1637\_p1
- ▶ precursor=417.594710
- ▶ chargePrecursor=6
- ▶ itol=0.8

| AA |      | c              | y              | z+1            | z+2            | z              | AA    |
|----|------|----------------|----------------|----------------|----------------|----------------|-------|
| S  | [1]  | 37.525         | <b>625.885</b> | <b>621.880</b> | 0.755          | <b>621.628</b> | S[23] |
| G  | [2]  | 51.780         | 593.624        | <b>589.619</b> | 0.755          | <b>589.367</b> | G[22] |
| R  | [3]  | 84.309         | <b>579.368</b> | 575.363        | 513.614        | 576.112        | R[21] |
| G  | [4]  | 108.564        | 536.840        | <b>532.835</b> | <b>533.007</b> | <b>532.583</b> | G[20] |
| K  | [5]  | 140.588        | 522.584        | 518.579        | 518.831        | 518.320        | K[19] |
| G  | [6]  | 154.844        | <b>490.560</b> | <b>486.556</b> | <b>486.808</b> | <b>486.304</b> | G[18] |
| G  | [7]  | 169.099        | 476.305        | <b>472.300</b> | <b>472.552</b> | <b>472.048</b> | G[17] |
| K  | [8]  | 201.123        | 462.050        | 458.045        | 458.297        | 457.793        | K[16] |
| G  | [9]  | 215.378        | <b>430.026</b> | <b>426.021</b> | <b>426.273</b> | <b>425.769</b> | G[15] |
| L  | [10] | 243.649        | 415.771        | <b>411.766</b> | <b>412.018</b> | <b>411.514</b> | L[14] |
| G  | [11] | 257.904        | 387.500        | 383.495        | 383.747        | 383.243        | G[13] |
| K  | [12] | 289.928        | 373.244        | 369.240        | 369.491        | 368.988        | K[12] |
| G  | [13] | 304.184        | 341.220        | <b>337.216</b> | <b>337.468</b> | <b>336.964</b> | G[11] |
| G  | [14] | 318.439        | 326.965        | 322.960        | 323.212        | 322.708        | G[10] |
| A  | [15] | 336.198        | 312.710        | 308.705        | 308.957        | 308.453        | A[9]  |
| K  | [16] | 378.725        | 294.950        | 290.946        | 291.198        | 290.694        | K[8]  |
| R  | [17] | 417.750        | 252.424        | 248.419        | 248.671        | 248.167        | R[7]  |
| H  | [18] | 452.015        | 213.399        | 209.394        | 209.646        | 209.142        | H[6]  |
| R  | [19] | 491.040        | 179.134        | 175.129        | 175.381        | 174.877        | R[5]  |
| K  | [20] | 526.568        | 140.109        | 136.104        | 136.356        | 135.852        | K[4]  |
| V  | [21] | <b>551.335</b> | 104.581        | 100.576        | 100.828        | 100.325        | V[3]  |
| L  | [22] | <b>579.606</b> | 79.814         | 75.809         | 76.061         | 75.557         | L[2]  |
| R  | [23] | <b>625.639</b> | 51.543         | 47.538         | 47.790         | 47.286         | R[1]  |

# sp | P62806 | H4\_MOUSE

[Acetyl]SGR<sup>Methyl</sup><sub>14.02</sub> GKGKGLGKGGAK<sup>Acetyl</sup><sub>42.01</sub> RHRK<sup>Methyl</sup><sub>14.02</sub> VLR<sup>Dimethyl</sup><sub>28.03</sub>

- ▶ fragmentation table for charge state 5+
- ▶ specType=etd
- ▶ score=68.83
- ▶ F104900.dat
- ▶ query=q1637\_p1
- ▶ precursor=417.594710
- ▶ chargePrecursor=6
- ▶ itol=0.8

| AA |      | c              | y              | z+1            | z+2            | z              | AA    |
|----|------|----------------|----------------|----------------|----------------|----------------|-------|
| S  | [1]  | 30.221         | <b>500.909</b> | <b>497.706</b> | 0.806          | <b>497.504</b> | S[23] |
| G  | [2]  | 41.625         | 475.101        | <b>471.897</b> | 0.806          | <b>471.695</b> | G[22] |
| R  | [3]  | 75.640         | 433.095        | <b>460.493</b> | <b>460.694</b> | <b>460.291</b> | R[21] |
| G  | [4]  | 87.053         | <b>429.673</b> | <b>426.469</b> | 428.671        | <b>426.268</b> | G[20] |
| K  | [5]  | 112.072        | 418.265        | 415.057        | 415.267        | 414.053        | K[19] |
| G  | [6]  | 124.076        | 392.650        | 389.442        | 389.648        | 389.244        | G[18] |
| G  | [7]  | 135.481        | 381.240        | <b>378.042</b> | 378.243        | <b>377.840</b> | G[17] |
| K  | [8]  | 161.100        | 369.841        | 366.637        | 366.839        | 366.436        | K[16] |
| G  | [9]  | 172.504        | 344.222        | 341.019        | 341.220        | 340.817        | G[15] |
| L  | [10] | 195.121        | 332.818        | 329.614        | 329.816        | 329.413        | L[14] |
| G  | [11] | 206.525        | 310.201        | 306.997        | 307.199        | 306.796        | G[13] |
| K  | [12] | 232.144        | 298.791        | 295.593        | 295.795        | 295.392        | K[12] |
| G  | [13] | 253.548        | <b>273.178</b> | 269.974        | 270.176        | 269.773        | G[11] |
| G  | [14] | 254.953        | 261.774        | 258.570        | 258.771        | 258.368        | G[10] |
| A  | [15] | 299.160        | 250.369        | 247.165        | 247.367        | 246.964        | A[9]  |
| K  | [16] | 303.181        | 236.162        | 232.959        | 233.160        | 232.757        | K[8]  |
| R  | [17] | 334.401        | 202.141        | 198.937        | 199.139        | 198.735        | R[7]  |
| H  | [18] | 361.813        | 170.920        | 167.717        | 167.918        | 167.515        | H[6]  |
| R  | [19] | 393.033        | 143.509        | 140.305        | 140.507        | 140.103        | R[5]  |
| K  | [20] | 421.455        | 112.288        | 109.085        | 109.286        | 108.883        | K[4]  |
| V  | [21] | <b>441.269</b> | 83.866         | 80.663         | 80.864         | 80.461         | V[3]  |
| L  | [22] | 493.889        | 64.053         | 60.849         | 61.051         | 60.647         | L[2]  |
| R  | [23] | <b>500.712</b> | 41.430         | 38.227         | 38.428         | 38.024         | R[1]  |





# sp | P62806 | H4\_MOUSE

[Acetyl]SGRGKGGK <sup>Acetyl</sup><sub>42.01</sub> GLGKGGAK <sup>Trimethyl</sup><sub>42.05</sub> RHRK <sup>Dimethyl</sup><sub>28.03</sub> VLR

- ▶ fragmentation table for charge state 1+
- ▶ specType=etd
- ▶ score=70.98
- ▶ F104900.dat
- ▶ query=q1651\_p1
- ▶ precursor=838.843860
- ▶ chargePrecursor=3
- ▶ itol=0.8

| AA    | c               | y        | z+1             | z+2             | z        | AA    |
|-------|-----------------|----------|-----------------|-----------------|----------|-------|
| S[1]  | 147.076         | 2514.533 | 2498.514        | 0.000           | 2497.506 | S[23] |
| G[2]  | 354.058         | 2385.490 | 2369.471        | 0.000           | 2368.464 | G[22] |
| R[3]  | <b>360.199</b>  | 2328.469 | 2312.450        | 2313.458        | 2311.442 | R[21] |
| G[4]  | <b>417.220</b>  | 2172.368 | 2156.349        | 2157.357        | 2155.341 | G[20] |
| K[5]  | <b>543.315</b>  | 2115.346 | 2099.327        | 2100.335        | 2098.320 | K[19] |
| G[6]  | <b>602.137</b>  | 1987.251 | 1971.232        | 1972.240        | 1970.225 | G[18] |
| G[7]  | <b>659.358</b>  | 1930.230 | <b>1914.211</b> | 1915.219        | 1913.203 | G[17] |
| K[8]  | <b>829.464</b>  | 1873.208 | <b>1857.190</b> | 1858.197        | 1856.182 | K[16] |
| G[9]  | <b>886.485</b>  | 1763.103 | 1687.084        | <b>1688.092</b> | 1686.076 | G[15] |
| L[10] | 999.569         | 1646.081 | 1630.063        | <b>1631.070</b> | 1629.055 | L[14] |
| G[11] | 1057.591        | 1532.997 | 1516.978        | 1517.986        | 1515.971 | G[13] |
| R[12] | <b>1184.686</b> | 1475.976 | <b>1459.957</b> | 1460.965        | 1458.949 | R[12] |
| G[13] | <b>1241.707</b> | 1347.881 | 1331.862        | <b>1332.870</b> | 1330.854 | G[11] |
| G[14] | 1298.729        | 1290.859 | 1274.841        | <b>1275.848</b> | 1273.833 | G[10] |
| A[15] | 1369.796        | 1233.838 | 1217.819        | <b>1218.827</b> | 1216.811 | A[9]  |
| K[16] | 1539.908        | 1162.801 | 1146.782        | <b>1147.790</b> | 1145.774 | K[8]  |
| R[17] | 1696.030        | 992.659  | 976.640         | <b>977.648</b>  | 975.632  | R[7]  |
| T[18] | 1833.086        | 836.598  | 820.579         | <b>821.587</b>  | 819.571  | T[6]  |
| R[19] | 1989.169        | 699.499  | 683.480         | <b>684.488</b>  | 682.472  | R[5]  |
| K[20] | 2145.295        | 543.398  | 527.379         | <b>528.387</b>  | 526.371  | K[4]  |
| V[21] | 2244.364        | 387.271  | 371.253         | 372.261         | 370.245  | V[3]  |
| L[22] | 2357.448        | 288.203  | 272.184         | 273.192         | 271.176  | L[2]  |
| R[23] | 2513.549        | 178.119  | 159.100         | 160.108         | 158.082  | R[1]  |

# sp | P62806 | H4\_MOUSE

[Acetyl]SGRGKGGK Acetyl  
42.01 GLGKGGAK Trimethyl  
42.05 RHRK Dimethyl  
28.03 VLR

- ▶ fragmentation table for charge state 2+
- ▶ specType=etd
- ▶ score=70.98
- ▶ F104900.dat
- ▶ query=q1651\_p1
- ▶ precursor=838.843860
- ▶ chargePrecursor=3
- ▶ itol=0.8

| AA   | c               | y               | z+1             | z+2             | z               | AA   |
|------|-----------------|-----------------|-----------------|-----------------|-----------------|------|
| S 1  | 74.042          | <b>1257.776</b> | <b>1249.761</b> | 0.504           | <b>1249.257</b> | S 21 |
| G 2  | 102.553         | 1193.249        | <b>1185.239</b> | 0.504           | <b>1184.735</b> | G 22 |
| R 3  | 180.603         | 1164.738        | <b>1156.729</b> | <b>1157.233</b> | 1156.235        | R 21 |
| G 4  | 209.114         | 1038.687        | <b>1078.678</b> | <b>1079.182</b> | <b>1078.174</b> | G 20 |
| K 5  | 273.161         | 1038.177        | 1050.167        | 1050.671        | 1049.663        | K 19 |
| G 6  | 301.672         | 994.129         | 989.130         | 988.624         | 989.911         | G 18 |
| G 7  | 330.183         | 965.619         | 957.609         | 958.113         | <b>957.105</b>  | G 17 |
| K 8  | 415.236         | 937.108         | 929.098         | 929.602         | 928.594         | K 16 |
| G 9  | 443.746         | 852.055         | <b>844.046</b>  | <b>844.550</b>  | 843.542         | G 15 |
| L 10 | 500.288         | 823.544         | 815.535         | 816.039         | 815.031         | L 14 |
| G 11 | <b>528.799</b>  | 787.032         | 786.903         | 789.497         | 788.489         | G 13 |
| K 12 | 592.847         | 738.692         | 730.682         | 731.686         | 729.971         | K 12 |
| G 13 | 621.357         | 674.444         | 666.435         | 666.939         | 665.931         | G 11 |
| G 14 | 646.868         | 645.933         | 637.924         | 638.428         | 637.420         | G 10 |
| A 15 | <b>685.387</b>  | 617.423         | 609.413         | 609.917         | 608.909         | A 9  |
| K 16 | 770.458         | 581.904         | 573.895         | 574.399         | 573.391         | K 8  |
| R 17 | 848.508         | 498.833         | 488.823         | 489.328         | 488.320         | R 7  |
| H 18 | 917.038         | 418.782         | 410.773         | 411.277         | 410.269         | H 6  |
| R 19 | 995.088         | 350.253         | 342.244         | 342.748         | 341.740         | R 5  |
| K 20 | 1073.151        | 272.202         | 264.193         | 264.697         | 263.689         | K 4  |
| V 21 | <b>1122.685</b> | 194.139         | 186.130         | 186.634         | 185.626         | V 3  |
| L 22 | 1179.227        | 144.665         | 136.656         | 137.160         | 136.152         | L 1  |
| R 23 | <b>1257.278</b> | 98.051          | 89.044          | 89.558          | 79.550          | R 1  |



# sp | P62806 | H4\_MOUSE

[Acetyl]SGRGKGGKGLGK <sup>Acetyl</sup>42.01 **GGAK** <sup>Trimethyl</sup>42.05 **RHRK** <sup>Dimethyl</sup>28.03 **VLR**

- ▶ fragmentation table for charge state 1+
- ▶ specType=etd
- ▶ score=100.07
- ▶ F104900.dat
- ▶ query=q1652\_p1
- ▶ precursor=503.709430
- ▶ chargePrecursor=5
- ▶ itol=0.8

| AA    | c               | y              | z+1             | z+2             | z              | AA    |
|-------|-----------------|----------------|-----------------|-----------------|----------------|-------|
| S[1]  | 147.076         | 2534.533       | 2498.514        | 0.000           | 2497.506       | S[23] |
| G[2]  | 354.058         | 2385.490       | 2369.471        | 0.000           | 2368.464       | G[22] |
| R[3]  | <b>360.199</b>  | 2328.469       | 2312.450        | 2313.458        | 2311.442       | R[21] |
| G[4]  | <b>417.220</b>  | 2172.368       | 2156.349        | 2157.357        | 2155.341       | G[20] |
| K[5]  | <b>545.315</b>  | 2115.346       | 2099.327        | 2100.335        | 2098.320       | K[19] |
| G[6]  | 603.337         | 1987.251       | 1971.232        | 1972.240        | 1970.225       | G[18] |
| G[7]  | <b>659.358</b>  | 1930.230       | 1914.211        | 1915.219        | 1913.203       | G[17] |
| K[8]  | <b>787.453</b>  | 1873.208       | 1857.189        | 1858.197        | 1856.182       | K[16] |
| G[9]  | <b>844.475</b>  | 1745.113       | 1729.095        | 1730.102        | 1728.087       | G[15] |
| L[10] | <b>957.559</b>  | 1688.092       | 1672.073        | 1673.081        | 1671.065       | L[14] |
| G[11] | <b>1014.580</b> | 1575.008       | 1558.989        | 1559.997        | 1557.981       | G[13] |
| R[12] | <b>1184.686</b> | 1317.986       | 1301.968        | 1302.975        | 1300.960       | R[12] |
| G[13] | <b>1241.707</b> | 1247.881       | 1231.862        | 1232.870        | 1230.854       | G[11] |
| G[14] | <b>1298.729</b> | 1200.859       | <b>1274.841</b> | <b>1275.848</b> | 1273.833       | G[10] |
| A[15] | <b>1369.766</b> | 1233.838       | 1217.819        | <b>1218.827</b> | 1216.811       | A[0]  |
| K[16] | <b>1539.908</b> | 1162.801       | <b>1146.782</b> | 1147.790        | 1145.774       | K[8]  |
| R[17] | 1696.039        | 992.659        | 976.640         | <b>977.648</b>  | 975.633        | R[7]  |
| T[18] | 1833.086        | 836.508        | <b>820.539</b>  | 821.547         | <b>819.531</b> | T[6]  |
| R[19] | 1989.169        | 699.490        | <b>683.480</b>  | <b>684.488</b>  | 682.472        | R[5]  |
| K[20] | 2145.295        | <b>543.398</b> | <b>527.379</b>  | <b>528.387</b>  | 526.371        | K[4]  |
| V[21] | 2244.364        | 387.271        | <b>371.253</b>  | 372.261         | 370.245        | V[3]  |
| L[22] | 2357.448        | 288.203        | <b>272.184</b>  | 273.192         | 271.176        | L[2]  |
| R[23] | 2513.549        | <b>175.119</b> | <b>159.100</b>  | 160.108         | 158.092        | R[1]  |

# sp | P62806 | H4\_MOUSE

[Acetyl]SGRGKGGKGLGK<sup>Acetyl</sup> 42.01 **GGAK**<sup>Trimethyl</sup> 42.05 **RHRK**<sup>Dimethyl</sup> 28.03 **VLR**

- ▶ fragmentation table for charge state 2+
- ▶ specType=etd
- ▶ score=100.07
- ▶ F104900.dat
- ▶ query=q1652\_p1
- ▶ precursor=503.709430
- ▶ chargePrecursor=5
- ▶ itol=0.8

| AA   | c               | y               | z+1             | z+2             | z               | AA   |
|------|-----------------|-----------------|-----------------|-----------------|-----------------|------|
| S 1  | 74.042          | 1257.770        | <b>1249.761</b> | 0.504           | 1249.257        | S 21 |
| G 2  | 102.553         | 1193.249        | <b>1185.239</b> | 0.504           | <b>1184.735</b> | G 20 |
| R 3  | 180.603         | <b>1164.738</b> | 1156.739        | <b>1157.233</b> | 1156.235        | R 21 |
| G 4  | 209.114         | 1038.687        | <b>1078.678</b> | <b>1079.182</b> | 1078.178        | G 20 |
| K 5  | 273.161         | <b>1058.177</b> | <b>1050.167</b> | <b>1050.671</b> | 1049.663        | K 19 |
| G 6  | 301.672         | 994.329         | <b>986.320</b>  | <b>986.824</b>  | 985.816         | G 18 |
| G 7  | 330.183         | <b>965.619</b>  | <b>957.609</b>  | <b>958.113</b>  | <b>957.105</b>  | G 17 |
| K 8  | 394.230         | <b>937.108</b>  | <b>929.098</b>  | <b>929.602</b>  | 928.594         | K 18 |
| G 9  | <b>422.741</b>  | 873.060         | <b>865.051</b>  | <b>865.555</b>  | 864.547         | G 15 |
| L 10 | <b>479.283</b>  | <b>844.550</b>  | 838.540         | 837.044         | 836.030         | L 14 |
| G 11 | <b>507.794</b>  | 786.089         | <b>778.988</b>  | <b>780.502</b>  | 779.494         | G 13 |
| K 12 | <b>552.847</b>  | <b>759.497</b>  | <b>751.487</b>  | <b>751.991</b>  | 750.983         | K 12 |
| G 13 | <b>621.357</b>  | 674.444         | <b>666.435</b>  | <b>666.939</b>  | <b>665.931</b>  | G 11 |
| G 14 | <b>649.868</b>  | 645.933         | <b>637.924</b>  | <b>638.428</b>  | <b>637.420</b>  | G 10 |
| A 15 | <b>685.387</b>  | 617.423         | <b>609.413</b>  | <b>609.917</b>  | <b>608.909</b>  | A 9  |
| K 16 | <b>770.458</b>  | 581.904         | <b>573.895</b>  | <b>574.399</b>  | 573.391         | K 8  |
| R 17 | <b>848.508</b>  | 498.833         | <b>488.824</b>  | <b>489.328</b>  | <b>488.320</b>  | R 7  |
| H 18 | <b>917.038</b>  | 418.782         | <b>410.773</b>  | <b>411.277</b>  | 410.269         | H 6  |
| R 19 | <b>995.088</b>  | 350.253         | <b>342.244</b>  | <b>342.748</b>  | <b>341.740</b>  | R 5  |
| K 20 | <b>1073.151</b> | <b>272.202</b>  | 264.193         | 264.697         | 263.689         | K 4  |
| V 21 | <b>1122.685</b> | 194.139         | 186.130         | 186.634         | 185.620         | V 9  |
| L 22 | 1179.227        | 144.665         | 136.656         | 137.160         | 136.150         | L 8  |
| R 23 | 1287.278        | 88.063          | 80.054          | 80.558          | 79.550          | R 1  |

# sp | P62806 | H4\_MOUSE

[Acetyl]SGRGKGGKGLGK<sup>Acetyl</sup> 42.01 **GGAK**<sup>Trimethyl</sup> 42.05 **RHRK**<sup>Dimethyl</sup> 28.03 **VLR**

- ▶ fragmentation table for charge state 3+
- ▶ specType=etd
- ▶ score=100.07
- ▶ F104900.dat
- ▶ query=q1652\_p1
- ▶ precursor=503.709430
- ▶ chargePrecursor=5
- ▶ itol=0.8

| AA |      | c              | y              | z+1            | z+2            | z              | AA    |
|----|------|----------------|----------------|----------------|----------------|----------------|-------|
| S  | [1]  | 49.697         | <b>838.849</b> | <b>833.510</b> | 0.672          | <b>833.174</b> | S[2]  |
| G  | [2]  | 68.704         | 795.835        | <b>790.495</b> |                | <b>790.159</b> | G[22] |
| R  | [3]  | 120.730        | <b>776.828</b> | <b>771.488</b> | <b>771.824</b> | <b>771.152</b> | R[21] |
| G  | [4]  | 139.743        | 724.798        | <b>719.454</b> | <b>719.790</b> | <b>719.119</b> | G[20] |
| K  | [5]  | 182.443        | 705.787        | <b>700.447</b> | <b>700.783</b> | <b>700.111</b> | K[19] |
| G  | [6]  | 201.450        | <b>663.089</b> | <b>657.749</b> | <b>658.085</b> | <b>657.413</b> | G[18] |
| G  | [7]  | 220.458        | <b>644.081</b> | <b>638.742</b> | <b>639.078</b> | <b>638.406</b> | G[17] |
| K  | [8]  | 263.156        | <b>625.074</b> | <b>619.735</b> | <b>620.071</b> | <b>619.399</b> | K[16] |
| G  | [9]  | 282.163        | 582.576        | <b>577.036</b> | <b>577.372</b> | <b>576.700</b> | G[15] |
| L  | [10] | 319.658        | <b>563.369</b> | <b>558.029</b> | <b>558.365</b> | <b>557.693</b> | L[14] |
| G  | [11] | 338.665        | 525.674        | 520.335        | 520.670        | 519.999        | G[13] |
| K  | [12] | 395.567        | <b>506.667</b> | 501.327        | 501.663        | 500.991        | K[12] |
| G  | [13] | 414.574        | 449.965        | 444.626        | 444.961        | 444.290        | G[11] |
| G  | [14] | 433.581        | 430.958        | 425.619        | 425.954        | 425.282        | G[10] |
| A  | [15] | 457.260        | 411.951        | 406.611        | 406.947        | 406.275        | A[9]  |
| K  | [16] | 513.974        | 388.272        | 382.932        | 383.268        | 382.596        | K[8]  |
| R  | [17] | <b>566.008</b> | 351.558        | 326.218        | 326.554        | 325.882        | R[7]  |
| H  | [18] | <b>611.694</b> | 279.524        | 274.185        | 274.520        | 273.849        | H[6]  |
| R  | [19] | <b>663.728</b> | 233.838        | 228.498        | 228.834        | 228.162        | R[5]  |
| K  | [20] | <b>715.770</b> | 181.804        | 176.465        | 176.800        | 176.129        | K[4]  |
| V  | [21] | <b>748.793</b> | 129.762        | 124.422        | 124.758        | 124.086        | V[3]  |
| L  | [22] | <b>785.487</b> | 96.739         | 91.400         | 91.736         | 91.064         | L[2]  |
| R  | [23] | <b>838.521</b> | 59.045         | 53.705         | 54.041         | 53.369         | R[1]  |

# sp | P62806 | H4\_MOUSE

[Acetyl]SGRGKGGKGLGK<sup>Acetyl</sup> 42.01 GGAK<sup>Trimethyl</sup> 42.05 RHRK<sup>Dimethyl</sup> 28.03 VLR

- ▶ fragmentation table for charge state 4+
- ▶ specType=etd
- ▶ score=100.07
- ▶ F104900.dat
- ▶ query=q1652\_p1
- ▶ precursor=503.709430
- ▶ chargePrecursor=5
- ▶ itol=0.8

| AA |      | c              | y              | z+1            | z+2            | z              | AA    |
|----|------|----------------|----------------|----------------|----------------|----------------|-------|
| S  | [1]  | 37.525         | <b>629.389</b> | <b>625.384</b> | 0.755          | <b>625.132</b> | S[23] |
| G  | [2]  | 51.780         | 597.126        | <b>593.123</b> | 0.755          | <b>592.871</b> | G[22] |
| R  | [3]  | 60.806         | 732.373        | <b>578.868</b> | <b>579.120</b> | <b>578.616</b> | R[21] |
| G  | [4]  | 105.061        | <b>543.847</b> | 539.843        | 540.095        | 539.591        | G[20] |
| K  | [5]  | 137.084        | <b>529.592</b> | 525.587        | 525.839        | 525.335        | K[19] |
| G  | [6]  | 151.340        | 497.568        | 493.564        | 493.816        | 493.312        | G[18] |
| G  | [7]  | 165.595        | 483.313        | <b>479.308</b> | <b>479.560</b> | <b>479.056</b> | G[17] |
| K  | [8]  | 197.619        | 469.058        | 465.053        | 465.305        | 464.801        | K[16] |
| G  | [9]  | 211.874        | 437.034        | 433.029        | 433.281        | 432.777        | G[15] |
| L  | [10] | 240.145        | <b>422.778</b> | 418.774        | 419.026        | 418.522        | L[14] |
| G  | [11] | 254.401        | 394.507        | 390.503        | 390.755        | 390.251        | G[13] |
| K  | [12] | 296.927        | 380.252        | 376.247        | 376.499        | 375.995        | K[12] |
| G  | [13] | 311.182        | 337.726        | 333.722        | 333.974        | 333.469        | G[11] |
| G  | [14] | 325.438        | 323.470        | 319.466        | 319.718        | 319.214        | G[10] |
| A  | [15] | 343.197        | 309.215        | 305.210        | 305.462        | 304.958        | A[9]  |
| K  | [16] | 385.732        | 291.456        | 287.451        | 287.703        | 287.199        | K[8]  |
| R  | [17] | 424.758        | 248.920        | 244.915        | 245.167        | 244.664        | R[7]  |
| H  | [18] | 459.022        | 209.895        | 205.890        | 206.142        | 205.638        | H[6]  |
| R  | [19] | 498.048        | <b>175.630</b> | 171.625        | 171.877        | 171.374        | R[5]  |
| K  | [20] | 537.079        | 136.605        | 132.600        | 132.852        | 132.348        | K[4]  |
| V  | [21] | 561.846        | 97.573         | 93.568         | 93.821         | 93.317         | V[3]  |
| L  | [22] | 599.117        | 72.306         | 68.302         | 68.554         | 68.050         | L[2]  |
| R  | [23] | <b>629.143</b> | 44.535         | 40.531         | 40.782         | 40.279         | R[1]  |



# sp | P62806 | H4\_MOUSE

[Acetyl]SGRGKGGK <sup>Acetyl</sup> 42.01 GLGKGGAK <sup>Trimethyl</sup> 42.05 RHRK <sup>Dimethyl</sup> 28.03 VLR

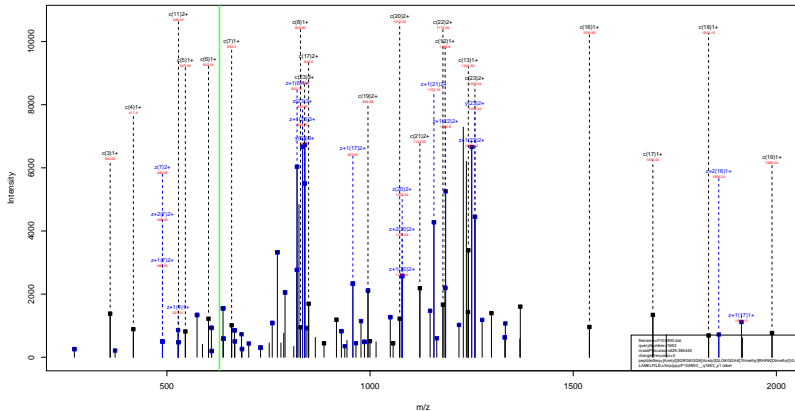

# sp | P62806 | H4\_MOUSE

[Acetyl]SGRGKGGK <sup>Acetyl</sup><sub>42.01</sub> GLGKGGAK <sup>Trimethyl</sup><sub>42.05</sub> RHRK <sup>Dimethyl</sup><sub>28.03</sub> VLR

- ▶ fragmentation table for charge state 1+
- ▶ specType=etd
- ▶ score=139.19
- ▶ F104900.dat
- ▶ query=q1653\_p1
- ▶ precursor=629.385440
- ▶ chargePrecursor=4
- ▶ itol=0.8

| AA | c  | y               | z+1      | z+2             | z               | AA              |      |
|----|----|-----------------|----------|-----------------|-----------------|-----------------|------|
| S  | 1  | 147.076         | 2514.533 | 2498.514        | 0.000           | 2497.506        | S(2) |
| G  | 2  | 204.098         | 2385.490 | 2369.471        | 0.000           | 2368.464        | G(2) |
| R  | 3  | <b>360.199</b>  | 2326.469 | 2312.450        | 2313.458        | 2311.442        | R(2) |
| G  | 4  | <b>417.220</b>  | 2172.368 | 2156.349        | 2157.357        | 2155.341        | G(2) |
| K  | 5  | <b>545.315</b>  | 2115.346 | 2099.327        | 2100.335        | 2098.320        | K(2) |
| G  | 6  | <b>602.337</b>  | 1997.251 | 1971.232        | 1972.240        | 1970.225        | G(2) |
| G  | 7  | <b>659.358</b>  | 1930.230 | <b>1914.211</b> | 1915.219        | 1913.203        | G(2) |
| K  | 8  | <b>829.484</b>  | 1873.208 | 1857.190        | <b>1858.197</b> | 1856.182        | K(2) |
| G  | 9  | <b>886.485</b>  | 1703.103 | 1687.084        | 1688.092        | 1686.076        | G(2) |
| L  | 10 | <b>999.569</b>  | 1646.081 | 1630.063        | 1631.070        | 1629.055        | L(2) |
| G  | 11 | <b>1056.591</b> | 1532.997 | 1516.978        | 1517.986        | 1515.971        | G(2) |
| R  | 12 | <b>1184.680</b> | 1475.876 | 1459.857        | 1460.865        | 1458.849        | R(2) |
| G  | 13 | <b>1241.707</b> | 1347.881 | <b>1331.862</b> | <b>1332.870</b> | <b>1330.854</b> | G(2) |
| G  | 14 | <b>1298.729</b> | 1290.859 | 1274.841        | <b>1275.848</b> | 1273.833        | G(2) |
| A  | 15 | <b>1369.766</b> | 1233.838 | 1217.819        | <b>1218.827</b> | 1216.811        | A(2) |
| K  | 16 | <b>1539.908</b> | 1162.801 | 1146.782        | <b>1147.790</b> | 1145.774        | K(2) |
| R  | 17 | <b>1698.909</b> | 892.859  | 876.840         | <b>877.848</b>  | 875.833         | R(2) |
| R  | 18 | <b>1813.060</b> | 838.838  | <b>820.839</b>  | 821.847         | <b>819.831</b>  | R(2) |
| R  | 19 | <b>1989.109</b> | 809.899  | <b>681.480</b>  | <b>684.488</b>  | 682.472         | R(2) |
| K  | 20 | 2145.295        | 543.908  | <b>527.379</b>  | <b>528.387</b>  | 526.371         | K(2) |
| V  | 21 | 2264.304        | 497.271  | 471.253         | <b>372.261</b>  | 370.245         | V(2) |
| L  | 22 | 2357.448        | 388.203  | <b>272.184</b>  | 273.192         | 271.176         | L(2) |
| R  | 23 | 2813.549        | 175.119  | 159.100         | 160.108         | 158.092         | R(2) |

# sp | P62806 | H4\_MOUSE

[Acetyl]SGRGKGGK <sup>Acetyl</sup><sub>42.01</sub> GLGKGGAK <sup>Trimethyl</sup><sub>42.05</sub> RHRK <sup>Dimethyl</sup><sub>28.03</sub> VLR

- ▶ fragmentation table for charge state 2+
- ▶ specType=etd
- ▶ score=139.19
- ▶ F104900.dat
- ▶ query=q1653\_p1
- ▶ precursor=629.385440
- ▶ chargePrecursor=4
- ▶ itol=0.8

| AA   | c               | y               | z+1             | z+2             | z               | AA   |
|------|-----------------|-----------------|-----------------|-----------------|-----------------|------|
| S 1  | 74.042          | <b>1257.776</b> | <b>1249.761</b> | 0.904           | 1249.257        | S 21 |
| G 2  | 102.553         | 1191.249        | <b>1185.239</b> | 0.904           | <b>1184.735</b> | G 20 |
| R 3  | 180.603         | <b>1164.738</b> | <b>1156.729</b> | <b>1157.233</b> | 1156.225        | R 21 |
| G 4  | 209.114         | 1038.687        | <b>1078.678</b> | <b>1079.182</b> | <b>1078.174</b> | G 20 |
| K 5  | 273.161         | 1028.777        | <b>1050.167</b> | 1029.271        | <b>1049.063</b> | K 19 |
| G 6  | 301.672         | <b>994.129</b>  | <b>995.120</b>  | <b>986.624</b>  | <b>985.515</b>  | G 18 |
| G 7  | 330.183         | <b>965.619</b>  | <b>957.609</b>  | <b>958.113</b>  | <b>957.105</b>  | G 17 |
| K 8  | 415.236         | <b>937.108</b>  | <b>929.098</b>  | <b>929.602</b>  | 928.594         | K 16 |
| G 9  | 443.746         | 852.055         | <b>844.046</b>  | <b>844.550</b>  | 843.542         | G 15 |
| L 10 | 500.298         | 823.544         | 815.535         | 816.039         | 815.031         | L 14 |
| G 11 | <b>528.799</b>  | 787.062         | <b>758.993</b>  | <b>759.497</b>  | <b>758.489</b>  | G 13 |
| K 12 | 597.847         | 738.662         | <b>730.482</b>  | <b>730.986</b>  | <b>729.978</b>  | K 12 |
| G 13 | 621.357         | 674.444         | <b>666.435</b>  | <b>666.939</b>  | <b>665.931</b>  | G 11 |
| G 14 | 646.868         | 645.933         | <b>637.924</b>  | <b>638.428</b>  | <b>637.420</b>  | G 10 |
| A 15 | <b>685.387</b>  | 617.423         | <b>609.413</b>  | <b>609.917</b>  | <b>608.909</b>  | A 9  |
| K 16 | 770.458         | 581.904         | <b>573.895</b>  | <b>574.399</b>  | <b>573.391</b>  | K 8  |
| R 17 | <b>848.508</b>  | 498.833         | <b>488.824</b>  | <b>489.328</b>  | <b>488.320</b>  | R 7  |
| H 18 | <b>917.038</b>  | 418.782         | 410.773         | 411.277         | 410.269         | H 6  |
| R 19 | <b>995.088</b>  | 350.253         | 342.244         | 342.748         | 341.740         | R 5  |
| K 20 | <b>1073.151</b> | <b>272.202</b>  | 264.193         | 264.697         | 263.689         | K 4  |
| V 21 | <b>1122.685</b> | 194.139         | 186.130         | 186.634         | 185.626         | V 3  |
| L 22 | <b>1179.227</b> | 144.065         | 136.056         | 137.060         | 136.052         | L 1  |
| R 23 | <b>1257.278</b> | 88.051          | 80.042          | 80.546          | 79.538          | R 1  |

# sp | P62806 | H4\_MOUSE

[Acetyl]SGRGKGGK<sup>Acetyl</sup><sub>42.01</sub> GLGKGGAK<sup>Trimethyl</sup><sub>42.05</sub> RHRK<sup>Dimethyl</sup><sub>28.03</sub> VLR

- ▶ fragmentation table for charge state 3+
- ▶ specType=etd
- ▶ score=139.19
- ▶ F104900.dat
- ▶ query=q1653\_p1
- ▶ precursor=629.385440
- ▶ chargePrecursor=4
- ▶ itol=0.8

| AA |      | c              | y              | z+1            | z+2            | z              | AA    |
|----|------|----------------|----------------|----------------|----------------|----------------|-------|
| S  | [1]  | 49.697         | <b>838.849</b> | <b>833.510</b> | 0.672          | <b>833.174</b> | S[2]  |
| G  | [2]  | 68.704         | 795.835        | <b>790.495</b> | 0.672          | <b>790.159</b> | G[2]  |
| R  | [3]  | 120.738        | 776.828        | <b>771.488</b> | <b>771.824</b> | <b>771.152</b> | R[2]  |
| G  | [4]  | 139.743        | 724.798        | 719.457        | 719.790        | 719.119        | G[25] |
| K  | [5]  | 182.443        | 705.787        | 700.447        | <b>700.783</b> | 700.111        | K[19] |
| G  | [6]  | 201.450        | 663.089        | 657.749        | 658.085        | 657.413        | G[18] |
| G  | [7]  | 220.458        | 644.081        | <b>638.742</b> | <b>639.078</b> | <b>638.406</b> | G[17] |
| K  | [8]  | 277.159        | 625.074        | 619.735        | 620.071        | 619.399        | K[16] |
| G  | [9]  | 296.167        | 568.372        | 563.033        | 563.369        | 562.697        | G[15] |
| L  | [10] | 333.661        | 549.365        | 544.026        | 544.362        | 543.690        | L[14] |
| G  | [11] | 352.668        | 511.671        | 506.331        | 506.667        | 505.995        | G[13] |
| K  | [12] | 395.567        | 492.663        | 487.324        | 487.660        | 486.988        | K[12] |
| G  | [13] | 414.574        | 449.965        | 444.626        | 444.961        | 444.290        | G[11] |
| G  | [14] | 433.581        | 430.958        | 425.619        | 425.954        | 425.282        | G[10] |
| A  | [15] | 457.590        | 411.951        | 406.611        | 406.947        | 406.275        | A[9]  |
| K  | [16] | 513.974        | 388.272        | 382.932        | 383.268        | 382.596        | K[8]  |
| R  | [17] | 566.068        | 351.558        | 346.218        | 346.554        | 345.882        | R[7]  |
| H  | [18] | 611.694        | 279.524        | 274.185        | 274.520        | 273.849        | H[6]  |
| R  | [19] | 663.728        | 233.838        | 228.498        | 228.834        | 228.162        | R[5]  |
| K  | [20] | 715.770        | 181.804        | 176.465        | 176.800        | 176.129        | K[4]  |
| V  | [21] | 748.793        | 129.762        | 124.422        | 124.758        | 124.086        | V[9]  |
| L  | [22] | 785.807        | 96.739         | 91.400         | 91.736         | 91.064         | L[2]  |
| R  | [23] | <b>838.521</b> | 59.043         | 53.703         | 54.041         | 53.369         | R[1]  |

# sp | P62806 | H4\_MOUSE

[Acetyl]SGRGK<sup>Trimethyl</sup><sub>42.05</sub> GGGKGLGK<sup>Acetyl</sup><sub>42.01</sub> GGAK<sup>Acetyl</sup><sub>42.01</sub> RHRK<sup>Methyl</sup><sub>14.02</sub> VLR

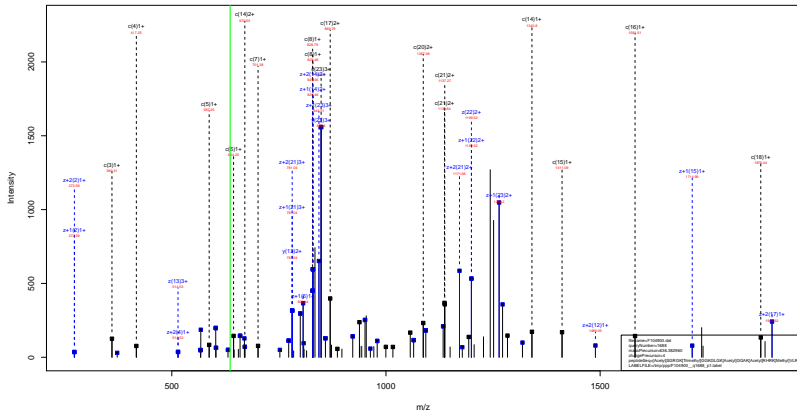

# sp | P62806 | H4\_MOUSE

[Acetyl]SGRGK<sup>Trimethyl  
42.05</sup> GGGKGLGK<sup>Acetyl  
42.01</sup> GGAK<sup>Acetyl  
42.01</sup> RHRK<sup>Methyl  
14.02</sup> VLR

- ▶ fragmentation table for charge state 1+
- ▶ specType=etd
- ▶ score=101.67
- ▶ F104900.dat
- ▶ query=q1688\_p1
- ▶ precursor=636.382960
- ▶ chargePrecursor=4
- ▶ itol=0.8

| AA    | c               | y        | z+1             | z+2             | z        | AA    |
|-------|-----------------|----------|-----------------|-----------------|----------|-------|
| S[1]  | 147.076         | 2542.528 | 2526.509        | 0.000           | 2525.501 | S[23] |
| G[2]  | 304.098         | 2413.485 | 2397.466        | 0.000           | 2396.458 | G[22] |
| R[3]  | <b>360.199</b>  | 2356.664 | 2340.445        | 2341.453        | 2339.437 | R[21] |
| G[4]  | <b>417.220</b>  | 2200.363 | 2184.344        | 2185.352        | 2183.336 | G[20] |
| K[5]  | <b>587.362</b>  | 2143.241 | 2127.222        | 2128.230        | 2126.215 | K[19] |
| G[6]  | <b>644.184</b>  | 1973.190 | 1957.170        | 1958.180        | 1956.171 | G[18] |
| G[7]  | <b>701.405</b>  | 1916.178 | 1900.159        | <b>1901.167</b> | 1899.151 | G[17] |
| K[8]  | <b>829.500</b>  | 1859.150 | 1843.130        | 1844.145        | 1842.130 | K[16] |
| G[9]  | <b>886.522</b>  | 1731.061 | <b>1715.043</b> | 1716.050        | 1714.035 | G[15] |
| L[10] | <b>999.606</b>  | 1674.040 | 1658.021        | 1659.029        | 1657.013 | L[14] |
| G[11] | <b>1056.627</b> | 1560.956 | 1544.937        | 1545.945        | 1543.929 | G[13] |
| R[12] | 1228.732        | 1303.934 | 1287.915        | <b>1288.923</b> | 1286.908 | R[12] |
| G[13] | <b>1283.754</b> | 1333.829 | 1317.810        | <b>1318.818</b> | 1316.802 | G[11] |
| G[14] | <b>1340.776</b> | 1276.807 | 1260.789        | 1261.796        | 1259.781 | G[10] |
| A[15] | <b>1411.813</b> | 1219.786 | 1203.767        | 1204.775        | 1202.759 | A[0]  |
| K[16] | <b>1581.918</b> | 1148.749 | <b>1132.730</b> | <b>1133.738</b> | 1131.722 | K[8]  |
| R[17] | 1738.019        | 978.643  | 962.624         | <b>963.632</b>  | 961.617  | R[7]  |
| T[18] | <b>1875.078</b> | 822.542  | <b>806.523</b>  | <b>807.531</b>  | 805.516  | T[6]  |
| R[19] | 2031.175        | 685.483  | <b>669.464</b>  | <b>670.472</b>  | 668.457  | R[5]  |
| K[20] | 2173.290        | 520.382  | 513.363         | <b>514.371</b>  | 512.356  | K[4]  |
| V[21] | 2272.369        | 387.271  | 371.253         | <b>372.261</b>  | 370.245  | V[3]  |
| L[22] | 2385.443        | 288.203  | <b>272.184</b>  | <b>273.192</b>  | 271.176  | L[2]  |
| R[23] | 2541.544        | 175.119  | 159.100         | 160.108         | 158.082  | R[1]  |

# sp | P62806 | H4\_MOUSE

[Acetyl]SGRGK<sup>Trimethyl</sup><sub>42.05</sub> GGGKGLGK<sup>Acetyl</sup><sub>42.01</sub> GGAK<sup>Acetyl</sup><sub>42.01</sub> RHRK<sup>Methyl</sup><sub>14.02</sub> VLR

- ▶ fragmentation table for charge state 2+
- ▶ specType=etd
- ▶ score=101.67
- ▶ F104900.dat
- ▶ query=q1688\_p1
- ▶ precursor=636.382960
- ▶ chargePrecursor=4
- ▶ itol=0.8

| AA    | c               | y               | z+1             | z+2             | z               | AA    |
|-------|-----------------|-----------------|-----------------|-----------------|-----------------|-------|
| S[1]  | 74.042          | <b>1271.767</b> | <b>1263.758</b> | 0.904           | 1263.754        | S[2]  |
| G[2]  | 102.553         | 1207.246        | <b>1199.237</b> | 0.904           | <b>1198.733</b> | G[3]  |
| R[3]  | 180.603         | <b>1178.735</b> | 1170.726        | <b>1171.230</b> | 1170.222        | R[2]  |
| G[4]  | 209.114         | 1100.685        | <b>1092.676</b> | <b>1093.179</b> | 1092.172        | G[20] |
| K[5]  | 288.185         | 1072.174        | <b>1064.165</b> | <b>1064.669</b> | 1063.661        | K[19] |
| G[6]  | 322.696         | 989.203         | <b>975.694</b>  | <b>976.198</b>  | 975.190         | G[18] |
| G[7]  | 351.206         | 958.582         | <b>950.583</b>  | <b>951.087</b>  | 950.079         | G[17] |
| K[8]  | 435.254         | 930.082         | <b>922.072</b>  | <b>922.576</b>  | 921.569         | K[16] |
| G[9]  | 443.705         | 866.034         | <b>858.025</b>  | <b>858.529</b>  | 857.521         | G[15] |
| L[10] | 500.307         | 837.524         | <b>829.514</b>  | <b>830.018</b>  | <b>829.010</b>  | L[14] |
| G[11] | 558.817         | <b>796.062</b>  | <b>772.972</b>  | <b>773.476</b>  | <b>772.468</b>  | G[13] |
| K[12] | 613.916         | <b>752.471</b>  | 744.463         | 744.965         | 743.957         | K[12] |
| G[13] | 642.381         | 667.418         | <b>659.409</b>  | <b>659.913</b>  | <b>658.905</b>  | G[11] |
| G[14] | <b>670.891</b>  | 638.907         | <b>630.898</b>  | <b>631.402</b>  | 630.394         | G[10] |
| A[15] | 708.410         | 610.397         | <b>602.387</b>  | <b>602.891</b>  | <b>601.883</b>  | A[9]  |
| K[16] | 791.463         | 574.878         | <b>566.869</b>  | <b>567.373</b>  | <b>566.365</b>  | K[8]  |
| R[17] | <b>809.513</b>  | 489.825         | 481.817         | 482.320         | 481.312         | R[7]  |
| H[18] | <b>938.043</b>  | 411.725         | 403.716         | 404.219         | 403.211         | H[6]  |
| R[19] | <b>1016.093</b> | 343.245         | 335.236         | 335.740         | 334.732         | R[5]  |
| K[20] | <b>1087.149</b> | 265.195         | 257.185         | 257.689         | 256.681         | K[4]  |
| V[21] | <b>1136.683</b> | 194.139         | 186.130         | 186.634         | 185.626         | V[3]  |
| L[22] | <b>1193.225</b> | 144.605         | 136.595         | 137.100         | 136.092         | L[1]  |
| R[23] | 1271.215        | 98.051          | 90.044          | 90.548          | 89.540          | R[1]  |

# sp | P62806 | H4\_MOUSE

[Acetyl]SGRGK<sup>Trimethyl  
42.05</sup> GGGKGLGK<sup>Acetyl  
42.01</sup> GGAK<sup>Acetyl  
42.01</sup> RHRK<sup>Methyl  
14.02</sup> VLR

- ▶ fragmentation table for charge state 3+
- ▶ specType=etd
- ▶ score=101.67
- ▶ F104900.dat
- ▶ query=q1688\_p1
- ▶ precursor=636.382960
- ▶ chargePrecursor=4
- ▶ itol=0.8

| AA |      | c              | y              | z+1            | z+2            | z              | AA    |
|----|------|----------------|----------------|----------------|----------------|----------------|-------|
| S  | [1]  | 49.697         | <b>848.181</b> | <b>842.841</b> | 0.672          | 842.905        | S[23] |
| G  | [2]  | 68.704         | 805.167        | <b>799.827</b> | 0.672          | <b>799.491</b> | G[22] |
| R  | [3]  | 120.738        | 786.150        | <b>780.820</b> | <b>781.156</b> | <b>780.484</b> | R[21] |
| G  | [4]  | 139.743        | 734.126        | 728.789        | 729.122        | 728.450        | G[20] |
| K  | [5]  | 196.459        | 715.119        | 709.770        | 710.115        | 709.443        | K[19] |
| G  | [6]  | 215.466        | 658.405        | 651.065        | 653.401        | 652.729        | G[18] |
| G  | [7]  | 234.473        | 639.397        | 634.059        | 634.394        | 633.722        | G[17] |
| K  | [8]  | 277.172        | 620.390        | 615.051        | 615.387        | 614.715        | K[16] |
| G  | [9]  | 296.179        | 577.692        | 572.352        | 572.688        | 572.016        | G[15] |
| L  | [10] | 333.673        | 558.685        | 553.345        | 553.681        | 553.009        | L[14] |
| G  | [11] | 352.681        | 520.990        | 515.651        | 515.986        | <b>515.315</b> | G[13] |
| K  | [12] | 409.582        | 501.983        | 496.643        | 496.979        | 496.307        | K[12] |
| G  | [13] | 428.590        | 445.281        | 439.942        | 440.277        | 439.606        | G[11] |
| G  | [14] | 447.597        | 426.274        | 420.934        | 421.270        | 420.598        | G[10] |
| A  | [15] | 471.276        | 407.267        | 401.927        | 402.263        | 401.591        | A[9]  |
| K  | [16] | 527.978        | 383.588        | 378.249        | 378.584        | 377.912        | K[8]  |
| R  | [17] | 580.011        | 326.886        | 321.546        | 321.882        | 321.210        | R[7]  |
| H  | [18] | 625.698        | 274.852        | 269.513        | 269.849        | 269.177        | H[6]  |
| R  | [19] | 677.731        | 229.166        | 223.826        | 224.162        | 223.490        | R[5]  |
| K  | [20] | 725.102        | 177.132        | 171.793        | 172.129        | 171.457        | K[4]  |
| V  | [21] | 758.124        | 129.762        | 124.422        | 124.758        | 124.086        | V[9]  |
| L  | [22] | 795.819        | 96.739         | 91.400         | 91.736         | 91.064         | L[2]  |
| R  | [23] | <b>847.853</b> | 59.043         | 53.703         | 54.041         | 53.369         | R[1]  |



# sp | Q6GSS7 | H2A2A\_MOUSE

LNKLLGK <sup>Dimethyl</sup> VTIAQGGVLPNIQAVLLPKKTE  
28.03

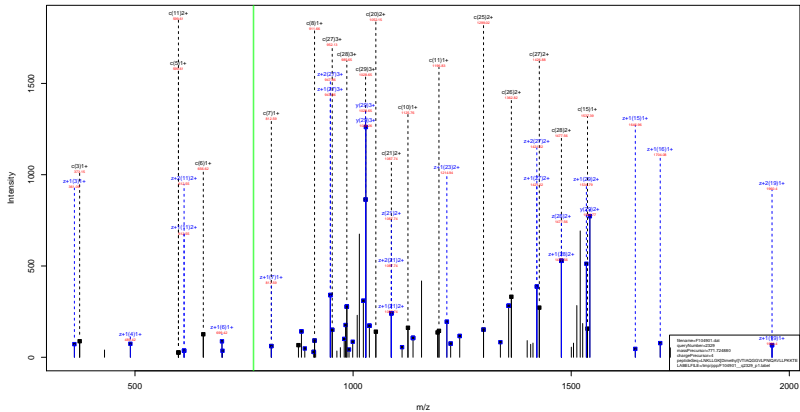

# sp | Q6GSS7 | H2A2A\_MOUSE

LNKLLGK <sup>Dimethyl</sup> <sub>28.03</sub> VTIAQGGVLPNIQAVLLPKKTE

- ▶ fragmentation table for charge state 1+
- ▶ specType=etd
- ▶ score=83.51
- ▶ F104901.dat
- ▶ query=q2329\_p1
- ▶ precursor=771.724880
- ▶ chargePrecursor=4
- ▶ itol=0.8

| AA    | c               | y              | z+1             | z+2             | z        | AA    |
|-------|-----------------|----------------|-----------------|-----------------|----------|-------|
| L[1]  | 131.118         | 3081.892       | 3067.873        | 0.000           | 3066.895 | L[29] |
| N[2]  | 345.161         | 2970.808       | 2954.789        | 2955.797        | 2951.781 | N[28] |
| K[3]  | <b>373.256</b>  | 2856.765       | 2840.746        | 2841.754        | 2839.738 | K[27] |
| L[4]  | 486.340         | 2728.670       | 2712.651        | 2713.659        | 2711.643 | L[26] |
| L[5]  | <b>599.424</b>  | 2615.585       | 2599.567        | 2600.575        | 2598.560 | L[25] |
| Q[6]  | <b>656.445</b>  | 2502.502       | 2486.483        | 2487.491        | 2485.475 | Q[24] |
| K[7]  | <b>812.572</b>  | 2345.480       | 2429.462        | 2430.469        | 2428.454 | K[23] |
| V[8]  | <b>911.640</b>  | 2288.354       | 2273.335        | 2274.343        | 2272.327 | V[22] |
| T[9]  | 1017.688        | 2190.288       | 2174.269        | 2175.275        | 2173.259 | T[21] |
| I[10] | <b>1125.772</b> | 2089.238       | 2073.219        | 2074.227        | 2072.211 | I[20] |
| A[11] | <b>1196.809</b> | 1976.154       | <b>1960.135</b> | <b>1961.143</b> | 1959.127 | A[19] |
| Q[12] | 1324.857        | 1905.111       | 1889.092        | 1890.100        | 1888.084 | Q[18] |
| G[13] | 1381.889        | 1777.055       | 1761.036        | 1762.047        | 1760.032 | G[17] |
| G[14] | 1438.910        | 1720.037       | <b>1704.018</b> | 1705.026        | 1703.010 | G[16] |
| V[15] | <b>1537.979</b> | 1663.015       | <b>1646.997</b> | 1648.004        | 1645.989 | V[15] |
| L[16] | 1651.063        | 1563.947       | 1547.928        | 1548.936        | 1546.920 | L[14] |
| P[17] | 1748.116        | 1450.863       | 1434.844        | 1435.852        | 1433.836 | P[13] |
| T[18] | 1852.159        | 1383.810       | <b>1337.791</b> | 1338.799        | 1336.783 | T[12] |
| I[19] | 1975.243        | 1236.767       | <b>1223.748</b> | 1224.756        | 1222.741 | I[11] |
| Q[20] | 2103.301        | 1126.683       | 1110.664        | <b>1111.672</b> | 1109.656 | Q[10] |
| A[21] | 2174.336        | <b>998.624</b> | <b>982.606</b>  | 983.614         | 981.598  | A[9]  |
| V[22] | 2273.407        | 927.587        | <b>911.569</b>  | 912.576         | 910.561  | V[8]  |
| L[23] | 2386.491        | 828.519        | <b>812.500</b>  | 813.508         | 811.492  | L[7]  |
| L[24] | 2499.575        | 715.435        | <b>699.415</b>  | <b>700.424</b>  | 698.408  | L[6]  |
| P[25] | 2596.626        | 602.351        | 586.332         | 587.340         | 585.324  | P[5]  |
| K[26] | 2724.723        | 505.298        | <b>489.279</b>  | 490.287         | 488.271  | K[4]  |
| K[27] | 2852.816        | 377.203        | <b>361.184</b>  | 362.192         | 360.177  | K[3]  |
| T[28] | 2951.895        | 249.108        | 233.089         | 234.097         | 232.082  | T[2]  |
| E[29] | 3082.938        | 148.060        | 132.042         | 133.050         | 131.034  | E[1]  |

# sp | Q6GSS7 | H2A2A\_MOUSE

LNKLLGK <sup>Dimethyl</sup><sub>28.03</sub> VTIAQGGVLPNIQAVLLPKKTE

- ▶ fragmentation table for charge state 2+
- ▶ specType=etd
- ▶ score=83.51
- ▶ F104901.dat
- ▶ query=q2329\_p1
- ▶ precursor=771.724880
- ▶ chargePrecursor=4
- ▶ itol=0.8

| AA  | c               | y               | z+1             | z+2             | z               | AA   |
|-----|-----------------|-----------------|-----------------|-----------------|-----------------|------|
| L1  | 66.053          | <b>1542.450</b> | <b>1534.440</b> | 9.504           | 1533.930        | L126 |
| N1  | 123.084         | 1485.905        | <b>1477.898</b> | 1478.402        | <b>1477.394</b> | N20  |
| K1  | 187.132         | 1428.889        | <b>1420.877</b> | <b>1421.381</b> | 1420.373        | K27  |
| L1  | 243.674         | 1364.839        | <b>1356.829</b> | <b>1357.333</b> | <b>1356.325</b> | L26  |
| L1  | 300.216         | 1308.297        | 1300.287        | 1300.791        | <b>1299.783</b> | L25  |
| G1  | 358.758         | 1251.755        | <b>1243.745</b> | <b>1244.249</b> | 1243.241        | G24  |
| K1  | 406.799         | <b>1223.244</b> | <b>1215.234</b> | 1215.738        | <b>1214.731</b> | K23  |
| V1  | 456.324         | 1145.181        | <b>1137.171</b> | <b>1137.675</b> | <b>1136.667</b> | V22  |
| T1  | 506.840         | 1095.646        | <b>1087.637</b> | <b>1088.141</b> | <b>1087.133</b> | T21  |
| T10 | 563.390         | 1045.123        | <b>1037.113</b> | <b>1037.617</b> | <b>1036.609</b> | T20  |
| A11 | <b>598.908</b>  | 988.581         | 980.571         | 981.075         | <b>980.067</b>  | A19  |
| G12 | 662.937         | 933.060         | 925.053         | 925.557         | 924.549         | G18  |
| G13 | 691.448         | <b>899.033</b>  | <b>891.023</b>  | <b>891.527</b>  | 889.519         | G17  |
| G14 | 719.959         | 860.522         | 852.513         | 853.017         | 852.009         | G16  |
| V15 | 769.493         | 812.011         | 804.002         | 804.506         | 803.498         | V15  |
| L16 | 838.035         | 762.477         | 754.468         | 754.972         | 753.964         | L14  |
| T17 | <b>874.561</b>  | 728.935         | 720.928         | 721.430         | 720.422         | T13  |
| N18 | 911.553         | 677.400         | 669.390         | 669.893         | 668.885         | N12  |
| I19 | 988.125         | 620.867         | <b>612.878</b>  | <b>612.882</b>  | <b>611.874</b>  | I11  |
| Q20 | <b>1052.154</b> | 563.845         | 555.836         | 556.340         | 555.332         | Q10  |
| A21 | <b>1087.673</b> | 499.816         | 491.807         | 492.310         | 491.303         | A0   |
| V22 | <b>1137.207</b> | 484.297         | 476.288         | 476.792         | 475.784         | V8   |
| L23 | <b>1193.749</b> | 414.763         | 406.754         | 407.258         | 406.251         | L17  |
| L24 | 1250.291        | 358.221         | 350.213         | 350.716         | 349.708         | L16  |
| P25 | <b>1298.817</b> | 301.678         | 293.670         | 294.174         | 293.166         | P5   |
| K26 | <b>1362.865</b> | 253.153         | 245.143         | 245.647         | 244.639         | K4   |
| K27 | <b>1426.912</b> | 189.105         | 181.096         | 181.600         | 180.592         | K3   |
| T28 | <b>1477.436</b> | 125.058         | 117.048         | 117.552         | 116.544         | T2   |
| E29 | 1541.958        | 74.534          | 66.524          | 67.028          | 66.021          | E1   |

# sp | Q6GSS7 | H2A2A\_MOUSE

LNKLLGK <sup>Dimethyl</sup> <sub>28.03</sub> VTIAQGGVLPNIQAVLLPKKTE

- ▶ fragmentation table for charge state 3+
- ▶ specType=etd
- ▶ score=83.51
- ▶ F104901.dat
- ▶ query=q2329\_p1
- ▶ precursor=771.724880
- ▶ chargePrecursor=4
- ▶ itol=0.8

| AA    | c               | y               | z+1             | z+2            | z               | AA    |
|-------|-----------------|-----------------|-----------------|----------------|-----------------|-------|
| L[1]  | 44.577          | <b>1028.635</b> | <b>1023.296</b> | 0.672          | <b>1022.960</b> | L[20] |
| N[2]  | 82.302          | <b>990.941</b>  | <b>985.601</b>  | <b>985.937</b> | <b>985.265</b>  | N[28] |
| K[3]  | 125.090         | <b>952.926</b>  | <b>947.587</b>  | <b>947.923</b> | <b>947.251</b>  | K[27] |
| L[4]  | 162.785         | <b>910.228</b>  | 904.889         | 905.225        | 904.553         | L[26] |
| L[5]  | 200.479         | 872.513         | 867.174         | 867.510        | 866.886         | L[25] |
| Q[6]  | 239.207         | 834.839         | 829.499         | 829.835        | 829.161         | Q[24] |
| K[7]  | 277.529         | 815.832         | 810.492         | 810.828        | 810.154         | K[23] |
| V[8]  | 304.552         | 795.700         | 790.360         | 790.696        | 789.991         | V[22] |
| T[9]  | 338.234         | 776.767         | 771.427         | 771.763        | 771.090         | T[21] |
| I[10] | 375.920         | 697.084         | 691.745         | 692.081        | 691.409         | I[20] |
| A[11] | 399.608         | 699.380         | 694.050         | 694.386        | 693.714         | A[19] |
| Q[12] | 442.294         | 639.710         | 634.371         | 634.707        | 634.035         | Q[18] |
| G[13] | 461.301         | 593.024         | 587.685         | 588.021        | 587.349         | G[17] |
| G[14] | 480.308         | 574.017         | 568.678         | 569.013        | 568.342         | G[16] |
| V[15] | 513.331         | 555.010         | 549.670         | 550.006        | 549.334         | V[15] |
| L[16] | 551.026         | 521.987         | 516.648         | 516.984        | 516.312         | L[14] |
| F[17] | 563.177         | 484.262         | 478.923         | 479.259        | 478.587         | F[13] |
| T[18] | 621.391         | 451.942         | 446.603         | 446.939        | 446.266         | T[12] |
| I[19] | 659.086         | 413.927         | 408.588         | 408.924        | 408.252         | I[11] |
| Q[20] | 701.772         | 376.233         | 370.893         | 371.229        | 370.557         | Q[10] |
| A[21] | 725.451         | 333.540         | 328.201         | 328.543        | 327.871         | A[9]  |
| V[22] | 758.474         | 309.867         | 304.528         | 304.864        | 304.192         | V[9]  |
| L[23] | 796.168         | 276.844         | 271.505         | 271.841        | 271.169         | L[7]  |
| L[24] | 833.863         | 239.159         | 233.819         | 234.148        | 233.474         | L[6]  |
| P[25] | 866.214         | 201.455         | 196.116         | 196.451        | 195.780         | P[5]  |
| K[26] | <b>908.912</b>  | 169.104         | 163.765         | 164.101        | 163.429         | K[4]  |
| K[27] | <b>951.611</b>  | 126.400         | 121.061         | 121.402        | 120.730         | K[3]  |
| T[28] | <b>985.293</b>  | 83.700          | 78.361          | 78.704         | 78.032          | T[2]  |
| E[29] | <b>1028.307</b> | 50.025          | 44.686          | 45.021         | 44.349          | E[1]  |

# sp | Q6GSS7 | H2A2A\_MOUSE

LNKLLGK <sup>Dimethyl</sup>VTIAQGGVLPNIQAVLLPKKTE  
28.03

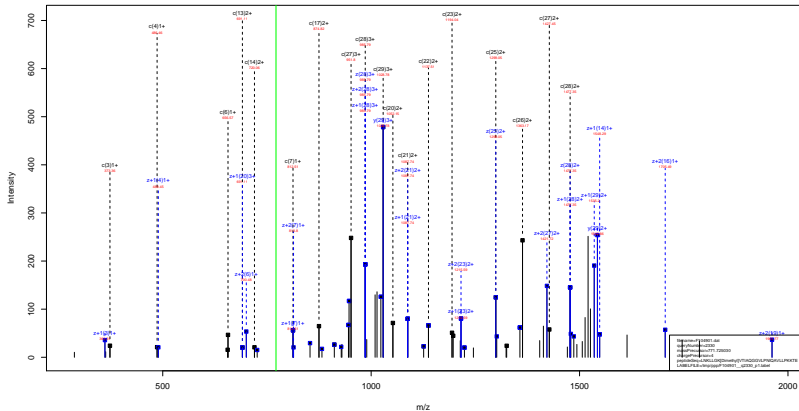

# sp | Q6GSS7 | H2A2A\_MOUSE

LNKLLGK <sup>Dimethyl</sup> <sub>28.03</sub> VTIAQGGVLPNIQAVLLPKKTE

- ▶ fragmentation table for charge state 1+
- ▶ specType=etd
- ▶ score=64.26
- ▶ F104901.dat
- ▶ query=q2330\_p1
- ▶ precursor=771.725030
- ▶ chargePrecursor=4
- ▶ itol=0.8

| AA    | c               | y               | z+1             | z+2             | z        | AA    |
|-------|-----------------|-----------------|-----------------|-----------------|----------|-------|
| L[1]  | 131.118         | 3083.892        | 3067.873        | 0.000           | 3066.865 | L[26] |
| N[2]  | 245.161         | 2970.808        | 2954.789        | 2955.797        | 2953.781 | N[28] |
| K[3]  | <b>373.256</b>  | 2856.765        | 2840.746        | 2841.754        | 2839.738 | K[27] |
| L[4]  | <b>486.340</b>  | 2738.670        | 2722.651        | 2713.659        | 2711.643 | L[26] |
| L[5]  | 599.424         | 2615.585        | 2599.567        | 2600.575        | 2598.559 | L[25] |
| G[6]  | <b>658.445</b>  | 2502.500        | 2486.483        | 2487.491        | 2485.475 | G[24] |
| K[7]  | <b>812.572</b>  | 2445.480        | 2429.462        | 2430.469        | 2428.454 | K[23] |
| V[8]  | <b>911.640</b>  | 2289.354        | 2273.335        | 2274.343        | 2272.327 | V[22] |
| T[9]  | 1012.688        | 2190.288        | 2174.267        | 2175.275        | 2173.259 | T[21] |
| I[10] | <b>1125.772</b> | 2089.230        | 2073.210        | 2074.227        | 2072.211 | I[20] |
| A[11] | <b>1196.809</b> | 1976.154        | 1960.135        | <b>1961.143</b> | 1959.127 | A[19] |
| Q[12] | <b>1324.867</b> | 1905.111        | 1889.098        | 1890.106        | 1888.090 | Q[18] |
| G[13] | 1381.889        | 1777.058        | 1761.039        | 1762.047        | 1760.032 | G[17] |
| G[14] | 1438.910        | 1720.037        | 1704.018        | <b>1705.026</b> | 1703.010 | G[16] |
| V[15] | 1537.979        | 1663.015        | 1646.997        | 1648.004        | 1646.989 | V[15] |
| L[16] | 1651.063        | 1563.947        | <b>1547.928</b> | <b>1548.936</b> | 1546.920 | L[14] |
| F[17] | 1748.116        | 1490.863        | 1474.844        | 1475.852        | 1473.836 | F[13] |
| N[18] | 1862.159        | 1353.810        | 1337.791        | 1338.799        | 1336.783 | N[12] |
| I[19] | 1975.243        | 1239.761        | <b>1223.748</b> | 1224.756        | 1222.741 | I[11] |
| Q[20] | 2103.301        | <b>1126.683</b> | 1110.664        | 1111.672        | 1109.656 | Q[10] |
| A[21] | 2174.338        | 998.624         | 982.606         | 983.614         | 981.598  | A[9]  |
| V[22] | 2273.407        | <b>927.587</b>  | <b>911.569</b>  | 912.576         | 910.561  | V[8]  |
| L[23] | 2389.491        | 808.513         | <b>813.500</b>  | <b>813.508</b>  | 811.492  | L[7]  |
| L[24] | 2499.575        | 715.435         | 699.416         | <b>700.424</b>  | 698.409  | L[6]  |
| P[25] | 2596.628        | 602.351         | 586.332         | 587.340         | 585.324  | P[5]  |
| K[26] | 2724.723        | 505.268         | <b>489.279</b>  | 490.287         | 488.271  | K[4]  |
| K[27] | 2852.818        | 377.203         | <b>361.184</b>  | 362.192         | 360.177  | K[3]  |
| T[28] | 2953.865        | 249.106         | 233.089         | 234.097         | 232.082  | T[2]  |
| E[29] | 3082.008        | 148.060         | 132.042         | 133.050         | 131.034  | E[1]  |

# sp | Q6GSS7 | H2A2A\_MOUSE

LNKLLGK <sup>Dimethyl</sup> <sub>28.03</sub> VTIAQGGVLPNIQAVLLPKKTE

- ▶ fragmentation table for charge state 2+
- ▶ specType=etd
- ▶ score=64.26
- ▶ F104901.dat
- ▶ query=q2330\_p1
- ▶ precursor=771.725030
- ▶ chargePrecursor=4
- ▶ itol=0.8

| AA  | c               | y               | z+1             | z+2             | z               | AA   |
|-----|-----------------|-----------------|-----------------|-----------------|-----------------|------|
| L1  | 66.053          | <b>1542.450</b> | <b>1534.440</b> | 8.504           | 1533.930        | L126 |
| N12 | 123.054         | <b>1485.908</b> | <b>1477.898</b> | <b>1478.402</b> | <b>1477.394</b> | N020 |
| K13 | 187.132         | 1428.886        | 1420.877        | <b>1421.381</b> | 1420.373        | K027 |
| L14 | 243.674         | 1364.839        | <b>1356.829</b> | <b>1357.333</b> | <b>1356.325</b> | L126 |
| L15 | 300.216         | 1308.297        | 1300.287        | <b>1300.791</b> | <b>1299.783</b> | L125 |
| Q16 | 358.258         | 1251.755        | 1243.745        | 1244.249        | 1243.241        | Q024 |
| K17 | 406.799         | <b>1223.244</b> | <b>1215.234</b> | <b>1215.738</b> | 1214.731        | K023 |
| V18 | 456.324         | 1145.181        | <b>1137.171</b> | <b>1137.675</b> | 1136.667        | V022 |
| T19 | 506.849         | 1095.646        | <b>1087.637</b> | <b>1088.141</b> | <b>1087.133</b> | T121 |
| T10 | 563.390         | 1045.123        | 1037.113        | 1037.617        | 1036.609        | T20  |
| A11 | 588.808         | 988.561         | 980.551         | 981.055         | 980.047         | A119 |
| Q12 | 603.817         | 933.065         | <b>945.053</b>  | <b>945.557</b>  | 944.549         | Q118 |
| G13 | <b>691.448</b>  | 889.033         | 881.023         | <b>881.527</b>  | 880.519         | G117 |
| G14 | <b>719.959</b>  | 860.522         | 852.513         | <b>853.017</b>  | 852.009         | G116 |
| V15 | 769.493         | 832.011         | 824.002         | 824.506         | 823.498         | V115 |
| L16 | 825.035         | 782.477         | 774.468         | 774.972         | 773.964         | L114 |
| T17 | <b>874.561</b>  | <b>725.935</b>  | 717.926         | 718.430         | 717.422         | T113 |
| N18 | 911.553         | 677.420         | 669.410         | 669.913         | 668.905         | N112 |
| I19 | 968.125         | 620.887         | 612.878         | 612.882         | 611.874         | I111 |
| Q20 | <b>1052.154</b> | 563.845         | 555.836         | 556.340         | 555.332         | Q110 |
| A21 | <b>1087.673</b> | 499.816         | 491.807         | 492.310         | 491.303         | A10  |
| V22 | <b>1137.207</b> | 484.297         | 476.288         | 476.792         | 475.784         | V19  |
| L23 | <b>1193.749</b> | 414.763         | 406.754         | 407.258         | 406.251         | L17  |
| L24 | 1250.291        | 358.221         | 350.212         | 350.716         | 349.708         | L16  |
| P25 | <b>1298.817</b> | 301.679         | 293.670         | 294.174         | 293.166         | P19  |
| K26 | <b>1362.865</b> | 253.153         | 245.143         | 245.647         | 244.639         | K14  |
| K27 | <b>1426.912</b> | 189.105         | 181.096         | 181.600         | 180.592         | K13  |
| T28 | <b>1477.436</b> | 125.058         | 117.048         | 117.552         | 116.544         | T12  |
| E29 | 1541.958        | 74.534          | 66.524          | 67.028          | 66.021          | E11  |

# sp | Q6GSS7 | H2A2A\_MOUSE

LNKLLGK <sup>Dimethyl</sup> <sub>28.03</sub> VTIAQGGVLPNIQAVLLPKKTE

- ▶ fragmentation table for charge state 3+
- ▶ specType=etd
- ▶ score=64.26
- ▶ F104901.dat
- ▶ query=q2330\_p1
- ▶ precursor=771.725030
- ▶ chargePrecursor=4
- ▶ itol=0.8

| AA    | c               | y               | z+1             | z+2            | z               | AA    |
|-------|-----------------|-----------------|-----------------|----------------|-----------------|-------|
| L[1]  | 44.377          | <b>1028.635</b> | <b>1023.296</b> | 0.672          | <b>1022.960</b> | L[20] |
| N[2]  | 82.302          | 900.941         | <b>985.601</b>  | <b>985.937</b> | <b>985.265</b>  | N[20] |
| K[3]  | 125.090         | 952.926         | <b>947.587</b>  | 947.923        | <b>947.251</b>  | K[27] |
| L[4]  | 162.785         | 910.228         | 904.889         | 905.225        | 904.553         | L[26] |
| L[5]  | 200.479         | 872.533         | 867.194         | 867.530        | 866.896         | L[25] |
| Q[6]  | 239.487         | 834.839         | 829.499         | 829.835        | 829.199         | Q[24] |
| K[7]  | 271.529         | 815.832         | 810.492         | 810.828        | 810.156         | K[23] |
| V[8]  | 304.552         | 795.700         | 790.450         | 790.786        | 789.114         | V[22] |
| T[9]  | 338.234         | 776.767         | 771.427         | 771.763        | 771.091         | T[21] |
| T[10] | 375.920         | 697.084         | <b>691.745</b>  | 692.081        | <b>691.409</b>  | T[20] |
| A[11] | 399.608         | 699.380         | 694.050         | 694.386        | 693.714         | A[19] |
| Q[12] | 442.294         | 639.711         | 634.371         | 634.707        | 634.035         | Q[18] |
| G[13] | 461.301         | 593.024         | 587.685         | 588.021        | 587.349         | G[17] |
| G[14] | 480.308         | 574.017         | 568.678         | 569.013        | 568.342         | G[16] |
| V[15] | 513.331         | 555.010         | 549.670         | 550.006        | 549.334         | V[15] |
| L[16] | 551.026         | 521.987         | 516.648         | 516.984        | 516.312         | L[14] |
| F[17] | 563.177         | 484.262         | 478.923         | 479.259        | 478.587         | F[13] |
| T[18] | 623.391         | 451.942         | 446.603         | 446.939        | 446.267         | T[12] |
| T[19] | 659.086         | 415.927         | 409.588         | 409.924        | 409.252         | T[11] |
| Q[20] | 701.772         | 376.233         | 370.893         | 371.229        | 370.557         | Q[10] |
| A[21] | 725.451         | 333.540         | 328.201         | 328.537        | 327.865         | A[9]  |
| V[22] | 758.474         | 309.867         | 304.528         | 304.864        | 304.192         | V[9]  |
| L[23] | 796.168         | 276.844         | 271.505         | 271.841        | 271.169         | L[7]  |
| L[24] | 833.863         | 239.159         | 233.819         | 234.156        | 233.484         | L[6]  |
| P[25] | 866.214         | 201.455         | 196.116         | 196.451        | 195.779         | P[5]  |
| K[26] | 908.912         | 169.104         | 163.765         | 164.101        | 163.429         | K[4]  |
| K[27] | <b>951.611</b>  | 126.406         | 121.066         | 121.402        | 120.730         | K[3]  |
| T[28] | <b>985.293</b>  | 83.700          | 78.360          | 78.704         | 78.032          | T[2]  |
| E[29] | <b>1028.307</b> | 50.025          | 44.685          | 45.021         | 44.349          | E[1]  |





# sp | Q6GSS7 | H2A2A\_MOUSE

LNKLLGK <sup>Dimethyl</sup> <sub>28.03</sub> VTIAQGGVLPNIQAVLLPKKTE

- ▶ fragmentation table for charge state 1+
- ▶ specType=etd
- ▶ score=89.67
- ▶ F104901.dat
- ▶ query=q2331\_p1
- ▶ precursor=771.726140
- ▶ chargePrecursor=4
- ▶ itol=0.8

| AA    | c               | y        | z+1             | z+2             | z        | AA    |
|-------|-----------------|----------|-----------------|-----------------|----------|-------|
| L[1]  | 131.118         | 3081.892 | 3067.873        | 0.000           | 3066.895 | L[29] |
| N[2]  | 345.161         | 2970.808 | 2954.789        | 2955.797        | 2951.781 | N[28] |
| K[3]  | <b>373.256</b>  | 2856.765 | 2840.746        | 2841.754        | 2839.738 | K[27] |
| L[4]  | 486.340         | 2728.670 | 2712.651        | 2713.659        | 2711.643 | L[26] |
| L[5]  | <b>599.424</b>  | 2615.585 | 2599.567        | 2600.575        | 2598.560 | L[25] |
| G[6]  | <b>656.445</b>  | 2502.502 | 2486.483        | 2487.491        | 2485.475 | G[24] |
| K[7]  | <b>812.572</b>  | 2345.480 | 2429.462        | 2430.469        | 2428.454 | K[23] |
| V[8]  | <b>911.640</b>  | 2288.354 | 2273.335        | 2274.343        | 2272.327 | V[22] |
| T[9]  | 1017.688        | 2190.286 | 2174.267        | 2175.275        | 2173.259 | T[21] |
| I[10] | <b>1125.772</b> | 2089.238 | 2073.219        | 2074.227        | 2072.211 | I[20] |
| A[11] | <b>1196.809</b> | 1976.154 | 1960.135        | <b>1961.143</b> | 1959.127 | A[19] |
| Q[12] | 1324.857        | 1905.111 | <b>1889.094</b> | 1890.102        | 1888.086 | Q[18] |
| G[13] | 1381.589        | 1777.058 | <b>1761.039</b> | <b>1762.047</b> | 1760.032 | G[17] |
| G[14] | 1438.910        | 1720.937 | 1704.918        | <b>1705.926</b> | 1703.910 | G[16] |
| V[15] | <b>1537.979</b> | 1663.015 | 1646.997        | 1646.004        | 1645.989 | V[15] |
| L[16] | 1651.063        | 1563.947 | <b>1547.928</b> | 1548.936        | 1546.920 | L[14] |
| P[17] | 1748.116        | 1450.893 | 1434.874        | 1435.882        | 1433.866 | P[13] |
| T[18] | 1892.159        | 1383.810 | <b>1377.791</b> | <b>1378.799</b> | 1376.783 | T[12] |
| I[19] | 1975.243        | 1239.767 | <b>1223.748</b> | 1224.756        | 1222.741 | I[11] |
| Q[20] | 2103.301        | 1126.683 | 1110.664        | 1111.672        | 1109.656 | Q[10] |
| A[21] | 2174.336        | 998.624  | 982.606         | 983.614         | 981.598  | A[9]  |
| V[22] | 2273.407        | 927.587  | <b>911.569</b>  | 912.576         | 910.561  | V[8]  |
| L[23] | 2386.491        | 828.519  | <b>812.500</b>  | <b>813.508</b>  | 811.492  | L[7]  |
| L[24] | 2499.575        | 715.435  | <b>699.415</b>  | <b>700.424</b>  | 698.408  | L[6]  |
| P[25] | 2596.626        | 602.351  | 586.332         | 587.340         | 585.324  | P[5]  |
| K[26] | 2724.723        | 505.298  | <b>489.279</b>  | 490.287         | 488.271  | K[4]  |
| K[27] | 2852.816        | 377.203  | <b>361.184</b>  | 362.192         | 360.177  | K[3]  |
| T[28] | 2951.905        | 249.108  | 233.089         | 234.097         | 232.082  | T[2]  |
| E[29] | 3082.938        | 148.060  | 132.042         | 133.050         | 131.034  | E[1]  |

# sp | Q6GSS7 | H2A2A\_MOUSE

LNKLLGK <sup>Dimethyl</sup><sub>28.03</sub> VTIAQGGVLPNIQAVLLPKKTE

- ▶ fragmentation table for charge state 2+
- ▶ specType=etd
- ▶ score=89.67
- ▶ F104901.dat
- ▶ query=q2331\_p1
- ▶ precursor=771.726140
- ▶ chargePrecursor=4
- ▶ itol=0.8

| AA | c               | y               | z+1             | z+2             | z               | AA   |
|----|-----------------|-----------------|-----------------|-----------------|-----------------|------|
| L1 | 66.053          | <b>1542.450</b> | <b>1534.440</b> | 8.504           | 1533.930        | L126 |
| N1 | 123.084         | 1485.905        | <b>1477.898</b> | 1478.402        | <b>1477.394</b> | N120 |
| K1 | 187.132         | 1428.889        | <b>1420.877</b> | <b>1421.381</b> | 1420.373        | K127 |
| L1 | 243.674         | 1364.839        | <b>1356.829</b> | 1357.333        | <b>1356.325</b> | L126 |
| L1 | 300.216         | 1308.297        | 1309.287        | 1309.791        | 1309.781        | L125 |
| G1 | 358.758         | 1251.795        | <b>1243.745</b> | <b>1244.249</b> | <b>1243.241</b> | G124 |
| K1 | 406.799         | <b>1223.244</b> | <b>1215.234</b> | <b>1215.738</b> | <b>1214.731</b> | K123 |
| V1 | 456.324         | 1145.181        | <b>1137.171</b> | <b>1137.675</b> | 1136.667        | V122 |
| F1 | 506.840         | 1095.646        | <b>1087.637</b> | <b>1088.141</b> | 1087.133        | F121 |
| T1 | 563.390         | 1045.123        | <b>1037.113</b> | <b>1037.617</b> | <b>1036.609</b> | T120 |
| A1 | <b>598.908</b>  | <b>988.581</b>  | 989.571         | 989.575         | 989.567         | A119 |
| Q1 | 662.937         | 933.066         | 933.033         | 933.537         | 934.540         | Q118 |
| G1 | 691.448         | 889.033         | <b>881.023</b>  | <b>881.527</b>  | <b>880.519</b>  | G117 |
| G1 | 719.959         | 860.522         | <b>852.513</b>  | <b>853.017</b>  | 852.009         | G116 |
| V1 | 769.493         | 832.011         | 834.002         | 834.506         | 833.498         | V115 |
| L1 | 838.035         | 782.477         | <b>774.468</b>  | <b>774.972</b>  | 773.964         | L114 |
| F1 | <b>874.561</b>  | 728.935         | 727.928         | 728.432         | 727.425         | F113 |
| N1 | 911.553         | 677.400         | 669.390         | 669.903         | 668.895         | N112 |
| I1 | <b>988.125</b>  | 620.867         | 612.858         | 612.862         | 611.874         | I111 |
| Q1 | <b>1052.154</b> | 563.845         | 555.836         | 556.340         | 555.332         | Q110 |
| A1 | <b>1087.673</b> | 499.816         | 491.807         | 492.310         | 491.303         | A10  |
| V1 | <b>1137.207</b> | 484.297         | 476.288         | 476.792         | 475.784         | V19  |
| L1 | <b>1193.749</b> | 414.763         | 406.754         | 407.258         | 406.250         | L17  |
| L1 | 1250.291        | 358.221         | 350.212         | 350.716         | 349.708         | L16  |
| P1 | <b>1298.817</b> | 301.679         | 293.670         | 294.174         | 293.166         | P15  |
| K1 | <b>1362.865</b> | 253.153         | 245.143         | 245.647         | 244.639         | K14  |
| K1 | <b>1426.912</b> | 189.105         | 181.096         | 181.600         | 180.592         | K13  |
| T1 | <b>1477.436</b> | 125.058         | 117.048         | 117.552         | 116.544         | T12  |
| E1 | <b>1541.958</b> | 74.534          | 66.524          | 67.028          | 66.021          | E11  |

# sp | Q6GSS7 | H2A2A\_MOUSE

LNKLLGK <sup>Dimethyl</sup> <sub>28.03</sub> VTIAQGGVLPNIQAVLLPKKTE

- ▶ fragmentation table for charge state 3+
- ▶ specType=etd
- ▶ score=89.67
- ▶ F104901.dat
- ▶ query=q2331\_p1
- ▶ precursor=771.726140
- ▶ chargePrecursor=4
- ▶ itol=0.8

| AA    | c               | y               | z+1             | z+2            | z               | AA    |
|-------|-----------------|-----------------|-----------------|----------------|-----------------|-------|
| L[1]  | 44.577          | <b>1028.635</b> | <b>1023.296</b> | 0.672          | <b>1022.960</b> | L[20] |
| N[2]  | 82.392          | <b>990.941</b>  | <b>985.601</b>  | <b>985.937</b> | <b>985.265</b>  | N[28] |
| K[3]  | 125.090         | 952.926         | <b>947.587</b>  | <b>947.923</b> | 947.251         | K[27] |
| L[4]  | 162.785         | 910.228         | 904.889         | 905.225        | 904.553         | L[26] |
| L[5]  | 200.479         | 872.533         | 867.194         | 867.530        | 866.896         | L[25] |
| Q[6]  | 239.287         | 834.839         | 829.499         | 829.835        | 829.199         | Q[24] |
| K[7]  | 271.529         | 815.832         | 810.492         | 810.828        | 810.156         | K[23] |
| V[8]  | 304.552         | 795.790         | 790.450         | 790.786        | 789.114         | V[22] |
| T[9]  | 338.234         | 776.767         | 771.427         | 771.763        | 771.091         | T[21] |
| I[10] | 375.929         | 697.084         | 691.745         | 692.081        | 691.409         | I[20] |
| A[11] | 399.608         | 699.389         | 694.050         | 694.386        | 693.714         | A[19] |
| Q[12] | 442.294         | 639.731         | 634.391         | 634.727        | 634.055         | Q[18] |
| G[13] | 461.301         | 593.024         | 587.685         | 588.021        | 587.349         | G[17] |
| G[14] | 480.308         | 574.017         | 568.678         | 569.013        | 568.342         | G[16] |
| V[15] | 513.331         | 555.010         | 549.670         | 550.006        | 549.334         | V[15] |
| L[16] | 551.026         | 521.987         | 516.648         | 516.984        | 516.312         | L[14] |
| F[17] | 563.177         | 484.262         | 478.923         | 479.259        | 478.587         | F[13] |
| T[18] | 621.391         | 451.942         | 446.603         | 446.939        | 446.267         | T[12] |
| I[19] | 659.086         | 413.927         | 408.588         | 408.924        | 408.252         | I[11] |
| Q[20] | 701.772         | 376.233         | 370.893         | 371.229        | 370.557         | Q[10] |
| A[21] | 725.451         | 333.540         | 328.201         | 328.537        | 327.865         | A[9]  |
| V[22] | 758.474         | 309.867         | 304.528         | 304.864        | 304.192         | V[9]  |
| L[23] | 796.168         | 276.844         | 271.505         | 271.841        | 271.169         | L[7]  |
| L[24] | 833.863         | 239.159         | 233.819         | 234.156        | 233.484         | L[6]  |
| P[25] | 866.214         | 201.455         | 196.116         | 196.451        | 195.779         | P[5]  |
| K[26] | 908.912         | 169.104         | 163.765         | 164.101        | 163.429         | K[4]  |
| K[27] | <b>951.611</b>  | 126.406         | 121.066         | 121.402        | 120.730         | K[3]  |
| T[28] | <b>985.293</b>  | 83.708          | 78.368          | 78.704         | 78.032          | T[2]  |
| E[29] | <b>1028.307</b> | 50.025          | 44.685          | 45.021         | 44.349          | E[1]  |

# sp | Q6GSS7 | H2A2A\_MOUSE

LNKLLGK <sup>Dimethyl</sup>VTIAQGGVLPNIQAVLLPKKTE  
28.03

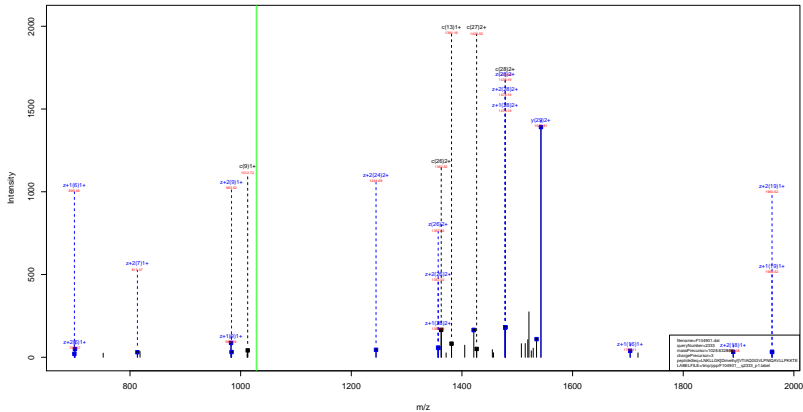

# sp | Q6GSS7 | H2A2A\_MOUSE

LNKLLGK <sup>Dimethyl</sup> 28.03 VTIAQGGVLPNIQAVLLPKKTE

- ▶ fragmentation table for charge state 1+
- ▶ specType=etd
- ▶ score=28.57
- ▶ F104901.dat
- ▶ query=q2333\_p1
- ▶ precursor=1028.632800
- ▶ chargePrecursor=3
- ▶ itol=0.8

| AA     | c               | y        | z+1             | z+2             | z        | AA     |
|--------|-----------------|----------|-----------------|-----------------|----------|--------|
| L[1]   | 131.118         | 3081.892 | 3067.873        | 0.000           | 3066.895 | L[29]  |
| N[2]   | 345.161         | 2970.808 | 2954.789        | 2955.797        | 2951.781 | N[28]  |
| K[3]   | 373.256         | 2856.765 | 2840.746        | 2841.754        | 2839.738 | K[27]  |
| L[4]   | 486.340         | 2728.670 | 2712.651        | 2713.659        | 2711.643 | L[26]  |
| L[5]   | 599.424         | 2615.585 | 2599.567        | 2600.575        | 2598.560 | L[25]  |
| G[6]   | 694.448         | 2502.502 | 2486.483        | 2487.491        | 2485.475 | G[24]  |
| K[7]   | 812.572         | 2345.480 | 2429.462        | 2430.469        | 2428.454 | K[23]  |
| V[8]   | 911.640         | 2288.554 | 2273.535        | 2274.543        | 2272.527 | V[22]  |
| T[9]   | <b>1012.688</b> | 2190.586 | 2174.567        | 2175.575        | 2173.559 | T[21]  |
| I[10]  | 1125.772        | 2089.238 | 2073.219        | 2074.227        | 2072.211 | I[20]  |
| A[11]  | 1196.859        | 1976.154 | <b>1960.135</b> | <b>1961.143</b> | 1959.127 | A[19]  |
| Q[12]  | 1274.897        | 1905.111 | 1889.092        | <b>1890.100</b> | 1888.084 | Q[18]  |
| G[13]  | <b>1381.889</b> | 1777.055 | 1761.036        | 1762.047        | 1760.032 | G[17]  |
| G[14]  | 1438.910        | 1720.037 | <b>1704.018</b> | 1705.026        | 1703.010 | G[16]  |
| V[15]  | 1537.879        | 1663.015 | 1646.997        | 1648.004        | 1645.989 | V[15]  |
| L[16]  | 1651.063        | 1563.947 | 1547.928        | 1548.936        | 1546.920 | L[14]  |
| P[17]  | 1748.116        | 1450.863 | 1434.844        | 1435.852        | 1433.836 | P[13]  |
| Tu[18] | 1852.159        | 1383.810 | 1367.791        | 1368.799        | 1366.783 | Tu[12] |
| I[19]  | 1975.243        | 1236.767 | 1223.748        | 1224.756        | 1222.741 | I[11]  |
| Q[20]  | 2103.301        | 1126.683 | 1110.664        | 1111.672        | 1109.656 | Q[10]  |
| A[21]  | 2174.336        | 996.624  | <b>982.606</b>  | <b>983.614</b>  | 981.598  | A[9]   |
| V[22]  | 2273.407        | 927.587  | 911.569         | 912.576         | 910.561  | V[8]   |
| L[23]  | 2386.491        | 828.519  | 812.500         | <b>813.508</b>  | 811.492  | L[7]   |
| L[24]  | 2499.575        | 715.435  | <b>699.416</b>  | <b>700.424</b>  | 698.408  | L[6]   |
| P[25]  | 2596.626        | 602.351  | 586.332         | 587.340         | 585.324  | P[5]   |
| K[26]  | 2724.723        | 505.298  | 489.279         | 490.287         | 488.271  | K[4]   |
| K[27]  | 2852.816        | 377.203  | 361.184         | 362.192         | 360.177  | K[3]   |
| T[28]  | 2951.895        | 249.108  | 233.089         | 234.097         | 232.082  | T[2]   |
| E[29]  | 3087.938        | 148.060  | 132.042         | 133.050         | 131.034  | E[1]   |

# sp | Q6GSS7 | H2A2A\_MOUSE

LNKLLGK <sup>Dimethyl</sup> <sub>28.03</sub> VTIAQGGVLPNIQAVLLPKKTE

- ▶ fragmentation table for charge state 2+
- ▶ specType=etd
- ▶ score=28.57
- ▶ F104901.dat
- ▶ query=q2333\_p1
- ▶ precursor=1028.632800
- ▶ chargePrecursor=3
- ▶ itol=0.8

| AA   | c               | y               | z+1             | z+2             | z               | AA   |
|------|-----------------|-----------------|-----------------|-----------------|-----------------|------|
| L1   | 66.053          | <b>1542.450</b> | <b>1534.440</b> | 9.504           | 533.930         | L120 |
| N12  | 123.054         | 1485.905        | <b>1477.898</b> | <b>1478.402</b> | <b>1477.394</b> | N120 |
| K13  | 187.132         | 1428.889        | <b>1420.877</b> | <b>1421.381</b> | 1420.373        | K127 |
| L14  | 243.674         | 1364.839        | <b>1356.829</b> | <b>1357.333</b> | <b>1356.325</b> | L126 |
| L15  | 300.216         | 1308.297        | 1300.287        | 1300.791        | 1299.783        | L125 |
| G16  | 356.759         | 1251.755        | 1243.745        | <b>1244.249</b> | 1243.241        | G124 |
| K17  | 406.799         | 1223.244        | 1215.234        | 1215.738        | 1214.731        | K123 |
| V18  | 456.324         | 1145.181        | 1137.171        | 1137.675        | 1136.667        | V122 |
| F19  | 506.849         | 1095.646        | 1087.637        | 1088.141        | 1087.133        | F121 |
| T10  | 563.390         | 1045.123        | 1037.113        | 1037.617        | 1036.609        | T20  |
| A111 | 588.908         | 988.581         | 980.571         | 981.075         | 980.067         | A119 |
| Q12  | 602.937         | 953.065         | 945.055         | 945.559         | 944.551         | Q118 |
| G133 | 691.448         | 889.033         | 881.023         | 881.527         | 880.519         | G117 |
| G14  | 719.959         | 860.522         | 852.513         | 853.017         | 852.009         | G116 |
| V15  | 769.493         | 832.011         | 824.002         | 824.506         | 823.498         | V115 |
| L16  | 826.035         | 782.477         | 774.468         | 774.972         | 773.964         | L114 |
| F17  | 874.581         | 728.935         | 720.925         | 721.429         | 720.421         | F113 |
| N118 | 931.583         | 677.400         | 669.390         | 669.893         | 668.885         | N112 |
| I19  | 988.125         | 620.867         | 612.857         | 613.361         | 612.353         | I111 |
| Q120 | 1052.154        | 563.845         | 555.835         | 556.340         | 555.332         | Q110 |
| A121 | 1087.673        | 499.816         | 491.807         | 492.311         | 491.303         | A10  |
| V122 | 1127.207        | 484.297         | 476.288         | 476.792         | 475.784         | V10  |
| L123 | 1193.749        | 414.763         | 406.753         | 407.257         | 406.250         | L11  |
| L124 | 1250.291        | 358.221         | 350.211         | 350.715         | 349.708         | L10  |
| P125 | 1298.817        | 301.679         | 293.670         | 294.174         | 293.166         | P10  |
| K126 | <b>1362.865</b> | 253.153         | 245.143         | 245.647         | 244.639         | K10  |
| K127 | <b>1426.912</b> | 189.105         | 181.095         | 181.600         | 180.592         | K13  |
| T128 | <b>1477.436</b> | 125.058         | 117.048         | 117.552         | 116.544         | T12  |
| E129 | 1541.958        | 74.534          | 66.524          | 67.028          | 66.021          | E11  |

# sp | Q6GSS7 | H2A2A\_MOUSE

LNKLLGK<sup>Dimethyl</sup>VTIAQGGVLPNIQAVLLPKKTE  
28.03

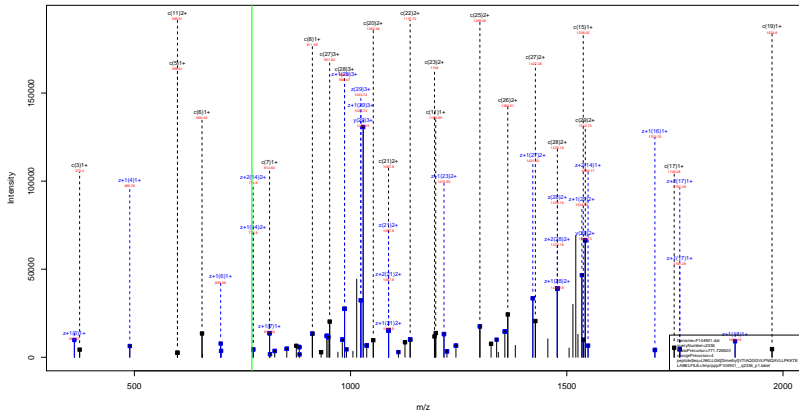



# sp | Q6GSS7 | H2A2A\_MOUSE

LNKLLGK <sup>Dimethyl</sup> <sub>28.03</sub> VTIAQGGVLPNIQAVLLPKKTE

- ▶ fragmentation table for charge state 1+
- ▶ specType=etd
- ▶ score=112.07
- ▶ F104901.dat
- ▶ query=q2336\_p1
- ▶ precursor=771.726820
- ▶ chargePrecursor=4
- ▶ itol=0.8

| AA    | c               | y        | z+1             | z+2             | z               | AA    |
|-------|-----------------|----------|-----------------|-----------------|-----------------|-------|
| L[1]  | 131.118         | 3083.802 | 2067.873        | 0.000           | 3056.885        | L[26] |
| N[2]  | 245.161         | 2970.808 | 2954.789        | 2955.797        | 2953.781        | N[28] |
| K[3]  | <b>373.256</b>  | 2856.765 | 3840.740        | 3841.754        | 2839.738        | K[27] |
| L[4]  | 488.340         | 3728.670 | 2712.651        | 2713.659        | 3711.643        | L[26] |
| L[5]  | <b>699.424</b>  | 2615.586 | 2599.567        | 2600.575        | 2598.559        | L[25] |
| G[6]  | <b>658.445</b>  | 2302.502 | 2488.483        | 2487.491        | 2485.473        | G[24] |
| K[7]  | <b>812.572</b>  | 2245.480 | 2429.461        | 2430.469        | 2428.454        | K[23] |
| V[8]  | <b>911.640</b>  | 2289.354 | 2273.335        | 2274.343        | 2272.327        | V[22] |
| T[9]  | 1012.688        | 2190.286 | 2174.267        | 2175.275        | 2173.259        | T[21] |
| I[10] | <b>1125.772</b> | 2089.238 | 2073.219        | 2074.227        | 2072.211        | I[20] |
| A[11] | <b>1196.809</b> | 1976.154 | 1960.135        | 1961.143        | 1959.117        | A[19] |
| Q[12] | <b>1324.867</b> | 1909.111 | <b>1885.098</b> | 1890.118        | 1888.096        | Q[18] |
| G[13] | 1381.889        | 1777.058 | <b>1761.039</b> | <b>1762.047</b> | 1760.032        | G[17] |
| G[14] | 1438.910        | 1720.037 | <b>1704.018</b> | 1705.026        | <b>1703.010</b> | G[16] |
| V[15] | <b>1537.979</b> | 1603.015 | 1648.997        | 1648.004        | 1645.989        | V[15] |
| L[16] | 1651.063        | 1563.947 | 1547.928        | <b>1548.936</b> | 1546.920        | L[14] |
| T[17] | <b>1748.116</b> | 1450.883 | 1434.864        | 1435.872        | 1433.856        | T[13] |
| N[18] | 1862.959        | 1353.810 | <b>1337.791</b> | 1338.799        | 1336.783        | N[12] |
| I[19] | <b>1975.243</b> | 1239.767 | 1223.748        | 1224.756        | <b>1222.741</b> | I[11] |
| Q[20] | 2103.301        | 1126.683 | <b>1110.664</b> | 1111.672        | 1109.656        | Q[10] |
| A[21] | 2174.338        | 998.624  | 982.606         | 983.614         | <b>981.598</b>  | A[9]  |
| V[22] | 2273.407        | 827.587  | <b>811.569</b>  | 812.576         | 810.561         | V[8]  |
| L[23] | 2389.491        | 628.519  | <b>612.500</b>  | <b>613.508</b>  | 611.492         | L[7]  |
| L[24] | 2499.575        | 715.435  | <b>699.416</b>  | <b>700.424</b>  | 698.408         | L[6]  |
| P[25] | 2596.628        | 602.351  | 586.332         | 587.340         | 585.324         | P[5]  |
| K[26] | 2724.723        | 505.298  | <b>489.279</b>  | 490.287         | 488.271         | K[4]  |
| K[27] | 2852.818        | 377.203  | <b>361.184</b>  | 362.192         | 360.177         | K[3]  |
| T[28] | 2953.865        | 249.108  | 233.089         | 234.097         | 232.082         | T[2]  |
| E[29] | 3082.008        | 148.050  | 132.042         | 133.050         | 131.034         | E[1]  |

# sp | Q6GSS7 | H2A2A\_MOUSE

LNKLLGK <sup>Dimethyl</sup><sub>28.03</sub> VTIAQGGVLPNIQAVLLPKKTE

- ▶ fragmentation table for charge state 2+
- ▶ specType=etd
- ▶ score=112.07
- ▶ F104901.dat
- ▶ query=q2336\_p1
- ▶ precursor=771.726820
- ▶ chargePrecursor=4
- ▶ itol=0.8

| AA   | c               | y               | z+1             | z+2             | z               | AA   |
|------|-----------------|-----------------|-----------------|-----------------|-----------------|------|
| L 1  | 66.093          | <b>1542.450</b> | <b>1534.440</b> | 9.504           | 533.930         | L 20 |
| N 2  | 123.084         | 1485.905        | <b>1477.898</b> | <b>1478.402</b> | <b>1477.394</b> | N 20 |
| K 3  | 187.132         | 1428.889        | <b>1420.877</b> | <b>1421.381</b> | 1420.373        | K 27 |
| L 4  | 243.674         | 1364.839        | <b>1356.829</b> | <b>1357.333</b> | <b>1356.325</b> | L 26 |
| L 5  | 300.216         | 1308.297        | 1300.287        | 1300.791        | <b>1299.783</b> | L 25 |
| G 6  | 358.708         | 1251.795        | <b>1243.745</b> | <b>1244.249</b> | <b>1243.241</b> | G 24 |
| K 7  | 406.750         | <b>1223.244</b> | <b>1215.234</b> | <b>1215.738</b> | 1214.731        | K 23 |
| V 8  | 456.324         | 1145.181        | <b>1137.171</b> | <b>1137.675</b> | 1136.667        | V 22 |
| T 9  | 506.840         | 1095.646        | <b>1087.637</b> | <b>1088.141</b> | <b>1087.133</b> | T 21 |
| T 10 | 563.390         | 1045.123        | <b>1037.113</b> | <b>1037.617</b> | <b>1036.609</b> | T 20 |
| A 11 | <b>598.908</b>  | 988.581         | <b>980.571</b>  | <b>981.075</b>  | <b>980.067</b>  | A 19 |
| Q 12 | 662.937         | 933.060         | <b>943.053</b>  | <b>945.557</b>  | <b>944.549</b>  | Q 18 |
| G 13 | 691.448         | 889.033         | <b>881.023</b>  | <b>881.527</b>  | <b>880.519</b>  | G 17 |
| G 14 | 719.959         | 860.522         | <b>852.513</b>  | <b>853.017</b>  | <b>852.009</b>  | G 16 |
| V 15 | 769.493         | 832.011         | <b>824.002</b>  | <b>824.506</b>  | 823.498         | V 15 |
| L 16 | 830.035         | 782.477         | <b>774.468</b>  | <b>774.972</b>  | 773.964         | L 14 |
| T 17 | <b>874.561</b>  | 728.935         | 717.928         | 718.432         | 717.424         | T 13 |
| N 18 | <b>931.583</b>  | 677.400         | 669.390         | 669.903         | 668.895         | N 12 |
| I 19 | 988.125         | 630.867         | 612.870         | 612.882         | 611.874         | I 11 |
| Q 20 | <b>1052.154</b> | 583.845         | 555.838         | 556.340         | 555.332         | Q 10 |
| A 21 | <b>1087.673</b> | 499.816         | 491.807         | 492.310         | 491.303         | A 0  |
| V 22 | <b>1137.207</b> | 404.297         | 456.288         | 456.792         | 455.784         | V 8  |
| L 23 | <b>1193.749</b> | 414.763         | 426.754         | 427.258         | 426.250         | L 7  |
| L 24 | 1250.291        | 358.221         | 350.213         | 350.716         | 349.708         | L 6  |
| P 25 | <b>1298.817</b> | 301.679         | 293.670         | 294.174         | 293.166         | P 5  |
| K 26 | <b>1362.865</b> | 253.153         | 245.143         | 245.647         | 244.639         | K 4  |
| K 27 | <b>1426.912</b> | 189.105         | 181.096         | 181.600         | 180.592         | K 3  |
| T 28 | <b>1477.436</b> | 125.058         | 117.048         | 117.552         | 116.544         | T 2  |
| E 29 | <b>1541.958</b> | 74.534          | 66.524          | 67.028          | 66.021          | E 1  |

# sp | Q6GSS7 | H2A2A\_MOUSE

LNKLLGK <sup>Dimethyl</sup> <sub>28.03</sub> VTIAQGGVLPNIQAVLLPKKTE

- ▶ fragmentation table for charge state 3+
- ▶ specType=etd
- ▶ score=112.07
- ▶ F104901.dat
- ▶ query=q2336\_p1
- ▶ precursor=771.726820
- ▶ chargePrecursor=4
- ▶ itol=0.8

| AA    | c              | y               | z+1             | z+2            | z     | AA                   |
|-------|----------------|-----------------|-----------------|----------------|-------|----------------------|
| L 1   | 44.377         | <b>1028.635</b> | <b>1023.296</b> |                | 0.672 | <b>1022.960</b> L 29 |
| N 2   | 62.392         | <b>990.941</b>  | <b>985.601</b>  | <b>985.937</b> |       | 985.265 N 28         |
| K 3   | 125.090        | 952.026         | <b>947.587</b>  | <b>947.923</b> |       | <b>947.251</b> K 27  |
| L 4   | 162.795        | 910.229         | 904.889         | 905.225        |       | 904.553 L 26         |
| L 5   | 200.479        | 872.523         | 867.184         | 867.520        |       | 866.955 L 25         |
| G 6   | 219.487        | 834.839         | 829.499         | 829.835        |       | 829.163 G 24         |
| K 7   | 271.529        | 815.832         | 810.492         | 810.828        |       | 810.156 K 23         |
| V 8   | 304.552        | 763.790         | 758.450         | 758.786        |       | 758.114 V 22         |
| T 9   | 336.234        | 730.767         | 725.427         | 725.763        |       | 725.091 T 21         |
| I 10  | 375.929        | 697.084         | 691.745         | 692.081        |       | 691.409 I 20         |
| A 11  | 399.608        | 658.389         | 654.050         | 654.386        |       | 653.714 A 19         |
| Q 12  | 442.294        | 636.720         | 630.371         | 630.707        |       | 630.035 Q 18         |
| G 13  | 461.301        | 593.024         | 587.685         | 588.021        |       | 587.349 G 17         |
| G 14  | 480.308        | 574.017         | 568.678         | 569.013        |       | 568.342 G 16         |
| V 15  | 513.331        | 555.010         | 549.670         | 550.006        |       | 549.334 V 15         |
| L 16  | 551.026        | 521.987         | 516.648         | 516.984        |       | 516.312 L 14         |
| F 17  | 583.377        | 484.292         | 478.953         | 479.289        |       | 478.617 F 13         |
| Tu 18 | 621.391        | 451.942         | 446.603         | 446.939        |       | 446.266 Tu 12        |
| I 19  | 659.086        | 413.927         | 408.588         | 408.924        |       | 408.252 I 11         |
| Q 20  | 701.772        | 376.233         | 370.893         | 371.229        |       | 370.557 Q 10         |
| A 21  | 725.451        | 333.546         | 328.207         | 328.543        |       | 327.871 A 9          |
| V 22  | 758.474        | 309.867         | 304.528         | 304.864        |       | 304.192 V 8          |
| L 23  | 796.168        | 276.844         | 271.505         | 271.841        |       | 271.169 L 7          |
| L 24  | 833.863        | 239.350         | 233.010         | 233.346        |       | 232.674 L 6          |
| P 25  | 866.214        | 201.655         | 195.316         | 195.651        |       | 195.005 P 5          |
| K 26  | 908.912        | 169.104         | 163.765         | 164.101        |       | 163.428 K 4          |
| K 27  | <b>951.611</b> | 126.406         | 121.066         | 121.402        |       | 120.730 K 3          |
| T 28  | <b>985.293</b> | 83.708          | 78.368          | 78.704         |       | 78.032 T 2           |
| E 29  | 1028.307       | 50.025          | 44.685          | 45.021         |       | 44.349 E 1           |



# sp | Q6GSS7 | H2A2A\_MOUSE

LNKLLGK <sup>Dimethyl</sup> <sub>28.03</sub> VTIAQGGVLPNIQAVLLPKKTE

- ▶ fragmentation table for charge state 1+
- ▶ specType=etd
- ▶ score=35.15
- ▶ F104901.dat
- ▶ query=q2337\_p1
- ▶ precursor=1028.633600
- ▶ chargePrecursor=3
- ▶ itol=0.8

| AA    | c               | y        | z+1            | z+2             | z        | AA    |
|-------|-----------------|----------|----------------|-----------------|----------|-------|
| L 1   | 131.118         | 2083.892 | 2067.873       | 0.000           | 2066.865 | L 29  |
| N 2   | 245.161         | 2970.808 | 2954.789       | 2955.797        | 2953.781 | N 28  |
| K 3   | 373.256         | 2856.765 | 2840.746       | 2841.754        | 2839.738 | K 27  |
| L 4   | 486.340         | 2738.670 | 2722.651       | 2713.659        | 2711.643 | L 26  |
| L 5   | 599.424         | 2615.585 | 2599.567       | 2600.575        | 2598.559 | L 25  |
| G 6   | <b>656.445</b>  | 2502.502 | 2486.483       | 2487.491        | 2485.475 | G 24  |
| K 7   | 812.572         | 2445.468 | 2429.450       | 2430.458        | 2428.454 | K 23  |
| V 8   | 911.640         | 2329.354 | 2273.335       | 2274.343        | 2272.327 | V 22  |
| T 9   | 1012.688        | 2190.288 | 2174.269       | 2175.275        | 2173.259 | T 21  |
| I 10  | 1125.772        | 2089.239 | 2073.219       | 2074.227        | 2072.211 | I 20  |
| A 11  | <b>1196.809</b> | 1976.154 | 1960.135       | 1961.143        | 1959.127 | A 19  |
| Q 12  | 1324.887        | 1925.111 | 1889.090       | 1890.106        | 1888.090 | Q 18  |
| G 13  | <b>1381.889</b> | 1777.058 | 1761.039       | 1762.047        | 1760.032 | G 17  |
| G 14  | 1438.930        | 1720.037 | 1704.018       | <b>1705.026</b> | 1703.010 | G 16  |
| V 15  | 1537.979        | 1663.015 | 1646.997       | 1648.004        | 1646.989 | V 15  |
| L 16  | 1651.063        | 1563.947 | 1547.928       | <b>1548.936</b> | 1546.920 | L 14  |
| P 17  | 1748.116        | 1450.863 | 1434.844       | 1435.852        | 1433.836 | P 13  |
| TW 18 | 1862.159        | 1333.813 | 1317.793       | 1318.799        | 1316.783 | TW 12 |
| I 19  | 1975.243        | 1239.787 | 1223.768       | 1224.776        | 1222.761 | I 11  |
| Q 20  | 2103.301        | 1120.683 | 1110.664       | 1111.672        | 1109.656 | Q 10  |
| A 21  | 2174.338        | 998.624  | 982.605        | <b>983.614</b>  | 981.598  | A 9   |
| V 22  | 2273.407        | 827.587  | 911.569        | 912.576         | 910.561  | V 8   |
| L 23  | 2386.491        | 628.519  | 812.500        | <b>813.508</b>  | 811.492  | L 7   |
| L 24  | 2489.576        | 435.435  | <b>695.416</b> | <b>700.424</b>  | 698.408  | L 6   |
| T 25  | 2598.638        | 602.351  | 586.332        | 587.340         | 585.324  | T 5   |
| K 26  | 2724.723        | 505.295  | 489.276        | 490.282         | 488.271  | K 4   |
| K 27  | 2852.818        | 377.203  | 361.184        | 362.192         | 360.177  | K 3   |
| T 28  | 2963.865        | 249.108  | 233.089        | 234.097         | 232.082  | T 2   |
| E 29  | 3082.958        | 148.060  | 132.942        | 133.950         | 131.934  | E 1   |

# sp | Q6GSS7 | H2A2A\_MOUSE

LNKLLGK <sup>Dimethyl</sup> <sub>28.03</sub> VTIAQGGVLPNIQAVLLPKKTE

- ▶ fragmentation table for charge state 2+
- ▶ specType=etd
- ▶ score=35.15
- ▶ F104901.dat
- ▶ query=q2337\_p1
- ▶ precursor=1028.633600
- ▶ chargePrecursor=3
- ▶ itol=0.8

| AA  | c               | y               | z+1             | z+2             | z               | AA  |
|-----|-----------------|-----------------|-----------------|-----------------|-----------------|-----|
| L1  | 66.053          | <b>1542.450</b> | 1524.440        | 9.504           | 1533.930        | L19 |
| N1  | 123.054         | 1485.905        | <b>1477.898</b> | <b>1478.402</b> | <b>1477.394</b> | N20 |
| K1  | 187.132         | 1428.886        | 1420.877        | <b>1421.381</b> | 1420.373        | K27 |
| L1  | 243.674         | 1364.839        | <b>1356.829</b> | <b>1357.333</b> | <b>1356.325</b> | L26 |
| L1  | 300.216         | 1308.297        | 1300.287        | <b>1300.791</b> | 1299.781        | L25 |
| G1  | 358.720         | 1251.755        | 1243.745        | 1244.249        | <b>1243.241</b> | G24 |
| K1  | 406.780         | 1223.244        | 1215.234        | 1215.738        | 1214.731        | K23 |
| V1  | 456.324         | 1145.181        | 1137.171        | 1137.675        | 1136.667        | V22 |
| T1  | 506.840         | 1095.646        | 1087.637        | 1088.141        | 1087.133        | T21 |
| T10 | 563.390         | 1045.123        | 1037.113        | 1037.617        | 1036.609        | T20 |
| A11 | <b>596.908</b>  | 988.581         | 980.571         | 981.075         | 980.067         | A19 |
| G12 | 662.937         | 933.065         | 925.055         | 925.559         | 924.551         | G18 |
| G13 | 691.448         | 889.033         | 881.023         | 881.527         | 880.519         | G17 |
| G14 | 719.959         | 860.522         | 852.513         | 853.017         | 852.009         | G16 |
| V15 | 769.493         | 832.011         | 824.002         | 824.506         | 823.498         | V15 |
| L16 | 826.035         | 782.477         | 774.468         | 774.972         | 773.964         | L14 |
| T17 | 874.581         | <b>725.935</b>  | 717.925         | 718.429         | 717.421         | T13 |
| N18 | 931.583         | 677.402         | 669.392         | 669.896         | 668.888         | N12 |
| I19 | 988.125         | 620.867         | 612.857         | 613.361         | 612.353         | I11 |
| Q20 | 1052.154        | 563.845         | 555.836         | 556.340         | 555.332         | Q10 |
| A21 | 1087.673        | 499.816         | 491.807         | 492.311         | 491.303         | A0  |
| V22 | 1127.207        | 484.297         | 476.288         | 476.792         | 475.784         | V8  |
| L23 | 1193.760        | 414.763         | 406.754         | 407.258         | 406.250         | L17 |
| L24 | 1250.291        | 358.221         | 350.212         | 350.716         | 349.708         | L16 |
| P25 | <b>1298.817</b> | 301.679         | 293.670         | 294.174         | 293.166         | P5  |
| K26 | <b>1362.865</b> | 253.153         | 245.143         | 245.647         | 244.639         | K4  |
| K27 | <b>1426.912</b> | 189.105         | 181.096         | 181.600         | 180.592         | K3  |
| T28 | <b>1477.436</b> | 125.058         | 117.048         | 117.552         | 116.544         | T2  |
| E29 | <b>1541.958</b> | 74.534          | 66.524          | 67.028          | 66.021          | E1  |



# sp | Q6GSS7 | H2A2A\_MOUSE

LNKLLGK <sup>Dimethyl</sup> <sub>28.03</sub> VTIAQGGVLPNIQAVLLPKKTE

- ▶ fragmentation table for charge state 1+
- ▶ specType=etd
- ▶ score=106.53
- ▶ F104901.dat
- ▶ query=q2338\_p1
- ▶ precursor=617.583300
- ▶ chargePrecursor=5
- ▶ itol=0.8

| AA  | c               | y        | z+1             | z+2             | z              | AA   |
|-----|-----------------|----------|-----------------|-----------------|----------------|------|
| L1  | 131.118         | 3081.892 | 3067.873        | 0.000           | 3066.895       | L129 |
| N2  | <b>245.161</b>  | 2970.808 | 2954.789        | 2955.797        | 2951.781       | N28  |
| K3  | <b>373.256</b>  | 2856.765 | 2840.746        | 2841.754        | 2839.738       | K27  |
| L4  | 486.340         | 2728.670 | 2712.651        | 2713.659        | 2711.643       | L26  |
| L5  | <b>599.424</b>  | 2615.585 | 2599.567        | 2600.575        | 2598.560       | L25  |
| G6  | <b>656.445</b>  | 2502.502 | 2486.483        | 2487.491        | 2485.475       | G24  |
| K7  | <b>812.572</b>  | 2345.480 | 2429.462        | 2430.469        | 2428.454       | K23  |
| V8  | <b>911.640</b>  | 2288.354 | 2273.335        | 2274.343        | 2272.327       | V22  |
| T9  | 1012.688        | 2190.286 | 2174.267        | 2175.275        | 2173.259       | T21  |
| I10 | 1125.772        | 2089.238 | 2073.219        | 2074.227        | 2072.211       | I20  |
| A11 | <b>1196.899</b> | 1976.154 | 1960.135        | 1961.143        | 1959.127       | A19  |
| Q12 | <b>1324.867</b> | 1895.111 | 1889.093        | 1890.106        | 1888.090       | Q18  |
| G13 | <b>1381.889</b> | 1777.058 | <b>1761.039</b> | 1762.047        | 1760.032       | G17  |
| G14 | <b>1438.910</b> | 1720.937 | 1704.918        | 1705.926        | 1703.910       | G16  |
| V15 | 1537.879        | 1663.015 | 1646.997        | <b>1648.004</b> | 1645.989       | V15  |
| L16 | 1651.063        | 1563.947 | 1547.928        | <b>1548.936</b> | 1546.920       | L14  |
| P17 | 1748.116        | 1450.893 | 1434.864        | 1435.872        | 1433.856       | P13  |
| T18 | 1852.159        | 1383.810 | 1337.791        | 1338.799        | 1336.783       | T12  |
| I19 | 1975.243        | 1236.767 | 1223.748        | 1224.756        | 1222.741       | I11  |
| Q20 | 2103.301        | 1126.683 | 1110.664        | 1111.672        | 1109.656       | Q10  |
| A21 | 2174.336        | 998.624  | 982.606         | 983.614         | 981.598        | A9   |
| V22 | 2273.407        | 927.587  | <b>911.569</b>  | 912.576         | 910.561        | V8   |
| L23 | 2386.491        | 828.519  | <b>812.500</b>  | 813.508         | <b>811.492</b> | L7   |
| L24 | 2499.576        | 715.435  | <b>699.415</b>  | <b>700.424</b>  | 698.408        | L6   |
| P25 | 2596.626        | 602.351  | 586.332         | 587.340         | 585.324        | P5   |
| K26 | 2724.723        | 505.298  | <b>489.279</b>  | <b>490.287</b>  | 488.271        | K4   |
| K27 | 2852.816        | 377.203  | <b>361.184</b>  | 362.192         | 360.177        | K3   |
| T28 | 2953.895        | 249.108  | 233.089         | 234.097         | 232.082        | T2   |
| E29 | 3082.968        | 148.060  | 132.042         | 133.050         | 131.034        | E1   |



# sp | Q6GSS7 | H2A2A\_MOUSE

LNKLLGK <sup>Dimethyl</sup> <sub>28.03</sub> VTIAQGGVLPNIQAVLLPKKTE

- ▶ fragmentation table for charge state 2+
- ▶ specType=etd
- ▶ score=106.53
- ▶ F104901.dat
- ▶ query=q2338\_p1
- ▶ precursor=617.583300
- ▶ chargePrecursor=5
- ▶ itol=0.8

| AA | c               | y               | z+1             | z+2             | z               | AA   |
|----|-----------------|-----------------|-----------------|-----------------|-----------------|------|
| L1 | 66.053          | <b>1542.450</b> | 1534.440        | 9.504           | 1533.930        | L126 |
| N1 | 123.084         | 1485.905        | <b>1477.898</b> | 1478.402        | <b>1477.394</b> | N128 |
| K1 | 187.132         | 1428.888        | 1420.877        | <b>1421.381</b> | 1420.373        | K127 |
| L1 | 243.674         | 1364.839        | <b>1356.829</b> | <b>1357.333</b> | 1356.325        | L126 |
| L1 | 300.216         | 1308.297        | 1300.287        | 1300.791        | 1299.783        | L125 |
| G1 | 358.758         | 1254.755        | 1247.745        | <b>1244.240</b> | 1243.230        | G124 |
| K1 | <b>406.789</b>  | 1223.244        | <b>1215.234</b> | <b>1215.738</b> | <b>1214.731</b> | K123 |
| V1 | <b>456.324</b>  | 1145.181        | <b>1137.171</b> | <b>1137.675</b> | 1136.667        | V122 |
| T1 | 506.640         | 1095.646        | <b>1087.637</b> | <b>1088.141</b> | 1087.133        | T121 |
| T1 | 563.390         | <b>1045.123</b> | <b>1037.113</b> | <b>1037.617</b> | 1036.609        | T120 |
| A1 | <b>598.908</b>  | <b>988.581</b>  | 982.117         | 981.675         | 980.667         | A119 |
| G1 | <b>662.837</b>  | 933.066         | <b>945.053</b>  | <b>945.557</b>  | 944.549         | G118 |
| G1 | <b>691.448</b>  | 889.033         | <b>881.023</b>  | <b>881.527</b>  | <b>880.519</b>  | G117 |
| G1 | <b>719.959</b>  | 860.522         | <b>852.513</b>  | <b>853.017</b>  | <b>852.009</b>  | G116 |
| V1 | <b>769.493</b>  | 832.011         | <b>824.002</b>  | <b>824.506</b>  | <b>823.498</b>  | V115 |
| L1 | 826.035         | <b>782.477</b>  | 774.468         | 774.972         | 773.964         | L114 |
| T1 | <b>874.561</b>  | <b>725.335</b>  | 719.325         | 718.829         | 717.821         | T113 |
| N1 | 931.553         | 677.820         | <b>669.399</b>  | <b>669.903</b>  | <b>668.895</b>  | N112 |
| N1 | <b>988.125</b>  | 620.387         | <b>612.378</b>  | <b>612.882</b>  | 611.874         | N111 |
| Q1 | <b>1052.154</b> | 563.845         | 555.836         | 556.340         | 555.332         | Q110 |
| A1 | <b>1087.673</b> | 499.816         | <b>491.807</b>  | <b>492.310</b>  | <b>491.303</b>  | A10  |
| V1 | <b>1137.207</b> | 484.297         | <b>456.288</b>  | <b>456.792</b>  | <b>455.784</b>  | V18  |
| L1 | <b>1193.709</b> | 414.763         | <b>406.754</b>  | <b>407.258</b>  | 406.250         | L17  |
| L1 | 1250.291        | 358.221         | 350.212         | 350.716         | 349.708         | L16  |
| P1 | <b>1298.817</b> | 301.678         | 293.670         | 294.174         | 293.166         | P15  |
| K1 | <b>1362.805</b> | 253.153         | <b>245.143</b>  | <b>245.647</b>  | <b>244.639</b>  | K14  |
| K1 | <b>1426.912</b> | 189.105         | 181.096         | 181.600         | 180.592         | K13  |
| T1 | <b>1477.436</b> | 125.058         | 117.048         | 117.552         | 116.544         | T12  |
| E1 | 1541.928        | 74.534          | 66.524          | 67.028          | 66.021          | E11  |

# sp | Q6GSS7 | H2A2A\_MOUSE

LNKLLGK <sup>Dimethyl</sup><sub>28.03</sub> VTIAQGGVLPNIQAVLLPKKTE

- ▶ fragmentation table for charge state 3+
- ▶ specType=etd
- ▶ score=106.53
- ▶ F104901.dat
- ▶ query=q2338\_p1
- ▶ precursor=617.583300
- ▶ chargePrecursor=5
- ▶ itol=0.8

| AA    | c              | y               | z+1             | z+2            | z              | AA    |
|-------|----------------|-----------------|-----------------|----------------|----------------|-------|
| L[1]  | 44.377         | <b>1028.635</b> | <b>1023.296</b> | 0.672          | 1023.660       | L[29] |
| N[2]  | 62.302         | 090.941         | <b>985.601</b>  | <b>965.937</b> | <b>985.265</b> | N[28] |
| K[3]  | 125.090        | 952.320         | <b>947.587</b>  | <b>947.923</b> | <b>947.251</b> | K[27] |
| L[4]  | 162.785        | 910.226         | <b>904.889</b>  | <b>905.225</b> | <b>904.553</b> | L[26] |
| L[5]  | 200.479        | 872.531         | <b>867.194</b>  | <b>867.530</b> | <b>866.856</b> | L[25] |
| G[6]  | 239.487        | 834.835         | <b>829.499</b>  | <b>829.835</b> | <b>829.163</b> | G[24] |
| K[7]  | 271.529        | 815.833         | <b>810.492</b>  | <b>810.828</b> | <b>810.156</b> | K[23] |
| V[8]  | 304.552        | 763.790         | <b>758.450</b>  | <b>758.786</b> | <b>758.114</b> | V[22] |
| T[9]  | 338.234        | 730.767         | <b>725.427</b>  | <b>725.763</b> | <b>725.091</b> | T[21] |
| I[10] | 375.929        | 697.084         | <b>691.745</b>  | <b>692.081</b> | <b>691.409</b> | I[20] |
| A[11] | 389.608        | 699.389         | 654.250         | 654.586        | 653.714        | A[19] |
| Q[12] | 442.294        | 636.710         | 630.374         | 630.707        | 630.035        | Q[18] |
| G[13] | 461.301        | 593.024         | 587.685         | 588.021        | 587.349        | G[17] |
| G[14] | 480.308        | 574.017         | 568.678         | 569.013        | 568.342        | G[16] |
| V[15] | 513.331        | 555.010         | 549.670         | 550.006        | 549.334        | V[15] |
| L[16] | 551.026        | 521.987         | 516.648         | 516.984        | 516.312        | L[14] |
| P[17] | 583.377        | 484.202         | 478.963         | 479.289        | 478.617        | P[13] |
| N[18] | 621.391        | 451.942         | 446.702         | 446.938        | 446.266        | N[12] |
| I[19] | 659.086        | 413.927         | 408.588         | 408.924        | 408.252        | I[11] |
| Q[20] | 701.772        | 376.233         | 370.893         | 371.229        | 370.557        | Q[10] |
| A[21] | <b>725.451</b> | 333.546         | 328.207         | 328.543        | 327.871        | A[9]  |
| V[22] | <b>758.474</b> | 309.867         | 304.528         | 304.864        | 304.192        | V[8]  |
| L[23] | 796.188        | 276.844         | 271.505         | 271.841        | 271.169        | L[7]  |
| L[24] | 833.863        | 239.150         | 233.810         | 234.146        | 233.474        | L[6]  |
| T[25] | 869.214        | 201.455         | 196.116         | 196.452        | 195.780        | T[5]  |
| K[26] | <b>908.912</b> | 169.100         | 163.760         | 164.100        | 163.429        | K[4]  |
| K[27] | <b>951.611</b> | 138.406         | 133.066         | 133.402        | 132.730        | K[3]  |
| T[28] | <b>985.293</b> | 83.708          | 78.368          | 78.704         | 78.032         | T[2]  |
| E[29] | 1028.307       | 50.025          | 44.685          | 45.021         | 44.349         | E[1]  |

# sp | Q6GSS7 | H2A2A\_MOUSE

LNKLLGK <sup>Dimethyl</sup> <sub>28.03</sub> VTIAQGGVLPNIQAVLLPKKTE

- ▶ fragmentation table for charge state 4+
- ▶ specType=etd
- ▶ score=106.53
- ▶ F104901.dat
- ▶ query=q2338\_p1
- ▶ precursor=617.583300
- ▶ chargePrecursor=5
- ▶ itol=0.8

| AA |    | c              | y              | z+1            | z+2            | z              | AA |    |
|----|----|----------------|----------------|----------------|----------------|----------------|----|----|
| L  | 1  | 33.535         | <b>771.728</b> | 767.724        | 0.756          | 767.472        | L  | 29 |
| N  | 2  | 62.046         | 743.451        | <b>739.453</b> | <b>739.705</b> | <b>739.201</b> | N  | 28 |
| K  | 3  | 94.059         | 714.941        | 710.942        | 711.194        | 710.690        | K  | 27 |
| L  | 4  | 122.340        | 687.923        | 678.918        | 679.170        | 678.666        | L  | 26 |
| L  | 5  | 150.611        | 654.652        | 650.647        | 650.899        | 650.395        | L  | 25 |
| G  | 6  | 164.867        | 626.381        | 622.376        | 622.628        | 622.124        | G  | 24 |
| K  | 7  | 203.898        | <b>612.126</b> | 608.121        | 609.373        | 607.869        | K  | 23 |
| V  | 8  | 228.665        | 573.094        | 569.089        | 569.341        | 568.837        | V  | 22 |
| T  | 9  | 253.927        | 548.327        | 544.322        | 544.574        | 544.070        | T  | 21 |
| I  | 10 | 262.198        | 523.065        | 519.060        | 519.312        | 518.808        | I  | 20 |
| A  | 11 | 269.958        | 494.794        | <b>490.789</b> | <b>491.041</b> | <b>490.537</b> | A  | 19 |
| Q  | 12 | 311.972        | 477.035        | 473.030        | 473.282        | 472.778        | Q  | 18 |
| G  | 13 | 346.728        | 445.020        | 441.015        | 441.267        | 440.763        | G  | 17 |
| G  | 14 | <b>360.483</b> | 430.765        | 426.760        | 427.012        | 426.508        | G  | 16 |
| V  | 15 | 385.250        | 416.509        | 412.504        | 412.757        | 412.253        | V  | 15 |
| L  | 16 | 413.521        | 391.742        | 387.737        | 387.989        | 387.486        | L  | 14 |
| P  | 17 | 437.784        | 363.471        | 359.466        | 359.718        | 359.215        | P  | 13 |
| N  | 18 | 466.295        | 339.208        | 335.203        | 335.455        | 334.951        | N  | 12 |
| I  | 19 | 494.566        | 310.897        | 306.891        | 307.143        | 306.641        | I  | 11 |
| Q  | 20 | 525.381        | 282.426        | 278.422        | 278.673        | 278.170        | Q  | 10 |
| A  | 21 | 544.340        | 250.412        | 246.407        | 246.659        | 246.155        | A  | 9  |
| V  | 22 | 569.107        | 232.652        | 228.646        | 228.898        | 228.395        | V  | 8  |
| L  | 23 | 597.378        | 207.885        | 203.881        | 204.132        | 203.629        | L  | 7  |
| L  | 24 | 625.649        | 179.614        | 175.609        | 175.861        | 175.358        | L  | 6  |
| P  | 25 | 649.912        | 151.343        | 147.338        | 147.590        | 147.087        | P  | 5  |
| K  | 26 | 681.936        | 127.080        | 123.075        | 123.327        | 122.823        | K  | 4  |
| K  | 27 | <b>713.960</b> | 95.056         | 91.052         | 91.304         | 90.800         | K  | 3  |
| T  | 28 | <b>739.222</b> | 63.032         | 59.028         | 59.280         | 58.776         | T  | 2  |
| E  | 29 | <b>771.482</b> | 37.771         | 33.766         | 34.018         | 33.514         | E  | 1  |

# sp | Q6GSS7 | H2A2A\_MOUSE

LNKLLGK <sup>Dimethyl</sup>VTIAQGGVLPNIQAVLLPKKTE  
28.03

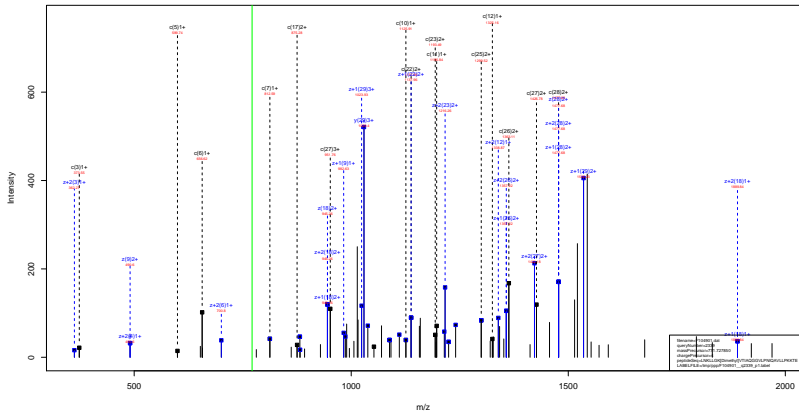

# sp | Q6GSS7 | H2A2A\_MOUSE

LNKLLGK <sup>Dimethyl</sup> <sub>28.03</sub> VTIAQGGVLPNIQAVLLPKKTE

- ▶ fragmentation table for charge state 1+
- ▶ specType=etd
- ▶ score=39.21
- ▶ F104901.dat
- ▶ query=q2339\_p1
- ▶ precursor=771.727850
- ▶ chargePrecursor=4
- ▶ itol=0.8

| AA    | c               | y               | z+1             | z+2             | z        | AA    |
|-------|-----------------|-----------------|-----------------|-----------------|----------|-------|
| L[1]  | 131.118         | 3083.892        | 3067.873        | 0.000           | 3066.865 | L[20] |
| N[2]  | 245.161         | 2970.808        | 2954.789        | 2938.769        | 2953.781 | N[20] |
| K[3]  | <b>373.256</b>  | 2856.765        | 2840.746        | 2841.754        | 2839.738 | K[27] |
| L[4]  | 488.340         | 2728.670        | 2712.651        | 2713.659        | 2711.643 | L[26] |
| L[5]  | <b>999.424</b>  | 2615.586        | 2599.567        | 2600.575        | 2598.559 | L[25] |
| G[6]  | <b>658.445</b>  | 2502.500        | 2486.483        | 2487.491        | 2485.475 | G[24] |
| K[7]  | <b>812.572</b>  | 2445.480        | 2429.462        | 2430.469        | 2428.454 | K[23] |
| V[8]  | 911.640         | 2289.354        | 2273.335        | 2274.343        | 2272.327 | V[22] |
| T[9]  | 1012.688        | 2190.288        | 2174.267        | 2175.275        | 2173.259 | T[21] |
| I[10] | <b>1125.772</b> | 2089.230        | 2073.210        | 2074.227        | 2072.211 | I[20] |
| A[11] | <b>1196.809</b> | 1976.154        | 1960.135        | 1961.143        | 1959.127 | A[19] |
| Q[12] | <b>1324.867</b> | 1865.111        | <b>1889.098</b> | <b>1890.106</b> | 1888.090 | Q[18] |
| G[13] | 1381.889        | 1777.058        | 1761.039        | 1762.047        | 1760.032 | G[17] |
| G[14] | 1438.910        | 1720.037        | 1704.018        | 1705.026        | 1703.010 | G[16] |
| V[15] | 1537.979        | 1663.015        | 1646.997        | 1648.004        | 1646.989 | V[15] |
| L[16] | 1651.063        | 1563.947        | 1547.928        | 1548.936        | 1546.920 | L[14] |
| T[17] | 1768.116        | 1490.863        | 1474.844        | 1475.852        | 1473.836 | T[13] |
| N[18] | 1862.159        | 1353.810        | 1337.791        | <b>1338.799</b> | 1336.783 | N[12] |
| I[19] | 1975.243        | <b>1239.767</b> | <b>1223.748</b> | <b>1224.756</b> | 1222.741 | I[11] |
| Q[20] | 2103.301        | <b>1126.683</b> | <b>1110.664</b> | 1111.672        | 1109.656 | Q[10] |
| A[21] | 2174.338        | 998.624         | <b>982.606</b>  | 983.614         | 981.598  | A[9]  |
| V[22] | 2273.407        | 927.587         | 911.569         | 912.576         | 910.561  | V[8]  |
| L[23] | 2389.491        | 808.513         | <b>812.500</b>  | 813.508         | 811.492  | L[7]  |
| L[24] | 2499.575        | 715.435         | 699.416         | <b>700.424</b>  | 698.408  | L[6]  |
| P[25] | 2596.628        | 602.351         | 586.332         | 587.340         | 585.324  | P[5]  |
| K[26] | 2724.723        | 505.268         | 489.249         | <b>490.287</b>  | 488.271  | K[4]  |
| K[27] | 2852.818        | 377.203         | 361.184         | <b>362.192</b>  | 360.177  | K[3]  |
| T[28] | 2953.865        | 249.108         | 233.089         | 234.097         | 232.082  | T[2]  |
| E[29] | 3082.008        | 148.980         | 132.962         | 133.970         | 131.954  | E[1]  |

# sp | Q6GSS7 | H2A2A\_MOUSE

LNKLLGK <sup>Dimethyl</sup> <sub>28.03</sub> VTIAQGGVLPNIQAVLLPKKTE

- ▶ fragmentation table for charge state 2+
- ▶ specType=etd
- ▶ score=39.21
- ▶ F104901.dat
- ▶ query=q2339\_p1
- ▶ precursor=771.727850
- ▶ chargePrecursor=4
- ▶ itol=0.8

| AA | c               | y        | z+1             | z+2             | z               | AA   |
|----|-----------------|----------|-----------------|-----------------|-----------------|------|
| L1 | 66.063          | 1542.450 | <b>1534.440</b> | 0.504           | 1533.936        | L126 |
| N1 | 123.084         | 1485.908 | <b>1477.898</b> | <b>1478.402</b> | <b>1477.394</b> | N128 |
| K1 | 187.132         | 1438.886 | 1438.877        | <b>1421.381</b> | 1420.373        | K127 |
| L1 | 243.674         | 1384.839 | <b>1356.829</b> | <b>1357.333</b> | 1356.325        | L126 |
| L1 | 300.216         | 1330.297 | <b>1300.287</b> | 1300.791        | <b>1299.783</b> | L125 |
| G1 | 338.726         | 1281.758 | 1244.740        | 1244.849        | 1243.741        | G124 |
| K1 | 406.789         | 1223.244 | 1215.235        | <b>1215.738</b> | <b>1214.731</b> | K123 |
| V1 | 456.324         | 1145.181 | <b>1137.171</b> | <b>1137.675</b> | 1136.667        | V122 |
| T1 | 506.846         | 1095.646 | <b>1087.637</b> | <b>1088.141</b> | 1087.133        | T121 |
| I1 | 563.390         | 1045.123 | 1037.113        | <b>1037.617</b> | 1036.609        | I120 |
| A1 | 608.608         | 998.581  | 988.571         | 981.575         | 980.567         | A119 |
| Q1 | 662.937         | 953.066  | <b>945.053</b>  | <b>945.557</b>  | <b>944.549</b>  | Q118 |
| G1 | 691.448         | 899.033  | <b>881.023</b>  | <b>881.527</b>  | 880.519         | G117 |
| G1 | 719.959         | 860.522  | 852.513         | 853.017         | 852.009         | G116 |
| V1 | 769.493         | 832.011  | 824.002         | 824.506         | 823.498         | V115 |
| L1 | 826.035         | 782.477  | 774.468         | 774.972         | 773.964         | L114 |
| T1 | <b>874.561</b>  | 725.935  | 717.926         | 718.430         | 717.422         | T113 |
| N1 | 913.583         | 677.409  | 669.399         | 669.903         | 668.895         | N112 |
| I1 | 968.125         | 626.867  | 612.878         | 612.882         | 611.874         | I111 |
| Q1 | <b>1052.154</b> | 563.945  | 555.839         | 556.340         | 555.332         | Q110 |
| A1 | <b>1087.673</b> | 499.616  | 491.807         | 492.310         | <b>491.303</b>  | A109 |
| V1 | <b>1137.207</b> | 464.297  | 456.288         | 456.792         | 455.784         | V108 |
| L1 | <b>1193.749</b> | 414.763  | 406.754         | 407.258         | 406.250         | L107 |
| L1 | 1250.291        | 358.221  | 350.211         | 350.716         | 349.708         | L106 |
| P1 | <b>1298.817</b> | 301.679  | 293.670         | 294.174         | 293.166         | P105 |
| K1 | <b>1362.865</b> | 253.153  | 245.143         | 245.647         | 244.639         | K104 |
| K1 | <b>1426.912</b> | 189.105  | 181.096         | 181.600         | 180.592         | K103 |
| T1 | <b>1477.436</b> | 125.058  | 117.048         | 117.552         | 116.544         | T102 |
| E1 | 1541.958        | 74.534   | 66.524          | 67.028          | 66.021          | E101 |

# sp | Q6GSS7 | H2A2A\_MOUSE

LNKLLGK <sup>Dimethyl</sup> <sub>28.03</sub> VTIAQGGVLPNIQAVLLPKKTE

- ▶ fragmentation table for charge state 3+
- ▶ specType=etd
- ▶ score=39.21
- ▶ F104901.dat
- ▶ query=q2339\_p1
- ▶ precursor=771.727850
- ▶ chargePrecursor=4
- ▶ itol=0.8

| AA  | c              | y               | z+1             | z+2            | z        | AA  |
|-----|----------------|-----------------|-----------------|----------------|----------|-----|
| L1  | 44.377         | <b>1028.635</b> | <b>1023.296</b> | 0.672          | 1022.660 | L20 |
| N2  | 82.302         | 990.941         | 985.601         | <b>985.937</b> | 985.265  | N28 |
| K3  | 125.090        | 952.926         | 947.587         | 947.923        | 947.251  | K27 |
| L4  | 162.785        | 910.228         | 904.889         | 905.225        | 904.551  | L26 |
| L5  | 200.479        | 872.531         | 867.194         | 867.530        | 866.858  | L25 |
| G6  | 239.487        | 834.835         | 829.499         | 829.835        | 829.163  | G24 |
| K7  | 271.529        | 815.832         | 810.492         | 810.828        | 810.156  | K23 |
| V8  | 304.552        | 763.790         | 758.450         | 758.786        | 758.114  | V22 |
| T9  | 338.234        | 730.767         | 725.427         | 725.763        | 725.091  | T21 |
| I10 | 375.929        | 697.084         | 691.745         | 692.081        | 691.409  | I20 |
| A11 | 399.608        | 659.389         | 654.050         | 654.386        | 653.714  | A19 |
| Q12 | 442.294        | 626.710         | 621.371         | 621.707        | 621.035  | Q18 |
| G13 | 461.301        | 593.024         | 587.685         | 588.021        | 587.349  | G17 |
| G14 | 480.308        | 574.017         | 568.678         | 569.013        | 568.342  | G16 |
| V15 | 513.331        | 555.010         | 549.670         | 550.006        | 549.334  | V15 |
| L16 | 551.026        | 521.987         | 516.648         | 516.984        | 516.312  | L14 |
| P17 | 583.377        | 484.202         | 478.863         | 479.200        | 478.527  | P13 |
| N18 | 621.391        | 451.942         | 446.602         | 446.938        | 446.266  | N12 |
| I19 | 659.086        | 413.927         | 408.588         | 408.924        | 408.252  | I11 |
| Q20 | 701.772        | 376.233         | 370.893         | 371.229        | 370.557  | Q10 |
| A21 | 725.451        | 333.546         | 328.207         | 328.543        | 327.871  | A9  |
| V22 | 758.474        | 309.867         | 304.528         | 304.864        | 304.192  | V8  |
| L23 | 796.168        | 276.844         | 271.505         | 271.841        | 271.169  | L7  |
| L24 | 833.863        | 239.150         | 233.810         | 234.146        | 233.474  | L6  |
| T25 | 869.214        | 201.455         | 196.116         | 196.452        | 195.780  | T5  |
| K26 | 908.912        | 169.100         | 163.760         | 164.100        | 163.429  | K4  |
| K27 | <b>951.611</b> | 138.406         | 133.066         | 133.402        | 132.730  | K3  |
| T28 | 985.293        | 83.708          | 78.368          | 78.704         | 78.032   | T2  |
| E29 | 1028.307       | 50.025          | 44.685          | 45.021         | 44.349   | E1  |





# sp | P43276 | H15\_MOUSE

TAAPAPVEKS <sup>Phospho</sup>79.97 PAKKKTTKKAGAAKRKATGPPVSE

- ▶ fragmentation table for charge state 1+
- ▶ specType=etd
- ▶ score=51.45
- ▶ F104901.dat
- ▶ query=q2499\_p1
- ▶ precursor=581.163060
- ▶ chargePrecursor=6
- ▶ itol=0.8

| AA | c               | y               | z+1             | z+2             | z               | AA |     |
|----|-----------------|-----------------|-----------------|-----------------|-----------------|----|-----|
| T  | 119.082         | 3481.925        | 3465.907        | 0.000           | 3464.890        | R  | 134 |
| A  | 180.119         | 3390.979        | 3364.959        | 0.000           | 3363.951        | A  | 133 |
| A  | 293.156         | 3309.941        | 3293.922        | 0.000           | 3292.914        | A  | 132 |
| F  | <b>358.208</b>  | 3238.894        | 3222.785        | 0.000           | 3221.777        | P  | 131 |
| A  | 439.246         | 3141.751        | 3125.732        | 0.000           | 3124.724        | A  | 130 |
| F  | 528.299         | 3070.714        | 3054.695        | 0.000           | 3053.687        | P  | 129 |
| V  | <b>625.367</b>  | 2973.661        | 2957.642        | 0.000           | 2956.634        | V  | 128 |
| T  | <b>754.409</b>  | 2874.592        | 2858.573        | 0.000           | 2857.565        | T  | 127 |
| K  | 892.554         | 2745.550        | 2729.531        | 27.80.539       | 2728.523        | K  | 126 |
| S  | 1049.503        | 2617.495        | 2601.436        | 2602.444        | 2600.426        | S  | 125 |
| F  | <b>1146.555</b> | 2650.457        | 2434.438        | 2435.446        | 2433.430        | P  | 124 |
| A  | <b>1217.593</b> | 2353.404        | 2337.385        | 2338.393        | 2336.377        | A  | 123 |
| K  | <b>1365.668</b> | 2282.367        | 2066.348        | 2267.356        | 2265.340        | K  | 122 |
| R  | <b>1473.783</b> | 2154.322        | 2138.293        | 2139.281        | 2137.286        | R  | 121 |
| K  | 1691.877        | 2026.177        | 2010.158        | 2011.166        | 2009.150        | K  | 120 |
| T  | 1702.925        | 1898.082        | 1882.063        | 1883.071        | 1881.055        | T  | 119 |
| T  | 1893.973        | 1797.034        | 1781.015        | 1782.023        | 1780.006        | T  | 118 |
| K  | 1932.068        | 1695.986        | 1679.968        | 1680.976        | 1678.960        | K  | 117 |
| K  | 2080.283        | 1567.891        | 1551.873        | <b>1552.881</b> | 1550.865        | K  | 116 |
| A  | 2111.290        | 1439.797        | 1423.778        | <b>1424.786</b> | 1422.770        | A  | 115 |
| G  | 2188.221        | 1368.759        | 1352.741        | 1353.748        | 1351.733        | G  | 114 |
| A  | 2259.259        | 1311.738        | <b>1295.719</b> | <b>1296.727</b> | 1294.711        | A  | 113 |
| A  | 2330.296        | 1240.703        | 1224.682        | 1225.690        | <b>1223.674</b> | A  | 112 |
| K  | 2458.291        | <b>1169.664</b> | 1153.642        | 1154.653        | <b>1152.637</b> | K  | 111 |
| K  | 2614.492        | 1074.599        | <b>1025.590</b> | 1026.598        | 1024.584        | K  | 110 |
| K  | 2742.587        | <b>885.468</b>  | 869.449         | 870.457         | <b>868.441</b>  | K  | 109 |
| A  | 2813.624        | <b>757.373</b>  | 741.354         | 742.362         | 740.346         | A  | 108 |
| T  | 2914.671        | <b>686.336</b>  | 670.317         | <b>671.325</b>  | <b>669.309</b>  | T  | 107 |
| G  | 2971.693        | 585.289         | 569.269         | 570.277         | 568.261         | G  | 106 |
| P  | 3068.746        | 508.266         | 512.268         | <b>513.256</b>  | 511.249         | P  | 105 |
| F  | 3185.798        | 433.214         | 435.195         | 436.203         | 434.187         | F  | 104 |
| V  | 3264.867        | 354.161         | 338.142         | 339.150         | 337.134         | V  | 103 |
| S  | 3351.899        | 235.092         | 219.074         | 220.082         | <b>218.066</b>  | S  | 102 |
| E  | 3480.941        | 148.060         | 132.042         | 133.050         | 131.034         | E  | 101 |

# sp | P43276 | H15\_MOUSE

TAAPAPVEKS <sup>Phospho</sup>79.97 PAKKKTTKKAGAAKRKATGPPVSE

- ▶ fragmentation table for charge state 2+
- ▶ specType=etd
- ▶ score=51.45
- ▶ F104901.dat
- ▶ query=q2499\_p1
- ▶ precursor=581.163060
- ▶ chargePrecursor=6
- ▶ itol=0.8

| AA  | c               | y               | z+1             | z+2             | z               | AA  |
|-----|-----------------|-----------------|-----------------|-----------------|-----------------|-----|
| T 1 | 60.044          | 1741.466        | <b>1733.457</b> | 0.504           | <b>1732.953</b> | T14 |
| A 2 | 65.263          | 1699.243        | 1682.733        | 0.504           | 1662.420        | A13 |
| A 3 | 131.682         | <b>1655.424</b> | 1647.435        | 0.504           | 1646.911        | A12 |
| F 4 | 179.608         | 1619.905        | 1611.896        | 0.504           | 1611.392        | F11 |
| A 5 | 215.126         | 1571.379        | 1563.370        | 0.504           | 1562.866        | A10 |
| F 6 | 263.651         | 1535.860        | 1527.851        | 0.504           | 1527.347        | F10 |
| V 7 | 313.167         | 1487.334        | 1479.325        | 0.504           | 1478.821        | V10 |
| E 8 | 377.398         | 1457.805        | 1449.797        | 0.504           | 1449.292        | E11 |
| K 9 | 441.758         | <b>1373.278</b> | 1365.269        | <b>1365.773</b> | 1364.765        | K10 |
| S10 | 505.235         | <b>1309.231</b> | <b>1301.222</b> | <b>1301.726</b> | 1300.718        | S10 |
| F11 | 573.761         | 1225.732        | <b>1217.723</b> | <b>1218.226</b> | <b>1217.210</b> | F10 |
| A12 | 609.300         | 1177.205        | <b>1169.196</b> | <b>1169.700</b> | 1168.692        | A11 |
| K13 | <b>673.347</b>  | 1141.687        | 1133.678        | <b>1134.182</b> | 1133.174        | K12 |
| R14 | <b>737.395</b>  | 1077.630        | <b>1069.630</b> | <b>1070.134</b> | 1069.126        | R11 |
| R15 | <b>801.442</b>  | <b>1013.592</b> | <b>1005.583</b> | <b>1006.087</b> | 1005.079        | R10 |
| T16 | <b>851.966</b>  | <b>949.545</b>  | 941.535         | 942.039         | <b>941.031</b>  | T10 |
| T17 | <b>902.490</b>  | <b>899.021</b>  | <b>891.011</b>  | <b>891.515</b>  | 890.507         | T10 |
| K18 | <b>966.538</b>  | 848.467         | 840.457         | <b>840.961</b>  | 839.953         | K11 |
| R19 | <b>1038.585</b> | <b>784.449</b>  | <b>776.440</b>  | <b>776.944</b>  | <b>775.936</b>  | R10 |
| A20 | <b>1064.104</b> | 729.920         | <b>712.393</b>  | <b>712.896</b>  | <b>711.889</b>  | A11 |
| G21 | <b>1094.614</b> | 684.883         | <b>676.874</b>  | <b>677.378</b>  | <b>676.370</b>  | G14 |
| A22 | <b>1130.133</b> | 656.373         | <b>648.363</b>  | <b>648.867</b>  | <b>647.859</b>  | A11 |
| A23 | 1185.651        | 620.854         | <b>612.845</b>  | <b>613.349</b>  | 612.341         | A12 |
| K24 | <b>1229.699</b> | 585.335         | <b>577.326</b>  | <b>577.830</b>  | 576.822         | K11 |
| R25 | 1307.719        | 503.288         | <b>513.279</b>  | <b>513.783</b>  | <b>512.775</b>  | R10 |
| K26 | 1371.797        | 443.237         | 435.228         | 435.732         | 434.724         | K10 |
| A27 | 1407.315        | 379.190         | 371.181         | 371.685         | 370.677         | A10 |
| T28 | 1457.839        | 343.671         | 335.662         | 336.166         | 335.158         | T11 |
| G29 | 1486.350        | 293.149         | 285.138         | 285.642         | 284.634         | G10 |
| F30 | 1534.876        | 264.637         | 256.627         | 257.131         | 256.123         | F10 |
| F31 | 1583.403        | 218.110         | 209.101         | 209.605         | 208.597         | F10 |
| V32 | 1632.931        | 167.584         | 159.575         | 160.079         | 159.071         | V10 |
| S33 | 1676.453        | 118.050         | 110.041         | 110.544         | 109.537         | S10 |
| E34 | 1740.974        | 74.534          | 66.524          | 67.028          | 66.021          | E11 |

# sp | P43276 | H15\_MOUSE

TAAPAPVEKS <sup>Phospho</sup>79.97 PAKKKTTKKAGAAKRKATGPPVSE

- ▶ fragmentation table for charge state 3+
- ▶ specType=etd
- ▶ score=51.45
- ▶ F104901.dat
- ▶ query=q2499\_p1
- ▶ precursor=581.163060
- ▶ chargePrecursor=6
- ▶ itol=0.8

| AA |    | c               | y               | z+1             | z+2            | z               | AA    |
|----|----|-----------------|-----------------|-----------------|----------------|-----------------|-------|
| T  | 3  | 60.385          | <b>1161.313</b> | <b>1155.974</b> | 0.672          | <b>1155.638</b> | T[3]  |
| A  | 2  | 64.044          | 1177.631        | 1173.291        | 0.672          | 1171.951        | A[2]  |
| A  | 3  | 87.723          | <b>1103.952</b> | <b>1098.612</b> | 0.672          | <b>1098.276</b> | A[3]  |
| P  | 4  | 120.074         | <b>1080.273</b> | 1074.933        | 0.672          | 1074.597        | P[4]  |
| A  | 5  | 143.753         | 1047.922        | <b>1042.582</b> | 0.672          | 1042.246        | A[5]  |
| P  | 6  | 176.104         | 1024.241        | 1018.903        | 0.672          | 1018.567        | P[6]  |
| V  | 7  | 209.127         | 991.882         | <b>986.552</b>  | 0.672          | <b>986.216</b>  | V[7]  |
| E  | 8  | 252.141         | <b>954.809</b>  | <b>953.529</b>  | 0.672          | 953.193         | E[8]  |
| K  | 9  | 294.840         | <b>915.855</b>  | 910.515         | <b>910.851</b> | 910.175         | K[9]  |
| S  | 10 | 350.506         | 873.156         | <b>867.817</b>  | <b>868.153</b> | <b>867.481</b>  | S[10] |
| P  | 11 | 382.857         | 817.490         | 812.151         | 812.487        | 811.815         | P[11] |
| A  | 12 | 406.536         | <b>785.139</b>  | <b>779.800</b>  | <b>780.136</b> | <b>779.464</b>  | A[12] |
| K  | 13 | 449.234         | 761.460         | <b>756.121</b>  | <b>756.457</b> | 755.785         | K[13] |
| R  | 14 | 491.932         | 718.767         | <b>713.423</b>  | 713.758        | <b>713.087</b>  | R[14] |
| K  | 15 | 534.631         | 676.064         | <b>670.724</b>  | <b>671.060</b> | 670.388         | K[15] |
| T  | 16 | 568.313         | 633.365         | <b>628.026</b>  | <b>628.362</b> | <b>627.690</b>  | T[16] |
| T  | 17 | <b>601.996</b>  | <b>599.683</b>  | <b>594.343</b>  | <b>594.679</b> | 594.007         | T[17] |
| K  | 18 | <b>644.694</b>  | 566.000         | <b>560.661</b>  | <b>560.997</b> | 560.325         | K[18] |
| K  | 19 | <b>687.392</b>  | 523.302         | 517.964         | 518.298        | 517.626         | K[19] |
| A  | 20 | <b>711.071</b>  | 480.604         | 475.264         | 475.600        | 474.928         | A[20] |
| G  | 21 | <b>730.079</b>  | 456.925         | 451.585         | 451.921        | 451.249         | G[21] |
| A  | 22 | <b>753.758</b>  | 437.917         | 432.578         | 432.914        | 432.242         | A[22] |
| A  | 23 | 777.437         | 414.230         | 408.890         | 409.235        | 408.563         | A[23] |
| K  | 24 | <b>820.135</b>  | 390.550         | 385.210         | 385.546        | 384.894         | K[24] |
| K  | 25 | <b>814.867</b>  | 347.861         | 342.522         | 342.857        | 342.186         | K[25] |
| K  | 26 | <b>914.867</b>  | 296.921         | 290.488         | 290.824        | 290.152         | K[26] |
| A  | 27 | 938.546         | 253.129         | 247.789         | 248.125        | 247.454         | A[27] |
| T  | 28 | <b>972.229</b>  | 229.450         | 224.110         | 224.446        | 223.775         | T[28] |
| G  | 29 | 991.236         | 195.767         | 190.428         | 190.764        | 190.092         | G[29] |
| P  | 30 | 1023.587        | 176.760         | 171.421         | 171.757        | 171.085         | P[30] |
| P  | 31 | 1057.938        | 144.400         | 139.070         | 139.406        | 138.734         | P[31] |
| V  | 32 | <b>1088.560</b> | 112.050         | 106.719         | 107.055        | 106.383         | V[32] |
| S  | 33 | 1117.971        | 79.030          | 73.696          | 74.032         | 73.360          | S[33] |
| E  | 34 | 1160.985        | 50.025          | 44.685          | 45.021         | 44.349          | E[34] |

# sp | P43276 | H15\_MOUSE

TAAPAPVEKS<sup>Phospho</sup> PAKKKTTKKAGAAKRKATGPPVSE  
79.97

- ▶ fragmentation table for charge state 4+
- ▶ specType=etd
- ▶ score=51.45
- ▶ F104901.dat
- ▶ query=q2499\_p1
- ▶ precursor=581.163060
- ▶ chargePrecursor=6
- ▶ itol=0.8

| AA | c  | y              | z+1            | z+2            | z              | AA             |   |    |
|----|----|----------------|----------------|----------------|----------------|----------------|---|----|
| T  | 1  | 30.526         | <b>871.237</b> | <b>867.232</b> | 0.755          | <b>866.980</b> | T | 34 |
| A  | 2  | 48.285         | 845.975        | <b>841.970</b> | 0.755          | <b>841.718</b> | A | 33 |
| A  | 3  | 66.044         | <b>828.216</b> | <b>824.211</b> | 0.755          | <b>823.959</b> | A | 32 |
| P  | 4  | 83.803         | <b>810.456</b> | <b>806.452</b> | 0.755          | <b>806.200</b> | P | 31 |
| A  | 5  | 108.067        | 786.193        | 782.188        | 0.755          | 781.937        | A | 30 |
| P  | 6  | 132.330        | 768.434        | <b>764.429</b> | 0.755          | <b>764.177</b> | P | 29 |
| V  | 7  | 157.097        | 744.171        | 740.166        | 0.755          | 739.914        | V | 28 |
| E  | 8  | 189.358        | 719.404        | <b>715.399</b> | 0.755          | <b>715.147</b> | E | 27 |
| K  | 9  | 221.382        | <b>687.143</b> | <b>683.138</b> | <b>683.390</b> | <b>682.886</b> | K | 26 |
| S  | 10 | 263.131        | <b>655.119</b> | <b>651.115</b> | <b>651.366</b> | <b>650.863</b> | S | 25 |
| P  | 11 | 287.394        | <b>613.370</b> | 609.365        | 609.617        | 609.113        | P | 24 |
| A  | 12 | 305.154        | 589.106        | 585.102        | 585.354        | 584.850        | A | 23 |
| K  | 13 | 337.177        | 571.341        | 567.342        | 567.594        | 567.090        | K | 22 |
| K  | 14 | 369.201        | 539.321        | 535.319        | 535.571        | 535.067        | K | 21 |
| K  | 15 | 401.225        | 507.300        | 503.298        | 503.547        | 503.043        | K | 20 |
| T  | 16 | 428.487        | 475.276        | 471.271        | 471.523        | 471.019        | T | 19 |
| T  | 17 | 451.749        | 450.014        | 446.009        | 446.261        | 445.757        | T | 18 |
| K  | 18 | 483.772        | 424.752        | 420.747        | 420.999        | 420.495        | K | 17 |
| K  | 19 | 515.796        | 392.728        | 388.724        | 388.976        | 388.472        | K | 16 |
| A  | 20 | 533.555        | 360.705        | 356.700        | 356.952        | 356.448        | A | 15 |
| G  | 21 | 547.811        | 342.945        | 339.941        | 339.193        | 338.689        | G | 14 |
| A  | 22 | 565.570        | 328.690        | 324.685        | 324.937        | 324.433        | A | 13 |
| A  | 23 | 583.329        | 310.931        | 306.928        | 307.178        | 306.674        | A | 12 |
| K  | 24 | 615.353        | 293.171        | 289.167        | 289.419        | 288.915        | K | 11 |
| R  | 25 | <b>654.378</b> | 261.148        | 257.143        | 257.395        | 256.891        | R | 10 |
| K  | 26 | <b>686.402</b> | 222.122        | <b>218.118</b> | <b>218.370</b> | <b>217.866</b> | K | 9  |
| A  | 27 | 704.161        | 190.099        | 186.094        | 186.346        | 185.842        | A | 8  |
| T  | 28 | 729.423        | 172.339        | 168.335        | 168.587        | 168.083        | T | 7  |
| G  | 29 | 743.679        | 147.077        | 143.073        | 143.325        | 142.821        | G | 6  |
| P  | 30 | 767.942        | 132.822        | 128.817        | 129.069        | 128.565        | P | 5  |
| P  | 31 | <b>792.205</b> | 108.559        | 104.554        | 104.806        | 104.302        | P | 4  |
| V  | 32 | 819.972        | 84.296         | 80.291         | 80.543         | 80.039         | V | 3  |
| S  | 33 | <b>838.730</b> | 59.529         | 55.524         | 55.776         | 55.272         | S | 2  |
| E  | 34 | <b>870.991</b> | 37.771         | 33.766         | 34.018         | 33.514         | E | 1  |

# sp | P43276 | H15\_MOUSE

TAAPAPVEKS <sup>Phospho</sup>79.97 PAKKKTTKKAGAAKRKATGPPVSE

- ▶ fragmentation table for charge state 5+
- ▶ specType=etd
- ▶ score=51.45
- ▶ F104901.dat
- ▶ query=q2499\_p1
- ▶ precursor=581.163060
- ▶ chargePrecursor=6
- ▶ itol=0.8

| AA |    | c              | y              | z+1            | z+2     | z              | AA              |
|----|----|----------------|----------------|----------------|---------|----------------|-----------------|
| T  | 1  | 24.622         | <b>697.191</b> | <b>693.967</b> | 0.806   | <b>693.786</b> | T <sub>34</sub> |
| A  | 2  | 38.830         | <b>676.981</b> | <b>673.778</b> | 0.806   | <b>673.576</b> | A <sub>33</sub> |
| A  | 3  | 83.037         | 562.775        | 559.570        | 0.806   | 559.369        | A <sub>32</sub> |
| P  | 4  | 72.448         | <b>648.567</b> | <b>645.363</b> | 0.806   | <b>645.161</b> | P <sub>31</sub> |
| A  | 5  | 96.655         | 529.155        | <b>625.952</b> | 0.806   | <b>625.751</b> | A <sub>30</sub> |
| P  | 6  | 106.065        | 514.049        | 511.745        | 0.806   | 511.543        | P <sub>29</sub> |
| V  | 7  | 125.879        | <b>595.538</b> | 592.334        | 0.806   | 592.133        | V <sub>28</sub> |
| E  | 8  | 151.688        | 575.724        | 572.521        | 0.806   | 572.319        | E <sub>27</sub> |
| K  | 9  | 177.307        | 549.916        | 546.712        | 546.914 | 546.510        | K <sub>26</sub> |
| S  | 10 | 210.706        | 524.297        | 521.093        | 521.295 | 520.891        | S <sub>25</sub> |
| P  | 11 | 230.117        | 490.897        | 487.693        | 487.895 | 487.492        | P <sub>24</sub> |
| A  | 12 | 244.324        | 471.487        | 468.283        | 468.484 | 468.081        | A <sub>23</sub> |
| K  | 13 | 269.943        | 457.270        | 454.075        | 454.277 | 453.874        | K <sub>22</sub> |
| K  | 14 | 295.562        | 431.660        | 428.458        | 428.658 | 428.256        | K <sub>21</sub> |
| K  | 15 | 321.181        | 406.041        | 402.837        | 403.039 | 402.636        | K <sub>20</sub> |
| T  | 16 | 341.391        | 380.422        | 377.218        | 377.420 | 377.017        | T <sub>19</sub> |
| T  | 17 | 361.600        | 360.213        | 357.009        | 357.210 | 356.807        | T <sub>18</sub> |
| K  | 18 | 387.219        | 340.003        | 336.799        | 337.001 | 336.598        | K <sub>17</sub> |
| K  | 19 | 412.838        | 314.384        | 311.180        | 311.382 | 310.979        | K <sub>16</sub> |
| A  | 20 | 427.046        | 288.765        | 285.561        | 285.763 | 285.360        | A <sub>15</sub> |
| G  | 21 | 438.450        | 274.558        | 271.354        | 271.556 | 271.152        | G <sub>14</sub> |
| A  | 22 | 452.658        | 263.153        | 259.950        | 260.151 | 259.748        | A <sub>13</sub> |
| A  | 23 | 466.865        | 248.946        | 245.742        | 245.944 | 245.541        | A <sub>12</sub> |
| K  | 24 | 492.484        | 234.739        | 231.535        | 231.736 | 231.333        | K <sub>11</sub> |
| R  | 25 | 524.704        | 209.120        | 205.916        | 206.117 | 205.714        | R <sub>10</sub> |
| K  | 26 | 549.323        | 177.899        | 174.696        | 174.897 | 174.494        | K <sub>9</sub>  |
| A  | 27 | 563.531        | 152.280        | 149.077        | 149.278 | 148.875        | A <sub>8</sub>  |
| T  | 28 | 583.740        | 138.073        | 134.869        | 135.071 | 134.668        | T <sub>7</sub>  |
| G  | 29 | <b>595.144</b> | 117.863        | 114.660        | 114.861 | 114.458        | G <sub>6</sub>  |
| P  | 30 | 614.355        | 106.459        | 103.255        | 103.457 | 103.054        | P <sub>5</sub>  |
| P  | 31 | 633.965        | 87.049         | 83.845         | 84.046  | 83.643         | P <sub>4</sub>  |
| V  | 32 | 653.779        | 67.830         | 64.624         | 64.826  | 64.423         | V <sub>3</sub>  |
| S  | 33 | <b>671.186</b> | 47.824         | 44.621         | 44.822  | 44.419         | S <sub>2</sub>  |
| E  | 34 | <b>696.994</b> | 30.418         | 27.214         | 27.416  | 27.013         | E <sub>1</sub>  |



# sp | P43276 | H15\_MOUSE

TAAPAPVEKS <sup>Phospho</sup>79.97 PAKKKTTKKAGAAKRKATGPPVSE

- ▶ fragmentation table for charge state 1+
- ▶ specType=etd
- ▶ score=68.06
- ▶ F104901.dat
- ▶ query=q2500\_p1
- ▶ precursor=697.194740
- ▶ chargePrecursor=5
- ▶ itol=0.8

| AA | c       | y               | z+1            | z+2             | z               | AA       |     |
|----|---------|-----------------|----------------|-----------------|-----------------|----------|-----|
| T  | 119.082 | 1481.925        | 1465.967       | 0.000           | 1464.999        | T14      |     |
| A  | 2       | 190.119         | 1380.678       | 1364.650        | 0.000           | 1363.651 | A13 |
| A  | 3       | 261.156         | 1300.841       | 1293.822        | 0.000           | 1292.814 | A32 |
| F  | 4       | 358.208         | 1238.804       | 1222.785        | 0.000           | 1221.777 | F31 |
| A  | 5       | 429.246         | 1141.751       | 1125.732        | 0.000           | 1124.724 | A30 |
| P  | 6       | 530.288         | 1070.714       | 1054.695        | 0.000           | 1053.687 | P29 |
| V  | 7       | <b>625.307</b>  | 2073.661       | 2057.642        | 0.000           | 2056.634 | V28 |
| E  | 8       | <b>754.409</b>  | 2074.592       | 2058.574        | 0.000           | 2057.566 | E27 |
| K  | 9       | 862.504         | 2745.550       | 2729.531        | 2730.539        | 2728.523 | K26 |
| S  | 10      | 1049.503        | 2617.455       | 2601.436        | 2602.444        | 2600.428 | S25 |
| F  | 11      | <b>1146.555</b> | 2450.657       | 2434.638        | 2435.646        | 2433.630 | F24 |
| A  | 12      | 1217.593        | 2353.404       | 2337.385        | 2338.393        | 2336.377 | A23 |
| K  | 13      | <b>1345.688</b> | 2282.367       | 2266.348        | 2267.356        | 2265.340 | K22 |
| R  | 14      | <b>1413.183</b> | 2154.972       | 2138.953        | 2139.961        | 2137.945 | R21 |
| K  | 15      | 1601.577        | 2026.177       | 2010.158        | 2011.166        | 2009.150 | K20 |
| T  | 16      | 1702.925        | 1898.082       | 1882.063        | 1883.071        | 1881.055 | T19 |
| T  | 17      | 1803.973        | 1797.034       | 1781.015        | 1782.023        | 1780.006 | T18 |
| K  | 18      | <b>1932.068</b> | 1695.989       | 1679.968        | 1680.976        | 1678.960 | K17 |
| K  | 19      | 2080.163        | 1567.891       | 1551.873        | 1552.881        | 1550.865 | K16 |
| A  | 20      | 2131.200        | 1439.797       | 1423.778        | 1424.786        | 1422.770 | A15 |
| G  | 21      | 2188.221        | 1368.750       | 1352.741        | 1353.748        | 1351.733 | G14 |
| A  | 22      | 2259.258        | 1311.738       | 1295.719        | <b>1296.727</b> | 1294.711 | A13 |
| A  | 23      | 2330.296        | 1240.701       | 1224.682        | 1225.690        | 1223.674 | A12 |
| K  | 24      | 2428.391        | 1169.664       | 1153.645        | 1154.653        | 1152.637 | K11 |
| R  | 25      | 2614.492        | 1041.569       | <b>1025.550</b> | <b>1026.558</b> | 1024.542 | R10 |
| K  | 26      | 2742.537        | 985.566        | 969.549         | 970.557         | 968.541  | K9  |
| A  | 27      | 2813.624        | 877.573        | 861.554         | 862.562         | 860.546  | A8  |
| T  | 28      | 2914.671        | 698.538        | 679.517         | 679.525         | 669.509  | T7  |
| G  | 29      | 2971.693        | 585.488        | 569.469         | 570.477         | 568.461  | G6  |
| P  | 30      | 3098.746        | <b>578.266</b> | 512.248         | 513.256         | 511.240  | P5  |
| P  | 31      | 3185.798        | 431.214        | 415.195         | 416.203         | 414.187  | P4  |
| V  | 32      | 3264.887        | 384.161        | 368.142         | 369.150         | 367.134  | V3  |
| S  | 33      | 3351.939        | 278.092        | 262.074         | 263.082         | 261.066  | S2  |
| E  | 34      | 3480.941        | 148.060        | 132.042         | 133.050         | 131.034  | E1  |

# sp | P43276 | H15\_MOUSE

TAAPAPVEKS <sup>Phospho</sup>79.97 PAKKKTTKKAGAAKRKATGPPVSE

- ▶ fragmentation table for charge state 2+
- ▶ specType=etd
- ▶ score=68.06
- ▶ F104901.dat
- ▶ query=q2500\_p1
- ▶ precursor=697.194740
- ▶ chargePrecursor=5
- ▶ itol=0.8

| AA | c  | y               | z+1             | z+2             | z               | AA              |       |
|----|----|-----------------|-----------------|-----------------|-----------------|-----------------|-------|
| T  | 1  | 60.044          | 1741.466        | <b>1733.457</b> | 0.504           | <b>1732.953</b> | T[94] |
| A  | 2  | 65.263          | 1660.941        | 1662.932        | 0.504           | 1662.429        | A[30] |
| A  | 3  | 131.682         | 1056.424        | <b>1647.415</b> | 0.504           | 1646.911        | A[32] |
| F  | 4  | 179.608         | 1019.005        | 1011.596        | 0.504           | 1011.302        | F[31] |
| A  | 5  | 215.126         | 1571.379        | <b>1563.370</b> | 0.504           | 1562.866        | A[30] |
| F  | 6  | 263.651         | 1535.860        | 1527.851        | 0.504           | 1527.347        | F[29] |
| V  | 7  | 313.167         | 1487.334        | 1479.325        | 0.504           | 1478.821        | V[28] |
| E  | 8  | 377.898         | 1437.800        | 1429.791        | 0.504           | 1429.287        | E[27] |
| K  | 9  | 441.758         | 1373.279        | 1365.269        | 1365.773        | 1364.765        | K[24] |
| S  | 10 | 505.235         | 1309.231        | 1301.222        | 1301.726        | 1300.718        | S[25] |
| F  | 11 | 573.761         | 1225.732        | 1217.723        | 1218.226        | 1217.219        | F[24] |
| A  | 12 | 609.300         | 1177.206        | 1169.196        | 1169.700        | 1168.692        | A[23] |
| K  | 13 | <b>673.347</b>  | <b>1141.687</b> | <b>1133.678</b> | <b>1134.182</b> | <b>1133.174</b> | K[22] |
| R  | 14 | <b>737.395</b>  | <b>1079.599</b> | <b>1069.630</b> | <b>1070.134</b> | <b>1069.126</b> | R[21] |
| K  | 15 | <b>801.442</b>  | <b>1013.592</b> | <b>1005.583</b> | <b>1006.087</b> | <b>1005.079</b> | K[20] |
| T  | 16 | <b>851.966</b>  | 949.545         | <b>941.535</b>  | <b>942.039</b>  | <b>941.031</b>  | T[19] |
| T  | 17 | 902.490         | <b>899.021</b>  | <b>891.011</b>  | <b>891.515</b>  | <b>890.507</b>  | T[18] |
| K  | 18 | <b>966.538</b>  | <b>848.497</b>  | <b>840.487</b>  | <b>840.991</b>  | <b>839.984</b>  | K[17] |
| K  | 19 | 1030.565        | <b>784.449</b>  | <b>776.440</b>  | <b>776.944</b>  | <b>775.936</b>  | K[16] |
| A  | 20 | <b>1064.104</b> | 720.562         | <b>712.556</b>  | <b>712.556</b>  | <b>711.548</b>  | A[15] |
| G  | 21 | <b>1094.614</b> | 684.883         | 676.874         | 677.378         | 676.370         | G[14] |
| A  | 22 | <b>1130.133</b> | 658.373         | <b>648.363</b>  | <b>648.867</b>  | <b>647.859</b>  | A[13] |
| A  | 23 | 1185.651        | 620.854         | <b>612.845</b>  | <b>613.349</b>  | 612.341         | A[12] |
| K  | 24 | <b>1229.699</b> | 585.335         | <b>577.326</b>  | <b>577.830</b>  | <b>576.822</b>  | K[11] |
| K  | 25 | <b>1307.749</b> | 503.289         | 493.279         | 493.783         | 492.775         | K[10] |
| K  | 26 | <b>1371.797</b> | 443.237         | 435.228         | 435.732         | 434.724         | K[9]  |
| A  | 27 | <b>1407.315</b> | 379.190         | 371.181         | 371.685         | 370.677         | A[8]  |
| T  | 28 | 1457.839        | 343.671         | 335.662         | 336.166         | 335.158         | T[7]  |
| G  | 29 | 1486.350        | 293.149         | 285.138         | 285.642         | 284.634         | G[6]  |
| F  | 30 | 1534.876        | 264.630         | 256.621         | 257.125         | 256.117         | F[5]  |
| F  | 31 | 1583.403        | 218.110         | 209.101         | 209.605         | 208.597         | F[4]  |
| V  | 32 | 1632.931        | 167.584         | 159.575         | 160.079         | 159.071         | V[3]  |
| S  | 33 | <b>1676.453</b> | 118.050         | 110.041         | 110.544         | 109.537         | S[2]  |
| E  | 34 | 1740.974        | 74.534          | 66.524          | 67.028          | 66.021          | E[1]  |



# sp | P43276 | H15\_MOUSE

TAAPAPVEKS <sup>Phospho</sup>79.97 PAKKKTTKKAGAAKRKATGPPVSE

- ▶ fragmentation table for charge state 3+
- ▶ specType=etd
- ▶ score=68.06
- ▶ F104901.dat
- ▶ query=q2500.p1
- ▶ precursor=697.194740
- ▶ chargePrecursor=5
- ▶ itol=0.8

| AA | c  | y               | z+1             | z+2             | z              | AA              |       |
|----|----|-----------------|-----------------|-----------------|----------------|-----------------|-------|
| T  | 3  | 60.395          | <b>1161.313</b> | <b>1155.974</b> | 0.672          | <b>1155.638</b> | T[3]  |
| A  | 2  | 64.044          | 1177.913        | <b>1122.291</b> | 0.672          | 1121.965        | A[2]  |
| A  | 3  | 87.723          | <b>1103.952</b> | <b>1098.612</b> | 0.672          | 1098.276        | A[3]  |
| P  | 4  | 120.074         | 1080.273        | 1074.933        | 0.672          | 1074.597        | P[4]  |
| A  | 5  | 143.753         | 1047.922        | <b>1042.582</b> | 0.672          | 1042.246        | A[5]  |
| P  | 6  | 176.104         | 1024.241        | 1018.903        | 0.672          | 1018.567        | P[6]  |
| V  | 7  | 209.127         | 991.892         | 986.952         | 0.672          | 986.213         | V[7]  |
| E  | 8  | 252.141         | 959.959         | <b>953.529</b>  | 0.672          | <b>953.193</b>  | E[8]  |
| K  | 9  | 294.840         | <b>915.855</b>  | <b>910.515</b>  | <b>910.851</b> | <b>910.179</b>  | K[9]  |
| S  | 10 | 350.906         | 873.156         | <b>867.817</b>  | <b>868.153</b> | <b>867.481</b>  | S[10] |
| P  | 11 | 382.857         | 817.490         | 812.151         | 812.487        | 811.815         | P[11] |
| A  | 12 | 406.536         | <b>785.139</b>  | <b>779.800</b>  | <b>780.136</b> | <b>779.464</b>  | A[12] |
| K  | 13 | 449.234         | 761.460         | 756.121         | 756.457        | 755.785         | K[13] |
| R  | 14 | 491.932         | 738.762         | <b>713.423</b>  | <b>713.758</b> | <b>713.087</b>  | R[14] |
| K  | 15 | 534.631         | 676.064         | 670.724         | 671.060        | 670.388         | K[15] |
| T  | 16 | 568.313         | 633.365         | 628.026         | 628.362        | 627.690         | T[16] |
| T  | 17 | 601.996         | 599.687         | 594.343         | 594.679        | 594.007         | T[17] |
| K  | 18 | 644.694         | 566.000         | 560.661         | 560.997        | 560.325         | K[18] |
| K  | 19 | 687.392         | 523.302         | 517.962         | 518.298        | 517.626         | K[19] |
| A  | 20 | 711.071         | 480.604         | 475.264         | 475.600        | 474.928         | A[20] |
| G  | 21 | <b>730.079</b>  | 456.925         | 451.585         | 451.921        | 451.249         | G[21] |
| A  | 22 | <b>753.758</b>  | 437.917         | 432.578         | 432.914        | 432.242         | A[22] |
| A  | 23 | <b>777.437</b>  | 414.230         | 408.890         | 409.235        | 408.563         | A[23] |
| K  | 24 | <b>820.135</b>  | 390.550         | 385.210         | 385.546        | 384.874         | K[24] |
| K  | 25 | <b>872.169</b>  | 347.861         | 342.522         | 342.857        | 342.186         | K[25] |
| R  | 26 | <b>914.867</b>  | 296.921         | 290.488         | 290.824        | 290.152         | R[26] |
| A  | 27 | <b>938.546</b>  | 253.129         | 247.789         | 248.125        | 247.454         | A[27] |
| T  | 28 | 972.220         | 229.450         | 224.110         | 224.446        | 223.775         | T[28] |
| G  | 29 | 991.236         | 195.767         | 190.428         | 190.764        | 190.092         | G[29] |
| P  | 30 | 1023.587        | 176.760         | 171.421         | 171.757        | 171.085         | P[30] |
| P  | 31 | <b>1055.938</b> | 144.400         | 139.070         | 139.406        | 138.734         | P[31] |
| V  | 32 | 1088.686        | 112.953         | 108.119         | 107.058        | 106.385         | V[32] |
| S  | 33 | <b>1117.971</b> | 79.030          | 73.696          | 74.032         | 73.360          | S[33] |
| E  | 34 | 1160.985        | 50.025          | 44.685          | 45.021         | 44.349          | E[34] |

# sp | P43276 | H15\_MOUSE

TAAPAPVEKS <sup>Phospho</sup>79.97 PAKKKTTKKAGAAKRKATGPPVSE

- ▶ fragmentation table for charge state 4+
- ▶ specType=etd
- ▶ score=68.06
- ▶ F104901.dat
- ▶ query=q2500\_p1
- ▶ precursor=697.194740
- ▶ chargePrecursor=5
- ▶ itol=0.8

| AA |    | c              | y              | z+1            | z+2   | z              | AA |    |
|----|----|----------------|----------------|----------------|-------|----------------|----|----|
| T  | 1  | 30.526         | <b>871.237</b> | <b>867.232</b> | 0.755 | <b>866.980</b> | T  | 34 |
| A  | 2  | 48.285         | 845.975        | 841.970        | 0.755 | 841.718        | A  | 33 |
| A  | 3  | 65.044         | <b>828.216</b> | <b>824.211</b> | 0.755 | <b>823.959</b> | A  | 32 |
| P  | 4  | 90.308         | 810.436        | 806.431        | 0.755 | 806.200        | P  | 31 |
| A  | 5  | 108.067        | 786.197        | 782.192        | 0.755 | 781.937        | A  | 30 |
| P  | 6  | 132.330        | 768.434        | 764.429        | 0.755 | 764.177        | P  | 29 |
| V  | 7  | 157.097        | 744.171        | 740.166        | 0.755 | 739.914        | V  | 28 |
| E  | 8  | 189.358        | 719.404        | <b>715.399</b> | 0.755 | <b>715.147</b> | E  | 27 |
| K  | 9  | 221.362        | 697.147        | 693.138        | 0.683 | 692.895        | K  | 26 |
| S  | 10 | 263.131        | 655.119        | 651.115        | 0.613 | 650.863        | S  | 25 |
| P  | 11 | 287.394        | <b>613.370</b> | 609.365        | 0.609 | 609.113        | P  | 24 |
| A  | 12 | 305.154        | 589.106        | 585.102        | 0.585 | 584.850        | A  | 23 |
| K  | 13 | 337.177        | 571.347        | 567.342        | 0.567 | 567.090        | K  | 22 |
| K  | 14 | 369.201        | 539.321        | 535.319        | 0.535 | 535.067        | K  | 21 |
| K  | 15 | 401.225        | 507.300        | 503.295        | 0.503 | 503.043        | K  | 20 |
| T  | 16 | 426.487        | 475.276        | 471.271        | 0.471 | 471.019        | T  | 19 |
| T  | 17 | 451.749        | 450.014        | 446.009        | 0.446 | 445.757        | T  | 18 |
| K  | 18 | 483.772        | 424.752        | 420.747        | 0.420 | 420.495        | K  | 17 |
| K  | 19 | 515.796        | 392.728        | 388.724        | 0.388 | 388.472        | K  | 16 |
| A  | 20 | 533.555        | 360.705        | 356.700        | 0.356 | 356.448        | A  | 15 |
| G  | 21 | 547.811        | 342.945        | 338.941        | 0.338 | 338.689        | G  | 14 |
| A  | 22 | 565.570        | 328.690        | 324.685        | 0.324 | 324.433        | A  | 13 |
| A  | 23 | 583.329        | 310.931        | 306.926        | 0.306 | 306.674        | A  | 12 |
| K  | 24 | 613.353        | 293.171        | 289.167        | 0.289 | 288.915        | K  | 11 |
| R  | 25 | 654.178        | 261.148        | 257.143        | 0.257 | 256.891        | R  | 10 |
| K  | 26 | 696.402        | 222.122        | 218.118        | 0.218 | 217.866        | K  | 9  |
| A  | 27 | 704.161        | 190.099        | 186.094        | 0.186 | 185.842        | A  | 8  |
| T  | 28 | 729.423        | 172.339        | 168.335        | 0.168 | 168.083        | T  | 7  |
| G  | 29 | 743.679        | 147.077        | 143.073        | 0.143 | 142.821        | G  | 6  |
| P  | 30 | 767.942        | 132.822        | 128.817        | 0.128 | 128.565        | P  | 5  |
| P  | 31 | <b>792.205</b> | 108.559        | 104.554        | 0.104 | 104.302        | P  | 4  |
| V  | 32 | 816.972        | 84.296         | 80.291         | 0.080 | 80.039         | V  | 3  |
| S  | 33 | <b>838.730</b> | 59.529         | 55.524         | 0.055 | 55.272         | S  | 2  |
| E  | 34 | 878.991        | 37.771         | 33.766         | 0.033 | 33.514         | E  | 1  |

# sp | P43276 | H15\_MOUSE

TAAPAPVEKS <sup>Phospho</sup> PAKKKT<sub>79.97</sub> TTKAGAAKRKATGPPVSE

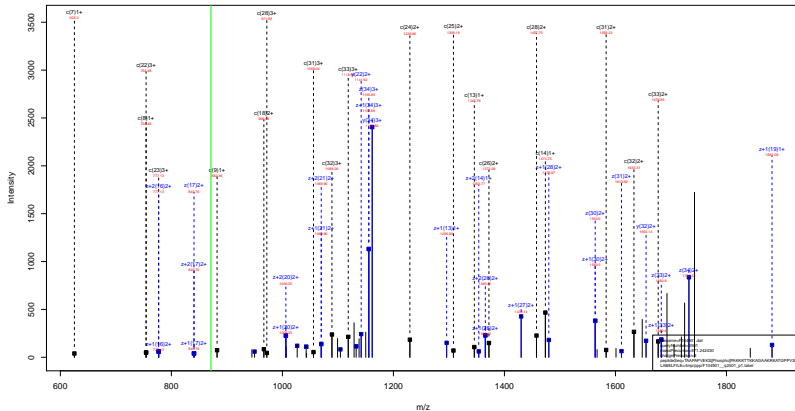

# sp | P43276 | H15\_MOUSE

TAAPAPVEKS <sup>Phospho</sup>79.97 PAKKKTTKKAGAAKRKATGPPVSE

- ▶ fragmentation table for charge state 1+
- ▶ specType=etd
- ▶ score=50.70
- ▶ F104901.dat
- ▶ query=q2501\_p1
- ▶ precursor=871.242430
- ▶ chargePrecursor=4
- ▶ itol=0.8

| AA   | c               | y        | z+1             | z+2             | z        | AA   |
|------|-----------------|----------|-----------------|-----------------|----------|------|
| T13  | 119.082         | 1481.925 | 1465.967        | 0.000           | 1464.999 | T14  |
| A12  | 190.119         | 1380.878 | 1364.850        | 0.000           | 1363.851 | A13  |
| A13  | 261.156         | 1300.841 | 1293.822        | 0.000           | 1292.814 | A14  |
| F14  | 358.208         | 1238.804 | 1222.785        | 0.000           | 1221.777 | F15  |
| A15  | 429.246         | 1141.751 | 1125.732        | 0.000           | 1124.724 | A16  |
| P16  | 570.298         | 1070.714 | 1054.695        | 0.000           | 1053.687 | P17  |
| V17  | <b>625.307</b>  | 2073.661 | 2057.642        | 0.000           | 2056.634 | V18  |
| E18  | <b>754.409</b>  | 2074.592 | 2058.574        | 0.000           | 2057.566 | E19  |
| K19  | <b>882.504</b>  | 2745.550 | 2729.531        | 2730.539        | 2728.523 | K20  |
| S10  | 1049.503        | 2617.455 | 2601.436        | 2602.444        | 2600.428 | S25  |
| F111 | 1146.555        | 2450.657 | 2434.638        | 2435.646        | 2433.630 | F24  |
| A112 | 1217.593        | 2353.604 | 2337.585        | 2338.593        | 2336.577 | A23  |
| K113 | <b>1345.688</b> | 2282.567 | 2266.548        | 2267.556        | 2265.540 | K122 |
| R14  | <b>1413.183</b> | 2154.672 | 2138.653        | 2139.661        | 2137.645 | R21  |
| K115 | 1601.577        | 2026.172 | 2010.158        | 2011.166        | 2009.150 | K20  |
| T116 | 1702.925        | 1898.082 | <b>1882.063</b> | 1883.071        | 1881.055 | T10  |
| T117 | 1803.973        | 1797.034 | 1781.015        | 1782.023        | 1780.006 | T18  |
| K118 | 1932.068        | 1695.989 | 1679.968        | 1680.976        | 1678.960 | K17  |
| K119 | 2060.163        | 1594.941 | 1578.923        | 1579.931        | 1577.915 | K16  |
| A120 | 2111.200        | 1439.797 | 1423.778        | 1424.786        | 1422.770 | A15  |
| G121 | 2188.221        | 1368.750 | 1352.741        | <b>1353.748</b> | 1351.733 | G14  |
| A122 | 2259.258        | 1311.738 | <b>1295.719</b> | 1296.727        | 1294.711 | A13  |
| A123 | 2330.296        | 1240.701 | 1224.682        | 1225.690        | 1223.674 | A12  |
| K124 | 2428.391        | 1169.664 | 1153.645        | 1154.653        | 1152.637 | K11  |
| R125 | 2614.492        | 1041.569 | 1025.550        | <b>1026.558</b> | 1024.542 | R10  |
| K126 | 2742.537        | 985.566  | 969.549         | 970.557         | 968.541  | K19  |
| A127 | 2813.624        | 877.573  | 861.554         | 862.562         | 860.546  | A16  |
| T128 | 2914.671        | 698.188  | 679.117         | 679.125         | 669.309  | T17  |
| G129 | 2971.693        | 585.288  | 569.269         | 570.277         | 568.261  | G10  |
| P130 | 3068.746        | 428.266  | 412.248         | 413.256         | 411.240  | P15  |
| P131 | 3185.798        | 431.214  | 415.195         | 416.203         | 414.187  | P14  |
| V132 | 3264.887        | 384.161  | 368.142         | 369.150         | 367.134  | V19  |
| S133 | 3351.899        | 278.092  | 262.074         | 263.082         | 261.066  | S15  |
| E134 | 3480.941        | 148.060  | 132.042         | 133.050         | 131.034  | E11  |

# sp | P43276 | H15\_MOUSE

TAAPAPVEKS <sup>Phospho</sup>79.97 PAKKKTTKKAGAAKRKATGPPVSE

- ▶ fragmentation table for charge state 2+
- ▶ specType=etd
- ▶ score=50.70
- ▶ F104901.dat
- ▶ query=q2501\_p1
- ▶ precursor=871.242430
- ▶ chargePrecursor=4
- ▶ itol=0.8

| AA | c  | y               | z+1             | z+2             | z               | AA              |       |
|----|----|-----------------|-----------------|-----------------|-----------------|-----------------|-------|
| T  | 1  | 60.044          | 1741.466        | 1733.457        | 0.504           | <b>1732.953</b> | T[94] |
| A  | 2  | 65.263          | 1690.243        | <b>1682.933</b> | 0.504           | <b>1682.429</b> | A[30] |
| A  | 3  | 131.682         | <b>1655.424</b> | 1647.415        | 0.504           | 1646.911        | A[32] |
| F  | 4  | 179.608         | 1619.905        | 1611.896        | 0.504           | <b>1611.392</b> | F[31] |
| A  | 5  | 218.126         | 1571.379        | <b>1563.370</b> | 0.504           | <b>1562.866</b> | A[30] |
| F  | 6  | 263.651         | 1535.860        | 1527.851        | 0.504           | 1527.347        | F[29] |
| V  | 7  | 313.167         | 1487.334        | <b>1479.325</b> | 0.504           | 1478.821        | V[28] |
| E  | 8  | 377.898         | 1437.800        | <b>1429.791</b> | 0.504           | 1429.287        | E[27] |
| R  | 9  | 441.758         | 1393.279        | <b>1385.269</b> | <b>1385.773</b> | 1384.765        | R[24] |
| S  | 10 | 505.235         | 1349.231        | 1341.222        | 1341.726        | 1340.718        | S[25] |
| F  | 11 | 573.761         | 1225.732        | 1217.723        | 1218.226        | 1217.219        | F[24] |
| A  | 12 | 609.300         | 1177.206        | 1169.196        | 1169.700        | 1168.692        | A[23] |
| R  | 13 | 673.247         | <b>1141.687</b> | <b>1133.678</b> | 1134.182        | <b>1133.174</b> | R[22] |
| R  | 14 | 737.206         | 1077.539        | <b>1069.530</b> | <b>1070.134</b> | 1069.126        | R[21] |
| R  | 15 | 801.442         | 1013.592        | <b>1005.583</b> | <b>1006.087</b> | 1005.079        | R[20] |
| T  | 16 | 851.966         | <b>949.545</b>  | 941.535         | 942.039         | 941.031         | T[19] |
| T  | 17 | 902.490         | 899.021         | 891.011         | 891.515         | 890.507         | T[18] |
| R  | 18 | <b>966.538</b>  | 848.497         | <b>840.487</b>  | <b>840.991</b>  | <b>839.984</b>  | R[17] |
| R  | 19 | 1030.265        | 794.449         | <b>776.440</b>  | <b>776.944</b>  | 775.936         | R[16] |
| A  | 20 | 1096.104        | 720.462         | 712.453         | 712.956         | 711.948         | A[15] |
| G  | 21 | 1094.614        | 684.883         | 676.874         | 677.378         | 676.370         | G[14] |
| A  | 22 | 1130.133        | 656.373         | 648.363         | 648.867         | 647.859         | A[13] |
| A  | 23 | 1185.651        | 620.854         | 612.845         | 613.349         | 612.341         | A[12] |
| R  | 24 | <b>1229.699</b> | 585.315         | 577.305         | 577.809         | 576.802         | R[11] |
| R  | 25 | <b>1307.749</b> | 503.288         | 495.279         | 495.783         | 494.775         | R[10] |
| R  | 26 | <b>1371.797</b> | 443.237         | 435.228         | 435.732         | 434.724         | R[9]  |
| A  | 27 | 1407.315        | 379.190         | 371.181         | 371.685         | 370.677         | A[8]  |
| T  | 28 | <b>1457.839</b> | 343.671         | 335.662         | 336.166         | 335.158         | T[7]  |
| G  | 29 | 1486.350        | 293.149         | 285.138         | 285.642         | 284.634         | G[6]  |
| F  | 30 | 1534.876        | 264.631         | 256.621         | 257.125         | 256.116         | F[5]  |
| F  | 31 | <b>1583.403</b> | 218.110         | 210.101         | 210.605         | 209.597         | F[4]  |
| V  | 32 | <b>1632.937</b> | 167.584         | 159.575         | 160.079         | 159.071         | V[3]  |
| S  | 33 | <b>1676.453</b> | 118.050         | 110.041         | 110.544         | 109.537         | S[2]  |
| E  | 34 | 1740.974        | 74.534          | 66.524          | 67.028          | 66.021          | E[1]  |

# sp | P43276 | H15\_MOUSE

TAAPAPVEKS <sup>Phospho</sup>79.97 PAKKKTTKKAGAAKRKATGPPVSE

- ▶ fragmentation table for charge state 3+
- ▶ specType=etd
- ▶ score=50.70
- ▶ F104901.dat
- ▶ query=q2501\_p1
- ▶ precursor=871.242430
- ▶ chargePrecursor=4
- ▶ itol=0.8

| AA | c  | y               | z+1             | z+2             | z     | AA              |       |
|----|----|-----------------|-----------------|-----------------|-------|-----------------|-------|
| T  | 3  | 40.385          | <b>1161.313</b> | <b>1155.974</b> | 0.672 | <b>1155.638</b> | T[9]  |
| A  | 2  | 64.044          | 1137.631        | 1122.291        | 0.672 | 1121.955        | A[33] |
| A  | 3  | 67.723          | <b>1103.952</b> | 1098.612        | 0.672 | 1098.276        | A[32] |
| F  | 4  | 120.074         | 1080.273        | 1074.933        | 0.672 | 1074.597        | F[31] |
| A  | 5  | 143.753         | 1047.922        | <b>1042.582</b> | 0.672 | <b>1042.246</b> | A[30] |
| P  | 6  | 176.104         | 1024.243        | 1018.903        | 0.672 | 1018.567        | P[29] |
| V  | 7  | 209.127         | 991.893         | 986.552         | 0.672 | 986.215         | V[28] |
| E  | 8  | 252.141         | 958.800         | 953.529         | 0.672 | 953.193         | E[27] |
| K  | 9  | 294.640         | 915.855         | 910.515         | 0.672 | 910.179         | K[26] |
| S  | 10 | 350.506         | 873.159         | 867.817         | 0.672 | 867.481         | S[25] |
| F  | 11 | 382.857         | 817.400         | 812.151         | 0.672 | 811.815         | F[24] |
| A  | 12 | 406.536         | 785.130         | 779.800         | 0.672 | 779.464         | A[23] |
| K  | 13 | 449.234         | 761.460         | 756.121         | 0.672 | 755.785         | K[22] |
| R  | 14 | 493.932         | 718.762         | 713.423         | 0.672 | 713.087         | R[21] |
| K  | 15 | 534.631         | 675.064         | 670.724         | 0.672 | 670.388         | K[20] |
| T  | 16 | 568.313         | 633.365         | 628.026         | 0.672 | 627.690         | T[19] |
| T  | 17 | 601.996         | 599.663         | 594.343         | 0.672 | 594.007         | T[18] |
| K  | 18 | 644.694         | 566.000         | 560.661         | 0.672 | 560.325         | K[17] |
| K  | 19 | 687.392         | 523.302         | 517.962         | 0.672 | 517.626         | K[16] |
| A  | 20 | 711.071         | 489.604         | 479.264         | 0.672 | 478.928         | A[15] |
| G  | 21 | 730.079         | 456.925         | 451.585         | 0.672 | 451.249         | G[14] |
| A  | 22 | <b>753.758</b>  | 437.917         | 432.578         | 0.672 | 432.242         | A[13] |
| A  | 23 | <b>777.437</b>  | 414.238         | 408.899         | 0.672 | 408.563         | A[12] |
| K  | 24 | 820.135         | 390.559         | 385.220         | 0.672 | 384.884         | K[11] |
| R  | 25 | 872.169         | 347.861         | 342.522         | 0.672 | 342.186         | R[10] |
| K  | 26 | 914.867         | 295.823         | 290.484         | 0.672 | 290.148         | K[9]  |
| A  | 27 | 938.546         | 263.120         | 257.780         | 0.672 | 257.444         | A[8]  |
| T  | 28 | <b>972.229</b>  | 229.450         | 224.110         | 0.672 | 223.774         | T[7]  |
| G  | 29 | 991.236         | 195.767         | 190.428         | 0.672 | 190.092         | G[6]  |
| F  | 30 | 1023.587        | 176.760         | 171.421         | 0.672 | 171.085         | F[5]  |
| P  | 31 | <b>1055.938</b> | 144.420         | 139.070         | 0.672 | 138.734         | P[4]  |
| V  | 32 | <b>1088.560</b> | 112.058         | 106.719         | 0.672 | 106.383         | V[3]  |
| S  | 33 | <b>1117.971</b> | 79.039          | 73.699          | 0.672 | 73.363          | S[2]  |
| E  | 34 | 1180.885        | 50.025          | 44.685          | 0.672 | 44.349          | E[1]  |



# sp | P43274 | H14\_MOUSE

[Acetyl]SETAPAAPAAPAPAEKTPVKKKARKAAGGAKRKTS GPVSE

- ▶ fragmentation table for charge state 1+
- ▶ specType=etd
- ▶ score=80.43
- ▶ F104901.dat
- ▶ query=q2690\_p1
- ▶ precursor=811.059060
- ▶ chargePrecursor=5
- ▶ itol=0.8

| AA | c  | y               | z+1             | z+2             | z               | AA              |       |
|----|----|-----------------|-----------------|-----------------|-----------------|-----------------|-------|
| S  | 1  | 147.076         | 4051.241        | 4035.222        | 0.000           | 4034.215        | S[41] |
| E  | 2  | 276.119         | 3022.195        | 3005.180        | 0.000           | 3005.172        | E[42] |
| T  | 3  | 377.187         | 3793.156        | 3777.137        | 0.000           | 3776.120        | T[39] |
| A  | 4  | 448.204         | 3692.108        | 3676.090        | 0.000           | 3675.082        | A[38] |
| P  | 5  | 545.257         | 3021.071        | 3005.052        | 0.000           | 3004.045        | P[37] |
| A  | 6  | 618.204         | 3024.018        | 3008.000        | 0.000           | 3007.992        | A[36] |
| A  | 7  | 687.313         | 3452.981        | 3436.963        | 0.000           | 3435.955        | A[35] |
| P  | 8  | 794.384         | 3381.944        | 3365.925        | 0.000           | 3364.918        | P[34] |
| A  | 9  | 895.421         | 3384.901        | 3368.873        | 0.000           | 3367.865        | A[33] |
| A  | 10 | 926.458         | 3213.854        | 3197.836        | 0.000           | 3196.828        | A[32] |
| P  | 11 | <b>1023.511</b> | 3142.817        | 3126.798        | 0.000           | 3125.791        | P[31] |
| A  | 12 | 1094.548        | 3026.784        | 3020.748        | 0.000           | 3020.739        | A[30] |
| P  | 13 | 1191.600        | 3074.727        | 3058.709        | 0.000           | 3057.701        | P[29] |
| A  | 14 | 1262.638        | 2877.674        | 2861.656        | 0.000           | 2860.648        | A[28] |
| E  | 15 | 1361.680        | 2806.637        | 2790.619        | 0.000           | 2789.611        | E[27] |
| K  | 16 | <b>1519.775</b> | 2877.595        | 2861.578        | 2662.584        | 2660.568        | K[26] |
| T  | 17 | <b>1620.823</b> | 2549.560        | 2533.483        | 2434.489        | 2532.473        | T[25] |
| P  | 18 | 1717.878        | 2448.625        | 2432.433        | 2433.444        | 2431.426        | P[24] |
| V  | 19 | 1816.944        | 2351.399        | 2335.381        | 2336.388        | 2334.373        | V[23] |
| K  | 20 | <b>1945.039</b> | 2252.331        | 2236.312        | 2237.320        | 2235.304        | K[22] |
| K  | 21 | 2073.134        | 2124.236        | 2108.217        | 2109.225        | 2107.209        | K[21] |
| K  | 22 | 2201.229        | 1996.141        | 1980.122        | 1981.130        | 1979.114        | K[20] |
| A  | 23 | 2272.268        | 1868.046        | 1852.027        | 1853.035        | 1851.020        | A[19] |
| R  | 24 | 2428.367        | 1797.020        | 1780.990        | 1781.998        | 1779.982        | R[18] |
| K  | 25 | 2556.462        | 1640.908        | <b>1624.889</b> | <b>1625.897</b> | 1623.881        | K[17] |
| A  | 26 | 2627.499        | 1512.813        | 1496.794        | 1497.802        | 1495.786        | A[16] |
| A  | 27 | 2698.536        | 1441.776        | 1425.757        | 1426.765        | 1424.749        | A[15] |
| G  | 28 | 2765.558        | 1370.739        | 1354.720        | 1355.728        | 1353.712        | G[14] |
| G  | 29 | 2812.579        | 1313.711        | <b>1297.688</b> | 1298.696        | <b>1296.681</b> | G[13] |
| A  | 30 | 2883.616        | 1256.696        | 1240.677        | 1241.685        | 1239.669        | A[12] |
| K  | 31 | 3031.711        | 1185.659        | <b>1169.640</b> | 1170.648        | 1168.632        | K[11] |
| R  | 32 | 3187.812        | <b>1057.564</b> | <b>1041.545</b> | 1042.553        | 1040.537        | R[10] |
| K  | 33 | 3295.907        | 901.463         | <b>885.444</b>  | 886.452         | 884.436         | K[9]  |
| T  | 34 | 3368.928        | 773.368         | <b>757.349</b>  | 758.357         | <b>756.341</b>  | T[8]  |
| S  | 35 | 3483.987        | 672.320         | 656.301         | 657.309         | 655.293         | S[7]  |
| G  | 36 | 3541.009        | <b>585.288</b>  | 586.299         | 570.277         | 568.261         | G[6]  |
| P  | 37 | 3638.061        | 628.266         | 612.248         | 613.256         | 611.240         | P[5]  |
| P  | 38 | 3735.114        | <b>431.214</b>  | 431.195         | 416.203         | 414.187         | P[4]  |
| V  | 39 | 3834.162        | 334.161         | 318.142         | 319.150         | 317.134         | V[3]  |
| S  | 40 | 3931.214        | 236.092         | 219.073         | 220.081         | 218.065         | S[2]  |
| E  | 41 | 4050.257        | 148.060         | 132.042         | 133.050         | 131.034         | E[1]  |



# sp | P43274 | H14\_MOUSE

[Acetyl]SETAPAAPAAPAPAEKTPVKKKARKAAGGAKRKTSGPPVSE

- ▶ fragmentation table for charge state 2+
- ▶ specType=etd
- ▶ score=80.43
- ▶ F104901.dat
- ▶ query=q2690\_p1
- ▶ precursor=811.059060
- ▶ chargePrecursor=5
- ▶ itol=0.8

| AA | c  | y               | z+1             | z+2             | z               | AA              |       |
|----|----|-----------------|-----------------|-----------------|-----------------|-----------------|-------|
| S  | 1  | 74.043          | 2026.124        | 2018.115        | 0.504           | 2017.611        | S[41] |
| E  | 2  | 135.503         | <b>1961.603</b> | <b>1953.594</b> | 0.504           | <b>1953.090</b> | E[42] |
| T  | 3  | 189.087         | 1897.082        | <b>1889.072</b> | 0.504           | <b>1888.568</b> | T[30] |
| A  | 4  | 224.606         | <b>1646.558</b> | 1638.549        | 0.504           | 1638.044        | A[38] |
| P  | 5  | 273.132         | <b>1811.039</b> | 1803.030        | 0.504           | 1802.526        | P[37] |
| A  | 6  | 308.890         | 1762.313        | 1754.303        | 0.504           | 1753.800        | A[36] |
| A  | 7  | 344.159         | 1726.994        | 1718.985        | 0.504           | 1718.481        | A[35] |
| P  | 8  | 392.695         | 1691.476        | 1683.466        | 0.504           | 1682.962        | P[34] |
| A  | 9  | 438.214         | 1642.949        | <b>1634.940</b> | 0.504           | <b>1634.436</b> | A[33] |
| A  | 10 | 463.733         | 1607.431        | <b>1599.421</b> | 0.504           | <b>1598.917</b> | A[32] |
| P  | 11 | 512.259         | 1571.912        | 1563.903        | 0.504           | 1563.399        | P[31] |
| A  | 12 | 547.977         | 1532.395        | <b>1515.376</b> | 0.504           | 1514.872        | A[30] |
| P  | 13 | 596.504         | 1487.867        | 1479.858        | 0.504           | 1479.354        | P[29] |
| A  | 14 | 631.822         | 1449.341        | 1441.332        | 0.504           | 1440.828        | A[28] |
| E  | 15 | 666.344         | 1403.822        | 1395.813        | 0.504           | 1395.309        | E[27] |
| K  | 16 | 700.301         | <b>1339.301</b> | <b>1331.292</b> | <b>1331.796</b> | <b>1330.788</b> | K[26] |
| T  | 17 | 810.815         | 1275.264        | <b>1267.244</b> | <b>1267.748</b> | <b>1266.740</b> | T[25] |
| P  | 18 | 859.443         | 1224.735        | <b>1216.720</b> | <b>1217.224</b> | <b>1216.216</b> | P[24] |
| V  | 19 | <b>908.976</b>  | 1178.203        | 1168.194        | 1168.698        | 1167.690        | V[23] |
| K  | 20 | <b>973.023</b>  | 1128.669        | 1118.660        | 1119.164        | 1118.156        | K[22] |
| K  | 21 | <b>1037.071</b> | 1082.623        | <b>1054.612</b> | <b>1055.116</b> | <b>1054.108</b> | K[21] |
| K  | 22 | 1101.118        | <b>998.574</b>  | <b>990.565</b>  | <b>991.069</b>  | <b>990.061</b>  | K[20] |
| A  | 23 | <b>1136.637</b> | <b>934.527</b>  | 926.517         | 927.021         | 926.013         | A[19] |
| R  | 24 | 1214.682        | 899.024         | <b>890.999</b>  | <b>891.503</b>  | <b>890.495</b>  | R[18] |
| K  | 25 | <b>1278.735</b> | 850.958         | <b>812.948</b>  | <b>813.452</b>  | 812.444         | K[17] |
| A  | 26 | 1314.253        | <b>756.910</b>  | <b>748.901</b>  | <b>749.405</b>  | 748.397         | A[16] |
| A  | 27 | 1349.772        | 721.392         | <b>713.382</b>  | <b>713.886</b>  | <b>712.878</b>  | A[15] |
| G  | 28 | <b>1378.263</b> | 685.873         | 675.863         | 676.367         | 675.359         | G[14] |
| G  | 29 | <b>1408.793</b> | 657.362         | <b>649.353</b>  | <b>649.857</b>  | <b>648.849</b>  | G[13] |
| A  | 30 | <b>1442.312</b> | 628.852         | <b>620.842</b>  | <b>621.346</b>  | 620.338         | A[12] |
| K  | 31 | <b>1506.359</b> | <b>593.333</b>  | <b>585.324</b>  | <b>585.827</b>  | <b>584.820</b>  | K[11] |
| R  | 32 | <b>1584.410</b> | 529.285         | 521.276         | 521.780         | 520.772         | R[10] |
| K  | 33 | 1648.457        | 451.235         | 443.226         | 443.729         | 442.722         | K[9]  |
| T  | 34 | <b>1698.981</b> | 389.187         | 379.178         | 379.682         | 378.674         | T[8]  |
| S  | 35 | 1742.493        | 336.664         | 326.654         | 327.158         | 326.151         | S[7]  |
| G  | 36 | 1771.008        | 293.148         | 283.138         | 283.642         | 282.634         | G[6]  |
| P  | 37 | 1819.534        | 264.637         | 254.627         | 255.131         | 254.124         | P[5]  |
| P  | 38 | 1868.061        | 216.110         | 206.101         | 206.605         | 205.597         | P[4]  |
| V  | 39 | 1917.595        | 167.584         | 157.575         | 158.079         | 157.071         | V[3]  |
| S  | 40 | 1961.111        | 118.066         | 110.043         | 110.544         | 109.535         | S[2]  |
| E  | 41 | 2005.632        | 74.534          | 66.524          | 67.028          | 66.021          | E[1]  |

# sp | P43274 | H14\_MOUSE

[Acetyl]SETAPAAPAAPAPAEKTPVKKKARKAAGGAKRKTSGPPVSE

- ▶ fragmentation table for charge state 3+
- ▶ specType=etd
- ▶ score=80.43
- ▶ F104901.dat
- ▶ query=q2690\_p1
- ▶ precursor=811.059060
- ▶ chargePrecursor=5
- ▶ itol=0.8

| AA | c  | y               | z+1             | z+2             | z              | AA              |       |
|----|----|-----------------|-----------------|-----------------|----------------|-----------------|-------|
| S  | 1  | 49.697          | 1351.085        | <b>1345.746</b> | 0.672          | <b>1345.410</b> | S[41] |
| E  | 2  | 92.711          | <b>1308.071</b> | <b>1302.731</b> | 0.672          | <b>1302.396</b> | E[40] |
| T  | 3  | 126.394         | <b>1265.057</b> | <b>1259.717</b> | 0.672          | <b>1259.381</b> | T[39] |
| A  | 4  | 150.073         | <b>1231.374</b> | <b>1226.035</b> | 0.672          | 1225.699        | A[38] |
| W  | 5  | 184.424         | <b>1207.695</b> | <b>1202.356</b> | 0.672          | <b>1202.020</b> | W[37] |
| A  | 6  | 208.193         | 1175.344        | <b>1170.005</b> | 0.672          | <b>1169.669</b> | A[36] |
| A  | 7  | 229.782         | 1151.065        | <b>1146.326</b> | 0.672          | <b>1145.990</b> | A[35] |
| P  | 8  | 262.133         | <b>1127.986</b> | 1122.647        | 0.672          | 1122.311        | P[34] |
| A  | 9  | 285.812         | 1095.835        | 1090.296        | 0.672          | 1089.960        | A[33] |
| A  | 10 | 309.491         | 1071.950        | <b>1066.617</b> | 0.672          | <b>1066.281</b> | A[32] |
| P  | 11 | 341.242         | <b>1048.277</b> | 1042.938        | 0.672          | 1042.602        | P[31] |
| A  | 12 | 365.921         | 1019.930        | <b>1010.587</b> | 0.672          | <b>1010.251</b> | A[30] |
| P  | 13 | 397.872         | 992.241         | 986.808         | 0.672          | 986.572         | P[29] |
| A  | 14 | 421.551         | <b>959.896</b>  | 954.557         | 0.672          | 954.221         | A[28] |
| E  | 15 | 464.565         | 936.217         | <b>930.878</b>  | 0.672          | <b>930.542</b>  | E[27] |
| K  | 16 | 507.263         | 893.203         | <b>887.864</b>  | <b>888.199</b> | <b>887.528</b>  | K[26] |
| T  | 17 | 540.946         | <b>850.505</b>  | <b>845.165</b>  | <b>845.501</b> | <b>844.829</b>  | T[25] |
| P  | 18 | 574.297         | 826.329         | 811.483         | 811.819        | 811.147         | P[24] |
| V  | 19 | 606.320         | 784.471         | 779.132         | 779.468        | 778.796         | V[23] |
| K  | 20 | <b>649.018</b>  | 751.449         | <b>746.109</b>  | <b>746.445</b> | <b>745.773</b>  | K[22] |
| K  | 21 | 691.716         | 708.750         | 703.411         | 703.747        | 703.075         | K[21] |
| K  | 22 | 734.414         | 666.052         | 660.712         | 661.048        | 660.376         | K[20] |
| A  | 23 | 758.094         | 623.354         | 618.014         | 618.350        | 617.678         | A[19] |
| R  | 24 | 819.127         | 599.876         | 594.536         | 594.872        | <b>593.999</b>  | R[18] |
| R  | 25 | 852.826         | 547.641         | 542.301         | 542.637        | 541.965         | R[17] |
| A  | 26 | 876.505         | 504.942         | 499.603         | 499.939        | 499.267         | A[16] |
| A  | 27 | 900.184         | 461.263         | 475.924         | 476.260        | 475.588         | A[15] |
| G  | 28 | 919.191         | 457.584         | 452.245         | 452.581        | 451.909         | G[14] |
| G  | 29 | 938.198         | 438.577         | 433.238         | 433.574        | 432.902         | G[13] |
| A  | 30 | 961.877         | 419.570         | 414.231         | 414.566        | <b>413.895</b>  | A[12] |
| K  | 31 | <b>1004.575</b> | 395.891         | 390.551         | 390.887        | 390.216         | K[11] |
| R  | 32 | 1056.609        | 353.193         | 347.853         | 348.189        | 347.517         | R[10] |
| K  | 33 | <b>1099.307</b> | 301.159         | 295.819         | 296.155        | 295.484         | K[9]  |
| T  | 34 | <b>1132.990</b> | 258.461         | 253.121         | 253.457        | 252.785         | T[8]  |
| S  | 35 | <b>1162.801</b> | 224.778         | 219.438         | 219.775        | 219.103         | S[7]  |
| G  | 36 | 1181.068        | 199.761         | 194.421         | 194.756        | 194.084         | G[6]  |
| P  | 37 | 1213.359        | 175.760         | 171.421         | 171.757        | 171.085         | P[5]  |
| P  | 38 | <b>1245.710</b> | 144.400         | 139.070         | 139.406        | 138.734         | P[4]  |
| V  | 39 | <b>1278.732</b> | 112.050         | 106.710         | 107.045        | 106.373         | V[3]  |
| S  | 40 | <b>1307.743</b> | 79.030          | 73.696          | 74.032         | 73.360          | S[2]  |
| E  | 41 | 1350.757        | 50.025          | 44.685          | 45.021         | 44.349          | E[1]  |

# sp | P43274 | H14\_MOUSE

[Acetyl]SETAPAAPAAPAPAEKTPVKKKARKAAGGAKRKTSGPPVSE

- ▶ fragmentation table for charge state 4+
- ▶ specType=etd
- ▶ score=80.43
- ▶ F104901.dat
- ▶ query=q2690\_p1
- ▶ precursor=811.059060
- ▶ chargePrecursor=5
- ▶ itol=0.8

| AA | c  | y               | z+1             | z+2             | z              | AA              |       |
|----|----|-----------------|-----------------|-----------------|----------------|-----------------|-------|
| S  | 1  | 37.526          | <b>1013.566</b> | <b>1009.561</b> | 0.755          | <b>1009.309</b> | S[41] |
| E  | 2  | 69.785          | <b>981.305</b>  | <b>977.300</b>  | 0.755          | <b>977.048</b>  | E[40] |
| T  | 3  | 95.047          | 949.044         | <b>945.040</b>  | 0.755          | <b>944.788</b>  | T[39] |
| A  | 4  | 112.806         | <b>923.783</b>  | <b>919.778</b>  | 0.755          | <b>919.526</b>  | A[38] |
| P  | 5  | 137.070         | <b>906.023</b>  | 902.019         | 0.755          | 901.761         | P[37] |
| A  | 6  | 154.829         | 881.766         | 877.755         | 0.755          | 877.501         | A[36] |
| A  | 7  | 172.588         | 864.001         | 859.996         | 0.755          | 859.744         | A[35] |
| P  | 8  | 196.851         | 846.241         | 842.237         | 0.755          | 841.985         | P[34] |
| A  | 9  | 214.611         | 821.979         | 817.974         | 0.755          | 817.722         | A[33] |
| A  | 10 | 232.370         | 804.210         | 800.214         | 0.755          | 799.962         | A[32] |
| P  | 11 | 256.633         | 786.460         | 782.455         | 0.755          | 782.203         | P[31] |
| A  | 12 | 274.392         | 769.197         | 765.192         | 0.755          | 764.940         | A[30] |
| P  | 13 | 298.656         | 744.431         | 740.433         | 0.755          | 740.181         | P[29] |
| A  | 14 | 316.415         | 720.174         | 716.169         | 0.755          | 715.917         | A[28] |
| E  | 15 | 348.675         | 702.415         | 698.410         | 0.755          | 698.158         | E[27] |
| K  | 16 | 380.699         | 670.154         | 666.149         | 0.666          | 665.898         | K[26] |
| T  | 17 | 405.961         | 648.130         | 634.126         | 0.634          | 633.874         | T[25] |
| P  | 18 | 439.224         | 612.869         | 608.864         | 0.608          | 608.612         | P[24] |
| V  | 19 | 454.991         | 588.005         | 584.001         | <b>584.853</b> | 584.349         | V[23] |
| K  | 20 | 487.015         | 563.838         | 559.834         | 560.085        | 559.589         | K[22] |
| K  | 21 | 519.039         | 531.814         | 527.810         | 528.062        | 527.556         | K[21] |
| K  | 22 | 551.063         | 499.791         | 495.786         | 496.038        | 495.534         | K[20] |
| A  | 23 | 568.822         | 487.767         | 483.762         | 484.014        | 483.510         | A[19] |
| R  | 24 | 607.847         | 450.000         | 446.003         | 446.255        | 445.751         | R[18] |
| R  | 25 | <b>639.871</b>  | 410.982         | 406.976         | 407.230        | 406.726         | R[17] |
| A  | 26 | 657.630         | 378.959         | 374.954         | 375.206        | 374.702         | A[16] |
| A  | 27 | 675.390         | 361.199         | 357.195         | 357.447        | 356.941         | A[15] |
| G  | 28 | 689.645         | 343.440         | 339.435         | 339.687        | 339.181         | G[14] |
| G  | 29 | 703.900         | 329.185         | 325.180         | 325.432        | 324.926         | G[13] |
| A  | 30 | 721.660         | 314.929         | 310.925         | 311.177        | 310.671         | A[12] |
| K  | 31 | 753.683         | 297.170         | 293.165         | 293.417        | 292.913         | K[11] |
| R  | 32 | 792.709         | 265.146         | 261.142         | 261.394        | 260.890         | R[10] |
| K  | 33 | 824.732         | 226.121         | 222.116         | 222.368        | 221.864         | K[9]  |
| T  | 34 | 849.994         | 194.097         | 190.093         | 190.345        | 189.841         | T[8]  |
| S  | 35 | 877.252         | 166.835         | 164.831         | 165.083        | 164.579         | S[7]  |
| G  | 36 | <b>896.608</b>  | 147.077         | 143.073         | 143.325        | 142.821         | G[6]  |
| P  | 37 | 910.271         | 132.822         | 128.817         | 129.069        | 128.565         | P[5]  |
| P  | 38 | <b>934.534</b>  | 108.550         | 104.554         | 104.806        | 104.302         | P[4]  |
| V  | 39 | <b>959.301</b>  | 84.290          | 80.291          | 80.543         | 80.039          | V[3]  |
| S  | 40 | <b>981.659</b>  | 59.529          | 55.524          | 55.776         | 55.272          | S[2]  |
| E  | 41 | <b>1013.320</b> | 37.771          | 33.766          | 34.018         | 33.514          | E[1]  |



# sp | P43277 | H13\_MOUSE

[Acetyl]SETAPAAPAAPAPVEKTPVKKKAKKTGAAAGKRKASGPPVSE

- ▶ fragmentation table for charge state 1+
- ▶ specType=etd
- ▶ score=58.42
- ▶ F104901.dat
- ▶ query=q2712\_p1
- ▶ precursor=825.271400
- ▶ chargePrecursor=5
- ▶ itol=0.8

| AA | c  | y               | z+1             | z+2             | z               | AA       |       |
|----|----|-----------------|-----------------|-----------------|-----------------|----------|-------|
| S  | 1  | 147.079         | 4122.303        | 4106.285        | 0.000           | 4105.277 | S[42] |
| E  | 2  | 276.119         | 3993.261        | 3977.242        | 0.000           | 3976.234 | E[41] |
| L  | 3  | 377.167         | 3684.218        | 3668.199        | 0.000           | 3667.192 | L[40] |
| A  | 4  | 448.204         | 3763.175        | 3747.155        | 0.000           | 3746.148 | A[39] |
| P  | 5  | 545.257         | 3692.133        | 3676.115        | 0.000           | 3675.107 | P[38] |
| A  | 6  | 616.294         | 3595.081        | 3579.062        | 0.000           | 3578.054 | A[37] |
| A  | 7  | 667.331         | 3524.044        | 3508.025        | 0.000           | 3507.017 | A[36] |
| P  | 8  | <b>784.384</b>  | 3453.000        | 3436.980        | 0.000           | 3435.980 | P[35] |
| A  | 9  | 855.421         | 3355.954        | 3339.935        | 0.000           | 3338.927 | A[34] |
| A  | 10 | 926.458         | 3284.917        | 3268.898        | 0.000           | 3267.890 | A[33] |
| P  | 11 | 1023.513        | 3213.879        | 3197.861        | 0.000           | 3196.853 | P[32] |
| A  | 12 | 1094.548        | 3116.827        | 3100.808        | 0.000           | 3099.800 | A[31] |
| P  | 13 | 1161.600        | 3045.790        | 3029.771        | 0.000           | 3028.763 | P[30] |
| V  | 14 | 1290.669        | 2948.737        | 2932.718        | 0.000           | 2931.710 | V[29] |
| E  | 15 | 1419.711        | 2849.686        | 2833.666        | 0.000           | 2832.642 | E[28] |
| R  | 16 | 1647.808        | 2720.626        | 2704.607        | 0.000           | 2703.599 | R[27] |
| L  | 17 | 1648.854        | 2592.533        | 2576.512        | 2577.520        | 2575.504 | L[26] |
| P  | 18 | 1745.907        | 2491.483        | 2475.464        | 2476.472        | 2474.457 | P[25] |
| V  | 19 | 1864.975        | 2394.430        | 2378.412        | 2379.419        | 2377.404 | V[24] |
| R  | 20 | <b>1973.070</b> | 2295.362        | 2279.343        | 2280.351        | 2278.335 | R[23] |
| R  | 21 | 2101.105        | 2187.287        | 2171.268        | 2152.250        | 2150.240 | R[22] |
| R  | 22 | 2229.269        | 2039.174        | 2023.153        | 2004.141        | 2002.142 | R[21] |
| A  | 23 | 2300.297        | 1911.077        | 1895.058        | 1896.066        | 1894.050 | A[20] |
| R  | 24 | 2438.362        | 1840.040        | 1824.021        | 1825.029        | 1823.013 | R[19] |
| R  | 25 | 2556.407        | 1711.945        | 1695.926        | 1696.934        | 1694.918 | R[18] |
| T  | 26 | 2657.535        | 1583.850        | 1567.831        | 1568.839        | 1566.823 | T[17] |
| T  | 27 | 2714.550        | 1482.802        | <b>1466.784</b> | <b>1467.791</b> | 1465.770 | T[16] |
| A  | 28 | 2785.593        | 1425.783        | 1409.764        | 1410.770        | 1408.754 | A[15] |
| A  | 29 | 2856.631        | <b>1354.744</b> | 1338.725        | 1339.733        | 1337.717 | A[14] |
| A  | 30 | 2927.668        | <b>1283.707</b> | 1267.688        | 1268.696        | 1266.680 | A[13] |
| G  | 31 | 2984.689        | 1212.670        | 1196.651        | 1197.659        | 1195.643 | G[12] |
| R  | 32 | 3112.784        | 1135.649        | 1119.630        | 1140.637        | 1138.621 | R[11] |
| R  | 33 | 3268.885        | <b>1037.553</b> | <b>1011.534</b> | <b>1012.542</b> | 1010.527 | R[10] |
| R  | 34 | 3396.982        | 971.522         | 955.503         | 956.511         | 954.495  | R[9]  |
| A  | 35 | 3468.017        | 743.351         | 727.330         | 728.346         | 726.330  | A[8]  |
| S  | 36 | 3535.049        | 672.320         | 656.301         | 657.309         | 655.293  | S[7]  |
| G  | 37 | 3612.071        | 585.288         | 569.269         | 570.277         | 568.261  | G[6]  |
| P  | 38 | 3706.124        | 508.266         | 512.248         | 513.256         | 511.240  | P[5]  |
| P  | 39 | 3888.170        | <b>431.214</b>  | 435.195         | 436.203         | 434.187  | P[4]  |
| V  | 40 | 3905.245        | 334.161         | 338.142         | 339.150         | 337.134  | V[3]  |
| S  | 41 | 3992.277        | 235.092         | 239.074         | 240.082         | 238.066  | S[2]  |
| E  | 42 | 4121.319        | 148.050         | 152.032         | 153.050         | 151.034  | E[1]  |

# sp | P43277 | H13\_MOUSE

[Acetyl]SETAPAAPAAPAPVEKTPVKKKAKKTGAAAGKRKASGPPVSE

- ▶ fragmentation table for charge state 2+
- ▶ specType=etd
- ▶ score=58.42
- ▶ F104901.dat
- ▶ query=q2712\_p1
- ▶ precursor=825.271400
- ▶ chargePrecursor=5
- ▶ itol=0.8

| AA | c  | y               | z+1             | z+2             | z               | AA              |       |
|----|----|-----------------|-----------------|-----------------|-----------------|-----------------|-------|
| S  | 1  | 74.042          | 2061.655        | 2053.646        | 0.504           | 2053.142        | S[42] |
| E  | 2  | 138.563         | <b>1997.134</b> | 1889.125        | 0.504           | 1988.621        | E[41] |
| T  | 3  | 189.087         | 1932.613        | <b>1924.603</b> | 0.504           | <b>1924.099</b> | T[40] |
| A  | 4  | 224.606         | 1926.089        | 1874.080        | 0.504           | 1873.576        | A[39] |
| P  | 5  | 293.133         | <b>1846.570</b> | 1828.561        | 0.504           | 1828.056        | P[38] |
| A  | 6  | 358.650         | 1790.044        | 1790.035        | 0.504           | 1790.531        | A[37] |
| A  | 7  | 344.169         | 1762.525        | 1754.516        | 0.504           | 1754.012        | A[36] |
| F  | 8  | 392.695         | 1727.007        | 1718.997        | 0.504           | 1718.494        | F[35] |
| A  | 9  | 428.214         | 1678.480        | 1670.471        | 0.504           | 1669.967        | A[34] |
| A  | 10 | 463.733         | 1642.962        | <b>1634.953</b> | 0.504           | 1634.448        | A[33] |
| P  | 11 | 532.259         | 1607.443        | 1599.434        | 0.504           | 1599.930        | P[32] |
| A  | 12 | 547.777         | 1558.917        | <b>1550.908</b> | 0.504           | <b>1550.404</b> | A[31] |
| P  | 13 | 596.304         | 1523.398        | 1515.389        | 0.504           | 1514.885        | P[30] |
| V  | 14 | 645.830         | 1474.872        | <b>1466.863</b> | 0.504           | <b>1466.359</b> | V[29] |
| E  | 15 | 710.359         | 1425.356        | 1417.348        | 0.504           | 1416.843        | E[28] |
| R  | 16 | 774.887         | 1369.831        | 1361.822        | 1353.813        | 1353.308        | R[27] |
| T  | 17 | 824.911         | <b>1296.769</b> | <b>1288.760</b> | <b>1289.264</b> | 1288.760        | T[26] |
| F  | 18 | 873.457         | 1246.245        | <b>1238.236</b> | 1238.740        | <b>1237.732</b> | F[25] |
| V  | 19 | 922.991         | 1197.719        | 1189.710        | 1190.213        | 1189.706        | V[24] |
| K  | 20 | <b>987.039</b>  | 1148.195        | 1140.185        | 1140.679        | 1139.671        | K[23] |
| K  | 21 | <b>1051.066</b> | <b>1084.137</b> | <b>1076.128</b> | <b>1076.632</b> | 1075.624        | K[22] |
| K  | 22 | <b>1115.134</b> | <b>1020.090</b> | <b>1012.080</b> | <b>1012.584</b> | <b>1011.576</b> | K[21] |
| A  | 23 | <b>1150.652</b> | <b>956.042</b>  | 948.033         | <b>948.537</b>  | 947.529         | A[20] |
| K  | 24 | <b>1214.700</b> | 920.524         | <b>912.514</b>  | <b>913.018</b>  | <b>912.010</b>  | K[19] |
| K  | 25 | <b>1278.747</b> | 856.476         | <b>848.467</b>  | <b>848.971</b>  | <b>847.963</b>  | K[18] |
| T  | 26 | 1329.271        | <b>792.429</b>  | <b>784.419</b>  | <b>784.923</b>  | <b>783.915</b>  | T[17] |
| G  | 27 | 1327.892        | 743.905         | 735.895         | 736.389         | 735.381         | G[16] |
| A  | 28 | 1393.300        | 713.394         | 705.385         | 705.889         | 704.881         | A[15] |
| A  | 29 | 1428.819        | 677.876         | <b>669.866</b>  | <b>670.370</b>  | 669.362         | A[14] |
| A  | 30 | 1464.337        | 642.357         | 634.348         | 634.852         | 633.844         | A[13] |
| G  | 31 | 1492.848        | 606.839         | 598.830         | 599.333         | 598.325         | G[12] |
| K  | 32 | <b>1556.896</b> | 576.328         | 570.318         | 570.822         | 569.814         | K[11] |
| R  | 33 | <b>1634.946</b> | 514.800         | 506.791         | 507.295         | 506.287         | R[10] |
| K  | 34 | 1698.994        | 486.280         | 478.270         | 478.774         | 477.766         | K[9]  |
| A  | 35 | 1734.512        | 372.182         | 364.173         | 364.677         | 363.669         | A[8]  |
| S  | 36 | 1778.028        | 336.664         | 328.654         | 329.158         | 328.150         | S[7]  |
| G  | 37 | 1806.539        | 291.140         | 283.130         | 283.642         | 282.634         | G[6]  |
| P  | 38 | 1855.065        | 264.617         | 256.607         | 257.111         | 256.103         | P[5]  |
| F  | 39 | 1903.592        | 238.110         | 230.101         | 230.605         | 229.597         | F[4]  |
| V  | 40 | 1953.126        | 167.584         | 159.575         | 160.079         | 159.071         | V[3]  |
| S  | 41 | 1996.642        | 118.050         | 110.041         | 110.544         | 109.537         | S[2]  |
| E  | 42 | 2061.161        | 74.534          | 66.524          | 67.028          | 66.021          | E[1]  |

# sp | P43277 | H13\_MOUSE

[Acetyl]SETAPAAPAAPAVEKTPVKKKAKKTGAAAGKRKASGPPVSE

- ▶ fragmentation table for charge state 3+
- ▶ specType=etd
- ▶ score=58.42
- ▶ F104901.dat
- ▶ query=q2712\_p1
- ▶ precursor=825.271400
- ▶ chargePrecursor=5
- ▶ itol=0.8

| AA | c  | y               | z+1             | z+2             | z     | AA              |       |
|----|----|-----------------|-----------------|-----------------|-------|-----------------|-------|
| S  | 1  | 49.697          | 1374.773        | <b>1369.433</b> | 0.672 | <b>1369.097</b> | S[42] |
| E  | 2  | 92.711          | <b>1331.750</b> | <b>1326.419</b> | 0.672 | 1326.083        | E[41] |
| T  | 3  | 126.394         | <b>1288.744</b> | <b>1283.405</b> | 0.672 | <b>1283.069</b> | T[40] |
| A  | 4  | 150.073         | 1258.766        | 1249.723        | 0.672 | 1249.360        | A[39] |
| P  | 5  | 182.424         | <b>1231.383</b> | 1228.043        | 0.672 | 1225.707        | P[38] |
| A  | 6  | 206.103         | 1199.032        | <b>1193.692</b> | 0.672 | 1193.356        | A[37] |
| A  | 7  | 229.782         | 1175.363        | <b>1170.013</b> | 0.672 | 1169.677        | A[36] |
| P  | 8  | 262.133         | <b>1151.674</b> | 1146.334        | 0.672 | 1145.990        | P[35] |
| A  | 9  | 285.812         | 1119.323        | <b>1113.983</b> | 0.672 | <b>1113.647</b> | A[34] |
| A  | 10 | 309.491         | 1359.644        | <b>1090.304</b> | 0.672 | 1089.956        | A[33] |
| P  | 11 | 341.842         | 1071.905        | 1056.625        | 0.672 | 1056.289        | P[32] |
| A  | 12 | 365.521         | <b>1039.614</b> | 1034.274        | 0.672 | 1033.938        | A[31] |
| P  | 13 | 397.872         | 1015.935        | 1010.595        | 0.672 | 1010.259        | P[30] |
| V  | 14 | <b>430.894</b>  | 983.584         | <b>978.244</b>  | 0.672 | <b>977.908</b>  | V[29] |
| E  | 15 | 473.909         | 950.363         | <b>945.221</b>  | 0.672 | <b>944.885</b>  | E[28] |
| R  | 16 | 516.607         | 907.547         | <b>902.207</b>  | 0.672 | <b>901.871</b>  | R[27] |
| T  | 17 | 550.290         | <b>864.848</b>  | <b>859.509</b>  | 0.672 | 859.173         | T[26] |
| P  | 18 | 582.640         | 831.166         | 825.826         | 0.672 | 825.490         | P[25] |
| V  | 19 | 615.663         | 798.815         | <b>793.475</b>  | 0.672 | <b>793.139</b>  | V[24] |
| K  | 20 | 658.362         | 765.792         | 760.453         | 0.672 | 760.117         | K[23] |
| K  | 21 | 701.060         | 723.094         | 717.754         | 0.672 | 717.418         | K[22] |
| K  | 22 | 743.758         | 680.396         | 675.056         | 0.672 | 674.720         | K[21] |
| A  | 23 | 787.437         | 637.697         | 632.358         | 0.672 | 632.022         | A[20] |
| K  | 24 | 830.136         | 614.018         | 608.679         | 0.672 | 608.343         | K[19] |
| K  | 25 | 872.834         | 571.320         | 565.980         | 0.672 | 565.644         | K[18] |
| T  | 26 | 895.516         | 529.623         | 523.282         | 0.672 | 522.946         | T[17] |
| G  | 27 | 905.524         | 494.930         | 489.590         | 0.672 | 489.254         | G[16] |
| A  | 28 | 929.203         | 475.932         | 470.592         | 0.672 | 470.256         | A[15] |
| A  | 29 | 952.882         | 452.253         | 446.913         | 0.672 | 446.577         | A[14] |
| A  | 30 | <b>976.561</b>  | 428.574         | 423.234         | 0.672 | 422.898         | A[13] |
| G  | 31 | <b>995.568</b>  | 404.895         | 399.555         | 0.672 | 399.219         | G[12] |
| K  | 32 | <b>1038.266</b> | 385.888         | 380.548         | 0.672 | 380.212         | K[11] |
| K  | 33 | <b>1090.300</b> | 342.180         | 337.850         | 0.672 | 337.514         | K[10] |
| R  | 34 | <b>1132.596</b> | 291.159         | 285.818         | 0.672 | 285.482         | R[9]  |
| A  | 35 | <b>1156.677</b> | 245.457         | 243.118         | 0.672 | 242.782         | A[8]  |
| S  | 36 | <b>1185.688</b> | 224.778         | 219.439         | 0.672 | 219.103         | S[7]  |
| G  | 37 | 1204.695        | 195.767         | 190.428         | 0.672 | 190.092         | G[6]  |
| P  | 38 | <b>1237.046</b> | 176.760         | 171.421         | 0.672 | 171.085         | P[5]  |
| P  | 39 | 1257.397        | 144.400         | 139.070         | 0.672 | 138.734         | P[4]  |
| V  | 40 | <b>1302.420</b> | 132.954         | 128.719         | 0.672 | 128.383         | V[3]  |
| S  | 41 | <b>1331.430</b> | 75.030          | 73.690          | 0.672 | 73.354          | S[2]  |
| E  | 42 | 1374.445        | 50.025          | 44.685          | 0.672 | 44.349          | E[1]  |

# sp | P43277 | H13\_MOUSE

[Acetyl]SETAPAAPAAPAPVEKTPVKKKAKKTGAAAGKRKASGPPVSE

- ▶ fragmentation table for charge state 4+
- ▶ specType=etd
- ▶ score=58.42
- ▶ F104901.dat
- ▶ query=q2712\_p1
- ▶ precursor=825.271400
- ▶ chargePrecursor=5
- ▶ itol=0.8

| AA | c  | y               | a+1             | a+2             | z       | AA              |       |
|----|----|-----------------|-----------------|-----------------|---------|-----------------|-------|
| S  | 1  | 37.525          | <b>1031.331</b> | <b>1027.327</b> | 0.755   | <b>1027.075</b> | S[42] |
| E  | 2  | 69.785          | 995.071         | <b>995.066</b>  | 0.755   | <b>994.814</b>  | E[41] |
| T  | 3  | 95.447          | 960.319         | <b>962.805</b>  | 0.755   | <b>962.553</b>  | T[40] |
| A  | 4  | 112.506         | 945.540         | <b>937.543</b>  | 0.755   | 937.291         | A[39] |
| P  | 5  | 137.070         | <b>923.789</b>  | 919.784         | 0.755   | 919.532         | P[38] |
| A  | 6  | 154.829         | 899.520         | 895.521         | 0.755   | 895.269         | A[37] |
| A  | 7  | 172.588         | 883.760         | 877.762         | 0.755   | 877.510         | A[36] |
| P  | 8  | 190.851         | <b>864.007</b>  | <b>860.002</b>  | 0.755   | <b>859.750</b>  | P[35] |
| A  | 9  | 214.811         | 839.744         | 835.739         | 0.755   | 835.487         | A[34] |
| A  | 10 | 232.570         | 824.985         | 817.980         | 0.755   | 817.728         | A[33] |
| P  | 11 | 256.633         | 800.225         | 800.221         | 0.755   | 799.969         | P[32] |
| A  | 12 | 274.392         | 779.969         | 775.967         | 0.755   | 775.705         | A[31] |
| P  | 13 | 298.656         | 762.203         | 758.198         | 0.755   | 757.946         | P[30] |
| V  | 14 | 323.423         | 737.940         | 733.935         | 0.755   | 733.683         | V[29] |
| E  | 15 | 355.683         | 713.173         | 709.168         | 0.755   | 708.916         | E[28] |
| K  | 16 | 387.707         | 689.913         | 676.807         | 677.159 | 676.951         | K[27] |
| T  | 17 | <b>412.969</b>  | 648.888         | 644.883         | 645.135 | 644.033         | T[26] |
| P  | 18 | 437.232         | 623.620         | 619.622         | 619.874 | 619.370         | P[25] |
| V  | 19 | 461.999         | 599.363         | 595.358         | 595.610 | 595.106         | V[24] |
| K  | 20 | 494.023         | 574.590         | 570.591         | 570.843 | 570.339         | K[23] |
| K  | 21 | 526.047         | 542.372         | 538.568         | 538.819 | 538.316         | K[22] |
| K  | 22 | 558.070         | 510.948         | 508.344         | 508.796 | 508.292         | K[21] |
| A  | 23 | 575.930         | 478.525         | 474.526         | 474.772 | 474.268         | A[20] |
| K  | 24 | 607.894         | 460.705         | 456.701         | 457.013 | 456.509         | K[19] |
| K  | 25 | 639.877         | 428.742         | 424.737         | 424.989 | 424.485         | K[18] |
| T  | 26 | 665.139         | 396.718         | 392.713         | 392.965 | 392.461         | T[17] |
| G  | 27 | 679.395         | 371.458         | 367.451         | 367.703 | 367.199         | G[16] |
| A  | 28 | 697.154         | 367.201         | 353.196         | 353.448 | 352.944         | A[15] |
| A  | 29 | 714.913         | 339.441         | 335.437         | 335.689 | 335.185         | A[14] |
| A  | 30 | 732.672         | 321.682         | 317.677         | 317.929 | 317.425         | A[13] |
| G  | 31 | 746.928         | 303.923         | 299.918         | 300.170 | 299.666         | G[12] |
| K  | 32 | 778.951         | 289.667         | 285.663         | 285.915 | 285.411         | K[11] |
| R  | 33 | 817.977         | 257.644         | 253.639         | 253.891 | 253.387         | R[10] |
| K  | 34 | 850.001         | 218.618         | 214.614         | 214.866 | 214.362         | K[9]  |
| A  | 35 | 867.760         | 189.591         | 185.586         | 185.838 | 185.334         | A[8]  |
| S  | 36 | 889.518         | 168.835         | 164.831         | 165.083 | 164.579         | S[7]  |
| G  | 37 | 903.773         | 147.077         | 143.073         | 143.325 | 142.821         | G[6]  |
| P  | 38 | 928.036         | 132.822         | 128.817         | 129.069 | 128.565         | P[5]  |
| P  | 39 | 952.300         | 108.559         | 104.554         | 104.806 | 104.302         | P[4]  |
| V  | 40 | <b>977.067</b>  | 84.290          | 80.291          | 80.543  | 80.039          | V[3]  |
| S  | 41 | 999.826         | 69.528          | 65.524          | 65.776  | 65.272          | S[2]  |
| E  | 42 | <b>1031.085</b> | 37.771          | 33.766          | 34.018  | 33.514          | E[1]  |



# sp | P22752 | H2A1\_MOUSE

SHHKAK Acetyl GK  
42.01

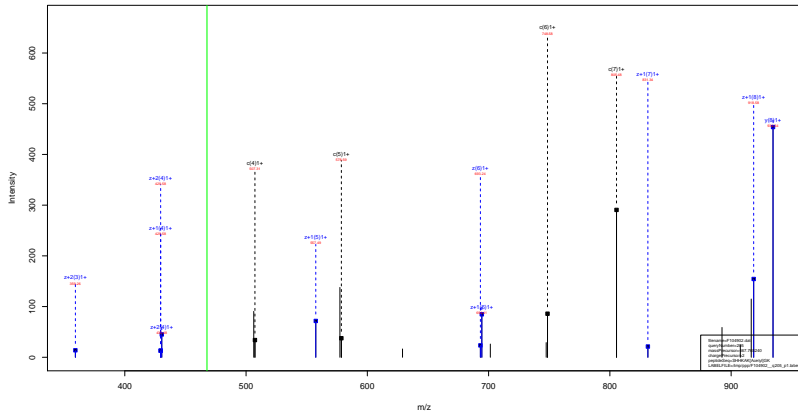

# sp | P22752 | H2A1\_MOUSE

SHHKAK<sup>Acetyl</sup> GK  
42.01

- ▶ fragmentation table for charge state 1+
- ▶ specType=etd
- ▶ score=38.20
- ▶ F104902.dat
- ▶ query=q205\_p1
- ▶ precursor=467.765240
- ▶ chargePrecursor=2
- ▶ itol=0.8

| AA   | c              | y              | z+1            | z+2            | z              | AA   |
|------|----------------|----------------|----------------|----------------|----------------|------|
| S[1] | 105.066        | <b>934.522</b> | <b>918.503</b> | 0.000          | 917.499        | S[8] |
| H[2] | 242.125        | 947.490        | <b>831.471</b> | 0.000          | 830.463        | H[7] |
| H[3] | 379.184        | 710.431        | <b>694.412</b> | 0.000          | <b>693.404</b> | H[6] |
| K[4] | <b>507.279</b> | 573.372        | <b>557.353</b> | 558.361        | 556.345        | K[5] |
| A[5] | <b>578.316</b> | 445.277        | <b>429.258</b> | <b>430.266</b> | 428.250        | A[4] |
| R[6] | <b>748.421</b> | 374.240        | 358.221        | <b>359.229</b> | 357.213        | R[3] |
| G[7] | <b>805.443</b> | 204.134        | 188.116        | 189.123        | 187.108        | G[2] |
| R[8] | 933.538        | 147.113        | 131.094        | 132.102        | 130.086        | R[1] |



# sp | P62806 | H4\_MOUSE

[Acetyl]SGRGKGGKGLGKGGAKRHRK<sup>Dimethyl</sup>VLRD<sub>28.03</sub>

- ▶ fragmentation table for charge state 1+
- ▶ specType=etd
- ▶ score=65.65
- ▶ F104902.dat
- ▶ query=q2179\_p1
- ▶ precursor=849.176750
- ▶ chargePrecursor=3
- ▶ itol=0.8

| AA    | c               | y        | z+1             | z+2             | z        | AA    |
|-------|-----------------|----------|-----------------|-----------------|----------|-------|
| S[1]  | 347.676         | 2545.502 | 2529.463        | 0.000           | 2528.478 | S[24] |
| G[2]  | 204.098         | 2416.460 | 2400.441        | 0.000           | 2399.433 | G[23] |
| R[3]  | <b>368.199</b>  | 2389.438 | 2343.419        | 2344.427        | 2342.412 | R[22] |
| G[4]  | <b>417.220</b>  | 2203.337 | 2187.318        | 2188.326        | 2186.310 | G[21] |
| K[5]  | <b>545.315</b>  | 2146.316 | 2130.297        | 2131.305        | 2129.289 | K[20] |
| G[6]  | <b>602.337</b>  | 2018.221 | 2002.200        | 2003.210        | 2001.194 | G[19] |
| G[7]  | <b>659.358</b>  | 1961.199 | <b>1945.180</b> | <b>1946.188</b> | 1944.173 | G[18] |
| K[8]  | <b>787.453</b>  | 1904.178 | <b>1888.159</b> | 1889.167        | 1887.151 | K[17] |
| G[9]  | 864.475         | 1776.063 | <b>1765.064</b> | 1761.072        | 1759.056 | G[16] |
| L[10] | 957.559         | 1719.061 | <b>1703.043</b> | 1704.050        | 1702.035 | L[15] |
| G[11] | <b>1014.580</b> | 1605.977 | <b>1589.958</b> | 1590.966        | 1588.951 | G[14] |
| K[12] | 1142.675        | 1548.956 | <b>1532.937</b> | 1533.945        | 1531.929 | K[13] |
| G[13] | 1199.697        | 1420.961 | <b>1404.842</b> | 1405.850        | 1403.834 | G[12] |
| G[14] | <b>1256.718</b> | 1363.839 | <b>1347.821</b> | <b>1348.828</b> | 1346.813 | G[11] |
| A[15] | 1327.755        | 1306.818 | <b>1295.799</b> | 1291.807        | 1289.791 | A[10] |
| R[16] | 1459.850        | 1238.781 | <b>1219.762</b> | <b>1220.770</b> | 1218.754 | R[9]  |
| R[17] | 1611.951        | 1107.685 | 1051.667        | 1092.675        | 1090.659 | R[8]  |
| H[18] | 1749.010        | 951.585  | 935.566         | 936.574         | 934.558  | H[7]  |
| R[19] | 1905.111        | 814.526  | <b>798.507</b>  | <b>799.515</b>  | 797.499  | R[6]  |
| K[20] | 2061.238        | 658.425  | 642.406         | 643.414         | 641.399  | K[5]  |
| V[21] | 2180.306        | 502.298  | 486.280         | 487.287         | 485.272  | V[4]  |
| L[22] | 2273.390        | 403.230  | 387.211         | 388.219         | 386.203  | L[3]  |
| R[23] | 2429.491        | 280.146  | 274.127         | 275.135         | 273.119  | R[2]  |
| D[24] | 2544.518        | 134.045  | 118.026         | 119.034         | 117.018  | D[1]  |

# sp | P62806 | H4\_MOUSE

[Acetyl]SGRGKGGKGLGKGGAKRHRK<sup>Dimethyl</sup>VLRD<sub>28.03</sub>

- ▶ fragmentation table for charge state 2+
- ▶ specType=etd
- ▶ score=65.65
- ▶ F104902.dat
- ▶ query=q2179\_p1
- ▶ precursor=849.176750
- ▶ chargePrecursor=3
- ▶ itol=0.8

| AA |    | c               | y               | z+1             | z+2             | z              | AA    |
|----|----|-----------------|-----------------|-----------------|-----------------|----------------|-------|
| S  | 1  | 74.042          | <b>1273.255</b> | <b>1265.245</b> | 0.504           | 1264.741       | S[24] |
| G  | 2  | 102.553         | 1238.733        | <b>1200.724</b> | 0.504           | 1200.220       | G[23] |
| R  | 3  | 180.603         | 1180.222        | <b>1172.213</b> | <b>1172.717</b> | 1171.709       | R[22] |
| G  | 4  | 269.114         | 1102.172        | 1064.163        | 1054.661        | 1093.659       | G[21] |
| K  | 5  | 273.161         | 1073.062        | 1055.052        | 1006.155        | 1065.148       | K[20] |
| G  | 6  | 301.672         | 1009.614        | 1001.605        | 1002.108        | 1001.101       | G[19] |
| G  | 7  | 330.183         | 961.103         | 973.094         | 973.596         | 972.590        | G[18] |
| K  | 8  | 394.230         | 952.592         | 944.583         | 945.087         | 944.079        | K[17] |
| G  | 9  | 422.741         | 888.545         | 880.536         | 881.040         | 880.032        | G[16] |
| L  | 10 | 479.293         | 860.036         | 852.027         | 852.529         | 851.521        | L[15] |
| G  | 11 | 507.794         | 803.492         | 795.483         | 795.987         | 794.979        | G[14] |
| K  | 12 | 571.841         | 774.982         | 766.972         | 767.476         | 766.468        | K[13] |
| G  | 13 | 600.352         | 710.934         | 702.925         | 703.429         | 702.421        | G[12] |
| G  | 14 | 628.863         | 682.423         | 674.414         | 674.918         | 673.910        | G[11] |
| A  | 15 | 664.361         | 653.913         | 645.903         | 646.407         | 645.399        | A[10] |
| R  | 16 | 702.409         | 618.398         | 610.389         | 610.893         | 609.885        | R[9]  |
| R  | 17 | 806.479         | 554.341         | 546.331         | 546.841         | <b>545.833</b> | R[8]  |
| H  | 18 | 875.009         | 476.200         | 468.191         | 468.701         | 467.783        | H[7]  |
| R  | 19 | 953.059         | 407.767         | 399.757         | 400.261         | 399.253        | R[6]  |
| K  | 20 | 1031.122        | 329.716         | 321.707         | 322.211         | 321.203        | K[5]  |
| V  | 21 | 1087.667        | 251.662         | 243.653         | 244.147         | 243.140        | V[4]  |
| L  | 22 | <b>1117.199</b> | 202.112         | 194.103         | 194.613         | 193.605        | L[3]  |
| R  | 23 | <b>1215.248</b> | 145.577         | 137.567         | 138.071         | 137.063        | R[2]  |
| D  | 24 | 1272.763        | 67.526          | 59.517          | 60.021          | 59.013         | D[1]  |

# sp | P62806 | H4\_MOUSE

[Acetyl]SGRGKGGKGLGKGGAK Acetyl 42.01 RHRK Dimethyl 28.03 VLRD

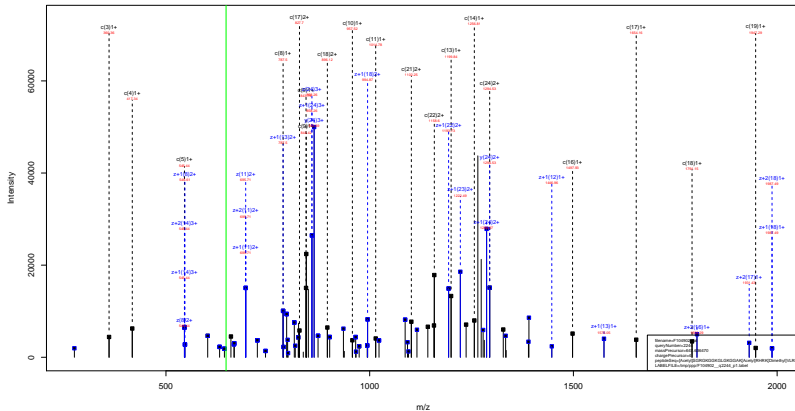

# sp | P62806 | H4\_MOUSE

[Acetyl]SGRGKGGKGLGKGGAK<sup>Acetyl</sup> RHRK<sup>Dimethyl</sup> VLRD<sup>28.03</sup>

- ▶ fragmentation table for charge state 1+
- ▶ specType=etd
- ▶ score=152.26
- ▶ F104902.dat
- ▶ query=q2244\_p1
- ▶ precursor=647.636470
- ▶ chargePrecursor=4
- ▶ itol=0.8

| AA    | c               | y               | z+1             | z+2             | z        | AA    |
|-------|-----------------|-----------------|-----------------|-----------------|----------|-------|
| S[1]  | 147.076         | 2587.513        | 2571.494        | 0.000           | 2570.486 | S[24] |
| G[2]  | 204.098         | 2458.470        | 2442.451        | 0.000           | 2441.444 | G[23] |
| R[3]  | <b>360.199</b>  | 2401.440        | 2385.430        | 2388.438        | 2384.422 | R[22] |
| G[4]  | <b>417.220</b>  | 2249.340        | 2229.330        | 2230.337        | 2228.321 | G[21] |
| K[5]  | <b>545.315</b>  | 2188.320        | 2172.307        | 2173.315        | 2171.300 | K[20] |
| G[6]  | <b>602.337</b>  | 2060.231        | 2044.217        | 2045.220        | 2043.205 | G[19] |
| G[7]  | <b>659.358</b>  | 2003.210        | <b>1987.191</b> | <b>1988.199</b> | 1986.181 | G[18] |
| K[8]  | <b>787.453</b>  | 1946.189        | 1930.170        | <b>1931.177</b> | 1929.162 | K[17] |
| G[9]  | <b>844.475</b>  | 1818.083        | 1802.075        | <b>1803.082</b> | 1801.067 | G[16] |
| L[10] | <b>957.559</b>  | 1761.072        | 1745.063        | 1746.061        | 1744.045 | L[15] |
| Q[11] | <b>1014.580</b> | 1647.988        | 1631.980        | 1632.977        | 1630.961 | Q[14] |
| K[12] | <b>1142.675</b> | 1590.966        | <b>1574.948</b> | 1575.955        | 1573.940 | K[13] |
| G[13] | <b>1199.697</b> | 1462.871        | <b>1446.853</b> | 1447.860        | 1445.845 | G[12] |
| G[14] | <b>1256.718</b> | 1405.850        | <b>1389.831</b> | <b>1390.839</b> | 1388.821 | G[11] |
| A[15] | <b>1327.755</b> | 1348.828        | 1332.810        | <b>1333.818</b> | 1331.803 | A[10] |
| R[16] | <b>1407.861</b> | <b>1277.791</b> | 1261.773        | 1262.780        | 1260.765 | R[9]  |
| R[17] | <b>1653.962</b> | 1107.688        | 1091.667        | <b>1092.675</b> | 1090.659 | R[8]  |
| H[18] | <b>1791.021</b> | 951.585         | <b>935.566</b>  | 936.574         | 934.558  | H[7]  |
| R[19] | <b>1947.122</b> | <b>814.526</b>  | <b>798.507</b>  | <b>799.515</b>  | 797.499  | R[6]  |
| K[20] | 2103.248        | 658.425         | 642.406         | <b>643.414</b>  | 641.398  | K[5]  |
| V[21] | 2202.217        | 502.300         | 486.280         | 487.287         | 485.272  | V[4]  |
| L[22] | 2315.403        | 463.179         | 447.161         | 448.169         | 446.153  | L[3]  |
| R[23] | 2471.502        | 290.146         | 274.127         | <b>275.135</b>  | 273.119  | R[2]  |
| D[24] | 2586.529        | 134.045         | 118.026         | 119.034         | 117.018  | D[1]  |

# sp | P62806 | H4\_MOUSE

[Acetyl]SGRGKGGKGLGKGGAK<sup>Acetyl</sup>42.01 RHRK<sup>Dimethyl</sup>28.03 VLRD

- ▶ fragmentation table for charge state 2+
- ▶ specType=etd
- ▶ score=152.26
- ▶ F104902.dat
- ▶ query=q2244\_p1
- ▶ precursor=647.636470
- ▶ chargePrecursor=4
- ▶ itol=0.8

| AA    | c               | y               | z+1             | z+2             | z              | AA    |
|-------|-----------------|-----------------|-----------------|-----------------|----------------|-------|
| S[1]  | 74.042          | <b>1294.260</b> | <b>1286.251</b> | 0.504           | 1285.747       | S[24] |
| G[2]  | 102.553         | 1229.739        | <b>1221.729</b> | 0.504           | 1221.225       | G[23] |
| R[3]  | 180.603         | 1201.228        | <b>1193.219</b> | <b>1193.723</b> | 1192.715       | R[22] |
| G[4]  | 269.114         | 1123.177        | 1115.168        | <b>1115.672</b> | 1114.664       | G[21] |
| K[5]  | 273.161         | <b>1094.667</b> | <b>1086.657</b> | <b>1087.161</b> | 1086.153       | K[20] |
| G[6]  | 301.672         | 1030.619        | <b>1022.610</b> | <b>1023.114</b> | 1022.106       | G[19] |
| G[7]  | 330.183         | 1002.108        | <b>994.099</b>  | <b>994.603</b>  | <b>993.595</b> | G[18] |
| K[8]  | 394.230         | <b>973.598</b>  | <b>965.588</b>  | <b>966.092</b>  | <b>965.084</b> | K[17] |
| G[9]  | 422.741         | 909.550         | <b>901.541</b>  | <b>902.045</b>  | <b>901.037</b> | G[16] |
| L[10] | 479.293         | 861.040         | <b>873.030</b>  | <b>873.534</b>  | <b>872.526</b> | L[15] |
| G[11] | 507.794         | <b>824.498</b>  | 816.488         | <b>816.992</b>  | 815.984        | G[14] |
| K[12] | 571.841         | <b>795.987</b>  | <b>787.977</b>  | <b>788.481</b>  | <b>787.474</b> | K[13] |
| G[13] | 600.352         | 731.939         | <b>723.930</b>  | <b>724.434</b>  | 723.426        | G[12] |
| G[14] | 628.863         | 703.429         | <b>695.419</b>  | <b>695.923</b>  | <b>694.915</b> | G[11] |
| A[15] | 664.361         | 674.918         | <b>666.908</b>  | <b>667.412</b>  | <b>666.405</b> | A[10] |
| R[16] | 789.434         | 639.399         | <b>631.390</b>  | <b>631.894</b>  | <b>630.886</b> | R[9]  |
| R[17] | <b>827.485</b>  | 554.341         | <b>546.337</b>  | <b>546.841</b>  | <b>545.833</b> | R[8]  |
| H[18] | <b>896.014</b>  | 476.200         | 468.187         | 468.701         | 467.783        | H[7]  |
| R[19] | <b>974.065</b>  | 407.767         | 399.757         | 400.261         | 399.253        | R[6]  |
| K[20] | 1052.126        | 329.716         | 321.707         | 322.211         | 321.203        | K[5]  |
| V[21] | <b>1181.662</b> | 251.663         | 243.653         | 244.147         | 243.140        | V[4]  |
| L[22] | <b>1158.204</b> | 202.119         | 194.108         | 194.613         | 193.605        | L[3]  |
| R[23] | <b>1236.255</b> | 145.577         | 137.567         | 138.071         | 137.063        | R[2]  |
| D[24] | <b>1293.768</b> | 67.526          | 59.517          | 60.021          | 59.013         | D[1]  |



# sp | P62806 | H4\_MOUSE

[Acetyl]SGRGKGGKGLGKGGAK<sup>Acetyl</sup>42.01 RHRK<sup>Dimethyl</sup>28.03 VLRD

- ▶ fragmentation table for charge state 3+
- ▶ specType=etd
- ▶ score=152.26
- ▶ F104902.dat
- ▶ query=q2244.p1
- ▶ precursor=647.636470
- ▶ chargePrecursor=4
- ▶ itol=0.8

| AA    | c              | y              | z+1            | z+2            | z              | AA    |
|-------|----------------|----------------|----------------|----------------|----------------|-------|
| S[1]  | 49.697         | <b>863.176</b> | <b>857.836</b> | 0.672          | <b>857.500</b> | S[24] |
| G[2]  | 58.704         | 820.162        | <b>814.822</b> | 0.672          | <b>814.486</b> | G[23] |
| R[3]  | 120.738        | 801.154        | <b>795.815</b> | <b>796.151</b> | <b>795.479</b> | R[22] |
| G[4]  | 139.745        | 749.121        | <b>743.781</b> | <b>744.117</b> | 743.445        | G[21] |
| K[5]  | 182.443        | 730.114        | <b>724.774</b> | 725.110        | <b>724.438</b> | K[20] |
| G[6]  | 201.450        | 687.415        | 682.076        | 682.412        | 681.740        | G[19] |
| G[7]  | 220.458        | <b>668.408</b> | 663.069        | 663.404        | 662.733        | G[18] |
| K[8]  | 263.156        | 649.401        | <b>644.061</b> | 644.397        | <b>643.725</b> | K[17] |
| G[9]  | 282.163        | 606.703        | 602.363        | <b>601.699</b> | 601.027        | G[16] |
| L[10] | 319.858        | 587.695        | 582.355        | 582.691        | 582.020        | L[15] |
| G[11] | 338.865        | 550.001        | <b>544.661</b> | <b>544.997</b> | 544.325        | G[14] |
| K[12] | 381.563        | 530.994        | 525.654        | 525.990        | 525.318        | K[13] |
| G[13] | 400.570        | 488.295        | 482.956        | 483.292        | 482.620        | G[12] |
| G[14] | 419.578        | 469.288        | 463.949        | 464.285        | 463.613        | G[11] |
| A[15] | 443.257        | 450.281        | 444.941        | 445.277        | 444.605        | A[10] |
| K[16] | 469.958        | 426.602        | 421.262        | 421.598        | 420.926        | K[9]  |
| R[17] | 551.992        | 369.900        | 364.561        | 364.896        | 364.225        | R[8]  |
| H[18] | 597.678        | 317.866        | 312.527        | 312.863        | 312.191        | H[7]  |
| R[19] | 649.712        | 272.180        | 266.841        | 267.176        | 266.505        | R[6]  |
| K[20] | 701.754        | 220.146        | 214.807        | 215.143        | 214.471        | K[5]  |
| V[21] | 734.777        | 168.104        | 162.765        | 163.101        | 162.429        | V[4]  |
| L[22] | 772.472        | 135.082        | 129.742        | 130.078        | 129.406        | L[3]  |
| R[23] | <b>824.505</b> | 97.387         | 92.047         | 92.383         | 91.711         | R[2]  |
| D[24] | 862.848        | 45.353         | 40.014         | 40.349         | 39.678         | D[1]  |

# sp | P62806 | H4\_MOUSE

[Acetyl]SGRGKGGKGLGKGGAKRHR (Dimethyl) K (Acetyl) VLRD  
 (28.03) (42.01)

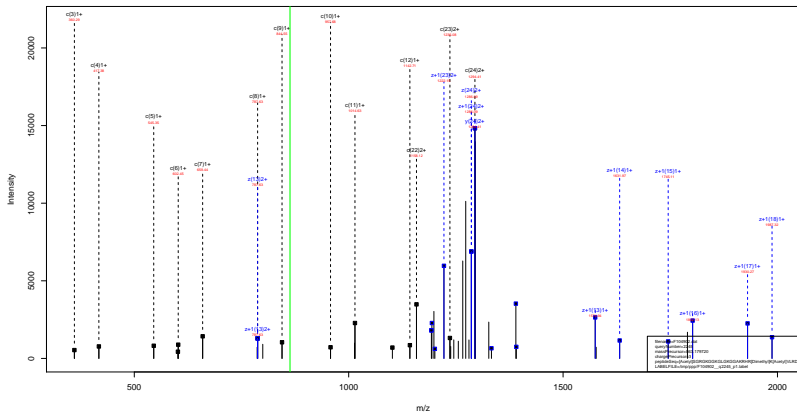

# sp | P62806 | H4\_MOUSE

[Acetyl]SGRGKGGKGLGKGGAKRHR <sup>(Dimethyl)</sup>K <sup>(Acetyl)</sup>VLRD  
(28.03) (42.01)

- ▶ fragmentation table for charge state 1+
- ▶ specType=etd
- ▶ score=66.49
- ▶ F104902.dat
- ▶ query=q2245\_p1
- ▶ precursor=863.179720
- ▶ chargePrecursor=3
- ▶ itol=0.8

| AA | c  | y               | z+1      | z+2             | z               | AA       |       |
|----|----|-----------------|----------|-----------------|-----------------|----------|-------|
| S  | 1  | 147.076         | 2587.513 | 2571.494        | 0.000           | 2570.488 | S[24] |
| G  | 2  | 204.098         | 2458.470 | 2442.451        | 0.000           | 2441.444 | G[23] |
| R  | 3  | <b>366.199</b>  | 3401.449 | 3385.430        | 2386.438        | 2384.422 | R[22] |
| G  | 4  | <b>417.220</b>  | 2345.348 | 2329.329        | 2230.337        | 2228.321 | G[21] |
| K  | 5  | <b>545.315</b>  | 2188.536 | 2172.507        | 2173.515        | 2171.500 | K[20] |
| G  | 6  | <b>602.337</b>  | 2090.291 | 2044.212        | 2045.220        | 2043.205 | G[19] |
| G  | 7  | <b>659.358</b>  | 2003.210 | <b>1987.191</b> | 1988.199        | 1986.183 | G[18] |
| K  | 8  | <b>787.453</b>  | 1946.188 | <b>1930.170</b> | 1931.177        | 1929.162 | K[17] |
| G  | 9  | <b>844.475</b>  | 1818.093 | <b>1802.075</b> | 1803.082        | 1801.067 | G[16] |
| L  | 10 | <b>937.559</b>  | 1781.072 | <b>1745.053</b> | 1746.061        | 1744.045 | L[15] |
| G  | 11 | <b>1014.580</b> | 1647.985 | <b>1631.969</b> | 1632.977        | 1630.961 | G[14] |
| R  | 12 | <b>1142.675</b> | 1590.966 | <b>1574.948</b> | 1575.955        | 1573.940 | R[13] |
| G  | 13 | 1199.697        | 1462.871 | 1446.853        | 1447.860        | 1445.845 | G[12] |
| G  | 14 | 1256.718        | 1405.850 | <b>1389.831</b> | <b>1390.839</b> | 1388.823 | G[11] |
| A  | 15 | 1327.755        | 1348.828 | <b>1332.810</b> | 1333.818        | 1331.802 | A[10] |
| R  | 16 | 1405.850        | 1277.791 | 1261.773        | 1262.780        | 1260.765 | R[9]  |
| R  | 17 | 1611.951        | 1149.696 | 1133.678        | 1134.685        | 1132.670 | R[8]  |
| H  | 18 | 1749.010        | 993.595  | 977.577         | 978.584         | 976.569  | H[7]  |
| R  | 19 | 1933.143        | 856.530  | 840.518         | 841.525         | 839.510  | R[6]  |
| R  | 20 | 2103.248        | 672.404  | 656.385         | 657.393         | 655.377  | R[5]  |
| V  | 21 | 2202.317        | 502.298  | 486.280         | 487.287         | 485.272  | V[4]  |
| L  | 22 | 2335.401        | 403.230  | 387.213         | 388.219         | 386.203  | L[3]  |
| D  | 23 | 2471.502        | 299.146  | 283.127         | 284.134         | 282.118  | D[2]  |
| D  | 24 | 2586.529        | 194.045  | 178.026         | 179.034         | 177.018  | D[1]  |

# sp | P62806 | H4\_MOUSE

[Acetyl]SGRGKGGKGLGKGGAKRHR <sup>(Dimethyl)</sup> K <sup>(Acetyl)</sup> VLRD  
(28.03) (42.01)

- ▶ fragmentation table for charge state 2+
- ▶ specType=etd
- ▶ score=66.49
- ▶ F104902.dat
- ▶ query=q2245\_p1
- ▶ precursor=863.179720
- ▶ chargePrecursor=3
- ▶ itol=0.8

| AA    | c               | y               | z+1             | z+2             | z               | AA    |
|-------|-----------------|-----------------|-----------------|-----------------|-----------------|-------|
| S[1]  | 74.092          | <b>1294.260</b> | <b>1286.251</b> | 0.504           | <b>1285.747</b> | S[24] |
| G[2]  | 102.553         | 1229.739        | <b>1221.729</b> | 0.504           | 1221.225        | G[23] |
| R[3]  | 180.603         | <b>1201.228</b> | <b>1193.219</b> | <b>1193.723</b> | <b>1192.715</b> | R[22] |
| G[4]  | 269.114         | 1123.177        | 1115.168        | 1115.672        | 1114.663        | G[21] |
| R[5]  | 357.163         | 1044.661        | 1036.657        | 1037.161        | 1036.151        | R[20] |
| G[6]  | 351.672         | 1030.615        | 1022.610        | 1023.114        | 1022.106        | G[19] |
| G[7]  | 330.183         | 1002.108        | 994.099         | 994.603         | 993.595         | G[18] |
| K[8]  | 394.230         | 973.598         | 965.589         | 966.092         | 965.084         | K[17] |
| G[9]  | 422.741         | 909.550         | 901.541         | 902.045         | 901.037         | G[16] |
| L[10] | 479.283         | 881.040         | 873.033         | 873.536         | 872.528         | L[15] |
| G[11] | 507.794         | 824.495         | 816.488         | 816.992         | 815.984         | G[14] |
| K[12] | 571.841         | 795.987         | <b>787.977</b>  | 788.481         | <b>787.474</b>  | K[13] |
| G[13] | 600.352         | 731.939         | 723.930         | 724.434         | 723.426         | G[12] |
| G[14] | 628.863         | 703.429         | 695.419         | 695.923         | 694.915         | G[11] |
| A[15] | 664.361         | 674.918         | 666.908         | 667.412         | 666.405         | A[10] |
| R[16] | 728.429         | 639.399         | 631.393         | 631.894         | 630.886         | R[9]  |
| R[17] | 806.479         | 575.352         | 567.342         | 567.846         | 566.839         | R[8]  |
| H[18] | 875.009         | 497.301         | 489.292         | 489.796         | 488.789         | H[7]  |
| R[19] | 967.075         | 426.772         | 420.762         | 421.266         | 420.259         | R[6]  |
| K[20] | 1052.178        | 336.706         | 328.696         | 329.200         | 328.193         | K[5]  |
| V[21] | <b>1101.662</b> | 251.953         | 243.943         | 244.447         | 243.440         | V[4]  |
| L[22] | <b>1158.204</b> | 202.119         | 194.109         | 194.613         | 193.605         | L[3]  |
| R[23] | <b>1236.255</b> | 145.577         | 137.567         | 138.071         | 137.064         | R[2]  |
| D[24] | <b>1293.768</b> | 67.526          | 59.517          | 60.021          | 59.013          | D[1]  |



# sp | P62806 | H4\_MOUSE

[Acetyl]SGR<sup>Dimethyl</sup><sub>28.03</sub> GKGGKGLGKGGAK<sup>Acetyl</sup><sub>42.01</sub> RHRK<sup>Dimethyl</sup><sub>28.03</sub> VLRLD

- ▶ fragmentation table for charge state 1+
- ▶ specType=etd
- ▶ score=94.91
- ▶ F104902.dat
- ▶ query=q2297\_p1
- ▶ precursor=654.644070
- ▶ chargePrecursor=4
- ▶ itol=0.8

| AA | c  | y               | z+1      | z+2             | z               | AA       |       |
|----|----|-----------------|----------|-----------------|-----------------|----------|-------|
| S  | 1  | 147.076         | 2615.544 | 2599.525        | 0.000           | 2598.518 | S[24] |
| G  | 2  | 204.098         | 2486.501 | 2470.483        | 0.000           | 2469.475 | G[23] |
| R  | 3  | <b>388.230</b>  | 2420.480 | 2413.463        | 2414.469        | 2412.453 | R[22] |
| G  | 4  | <b>445.292</b>  | 2345.340 | 2229.320        | 2230.327        | 2228.311 | G[21] |
| K  | 5  | <b>573.347</b>  | 2188.326 | 2172.307        | 2173.315        | 2171.300 | K[20] |
| G  | 6  | <b>630.368</b>  | 2060.231 | 2044.210        | 2045.220        | 2043.205 | G[19] |
| G  | 7  | <b>647.390</b>  | 2003.210 | <b>1987.191</b> | <b>1988.199</b> | 1986.183 | G[18] |
| K  | 8  | <b>815.485</b>  | 1946.188 | 1930.170        | 1931.177        | 1929.162 | K[17] |
| G  | 9  | <b>872.506</b>  | 1818.093 | 1802.075        | <b>1803.082</b> | 1801.067 | G[16] |
| L  | 10 | 685.599         | 1783.072 | 1748.053        | 1749.061        | 1744.043 | L[15] |
| G  | 11 | <b>1042.612</b> | 1647.985 | 1631.969        | 1632.977        | 1630.961 | G[14] |
| K  | 12 | 1170.707        | 1590.969 | 1574.948        | 1575.955        | 1573.940 | K[13] |
| G  | 13 | <b>1227.728</b> | 1462.871 | 1446.853        | <b>1447.860</b> | 1445.845 | G[12] |
| G  | 14 | 1284.749        | 1405.850 | 1389.831        | <b>1390.839</b> | 1388.823 | G[11] |
| A  | 15 | 1355.787        | 1348.828 | 1332.810        | <b>1333.818</b> | 1331.802 | A[10] |
| R  | 16 | 1525.882        | 1277.791 | 1261.773        | 1262.780        | 1260.765 | R[9]  |
| R  | 17 | 1681.993        | 1107.680 | <b>1091.667</b> | 1092.675        | 1090.659 | R[8]  |
| H  | 18 | 1819.052        | 951.585  | <b>935.566</b>  | 936.574         | 934.558  | H[7]  |
| R  | 19 | 1975.153        | 814.526  | <b>798.507</b>  | <b>799.515</b>  | 797.499  | R[6]  |
| K  | 20 | 2131.280        | 658.425  | 642.405         | <b>643.414</b>  | 641.398  | K[5]  |
| V  | 21 | 2230.348        | 502.298  | 486.280         | 487.287         | 485.272  | V[4]  |
| L  | 22 | 2343.432        | 403.230  | 387.211         | <b>388.219</b>  | 386.203  | L[3]  |
| R  | 23 | 2499.533        | 290.140  | 274.127         | <b>275.135</b>  | 273.119  | R[2]  |
| D  | 24 | 2614.590        | 134.045  | 118.026         | 119.034         | 117.018  | D[1]  |

# sp | P62806 | H4\_MOUSE

[Acetyl]SGR<sup>Dimethyl</sup><sub>28.03</sub> GKGGKGLGKGGAK<sup>Acetyl</sup><sub>42.01</sub> RHRK<sup>Dimethyl</sup><sub>28.03</sub> VLRLD

- ▶ fragmentation table for charge state 2+
- ▶ specType=etd
- ▶ score=94.91
- ▶ F104902.dat
- ▶ query=q2297\_p1
- ▶ precursor=654.644070
- ▶ chargePrecursor=4
- ▶ itol=0.8

| AA   | c               | y               | z+1             | z+2             | z               | AA   |
|------|-----------------|-----------------|-----------------|-----------------|-----------------|------|
| S 1  | 74.042          | <b>1308.276</b> | <b>1300.266</b> | 0.504           | <b>1299.762</b> | S 24 |
| G 2  | 102.553         | 1243.754        | <b>1235.745</b> | 0.504           | 1235.241        | G 23 |
| R 3  | 194.619         | <b>1215.244</b> | 1207.234        | <b>1207.738</b> | 1209.730        | R 22 |
| G 4  | 229.130         | 1123.177        | <b>1115.168</b> | <b>1115.072</b> | <b>1114.564</b> | G 21 |
| K 5  | 267.177         | 1094.661        | <b>1086.657</b> | <b>1087.161</b> | <b>1086.153</b> | K 20 |
| G 6  | 315.688         | <b>1030.619</b> | <b>1022.610</b> | <b>1023.114</b> | 1022.106        | G 19 |
| G 7  | 344.199         | 1002.108        | <b>994.099</b>  | <b>994.603</b>  | <b>993.595</b>  | G 18 |
| K 8  | 408.246         | 973.590         | <b>965.588</b>  | <b>966.092</b>  | <b>965.084</b>  | K 17 |
| G 9  | 436.257         | <b>909.550</b>  | <b>901.541</b>  | <b>902.045</b>  | <b>901.037</b>  | G 16 |
| L 10 | 493.299         | <b>881.040</b>  | <b>873.030</b>  | <b>873.534</b>  | <b>872.526</b>  | L 15 |
| G 11 | 531.809         | <b>824.498</b>  | <b>816.488</b>  | <b>816.992</b>  | <b>815.984</b>  | G 14 |
| K 12 | 585.857         | 795.987         | <b>787.977</b>  | <b>788.481</b>  | <b>787.474</b>  | K 13 |
| G 13 | 614.368         | 731.939         | <b>723.930</b>  | <b>724.434</b>  | 723.426         | G 12 |
| G 14 | <b>642.878</b>  | 703.429         | <b>695.419</b>  | <b>695.923</b>  | 694.915         | G 11 |
| A 15 | 698.927         | 674.918         | <b>666.908</b>  | <b>667.412</b>  | <b>666.405</b>  | A 10 |
| R 16 | <b>763.450</b>  | 639.399         | <b>631.390</b>  | <b>631.894</b>  | <b>630.886</b>  | R 9  |
| R 17 | <b>841.500</b>  | 554.347         | <b>546.337</b>  | <b>546.841</b>  | 545.833         | R 8  |
| H 18 | <b>916.030</b>  | 476.296         | 468.287         | 468.791         | 467.783         | H 7  |
| R 19 | <b>988.080</b>  | 407.767         | 399.757         | 400.261         | 399.253         | R 6  |
| K 20 | <b>1066.143</b> | 329.746         | 321.737         | 322.241         | 321.233         | K 5  |
| V 21 | <b>1115.678</b> | 252.693         | 244.683         | 244.187         | 243.180         | V 4  |
| L 22 | <b>1172.220</b> | 202.119         | 194.109         | 194.613         | 193.605         | L 3  |
| R 23 | <b>1250.270</b> | 145.577         | 137.567         | 138.071         | 137.063         | R 2  |
| D 24 | <b>1307.784</b> | 67.526          | 59.517          | 60.021          | 59.013          | D 1  |

# sp | P62806 | H4\_MOUSE

[Acetyl]SGR<sup>Dimethyl</sup><sub>28.03</sub> GKGGKGLGKGGAK<sup>Acetyl</sup><sub>42.01</sub> RHRK<sup>Dimethyl</sup><sub>28.03</sub> VLRD

- ▶ fragmentation table for charge state 3+
- ▶ specType=etd
- ▶ score=94.91
- ▶ F104902.dat
- ▶ query=q2297\_p1
- ▶ precursor=654.644070
- ▶ chargePrecursor=4
- ▶ itol=0.8

| AA    | c              | y              | z+1            | z+2            | z              | AA    |
|-------|----------------|----------------|----------------|----------------|----------------|-------|
| S[1]  | 49.697         | <b>872.520</b> | <b>867.180</b> | 0.672          | <b>866.844</b> | S[24] |
| G[2]  | 58.704         | 329.905        | <b>824.166</b> | 0.672          | <b>823.830</b> | G[23] |
| R[3]  | 130.082        | 810.498        | <b>805.159</b> | <b>805.495</b> | 804.023        | R[22] |
| G[4]  | 149.089        | 749.121        | 743.781        | 744.117        | 743.445        | G[21] |
| K[5]  | 191.787        | 730.114        | <b>724.774</b> | <b>725.110</b> | <b>724.438</b> | K[20] |
| G[6]  | 210.794        | <b>687.415</b> | 682.076        | 682.412        | 681.740        | G[19] |
| G[7]  | 229.801        | <b>668.408</b> | 663.069        | 663.404        | 662.733        | G[18] |
| K[8]  | 272.500        | 649.401        | <b>644.061</b> | <b>644.397</b> | <b>643.725</b> | K[17] |
| G[9]  | 281.307        | 636.793        | 631.353        | 631.689        | 631.027        | G[16] |
| L[10] | 329.202        | 687.695        | 582.356        | 582.692        | 582.020        | L[15] |
| G[11] | 348.209        | 550.001        | 544.661        | 544.997        | 544.325        | G[14] |
| K[12] | 390.907        | 530.994        | 525.654        | 525.990        | 525.318        | K[13] |
| G[13] | 409.914        | 488.295        | 482.956        | 483.292        | 482.620        | G[12] |
| G[14] | 428.921        | 469.288        | 463.949        | 464.285        | 463.613        | G[11] |
| A[15] | 452.600        | 450.281        | <b>444.941</b> | <b>445.277</b> | <b>444.605</b> | A[10] |
| K[16] | 509.302        | 426.602        | 421.262        | 421.598        | 420.926        | K[9]  |
| R[17] | 561.186        | 369.900        | 364.561        | 364.896        | 364.225        | R[8]  |
| H[18] | 607.022        | 317.896        | 312.527        | 312.863        | 312.191        | H[7]  |
| R[19] | 659.056        | 272.180        | 266.841        | 267.176        | 266.505        | R[6]  |
| K[20] | 711.098        | 220.140        | 214.807        | 215.143        | 214.471        | K[5]  |
| V[21] | 744.121        | 168.104        | 162.765        | 163.101        | 162.429        | V[4]  |
| L[22] | 781.816        | 135.082        | 129.742        | 130.078        | 129.406        | L[3]  |
| R[23] | <b>833.849</b> | 97.387         | 92.047         | 92.383         | 91.711         | R[2]  |
| D[24] | <b>872.192</b> | 45.353         | 40.014         | 40.349         | 39.678         | D[1]  |





# sp | Q6ZWY9 | H2B1C\_MOUSE

PEPAKSAPAPKK <sup>Acetyl</sup><sub>42.01</sub> GSKKAVTKAQKKD

- ▶ fragmentation table for charge state 1+
- ▶ specType=etd
- ▶ score=82.24
- ▶ F104902.dat
- ▶ query=q23222\_p1
- ▶ precursor=658.885980
- ▶ chargePrecursor=4
- ▶ itol=0.8

| AA | c       | y               | z+1            | z+2             | z               | AA  |
|----|---------|-----------------|----------------|-----------------|-----------------|-----|
| P  | 115.087 | 2032.514        | 2018.495       | 0.000           | 2015.485        | P25 |
| E  | 244.129 | 2535.462        | 2519.443       | 0.000           | 2519.435        | E24 |
| P  | 341.182 | 2906.418        | 2390.400       | 0.000           | 2389.393        | P23 |
| A  | 412.219 | 2309.366        | 2293.348       | 0.000           | 2292.340        | A22 |
| K  | 5       | <b>540.314</b>  | 2238.329       | 2222.311        | 2223.318        | K21 |
| S  | 6       | <b>627.346</b>  | 2110.234       | 2094.216        | 2095.223        | S20 |
| A  | 7       | 697.383         | 2023.202       | 2007.184        | 2008.191        | A19 |
| P  | 8       | <b>795.436</b>  | 1952.166       | 1936.148        | 1937.154        | P18 |
| A  | 9       | 866.473         | 1855.112       | 1839.094        | <b>1840.101</b> | A17 |
| P  | 10      | <b>963.526</b>  | 1784.075       | 1768.057        | 1769.064        | P16 |
| K  | 11      | <b>1091.621</b> | 1687.022       | 1671.004        | <b>1672.012</b> | K15 |
| K  | 12      | 1261.726        | 1558.928       | <b>1542.909</b> | 1543.917        | K14 |
| G  | 13      | 1318.748        | 1388.822       | 1372.803        | <b>1373.811</b> | G13 |
| S  | 14      | 1408.780        | 1331.801       | 1315.782        | 1316.790        | S12 |
| K  | 15      | <b>1533.875</b> | 1244.768       | <b>1228.750</b> | 1229.758        | K11 |
| K  | 16      | 1601.970        | 1118.674       | <b>1100.655</b> | <b>1101.663</b> | K10 |
| A  | 17      | 1733.007        | 988.579        | <b>972.560</b>  | <b>973.568</b>  | A10 |
| V  | 18      | <b>1832.075</b> | <b>917.541</b> | 901.523         | 902.531         | V18 |
| T  | 19      | <b>1933.123</b> | 818.472        | <b>802.454</b>  | <b>803.462</b>  | T17 |
| R  | 20      | 2059.218        | 717.425        | <b>701.407</b>  | <b>702.414</b>  | R16 |
| A  | 21      | 2132.255        | 589.330        | <b>573.312</b>  | <b>574.320</b>  | A15 |
| Q  | 22      | 2260.314        | 518.293        | <b>502.275</b>  | 503.282         | Q14 |
| K  | 23      | 2388.409        | 400.235        | <b>374.216</b>  | 375.224         | K13 |
| K  | 24      | 2516.504        | 282.140        | 246.121         | 247.129         | K12 |
| D  | 25      | 2631.530        | 134.045        | 118.028         | 119.034         | D11 |

# sp | Q6ZWY9 | H2B1C\_MOUSE

PEPAKSAPAPKK <sup>Acetyl</sup><sub>42.01</sub> GSKKAVTKAQKKD

- ▶ fragmentation table for charge state 2+
- ▶ specType=etd
- ▶ score=82.24
- ▶ F104902.dat
- ▶ query=q2322\_p1
- ▶ precursor=658.885980
- ▶ chargePrecursor=4
- ▶ itol=0.8

| AA |    | c               | y               | z+1             | z+2             | z               | AA    |
|----|----|-----------------|-----------------|-----------------|-----------------|-----------------|-------|
| F  | 1  | 58.047          | 1316.761        | <b>1308.752</b> | 0.504           | <b>1308.248</b> | P[25] |
| E  | 3  | 122.508         | 1288.238        | <b>1260.225</b> | 0.504           | <b>1259.721</b> | E[24] |
| F  | 3  | 171.095         | 1203.713        | 1195.708        | 0.504           | <b>1195.200</b> | F[23] |
| A  | 4  | 208.613         | 1155.187        | <b>1147.177</b> | 0.504           | 1146.674        | A[22] |
| K  | 5  | 270.681         | <b>1119.668</b> | <b>1111.659</b> | <b>1112.163</b> | 1111.155        | K[21] |
| S  | 6  | 314.177         | 1055.621        | <b>1047.611</b> | <b>1048.115</b> | <b>1047.107</b> | S[20] |
| A  | 7  | 349.695         | 1012.105        | <b>1004.095</b> | <b>1004.599</b> | <b>1003.591</b> | A[19] |
| F  | 8  | 388.222         | 978.589         | <b>968.577</b>  | 969.081         | <b>968.673</b>  | F[18] |
| A  | 9  | 433.740         | 928.065         | <b>920.050</b>  | <b>920.554</b>  | 919.547         | A[17] |
| F  | 10 | 482.267         | 892.541         | 884.532         | 885.036         | 884.029         | F[16] |
| K  | 11 | 546.314         | 844.015         | <b>836.006</b>  | <b>836.509</b>  | <b>835.502</b>  | K[15] |
| K  | 12 | 631.367         | 779.967         | <b>771.958</b>  | <b>772.462</b>  | <b>771.454</b>  | K[14] |
| C  | 13 | 659.878         | 694.915         | <b>686.905</b>  | <b>687.409</b>  | <b>686.401</b>  | C[13] |
| S  | 14 | 701.394         | 656.804         | 658.305         | 658.809         | 657.801         | S[12] |
| K  | 15 | <b>767.441</b>  | 622.888         | 614.879         | 615.382         | 614.375         | K[11] |
| K  | 16 | <b>831.488</b>  | 558.840         | 550.831         | 551.335         | 550.327         | K[10] |
| A  | 17 | 867.007         | 494.793         | 486.784         | 487.287         | 486.280         | A[9]  |
| V  | 18 | <b>916.541</b>  | 459.274         | 451.265         | 451.769         | 450.761         | V[8]  |
| T  | 19 | <b>967.065</b>  | 409.746         | 401.737         | 402.239         | 401.227         | T[7]  |
| K  | 20 | <b>1031.113</b> | 359.215         | 351.207         | 351.711         | 350.703         | K[6]  |
| A  | 21 | <b>1066.631</b> | 295.169         | 287.159         | 287.663         | 286.656         | A[5]  |
| Q  | 22 | <b>1130.660</b> | 259.650         | 251.641         | 252.145         | 251.137         | Q[4]  |
| K  | 23 | <b>1194.708</b> | 195.621         | 187.612         | 188.116         | 187.108         | K[3]  |
| K  | 24 | 1258.750        | 131.574         | 123.564         | 124.068         | 123.060         | K[2]  |
| D  | 25 | 1318.280        | 67.526          | 59.517          | 60.021          | 59.013          | D[1]  |

# sp | Q6ZWY9 | H2B1C\_MOUSE

PEPAKSAPAPKK <sup>Acetyl</sup><sub>42.01</sub> GSKKAVTKAQKKD

- ▶ fragmentation table for charge state 3+
- ▶ specType=etd
- ▶ score=82.24
- ▶ F104902.dat
- ▶ query=q2322\_p1
- ▶ precursor=658.885980
- ▶ chargePrecursor=4
- ▶ itol=0.8

| AA    | c              | y              | z+1            | z+2     | z              | AA    |
|-------|----------------|----------------|----------------|---------|----------------|-------|
| P[3]  | 39.034         | <b>878.176</b> | <b>872.837</b> | 0.672   | <b>872.501</b> | P[25] |
| E[2]  | 82.048         | 845.825        | <b>840.486</b> | 0.672   | <b>840.150</b> | E[24] |
| P[3]  | 114.399        | <b>802.811</b> | 797.472        | 0.672   | 797.135        | P[23] |
| A[4]  | 138.078        | 770.460        | 765.121        | 0.672   | 764.785        | A[22] |
| K[5]  | 180.776        | 746.781        | 741.442        | 741.778 | 741.156        | K[21] |
| S[6]  | 209.737        | 724.083        | 698.743        | 699.079 | 698.407        | S[20] |
| A[7]  | 233.466        | 675.072        | 669.733        | 670.069 | 669.397        | A[19] |
| P[8]  | 265.817        | 651.393        | 646.054        | 646.390 | 645.718        | P[18] |
| A[9]  | 289.496        | 619.042        | 613.703        | 614.039 | 613.367        | A[17] |
| P[10] | 321.847        | 595.363        | 590.024        | 590.360 | 589.688        | P[16] |
| K[11] | 364.545        | 563.012        | 557.673        | 558.009 | 557.337        | K[15] |
| K[12] | 421.247        | 520.314        | 514.974        | 515.310 | 514.639        | K[14] |
| G[13] | 440.254        | 493.612        | 488.273        | 488.609 | 487.937        | G[13] |
| S[14] | 469.265        | 444.605        | 439.265        | 439.601 | 438.930        | S[12] |
| K[15] | 511.963        | 415.594        | 410.255        | 410.591 | 409.919        | K[11] |
| K[16] | 554.051        | 372.896        | 367.556        | 367.892 | 367.221        | K[10] |
| A[17] | 578.140        | 330.196        | 324.856        | 325.194 | 324.522        | A[9]  |
| V[18] | 611.363        | 306.519        | 301.179        | 301.515 | 300.843        | V[8]  |
| T[19] | 645.046        | 273.496        | 268.156        | 268.492 | 267.820        | T[7]  |
| K[20] | <b>687.744</b> | 239.813        | 234.474        | 234.810 | 234.138        | K[6]  |
| A[21] | 711.423        | 197.113        | 191.773        | 192.111 | 191.439        | A[5]  |
| Q[22] | 754.109        | 173.436        | 168.096        | 168.432 | 167.760        | Q[4]  |
| K[23] | 796.808        | 130.750        | 125.410        | 125.746 | 125.074        | K[3]  |
| K[24] | 839.506        | 88.051         | 82.712         | 83.048  | 82.376         | K[2]  |
| D[25] | 877.848        | 45.353         | 40.014         | 40.349  | 39.678         | D[1]  |

sp | Q6ZWY9 | H2B1C\_MOUSE  
 PEPAKSAPAPKK Acetyl GSKKAVTKAQKKD  
 42.01

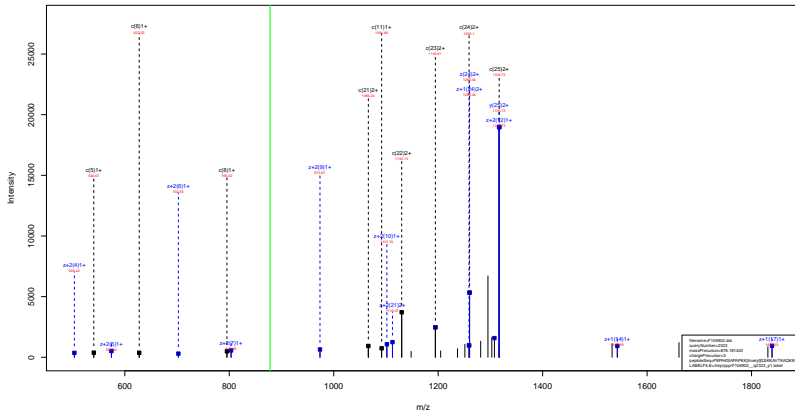

# sp | Q6ZWY9 | H2B1C\_MOUSE

PEPAKSAPAPKK <sup>Acetyl</sup><sub>42.01</sub> GSKKAVTKAQKKD

- ▶ fragmentation table for charge state 1+
- ▶ specType=etd
- ▶ score=46.32
- ▶ F104902.dat
- ▶ query=q23223\_p1
- ▶ precursor=878.181420
- ▶ chargePrecursor=3
- ▶ itol=0.8

| AA | c       | y               | z+1      | z+2             | z               | AA  |
|----|---------|-----------------|----------|-----------------|-----------------|-----|
| P  | 115.087 | 2032.514        | 2018.495 | 0.000           | 2015.485        | P25 |
| E  | 244.129 | 2535.462        | 2519.443 | 0.000           | 2519.435        | E24 |
| P  | 341.182 | 2906.415        | 2390.400 | 0.000           | 2389.393        | P23 |
| A  | 412.219 | 2309.366        | 2293.348 | 0.000           | 2292.340        | A22 |
| K  | 5       | <b>540.314</b>  | 2238.329 | 2222.311        | 2223.318        | K21 |
| S  | 6       | <b>627.346</b>  | 2110.234 | 2094.216        | 2095.223        | S20 |
| A  | 7       | 696.383         | 2023.202 | 2007.184        | 2008.191        | A19 |
| P  | 8       | <b>795.436</b>  | 1952.166 | 1936.148        | 1937.154        | P18 |
| A  | 9       | 866.473         | 1855.112 | <b>1839.094</b> | 1840.101        | A17 |
| P  | 10      | 963.526         | 1784.075 | 1768.057        | 1769.064        | P16 |
| K  | 11      | <b>1091.621</b> | 1687.022 | 1671.004        | 1672.012        | K15 |
| K  | 12      | 1261.726        | 1558.928 | <b>1542.909</b> | 1543.917        | K14 |
| G  | 13      | 1318.748        | 1388.822 | 1372.803        | 1373.811        | G13 |
| S  | 14      | 1409.780        | 1331.801 | 1315.782        | <b>1316.790</b> | S12 |
| K  | 15      | 1533.875        | 1244.765 | 1228.750        | 1229.758        | K11 |
| K  | 16      | 1661.970        | 1158.674 | 1140.655        | <b>1101.663</b> | K10 |
| A  | 17      | 1733.007        | 988.579  | 972.560         | <b>973.568</b>  | A09 |
| V  | 18      | 1832.075        | 917.541  | 901.523         | 902.531         | V08 |
| T  | 19      | 1933.123        | 818.472  | 802.454         | <b>803.462</b>  | T07 |
| H  | 20      | 2091.218        | 717.425  | 701.407         | <b>702.414</b>  | H06 |
| A  | 21      | 2132.255        | 588.330  | 573.312         | <b>574.320</b>  | A05 |
| Q  | 22      | 2260.314        | 518.293  | 502.275         | <b>503.282</b>  | Q04 |
| K  | 23      | 2388.409        | 460.235  | 374.216         | 375.224         | K03 |
| K  | 24      | 2516.504        | 282.140  | 246.121         | 247.129         | K02 |
| D  | 25      | 2631.530        | 134.045  | 118.028         | 119.034         | D01 |

# sp | Q6ZWY9 | H2B1C\_MOUSE

PEPAKSAPAPKK <sup>Acetyl</sup>42.01 GSKKAVTKAQKKD

- ▶ fragmentation table for charge state 2+
- ▶ specType=etd
- ▶ score=46.32
- ▶ F104902.dat
- ▶ query=q2323\_p1
- ▶ precursor=878.181420
- ▶ chargePrecursor=3
- ▶ itol=0.8

| AA  | c               | y               | z+1             | z+2             | z               | AA  |
|-----|-----------------|-----------------|-----------------|-----------------|-----------------|-----|
| P1  | 58.047          | <b>1316.761</b> | 1308.752        | 0.504           | <b>1308.248</b> | P25 |
| E2  | 122.508         | 1288.278        | <b>1260.225</b> | 0.504           | <b>1259.721</b> | E24 |
| F3  | 171.095         | 1203.711        | 1195.708        | 0.504           | <b>1195.260</b> | F23 |
| A4  | 206.613         | 1155.187        | 1147.177        | 0.504           | 1146.674        | A22 |
| K5  | 270.601         | 1110.668        | 1111.650        | <b>1112.163</b> | 1111.155        | K21 |
| S6  | 314.177         | 1055.621        | 1047.611        | 1048.115        | 1047.107        | S20 |
| A7  | 349.695         | 1012.105        | 1004.085        | 1004.599        | 1003.591        | A19 |
| F8  | 388.222         | 976.589         | 968.577         | 969.081         | 968.071         | F18 |
| A9  | 433.740         | 928.062         | 920.050         | 920.554         | 919.547         | A17 |
| P10 | 482.267         | 892.541         | 884.532         | 885.036         | 884.028         | P16 |
| K11 | 546.314         | 844.015         | 836.006         | 836.509         | 835.502         | K15 |
| K12 | 631.367         | 779.967         | 771.958         | 772.462         | 771.454         | K14 |
| C13 | 659.878         | 694.915         | 686.903         | 687.409         | 686.401         | C12 |
| S14 | 703.394         | 656.824         | 658.395         | 658.898         | 657.891         | S12 |
| K15 | 767.441         | 622.888         | 614.879         | 615.382         | 614.375         | K11 |
| K16 | 831.488         | 558.840         | 550.831         | 551.335         | 550.327         | K10 |
| A17 | 867.027         | 494.793         | 486.784         | 487.287         | 486.280         | A9  |
| V18 | 916.541         | 459.274         | 451.265         | 451.769         | 450.761         | V8  |
| T19 | 967.068         | 409.746         | 401.731         | 402.235         | 401.227         | T17 |
| K20 | 1031.113        | 359.215         | 351.207         | 351.711         | 350.703         | K6  |
| A21 | <b>1066.631</b> | 295.169         | 287.159         | 287.663         | 286.656         | A5  |
| Q22 | <b>1130.660</b> | 259.650         | 251.641         | 252.145         | 251.137         | Q4  |
| K23 | <b>1194.708</b> | 195.621         | 187.612         | 188.116         | 187.108         | K3  |
| K24 | <b>1258.755</b> | 131.374         | 123.364         | 124.868         | 123.860         | K2  |
| D25 | <b>1316.269</b> | 67.526          | 59.517          | 60.021          | 59.013          | D1  |





# sp | Q64525 | H2B2B\_MOUSE

PDKAKSAPAPKKGSKKAVTK <sup>Acetyl</sup> 42.01 VQKKD

- ▶ fragmentation table for charge state 1+
- ▶ specType=etd
- ▶ score=32.43
- ▶ F104902.dat
- ▶ query=q2345\_p1
- ▶ precursor=882.852220
- ▶ chargePrecursor=3
- ▶ itol=0.8

| AA | c  | y              | z+1      | z+2      | z               | AA       |   |    |
|----|----|----------------|----------|----------|-----------------|----------|---|----|
| P  | 1  | 115.087        | 2648.530 | 2630.511 | 0.000           | 2679.504 | F | 25 |
| D  | 2  | 230.114        | 2549.477 | 2533.450 | 0.000           | 2532.451 | D | 24 |
| P  | 3  | 327.166        | 2434.450 | 2418.432 | 0.000           | 2417.424 | F | 23 |
| A  | 4  | 398.203        | 2337.398 | 2321.370 | 0.000           | 2320.371 | A | 22 |
| K  | 5  | 528.238        | 2206.361 | 2250.342 | 2251.350        | 2249.334 | K | 21 |
| S  | 6  | 613.330        | 2138.266 | 2122.247 | 2123.255        | 2121.239 | S | 20 |
| A  | 7  | 659.354        | 2031.234 | 2035.212 | 2038.223        | 2034.207 | A | 19 |
| P  | 8  | <b>781.420</b> | 1988.190 | 1964.170 | 1965.186        | 1963.170 | F | 18 |
| A  | 9  | 852.457        | 1883.144 | 1867.125 | <b>1868.133</b> | 1866.117 | A | 17 |
| P  | 10 | 949.510        | 1812.107 | 1796.088 | 1797.096        | 1795.080 | F | 16 |
| K  | 11 | 1077.605       | 1715.054 | 1699.035 | 1700.043        | 1698.027 | K | 15 |
| K  | 12 | 1205.700       | 1586.959 | 1570.940 | <b>1571.948</b> | 1569.932 | K | 14 |
| G  | 13 | 1262.722       | 1458.864 | 1442.845 | 1443.853        | 1441.837 | G | 13 |
| S  | 14 | 1349.754       | 1401.842 | 1385.824 | 1388.831        | 1384.816 | S | 12 |
| K  | 15 | 1477.849       | 1314.810 | 1298.792 | 1299.799        | 1297.784 | K | 11 |
| K  | 16 | 1605.944       | 1186.715 | 1170.697 | <b>1171.705</b> | 1169.689 | K | 10 |
| A  | 17 | 1676.981       | 1058.620 | 1042.602 | <b>1043.610</b> | 1041.594 | A | 9  |
| V  | 18 | 1776.049       | 987.583  | 971.565  | 972.572         | 970.557  | V | 8  |
| T  | 19 | 1877.097       | 888.515  | 872.496  | 873.504         | 871.488  | T | 7  |
| K  | 20 | 2047.202       | 787.467  | 771.449  | <b>772.456</b>  | 770.441  | K | 6  |
| V  | 21 | 2148.271       | 617.362  | 601.343  | <b>602.351</b>  | 600.335  | V | 5  |
| Q  | 22 | 2274.329       | 518.293  | 502.275  | <b>503.282</b>  | 501.267  | Q | 4  |
| K  | 23 | 2402.424       | 390.235  | 374.216  | 375.224         | 373.208  | K | 3  |
| K  | 24 | 2530.519       | 262.140  | 246.121  | 247.129         | 245.113  | K | 2  |
| D  | 25 | 2646.546       | 134.045  | 118.026  | 119.034         | 117.018  | D | 1  |

# sp | Q64525 | H2B2B\_MOUSE

PDKASAPAPKKGSKKAVTK <sup>Acetyl</sup> 42.01 VQKKD

- ▶ fragmentation table for charge state 2+
- ▶ specType=etd
- ▶ score=32.43
- ▶ F104902.dat
- ▶ query=q2345\_p1
- ▶ precursor=882.852220
- ▶ chargePrecursor=3
- ▶ itol=0.8

| AA |    | c               | y               | z+1             | z+2             | z               | AA    |
|----|----|-----------------|-----------------|-----------------|-----------------|-----------------|-------|
| P  | 1  | 58.047          | <b>1323.769</b> | <b>1315.759</b> | 0.504           | <b>1315.255</b> | P[25] |
| D  | 3  | 115.569         | 1279.242        | 1267.233        | 0.504           | <b>1266.729</b> | D[3]  |
| F  | 3  | 194.097         | 1217.725        | 1209.719        | 0.504           | 1209.219        | F[3]  |
| A  | 4  | 199.605         | 1169.202        | 1161.193        | 0.504           | 1160.689        | A[22] |
| K  | 5  | 263.653         | 1131.684        | <b>1125.675</b> | <b>1126.178</b> | 1125.171        | K[21] |
| S  | 6  | 307.169         | 1059.639        | 1061.627        | 1062.131        | 1061.123        | S[20] |
| A  | 7  | 342.697         | 1026.120        | 1018.111        | 1018.615        | 1017.607        | A[19] |
| T  | 8  | 391.214         | 999.602         | 992.592         | 993.096         | 992.089         | T[18] |
| A  | 9  | 426.732         | 942.075         | 934.066         | 934.570         | 933.562         | A[17] |
| P  | 10 | 475.259         | 906.557         | 898.548         | 899.051         | 898.044         | P[16] |
| K  | 11 | 539.306         | 858.031         | 850.021         | 850.525         | 849.517         | K[15] |
| K  | 12 | 603.354         | 793.983         | 785.974         | 786.478         | 785.470         | K[14] |
| C  | 13 | 631.864         | 759.936         | 751.928         | 752.430         | 751.422         | C[13] |
| S  | 14 | 675.380         | 703.825         | 695.815         | 696.319         | 695.312         | S[12] |
| K  | 15 | 739.428         | 657.905         | 649.899         | 650.403         | 649.396         | K[11] |
| K  | 16 | 803.475         | 593.861         | 585.852         | 586.356         | 585.348         | K[10] |
| A  | 17 | 838.994         | 529.814         | 521.804         | 522.308         | 521.301         | A[9]  |
| V  | 18 | 888.526         | 494.295         | 486.286         | 486.790         | 485.782         | V[8]  |
| T  | 19 | 939.052         | 444.761         | 436.752         | 437.256         | 436.248         | T[7]  |
| K  | 20 | 1024.105        | 394.237         | 386.228         | 386.732         | 385.724         | K[6]  |
| V  | 21 | 1073.639        | 309.184         | 301.175         | 301.679         | 300.671         | V[5]  |
| Q  | 22 | <b>1137.668</b> | 259.656         | 251.641         | 252.145         | 251.137         | Q[4]  |
| K  | 23 | <b>1201.716</b> | 195.621         | 187.612         | 188.116         | 187.108         | K[3]  |
| K  | 24 | <b>1285.763</b> | 131.574         | 123.564         | 124.068         | 123.060         | K[2]  |
| D  | 25 | 1323.277        | 67.526          | 59.517          | 60.021          | 59.013          | D[1]  |



# sp | P62806 | H4\_MOUSE

[Acetyl]S<sup>Phospho</sup> GRGKGGKGLGKGGAK<sup>Acetyl</sup> RHRK<sup>Dimethyl</sup> VLRD<sup>28.03</sup>  
79.97 42.01

- ▶ fragmentation table for charge state 1+
- ▶ specType=etd
- ▶ score=74.22
- ▶ F104902.dat
- ▶ query=q2374\_p1
- ▶ precursor=534.303430
- ▶ chargePrecursor=5
- ▶ itol=0.8

| AA | c  | y               | z+1      | z+2             | z               | AA             |       |
|----|----|-----------------|----------|-----------------|-----------------|----------------|-------|
| S  | 1  | 227.643         | 2607.479 | 2651.460        | 0.000           | 2650.453       | S[24] |
| G  | 2  | 284.064         | 2458.470 | 2442.451        | 0.000           | 2441.444       | G[23] |
| R  | 3  | <b>440.106</b>  | 2620.440 | 2385.430        | 2386.438        | 2384.422       | R[22] |
| G  | 4  | <b>497.187</b>  | 2345.340 | 2229.330        | 2230.337        | 2228.321       | G[21] |
| K  | 5  | 625.282         | 2188.326 | 2172.307        | 2173.315        | 2171.300       | K[20] |
| G  | 6  | <b>682.303</b>  | 2060.231 | 2044.210        | 2045.220        | 2043.205       | G[19] |
| G  | 7  | <b>739.325</b>  | 2003.210 | 1987.191        | 1988.199        | 1986.183       | G[18] |
| K  | 8  | <b>867.420</b>  | 1946.189 | 1930.170        | 1931.177        | 1929.162       | K[17] |
| G  | 9  | <b>924.441</b>  | 1818.093 | 1802.075        | <b>1803.082</b> | 1801.067       | G[16] |
| L  | 10 | <b>1037.525</b> | 1763.072 | 1748.053        | 1749.061        | 1744.043       | L[15] |
| G  | 11 | <b>1094.547</b> | 1647.985 | <b>1631.969</b> | 1632.977        | 1630.961       | G[14] |
| K  | 12 | <b>1222.642</b> | 1590.966 | 1574.948        | 1575.955        | 1573.940       | K[13] |
| G  | 13 | <b>1279.663</b> | 1462.871 | 1446.853        | <b>1447.860</b> | 1445.845       | G[12] |
| G  | 14 | 1336.685        | 1405.850 | 1389.831        | 1390.839        | 1388.823       | G[11] |
| A  | 15 | <b>1467.722</b> | 1348.828 | 1332.810        | 1333.818        | 1331.802       | A[10] |
| R  | 16 | <b>1577.827</b> | 1277.791 | 1261.773        | 1262.780        | 1260.765       | R[9]  |
| R  | 17 | <b>1733.928</b> | 1107.680 | 1091.667        | <b>1092.675</b> | 1090.659       | R[8]  |
| H  | 18 | 1870.987        | 951.585  | <b>935.566</b>  | <b>936.574</b>  | 934.558        | H[7]  |
| R  | 19 | 2027.088        | 814.526  | 798.507         | <b>799.515</b>  | <b>797.499</b> | R[6]  |
| K  | 20 | 2183.215        | 658.425  | 642.406         | <b>643.414</b>  | <b>641.398</b> | K[5]  |
| V  | 21 | 2262.283        | 502.298  | 486.280         | <b>487.287</b>  | 485.272        | V[4]  |
| L  | 22 | 2399.387        | 403.230  | <b>387.211</b>  | <b>388.219</b>  | 386.203        | L[3]  |
| R  | 23 | 2531.468        | 290.146  | <b>274.127</b>  | -75.135         | 273.110        | R[2]  |
| D  | 24 | 2666.495        | 134.045  | 118.026         | 119.034         | 117.018        | D[1]  |

# sp | P62806 | H4\_MOUSE

[Acetyl]S<sup>Phospho</sup><sub>79.97</sub> GRGKGGKGLGKGGAK Acetyl<sub>42.01</sub> RHRK Dimethyl<sub>28.03</sub> VLRD

- ▶ fragmentation table for charge state 2+
- ▶ specType=etd
- ▶ score=74.22
- ▶ F104902.dat
- ▶ query=q2374\_p1
- ▶ precursor=534.303430
- ▶ chargePrecursor=5
- ▶ itol=0.8

| AA | c  | y               | z+1             | z+2             | z               | AA              |       |
|----|----|-----------------|-----------------|-----------------|-----------------|-----------------|-------|
| S  | 1  | 144.625         | <b>1334.243</b> | 1156.234        | 0.504           | 1329.730        | S[24] |
| G  | 2  | 142.536         | 1229.739        | 1221.729        | 0.504           | 1221.225        | G[23] |
| K  | 3  | 230.566         | 1201.229        | 1193.219        | 1193.723        | 1192.715        | K[22] |
| G  | 4  | 249.997         | 1123.177        | 1115.168        | <b>1115.672</b> | 1114.664        | G[21] |
| K  | 5  | 313.149         | <b>1094.667</b> | <b>1086.657</b> | <b>1087.161</b> | <b>1086.153</b> | K[20] |
| G  | 6  | 341.655         | 1030.619        | 1022.610        | 1023.114        | 1022.106        | G[19] |
| G  | 7  | 370.166         | <b>1002.108</b> | 994.099         | <b>994.603</b>  | 993.595         | G[18] |
| K  | 8  | 434.213         | 973.599         | 965.588         | <b>966.092</b>  | 965.084         | K[17] |
| G  | 9  | 462.724         | 909.546         | <b>901.541</b>  | <b>902.045</b>  | 901.037         | G[16] |
| L  | 10 | <b>519.266</b>  | 893.040         | 871.929         | 873.934         | 872.926         | L[15] |
| G  | 11 | 587.777         | 824.488         | <b>816.488</b>  | <b>816.992</b>  | <b>815.984</b>  | G[14] |
| K  | 12 | <b>611.824</b>  | <b>795.987</b>  | <b>787.977</b>  | <b>788.481</b>  | 787.474         | K[13] |
| G  | 13 | <b>640.335</b>  | 731.939         | <b>723.930</b>  | <b>724.434</b>  | <b>723.426</b>  | G[12] |
| G  | 14 | 668.846         | 693.429         | <b>695.419</b>  | <b>695.923</b>  | 694.915         | G[11] |
| A  | 15 | <b>704.364</b>  | <b>674.918</b>  | 665.908         | <b>667.412</b>  | 666.404         | A[10] |
| R  | 16 | <b>729.417</b>  | <b>639.399</b>  | <b>631.390</b>  | <b>631.894</b>  | 630.886         | R[9]  |
| R  | 17 | <b>867.468</b>  | 554.347         | <b>546.337</b>  | <b>546.841</b>  | 545.833         | R[8]  |
| H  | 18 | <b>935.997</b>  | 476.296         | <b>468.287</b>  | <b>468.791</b>  | <b>467.783</b>  | H[7]  |
| R  | 19 | <b>1014.048</b> | 407.767         | <b>399.757</b>  | <b>400.261</b>  | <b>399.253</b>  | R[6]  |
| K  | 20 | <b>1092.111</b> | 329.716         | 321.707         | 322.211         | 321.203         | K[5]  |
| V  | 21 | <b>1141.645</b> | 251.663         | 243.653         | 244.157         | 243.149         | V[4]  |
| L  | 22 | <b>1198.187</b> | 202.119         | 194.109         | 194.613         | 193.605         | L[3]  |
| R  | 23 | 1276.238        | 145.577         | 137.567         | 138.071         | 137.063         | R[2]  |
| D  | 24 | 1333.751        | 67.526          | 59.517          | 60.021          | 59.013          | D[1]  |

# sp | P62806 | H4\_MOUSE

[Acetyl]S<sup>Phospho</sup> GRGKGGKGLGKGGAK<sup>Acetyl</sup> RHRK<sup>Dimethyl</sup> VLRD<sup>28.03</sup>  
79.97 42.01

- ▶ fragmentation table for charge state 3+
- ▶ specType=etd
- ▶ score=74.22
- ▶ F104902.dat
- ▶ query=q2374\_p1
- ▶ precursor=534.303430
- ▶ chargePrecursor=5
- ▶ itol=0.8

| AA    | c              | y              | z+1            | z+2            | z              | AA    |
|-------|----------------|----------------|----------------|----------------|----------------|-------|
| S[1]  | 76.352         | <b>889.831</b> | 884.492        | 0.672          | 884.156        | S[24] |
| G[2]  | 95.360         | 320.162        | <b>814.822</b> | 0.672          | 814.486        | G[23] |
| R[3]  | 147.393        | 801.154        | 795.815        | <b>796.151</b> | 795.479        | R[22] |
| G[4]  | 166.400        | 749.121        | <b>743.781</b> | <b>744.117</b> | 743.445        | G[21] |
| K[5]  | 209.099        | 730.114        | <b>724.774</b> | <b>725.110</b> | <b>724.438</b> | K[20] |
| G[6]  | 228.106        | 687.415        | <b>682.076</b> | <b>682.412</b> | <b>681.740</b> | G[19] |
| G[7]  | 247.113        | <b>668.408</b> | 663.069        | <b>663.404</b> | 662.733        | G[18] |
| K[8]  | 289.811        | 649.401        | <b>644.061</b> | <b>644.397</b> | <b>643.725</b> | K[17] |
| G[9]  | 308.819        | 638.793        | <b>601.363</b> | <b>601.699</b> | <b>601.027</b> | G[16] |
| L[10] | <b>346.513</b> | <b>587.695</b> | <b>582.356</b> | <b>582.692</b> | <b>582.020</b> | L[15] |
| G[11] | 365.520        | 550.001        | <b>544.661</b> | <b>544.997</b> | <b>544.325</b> | G[14] |
| K[12] | 408.219        | 530.994        | <b>525.654</b> | <b>525.990</b> | <b>525.318</b> | K[13] |
| G[13] | 427.226        | <b>488.295</b> | 482.956        | 483.292        | 482.620        | G[12] |
| G[14] | 446.233        | 469.288        | 463.949        | 464.285        | 463.613        | G[11] |
| A[15] | 469.912        | 450.281        | 444.941        | 445.277        | 444.605        | A[10] |
| K[16] | <b>526.614</b> | 426.602        | 421.262        | 421.598        | 420.926        | K[9]  |
| R[17] | 578.648        | 369.900        | 364.561        | 364.896        | 364.225        | R[8]  |
| H[18] | 607.334        | 317.866        | 312.527        | 312.863        | 312.191        | H[7]  |
| R[19] | <b>676.368</b> | 272.180        | 266.841        | 267.176        | 266.505        | R[6]  |
| K[20] | <b>728.410</b> | 220.140        | 214.807        | 215.143        | 214.471        | K[5]  |
| V[21] | 761.433        | 168.104        | 162.765        | 163.101        | 162.429        | V[4]  |
| L[22] | <b>799.127</b> | 135.082        | 129.742        | 130.078        | 129.406        | L[3]  |
| R[23] | <b>851.161</b> | 97.387         | 92.047         | 92.383         | 91.711         | R[2]  |
| D[24] | <b>889.503</b> | 45.353         | 40.014         | 40.349         | 39.678         | D[1]  |

# sp | P62806 | H4\_MOUSE

[Acetyl]S<sup>Phospho</sup><sub>79.97</sub> GRGKGGKGLGKGGAK<sup>Acetyl</sup><sub>42.01</sub> RHRK<sup>Dimethyl</sup><sub>28.03</sub> VLRD

- ▶ fragmentation table for charge state 4+
- ▶ specType=etd
- ▶ score=74.22
- ▶ F104902.dat
- ▶ query=q2374\_p1
- ▶ precursor=534.303430
- ▶ chargePrecursor=5
- ▶ itol=0.8

| AA    | c              | y              | z+1            | z+2            | z              | AA    |
|-------|----------------|----------------|----------------|----------------|----------------|-------|
| S[1]  | 57.518         | <b>667.625</b> | <b>663.621</b> | 0.755          | <b>663.369</b> | S[24] |
| G[2]  | 71.772         | 515.373        | <b>611.368</b> | 0.755          | <b>611.116</b> | G[23] |
| R[3]  | 110.797        | <b>601.118</b> | <b>597.113</b> | <b>597.365</b> | <b>596.061</b> | R[22] |
| G[4]  | 125.052        | 562.092        | 558.088        | 558.340        | 557.836        | G[21] |
| K[5]  | 157.076        | 547.837        | 543.832        | <b>544.084</b> | 543.580        | K[20] |
| G[6]  | 171.331        | 515.813        | 511.809        | 512.061        | 511.557        | G[19] |
| G[7]  | 185.587        | 501.558        | <b>497.553</b> | <b>497.805</b> | <b>497.301</b> | G[18] |
| K[8]  | 217.610        | <b>487.303</b> | 483.298        | 483.550        | 483.046        | K[17] |
| G[9]  | 231.866        | 455.278        | 451.273        | 451.525        | 451.022        | G[16] |
| L[10] | 250.137        | <b>441.023</b> | 437.019        | 437.271        | 436.767        | L[15] |
| G[11] | <b>274.392</b> | 417.752        | 408.748        | 409.000        | 408.496        | G[14] |
| K[12] | 306.416        | 398.497        | 394.492        | 394.744        | 394.240        | K[13] |
| G[13] | 320.671        | 366.473        | 362.469        | 362.721        | 362.217        | G[12] |
| G[14] | 334.927        | 352.218        | 348.213        | 348.465        | <b>347.961</b> | G[11] |
| A[15] | 352.686        | 337.963        | 333.958        | 334.210        | 333.706        | A[10] |
| K[16] | 395.212        | 320.203        | 316.199        | 316.451        | 315.947        | K[9]  |
| R[17] | 434.238        | -77.877        | <b>273.672</b> | <b>273.924</b> | <b>273.420</b> | R[8]  |
| H[18] | <b>468.502</b> | 238.652        | 234.647        | 234.899        | 234.395        | H[7]  |
| R[19] | 507.528        | 204.397        | 200.392        | 200.644        | 200.140        | R[6]  |
| K[20] | <b>546.559</b> | 185.362        | 181.357        | 181.609        | 181.105        | K[5]  |
| V[21] | 571.326        | 126.330        | 122.325        | 122.577        | 122.073        | V[4]  |
| L[22] | 599.597        | 101.563        | 97.558         | 97.810         | 97.306         | L[3]  |
| R[23] | <b>638.622</b> | 73.292         | 69.287         | 69.539         | 69.035         | R[2]  |
| D[24] | <b>667.379</b> | 34.267         | 30.262         | 30.514         | 30.010         | D[1]  |





# sp | P62806 | H4\_MOUSE

[Acetyl]SGRGK<sup>Acetyl</sup><sub>42.01</sub> GGK<sup>Acetyl</sup><sub>42.01</sub> GLGK<sup>Acetyl</sup><sub>42.01</sub> GGAKRHRK<sup>Dimethyl</sup><sub>28.03</sub> VLRD

- ▶ fragmentation table for charge state 1+
- ▶ specType=etd
- ▶ score=53.17
- ▶ F104902.dat
- ▶ query=q2377\_p1
- ▶ precursor=668.641650
- ▶ chargePrecursor=4
- ▶ itol=0.8

| AA | c  | y               | z+1             | z+2             | z               | AA             |       |
|----|----|-----------------|-----------------|-----------------|-----------------|----------------|-------|
| S  | 1  | 147.076         | 2671.934        | 2655.515        | 0.000           | 2654.507       | S[24] |
| G  | 2  | 204.098         | 2542.491        | 2528.473        | 0.000           | 2525.465       | G[23] |
| R  | 3  | <b>360.199</b>  | 2485.470        | 2469.451        | 2470.459        | 2468.443       | R[22] |
| G  | 4  | <b>417.220</b>  | 2329.969        | 2313.950        | 2314.958        | 2312.941       | G[21] |
| K  | 5  | <b>587.326</b>  | 2272.347        | 2256.329        | 2257.336        | 2255.321       | K[20] |
| G  | 6  | <b>644.347</b>  | 2102.342        | 2086.323        | 2087.331        | 2085.315       | G[19] |
| G  | 7  | <b>701.369</b>  | 2045.220        | 2029.200        | 2030.209        | 2028.194       | G[18] |
| K  | 8  | <b>871.474</b>  | 1988.199        | 1972.180        | <b>1973.188</b> | 1971.172       | K[17] |
| G  | 9  | <b>928.496</b>  | 1818.083        | <b>1802.075</b> | <b>1803.082</b> | 1801.067       | G[16] |
| L  | 10 | 1043.589        | 1761.072        | <b>1745.063</b> | 1746.061        | 1744.045       | L[15] |
| Q  | 11 | <b>1098.601</b> | 1647.988        | 1631.969        | 1632.977        | 1630.961       | Q[14] |
| K  | 12 | 1268.707        | 1590.966        | 1574.948        | 1575.955        | 1573.940       | K[13] |
| G  | 13 | 1325.728        | 1420.861        | 1404.842        | 1405.850        | 1403.834       | G[12] |
| G  | 14 | 1382.750        | 1363.839        | 1347.821        | 1348.828        | 1346.813       | G[11] |
| A  | 15 | 1453.807        | 1298.813        | 1282.795        | 1283.803        | 1281.787       | A[10] |
| R  | 16 | <b>1501.882</b> | <b>1235.781</b> | 1219.762        | 1220.770        | 1218.754       | R[9]  |
| R  | 17 | 1737.883        | 1107.688        | 1091.667        | <b>1092.675</b> | 1090.659       | R[8]  |
| H  | 18 | <b>1875.042</b> | 951.585         | <b>935.566</b>  | 936.574         | 934.558        | H[7]  |
| R  | 19 | 2031.143        | 814.526         | <b>798.507</b>  | <b>799.515</b>  | 797.499        | R[6]  |
| K  | 20 | 2187.269        | 658.425         | 642.406         | 643.414         | <b>641.398</b> | K[5]  |
| V  | 21 | 2286.138        | 502.366         | 486.346         | 487.354         | 485.337        | V[4]  |
| L  | 22 | 2389.472        | 363.239         | 347.211         | 348.219         | 346.203        | L[3]  |
| R  | 23 | 2555.523        | 260.148         | 274.127         | 275.135         | 273.119        | R[2]  |
| D  | 24 | 2670.950        | 134.045         | 138.026         | 139.034         | 137.018        | D[1]  |

# sp | P62806 | H4\_MOUSE

[Acetyl]SGR**GGK**<sup>Acetyl</sup><sub>42.01</sub> **GGK**<sup>Acetyl</sup><sub>42.01</sub> **GLGK**<sup>Acetyl</sup><sub>42.01</sub> **GGAKRHRK**<sup>Dimethyl</sup><sub>28.03</sub> **VLRD**

- ▶ fragmentation table for charge state 2+
- ▶ specType=etd
- ▶ score=53.17
- ▶ F104902.dat
- ▶ query=q2377\_p1
- ▶ precursor=668.641650
- ▶ chargePrecursor=4
- ▶ itol=0.8

| AA    | c               | y               | z+1             | z+2             | z               | AA    |
|-------|-----------------|-----------------|-----------------|-----------------|-----------------|-------|
| S[1]  | 74.642          | <b>1336.271</b> | <b>1328.261</b> | 0.504           | <b>1327.757</b> | S[24] |
| G[2]  | 102.553         | 1271.749        | <b>1263.740</b> | 0.504           | <b>1263.236</b> | G[23] |
| R[3]  | 180.603         | 1243.239        | 1235.239        | <b>1235.733</b> | 1234.725        | R[22] |
| G[4]  | 259.114         | 1165.189        | <b>1157.179</b> | <b>1157.683</b> | 1156.675        | G[21] |
| K[5]  | 294.157         | 1136.677        | 1128.668        | 1128.668        | 1128.164        | K[20] |
| G[6]  | 322.677         | 1051.625        | 1043.615        | 1044.119        | <b>1043.111</b> | G[19] |
| G[7]  | 351.188         | 1023.114        | <b>1015.104</b> | <b>1015.608</b> | <b>1014.601</b> | G[18] |
| K[8]  | 436.241         | <b>994.603</b>  | 986.594         | <b>987.098</b>  | <b>986.090</b>  | K[17] |
| G[9]  | 464.752         | 929.202         | <b>901.541</b>  | <b>902.045</b>  | <b>901.037</b>  | G[16] |
| L[10] | 511.294         | <b>881.040</b>  | 873.030         | 873.534         | <b>872.526</b>  | L[15] |
| G[11] | 549.804         | <b>824.498</b>  | <b>816.488</b>  | <b>816.992</b>  | <b>815.984</b>  | G[14] |
| K[12] | 634.857         | 795.987         | <b>787.977</b>  | <b>788.481</b>  | 787.474         | K[13] |
| G[13] | 663.368         | 710.934         | 702.925         | 703.429         | 702.421         | G[12] |
| G[14] | 691.879         | 682.423         | 674.414         | 674.918         | 673.910         | G[11] |
| A[15] | 720.389         | 653.913         | 645.903         | 646.407         | 645.399         | A[10] |
| R[16] | <b>791.445</b>  | 618.394         | 610.385         | 610.889         | 609.881         | R[9]  |
| R[17] | 869.495         | 554.347         | 546.337         | 546.841         | 545.833         | R[8]  |
| H[18] | <b>938.025</b>  | 476.290         | 468.280         | 468.784         | 467.776         | H[7]  |
| R[19] | <b>1016.075</b> | 407.767         | 399.757         | 400.261         | 399.253         | R[6]  |
| K[20] | <b>1094.138</b> | 329.716         | 321.707         | 322.211         | 321.203         | K[5]  |
| V[21] | <b>1143.673</b> | 251.663         | 243.653         | 244.157         | 243.149         | V[4]  |
| L[22] | <b>1200.215</b> | 202.110         | 194.100         | 194.613         | 193.605         | L[3]  |
| R[23] | 1278.265        | 145.577         | 137.567         | 138.071         | 137.063         | R[2]  |
| D[24] | <b>1335.779</b> | 67.526          | 59.517          | 60.021          | 59.013          | D[1]  |

# sp | P62806 | H4\_MOUSE

[Acetyl]SGRGK<sup>Acetyl</sup><sub>42.01</sub> GGK<sup>Acetyl</sup><sub>42.01</sub> GLGK<sup>Acetyl</sup><sub>42.01</sub> GGAKRHRK<sup>Dimethyl</sup><sub>28.03</sub> VLRD

- ▶ fragmentation table for charge state 3+
- ▶ specType=etd
- ▶ score=53.17
- ▶ F104902.dat
- ▶ query=q2377\_p1
- ▶ precursor=668.641650
- ▶ chargePrecursor=4
- ▶ itol=0.8

| AA    | c              | y              | z+1            | z+2            | z              | AA    |
|-------|----------------|----------------|----------------|----------------|----------------|-------|
| S[1]  | 49.697         | <b>891.183</b> | <b>685.843</b> | 0.672          | <b>885.507</b> | S[24] |
| G[2]  | 58.704         | 848.199        | <b>842.829</b> | 0.672          | 842.893        | G[23] |
| R[3]  | 130.738        | 829.161        | <b>823.822</b> | <b>824.158</b> | <b>823.486</b> | R[22] |
| G[4]  | 139.745        | 777.128        | 771.788        | 772.124        | 771.452        | G[21] |
| K[5]  | 196.447        | 758.121        | 752.781        | 753.117        | 752.445        | K[20] |
| G[6]  | 215.454        | <b>701.419</b> | <b>696.079</b> | <b>696.415</b> | <b>695.743</b> | G[19] |
| G[7]  | 234.461        | 682.412        | 677.072        | 677.408        | 676.736        | G[18] |
| K[8]  | 291.163        | 663.404        | 658.063        | 658.401        | 657.729        | K[17] |
| G[9]  | 310.170        | 638.703        | 603.363        | 603.699        | 603.027        | G[16] |
| L[10] | 347.688        | <b>587.695</b> | 582.355        | 582.692        | 582.020        | L[15] |
| G[11] | 396.872        | 550.001        | 544.661        | 544.997        | 544.325        | G[14] |
| K[12] | 423.574        | 530.994        | 525.654        | 525.990        | 525.318        | K[13] |
| G[13] | 442.581        | 474.292        | 468.952        | 469.288        | 468.616        | G[12] |
| G[14] | 461.588        | 455.285        | 449.945        | 450.281        | 449.609        | G[11] |
| A[15] | 485.267        | 436.277        | 430.937        | 431.274        | 430.602        | A[10] |
| K[16] | 527.966        | 412.598        | 407.259        | 407.595        | 406.923        | K[9]  |
| R[17] | 579.999        | 369.900        | 364.561        | 364.896        | 364.225        | R[8]  |
| H[18] | 625.686        | 317.866        | 312.527        | 312.863        | 312.191        | H[7]  |
| R[19] | 677.719        | 272.180        | 266.841        | 267.176        | 266.505        | R[6]  |
| K[20] | 729.761        | 220.146        | 214.807        | 215.143        | 214.471        | K[5]  |
| V[21] | 762.784        | 168.104        | 162.765        | 163.101        | 162.429        | V[4]  |
| L[22] | 800.479        | 135.082        | 129.742        | 130.078        | 129.406        | L[3]  |
| R[23] | <b>852.513</b> | 97.387         | 92.047         | 92.383         | 91.711         | R[2]  |
| D[24] | <b>896.855</b> | 45.353         | 40.014         | 40.349         | 39.678         | D[1]  |

# sp | P62806 | H4\_MOUSE

[Acetyl]SGRGKGGK Acetyl  
42.01 GLGK Acetyl  
42.01 GGAK Acetyl  
42.01 RHRK Dimethyl  
28.03 VLRD

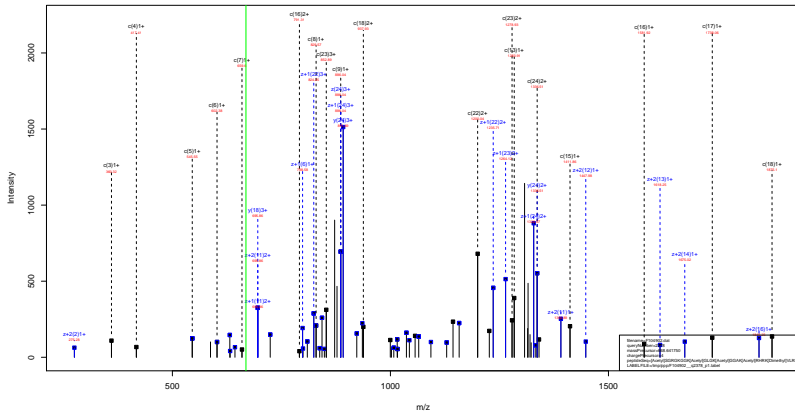

# sp | P62806 | H4\_MOUSE

[Acetyl]SGRGKGGK <sup>Acetyl</sup><sub>42.01</sub> GLGK <sup>Acetyl</sup><sub>42.01</sub> GGAK <sup>Acetyl</sup><sub>42.01</sub> RHRK <sup>Dimethyl</sup><sub>28.03</sub> VLRD

- ▶ fragmentation table for charge state 1+
- ▶ specType=etd
- ▶ score=123.52
- ▶ F104902.dat
- ▶ query=q2378\_p1
- ▶ precursor=668.641750
- ▶ chargePrecursor=4
- ▶ itol=0.8

| AA | c  | y               | z+1      | z+2             | z               | AA       |       |
|----|----|-----------------|----------|-----------------|-----------------|----------|-------|
| S  | 1  | 147.076         | 2671.534 | 2655.515        | 0.000           | 2654.507 | S[24] |
| G  | 2  | 204.008         | 2542.491 | 2526.473        | 0.000           | 2525.465 | G[23] |
| R  | 3  | <b>368.199</b>  | 2486.470 | 2469.451        | 2470.439        | 2468.443 | R[22] |
| G  | 4  | <b>417.230</b>  | 2329.369 | 2313.350        | 2314.368        | 2312.341 | G[21] |
| K  | 5  | <b>545.315</b>  | 2272.347 | 2256.329        | 2257.336        | 2255.321 | K[20] |
| G  | 6  | <b>602.337</b>  | 2144.252 | 2128.234        | 2129.241        | 2127.226 | G[19] |
| G  | 7  | <b>659.358</b>  | 2087.231 | 2071.213        | 2072.220        | 2070.204 | G[18] |
| K  | 8  | <b>829.464</b>  | 2030.209 | 2014.191        | 2015.198        | 2013.183 | K[17] |
| G  | 9  | <b>886.485</b>  | 1980.104 | 1864.085        | <b>1845.093</b> | 1843.077 | G[16] |
| L  | 10 | <b>929.549</b>  | 1893.062 | 1787.044        | 1788.071        | 1786.056 | L[15] |
| G  | 11 | <b>1056.591</b> | 1688.998 | 1673.980        | <b>1674.987</b> | 1672.972 | G[14] |
| K  | 12 | <b>1226.696</b> | 1632.977 | 1616.958        | <b>1617.966</b> | 1615.950 | K[13] |
| G  | 13 | <b>1283.718</b> | 1462.871 | 1446.853        | <b>1447.860</b> | 1445.845 | G[12] |
| G  | 14 | <b>1340.739</b> | 1405.850 | 1389.831        | <b>1390.839</b> | 1388.823 | G[11] |
| A  | 15 | <b>1411.776</b> | 1348.828 | <b>1332.810</b> | <b>1333.818</b> | 1331.802 | A[10] |
| R  | 16 | <b>1581.882</b> | 1277.791 | 1262.773        | 1263.780        | 1260.765 | R[9]  |
| R  | 17 | <b>1737.983</b> | 1107.685 | 1091.667        | <b>1092.675</b> | 1090.659 | R[8]  |
| H  | 18 | <b>1875.042</b> | 951.585  | <b>935.566</b>  | 936.574         | 934.558  | H[7]  |
| R  | 19 | 2031.143        | 814.526  | <b>798.507</b>  | <b>799.515</b>  | 797.499  | R[6]  |
| K  | 20 | 2187.209        | 658.425  | 642.406         | <b>643.414</b>  | 641.398  | K[5]  |
| V  | 21 | 2286.338        | 502.298  | 486.280         | 487.287         | 485.272  | V[4]  |
| L  | 22 | 2399.422        | 403.230  | 387.211         | 388.219         | 386.203  | L[3]  |
| R  | 23 | 2555.523        | 298.146  | 274.127         | <b>275.135</b>  | 273.119  | R[2]  |
| D  | 24 | 2670.550        | 134.045  | 118.026         | 119.034         | 117.018  | D[1]  |

# sp | P62806 | H4\_MOUSE

[Acetyl]SGRGKGGK <sup>Acetyl</sup><sub>42.01</sub> GLGK <sup>Acetyl</sup><sub>42.01</sub> GGAK <sup>Acetyl</sup><sub>42.01</sub> RHRK <sup>Dimethyl</sup><sub>28.03</sub> VLRD

- ▶ fragmentation table for charge state 2+
- ▶ specType=etd
- ▶ score=123.52
- ▶ F104902.dat
- ▶ query=q2378\_p1
- ▶ precursor=668.641750
- ▶ chargePrecursor=4
- ▶ itol=0.8

| AA | c  | y               | z+1             | z+2             | z               | AA              |       |
|----|----|-----------------|-----------------|-----------------|-----------------|-----------------|-------|
| S  | 1  | 74.642          | <b>1336.271</b> | <b>1328.261</b> | 0.504           | 1327.757        | S[24] |
| G  | 2  | 102.553         | 1271.746        | <b>1263.740</b> | 0.504           | 1265.236        | G[23] |
| R  | 3  | 180.603         | 1243.239        | <b>1235.229</b> | <b>1235.733</b> | 1234.725        | R[22] |
| G  | 4  | 259.114         | 1165.189        | <b>1157.179</b> | <b>1157.683</b> | 1159.675        | G[21] |
| K  | 5  | 273.163         | 1136.677        | <b>1128.668</b> | <b>1129.172</b> | 1128.164        | K[20] |
| G  | 6  | 301.672         | 1072.630        | <b>1064.620</b> | <b>1065.124</b> | <b>1064.117</b> | G[19] |
| G  | 7  | 330.183         | <b>1044.119</b> | <b>1036.110</b> | <b>1036.614</b> | 1035.606        | G[18] |
| K  | 8  | 415.236         | <b>1015.608</b> | <b>1007.599</b> | <b>1008.103</b> | <b>1007.095</b> | K[17] |
| G  | 9  | 443.746         | 0.30356         | <b>922.546</b>  | <b>923.050</b>  | 922.042         | G[16] |
| L  | 10 | 509.298         | 892.045         | 864.035         | 864.539         | 893.531         | L[15] |
| G  | 11 | 528.799         | 845.503         | <b>837.493</b>  | <b>837.997</b>  | 836.990         | G[14] |
| K  | 12 | 613.852         | 816.992         | <b>808.983</b>  | <b>809.487</b>  | 808.479         | K[13] |
| G  | 13 | 642.363         | 731.939         | <b>723.930</b>  | <b>724.434</b>  | 723.426         | G[12] |
| G  | 14 | 670.873         | 703.429         | <b>695.419</b>  | <b>695.923</b>  | 694.915         | G[11] |
| A  | 15 | 698.384         | 674.918         | 665.908         | 667.412         | 666.404         | A[10] |
| R  | 16 | <b>791.445</b>  | 639.399         | <b>631.390</b>  | <b>631.894</b>  | 630.886         | R[9]  |
| R  | 17 | 869.495         | 554.347         | <b>546.337</b>  | 546.841         | <b>545.833</b>  | R[8]  |
| H  | 18 | <b>938.025</b>  | 476.290         | 468.287         | 468.791         | 467.783         | H[7]  |
| R  | 19 | <b>1016.075</b> | 407.767         | 399.757         | 400.261         | 399.253         | R[6]  |
| K  | 20 | 1094.128        | 329.716         | 321.707         | 322.211         | 321.203         | K[5]  |
| V  | 21 | <b>1143.673</b> | 251.663         | 243.653         | 244.157         | 243.149         | V[4]  |
| L  | 22 | <b>1200.215</b> | 202.119         | 194.109         | 194.613         | 193.605         | L[3]  |
| R  | 23 | <b>1278.265</b> | 145.577         | 137.567         | 138.071         | 137.063         | R[2]  |
| D  | 24 | <b>1335.779</b> | 67.526          | 59.517          | 60.021          | 59.013          | D[1]  |

# sp | P62806 | H4\_MOUSE

[Acetyl]SGRGKGGK <sup>Acetyl</sup><sub>42.01</sub> GLGK <sup>Acetyl</sup><sub>42.01</sub> GGAK <sup>Acetyl</sup><sub>42.01</sub> RHRK <sup>Dimethyl</sup><sub>28.03</sub> VLRD

- ▶ fragmentation table for charge state 3+
- ▶ specType=etd
- ▶ score=123.52
- ▶ F104902.dat
- ▶ query=q2378\_p1
- ▶ precursor=668.641750
- ▶ chargePrecursor=4
- ▶ itol=0.8

| AA    | c              | y              | z+1            | z+2            | z              | AA    |
|-------|----------------|----------------|----------------|----------------|----------------|-------|
| S[1]  | 49.697         | <b>891.183</b> | <b>685.843</b> | 0.672          | <b>885.507</b> | S[24] |
| G[2]  | 58.704         | <b>848.169</b> | <b>842.829</b> | 0.672          | <b>842.493</b> | G[23] |
| R[3]  | 150.738        | <b>829.161</b> | <b>823.822</b> | <b>824.158</b> | <b>823.486</b> | R[22] |
| G[4]  | 139.745        | 777.128        | 771.788        | 772.124        | 771.452        | G[21] |
| K[5]  | 182.443        | 758.121        | 752.781        | 753.117        | 752.445        | K[20] |
| G[6]  | 201.450        | 715.422        | 710.083        | 710.419        | 709.747        | G[19] |
| G[7]  | 220.458        | <b>696.415</b> | 691.076        | 691.412        | 690.740        | G[18] |
| K[8]  | 277.159        | 677.408        | 672.068        | 672.404        | 671.732        | K[17] |
| G[9]  | 296.167        | 630.709        | 615.367        | 615.703        | 615.031        | G[16] |
| L[10] | 313.681        | <b>601.699</b> | 596.359        | 596.695        | 596.023        | L[15] |
| G[11] | 352.868        | 504.024        | 558.665        | 559.001        | 558.329        | G[14] |
| K[12] | 409.570        | <b>544.997</b> | 539.658        | 539.994        | 539.322        | K[13] |
| G[13] | 428.577        | 488.295        | 482.956        | 483.292        | 482.620        | G[12] |
| G[14] | 447.585        | 469.288        | 463.949        | 464.285        | 463.613        | G[11] |
| A[15] | 471.264        | 450.281        | 444.941        | 445.277        | 444.605        | A[10] |
| K[16] | 527.966        | 426.602        | 421.262        | 421.598        | 420.926        | K[9]  |
| R[17] | 579.999        | 369.900        | 364.561        | 364.896        | 364.225        | R[8]  |
| H[18] | 625.686        | 317.896        | 312.527        | 312.863        | 312.191        | H[7]  |
| R[19] | 677.719        | 272.180        | 266.841        | 267.176        | 266.505        | R[6]  |
| K[20] | 729.761        | 220.146        | 214.807        | 215.143        | 214.471        | K[5]  |
| V[21] | 762.784        | 168.104        | 162.765        | 163.101        | 162.429        | V[4]  |
| L[22] | 800.479        | 135.082        | 129.742        | 130.078        | 129.406        | L[3]  |
| R[23] | <b>852.513</b> | 97.387         | 92.047         | 92.383         | 91.711         | R[2]  |
| D[24] | 890.855        | 45.353         | 40.014         | 40.349         | 39.678         | D[1]  |





# sp | Q6ZWY9 | H2B1C\_MOUSE

PEPAKSAPAPKK <sup>Acetyl</sup>42.01 GSK <sup>Acetyl</sup>42.01 KAVTKAQKKD

- ▶ fragmentation table for charge state 1+
- ▶ specType=etd
- ▶ score=47.35
- ▶ F104902.dat
- ▶ query=q2386\_p1
- ▶ precursor=892.183500
- ▶ chargePrecursor=3
- ▶ itol=0.8

| AA | c       | y               | z+1      | z+2             | z               | AA       |    |    |
|----|---------|-----------------|----------|-----------------|-----------------|----------|----|----|
| F  | 115.087 | 2074.526        | 2058.855 | 0.000           | 2057.495        | F        | 25 |    |
| E  | 244.129 | 2577.472        | 2561.434 | 0.000           | 2560.440        | E        | 24 |    |
| P  | 341.182 | 2848.430        | 2832.411 | 0.000           | 2831.403        | P        | 23 |    |
| A  | 412.219 | 2351.377        | 2335.358 | 0.000           | 2334.350        | A        | 22 |    |
| K  | 5       | <b>540.314</b>  | 2260.340 | 2264.321        | 2205.329        | 2263.313 | K  | 21 |
| S  | 6       | 627.346         | 2152.245 | 2136.226        | 2137.234        | 2135.219 | S  | 20 |
| A  | 7       | 806.283         | 2086.212 | 2040.194        | 2050.202        | 2048.186 | A  | 19 |
| P  | 8       | <b>795.436</b>  | 1394.176 | 1378.157        | 1379.165        | 1377.141 | P  | 18 |
| A  | 9       | 866.473         | 1397.123 | 1381.104        | 1382.112        | 1380.096 | A  | 17 |
| P  | 10      | <b>963.526</b>  | 1826.080 | 1810.069        | 1811.075        | 1809.059 | P  | 16 |
| K  | 11      | <b>1091.621</b> | 1729.033 | 1713.014        | 1714.022        | 1712.006 | K  | 15 |
| K  | 12      | 1261.726        | 1600.938 | <b>1584.919</b> | 1585.927        | 1583.912 | K  | 14 |
| G  | 13      | 1318.748        | 1430.833 | 1414.814        | <b>1415.822</b> | 1413.806 | G  | 13 |
| S  | 14      | 1409.780        | 1373.811 | <b>1357.792</b> | 1358.800        | 1356.785 | S  | 12 |
| K  | 15      | 1575.885        | 1288.729 | 1270.700        | <b>1271.768</b> | 1269.753 | K  | 11 |
| K  | 16      | 1701.980        | 1118.674 | 1100.655        | <b>1101.663</b> | 1099.647 | K  | 10 |
| A  | 17      | 1775.017        | 988.579  | 972.560         | <b>973.568</b>  | 971.552  | A  | 9  |
| V  | 18      | 1874.086        | 917.541  | 901.523         | 902.531         | 900.515  | V  | 8  |
| T  | 19      | <b>1975.133</b> | 818.472  | 802.454         | 803.462         | 801.446  | T  | 7  |
| T  | 20      | 2103.228        | 717.425  | 701.407         | <b>702.414</b>  | 700.399  | T  | 6  |
| A  | 21      | 2174.266        | 589.330  | 573.312         | <b>574.320</b>  | 572.304  | A  | 5  |
| Q  | 22      | 2202.324        | 518.293  | 502.275         | 503.283         | 501.267  | Q  | 4  |
| K  | 23      | 2430.419        | 390.235  | 374.216         | 375.224         | 373.208  | K  | 3  |
| K  | 24      | 2598.514        | 282.140  | 246.121         | 247.129         | 245.113  | K  | 2  |
| D  | 25      | 2673.541        | 134.045  | 118.028         | 119.034         | 117.018  | D  | 1  |

# sp | Q6ZWY9 | H2B1C\_MOUSE

PEPAKSAPAPKK <sup>Acetyl</sup>42.01 GSK <sup>Acetyl</sup>42.01 KAVTKAQKKD

- ▶ fragmentation table for charge state 2+
- ▶ specType=etd
- ▶ score=47.35
- ▶ F104902.dat
- ▶ query=q2386\_p1
- ▶ precursor=892.183500
- ▶ chargePrecursor=3
- ▶ itol=0.8

| AA   | c               | y               | z+1             | z+2             | z               | AA   |
|------|-----------------|-----------------|-----------------|-----------------|-----------------|------|
| P 1  | 58.047          | <b>1337.766</b> | <b>1329.757</b> | 0.504           | <b>1329.253</b> | P 25 |
| E 3  | 127.508         | 1289.740        | <b>1281.230</b> | 0.504           | <b>1280.726</b> | E 24 |
| F 3  | 171.095         | 1224.715        | <b>1216.709</b> | 0.504           | <b>1216.205</b> | F 23 |
| A 4  | 298.613         | 1176.192        | <b>1168.183</b> | 0.504           | 1167.679        | A 22 |
| K 5  | 276.681         | 1140.674        | <b>1132.664</b> | <b>1133.168</b> | <b>1132.160</b> | K 21 |
| S 6  | 314.177         | 1076.629        | 1068.617        | 1069.121        | 1068.113        | S 20 |
| A 7  | 349.695         | 1033.110        | 1025.101        | 1025.605        | 1024.597        | A 19 |
| F 8  | 388.222         | 997.591         | 989.582         | 990.086         | 989.078         | F 18 |
| A 9  | 433.740         | 949.065         | 941.056         | 941.560         | 940.552         | A 17 |
| P 10 | 482.287         | 913.547         | 905.537         | 906.041         | 905.033         | P 16 |
| K 11 | 546.314         | 865.020         | 857.011         | 857.515         | 856.507         | K 15 |
| K 12 | 631.367         | 800.973         | 792.963         | 793.467         | 792.459         | K 14 |
| G 13 | 659.878         | 743.920         | 735.911         | 736.414         | 735.407         | G 13 |
| S 14 | 703.394         | 689.400         | 679.400         | 679.904         | 678.896         | S 12 |
| K 15 | 788.446         | 643.891         | 635.884         | 636.388         | 635.380         | K 11 |
| K 16 | 852.494         | 598.840         | 590.831         | 591.335         | 590.327         | K 10 |
| A 17 | 888.012         | 594.793         | 586.784         | 587.287         | 586.280         | A 9  |
| V 18 | 937.547         | 499.274         | 491.265         | 491.769         | 490.761         | V 8  |
| T 19 | 988.078         | 499.746         | 491.737         | 492.240         | 491.232         | T 7  |
| K 20 | <b>1052.118</b> | 359.215         | 351.207         | 351.711         | 350.703         | K 6  |
| A 21 | <b>1087.636</b> | 295.169         | 287.159         | 287.663         | 286.656         | A 5  |
| Q 22 | <b>1151.666</b> | 259.656         | 251.641         | 252.145         | 251.137         | Q 4  |
| K 23 | <b>1215.713</b> | 195.621         | 187.612         | 188.116         | 187.108         | K 3  |
| K 24 | 1279.761        | 131.574         | 123.564         | 124.068         | 123.060         | K 2  |
| D 25 | 1337.274        | 67.526          | 59.517          | 60.021          | 59.013          | D 1  |

# sp | P62806 | H4\_MOUSE

[Acetyl]SGRGK Acetyl 42.01 GGK Acetyl 42.01 GLGK Acetyl 42.01 GGAK Acetyl 42.01 RHR Dimethyl 28.03 KVLRD

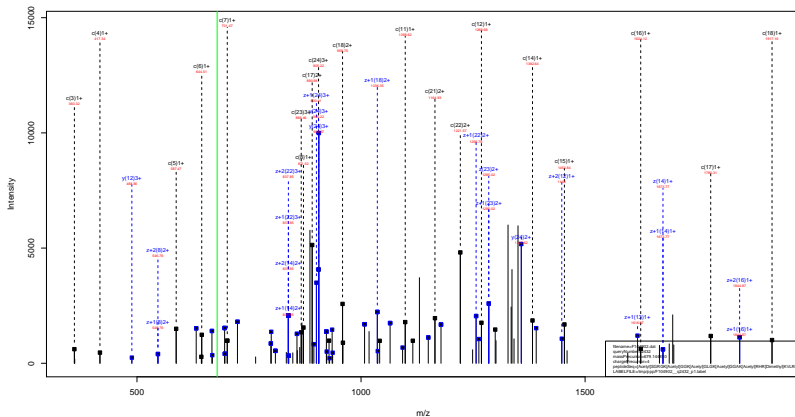

# sp | P62806 | H4\_MOUSE

[Acetyl]SGR**GK** Acetyl 42.01 **G**GK Acetyl 42.01 **GLGK** Acetyl 42.01 **GGAK** Acetyl 42.01 **RHR** Dimethyl 28.03 **KVLRD**

- ▶ fragmentation table for charge state 1+
- ▶ specType=etd
- ▶ score=99.92
- ▶ F104902.dat
- ▶ query=q2432\_p1
- ▶ precursor=679.144810
- ▶ chargePrecursor=4
- ▶ itol=0.8

| AA | c  | y               | z+1      | z+2             | z               | AA              |       |
|----|----|-----------------|----------|-----------------|-----------------|-----------------|-------|
| S  | 1  | 147.076         | 2713.544 | 2697.529        | 0.000           | 2696.510        | S[24] |
| G  | 2  | 204.008         | 2584.502 | 2568.483        | 0.000           | 2567.473        | G[23] |
| R  | 3  | <b>360.199</b>  | 2527.480 | 2511.462        | 2612.470        | 2510.454        | R[22] |
| G  | 4  | <b>417.220</b>  | 2371.379 | 2355.360        | 2356.368        | 2354.351        | G[21] |
| K  | 5  | <b>587.326</b>  | 2314.358 | 2298.339        | 2299.347        | 2297.331        | K[20] |
| G  | 6  | <b>644.347</b>  | 2144.252 | 2128.234        | 2129.241        | 2127.228        | G[19] |
| G  | 7  | <b>701.369</b>  | 2087.231 | 2071.212        | 2072.220        | 2070.204        | G[18] |
| K  | 8  | <b>871.474</b>  | 2030.209 | 2014.191        | 2015.198        | 2013.183        | K[17] |
| G  | 9  | <b>928.496</b>  | 1860.104 | <b>1844.085</b> | <b>1845.093</b> | 1843.077        | G[16] |
| L  | 10 | <b>1041.500</b> | 1803.082 | 1787.064        | 1788.071        | 1786.056        | L[15] |
| G  | 11 | <b>1098.501</b> | 1639.968 | <b>1613.950</b> | 1614.957        | <b>1612.972</b> | G[14] |
| K  | 12 | <b>1268.707</b> | 1632.977 | <b>1616.958</b> | 1617.966        | 1615.950        | K[13] |
| G  | 13 | 1325.728        | 1462.871 | 1446.853        | <b>1447.860</b> | 1445.845        | G[12] |
| G  | 14 | <b>1382.750</b> | 1405.850 | 1389.831        | <b>1390.839</b> | 1388.823        | G[11] |
| A  | 15 | <b>1453.787</b> | 1348.828 | 1332.810        | 1333.817        | 1331.801        | A[10] |
| R  | 16 | <b>1621.893</b> | 1277.791 | 1261.773        | <b>1262.780</b> | 1260.765        | R[9]  |
| R  | 17 | <b>1779.994</b> | 1107.686 | 1091.667        | <b>1092.675</b> | 1090.659        | R[8]  |
| H  | 18 | <b>1917.053</b> | 951.585  | <b>935.566</b>  | <b>936.574</b>  | 934.558         | H[7]  |
| R  | 19 | 2101.185        | 814.526  | <b>798.507</b>  | <b>799.515</b>  | 797.499         | R[6]  |
| K  | 20 | 2229.280        | 630.393  | 614.375         | 615.382         | 613.367         | K[5]  |
| V  | 21 | 2428.348        | 502.298  | 486.280         | 487.287         | 485.272         | V[4]  |
| L  | 22 | 2441.432        | 403.230  | 387.211         | 388.219         | 386.203         | L[3]  |
| R  | 23 | 2597.534        | 290.148  | 274.129         | 275.135         | 273.119         | R[2]  |
| D  | 24 | 2712.560        | 134.045  | 118.026         | 119.034         | 117.018         | D[1]  |

# sp | P62806 | H4\_MOUSE

[Acetyl]SGR**GK**<sup>Acetyl</sup><sub>42.01</sub> **G**G**K**<sup>Acetyl</sup><sub>42.01</sub> **G**L**G****K**<sup>Acetyl</sup><sub>42.01</sub> **G**G**A****K**<sup>Acetyl</sup><sub>42.01</sub> **R**H**R**<sup>Dimethyl</sup><sub>28.03</sub> **K**V**L****R****D**

- ▶ fragmentation table for charge state 2+
- ▶ specType=etd
- ▶ score=99.92
- ▶ F104902.dat
- ▶ query=q2432\_p1
- ▶ precursor=679.144810
- ▶ chargePrecursor=4
- ▶ itol=0.8

| AA    | c               | y               | z+1             | z+2             | z               | AA    |
|-------|-----------------|-----------------|-----------------|-----------------|-----------------|-------|
| S[1]  | 74.042          | <b>1357.276</b> | 1340.267        | 0.504           | 1348.761        | S[24] |
| G[2]  | 102.553         | 1292.755        | <b>1284.745</b> | 0.504           | <b>1284.241</b> | G[23] |
| R[3]  | 180.603         | 1264.244        | <b>1256.234</b> | <b>1256.738</b> | 1265.731        | R[22] |
| G[4]  | 259.114         | 1198.193        | <b>1178.184</b> | <b>1178.688</b> | <b>1177.689</b> | G[21] |
| K[5]  | 294.157         | 1157.683        | <b>1149.673</b> | <b>1150.177</b> | 1149.169        | K[20] |
| G[6]  | 322.677         | 1072.630        | <b>1064.620</b> | <b>1065.124</b> | <b>1064.117</b> | G[19] |
| G[7]  | 351.188         | 1044.119        | <b>1036.110</b> | <b>1036.614</b> | <b>1035.606</b> | G[18] |
| K[8]  | 436.241         | 1015.609        | <b>1007.599</b> | <b>1008.103</b> | <b>1007.095</b> | K[17] |
| G[9]  | 464.752         | <b>930.556</b>  | <b>922.546</b>  | <b>923.050</b>  | <b>922.042</b>  | G[16] |
| L[10] | 511.294         | 792.046         | <b>994.035</b>  | <b>994.539</b>  | 792.538         | L[15] |
| G[11] | 540.804         | 845.503         | <b>837.493</b>  | <b>837.997</b>  | 836.990         | G[14] |
| K[12] | 634.857         | 816.992         | <b>808.983</b>  | <b>809.487</b>  | <b>808.479</b>  | K[13] |
| G[13] | 663.368         | 731.939         | <b>723.930</b>  | <b>724.434</b>  | 723.426         | G[12] |
| G[14] | 691.879         | 703.429         | <b>695.419</b>  | <b>695.923</b>  | <b>694.915</b>  | G[11] |
| A[15] | 720.389         | 674.918         | <b>666.908</b>  | <b>667.412</b>  | 666.404         | A[10] |
| R[16] | 812.430         | 639.399         | <b>631.390</b>  | <b>631.894</b>  | 630.886         | R[9]  |
| R[17] | <b>890.500</b>  | 554.347         | <b>546.337</b>  | <b>546.841</b>  | 545.833         | R[8]  |
| H[18] | <b>959.030</b>  | 476.290         | 468.282         | 468.786         | 467.778         | H[7]  |
| R[19] | 1051.096        | 407.767         | 399.757         | 400.261         | 399.253         | R[6]  |
| K[20] | <b>1115.144</b> | 315.700         | 307.691         | 308.195         | 307.187         | K[5]  |
| V[21] | <b>1164.676</b> | 251.653         | 243.643         | 244.147         | 243.140         | V[4]  |
| L[22] | <b>1221.220</b> | 202.119         | 194.109         | 194.613         | 193.605         | L[3]  |
| R[23] | <b>1299.270</b> | 145.577         | 137.567         | 138.071         | 137.063         | R[2]  |
| D[24] | 1356.704        | 67.526          | 59.517          | 60.021          | 59.013          | D[1]  |

# sp | P62806 | H4\_MOUSE

[Acetyl]SGRGK<sup>Acetyl</sup><sub>42.01</sub> GGK<sup>Acetyl</sup><sub>42.01</sub> GLGK<sup>Acetyl</sup><sub>42.01</sub> GGAK<sup>Acetyl</sup><sub>42.01</sub> RHR<sup>Dimethyl</sup><sub>28.03</sub> KVLRD

- ▶ fragmentation table for charge state 3+
- ▶ specType=etd
- ▶ score=99.92
- ▶ F104902.dat
- ▶ query=q2432\_p1
- ▶ precursor=679.144810
- ▶ chargePrecursor=4
- ▶ itol=0.8

| AA    | c              | y              | z+1            | z+2            | z              | AA    |
|-------|----------------|----------------|----------------|----------------|----------------|-------|
| S[1]  | 49.697         | <b>905.186</b> | <b>699.847</b> | 0.672          | 899.511        | S[24] |
| G[2]  | 58.704         | 392.172        | <b>856.833</b> | 0.672          | <b>856.497</b> | G[23] |
| R[3]  | 120.738        | 843.165        | <b>837.825</b> | <b>830.161</b> | <b>837.489</b> | R[22] |
| G[4]  | 139.745        | 791.131        | 785.792        | 786.128        | 785.456        | G[21] |
| K[5]  | 196.447        | 772.124        | 766.785        | 767.120        | 766.449        | K[20] |
| G[6]  | 215.454        | 715.422        | 710.083        | 710.419        | 709.747        | G[19] |
| G[7]  | 234.461        | <b>696.415</b> | 691.076        | 691.412        | 690.740        | G[18] |
| K[8]  | 291.163        | 677.408        | 672.068        | 672.404        | 671.732        | K[17] |
| G[9]  | 310.170        | 620.706        | 615.367        | 615.703        | 615.031        | G[16] |
| L[10] | 317.885        | 601.699        | 596.359        | 596.695        | 596.023        | L[15] |
| G[11] | 396.872        | 564.004        | 558.665        | 559.001        | 558.329        | G[14] |
| K[12] | 423.574        | 544.997        | 539.658        | 539.994        | 539.322        | K[13] |
| G[13] | 442.581        | <b>488.295</b> | 482.956        | 483.292        | 482.620        | G[12] |
| G[14] | 461.588        | 469.288        | 463.949        | 464.285        | 463.613        | G[11] |
| A[15] | 485.267        | 450.281        | 444.941        | 445.277        | 444.605        | A[10] |
| K[16] | 541.969        | 426.602        | 421.262        | 421.598        | 420.926        | K[9]  |
| R[17] | 594.003        | 369.900        | 364.561        | 364.896        | 364.225        | R[8]  |
| H[18] | 609.689        | 317.866        | 312.527        | 312.863        | 312.191        | H[7]  |
| R[19] | <b>701.067</b> | 272.180        | 266.841        | 267.176        | 266.505        | R[6]  |
| K[20] | 753.705        | 210.803        | 205.463        | 205.799        | 205.127        | K[5]  |
| V[21] | 776.788        | 168.104        | 162.765        | 163.101        | 162.429        | V[4]  |
| L[22] | 814.482        | 135.082        | 129.742        | 130.078        | 129.406        | L[3]  |
| R[23] | <b>856.516</b> | 97.387         | 92.047         | 92.383         | 91.711         | R[2]  |
| D[24] | <b>904.858</b> | 45.353         | 40.014         | 40.349         | 39.678         | D[1]  |

# sp | Q6GSS7 | H2A2A\_MOUSE

LNKLLGK <sup>Dimethyl</sup>VTIAQGGVLPNIQAVLLPKKTE  
28.03

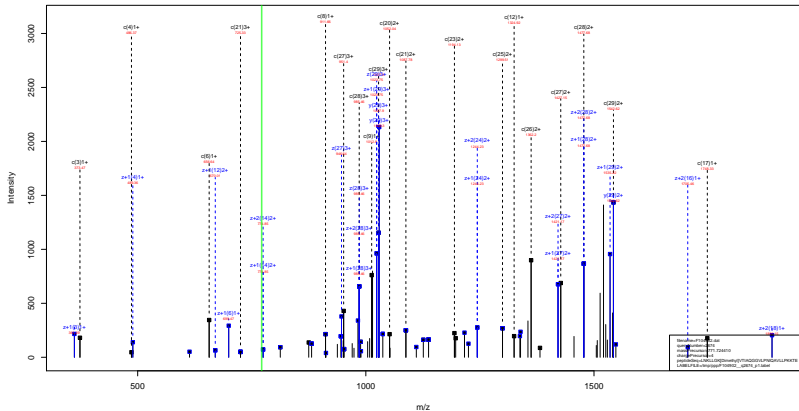

# sp | Q6GSS7 | H2A2A\_MOUSE

LNKLLGK <sup>Dimethyl</sup> <sub>28.03</sub> VTIAQGGVLPNIQAVLLPKKTE

- ▶ fragmentation table for charge state 1+
- ▶ specType=etd
- ▶ score=81.34
- ▶ F104902.dat
- ▶ query=q2674\_p1
- ▶ precursor=771.724410
- ▶ chargePrecursor=4
- ▶ itol=0.8

| AA    | c               | y               | z+1             | z+2             | z        | AA    |
|-------|-----------------|-----------------|-----------------|-----------------|----------|-------|
| L[1]  | 131.118         | 3083.892        | 3067.873        | 0.000           | 3066.865 | L[26] |
| N[2]  | 245.161         | 2970.808        | 2954.789        | 2938.797        | 2953.781 | N[28] |
| K[3]  | <b>373.256</b>  | 2836.765        | 2840.746        | 2841.754        | 2839.738 | K[27] |
| L[4]  | <b>486.340</b>  | 2728.670        | 2712.651        | 2713.659        | 2711.643 | L[26] |
| L[5]  | 599.424         | 2615.586        | 2599.567        | 2600.575        | 2598.559 | L[25] |
| G[6]  | <b>658.445</b>  | 2502.500        | 2486.483        | 2487.491        | 2485.475 | G[24] |
| K[7]  | <b>812.572</b>  | 2445.460        | 2429.462        | 2430.469        | 2428.454 | K[23] |
| V[8]  | <b>911.640</b>  | 2289.354        | 2273.335        | 2274.343        | 2272.327 | V[22] |
| T[9]  | <b>1012.688</b> | 2190.288        | 2174.267        | 2175.275        | 2173.259 | T[21] |
| I[10] | <b>1125.772</b> | 2089.230        | 2073.210        | 2074.227        | 2072.211 | I[20] |
| A[11] | <b>1196.809</b> | 1976.154        | 1960.135        | 1961.143        | 1959.127 | A[19] |
| Q[12] | <b>1244.867</b> | 1905.111        | 1889.098        | <b>1890.106</b> | 1888.090 | Q[18] |
| G[13] | <b>1381.889</b> | 1777.058        | 1761.039        | 1762.047        | 1760.032 | G[17] |
| G[14] | 1438.910        | 1720.037        | 1704.019        | <b>1705.026</b> | 1703.010 | G[16] |
| V[15] | 1537.979        | 1663.015        | 1646.997        | 1648.004        | 1645.989 | V[15] |
| L[16] | 1651.063        | 1563.947        | <b>1547.928</b> | 1548.936        | 1546.920 | L[14] |
| F[17] | <b>1748.116</b> | 1490.863        | 1474.844        | 1475.852        | 1473.836 | F[13] |
| N[18] | 1862.959        | 1353.810        | <b>1337.791</b> | <b>1338.799</b> | 1336.783 | N[12] |
| I[19] | 1975.243        | 1239.767        | 1223.748        | <b>1224.756</b> | 1222.741 | I[11] |
| Q[20] | 2103.301        | <b>1126.683</b> | <b>1110.664</b> | 1111.672        | 1109.656 | Q[10] |
| A[21] | 2174.338        | 998.624         | <b>982.606</b>  | 983.614         | 981.598  | A[9]  |
| V[22] | 2273.407        | 927.587         | <b>911.569</b>  | <b>912.576</b>  | 910.561  | V[8]  |
| L[23] | 2389.491        | 808.513         | <b>813.500</b>  | 813.508         | 811.492  | L[7]  |
| L[24] | 2499.575        | 715.435         | <b>699.416</b>  | 700.424         | 698.408  | L[6]  |
| P[25] | 2596.628        | 602.351         | 586.332         | 587.340         | 585.324  | P[5]  |
| K[26] | 2724.723        | 505.268         | <b>489.279</b>  | 490.287         | 488.271  | K[4]  |
| K[27] | 2852.818        | 377.203         | <b>361.184</b>  | 362.192         | 360.177  | K[3]  |
| T[28] | 2953.865        | 249.106         | 233.089         | 234.097         | 232.082  | T[2]  |
| E[29] | 3082.008        | 148.060         | 132.042         | 133.050         | 131.034  | E[1]  |



# sp | Q6GSS7 | H2A2A\_MOUSE

LNKLLGK <sup>Dimethyl</sup> <sub>28.03</sub> VTIAQGGVLPNIQAVLLPKKTE

- ▶ fragmentation table for charge state 2+
- ▶ specType=etd
- ▶ score=81.34
- ▶ F104902.dat
- ▶ query=q2674\_p1
- ▶ precursor=771.724410
- ▶ chargePrecursor=4
- ▶ itol=0.8

| AA   | c               | y               | z+1             | z+2             | z               | AA   |
|------|-----------------|-----------------|-----------------|-----------------|-----------------|------|
| L 1  | 66.093          | <b>1542.450</b> | <b>1534.440</b> | 8.504           | 1533.930        | L 20 |
| N 2  | 123.084         | 1485.905        | <b>1477.898</b> | <b>1478.402</b> | <b>1477.394</b> | N 20 |
| K 3  | 187.132         | 1428.889        | <b>1420.877</b> | <b>1421.381</b> | 1420.373        | K 27 |
| L 4  | 243.674         | 1364.839        | 1366.829        | 1367.333        | 1366.325        | L 26 |
| L 5  | 300.216         | 1308.297        | <b>1300.287</b> | 1300.791        | <b>1299.783</b> | L 25 |
| G 6  | 358.759         | 1251.755        | <b>1243.745</b> | <b>1244.249</b> | 1243.241        | G 24 |
| K 7  | 406.799         | 1223.244        | 1225.234        | <b>1215.238</b> | 1214.731        | K 23 |
| V 8  | 456.324         | 1145.181        | <b>1137.171</b> | <b>1137.675</b> | <b>1136.667</b> | V 22 |
| T 9  | 506.840         | 1095.646        | <b>1087.637</b> | <b>1088.141</b> | <b>1087.133</b> | T 21 |
| T 10 | 563.390         | 1045.123        | <b>1037.113</b> | <b>1037.617</b> | <b>1036.609</b> | T 20 |
| A 11 | 608.909         | <b>988.581</b>  | 989.117         | 989.679         | 989.201         | A 19 |
| G 12 | 662.937         | <b>953.062</b>  | <b>945.053</b>  | <b>945.557</b>  | <b>944.549</b>  | G 18 |
| G 13 | 691.448         | 899.033         | <b>881.023</b>  | <b>881.527</b>  | <b>880.519</b>  | G 17 |
| G 14 | 719.959         | 860.522         | 852.513         | 853.017         | 852.009         | G 16 |
| V 15 | 769.493         | 832.011         | 824.002         | 824.506         | 823.498         | V 15 |
| L 16 | 830.035         | 782.477         | <b>774.468</b>  | <b>774.972</b>  | 773.964         | L 14 |
| T 17 | <b>874.561</b>  | <b>725.935</b>  | 726.439         | 726.943         | 725.935         | T 13 |
| N 18 | 911.553         | 677.420         | <b>669.399</b>  | <b>669.903</b>  | 668.895         | N 12 |
| I 19 | <b>988.125</b>  | 620.907         | 612.898         | <b>612.882</b>  | 611.874         | I 11 |
| Q 20 | <b>1052.154</b> | 563.845         | 555.836         | 556.340         | 555.332         | Q 10 |
| A 21 | <b>1087.673</b> | 499.816         | 491.807         | 492.310         | 491.303         | A 0  |
| V 22 | <b>1137.207</b> | 484.297         | 476.288         | 476.792         | 475.784         | V 8  |
| L 23 | <b>1193.749</b> | 414.763         | 406.754         | 407.258         | 406.251         | L 1  |
| L 24 | 1250.291        | 358.221         | 350.212         | 350.716         | 349.708         | L 6  |
| P 25 | <b>1298.817</b> | 301.679         | 293.670         | 294.174         | 293.166         | P 5  |
| K 26 | <b>1362.865</b> | 253.153         | 245.143         | 245.647         | 244.639         | K 4  |
| K 27 | <b>1426.912</b> | 189.105         | 181.096         | 181.600         | 180.592         | K 3  |
| T 28 | <b>1477.436</b> | 125.058         | 117.048         | 117.552         | 116.544         | T 2  |
| E 29 | <b>1541.958</b> | 74.534          | 66.524          | 67.028          | 66.021          | E 1  |

# sp | Q6GSS7 | H2A2A\_MOUSE

LNKLLGK <sup>Dimethyl</sup> <sub>28.03</sub> VTIAQGGVLPNIQAVLLPKKTE

- ▶ fragmentation table for charge state 3+
- ▶ specType=etd
- ▶ score=81.34
- ▶ F104902.dat
- ▶ query=q2674\_p1
- ▶ precursor=771.724410
- ▶ chargePrecursor=4
- ▶ itol=0.8

| AA    | c               | y               | z+1             | z+2            | z               | AA    |
|-------|-----------------|-----------------|-----------------|----------------|-----------------|-------|
| L[1]  | 44.577          | <b>1028.635</b> | <b>1023.296</b> | 0.672          | <b>1022.960</b> | L[20] |
| N[2]  | 82.392          | 990.941         | <b>985.601</b>  | <b>985.937</b> | <b>985.265</b>  | N[20] |
| K[3]  | 125.090         | <b>952.926</b>  | 947.597         | 947.923        | <b>947.251</b>  | K[27] |
| L[4]  | 162.785         | 910.228         | 904.889         | 905.225        | 904.553         | L[26] |
| L[5]  | 200.479         | 872.533         | 867.194         | 867.530        | 866.896         | L[25] |
| Q[6]  | 239.287         | 834.839         | 829.499         | 829.835        | 829.199         | Q[24] |
| K[7]  | 271.529         | 815.832         | 810.492         | 810.828        | 810.156         | K[23] |
| V[8]  | 304.552         | 795.700         | 790.450         | 790.786        | 790.114         | V[22] |
| T[9]  | 338.234         | 776.767         | <b>775.427</b>  | <b>775.763</b> | <b>775.091</b>  | T[21] |
| I[10] | 375.929         | 697.084         | 691.745         | 692.081        | 691.409         | I[20] |
| A[11] | 399.608         | 699.389         | 694.050         | 694.386        | 693.714         | A[19] |
| Q[12] | 442.294         | 639.731         | 634.391         | 634.727        | 634.035         | Q[19] |
| G[13] | 461.301         | 593.024         | 587.685         | 588.021        | 587.349         | G[17] |
| G[14] | 480.308         | 574.017         | 568.678         | 569.013        | 568.342         | G[16] |
| V[15] | 513.331         | 555.010         | 549.670         | 550.006        | 549.334         | V[15] |
| L[16] | 551.026         | 521.987         | 516.648         | 516.984        | 516.312         | L[14] |
| F[17] | 583.177         | 484.262         | 478.923         | 479.259        | 478.581         | F[13] |
| T[18] | 621.391         | 451.942         | 446.603         | 446.939        | 446.266         | T[12] |
| I[19] | 659.886         | 413.927         | 408.588         | 408.924        | 408.252         | I[11] |
| Q[20] | 701.772         | 376.233         | 370.893         | 371.229        | 370.557         | Q[10] |
| A[21] | <b>725.451</b>  | 333.540         | 328.201         | 328.543        | 327.871         | A[9]  |
| V[22] | 758.474         | 309.867         | 304.528         | 304.864        | 304.192         | V[9]  |
| L[23] | 796.168         | 276.844         | 271.505         | 271.841        | 271.169         | L[7]  |
| L[24] | 833.863         | 239.159         | 233.819         | 234.148        | 233.474         | L[6]  |
| P[25] | 866.214         | 201.455         | 196.116         | 196.451        | 195.780         | P[5]  |
| K[26] | 908.912         | 169.104         | 163.765         | 164.101        | 163.429         | K[4]  |
| K[27] | <b>951.611</b>  | 126.400         | 121.061         | 121.402        | 120.730         | K[3]  |
| T[28] | <b>985.293</b>  | 83.708          | 78.368          | 78.704         | 78.032          | T[2]  |
| E[29] | <b>1028.307</b> | 50.025          | 44.685          | 45.021         | 44.349          | E[1]  |

# sp | Q6GSS7 | H2A2A\_MOUSE

LNK<sup>Dimethyl</sup><sub>28.03</sub> LLGKVTIAQGGVLPNIQAVLLPKKTE

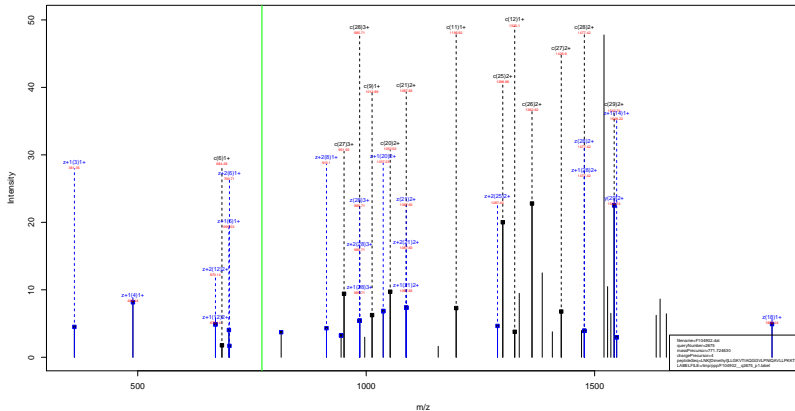

# sp | Q6GSS7 | H2A2A\_MOUSE

LNK<sup>Dimethyl</sup><sub>28.03</sub> LLGKVTIAQGGVLPNIQAVLLPKKTE

- ▶ fragmentation table for charge state 1+
- ▶ specType=etd
- ▶ score=32.11
- ▶ F104902.dat
- ▶ query=q2675\_p1
- ▶ precursor=771.724630
- ▶ chargePrecursor=4
- ▶ itol=0.8

| AA    | c               | y        | z+1             | z+2             | z               | AA    |
|-------|-----------------|----------|-----------------|-----------------|-----------------|-------|
| L[1]  | 131.118         | 3083.802 | 2067.873        | 0.000           | 3056.865        | L[28] |
| N[2]  | 245.161         | 2970.808 | 2954.789        | 2955.797        | 2953.781        | N[28] |
| K[3]  | 401.287         | 2856.765 | 2840.746        | 2841.754        | 2839.738        | K[27] |
| L[4]  | 514.371         | 2700.639 | 2684.620        | 2685.628        | 2683.612        | L[26] |
| L[5]  | 627.455         | 2587.555 | 2571.536        | 2572.544        | 2570.528        | L[25] |
| G[6]  | <b>684.477</b>  | 2474.470 | 2458.451        | 2459.460        | 2457.444        | G[24] |
| K[7]  | 812.572         | 2317.440 | 2401.430        | 2402.438        | 2400.422        | K[23] |
| V[8]  | 911.640         | 2289.354 | 2273.335        | 2274.343        | 2272.327        | V[22] |
| T[9]  | <b>1012.688</b> | 2190.266 | 2174.267        | 2175.275        | 2173.259        | T[21] |
| I[10] | 1125.772        | 2089.238 | 2073.219        | 2074.227        | 2072.211        | I[20] |
| A[11] | <b>1196.809</b> | 1976.154 | 1960.135        | 1961.143        | 1959.127        | A[19] |
| Q[12] | <b>1324.867</b> | 1909.111 | 1893.092        | 1894.100        | <b>1888.090</b> | Q[18] |
| G[13] | 1381.889        | 1777.058 | 1761.039        | 1762.047        | 1760.032        | G[17] |
| G[14] | 1438.910        | 1720.037 | 1704.018        | 1705.026        | 1703.010        | G[16] |
| V[15] | 1537.979        | 1603.015 | 1648.997        | 1648.004        | 1645.989        | V[15] |
| L[16] | 1651.063        | 1563.947 | <b>1547.928</b> | <b>1548.936</b> | 1546.920        | L[14] |
| T[17] | 1748.116        | 1450.883 | 1434.864        | 1435.872        | 1433.856        | T[13] |
| N[18] | 1862.159        | 1353.810 | 1337.791        | 1338.799        | 1336.783        | N[12] |
| I[19] | 1975.243        | 1239.767 | 1223.748        | 1224.756        | 1222.741        | I[11] |
| Q[20] | 2103.301        | 1126.683 | 1110.664        | 1111.672        | 1109.656        | Q[10] |
| A[21] | 2174.338        | 998.624  | 982.605         | 983.614         | 981.598         | A[9]  |
| V[22] | 2273.407        | 927.587  | 911.568         | <b>912.576</b>  | 910.561         | V[8]  |
| L[23] | 2389.491        | 828.519  | 812.500         | <b>813.508</b>  | 811.483         | L[7]  |
| L[24] | 2499.575        | 715.435  | <b>699.416</b>  | <b>700.424</b>  | 698.408         | L[6]  |
| P[25] | 2596.628        | 602.351  | 586.332         | 587.340         | 585.324         | P[5]  |
| K[26] | 2724.723        | 505.298  | <b>489.279</b>  | 490.287         | 488.271         | K[4]  |
| K[27] | 2852.818        | 377.203  | <b>361.184</b>  | 362.192         | 360.177         | K[3]  |
| T[28] | 2953.865        | 249.108  | 233.089         | 234.097         | 232.082         | T[2]  |
| E[29] | 3082.008        | 148.050  | 132.040         | 133.050         | 131.034         | E[1]  |

# sp | Q6GSS7 | H2A2A\_MOUSE

LNK<sup>Dimethyl</sup><sub>28.03</sub> LLGKVTIAQGGVLPNIQAVLLPKKTE

- ▶ fragmentation table for charge state 2+
- ▶ specType=etd
- ▶ score=32.11
- ▶ F104902.dat
- ▶ query=q2675\_p1
- ▶ precursor=771.724630
- ▶ chargePrecursor=4
- ▶ itol=0.8

| AA  | c               | y               | z+1             | z+2             | z               | AA   |
|-----|-----------------|-----------------|-----------------|-----------------|-----------------|------|
| L1  | 66.053          | <b>1542.450</b> | 1534.440        | 9.504           | 1533.930        | L120 |
| N1  | 123.054         | 1485.905        | <b>1477.898</b> | 1478.402        | <b>1477.394</b> | N120 |
| K1  | 201.147         | 1428.886        | 1420.877        | 1421.381        | 1420.373        | K127 |
| L1  | 257.609         | 1350.823        | 1342.814        | 1343.317        | 1342.310        | L126 |
| L1  | 314.211         | 1294.281        | 1286.272        | <b>1286.775</b> | 1285.768        | L125 |
| G1  | 342.742         | 1237.739        | 1229.730        | 1230.233        | 1229.226        | G124 |
| K1  | 406.730         | 1159.525        | 1151.516        | 1152.019        | 1151.012        | K123 |
| V1  | 456.324         | 1145.181        | 1137.171        | 1137.675        | 1136.667        | V122 |
| T1  | 506.840         | 1095.646        | <b>1087.637</b> | <b>1088.141</b> | <b>1087.133</b> | T121 |
| T10 | 563.390         | 1045.123        | <b>1037.113</b> | <b>1037.617</b> | <b>1036.609</b> | T120 |
| A11 | 588.908         | 988.561         | 980.551         | 981.054         | 980.047         | A119 |
| G12 | 662.937         | 933.065         | <b>945.053</b>  | <b>945.557</b>  | <b>944.549</b>  | G118 |
| G13 | 691.448         | 889.033         | 881.023         | 881.527         | 880.519         | G117 |
| G14 | 719.959         | 860.522         | 852.513         | 853.017         | 852.009         | G116 |
| V15 | 769.493         | 832.011         | 824.002         | 824.506         | 823.498         | V115 |
| L16 | 826.035         | 782.477         | 774.468         | 774.972         | 773.964         | L114 |
| T17 | 874.584         | 728.935         | 721.926         | 722.430         | 721.422         | T113 |
| N18 | 931.583         | 677.400         | <b>669.399</b>  | <b>669.903</b>  | 668.895         | N112 |
| I19 | 988.125         | 620.867         | 612.858         | 613.362         | 612.354         | I111 |
| Q10 | <b>1052.154</b> | 563.845         | 555.836         | 556.340         | 555.332         | Q110 |
| A21 | <b>1087.673</b> | 499.816         | 491.807         | 492.310         | 491.303         | A10  |
| V22 | 1137.207        | 484.297         | 476.288         | 476.792         | 475.784         | V10  |
| L23 | 1193.769        | 414.763         | 406.754         | 407.258         | 406.250         | L17  |
| L24 | 1250.291        | 358.221         | 350.212         | 350.716         | 349.708         | L16  |
| P25 | <b>1298.817</b> | 301.679         | 293.670         | 294.174         | 293.166         | P15  |
| K26 | <b>1362.805</b> | 253.153         | 245.143         | 245.647         | 244.639         | K14  |
| K27 | <b>1426.912</b> | 189.105         | 181.096         | 181.600         | 180.592         | K13  |
| T28 | <b>1477.436</b> | 125.058         | 117.048         | 117.552         | 116.544         | T12  |
| E29 | <b>1541.958</b> | 74.534          | 66.524          | 67.028          | 66.021          | E11  |

# sp | Q6GSS7 | H2A2A\_MOUSE

LNK<sup>Dimethyl</sup><sub>28.03</sub> LLGKVTIAQGGVLPNIQAVLLPKKTE

- ▶ fragmentation table for charge state 3+
- ▶ specType=etd
- ▶ score=32.11
- ▶ F104902.dat
- ▶ query=q2675\_p1
- ▶ precursor=771.724630
- ▶ chargePrecursor=4
- ▶ itol=0.8

| AA |    | c              | y        | z+1            | z+2            | z              | AA  |
|----|----|----------------|----------|----------------|----------------|----------------|-----|
| L  | 1  | 44.377         | 1028.035 | 1021.295       | 0.672          | 1022.960       | L29 |
| N  | 2  | 82.302         | 990.941  | <b>985.601</b> | <b>985.937</b> | <b>985.265</b> | N28 |
| K  | 3  | 134.434        | 952.926  | 947.587        | 947.923        | 947.251        | K27 |
| L  | 4  | 172.239        | 890.804  | 895.543        | 895.881        | 895.209        | L26 |
| L  | 5  | 209.823        | 863.190  | 857.850        | 858.186        | 857.514        | L25 |
| G  | 6  | 228.830        | 825.495  | 820.155        | 820.491        | 819.819        | G24 |
| K  | 7  | 271.529        | 806.488  | 801.148        | 801.484        | 800.812        | K23 |
| V  | 8  | 304.552        | 763.790  | 758.450        | 758.786        | 758.114        | V22 |
| Y  | 9  | 338.234        | 730.767  | 725.427        | 725.763        | 725.091        | Y21 |
| V  | 10 | 375.929        | 697.084  | 691.745        | 692.081        | 691.409        | V20 |
| A  | 11 | 399.608        | 659.389  | 654.050        | 654.386        | 653.714        | A19 |
| Q  | 12 | 442.294        | 636.710  | 630.371        | 630.707        | 630.035        | Q18 |
| Q  | 13 | 461.301        | 593.024  | 587.685        | 588.021        | 587.349        | Q17 |
| G  | 14 | 480.308        | 574.017  | 568.678        | 569.015        | 568.343        | G16 |
| V  | 15 | 513.331        | 555.010  | 549.670        | 550.006        | 549.334        | V15 |
| L  | 16 | 551.026        | 521.987  | 516.648        | 516.984        | 516.312        | L14 |
| P  | 17 | 583.377        | 484.292  | 478.953        | 479.289        | 478.617        | P13 |
| N  | 18 | 621.391        | 451.942  | 446.602        | 446.938        | 446.266        | N12 |
| T  | 19 | 659.086        | 413.927  | 408.588        | 408.924        | 408.252        | T11 |
| Q  | 20 | 701.772        | 376.231  | 370.893        | 371.229        | 370.557        | Q10 |
| A  | 21 | 725.451        | 333.546  | 328.207        | 328.543        | 327.871        | A9  |
| V  | 22 | 758.474        | 309.807  | 304.468        | 304.804        | 304.132        | V8  |
| L  | 23 | 796.168        | 276.844  | 271.505        | 271.841        | 271.169        | L7  |
| L  | 24 | 833.863        | 239.150  | 233.810        | 234.146        | 233.474        | L6  |
| P  | 25 | 866.214        | 201.455  | 196.116        | 196.451        | 195.780        | P5  |
| K  | 26 | 898.612        | 169.104  | 163.765        | 164.101        | 163.429        | K4  |
| K  | 27 | <b>951.611</b> | 126.406  | 121.068        | 121.402        | 120.730        | K3  |
| T  | 28 | <b>985.293</b> | 83.709   | 78.369         | 78.704         | 78.032         | T2  |
| E  | 29 | 1028.307       | 50.025   | 44.685         | 45.021         | 44.349         | E1  |



# sp | Q8BFU2 | H2A3\_MOUSE

[Acetyl]SGRGKQGGKARAKAKSRSSRAGLQFPVGRVHLLRKGNYSE

- ▶ fragmentation table for charge state 1+
- ▶ specType=etd
- ▶ score=42.65
- ▶ F104902.dat
- ▶ query=q3279\_p1
- ▶ precursor=749.760680
- ▶ chargePrecursor=6
- ▶ itol=0.8

| AA | c  | y               | z+1             | z+2             | z               | AA       |       |
|----|----|-----------------|-----------------|-----------------|-----------------|----------|-------|
| S  | 1  | 147.076         | 4463.595        | 4437.486        | 0.000           | 4476.470 | S[41] |
| G  | 2  | 204.068         | 4364.462        | 4348.444        | 0.000           | 4347.436 | G[40] |
| R  | 3  | <b>360.199</b>  | 4307.441        | 4291.422        | 4.992.430       | 4290.414 | R[39] |
| G  | 4  | <b>417.220</b>  | 4151.340        | 4135.321        | 4136.320        | 4134.313 | G[38] |
| K  | 5  | <b>545.315</b>  | 4094.318        | 4078.300        | 4079.307        | 4077.292 | K[37] |
| Q  | 6  | <b>673.374</b>  | 3996.273        | 3979.255        | 3951.272        | 3949.197 | Q[36] |
| G  | 7  | <b>730.395</b>  | 3838.165        | 3822.146        | 3823.154        | 3821.135 | G[35] |
| G  | 8  | 787.417         | 3781.143        | 3765.125        | 3766.132        | 3764.111 | G[34] |
| K  | 9  | <b>915.512</b>  | 3724.122        | 3708.103        | 3709.111        | 3707.099 | K[33] |
| A  | 10 | <b>986.549</b>  | 3596.027        | 3580.008        | 3581.016        | 3579.000 | A[32] |
| R  | 11 | 1142.650        | 3524.960        | 3508.971        | 3509.979        | 3507.963 | R[31] |
| A  | 12 | <b>1213.687</b> | 3388.899        | 3372.879        | 3353.878        | 3351.863 | A[30] |
| R  | 13 | 1381.782        | 3297.852        | 3281.833        | 3282.841        | 3280.825 | R[29] |
| A  | 14 | 1412.819        | 3169.757        | 3153.738        | 3154.746        | 3152.730 | A[28] |
| K  | 15 | <b>1540.914</b> | 3098.719        | 3082.701        | 3083.709        | 3081.693 | K[27] |
| S  | 16 | 1627.946        | 2976.625        | 2954.606        | 2955.614        | 2953.598 | S[26] |
| R  | 17 | 1784.047        | 2883.562        | 2867.574        | 2868.582        | 2866.566 | R[25] |
| S  | 18 | 1871.078        | 2727.491        | 2711.473        | 2712.480        | 2710.465 | S[24] |
| S  | 19 | 1958.111        | 2640.459        | 2624.441        | 2625.448        | 2623.433 | S[23] |
| R  | 20 | 2114.213        | 2553.427        | 2537.409        | 2538.416        | 2536.401 | R[22] |
| A  | 21 | 2185.250        | 2397.326        | 2381.307        | 2382.315        | 2380.300 | A[21] |
| G  | 22 | 2242.271        | 2336.289        | 2310.270        | 2311.278        | 2309.263 | G[20] |
| L  | 23 | 2355.308        | 2209.208        | 2203.249        | 2204.257        | 2202.241 | L[19] |
| Q  | 24 | 2483.414        | 2156.184        | 2140.165        | 2141.173        | 2139.157 | Q[18] |
| F  | 25 | 2630.482        | 2028.125        | 2012.106        | 2013.114        | 2011.099 | F[17] |
| P  | 26 | 2727.535        | 1881.057        | 1865.038        | 1866.046        | 1864.030 | P[16] |
| V  | 27 | 2826.603        | 1784.004        | 1767.985        | 1768.993        | 1766.977 | V[15] |
| G  | 28 | 2883.625        | 1684.935        | 1668.917        | 1669.924        | 1667.909 | G[14] |
| R  | 29 | 3030.726        | 1627.914        | 1611.895        | <b>1612.903</b> | 1610.887 | R[13] |
| V  | 30 | 3138.784        | 1471.811        | 1455.794        | 1456.802        | 1454.786 | V[12] |
| H  | 31 | 3275.853        | 1372.744        | 1356.726        | 1357.734        | 1355.718 | H[11] |
| R  | 32 | 3431.954        | <b>1235.685</b> | <b>1219.667</b> | <b>1220.675</b> | 1218.659 | R[10] |
| L  | 33 | 3545.038        | <b>1079.584</b> | 1063.566        | 1064.573        | 1062.558 | L[9]  |
| L  | 34 | 3658.123        | 966.500         | 950.482         | 951.489         | 949.474  | L[8]  |
| I  | 35 | 3814.224        | 853.418         | 837.399         | <b>838.405</b>  | 836.389  | I[7]  |
| K  | 36 | 3942.319        | 697.315         | 681.296         | 682.304         | 680.289  | K[6]  |
| G  | 37 | 3999.340        | 549.220         | 533.201         | 534.209         | 532.194  | G[5]  |
| N  | 38 | 4113.383        | 512.109         | 496.180         | 497.188         | 495.172  | N[4]  |
| V  | 39 | 4276.446        | 398.150         | 382.131         | 383.145         | 381.129  | V[3]  |
| S  | 40 | 4363.478        | 235.062         | 219.074         | 220.082         | 218.066  | S[2]  |
| E  | 41 | 4492.521        | 148.000         | 132.042         | 133.050         | 131.034  | E[1]  |



# sp | Q8BFU2 | H2A3\_MOUSE

[Acetyl]SGRGKQGGKARAKAKSRSSRAGLQFPVGRVHRLLRKGNYS

- ▶ fragmentation table for charge state 2+
- ▶ specType=etd
- ▶ score=42.65
- ▶ F104902.dat
- ▶ query=q3279\_p1
- ▶ precursor=749.760680
- ▶ chargePrecursor=6
- ▶ itol=0.8

| AA | c  | y               | #s1             | #s2             | z               | AA              |       |
|----|----|-----------------|-----------------|-----------------|-----------------|-----------------|-------|
| S  | 1  | 74.062          | 2247.256        | 2229.267        | 0.804           | 2238.747        | S[41] |
| G  | 2  | 102.553         | 2182.735        | 2174.726        | 0.504           | 2174.222        | G[40] |
| R  | 3  | 180.603         | 2154.224        | 2146.215        | 2146.719        | 2145.711        | R[39] |
| G  | 4  | 209.114         | 2076.174        | 2068.164        | 2068.666        | 2067.660        | G[38] |
| K  | 5  | 273.161         | 2047.663        | 2039.653        | 2040.157        | 2039.150        | K[37] |
| G  | 6  | 337.194         | 1983.615        | <b>1975.606</b> | <b>1976.110</b> | 1975.102        | G[36] |
| G  | 7  | 365.704         | 1919.566        | <b>1911.577</b> | <b>1912.081</b> | 1911.073        | G[35] |
| G  | 8  | 394.212         | 1861.075        | 1853.066        | <b>1883.570</b> | 1882.562        | G[34] |
| K  | 9  | 458.260         | 1863.565        | <b>1854.555</b> | 1855.059        | <b>1854.051</b> | K[33] |
| A  | 10 | 493.778         | 1798.517        | 1790.508        | 1791.012        | 1790.004        | A[32] |
| R  | 11 | 577.829         | 1762.999        | 1754.989        | 1755.493        | 1754.485        | R[31] |
| A  | 12 | <b>607.397</b>  | 1684.948        | 1676.939        | 1677.443        | 1676.435        | A[30] |
| K  | 13 | <b>671.395</b>  | 1649.420        | <b>1641.420</b> | <b>1641.924</b> | 1640.916        | K[29] |
| A  | 14 | <b>706.913</b>  | 1585.363        | <b>1577.373</b> | <b>1577.876</b> | <b>1576.869</b> | A[28] |
| K  | 15 | <b>770.961</b>  | 1549.861        | <b>1541.854</b> | 1542.358        | <b>1541.350</b> | K[27] |
| S  | 16 | <b>814.477</b>  | 1485.816        | 1477.807        | 1478.310        | 1477.303        | S[26] |
| R  | 17 | 872.527         | <b>1442.300</b> | 1434.291        | <b>1434.794</b> | 1433.786        | R[25] |
| S  | 18 | <b>936.043</b>  | 1364.249        | 1356.240        | 1356.744        | 1355.736        | S[24] |
| S  | 19 | <b>979.559</b>  | 1320.733        | 1312.724        | 1313.228        | 1312.220        | S[23] |
| R  | 20 | <b>1057.610</b> | 1277.217        | <b>1269.208</b> | <b>1269.712</b> | <b>1268.704</b> | R[22] |
| A  | 21 | <b>1093.128</b> | 1199.161        | 1191.157        | 1191.661        | 1190.653        | A[21] |
| G  | 22 | 1171.639        | 1163.648        | <b>1155.639</b> | <b>1156.143</b> | 1155.135        | G[20] |
| L  | 23 | <b>1178.181</b> | 1126.131        | 1118.127        | 1118.631        | 1117.623        | L[19] |
| G  | 24 | <b>1242.211</b> | <b>1078.595</b> | <b>1070.586</b> | <b>1071.090</b> | <b>1070.082</b> | G[18] |
| F  | 25 | 1315.745        | 1014.566        | <b>1006.557</b> | <b>1007.061</b> | 1006.053        | F[17] |
| F  | 26 | 1364.271        | 941.033         | 933.023         | 933.526         | 932.519         | F[16] |
| V  | 27 | 1413.805        | 892.506         | 884.496         | 885.000         | 883.992         | V[15] |
| G  | 28 | <b>1442.316</b> | 842.971         | <b>834.962</b>  | <b>835.466</b>  | 834.458         | G[14] |
| R  | 29 | 1503.889        | <b>814.461</b>  | <b>806.451</b>  | <b>806.955</b>  | <b>805.947</b>  | R[13] |
| V  | 30 | 1569.901        | 736.410         | 728.401         | 728.905         | 727.897         | V[12] |
| H  | 31 | 1636.430        | 688.876         | <b>678.866</b>  | <b>679.370</b>  | <b>678.363</b>  | H[11] |
| R  | 32 | 1716.461        | 618.346         | 610.337         | 610.841         | 609.833         | R[10] |
| L  | 33 | 1773.023        | 540.296         | 532.286         | 532.790         | 531.783         | L[9]  |
| L  | 34 | 1829.968        | 469.754         | 461.743         | 462.246         | 461.239         | L[8]  |
| R  | 35 | 1907.615        | 427.212         | 419.202         | 419.706         | 418.699         | R[7]  |
| K  | 36 | 1971.663        | 349.161         | 341.152         | 341.656         | 340.648         | K[6]  |
| G  | 37 | 2050.174        | 285.114         | 277.104         | 277.608         | 276.600         | G[5]  |
| N  | 38 | 2057.195        | 256.603         | 248.594         | 249.098         | 248.090         | N[4]  |
| V  | 39 | 2138.227        | 189.562         | 181.572         | 182.076         | 181.068         | V[3]  |
| S  | 40 | 2192.813        | 118.056         | 110.061         | 110.564         | 109.557         | S[2]  |
| E  | 41 | 2246.764        | 74.534          | 66.524          | 67.028          | 66.021          | E[1]  |

# sp | Q8BFU2 | H2A3\_MOUSE

[Acetyl]SGRGKQGQGGKARAKAKSRSSRAGLQFPVGRVHRLLRKGNYS

- ▶ fragmentation table for charge state 3+
- ▶ specType=etd
- ▶ score=42.65
- ▶ F104902.dat
- ▶ query=q3279\_p1
- ▶ precursor=749.760680
- ▶ chargePrecursor=6
- ▶ itol=0.8

| AA | c  | y               | #s1             | #s2             | #s              | AA              |       |
|----|----|-----------------|-----------------|-----------------|-----------------|-----------------|-------|
| S  | 1  | 489.697         | <b>1498.507</b> | <b>1493.167</b> | 0.872           | <b>1492.831</b> | S[41] |
| G  | 2  | 66.704          | 1455.452        | <b>1450.153</b> | 0.672           | 1449.817        | G[40] |
| R  | 3  | 1307.180        | 1436.485        | <b>1431.146</b> | <b>1431.482</b> | <b>1430.810</b> | R[39] |
| G  | 4  | 139.745         | 1384.451        | <b>1379.112</b> | <b>1379.448</b> | <b>1378.776</b> | G[38] |
| K  | 5  | 182.443         | 1365.444        | <b>1360.105</b> | <b>1360.441</b> | 1359.769        | K[37] |
| G  | 6  | 225.130         | 1342.746        | <b>1337.406</b> | <b>1337.742</b> | <b>1337.070</b> | G[36] |
| G  | 7  | 244.137         | 1326.060        | <b>1321.720</b> | <b>1321.056</b> | <b>1320.384</b> | G[35] |
| G  | 8  | 263.144         | 1301.051        | <b>1295.713</b> | <b>1296.049</b> | <b>1295.377</b> | G[34] |
| K  | 9  | 305.642         | <b>1242.045</b> | <b>1236.706</b> | <b>1237.042</b> | <b>1236.370</b> | K[33] |
| A  | 10 | 329.521         | 1199.347        | <b>1194.008</b> | <b>1194.344</b> | 1193.672        | A[32] |
| R  | 11 | 381.555         | <b>1175.668</b> | 1170.329        | <b>1170.664</b> | 1169.993        | R[31] |
| A  | 12 | 405.234         | <b>1123.534</b> | 1118.204        | 1117.539        | 1116.868        | A[30] |
| R  | 13 | 447.932         | 1059.955        | <b>1094.616</b> | <b>1094.952</b> | 1094.281        | R[29] |
| A  | 14 | 491.611         | 1057.257        | 1051.917        | 1052.253        | 1051.582        | A[28] |
| K  | 15 | 514.310         | 1033.578        | 1028.238        | 1028.574        | 1027.902        | K[27] |
| S  | 16 | 543.320         | 990.880         | <b>985.540</b>  | <b>985.876</b>  | <b>985.204</b>  | S[26] |
| R  | 17 | 585.254         | <b>961.869</b>  | <b>956.529</b>  | <b>956.865</b>  | <b>956.193</b>  | R[25] |
| S  | 18 | 624.365         | 959.939         | 954.488         | 954.824         | 954.152         | S[24] |
| S  | 19 | 653.375         | 980.825         | <b>875.485</b>  | <b>875.821</b>  | 875.149         | S[23] |
| R  | 20 | 705.409         | 851.614         | <b>846.474</b>  | <b>846.810</b>  | 846.138         | R[22] |
| A  | 21 | 729.088         | 799.780         | 794.441         | 794.777         | 794.105         | A[21] |
| G  | 22 | 748.095         | 776.101         | <b>770.762</b>  | <b>771.098</b>  | 770.426         | G[20] |
| L  | 23 | <b>785.790</b>  | 759.094         | 753.754         | 754.090         | 753.418         | L[19] |
| Q  | 24 | <b>828.476</b>  | 733.366         | 728.026         | 728.362         | 727.690         | Q[18] |
| F  | 25 | 877.409         | 676.713         | <b>671.374</b>  | <b>671.710</b>  | <b>671.038</b>  | F[17] |
| F  | 26 | 909.850         | 627.600         | 622.261         | 622.597         | 621.925         | F[16] |
| V  | 27 | <b>942.873</b>  | 595.139         | 590.000         | 590.336         | 589.664         | V[15] |
| G  | 28 | <b>961.860</b>  | 562.317         | 556.977         | 557.313         | 556.641         | G[14] |
| R  | 29 | 1013.814        | 464.309         | 457.970         | 458.306         | 457.634         | R[13] |
| V  | 30 | <b>1046.936</b> | 490.275         | 485.936         | 486.272         | 485.600         | V[12] |
| H  | 31 | <b>1092.623</b> | 458.253         | 452.913         | 453.249         | 452.577         | H[11] |
| R  | 32 | <b>1144.656</b> | 412.967         | 407.227         | 407.563         | 406.891         | R[10] |
| L  | 33 | 1182.351        | <b>360.533</b>  | 355.193         | 355.529         | 354.857         | L[9]  |
| L  | 34 | <b>1220.046</b> | 322.874         | 317.489         | 317.825         | 317.153         | L[8]  |
| R  | 35 | 1272.974        | 285.144         | 279.804         | 280.140         | 279.468         | R[7]  |
| K  | 36 | 1314.778        | 233.110         | 227.770         | 228.106         | 227.434         | K[6]  |
| G  | 37 | 1333.785        | 190.412         | 185.072         | 185.408         | 184.736         | G[5]  |
| N  | 38 | 1371.799        | 171.404         | 166.065         | 166.401         | 165.729         | N[4]  |
| V  | 39 | 1426.154        | 133.390         | 128.051         | 128.387         | 127.715         | V[3]  |
| S  | 40 | 1455.164        | 99.136          | 93.796          | 94.132          | 93.460          | S[2]  |
| E  | 41 | 1498.178        | 50.025          | 44.685          | 45.021          | 44.349          | E[1]  |

# sp | Q8BFU2 | H2A3\_MOUSE

[Acetyl]SGRGKQGGKARAKAKSRSSRAGLQFPVGRVHRLLRKGNYS

- ▶ fragmentation table for charge state 4+
- ▶ specType=etd
- ▶ score=42.65
- ▶ F104902.dat
- ▶ query=q3279\_p1
- ▶ precursor=749.760680
- ▶ chargePrecursor=6
- ▶ itol=0.8

| AA |    | c               | y               | #s1             | #s2             | #               | AA    |
|----|----|-----------------|-----------------|-----------------|-----------------|-----------------|-------|
| S  | 1  | 37.505          | <b>1124.132</b> | <b>1120.127</b> | 0.705           | <b>1110.875</b> | S[4]  |
| G  | 2  | 51.780          | <b>1091.871</b> | 1087.866        | 0.795           | 1087.614        | G[6]  |
| R  | 3  | 90.805          | 1077.610        | <b>1073.611</b> | <b>1073.863</b> | 1073.350        | R[9]  |
| G  | 4  | 109.061         | 1038.500        | <b>1034.566</b> | <b>1034.838</b> | 1034.134        | G[38] |
| K  | 5  | 137.084         | 1024.335        | <b>1020.330</b> | <b>1020.582</b> | <b>1020.078</b> | K[37] |
| G  | 6  | 169.059         | 992.311         | 987.307         | <b>988.559</b>  | 986.753         | G[36] |
| G  | 7  | 183.354         | 960.291         | <b>956.292</b>  | <b>956.544</b>  | <b>956.040</b>  | G[35] |
| G  | 8  | 197.610         | 948.041         | <b>942.037</b>  | <b>942.289</b>  | <b>941.785</b>  | G[34] |
| K  | 9  | 239.633         | 931.788         | 927.781         | 928.031         | 927.529         | K[33] |
| A  | 10 | 247.303         | <b>899.762</b>  | 895.757         | 896.009         | 895.500         | A[32] |
| R  | 11 | 286.418         | 882.003         | 877.998         | 878.250         | 877.740         | R[31] |
| A  | 12 | 304.177         | 862.918         | <b>858.973</b>  | <b>859.225</b>  | <b>858.721</b>  | A[30] |
| K  | 13 | 336.201         | 825.215         | 821.214         | 821.466         | 820.962         | K[29] |
| A  | 14 | 353.960         | 793.195         | 789.190         | 789.442         | 788.934         | A[28] |
| K  | 15 | 385.984         | 775.435         | <b>771.431</b>  | <b>771.683</b>  | <b>771.179</b>  | K[27] |
| S  | 16 | 407.742         | 743.412         | 739.407         | 739.659         | 739.153         | S[26] |
| R  | 17 | 446.767         | 721.954         | 717.949         | 718.201         | 717.693         | R[25] |
| S  | 18 | 488.526         | 692.626         | <b>678.624</b>  | <b>678.876</b>  | <b>678.372</b>  | S[24] |
| S  | 19 | 490.283         | 660.670         | 656.666         | 657.118         | 656.614         | S[23] |
| R  | 20 | 529.300         | 638.112         | 634.108         | 635.360         | 634.856         | R[22] |
| A  | 21 | 547.088         | 600.087         | 596.082         | 596.334         | 595.830         | A[21] |
| G  | 22 | 561.323         | 582.328         | 578.323         | 578.575         | 578.071         | G[20] |
| L  | 23 | 589.394         | 568.072         | 564.068         | 564.320         | 563.816         | L[19] |
| G  | 24 | 621.609         | 539.801         | 535.797         | 536.049         | 535.545         | G[18] |
| F  | 25 | 658.376         | 507.787         | 503.782         | 504.034         | 503.530         | F[17] |
| F  | 26 | 662.639         | 471.020         | 467.015         | 467.267         | 466.763         | F[16] |
| V  | 27 | <b>707.406</b>  | 446.756         | 442.752         | 443.004         | 442.500         | V[15] |
| G  | 28 | 721.662         | 421.989         | <b>417.985</b>  | 418.237         | <b>417.733</b>  | G[14] |
| R  | 29 | 790.687         | 389.734         | 385.729         | 385.981         | 385.477         | R[13] |
| V  | 30 | <b>785.454</b>  | 368.705         | 364.704         | 364.956         | 364.452         | V[12] |
| H  | 31 | <b>819.719</b>  | 343.942         | 339.937         | 340.189         | 339.685         | H[11] |
| R  | 32 | <b>858.744</b>  | 309.677         | 305.672         | 305.924         | 305.420         | R[10] |
| L  | 33 | 887.015         | 270.652         | 266.647         | 266.899         | 266.395         | L[9]  |
| L  | 34 | <b>915.286</b>  | 242.361         | 238.356         | 238.608         | 238.104         | L[8]  |
| R  | 35 | 924.311         | 214.110         | 210.105         | 210.357         | 209.853         | R[7]  |
| K  | 36 | <b>966.335</b>  | 175.084         | 171.080         | 171.332         | 170.828         | K[6]  |
| G  | 37 | <b>1000.590</b> | 143.061         | 139.056         | 139.308         | 138.804         | G[5]  |
| N  | 38 | <b>1029.101</b> | 128.805         | 124.800         | 125.052         | 124.548         | N[4]  |
| V  | 39 | <b>1069.867</b> | 100.294         | 96.289          | 96.542          | 96.038          | V[3]  |
| S  | 40 | <b>1091.625</b> | 98.529          | 94.524          | 94.776          | 94.272          | S[2]  |
| E  | 41 | <b>1123.886</b> | 97.771          | 93.766          | 94.018          | 93.514          | E[1]  |

# sp | Q8BFU2 | H2A3\_MOUSE

[Acetyl]SGRGKQGGKARAKAKSRSSRAGLQFPVGRVHLLRKGNYSE

- ▶ fragmentation table for charge state 5+
- ▶ specType=etd
- ▶ score=42.65
- ▶ F104902.dat
- ▶ query=q3279\_p1
- ▶ precursor=749.760680
- ▶ chargePrecursor=6
- ▶ itol=0.8

| AA | c  | y       | z+1     | z#2   | z       | AA |
|----|----|---------|---------|-------|---------|----|
| S  | 1  | 899.507 | 896.923 | 0.806 | 896.102 | S  |
| G  | 2  | 870.495 | 870.495 | 0.806 | 870.293 | G  |
| R  | 3  | 859.050 | 859.050 | 0.806 | 859.292 | R  |
| G  | 4  | 827.870 | 827.870 | 0.806 | 827.668 | G  |
| K  | 5  | 819.569 | 819.569 | 0.806 | 819.667 | K  |
| Q  | 6  | 790.847 | 790.847 | 0.806 | 790.645 | Q  |
| G  | 7  | 765.233 | 765.233 | 0.806 | 765.033 | G  |
| G  | 8  | 753.831 | 753.831 | 0.806 | 753.629 | G  |
| K  | 9  | 742.428 | 742.428 | 0.806 | 742.225 | K  |
| A  | 10 | 717.009 | 717.009 | 0.806 | 716.806 | A  |
| R  | 11 | 702.802 | 702.802 | 0.806 | 702.598 | R  |
| A  | 12 | 671.380 | 671.380 | 0.806 | 671.178 | A  |
| K  | 13 | 657.172 | 657.172 | 0.806 | 656.971 | K  |
| A  | 14 | 631.755 | 631.755 | 0.806 | 631.552 | A  |
| K  | 15 | 617.548 | 617.548 | 0.806 | 617.344 | K  |
| S  | 16 | 591.929 | 591.929 | 0.806 | 591.725 | S  |
| R  | 17 | 574.522 | 574.522 | 0.806 | 574.319 | R  |
| S  | 18 | 543.302 | 543.302 | 0.806 | 543.099 | S  |
| S  | 19 | 525.892 | 525.892 | 0.806 | 525.689 | S  |
| R  | 20 | 508.489 | 508.489 | 0.806 | 508.286 | R  |
| A  | 21 | 477.269 | 477.269 | 0.806 | 477.066 | A  |
| G  | 22 | 462.850 | 462.850 | 0.806 | 462.647 | G  |
| L  | 23 | 451.456 | 451.456 | 0.806 | 451.254 | L  |
| Q  | 24 | 429.040 | 429.040 | 0.806 | 428.837 | Q  |
| F  | 25 | 403.227 | 403.227 | 0.806 | 403.025 | F  |
| P  | 26 | 375.813 | 375.813 | 0.806 | 375.612 | P  |
| V  | 27 | 354.604 | 354.604 | 0.806 | 354.401 | V  |
| G  | 28 | 334.395 | 334.395 | 0.806 | 334.192 | G  |
| R  | 29 | 323.386 | 323.386 | 0.806 | 323.183 | R  |
| V  | 30 | 292.166 | 292.166 | 0.806 | 291.963 | V  |
| H  | 31 | 272.353 | 272.353 | 0.806 | 272.150 | H  |
| R  | 32 | 244.739 | 244.739 | 0.806 | 244.536 | R  |
| L  | 33 | 213.519 | 213.519 | 0.806 | 213.317 | L  |
| L  | 34 | 190.902 | 190.902 | 0.806 | 190.701 | L  |
| R  | 35 | 168.487 | 168.487 | 0.806 | 168.284 | R  |
| K  | 36 | 137.065 | 137.065 | 0.806 | 136.864 | K  |
| G  | 37 | 114.449 | 114.449 | 0.806 | 114.245 | G  |
| N  | 38 | 100.042 | 100.042 | 0.806 | 99.840  | N  |
| V  | 39 | 77.435  | 77.435  | 0.806 | 77.232  | V  |
| S  | 40 | 44.822  | 44.822  | 0.806 | 44.619  | S  |
| E  | 41 | 27.416  | 27.416  | 0.806 | 27.213  | E  |

# sp | Q8CGP5 | H2A1F\_MOUSE

[Acetyl]SGRGKQGGKARAKATRSSRAGLQFPVGRVHRLLRKGNYS

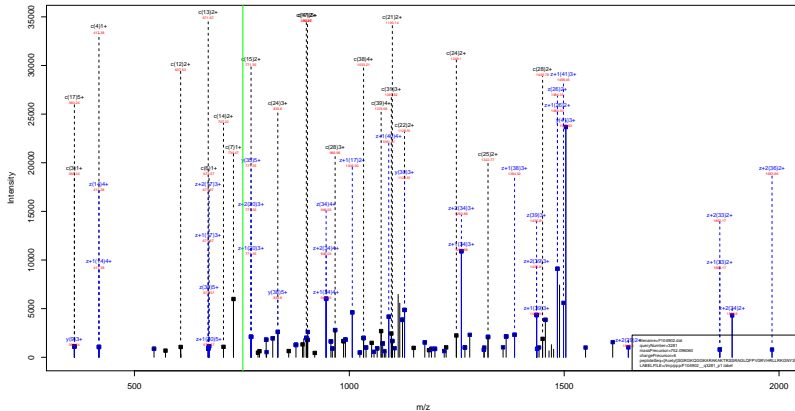

# sp | Q8CGP5 | H2A1F\_MOUSE

[Acetyl]SGRGKQGGKARAKAKTRSSRAGLQFPVGRVHLLRKGNYSE

- ▶ fragmentation table for charge state 1+
- ▶ specType=etd
- ▶ score=54.81
- ▶ F104902.dat
- ▶ query=q3281\_p1
- ▶ precursor=752.096060
- ▶ chargePrecursor=6
- ▶ itol=0.8

| AA | c  | y              | z+1            | z+2             | z               | AA       |       |
|----|----|----------------|----------------|-----------------|-----------------|----------|-------|
| S  | 1  | 147.076        | 4507.521       | 4491.502        | 0.000           | 4400.494 | S[41] |
| G  | 2  | 204.098        | 4378.478       | 4362.459        | 0.000           | 4361.451 | G[46] |
| R  | 3  | <b>360.199</b> | 4321.457       | 4305.438        | 4306.446        | 4304.430 | R[39] |
| C  | 4  | <b>417.220</b> | 4185.355       | 4148.337        | 4150.345        | 4148.329 | C[38] |
| K  | 5  | <b>545.315</b> | 4108.334       | 4092.315        | 4093.323        | 4091.307 | K[15] |
| Q  | 6  | <b>673.374</b> | 3980.239       | 3954.220        | 3955.228        | 3953.212 | Q[36] |
| G  | 7  | <b>730.395</b> | 3852.180       | 3836.162        | 3837.170        | 3835.154 | G[35] |
| G  | 8  | <b>787.417</b> | 3795.159       | 3779.140        | 3780.148        | 3778.132 | G[34] |
| K  | 9  | 915.512        | 3738.139       | 3722.119        | 3723.127        | 3721.111 | K[33] |
| A  | 10 | <b>985.549</b> | 3610.043       | 3594.024        | 3595.032        | 3593.016 | A[32] |
| R  | 11 | 1142.650       | 3539.955       | 3523.936        | 3524.944        | 3522.928 | R[31] |
| A  | 12 | 1213.667       | 3382.904       | 3366.885        | 3367.893        | 3365.877 | A[30] |
| K  | 13 | 1341.782       | 3311.867       | 3295.848        | 3296.856        | 3294.841 | K[29] |
| A  | 14 | 1412.819       | 3183.772       | 3167.754        | 3168.761        | 3166.746 | A[28] |
| K  | 15 | 1540.914       | 3112.735       | 3096.716        | 3097.724        | 3095.709 | K[27] |
| T  | 16 | 1641.962       | 2984.640       | 2968.621        | 2969.629        | 2967.614 | T[26] |
| K  | 17 | 1798.063       | 2883.592       | 2867.574        | 2868.582        | 2866.566 | K[25] |
| S  | 18 | 1885.095       | 2727.493       | 2711.473        | 2712.480        | 2710.465 | S[24] |
| S  | 19 | 1972.127       | 2648.459       | 2632.441        | 2633.448        | 2631.433 | S[23] |
| R  | 20 | 2128.228       | 2563.427       | 2547.409        | 2548.416        | 2546.401 | R[22] |
| A  | 21 | 2199.265       | 2397.326       | 2381.307        | 2382.315        | 2380.300 | A[21] |
| G  | 22 | 2256.287       | 2326.289       | 2310.270        | 2311.278        | 2309.263 | G[20] |
| L  | 23 | 2369.371       | 2269.268       | 2253.249        | 2254.257        | 2252.241 | L[19] |
| Q  | 24 | 2497.459       | 2126.184       | 2110.165        | 2111.173        | 2109.157 | Q[18] |
| F  | 25 | 2644.498       | 2028.125       | 2012.106        | 2013.114        | 2011.098 | F[17] |
| P  | 26 | 2741.551       | 1881.057       | 1865.038        | 1866.046        | 1864.030 | P[16] |
| V  | 27 | 2840.619       | 1784.004       | 1767.985        | 1768.993        | 1766.977 | V[15] |
| G  | 28 | 2897.641       | 1684.935       | 1668.917        | 1669.924        | 1667.909 | G[14] |
| R  | 29 | 3053.742       | 1627.914       | 1611.895        | <b>1612.903</b> | 1610.887 | R[13] |
| V  | 30 | 3152.810       | 1471.813       | <b>1455.794</b> | <b>1456.802</b> | 1454.786 | V[12] |
| I  | 31 | 3269.869       | 1372.744       | 1356.725        | <b>1357.734</b> | 1355.718 | I[11] |
| R  | 32 | 3445.970       | 1235.685       | 1219.667        | <b>1220.675</b> | 1218.659 | R[10] |
| L  | 33 | 3550.054       | 1079.584       | 1063.566        | <b>1064.573</b> | 1062.558 | L[9]  |
| L  | 34 | 3672.138       | <b>966.500</b> | 950.482         | 951.489         | 949.474  | L[8]  |
| R  | 35 | 3828.239       | 853.416        | 837.398         | 838.405         | 836.390  | R[7]  |
| K  | 36 | 3956.334       | 697.315        | 681.296         | 682.304         | 680.289  | K[6]  |
| C  | 37 | 4013.358       | 569.220        | 553.201         | 554.209         | 552.194  | C[5]  |
| N  | 38 | 4127.399       | 512.199        | 496.180         | 497.188         | 495.172  | N[4]  |
| V  | 39 | 4290.482       | 398.156        | 382.137         | 383.145         | 381.129  | V[3]  |
| S  | 40 | 4377.494       | 235.092        | 219.074         | 220.082         | 218.066  | S[2]  |
| E  | 41 | 4506.537       | 148.060        | 132.042         | 133.050         | 131.034  | E[1]  |

# sp | Q8CGP5 | H2A1F\_MOUSE

[Acetyl]SGRGKQGGKARAKAKTRSSRAGLQFPVGRVHRLLRKGNYS

- ▶ fragmentation table for charge state 2+
- ▶ specType=etd
- ▶ score=54.81
- ▶ F104902.dat
- ▶ query=q3281\_p1
- ▶ precursor=752.096060
- ▶ chargePrecursor=6
- ▶ itol=0.8

| AA | c  | y               | #s1             | #s2             | c               | AA              |       |
|----|----|-----------------|-----------------|-----------------|-----------------|-----------------|-------|
| S  | 1  | 74.062          | 2054.264        | 2266.255        | 0.804           | 2245.781        | S[41] |
| G  | 2  | 102.553         | 2189.743        | 2381.733        | 0.504           | 2181.220        | G[40] |
| R  | 3  | 180.603         | 2161.232        | 2153.233        | 2153.236        | 2152.710        | R[39] |
| G  | 4  | 209.114         | 2083.181        | 2075.172        | 2075.676        | 2074.660        | G[38] |
| K  | 5  | 273.181         | 2054.671        | 2046.661        | 2047.165        | 2046.157        | K[37] |
| G  | 6  | 337.194         | 1990.622        | 1982.614        | <b>1983.118</b> | 1982.110        | G[36] |
| G  | 7  | 385.193         | 1926.594        | 1918.584        |                 | 1918.080        | G[35] |
| G  | 8  | 394.212         | 1898.083        | 1890.074        | <b>1890.578</b> | 1889.570        | G[34] |
| K  | 9  | 458.260         | 1869.572        | <b>1861.563</b> | <b>1862.067</b> | 1861.059        | K[33] |
| A  | 10 | 493.778         | 1805.525        | 1797.516        | 1798.019        | 1797.012        | A[32] |
| R  | 11 | <b>571.829</b>  | 1770.008        | 1761.997        | 1762.501        | 1761.493        | R[31] |
| A  | 12 | <b>607.347</b>  | 1692.956        | 1684.946        | 1684.950        | 1683.944        | A[30] |
| R  | 13 | <b>671.395</b>  | 1656.437        | 1648.428        | <b>1648.932</b> | 1647.924        | R[29] |
| A  | 14 | <b>706.913</b>  | 1592.900        | 1584.890        | 1584.894        | 1583.876        | A[28] |
| K  | 15 | <b>770.961</b>  | 1556.871        | 1548.862        | <b>1549.366</b> | 1548.358        | K[27] |
| T  | 16 | <b>821.485</b>  | 1492.824        | <b>1484.814</b> | 1485.318        | <b>1484.310</b> | T[26] |
| R  | 17 | <b>899.535</b>  | 1452.292        | 1434.283        | 1434.784        | 1433.767        | R[25] |
| S  | 18 | <b>934.054</b>  | <b>1364.249</b> | 1356.240        | 1356.744        | 1355.736        | S[24] |
| S  | 19 | <b>986.567</b>  | 1320.713        | <b>1312.724</b> | <b>1313.228</b> | 1312.220        | S[23] |
| R  | 20 | <b>1064.618</b> | 1277.217        | <b>1269.208</b> | <b>1269.712</b> | <b>1268.704</b> | R[22] |
| A  | 21 | <b>1100.136</b> | <b>1199.167</b> | <b>1191.157</b> | <b>1191.661</b> | <b>1190.653</b> | A[21] |
| G  | 22 | <b>1126.647</b> | 1103.648        | 1105.639        | 1106.143        | 1105.135        | G[20] |
| L  | 23 | <b>1185.189</b> | 1138.137        | 1127.128        | 1127.632        | 1126.624        | L[19] |
| Q  | 24 | <b>1249.218</b> | 1078.595        | 1070.586        | 1071.090        | 1070.082        | Q[18] |
| F  | 25 | <b>1322.753</b> | 1014.566        | <b>1006.557</b> | <b>1007.061</b> | 1006.053        | F[17] |
| F  | 26 | 1371.279        | 941.033         | 933.023         | 933.526         | 932.519         | F[16] |
| V  | 27 | 1420.811        | 892.506         | 884.496         | 885.000         | 883.992         | V[15] |
| G  | 28 | <b>1449.324</b> | 842.971         | 834.962         | 835.466         | 834.458         | G[14] |
| R  | 29 | 1507.914        | 814.461         | <b>806.451</b>  | <b>806.955</b>  | <b>805.947</b>  | R[13] |
| V  | 30 | 1576.909        | 736.410         | 728.401         | 728.905         | 727.897         | V[12] |
| H  | 31 | 1645.438        | 688.876         | 678.866         | 679.370         | 678.363         | H[11] |
| R  | 32 | 1723.489        | 618.346         | 610.337         | 610.841         | 609.833         | R[10] |
| L  | 33 | 1780.031        | 540.296         | 532.286         | 532.790         | 531.783         | L[9]  |
| L  | 34 | 1838.573        | 489.794         | 479.784         | 479.288         | 478.281         | L[8]  |
| R  | 35 | 1914.623        | 427.232         | 419.222         | 419.726         | 418.719         | R[7]  |
| K  | 36 | 1978.671        | 349.181         | 341.172         | 341.676         | 340.668         | K[6]  |
| G  | 37 | 2067.181        | 285.114         | 277.104         | 277.608         | 276.600         | G[5]  |
| N  | 38 | 2094.203        | 256.603         | 248.594         | 249.098         | 248.090         | N[4]  |
| V  | 39 | 2145.736        | 199.562         | 191.552         | 192.056         | 191.048         | V[3]  |
| S  | 40 | 2189.261        | 118.056         | 110.046         | 110.549         | 109.541         | S[2]  |
| E  | 41 | 2253.772        | 74.534          | 66.524          | 67.028          | 66.021          | E[1]  |

# sp | Q8CGP5 | H2A1F\_MOUSE

[Acetyl]SGRGKQGGKARAKAKTRSSRAGLQFPVGRVHRLLRKGNYS

- ▶ fragmentation table for charge state 3+
- ▶ specType=etd
- ▶ score=54.81
- ▶ F104902.dat
- ▶ query=q3281\_p1
- ▶ precursor=752.096060
- ▶ chargePrecursor=6
- ▶ itol=0.8

| AA | c  | y               | #s1             | #s2             | z               | AA              |       |
|----|----|-----------------|-----------------|-----------------|-----------------|-----------------|-------|
| S  | 1  | 489.697         | <b>1503.178</b> | <b>1497.839</b> | 0.872           | 2497.567        | S[41] |
| G  | 2  | 86.704          | 1460.184        | 1454.875        | 0.872           | 1454.480        | G[40] |
| R  | 3  | 1307.788        | <b>1441.157</b> | <b>1435.817</b> | <b>1436.153</b> | <b>1435.482</b> | R[30] |
| G  | 4  | 139.745         | 1389.123        | <b>1383.784</b> | <b>1384.120</b> | 1383.448        | G[38] |
| K  | 5  | 182.443         | 1370.116        | <b>1364.777</b> | <b>1365.113</b> | <b>1364.441</b> | K[37] |
| G  | 6  | 225.130         | 1327.418        | <b>1322.078</b> | <b>1322.414</b> | 1321.742        | G[36] |
| G  | 7  | 244.137         | 1284.733        | 1279.393        | <b>1279.728</b> | 1279.056        | G[35] |
| G  | 8  | 263.144         | 1265.725        | <b>1260.385</b> | <b>1260.721</b> | 1260.049        | G[34] |
| K  | 9  | 305.642         | 1246.717        | 1241.378        | 1241.714        | 1241.042        | K[33] |
| A  | 10 | 329.521         | 1234.010        | <b>1198.679</b> | <b>1199.015</b> | 1198.344        | A[32] |
| R  | 11 | 381.555         | 1180.340        | <b>1175.000</b> | <b>1175.336</b> | 1174.664        | R[31] |
| A  | 12 | 489.294         | <b>1128.306</b> | <b>1122.967</b> | <b>1123.303</b> | 1122.631        | A[30] |
| R  | 13 | 447.932         | <b>1104.627</b> | 1099.285        | <b>1099.624</b> | 1098.952        | R[29] |
| A  | 14 | 491.811         | 1081.929        | 1056.589        | <b>1056.925</b> | 1056.253        | A[28] |
| K  | 15 | 514.310         | <b>1038.250</b> | <b>1032.910</b> | <b>1033.246</b> | <b>1032.574</b> | K[27] |
| T  | 16 | 547.602         | 995.552         | <b>990.212</b>  | <b>990.548</b>  | 989.870         | T[26] |
| R  | 17 | 606.626         | 981.869         | <b>956.529</b>  | <b>956.865</b>  | 956.193         | R[25] |
| S  | 18 | 629.017         | 959.835         | 944.495         | 944.831         | 944.160         | S[24] |
| S  | 19 | 658.047         | 938.025         | <b>875.485</b>  | <b>875.821</b>  | <b>875.149</b>  | S[23] |
| R  | 20 | 710.081         | 851.814         | 846.474         | 846.810         | 846.138         | R[22] |
| A  | 21 | 733.760         | 799.780         | 794.441         | 794.777         | 794.105         | A[21] |
| G  | 22 | 762.789         | 776.101         | <b>770.762</b>  | <b>771.098</b>  | 770.426         | G[20] |
| L  | 23 | <b>790.462</b>  | 759.094         | 753.754         | 754.090         | 753.418         | L[19] |
| Q  | 24 | <b>833.148</b>  | 733.366         | 724.000         | 724.336         | 723.722         | Q[18] |
| F  | 25 | 882.171         | 676.713         | <b>671.374</b>  | <b>671.710</b>  | <b>671.038</b>  | F[17] |
| F  | 26 | 914.552         | 627.600         | 622.261         | 622.597         | 622.015         | F[16] |
| V  | 27 | 947.545         | 595.139         | 590.000         | 590.336         | 589.664         | V[15] |
| G  | 28 | <b>966.552</b>  | 562.317         | 556.977         | 557.313         | 556.641         | G[14] |
| R  | 29 | 1103.594        | 443.309         | 437.970         | 438.306         | 437.634         | R[13] |
| V  | 30 | <b>1051.608</b> | 491.275         | 485.936         | 486.272         | 485.600         | V[12] |
| H  | 31 | <b>1097.294</b> | 458.253         | 452.913         | 453.249         | 452.577         | H[11] |
| R  | 32 | <b>1149.328</b> | 412.967         | 407.227         | 407.563         | 406.891         | R[10] |
| L  | 33 | 1187.023        | <b>360.533</b>  | 355.193         | 355.529         | 354.857         | L[9]  |
| L  | 34 | <b>1224.718</b> | 322.574         | 317.489         | 317.825         | 317.153         | L[8]  |
| R  | 35 | 1275.753        | 285.144         | 279.804         | 280.140         | 279.468         | R[7]  |
| K  | 36 | 1319.450        | 233.110         | 227.770         | 228.106         | 227.434         | K[6]  |
| G  | 37 | 1338.457        | 190.412         | 185.072         | 185.408         | 184.736         | G[5]  |
| N  | 38 | 1376.471        | 171.404         | 166.065         | 166.401         | 165.729         | N[4]  |
| V  | 39 | 1436.826        | 133.390         | 128.051         | 128.386         | 127.715         | V[3]  |
| S  | 40 | 1459.836        | 99.136          | 93.796          | 94.132          | 93.460          | S[2]  |
| E  | 41 | 1502.850        | 50.025          | 44.685          | 45.021          | 44.349          | E[1]  |



# sp | Q8CGP5 | H2A1F\_MOUSE

[Acetyl]SGRGKQGGKARAKAKTRSSRAGLQFPVGRVHRLLRKGNYS

- ▶ fragmentation table for charge state 4+
- ▶ specType=etd
- ▶ score=54.81
- ▶ F104902.dat
- ▶ query=q3281\_p1
- ▶ precursor=752.096060
- ▶ chargePrecursor=6
- ▶ itol=0.8

| AA    | c               | y               | #=1             | #=2             | #               | AA    |
|-------|-----------------|-----------------|-----------------|-----------------|-----------------|-------|
| S[1]  | 37.505          | 1127.830        | <b>1123.631</b> | 0.705           | <b>1123.370</b> | S[41] |
| G[2]  | 51.780          | 1095.975        | <b>1091.370</b> | 0.795           | <b>1091.118</b> | G[40] |
| R[3]  | 90.805          | <b>1081.120</b> | <b>1077.115</b> | <b>1077.367</b> | <b>1076.863</b> | R[30] |
| G[4]  | 109.001         | 1042.094        | 1038.090        | <b>1038.342</b> | 1037.830        | G[38] |
| K[5]  | 137.084         | 1027.839        | <b>1023.834</b> | <b>1024.086</b> | 1023.587        | K[37] |
| G[6]  | 169.059         | 995.815         | <b>991.811</b>  | <b>992.062</b>  | <b>991.559</b>  | G[36] |
| G[7]  | 193.354         | 963.803         | <b>959.796</b>  | <b>960.048</b>  | 959.544         | G[35] |
| G[8]  | 197.610         | 949.545         | <b>945.541</b>  | <b>945.792</b>  | <b>945.289</b>  | G[34] |
| K[9]  | 239.633         | 935.290         | 931.285         | 931.537         | 931.033         | K[33] |
| A[10] | 247.303         | <b>903.266</b>  | <b>899.261</b>  | <b>899.513</b>  | 899.009         | A[32] |
| R[11] | 286.419         | 895.507         | 891.502         | 891.754         | 891.250         | R[31] |
| A[12] | 304.177         | 868.482         | 864.477         | 864.729         | 864.225         | A[30] |
| K[13] | 336.201         | 828.722         | 824.718         | 824.970         | 824.466         | K[29] |
| A[14] | 353.980         | 796.699         | 792.694         | 792.946         | 792.442         | A[28] |
| K[15] | 385.904         | 778.939         | 774.935         | 775.187         | 774.683         | K[27] |
| T[16] | 411.246         | 746.915         | 742.911         | 743.163         | 742.659         | T[26] |
| R[17] | 459.274         | 721.954         | 717.949         | 718.201         | 717.697         | R[25] |
| S[18] | 472.609         | 692.626         | 688.621         | 688.873         | 688.369         | S[24] |
| S[19] | 493.787         | 660.870         | 656.866         | 657.118         | 656.614         | S[23] |
| R[20] | 532.813         | 639.112         | 635.108         | 635.360         | 634.856         | R[22] |
| A[21] | 550.572         | 600.087         | 596.082         | 596.334         | 595.830         | A[21] |
| G[22] | 564.827         | 582.328         | 578.323         | 578.575         | 578.071         | G[20] |
| L[23] | 593.098         | 568.072         | 564.068         | 564.320         | 563.816         | L[19] |
| Q[24] | 625.113         | 539.801         | 535.797         | 536.049         | 535.545         | Q[18] |
| F[25] | 661.880         | 507.787         | 503.782         | 504.034         | 503.530         | F[17] |
| F[26] | 698.143         | 471.020         | 467.015         | 467.267         | 466.763         | F[16] |
| V[27] | 710.910         | 446.756         | 442.752         | 443.004         | 442.500         | V[15] |
| G[28] | 725.169         | 421.989         | <b>417.985</b>  | 418.237         | <b>417.733</b>  | G[14] |
| R[29] | 764.181         | 389.734         | 385.729         | 385.981         | 385.477         | R[13] |
| V[30] | 788.958         | 368.709         | 364.704         | 364.956         | 364.452         | V[12] |
| H[31] | 823.223         | 343.942         | 339.937         | 340.189         | 339.685         | H[11] |
| R[32] | 862.248         | 309.677         | 305.672         | 305.924         | 305.420         | R[10] |
| L[33] | <b>890.519</b>  | 270.652         | 266.647         | 266.899         | 266.395         | L[9]  |
| L[34] | <b>918.790</b>  | 242.381         | 238.376         | 238.628         | 238.124         | L[8]  |
| R[35] | <b>957.815</b>  | 214.110         | 210.105         | 210.357         | 209.853         | R[7]  |
| K[36] | 989.839         | 175.084         | 171.079         | 171.331         | 170.827         | K[6]  |
| G[37] | 1004.094        | 143.061         | 139.056         | 139.308         | 138.804         | G[5]  |
| N[38] | <b>1032.605</b> | 128.805         | 124.800         | 125.052         | 124.548         | N[4]  |
| Y[39] | <b>1073.371</b> | 100.294         | 96.289          | 96.541          | 96.037          | Y[3]  |
| S[40] | 1095.419        | 98.529          | 94.524          | 94.776          | 94.272          | S[2]  |
| E[41] | 1127.590        | 97.771          | 93.766          | 94.018          | 93.514          | E[1]  |

# sp | Q8CGP5 | H2A1F\_MOUSE

[Acetyl]SGRGKQGGKARAKAKTRSSRAGLQFPVGRVHRLLRKGNYS

- ▶ fragmentation table for charge state 5+
- ▶ specType=etd
- ▶ score=54.81
- ▶ F104902.dat
- ▶ query=q3281\_p1
- ▶ precursor=752.096060
- ▶ chargePrecursor=6
- ▶ itol=0.8

| AA    | c              | y              | z+1            | z+2     | z              | AA    |
|-------|----------------|----------------|----------------|---------|----------------|-------|
| S[1]  | 30.221         | <b>902.310</b> | 899.106        | 0.806   | 898.905        | S[41] |
| G[2]  | 41.625         | <b>876.501</b> | 873.290        | 0.806   | 873.096        | G[40] |
| R[3]  | 72.846         | 865.097        | 861.893        | 862.095 | 861.692        | R[39] |
| G[4]  | 84.250         | <b>833.877</b> | 830.673        | 830.875 | 830.472        | G[38] |
| K[5]  | 109.869        | <b>822.473</b> | 819.269        | 819.470 | 819.067        | K[37] |
| Q[6]  | 135.481        | 795.854        | 793.650        | 793.851 | 793.448        | Q[36] |
| G[7]  | 146.885        | <b>771.242</b> | 768.038        | 768.240 | 767.837        | G[35] |
| G[8]  | 158.289        | 759.835        | 756.634        | 756.835 | 756.432        | G[34] |
| K[9]  | 183.908        | 748.431        | 745.230        | 745.431 | 745.028        | K[33] |
| A[10] | 198.116        | 722.814        | 719.611        | 719.812 | 719.409        | A[32] |
| R[11] | 229.136        | 708.007        | 705.403        | 705.605 | 705.202        | R[31] |
| A[12] | 243.543        | 677.387        | <b>674.183</b> | 674.385 | <b>673.981</b> | A[30] |
| K[13] | 269.162        | 663.179        | 659.976        | 660.177 | 659.774        | K[29] |
| A[14] | 283.370        | 637.560        | 634.357        | 634.558 | 634.155        | A[28] |
| K[15] | 308.989        | 623.353        | 620.149        | 620.351 | 619.948        | K[27] |
| T[16] | 329.198        | 597.734        | 594.530        | 594.732 | 594.329        | T[26] |
| R[17] | <b>360.418</b> | 577.524        | 574.321        | 574.522 | 574.119        | R[25] |
| S[18] | 377.825        | <b>546.304</b> | 543.100        | 543.302 | 542.899        | S[24] |
| S[19] | 399.231        | 528.696        | 525.694        | 525.896 | 525.492        | S[23] |
| R[20] | 426.451        | 511.491        | 508.288        | 508.489 | 508.086        | R[22] |
| A[21] | 440.659        | 480.271        | 477.067        | 477.269 | 476.866        | A[21] |
| G[22] | 452.063        | 466.064        | 462.860        | 463.061 | 462.658        | G[20] |
| L[23] | 474.680        | 454.659        | 451.456        | 451.657 | 451.254        | L[19] |
| Q[24] | 500.292        | 432.043        | 428.839        | 429.040 | 428.637        | Q[18] |
| F[25] | 529.705        | 406.431        | 403.227        | 403.429 | 403.026        | F[17] |
| P[26] | 549.116        | 377.017        | 373.813        | 374.015 | 373.612        | P[16] |
| V[27] | 568.930        | 357.607        | 354.403        | 354.604 | 354.201        | V[15] |
| G[28] | 589.334        | 337.793        | 334.589        | 334.791 | 334.388        | G[14] |
| K[29] | 611.354        | 326.389        | 323.185        | 323.386 | 322.983        | K[13] |
| V[30] | 631.368        | 295.165        | 291.965        | 292.166 | 291.763        | V[12] |
| H[31] | 658.780        | 275.355        | 272.151        | 272.353 | 271.949        | H[11] |
| R[32] | 690.000        | 247.943        | 244.739        | 244.941 | 244.538        | R[10] |
| L[33] | 712.617        | 216.723        | 213.519        | 213.721 | 213.317        | L[9]  |
| L[34] | 735.233        | 194.106        | 190.902        | 191.104 | 190.701        | L[8]  |
| R[35] | 766.454        | 171.489        | 168.285        | 168.487 | 168.084        | R[7]  |
| K[36] | 792.073        | 140.269        | 137.065        | 137.267 | 136.864        | K[6]  |
| G[37] | 803.477        | 114.650        | 111.446        | 111.648 | 111.245        | G[5]  |
| N[38] | 829.296        | 103.245        | 100.042        | 100.243 | 99.840         | N[4]  |
| V[39] | <b>854.898</b> | 80.431         | 77.233         | 77.435  | 77.032         | V[3]  |
| S[40] | <b>876.305</b> | 47.824         | 44.621         | 44.822  | 44.419         | S[2]  |
| E[41] | <b>902.113</b> | 30.418         | 27.214         | 27.416  | 27.013         | E[1]  |

# sp | P62806 | H4\_MOUSE

[Acetyl]SGRGKGGKGLGKGGAKRHRK <sup>Dimethyl</sup> VLRD  
28.03

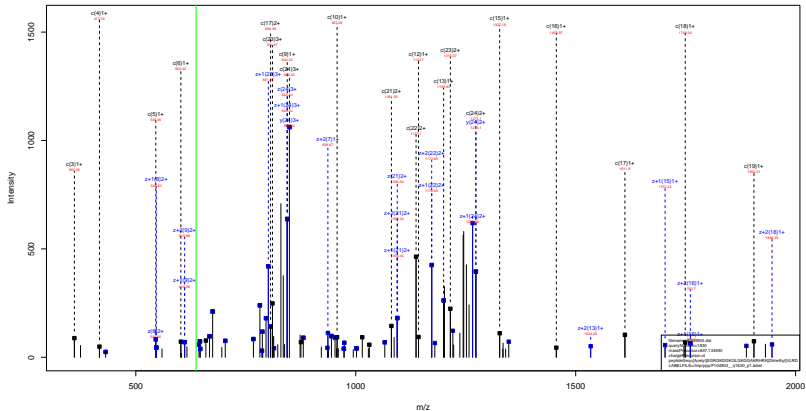

# sp | P62806 | H4\_MOUSE

[Acetyl]SGRGKGGKGLGKGGAKRHRK<sup>Dimethyl</sup>VLRD<sub>28.03</sub>

- ▶ fragmentation table for charge state 1+
- ▶ specType=etd
- ▶ score=103.88
- ▶ F104903.dat
- ▶ query=q1830\_p1
- ▶ precursor=637.134590
- ▶ chargePrecursor=4
- ▶ itol=0.8

| AA    | c               | y              | z+1             | z+2             | z        | AA    |
|-------|-----------------|----------------|-----------------|-----------------|----------|-------|
| S[1]  | 147.676         | 2545.502       | 2529.463        | 0.000           | 2528.478 | S[24] |
| G[2]  | 204.098         | 2416.460       | 2400.441        | 0.000           | 2399.433 | G[23] |
| R[3]  | <b>350.199</b>  | 2359.438       | 2343.419        | 2344.427        | 2342.412 | R[22] |
| G[4]  | <b>417.220</b>  | 2203.337       | 2187.318        | 2188.326        | 2186.310 | G[21] |
| K[5]  | <b>545.315</b>  | 2146.316       | 2130.297        | 2131.305        | 2129.289 | K[20] |
| G[6]  | <b>602.337</b>  | 2018.221       | 2002.202        | 2003.210        | 2001.194 | G[19] |
| G[7]  | <b>659.358</b>  | 1961.199       | 1945.180        | <b>1946.188</b> | 1944.173 | G[18] |
| K[8]  | <b>787.453</b>  | 1904.178       | <b>1888.159</b> | 1889.167        | 1887.151 | K[17] |
| G[9]  | <b>844.475</b>  | 1776.063       | <b>1760.064</b> | <b>1761.072</b> | 1759.056 | G[16] |
| L[10] | <b>927.559</b>  | 1719.061       | <b>1703.043</b> | 1704.050        | 1702.035 | L[15] |
| G[11] | <b>1014.580</b> | 1605.977       | 1589.958        | 1590.966        | 1588.951 | G[14] |
| K[12] | <b>1142.675</b> | 1548.956       | 1532.937        | <b>1533.945</b> | 1531.929 | K[13] |
| G[13] | <b>1199.697</b> | 1420.861       | 1404.842        | 1405.850        | 1403.834 | G[12] |
| G[14] | 1256.718        | 1363.839       | <b>1347.821</b> | 1348.828        | 1346.813 | G[11] |
| A[15] | <b>1327.795</b> | 1306.818       | 1290.799        | 1291.807        | 1289.791 | A[10] |
| R[16] | <b>1455.850</b> | 1238.781       | 1222.762        | <b>1220.770</b> | 1218.754 | R[9]  |
| R[17] | <b>1611.951</b> | 1107.685       | 1091.667        | 1092.675        | 1090.659 | R[8]  |
| H[18] | <b>1749.010</b> | 951.585        | <b>935.566</b>  | <b>936.574</b>  | 934.558  | H[7]  |
| R[19] | <b>1905.111</b> | <b>814.526</b> | 798.507         | 799.515         | 797.499  | R[6]  |
| K[20] | 2061.238        | 658.425        | 642.406         | <b>643.414</b>  | 641.398  | K[5]  |
| V[21] | 2180.306        | 502.298        | 486.280         | 487.287         | 485.272  | V[4]  |
| L[22] | 2273.390        | 403.230        | 387.211         | 388.219         | 386.203  | L[3]  |
| R[23] | 2429.491        | 290.146        | 274.127         | 275.135         | 273.119  | R[2]  |
| D[24] | 2544.518        | 134.045        | 118.026         | 119.034         | 117.018  | D[1]  |

# sp | P62806 | H4\_MOUSE

[Acetyl]SGRGKGGKGLGKGGAKRHRK<sup>Dimethyl</sup>VLRD<sub>28.03</sub>

- ▶ fragmentation table for charge state 2+
- ▶ specType=etd
- ▶ score=103.88
- ▶ F104903.dat
- ▶ query=q1830\_p1
- ▶ precursor=637.134590
- ▶ chargePrecursor=4
- ▶ itol=0.8

| AA    | c               | y               | z+1             | z+2             | z               | AA    |
|-------|-----------------|-----------------|-----------------|-----------------|-----------------|-------|
| S[1]  | 74.042          | <b>1273.255</b> | <b>1265.245</b> | 0.504           | 1264.741        | S[24] |
| G[2]  | 102.553         | 1208.733        | 1200.724        | 0.504           | <b>1200.220</b> | G[23] |
| R[3]  | 180.603         | <b>1180.223</b> | <b>1172.213</b> | <b>1172.717</b> | 1171.709        | R[22] |
| G[4]  | 259.114         | 1102.772        | <b>1094.163</b> | <b>1094.667</b> | <b>1093.659</b> | G[21] |
| K[5]  | 273.163         | 1073.661        | <b>1065.652</b> | <b>1066.156</b> | 1065.148        | K[20] |
| G[6]  | 301.672         | 1009.614        | <b>1001.605</b> | <b>1002.108</b> | <b>1001.101</b> | G[19] |
| G[7]  | 330.183         | 981.103         | <b>973.094</b>  | <b>973.598</b>  | <b>972.590</b>  | G[18] |
| K[8]  | 394.230         | <b>952.592</b>  | <b>944.583</b>  | <b>945.087</b>  | <b>944.079</b>  | K[17] |
| G[9]  | 422.741         | 888.545         | <b>880.536</b>  | <b>881.040</b>  | <b>880.032</b>  | G[16] |
| L[10] | 479.293         | 860.036         | 852.027         | 852.529         | 851.521         | L[15] |
| G[11] | 507.794         | 803.482         | <b>795.483</b>  | <b>795.987</b>  | 794.979         | G[14] |
| K[12] | 571.841         | 774.982         | <b>766.972</b>  | <b>767.476</b>  | 766.468         | K[13] |
| G[13] | 600.352         | 710.934         | <b>702.925</b>  | <b>703.429</b>  | 702.421         | G[12] |
| G[14] | 638.863         | 682.423         | <b>674.414</b>  | <b>674.918</b>  | <b>673.910</b>  | G[11] |
| A[15] | 684.381         | 653.913         | <b>645.903</b>  | <b>646.407</b>  | <b>645.399</b>  | A[10] |
| R[16] | 728.430         | 618.394         | <b>610.385</b>  | <b>610.889</b>  | 609.881         | R[9]  |
| R[17] | <b>806.479</b>  | 554.347         | <b>546.337</b>  | <b>546.841</b>  | <b>545.833</b>  | R[8]  |
| H[18] | <b>875.009</b>  | 476.290         | 468.281         | 468.781         | 467.783         | H[7]  |
| R[19] | <b>953.059</b>  | 407.767         | 399.757         | 400.261         | 399.253         | R[6]  |
| K[20] | <b>1031.122</b> | 339.716         | 331.707         | 332.211         | 331.203         | K[5]  |
| V[21] | <b>1080.667</b> | 251.663         | 243.653         | 244.157         | 243.149         | V[4]  |
| L[22] | <b>1137.199</b> | 202.110         | 194.100         | 194.613         | 193.605         | L[3]  |
| R[23] | <b>1215.249</b> | 145.577         | 137.567         | 138.071         | 137.063         | R[2]  |
| D[24] | <b>1272.763</b> | 67.526          | 59.517          | 60.021          | 59.013          | D[1]  |

# sp | P62806 | H4\_MOUSE

[Acetyl]SGRGKGGKGLGKGGAKRHRK<sup>Dimethyl</sup>VLRD<sub>28.03</sub>

- ▶ fragmentation table for charge state 3+
- ▶ specType=etd
- ▶ score=103.88
- ▶ F104903.dat
- ▶ query=q1830\_p1
- ▶ precursor=637.134590
- ▶ chargePrecursor=4
- ▶ itol=0.8

| AA    | c              | y              | z+1            | z+2            | z              | AA    |
|-------|----------------|----------------|----------------|----------------|----------------|-------|
| S[1]  | 49.697         | <b>849.172</b> | <b>843.833</b> | 0.672          | <b>843.497</b> | S[24] |
| G[2]  | 58.704         | <b>806.158</b> | <b>800.818</b> | 0.672          | <b>800.483</b> | G[23] |
| R[3]  | 150.738        | <b>787.151</b> | <b>781.811</b> | <b>782.147</b> | <b>781.475</b> | R[22] |
| G[4]  | 139.745        | 735.117        | 729.778        | 730.114        | 729.442        | G[21] |
| K[5]  | 182.443        | 716.110        | 710.770        | 711.106        | 710.435        | K[20] |
| G[6]  | 201.450        | 673.412        | <b>668.072</b> | <b>668.408</b> | <b>667.736</b> | G[19] |
| G[7]  | 220.458        | 654.405        | 649.065        | 649.401        | 648.729        | G[18] |
| K[8]  | 263.156        | 635.397        | 630.058        | 630.394        | 629.722        | K[17] |
| G[9]  | 282.163        | 592.699        | 587.360        | 587.696        | 587.024        | G[16] |
| L[10] | 319.658        | 573.692        | 568.352        | 568.688        | 568.016        | L[15] |
| G[11] | 338.665        | 535.997        | 530.658        | 530.994        | 530.322        | G[14] |
| K[12] | 381.563        | 516.990        | 511.651        | 511.986        | 511.315        | K[13] |
| G[13] | 400.570        | 474.292        | 468.952        | 469.288        | 468.616        | G[12] |
| G[14] | 419.578        | 455.285        | 449.945        | 450.281        | 449.609        | G[11] |
| A[15] | 443.257        | 436.277        | <b>430.938</b> | <b>431.274</b> | 430.602        | A[10] |
| K[16] | 485.955        | 412.598        | 407.259        | 407.595        | 406.923        | K[9]  |
| R[17] | 537.989        | 369.900        | 364.561        | 364.896        | 364.225        | R[8]  |
| H[18] | 583.675        | 317.866        | 312.527        | 312.863        | 312.191        | H[7]  |
| R[19] | 635.709        | 272.180        | 266.841        | 267.176        | 266.505        | R[6]  |
| K[20] | 687.751        | 220.140        | 214.801        | 215.143        | 214.471        | K[5]  |
| V[21] | 720.774        | 168.104        | 162.765        | 163.101        | 162.429        | V[4]  |
| L[22] | 758.468        | 135.082        | 129.742        | 130.078        | 129.406        | L[3]  |
| R[23] | <b>810.502</b> | 97.387         | 92.047         | 92.383         | 91.711         | R[2]  |
| D[24] | <b>848.844</b> | 45.353         | 40.014         | 40.349         | 39.678         | D[1]  |



# sp | P62806 | H4\_MOUSE

[Acetyl]SGRGKGGKGLGKGGAKRHRK<sup>Dimethyl</sup>VLRD<sub>28.03</sub>

- ▶ fragmentation table for charge state 1+
- ▶ specType=etd
- ▶ score=57.75
- ▶ F104903.dat
- ▶ query=q1831\_p1
- ▶ precursor=849.178390
- ▶ chargePrecursor=3
- ▶ itol=0.8

| AA    | c               | y              | z+1             | z+2             | z        | AA    |
|-------|-----------------|----------------|-----------------|-----------------|----------|-------|
| S[1]  | 347.676         | 2545.502       | 2529.463        | 0.000           | 2528.476 | S[24] |
| G[2]  | 204.098         | 2416.460       | 2400.441        | 0.000           | 2399.433 | G[23] |
| R[3]  | <b>368.199</b>  | 2389.438       | 2343.419        | 2344.427        | 2342.412 | R[22] |
| G[4]  | <b>417.220</b>  | 2203.337       | 2187.318        | 2188.326        | 2186.310 | G[21] |
| K[5]  | <b>545.315</b>  | 2146.316       | 2130.297        | 2131.305        | 2129.289 | K[20] |
| G[6]  | <b>602.337</b>  | 2018.221       | 2002.200        | 2003.210        | 2001.194 | G[19] |
| G[7]  | <b>659.358</b>  | 1961.199       | <b>1945.180</b> | 1946.188        | 1944.173 | G[18] |
| K[8]  | <b>787.453</b>  | 1904.178       | <b>1889.159</b> | <b>1889.167</b> | 1887.151 | K[17] |
| G[9]  | 864.475         | 1776.063       | <b>1760.064</b> | 1761.072        | 1759.056 | G[16] |
| L[10] | 957.559         | 1719.061       | <b>1703.043</b> | 1704.050        | 1702.035 | L[15] |
| G[11] | <b>1014.580</b> | 1605.977       | <b>1589.958</b> | 1590.966        | 1588.951 | G[14] |
| K[12] | 1142.675        | 1548.956       | <b>1532.937</b> | 1533.945        | 1531.929 | K[13] |
| G[13] | <b>1199.697</b> | 1420.861       | 1404.840        | <b>1405.850</b> | 1403.834 | G[12] |
| G[14] | <b>1256.718</b> | 1363.839       | <b>1347.821</b> | <b>1348.828</b> | 1346.813 | G[11] |
| A[15] | 1427.755        | 1306.818       | <b>1290.799</b> | <b>1291.807</b> | 1289.791 | A[10] |
| R[16] | 1469.850        | 1238.781       | <b>1219.762</b> | <b>1220.770</b> | 1218.754 | R[9]  |
| R[17] | 1611.951        | 1107.685       | 1091.667        | 1092.675        | 1090.659 | R[8]  |
| H[18] | 1749.010        | 951.585        | 935.566         | 936.574         | 934.558  | H[7]  |
| R[19] | 1905.111        | 814.526        | <b>798.507</b>  | <b>799.515</b>  | 797.499  | R[6]  |
| K[20] | 2061.238        | <b>658.425</b> | 642.405         | 643.414         | 641.398  | K[5]  |
| V[21] | 2180.306        | 502.298        | 486.280         | 487.287         | 485.272  | V[4]  |
| L[22] | 2273.390        | 403.230        | 387.211         | 388.219         | 386.203  | L[3]  |
| R[23] | 2429.491        | 280.146        | 274.127         | 275.135         | 273.119  | R[2]  |
| D[24] | 2544.518        | 134.045        | 118.026         | 119.034         | 117.018  | D[1]  |



# sp | P62806 | H4\_MOUSE

[Acetyl]SGRGKGGKGLGKGGAKRHRK<sup>Dimethyl</sup>VLRD<sub>28.03</sub>

- ▶ fragmentation table for charge state 2+
- ▶ specType=etd
- ▶ score=57.75
- ▶ F104903.dat
- ▶ query=q1831\_p1
- ▶ precursor=849.178390
- ▶ chargePrecursor=3
- ▶ itol=0.8

| AA    | c               | y               | z+1             | z+2             | z               | AA    |
|-------|-----------------|-----------------|-----------------|-----------------|-----------------|-------|
| S[1]  | 74.042          | <b>1273.255</b> | <b>1265.245</b> | 0.504           | <b>1264.741</b> | S[24] |
| G[2]  | 102.553         | 1208.733        | <b>1200.724</b> | 0.504           | <b>1200.220</b> | G[23] |
| K[3]  | 180.603         | 1180.223        | <b>1172.213</b> | <b>1172.717</b> | <b>1171.709</b> | K[22] |
| G[4]  | 259.114         | 1102.172        | 1094.163        | 1094.667        | 1093.659        | G[21] |
| K[5]  | 273.153         | 1073.661        | 1065.652        | 1066.156        | 1065.148        | K[20] |
| G[6]  | 301.672         | 1009.614        | 1001.605        | 1002.109        | 1001.101        | G[19] |
| G[7]  | 330.183         | 981.103         | 973.094         | 973.598         | 972.590         | G[18] |
| K[8]  | 394.210         | 952.592         | 944.583         | 945.087         | 944.079         | K[17] |
| G[9]  | 422.741         | 898.545         | 890.536         | 891.040         | 890.032         | G[16] |
| L[10] | 479.263         | 860.036         | 852.027         | 852.529         | 851.521         | L[15] |
| G[11] | 507.794         | 803.492         | 795.483         | 795.987         | 794.979         | G[14] |
| K[12] | 571.841         | 774.982         | 766.972         | 767.476         | 766.468         | K[13] |
| G[13] | 600.352         | 710.934         | 702.925         | 703.429         | 702.421         | G[12] |
| G[14] | 628.863         | 682.423         | 674.414         | 674.918         | 673.910         | G[11] |
| A[15] | 684.384         | 653.913         | 645.903         | 646.407         | 645.399         | A[10] |
| R[16] | 728.432         | 618.394         | 610.385         | 610.889         | 609.881         | R[9]  |
| R[17] | 806.470         | 554.347         | 546.337         | 546.841         | <b>545.833</b>  | R[6]  |
| H[18] | 875.009         | 476.290         | 468.281         | 468.784         | 467.776         | H[7]  |
| R[19] | 953.059         | 407.767         | 399.757         | 400.261         | 399.253         | R[6]  |
| K[20] | 1031.122        | 339.716         | 331.707         | 332.211         | 331.203         | K[5]  |
| V[21] | 1080.669        | 251.663         | 243.653         | 244.157         | 243.149         | V[4]  |
| L[22] | <b>1137.199</b> | 202.119         | 194.109         | 194.613         | 193.605         | L[3]  |
| R[23] | <b>1215.249</b> | 145.577         | 137.567         | 138.071         | 137.063         | R[2]  |
| D[24] | <b>1272.763</b> | 67.526          | 59.517          | 60.021          | 59.013          | D[1]  |



# sp | P62806 | H4\_MOUSE

[Acetyl]SGRGKGGKGLGKGGAKRHRK<sup>Acetyl</sup>VLRD<sub>42.01</sub>

- ▶ fragmentation table for charge state 1+
- ▶ specType=etd
- ▶ score=62.39
- ▶ F104903.dat
- ▶ query=q1854\_p1
- ▶ precursor=512.706080
- ▶ chargePrecursor=5
- ▶ itol=0.8

| AA | c  | y               | z+1            | z+2             | z               | AA       |       |
|----|----|-----------------|----------------|-----------------|-----------------|----------|-------|
| S  | 1  | 147.676         | 2509.481       | 2543.463        | 0.000           | 2542.455 | S[24] |
| G  | 2  | 204.098         | 2430.439       | 2414.420        | 0.000           | 2413.412 | G[23] |
| R  | 3  | <b>368.199</b>  | 2373.417       | 2367.399        | 2358.407        | 2366.391 | R[22] |
| G  | 4  | <b>417.230</b>  | 2217.336       | 2201.288        | 2202.308        | 2200.290 | G[21] |
| K  | 5  | <b>545.315</b>  | 2160.295       | 2144.276        | 2145.284        | 2143.268 | K[20] |
| G  | 6  | <b>602.337</b>  | 2032.200       | 2016.181        | 2017.189        | 2015.173 | G[19] |
| G  | 7  | <b>659.358</b>  | 1975.178       | 1959.160        | 1960.168        | 1958.152 | G[18] |
| K  | 8  | <b>787.453</b>  | 1918.157       | <b>1902.138</b> | 1903.146        | 1901.130 | K[17] |
| G  | 9  | 814.875         | 1790.062       | 1774.043        | 1775.051        | 1773.035 | G[16] |
| L  | 10 | <b>957.559</b>  | 1733.041       | 1717.022        | 1718.030        | 1716.014 | L[15] |
| G  | 11 | <b>1014.580</b> | 1619.956       | <b>1603.938</b> | 1604.946        | 1602.930 | G[14] |
| K  | 12 | 1142.675        | 1562.935       | 1546.916        | 1547.924        | 1545.908 | K[13] |
| G  | 13 | <b>1199.697</b> | 1434.840       | 1418.821        | <b>1419.829</b> | 1417.813 | G[12] |
| G  | 14 | 1256.718        | 1377.819       | 1361.800        | 1362.808        | 1360.792 | G[11] |
| A  | 15 | <b>1327.795</b> | 1320.797       | 1304.778        | <b>1305.786</b> | 1303.771 | A[10] |
| R  | 16 | 1459.950        | 1249.766       | 1233.747        | <b>1234.749</b> | 1232.733 | R[9]  |
| R  | 17 | 1611.951        | 1122.665       | <b>1105.646</b> | 1106.654        | 1104.638 | R[8]  |
| H  | 18 | <b>1749.010</b> | <b>965.564</b> | 949.545         | <b>950.553</b>  | 948.537  | H[7]  |
| R  | 19 | 1905.111        | 838.505        | 812.486         | 813.494         | 811.478  | R[6]  |
| K  | 20 | 2075.217        | <b>672.404</b> | <b>656.385</b>  | <b>657.393</b>  | 655.377  | K[5]  |
| V  | 21 | 2174.285        | 502.298        | <b>486.280</b>  | 487.287         | 485.272  | V[4]  |
| L  | 22 | 2287.389        | 403.230        | <b>387.211</b>  | 388.219         | 386.203  | L[3]  |
| R  | 23 | 2443.471        | 280.146        | 274.127         | 275.135         | 273.119  | R[2]  |
| D  | 24 | 2558.497        | 134.045        | 118.026         | 119.034         | 117.018  | D[1]  |

# sp | P62806 | H4\_MOUSE

[Acetyl]SGRGKGGKGLGKGGAKRHRK<sup>Acetyl</sup>VLRD  
42.01

- ▶ fragmentation table for charge state 2+
- ▶ specType=etd
- ▶ score=62.39
- ▶ F104903.dat
- ▶ query=q1854\_p1
- ▶ precursor=512.706080
- ▶ chargePrecursor=5
- ▶ itol=0.8

| AA   | c               | y               | z+1             | z+2             | z               | AA   |
|------|-----------------|-----------------|-----------------|-----------------|-----------------|------|
| S 1  | 74.642          | 1080.244        | <b>1272.235</b> | 0.504           | <b>1271.731</b> | S 24 |
| G 2  | 102.553         | 1215.723        | <b>1207.714</b> | 0.504           | 1207.210        | G 23 |
| R 3  | 180.603         | <b>1187.212</b> | 1170.263        | <b>1179.707</b> | 1179.699        | R 22 |
| G 4  | 259.114         | 1309.162        | <b>1101.152</b> | <b>1101.556</b> | 1100.999        | G 21 |
| K 5  | 273.163         | 1080.651        | <b>1072.642</b> | <b>1073.146</b> | <b>1072.138</b> | K 20 |
| G 6  | <b>301.672</b>  | 1016.604        | <b>1008.594</b> | <b>1009.098</b> | <b>1008.090</b> | G 19 |
| G 7  | 330.163         | 868.093         | <b>980.083</b>  | <b>980.587</b>  | <b>979.580</b>  | G 18 |
| K 8  | 394.210         | <b>959.582</b>  | 951.573         | 952.077         | <b>951.069</b>  | K 17 |
| G 9  | <b>422.741</b>  | 895.535         | <b>887.525</b>  | <b>888.029</b>  | 887.021         | G 16 |
| L 10 | <b>479.263</b>  | 867.024         | 860.015         | 860.519         | 859.511         | L 15 |
| G 11 | 507.794         | <b>810.482</b>  | <b>802.473</b>  | <b>802.976</b>  | <b>801.969</b>  | G 14 |
| K 12 | <b>571.841</b>  | <b>781.971</b>  | <b>773.962</b>  | <b>774.466</b>  | 773.459         | K 13 |
| G 13 | <b>600.352</b>  | 717.924         | <b>709.914</b>  | <b>710.418</b>  | <b>709.410</b>  | G 12 |
| G 14 | 628.863         | 699.413         | <b>681.404</b>  | <b>681.907</b>  | 680.900         | G 11 |
| A 15 | 694.361         | 660.902         | <b>652.893</b>  | <b>653.397</b>  | <b>652.389</b>  | A 10 |
| R 16 | <b>728.429</b>  | 625.384         | <b>617.374</b>  | <b>617.878</b>  | 616.871         | R 9  |
| R 17 | <b>806.479</b>  | 561.336         | <b>553.327</b>  | <b>553.831</b>  | <b>552.823</b>  | R 8  |
| H 18 | <b>875.009</b>  | 483.289         | <b>475.276</b>  | <b>475.780</b>  | <b>474.772</b>  | H 7  |
| R 19 | <b>953.059</b>  | 414.750         | <b>406.747</b>  | <b>407.251</b>  | <b>406.243</b>  | R 6  |
| K 20 | <b>1038.112</b> | 336.706         | 328.695         | 329.200         | 328.192         | K 5  |
| V 21 | <b>1087.646</b> | 252.653         | 243.643         | 244.147         | 243.140         | V 4  |
| L 22 | 1144.188        | 202.119         | 194.109         | 194.613         | 193.605         | L 3  |
| R 23 | <b>1222.239</b> | 145.577         | 137.567         | 138.071         | 137.063         | R 2  |
| D 24 | 1279.752        | 67.526          | 59.517          | 60.021          | 59.013          | D 1  |

# sp | P62806 | H4\_MOUSE

[Acetyl]SGRGKGGKGLGKGGAKRHRK<sup>Acetyl</sup>VLRD<sub>42.01</sub>

- ▶ fragmentation table for charge state 3+
- ▶ specType=etd
- ▶ score=62.39
- ▶ F104903.dat
- ▶ query=q1854\_p1
- ▶ precursor=512.706080
- ▶ chargePrecursor=5
- ▶ itol=0.8

| AA    | c              | y              | z+1            | z+2            | z              | AA    |
|-------|----------------|----------------|----------------|----------------|----------------|-------|
| S[1]  | 49.697         | <b>853.832</b> | <b>848.492</b> | 0.672          | <b>848.156</b> | S[24] |
| G[2]  | 58.704         | <b>810.818</b> | <b>805.478</b> | 0.672          | <b>805.142</b> | G[23] |
| R[3]  | 150.738        | <b>791.811</b> | <b>786.471</b> | <b>786.807</b> | 786.135        | R[22] |
| G[4]  | 139.745        | 739.777        | <b>734.437</b> | <b>734.773</b> | <b>734.101</b> | G[21] |
| K[5]  | 182.443        | 720.770        | <b>715.430</b> | <b>715.766</b> | <b>715.094</b> | K[20] |
| G[6]  | 201.450        | 678.071        | <b>672.732</b> | <b>673.068</b> | <b>672.396</b> | G[19] |
| G[7]  | 220.458        | <b>659.064</b> | <b>653.725</b> | <b>654.061</b> | <b>653.389</b> | G[18] |
| K[8]  | 263.156        | <b>640.057</b> | 634.718        | 635.054        | 634.382        | K[17] |
| G[9]  | 282.163        | <b>597.359</b> | <b>592.019</b> | <b>592.355</b> | <b>591.683</b> | G[16] |
| L[10] | 319.858        | 578.352        | <b>573.012</b> | <b>573.348</b> | <b>572.676</b> | L[15] |
| G[11] | 338.865        | <b>540.657</b> | <b>535.317</b> | <b>535.653</b> | <b>534.981</b> | G[14] |
| K[12] | 381.563        | <b>521.650</b> | 516.310        | 516.646        | 515.974        | K[13] |
| G[13] | <b>400.570</b> | <b>478.952</b> | 473.612        | 473.948        | 473.276        | G[12] |
| G[14] | 419.578        | 459.944        | 454.605        | <b>454.941</b> | 454.269        | G[11] |
| A[15] | 443.257        | 440.937        | 435.598        | 435.934        | 435.262        | A[10] |
| K[16] | <b>485.955</b> | <b>417.258</b> | 411.919        | 412.255        | 411.583        | K[9]  |
| R[17] | <b>537.989</b> | 374.560        | 369.220        | 369.556        | 368.884        | R[8]  |
| H[18] | <b>583.675</b> | 322.526        | 317.187        | 317.523        | 316.851        | H[7]  |
| R[19] | <b>635.709</b> | 276.940        | 271.599        | 271.936        | 271.264        | R[6]  |
| K[20] | 692.410        | 224.806        | 219.467        | 219.803        | 219.131        | K[5]  |
| V[21] | <b>725.433</b> | 168.104        | 162.765        | 163.101        | 162.429        | V[4]  |
| L[22] | <b>763.128</b> | 135.082        | 129.742        | 130.078        | 129.406        | L[3]  |
| R[23] | <b>815.162</b> | 97.387         | 92.047         | 92.383         | 91.711         | R[2]  |
| D[24] | <b>853.504</b> | 45.353         | 40.014         | 40.349         | 39.678         | D[1]  |

# sp | P62806 | H4\_MOUSE

[Acetyl]SGRGKGGKGLGKGGAKRHRK<sup>Acetyl</sup>VLRD<sub>42.01</sub>

- ▶ fragmentation table for charge state 4+
- ▶ specType=etd
- ▶ score=62.39
- ▶ F104903.dat
- ▶ query=q1854.p1
- ▶ precursor=512.706080
- ▶ chargePrecursor=5
- ▶ itol=0.8

| AA    | c              | y              | z+1            | z+2            | z              | AA    |
|-------|----------------|----------------|----------------|----------------|----------------|-------|
| S[1]  | 37.525         | <b>640.626</b> | <b>636.621</b> | 0.755          | <b>636.369</b> | S[24] |
| G[2]  | 51.780         | 508.365        | <b>604.360</b> | 0.755          | <b>604.109</b> | G[23] |
| R[3]  | 90.805         | 594.110        | <b>590.105</b> | <b>590.357</b> | <b>589.853</b> | R[22] |
| G[4]  | 105.061        | 555.085        | 551.080        | 551.332        | 550.828        | G[21] |
| K[5]  | 137.084        | <b>540.829</b> | 536.824        | 537.076        | 536.573        | K[20] |
| G[6]  | 151.340        | 508.805        | 504.801        | 505.053        | 504.549        | G[19] |
| G[7]  | 165.595        | 494.550        | 490.545        | 490.797        | 490.293        | G[18] |
| K[8]  | 197.619        | <b>480.295</b> | 476.290        | 476.542        | <b>476.038</b> | K[17] |
| G[9]  | 211.874        | 446.271        | 442.266        | 442.518        | 442.014        | G[16] |
| L[10] | 280.148        | 434.016        | 430.011        | 430.263        | 429.759        | L[15] |
| G[11] | 254.401        | 405.745        | <b>401.740</b> | <b>401.992</b> | <b>401.488</b> | G[14] |
| K[12] | 286.424        | 391.489        | <b>387.485</b> | <b>387.736</b> | <b>387.233</b> | K[13] |
| G[13] | <b>300.680</b> | <b>359.465</b> | 355.461        | 355.713        | 355.209        | G[12] |
| G[14] | 314.935        | 345.210        | 341.205        | 341.457        | 340.953        | G[11] |
| A[15] | 332.694        | 330.955        | 326.950        | 327.202        | 326.698        | A[10] |
| K[16] | 364.718        | 313.195        | 309.191        | 309.443        | 308.939        | K[9]  |
| R[17] | 403.743        | 281.172        | 277.167        | 277.419        | 276.915        | R[8]  |
| H[18] | 438.008        | 262.146        | 258.142        | 258.394        | 257.890        | H[7]  |
| R[19] | 477.033        | 207.882        | 203.877        | 204.129        | 203.625        | R[6]  |
| K[20] | 519.560        | 168.856        | 164.852        | 165.104        | 164.600        | K[5]  |
| V[21] | 544.327        | 126.330        | 122.325        | 122.577        | 122.073        | V[4]  |
| L[22] | <b>572.598</b> | 101.563        | 97.558         | 97.810         | 97.306         | L[3]  |
| R[23] | <b>611.623</b> | 73.292         | 69.287         | 69.539         | 69.035         | R[2]  |
| D[24] | <b>640.380</b> | 34.267         | 30.262         | 30.514         | 30.010         | D[1]  |

# sp | P22752 | H2A1\_MOUSE

SHHKAKGK Acetyl  
42.01

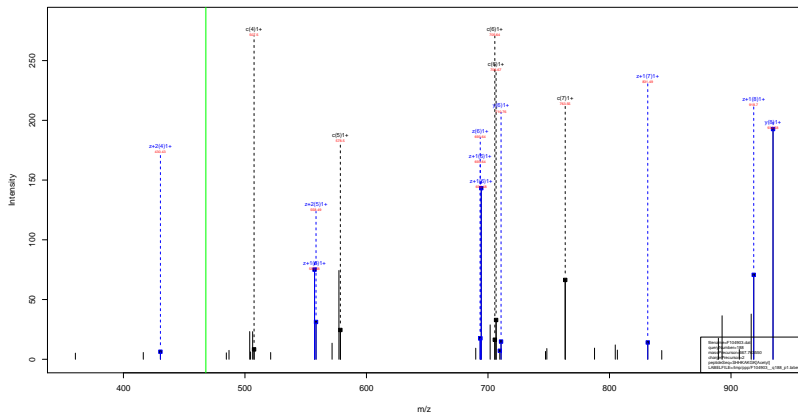

# sp | P22752 | H2A1\_MOUSE

SHHKAKGK<sup>Acetyl</sup>  
42.01

- ▶ fragmentation table for charge state 1+
- ▶ specType=etd
- ▶ score=31.77
- ▶ F104903.dat
- ▶ query=q188\_p1
- ▶ precursor=467.763550
- ▶ chargePrecursor=2
- ▶ itol=0.8

| AA   | c              | y              | z+1            | z+2            | z              | AA   |
|------|----------------|----------------|----------------|----------------|----------------|------|
| S[1] | 105.066        | <b>934.522</b> | <b>918.503</b> | 0.000          | 917.400        | S[8] |
| H[2] | 242.125        | 847.490        | <b>831.471</b> | 0.000          | 830.463        | H[7] |
| H[3] | 379.184        | <b>710.431</b> | <b>694.412</b> | 0.000          | <b>693.404</b> | H[6] |
| K[4] | <b>507.279</b> | 573.372        | <b>557.353</b> | <b>558.361</b> | 556.345        | K[5] |
| A[5] | <b>578.316</b> | 445.277        | 429.258        | <b>430.266</b> | 428.250        | A[4] |
| R[6] | <b>706.411</b> | 374.240        | 358.221        | 359.220        | 357.213        | R[3] |
| G[7] | <b>763.432</b> | 246.145        | 230.126        | 231.134        | 229.118        | G[2] |
| R[8] | 933.538        | 189.123        | 173.105        | 174.112        | 172.097        | R[1] |



# sp | P62806 | H4\_MOUSE

[Acetyl]SGRGKGGKGLGKGGAK Acetyl 42.01 RHRK Dimethyl 28.03 VLRD

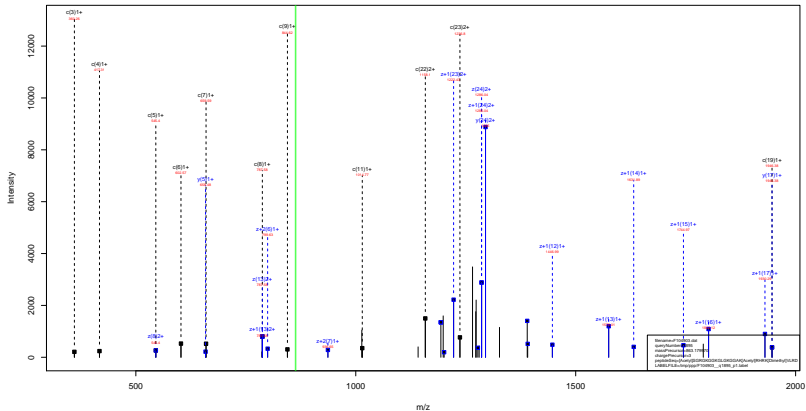

# sp | P62806 | H4\_MOUSE

[Acetyl]SGRGKGGKGLGKGGAK<sup>Acetyl</sup>RHRK<sup>Dimethyl</sup>VLRD<sup>28.03</sup>

- ▶ fragmentation table for charge state 1+
- ▶ specType=etd
- ▶ score=61.25
- ▶ F104903.dat
- ▶ query=q1895\_p1
- ▶ precursor=863.179970
- ▶ chargePrecursor=3
- ▶ itol=0.8

| AA    | c               | y               | z+1             | z+2             | z        | AA    |
|-------|-----------------|-----------------|-----------------|-----------------|----------|-------|
| S[1]  | 147.076         | 2587.513        | 2571.494        | 0.000           | 2570.486 | S[24] |
| G[2]  | 204.098         | 2458.470        | 2442.451        | 0.000           | 2441.444 | G[23] |
| R[3]  | <b>360.199</b>  | 2401.440        | 2385.430        | 2386.438        | 2384.422 | R[22] |
| G[4]  | <b>417.220</b>  | 2249.340        | 2229.330        | 2230.337        | 2228.321 | G[21] |
| K[5]  | <b>545.315</b>  | 2188.320        | 2172.307        | 2173.315        | 2171.300 | K[20] |
| G[6]  | <b>602.337</b>  | 2060.231        | 2044.212        | 2045.220        | 2043.205 | G[19] |
| G[7]  | <b>659.358</b>  | 2003.210        | 1987.191        | 1988.199        | 1986.181 | G[18] |
| K[8]  | <b>787.453</b>  | <b>1946.188</b> | <b>1930.170</b> | 1931.177        | 1929.162 | K[17] |
| G[9]  | <b>844.475</b>  | 1818.083        | <b>1802.075</b> | 1803.082        | 1801.067 | G[16] |
| L[10] | 907.559         | 1761.072        | <b>1745.063</b> | 1746.061        | 1744.045 | L[15] |
| Q[11] | <b>1014.580</b> | 1647.985        | <b>1631.969</b> | 1632.977        | 1630.961 | Q[14] |
| K[12] | 1142.675        | 1590.966        | <b>1574.948</b> | 1575.955        | 1573.940 | K[13] |
| G[13] | 1199.697        | 1462.871        | <b>1446.853</b> | 1447.860        | 1445.845 | G[12] |
| G[14] | 1256.718        | 1405.850        | <b>1389.831</b> | <b>1390.839</b> | 1388.823 | G[11] |
| A[15] | 1307.739        | 1348.829        | 1332.810        | 1333.818        | 1331.802 | A[10] |
| R[16] | 1407.884        | <b>1277.791</b> | 1261.774        | 1262.782        | 1260.765 | R[9]  |
| R[17] | 1653.962        | 1107.688        | 1091.667        | 1092.675        | 1090.659 | R[8]  |
| H[18] | 1791.021        | 951.585         | 935.566         | <b>936.574</b>  | 934.558  | H[7]  |
| R[19] | <b>1947.122</b> | 814.526         | 798.507         | <b>799.515</b>  | 797.499  | R[6]  |
| K[20] | 2103.248        | <b>658.425</b>  | 642.406         | 643.414         | 641.399  | K[5]  |
| V[21] | 2202.217        | 502.360         | 486.340         | 487.347         | 485.329  | V[4]  |
| L[22] | 2315.403        | 363.199         | 347.178         | 348.185         | 346.169  | L[3]  |
| R[23] | 2471.502        | 200.146         | 194.127         | 195.135         | 193.119  | R[2]  |
| D[24] | 2586.529        | 134.045         | 128.026         | 129.034         | 127.018  | D[1]  |

# sp | P62806 | H4\_MOUSE

[Acetyl]SGRGKGGKGLGKGGAK<sup>Acetyl</sup>42.01 RHRK<sup>Dimethyl</sup>28.03 VLRD

- ▶ fragmentation table for charge state 2+
- ▶ specType=etd
- ▶ score=61.25
- ▶ F104903.dat
- ▶ query=q1895\_p1
- ▶ precursor=863.179970
- ▶ chargePrecursor=3
- ▶ itol=0.8

| AA | c  | y               | z+1             | z+2             | z               | AA              |       |
|----|----|-----------------|-----------------|-----------------|-----------------|-----------------|-------|
| S  | 1  | 74.042          | <b>1294.260</b> | <b>1286.251</b> | 0.504           | <b>1285.747</b> | S[24] |
| G  | 2  | 102.553         | 1229.739        | <b>1221.729</b> | 0.504           | 1221.225        | G[23] |
| R  | 3  | 150.603         | <b>1261.228</b> | <b>1193.219</b> | <b>1193.723</b> | <b>1192.715</b> | R[22] |
| G  | 4  | 209.114         | 1123.177        | 1115.368        | 1115.972        | 1114.964        | G[21] |
| K  | 5  | 273.163         | 1094.667        | 1086.857        | 1087.161        | 1086.151        | K[20] |
| G  | 6  | 303.672         | 1030.619        | 1022.610        | 1023.114        | 1022.106        | G[19] |
| G  | 7  | 330.183         | 1002.108        | 994.099         | 994.603         | 993.595         | G[18] |
| K  | 8  | 394.230         | 973.599         | 965.588         | 966.092         | 965.084         | K[17] |
| G  | 9  | 422.741         | 909.560         | 901.541         | 902.045         | 901.037         | G[16] |
| L  | 10 | 479.293         | 893.040         | 873.030         | 873.534         | 872.526         | L[15] |
| G  | 11 | 507.794         | 824.468         | 816.458         | 816.962         | 815.954         | G[14] |
| K  | 12 | 571.841         | 795.987         | <b>787.977</b>  | 788.481         | <b>787.474</b>  | K[13] |
| G  | 13 | 600.352         | 731.939         | 723.930         | 724.434         | 723.426         | G[12] |
| G  | 14 | 638.863         | 703.429         | 695.419         | 695.923         | 694.915         | G[11] |
| A  | 15 | 684.381         | 674.918         | 666.908         | 667.412         | 666.404         | A[10] |
| R  | 16 | 749.434         | 639.390         | 631.380         | 631.884         | 630.876         | R[9]  |
| R  | 17 | 827.485         | 554.347         | 546.337         | 546.841         | <b>545.833</b>  | R[8]  |
| H  | 18 | 866.014         | 476.290         | 468.280         | 468.784         | 467.776         | H[7]  |
| R  | 19 | 974.065         | 407.767         | 399.757         | 400.261         | 399.253         | R[6]  |
| K  | 20 | 1052.126        | 329.716         | 321.707         | 322.211         | 321.203         | K[5]  |
| V  | 21 | 1101.662        | 251.663         | 243.653         | 244.157         | 243.149         | V[4]  |
| L  | 22 | <b>1158.204</b> | 202.119         | 194.109         | 194.613         | 193.605         | L[3]  |
| R  | 23 | <b>1236.255</b> | 145.577         | 137.567         | 138.071         | 137.063         | R[2]  |
| D  | 24 | 1293.768        | 67.526          | 59.517          | 60.021          | 59.013          | D[1]  |



# sp | P62806 | H4\_MOUSE

[Acetyl]SGRGKGGKGLGKGGAK<sup>Acetyl</sup>RHRK<sup>Dimethyl</sup>VLRD<sup>28.03</sup>

- ▶ fragmentation table for charge state 1+
- ▶ specType=etd
- ▶ score=115.26
- ▶ F104903.dat
- ▶ query=q1896\_p1
- ▶ precursor=647.636810
- ▶ chargePrecursor=4
- ▶ itol=0.8

| AA    | c               | y               | z+1             | z+2             | z        | AA    |
|-------|-----------------|-----------------|-----------------|-----------------|----------|-------|
| S[1]  | 147.076         | 2587.513        | 2571.494        | 0.000           | 2570.486 | S[24] |
| G[2]  | 204.098         | 2458.470        | 2442.451        | 0.000           | 2441.444 | G[23] |
| R[3]  | <b>360.199</b>  | 2401.440        | 2385.430        | 2388.438        | 2384.422 | R[22] |
| G[4]  | <b>417.220</b>  | 2349.340        | 2229.330        | 2230.337        | 2228.321 | G[21] |
| K[5]  | <b>545.315</b>  | 2185.320        | 2172.307        | 2173.315        | 2171.300 | K[20] |
| G[6]  | <b>602.337</b>  | 2060.231        | 2044.212        | 2045.220        | 2043.205 | G[19] |
| G[7]  | <b>659.358</b>  | 2003.210        | 1987.191        | <b>1988.199</b> | 1986.181 | G[18] |
| K[8]  | <b>787.453</b>  | 1946.189        | <b>1930.170</b> | 1931.177        | 1929.162 | K[17] |
| G[9]  | <b>844.475</b>  | 1818.083        | 1802.075        | <b>1803.082</b> | 1801.067 | G[16] |
| L[10] | <b>957.559</b>  | 1761.072        | 1745.063        | <b>1746.061</b> | 1744.045 | L[15] |
| Q[11] | <b>1014.580</b> | 1647.985        | <b>1631.969</b> | 1632.977        | 1630.961 | Q[14] |
| K[12] | <b>1142.675</b> | 1590.966        | 1574.948        | <b>1575.955</b> | 1573.940 | K[13] |
| G[13] | <b>1199.697</b> | 1462.871        | 1446.853        | <b>1447.860</b> | 1445.845 | G[12] |
| G[14] | <b>1256.718</b> | 1405.850        | 1389.831        | <b>1390.839</b> | 1388.821 | G[11] |
| A[15] | <b>1327.755</b> | 1348.829        | 1332.810        | <b>1333.818</b> | 1331.802 | A[10] |
| R[16] | <b>1407.861</b> | <b>1277.791</b> | 1261.773        | 1262.780        | 1260.765 | R[9]  |
| R[17] | 1653.962        | 1107.680        | 1091.667        | <b>1092.675</b> | 1090.659 | R[8]  |
| H[18] | 1791.021        | 951.585         | <b>935.566</b>  | <b>936.574</b>  | 934.558  | H[7]  |
| R[19] | 1947.122        | <b>814.526</b>  | 798.507         | <b>799.515</b>  | 797.499  | R[6]  |
| K[20] | 2103.248        | 658.425         | 642.406         | <b>643.414</b>  | 641.396  | K[5]  |
| V[21] | 2202.217        | 502.300         | 486.280         | 487.287         | 485.272  | V[4]  |
| L[22] | 2315.403        | 463.170         | 447.151         | 448.158         | 446.143  | L[3]  |
| R[23] | 2471.502        | 290.146         | 274.127         | <b>275.135</b>  | 273.119  | R[2]  |
| D[24] | 2586.529        | 134.045         | 118.026         | 119.034         | 117.018  | D[1]  |

# sp | P62806 | H4\_MOUSE

[Acetyl]SGRGKGGKGLGKGGAK<sup>Acetyl</sup>42.01 RHRK<sup>Dimethyl</sup>28.03 VLRD

- ▶ fragmentation table for charge state 2+
- ▶ specType=etd
- ▶ score=115.26
- ▶ F104903.dat
- ▶ query=q1896\_p1
- ▶ precursor=647.636810
- ▶ chargePrecursor=4
- ▶ itol=0.8

| AA    | c               | y               | z+1             | z+2             | z               | AA    |
|-------|-----------------|-----------------|-----------------|-----------------|-----------------|-------|
| S[1]  | 74.042          | <b>1294.260</b> | <b>1286.251</b> | 0.504           | 1285.747        | S[24] |
| G[2]  | 102.553         | 1229.739        | <b>1221.729</b> | 0.504           | 1221.225        | G[23] |
| R[3]  | 180.603         | 1201.229        | <b>1193.219</b> | <b>1193.723</b> | 1192.713        | R[22] |
| G[4]  | 259.114         | 1123.177        | <b>1115.168</b> | <b>1115.672</b> | <b>1114.664</b> | G[21] |
| K[5]  | 273.153         | 1094.667        | <b>1086.657</b> | <b>1087.161</b> | <b>1086.153</b> | K[20] |
| G[6]  | 303.672         | 1030.619        | <b>1022.610</b> | <b>1023.114</b> | 1022.100        | G[19] |
| G[7]  | 330.183         | 1002.108        | <b>994.099</b>  | <b>994.603</b>  | 993.590         | G[18] |
| K[8]  | 394.230         | <b>973.598</b>  | <b>965.588</b>  | <b>966.092</b>  | 965.083         | K[17] |
| G[9]  | 422.741         | 909.550         | <b>901.541</b>  | <b>902.045</b>  | <b>901.037</b>  | G[16] |
| L[10] | 479.293         | 869.040         | <b>871.030</b>  | <b>871.534</b>  | 870.520         | L[15] |
| G[11] | 507.794         | <b>824.498</b>  | <b>816.488</b>  | <b>816.992</b>  | <b>815.984</b>  | G[14] |
| K[12] | 571.841         | <b>795.987</b>  | <b>787.977</b>  | <b>788.481</b>  | <b>787.474</b>  | K[13] |
| G[13] | 600.352         | 731.939         | <b>723.930</b>  | <b>724.434</b>  | 723.420         | G[12] |
| G[14] | 628.863         | 703.429         | <b>695.419</b>  | <b>695.923</b>  | 694.913         | G[11] |
| A[15] | 694.381         | 674.919         | <b>666.908</b>  | <b>667.412</b>  | <b>666.405</b>  | A[10] |
| R[16] | 749.434         | 639.399         | <b>631.390</b>  | <b>631.894</b>  | 630.880         | R[9]  |
| R[17] | <b>827.485</b>  | 554.347         | <b>546.337</b>  | <b>546.841</b>  | <b>545.833</b>  | R[8]  |
| H[18] | <b>896.014</b>  | 476.290         | 468.287         | 468.791         | 467.783         | H[7]  |
| R[19] | <b>974.065</b>  | 407.767         | 399.757         | 400.261         | 399.253         | R[6]  |
| K[20] | 1052.128        | 329.716         | 321.707         | 322.211         | 321.203         | K[5]  |
| V[21] | <b>1101.662</b> | 252.693         | 244.683         | 244.647         | 243.140         | V[4]  |
| L[22] | <b>1158.204</b> | 202.119         | 194.109         | 194.613         | 193.605         | L[3]  |
| R[23] | <b>1236.255</b> | 145.577         | 137.567         | 138.071         | 137.063         | R[2]  |
| D[24] | 1293.768        | 67.526          | 59.517          | 60.021          | 59.013          | D[1]  |

# sp | P62806 | H4\_MOUSE

[Acetyl]SGRGKGGKGLGKGGAK<sup>Acetyl</sup> RHRK<sup>Dimethyl</sup> VLRD<sup>28.03</sup>

- ▶ fragmentation table for charge state 3+
- ▶ specType=etd
- ▶ score=115.26
- ▶ F104903.dat
- ▶ query=q1896.p1
- ▶ precursor=647.636810
- ▶ chargePrecursor=4
- ▶ itol=0.8

| AA    | c              | y              | z+1            | z+2            | z              | AA    |
|-------|----------------|----------------|----------------|----------------|----------------|-------|
| S[1]  | 49.697         | <b>863.176</b> | <b>657.836</b> | 0.672          | <b>857.500</b> | S[24] |
| G[2]  | 58.704         | 320.162        | <b>814.822</b> | 0.672          | <b>814.486</b> | G[23] |
| R[3]  | 150.738        | <b>801.154</b> | <b>795.815</b> | <b>796.151</b> | <b>795.479</b> | R[22] |
| G[4]  | 139.745        | 749.121        | 743.781        | 744.117        | 743.445        | G[21] |
| K[5]  | 182.443        | 730.114        | <b>724.774</b> | <b>725.110</b> | <b>724.438</b> | K[20] |
| G[6]  | 201.450        | 687.415        | 682.076        | 682.412        | 681.740        | G[19] |
| G[7]  | 220.458        | <b>668.408</b> | 663.069        | 663.404        | 662.733        | G[18] |
| K[8]  | 263.156        | 649.401        | <b>644.061</b> | <b>644.397</b> | <b>643.725</b> | K[17] |
| G[9]  | 282.163        | 606.703        | 601.363        | <b>601.699</b> | 601.027        | G[16] |
| L[10] | 319.858        | 587.695        | 582.355        | 582.691        | 582.020        | L[15] |
| G[11] | 338.865        | 550.001        | <b>544.661</b> | <b>544.997</b> | 544.325        | G[14] |
| K[12] | 381.563        | 530.994        | 525.654        | 525.990        | 525.318        | K[13] |
| G[13] | 400.570        | 488.295        | 482.956        | 483.292        | 482.620        | G[12] |
| G[14] | 419.578        | 469.288        | 463.949        | 464.285        | 463.613        | G[11] |
| A[15] | 443.257        | 450.281        | 444.941        | 445.277        | 444.605        | A[10] |
| K[16] | 469.958        | 426.602        | 421.262        | 421.598        | 420.926        | K[9]  |
| R[17] | 551.992        | 369.900        | 364.561        | 364.896        | 364.225        | R[8]  |
| H[18] | 597.678        | 317.866        | 312.527        | 312.863        | 312.191        | H[7]  |
| R[19] | 649.712        | 272.180        | 266.841        | 267.176        | 266.505        | R[6]  |
| K[20] | 701.754        | 220.146        | 214.807        | 215.143        | 214.471        | K[5]  |
| V[21] | 734.777        | 168.104        | 162.765        | 163.101        | 162.429        | V[4]  |
| L[22] | 772.472        | 135.082        | 129.742        | 130.078        | 129.406        | L[3]  |
| R[23] | <b>824.505</b> | 97.387         | 92.047         | 92.383         | 91.711         | R[2]  |
| D[24] | <b>862.848</b> | 45.353         | 40.014         | 40.349         | 39.678         | D[1]  |

# sp | P22752 | H2A1\_MOUSE

SHHKAKGK Acetyl  
42.01

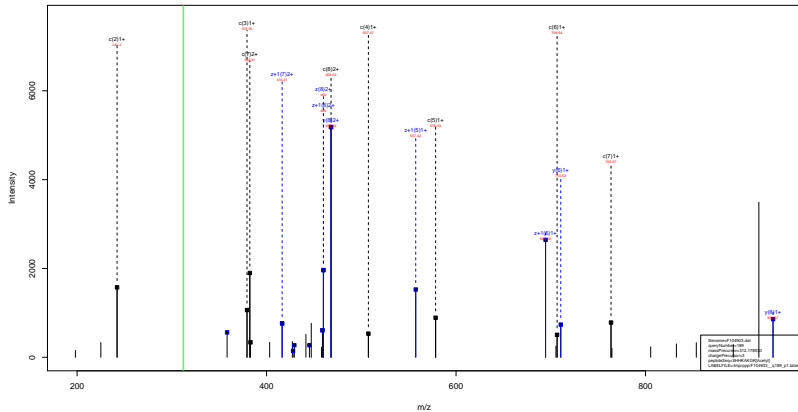



# sp | P22752 | H2A1\_MOUSE

SHHKAKGK<sup>Acetyl</sup>  
42.01

- ▶ fragmentation table for charge state 1+
- ▶ specType=etd
- ▶ score=37.63
- ▶ F104903.dat
- ▶ query=q189\_p1
- ▶ precursor=312.178930
- ▶ chargePrecursor=3
- ▶ itol=0.8

| AA   | c              | y              | z+1            | z+2     | z              | AA   |
|------|----------------|----------------|----------------|---------|----------------|------|
| S[1] | 109.066        | <b>934.522</b> | 918.503        | 0.000   | 917.495        | S[8] |
| H[2] | <b>242.125</b> | 847.490        | 831.471        | 0.000   | 830.463        | H[7] |
| H[3] | <b>379.184</b> | <b>710.431</b> | <b>694.412</b> | 0.000   | 693.404        | H[6] |
| K[4] | <b>507.279</b> | 673.372        | <b>557.353</b> | 558.361 | 556.345        | K[5] |
| A[5] | <b>578.316</b> | <b>445.277</b> | <b>429.258</b> | 430.266 | <b>428.250</b> | A[4] |
| K[6] | <b>706.411</b> | 374.240        | <b>358.221</b> | 359.229 | 357.213        | K[3] |
| G[7] | <b>763.432</b> | 246.145        | 230.126        | 231.134 | 229.118        | G[2] |
| K[8] | 933.538        | 189.123        | 173.105        | 174.112 | 172.097        | K[1] |

# sp | P22752 | H2A1\_MOUSE

SHHKAKGK <sup>Acetyl</sup>  
42.01

- ▶ fragmentation table for charge state 2+
- ▶ specType=etd
- ▶ score=37.63
- ▶ F104903.dat
- ▶ query=q189\_p1
- ▶ precursor=312.178930
- ▶ chargePrecursor=3
- ▶ itol=0.8

| AA   | c              | y              | z+1            | z+2     | z              | AA   |
|------|----------------|----------------|----------------|---------|----------------|------|
| S[1] | 93.037         | <b>467.765</b> | <b>459.755</b> | 0.504   | <b>459.251</b> | S[8] |
| H[2] | 121.566        | 424.248        | <b>416.239</b> | 0.504   | <b>415.735</b> | H[7] |
| H[3] | 190.095        | 355.719        | 347.710        | 0.504   | 347.206        | H[6] |
| K[4] | 254.143        | 287.190        | 279.180        | 279.684 | 278.676        | K[5] |
| A[5] | 289.662        | 223.142        | 215.133        | 215.637 | 214.629        | A[4] |
| K[6] | 353.709        | 187.624        | 179.614        | 180.118 | 179.110        | K[3] |
| G[7] | <b>382.220</b> | 123.576        | 115.567        | 116.071 | 115.063        | G[2] |
| K[8] | <b>467.272</b> | 95.065         | 87.056         | 87.560  | 86.552         | K[1] |

# sp | P22752 | H2A1\_MOUSE

SHHKAK<sup>Acetyl</sup>GK  
42.01

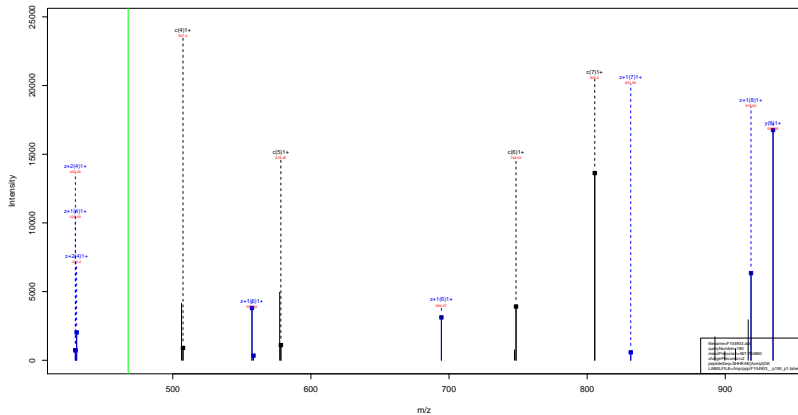

# sp | P22752 | H2A1\_MOUSE

SHHKAK<sup>Acetyl</sup> GK  
42.01

- ▶ fragmentation table for charge state 1+
- ▶ specType=etd
- ▶ score=36.98
- ▶ F104903.dat
- ▶ query=q190\_p1
- ▶ precursor=467.764860
- ▶ chargePrecursor=2
- ▶ itol=0.8

| AA   | c              | y              | z+1            | z+2            | z       | AA   |
|------|----------------|----------------|----------------|----------------|---------|------|
| S[1] | 109.066        | <b>934.522</b> | <b>916.503</b> | 0.000          | 917.495 | S[8] |
| H[2] | 242.125        | 947.490        | <b>831.471</b> | 0.000          | 830.463 | H[7] |
| H[3] | 379.184        | 710.431        | <b>694.412</b> | 0.000          | 693.404 | H[6] |
| K[4] | <b>507.279</b> | 573.372        | <b>557.353</b> | <b>558.361</b> | 556.345 | K[5] |
| A[5] | <b>578.316</b> | 445.277        | <b>429.258</b> | <b>430.266</b> | 428.250 | A[4] |
| K[6] | <b>748.421</b> | 374.240        | 358.221        | 359.229        | 357.213 | K[3] |
| G[7] | <b>805.443</b> | 204.134        | 180.116        | 189.123        | 187.108 | G[2] |
| K[8] | 933.538        | 147.113        | 131.094        | 132.102        | 130.086 | K[1] |

# sp | P22752 | H2A1\_MOUSE

SHHKAK <sup>Acetyl</sup> GK  
42.01

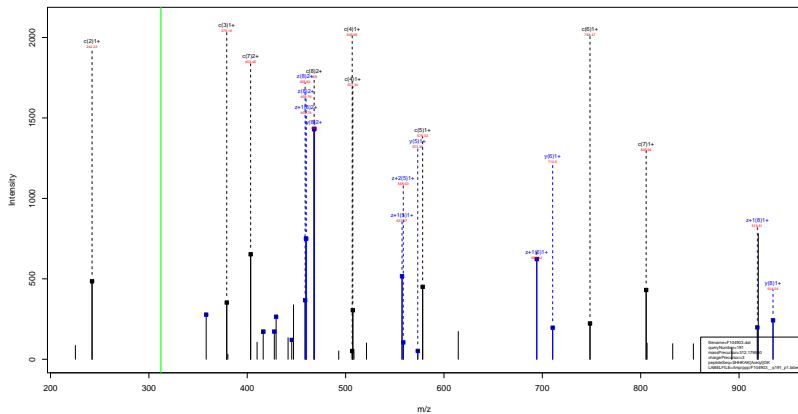

# sp | P22752 | H2A1\_MOUSE

SHHKAK<sup>Acetyl</sup> GK  
42.01

- ▶ fragmentation table for charge state 1+
- ▶ specType=etd
- ▶ score=34.21
- ▶ F104903.dat
- ▶ query=q191\_p1
- ▶ precursor=312.179550
- ▶ chargePrecursor=3
- ▶ itol=0.8

| AA   | c              | y              | z+1            | z+2            | z              | AA   |
|------|----------------|----------------|----------------|----------------|----------------|------|
| S[1] | 105.066        | <b>934.522</b> | <b>918.503</b> | 0.000          | 917.499        | S[8] |
| H[2] | <b>242.125</b> | 847.490        | 831.471        | 0.000          | 830.463        | H[7] |
| H[3] | <b>379.184</b> | <b>710.431</b> | <b>694.412</b> | 0.000          | 693.404        | H[6] |
| K[4] | <b>507.279</b> | <b>573.372</b> | <b>557.353</b> | <b>558.361</b> | 556.345        | K[5] |
| A[5] | <b>578.316</b> | <b>445.277</b> | <b>429.258</b> | 430.266        | <b>428.250</b> | A[4] |
| R[6] | <b>748.421</b> | 374.240        | <b>358.221</b> | 359.229        | 357.213        | R[3] |
| G[7] | <b>805.443</b> | 204.134        | 188.116        | 189.123        | 187.108        | G[2] |
| R[8] | 933.538        | 147.113        | 131.094        | 132.102        | 130.086        | R[1] |

# sp | P22752 | H2A1\_MOUSE

SHHKAK<sup>Acetyl</sup> GK  
42.01

- ▶ fragmentation table for charge state 2+
- ▶ specType=etd
- ▶ score=34.21
- ▶ F104903.dat
- ▶ query=q191\_p1
- ▶ precursor=312.179550
- ▶ chargePrecursor=3
- ▶ itol=0.8

| AA   | c              | y              | z+1            | z+2     | z              | AA   |
|------|----------------|----------------|----------------|---------|----------------|------|
| S[1] | 93.037         | <b>467.765</b> | <b>459.755</b> | 0.504   | <b>459.251</b> | S[8] |
| H[2] | 121.566        | 424.248        | <b>416.239</b> | 0.504   | <b>415.735</b> | H[7] |
| H[3] | 190.095        | 355.719        | 347.710        | 0.504   | 347.206        | H[6] |
| K[4] | 254.143        | 287.190        | 279.180        | 279.684 | 278.676        | K[5] |
| A[5] | 289.662        | 223.142        | 215.133        | 215.637 | 214.629        | A[4] |
| K[6] | 374.714        | 187.624        | 179.614        | 190.118 | 179.110        | K[3] |
| G[7] | <b>403.225</b> | 102.571        | 94.561         | 95.065  | 94.057         | G[2] |
| K[8] | <b>467.272</b> | 74.060         | 66.051         | 66.555  | 65.547         | K[1] |

# sp | P62806 | H4\_MOUSE

[Acetyl]SGRGKGGKGLGK <sup>Acetyl</sup> 42.01 GGAK <sup>Acetyl</sup> 42.01 RHRK <sup>Dimethyl</sup> 28.03 VLRD

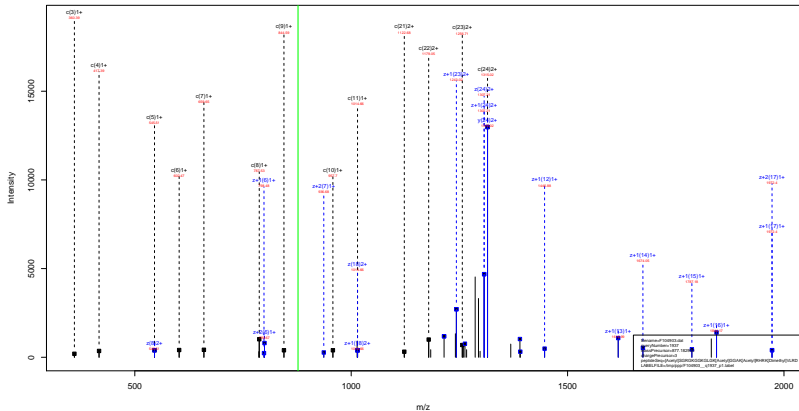



# sp | P62806 | H4\_MOUSE

[Acetyl]SGRGKGGKGLGK<sup>Acetyl</sup><sub>42.01</sub> GGAK<sup>Acetyl</sup><sub>42.01</sub> RHRK<sup>Dimethyl</sup><sub>28.03</sub> VLRD

- ▶ fragmentation table for charge state 1+
- ▶ specType=etd
- ▶ score=69.41
- ▶ F104903.dat
- ▶ query=q1937\_p1
- ▶ precursor=877.182900
- ▶ chargePrecursor=3
- ▶ itol=0.8

| AA | c  | y               | z+1      | z+2             | z               | AA       |       |
|----|----|-----------------|----------|-----------------|-----------------|----------|-------|
| S  | 1  | 147.076         | 2629.523 | 2613.505        | 0.000           | 2612.497 | S[24] |
| G  | 2  | 204.098         | 2500.481 | 2484.462        | 0.000           | 2483.454 | G[23] |
| R  | 3  | <b>368.199</b>  | 2443.459 | 2427.441        | 2426.448        | 2426.433 | R[22] |
| G  | 4  | <b>417.230</b>  | 2387.958 | 2271.330        | 2272.347        | 2270.333 | G[21] |
| K  | 5  | <b>545.315</b>  | 2230.337 | 2214.318        | 2215.326        | 2213.310 | K[20] |
| G  | 6  | <b>602.337</b>  | 2182.242 | 2086.225        | 2087.231        | 2085.215 | G[19] |
| G  | 7  | <b>659.358</b>  | 2045.230 | 2026.200        | 2030.209        | 2028.194 | G[18] |
| K  | 8  | <b>787.453</b>  | 1988.199 | <b>1972.180</b> | <b>1973.188</b> | 1971.172 | K[17] |
| G  | 9  | <b>844.475</b>  | 1850.104 | <b>1844.085</b> | 1845.093        | 1843.077 | G[16] |
| L  | 10 | <b>927.559</b>  | 1803.062 | <b>1787.044</b> | 1788.071        | 1786.056 | L[15] |
| G  | 11 | <b>1014.580</b> | 1588.995 | <b>1673.958</b> | 1674.987        | 1672.972 | G[14] |
| K  | 12 | 1184.688        | 1632.977 | <b>1616.958</b> | 1617.966        | 1615.950 | K[13] |
| G  | 13 | 1241.707        | 1462.971 | <b>1446.853</b> | 1447.860        | 1445.845 | G[12] |
| G  | 14 | 1298.729        | 1405.850 | <b>1389.831</b> | <b>1390.839</b> | 1388.823 | G[11] |
| A  | 15 | 1369.796        | 1348.828 | 1332.810        | 1333.818        | 1331.802 | A[10] |
| R  | 16 | 1539.871        | 1277.791 | 1261.773        | <b>1262.780</b> | 1260.765 | R[9]  |
| R  | 17 | 1695.973        | 1107.685 | 1091.667        | 1092.675        | 1090.659 | R[8]  |
| H  | 18 | 1833.031        | 951.585  | 935.566         | <b>936.574</b>  | 934.558  | H[7]  |
| R  | 19 | 1989.133        | 814.526  | <b>798.507</b>  | <b>799.515</b>  | 797.499  | R[6]  |
| K  | 20 | 2145.259        | 658.425  | 642.406         | 643.414         | 641.399  | K[5]  |
| V  | 21 | 2244.327        | 502.298  | 486.280         | 487.287         | 485.272  | V[4]  |
| L  | 22 | 2357.411        | 403.230  | 387.211         | 388.219         | 386.203  | L[3]  |
| R  | 23 | 2513.512        | 280.146  | 274.127         | 275.135         | 273.119  | R[2]  |
| D  | 24 | 2628.539        | 134.045  | 118.026         | 119.034         | 117.018  | D[1]  |

# sp | P62806 | H4\_MOUSE

[Acetyl]SGRGKGGKGLGK<sup>Acetyl</sup> 42.01 GGAK<sup>Acetyl</sup> 42.01 RHRK<sup>Dimethyl</sup> 28.03 VLRD

- ▶ fragmentation table for charge state 2+
- ▶ specType=etd
- ▶ score=69.41
- ▶ F104903.dat
- ▶ query=q1937\_p1
- ▶ precursor=877.182900
- ▶ chargePrecursor=3
- ▶ itol=0.8

| AA    | c               | y               | z+1             | z+2             | z               | AA    |
|-------|-----------------|-----------------|-----------------|-----------------|-----------------|-------|
| S[1]  | 74.042          | <b>1315.265</b> | <b>1307.256</b> | 0.504           | <b>1306.752</b> | S[24] |
| G[2]  | 102.553         | 1250.744        | <b>1242.735</b> | 0.504           | <b>1242.231</b> | G[23] |
| R[3]  | 180.603         | 1222.233        | <b>1214.224</b> | <b>1214.728</b> | 1213.720        | R[22] |
| G[4]  | 259.114         | 1144.183        | 1136.173        | 1130.677        | 1139.669        | G[21] |
| K[5]  | 273.153         | 1115.672        | 1107.663        | 1108.167        | 1107.159        | K[20] |
| G[6]  | 303.672         | 1051.625        | 1043.615        | 1044.119        | 1043.111        | G[19] |
| G[7]  | 330.183         | 1023.114        | <b>1015.104</b> | 1015.608        | <b>1014.601</b> | G[18] |
| K[8]  | 394.230         | 994.603         | 986.594         | 987.098         | 986.090         | K[17] |
| G[9]  | 422.741         | 930.566         | 922.546         | 923.050         | 922.042         | G[16] |
| L[10] | 479.283         | 902.045         | 894.035         | 894.539         | 893.531         | L[15] |
| G[11] | 507.794         | 845.503         | 837.493         | 837.997         | 836.990         | G[14] |
| K[12] | 502.847         | 816.992         | 808.983         | 809.487         | 808.479         | K[13] |
| G[13] | 621.357         | 731.939         | 723.930         | 724.434         | 723.426         | G[12] |
| G[14] | 646.868         | 703.429         | 695.419         | 695.923         | 694.915         | G[11] |
| A[15] | 685.389         | 674.918         | 666.908         | 667.412         | 666.404         | A[10] |
| R[16] | 770.439         | 639.399         | 631.390         | 631.894         | 630.886         | R[9]  |
| R[17] | 848.490         | 554.347         | 546.337         | 546.841         | <b>545.833</b>  | R[6]  |
| H[18] | 917.019         | 476.290         | 468.280         | 468.784         | 467.776         | H[7]  |
| R[19] | 995.070         | 407.767         | 399.757         | 400.261         | 399.253         | R[6]  |
| K[20] | 1073.113        | 329.716         | 321.707         | 322.211         | 321.203         | K[5]  |
| V[21] | <b>1122.667</b> | 251.653         | 243.643         | 244.147         | 243.140         | V[4]  |
| L[22] | <b>1179.209</b> | 202.119         | 194.109         | 194.613         | 193.605         | L[3]  |
| R[23] | <b>1257.260</b> | 145.577         | 137.567         | 138.071         | 137.063         | R[2]  |
| D[24] | <b>1314.773</b> | 67.526          | 59.517          | 60.021          | 59.013          | D[1]  |

# sp | P62806 | H4\_MOUSE

[Acetyl]SGRGKGGKGLGK <sup>Acetyl</sup> 42.01 GGAK <sup>Acetyl</sup> 42.01 RHRK <sup>Dimethyl</sup> 28.03 VLRD

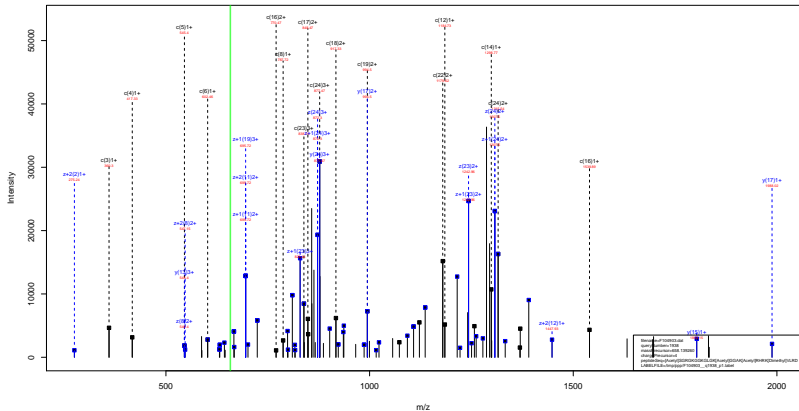

# sp | P62806 | H4\_MOUSE

[Acetyl]SGRGKGGKGLGK<sup>Acetyl</sup> 42.01 **GGAK**<sup>Acetyl</sup> 42.01 **RHRK**<sup>Dimethyl</sup> 28.03 **VLRD**

- ▶ fragmentation table for charge state 1+
- ▶ specType=etd
- ▶ score=77.58
- ▶ F104903.dat
- ▶ query=q1938\_p1
- ▶ precursor=658.139260
- ▶ chargePrecursor=4
- ▶ itol=0.8

| AA | c  | y               | z+1             | z+2             | z               | AA       |       |
|----|----|-----------------|-----------------|-----------------|-----------------|----------|-------|
| S  | 1  | 147.076         | 2629.523        | 2613.505        | 0.000           | 2612.497 | S[24] |
| G  | 2  | 204.098         | 2500.481        | 2484.462        | 0.000           | 2483.454 | G[23] |
| R  | 3  | <b>360.199</b>  | 2641.450        | 2427.431        | 2426.448        | 2626.433 | R[22] |
| G  | 4  | <b>417.220</b>  | 2397.564        | 2271.538        | 2272.547        | 2270.531 | G[21] |
| K  | 5  | <b>945.315</b>  | 2230.337        | 2214.318        | 2215.326        | 2213.310 | K[20] |
| G  | 6  | <b>602.337</b>  | 2102.342        | 2086.323        | 2087.331        | 2085.315 | G[19] |
| G  | 7  | 659.358         | 2045.220        | 2029.200        | 2030.209        | 2028.194 | G[18] |
| K  | 8  | <b>787.453</b>  | <b>1988.199</b> | 1972.180        | 1973.188        | 1971.172 | K[17] |
| G  | 9  | 884.475         | 1899.174        | 1884.055        | 1885.063        | 1884.047 | G[16] |
| L  | 10 | 957.559         | <b>1803.082</b> | 1787.064        | 1788.071        | 1786.056 | L[15] |
| Q  | 11 | 1014.580        | 1689.958        | 1673.939        | 1674.947        | 1672.932 | Q[14] |
| K  | 12 | <b>1184.686</b> | 1632.977        | 1616.958        | 1617.966        | 1615.950 | K[13] |
| G  | 13 | 1241.707        | 1462.977        | 1446.953        | <b>1447.860</b> | 1445.845 | G[12] |
| G  | 14 | <b>1298.729</b> | 1405.950        | 1389.931        | <b>1390.839</b> | 1388.823 | G[11] |
| A  | 15 | <b>1369.766</b> | 1348.925        | <b>1332.818</b> | 1333.819        | 1331.804 | A[10] |
| R  | 16 | <b>1539.871</b> | <b>1277.793</b> | <b>1261.773</b> | 1262.781        | 1260.765 | R[9]  |
| R  | 17 | 1695.973        | <b>1107.686</b> | 1091.667        | <b>1092.675</b> | 1090.659 | R[8]  |
| H  | 18 | 1833.031        | 951.585         | <b>935.566</b>  | <b>936.574</b>  | 934.558  | H[7]  |
| R  | 19 | 1969.133        | 814.526         | <b>798.507</b>  | <b>799.515</b>  | 797.499  | R[6]  |
| K  | 20 | 2145.250        | 658.425         | 642.406         | <b>643.414</b>  | 641.398  | K[5]  |
| V  | 21 | 2244.227        | 502.360         | 486.280         | 487.287         | 485.272  | V[4]  |
| L  | 22 | 2397.413        | 363.299         | 347.211         | 348.219         | 346.203  | L[3]  |
| R  | 23 | 2513.512        | 200.146         | 274.127         | <b>275.135</b>  | 273.119  | R[2]  |
| D  | 24 | 2628.539        | 134.045         | 138.026         | 139.034         | 137.018  | D[1]  |

# sp | P62806 | H4\_MOUSE

[Acetyl]SGRGKGGKGLGK<sup>Acetyl</sup><sub>42.01</sub> GGAK<sup>Acetyl</sup><sub>42.01</sub> RHRK<sup>Dimethyl</sup><sub>28.03</sub> VLRD

- ▶ fragmentation table for charge state 2+
- ▶ specType=etd
- ▶ score=77.58
- ▶ F104903.dat
- ▶ query=q1938\_p1
- ▶ precursor=658.139260
- ▶ chargePrecursor=4
- ▶ itol=0.8

| AA    | c               | y               | z+1             | z+2             | z               | AA    |
|-------|-----------------|-----------------|-----------------|-----------------|-----------------|-------|
| S[1]  | 74.642          | <b>1315.265</b> | <b>1307.256</b> | 0.504           | <b>1306.752</b> | S[24] |
| G[2]  | 102.553         | <b>1250.744</b> | <b>1242.735</b> | 0.504           | <b>1242.231</b> | G[23] |
| R[3]  | 180.603         | <b>1222.233</b> | 1214.224        | <b>1214.728</b> | 1213.720        | R[22] |
| G[4]  | 259.114         | 1144.163        | <b>1138.173</b> | <b>1136.677</b> | 1135.669        | G[21] |
| K[5]  | 273.163         | 1115.672        | <b>1107.663</b> | <b>1108.167</b> | 1107.159        | K[20] |
| G[6]  | 301.672         | 1051.625        | 1043.615        | 1044.119        | 1043.111        | G[19] |
| G[7]  | 330.183         | <b>1023.114</b> | 1015.104        | <b>1015.608</b> | 1014.601        | G[18] |
| K[8]  | 394.230         | <b>994.603</b>  | <b>986.594</b>  | <b>987.098</b>  | <b>986.090</b>  | K[17] |
| G[9]  | 422.741         | 930.556         | <b>922.546</b>  | <b>923.050</b>  | 922.042         | G[16] |
| L[10] | 479.293         | <b>902.045</b>  | 894.035         | 894.539         | 893.531         | L[15] |
| G[11] | 507.794         | 845.503         | 837.493         | <b>837.997</b>  | 836.990         | G[14] |
| K[12] | 502.847         | <b>816.992</b>  | 808.983         | 809.487         | 808.479         | K[13] |
| G[13] | 621.357         | 731.939         | <b>723.930</b>  | <b>724.434</b>  | <b>723.426</b>  | G[12] |
| G[14] | 649.868         | 703.429         | <b>695.419</b>  | <b>695.923</b>  | 694.915         | G[11] |
| A[15] | 688.389         | 674.919         | <b>666.908</b>  | <b>667.412</b>  | <b>666.405</b>  | A[10] |
| R[16] | <b>776.439</b>  | 639.399         | <b>631.390</b>  | <b>631.894</b>  | <b>630.886</b>  | R[9]  |
| R[17] | <b>848.490</b>  | 554.347         | 546.337         | <b>546.841</b>  | <b>545.833</b>  | R[8]  |
| H[18] | <b>917.019</b>  | 476.296         | 468.287         | 468.791         | 467.783         | H[7]  |
| R[19] | <b>995.070</b>  | 407.767         | 399.757         | 400.261         | 399.253         | R[6]  |
| K[20] | <b>1073.133</b> | 329.716         | 321.707         | 322.211         | 321.203         | K[5]  |
| V[21] | <b>1122.667</b> | 251.663         | 243.653         | 244.157         | 243.149         | V[4]  |
| L[22] | <b>1179.209</b> | 202.119         | 194.109         | 194.613         | 193.605         | L[3]  |
| R[23] | <b>1257.260</b> | 145.577         | 137.567         | 138.071         | 137.063         | R[2]  |
| D[24] | <b>1314.773</b> | 67.526          | 59.517          | 60.021          | 59.013          | D[1]  |

# sp | P62806 | H4\_MOUSE

[Acetyl]SGRGKGGKGLGK <sup>Acetyl</sup><sub>42.01</sub> GGAK <sup>Acetyl</sup><sub>42.01</sub> RHRK <sup>Dimethyl</sup><sub>28.03</sub> VLRD

- ▶ fragmentation table for charge state 3+
- ▶ specType=etd
- ▶ score=77.58
- ▶ F104903.dat
- ▶ query=q1938\_p1
- ▶ precursor=658.139260
- ▶ chargePrecursor=4
- ▶ itol=0.8

| AA    | c              | y              | z+1            | z+2            | z              | AA    |
|-------|----------------|----------------|----------------|----------------|----------------|-------|
| S[1]  | 49.697         | <b>877.179</b> | <b>871.840</b> | 0.672          | <b>871.504</b> | S[24] |
| G[2]  | 58.704         | 134.165        | <b>828.826</b> | 0.672          | 828.480        | G[23] |
| R[3]  | 150.738        | 815.158        | <b>809.818</b> | <b>810.154</b> | 809.482        | R[22] |
| G[4]  | 139.745        | 763.124        | 757.785        | 758.121        | 757.449        | G[21] |
| K[5]  | 182.443        | 744.117        | 738.778        | 739.113        | 738.442        | K[20] |
| G[6]  | 201.450        | <b>701.419</b> | <b>696.079</b> | <b>696.415</b> | <b>695.743</b> | G[19] |
| G[7]  | 220.458        | 682.412        | 677.072        | 677.408        | 676.736        | G[18] |
| K[8]  | 263.156        | 663.404        | 658.063        | 658.401        | 657.729        | K[17] |
| G[9]  | 282.163        | 633.705        | 615.367        | 615.703        | 615.031        | G[16] |
| L[10] | 319.958        | <b>601.699</b> | 596.359        | 596.698        | 596.023        | L[15] |
| G[11] | 338.965        | 504.024        | 558.665        | 559.001        | 558.329        | G[14] |
| K[12] | 395.567        | <b>544.997</b> | 539.658        | 539.994        | 539.322        | K[13] |
| G[13] | 414.574        | 488.295        | 482.956        | 483.292        | 482.620        | G[12] |
| G[14] | 433.581        | 469.288        | 463.949        | 464.285        | 463.613        | G[11] |
| A[15] | 457.260        | 450.281        | 444.941        | 445.277        | 444.605        | A[10] |
| K[16] | 513.962        | 426.602        | 421.262        | 421.598        | 420.926        | K[9]  |
| R[17] | 565.996        | 369.900        | 364.561        | 364.896        | 364.225        | R[8]  |
| H[18] | 611.682        | 317.866        | 312.527        | 312.863        | 312.191        | H[7]  |
| R[19] | 663.716        | 272.180        | 266.841        | 267.176        | 266.505        | R[6]  |
| K[20] | 715.758        | 220.146        | 214.807        | 215.143        | 214.471        | K[5]  |
| V[21] | 748.781        | 168.104        | 162.765        | 163.101        | 162.429        | V[4]  |
| L[22] | 786.475        | 135.082        | 129.742        | 130.078        | 129.406        | L[3]  |
| R[23] | <b>838.509</b> | 97.387         | 92.047         | 92.383         | 91.711         | R[2]  |
| D[24] | <b>876.851</b> | 45.353         | 40.014         | 40.349         | 39.678         | D[1]  |

# sp | P62806 | H4\_MOUSE

[Acetyl]S<sup>Phospho</sup> GRGKGGKGLGKGGAK Acetyl RHRK Dimethyl VLRD  
 79.97 42.01 28.03

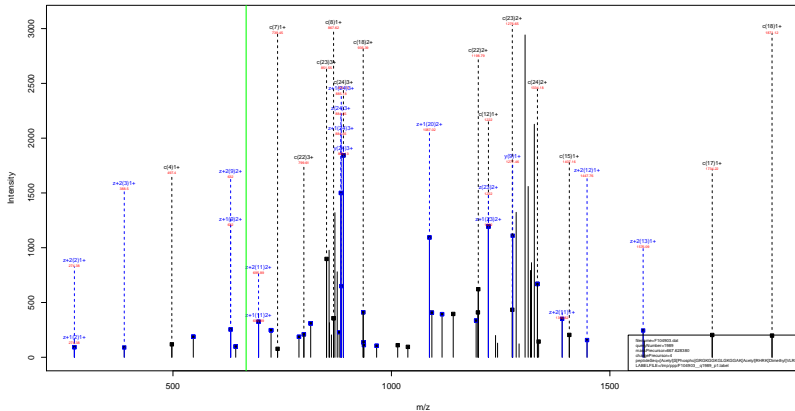

# sp | P62806 | H4\_MOUSE

[Acetyl]S<sup>Phospho</sup> GRGKGGKGLGKGGAK<sup>Acetyl</sup> RHRK<sup>Dimethyl</sup> VLRD<sup>28.03</sup>  
79.97 42.01

- ▶ fragmentation table for charge state 1+
- ▶ specType=etd
- ▶ score=78.08
- ▶ F104903.dat
- ▶ query=q1989\_p1
- ▶ precursor=667.628380
- ▶ chargePrecursor=4
- ▶ itol=0.8

| AA | c  | y               | z+1             | z+2            | z               | AA       |       |
|----|----|-----------------|-----------------|----------------|-----------------|----------|-------|
| S  | 1  | 227.643         | 2667.470        | 2051.460       | 0.000           | 2050.453 | S[24] |
| G  | 2  | 284.064         | 2458.470        | 2442.451       | 0.000           | 2441.444 | G[23] |
| R  | 3  | 400.326         | 2401.440        | 2385.430       | 2386.438        | 2384.422 | R[22] |
| G  | 4  | <b>497.187</b>  | 2245.340        | 2229.330       | 2230.337        | 2228.321 | G[21] |
| K  | 5  | 625.382         | 2188.320        | 2172.307       | 2173.315        | 2171.300 | K[20] |
| G  | 6  | 682.303         | 2040.231        | 2044.210       | 2045.220        | 2043.205 | G[19] |
| G  | 7  | <b>739.325</b>  | 2003.210        | 1987.191       | 1988.199        | 1986.183 | G[18] |
| K  | 8  | <b>867.420</b>  | 1946.180        | 1930.170       | 1931.177        | 1929.162 | K[17] |
| G  | 9  | 824.841         | 1818.093        | 1802.075       | 1803.082        | 1801.067 | G[16] |
| L  | 10 | <b>1037.525</b> | 1761.072        | 1745.053       | 1746.061        | 1744.045 | L[15] |
| G  | 11 | 1094.547        | 1647.958        | 1631.900       | 1632.977        | 1630.961 | G[14] |
| K  | 12 | <b>1222.642</b> | 1590.950        | 1574.940       | <b>1575.955</b> | 1573.940 | K[13] |
| G  | 13 | 1279.663        | 1462.871        | 1446.853       | <b>1447.860</b> | 1445.845 | G[12] |
| G  | 14 | <b>1336.685</b> | 1405.850        | 1389.831       | <b>1390.839</b> | 1388.823 | G[11] |
| A  | 15 | <b>1467.722</b> | 1348.828        | 1332.810       | <b>1333.818</b> | 1331.802 | A[10] |
| R  | 16 | 1524.827        | <b>1277.791</b> | 1261.773       | 1262.780        | 1260.765 | R[9]  |
| R  | 17 | <b>1733.928</b> | 1107.680        | 1091.667       | <b>1092.675</b> | 1090.659 | R[8]  |
| H  | 18 | <b>1870.987</b> | 951.580         | <b>935.566</b> | <b>936.574</b>  | 934.558  | H[7]  |
| R  | 19 | 2027.088        | <b>814.526</b>  | 798.507        | <b>799.515</b>  | 797.499  | R[6]  |
| K  | 20 | 2183.215        | 658.425         | 642.406        | <b>643.414</b>  | 641.398  | K[5]  |
| V  | 21 | 2262.283        | 502.260         | 486.260        | 487.267         | 485.272  | V[4]  |
| L  | 22 | 2399.387        | 403.230         | 387.211        | <b>388.219</b>  | 386.203  | L[3]  |
| R  | 23 | 2531.468        | 290.140         | <b>274.127</b> | <b>275.135</b>  | 273.119  | R[2]  |
| D  | 24 | 2666.495        | 134.045         | 118.026        | 119.034         | 117.018  | D[1]  |



# sp | P62806 | H4\_MOUSE

[Acetyl]S<sup>Phospho</sup> GRGKGGKGLGKGGAK<sup>Acetyl</sup> RHRK<sup>Dimethyl</sup> VLRD<sup>28.03</sup>  
79.97 42.01

- ▶ fragmentation table for charge state 2+
- ▶ specType=etd
- ▶ score=78.08
- ▶ F104903.dat
- ▶ query=q1989\_p1
- ▶ precursor=667.628380
- ▶ chargePrecursor=4
- ▶ itol=0.8

| AA | c  | y               | z+1             | z+2             | z               | AA              |       |
|----|----|-----------------|-----------------|-----------------|-----------------|-----------------|-------|
| S  | 1  | 144.605         | <b>1334.243</b> | 1336.234        | 0.504           | 1329.730        | S[24] |
| G  | 2  | 142.536         | 1229.739        | <b>1221.729</b> | 0.504           | <b>1221.225</b> | G[23] |
| R  | 3  | 230.566         | 1201.229        | <b>1193.219</b> | <b>1193.723</b> | 1192.715        | R[22] |
| G  | 4  | 249.097         | 1123.177        | <b>1115.168</b> | <b>1115.672</b> | 1114.666        | G[21] |
| K  | 5  | 313.145         | 1094.667        | <b>1086.657</b> | <b>1087.161</b> | 1086.151        | K[20] |
| G  | 6  | 341.655         | 1030.619        | 1022.610        | 1023.114        | 1022.106        | G[19] |
| G  | 7  | 370.166         | 1002.108        | 994.099         | 994.603         | 993.595         | G[18] |
| K  | 8  | 434.213         | 973.599         | <b>965.588</b>  | <b>966.092</b>  | 965.084         | K[17] |
| G  | 9  | 462.724         | 899.045         | 891.541         | 892.045         | 891.037         | G[16] |
| L  | 10 | 519.266         | <b>881.040</b>  | 873.033         | 873.534         | 872.526         | L[15] |
| G  | 11 | 547.777         | 824.493         | 816.488         | 816.992         | <b>815.984</b>  | G[14] |
| K  | 12 | 611.824         | 795.987         | <b>787.977</b>  | <b>788.481</b>  | 787.474         | K[13] |
| G  | 13 | 640.335         | 731.939         | <b>723.930</b>  | <b>724.434</b>  | 723.426         | G[12] |
| G  | 14 | 668.846         | 703.429         | <b>695.419</b>  | <b>695.923</b>  | 694.915         | G[11] |
| A  | 15 | 698.354         | 674.918         | 666.909         | 667.412         | 666.405         | A[10] |
| R  | 16 | 739.417         | 639.399         | <b>631.390</b>  | <b>631.894</b>  | 630.886         | R[9]  |
| R  | 17 | <b>667.468</b>  | 554.347         | <b>546.337</b>  | <b>546.841</b>  | <b>545.833</b>  | R[8]  |
| H  | 18 | <b>935.997</b>  | 476.296         | 468.287         | 468.791         | 467.783         | H[7]  |
| R  | 19 | <b>1014.048</b> | 407.767         | 399.757         | 400.261         | 399.253         | R[6]  |
| K  | 20 | <b>1092.111</b> | 329.716         | 321.707         | 322.211         | 321.203         | K[5]  |
| V  | 21 | <b>1141.645</b> | 251.663         | 243.653         | 244.157         | 243.149         | V[4]  |
| L  | 22 | <b>1198.187</b> | 202.119         | 194.109         | 194.613         | 193.605         | L[3]  |
| R  | 23 | <b>1276.238</b> | 145.577         | 137.567         | 138.071         | 137.063         | R[2]  |
| D  | 24 | <b>1333.751</b> | 67.526          | 59.517          | 60.021          | 59.013          | D[1]  |

# sp | P62806 | H4\_MOUSE

[Acetyl]S<sup>Phospho</sup><sub>79.97</sub> GRGKGGKGLGKGGAK<sup>Acetyl</sup><sub>42.01</sub> RHRK<sup>Dimethyl</sup><sub>28.03</sub> VLRD

- ▶ fragmentation table for charge state 3+
- ▶ specType=etd
- ▶ score=78.08
- ▶ F104903.dat
- ▶ query=q1989\_p1
- ▶ precursor=667.628380
- ▶ chargePrecursor=4
- ▶ itol=0.8

| AA    | c              | y              | z+1            | z+2            | z              | AA    |
|-------|----------------|----------------|----------------|----------------|----------------|-------|
| S[1]  | 76.352         | <b>889.831</b> | <b>884.492</b> | 0.672          | <b>884.156</b> | S[24] |
| G[2]  | 95.360         | 820.162        | <b>814.822</b> | 0.672          | <b>814.486</b> | G[23] |
| R[3]  | 147.393        | 801.154        | 795.815        | 796.151        | 795.479        | R[22] |
| G[4]  | 166.400        | 749.121        | 743.781        | 744.117        | 743.445        | G[21] |
| K[5]  | 209.099        | 730.114        | <b>724.774</b> | <b>725.110</b> | <b>724.438</b> | K[20] |
| G[6]  | 228.106        | 687.415        | 682.076        | 682.412        | 681.740        | G[19] |
| G[7]  | 247.113        | 668.408        | 663.069        | 663.404        | 662.733        | G[18] |
| K[8]  | 289.811        | 649.401        | <b>644.061</b> | <b>644.397</b> | <b>643.725</b> | K[17] |
| G[9]  | 308.819        | 606.793        | 601.353        | 601.689        | 601.027        | G[16] |
| L[10] | 348.313        | 587.695        | 582.256        | 582.592        | 582.020        | L[15] |
| G[11] | 385.520        | 550.001        | 544.661        | 544.997        | 544.325        | G[14] |
| K[12] | 408.219        | 530.994        | 525.654        | 525.990        | 525.318        | K[13] |
| G[13] | 427.226        | 488.295        | 482.956        | 483.292        | 482.620        | G[12] |
| G[14] | 446.233        | 469.288        | 463.949        | 464.285        | 463.613        | G[11] |
| A[15] | 469.912        | 450.281        | 444.941        | 445.277        | 444.605        | A[10] |
| K[16] | 528.614        | 426.602        | 421.262        | 421.598        | 420.926        | K[9]  |
| R[17] | 578.648        | 369.900        | 364.561        | 364.896        | 364.225        | R[8]  |
| H[18] | 624.134        | 317.896        | 312.527        | 312.863        | 312.191        | H[7]  |
| R[19] | 678.368        | 272.180        | 266.841        | 267.176        | 266.505        | R[6]  |
| K[20] | 728.410        | 220.146        | 214.807        | 215.143        | 214.471        | K[5]  |
| V[21] | 751.433        | 168.104        | 162.765        | 163.101        | 162.429        | V[4]  |
| L[22] | <b>799.127</b> | 135.082        | 129.742        | 130.078        | 129.406        | L[3]  |
| R[23] | <b>851.161</b> | 97.387         | 92.047         | 92.383         | 91.711         | R[2]  |
| D[24] | <b>889.503</b> | 45.353         | 40.014         | 40.349         | 39.678         | D[1]  |



# sp | P62806 | H4\_MOUSE

[Acetyl]SGRGKGGK <sup>Acetyl</sup><sub>42.01</sub> GLGK <sup>Acetyl</sup><sub>42.01</sub> GGAK <sup>Acetyl</sup><sub>42.01</sub> RHRK <sup>Dimethyl</sup><sub>28.03</sub> VLRD

- ▶ fragmentation table for charge state 1+
- ▶ specType=etd
- ▶ score=100.83
- ▶ F104903.dat
- ▶ query=q1992\_p1
- ▶ precursor=668.642020
- ▶ chargePrecursor=4
- ▶ itol=0.8

| AA | c  | y               | z+1             | z+2            | z               | AA       |       |
|----|----|-----------------|-----------------|----------------|-----------------|----------|-------|
| S  | 1  | 147.076         | 2073.534        | 2055.515       | 0.000           | 2054.507 | S[24] |
| G  | 2  | 204.008         | 2542.491        | 2526.473       | 0.000           | 2525.465 | G[23] |
| R  | 3  | <b>350.199</b>  | 2495.470        | 2469.451       | 2470.439        | 2468.443 | R[22] |
| G  | 4  | <b>417.230</b>  | 2329.369        | 2313.350       | 2314.338        | 2312.341 | G[21] |
| K  | 5  | <b>545.315</b>  | 2272.347        | 2256.328       | 2257.316        | 2255.321 | K[20] |
| G  | 6  | <b>602.337</b>  | 2144.252        | 2128.234       | 2129.241        | 2127.238 | G[19] |
| G  | 7  | <b>659.358</b>  | 2087.231        | 2071.215       | 2072.220        | 2070.204 | G[18] |
| K  | 8  | <b>829.464</b>  | 2030.209        | 2014.191       | 2015.198        | 2013.183 | K[17] |
| G  | 9  | <b>886.485</b>  | 1973.188        | 1844.085       | 1845.093        | 1843.077 | G[16] |
| L  | 10 | <b>959.569</b>  | <b>1893.082</b> | 1787.084       | 1788.071        | 1786.056 | L[15] |
| G  | 11 | <b>1056.591</b> | 1689.958        | 1673.980       | 1674.987        | 1672.972 | G[14] |
| K  | 12 | <b>1226.696</b> | 1632.977        | 1616.958       | <b>1617.966</b> | 1615.950 | K[13] |
| G  | 13 | <b>1283.718</b> | 1462.871        | 1446.853       | 1447.860        | 1445.845 | G[12] |
| G  | 14 | <b>1340.739</b> | 1405.850        | 1389.831       | <b>1390.839</b> | 1388.823 | G[11] |
| A  | 15 | <b>1411.776</b> | 1348.828        | 1332.810       | 1333.818        | 1331.802 | A[10] |
| R  | 16 | <b>1581.882</b> | <b>1277.791</b> | 1261.773       | 1262.780        | 1260.765 | R[9]  |
| R  | 17 | <b>1737.983</b> | 1107.688        | 1091.667       | <b>1092.675</b> | 1090.659 | R[8]  |
| H  | 18 | <b>1875.042</b> | 951.585         | <b>935.566</b> | 936.574         | 934.558  | H[7]  |
| R  | 19 | 2031.143        | 814.526         | <b>798.507</b> | <b>799.515</b>  | 797.499  | R[6]  |
| K  | 20 | 2187.209        | 658.425         | 642.405        | <b>643.414</b>  | 641.398  | K[5]  |
| V  | 21 | 2286.338        | 502.268         | 486.250        | 487.257         | 485.272  | V[4]  |
| L  | 22 | 2399.422        | 403.239         | 387.211        | <b>388.219</b>  | 386.203  | L[3]  |
| R  | 23 | 2555.523        | 290.140         | 274.127        | <b>275.135</b>  | 273.119  | R[2]  |
| D  | 24 | 2670.550        | 134.045         | 118.026        | 119.034         | 117.018  | D[1]  |

# sp | P62806 | H4\_MOUSE

[Acetyl]SGRGKGGK <sup>Acetyl</sup><sub>42.01</sub> GLGK <sup>Acetyl</sup><sub>42.01</sub> GGAK <sup>Acetyl</sup><sub>42.01</sub> RHRK <sup>Dimethyl</sup><sub>28.03</sub> VLRD

- ▶ fragmentation table for charge state 2+
- ▶ specType=etd
- ▶ score=100.83
- ▶ F104903.dat
- ▶ query=q1992\_p1
- ▶ precursor=668.642020
- ▶ chargePrecursor=4
- ▶ itol=0.8

| AA | c  | y               | z+1             | z+2             | z               | AA              |       |
|----|----|-----------------|-----------------|-----------------|-----------------|-----------------|-------|
| S  | 1  | 74.642          | <b>1336.271</b> | 1326.261        | 0.504           | 1327.757        | S[24] |
| G  | 2  | 102.553         | 1271.746        | <b>1263.740</b> | 0.504           | <b>1263.236</b> | G[23] |
| R  | 3  | 180.603         | 1243.239        | <b>1235.229</b> | <b>1235.733</b> | 1234.725        | R[22] |
| G  | 4  | 259.114         | 1165.169        | <b>1157.179</b> | <b>1157.683</b> | <b>1156.675</b> | G[21] |
| K  | 5  | 273.153         | 1136.677        | <b>1128.668</b> | <b>1129.172</b> | <b>1128.164</b> | K[20] |
| G  | 6  | 301.672         | 1072.630        | <b>1064.620</b> | 1065.124        | <b>1064.117</b> | G[19] |
| G  | 7  | 330.183         | <b>1044.119</b> | <b>1036.110</b> | <b>1036.614</b> | <b>1035.606</b> | G[18] |
| K  | 8  | 415.236         | <b>1015.608</b> | 1007.599        | <b>1008.103</b> | 1007.599        | K[17] |
| G  | 9  | 443.746         | 930.525         | <b>922.546</b>  | <b>923.050</b>  | 922.542         | G[16] |
| L  | 10 | 509.268         | <b>902.045</b>  | 894.035         | 894.539         | 893.532         | L[15] |
| G  | 11 | 538.799         | 845.503         | <b>837.493</b>  | <b>837.997</b>  | <b>836.990</b>  | G[14] |
| K  | 12 | 613.852         | <b>816.992</b>  | <b>808.983</b>  | <b>809.487</b>  | <b>808.479</b>  | K[13] |
| G  | 13 | 642.363         | 731.939         | <b>723.930</b>  | <b>724.434</b>  | <b>723.426</b>  | G[12] |
| G  | 14 | 670.873         | 703.429         | <b>695.419</b>  | <b>695.923</b>  | <b>694.915</b>  | G[11] |
| A  | 15 | 698.392         | 674.918         | 666.908         | 667.412         | 666.405         | A[10] |
| R  | 16 | 731.445         | 639.399         | <b>631.390</b>  | <b>631.894</b>  | 630.886         | R[9]  |
| R  | 17 | <b>669.495</b>  | 554.347         | <b>546.337</b>  | <b>546.841</b>  | <b>545.833</b>  | R[8]  |
| H  | 18 | <b>938.025</b>  | 476.296         | 468.287         | 468.791         | 467.783         | H[7]  |
| R  | 19 | <b>1016.075</b> | 407.747         | 399.737         | 400.241         | 399.233         | R[6]  |
| K  | 20 | 1094.128        | 329.716         | 321.707         | 322.211         | 321.203         | K[5]  |
| V  | 21 | <b>1143.673</b> | 251.663         | 243.653         | 244.157         | 243.149         | V[4]  |
| L  | 22 | <b>1200.215</b> | 202.119         | 194.109         | 194.613         | 193.605         | L[3]  |
| R  | 23 | <b>1278.265</b> | 145.577         | 137.567         | 138.071         | 137.063         | R[2]  |
| D  | 24 | <b>1335.779</b> | 67.526          | 59.517          | 60.021          | 59.013          | D[1]  |

# sp | P62806 | H4\_MOUSE

[Acetyl]SGRGKGGK <sup>Acetyl</sup><sub>42.01</sub> GLGK <sup>Acetyl</sup><sub>42.01</sub> GGAK <sup>Acetyl</sup><sub>42.01</sub> RHRK <sup>Dimethyl</sup><sub>28.03</sub> VLRD

- ▶ fragmentation table for charge state 3+
- ▶ specType=etd
- ▶ score=100.83
- ▶ F104903.dat
- ▶ query=q1992\_p1
- ▶ precursor=668.642020
- ▶ chargePrecursor=4
- ▶ itol=0.8

| AA    | c              | y              | z+1            | z+2            | z              | AA    |
|-------|----------------|----------------|----------------|----------------|----------------|-------|
| S[1]  | 49.697         | <b>891.183</b> | <b>885.843</b> | 0.672          | <b>885.507</b> | S[24] |
| G[2]  | 58.704         | 848.195        | <b>842.829</b> | 0.672          | <b>842.493</b> | G[23] |
| R[3]  | 150.738        | <b>829.161</b> | <b>823.822</b> | <b>824.158</b> | <b>823.486</b> | R[22] |
| G[4]  | 139.745        | 777.128        | 771.788        | 772.124        | 771.452        | G[21] |
| K[5]  | 182.443        | 758.121        | 752.781        | 753.117        | 752.445        | K[20] |
| G[6]  | 201.450        | 715.422        | 710.083        | 710.419        | 709.747        | G[19] |
| G[7]  | 220.458        | <b>696.415</b> | 691.076        | 691.412        | 690.740        | G[18] |
| K[8]  | 277.159        | 677.408        | 672.068        | 672.404        | 671.732        | K[17] |
| G[9]  | 296.167        | 630.709        | 615.367        | 615.703        | 615.031        | G[16] |
| L[10] | 313.681        | <b>601.699</b> | 596.359        | 596.695        | 596.023        | L[15] |
| G[11] | 352.868        | 504.024        | 558.665        | 559.001        | 558.329        | G[14] |
| K[12] | 409.570        | <b>544.997</b> | 539.658        | 539.994        | 539.322        | K[13] |
| G[13] | 428.577        | 488.295        | 483.956        | 483.292        | 482.620        | G[12] |
| G[14] | 447.585        | 469.288        | 463.949        | 464.285        | 463.613        | G[11] |
| A[15] | 471.264        | 450.281        | 444.941        | 445.277        | 444.605        | A[10] |
| K[16] | 527.966        | 426.602        | 421.262        | 421.598        | 420.926        | K[9]  |
| R[17] | 579.999        | 369.900        | 364.561        | 364.896        | 364.225        | R[8]  |
| H[18] | 625.686        | 317.866        | 312.527        | 312.863        | 312.191        | H[7]  |
| R[19] | 677.719        | 272.180        | 266.841        | 267.176        | 266.505        | R[6]  |
| K[20] | 729.761        | 220.146        | 214.807        | 215.143        | 214.471        | K[5]  |
| V[21] | 762.784        | 168.104        | 162.765        | 163.101        | 162.429        | V[4]  |
| L[22] | 800.479        | 135.082        | 129.742        | 130.078        | 129.406        | L[3]  |
| R[23] | <b>852.513</b> | 97.387         | 92.047         | 92.383         | 91.711         | R[2]  |
| D[24] | 890.855        | 45.353         | 40.014         | 40.349         | 39.678         | D[1]  |

# sp | P62806 | H4\_MOUSE

[Acetyl]SGRGKGGK Acetyl  
42.01 GLGK Acetyl  
42.01 GGAK Acetyl  
42.01 RHRK Dimethyl  
28.03 VLRD

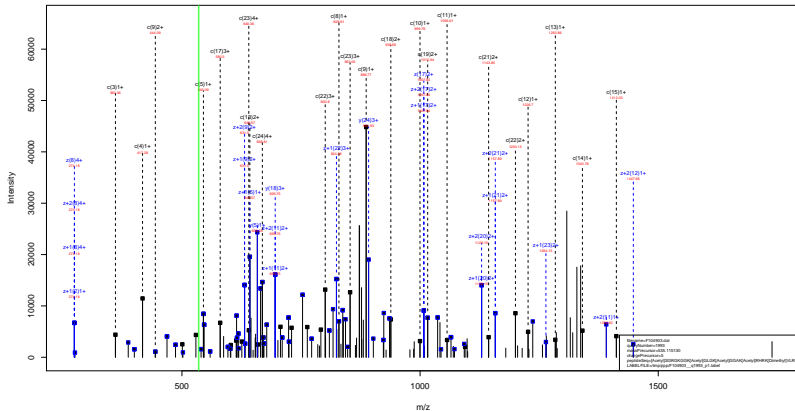

# sp | P62806 | H4\_MOUSE

[Acetyl]SGRGKGGK <sup>Acetyl</sup><sub>42.01</sub> GLGK <sup>Acetyl</sup><sub>42.01</sub> GGAK <sup>Acetyl</sup><sub>42.01</sub> RHRK <sup>Dimethyl</sup><sub>28.03</sub> VLRD

- ▶ fragmentation table for charge state 1+
- ▶ specType=etd
- ▶ score=92.29
- ▶ F104903.dat
- ▶ query=q1993\_p1
- ▶ precursor=535.115130
- ▶ chargePrecursor=5
- ▶ itol=0.8

| AA | c  | y               | z+1            | z+2            | z               | AA       |       |
|----|----|-----------------|----------------|----------------|-----------------|----------|-------|
| S  | 1  | 147.076         | 2071.534       | 2055.515       | 0.000           | 2054.507 | S[24] |
| G  | 2  | 254.598         | 2542.491       | 2526.473       | 0.000           | 2525.465 | G[23] |
| T  | 3  | <b>300.199</b>  | 2328.470       | 2309.451       | 2670.450        | 2308.443 | T[22] |
| G  | 4  | <b>417.220</b>  | 2329.369       | 2313.350       | 2314.338        | 2312.342 | G[21] |
| K  | 5  | <b>545.115</b>  | 2272.347       | 2256.329       | 2257.330        | 2255.321 | K[20] |
| G  | 6  | <b>602.337</b>  | 2144.253       | 2128.234       | 2129.241        | 2127.226 | G[19] |
| G  | 7  | <b>659.358</b>  | 2087.233       | 2071.212       | 2072.220        | 2070.204 | G[18] |
| K  | 8  | <b>829.464</b>  | 2030.209       | 2014.191       | 2015.198        | 2013.183 | K[17] |
| G  | 9  | <b>886.485</b>  | 1890.104       | 1884.085       | 1845.093        | 1843.077 | G[16] |
| L  | 10 | <b>939.549</b>  | 1803.082       | 1787.064       | 1788.071        | 1786.056 | L[15] |
| G  | 11 | <b>1056.591</b> | 1689.998       | 1673.980       | 1674.987        | 1672.972 | G[14] |
| K  | 12 | <b>1226.696</b> | 1632.977       | 1616.958       | 1617.966        | 1615.950 | K[13] |
| G  | 13 | <b>1283.718</b> | 1462.871       | 1446.853       | <b>1447.860</b> | 1445.845 | G[12] |
| G  | 14 | <b>1340.739</b> | 1405.850       | 1389.831       | <b>1390.839</b> | 1388.823 | G[11] |
| A  | 15 | <b>1411.776</b> | 1348.829       | 1332.810       | 1333.818        | 1331.802 | A[10] |
| K  | 16 | 1581.882        | 1277.791       | 1261.773       | 1262.780        | 1260.765 | K[9]  |
| R  | 17 | 1737.983        | 1197.686       | 1091.667       | <b>1092.675</b> | 1090.659 | R[8]  |
| H  | 18 | 1875.042        | 991.585        | <b>935.566</b> | <b>936.574</b>  | 934.558  | H[7]  |
| R  | 19 | 2031.143        | 814.526        | 708.507        | 709.515         | 707.499  | R[6]  |
| K  | 20 | 2187.209        | <b>658.425</b> | <b>642.406</b> | 643.414         | 641.398  | K[5]  |
| V  | 21 | 2286.338        | <b>502.298</b> | <b>486.280</b> | <b>487.287</b>  | 485.272  | V[4]  |
| L  | 22 | 2399.422        | 401.236        | <b>397.211</b> | 398.219         | 396.203  | L[3]  |
| D  | 23 | 2529.523        | 290.140        | <b>274.127</b> | <b>275.135</b>  | 273.119  | D[2]  |
| D  | 24 | 2670.550        | 134.045        | 118.026        | 119.034         | 117.018  | D[1]  |



# sp | P62806 | H4\_MOUSE

[Acetyl]SGRGKGGK <sup>Acetyl</sup><sub>42.01</sub> GLGK <sup>Acetyl</sup><sub>42.01</sub> GGAK <sup>Acetyl</sup><sub>42.01</sub> RHRK <sup>Dimethyl</sup><sub>28.03</sub> VLRD

- ▶ fragmentation table for charge state 2+
- ▶ specType=etd
- ▶ score=92.29
- ▶ F104903.dat
- ▶ query=q1993\_p1
- ▶ precursor=535.115130
- ▶ chargePrecursor=5
- ▶ itol=0.8

| AA    | c               | y               | z+1             | z+2             | z               | AA    |
|-------|-----------------|-----------------|-----------------|-----------------|-----------------|-------|
| S[1]  | 74.042          | 1138.271        | 1126.261        | 0.504           | 1327.757        | S[24] |
| G[2]  | 102.551         | 1271.748        | <b>1263.740</b> | 0.504           | 1263.230        | G[23] |
| R[3]  | 180.603         | 1243.239        | 1243.259        | <b>1235.733</b> | 1234.725        | R[22] |
| G[4]  | 259.114         | 1165.189        | <b>1157.179</b> | <b>1157.583</b> | 1159.671        | G[21] |
| K[5]  | 273.151         | 1138.677        | <b>1128.668</b> | <b>1129.172</b> | 1128.155        | K[20] |
| G[6]  | 301.672         | <b>1072.630</b> | <b>1064.620</b> | <b>1065.124</b> | <b>1064.117</b> | G[19] |
| G[7]  | 330.183         | <b>1044.119</b> | <b>1036.110</b> | <b>1036.614</b> | 1035.606        | G[18] |
| K[8]  | 415.216         | <b>1015.608</b> | <b>1007.599</b> | <b>1008.103</b> | <b>1007.095</b> | K[17] |
| G[9]  | <b>443.746</b>  | <b>930.209</b>  | <b>922.546</b>  | <b>923.050</b>  | 922.042         | G[16] |
| L[10] | <b>500.288</b>  | <b>902.945</b>  | 884.035         | 884.539         | 883.532         | L[15] |
| G[11] | <b>528.799</b>  | 845.503         | <b>837.493</b>  | <b>837.997</b>  | <b>836.990</b>  | G[14] |
| K[12] | <b>613.852</b>  | <b>816.992</b>  | <b>808.983</b>  | <b>809.487</b>  | 808.479         | K[13] |
| G[13] | <b>642.363</b>  | 731.939         | <b>723.930</b>  | <b>724.434</b>  | <b>723.426</b>  | G[12] |
| G[14] | <b>670.873</b>  | 703.429         | <b>695.419</b>  | <b>695.923</b>  | 694.915         | G[11] |
| A[15] | <b>706.392</b>  | 674.919         | 665.909         | 667.412         | 666.405         | A[10] |
| R[16] | <b>751.445</b>  | 639.399         | <b>631.390</b>  | <b>631.894</b>  | <b>630.886</b>  | R[9]  |
| R[17] | 889.495         | 554.347         | <b>546.337</b>  | <b>546.841</b>  | <b>545.833</b>  | R[8]  |
| H[18] | <b>938.025</b>  | 476.206         | <b>468.287</b>  | <b>468.791</b>  | 467.783         | H[7]  |
| R[19] | <b>1016.075</b> | 407.767         | <b>399.757</b>  | <b>400.261</b>  | <b>399.253</b>  | R[6]  |
| K[20] | <b>1094.138</b> | 329.716         | 321.707         | 322.211         | 321.203         | K[5]  |
| V[21] | <b>1143.673</b> | 251.663         | 243.653         | 244.157         | 243.149         | V[4]  |
| L[22] | <b>1200.215</b> | 202.119         | 194.109         | 194.613         | 193.605         | L[3]  |
| R[23] | 1276.265        | 145.577         | 137.567         | 138.071         | 137.063         | R[2]  |
| D[24] | 1336.779        | 67.526          | 59.517          | 60.021          | 59.013          | D[1]  |

# sp | P62806 | H4\_MOUSE

[Acetyl]SGRGKGGK <sup>Acetyl</sup><sub>42.01</sub> GLGK <sup>Acetyl</sup><sub>42.01</sub> GGAK <sup>Acetyl</sup><sub>42.01</sub> RHRK <sup>Dimethyl</sup><sub>28.03</sub> VLRD

- ▶ fragmentation table for charge state 3+
- ▶ specType=etd
- ▶ score=92.29
- ▶ F104903.dat
- ▶ query=q1993\_p1
- ▶ precursor=535.115130
- ▶ chargePrecursor=5
- ▶ itol=0.8

| AA    | c              | y              | z+1            | z+2            | z              | AA    |
|-------|----------------|----------------|----------------|----------------|----------------|-------|
| S[1]  | 49.697         | <b>891.183</b> | 885.841        | 0.672          | 885.507        | S[24] |
| G[2]  | 58.704         | <b>848.169</b> | <b>842.829</b> | 0.672          | 842.493        | G[23] |
| R[3]  | 150.738        | <b>829.161</b> | <b>823.822</b> | <b>824.158</b> | 823.486        | R[22] |
| G[4]  | 139.745        | 777.128        | <b>771.788</b> | <b>772.124</b> | 771.452        | G[21] |
| K[5]  | 182.443        | 798.121        | <b>752.781</b> | <b>753.117</b> | 752.445        | K[20] |
| G[6]  | 201.450        | 715.422        | <b>710.083</b> | <b>710.419</b> | <b>709.747</b> | G[19] |
| G[7]  | 220.458        | <b>696.415</b> | 691.076        | 691.412        | 690.740        | G[18] |
| K[8]  | 277.159        | <b>677.408</b> | <b>672.068</b> | <b>672.404</b> | <b>671.732</b> | K[17] |
| G[9]  | 296.167        | 620.799        | <b>615.367</b> | <b>615.703</b> | <b>615.031</b> | G[16] |
| L[10] | 313.681        | <b>601.699</b> | <b>596.359</b> | <b>596.695</b> | <b>596.023</b> | L[15] |
| G[11] | 352.868        | 504.024        | <b>558.665</b> | <b>559.001</b> | 558.329        | G[14] |
| K[12] | 409.570        | <b>544.997</b> | <b>539.658</b> | <b>539.994</b> | 539.322        | K[13] |
| G[13] | 428.577        | 488.295        | 482.956        | 483.292        | 482.620        | G[12] |
| G[14] | 447.585        | <b>469.288</b> | 463.949        | 464.285        | 463.613        | G[11] |
| A[15] | 471.264        | 450.281        | 444.941        | 445.277        | <b>444.605</b> | A[10] |
| K[16] | 527.966        | 426.602        | 421.262        | 421.598        | 420.926        | K[9]  |
| R[17] | <b>579.999</b> | 369.900        | 364.561        | 364.896        | 364.225        | R[8]  |
| H[18] | <b>625.686</b> | 317.896        | 312.527        | 312.863        | 312.191        | H[7]  |
| R[19] | <b>677.719</b> | 272.180        | 266.841        | 267.176        | 266.505        | R[6]  |
| K[20] | <b>729.761</b> | 220.140        | 214.807        | 215.143        | 214.471        | K[5]  |
| V[21] | <b>762.784</b> | 168.104        | 162.765        | 163.101        | 162.429        | V[4]  |
| L[22] | <b>800.479</b> | 135.082        | 129.742        | 130.078        | 129.406        | L[3]  |
| R[23] | <b>852.513</b> | 97.387         | 92.047         | 92.383         | 91.711         | R[2]  |
| D[24] | 890.855        | 45.353         | 40.014         | 40.349         | 39.678         | D[1]  |

# sp | P62806 | H4\_MOUSE

[Acetyl]SGRGKGGK<sup>Acetyl</sup><sub>42.01</sub> GLGK<sup>Acetyl</sup><sub>42.01</sub> GGAK<sup>Acetyl</sup><sub>42.01</sub> RHRK<sup>Dimethyl</sup><sub>28.03</sub> VLRD

- ▶ fragmentation table for charge state 4+
- ▶ specType=etd
- ▶ score=92.29
- ▶ F104903.dat
- ▶ query=q1993\_p1
- ▶ precursor=535.115130
- ▶ chargePrecursor=5
- ▶ itol=0.8

| AA    | c              | y              | z+1            | z+2            | z              | AA    |
|-------|----------------|----------------|----------------|----------------|----------------|-------|
| S[1]  | 37.525         | <b>668.639</b> | <b>664.634</b> | 0.755          | <b>664.182</b> | S[24] |
| G[2]  | 51.780         | 536.378        | <b>632.374</b> | 0.755          | <b>632.122</b> | G[23] |
| R[3]  | 90.805         | 622.123        | <b>618.118</b> | <b>618.370</b> | <b>617.866</b> | R[22] |
| G[4]  | 105.061        | 583.098        | 579.093        | 579.345        | 578.841        | G[21] |
| K[5]  | 137.084        | 568.842        | 564.838        | 565.090        | 564.586        | K[20] |
| G[6]  | 151.340        | 536.819        | 532.814        | 533.066        | 532.562        | G[19] |
| G[7]  | 165.595        | 522.563        | 518.558        | 518.810        | 518.307        | G[18] |
| K[8]  | 208.121        | 508.308        | 504.303        | 504.555        | 504.051        | K[17] |
| G[9]  | 222.377        | 495.781        | 491.777        | 492.029        | 491.525        | G[16] |
| L[10] | 250.048        | 451.526        | 447.521        | 447.773        | 447.269        | L[15] |
| G[11] | 264.303        | 423.255        | 419.250        | 419.502        | 418.998        | G[14] |
| K[12] | 307.430        | 400.000        | 404.995        | 405.247        | 404.743        | K[13] |
| G[13] | 321.685        | 366.473        | 362.469        | 362.721        | 362.217        | G[12] |
| G[14] | 335.940        | 352.218        | 348.213        | 348.465        | 347.961        | G[11] |
| A[15] | 353.700        | 337.963        | 333.958        | 334.210        | 333.706        | A[10] |
| K[16] | 398.226        | 320.203        | 316.199        | 316.451        | 315.947        | K[9]  |
| R[17] | 435.251        | -77.877        | <b>273.672</b> | <b>273.924</b> | <b>273.420</b> | R[8]  |
| H[18] | 469.516        | 238.652        | 234.647        | 234.899        | 234.395        | H[7]  |
| R[19] | 508.541        | 204.397        | 200.392        | 200.644        | 200.140        | R[6]  |
| K[20] | 547.573        | 165.362        | 161.357        | 161.609        | 161.105        | K[5]  |
| V[21] | 572.340        | 126.330        | 122.325        | 122.577        | 122.073        | V[4]  |
| L[22] | 600.611        | 101.563        | 97.558         | 97.810         | 97.306         | L[3]  |
| R[23] | <b>639.636</b> | 73.292         | 69.287         | 69.539         | 69.035         | R[2]  |
| D[24] | <b>668.393</b> | 34.267         | 30.262         | 30.514         | 30.010         | D[1]  |

# sp | Q6GSS7 | H2A2A\_MOUSE

LNKLLGK <sup>Dimethyl</sup>VTIAQGGVLPNIQAVLLPKKTE  
28.03

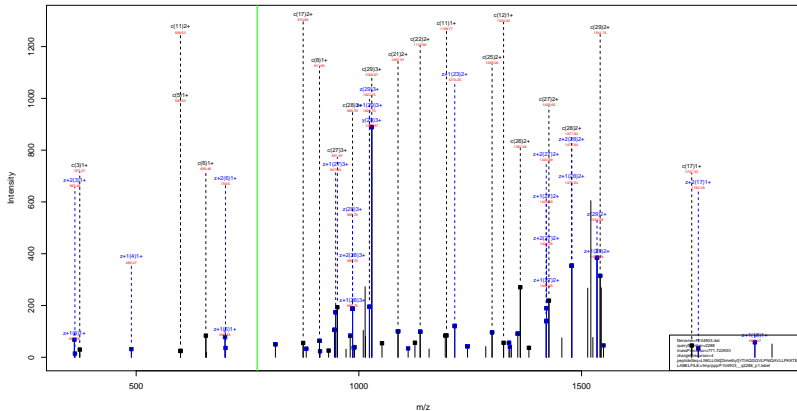

# sp | Q6GSS7 | H2A2A\_MOUSE

LNKLLGK <sup>Dimethyl</sup> <sub>28.03</sub> VTIAQGGVLPNIQAVLLPKKTE

- ▶ fragmentation table for charge state 1+
- ▶ specType=etd
- ▶ score=84.66
- ▶ F104903.dat
- ▶ query=q2288\_p1
- ▶ precursor=771.722930
- ▶ chargePrecursor=4
- ▶ itol=0.8

| AA    | c               | y        | z+1             | z+2             | z               | AA    |
|-------|-----------------|----------|-----------------|-----------------|-----------------|-------|
| L[1]  | 131.118         | 3083.802 | 3067.873        | 0.000           | 3066.865        | L[26] |
| N[2]  | 245.161         | 2970.808 | 2954.789        | 2955.797        | 2953.781        | N[28] |
| K[3]  | <b>373.256</b>  | 2856.765 | 2840.746        | 2841.754        | 2839.738        | K[27] |
| L[4]  | 488.340         | 2728.670 | 2712.651        | 2713.659        | 2711.643        | L[26] |
| L[5]  | <b>699.424</b>  | 2615.586 | 2599.567        | 2600.575        | 2598.559        | L[25] |
| G[6]  | <b>658.445</b>  | 2502.502 | 2486.483        | 2487.491        | 2485.475        | G[24] |
| K[7]  | <b>812.572</b>  | 2445.480 | 2429.461        | 2430.469        | 2428.454        | K[23] |
| V[8]  | <b>911.640</b>  | 2389.354 | 2373.335        | 2374.343        | 2372.327        | V[22] |
| T[9]  | 1012.688        | 2190.286 | 2174.267        | 2175.275        | 2173.259        | T[21] |
| I[10] | <b>1125.772</b> | 2089.238 | 2073.219        | 2074.227        | 2072.211        | I[20] |
| A[11] | <b>1196.809</b> | 1976.154 | 1960.135        | 1961.143        | 1959.127        | A[19] |
| Q[12] | <b>1244.867</b> | 1909.111 | <b>1893.090</b> | 1894.108        | 1892.092        | Q[18] |
| G[13] | <b>1381.889</b> | 1777.058 | 1761.039        | <b>1762.047</b> | 1760.032        | G[17] |
| G[14] | 1438.910        | 1720.037 | 1704.018        | 1705.026        | 1703.010        | G[16] |
| V[15] | 1537.979        | 1603.015 | 1648.997        | 1648.004        | 1645.989        | V[15] |
| L[16] | 1651.063        | 1563.947 | 1547.928        | <b>1548.936</b> | 1546.920        | L[14] |
| T[17] | <b>1748.116</b> | 1450.883 | 1434.864        | 1435.872        | 1433.856        | T[13] |
| N[18] | 1862.959        | 1353.810 | <b>1337.791</b> | <b>1338.799</b> | <b>1336.783</b> | N[12] |
| I[19] | 1975.243        | 1239.767 | 1223.748        | 1224.756        | 1222.741        | I[11] |
| Q[20] | 2103.301        | 1126.683 | <b>1110.664</b> | 1111.672        | 1109.656        | Q[10] |
| A[21] | 2174.338        | 998.624  | 982.605         | 983.614         | 981.598         | A[9]  |
| V[22] | 2273.407        | 827.587  | <b>811.569</b>  | <b>812.576</b>  | 810.561         | V[8]  |
| L[23] | 2389.491        | 628.519  | <b>612.500</b>  | 613.508         | 611.492         | L[7]  |
| L[24] | 2499.575        | 415.435  | <b>699.416</b>  | <b>700.424</b>  | 698.408         | L[6]  |
| P[25] | 2596.628        | 602.351  | 586.332         | 587.340         | 585.324         | P[5]  |
| K[26] | 2724.723        | 505.298  | <b>489.279</b>  | 490.287         | 488.271         | K[4]  |
| K[27] | 2852.818        | 377.203  | <b>361.184</b>  | <b>362.192</b>  | 360.177         | K[3]  |
| T[28] | 2953.865        | 249.108  | 233.089         | 234.097         | 232.082         | T[2]  |
| E[29] | 3082.008        | 148.050  | 132.042         | 133.050         | 131.034         | E[1]  |

# sp | Q6GSS7 | H2A2A\_MOUSE

LNKLLGK <sup>Dimethyl</sup><sub>28.03</sub> VTIAQGGVLPNIQAVLLPKKTE

- ▶ fragmentation table for charge state 2+
- ▶ specType=etd
- ▶ score=84.66
- ▶ F104903.dat
- ▶ query=q2288\_p1
- ▶ precursor=771.722930
- ▶ chargePrecursor=4
- ▶ itol=0.8

| AA     | c               | y               | z+1             | z+2             | z               | AA   |
|--------|-----------------|-----------------|-----------------|-----------------|-----------------|------|
| L   1  | 66.053          | <b>1542.450</b> | <b>1534.440</b> | 9.504           | <b>1533.936</b> | L 20 |
| N   2  | 123.054         | 1485.905        | <b>1477.898</b> | <b>1478.402</b> | <b>1477.394</b> | N 20 |
| K   3  | 187.132         | 1428.889        | <b>1420.877</b> | <b>1421.381</b> | <b>1420.373</b> | K 27 |
| L   4  | 243.674         | 1364.839        | <b>1356.829</b> | <b>1357.333</b> | <b>1356.325</b> | L 26 |
| L   5  | 300.216         | 1308.297        | 1300.287        | 1300.791        | <b>1299.783</b> | L 25 |
| G   6  | 358.758         | 1251.755        | <b>1243.745</b> | <b>1244.249</b> | <b>1243.241</b> | G 24 |
| K   7  | 406.780         | 1223.244        | <b>1215.234</b> | <b>1215.738</b> | <b>1214.731</b> | K 23 |
| V   8  | 456.324         | 1145.181        | <b>1137.171</b> | <b>1137.675</b> | 1136.667        | V 22 |
| T   9  | 506.840         | 1095.646        | <b>1087.637</b> | <b>1088.141</b> | <b>1087.133</b> | T 21 |
| T   10 | 563.390         | 1045.123        | 1037.113        | 1037.617        | 1036.609        | T 20 |
| A   11 | <b>598.908</b>  | <b>988.581</b>  | <b>980.571</b>  | <b>981.075</b>  | <b>980.067</b>  | A 19 |
| Q   12 | 662.937         | 933.066         | <b>945.053</b>  | <b>945.557</b>  | <b>944.549</b>  | Q 18 |
| G   13 | 691.448         | 889.033         | <b>881.023</b>  | <b>881.527</b>  | 880.519         | G 17 |
| G   14 | 719.959         | 860.522         | 852.513         | 853.017         | 852.009         | G 16 |
| V   15 | 769.493         | 832.011         | 824.002         | 824.506         | 823.498         | V 15 |
| L   16 | 835.035         | 782.477         | 774.468         | 774.972         | 773.964         | L 14 |
| T   17 | <b>874.561</b>  | 728.935         | 719.926         | 719.430         | 717.422         | T 13 |
| N   18 | <b>931.583</b>  | 677.400         | 668.390         | 669.393         | 668.385         | N 12 |
| I   19 | <b>988.125</b>  | 620.867         | 612.858         | 612.862         | 611.874         | I 11 |
| Q   20 | <b>1052.154</b> | 563.845         | 555.836         | 556.340         | 555.332         | Q 10 |
| A   21 | <b>1087.673</b> | 499.816         | 491.807         | 492.310         | 491.303         | A 0  |
| V   22 | <b>1137.207</b> | 484.297         | 476.288         | 476.792         | 475.784         | V 8  |
| L   23 | <b>1193.749</b> | 414.763         | 406.754         | 407.258         | 406.250         | L 7  |
| L   24 | 1250.291        | 358.221         | 350.212         | 350.716         | 349.708         | L 6  |
| P   25 | <b>1298.817</b> | 301.679         | 293.670         | 294.174         | 293.166         | P 5  |
| K   26 | <b>1362.865</b> | 253.153         | 245.143         | 245.647         | 244.639         | K 4  |
| K   27 | <b>1426.912</b> | 189.105         | 181.096         | 181.600         | 180.592         | K 3  |
| T   28 | <b>1477.436</b> | 125.058         | 117.048         | 117.552         | 116.544         | T 2  |
| E   29 | <b>1541.958</b> | 74.534          | 66.524          | 67.028          | 66.021          | E 1  |

# sp | Q6GSS7 | H2A2A\_MOUSE

LNKLLGK <sup>Dimethyl</sup> <sub>28.03</sub> VTIAQGGVLPNIQAVLLPKKTE

- ▶ fragmentation table for charge state 3+
- ▶ specType=etd
- ▶ score=84.66
- ▶ F104903.dat
- ▶ query=q2288\_p1
- ▶ precursor=771.722930
- ▶ chargePrecursor=4
- ▶ itol=0.8

| AA    | c               | y               | z+1             | z+2            | z               | AA    |
|-------|-----------------|-----------------|-----------------|----------------|-----------------|-------|
| L[1]  | 44.377          | <b>1028.635</b> | <b>1023.296</b> | 0.672          | <b>1022.960</b> | L[20] |
| N[2]  | 82.302          | <b>990.941</b>  | <b>985.601</b>  | <b>985.937</b> | <b>985.265</b>  | N[20] |
| K[3]  | 125.090         | 952.926         | <b>947.587</b>  | <b>947.923</b> | <b>947.251</b>  | K[27] |
| L[4]  | 162.785         | 910.228         | 904.889         | 905.225        | 904.553         | L[26] |
| L[5]  | 200.479         | 872.513         | 867.104         | 867.5.30       | 866.888         | L[25] |
| Q[6]  | 239.287         | 834.839         | 829.499         | 829.835        | 829.163         | Q[24] |
| K[7]  | 271.529         | 815.832         | 810.492         | 810.828        | 810.156         | K[23] |
| V[8]  | 304.552         | 793.700         | 788.450         | 788.786        | 788.114         | V[22] |
| T[9]  | 338.234         | 776.767         | 771.427         | 771.763        | 771.091         | T[21] |
| I[10] | 375.920         | 697.084         | 691.745         | 692.081        | 691.409         | I[20] |
| A[11] | 399.608         | 699.380         | 694.050         | 694.386        | 693.714         | A[19] |
| Q[12] | 442.294         | 639.711         | 634.371         | 634.707        | 634.035         | Q[18] |
| G[13] | 461.301         | 593.024         | 587.685         | 588.021        | 587.349         | G[17] |
| G[14] | 480.308         | 574.017         | 568.678         | 569.013        | 568.341         | G[16] |
| V[15] | 513.131         | 555.010         | 549.670         | 550.006        | 549.334         | V[15] |
| L[16] | 551.026         | 521.987         | 516.648         | 516.984        | 516.312         | L[14] |
| F[17] | 583.177         | 484.262         | 478.923         | 479.259        | 478.587         | F[13] |
| T[18] | 621.391         | 451.942         | 446.603         | 446.939        | 446.267         | T[12] |
| I[19] | 659.086         | 413.927         | 408.588         | 408.924        | 408.252         | I[11] |
| Q[20] | 701.772         | 376.233         | 370.893         | 371.229        | 370.557         | Q[10] |
| A[21] | 725.451         | 333.540         | 328.201         | 328.543        | 327.871         | A[9]  |
| V[22] | 758.474         | 309.867         | 304.528         | 304.864        | 304.192         | V[9]  |
| L[23] | 796.168         | 276.844         | 271.505         | 271.841        | 271.169         | L[7]  |
| L[24] | 833.863         | 239.159         | 233.810         | 234.146        | 233.474         | L[6]  |
| P[25] | 866.214         | 201.455         | 196.116         | 196.451        | 195.779         | P[5]  |
| K[26] | 908.912         | 169.104         | 163.765         | 164.101        | 163.429         | K[4]  |
| K[27] | <b>951.611</b>  | 126.406         | 121.066         | 121.402        | 120.730         | K[3]  |
| T[28] | <b>985.293</b>  | 83.700          | 78.366          | 78.704         | 78.032          | T[2]  |
| E[29] | <b>1028.307</b> | 50.025          | 44.685          | 45.021         | 44.349          | E[1]  |

# sp | Q6GSS7 | H2A2A\_MOUSE

LNKLLGK <sup>Dimethyl</sup>VTIAQGGVLPNIQAVLLPKKTE  
28.03

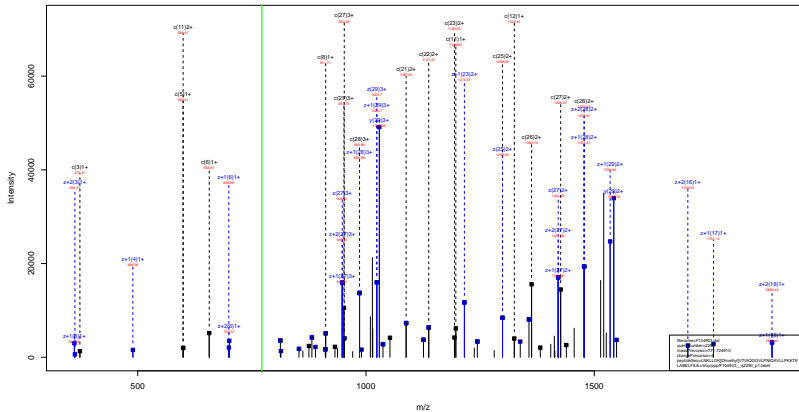



# sp | Q6GSS7 | H2A2A\_MOUSE

LNKLLGK <sup>Dimethyl</sup> <sub>28.03</sub> VTIAQGGVLPNIQAVLLPKKTE

- ▶ fragmentation table for charge state 1+
- ▶ specType=etd
- ▶ score=78.65
- ▶ F104903.dat
- ▶ query=q2290\_p1
- ▶ precursor=771.724910
- ▶ chargePrecursor=4
- ▶ itol=0.8

| AA    | c               | y               | z+1             | z+2             | z              | AA    |
|-------|-----------------|-----------------|-----------------|-----------------|----------------|-------|
| L[1]  | 131.118         | 3083.892        | 3067.873        | 0.000           | 3066.865       | L[28] |
| N[2]  | 245.161         | 2970.808        | 2954.789        | 2955.797        | 2953.781       | N[28] |
| K[3]  | <b>373.256</b>  | 2856.765        | 2840.746        | 2841.754        | 2839.738       | K[27] |
| L[4]  | 488.340         | 2738.670        | 2722.651        | 2713.659        | 2711.643       | L[26] |
| L[5]  | <b>699.424</b>  | 2615.585        | 2599.567        | 2600.575        | 2598.559       | L[25] |
| G[6]  | <b>658.445</b>  | 2502.500        | 2486.483        | 2487.491        | 2485.475       | G[24] |
| K[7]  | <b>812.572</b>  | 2445.480        | 2429.462        | 2430.469        | 2428.454       | K[23] |
| V[8]  | <b>911.640</b>  | 2289.354        | 2273.335        | 2274.343        | 2272.327       | V[22] |
| T[9]  | 1012.688        | 2190.288        | 2174.267        | 2175.275        | 2173.259       | T[21] |
| I[10] | <b>1125.772</b> | 2089.230        | 2073.210        | 2074.227        | 2072.211       | I[20] |
| A[11] | <b>1196.809</b> | 1976.154        | 1960.133        | 1961.143        | 1959.127       | A[19] |
| Q[12] | <b>1324.867</b> | 1905.111        | <b>1889.098</b> | <b>1890.106</b> | 1888.090       | Q[18] |
| G[13] | <b>1381.889</b> | 1777.058        | <b>1761.039</b> | 1762.047        | 1760.032       | G[17] |
| G[14] | <b>1438.910</b> | 1720.037        | 1704.018        | <b>1705.026</b> | 1703.010       | G[16] |
| V[15] | 1537.879        | 1663.015        | 1646.997        | 1648.004        | 1645.989       | V[15] |
| L[16] | 1651.063        | 1563.947        | 1547.928        | <b>1548.936</b> | 1546.920       | L[14] |
| F[17] | 1768.116        | 1490.863        | 1474.844        | 1475.852        | 1473.836       | F[13] |
| N[18] | 1882.159        | 1353.810        | <b>1337.791</b> | 1338.799        | 1336.783       | N[12] |
| I[19] | 1975.243        | 1239.767        | 1223.748        | 1224.756        | 1222.741       | I[11] |
| Q[20] | 2103.301        | <b>1126.683</b> | 1110.664        | 1111.672        | 1109.656       | Q[10] |
| A[21] | 2174.338        | 998.624         | 982.606         | 983.614         | 981.598        | A[9]  |
| V[22] | 2273.407        | 927.587         | <b>911.569</b>  | 912.576         | <b>910.561</b> | V[8]  |
| L[23] | 2389.491        | 808.513         | <b>813.509</b>  | <b>813.508</b>  | 811.492        | L[7]  |
| L[24] | 2499.575        | 715.435         | <b>699.416</b>  | <b>700.424</b>  | 698.408        | L[6]  |
| P[25] | 2596.628        | 602.351         | 586.332         | 587.340         | 585.324        | P[5]  |
| K[26] | 2724.723        | 505.268         | <b>489.279</b>  | 490.287         | 488.271        | K[4]  |
| K[27] | 2852.818        | 377.203         | <b>361.184</b>  | <b>362.192</b>  | 360.177        | K[3]  |
| T[28] | 2953.865        | 249.108         | 233.089         | 234.097         | 232.082        | T[2]  |
| E[29] | 3082.008        | 148.060         | 132.042         | 133.050         | 131.034        | E[1]  |

# sp | Q6GSS7 | H2A2A\_MOUSE

LNKLLGK <sup>Dimethyl</sup> <sub>28.03</sub> VTIAQGGVLPNIQAVLLPKKTE

- ▶ fragmentation table for charge state 2+
- ▶ specType=etd
- ▶ score=78.65
- ▶ F104903.dat
- ▶ query=q2290\_p1
- ▶ precursor=771.724910
- ▶ chargePrecursor=4
- ▶ itol=0.8

| AA     | c               | y               | z+1             | z+2             | z               | AA   |
|--------|-----------------|-----------------|-----------------|-----------------|-----------------|------|
| L   1  | 66.093          | <b>1542.450</b> | <b>1534.440</b> | 8.504           | 1533.930        | L 20 |
| N   2  | 123.084         | 1485.905        | <b>1477.898</b> | <b>1478.402</b> | <b>1477.394</b> | N 20 |
| K   3  | 187.132         | 1428.889        | <b>1420.877</b> | <b>1421.381</b> | <b>1420.373</b> | K 27 |
| L   4  | 243.674         | 1364.839        | <b>1356.829</b> | <b>1357.333</b> | <b>1356.325</b> | L 26 |
| L   5  | 300.216         | 1308.297        | 1300.287        | 1300.791        | <b>1299.783</b> | L 25 |
| G   6  | 358.760         | 1251.755        | <b>1243.745</b> | <b>1244.249</b> | <b>1243.241</b> | G 24 |
| K   7  | 406.799         | 1223.244        | <b>1215.234</b> | <b>1215.738</b> | 1214.731        | K 23 |
| V   8  | 456.324         | 1145.181        | <b>1137.171</b> | <b>1137.675</b> | 1136.667        | V 22 |
| F   9  | 506.840         | 1095.646        | <b>1087.637</b> | <b>1088.141</b> | 1087.133        | F 21 |
| T   10 | 563.390         | 1045.123        | <b>1037.113</b> | <b>1037.617</b> | <b>1036.609</b> | T 20 |
| A   11 | <b>598.908</b>  | 1009.581        | 980.571         | 981.075         | 980.067         | A 19 |
| Q   12 | 662.937         | <b>953.062</b>  | 965.033         | 965.537         | 944.540         | Q 18 |
| G   13 | 691.448         | <b>899.033</b>  | <b>881.023</b>  | <b>881.527</b>  | 880.519         | G 17 |
| G   14 | 719.959         | 860.522         | <b>852.513</b>  | <b>853.017</b>  | 852.009         | G 16 |
| V   15 | 769.493         | 832.011         | 824.002         | 824.506         | 823.498         | V 15 |
| L   16 | 830.035         | 782.477         | 774.468         | 774.972         | 773.964         | L 14 |
| F   17 | <b>874.561</b>  | 728.935         | 719.926         | 719.430         | 717.422         | F 13 |
| N   18 | <b>931.583</b>  | 677.400         | 668.390         | 669.893         | 668.885         | N 12 |
| I   19 | 988.125         | 630.867         | 612.858         | 612.862         | 611.874         | I 11 |
| Q   20 | <b>1052.154</b> | 583.845         | 555.836         | 556.340         | 555.332         | Q 10 |
| A   21 | <b>1087.673</b> | 499.816         | 491.807         | 492.310         | 491.303         | A 0  |
| V   22 | <b>1137.207</b> | 484.297         | 456.288         | 456.792         | 455.784         | V 0  |
| L   23 | <b>1193.749</b> | 414.763         | 406.754         | 407.258         | 406.250         | L 1  |
| L   24 | 1250.291        | 358.221         | 350.212         | 350.716         | 349.708         | L 0  |
| P   25 | <b>1298.817</b> | 301.679         | 293.670         | 294.174         | 293.166         | P 0  |
| K   26 | <b>1362.865</b> | 253.153         | 245.143         | 245.647         | 244.639         | K 4  |
| K   27 | <b>1426.912</b> | 189.105         | 181.096         | 181.600         | 180.592         | K 3  |
| T   28 | <b>1477.436</b> | 125.058         | 117.049         | 117.552         | 116.544         | T 2  |
| E   29 | 1541.958        | 74.534          | 66.524          | 67.028          | 66.021          | E 1  |

# sp | Q6GSS7 | H2A2A\_MOUSE

LNKLLGK <sup>Dimethyl</sup> <sub>28.03</sub> VTIAQGGVLPNIQAVLLPKKTE

- ▶ fragmentation table for charge state 3+
- ▶ specType=etd
- ▶ score=78.65
- ▶ F104903.dat
- ▶ query=q2290\_p1
- ▶ precursor=771.724910
- ▶ chargePrecursor=4
- ▶ itol=0.8

| AA  | c              | y               | z+1             | z+2            | z       | AA                  |
|-----|----------------|-----------------|-----------------|----------------|---------|---------------------|
| L1  | 44.377         | <b>1028.635</b> | <b>1023.296</b> |                | 0.672   | <b>1022.960</b> L20 |
| N2  | 62.392         | <b>990.941</b>  | <b>985.601</b>  | <b>985.937</b> |         | <b>985.265</b> N28  |
| K3  | 125.090        | <b>952.926</b>  | <b>947.587</b>  | <b>947.923</b> |         | <b>947.251</b> K27  |
| L4  | 162.795        | <b>910.228</b>  | 904.889         | 905.225        | 904.553 | L26                 |
| L5  | 200.479        | 872.533         | 867.194         | 867.530        | 868.855 | L25                 |
| G6  | 219.487        | 834.839         | 829.499         | 829.835        | 829.161 | G24                 |
| K7  | 271.529        | 815.832         | 810.492         | 810.828        | 810.156 | K23                 |
| V8  | 304.552        | 783.790         | 778.450         | 778.786        | 778.114 | V22                 |
| T9  | 338.234        | 730.767         | 725.427         | 725.763        | 725.091 | T21                 |
| I10 | 375.929        | 697.084         | 691.745         | 692.081        | 691.409 | I20                 |
| A11 | 399.608        | 659.389         | 654.050         | 654.386        | 653.714 | A19                 |
| Q12 | 442.294        | 636.720         | 630.374         | 630.707        | 630.035 | Q18                 |
| G13 | 461.301        | 593.024         | 587.685         | 588.021        | 587.349 | G17                 |
| G14 | 480.308        | 574.017         | 568.678         | 569.013        | 568.342 | G16                 |
| V15 | 513.331        | 555.010         | 549.670         | 550.006        | 549.334 | V15                 |
| L16 | 551.026        | 521.987         | 516.648         | 516.984        | 516.312 | L14                 |
| F17 | 583.377        | 484.292         | 478.953         | 479.289        | 478.617 | F13                 |
| T18 | 621.391        | 451.942         | 446.603         | 446.939        | 446.267 | T12                 |
| I19 | 659.088        | 413.927         | 408.588         | 408.924        | 408.252 | I11                 |
| Q20 | 701.772        | 376.233         | 370.893         | 371.229        | 370.557 | Q10                 |
| A21 | 725.451        | 333.546         | 328.207         | 328.543        | 327.871 | A09                 |
| V22 | 758.474        | 309.867         | 304.528         | 304.864        | 304.192 | V08                 |
| L23 | 796.168        | 276.844         | 271.505         | 271.841        | 271.169 | L07                 |
| L24 | 833.983        | 239.350         | 233.010         | 233.346        | 232.674 | L06                 |
| P25 | 869.214        | 201.655         | 195.316         | 195.651        | 194.979 | P05                 |
| K26 | 908.912        | 169.104         | 163.765         | 164.101        | 163.429 | K04                 |
| K27 | <b>951.611</b> | 126.406         | 121.066         | 121.402        | 120.730 | K03                 |
| T28 | <b>985.293</b> | 83.708          | 78.368          | 78.704         | 78.032  | T02                 |
| E29 | 1028.307       | 50.025          | 44.685          | 45.021         | 44.349  | E01                 |



# sp | Q6GSS7 | H2A2A\_MOUSE

LNKLLGK <sup>Dimethyl</sup> <sub>28.03</sub> VTIAQGGVLPNIQAVLLPKKTE

- ▶ fragmentation table for charge state 1+
- ▶ specType=etd
- ▶ score=103.71
- ▶ F104903.dat
- ▶ query=q2292\_p1
- ▶ precursor=771.725500
- ▶ chargePrecursor=4
- ▶ itol=0.8

| AA    | c               | y        | z+1             | z+2             | z               | AA    |
|-------|-----------------|----------|-----------------|-----------------|-----------------|-------|
| L[1]  | 131.118         | 3083.802 | 2067.873        | 0.000           | 3066.865        | L[26] |
| N[2]  | 245.161         | 2970.808 | 2954.789        | 2955.797        | 2953.781        | N[28] |
| K[3]  | <b>373.256</b>  | 2856.765 | 3840.740        | 3841.754        | 2839.738        | K[27] |
| L[4]  | 488.340         | 3728.670 | 2712.651        | 2713.659        | 3711.643        | L[26] |
| L[5]  | <b>699.424</b>  | 2615.586 | 2599.567        | 2600.575        | 2598.559        | L[25] |
| G[6]  | <b>658.445</b>  | 2302.502 | 2488.483        | 2487.491        | 2485.475        | G[24] |
| K[7]  | <b>812.572</b>  | 2645.480 | 2429.462        | 2430.469        | 2425.454        | K[23] |
| V[8]  | <b>911.640</b>  | 2289.354 | 2273.335        | 2274.343        | 2272.327        | V[22] |
| T[9]  | <b>1012.688</b> | 2190.286 | 2174.267        | 2175.275        | 2173.259        | T[21] |
| T[10] | <b>1125.772</b> | 2089.238 | 2073.219        | 2074.227        | 2072.211        | T[20] |
| A[11] | <b>1196.809</b> | 1076.154 | <b>1960.135</b> | <b>1961.143</b> | 1059.131        | A[19] |
| Q[12] | <b>1324.867</b> | 1909.111 | <b>1889.090</b> | 1890.108        | <b>1888.090</b> | Q[18] |
| G[13] | 1381.889        | 1777.058 | <b>1761.039</b> | 1762.047        | 1760.032        | G[17] |
| G[14] | 1438.910        | 1720.037 | 1704.018        | <b>1705.026</b> | 1703.010        | G[16] |
| V[15] | 1537.979        | 1603.015 | 1648.997        | 1648.004        | 1645.989        | V[15] |
| L[16] | 1651.063        | 1563.947 | 1547.928        | <b>1548.936</b> | 1546.920        | L[14] |
| T[17] | <b>1748.116</b> | 1450.883 | 1434.864        | 1435.872        | 1433.856        | T[13] |
| N[18] | 1862.959        | 1353.810 | <b>1337.791</b> | 1338.799        | 1336.783        | N[12] |
| I[19] | 1975.243        | 1239.767 | <b>1223.748</b> | 1224.756        | 1222.741        | I[11] |
| Q[20] | 2103.301        | 1126.683 | 1110.664        | <b>1111.672</b> | 1109.656        | Q[10] |
| A[21] | 2174.338        | 998.624  | <b>982.606</b>  | 983.614         | 981.598         | A[9]  |
| V[22] | 2273.407        | 927.587  | <b>911.569</b>  | 912.576         | 910.561         | V[8]  |
| L[23] | 2389.491        | 828.519  | <b>812.500</b>  | <b>813.508</b>  | 811.492         | L[7]  |
| L[24] | 2499.575        | 715.435  | <b>699.416</b>  | <b>700.424</b>  | 698.408         | L[6]  |
| P[25] | 2596.628        | 602.351  | 586.332         | 587.340         | 585.324         | P[5]  |
| K[26] | 2724.723        | 505.298  | <b>489.279</b>  | 490.287         | 488.271         | K[4]  |
| K[27] | 2852.818        | 377.203  | <b>361.184</b>  | <b>362.192</b>  | 360.177         | K[3]  |
| T[28] | 2953.865        | 249.108  | 233.089         | 234.097         | 232.082         | T[2]  |
| E[29] | 3082.008        | 148.050  | 132.042         | 133.050         | 131.034         | E[1]  |

# sp | Q6GSS7 | H2A2A\_MOUSE

LNKLLGK <sup>Dimethyl</sup><sub>28.03</sub> VTIAQGGVLPNIQAVLLPKKTE

- ▶ fragmentation table for charge state 2+
- ▶ specType=etd
- ▶ score=103.71
- ▶ F104903.dat
- ▶ query=q2292\_p1
- ▶ precursor=771.725500
- ▶ chargePrecursor=4
- ▶ itol=0.8

| AA  | c               | y               | z+1             | z+2             | z               | AA   |
|-----|-----------------|-----------------|-----------------|-----------------|-----------------|------|
| L1  | 66.063          | 1542.850        | <b>1534.440</b> | 8.504           | 1533.990        | L120 |
| N12 | 123.084         | 1485.058        | <b>1477.898</b> | <b>1478.402</b> | <b>1477.394</b> | N120 |
| K13 | 187.132         | 1428.889        | <b>1420.877</b> | <b>1421.381</b> | 1420.373        | K127 |
| L14 | 243.674         | 1364.839        | <b>1356.829</b> | <b>1357.333</b> | <b>1356.325</b> | L126 |
| L15 | 300.216         | 1308.297        | <b>1300.287</b> | <b>1300.791</b> | <b>1299.783</b> | L125 |
| G16 | 356.758         | 1251.795        | <b>1243.745</b> | <b>1244.249</b> | 1243.241        | G124 |
| K17 | 406.789         | <b>1223.244</b> | <b>1215.234</b> | <b>1215.738</b> | <b>1214.731</b> | K123 |
| V18 | 456.324         | 1145.181        | <b>1137.171</b> | <b>1137.675</b> | <b>1136.667</b> | V122 |
| T19 | 506.840         | 1095.646        | <b>1087.637</b> | <b>1088.141</b> | 1087.133        | T121 |
| T10 | 563.390         | 1045.123        | <b>1037.113</b> | <b>1037.617</b> | <b>1036.609</b> | T20  |
| A11 | <b>598.908</b>  | 998.241         | <b>990.571</b>  | <b>981.075</b>  | <b>980.067</b>  | A119 |
| G12 | 652.977         | <b>953.062</b>  | <b>945.053</b>  | <b>945.557</b>  | <b>944.549</b>  | G118 |
| G13 | 691.448         | 899.033         | <b>881.023</b>  | <b>881.527</b>  | <b>880.519</b>  | G117 |
| G14 | 719.959         | 860.522         | <b>852.513</b>  | <b>853.017</b>  | <b>852.009</b>  | G116 |
| V15 | 769.493         | 832.011         | 824.002         | 824.506         | 823.498         | V115 |
| L16 | 820.035         | 782.477         | <b>774.468</b>  | <b>774.972</b>  | 773.964         | L114 |
| T17 | <b>874.561</b>  | 728.935         | 721.926         | 722.430         | 721.422         | T113 |
| N18 | <b>931.583</b>  | 677.400         | <b>669.390</b>  | <b>669.903</b>  | 668.895         | N112 |
| I19 | 988.125         | 620.867         | 612.858         | 612.862         | 611.874         | I111 |
| Q10 | <b>1052.154</b> | 563.845         | 555.836         | 556.340         | 555.332         | Q110 |
| A11 | <b>1087.673</b> | 499.816         | 491.807         | 492.310         | 491.303         | A10  |
| V12 | <b>1137.207</b> | 484.297         | 476.288         | 476.792         | 475.784         | V10  |
| L13 | 1193.199        | 414.763         | 406.754         | 407.258         | 406.250         | L11  |
| L14 | 1250.291        | 358.221         | 350.212         | 350.716         | 349.708         | L10  |
| P15 | <b>1298.817</b> | 301.679         | 293.670         | 294.174         | 293.166         | P10  |
| K16 | <b>1362.865</b> | 253.153         | 245.143         | 245.647         | 244.639         | K14  |
| K17 | <b>1426.912</b> | 189.105         | 181.096         | 181.600         | 180.592         | K13  |
| T18 | <b>1477.436</b> | 125.058         | 117.049         | 117.552         | 116.544         | T12  |
| E19 | 1541.958        | 74.534          | 66.524          | 67.028          | 66.021          | E11  |

# sp | Q6GSS7 | H2A2A\_MOUSE

LNKLLGK <sup>Dimethyl</sup> <sub>28.03</sub> VTIAQGGVLPNIQAVLLPKKTE

- ▶ fragmentation table for charge state 3+
- ▶ specType=etd
- ▶ score=103.71
- ▶ F104903.dat
- ▶ query=q2292\_p1
- ▶ precursor=771.725500
- ▶ chargePrecursor=4
- ▶ itol=0.8

| AA    | c              | y               | z+1             | z+2            | z               | AA    |
|-------|----------------|-----------------|-----------------|----------------|-----------------|-------|
| L 1   | 44.377         | <b>1028.635</b> | <b>1023.296</b> | 0.672          | <b>1022.960</b> | L 29  |
| N 2   | 62.392         | <b>990.941</b>  | <b>985.601</b>  | <b>985.937</b> | <b>985.265</b>  | N 28  |
| K 3   | 125.090        | <b>952.926</b>  | <b>947.587</b>  | <b>947.923</b> | 947.251         | K 27  |
| L 4   | 162.795        | 910.229         | 904.889         | 905.225        | 904.553         | L 26  |
| L 5   | 200.479        | 872.523         | 867.184         | 867.520        | 866.855         | L 25  |
| G 6   | 219.487        | 834.839         | 829.499         | 829.835        | 829.161         | G 24  |
| K 7   | 271.529        | 815.832         | 810.492         | 810.828        | 810.158         | K 23  |
| V 8   | 304.552        | 763.790         | 758.450         | 758.786        | 758.114         | V 22  |
| T 9   | 336.234        | 730.767         | 725.427         | 725.763        | 725.091         | T 21  |
| I 10  | 375.929        | 697.084         | 691.745         | 692.081        | 691.409         | I 20  |
| A 11  | 399.608        | 659.389         | 654.050         | 654.386        | 653.714         | A 19  |
| Q 12  | 442.294        | 636.720         | 631.379         | 631.717        | 631.035         | Q 18  |
| G 13  | 461.301        | 593.024         | 587.685         | 588.021        | 587.349         | G 17  |
| G 14  | 480.308        | 574.017         | 568.678         | 569.013        | 568.342         | G 16  |
| V 15  | 513.331        | 555.010         | 549.670         | 550.006        | 549.334         | V 15  |
| L 16  | 551.026        | 521.987         | 516.648         | 516.984        | 516.312         | L 14  |
| F 17  | 583.377        | 484.292         | 478.953         | 479.289        | 478.617         | F 13  |
| Tu 18 | 621.391        | 451.942         | 446.603         | 446.939        | 446.266         | Tu 12 |
| I 19  | 659.086        | 413.927         | 408.588         | 408.924        | 408.252         | I 11  |
| Q 20  | 701.772        | 376.233         | 370.893         | 371.229        | 370.557         | Q 10  |
| A 21  | 725.451        | 333.546         | 328.207         | 328.543        | 327.871         | A 9   |
| V 22  | 758.474        | 309.867         | 304.528         | 304.864        | 304.192         | V 8   |
| L 23  | 796.168        | 276.844         | 271.505         | 271.841        | 271.169         | L 7   |
| L 24  | 833.863        | 239.350         | 234.011         | 234.346        | 233.674         | L 6   |
| P 25  | 866.214        | 201.655         | 196.316         | 196.651        | 195.979         | P 5   |
| K 26  | 908.912        | 169.104         | 163.765         | 164.101        | 163.429         | K 4   |
| K 27  | <b>951.611</b> | 126.406         | 121.066         | 121.402        | 120.730         | K 3   |
| T 28  | <b>985.293</b> | 83.708          | 78.368          | 78.704         | 78.032          | T 2   |
| E 29  | 1028.307       | 50.025          | 44.685          | 45.021         | 44.349          | E 1   |

# sp | Q6GSS7 | H2A2A\_MOUSE

LNKLLGK<sup>Dimethyl</sup>VTIAQGGVLPNIQAVLLPKKTE  
28.03

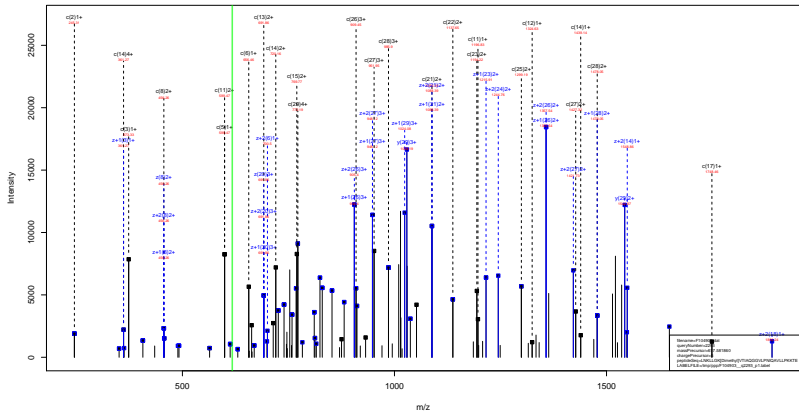



# sp | Q6GSS7 | H2A2A\_MOUSE

LNKLLGK <sup>Dimethyl</sup> <sub>28.03</sub> VTIAQGGVLPNIQAVLLPKKTE

- ▶ fragmentation table for charge state 1+
- ▶ specType=etd
- ▶ score=103.32
- ▶ F104903.dat
- ▶ query=q2293\_p1
- ▶ precursor=617.581860
- ▶ chargePrecursor=5
- ▶ itol=0.8

| AA    | c               | y        | z+1             | z+2             | z              | AA    |
|-------|-----------------|----------|-----------------|-----------------|----------------|-------|
| L[1]  | 131.118         | 3081.892 | 3067.873        | 0.000           | 3066.895       | L[29] |
| N[2]  | <b>245.161</b>  | 2970.808 | 2954.789        | 2955.797        | 2951.781       | N[28] |
| K[3]  | <b>373.256</b>  | 2856.765 | 2840.746        | 2841.754        | 2839.738       | K[27] |
| L[4]  | 486.340         | 2728.670 | 2712.651        | 2713.659        | 2711.643       | L[26] |
| L[5]  | <b>599.424</b>  | 2615.585 | 2599.567        | 2600.575        | 2598.560       | L[25] |
| G[6]  | <b>656.445</b>  | 2502.502 | 2486.483        | 2487.491        | 2485.475       | G[24] |
| K[7]  | <b>812.572</b>  | 2345.480 | 2429.462        | 2430.469        | 2428.454       | K[23] |
| V[8]  | <b>911.640</b>  | 2288.354 | 2273.335        | 2274.343        | 2272.327       | V[22] |
| T[9]  | 1012.688        | 2190.288 | 2174.269        | 2175.275        | 2173.259       | T[21] |
| I[10] | 1125.772        | 2089.238 | 2073.219        | 2074.227        | 2072.211       | I[20] |
| A[11] | <b>1196.809</b> | 1976.154 | 1960.135        | 1961.143        | 1959.127       | A[19] |
| Q[12] | <b>1324.867</b> | 1895.111 | 1889.098        | <b>1890.106</b> | 1888.090       | Q[18] |
| G[13] | 1381.889        | 1777.058 | 1761.039        | 1762.047        | 1760.032       | G[17] |
| G[14] | <b>1438.910</b> | 1720.937 | 1704.918        | 1705.926        | 1703.910       | G[16] |
| V[15] | 1537.879        | 1663.015 | 1646.997        | <b>1648.004</b> | 1646.989       | V[15] |
| L[16] | 1651.063        | 1563.947 | <b>1547.928</b> | <b>1548.936</b> | 1546.920       | L[14] |
| P[17] | <b>1748.116</b> | 1450.893 | 1434.864        | 1435.872        | 1433.856       | P[13] |
| T[18] | 1862.159        | 1383.810 | 1337.791        | 1338.799        | 1336.783       | T[12] |
| I[19] | 1975.243        | 1238.767 | 1223.748        | 1224.756        | 1222.741       | I[11] |
| Q[20] | 2103.301        | 1126.683 | 1110.664        | 1111.672        | 1109.656       | Q[10] |
| A[21] | 2174.338        | 998.624  | 983.606         | 983.614         | 981.598        | A[9]  |
| V[22] | 2273.407        | 927.587  | <b>911.569</b>  | 912.576         | 910.561        | V[8]  |
| L[23] | 2386.491        | 828.519  | <b>812.500</b>  | 813.508         | <b>811.492</b> | L[7]  |
| L[24] | 2499.575        | 715.435  | <b>693.415</b>  | <b>700.424</b>  | 698.405        | L[6]  |
| P[25] | 2598.626        | 602.351  | 586.332         | 587.340         | 585.324        | P[5]  |
| K[26] | 2724.723        | 505.298  | <b>489.279</b>  | 490.287         | 488.271        | K[4]  |
| K[27] | 2852.816        | 377.203  | <b>361.184</b>  | <b>362.192</b>  | 360.177        | K[3]  |
| T[28] | 2953.895        | 249.108  | 233.089         | 234.097         | 232.082        | T[2]  |
| E[29] | 3082.938        | 148.060  | 132.042         | 133.050         | 131.034        | E[1]  |

# sp | Q6GSS7 | H2A2A\_MOUSE

LNKLLGK <sup>Dimethyl</sup> <sub>28.03</sub> VTIAQGGVLPNIQAVLLPKKTE

- ▶ fragmentation table for charge state 2+
- ▶ specType=etd
- ▶ score=103.32
- ▶ F104903.dat
- ▶ query=q2293\_p1
- ▶ precursor=617.581860
- ▶ chargePrecursor=5
- ▶ itol=0.8

| AA  | c               | y               | z+1             | z+2             | z               | AA   |
|-----|-----------------|-----------------|-----------------|-----------------|-----------------|------|
| L1  | 66.053          | <b>1542.450</b> | 1524.440        | 9.504           | 1533.930        | L126 |
| N1  | 123.054         | 1485.905        | <b>1477.898</b> | <b>1478.402</b> | <b>1477.394</b> | N120 |
| K1  | 187.132         | 1428.888        | 1420.877        | <b>1421.381</b> | 1420.373        | K127 |
| L14 | 243.674         | 1364.839        | <b>1356.829</b> | <b>1357.333</b> | 1356.325        | L126 |
| L15 | 300.216         | 1308.297        | 1300.287        | 1299.791        | <b>1299.783</b> | L125 |
| G16 | 328.228         | 1251.755        | 1243.745        | <b>1244.249</b> | 1243.241        | G124 |
| K17 | <b>406.789</b>  | 1223.244        | <b>1215.234</b> | <b>1215.738</b> | 1214.731        | K123 |
| V18 | <b>456.324</b>  | 1145.181        | <b>1137.171</b> | <b>1137.675</b> | 1136.667        | V122 |
| T19 | 506.640         | 1095.646        | <b>1087.637</b> | <b>1088.141</b> | 1087.133        | T121 |
| T10 | <b>563.390</b>  | 1045.123        | <b>1037.113</b> | <b>1037.617</b> | 1036.609        | T20  |
| A11 | <b>598.908</b>  | 988.581         | 980.571         | 981.075         | 980.067         | A119 |
| G12 | <b>602.837</b>  | 953.060         | 945.050         | 945.554         | 944.546         | G118 |
| G13 | <b>691.448</b>  | 889.033         | <b>881.023</b>  | <b>881.527</b>  | 880.519         | G117 |
| G14 | <b>719.959</b>  | 860.522         | <b>852.513</b>  | <b>853.017</b>  | <b>852.009</b>  | G116 |
| V15 | <b>769.493</b>  | 832.011         | <b>824.002</b>  | <b>824.506</b>  | 823.498         | V115 |
| L16 | 828.035         | <b>782.477</b>  | 774.468         | 774.972         | 773.964         | L114 |
| T17 | <b>874.561</b>  | <b>725.935</b>  | 717.925         | 718.429         | 717.421         | T113 |
| N18 | <b>931.583</b>  | 677.420         | <b>669.399</b>  | <b>669.903</b>  | <b>668.895</b>  | N112 |
| I19 | 988.125         | 620.907         | <b>612.378</b>  | <b>612.882</b>  | <b>611.874</b>  | I111 |
| Q10 | <b>1052.154</b> | <b>563.845</b>  | 555.836         | 556.340         | 555.332         | Q110 |
| A11 | <b>1087.673</b> | 499.816         | <b>491.807</b>  | <b>492.310</b>  | <b>491.303</b>  | A10  |
| V12 | <b>1137.207</b> | 484.297         | <b>456.288</b>  | <b>456.792</b>  | <b>455.784</b>  | V10  |
| L13 | <b>1193.749</b> | 414.763         | <b>406.754</b>  | <b>407.258</b>  | <b>406.250</b>  | L11  |
| L14 | 1250.291        | 358.221         | <b>350.212</b>  | <b>350.716</b>  | 349.708         | L10  |
| P15 | <b>1298.817</b> | 301.678         | 293.670         | 294.174         | 293.166         | P10  |
| K16 | 1362.805        | 253.153         | <b>245.143</b>  | <b>245.647</b>  | <b>244.639</b>  | K14  |
| K17 | <b>1426.912</b> | 189.105         | 181.096         | 181.600         | 180.592         | K13  |
| T18 | <b>1477.436</b> | 125.058         | 117.048         | 117.552         | 116.544         | T12  |
| E19 | 1541.928        | 74.534          | 66.524          | 67.028          | 66.021          | E11  |

# sp | Q6GSS7 | H2A2A\_MOUSE

LNKLLGK <sup>Dimethyl</sup> <sub>28.03</sub> VTIAQGGVLPNIQAVLLPKKTE

- ▶ fragmentation table for charge state 3+
- ▶ specType=etd
- ▶ score=103.32
- ▶ F104903.dat
- ▶ query=q2293.p1
- ▶ precursor=617.581860
- ▶ chargePrecursor=5
- ▶ itol=0.8

| AA  | c              | y               | z+1             | z+2            | z              | AA  |
|-----|----------------|-----------------|-----------------|----------------|----------------|-----|
| L1  | 44.377         | <b>1028.635</b> | <b>1023.296</b> | 0.672          | 1023.660       | L29 |
| N2  | 62.302         | 090.941         | <b>985.601</b>  | <b>985.937</b> | <b>985.265</b> | N28 |
| K3  | 125.090        | 952.929         | <b>947.587</b>  | <b>947.923</b> | 947.251        | K27 |
| L4  | 162.785        | <b>910.228</b>  | <b>904.889</b>  | <b>905.225</b> | 904.551        | L26 |
| L5  | 200.479        | 872.531         | 867.194         | 867.530        | 866.856        | L25 |
| G6  | 239.487        | 834.839         | <b>829.499</b>  | <b>829.835</b> | <b>829.163</b> | G24 |
| K7  | 271.529        | <b>815.832</b>  | <b>810.492</b>  | <b>810.828</b> | <b>810.156</b> | K23 |
| V8  | 304.552        | 763.790         | <b>758.450</b>  | <b>758.786</b> | <b>758.114</b> | V22 |
| T9  | 338.234        | 730.761         | <b>725.427</b>  | <b>725.763</b> | 725.091        | T21 |
| I10 | 375.929        | 697.084         | <b>691.745</b>  | <b>692.081</b> | <b>691.409</b> | I20 |
| A11 | 399.608        | 659.389         | 654.050         | 654.386        | 653.713        | A19 |
| Q12 | 442.294        | 626.710         | <b>620.371</b>  | <b>620.707</b> | <b>620.035</b> | Q18 |
| G13 | 461.301        | 593.024         | 587.685         | 588.021        | 587.349        | G17 |
| G14 | 480.308        | 574.017         | 568.678         | 569.013        | 568.342        | G16 |
| V15 | 513.131        | 555.010         | 549.670         | 550.006        | 549.334        | V15 |
| L16 | 551.026        | 521.987         | 516.648         | 516.984        | 516.312        | L14 |
| P17 | 583.377        | 484.202         | 478.863         | 479.209        | 478.617        | P13 |
| N18 | 621.391        | 451.942         | 446.602         | 446.938        | 446.265        | N12 |
| I19 | 659.088        | 413.927         | 408.588         | 408.924        | 408.252        | I11 |
| Q20 | 701.772        | 376.233         | 370.893         | 371.229        | 370.557        | Q10 |
| A21 | <b>725.451</b> | 333.546         | 328.207         | 328.543        | 327.871        | A9  |
| V22 | <b>758.474</b> | 309.867         | 304.528         | 304.864        | 304.192        | V8  |
| L23 | 796.188        | 276.844         | 271.505         | 271.841        | 271.169        | L7  |
| L24 | 833.863        | 239.150         | 233.810         | 234.146        | 233.474        | L6  |
| T25 | 869.214        | 201.458         | 196.119         | 196.455        | 195.783        | T9  |
| K26 | <b>908.912</b> | 169.100         | 163.760         | 164.100        | 163.429        | K4  |
| K27 | <b>951.611</b> | 138.406         | 133.066         | 133.402        | 132.730        | K3  |
| T28 | <b>985.293</b> | 83.708          | 78.368          | 78.704         | 78.032         | T2  |
| E29 | 1028.307       | 50.025          | 44.685          | 45.021         | 44.349         | E1  |

# sp | Q6GSS7 | H2A2A\_MOUSE

LNKLLGK <sup>Dimethyl</sup> <sub>28.03</sub> VTIAQGGVLPNIQAVLLPKKTE

- ▶ fragmentation table for charge state 4+
- ▶ specType=etd
- ▶ score=103.32
- ▶ F104903.dat
- ▶ query=q2293\_p1
- ▶ precursor=617.581860
- ▶ chargePrecursor=5
- ▶ itol=0.8

| AA |    | c              | y              | z+1            | z+2            | z              | AA              |
|----|----|----------------|----------------|----------------|----------------|----------------|-----------------|
| L  | 1  | 33.535         | <b>771.728</b> | <b>767.724</b> | 0.750          | <b>767.412</b> | L <sub>29</sub> |
| N  | 2  | 62.046         | 743.451        | <b>739.453</b> | <b>739.705</b> | <b>739.201</b> | N <sub>26</sub> |
| K  | 3  | 94.059         | 714.941        | 710.942        | 711.194        | 710.690        | K <sub>27</sub> |
| L  | 4  | 122.340        | 687.923        | 678.918        | 679.170        | 678.666        | L <sub>26</sub> |
| L  | 5  | 150.611        | 654.652        | 650.647        | 650.899        | 650.395        | L <sub>25</sub> |
| G  | 6  | 164.867        | 626.381        | 622.376        | 622.628        | 622.124        | G <sub>24</sub> |
| K  | 7  | 203.898        | <b>612.126</b> | 608.121        | 609.373        | 607.869        | K <sub>23</sub> |
| V  | 8  | 228.665        | 573.094        | 569.089        | 569.341        | 568.837        | V <sub>22</sub> |
| T  | 9  | 253.927        | 548.327        | 544.322        | 544.574        | 544.070        | T <sub>21</sub> |
| T  | 10 | 262.198        | 523.065        | 519.060        | 519.312        | 518.808        | T <sub>20</sub> |
| A  | 11 | 269.958        | 494.794        | 490.789        | 491.041        | 490.537        | A <sub>19</sub> |
| Q  | 12 | 311.972        | 477.035        | 473.030        | 473.282        | 472.778        | Q <sub>18</sub> |
| G  | 13 | 346.728        | 445.020        | 441.015        | 441.267        | 440.763        | G <sub>17</sub> |
| G  | 14 | <b>360.483</b> | 430.765        | 426.760        | 427.012        | 426.508        | G <sub>16</sub> |
| V  | 15 | 385.250        | 416.509        | 412.504        | 412.757        | 412.253        | V <sub>15</sub> |
| L  | 16 | 413.521        | 391.742        | 387.737        | 387.989        | 387.486        | L <sub>14</sub> |
| P  | 17 | 437.784        | 363.471        | 359.466        | 359.718        | 359.215        | P <sub>13</sub> |
| N  | 18 | 466.295        | 339.208        | 335.203        | 335.455        | 334.951        | N <sub>12</sub> |
| T  | 19 | 494.566        | 310.897        | 306.891        | 306.945        | 306.441        | T <sub>11</sub> |
| Q  | 20 | 525.381        | 282.426        | 278.422        | 278.673        | 278.170        | Q <sub>10</sub> |
| A  | 21 | 544.340        | 250.412        | 246.407        | 246.659        | 246.155        | A <sub>9</sub>  |
| V  | 22 | 569.107        | 232.652        | 228.646        | 228.900        | 228.396        | V <sub>8</sub>  |
| L  | 23 | 597.378        | 207.885        | 203.881        | 204.132        | 203.629        | L <sub>7</sub>  |
| L  | 24 | 625.649        | 179.614        | 175.609        | 175.861        | 175.358        | L <sub>6</sub>  |
| P  | 25 | 649.912        | 151.343        | 147.338        | 147.590        | 147.087        | P <sub>5</sub>  |
| K  | 26 | 681.936        | 127.080        | 123.075        | 123.327        | 122.823        | K <sub>4</sub>  |
| K  | 27 | <b>713.960</b> | 95.056         | 91.052         | 91.304         | 90.800         | K <sub>3</sub>  |
| T  | 28 | <b>739.222</b> | 63.032         | 59.028         | 59.280         | 58.776         | T <sub>2</sub>  |
| E  | 29 | <b>771.482</b> | 37.771         | 33.766         | 34.018         | 33.514         | E <sub>1</sub>  |

# sp | Q6GSS7 | H2A2A\_MOUSE

LNKLLGK <sup>Dimethyl</sup>VTIAQGGVLPNIQAVLLPKKTE  
28.03

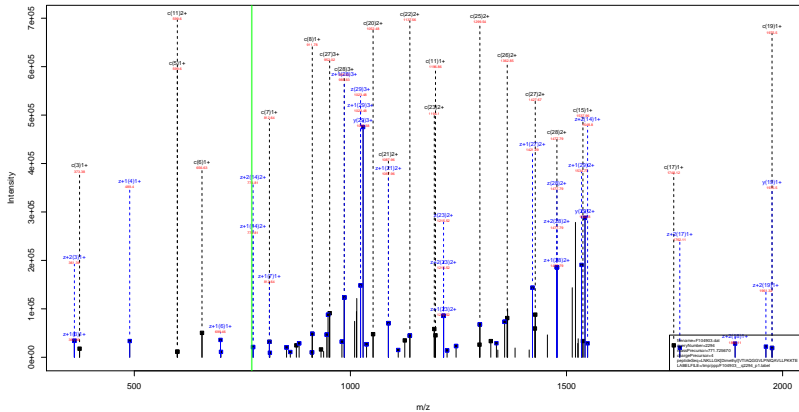

# sp | Q6GSS7 | H2A2A\_MOUSE

LNKLLGK <sup>Dimethyl</sup> <sub>28.03</sub> VTIAQGGVLPNIQAVLLPKKTE

- ▶ fragmentation table for charge state 1+
- ▶ specType=etd
- ▶ score=103.61
- ▶ F104903.dat
- ▶ query=q2294\_p1
- ▶ precursor=771.725670
- ▶ chargePrecursor=4
- ▶ itol=0.8

| AA    | c               | y               | z+1             | z+2             | z              | AA    |
|-------|-----------------|-----------------|-----------------|-----------------|----------------|-------|
| L[1]  | 131.118         | 3083.892        | 3067.873        | 0.000           | 3066.865       | L[26] |
| N[2]  | 245.161         | 2970.808        | 2954.789        | 2955.797        | 2953.781       | N[28] |
| K[3]  | <b>373.256</b>  | 2856.765        | 2840.746        | 2841.754        | 2839.738       | K[27] |
| L[4]  | 488.340         | 2738.670        | 2722.651        | 2713.659        | 2711.643       | L[26] |
| L[5]  | <b>699.424</b>  | 2615.585        | 2599.567        | 2600.575        | 2598.559       | L[25] |
| G[6]  | <b>658.445</b>  | 2502.500        | 2486.483        | 2487.491        | 2485.475       | G[24] |
| K[7]  | <b>812.572</b>  | 2445.460        | 2429.442        | 2430.450        | 2428.434       | K[23] |
| V[8]  | <b>911.640</b>  | 2289.354        | 2273.335        | 2274.343        | 2272.327       | V[22] |
| T[9]  | 1012.688        | 2190.288        | 2174.269        | 2175.275        | 2173.259       | T[21] |
| I[10] | <b>1125.772</b> | 2089.230        | 2073.210        | 2074.227        | 2072.211       | I[20] |
| A[11] | <b>1196.809</b> | <b>1976.154</b> | 1960.135        | <b>1961.143</b> | 1959.127       | A[19] |
| Q[12] | <b>1324.867</b> | 1925.111        | 1899.098        | <b>1890.106</b> | 1888.090       | Q[18] |
| G[13] | 1381.889        | 1777.058        | 1761.039        | <b>1762.047</b> | 1760.032       | G[17] |
| G[14] | 1438.910        | 1720.037        | 1704.018        | 1705.026        | 1703.010       | G[16] |
| V[15] | <b>1537.979</b> | 1663.015        | 1646.997        | 1648.004        | 1646.989       | V[15] |
| L[16] | 1651.063        | 1563.947        | 1547.928        | <b>1548.936</b> | 1546.920       | L[14] |
| F[17] | <b>1748.116</b> | 1490.863        | 1474.844        | 1475.852        | 1473.836       | F[13] |
| N[18] | 1869.959        | 1353.810        | <b>1337.791</b> | 1338.799        | 1336.783       | N[12] |
| I[19] | <b>1975.243</b> | 1239.761        | <b>1223.748</b> | 1224.756        | 1222.741       | I[11] |
| Q[20] | 2103.301        | 1126.683        | <b>1110.664</b> | 1111.672        | 1109.656       | Q[10] |
| A[21] | 2174.338        | 998.624         | 982.606         | 983.614         | 981.598        | A[9]  |
| V[22] | 2273.407        | 927.587         | <b>911.569</b>  | <b>912.576</b>  | <b>910.561</b> | V[8]  |
| L[23] | 2389.491        | 808.513         | <b>813.500</b>  | <b>813.508</b>  | 811.492        | L[7]  |
| L[24] | 2499.575        | 715.435         | <b>699.416</b>  | <b>700.424</b>  | 698.408        | L[6]  |
| P[25] | 2596.628        | 602.351         | 586.332         | 587.340         | 585.324        | P[5]  |
| K[26] | 2724.723        | 505.268         | <b>489.279</b>  | 490.287         | 488.271        | K[4]  |
| K[27] | 2852.818        | 377.203         | <b>361.184</b>  | <b>362.192</b>  | 360.177        | K[3]  |
| T[28] | 2953.865        | 249.106         | 233.089         | 234.097         | 232.082        | T[2]  |
| E[29] | 3082.008        | 148.060         | 132.042         | 133.050         | 131.034        | E[1]  |

# sp | Q6GSS7 | H2A2A\_MOUSE

LNKLLGK <sup>Dimethyl</sup><sub>28.03</sub> VTIAQGGVLPNIQAVLLPKKTE

- ▶ fragmentation table for charge state 2+
- ▶ specType=etd
- ▶ score=103.61
- ▶ F104903.dat
- ▶ query=q2294\_p1
- ▶ precursor=771.725670
- ▶ chargePrecursor=4
- ▶ itol=0.8

| AA  | c               | y               | z+1             | z+2             | z               | AA   |
|-----|-----------------|-----------------|-----------------|-----------------|-----------------|------|
| L1  | 66.093          | <b>1542.450</b> | <b>1534.440</b> | 8.504           | 1533.930        | L198 |
| N12 | 123.084         | 1485.905        | <b>1477.898</b> | <b>1478.402</b> | <b>1477.394</b> | N108 |
| K13 | 187.132         | 1428.889        | <b>1420.877</b> | <b>1421.381</b> |                 | K127 |
| L14 | 243.674         | 1364.839        | <b>1356.829</b> | <b>1357.333</b> | <b>1356.325</b> | L126 |
| L15 | 300.216         | 1308.297        | <b>1300.287</b> | 1300.791        | <b>1299.783</b> | L125 |
| G16 | 358.758         | 1251.795        | <b>1243.745</b> | <b>1244.249</b> | 1243.241        | G124 |
| K17 | 406.799         | <b>1223.244</b> | <b>1215.234</b> | <b>1215.738</b> | <b>1214.731</b> | K123 |
| V18 | 456.324         | 1145.181        | <b>1137.171</b> | <b>1137.675</b> | 1136.667        | V122 |
| F19 | 506.840         | 1095.646        | <b>1087.637</b> | <b>1088.141</b> | 1087.133        | F121 |
| T10 | 563.390         | 1045.123        | <b>1037.113</b> | <b>1037.617</b> | <b>1036.609</b> | T120 |
| A11 | <b>598.908</b>  | 988.581         | <b>980.571</b>  | <b>981.075</b>  | <b>980.067</b>  | A119 |
| G12 | 662.977         | 933.060         | <b>945.053</b>  | <b>945.557</b>  | <b>944.549</b>  | G118 |
| G13 | 691.448         | 889.033         | <b>881.023</b>  | <b>881.527</b>  | 880.519         | G117 |
| G14 | 719.959         | <b>860.522</b>  | <b>852.513</b>  | <b>853.017</b>  | <b>852.009</b>  | G116 |
| V15 | 769.493         | 832.011         | 824.002         | 824.506         | 823.498         | V115 |
| L16 | 830.035         | 782.477         | <b>774.468</b>  | <b>774.972</b>  | 773.964         | L114 |
| F17 | <b>874.561</b>  | 728.935         | 721.928         | 722.432         | 721.424         | F113 |
| N18 | <b>931.583</b>  | 677.400         | 669.390         | 669.903         | 668.895         | N112 |
| I19 | 988.125         | 630.867         | 622.878         | 623.382         | 622.374         | I111 |
| Q10 | <b>1052.154</b> | 583.845         | 575.836         | 576.340         | 575.332         | Q110 |
| A11 | <b>1087.673</b> | 499.816         | 491.807         | 492.310         | 491.303         | A10  |
| V12 | <b>1137.207</b> | 484.297         | 476.288         | 476.792         | 475.784         | V19  |
| L13 | <b>1193.749</b> | 414.763         | 406.754         | 407.258         | 406.250         | L17  |
| L14 | 1250.291        | 358.221         | 350.212         | 350.716         | 349.708         | L16  |
| P15 | <b>1288.817</b> | 301.679         | 293.670         | 294.174         | 293.166         | P15  |
| K16 | <b>1362.865</b> | 253.153         | 245.143         | 245.647         | 244.639         | K14  |
| K17 | <b>1426.912</b> | 189.105         | 181.096         | 181.600         | 180.592         | K13  |
| T18 | <b>1477.436</b> | 125.058         | 117.048         | 117.552         | 116.544         | T12  |
| E19 | 1541.958        | 74.534          | 66.524          | 67.028          | 66.021          | E11  |

# sp | Q6GSS7 | H2A2A\_MOUSE

LNKLLGK <sup>Dimethyl</sup> <sub>28.03</sub> VTIAQGGVLPNIQAVLLPKKTE

- ▶ fragmentation table for charge state 3+
- ▶ specType=etd
- ▶ score=103.61
- ▶ F104903.dat
- ▶ query=q2294\_p1
- ▶ precursor=771.725670
- ▶ chargePrecursor=4
- ▶ itol=0.8

| AA    | c              | y               | z+1             | z+2            | z     | AA                   |
|-------|----------------|-----------------|-----------------|----------------|-------|----------------------|
| L 1   | 44.377         | <b>1028.635</b> | <b>1023.296</b> |                | 0.672 | <b>1022.960</b> L 29 |
| N 2   | 62.392         | 990.941         | <b>985.601</b>  | <b>985.937</b> |       | <b>985.265</b> N 28  |
| K 3   | 125.090        | 952.026         | <b>947.587</b>  | <b>947.923</b> |       | 947.251 K 27         |
| L 4   | 162.795        | 910.229         | 904.889         | 905.225        |       | 904.553 L 26         |
| L 5   | 200.479        | 872.523         | 867.124         | 867.550        |       | 866.955 L 25         |
| G 6   | 219.487        | 834.839         | 829.409         | 829.835        |       | 829.163 G 24         |
| K 7   | 271.529        | 815.832         | 810.492         | 810.828        |       | 810.156 K 23         |
| V 8   | 304.552        | 763.790         | 758.450         | 758.786        |       | 758.114 V 22         |
| T 9   | 336.234        | 730.767         | 725.427         | 725.763        |       | 725.091 T 21         |
| I 10  | 375.929        | 697.084         | 691.745         | 692.081        |       | 691.409 I 20         |
| A 11  | 399.608        | 659.389         | 654.050         | 654.386        |       | 653.714 A 19         |
| Q 12  | 442.294        | 636.720         | 630.374         | 630.707        |       | 630.035 Q 18         |
| G 13  | 461.301        | 593.024         | 587.685         | 588.021        |       | 587.349 G 17         |
| G 14  | 480.308        | 574.017         | 568.678         | 569.013        |       | 568.342 G 16         |
| V 15  | 513.331        | 555.010         | 549.670         | 550.006        |       | 549.334 V 15         |
| L 16  | 551.026        | 521.987         | 516.648         | 516.984        |       | 516.312 L 14         |
| F 17  | 583.377        | 484.292         | 478.953         | 479.289        |       | 478.617 F 13         |
| Tu 18 | 621.391        | 451.942         | 446.603         | 446.939        |       | 446.266 Tu 12        |
| I 19  | 659.086        | 413.927         | 408.588         | 408.924        |       | 408.252 I 11         |
| Q 20  | 701.772        | 376.213         | 370.893         | 371.229        |       | 370.557 Q 10         |
| A 21  | 725.451        | 333.546         | 328.207         | 328.543        |       | 327.871 A 9          |
| V 22  | 758.474        | 309.867         | 304.528         | 304.864        |       | 304.192 V 8          |
| L 23  | 796.168        | 276.844         | 271.505         | 271.841        |       | 271.169 L 7          |
| L 24  | 833.863        | 239.350         | 233.910         | 234.246        |       | 233.474 L 6          |
| P 25  | 866.214        | 201.655         | 196.116         | 196.451        |       | 195.785 P 5          |
| K 26  | 908.912        | 169.104         | 163.765         | 164.101        |       | 163.429 K 4          |
| K 27  | <b>951.611</b> | 126.406         | 121.066         | 121.402        |       | 120.730 K 3          |
| T 28  | <b>985.293</b> | 83.708          | 78.368          | 78.704         |       | 78.032 T 2           |
| E 29  | 1028.307       | 50.025          | 44.685          | 45.021         |       | 44.349 E 1           |



# sp | Q6GSS7 | H2A2A\_MOUSE

LNKLLGK <sup>Dimethyl</sup>VTIAQGGVLPNIQAVLLPKKTE  
28.03

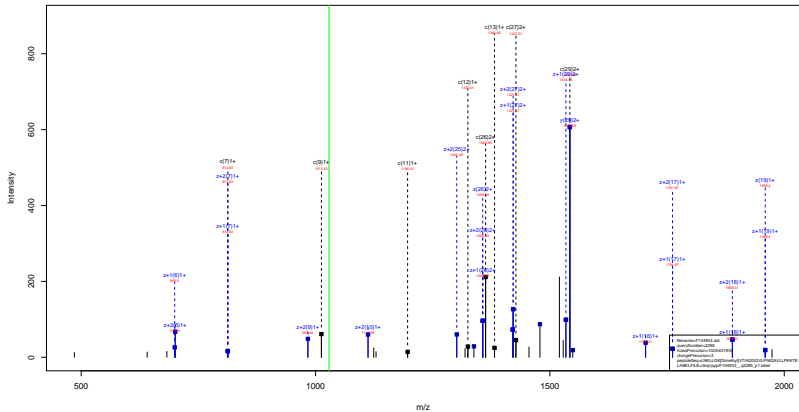

# sp | Q6GSS7 | H2A2A\_MOUSE

LNKLLGK <sup>Dimethyl</sup> <sub>28.03</sub> VTIAQGGVLPNIQAVLLPKKTE

- ▶ fragmentation table for charge state 1+
- ▶ specType=etd
- ▶ score=44.60
- ▶ F104903.dat
- ▶ query=q2295\_p1
- ▶ precursor=1028.631900
- ▶ chargePrecursor=3
- ▶ itol=0.8

| AA   | c               | y        | z+1             | z+2             | z               | AA   |
|------|-----------------|----------|-----------------|-----------------|-----------------|------|
| L 1  | 131.118         | 3083.802 | 2067.873        | 0.000           | 3066.865        | L 26 |
| N 2  | 245.161         | 2970.808 | 2954.789        | 2955.797        | 2953.781        | N 28 |
| K 3  | 373.256         | 2856.765 | 3840.740        | 3841.754        | 3839.738        | K 27 |
| L 4  | 486.340         | 2728.670 | 2712.651        | 2713.659        | 2711.643        | L 26 |
| L 5  | 599.424         | 2615.586 | 2599.567        | 2600.575        | 2598.559        | L 25 |
| G 6  | 699.495         | 2502.502 | 2486.483        | 2487.491        | 2485.475        | G 24 |
| K 7  | <b>812.572</b>  | 2445.480 | 2429.462        | 2430.469        | 2428.454        | K 23 |
| V 8  | 911.640         | 2289.354 | 2273.335        | 2274.343        | 2272.327        | V 22 |
| T 9  | <b>1012.688</b> | 2190.266 | 2174.267        | 2175.275        | 2173.259        | T 21 |
| I 10 | 1125.772        | 2089.238 | 2073.219        | 2074.227        | 2072.211        | I 20 |
| A 11 | <b>1196.809</b> | 1976.154 | <b>1960.135</b> | 1961.143        | <b>1959.127</b> | A 19 |
| Q 12 | <b>1324.867</b> | 1909.111 | <b>1893.099</b> | <b>1894.106</b> | 1892.090        | Q 18 |
| G 13 | <b>1381.889</b> | 1777.058 | <b>1761.039</b> | <b>1762.047</b> | 1760.032        | G 17 |
| G 14 | 1438.910        | 1720.037 | <b>1704.018</b> | 1705.026        | 1703.010        | G 16 |
| V 15 | 1537.979        | 1603.015 | 1646.997        | 1648.004        | 1646.989        | V 15 |
| L 16 | 1651.063        | 1563.947 | 1547.928        | <b>1548.936</b> | 1546.920        | L 14 |
| T 17 | 1768.116        | 1450.883 | 1434.864        | 1435.872        | 1433.856        | T 13 |
| N 18 | 1892.159        | 1353.810 | <b>1337.791</b> | 1338.799        | 1336.783        | N 12 |
| I 19 | 1975.243        | 1239.767 | 1223.748        | 1224.756        | 1222.741        | I 11 |
| Q 20 | 2103.301        | 1126.683 | 1110.664        | <b>1111.672</b> | 1109.656        | Q 10 |
| A 21 | 2174.338        | 998.624  | 982.606         | <b>983.614</b>  | 981.598         | A 9  |
| V 22 | 2273.407        | 927.587  | 911.568         | 912.576         | 910.561         | V 8  |
| L 23 | 2389.491        | 826.519  | <b>810.500</b>  | <b>811.508</b>  | 811.492         | L 7  |
| L 24 | 2499.575        | 715.435  | <b>699.416</b>  | <b>700.424</b>  | 698.408         | L 6  |
| P 25 | 2596.628        | 602.351  | 586.332         | 587.340         | 585.324         | P 5  |
| K 26 | 2724.723        | 505.298  | 489.279         | 490.287         | 488.271         | K 4  |
| K 27 | 2852.818        | 377.203  | 361.184         | 362.192         | 360.177         | K 3  |
| T 28 | 2953.865        | 249.108  | 233.089         | 234.097         | 232.082         | T 2  |
| E 29 | 3082.908        | 148.060  | 132.042         | 133.050         | 131.034         | E 1  |

# sp | Q6GSS7 | H2A2A\_MOUSE

LNKLLGK <sup>Dimethyl</sup> <sub>28.03</sub> VTIAQGGVLPNIQAVLLPKKTE

- ▶ fragmentation table for charge state 2+
- ▶ specType=etd
- ▶ score=44.60
- ▶ F104903.dat
- ▶ query=q2295\_p1
- ▶ precursor=1028.631900
- ▶ chargePrecursor=3
- ▶ itol=0.8

| AA | c               | y               | z+1             | z+2             | z               | AA   |
|----|-----------------|-----------------|-----------------|-----------------|-----------------|------|
| L1 | 66.053          | <b>1542.450</b> | <b>1534.440</b> | 9.504           | <b>1533.936</b> | L126 |
| N1 | 123.054         | 1485.905        | 1477.898        | <b>1478.402</b> | 1477.394        | N20  |
| K1 | 187.132         | 1428.889        | <b>1420.877</b> | <b>1421.381</b> | <b>1420.373</b> | K27  |
| L1 | 243.674         | 1364.839        | <b>1356.829</b> | <b>1357.333</b> | <b>1356.325</b> | L26  |
| L1 | 300.216         | 1308.297        | 1300.287        | <b>1300.791</b> | 1299.783        | L25  |
| G1 | 358.759         | 1251.755        | 1243.745        | 1244.249        | 1243.241        | G24  |
| K1 | 406.799         | 1223.244        | 1215.234        | 1215.738        | 1214.731        | K23  |
| V1 | 456.324         | 1145.181        | 1137.171        | 1137.675        | 1136.667        | V22  |
| F1 | 506.849         | 1095.646        | 1087.637        | 1088.141        | 1087.133        | F21  |
| T1 | 563.390         | 1045.123        | 1037.113        | 1037.617        | 1036.609        | T20  |
| A1 | 608.908         | 988.581         | 980.571         | 981.075         | 980.067         | A19  |
| Q1 | 662.937         | 933.062         | 925.053         | 925.557         | 924.549         | Q18  |
| G1 | 691.448         | 889.033         | 881.023         | 881.527         | 880.519         | G17  |
| G1 | 719.959         | 860.522         | 852.513         | 853.017         | 852.009         | G16  |
| V1 | 769.493         | 832.011         | 824.002         | 824.506         | 823.498         | V15  |
| L1 | 826.035         | 782.477         | 774.468         | 774.972         | 773.964         | L14  |
| F1 | 874.581         | 728.935         | 720.926         | 721.430         | 720.422         | F13  |
| N1 | 911.583         | 677.400         | 669.390         | 669.893         | 668.885         | N12  |
| I1 | 968.125         | 620.867         | 612.858         | 613.362         | 612.354         | I11  |
| Q1 | 1052.154        | 563.845         | 555.836         | 556.340         | 555.332         | Q10  |
| A1 | 1087.673        | 499.816         | 491.807         | 492.310         | 491.303         | A0   |
| V1 | 1127.207        | 484.297         | 476.288         | 476.792         | 475.784         | V9   |
| L1 | 1193.749        | 414.763         | 406.754         | 407.258         | 406.250         | L1   |
| L1 | 1250.291        | 358.221         | 350.212         | 350.716         | 349.708         | L0   |
| P1 | 1298.817        | 301.679         | 293.670         | 294.174         | 293.166         | P9   |
| K1 | <b>1362.865</b> | 253.153         | 245.143         | 245.647         | 244.639         | K4   |
| K1 | <b>1426.912</b> | 189.105         | 181.096         | 181.600         | 180.592         | K3   |
| T1 | 1477.438        | 125.058         | 117.049         | 117.552         | 116.544         | T2   |
| E1 | <b>1541.958</b> | 74.534          | 66.524          | 67.028          | 66.021          | E1   |

# sp | Q6GSS7 | H2A2A\_MOUSE

LNKLLGK<sup>Dimethyl</sup>VTIAQGGVLPNIQAVLLPKKTE  
28.03

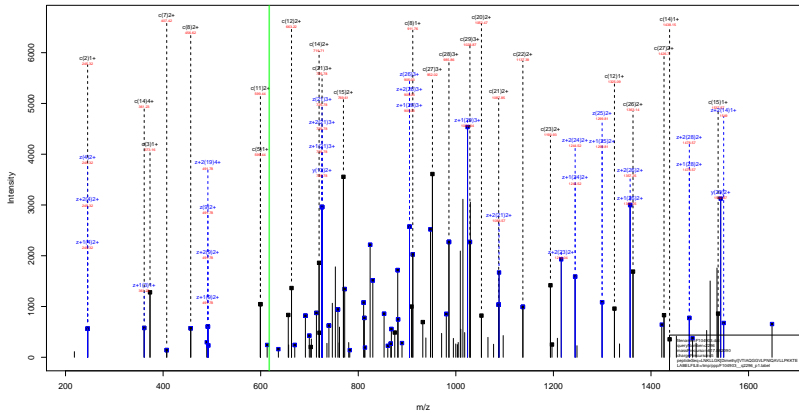

# sp | Q6GSS7 | H2A2A\_MOUSE

LNKLLGK <sup>Dimethyl</sup> <sub>28.03</sub> VTIAQGGVLPNIQAVLLPKKTE

- ▶ fragmentation table for charge state 1+
- ▶ specType=etd
- ▶ score=98.64
- ▶ F104903.dat
- ▶ query=q2296\_p1
- ▶ precursor=617.582090
- ▶ chargePrecursor=5
- ▶ itol=0.8

| AA |    | c               | y        | z+1            | z+2             | z              | AA              |
|----|----|-----------------|----------|----------------|-----------------|----------------|-----------------|
| L  | 1  | 131.118         | 2083.892 | 2067.873       | 0.000           | 2066.865       | L <sub>29</sub> |
| N  | 2  | <b>245.161</b>  | 2070.808 | 2054.789       | 2055.797        | 2053.781       | N <sub>28</sub> |
| K  | 3  | <b>373.256</b>  | 2056.765 | 2040.746       | 2041.754        | 2039.738       | K <sub>27</sub> |
| L  | 4  | 480.240         | 2728.670 | 2712.651       | 2713.659        | 2711.643       | L <sub>26</sub> |
| L  | 5  | <b>599.224</b>  | 2315.588 | 2299.567       | 2300.575        | 2298.559       | L <sub>25</sub> |
| G  | 6  | <b>656.445</b>  | 2502.502 | 2486.481       | 2487.491        | 2485.475       | G <sub>24</sub> |
| K  | 7  | <b>812.572</b>  | 2245.408 | 2429.402       | 2430.409        | 2428.404       | K <sub>23</sub> |
| V  | 8  | <b>911.640</b>  | 2289.354 | 2273.335       | 2274.343        | 2272.327       | V <sub>22</sub> |
| T  | 9  | 1012.688        | 2190.288 | 2174.267       | 2175.275        | 2173.259       | T <sub>21</sub> |
| I  | 10 | 1125.722        | 2089.230 | 2073.210       | 2074.227        | 2072.211       | I <sub>20</sub> |
| A  | 11 | <b>1196.809</b> | 1976.154 | 1960.135       | 1961.143        | 1959.127       | A <sub>19</sub> |
| Q  | 12 | <b>1324.867</b> | 1925.111 | 1889.090       | 1890.108        | 1888.090       | Q <sub>18</sub> |
| G  | 13 | 1381.889        | 1777.058 | 1761.039       | 1762.047        | 1760.032       | G <sub>17</sub> |
| G  | 14 | <b>1438.910</b> | 1720.037 | 1704.018       | 1705.026        | 1703.010       | G <sub>16</sub> |
| V  | 15 | <b>1537.979</b> | 1663.015 | 1646.997       | <b>1648.004</b> | 1646.989       | V <sub>15</sub> |
| L  | 16 | 1651.063        | 1563.947 | 1547.928       | <b>1548.936</b> | 1546.920       | L <sub>14</sub> |
| P  | 17 | 1748.116        | 1450.863 | 1434.844       | 1435.852        | 1433.836       | P <sub>13</sub> |
| T  | 18 | 1862.159        | 1333.813 | 1317.792       | 1318.799        | 1316.783       | T <sub>12</sub> |
| I  | 19 | 1975.243        | 1230.787 | 1223.748       | 1224.756        | 1222.741       | I <sub>11</sub> |
| Q  | 20 | 2103.301        | 1120.683 | 1110.664       | 1111.672        | 1109.656       | Q <sub>10</sub> |
| A  | 21 | 2174.338        | 998.624  | 982.606        | 983.614         | 981.598        | A <sub>9</sub>  |
| V  | 22 | 2273.407        | 927.587  | <b>911.569</b> | 912.576         | 910.561        | V <sub>8</sub>  |
| L  | 23 | 2386.491        | 828.519  | <b>812.500</b> | <b>813.508</b>  | <b>811.492</b> | L <sub>7</sub>  |
| L  | 24 | 2489.576        | 735.435  | <b>695.416</b> | <b>700.424</b>  | 698.408        | L <sub>6</sub>  |
| L  | 25 | 2598.638        | 662.351  | 546.132        | 547.140         | 545.124        | L <sub>5</sub>  |
| K  | 26 | 2724.723        | 505.295  | <b>485.279</b> | 490.287         | 488.271        | K <sub>4</sub>  |
| K  | 27 | 2852.818        | 377.203  | <b>361.184</b> | 362.192         | 360.177        | K <sub>3</sub>  |
| T  | 28 | 2953.865        | 249.108  | 233.089        | 234.097         | 232.082        | T <sub>2</sub>  |
| E  | 29 | 3082.908        | 148.060  | 132.942        | 133.950         | 131.934        | E <sub>1</sub>  |

# sp | Q6GSS7 | H2A2A\_MOUSE

LNKLLGK <sup>Dimethyl</sup><sub>28.03</sub> VTIAQGGVLPNIQAVLLPKKTE

- ▶ fragmentation table for charge state 2+
- ▶ specType=etd
- ▶ score=98.64
- ▶ F104903.dat
- ▶ query=q2296\_p1
- ▶ precursor=617.582090
- ▶ chargePrecursor=5
- ▶ itol=0.8

| AA  | c               | y               | z+1             | z+2             | z               | AA   |
|-----|-----------------|-----------------|-----------------|-----------------|-----------------|------|
| L1  | 66.093          | <b>1542.450</b> | 1534.440        | 9.504           | 1533.990        | L120 |
| N12 | 123.034         | <b>1485.908</b> | <b>1477.898</b> | <b>1478.402</b> | 1477.394        | N08  |
| K13 | 187.132         | 1428.898        | 1420.877        | <b>1421.381</b> | 1420.373        | K27  |
| L14 | 243.674         | 1364.839        | <b>1356.829</b> | <b>1357.333</b> | 1356.325        | L26  |
| L15 | 300.216         | 1308.297        | <b>1300.287</b> | 1300.791        | <b>1299.783</b> | L25  |
| G16 | 358.298         | 1251.795        | <b>1243.745</b> | <b>1244.249</b> | 1243.241        | G24  |
| K17 | <b>406.789</b>  | 1223.244        | 1215.234        | <b>1215.738</b> | 1214.731        | K23  |
| V18 | <b>456.324</b>  | 1145.181        | <b>1137.171</b> | <b>1137.675</b> | <b>1136.667</b> | V22  |
| T19 | 506.640         | 1095.646        | <b>1087.637</b> | <b>1088.141</b> | <b>1087.133</b> | T21  |
| T10 | 563.390         | 1045.123        | 1037.113        | 1037.617        | 1036.609        | T20  |
| A11 | <b>598.908</b>  | 988.561         | <b>980.571</b>  | <b>981.075</b>  | <b>980.067</b>  | A19  |
| G12 | <b>602.837</b>  | 953.065         | 945.053         | 945.557         | 944.549         | G18  |
| G13 | <b>691.448</b>  | <b>889.033</b>  | <b>881.023</b>  | <b>881.527</b>  | <b>880.519</b>  | G17  |
| G14 | <b>719.959</b>  | <b>860.522</b>  | <b>852.513</b>  | <b>853.017</b>  | 852.009         | G16  |
| V15 | <b>769.493</b>  | 832.011         | <b>824.002</b>  | <b>824.506</b>  | 823.498         | V15  |
| L16 | 820.935         | <b>782.477</b>  | 774.468         | 774.972         | 773.964         | L14  |
| T17 | <b>874.561</b>  | <b>725.935</b>  | 717.925         | 718.429         | 717.421         | T13  |
| N18 | <b>931.583</b>  | 677.402         | <b>669.399</b>  | <b>669.903</b>  | 668.895         | N12  |
| I19 | 988.125         | 620.367         | 612.358         | <b>612.862</b>  | 611.854         | I11  |
| Q20 | <b>1052.154</b> | 563.845         | 555.836         | 556.340         | 555.332         | Q10  |
| A21 | <b>1087.673</b> | 499.816         | <b>491.807</b>  | <b>492.310</b>  | <b>491.303</b>  | A10  |
| V22 | <b>1137.207</b> | 484.297         | <b>456.288</b>  | <b>456.792</b>  | 455.784         | V8   |
| L23 | <b>1193.709</b> | 414.763         | <b>406.754</b>  | <b>407.258</b>  | 406.250         | L17  |
| L24 | 1250.291        | 358.221         | 350.213         | 350.716         | 349.708         | L16  |
| P25 | 1298.817        | 301.679         | 293.670         | 294.174         | 293.166         | P5   |
| K26 | <b>1362.805</b> | 253.153         | <b>245.143</b>  | <b>245.647</b>  | <b>244.639</b>  | K4   |
| K27 | <b>1426.912</b> | 189.105         | 181.096         | 181.600         | 180.592         | K3   |
| T28 | 1477.436        | 125.058         | 117.049         | 117.552         | 116.544         | T2   |
| E29 | 1541.958        | 74.534          | 66.524          | 67.028          | 66.021          | E1   |

# sp | Q6GSS7 | H2A2A\_MOUSE

LNKLLGK <sup>Dimethyl</sup> <sub>28.03</sub> VTIAQGGVLPNIQAVLLPKKTE

- ▶ fragmentation table for charge state 3+
- ▶ specType=etd
- ▶ score=98.64
- ▶ F104903.dat
- ▶ query=q2296\_p1
- ▶ precursor=617.582090
- ▶ chargePrecursor=5
- ▶ itol=0.8

| AA    | c               | y               | z+1             | z+2            | z              | AA    |
|-------|-----------------|-----------------|-----------------|----------------|----------------|-------|
| L 1   | 44.377          | <b>1028.635</b> | <b>1023.296</b> | 0.672          | 1022.660       | L 26  |
| N 2   | 62.362          | 990.941         | <b>985.601</b>  | <b>985.937</b> | <b>985.265</b> | N 28  |
| K 3   | 125.000         | 952.920         | <b>947.587</b>  | <b>947.923</b> | 947.251        | K 27  |
| L 4   | 162.785         | 910.228         | <b>904.889</b>  | <b>905.225</b> | <b>904.553</b> | L 26  |
| L 5   | 200.479         | 872.531         | <b>867.194</b>  | <b>867.530</b> | <b>866.853</b> | L 25  |
| G 6   | 219.487         | 836.830         | <b>829.499</b>  | <b>829.835</b> | <b>829.163</b> | G 24  |
| K 7   | 271.529         | 815.830         | <b>810.492</b>  | <b>810.828</b> | 810.156        | K 23  |
| V 8   | 304.552         | 783.790         | <b>758.450</b>  | <b>758.786</b> | <b>758.114</b> | V 22  |
| T 9   | 338.234         | 733.767         | <b>725.427</b>  | <b>725.763</b> | <b>725.091</b> | T 21  |
| I 10  | 375.929         | 697.084         | <b>691.745</b>  | <b>692.081</b> | <b>691.409</b> | I 20  |
| A 11  | 399.608         | 669.389         | 654.050         | 654.386        | 653.714        | A 19  |
| Q 12  | 442.294         | <b>635.710</b>  | 630.371         | 630.707        | 630.035        | Q 18  |
| G 13  | 461.301         | 593.024         | 587.685         | 588.021        | 587.349        | G 17  |
| G 14  | 480.308         | 574.017         | 568.678         | 569.013        | 568.342        | G 16  |
| V 15  | 513.331         | 555.010         | 549.670         | 550.006        | 549.334        | V 15  |
| L 16  | 551.026         | 521.997         | 516.648         | 516.984        | 516.312        | L 14  |
| P 17  | 583.377         | 484.292         | 478.953         | 479.289        | 478.617        | P 13  |
| Tu 18 | 603.391         | 493.943         | 449.002         | 448.938        | 448.266        | Tu 18 |
| I 19  | 659.088         | 413.927         | 408.588         | 408.924        | 408.252        | I 11  |
| Q 20  | <b>701.772</b>  | 376.231         | 370.893         | 371.229        | 370.557        | Q 10  |
| A 21  | <b>725.451</b>  | 333.540         | 328.207         | 328.543        | 327.871        | A 9   |
| V 22  | <b>758.474</b>  | 309.867         | 304.528         | 304.864        | 304.192        | V 8   |
| L 23  | 796.168         | 276.844         | 271.505         | 271.841        | 271.169        | L 7   |
| L 24  | 833.863         | 238.190         | 233.850         | 234.186        | 233.514        | L 6   |
| P 25  | <b>866.214</b>  | 201.450         | 196.110         | 196.451        | 195.785        | P 5   |
| K 26  | <b>908.912</b>  | 169.104         | 163.765         | 164.101        | 163.429        | K 4   |
| K 27  | <b>951.611</b>  | 128.409         | 121.066         | 121.402        | 120.730        | K 3   |
| T 28  | <b>985.293</b>  | 83.708          | 78.368          | 78.704         | 78.032         | T 2   |
| E 29  | <b>1028.307</b> | 50.025          | 44.685          | 45.021         | 44.349         | E 1   |

# sp | Q6GSS7 | H2A2A\_MOUSE

LNKLLGK <sup>Dimethyl</sup> <sub>28.03</sub> VTIAQGGVLPNIQAVLLPKKTE

- ▶ fragmentation table for charge state 4+
- ▶ specType=etd
- ▶ score=98.64
- ▶ F104903.dat
- ▶ query=q2296\_p1
- ▶ precursor=617.582090
- ▶ chargePrecursor=5
- ▶ itol=0.8

| AA |    | c              | y              | z+1            | z+2            | z              | AA |    |
|----|----|----------------|----------------|----------------|----------------|----------------|----|----|
| L  | 1  | 33.535         | <b>771.728</b> | 767.724        | 0.756          | 767.472        | L  | 29 |
| N  | 2  | 62.046         | 731.557        | <b>739.453</b> | <b>739.705</b> | <b>739.201</b> | N  | 28 |
| K  | 3  | 94.059         | <b>714.947</b> | 710.942        | 711.194        | 710.690        | K  | 27 |
| L  | 4  | 122.340        | 692.923        | 678.918        | 679.170        | 678.666        | L  | 26 |
| L  | 5  | 150.611        | 654.652        | 650.647        | 650.899        | 650.395        | L  | 25 |
| G  | 6  | 164.867        | 626.381        | 622.376        | 622.628        | 622.124        | G  | 24 |
| K  | 7  | 203.898        | 612.126        | 608.121        | 608.373        | 607.869        | K  | 23 |
| V  | 8  | 228.665        | 573.094        | 569.089        | 569.341        | 568.837        | V  | 22 |
| T  | 9  | 253.927        | 548.327        | 544.322        | 544.574        | 544.070        | T  | 21 |
| I  | 10 | 262.198        | 523.065        | 519.060        | 519.312        | 518.808        | I  | 20 |
| A  | 11 | 269.958        | 494.794        | 490.789        | <b>491.041</b> | 490.537        | A  | 19 |
| Q  | 12 | 331.972        | 477.035        | 473.030        | 473.282        | 472.778        | Q  | 18 |
| G  | 13 | 346.228        | 445.020        | 441.015        | 441.267        | 440.763        | G  | 17 |
| G  | 14 | <b>360.483</b> | 430.765        | 426.760        | 427.012        | 426.508        | G  | 16 |
| V  | 15 | 385.250        | 416.509        | 412.504        | 412.757        | 412.253        | V  | 15 |
| L  | 16 | 413.521        | 391.742        | 387.737        | 387.989        | 387.486        | L  | 14 |
| P  | 17 | 437.784        | 363.471        | 359.466        | 359.718        | 359.215        | P  | 13 |
| N  | 18 | 466.295        | 339.208        | 335.203        | 335.455        | 334.951        | N  | 12 |
| I  | 19 | 494.566        | 310.897        | 306.891        | 307.143        | 306.641        | I  | 11 |
| Q  | 20 | 525.381        | 282.426        | 278.421        | 278.673        | 278.170        | Q  | 10 |
| A  | 21 | 544.340        | 250.412        | 246.407        | 246.659        | 246.155        | A  | 9  |
| V  | 22 | 569.107        | 232.652        | 228.647        | 228.900        | 228.396        | V  | 8  |
| L  | 23 | 597.378        | 207.885        | 203.881        | 204.132        | 203.629        | L  | 7  |
| L  | 24 | 625.649        | 179.614        | 175.609        | 175.861        | 175.358        | L  | 6  |
| P  | 25 | 649.912        | 151.343        | 147.338        | 147.590        | 147.087        | P  | 5  |
| K  | 26 | 681.936        | 127.080        | 123.075        | 123.327        | 122.823        | K  | 4  |
| K  | 27 | <b>713.960</b> | 95.056         | 91.052         | 91.304         | 90.800         | K  | 3  |
| T  | 28 | <b>739.222</b> | 63.032         | 59.028         | 59.280         | 58.776         | T  | 2  |
| E  | 29 | <b>771.482</b> | 37.771         | 33.766         | 34.018         | 33.514         | E  | 1  |





# sp | Q6GSS7 | H2A2A\_MOUSE

LNKLLGK <sup>Dimethyl</sup> <sub>28.03</sub> VTIAQGGVLPNIQAVLLPKKTE

- ▶ fragmentation table for charge state 1+
- ▶ specType=etd
- ▶ score=136.68
- ▶ F104903.dat
- ▶ query=q2297\_p1
- ▶ precursor=617.582130
- ▶ chargePrecursor=5
- ▶ itol=0.8

| AA    | c               | y               | z+1             | z+2             | z              | AA    |
|-------|-----------------|-----------------|-----------------|-----------------|----------------|-------|
| L[1]  | 131.118         | 3083.892        | 3067.873        | 0.000           | 3066.865       | L[26] |
| N[2]  | <b>245.161</b>  | 2970.808        | 2954.789        | 2938.769        | 2953.781       | N[28] |
| K[3]  | <b>373.256</b>  | 2856.765        | 2840.746        | 2841.754        | 2839.738       | K[27] |
| L[4]  | 488.340         | 2728.670        | 2712.651        | 2713.659        | 2711.643       | L[26] |
| L[5]  | <b>699.424</b>  | 2615.586        | 2599.567        | 2600.575        | 2598.559       | L[25] |
| G[6]  | <b>836.445</b>  | 2502.500        | 2486.483        | 2487.491        | 2485.475       | G[24] |
| K[7]  | <b>812.572</b>  | 2445.480        | 2429.462        | 2430.469        | 2428.454       | K[23] |
| V[8]  | <b>911.640</b>  | 2289.354        | 2273.335        | 2274.343        | 2272.327       | V[22] |
| T[9]  | 1012.688        | 2190.288        | 2174.269        | 2175.275        | 2173.259       | T[21] |
| I[10] | <b>1125.772</b> | 2089.230        | 2073.210        | 2074.227        | 2072.211       | I[20] |
| A[11] | <b>1196.809</b> | 1976.154        | 1960.135        | 1961.143        | 1959.127       | A[19] |
| Q[12] | <b>1324.867</b> | 1865.111        | 1849.090        | 1850.106        | 1848.090       | Q[18] |
| G[13] | <b>1381.889</b> | 1777.058        | <b>1761.039</b> | 1762.047        | 1760.032       | G[17] |
| G[14] | <b>1438.910</b> | 1720.037        | 1704.018        | 1705.026        | 1703.010       | G[16] |
| V[15] | 1537.879        | 1663.015        | 1646.997        | <b>1648.004</b> | 1646.989       | V[15] |
| L[16] | 1651.063        | 1563.947        | 1547.928        | <b>1548.936</b> | 1546.920       | L[14] |
| F[17] | 1748.116        | 1490.863        | 1474.844        | 1475.852        | 1473.836       | F[13] |
| N[18] | 1862.159        | 1353.810        | 1337.791        | 1338.799        | 1336.783       | N[12] |
| I[19] | 1975.243        | 1239.767        | 1223.748        | 1224.756        | 1222.741       | I[11] |
| Q[20] | 2103.301        | <b>1126.683</b> | 1110.664        | 1111.672        | 1109.656       | Q[10] |
| A[21] | 2174.338        | 998.624         | 982.606         | 983.614         | 981.598        | A[9]  |
| V[22] | 2273.407        | 927.587         | <b>911.569</b>  | <b>912.576</b>  | 910.561        | V[8]  |
| L[23] | 2389.491        | 808.513         | <b>813.509</b>  | <b>813.508</b>  | <b>811.492</b> | L[7]  |
| L[24] | 2499.575        | 715.435         | <b>699.416</b>  | <b>700.424</b>  | 698.408        | L[6]  |
| P[25] | 2596.628        | 602.351         | 586.332         | 587.340         | 585.324        | P[5]  |
| K[26] | 2724.723        | 505.268         | 489.249         | 490.257         | 488.271        | K[4]  |
| K[27] | 2852.818        | 377.203         | <b>361.184</b>  | 362.192         | 360.177        | K[3]  |
| T[28] | 2953.865        | 249.106         | 233.089         | 234.097         | 232.082        | T[2]  |
| E[29] | 3082.008        | 148.060         | 132.042         | 133.050         | 131.034        | E[1]  |

# sp | Q6GSS7 | H2A2A\_MOUSE

LNKLLGK <sup>Dimethyl</sup> <sub>28.03</sub> VTIAQGGVLPNIQAVLLPKKTE

- ▶ fragmentation table for charge state 2+
- ▶ specType=etd
- ▶ score=136.68
- ▶ F104903.dat
- ▶ query=q2297\_p1
- ▶ precursor=617.582130
- ▶ chargePrecursor=5
- ▶ itol=0.8

| AA   | c               | y               | z+1             | z+2             | z               | AA   |
|------|-----------------|-----------------|-----------------|-----------------|-----------------|------|
| L1   | 66.053          | <b>1542.450</b> | 1534.440        | 9.504           | 1533.930        | L126 |
| N12  | 123.054         | 1485.905        | <b>1477.898</b> | <b>1478.402</b> | <b>1477.394</b> | N120 |
| K13  | 157.132         | 1428.889        | <b>1420.877</b> | <b>1421.381</b> | 1420.373        | K127 |
| L14  | 243.674         | 1364.839        | <b>1356.829</b> | <b>1357.333</b> | <b>1356.325</b> | L126 |
| L15  | 300.216         | 1308.297        | 1300.287        | 1300.791        | <b>1299.783</b> | L125 |
| G16  | 328.299         | 1254.755        | 1246.745        | <b>1244.240</b> | 1243.231        | G124 |
| K17  | <b>404.789</b>  | 1223.244        | <b>1215.234</b> | <b>1215.738</b> | 1214.731        | K123 |
| V18  | <b>456.324</b>  | 1145.181        | 1137.171        | <b>1137.675</b> | 1136.667        | V122 |
| T19  | <b>506.848</b>  | 1095.646        | <b>1087.637</b> | <b>1088.141</b> | 1087.133        | T121 |
| T110 | <b>563.390</b>  | 1045.123        | <b>1037.113</b> | <b>1037.617</b> | 1036.609        | T120 |
| A111 | <b>596.908</b>  | 998.581         | <b>990.571</b>  | <b>991.075</b>  | <b>990.067</b>  | A119 |
| G112 | <b>602.837</b>  | <b>953.062</b>  | <b>945.053</b>  | <b>945.557</b>  | <b>944.549</b>  | G118 |
| G113 | <b>691.448</b>  | 899.033         | <b>891.023</b>  | <b>891.527</b>  | <b>890.519</b>  | G117 |
| G114 | <b>719.959</b>  | 860.522         | <b>852.513</b>  | <b>853.017</b>  | <b>852.009</b>  | G116 |
| V115 | <b>769.493</b>  | 832.011         | <b>824.002</b>  | <b>824.506</b>  | 823.498         | V115 |
| L116 | 820.935         | <b>782.477</b>  | <b>774.468</b>  | <b>774.972</b>  | <b>773.964</b>  | L114 |
| T117 | <b>874.561</b>  | <b>725.935</b>  | 717.925         | 718.429         | 717.421         | T118 |
| N118 | <b>931.583</b>  | 677.422         | <b>669.399</b>  | <b>669.903</b>  | 668.895         | N112 |
| L119 | 988.125         | 630.917         | 622.907         | 623.411         | 622.403         | L111 |
| Q120 | <b>1052.154</b> | <b>563.845</b>  | <b>555.836</b>  | <b>556.340</b>  | <b>555.332</b>  | Q110 |
| A121 | <b>1087.673</b> | 499.816         | <b>491.807</b>  | <b>492.310</b>  | <b>491.303</b>  | A10  |
| V122 | <b>1137.207</b> | 484.297         | <b>456.288</b>  | <b>456.792</b>  | <b>455.784</b>  | V18  |
| L123 | 1193.759        | 414.763         | <b>406.754</b>  | <b>407.258</b>  | <b>406.250</b>  | L11  |
| L124 | 1250.291        | 358.221         | <b>350.212</b>  | <b>350.716</b>  | 349.708         | L16  |
| P125 | <b>1298.817</b> | 301.679         | 293.670         | 294.174         | 293.166         | P15  |
| K126 | <b>1362.905</b> | 253.153         | <b>245.143</b>  | <b>245.647</b>  | <b>244.639</b>  | K14  |
| K127 | 1428.917        | 189.105         | 181.096         | 181.600         | 180.592         | K13  |
| T128 | <b>1477.436</b> | 125.058         | 117.048         | 117.552         | 116.544         | T12  |
| E129 | 1541.958        | 74.534          | 66.524          | 67.028          | 66.021          | E11  |

# sp | Q6GSS7 | H2A2A\_MOUSE

LNKLLGK <sup>Dimethyl</sup> <sub>28.03</sub> VTIAQGGVLPNIQAVLLPKKTE

- ▶ fragmentation table for charge state 3+
- ▶ specType=etd
- ▶ score=136.68
- ▶ F104903.dat
- ▶ query=q2297\_p1
- ▶ precursor=617.582130
- ▶ chargePrecursor=5
- ▶ itol=0.8

| AA  | c              | y               | z+1             | z+2            | z              | AA  |
|-----|----------------|-----------------|-----------------|----------------|----------------|-----|
| L1  | 44.377         | <b>1028.635</b> | <b>1023.296</b> | 0.672          | 1022.960       | L20 |
| N2  | 62.302         | 990.941         | <b>985.601</b>  | <b>985.937</b> | <b>985.265</b> | N28 |
| K3  | 125.090        | <b>952.926</b>  | <b>947.587</b>  | <b>947.923</b> | <b>947.251</b> | K27 |
| L4  | 162.785        | <b>910.228</b>  | <b>904.889</b>  | <b>905.225</b> | <b>904.553</b> | L26 |
| L5  | 200.479        | 872.531         | <b>867.194</b>  | 867.932        | <b>866.858</b> | L25 |
| G6  | 239.487        | 834.832         | <b>829.499</b>  | <b>829.835</b> | <b>829.163</b> | G24 |
| K7  | 271.529        | 815.832         | <b>810.492</b>  | <b>810.828</b> | 810.156        | K23 |
| V8  | 304.552        | 763.790         | <b>758.450</b>  | <b>758.786</b> | <b>758.114</b> | V22 |
| T9  | 338.234        | 730.767         | <b>725.427</b>  | <b>725.763</b> | 725.091        | T21 |
| I10 | 375.929        | 697.084         | <b>691.745</b>  | <b>692.081</b> | <b>691.409</b> | I20 |
| A11 | 389.608        | 699.380         | 654.250         | 654.388        | 653.714        | A19 |
| Q12 | 442.294        | 626.710         | 630.374         | 630.707        | 630.035        | Q18 |
| G13 | 461.301        | 593.024         | 587.685         | 588.021        | 587.349        | G17 |
| G14 | 480.308        | 574.017         | 568.678         | 569.013        | 568.342        | G16 |
| V15 | 513.331        | 555.010         | 549.670         | 550.006        | 549.334        | V15 |
| L16 | 551.026        | 521.987         | 516.648         | 516.984        | 516.312        | L14 |
| P17 | 583.377        | 484.202         | 478.963         | 479.289        | 478.617        | P13 |
| N18 | 621.301        | 451.942         | 446.602         | 446.938        | 446.265        | N12 |
| I19 | 659.088        | 413.927         | 408.588         | 408.924        | 408.252        | I11 |
| Q20 | 701.772        | 376.233         | 370.893         | 371.229        | 370.557        | Q10 |
| A21 | <b>725.451</b> | 333.546         | 328.207         | 328.543        | 327.871        | A9  |
| V22 | <b>758.474</b> | 309.867         | 304.528         | 304.864        | 304.192        | V8  |
| L23 | 796.188        | 276.844         | 271.505         | 271.841        | 271.169        | L7  |
| L24 | 863.883        | 239.150         | 233.810         | 234.146        | 233.474        | L6  |
| T25 | <b>846.214</b> | 201.493         | 196.154         | 196.490        | 195.818        | T5  |
| K26 | <b>908.912</b> | 169.100         | 163.760         | 164.100        | 163.429        | K4  |
| K27 | <b>951.611</b> | 138.406         | 133.066         | 133.402        | 132.730        | K3  |
| T28 | <b>985.293</b> | 83.708          | 78.368          | 78.704         | 78.032         | T2  |
| E29 | 1028.307       | 50.025          | 44.685          | 45.021         | 44.349         | E1  |

# sp | Q6GSS7 | H2A2A\_MOUSE

LNKLLGK <sup>Dimethyl</sup> <sub>28.03</sub> VTIAQGGVLPNIQAVLLPKKTE

- ▶ fragmentation table for charge state 4+
- ▶ specType=etd
- ▶ score=136.68
- ▶ F104903.dat
- ▶ query=q2297\_p1
- ▶ precursor=617.582130
- ▶ chargePrecursor=5
- ▶ itol=0.8

| AA |    | c              | y              | z+1            | z+2            | z              | AA |    |
|----|----|----------------|----------------|----------------|----------------|----------------|----|----|
| L  | 1  | 33.535         | <b>771.728</b> | 767.724        | 0.756          | 767.472        | L  | 29 |
| N  | 2  | 62.046         | 731.557        | <b>739.453</b> | <b>739.705</b> | <b>739.201</b> | N  | 28 |
| K  | 3  | 94.059         | <b>714.947</b> | 710.942        | 711.194        | 710.690        | K  | 27 |
| L  | 4  | 122.340        | 692.923        | 678.918        | 679.170        | 678.666        | L  | 26 |
| L  | 5  | 150.611        | 654.652        | 650.647        | 650.899        | 650.395        | L  | 25 |
| G  | 6  | 164.867        | 626.381        | 622.376        | 622.628        | 622.124        | G  | 24 |
| K  | 7  | 203.898        | 612.126        | 608.121        | 608.373        | 607.869        | K  | 23 |
| V  | 8  | 228.665        | 573.094        | 569.089        | 569.341        | 568.837        | V  | 22 |
| T  | 9  | 253.927        | 548.327        | 544.322        | 544.574        | 544.070        | T  | 21 |
| I  | 10 | 262.198        | 523.065        | 519.060        | 519.312        | 518.808        | I  | 20 |
| A  | 11 | 269.958        | 494.794        | 490.789        | <b>491.041</b> | 490.537        | A  | 19 |
| Q  | 12 | 311.972        | 477.035        | 473.030        | 473.282        | 472.778        | Q  | 18 |
| G  | 13 | 346.728        | 445.020        | 441.015        | 441.267        | 440.763        | G  | 17 |
| G  | 14 | <b>360.483</b> | 430.765        | 426.760        | 427.012        | 426.508        | G  | 16 |
| V  | 15 | 385.250        | 416.509        | 412.504        | 412.757        | 412.253        | V  | 15 |
| L  | 16 | 413.521        | 391.742        | 387.737        | 387.989        | 387.486        | L  | 14 |
| P  | 17 | 437.784        | 363.471        | 359.466        | 359.718        | 359.215        | P  | 13 |
| N  | 18 | 466.295        | 339.208        | 335.203        | 335.455        | 334.951        | N  | 12 |
| I  | 19 | 494.566        | 310.897        | 306.891        | 307.143        | 306.641        | I  | 11 |
| Q  | 20 | 525.381        | 282.426        | 278.421        | 278.673        | 278.170        | Q  | 10 |
| A  | 21 | 544.340        | 250.412        | 246.407        | 246.659        | 246.155        | A  | 9  |
| V  | 22 | 569.107        | 232.652        | 228.647        | 228.900        | 228.396        | V  | 8  |
| L  | 23 | 597.378        | 207.885        | 203.881        | 204.132        | 203.629        | L  | 7  |
| L  | 24 | 625.649        | 179.614        | 175.609        | 175.861        | 175.358        | L  | 6  |
| P  | 25 | 649.912        | 151.343        | 147.338        | 147.590        | 147.087        | P  | 5  |
| K  | 26 | 681.936        | 127.080        | 123.075        | 123.327        | 122.823        | K  | 4  |
| K  | 27 | <b>713.960</b> | 95.056         | 91.052         | 91.304         | 90.800         | K  | 3  |
| T  | 28 | <b>739.222</b> | 63.032         | 59.028         | 59.280         | 58.776         | T  | 2  |
| E  | 29 | 771.462        | 37.771         | 33.766         | 34.018         | 33.514         | E  | 1  |

# sp | Q6GSS7 | H2A2A\_MOUSE

LNKLLGK <sup>Dimethyl</sup>VTIAQGGVLPNIQAVLLPKKTE  
28.03

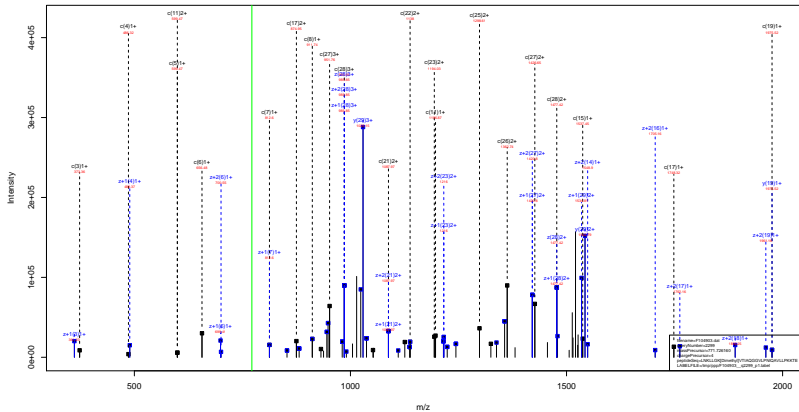

# sp | Q6GSS7 | H2A2A\_MOUSE

LNKLLGK <sup>Dimethyl</sup> <sub>28.03</sub> VTIAQGGVLPNIQAVLLPKKTE

- ▶ fragmentation table for charge state 1+
- ▶ specType=etd
- ▶ score=110.04
- ▶ F104903.dat
- ▶ query=q2299\_p1
- ▶ precursor=771.726160
- ▶ chargePrecursor=4
- ▶ itol=0.8

| AA    | c               | y               | z+1             | z+2             | z              | AA    |
|-------|-----------------|-----------------|-----------------|-----------------|----------------|-------|
| L[1]  | 131.118         | 3083.892        | 3067.873        | 0.000           | 3066.865       | L[20] |
| N[2]  | 245.161         | 2970.808        | 2954.789        | 2955.797        | 2953.781       | N[20] |
| K[3]  | <b>373.256</b>  | 2856.765        | 2840.746        | 2841.754        | 2839.738       | K[27] |
| L[4]  | <b>486.340</b>  | 2738.670        | 2712.651        | 2713.659        | 2711.643       | L[26] |
| L[5]  | <b>599.424</b>  | 2615.585        | 2589.567        | 2600.575        | 2598.559       | L[25] |
| G[6]  | <b>638.445</b>  | 2502.500        | 2486.483        | 2487.491        | 2485.475       | G[24] |
| K[7]  | <b>812.572</b>  | 2445.480        | 2429.462        | 2430.469        | 2428.454       | K[23] |
| V[8]  | <b>911.640</b>  | 2289.354        | 2273.335        | 2274.343        | 2272.327       | V[22] |
| T[9]  | 1012.688        | 2190.288        | 2174.267        | 2175.275        | 2173.259       | T[21] |
| I[10] | <b>1125.772</b> | 2089.230        | 2073.210        | 2074.227        | 2072.211       | I[20] |
| A[11] | <b>1196.809</b> | <b>1976.154</b> | 1960.135        | <b>1961.143</b> | 1959.127       | A[19] |
| Q[12] | <b>1324.867</b> | 1925.111        | 1899.098        | <b>1890.106</b> | 1888.090       | Q[18] |
| G[13] | 1381.889        | 1777.058        | 1761.039        | <b>1762.047</b> | 1760.032       | G[17] |
| G[14] | 1438.910        | 1720.037        | 1704.018        | <b>1705.026</b> | 1703.010       | G[16] |
| V[15] | <b>1537.979</b> | 1661.015        | 1645.997        | 1646.004        | 1645.989       | V[15] |
| L[16] | 1651.063        | 1563.947        | 1547.928        | <b>1548.936</b> | 1546.920       | L[14] |
| F[17] | <b>1748.116</b> | 1490.863        | 1474.844        | 1475.852        | 1473.836       | F[13] |
| N[18] | 1862.959        | 1353.810        | <b>1337.791</b> | 1338.799        | 1336.783       | N[12] |
| I[19] | <b>1975.243</b> | 1239.761        | <b>1223.748</b> | 1224.756        | 1222.741       | I[11] |
| Q[20] | 2103.301        | 1126.683        | <b>1110.664</b> | 1111.672        | 1109.656       | Q[10] |
| A[21] | 2174.338        | 998.624         | 982.606         | 983.614         | <b>981.598</b> | A[9]  |
| V[22] | 2273.407        | 927.587         | <b>911.569</b>  | 912.576         | 910.561        | V[8]  |
| L[23] | 2389.491        | 808.513         | <b>813.500</b>  | 813.508         | 811.492        | L[7]  |
| L[24] | 2499.575        | 715.435         | <b>699.416</b>  | <b>700.424</b>  | 698.408        | L[6]  |
| P[25] | 2596.628        | 602.351         | 586.332         | 587.340         | 585.324        | P[5]  |
| K[26] | 2724.723        | 505.268         | <b>489.279</b>  | 490.287         | 488.271        | K[4]  |
| K[27] | 2852.818        | 377.203         | <b>361.184</b>  | 362.192         | 360.177        | K[3]  |
| T[28] | 2953.865        | 249.106         | 233.089         | 234.097         | 232.082        | T[2]  |
| E[29] | 3082.008        | 148.060         | 132.042         | 133.050         | 131.034        | E[1]  |

# sp | Q6GSS7 | H2A2A\_MOUSE

LNKLLGK <sup>Dimethyl</sup><sub>28.03</sub> VTIAQGGVLPNIQAVLLPKKTE

- ▶ fragmentation table for charge state 2+
- ▶ specType=etd
- ▶ score=110.04
- ▶ F104903.dat
- ▶ query=q2299\_p1
- ▶ precursor=771.726160
- ▶ chargePrecursor=4
- ▶ itol=0.8

| AA | c               | y               | z+1             | z+2             | z               | AA   |
|----|-----------------|-----------------|-----------------|-----------------|-----------------|------|
| L1 | 66.093          | <b>1542.450</b> | <b>1534.440</b> | 8.504           | 1533.930        | L126 |
| N1 | 123.084         | 1485.905        | <b>1477.898</b> | <b>1478.402</b> | <b>1477.394</b> | N120 |
| K1 | 187.132         | 1428.889        | <b>1420.877</b> | <b>1421.381</b> | <b>1420.373</b> | K127 |
| L1 | 243.674         | 1364.839        | <b>1356.829</b> | <b>1357.333</b> | <b>1356.325</b> | L126 |
| L1 | 300.216         | 1308.297        | 1300.287        | 1300.791        | 1299.783        | L125 |
| G1 | 358.758         | 1251.755        | <b>1243.745</b> | <b>1244.249</b> | <b>1243.241</b> | G124 |
| K1 | 406.799         | <b>1223.244</b> | <b>1215.234</b> | <b>1215.738</b> | <b>1214.731</b> | K123 |
| V1 | 456.324         | 1145.181        | <b>1137.171</b> | <b>1137.675</b> | <b>1136.667</b> | V122 |
| F1 | 506.840         | 1095.646        | <b>1087.637</b> | <b>1088.141</b> | 1087.133        | F121 |
| T1 | 563.390         | 1045.123        | <b>1037.113</b> | <b>1037.617</b> | <b>1036.609</b> | T120 |
| A1 | <b>598.908</b>  | 998.581         | <b>990.571</b>  | <b>991.075</b>  | 990.067         | A119 |
| Q1 | 662.937         | 953.060         | <b>945.053</b>  | <b>945.557</b>  | 944.549         | Q118 |
| G1 | 691.448         | 899.033         | <b>891.023</b>  | <b>891.527</b>  | <b>890.519</b>  | G117 |
| G1 | 719.959         | 860.522         | <b>852.513</b>  | <b>853.017</b>  | 852.009         | G116 |
| V1 | 769.493         | 832.011         | 824.002         | 824.506         | 823.498         | V115 |
| L1 | 830.035         | 782.477         | 774.468         | 774.972         | 773.964         | L114 |
| F1 | <b>874.561</b>  | 728.935         | 721.928         | 722.432         | 721.424         | F113 |
| N1 | <b>931.583</b>  | 677.400         | 669.390         | 669.893         | 668.885         | N112 |
| I1 | 988.125         | 630.867         | 622.858         | 623.362         | 622.354         | I111 |
| Q1 | <b>1052.154</b> | 583.845         | 575.836         | 576.340         | 575.332         | Q110 |
| A1 | <b>1087.673</b> | 499.816         | 491.807         | 492.310         | 491.303         | A10  |
| V1 | <b>1137.207</b> | 484.297         | 476.288         | 476.792         | 475.784         | V10  |
| L1 | <b>1193.749</b> | 414.763         | 406.754         | 407.258         | 406.250         | L10  |
| L1 | 1250.291        | 358.221         | 350.212         | 350.716         | 349.708         | L10  |
| P1 | <b>1298.817</b> | 301.679         | 293.670         | 294.174         | 293.166         | P10  |
| K1 | <b>1362.865</b> | 253.153         | 245.143         | 245.647         | 244.639         | K10  |
| K1 | <b>1426.912</b> | 189.105         | 181.096         | 181.600         | 180.592         | K10  |
| T1 | <b>1477.436</b> | 125.058         | 117.049         | 117.552         | 116.544         | T10  |
| E1 | 1541.958        | 74.534          | 66.524          | 67.028          | 66.021          | E10  |



# sp | Q6GSS7 | H2A2A\_MOUSE

LNKLLGK <sup>Dimethyl</sup> <sub>28.03</sub> VTIAQGGVLPNIQAVLLPKKTE

- ▶ fragmentation table for charge state 3+
- ▶ specType=etd
- ▶ score=110.04
- ▶ F104903.dat
- ▶ query=q2299\_p1
- ▶ precursor=771.726160
- ▶ chargePrecursor=4
- ▶ itol=0.8

| AA  | c              | y               | z+1             | z+2            | z              | AA  |
|-----|----------------|-----------------|-----------------|----------------|----------------|-----|
| L1  | 44.377         | <b>1028.635</b> | <b>1023.296</b> | 0.672          | 1023.960       | L29 |
| N2  | 62.302         | <b>990.941</b>  | <b>985.601</b>  | <b>985.937</b> | <b>985.265</b> | N28 |
| K3  | 125.090        | 952.326         | <b>947.587</b>  | <b>947.923</b> | 947.251        | K27 |
| L4  | 162.785        | 910.228         | 904.889         | 905.225        | 904.551        | L26 |
| L5  | 200.479        | 872.531         | 867.194         | 867.530        | 866.858        | L25 |
| G6  | 239.487        | 834.835         | 829.499         | 829.835        | 829.163        | G24 |
| K7  | 271.529        | 815.832         | 810.492         | 810.828        | 810.156        | K23 |
| V8  | 304.552        | 783.790         | 778.450         | 778.786        | 778.114        | V22 |
| T9  | 338.234        | 730.767         | 725.427         | 725.763        | 725.091        | T21 |
| I10 | 375.929        | 697.084         | 691.745         | 692.081        | 691.409        | I20 |
| A11 | 399.608        | 659.389         | 654.050         | 654.386        | 653.714        | A19 |
| Q12 | 442.294        | 626.710         | 621.371         | 621.707        | 621.035        | Q18 |
| G13 | 461.301        | 593.024         | 587.685         | 588.021        | 587.349        | G17 |
| G14 | 480.308        | 574.017         | 568.678         | 569.013        | 568.342        | G16 |
| V15 | 513.131        | 555.010         | 549.670         | 550.006        | 549.334        | V15 |
| L16 | 551.026        | 521.987         | 516.648         | 516.984        | 516.312        | L14 |
| P17 | 583.377        | 484.202         | 478.863         | 479.200        | 478.527        | P13 |
| N18 | 621.301        | 451.942         | 446.602         | 446.938        | 446.266        | N12 |
| I19 | 659.086        | 413.927         | 408.588         | 408.924        | 408.252        | I11 |
| Q20 | 701.772        | 376.233         | 370.893         | 371.229        | 370.557        | Q10 |
| A21 | 725.451        | 333.546         | 328.207         | 328.543        | 327.871        | A9  |
| V22 | 758.474        | 309.867         | 304.528         | 304.864        | 304.192        | V8  |
| L23 | 796.188        | 276.844         | 271.505         | 271.841        | 271.169        | L7  |
| L24 | 833.863        | 239.150         | 233.810         | 234.146        | 233.474        | L6  |
| T25 | 869.214        | 201.493         | 196.154         | 196.490        | 195.818        | T5  |
| K26 | 908.912        | 169.100         | 163.760         | 164.100        | 163.429        | K4  |
| K27 | <b>951.611</b> | 138.406         | 133.066         | 133.402        | 132.730        | K3  |
| T28 | <b>985.293</b> | 83.708          | 78.368          | 78.704         | 78.032         | T2  |
| E29 | 1028.307       | 50.025          | 44.685          | 45.021         | 44.349         | E1  |



# sp | Q6GSS7 | H2A2A\_MOUSE

LNKLLGK <sup>Dimethyl</sup> <sub>28.03</sub> VTIAQGGVLPNIQAVLLPKKTE

- ▶ fragmentation table for charge state 1+
- ▶ specType=etd
- ▶ score=33.04
- ▶ F104903.dat
- ▶ query=q2300\_p1
- ▶ precursor=771.726230
- ▶ chargePrecursor=4
- ▶ itol=0.8

| AA    | c               | y               | z+1             | z+2             | z              | AA    |
|-------|-----------------|-----------------|-----------------|-----------------|----------------|-------|
| L[1]  | 131.118         | 3083.892        | 3067.873        | 0.000           | 3066.895       | L[28] |
| N[2]  | 245.161         | 2970.808        | 2954.789        | 2955.797        | 2953.781       | N[28] |
| K[3]  | 373.256         | 2856.765        | 2840.746        | 2841.754        | 2839.738       | K[27] |
| L[4]  | 486.340         | 2738.670        | 2712.651        | 2713.659        | 2711.643       | L[26] |
| L[5]  | 597.424         | 2615.585        | 2589.567        | 2600.575        | 2598.559       | L[25] |
| G[6]  | <b>656.445</b>  | 2502.500        | 2486.483        | 2487.491        | 2485.475       | G[24] |
| K[7]  | <b>812.572</b>  | 2445.480        | 2429.462        | 2430.469        | 2428.454       | K[23] |
| V[8]  | <b>911.640</b>  | 2289.354        | 2273.335        | 2274.343        | 2272.327       | V[22] |
| T[9]  | 1012.688        | 2190.288        | 2174.267        | 2175.275        | 2173.259       | T[21] |
| I[10] | <b>1125.772</b> | 2089.230        | 2073.210        | 2074.227        | 2072.211       | I[20] |
| A[11] | <b>1196.809</b> | 1976.154        | 1960.135        | 1961.143        | 1959.127       | A[19] |
| Q[12] | 1214.857        | 1905.111        | 1889.098        | <b>1890.106</b> | 1888.090       | Q[18] |
| G[13] | 1381.889        | 1777.058        | 1761.039        | 1762.047        | 1760.032       | G[17] |
| G[14] | 1438.910        | 1720.037        | 1704.018        | 1705.026        | 1703.010       | G[16] |
| V[15] | 1537.979        | 1663.015        | <b>1646.997</b> | 1648.004        | 1646.989       | V[15] |
| L[16] | 1651.063        | 1563.947        | 1547.928        | <b>1548.936</b> | 1546.920       | L[14] |
| F[17] | 1708.116        | 1490.863        | 1474.844        | 1475.852        | 1473.836       | F[13] |
| N[18] | <b>1862.159</b> | 1353.810        | 1337.791        | <b>1338.799</b> | 1336.783       | N[12] |
| I[19] | 1975.243        | 1239.767        | 1223.748        | 1224.756        | 1222.741       | I[11] |
| Q[20] | 2103.301        | <b>1126.683</b> | 1110.664        | 1111.672        | 1109.656       | Q[10] |
| A[21] | 2174.338        | 998.624         | 982.606         | 983.614         | 981.598        | A[9]  |
| V[22] | 2273.407        | 927.587         | <b>911.569</b>  | <b>912.576</b>  | 910.561        | V[8]  |
| L[23] | 2389.491        | 808.513         | <b>813.509</b>  | <b>813.508</b>  | 811.492        | L[7]  |
| L[24] | 2489.575        | 715.435         | <b>699.416</b>  | <b>700.424</b>  | <b>698.408</b> | L[6]  |
| P[25] | 2596.628        | 602.351         | 586.332         | 587.340         | 585.324        | P[5]  |
| K[26] | 2724.723        | 505.268         | <b>489.279</b>  | 490.287         | 488.271        | K[4]  |
| K[27] | 2852.818        | <b>377.203</b>  | <b>361.184</b>  | 362.192         | 360.177        | K[3]  |
| T[28] | 2953.865        | 249.106         | 233.089         | 234.097         | 232.082        | T[2]  |
| E[29] | 3082.008        | 148.060         | 132.042         | 133.050         | 131.034        | E[1]  |

# sp | Q6GSS7 | H2A2A\_MOUSE

LNKLLGK <sup>Dimethyl</sup> <sub>28.03</sub> VTIAQGGVLPNIQAVLLPKKTE

- ▶ fragmentation table for charge state 2+
- ▶ specType=etd
- ▶ score=33.04
- ▶ F104903.dat
- ▶ query=q2300\_p1
- ▶ precursor=771.726230
- ▶ chargePrecursor=4
- ▶ itol=0.8

| AA | c  | y               | z+1             | z+2             | z               | AA              |      |
|----|----|-----------------|-----------------|-----------------|-----------------|-----------------|------|
| L  | 1  | 66.053          | 1542.450        | 1524.440        | 9.504           | 1533.930        | L126 |
| N  | 2  | 123.054         | 1485.055        | <b>1477.898</b> | <b>1478.402</b> | <b>1477.394</b> | N120 |
| K  | 3  | 187.132         | 1428.889        | <b>1420.877</b> | <b>1421.381</b> | <b>1420.373</b> | K127 |
| L  | 4  | 243.674         | 1364.839        | <b>1356.829</b> | <b>1357.333</b> | <b>1356.325</b> | L126 |
| L  | 5  | 300.216         | <b>1308.297</b> | 1300.287        | 1300.791        | <b>1299.783</b> | L125 |
| G  | 6  | 358.758         | 1251.795        | <b>1243.745</b> | <b>1244.249</b> | <b>1243.241</b> | G124 |
| K  | 7  | 406.790         | 1223.244        | <b>1215.234</b> | <b>1215.738</b> | <b>1214.731</b> | K123 |
| V  | 8  | 456.324         | 1145.181        | 1137.171        | 1137.675        | 1136.667        | V122 |
| T  | 9  | 506.840         | 1095.646        | <b>1087.637</b> | <b>1088.141</b> | 1087.133        | T121 |
| T  | 10 | 563.390         | 1045.123        | 1037.113        | 1037.617        | 1036.609        | T120 |
| A  | 11 | <b>598.908</b>  | <b>988.581</b>  | 980.571         | 981.075         | 980.067         | A119 |
| G  | 12 | 657.937         | <b>953.062</b>  | <b>945.053</b>  | <b>945.557</b>  | 944.549         | G118 |
| G  | 13 | <b>691.448</b>  | 899.033         | 891.023         | 891.527         | 890.519         | G117 |
| G  | 14 | 719.959         | 860.522         | 852.513         | 853.017         | 852.009         | G116 |
| V  | 15 | 769.493         | 832.011         | 824.002         | 824.506         | 823.498         | V115 |
| L  | 16 | 826.035         | 782.477         | 774.468         | 774.972         | 773.964         | L114 |
| T  | 17 | 874.581         | 728.935         | 721.926         | 722.430         | 721.422         | T113 |
| N  | 18 | 931.583         | 677.400         | 669.390         | 669.893         | 668.885         | N112 |
| I  | 19 | 988.125         | 620.867         | 612.858         | 613.362         | 612.354         | I111 |
| Q  | 20 | <b>1052.154</b> | 563.845         | 555.836         | 556.340         | 555.332         | Q110 |
| A  | 21 | <b>1087.673</b> | 499.816         | 491.807         | 492.310         | 491.303         | A10  |
| V  | 22 | 1127.207        | 494.297         | 486.288         | 486.792         | 485.784         | V10  |
| L  | 23 | 1193.709        | 434.763         | 426.754         | 427.258         | 426.250         | L1   |
| L  | 24 | 1250.291        | 358.221         | 350.212         | 350.716         | 349.708         | L10  |
| P  | 25 | <b>1288.817</b> | 301.679         | 293.670         | 294.174         | 293.166         | P10  |
| K  | 26 | <b>1362.865</b> | 253.153         | 245.143         | 245.647         | 244.639         | K10  |
| K  | 27 | <b>1426.912</b> | 189.105         | 181.096         | 181.600         | 180.592         | K10  |
| T  | 28 | <b>1477.436</b> | 125.058         | 117.048         | 117.552         | 116.544         | T10  |
| E  | 29 | 1541.958        | 74.534          | 66.524          | 67.028          | 66.021          | E10  |

# sp | Q6GSS7 | H2A2A\_MOUSE

LNKLLGK <sup>Dimethyl</sup> <sub>28.03</sub> VTIAQGGVLPNIQAVLLPKKTE

- ▶ fragmentation table for charge state 3+
- ▶ specType=etd
- ▶ score=33.04
- ▶ F104903.dat
- ▶ query=q2300\_p1
- ▶ precursor=771.726230
- ▶ chargePrecursor=4
- ▶ itol=0.8

| AA    | c               | y               | z+1             | z+2            | z              | AA    |
|-------|-----------------|-----------------|-----------------|----------------|----------------|-------|
| L 1   | 44.377          | <b>1028.635</b> | <b>1023.296</b> | 0.672          | 1022.960       | L 20  |
| N 2   | 62.392          | 990.941         | <b>985.601</b>  | <b>985.937</b> | <b>985.265</b> | N 28  |
| K 3   | 125.000         | <b>952.926</b>  | <b>947.587</b>  | <b>947.923</b> | <b>947.251</b> | K 27  |
| L 4   | 162.785         | 910.228         | 904.889         | 905.225        | 904.553        | L 26  |
| L 5   | 200.479         | 872.533         | 867.194         | 867.530        | 866.855        | L 25  |
| G 6   | 219.487         | 836.830         | 829.499         | 829.835        | 829.161        | G 24  |
| K 7   | 271.529         | 815.832         | 810.492         | 810.828        | 810.154        | K 23  |
| V 8   | 304.552         | 783.790         | 778.450         | 778.786        | 778.114        | V 22  |
| T 9   | 338.234         | <b>730.767</b>  | 725.427         | 725.763        | 725.091        | T 21  |
| I 10  | 375.929         | 697.084         | <b>691.745</b>  | <b>692.081</b> | <b>691.409</b> | I 20  |
| A 11  | 399.608         | 659.389         | 654.050         | 654.386        | 653.714        | A 19  |
| Q 12  | 442.294         | 639.710         | 630.371         | 630.707        | 630.033        | Q 18  |
| G 13  | 461.301         | 593.024         | 587.585         | 588.021        | 587.349        | G 17  |
| G 14  | 480.308         | 574.017         | 568.678         | 569.013        | 568.342        | G 16  |
| V 15  | 513.331         | 555.010         | 549.670         | 550.006        | 549.334        | V 15  |
| L 16  | 551.026         | 521.997         | 516.648         | 516.984        | 516.312        | L 14  |
| P 17  | 583.377         | 484.292         | 478.953         | 479.289        | 478.617        | P 13  |
| Tu 18 | 603.391         | 493.943         | 489.602         | 489.938        | 489.266        | Tu 18 |
| I 19  | 659.088         | 413.927         | 408.588         | 408.924        | 408.252        | I 11  |
| Q 20  | 701.772         | 376.231         | 370.893         | 371.229        | 370.557        | Q 10  |
| A 21  | 725.451         | 333.540         | 328.201         | 328.543        | 327.871        | A 9   |
| V 22  | 758.474         | 309.867         | 304.528         | 304.864        | 304.192        | V 8   |
| L 23  | 796.168         | 276.844         | 271.505         | 271.841        | 271.169        | L 7   |
| L 24  | 813.863         | 239.190         | 233.850         | 234.186        | 233.514        | L 6   |
| P 25  | 856.214         | 201.450         | 196.110         | 196.451        | 195.779        | P 5   |
| K 26  | 908.912         | 169.104         | 163.765         | 164.101        | 163.429        | K 4   |
| K 27  | <b>951.611</b>  | 128.409         | 121.069         | 121.402        | 120.730        | K 3   |
| T 28  | <b>985.293</b>  | 83.708          | 78.368          | 78.704         | 78.032         | T 2   |
| E 29  | <b>1028.307</b> | 50.025          | 44.685          | 45.021         | 44.349         | E 1   |

# sp | Q6GSS7 | H2A2A\_MOUSE

LNKLLGK <sup>Dimethyl</sup> VTIAQGGVLPNIQAVLLPKKTE  
28.03

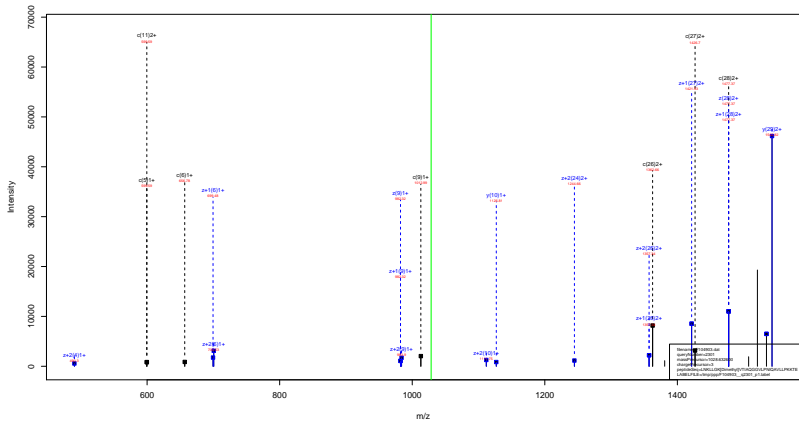

# sp | Q6GSS7 | H2A2A\_MOUSE

LNKLLGK <sup>Dimethyl</sup> <sub>28.03</sub> VTIAQGGVLPNIQAVLLPKKTE

- ▶ fragmentation table for charge state 1+
- ▶ specType=etd
- ▶ score=29.21
- ▶ F104903.dat
- ▶ query=q2301\_p1
- ▶ precursor=1028.632600
- ▶ chargePrecursor=3
- ▶ itol=0.8

| AA  | c               | y               | z+1            | z+2             | z              | AA   |
|-----|-----------------|-----------------|----------------|-----------------|----------------|------|
| L1  | 131.118         | 3081.892        | 3087.873       | 0.000           | 3086.895       | L129 |
| N2  | 245.161         | 2970.838        | 2954.789       | 2955.797        | 2951.781       | N28  |
| K3  | 373.256         | 2856.795        | 2860.746       | 2841.754        | 2839.738       | K27  |
| L4  | 486.340         | 2728.670        | 2712.651       | 2713.659        | 2711.643       | L26  |
| L5  | <b>599.424</b>  | 2615.588        | 2599.567       | 2600.575        | 2598.560       | L25  |
| Q6  | <b>656.445</b>  | 2502.507        | 2486.483       | 2487.491        | 2485.475       | Q24  |
| K7  | 812.572         | 2445.480        | 2429.462       | 2430.469        | 2428.454       | K23  |
| V8  | 911.640         | 2389.354        | 2373.335       | 2374.343        | 2372.327       | V22  |
| T9  | <b>1012.688</b> | 2190.286        | 2174.267       | 2175.275        | 2173.259       | T21  |
| I10 | 1125.772        | 2089.238        | 2073.219       | 2074.227        | 2072.211       | I20  |
| A11 | 1196.859        | 1976.154        | 1960.135       | 1961.143        | 1959.127       | A19  |
| Q12 | 1224.887        | 1909.117        | 1893.098       | 1894.106        | 1892.090       | Q18  |
| G13 | 1361.889        | 1777.058        | 1761.039       | 1762.047        | 1760.032       | G17  |
| G14 | 1438.910        | 1720.937        | 1704.918       | 1705.926        | 1703.910       | G16  |
| V15 | 1537.879        | 1663.015        | 1646.997       | 1648.004        | 1645.989       | V15  |
| L16 | 1651.063        | 1561.947        | 1545.928       | 1546.936        | 1544.920       | L14  |
| P17 | 1748.116        | 1496.863        | 1480.844       | 1481.852        | 1479.836       | P13  |
| T18 | 1862.159        | 1393.810        | 1377.791       | 1378.799        | 1376.783       | T12  |
| I19 | 1975.243        | 1292.767        | 1276.748       | 1277.756        | 1275.741       | I11  |
| Q20 | 2103.301        | <b>1126.683</b> | 1110.664       | <b>1111.672</b> | 1109.656       | Q10  |
| A21 | 2174.338        | 998.624         | <b>982.606</b> | <b>983.614</b>  | <b>981.598</b> | A9   |
| V22 | 2273.407        | 927.587         | 911.569        | 912.576         | 910.561        | V8   |
| L23 | 2386.491        | 828.519         | 812.500        | 813.508         | 811.492        | L7   |
| L24 | 2499.575        | 715.438         | <b>699.418</b> | <b>700.424</b>  | 698.408        | L6   |
| P25 | 2596.626        | 602.351         | 586.332        | 587.340         | 585.324        | P5   |
| K26 | 2724.723        | 505.290         | 489.279        | <b>490.287</b>  | 488.271        | K4   |
| K27 | 2852.816        | 377.203         | 361.184        | 362.192         | 360.177        | K3   |
| T28 | 2951.895        | 249.108         | 233.089        | 234.097         | 232.082        | T2   |
| E29 | 3082.938        | 148.060         | 132.042        | 133.050         | 131.034        | E1   |

# sp | Q6GSS7 | H2A2A\_MOUSE

LNKLLGK <sup>Dimethyl</sup> <sub>28.03</sub> VTIAQGGVLPNIQAVLLPKKTE

- ▶ fragmentation table for charge state 2+
- ▶ specType=etd
- ▶ score=29.21
- ▶ F104903.dat
- ▶ query=q2301\_p1
- ▶ precursor=1028.632600
- ▶ chargePrecursor=3
- ▶ itol=0.8

| AA  | c               | y               | z+1             | z+2             | z               | AA   |
|-----|-----------------|-----------------|-----------------|-----------------|-----------------|------|
| L 1 | 66.053          | <b>1542.450</b> | <b>1534.440</b> | 9.504           | <b>1533.936</b> | L120 |
| N 2 | 123.054         | 1485.905        | <b>1477.898</b> | 1478.402        | <b>1477.394</b> | N08  |
| K 3 | 187.132         | 1428.889        | <b>1420.877</b> | <b>1421.381</b> | 1420.373        | K27  |
| L 4 | 243.674         | 1364.839        | <b>1356.829</b> | <b>1357.333</b> | 1356.325        | L26  |
| L 5 | 300.216         | 1308.297        | 1300.287        | 1309.791        | 1299.783        | L25  |
| G 6 | 358.759         | 1251.755        | 1243.745        | <b>1244.249</b> | 1243.241        | G24  |
| K 7 | 406.799         | 1223.244        | 1215.234        | 1215.738        | 1214.731        | K23  |
| V 8 | 456.324         | 1145.181        | 1137.171        | 1137.675        | 1136.667        | V22  |
| T 9 | 506.849         | 1095.646        | 1087.637        | 1088.141        | 1087.133        | T21  |
| T10 | 563.390         | 1045.123        | 1037.113        | 1037.617        | 1036.609        | T20  |
| A11 | <b>598.908</b>  | 988.581         | 980.571         | 981.075         | 980.067         | A19  |
| Q12 | 662.937         | 933.062         | 925.053         | 925.557         | 924.549         | Q18  |
| G13 | 691.448         | 889.033         | 881.023         | 881.527         | 880.519         | G17  |
| G14 | 719.959         | 860.522         | 852.513         | 853.017         | 852.009         | G16  |
| V15 | 769.493         | 832.011         | 824.002         | 824.506         | 823.498         | V15  |
| L16 | 826.035         | 782.477         | 774.468         | 774.972         | 773.964         | L14  |
| T17 | 874.581         | 728.935         | 720.926         | 721.430         | 720.422         | T13  |
| N18 | 931.583         | 677.400         | 669.390         | 669.893         | 668.885         | N12  |
| I19 | 988.125         | 620.867         | 612.858         | 613.362         | 612.354         | I11  |
| Q20 | 1052.154        | 563.845         | 555.836         | 556.340         | 555.332         | Q10  |
| A21 | 1087.673        | 499.816         | 491.807         | 492.310         | 491.303         | A0   |
| V22 | 1137.207        | 484.297         | 476.288         | 476.792         | 475.784         | V8   |
| L23 | 1193.749        | 414.763         | 406.754         | 407.258         | 406.250         | L17  |
| L24 | 1250.291        | 358.221         | 350.212         | 350.716         | 349.708         | L16  |
| P25 | 1298.817        | 301.679         | 293.670         | 294.174         | 293.166         | P5   |
| K26 | <b>1362.865</b> | 253.153         | 245.143         | 245.647         | 244.639         | K4   |
| K27 | <b>1426.912</b> | 189.105         | 181.096         | 181.600         | 180.592         | K3   |
| T28 | <b>1477.436</b> | 125.058         | 117.049         | 117.552         | 116.544         | T2   |
| E29 | 1541.958        | 74.534          | 66.524          | 67.028          | 66.021          | E1   |



# sp | Q6GSS7 | H2A2A\_MOUSE

LNKLLGK <sup>Dimethyl</sup>VTIAQGGVLPNIQAVLLPKKTE  
28.03

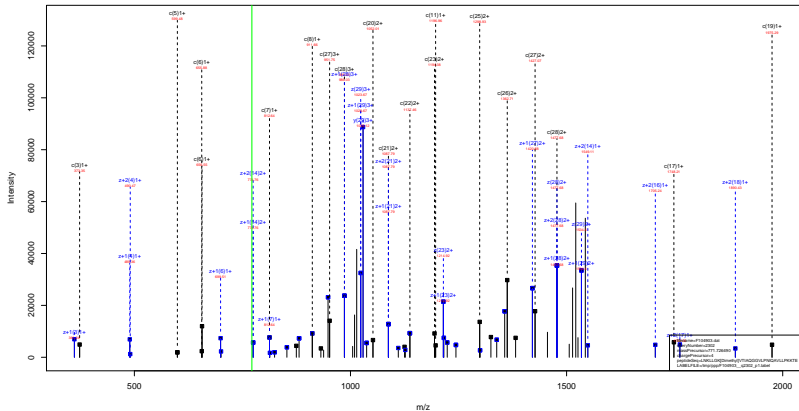

# sp | Q6GSS7 | H2A2A\_MOUSE

LNKLLGK <sup>Dimethyl</sup><sub>28.03</sub> VTIAQGGVLPNIQAVLLPKKTE

- ▶ fragmentation table for charge state 1+
- ▶ specType=etd
- ▶ score=108.80
- ▶ F104903.dat
- ▶ query=q2302\_p1
- ▶ precursor=771.726490
- ▶ chargePrecursor=4
- ▶ itol=0.8

| AA    | c               | y               | z+1             | z+2             | z        | AA    |
|-------|-----------------|-----------------|-----------------|-----------------|----------|-------|
| L[1]  | 131.118         | 3083.892        | 3067.873        | 0.000           | 3066.865 | L[26] |
| N[2]  | 245.161         | 2970.808        | 2954.789        | 2935.797        | 2953.781 | N[28] |
| K[3]  | <b>373.256</b>  | 2856.765        | 2840.746        | 2841.754        | 2839.738 | K[27] |
| L[4]  | 488.340         | 2728.670        | 2712.651        | 2713.659        | 2711.643 | L[26] |
| L[5]  | <b>699.424</b>  | 2615.585        | 2599.567        | 2600.575        | 2598.559 | L[25] |
| G[6]  | <b>658.445</b>  | 2502.500        | 2486.483        | 2487.491        | 2485.475 | G[24] |
| K[7]  | <b>812.572</b>  | 2445.460        | 2429.442        | 2430.450        | 2428.434 | K[23] |
| V[8]  | <b>911.640</b>  | 2289.354        | 2273.335        | 2274.343        | 2272.327 | V[22] |
| T[9]  | 1012.688        | 2190.288        | 2174.269        | 2175.275        | 2173.259 | T[21] |
| I[10] | <b>1125.772</b> | 2089.230        | 2073.210        | 2074.227        | 2072.211 | I[20] |
| A[11] | <b>1196.809</b> | 1976.154        | 1960.135        | 1961.143        | 1959.127 | A[19] |
| Q[12] | <b>1324.867</b> | 1865.111        | 1849.098        | <b>1690.106</b> | 1888.096 | Q[18] |
| G[13] | <b>1381.889</b> | 1777.058        | 1761.039        | <b>1762.047</b> | 1760.032 | G[17] |
| G[14] | 1438.910        | 1720.037        | 1704.018        | <b>1705.026</b> | 1703.010 | G[16] |
| V[15] | 1537.979        | 1663.015        | 1646.997        | 1648.004        | 1645.989 | V[15] |
| L[16] | 1651.063        | 1563.947        | 1547.928        | <b>1548.936</b> | 1546.920 | L[14] |
| F[17] | <b>1748.116</b> | 1490.863        | 1474.844        | 1475.852        | 1473.836 | F[13] |
| N[18] | 1868.959        | 1353.810        | <b>1337.791</b> | <b>1338.799</b> | 1336.783 | N[12] |
| I[19] | <b>1975.243</b> | 1239.761        | <b>1223.748</b> | 1224.756        | 1222.741 | I[11] |
| Q[20] | 2103.301        | <b>1126.683</b> | <b>1110.664</b> | 1111.672        | 1109.656 | Q[10] |
| A[21] | 2174.338        | 998.624         | 992.606         | 993.614         | 991.598  | A[9]  |
| V[22] | 2273.407        | 927.587         | <b>911.569</b>  | 912.576         | 910.561  | V[8]  |
| L[23] | 2389.491        | 808.515         | <b>813.509</b>  | <b>813.508</b>  | 811.492  | L[7]  |
| L[24] | 2499.575        | 715.435         | <b>699.416</b>  | <b>700.424</b>  | 698.408  | L[6]  |
| P[25] | 2596.628        | 602.351         | 596.332         | 597.340         | 595.324  | P[5]  |
| K[26] | 2724.723        | 505.268         | <b>489.279</b>  | <b>490.287</b>  | 488.271  | K[4]  |
| K[27] | 2852.818        | 377.203         | <b>361.184</b>  | 362.192         | 360.177  | K[3]  |
| T[28] | 2953.865        | 249.108         | 243.089         | 234.097         | 232.082  | T[2]  |
| E[29] | 3082.008        | 148.060         | 132.042         | 133.050         | 131.034  | E[1]  |

# sp | Q6GSS7 | H2A2A\_MOUSE

LNKLLGK <sup>Dimethyl</sup><sub>28.03</sub> VTIAQGGVLPNIQAVLLPKKTE

- ▶ fragmentation table for charge state 2+
- ▶ specType=etd
- ▶ score=108.80
- ▶ F104903.dat
- ▶ query=q2302\_p1
- ▶ precursor=771.726490
- ▶ chargePrecursor=4
- ▶ itol=0.8

| AA  | c               | y               | z+1             | z+2             | z               | AA   |
|-----|-----------------|-----------------|-----------------|-----------------|-----------------|------|
| L1  | 66.093          | 1542.850        | <b>1534.440</b> | 0.504           | <b>1533.936</b> | L126 |
| N12 | 123.084         | 1485.058        | <b>1477.898</b> | <b>1478.402</b> | <b>1477.394</b> | N120 |
| K13 | 187.132         | 1428.889        | <b>1420.877</b> | <b>1421.381</b> | <b>1420.373</b> | K127 |
| L14 | 243.674         | 1364.839        | <b>1356.829</b> | <b>1357.333</b> | <b>1356.325</b> | L126 |
| L15 | 300.216         | 1308.297        | <b>1300.287</b> | 1309.791        | <b>1299.783</b> | L125 |
| G16 | 358.758         | 1251.795        | <b>1243.745</b> | <b>1244.249</b> | <b>1243.241</b> | G124 |
| K17 | 406.789         | <b>1223.244</b> | <b>1215.234</b> | <b>1215.738</b> | <b>1214.731</b> | K123 |
| V18 | 456.324         | 1145.181        | <b>1137.171</b> | <b>1137.675</b> | <b>1136.667</b> | V122 |
| T19 | 506.840         | 1095.646        | <b>1087.637</b> | <b>1088.141</b> | <b>1087.133</b> | T121 |
| T10 | 563.390         | 1045.123        | <b>1037.113</b> | <b>1037.617</b> | <b>1036.609</b> | T20  |
| A11 | <b>598.908</b>  | 988.581         | 989.571         | 991.075         | 990.067         | A119 |
| Q12 | 662.937         | 933.060         | 940.053         | 948.557         | 944.549         | Q118 |
| G13 | 691.448         | 889.033         | <b>881.023</b>  | <b>881.527</b>  | <b>880.519</b>  | G117 |
| G14 | 719.959         | 860.522         | <b>852.513</b>  | <b>853.017</b>  | 852.009         | G116 |
| V15 | 769.493         | 832.011         | <b>824.002</b>  | <b>824.506</b>  | 823.498         | V115 |
| L16 | 820.035         | 782.477         | <b>774.468</b>  | <b>774.972</b>  | <b>773.964</b>  | L114 |
| T17 | <b>874.561</b>  | 728.935         | 731.928         | 738.930         | 737.922         | T113 |
| N18 | <b>931.583</b>  | 677.400         | 680.390         | 689.903         | 688.895         | N112 |
| I19 | 988.125         | 620.867         | 612.378         | 612.882         | 611.874         | I111 |
| Q20 | <b>1052.154</b> | 563.845         | 555.838         | 556.340         | 555.332         | Q110 |
| A21 | <b>1087.673</b> | 499.816         | 491.807         | 492.310         | 491.303         | A10  |
| V22 | <b>1137.207</b> | 484.297         | 456.288         | 456.792         | 455.784         | V19  |
| L23 | <b>1193.749</b> | 414.763         | 406.754         | 407.258         | 406.250         | L17  |
| L24 | 1250.291        | 358.221         | 350.213         | 350.716         | 349.708         | L16  |
| P25 | <b>1298.817</b> | 301.679         | 293.670         | 294.174         | 293.166         | P15  |
| K26 | <b>1362.865</b> | 253.153         | 245.143         | 245.647         | 244.639         | K14  |
| K27 | <b>1426.912</b> | 189.105         | 181.096         | 181.600         | 180.592         | K13  |
| T28 | <b>1477.436</b> | 125.058         | 117.048         | 117.552         | 116.544         | T12  |
| E29 | 1541.958        | 74.534          | 66.524          | 67.028          | 66.021          | E11  |

# sp | Q6GSS7 | H2A2A\_MOUSE

LNKLLGK <sup>Dimethyl</sup> <sub>28.03</sub> VTIAQGGVLPNIQAVLLPKKTE

- ▶ fragmentation table for charge state 3+
- ▶ specType=etd
- ▶ score=108.80
- ▶ F104903.dat
- ▶ query=q2302\_p1
- ▶ precursor=771.726490
- ▶ chargePrecursor=4
- ▶ itol=0.8

| AA    | c              | y               | z+1             | z+2            | z     | AA                   |
|-------|----------------|-----------------|-----------------|----------------|-------|----------------------|
| L 1   | 44.377         | <b>1028.635</b> | <b>1023.296</b> |                | 0.672 | <b>1022.960</b> L 29 |
| N 2   | 62.392         | 990.941         | <b>985.601</b>  | <b>985.937</b> |       | <b>985.265</b> N 28  |
| K 3   | 125.090        | 952.026         | <b>947.587</b>  | <b>947.923</b> |       | 947.251 K 27         |
| L 4   | 162.795        | 910.229         | 904.889         | 905.225        |       | 904.553 L 26         |
| L 5   | 200.479        | 872.523         | 867.124         | 867.550        |       | 866.955 L 25         |
| G 6   | 219.487        | 834.839         | 829.409         | 829.835        |       | 829.163 G 24         |
| K 7   | 271.529        | 815.832         | 810.492         | 810.828        |       | 810.156 K 23         |
| V 8   | 304.552        | 763.790         | 758.450         | 758.786        |       | 758.114 V 22         |
| T 9   | 336.234        | 730.767         | 725.427         | 725.763        |       | 725.091 T 21         |
| I 10  | 375.929        | 697.084         | 691.745         | 692.081        |       | 691.409 I 20         |
| A 11  | 399.608        | 659.389         | 654.050         | 654.386        |       | 653.714 A 19         |
| Q 12  | 442.294        | 636.720         | 630.374         | 630.707        |       | 630.035 Q 18         |
| G 13  | 461.301        | 593.024         | 587.685         | 588.021        |       | 587.349 G 17         |
| G 14  | 480.308        | 574.017         | 568.678         | 569.013        |       | 568.342 G 16         |
| V 15  | 513.331        | 555.010         | 549.670         | 550.006        |       | 549.334 V 15         |
| L 16  | 551.026        | 521.987         | 516.648         | 516.984        |       | 516.312 L 14         |
| F 17  | 583.377        | 484.292         | 478.953         | 479.289        |       | 478.617 F 13         |
| Tu 18 | 621.391        | 451.942         | 446.603         | 446.939        |       | 446.266 Tu 12        |
| I 19  | 659.086        | 413.927         | 408.588         | 408.924        |       | 408.252 I 11         |
| Q 20  | 701.772        | 376.233         | 370.893         | 371.229        |       | 370.557 Q 10         |
| A 21  | 725.451        | 333.546         | 328.207         | 328.543        |       | 327.871 A 9          |
| V 22  | 758.474        | 309.867         | 304.528         | 304.864        |       | 304.192 V 8          |
| L 23  | 796.168        | 276.844         | 271.505         | 271.841        |       | 271.169 L 7          |
| L 24  | 833.863        | 239.350         | 233.910         | 234.246        |       | 233.574 L 6          |
| P 25  | 866.214        | 201.655         | 196.116         | 196.451        |       | 195.780 P 5          |
| K 26  | 908.912        | 169.104         | 163.765         | 164.101        |       | 163.429 K 4          |
| K 27  | <b>951.611</b> | 126.406         | 121.066         | 121.402        |       | 120.730 K 3          |
| T 28  | <b>985.293</b> | 83.708          | 78.368          | 78.704         |       | 78.032 T 2           |
| E 29  | 1028.307       | 50.025          | 44.685          | 45.021         |       | 44.349 E 1           |



# sp | Q6GSS7 | H2A2A\_MOUSE

LNKLLGK <sup>Dimethyl</sup><sub>28.03</sub> VTIAQGGVLPNIQAVLLPKKTE

- ▶ fragmentation table for charge state 1+
- ▶ specType=etd
- ▶ score=78.21
- ▶ F104903.dat
- ▶ query=q2303\_p1
- ▶ precursor=771.726490
- ▶ chargePrecursor=4
- ▶ itol=0.8

| AA    | c               | y        | z+1             | z+2             | z        | AA    |
|-------|-----------------|----------|-----------------|-----------------|----------|-------|
| L[1]  | 131.118         | 3081.892 | 3067.873        | 0.000           | 3066.895 | L[29] |
| N[2]  | 345.161         | 2970.808 | 2954.789        | 2955.797        | 2951.781 | N[28] |
| K[3]  | <b>373.256</b>  | 2856.765 | 2840.746        | 2841.754        | 2839.738 | K[27] |
| L[4]  | 486.340         | 2728.670 | 2712.651        | 2713.659        | 2711.643 | L[26] |
| L[5]  | 597.424         | 2615.585 | 2599.567        | 2600.575        | 2598.560 | L[25] |
| Q[6]  | <b>656.445</b>  | 2502.502 | 2486.483        | 2487.491        | 2485.475 | Q[24] |
| K[7]  | <b>812.572</b>  | 2345.480 | 2429.462        | 2430.469        | 2428.454 | K[23] |
| V[8]  | <b>911.640</b>  | 2288.354 | 2273.335        | 2274.343        | 2272.327 | V[22] |
| T[9]  | 1017.688        | 2190.286 | 2174.267        | 2175.275        | 2173.259 | T[21] |
| I[10] | <b>1125.772</b> | 2089.238 | 2073.219        | 2074.227        | 2072.211 | I[20] |
| A[11] | <b>1196.809</b> | 1976.154 | <b>1960.135</b> | 1961.143        | 1959.127 | A[19] |
| Q[12] | 1324.857        | 1905.111 | <b>1889.098</b> | 1890.106        | 1888.090 | Q[18] |
| G[13] | <b>1381.889</b> | 1777.058 | 1761.039        | 1762.047        | 1760.032 | G[17] |
| G[14] | <b>1438.910</b> | 1720.937 | 1704.918        | 1705.926        | 1703.910 | G[16] |
| V[15] | 1537.879        | 1663.015 | 1646.997        | 1648.004        | 1645.989 | V[15] |
| L[16] | 1651.063        | 1563.947 | 1547.928        | 1548.936        | 1546.920 | L[14] |
| P[17] | 1748.116        | 1450.863 | 1434.844        | 1435.852        | 1433.836 | P[13] |
| T[18] | 1852.159        | 1383.810 | <b>1337.791</b> | <b>1338.799</b> | 1336.783 | T[12] |
| I[19] | 1975.243        | 1236.767 | 1223.748        | 1224.756        | 1222.741 | I[11] |
| Q[20] | 2103.301        | 1126.683 | <b>1110.664</b> | 1111.672        | 1109.656 | Q[10] |
| A[21] | 2174.336        | 998.624  | <b>982.606</b>  | 983.614         | 981.598  | A[9]  |
| V[22] | 2273.407        | 927.587  | <b>911.569</b>  | <b>912.576</b>  | 910.561  | V[8]  |
| L[23] | 2386.491        | 828.519  | <b>812.500</b>  | <b>813.508</b>  | 811.492  | L[7]  |
| L[24] | 2499.576        | 715.435  | <b>699.415</b>  | 700.424         | 698.408  | L[6]  |
| P[25] | 2596.626        | 602.351  | 586.332         | 587.340         | 585.324  | P[5]  |
| K[26] | 2724.723        | 505.298  | <b>489.279</b>  | 490.287         | 488.271  | K[4]  |
| K[27] | 2852.816        | 377.203  | <b>361.184</b>  | 362.192         | 360.177  | K[3]  |
| T[28] | 2953.895        | 249.108  | 233.089         | 234.097         | 232.082  | T[2]  |
| E[29] | 3082.968        | 148.060  | 132.042         | 133.050         | 131.034  | E[1]  |

# sp | Q6GSS7 | H2A2A\_MOUSE

LNKLLGK <sup>Dimethyl</sup><sub>28.03</sub> VTIAQGGVLPNIQAVLLPKKTE

- ▶ fragmentation table for charge state 2+
- ▶ specType=etd
- ▶ score=78.21
- ▶ F104903.dat
- ▶ query=q2303\_p1
- ▶ precursor=771.726490
- ▶ chargePrecursor=4
- ▶ itol=0.8

| AA  | c               | y               | z+1             | z+2             | z               | AA   |
|-----|-----------------|-----------------|-----------------|-----------------|-----------------|------|
| L1  | 66.093          | <b>1542.450</b> | <b>1534.440</b> | 9.504           | <b>1533.936</b> | L128 |
| N12 | 123.084         | 1485.905        | <b>1477.898</b> | <b>1478.402</b> | <b>1477.394</b> | N20  |
| K13 | 187.132         | 1428.889        | <b>1420.877</b> | <b>1421.381</b> | <b>1420.373</b> | K27  |
| L14 | 243.674         | 1364.839        | <b>1356.829</b> | <b>1357.333</b> | <b>1356.325</b> | L26  |
| L15 | 300.216         | 1308.297        | 1300.287        | 1300.791        | <b>1299.783</b> | L25  |
| G16 | 358.759         | 1251.755        | 1243.745        | 1244.249        | 1243.241        | G24  |
| K17 | 406.799         | 1223.244        | <b>1215.234</b> | <b>1215.738</b> | <b>1214.731</b> | K23  |
| V18 | 456.324         | 1145.181        | <b>1137.171</b> | <b>1137.675</b> | 1136.667        | V22  |
| T19 | 506.840         | 1095.646        | <b>1087.637</b> | <b>1088.141</b> | <b>1087.133</b> | T21  |
| T10 | 563.390         | 1045.123        | <b>1037.113</b> | <b>1037.617</b> | <b>1036.609</b> | T20  |
| A11 | <b>598.908</b>  | <b>988.581</b>  | 980.571         | 981.075         | 980.067         | A19  |
| G12 | 662.937         | 933.066         | <b>945.053</b>  | <b>945.557</b>  | 944.549         | G18  |
| G13 | 691.448         | 889.033         | <b>881.023</b>  | <b>881.527</b>  | <b>880.519</b>  | G17  |
| G14 | 719.959         | 860.522         | <b>852.513</b>  | <b>853.017</b>  | <b>852.009</b>  | G16  |
| V15 | 769.493         | 832.011         | 824.002         | 824.506         | 823.498         | V15  |
| L16 | 838.035         | 782.477         | <b>774.468</b>  | <b>774.972</b>  | <b>773.964</b>  | L14  |
| T17 | <b>874.561</b>  | 728.935         | 721.925         | 722.429         | 721.421         | T13  |
| N18 | 911.583         | 677.405         | 669.395         | 669.900         | 668.892         | N12  |
| I19 | <b>988.125</b>  | 620.387         | 612.378         | 612.882         | 611.874         | I11  |
| Q20 | <b>1052.154</b> | 563.845         | 555.836         | 556.340         | 555.332         | Q10  |
| A21 | <b>1087.673</b> | 499.816         | 491.807         | 492.311         | 491.303         | A0   |
| V22 | <b>1137.207</b> | 484.297         | 476.288         | 476.792         | 475.784         | V8   |
| L23 | <b>1193.749</b> | 414.763         | 406.754         | 407.258         | 406.250         | L17  |
| L24 | 1250.291        | 358.221         | 350.212         | 350.716         | 349.708         | L6   |
| P25 | <b>1288.817</b> | 301.679         | 293.670         | 294.174         | 293.166         | P5   |
| K26 | <b>1362.865</b> | 253.153         | 245.143         | 245.647         | 244.639         | K4   |
| K27 | 1428.917        | 189.105         | 181.096         | 181.600         | 180.592         | K3   |
| T28 | <b>1477.436</b> | 125.058         | 117.048         | 117.552         | 116.544         | T2   |
| E29 | <b>1541.958</b> | 74.534          | 66.524          | 67.028          | 66.021          | E1   |

# sp | Q6GSS7 | H2A2A\_MOUSE

LNKLLGK <sup>Dimethyl</sup> <sub>28.03</sub> VTIAQGGVLPNIQAVLLPKKTE

- ▶ fragmentation table for charge state 3+
- ▶ specType=etd
- ▶ score=78.21
- ▶ F104903.dat
- ▶ query=q2303\_p1
- ▶ precursor=771.726490
- ▶ chargePrecursor=4
- ▶ itol=0.8

| AA    | c               | y               | z+1             | z+2            | z               | AA    |
|-------|-----------------|-----------------|-----------------|----------------|-----------------|-------|
| L[1]  | 44.377          | <b>1028.635</b> | <b>1023.296</b> | 0.672          | <b>1022.960</b> | L[20] |
| N[2]  | 82.302          | 900.941         | <b>985.601</b>  | <b>985.937</b> | <b>985.265</b>  | N[20] |
| K[3]  | 125.090         | <b>952.926</b>  | <b>947.587</b>  | <b>947.923</b> | <b>947.251</b>  | K[27] |
| L[4]  | 162.785         | 810.228         | 904.889         | 905.225        | 904.553         | L[26] |
| L[5]  | 200.479         | 872.533         | 887.104         | 887.530        | 886.898         | L[25] |
| Q[6]  | 239.487         | 834.839         | 829.499         | 829.835        | 829.163         | Q[24] |
| K[7]  | 271.529         | 815.832         | 810.492         | 810.828        | 810.156         | K[23] |
| V[8]  | 304.552         | 783.790         | 758.450         | 758.786        | 758.114         | V[22] |
| T[9]  | 338.234         | 730.767         | 725.427         | 725.763        | 725.091         | T[21] |
| T[10] | 375.920         | 697.084         | 691.745         | 692.081        | 691.409         | T[20] |
| A[11] | 399.608         | 699.380         | 654.050         | 654.386        | 653.714         | A[19] |
| Q[12] | 442.294         | 630.713         | 630.374         | 630.707        | 630.035         | Q[18] |
| G[13] | 461.301         | 593.024         | 587.685         | 588.021        | 587.349         | G[17] |
| G[14] | 480.308         | 574.017         | 568.678         | 569.013        | 568.342         | G[16] |
| V[15] | 513.331         | 555.010         | 549.670         | 550.006        | 549.334         | V[15] |
| L[16] | 551.026         | 521.987         | 516.648         | 516.984        | 516.312         | L[14] |
| F[17] | 583.177         | 484.262         | 478.923         | 479.259        | 478.587         | F[13] |
| T[18] | 621.391         | 451.942         | 446.603         | 446.939        | 446.267         | T[12] |
| T[19] | 659.086         | 413.927         | 408.588         | 408.924        | 408.252         | T[11] |
| Q[20] | 701.772         | 376.233         | 370.893         | 371.229        | 370.557         | Q[10] |
| A[21] | 725.451         | 333.540         | 328.201         | 328.543        | 327.871         | A[9]  |
| V[22] | 758.474         | 309.867         | 304.528         | 304.864        | 304.192         | V[9]  |
| L[23] | 796.168         | 276.844         | 271.505         | 271.841        | 271.169         | L[7]  |
| L[24] | 833.863         | 239.159         | 233.810         | 234.146        | 233.474         | L[6]  |
| P[25] | 866.214         | 201.455         | 196.116         | 196.451        | 195.779         | P[5]  |
| K[26] | 908.912         | 169.104         | 163.765         | 164.101        | 163.429         | K[4]  |
| K[27] | <b>951.611</b>  | 126.400         | 121.061         | 121.402        | 120.730         | K[3]  |
| T[28] | <b>985.293</b>  | 83.700          | 78.366          | 78.704         | 78.032          | T[2]  |
| E[29] | <b>1028.307</b> | 50.025          | 44.685          | 45.021         | 44.349          | E[1]  |





# sp | Q6GSS7 | H2A2A\_MOUSE

LNKLLGK <sup>Dimethyl</sup> <sub>28.03</sub> VTIAQGGVLPNIQAVLLPKKTE

- ▶ fragmentation table for charge state 1+
- ▶ specType=etd
- ▶ score=95.23
- ▶ F104903.dat
- ▶ query=q2304\_p1
- ▶ precursor=617.582700
- ▶ chargePrecursor=5
- ▶ itol=0.8

| AA   | c               | y               | z+1             | z+2             | z              | AA   |
|------|-----------------|-----------------|-----------------|-----------------|----------------|------|
| L 1  | 131.118         | 3083.892        | 3067.873        | 0.000           | 3066.865       | L 26 |
| N 2  | <b>245.161</b>  | 2970.808        | 2954.789        | 2938.797        | 2953.781       | N 28 |
| K 3  | <b>373.256</b>  | 2856.765        | 2840.746        | 2841.754        | 2839.738       | K 27 |
| L 4  | 488.340         | 2728.670        | 2712.651        | 2713.659        | 2711.643       | L 26 |
| L 5  | <b>699.424</b>  | 2615.585        | 2599.567        | 2600.575        | 2598.559       | L 25 |
| G 6  | <b>658.445</b>  | 2502.500        | 2486.483        | 2487.491        | 2485.475       | G 24 |
| K 7  | <b>812.572</b>  | 2445.460        | 2429.462        | 2430.469        | 2428.454       | K 23 |
| V 8  | <b>911.640</b>  | 2289.354        | 2273.335        | 2274.343        | 2272.327       | V 22 |
| T 9  | 1012.688        | 2190.288        | 2174.267        | 2175.275        | 2173.259       | T 21 |
| I 10 | <b>1125.772</b> | 2089.230        | 2073.210        | 2074.227        | 2072.211       | I 20 |
| A 11 | <b>1196.809</b> | 1976.154        | 1960.135        | 1961.143        | 1959.127       | A 19 |
| Q 12 | <b>1324.867</b> | 1905.111        | 1889.098        | 1890.106        | 1888.090       | Q 18 |
| G 13 | <b>1381.889</b> | 1777.058        | 1761.039        | <b>1762.047</b> | 1760.032       | G 17 |
| G 14 | <b>1438.910</b> | 1720.037        | 1704.018        | <b>1705.026</b> | 1703.010       | G 16 |
| V 15 | <b>1537.979</b> | 1663.015        | 1646.997        | <b>1648.004</b> | 1646.989       | V 15 |
| L 16 | 1651.063        | 1583.947        | <b>1547.928</b> | 1548.936        | 1546.920       | L 14 |
| F 17 | 1748.116        | <b>1450.863</b> | 1434.844        | 1435.852        | 1433.836       | F 13 |
| N 18 | 1862.159        | 1383.810        | 1337.791        | <b>1338.799</b> | 1336.783       | N 12 |
| I 19 | 1975.243        | 1239.767        | 1223.748        | 1224.756        | 1222.741       | I 11 |
| Q 20 | 2103.301        | 1126.683        | 1110.664        | 1111.672        | 1109.656       | Q 10 |
| A 21 | 2174.338        | 998.624         | 982.606         | 983.614         | 981.598        | A 9  |
| V 22 | 2273.407        | 927.587         | <b>911.569</b>  | 912.576         | 910.561        | V 8  |
| L 23 | 2389.491        | 808.513         | <b>811.500</b>  | 812.508         | <b>811.492</b> | L 7  |
| L 24 | 2499.575        | 715.435         | <b>699.416</b>  | <b>700.424</b>  | 698.408        | L 6  |
| P 25 | 2596.628        | 602.351         | 586.332         | 587.340         | 585.324        | P 5  |
| K 26 | 2724.723        | 505.268         | <b>489.279</b>  | 490.287         | 488.271        | K 4  |
| K 27 | 2852.818        | 377.203         | <b>361.184</b>  | 362.192         | 360.177        | K 3  |
| T 28 | 2953.865        | 249.106         | 233.089         | 234.097         | 232.082        | T 2  |
| E 29 | 3082.008        | 148.060         | 132.042         | 133.050         | 131.034        | E 1  |

# sp | Q6GSS7 | H2A2A\_MOUSE

LNKLLGK <sup>Dimethyl</sup> <sub>28.03</sub> VTIAQGGVLPNIQAVLLPKKTE

- ▶ fragmentation table for charge state 2+
- ▶ specType=etd
- ▶ score=95.23
- ▶ F104903.dat
- ▶ query=q2304\_p1
- ▶ precursor=617.582700
- ▶ chargePrecursor=5
- ▶ itol=0.8

| AA  | c               | y               | z+1             | z+2             | z               | AA   |
|-----|-----------------|-----------------|-----------------|-----------------|-----------------|------|
| L1  | 66.053          | <b>1542.450</b> | 1524.440        | 9.504           | 1533.930        | L126 |
| N1  | 123.054         | 1485.905        | <b>1477.898</b> | <b>1478.402</b> | 1477.304        | N20  |
| K3  | 187.132         | 1428.889        | <b>1420.877</b> | <b>1421.381</b> | 1420.373        | K27  |
| L4  | 243.674         | 1364.839        | <b>1356.829</b> | <b>1357.333</b> | 1356.325        | L26  |
| L5  | 300.216         | 1308.297        | 1300.287        | 1300.791        | <b>1299.783</b> | L25  |
| G6  | 358.759         | 1251.755        | <b>1243.745</b> | <b>1244.249</b> | 1243.241        | G24  |
| K7  | 406.799         | 1223.244        | <b>1215.234</b> | <b>1215.738</b> | 1214.731        | K23  |
| V8  | <b>456.324</b>  | 1145.181        | 1137.171        | <b>1137.675</b> | 1136.667        | V22  |
| F9  | <b>506.848</b>  | 1095.646        | <b>1087.637</b> | <b>1088.141</b> | 1087.133        | F21  |
| T10 | 563.590         | 1045.123        | <b>1037.113</b> | <b>1037.617</b> | <b>1036.609</b> | T20  |
| A11 | <b>598.908</b>  | <b>988.581</b>  | <b>980.571</b>  | <b>981.075</b>  | <b>980.067</b>  | A19  |
| G12 | <b>642.837</b>  | 938.066         | 930.053         | 930.557         | 929.549         | G18  |
| G13 | <b>691.448</b>  | 889.033         | <b>881.023</b>  | <b>881.527</b>  | <b>880.519</b>  | G17  |
| G14 | <b>719.959</b>  | 860.522         | <b>852.513</b>  | <b>853.017</b>  | 852.009         | G16  |
| V15 | <b>769.493</b>  | 832.011         | <b>824.002</b>  | <b>824.506</b>  | 823.498         | V15  |
| L16 | 828.035         | <b>782.477</b>  | 774.468         | <b>774.972</b>  | 773.964         | L14  |
| F17 | <b>874.561</b>  | <b>725.935</b>  | 717.926         | 718.430         | 717.422         | F13  |
| N18 | 931.583         | 677.400         | <b>669.390</b>  | <b>669.903</b>  | <b>668.895</b>  | N12  |
| I19 | 988.125         | 620.387         | 612.378         | 612.882         | 611.874         | I11  |
| Q20 | <b>1052.154</b> | 563.845         | 555.836         | 556.340         | 555.332         | Q10  |
| A21 | <b>1087.673</b> | 499.816         | <b>491.807</b>  | <b>492.310</b>  | <b>491.303</b>  | A10  |
| V22 | 1147.207        | 484.297         | <b>456.288</b>  | <b>456.792</b>  | <b>455.784</b>  | V18  |
| L23 | <b>1193.749</b> | 414.763         | 406.753         | 407.257         | 406.250         | L17  |
| L24 | 1250.291        | 358.221         | 350.212         | 350.716         | 349.708         | L16  |
| P25 | <b>1298.817</b> | 301.679         | 293.670         | 294.174         | 293.166         | P15  |
| K26 | <b>1362.805</b> | 253.153         | <b>245.143</b>  | <b>245.647</b>  | <b>244.639</b>  | K14  |
| K27 | <b>1426.912</b> | 189.105         | 181.096         | 181.600         | 180.592         | K13  |
| T28 | <b>1477.436</b> | 125.058         | 117.049         | 117.552         | 116.544         | T12  |
| E29 | 1541.958        | 74.534          | 66.524          | 67.028          | 66.021          | E11  |

# sp | Q6GSS7 | H2A2A\_MOUSE

LNKLLGK <sup>Dimethyl</sup> <sub>28.03</sub> VTIAQGGVLPNIQAVLLPKKTE

- ▶ fragmentation table for charge state 3+
- ▶ specType=etd
- ▶ score=95.23
- ▶ F104903.dat
- ▶ query=q2304\_p1
- ▶ precursor=617.582700
- ▶ chargePrecursor=5
- ▶ itol=0.8

| AA    | c               | y               | z+1             | z+2            | z              | AA    |
|-------|-----------------|-----------------|-----------------|----------------|----------------|-------|
| L[1]  | 44.377          | <b>1028.635</b> | <b>1023.296</b> | 0.672          | 1022.660       | L[26] |
| N[2]  | 62.362          | 990.941         | <b>965.601</b>  | <b>965.937</b> | <b>965.265</b> | N[28] |
| K[3]  | 125.000         | 952.920         | <b>947.567</b>  | <b>947.923</b> | 947.251        | K[27] |
| L[4]  | 162.785         | 910.228         | <b>904.889</b>  | <b>905.225</b> | 904.553        | L[26] |
| L[5]  | 200.479         | 872.531         | <b>867.194</b>  | <b>867.530</b> | 866.855        | L[25] |
| G[6]  | 219.487         | 834.830         | <b>829.499</b>  | <b>829.835</b> | <b>829.163</b> | G[24] |
| K[7]  | 271.529         | <b>815.832</b>  | <b>810.492</b>  | <b>810.828</b> | <b>810.156</b> | K[23] |
| V[8]  | 304.552         | 783.790         | <b>758.450</b>  | <b>758.786</b> | <b>758.114</b> | V[22] |
| T[9]  | 338.434         | 738.767         | 725.427         | <b>725.763</b> | 725.091        | T[21] |
| I[10] | 375.929         | 697.084         | <b>691.745</b>  | <b>692.081</b> | <b>691.409</b> | I[20] |
| A[11] | 399.608         | 656.389         | 644.399         | 644.735        | 644.063        | A[19] |
| Q[12] | 442.294         | 639.710         | <b>630.371</b>  | <b>630.707</b> | <b>630.035</b> | Q[18] |
| G[13] | 461.301         | 593.024         | 587.685         | 588.021        | 587.349        | G[17] |
| G[14] | 480.308         | 574.017         | 568.678         | 569.013        | 568.342        | G[16] |
| V[15] | 513.331         | 555.010         | 549.670         | 550.006        | 549.334        | V[15] |
| L[16] | 551.026         | 521.997         | 516.648         | 516.984        | 516.312        | L[14] |
| P[17] | 583.377         | 484.292         | 478.953         | 479.289        | 478.617        | P[13] |
| T[18] | 633.391         | 433.943         | 449.002         | 448.338        | 448.266        | T[12] |
| I[19] | 659.088         | 413.927         | 408.588         | 408.924        | 408.252        | I[11] |
| Q[20] | <b>701.772</b>  | 376.231         | 370.893         | 371.229        | 370.557        | Q[10] |
| A[21] | 725.451         | 333.540         | 328.201         | 328.543        | 327.871        | A[9]  |
| V[22] | <b>758.474</b>  | 309.867         | 304.528         | 304.864        | 304.192        | V[8]  |
| L[23] | <b>796.168</b>  | 276.844         | 271.505         | 271.841        | 271.169        | L[7]  |
| L[24] | 833.863         | 238.190         | 233.850         | 234.186        | 233.474        | L[6]  |
| P[25] | 866.214         | 201.450         | 196.110         | 196.451        | 195.785        | P[5]  |
| K[26] | <b>908.912</b>  | 166.104         | 163.765         | 164.101        | 163.429        | K[4]  |
| K[27] | <b>951.611</b>  | 128.409         | 121.069         | 121.402        | 120.730        | K[3]  |
| T[28] | <b>985.293</b>  | 83.768          | 78.368          | 78.704         | 78.032         | T[2]  |
| E[29] | <b>1028.307</b> | 50.025          | 44.685          | 45.021         | 44.349         | E[1]  |

# sp | Q6GSS7 | H2A2A\_MOUSE

LNKLLGK <sup>Dimethyl</sup> <sub>28.03</sub> VTIAQGGVLPNIQAVLLPKKTE

- ▶ fragmentation table for charge state 4+
- ▶ specType=etd
- ▶ score=95.23
- ▶ F104903.dat
- ▶ query=q2304\_p1
- ▶ precursor=617.582700
- ▶ chargePrecursor=5
- ▶ itol=0.8

| AA |    | c              | y              | z+1            | z+2            | z              | AA |    |
|----|----|----------------|----------------|----------------|----------------|----------------|----|----|
| L  | 1  | 33.535         | <b>771.728</b> | 767.724        | 0.756          | 767.472        | L  | 29 |
| N  | 2  | 62.046         | 731.557        | <b>739.453</b> | <b>739.705</b> | <b>739.201</b> | N  | 28 |
| K  | 3  | 94.059         | <b>714.947</b> | 710.942        | 711.194        | 710.690        | K  | 27 |
| L  | 4  | 122.340        | 692.923        | 678.918        | 679.170        | 678.666        | L  | 26 |
| L  | 5  | 150.611        | 654.652        | 650.647        | 650.899        | 650.395        | L  | 25 |
| G  | 6  | 164.867        | 626.381        | 622.376        | 622.628        | 622.124        | G  | 24 |
| K  | 7  | 203.898        | 612.126        | 608.121        | 608.373        | 607.869        | K  | 23 |
| V  | 8  | 228.665        | 573.094        | 569.089        | 569.341        | 568.837        | V  | 22 |
| T  | 9  | 253.927        | 548.327        | 544.322        | 544.574        | 544.070        | T  | 21 |
| T  | 10 | 262.198        | 523.065        | 519.060        | 519.312        | 518.808        | T  | 20 |
| A  | 11 | 269.958        | 494.794        | 490.789        | 491.041        | 490.537        | A  | 19 |
| Q  | 12 | 331.972        | 477.035        | 473.030        | 473.282        | 472.778        | Q  | 18 |
| G  | 13 | 346.228        | 445.020        | 441.015        | 441.267        | 440.763        | G  | 17 |
| G  | 14 | 360.483        | 430.765        | 426.760        | 427.012        | 426.508        | G  | 16 |
| V  | 15 | 385.250        | 416.509        | 412.504        | 412.757        | 412.253        | V  | 15 |
| L  | 16 | 413.521        | 391.742        | 387.737        | 387.989        | 387.486        | L  | 14 |
| P  | 17 | 437.784        | 363.471        | 359.466        | 359.718        | 359.215        | P  | 13 |
| N  | 18 | 466.295        | 339.208        | 335.203        | 335.455        | 334.951        | N  | 12 |
| T  | 19 | 494.566        | 310.897        | 306.891        | 307.143        | 306.641        | T  | 11 |
| Q  | 20 | 526.381        | 282.426        | 278.421        | 278.673        | 278.170        | Q  | 10 |
| A  | 21 | 544.340        | 250.412        | 246.407        | 246.659        | 246.155        | A  | 9  |
| V  | 22 | 569.107        | 232.652        | 228.647        | 228.900        | 228.396        | V  | 8  |
| L  | 23 | 597.378        | 207.885        | 203.881        | 204.132        | 203.629        | L  | 7  |
| L  | 24 | 625.649        | 179.614        | 175.609        | 175.861        | 175.358        | L  | 6  |
| P  | 25 | 649.912        | 151.343        | 147.338        | 147.590        | 147.087        | P  | 5  |
| K  | 26 | 681.936        | 127.080        | 123.075        | 123.327        | 122.823        | K  | 4  |
| K  | 27 | <b>713.960</b> | 95.056         | 91.052         | 91.304         | 90.800         | K  | 3  |
| T  | 28 | <b>739.222</b> | 63.032         | 59.028         | 59.280         | 58.776         | T  | 2  |
| E  | 29 | <b>771.482</b> | 37.771         | 33.766         | 34.018         | 33.514         | E  | 1  |



# sp | Q6GSS7 | H2A2A\_MOUSE

LNKLLGK <sup>Dimethyl</sup><sub>28.03</sub> VTIAQGGVLPNIQAVLLPKKTE

- ▶ fragmentation table for charge state 1+
- ▶ specType=etd
- ▶ score=128.74
- ▶ F104903.dat
- ▶ query=q2305\_p1
- ▶ precursor=617.582740
- ▶ chargePrecursor=5
- ▶ itol=0.8

| AA    | c               | y        | z+1             | z+2             | z              | AA    |
|-------|-----------------|----------|-----------------|-----------------|----------------|-------|
| L[1]  | 131.118         | 3081.892 | 3067.873        | 0.000           | 3066.895       | L[29] |
| N[2]  | <b>245.161</b>  | 2970.808 | 2954.789        | 2955.797        | 2951.781       | N[28] |
| K[3]  | <b>373.256</b>  | 2856.765 | 2840.746        | 2841.754        | 2839.738       | K[27] |
| L[4]  | 486.340         | 2728.670 | 2712.651        | 2713.659        | 2711.643       | L[26] |
| L[5]  | <b>599.424</b>  | 2615.585 | 2599.567        | 2600.575        | 2598.560       | L[25] |
| G[6]  | <b>656.445</b>  | 2502.502 | 2486.483        | 2487.491        | 2485.475       | G[24] |
| K[7]  | <b>812.572</b>  | 2345.480 | 2429.462        | 2430.469        | 2428.454       | K[23] |
| V[8]  | <b>911.640</b>  | 2288.354 | 2273.335        | 2274.343        | 2272.327       | V[22] |
| T[9]  | 1017.688        | 2190.286 | 2174.267        | 2175.275        | 2173.259       | T[21] |
| I[10] | 1125.772        | 2089.238 | 2073.219        | 2074.227        | 2072.211       | I[20] |
| A[11] | <b>1196.809</b> | 1976.154 | 1960.135        | 1961.143        | 1959.127       | A[19] |
| Q[12] | <b>1324.867</b> | 1895.111 | 1889.093        | 1890.106        | 1888.090       | Q[18] |
| G[13] | 1381.889        | 1777.058 | 1761.039        | 1762.047        | 1760.032       | G[17] |
| G[14] | <b>1438.910</b> | 1720.937 | 1704.918        | 1705.926        | 1703.910       | G[16] |
| V[15] | <b>1537.979</b> | 1663.915 | 1646.907        | <b>1648.004</b> | 1645.989       | V[15] |
| L[16] | 1651.063        | 1563.947 | 1547.928        | <b>1548.936</b> | 1546.920       | L[14] |
| P[17] | 1748.116        | 1450.893 | 1434.864        | 1435.852        | 1433.836       | P[13] |
| T[18] | 1852.159        | 1383.810 | <b>1337.791</b> | 1338.799        | 1336.783       | T[12] |
| I[19] | 1975.243        | 1239.767 | <b>1223.748</b> | 1224.756        | 1222.741       | I[11] |
| Q[20] | 2103.301        | 1126.683 | 1110.664        | 1111.672        | 1109.656       | Q[10] |
| A[21] | 2174.336        | 998.624  | 982.606         | 983.614         | 981.598        | A[9]  |
| V[22] | 2273.407        | 927.587  | <b>911.569</b>  | <b>912.576</b>  | 910.561        | V[8]  |
| L[23] | 2386.491        | 828.519  | <b>812.500</b>  | 813.508         | <b>811.492</b> | L[7]  |
| L[24] | 2499.575        | 715.435  | <b>693.415</b>  | <b>700.424</b>  | <b>696.408</b> | L[6]  |
| P[25] | 2596.626        | 602.351  | 586.332         | 587.340         | 585.324        | P[5]  |
| K[26] | 2724.723        | 505.298  | 489.279         | <b>490.287</b>  | 488.271        | K[4]  |
| K[27] | 2852.816        | 377.203  | <b>361.184</b>  | 362.192         | 360.177        | K[3]  |
| T[28] | 2953.895        | 249.108  | 233.089         | 234.097         | 232.082        | T[2]  |
| E[29] | 3082.938        | 148.060  | 132.042         | 133.050         | 131.034        | E[1]  |

# sp | Q6GSS7 | H2A2A\_MOUSE

LNKLLGK <sup>Dimethyl</sup><sub>28.03</sub> VTIAQGGVLPNIQAVLLPKKTE

- ▶ fragmentation table for charge state 2+
- ▶ specType=etd
- ▶ score=128.74
- ▶ F104903.dat
- ▶ query=q2305\_p1
- ▶ precursor=617.582740
- ▶ chargePrecursor=5
- ▶ itol=0.8

| AA  | c               | y               | z+1             | z+2             | z               | AA   |
|-----|-----------------|-----------------|-----------------|-----------------|-----------------|------|
| L1  | 66.093          | <b>1542.450</b> | 1534.440        | 9.504           | 1533.930        | L126 |
| N12 | 123.084         | 1485.908        | <b>1477.898</b> | <b>1478.402</b> | 1477.304        | N020 |
| K13 | 187.132         | 1428.889        | <b>1420.877</b> | <b>1421.381</b> | 1420.373        | K027 |
| L14 | 263.674         | 1364.839        | <b>1356.829</b> | <b>1357.333</b> | <b>1356.325</b> | L126 |
| L15 | 300.216         | 1308.297        | 1300.287        | 1299.791        | 1299.783        | L125 |
| G16 | 328.200         | 1251.795        | 1243.785        | <b>1244.240</b> | 1243.241        | G024 |
| K17 | 406.730         | <b>1223.244</b> | <b>1215.234</b> | <b>1215.738</b> | 1214.731        | K023 |
| V18 | <b>456.324</b>  | 1145.181        | <b>1137.171</b> | <b>1137.675</b> | 1136.667        | V022 |
| F19 | <b>506.848</b>  | 1095.646        | <b>1087.637</b> | <b>1088.141</b> | 1087.133        | F121 |
| T10 | 563.390         | 1045.123        | <b>1037.113</b> | <b>1037.617</b> | <b>1036.609</b> | T020 |
| A11 | <b>598.908</b>  | <b>988.581</b>  | <b>980.571</b>  | <b>981.075</b>  | <b>980.067</b>  | A119 |
| G12 | <b>602.837</b>  | 933.066         | <b>943.053</b>  | <b>945.557</b>  | <b>944.549</b>  | G118 |
| G13 | <b>691.448</b>  | 889.033         | <b>881.023</b>  | <b>881.527</b>  | <b>880.519</b>  | G117 |
| G14 | <b>719.959</b>  | 860.522         | <b>852.513</b>  | <b>853.017</b>  | <b>852.009</b>  | G116 |
| V15 | <b>769.493</b>  | 832.011         | <b>824.002</b>  | <b>824.506</b>  | 823.498         | V115 |
| L16 | 820.935         | <b>782.477</b>  | 774.468         | 774.972         | 773.964         | L114 |
| F17 | <b>874.561</b>  | <b>725.935</b>  | 717.926         | 718.430         | 717.422         | F113 |
| N18 | <b>931.583</b>  | 677.420         | <b>669.399</b>  | <b>669.903</b>  | 668.895         | N012 |
| I19 | <b>988.125</b>  | 620.907         | <b>612.378</b>  | <b>612.882</b>  | <b>611.874</b>  | I111 |
| Q20 | <b>1052.154</b> | 563.849         | <b>555.836</b>  | <b>556.340</b>  | 555.332         | Q110 |
| A21 | <b>1087.673</b> | 499.816         | <b>491.807</b>  | <b>492.310</b>  | <b>491.303</b>  | A10  |
| V22 | <b>1137.207</b> | 484.297         | <b>456.288</b>  | <b>456.792</b>  | 455.784         | V18  |
| L23 | <b>1193.749</b> | 414.763         | 406.753         | 407.257         | 406.250         | L17  |
| L24 | 1250.291        | 358.221         | <b>350.212</b>  | <b>350.716</b>  | 349.708         | L16  |
| P25 | <b>1298.817</b> | 301.678         | 293.670         | 294.174         | 293.166         | P15  |
| K26 | <b>1362.805</b> | 253.153         | <b>245.143</b>  | <b>245.647</b>  | <b>244.639</b>  | K14  |
| K27 | <b>1426.912</b> | 189.105         | 181.096         | 181.600         | 180.592         | K13  |
| T28 | 1477.436        | 125.058         | 117.048         | 117.552         | 116.544         | T12  |
| E29 | 1541.958        | 74.534          | 66.524          | 67.028          | 66.021          | E11  |



# sp | Q6GSS7 | H2A2A\_MOUSE

LNKLLGK <sup>Dimethyl</sup> <sub>28.03</sub> VTIAQGGVLPNIQAVLLPKKTE

- ▶ fragmentation table for charge state 3+
- ▶ specType=etd
- ▶ score=128.74
- ▶ F104903.dat
- ▶ query=q2305\_p1
- ▶ precursor=617.582740
- ▶ chargePrecursor=5
- ▶ itol=0.8

| AA   | c              | y               | z+1             | z+2            | z              | AA   |
|------|----------------|-----------------|-----------------|----------------|----------------|------|
| L 1  | 44.377         | <b>1028.635</b> | <b>1023.296</b> | 0.672          | 1023.660       | L 29 |
| N 2  | 62.302         | <b>990.941</b>  | <b>985.601</b>  | <b>985.937</b> | <b>985.265</b> | N 28 |
| K 3  | 125.090        | 952.326         | <b>947.587</b>  | <b>947.923</b> | 947.251        | K 27 |
| L 4  | 162.785        | 910.226         | <b>904.889</b>  | <b>905.225</b> | <b>904.553</b> | L 26 |
| L 5  | 200.479        | 872.531         | 867.194         | 867.530        | 866.858        | L 25 |
| G 6  | 239.487        | 834.839         | <b>829.499</b>  | <b>829.835</b> | <b>829.163</b> | G 24 |
| K 7  | 271.529        | <b>815.832</b>  | <b>810.492</b>  | <b>810.828</b> | <b>810.156</b> | K 23 |
| V 8  | 304.552        | 763.790         | <b>758.450</b>  | <b>758.786</b> | <b>758.114</b> | V 22 |
| T 9  | 338.234        | 730.761         | <b>725.427</b>  | <b>725.763</b> | <b>725.091</b> | T 21 |
| I 10 | 375.929        | 697.084         | <b>691.745</b>  | <b>692.081</b> | <b>691.409</b> | I 20 |
| A 11 | 399.608        | 659.389         | <b>654.050</b>  | <b>654.386</b> | <b>653.714</b> | A 19 |
| Q 12 | 442.294        | 636.710         | <b>630.371</b>  | <b>630.707</b> | <b>630.035</b> | Q 18 |
| G 13 | 461.301        | 593.024         | 587.685         | 588.021        | 587.349        | G 17 |
| G 14 | 480.308        | 574.017         | 568.678         | 569.013        | 568.342        | G 16 |
| V 15 | 513.131        | 555.010         | 549.670         | 550.006        | 549.334        | V 15 |
| L 16 | 551.026        | 521.987         | 516.648         | 516.984        | 516.312        | L 14 |
| P 17 | 583.377        | 484.292         | 478.953         | 479.289        | 478.617        | P 13 |
| N 18 | 621.391        | 451.942         | 446.602         | 446.938        | 446.266        | N 12 |
| I 19 | 659.086        | 413.927         | 408.588         | 408.924        | 408.252        | I 11 |
| Q 20 | 701.772        | 376.233         | 370.893         | 371.229        | 370.557        | Q 10 |
| A 21 | <b>725.451</b> | 333.546         | 328.207         | 328.543        | 327.871        | A 9  |
| V 22 | <b>758.474</b> | 309.867         | 304.528         | 304.864        | 304.192        | V 8  |
| L 23 | 796.188        | 276.844         | 271.505         | 271.841        | 271.169        | L 7  |
| L 24 | 833.863        | 239.150         | 233.810         | 234.146        | 233.474        | L 6  |
| T 25 | 869.214        | 201.455         | 196.116         | 196.452        | 195.780        | T 5  |
| K 26 | <b>908.912</b> | 169.100         | 163.760         | 164.100        | 163.429        | K 4  |
| K 27 | <b>951.611</b> | 138.406         | 133.066         | 133.402        | 132.730        | K 3  |
| T 28 | <b>985.293</b> | 83.708          | 78.368          | 78.704         | 78.032         | T 2  |
| E 29 | 1028.307       | 50.025          | 44.685          | 45.021         | 44.349         | E 1  |

# sp | Q6GSS7 | H2A2A\_MOUSE

LNKLLGK <sup>Dimethyl</sup> <sub>28.03</sub> VTIAQGGVLPNIQAVLLPKKTE

- ▶ fragmentation table for charge state 4+
- ▶ specType=etd
- ▶ score=128.74
- ▶ F104903.dat
- ▶ query=q2305\_p1
- ▶ precursor=617.582740
- ▶ chargePrecursor=5
- ▶ itol=0.8

| AA |    | c              | y              | z+1            | z+2            | z              | AA |    |
|----|----|----------------|----------------|----------------|----------------|----------------|----|----|
| L  | 1  | 33.535         | <b>771.726</b> | 767.724        | 0.756          | 767.472        | L  | 29 |
| N  | 2  | 62.046         | 743.451        | <b>739.453</b> | <b>739.705</b> | <b>739.201</b> | N  | 28 |
| K  | 3  | 94.059         | 714.947        | 710.945        | 711.194        | 710.690        | K  | 27 |
| L  | 4  | 122.340        | 687.923        | 678.918        | 679.170        | 678.666        | L  | 26 |
| L  | 5  | 150.611        | <b>654.652</b> | 650.647        | 650.899        | 650.395        | L  | 25 |
| G  | 6  | 164.867        | 626.381        | 622.376        | 622.628        | 622.124        | G  | 24 |
| K  | 7  | 203.898        | <b>612.126</b> | 608.121        | 609.373        | 607.869        | K  | 23 |
| V  | 8  | 228.665        | 573.094        | 569.089        | 569.341        | 568.837        | V  | 22 |
| T  | 9  | 253.927        | 548.327        | 544.322        | 544.574        | 544.070        | T  | 21 |
| I  | 10 | 262.198        | 523.065        | 519.060        | 519.312        | 518.808        | I  | 20 |
| A  | 11 | 289.958        | 494.794        | <b>490.789</b> | <b>491.041</b> | <b>490.537</b> | A  | 19 |
| Q  | 12 | 311.972        | 477.035        | 473.030        | 473.282        | 472.778        | Q  | 18 |
| G  | 13 | 346.728        | 445.020        | 441.015        | 441.267        | 440.763        | G  | 17 |
| G  | 14 | <b>360.483</b> | 430.765        | 426.760        | 427.012        | 426.508        | G  | 16 |
| V  | 15 | 385.250        | 416.509        | 412.505        | 412.757        | 412.253        | V  | 15 |
| L  | 16 | 413.521        | 391.742        | 387.737        | 387.989        | 387.486        | L  | 14 |
| P  | 17 | 437.784        | 363.471        | 359.466        | 359.718        | 359.215        | P  | 13 |
| N  | 18 | 466.295        | 339.208        | 335.203        | 335.455        | 334.951        | N  | 12 |
| I  | 19 | 494.566        | 310.897        | 306.891        | 307.143        | 306.641        | I  | 11 |
| Q  | 20 | 525.381        | 282.426        | 278.422        | 278.673        | 278.170        | Q  | 10 |
| A  | 21 | 544.340        | 259.412        | 249.407        | 249.659        | 249.155        | A  | 9  |
| V  | 22 | 569.107        | 232.652        | 228.648        | 228.900        | 228.396        | V  | 8  |
| L  | 23 | 597.378        | 207.885        | 203.881        | 204.132        | 203.629        | L  | 7  |
| L  | 24 | 625.649        | 179.614        | 175.609        | 175.861        | 175.358        | L  | 6  |
| P  | 25 | 649.912        | 151.343        | 147.338        | 147.590        | 147.087        | P  | 5  |
| K  | 26 | 681.936        | 127.080        | 123.075        | 123.327        | 122.823        | K  | 4  |
| K  | 27 | <b>713.960</b> | 95.056         | 91.052         | 91.304         | 90.800         | K  | 3  |
| T  | 28 | <b>739.222</b> | 63.032         | 59.028         | 59.280         | 58.776         | T  | 2  |
| E  | 29 | <b>771.482</b> | 37.771         | 33.766         | 34.018         | 33.514         | E  | 1  |

# sp | Q6GSS7 | H2A2A\_MOUSE

LNKLLGK <sup>Dimethyl</sup>VTIAQGGVLPNIQAVLLPKKTE  
28.03

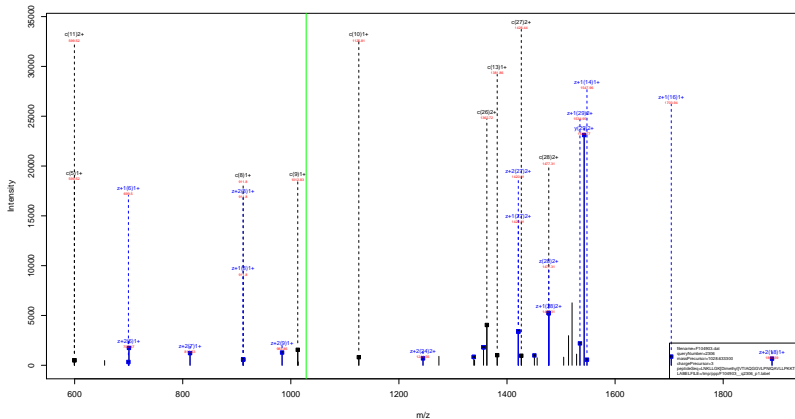

# sp | Q6GSS7 | H2A2A\_MOUSE

LNKLLGK <sup>Dimethyl</sup> <sub>28.03</sub> VTIAQGGVLPNIQAVLLPKKTE

- ▶ fragmentation table for charge state 1+
- ▶ specType=etd
- ▶ score=39.89
- ▶ F104903.dat
- ▶ query=q2306\_p1
- ▶ precursor=1028.633300
- ▶ chargePrecursor=3
- ▶ itol=0.8

| AA  | c               | y               | z+1             | z+2             | z        | AA  |
|-----|-----------------|-----------------|-----------------|-----------------|----------|-----|
| L1  | 131.118         | 3083.892        | 3067.873        | 0.000           | 3066.865 | L26 |
| N2  | 245.161         | 2970.808        | 2954.789        | 2935.797        | 2953.781 | N28 |
| K3  | 373.256         | 2856.765        | 2840.746        | 2841.754        | 2839.738 | K27 |
| L4  | 488.340         | 2728.670        | 2712.651        | 2713.659        | 2711.643 | L26 |
| L5  | <b>599.424</b>  | 2615.585        | 2599.567        | 2600.575        | 2598.559 | L25 |
| G6  | 659.449         | 2502.500        | 2486.483        | 2487.491        | 2485.475 | G24 |
| K7  | 812.572         | 2445.480        | 2429.462        | 2430.469        | 2428.454 | K23 |
| V8  | <b>911.640</b>  | 2289.354        | 2273.335        | 2274.343        | 2272.327 | V22 |
| T9  | <b>1012.688</b> | 2190.268        | 2174.260        | 2175.275        | 2173.259 | T21 |
| T10 | <b>1125.772</b> | 2089.238        | 2073.219        | 2074.227        | 2072.211 | T20 |
| A11 | 1196.809        | 1976.154        | 1960.135        | 1961.143        | 1959.127 | A19 |
| Q12 | 1214.867        | 1905.111        | 1889.098        | <b>1890.106</b> | 1888.090 | Q18 |
| G13 | <b>1381.889</b> | 1777.058        | 1761.039        | 1762.047        | 1760.032 | G17 |
| G14 | 1438.910        | 1720.037        | <b>1704.018</b> | 1705.026        | 1703.010 | G16 |
| V15 | 1537.879        | 1663.015        | 1646.997        | 1648.004        | 1645.989 | V15 |
| L16 | 1651.063        | 1583.947        | <b>1547.928</b> | 1548.936        | 1546.920 | L14 |
| T17 | 1748.116        | <b>1450.863</b> | <b>1414.844</b> | 1415.852        | 1413.836 | T13 |
| N18 | 1862.159        | 1383.810        | <b>1337.791</b> | <b>1338.799</b> | 1336.783 | N12 |
| I19 | 1975.243        | 1293.767        | 1273.748        | 1274.756        | 1272.741 | I11 |
| Q20 | 2103.301        | 1126.683        | 1110.664        | 1111.672        | 1109.656 | Q10 |
| A21 | 2174.338        | 998.624         | 982.606         | <b>983.614</b>  | 981.598  | A9  |
| V22 | 2273.407        | 927.587         | <b>911.569</b>  | <b>912.576</b>  | 910.561  | V8  |
| L23 | 2389.491        | 808.513         | 813.522         | <b>813.508</b>  | 811.492  | L7  |
| L24 | 2499.575        | 715.435         | <b>699.416</b>  | <b>700.424</b>  | 698.408  | L6  |
| P25 | 2596.628        | 602.351         | 586.332         | 587.340         | 585.324  | P5  |
| K26 | 2774.723        | 505.268         | 489.249         | 490.257         | 488.271  | K4  |
| K27 | 2852.818        | 377.203         | 361.184         | 362.192         | 360.177  | K3  |
| T28 | 2953.865        | 249.108         | 233.089         | 234.097         | 232.082  | T2  |
| E29 | 3082.898        | 148.080         | 132.062         | 133.070         | 131.054  | E1  |

# sp | Q6GSS7 | H2A2A\_MOUSE

LNKLLGK <sup>Dimethyl</sup><sub>28.03</sub> VTIAQGGVLPNIQAVLLPKKTE

- ▶ fragmentation table for charge state 2+
- ▶ specType=etd
- ▶ score=39.89
- ▶ F104903.dat
- ▶ query=q2306\_p1
- ▶ precursor=1028.633300
- ▶ chargePrecursor=3
- ▶ itol=0.8

| AA  | c               | y               | z+1             | z+2             | z               | AA   |
|-----|-----------------|-----------------|-----------------|-----------------|-----------------|------|
| L1  | 66.053          | <b>1542.450</b> | <b>1534.440</b> | 8.504           | 1533.930        | L120 |
| N12 | 123.054         | 1485.905        | <b>1477.898</b> | 1478.402        | <b>1477.394</b> | N120 |
| K13 | 187.132         | 1428.889        | <b>1420.877</b> | <b>1421.381</b> | <b>1420.373</b> | K127 |
| L14 | 243.674         | 1364.839        | <b>1356.829</b> | <b>1357.333</b> | <b>1356.325</b> | L126 |
| L15 | 300.216         | 1308.297        | 1300.287        | 1300.791        | 1299.783        | L125 |
| G16 | 358.759         | 1251.755        | 1243.745        | <b>1244.249</b> | 1243.241        | G124 |
| K17 | 406.799         | 1223.244        | 1215.234        | 1215.738        | 1214.731        | K123 |
| V18 | 456.324         | 1145.181        | 1137.171        | 1137.675        | 1136.667        | V122 |
| T19 | 506.849         | 1095.646        | 1087.637        | 1088.141        | 1087.133        | T121 |
| T10 | 563.390         | 1045.123        | 1037.113        | 1037.617        | 1036.609        | T20  |
| A11 | <b>598.908</b>  | 988.581         | 980.571         | 981.075         | 980.067         | A119 |
| Q12 | 662.937         | 933.062         | 925.053         | 925.557         | 924.549         | Q118 |
| G13 | 691.448         | 889.033         | 881.023         | 881.527         | 880.519         | G117 |
| G14 | 719.959         | 860.522         | 852.513         | 853.017         | 852.009         | G116 |
| V15 | 769.493         | 832.011         | 824.002         | 824.506         | 823.498         | V115 |
| L16 | 826.035         | 782.477         | 774.468         | 774.972         | 773.964         | L114 |
| T17 | 874.581         | 728.935         | 720.926         | 721.430         | 720.422         | T113 |
| N18 | 931.583         | 677.400         | 669.390         | 669.893         | 668.885         | N112 |
| I19 | 988.125         | 620.867         | 612.858         | 613.362         | 612.354         | I111 |
| Q20 | 1052.154        | 563.845         | 555.836         | 556.340         | 555.332         | Q110 |
| A21 | 1087.673        | 499.816         | 491.807         | 492.311         | 491.303         | A10  |
| V22 | 1127.207        | 484.297         | 476.288         | 476.792         | 475.784         | V19  |
| L23 | 1193.769        | 414.763         | 406.754         | 407.258         | 406.250         | L17  |
| L24 | 1250.291        | 358.221         | 350.212         | 350.716         | 349.708         | L16  |
| P25 | 1298.817        | 301.679         | 293.670         | 294.174         | 293.166         | P15  |
| K26 | <b>1362.865</b> | 253.153         | 245.143         | 245.647         | 244.639         | K14  |
| K27 | <b>1426.912</b> | 189.105         | 181.096         | 181.600         | 180.592         | K13  |
| T28 | <b>1477.436</b> | 125.058         | 117.049         | 117.552         | 116.544         | T12  |
| E29 | 1541.958        | 74.534          | 66.524          | 67.028          | 66.021          | E11  |



# sp | Q8CGP5 | H2A1F\_MOUSE

LNK<sup>Dimethyl</sup><sub>28.03</sub> LLGRVTIAQGGVLPNIQAVLLPKKTE

- ▶ fragmentation table for charge state 1+
- ▶ specType=etd
- ▶ score=59.85
- ▶ F104903.dat
- ▶ query=q2344\_p1
- ▶ precursor=778.725130
- ▶ chargePrecursor=4
- ▶ itol=0.8

| AA  | c               | y               | z+1             | z+2             | z               | AA   |
|-----|-----------------|-----------------|-----------------|-----------------|-----------------|------|
| L1  | 131.118         | 3111.896        | 3056.870        | 9.000           | 3094.871        | L126 |
| N2  | 245.151         | 2998.014        | 2982.795        | 2983.003        | 2981.787        | N20  |
| K3  | 481.287         | 2884.711        | 2866.792        | 2869.760        | 2867.744        | K27  |
| L4  | 514.371         | 2728.645        | 2712.620        | 2713.634        | 2711.618        | L26  |
| L5  | 627.455         | 2615.561        | 2599.542        | 2600.550        | 2598.534        | L25  |
| G6  | 684.877         | 2502.877        | 2486.858        | 2487.866        | 2485.850        | G24  |
| R7  | 840.578         | 2344.855        | 2429.430        | 2430.444        | 2429.420        | R23  |
| V8  | 939.646         | 2289.954        | 2273.935        | 2274.943        | 2272.927        | V22  |
| F9  | 1046.694        | 2190.266        | 2174.267        | 2175.275        | 2173.259        | F21  |
| T10 | 1153.778        | 2099.238        | 2073.219        | 2074.227        | 2072.211        | T20  |
| A11 | 1224.815        | 1978.154        | 1962.135        | <b>1961.143</b> | 1959.117        | A19  |
| Q12 | 1352.874        | 1905.111        | <b>1889.098</b> | 1899.106        | 1889.090        | Q18  |
| G13 | 1409.895        | 1777.058        | 1761.039        | 1762.047        | 1760.032        | G17  |
| G14 | 1466.917        | 1720.037        | 1704.018        | <b>1705.026</b> | 1703.010        | G16  |
| V15 | <b>1565.985</b> | 1663.015        | 1646.997        | 1648.004        | 1645.989        | V15  |
| L16 | 1679.069        | <b>1563.947</b> | <b>1547.928</b> | 1548.936        | 1546.920        | L14  |
| F17 | 1778.222        | 1450.951        | 1434.931        | 1435.932        | 1433.916        | F13  |
| N18 | 1890.105        | 1353.810        | <b>1337.791</b> | 1338.799        | 1336.781        | N12  |
| I19 | 2003.249        | 1239.767        | <b>1223.748</b> | 1224.756        | <b>1222.741</b> | I11  |
| Q20 | 2131.307        | 1126.681        | <b>1110.664</b> | 1111.672        | 1109.656        | Q10  |
| A21 | 2202.344        | 998.624         | <b>982.606</b>  | 983.614         | 981.598         | A0   |
| V22 | 2301.413        | 927.587         | <b>911.569</b>  | 912.576         | 910.561         | V8   |
| L23 | 2414.469        | 838.519         | <b>812.500</b>  | <b>813.508</b>  | <b>811.492</b>  | L7   |
| L24 | 2527.581        | 715.435         | <b>699.416</b>  | <b>700.424</b>  | 698.408         | L6   |
| P25 | 2624.634        | 602.351         | 586.332         | 587.340         | 585.324         | P5   |
| K26 | 2752.729        | 505.298         | <b>489.279</b>  | <b>490.287</b>  | 488.271         | K4   |
| K27 | 2880.824        | 377.203         | <b>361.184</b>  | 362.192         | 360.177         | K3   |
| T28 | 2983.871        | 249.108         | 233.089         | 234.097         | 232.081         | T2   |
| E29 | 3110.914        | 148.060         | 132.042         | 133.050         | 131.034         | E1   |

# sp | Q8CGP5 | H2A1F\_MOUSE

LNK<sup>Dimethyl</sup><sub>28.03</sub> LLGRVTIAQGGVLPNIQAVLLPKKTE

- ▶ fragmentation table for charge state 2+
- ▶ specType=etd
- ▶ score=59.85
- ▶ F104903.dat
- ▶ query=q2344\_p1
- ▶ precursor=778.725130
- ▶ chargePrecursor=4
- ▶ itol=0.8

| AA  | c               | y               | z+1             | z+2             | z               | AA   |
|-----|-----------------|-----------------|-----------------|-----------------|-----------------|------|
| L1  | 66.093          | <b>1556.453</b> | <b>1548.443</b> | 9.504           | <b>1547.939</b> | L198 |
| N1  | 123.084         | 1499.911        | <b>1491.901</b> | 1492.405        | <b>1491.397</b> | N20  |
| K3  | 201.147         | 1442.899        | 1434.889        | 1435.384        | 1434.376        | K27  |
| L4  | 257.609         | <b>1364.826</b> | <b>1356.817</b> | <b>1357.321</b> | <b>1356.313</b> | L26  |
| L5  | 314.211         | 1308.264        | 1300.275        | 1300.779        | 1299.771        | L25  |
| G6  | 382.782         | 1251.745        | 1243.733        | 1244.236        | 1243.229        | G24  |
| R7  | 430.793         | <b>1223.231</b> | <b>1215.222</b> | <b>1215.726</b> | <b>1214.718</b> | R23  |
| V8  | 479.327         | 1145.181        | <b>1137.171</b> | <b>1137.675</b> | 1136.667        | V22  |
| T9  | 528.851         | 1095.646        | <b>1087.637</b> | <b>1088.141</b> | 1087.133        | T21  |
| T10 | 577.393         | 1045.123        | <b>1037.113</b> | <b>1037.617</b> | 1036.609        | T20  |
| A11 | 622.811         | 998.581         | <b>990.571</b>  | <b>991.075</b>  | <b>990.067</b>  | A19  |
| G12 | 678.988         | 953.063         | <b>945.053</b>  | <b>945.557</b>  | <b>944.549</b>  | G18  |
| G13 | 705.451         | <b>899.033</b>  | <b>891.023</b>  | <b>891.527</b>  | <b>890.519</b>  | G17  |
| G14 | <b>733.962</b>  | <b>860.522</b>  | <b>852.513</b>  | <b>853.017</b>  | 852.009         | G16  |
| V15 | <b>783.496</b>  | 832.011         | 824.002         | 824.506         | 823.498         | V15  |
| L16 | 840.038         | <b>782.477</b>  | 774.468         | 774.972         | 773.964         | L14  |
| T17 | <b>888.565</b>  | <b>725.935</b>  | 717.926         | 718.430         | 717.422         | T13  |
| N18 | <b>945.586</b>  | 677.422         | 669.409         | 669.913         | 668.905         | N12  |
| I19 | <b>1002.128</b> | 630.907         | 622.898         | 623.402         | 622.394         | I11  |
| Q20 | <b>1066.157</b> | 583.845         | 575.836         | 576.340         | 575.332         | Q10  |
| A21 | 1101.676        | 499.816         | 491.807         | 492.311         | 491.303         | A0   |
| V22 | <b>1151.210</b> | 484.297         | 476.288         | 476.792         | 475.784         | V8   |
| L23 | <b>1207.752</b> | 414.761         | 406.752         | 407.256         | 406.248         | L17  |
| L24 | 1254.294        | 358.221         | 350.212         | 350.716         | 349.708         | L16  |
| P25 | <b>1312.821</b> | 301.679         | 293.670         | 294.174         | 293.166         | P5   |
| K26 | 1378.868        | 253.153         | 245.143         | 245.647         | 244.639         | K4   |
| K27 | <b>1440.915</b> | 199.105         | 191.096         | 191.600         | 190.592         | K3   |
| T28 | <b>1491.439</b> | 125.058         | 117.048         | 117.552         | 116.544         | T2   |
| E29 | <b>1555.961</b> | 74.534          | 66.524          | 67.028          | 66.021          | E1   |



# sp | Q8CGP5 | H2A1F\_MOUSE

LNK<sup>Dimethyl</sup><sub>28.03</sub> LLGRVTIAQGGVLPNIQAVLLPKKTE

- ▶ fragmentation table for charge state 3+
- ▶ specType=etd
- ▶ score=59.85
- ▶ F104903.dat
- ▶ query=q2344\_p1
- ▶ precursor=778.725130
- ▶ chargePrecursor=4
- ▶ itol=0.8

| AA    | c               | y               | z+1             | z+2            | z               | AA    |
|-------|-----------------|-----------------|-----------------|----------------|-----------------|-------|
| L[1]  | 44.377          | <b>1037.971</b> | <b>1032.611</b> | 0.672          | <b>1032.295</b> | L[20] |
| N[2]  | 82.302          | 1000.276        | <b>994.937</b>  | <b>995.273</b> | <b>994.601</b>  | N[20] |
| K[3]  | 134.434         | 962.267         | 956.922         | 957.258        | 956.589         | K[27] |
| L[4]  | 172.129         | 910.220         | 904.880         | 905.216        | 904.544         | L[26] |
| L[5]  | 209.823         | 872.525         | 867.186         | 867.521        | 866.860         | L[25] |
| Q[6]  | 249.830         | 834.930         | 829.491         | 829.827        | 829.155         | Q[24] |
| R[7]  | 280.804         | 815.823         | 810.484         | 810.820        | 810.148         | R[23] |
| V[8]  | 313.887         | 793.700         | 788.450         | 788.786        | 788.114         | V[22] |
| T[9]  | 347.569         | 736.767         | <b>725.427</b>  | <b>725.763</b> | 725.091         | T[21] |
| I[10] | 385.264         | 697.084         | 691.745         | 692.081        | 691.409         | I[20] |
| A[11] | 408.643         | 669.389         | 664.050         | 664.386        | 663.714         | A[19] |
| Q[12] | 451.629         | 630.717         | 625.378         | 625.714        | 625.035         | Q[18] |
| G[13] | 470.637         | 593.024         | 587.685         | 588.021        | 587.349         | G[17] |
| G[14] | <b>489.644</b>  | 574.017         | 568.678         | 569.013        | 568.342         | G[16] |
| V[15] | 522.607         | 555.010         | 549.670         | 550.006        | 549.334         | V[15] |
| L[16] | 560.361         | 521.987         | 516.648         | 516.984        | 516.312         | L[14] |
| F[17] | 592.712         | 484.262         | 478.923         | 479.259        | 478.587         | F[13] |
| T[18] | 630.229         | 451.942         | 446.603         | 446.938        | 446.266         | T[12] |
| I[19] | 668.421         | 413.927         | 408.588         | 408.924        | 408.252         | I[11] |
| Q[20] | 711.107         | 376.233         | 370.893         | 371.229        | 370.557         | Q[10] |
| A[21] | 734.786         | 333.540         | 328.201         | 328.543        | 327.871         | A[9]  |
| V[22] | 767.809         | 309.867         | 304.528         | 304.864        | 304.192         | V[9]  |
| L[23] | 805.504         | 276.844         | 271.505         | 271.841        | 271.169         | L[7]  |
| L[24] | 843.299         | 239.129         | 233.810         | 234.146        | 233.474         | L[6]  |
| P[25] | 875.549         | 201.455         | 196.116         | 196.451        | 195.780         | P[5]  |
| K[26] | 918.248         | 169.104         | 163.765         | 164.101        | 163.429         | K[4]  |
| K[27] | <b>960.946</b>  | 126.406         | 121.066         | 121.402        | 120.730         | K[3]  |
| T[28] | <b>994.629</b>  | 83.708          | 78.368          | 78.704         | 78.032          | T[2]  |
| E[29] | <b>1037.643</b> | 50.025          | 44.685          | 45.021         | 44.349          | E[1]  |

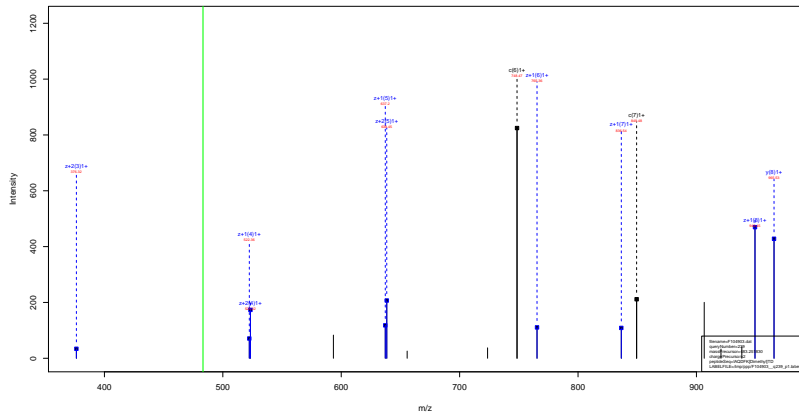

# sp | P68433 | H31\_MOUSE

IAQDFK<sup>Dimethyl</sup> TD  
28.03

- ▶ fragmentation table for charge state 1+
- ▶ specType=etd
- ▶ score=41.87
- ▶ F104903.dat
- ▶ query=q239\_p1
- ▶ precursor=483.251830
- ▶ chargePrecursor=2
- ▶ itol=0.8

| AA  | c              | y              | z+1            | z+2            | z       | AA  |
|-----|----------------|----------------|----------------|----------------|---------|-----|
| I 1 | 131.118        | <b>965.494</b> | <b>949.475</b> | 0.000          | 948.467 | I 8 |
| A 2 | 202.155        | 852.410        | <b>836.391</b> | 0.000          | 835.383 | A 7 |
| Q 3 | 330.214        | 781.373        | <b>765.354</b> | 766.362        | 764.346 | Q 6 |
| D 4 | 445.241        | 653.314        | <b>637.295</b> | <b>638.303</b> | 636.288 | D 5 |
| F 5 | 592.309        | 538.287        | <b>522.268</b> | <b>523.276</b> | 521.261 | F 4 |
| K 6 | <b>748.435</b> | 391.219        | 375.200        | <b>376.208</b> | 374.192 | K 3 |
| T 7 | <b>849.483</b> | 235.092        | 219.074        | 220.082        | 218.066 | T 2 |
| D 8 | 964.510        | 134.045        | 118.026        | 119.034        | 117.018 | D 1 |



# sp | Q6GSS7 | H2A2A\_MOUSE

ELNKLKLGK<sup>Dimethyl</sup><sub>28.03</sub>VTIAQGGVLPNIQAVLLPKKTE

- ▶ fragmentation table for charge state 1+
- ▶ specType=etd
- ▶ score=102.99
- ▶ F104903.dat
- ▶ query=q2442\_p1
- ▶ precursor=803.987010
- ▶ chargePrecursor=4
- ▶ itol=0.8

| AA |    | c               | y        | z+1             | z+2             | z              | AA |    |
|----|----|-----------------|----------|-----------------|-----------------|----------------|----|----|
| E  | 1  | 147.076         | 3212.934 | 3196.916        | 0.000           | 3195.908       | E  | 30 |
| L  | 2  | 260.160         | 3083.892 | 3067.873        | 0.000           | 3066.865       | L  | 29 |
| R  | 3  | 374.333         | 2970.868 | 2954.789        | 2855.797        | 2953.781       | R  | 28 |
| K  | 4  | <b>502.298</b>  | 2956.765 | 2940.746        | 2841.754        | 2839.738       | K  | 27 |
| L  | 5  | 615.382         | 2728.670 | 2712.651        | 2713.659        | 2711.643       | L  | 26 |
| L  | 6  | <b>728.466</b>  | 2615.586 | 2599.567        | 2600.575        | 2598.559       | L  | 25 |
| G  | 7  | <b>785.488</b>  | 2502.502 | 2486.483        | 2487.491        | 2485.475       | G  | 24 |
| K  | 8  | 941.614         | 2445.480 | 2429.462        | 2430.469        | 2428.454       | K  | 23 |
| V  | 9  | <b>1048.683</b> | 2388.384 | 2373.385        | 2274.343        | 2272.327       | V  | 22 |
| I  | 10 | <b>1141.730</b> | 2190.386 | 2174.287        | 2178.278        | 2176.293       | I  | 21 |
| I  | 11 | <b>1254.814</b> | 2089.238 | 2073.219        | 2074.227        | 2072.211       | I  | 20 |
| A  | 12 | <b>1325.851</b> | 1978.154 | 1960.135        | 1961.143        | 1959.127       | A  | 19 |
| Q  | 13 | 1453.910        | 1905.117 | 1889.089        | <b>1890.106</b> | 1888.090       | Q  | 18 |
| G  | 14 | <b>1510.932</b> | 1777.058 | 1761.039        | <b>1762.047</b> | 1760.032       | G  | 17 |
| G  | 15 | 1627.953        | 1730.037 | 1704.018        | <b>1705.026</b> | 1703.010       | G  | 16 |
| V  | 16 | <b>1667.021</b> | 1583.015 | 1549.997        | 1548.004        | 1546.989       | V  | 15 |
| L  | 17 | 1780.105        | 1563.947 | <b>1547.928</b> | 1548.936        | 1546.920       | L  | 14 |
| P  | 18 | 1877.158        | 1450.863 | 1434.844        | 1435.852        | 1433.836       | P  | 13 |
| N  | 19 | 1991.201        | 1353.810 | <b>1337.791</b> | 1336.799        | 1336.783       | N  | 12 |
| T  | 20 | 2104.285        | 1230.767 | 1223.748        | 1224.756        | 1222.741       | T  | 11 |
| Q  | 21 | 2232.344        | 1136.682 | <b>1118.664</b> | 1111.612        | 1109.605       | Q  | 10 |
| A  | 22 | 2303.391        | 998.624  | <b>982.606</b>  | 981.614         | <b>981.598</b> | A  | 9  |
| V  | 23 | 2402.449        | 927.587  | 913.500         | <b>912.576</b>  | 910.560        | V  | 8  |
| L  | 24 | 2515.533        | 828.519  | <b>812.500</b>  | <b>813.508</b>  | 811.492        | L  | 7  |
| L  | 25 | 3058.617        | 715.435  | <b>699.416</b>  | <b>700.424</b>  | 698.408        | L  | 6  |
| P  | 26 | 2725.670        | 602.351  | 588.332         | 587.340         | 585.324        | P  | 5  |
| K  | 27 | 2853.765        | 505.298  | <b>489.279</b>  | <b>490.287</b>  | 488.271        | K  | 4  |
| R  | 28 | 2883.886        | 377.262  | <b>361.184</b>  | 352.192         | 360.177        | R  | 3  |
| T  | 29 | 3082.908        | 248.188  | 233.000         | 234.007         | 232.982        | T  | 2  |
| E  | 30 | 3211.950        | 148.060  | 132.042         | 133.050         | 131.034        | E  | 1  |

# sp | Q6GSS7 | H2A2A\_MOUSE

ELNKLKLGK<sup>Dimethyl</sup><sub>28.03</sub>VTIAQGGVLPNIQAVLLPKKTE

- ▶ fragmentation table for charge state 2+
- ▶ specType=etd
- ▶ score=102.99
- ▶ F104903.dat
- ▶ query=q2442\_p1
- ▶ precursor=803.987010
- ▶ chargePrecursor=4
- ▶ itol=0.8

| AA   | c               | y               | z+1             | z+2             | z               | AA   |
|------|-----------------|-----------------|-----------------|-----------------|-----------------|------|
| E 1  | 74.042          | <b>1606.971</b> | <b>1598.962</b> | 0.504           | <b>1598.458</b> | E 30 |
| L 2  | 130.504         | <b>1542.450</b> | <b>1534.440</b> | 0.504           | <b>1533.936</b> | L 29 |
| N 3  | 187.605         | 1485.908        | <b>1477.898</b> | <b>1476.402</b> | 1477.394        | N 28 |
| K 4  | 241.953         | 1478.899        | <b>1420.877</b> | <b>1421.381</b> | 1420.374        | K 27 |
| L 5  | 308.195         | <b>1364.839</b> | <b>1356.829</b> | <b>1357.333</b> | <b>1356.325</b> | L 26 |
| L 6  | 364.737         | 1308.297        | 1300.287        | 1300.791        | 1299.783        | L 25 |
| G 7  | 391.240         | 1251.735        | <b>1243.745</b> | <b>1244.249</b> | <b>1243.241</b> | G 24 |
| K 8  | 471.311         | 1223.244        | <b>1215.234</b> | <b>1215.738</b> | 1214.731        | K 23 |
| V 9  | 520.845         | 1148.181        | 1137.713        | 1137.679        | 1138.969        | V 22 |
| T 10 | 573.369         | 1095.646        | <b>1087.637</b> | <b>1088.141</b> | <b>1087.133</b> | T 21 |
| I 11 | 627.911         | 1048.123        | <b>1037.113</b> | <b>1037.617</b> | 1039.602        | I 20 |
| A 12 | 683.429         | 988.581         | <b>980.571</b>  | <b>981.075</b>  | 980.067         | A 19 |
| Q 13 | 727.459         | 933.062         | <b>945.053</b>  | <b>945.557</b>  | <b>944.549</b>  | Q 18 |
| G 14 | 755.969         | 889.033         | 881.023         | 881.527         | 880.519         | G 17 |
| C 15 | 794.488         | 869.522         | 862.112         | <b>853.017</b>  | 852.009         | C 16 |
| V 16 | <b>834.014</b>  | 832.011         | <b>824.002</b>  | <b>824.506</b>  | 823.498         | V 15 |
| L 17 | 890.556         | 782.477         | <b>774.468</b>  | <b>774.972</b>  | 773.964         | L 14 |
| P 18 | <b>939.083</b>  | 725.935         | 717.926         | 718.430         | 717.422         | P 13 |
| N 19 | 996.104         | 677.409         | 669.399         | 669.903         | 668.895         | N 12 |
| I 20 | <b>1052.646</b> | 620.387         | 612.378         | 612.882         | 611.874         | I 11 |
| Q 21 | <b>1116.676</b> | 563.845         | 555.836         | 556.340         | 555.332         | Q 10 |
| A 22 | <b>1152.194</b> | 499.816         | 491.807         | 492.310         | 491.303         | A 9  |
| V 23 | <b>1201.728</b> | 464.297         | 456.288         | 456.792         | 455.784         | V 8  |
| L 24 | <b>1258.270</b> | 414.763         | 406.754         | 407.258         | 406.250         | L 7  |
| L 25 | 1314.812        | 358.221         | 350.212         | 350.716         | 349.708         | L 6  |
| T 26 | <b>1363.339</b> | 308.679         | 298.670         | 299.174         | 298.166         | T 5  |
| K 27 | <b>1427.386</b> | 253.153         | 245.143         | 245.647         | 244.639         | K 4  |
| K 28 | 1491.434        | 189.105         | 181.096         | 181.600         | 180.592         | K 3  |
| T 29 | <b>1541.958</b> | 125.058         | 117.048         | 117.552         | 116.544         | T 2  |
| E 30 | 1606.479        | 74.534          | 66.524          | 67.028          | 66.021          | E 1  |

# sp | Q6GSS7 | H2A2A\_MOUSE

ELNKLKLGK<sup>Dimethyl</sup><sub>28.03</sub>VTIAQGGVLPNIQAVLLPKKTE

- ▶ fragmentation table for charge state 3+
- ▶ specType=etd
- ▶ score=102.99
- ▶ F104903.dat
- ▶ query=q2442\_p1
- ▶ precursor=803.987010
- ▶ chargePrecursor=4
- ▶ itol=0.8

| AA | c  | y               | z+1             | z+2             | z              | AA       |   |    |
|----|----|-----------------|-----------------|-----------------|----------------|----------|---|----|
| E  | 1  | 49.697          | <b>1071.650</b> | <b>1066.310</b> | 0.672          | 1065.974 | E | 30 |
| L  | 2  | 87.302          | <b>1028.635</b> | 1023.296        | 0.672          | 1022.960 | L | 29 |
| T  | 3  | 125.806         | 999.941         | 995.601         | 0.672          | 995.265  | T | 28 |
| K  | 4  | 168.104         | 952.926         | 947.587         | <b>947.923</b> | 947.251  | K | 27 |
| L  | 5  | 205.799         | 910.228         | 904.889         | 905.225        | 904.551  | L | 26 |
| L  | 6  | 243.494         | 872.531         | 867.194         | 867.530        | 866.858  | L | 25 |
| G  | 7  | 282.501         | <b>834.839</b>  | 829.499         | 829.835        | 829.161  | G | 24 |
| K  | 8  | 314.543         | 815.832         | 810.492         | 810.828        | 810.156  | K | 23 |
| V  | 9  | 347.566         | 783.780         | 778.450         | 778.786        | 778.114  | V | 22 |
| T  | 10 | 381.248         | 730.767         | 725.427         | 725.763        | 725.091  | T | 21 |
| I  | 11 | 418.943         | 697.054         | 691.745         | 692.081        | 691.409  | I | 20 |
| A  | 12 | 442.622         | 659.389         | 654.050         | 654.386        | 653.714  | A | 19 |
| Q  | 13 | 485.308         | 635.710         | 630.371         | 630.707        | 630.035  | Q | 18 |
| G  | 14 | 504.315         | 593.024         | 587.685         | 588.021        | 587.349  | G | 17 |
| G  | 15 | 523.323         | 574.017         | 568.678         | 569.013        | 568.342  | G | 16 |
| V  | 16 | 559.345         | 535.010         | 529.670         | 530.006        | 529.334  | V | 15 |
| L  | 17 | 594.040         | 523.957         | 518.648         | 518.984        | 518.312  | L | 14 |
| P  | 18 | 626.391         | 484.292         | 478.953         | 479.289        | 478.617  | P | 13 |
| N  | 19 | 664.405         | 451.942         | 446.602         | 446.938        | 446.266  | N | 12 |
| I  | 20 | 702.100         | 413.927         | 408.588         | 408.924        | 408.252  | I | 11 |
| Q  | 21 | 744.786         | 376.233         | 370.893         | 371.229        | 370.557  | Q | 10 |
| A  | 22 | 788.465         | 333.549         | 328.207         | 328.543        | 327.871  | A | 9  |
| V  | 23 | 801.488         | 309.857         | 304.526         | 304.864        | 304.192  | V | 8  |
| L  | 24 | 839.183         | 276.844         | 271.505         | 271.841        | 271.169  | L | 7  |
| L  | 25 | 876.877         | 239.150         | 233.810         | 234.146        | 233.474  | L | 6  |
| P  | 26 | 909.228         | 201.455         | 196.116         | 196.451        | 195.780  | P | 5  |
| K  | 27 | 951.927         | 169.164         | 163.765         | 164.101        | 163.429  | K | 4  |
| K  | 28 | <b>994.825</b>  | 128.408         | 121.096         | 121.462        | 120.750  | K | 3  |
| T  | 29 | <b>1028.307</b> | 83.709          | 78.368          | 78.704         | 78.032   | T | 2  |
| E  | 30 | <b>1071.322</b> | 50.025          | 44.685          | 45.021         | 44.349   | E | 1  |

# sp | Q6GSS7 | H2A2A\_MOUSE

ELNKLKLGK<sup>Dimethyl</sup>VTIAQGGVLPNIQAVLLPKKTE  
28.03

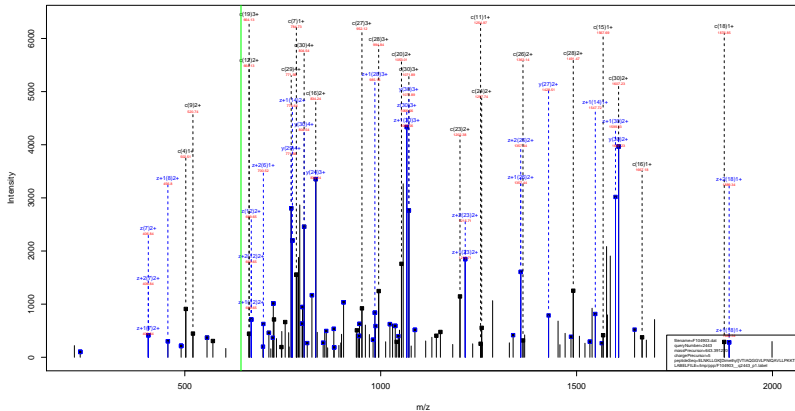



# sp | Q6GSS7 | H2A2A\_MOUSE

ELNKLKLGK<sup>Dimethyl</sup>VTIAQGGVLPNIQAVLLPKKTE  
28.03

- ▶ fragmentation table for charge state 1+
- ▶ specType=etd
- ▶ score=62.62
- ▶ F104903.dat
- ▶ query=q2443.p1
- ▶ precursor=643.391270
- ▶ chargePrecursor=5
- ▶ itol=0.8

| AA   | c               | y               | z+1             | z+2             | z        | AA   |
|------|-----------------|-----------------|-----------------|-----------------|----------|------|
| E 1  | 147.076         | 3212.934        | 3106.916        | 0.000           | 3195.908 | E 30 |
| L 2  | 200.160         | 3083.892        | 3067.873        | 0.000           | 3056.855 | L 29 |
| N 3  | 274.203         | 2970.808        | 2954.789        | 2935.797        | 2953.781 | N 28 |
| K 4  | <b>502.298</b>  | 2856.765        | 2840.746        | 2841.754        | 2839.735 | K 27 |
| L 5  | 615.382         | 2728.670        | 2712.651        | 2713.659        | 2711.643 | L 26 |
| L 6  | 728.466         | 2615.586        | 2599.567        | 2600.575        | 2598.559 | L 25 |
| G 7  | <b>785.488</b>  | 2502.500        | 2486.483        | 2487.491        | 2485.475 | G 24 |
| K 8  | 941.614         | 2445.480        | 2429.462        | 2430.469        | 2428.454 | K 23 |
| V 9  | <b>1040.583</b> | 2289.354        | 2273.335        | 2274.343        | 2272.327 | V 22 |
| T 10 | <b>1141.730</b> | 2190.288        | 2174.267        | 2175.275        | 2173.259 | T 21 |
| I 11 | <b>1254.814</b> | 2089.238        | 2073.219        | 2074.227        | 2072.211 | I 20 |
| A 12 | 1325.851        | 1976.154        | 1960.135        | 1961.143        | 1959.127 | A 19 |
| Q 13 | 1453.910        | 1905.117        | <b>1889.098</b> | <b>1890.106</b> | 1888.090 | Q 18 |
| G 14 | 1510.932        | 1777.050        | 1761.030        | 1762.047        | 1760.032 | G 17 |
| C 15 | <b>1567.953</b> | 1720.020        | 1704.000        | 1705.008        | 1703.000 | C 16 |
| V 16 | <b>1667.021</b> | 1663.015        | 1646.997        | <b>1648.004</b> | 1646.986 | V 15 |
| L 17 | 1780.105        | <b>1563.947</b> | <b>1547.928</b> | 1548.936        | 1546.920 | L 14 |
| P 18 | <b>1877.158</b> | 1450.863        | 1434.844        | 1435.852        | 1433.836 | P 13 |
| N 19 | 1991.201        | 1353.810        | <b>1337.791</b> | 1338.799        | 1336.783 | N 12 |
| I 20 | 2104.285        | 1239.767        | 1223.748        | 1224.756        | 1222.741 | I 11 |
| Q 21 | 2232.244        | 1126.683        | 1110.664        | 1111.672        | 1109.656 | Q 10 |
| A 22 | 2303.381        | 998.624         | 982.606         | 983.614         | 981.599  | A 9  |
| V 23 | 2402.449        | 927.587         | 911.569         | 912.576         | 910.561  | V 8  |
| L 24 | 2515.533        | 828.519         | <b>812.500</b>  | 813.508         | 811.493  | L 7  |
| L 25 | 2628.617        | 715.435         | <b>699.416</b>  | <b>700.424</b>  | 698.408  | L 6  |
| P 26 | 2725.670        | 602.351         | 586.333         | 587.340         | 585.324  | P 5  |
| K 27 | 2833.705        | 509.266         | 489.249         | <b>490.287</b>  | 488.271  | K 4  |
| K 28 | 2981.860        | 377.203         | 361.184         | 362.192         | 360.177  | K 3  |
| T 29 | 3062.908        | 249.108         | <b>231.089</b>  | 234.097         | 232.082  | T 2  |
| E 30 | 3211.950        | 148.060         | 132.042         | 133.050         | 131.034  | E 1  |

# sp | Q6GSS7 | H2A2A\_MOUSE

ELNKLKLGK<sup>Dimethyl</sup>VTIAQGGVLPNIQAVLLPKKTE  
28.03

- ▶ fragmentation table for charge state 2+
- ▶ specType=etd
- ▶ score=62.62
- ▶ F104903.dat
- ▶ query=q2443\_p1
- ▶ precursor=643.391270
- ▶ chargePrecursor=5
- ▶ itol=0.8

| AA   | c               | y               | z+1             | z+2             | z               | AA   |
|------|-----------------|-----------------|-----------------|-----------------|-----------------|------|
| E 1  | 74.042          | <b>1606.971</b> | <b>1598.962</b> | 0.504           | 4598.458        | E 30 |
| L 2  | 130.504         | 1542.456        | <b>1534.440</b> | 0.504           | <b>1533.936</b> | L 29 |
| N 3  | 187.605         | <b>1485.908</b> | 1477.898        | 1478.402        | 1477.391        | N 28 |
| K 4  | 251.653         | <b>1428.886</b> | 1420.877        | 1421.381        | 1420.371        | K 27 |
| L 5  | 308.195         | 1364.939        | <b>1356.829</b> | <b>1357.333</b> | 1356.323        | L 26 |
| L 6  | 364.737         | 1308.297        | 1300.287        | 1300.791        | 1299.781        | L 25 |
| G 7  | 381.240         | 1251.735        | 1243.745        | 1244.249        | 1243.241        | G 24 |
| K 8  | 471.311         | 1223.244        | <b>1215.234</b> | <b>1215.738</b> | 1214.731        | K 23 |
| V 9  | <b>520.845</b>  | 1148.181        | 1147.173        | 1137.679        | 1136.669        | V 22 |
| T 10 | <b>571.369</b>  | 1095.646        | <b>1087.637</b> | <b>1088.141</b> | <b>1087.133</b> | T 21 |
| I 11 | 627.911         | <b>1045.123</b> | <b>1037.113</b> | <b>1037.617</b> | <b>1036.609</b> | I 20 |
| A 12 | <b>663.429</b>  | 988.581         | <b>980.571</b>  | <b>981.075</b>  | <b>980.067</b>  | A 19 |
| Q 13 | <b>727.459</b>  | 923.063         | <b>945.053</b>  | <b>945.557</b>  | <b>944.549</b>  | Q 18 |
| G 14 | <b>755.969</b>  | 889.633         | <b>881.623</b>  | <b>881.527</b>  | <b>880.519</b>  | G 17 |
| C 15 | <b>784.480</b>  | <b>860.522</b>  | <b>852.513</b>  | <b>853.017</b>  | 852.007         | C 16 |
| V 16 | <b>834.014</b>  | 819.044         | <b>824.002</b>  | <b>824.506</b>  | 823.496         | V 15 |
| L 17 | 890.556         | 782.477         | <b>774.468</b>  | <b>774.972</b>  | <b>773.964</b>  | L 14 |
| F 18 | <b>939.083</b>  | <b>725.935</b>  | 717.926         | 718.430         | 717.421         | F 13 |
| N 19 | 996.104         | 677.409         | <b>669.399</b>  | <b>669.903</b>  | <b>668.895</b>  | N 12 |
| I 20 | <b>1052.646</b> | 630.387         | 612.378         | 612.882         | 611.874         | I 11 |
| Q 21 | 1118.678        | 583.849         | 583.838         | <b>556.340</b>  | 555.331         | Q 10 |
| A 22 | <b>1152.194</b> | 499.916         | 481.907         | 492.910         | <b>491.303</b>  | A 9  |
| V 23 | <b>1201.728</b> | 464.297         | <b>456.288</b>  | <b>456.792</b>  | 455.784         | V 8  |
| L 24 | <b>1258.270</b> | 414.763         | <b>406.754</b>  | <b>407.258</b>  | <b>406.250</b>  | L 7  |
| L 25 | 1314.812        | 358.221         | 350.212         | 350.716         | 349.708         | L 6  |
| T 26 | <b>1363.339</b> | 301.679         | 283.670         | 294.674         | 293.665         | T 5  |
| K 27 | 1427.356        | 253.153         | 245.143         | 245.647         | 244.639         | K 4  |
| K 28 | <b>1481.434</b> | 189.105         | 181.096         | 181.600         | 180.592         | K 3  |
| T 29 | 1541.658        | 125.058         | 117.048         | 117.552         | 116.544         | T 2  |
| E 30 | <b>1606.479</b> | 74.534          | 66.524          | 67.028          | 66.021          | E 1  |

# sp | Q6GSS7 | H2A2A\_MOUSE

ELNKLKLGK<sup>Dimethyl</sup><sub>28.03</sub>VTIAQGGVLPNIQAVLLPKKTE

- ▶ fragmentation table for charge state 3+
- ▶ specType=etd
- ▶ score=62.62
- ▶ F104903.dat
- ▶ query=q2443.p1
- ▶ precursor=643.391270
- ▶ chargePrecursor=5
- ▶ itol=0.8

| AA |    | c               | y               | z+1             | z+2            | z               | AA    |
|----|----|-----------------|-----------------|-----------------|----------------|-----------------|-------|
| E  | 1  | 49.697          | <b>1071.650</b> | <b>1066.310</b> | 0.672          | <b>1065.974</b> | E[30] |
| L  | 2  | 87.302          | 1028.635        | <b>1023.296</b> | 0.672          | <b>1022.960</b> | L[29] |
| K  | 3  | 125.406         | 990.941         | <b>985.601</b>  | <b>985.937</b> | <b>985.265</b>  | K[28] |
| R  | 4  | 168.334         | 952.926         | <b>947.587</b>  | <b>947.923</b> | <b>947.251</b>  | R[27] |
| L  | 5  | 205.799         | 910.228         | <b>904.889</b>  | <b>905.225</b> | <b>904.553</b>  | L[26] |
| L  | 6  | 243.494         | 872.531         | 867.194         | 867.530        | 866.858         | L[25] |
| G  | 7  | 282.501         | <b>834.839</b>  | 829.499         | 829.835        | 829.163         | G[24] |
| K  | 8  | 314.543         | 815.832         | 810.492         | 810.828        | 810.156         | K[23] |
| V  | 9  | 347.566         | 783.790         | 778.450         | 778.786        | 778.114         | V[22] |
| V  | 10 | 381.248         | 750.767         | <b>725.427</b>  | <b>725.763</b> | <b>725.091</b>  | V[21] |
| I  | 11 | 418.943         | 697.084         | 691.743         | 692.081        | 691.409         | I[20] |
| A  | 12 | 442.822         | 659.389         | 654.050         | 654.386        | 653.714         | A[19] |
| Q  | 13 | 485.308         | 635.710         | 630.371         | 630.707        | 630.035         | Q[18] |
| G  | 14 | 504.315         | 593.024         | 587.685         | 588.021        | 587.349         | G[17] |
| G  | 15 | 527.323         | 574.017         | 568.678         | 569.013        | 568.342         | G[16] |
| V  | 16 | <b>554.345</b>  | 559.011         | 549.670         | 550.006        | 549.334         | V[15] |
| L  | 17 | 594.040         | 521.987         | 516.648         | 516.984        | 516.312         | L[14] |
| P  | 18 | 626.891         | 484.202         | 478.963         | 479.299        | 478.617         | P[13] |
| N  | 19 | <b>644.405</b>  | 451.947         | 446.602         | 446.938        | 446.266         | N[12] |
| I  | 20 | 702.100         | 413.927         | 408.588         | 408.924        | 408.252         | I[11] |
| Q  | 21 | 744.786         | 376.213         | 370.873         | 371.209        | 370.537         | Q[10] |
| A  | 22 | 788.465         | 333.546         | 328.207         | 328.543        | 327.871         | A[9]  |
| V  | 23 | 801.488         | 309.967         | 304.628         | 304.964        | 304.292         | V[8]  |
| L  | 24 | 839.183         | 276.844         | 271.505         | 271.841        | 271.169         | L[7]  |
| L  | 25 | 878.877         | 239.150         | <b>233.810</b>  | <b>234.146</b> | <b>233.474</b>  | L[6]  |
| P  | 26 | 909.228         | 201.455         | 196.116         | 196.451        | 195.780         | P[5]  |
| K  | 27 | <b>931.927</b>  | 169.104         | 163.765         | 164.101        | 163.429         | K[4]  |
| K  | 28 | <b>994.625</b>  | 129.420         | 124.081         | 124.417        | 123.745         | K[3]  |
| I  | 29 | 1028.307        | 83.708          | 78.368          | 78.704         | 78.032          | I[2]  |
| E  | 30 | <b>1071.322</b> | 50.025          | 44.685          | 45.021         | 44.349          | E[1]  |

# sp | Q6GSS7 | H2A2A\_MOUSE

ELNKLKLGK<sup>Dimethyl</sup>VTIAQGGVLPNIQAVLLPKKTE  
28.03

- ▶ fragmentation table for charge state 4+
- ▶ specType=etd
- ▶ score=62.62
- ▶ F104903.dat
- ▶ query=q2443\_p1
- ▶ precursor=643.391270
- ▶ chargePrecursor=5
- ▶ itol=0.8

| AA    | c              | y              | z+1            | z+2            | z              | AA    |
|-------|----------------|----------------|----------------|----------------|----------------|-------|
| E[1]  | 37.525         | <b>803.909</b> | <b>799.984</b> | 0.735          | <b>799.732</b> | E[30] |
| L[2]  | 65.790         | <b>771.728</b> | 767.724        | 0.735          | 767.472        | L[29] |
| N[3]  | 94.306         | 743.457        | 739.453        | 739.705        | 739.201        | N[28] |
| K[4]  | 126.330        | <b>714.947</b> | 710.942        | 711.194        | 710.690        | K[27] |
| L[5]  | 154.601        | 682.923        | 678.918        | 679.170        | 678.666        | L[26] |
| L[6]  | 182.872        | 654.652        | 650.647        | 650.899        | 650.395        | L[25] |
| G[7]  | 197.127        | 626.381        | 622.376        | 622.628        | 622.124        | G[24] |
| K[8]  | 236.159        | 612.126        | 608.121        | 608.373        | 607.869        | K[23] |
| V[9]  | 260.926        | 573.094        | 569.089        | 569.341        | 568.837        | V[22] |
| T[10] | 286.188        | 548.327        | 544.322        | 544.574        | 544.070        | T[21] |
| I[11] | 314.499        | 523.065        | 519.060        | 519.312        | 518.808        | I[20] |
| A[12] | 332.218        | 494.794        | <b>490.789</b> | <b>491.041</b> | <b>490.537</b> | A[19] |
| Q[13] | 364.233        | 477.035        | 473.030        | 473.282        | 472.778        | Q[18] |
| G[14] | 378.488        | 445.020        | 441.015        | 441.267        | 440.763        | G[17] |
| G[15] | 392.744        | 430.765        | 426.760        | 427.012        | 426.508        | G[16] |
| V[16] | 417.511        | 416.509        | 412.503        | 412.757        | 412.253        | V[15] |
| L[17] | 445.782        | 391.742        | 387.737        | 387.989        | 387.485        | L[14] |
| T[18] | 470.043        | 363.471        | 359.466        | 359.718        | 359.215        | T[13] |
| N[19] | 498.556        | 339.205        | 335.201        | 335.453        | 334.951        | N[12] |
| I[20] | 526.827        | 310.697        | 306.693        | 306.945        | 306.441        | I[11] |
| Q[21] | 558.941        | 282.426        | 278.422        | 278.673        | 278.170        | Q[10] |
| A[22] | 576.601        | 250.412        | 246.407        | 246.659        | 246.155        | A[9]  |
| V[23] | 601.368        | <b>232.652</b> | 228.648        | 228.900        | 228.396        | V[8]  |
| L[24] | 629.639        | 207.885        | 203.881        | 204.132        | 203.629        | L[7]  |
| L[25] | 657.910        | 179.614        | 175.609        | 175.861        | 175.358        | L[6]  |
| F[26] | 682.173        | 151.343        | 147.338        | 147.590        | 147.087        | F[5]  |
| K[27] | <b>714.197</b> | 127.080        | 123.075        | 123.327        | 122.823        | K[4]  |
| K[28] | <b>746.220</b> | 95.056         | 91.052         | 91.304         | 90.800         | K[3]  |
| T[29] | <b>771.482</b> | 63.032         | 59.028         | 59.280         | 58.776         | T[2]  |
| E[30] | <b>803.743</b> | 37.771         | 33.766         | 34.018         | 33.514         | E[1]  |



# sp | Q6GSS7 | H2A2A\_MOUSE

ELNKLKLGK<sup>Dimethyl</sup>VTIAQGGVLPNIQAVLLPKKTE  
28.03

- ▶ fragmentation table for charge state 1+
- ▶ specType=etd
- ▶ score=32.85
- ▶ F104903.dat
- ▶ query=q2444\_p1
- ▶ precursor=1071.647900
- ▶ chargePrecursor=3
- ▶ itol=0.8

| AA |    | c               | y        | z+1             | z+2            | z               | AA |    |
|----|----|-----------------|----------|-----------------|----------------|-----------------|----|----|
| E  | 1  | 147.076         | 3212.934 | 3196.916        | 0.000          | 3195.908        | E  | 30 |
| L  | 2  | 260.160         | 3083.892 | 3067.873        | 0.000          | 3066.865        | L  | 29 |
| R  | 3  | 374.323         | 2970.969 | 2954.789        | 2935.797       | 2933.781        | R  | 28 |
| K  | 4  | <b>502.298</b>  | 2956.765 | 2940.746        | 2921.754       | 2920.745        | K  | 27 |
| L  | 5  | 615.382         | 2728.670 | 2712.651        | 2713.659       | 2711.643        | L  | 26 |
| L  | 6  | <b>728.466</b>  | 2615.586 | 2599.589        | 2600.575       | 2598.559        | L  | 25 |
| G  | 7  | 785.488         | 2502.502 | 2486.463        | 2487.491       | 2485.475        | G  | 24 |
| K  | 8  | 941.614         | 2445.480 | 2429.462        | 2430.469       | 2428.454        | K  | 23 |
| V  | 9  | 1010.683        | 2289.364 | 2273.335        | 2274.343       | 2272.327        | V  | 22 |
| I  | 10 | <b>1141.730</b> | 2190.286 | 2174.267        | 2175.276       | 2173.259        | I  | 21 |
| I  | 11 | 1254.814        | 2089.238 | 2073.219        | 2074.227       | 2072.211        | I  | 20 |
| A  | 12 | <b>1325.851</b> | 1978.154 | 1962.135        | 1963.143       | <b>1959.127</b> | A  | 19 |
| Q  | 13 | 1453.910        | 1905.117 | <b>1889.098</b> | 1890.106       | 1888.090        | Q  | 18 |
| G  | 14 | <b>1510.932</b> | 1777.058 | 1761.039        | 1762.047       | 1760.032        | G  | 17 |
| G  | 15 | 1567.057        | 1730.037 | 1704.018        | 1705.026       | 1703.010        | G  | 16 |
| V  | 16 | <b>1667.021</b> | 1583.015 | 1567.997        | 1568.004       | 1566.989        | V  | 15 |
| L  | 17 | 1780.105        | 1563.947 | <b>1547.928</b> | 1548.936       | 1546.920        | L  | 14 |
| P  | 18 | 1877.158        | 1450.863 | 1434.844        | 1435.852       | 1433.836        | P  | 13 |
| N  | 19 | 1991.201        | 1353.810 | 1337.791        | 1338.799       | 1336.783        | N  | 12 |
| I  | 20 | 2104.285        | 1239.767 | 1223.748        | 1224.756       | 1222.741        | I  | 11 |
| Q  | 21 | 2232.344        | 1126.682 | 1110.664        | 1111.672       | 1109.656        | Q  | 10 |
| A  | 22 | 2303.393        | 998.624  | 982.605         | <b>983.614</b> | 981.599         | A  | 9  |
| V  | 23 | 2402.449        | 927.587  | 911.569         | 912.576        | 910.561         | V  | 8  |
| L  | 24 | 2515.533        | 828.519  | 812.500         | 813.508        | 811.492         | L  | 7  |
| L  | 25 | 2628.617        | 715.435  | 699.416         | <b>700.424</b> | 698.408         | L  | 6  |
| P  | 26 | 2725.670        | 602.351  | 586.332         | 587.340        | 585.324         | P  | 5  |
| K  | 27 | 2853.765        | 505.299  | 489.279         | 489.287        | 488.271         | K  | 4  |
| R  | 28 | 2981.850        | 377.262  | 361.244         | 362.252        | 360.237         | R  | 3  |
| T  | 29 | 3082.908        | 249.198  | 233.080         | 234.087        | 232.082         | T  | 2  |
| E  | 30 | 3211.950        | 148.060  | 132.042         | 133.050        | 131.034         | E  | 1  |

# sp | Q6GSS7 | H2A2A\_MOUSE

ELNKLKLGK<sup>Dimethyl</sup>VTIAQGGVLPNIQAVLLPKKTE  
28.03

- ▶ fragmentation table for charge state 2+
- ▶ specType=etd
- ▶ score=32.85
- ▶ F104903.dat
- ▶ query=q2444\_p1
- ▶ precursor=1071.647900
- ▶ chargePrecursor=3
- ▶ itol=0.8

| AA | c  | y               | z+1             | z+2             | z               | AA              |   |    |
|----|----|-----------------|-----------------|-----------------|-----------------|-----------------|---|----|
| E  | 1  | 74.042          | <b>1606.971</b> | <b>1598.962</b> | 0.504           | <b>1598.458</b> | E | 30 |
| L  | 2  | 130.504         | <b>1542.450</b> | 1534.440        | 0.504           | 1533.930        | L | 26 |
| N  | 3  | 187.605         | 1485.908        | 1477.898        | 1478.402        | 1477.394        | N | 28 |
| K  | 4  | 251.653         | 1428.869        | <b>1420.877</b> | <b>1421.381</b> | 1420.371        | K | 27 |
| L  | 5  | 308.195         | 1364.830        | 1356.820        | 1357.324        | 1356.316        | L | 26 |
| L  | 6  | 364.737         | 1308.297        | 1300.287        | 1300.791        | 1299.783        | L | 28 |
| G  | 7  | 381.240         | 1251.755        | 1243.745        | 1244.249        | 1243.241        | G | 24 |
| K  | 8  | 471.311         | 1223.244        | 1215.234        | 1215.738        | 1214.731        | K | 23 |
| V  | 9  | 520.845         | 1148.181        | 1137.171        | 1137.675        | 1136.667        | V | 22 |
| T  | 10 | 573.389         | 1095.646        | 1087.637        | 1088.141        | 1087.133        | T | 21 |
| I  | 11 | 627.911         | 1045.123        | 1037.113        | 1037.617        | 1036.609        | I | 20 |
| A  | 12 | 683.429         | 988.581         | 980.571         | 981.075         | 980.067         | A | 19 |
| Q  | 13 | <b>727.459</b>  | 933.062         | 945.053         | 945.557         | 944.549         | Q | 18 |
| G  | 14 | 755.969         | 889.033         | 881.023         | 881.527         | 880.519         | G | 17 |
| C  | 15 | 784.480         | 869.522         | 862.513         | 863.017         | 862.009         | C | 16 |
| V  | 16 | 834.014         | 832.011         | 824.002         | 824.506         | 823.498         | V | 15 |
| L  | 17 | 890.556         | 782.477         | 774.468         | 774.972         | 773.964         | L | 14 |
| P  | 18 | 936.083         | 725.935         | 717.926         | 718.430         | 717.422         | P | 13 |
| N  | 19 | 996.104         | 677.409         | 669.399         | 669.903         | 668.895         | N | 12 |
| I  | 20 | 1052.646        | 630.387         | 612.378         | 612.882         | 611.874         | I | 11 |
| Q  | 21 | 1116.678        | 583.845         | 565.836         | 566.340         | 565.332         | Q | 10 |
| A  | 22 | 1182.194        | 499.816         | 481.807         | 482.311         | 481.303         | A | 9  |
| V  | 23 | 1261.728        | 464.297         | 456.288         | 456.792         | 455.784         | V | 8  |
| L  | 24 | 1268.270        | 414.763         | 406.754         | 407.258         | 406.250         | L | 7  |
| L  | 25 | 1314.812        | 358.221         | 350.212         | 350.716         | 349.708         | L | 6  |
| T  | 26 | 1353.328        | 306.679         | 288.670         | 289.174         | 288.166         | T | 5  |
| K  | 27 | <b>1427.386</b> | 253.153         | 245.143         | 245.647         | 244.639         | K | 4  |
| K  | 28 | <b>1491.434</b> | 189.055         | 181.046         | 181.550         | 180.542         | K | 3  |
| T  | 29 | <b>1541.958</b> | 125.058         | 117.048         | 117.552         | 116.544         | T | 2  |
| E  | 30 | 1606.479        | 74.534          | 66.524          | 67.028          | 66.021          | E | 1  |





# sp | Q8CGP5 | H2A1F\_MOUSE

[Acetyl]SGRGKQGGKARAKAKTRSSRAGLQFPVGRVHRLLRKGNYS

- ▶ fragmentation table for charge state 1+
- ▶ specType=etd
- ▶ score=61.55
- ▶ F104903.dat
- ▶ query=q2814\_p1
- ▶ precursor=752.097670
- ▶ chargePrecursor=6
- ▶ itol=0.8

| AA | c  | y               | z+1            | z+2             | z               | AA       |       |
|----|----|-----------------|----------------|-----------------|-----------------|----------|-------|
| S  | 1  | 147.076         | 4507.521       | 4491.502        | 0.000           | 4490.494 | S[41] |
| G  | 2  | 304.098         | 4378.478       | 4362.459        | 0.000           | 4361.451 | G[40] |
| R  | 3  | <b>360.199</b>  | 4321.457       | 4305.438        | 4300.440        | 4304.430 | R[39] |
| G  | 4  | <b>417.220</b>  | 4165.355       | 4149.337        | 4150.345        | 4148.329 | G[38] |
| K  | 5  | <b>543.315</b>  | 4108.334       | 4092.315        | 4093.322        | 4091.307 | K[37] |
| Q  | 6  | <b>673.374</b>  | 3989.239       | 3974.220        | 3965.228        | 3963.213 | Q[36] |
| G  | 7  | <b>730.395</b>  | 3852.180       | 3836.162        | 3837.170        | 3835.154 | G[35] |
| G  | 8  | <b>787.417</b>  | 3795.159       | 3779.140        | 3780.148        | 3778.132 | G[34] |
| K  | 9  | <b>915.512</b>  | 3738.138       | 3722.119        | 3723.127        | 3721.111 | K[33] |
| A  | 10 | <b>986.549</b>  | 3610.043       | 3594.024        | 3595.032        | 3593.016 | A[32] |
| R  | 11 | <b>1142.650</b> | 3539.005       | 3522.987        | 3523.995        | 3521.979 | R[31] |
| A  | 12 | 1213.667        | 3382.904       | 3366.886        | 3367.893        | 3365.878 | A[30] |
| K  | 13 | 1341.782        | 3311.867       | 3295.848        | 3296.856        | 3294.841 | K[29] |
| A  | 14 | 1412.819        | 3183.772       | 3167.754        | 3168.761        | 3166.746 | A[28] |
| K  | 15 | 1540.914        | 3112.735       | 3096.716        | 3097.724        | 3095.709 | K[27] |
| T  | 16 | 1641.962        | 2984.640       | 2968.621        | 2969.629        | 2967.614 | T[26] |
| K  | 17 | 1798.063        | 2883.592       | 2867.574        | 2868.582        | 2866.566 | K[25] |
| S  | 18 | 1885.098        | 2727.491       | 2711.473        | 2712.480        | 2710.465 | S[24] |
| S  | 19 | 1972.127        | 2640.455       | 2624.441        | 2625.448        | 2623.433 | S[23] |
| R  | 20 | 2128.228        | 2553.427       | 2537.409        | 2538.416        | 2536.401 | R[22] |
| A  | 21 | 2199.265        | 2397.326       | 2381.307        | 2382.315        | 2380.300 | A[21] |
| G  | 22 | 2286.287        | 2326.289       | 2310.270        | 2311.278        | 2309.263 | G[20] |
| L  | 23 | 2369.371        | 2269.268       | 2253.249        | 2254.257        | 2252.241 | L[19] |
| Q  | 24 | 2497.429        | 2156.184       | 2140.165        | 2141.173        | 2139.157 | Q[18] |
| F  | 25 | 2644.498        | 2028.125       | 2012.106        | 2013.114        | 2011.099 | F[17] |
| P  | 26 | 2741.551        | 1881.057       | 1865.038        | 1866.046        | 1864.031 | P[16] |
| V  | 27 | 2840.619        | 1784.004       | 1767.985        | 1768.993        | 1766.977 | V[15] |
| G  | 28 | 2897.641        | 1684.935       | 1668.917        | 1669.924        | 1667.909 | G[14] |
| R  | 29 | 3053.742        | 1627.914       | 1611.895        | <b>1612.903</b> | 1610.887 | R[13] |
| V  | 30 | 3153.810        | 1491.833       | <b>1455.794</b> | 1456.802        | 1454.785 | V[12] |
| H  | 31 | 3289.869        | 1372.744       | <b>1356.726</b> | 1357.734        | 1355.718 | H[11] |
| R  | 32 | 3445.970        | 1235.685       | 1219.667        | 1220.675        | 1218.659 | R[10] |
| L  | 33 | 3559.054        | 1079.584       | 1063.566        | 1064.573        | 1062.558 | L[9]  |
| L  | 34 | 3672.138        | <b>966.500</b> | 950.482         | 951.489         | 949.474  | L[8]  |
| R  | 35 | 3828.239        | 853.416        | 837.398         | <b>838.405</b>  | 836.390  | R[7]  |
| K  | 36 | 3956.314        | 697.315        | 681.298         | 682.304         | 680.289  | K[6]  |
| G  | 37 | 4013.356        | 569.220        | 553.201         | 554.209         | 552.194  | G[5]  |
| N  | 38 | 4127.399        | 512.109        | 496.100         | 497.108         | 495.172  | N[4]  |
| V  | 39 | 4290.462        | 396.156        | 380.137         | 381.145         | 381.129  | V[3]  |
| S  | 40 | 4377.494        | 235.092        | 219.074         | 220.082         | 218.066  | S[2]  |
| E  | 41 | 4506.537        | 148.060        | 132.042         | 133.050         | 131.034  | E[1]  |

# sp | Q8CGP5 | H2A1F\_MOUSE

[Acetyl]SGRGKQGGKARAKAKTRSSRAGLQFPVGRVHRLLRKGNYS

- ▶ fragmentation table for charge state 2+
- ▶ specType=etd
- ▶ score=61.55
- ▶ F104903.dat
- ▶ query=q2814\_p1
- ▶ precursor=752.097670
- ▶ chargePrecursor=6
- ▶ itol=0.8

| AA | c  | y               | #s1             | #s2             | c               | AA              |       |
|----|----|-----------------|-----------------|-----------------|-----------------|-----------------|-------|
| S  | 1  | 74.062          | 2054.264        | 2266.285        | 8.804           | 2245.781        | S[41] |
| G  | 2  | 102.553         | 2189.743        | 2381.733        | 0.504           | 2181.220        | G[40] |
| R  | 3  | 180.603         | 2161.232        | 2153.233        | 2153.236        | 2152.710        | R[39] |
| G  | 4  | 209.114         | 2083.181        | 2075.172        | 2075.676        | 2074.660        | G[38] |
| K  | 5  | 273.181         | 2054.671        | 2046.681        | 2047.105        | 2046.157        | K[37] |
| G  | 6  | 337.194         | 1990.622        | <b>1982.614</b> | <b>1983.118</b> | 1982.110        | G[36] |
| G  | 7  | 385.703         | 1926.594        | 1918.584        | <b>1919.088</b> | 1918.080        | G[35] |
| G  | 8  | 394.212         | 1898.083        | 1890.074        | 1890.578        | 1889.570        | G[34] |
| K  | 9  | 458.260         | 1869.572        | <b>1861.563</b> | <b>1862.067</b> | 1861.059        | K[33] |
| A  | 10 | 493.778         | 1805.525        | 1797.516        | 1798.019        | 1797.012        | A[32] |
| R  | 11 | <b>571.829</b>  | 1770.008        | 1761.997        | 1762.501        | 1761.493        | R[31] |
| A  | 12 | <b>607.337</b>  | 1692.959        | 1684.949        | 1685.453        | 1684.445        | A[30] |
| K  | 13 | <b>671.395</b>  | 1656.437        | <b>1648.428</b> | <b>1648.932</b> | <b>1647.924</b> | K[29] |
| A  | 14 | <b>706.913</b>  | 1592.390        | 1584.380        | <b>1584.884</b> | 1583.876        | A[28] |
| K  | 15 | <b>770.961</b>  | 1556.871        | 1548.862        | <b>1549.366</b> | 1548.358        | K[27] |
| T  | 16 | <b>821.485</b>  | 1492.824        | <b>1484.814</b> | 1485.318        | <b>1484.310</b> | T[26] |
| R  | 17 | 896.526         | 1442.800        | 1434.790        | 1435.294        | 1434.286        | R[25] |
| S  | 18 | 913.051         | 1364.249        | <b>1356.240</b> | <b>1356.744</b> | 1355.736        | S[24] |
| S  | 19 | <b>986.567</b>  | 1328.733        | 1321.724        | <b>1313.228</b> | 1312.220        | S[23] |
| R  | 20 | 1064.618        | 1277.217        | <b>1269.208</b> | <b>1269.712</b> | 1268.704        | R[22] |
| A  | 21 | <b>1100.136</b> | <b>1199.167</b> | <b>1191.157</b> | <b>1191.661</b> | <b>1190.653</b> | A[21] |
| G  | 22 | <b>1126.647</b> | 1153.648        | <b>1155.639</b> | <b>1156.143</b> | 1155.135        | G[20] |
| L  | 23 | <b>1185.189</b> | 1138.137        | 1127.128        | <b>1127.632</b> | 1126.624        | L[19] |
| Q  | 24 | <b>1249.218</b> | 1073.595        | 1070.586        | <b>1071.090</b> | 1070.082        | Q[18] |
| F  | 25 | <b>1322.753</b> | 1014.568        | <b>1006.557</b> | <b>1007.061</b> | 1006.053        | F[17] |
| F  | 26 | 1371.279        | 941.033         | 933.023         | 933.526         | 932.518         | F[16] |
| V  | 27 | <b>1420.813</b> | 892.506         | 884.496         | 885.000         | 883.992         | V[15] |
| G  | 28 | <b>1449.324</b> | 842.971         | <b>834.962</b>  | <b>835.466</b>  | <b>834.458</b>  | G[14] |
| R  | 29 | 1507.874        | 814.481         | <b>806.451</b>  | <b>806.955</b>  | <b>805.947</b>  | R[13] |
| V  | 30 | 1576.909        | 736.410         | 728.401         | 728.905         | 727.897         | V[12] |
| H  | 31 | 1645.438        | 688.876         | 678.866         | 679.370         | 678.363         | H[11] |
| R  | 32 | 1723.489        | 618.346         | 610.337         | 610.841         | 609.833         | R[10] |
| L  | 33 | 1780.031        | 540.296         | 532.286         | 532.790         | 531.783         | L[9]  |
| L  | 34 | 1838.573        | 489.764         | 479.749         | 479.248         | 478.241         | L[8]  |
| R  | 35 | 1914.623        | 427.212         | 419.202         | 419.706         | 418.698         | R[7]  |
| K  | 36 | 1978.671        | 349.161         | 341.152         | 341.656         | 340.648         | K[6]  |
| G  | 37 | 2067.181        | 285.114         | 277.104         | 277.608         | 276.600         | G[5]  |
| N  | 38 | 2094.203        | 256.603         | 248.594         | 249.098         | 248.090         | N[4]  |
| V  | 39 | 2145.726        | 199.562         | 191.572         | 192.076         | 191.068         | V[3]  |
| S  | 40 | 2199.251        | 118.056         | 110.041         | 110.544         | 109.537         | S[2]  |
| E  | 41 | 2253.772        | 74.534          | 66.524          | 67.028          | 66.021          | E[1]  |

# sp | Q8CGP5 | H2A1F\_MOUSE

[Acetyl]SGRGKQGGKARAKAKTRSSRAGLQFPVGRVHRLLRKGNYS

- ▶ fragmentation table for charge state 3+
- ▶ specType=etd
- ▶ score=61.55
- ▶ F104903.dat
- ▶ query=q2814\_p1
- ▶ precursor=752.097670
- ▶ chargePrecursor=6
- ▶ itol=0.8

| AA | c  | y               | #=1             | #=2             | #=3             | AA              |       |
|----|----|-----------------|-----------------|-----------------|-----------------|-----------------|-------|
| S  | 1  | 489.697         | <b>1503.178</b> | 1487.830        | 8.872           | 1487.561        | S[41] |
| G  | 2  | 86.704          | 1490.184        | <b>1454.825</b> | 0.672           | 1454.480        | G[49] |
| R  | 3  | 1307.748        | 1441.157        | 1435.817        | <b>1436.153</b> | 1435.482        | R[30] |
| G  | 4  | 139.745         | 1389.123        | 1383.784        | <b>1384.120</b> | 1383.440        | G[38] |
| K  | 5  | 182.443         | 1370.116        | <b>1364.777</b> | <b>1365.113</b> | 1364.441        | K[37] |
| G  | 6  | 225.130         | 1327.418        | 1322.078        | <b>1322.414</b> | 1321.742        | G[36] |
| G  | 7  | 244.137         | 1284.732        | 1279.392        | 1279.728        | 1279.056        | G[35] |
| G  | 8  | 263.144         | 1265.725        | <b>1260.385</b> | <b>1260.721</b> | 1260.049        | G[34] |
| K  | 9  | 305.842         | 1246.717        | 1241.378        | 1241.714        | 1241.042        | K[33] |
| A  | 10 | 329.521         | 1204.019        | <b>1198.679</b> | <b>1199.015</b> | <b>1198.344</b> | A[32] |
| R  | 11 | 381.555         | 1180.310        | <b>1175.000</b> | <b>1175.336</b> | 1174.664        | R[31] |
| A  | 12 | 405.234         | <b>1128.306</b> | 1122.967        | <b>1123.303</b> | 1122.631        | A[30] |
| K  | 13 | 447.932         | 1104.627        | <b>1099.288</b> | <b>1099.624</b> | <b>1098.952</b> | K[29] |
| A  | 14 | 491.611         | 1081.929        | <b>1056.589</b> | <b>1056.925</b> | 1056.253        | A[28] |
| K  | 15 | 514.310         | <b>1038.250</b> | <b>1032.910</b> | <b>1033.246</b> | <b>1032.574</b> | K[27] |
| T  | 16 | 547.002         | 995.552         | <b>990.212</b>  | <b>990.548</b>  | 989.870         | T[26] |
| R  | 17 | 600.626         | 981.869         | <b>956.529</b>  | <b>956.865</b>  | <b>956.193</b>  | R[25] |
| S  | 18 | 629.017         | 959.835         | 954.495         | 954.831         | 954.160         | S[24] |
| S  | 19 | 658.047         | 938.025         | <b>875.485</b>  | <b>875.821</b>  | <b>875.149</b>  | S[23] |
| R  | 20 | <b>710.081</b>  | 951.814         | 946.474         | 946.810         | 946.138         | R[22] |
| A  | 21 | <b>733.760</b>  | 799.780         | 794.441         | 794.777         | 794.105         | A[21] |
| G  | 22 | 752.767         | 778.101         | <b>770.762</b>  | <b>771.098</b>  | 770.426         | G[20] |
| L  | 23 | <b>790.462</b>  | 759.094         | 753.754         | 754.090         | 753.418         | L[19] |
| Q  | 24 | <b>833.148</b>  | 733.305         | 724.000         | 724.336         | 723.722         | Q[18] |
| F  | 25 | 882.171         | 676.713         | <b>671.374</b>  | <b>671.710</b>  | <b>671.038</b>  | F[17] |
| F  | 26 | 914.552         | 627.600         | 622.261         | 622.597         | 622.015         | F[16] |
| V  | 27 | 947.545         | 595.139         | 590.000         | 590.336         | 589.664         | V[15] |
| G  | 28 | <b>966.552</b>  | 562.317         | 556.977         | 557.313         | 556.641         | G[14] |
| R  | 29 | 1015.558        | 543.309         | 537.970         | 538.306         | 537.634         | R[13] |
| V  | 30 | <b>1051.608</b> | 490.275         | 485.036         | 486.372         | 485.600         | V[12] |
| H  | 31 | <b>1097.394</b> | 458.253         | 452.913         | 453.249         | 452.577         | H[11] |
| R  | 32 | <b>1149.328</b> | 412.967         | 407.227         | 407.563         | 406.891         | R[10] |
| L  | 33 | <b>1187.023</b> | <b>360.533</b>  | 355.193         | 355.529         | 354.857         | L[9]  |
| L  | 34 | <b>1224.718</b> | 322.578         | 317.489         | 317.825         | 317.153         | L[8]  |
| R  | 35 | 1275.753        | 285.144         | 279.804         | 280.140         | 279.468         | R[7]  |
| K  | 36 | 1319.450        | 233.110         | 227.770         | 228.106         | 227.434         | K[6]  |
| G  | 37 | 1338.457        | 190.412         | 185.072         | 185.408         | 184.736         | G[5]  |
| N  | 38 | 1376.471        | 171.404         | 166.065         | 166.401         | 165.729         | N[4]  |
| V  | 39 | 1430.826        | 133.390         | 128.051         | 128.387         | 127.715         | V[3]  |
| S  | 40 | 1459.836        | 99.136          | 93.796          | 94.132          | 93.460          | S[2]  |
| E  | 41 | 1502.850        | 50.025          | 44.685          | 45.021          | 44.349          | E[1]  |

# sp | Q8CGP5 | H2A1F\_MOUSE

[Acetyl]SGRGKQGGKARAKAKTRSSRAGLQFPVGRVHRLLRKGNYS

- ▶ fragmentation table for charge state 4+
- ▶ specType=etd
- ▶ score=61.55
- ▶ F104903.dat
- ▶ query=q2814\_p1
- ▶ precursor=752.097670
- ▶ chargePrecursor=6
- ▶ itol=0.8

| AA | c  | m               | p               | #=1             | #=2             | #               | AA    |
|----|----|-----------------|-----------------|-----------------|-----------------|-----------------|-------|
| S  | 1  | 37.505          | <b>1127.636</b> | <b>1123.631</b> | 0.705           | <b>1123.370</b> | S[41] |
| G  | 2  | 51.780          | 1035.375        | <b>1091.370</b> | 0.795           | 1002.110        | G[40] |
| R  | 3  | 90.805          | 1081.120        | <b>1077.115</b> | <b>1077.367</b> | <b>1076.863</b> | R[39] |
| G  | 4  | 109.001         | 1042.094        | <b>1038.090</b> | <b>1038.342</b> | <b>1037.838</b> | G[38] |
| K  | 5  | 137.084         | 1027.839        | <b>1023.834</b> | <b>1024.086</b> | <b>1023.582</b> | K[37] |
| G  | 6  | 169.059         | 995.815         | <b>961.811</b>  | <b>962.063</b>  | <b>961.559</b>  | G[36] |
| G  | 7  | 193.354         | 963.801         | <b>959.796</b>  | <b>960.048</b>  | <b>959.544</b>  | G[35] |
| G  | 8  | 197.610         | 949.545         | <b>945.541</b>  | <b>945.792</b>  | <b>945.289</b>  | G[34] |
| K  | 9  | 239.613         | 935.290         | 931.285         | 931.537         | 931.033         | K[33] |
| A  | 10 | 247.303         | <b>903.266</b>  | 899.261         | 899.513         | 899.009         | A[32] |
| R  | 11 | 286.418         | 895.507         | 881.502         | 881.754         | 881.250         | R[31] |
| A  | 12 | 304.177         | 868.482         | 842.477         | 842.729         | 842.225         | A[30] |
| K  | 13 | 336.201         | 828.722         | 824.718         | 824.970         | 824.466         | K[29] |
| A  | 14 | 353.980         | 796.699         | 792.694         | 792.946         | 792.442         | A[28] |
| K  | 15 | 385.904         | 778.939         | 774.935         | 775.187         | 774.683         | K[27] |
| T  | 16 | 411.246         | 746.915         | 742.911         | 743.163         | 742.659         | T[26] |
| R  | 17 | 459.271         | 721.954         | 717.949         | 718.201         | 717.697         | R[25] |
| S  | 18 | 472.609         | 692.629         | 692.624         | 692.876         | 692.372         | S[24] |
| S  | 19 | 493.787         | 660.970         | 656.966         | 657.218         | 656.714         | S[23] |
| R  | 20 | 532.613         | 639.112         | 635.108         | 635.360         | 634.856         | R[22] |
| A  | 21 | 550.572         | 600.087         | 596.082         | 596.334         | 595.830         | A[21] |
| G  | 22 | 564.827         | 582.329         | 578.323         | 578.575         | 578.071         | G[20] |
| L  | 23 | 593.098         | 568.072         | 564.068         | 564.320         | 563.816         | L[19] |
| Q  | 24 | 625.113         | 539.801         | 535.797         | 536.049         | 535.545         | Q[18] |
| F  | 25 | 661.880         | 507.797         | 503.792         | 504.044         | 503.540         | F[17] |
| F  | 26 | 698.143         | 471.020         | 467.015         | 467.267         | 466.763         | F[16] |
| V  | 27 | <b>710.910</b>  | 446.756         | 442.752         | 443.004         | 442.500         | V[15] |
| G  | 28 | 725.169         | 421.989         | <b>417.985</b>  | 418.237         | <b>417.733</b>  | G[14] |
| R  | 29 | 764.181         | 389.734         | 385.729         | 385.981         | 385.477         | R[13] |
| V  | 30 | 788.958         | 368.709         | 364.704         | 364.956         | 364.452         | V[12] |
| H  | 31 | <b>823.223</b>  | 343.942         | 339.937         | 340.189         | 339.685         | H[11] |
| R  | 32 | 862.248         | 309.677         | 305.672         | 305.924         | 305.420         | R[10] |
| L  | 33 | <b>890.519</b>  | 270.652         | 266.647         | 266.899         | 266.395         | L[9]  |
| L  | 34 | 918.770         | 242.381         | 238.376         | 238.628         | 238.124         | L[8]  |
| R  | 35 | 957.615         | 214.110         | 210.105         | 210.357         | 209.853         | R[7]  |
| K  | 36 | 989.839         | 175.084         | 171.079         | 171.331         | 170.827         | K[6]  |
| G  | 37 | 1004.094        | 143.061         | 139.056         | 139.308         | 138.804         | G[5]  |
| N  | 38 | <b>1032.605</b> | 128.805         | 124.800         | 125.052         | 124.548         | N[4]  |
| V  | 39 | <b>1073.371</b> | 100.294         | 96.289          | 96.541          | 96.037          | V[3]  |
| S  | 40 | 1095.419        | 99.529          | 95.524          | 95.776          | 95.272          | S[2]  |
| E  | 41 | 1127.590        | 97.771          | 93.766          | 94.018          | 93.514          | E[1]  |

# sp | Q8CGP5 | H2A1F\_MOUSE

[Acetyl]SGRGKQGGKARAKAKTRSSRAGLQFPVGRVHRLLRKGNYS

- ▶ fragmentation table for charge state 5+
- ▶ specType=etd
- ▶ score=61.55
- ▶ F104903.dat
- ▶ query=q2814\_p1
- ▶ precursor=752.097670
- ▶ chargePrecursor=6
- ▶ itol=0.8

| AA    | c              | y              | z+1            | z+2     | z              | AA    |
|-------|----------------|----------------|----------------|---------|----------------|-------|
| S[1]  | 30.221         | <b>902.310</b> | 899.106        | 0.806   | 898.905        | S[41] |
| G[2]  | 41.625         | <b>876.501</b> | <b>873.290</b> | 0.806   | <b>873.096</b> | G[40] |
| R[3]  | 72.846         | 865.097        | 861.893        | 862.095 | 861.692        | R[39] |
| G[4]  | 84.250         | <b>833.877</b> | 830.673        | 830.875 | 830.472        | G[38] |
| K[5]  | 109.859        | 822.473        | 819.269        | 819.470 | 819.067        | K[37] |
| Q[6]  | 135.481        | 796.854        | 793.650        | 793.851 | 793.448        | Q[36] |
| G[7]  | 146.885        | <b>771.242</b> | 768.038        | 768.240 | 767.837        | G[35] |
| G[8]  | 158.289        | 759.835        | 756.634        | 756.835 | 756.432        | G[34] |
| K[9]  | 183.908        | 748.431        | 745.230        | 745.431 | 745.028        | K[33] |
| A[10] | 198.116        | 722.814        | 719.611        | 719.812 | 719.409        | A[32] |
| R[11] | 229.136        | 708.007        | 705.403        | 705.605 | 705.202        | R[31] |
| A[12] | 243.543        | 677.387        | <b>674.183</b> | 674.385 | <b>673.981</b> | A[30] |
| K[13] | 269.162        | 663.179        | 659.976        | 660.177 | 659.774        | K[29] |
| A[14] | 283.370        | 637.560        | 634.357        | 634.558 | 634.155        | A[28] |
| K[15] | 308.989        | 623.353        | 620.149        | 620.351 | 619.948        | K[27] |
| T[16] | 329.198        | 597.734        | 594.530        | 594.732 | 594.329        | T[26] |
| R[17] | <b>360.418</b> | 577.524        | 574.321        | 574.522 | 574.119        | R[25] |
| S[18] | 377.825        | 546.305        | 543.100        | 543.302 | 542.899        | S[24] |
| S[19] | 399.231        | 528.899        | 525.694        | 525.896 | 525.492        | S[23] |
| R[20] | 426.451        | 511.491        | 508.288        | 508.489 | 508.086        | R[22] |
| A[21] | 440.659        | 480.271        | 477.067        | 477.269 | 476.866        | A[21] |
| G[22] | 452.063        | 466.064        | 462.860        | 463.061 | 462.658        | G[20] |
| L[23] | 474.680        | 454.659        | 451.456        | 451.657 | 451.254        | L[19] |
| Q[24] | 500.292        | 432.043        | 428.839        | 429.040 | 428.637        | Q[18] |
| F[25] | 529.705        | 406.431        | 403.227        | 403.429 | 403.026        | F[17] |
| P[26] | 549.116        | 377.017        | 373.813        | 374.015 | 373.612        | P[16] |
| V[27] | 568.930        | 357.607        | 354.403        | 354.604 | 354.201        | V[15] |
| G[28] | 589.334        | 337.793        | 334.589        | 334.791 | 334.388        | G[14] |
| K[29] | 611.354        | 326.389        | 323.185        | 323.386 | 322.983        | K[13] |
| V[30] | 631.368        | 295.165        | 291.960        | 292.166 | 291.763        | V[12] |
| H[31] | 658.780        | 275.355        | 272.151        | 272.353 | 271.949        | H[11] |
| R[32] | 690.000        | 247.943        | 244.739        | 244.941 | 244.538        | R[10] |
| L[33] | 712.617        | 216.723        | 213.519        | 213.721 | 213.317        | L[9]  |
| L[34] | 735.233        | 194.106        | 190.902        | 191.104 | 190.701        | L[8]  |
| R[35] | 766.454        | 171.489        | 168.285        | 168.487 | 168.084        | R[7]  |
| K[36] | 792.073        | 140.269        | 137.065        | 137.267 | 136.864        | K[6]  |
| G[37] | 803.477        | 114.650        | 111.446        | 111.648 | 111.245        | G[5]  |
| H[38] | 828.286        | 103.245        | 100.042        | 100.243 | 99.840         | H[6]  |
| V[39] | 859.698        | 80.431         | 77.223         | 77.425  | 77.022         | V[3]  |
| S[40] | <b>876.305</b> | 47.824         | 44.621         | 44.822  | 44.419         | S[2]  |
| E[41] | <b>902.113</b> | 30.418         | 27.214         | 27.416  | 27.013         | E[1]  |



# sp | Q8CGP5 | H2A1F\_MOUSE

[Acetyl]SGRGKQGGKARAKAKTRSSRAGLQFPVGRVHLLRKGNYSE

- ▶ fragmentation table for charge state 1+
- ▶ specType=etd
- ▶ score=38.34
- ▶ F104903.dat
- ▶ query=q2815\_p1
- ▶ precursor=644.799140
- ▶ chargePrecursor=7
- ▶ itol=0.8

| AA   | c               | y              | z+1             | z+2             | z        | AA   |
|------|-----------------|----------------|-----------------|-----------------|----------|------|
| S 1  | 147.076         | 4507.521       | 4491.502        | 0.000           | 4490.494 | S 41 |
| G 2  | 304.098         | 4378.478       | 4362.459        | 0.000           | 4361.451 | G 40 |
| R 3  | <b>360.199</b>  | 4321.457       | 4305.438        | 4306.448        | 4304.430 | R 39 |
| G 4  | <b>417.220</b>  | 4165.355       | 4149.337        | 4150.345        | 4148.329 | G 38 |
| K 5  | <b>543.315</b>  | 4108.334       | 4092.315        | 4093.322        | 4091.307 | K 37 |
| Q 6  | <b>673.374</b>  | 3989.239       | 3974.220        | 3985.228        | 3983.211 | Q 36 |
| G 7  | <b>730.395</b>  | 3852.180       | 3836.162        | 3837.170        | 3835.154 | G 35 |
| G 8  | <b>787.417</b>  | 3795.159       | 3779.140        | 3780.148        | 3778.132 | G 34 |
| K 9  | 915.512         | 3738.138       | 3722.119        | 3723.127        | 3721.111 | K 33 |
| A 10 | <b>986.549</b>  | 3610.043       | 3594.024        | 3595.032        | 3593.016 | A 32 |
| R 11 | <b>1142.650</b> | 3536.005       | 3522.987        | 3523.995        | 3521.979 | R 31 |
| A 12 | 1213.667        | 3382.904       | 3366.886        | 3367.893        | 3366.878 | A 30 |
| K 13 | 1341.782        | 3311.867       | 3295.848        | 3296.856        | 3294.841 | K 29 |
| A 14 | 1412.819        | 3183.772       | 3167.754        | 3168.761        | 3166.746 | A 28 |
| K 15 | 1540.914        | 3112.735       | 3096.716        | 3097.724        | 3095.709 | K 27 |
| T 16 | 1641.962        | 2984.640       | 2968.621        | 2969.629        | 2967.614 | T 26 |
| R 17 | 1798.063        | 2883.592       | 2867.574        | 2868.582        | 2866.566 | R 25 |
| S 18 | 1885.098        | 2727.491       | 2711.473        | 2712.480        | 2710.465 | S 24 |
| S 19 | 1972.127        | 2640.455       | 2624.441        | 2625.448        | 2623.433 | S 23 |
| R 20 | 2128.228        | 2553.427       | 2537.409        | 2538.416        | 2536.401 | R 22 |
| A 21 | 2199.265        | 2497.326       | 2481.307        | 2482.315        | 2480.300 | A 21 |
| G 22 | 2286.287        | 2326.289       | 2310.270        | 2311.278        | 2309.263 | G 20 |
| L 23 | 2369.371        | 2269.268       | 2253.249        | 2254.257        | 2252.241 | L 19 |
| Q 24 | 2497.429        | 2156.184       | 2140.165        | 2141.173        | 2139.157 | Q 18 |
| F 25 | 2644.498        | 2028.125       | 2012.106        | 2013.114        | 2011.099 | F 17 |
| P 26 | 2741.551        | 1881.057       | 1865.038        | 1866.046        | 1864.031 | P 16 |
| V 27 | 2840.619        | 1784.004       | 1767.985        | 1768.993        | 1766.977 | V 15 |
| G 28 | 2897.641        | 1684.935       | 1668.917        | 1669.924        | 1667.909 | G 14 |
| R 29 | 3053.742        | 1627.914       | <b>1611.895</b> | 1612.903        | 1610.887 | R 13 |
| V 30 | 3153.810        | 1519.833       | <b>1455.794</b> | <b>1456.802</b> | 1454.785 | V 12 |
| H 31 | 3289.869        | 1372.744       | <b>1356.726</b> | 1357.734        | 1355.718 | H 11 |
| R 32 | 3445.970        | 1235.685       | <b>1219.667</b> | <b>1220.675</b> | 1218.659 | R 10 |
| L 33 | 3559.054        | 1079.584       | 1063.566        | <b>1064.573</b> | 1062.558 | L 9  |
| L 34 | 3672.138        | <b>966.509</b> | <b>950.482</b>  | 951.489         | 949.474  | L 8  |
| R 35 | 3828.239        | 851.416        | <b>837.398</b>  | <b>838.405</b>  | 836.390  | R 7  |
| K 36 | 3956.314        | 697.315        | 681.297         | 682.304         | 680.289  | K 6  |
| G 37 | 4013.356        | 569.220        | 553.201         | 554.209         | 552.194  | G 5  |
| N 38 | 4127.399        | 512.109        | 496.100         | 497.108         | 495.172  | N 4  |
| V 39 | 4290.462        | 396.156        | 382.137         | 383.145         | 381.129  | V 3  |
| S 40 | 4377.494        | 235.092        | 219.074         | 220.082         | 218.066  | S 2  |
| E 41 | 4506.537        | 148.060        | 132.042         | 133.050         | 131.034  | E 1  |

# sp | Q8CGP5 | H2A1F\_MOUSE

[Acetyl]SGRGKQGGKARAKAKTRSSRAGLQFPVGRVHRLLRKGNYS

- ▶ fragmentation table for charge state 2+
- ▶ specType=etd
- ▶ score=38.34
- ▶ F104903.dat
- ▶ query=q2815\_p1
- ▶ precursor=644.799140
- ▶ chargePrecursor=7
- ▶ itol=0.8

| AA | c               | y               | #s1             | #s2             | c               | AA    |
|----|-----------------|-----------------|-----------------|-----------------|-----------------|-------|
| S  | 74.062          | 2054.264        | 2266.255        | 0.804           | 2245.781        | S[41] |
| G  | 102.553         | 2189.743        | 2381.733        | 0.504           | 2181.220        | G[40] |
| R  | 180.603         | 2161.232        | 2153.233        | 2153.236        | 2152.710        | R[39] |
| G  | 209.114         | 2083.181        | 2075.172        | 2075.676        | 2074.660        | G[38] |
| K  | 273.181         | 2054.671        | 2046.661        | 2047.165        | 2046.157        | K[37] |
| G  | 337.194         | 1990.622        | 1982.614        | 1983.118        | 1982.110        | G[36] |
| G  | 385.703         | 1926.594        | 1918.584        | 1919.088        | 1918.080        | G[35] |
| G  | 394.212         | 1898.083        | 1890.074        | 1890.578        | 1889.570        | G[34] |
| K  | <b>458.260</b>  | 1869.572        | 1861.563        | 1862.067        | 1861.059        | K[33] |
| A  | 493.778         | 1805.525        | 1797.516        | 1798.019        | 1797.012        | A[32] |
| R  | <b>571.829</b>  | 1770.008        | 1761.997        | 1762.501        | 1761.493        | R[31] |
| A  | <b>607.347</b>  | 1692.959        | 1684.949        | 1685.453        | 1684.445        | A[30] |
| K  | <b>671.395</b>  | 1656.437        | 1648.428        | <b>1648.932</b> | 1647.924        | K[29] |
| A  | <b>706.913</b>  | 1592.900        | 1584.890        | <b>1584.884</b> | 1583.876        | A[28] |
| K  | <b>770.961</b>  | 1556.871        | 1548.862        | 1549.366        | 1548.358        | K[27] |
| T  | <b>821.485</b>  | 1492.824        | <b>1484.814</b> | <b>1485.318</b> | <b>1484.310</b> | T[26] |
| R  | 895.329         | 1442.800        | 1434.791        | 1435.294        | 1434.287        | R[25] |
| S  | <b>943.051</b>  | 1384.269        | <b>1356.240</b> | <b>1356.744</b> | <b>1355.736</b> | S[24] |
| S  | <b>986.567</b>  | 1320.733        | 1312.724        | <b>1313.228</b> | 1312.220        | S[23] |
| R  | <b>1064.618</b> | 1277.217        | 1269.208        | <b>1269.712</b> | 1268.704        | R[22] |
| A  | <b>1100.136</b> | <b>1199.167</b> | <b>1191.157</b> | <b>1191.661</b> | 1190.653        | A[21] |
| G  | <b>1126.647</b> | 1153.648        | <b>1155.639</b> | <b>1156.143</b> | 1155.135        | G[20] |
| L  | 1165.789        | 1138.137        | 1129.127        | <b>1127.632</b> | 1126.624        | L[19] |
| Q  | 1269.218        | 1073.595        | <b>1070.586</b> | <b>1071.090</b> | <b>1070.082</b> | Q[18] |
| F  | <b>1322.753</b> | 1014.566        | <b>1006.557</b> | <b>1007.061</b> | 1006.053        | F[17] |
| F  | 1371.279        | <b>941.032</b>  | 933.023         | 933.526         | <b>932.519</b>  | F[16] |
| V  | 1420.811        | 892.506         | 884.496         | <b>885.000</b>  | 883.992         | V[15] |
| G  | <b>1449.324</b> | 846.971         | <b>834.962</b>  | <b>835.466</b>  | 834.458         | G[14] |
| R  | 1527.814        | <b>814.461</b>  | <b>806.451</b>  | <b>806.955</b>  | <b>805.947</b>  | R[13] |
| V  | 1576.909        | 736.410         | 728.401         | 728.905         | 727.897         | V[12] |
| H  | 1645.438        | 688.876         | <b>678.866</b>  | <b>679.370</b>  | 678.363         | H[11] |
| R  | 1723.489        | 618.346         | 610.337         | 610.841         | 609.833         | R[10] |
| L  | 1780.031        | 540.296         | 532.286         | 532.790         | 531.783         | L[9]  |
| L  | 1836.573        | 483.754         | 475.744         | 476.248         | 475.241         | L[8]  |
| R  | 1914.623        | 427.212         | 419.202         | 419.706         | 418.699         | R[7]  |
| K  | 1978.671        | 349.161         | 341.152         | 341.656         | 340.648         | K[6]  |
| G  | 2067.181        | 285.114         | 277.104         | 277.608         | 276.600         | G[5]  |
| N  | 2094.203        | 256.603         | 248.594         | 249.098         | 248.090         | N[4]  |
| V  | 2145.736        | 199.562         | 191.552         | 192.056         | 191.048         | V[3]  |
| S  | 2199.251        | 118.056         | 110.047         | 110.551         | 109.543         | S[2]  |
| E  | 2253.772        | 74.534          | 66.524          | 67.028          | 66.021          | E[1]  |



# sp | Q8CGP5 | H2A1F\_MOUSE

[Acetyl]SGRGKQGGKARAKAKTRSSRAGLQFPVGRVHRLLRKGNYS

- ▶ fragmentation table for charge state 3+
- ▶ specType=etd
- ▶ score=38.34
- ▶ F104903.dat
- ▶ query=q2815\_p1
- ▶ precursor=644.799140
- ▶ chargePrecursor=7
- ▶ itol=0.8

| AA | c  | y               | z=1             | z=2             | z               | AA              |       |
|----|----|-----------------|-----------------|-----------------|-----------------|-----------------|-------|
| S  | 1  | 48.607          | 1502.178        | <b>1497.839</b> | 0.872           | <b>1497.563</b> | S[41] |
| G  | 2  | 86.704          | 1460.184        | 1454.225        | 0.672           | 1454.480        | G[40] |
| R  | 3  | 130.718         | <b>1441.157</b> | <b>1435.817</b> | <b>1436.153</b> | <b>1435.482</b> | R[39] |
| G  | 4  | 159.745         | 1389.123        | 1383.784        | <b>1384.120</b> | 1383.440        | G[38] |
| K  | 5  | 182.443         | 1370.110        | 1364.777        | <b>1365.113</b> | 1364.441        | K[37] |
| G  | 6  | 225.130         | 1327.418        | <b>1322.078</b> | <b>1322.414</b> | 1321.742        | G[36] |
| G  | 7  | 244.137         | 1284.732        | 1279.392        | 1279.729        | 1279.056        | G[35] |
| G  | 8  | 263.144         | 1245.725        | <b>1240.385</b> | <b>1240.721</b> | 1240.049        | G[34] |
| K  | 9  | 305.842         | 1246.717        | 1241.378        | 1241.714        | 1241.042        | K[33] |
| A  | 10 | 329.521         | 1204.019        | <b>1198.679</b> | <b>1199.015</b> | 1198.344        | A[32] |
| R  | 11 | 381.555         | 1180.390        | <b>1175.000</b> | 1175.336        | <b>1174.664</b> | R[31] |
| A  | 12 | 405.234         | <b>1128.306</b> | 1123.967        | 1123.303        | 1122.631        | A[30] |
| K  | 13 | 447.932         | 1104.627        | <b>1099.288</b> | <b>1099.624</b> | <b>1098.952</b> | K[29] |
| A  | 14 | 491.611         | 1081.929        | <b>1056.589</b> | <b>1056.925</b> | <b>1056.253</b> | A[28] |
| K  | 15 | 514.310         | <b>1038.250</b> | <b>1032.910</b> | <b>1033.246</b> | 1032.574        | K[27] |
| T  | 16 | 547.002         | 995.552         | <b>990.212</b>  | <b>990.548</b>  | <b>989.876</b>  | T[26] |
| R  | 17 | 606.626         | <b>961.869</b>  | 956.529         | <b>956.865</b>  | 956.193         | R[25] |
| S  | 18 | 629.319         | 959.839         | 954.499         | 954.834         | 954.162         | S[24] |
| S  | 19 | <b>658.947</b>  | 980.825         | <b>875.485</b>  | <b>875.821</b>  | 875.149         | S[23] |
| R  | 20 | <b>710.081</b>  | 951.814         | <b>846.474</b>  | <b>846.810</b>  | <b>846.138</b>  | R[22] |
| A  | 21 | <b>733.760</b>  | 799.789         | 794.441         | <b>794.777</b>  | <b>794.105</b>  | A[21] |
| G  | 22 | <b>752.767</b>  | 778.101         | <b>770.762</b>  | <b>771.098</b>  | <b>770.426</b>  | G[20] |
| L  | 23 | 769.483         | <b>737.094</b>  | <b>731.754</b>  | <b>732.090</b>  | <b>731.419</b>  | L[19] |
| Q  | 24 | <b>833.148</b>  | 719.356         | 714.008         | 714.344         | 713.672         | Q[18] |
| F  | 25 | 882.171         | 676.713         | <b>671.374</b>  | <b>671.710</b>  | <b>671.038</b>  | F[17] |
| F  | 26 | <b>914.522</b>  | 627.600         | 622.251         | 622.587         | 622.015         | F[16] |
| V  | 27 | 947.545         | 595.139         | 590.080         | 590.416         | 589.864         | V[15] |
| G  | 28 | <b>966.552</b>  | 566.317         | 560.977         | 561.313         | 560.641         | G[14] |
| R  | 29 | 1013.568        | 543.309         | 537.970         | 538.306         | 537.634         | R[13] |
| V  | 30 | <b>1051.608</b> | 491.276         | 485.938         | 486.272         | 485.600         | V[12] |
| H  | 31 | 1097.204        | <b>458.253</b>  | 452.913         | 453.249         | 452.577         | H[11] |
| R  | 32 | <b>1149.328</b> | 412.967         | 407.227         | 407.563         | 406.891         | R[10] |
| L  | 33 | 1187.023        | <b>360.533</b>  | 355.193         | 355.529         | 354.857         | L[9]  |
| L  | 34 | <b>1224.718</b> | 322.874         | 317.489         | 317.825         | 317.153         | L[8]  |
| R  | 35 | 1275.753        | 285.144         | 279.804         | 280.140         | 279.468         | R[7]  |
| K  | 36 | 1319.450        | 233.110         | 227.770         | 228.106         | 227.434         | K[6]  |
| G  | 37 | 1338.457        | 190.412         | 185.072         | 185.408         | 184.736         | G[5]  |
| N  | 38 | 1376.471        | 171.404         | 166.065         | 166.401         | 165.729         | N[4]  |
| V  | 39 | 1436.826        | 133.390         | 128.051         | 128.386         | 127.715         | V[3]  |
| S  | 40 | 1459.836        | 99.136          | 93.796          | 94.132          | 93.460          | S[2]  |
| E  | 41 | 1502.850        | 50.025          | 44.685          | 45.021          | 44.349          | E[1]  |

# sp | Q8CGP5 | H2A1F\_MOUSE

[Acetyl]SGRGKQGGKARAKAKTRSSRAGLQFPVGRVHRLLRKGNYS

- ▶ fragmentation table for charge state 4+
- ▶ specType=etd
- ▶ score=38.34
- ▶ F104903.dat
- ▶ query=q2815\_p1
- ▶ precursor=644.799140
- ▶ chargePrecursor=7
- ▶ itol=0.8

| AA | c  | s               | p               | #s1             | #s2             | #s3             | AA    |
|----|----|-----------------|-----------------|-----------------|-----------------|-----------------|-------|
| S  | 1  | 37.505          | <b>1127.636</b> | 1123.631        | 0.795           | 913.271         | S[41] |
| G  | 2  | 51.780          | 1026.375        | <b>1091.370</b> | 0.795           | <b>1091.118</b> | G[40] |
| R  | 3  | 90.805          | <b>1081.120</b> | <b>1077.115</b> | <b>1077.367</b> | 1076.861        | R[39] |
| G  | 4  | 109.001         | 1042.094        | <b>1038.090</b> | <b>1038.342</b> | 1037.830        | G[38] |
| K  | 5  | 137.064         | 1027.839        | <b>1023.834</b> | <b>1024.086</b> | <b>1023.582</b> | K[37] |
| G  | 6  | 169.059         | 995.015         | <b>991.811</b>  | 992.267         | <b>991.559</b>  | G[36] |
| G  | 7  | 193.254         | 963.801         | <b>959.700</b>  | <b>960.048</b>  | <b>959.544</b>  | G[35] |
| G  | 8  | 197.610         | 949.545         | <b>945.541</b>  | <b>945.792</b>  | <b>945.289</b>  | G[34] |
| K  | 9  | 229.613         | <b>935.290</b>  | <b>931.285</b>  | <b>931.537</b>  | 931.031         | K[33] |
| A  | 10 | 247.201         | <b>903.266</b>  | 899.261         | 899.513         | 899.007         | A[32] |
| R  | 11 | 286.418         | <b>885.507</b>  | 881.502         | 881.754         | 881.250         | R[31] |
| A  | 12 | 304.177         | <b>846.482</b>  | 842.477         | 842.729         | 842.225         | A[30] |
| K  | 13 | 336.201         | 828.722         | <b>824.718</b>  | <b>824.970</b>  | <b>824.466</b>  | K[29] |
| A  | 14 | 353.960         | 796.699         | <b>792.694</b>  | <b>792.946</b>  | 792.442         | A[28] |
| K  | 15 | 385.904         | 778.939         | 774.935         | 775.187         | 774.683         | K[27] |
| T  | 16 | 411.246         | 746.915         | <b>742.911</b>  | <b>743.163</b>  | <b>742.659</b>  | T[26] |
| R  | 17 | 458.274         | 721.954         | <b>717.649</b>  | <b>717.901</b>  | <b>717.397</b>  | R[25] |
| S  | 18 | 472.609         | 692.609         | <b>678.624</b>  | <b>678.876</b>  | 678.372         | S[24] |
| S  | 19 | 493.787         | 660.870         | 656.866         | 657.118         | 656.614         | S[23] |
| R  | 20 | 532.613         | 638.112         | 635.108         | 635.360         | 634.856         | R[22] |
| A  | 21 | 550.572         | 600.087         | 596.082         | 596.334         | 595.830         | A[21] |
| G  | 22 | 564.827         | 582.328         | 578.323         | 578.575         | 578.071         | G[20] |
| L  | 23 | 593.098         | 568.072         | 564.068         | 564.320         | 563.816         | L[19] |
| Q  | 24 | <b>625.113</b>  | 539.801         | 535.797         | 536.049         | 535.545         | Q[18] |
| F  | 25 | 661.880         | 507.787         | 503.782         | 504.034         | 503.530         | F[17] |
| F  | 26 | 698.143         | 471.020         | 467.015         | 467.267         | 466.763         | F[16] |
| V  | 27 | <b>710.910</b>  | 446.756         | 442.752         | 443.004         | 442.500         | V[15] |
| G  | 28 | <b>725.166</b>  | 421.989         | <b>417.985</b>  | 418.237         | <b>417.733</b>  | G[14] |
| R  | 29 | 764.415         | 389.734         | 385.729         | 385.981         | 385.477         | R[13] |
| V  | 30 | <b>788.958</b>  | 368.709         | 364.704         | 364.956         | 364.452         | V[12] |
| H  | 31 | 823.223         | 343.942         | 339.937         | 340.189         | 339.685         | H[11] |
| R  | 32 | <b>862.248</b>  | 309.677         | 305.672         | 305.924         | 305.420         | R[10] |
| L  | 33 | <b>890.519</b>  | 270.652         | 266.647         | 266.899         | 266.395         | L[9]  |
| L  | 34 | <b>918.790</b>  | 242.381         | 238.376         | 238.628         | 238.124         | L[8]  |
| R  | 35 | <b>957.815</b>  | 214.110         | 210.105         | 210.357         | 209.853         | R[7]  |
| K  | 36 | <b>989.839</b>  | 175.084         | 171.079         | 171.331         | 170.827         | K[6]  |
| G  | 37 | 1064.094        | 143.061         | 139.056         | 139.308         | 138.804         | G[5]  |
| N  | 38 | 1032.605        | 128.805         | 124.800         | 125.052         | 124.548         | N[4]  |
| V  | 39 | 1078.271        | 100.294         | 96.289          | 96.541          | 96.037          | V[3]  |
| S  | 40 | 1098.124        | 99.529          | 95.524          | 95.776          | 95.272          | S[2]  |
| E  | 41 | <b>1127.390</b> | 97.771          | 93.766          | 94.018          | 93.514          | E[1]  |

# sp | Q8CGP5 | H2A1F\_MOUSE

[Acetyl]SGRGKQGGKARAKAKTRSSRAGLQFPVGRVHRLLRKGNYS

- ▶ fragmentation table for charge state 5+
- ▶ specType=etd
- ▶ score=38.34
- ▶ F104903.dat
- ▶ query=q2815\_p1
- ▶ precursor=644.799140
- ▶ chargePrecursor=7
- ▶ itol=0.8

| AA    | c              | y              | z+1            | z#2            | z              | AA    |
|-------|----------------|----------------|----------------|----------------|----------------|-------|
| S[1]  | 30.221         | <b>902.310</b> | 899.108        | 0.806          | 898.905        | S[41] |
| G[2]  | 41.625         | <b>876.501</b> | <b>873.298</b> | 0.806          | <b>873.096</b> | G[40] |
| R[3]  | 72.846         | 805.097        | 801.893        | <b>062.095</b> | 801.692        | R[39] |
| G[4]  | 84.250         | <b>833.877</b> | 830.673        | 830.875        | 830.472        | G[38] |
| K[5]  | 109.869        | <b>822.473</b> | 819.269        | 819.470        | 819.067        | K[37] |
| Q[6]  | 135.481        | 796.954        | <b>793.650</b> | <b>793.851</b> | <b>793.448</b> | Q[36] |
| G[7]  | 146.685        | <b>771.242</b> | 768.038        | 768.240        | 767.837        | G[35] |
| G[8]  | 158.289        | 759.838        | <b>756.634</b> | <b>756.835</b> | 756.432        | G[34] |
| K[9]  | 183.908        | 748.833        | <b>745.230</b> | <b>745.431</b> | <b>745.028</b> | K[33] |
| A[10] | 198.116        | 722.814        | 719.611        | 719.812        | 719.409        | A[32] |
| R[11] | 229.336        | 708.607        | 705.403        | 705.605        | 705.202        | R[31] |
| A[12] | 243.543        | 677.387        | <b>674.183</b> | 674.385        | <b>673.981</b> | A[30] |
| K[13] | 269.162        | 663.179        | <b>659.976</b> | <b>660.177</b> | <b>659.774</b> | K[29] |
| A[14] | 283.370        | 637.960        | 634.757        | 634.958        | 634.555        | A[28] |
| K[15] | 308.989        | 623.753        | 620.549        | 620.751        | 619.948        | K[27] |
| T[16] | 329.198        | 597.734        | 594.530        | 594.732        | 594.329        | T[26] |
| R[17] | <b>360.418</b> | 577.524        | 574.321        | 574.522        | 574.119        | R[25] |
| S[18] | 377.825        | <b>546.304</b> | 543.100        | 543.302        | 542.899        | S[24] |
| S[19] | 399.231        | 529.996        | 526.791        | 526.994        | 526.592        | S[23] |
| R[20] | 426.451        | 511.491        | 508.288        | 508.489        | 508.088        | R[22] |
| A[21] | 440.659        | 480.271        | 477.067        | 477.269        | 476.866        | A[21] |
| G[22] | 452.063        | 466.064        | 462.860        | 463.061        | 462.658        | G[20] |
| L[23] | 474.680        | 494.659        | 451.456        | 451.657        | 451.254        | L[19] |
| Q[24] | 500.292        | 432.043        | 428.839        | 429.040        | 428.637        | Q[18] |
| F[25] | 529.705        | 406.831        | 403.227        | 403.429        | 403.026        | F[17] |
| P[26] | 549.116        | 377.017        | 373.813        | 374.015        | 373.612        | P[16] |
| V[27] | 568.530        | 357.607        | 354.403        | 354.604        | 354.201        | V[15] |
| G[28] | 589.334        | 337.793        | 334.589        | 334.791        | 334.388        | G[14] |
| R[29] | 611.554        | 326.389        | 323.185        | 323.386        | 322.983        | R[13] |
| V[30] | 631.368        | 295.168        | 291.965        | 292.166        | 291.763        | V[12] |
| H[31] | <b>658.780</b> | 275.355        | 272.151        | 272.353        | 271.949        | H[11] |
| R[32] | 690.000        | 247.943        | 244.739        | 244.941        | 244.538        | R[10] |
| L[33] | 712.617        | 216.723        | 213.519        | 213.721        | 213.317        | L[9]  |
| L[34] | 735.233        | 194.106        | 190.902        | 191.104        | 190.701        | L[8]  |
| R[35] | 766.454        | 171.489        | 168.285        | 168.487        | 168.084        | R[7]  |
| K[36] | 782.073        | 140.269        | 137.065        | 137.267        | 136.864        | K[6]  |
| G[37] | 803.877        | 114.650        | 111.446        | 111.648        | 111.245        | G[5]  |
| N[38] | 826.286        | 103.246        | 100.042        | 100.243        | 99.840         | N[4]  |
| V[39] | 858.898        | 80.437         | 77.233         | 77.435         | 77.032         | V[3]  |
| S[40] | <b>876.305</b> | 47.824         | 44.621         | 44.822         | 44.419         | S[2]  |
| E[41] | 902.113        | 30.418         | 27.214         | 27.416         | 27.013         | E[1]  |

# sp | Q8CGP5 | H2A1F\_MOUSE

[Acetyl]SGRGKQGGKARAKAKTRSSRAGLQFPVGRVHRLLRKGNYS

- ▶ fragmentation table for charge state 6+
- ▶ specType=etd
- ▶ score=38.34
- ▶ F104903.dat
- ▶ query=q2815.p1
- ▶ precursor=644.799140
- ▶ chargePrecursor=7
- ▶ itol=0.8

| AA | c  | y              | z+1            | z#2            | z              | AA             |   |    |
|----|----|----------------|----------------|----------------|----------------|----------------|---|----|
| S  | 1  | 25.352         | <b>752.093</b> | 749.423        | 0.839          | 149.255        | S | 41 |
| G  | 2  | 34.856         | <b>730.586</b> | 727.916        | 0.839          | 727.748        | G | 40 |
| R  | 3  | 60.873         | 721.082        | <b>718.412</b> | <b>718.580</b> | <b>718.244</b> | R | 39 |
| G  | 4  | 70.376         | 695.065        | 692.396        | 692.563        | 692.238        | G | 38 |
| K  | 5  | 91.725         | 685.562        | 682.892        | 683.060        | 682.724        | K | 37 |
| Q  | 6  | 113.068        | 674.213        | 661.543        | 661.711        | 661.375        | Q | 36 |
| G  | 7  | 122.572        | 642.869        | 640.200        | 640.368        | 640.032        | G | 35 |
| G  | 8  | 132.076        | 631.366        | 630.696        | 630.864        | 630.528        | G | 34 |
| K  | 9  | 153.425        | 623.862        | 621.193        | 621.360        | 621.024        | K | 33 |
| A  | 10 | 165.264        | 602.513        | 599.843        | 600.011        | 599.675        | A | 32 |
| R  | 11 | 191.381        | 590.674        | 588.004        | 588.172        | 587.836        | R | 31 |
| A  | 12 | 203.121        | 564.657        | 561.987        | 562.155        | 561.819        | A | 30 |
| K  | 13 | 224.470        | 552.817        | 550.147        | 550.315        | 549.980        | K | 29 |
| A  | 14 | 236.309        | 531.468        | 528.798        | 528.966        | 528.630        | A | 28 |
| K  | 15 | 257.658        | 519.629        | 516.959        | 517.127        | 516.791        | K | 27 |
| T  | 16 | 274.500        | 498.279        | 495.610        | 495.778        | 495.442        | T | 26 |
| R  | 17 | 300.517        | 481.438        | 478.768        | 478.936        | 478.600        | R | 25 |
| S  | 18 | 313.022        | 456.421        | 453.752        | 453.919        | 453.584        | S | 24 |
| S  | 19 | 329.527        | 440.916        | 438.246        | 438.414        | 438.078        | S | 23 |
| R  | 20 | 355.544        | 426.411        | 423.741        | 423.909        | 423.573        | R | 22 |
| A  | 21 | 367.384        | 400.994        | 397.724        | 397.892        | 397.556        | A | 21 |
| G  | 22 | 376.887        | 388.554        | 385.884        | 386.052        | 385.716        | G | 20 |
| L  | 23 | 395.735        | 379.051        | 376.381        | 376.549        | 376.213        | L | 19 |
| Q  | 24 | <b>417.078</b> | <b>360.203</b> | 357.534        | 357.702        | 357.366        | Q | 18 |
| P  | 25 | 441.589        | 338.880        | 336.190        | 336.358        | 336.022        | P | 17 |
| P  | 26 | 457.765        | 314.349        | 311.679        | 311.847        | 311.511        | P | 16 |
| V  | 27 | 474.276        | 298.173        | 295.503        | 295.672        | 295.336        | V | 15 |
| G  | 28 | 483.779        | 281.662        | 278.992        | 279.160        | 278.824        | G | 14 |
| R  | 29 | 500.796        | 272.158        | 269.488        | 269.657        | 269.321        | R | 13 |
| V  | 30 | 526.308        | 246.142        | 243.472        | 243.640        | 243.304        | V | 12 |
| H  | 31 | 549.151        | 229.630        | 226.960        | 227.128        | 226.792        | H | 11 |
| R  | 32 | 575.168        | 206.787        | 204.117        | 204.285        | 203.949        | R | 10 |
| L  | 33 | 594.015        | 180.770        | 178.100        | 178.268        | 177.932        | L | 9  |
| L  | 34 | 612.862        | 161.923        | 159.253        | 159.421        | 159.085        | L | 8  |
| R  | 35 | 638.879        | 143.075        | 140.405        | 140.574        | 140.238        | R | 7  |
| R  | 36 | <b>660.228</b> | 117.059        | 114.389        | 114.557        | 114.221        | R | 6  |
| G  | 37 | 689.732        | 95.709         | 93.040         | 93.208         | 92.872         | G | 5  |
| N  | 38 | 688.739        | 86.206         | 83.536         | 83.704         | 83.368         | N | 4  |
| V  | 39 | 715.916        | 67.199         | 64.529         | 64.697         | 64.361         | V | 3  |
| S  | 40 | <b>730.422</b> | 40.021         | 37.352         | 37.520         | 37.184         | S | 2  |
| E  | 41 | <b>751.929</b> | 25.516         | 22.846         | 23.014         | 22.678         | E | 1  |



# sp | Q8BFU2 | H2A3\_MOUSE

[Acetyl]SGR<sup>Acetyl</sup>RGK<sub>42.01</sub> QGGKARAKAKSRSSRAGLQFPVGRVHLLLRKGNYS

- ▶ fragmentation table for charge state 1+
- ▶ specType=etd
- ▶ score=62.47
- ▶ F104903.dat
- ▶ query=q2828\_p1
- ▶ precursor=756.763030
- ▶ chargePrecursor=6
- ▶ itol=0.8

| AA | c  | y               | z+1             | z+2             | z               | AA             |       |
|----|----|-----------------|-----------------|-----------------|-----------------|----------------|-------|
| S  | 1  | 147.076         | 4535.518        | 4519.497        | 0.000           | 4519.489       | S[41] |
| G  | 2  | 204.098         | 4408.473        | 4390.454        | 0.000           | 4389.446       | G[40] |
| R  | 3  | <b>360.199</b>  | 4349.451        | 4333.433        | 4334.441        | 4332.425       | R[39] |
| G  | 4  | <b>417.220</b>  | 4193.350        | 4177.332        | 4178.339        | 4176.324       | G[38] |
| K  | 5  | <b>587.326</b>  | 4136.329        | 4120.310        | 4121.318        | 4119.302       | K[37] |
| Q  | 6  | <b>715.345</b>  | 3999.221        | 3980.205        | 3981.212        | 3980.197       | Q[36] |
| G  | 7  | <b>772.406</b>  | 3838.165        | 3822.146        | 3823.154        | 3821.135       | G[35] |
| G  | 8  | 829.427         | 3781.143        | 3765.125        | 3766.132        | 3764.111       | G[34] |
| K  | 9  | <b>957.522</b>  | 3724.122        | 3708.103        | 3709.111        | 3707.099       | K[33] |
| A  | 10 | <b>1028.560</b> | 3596.027        | 3580.008        | 3581.016        | 3579.000       | A[32] |
| R  | 11 | 1184.661        | 3524.990        | 3508.971        | 3509.979        | 3507.961       | R[31] |
| A  | 12 | 1255.698        | 3388.980        | 3372.970        | 3373.978        | 3371.960       | A[30] |
| R  | 13 | 1383.793        | 3297.852        | 3281.833        | 3282.841        | 3280.825       | R[29] |
| A  | 14 | 1454.830        | 3169.757        | 3153.738        | 3154.746        | 3152.730       | A[28] |
| K  | 15 | 1582.925        | 3098.719        | 3082.701        | 3083.709        | 3081.691       | K[27] |
| S  | 16 | 1669.957        | 2970.625        | 2954.606        | 2955.614        | 2953.598       | S[26] |
| R  | 17 | 1829.058        | 2883.562        | 2867.544        | 2868.552        | 2866.536       | R[25] |
| S  | 18 | <b>1913.090</b> | 2727.491        | 2711.473        | 2712.480        | 2710.465       | S[24] |
| S  | 19 | 2000.122        | 2640.459        | 2624.441        | 2625.448        | 2623.433       | S[23] |
| R  | 20 | 2156.223        | 2553.427        | 2537.409        | 2538.416        | 2536.401       | R[22] |
| A  | 21 | 2227.260        | 2397.326        | 2381.307        | 2382.315        | 2380.300       | A[21] |
| G  | 22 | 2384.282        | 2326.289        | 2310.270        | 2311.278        | 2309.261       | G[20] |
| L  | 23 | 2497.306        | 2269.268        | 2253.249        | 2254.257        | 2252.241       | L[19] |
| Q  | 24 | 2625.424        | 2156.184        | 2140.165        | 2141.173        | 2139.157       | Q[18] |
| F  | 25 | 2672.493        | 2028.125        | 2012.106        | 2013.114        | 2011.099       | F[17] |
| P  | 26 | 2769.546        | 1881.057        | 1865.038        | 1866.046        | 1864.030       | P[16] |
| V  | 27 | 2868.614        | 1784.004        | 1767.985        | 1768.993        | 1766.977       | V[15] |
| G  | 28 | 2925.635        | 1684.935        | 1668.917        | 1669.924        | 1667.909       | G[14] |
| R  | 29 | 3031.237        | 1627.914        | 1611.895        | <b>1612.903</b> | 1610.887       | R[13] |
| V  | 30 | 3180.808        | 1471.811        | 1455.794        | 1456.802        | 1454.786       | V[12] |
| H  | 31 | 3317.864        | 1372.744        | <b>1356.726</b> | <b>1357.734</b> | 1355.718       | H[11] |
| R  | 32 | 3473.965        | 1235.685        | 1219.667        | 1220.675        | 1218.659       | R[10] |
| L  | 33 | 3587.049        | <b>1079.584</b> | 1063.566        | 1064.573        | 1062.558       | L[9]  |
| L  | 34 | 3700.133        | 966.500         | 950.482         | 951.489         | 949.473        | L[8]  |
| I  | 35 | 3859.234        | 853.418         | 837.399         | 838.406         | <b>836.390</b> | I[7]  |
| K  | 36 | 3984.329        | 697.315         | 681.296         | 682.304         | 680.289        | K[6]  |
| G  | 37 | 4041.351        | 669.220         | 653.201         | 654.209         | 652.194        | G[5]  |
| N  | 38 | 4155.394        | 612.109         | 496.180         | 497.188         | 495.172        | N[4]  |
| V  | 39 | 4318.457        | 398.159         | 382.139         | 383.145         | 381.129        | V[3]  |
| S  | 40 | 4405.489        | 235.062         | 219.074         | 220.082         | 218.066        | S[2]  |
| E  | 41 | 4534.532        | 148.000         | 132.042         | 133.050         | 131.034        | E[1]  |

# sp | Q8BFU2 | H2A3\_MOUSE

[Acetyl]SGRGGK<sup>Acetyl</sup><sub>42.01</sub> QGGKARAKAKSRSSRAGLQFPVGRVHRLLRKGNYS

- ▶ fragmentation table for charge state 2+
- ▶ specType=etd
- ▶ score=62.47
- ▶ F104903.dat
- ▶ query=q2828\_p1
- ▶ precursor=756.763030
- ▶ chargePrecursor=6
- ▶ itol=0.8

| AA | c  | y               | #s=1            | #s=2            | z               | AA              |       |
|----|----|-----------------|-----------------|-----------------|-----------------|-----------------|-------|
| S  | 1  | 74.062          | 2308.241        | 2309.250        | 0.804           | 2309.746        | S[41] |
| G  | 2  | 102.553         | 2303.740        | 2305.731        | 0.804           | 2305.227        | G[40] |
| R  | 3  | 180.603         | 2175.229        | 2187.230        | 2167.724        | 2168.710        | R[39] |
| G  | 4  | 209.114         | 2097.179        | 2099.169        | 2089.673        | 2088.660        | G[38] |
| K  | 5  | 294.167         | 2058.668        | 2060.659        | 2061.163        | 2060.155        | K[37] |
| G  | 6  | 358.196         | 1983.615        | 1979.602        | 1978.100        | 1975.102        | G[36] |
| G  | 7  | 388.187         | 1919.586        | <b>1911.577</b> | <b>1912.081</b> | 1911.077        | G[35] |
| G  | 8  | 435.217         | 1891.075        | 1883.066        | 1883.570        | 1882.562        | G[34] |
| K  | 9  | 479.265         | 1863.565        | <b>1854.555</b> | <b>1855.059</b> | 1854.051        | K[33] |
| A  | 10 | 514.263         | 1798.511        | 1790.500        | 1791.012        | 1790.004        | A[32] |
| R  | 11 | 602.524         | 1762.999        | <b>1754.989</b> | <b>1755.493</b> | 1754.485        | R[31] |
| A  | 12 | <b>628.353</b>  | 1684.948        | 1676.937        | 1677.441        | 1676.433        | A[30] |
| R  | 13 | <b>692.400</b>  | 1649.435        | 1641.420        | <b>1641.924</b> | 1640.912        | R[29] |
| A  | 14 | <b>727.919</b>  | 1585.383        | <b>1577.373</b> | <b>1577.876</b> | 1576.869        | A[28] |
| K  | 15 | <b>791.966</b>  | 1549.863        | 1541.854        | 1542.358        | 1541.350        | K[27] |
| S  | 16 | <b>835.482</b>  | 1485.816        | 1477.807        | <b>1478.310</b> | 1477.303        | S[26] |
| R  | 17 | 873.551         | 1442.300        | <b>1434.291</b> | <b>1434.794</b> | 1433.786        | R[25] |
| S  | 18 | <b>957.049</b>  | 1384.249        | <b>1356.240</b> | <b>1356.744</b> | 1355.736        | S[24] |
| S  | 19 | <b>1000.565</b> | 1320.733        | <b>1312.724</b> | <b>1313.228</b> | <b>1312.220</b> | S[23] |
| R  | 20 | 1078.615        | 1277.217        | <b>1269.208</b> | <b>1269.712</b> | 1268.704        | R[22] |
| A  | 21 | 1114.134        | <b>1199.167</b> | <b>1191.157</b> | <b>1191.661</b> | <b>1190.653</b> | A[21] |
| G  | 22 | 1142.644        | 1103.648        | 1105.639        | 1106.643        | 1105.135        | G[20] |
| L  | 23 | <b>1199.187</b> | <b>1135.137</b> | <b>1127.128</b> | <b>1127.632</b> | <b>1126.624</b> | L[19] |
| Q  | 24 | <b>1263.216</b> | <b>1070.586</b> | <b>1070.586</b> | <b>1071.090</b> | <b>1070.082</b> | Q[18] |
| F  | 25 | 1336.750        | 1014.566        | <b>1006.557</b> | <b>1007.061</b> | <b>1006.053</b> | F[17] |
| F  | 26 | 1385.276        | 941.053         | 933.023         | 933.526         | 932.519         | F[16] |
| V  | 27 | <b>1434.811</b> | 892.506         | 884.496         | 885.000         | 883.992         | V[15] |
| G  | 28 | 1483.271        | <b>842.971</b>  | <b>834.962</b>  | <b>835.466</b>  | 834.458         | G[14] |
| R  | 29 | 1541.773        | 814.461         | <b>806.451</b>  | <b>806.955</b>  | <b>805.947</b>  | R[13] |
| V  | 30 | 1590.306        | 736.410         | <b>728.401</b>  | <b>728.905</b>  | <b>727.897</b>  | V[12] |
| H  | 31 | 1659.436        | 688.876         | 678.866         | 679.370         | 678.363         | H[11] |
| R  | 32 | 1737.488        | 618.346         | 610.337         | 610.841         | 609.833         | R[10] |
| L  | 33 | 1794.028        | 540.206         | 532.196         | 532.700         | 531.713         | L[9]  |
| L  | 34 | 1850.570        | 469.794         | 459.783         | 459.286         | 458.281         | L[8]  |
| R  | 35 | 1928.612        | 427.212         | 419.202         | 419.706         | 418.699         | R[7]  |
| K  | 36 | 1992.668        | 349.161         | 341.152         | 341.656         | 340.648         | K[6]  |
| G  | 37 | 2021.179        | 285.114         | 277.104         | 277.608         | 276.600         | G[5]  |
| N  | 38 | 2078.200        | 256.603         | 248.594         | 249.098         | 248.090         | N[4]  |
| V  | 39 | 2159.732        | 199.562         | 191.572         | 192.076         | 191.068         | V[3]  |
| S  | 40 | 2203.246        | 118.056         | 110.047         | 110.544         | 109.537         | S[2]  |
| E  | 41 | 2287.769        | 74.534          | 66.524          | 67.028          | 66.021          | E[1]  |

# sp | Q8BFU2 | H2A3\_MOUSE

[Acetyl]SGR<sup>Acetyl</sup>RGK<sub>42.01</sub> QGGKARAKAKSRSSRAGLQFPVGRVHLLLRKGNYS

- ▶ fragmentation table for charge state 3+
- ▶ specType=etd
- ▶ score=62.47
- ▶ F104903.dat
- ▶ query=q2828\_p1
- ▶ precursor=756.763030
- ▶ chargePrecursor=6
- ▶ itol=0.8

| AA |    | c               | p               | s+1             | s+2             | s               | AA    |
|----|----|-----------------|-----------------|-----------------|-----------------|-----------------|-------|
| S  | 1  | 48.097          | <b>1512.510</b> | <b>1507.170</b> | 0.872           | <b>1506.835</b> | S[41] |
| G  | 2  | 86.704          | 1489.636        | <b>1464.156</b> | 0.672           | <b>1463.820</b> | G[40] |
| R  | 3  | 130.718         | 1450.489        | <b>1445.149</b> | <b>1445.485</b> | <b>1444.811</b> | R[39] |
| G  | 4  | 159.745         | 1398.455        | <b>1393.115</b> | <b>1393.451</b> | 1392.779        | G[38] |
| K  | 5  | 196.447         | 1379.448        | <b>1374.108</b> | <b>1374.444</b> | 1373.772        | K[37] |
| G  | 6  | 239.133         | 1322.746        | 1317.457        | <b>1317.742</b> | 1317.070        | G[36] |
| G  | 7  | 288.140         | 1266.066        | <b>1274.720</b> | <b>1275.056</b> | <b>1274.384</b> | G[35] |
| G  | 8  | 297.147         | 1261.051        | 1255.113        | <b>1256.049</b> | 1255.377        | G[34] |
| K  | 9  | 319.646         | <b>1242.045</b> | <b>1236.706</b> | <b>1237.042</b> | <b>1236.370</b> | K[33] |
| A  | 10 | 343.525         | <b>1199.347</b> | 1194.008        | 1194.344        | 1193.672        | A[32] |
| R  | 11 | 395.558         | 1174.049        | <b>1170.329</b> | <b>1170.664</b> | 1169.991        | R[31] |
| A  | 12 | 439.237         | <b>1123.534</b> | 1118.205        | 1118.541        | 1117.869        | A[30] |
| K  | 13 | 461.936         | 1099.955        | <b>1094.616</b> | <b>1094.952</b> | <b>1094.280</b> | K[29] |
| A  | 14 | 485.615         | 1057.257        | 1051.917        | 1052.253        | 1051.581        | A[28] |
| K  | 15 | 508.313         | 1033.578        | <b>1028.238</b> | <b>1028.574</b> | <b>1027.902</b> | K[27] |
| S  | 16 | 557.324         | 990.880         | <b>985.540</b>  | <b>985.876</b>  | <b>985.204</b>  | S[26] |
| R  | 17 | 606.258         | 948.989         | <b>956.529</b>  | <b>956.865</b>  | 956.193         | R[25] |
| S  | 18 | 638.368         | 909.835         | 904.495         | 904.831         | 904.160         | S[24] |
| S  | 19 | 667.376         | 880.825         | <b>875.485</b>  | <b>875.821</b>  | <b>875.149</b>  | S[23] |
| R  | 20 | 719.413         | 851.814         | 846.474         | 846.810         | 846.138         | R[22] |
| A  | 21 | 743.092         | <b>799.780</b>  | 794.441         | 794.777         | 794.105         | A[21] |
| G  | 22 | 762.099         | 776.101         | 770.762         | 771.098         | 770.426         | G[20] |
| L  | 23 | <b>799.793</b>  | 753.094         | 747.754         | 748.090         | 747.418         | L[19] |
| G  | 24 | 842.480         | 719.366         | 714.026         | 714.362         | 713.690         | G[18] |
| F  | 25 | 891.502         | 676.713         | 671.374         | 671.710         | 671.038         | F[17] |
| F  | 26 | 923.853         | 627.600         | 622.260         | 622.597         | 621.925         | F[16] |
| V  | 27 | <b>956.876</b>  | 595.139         | 590.000         | 590.336         | 589.664         | V[15] |
| G  | 28 | <b>975.863</b>  | 562.317         | 556.977         | 557.313         | 556.641         | G[14] |
| R  | 29 | <b>1027.917</b> | 443.309         | 437.970         | 438.306         | 437.634         | R[13] |
| V  | 30 | <b>1060.940</b> | 409.276         | 403.936         | 404.272         | 403.600         | V[12] |
| H  | 31 | <b>1106.626</b> | 458.253         | 452.913         | 453.249         | 452.577         | H[11] |
| R  | 32 | <b>1158.660</b> | 412.567         | 407.227         | 407.563         | 406.891         | R[10] |
| L  | 33 | <b>1196.355</b> | <b>360.533</b>  | 355.193         | 355.529         | 354.857         | L[9]  |
| L  | 34 | <b>1234.049</b> | 322.876         | 317.536         | 317.872         | 317.200         | L[8]  |
| R  | 35 | 1258.848        | 285.144         | 279.804         | 280.140         | 279.468         | R[7]  |
| K  | 36 | 1328.781        | 233.110         | 227.770         | 228.106         | 227.434         | K[6]  |
| G  | 37 | 1347.788        | 190.412         | 185.072         | 185.408         | 184.736         | G[5]  |
| N  | 38 | 1385.803        | 171.404         | 166.064         | 166.400         | 165.728         | N[4]  |
| V  | 39 | 1440.157        | 133.390         | 128.050         | 128.386         | 127.714         | V[3]  |
| S  | 40 | 1469.166        | 99.136          | 93.796          | 94.132          | 93.460          | S[2]  |
| E  | 41 | 1512.182        | 50.025          | 44.685          | 45.021          | 44.349          | E[1]  |



# sp | Q8BFU2 | H2A3\_MOUSE

[Acetyl]SGRGK<sup>Acetyl</sup><sub>42.01</sub> QGGKARAKAKSRSSRAGLQFPVGRVHRLLRKGNYS

- ▶ fragmentation table for charge state 4+
- ▶ specType=etd
- ▶ score=62.47
- ▶ F104903.dat
- ▶ query=q2828\_p1
- ▶ precursor=756.763030
- ▶ chargePrecursor=6
- ▶ itol=0.8

| AA | c  | m               | p               | #s=1            | #s=2            | #s=3            | #s=4  | AA  |
|----|----|-----------------|-----------------|-----------------|-----------------|-----------------|-------|-----|
| S  | 1  | 37.505          | <b>1134.634</b> | <b>1130.630</b> | 0.705           | <b>1130.370</b> | 0.541 | G49 |
| G  | 2  | 51.780          | 1102.374        | <b>1098.369</b> | 0.795           | 1039.117        | 0.469 | R30 |
| R  | 3  | 90.805          | <b>1088.118</b> | <b>1084.114</b> | <b>1084.366</b> | 1083.862        | 0.430 | G38 |
| G  | 4  | 109.001         | 1049.093        | <b>1045.088</b> | <b>1045.340</b> | <b>1044.836</b> | 0.338 | K37 |
| K  | 5  | 147.587         | 1034.839        | <b>1030.833</b> | <b>1031.085</b> | 1030.581        | 0.267 | Q36 |
| G  | 6  | 179.604         | 992.311         | <b>988.307</b>  | <b>988.559</b>  | 988.055         | 0.205 | G45 |
| G  | 7  | 193.857         | 960.291         | 959.287         | <b>956.544</b>  | 956.040         | 0.154 | K33 |
| G  | 8  | 208.112         | 948.041         | <b>942.037</b>  | <b>942.289</b>  | 941.785         | 0.103 | A32 |
| K  | 9  | 240.136         | 931.788         | 927.781         | 928.033         | 927.529         | 0.052 | R31 |
| A  | 10 | 257.895         | <b>899.762</b>  | <b>895.757</b>  | <b>896.009</b>  | 895.505         | 0.001 | A30 |
| R  | 11 | 296.921         | 882.003         | 877.998         | 878.250         | 877.746         | 0.000 | A28 |
| A  | 12 | 314.680         | <b>842.978</b>  | 838.973         | 839.225         | 838.721         | 0.000 | K29 |
| K  | 13 | 346.704         | 825.215         | 821.214         | 821.466         | 820.962         | 0.000 | A26 |
| A  | 14 | 384.443         | 793.195         | 789.190         | 789.442         | 788.938         | 0.000 | R27 |
| K  | 15 | 396.497         | 775.435         | 771.431         | 771.683         | 771.179         | 0.000 | S26 |
| S  | 16 | 418.245         | 743.412         | 739.407         | 739.659         | 739.155         | 0.000 | R25 |
| R  | 17 | 457.270         | 721.954         | 717.949         | 718.201         | 717.697         | 0.000 | S24 |
| S  | 18 | 479.028         | 692.626         | 688.621         | 688.873         | 688.369         | 0.000 | R22 |
| S  | 19 | 500.786         | 660.970         | 656.966         | 657.218         | 656.714         | 0.000 | A21 |
| R  | 20 | 539.811         | 639.112         | 635.108         | 635.360         | 634.856         | 0.000 | Q20 |
| A  | 21 | 557.571         | 600.087         | 596.082         | 596.334         | 595.830         | 0.000 | Q19 |
| G  | 22 | 571.826         | 582.328         | 578.323         | 578.575         | 578.071         | 0.000 | Q18 |
| L  | 23 | 603.097         | 568.072         | 564.068         | 564.320         | 563.816         | 0.000 | Q17 |
| Q  | 24 | 632.112         | 539.803         | 535.797         | 536.049         | 535.545         | 0.000 | F17 |
| F  | 25 | 668.879         | 507.787         | 503.782         | 504.034         | 503.530         | 0.000 | F16 |
| P  | 26 | <b>693.142</b>  | 471.020         | 467.015         | 467.267         | 466.763         | 0.000 | V15 |
| V  | 27 | 717.909         | 446.756         | 442.752         | 443.004         | 442.500         | 0.000 | Q14 |
| G  | 28 | 752.104         | 421.989         | <b>417.985</b>  | 418.237         | <b>417.733</b>  | 0.000 | R13 |
| R  | 29 | 771.190         | 409.734         | 405.729         | 405.981         | 405.477         | 0.000 | V12 |
| V  | 30 | 795.957         | 388.709         | 384.704         | 384.956         | 384.452         | 0.000 | H11 |
| H  | 31 | 830.221         | 343.942         | 339.937         | 340.189         | 339.685         | 0.000 | R10 |
| R  | 32 | 869.247         | 309.677         | 305.672         | 305.924         | 305.420         | 0.000 | L9  |
| L  | 33 | 897.518         | 270.652         | 266.647         | 266.899         | 266.395         | 0.000 | R15 |
| L  | 34 | 925.989         | 242.361         | 238.356         | 238.608         | 238.104         | 0.000 | R17 |
| R  | 35 | 964.814         | 214.110         | 210.105         | 210.357         | 209.853         | 0.000 | K6  |
| K  | 36 | 996.838         | 175.084         | 171.079         | 171.331         | 170.827         | 0.000 | G5  |
| G  | 37 | <b>1011.093</b> | 143.061         | 139.056         | 139.308         | 138.804         | 0.000 | N4  |
| N  | 38 | <b>1039.604</b> | 128.805         | 124.800         | 125.052         | 124.548         | 0.000 | F3  |
| F  | 39 | <b>1080.370</b> | 100.294         | 96.289          | 96.541          | 96.037          | 0.000 | S21 |
| S  | 40 | 1103.218        | 98.529          | 94.524          | 94.776          | 94.272          | 0.000 | E1  |
| E  | 41 | <b>1134.888</b> | 97.771          | 93.766          | 94.018          | 93.514          | 0.000 |     |

# sp | Q8BFU2 | H2A3\_MOUSE

[Acetyl]SGR<sup>Acetyl</sup>RGK<sub>42.01</sub> QGGKARAKAKSRSSRAGLQFPVGRVHRLLRKGNYS

- ▶ fragmentation table for charge state 5+
- ▶ specType=etd
- ▶ score=62.47
- ▶ F104903.dat
- ▶ query=q2828\_p1
- ▶ precursor=756.763030
- ▶ chargePrecursor=6
- ▶ itol=0.8

| AA | c  | y              | z+1            | z#2            | z              | AA             |   |    |
|----|----|----------------|----------------|----------------|----------------|----------------|---|----|
| S  | 1  | 30.221         | <b>907.909</b> | 904.705        | 0.806          | 904.504        | S | 41 |
| G  | 2  | 41.625         | 392.100        | 875.897        | 0.806          | 876.695        | G | 40 |
| R  | 3  | 72.846         | 870.696        | 867.492        | 867.594        | 867.291        | R | 39 |
| G  | 4  | 84.250         | 839.476        | <b>836.272</b> | <b>836.474</b> | <b>836.071</b> | G | 38 |
| K  | 5  | 118.271        | 828.072        | 824.868        | 825.069        | 824.666        | K | 37 |
| Q  | 6  | 143.883        | 794.050        | 790.847        | 791.048        | 790.645        | Q | 36 |
| G  | 7  | 195.287        | 768.439        | 765.235        | 765.437        | 765.033        | G | 35 |
| G  | 8  | 166.691        | 757.034        | 753.831        | 754.032        | 753.629        | G | 34 |
| K  | 9  | 192.310        | 745.930        | 742.728        | 742.928        | 742.525        | K | 33 |
| A  | 10 | 208.518        | 720.011        | 716.807        | 717.009        | 716.606        | A | 32 |
| R  | 11 | 237.738        | 705.804        | 702.600        | 702.802        | 702.398        | R | 31 |
| A  | 12 | 251.945        | 674.584        | 671.380        | 671.581        | 671.178        | A | 30 |
| K  | 13 | 277.564        | 660.376        | 657.172        | 657.374        | 656.971        | K | 29 |
| A  | 14 | 291.772        | 634.757        | 631.553        | 631.755        | 631.352        | A | 28 |
| K  | 15 | 317.391        | 620.550        | 617.346        | 617.548        | 617.144        | K | 27 |
| S  | 16 | 334.797        | 594.931        | 591.727        | 591.929        | 591.525        | S | 26 |
| R  | 17 | 366.017        | 577.524        | 574.321        | 574.522        | 574.119        | R | 25 |
| S  | 18 | 383.424        | 546.304        | 543.100        | 543.302        | 542.899        | S | 24 |
| S  | 19 | 400.830        | 528.696        | 525.491        | 525.694        | 525.292        | S | 23 |
| R  | 20 | 432.050        | 511.491        | 508.288        | 508.489        | 508.086        | R | 22 |
| A  | 21 | 446.258        | 480.271        | 477.067        | 477.269        | 476.866        | A | 21 |
| G  | 22 | 457.662        | 466.064        | 462.860        | 463.061        | 462.658        | G | 20 |
| L  | 23 | 480.279        | 494.659        | 451.456        | 451.657        | 451.254        | L | 19 |
| Q  | 24 | 505.891        | 432.043        | 428.839        | 429.040        | 428.637        | Q | 18 |
| F  | 25 | 535.304        | 406.431        | 403.227        | 403.429        | 403.026        | F | 17 |
| P  | 26 | 554.715        | 377.017        | 373.813        | 374.015        | 373.612        | P | 16 |
| V  | 27 | 574.520        | 357.807        | 354.603        | 354.804        | 354.401        | V | 15 |
| G  | 28 | 589.933        | 337.793        | 334.589        | 334.791        | 334.388        | G | 14 |
| R  | 29 | 617.153        | 326.380        | 323.176        | 323.378        | 322.975        | R | 13 |
| V  | 30 | 636.967        | 295.168        | 291.965        | 292.166        | 291.763        | V | 12 |
| H  | 31 | 664.379        | 275.355        | 272.151        | 272.353        | 271.949        | H | 11 |
| R  | 32 | 695.599        | 247.943        | 244.739        | 244.941        | 244.538        | R | 10 |
| L  | 33 | 718.216        | 216.723        | 213.519        | 213.721        | 213.317        | L | 9  |
| L  | 34 | 740.832        | 194.109        | 190.902        | 191.104        | 190.701        | L | 8  |
| R  | 35 | <b>772.053</b> | 171.489        | 168.283        | 168.487        | 168.084        | R | 7  |
| K  | 36 | 787.872        | 140.269        | 137.065        | 137.267        | 136.864        | K | 6  |
| G  | 37 | 839.078        | 114.650        | 111.446        | 111.648        | 111.245        | G | 5  |
| N  | 38 | 831.885        | 103.246        | 100.042        | 100.243        | 99.840         | N | 4  |
| V  | 39 | <b>864.497</b> | 80.437         | 77.233         | 77.435         | 77.032         | V | 3  |
| S  | 40 | 881.904        | 47.824         | 44.621         | 44.822         | 44.419         | S | 2  |
| E  | 41 | <b>907.712</b> | 30.418         | 27.214         | 27.416         | 27.013         | E | 1  |

# sp | Q6GSS7 | H2A2A\_MOUSE

[Acetyl]SGRGK<sup>Acetyl</sup><sub>42.01</sub> QGGK<sup>Dimethyl</sup><sub>28.03</sub> ARAKAKSRSSRAGLQFPVGRVHLLRKGNYAE

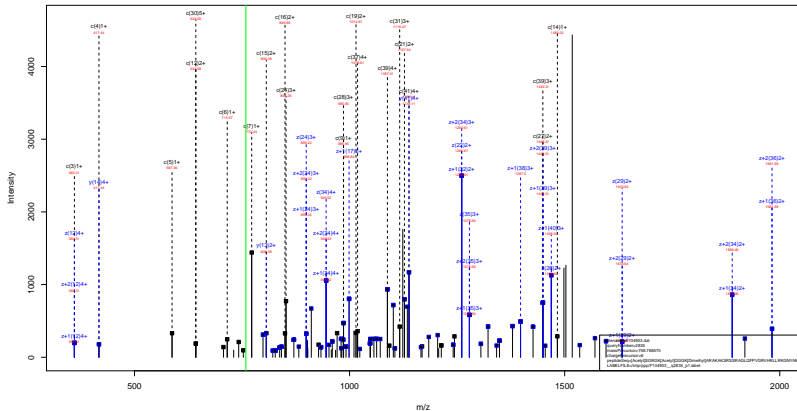

# sp | Q6GSS7 | H2A2A\_MOUSE

[Acetyl]SGR<sup>Acetyl</sup>GRK<sub>42.01</sub> QGGK<sup>Dimethyl</sup><sub>28.03</sub> ARAKAKSRSSRAGLQFPVGRVHRLLRKGN<sup>YAE</sup>

- ▶ fragmentation table for charge state 1+
- ▶ specType=etd
- ▶ score=57.66
- ▶ F104903.dat
- ▶ query=q2835\_p1
- ▶ precursor=758.768570
- ▶ chargePrecursor=6
- ▶ itol=0.8

| AA | c  | y               | z+1             | z+2             | z               | AA             |       |
|----|----|-----------------|-----------------|-----------------|-----------------|----------------|-------|
| S  | 1  | 147.076         | 4547.953        | 4531.533        | 0.000           | 4530.529       | S[41] |
| G  | 2  | 204.068         | 4418.908        | 4402.491        | 0.000           | 4401.483       | G[40] |
| R  | 3  | <b>360.199</b>  | 4301.488        | 4285.409        | 4346.477        | 4344.461       | R[39] |
| G  | 4  | <b>417.220</b>  | 4235.387        | 4189.308        | 4190.376        | 4188.360       | G[38] |
| K  | 5  | <b>587.326</b>  | 4148.365        | 4132.307        | 4133.364        | 4131.339       | K[37] |
| Q  | 6  | <b>715.345</b>  | 3978.260        | 3962.241        | 3963.249        | 3961.231       | Q[36] |
| G  | 7  | <b>772.406</b>  | 3899.200        | 3854.120        | 3838.190        | 3835.175       | G[35] |
| G  | 8  | 829.427         | 3793.180        | 3777.101        | 3778.169        | 3776.153       | G[34] |
| K  | 9  | <b>965.554</b>  | 3736.158        | 3720.140        | 3721.147        | 3719.131       | K[33] |
| A  | 10 | <b>1056.591</b> | 3580.032        | 3564.013        | 3565.021        | 3563.005       | A[32] |
| R  | 11 | <b>1212.692</b> | 3508.995        | 3482.976        | 3483.984        | 3481.968       | R[31] |
| A  | 12 | 1283.729        | 3382.984        | 3338.975        | 3337.983        | 3335.967       | A[30] |
| R  | 13 | 1411.824        | 3281.857        | 3265.838        | 3266.846        | 3264.830       | R[29] |
| A  | 14 | <b>1482.861</b> | 3153.762        | 3137.743        | 3138.751        | 3136.735       | A[28] |
| K  | 15 | 1610.956        | 3062.725        | 3066.706        | 3067.714        | 3065.698       | K[27] |
| S  | 16 | 1507.988        | 2954.630        | 2938.611        | 2939.619        | 2937.603       | S[26] |
| R  | 17 | 1854.089        | 2897.586        | 2851.579        | 2852.587        | 2850.571       | R[25] |
| S  | 18 | 1991.121        | 2741.490        | 2695.478        | 2696.486        | 2694.470       | S[24] |
| S  | 19 | 2028.153        | 2624.464        | 2608.446        | 2609.454        | 2607.438       | S[23] |
| R  | 20 | 2184.254        | 2537.432        | 2521.414        | 2522.422        | 2520.406       | R[22] |
| A  | 21 | 2255.292        | 2381.331        | 2365.313        | 2366.320        | 2364.305       | A[21] |
| G  | 22 | 2312.313        | 2310.294        | 2294.275        | 2295.283        | 2293.267       | G[20] |
| L  | 23 | 2435.307        | 2253.273        | 2237.254        | 2238.262        | 2236.246       | L[19] |
| Q  | 24 | 2553.458        | 2140.189        | 2124.170        | 2125.178        | 2123.162       | Q[18] |
| F  | 25 | 2700.524        | 2012.130        | 1996.111        | 1997.119        | 1995.104       | F[17] |
| P  | 26 | 2797.577        | 1895.062        | 1849.043        | 1850.051        | 1848.035       | P[16] |
| V  | 27 | 2896.645        | 1768.000        | 1751.990        | 1752.998        | 1750.982       | V[15] |
| G  | 28 | 2953.667        | 1668.940        | 1652.922        | 1653.930        | 1651.914       | G[14] |
| R  | 29 | 3109.266        | 1611.910        | <b>1595.900</b> | <b>1596.908</b> | 1594.892       | R[13] |
| V  | 30 | 3208.438        | 1455.810        | 1440.799        | 1441.807        | 1439.791       | V[12] |
| H  | 31 | 3345.895        | 1356.748        | 1340.731        | <b>1341.739</b> | 1339.723       | H[11] |
| R  | 32 | 3501.996        | 1219.691        | 1203.672        | <b>1204.680</b> | 1202.664       | R[10] |
| L  | 33 | 3615.080        | <b>1063.589</b> | <b>1047.571</b> | <b>1048.579</b> | 1046.563       | L[9]  |
| L  | 34 | 3728.164        | 950.505         | 934.486         | 935.495         | <b>933.479</b> | L[8]  |
| R  | 35 | 3884.266        | <b>837.421</b>  | <b>821.403</b>  | 822.410         | 820.394        | R[7]  |
| K  | 36 | 4012.300        | 681.320         | 665.302         | 666.309         | 664.293        | K[6]  |
| G  | 37 | 4069.382        | 553.225         | 537.207         | 538.214         | 536.199        | G[5]  |
| N  | 38 | 4183.425        | 406.204         | 480.185         | 481.193         | 479.177        | N[4]  |
| V  | 39 | 4346.488        | 382.161         | 366.142         | 367.150         | 365.134        | V[3]  |
| A  | 40 | 4417.525        | 219.086         | 203.079         | 204.087         | 202.071        | A[2]  |
| E  | 41 | 4546.568        | 148.000         | 132.982         | 133.990         | 131.974        | E[1]  |

# sp | Q6GSS7 | H2A2A\_MOUSE

[Acetyl]SGR<sup>Acetyl</sup>GRK<sub>42.01</sub> QGGK<sup>Dimethyl</sup> ARAKAKSRSSRAGLQFPVGRVHRLLRKGN<sup>28.03</sup>YAE

- ▶ fragmentation table for charge state 2+
- ▶ specType=etd
- ▶ score=57.66
- ▶ F104903.dat
- ▶ query=q2835\_p1
- ▶ precursor=758.768570
- ▶ chargePrecursor=6
- ▶ itol=0.8

| AA | c  | w               | #±1             | #±2             | z               | AA              |       |
|----|----|-----------------|-----------------|-----------------|-----------------|-----------------|-------|
| S  | 1  | 74.042          | 2274.246        | 2269.210        | 8.804           | 2265.167        | S[41] |
| G  | 2  | 102.553         | 2269.755        | 2261.749        | 0.504           | 2261.245        | G[40] |
| R  | 3  | 180.603         | 2181.248        | 2173.238        | 2173.742        | 2172.734        | R[39] |
| G  | 4  | 209.114         | 2103.197        | 2095.189        | 2095.692        | 2094.684        | G[38] |
| K  | 5  | 294.167         | 2074.699        | 2066.677        | 2067.181        | 2066.173        | K[37] |
| G  | 6  | 358.196         | 1999.634        | <b>1991.624</b> | <b>1992.126</b> | 1991.120        | G[36] |
| G  | 7  | 389.379         | 1925.604        | 1917.595        |                 | <b>1918.099</b> | G[35] |
| G  | 8  | 435.217         | 1897.093        | <b>1889.084</b> | <b>1889.588</b> | 1888.580        | G[34] |
| K  | 9  | 493.261         | 1868.583        | 1860.573        | 1861.077        | 1860.069        | K[33] |
| A  | 10 | 528.799         | 1790.520        | 1782.510        | 1783.014        | 1782.006        | A[32] |
| R  | 11 | 605.850         | 1735.001        | 1746.992        | 1747.496        | 1746.488        | R[31] |
| A  | 12 | <b>642.368</b>  | 1678.943        | 1669.933        | 1669.436        | 1669.430        | A[30] |
| K  | 13 | <b>706.416</b>  | 1643.432        | <b>1633.423</b> | <b>1633.927</b> | <b>1632.919</b> | K[29] |
| A  | 14 | <b>741.934</b>  | 1577.384        | 1569.375        | <b>1569.879</b> | 1568.871        | A[28] |
| K  | 15 | <b>805.982</b>  | 1541.866        | 1533.857        | <b>1534.360</b> | 1533.351        | K[27] |
| S  | 16 | <b>849.498</b>  | 1477.818        | 1469.809        | 1470.313        | <b>1469.305</b> | S[26] |
| R  | 17 | <b>927.548</b>  | 1434.302        | <b>1428.293</b> | <b>1428.797</b> | <b>1428.789</b> | R[25] |
| S  | 18 | <b>971.064</b>  | 1366.262        | <b>1348.243</b> | <b>1348.746</b> | <b>1347.739</b> | S[24] |
| S  | 19 | <b>1014.580</b> | 1312.738        | <b>1304.726</b> | <b>1305.230</b> | 1304.223        | S[23] |
| R  | 20 | <b>1092.631</b> | 1269.220        | <b>1261.210</b> | 1261.714        | <b>1260.707</b> | R[22] |
| A  | 21 | <b>1128.149</b> | 1191.169        | 1183.160        | <b>1183.664</b> | 1182.656        | A[21] |
| G  | 22 | 1156.660        | 1135.071        | 1147.061        | 1148.065        | 1147.137        | G[20] |
| L  | 23 | <b>1213.202</b> | <b>1127.140</b> | 1119.131        | 1119.635        | 1118.627        | L[19] |
| G  | 24 | 1277.212        | <b>1070.598</b> | <b>1062.589</b> | <b>1063.093</b> | 1062.085        | G[18] |
| F  | 25 | 1350.716        | 1006.599        | <b>998.559</b>  | <b>999.063</b>  | <b>998.055</b>  | F[17] |
| F  | 26 | 1399.292        | <b>933.034</b>  | 925.025         | 925.529         | 924.521         | F[16] |
| V  | 27 | <b>1448.826</b> | 884.506         | 876.499         | 877.003         | 876.005         | V[15] |
| G  | 28 | 1477.317        | 838.974         | <b>826.965</b>  | <b>827.468</b>  | <b>826.461</b>  | G[14] |
| R  | 29 | 1555.388        | <b>806.463</b>  | <b>798.454</b>  | <b>798.958</b>  | 797.950         | R[13] |
| V  | 30 | 1604.922        | 728.413         | 720.403         | 720.907         | 719.899         | V[12] |
| H  | 31 | 1673.451        | 678.878         | 670.869         | 671.373         | 670.365         | H[11] |
| R  | 32 | 1751.502        | 610.349         | 602.340         | 602.843         | 601.835         | R[10] |
| L  | 33 | 1838.044        | 532.299         | 524.289         | 524.793         | 523.785         | L[9]  |
| L  | 34 | 1884.588        | 478.766         | 469.747         | 469.251         | 468.243         | L[8]  |
| R  | 35 | 1962.636        | 419.214         | 411.205         | 411.709         | 410.701         | R[7]  |
| K  | 36 | 2006.684        | 341.164         | 333.154         | 333.658         | 332.650         | K[6]  |
| G  | 37 | 2058.195        | 277.116         | 269.107         | 269.611         | 268.603         | G[5]  |
| M  | 38 | 2092.216        | 248.606         | 240.596         | 241.100         | 240.092         | M[4]  |
| V  | 39 | 2178.748        | 181.564         | 183.575         | 184.079         | 183.071         | V[3]  |
| A  | 40 | 2209.266        | 110.026         | 109.043         | 109.547         | 108.539         | A[2]  |
| E  | 41 | 2273.788        | 74.534          | 66.524          | 67.028          | 66.021          | E[1]  |

# sp | Q6GSS7 | H2A2A\_MOUSE

[Acetyl]SGR<sup>Acetyl</sup>GRK<sup>42.01</sup> QGGK<sup>Dimethyl</sup> D<sup>28.03</sup> ARAKAKSRSSRAGLQFPVGRVHRLLRKGN<sup>YAE</sup>

- ▶ fragmentation table for charge state 3+
- ▶ specType=etd
- ▶ score=57.66
- ▶ F104903.dat
- ▶ query=q2835\_p1
- ▶ precursor=758.768570
- ▶ chargePrecursor=6
- ▶ itol=0.8

| AA | c  | w               | #±1             | #±2             | #±3             | AA              |       |
|----|----|-----------------|-----------------|-----------------|-----------------|-----------------|-------|
| S  | 1  | 49.607          | 1518.322        | 1511.193        | 0.672           | 1519.847        | S[41] |
| G  | 2  | 66.704          | 1473.526        | <b>1468.168</b> | 0.672           | 1467.832        | G[49] |
| R  | 3  | 130.718         | <b>1454.501</b> | <b>1449.161</b> | <b>1449.497</b> | <b>1448.825</b> | R[30] |
| G  | 4  | 139.745         | 1402.467        | <b>1397.128</b> | <b>1397.463</b> | <b>1396.792</b> | G[38] |
| K  | 5  | 196.447         | 1383.460        | <b>1378.120</b> | <b>1378.456</b> | 1377.781        | K[37] |
| G  | 6  | 239.123         | 1326.759        | <b>1321.419</b> | <b>1321.754</b> | 1321.083        | G[36] |
| G  | 7  | 288.140         | 1284.072        | <b>1278.732</b> | <b>1279.068</b> | <b>1278.398</b> | G[55] |
| G  | 8  | 297.147         | 1265.065        | 1259.725        | <b>1260.061</b> | 1259.399        | G[34] |
| K  | 9  | 339.189         | 1246.058        | <b>1240.718</b> | <b>1241.054</b> | <b>1240.382</b> | K[33] |
| A  | 10 | 352.668         | 1194.016        | 1188.076        | 1189.012        | 1188.340        | A[32] |
| R  | 11 | 404.902         | 1170.336        | 1164.997        | <b>1165.333</b> | 1164.661        | R[31] |
| A  | 12 | 408.903         | 1138.303        | 1132.963        | 1133.299        | 1132.623        | A[30] |
| K  | 13 | 471.280         | 1094.624        | 1089.284        | 1089.620        | 1088.944        | K[29] |
| A  | 14 | 484.959         | 1051.925        | 1046.585        | <b>1046.922</b> | 1046.250        | A[28] |
| K  | 15 | 537.657         | 1028.246        | 1022.907        | <b>1023.243</b> | 1022.571        | K[27] |
| S  | 16 | 566.668         | <b>985.548</b>  | <b>980.208</b>  | <b>980.544</b>  | <b>979.873</b>  | S[26] |
| R  | 17 | 618.204         | 956.517         | 951.177         | <b>951.514</b>  | 950.842         | R[25] |
| S  | 18 | 647.712         | 904.504         | <b>899.164</b>  | <b>899.500</b>  | <b>898.829</b>  | S[24] |
| S  | 19 | 676.723         | 875.493         | <b>870.153</b>  | <b>870.489</b>  | <b>869.817</b>  | S[23] |
| R  | 20 | 738.756         | 846.482         | <b>841.143</b>  | <b>841.479</b>  | 840.807         | R[22] |
| A  | 21 | <b>752.435</b>  | 794.449         | 789.109         | 789.445         | 788.773         | A[21] |
| G  | 22 | 771.443         | 770.770         | 765.430         | 765.766         | 765.094         | G[20] |
| L  | 23 | 809.138         | 754.762         | 749.422         | 749.758         | 749.086         | L[19] |
| G  | 24 | <b>851.823</b>  | 714.085         | 708.745         | 709.084         | 708.412         | G[18] |
| F  | 25 | 900.540         | 671.382         | 666.042         | 666.378         | 665.706         | F[17] |
| F  | 26 | <b>933.197</b>  | 622.359         | 617.019         | 617.355         | 616.683         | F[16] |
| V  | 27 | 966.220         | 590.006         | 584.666         | 585.004         | 584.332         | V[15] |
| G  | 28 | <b>985.227</b>  | 556.985         | 551.645         | 551.981         | 551.309         | G[14] |
| R  | 29 | 1017.674        | 519.076         | 513.736         | 514.074         | 513.402         | R[13] |
| V  | 30 | 1070.204        | 485.944         | 480.604         | 480.941         | 480.269         | V[12] |
| H  | 31 | <b>1115.970</b> | 452.921         | 447.581         | 447.918         | 447.246         | H[11] |
| R  | 32 | <b>1168.004</b> | 407.235         | 401.895         | 402.231         | 401.560         | R[10] |
| L  | 33 | 1205.058        | 355.201         | 349.862         | 350.198         | 349.526         | L[9]  |
| L  | 34 | <b>1243.293</b> | 312.509         | 307.169         | 307.505         | 306.833         | L[8]  |
| R  | 35 | 1285.654        | 279.812         | 274.472         | 274.808         | 274.136         | R[7]  |
| K  | 36 | 1338.125        | 227.778         | 222.438         | 222.775         | 222.103         | K[6]  |
| G  | 37 | 1357.132        | 185.980         | 179.740         | 180.076         | 179.404         | G[5]  |
| N  | 38 | 1395.146        | 166.073         | 160.733         | 161.069         | 160.397         | N[4]  |
| V  | 39 | <b>1449.501</b> | 128.098         | 122.758         | 123.095         | 122.423         | V[3]  |
| A  | 40 | 1491.516        | 83.348          | 78.008          | 78.344          | 77.672          | A[2]  |
| E  | 41 | 1518.194        | 50.025          | 44.685          | 45.021          | 44.349          | E[1]  |

# sp | Q6GSS7 | H2A2A\_MOUSE

[Acetyl]SGR<sup>Acetyl</sup>GRK<sup>42.01</sup> QGGK<sup>Dimethyl</sup> D<sup>28.03</sup> ARAKAKSRSSRAGLQFPVGRVHRLLRKGN<sup>YAE</sup>

- ▶ fragmentation table for charge state 4+
- ▶ specType=etd
- ▶ score=57.66
- ▶ F104903.dat
- ▶ query=q2835\_p1
- ▶ precursor=758.768570
- ▶ chargePrecursor=6
- ▶ itol=0.8

| AA   | c               | y               | #+1             | #+2             | z               | AA                   |
|------|-----------------|-----------------|-----------------|-----------------|-----------------|----------------------|
| S 1  | 37.505          | <b>1137.643</b> | <b>1133.639</b> | 0.705           | 0.705           | 5 41                 |
| G 2  | 51.780          | <b>1105.383</b> | <b>1101.378</b> | 0.705           | 0.705           | <b>1101.126</b> G 40 |
| R 3  | 90.805          | 1091.127        | <b>1087.123</b> | <b>1087.375</b> | 1.088           | 8 30                 |
| G 4  | 109.001         | 1052.103        | <b>1048.097</b> | <b>1048.349</b> | <b>1047.846</b> | G 38                 |
| K 5  | 147.587         | 1037.847        | 1033.842        | 1034.304        | 1033.590        | K 37                 |
| G 6  | 179.602         | 995.320         | <b>991.316</b>  | <b>991.568</b>  | <b>991.064</b>  | Q 36                 |
| G 7  | 193.857         | 962.306         | <b>959.301</b>  | <b>959.553</b>  | <b>959.049</b>  | G 35                 |
| G 8  | 208.112         | 949.050         | <b>945.046</b>  | <b>945.298</b>  | <b>944.794</b>  | K 34                 |
| K 9  | 247.144         | 934.795         | 930.790         | 931.042         | 930.538         | K 33                 |
| A 10 | 284.903         | 895.763         | 891.759         | 892.011         | 891.507         | A 32                 |
| R 11 | 303.620         | 878.004         | 873.999         | 874.251         | 873.748         | R 31                 |
| A 12 | 301.688         | 838.919         | 834.914         | 835.236         | 834.722         | A 30                 |
| K 13 | 353.711         | <b>821.220</b>  | 817.215         | 817.467         | 816.963         | K 29                 |
| A 14 | 371.471         | 799.190         | 795.185         | 795.443         | 794.939         | A 28                 |
| K 15 | 403.494         | 771.431         | 767.426         | 767.684         | 767.180         | K 27                 |
| S 16 | 425.252         | 739.413         | 735.408         | 735.660         | 735.156         | S 26                 |
| R 17 | 464.278         | 717.695         | 713.690         | 713.942         | 713.438         | R 25                 |
| S 18 | 488.916         | 678.930         | 674.925         | 675.177         | 674.673         | S 24                 |
| S 19 | 507.794         | 656.672         | 652.667         | 652.919         | 652.415         | S 23                 |
| R 20 | 546.819         | 635.114         | 631.109         | 631.361         | 630.857         | R 22                 |
| A 21 | 584.578         | 596.089         | 592.084         | 592.336         | 591.832         | A 21                 |
| G 22 | 578.834         | 578.329         | 574.324         | 574.576         | 574.072         | G 20                 |
| L 23 | 607.305         | 648.074         | 644.069         | 644.321         | 643.817         | L 19                 |
| Q 24 | 630.119         | 635.803         | 631.798         | 632.050         | 631.546         | Q 18                 |
| F 25 | 675.888         | 593.788         | 499.783         | 500.035         | 499.531         | F 17                 |
| F 26 | 700.150         | 667.021         | 463.018         | 463.269         | 462.764         | F 16                 |
| V 27 | 724.917         | 642.750         | 438.753         | 439.005         | 438.501         | V 15                 |
| G 28 | 736.172         | <b>417.991</b>  | 413.986         | 414.238         | 413.734         | G 14                 |
| R 29 | 748.108         | 644.786         | 369.711         | 369.963         | 369.459         | R 13                 |
| V 30 | 802.965         | 364.710         | <b>360.705</b>  | <b>360.957</b>  | <b>360.453</b>  | V 12                 |
| H 31 | <b>837.229</b>  | 338.643         | 335.938         | 336.190         | 335.686         | H 11                 |
| R 32 | 876.255         | 305.678         | 301.673         | 301.925         | 301.421         | R 10                 |
| L 33 | 884.526         | 266.657         | 262.648         | 262.900         | 262.396         | L 9                  |
| L 34 | <b>932.797</b>  | 238.362         | 234.357         | 234.609         | 234.105         | L 8                  |
| R 35 | 935.222         | 210.111         | 206.106         | 206.358         | 205.854         | R 7                  |
| K 36 | 1003.846        | 171.088         | 167.083         | 167.335         | 166.829         | K 6                  |
| G 37 | <b>1018.101</b> | 139.062         | 135.057         | 135.309         | 134.805         | G 5                  |
| N 38 | 1096.612        | 124.806         | 120.802         | 121.054         | 120.550         | N 4                  |
| V 39 | <b>1087.376</b> | 96.296          | 92.291          | 92.543          | 92.039          | V 3                  |
| A 40 | <b>1106.137</b> | 55.530          | 51.525          | 51.777          | 51.273          | A 2                  |
| E 41 | <b>1137.397</b> | 37.771          | 33.766          | 34.018          | 33.514          | E 1                  |

# sp | Q6GSS7 | H2A2A\_MOUSE

[Acetyl]SGR<sup>Acetyl</sup>GRK<sub>42.01</sub> QGGK<sup>Dimethyl</sup><sub>28.03</sub> ARAKAKSRSSRAGLQFPVGRVHRLLRKGN<sup>YAE</sup>

- ▶ fragmentation table for charge state 5+
- ▶ specType=etd
- ▶ score=57.66
- ▶ F104903.dat
- ▶ query=q2835\_p1
- ▶ precursor=758.768570
- ▶ chargePrecursor=6
- ▶ itol=0.8

| AA    | c              | y              | z+1            | z#2            | z              | AA    |
|-------|----------------|----------------|----------------|----------------|----------------|-------|
| S[1]  | 30.221         | <b>910.316</b> | 907.112        | 0.806          | 906.911        | S[41] |
| G[2]  | 41.625         | 394.505        | <b>881.304</b> | 0.806          | 881.102        | G[40] |
| R[3]  | 72.846         | 873.103        | <b>869.900</b> | <b>870.101</b> | 869.699        | R[39] |
| G[4]  | 84.250         | <b>841.883</b> | 838.679        | 838.881        | 838.478        | G[38] |
| K[5]  | 118.271        | 830.479        | <b>827.275</b> | <b>827.477</b> | <b>827.074</b> | K[37] |
| Q[6]  | 143.883        | 796.458        | 793.254        | 793.456        | 793.052        | Q[36] |
| G[7]  | 195.287        | 770.846        | 767.642        | 767.844        | 767.441        | G[35] |
| G[8]  | 166.691        | 759.442        | 756.238        | 756.440        | 756.036        | G[34] |
| K[9]  | 197.917        | 748.037        | 744.834        | 745.035        | 744.632        | K[33] |
| A[10] | 212.124        | 716.812        | 713.608        | 713.810        | 713.407        | A[32] |
| R[11] | 243.344        | 702.605        | 699.401        | 699.603        | 699.199        | R[31] |
| A[12] | 257.552        | 671.385        | 668.181        | 668.382        | 667.979        | A[30] |
| K[13] | 283.171        | 657.177        | 653.973        | 654.175        | 653.772        | K[29] |
| A[14] | 297.378        | 631.958        | 628.754        | 628.956        | 628.553        | A[28] |
| K[15] | 322.997        | 617.351        | 614.147        | 614.349        | 613.945        | K[27] |
| S[16] | 340.403        | 591.732        | 588.528        | 588.730        | 588.326        | S[26] |
| R[17] | 371.624        | 574.325        | 571.122        | 571.323        | 570.920        | R[25] |
| S[18] | 389.830        | 543.105        | 539.901        | 540.103        | 539.700        | S[24] |
| S[19] | 408.436        | 525.699        | 522.495        | 522.697        | 522.293        | S[23] |
| R[20] | 437.657        | 508.292        | 505.089        | 505.290        | 504.887        | R[22] |
| A[21] | 451.864        | 477.072        | 473.868        | 474.070        | 473.667        | A[21] |
| G[22] | 463.268        | 462.865        | 459.661        | 459.862        | 459.459        | G[20] |
| L[23] | 485.885        | 451.460        | 448.257        | 448.458        | 448.055        | L[19] |
| Q[24] | 511.497        | 428.844        | 425.640        | 425.841        | 425.438        | Q[18] |
| F[25] | 540.911        | 403.232        | 400.028        | 400.230        | 399.827        | F[17] |
| P[26] | 560.321        | 373.816        | 370.614        | 370.816        | 370.413        | P[16] |
| V[27] | 580.135        | 354.408        | 351.203        | 351.405        | 351.002        | V[15] |
| G[28] | 593.539        | 334.994        | 331.790        | 331.992        | 331.589        | G[14] |
| R[29] | 622.759        | 323.190        | 319.986        | 320.187        | 319.784        | R[13] |
| V[30] | <b>642.573</b> | 291.969        | 288.766        | 288.967        | 288.564        | V[12] |
| H[31] | 669.985        | 272.156        | 268.952        | 269.154        | 268.750        | H[11] |
| R[32] | 701.205        | 244.744        | 241.540        | 241.742        | 241.339        | R[10] |
| L[33] | 723.822        | 213.524        | 210.320        | 210.522        | 210.118        | L[9]  |
| L[34] | 746.439        | 190.907        | 187.703        | 187.905        | 187.502        | L[8]  |
| R[35] | 777.659        | 168.290        | 165.086        | 165.288        | 164.885        | R[7]  |
| R[36] | 803.276        | 137.070        | 133.866        | 134.068        | 133.665        | R[6]  |
| G[37] | 814.682        | 111.851        | 108.247        | 108.449        | 108.046        | G[5]  |
| N[38] | <b>837.491</b> | 100.047        | 96.843         | 97.044         | 96.641         | N[4]  |
| V[39] | <b>870.103</b> | 77.238         | 74.034         | 74.236         | 73.833         | V[3]  |
| A[40] | 894.311        | 44.625         | 41.422         | 41.623         | 41.220         | A[2]  |
| E[41] | 910.119        | 30.418         | 27.214         | 27.416         | 27.013         | E[1]  |





# sp | Q8CGP5 | H2A1F\_MOUSE

[Acetyl]SGR<sup>Acetyl</sup>GRK<sup>42.01</sup> QGGKARAKAKTRSSRAGLQFPVGRVHRLLRKGNYS

- ▶ fragmentation table for charge state 1+
- ▶ specType=etd
- ▶ score=46.71
- ▶ F104903.dat
- ▶ query=q2836\_p1
- ▶ precursor=650.799710
- ▶ chargePrecursor=7
- ▶ itol=0.8

| AA | c  | y               | z+1      | z+2             | z              | AA              |       |
|----|----|-----------------|----------|-----------------|----------------|-----------------|-------|
| S  | 1  | 147.076         | 4549.531 | 4531.512        | 0.000          | 4532.905        | S[41] |
| G  | 2  | 304.098         | 4420.489 | 4404.470        | 0.000          | 4403.463        | G[40] |
| R  | 3  | <b>360.199</b>  | 4303.607 | 4347.440        | 4380.456       | 4346.441        | R[39] |
| G  | 4  | <b>417.220</b>  | 4207.366 | 4161.347        | 4192.355       | 4190.339        | G[38] |
| K  | 5  | <b>587.326</b>  | 4150.345 | 4134.320        | 4135.334       | 4133.318        | K[37] |
| G  | 6  | <b>715.385</b>  | 3989.239 | 3964.220        | 3985.228       | 3963.213        | G[36] |
| G  | 7  | <b>772.406</b>  | 3892.180 | 3836.162        | 3837.176       | 3835.154        | G[35] |
| G  | 8  | 829.427         | 3795.159 | 3779.140        | 3780.148       | 3778.132        | G[34] |
| K  | 9  | <b>957.522</b>  | 3738.138 | 3722.119        | 3723.127       | 3721.111        | K[33] |
| A  | 10 | 1028.560        | 3610.043 | 3594.024        | 3595.032       | 3593.016        | A[32] |
| R  | 11 | <b>1184.661</b> | 3536.005 | 3522.987        | 3523.995       | 3521.979        | R[31] |
| A  | 12 | <b>1255.690</b> | 3392.904 | 3366.886        | 3367.893       | 3366.877        | A[30] |
| K  | 13 | <b>1383.793</b> | 3311.867 | 3295.848        | 3296.856       | 3294.841        | K[29] |
| A  | 14 | <b>1454.830</b> | 3183.772 | 3167.754        | 3168.761       | 3166.746        | A[28] |
| K  | 15 | 1562.925        | 3112.735 | 3096.716        | 3097.724       | 3095.709        | K[27] |
| T  | 16 | <b>1683.973</b> | 2984.640 | 2968.621        | 2969.629       | 2967.614        | T[26] |
| R  | 17 | 1840.074        | 2883.592 | 2867.574        | 2868.582       | 2866.566        | R[25] |
| S  | 18 | 1927.306        | 2727.491 | 2711.473        | 2712.480       | 2710.465        | S[24] |
| S  | 19 | 2014.138        | 2640.455 | 2624.441        | 2625.448       | 2623.433        | S[23] |
| R  | 20 | 2170.239        | 2553.427 | 2537.409        | 2538.416       | 2536.401        | R[22] |
| A  | 21 | 2241.476        | 2497.326 | 2481.307        | 2482.315       | 2480.300        | A[21] |
| G  | 22 | 2298.297        | 2326.289 | 2310.270        | 2311.278       | 2309.263        | G[20] |
| L  | 23 | 2411.361        | 2269.268 | 2253.249        | 2254.257       | 2252.241        | L[19] |
| G  | 24 | 2519.640        | 2156.184 | 2140.165        | 2141.173       | 2139.157        | G[18] |
| F  | 25 | 2686.508        | 2028.125 | 2012.106        | 2013.114       | 2011.099        | F[17] |
| F  | 26 | 2783.551        | 1881.057 | 1865.038        | 1866.046       | 1864.031        | F[16] |
| V  | 27 | 2862.630        | 1784.004 | 1767.985        | 1768.993       | 1766.977        | V[15] |
| G  | 28 | 2919.651        | 1684.935 | 1668.917        | 1669.924       | 1667.909        | G[14] |
| R  | 29 | 3095.752        | 1627.914 | 1611.895        | 1612.903       | 1610.887        | R[13] |
| V  | 30 | 3194.221        | 1478.833 | <b>1455.794</b> | 1456.802       | <b>1454.786</b> | V[12] |
| H  | 31 | 3331.880        | 1372.744 | <b>1356.726</b> | 1357.734       | 1355.718        | H[11] |
| R  | 32 | 3487.981        | 1235.685 | <b>1219.667</b> | 1220.675       | 1218.659        | R[10] |
| L  | 33 | 3601.065        | 1079.584 | <b>1063.566</b> | 1064.573       | 1062.558        | L[9]  |
| L  | 34 | 3714.149        | 956.500  | 950.482         | <b>951.489</b> | 949.474         | L[8]  |
| R  | 35 | 3870.250        | 853.416  | 837.398         | 838.405        | <b>836.390</b>  | R[7]  |
| K  | 36 | 3998.345        | 697.315  | 681.296         | 682.304        | 680.289         | K[6]  |
| G  | 37 | 4055.366        | 569.220  | 553.201         | 554.209        | 552.194         | G[5]  |
| N  | 38 | 4199.409        | 512.109  | 496.100         | 497.108        | 495.172         | N[4]  |
| V  | 39 | 4332.473        | 396.156  | 380.137         | 381.145        | 381.129         | V[3]  |
| S  | 40 | 4419.505        | 235.092  | 219.074         | 220.082        | 218.066         | S[2]  |
| E  | 41 | 4548.547        | 148.060  | 132.042         | 133.050        | 131.034         | E[1]  |

# sp | Q8CGP5 | H2A1F\_MOUSE

[Acetyl]SGR<sup>Acetyl</sup>RGK<sub>42.01</sub> QGGKARAKAKTRSSRAGLQFPVGRVHRLLRKGNYS

- ▶ fragmentation table for charge state 2+
- ▶ specType=etd
- ▶ score=46.71
- ▶ F104903.dat
- ▶ query=q2836\_p1
- ▶ precursor=650.799710
- ▶ chargePrecursor=7
- ▶ itol=0.8

| AA | c  | y               | #s1             | #s2             | z               | AA              |       |
|----|----|-----------------|-----------------|-----------------|-----------------|-----------------|-------|
| S  | 1  | 74.062          | 2278.206        | 2287.280        | 8.804           | 2286.187        | S[41] |
| G  | 2  | 102.553         | 2210.748        | 2203.730        | 0.504           | 2202.232        | G[40] |
| R  | 3  | 180.603         | 2182.237        | 2174.238        | 2174.732        | 2173.724        | R[39] |
| G  | 4  | 209.114         | 2104.187        | 2096.177        | 2096.681        | 2095.673        | G[38] |
| K  | 5  | 294.187         | 2075.676        | 2067.667        | 2068.170        | 2067.163        | K[37] |
| G  | 6  | 358.196         | 1990.622        | 1982.614        | 1983.118        | 1982.110        | G[36] |
| G  | 7  | 388.197         | 1926.594        | 1918.584        | 1919.088        | 1918.080        | G[35] |
| G  | 8  | 435.217         | 1868.083        | 1860.074        | 1860.578        | 1859.570        | G[34] |
| K  | 9  | <b>479.265</b>  | 1869.572        | 1861.563        | 1862.067        | 1861.059        | K[33] |
| A  | 10 | 514.283         | 1805.525        | 1797.516        | 1798.019        | 1797.012        | A[32] |
| R  | 11 | <b>592.834</b>  | 1770.008        | 1762.000        | 1762.503        | 1761.495        | R[31] |
| A  | 12 | <b>628.353</b>  | 1692.995        | <b>1684.946</b> | <b>1684.450</b> | <b>1683.443</b> | A[30] |
| R  | 13 | <b>662.400</b>  | 1656.437        | 1648.428        | 1648.932        | 1647.924        | R[29] |
| A  | 14 | <b>727.919</b>  | 1592.900        | 1584.890        | 1584.884        | 1583.876        | A[28] |
| K  | 15 | <b>791.966</b>  | 1556.871        | 1548.862        | 1549.366        | 1548.358        | K[27] |
| T  | 16 | <b>842.490</b>  | 1492.824        | <b>1484.814</b> | <b>1485.318</b> | <b>1484.310</b> | T[26] |
| R  | 17 | 926.540         | <b>1442.300</b> | 1434.291        | <b>1434.794</b> | 1433.786        | R[25] |
| S  | 18 | 984.076         | 1384.249        | <b>1356.240</b> | <b>1356.744</b> | 1355.736        | S[24] |
| S  | 19 | <b>1007.572</b> | 1320.733        | 1312.724        | 1313.228        | 1312.220        | S[23] |
| R  | 20 | 1085.623        | 1277.217        | 1269.208        | <b>1269.712</b> | 1268.704        | R[22] |
| A  | 21 | <b>1121.142</b> | <b>1199.167</b> | <b>1191.157</b> | <b>1191.661</b> | 1190.653        | A[21] |
| G  | 22 | 1149.652        | 1103.640        | <b>1155.630</b> | <b>1156.134</b> | 1155.126        | G[20] |
| L  | 23 | 1206.094        | 1044.581        | <b>1135.137</b> | <b>1135.641</b> | 1134.633        | L[19] |
| Q  | 24 | <b>1270.224</b> | <b>1070.566</b> | <b>1070.566</b> | <b>1071.069</b> | 1070.062        | Q[18] |
| F  | 25 | 1343.758        | 1014.506        | <b>1006.557</b> | <b>1007.061</b> | <b>1006.053</b> | F[17] |
| F  | 26 | 1392.284        | <b>941.032</b>  | <b>933.023</b>  | 933.526         | <b>932.519</b>  | F[16] |
| V  | 27 | <b>1441.818</b> | 892.506         | <b>884.496</b>  | <b>885.000</b>  | 883.992         | V[15] |
| G  | 28 | <b>1470.329</b> | <b>842.971</b>  | <b>834.962</b>  | <b>835.466</b>  | 834.458         | G[14] |
| R  | 29 | 1543.859        | 814.481         | <b>806.451</b>  | <b>806.955</b>  | <b>805.947</b>  | R[13] |
| V  | 30 | 1597.914        | <b>736.410</b>  | <b>728.401</b>  | <b>728.905</b>  | <b>727.897</b>  | V[12] |
| H  | 31 | 1666.443        | 698.876         | <b>678.866</b>  | <b>679.370</b>  | <b>678.363</b>  | H[11] |
| R  | 32 | 1744.494        | 618.346         | 610.337         | 610.841         | 609.833         | R[10] |
| L  | 33 | 1803.036        | 540.206         | 532.196         | 532.700         | 531.692         | L[9]  |
| L  | 34 | 1887.578        | 469.754         | 461.744         | 462.248         | 461.240         | L[8]  |
| R  | 35 | 1935.620        | 427.212         | 419.202         | 419.706         | 418.698         | R[7]  |
| K  | 36 | 1999.676        | 349.161         | 341.152         | 341.656         | 340.648         | K[6]  |
| G  | 37 | 2028.187        | 285.114         | 277.104         | 277.608         | 276.600         | G[5]  |
| N  | 38 | 2085.208        | 256.603         | 248.594         | 249.098         | 248.090         | N[4]  |
| V  | 39 | 2166.740        | 189.582         | 181.572         | 182.076         | 181.068         | V[3]  |
| S  | 40 | 2210.266        | 118.056         | 110.046         | 110.550         | 109.542         | S[2]  |
| E  | 41 | 2274.777        | 74.534          | 66.524          | 67.028          | 66.021          | E[1]  |

# sp | Q8CGP5 | H2A1F\_MOUSE

[Acetyl]SGR<sup>Acetyl</sup>RGK<sub>42.01</sub> QGGKARAKAKTRSSRAGLQFPVGRVHRLLRKGNYS

- ▶ fragmentation table for charge state 3+
- ▶ specType=etd
- ▶ score=46.71
- ▶ F104903.dat
- ▶ query=q2836.p1
- ▶ precursor=650.799710
- ▶ chargePrecursor=7
- ▶ itol=0.8

| AA | c  | y               | #s1             | #s2             | z               | AA              |       |
|----|----|-----------------|-----------------|-----------------|-----------------|-----------------|-------|
| S  | 1  | 49.697          | <b>1517.182</b> | 1311.852        | 8.872           | 1311.567        | S(1)  |
| G  | 2  | 86.704          | 1474.155        | 1468.828        | 0.672           | 1468.462        | G(2)  |
| R  | 3  | 1307.788        | <b>1455.161</b> | 1449.821        | 1450.157        | 1449.485        | R(3)  |
| G  | 4  | 139.745         | 1460.127        | 1397.787        | <b>1398.123</b> | 1397.451        | G(3)  |
| K  | 5  | 196.447         | <b>1384.120</b> | <b>1378.780</b> | <b>1379.116</b> | 1378.441        | K(37) |
| G  | 6  | 239.133         | 1327.418        | 1322.078        | <b>1322.414</b> | 1321.742        | G(36) |
| G  | 7  | 288.140         | 1384.733        | 1279.332        | <b>1279.728</b> | 1279.056        | G(35) |
| G  | 8  | 277.147         | 1265.725        | 1260.385        | 1260.721        | 1260.049        | G(34) |
| K  | 9  | 319.646         | <b>1246.717</b> | <b>1241.378</b> | <b>1241.714</b> | <b>1241.042</b> | K(33) |
| A  | 10 | 383.525         | 1204.019        | <b>1198.679</b> | <b>1199.015</b> | <b>1198.344</b> | A(32) |
| R  | 11 | 395.558         | 1180.310        | 1175.000        | <b>1175.336</b> | 1174.664        | R(31) |
| A  | 12 | 419.237         | <b>1128.306</b> | 1123.967        | <b>1123.303</b> | 1122.631        | A(30) |
| K  | 13 | 461.936         | 1104.627        | <b>1099.288</b> | <b>1099.624</b> | <b>1098.952</b> | K(29) |
| A  | 14 | 485.615         | 1081.929        | <b>1056.589</b> | <b>1056.925</b> | 1056.253        | A(28) |
| K  | 15 | 528.313         | 1038.250        | 1032.910        | 1033.246        | 1032.574        | K(27) |
| T  | 16 | 561.996         | 995.552         | 990.212         | <b>990.548</b>  | 989.876         | T(26) |
| R  | 17 | <b>614.029</b>  | <b>961.869</b>  | <b>956.529</b>  | <b>956.865</b>  | <b>956.193</b>  | R(25) |
| S  | 18 | 643.640         | 959.835         | 954.495         | 954.831         | 954.160         | S(24) |
| S  | 19 | <b>672.951</b>  | 880.825         | 875.485         | 875.821         | 875.149         | S(23) |
| R  | 20 | 734.084         | 851.814         | <b>846.474</b>  | <b>846.810</b>  | 846.138         | R(22) |
| A  | 21 | <b>747.763</b>  | <b>799.780</b>  | <b>794.441</b>  | <b>794.777</b>  | <b>794.105</b>  | A(21) |
| G  | 22 | <b>766.771</b>  | 778.101         | 772.762         | 773.098         | 772.426         | G(20) |
| L  | 23 | <b>804.465</b>  | <b>737.094</b>  | 731.754         | <b>732.090</b>  | 731.419         | L(19) |
| Q  | 24 | <b>847.152</b>  | 719.359         | 714.020         | <b>714.356</b>  | 713.684         | Q(18) |
| F  | 25 | 896.174         | 676.713         | <b>671.374</b>  | <b>671.710</b>  | 671.038         | F(17) |
| F  | 26 | 928.525         | 627.600         | 622.261         | 622.597         | 621.925         | F(16) |
| V  | 27 | <b>961.548</b>  | 595.139         | 590.000         | 590.336         | 589.664         | V(15) |
| G  | 28 | <b>980.555</b>  | 562.317         | 556.977         | 557.313         | 556.641         | G(14) |
| R  | 29 | 1023.844        | 543.309         | 537.970         | 538.306         | 537.634         | R(13) |
| V  | 30 | <b>1065.612</b> | 490.275         | 485.036         | 485.372         | 484.700         | V(12) |
| H  | 31 | <b>1111.298</b> | 458.253         | 452.913         | 453.249         | 452.577         | H(11) |
| R  | 32 | 1183.332        | 412.967         | 407.227         | 407.563         | 406.891         | R(10) |
| L  | 33 | 1201.626        | <b>368.533</b>  | 363.193         | 363.529         | 362.857         | L(9)  |
| L  | 34 | 1238.971        | 322.316         | 317.000         | 317.336         | 316.664         | L(8)  |
| R  | 35 | 1290.755        | 285.144         | 279.804         | 280.140         | 279.468         | R(7)  |
| K  | 36 | 1333.453        | 233.110         | 227.770         | 228.106         | 227.434         | K(6)  |
| G  | 37 | 1352.460        | 190.412         | 185.072         | 185.408         | 184.736         | G(5)  |
| N  | 38 | 1395.475        | 171.404         | 166.065         | 166.401         | 165.729         | N(4)  |
| V  | 39 | 1444.829        | 133.390         | 128.051         | 128.386         | 127.715         | V(3)  |
| S  | 40 | 1474.580        | 99.136          | 93.796          | 94.132          | 93.460          | S(2)  |
| E  | 41 | 1518.854        | 50.025          | 44.685          | 45.021          | 44.349          | E(1)  |

# sp | Q8CGP5 | H2A1F\_MOUSE

[Acetyl]SGR<sup>Acetyl</sup>GRK<sub>42.01</sub> QGGKARAKAKTRSSRAGLQFPVGRVHRLLRKGNYS

- ▶ fragmentation table for charge state 4+
- ▶ specType=etd
- ▶ score=46.71
- ▶ F104903.dat
- ▶ query=q2836\_p1
- ▶ precursor=650.799710
- ▶ chargePrecursor=7
- ▶ itol=0.8

| AA | c  | y              | z+1             | z+2             | z               | AA              |       |
|----|----|----------------|-----------------|-----------------|-----------------|-----------------|-------|
| S  | 1  | 37.535         | 1138.136        | <b>1134.134</b> | 0.765           | <b>1133.882</b> | S[41] |
| G  | 2  | 51.780         | 1105.878        | 1101.871        | 0.795           | 1101.621        | G[40] |
| R  | 3  | 90.805         | <b>1091.622</b> | <b>1087.618</b> | <b>1087.870</b> | <b>1087.366</b> | R[39] |
| G  | 4  | 105.061        | 1052.597        | <b>1048.592</b> | <b>1048.844</b> | 1048.340        | G[38] |
| K  | 5  | 147.587        | 1036.342        | 1034.337        | 1034.589        | 1034.085        | K[37] |
| Q  | 6  | 139.663        | 995.815         | <b>991.811</b>  | 992.062         | <b>991.559</b>  | Q[36] |
| G  | 7  | 153.857        | 953.601         | 954.100         | <b>960.048</b>  | 955.543         | G[35] |
| G  | 8  | 208.112        | 949.545         | <b>945.541</b>  | <b>945.792</b>  | 945.289         | G[34] |
| K  | 9  | 240.136        | <b>935.290</b>  | 931.285         | 931.537         | 931.031         | K[33] |
| A  | 10 | 257.895        | <b>903.266</b>  | <b>899.261</b>  | <b>899.513</b>  | <b>899.009</b>  | A[32] |
| R  | 11 | 296.921        | <b>885.507</b>  | <b>881.502</b>  | <b>881.754</b>  | 881.250         | R[31] |
| A  | 12 | 318.680        | <b>846.482</b>  | <b>842.477</b>  | <b>842.729</b>  | <b>842.225</b>  | A[30] |
| R  | 13 | 345.704        | <b>828.722</b>  | <b>824.718</b>  | <b>824.970</b>  | 824.466         | R[29] |
| A  | 14 | 394.483        | 796.699         | <b>792.694</b>  | <b>792.946</b>  | <b>792.442</b>  | A[28] |
| K  | 15 | 396.487        | 778.939         | 774.935         | 775.187         | 774.681         | K[27] |
| T  | 16 | 421.745        | 746.915         | <b>742.911</b>  | <b>743.163</b>  | <b>742.659</b>  | T[26] |
| R  | 17 | 460.774        | <b>721.654</b>  | <b>717.649</b>  | <b>717.901</b>  | <b>717.397</b>  | R[25] |
| S  | 18 | 482.532        | 652.628         | <b>678.624</b>  | <b>678.876</b>  | <b>678.372</b>  | S[24] |
| S  | 19 | 504.290        | 660.870         | 655.865         | 657.118         | 656.614         | S[23] |
| R  | 20 | 543.315        | 639.112         | 635.108         | 635.360         | 634.856         | R[22] |
| A  | 21 | 561.074        | 600.087         | 596.082         | 596.334         | 595.830         | A[21] |
| G  | 22 | 575.330        | 582.328         | 578.321         | 578.575         | 578.071         | G[20] |
| L  | 23 | 603.093        | 566.072         | 564.068         | 564.320         | 563.816         | L[19] |
| Q  | 24 | <b>635.615</b> | 539.801         | 535.797         | 536.049         | 535.545         | Q[18] |
| F  | 25 | <b>672.383</b> | 507.787         | 503.782         | 504.034         | 503.530         | F[17] |
| P  | 26 | 696.646        | 471.020         | 467.015         | 467.267         | 466.763         | P[16] |
| V  | 27 | <b>721.413</b> | 446.756         | 442.752         | 443.004         | 442.500         | V[15] |
| G  | 28 | <b>735.668</b> | 421.989         | <b>417.985</b>  | 418.237         | <b>417.733</b>  | G[14] |
| R  | 29 | 728.027        | 407.734         | 403.729         | 403.981         | 403.477         | R[13] |
| V  | 30 | <b>799.461</b> | 368.769         | 364.764         | 364.966         | 364.462         | V[12] |
| H  | 31 | <b>831.725</b> | 343.942         | 339.937         | 340.189         | 339.685         | H[11] |
| R  | 32 | 872.751        | 309.677         | 305.672         | 305.924         | 305.420         | R[10] |
| L  | 33 | 901.022        | 270.652         | 266.647         | 266.899         | 266.395         | L[9]  |
| L  | 34 | 929.283        | 242.381         | 238.376         | 238.628         | 238.124         | L[8]  |
| R  | 35 | <b>946.318</b> | 214.130         | 210.125         | 210.377         | 209.873         | R[7]  |
| R  | 36 | 1000.342       | 175.084         | 171.080         | 171.332         | 170.828         | R[6]  |
| G  | 37 | 1014.597       | 143.061         | 139.056         | 139.308         | 138.804         | G[5]  |
| N  | 38 | 1043.108       | 126.805         | 124.800         | 125.052         | 124.548         | N[4]  |
| V  | 39 | 1083.874       | 100.294         | 96.290          | 96.542          | 96.038          | V[3]  |
| S  | 40 | 1105.632       | 59.529          | 55.524          | 55.776          | 55.272          | S[2]  |
| E  | 41 | 1137.892       | 37.771          | 33.766          | 34.018          | 33.514          | E[1]  |

# sp | Q8CGP5 | H2A1F\_MOUSE

[Acetyl]SGR<sup>Acetyl</sup>RGK<sub>42.01</sub> QGGKARAKAKTRSSRAGLQFPVGRVHRLLRKGNYS

- ▶ fragmentation table for charge state 5+
- ▶ specType=etd
- ▶ score=46.71
- ▶ F104903.dat
- ▶ query=q2836.p1
- ▶ precursor=650.799710
- ▶ chargePrecursor=7
- ▶ itol=0.8

| AA | c  | y              | z+1            | z#2            | z              | AA             |   |    |
|----|----|----------------|----------------|----------------|----------------|----------------|---|----|
| S  | 1  | 30.221         | <b>910.712</b> | 907.508        | 0.806          | 907.507        | S | 41 |
| G  | 2  | 41.625         | <b>884.904</b> | <b>881.700</b> | 0.806          | <b>881.498</b> | G | 40 |
| R  | 3  | 72.846         | 873.499        | <b>870.295</b> | <b>870.497</b> | <b>870.094</b> | R | 39 |
| G  | 4  | 84.250         | <b>842.279</b> | 839.075        | 839.277        | 838.074        | G | 38 |
| K  | 5  | 118.271        | 830.075        | <b>827.671</b> | <b>827.873</b> | 827.469        | K | 37 |
| Q  | 6  | 143.883        | 796.954        | 793.650        | <b>793.851</b> | 793.448        | Q | 36 |
| G  | 7  | 195.287        | 771.242        | 768.038        | 768.240        | <b>767.837</b> | G | 35 |
| G  | 8  | 166.691        | <b>759.838</b> | <b>756.634</b> | <b>756.835</b> | <b>756.432</b> | G | 34 |
| K  | 9  | 192.310        | <b>748.433</b> | 745.230        | 745.431        | 745.028        | K | 33 |
| A  | 10 | 206.518        | 722.814        | 719.611        | 719.812        | 719.409        | A | 32 |
| R  | 11 | 237.738        | 708.607        | 705.403        | 705.605        | 705.202        | R | 31 |
| A  | 12 | 251.945        | 677.387        | 674.183        | 674.385        | 673.981        | A | 30 |
| K  | 13 | 277.564        | 663.179        | 659.976        | 660.177        | 659.774        | K | 29 |
| A  | 14 | 291.772        | 637.560        | 634.357        | 634.558        | 634.155        | A | 28 |
| K  | 15 | 317.391        | 623.353        | 620.149        | 620.351        | 619.948        | K | 27 |
| T  | 16 | 337.600        | 597.734        | 594.530        | 594.732        | 594.329        | T | 26 |
| R  | 17 | 368.821        | 577.524        | 574.321        | 574.522        | 574.119        | R | 25 |
| S  | 18 | 388.227        | 546.304        | 543.100        | 543.302        | 542.899        | S | 24 |
| S  | 19 | 403.033        | 528.686        | 525.481        | 525.684        | 525.282        | S | 23 |
| R  | 20 | 434.854        | 511.491        | 508.288        | 508.489        | 508.086        | R | 22 |
| A  | 21 | 449.061        | <b>480.271</b> | 477.067        | 477.269        | 476.866        | A | 21 |
| G  | 22 | 460.465        | 466.064        | 462.860        | 463.061        | 462.658        | G | 20 |
| L  | 23 | 483.082        | 494.659        | 451.456        | 451.657        | 451.254        | L | 19 |
| Q  | 24 | 508.694        | 432.043        | 428.839        | 429.040        | 428.637        | Q | 18 |
| F  | 25 | 538.108        | 406.431        | 403.227        | 403.429        | 403.026        | F | 17 |
| P  | 26 | 557.518        | 377.017        | 373.813        | 374.015        | 373.612        | P | 16 |
| V  | 27 | 577.832        | 357.607        | 354.403        | 354.604        | 354.201        | V | 15 |
| G  | 28 | 588.736        | 337.793        | 334.589        | 334.791        | 334.388        | G | 14 |
| R  | 29 | 619.956        | 326.380        | 323.176        | 323.378        | 322.975        | R | 13 |
| V  | 30 | 639.770        | 295.168        | 291.965        | 292.166        | 291.763        | V | 12 |
| H  | 31 | 667.182        | 275.355        | 272.151        | 272.353        | 271.949        | H | 11 |
| R  | 32 | 698.402        | 247.943        | 244.739        | 244.941        | 244.538        | R | 10 |
| L  | 33 | <b>721.019</b> | 216.723        | 213.519        | 213.721        | 213.317        | L | 9  |
| L  | 34 | <b>743.636</b> | 194.106        | 190.902        | 191.104        | 190.701        | L | 8  |
| R  | 35 | 774.856        | 171.489        | 168.285        | 168.487        | 168.084        | R | 7  |
| K  | 36 | 803.475        | 140.269        | 137.065        | 137.267        | 136.864        | K | 6  |
| G  | 37 | 813.878        | 114.650        | 111.446        | 111.648        | 111.245        | G | 5  |
| N  | 38 | <b>834.688</b> | 103.246        | 100.042        | 100.243        | 99.840         | N | 4  |
| V  | 39 | 867.300        | 80.437         | 77.233         | 77.435         | 77.032         | V | 3  |
| S  | 40 | <b>884.707</b> | 47.824         | 44.621         | 44.822         | 44.419         | S | 2  |
| E  | 41 | 910.515        | 30.418         | 27.214         | 27.416         | 27.013         | E | 1  |

# sp | Q8CGP5 | H2A1F\_MOUSE

[Acetyl]SGR<sup>Acetyl</sup>RGK<sub>42.01</sub> QGGKARAKAKTRSSRAGLQFPVGRVHRLLRKGNYS

- ▶ fragmentation table for charge state 6+
- ▶ specType=etd
- ▶ score=46.71
- ▶ F104903.dat
- ▶ query=q2836.p1
- ▶ precursor=650.799710
- ▶ chargePrecursor=7
- ▶ itol=0.8

| AA | c  | y              | z+1            | z#2            | z              | AA             |   |    |
|----|----|----------------|----------------|----------------|----------------|----------------|---|----|
| S  | 1  | 25.352         | <b>759.095</b> | <b>756.425</b> | 0.839          | <b>756.257</b> | S | 41 |
| G  | 2  | 34.856         | 737.587        | 734.918        | 0.839          | 734.750        | G | 40 |
| R  | 3  | 60.873         | <b>728.084</b> | 725.414        | 725.582        | 725.246        | R | 39 |
| G  | 4  | 70.376         | 702.067        | 699.397        | 699.565        | 699.229        | G | 38 |
| K  | 5  | 98.727         | <b>692.563</b> | 689.894        | 690.062        | 689.726        | K | 37 |
| Q  | 6  | 120.070        | 664.213        | 661.543        | 661.711        | 661.375        | Q | 36 |
| G  | 7  | 129.574        | 642.869        | 640.200        | 640.368        | 640.032        | G | 35 |
| G  | 8  | 139.077        | 631.366        | 630.696        | 630.864        | 630.528        | G | 34 |
| K  | 9  | 180.426        | 623.862        | 621.193        | 621.360        | 621.025        | K | 33 |
| A  | 10 | 172.266        | 602.513        | 599.843        | 600.011        | 599.675        | A | 32 |
| R  | 11 | 198.283        | 590.674        | <b>588.004</b> | <b>588.172</b> | <b>587.836</b> | R | 31 |
| A  | 12 | 210.122        | 564.657        | 561.987        | 562.155        | 561.819        | A | 30 |
| K  | 13 | 231.472        | 552.817        | 550.147        | 550.315        | 549.980        | K | 29 |
| A  | 14 | 243.311        | 531.468        | 528.798        | 528.966        | 528.630        | A | 28 |
| K  | 15 | 264.660        | 519.629        | 516.959        | 517.127        | 516.791        | K | 27 |
| T  | 16 | 281.501        | 498.279        | 495.610        | 495.778        | 495.442        | T | 26 |
| R  | 17 | 307.518        | 481.438        | <b>478.768</b> | <b>478.936</b> | 478.600        | R | 25 |
| S  | 18 | 323.024        | 455.421        | 452.752        | 452.919        | 452.584        | S | 24 |
| S  | 19 | 336.529        | 440.916        | 438.246        | 438.414        | 438.078        | S | 23 |
| R  | 20 | 362.546        | 426.411        | 423.741        | 423.909        | 423.573        | R | 22 |
| A  | 21 | 374.385        | 400.994        | 397.724        | 397.892        | 397.556        | A | 21 |
| G  | 22 | 383.889        | 388.554        | 385.884        | 386.052        | 385.716        | G | 20 |
| L  | 23 | 402.736        | 379.051        | 376.381        | 376.549        | 376.213        | L | 19 |
| Q  | 24 | 424.079        | <b>360.203</b> | 357.534        | 357.702        | 357.366        | Q | 18 |
| F  | 25 | 448.591        | 338.880        | 336.190        | 336.358        | 336.022        | F | 17 |
| P  | 26 | 464.766        | 314.349        | 311.679        | 311.847        | 311.511        | P | 16 |
| V  | 27 | 483.278        | 298.173        | 295.503        | 295.672        | 295.336        | V | 15 |
| G  | 28 | 490.781        | 281.662        | 278.992        | 279.160        | 278.824        | G | 14 |
| R  | 29 | 516.798        | 272.158        | 269.489        | 269.657        | 269.321        | R | 13 |
| V  | 30 | 533.309        | 246.142        | 243.472        | 243.640        | 243.304        | V | 12 |
| H  | 31 | 556.153        | 229.630        | 226.960        | 227.128        | 226.792        | H | 11 |
| R  | 32 | 582.169        | 206.787        | 204.117        | 204.285        | 203.949        | R | 10 |
| L  | 33 | 603.017        | 180.770        | 178.100        | 178.268        | 177.932        | L | 9  |
| L  | 34 | 619.884        | 161.923        | 159.253        | 159.421        | 159.085        | L | 8  |
| R  | 35 | 645.881        | 143.075        | 140.405        | 140.574        | 140.238        | R | 7  |
| R  | 36 | 667.230        | 117.059        | 114.389        | 114.557        | 114.221        | R | 6  |
| G  | 37 | 678.734        | 95.709         | 93.040         | 93.208         | 92.872         | G | 5  |
| N  | 38 | 695.741        | 86.206         | 83.536         | 83.704         | 83.368         | N | 4  |
| V  | 39 | 722.918        | 67.199         | 64.529         | 64.697         | 64.361         | V | 3  |
| S  | 40 | 737.423        | 40.021         | 37.352         | 37.520         | 37.184         | S | 2  |
| E  | 41 | <b>758.931</b> | 25.516         | 22.846         | 23.014         | 22.678         | E | 1  |





# sp | Q8CGP5 | H2A1F\_MOUSE

[Acetyl]SGR<sup>Acetyl</sup>RGK<sub>42.01</sub> QGGKARAKAKTRSSRAGLQFPVGRVHRLLRKGNYS

- ▶ fragmentation table for charge state 1+
- ▶ specType=etd
- ▶ score=62.93
- ▶ F104903.dat
- ▶ query=q2837\_p1
- ▶ precursor=759.099490
- ▶ chargePrecursor=6
- ▶ itol=0.8

| AA | c  | y               | z+1             | z+2             | z               | AA       |       |
|----|----|-----------------|-----------------|-----------------|-----------------|----------|-------|
| S  | 1  | 147.076         | 4549.531        | 4533.517        | 0.000           | 4533.509 | S[41] |
| G  | 2  | 204.068         | 4420.488        | 4404.470        | 0.000           | 4403.462 | G[40] |
| R  | 3  | <b>360.199</b>  | 4301.467        | 4287.448        | 4248.456        | 4346.441 | R[39] |
| G  | 4  | <b>417.220</b>  | 4207.368        | 4191.347        | 4152.355        | 4190.339 | G[38] |
| K  | 5  | <b>587.326</b>  | 4150.345        | 4134.326        | 4135.334        | 4133.318 | K[37] |
| Q  | 6  | <b>713.345</b>  | 3999.230        | 3984.220        | 3955.228        | 3993.211 | Q[36] |
| G  | 7  | <b>772.406</b>  | 3852.180        | 3836.170        | 3837.170        | 3835.154 | G[35] |
| G  | 8  | 829.427         | 3795.159        | 3779.140        | 3780.148        | 3778.132 | G[34] |
| K  | 9  | <b>957.522</b>  | 3738.138        | 3722.119        | 3723.127        | 3721.111 | K[33] |
| A  | 10 | 1028.560        | 3610.043        | 3594.024        | 3595.032        | 3593.016 | A[32] |
| R  | 11 | 1184.661        | 3539.005        | 3522.987        | 3523.995        | 3521.979 | R[31] |
| A  | 12 | 1255.698        | 3382.904        | 3368.886        | 3367.893        | 3366.877 | A[30] |
| R  | 13 | 1383.793        | 3311.867        | 3295.848        | 3296.856        | 3294.841 | R[29] |
| A  | 14 | 1454.830        | 3183.772        | 3167.754        | 3168.761        | 3166.746 | A[28] |
| K  | 15 | 1582.925        | 3112.735        | 3096.716        | 3097.724        | 3095.709 | K[27] |
| T  | 16 | <b>1683.973</b> | 2984.640        | 2968.621        | 2969.629        | 2967.614 | T[26] |
| R  | 17 | 1840.074        | 2883.582        | 2867.574        | 2868.582        | 2866.566 | R[25] |
| S  | 18 | 1927.108        | 2727.491        | 2711.473        | 2712.480        | 2710.465 | S[24] |
| S  | 19 | 2014.138        | 2640.459        | 2624.441        | 2625.448        | 2623.433 | S[23] |
| R  | 20 | 2170.239        | 2553.427        | 2537.409        | 2538.416        | 2536.401 | R[22] |
| A  | 21 | 2241.276        | 2397.328        | 2381.309        | 2382.315        | 2380.300 | A[21] |
| G  | 22 | 2298.297        | 2326.289        | 2310.270        | 2311.278        | 2309.263 | G[20] |
| L  | 23 | 2413.381        | 2209.268        | 2193.249        | 2194.257        | 2192.241 | L[19] |
| Q  | 24 | 2539.449        | 2156.184        | 2140.165        | 2141.173        | 2139.157 | Q[18] |
| F  | 25 | 2686.508        | 2028.125        | 2012.106        | 2013.114        | 2011.099 | F[17] |
| P  | 26 | 2783.561        | 1881.057        | 1865.038        | 1866.046        | 1864.030 | P[16] |
| V  | 27 | 2822.630        | 1784.004        | 1767.985        | 1768.993        | 1766.977 | V[15] |
| G  | 28 | 2939.651        | <b>1684.935</b> | 1668.917        | 1669.924        | 1667.909 | G[14] |
| R  | 29 | 3026.732        | 1627.914        | 1611.895        | <b>1612.903</b> | 1610.887 | R[13] |
| V  | 30 | 3104.821        | 1471.811        | <b>1455.794</b> | 1456.802        | 1454.786 | V[12] |
| H  | 31 | 3331.880        | 1372.744        | <b>1356.726</b> | 1357.734        | 1355.718 | H[11] |
| R  | 32 | 3487.981        | 1235.685        | 1219.667        | 1220.675        | 1218.659 | R[10] |
| L  | 33 | 3601.065        | 1079.584        | 1063.566        | 1064.573        | 1062.558 | L[9]  |
| L  | 34 | 3714.149        | 966.500         | 950.482         | 951.489         | 949.474  | L[8]  |
| I  | 35 | 3870.250        | 853.418         | 837.399         | 838.406         | 836.390  | I[7]  |
| K  | 36 | 3998.345        | 697.315         | 681.296         | 682.304         | 680.289  | K[6]  |
| G  | 37 | 4055.366        | 569.220         | 553.201         | 554.209         | 552.194  | G[5]  |
| N  | 38 | 4169.409        | 512.109         | 496.100         | 497.108         | 495.172  | N[4]  |
| V  | 39 | 4312.473        | 398.150         | 382.131         | 383.145         | 381.129  | V[3]  |
| S  | 40 | 4419.505        | 235.062         | 219.074         | 220.082         | 218.066  | S[2]  |
| E  | 41 | 4548.547        | 148.000         | 132.042         | 133.050         | 131.034  | E[1]  |

# sp | Q8CGP5 | H2A1F\_MOUSE

[Acetyl]SGR<sup>Acetyl</sup>RGK<sub>42.01</sub> QGGKARAKAKTRSSRAGLQFPVGRVHRLLRKGNYS

- ▶ fragmentation table for charge state 2+
- ▶ specType=etd
- ▶ score=62.93
- ▶ F104903.dat
- ▶ query=q2837\_p1
- ▶ precursor=759.099490
- ▶ chargePrecursor=6
- ▶ itol=0.8

| AA | c  | w               | #±1             | #±2             | z               | AA              |       |
|----|----|-----------------|-----------------|-----------------|-----------------|-----------------|-------|
| S  | 1  | 74.062          | 2278.206        | 2267.260        | 8.804           | 2266.187        | S[41] |
| G  | 2  | 102.553         | 2210.748        | 2203.730        | 0.504           | 2202.231        | G[40] |
| R  | 3  | 180.603         | 2182.297        | 2174.238        | 2174.732        | 2173.724        | R[39] |
| G  | 4  | 209.114         | 2104.187        | 2096.177        | 2096.681        | 2095.673        | G[38] |
| K  | 5  | 294.187         | 2075.876        | 2067.887        | 2068.170        | 2067.163        | K[37] |
| G  | 6  | 358.196         | 1990.623        | 1982.614        | 1983.118        | 1982.110        | G[36] |
| G  | 7  | 388.707         | 1926.594        | 1918.584        |                 | <b>1919.088</b> | G[35] |
| G  | 8  | 435.217         | 1898.083        | 1890.074        | <b>1890.578</b> | 1889.570        | G[34] |
| K  | 9  | 479.265         | 1869.572        | 1861.563        | 1862.067        | 1861.059        | K[33] |
| A  | 10 | 534.783         | 1805.525        | 1797.516        | 1798.019        | 1797.011        | A[32] |
| R  | 11 | 602.824         | 1770.008        | 1762.000        | 1762.503        | 1761.495        | R[31] |
| A  | 12 | <b>628.353</b>  | 1692.995        | <b>1683.946</b> | <b>1684.450</b> | 1683.442        | A[30] |
| R  | 13 | <b>692.400</b>  | 1656.437        | <b>1648.428</b> | <b>1648.932</b> | 1647.924        | R[29] |
| A  | 14 | <b>727.919</b>  | 1592.900        | <b>1584.380</b> | <b>1584.884</b> | <b>1583.876</b> | A[28] |
| K  | 15 | <b>791.966</b>  | 1556.871        | 1548.862        | 1549.366        | 1548.358        | K[27] |
| T  | 16 | <b>842.490</b>  | 1492.824        | <b>1484.814</b> | <b>1485.318</b> | <b>1484.310</b> | T[26] |
| R  | 17 | <b>920.540</b>  | 1442.800        | 1434.791        | <b>1434.794</b> | 1433.787        | R[25] |
| S  | 18 | <b>964.056</b>  | 1384.249        | <b>1356.240</b> | <b>1356.744</b> | 1355.736        | S[24] |
| S  | 19 | <b>1007.572</b> | 1326.733        | 1312.724        | <b>1313.228</b> | 1312.220        | S[23] |
| R  | 20 | 1085.623        | 1277.217        | 1269.208        | <b>1269.712</b> | 1268.704        | R[22] |
| A  | 21 | 1121.142        | <b>1199.167</b> | <b>1191.157</b> | <b>1191.661</b> | 1190.653        | A[21] |
| G  | 22 | 1149.652        | 1103.648        | 1105.639        | 1106.643        | 1105.135        | G[20] |
| L  | 23 | 1209.094        | 1054.131        | 1027.123        | <b>1127.632</b> | 1129.624        | L[19] |
| Q  | 24 | <b>1270.224</b> | 1004.614        | <b>1070.586</b> | <b>1071.090</b> | <b>1070.082</b> | Q[18] |
| F  | 25 | 1343.758        | <b>1014.566</b> | <b>1006.557</b> | <b>1007.061</b> | <b>1006.053</b> | F[17] |
| F  | 26 | 1392.284        | 941.053         | 933.043         | 933.526         | 932.519         | F[16] |
| V  | 27 | 1441.818        | 892.506         | 884.496         | 885.000         | 883.992         | V[15] |
| G  | 28 | <b>1470.329</b> | <b>842.971</b>  | <b>834.962</b>  | <b>835.466</b>  | <b>834.458</b>  | G[14] |
| R  | 29 | 1545.854        | 814.463         | <b>805.451</b>  | <b>806.955</b>  | <b>805.947</b>  | R[13] |
| V  | 30 | 1597.914        | 736.410         | <b>728.401</b>  | <b>728.905</b>  | <b>727.897</b>  | V[12] |
| H  | 31 | 1666.443        | 688.876         | 678.866         | 679.370         | 678.363         | H[11] |
| R  | 32 | 1744.494        | 618.346         | 610.337         | 610.841         | 609.833         | R[10] |
| L  | 33 | 1803.036        | 540.206         | 532.200         | 532.700         | 531.703         | L[9]  |
| L  | 34 | 1897.878        | 489.794         | 479.783         | 479.286         | 478.281         | L[8]  |
| R  | 35 | 1935.829        | 427.212         | 419.202         | 419.706         | 418.698         | R[7]  |
| K  | 36 | 1999.876        | 349.161         | 341.152         | 341.656         | 340.648         | K[6]  |
| G  | 37 | 2028.187        | 285.114         | 277.104         | 277.608         | 276.600         | G[5]  |
| N  | 38 | 2085.208        | 256.603         | 248.594         | 249.098         | 248.090         | N[4]  |
| V  | 39 | 2166.740        | 199.582         | 191.572         | 192.076         | 191.068         | V[3]  |
| S  | 40 | 2219.266        | 118.056         | 110.046         | 110.549         | 109.541         | S[2]  |
| E  | 41 | 2274.777        | 74.534          | 66.524          | 67.028          | 66.021          | E[1]  |

# sp | Q8CGP5 | H2A1F\_MOUSE

[Acetyl]SGR<sup>Acetyl</sup>RGK<sub>42.01</sub> QGGKARAKAKTRSSRAGLQFPVGRVHLLRKGNYSE

- ▶ fragmentation table for charge state 3+
- ▶ specType=etd
- ▶ score=62.93
- ▶ F104903.dat
- ▶ query=q2837\_p1
- ▶ precursor=759.099490
- ▶ chargePrecursor=6
- ▶ itol=0.8

| AA | c  | y               | #s1             | #s2             | z               | AA              |       |
|----|----|-----------------|-----------------|-----------------|-----------------|-----------------|-------|
| S  | 1  | 489.697         | 1511.184        | <b>1511.842</b> | 0.872           | 1311.567        | S[41] |
| G  | 2  | 86.704          | 1474.188        | <b>1466.828</b> | 0.872           | 1468.402        | G[40] |
| R  | 3  | 1307.788        | <b>1455.161</b> | <b>1449.821</b> | <b>1450.157</b> | <b>1440.485</b> | R[39] |
| G  | 4  | 139.745         | 1460.127        | <b>1397.787</b> | <b>1398.123</b> | <b>1397.451</b> | G[38] |
| K  | 5  | 196.447         | 1384.120        | <b>1378.780</b> | <b>1379.116</b> | <b>1378.444</b> | K[37] |
| G  | 6  | 239.133         | <b>1327.418</b> | <b>1322.078</b> | <b>1322.414</b> | <b>1321.742</b> | G[36] |
| G  | 7  | 288.140         | 1374.735        | <b>1279.392</b> | <b>1278.728</b> | <b>1279.056</b> | G[35] |
| G  | 8  | 277.147         | 1265.725        | 1260.385        | <b>1260.721</b> | 1260.049        | G[34] |
| K  | 9  | 319.846         | 1246.717        | <b>1241.378</b> | <b>1241.714</b> | 1241.042        | K[33] |
| A  | 10 | 383.525         | 1204.019        | <b>1198.679</b> | <b>1199.015</b> | 1198.344        | A[32] |
| R  | 11 | 395.558         | 1180.310        | <b>1175.000</b> | <b>1175.336</b> | 1174.664        | R[31] |
| A  | 12 | 439.239         | <b>1128.306</b> | 1122.967        | 1123.303        | 1122.631        | A[30] |
| K  | 13 | 481.938         | 1104.627        | <b>1099.288</b> | <b>1099.624</b> | <b>1098.952</b> | K[29] |
| A  | 14 | 485.615         | 1081.929        | <b>1056.589</b> | <b>1056.925</b> | 1056.253        | A[28] |
| K  | 15 | 528.313         | 1038.250        | <b>1032.910</b> | <b>1033.246</b> | <b>1032.574</b> | K[27] |
| T  | 16 | 581.996         | 995.552         | <b>990.212</b>  | <b>990.548</b>  | <b>989.876</b>  | T[26] |
| R  | 17 | 634.629         | <b>961.869</b>  | <b>956.529</b>  | <b>956.865</b>  | 956.193         | R[25] |
| S  | 18 | 683.090         | 959.835         | 954.495         | 954.831         | 954.160         | S[24] |
| S  | 19 | 692.051         | 880.825         | <b>875.485</b>  | <b>875.821</b>  | 875.149         | S[23] |
| R  | 20 | 734.084         | 851.814         | 846.474         | <b>846.810</b>  | 846.138         | R[22] |
| A  | 21 | 787.763         | 799.780         | 794.441         | 794.777         | 794.105         | A[21] |
| G  | 22 | 866.771         | 776.101         | 770.762         | 771.098         | 770.426         | G[20] |
| L  | 23 | <b>804.465</b>  | 759.094         | 753.754         | 754.090         | 753.419         | L[19] |
| Q  | 24 | <b>847.152</b>  | 733.369         | 724.000         | 724.336         | 723.664         | Q[18] |
| F  | 25 | 896.174         | 676.713         | 671.374         | 671.710         | 671.038         | F[17] |
| P  | 26 | 928.525         | <b>627.690</b>  | 622.351         | 622.687         | 622.015         | P[16] |
| V  | 27 | <b>961.548</b>  | 595.139         | 590.000         | 590.336         | 589.664         | V[15] |
| C  | 28 | <b>980.555</b>  | 562.317         | 556.977         | 557.313         | 556.641         | C[14] |
| R  | 29 | <b>1032.589</b> | 443.309         | 437.970         | 438.306         | 437.634         | R[13] |
| V  | 30 | <b>1065.612</b> | 401.275         | 405.936         | 406.272         | 405.600         | V[12] |
| H  | 31 | <b>1111.298</b> | 458.253         | 452.913         | 453.249         | 452.577         | H[11] |
| R  | 32 | 1183.332        | 412.967         | 407.227         | 407.563         | 406.891         | R[10] |
| L  | 33 | 1261.029        | <b>360.533</b>  | 355.193         | 355.529         | 354.857         | L[9]  |
| L  | 34 | <b>1288.721</b> | 322.376         | 317.036         | 317.372         | 316.700         | L[8]  |
| R  | 35 | 1295.823        | 285.144         | 279.804         | 280.140         | 279.468         | R[7]  |
| K  | 36 | 1333.453        | 233.110         | 227.770         | 228.106         | 227.434         | K[6]  |
| G  | 37 | 1354.460        | 190.412         | 185.072         | 185.408         | 184.736         | G[5]  |
| N  | 38 | 1390.475        | 171.404         | 166.065         | 166.401         | 165.729         | N[4]  |
| V  | 39 | 1444.629        | 133.390         | 128.051         | 128.386         | 127.714         | V[3]  |
| S  | 40 | 1471.680        | 99.136          | 93.796          | 94.132          | 93.460          | S[2]  |
| E  | 41 | 1516.854        | 50.025          | 44.685          | 45.021          | 44.349          | E[1]  |

# sp | Q8CGP5 | H2A1F\_MOUSE

[Acetyl]SGR<sup>Acetyl</sup>RGK<sup>42.01</sup> QGGKARAKAKTRSSRAGLQFPVGRVHRLLRKGNYS

- ▶ fragmentation table for charge state 4+
- ▶ specType=etd
- ▶ score=62.93
- ▶ F104903.dat
- ▶ query=q2837\_p1
- ▶ precursor=759.099490
- ▶ chargePrecursor=6
- ▶ itol=0.8

| AA | c  | y               | #s1             | #s2             | #               | AA              |       |
|----|----|-----------------|-----------------|-----------------|-----------------|-----------------|-------|
| S  | 1  | 37.505          | 1138.138        | <b>1134.134</b> | 0.705           | <b>1133.882</b> | S[41] |
| G  | 2  | 51.780          | <b>1105.878</b> | <b>1101.873</b> | 0.795           | 1101.021        | G[40] |
| R  | 3  | 90.805          | 1091.623        | <b>1087.618</b> | <b>1087.870</b> | 1087.360        | R[39] |
| G  | 4  | 109.001         | 1052.597        | <b>1048.592</b> | <b>1048.844</b> | 1048.340        | G[38] |
| K  | 5  | 147.587         | 1038.342        | 1034.337        | 1034.589        | 1034.085        | K[37] |
| G  | 6  | 179.604         | 999.315         | <b>995.311</b>  | <b>992.862</b>  | 991.959         | G[36] |
| G  | 7  | 193.857         | <b>963.801</b>  | <b>959.796</b>  | <b>960.048</b>  | <b>959.544</b>  | G[35] |
| G  | 8  | 208.112         | 949.545         | <b>945.541</b>  | <b>945.792</b>  | <b>945.289</b>  | G[34] |
| K  | 9  | 240.136         | 935.290         | 931.285         | 931.537         | 931.033         | K[33] |
| A  | 10 | 257.895         | 903.266         | <b>899.261</b>  | <b>899.513</b>  | <b>899.009</b>  | A[32] |
| R  | 11 | 296.921         | 895.507         | 891.502         | <b>881.754</b>  | 881.250         | R[31] |
| A  | 12 | 314.680         | 868.282         | <b>842.477</b>  | <b>842.729</b>  | <b>842.225</b>  | A[30] |
| K  | 13 | 346.704         | 838.722         | 834.718         | 834.970         | 834.466         | K[29] |
| A  | 14 | 384.443         | 796.699         | <b>792.694</b>  | <b>792.946</b>  | <b>792.442</b>  | A[28] |
| K  | 15 | 396.497         | 778.939         | 774.935         | 775.187         | 774.683         | K[27] |
| T  | 16 | 421.749         | 746.915         | 742.911         | 743.163         | 742.659         | T[26] |
| R  | 17 | 469.774         | 721.894         | 717.889         | 717.901         | 717.901         | R[25] |
| S  | 18 | 482.532         | 692.626         | 688.621         | 688.873         | 688.370         | S[24] |
| S  | 19 | 504.290         | 660.870         | 656.866         | 657.118         | 656.614         | S[23] |
| R  | 20 | 543.315         | 638.112         | 634.108         | 635.360         | 634.856         | R[22] |
| A  | 21 | 581.074         | 600.087         | 596.082         | 596.334         | 595.830         | A[21] |
| G  | 22 | 575.330         | 582.328         | 578.323         | 578.575         | 578.071         | G[20] |
| L  | 23 | 603.683         | 658.072         | 654.068         | 654.320         | 653.816         | L[19] |
| Q  | 24 | 635.615         | 639.803         | 635.797         | 636.049         | 635.545         | Q[18] |
| F  | 25 | 672.383         | 597.787         | 593.782         | 594.034         | 593.530         | F[17] |
| F  | 26 | 698.646         | 471.020         | 467.015         | 467.267         | 466.763         | F[16] |
| V  | 27 | 721.413         | 446.756         | 442.752         | 443.004         | 442.500         | V[15] |
| G  | 28 | 735.669         | 421.989         | <b>417.985</b>  | 418.237         | <b>417.733</b>  | G[14] |
| R  | 29 | 774.694         | 409.734         | 405.729         | 405.981         | 405.477         | R[13] |
| V  | 30 | 799.461         | 368.709         | 364.704         | 364.956         | 364.452         | V[12] |
| H  | 31 | 833.725         | 343.942         | 339.937         | 340.189         | 339.685         | H[11] |
| R  | 32 | 872.751         | 309.677         | 305.672         | 305.924         | 305.420         | R[10] |
| L  | 33 | 901.022         | 270.652         | 266.647         | 266.899         | 266.395         | L[9]  |
| L  | 34 | 929.284         | 242.381         | 238.376         | 238.628         | 238.124         | L[8]  |
| R  | 35 | 958.318         | 214.110         | 210.105         | 210.357         | 209.853         | R[7]  |
| K  | 36 | <b>1000.342</b> | 175.084         | 171.079         | 171.331         | 170.827         | K[6]  |
| G  | 37 | <b>1014.597</b> | 143.061         | 139.056         | 139.308         | 138.804         | G[5]  |
| N  | 38 | <b>1043.108</b> | 128.805         | 124.800         | 125.052         | 124.548         | N[4]  |
| Y  | 39 | <b>1083.874</b> | 100.294         | 96.289          | 96.541          | 96.037          | Y[3]  |
| S  | 40 | <b>1105.632</b> | 99.529          | 95.524          | 95.776          | 95.272          | S[2]  |
| E  | 41 | 1137.892        | 97.771          | 93.766          | 94.018          | 93.514          | E[1]  |

# sp | Q8CGP5 | H2A1F\_MOUSE

[Acetyl]SGR<sup>Acetyl</sup>RGK<sup>42.01</sup> QGGKARAKAKTRSSRAGLQFPVGRVHLLRKGNYSE

- ▶ fragmentation table for charge state 5+
- ▶ specType=etd
- ▶ score=62.93
- ▶ F104903.dat
- ▶ query=q2837.p1
- ▶ precursor=759.099490
- ▶ chargePrecursor=6
- ▶ itol=0.8

| AA | c  | y              | z+1            | z+2     | z       | AA      |   |    |
|----|----|----------------|----------------|---------|---------|---------|---|----|
| S  | 1  | 30.221         | <b>910.712</b> | 907.508 | 0.806   | 907.307 | S | 41 |
| G  | 2  | 41.625         | 884.904        | 881.700 | 0.806   | 881.498 | G | 40 |
| R  | 3  | 72.845         | 873.490        | 870.295 | 870.497 | 870.094 | R | 39 |
| G  | 4  | 84.250         | <b>842.279</b> | 839.075 | 839.277 | 838.874 | G | 38 |
| K  | 5  | 118.271        | 830.875        | 827.671 | 827.873 | 827.469 | K | 37 |
| G  | 6  | 143.883        | 796.854        | 793.650 | 793.851 | 793.448 | G | 36 |
| G  | 7  | 155.387        | 771.247        | 768.043 | 768.244 | 767.837 | G | 35 |
| G  | 8  | 166.691        | 759.830        | 756.634 | 756.835 | 756.432 | G | 34 |
| K  | 9  | 192.110        | 748.433        | 745.230 | 745.431 | 745.028 | K | 33 |
| A  | 10 | 206.518        | 722.814        | 719.611 | 719.812 | 719.409 | A | 32 |
| R  | 11 | 237.738        | 708.607        | 705.403 | 705.605 | 705.202 | R | 31 |
| A  | 12 | 251.945        | 677.387        | 674.183 | 674.385 | 673.981 | A | 30 |
| K  | 13 | 277.564        | 663.179        | 659.976 | 660.177 | 659.774 | K | 29 |
| A  | 14 | 291.772        | 637.560        | 634.357 | 634.558 | 634.155 | A | 28 |
| K  | 15 | 317.391        | 623.353        | 620.149 | 620.351 | 619.948 | K | 27 |
| T  | 16 | 337.600        | 597.734        | 594.530 | 594.732 | 594.329 | T | 26 |
| R  | 17 | 368.821        | 577.524        | 574.321 | 574.522 | 574.119 | R | 25 |
| S  | 18 | 389.227        | 546.304        | 543.100 | 543.302 | 542.899 | S | 24 |
| S  | 19 | 403.633        | 529.898        | 526.694 | 526.896 | 526.492 | S | 23 |
| R  | 20 | 434.854        | 511.401        | 508.208 | 508.409 | 508.008 | R | 22 |
| A  | 21 | 449.061        | 480.271        | 477.067 | 477.269 | 476.866 | A | 21 |
| G  | 22 | 460.465        | 466.064        | 462.860 | 463.061 | 462.658 | G | 20 |
| L  | 23 | 483.082        | 454.659        | 451.456 | 451.657 | 451.254 | L | 19 |
| Q  | 24 | 508.694        | 432.043        | 428.839 | 429.040 | 428.637 | Q | 18 |
| F  | 25 | 538.108        | 406.431        | 403.227 | 403.429 | 403.026 | F | 17 |
| P  | 26 | 557.518        | 377.017        | 373.813 | 374.015 | 373.612 | P | 16 |
| V  | 27 | 577.332        | 357.607        | 354.403 | 354.604 | 354.201 | V | 15 |
| G  | 28 | 588.736        | 337.793        | 334.589 | 334.791 | 334.388 | G | 14 |
| R  | 29 | 619.956        | 326.389        | 323.185 | 323.386 | 322.983 | R | 13 |
| V  | 30 | 639.770        | 295.168        | 291.965 | 292.166 | 291.763 | V | 12 |
| H  | 31 | 667.182        | 275.350        | 272.147 | 272.349 | 271.946 | H | 11 |
| R  | 32 | 698.402        | 247.943        | 244.739 | 244.941 | 244.538 | R | 10 |
| L  | 33 | 721.019        | 216.723        | 213.519 | 213.721 | 213.317 | L | 9  |
| L  | 34 | 743.636        | 194.108        | 190.902 | 191.104 | 190.701 | L | 8  |
| R  | 35 | 774.856        | 171.489        | 168.285 | 168.487 | 168.084 | R | 7  |
| K  | 36 | 800.475        | 140.269        | 137.065 | 137.267 | 136.864 | K | 6  |
| G  | 37 | 811.879        | 114.650        | 111.446 | 111.648 | 111.245 | G | 5  |
| N  | 38 | <b>834.688</b> | 103.246        | 100.042 | 100.243 | 99.840  | N | 4  |
| Y  | 39 | 867.300        | 80.437         | 77.233  | 77.435  | 77.032  | Y | 3  |
| S  | 40 | 884.707        | 47.824         | 44.621  | 44.822  | 44.419  | S | 2  |
| E  | 41 | <b>910.515</b> | 30.418         | 27.214  | 27.416  | 27.013  | E | 1  |



# sp | Q6GSS7 | H2A2A\_MOUSE

S<sup>Phospho</sup> 79.97 GRGKQGGK<sup>Acetyl</sup> 42.01 ARAKAKSRSSRAGLQFPVGRVHLLLRKGN<sup>YAE</sup>

- ▶ fragmentation table for charge state 1+
- ▶ specType=etd
- ▶ score=59.84
- ▶ F104903.dat
- ▶ query=q2841\_p1
- ▶ precursor=912.305630
- ▶ chargePrecursor=5
- ▶ itol=0.8

| AA | c  | y               | #s1             | #s2             | z               | AA              |       |
|----|----|-----------------|-----------------|-----------------|-----------------|-----------------|-------|
| S  | 1  | 185.932         | 4331.478        | 4341.458        | 0.000           | 4340.458        | S[1]  |
| G  | 2  | 242.054         | 4390.475        | 4374.450        | 0.000           | 4373.451        | G[2]  |
| R  | 3  | 308.135         | 4333.467        | 4317.438        | 4318.446        | 4318.430        | R[3]  |
| G  | 4  | 458.170         | 4177.355        | 4161.337        | 4162.345        | 4160.329        | G[4]  |
| K  | 5  | 583.271         | 4120.334        | 4104.315        | 4105.323        | 4103.307        | K[5]  |
| G  | 6  | 741.330         | 3992.230        | 3976.220        | 3977.228        | 3975.212        | G[6]  |
| G  | 7  | 788.353         | 3954.180        | 3940.182        | 3939.170        | 3941.154        | G[7]  |
| G  | 8  | 825.373         | 3907.158        | 3791.140        | 3792.148        | 3790.132        | G[8]  |
| K  | 9  | 896.478         | 3760.138        | 3754.119        | 3735.127        | 3733.111        | K[9]  |
| A  | 10 | 1098.515        | 3380.012        | 3364.013        | 3365.021        | 3363.005        | A[10] |
| R  | 11 | <b>1222.616</b> | 3538.095        | 3482.076        | 3483.084        | 3491.066        | R[11] |
| A  | 12 | <b>1293.654</b> | 3382.984        | 3338.975        | 3337.983        | 3335.967        | A[12] |
| R  | 13 | <b>1421.749</b> | 3381.857        | 3265.838        | 3266.846        | 3264.830        | R[13] |
| A  | 14 | 1482.788        | 3153.762        | 3137.743        | 3138.751        | 3136.735        | A[14] |
| K  | 15 | <b>1620.881</b> | 3082.725        | 3066.706        | 3067.714        | 3065.698        | K[15] |
| S  | 16 | 1707.911        | 2954.630        | 2938.611        | 2939.619        | 2937.603        | S[16] |
| R  | 17 | 1884.014        | 2887.598        | 2861.579        | 2862.587        | 2860.571        | R[17] |
| S  | 18 | 1951.066        | 2711.496        | 2695.475        | 2696.483        | 2694.467        | S[18] |
| S  | 19 | 2038.078        | 2624.464        | 2608.446        | 2609.454        | 2607.438        | S[19] |
| R  | 20 | 2194.179        | 2537.432        | 2521.414        | 2522.422        | 2520.406        | R[20] |
| A  | 21 | 2285.216        | 2381.311        | 2365.313        | 2366.320        | 2364.305        | A[21] |
| G  | 22 | 2322.237        | 2310.294        | 2294.275        | 2295.283        | 2293.267        | G[22] |
| L  | 23 | 2485.323        | 2253.271        | 2237.254        | 2238.262        | 2236.246        | L[23] |
| Q  | 24 | 2583.388        | 2140.188        | 2124.170        | 2125.178        | 2123.162        | Q[24] |
| F  | 25 | 2710.449        | 2012.138        | <b>1996.111</b> | <b>1997.119</b> | 1995.104        | F[25] |
| F  | 26 | 2807.501        | 1895.062        | 1849.043        | 1850.051        | 1848.035        | F[26] |
| V  | 27 | 2906.570        | 1748.009        | 1751.990        | 1752.998        | 1750.982        | V[27] |
| G  | 28 | 2983.591        | <b>1668.940</b> | 1682.922        | 1683.930        | 1681.914        | G[28] |
| R  | 29 | 3118.692        | 1518.919        | 1502.902        | <b>1596.908</b> | 1504.886        | R[29] |
| V  | 30 | 3218.761        | 1455.815        | 1439.799        | 1440.807        | <b>1438.791</b> | V[30] |
| H  | 31 | 3355.820        | 1358.749        | 1340.731        | <b>1341.739</b> | 1339.723        | H[31] |
| R  | 32 | 3511.921        | 1219.691        | 1203.672        | <b>1204.680</b> | 1202.664        | R[32] |
| L  | 33 | 3625.005        | 1083.589        | 1047.571        | <b>1048.579</b> | <b>1046.563</b> | L[33] |
| L  | 34 | 3728.089        | 958.505         | 924.487         | <b>915.495</b>  | 933.470         | L[34] |
| R  | 35 | 3894.190        | 837.422         | 821.403         | <b>822.410</b>  | 820.395         | R[35] |
| K  | 36 | 4022.285        | 681.320         | 665.302         | 666.309         | 664.294         | K[36] |
| G  | 37 | 4079.306        | 583.225         | 537.207         | 538.214         | 536.199         | G[37] |
| N  | 38 | 4193.349        | 496.204         | 480.185         | 481.193         | 479.177         | N[38] |
| V  | 39 | 4358.413        | 382.161         | 366.142         | 367.150         | 365.134         | V[39] |
| A  | 40 | 4427.456        | 219.098         | 203.079         | 204.087         | 202.071         | A[40] |
| E  | 41 | 4556.492        | 148.060         | 132.042         | 133.050         | 131.034         | E[41] |

# sp | Q6GSS7 | H2A2A\_MOUSE

S<sup>Phospho</sup> 79.97 GRGKQGGK<sup>Acetyl</sup> 42.01 ARAKAKSRSSRAGLQFPVGRVHRLLRKGN<sup>YAE</sup>

- ▶ fragmentation table for charge state 2+
- ▶ specType=etd
- ▶ score=59.84
- ▶ F104903.dat
- ▶ query=q2841\_p1
- ▶ precursor=912.305630
- ▶ chargePrecursor=5
- ▶ itol=0.8

| AA | c  | y               | #s1             | #s2             | z               | AA              |       |
|----|----|-----------------|-----------------|-----------------|-----------------|-----------------|-------|
| S  | 1  | 813.00          | 2278.242        | 2271.820        | 8.804           | 2270.721        | S[41] |
| G  | 2  | 121.530         | 2195.743        | 2187.733        | 0.504           | 2187.220        | G[40] |
| R  | 3  | 199.581         | 2167.232        | 2159.233        | 2159.726        | 2158.710        | R[39] |
| G  | 4  | 228.092         | 2089.181        | 2081.172        | 2081.876        | 2080.668        | G[38] |
| K  | 5  | 292.139         | 2050.871        | 2052.681        | 2053.105        | 2052.157        | K[37] |
| G  | 6  | 356.169         | <b>1996.623</b> | 1998.432        | 1999.138        | 1998.110        | G[36] |
| G  | 7  | 394.678         | 1975.594        | <b>1924.584</b> | 1975.988        | <b>1924.081</b> | G[35] |
| G  | 8  | 433.190         | 1904.083        | 1896.074        | 1896.578        | 1895.570        | G[34] |
| K  | 9  | 498.243         | 1875.572        | 1867.563        | 1868.067        | 1867.059        | K[33] |
| A  | 10 | 533.761         | 1790.520        | 1782.510        | 1783.014        | 1782.500        | A[32] |
| R  | 11 | 611.812         | 1735.001        | 1746.992        | 1747.998        | 1746.488        | R[31] |
| A  | 12 | 687.330         | 1678.981        | <b>1668.941</b> | <b>1669.945</b> | 1669.439        | A[30] |
| K  | 13 | 711.378         | 1643.433        | 1633.423        | <b>1633.927</b> | 1632.910        | K[29] |
| A  | 14 | 746.896         | 1577.984        | <b>1569.375</b> | <b>1569.879</b> | 1568.871        | A[28] |
| K  | 15 | <b>810.944</b>  | 1541.866        | 1533.857        | 1534.360        | 1533.351        | K[27] |
| S  | 16 | 854.460         | 1477.818        | 1469.809        | 1470.313        | <b>1469.305</b> | S[26] |
| R  | 17 | <b>922.511</b>  | 1434.362        | <b>1426.293</b> | <b>1426.797</b> | <b>1425.789</b> | R[25] |
| S  | 18 | <b>976.027</b>  | 1366.263        | 1360.263        | 1360.768        | 1359.760        | S[24] |
| S  | 19 | 1019.543        | 1312.738        | <b>1304.726</b> | <b>1305.230</b> | <b>1304.223</b> | S[23] |
| R  | 20 | <b>1097.593</b> | <b>1269.220</b> | <b>1261.210</b> | <b>1261.714</b> | <b>1260.707</b> | R[22] |
| A  | 21 | 1133.112        | 1191.169        | 1183.160        | <b>1183.664</b> | 1182.656        | A[21] |
| G  | 22 | 1161.622        | 1135.051        | 1147.041        | 1148.546        | 1147.541        | G[20] |
| L  | 23 | 1218.384        | 1127.140        | <b>1119.131</b> | <b>1119.635</b> | <b>1118.627</b> | L[19] |
| G  | 24 | <b>1282.194</b> | 1073.588        | 1065.589        | 1065.993        | 1064.985        | G[18] |
| F  | 25 | 1355.728        | 1008.599        | <b>998.559</b>  | <b>999.063</b>  | <b>998.055</b>  | F[17] |
| F  | 26 | 1404.254        | <b>933.034</b>  | 925.025         | 925.529         | 924.521         | F[16] |
| V  | 27 | <b>1453.788</b> | 884.508         | 876.499         | 877.003         | 875.995         | V[15] |
| G  | 28 | <b>1482.299</b> | 834.974         | <b>826.965</b>  | <b>827.468</b>  | 826.461         | G[14] |
| R  | 29 | 1556.819        | 808.483         | <b>798.454</b>  | <b>798.958</b>  | 797.950         | R[13] |
| V  | 30 | <b>1609.884</b> | 728.413         | 720.403         | 720.907         | 719.899         | V[12] |
| H  | 31 | <b>1678.413</b> | 678.878         | 670.869         | 671.373         | 670.365         | H[11] |
| R  | 32 | <b>1756.464</b> | 610.349         | 602.340         | 602.843         | 601.836         | R[10] |
| L  | 33 | <b>1813.006</b> | 532.209         | 524.200         | 524.703         | 523.705         | L[9]  |
| L  | 34 | <b>1869.548</b> | 478.756         | 469.747         | 469.251         | 468.243         | L[8]  |
| R  | 35 | 1987.071        | 419.214         | 411.205         | 411.709         | 410.701         | R[7]  |
| K  | 36 | 2011.646        | 341.164         | 333.154         | 333.658         | 332.650         | K[6]  |
| G  | 37 | 2040.157        | 277.116         | 269.107         | 269.611         | 268.603         | G[5]  |
| M  | 38 | 2097.178        | 248.606         | 240.596         | 241.100         | 240.092         | M[4]  |
| V  | 39 | 2178.710        | 181.564         | 183.575         | 184.079         | 183.071         | V[3]  |
| A  | 40 | 2214.229        | 110.026         | 102.043         | 102.547         | 101.539         | A[2]  |
| E  | 41 | 2278.750        | 74.534          | 66.524          | 67.028          | 66.021          | E[1]  |



# sp | Q6GSS7 | H2A2A\_MOUSE

S<sup>Phospho</sup> 79.97 GRGKQGGK<sup>Acetyl</sup> 42.01 ARAKAKSRSSRAGLQFPVGRVHLLLRKGN<sup>YAE</sup>

- ▶ fragmentation table for charge state 3+
- ▶ specType=etd
- ▶ score=59.84
- ▶ F104903.dat
- ▶ query=q2841\_p1
- ▶ precursor=912.305630
- ▶ chargePrecursor=5
- ▶ itol=0.8

| AA | c  | y               | #+1             | #+2             | z               | AA              |       |
|----|----|-----------------|-----------------|-----------------|-----------------|-----------------|-------|
| S  | 1  | 62.390          | <b>1519.830</b> | <b>1514.401</b> | 0.872           | <b>1514.155</b> | S[41] |
| G  | 2  | 81.356          | 1484.154        | <b>1458.825</b> | 0.872           | <b>1458.489</b> | G[40] |
| R  | 3  | 133.390         | 1445.157        | 1439.817        | 1440.153        | 1439.482        | R[39] |
| G  | 4  | 152.397         | 1393.123        | 1387.784        | 1388.120        | 1387.448        | G[38] |
| K  | 5  | 195.095         | <b>1374.116</b> | 1368.777        | 1369.113        | 1368.441        | K[37] |
| G  | 6  | 227.764         | 1331.418        | 1326.078        | 1326.414        | 1325.742        | G[36] |
| G  | 7  | 286.789         | 1308.152        | 1293.302        | 1293.738        | <b>1283.056</b> | G[35] |
| G  | 8  | 276.796         | <b>1269.725</b> | 1264.385        | 1264.721        | 1264.049        | G[34] |
| K  | 9  | 332.498         | <b>1250.717</b> | 1245.378        | 1245.714        | 1245.042        | K[33] |
| A  | 10 | 356.177         | 1194.016        | 1188.076        | 1189.012        | 1188.340        | A[32] |
| R  | 11 | 408.210         | 1170.338        | <b>1164.997</b> | <b>1165.333</b> | <b>1164.661</b> | R[31] |
| A  | 12 | 431.889         | 1138.303        | 1132.363        | 1132.699        | 1132.027        | A[30] |
| K  | 13 | 474.588         | 1094.624        | <b>1089.284</b> | <b>1089.620</b> | 1089.942        | K[29] |
| A  | 14 | 498.267         | 1051.925        | <b>1046.580</b> | <b>1046.922</b> | <b>1046.250</b> | A[28] |
| K  | 15 | 540.965         | 1028.246        | 1022.307        | 1023.243        | 1022.571        | K[27] |
| S  | 16 | 569.976         | 985.548         | 980.208         | 980.544         | 979.873         | S[26] |
| R  | 17 | 622.069         | 956.537         | 951.198         | 951.534         | 950.862         | R[25] |
| S  | 18 | 651.020         | 904.504         | 900.164         | 900.500         | 899.829         | S[24] |
| S  | 19 | 680.031         | 875.493         | 870.153         | 870.489         | 869.817         | S[23] |
| R  | 20 | 732.064         | 846.482         | 841.143         | 841.479         | 840.807         | R[22] |
| A  | 21 | 755.744         | 794.449         | 789.109         | 789.445         | 788.773         | A[21] |
| G  | 22 | 774.751         | 770.770         | 765.430         | 765.766         | 765.094         | G[20] |
| L  | 23 | 812.448         | 754.762         | 749.423         | 749.759         | 749.087         | L[19] |
| Q  | 24 | 835.132         | 714.085         | 708.745         | 709.081         | 708.409         | Q[18] |
| F  | 25 | 904.154         | 671.382         | 666.042         | 666.378         | 665.706         | F[17] |
| F  | 26 | 938.505         | 622.359         | 617.019         | 617.355         | 616.683         | F[16] |
| V  | 27 | 969.528         | 590.006         | 584.666         | 585.004         | 584.332         | V[15] |
| G  | 28 | 988.535         | 556.985         | 551.645         | 551.981         | 551.309         | G[14] |
| R  | 29 | 1065.569        | 439.978         | 434.638         | 434.974         | 434.302         | R[13] |
| V  | 30 | <b>1073.592</b> | 485.944         | 480.604         | 480.941         | 480.269         | V[12] |
| H  | 31 | <b>1119.378</b> | 452.921         | 447.582         | 447.918         | 447.246         | H[11] |
| R  | 32 | 1171.312        | 407.235         | 401.895         | 402.231         | 401.560         | R[10] |
| L  | 33 | <b>1209.006</b> | 355.201         | 349.862         | 350.198         | 349.526         | L[9]  |
| L  | 34 | <b>1246.761</b> | 312.509         | 307.169         | 307.505         | 306.833         | L[8]  |
| R  | 35 | 1255.812        | 273.812         | 274.472         | 274.808         | 274.136         | R[7]  |
| K  | 36 | <b>1341.433</b> | 227.778         | 222.439         | 222.775         | 222.103         | K[6]  |
| G  | 37 | <b>1360.440</b> | 185.080         | 179.740         | 180.076         | 179.404         | G[5]  |
| N  | 38 | <b>1398.455</b> | 166.073         | 160.733         | 161.069         | 160.397         | N[4]  |
| V  | 39 | <b>1452.869</b> | 128.098         | 122.758         | 123.094         | 122.422         | V[3]  |
| A  | 40 | <b>1474.408</b> | 83.348          | 82.384          | 82.720          | 82.048          | A[2]  |
| E  | 41 | <b>1519.502</b> | 50.025          | 44.685          | 45.021          | 44.349          | E[1]  |

# sp | Q6GSS7 | H2A2A\_MOUSE

S<sup>Phospho</sup> 79.97 GRGKQGGK<sup>Acetyl</sup> 42.01 ARAKAKSRSSRAGLQFPVGRVHRLLRKGN<sup>YAE</sup>

- ▶ fragmentation table for charge state 4+
- ▶ specType=etd
- ▶ score=59.84
- ▶ F104903.dat
- ▶ query=q2841\_p1
- ▶ precursor=912.305630
- ▶ chargePrecursor=5
- ▶ itol=0.8

| AA   | c               | y               | z+1             | z+2      | z               | AA   |
|------|-----------------|-----------------|-----------------|----------|-----------------|------|
| S 1  | 47.014          | <b>1140.125</b> | <b>1136.120</b> | 0.755    | <b>1135.860</b> | S 41 |
| G 2  | 61.269          | <b>1090.375</b> | 1094.370        | 0.755    | 1094.118        | G 40 |
| R 3  | 100.294         | 1084.120        | 1080.115        | 1080.307 | 1079.851        | R 39 |
| G 4  | 114.550         | 1045.094        | 1041.090        | 1041.342 | 1040.839        | G 38 |
| K 5  | 146.573         | 1030.039        | 1026.834        | 1027.086 | 1026.582        | K 37 |
| Q 6  | 178.308         | <b>990.815</b>  | 994.811         | 995.062  | 994.555         | Q 36 |
| G 7  | 192.543         | 966.852         | 962.796         | 963.048  | 962.544         | G 35 |
| G 8  | 207.089         | 962.545         | 948.541         | 948.792  | 948.289         | G 34 |
| K 9  | 249.625         | 938.200         | 934.205         | 934.537  | 934.031         | K 33 |
| A 10 | 267.384         | 895.763         | 891.759         | 892.011  | 891.507         | A 32 |
| R 11 | 306.410         | 878.004         | 873.999         | 874.251  | 873.746         | R 31 |
| A 12 | 334.399         | 838.974         | 834.974         | 835.226  | 834.722         | A 30 |
| R 13 | 356.193         | 821.220         | 817.215         | 817.467  | 816.961         | R 29 |
| A 14 | 373.952         | 789.196         | 785.191         | 785.443  | 784.939         | A 28 |
| K 15 | 409.976         | 771.437         | 767.432         | 767.684  | 767.180         | K 27 |
| S 16 | 427.734         | 739.413         | 735.408         | 735.660  | 735.156         | S 26 |
| R 17 | 466.759         | 747.665         | 743.650         | 743.902  | 743.398         | R 25 |
| S 18 | 488.517         | 678.939         | 674.935         | 674.977  | 674.371         | S 24 |
| S 19 | 510.275         | 656.872         | 652.867         | 653.119  | 652.615         | S 23 |
| R 20 | 549.300         | 635.114         | 631.109         | 631.361  | 630.857         | R 22 |
| A 21 | 567.059         | 596.088         | 592.084         | 592.336  | 591.832         | A 21 |
| G 22 | 581.315         | 578.329         | 574.324         | 574.576  | 574.072         | G 20 |
| L 23 | 609.586         | 564.074         | 560.069         | 560.321  | 559.817         | L 19 |
| Q 24 | 641.609         | 535.801         | 531.796         | 532.050  | 531.546         | Q 19 |
| F 25 | 678.368         | 503.768         | 499.763         | 500.035  | 499.531         | F 17 |
| P 26 | 702.631         | 467.021         | 463.016         | 463.268  | 462.764         | P 16 |
| V 27 | 727.398         | 442.758         | 438.753         | 439.005  | 438.501         | V 15 |
| G 28 | 741.651         | 417.991         | 413.986         | 414.238  | 413.734         | G 14 |
| R 29 | 780.676         | 401.735         | 397.731         | 398.002  | 397.479         | R 13 |
| V 30 | 805.448         | 384.710         | 380.705         | 380.957  | 380.453         | V 12 |
| H 31 | 839.710         | 339.943         | 335.938         | 336.190  | 335.686         | H 11 |
| R 32 | 878.736         | 305.678         | 301.673         | 301.925  | 301.421         | R 10 |
| L 33 | 907.007         | 266.653         | 262.648         | 262.900  | 262.396         | L 9  |
| L 34 | <b>935.278</b>  | 238.387         | 234.377         | 234.629  | 234.125         | L 8  |
| R 35 | 974.363         | 210.111         | 206.106         | 206.358  | 205.854         | R 7  |
| K 36 | 1036.327        | 171.085         | 167.081         | 167.333  | 166.829         | K 6  |
| G 37 | 1020.582        | 139.062         | 135.057         | 135.309  | 134.805         | G 5  |
| N 38 | <b>1049.093</b> | 124.808         | 120.802         | 121.054  | 120.550         | N 4  |
| V 39 | <b>1089.859</b> | 96.290          | 92.291          | 92.543   | 92.039          | V 3  |
| A 40 | <b>1107.618</b> | 55.530          | 51.525          | 51.777   | 51.273          | A 2  |
| E 41 | <b>1139.879</b> | 37.771          | 33.766          | 34.018   | 33.514          | E 1  |



# sp | Q6GSS7 | H2A2A\_MOUSE

[Acetyl]S<sup>Phospho</sup><sub>79.97</sub> GRGKQGKARAKAKSRSSRAGLQFPVGRVHLLRKGNYAE

- ▶ fragmentation table for charge state 1+
- ▶ specType=etd
- ▶ score=53.15
- ▶ F104903.dat
- ▶ query=q2842\_p1
- ▶ precursor=760.423910
- ▶ chargePrecursor=6
- ▶ itol=0.8

| AA | c  | y               | #±1             | #±2             | z               | AA              |       |
|----|----|-----------------|-----------------|-----------------|-----------------|-----------------|-------|
| S  | 1  | 221.063         | 4351.476        | 4941.455        | 4.800           | 4540.456        | S[1]  |
| G  | 2  | 284.064         | 4348.467        | 4332.449        | 0.000           | 4331.441        | G[2]  |
| R  | 3  | 440.165         | 4291.464        | 4275.427        | 4276.435        | 4274.410        | R[3]  |
| G  | 4  | 497.167         | 4135.345        | 4119.320        | 4120.334        | 4118.310        | G[4]  |
| K  | 5  | 625.262         | 4078.323        | 4062.305        | 4063.313        | 4061.297        | K[5]  |
| G  | 6  | <b>753.340</b>  | 3950.228        | 3934.210        | 3935.218        | 3933.202        | G[6]  |
| G  | 7  | <b>810.352</b>  | 3932.170        | 3899.151        | 3907.159        | 3895.141        | G[7]  |
| G  | 8  | 867.353         | 3765.148        | 3749.130        | 3750.138        | 3748.122        | G[8]  |
| K  | 9  | 895.478         | 3708.127        | 3692.108        | 3693.116        | 3691.100        | K[9]  |
| A  | 10 | 1098.515        | 3380.012        | 3364.013        | 3365.021        | 3363.005        | A[10] |
| R  | 11 | 1227.614        | 3538.995        | 3492.976        | 3493.984        | 3491.968        | R[11] |
| A  | 12 | <b>1291.654</b> | 3382.994        | 3336.975        | 3337.983        | 3335.967        | A[12] |
| K  | 13 | 1421.749        | 3281.857        | 3265.838        | 3266.846        | 3264.830        | K[13] |
| A  | 14 | 1462.766        | 3153.762        | 3137.743        | 3138.751        | 3136.735        | A[14] |
| K  | 15 | 1620.861        | 3082.725        | 3066.706        | 3067.714        | 3065.698        | K[15] |
| S  | 16 | 1707.911        | 2954.630        | 2938.611        | 2939.619        | 2937.603        | S[16] |
| R  | 17 | 1864.014        | 2897.598        | 2881.579        | 2882.587        | 2880.571        | R[17] |
| S  | 18 | 1951.066        | 2711.496        | 2695.477        | 2696.486        | 2694.470        | S[18] |
| S  | 19 | 2038.078        | 2634.464        | 2608.446        | 2609.454        | 2607.438        | S[19] |
| R  | 20 | 2194.179        | 2537.432        | 2521.414        | 2522.422        | 2520.406        | R[20] |
| A  | 21 | 2285.216        | 2381.311        | 2365.293        | 2366.300        | 2364.284        | A[21] |
| G  | 22 | 2322.237        | 2310.294        | 2294.275        | 2295.283        | 2293.267        | G[22] |
| L  | 23 | 2485.322        | 2253.271        | 2237.252        | 2238.260        | 2236.244        | L[23] |
| Q  | 24 | 2563.360        | 2140.185        | 2124.170        | 2125.178        | 2123.162        | Q[24] |
| F  | 25 | 2710.449        | 2012.130        | 1996.111        | <b>1997.119</b> | 1995.104        | F[25] |
| F  | 26 | 2807.501        | 1895.062        | 1849.043        | 1850.051        | 1848.035        | F[26] |
| V  | 27 | 2906.570        | 1768.009        | 1751.990        | 1752.998        | 1750.982        | V[27] |
| G  | 28 | 2963.591        | 1688.942        | 1682.922        | 1683.930        | 1681.914        | G[28] |
| R  | 29 | 3118.692        | 1611.919        | 1595.900        | <b>1596.908</b> | 1594.884        | R[29] |
| V  | 30 | 3218.761        | 1455.815        | 1439.799        | 1440.807        | 1438.791        | V[30] |
| H  | 31 | 3355.820        | 1358.749        | 1340.731        | <b>1341.739</b> | 1339.723        | H[31] |
| R  | 32 | 3511.921        | <b>1219.691</b> | <b>1203.672</b> | 1204.680        | 1202.664        | R[32] |
| L  | 33 | 3625.005        | <b>1063.589</b> | <b>1047.571</b> | <b>1048.579</b> | <b>1046.563</b> | L[33] |
| L  | 34 | 3738.089        | 950.505         | <b>934.487</b>  | <b>935.495</b>  | <b>933.479</b>  | L[34] |
| R  | 35 | 3894.190        | 837.422         | <b>821.403</b>  |                 |                 | R[35] |
| K  | 36 | 4022.285        | 681.320         | 665.302         | 666.309         | 664.294         | K[36] |
| G  | 37 | 4079.306        | 553.225         | 537.207         | 538.214         | 536.199         | G[37] |
| N  | 38 | 4193.349        | 496.204         | 480.185         | 481.193         | 479.177         | N[38] |
| V  | 39 | 4358.413        | 382.161         | 366.142         | 367.150         | 365.134         | V[39] |
| A  | 40 | 4427.456        | 219.096         | 203.079         | 204.086         | 202.070         | A[40] |
| E  | 41 | 4556.492        | 148.060         | 132.042         | 133.050         | 131.034         | E[41] |

# sp | Q6GSS7 | H2A2A\_MOUSE

[Acetyl]S<sup>Phospho</sup><sub>79.97</sub> GRGKQG GKARAKAKSRSSRAGLQFPVGRVHRLLRKGN<sup>YAE</sup>

- ▶ fragmentation table for charge state 2+
- ▶ specType=etd
- ▶ score=53.15
- ▶ F104903.dat
- ▶ query=q2842\_p1
- ▶ precursor=760.423910
- ▶ chargePrecursor=6
- ▶ itol=0.8

| AA | c  | y               | s+1             | s+2             | z               | AA              |       |
|----|----|-----------------|-----------------|-----------------|-----------------|-----------------|-------|
| S  | 1  | 114.005         | 2278.242        | 2271.232        | 0.804           | 2270.121        | S[41] |
| G  | 2  | 142.516         | 2174.737        | 2166.726        | 0.804           | 2166.254        | G[40] |
| R  | 3  | 220.586         | 2146.227        | 2138.217        | 2138.921        | 2137.711        | R[39] |
| G  | 4  | 249.097         | 2088.176        | 2080.167        | 2080.671        | 2059.663        | G[38] |
| K  | 5  | 313.145         | 2039.665        | 2031.656        | 2032.160        | 2031.152        | K[37] |
| G  | 6  | 377.174         | 1975.616        | 1967.606        | 1968.112        | 1967.105        | G[36] |
| G  | 7  | 405.685         | 1911.569        | 1903.579        | 1904.083        | 1903.073        | G[35] |
| G  | 8  | 434.195         | 1883.078        | 1875.088        | 1875.592        | 1874.585        | G[34] |
| K  | 9  | 498.243         | 1854.567        | 1846.558        | 1847.062        | 1846.054        | K[33] |
| A  | 10 | 533.761         | 1790.520        | 1782.510        | 1783.014        | 1782.006        | A[32] |
| R  | 11 | 617.817         | 1735.001        | 1726.992        | 1727.496        | 1726.488        | R[31] |
| A  | 12 | <b>647.330</b>  | 1678.954        | 1669.943        | 1669.446        | 1668.439        | A[30] |
| K  | 13 | <b>711.378</b>  | 1643.432        | <b>1633.423</b> | <b>1633.927</b> | <b>1632.919</b> | K[29] |
| A  | 14 | 766.896         | 1577.384        | 1569.375        | 1569.879        | 1568.871        | A[28] |
| K  | 15 | <b>810.944</b>  | 1541.866        | 1533.857        | 1534.360        | 1533.351        | K[27] |
| S  | 16 | <b>854.460</b>  | 1477.818        | <b>1469.809</b> | <b>1470.313</b> | 1469.305        | S[26] |
| R  | 17 | <b>932.511</b>  | 1434.302        | <b>1426.293</b> | <b>1426.797</b> | 1425.789        | R[25] |
| S  | 18 | <b>976.027</b>  | <b>1356.252</b> | <b>1348.243</b> | <b>1348.746</b> | 1347.739        | S[24] |
| S  | 19 | <b>1019.543</b> | <b>1312.736</b> | 1304.726        | <b>1305.230</b> | 1304.223        | S[23] |
| R  | 20 | <b>1097.593</b> | 1269.220        | <b>1261.210</b> | <b>1261.714</b> | <b>1260.707</b> | R[22] |
| A  | 21 | 1133.112        | 1191.169        | 1183.160        | <b>1183.664</b> | 1182.656        | A[21] |
| G  | 22 | 1167.627        | 1135.051        | 1127.041        | <b>1148.145</b> | 1147.137        | G[20] |
| G  | 23 | 1213.144        | <b>1127.140</b> | <b>1119.131</b> | <b>1119.635</b> | 1118.627        | G[19] |
| Q  | 24 | <b>1282.194</b> | <b>1070.598</b> | <b>1062.589</b> | <b>1063.093</b> | 1062.085        | Q[18] |
| F  | 25 | <b>1355.728</b> | 1008.590        | <b>998.559</b>  | <b>999.063</b>  | 998.055         | F[17] |
| F  | 26 | 1404.254        | <b>933.034</b>  | 925.025         | 925.529         | 924.521         | F[16] |
| V  | 27 | 1453.788        | 884.508         | 876.499         | 877.003         | 876.995         | V[15] |
| G  | 28 | <b>1482.299</b> | 834.974         | <b>826.965</b>  | <b>827.468</b>  | 826.461         | G[14] |
| R  | 29 | 1569.353        | 806.483         | <b>798.454</b>  | <b>798.958</b>  | <b>797.950</b>  | R[13] |
| V  | 30 | <b>1609.884</b> | 728.413         | 720.403         | 720.907         | 719.899         | V[12] |
| H  | 31 | <b>1678.413</b> | 678.878         | <b>670.869</b>  | <b>671.373</b>  | 670.365         | H[11] |
| R  | 32 | 1736.464        | 610.349         | <b>602.340</b>  | <b>602.843</b>  | <b>601.836</b>  | R[10] |
| L  | 33 | 1813.006        | 532.289         | 524.280         | 524.783         | 523.785         | L[9]  |
| L  | 34 | 1889.548        | 478.756         | 469.747         | 469.251         | 468.243         | L[8]  |
| R  | 35 | 1947.599        | 419.214         | 411.205         | 411.709         | 410.701         | R[7]  |
| K  | 36 | 2011.646        | 341.164         | 333.154         | 333.658         | 332.650         | K[6]  |
| G  | 37 | 2046.157        | 277.116         | 269.107         | 269.611         | 268.603         | G[5]  |
| M  | 38 | 2097.178        | 248.606         | 240.596         | 241.100         | 240.092         | M[4]  |
| V  | 39 | 2178.710        | 181.564         | 183.575         | 184.079         | 183.071         | V[3]  |
| A  | 40 | 2214.229        | 110.026         | 109.530         | 109.234         | 108.530         | A[2]  |
| E  | 41 | 2278.750        | 74.534          | 66.524          | 67.028          | 66.021          | E[1]  |

# sp | Q6GSS7 | H2A2A\_MOUSE

[Acetyl]S<sup>Phospho</sup><sub>79.97</sub> GRGKQG GKARAKAKSRSSRAGLQFPVGRVH RLLRKGNYAE

- ▶ fragmentation table for charge state 3+
- ▶ specType=etd
- ▶ score=53.15
- ▶ F104903.dat
- ▶ query=q2842\_p1
- ▶ precursor=760.423910
- ▶ chargePrecursor=6
- ▶ itol=0.8

| AA   | c               | y              | z+1             | z+2             | z               | AA   |
|------|-----------------|----------------|-----------------|-----------------|-----------------|------|
| S 1  | 76.352          | 1519.830       | 1514.461        | 0.672           | 1514.155        | S 41 |
| G 2  | 95.360          | 1450.161       | 1444.821        | 0.672           | 1444.485        | G 40 |
| R 3  | 147.393         | 1431.154       | 1425.814        | 1426.150        | 1425.478        | R 39 |
| G 4  | 106.400         | 1379.120       | 1373.780        | 1374.116        | 1373.444        | G 38 |
| K 5  | 209.069         | 1360.113       | <b>1354.773</b> | <b>1355.109</b> | 1354.437        | K 37 |
| Q 6  | 261.705         | 1317.814       | <b>1312.075</b> | <b>1312.411</b> | <b>1311.739</b> | Q 36 |
| G 7  | 320.792         | 1274.726       | <b>1269.389</b> | <b>1269.725</b> | 1269.055        | G 35 |
| G 8  | 289.799         | 1255.721       | <b>1250.381</b> | <b>1250.717</b> | 1250.045        | G 34 |
| K 9  | 332.496         | 1236.714       | <b>1231.374</b> | <b>1231.710</b> | 1231.038        | K 33 |
| A 10 | 356.177         | 1194.016       | 1189.676        | 1189.012        | 1188.340        | A 32 |
| R 11 | 408.210         | 1170.336       | <b>1164.997</b> | <b>1165.333</b> | 1164.661        | R 31 |
| A 12 | 431.889         | 1138.303       | 1133.963        | 1133.300        | 1132.627        | A 30 |
| R 13 | 474.588         | 1094.024       | <b>1089.284</b> | <b>1089.620</b> | 1088.948        | R 29 |
| A 14 | 498.267         | 1051.925       | <b>1046.586</b> | <b>1046.922</b> | 1046.250        | A 28 |
| K 15 | 540.965         | 1028.246       | 1022.907        | 1023.243        | 1022.571        | K 27 |
| S 16 | 509.976         | 985.548        | <b>980.208</b>  | <b>980.544</b>  | <b>979.873</b>  | S 26 |
| R 17 | 622.069         | 936.537        | <b>951.198</b>  | <b>951.534</b>  | <b>950.862</b>  | R 25 |
| S 18 | 651.029         | <b>904.504</b> | 899.164         | 899.500         | 898.828         | S 24 |
| S 19 | 680.031         | 875.493        | <b>870.153</b>  | <b>870.489</b>  | <b>869.817</b>  | S 23 |
| R 20 | <b>732.064</b>  | 846.483        | <b>841.143</b>  | <b>841.479</b>  | <b>840.807</b>  | R 22 |
| A 21 | 755.744         | 794.449        | <b>789.109</b>  | <b>789.445</b>  | 788.773         | A 21 |
| G 22 | 774.751         | 770.770        | 765.430         | 765.766         | 765.094         | G 20 |
| L 23 | <b>812.445</b>  | 731.762        | 746.423         | 746.759         | 746.087         | L 19 |
| Q 24 | <b>855.132</b>  | 714.068        | 708.728         | 709.064         | 708.392         | Q 19 |
| F 25 | <b>904.154</b>  | <b>671.382</b> | 666.042         | 666.378         | 665.706         | F 17 |
| F 26 | 936.505         | 622.359        | 617.019         | 617.355         | 616.683         | F 16 |
| V 27 | <b>969.528</b>  | 590.028        | 584.688         | 585.024         | 584.352         | V 15 |
| G 28 | <b>988.535</b>  | 556.985        | 551.645         | 551.981         | 551.309         | G 14 |
| R 29 | 1027.599        | 517.878        | 512.538         | 512.874         | 512.202         | R 13 |
| V 30 | <b>1073.592</b> | 488.944        | 483.604         | 483.941         | 483.269         | V 12 |
| H 31 | <b>1119.278</b> | 452.921        | 447.581         | 447.918         | 447.246         | H 11 |
| R 32 | <b>1171.312</b> | 407.735        | 402.395         | 402.731         | 402.059         | R 10 |
| L 33 | <b>1209.066</b> | 355.201        | 349.862         | 350.198         | 349.526         | L 9  |
| L 34 | <b>1246.791</b> | 317.507        | 312.167         | 312.503         | 311.831         | L 8  |
| R 35 | <b>1298.735</b> | 279.812        | 274.472         | 274.808         | 274.136         | R 7  |
| R 36 | <b>1341.433</b> | 232.778        | 227.438         | 227.775         | 227.103         | R 6  |
| G 37 | 1360.440        | 185.080        | 179.740         | 180.076         | 179.404         | G 5  |
| N 38 | 1398.455        | 166.073        | 160.733         | 161.069         | 160.397         | N 4  |
| V 39 | 1452.809        | 128.058        | 122.719         | 123.055         | 122.383         | V 3  |
| A 40 | 1476.488        | 71.704         | 66.364          | 66.700          | 66.028          | A 2  |
| E 41 | 1519.302        | 30.025         | 44.685          | 45.021          | 44.349          | E 1  |

# sp | Q6GSS7 | H2A2A\_MOUSE

[Acetyl]S<sup>Phospho</sup><sub>79.97</sub> GRGKQGKKARAKAKSRSSRAGLQFPVGRVHLLLRKGN<sup>YAE</sup>

- ▶ fragmentation table for charge state 4+
- ▶ specType=etd
- ▶ score=53.15
- ▶ F104903.dat
- ▶ query=q2842\_p1
- ▶ precursor=760.423910
- ▶ chargePrecursor=6
- ▶ itol=0.8

| AA   | c               | y               | z+1             | z+2      | z               | AA   |
|------|-----------------|-----------------|-----------------|----------|-----------------|------|
| S 1  | 57.516          | <b>1140.125</b> | <b>1136.120</b> | 0.755    | <b>1135.868</b> | S 41 |
| G 2  | 71.772          | 1087.872        | <b>1083.868</b> | 0.755    | <b>1083.616</b> | G 40 |
| R 3  | 110.797         | <b>1073.617</b> | 1069.612        | 1069.804 | 1069.350        | R 39 |
| G 4  | 125.052         | 1034.592        | 1030.587        | 1030.839 | 1030.135        | G 38 |
| K 5  | 157.076         | <b>1020.336</b> | 1016.331        | 1016.584 | 1016.080        | K 37 |
| Q 6  | 189.093         | <b>988.313</b>  | 984.308         | 984.560  | 984.056         | Q 36 |
| G 7  | 203.348         | 956.256         | 952.251         | 952.503  | <b>952.041</b>  | G 35 |
| G 8  | 217.601         | 942.043         | 938.038         | 938.290  | 937.786         | G 34 |
| K 9  | 249.625         | 927.787         | 923.783         | 924.034  | 923.531         | K 33 |
| A 10 | 267.384         | 895.763         | 891.759         | 892.011  | 891.507         | A 32 |
| R 11 | 306.430         | 878.004         | 874.000         | 874.251  | 873.748         | R 31 |
| A 12 | 334.399         | 838.978         | 834.974         | 835.226  | 834.722         | A 30 |
| R 13 | 356.193         | <b>821.220</b>  | 817.215         | 817.467  | 816.963         | R 29 |
| A 14 | 373.952         | <b>789.196</b>  | 785.191         | 785.443  | 784.939         | A 28 |
| K 15 | 409.976         | 771.437         | 767.432         | 767.684  | 767.180         | K 27 |
| S 16 | 427.734         | 739.413         | 735.408         | 735.660  | 735.156         | S 26 |
| R 17 | 466.759         | 747.655         | 743.650         | 743.902  | 743.398         | R 25 |
| S 18 | 488.517         | 678.930         | 674.925         | 675.177  | 674.673         | S 24 |
| S 19 | 510.275         | 656.872         | 652.867         | 653.119  | 652.615         | S 23 |
| R 20 | 549.300         | 635.114         | 631.109         | 631.361  | 630.857         | R 22 |
| A 21 | 567.059         | 596.088         | 592.084         | 592.336  | 591.832         | A 21 |
| G 22 | 581.315         | 578.320         | 574.314         | 574.576  | 574.072         | G 20 |
| L 23 | 600.588         | 564.074         | 560.069         | 560.321  | 559.817         | L 19 |
| Q 24 | 641.609         | 535.803         | 531.798         | 532.050  | 531.546         | Q 19 |
| F 25 | 678.368         | 503.768         | 499.763         | 500.015  | 499.511         | F 17 |
| P 26 | 702.631         | 467.021         | 463.016         | 463.268  | 462.764         | P 16 |
| V 27 | 727.398         | 442.758         | 438.753         | 439.005  | 438.501         | V 15 |
| G 28 | 741.653         | 417.991         | 413.986         | 414.238  | 413.734         | G 14 |
| R 29 | 780.678         | 403.735         | 399.730         | 399.982  | 399.478         | R 13 |
| L 30 | 805.448         | 364.710         | 360.705         | 360.957  | 360.453         | L 12 |
| H 31 | <b>839.710</b>  | 339.943         | 335.938         | 336.190  | 335.686         | H 11 |
| R 32 | 878.736         | 305.678         | 301.673         | 301.925  | 301.421         | R 10 |
| L 33 | 907.007         | 266.653         | 262.648         | 262.900  | 262.396         | L 9  |
| L 34 | <b>935.278</b>  | 238.387         | 234.377         | 234.629  | 234.125         | L 8  |
| R 35 | 974.303         | 210.111         | 206.106         | 206.358  | 205.854         | R 7  |
| K 36 | 1036.327        | 171.085         | 167.081         | 167.333  | 166.829         | K 6  |
| G 37 | <b>1020.582</b> | 139.062         | 135.057         | 135.309  | 134.805         | G 5  |
| N 38 | <b>1049.093</b> | 124.808         | 120.802         | 121.054  | 120.550         | N 4  |
| V 39 | <b>1089.859</b> | 96.290          | 92.291          | 92.543   | 92.039          | V 3  |
| A 40 | <b>1107.618</b> | 55.530          | 51.525          | 51.777   | 51.273          | A 2  |
| E 41 | <b>1139.879</b> | 37.771          | 33.766          | 34.018   | 33.514          | E 1  |

# sp | Q6GSS7 | H2A2A\_MOUSE

[Acetyl]S<sup>Phospho</sup><sub>79.97</sub> GRGKQGKKARAKAKSRSSRAGLQFPVGRVHLLLKRGNYAE

- ▶ fragmentation table for charge state 5+
- ▶ specType=etd
- ▶ score=53.15
- ▶ F104903.dat
- ▶ query=q2842\_p1
- ▶ precursor=760.423910
- ▶ chargePrecursor=6
- ▶ itol=0.8

| AA | c  | y              | z+1            | z#2            | z              | AA             |   |    |
|----|----|----------------|----------------|----------------|----------------|----------------|---|----|
| S  | 1  | 46.214         | <b>912.301</b> | 909.097        | 0.806          | 908.896        | S | 41 |
| G  | 2  | 57.619         | <b>870.499</b> | 867.296        | 0.806          | 867.094        | G | 40 |
| R  | 3  | 68.839         | 859.095        | <b>855.891</b> | <b>856.093</b> | <b>855.690</b> | R | 39 |
| G  | 4  | 100.243        | <b>827.875</b> | 824.671        | 824.873        | 824.469        | G | 38 |
| K  | 5  | 125.862        | 816.471        | <b>813.267</b> | <b>813.468</b> | <b>813.065</b> | K | 37 |
| Q  | 6  | 151.474        | 790.952        | 787.648        | 787.949        | 787.446        | Q | 36 |
| G  | 7  | 162.676        | 765.240        | 762.036        | 762.238        | 761.834        | G | 35 |
| G  | 8  | 174.282        | <b>753.836</b> | 750.632        | 750.833        | 750.430        | G | 34 |
| K  | 9  | 189.901        | 742.431        | 739.227        | 739.429        | 739.026        | K | 33 |
| A  | 10 | 214.109        | 716.812        | 713.608        | 713.810        | 713.407        | A | 32 |
| R  | 11 | 245.329        | 702.605        | 699.401        | 699.603        | 699.199        | R | 31 |
| A  | 12 | 259.537        | <b>671.385</b> | 668.181        | 668.382        | 667.979        | A | 30 |
| K  | 13 | 285.156        | 657.177        | 653.973        | 654.175        | 653.772        | K | 29 |
| A  | 14 | 299.363        | 631.558        | 628.354        | 628.556        | 628.153        | A | 28 |
| K  | 15 | 324.982        | 617.351        | 614.147        | 614.349        | 613.945        | K | 27 |
| S  | 16 | 342.388        | 591.732        | 588.528        | 588.730        | 588.326        | S | 26 |
| R  | 17 | 373.609        | 574.325        | 571.122        | 571.323        | 570.920        | R | 25 |
| S  | 18 | 381.915        | 543.105        | 539.901        | 540.103        | 539.700        | S | 24 |
| S  | 19 | 408.421        | 525.690        | 522.486        | 522.687        | 522.283        | S | 23 |
| R  | 20 | 439.642        | 508.282        | 505.079        | 505.280        | 504.877        | R | 22 |
| A  | 21 | 453.849        | 477.072        | 473.868        | 474.070        | 473.667        | A | 21 |
| G  | 22 | 465.253        | 462.865        | 459.661        | 459.862        | 459.459        | G | 20 |
| L  | 23 | 467.870        | 451.460        | 448.257        | 448.458        | 448.055        | L | 19 |
| Q  | 24 | 513.482        | 428.844        | 425.640        | 425.841        | 425.438        | Q | 18 |
| F  | 25 | 542.896        | 403.232        | 400.028        | 400.230        | 399.827        | F | 17 |
| P  | 26 | 562.306        | 373.816        | 370.614        | 370.816        | 370.413        | P | 16 |
| V  | 27 | 652.120        | 354.408        | 351.204        | 351.405        | 351.002        | V | 15 |
| G  | 28 | 593.524        | 334.594        | 331.390        | 331.592        | 331.189        | G | 14 |
| R  | 29 | 624.744        | 323.190        | 319.986        | 320.187        | 319.784        | R | 13 |
| V  | 30 | 644.558        | 291.969        | 288.766        | 288.967        | 288.564        | V | 12 |
| H  | 31 | <b>671.970</b> | 272.156        | 268.952        | 269.154        | 268.750        | H | 11 |
| R  | 32 | 703.190        | 244.744        | 241.540        | 241.742        | 241.339        | R | 10 |
| L  | 33 | 725.807        | 213.524        | 210.320        | 210.522        | 210.118        | L | 9  |
| L  | 34 | 748.424        | 190.907        | 187.703        | 187.905        | 187.502        | L | 8  |
| R  | 35 | 776.644        | 168.290        | 165.086        | 165.288        | 164.885        | R | 7  |
| R  | 36 | 805.263        | 137.070        | 133.866        | 134.068        | 133.665        | R | 6  |
| G  | 37 | 819.664        | 111.451        | 108.247        | 108.449        | 108.046        | G | 5  |
| N  | 38 | <b>839.476</b> | 100.047        | 96.843         | 97.044         | 96.641         | N | 4  |
| V  | 39 | 872.088        | 77.238         | 74.034         | 74.236         | 73.833         | V | 3  |
| A  | 40 | 886.296        | 44.625         | 41.422         | 41.623         | 41.220         | A | 2  |
| E  | 41 | <b>912.104</b> | 30.418         | 27.214         | 27.416         | 27.013         | E | 1  |





# sp | Q6GSS7 | H2A2A\_MOUSE

[Acetyl]S<sup>Phospho</sup><sub>79.97</sub> GRGKQGGK<sup>Dimethyl</sup><sub>28.03</sub> ARAKAKSRSSRAGLQFPVGRVHRLLRKGN<sup>YAE</sup>

- ▶ fragmentation table for charge state 1+
- ▶ specType=etd
- ▶ score=61.45
- ▶ F104903.dat
- ▶ query=q2858\_p1
- ▶ precursor=655.939030
- ▶ chargePrecursor=7
- ▶ itol=0.8

| AA | c  | w               | #±1             | #±2             | z               | AA              |       |
|----|----|-----------------|-----------------|-----------------|-----------------|-----------------|-------|
| S  | 1  | 221.063         | 4368.508        | 4369.480        | 0.000           | 4368.481        | S[1]  |
| G  | 2  | 284.064         | 4376.499        | 4380.480        | 0.000           | 4359.472        | G[2]  |
| R  | 3  | 440.116         | 4319.477        | 4303.459        | 4304.466        | 4307.451        | R[3]  |
| G  | 4  | 497.167         | 4163.376        | 4147.357        | 4146.365        | 4146.350        | G[4]  |
| K  | 5  | <b>625.282</b>  | 4106.355        | 4090.336        | 4091.344        | 4089.328        | K[5]  |
| G  | 6  | <b>753.340</b>  | 3978.260        | 3962.241        | 3963.249        | 3961.233        | G[6]  |
| G  | 7  | <b>810.362</b>  | 3950.251        | 3934.232        | 3935.240        | 3933.224        | G[7]  |
| G  | 8  | 867.363         | 3793.180        | 3777.161        | 3778.169        | 3776.153        | G[8]  |
| K  | 9  | <b>1023.510</b> | 3736.158        | 3720.140        | 3721.147        | 3719.131        | K[9]  |
| A  | 10 | 1084.547        | 3580.032        | 3564.013        | 3565.021        | 3563.005        | A[10] |
| R  | 11 | 1202.618        | 3538.095        | 3492.076        | 3493.084        | 3491.068        | R[11] |
| A  | 12 | <b>1321.685</b> | 3392.984        | 3358.965        | 3359.973        | 3357.957        | A[12] |
| R  | 13 | 1440.750        | 3281.857        | 3265.838        | 3266.846        | 3264.830        | R[13] |
| A  | 14 | 1550.817        | 3153.760        | 3137.741        | 3138.751        | 3136.735        | A[14] |
| K  | 15 | 1648.912        | 3022.725        | 3006.706        | 3007.714        | 3005.699        | K[15] |
| S  | 16 | 1735.944        | 2954.630        | 2938.611        | 2939.619        | 2937.603        | S[16] |
| R  | 17 | 1822.045        | 2897.598        | 2881.579        | 2882.587        | 2880.571        | R[17] |
| S  | 18 | 1979.077        | 2711.496        | 2695.477        | 2696.486        | 2694.470        | S[18] |
| S  | 19 | 2056.116        | 2634.464        | 2608.446        | 2609.454        | 2607.438        | S[19] |
| R  | 20 | 2232.210        | 2537.433        | 2521.414        | 2522.422        | 2520.406        | R[20] |
| A  | 21 | 2293.247        | 2381.311        | 2365.292        | 2366.300        | 2364.284        | A[21] |
| G  | 22 | 2350.269        | 2310.294        | 2294.275        | 2295.283        | 2293.267        | G[22] |
| L  | 23 | 2463.363        | 2253.271        | 2237.252        | 2238.260        | 2236.244        | L[23] |
| Q  | 24 | 2591.411        | 2140.189        | 2124.170        | 2125.178        | 2123.162        | Q[24] |
| F  | 25 | 2738.480        | 2012.130        | 1996.111        | <b>1997.119</b> | 1995.104        | F[25] |
| F  | 26 | 2835.513        | 1895.062        | 1889.043        | 1890.051        | 1888.035        | F[26] |
| V  | 27 | 2934.601        | 1768.009        | 1751.990        | 1752.998        | 1750.982        | V[27] |
| G  | 28 | 2991.622        | 1688.940        | 1682.921        | 1683.930        | 1681.914        | G[28] |
| R  | 29 | 3167.678        | 1511.819        | 1505.800        | 1506.808        | 1504.792        | R[29] |
| V  | 30 | 3246.792        | 1455.815        | 1439.799        | 1440.807        | 1438.791        | V[30] |
| H  | 31 | 3381.851        | 1358.749        | <b>1340.731</b> | 1341.739        | <b>1339.723</b> | H[31] |
| R  | 32 | 3539.952        | 1219.691        | <b>1203.672</b> | 1204.680        | 1202.664        | R[32] |
| L  | 33 | 3653.036        | <b>1063.589</b> | <b>1047.571</b> | 1048.579        | 1046.563        | L[33] |
| L  | 34 | 3766.120        | 926.505         | <b>934.487</b>  | 935.495         | <b>933.479</b>  | L[34] |
| R  | 35 | 3922.212        | 837.423         | <b>821.403</b>  | <b>822.410</b>  | 820.394         | R[35] |
| K  | 36 | 4050.316        | 681.320         | 665.302         | <b>666.309</b>  | 664.294         | K[36] |
| G  | 37 | 4187.338        | 533.225         | 517.207         | 518.214         | 516.199         | G[37] |
| N  | 38 | 4221.361        | 496.204         | 480.185         | 481.193         | 479.177         | N[38] |
| V  | 39 | 4364.444        | 382.161         | 366.142         | 367.150         | 365.134         | V[39] |
| A  | 40 | 4455.463        | 319.096         | 303.079         | 304.087         | 302.071         | A[40] |
| E  | 41 | 4584.534        | 148.060         | 132.042         | 133.050         | 131.034         | E[41] |

# sp | Q6GSS7 | H2A2A\_MOUSE

[Acetyl]S<sup>Phospho</sup><sub>79.97</sub> GRGKQGGK<sup>Dimethyl</sup><sub>28.03</sub> ARAKAKSRSSRAGLQFPVGRVHLLLRKGN<sup>YAE</sup>

- ▶ fragmentation table for charge state 2+
- ▶ specType=etd
- ▶ score=61.45
- ▶ F104903.dat
- ▶ query=q2858\_p1
- ▶ precursor=655.939030
- ▶ chargePrecursor=7
- ▶ itol=0.8

| AA   | c               | y              | z+1             | z+2             | z               | AA   |
|------|-----------------|----------------|-----------------|-----------------|-----------------|------|
| S 1  | 114.025         | 2793.257       | 2795.240        | 0.504           | 2384.744        | S 41 |
| G 2  | 142.536         | 2188.753       | 2180.744        | 0.504           | 2180.240        | G 40 |
| R 3  | 280.586         | 2160.942       | 2154.233        | 2152.737        | 2151.729        | R 39 |
| G 4  | 289.097         | 2082.192       | 2074.182        | 2074.686        | 2073.678        | G 38 |
| K 5  | 313.145         | 2051.681       | 2045.672        | 2046.176        | 2045.168        | K 37 |
| Q 6  | 377.174         | 1989.634       | 1983.624        | 1982.228        | 1981.120        | Q 36 |
| G 7  | 405.982         | 1925.664       | 1917.555        | 1918.059        | 1917.051        | G 35 |
| G 8  | 434.195         | 1897.093       | <b>1889.084</b> | <b>1889.588</b> | 1888.580        | G 34 |
| K 9  | 512.250         | 1886.583       | 1880.573        | 1861.077        | 1860.069        | K 33 |
| A 10 | 547.777         | 1790.620       | 1782.510        | 1783.014        | 1782.006        | A 32 |
| R 11 | <b>625.828</b>  | 1755.001       | 1746.992        | 1747.496        | 1746.488        | R 31 |
| A 12 | <b>661.346</b>  | 1676.951       | 1668.941        | 1669.445        | 1668.437        | A 30 |
| R 13 | <b>725.394</b>  | 1641.432       | 1633.423        | 1633.927        | 1632.919        | R 29 |
| A 14 | <b>760.912</b>  | 1577.384       | 1569.375        | 1569.879        | 1568.871        | A 28 |
| K 15 | <b>824.960</b>  | 1541.866       | 1533.857        | 1534.361        | 1533.353        | K 27 |
| S 16 | <b>868.476</b>  | 1477.818       | 1469.809        | 1470.313        | 1469.305        | S 26 |
| R 17 | <b>946.526</b>  | 1434.302       | <b>1426.293</b> | <b>1426.797</b> | 1425.789        | R 25 |
| S 18 | <b>980.642</b>  | 1356.252       | <b>1348.243</b> | <b>1348.746</b> | 1347.738        | S 24 |
| S 19 | <b>1033.558</b> | 1312.736       | 1304.727        | 1305.230        | 1304.223        | S 23 |
| R 20 | <b>1111.609</b> | 1269.220       | 1261.210        | <b>1261.714</b> | 1260.707        | R 22 |
| A 21 | 1147.127        | 1191.099       | <b>1183.100</b> | <b>1183.604</b> | <b>1182.606</b> | A 21 |
| G 22 | <b>1175.638</b> | 1155.051       | <b>1147.641</b> | <b>1148.145</b> | 1147.137        | G 20 |
| L 23 | <b>1232.180</b> | 1127.140       | <b>1119.131</b> | 1119.635        | <b>1118.627</b> | L 19 |
| Q 24 | <b>1296.209</b> | 1070.588       | <b>1062.589</b> | <b>1063.093</b> | 1062.085        | Q 19 |
| F 25 | 1369.744        | 1006.569       | <b>998.559</b>  | <b>999.063</b>  | 998.055         | F 17 |
| P 26 | 1418.270        | 933.034        | 925.025         | 925.529         | 924.521         | P 16 |
| V 27 | <b>1467.804</b> | 894.508        | <b>876.499</b>  | <b>877.003</b>  | <b>875.995</b>  | V 15 |
| G 28 | <b>1496.315</b> | <b>834.974</b> | <b>826.965</b>  | <b>827.468</b>  | <b>826.461</b>  | G 14 |
| R 29 | 1574.393        | 856.603        | <b>798.454</b>  | <b>798.958</b>  | <b>797.950</b>  | R 13 |
| L 30 | 1621.902        | 728.413        | 720.403         | 720.907         | 719.899         | L 12 |
| H 31 | 1692.420        | 678.878        | <b>670.869</b>  | <b>671.373</b>  | 670.365         | H 11 |
| R 32 | 1770.480        | 610.349        | <b>602.340</b>  | <b>602.843</b>  | <b>601.836</b>  | R 10 |
| L 33 | 1827.022        | 532.298        | 524.289         | 524.793         | 523.785         | L 9  |
| L 34 | 1883.564        | 475.756        | 467.747         | 468.251         | 467.243         | L 8  |
| R 35 | 1963.614        | 419.214        | 411.205         | 411.709         | 410.701         | R 7  |
| R 36 | 2025.662        | 341.164        | 333.154         | 333.658         | 332.650         | R 6  |
| G 37 | 2054.172        | 277.118        | 269.107         | 269.611         | 268.603         | G 5  |
| N 38 | 2111.194        | 246.606        | 240.596         | 241.100         | 240.092         | N 4  |
| V 39 | 2192.726        | 191.984        | 183.975         | 184.479         | 183.471         | V 3  |
| A 40 | 2228.244        | 110.052        | 102.043         | 102.547         | 101.539         | A 2  |
| E 41 | 2292.785        | 74.534         | 66.524          | 67.028          | 66.021          | E 1  |

# sp | Q6GSS7 | H2A2A\_MOUSE

[Acetyl]S<sup>Phospho</sup><sub>79.97</sub> GRGKQGGK<sup>Dimethyl</sup><sub>28.03</sub> ARAKAKSRSSRAGLQFPVGRVHRLLRKGN<sup>YAE</sup>

- ▶ fragmentation table for charge state 3+
- ▶ specType=etd
- ▶ score=61.45
- ▶ F104903.dat
- ▶ query=q2858\_p1
- ▶ precursor=655.939030
- ▶ chargePrecursor=7
- ▶ itol=0.8

| AA | c  | y               | #s1             | #s2             | z               | AA              |       |
|----|----|-----------------|-----------------|-----------------|-----------------|-----------------|-------|
| S  | 1  | 76.352          | <b>1529.174</b> | 1523.835        | 0.872           | 1523.497        | S[1]  |
| G  | 2  | 95.360          | 1455.526        | 1454.165        | 0.872           | 1453.820        | G[2]  |
| R  | 3  | 147.393         | 1440.497        | 1435.158        | 1435.494        | 1434.822        | R[3]  |
| G  | 4  | 166.400         | 1388.464        | 1383.124        | 1383.460        | 1382.788        | G[4]  |
| K  | 5  | 209.099         | 1369.456        | 1364.117        | 1364.453        | 1363.781        | K[5]  |
| G  | 6  | 251.795         | 1326.759        | 1321.419        | <b>1321.754</b> | 1321.083        | G[6]  |
| G  | 7  | 270.792         | 1304.674        | 1299.335        | 1299.668        | 1298.997        | G[7]  |
| G  | 8  | 289.799         | 1285.065        | 1279.725        | 1280.061        | 1279.389        | G[8]  |
| K  | 9  | 341.841         | 1246.058        | 1240.718        | 1241.054        | <b>1240.382</b> | K[9]  |
| A  | 10 | 395.520         | 1194.016        | 1188.676        | 1189.012        | 1188.340        | A[10] |
| R  | 11 | 427.554         | 1170.539        | 1165.199        | 1165.535        | 1164.861        | R[11] |
| A  | 12 | 481.233         | <b>1118.303</b> | 1113.003        | <b>1113.299</b> | 1112.597        | A[12] |
| K  | 13 | 483.931         | 1094.624        | <b>1089.284</b> | <b>1089.620</b> | 1088.946        | K[13] |
| A  | 14 | 507.610         | 1051.925        | 1046.585        | <b>1046.922</b> | 1046.250        | A[14] |
| K  | 15 | 550.309         | 1028.246        | <b>1022.907</b> | <b>1023.243</b> | 1022.571        | K[15] |
| S  | 16 | 579.319         | 985.548         | 980.208         | <b>980.544</b>  | 979.873         | S[16] |
| R  | 17 | <b>631.353</b>  | 956.531         | <b>951.198</b>  | <b>951.534</b>  | <b>950.862</b>  | R[17] |
| S  | 18 | 668.954         | 904.504         | <b>899.164</b>  | <b>899.500</b>  | <b>898.828</b>  | S[18] |
| S  | 19 | <b>689.375</b>  | 875.493         | <b>870.153</b>  | <b>870.489</b>  | <b>869.817</b>  | S[19] |
| R  | 20 | 741.408         | 846.482         | <b>841.143</b>  | <b>841.479</b>  | <b>840.807</b>  | R[20] |
| A  | 21 | <b>765.087</b>  | 794.449         | 789.109         | 789.445         | 788.773         | A[21] |
| C  | 22 | <b>784.094</b>  | 770.710         | <b>765.430</b>  | <b>765.766</b>  | <b>765.094</b>  | C[22] |
| L  | 23 | <b>821.789</b>  | 753.762         | <b>746.423</b>  | <b>746.759</b>  | <b>746.087</b>  | L[23] |
| Q  | 24 | <b>864.475</b>  | 714.085         | 708.745         | 709.084         | 708.412         | Q[24] |
| F  | 25 | 913.498         | <b>671.382</b>  | <b>666.042</b>  | <b>666.378</b>  | <b>665.706</b>  | F[25] |
| P  | 26 | <b>945.849</b>  | 622.359         | 617.019         | 617.355         | 616.683         | P[26] |
| V  | 27 | 978.672         | 590.006         | 584.666         | 585.004         | 584.332         | V[27] |
| C  | 28 | 987.879         | 558.985         | 553.645         | 553.981         | 553.309         | C[28] |
| R  | 29 | 1069.913        | 537.916         | 532.576         | 532.914         | 532.242         | R[29] |
| V  | 30 | <b>1082.936</b> | 485.944         | 480.604         | 480.941         | 480.269         | V[30] |
| H  | 31 | 1138.622        | 452.921         | 447.581         | 447.918         | 447.246         | H[31] |
| R  | 32 | <b>1180.656</b> | 407.235         | 401.895         | 402.231         | 401.560         | R[32] |
| L  | 33 | <b>1218.350</b> | 355.201         | 349.862         | 350.198         | 349.526         | L[33] |
| L  | 34 | <b>1256.045</b> | 312.509         | 307.169         | 307.505         | 306.833         | L[34] |
| R  | 35 | 1289.812        | 279.812         | 274.472         | 274.808         | 274.136         | R[35] |
| K  | 36 | 1350.777        | 227.778         | 222.438         | 222.775         | 222.103         | K[36] |
| G  | 37 | 1389.784        | 185.880         | 179.740         | 180.076         | 179.404         | G[37] |
| N  | 38 | 1407.798        | 166.873         | 160.733         | 161.069         | 160.397         | N[38] |
| Y  | 39 | 1452.153        | 128.998         | 122.719         | 123.055         | 122.383         | Y[39] |
| A  | 40 | <b>1485.832</b> | 83.304          | 78.004          | 78.340          | 77.668          | A[40] |
| E  | 41 | 1528.848        | 50.025          | 44.685          | 45.021          | 44.349          | E[41] |

# sp | Q6GSS7 | H2A2A\_MOUSE

[Acetyl]S<sup>Phospho</sup><sub>79.97</sub> GRGKQGGK<sup>Dimethyl</sup><sub>28.03</sub> ARAKAKSRSSRAGLQFPVGRVHRLLRKGN<sup>YAE</sup>

- ▶ fragmentation table for charge state 4+
- ▶ specType=etd
- ▶ score=61.45
- ▶ F104903.dat
- ▶ query=q2858.p1
- ▶ precursor=655.939030
- ▶ chargePrecursor=7
- ▶ itol=0.8

| AA   | c              | y              | z+1             | z+2             | z               | AA   |
|------|----------------|----------------|-----------------|-----------------|-----------------|------|
| S 1  | 57.518         | 1147.132       | 1143.228        | 0.755           | 1142.878        | S 41 |
| G 2  | 71.772         | 1094.880       | 1090.875        | 0.755           | <b>1090.624</b> | G 40 |
| R 3  | 110.797        | 1080.625       | 1076.620        | 1076.872        | 1076.368        | R 39 |
| G 4  | 125.052        | 1041.600       | 1037.595        | 1037.847        | 1037.343        | G 38 |
| K 5  | 157.078        | 1027.344       | <b>1023.339</b> | <b>1023.591</b> | <b>1023.087</b> | K 37 |
| G 6  | 189.091        | 995.220        | 991.311         | 991.568         | <b>991.064</b>  | G 29 |
| G 7  | 203.346        | 963.306        | <b>959.301</b>  | <b>959.553</b>  | 959.049         | G 35 |
| G 8  | 217.601        | 949.050        | <b>945.046</b>  | <b>945.298</b>  | 944.794         | G 34 |
| K 9  | 256.633        | 934.795        | 930.790         | 931.042         | 930.538         | K 33 |
| A 10 | 274.302        | 895.763        | 891.750         | 892.011         | 891.507         | A 32 |
| R 11 | 313.417        | 879.804        | 875.999         | 874.251         | 873.748         | R 31 |
| A 12 | 321.177        | <b>818.979</b> | <b>814.974</b>  | <b>815.226</b>  | <b>814.722</b>  | A 29 |
| K 13 | 363.200        | <b>821.220</b> | <b>817.215</b>  | <b>817.467</b>  | <b>816.963</b>  | K 29 |
| A 14 | 380.940        | 789.196        | <b>785.191</b>  | 785.443         | <b>784.939</b>  | A 28 |
| K 15 | 412.993        | 771.437        | <b>767.432</b>  | <b>767.684</b>  | <b>767.180</b>  | K 27 |
| S 16 | 434.741        | 739.413        | 735.408         | 735.660         | 735.156         | S 26 |
| R 17 | 473.767        | 717.696        | 713.690         | 713.902         | 713.398         | R 25 |
| S 18 | 495.535        | <b>678.630</b> | 674.623         | 674.877         | 674.373         | S 24 |
| S 19 | 517.283        | 656.572        | 652.567         | 653.119         | 652.615         | S 23 |
| R 20 | 556.308        | 635.114        | <b>631.109</b>  | <b>631.361</b>  | 630.857         | R 22 |
| A 21 | 574.067        | 596.688        | 592.684         | <b>592.336</b>  | 591.833         | A 21 |
| G 22 | 588.323        | 578.329        | 574.324         | 574.576         | 574.072         | G 20 |
| L 23 | 616.564        | 564.074        | 560.069         | 560.321         | 559.817         | L 19 |
| G 24 | <b>648.608</b> | 535.803        | 531.798         | 532.050         | 531.546         | G 18 |
| F 25 | 655.375        | 503.788        | 499.782         | 500.035         | 499.531         | F 17 |
| F 26 | <b>709.639</b> | 487.821        | 483.816         | 483.288         | 482.764         | F 16 |
| V 27 | 734.406        | 442.752        | 438.753         | 439.005         | 438.501         | V 15 |
| G 28 | <b>748.661</b> | 417.991        | 413.986         | 414.238         | 413.734         | G 14 |
| R 29 | 757.726        | 403.735        | 399.731         | 399.982         | 399.479         | R 13 |
| V 30 | <b>812.453</b> | 354.710        | 350.705         | 350.957         | 350.453         | V 12 |
| H 31 | <b>846.718</b> | 339.943        | 335.938         | 336.190         | 335.686         | H 11 |
| R 32 | <b>885.743</b> | 305.678        | 301.673         | 301.925         | 301.421         | R 10 |
| L 33 | 914.014        | 266.653        | 262.648         | 262.900         | 262.396         | L 9  |
| L 34 | 942.285        | 238.302        | 234.297         | 234.629         | 234.125         | L 8  |
| R 35 | <b>981.311</b> | 210.111        | 206.106         | 206.358         | 205.854         | R 7  |
| K 36 | 1013.335       | 171.888        | 167.883         | 168.213         | 167.709         | K 6  |
| G 37 | 1027.590       | 139.062        | 135.057         | 135.309         | 134.805         | G 5  |
| N 38 | 1056.101       | 124.806        | 120.802         | 121.054         | 120.550         | N 4  |
| Y 39 | 1096.686       | 96.296         | 92.291          | 92.543          | 92.039          | Y 3  |
| A 40 | 1114.626       | 55.530         | 51.525          | 51.777          | 51.273          | A 2  |
| E 41 | 1146.888       | 37.771         | 33.766          | 34.018          | 33.514          | E 1  |

# sp | Q6GSS7 | H2A2A\_MOUSE

[Acetyl]S<sup>Phospho</sup><sub>79.97</sub> GRGKQGGK<sup>Dimethyl</sup><sub>28.03</sub> ARAKAKSRSSRAGLQFPVGRVHRLLRKGN<sup>YAE</sup>

- ▶ fragmentation table for charge state 5+
- ▶ specType=etd
- ▶ score=61.45
- ▶ F104903.dat
- ▶ query=q2858.p1
- ▶ precursor=655.939030
- ▶ chargePrecursor=7
- ▶ itol=0.8

| AA | c  | y              | z+1            | z#2            | z              | AA             |   |    |
|----|----|----------------|----------------|----------------|----------------|----------------|---|----|
| S  | 1  | 46.214         | <b>917.907</b> | 934.704        | 0.806          | 914.502        | S | 41 |
| G  | 2  | 57.619         | <b>876.106</b> | 872.902        | 0.806          | 872.700        | G | 40 |
| R  | 3  | 68.839         | <b>864.701</b> | 861.498        | 861.599        | 861.296        | R | 39 |
| G  | 4  | 100.243        | <b>833.481</b> | 830.277        | 830.479        | 830.076        | G | 38 |
| K  | 5  | 125.862        | <b>822.077</b> | 818.873        | 819.075        | 818.671        | K | 37 |
| Q  | 6  | 151.474        | 796.458        | <b>793.254</b> | <b>793.456</b> | <b>793.052</b> | Q | 36 |
| G  | 7  | 162.676        | 770.846        | <b>767.642</b> | <b>767.844</b> | <b>767.441</b> | G | 35 |
| G  | 8  | 174.282        | 759.442        | 756.238        | 756.440        | 756.036        | G | 34 |
| K  | 9  | 205.508        | 748.037        | 744.831        | 745.033        | 744.632        | K | 33 |
| A  | 10 | 219.715        | 716.812        | 713.608        | 713.810        | 713.407        | A | 32 |
| R  | 11 | 250.935        | 702.605        | 699.401        | 699.603        | 699.199        | R | 31 |
| A  | 12 | 265.143        | <b>671.385</b> | 668.181        | 668.382        | 667.979        | A | 30 |
| K  | 13 | 290.762        | 657.177        | 653.973        | 654.175        | 653.772        | K | 29 |
| A  | 14 | 304.969        | <b>631.558</b> | 628.354        | 628.556        | 628.153        | A | 28 |
| K  | 15 | 330.588        | 617.351        | 614.147        | 614.349        | 613.945        | K | 27 |
| S  | 16 | 347.995        | 591.732        | 588.528        | 588.730        | 588.326        | S | 26 |
| R  | 17 | 379.215        | 574.325        | 571.122        | 571.323        | 570.920        | R | 25 |
| S  | 18 | 388.621        | 543.105        | 539.901        | 540.103        | 539.700        | S | 24 |
| S  | 19 | 414.028        | 525.699        | 522.495        | 522.697        | 522.293        | S | 23 |
| R  | 20 | 445.248        | 508.292        | 505.089        | 505.290        | 504.887        | R | 22 |
| A  | 21 | 459.455        | 477.072        | 473.868        | 474.070        | 473.667        | A | 21 |
| G  | 22 | 470.860        | 462.865        | 459.661        | 459.862        | 459.459        | G | 20 |
| L  | 23 | 493.476        | 451.460        | 448.257        | 448.458        | 448.055        | L | 19 |
| Q  | 24 | 519.088        | 428.844        | 425.640        | 425.841        | 425.438        | Q | 18 |
| F  | 25 | 548.502        | 403.232        | 400.028        | 400.230        | 399.827        | F | 17 |
| P  | 26 | 567.612        | 373.816        | 370.614        | 370.816        | 370.413        | P | 16 |
| V  | 27 | 587.726        | 354.408        | 351.204        | 351.405        | 351.002        | V | 15 |
| G  | 28 | 599.130        | 334.594        | 331.390        | 331.592        | 331.189        | G | 14 |
| R  | 29 | 630.351        | 323.190        | 319.986        | 320.187        | 319.784        | R | 13 |
| V  | 30 | 650.164        | 291.969        | 288.766        | 288.967        | 288.564        | V | 12 |
| H  | 31 | <b>677.576</b> | 272.156        | 268.952        | 269.154        | 268.750        | H | 11 |
| K  | 32 | 708.796        | 244.744        | 241.540        | 241.742        | 241.339        | K | 10 |
| L  | 33 | 731.413        | 213.524        | 210.320        | 210.522        | 210.118        | L | 9  |
| L  | 34 | <b>754.030</b> | 190.907        | 187.703        | 187.905        | 187.502        | L | 8  |
| R  | 35 | <b>785.250</b> | 168.290        | 165.086        | 165.288        | 164.885        | R | 7  |
| K  | 36 | <b>810.869</b> | 137.070        | 133.866        | 134.068        | 133.665        | K | 6  |
| G  | 37 | <b>822.273</b> | 111.451        | 108.247        | 108.449        | 108.046        | G | 5  |
| N  | 38 | <b>845.082</b> | 100.047        | 96.843         | 97.044         | 96.641         | N | 4  |
| V  | 39 | 877.695        | 77.238         | 74.034         | 74.236         | 73.833         | V | 3  |
| A  | 40 | 891.902        | 44.625         | 41.422         | 41.623         | 41.220         | A | 2  |
| E  | 41 | <b>917.711</b> | 30.418         | 27.214         | 27.416         | 27.013         | E | 1  |

# sp | Q6GSS7 | H2A2A\_MOUSE

[Acetyl]S<sup>Phospho</sup><sub>79.97</sub> GRGKQGGK<sup>Dimethyl</sup><sub>28.03</sub> ARAKAKSRSSRAGLQFPVGRVHRLLRKGN<sup>YAE</sup>

- ▶ fragmentation table for charge state 6+
- ▶ specType=etd
- ▶ score=61.45
- ▶ F104903.dat
- ▶ query=q2858\_p1
- ▶ precursor=655.939030
- ▶ chargePrecursor=7
- ▶ itol=0.8

| AA    | c       | y              | z+1            | z+2            | z              | AA    |
|-------|---------|----------------|----------------|----------------|----------------|-------|
| S[1]  | 38.680  | <b>765.091</b> | 762.421        | 0.839          | <b>762.253</b> | S[41] |
| G[2]  | 48.183  | 730.256        | 727.586        | 0.839          | 727.418        | G[40] |
| R[3]  | 74.200  | 720.752        | 718.082        | 718.250        | 717.915        | R[39] |
| G[4]  | 83.704  | 694.735        | 692.066        | 692.234        | 691.896        | G[38] |
| K[5]  | 105.053 | 685.232        | 682.562        | 682.730        | 682.394        | K[37] |
| Q[6]  | 126.396 | 663.883        | <b>661.213</b> | <b>661.381</b> | <b>661.045</b> | Q[36] |
| G[7]  | 135.900 | 642.540        | 639.870        | 640.038        | 639.702        | G[35] |
| G[8]  | 145.403 | 633.036        | 630.366        | 630.534        | 630.186        | G[34] |
| K[9]  | 171.424 | 623.532        | 620.863        | 621.031        | 620.685        | K[33] |
| A[10] | 183.264 | 597.511        | 594.842        | 595.010        | 594.674        | A[32] |
| R[11] | 209.281 | 585.672        | 583.002        | 583.170        | 582.834        | R[31] |
| A[12] | 221.120 | 559.655        | 556.985        | 557.153        | 556.817        | A[30] |
| K[13] | 242.469 | 547.816        | 545.146        | 545.314        | 544.978        | K[29] |
| A[14] | 254.309 | 526.466        | 523.797        | 523.965        | 523.629        | A[28] |
| K[15] | 275.658 | 514.627        | 511.957        | 512.125        | 511.789        | K[27] |
| S[16] | 290.163 | 493.278        | 490.608        | 490.776        | 490.440        | S[26] |
| R[17] | 316.180 | 478.772        | 476.103        | 476.271        | 475.935        | R[25] |
| S[18] | 330.688 | 452.755        | 450.085        | 450.254        | 449.918        | S[24] |
| S[19] | 345.191 | 438.250        | 435.580        | 435.748        | 435.412        | S[23] |
| R[20] | 371.208 | 423.745        | 421.075        | 421.243        | 420.907        | R[22] |
| A[21] | 383.047 | 397.728        | 395.058        | 395.226        | 394.890        | A[21] |
| G[22] | 392.551 | 385.888        | 383.219        | 383.387        | 383.051        | G[20] |
| L[23] | 411.398 | 376.385        | 373.715        | 373.883        | 373.547        | L[19] |
| Q[24] | 432.741 | 357.538        | 354.868        | 355.036        | 354.700        | Q[18] |
| F[25] | 457.253 | 336.194        | 333.525        | 333.693        | 333.357        | F[17] |
| P[26] | 473.428 | 311.683        | 309.013        | 309.181        | 308.845        | P[16] |
| V[27] | 489.940 | 295.508        | 292.838        | 293.006        | 292.670        | V[15] |
| V[28] | 499.443 | 278.996        | 276.326        | 276.494        | 276.158        | V[14] |
| K[29] | 525.460 | 269.493        | 266.823        | 266.991        | 266.655        | K[13] |
| V[30] | 541.971 | 243.476        | 240.806        | 240.974        | 240.638        | V[12] |
| H[31] | 564.815 | 228.964        | 224.295        | 224.462        | 224.127        | H[11] |
| R[32] | 590.831 | 204.121        | 201.451        | 201.619        | 201.283        | R[10] |
| L[33] | 609.679 | 178.104        | 175.435        | 175.602        | 175.267        | L[9]  |
| L[34] | 628.526 | 159.297        | 156.627        | 156.795        | 156.459        | L[8]  |
| R[35] | 654.543 | 140.410        | 137.740        | 137.908        | 137.572        | R[7]  |
| K[36] | 675.892 | 114.393        | 111.723        | 111.891        | 111.555        | K[6]  |
| G[37] | 685.396 | 93.044         | 90.374         | 90.542         | 90.206         | G[5]  |
| N[38] | 704.403 | 83.540         | 80.870         | 81.038         | 80.702         | N[4]  |
| L[39] | 731.380 | 64.533         | 61.863         | 62.031         | 61.695         | L[3]  |
| A[40] | 743.420 | 37.356         | 34.686         | 34.854         | 34.518         | A[2]  |
| E[41] | 764.927 | 25.516         | 22.846         | 23.014         | 22.678         | E[1]  |

# sp | Q64523 | H2A2C\_MOUSE

SHKAK Acetyl SK  
42.01

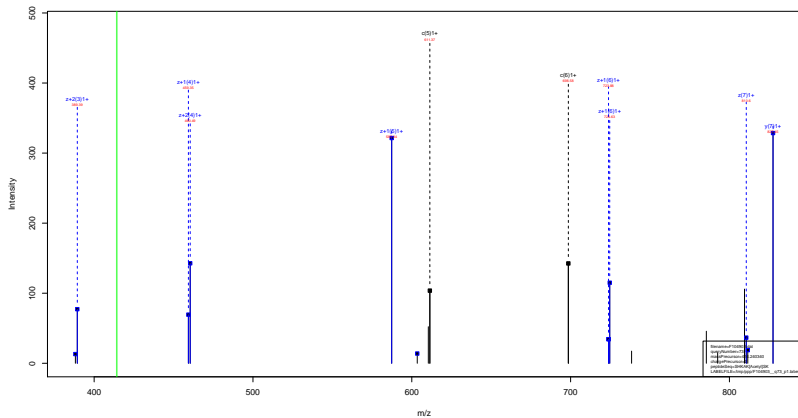



# sp | Q64523 | H2A2C\_MOUSE

SHKAK<sup>Acetyl</sup>SK  
42.01

- ▶ fragmentation table for charge state 1+
- ▶ specType=etd
- ▶ score=30.06
- ▶ F104903.dat
- ▶ query=q73.p1
- ▶ precursor=414.240340
- ▶ chargePrecursor=2
- ▶ itol=0.8

| AA   | c              | y              | z+1            | z+2            | z              | AA   |
|------|----------------|----------------|----------------|----------------|----------------|------|
| S[1] | 105.066        | <b>827.473</b> | <b>811.455</b> | 0.000          | <b>810.447</b> | S[7] |
| H[2] | 382.125        | 740.343        | <b>724.423</b> | 0.000          | <b>723.415</b> | H[6] |
| K[3] | 170.220        | <b>603.382</b> | <b>587.364</b> | 588.372        | 586.366        | K[5] |
| A[4] | 441.297        | 475.287        | <b>459.269</b> | <b>460.277</b> | 458.261        | A[8] |
| R[5] | <b>611.362</b> | 404.250        | <b>388.232</b> | <b>389.239</b> | 387.224        | R[9] |
| S[6] | <b>690.394</b> | 294.145        | 218.126        | 219.134        | 217.118        | S[2] |
| R[7] | 826.489        | 147.113        | 131.094        | 132.102        | 130.086        | R[1] |

# sp | P22752 | H2A1\_MOUSE

SHHKAKGK Acetyl  
42.01

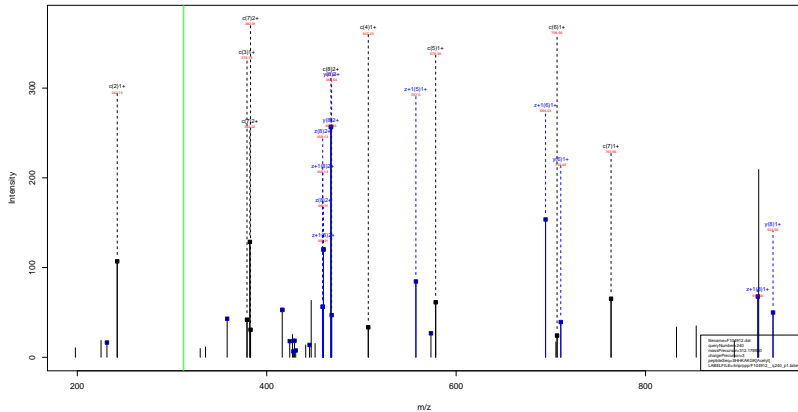

# sp | P22752 | H2A1\_MOUSE

SHHKAKGK<sup>Acetyl</sup>  
42.01

- ▶ fragmentation table for charge state 1+
- ▶ specType=etd
- ▶ score=44.06
- ▶ F104912.dat
- ▶ query=q240\_p1
- ▶ precursor=312.178930
- ▶ chargePrecursor=3
- ▶ itol=0.8

| AA |   | c              | y              | z+1            | z+2            | z              | AA |   |
|----|---|----------------|----------------|----------------|----------------|----------------|----|---|
| S  | 1 | 105.066        | <b>934.522</b> | <b>918.503</b> | 0.000          | 917.490        | S  | 8 |
| H  | 2 | <b>242.125</b> | 847.490        | 831.471        | 0.000          | 830.463        | H  | 7 |
| H  | 3 | <b>379.184</b> | <b>710.431</b> | <b>694.412</b> | 0.000          | 693.404        | H  | 6 |
| K  | 4 | <b>507.279</b> | <b>573.372</b> | <b>557.353</b> | 558.361        | 556.345        | K  | 5 |
| A  | 5 | <b>578.316</b> | <b>445.277</b> | <b>429.258</b> | <b>430.266</b> | <b>428.250</b> | A  | 4 |
| R  | 6 | <b>706.411</b> | 374.240        | <b>358.221</b> | 359.220        | 357.213        | R  | 3 |
| G  | 7 | <b>763.432</b> | 246.145        | 230.126        | <b>231.134</b> | 229.118        | G  | 2 |
| R  | 8 | 933.538        | 189.123        | 173.105        | 174.112        | 172.507        | R  | 1 |

# sp | P22752 | H2A1\_MOUSE

SHHKAKGK <sup>Acetyl</sup>  
42.01

- ▶ fragmentation table for charge state 2+
- ▶ specType=etd
- ▶ score=44.06
- ▶ F104912.dat
- ▶ query=q240\_p1
- ▶ precursor=312.178930
- ▶ chargePrecursor=3
- ▶ itol=0.8

| AA   | c              | y              | z+1            | z+2     | z              | AA   |
|------|----------------|----------------|----------------|---------|----------------|------|
| S[1] | 93.037         | <b>467.765</b> | <b>459.755</b> | 0.504   | <b>459.251</b> | S[8] |
| H[2] | 121.566        | <b>424.248</b> | <b>416.239</b> | 0.504   | <b>415.735</b> | H[7] |
| H[3] | 190.095        | 355.719        | 347.710        | 0.504   | 347.206        | H[6] |
| K[4] | 254.143        | 287.190        | 279.180        | 279.684 | 278.676        | K[5] |
| A[5] | 289.662        | 223.142        | 215.133        | 215.637 | 214.629        | A[4] |
| K[6] | 353.709        | 187.624        | 179.614        | 180.118 | 179.110        | K[3] |
| G[7] | <b>382.220</b> | 123.576        | 115.567        | 116.071 | 115.063        | G[2] |
| K[8] | <b>467.272</b> | 95.065         | 87.056         | 87.560  | 86.552         | K[1] |



# sp | P22752 | H2A1\_MOUSE

SHHKAKGK<sup>Acetyl</sup>  
42.01

- ▶ fragmentation table for charge state 1+
- ▶ specType=etd
- ▶ score=27.43
- ▶ F104912.dat
- ▶ query=q241\_p1
- ▶ precursor=467.764920
- ▶ chargePrecursor=2
- ▶ itol=0.8

| AA   | c              | y              | z+1            | z+2            | z              | AA   |
|------|----------------|----------------|----------------|----------------|----------------|------|
| S[1] | 105.066        | <b>934.522</b> | <b>918.503</b> | 0.000          | <b>917.495</b> | S[8] |
| H[2] | 242.125        | 847.490        | <b>831.471</b> | 0.000          | 830.463        | H[7] |
| H[3] | 379.184        | <b>710.431</b> | <b>694.412</b> | 0.000          | 693.404        | H[6] |
| K[4] | 507.279        | 573.372        | <b>557.353</b> | <b>558.361</b> | 556.345        | K[5] |
| A[5] | <b>578.316</b> | 445.277        | 429.258        | 430.266        | 428.250        | A[4] |
| R[6] | 706.411        | 374.240        | 358.221        | <b>359.229</b> | 357.213        | R[3] |
| G[7] | <b>763.432</b> | 246.145        | 230.126        | 231.134        | 229.118        | G[2] |
| R[8] | 933.538        | 189.123        | 173.105        | 174.112        | 172.097        | R[1] |



# sp | P62806 | H4\_MOUSE

[Acetyl]SGRGKGGKGLGKGGAKRHRK<sup>Dimethyl</sup>VLRD<sub>28.03</sub>

- ▶ fragmentation table for charge state 1+
- ▶ specType=etd
- ▶ score=119.56
- ▶ F104912.dat
- ▶ query=q2962\_p1
- ▶ precursor=509.907080
- ▶ chargePrecursor=5
- ▶ itol=0.8

| AA    | c               | y               | z+1             | z+2             | z               | AA    |
|-------|-----------------|-----------------|-----------------|-----------------|-----------------|-------|
| S[1]  | 147.070         | 2545.900        | 2529.483        | 0.000           | 2529.476        | S[24] |
| G[2]  | 204.008         | 2416.460        | 2400.441        | 0.000           | 2399.431        | G[23] |
| R[3]  | <b>360.199</b>  | 2359.438        | 2343.419        | 2344.427        | 2342.412        | R[22] |
| G[4]  | <b>417.230</b>  | 2003.337        | 2087.333        | 2108.306        | 2109.311        | G[21] |
| K[5]  | <b>545.315</b>  | 2146.316        | 2130.297        | 2131.305        | 2129.287        | K[20] |
| G[6]  | 602.337         | 2018.221        | 2002.202        | 2003.210        | 2001.194        | G[19] |
| G[7]  | <b>659.358</b>  | 1961.199        | 1945.180        | 1946.188        | 1944.171        | G[18] |
| K[8]  | <b>787.453</b>  | 1904.179        | 1888.159        | 1889.167        | 1887.151        | K[17] |
| G[9]  | <b>844.475</b>  | 1776.081        | 1760.064        | 1761.072        | 1759.056        | G[16] |
| L[10] | <b>957.559</b>  | 1719.061        | 1703.043        | <b>1704.050</b> | 1702.035        | L[15] |
| G[11] | <b>1014.580</b> | 1605.977        | <b>1589.958</b> | 1590.966        | 1588.951        | G[14] |
| K[12] | <b>1142.675</b> | 1548.956        | 1532.937        | 1533.945        | 1531.929        | K[13] |
| G[13] | 1199.607        | 1420.861        | 1404.842        | <b>1405.850</b> | 1403.834        | G[12] |
| G[14] | <b>1256.718</b> | 1363.839        | 1347.821        | <b>1348.828</b> | 1346.813        | G[11] |
| A[15] | 1287.858        | 1306.818        | <b>1290.799</b> | <b>1291.807</b> | 1289.791        | A[10] |
| R[16] | 1436.850        | <b>1235.781</b> | <b>1219.762</b> | 1220.770        | <b>1218.754</b> | R[9]  |
| R[17] | 1611.951        | 1107.688        | 1091.669        | 1092.675        | 1090.659        | R[8]  |
| H[18] | 1749.010        | 951.585         | <b>935.566</b>  | <b>936.574</b>  | 934.558         | H[7]  |
| R[19] | 1905.111        | 814.520         | 798.507         | 799.515         | 797.499         | R[6]  |
| K[20] | 2061.236        | <b>658.425</b>  | <b>642.406</b>  | 643.414         | 641.398         | K[5]  |
| V[21] | 2189.306        | 502.296         | <b>486.280</b>  | <b>487.287</b>  | 485.271         | V[4]  |
| L[22] | 2273.390        | 403.230         | <b>387.211</b>  | 388.219         | 386.203         | L[3]  |
| R[23] | 2429.491        | 290.146         | <b>274.127</b>  | <b>275.135</b>  | 273.119         | R[2]  |
| D[24] | 2544.518        | 134.045         | 118.030         | 119.034         | 117.018         | D[1]  |



# sp | P62806 | H4\_MOUSE

[Acetyl]SGRGKGGKGLGKGGAKRHRK<sup>Dimethyl</sup>VLRD<sub>28.03</sub>

- ▶ fragmentation table for charge state 2+
- ▶ specType=etd
- ▶ score=119.56
- ▶ F104912.dat
- ▶ query=q2962\_p1
- ▶ precursor=509.907080
- ▶ chargePrecursor=5
- ▶ itol=0.8

| AA    | c               | y               | z+1             | z+2             | z              | AA    |
|-------|-----------------|-----------------|-----------------|-----------------|----------------|-------|
| S[1]  | 74.042          | 1273.255        | <b>1265.245</b> | 0.504           | 1264.741       | S[24] |
| G[2]  | 102.553         | 1238.733        | <b>1200.724</b> | 0.504           | 1200.220       | G[23] |
| R[3]  | 180.603         | 1180.222        | <b>1172.213</b> | 1172.717        | 1171.709       | R[22] |
| G[4]  | 209.114         | 1102.172        | <b>1094.163</b> | <b>1094.667</b> | 1093.659       | G[21] |
| K[5]  | 278.163         | 1073.062        | 1058.552        | <b>1066.156</b> | 1065.148       | K[20] |
| G[6]  | 301.672         | <b>1009.614</b> | <b>1001.605</b> | <b>1002.108</b> | 1001.101       | G[19] |
| G[7]  | 330.183         | 981.101         | <b>973.094</b>  | <b>973.598</b>  | 972.590        | G[18] |
| K[8]  | <b>394.230</b>  | <b>952.592</b>  | 944.583         | <b>945.087</b>  | 944.079        | K[17] |
| G[9]  | <b>422.741</b>  | 898.245         | 880.236         | <b>881.040</b>  | 880.032        | G[16] |
| L[10] | <b>479.283</b>  | <b>860.034</b>  | 852.025         | 852.529         | 851.521        | L[15] |
| G[11] | <b>507.794</b>  | 803.492         | <b>795.483</b>  | <b>795.987</b>  | 794.979        | G[14] |
| K[12] | <b>571.841</b>  | 774.982         | <b>766.972</b>  | <b>767.476</b>  | 766.468        | K[13] |
| G[13] | <b>600.352</b>  | <b>710.934</b>  | <b>702.925</b>  | <b>703.429</b>  | 702.421        | G[12] |
| G[14] | <b>628.863</b>  | <b>682.423</b>  | <b>674.414</b>  | <b>674.918</b>  | <b>673.910</b> | G[11] |
| A[15] | <b>664.381</b>  | 653.913         | <b>645.903</b>  | <b>646.407</b>  | 645.399        | A[10] |
| R[16] | 702.432         | 618.399         | <b>610.305</b>  | <b>610.809</b>  | 609.801        | R[9]  |
| R[17] | <b>806.479</b>  | 554.341         | <b>546.337</b>  | <b>546.841</b>  | <b>545.833</b> | R[8]  |
| H[18] | <b>875.009</b>  | 476.208         | <b>468.287</b>  | <b>468.791</b>  | <b>467.783</b> | H[7]  |
| R[19] | <b>953.059</b>  | 407.767         | <b>399.757</b>  | <b>400.261</b>  | <b>399.253</b> | R[6]  |
| K[20] | <b>1031.122</b> | 329.716         | 321.707         | 322.211         | 321.203        | K[5]  |
| V[21] | <b>1080.657</b> | 251.663         | 243.653         | 244.147         | 243.140        | V[4]  |
| L[22] | <b>1137.199</b> | 202.112         | 194.103         | 194.613         | 193.605        | L[3]  |
| R[23] | 1215.248        | 145.577         | 137.567         | 138.071         | 137.063        | R[2]  |
| D[24] | 1272.763        | 67.528          | 59.517          | 60.021          | 59.013         | D[1]  |

# sp | P62806 | H4\_MOUSE

[Acetyl]SGRGKGGKGLGKGGAKRHRK<sup>Dimethyl</sup>VLRD  
28.03

- ▶ fragmentation table for charge state 3+
- ▶ specType=etd
- ▶ score=119.56
- ▶ F104912.dat
- ▶ query=q2962.p1
- ▶ precursor=509.907080
- ▶ chargePrecursor=5
- ▶ itol=0.8

| AA    | c              | y              | z+1            | z+2            | z              | AA    |
|-------|----------------|----------------|----------------|----------------|----------------|-------|
| S[1]  | 49.697         | 349.172        | <b>843.833</b> | 0.672          | 843.497        | S[24] |
| G[2]  | 56.704         | <b>806.158</b> | <b>800.818</b> | 0.672          | 800.483        | G[23] |
| R[3]  | 120.738        | <b>787.151</b> | <b>781.811</b> | <b>782.147</b> | 781.475        | R[22] |
| G[4]  | 139.745        | 735.117        | <b>725.778</b> | <b>730.114</b> | <b>729.442</b> | G[21] |
| K[5]  | 182.443        | 716.110        | <b>710.770</b> | <b>711.106</b> | <b>710.435</b> | K[20] |
| G[6]  | 201.450        | <b>673.412</b> | <b>668.072</b> | <b>668.408</b> | <b>667.736</b> | G[19] |
| G[7]  | 220.458        | 654.405        | <b>649.065</b> | <b>649.401</b> | 648.729        | G[18] |
| K[8]  | 263.156        | 635.397        | <b>630.058</b> | <b>630.394</b> | <b>629.722</b> | K[17] |
| G[9]  | 282.163        | <b>592.699</b> | <b>587.360</b> | <b>587.695</b> | <b>587.024</b> | G[16] |
| L[10] | 319.258        | 574.592        | <b>568.352</b> | <b>568.688</b> | <b>568.016</b> | L[15] |
| G[11] | 338.265        | 535.997        | 530.658        | 530.994        | 530.322        | G[14] |
| K[12] | 381.563        | 516.990        | 511.651        | 511.988        | 511.315        | K[13] |
| G[13] | <b>400.570</b> | 474.292        | <b>468.952</b> | <b>469.288</b> | <b>468.616</b> | G[12] |
| G[14] | 419.578        | 455.285        | 449.945        | 450.281        | 449.609        | G[11] |
| A[15] | 443.257        | 436.277        | 430.938        | 431.274        | 430.602        | A[10] |
| K[16] | <b>485.955</b> | 412.598        | 407.259        | 407.595        | 406.923        | K[9]  |
| R[17] | <b>537.989</b> | 369.900        | 364.561        | 364.896        | 364.225        | R[8]  |
| H[18] | <b>583.675</b> | 317.866        | 312.527        | 312.863        | 312.191        | H[7]  |
| R[19] | 635.709        | 272.180        | 266.841        | 267.176        | 266.505        | R[6]  |
| K[20] | <b>687.751</b> | 220.140        | 214.801        | 215.143        | 214.471        | K[5]  |
| V[21] | <b>720.774</b> | 168.104        | 162.765        | 163.101        | 162.429        | V[4]  |
| L[22] | <b>758.468</b> | 135.082        | 129.742        | 130.078        | 129.406        | L[3]  |
| R[23] | <b>810.502</b> | 97.387         | 92.047         | 92.383         | 91.711         | R[2]  |
| D[24] | 848.844        | 45.353         | 40.014         | 40.349         | 39.678         | D[1]  |

# sp | P62806 | H4\_MOUSE

[Acetyl]SGRGKGGKGLGKGGAKRHRK<sup>Dimethyl</sup>VLRD<sub>28.03</sub>

- ▶ fragmentation table for charge state 4+
- ▶ specType=etd
- ▶ score=119.56
- ▶ F104912.dat
- ▶ query=q2962.p1
- ▶ precursor=509.907080
- ▶ chargePrecursor=5
- ▶ itol=0.8

| AA    | c              | y              | z+1            | z+2            | z              | AA    |
|-------|----------------|----------------|----------------|----------------|----------------|-------|
| S[1]  | 37.525         | <b>637.131</b> | <b>633.126</b> | 0.755          | <b>632.674</b> | S[24] |
| G[2]  | 51.780         | 604.870        | <b>600.866</b> | 0.755          | <b>600.614</b> | G[23] |
| R[3]  | 90.805         | 590.615        | <b>586.610</b> | <b>586.862</b> | <b>586.358</b> | R[22] |
| G[4]  | 105.061        | 551.590        | <b>547.585</b> | <b>547.837</b> | <b>547.333</b> | G[21] |
| K[5]  | 137.084        | 537.334        | 533.330        | 533.582        | 533.078        | K[20] |
| G[6]  | 151.340        | 505.311        | 501.306        | 501.558        | 501.054        | G[19] |
| G[7]  | 165.595        | 491.055        | <b>487.051</b> | <b>487.303</b> | <b>486.799</b> | G[18] |
| K[8]  | 197.619        | 476.800        | 472.795        | 473.047        | 472.543        | K[17] |
| G[9]  | 211.874        | 444.776        | 440.771        | 441.023        | 440.520        | G[16] |
| L[10] | 280.148        | 430.521        | 426.516        | 426.768        | 426.264        | L[15] |
| G[11] | 254.401        | 407.260        | 398.243        | 398.497        | 397.993        | G[14] |
| K[12] | 286.424        | <b>387.994</b> | 383.990        | 384.242        | 383.738        | K[13] |
| G[13] | 300.680        | 355.971        | 351.966        | 352.218        | 351.714        | G[12] |
| G[14] | 314.935        | 341.715        | 337.711        | 337.963        | 337.459        | G[11] |
| A[15] | 332.694        | 327.460        | 323.455        | 323.707        | 323.203        | A[10] |
| K[16] | 364.718        | 309.701        | 305.696        | 305.948        | 305.444        | K[9]  |
| R[17] | 403.743        | 277.677        | <b>273.672</b> | <b>273.924</b> | 273.420        | R[8]  |
| H[18] | 438.008        | 238.652        | 234.647        | 234.899        | 234.395        | H[7]  |
| R[19] | 477.033        | 204.387        | 200.382        | 200.634        | 200.130        | R[6]  |
| K[20] | 516.058        | 165.362        | 161.357        | 161.609        | 161.105        | K[5]  |
| V[21] | 540.832        | 126.330        | 122.325        | 122.577        | 122.073        | V[4]  |
| L[22] | <b>569.103</b> | 101.563        | 97.558         | 97.810         | 97.306         | L[3]  |
| R[23] | <b>608.128</b> | 73.292         | 69.287         | 69.539         | 69.035         | R[2]  |
| D[24] | <b>636.885</b> | 34.267         | 30.262         | 30.514         | 30.010         | D[1]  |

# sp | P62806 | H4\_MOUSE

[Acetyl]SGRGKGGKGLGKGGAKRHRK Dimethyl VLRD  
28.03

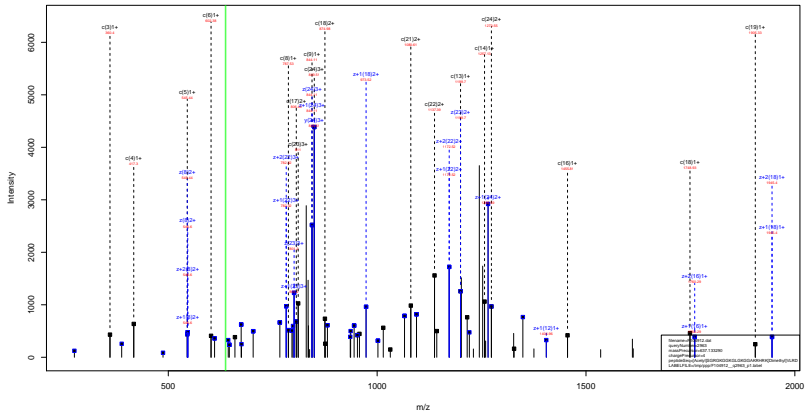

# sp | P62806 | H4\_MOUSE

[Acetyl]SGRGKGGKGLGKGGAKRHRK<sup>Dimethyl</sup>VLRD<sub>28.03</sub>

- ▶ fragmentation table for charge state 1+
- ▶ specType=etd
- ▶ score=119.38
- ▶ F104912.dat
- ▶ query=q2963\_p1
- ▶ precursor=637.133290
- ▶ chargePrecursor=4
- ▶ itol=0.8

| AA | c  | y               | z+1      | z+2             | z               | AA       |       |
|----|----|-----------------|----------|-----------------|-----------------|----------|-------|
| S  | 1  | 147.076         | 2545.502 | 2529.483        | 0.000           | 2528.478 | S[24] |
| G  | 2  | 204.098         | 2416.460 | 2400.441        | 0.000           | 2399.433 | G[23] |
| R  | 3  | <b>368.199</b>  | 2289.438 | 2243.419        | 2244.427        | 2242.412 | R[22] |
| G  | 4  | <b>417.220</b>  | 2203.337 | 2187.318        | 2188.326        | 2186.310 | G[21] |
| K  | 5  | <b>545.315</b>  | 2146.316 | 2130.297        | 2131.305        | 2129.289 | K[20] |
| G  | 6  | <b>602.337</b>  | 2038.221 | 2002.200        | 2003.210        | 2001.194 | G[19] |
| G  | 7  | <b>659.358</b>  | 1991.199 | <b>1945.180</b> | <b>1946.188</b> | 1944.173 | G[18] |
| K  | 8  | <b>787.453</b>  | 1904.178 | 1888.159        | 1889.167        | 1887.151 | K[17] |
| G  | 9  | <b>844.475</b>  | 1778.063 | <b>1768.064</b> | <b>1763.072</b> | 1759.056 | G[16] |
| L  | 10 | <b>927.559</b>  | 1719.061 | 1703.043        | 1704.050        | 1702.035 | L[15] |
| G  | 11 | <b>1014.580</b> | 1605.977 | 1589.958        | 1590.966        | 1588.951 | G[14] |
| K  | 12 | <b>1142.675</b> | 1548.956 | 1532.937        | 1533.945        | 1531.929 | K[13] |
| G  | 13 | <b>1199.697</b> | 1420.861 | <b>1404.842</b> | 1405.850        | 1403.834 | G[12] |
| G  | 14 | <b>1256.718</b> | 1363.839 | 1347.821        | <b>1348.828</b> | 1346.813 | G[11] |
| A  | 15 | <b>1327.795</b> | 1306.818 | 1290.799        | 1291.807        | 1289.791 | A[10] |
| R  | 16 | <b>1435.850</b> | 1238.781 | 1219.762        | <b>1220.770</b> | 1218.754 | R[9]  |
| R  | 17 | 1511.951        | 1107.686 | 1091.667        | 1092.675        | 1090.659 | R[8]  |
| H  | 18 | <b>1749.010</b> | 951.585  | <b>935.566</b>  | <b>936.574</b>  | 934.558  | H[7]  |
| R  | 19 | <b>1905.111</b> | 814.526  | <b>798.507</b>  | 799.515         | 797.499  | R[6]  |
| K  | 20 | 2061.238        | 658.425  | 642.406         | <b>643.414</b>  | 641.398  | K[5]  |
| V  | 21 | 2180.306        | 502.298  | 486.280         | <b>487.287</b>  | 485.272  | V[4]  |
| L  | 22 | 2273.390        | 403.230  | 387.211         | <b>388.219</b>  | 386.203  | L[3]  |
| R  | 23 | 2429.491        | 298.146  | 274.127         | <b>275.135</b>  | 273.119  | R[2]  |
| D  | 24 | 2544.518        | 134.045  | 118.026         | 119.034         | 117.018  | D[1]  |

# sp | P62806 | H4\_MOUSE

[Acetyl]SGRGKGGKGLGKGGAKRHRK<sup>Dimethyl</sup>VLRD<sub>28.03</sub>

- ▶ fragmentation table for charge state 2+
- ▶ specType=etd
- ▶ score=119.38
- ▶ F104912.dat
- ▶ query=q2963\_p1
- ▶ precursor=637.133290
- ▶ chargePrecursor=4
- ▶ itol=0.8

| AA    | c               | y               | z+1             | z+2             | z               | AA    |
|-------|-----------------|-----------------|-----------------|-----------------|-----------------|-------|
| S[1]  | 74.642          | <b>1273.255</b> | <b>1265.245</b> | 0.504           | 1264.741        | S[24] |
| G[2]  | 102.551         | 1208.733        | 1200.724        | 0.504           | <b>1200.220</b> | G[23] |
| R[3]  | 180.603         | 1180.223        | <b>1172.213</b> | <b>1172.717</b> | 1171.709        | R[22] |
| G[4]  | 259.114         | 1102.172        | <b>1094.163</b> | <b>1094.667</b> | <b>1093.659</b> | G[21] |
| K[5]  | 273.151         | 1073.661        | <b>1065.652</b> | <b>1066.156</b> | <b>1065.148</b> | K[20] |
| G[6]  | 301.672         | 1009.614        | <b>1001.605</b> | <b>1002.108</b> | <b>1001.101</b> | G[19] |
| G[7]  | 330.183         | 981.103         | <b>973.094</b>  | <b>973.598</b>  | 972.590         | G[18] |
| K[8]  | 394.210         | <b>952.592</b>  | <b>944.583</b>  | <b>945.087</b>  | <b>944.079</b>  | K[17] |
| G[9]  | 422.741         | 898.545         | <b>890.536</b>  | <b>891.040</b>  | 890.032         | G[16] |
| L[10] | 479.263         | 860.036         | 852.027         | 852.530         | 851.522         | L[15] |
| G[11] | 507.794         | 803.482         | <b>795.483</b>  | <b>795.987</b>  | 794.979         | G[14] |
| K[12] | 571.841         | 774.982         | <b>766.972</b>  | <b>767.476</b>  | <b>766.468</b>  | K[13] |
| G[13] | 600.352         | 710.934         | <b>702.925</b>  | <b>703.429</b>  | <b>702.421</b>  | G[12] |
| G[14] | 638.863         | 682.423         | <b>674.414</b>  | <b>674.918</b>  | <b>673.910</b>  | G[11] |
| A[15] | 684.381         | 653.913         | <b>645.903</b>  | <b>646.407</b>  | <b>645.399</b>  | A[10] |
| R[16] | 739.430         | 618.394         | <b>610.385</b>  | <b>610.889</b>  | 609.881         | R[9]  |
| R[17] | <b>806.479</b>  | 554.347         | <b>546.337</b>  | <b>546.841</b>  | <b>545.833</b>  | R[8]  |
| H[18] | <b>875.009</b>  | 476.290         | 468.281         | 468.784         | 467.776         | H[7]  |
| R[19] | <b>953.059</b>  | 407.767         | 399.757         | 400.261         | 399.253         | R[6]  |
| K[20] | <b>1031.122</b> | 339.716         | 331.707         | 332.211         | 331.203         | K[5]  |
| V[21] | <b>1080.667</b> | 251.663         | 243.653         | 244.157         | 243.149         | V[4]  |
| L[22] | <b>1137.199</b> | 202.119         | 194.109         | 194.613         | 193.605         | L[3]  |
| R[23] | <b>1215.249</b> | 145.577         | 137.567         | 138.071         | 137.063         | R[2]  |
| D[24] | <b>1272.763</b> | 67.526          | 59.517          | 60.021          | 59.013          | D[1]  |

# sp | P62806 | H4\_MOUSE

[Acetyl]SGRGKGGKGLGKGGAKRHRK<sup>Dimethyl</sup>VLRD<sub>28.03</sub>

- ▶ fragmentation table for charge state 3+
- ▶ specType=etd
- ▶ score=119.38
- ▶ F104912.dat
- ▶ query=q2963.p1
- ▶ precursor=637.133290
- ▶ chargePrecursor=4
- ▶ itol=0.8

| AA    | c              | y              | z+1            | z+2            | z              | AA    |
|-------|----------------|----------------|----------------|----------------|----------------|-------|
| S[1]  | 49.697         | <b>849.172</b> | <b>843.833</b> | 0.672          | <b>843.497</b> | S[24] |
| G[2]  | 58.704         | <b>806.158</b> | <b>800.818</b> | 0.672          | <b>800.483</b> | G[23] |
| R[3]  | 150.738        | <b>787.151</b> | <b>781.811</b> | <b>782.147</b> | 781.475        | R[22] |
| G[4]  | 139.745        | 735.117        | 729.778        | 730.114        | 729.442        | G[21] |
| K[5]  | 182.443        | 716.110        | 710.770        | 711.106        | 710.435        | K[20] |
| G[6]  | 201.450        | 673.412        | 668.072        | 668.408        | 667.736        | G[19] |
| G[7]  | 220.458        | 654.405        | 649.065        | 649.401        | 648.729        | G[18] |
| K[8]  | 263.156        | 635.397        | 630.058        | 630.394        | 629.722        | K[17] |
| G[9]  | 282.163        | 592.699        | 587.359        | 587.695        | 587.024        | G[16] |
| L[10] | 319.658        | 573.692        | 568.352        | 568.688        | 568.016        | L[15] |
| G[11] | 338.665        | 535.997        | 530.658        | 530.994        | 530.322        | G[14] |
| K[12] | 381.563        | 516.990        | 511.651        | 511.986        | 511.315        | K[13] |
| G[13] | 400.570        | 474.292        | 468.952        | 469.288        | 468.616        | G[12] |
| G[14] | 419.578        | 455.285        | 449.945        | 450.281        | 449.609        | G[11] |
| A[15] | 443.257        | 436.277        | 430.938        | 431.274        | 430.602        | A[10] |
| K[16] | 485.955        | 412.598        | 407.259        | 407.595        | 406.923        | K[9]  |
| R[17] | 537.989        | 369.900        | 364.561        | 364.896        | 364.225        | R[8]  |
| H[18] | 583.675        | 317.866        | 312.527        | 312.863        | 312.191        | H[7]  |
| R[19] | 635.709        | 272.180        | 266.841        | 267.176        | 266.505        | R[6]  |
| K[20] | 687.751        | 220.146        | 214.807        | 215.143        | 214.471        | K[5]  |
| V[21] | 720.774        | 168.104        | 162.765        | 163.101        | 162.429        | V[4]  |
| L[22] | 758.468        | 135.082        | 129.742        | 130.078        | 129.406        | L[3]  |
| R[23] | <b>810.502</b> | 97.387         | 92.047         | 92.383         | 91.711         | R[2]  |
| D[24] | <b>848.844</b> | 45.353         | 40.014         | 40.349         | 39.678         | D[1]  |

# sp | Q6GSS7 | H2A2A\_MOUSE

LNKLLGK <sup>Dimethyl</sup>VTIAQGGVLPNIQAVLLPKKTE  
28.03

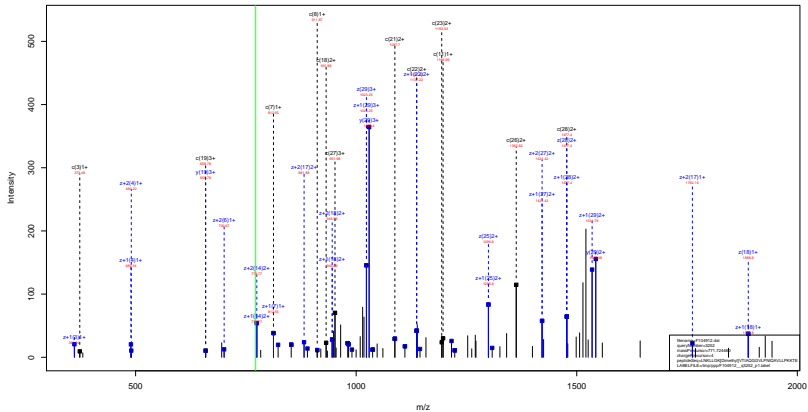



# sp | Q6GSS7 | H2A2A\_MOUSE

LNKLLGK <sup>Dimethyl</sup> <sub>28.03</sub> VTIAQGGVLPNIQAVLLPKKTE

- ▶ fragmentation table for charge state 1+
- ▶ specType=etd
- ▶ score=38.13
- ▶ F104912.dat
- ▶ query=q3252\_p1
- ▶ precursor=771.724460
- ▶ chargePrecursor=4
- ▶ itol=0.8

| AA  | c               | y        | z+1             | z+2             | z               | AA  |
|-----|-----------------|----------|-----------------|-----------------|-----------------|-----|
| L1  | 131.118         | 3083.802 | 2067.873        | 0.000           | 3066.865        | L26 |
| N2  | 245.161         | 2970.808 | 2954.789        | 2955.797        | 2953.781        | N28 |
| K3  | <b>373.256</b>  | 2856.765 | 3840.740        | 3841.754        | 3839.738        | K27 |
| L4  | 486.340         | 3728.670 | 2712.651        | 2713.659        | 3711.643        | L26 |
| L5  | 599.424         | 2615.586 | 2598.567        | 2600.575        | 2598.559        | L25 |
| G6  | 699.495         | 2502.502 | 2488.483        | 2487.491        | 2485.475        | G24 |
| K7  | <b>812.572</b>  | 2445.480 | 2429.452        | 2430.469        | 2425.454        | K23 |
| V8  | <b>911.640</b>  | 2389.354 | 2273.335        | 2274.343        | 2272.327        | V22 |
| T9  | 1012.688        | 2190.286 | 2174.267        | 2175.275        | 2173.259        | T21 |
| I10 | 1125.772        | 2089.238 | 2073.219        | 2074.227        | 2072.211        | I20 |
| A11 | <b>1196.809</b> | 1976.154 | 1960.135        | 1961.143        | 1959.127        | A19 |
| Q12 | 1314.857        | 1909.111 | <b>1895.098</b> | 1896.106        | <b>1888.090</b> | Q18 |
| G13 | 1381.889        | 1777.058 | 1761.039        | <b>1762.047</b> | 1760.032        | G17 |
| G14 | 1438.910        | 1720.937 | 1704.918        | 1705.926        | 1703.910        | G16 |
| V15 | 1537.979        | 1603.015 | 1648.997        | 1648.004        | 1645.989        | V15 |
| L16 | 1651.063        | 1563.947 | 1547.928        | 1548.936        | 1546.920        | L14 |
| T17 | 1748.116        | 1450.863 | 1434.844        | 1435.852        | 1433.836        | T13 |
| N18 | 1862.159        | 1335.810 | 1337.791        | 1338.799        | 1336.783        | N12 |
| I19 | 1975.243        | 1239.767 | <b>1223.748</b> | 1224.756        | <b>1222.741</b> | I11 |
| Q20 | 2103.301        | 1126.683 | <b>1110.664</b> | 1111.672        | <b>1109.656</b> | Q10 |
| A21 | 2174.338        | 998.624  | <b>982.606</b>  | <b>983.614</b>  | <b>981.598</b>  | A9  |
| V22 | 2273.407        | 827.587  | <b>811.569</b>  | 812.576         | 810.561         | V8  |
| L23 | 2388.491        | 628.519  | <b>612.500</b>  | 613.508         | 611.492         | L17 |
| L24 | 2499.575        | 415.435  | 699.416         | <b>700.424</b>  | 698.408         | L10 |
| P25 | 2596.628        | 602.351  | 586.332         | 587.340         | 585.324         | P5  |
| K26 | 2724.723        | 505.298  | <b>489.279</b>  | <b>490.287</b>  | 488.271         | K4  |
| K27 | 2852.818        | 377.203  | <b>361.184</b>  | 362.192         | 360.177         | K3  |
| T28 | 2953.865        | 249.108  | 233.089         | 234.097         | 232.082         | T2  |
| E29 | 3082.908        | 148.050  | 132.942         | 133.950         | 131.934         | E1  |

# sp | Q6GSS7 | H2A2A\_MOUSE

LNKLLGK <sup>Dimethyl</sup><sub>28.03</sub> VTIAQGGVLPNIQAVLLPKKTE

- ▶ fragmentation table for charge state 2+
- ▶ specType=etd
- ▶ score=38.13
- ▶ F104912.dat
- ▶ query=q3252\_p1
- ▶ precursor=771.724460
- ▶ chargePrecursor=4
- ▶ itol=0.8

| AA   | c               | y               | z+1             | z+2             | z               | AA   |
|------|-----------------|-----------------|-----------------|-----------------|-----------------|------|
| L1   | 66.053          | <b>1542.450</b> | <b>1534.440</b> | 8.504           | 1533.930        | L126 |
| N12  | 123.054         | 1485.905        | <b>1477.898</b> | 1478.402        | <b>1477.394</b> | N128 |
| K13  | 187.132         | 1428.889        | <b>1420.877</b> | <b>1421.381</b> | 1420.373        | K127 |
| L14  | 243.674         | 1364.839        | 1366.829        | 1357.333        | 1356.325        | L126 |
| L15  | 300.216         | <b>1308.297</b> | <b>1300.287</b> | 1300.791        | <b>1299.783</b> | L125 |
| G16  | 358.758         | 1243.795        | 1243.785        | 1244.289        | 1243.283        | G124 |
| K17  | 406.799         | <b>1223.244</b> | 1215.234        | <b>1215.738</b> | 1214.731        | K123 |
| V18  | 456.324         | <b>1145.181</b> | <b>1137.171</b> | <b>1137.675</b> | <b>1136.667</b> | V122 |
| F19  | 506.840         | 1095.646        | <b>1087.637</b> | <b>1088.141</b> | <b>1087.133</b> | F121 |
| T110 | 563.390         | 1045.123        | <b>1037.113</b> | <b>1037.617</b> | <b>1036.609</b> | T120 |
| A111 | 608.908         | 988.581         | <b>980.571</b>  | <b>981.075</b>  | <b>980.067</b>  | A119 |
| G112 | 662.937         | 933.063         | <b>945.053</b>  | <b>945.557</b>  | 944.550         | G118 |
| G113 | 691.448         | <b>889.033</b>  | 881.023         | <b>881.527</b>  | 880.519         | G117 |
| G114 | 719.959         | 860.522         | <b>852.513</b>  | <b>853.017</b>  | <b>852.009</b>  | G116 |
| V115 | 769.493         | 832.011         | 824.002         | 824.506         | <b>823.498</b>  | V115 |
| L116 | 826.035         | 782.477         | <b>774.468</b>  | <b>774.972</b>  | 773.964         | L114 |
| F117 | 874.584         | 728.935         | 721.925         | 722.429         | 721.422         | F115 |
| N118 | <b>931.583</b>  | 677.820         | 669.810         | 669.903         | 668.895         | N112 |
| I119 | 988.125         | 620.387         | 612.378         | 612.882         | 611.874         | I111 |
| Q120 | 1052.154        | 563.845         | 555.836         | 556.340         | 555.332         | Q110 |
| A121 | <b>1087.673</b> | 499.816         | 491.807         | 492.310         | 491.303         | A10  |
| V122 | <b>1137.207</b> | 484.297         | 476.288         | 476.792         | 475.784         | V18  |
| L123 | <b>1193.749</b> | 414.763         | 406.754         | 407.258         | 406.250         | L17  |
| L124 | 1250.291        | 358.221         | 350.212         | 350.716         | 349.708         | L16  |
| P125 | 1298.817        | 301.679         | 293.670         | 294.174         | 293.166         | P15  |
| K126 | <b>1362.865</b> | 253.153         | 245.143         | 245.647         | 244.639         | K14  |
| K127 | 1428.917        | 189.105         | 181.096         | 181.600         | 180.592         | K13  |
| T128 | <b>1477.436</b> | 125.058         | 117.048         | 117.552         | 116.544         | T12  |
| E129 | 1541.958        | 74.534          | 66.524          | 67.028          | 66.021          | E11  |

# sp | Q6GSS7 | H2A2A\_MOUSE

LNKLLGK <sup>Dimethyl</sup> <sub>28.03</sub> VTIAQGGVLPNIQAVLLPKKTE

- ▶ fragmentation table for charge state 3+
- ▶ specType=etd
- ▶ score=38.13
- ▶ F104912.dat
- ▶ query=q3252\_p1
- ▶ precursor=771.724460
- ▶ chargePrecursor=4
- ▶ itol=0.8

| AA    | c              | y               | z+1             | z+2     | z               | AA    |
|-------|----------------|-----------------|-----------------|---------|-----------------|-------|
| L[1]  | 44.377         | <b>1028.635</b> | <b>1023.296</b> | 0.672   | <b>1022.960</b> | L[26] |
| N[2]  | 82.302         | <b>990.941</b>  | 985.601         | 985.937 | 985.265         | N[28] |
| K[3]  | 125.090        | 952.308         | 947.587         | 947.923 | 947.251         | K[27] |
| L[4]  | 162.785        | 910.228         | 904.889         | 905.225 | 904.553         | L[26] |
| L[5]  | 200.479        | 872.533         | 867.194         | 867.530 | 866.858         | L[25] |
| G[6]  | 239.487        | 834.839         | 829.499         | 829.835 | 829.163         | G[24] |
| K[7]  | 271.529        | 815.835         | 810.495         | 810.831 | 810.159         | K[23] |
| V[8]  | 304.552        | 783.790         | 778.450         | 778.786 | 778.114         | V[22] |
| T[9]  | 338.234        | 738.763         | 735.427         | 735.763 | 735.091         | T[21] |
| I[10] | 375.929        | 697.084         | 691.745         | 692.081 | 691.409         | I[20] |
| A[11] | 399.608        | <b>659.389</b>  | 654.050         | 654.386 | 653.714         | A[19] |
| Q[12] | 442.294        | 626.718         | 620.371         | 620.707 | 620.035         | Q[18] |
| G[13] | 461.301        | 593.024         | 587.685         | 588.021 | 587.349         | G[17] |
| G[14] | 480.308        | 574.017         | 568.678         | 569.013 | 568.342         | G[16] |
| V[15] | 513.131        | 555.010         | 549.670         | 550.006 | 549.334         | V[15] |
| L[16] | 551.026        | 521.987         | 516.648         | 516.984 | 516.312         | L[14] |
| P[17] | 583.377        | 484.202         | 478.953         | 479.289 | 478.617         | P[13] |
| T[18] | 621.302        | 453.942         | 448.602         | 448.938 | 448.266         | T[12] |
| I[19] | <b>659.086</b> | 413.927         | 408.588         | 408.924 | 408.252         | I[11] |
| Q[20] | 701.772        | 378.233         | 370.893         | 371.229 | 370.557         | Q[10] |
| A[21] | 725.451        | 333.546         | 328.207         | 328.543 | 327.871         | A[9]  |
| V[22] | 758.474        | 309.867         | 304.528         | 304.864 | 304.192         | V[8]  |
| L[23] | 796.168        | 276.844         | 271.505         | 271.841 | 271.169         | L[7]  |
| L[24] | 833.863        | 239.150         | 233.810         | 234.146 | 233.474         | L[6]  |
| T[25] | 869.214        | 201.485         | 196.146         | 196.481 | 195.809         | T[5]  |
| K[26] | 908.912        | 169.104         | 163.765         | 164.101 | 163.429         | K[4]  |
| K[27] | <b>951.611</b> | 138.406         | 131.066         | 131.402 | 130.730         | K[3]  |
| T[28] | 985.293        | 83.708          | 78.368          | 78.704  | 78.032          | T[2]  |
| E[29] | 1028.307       | 50.025          | 44.685          | 45.021  | 44.349          | E[1]  |



# sp | Q6GSS7 | H2A2A\_MOUSE

LNKLLGK <sup>Dimethyl</sup> <sub>28.03</sub> VTIAQGGVLPNIQAVLLPKKTE

- ▶ fragmentation table for charge state 1+
- ▶ specType=etd
- ▶ score=89.03
- ▶ F104912.dat
- ▶ query=q3253\_p1
- ▶ precursor=771.724660
- ▶ chargePrecursor=4
- ▶ itol=0.8

| AA    | c               | y        | z+1             | z+2             | z               | AA    |
|-------|-----------------|----------|-----------------|-----------------|-----------------|-------|
| L[1]  | 131.118         | 3083.802 | 2067.873        | 0.000           | 3066.865        | L[26] |
| N[2]  | 245.161         | 2970.808 | 2954.789        | 2955.797        | 2953.781        | N[28] |
| K[3]  | <b>373.256</b>  | 2856.765 | 3840.740        | 3841.754        | 3839.738        | K[27] |
| L[4]  | 488.340         | 3728.670 | 3712.651        | 3713.659        | 3711.643        | L[26] |
| L[5]  | <b>599.424</b>  | 2615.586 | 2599.567        | 2600.575        | 2598.559        | L[25] |
| G[6]  | <b>658.445</b>  | 2302.502 | 2488.483        | 2487.491        | 2485.475        | G[24] |
| K[7]  | <b>812.572</b>  | 2245.480 | 2429.461        | 2430.469        | 2428.454        | K[23] |
| V[8]  | <b>911.640</b>  | 2289.354 | 2273.335        | 2274.343        | 2272.327        | V[22] |
| T[9]  | 1012.688        | 2190.286 | 2174.267        | 2175.275        | 2173.259        | T[21] |
| I[10] | <b>1125.772</b> | 2089.238 | 2073.219        | 2074.227        | 2072.211        | I[20] |
| A[11] | <b>1196.809</b> | 1976.154 | <b>1960.135</b> | 1961.143        | 1959.127        | A[19] |
| Q[12] | <b>1244.867</b> | 1909.111 | <b>1589.098</b> | 1699.108        | 1588.090        | Q[18] |
| G[13] | <b>1381.889</b> | 1777.058 | 1761.039        | 1762.047        | 1760.032        | G[17] |
| G[14] | 1438.910        | 1720.037 | 1704.018        | <b>1705.026</b> | 1703.010        | G[16] |
| V[15] | 1537.979        | 1663.015 | 1646.997        | 1648.004        | 1645.989        | V[15] |
| L[16] | 1651.063        | 1563.947 | 1547.928        | <b>1548.936</b> | 1546.920        | L[14] |
| T[17] | <b>1748.116</b> | 1450.863 | 1434.844        | 1435.852        | 1433.836        | T[13] |
| N[18] | 1862.159        | 1353.810 | <b>1337.791</b> | 1338.799        | 1336.783        | N[12] |
| I[19] | 1975.243        | 1239.767 | <b>1223.748</b> | <b>1224.756</b> | <b>1222.741</b> | I[11] |
| Q[20] | 2103.301        | 1126.683 | <b>1110.664</b> | 1111.672        | 1109.656        | Q[10] |
| A[21] | 2174.338        | 998.624  | 982.606         | 983.614         | <b>981.598</b>  | A[9]  |
| V[22] | 2273.407        | 827.587  | <b>811.569</b>  | 812.576         | 810.561         | V[8]  |
| L[23] | 2389.491        | 628.519  | <b>612.500</b>  | 613.508         | 611.492         | L[7]  |
| L[24] | 2499.575        | 715.435  | <b>699.416</b>  | <b>700.424</b>  | 698.408         | L[6]  |
| P[25] | 2596.628        | 602.351  | 586.332         | 587.340         | 585.324         | P[5]  |
| K[26] | 2724.723        | 505.298  | <b>489.279</b>  | 490.287         | 488.271         | K[4]  |
| K[27] | 2852.818        | 377.203  | <b>361.184</b>  | <b>362.192</b>  | 360.177         | K[3]  |
| T[28] | 2953.865        | 249.108  | 233.089         | 234.097         | 232.082         | T[2]  |
| E[29] | 3082.008        | 148.050  | 132.042         | 133.050         | 131.034         | E[1]  |

# sp | Q6GSS7 | H2A2A\_MOUSE

LNKLLGK <sup>Dimethyl</sup><sub>28.03</sub> VTIAQGGVLPNIQAVLLPKKTE

- ▶ fragmentation table for charge state 2+
- ▶ specType=etd
- ▶ score=89.03
- ▶ F104912.dat
- ▶ query=q3253\_p1
- ▶ precursor=771.724660
- ▶ chargePrecursor=4
- ▶ itol=0.8

| AA | c               | y               | z+1             | z+2             | z               | AA   |
|----|-----------------|-----------------|-----------------|-----------------|-----------------|------|
| L1 | 66.053          | <b>1542.450</b> | 1524.440        | 9.504           | 1533.930        | L120 |
| N1 | 123.054         | 1485.905        | <b>1477.898</b> | 1478.402        | <b>1477.394</b> | N120 |
| K1 | 187.132         | 1428.889        | <b>1420.877</b> | <b>1421.381</b> | 1420.373        | K127 |
| L1 | 243.674         | 1364.839        | <b>1356.829</b> | <b>1357.333</b> | <b>1356.325</b> | L126 |
| L1 | 300.216         | 1308.297        | 1300.287        | 1300.791        | <b>1299.783</b> | L125 |
| G1 | 358.758         | 1251.795        | <b>1243.745</b> | <b>1244.249</b> | 1243.241        | G124 |
| K1 | 406.799         | <b>1223.244</b> | <b>1215.234</b> | <b>1215.738</b> | 1214.731        | K123 |
| V1 | 456.324         | 1145.181        | <b>1137.171</b> | <b>1137.675</b> | <b>1136.667</b> | V122 |
| F1 | 506.840         | 1095.646        | <b>1087.637</b> | <b>1088.141</b> | <b>1087.133</b> | F121 |
| T1 | 563.390         | 1045.123        | <b>1037.113</b> | <b>1037.617</b> | 1036.609        | T120 |
| A1 | <b>598.908</b>  | <b>988.581</b>  | <b>980.571</b>  | <b>981.075</b>  | <b>980.067</b>  | A119 |
| G1 | 662.937         | 933.066         | <b>945.053</b>  | <b>945.557</b>  | 944.549         | G118 |
| G1 | 691.448         | 889.033         | <b>881.023</b>  | <b>881.527</b>  | 880.519         | G117 |
| G1 | 719.959         | 860.522         | <b>852.513</b>  | <b>853.017</b>  | <b>852.009</b>  | G116 |
| V1 | 769.493         | 832.011         | 824.002         | 824.506         | 823.498         | V115 |
| L1 | 835.035         | 782.477         | 774.468         | 774.972         | 773.964         | L114 |
| F1 | <b>874.561</b>  | 728.935         | 721.926         | 722.430         | 721.422         | F113 |
| N1 | <b>931.583</b>  | 677.400         | 669.390         | 669.893         | 668.885         | N112 |
| I1 | <b>988.125</b>  | 620.867         | 612.858         | 613.362         | 612.354         | I111 |
| Q1 | <b>1052.154</b> | 563.845         | 555.836         | 556.340         | 555.332         | Q110 |
| A1 | <b>1087.673</b> | 499.816         | 491.807         | 492.310         | 491.303         | A10  |
| V1 | <b>1137.207</b> | 484.297         | 476.288         | 476.792         | 475.784         | V10  |
| L1 | <b>1193.749</b> | 414.763         | 406.754         | 407.258         | 406.250         | L10  |
| L1 | 1250.291        | 358.221         | 350.212         | 350.716         | 349.708         | L10  |
| P1 | <b>1298.817</b> | 301.679         | 293.670         | 294.174         | 293.166         | P10  |
| K1 | <b>1362.865</b> | 253.153         | 245.143         | 245.647         | 244.639         | K10  |
| K1 | <b>1426.912</b> | 189.105         | 181.096         | 181.600         | 180.592         | K10  |
| T1 | <b>1477.436</b> | 125.058         | 117.049         | 117.552         | 116.544         | T10  |
| E1 | <b>1541.958</b> | 74.534          | 66.524          | 67.028          | 66.021          | E10  |

# sp | Q6GSS7 | H2A2A\_MOUSE

LNKLLGK <sup>Dimethyl</sup> <sub>28.03</sub> VTIAQGGVLPNIQAVLLPKKTE

- ▶ fragmentation table for charge state 3+
- ▶ specType=etd
- ▶ score=89.03
- ▶ F104912.dat
- ▶ query=q3253.p1
- ▶ precursor=771.724660
- ▶ chargePrecursor=4
- ▶ itol=0.8

| AA    | c              | y               | z+1             | z+2            | z     | AA                   |
|-------|----------------|-----------------|-----------------|----------------|-------|----------------------|
| L 1   | 44.377         | <b>1028.635</b> | <b>1023.296</b> |                | 0.672 | <b>1022.960</b> L 29 |
| N 2   | 62.392         | 990.941         | <b>985.601</b>  | <b>985.937</b> |       | <b>985.265</b> N 28  |
| K 3   | 125.090        | 952.026         | <b>947.587</b>  | <b>947.923</b> |       | 947.251 K 27         |
| L 4   | 162.795        | 910.228         | 904.889         | 905.225        |       | 904.553 L 26         |
| L 5   | 200.479        | 872.533         | 867.134         | 867.530        |       | 866.955 L 25         |
| G 6   | 219.487        | 834.839         | 829.409         | 829.835        |       | 829.163 G 24         |
| K 7   | 271.529        | 815.832         | 810.492         | 810.828        |       | 810.156 K 23         |
| V 8   | 304.552        | 763.790         | 758.450         | 758.786        |       | 758.114 V 22         |
| T 9   | 336.234        | 730.767         | 725.427         | 725.763        |       | 725.091 T 21         |
| I 10  | 375.929        | 697.084         | 691.745         | 692.081        |       | 691.409 I 20         |
| A 11  | 399.608        | 659.389         | 654.050         | 654.386        |       | 653.714 A 19         |
| Q 12  | 442.294        | 636.720         | 630.374         | 630.707        |       | 630.035 Q 18         |
| G 13  | 461.301        | 593.024         | 587.685         | 588.021        |       | 587.349 G 17         |
| G 14  | 480.308        | 574.017         | 568.678         | 569.013        |       | 568.342 G 16         |
| V 15  | 513.331        | 555.010         | 549.670         | 550.006        |       | 549.334 V 15         |
| L 16  | 551.026        | 521.987         | 516.648         | 516.984        |       | 516.312 L 14         |
| F 17  | 583.377        | 484.292         | 478.953         | 479.289        |       | 478.617 F 13         |
| Tu 18 | 621.391        | 451.942         | 446.603         | 446.939        |       | 446.266 Tu 12        |
| I 19  | 659.086        | 413.927         | 408.588         | 408.924        |       | 408.252 I 11         |
| Q 20  | 701.772        | 376.233         | 370.893         | 371.229        |       | 370.557 Q 10         |
| A 21  | 725.451        | 333.546         | 328.207         | 328.543        |       | 327.871 A 9          |
| V 22  | 758.474        | 309.867         | 304.528         | 304.864        |       | 304.192 V 8          |
| L 23  | 796.168        | 276.844         | 271.505         | 271.841        |       | 271.169 L 7          |
| L 24  | 833.863        | 239.350         | 233.910         | 234.246        |       | 233.574 L 6          |
| P 25  | 866.214        | 201.655         | 196.216         | 196.551        |       | 195.785 P 5          |
| K 26  | 908.912        | 169.104         | 163.765         | 164.101        |       | 163.429 K 4          |
| K 27  | <b>951.611</b> | 126.406         | 121.066         | 121.402        |       | 120.730 K 3          |
| T 28  | <b>985.293</b> | 83.708          | 78.368          | 78.704         |       | 78.032 T 2           |
| E 29  | 1028.307       | 50.025          | 44.685          | 45.021         |       | 44.349 E 1           |

# sp | Q6GSS7 | H2A2A\_MOUSE

LNKLLGK <sup>Dimethyl</sup>VTIAQGGVLPNIQAVLLPKKTE  
28.03

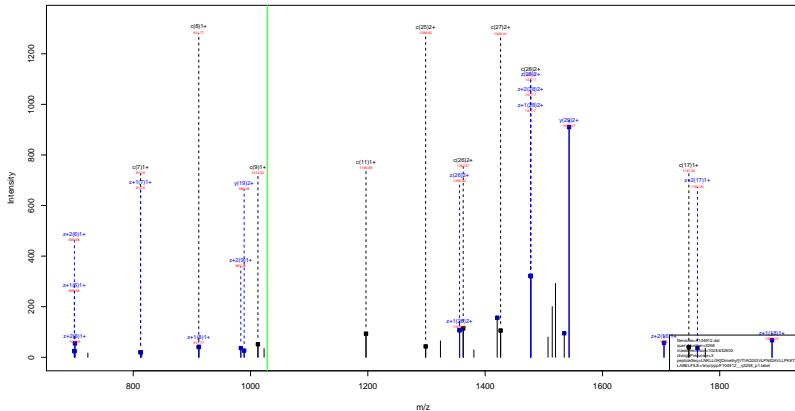



# sp | Q6GSS7 | H2A2A\_MOUSE

LNKLLGK <sup>Dimethyl</sup> <sub>28.03</sub> VTIAQGGVLPNIQAVLLPKKTE

- ▶ fragmentation table for charge state 1+
- ▶ specType=etd
- ▶ score=36.59
- ▶ F104912.dat
- ▶ query=q3258\_p1
- ▶ precursor=1028.632600
- ▶ chargePrecursor=3
- ▶ itol=0.8

| AA  | c               | y        | z+1             | z+2             | z        | AA   |
|-----|-----------------|----------|-----------------|-----------------|----------|------|
| L1  | 131.118         | 3081.892 | 3067.873        | 0.000           | 3066.895 | L129 |
| N2  | 345.161         | 2970.808 | 2954.789        | 2955.797        | 2951.781 | N28  |
| K3  | 373.256         | 2856.765 | 2840.746        | 2841.754        | 2839.738 | K27  |
| L4  | 486.340         | 2728.670 | 2712.651        | 2713.659        | 2711.643 | L26  |
| L5  | 599.424         | 2615.585 | 2599.567        | 2600.575        | 2598.560 | L25  |
| G6  | 694.448         | 2502.502 | 2486.483        | 2487.491        | 2485.475 | G24  |
| K7  | <b>812.572</b>  | 2345.480 | 2429.462        | 2430.469        | 2428.454 | K23  |
| V8  | <b>911.640</b>  | 2288.354 | 2273.335        | 2274.343        | 2272.327 | V22  |
| T9  | <b>1012.688</b> | 2190.286 | 2174.267        | 2175.275        | 2173.259 | T21  |
| I10 | 1125.772        | 2089.238 | 2073.219        | 2074.227        | 2072.211 | I20  |
| A11 | <b>1196.809</b> | 1976.154 | 1960.135        | 1961.143        | 1959.127 | A19  |
| Q12 | 1324.857        | 1905.111 | <b>1889.094</b> | 1906.108        | 1888.090 | Q18  |
| G13 | 1381.589        | 1777.055 | 1761.036        | <b>1762.047</b> | 1760.032 | G17  |
| G14 | 1438.910        | 1720.937 | 1704.918        | <b>1705.926</b> | 1703.910 | G16  |
| V15 | 1537.879        | 1663.015 | 1646.997        | 1648.004        | 1645.989 | V15  |
| L16 | 1651.063        | 1563.947 | 1547.928        | 1548.936        | 1546.920 | L14  |
| P17 | <b>1748.116</b> | 1450.893 | 1434.874        | 1435.882        | 1433.866 | P13  |
| T18 | 1867.159        | 1383.810 | 1367.791        | 1368.799        | 1366.783 | T12  |
| I19 | 1975.243        | 1298.767 | 1283.748        | 1284.756        | 1282.741 | I11  |
| Q20 | 2103.301        | 1126.683 | 1110.664        | 1111.672        | 1109.656 | Q10  |
| A21 | 2174.336        | 996.624  | 980.606         | <b>983.614</b>  | 981.598  | A9   |
| V22 | 2273.407        | 927.587  | <b>911.569</b>  | 912.576         | 910.561  | V8   |
| L23 | 2386.491        | 828.519  | <b>812.500</b>  | 813.508         | 811.492  | L7   |
| L24 | 2499.575        | 715.435  | <b>699.415</b>  | <b>700.424</b>  | 698.408  | L6   |
| P25 | 2596.626        | 602.351  | 586.332         | 587.340         | 585.324  | P5   |
| K26 | 2724.723        | 505.298  | 489.279         | 490.287         | 488.271  | K4   |
| K27 | 2852.816        | 377.203  | 361.184         | 362.192         | 360.177  | K3   |
| T28 | 2951.895        | 249.108  | 233.089         | 234.097         | 232.082  | T2   |
| E29 | 3087.938        | 148.060  | 132.042         | 133.050         | 131.034  | E1   |

# sp | Q6GSS7 | H2A2A\_MOUSE

LNKLLGK <sup>Dimethyl</sup> <sub>28.03</sub> VTIAQGGVLPNIQAVLLPKKTE

- ▶ fragmentation table for charge state 2+
- ▶ specType=etd
- ▶ score=36.59
- ▶ F104912.dat
- ▶ query=q3258\_p1
- ▶ precursor=1028.632600
- ▶ chargePrecursor=3
- ▶ itol=0.8

| AA  | c               | y               | z+1             | z+2             | z               | AA  |
|-----|-----------------|-----------------|-----------------|-----------------|-----------------|-----|
| L1  | 66.053          | <b>1542.450</b> | <b>1534.440</b> | 8.504           | 1533.930        | L19 |
| N12 | 123.054         | 1485.905        | <b>1477.898</b> | <b>1478.402</b> | <b>1477.394</b> | N20 |
| K13 | 187.132         | 1428.889        | <b>1420.877</b> | 1421.381        | <b>1420.373</b> | K27 |
| L14 | 243.674         | 1364.839        | <b>1356.829</b> | 1357.333        | <b>1356.325</b> | L26 |
| L15 | 300.216         | 1308.297        | 1300.287        | 1300.791        | 1299.783        | L25 |
| G16 | 358.759         | 1251.755        | 1243.745        | 1244.249        | 1243.241        | G24 |
| K17 | 406.799         | 1223.244        | 1215.234        | 1215.738        | 1214.731        | K23 |
| V18 | 456.324         | 1145.181        | 1137.171        | 1137.675        | 1136.667        | V22 |
| F19 | 506.849         | 1095.646        | 1087.637        | 1088.141        | 1087.133        | F21 |
| T10 | 563.390         | 1045.123        | 1037.113        | 1037.617        | 1036.609        | T20 |
| A11 | 608.909         | <b>988.581</b>  | 980.571         | 981.075         | 980.067         | A19 |
| G12 | 662.937         | 938.066         | 930.056         | 930.559         | 929.551         | G18 |
| G13 | 691.448         | 889.033         | 881.023         | 881.527         | 880.519         | G17 |
| G14 | 719.959         | 860.522         | 852.512         | 853.017         | 852.009         | G16 |
| V15 | 769.493         | 832.011         | 824.002         | 824.506         | 823.498         | V15 |
| L16 | 826.035         | 782.477         | 774.468         | 774.972         | 773.964         | L14 |
| F17 | 874.581         | 728.935         | 720.925         | 721.429         | 720.421         | F13 |
| N18 | 931.583         | 677.400         | 669.390         | 669.893         | 668.885         | N12 |
| I19 | 988.125         | 620.867         | 612.858         | 613.362         | 612.354         | I11 |
| Q20 | 1052.154        | 563.845         | 555.836         | 556.340         | 555.332         | Q10 |
| A21 | 1087.673        | 499.816         | 491.807         | 492.310         | 491.303         | A0  |
| V22 | 1127.207        | 484.297         | 476.288         | 476.792         | 475.784         | V8  |
| L23 | 1193.769        | 414.763         | 406.754         | 407.258         | 406.250         | L17 |
| L24 | 1250.291        | 358.221         | 350.212         | 350.716         | 349.708         | L16 |
| P25 | <b>1298.817</b> | 301.679         | 293.670         | 294.174         | 293.166         | P5  |
| K26 | <b>1362.865</b> | 253.153         | 245.143         | 245.647         | 244.639         | K4  |
| K27 | <b>1426.912</b> | 189.105         | 181.096         | 181.600         | 180.592         | K3  |
| T28 | <b>1477.436</b> | 125.058         | 117.048         | 117.552         | 116.544         | T12 |
| E19 | 1541.958        | 74.534          | 66.524          | 67.028          | 66.021          | E11 |

# sp | Q6GSS7 | H2A2A\_MOUSE

LNKLLGK<sup>Dimethyl</sup>VTIAQGGVLPNIQAVLLPKKTE  
28.03

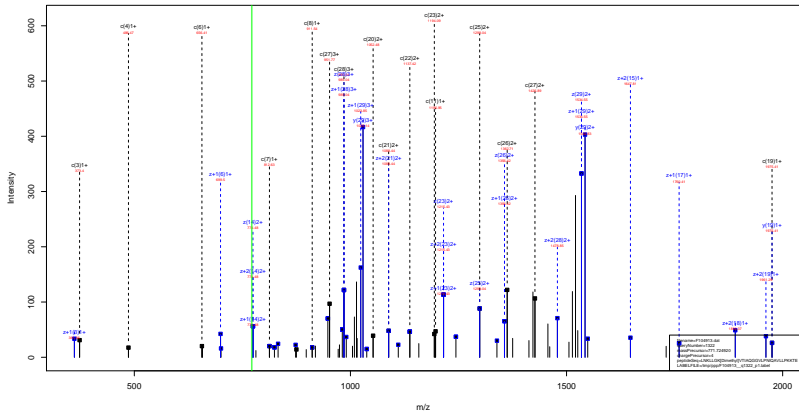

# sp | Q6GSS7 | H2A2A\_MOUSE

LNKLLGK <sup>Dimethyl</sup> <sub>28.03</sub> VTIAQGGVLPNIQAVLLPKKTE

- ▶ fragmentation table for charge state 1+
- ▶ specType=etd
- ▶ score=48.66
- ▶ F104913.dat
- ▶ query=q1322\_p1
- ▶ precursor=771.724920
- ▶ chargePrecursor=4
- ▶ itol=0.8

| AA  | c               | y               | z+1             | z+2             | z               | AA   |
|-----|-----------------|-----------------|-----------------|-----------------|-----------------|------|
| L1  | 131.118         | 2083.892        | 3067.873        | 9.800           | 3066.865        | L128 |
| N2  | 245.151         | 2970.808        | 2954.789        | 2955.797        | 2953.781        | N20  |
| K3  | <b>373.256</b>  | 3856.705        | 2840.746        | 2841.754        | 2839.738        | K27  |
| L4  | <b>480.340</b>  | 3728.670        | 2712.653        | 2713.659        | 2711.643        | L26  |
| L5  | 599.424         | 2615.588        | 2599.567        | 2600.575        | 2598.559        | L25  |
| G6  | <b>658.445</b>  | 2502.502        | 2486.483        | 2487.491        | 2485.475        | G24  |
| K7  | <b>812.572</b>  | 2345.480        | 2420.462        | 2420.469        | 2420.454        | K23  |
| V8  | <b>911.640</b>  | 2289.954        | 2273.935        | 2274.943        | 2272.927        | V22  |
| F9  | 1012.688        | 2100.266        | 2174.267        | 2175.275        | 2173.259        | F21  |
| T10 | 1125.772        | 2089.239        | 2073.219        | 2074.227        | 2072.211        | T20  |
| A11 | <b>1196.809</b> | <b>1976.154</b> | 1960.135        | <b>1961.143</b> | 1959.127        | A19  |
| Q12 | 1244.857        | 1926.111        | 1889.089        | <b>1890.106</b> | 1889.090        | Q18  |
| G13 | 1381.889        | 1777.058        | <b>1761.039</b> | 1762.047        | <b>1760.032</b> | G17  |
| G14 | 1438.910        | 1720.037        | 1704.018        | 1705.026        | 1703.010        | G16  |
| V15 | 1537.979        | 1663.015        | 1646.997        | <b>1648.004</b> | 1645.989        | V15  |
| L16 | 1651.063        | 1563.947        | 1547.928        | <b>1548.936</b> | 1546.920        | L14  |
| F17 | 1768.316        | 1458.863        | 1438.844        | 1439.852        | 1437.836        | F13  |
| N18 | 1862.150        | 1353.810        | 1337.791        | <b>1338.799</b> | 1336.783        | N12  |
| I19 | <b>1975.243</b> | 1239.767        | 1223.748        | 1224.756        | 1222.741        | I11  |
| Q20 | 2163.301        | 1126.663        | <b>1110.664</b> | 1111.672        | 1109.656        | Q10  |
| A21 | 2174.338        | 998.624         | 982.606         | 983.614         | <b>981.598</b>  | A0   |
| V22 | 2273.407        | 927.587         | <b>911.569</b>  | 912.576         | 910.561         | V8   |
| L23 | 2388.493        | 828.519         | <b>812.500</b>  | 813.508         | 811.492         | L17  |
| L24 | 2499.575        | 715.435         | <b>699.416</b>  | <b>700.424</b>  | 698.408         | L16  |
| P25 | 2596.628        | 602.351         | 586.332         | 587.340         | 585.324         | P5   |
| K26 | 2724.723        | 505.298         | 489.279         | 490.287         | 488.271         | K4   |
| K27 | 2852.818        | 377.203         | <b>361.184</b>  | 362.192         | 360.177         | K3   |
| T28 | 2953.885        | 249.108         | 233.089         | 234.097         | 232.081         | T2   |
| E29 | 3062.968        | 148.060         | 132.042         | 133.050         | 131.034         | E1   |

# sp | Q6GSS7 | H2A2A\_MOUSE

LNKLLGK <sup>Dimethyl</sup><sub>28.03</sub> VTIAQGGVLPNIQAVLLPKKTE

- ▶ fragmentation table for charge state 2+
- ▶ specType=etd
- ▶ score=48.66
- ▶ F104913.dat
- ▶ query=q1322\_p1
- ▶ precursor=771.724920
- ▶ chargePrecursor=4
- ▶ itol=0.8

| AA | c               | y               | z+1             | z+2             | z               | AA   |
|----|-----------------|-----------------|-----------------|-----------------|-----------------|------|
| L1 | 66.053          | <b>1542.450</b> | <b>1534.440</b> | 9.504           | <b>1533.936</b> | L126 |
| N1 | 123.084         | 1485.905        | 1477.898        | <b>1478.402</b> | 1477.891        | N20  |
| K1 | 187.132         | 1428.886        | 1420.879        | 1421.381        | 1420.373        | K27  |
| L1 | 243.674         | 1364.839        | <b>1356.829</b> | 1357.331        | <b>1356.325</b> | L26  |
| L1 | 300.216         | 1308.297        | 1300.291        | 1300.791        | <b>1299.783</b> | L25  |
| G1 | 358.759         | 1251.795        | <b>1243.745</b> | <b>1244.249</b> | 1243.751        | G24  |
| K1 | 406.799         | 1197.244        | <b>1215.234</b> | <b>1215.738</b> | <b>1214.731</b> | K23  |
| V1 | 456.324         | 1145.181        | <b>1137.171</b> | <b>1137.675</b> | <b>1136.667</b> | V22  |
| T1 | 506.840         | 1095.646        | 1087.637        | <b>1088.141</b> | 1087.133        | T21  |
| T1 | 563.390         | 1045.123        | <b>1037.113</b> | <b>1037.617</b> | 1036.609        | T20  |
| A1 | 608.909         | 998.581         | <b>990.571</b>  | <b>991.075</b>  | 990.067         | A19  |
| Q1 | 662.937         | 953.065         | 945.053         | 945.557         | 944.549         | Q18  |
| G1 | 691.448         | 899.033         | 891.023         | 891.527         | 890.519         | G17  |
| G1 | 719.959         | 860.522         | 852.513         | 853.017         | 852.009         | G16  |
| V1 | 769.493         | <b>832.011</b>  | <b>824.002</b>  | <b>824.506</b>  | <b>823.498</b>  | V15  |
| L1 | 826.035         | 782.477         | <b>774.468</b>  | <b>774.972</b>  | <b>773.964</b>  | L14  |
| T1 | <b>874.561</b>  | 728.935         | 721.925         | 722.429         | 721.421         | T13  |
| N1 | 911.553         | 677.405         | 669.399         | 669.903         | 668.895         | N12  |
| I1 | 968.125         | 620.887         | 612.878         | 612.882         | 611.874         | I11  |
| Q1 | <b>1052.154</b> | 563.845         | 555.836         | 556.340         | 555.332         | Q10  |
| A1 | <b>1087.673</b> | 499.816         | 491.807         | 492.310         | 491.303         | A10  |
| V2 | <b>1137.207</b> | 494.297         | 486.288         | 486.792         | 485.784         | V9   |
| L2 | <b>1193.749</b> | 414.763         | 406.754         | 407.258         | 406.251         | L1   |
| L2 | 1250.291        | 358.221         | 350.212         | 350.716         | 349.708         | L0   |
| P2 | <b>1298.817</b> | 301.679         | 293.670         | 294.174         | 293.166         | P5   |
| K2 | <b>1362.865</b> | 253.153         | 245.143         | 245.647         | 244.639         | K4   |
| K2 | <b>1426.912</b> | 189.105         | 181.096         | 181.600         | 180.592         | K3   |
| T2 | 1477.436        | 125.058         | 117.048         | 117.552         | 116.544         | T1   |
| E2 | 1541.958        | 74.534          | 66.524          | 67.028          | 66.021          | E1   |

# sp | Q6GSS7 | H2A2A\_MOUSE

LNKLLGK <sup>Dimethyl</sup><sub>28.03</sub> VTIAQGGVLPNIQAVLLPKKTE

- ▶ fragmentation table for charge state 3+
- ▶ specType=etd
- ▶ score=48.66
- ▶ F104913.dat
- ▶ query=q1322\_p1
- ▶ precursor=771.724920
- ▶ chargePrecursor=4
- ▶ itol=0.8

| AA  | c              | y               | z+1             | z+2            | z              | AA  |
|-----|----------------|-----------------|-----------------|----------------|----------------|-----|
| L1  | 44.377         | <b>1028.635</b> | <b>1023.296</b> | 0.672          | 1022.660       | L20 |
| N2  | 62.302         | <b>990.941</b>  | <b>985.601</b>  | 985.937        | <b>985.265</b> | N28 |
| K3  | 125.090        | 952.326         | <b>947.587</b>  | <b>947.923</b> | <b>947.251</b> | K27 |
| L4  | 162.785        | 910.225         | 904.869         | 905.225        | 904.551        | L26 |
| L5  | 200.479        | <b>872.533</b>  | 867.194         | 867.530        | 866.858        | L25 |
| G6  | 239.487        | 834.539         | 829.499         | 829.835        | 829.163        | G24 |
| K7  | 271.529        | 815.833         | 810.492         | 810.828        | 810.156        | K23 |
| V8  | 304.552        | 763.790         | 758.450         | 758.786        | 758.114        | V22 |
| T9  | 338.234        | 730.767         | 725.427         | 725.763        | 725.091        | T21 |
| I10 | 375.929        | 697.084         | 691.745         | 692.081        | 691.409        | I20 |
| A11 | 399.608        | 659.389         | 654.050         | 654.386        | 653.714        | A19 |
| Q12 | 442.294        | 626.713         | 621.374         | 621.707        | 621.035        | Q18 |
| G13 | 461.301        | 593.024         | 587.685         | 588.021        | 587.349        | G17 |
| G14 | 480.308        | 574.017         | 568.678         | 569.013        | 568.342        | G16 |
| V15 | 513.131        | 555.010         | 549.670         | 550.006        | 549.334        | V15 |
| L16 | 551.026        | 521.987         | 516.648         | 516.984        | 516.312        | L14 |
| P17 | 583.377        | 484.202         | 478.963         | 479.299        | 478.627        | P13 |
| N18 | 621.391        | 451.942         | 446.602         | 446.938        | 446.266        | N12 |
| I19 | 659.086        | 413.927         | 408.588         | 408.924        | 408.252        | I11 |
| Q20 | 701.772        | 376.233         | 370.893         | 371.229        | 370.557        | Q10 |
| A21 | 725.451        | 333.546         | 328.207         | 328.543        | 327.871        | A9  |
| V22 | 758.474        | 309.867         | 304.528         | 304.864        | 304.192        | V8  |
| L23 | 796.188        | 276.844         | 271.505         | 271.841        | 271.169        | L7  |
| L24 | 833.863        | 239.150         | 233.810         | 234.146        | 233.474        | L6  |
| T25 | 869.214        | 201.455         | 196.116         | 196.452        | 195.780        | T5  |
| K26 | 908.912        | 169.100         | 163.761         | 164.101        | 163.429        | K4  |
| K27 | <b>951.611</b> | 138.406         | 133.066         | 133.402        | 132.730        | K3  |
| T28 | <b>985.293</b> | 83.708          | 78.368          | 78.704         | 78.032         | T2  |
| E29 | 1028.307       | 50.025          | 44.685          | 45.021         | 44.349         | E1  |

# sp | Q6GSS7 | H2A2A\_MOUSE

LNKLLGK <sup>Dimethyl</sup> VTIAQGGVLPNIQAVLLPKKTE  
28.03

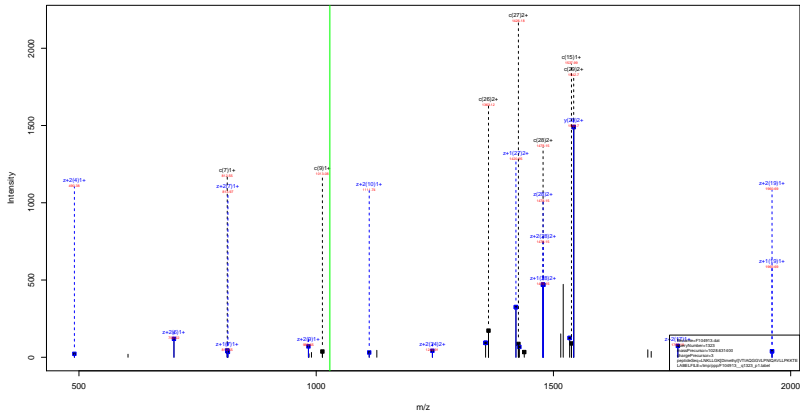

# sp | Q6GSS7 | H2A2A\_MOUSE

LNKLLGK <sup>Dimethyl</sup><sub>28.03</sub> VTIAQGGVLPNIQAVLLPKKTE

- ▶ fragmentation table for charge state 1+
- ▶ specType=etd
- ▶ score=40.22
- ▶ F104913.dat
- ▶ query=q1323\_p1
- ▶ precursor=1028.631400
- ▶ chargePrecursor=3
- ▶ itol=0.8

| AA     | c               | y        | z+1             | z+2             | z        | AA     |
|--------|-----------------|----------|-----------------|-----------------|----------|--------|
| L[1]   | 131.118         | 3081.892 | 3067.873        | 0.000           | 3066.895 | L[29]  |
| N[2]   | 345.161         | 2970.808 | 2954.789        | 2955.797        | 2951.781 | N[28]  |
| K[3]   | 373.256         | 2856.765 | 2840.746        | 2841.754        | 2839.738 | K[27]  |
| L[4]   | 486.340         | 2728.670 | 2712.651        | 2713.659        | 2711.643 | L[26]  |
| L[5]   | 599.424         | 2615.585 | 2599.567        | 2600.575        | 2598.560 | L[25]  |
| G[6]   | 694.445         | 2502.502 | 2486.483        | 2487.491        | 2485.475 | G[24]  |
| K[7]   | <b>812.572</b>  | 2345.480 | 2429.462        | 2430.469        | 2428.454 | K[23]  |
| V[8]   | 911.640         | 2288.354 | 2273.335        | 2274.343        | 2272.327 | V[22]  |
| T[9]   | <b>1012.688</b> | 2190.286 | 2174.267        | 2175.275        | 2173.259 | T[21]  |
| I[10]  | 1125.772        | 2089.238 | 2073.219        | 2074.227        | 2072.211 | I[20]  |
| A[11]  | 1196.859        | 1976.154 | <b>1960.135</b> | <b>1961.143</b> | 1959.127 | A[19]  |
| Q[12]  | 1274.897        | 1905.111 | 1889.092        | 1890.100        | 1888.084 | Q[18]  |
| G[13]  | 1361.989        | 1777.055 | 1761.036        | <b>1762.047</b> | 1760.032 | G[17]  |
| G[14]  | <b>1438.910</b> | 1720.937 | 1704.918        | 1705.926        | 1703.910 | G[16]  |
| V[15]  | <b>1537.979</b> | 1663.015 | 1646.997        | 1648.004        | 1645.989 | V[15]  |
| L[16]  | 1651.063        | 1563.947 | 1547.928        | 1548.936        | 1546.920 | L[14]  |
| F[17]  | 1748.116        | 1450.893 | 1434.874        | 1435.882        | 1433.866 | F[13]  |
| Tu[18] | 1852.159        | 1383.810 | 1367.791        | 1368.799        | 1366.783 | Tu[12] |
| I[19]  | 1975.243        | 1239.767 | 1223.748        | 1224.756        | 1222.741 | I[11]  |
| Q[20]  | 2103.301        | 1126.683 | 1110.664        | <b>1111.672</b> | 1109.656 | Q[10]  |
| A[21]  | 2174.336        | 996.624  | 980.605         | <b>983.614</b>  | 981.598  | A[9]   |
| V[22]  | 2273.407        | 927.587  | 911.569         | 912.576         | 910.561  | V[8]   |
| L[23]  | 2386.491        | 828.519  | <b>812.500</b>  | <b>813.508</b>  | 811.492  | L[7]   |
| L[24]  | 2499.575        | 715.435  | 699.415         | <b>700.424</b>  | 698.408  | L[6]   |
| P[25]  | 2596.626        | 602.351  | 586.332         | 587.340         | 585.324  | P[5]   |
| K[26]  | 2724.723        | 505.298  | 489.279         | <b>490.287</b>  | 488.271  | K[4]   |
| K[27]  | 2852.816        | 377.203  | 361.184         | 362.192         | 360.177  | K[3]   |
| T[28]  | 2953.895        | 249.108  | 233.089         | 234.097         | 232.082  | T[2]   |
| E[29]  | 3082.938        | 148.060  | 132.042         | 133.050         | 131.034  | E[1]   |



# sp | Q6GSS7 | H2A2A\_MOUSE

LNKLLGK <sup>Dimethyl</sup> <sub>28.03</sub> VTIAQGGVLPNIQAVLLPKKTE

- ▶ fragmentation table for charge state 2+
- ▶ specType=etd
- ▶ score=40.22
- ▶ F104913.dat
- ▶ query=q1323\_p1
- ▶ precursor=1028.631400
- ▶ chargePrecursor=3
- ▶ itol=0.8

| AA  | c               | y               | z+1             | z+2             | z               | AA   |
|-----|-----------------|-----------------|-----------------|-----------------|-----------------|------|
| L1  | 66.053          | <b>1542.450</b> | <b>1534.440</b> | 9.504           | <b>1533.936</b> | L128 |
| N12 | 123.054         | 1485.905        | <b>1477.898</b> | <b>1478.402</b> | <b>1477.394</b> | N20  |
| K13 | 187.132         | <b>1428.886</b> | <b>1420.877</b> | <b>1421.381</b> | <b>1420.373</b> | K27  |
| L14 | 243.674         | 1364.839        | <b>1356.829</b> | <b>1357.333</b> | <b>1356.325</b> | L26  |
| L15 | 300.216         | 1308.297        | 1300.287        | 1300.791        | 1299.783        | L25  |
| G16 | 356.758         | 1251.755        | 1243.745        | <b>1244.249</b> | 1243.241        | G24  |
| K17 | 406.799         | 1223.244        | 1215.234        | 1215.738        | 1214.731        | K23  |
| V18 | 456.324         | 1145.181        | 1137.171        | 1137.675        | 1136.667        | V22  |
| F19 | 506.849         | 1095.646        | 1087.637        | 1088.141        | 1087.133        | F21  |
| T10 | 563.390         | 1045.123        | 1037.113        | 1037.617        | 1036.609        | T20  |
| A11 | 688.608         | 988.581         | 980.571         | 981.075         | 980.067         | A19  |
| Q12 | 692.937         | 953.065         | 945.055         | 945.559         | 944.551         | Q18  |
| G13 | 691.448         | 889.033         | 881.023         | 881.527         | 880.519         | G17  |
| G14 | 719.959         | 860.522         | 852.513         | 853.017         | 852.009         | G16  |
| V15 | 769.493         | 832.011         | 824.002         | 824.506         | 823.498         | V15  |
| L16 | 826.035         | 782.477         | 774.468         | 774.972         | 773.964         | L14  |
| F17 | 874.581         | 728.935         | 720.925         | 721.429         | 720.421         | F13  |
| N18 | 931.583         | 677.400         | 669.390         | 669.893         | 668.885         | N12  |
| I19 | 988.125         | 620.867         | 612.857         | 613.361         | 612.353         | I11  |
| Q20 | 1052.154        | 563.845         | 555.835         | 556.340         | 555.332         | Q10  |
| A21 | 1087.673        | 499.816         | 491.807         | 492.311         | 491.303         | A0   |
| V22 | 1127.207        | 484.297         | 476.288         | 476.792         | 475.784         | V8   |
| L23 | 1193.749        | 414.763         | 406.753         | 407.257         | 406.250         | L17  |
| L24 | 1250.291        | 358.221         | 350.211         | 350.715         | 349.708         | L6   |
| P25 | 1298.817        | 301.679         | 293.670         | 294.174         | 293.166         | P5   |
| K26 | <b>1362.865</b> | 253.153         | 245.143         | 245.647         | 244.639         | K4   |
| K27 | <b>1426.912</b> | 189.105         | 181.096         | 181.600         | 180.592         | K3   |
| T28 | <b>1477.436</b> | 125.058         | 117.048         | 117.552         | 116.544         | T2   |
| E29 | <b>1541.958</b> | 74.534          | 66.524          | 67.028          | 66.021          | E1   |

# sp | Q6GSS7 | H2A2A\_MOUSE

LNKLLGK<sup>Dimethyl</sup>VTIAQGGVLPNIQAVLLPKKTE  
28.03

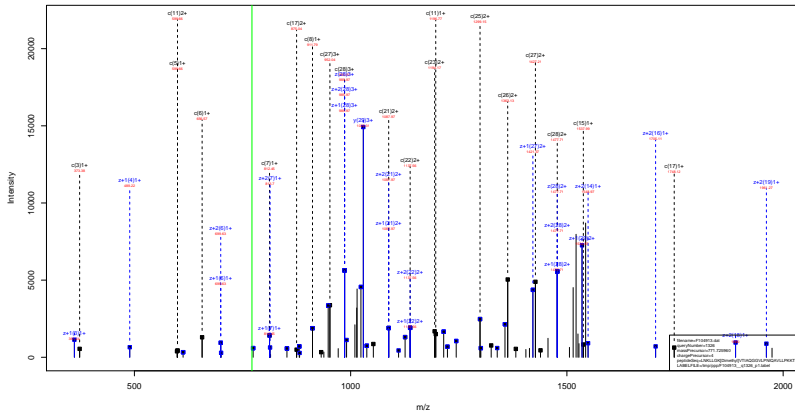

# sp | Q6GSS7 | H2A2A\_MOUSE

LNKLLGK <sup>Dimethyl</sup> <sub>28.03</sub> VTIAQGGVLPNIQAVLLPKKTE

- ▶ fragmentation table for charge state 1+
- ▶ specType=etd
- ▶ score=95.34
- ▶ F104913.dat
- ▶ query=q1326\_p1
- ▶ precursor=771.725960
- ▶ chargePrecursor=4
- ▶ itol=0.8

| AA  | c               | y               | z+1             | z+2             | z        | AA  |
|-----|-----------------|-----------------|-----------------|-----------------|----------|-----|
| L1  | 131.118         | 3083.892        | 3067.873        | 0.000           | 3066.865 | L26 |
| N2  | 245.161         | 2970.808        | 2954.789        | 2955.797        | 2953.781 | N28 |
| K3  | <b>373.256</b>  | 2856.765        | 2840.746        | 2841.754        | 2839.738 | K27 |
| L4  | 488.340         | 2728.670        | 2712.651        | 2713.659        | 2711.643 | L26 |
| L5  | <b>699.424</b>  | 2615.586        | 2599.567        | 2600.575        | 2598.559 | L25 |
| G6  | <b>658.445</b>  | 2502.500        | 2486.483        | 2487.491        | 2485.475 | G24 |
| K7  | <b>812.572</b>  | 2445.460        | 2429.442        | 2430.450        | 2428.434 | K23 |
| V8  | <b>911.640</b>  | 2289.354        | 2273.335        | 2274.343        | 2272.327 | V22 |
| T9  | 1012.688        | 2190.288        | 2174.269        | 2175.275        | 2173.259 | T21 |
| I10 | <b>1125.772</b> | 2089.230        | 2073.210        | 2074.227        | 2072.211 | I20 |
| A11 | <b>1196.809</b> | 1976.154        | 1960.135        | <b>1961.143</b> | 1959.127 | A19 |
| Q12 | <b>1324.867</b> | 1905.111        | 1889.098        | <b>1890.106</b> | 1888.090 | Q18 |
| G13 | <b>1381.889</b> | 1777.058        | 1761.039        | 1762.047        | 1760.032 | G17 |
| G14 | <b>1438.910</b> | 1720.037        | 1704.018        | <b>1705.026</b> | 1703.010 | G16 |
| V15 | <b>1537.979</b> | 1663.015        | 1646.997        | 1648.004        | 1646.989 | V15 |
| L16 | 1651.063        | 1563.947        | 1547.928        | <b>1548.936</b> | 1546.920 | L14 |
| T17 | <b>1748.116</b> | 1490.863        | 1474.844        | 1475.852        | 1473.836 | T13 |
| N18 | 1862.959        | 1353.810        | 1337.791        | <b>1338.799</b> | 1336.783 | N12 |
| I19 | 1975.243        | 1239.761        | <b>1223.748</b> | 1224.756        | 1222.741 | I11 |
| Q20 | 2103.301        | <b>1126.683</b> | <b>1110.664</b> | 1111.672        | 1109.656 | Q10 |
| A21 | 2174.338        | 998.624         | 982.606         | 983.614         | 981.598  | A9  |
| V22 | 2273.407        | 927.587         | <b>911.569</b>  | <b>912.576</b>  | 910.561  | V8  |
| L23 | 2389.491        | 808.513         | <b>813.508</b>  | <b>813.508</b>  | 811.492  | L7  |
| L24 | 2499.575        | 715.435         | <b>699.416</b>  | <b>700.424</b>  | 698.408  | L6  |
| P25 | 2596.628        | 602.351         | 586.332         | 587.340         | 585.324  | P5  |
| K26 | 2724.723        | 505.268         | <b>489.279</b>  | 490.287         | 488.271  | K4  |
| K27 | 2852.818        | 377.203         | <b>361.184</b>  | 362.192         | 360.177  | K3  |
| T28 | 2953.865        | 249.106         | 233.089         | 234.097         | 232.082  | T2  |
| E29 | 3082.008        | 148.080         | 132.062         | 133.070         | 131.054  | E1  |

# sp | Q6GSS7 | H2A2A\_MOUSE

LNKLLGK <sup>Dimethyl</sup> <sub>28.03</sub> VTIAQGGVLPNIQAVLLPKKTE

- ▶ fragmentation table for charge state 2+
- ▶ specType=etd
- ▶ score=95.34
- ▶ F104913.dat
- ▶ query=q1326\_p1
- ▶ precursor=771.725960
- ▶ chargePrecursor=4
- ▶ itol=0.8

| AA  | c               | y               | z+1             | z+2             | z               | AA  |
|-----|-----------------|-----------------|-----------------|-----------------|-----------------|-----|
| L1  | 66.063          | 1542.850        | <b>1534.440</b> | 9.504           | 1533.990        | L19 |
| N1  | 123.084         | 1485.058        | <b>1477.898</b> | <b>1478.402</b> | <b>1477.394</b> | N20 |
| K1  | 187.132         | 1428.889        | <b>1420.877</b> | <b>1421.381</b> | 1420.373        | K27 |
| L1  | 243.674         | 1364.839        | <b>1356.829</b> | <b>1357.333</b> | <b>1356.325</b> | L26 |
| L1  | 300.216         | 1308.297        | <b>1300.287</b> | <b>1300.791</b> | <b>1299.783</b> | L25 |
| G1  | 358.758         | 1251.795        | <b>1243.745</b> | <b>1244.249</b> | 1243.241        | G24 |
| K1  | 406.799         | <b>1223.244</b> | <b>1215.234</b> | <b>1215.738</b> | <b>1214.731</b> | K23 |
| V1  | 456.324         | 1145.181        | <b>1137.171</b> | <b>1137.675</b> | 1136.667        | V22 |
| T1  | 506.840         | 1095.646        | <b>1087.637</b> | <b>1088.141</b> | 1087.133        | T21 |
| T10 | 563.390         | 1045.123        | <b>1037.113</b> | <b>1037.617</b> | <b>1036.609</b> | T20 |
| A11 | <b>598.908</b>  | 988.581         | 980.571         | 981.075         | 980.067         | A19 |
| Q12 | 662.937         | 933.060         | 925.053         | 925.557         | 924.549         | Q18 |
| G13 | 691.448         | 889.033         | <b>881.023</b>  | <b>881.527</b>  | <b>880.519</b>  | G17 |
| G14 | 719.959         | 860.522         | <b>852.513</b>  | <b>853.017</b>  | <b>852.009</b>  | G16 |
| V15 | 769.493         | 832.011         | 824.002         | 824.506         | 823.498         | V15 |
| L16 | 830.035         | 782.477         | <b>774.468</b>  | <b>774.972</b>  | <b>773.964</b>  | L14 |
| T17 | <b>874.561</b>  | 728.935         | 721.928         | 722.432         | 721.424         | T13 |
| N18 | <b>931.583</b>  | 677.400         | 669.390         | 669.893         | 668.885         | N12 |
| I19 | 988.125         | 630.867         | <b>612.378</b>  | <b>612.882</b>  | <b>611.874</b>  | I11 |
| Q20 | <b>1052.154</b> | 583.845         | 575.836         | 576.340         | 575.332         | Q10 |
| A21 | <b>1087.673</b> | 499.816         | 491.807         | 492.310         | 491.303         | A0  |
| V22 | <b>1137.207</b> | 484.297         | 476.288         | 476.792         | 475.784         | V8  |
| L23 | <b>1193.749</b> | 414.763         | 406.754         | 407.258         | 406.250         | L17 |
| L24 | 1250.291        | 358.221         | 350.212         | 350.716         | 349.708         | L16 |
| P25 | <b>1298.817</b> | 301.678         | 293.670         | 294.174         | 293.166         | P5  |
| K26 | <b>1362.865</b> | 253.153         | 245.143         | 245.647         | 244.639         | K4  |
| K27 | <b>1426.912</b> | 189.105         | 181.096         | 181.600         | 180.592         | K3  |
| T28 | <b>1477.436</b> | 125.058         | 117.049         | 117.552         | 116.544         | T12 |
| E29 | 1541.958        | 74.534          | 66.524          | 67.028          | 66.021          | E1  |

# sp | Q6GSS7 | H2A2A\_MOUSE

LNKLLGK <sup>Dimethyl</sup> <sub>28.03</sub> VTIAQGGVLPNIQAVLLPKKTE

- ▶ fragmentation table for charge state 3+
- ▶ specType=etd
- ▶ score=95.34
- ▶ F104913.dat
- ▶ query=q1326\_p1
- ▶ precursor=771.725960
- ▶ chargePrecursor=4
- ▶ itol=0.8

| AA    | c              | y               | z+1             | z+2            | z     | AA                   |
|-------|----------------|-----------------|-----------------|----------------|-------|----------------------|
| L 1   | 44.377         | <b>1028.635</b> | <b>1023.296</b> |                | 0.672 | <b>1022.960</b> L 29 |
| N 2   | 62.392         | <b>990.941</b>  | <b>985.601</b>  | <b>985.937</b> |       | <b>985.265</b> N 28  |
| K 3   | 125.090        | 952.026         | <b>947.587</b>  | <b>947.923</b> |       | 947.251 K 27         |
| L 4   | 162.795        | 910.229         | 904.889         | 905.225        |       | 904.553 L 26         |
| L 5   | 200.479        | 872.523         | 867.184         | 867.520        |       | 866.955 L 25         |
| G 6   | 219.487        | 834.839         | 829.499         | 829.835        |       | 829.161 G 24         |
| K 7   | 271.529        | 815.832         | 810.492         | 810.828        |       | 810.156 K 23         |
| V 8   | 304.552        | 763.790         | 758.450         | 758.786        |       | 758.114 V 22         |
| T 9   | 336.234        | 730.767         | 725.427         | 725.763        |       | 725.091 T 21         |
| I 10  | 375.929        | 697.084         | 691.745         | 692.081        |       | 691.409 I 20         |
| A 11  | 399.608        | 659.389         | 654.050         | 654.386        |       | 653.714 A 19         |
| Q 12  | 442.294        | 636.720         | 630.371         | 630.707        |       | 630.033 Q 18         |
| G 13  | 461.301        | 593.024         | 587.685         | 588.021        |       | 587.349 G 17         |
| G 14  | 480.308        | 574.017         | 568.678         | 569.013        |       | 568.342 G 16         |
| V 15  | 513.331        | 555.010         | 549.670         | 550.006        |       | 549.334 V 15         |
| L 16  | 551.026        | 521.987         | 516.648         | 516.984        |       | 516.312 L 14         |
| F 17  | 583.377        | 484.292         | 478.953         | 479.289        |       | 478.611 F 13         |
| Tu 18 | 621.391        | 451.942         | 446.603         | 446.939        |       | 446.265 Tu 12        |
| I 19  | 659.086        | 413.927         | 408.588         | 408.924        |       | 408.252 I 11         |
| Q 20  | 701.772        | 376.213         | 370.893         | 371.229        |       | 370.551 Q 10         |
| A 21  | 725.451        | 333.546         | 328.207         | 328.543        |       | 327.871 A 9          |
| V 22  | 758.474        | 309.867         | 304.528         | 304.864        |       | 304.192 V 8          |
| L 23  | 796.168        | 276.844         | 271.505         | 271.841        |       | 271.169 L 7          |
| L 24  | 833.863        | 239.350         | 233.991         | 234.326        |       | 233.653 L 6          |
| P 25  | 866.214        | 201.655         | 196.116         | 196.451        |       | 195.785 P 5          |
| K 26  | 908.912        | 169.104         | 163.765         | 164.101        |       | 163.429 K 4          |
| K 27  | <b>951.611</b> | 126.406         | 121.066         | 121.402        |       | 120.730 K 3          |
| T 28  | <b>985.293</b> | 83.768          | 78.368          | 78.704         |       | 78.032 T 2           |
| E 29  | 1028.307       | 50.025          | 44.685          | 45.021         |       | 44.349 E 1           |



# sp | Q6GSS7 | H2A2A\_MOUSE

LNKLLGK <sup>Dimethyl</sup> <sub>28.03</sub> VTIAQGGVLPNIQAVLLPKKTE

- ▶ fragmentation table for charge state 1+
- ▶ specType=etd
- ▶ score=87.04
- ▶ F104913.dat
- ▶ query=q1327\_p1
- ▶ precursor=771.726280
- ▶ chargePrecursor=4
- ▶ itol=0.8

| AA  | c               | y        | z+1             | z+2             | z        | AA  |
|-----|-----------------|----------|-----------------|-----------------|----------|-----|
| L1  | 131.118         | 3081.892 | 3067.873        | 0.000           | 3066.895 | L29 |
| N2  | 345.161         | 2970.808 | 2954.789        | 2955.797        | 2951.781 | N38 |
| K3  | <b>373.256</b>  | 2856.765 | 2840.746        | 2841.754        | 2839.738 | K27 |
| L4  | 486.340         | 2728.670 | 2712.651        | 2713.659        | 2711.643 | L26 |
| L5  | 597.424         | 2615.585 | 2599.567        | 2600.575        | 2598.560 | L25 |
| Q6  | <b>656.445</b>  | 2502.502 | 2486.483        | 2487.491        | 2485.475 | Q24 |
| K7  | <b>812.572</b>  | 2345.480 | 2429.462        | 2430.469        | 2428.454 | K23 |
| V8  | <b>911.640</b>  | 2288.354 | 2273.335        | 2274.343        | 2272.327 | V22 |
| T9  | <b>1012.688</b> | 2190.286 | 2174.267        | 2175.275        | 2173.259 | T21 |
| I10 | <b>1125.772</b> | 2089.238 | 2073.219        | 2074.227        | 2072.211 | I20 |
| A11 | <b>1196.809</b> | 1976.154 | 1960.135        | 1961.143        | 1959.127 | A19 |
| Q12 | <b>1324.867</b> | 1895.111 | 1889.098        | <b>1890.106</b> | 1888.090 | Q18 |
| G13 | <b>1381.889</b> | 1777.058 | 1761.039        | 1762.047        | 1760.032 | G17 |
| G14 | 1438.910        | 1720.937 | 1704.918        | <b>1705.926</b> | 1703.910 | G16 |
| V15 | 1537.879        | 1663.015 | 1646.997        | 1646.004        | 1645.989 | V15 |
| L16 | 1651.063        | 1563.947 | <b>1547.928</b> | 1548.936        | 1546.920 | L14 |
| F17 | 1748.116        | 1450.893 | 1434.864        | 1435.872        | 1433.856 | F13 |
| T18 | 1852.159        | 1383.810 | 1337.791        | <b>1338.799</b> | 1336.783 | T12 |
| I19 | 1975.243        | 1236.767 | 1223.748        | 1224.756        | 1222.741 | I11 |
| Q20 | 2103.301        | 1126.683 | <b>1110.664</b> | 1111.672        | 1109.656 | Q10 |
| A21 | 2174.336        | 998.624  | 983.606         | 983.614         | 981.598  | A9  |
| V22 | 2273.407        | 927.587  | <b>911.569</b>  | 912.576         | 910.561  | V8  |
| L23 | 2386.491        | 828.519  | <b>812.500</b>  | 813.508         | 811.492  | L7  |
| L24 | 2499.576        | 715.435  | <b>699.415</b>  | <b>700.424</b>  | 698.408  | L6  |
| P25 | 2596.626        | 602.351  | 586.332         | 587.340         | 585.324  | P5  |
| K26 | 2724.723        | 505.298  | <b>489.279</b>  | <b>490.287</b>  | 488.271  | K4  |
| K27 | 2852.816        | 377.203  | <b>361.184</b>  | 362.192         | 360.177  | K3  |
| T28 | 2953.895        | 249.108  | 233.089         | 234.097         | 232.082  | T2  |
| E29 | 3082.938        | 148.060  | 132.042         | 133.050         | 131.034  | E1  |

# sp | Q6GSS7 | H2A2A\_MOUSE

LNKLLGK <sup>Dimethyl</sup><sub>28.03</sub> VTIAQGGVLPNIQAVLLPKKTE

- ▶ fragmentation table for charge state 2+
- ▶ specType=etd
- ▶ score=87.04
- ▶ F104913.dat
- ▶ query=q1327\_p1
- ▶ precursor=771.726280
- ▶ chargePrecursor=4
- ▶ itol=0.8

| AA  | c               | y               | z+1             | z+2             | z               | AA   |
|-----|-----------------|-----------------|-----------------|-----------------|-----------------|------|
| L1  | 66.093          | <b>1542.450</b> | <b>1534.440</b> | 8.504           | 1533.992        | L120 |
| N12 | 123.084         | 1485.905        | <b>1477.898</b> | <b>1478.402</b> | <b>1477.394</b> | N120 |
| K13 | 187.132         | 1428.889        | <b>1420.877</b> | <b>1421.381</b> | 1420.373        | K127 |
| L14 | 243.674         | 1364.839        | <b>1356.829</b> | <b>1357.333</b> | <b>1356.325</b> | L126 |
| L15 | 300.216         | 1308.297        | 1300.287        | 1300.791        | 1299.783        | L125 |
| G16 | 358.759         | 1251.755        | <b>1243.745</b> | <b>1244.249</b> | 1243.241        | G124 |
| K17 | 406.799         | 1223.244        | <b>1215.234</b> | <b>1215.738</b> | 1214.731        | K123 |
| V18 | 456.324         | 1145.181        | <b>1137.171</b> | <b>1137.675</b> | 1136.667        | V122 |
| F19 | 506.849         | 1095.646        | <b>1087.637</b> | <b>1088.141</b> | 1087.133        | F121 |
| T10 | 563.390         | 1045.123        | <b>1037.113</b> | <b>1037.617</b> | 1036.609        | T20  |
| A11 | 608.909         | 998.591         | <b>990.571</b>  | <b>991.075</b>  | <b>990.067</b>  | A119 |
| Q12 | 662.937         | 953.062         | <b>945.053</b>  | <b>945.557</b>  | <b>944.549</b>  | Q118 |
| G13 | 691.448         | 889.033         | <b>881.023</b>  | <b>881.527</b>  | 880.519         | G117 |
| G14 | 719.959         | 860.522         | <b>852.513</b>  | <b>853.017</b>  | <b>852.009</b>  | G116 |
| V15 | 769.493         | 832.011         | <b>824.002</b>  | <b>824.506</b>  | <b>823.498</b>  | V115 |
| L16 | 830.035         | 782.477         | 774.468         | 774.972         | 773.964         | L114 |
| F17 | <b>874.561</b>  | 728.935         | 721.928         | 722.432         | 721.424         | F113 |
| N18 | 911.553         | 677.405         | 669.399         | 669.903         | 668.895         | N112 |
| I19 | 968.125         | 620.867         | 612.870         | 612.882         | 611.874         | I111 |
| Q20 | <b>1052.154</b> | 563.845         | 555.838         | 556.340         | 555.332         | Q110 |
| A21 | <b>1087.673</b> | 499.816         | 491.807         | 492.310         | 491.303         | A10  |
| V22 | <b>1137.207</b> | 494.297         | 486.288         | 486.792         | 485.784         | V10  |
| L23 | <b>1193.749</b> | 414.763         | 406.754         | 407.258         | 406.250         | L17  |
| L24 | 1250.291        | 358.221         | 350.213         | 350.716         | 349.708         | L16  |
| P25 | <b>1298.817</b> | 301.679         | 293.670         | 294.174         | 293.166         | P15  |
| K26 | <b>1362.865</b> | 253.153         | 245.143         | 245.647         | 244.639         | K14  |
| K27 | <b>1426.912</b> | 189.105         | 181.096         | 181.600         | 180.592         | K13  |
| T28 | <b>1477.436</b> | 125.058         | 117.048         | 117.552         | 116.544         | T12  |
| E29 | 1541.958        | 74.534          | 66.524          | 67.028          | 66.021          | E11  |



# sp | Q6GSS7 | H2A2A\_MOUSE

LNKLLGK <sup>Dimethyl</sup> <sub>28.03</sub> VTIAQGGVLPNIQAVLLPKKTE

- ▶ fragmentation table for charge state 3+
- ▶ specType=etd
- ▶ score=87.04
- ▶ F104913.dat
- ▶ query=q1327\_p1
- ▶ precursor=771.726280
- ▶ chargePrecursor=4
- ▶ itol=0.8

| AA    | c               | y               | z+1             | z+2            | z               | AA    |
|-------|-----------------|-----------------|-----------------|----------------|-----------------|-------|
| L[1]  | 44.377          | <b>1028.635</b> | <b>1023.296</b> | 0.672          | <b>1022.960</b> | L[20] |
| N[2]  | 82.302          | 900.941         | <b>985.601</b>  | <b>985.937</b> | <b>985.265</b>  | N[20] |
| K[3]  | 129.090         | <b>952.926</b>  | <b>947.587</b>  | <b>947.923</b> | <b>947.251</b>  | K[27] |
| L[4]  | 162.785         | 910.228         | 904.889         | 905.225        | 904.553         | L[26] |
| L[5]  | 200.479         | 872.533         | 867.194         | 867.530        | 866.898         | L[25] |
| Q[6]  | 219.487         | 834.839         | 829.499         | 829.835        | 829.163         | Q[24] |
| K[7]  | 271.529         | 815.832         | 810.492         | 810.828        | 810.156         | K[23] |
| V[8]  | 304.552         | 783.700         | 778.450         | 778.786        | 778.114         | V[22] |
| T[9]  | 338.234         | 730.767         | 725.427         | 725.763        | 725.091         | T[21] |
| T[10] | 375.920         | 697.084         | 691.745         | 692.081        | 691.409         | T[20] |
| A[11] | 399.608         | 669.389         | 664.050         | 664.386        | 663.714         | A[19] |
| Q[12] | 442.294         | 630.713         | 625.374         | 625.709        | 625.037         | Q[18] |
| G[13] | 461.301         | 593.024         | 587.685         | 588.021        | 587.349         | G[17] |
| G[14] | 480.308         | 574.017         | 568.678         | 569.013        | 568.342         | G[16] |
| V[15] | 513.331         | 555.010         | 549.670         | 550.006        | 549.334         | V[15] |
| L[16] | 551.026         | 521.987         | 516.648         | 516.984        | 516.312         | L[14] |
| F[17] | 583.177         | 484.262         | 478.923         | 479.259        | 478.587         | F[13] |
| T[18] | 621.391         | 451.942         | 446.603         | 446.939        | 446.267         | T[12] |
| T[19] | 659.086         | 413.927         | 408.588         | 408.924        | 408.252         | T[11] |
| Q[20] | 701.772         | 376.233         | 370.893         | 371.229        | 370.557         | Q[10] |
| A[21] | 729.461         | 333.540         | 328.201         | 328.537        | 327.865         | A[9]  |
| V[22] | 758.474         | 309.867         | 304.528         | 304.864        | 304.192         | V[9]  |
| L[23] | 796.168         | 276.844         | 271.505         | 271.841        | 271.169         | L[7]  |
| L[24] | 833.863         | 239.159         | 233.819         | 234.156        | 233.484         | L[6]  |
| P[25] | 866.214         | 201.455         | 196.116         | 196.451        | 195.779         | P[5]  |
| K[26] | 908.912         | 169.104         | 163.765         | 164.101        | 163.429         | K[4]  |
| K[27] | <b>951.611</b>  | 126.400         | 121.061         | 121.402        | 120.730         | K[3]  |
| T[28] | <b>985.293</b>  | 83.700          | 78.361          | 78.704         | 78.032          | T[2]  |
| E[29] | <b>1028.307</b> | 50.025          | 44.686          | 45.021         | 44.349          | E[1]  |



# sp | Q6GSS7 | H2A2A\_MOUSE

LNKLLGK <sup>Dimethyl</sup> <sub>28.03</sub> VTIAQGGVLPNIQAVLLPKKTE

- ▶ fragmentation table for charge state 1+
- ▶ specType=etd
- ▶ score=94.58
- ▶ F104913.dat
- ▶ query=q1328\_p1
- ▶ precursor=771.726550
- ▶ chargePrecursor=4
- ▶ itol=0.8

| AA    | c               | y        | z+1             | z+2             | z               | AA    |
|-------|-----------------|----------|-----------------|-----------------|-----------------|-------|
| L[1]  | 131.118         | 3083.802 | 3067.873        | 0.000           | 3066.865        | L[26] |
| N[2]  | 245.161         | 2970.808 | 2954.789        | 2955.797        | 2953.781        | N[28] |
| K[3]  | <b>373.256</b>  | 2856.765 | 2840.746        | 2841.754        | 2839.738        | K[27] |
| L[4]  | 488.340         | 2728.670 | 2712.651        | 2713.659        | 2711.643        | L[26] |
| L[5]  | <b>699.424</b>  | 2615.586 | 2599.567        | 2600.575        | 2598.559        | L[25] |
| G[6]  | <b>658.445</b>  | 2502.502 | 2486.483        | 2487.491        | 2485.475        | G[24] |
| K[7]  | <b>812.572</b>  | 2445.480 | 2429.461        | 2430.469        | 2428.454        | K[23] |
| V[8]  | <b>911.640</b>  | 2389.354 | 2373.335        | 2374.343        | 2372.327        | V[22] |
| T[9]  | <b>1012.688</b> | 2190.266 | 2174.267        | 2175.275        | 2173.259        | T[21] |
| T[10] | <b>1125.772</b> | 2089.238 | 2073.219        | 2074.227        | 2072.211        | T[20] |
| A[11] | <b>1196.809</b> | 1976.154 | <b>1960.135</b> | 1961.143        | 1959.127        | A[19] |
| Q[12] | 1314.667        | 1909.111 | 1893.067        | <b>1890.106</b> | 1889.090        | Q[18] |
| G[13] | <b>1381.889</b> | 1777.058 | 1761.039        | 1762.047        | 1760.032        | G[17] |
| G[14] | <b>1438.910</b> | 1720.037 | 1704.018        | 1705.026        | 1703.010        | G[16] |
| V[15] | 1537.879        | 1603.015 | 1648.997        | 1648.004        | 1645.989        | V[15] |
| L[16] | 1651.063        | 1563.947 | 1547.928        | <b>1548.936</b> | 1546.920        | L[14] |
| T[17] | 1768.116        | 1450.863 | 1434.844        | 1435.852        | 1433.836        | T[13] |
| N[18] | 1882.159        | 1353.810 | <b>1337.791</b> | <b>1338.799</b> | 1336.783        | N[12] |
| I[19] | 1975.243        | 1239.767 | 1223.748        | 1224.756        | <b>1222.741</b> | I[11] |
| Q[20] | 2103.301        | 1126.683 | 1119.664        | 1111.672        | 1109.656        | Q[10] |
| A[21] | 2174.338        | 998.624  | 982.606         | 983.614         | <b>981.598</b>  | A[9]  |
| V[22] | 2273.407        | 827.587  | <b>811.569</b>  | 812.576         | 810.561         | V[8]  |
| L[23] | 2389.491        | 678.519  | <b>812.500</b>  | 813.508         | 811.492         | L[7]  |
| L[24] | 2499.575        | 715.435  | <b>699.416</b>  | <b>700.424</b>  | 698.408         | L[6]  |
| P[25] | 2596.628        | 602.351  | 586.332         | 587.340         | 585.324         | P[5]  |
| K[26] | 2724.723        | 505.298  | 489.279         | 490.287         | 488.271         | K[4]  |
| K[27] | 2852.818        | 377.203  | <b>361.184</b>  | 362.192         | 360.177         | K[3]  |
| T[28] | 2953.865        | 249.108  | 233.089         | 234.097         | 232.082         | T[2]  |
| E[29] | 3082.008        | 148.050  | 132.042         | 133.050         | 131.034         | E[1]  |

# sp | Q6GSS7 | H2A2A\_MOUSE

LNKLLGK <sup>Dimethyl</sup><sub>28.03</sub> VTIAQGGVLPNIQAVLLPKKTE

- ▶ fragmentation table for charge state 2+
- ▶ specType=etd
- ▶ score=94.58
- ▶ F104913.dat
- ▶ query=q1328\_p1
- ▶ precursor=771.726550
- ▶ chargePrecursor=4
- ▶ itol=0.8

| AA  | c               | y               | z+1             | z+2             | z               | AA   |
|-----|-----------------|-----------------|-----------------|-----------------|-----------------|------|
| L1  | 66.093          | <b>1542.450</b> | <b>1534.440</b> | 9.504           | <b>1533.936</b> | L126 |
| N12 | 123.084         | <b>1485.908</b> | <b>1477.898</b> | <b>1478.402</b> | <b>1477.394</b> | N020 |
| K13 | 187.132         | 1428.888        | <b>1420.877</b> | <b>1421.381</b> |                 | K027 |
| L14 | 243.674         | 1364.839        | <b>1356.829</b> | <b>1357.333</b> | 1356.325        | L126 |
| L15 | 300.216         | 1308.297        | <b>1300.287</b> | 1300.791        | <b>1299.783</b> | L125 |
| G16 | 358.758         | 1251.795        | <b>1243.745</b> | <b>1244.249</b> | 1243.241        | G024 |
| K17 | 406.799         | <b>1223.244</b> | <b>1215.234</b> | <b>1215.738</b> | <b>1214.731</b> | K023 |
| V18 | 456.324         | 1145.181        | <b>1137.171</b> | <b>1137.675</b> | 1136.667        | V022 |
| T19 | 506.840         | 1095.646        | <b>1087.637</b> | <b>1088.141</b> | <b>1087.133</b> | T121 |
| T10 | 563.390         | 1045.123        | <b>1037.113</b> | <b>1037.617</b> | 1036.609        | T020 |
| A11 | <b>598.908</b>  | 988.581         | 980.571         | <b>981.075</b>  | 980.067         | A119 |
| Q12 | 662.937         | 933.060         | 925.053         | 925.557         | 924.549         | Q118 |
| G13 | 691.448         | 889.033         | <b>881.023</b>  | <b>881.527</b>  | <b>880.519</b>  | G117 |
| G14 | 719.959         | 860.522         | <b>852.513</b>  | <b>853.017</b>  | <b>852.009</b>  | G116 |
| V15 | 769.493         | 832.011         | <b>824.002</b>  | <b>824.506</b>  | <b>823.498</b>  | V115 |
| L16 | 830.035         | 782.477         | <b>774.468</b>  | <b>774.972</b>  | 773.964         | L114 |
| T17 | <b>874.561</b>  | 728.935         | 721.928         | 722.432         | 721.424         | T113 |
| N18 | 911.553         | 677.400         | 669.390         | 669.903         | 668.895         | N112 |
| I19 | 988.125         | 620.867         | 612.858         | 612.882         | 611.874         | I111 |
| Q20 | <b>1052.154</b> | 563.845         | 555.836         | 556.340         | 555.332         | Q110 |
| A21 | <b>1087.673</b> | 499.816         | 491.807         | 492.310         | 491.303         | A10  |
| V22 | <b>1137.207</b> | 484.297         | 476.288         | 476.792         | 475.784         | V10  |
| L23 | <b>1193.709</b> | 414.763         | 406.754         | 407.258         | 406.250         | L11  |
| L24 | 1250.291        | 358.221         | 350.213         | 350.716         | 349.708         | L10  |
| P25 | <b>1288.817</b> | 301.679         | 293.670         | 294.174         | 293.166         | P10  |
| K26 | <b>1362.865</b> | 253.153         | 245.143         | 245.647         | 244.639         | K10  |
| K27 | <b>1426.912</b> | 189.105         | 181.096         | 181.600         | 180.592         | K10  |
| T28 | <b>1477.436</b> | 125.058         | 117.048         | 117.552         | 116.544         | T10  |
| E29 | <b>1541.958</b> | 74.534          | 66.524          | 67.028          | 66.021          | E10  |

# sp | Q6GSS7 | H2A2A\_MOUSE

LNKLLGK <sup>Dimethyl</sup> <sub>28.03</sub> VTIAQGGVLPNIQAVLLPKKTE

- ▶ fragmentation table for charge state 3+
- ▶ specType=etd
- ▶ score=94.58
- ▶ F104913.dat
- ▶ query=q1328\_p1
- ▶ precursor=771.726550
- ▶ chargePrecursor=4
- ▶ itol=0.8

| AA    | c               | y               | z+1             | z+2            | z               | AA    |
|-------|-----------------|-----------------|-----------------|----------------|-----------------|-------|
| L[1]  | 44.577          | <b>1028.635</b> | <b>1023.296</b> | 0.672          | <b>1022.960</b> | L[20] |
| N[2]  | 82.302          | 990.941         | <b>985.601</b>  | <b>985.937</b> | <b>985.265</b>  | N[28] |
| K[3]  | 125.090         | 952.926         | <b>947.587</b>  | <b>947.923</b> | <b>947.251</b>  | K[27] |
| L[4]  | 162.785         | 910.228         | 904.889         | 905.225        | 904.553         | L[26] |
| L[5]  | 200.479         | 872.533         | 867.194         | 867.530        | 866.896         | L[25] |
| Q[6]  | 239.487         | 834.839         | 829.499         | 829.835        | 829.199         | Q[24] |
| K[7]  | 271.529         | 815.832         | 810.492         | 810.828        | 810.156         | K[23] |
| V[8]  | 304.552         | 795.790         | 790.450         | 790.786        | 789.114         | V[22] |
| T[9]  | 338.234         | 776.767         | 771.427         | 771.763        | 771.091         | T[21] |
| I[10] | 375.920         | 697.084         | 691.745         | 692.081        | 691.409         | I[20] |
| A[11] | 399.608         | 699.380         | 694.050         | 694.386        | 693.714         | A[19] |
| Q[12] | 442.294         | 639.711         | 634.371         | 634.707        | 634.035         | Q[18] |
| G[13] | 461.301         | 593.024         | 587.685         | 588.021        | 587.349         | G[17] |
| G[14] | 480.308         | 574.017         | 568.678         | 569.013        | 568.342         | G[16] |
| V[15] | 513.331         | 555.010         | 549.670         | 550.006        | 549.334         | V[15] |
| L[16] | 551.026         | 521.987         | 516.648         | 516.984        | 516.312         | L[14] |
| F[17] | 563.277         | 484.262         | 478.923         | 479.259        | 478.587         | F[13] |
| T[18] | 621.391         | 451.942         | 446.603         | 446.939        | 446.267         | T[12] |
| I[19] | 659.086         | 413.927         | 408.588         | 408.924        | 408.252         | I[11] |
| Q[20] | 701.772         | 376.233         | 370.893         | 371.229        | 370.557         | Q[10] |
| A[21] | 725.451         | 333.540         | 328.201         | 328.537        | 327.865         | A[9]  |
| V[22] | 758.474         | 309.867         | 304.528         | 304.864        | 304.192         | V[9]  |
| L[23] | 796.168         | 276.844         | 271.505         | 271.841        | 271.169         | L[7]  |
| L[24] | 833.863         | 239.159         | 233.819         | 234.156        | 233.484         | L[6]  |
| P[25] | 866.214         | 201.455         | 196.116         | 196.451        | 195.779         | P[5]  |
| K[26] | 908.912         | 169.104         | 163.765         | 164.101        | 163.429         | K[4]  |
| K[27] | <b>951.611</b>  | 126.406         | 121.066         | 121.402        | 120.730         | K[3]  |
| T[28] | <b>985.293</b>  | 83.708          | 78.368          | 78.704         | 78.032          | T[2]  |
| E[29] | <b>1028.307</b> | 50.025          | 44.685          | 45.021         | 44.349          | E[1]  |

# sp | Q6GSS7 | H2A2A\_MOUSE

LNKLLGK <sup>Dimethyl</sup> VTIAQGGVLPNIQAVLLPKKTE  
28.03

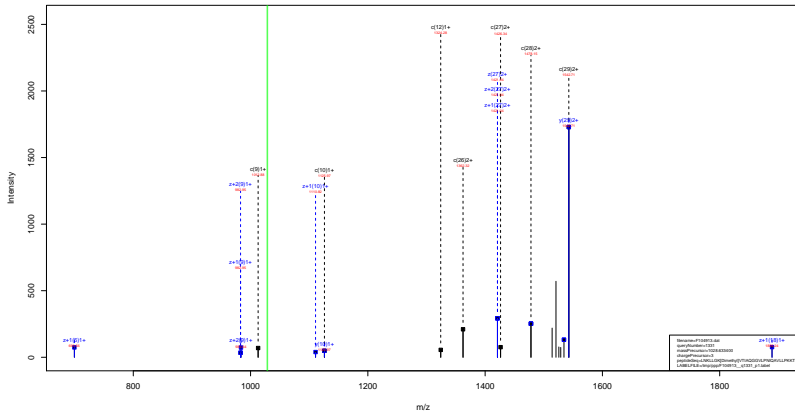

# sp | Q6GSS7 | H2A2A\_MOUSE

LNKLLGK <sup>Dimethyl</sup> <sub>28.03</sub> VTIAQGGVLPNIQAVLLPKKTE

- ▶ fragmentation table for charge state 1+
- ▶ specType=etd
- ▶ score=31.52
- ▶ F104913.dat
- ▶ query=q1331\_p1
- ▶ precursor=1028.633400
- ▶ chargePrecursor=3
- ▶ itol=0.8

| AA  | c               | y               | z+1             | z+2            | z        | AA   |
|-----|-----------------|-----------------|-----------------|----------------|----------|------|
| L1  | 131.118         | 3081.892        | 3067.873        | 0.000          | 3066.895 | L129 |
| N2  | 345.161         | 2970.808        | 2954.789        | 2955.797       | 2951.781 | N28  |
| K3  | 373.256         | 2856.795        | 2840.746        | 2841.754       | 2839.738 | K27  |
| L4  | 486.340         | 2728.670        | 2712.651        | 2713.659       | 2711.643 | L26  |
| L5  | 599.424         | 2615.586        | 2599.567        | 2600.575       | 2598.560 | L25  |
| Q6  | 694.445         | 2502.502        | 2486.483        | 2487.491       | 2485.475 | Q24  |
| K7  | 812.572         | 2445.480        | 2429.462        | 2430.469       | 2428.454 | K23  |
| V8  | 911.640         | 2389.354        | 2373.335        | 2374.343       | 2372.327 | V22  |
| T9  | <b>1013.688</b> | 2196.286        | 2174.267        | 2175.275       | 2173.259 | T21  |
| I10 | <b>1125.772</b> | 2089.238        | 2073.219        | 2074.227       | 2072.211 | I20  |
| A11 | 1159.856        | 1976.154        | 1960.135        | 1961.143       | 1959.127 | A19  |
| Q12 | <b>1244.867</b> | 1909.117        | <b>1889.098</b> | 1890.106       | 1888.090 | Q18  |
| G13 | 1361.989        | 1777.058        | 1761.039        | 1762.047       | 1760.032 | G17  |
| G14 | 1438.910        | 1720.937        | 1704.918        | 1705.926       | 1703.910 | G16  |
| V15 | 1537.879        | 1663.915        | 1646.897        | 1646.904       | 1645.889 | V15  |
| L16 | 1651.063        | 1563.947        | 1547.928        | 1548.936       | 1546.920 | L14  |
| P17 | 1748.116        | 1496.863        | 1484.844        | 1485.852       | 1483.836 | P13  |
| T18 | 1862.159        | 1393.810        | 1377.791        | 1378.799       | 1376.783 | T12  |
| I19 | 1975.243        | 1239.767        | 1223.748        | 1224.756       | 1222.741 | I11  |
| Q20 | 2103.301        | <b>1126.683</b> | <b>1110.664</b> | 1111.672       | 1109.656 | Q10  |
| A21 | 2174.338        | 998.624         | <b>982.606</b>  | <b>983.614</b> | 981.598  | A9   |
| V22 | 2273.407        | 927.587         | 911.569         | 912.576        | 910.561  | V8   |
| L23 | 2386.491        | 828.519         | 812.500         | 813.508        | 811.492  | L7   |
| L24 | 2499.575        | 715.435         | <b>699.416</b>  | 700.424        | 698.408  | L6   |
| P25 | 2596.626        | 602.351         | 586.332         | 587.340        | 585.324  | P5   |
| K26 | 2724.723        | 505.298         | 489.279         | 490.287        | 488.271  | K4   |
| K27 | 2852.818        | 377.203         | 361.184         | 362.192        | 360.177  | K3   |
| T28 | 2951.895        | 249.108         | 233.089         | 234.097        | 232.082  | T2   |
| E29 | 3067.938        | 148.060         | 132.042         | 133.050        | 131.034  | E1   |

# sp | Q6GSS7 | H2A2A\_MOUSE

LNKLLGK <sup>Dimethyl</sup> <sub>28.03</sub> VTIAQGGVLPNIQAVLLPKKTE

- ▶ fragmentation table for charge state 2+
- ▶ specType=etd
- ▶ score=31.52
- ▶ F104913.dat
- ▶ query=q1331\_p1
- ▶ precursor=1028.633400
- ▶ chargePrecursor=3
- ▶ itol=0.8

| AA   | c               | y               | z+1             | z+2             | z               | AA   |
|------|-----------------|-----------------|-----------------|-----------------|-----------------|------|
| L1   | 66.053          | <b>1542.450</b> | <b>1534.440</b> | 9.504           | <b>1533.936</b> | L126 |
| N12  | 123.054         | 1485.955        | <b>1477.898</b> | <b>1478.402</b> | <b>1477.394</b> | N120 |
| K13  | 187.132         | 1428.889        | <b>1420.877</b> | <b>1421.381</b> | <b>1420.373</b> | K127 |
| L14  | 243.674         | 1364.839        | 1366.829        | 1357.331        | 1356.325        | L126 |
| L15  | 300.216         | 1308.297        | 1300.287        | 1300.791        | 1299.783        | L125 |
| G16  | 358.759         | 1251.755        | 1243.745        | 1244.249        | 1243.241        | G124 |
| K17  | 406.799         | 1223.244        | 1215.234        | 1215.738        | 1214.731        | K123 |
| V18  | 456.324         | 1145.181        | 1137.171        | 1137.675        | 1136.667        | V122 |
| F19  | 506.849         | 1095.646        | 1087.637        | 1088.141        | 1087.133        | F121 |
| T10  | 563.390         | 1045.123        | 1037.113        | 1037.617        | 1036.609        | T20  |
| A111 | 588.938         | 988.581         | 980.571         | 981.075         | 980.067         | A119 |
| Q12  | 602.937         | 953.065         | 945.055         | 945.559         | 944.551         | Q118 |
| G133 | 691.448         | 889.033         | 881.023         | 881.527         | 880.519         | G117 |
| G14  | 719.959         | 860.522         | 852.513         | 853.017         | 852.009         | G116 |
| V15  | 769.493         | 832.011         | 824.002         | 824.506         | 823.498         | V115 |
| L16  | 826.035         | 782.477         | 774.468         | 774.972         | 773.964         | L114 |
| F117 | 874.581         | 728.935         | 720.925         | 721.429         | 720.421         | F113 |
| N118 | 931.583         | 677.400         | 669.390         | 669.893         | 668.885         | N112 |
| I19  | 988.125         | 620.867         | 612.857         | 613.361         | 612.353         | I111 |
| Q120 | 1052.154        | 563.845         | 555.836         | 556.340         | 555.332         | Q110 |
| A121 | 1087.673        | 499.816         | 491.807         | 492.311         | 491.303         | A10  |
| V122 | 1127.207        | 484.297         | 476.288         | 476.792         | 475.784         | V10  |
| L123 | 1193.749        | 414.763         | 406.754         | 407.258         | 406.250         | L11  |
| L124 | 1250.291        | 358.221         | 350.212         | 350.716         | 349.708         | L10  |
| P125 | 1298.817        | 301.679         | 293.670         | 294.174         | 293.166         | P10  |
| K126 | <b>1362.865</b> | 253.153         | 245.143         | 245.647         | 244.639         | K14  |
| K127 | <b>1426.912</b> | 189.105         | 181.096         | 181.600         | 180.592         | K13  |
| T128 | <b>1477.436</b> | 125.058         | 117.048         | 117.552         | 116.544         | T12  |
| E129 | <b>1541.958</b> | 74.534          | 66.524          | 67.028          | 66.021          | E11  |





# sp | Q6GSS7 | H2A2A\_MOUSE

LNKLLGK <sup>Dimethyl</sup> <sub>28.03</sub> VTIAQGGVLPNIQAVLLPKKTE

- ▶ fragmentation table for charge state 1+
- ▶ specType=etd
- ▶ score=106.94
- ▶ F104913.dat
- ▶ query=q1332\_p1
- ▶ precursor=771.727060
- ▶ chargePrecursor=4
- ▶ itol=0.8

| AA    | c               | y        | z+1             | z+2             | z               | AA    |
|-------|-----------------|----------|-----------------|-----------------|-----------------|-------|
| L[1]  | 131.118         | 3083.802 | 2067.873        | 0.000           | 3066.865        | L[26] |
| N[2]  | 245.161         | 2970.808 | 2954.789        | 2955.797        | 2953.781        | N[28] |
| K[3]  | <b>373.256</b>  | 2856.765 | 3840.740        | 3841.754        | 3839.738        | K[27] |
| L[4]  | <b>486.340</b>  | 3728.670 | 2712.651        | 2713.659        | 3711.643        | L[26] |
| L[5]  | <b>599.424</b>  | 2615.586 | 2599.567        | 2600.575        | 2598.559        | L[25] |
| G[6]  | <b>636.445</b>  | 2302.502 | 2488.483        | 2487.491        | 2485.475        | G[24] |
| K[7]  | <b>812.572</b>  | 2645.480 | 2429.462        | 2430.469        | 2428.454        | K[23] |
| V[8]  | <b>911.640</b>  | 2289.354 | 2273.335        | 2274.343        | 2272.327        | V[22] |
| T[9]  | 1012.688        | 2190.286 | 2174.267        | 2175.275        | 2173.259        | T[21] |
| T[10] | <b>1125.772</b> | 2089.238 | 2073.219        | 2074.227        | 2072.211        | T[20] |
| A[11] | <b>1196.809</b> | 1076.154 | 1860.135        | <b>1961.143</b> | 1859.117        | A[19] |
| Q[12] | <b>1244.867</b> | 3006.111 | 1859.060        | <b>1890.108</b> | 1888.096        | Q[18] |
| G[13] | <b>1381.889</b> | 1777.058 | 1761.039        | 1762.047        | 1760.032        | G[17] |
| G[14] | <b>1438.910</b> | 1720.037 | 1704.018        | 1705.026        | 1703.010        | G[16] |
| V[15] | <b>1537.979</b> | 1603.015 | 1648.997        | 1648.004        | 1646.989        | V[15] |
| L[16] | 1651.063        | 1563.947 | <b>1547.928</b> | 1548.936        | 1546.920        | L[14] |
| T[17] | <b>1748.116</b> | 1450.083 | 1434.064        | 1435.072        | 1433.056        | T[13] |
| N[18] | 1862.159        | 1353.010 | <b>1337.991</b> | 1338.999        | 1336.983        | N[12] |
| I[19] | 1975.243        | 1239.767 | <b>1223.748</b> | 1224.756        | <b>1222.741</b> | I[11] |
| Q[20] | 2103.301        | 1126.683 | <b>1110.664</b> | 1111.672        | 1109.656        | Q[10] |
| A[21] | 2174.328        | 908.624  | 982.600         | 983.614         | 981.598         | A[9]  |
| V[22] | 2273.407        | 827.587  | <b>911.569</b>  | 912.576         | <b>910.561</b>  | V[8]  |
| L[23] | 2389.491        | 628.519  | <b>812.500</b>  | <b>813.508</b>  | 811.492         | L[7]  |
| L[24] | 2499.575        | 715.435  | <b>699.416</b>  | <b>700.424</b>  | 698.408         | L[6]  |
| P[25] | 2596.628        | 602.351  | 586.332         | 587.340         | 585.324         | P[5]  |
| K[26] | 2724.723        | 505.298  | <b>489.279</b>  | 490.287         | 488.271         | K[4]  |
| K[27] | 2852.818        | 377.203  | <b>361.184</b>  | 362.192         | 360.177         | K[3]  |
| T[28] | 2953.865        | 249.108  | 233.080         | 234.087         | 232.082         | T[2]  |
| E[29] | 3082.008        | 148.050  | 132.042         | 133.050         | 131.034         | E[1]  |

# sp | Q6GSS7 | H2A2A\_MOUSE

LNKLLGK <sup>Dimethyl</sup><sub>28.03</sub> VTIAQGGVLPNIQAVLLPKKTE

- ▶ fragmentation table for charge state 2+
- ▶ specType=etd
- ▶ score=106.94
- ▶ F104913.dat
- ▶ query=q1332\_p1
- ▶ precursor=771.727060
- ▶ chargePrecursor=4
- ▶ itol=0.8

| AA  | c               | y               | z+1             | z+2             | z               | AA   |
|-----|-----------------|-----------------|-----------------|-----------------|-----------------|------|
| L1  | 66.053          | <b>1542.450</b> | <b>1534.440</b> | 9.504           | <b>1533.936</b> | L126 |
| N1  | 123.054         | 1485.905        | <b>1477.898</b> | <b>1478.402</b> | <b>1477.394</b> | N20  |
| K1  | 187.132         | 1428.889        | <b>1420.877</b> | <b>1421.381</b> | 1420.373        | K27  |
| L1  | 243.674         | 1364.839        | <b>1356.829</b> | 1357.333        | <b>1356.325</b> | L26  |
| L1  | 300.216         | 1308.297        | 1309.287        | 1309.791        | <b>1299.783</b> | L25  |
| G1  | 358.758         | 1251.755        | <b>1243.745</b> | <b>1244.249</b> | <b>1243.241</b> | G24  |
| K1  | 406.799         | <b>1223.244</b> | <b>1215.234</b> | <b>1215.738</b> | <b>1214.731</b> | K23  |
| V1  | 456.324         | 1145.181        | <b>1137.171</b> | <b>1137.675</b> | 1136.667        | V22  |
| T1  | 506.840         | 1095.646        | <b>1087.637</b> | <b>1088.141</b> | 1087.133        | T21  |
| T10 | 563.390         | 1045.123        | <b>1037.113</b> | <b>1037.617</b> | <b>1036.609</b> | T20  |
| A11 | <b>598.908</b>  | 988.581         | 989.117         | 989.725         | 988.261         | A19  |
| G12 | 662.937         | 933.063         | <b>945.053</b>  | <b>945.557</b>  | <b>944.549</b>  | G18  |
| G13 | 691.448         | <b>889.033</b>  | <b>881.023</b>  | <b>881.527</b>  | 880.519         | G17  |
| G14 | 719.959         | 860.522         | 852.513         | 853.017         | 852.009         | G16  |
| V15 | 769.493         | 832.011         | 824.002         | 824.506         | 823.498         | V15  |
| L16 | 835.035         | 782.477         | <b>774.468</b>  | <b>774.972</b>  | 773.964         | L14  |
| T17 | <b>874.561</b>  | <b>725.935</b>  | 717.925         | 718.430         | 717.422         | T13  |
| N18 | <b>931.583</b>  | 677.405         | 669.396         | 669.901         | 668.893         | N12  |
| I19 | 988.125         | 630.387         | 622.378         | 622.882         | 621.874         | I11  |
| Q20 | <b>1052.154</b> | 583.845         | 575.836         | 576.340         | 575.332         | Q10  |
| A21 | <b>1087.673</b> | 499.816         | 491.807         | 492.310         | 491.303         | A0   |
| V22 | <b>1137.207</b> | 484.297         | 476.288         | 476.792         | 475.784         | V8   |
| L23 | <b>1193.709</b> | 414.763         | 406.754         | 407.258         | 406.250         | L17  |
| L24 | 1250.291        | 358.221         | 350.212         | 350.716         | 349.708         | L6   |
| P25 | <b>1298.817</b> | 301.679         | 293.670         | 294.174         | 293.166         | P5   |
| K26 | <b>1362.865</b> | 253.153         | 245.143         | 245.647         | 244.639         | K4   |
| K27 | <b>1426.912</b> | 189.105         | 181.096         | 181.600         | 180.592         | K3   |
| T28 | <b>1477.436</b> | 125.058         | 117.048         | 117.552         | 116.544         | T2   |
| E29 | 1541.958        | 74.534          | 66.524          | 67.028          | 66.021          | E1   |

# sp | Q6GSS7 | H2A2A\_MOUSE

LNKLLGK <sup>Dimethyl</sup> <sub>28.03</sub> VTIAQGGVLPNIQAVLLPKKTE

- ▶ fragmentation table for charge state 3+
- ▶ specType=etd
- ▶ score=106.94
- ▶ F104913.dat
- ▶ query=q1332\_p1
- ▶ precursor=771.727060
- ▶ chargePrecursor=4
- ▶ itol=0.8

| AA    | c              | y               | z+1             | z+2            | z              | AA    |
|-------|----------------|-----------------|-----------------|----------------|----------------|-------|
| L[1]  | 44.377         | <b>1028.635</b> | <b>1023.296</b> | 0.672          | 1023.960       | L[29] |
| N[2]  | 62.302         | <b>990.941</b>  | <b>985.601</b>  | <b>985.937</b> | <b>985.265</b> | N[28] |
| K[3]  | 125.090        | 952.326         | <b>947.587</b>  | <b>947.923</b> | <b>947.251</b> | K[27] |
| L[4]  | 162.785        | 910.228         | 904.889         | 905.225        | 904.551        | L[26] |
| L[5]  | 200.479        | 872.531         | 867.194         | 867.530        | 866.858        | L[25] |
| G[6]  | 239.487        | 834.839         | 829.499         | 829.835        | 829.163        | G[24] |
| K[7]  | 271.529        | 815.833         | 810.492         | 810.828        | 810.156        | K[23] |
| V[8]  | 304.552        | 763.790         | 758.450         | 758.786        | 758.114        | V[22] |
| T[9]  | 338.234        | 730.767         | 725.427         | <b>725.763</b> | 725.091        | T[21] |
| I[10] | 375.929        | 697.084         | 691.745         | 692.081        | 691.409        | I[20] |
| A[11] | 399.608        | 659.389         | 654.050         | 654.386        | 653.714        | A[19] |
| Q[12] | 442.294        | 626.710         | 621.371         | 621.707        | 621.035        | Q[18] |
| G[13] | 461.301        | 593.024         | 587.685         | 588.021        | 587.349        | G[17] |
| G[14] | 480.308        | 574.017         | 568.678         | 569.013        | 568.342        | G[16] |
| V[15] | 513.131        | 555.010         | 549.670         | 550.006        | 549.334        | V[15] |
| L[16] | 551.026        | 521.987         | 516.648         | 516.984        | 516.312        | L[14] |
| P[17] | 583.377        | 484.202         | 478.863         | 479.209        | 478.537        | P[13] |
| N[18] | 621.301        | 451.942         | 446.602         | 446.938        | 446.266        | N[12] |
| I[19] | 659.086        | 413.927         | 408.588         | 408.924        | 408.252        | I[11] |
| Q[20] | 701.772        | 376.233         | 370.893         | 371.229        | 370.557        | Q[10] |
| A[21] | 725.451        | 333.546         | 328.207         | 328.543        | 327.871        | A[9]  |
| V[22] | 758.474        | 309.867         | 304.528         | 304.864        | 304.192        | V[8]  |
| L[23] | 796.188        | 276.844         | 271.505         | 271.841        | 271.169        | L[7]  |
| L[24] | 833.863        | 239.150         | 233.810         | 234.146        | 233.474        | L[6]  |
| T[25] | 869.214        | 201.493         | 196.154         | 196.490        | 195.818        | T[5]  |
| K[26] | 908.912        | 169.100         | 163.760         | 164.100        | 163.429        | K[4]  |
| K[27] | <b>951.611</b> | 138.406         | 133.066         | 133.402        | 132.730        | K[3]  |
| T[28] | <b>985.293</b> | 83.708          | 78.368          | 78.704         | 78.032         | T[2]  |
| E[29] | 1028.307       | 50.025          | 44.685          | 45.021         | 44.349         | E[1]  |

# sp | Q6GSS7 | H2A2A\_MOUSE

LNKLLGK <sup>Dimethyl</sup>VTIAQGGVLPNIQAVLLPKKTE  
28.03

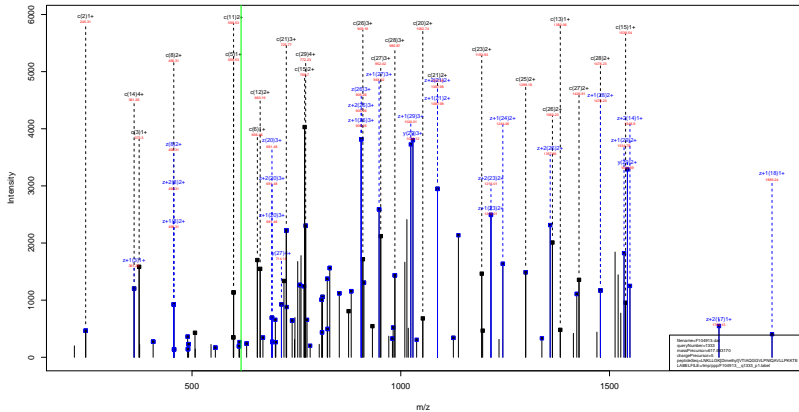

# sp | Q6GSS7 | H2A2A\_MOUSE

LNKLLGK <sup>Dimethyl</sup> <sub>28.03</sub> VTIAQGGVLPNIQAVLLPKKTE

- ▶ fragmentation table for charge state 1+
- ▶ specType=etd
- ▶ score=128.04
- ▶ F104913.dat
- ▶ query=q1333\_p1
- ▶ precursor=617.583170
- ▶ chargePrecursor=5
- ▶ itol=0.8

| AA    | c               | y               | z+1             | z+2             | z              | AA    |
|-------|-----------------|-----------------|-----------------|-----------------|----------------|-------|
| L[1]  | 131.118         | 3083.892        | 3067.873        | 0.000           | 3066.865       | L[28] |
| N[2]  | <b>245.161</b>  | 2970.808        | 2954.789        | 2938.797        | 2953.781       | N[28] |
| K[3]  | <b>373.256</b>  | 2856.765        | 2840.746        | 2841.754        | 2839.738       | K[27] |
| L[4]  | 488.340         | 2728.670        | 2712.651        | 2713.659        | 2711.643       | L[26] |
| L[5]  | <b>699.424</b>  | 2615.585        | 2599.567        | 2600.575        | 2598.559       | L[25] |
| G[6]  | <b>836.445</b>  | 2502.500        | 2486.483        | 2487.491        | 2485.475       | G[24] |
| K[7]  | <b>912.572</b>  | 2445.460        | 2429.462        | 2430.469        | 2428.454       | K[23] |
| V[8]  | <b>911.640</b>  | 2289.354        | 2273.335        | 2274.343        | 2272.327       | V[22] |
| T[9]  | 1012.688        | 2190.288        | 2174.267        | 2175.275        | 2173.259       | T[21] |
| I[10] | <b>1125.772</b> | 2089.230        | 2073.210        | 2074.227        | 2072.211       | I[20] |
| A[11] | <b>1196.809</b> | 1976.154        | 1960.133        | 1961.141        | 1959.127       | A[19] |
| Q[12] | 1314.879        | 1905.111        | <b>1889.098</b> | 1890.106        | 1888.090       | Q[18] |
| G[13] | <b>1381.889</b> | 1777.058        | 1761.039        | <b>1762.047</b> | 1760.032       | G[17] |
| G[14] | 1438.910        | 1720.037        | 1704.018        | 1705.026        | 1703.010       | G[16] |
| V[15] | <b>1537.979</b> | 1663.015        | 1646.997        | 1648.004        | 1645.989       | V[15] |
| L[16] | 1651.063        | 1563.947        | 1547.928        | <b>1548.936</b> | 1546.920       | L[14] |
| F[17] | 1748.116        | 1490.863        | 1474.844        | 1475.852        | 1473.836       | F[13] |
| N[18] | 1862.159        | 1353.810        | <b>1337.791</b> | 1338.799        | 1336.783       | N[12] |
| I[19] | 1975.243        | 1239.767        | 1223.748        | 1224.756        | 1222.741       | I[11] |
| Q[20] | 2103.301        | <b>1126.683</b> | 1110.664        | 1111.672        | 1109.656       | Q[10] |
| A[21] | 2174.338        | 998.624         | 982.606         | 983.614         | <b>981.598</b> | A[9]  |
| V[22] | 2273.407        | 927.587         | <b>911.569</b>  | 912.576         | 910.561        | V[8]  |
| L[23] | 2389.491        | 808.513         | <b>813.509</b>  | 813.508         | <b>811.493</b> | L[7]  |
| L[24] | 2499.575        | 715.435         | <b>699.416</b>  | <b>700.424</b>  | 698.407        | L[6]  |
| P[25] | 2596.628        | 602.351         | 586.332         | 587.340         | 585.324        | P[5]  |
| K[26] | 2724.723        | 505.268         | <b>489.279</b>  | <b>490.287</b>  | 488.271        | K[4]  |
| K[27] | 2852.818        | 377.203         | <b>361.184</b>  | 362.192         | 360.177        | K[3]  |
| T[28] | 2953.865        | 249.106         | 233.089         | 234.097         | 232.082        | T[2]  |
| E[29] | 3082.908        | 148.060         | 132.042         | 133.050         | 131.034        | E[1]  |

# sp | Q6GSS7 | H2A2A\_MOUSE

LNKLLGK <sup>Dimethyl</sup> <sub>28.03</sub> VTIAQGGVLPNIQAVLLPKKTE

- ▶ fragmentation table for charge state 2+
- ▶ specType=etd
- ▶ score=128.04
- ▶ F104913.dat
- ▶ query=q1333\_p1
- ▶ precursor=617.583170
- ▶ chargePrecursor=5
- ▶ itol=0.8

| AA  | c               | y               | z+1             | z+2             | z               | AA   |
|-----|-----------------|-----------------|-----------------|-----------------|-----------------|------|
| L1  | 66.053          | <b>1542.450</b> | <b>1534.440</b> | 9.504           | 1533.930        | L126 |
| N12 | 123.054         | 1485.905        | <b>1477.898</b> | <b>1478.402</b> | 1477.304        | N020 |
| K13 | 187.132         | 1428.889        | <b>1420.877</b> | <b>1421.381</b> | 1420.373        | K027 |
| L14 | 263.674         | 1364.839        | 1356.829        | <b>1357.333</b> | 1356.325        | L126 |
| L15 | 300.216         | 1308.297        | 1300.287        | 1300.791        | <b>1299.783</b> | L125 |
| G16 | 328.228         | 1251.755        | <b>1243.745</b> | <b>1244.249</b> | 1243.241        | G024 |
| K17 | <b>406.789</b>  | 1223.244        | <b>1215.234</b> | <b>1215.738</b> | 1214.731        | K023 |
| V18 | <b>456.324</b>  | 1145.181        | 1137.171        | <b>1137.675</b> | 1136.667        | V022 |
| F19 | <b>506.848</b>  | 1095.646        | <b>1087.637</b> | <b>1088.141</b> | 1087.133        | F121 |
| T10 | 563.390         | 1045.123        | 1037.113        | <b>1037.617</b> | 1036.609        | T020 |
| A11 | <b>598.908</b>  | 988.581         | <b>980.571</b>  | <b>981.075</b>  | <b>980.067</b>  | A119 |
| G12 | <b>602.837</b>  | 953.062         | 945.053         | 945.557         | 944.549         | G118 |
| G13 | <b>691.448</b>  | 889.033         | <b>881.023</b>  | <b>881.527</b>  | <b>880.519</b>  | G117 |
| G14 | <b>719.959</b>  | 860.522         | <b>852.513</b>  | <b>853.017</b>  | <b>852.009</b>  | G116 |
| V15 | <b>769.493</b>  | 832.011         | <b>824.002</b>  | <b>824.506</b>  | <b>823.498</b>  | V115 |
| L16 | 838.035         | <b>782.477</b>  | 774.468         | <b>774.972</b>  | 773.964         | L114 |
| F17 | <b>874.561</b>  | <b>725.935</b>  | 717.926         | 718.430         | 717.422         | F113 |
| N18 | <b>931.583</b>  | 677.405         | <b>669.399</b>  | <b>669.903</b>  | 668.895         | N012 |
| I19 | 988.125         | 620.887         | <b>612.878</b>  | <b>612.882</b>  | <b>611.874</b>  | I111 |
| Q10 | <b>1052.154</b> | 563.845         | <b>555.836</b>  | <b>556.340</b>  | <b>555.332</b>  | Q110 |
| A11 | <b>1087.673</b> | 499.816         | <b>491.807</b>  | <b>492.310</b>  | <b>491.303</b>  | A10  |
| V12 | 117.267         | 484.297         | <b>456.288</b>  | <b>456.792</b>  | <b>455.784</b>  | V10  |
| L23 | <b>1193.749</b> | 414.763         | <b>406.754</b>  | <b>407.258</b>  | <b>406.250</b>  | L10  |
| L24 | 1250.291        | 358.221         | 350.212         | 350.716         | 349.708         | L10  |
| P25 | <b>1298.817</b> | 301.678         | 293.670         | 294.174         | 293.166         | P10  |
| K16 | <b>1362.805</b> | 253.153         | <b>245.143</b>  | <b>245.647</b>  | <b>244.639</b>  | K14  |
| K17 | <b>1426.912</b> | 189.105         | 181.096         | 181.600         | 180.592         | K13  |
| T28 | <b>1477.436</b> | 125.058         | 117.049         | 117.552         | 116.544         | T12  |
| E10 | 1541.958        | 74.534          | 66.524          | 67.028          | 66.021          | E10  |

# sp | Q6GSS7 | H2A2A\_MOUSE

LNKLLGK <sup>Dimethyl</sup> <sub>28.03</sub> VTIAQGGVLPNIQAVLLPKKTE

- ▶ fragmentation table for charge state 3+
- ▶ specType=etd
- ▶ score=128.04
- ▶ F104913.dat
- ▶ query=q1333\_p1
- ▶ precursor=617.583170
- ▶ chargePrecursor=5
- ▶ itol=0.8

| AA  | c              | y               | z+1             | z+2            | z              | AA  |
|-----|----------------|-----------------|-----------------|----------------|----------------|-----|
| L1  | 44.377         | <b>1028.635</b> | <b>1023.296</b> | 0.672          | 1023.660       | L29 |
| N2  | 62.302         | 990.941         | <b>985.601</b>  | <b>985.937</b> | <b>985.265</b> | N28 |
| K3  | 125.090        | 952.326         | <b>947.587</b>  | <b>947.923</b> | <b>947.251</b> | K27 |
| L4  | 162.785        | 910.226         | <b>904.889</b>  | <b>905.225</b> | <b>904.553</b> | L26 |
| L5  | 200.479        | 872.531         | 867.194         | 867.530        | 866.858        | L25 |
| G6  | 239.487        | 834.835         | <b>829.499</b>  | <b>829.835</b> | <b>829.163</b> | G24 |
| K7  | 271.529        | 815.832         | <b>810.492</b>  | <b>810.828</b> | <b>810.156</b> | K23 |
| V8  | 304.552        | 763.790         | <b>758.450</b>  | <b>758.786</b> | <b>758.114</b> | V22 |
| T9  | 338.234        | 730.767         | <b>725.427</b>  | <b>725.763</b> | <b>725.091</b> | T21 |
| I10 | 375.929        | 697.084         | <b>691.745</b>  | <b>692.081</b> | <b>691.409</b> | I20 |
| A11 | 399.608        | 659.389         | 654.050         | 654.386        | 653.714        | A19 |
| Q12 | 442.294        | 626.710         | <b>630.371</b>  | <b>630.707</b> | <b>630.035</b> | Q18 |
| G13 | 461.301        | 593.024         | 587.685         | 588.021        | 587.349        | G17 |
| G14 | 480.308        | 574.017         | 568.678         | 569.013        | 568.342        | G16 |
| V15 | 513.331        | 555.010         | 549.670         | 550.006        | 549.334        | V15 |
| L16 | 551.026        | 521.987         | 516.648         | 516.984        | 516.312        | L14 |
| P17 | 583.377        | 484.292         | 478.953         | 479.289        | 478.617        | P13 |
| N18 | 621.391        | 451.942         | 446.602         | 446.938        | 446.266        | N12 |
| I19 | 659.086        | 413.927         | 408.588         | 408.924        | 408.252        | I11 |
| Q20 | 701.772        | 376.233         | 370.893         | 371.229        | 370.557        | Q10 |
| A21 | <b>725.451</b> | 333.546         | 328.207         | 328.543        | 327.871        | A9  |
| V22 | <b>758.474</b> | 309.867         | 304.528         | 304.864        | 304.192        | V8  |
| L23 | 796.188        | 276.844         | 271.505         | 271.841        | 271.169        | L7  |
| L24 | 833.863        | 239.150         | 233.810         | 234.146        | 233.474        | L6  |
| T25 | 869.214        | 201.455         | 196.116         | 196.452        | 195.780        | T5  |
| K26 | <b>908.912</b> | 169.100         | 163.760         | 164.100        | 163.429        | K4  |
| K27 | <b>951.611</b> | 138.406         | 133.066         | 133.402        | 132.730        | K3  |
| T28 | <b>985.293</b> | 83.708          | 78.368          | 78.704         | 78.032         | T2  |
| E29 | 1028.307       | 50.025          | 44.685          | 45.021         | 44.349         | E1  |



# sp | Q6GSS7 | H2A2A\_MOUSE

LNKLLGK <sup>Dimethyl</sup><sub>28.03</sub> VTIAQGGVLPNIQAVLLPKKTE

- ▶ fragmentation table for charge state 4+
- ▶ specType=etd
- ▶ score=128.04
- ▶ F104913.dat
- ▶ query=q1333\_p1
- ▶ precursor=617.583170
- ▶ chargePrecursor=5
- ▶ itol=0.8

| AA |    | c              | y              | z+1            | z+2            | z              | AA              |
|----|----|----------------|----------------|----------------|----------------|----------------|-----------------|
| L  | 1  | 33.535         | <b>771.728</b> | <b>767.724</b> | 0.750          | <b>767.412</b> | L <sub>29</sub> |
| N  | 2  | 62.046         | 731.557        | <b>739.453</b> | <b>739.705</b> | <b>739.201</b> | N <sub>26</sub> |
| K  | 3  | 94.059         | <b>714.947</b> | 720.942        | 711.194        | 710.690        | K <sub>21</sub> |
| L  | 4  | 122.340        | 692.923        | 678.918        | 679.170        | 678.666        | L <sub>26</sub> |
| L  | 5  | 150.611        | 654.652        | 650.647        | 650.899        | 650.395        | L <sub>25</sub> |
| G  | 6  | 164.867        | 626.381        | 622.376        | 622.628        | 622.124        | G <sub>24</sub> |
| K  | 7  | 203.898        | <b>612.126</b> | 608.121        | 608.373        | 607.869        | K <sub>23</sub> |
| V  | 8  | 228.665        | 573.094        | 569.089        | 569.341        | 568.837        | V <sub>22</sub> |
| T  | 9  | 253.927        | 548.327        | 544.322        | 544.574        | 544.070        | T <sub>21</sub> |
| I  | 10 | 262.198        | 523.065        | 519.060        | 519.312        | 518.808        | I <sub>20</sub> |
| A  | 11 | 289.958        | 494.794        | <b>490.789</b> | <b>491.041</b> | <b>490.537</b> | A <sub>19</sub> |
| Q  | 12 | 311.972        | 477.026        | 473.020        | 473.272        | 472.768        | Q <sub>18</sub> |
| G  | 13 | 346.728        | 445.020        | 441.015        | 441.267        | 440.763        | G <sub>17</sub> |
| G  | 14 | <b>360.483</b> | 430.765        | 426.760        | 427.012        | 426.508        | G <sub>16</sub> |
| V  | 15 | 385.250        | 416.509        | 412.504        | 412.757        | 412.253        | V <sub>15</sub> |
| L  | 16 | 413.521        | 391.742        | 387.737        | 387.989        | 387.486        | L <sub>14</sub> |
| P  | 17 | 437.784        | 363.471        | 359.466        | 359.718        | 359.215        | P <sub>13</sub> |
| N  | 18 | 466.295        | 339.208        | 335.203        | 335.455        | 334.951        | N <sub>12</sub> |
| I  | 19 | 494.566        | 310.897        | 306.891        | 307.143        | 306.641        | I <sub>11</sub> |
| Q  | 20 | 525.381        | 282.426        | 278.421        | 278.673        | 278.170        | Q <sub>16</sub> |
| A  | 21 | 544.340        | 250.412        | 246.407        | 246.659        | 246.155        | A <sub>9</sub>  |
| V  | 22 | 569.107        | 232.652        | 228.646        | 228.898        | 228.395        | V <sub>8</sub>  |
| L  | 23 | 597.378        | 207.885        | 203.881        | 204.132        | 203.629        | L <sub>7</sub>  |
| L  | 24 | 625.649        | 179.614        | 175.609        | 175.861        | 175.358        | L <sub>6</sub>  |
| P  | 25 | 649.912        | 151.343        | 147.338        | 147.590        | 147.087        | P <sub>5</sub>  |
| K  | 26 | 681.936        | 127.080        | 123.075        | 123.327        | 122.823        | K <sub>4</sub>  |
| K  | 27 | <b>713.960</b> | 95.056         | 91.052         | 91.304         | 90.800         | K <sub>3</sub>  |
| T  | 28 | <b>739.222</b> | 63.032         | 59.028         | 59.280         | 58.776         | T <sub>2</sub>  |
| E  | 29 | <b>771.482</b> | 37.771         | 33.766         | 34.018         | 33.514         | E <sub>1</sub>  |

# sp | Q6GSS7 | H2A2A\_MOUSE

LNKLLGK <sup>Dimethyl</sup>VTIAQGGVLPNIQAVLLPKKTE  
28.03

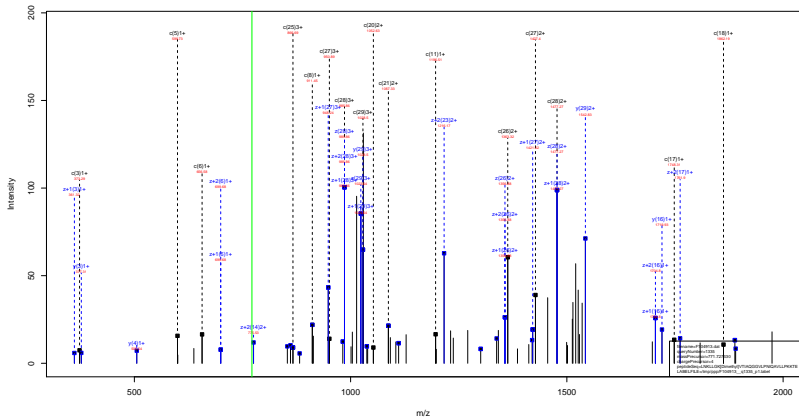

# sp | Q6GSS7 | H2A2A\_MOUSE

LNKLLGK <sup>Dimethyl</sup> <sub>28.03</sub> VTIAQGGVLPNIQAVLLPKKTE

- ▶ fragmentation table for charge state 1+
- ▶ specType=etd
- ▶ score=33.66
- ▶ F104913.dat
- ▶ query=q1335\_p1
- ▶ precursor=771.727330
- ▶ chargePrecursor=4
- ▶ itol=0.8

| AA  | c               | y               | z+1             | z+2             | z               | AA   |
|-----|-----------------|-----------------|-----------------|-----------------|-----------------|------|
| L1  | 131.119         | 2083.892        | 3067.873        | 9.800           | 3066.865        | L129 |
| N2  | 245.151         | 2970.808        | 2954.789        | 2955.797        | 2953.781        | N20  |
| K3  | <b>373.256</b>  | 3856.705        | 2840.746        | 2841.754        | 2839.738        | K27  |
| L4  | 489.340         | 2728.670        | 2712.653        | 2713.659        | 2711.643        | L26  |
| L5  | <b>599.424</b>  | 2615.588        | 2599.567        | 2600.575        | 2598.559        | L25  |
| G6  | <b>658.465</b>  | 2502.502        | 2486.483        | 2487.491        | 2485.475        | G24  |
| K7  | 812.512         | 2345.480        | 2429.462        | 2430.469        | 2428.454        | K23  |
| V8  | <b>911.640</b>  | 2289.954        | 2273.935        | 2274.943        | 2272.927        | V22  |
| F9  | 1012.688        | 2190.266        | 2174.267        | 2175.275        | 2173.259        | F21  |
| T10 | 1125.772        | 2099.239        | 2073.219        | 2074.227        | 2072.211        | T20  |
| A11 | <b>1196.809</b> | 1976.154        | 1960.135        | 1961.143        | 1959.127        | A19  |
| Q12 | 1324.867        | 1895.111        | <b>1889.098</b> | <b>1890.106</b> | <b>1888.090</b> | Q18  |
| G13 | 1381.889        | 1777.058        | 1761.039        | <b>1762.047</b> | 1760.032        | G17  |
| G14 | 1438.910        | <b>1720.037</b> | <b>1704.018</b> | <b>1705.026</b> | 1703.010        | G16  |
| V15 | 1537.979        | 1603.015        | 1646.997        | 1648.004        | 1645.989        | V15  |
| L16 | 1661.063        | 1563.947        | 1547.928        | 1548.936        | 1546.920        | L14  |
| F17 | <b>1748.116</b> | 1450.863        | 1434.844        | 1435.852        | 1433.836        | F13  |
| N18 | <b>1862.159</b> | 1353.810        | <b>1337.791</b> | 1338.799        | 1336.783        | N12  |
| I19 | 1975.243        | 1239.767        | 1223.748        | 1224.756        | 1222.741        | I11  |
| Q20 | 2183.301        | 1120.683        | <b>1110.664</b> | <b>1111.672</b> | 1109.656        | Q10  |
| A21 | 2174.338        | 998.624         | <b>982.606</b>  | 983.614         | <b>981.598</b>  | A0   |
| V22 | 2273.407        | 927.587         | <b>911.569</b>  | 912.576         | 910.561         | V8   |
| L23 | 2388.493        | 828.519         | 812.500         | 813.508         | 811.492         | L7   |
| L24 | 2499.575        | 715.435         | <b>699.416</b>  | <b>700.424</b>  | 698.408         | L6   |
| P25 | 2596.628        | 602.351         | 586.332         | 587.340         | 585.324         | P5   |
| K26 | 2724.723        | <b>505.298</b>  | 489.279         | 490.287         | 488.271         | K4   |
| K27 | 2852.819        | <b>377.203</b>  | <b>361.184</b>  | 362.192         | 360.177         | K3   |
| T28 | 2953.885        | 249.108         | 233.089         | 234.097         | 232.081         | T2   |
| E29 | 3062.968        | 148.050         | 132.042         | 133.050         | 131.034         | E1   |

# sp | Q6GSS7 | H2A2A\_MOUSE

LNKLLGK <sup>Dimethyl</sup><sub>28.03</sub> VTIAQGGVLPNIQAVLLPKKTE

- ▶ fragmentation table for charge state 2+
- ▶ specType=etd
- ▶ score=33.66
- ▶ F104913.dat
- ▶ query=q1335\_p1
- ▶ precursor=771.727330
- ▶ chargePrecursor=4
- ▶ itol=0.8

| AA  | c               | y               | z+1             | z+2             | z               | AA   |
|-----|-----------------|-----------------|-----------------|-----------------|-----------------|------|
| L1  | 66.053          | <b>1542.450</b> | 1534.440        | 9.504           | 1533.930        | L120 |
| N12 | 123.084         | 1485.905        | <b>1477.898</b> | 1478.402        | <b>1477.394</b> | N120 |
| K13 | 187.132         | 1428.889        | <b>1420.877</b> | <b>1421.381</b> | <b>1420.373</b> | K127 |
| L14 | 243.674         | 1364.839        | <b>1356.829</b> | <b>1357.333</b> | <b>1356.325</b> | L126 |
| L15 | 300.216         | 1308.297        | <b>1300.287</b> | <b>1300.791</b> | 1299.783        | L125 |
| G16 | 358.759         | 1251.755        | 1243.745        | 1244.249        | 1243.241        | G124 |
| K17 | 406.799         | 1223.244        | 1215.234        | <b>1215.738</b> | 1214.731        | K123 |
| V18 | 456.324         | 1145.181        | 1137.171        | 1137.675        | 1136.667        | V122 |
| F19 | 506.849         | 1095.646        | <b>1087.637</b> | 1088.141        | <b>1087.133</b> | F121 |
| T10 | 563.390         | 1045.123        | <b>1037.113</b> | <b>1037.617</b> | 1036.609        | T120 |
| A11 | 608.908         | 988.581         | 980.571         | 981.075         | 980.067         | A119 |
| Q12 | 662.937         | 933.065         | 925.055         | 925.559         | 924.551         | Q118 |
| G13 | 691.448         | 889.033         | 881.023         | <b>881.527</b>  | 880.519         | G117 |
| G14 | 719.959         | <b>860.522</b>  | 852.513         | <b>853.017</b>  | 852.009         | G116 |
| V15 | 769.493         | 832.011         | 824.002         | 824.506         | 823.498         | V115 |
| L16 | 826.035         | 782.477         | 774.468         | <b>774.972</b>  | 773.964         | L114 |
| F17 | 874.581         | 728.935         | 721.925         | 722.429         | 721.421         | F113 |
| N18 | 931.583         | 677.405         | 669.395         | 669.900         | 668.892         | N112 |
| I19 | 988.125         | 620.867         | 612.858         | 613.362         | 612.354         | I111 |
| Q10 | <b>1052.154</b> | 563.845         | 555.836         | 556.340         | 555.332         | Q110 |
| A11 | <b>1087.673</b> | 499.816         | 491.807         | 492.311         | 491.303         | A10  |
| V12 | 1137.207        | 484.297         | 476.288         | 476.792         | 475.784         | V10  |
| L13 | 1193.749        | 414.763         | 406.754         | 407.258         | 406.250         | L11  |
| L14 | 1250.291        | 358.221         | 350.212         | 350.716         | 349.708         | L10  |
| P15 | 1298.817        | 301.679         | 293.670         | 294.174         | 293.166         | P10  |
| K16 | <b>1362.865</b> | 253.153         | 245.143         | 245.647         | 244.639         | K14  |
| K17 | <b>1426.912</b> | 189.105         | 181.096         | 181.600         | 180.592         | K13  |
| T18 | <b>1477.436</b> | 125.058         | 117.048         | 117.552         | 116.544         | T12  |
| E19 | 1541.958        | 74.534          | 66.524          | 67.028          | 66.021          | E11  |

# sp | Q6GSS7 | H2A2A\_MOUSE

LNKLLGK <sup>Dimethyl</sup> <sub>28.03</sub> VTIAQGGVLPNIQAVLLPKKTE

- ▶ fragmentation table for charge state 3+
- ▶ specType=etd
- ▶ score=33.66
- ▶ F104913.dat
- ▶ query=q1335\_p1
- ▶ precursor=771.727330
- ▶ chargePrecursor=4
- ▶ itol=0.8

| AA    | c               | y               | z+1             | z+2            | z               | AA    |
|-------|-----------------|-----------------|-----------------|----------------|-----------------|-------|
| L[1]  | 44.577          | <b>1028.635</b> | <b>1023.296</b> | 0.672          | <b>1022.960</b> | L[20] |
| N[2]  | 82.302          | 900.941         | <b>985.601</b>  | <b>985.937</b> | <b>985.265</b>  | N[20] |
| K[3]  | 125.090         | 952.926         | <b>947.587</b>  | <b>947.923</b> | 947.251         | K[27] |
| L[4]  | 162.785         | 910.228         | 904.889         | 905.225        | 904.553         | L[26] |
| L[5]  | 200.479         | 872.533         | <b>867.194</b>  | 867.530        | <b>866.856</b>  | L[25] |
| Q[6]  | 239.207         | 834.839         | 827.459         | 829.839        | 829.163         | Q[24] |
| K[7]  | 271.529         | 815.832         | 810.492         | 810.828        | 810.154         | K[23] |
| V[8]  | 304.552         | 785.700         | 788.450         | 788.786        | 788.114         | V[22] |
| T[9]  | 338.234         | 736.767         | 725.427         | 725.763        | 725.091         | T[21] |
| T[10] | 375.920         | 697.084         | 691.745         | 692.081        | 691.409         | T[20] |
| A[11] | 399.608         | 659.380         | 654.050         | 654.386        | 653.714         | A[19] |
| Q[12] | 442.294         | 620.713         | 620.374         | 620.707        | 620.035         | Q[18] |
| G[13] | 461.301         | 593.024         | 587.685         | 588.021        | 587.349         | G[17] |
| G[14] | 480.308         | 574.017         | 568.678         | 569.013        | 568.342         | G[16] |
| V[15] | 513.331         | 555.010         | 549.670         | 550.006        | 549.334         | V[15] |
| L[16] | 551.026         | 521.987         | 516.648         | 516.984        | 516.312         | L[14] |
| F[17] | 563.277         | 484.262         | 478.953         | 479.289        | 478.617         | F[13] |
| T[18] | 623.393         | 451.942         | 446.603         | 446.938        | 446.266         | T[12] |
| T[19] | 659.086         | 413.927         | 408.588         | 408.924        | 408.252         | T[11] |
| Q[20] | 701.772         | 376.233         | 370.893         | 371.229        | 370.557         | Q[10] |
| A[21] | 725.451         | 333.540         | 328.207         | 328.543        | 327.871         | A[9]  |
| V[22] | 758.474         | 309.867         | 304.528         | 304.864        | 304.192         | V[9]  |
| L[23] | 796.168         | 276.844         | 271.505         | 271.841        | 271.169         | L[7]  |
| L[24] | 833.863         | 239.159         | 233.810         | 234.146        | 233.474         | L[6]  |
| P[25] | <b>866.214</b>  | 201.455         | 196.116         | 196.451        | 195.779         | P[5]  |
| K[26] | 908.912         | 169.104         | 163.765         | 164.101        | 163.429         | K[4]  |
| K[27] | <b>951.611</b>  | 126.406         | 121.066         | 121.402        | 120.730         | K[3]  |
| T[28] | <b>985.293</b>  | 83.700          | 78.366          | 78.704         | 78.032          | T[2]  |
| E[29] | <b>1028.307</b> | 50.025          | 44.685          | 45.021         | 44.349          | E[1]  |

# sp | Q6GSS7 | H2A2A\_MOUSE

LNKLLGK <sup>Dimethyl</sup>VTIAQGGVLPNIQAVLLPKKTE  
28.03

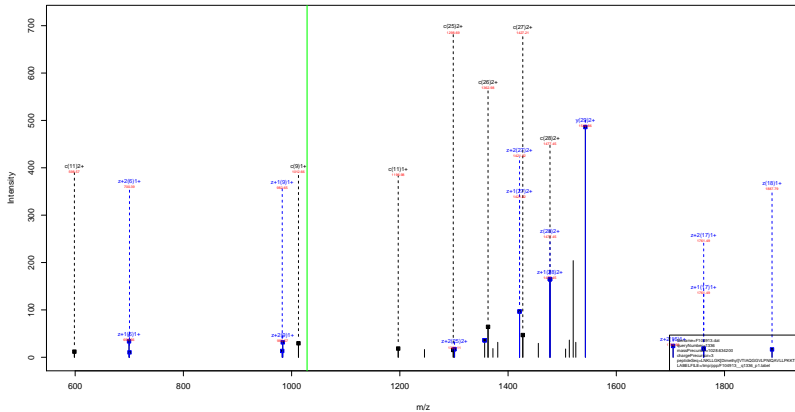

# sp | Q6GSS7 | H2A2A\_MOUSE

LNKLLGK <sup>Dimethyl</sup> <sub>28.03</sub> VTIAQGGVLPNIQAVLLPKKTE

- ▶ fragmentation table for charge state 1+
- ▶ specType=etd
- ▶ score=28.04
- ▶ F104913.dat
- ▶ query=q1336\_p1
- ▶ precursor=1028.634200
- ▶ chargePrecursor=3
- ▶ itol=0.8

| AA    | c               | y        | z+1             | z+2             | z               | AA    |
|-------|-----------------|----------|-----------------|-----------------|-----------------|-------|
| L[1]  | 131.118         | 3083.802 | 2067.873        | 0.000           | 3066.865        | L[20] |
| N[2]  | 245.161         | 2970.808 | 2954.789        | 2955.797        | 2953.781        | N[20] |
| K[3]  | 373.256         | 2856.765 | 2840.746        | 2841.754        | 2839.738        | K[27] |
| L[4]  | 486.340         | 2728.670 | 2712.651        | 2713.659        | 2711.643        | L[26] |
| L[5]  | 599.424         | 2615.586 | 2599.567        | 2600.575        | 2598.559        | L[25] |
| G[6]  | 699.489         | 2502.502 | 2486.483        | 2487.491        | 2485.475        | G[24] |
| K[7]  | 812.572         | 2445.480 | 2429.461        | 2430.469        | 2428.454        | K[23] |
| V[8]  | 911.640         | 2389.354 | 2373.335        | 2374.343        | 2372.327        | V[22] |
| T[9]  | <b>1012.688</b> | 2190.286 | 2174.267        | 2175.275        | 2173.259        | T[21] |
| I[10] | 1125.772        | 2089.238 | 2073.219        | 2074.227        | 2072.211        | I[20] |
| A[11] | <b>1196.809</b> | 1976.154 | 1960.135        | 1961.143        | 1959.127        | A[19] |
| Q[12] | 1314.897        | 1909.111 | 1893.092        | 1894.100        | <b>1888.076</b> | Q[18] |
| G[13] | 1381.889        | 1777.058 | <b>1761.039</b> | <b>1762.047</b> | 1760.032        | G[17] |
| G[14] | 1438.910        | 1720.037 | 1704.018        | <b>1705.026</b> | 1703.010        | G[16] |
| V[15] | 1537.979        | 1603.015 | 1586.997        | 1588.004        | 1586.989        | V[15] |
| L[16] | 1651.063        | 1563.947 | 1547.928        | 1548.936        | 1546.920        | L[14] |
| T[17] | 1768.116        | 1450.863 | 1434.844        | 1435.852        | 1433.836        | T[13] |
| N[18] | 1862.159        | 1353.810 | 1337.791        | 1338.799        | 1336.783        | N[12] |
| I[19] | 1975.243        | 1239.767 | 1223.748        | 1224.756        | 1222.741        | I[11] |
| Q[20] | 2103.301        | 1126.683 | 1110.664        | 1111.672        | 1109.656        | Q[10] |
| A[21] | 2174.338        | 998.624  | <b>982.606</b>  | <b>983.614</b>  | 981.598         | A[9]  |
| V[22] | 2273.407        | 827.587  | 811.568         | 812.576         | 810.561         | V[8]  |
| L[23] | 2389.491        | 628.519  | 612.500         | 613.508         | 611.492         | L[7]  |
| L[24] | 2499.575        | 715.435  | <b>699.416</b>  | <b>700.424</b>  | 698.408         | L[6]  |
| P[25] | 2596.628        | 602.351  | 586.332         | 587.340         | 585.324         | P[5]  |
| K[26] | 2724.723        | 505.298  | 489.279         | 490.287         | 488.271         | K[4]  |
| K[27] | 2852.818        | 377.203  | 361.184         | 362.192         | 360.177         | K[3]  |
| T[28] | 2953.865        | 249.108  | 233.089         | 234.097         | 232.082         | T[2]  |
| E[29] | 3082.008        | 148.050  | 132.042         | 133.050         | 131.034         | E[1]  |

# sp | Q6GSS7 | H2A2A\_MOUSE

LNKLLGK <sup>Dimethyl</sup> <sub>28.03</sub> VTIAQGGVLPNIQAVLLPKKTE

- ▶ fragmentation table for charge state 2+
- ▶ specType=etd
- ▶ score=28.04
- ▶ F104913.dat
- ▶ query=q1336\_p1
- ▶ precursor=1028.634200
- ▶ chargePrecursor=3
- ▶ itol=0.8

| AA | c               | y               | z+1             | z+2             | z               | AA   |
|----|-----------------|-----------------|-----------------|-----------------|-----------------|------|
| L1 | 66.053          | <b>1542.450</b> | 1534.440        | 9.504           | 1533.930        | L120 |
| N1 | 123.054         | 1485.905        | <b>1477.898</b> | 1478.402        | <b>1477.394</b> | N120 |
| K1 | 187.132         | 1428.889        | <b>1420.877</b> | <b>1421.381</b> | 1420.373        | K127 |
| L1 | 243.674         | 1364.839        | <b>1356.829</b> | <b>1357.333</b> | <b>1356.325</b> | L126 |
| L1 | 300.216         | 1308.297        | 1300.287        | <b>1300.791</b> | 1299.783        | L125 |
| G1 | 358.750         | 1251.755        | 1243.745        | 1244.249        | 1243.241        | G124 |
| K1 | 406.790         | 1223.244        | 1215.234        | 1215.738        | 1214.731        | K123 |
| V1 | 456.324         | 1145.181        | 1137.171        | 1137.675        | 1136.667        | V122 |
| T1 | 506.840         | 1095.646        | 1087.637        | 1088.141        | 1087.133        | T121 |
| T1 | 563.390         | 1045.123        | 1037.113        | 1037.617        | 1036.609        | T20  |
| A1 | <b>598.908</b>  | 988.581         | 980.571         | 981.075         | 980.067         | A119 |
| Q1 | 662.937         | 933.065         | 925.055         | 925.559         | 924.551         | Q118 |
| G1 | 691.448         | 889.033         | 881.023         | 881.527         | 880.519         | G117 |
| G1 | 719.959         | 860.522         | 852.513         | 853.017         | 852.009         | G116 |
| V1 | 769.493         | 832.011         | 824.002         | 824.506         | 823.498         | V115 |
| L1 | 826.035         | 782.477         | 774.468         | 774.972         | 773.964         | L114 |
| T1 | 874.581         | 728.935         | 720.925         | 721.429         | 720.421         | T113 |
| N1 | 931.583         | 677.400         | 669.390         | 669.893         | 668.885         | N112 |
| I1 | 988.125         | 620.867         | 612.857         | 613.361         | 612.353         | I111 |
| Q1 | 1052.154        | 563.845         | 555.836         | 556.340         | 555.332         | Q110 |
| A1 | 1087.673        | 499.816         | 491.807         | 492.311         | 491.303         | A10  |
| V1 | 1137.207        | 484.297         | 476.288         | 476.792         | 475.784         | V10  |
| L1 | 1193.769        | 414.763         | 406.754         | 407.258         | 406.250         | L11  |
| L1 | 1250.291        | 358.221         | 350.212         | 350.716         | 349.708         | L10  |
| P1 | <b>1298.817</b> | 301.679         | 293.670         | 294.174         | 293.166         | P10  |
| K1 | <b>1362.865</b> | 253.153         | 245.143         | 245.647         | 244.639         | K10  |
| K1 | <b>1426.912</b> | 189.105         | 181.096         | 181.600         | 180.592         | K10  |
| T1 | <b>1477.436</b> | 125.058         | 117.048         | 117.552         | 116.544         | T10  |
| E1 | 1541.958        | 74.534          | 66.524          | 67.028          | 66.021          | E10  |





# sp | Q6GSS7 | H2A2A\_MOUSE

LNKLLGK <sup>Dimethyl</sup> <sub>28.03</sub> VTIAQGGVLPNIQAVLLPKKTE

- ▶ fragmentation table for charge state 1+
- ▶ specType=etd
- ▶ score=42.99
- ▶ F104913.dat
- ▶ query=q1337\_p1
- ▶ precursor=617.583540
- ▶ chargePrecursor=5
- ▶ itol=0.8

| AA    | c               | y               | z+1             | z+2             | z              | AA    |
|-------|-----------------|-----------------|-----------------|-----------------|----------------|-------|
| L[1]  | 131.118         | 3083.892        | 3067.873        | 0.000           | 3066.865       | L[26] |
| N[2]  | <b>245.161</b>  | 2970.808        | 2954.789        | 2938.797        | 2953.781       | N[28] |
| K[3]  | <b>373.256</b>  | 2856.765        | 2840.746        | 2841.754        | 2839.738       | K[27] |
| L[4]  | 488.340         | 2728.670        | 2712.651        | 2713.659        | 2711.643       | L[26] |
| L[5]  | <b>999.424</b>  | 2615.585        | 2599.567        | 2600.575        | 2598.559       | L[25] |
| G[6]  | <b>636.445</b>  | 2502.500        | 2486.483        | 2487.491        | 2485.475       | G[24] |
| K[7]  | <b>812.572</b>  | 2445.460        | 2429.442        | 2430.449        | 2428.434       | K[23] |
| V[8]  | 911.640         | 2289.354        | 2273.335        | 2274.343        | 2272.327       | V[22] |
| T[9]  | 1012.688        | 2190.288        | 2174.267        | 2175.275        | 2173.259       | T[21] |
| I[10] | <b>1125.772</b> | 2089.238        | 2073.219        | 2074.227        | 2072.211       | I[20] |
| A[11] | <b>1196.869</b> | 1976.154        | 1960.135        | 1961.143        | 1959.127       | A[19] |
| Q[12] | <b>1324.867</b> | 1865.111        | 1849.098        | 1850.106        | 1848.090       | Q[18] |
| G[13] | 1381.889        | 1777.058        | 1761.039        | 1762.047        | 1760.032       | G[17] |
| G[14] | 1438.910        | 1720.037        | 1704.018        | 1705.026        | 1703.010       | G[16] |
| V[15] | 1537.979        | 1663.015        | <b>1646.997</b> | <b>1648.004</b> | 1646.989       | V[15] |
| L[16] | 1651.063        | <b>1563.947</b> | <b>1547.928</b> | <b>1548.936</b> | 1546.920       | L[14] |
| T[17] | 1748.116        | 1490.883        | 1474.864        | 1475.872        | 1473.856       | T[13] |
| N[18] | 1862.159        | 1363.810        | 1347.791        | 1348.799        | 1346.783       | N[12] |
| I[19] | 1975.243        | 1239.767        | 1223.748        | 1224.756        | 1222.741       | I[11] |
| Q[20] | 2103.301        | 1126.683        | 1110.664        | 1111.672        | 1109.656       | Q[10] |
| A[21] | 2174.338        | 998.624         | 982.606         | 983.614         | <b>981.598</b> | A[9]  |
| V[22] | 2273.407        | 927.587         | 911.569         | <b>912.576</b>  | 910.561        | V[8]  |
| L[23] | 2389.491        | 808.513         | <b>811.508</b>  | <b>813.508</b>  | <b>811.492</b> | L[7]  |
| L[24] | 2499.575        | 715.435         | 699.416         | 700.424         | 698.408        | L[6]  |
| P[25] | 2596.628        | 602.351         | 586.332         | 587.340         | 585.324        | P[5]  |
| K[26] | 2724.723        | <b>505.298</b>  | <b>489.279</b>  | 490.287         | 488.271        | K[4]  |
| K[27] | 2852.818        | 377.203         | <b>361.184</b>  | 362.192         | 360.177        | K[3]  |
| T[28] | 2953.865        | 249.106         | 233.089         | 234.097         | 232.082        | T[2]  |
| E[29] | 3082.008        | 148.060         | 132.042         | 133.050         | 131.034        | E[1]  |

# sp | Q6GSS7 | H2A2A\_MOUSE

LNKLLGK <sup>Dimethyl</sup> <sub>28.03</sub> VTIAQGGVLPNIQAVLLPKKTE

- ▶ fragmentation table for charge state 2+
- ▶ specType=etd
- ▶ score=42.99
- ▶ F104913.dat
- ▶ query=q1337\_p1
- ▶ precursor=617.583540
- ▶ chargePrecursor=5
- ▶ itol=0.8

| AA  | c               | y               | z+1             | z+2             | z               | AA   |
|-----|-----------------|-----------------|-----------------|-----------------|-----------------|------|
| L1  | 66.053          | <b>1542.450</b> | 1524.440        | 9.504           | 1533.930        | L120 |
| N12 | 123.054         | 1485.905        | 1477.898        | 1478.402        | 1477.304        | N20  |
| K13 | 187.132         | 1428.889        | <b>1420.877</b> | <b>1421.381</b> | <b>1420.373</b> | K27  |
| L14 | 243.674         | 1364.839        | <b>1356.829</b> | <b>1357.333</b> | 1356.325        | L26  |
| L15 | 300.216         | 1308.297        | <b>1300.287</b> | <b>1300.791</b> | 1299.783        | L25  |
| G16 | 358.759         | 1251.795        | <b>1243.745</b> | <b>1244.249</b> | 1243.241        | G24  |
| K17 | 406.790         | 1223.244        | 1215.234        | 1215.738        | 1214.731        | K23  |
| V18 | <b>456.324</b>  | 1145.181        | 1137.171        | <b>1137.675</b> | 1136.667        | V22  |
| F19 | 506.640         | 1095.646        | <b>1087.637</b> | <b>1088.141</b> | <b>1087.133</b> | F121 |
| T10 | 563.590         | 1045.123        | 1037.113        | 1037.617        | 1036.609        | T20  |
| A11 | <b>595.909</b>  | 988.581         | <b>980.571</b>  | <b>981.075</b>  | 980.067         | A19  |
| Q12 | <b>662.837</b>  | 933.062         | 925.053         | 925.557         | 924.549         | Q18  |
| G13 | <b>691.448</b>  | 889.033         | <b>881.023</b>  | <b>881.527</b>  | <b>880.519</b>  | G17  |
| G14 | <b>719.959</b>  | <b>860.522</b>  | <b>852.513</b>  | <b>853.017</b>  | <b>852.009</b>  | G16  |
| V15 | <b>769.493</b>  | 832.011         | <b>824.002</b>  | <b>824.506</b>  | 823.498         | V15  |
| L16 | 826.035         | 782.477         | 774.468         | 774.972         | 773.964         | L14  |
| F17 | <b>874.561</b>  | <b>725.935</b>  | 717.925         | 718.429         | 717.421         | F13  |
| N18 | 931.553         | 677.420         | 669.399         | 669.903         | 668.895         | N12  |
| I19 | 988.125         | 630.387         | 622.378         | 622.882         | 621.874         | I11  |
| Q20 | <b>1052.154</b> | 583.845         | 575.836         | 576.340         | 575.332         | Q10  |
| A21 | <b>1087.673</b> | 499.816         | <b>491.807</b>  | <b>492.310</b>  | <b>491.303</b>  | A10  |
| V22 | 1127.207        | 484.297         | <b>456.288</b>  | <b>456.792</b>  | 455.784         | V8   |
| L23 | 1193.749        | 414.763         | 406.753         | 407.257         | 406.250         | L17  |
| L24 | 1250.291        | 358.221         | 350.213         | 350.716         | 349.708         | L16  |
| P25 | 1298.817        | 301.679         | 293.670         | 294.174         | 293.166         | P5   |
| K26 | 1362.895        | 253.153         | <b>245.143</b>  | <b>245.647</b>  | <b>244.639</b>  | K14  |
| K27 | 1426.912        | 199.105         | 181.096         | 181.600         | 180.592         | K3   |
| T28 | 1477.436        | 125.058         | 117.048         | 117.552         | 116.544         | T12  |
| E29 | 1541.958        | 74.534          | 66.524          | 67.028          | 66.021          | E1   |

# sp | Q6GSS7 | H2A2A\_MOUSE

LNKLLGK <sup>Dimethyl</sup> <sub>28.03</sub> VTIAQGGVLPNIQAVLLPKKTE

- ▶ fragmentation table for charge state 3+
- ▶ specType=etd
- ▶ score=42.99
- ▶ F104913.dat
- ▶ query=q1337\_p1
- ▶ precursor=617.583540
- ▶ chargePrecursor=5
- ▶ itol=0.8

| AA    | c              | y               | z+1             | z+2            | z               | AA    |
|-------|----------------|-----------------|-----------------|----------------|-----------------|-------|
| L 1   | 44.377         | <b>1028.635</b> | <b>1023.296</b> |                | <b>1022.960</b> | L 29  |
| N 2   | 62.392         | 990.941         | 985.601         | <b>985.937</b> | 985.265         | N 28  |
| K 3   | 125.090        | 952.026         | <b>947.587</b>  | 947.923        | <b>947.251</b>  | K 27  |
| L 4   | 162.795        | 910.229         | 904.889         | 905.225        | 904.553         | L 26  |
| L 5   | 200.479        | 872.523         | 867.184         | 867.520        | 866.793         | L 25  |
| G 6   | 219.487        | 834.839         | <b>829.499</b>  | <b>829.835</b> | <b>829.163</b>  | G 24  |
| K 7   | 271.529        | 815.852         | <b>810.492</b>  | <b>810.828</b> | 810.156         | K 23  |
| V 8   | 304.552        | 763.790         | <b>758.450</b>  | <b>758.786</b> | <b>758.114</b>  | V 22  |
| T 9   | 336.234        | 730.707         | <b>725.427</b>  | <b>725.763</b> | 725.091         | T 21  |
| I 10  | 375.929        | 697.084         | <b>691.745</b>  | <b>692.081</b> | <b>691.409</b>  | I 20  |
| A 11  | 399.608        | 659.389         | 654.050         | 654.386        | 653.714         | A 19  |
| Q 12  | 442.294        | 636.720         | 630.371         | 630.707        | 630.035         | Q 18  |
| G 13  | 461.301        | 593.024         | 587.685         | 588.021        | 587.349         | G 17  |
| G 14  | 480.308        | 574.017         | 568.678         | 569.013        | 568.342         | G 16  |
| V 15  | 513.331        | 555.010         | 549.670         | 550.006        | 549.334         | V 15  |
| L 16  | 551.026        | 521.987         | 516.648         | 516.984        | 516.312         | L 14  |
| F 17  | 583.377        | 484.292         | 478.953         | 479.289        | 478.617         | F 13  |
| Tu 18 | 621.391        | 451.942         | 446.603         | 446.939        | 446.267         | Tu 12 |
| I 19  | 659.086        | 413.927         | 408.588         | 408.924        | 408.252         | I 11  |
| Q 20  | 701.772        | 376.233         | 370.893         | 371.229        | 370.557         | Q 10  |
| A 21  | <b>725.451</b> | 333.546         | 328.207         | 328.543        | 327.871         | A 9   |
| V 22  | <b>758.474</b> | 309.867         | 304.528         | 304.864        | 304.192         | V 8   |
| L 23  | 796.168        | 276.844         | 271.505         | 271.841        | 271.169         | L 7   |
| L 24  | 833.863        | 239.350         | 233.991         | 234.326        | 233.654         | L 6   |
| P 25  | 895.214        | 201.625         | 196.286         | 196.621        | 195.949         | P 5   |
| K 26  | <b>908.912</b> | 169.104         | 163.765         | 164.101        | 163.429         | K 4   |
| K 27  | <b>951.611</b> | 126.406         | 121.066         | 121.402        | 120.730         | K 3   |
| T 28  | 995.293        | 83.708          | 78.368          | 78.704         | 78.032          | T 2   |
| E 29  | 1028.307       | 50.025          | 44.685          | 45.021         | 44.349          | E 1   |

# sp | Q6GSS7 | H2A2A\_MOUSE

LNKLLGK <sup>Dimethyl</sup><sub>28.03</sub> VTIAQGGVLPNIQAVLLPKKTE

- ▶ fragmentation table for charge state 4+
- ▶ specType=etd
- ▶ score=42.99
- ▶ F104913.dat
- ▶ query=q1337.p1
- ▶ precursor=617.583540
- ▶ chargePrecursor=5
- ▶ itol=0.8

| AA    | c              | y              | z+1     | z+2     | z       | AA    |
|-------|----------------|----------------|---------|---------|---------|-------|
| L[1]  | 53.535         | <b>771.728</b> | 767.724 | 0.755   | 767.472 | L[29] |
| N[2]  | 62.046         | 743.457        | 739.453 | 739.705 | 739.201 | N[28] |
| K[3]  | 94.069         | 714.947        | 710.942 | 711.194 | 710.690 | K[27] |
| L[4]  | 122.340        | 682.923        | 678.918 | 679.170 | 678.666 | L[26] |
| L[5]  | 150.611        | 654.652        | 650.647 | 650.899 | 650.395 | L[25] |
| G[6]  | 194.867        | 626.381        | 622.376 | 622.628 | 622.124 | G[24] |
| K[7]  | 203.898        | 612.126        | 608.121 | 608.373 | 607.869 | K[23] |
| V[8]  | 228.665        | 573.094        | 569.089 | 569.341 | 568.837 | V[22] |
| T[9]  | 253.927        | 548.327        | 544.322 | 544.574 | 544.070 | T[21] |
| I[10] | 282.198        | 523.065        | 519.060 | 519.312 | 518.808 | I[20] |
| A[11] | 299.958        | 498.798        | 494.793 | 495.045 | 494.541 | A[19] |
| Q[12] | 331.972        | 477.035        | 473.030 | 473.282 | 472.778 | Q[18] |
| G[13] | 346.238        | 445.020        | 441.015 | 441.267 | 440.763 | G[17] |
| G[14] | <b>360.483</b> | 430.765        | 426.760 | 427.012 | 426.508 | G[16] |
| V[15] | 385.250        | 416.509        | 412.504 | 412.757 | 412.253 | V[15] |
| L[16] | 413.521        | 391.742        | 387.737 | 387.989 | 387.486 | L[14] |
| P[17] | 437.784        | <b>363.471</b> | 359.466 | 359.718 | 359.215 | P[13] |
| N[18] | 466.295        | 339.208        | 335.203 | 335.455 | 334.951 | N[12] |
| I[19] | 494.566        | 310.697        | 306.693 | 306.945 | 306.441 | I[11] |
| Q[20] | 526.581        | 282.426        | 278.422 | 278.673 | 278.170 | Q[10] |
| A[21] | 544.340        | 250.412        | 246.407 | 246.659 | 246.155 | A[9]  |
| V[22] | 589.107        | 232.652        | 228.648 | 228.900 | 228.396 | V[8]  |
| L[23] | 597.378        | 207.885        | 203.881 | 204.132 | 203.629 | L[7]  |
| L[24] | 625.549        | 179.614        | 175.609 | 175.861 | 175.358 | L[6]  |
| P[25] | 649.912        | 151.343        | 147.338 | 147.590 | 147.087 | P[5]  |
| K[26] | 681.936        | 127.080        | 123.075 | 123.327 | 122.823 | K[4]  |
| K[27] | <b>713.960</b> | 95.056         | 91.052  | 91.304  | 90.800  | K[3]  |
| T[28] | 739.222        | 63.032         | 59.028  | 59.280  | 58.776  | T[2]  |
| E[29] | <b>771.482</b> | 37.771         | 33.766  | 34.018  | 33.514  | E[1]  |

# sp | Q6GSS7 | H2A2A\_MOUSE

LNKLLGK <sup>Dimethyl</sup>VTIAQGGVLPNIQAVLLPKKTE  
28.03

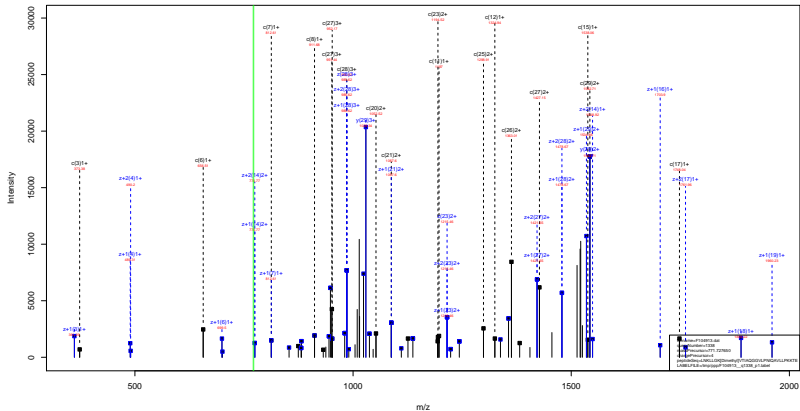

# sp | Q6GSS7 | H2A2A\_MOUSE

LNKLLGK <sup>Dimethyl</sup> <sub>28.03</sub> VTIAQGGVLPNIQAVLLPKKTE

- ▶ fragmentation table for charge state 1+
- ▶ specType=etd
- ▶ score=97.43
- ▶ F104913.dat
- ▶ query=q1338\_p1
- ▶ precursor=771.727650
- ▶ chargePrecursor=4
- ▶ itol=0.8

| AA    | c               | y        | z+1             | z+2             | z              | AA    |
|-------|-----------------|----------|-----------------|-----------------|----------------|-------|
| L[1]  | 131.118         | 3081.892 | 3067.873        | 0.000           | 3066.895       | L[29] |
| N[2]  | 345.161         | 2970.808 | 2954.789        | 2955.797        | 2951.781       | N[28] |
| K[3]  | <b>373.256</b>  | 2856.765 | 2840.746        | 2841.754        | 2839.738       | K[27] |
| L[4]  | 486.340         | 2728.670 | 2712.651        | 2713.659        | 2711.643       | L[26] |
| L[5]  | 607.424         | 2613.585 | 2599.567        | 2600.575        | 2598.560       | L[25] |
| Q[6]  | <b>656.445</b>  | 2502.502 | 2488.483        | 2487.491        | 2485.475       | Q[24] |
| K[7]  | <b>812.572</b>  | 2345.480 | 2429.462        | 2430.469        | 2428.454       | K[23] |
| V[8]  | <b>911.640</b>  | 2288.354 | 2273.335        | 2274.343        | 2272.327       | V[22] |
| T[9]  | 1017.688        | 2190.286 | 2174.267        | 2175.275        | 2173.259       | T[21] |
| I[10] | <b>1125.772</b> | 2089.238 | 2073.219        | 2074.227        | 2072.211       | I[20] |
| A[11] | <b>1196.809</b> | 1978.154 | <b>1966.135</b> | 1961.143        | 1959.127       | A[19] |
| Q[12] | <b>1324.867</b> | 1905.111 | <b>1893.098</b> | 1893.106        | 1891.090       | Q[18] |
| G[13] | <b>1381.889</b> | 1777.058 | 1761.039        | <b>1762.047</b> | 1760.032       | G[17] |
| G[14] | 1438.910        | 1720.937 | <b>1704.018</b> | 1705.026        | 1703.010       | G[16] |
| V[15] | <b>1537.979</b> | 1663.015 | 1646.997        | 1646.004        | 1645.989       | V[15] |
| L[16] | 1651.063        | 1563.947 | 1547.928        | <b>1548.936</b> | 1546.920       | L[14] |
| P[17] | <b>1748.116</b> | 1450.893 | 1434.864        | 1435.872        | 1433.856       | P[13] |
| T[18] | 1862.159        | 1383.810 | <b>1337.791</b> | 1338.799        | 1336.783       | T[12] |
| I[19] | 1975.243        | 1238.767 | <b>1223.748</b> | 1224.756        | 1222.741       | I[11] |
| Q[20] | 2103.301        | 1126.683 | <b>1110.664</b> | 1111.672        | 1109.656       | Q[10] |
| A[21] | 2174.336        | 998.624  | 982.606         | 981.614         | <b>981.598</b> | A[9]  |
| V[22] | 2273.407        | 927.587  | <b>911.569</b>  | 912.576         | 910.561        | V[8]  |
| L[23] | 2386.491        | 828.519  | <b>812.500</b>  | 813.508         | 811.492        | L[7]  |
| L[24] | 2499.576        | 715.435  | <b>693.415</b>  | <b>700.424</b>  | 698.408        | L[6]  |
| P[25] | 2596.626        | 602.351  | 586.332         | 587.340         | 585.324        | P[5]  |
| K[26] | 2724.723        | 505.298  | <b>489.279</b>  | <b>490.287</b>  | 488.271        | K[4]  |
| K[27] | 2852.816        | 377.203  | <b>361.184</b>  | 362.192         | 360.177        | K[3]  |
| T[28] | 2953.905        | 249.108  | 233.089         | 234.097         | 232.082        | T[2]  |
| E[29] | 3082.938        | 148.060  | 132.042         | 133.050         | 131.034        | E[1]  |

# sp | Q6GSS7 | H2A2A\_MOUSE

LNKLLGK <sup>Dimethyl</sup><sub>28.03</sub> VTIAQGGVLPNIQAVLLPKKTE

- ▶ fragmentation table for charge state 2+
- ▶ specType=etd
- ▶ score=97.43
- ▶ F104913.dat
- ▶ query=q1338\_p1
- ▶ precursor=771.727650
- ▶ chargePrecursor=4
- ▶ itol=0.8

| AA  | c               | y               | z+1             | z+2             | z               | AA   |
|-----|-----------------|-----------------|-----------------|-----------------|-----------------|------|
| L1  | 66.093          | <b>1542.450</b> | <b>1534.440</b> | 9.504           | 1533.930        | L120 |
| N1  | 123.084         | 1485.905        | <b>1477.898</b> | <b>1478.402</b> | 1477.304        | N20  |
| K1  | 187.132         | 1428.889        | <b>1420.877</b> | <b>1421.381</b> | 1420.373        | K27  |
| L14 | 243.674         | 1364.839        | <b>1356.829</b> | 1357.333        | <b>1356.325</b> | L26  |
| L15 | 300.216         | 1308.297        | 1309.287        | 1309.791        | 1309.781        | L25  |
| G16 | 358.759         | 1251.795        | <b>1243.745</b> | <b>1244.249</b> | <b>1243.241</b> | G24  |
| K17 | 406.799         | <b>1223.244</b> | <b>1215.234</b> | <b>1215.738</b> | <b>1214.731</b> | K23  |
| V18 | 456.324         | 1145.181        | <b>1137.171</b> | <b>1137.675</b> | <b>1136.667</b> | V22  |
| T19 | 506.840         | 1095.646        | <b>1087.637</b> | <b>1088.141</b> | <b>1087.133</b> | T21  |
| T10 | 563.390         | 1045.123        | <b>1037.113</b> | <b>1037.617</b> | 1036.609        | T20  |
| A11 | 608.909         | 998.581         | <b>990.571</b>  | <b>991.075</b>  | <b>990.067</b>  | A19  |
| G12 | 662.937         | 953.060         | <b>945.053</b>  | <b>945.557</b>  | <b>944.549</b>  | G18  |
| G13 | 691.448         | 899.033         | <b>891.023</b>  | <b>891.527</b>  | <b>890.519</b>  | G17  |
| G14 | 719.959         | 860.522         | 852.513         | <b>853.017</b>  | 852.009         | G16  |
| V15 | 769.493         | 832.011         | 824.002         | 824.506         | 823.498         | V15  |
| L16 | 820.035         | 782.477         | <b>774.468</b>  | <b>774.972</b>  | 773.964         | L14  |
| T17 | <b>874.561</b>  | 728.935         | 721.925         | 722.429         | 721.421         | T15  |
| N18 | <b>931.583</b>  | 677.400         | 669.390         | 669.903         | 668.895         | N12  |
| I19 | 988.125         | 620.867         | 612.858         | 612.862         | 611.874         | I11  |
| Q20 | <b>1052.154</b> | 563.845         | 555.836         | 556.340         | 555.332         | Q10  |
| A21 | <b>1087.673</b> | 499.816         | 491.807         | 492.310         | 491.303         | A0   |
| V22 | <b>1137.207</b> | 494.297         | 486.288         | 486.792         | 485.784         | V8   |
| L23 | <b>1193.749</b> | 434.763         | 426.754         | 427.258         | 426.250         | L17  |
| L24 | 1250.291        | 358.221         | 350.212         | 350.716         | 349.708         | L16  |
| P25 | <b>1298.817</b> | 301.679         | 293.670         | 294.174         | 293.166         | P5   |
| K26 | <b>1362.805</b> | 253.153         | 245.143         | 245.647         | 244.639         | K4   |
| K27 | <b>1426.912</b> | 189.105         | 181.096         | 181.600         | 180.592         | K3   |
| T28 | <b>1477.438</b> | 125.058         | 117.049         | 117.552         | 116.544         | T12  |
| E29 | <b>1541.958</b> | 74.534          | 66.524          | 67.028          | 66.021          | E1   |



# sp | Q6GSS7 | H2A2A\_MOUSE

LNKLLGK <sup>Dimethyl</sup> <sub>28.03</sub> VTIAQGGVLPNIQAVLLPKKTE

- ▶ fragmentation table for charge state 3+
- ▶ specType=etd
- ▶ score=97.43
- ▶ F104913.dat
- ▶ query=q1338\_p1
- ▶ precursor=771.727650
- ▶ chargePrecursor=4
- ▶ itol=0.8

| AA    | c              | y               | z+1             | z+2            | z              | AA    |
|-------|----------------|-----------------|-----------------|----------------|----------------|-------|
| L[1]  | 44.377         | <b>1028.635</b> | <b>1023.296</b> | 0.672          | 1022.660       | L[29] |
| N[2]  | 62.302         | <b>990.941</b>  | <b>985.601</b>  | <b>985.937</b> | <b>985.265</b> | N[28] |
| K[3]  | 125.090        | <b>952.926</b>  | <b>947.587</b>  | <b>947.923</b> | 947.251        | K[27] |
| L[4]  | 162.785        | 910.228         | 904.889         | 905.225        | 904.561        | L[26] |
| L[5]  | 200.479        | 872.531         | 867.194         | 867.530        | 866.858        | L[25] |
| G[6]  | 239.487        | 834.835         | 829.499         | 829.835        | 829.163        | G[24] |
| K[7]  | 271.529        | 815.833         | 810.492         | 810.828        | 810.156        | K[23] |
| V[8]  | 304.552        | 783.790         | 778.450         | 778.786        | 778.114        | V[22] |
| T[9]  | 338.234        | 730.767         | 725.427         | 725.763        | 725.091        | T[21] |
| I[10] | 375.929        | 697.084         | 691.745         | 692.081        | 691.409        | I[20] |
| A[11] | 389.608        | 699.389         | 654.050         | 654.386        | 653.714        | A[19] |
| Q[12] | 442.294        | 636.710         | 630.371         | 630.707        | 630.035        | Q[18] |
| G[13] | 461.301        | 593.024         | 587.685         | 588.021        | 587.349        | G[17] |
| G[14] | 480.308        | 574.017         | 568.678         | 569.013        | 568.342        | G[16] |
| V[15] | 513.331        | 555.010         | 549.670         | 550.006        | 549.334        | V[15] |
| L[16] | 551.026        | 521.987         | 516.648         | 516.984        | 516.312        | L[14] |
| P[17] | 583.377        | 484.202         | 478.863         | 479.200        | 478.527        | P[13] |
| N[18] | 621.391        | 451.942         | 446.602         | 446.938        | 446.266        | N[12] |
| I[19] | 659.086        | 413.927         | 408.588         | 408.924        | 408.252        | I[11] |
| Q[20] | 701.772        | 376.233         | 370.893         | 371.229        | 370.557        | Q[10] |
| A[21] | 725.451        | 333.546         | 328.207         | 328.543        | 327.871        | A[9]  |
| V[22] | 758.474        | 309.867         | 304.528         | 304.864        | 304.192        | V[8]  |
| L[23] | 796.168        | 276.844         | 271.505         | 271.841        | 271.169        | L[7]  |
| L[24] | 833.863        | 239.150         | 233.810         | 234.146        | 233.474        | L[6]  |
| T[25] | 869.214        | 201.493         | 196.154         | 196.490        | 195.818        | T[5]  |
| K[26] | 908.912        | 169.100         | 163.760         | 164.100        | 163.429        | K[4]  |
| K[27] | <b>951.611</b> | 138.406         | 133.066         | 133.402        | 132.730        | K[3]  |
| T[28] | <b>985.293</b> | 83.708          | 78.368          | 78.704         | 78.032         | T[2]  |
| E[29] | 1028.307       | 50.025          | 44.685          | 45.021         | 44.349         | E[1]  |



# sp | Q6GSS7 | H2A2A\_MOUSE

LNKLLGK <sup>Dimethyl</sup> <sub>28.03</sub> VTIAQGGVLPNIQAVLLPKKTE

- ▶ fragmentation table for charge state 1+
- ▶ specType=etd
- ▶ score=32.90
- ▶ F104913.dat
- ▶ query=q1339\_p1
- ▶ precursor=1028.634600
- ▶ chargePrecursor=3
- ▶ itol=0.8

| AA  | c               | y               | z+1            | z+2             | z        | AA   |
|-----|-----------------|-----------------|----------------|-----------------|----------|------|
| L1  | 131.118         | 3081.892        | 3087.873       | 0.000           | 3066.895 | L129 |
| N2  | 345.161         | 2970.808        | 2954.789       | 2955.797        | 2951.781 | N28  |
| K3  | 373.256         | 2856.795        | 2860.746       | 2841.754        | 2839.738 | K27  |
| L4  | 486.340         | 2728.670        | 2712.651       | 2713.659        | 2711.643 | L26  |
| L5  | 599.424         | 2615.586        | 2599.567       | 2600.575        | 2598.560 | L25  |
| Q6  | 694.485         | 2502.500        | 2486.483       | 2487.491        | 2485.475 | Q24  |
| K7  | <b>812.572</b>  | 2445.480        | 2429.462       | 2430.469        | 2428.454 | K23  |
| V8  | 911.640         | 2289.354        | 2273.335       | 2274.343        | 2272.327 | V22  |
| T9  | <b>1012.688</b> | 2190.266        | 2174.267       | 2175.275        | 2173.260 | T21  |
| I10 | <b>1125.772</b> | 2089.238        | 2073.219       | 2074.227        | 2072.211 | I20  |
| A11 | <b>1196.869</b> | 1976.154        | 1960.135       | 1961.143        | 1959.127 | A19  |
| Q12 | 1324.857        | 1869.117        | 1869.088       | 1890.106        | 1868.090 | Q18  |
| G13 | 1381.889        | 1777.058        | 1761.039       | 1762.047        | 1760.032 | G17  |
| G14 | 1438.910        | 1720.037        | 1704.018       | 1705.026        | 1703.010 | G16  |
| V15 | 1537.879        | 1663.015        | 1646.997       | 1646.004        | 1645.989 | V15  |
| L16 | 1651.063        | 1561.947        | 1547.928       | 1548.936        | 1546.920 | L14  |
| P17 | 1748.116        | 1450.863        | 1434.844       | 1435.852        | 1433.836 | P13  |
| T18 | 1852.150        | 1393.810        | 1377.791       | 1378.799        | 1376.783 | T12  |
| I19 | <b>1975.243</b> | 1239.767        | 1223.748       | 1224.756        | 1222.741 | I11  |
| Q20 | 2103.301        | <b>1126.683</b> | 1110.664       | <b>1111.672</b> | 1109.656 | Q10  |
| A21 | 2174.338        | 998.624         | 982.606        | 983.614         | 981.598  | A9   |
| V22 | 2273.407        | 927.587         | 911.569        | 912.576         | 910.561  | V8   |
| L23 | 2386.491        | 828.519         | <b>812.566</b> | 813.580         | 811.492  | L7   |
| L24 | 2499.575        | 715.439         | 699.419        | <b>700.424</b>  | 698.405  | L6   |
| P25 | 2596.626        | 602.351         | 586.332        | 587.340         | 585.324  | P5   |
| K26 | 2724.723        | 505.266         | 489.249        | 490.267         | 488.271  | K4   |
| K27 | 2852.816        | 377.203         | 361.184        | 362.192         | 360.177  | K3   |
| T28 | 2953.895        | 249.108         | 233.089        | 234.097         | 232.082  | T2   |
| E29 | 3082.938        | 148.060         | 132.042        | 133.050         | 131.034  | E1   |

# sp | Q6GSS7 | H2A2A\_MOUSE

LNKLLGK <sup>Dimethyl</sup> <sub>28.03</sub> VTIAQGGVLPNIQAVLLPKKTE

- ▶ fragmentation table for charge state 2+
- ▶ specType=etd
- ▶ score=32.90
- ▶ F104913.dat
- ▶ query=q1339\_p1
- ▶ precursor=1028.634600
- ▶ chargePrecursor=3
- ▶ itol=0.8

| AA  | c               | y               | z+1             | z+2             | z               | AA   |
|-----|-----------------|-----------------|-----------------|-----------------|-----------------|------|
| L1  | 66.053          | <b>1542.450</b> | <b>1534.440</b> | 9.504           | <b>1533.936</b> | L128 |
| N12 | 123.054         | 1485.905        | <b>1477.898</b> | <b>1478.402</b> | <b>1477.394</b> | N08  |
| K13 | 187.132         | 1428.889        | <b>1420.877</b> | <b>1421.381</b> | 1420.373        | K27  |
| L14 | 243.674         | 1364.839        | <b>1356.829</b> | 1357.333        | <b>1356.325</b> | L26  |
| L15 | 300.216         | 1308.297        | 1300.287        | 1300.791        | 1299.783        | L25  |
| G16 | 358.759         | 1251.755        | 1243.745        | 1244.249        | 1243.241        | G24  |
| K17 | 406.799         | 1223.244        | 1215.234        | 1215.738        | 1214.731        | K23  |
| V18 | 456.324         | 1145.181        | 1137.171        | 1137.675        | 1136.667        | V22  |
| T19 | 506.849         | 1095.646        | 1087.637        | 1088.141        | 1087.133        | T21  |
| T10 | 563.390         | 1045.123        | 1037.113        | 1037.617        | 1036.609        | T20  |
| A11 | <b>598.908</b>  | 988.581         | 980.571         | 981.075         | 980.067         | A19  |
| G12 | 662.937         | 953.065         | 945.055         | 945.559         | 944.551         | G18  |
| G13 | 691.448         | 889.033         | 881.023         | 881.527         | 880.519         | G17  |
| G14 | 719.959         | 860.522         | 852.512         | 853.017         | 852.009         | G16  |
| V15 | 769.493         | 832.011         | 824.002         | 824.506         | 823.498         | V15  |
| L16 | 826.035         | 782.477         | 774.468         | 774.972         | 773.964         | L14  |
| T17 | 874.581         | 728.935         | 720.925         | 721.429         | 720.421         | T13  |
| N18 | 931.583         | 677.405         | 669.395         | 669.900         | 668.892         | N12  |
| I19 | 988.125         | 620.867         | 612.857         | 613.362         | 612.354         | I11  |
| Q20 | 1052.154        | 563.845         | 555.835         | 556.340         | 555.332         | Q10  |
| A21 | 1087.673        | 499.816         | 491.807         | 492.311         | 491.303         | A0   |
| V22 | 1127.207        | 484.297         | 476.288         | 476.792         | 475.784         | V8   |
| L23 | 1193.749        | 414.763         | 406.753         | 407.257         | 406.250         | L17  |
| L24 | 1250.291        | 358.221         | 350.211         | 350.715         | 349.708         | L16  |
| P25 | 1298.817        | 301.679         | 293.670         | 294.174         | 293.166         | P5   |
| K26 | <b>1362.865</b> | 253.153         | 245.143         | 245.647         | 244.639         | K4   |
| K27 | <b>1426.912</b> | 189.105         | 181.095         | 181.600         | 180.592         | K3   |
| T28 | <b>1477.436</b> | 125.058         | 117.048         | 117.552         | 116.544         | T2   |
| E29 | <b>1541.958</b> | 74.534          | 66.524          | 67.028          | 66.021          | E1   |

# sp | Q6GSS7 | H2A2A\_MOUSE

LNKLLGK <sup>Dimethyl</sup>VTIAQGGVLPNIQAVLLPKKTE  
28.03

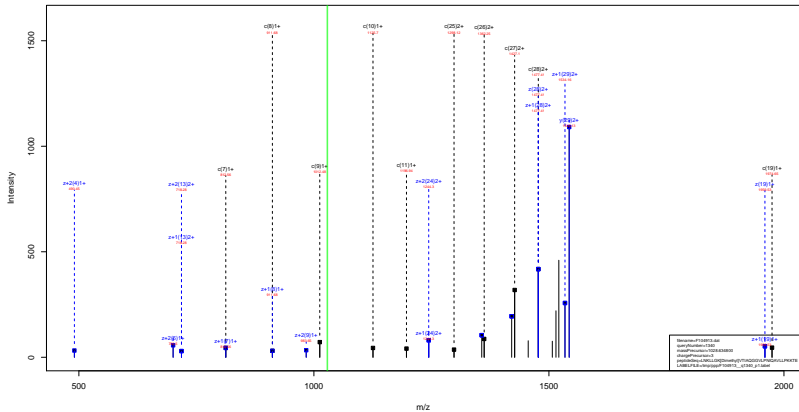

# sp | Q6GSS7 | H2A2A\_MOUSE

LNKLLGK <sup>Dimethyl</sup>VTIAQGGVLPNIQAVLLPKKTE  
28.03

- ▶ fragmentation table for charge state 1+
- ▶ specType=etd
- ▶ score=56.59
- ▶ F104913.dat
- ▶ query=q1340\_p1
- ▶ precursor=1028.634800
- ▶ chargePrecursor=3
- ▶ itol=0.8

| AA  | c               | y        | z+1             | z+2            | z               | AA  |
|-----|-----------------|----------|-----------------|----------------|-----------------|-----|
| L1  | 131.118         | 3081.892 | 3067.873        | 0.000          | 3066.895        | L29 |
| N2  | 345.161         | 2970.808 | 2954.789        | 2955.797       | 2951.781        | N38 |
| K3  | 373.256         | 2856.765 | 2840.746        | 2841.754       | 2839.738        | K27 |
| L4  | 486.340         | 2728.670 | 2712.651        | 2713.659       | 2711.643        | L26 |
| L5  | 599.424         | 2615.585 | 2599.567        | 2600.575       | 2598.560        | L25 |
| Q6  | 694.445         | 2502.502 | 2486.483        | 2487.491       | 2485.475        | Q24 |
| K7  | <b>812.572</b>  | 2345.480 | 2429.462        | 2430.469       | 2428.454        | K23 |
| V8  | <b>911.640</b>  | 2288.354 | 2273.335        | 2274.343       | 2272.327        | V22 |
| T9  | <b>1012.688</b> | 2190.286 | 2174.267        | 2175.275       | 2173.259        | T21 |
| I10 | <b>1125.772</b> | 2089.238 | 2073.219        | 2074.227       | 2072.211        | I20 |
| A11 | <b>1196.809</b> | 1976.154 | <b>1960.135</b> | 1961.143       | <b>1959.127</b> | A19 |
| Q12 | 1314.857        | 1905.111 | 1889.092        | 1890.100       | 1888.084        | Q18 |
| G13 | 1381.589        | 1777.055 | 1761.036        | 1762.044       | 1760.028        | G17 |
| G14 | 1438.910        | 1720.937 | 1704.918        | 1705.926       | 1703.910        | G16 |
| V15 | 1537.879        | 1663.015 | 1646.997        | 1648.004       | 1645.989        | V15 |
| L16 | 1651.063        | 1563.947 | 1547.928        | 1548.936       | 1546.920        | L14 |
| P17 | 1748.116        | 1450.893 | 1434.874        | 1435.882       | 1433.866        | P13 |
| T18 | 1852.159        | 1353.810 | 1337.791        | 1338.799       | 1336.783        | T12 |
| I19 | <b>1975.243</b> | 1236.767 | 1223.748        | 1224.756       | 1222.741        | I11 |
| Q20 | 2103.301        | 1126.683 | 1110.664        | 1111.672       | 1109.656        | Q10 |
| A21 | 2174.336        | 998.624  | 982.606         | <b>983.614</b> | 981.598         | A9  |
| V22 | 2273.407        | 927.587  | <b>911.569</b>  | 912.576        | 910.561         | V8  |
| L23 | 2386.491        | 828.519  | <b>812.500</b>  | 813.508        | 811.492         | L7  |
| L24 | 2499.575        | 715.435  | 699.415         | <b>700.424</b> | 698.408         | L6  |
| P25 | 2596.626        | 602.351  | 586.332         | 587.340        | 585.324         | P5  |
| K26 | 2724.723        | 505.298  | 489.279         | <b>490.287</b> | 488.271         | K4  |
| K27 | 2852.816        | 377.203  | 361.184         | 362.192        | 360.177         | K3  |
| T28 | 2953.895        | 249.108  | 233.089         | 234.097        | 232.082         | T2  |
| E29 | 3082.968        | 148.060  | 132.042         | 133.050        | 131.034         | E1  |

# sp | Q6GSS7 | H2A2A\_MOUSE

LNKLLGK <sup>Dimethyl</sup> <sub>28.03</sub> VTIAQGGVLPNIQAVLLPKKTE

- ▶ fragmentation table for charge state 2+
- ▶ specType=etd
- ▶ score=56.59
- ▶ F104913.dat
- ▶ query=q1340\_p1
- ▶ precursor=1028.634800
- ▶ chargePrecursor=3
- ▶ itol=0.8

| AA  | c               | y               | z+1             | z+2             | z               | AA   |
|-----|-----------------|-----------------|-----------------|-----------------|-----------------|------|
| L1  | 56.053          | <b>1542.450</b> | <b>1534.440</b> | 9.504           | <b>1533.936</b> | L128 |
| N12 | 123.054         | 1485.905        | <b>1477.898</b> | 1478.402        | <b>1477.394</b> | N20  |
| K13 | 187.132         | 1428.889        | <b>1420.877</b> | <b>1421.381</b> | <b>1420.373</b> | K27  |
| L14 | 243.674         | 1364.839        | <b>1356.829</b> | <b>1357.333</b> | <b>1356.325</b> | L26  |
| L15 | 300.216         | 1308.297        | 1300.287        | 1300.791        | 1299.783        | L25  |
| G16 | 358.759         | 1251.755        | <b>1243.745</b> | <b>1244.249</b> | 1243.241        | G24  |
| K17 | 406.799         | 1223.244        | 1215.234        | 1215.738        | 1214.731        | K23  |
| V18 | 456.324         | 1145.181        | 1137.171        | 1137.675        | 1136.667        | V22  |
| F19 | 506.849         | 1095.646        | 1087.637        | 1088.141        | 1087.133        | F21  |
| T10 | 563.390         | 1045.123        | 1037.113        | 1037.617        | 1036.609        | T20  |
| A11 | 588.908         | 988.581         | 980.571         | 981.075         | 980.067         | A19  |
| Q12 | 602.937         | 953.065         | 945.055         | 945.559         | 944.551         | Q18  |
| G13 | 691.448         | 889.033         | 881.023         | 881.527         | 880.519         | G17  |
| G14 | 719.959         | 860.522         | 852.512         | 853.017         | 852.009         | G16  |
| V15 | 769.493         | 832.011         | 824.002         | 824.506         | 823.498         | V15  |
| L16 | 826.035         | 782.477         | 774.468         | 774.972         | 773.964         | L14  |
| F17 | 874.581         | 728.935         | <b>717.926</b>  | <b>718.430</b>  | 717.422         | F13  |
| N18 | 931.583         | 677.400         | 669.390         | 669.893         | 668.885         | N12  |
| I19 | 988.125         | 620.867         | 612.858         | 613.362         | 612.354         | I11  |
| Q20 | 1052.154        | 563.845         | 555.836         | 556.340         | 555.332         | Q10  |
| A21 | 1087.673        | 499.816         | 491.807         | 492.311         | 491.303         | A0   |
| V22 | 1137.207        | 484.297         | 476.288         | 476.792         | 475.784         | V8   |
| L23 | 1193.749        | 414.763         | 406.754         | 407.258         | 406.250         | L17  |
| L24 | 1250.291        | 358.221         | 350.212         | 350.716         | 349.708         | L6   |
| P25 | <b>1288.817</b> | 301.679         | 293.670         | 294.174         | 293.166         | P5   |
| K26 | <b>1367.865</b> | 253.153         | 245.143         | 245.647         | 244.639         | K4   |
| K27 | <b>1426.912</b> | 189.105         | 181.096         | 181.600         | 180.592         | K3   |
| T28 | <b>1477.436</b> | 125.058         | 117.049         | 117.552         | 116.544         | T2   |
| E29 | 1541.958        | 74.534          | 66.524          | 67.028          | 66.021          | E1   |





# sp | Q6GSS7 | H2A2A\_MOUSE

LNK<sup>Dimethyl</sup><sub>28.03</sub> LLGKVTIAQGGVLPNIQAVLLPKKTE

- ▶ fragmentation table for charge state 1+
- ▶ specType=etd
- ▶ score=28.18
- ▶ F104913.dat
- ▶ query=q1341\_p1
- ▶ precursor=771.728390
- ▶ chargePrecursor=4
- ▶ itol=0.8

| AA    | c               | y        | z+1             | z+2             | z        | AA    |
|-------|-----------------|----------|-----------------|-----------------|----------|-------|
| L[1]  | 131.118         | 3081.892 | 3067.873        | 0.000           | 3066.895 | L[29] |
| N[2]  | 345.161         | 2970.808 | 2954.789        | 2955.797        | 2951.781 | N[28] |
| K[3]  | 401.297         | 2856.765 | 2840.746        | 2841.754        | 2839.738 | K[27] |
| L[4]  | 514.371         | 2700.639 | 2684.620        | 2685.628        | 2683.612 | L[26] |
| L[5]  | 627.456         | 2587.595 | 2571.576        | 2572.584        | 2570.568 | L[25] |
| Q[6]  | 694.577         | 2474.470 | 2458.451        | 2459.460        | 2457.444 | Q[24] |
| K[7]  | <b>812.572</b>  | 2317.440 | 2301.420        | 2302.428        | 2300.412 | K[23] |
| V[8]  | <b>911.640</b>  | 2208.354 | 2192.335        | 2193.343        | 2191.327 | V[22] |
| T[9]  | <b>1012.688</b> | 2100.268 | 2174.267        | 2175.275        | 2173.259 | T[21] |
| I[10] | <b>1125.772</b> | 2089.238 | 2073.219        | 2074.227        | 2072.211 | I[20] |
| A[11] | <b>1196.869</b> | 1976.154 | 1960.135        | 1961.143        | 1959.127 | A[19] |
| Q[12] | 1324.957        | 1905.111 | 1889.092        | 1890.100        | 1888.084 | Q[18] |
| G[13] | 1381.589        | 1777.055 | 1761.036        | 1762.044        | 1760.028 | G[17] |
| G[14] | 1438.910        | 1720.937 | 1704.918        | 1705.926        | 1703.910 | G[16] |
| V[15] | 1537.879        | 1663.015 | 1646.997        | 1648.004        | 1645.989 | V[15] |
| L[16] | 1651.063        | 1563.947 | 1547.928        | <b>1548.936</b> | 1546.920 | L[14] |
| P[17] | 1748.116        | 1450.893 | 1434.874        | 1435.882        | 1433.866 | P[13] |
| T[18] | 1892.159        | 1383.810 | <b>1337.791</b> | 1338.799        | 1336.783 | T[12] |
| I[19] | 1975.243        | 1236.767 | 1223.748        | <b>1224.756</b> | 1222.741 | I[11] |
| Q[20] | 2103.301        | 1126.683 | <b>1110.664</b> | 1111.672        | 1109.656 | Q[10] |
| A[21] | 2174.336        | 998.624  | 983.606         | <b>983.614</b>  | 981.598  | A[9]  |
| V[22] | 2273.407        | 927.587  | <b>911.569</b>  | 912.576         | 910.561  | V[8]  |
| L[23] | 2386.491        | 828.519  | <b>812.500</b>  | 813.508         | 811.492  | L[7]  |
| L[24] | 2499.576        | 715.435  | <b>699.415</b>  | 700.424         | 698.408  | L[6]  |
| P[25] | 2596.626        | 602.351  | 586.332         | 587.340         | 585.324  | P[5]  |
| K[26] | 2724.723        | 505.298  | <b>489.279</b>  | <b>490.287</b>  | 488.271  | K[4]  |
| K[27] | 2852.816        | 377.203  | <b>361.184</b>  | 362.192         | 360.177  | K[3]  |
| T[28] | 2951.905        | 249.108  | 233.089         | 234.097         | 232.082  | T[2]  |
| E[29] | 3082.938        | 148.060  | 132.042         | 133.050         | 131.034  | E[1]  |

# sp | Q6GSS7 | H2A2A\_MOUSE

LNK<sup>Dimethyl</sup><sub>28.03</sub> LLGKVTIAQGGVLPNIQAVLLPKKTE

- ▶ fragmentation table for charge state 2+
- ▶ specType=etd
- ▶ score=28.18
- ▶ F104913.dat
- ▶ query=q1341\_p1
- ▶ precursor=771.728390
- ▶ chargePrecursor=4
- ▶ itol=0.8

| AA    | c               | y              | z+1             | z+2             | z               | AA    |
|-------|-----------------|----------------|-----------------|-----------------|-----------------|-------|
| L[1]  | 66.063          | 1542.450       | 1534.440        | 0.504           | 1533.936        | L[26] |
| N[2]  | 123.084         | 1485.908       | <b>1477.898</b> | <b>1478.402</b> | 1477.304        | N[28] |
| K[3]  | 201.147         | 1438.886       | 1430.877        | <b>1421.381</b> | 1420.371        | K[27] |
| L[4]  | 257.689         | 1350.823       | 1342.814        | 1343.317        | 1342.310        | L[26] |
| L[5]  | 314.231         | 1294.281       | <b>1286.272</b> | 1286.775        | <b>1285.768</b> | L[25] |
| G[6]  | 342.742         | 1237.798       | 1229.789        | 1230.293        | 1229.286        | G[24] |
| K[7]  | 406.789         | 1209.228       | 1201.219        | 1201.723        | 1200.715        | K[23] |
| V[8]  | 456.324         | 1148.181       | 1137.171        | 1137.675        | 1136.667        | V[22] |
| T[9]  | 506.846         | 1095.646       | <b>1087.637</b> | <b>1088.141</b> | <b>1087.133</b> | T[21] |
| I[10] | 503.390         | 1045.123       | <b>1037.113</b> | <b>1037.617</b> | <b>1036.609</b> | I[20] |
| A[11] | 558.908         | 998.581        | <b>990.571</b>  | <b>981.075</b>  | <b>980.067</b>  | A[19] |
| Q[12] | 602.937         | 953.066        | <b>945.053</b>  | <b>945.557</b>  | <b>944.549</b>  | Q[18] |
| G[13] | 691.448         | <b>899.033</b> | <b>881.023</b>  | <b>881.527</b>  | 880.519         | G[17] |
| G[14] | 719.959         | <b>860.522</b> | 852.513         | 853.017         | 852.009         | G[16] |
| V[15] | 769.493         | 832.011        | 824.002         | 824.506         | 823.498         | V[15] |
| L[16] | 826.035         | 782.477        | <b>774.468</b>  | <b>774.972</b>  | <b>773.964</b>  | L[14] |
| T[17] | <b>874.561</b>  | 725.935        | 717.926         | 718.430         | 717.422         | T[13] |
| N[18] | <b>931.583</b>  | 671.409        | <b>663.399</b>  | <b>663.903</b>  | 662.895         | N[12] |
| I[19] | 988.125         | 626.867        | 618.858         | 619.362         | 618.354         | I[11] |
| Q[20] | <b>1052.154</b> | 563.945        | 555.936         | 556.440         | 555.432         | Q[10] |
| A[21] | <b>1087.673</b> | 499.616        | 491.607         | 492.110         | 491.102         | A[9]  |
| V[22] | 1137.207        | 464.297        | 456.288         | 456.792         | 455.784         | V[8]  |
| L[23] | <b>1193.749</b> | 414.763        | 406.754         | 407.258         | 406.250         | L[17] |
| L[24] | 1250.291        | 358.221        | 350.211         | 350.716         | 349.708         | L[6]  |
| P[25] | <b>1298.817</b> | 301.679        | 293.670         | 294.174         | 293.166         | P[5]  |
| K[26] | <b>1362.865</b> | 253.153        | 245.143         | 245.647         | 244.639         | K[4]  |
| K[27] | <b>1426.912</b> | 189.105        | 181.096         | 181.600         | 180.592         | K[3]  |
| T[28] | 1477.436        | 125.058        | 117.048         | 117.552         | 116.544         | T[2]  |
| E[29] | 1541.958        | 74.534         | 66.524          | 67.028          | 66.021          | E[1]  |

# sp | Q6GSS7 | H2A2A\_MOUSE

LNK<sup>Dimethyl</sup><sub>28.03</sub> LLGKVTIAQGGVLPNIQAVLLPKKTE

- ▶ fragmentation table for charge state 3+
- ▶ specType=etd
- ▶ score=28.18
- ▶ F104913.dat
- ▶ query=q1341\_p1
- ▶ precursor=771.728390
- ▶ chargePrecursor=4
- ▶ itol=0.8

| AA     | c              | y               | z+1             | z+2            | z               | AA     |
|--------|----------------|-----------------|-----------------|----------------|-----------------|--------|
| L[1]   | 44.377         | <b>1028.635</b> | <b>1023.296</b> | 0.672          | <b>1022.960</b> | L[20]  |
| N[2]   | 62.392         | 990.941         | <b>985.601</b>  | <b>985.937</b> | <b>985.265</b>  | N[28]  |
| K[3]   | 134.434        | 952.926         | <b>947.587</b>  | <b>947.923</b> | <b>947.251</b>  | K[27]  |
| L[4]   | 172.129        | <b>900.884</b>  | 895.545         | 895.861        | 895.209         | L[26]  |
| L[5]   | 209.823        | 863.395         | 857.859         | 858.188        | 857.514         | L[25]  |
| G[6]   | 228.830        | 825.695         | 820.155         | 820.493        | 819.819         | G[24]  |
| K[7]   | 271.529        | 806.488         | 801.148         | 801.484        | 800.812         | K[23]  |
| V[8]   | 304.552        | 763.790         | 758.450         | 758.786        | 758.114         | V[22]  |
| T[9]   | 336.234        | 730.767         | 725.427         | 725.763        | 725.091         | T[21]  |
| I[10]  | 375.929        | 697.084         | 691.745         | 692.081        | 691.409         | I[20]  |
| A[11]  | 399.608        | 659.389         | 654.050         | 654.386        | 653.714         | A[19]  |
| Q[12]  | 442.294        | 636.720         | 630.371         | 630.707        | 630.035         | Q[18]  |
| G[13]  | 461.301        | 593.024         | 587.685         | 588.021        | 587.349         | G[17]  |
| G[14]  | 480.308        | 574.017         | 568.678         | 569.013        | 568.342         | G[16]  |
| V[15]  | 513.331        | 555.010         | 549.670         | 550.006        | 549.334         | V[15]  |
| L[16]  | 551.026        | 521.987         | 516.648         | 516.984        | 516.312         | L[14]  |
| F[17]  | 583.377        | 484.292         | 478.953         | 479.289        | 478.617         | F[13]  |
| Tu[18] | 621.391        | 451.942         | 446.603         | 446.938        | 446.266         | Tu[12] |
| I[19]  | 659.086        | 413.927         | 408.588         | 408.924        | 408.252         | I[11]  |
| Q[20]  | 701.772        | 376.213         | 370.893         | 371.229        | 370.557         | Q[10]  |
| A[21]  | 725.451        | 333.546         | 328.207         | 328.543        | 327.871         | A[9]   |
| V[22]  | 758.474        | 309.867         | 304.528         | 304.864        | 304.192         | V[8]   |
| L[23]  | 796.168        | 276.844         | 271.505         | 271.841        | 271.169         | L[7]   |
| L[24]  | 833.863        | 239.350         | 233.810         | 234.146        | 233.474         | L[6]   |
| P[25]  | 866.214        | 201.655         | 196.116         | 196.451        | 195.780         | P[5]   |
| K[26]  | <b>908.912</b> | 169.104         | 163.765         | 164.101        | 163.429         | K[4]   |
| K[27]  | <b>951.611</b> | 126.406         | 121.066         | 121.402        | 120.730         | K[3]   |
| T[28]  | <b>985.293</b> | 83.708          | 78.368          | 78.704         | 78.032          | T[2]   |
| E[29]  | 1028.307       | 50.025          | 44.685          | 45.021         | 44.349          | E[1]   |

# sp | Q6GSS7 | H2A2A\_MOUSE

ELNKLKLGK<sup>Dimethyl</sup>VTIAQGGVLPNIQAVLLPKKTE  
28.03

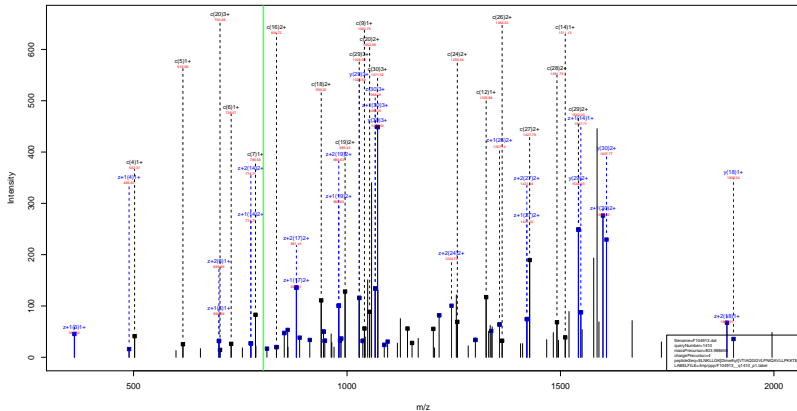

# sp | Q6GSS7 | H2A2A\_MOUSE

ELNKLKLGK<sup>Dimethyl</sup> VTIAGGGVLPNIQAVLLPKKTE  
28.03

- ▶ fragmentation table for charge state 1+
- ▶ specType=etd
- ▶ score=66.59
- ▶ F104913.dat
- ▶ query=q1410\_p1
- ▶ precursor=803.988650
- ▶ chargePrecursor=4
- ▶ itol=0.8

| AA   | c               | y               | z+1             | z+2             | z               | AA   |
|------|-----------------|-----------------|-----------------|-----------------|-----------------|------|
| E 1  | 147.076         | 3211.934        | 3196.918        | 0.000           | 3195.908        | E 30 |
| L 2  | 260.100         | 3083.962        | 3067.913        | 0.000           | 3066.905        | L 29 |
| N 3  | 374.203         | 2970.808        | 2954.799        | 2955.707        | 2953.781        | N 28 |
| K 4  | <b>502.298</b>  | 2856.705        | 2840.748        | 2841.754        | 2839.730        | K 27 |
| L 5  | <b>615.382</b>  | 2728.670        | 2712.651        | 2713.659        | 2711.641        | L 26 |
| L 6  | <b>728.466</b>  | 2615.586        | 2599.587        | 2600.575        | 2598.559        | L 25 |
| G 7  | <b>785.488</b>  | 2502.502        | 2486.483        | 2487.491        | 2485.475        | G 24 |
| K 8  | 981.614         | 2345.480        | 2329.462        | 2330.469        | 2328.454        | K 23 |
| V 9  | <b>1040.663</b> | 2239.354        | 2223.335        | 2224.343        | 2222.327        | V 22 |
| T 10 | <b>1141.730</b> | 2160.286        | 2144.267        | 2145.275        | 2143.259        | T 21 |
| I 11 | 1244.516        | 2089.235        | 2073.219        | 2074.227        | 2072.211        | I 20 |
| A 12 | <b>1325.851</b> | 1976.154        | 1960.135        | 1961.143        | 1959.127        | A 19 |
| Q 13 | 1453.910        | <b>1905.117</b> | 1889.099        | <b>1890.106</b> | 1888.090        | Q 18 |
| G 14 | <b>1510.932</b> | 1777.058        | 1761.039        | 1762.047        | 1760.032        | G 17 |
| C 15 | 1587.953        | 1720.937        | 1704.918        | 1705.926        | 1703.910        | C 16 |
| V 16 | 1687.024        | 1663.915        | 1647.897        | 1648.904        | 1646.889        | V 15 |
| L 17 | 1780.105        | 1563.047        | <b>1547.928</b> | 1548.936        | <b>1546.920</b> | L 14 |
| P 18 | 1877.150        | 1450.863        | 1434.844        | 1435.852        | 1433.836        | P 13 |
| N 19 | 1991.201        | 1353.010        | <b>1337.791</b> | 1338.799        | 1336.783        | N 12 |
| I 20 | 2104.265        | 1239.787        | 1223.768        | 1224.776        | 1222.761        | I 11 |
| Q 21 | 2232.344        | 1126.683        | 1110.664        | 1111.672        | 1109.656        | Q 10 |
| A 22 | 2303.351        | 998.624         | 982.606         | <b>983.614</b>  | 981.598         | A 9  |
| V 23 | 2402.449        | 927.587         | 911.569         | <b>912.576</b>  | 910.561         | V 8  |
| L 24 | 2515.513        | 828.519         | <b>812.500</b>  | 813.508         | 811.492         | L 7  |
| L 25 | 2628.617        | 715.435         | <b>699.416</b>  | <b>700.424</b>  | 698.408         | L 6  |
| T 26 | 2725.670        | 602.382         | 586.363         | 587.370         | 585.354         | T 5  |
| K 27 | 2853.765        | 505.295         | <b>489.279</b>  | 490.287         | 488.271         | K 4  |
| K 28 | 2981.860        | 377.263         | <b>361.184</b>  | 362.192         | 360.177         | K 3  |
| T 29 | 3082.908        | 249.108         | 233.089         | 234.097         | 232.082         | T 2  |
| E 30 | 3211.950        | 148.060         | 132.042         | 133.050         | 131.034         | E 1  |

# sp | Q6GSS7 | H2A2A\_MOUSE

ELNKLKLGK<sup>Dimethyl</sup><sub>28.03</sub>VTIAQGGVLPNIQAVLLPKKTE

- ▶ fragmentation table for charge state 2+
- ▶ specType=etd
- ▶ score=66.59
- ▶ F104913.dat
- ▶ query=q1410\_p1
- ▶ precursor=803.988650
- ▶ chargePrecursor=4
- ▶ itol=0.8

| AA   | c               | y               | z+1             | z+2             | z               | AA   |
|------|-----------------|-----------------|-----------------|-----------------|-----------------|------|
| E 1  | 74.042          | <b>1606.971</b> | <b>1598.962</b> | 0.504           | 459.456         | E 30 |
| L 2  | 130.504         | <b>1542.450</b> | 1534.440        | 0.504           | 433.930         | L 29 |
| N 3  | 187.605         | 1485.908        | 1477.898        | 1478.402        | 1477.394        | N 28 |
| K 4  | 251.653         | 1428.889        | <b>1420.877</b> | <b>1421.381</b> | 1420.371        | K 27 |
| L 5  | 308.195         | 1364.830        | <b>1356.820</b> | <b>1357.323</b> | 1356.313        | L 26 |
| L 6  | 364.737         | 1308.297        | <b>1300.287</b> | <b>1300.791</b> | 1299.781        | L 25 |
| G 7  | 381.240         | 1251.735        | 1243.745        | <b>1244.249</b> | 1243.241        | G 24 |
| K 8  | 471.311         | 1223.244        | <b>1215.234</b> | <b>1215.738</b> | 1214.731        | K 23 |
| V 9  | 520.845         | 1146.588        | 1137.713        | 1137.678        | 1136.667        | V 22 |
| T 10 | 573.389         | <b>1095.646</b> | <b>1087.637</b> | 1088.343        | <b>1087.133</b> | T 21 |
| I 11 | 627.911         | 1038.152        | <b>1037.113</b> | <b>1037.617</b> | <b>1036.609</b> | I 20 |
| A 12 | 683.429         | 988.581         | <b>980.571</b>  | <b>981.075</b>  | <b>980.067</b>  | A 19 |
| Q 13 | 727.459         | 933.062         | <b>945.053</b>  | <b>945.557</b>  | <b>944.549</b>  | Q 18 |
| G 14 | 755.969         | <b>889.033</b>  | <b>881.023</b>  | <b>881.527</b>  | 880.519         | G 17 |
| C 15 | 794.488         | <b>860.522</b>  | <b>852.513</b>  | <b>853.017</b>  | 852.009         | C 16 |
| V 16 | <b>834.014</b>  | 803.011         | 804.002         | 804.506         | 803.498         | V 15 |
| L 17 | 890.556         | 782.477         | <b>774.468</b>  | <b>774.972</b>  | <b>773.964</b>  | L 14 |
| F 18 | <b>939.083</b>  | 725.935         | 717.926         | 718.430         | 717.421         | F 13 |
| N 19 | <b>996.104</b>  | 677.409         | 669.399         | 669.903         | 668.895         | N 12 |
| I 20 | <b>1052.646</b> | 620.387         | 612.378         | 612.882         | 611.874         | I 11 |
| Q 21 | 1118.678        | 563.848         | 565.838         | 566.342         | 565.334         | Q 10 |
| A 22 | <b>1152.194</b> | 499.816         | 491.807         | 492.310         | 491.302         | A 9  |
| V 23 | <b>1201.728</b> | 464.297         | 456.288         | 456.792         | 455.784         | V 8  |
| L 24 | <b>1258.270</b> | 414.763         | 406.754         | 407.258         | 406.250         | L 7  |
| L 25 | 1314.812        | 358.221         | 350.212         | 350.716         | 349.708         | L 6  |
| T 26 | <b>1363.339</b> | 301.879         | 293.870         | 294.374         | 293.366         | T 5  |
| K 27 | <b>1427.386</b> | 253.157         | 245.147         | 245.647         | 244.639         | K 4  |
| K 28 | <b>1491.434</b> | 189.105         | 181.096         | 181.600         | 180.592         | K 3  |
| T 29 | <b>1541.958</b> | 125.058         | 117.048         | 117.552         | 116.544         | T 2  |
| E 30 | 1606.479        | 74.534          | 66.524          | 67.028          | 66.021          | E 1  |

# sp | Q6GSS7 | H2A2A\_MOUSE

ELNKLKLGK<sup>Dimethyl</sup>VTIAQGGVLPNIQAVLLPKKTE  
28.03

- ▶ fragmentation table for charge state 3+
- ▶ specType=etd
- ▶ score=66.59
- ▶ F104913.dat
- ▶ query=q1410\_p1
- ▶ precursor=803.988650
- ▶ chargePrecursor=4
- ▶ itol=0.8

| AA | c  | y               | z+1             | z+2             | z              | AA              |       |
|----|----|-----------------|-----------------|-----------------|----------------|-----------------|-------|
| E  | 1  | 49.697          | <b>1071.050</b> | <b>1066.310</b> | 0.672          | <b>1065.974</b> | E[30] |
| L  | 2  | 87.392          | <b>1028.635</b> | 1023.295        | 0.672          | 1022.960        | L[29] |
| K  | 3  | 125.406         | 990.941         | <b>985.601</b>  | <b>985.937</b> | 985.265         | K[28] |
| R  | 4  | 168.104         | 952.926         | <b>947.587</b>  | <b>947.923</b> | <b>947.251</b>  | R[27] |
| L  | 5  | 205.799         | 910.228         | 904.889         | 905.252        | 904.582         | L[26] |
| L  | 6  | 243.494         | 872.531         | 867.194         | 867.530        | 866.858         | L[25] |
| G  | 7  | 282.501         | <b>834.839</b>  | 829.499         | 829.835        | 829.161         | G[24] |
| K  | 8  | 314.543         | 815.832         | 810.492         | 810.828        | 810.156         | K[23] |
| V  | 9  | 347.566         | 783.790         | 778.450         | 778.786        | 778.114         | V[22] |
| V  | 10 | 381.248         | 750.767         | 745.427         | 745.763        | 745.091         | V[21] |
| I  | 11 | 418.943         | 697.084         | 691.745         | 692.081        | 691.409         | I[20] |
| A  | 12 | 442.622         | 659.389         | 654.050         | 654.386        | 653.714         | A[19] |
| Q  | 13 | 485.308         | 635.710         | 630.371         | 630.707        | 630.035         | Q[18] |
| G  | 14 | 504.315         | 593.024         | 587.685         | 588.021        | 587.349         | G[17] |
| G  | 15 | 523.123         | 574.017         | 568.678         | 569.013        | 568.342         | G[16] |
| V  | 16 | 556.345         | 559.011         | 549.670         | 550.006        | 549.334         | V[15] |
| L  | 17 | 594.040         | 521.987         | 516.648         | 516.984        | 516.312         | L[14] |
| P  | 18 | 626.891         | 484.202         | 478.963         | 479.299        | 478.617         | P[13] |
| N  | 19 | 664.405         | 451.947         | 446.602         | 446.938        | 446.266         | N[12] |
| I  | 20 | <b>702.100</b>  | 413.927         | 408.588         | 408.924        | 408.252         | I[11] |
| Q  | 21 | 744.786         | 376.213         | 370.893         | 371.229        | 370.557         | Q[10] |
| A  | 22 | 788.465         | 333.546         | 328.207         | 328.543        | 327.871         | A[9]  |
| V  | 23 | 801.488         | 309.967         | 304.628         | 304.964        | 304.292         | V[8]  |
| L  | 24 | 839.183         | 276.844         | 271.505         | 271.841        | 271.169         | L[7]  |
| L  | 25 | 876.877         | 239.150         | 233.810         | 234.146        | 233.474         | L[6]  |
| P  | 26 | 909.228         | 201.455         | 196.116         | 196.451        | 195.780         | P[5]  |
| K  | 27 | 951.627         | 169.104         | 163.765         | 164.101        | 163.429         | K[4]  |
| K  | 28 | 994.026         | 129.409         | 124.069         | 124.405        | 123.733         | K[3]  |
| I  | 29 | <b>1028.307</b> | 83.708          | 78.368          | 78.704         | 78.032          | I[2]  |
| E  | 30 | <b>1071.322</b> | 50.025          | 44.685          | 45.021         | 44.349          | E[1]  |





# sp | P70696 | H2B1A\_MOUSE

ASRLAHYNKRSTITS<sup>Phospho</sup> RE  
79.97

- ▶ fragmentation table for charge state 1+
- ▶ specType=etd
- ▶ score=54.28
- ▶ F104914.dat
- ▶ query=q1696\_p1
- ▶ precursor=518.264020
- ▶ chargePrecursor=4
- ▶ itol=0.8

| AA    | c               | y              | z+1             | z+2             | z              | AA    |
|-------|-----------------|----------------|-----------------|-----------------|----------------|-------|
| A[1]  | 59.071          | 2010.024       | 2054.085        | 0.000           | 2052.997       | A[17] |
| S[2]  | 179.373         | 1398.987       | 1462.969        | 0.000           | 1391.966       | S[16] |
| R[3]  | <b>332.204</b>  | 1311.955       | 1395.936        | <b>1896.944</b> | 1394.928       | R[15] |
| L[4]  | <b>445.288</b>  | 1755.854       | 1739.835        | <b>1740.843</b> | 1738.827       | L[14] |
| A[5]  | 516.325         | 1642.770       | 1626.751        | 1627.759        | 1625.747       | A[13] |
| H[6]  | <b>653.384</b>  | 1571.733       | 1555.714        | <b>1556.722</b> | 1554.706       | H[12] |
| V[7]  | <b>816.447</b>  | 1434.614       | <b>1418.655</b> | 1419.663        | 1417.647       | V[11] |
| W[8]  | <b>938.490</b>  | 1377.610       | 1255.592        | <b>1256.599</b> | 1254.586       | W[10] |
| K[9]  | <b>1058.585</b> | 1157.587       | 1141.569        | <b>1142.557</b> | 1140.541       | K[9]  |
| R[10] | 1214.686        | 1029.472       | <b>1013.454</b> | <b>1014.462</b> | 1012.446       | R[8]  |
| S[11] | <b>1301.719</b> | 873.371        | <b>857.353</b>  | <b>858.360</b>  | 856.345        | S[7]  |
| T[12] | 1402.764        | 736.139        | <b>770.321</b>  | <b>771.328</b>  | <b>769.313</b> | T[6]  |
| L[13] | 1515.850        | <b>685.292</b> | <b>669.273</b>  | 670.281         | 668.265        | L[5]  |
| T[14] | 1616.898        | <b>572.208</b> | <b>556.189</b>  | <b>557.197</b>  | 555.181        | T[4]  |
| S[15] | <b>1783.896</b> | 471.152        | <b>455.141</b>  | 456.149         | 454.133        | S[3]  |
| R[16] | 1939.997        | 304.162        | <b>288.143</b>  | 289.151         | <b>287.135</b> | R[2]  |
| E[17] | 2069.040        | 148.060        | 132.042         | 133.050         | 131.034        | E[1]  |

# sp | P70696 | H2B1A\_MOUSE

ASRLAHYNKRSTITS<sup>Phospho</sup> RE  
79.97

- ▶ fragmentation table for charge state 2+
- ▶ specType=etd
- ▶ score=54.28
- ▶ F104914.dat
- ▶ query=q1696.p1
- ▶ precursor=518.264020
- ▶ chargePrecursor=4
- ▶ itol=0.8

| AA    | c               | y               | z=1             | z=2            | z              | AA    |
|-------|-----------------|-----------------|-----------------|----------------|----------------|-------|
| A[1]  | 45.039          | <b>1035.516</b> | <b>1027.506</b> | 0.504          | 1027.002       | A[17] |
| S[2]  | 48.555          | 992.927         | <b>991.588</b>  | 1.954          | 993.481        | S[16] |
| R[3]  | 166.606         | <b>956.481</b>  | <b>948.472</b>  | <b>948.976</b> | <b>947.968</b> | R[15] |
| L[4]  | 223.148         | 878.431         | <b>870.421</b>  | <b>870.925</b> | <b>869.917</b> | L[14] |
| A[5]  | 258.666         | 823.868         | <b>813.879</b>  | <b>814.383</b> | <b>813.375</b> | A[13] |
| H[6]  | 327.196         | 786.370         | <b>778.361</b>  | <b>778.864</b> | <b>777.857</b> | H[12] |
| V[7]  | 406.427         | 717.860         | 709.851         | 710.355        | 709.347        | V[11] |
| W[8]  | <b>465.749</b>  | 638.309         | <b>628.299</b>  | <b>628.803</b> | <b>627.796</b> | W[10] |
| K[9]  | <b>529.796</b>  | 579.257         | <b>571.278</b>  | <b>571.782</b> | <b>570.774</b> | K[9]  |
| R[10] | <b>607.847</b>  | 515.240         | 507.231         | 507.734        | 506.727        | R[8]  |
| S[11] | <b>651.363</b>  | 457.189         | 449.180         | 449.684        | 448.678        | S[7]  |
| T[12] | <b>701.887</b>  | 393.673         | 385.664         | 386.168        | 385.160        | T[0]  |
| I[13] | <b>758.429</b>  | 343.169         | 335.160         | 335.664        | 334.656        | I[9]  |
| T[14] | <b>808.553</b>  | <b>286.567</b>  | 278.558         | 279.062        | 278.556        | T[4]  |
| S[15] | <b>892.452</b>  | 236.054         | 228.044         | 228.548        | 227.540        | S[3]  |
| R[16] | <b>970.502</b>  | 182.584         | 174.575         | 175.079        | 174.071        | R[2]  |
| E[17] | <b>1035.024</b> | 74.534          | 66.524          | 67.028         | 66.021         | E[1]  |

# sp | P70696 | H2B1A\_MOUSE

ASRLAHYNKRSTITS <sup>Phospho</sup> RE  
79.97

- ▶ fragmentation table for charge state 3+
- ▶ specType=etd
- ▶ score=54.28
- ▶ F104914.dat
- ▶ query=q1696.p1
- ▶ precursor=518.264020
- ▶ chargePrecursor=4
- ▶ itol=0.8

| AA    | c              | y              | z+1            | z+2            | z              | AA    |
|-------|----------------|----------------|----------------|----------------|----------------|-------|
| A[1]  | 50.582         | <b>690.680</b> | <b>685.340</b> | 0.672          | <b>685.004</b> | A[17] |
| S[2]  | 59.373         | 667.000        | 661.661        | 0.672          | 661.325        | S[16] |
| R[3]  | 111.406        | 637.990        | <b>632.650</b> | <b>632.906</b> | <b>632.314</b> | R[15] |
| L[4]  | 149.101        | 585.956        | 580.617        | 580.952        | 580.281        | L[14] |
| A[5]  | 172.780        | 548.261        | 542.922        | 543.258        | 542.586        | A[13] |
| H[6]  | 218.466        | 524.582        | 519.243        | 519.579        | 518.907        | H[12] |
| Y[7]  | 222.821        | 478.996        | 473.657        | 473.992        | 473.221        | Y[11] |
| N[8]  | 310.835        | 424.542        | 419.203        | 419.538        | 418.866        | N[10] |
| K[9]  | 353.533        | 386.527        | 381.188        | 381.524        | 380.852        | K[9]  |
| R[10] | 405.567        | 343.829        | 338.489        | 338.825        | 338.153        | R[8]  |
| S[11] | 434.578        | 291.795        | <b>286.456</b> | <b>286.792</b> | 286.120        | S[7]  |
| T[12] | 468.260        | 262.785        | 257.445        | 257.781        | 257.109        | T[6]  |
| L[13] | 505.955        | 229.102        | 223.762        | 224.098        | 223.427        | L[5]  |
| T[14] | 539.637        | 191.407        | 186.068        | 186.404        | 185.732        | T[4]  |
| S[15] | 595.304        | 157.725        | 152.385        | 152.721        | 152.049        | S[3]  |
| R[16] | <b>647.337</b> | 102.099        | 96.719         | 97.055         | 96.383         | R[2]  |
| E[17] | <b>690.352</b> | 50.029         | 44.685         | 45.021         | 44.349         | E[1]  |

# sp | P70696 | H2B1A\_MOUSE

ASRLAHYNKRSTIT (Phospho) SRE  
(79.97)

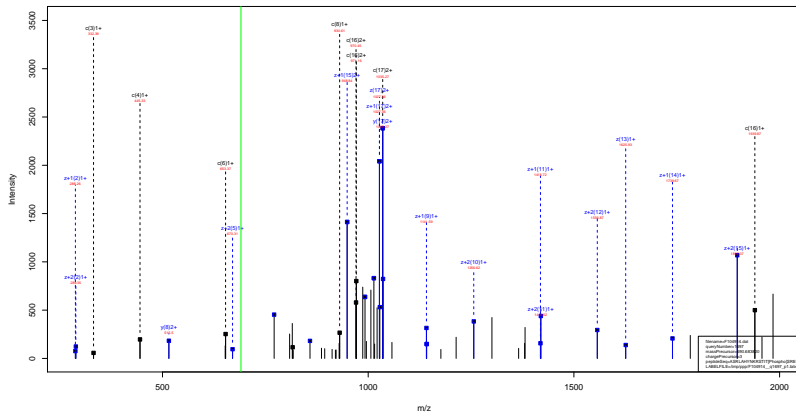

# sp | P70696 | H2B1A\_MOUSE

ASRLAHYNKRSTIT (Phospho) SRE  
(79.97)

- ▶ fragmentation table for charge state 1+
- ▶ specType=etd
- ▶ score=74.57
- ▶ F104914.dat
- ▶ query=q1697.p1
- ▶ precursor=690.683820
- ▶ chargePrecursor=3
- ▶ itol=0.8

| AA | c  | y               | z+1      | z+2             | z               | AA              |       |
|----|----|-----------------|----------|-----------------|-----------------|-----------------|-------|
| A  | 1  | 89.071          | 2070.024 | 2054.005        | 0.000           | 3052.997        | A[17] |
| S  | 2  | 178.103         | 1090.007 | 1082.990        | 0.000           | 1301.960        | S[16] |
| R  | 3  | <b>312.204</b>  | 3911.955 | 1895.930        | <b>1896.944</b> | 1994.920        | R[15] |
| L  | 4  | <b>445.288</b>  | 1755.934 | <b>1739.835</b> | 1740.843        | 1738.827        | L[14] |
| A  | 5  | 516.325         | 1042.770 | 1626.751        | 1627.759        | <b>1625.743</b> | A[13] |
| H  | 6  | <b>653.384</b>  | 1571.733 | 1355.714        | <b>1556.722</b> | 1554.706        | H[12] |
| Y  | 7  | <b>816.447</b>  | 1434.674 | <b>1418.655</b> | <b>1419.663</b> | 1417.647        | Y[11] |
| T  | 8  | <b>930.490</b>  | 1271.610 | 1275.595        | <b>1258.599</b> | 1254.585        | T[10] |
| K  | 9  | 1095.955        | 1157.857 | <b>1141.540</b> | <b>1142.557</b> | 1140.541        | K[9]  |
| R  | 10 | 1214.686        | 1029.472 | <b>1011.454</b> | <b>1014.462</b> | 1012.446        | R[8]  |
| S  | 11 | 1301.719        | 873.371  | 857.353         | <b>858.360</b>  | 856.345         | S[7]  |
| T  | 12 | 1402.766        | 706.339  | 770.321         | <b>771.328</b>  | 769.313         | T[6]  |
| I  | 13 | 1515.850        | 685.292  | 669.273         | <b>670.281</b>  | 668.265         | I[5]  |
| V  | 14 | 1698.834        | 572.208  | 556.189         | 557.197         | 555.181         | V[4]  |
| S  | 15 | 1783.806        | 391.184  | 375.170         | 376.183         | 374.167         | S[3]  |
| R  | 16 | <b>1930.997</b> | 304.162  | <b>288.143</b>  | <b>289.151</b>  | 287.135         | R[2]  |
| E  | 17 | 2069.040        | 148.060  | 132.042         | 133.050         | 131.034         | E[1]  |

# sp | P70696 | H2B1A\_MOUSE

ASRLAHYNKRSTIT (Phospho) SRE  
(79.97)

- ▶ fragmentation table for charge state 2+
- ▶ specType=etd
- ▶ score=74.57
- ▶ F104914.dat
- ▶ query=q1697\_p1
- ▶ precursor=690.683820
- ▶ chargePrecursor=3
- ▶ itol=0.8

| AA |    | c               | y               | z+1             | z+2            | z               | AA              |
|----|----|-----------------|-----------------|-----------------|----------------|-----------------|-----------------|
| A  | 1  | 45.039          | <b>1035.516</b> | <b>1027.506</b> | 0.504          | <b>1027.002</b> | A <sup>17</sup> |
| S  | 2  | 68.255          | 799.997         | <b>991.988</b>  | 0.504          | <b>991.484</b>  | S <sup>16</sup> |
| R  | 3  | 169.608         | 956.481         | <b>948.472</b>  | <b>948.976</b> | 241.966         | R <sup>15</sup> |
| L  | 4  | 223.148         | 878.431         | 870.421         | 870.925        | 869.915         | L <sup>14</sup> |
| A  | 5  | 258.666         | 821.888         | 813.879         | 814.383        | 813.375         | A <sup>13</sup> |
| H  | 6  | 327.196         | 786.370         | 778.361         | 778.864        | 777.857         | H <sup>12</sup> |
| V  | 7  | 408.727         | 717.840         | 709.831         | 710.335        | 709.327         | V <sup>11</sup> |
| T  | 8  | 465.240         | 636.300         | 628.290         | 628.793        | 627.786         | T <sup>10</sup> |
| K  | 9  | 529.796         | 579.267         | 571.258         | 571.762        | 570.754         | K <sup>9</sup>  |
| R  | 10 | 607.847         | <b>515.240</b>  | 507.231         | 507.734        | 506.727         | R <sup>8</sup>  |
| S  | 11 | 651.363         | 437.189         | 429.180         | 429.684        | 428.676         | S <sup>7</sup>  |
| T  | 12 | 701.897         | 393.673         | 385.664         | 386.168        | 385.160         | T <sup>6</sup>  |
| I  | 13 | 758.420         | 343.149         | 335.140         | 335.644        | 334.636         | I <sup>5</sup>  |
| T  | 14 | 868.036         | 286.607         | 278.598         | 279.102        | 278.094         | T <sup>4</sup>  |
| S  | 15 | 892.452         | 196.100         | 188.091         | 188.595        | 187.587         | S <sup>3</sup>  |
| R  | 16 | <b>970.502</b>  | 152.584         | 144.575         | 145.079        | 144.071         | R <sup>2</sup>  |
| E  | 17 | <b>1035.024</b> | 74.534          | 66.524          | 67.028         | 66.021          | E <sup>1</sup>  |



## tr | Q80ZM5 | Q80ZM5\_MOUSE

RRGASAASS<sup>Phospho</sup>PAPKARTAAADRTPARPQPE  
79.97

- ▶ fragmentation table for charge state 1+
- ▶ specType=etd
- ▶ score=64.55
- ▶ F104914.dat
- ▶ query=q2651\_p1
- ▶ precursor=756.890640
- ▶ chargePrecursor=4
- ▶ itol=0.8

| AA   | c               | y        | z+1             | z+2             | z        | AA   |
|------|-----------------|----------|-----------------|-----------------|----------|------|
| R 1  | 174.135         | 3024.524 | 3038.505        | 3050.513        | 3007.491 | R 29 |
| R 2  | 330.236         | 2968.422 | 2952.404        | 2953.412        | 2951.398 | R 28 |
| G 3  | <b>387.258</b>  | 2712.321 | 2696.303        | 2697.310        | 2695.295 | G 27 |
| A 4  | <b>458.295</b>  | 2655.300 | 2639.281        | 2640.289        | 2638.273 | A 26 |
| S 5  | <b>545.327</b>  | 2594.262 | 2568.244        | 2569.252        | 2567.236 | S 25 |
| A 6  | 616.354         | 2597.231 | 2481.213        | 2482.220        | 2480.204 | A 24 |
| A 7  | <b>687.401</b>  | 2626.194 | 2410.175        | 2411.183        | 2409.167 | A 23 |
| S 8  | <b>774.433</b>  | 2355.156 | 2339.138        | 2340.146        | 2338.130 | S 22 |
| S 9  | 941.431         | 2268.124 | 2252.106        | 2253.114        | 2251.099 | S 21 |
| P 10 | <b>1038.484</b> | 2101.126 | 2085.107        | 2086.115        | 2084.100 | P 20 |
| A 11 | 1109.521        | 2034.072 | 1988.055        | <b>1989.062</b> | 1987.047 | A 19 |
| P 12 | 1206.574        | 1933.036 | 1917.018        | 1918.026        | 1916.010 | P 18 |
| K 13 | <b>1334.669</b> | 1835.983 | 1819.965        | 1820.973        | 1818.957 | K 17 |
| A 14 | 1405.708        | 1707.889 | 1691.870        | 1692.878        | 1690.862 | A 16 |
| R 15 | 1561.807        | 1636.951 | 1620.933        | <b>1621.940</b> | 1619.925 | R 15 |
| T 16 | <b>1662.855</b> | 1480.750 | <b>1464.732</b> | <b>1465.739</b> | 1463.724 | T 14 |
| A 17 | <b>1733.892</b> | 1478.703 | 1363.684        | <b>1364.692</b> | 1362.676 | A 13 |
| A 18 | 1894.929        | 1308.669 | 1292.647        | <b>1293.655</b> | 1291.639 | A 12 |
| A 19 | 1875.968        | 1237.625 | 1221.610        | <b>1222.617</b> | 1220.602 | A 11 |
| D 20 | 1990.993        | 1166.591 | 1150.573        | <b>1151.580</b> | 1149.565 | D 10 |
| R 21 | 2147.094        | 1051.564 | <b>1035.546</b> | 1036.553        | 1034.538 | R 9  |
| T 22 | 2248.142        | 895.463  | <b>879.444</b>  | <b>880.452</b>  | 878.437  | T 8  |
| P 23 | 2345.195        | 794.416  | 778.397         | 779.405         | 777.389  | P 7  |
| A 24 | 2419.232        | 697.383  | 681.364         | 682.372         | 680.356  | A 6  |
| R 25 | 2572.333        | 626.326  | <b>610.307</b>  | <b>611.315</b>  | 609.299  | R 5  |
| P 26 | 2669.386        | 470.225  | 454.206         | 455.214         | 453.198  | P 4  |
| Q 27 | 2797.444        | 373.172  | 357.153         | 358.161         | 356.145  | Q 3  |
| P 28 | 2894.497        | 245.113  | 229.094         | 230.102         | 228.087  | P 2  |
| E 29 | 3023.540        | 148.060  | 132.042         | 133.050         | 131.034  | E 1  |



# tr | Q80ZM5 | Q80ZM5\_MOUSE

RRGASAASS<sup>Phospho</sup> PAPPKARTAAADRTPARPQPE  
79.97

- ▶ fragmentation table for charge state 2+
- ▶ specType=etd
- ▶ score=64.55
- ▶ F104914.dat
- ▶ query=q2651\_p1
- ▶ precursor=756.890640
- ▶ chargePrecursor=4
- ▶ itol=0.8

| AA | c  | y               | z+1             | z+2             | z               | AA              |       |
|----|----|-----------------|-----------------|-----------------|-----------------|-----------------|-------|
| R  | 1  | 67.571          | <b>1512.765</b> | <b>1504.756</b> | <b>1505.260</b> | <b>1504.252</b> | R(29) |
| R  | 2  | 165.622         | 1434.715        | <b>1426.705</b> | <b>1427.209</b> | 1428.202        | R(28) |
| G  | 3  | 194.132         | 1356.664        | 1348.655        | 1349.159        | 1348.151        | G(27) |
| A  | 4  | 229.651         | 1128.154        | <b>1320.144</b> | <b>1320.648</b> | 1319.640        | A(26) |
| S  | 5  | 273.167         | 1292.635        | <b>1284.626</b> | <b>1285.130</b> | <b>1284.122</b> | S(25) |
| A  | 6  | 308.686         | 1249.119        | 1241.113        | 1241.617        | 1240.609        | A(24) |
| A  | 7  | 344.204         | 1213.600        | 1205.591        | 1206.095        | 1205.087        | A(23) |
| S  | 8  | <b>387.720</b>  | 1178.082        | 1170.073        | 1170.576        | 1169.569        | S(22) |
| S  | 9  | 471.219         | <b>1134.566</b> | <b>1126.557</b> | <b>1127.060</b> | 1126.051        | S(21) |
| P  | 10 | 519.746         | 1051.057        | 1043.057        | 1043.561        | 1042.551        | P(20) |
| A  | 11 | 555.264         | 1002.540        | <b>994.531</b>  | <b>995.035</b>  | <b>994.027</b>  | A(19) |
| P  | 12 | 603.793         | 969.022         | 960.022         | 960.526         | 959.518         | P(18) |
| K  | 13 | 667.818         | 918.495         | 910.486         | 910.990         | 909.982         | K(17) |
| A  | 14 | 703.357         | 854.448         | 846.439         | 846.942         | 845.935         | A(16) |
| R  | 15 | <b>761.407</b>  | 818.929         | 810.920         | 811.424         | 810.416         | R(15) |
| T  | 16 | <b>831.931</b>  | 740.879         | 732.869         | 733.373         | 732.366         | T(14) |
| A  | 17 | <b>807.450</b>  | 690.355         | 682.346         | 682.849         | 681.841         | A(13) |
| A  | 18 | <b>902.968</b>  | 654.836         | 646.827         | 647.331         | 646.321         | A(12) |
| A  | 19 | <b>938.487</b>  | 619.318         | <b>611.308</b>  | <b>611.812</b>  | <b>610.805</b>  | A(11) |
| D  | 20 | <b>996.000</b>  | 583.799         | 575.790         | 576.294         | 575.286         | D(10) |
| R  | 21 | <b>1074.051</b> | 526.266         | 518.258         | 518.761         | 517.753         | R(9)  |
| T  | 22 | 1124.575        | 448.235         | 440.226         | 440.730         | 439.722         | T(8)  |
| F  | 23 | 1173.103        | 397.711         | 389.702         | 390.206         | 389.198         | F(7)  |
| A  | 24 | <b>1208.620</b> | 349.185         | 341.176         | 341.680         | 340.672         | A(6)  |
| R  | 25 | 1286.670        | 313.666         | 305.657         | 306.161         | 305.153         | R(5)  |
| P  | 26 | <b>1335.196</b> | 235.616         | 227.607         | 228.110         | 227.103         | P(4)  |
| Q  | 27 | 1399.226        | 187.090         | 179.080         | 179.584         | 178.576         | Q(3)  |
| F  | 28 | <b>1447.752</b> | 123.060         | 115.051         | 115.555         | 114.547         | F(2)  |
| E  | 29 | 1512.273        | 74.534          | 66.524          | 67.028          | 66.021          | E(1)  |

# tr | Q80ZM5 | Q80ZM5\_MOUSE

RRGASAASS <sup>Phospho</sup> P <sub>79.97</sub> PAPKARTAAADRTPARPQPE

- ▶ fragmentation table for charge state 3+
- ▶ specType=etd
- ▶ score=64.55
- ▶ F104914.dat
- ▶ query=q2651\_p1
- ▶ precursor=756.890640
- ▶ chargePrecursor=4
- ▶ itol=0.8

| AA | c  | y               | z+1             | z+2             | z               | AA              |       |
|----|----|-----------------|-----------------|-----------------|-----------------|-----------------|-------|
| R  | 11 | 58.716          | <b>1008.846</b> | <b>1003.506</b> | <b>1003.842</b> | <b>1003.171</b> | R(9)  |
| R  | 2  | 110.750         | 956.813         | 951.473         | 951.809         | 951.137         | R(28) |
| G  | 3  | 136.757         | 904.779         | 899.439         | 899.775         | 899.103         | G(27) |
| A  | 4  | 153.436         | 835.771         | <b>880.432</b>  | <b>880.768</b>  | <b>880.096</b>  | A(26) |
| S  | 5  | 182.447         | 862.092         | 856.753         | 857.089         | 856.417         | S(25) |
| A  | 6  | 206.126         | 833.062         | 827.722         | 828.058         | 827.400         | A(24) |
| A  | 7  | 229.805         | 809.483         | 804.143         | 804.500         | 803.727         | A(23) |
| S  | 8  | 258.816         | 785.724         | 780.384         | <b>780.720</b>  | 780.048         | S(22) |
| S  | 9  | 314.482         | 756.713         | 751.373         | 751.709         | 751.037         | S(21) |
| P  | 10 | 346.813         | 701.047         | 695.707         | 696.043         | 695.371         | P(20) |
| A  | 11 | 370.512         | 688.696         | 683.356         | 683.692         | 683.020         | A(19) |
| T  | 12 | 402.868         | 646.011         | 639.671         | 640.013         | 639.341         | T(18) |
| K  | 13 | 445.561         | 612.666         | 607.326         | 607.662         | 606.990         | K(17) |
| A  | 14 | 469.240         | 569.968         | 564.628         | 564.964         | 564.292         | A(16) |
| R  | 15 | 521.274         | <b>546.289</b>  | 540.949         | 541.285         | 540.613         | R(15) |
| T  | 16 | 554.956         | 494.255         | 488.915         | 489.251         | 488.579         | T(14) |
| A  | 17 | 578.839         | 460.572         | 455.232         | 455.568         | 454.897         | A(13) |
| A  | 18 | 602.315         | 436.891         | 431.551         | 431.886         | 431.214         | A(12) |
| A  | 19 | 625.994         | 413.214         | 407.874         | 408.211         | 407.539         | A(11) |
| D  | 20 | 664.336         | 389.535         | 384.195         | 384.532         | 383.860         | D(10) |
| R  | 21 | 716.370         | 351.193         | 345.853         | 346.189         | 345.517         | R(9)  |
| T  | 22 | 750.824         | 299.159         | 293.819         | 294.156         | 293.484         | T(8)  |
| T  | 23 | <b>782.403</b>  | 266.471         | 261.131         | 261.473         | 260.801         | T(7)  |
| A  | 24 | 806.082         | 233.126         | 227.786         | 228.122         | 227.450         | A(6)  |
| R  | 25 | 858.116         | 200.447         | 204.107         | 204.443         | 203.771         | R(5)  |
| P  | 26 | <b>890.467</b>  | 157.413         | 152.073         | 152.409         | 151.737         | P(4)  |
| Q  | 27 | 933.153         | 125.062         | 119.723         | 120.058         | 119.387         | Q(3)  |
| P  | 28 | <b>965.584</b>  | 82.376          | 77.036          | 77.372          | 76.700          | P(2)  |
| E  | 29 | <b>1008.518</b> | 50.925          | 44.685          | 45.021          | 44.349          | E(1)  |

# sp | Q6GSS7 | H2A2A\_MOUSE

LNKLLGK <sup>Dimethyl</sup>VTIAQGGVLPNIQAVLLPKKTE  
28.03

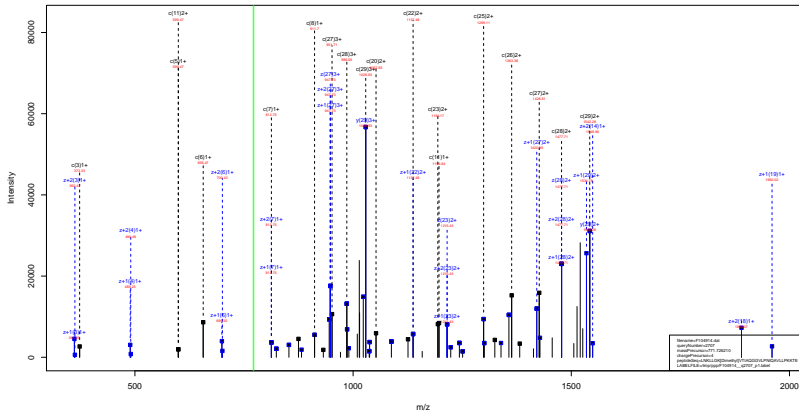

# sp | Q6GSS7 | H2A2A\_MOUSE

LNKLLGK <sup>Dimethyl</sup> <sub>28.03</sub> VTIAQGGVLPNIQAVLLPKKTE

- ▶ fragmentation table for charge state 1+
- ▶ specType=etd
- ▶ score=107.04
- ▶ F104914.dat
- ▶ query=q2707\_p1
- ▶ precursor=771.726210
- ▶ chargePrecursor=4
- ▶ itol=0.8

| AA  | c               | y        | z+1             | z+2             | z        | AA   |
|-----|-----------------|----------|-----------------|-----------------|----------|------|
| L1  | 131.118         | 3081.892 | 3067.873        | 0.000           | 3066.895 | L129 |
| N2  | 345.161         | 2970.808 | 2954.789        | 2955.797        | 2951.781 | N28  |
| K3  | <b>373.256</b>  | 2856.765 | 2840.746        | 2841.754        | 2839.738 | K27  |
| L4  | 486.340         | 2728.670 | 2712.651        | 2713.659        | 2711.643 | L26  |
| L5  | <b>599.424</b>  | 2615.585 | 2599.567        | 2600.575        | 2598.559 | L25  |
| Q6  | <b>656.445</b>  | 2502.502 | 2486.483        | 2487.491        | 2485.475 | Q24  |
| K7  | <b>812.572</b>  | 2345.480 | 2429.462        | 2430.469        | 2428.454 | K23  |
| V8  | <b>911.640</b>  | 2288.354 | 2273.335        | 2274.343        | 2272.327 | V22  |
| T9  | 1017.688        | 2190.286 | 2174.267        | 2175.275        | 2173.259 | T21  |
| I10 | <b>1125.772</b> | 2089.238 | 2073.219        | 2074.227        | 2072.211 | I20  |
| A11 | <b>1196.809</b> | 1976.154 | <b>1960.135</b> | 1961.143        | 1959.127 | A19  |
| Q12 | <b>1324.867</b> | 1895.111 | 1889.093        | <b>1890.106</b> | 1888.090 | Q18  |
| G13 | <b>1381.889</b> | 1777.058 | 1761.039        | 1762.047        | 1760.032 | G17  |
| G14 | 1438.910        | 1720.937 | 1704.918        | 1705.926        | 1703.910 | G16  |
| V15 | 1537.879        | 1663.015 | 1646.997        | 1646.004        | 1645.989 | V15  |
| L16 | 1651.063        | 1563.947 | 1547.928        | <b>1548.936</b> | 1546.920 | L14  |
| F17 | 1748.116        | 1450.863 | 1434.844        | 1435.852        | 1433.836 | F13  |
| T18 | 1852.159        | 1383.810 | 1377.791        | <b>1378.799</b> | 1376.783 | T12  |
| I19 | 1975.243        | 1236.767 | <b>1223.748</b> | 1224.756        | 1222.741 | I11  |
| Q20 | 2103.301        | 1126.683 | 1110.664        | 1111.672        | 1109.656 | Q10  |
| A21 | 2174.336        | 996.624  | 980.606         | 981.614         | 981.598  | A9   |
| V22 | 2273.407        | 927.587  | <b>911.569</b>  | 912.576         | 910.561  | V8   |
| L23 | 2386.491        | 828.519  | <b>812.500</b>  | <b>813.508</b>  | 811.492  | L7   |
| L24 | 2499.575        | 715.435  | <b>699.415</b>  | <b>700.424</b>  | 698.408  | L6   |
| P25 | 2596.626        | 602.351  | 586.332         | 587.340         | 585.324  | P5   |
| K26 | 2724.723        | 505.298  | <b>489.279</b>  | <b>490.287</b>  | 488.271  | K4   |
| K27 | 2852.816        | 377.203  | <b>361.184</b>  | <b>362.192</b>  | 360.177  | K3   |
| T28 | 2953.895        | 249.108  | 233.089         | 234.097         | 232.082  | T2   |
| E29 | 3082.968        | 148.060  | 132.042         | 133.050         | 131.034  | E1   |

# sp | Q6GSS7 | H2A2A\_MOUSE

LNKLLGK <sup>Dimethyl</sup> <sub>28.03</sub> VTIAQGGVLPNIQAVLLPKKTE

- ▶ fragmentation table for charge state 2+
- ▶ specType=etd
- ▶ score=107.04
- ▶ F104914.dat
- ▶ query=q2707\_p1
- ▶ precursor=771.726210
- ▶ chargePrecursor=4
- ▶ itol=0.8

| AA   | c               | y               | z+1             | z+2             | z               | AA   |
|------|-----------------|-----------------|-----------------|-----------------|-----------------|------|
| L1   | 66.093          | <b>1542.450</b> | <b>1534.440</b> | 8.504           | 1533.992        | L128 |
| N12  | 123.084         | 1485.905        | <b>1477.898</b> | <b>1478.402</b> | <b>1477.394</b> | N120 |
| K13  | 187.132         | <b>1428.886</b> | <b>1420.877</b> | <b>1421.381</b> | <b>1420.373</b> | K127 |
| L14  | 243.674         | 1364.839        | <b>1356.829</b> | <b>1357.333</b> | <b>1356.325</b> | L126 |
| L15  | 300.216         | 1308.292        | <b>1300.287</b> | <b>1300.791</b> | <b>1299.783</b> | L125 |
| G16  | 356.758         | <b>1251.755</b> | <b>1243.745</b> | <b>1244.249</b> | <b>1243.241</b> | G124 |
| K17  | 406.799         | <b>1223.244</b> | <b>1215.234</b> | <b>1215.738</b> | <b>1214.731</b> | K123 |
| V18  | 456.324         | 1145.181        | <b>1137.171</b> | <b>1137.675</b> | 1136.667        | V122 |
| T19  | 506.840         | 1095.646        | <b>1087.637</b> | <b>1088.141</b> | <b>1087.133</b> | T121 |
| T110 | 563.390         | 1045.123        | <b>1037.113</b> | <b>1037.617</b> | <b>1036.609</b> | T120 |
| A111 | <b>598.908</b>  | 988.581         | 982.133         | 981.637         | 980.631         | A119 |
| G112 | 662.937         | 933.060         | <b>945.053</b>  | <b>945.557</b>  | <b>944.549</b>  | G118 |
| G113 | 691.448         | 889.033         | 881.033         | <b>891.527</b>  | 889.519         | G117 |
| G114 | 719.959         | 860.522         | <b>852.513</b>  | <b>853.017</b>  | 852.009         | G116 |
| V115 | 769.493         | 832.011         | <b>824.002</b>  | <b>824.506</b>  | <b>823.498</b>  | V115 |
| L116 | 830.035         | 782.477         | 774.488         | 774.972         | 773.964         | L114 |
| T117 | <b>874.561</b>  | 728.935         | 719.928         | 718.930         | 717.922         | T113 |
| N118 | <b>931.583</b>  | 677.400         | 669.399         | 669.903         | 668.895         | N112 |
| I119 | 988.125         | 630.987         | 612.978         | 612.982         | 611.974         | I111 |
| Q120 | <b>1052.154</b> | 583.845         | 555.836         | 556.340         | 555.332         | Q110 |
| A121 | <b>1087.673</b> | 499.816         | 491.807         | 492.310         | 491.303         | A10  |
| V122 | <b>1137.207</b> | 494.297         | 456.288         | 456.792         | 455.784         | V18  |
| L123 | <b>1183.749</b> | 414.763         | 406.754         | 407.258         | 406.251         | L17  |
| L124 | <b>1250.291</b> | 358.221         | 350.212         | 350.716         | 349.708         | L16  |
| P125 | <b>1298.817</b> | 301.679         | 293.670         | 294.174         | 293.166         | P15  |
| K126 | <b>1362.865</b> | 253.153         | 245.143         | 245.647         | 244.639         | K14  |
| K127 | <b>1426.912</b> | 189.105         | 181.096         | 181.600         | 180.592         | K13  |
| T128 | <b>1477.436</b> | 125.058         | 117.048         | 117.552         | 116.544         | T12  |
| E129 | <b>1541.958</b> | 74.534          | 66.524          | 67.028          | 66.021          | E11  |

# sp | Q6GSS7 | H2A2A\_MOUSE

LNKLLGK <sup>Dimethyl</sup> <sub>28.03</sub> VTIAQGGVLPNIQAVLLPKKTE

- ▶ fragmentation table for charge state 3+
- ▶ specType=etd
- ▶ score=107.04
- ▶ F104914.dat
- ▶ query=q2707\_p1
- ▶ precursor=771.726210
- ▶ chargePrecursor=4
- ▶ itol=0.8

| AA    | c               | y               | z+1             | z+2            | z               | AA    |
|-------|-----------------|-----------------|-----------------|----------------|-----------------|-------|
| L[1]  | 44.377          | <b>1028.635</b> | <b>1023.296</b> | 0.672          | <b>1022.960</b> | L[20] |
| N[2]  | 82.392          | <b>990.941</b>  | <b>985.601</b>  | <b>985.937</b> | <b>985.265</b>  | N[20] |
| K[3]  | 125.090         | 952.926         | <b>947.587</b>  | <b>947.923</b> | <b>947.251</b>  | K[27] |
| L[4]  | 162.785         | 910.228         | 904.889         | 905.225        | 904.553         | L[26] |
| L[5]  | 200.479         | 872.513         | 867.194         | 867.530        | 866.856         | L[25] |
| Q[6]  | 239.287         | 834.339         | 829.499         | 829.835        | 829.161         | Q[24] |
| K[7]  | 271.529         | 815.832         | 810.492         | 810.828        | 810.154         | K[23] |
| V[8]  | 304.552         | 793.700         | 788.450         | 788.786        | 788.114         | V[22] |
| T[9]  | 338.234         | 776.767         | 771.427         | 771.763        | 771.091         | T[21] |
| I[10] | 375.920         | 697.084         | 691.745         | 692.081        | 691.409         | I[20] |
| A[11] | 399.608         | 699.380         | 654.050         | 654.386        | 653.714         | A[19] |
| Q[12] | 442.294         | 639.711         | 630.371         | 630.707        | 630.035         | Q[19] |
| G[13] | 461.301         | 593.024         | 587.685         | 588.021        | 587.349         | G[17] |
| G[14] | 480.308         | 574.017         | 568.678         | 569.013        | 568.342         | G[16] |
| V[15] | 513.331         | 555.010         | 549.670         | 550.006        | 549.334         | V[15] |
| L[16] | 551.026         | 521.987         | 516.648         | 516.984        | 516.312         | L[14] |
| F[17] | 583.277         | 484.262         | 478.923         | 479.259        | 478.587         | F[13] |
| T[18] | 621.391         | 451.942         | 446.603         | 446.939        | 446.267         | T[12] |
| I[19] | 659.086         | 413.927         | 408.588         | 408.924        | 408.252         | I[11] |
| Q[20] | 701.772         | 376.233         | 370.893         | 371.229        | 370.557         | Q[10] |
| A[21] | 725.451         | 333.540         | 328.201         | 328.537        | 327.865         | A[9]  |
| V[22] | 758.474         | 309.867         | 304.528         | 304.864        | 304.192         | V[9]  |
| L[23] | 796.168         | 276.844         | 271.505         | 271.841        | 271.169         | L[7]  |
| L[24] | 833.863         | 239.159         | 233.819         | 234.156        | 233.484         | L[6]  |
| P[25] | 866.214         | 201.455         | 196.116         | 196.451        | 195.779         | P[5]  |
| K[26] | 908.912         | 169.104         | 163.765         | 164.101        | 163.429         | K[4]  |
| K[27] | <b>951.611</b>  | 126.406         | 121.066         | 121.402        | 120.730         | K[3]  |
| T[28] | <b>985.293</b>  | 83.708          | 78.368          | 78.704         | 78.032          | T[2]  |
| E[29] | <b>1028.307</b> | 50.025          | 44.685          | 45.021         | 44.349          | E[1]  |

tr | Q80ZM5 | Q80ZM5\_MOUSE

GGAERRGASAAS<sup>Phospho</sup> SPAPKARTAAADRTPARPQPE  
79.97

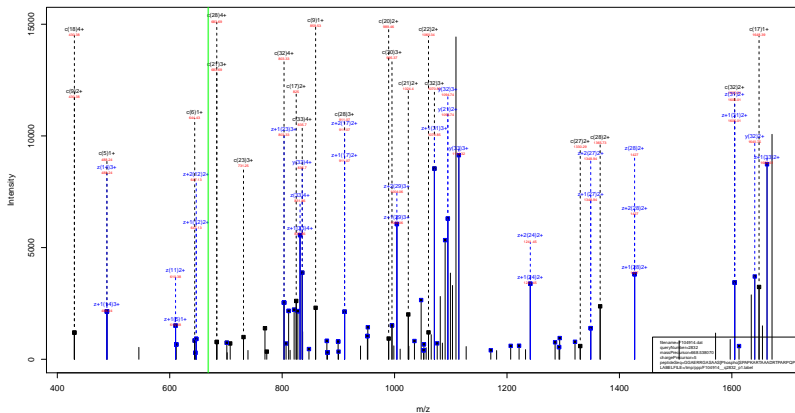

## tr | Q80ZM5 | Q80ZM5\_MOUSE

GGAERRGASAAS<sup>Phospho</sup><sub>79.97</sub> SPAPKARTAAADRTPARPQPE

- ▶ fragmentation table for charge state 1+
- ▶ specType=etd
- ▶ score=73.57
- ▶ F104914.dat
- ▶ query=q2832\_p1
- ▶ precursor=668.538070
- ▶ chargePrecursor=5
- ▶ itol=0.8

| AA | c  | y               | z+1             | z+2             | z               | AA       |   |    |
|----|----|-----------------|-----------------|-----------------|-----------------|----------|---|----|
| G  | 1  | 78.055          | 3338.648        | 3322.637        | 0.000           | 3321.630 | G | 33 |
| G  | 2  | 132.077         | 3281.625        | 3265.606        | 0.000           | 3264.598 | G | 32 |
| A  | 3  | 203.114         | 3234.603        | 3218.585        | 0.000           | 3207.577 | A | 31 |
| E  | 4  | 332.150         | 3153.566        | 3137.547        | 0.000           | 3136.540 | E | 30 |
| R  | 5  | <b>488.258</b>  | 3024.528        | 3008.508        | 3009.513        | 3007.497 | R | 29 |
| R  | 6  | <b>644.359</b>  | 2868.422        | 2852.404        | 2853.412        | 2851.396 | R | 28 |
| G  | 7  | <b>701.380</b>  | 2712.321        | 2696.303        | 2697.310        | 2695.295 | G | 27 |
| A  | 8  | <b>772.417</b>  | 2655.300        | 2639.281        | 2640.289        | 2638.273 | A | 26 |
| S  | 9  | <b>859.449</b>  | 2584.263        | 2568.244        | 2569.252        | 2567.236 | S | 25 |
| A  | 10 | 930.488         | 2497.231        | 2481.213        | 2482.220        | 2480.204 | A | 24 |
| A  | 11 | 1001.524        | 2426.194        | 2410.175        | 2411.183        | 2409.167 | A | 23 |
| S  | 12 | 1108.522        | 2355.157        | 2339.138        | 2340.146        | 2338.130 | S | 22 |
| S  | 13 | 1255.554        | 2188.158        | 2172.139        | 2173.147        | 2171.131 | S | 21 |
| P  | 14 | 1352.607        | 2101.120        | 2085.107        | 2086.115        | 2084.100 | P | 20 |
| A  | 15 | 1423.644        | 2034.073        | 1988.055        | 1989.062        | 1987.047 | A | 19 |
| P  | 16 | 1529.697        | 1933.036        | 1917.018        | 1918.026        | 1916.010 | P | 18 |
| K  | 17 | <b>1648.792</b> | 1835.983        | 1819.965        | 1820.973        | 1818.957 | K | 17 |
| A  | 18 | 1719.829        | 1707.889        | 1691.870        | 1692.878        | 1690.862 | A | 16 |
| R  | 19 | 1875.930        | 1636.851        | 1620.833        | 1621.840        | 1619.825 | R | 15 |
| T  | 20 | 1976.977        | 1480.750        | 1464.732        | 1465.739        | 1463.724 | T | 14 |
| A  | 21 | 2048.015        | 1379.703        | 1363.684        | 1364.692        | 1362.676 | A | 13 |
| A  | 22 | 2119.052        | 1308.665        | <b>1292.647</b> | <b>1293.655</b> | 1291.639 | A | 12 |
| A  | 23 | 2190.089        | 1237.628        | <b>1221.610</b> | 1222.617        | 1220.602 | A | 11 |
| D  | 24 | 2305.116        | 1166.591        | 1150.573        | 1151.580        | 1149.565 | D | 10 |
| R  | 25 | 2401.217        | <b>1051.564</b> | <b>1035.546</b> | 1036.553        | 1034.538 | R | 0  |
| T  | 26 | 2562.264        | 895.463         | <b>879.444</b>  | <b>880.452</b>  | 878.437  | T | 8  |
| P  | 27 | 2669.317        | 784.416         | 768.397         | 769.405         | 767.390  | P | 7  |
| A  | 28 | 2730.354        | 697.382         | 681.364         | 682.372         | 680.356  | A | 6  |
| R  | 29 | 3898.455        | 628.326         | <b>610.307</b>  | <b>611.315</b>  | 609.299  | R | 5  |
| P  | 30 | 2983.508        | 470.225         | 454.206         | 455.214         | 453.198  | P | 4  |
| Q  | 31 | 3111.567        | 373.172         | 357.153         | 358.161         | 356.145  | Q | 3  |
| P  | 32 | 3208.620        | 245.113         | 229.094         | 230.102         | 228.087  | P | 2  |
| E  | 33 | 3337.662        | 148.050         | 132.032         | 133.040         | 131.024  | E | 1  |



# tr | Q80ZM5 | Q80ZM5\_MOUSE

GGAERRGASAAS<sup>Phospho</sup><sub>79.97</sub> SPAPKARTAAADRTPARPQPE

- ▶ fragmentation table for charge state 2+
- ▶ specType=etd
- ▶ score=73.57
- ▶ F104914.dat
- ▶ query=q2832\_p1
- ▶ precursor=668.538070
- ▶ chargePrecursor=5
- ▶ itol=0.8

| AA   | c               | y               | z+1             | z+2             | z               | AA   |
|------|-----------------|-----------------|-----------------|-----------------|-----------------|------|
| G 1  | 38.031          | 1669.827        | <b>1661.817</b> | 0.504           | 1661.313        | G 33 |
| G 2  | 66.542          | <b>1641.316</b> | 1631.307        | 0.504           | 1632.803        | G 32 |
| A 3  | 102.061         | <b>1612.805</b> | <b>1604.796</b> | 0.504           | <b>1604.292</b> | A 31 |
| E 4  | 166.562         | 1577.287        | 1569.277        | 0.504           | 1569.773        | E 30 |
| R 5  | 244.632         | 1312.765        | 1308.759        | 1565.760        | 1304.755        | R 29 |
| R 6  | 322.683         | 1434.715        | <b>1426.705</b> | <b>1427.209</b> | <b>1426.202</b> | R 28 |
| G 7  | 351.194         | 1336.664        | <b>1348.655</b> | <b>1349.159</b> | <b>1348.151</b> | G 27 |
| A 8  | 389.712         | 1128.154        | 1120.144        | <b>1320.648</b> | 1319.640        | A 26 |
| S 9  | <b>430.228</b>  | <b>1292.635</b> | 1284.625        | <b>1285.130</b> | 1284.122        | S 25 |
| A 10 | 465.747         | 1349.119        | <b>1241.110</b> | <b>1241.614</b> | 1240.606        | A 24 |
| A 11 | 501.265         | 1213.600        | 1205.591        | <b>1206.095</b> | 1205.087        | A 23 |
| S 12 | 584.785         | 1178.082        | 1170.073        | <b>1170.576</b> | 1169.569        | S 22 |
| S 13 | 628.201         | <b>1094.583</b> | 1086.573        | 1087.577        | 1086.069        | S 21 |
| F 14 | 676.807         | <b>1051.067</b> | 1043.057        | 1043.561        | 1042.553        | F 20 |
| A 15 | 712.226         | 1052.540        | 994.531         | <b>995.035</b>  | 994.027         | A 19 |
| F 16 | 750.824         | 989.022         | 929.013         | 929.516         | 928.508         | F 18 |
| K 17 | <b>824.899</b>  | 918.495         | <b>910.486</b>  | <b>910.990</b>  | 909.982         | K 17 |
| A 18 | 860.418         | 854.448         | 846.439         | <b>846.942</b>  | 845.935         | A 16 |
| R 19 | 938.469         | 818.029         | <b>810.920</b>  | <b>811.424</b>  | 810.416         | R 15 |
| T 20 | <b>988.992</b>  | 740.879         | 732.869         | 733.373         | 732.366         | T 14 |
| A 21 | <b>1024.511</b> | 690.355         | 682.345         | 682.849         | 681.841         | A 13 |
| A 22 | <b>1060.029</b> | 654.835         | <b>646.827</b>  | <b>647.331</b>  | <b>646.323</b>  | A 12 |
| A 23 | 1095.548        | 619.318         | <b>611.308</b>  | <b>611.812</b>  | <b>610.805</b>  | A 11 |
| D 24 | 1153.061        | 583.799         | 575.790         | 576.294         | 575.286         | D 10 |
| R 25 | 1231.112        | 526.286         | 518.276         | 518.780         | 517.773         | R 9  |
| T 26 | 1267.638        | 448.235         | 440.225         | 440.729         | 439.722         | T 8  |
| F 27 | <b>1330.162</b> | 397.711         | 389.702         | 390.206         | 389.199         | F 7  |
| A 28 | <b>1365.681</b> | 349.185         | 341.176         | 341.680         | 340.672         | A 6  |
| R 29 | 1443.731        | 311.666         | 303.657         | 304.161         | 303.155         | R 5  |
| F 30 | 1492.258        | 235.016         | 227.007         | 227.511         | 226.503         | F 4  |
| Q 31 | 1556.297        | 187.000         | 179.000         | 179.504         | 178.576         | Q 3  |
| F 32 | <b>1604.813</b> | 123.960         | 115.951         | 116.455         | 115.447         | F 2  |
| E 33 | 1669.310        | 74.534          | 66.524          | 67.028          | 66.021          | E 1  |

# tr | Q80ZM5 | Q80ZM5\_MOUSE

GGAERRGASAAS <sup>Phospho</sup><sub>79.97</sub> SPAPKARTAAADRTPARPQPE

- ▶ fragmentation table for charge state 3+
- ▶ specType=etd
- ▶ score=73.57
- ▶ F104914.dat
- ▶ query=q2832\_p1
- ▶ precursor=668.538070
- ▶ chargePrecursor=5
- ▶ itol=0.8

| AA    | c               | y               | z+1             | z+2             | z              | AA    |
|-------|-----------------|-----------------|-----------------|-----------------|----------------|-------|
| G[1]  | 25.690          | <b>1113.554</b> | 1108.214        | 0.672           | 1107.878       | G[33] |
| G[2]  | 44.607          | <b>1094.546</b> | <b>1089.207</b> | 0.672           | 1088.871       | G[32] |
| A[3]  | 66.376          | <b>1075.539</b> | <b>1070.260</b> | 0.672           | 1069.864       | A[31] |
| E[4]  | 111.390         | <b>1051.560</b> | <b>1044.521</b> | 0.672           | 1040.125       | E[30] |
| R[5]  | 163.424         | 1035.540        | <b>1003.506</b> | <b>1003.842</b> | 1003.177       | R[29] |
| R[6]  | 215.458         | 956.812         | <b>951.473</b>  | <b>951.809</b>  | <b>951.103</b> | R[28] |
| G[7]  | 234.465         | 904.779         | <b>899.439</b>  | <b>899.775</b>  | <b>899.103</b> | G[27] |
| A[8]  | 258.144         | 885.771         | <b>880.432</b>  | <b>880.768</b>  | <b>880.096</b> | A[26] |
| S[9]  | 287.155         | 862.062         | 856.753         | 857.089         | 856.411        | S[25] |
| A[10] | 310.824         | 833.062         | <b>827.742</b>  | <b>828.078</b>  | <b>827.406</b> | A[24] |
| A[11] | 334.513         | 809.403         | <b>804.063</b>  | 804.399         | <b>803.727</b> | A[23] |
| S[12] | 390.179         | 785.724         | 780.384         | 780.720         | 780.048        | S[22] |
| S[13] | 419.189         | 730.058         | 724.718         | 725.054         | 724.382        | S[21] |
| P[14] | 451.540         | <b>701.047</b>  | 695.707         | 696.043         | 695.371        | P[20] |
| A[15] | 475.219         | 686.059         | 683.264         | 683.602         | 683.020        | A[19] |
| P[16] | 607.870         | <b>645.017</b>  | 639.677         | 640.013         | 639.341        | P[18] |
| K[17] | 550.289         | 612.564         | 607.226         | 607.562         | 606.906        | K[17] |
| A[18] | 573.948         | 569.968         | 564.628         | 564.964         | 564.292        | A[16] |
| R[19] | 625.981         | 546.280         | 540.940         | 541.285         | 540.613        | R[15] |
| T[20] | 659.664         | 494.255         | <b>488.915</b>  | 489.251         | <b>488.579</b> | T[14] |
| A[21] | <b>683.343</b>  | 460.572         | 455.233         | 455.569         | 454.897        | A[13] |
| A[22] | <b>707.622</b>  | 436.993         | 431.654         | 431.990         | 431.318        | A[12] |
| A[23] | <b>730.701</b>  | 413.214         | 407.875         | 408.211         | 407.539        | A[11] |
| D[24] | <b>769.043</b>  | 389.535         | 384.196         | 384.532         | 383.860        | D[10] |
| R[25] | <b>821.077</b>  | 351.197         | 345.853         | 346.189         | 345.517        | R[0]  |
| T[26] | 854.760         | 299.150         | 293.820         | 294.156         | 293.484        | T[8]  |
| P[27] | 897.111         | 265.477         | 260.137         | 260.473         | 259.801        | P[7]  |
| A[28] | <b>910.790</b>  | 233.120         | 227.788         | 228.122         | 227.450        | A[6]  |
| R[29] | 962.823         | 209.447         | 204.107         | 204.443         | 203.771        | R[5]  |
| P[30] | <b>995.174</b>  | 157.413         | 152.073         | 152.409         | 151.738        | P[4]  |
| Q[31] | 1037.860        | 125.062         | 119.723         | 120.058         | 119.387        | Q[3]  |
| P[32] | <b>1070.211</b> | 82.376          | 77.036          | 77.372          | 76.700         | P[2]  |
| E[33] | 1113.220        | 50.020          | 44.685          | 45.021          | 44.349         | E[1]  |

tr | Q80ZM5 | Q80ZM5\_MOUSE

GGAERRGASAAS<sup>Phospho</sup><sub>79.97</sub> SPAPKARTAAADRTPARPQPE

- ▶ fragmentation table for charge state 4+
- ▶ specType=etd
- ▶ score=73.57
- ▶ F104914.dat
- ▶ query=q2832\_p1
- ▶ precursor=668.538070
- ▶ chargePrecursor=5
- ▶ itol=0.8

| AA   | c              | y              | z+1            | z+2     | z              | AA   |
|------|----------------|----------------|----------------|---------|----------------|------|
| G 1  | 19.519         | <b>835.417</b> | <b>831.412</b> | 0.755   | <b>831.160</b> | G 33 |
| G 2  | 33.775         | <b>821.162</b> | 817.157        | 0.755   | 816.905        | G 32 |
| A 3  | 51.534         | <b>806.906</b> | <b>802.902</b> | 0.755   | <b>802.650</b> | A 31 |
| E 4  | 83.795         | 789.147        | 785.142        | 0.755   | 784.890        | E 30 |
| R 5  | 122.820        | 756.886        | 752.882        | 753.134 | 752.630        | R 29 |
| R 6  | 161.845        | 717.861        | 713.856        | 714.108 | 713.604        | R 28 |
| G 7  | 178.100        | 678.835        | 674.831        | 675.083 | 674.399        | G 27 |
| A 8  | 193.850        | 664.580        | 660.576        | 660.828 | 660.324        | A 26 |
| S 9  | 215.618        | <b>646.821</b> | 642.816        | 643.068 | 642.565        | S 25 |
| A 10 | 233.377        | 625.053        | 621.058        | 621.310 | 620.807        | A 24 |
| A 11 | 251.136        | 607.304        | 603.299        | 603.551 | 603.047        | A 23 |
| S 12 | 292.886        | 589.545        | 585.540        | 585.792 | 585.288        | S 22 |
| S 13 | 314.644        | 547.795        | 543.790        | 544.042 | 543.538        | S 21 |
| P 14 | 338.907        | 526.037        | 522.032        | 522.284 | 521.780        | P 20 |
| A 15 | 356.666        | 501.774        | 497.769        | 498.021 | 497.517        | A 19 |
| P 16 | 380.930        | 484.015        | 480.010        | 480.262 | 479.758        | P 18 |
| K 17 | 413.953        | 459.751        | 455.747        | 455.999 | 455.495        | K 17 |
| A 18 | <b>430.713</b> | 427.728        | 423.723        | 423.975 | 423.471        | A 16 |
| R 19 | 469.738        | 409.968        | 405.964        | 406.216 | 405.712        | R 15 |
| T 20 | 495.000        | 370.943        | 366.938        | 367.190 | 366.685        | T 14 |
| A 21 | 512.759        | 345.681        | 341.676        | 341.928 | 341.424        | A 13 |
| A 22 | 530.518        | 327.922        | 323.917        | 324.169 | 323.665        | A 12 |
| A 23 | 548.278        | 310.163        | 306.158        | 306.410 | 305.906        | A 11 |
| D 24 | 577.034        | 292.403        | 288.398        | 288.651 | 288.147        | D 10 |
| R 25 | 616.060        | 263.647        | 259.642        | 259.894 | 259.390        | R 9  |
| T 26 | 641.322        | 244.621        | 240.617        | 240.869 | 240.365        | T 8  |
| P 27 | 665.585        | 199.399        | 195.395        | 195.607 | 195.103        | P 7  |
| A 28 | <b>683.344</b> | 176.990        | 171.091        | 171.343 | 170.840        | A 6  |
| R 29 | 722.869        | 157.337        | 153.332        | 153.584 | 153.080        | R 5  |
| P 30 | 746.633        | 118.312        | 114.307        | 114.559 | 114.055        | P 4  |
| Q 31 | 778.647        | 94.048         | 90.044         | 90.296  | 89.792         | Q 3  |
| P 32 | <b>802.910</b> | 62.034         | 58.029         | 58.281  | 57.777         | P 2  |
| E 33 | <b>835.171</b> | 37.771         | 33.766         | 34.018  | 33.514         | E 1  |

# sp | P84244 | H33\_MOUSE

LRFQS<sup>Phospho</sup> AAIGALQE  
79.97

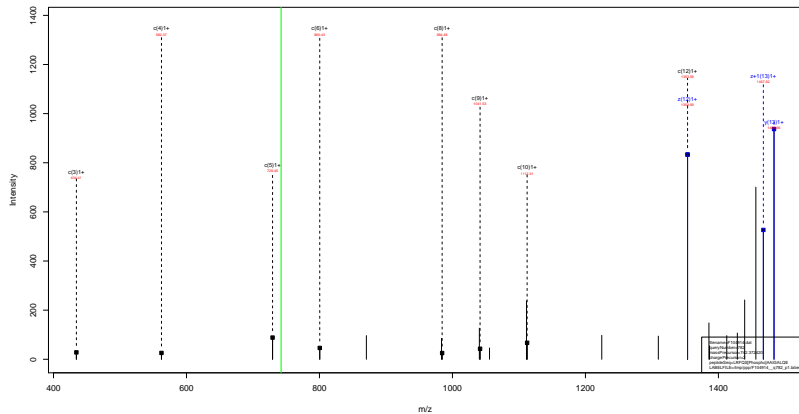

# sp | P84244 | H33\_MOUSE

LRFQS<sup>Phospho</sup> AAIGALQE  
79.97

- ▶ fragmentation table for charge state 1+
- ▶ specType=etd
- ▶ score=40.30
- ▶ F104914.dat
- ▶ query=q782\_p1
- ▶ precursor=742.372420
- ▶ chargePrecursor=2
- ▶ itol=0.8

| AA    | c               | y               | z+1             | z+2      | z               | AA    |
|-------|-----------------|-----------------|-----------------|----------|-----------------|-------|
| L[1]  | 131.118         | <b>1483.730</b> | <b>1467.712</b> | 0.000    | 1466.700        | L[13] |
| R[2]  | 287.210         | 1370.646        | 1354.628        | 1355.636 | <b>1353.020</b> | R[12] |
| F[3]  | <b>434.287</b>  | 1214.645        | 1198.527        | 1199.534 | 1197.519        | F[11] |
| Q[4]  | <b>562.346</b>  | 1067.477        | 1051.458        | 1052.466 | 1050.450        | Q[10] |
| S[5]  | <b>729.344</b>  | 939.418         | 923.400         | 924.407  | 922.392         | S[9]  |
| A[6]  | <b>800.381</b>  | 772.426         | 756.403         | 757.409  | 755.391         | A[9]  |
| A[7]  | 871.419         | 701.382         | 685.364         | 686.372  | 684.355         | A[7]  |
| I[8]  | <b>984.503</b>  | 630.346         | 614.327         | 615.335  | 613.319         | I[8]  |
| G[9]  | <b>1041.524</b> | 517.267         | 501.249         | 502.251  | 500.235         | G[5]  |
| A[10] | <b>1112.561</b> | 460.240         | 444.221         | 445.229  | 443.214         | A[4]  |
| L[11] | 1223.665        | 389.203         | 373.184         | 374.192  | 372.177         | L[11] |
| Q[12] | <b>1353.704</b> | 276.117         | 260.100         | 261.108  | 259.092         | Q[9]  |
| E[13] | 1482.746        | 148.060         | 132.042         | 133.050  | 131.034         | E[1]  |



# sp | P43277 | H13\_MOUSE

KNNSRIKLGLKSLVSKGTLVQTK <sup>Dimethyl</sup> 28.03 GTGASGSFKLNKKAASGE

- ▶ fragmentation table for charge state 1+
- ▶ specType=etd
- ▶ score=71.65
- ▶ F104915.dat
- ▶ query=q1503\_p1
- ▶ precursor=706.074710
- ▶ chargePrecursor=6
- ▶ itol=0.8

| AA   | c               | y               | z+1            | z+2             | z               | AA   |
|------|-----------------|-----------------|----------------|-----------------|-----------------|------|
| K 1  | 146.129         | 4233.425        | 4235.400       | 4216.414        | 4214.390        | K 41 |
| N 2  | <b>260.172</b>  | 4103.330        | 4087.311       | 4088.310        | 4086.301        | N 40 |
| N 3  | <b>374.215</b>  | 3909.287        | 3974.290       | 3974.276        | 3972.250        | N 39 |
| S 4  | <b>461.247</b>  | 3875.244        | 3859.226       | 3860.233        | 3858.217        | S 38 |
| K 5  | 617.348         | 3788.212        | 3772.193       | 3773.201        | 3771.185        | K 37 |
| T 6  | 730.422         | 3632.111        | 3616.090       | 3617.100        | 3615.084        | T 36 |
| K 7  | <b>858.537</b>  | 3519.027        | 3503.000       | 3504.018        | 3502.000        | K 35 |
| L 8  | <b>971.611</b>  | 3390.932        | 3374.915       | 3375.921        | 3373.905        | L 34 |
| G 9  | <b>1028.632</b> | 3277.848        | 3261.829       | 3262.837        | 3260.821        | G 33 |
| L 10 | <b>1141.716</b> | 3220.820        | 3204.800       | 3205.815        | 3203.800        | L 32 |
| K 11 | <b>1269.811</b> | 3107.742        | 3091.720       | 3092.731        | 3090.716        | K 31 |
| S 12 | <b>1358.843</b> | 3079.647        | 3063.629       | 3064.636        | 3062.621        | S 30 |
| L 13 | 1409.937        | 2982.615        | 2976.597       | 2977.604        | 2975.589        | L 29 |
| V 14 | 1568.996        | 2779.531        | 2763.513       | 2764.520        | 2762.505        | V 28 |
| S 15 | 1656.029        | 2680.463        | 2664.444       | 2665.452        | 2663.436        | S 27 |
| K 16 | 1784.123        | 2593.431        | 2577.412       | 2578.420        | 2576.404        | K 26 |
| G 17 | 1841.144        | 2495.386        | 2489.367       | 2490.375        | 2488.360        | G 25 |
| L 18 | 1942.192        | 2428.344        | 2392.299       | 2393.308        | 2391.293        | L 24 |
| L 19 | 2055.276        | 2307.267        | 2291.248       | 2292.256        | 2290.240        | L 23 |
| V 20 | 2154.344        | 2194.183        | 2178.164       | 2179.172        | 2177.156        | V 22 |
| Q 21 | 2252.403        | 2095.114        | 2079.090       | 2080.103        | 2078.088        | Q 21 |
| T 22 | 2383.451        | 1987.050        | 1971.037       | 1972.045        | 1970.029        | T 20 |
| K 23 | 2439.577        | 1899.000        | 1883.980       | 1884.997        | 1882.981        | K 19 |
| G 24 | 2508.599        | 1799.982        | 1793.961       | 1794.971        | 1792.954        | G 18 |
| T 25 | 2607.646        | <b>1652.860</b> | 1636.842       | 1637.849        | 1635.834        | T 17 |
| G 26 | 2754.668        | 1551.813        | 1535.794       | 1536.802        | 1534.786        | G 16 |
| A 27 | 2825.705        | 1494.791        | 1478.772       | 1479.780        | 1477.765        | A 15 |
| S 28 | 2912.737        | 1423.754        | 1407.735       | 1408.743        | <b>1406.727</b> | S 14 |
| G 29 | 2969.750        | <b>1336.722</b> | 1320.703       | <b>1321.711</b> | 1319.695        | G 13 |
| G 30 | 3056.792        | 1235.680        | 1219.660       | 1220.668        | 1218.654        | G 12 |
| F 31 | 3203.859        | <b>1192.658</b> | 1176.650       | <b>1177.658</b> | 1175.642        | F 11 |
| K 32 | 3331.954        | 1045.600        | 1029.581       | 1030.589        | <b>1028.573</b> | K 10 |
| L 33 | 3445.038        | 917.505         | 901.486        | 902.494         | <b>900.479</b>  | L 9  |
| N 34 | 3559.081        | 804.421         | <b>788.402</b> | 789.410         | 787.394         | N 8  |
| K 35 | 3687.176        | 699.374         | <b>674.359</b> | <b>675.367</b>  | 673.351         | K 7  |
| K 36 | 3815.271        | <b>562.293</b>  | <b>546.264</b> | 547.272         | 545.257         | K 6  |
| A 37 | 3896.308        | 434.188         | 418.169        | 419.177         | 417.162         | A 5  |
| A 38 | 3957.345        | 363.151         | 347.132        | 348.140         | 346.124         | A 4  |
| S 39 | 4044.377        | 292.114         | 276.095        | 277.103         | 275.087         | S 3  |
| G 40 | 4101.398        | 205.082         | 189.063        | 190.071         | 188.055         | G 2  |
| E 41 | 4230.441        | 148.050         | 132.042        | 133.050         | 131.034         | E 1  |

# sp | P43277 | H13\_MOUSE

KNNSRIKLGLKSLVSKGTLVQTK <sup>Dimethyl</sup> 28.03 GTGASGSFKLNKKAASGE

- ▶ fragmentation table for charge state 2+
- ▶ specType=etd
- ▶ score=71.65
- ▶ F104915.dat
- ▶ query=q1503\_p1
- ▶ precursor=706.074710
- ▶ chargePrecursor=6
- ▶ itol=0.8

| AA | c  | w               | #s1             | #s2             | #s3             | AA              |       |
|----|----|-----------------|-----------------|-----------------|-----------------|-----------------|-------|
| R  | 3  | 71.500          | 2118.210        | 2108.207        | 2118.711        | 2107.710        | K(4)  |
| N  | 2  | 130.589         | 2052.189        | 2044.150        | 2044.663        | 2043.655        | N(40) |
| N  | 3  | 187.611         | 1995.147        | 1987.130        | 1987.642        | 1986.634        | N(30) |
| S  | 4  | 231.127         | 1938.126        | 1930.110        | <b>1930.620</b> | 1929.612        | S(38) |
| R  | 5  | 309.178         | 1894.810        | <b>1886.600</b> | <b>1887.104</b> | <b>1886.096</b> | R(37) |
| T  | 6  | 365.720         | 1848.569        | 1840.550        | 1840.054        | 1840.040        | T(36) |
| R  | 7  | 429.282         | 1760.017        | 1752.000        | 1752.512        | 1751.504        | R(25) |
| L  | 8  | <b>486.309</b>  | 1695.970        | 1687.950        | 1688.464        | 1687.456        | L(34) |
| G  | 9  | <b>514.820</b>  | 1639.428        | <b>1631.418</b> | <b>1631.922</b> | 1630.914        | G(33) |
| L  | 10 | <b>571.362</b>  | 1610.917        | <b>1602.907</b> | <b>1603.411</b> | <b>1602.404</b> | L(32) |
| K  | 11 | <b>635.409</b>  | 1524.376        | 1546.365        | 1546.869        | 1545.862        | K(31) |
| S  | 12 | <b>678.925</b>  | <b>1490.327</b> | 1480.310        | <b>1482.822</b> | 1481.814        | S(30) |
| L  | 13 | 735.457         | 1446.811        | <b>1438.802</b> | <b>1439.306</b> | <b>1438.298</b> | L(29) |
| V  | 14 | <b>785.002</b>  | 1390.269        | 1382.250        | 1382.764        | 1381.756        | V(28) |
| S  | 15 | <b>828.518</b>  | 1340.735        | <b>1332.726</b> | <b>1333.230</b> | 1332.222        | S(27) |
| K  | 16 | <b>892.565</b>  | 1297.219        | 1289.210        | 1289.714        | <b>1288.706</b> | K(26) |
| G  | 17 | <b>921.076</b>  | 1243.172        | <b>1225.162</b> | <b>1225.666</b> | <b>1224.658</b> | G(25) |
| T  | 18 | <b>971.600</b>  | 1204.961        | 1196.951        | 1197.456        | 1196.448        | T(24) |
| L  | 19 | <b>1028.142</b> | 1154.137        | <b>1146.128</b> | <b>1146.632</b> | 1145.624        | L(23) |
| V  | 20 | <b>1077.676</b> | <b>1097.595</b> | 1089.586        | 1090.090        | <b>1089.082</b> | V(22) |
| Q  | 21 | <b>1141.705</b> | <b>1048.061</b> | <b>1040.051</b> | <b>1040.555</b> | <b>1039.547</b> | Q(21) |
| T  | 22 | <b>1192.229</b> | 1004.031        | <b>976.022</b>  | <b>976.526</b>  | <b>975.518</b>  | T(20) |
| L  | 23 | <b>1270.292</b> | <b>933.508</b>  | <b>925.498</b>  | <b>926.002</b>  | 924.994         | L(19) |
| G  | 24 | <b>1298.803</b> | <b>855.444</b>  | <b>847.435</b>  | <b>847.939</b>  | 846.931         | G(18) |
| T  | 25 | 1349.327        | 820.934         | <b>818.924</b>  | <b>819.428</b>  | <b>818.420</b>  | T(17) |
| G  | 26 | <b>1377.837</b> | 776.410         | 768.400         | 768.904         | 767.897         | G(16) |
| A  | 27 | 1413.356        | 747.899         | <b>739.890</b>  | <b>740.394</b>  | 739.386         | A(15) |
| S  | 28 | 1456.872        | 712.381         | 704.371         | 704.875         | 703.867         | S(14) |
| G  | 29 | 1495.393        | 668.869         | <b>660.855</b>  | <b>661.359</b>  | <b>660.351</b>  | G(13) |
| S  | 30 | <b>1528.899</b> | 640.354         | <b>632.345</b>  | <b>632.848</b>  | <b>631.841</b>  | S(12) |
| F  | 31 | <b>1602.433</b> | 606.838         | <b>588.829</b>  | <b>589.332</b>  | <b>588.325</b>  | F(11) |
| K  | 32 | 1696.480        | 523.304         | <b>515.294</b>  | <b>515.798</b>  | <b>514.790</b>  | K(10) |
| L  | 33 | 1723.022        | 499.256         | 451.247         | 451.751         | 450.743         | L(9)  |
| N  | 34 | 1789.044        | 468.714         | 384.703         | 385.207         | 384.201         | N(8)  |
| K  | 35 | <b>1844.091</b> | 345.697         | 337.693         | 338.197         | 337.170         | K(7)  |
| K  | 36 | 1908.139        | 281.645         | 273.636         | 274.140         | 273.132         | K(6)  |
| A  | 37 | 1943.657        | 217.598         | 209.589         | 210.092         | 209.084         | A(5)  |
| A  | 38 | 1979.176        | 182.079         | 174.070         | 174.574         | 173.566         | A(4)  |
| S  | 39 | 2022.692        | 148.567         | 136.553         | 137.056         | 136.048         | S(3)  |
| G  | 40 | 2051.203        | 103.045         | 89.035          | 89.539          | 88.531          | G(2)  |
| E  | 41 | 2115.724        | 74.534          | 66.524          | 67.028          | 66.021          | E(1)  |



# sp | P43277 | H13\_MOUSE

KNNSRIKLGLKSLVSKGTLVQTK <sup>Dimethyl</sup> 28.03 GTGASGSFKLNKKAASGE

- ▶ fragmentation table for charge state 3+
- ▶ specType=etd
- ▶ score=71.65
- ▶ F104915.dat
- ▶ query=q1503.p1
- ▶ precursor=706.074710
- ▶ chargePrecursor=6
- ▶ itol=0.8

| AA | c  | y               | g+1             | g+2             | e               | AA              |       |
|----|----|-----------------|-----------------|-----------------|-----------------|-----------------|-------|
| R  | 1  | 489.261         | <b>1411.146</b> | <b>1405.807</b> | <b>1406.143</b> | 4805.471        | K(4)  |
| N  | 2  | 87.395          | <b>1368.448</b> | <b>1363.109</b> | <b>1363.445</b> | <b>1362.773</b> | N(4)  |
| N  | 3  | 128.410         | 1330.434        | 1325.094        | <b>1325.430</b> | 1324.750        | N(3)  |
| S  | 4  | 154.420         | <b>1292.420</b> | 1287.080        | <b>1287.416</b> | 1286.744        | S(8)  |
| R  | 5  | 206.454         | 1263.409        | <b>1258.069</b> | <b>1258.405</b> | <b>1257.733</b> | R(37) |
| T  | 6  | 244.149         | 1231.375        | <b>1206.036</b> | <b>1206.372</b> | <b>1205.700</b> | T(6)  |
| R  | 7  | 288.647         | 1173.860        | 1168.521        | 1163.177        | 1168.000        | R(25) |
| L  | 8  | 324.542         | 1130.983        | <b>1125.643</b> | <b>1125.979</b> | 1125.307        | L(34) |
| G  | 9  | 343.549         | 1093.267        | <b>1087.948</b> | <b>1088.284</b> | <b>1087.612</b> | G(3)  |
| L  | 10 | 381.244         | 1074.280        | <b>1066.941</b> | <b>1069.277</b> | <b>1068.605</b> | L(32) |
| K  | 11 | 423.642         | <b>1036.586</b> | <b>1031.246</b> | <b>1031.582</b> | 1030.910        | K(31) |
| S  | 12 | 482.959         | <b>993.287</b>  | <b>988.548</b>  | <b>988.884</b>  | <b>988.212</b>  | S(30) |
| L  | 13 | 490.647         | 984.877         | <b>959.537</b>  | <b>959.873</b>  | 959.201         | L(28) |
| V  | 14 | 523.670         | 927.182         | <b>921.842</b>  | <b>922.178</b>  | <b>921.506</b>  | V(38) |
| S  | 15 | 552.681         | 894.159         | <b>888.820</b>  | <b>889.155</b>  | <b>888.484</b>  | S(27) |
| K  | 16 | 595.379         | <b>865.148</b>  | <b>859.809</b>  | <b>860.145</b>  | 859.473         | K(26) |
| G  | 17 | <b>814.266</b>  | 822.460         | <b>817.111</b>  | <b>817.446</b>  | <b>816.775</b>  | G(25) |
| T  | 18 | <b>648.869</b>  | 769.443         | 764.103         | <b>798.439</b>  | 797.767         | T(24) |
| L  | 19 | 685.754         | 769.760         | <b>764.421</b>  | <b>764.757</b>  | <b>764.085</b>  | L(23) |
| V  | 20 | <b>718.786</b>  | <b>732.066</b>  | <b>726.726</b>  | <b>727.062</b>  | <b>726.390</b>  | V(22) |
| Q  | 21 | <b>761.473</b>  | 699.043         | 693.703         | 694.039         | 693.367         | Q(21) |
| T  | 22 | <b>795.155</b>  | 656.357         | 651.017         | 651.353         | 650.681         | T(20) |
| L  | 23 | <b>847.187</b>  | 622.674         | 617.334         | 617.670         | 616.999         | L(19) |
| G  | 24 | <b>866.204</b>  | 570.632         | 565.293         | 565.628         | 564.957         | G(18) |
| T  | 25 | <b>899.887</b>  | 551.625         | <b>546.285</b>  | <b>546.621</b>  | <b>545.949</b>  | T(17) |
| G  | 26 | <b>918.894</b>  | 517.943         | 512.603         | 512.939         | 512.267         | G(16) |
| A  | 27 | 942.573         | 498.935         | 493.595         | 493.932         | 493.260         | A(15) |
| S  | 28 | <b>971.564</b>  | 475.266         | 469.927         | 470.263         | 469.591         | S(14) |
| G  | 29 | <b>990.571</b>  | 446.259         | 440.920         | 441.256         | 440.584         | G(13) |
| S  | 30 | 1019.602        | 427.235         | 421.896         | 422.232         | 421.561         | S(12) |
| F  | 31 | <b>1068.624</b> | 398.228         | 392.888         | 393.224         | 392.552         | F(11) |
| K  | 32 | <b>1111.323</b> | 349.205         | 343.865         | 344.201         | 343.529         | K(10) |
| L  | 33 | 1149.217        | 308.507         | 303.167         | 303.503         | 302.831         | L(9)  |
| N  | 34 | <b>1187.832</b> | 268.912         | 263.572         | 263.908         | 263.236         | N(8)  |
| K  | 35 | <b>1226.730</b> | 232.786         | 227.446         | 227.784         | 227.112         | K(7)  |
| K  | 36 | 1272.428        | 188.099         | 182.759         | 183.096         | 182.424         | K(6)  |
| A  | 37 | 1298.107        | 145.401         | 140.061         | 140.397         | 139.725         | A(5)  |
| A  | 38 | 1318.786        | 121.722         | 116.382         | 116.718         | 116.046         | A(4)  |
| S  | 39 | 1348.797        | 86.043          | 80.703          | 81.039          | 80.367          | S(3)  |
| G  | 40 | 1397.804        | 69.135          | 63.795          | 64.131          | 63.459          | G(2)  |
| E  | 41 | <b>1410.818</b> | 50.025          | 44.685          | 45.021          | 44.349          | E(1)  |

# sp | P43277 | H13\_MOUSE

KNNSRIKLGLKSLVSKGTLVQTK<sup>Dimethyl</sup> 28.03 GTGASGSFKLNKKAASGE

- ▶ fragmentation table for charge state 4+
- ▶ specType=etd
- ▶ score=71.65
- ▶ F104915.dat
- ▶ query=q1503\_p1
- ▶ precursor=706.074710
- ▶ chargePrecursor=6
- ▶ itol=0.8

| AA | c  | y               | #s1             | #s2             | z               | AA              |       |
|----|----|-----------------|-----------------|-----------------|-----------------|-----------------|-------|
| R  | 1  | 37.280          | <b>1058.612</b> | <b>1054.607</b> | <b>1054.859</b> | 1054.167        | K(4)  |
| N  | 2  | 65.798          | <b>1026.588</b> | <b>1022.583</b> | <b>1022.835</b> | <b>1022.331</b> | N(4)  |
| N  | 3  | 94.309          | 998.077         | <b>994.073</b>  | <b>994.324</b>  | <b>993.821</b>  | N(3)  |
| S  | 4  | 118.007         | 969.566         | <b>965.562</b>  | <b>965.814</b>  | <b>965.310</b>  | S(8)  |
| R  | 5  | 155.092         | 947.808         | <b>943.804</b>  | <b>944.056</b>  | <b>943.552</b>  | R(37) |
| I  | 6  | 183.263         | 926.763         | 924.737         | 923.581         | 924.267         | I(6)  |
| N  | 7  | 215.987         | 899.513         | <b>895.509</b>  | <b>895.761</b>  | <b>895.257</b>  | K(5)  |
| L  | 8  | 243.658         | <b>848.488</b>  | 844.484         | 844.736         | 844.232         | L(34) |
| G  | 9  | 257.614         | 820.217         | <b>816.213</b>  | <b>816.465</b>  | <b>815.961</b>  | G(3)  |
| L  | 10 | 286.125         | 805.965         | 801.957         | 802.209         | 801.705         | L(32) |
| K  | 11 | 318.208         | 777.691         | 773.686         | 773.938         | 773.434         | K(31) |
| S  | 12 | 339.666         | 748.561         | 744.553         | 743.918         | <b>741.411</b>  | S(30) |
| L  | 13 | 368.237         | 723.909         | 719.905         | 720.157         | 719.653         | L(28) |
| V  | 14 | 393.004         | 695.638         | 691.634         | 691.886         | 691.382         | V(26) |
| S  | 15 | 414.702         | 670.871         | 666.866         | 667.118         | 666.615         | S(27) |
| K  | 16 | 446.776         | <b>649.113</b>  | 645.108         | 645.360         | 644.857         | K(26) |
| G  | 17 | <b>461.042</b>  | 617.089         | <b>613.085</b>  | <b>613.337</b>  | 612.833         | G(25) |
| T  | 18 | <b>486.303</b>  | 602.834         | 598.827         | 599.081         | 598.577         | T(24) |
| L  | 19 | <b>514.574</b>  | 577.572         | 573.567         | 573.819         | 573.315         | L(23) |
| V  | 20 | 536.342         | <b>549.301</b>  | 545.296         | <b>545.548</b>  | 545.044         | V(22) |
| Q  | 21 | <b>571.356</b>  | 524.934         | 520.929         | 520.781         | 520.277         | Q(21) |
| T  | 22 | 598.618         | 492.519         | 488.515         | 488.767         | 488.263         | T(20) |
| K  | 23 | <b>635.650</b>  | 460.292         | 456.287         | 456.539         | 456.035         | K(19) |
| G  | 24 | 663.828         | 428.225         | 424.221         | 424.473         | 423.969         | G(18) |
| T  | 25 | <b>675.107</b>  | 413.971         | 409.966         | 410.218         | 409.714         | T(17) |
| G  | 26 | 689.422         | 388.709         | 384.704         | 384.956         | 384.452         | G(16) |
| A  | 27 | 707.182         | <b>374.453</b>  | 370.448         | 370.701         | 370.197         | A(15) |
| S  | 28 | 726.940         | 356.094         | 352.089         | 352.341         | 351.837         | S(14) |
| G  | 29 | 743.126         | 334.936         | 330.931         | 331.183         | 330.679         | G(13) |
| S  | 30 | <b>764.953</b>  | 320.681         | 316.676         | 316.928         | 316.424         | S(12) |
| F  | 31 | 801.720         | 298.923         | 294.918         | 295.170         | 294.666         | F(11) |
| K  | 32 | <b>833.744</b>  | 282.155         | 278.151         | 278.403         | 277.899         | K(10) |
| L  | 33 | <b>862.015</b>  | 230.132         | 226.127         | 226.379         | 225.875         | L(9)  |
| N  | 34 | <b>890.526</b>  | 208.061         | 204.056         | 204.308         | 203.804         | N(8)  |
| K  | 35 | <b>922.549</b>  | 173.526         | 169.521         | 169.773         | 169.269         | K(7)  |
| K  | 36 | 954.573         | 141.326         | 137.322         | 137.574         | 137.070         | K(6)  |
| A  | 37 | <b>972.332</b>  | 109.303         | 105.298         | 105.550         | 105.046         | A(5)  |
| A  | 38 | <b>990.092</b>  | 91.543          | 87.539          | 87.791          | 87.287          | A(4)  |
| S  | 39 | <b>1011.850</b> | 73.784          | 69.779          | 70.031          | 69.527          | S(3)  |
| G  | 40 | <b>1026.105</b> | 52.026          | 48.021          | 48.273          | 47.769          | G(2)  |
| E  | 41 | <b>1058.366</b> | 37.771          | 33.766          | 34.018          | 33.514          | E(1)  |

# sp | P43277 | H13\_MOUSE

KNNSRIKLGLKSLVSKGTLVQTK <sup>Dimethyl</sup> 28.03 GTGASGSFKLNKKAASGE

- ▶ fragmentation table for charge state 5+
- ▶ specType=etd
- ▶ score=71.65
- ▶ F104915.dat
- ▶ query=q1503.p1
- ▶ precursor=706.074710
- ▶ chargePrecursor=6
- ▶ itol=0.8

| AA | c  | y              | z+1            | z#2            | z              | AA             |       |
|----|----|----------------|----------------|----------------|----------------|----------------|-------|
| K  | 1  | 30.032         | <b>847.091</b> | 843.897        | 844.089        | 843.695        | K[41] |
| N  | 2  | 52.840         | <b>821.472</b> | 818.268        | <b>818.470</b> | 818.066        | N[40] |
| N  | 3  | 75.649         | <b>798.663</b> | <b>795.459</b> | <b>795.661</b> | <b>795.258</b> | N[39] |
| S  | 4  | 93.055         | 775.855        | 772.651        | 772.852        | 772.449        | S[38] |
| R  | 5  | 124.275        | 758.448        | 755.244        | 755.446        | 755.043        | R[37] |
| T  | 6  | 148.892        | <b>727.228</b> | 724.024        | 724.226        | 723.823        | T[36] |
| K  | 7  | 172.511        | 704.611        | 701.407        | 701.609        | 701.206        | K[35] |
| L  | 8  | 195.128        | <b>678.992</b> | <b>675.788</b> | 675.990        | <b>675.587</b> | L[34] |
| G  | 9  | 208.532        | 656.375        | 653.172        | 653.373        | 652.970        | G[33] |
| L  | 10 | 229.149        | 634.971        | 631.767        | 631.969        | 631.566        | L[32] |
| K  | 11 | 254.768        | 622.354        | 619.151        | 619.352        | 618.949        | K[31] |
| S  | 12 | 272.174        | 596.735        | 593.532        | 593.733        | 593.330        | S[30] |
| L  | 13 | 294.791        | 579.329        | 576.125        | 576.327        | 575.924        | L[29] |
| V  | 14 | 314.605        | 556.712        | 553.508        | 553.710        | 553.307        | V[28] |
| S  | 15 | 332.011        | 536.898        | 533.695        | 533.896        | 533.493        | S[27] |
| K  | 16 | 357.630        | 519.492        | 516.288        | 516.490        | 516.087        | K[26] |
| G  | 17 | 388.035        | 493.873        | 490.669        | 490.871        | 490.468        | G[25] |
| T  | 18 | 389.244        | 432.469        | 429.265        | 429.467        | 429.063        | T[24] |
| L  | 19 | 411.861        | 402.259        | 400.055        | 400.257        | 400.054        | L[23] |
| V  | 20 | 431.675        | 439.642        | 436.439        | 436.640        | 436.237        | V[22] |
| Q  | 21 | 457.286        | 419.829        | 416.625        | 416.826        | 416.423        | Q[21] |
| T  | 22 | 477.496        | 394.217        | 391.013        | 391.215        | 390.812        | T[20] |
| K  | 23 | 508.721        | <b>374.007</b> | 370.804        | 371.005        | 370.602        | K[19] |
| G  | 24 | 520.126        | 342.782        | 339.579        | 339.780        | 339.377        | G[18] |
| T  | 25 | 540.335        | 311.376        | 308.174        | 308.376        | 307.973        | T[17] |
| G  | 26 | 551.739        | 311.166        | 307.963        | 308.166        | 307.763        | G[16] |
| A  | 27 | 585.947        | 299.764        | 296.560        | 296.762        | 296.359        | A[15] |
| S  | 28 | 583.283        | 288.561        | 286.357        | 286.558        | 286.155        | S[14] |
| G  | 29 | 594.757        | 268.150        | 264.946        | 265.148        | 264.745        | G[13] |
| S  | 30 | 612.164        | 256.746        | 253.542        | 253.744        | 253.341        | S[12] |
| F  | 31 | 641.578        | 239.340        | 236.136        | 236.337        | 235.934        | F[11] |
| K  | 32 | 667.197        | 209.926        | 206.722        | 206.924        | 206.521        | K[10] |
| L  | 33 | 689.813        | 194.507        | 191.303        | 191.505        | 191.102        | L[9]  |
| N  | 34 | 712.622        | 161.690        | 158.486        | 158.688        | 158.285        | N[8]  |
| K  | 35 | 738.241        | 138.881        | 135.678        | 135.879        | 135.476        | K[7]  |
| K  | 36 | 763.860        | 113.262        | 110.058        | 110.260        | 109.857        | K[6]  |
| A  | 37 | 778.067        | 87.643         | 84.440         | 84.641         | 84.238         | A[5]  |
| A  | 38 | 792.275        | 73.436         | 70.232         | 70.434         | 70.031         | A[4]  |
| S  | 39 | 809.681        | 59.229         | 56.025         | 56.226         | 55.823         | S[3]  |
| G  | 40 | <b>821.085</b> | 41.822         | 38.618         | 38.820         | 38.417         | G[2]  |
| E  | 41 | 846.894        | 30.418         | 27.214         | 27.416         | 27.013         | E[1]  |

sp | P43277 | H13\_MOUSE

KNNSRIKLGLKSLVSKGLTVQTK <sup>Dimethyl</sup> 28.03 GTGASGSFKLNKKAASGE

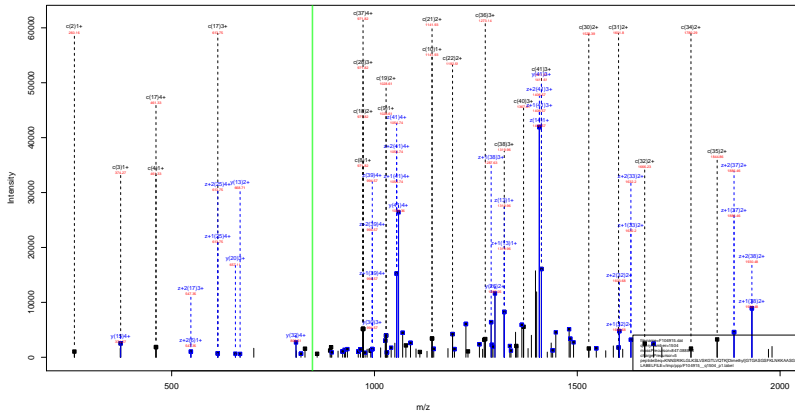

# sp | P43277 | H13\_MOUSE

KNNSRIKLGLKSLVSKGTLVQTK <sup>Dimethyl</sup> 28.03 GTGASGSFKLNKKAASGE

- ▶ fragmentation table for charge state 1+
- ▶ specType=etd
- ▶ score=75.55
- ▶ F104915.dat
- ▶ query=q1504\_p1
- ▶ precursor=847.088850
- ▶ chargePrecursor=5
- ▶ itol=0.8

| AA | c  | w               | g±1             | g±2             | z               | AA              |       |
|----|----|-----------------|-----------------|-----------------|-----------------|-----------------|-------|
| R  | 1  | 146.150         | 4231.523        | 4215.460        | 4216.414        | 4214.360        | R(4)  |
| N  | 2  | <b>260.172</b>  | 4103.130        | 4087.111        | 4088.119        | 4086.303        | N(40) |
| N  | 3  | <b>374.215</b>  | 3989.267        | 3971.288        | 3974.276        | 3972.260        | N(30) |
| S  | 4  | <b>461.247</b>  | 3875.244        | 3859.225        | 3860.431        | 3858.217        | S(8)  |
| R  | 5  | 617.348         | 3758.212        | 3742.193        | 3743.201        | 3741.185        | R(37) |
| I  | 6  | 720.429         | 3642.111        | 3626.062        | 3627.100        | 3625.084        | I(6)  |
| R  | 7  | <b>858.537</b>  | 3529.021        | 3513.000        | 3514.018        | 3512.000        | R(25) |
| L  | 8  | <b>971.611</b>  | 3416.932        | 3394.913        | 3395.921        | 3393.905        | L(34) |
| G  | 9  | <b>1028.632</b> | 3277.848        | 3261.830        | 3262.837        | 3260.821        | G(33) |
| L  | 10 | <b>1141.716</b> | 3120.826        | 3104.808        | 3105.815        | 3103.800        | L(32) |
| K  | 11 | 1269.811        | 3107.742        | 3091.724        | 3092.731        | 3090.716        | K(31) |
| S  | 12 | 1358.933        | 3079.541        | 3063.523        | 3064.536        | 3062.521        | S(30) |
| L  | 13 | 1469.937        | 2982.615        | 2975.597        | 2977.604        | 2975.589        | L(28) |
| V  | 14 | 1568.996        | 2779.531        | 2763.513        | 2764.520        | 2762.505        | V(28) |
| S  | 15 | 1656.020        | 2680.463        | 2664.444        | 2665.452        | 2663.436        | S(27) |
| K  | 16 | 1784.123        | 2593.431        | 2577.412        | 2578.420        | 2576.404        | K(26) |
| G  | 17 | 1841.144        | 2488.396        | 2469.317        | 2470.326        | 2468.307        | G(25) |
| T  | 18 | 1942.132        | 2408.314        | 2390.295        | 2393.303        | 2391.286        | T(24) |
| L  | 19 | 2055.276        | 2307.267        | 2291.248        | 2292.256        | 2290.240        | L(23) |
| V  | 20 | 2154.344        | 2194.183        | 2176.164        | 2179.172        | 2177.156        | V(22) |
| Q  | 21 | 2282.403        | 2095.114        | 2079.095        | 2080.103        | 2078.088        | Q(21) |
| T  | 22 | 2383.451        | 1997.056        | 1981.037        | 1982.046        | 1980.029        | T(20) |
| K  | 23 | 2539.577        | 1898.009        | 1884.000        | 1885.007        | 1883.991        | K(19) |
| G  | 24 | 2595.568        | 1799.882        | 1783.863        | 1784.871        | 1782.855        | G(18) |
| T  | 25 | 2697.646        | 1692.860        | 1676.842        | 1677.849        | 1675.834        | T(17) |
| G  | 26 | 2754.668        | 1581.813        | 1565.794        | 1566.802        | 1564.786        | G(16) |
| A  | 27 | 2825.705        | 1484.791        | 1478.772        | <b>1479.780</b> | 1477.765        | A(15) |
| S  | 28 | 2912.717        | 1374.744        | 1368.725        | 1369.743        | <b>1406.727</b> | S(14) |
| G  | 29 | 2999.718        | <b>1336.722</b> | <b>1320.703</b> | 1321.711        | <b>1319.695</b> | G(13) |
| S  | 30 | 3056.790        | 1279.700        | 1263.682        | 1264.690        | 1262.674        | S(12) |
| F  | 31 | 3203.859        | <b>1192.668</b> | 1176.650        | 1177.658        | 1175.642        | F(11) |
| K  | 32 | 3331.954        | 1045.600        | 1029.581        | <b>1030.589</b> | <b>1028.573</b> | K(10) |
| L  | 33 | 3445.038        | 917.505         | 901.486         | 902.494         | 900.479         | L(9)  |
| N  | 34 | 3559.081        | 804.421         | 788.402         | 789.410         | 787.394         | N(8)  |
| K  | 35 | 3673.116        | 690.378         | 674.359         | 675.367         | 673.352         | K(7)  |
| K  | 36 | 3815.271        | 562.283         | 546.264         | <b>547.272</b>  | 545.257         | K(6)  |
| A  | 37 | 3898.308        | 434.188         | 418.169         | 419.177         | 417.161         | A(5)  |
| A  | 38 | 3957.345        | 363.151         | 347.132         | 348.140         | 346.124         | A(4)  |
| S  | 39 | 4044.377        | 292.114         | 276.095         | 277.103         | 275.087         | S(3)  |
| G  | 40 | 4111.398        | 209.084         | 193.064         | 194.071         | 192.055         | G(2)  |
| E  | 41 | 4230.441        | 148.060         | 132.042         | 133.050         | 131.034         | E(1)  |

# sp | P43277 | H13\_MOUSE

KNNSRIKLGLKSLVSKGTLVQTK <sup>Dimethyl</sup> 28.03 GTGASGSFKLNKKAASGE

- ▶ fragmentation table for charge state 2+
- ▶ specType=etd
- ▶ score=75.55
- ▶ F104915.dat
- ▶ query=q1504\_p1
- ▶ precursor=847.088850
- ▶ chargePrecursor=5
- ▶ itol=0.8

| AA | c  | y               | #=1             | #=2             | z               | AA              |       |
|----|----|-----------------|-----------------|-----------------|-----------------|-----------------|-------|
| R  | 1  | 71.560          | 2118.210        | 2108.207        | 2118.711        | 2107.717        | K(4)  |
| N  | 2  | 130.589         | 2052.189        | 2044.150        | 2044.663        | 2043.655        | N(40) |
| N  | 3  | 187.611         | 1995.147        | 1987.130        | 1987.642        | 1986.634        | N(30) |
| S  | 4  | 231.127         | 1938.126        | <b>1930.116</b> | <b>1930.620</b> | 1929.612        | S(38) |
| R  | 5  | 309.176         | 1894.610        | <b>1886.600</b> | <b>1887.104</b> | <b>1886.096</b> | R(37) |
| T  | 6  | 365.720         | 1848.569        | 1838.550        | 1839.054        | 1838.046        | T(36) |
| R  | 7  | 429.767         | 1760.017        | 1752.000        | 1752.512        | 1751.504        | R(25) |
| L  | 8  | 498.306         | 1695.076        | <b>1687.960</b> | <b>1688.464</b> | <b>1687.456</b> | L(34) |
| G  | 9  | 514.620         | 1639.428        | <b>1631.418</b> | <b>1631.922</b> | 1630.914        | G(33) |
| L  | 10 | 571.302         | 1610.917        | <b>1602.907</b> | <b>1603.411</b> | <b>1602.404</b> | L(32) |
| K  | 11 | 635.409         | 1524.370        | <b>1546.365</b> | <b>1546.869</b> | 1545.862        | K(31) |
| S  | 12 | 693.626         | <b>1490.327</b> | <b>1482.318</b> | <b>1482.822</b> | 1481.814        | S(30) |
| L  | 13 | 735.667         | <b>1446.811</b> | <b>1438.802</b> | <b>1439.306</b> | 1438.298        | L(29) |
| V  | 14 | 785.002         | 1390.269        | 1382.250        | 1382.764        | 1381.756        | V(28) |
| S  | 15 | <b>828.518</b>  | 1340.735        | 1332.720        | <b>1333.230</b> | 1332.222        | S(27) |
| K  | 16 | <b>892.565</b>  | <b>1297.219</b> | <b>1289.210</b> | <b>1289.714</b> | <b>1288.706</b> | K(26) |
| G  | 17 | <b>921.076</b>  | 1231.172        | <b>1225.162</b> | <b>1225.666</b> | <b>1224.658</b> | G(25) |
| T  | 18 | <b>971.600</b>  | 1094.061        | <b>1196.051</b> | <b>1197.155</b> | 1196.147        | T(24) |
| L  | 19 | <b>1028.142</b> | 1154.137        | <b>1146.128</b> | <b>1146.632</b> | <b>1145.624</b> | L(23) |
| V  | 20 | <b>1077.676</b> | 1097.595        | <b>1089.586</b> | 1090.090        | <b>1089.082</b> | V(22) |
| Q  | 21 | <b>1141.705</b> | 1048.061        | 1040.051        | <b>1040.555</b> | 1039.547        | Q(21) |
| T  | 22 | <b>1192.229</b> | 984.031         | 976.022         | <b>976.526</b>  | 975.518         | T(20) |
| L  | 23 | <b>1270.292</b> | <b>933.508</b>  | 925.499         | <b>926.002</b>  | 924.994         | L(19) |
| G  | 24 | 1298.652        | 885.444         | 847.435         | 847.939         | 846.931         | G(18) |
| T  | 25 | <b>1349.327</b> | 826.034         | <b>818.924</b>  | <b>819.428</b>  | <b>818.420</b>  | T(17) |
| G  | 26 | 1377.637        | 776.410         | 768.401         | 768.904         | 767.897         | G(16) |
| A  | 27 | 1413.356        | 747.899         | 739.890         | 740.394         | 739.386         | A(15) |
| S  | 28 | 1456.672        | 712.381         | 704.371         | 704.875         | 703.867         | S(14) |
| G  | 29 | 1495.918        | <b>668.805</b>  | 660.795         | 661.299         | 660.291         | G(13) |
| S  | 30 | <b>1528.899</b> | 640.354         | 632.345         | 632.848         | 631.841         | S(12) |
| F  | 31 | <b>1602.433</b> | 596.838         | 588.829         | 589.332         | 588.325         | F(11) |
| K  | 32 | <b>1666.480</b> | 523.304         | 515.294         | 515.798         | 514.790         | K(10) |
| L  | 33 | 1727.022        | 499.256         | 451.247         | 451.751         | 450.743         | L(9)  |
| N  | 34 | <b>1780.044</b> | 469.714         | 394.703         | 395.206         | 394.201         | N(8)  |
| K  | 35 | <b>1844.091</b> | 345.697         | 337.683         | 338.187         | 337.179         | K(7)  |
| K  | 36 | 1908.139        | 281.645         | 273.636         | 274.140         | 273.132         | K(6)  |
| A  | 37 | 1943.657        | 217.598         | 209.589         | 210.092         | 209.084         | A(5)  |
| A  | 38 | 1978.176        | 182.079         | 174.070         | 174.574         | 173.566         | A(4)  |
| S  | 39 | 2022.662        | 148.561         | 138.551         | 139.055         | 138.047         | S(3)  |
| G  | 40 | 2051.203        | 103.045         | 88.033          | 88.536          | 87.528          | G(2)  |
| E  | 41 | 2115.724        | 74.534          | 66.524          | 67.028          | 66.021          | E(1)  |

# sp | P43277 | H13\_MOUSE

KNNSRIKLGLKSLVSKGTLVQTK <sup>Dimethyl</sup> 28.03 GTGASGSFKLNKKAASGE

- ▶ fragmentation table for charge state 3+
- ▶ specType=etd
- ▶ score=75.55
- ▶ F104915.dat
- ▶ query=q1504\_p1
- ▶ precursor=847.088850
- ▶ chargePrecursor=5
- ▶ itol=0.8

| AA | c  | p               | s+1             | s+2             | e               | AA              |       |
|----|----|-----------------|-----------------|-----------------|-----------------|-----------------|-------|
| R  | 1  | 49.361          | <b>1411.146</b> | <b>1405.807</b> | <b>1406.143</b> | 4035.471        | K(4)  |
| N  | 2  | 87.395          | 1336.445        | <b>1363.109</b> | <b>1363.445</b> | <b>1362.773</b> | N(4)  |
| N  | 3  | 125.410         | 1330.434        | 1325.094        | 1325.430        | 1324.756        | N(3)  |
| S  | 4  | 154.420         | <b>1292.426</b> | <b>1287.080</b> | <b>1287.416</b> | 1286.744        | S(8)  |
| R  | 5  | 206.454         | 1263.409        | <b>1258.069</b> | <b>1258.405</b> | 1257.731        | R(37) |
| I  | 6  | 244.149         | 1231.375        | 1206.036        | 1206.372        | 1205.700        | I(6)  |
| K  | 7  | 289.647         | 1173.690        | 1166.341        | 1166.677        | 1166.005        | K(5)  |
| L  | 8  | 324.542         | 1130.983        | 1125.643        | 1125.979        | 1125.307        | L(34) |
| G  | 9  | 343.549         | 1093.267        | 1087.948        | <b>1088.284</b> | 1087.612        | G(3)  |
| L  | 10 | 381.244         | 1074.260        | <b>1068.941</b> | <b>1069.277</b> | 1068.605        | L(32) |
| K  | 11 | 423.642         | 1036.549        | <b>1031.246</b> | 1031.582        | <b>1030.910</b> | K(31) |
| S  | 12 | 482.959         | <b>993.887</b>  | 988.549         | 988.884         | 988.212         | S(30) |
| L  | 13 | 490.647         | <b>964.877</b>  | <b>959.537</b>  | <b>959.873</b>  | <b>959.201</b>  | L(28) |
| V  | 14 | 523.670         | 927.183         | <b>921.842</b>  | <b>922.178</b>  | <b>921.506</b>  | V(38) |
| S  | 15 | 552.601         | <b>894.159</b>  | 888.820         | 889.156         | 888.484         | S(27) |
| K  | 16 | 595.379         | 865.148         | 859.809         | 860.145         | 859.473         | K(26) |
| G  | 17 | <b>614.386</b>  | 822.490         | 817.151         | 817.486         | 816.815         | G(25) |
| T  | 18 | 643.659         | 803.443         | 798.103         | 798.439         | 797.767         | T(24) |
| L  | 19 | 685.764         | 769.760         | 764.421         | 764.757         | 764.085         | L(23) |
| V  | 20 | 718.786         | 733.666         | 728.326         | 727.662         | 726.990         | V(22) |
| Q  | 21 | 761.473         | 699.043         | 693.703         | 694.039         | 693.367         | Q(21) |
| T  | 22 | 795.155         | <b>656.357</b>  | 651.017         | 651.353         | 650.681         | T(20) |
| K  | 23 | 847.129         | 622.674         | 617.334         | 617.670         | 616.999         | K(19) |
| G  | 24 | 896.204         | 579.632         | 574.293         | 574.628         | 574.956         | G(18) |
| T  | 25 | 899.887         | 551.625         | 546.285         | <b>546.621</b>  | 545.949         | T(17) |
| G  | 26 | 918.894         | 517.943         | 512.603         | 512.939         | 512.267         | G(16) |
| A  | 27 | 942.573         | 498.935         | 493.595         | 493.932         | 493.260         | A(15) |
| S  | 28 | <b>971.584</b>  | 476.266         | 469.917         | 470.253         | 469.581         | S(14) |
| G  | 29 | <b>990.591</b>  | 446.259         | 440.920         | 441.256         | 440.584         | G(13) |
| S  | 30 | 1019.602        | 427.235         | 421.896         | 422.232         | 421.561         | S(12) |
| F  | 31 | 1066.624        | 398.228         | 392.888         | 393.224         | 392.552         | F(11) |
| K  | 32 | <b>1111.323</b> | 349.205         | 343.865         | 344.201         | 343.529         | K(10) |
| L  | 33 | 1149.017        | 306.507         | 301.167         | 301.503         | 300.831         | L(9)  |
| N  | 34 | 1187.693        | 268.912         | 263.572         | 263.908         | 263.236         | N(8)  |
| K  | 35 | <b>1229.730</b> | 230.796         | 225.456         | 225.794         | 225.122         | K(7)  |
| K  | 36 | <b>1272.428</b> | 188.099         | 182.759         | 183.096         | 182.424         | K(6)  |
| A  | 37 | 1296.107        | 145.401         | 140.061         | 140.397         | 139.725         | A(5)  |
| A  | 38 | <b>1319.786</b> | 121.722         | 116.382         | 116.718         | 116.046         | A(4)  |
| S  | 39 | 1348.767        | 86.043          | 80.703          | 81.039          | 80.367          | S(3)  |
| G  | 40 | <b>1367.804</b> | 69.133          | 63.793          | 64.129          | 63.457          | G(2)  |
| E  | 41 | <b>1410.818</b> | 50.025          | 44.685          | 45.021          | 44.349          | E(1)  |

# sp | P43277 | H13\_MOUSE

KNNSRIKLGLKSLVSKGTLVQTK <sup>Dimethyl</sup> 28.03 GTGASGSFKLNKKAASGE

- ▶ fragmentation table for charge state 4+
- ▶ specType=etd
- ▶ score=75.55
- ▶ F104915.dat
- ▶ query=q1504\_p1
- ▶ precursor=847.088850
- ▶ chargePrecursor=5
- ▶ itol=0.8

| AA | c  | y               | #s1             | #s2             | #s3             | AA              |       |
|----|----|-----------------|-----------------|-----------------|-----------------|-----------------|-------|
| R  | 3  | 37.280          | <b>1058.612</b> | <b>1054.607</b> | <b>1054.850</b> | <b>1054.355</b> | K(4)  |
| N  | 2  | 65.798          | <b>1026.588</b> | 1022.583        | 1022.635        | 1022.311        | N(40) |
| N  | 3  | 94.309          | 998.077         | <b>994.073</b>  | <b>994.324</b>  | <b>993.821</b>  | N(30) |
| S  | 4  | 118.007         | 969.566         | <b>965.562</b>  | <b>965.814</b>  | <b>965.310</b>  | S(38) |
| R  | 5  | 155.092         | 947.808         | 943.804         | 944.056         | 943.552         | R(37) |
| I  | 6  | 183.263         | 926.763         | 924.779         | 925.030         | 924.527         | I(36) |
| I  | 7  | 213.387         | 908.512         | 905.507         | 906.759         | 906.256         | I(25) |
| L  | 8  | 243.658         | 888.488         | 884.484         | 884.736         | 884.232         | L(34) |
| G  | 9  | 257.914         | 820.217         | 816.213         | 816.465         | 815.961         | G(33) |
| L  | 10 | 288.125         | <b>805.962</b>  | 801.957         | 802.209         | 801.705         | L(32) |
| K  | 11 | 318.208         | 777.691         | 773.686         | 773.938         | 773.434         | K(31) |
| S  | 12 | 339.966         | 748.581         | 744.583         | 744.818         | 744.311         | S(30) |
| L  | 13 | 368.237         | 723.909         | 719.905         | 720.157         | 719.651         | L(28) |
| V  | 14 | 393.004         | 695.638         | 691.634         | 691.886         | 691.382         | V(28) |
| S  | 15 | 414.762         | 670.871         | 666.866         | 667.118         | 666.614         | S(27) |
| K  | 16 | 446.706         | 649.113         | 645.108         | 645.360         | 644.857         | K(26) |
| G  | 17 | <b>461.042</b>  | 617.089         | <b>613.085</b>  | <b>613.337</b>  | 612.833         | G(25) |
| T  | 18 | 488.973         | 602.834         | 598.833         | 599.084         | 598.577         | T(24) |
| L  | 19 | 514.574         | 577.572         | 573.567         | 573.819         | 573.315         | L(23) |
| V  | 20 | 539.342         | 549.301         | 545.296         | 545.548         | 545.044         | V(22) |
| Q  | 21 | 571.356         | 524.534         | 520.529         | 520.781         | 520.277         | Q(21) |
| T  | 22 | 596.618         | 492.519         | 488.515         | 488.767         | 488.263         | T(20) |
| K  | 23 | 635.950         | 460.252         | 456.253         | 456.505         | 456.001         | K(19) |
| G  | 24 | 669.962         | 428.225         | 424.221         | 424.473         | 423.969         | G(18) |
| T  | 25 | 695.187         | 413.971         | 409.966         | 410.218         | 409.714         | T(17) |
| G  | 26 | 669.422         | 388.709         | 384.704         | 384.956         | 384.452         | G(16) |
| A  | 27 | 707.182         | <b>374.453</b>  | 370.449         | 370.701         | 370.197         | A(15) |
| S  | 28 | 728.940         | 356.094         | 352.089         | 352.341         | 351.837         | S(14) |
| G  | 29 | 743.195         | 334.936         | 330.931         | 331.183         | 330.679         | G(13) |
| S  | 30 | 754.953         | 320.681         | 316.676         | 316.928         | 316.424         | S(12) |
| F  | 31 | 801.720         | 298.923         | 294.918         | 295.170         | 294.666         | F(11) |
| K  | 32 | 833.744         | 282.155         | 278.151         | 278.403         | 277.899         | K(10) |
| L  | 33 | <b>865.015</b>  | 230.132         | 226.127         | 226.379         | 225.875         | L(9)  |
| T  | 34 | <b>890.526</b>  | 208.081         | 204.082         | 204.334         | 203.830         | T(8)  |
| K  | 35 | 922.349         | 173.350         | 169.345         | 169.597         | 169.093         | K(7)  |
| K  | 36 | 954.573         | 141.326         | 137.322         | 137.574         | 137.070         | K(6)  |
| A  | 37 | <b>972.332</b>  | 109.303         | 105.298         | 105.550         | 105.046         | A(5)  |
| A  | 38 | <b>990.092</b>  | 91.543          | 87.539          | 87.790          | 87.287          | A(4)  |
| S  | 39 | 111.558         | 73.784          | 69.779          | 70.031          | 69.527          | S(3)  |
| G  | 40 | <b>1026.105</b> | 52.026          | 48.021          | 48.273          | 47.769          | G(2)  |
| E  | 41 | 1058.356        | 37.771          | 33.766          | 34.018          | 33.514          | E(1)  |



# sp | Q6GSS7 | H2A2A\_MOUSE

LNKLLGK <sup>Dimethyl</sup>VTIAQGGVLPNIQAVLLPKKTE  
28.03

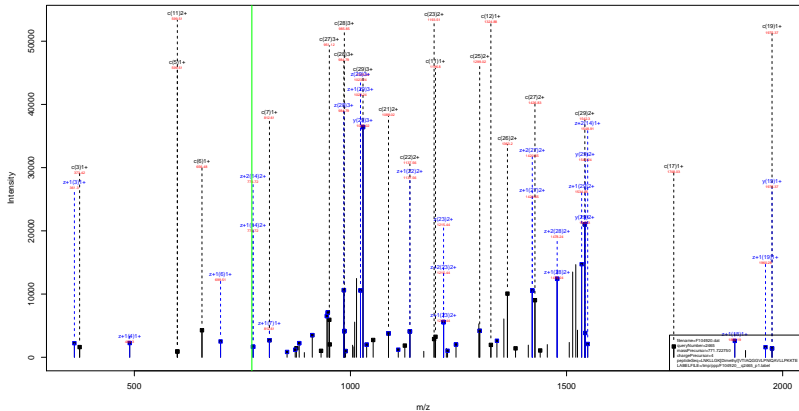

# sp | Q6GSS7 | H2A2A\_MOUSE

LNKLLGK <sup>Dimethyl</sup> <sub>28.03</sub> VTIAQGGVLPNIQAVLLPKKTE

- ▶ fragmentation table for charge state 1+
- ▶ specType=etd
- ▶ score=77.22
- ▶ F104920.dat
- ▶ query=q2465\_p1
- ▶ precursor=771.722750
- ▶ chargePrecursor=4
- ▶ itol=0.8

| AA    | c               | y               | z+1             | z+2             | z        | AA    |
|-------|-----------------|-----------------|-----------------|-----------------|----------|-------|
| L[1]  | 131.118         | 3083.892        | 3067.873        | 0.000           | 3066.865 | L[26] |
| N[2]  | 245.161         | 2970.808        | 2954.789        | 2935.797        | 2953.781 | N[28] |
| K[3]  | <b>373.256</b>  | 2856.765        | 2840.746        | 2841.754        | 2839.738 | K[27] |
| L[4]  | 488.340         | 2728.670        | 2712.651        | 2713.659        | 2711.643 | L[26] |
| L[5]  | <b>699.424</b>  | 2615.585        | 2599.567        | 2600.575        | 2598.559 | L[25] |
| G[6]  | <b>636.445</b>  | 2502.500        | 2486.483        | 2487.491        | 2485.475 | G[24] |
| K[7]  | <b>812.572</b>  | 2445.480        | 2429.462        | 2430.469        | 2428.454 | K[23] |
| V[8]  | <b>911.640</b>  | 2289.354        | 2273.335        | 2274.343        | 2272.327 | V[22] |
| T[9]  | 1012.688        | 2190.288        | 2174.267        | 2175.275        | 2173.259 | T[21] |
| I[10] | <b>1125.772</b> | 2089.230        | 2073.210        | 2074.227        | 2072.211 | I[20] |
| A[11] | <b>1196.809</b> | <b>1976.154</b> | <b>1960.135</b> | 1961.143        | 1959.127 | A[19] |
| Q[12] | <b>1324.867</b> | 1925.111        | <b>1809.098</b> | 1890.106        | 1888.090 | Q[18] |
| G[13] | <b>1381.889</b> | 1777.058        | 1761.039        | 1762.047        | 1760.032 | G[17] |
| G[14] | <b>1438.910</b> | 1720.037        | 1704.018        | 1705.026        | 1703.010 | G[16] |
| V[15] | 1537.879        | 1663.015        | 1646.997        | 1648.004        | 1645.989 | V[15] |
| L[16] | 1651.063        | 1563.947        | 1547.928        | <b>1548.936</b> | 1546.920 | L[14] |
| F[17] | <b>1748.116</b> | 1490.863        | 1474.844        | 1475.852        | 1473.836 | F[13] |
| N[18] | 1862.959        | 1353.810        | 1337.791        | <b>1338.799</b> | 1336.783 | N[12] |
| I[19] | <b>1975.243</b> | 1239.767        | 1223.748        | <b>1224.756</b> | 1222.741 | I[11] |
| Q[20] | 2103.301        | 1126.683        | <b>1110.664</b> | 1111.672        | 1109.656 | Q[10] |
| A[21] | 2174.338        | 998.624         | 982.606         | 983.614         | 981.598  | A[9]  |
| V[22] | 2273.407        | 927.587         | <b>911.569</b>  | 912.576         | 910.561  | V[8]  |
| L[23] | 2389.491        | 808.513         | <b>813.500</b>  | 813.508         | 811.492  | L[7]  |
| L[24] | 2499.575        | 715.435         | <b>699.416</b>  | 700.424         | 698.408  | L[6]  |
| P[25] | 2596.628        | 602.351         | 586.332         | 587.340         | 585.324  | P[5]  |
| K[26] | 2724.723        | 505.268         | <b>489.279</b>  | 490.287         | 488.271  | K[4]  |
| K[27] | 2852.818        | 377.203         | <b>361.184</b>  | 362.192         | 360.177  | K[3]  |
| T[28] | 2953.865        | 249.106         | 233.089         | 234.097         | 232.082  | T[2]  |
| E[29] | 3082.008        | 148.060         | 132.042         | 133.050         | 131.034  | E[1]  |

# sp | Q6GSS7 | H2A2A\_MOUSE

LNKLLGK <sup>Dimethyl</sup><sub>28.03</sub> VTIAQGGVLPNIQAVLLPKKTE

- ▶ fragmentation table for charge state 2+
- ▶ specType=etd
- ▶ score=77.22
- ▶ F104920.dat
- ▶ query=q2465\_p1
- ▶ precursor=771.722750
- ▶ chargePrecursor=4
- ▶ itol=0.8

| AA  | c               | y               | z+1             | z+2             | z               | AA   |
|-----|-----------------|-----------------|-----------------|-----------------|-----------------|------|
| L1  | 66.053          | <b>1542.450</b> | <b>1534.440</b> | 9.504           | 1533.930        | L126 |
| N12 | 123.054         | 1485.905        | <b>1477.898</b> | <b>1478.402</b> | 1477.304        | N20  |
| K13 | 187.132         | 1428.889        | <b>1420.877</b> | <b>1421.381</b> | <b>1420.373</b> | K27  |
| L14 | 243.674         | 1364.839        | 1356.829        | 1357.333        | 1356.325        | L26  |
| L15 | 300.216         | 1308.297        | 1300.287        | 1300.791        | <b>1299.783</b> | L25  |
| G16 | 358.759         | 1251.755        | <b>1243.745</b> | <b>1244.249</b> | 1243.241        | G24  |
| K17 | 406.799         | 1223.244        | <b>1215.234</b> | <b>1215.738</b> | <b>1214.731</b> | K23  |
| V18 | 456.324         | 1145.181        | <b>1137.171</b> | <b>1137.675</b> | 1136.667        | V22  |
| T19 | 506.840         | 1095.646        | <b>1087.637</b> | <b>1088.141</b> | 1087.133        | T21  |
| T10 | 563.390         | 1045.123        | <b>1037.113</b> | <b>1037.617</b> | 1036.609        | T20  |
| A11 | <b>598.908</b>  | <b>988.581</b>  | <b>982.117</b>  | <b>981.675</b>  | 980.667         | A19  |
| G12 | 662.937         | 933.066         | <b>945.053</b>  | <b>945.557</b>  | 944.549         | G18  |
| G13 | 691.448         | 889.033         | <b>881.023</b>  | <b>881.527</b>  | 880.519         | G17  |
| G14 | 719.959         | 860.522         | 852.513         | <b>853.017</b>  | 852.009         | G16  |
| V15 | 769.493         | 832.011         | 824.002         | 824.506         | 823.498         | V15  |
| L16 | 830.035         | 782.477         | <b>774.468</b>  | <b>774.972</b>  | <b>773.964</b>  | L14  |
| T17 | <b>874.561</b>  | 728.935         | 721.925         | 721.930         | 721.423         | T13  |
| N18 | <b>931.583</b>  | 677.400         | 669.390         | 669.903         | 668.895         | N12  |
| I19 | <b>988.125</b>  | 620.867         | 612.878         | 612.882         | 611.874         | I11  |
| Q20 | <b>1052.154</b> | 563.845         | 555.836         | 556.340         | 555.332         | Q10  |
| A21 | <b>1087.673</b> | 499.816         | 491.807         | 492.310         | 491.303         | A0   |
| V22 | <b>1137.207</b> | 484.297         | 476.288         | 476.792         | 475.784         | V8   |
| L23 | <b>1193.749</b> | 414.763         | 406.754         | 407.258         | 406.251         | L17  |
| L24 | 1250.291        | 358.221         | 350.213         | 350.716         | 349.708         | L16  |
| P25 | <b>1298.817</b> | 301.679         | 293.670         | 294.174         | 293.166         | P5   |
| K26 | <b>1362.805</b> | 253.153         | 245.143         | 245.647         | 244.639         | K4   |
| K27 | <b>1426.912</b> | 189.105         | 181.096         | 181.600         | 180.592         | K3   |
| T28 | 1474.838        | 125.058         | 117.048         | 117.552         | 116.544         | T12  |
| E29 | <b>1541.958</b> | 74.534          | 66.524          | 67.028          | 66.021          | E1   |

# sp | Q6GSS7 | H2A2A\_MOUSE

LNKLLGK <sup>Dimethyl</sup> <sub>28.03</sub> VTIAQGGVLPNIQAVLLPKKTE

- ▶ fragmentation table for charge state 3+
- ▶ specType=etd
- ▶ score=77.22
- ▶ F104920.dat
- ▶ query=q2465\_p1
- ▶ precursor=771.722750
- ▶ chargePrecursor=4
- ▶ itol=0.8

| AA    | c               | y               | z+1             | z+2            | z               | AA    |
|-------|-----------------|-----------------|-----------------|----------------|-----------------|-------|
| L[1]  | 44.377          | <b>1028.635</b> | <b>1023.296</b> | 0.672          | <b>1022.960</b> | L[20] |
| N[2]  | 82.302          | 900.941         | <b>985.601</b>  | <b>985.937</b> | <b>985.265</b>  | N[20] |
| K[3]  | 125.090         | 952.920         | <b>947.587</b>  | <b>947.923</b> | <b>947.251</b>  | K[27] |
| L[4]  | 162.785         | 910.228         | 904.889         | 905.225        | 904.553         | L[26] |
| L[5]  | 200.479         | <b>872.533</b>  | 867.104         | 867.530        | 866.898         | L[25] |
| Q[6]  | 239.887         | 824.337         | 820.499         | 820.835        | 820.163         | Q[24] |
| K[7]  | 271.529         | 815.832         | 810.402         | 810.828        | 810.156         | K[23] |
| V[8]  | 304.552         | 783.700         | 758.450         | 758.786        | 758.114         | V[22] |
| T[9]  | 338.234         | 730.767         | 725.427         | 725.763        | 725.091         | T[21] |
| I[10] | 375.920         | 697.084         | 691.745         | 692.081        | 691.409         | I[20] |
| A[11] | 399.608         | 699.380         | 654.050         | 654.386        | 653.714         | A[19] |
| Q[12] | 442.294         | 630.711         | 630.374         | 630.707        | 630.035         | Q[19] |
| G[13] | 461.301         | 593.024         | 587.685         | 588.021        | 587.349         | G[17] |
| G[14] | 480.308         | 574.017         | 568.678         | 569.013        | 568.341         | G[16] |
| V[15] | 513.331         | 555.010         | 549.670         | 550.006        | 549.334         | V[15] |
| L[16] | 551.026         | 521.987         | 516.648         | 516.984        | 516.312         | L[14] |
| F[17] | 583.177         | 484.262         | 478.923         | 479.259        | 478.587         | F[13] |
| T[18] | 621.391         | 451.942         | 446.603         | 446.938        | 446.266         | T[12] |
| I[19] | 659.886         | 413.927         | 408.588         | 408.924        | 408.252         | I[11] |
| Q[20] | 701.772         | 376.233         | 370.893         | 371.229        | 370.557         | Q[10] |
| A[21] | 725.451         | 333.540         | 328.201         | 328.543        | 327.871         | A[9]  |
| V[22] | 758.474         | 309.867         | 304.528         | 304.864        | 304.192         | V[9]  |
| L[23] | 796.168         | 276.844         | 271.505         | 271.841        | 271.169         | L[7]  |
| L[24] | 833.863         | 239.159         | 233.819         | 234.148        | 233.476         | L[6]  |
| P[25] | 866.214         | 201.455         | 196.116         | 196.451        | 195.780         | P[5]  |
| K[26] | 908.912         | 169.104         | 163.765         | 164.101        | 163.429         | K[4]  |
| K[27] | <b>951.611</b>  | 126.400         | 121.061         | 121.402        | 120.730         | K[3]  |
| T[28] | <b>985.293</b>  | 83.700          | 78.361          | 78.704         | 78.032          | T[2]  |
| E[29] | <b>1028.307</b> | 50.025          | 44.685          | 45.021         | 44.349          | E[1]  |



# sp | Q6GSS7 | H2A2A\_MOUSE

LNKLLGK <sup>Dimethyl</sup> <sub>28.03</sub> VTIAQGGVLPNIQAVLLPKKTE

- ▶ fragmentation table for charge state 1+
- ▶ specType=etd
- ▶ score=63.27
- ▶ F104920.dat
- ▶ query=q2466\_p1
- ▶ precursor=771.723940
- ▶ chargePrecursor=4
- ▶ itol=0.8

| AA    | c               | y               | z+1             | z+2             | z        | AA    |
|-------|-----------------|-----------------|-----------------|-----------------|----------|-------|
| L[1]  | 131.118         | 3083.892        | 3067.873        | 0.000           | 3066.865 | L[20] |
| N[2]  | 245.161         | 2970.808        | 2954.789        | 2938.797        | 2953.781 | N[20] |
| K[3]  | <b>373.256</b>  | 2856.765        | 2840.746        | 2841.754        | 2839.738 | K[27] |
| L[4]  | 486.340         | 2728.670        | 2712.651        | 2713.659        | 2711.643 | L[26] |
| L[5]  | 597.424         | 2615.585        | 2599.567        | 2600.575        | 2598.559 | L[25] |
| G[6]  | <b>656.445</b>  | 2502.500        | 2486.483        | 2487.491        | 2485.475 | G[24] |
| K[7]  | <b>812.572</b>  | 2445.480        | 2429.462        | 2430.469        | 2428.454 | K[23] |
| V[8]  | <b>911.640</b>  | 2289.354        | 2273.335        | 2274.343        | 2272.327 | V[22] |
| T[9]  | 1012.688        | 2190.288        | 2174.267        | 2175.275        | 2173.259 | T[21] |
| I[10] | <b>1125.772</b> | 2089.230        | 2073.210        | 2074.227        | 2072.211 | I[20] |
| A[11] | <b>1196.809</b> | 1976.154        | 1960.133        | 1961.143        | 1959.127 | A[19] |
| Q[12] | 1214.857        | 1905.111        | <b>1889.098</b> | <b>1890.106</b> | 1888.090 | Q[18] |
| G[13] | 1381.889        | 1777.058        | 1761.039        | 1762.047        | 1760.032 | G[17] |
| G[14] | 1438.910        | 1720.037        | 1704.018        | 1705.026        | 1703.010 | G[16] |
| V[15] | 1537.979        | 1661.015        | 1646.997        | 1648.004        | 1646.989 | V[15] |
| L[16] | 1651.063        | 1563.947        | 1547.928        | 1548.936        | 1546.920 | L[14] |
| F[17] | 1748.116        | 1490.863        | 1474.844        | 1475.852        | 1473.836 | F[13] |
| N[18] | 1862.159        | 1353.810        | <b>1337.791</b> | 1338.799        | 1336.783 | N[12] |
| I[19] | 1975.243        | 1239.767        | <b>1223.748</b> | <b>1224.756</b> | 1222.741 | I[11] |
| Q[20] | 2103.301        | <b>1126.683</b> | 1110.664        | 1111.672        | 1109.656 | Q[10] |
| A[21] | 2174.338        | 998.624         | <b>982.606</b>  | 983.614         | 981.598  | A[9]  |
| V[22] | 2273.407        | 927.587         | <b>911.569</b>  | <b>912.576</b>  | 910.561  | V[8]  |
| L[23] | 2389.491        | 808.513         | <b>813.500</b>  | <b>813.508</b>  | 811.492  | L[7]  |
| L[24] | 2499.575        | 715.435         | <b>699.416</b>  | 700.424         | 698.408  | L[6]  |
| P[25] | 2596.628        | 602.351         | 586.332         | 587.340         | 585.324  | P[5]  |
| K[26] | 2724.723        | 505.268         | <b>489.279</b>  | 490.287         | 488.271  | K[4]  |
| K[27] | 2852.818        | 377.203         | <b>361.184</b>  | 362.192         | 360.177  | K[3]  |
| T[28] | 2953.865        | 249.106         | 233.089         | 234.097         | 232.082  | T[2]  |
| E[29] | 3082.908        | 148.060         | 132.042         | 133.050         | 131.034  | E[1]  |

# sp | Q6GSS7 | H2A2A\_MOUSE

LNKLLGK <sup>Dimethyl</sup> <sub>28.03</sub> VTIAQGGVLPNIQAVLLPKKTE

- ▶ fragmentation table for charge state 2+
- ▶ specType=etd
- ▶ score=63.27
- ▶ F104920.dat
- ▶ query=q2466\_p1
- ▶ precursor=771.723940
- ▶ chargePrecursor=4
- ▶ itol=0.8

| AA | c               | y               | z+1             | z+2             | z               | AA   |
|----|-----------------|-----------------|-----------------|-----------------|-----------------|------|
| L1 | 66.053          | <b>1542.450</b> | <b>1534.440</b> | 9.504           | <b>1533.936</b> | L129 |
| N1 | 123.054         | 1485.905        | <b>1477.898</b> | <b>1478.402</b> | <b>1477.394</b> | N120 |
| K1 | 187.132         | 1428.889        | <b>1420.877</b> | <b>1421.381</b> | 1420.373        | K127 |
| L1 | 243.674         | 1364.839        | <b>1356.829</b> | <b>1357.333</b> | <b>1356.325</b> | L126 |
| L1 | 300.216         | 1308.297        | 1300.287        | 1300.791        | 1299.783        | L125 |
| G1 | 358.759         | 1251.755        | 1243.745        | 1244.249        | 1243.241        | G124 |
| K1 | 406.799         | 1223.244        | <b>1215.234</b> | <b>1215.738</b> | <b>1214.731</b> | K123 |
| V1 | 456.324         | 1145.181        | <b>1137.171</b> | <b>1137.675</b> | 1136.667        | V122 |
| T1 | 506.849         | 1095.646        | <b>1087.637</b> | 1088.141        | <b>1087.133</b> | T121 |
| T1 | 563.390         | 1045.123        | <b>1037.113</b> | <b>1037.617</b> | 1036.609        | T120 |
| A1 | 608.909         | 998.561         | 992.551         | 993.055         | 992.047         | A119 |
| G1 | 662.937         | 953.065         | <b>945.053</b>  | <b>945.557</b>  | <b>944.549</b>  | G118 |
| G1 | 691.448         | 889.033         | <b>881.023</b>  | <b>881.527</b>  | <b>880.519</b>  | G117 |
| G1 | 719.959         | 860.522         | 852.513         | 853.017         | 852.009         | G116 |
| V1 | 769.493         | 832.011         | 824.002         | 824.506         | 823.498         | V115 |
| L1 | 835.035         | 782.477         | 774.468         | 774.972         | 773.964         | L114 |
| T1 | <b>874.561</b>  | 728.935         | 721.926         | 722.430         | 721.422         | T113 |
| N1 | 911.553         | 677.400         | 669.390         | 669.893         | 668.885         | N112 |
| I1 | 968.125         | 620.867         | 612.858         | 613.362         | 612.354         | I111 |
| Q1 | <b>1052.154</b> | 563.845         | 555.836         | 556.340         | 555.332         | Q110 |
| A1 | <b>1087.673</b> | 499.816         | 491.807         | 492.310         | 491.303         | A10  |
| V1 | <b>1137.207</b> | 484.297         | 476.288         | 476.792         | 475.784         | V10  |
| L1 | <b>1193.749</b> | 414.763         | 406.754         | 407.258         | 406.250         | L10  |
| L1 | 1250.291        | 358.221         | 350.212         | 350.716         | 349.708         | L10  |
| P1 | <b>1298.817</b> | 301.679         | 293.670         | 294.174         | 293.166         | P10  |
| K1 | <b>1362.865</b> | 253.153         | 245.143         | 245.647         | 244.639         | K10  |
| K1 | <b>1426.912</b> | 189.105         | 181.096         | 181.600         | 180.592         | K10  |
| T1 | <b>1477.436</b> | 125.058         | 117.048         | 117.552         | 116.544         | T10  |
| E1 | 1541.958        | 74.534          | 66.524          | 67.028          | 66.021          | E10  |

# sp | Q6GSS7 | H2A2A\_MOUSE

LNKLLGK <sup>Dimethyl</sup> <sub>28.03</sub> VTIAQGGVLPNIQAVLLPKKTE

- ▶ fragmentation table for charge state 3+
- ▶ specType=etd
- ▶ score=63.27
- ▶ F104920.dat
- ▶ query=q2466\_p1
- ▶ precursor=771.723940
- ▶ chargePrecursor=4
- ▶ itol=0.8

| AA    | c               | y               | z+1             | z+2            | z               | AA    |
|-------|-----------------|-----------------|-----------------|----------------|-----------------|-------|
| L[1]  | 44.577          | <b>1028.635</b> | <b>1023.296</b> | 0.672          | <b>1022.960</b> | L[20] |
| N[2]  | 82.302          | 900.941         | <b>985.601</b>  | <b>985.937</b> | <b>985.265</b>  | N[28] |
| K[3]  | 125.090         | 952.926         | <b>947.587</b>  | <b>947.923</b> | 947.251         | K[27] |
| L[4]  | 162.785         | 910.228         | 904.889         | 905.225        | 904.553         | L[26] |
| L[5]  | 200.479         | 872.513         | 867.194         | 867.530        | 866.898         | L[25] |
| Q[6]  | 239.287         | 834.839         | 829.499         | 829.835        | 829.163         | Q[24] |
| K[7]  | 271.529         | 815.832         | 810.492         | 810.828        | 810.156         | K[23] |
| V[8]  | 304.552         | 783.700         | 778.450         | 778.786        | 778.114         | V[22] |
| T[9]  | 338.234         | 736.767         | 725.427         | 725.763        | 725.091         | T[21] |
| I[10] | 375.920         | 697.084         | 691.745         | 692.081        | 691.409         | I[20] |
| A[11] | 399.608         | 699.380         | 654.050         | 654.386        | 653.714         | A[19] |
| Q[12] | 442.294         | 635.711         | 630.371         | 630.707        | 630.035         | Q[18] |
| G[13] | 461.301         | 593.024         | 587.685         | 588.021        | 587.349         | G[17] |
| G[14] | 480.308         | 574.017         | 568.678         | 569.013        | 568.342         | G[16] |
| V[15] | 513.331         | 555.010         | 549.670         | 550.006        | 549.334         | V[15] |
| L[16] | 551.026         | 521.987         | 516.648         | 516.984        | 516.312         | L[14] |
| F[17] | 583.177         | 484.262         | 478.923         | 479.259        | 478.587         | F[13] |
| T[18] | 621.391         | 451.942         | 446.603         | 446.939        | 446.267         | T[12] |
| I[19] | 659.086         | 413.927         | 408.588         | 408.924        | 408.252         | I[11] |
| Q[20] | 701.772         | 376.233         | 370.893         | 371.229        | 370.557         | Q[10] |
| A[21] | 725.451         | 333.540         | 328.201         | 328.537        | 327.871         | A[9]  |
| V[22] | 758.474         | 309.867         | 304.528         | 304.864        | 304.192         | V[9]  |
| L[23] | 796.168         | 276.844         | 271.505         | 271.841        | 271.169         | L[7]  |
| L[24] | 833.863         | 239.159         | 233.819         | 234.156        | 233.484         | L[6]  |
| P[25] | 866.214         | 201.455         | 196.116         | 196.451        | 195.779         | P[5]  |
| K[26] | 908.912         | 169.104         | 163.765         | 164.101        | 163.429         | K[4]  |
| K[27] | <b>951.611</b>  | 126.406         | 121.066         | 121.402        | 120.730         | K[3]  |
| T[28] | <b>985.293</b>  | 83.708          | 78.368          | 78.704         | 78.032          | T[2]  |
| E[29] | <b>1028.307</b> | 50.025          | 44.685          | 45.021         | 44.349          | E[1]  |





# sp | Q6GSS7 | H2A2A\_MOUSE

LNKLLGK <sup>Dimethyl</sup> <sub>28.03</sub> VTIAQGGVLPNIQAVLLPKKTE

- ▶ fragmentation table for charge state 1+
- ▶ specType=etd
- ▶ score=124.21
- ▶ F104920.dat
- ▶ query=q2467\_p1
- ▶ precursor=771.724450
- ▶ chargePrecursor=4
- ▶ itol=0.8

| AA    | c               | y        | z+1             | z+2             | z               | AA    |
|-------|-----------------|----------|-----------------|-----------------|-----------------|-------|
| L[1]  | 131.118         | 3083.802 | 2067.873        | 0.000           | 3056.865        | L[26] |
| N[2]  | 245.161         | 2970.808 | 2954.789        | 2955.797        | 2953.781        | N[28] |
| K[3]  | <b>373.256</b>  | 2856.765 | 3840.740        | 3841.754        | 2839.738        | K[27] |
| L[4]  | <b>486.340</b>  | 3728.670 | 2712.651        | 2713.659        | 3711.643        | L[26] |
| L[5]  | <b>599.424</b>  | 2615.586 | 2599.567        | 2600.575        | 2598.559        | L[25] |
| G[6]  | <b>636.445</b>  | 2502.502 | 2486.483        | 2487.491        | 2485.473        | G[24] |
| K[7]  | <b>812.572</b>  | 2045.480 | 2429.455        | 2430.469        | 2425.454        | K[23] |
| V[8]  | <b>911.640</b>  | 2289.354 | 2273.335        | 2274.343        | 2272.327        | V[22] |
| T[9]  | 1012.688        | 2190.286 | 2174.267        | 2175.275        | 2173.259        | T[21] |
| I[10] | <b>1125.772</b> | 2089.238 | 2073.219        | 2074.227        | 2072.211        | I[20] |
| A[11] | <b>1196.809</b> | 1076.154 | 1093.135        | <b>1961.143</b> | <b>1959.127</b> | A[19] |
| Q[12] | <b>1324.867</b> | 1906.111 | <b>1889.090</b> | 1890.106        | 1888.090        | Q[18] |
| G[13] | <b>1381.889</b> | 1777.058 | 1761.039        | <b>1762.047</b> | 1760.032        | G[17] |
| G[14] | <b>1438.910</b> | 1720.037 | <b>1704.018</b> | 1705.026        | 1703.010        | G[16] |
| V[15] | <b>1537.979</b> | 1603.015 | 1646.997        | <b>1648.004</b> | 1645.989        | V[15] |
| L[16] | 1651.063        | 1563.947 | 1547.928        | <b>1548.936</b> | 1546.920        | L[14] |
| T[17] | <b>1748.116</b> | 1430.883 | 1434.864        | 1435.872        | 1433.856        | T[13] |
| N[18] | 1862.959        | 1353.810 | <b>1337.791</b> | 1338.799        | 1336.783        | N[12] |
| I[19] | 1975.243        | 1239.767 | <b>1223.748</b> | 1224.756        | 1222.741        | I[11] |
| Q[20] | 2103.301        | 1126.683 | 1119.664        | 1111.672        | 1109.656        | Q[10] |
| A[21] | 2174.328        | 998.624  | 982.606         | 983.614         | 981.598         | A[9]  |
| V[22] | 2273.407        | 827.587  | <b>911.569</b>  | 912.576         | 910.561         | V[8]  |
| L[23] | 2389.491        | 626.519  | <b>812.500</b>  | <b>813.508</b>  | 811.492         | L[7]  |
| L[24] | 2499.575        | 715.435  | <b>699.416</b>  | <b>700.424</b>  | 698.408         | L[6]  |
| P[25] | 2596.626        | 602.351  | 586.332         | 587.340         | 585.324         | P[5]  |
| K[26] | 2724.723        | 505.298  | <b>489.279</b>  | <b>490.287</b>  | 488.271         | K[4]  |
| K[27] | 2852.818        | 377.203  | <b>361.184</b>  | 362.192         | 360.177         | K[3]  |
| T[28] | 2953.865        | 249.108  | 233.089         | 234.097         | 232.082         | T[2]  |
| E[29] | 3082.008        | 148.050  | 132.042         | 133.050         | 131.034         | E[1]  |

# sp | Q6GSS7 | H2A2A\_MOUSE

LNKLLGK <sup>Dimethyl</sup><sub>28.03</sub> VTIAQGGVLPNIQAVLLPKKTE

- ▶ fragmentation table for charge state 2+
- ▶ specType=etd
- ▶ score=124.21
- ▶ F104920.dat
- ▶ query=q2467\_p1
- ▶ precursor=771.724450
- ▶ chargePrecursor=4
- ▶ itol=0.8

| AA   | c               | y               | z+1             | z+2             | z               | AA   |
|------|-----------------|-----------------|-----------------|-----------------|-----------------|------|
| L1   | 66.093          | <b>1542.450</b> | <b>1534.440</b> | 9.504           | 1533.930        | L128 |
| N12  | 123.084         | 1485.905        | <b>1477.898</b> | <b>1478.402</b> | <b>1477.394</b> | N120 |
| K13  | 187.132         | 1428.889        | <b>1420.877</b> | <b>1421.381</b> | <b>1420.373</b> | K127 |
| L14  | 243.674         | 1364.839        | <b>1356.829</b> | <b>1357.333</b> | <b>1356.325</b> | L126 |
| L15  | 300.216         | 1308.297        | <b>1300.287</b> | <b>1300.791</b> | 1299.783        | L125 |
| G16  | 358.208         | 1251.795        | <b>1243.745</b> | <b>1244.249</b> | 1243.241        | G124 |
| K17  | 406.750         | <b>1223.244</b> | <b>1215.234</b> | <b>1215.738</b> | <b>1214.731</b> | K123 |
| V18  | 456.224         | 1145.181        | <b>1137.171</b> | <b>1137.675</b> | <b>1136.667</b> | V122 |
| T19  | 506.640         | 1095.646        | <b>1087.637</b> | <b>1088.141</b> | <b>1087.133</b> | T121 |
| T110 | 563.390         | 1045.123        | <b>1037.113</b> | <b>1037.617</b> | <b>1036.609</b> | T120 |
| A111 | <b>598.908</b>  | <b>988.581</b>  | <b>980.571</b>  | <b>981.075</b>  | <b>980.067</b>  | A119 |
| G112 | 662.977         | 933.066         | <b>945.053</b>  | <b>945.557</b>  | <b>944.549</b>  | G118 |
| G113 | 691.448         | 889.033         | <b>881.023</b>  | <b>881.527</b>  | <b>880.519</b>  | G117 |
| G114 | 719.959         | <b>860.522</b>  | <b>852.513</b>  | <b>853.017</b>  | <b>852.009</b>  | G116 |
| V115 | 769.493         | 832.011         | <b>824.002</b>  | <b>824.506</b>  | 823.498         | V115 |
| L116 | 838.035         | 782.477         | <b>774.468</b>  | <b>774.972</b>  | <b>773.964</b>  | L114 |
| T117 | <b>874.561</b>  | <b>725.935</b>  | 717.925         | 718.930         | 717.922         | T115 |
| N118 | 911.583         | 677.620         | 669.399         | 669.903         | 668.895         | N112 |
| I119 | <b>988.125</b>  | 620.387         | <b>612.378</b>  | <b>612.882</b>  | <b>611.874</b>  | I111 |
| Q120 | <b>1052.154</b> | 563.845         | 555.836         | 556.340         | 555.332         | Q110 |
| A121 | <b>1087.673</b> | 499.816         | 491.807         | 492.310         | 491.303         | A10  |
| V122 | <b>1137.207</b> | 484.297         | 476.288         | 476.792         | 475.784         | V18  |
| L123 | <b>1193.749</b> | 414.763         | 406.754         | 407.258         | 406.251         | L17  |
| L124 | 1250.291        | 358.221         | 350.213         | 350.716         | 349.708         | L16  |
| P125 | <b>1298.817</b> | 301.678         | 293.670         | 294.174         | 293.166         | P15  |
| K126 | <b>1362.805</b> | 253.153         | 245.143         | 245.647         | 244.639         | K14  |
| K127 | <b>1426.912</b> | 189.105         | 181.096         | 181.600         | 180.592         | K13  |
| T128 | <b>1477.436</b> | 125.058         | 117.048         | 117.552         | 116.544         | T12  |
| E129 | 1541.958        | 74.534          | 66.524          | 67.028          | 66.021          | E11  |

# sp | Q6GSS7 | H2A2A\_MOUSE

LNKLLGK <sup>Dimethyl</sup> <sub>28.03</sub> VTIAQGGVLPNIQAVLLPKKTE

- ▶ fragmentation table for charge state 3+
- ▶ specType=etd
- ▶ score=124.21
- ▶ F104920.dat
- ▶ query=q2467\_p1
- ▶ precursor=771.724450
- ▶ chargePrecursor=4
- ▶ itol=0.8

| AA    | c               | y               | z+1             | z+2            | z               | AA    |
|-------|-----------------|-----------------|-----------------|----------------|-----------------|-------|
| L[1]  | 44.377          | <b>1028.635</b> | <b>1023.296</b> | 0.672          | <b>1022.960</b> | L[20] |
| N[2]  | 82.302          | 900.941         | <b>985.601</b>  | <b>985.937</b> | <b>985.265</b>  | N[20] |
| K[3]  | 125.060         | 952.920         | 947.507         | 947.923        | 947.251         | K[27] |
| L[4]  | 162.785         | 910.228         | 904.889         | 905.225        | 904.553         | L[26] |
| L[5]  | 200.479         | 872.513         | 867.104         | 867.530        | 866.888         | L[25] |
| Q[6]  | 239.487         | 834.839         | 829.409         | 829.835        | 829.163         | Q[24] |
| K[7]  | 271.529         | 815.832         | 810.402         | 810.828        | 810.156         | K[23] |
| V[8]  | 304.552         | 793.700         | 788.450         | 788.786        | 788.114         | V[22] |
| T[9]  | 338.234         | 730.767         | 725.427         | <b>725.763</b> | 725.091         | T[21] |
| I[10] | 375.920         | 697.084         | 691.745         | 692.081        | 691.409         | I[20] |
| A[11] | 399.608         | 699.380         | 654.050         | 654.386        | 653.714         | A[19] |
| Q[12] | 442.294         | 630.711         | 630.374         | 630.707        | 630.035         | Q[18] |
| G[13] | 461.301         | 593.024         | 587.685         | 588.021        | 587.349         | G[17] |
| G[14] | 480.308         | 574.017         | 568.678         | 569.013        | 568.341         | G[16] |
| V[15] | 513.331         | 555.010         | 549.670         | 550.006        | 549.334         | V[15] |
| L[16] | 551.026         | 521.987         | 516.648         | 516.984        | 516.312         | L[14] |
| F[17] | 583.177         | 484.262         | 478.923         | 479.259        | 478.587         | F[13] |
| T[18] | 621.391         | 451.942         | 446.603         | 446.938        | 446.266         | T[12] |
| I[19] | 659.886         | 413.927         | 408.588         | 408.924        | 408.252         | I[11] |
| Q[20] | 701.772         | 376.233         | 370.893         | 371.229        | 370.557         | Q[10] |
| A[21] | 725.451         | 333.540         | 328.207         | 328.543        | 327.871         | A[9]  |
| V[22] | 758.474         | 309.867         | 304.528         | 304.864        | 304.192         | V[9]  |
| L[23] | 796.168         | 276.844         | 271.505         | 271.841        | 271.169         | L[7]  |
| L[24] | 833.863         | 239.159         | 233.810         | 234.146        | 233.474         | L[6]  |
| P[25] | 866.214         | 201.455         | 196.116         | 196.451        | 195.779         | P[5]  |
| K[26] | 908.912         | 169.104         | 163.765         | 164.101        | 163.429         | K[4]  |
| K[27] | <b>951.611</b>  | 126.400         | 121.060         | 121.402        | 120.730         | K[3]  |
| T[28] | <b>985.293</b>  | 83.700          | 78.366          | 78.704         | 78.032          | T[2]  |
| E[29] | <b>1028.307</b> | 50.025          | 44.685          | 45.021         | 44.349          | E[1]  |

# sp | Q6GSS7 | H2A2A\_MOUSE

LNKLLGK <sup>Dimethyl</sup> 28.03 VTIAQGGVLPNIQAVLLPKKTE

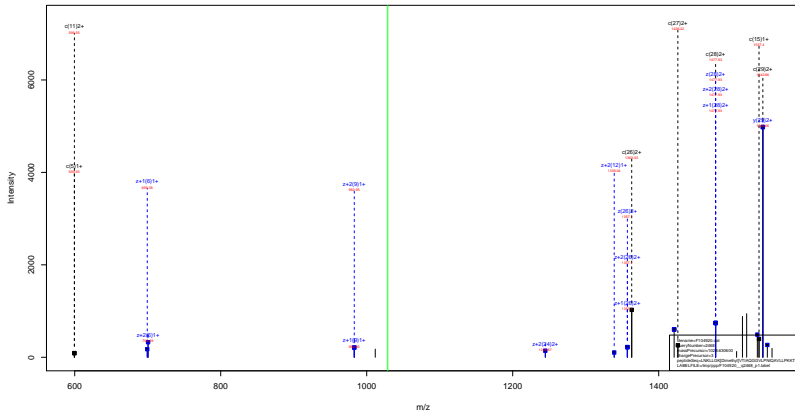

# sp | Q6GSS7 | H2A2A\_MOUSE

LNKLLGK <sup>Dimethyl</sup> <sub>28.03</sub> VTIAQGGVLPNIQAVLLPKKTE

- ▶ fragmentation table for charge state 1+
- ▶ specType=etd
- ▶ score=32.53
- ▶ F104920.dat
- ▶ query=q2468\_p1
- ▶ precursor=1028.630600
- ▶ chargePrecursor=3
- ▶ itol=0.8

| AA    | c               | y        | z+1            | z+2             | z        | AA    |
|-------|-----------------|----------|----------------|-----------------|----------|-------|
| L 1   | 131.118         | 2083.892 | 2067.873       | 0.000           | 2066.865 | L 29  |
| N 2   | 245.161         | 2970.808 | 2954.789       | 2955.797        | 2953.781 | N 28  |
| K 3   | 373.256         | 2856.765 | 2840.746       | 2841.754        | 2839.738 | K 27  |
| L 4   | 488.240         | 2738.670 | 2712.651       | 2713.659        | 2711.643 | L 26  |
| L 5   | <b>599.424</b>  | 2615.588 | 2599.567       | 2600.575        | 2598.559 | L 25  |
| G 6   | 656.445         | 2502.502 | 2486.481       | 2487.491        | 2485.475 | G 24  |
| K 7   | 812.572         | 2448.488 | 2429.462       | 2430.469        | 2428.454 | K 23  |
| V 8   | 911.640         | 2389.354 | 2373.335       | 2374.343        | 2372.327 | V 22  |
| T 9   | 1012.888        | 2330.288 | 2314.267       | 2315.275        | 2313.259 | T 21  |
| I 10  | 1125.772        | 2089.239 | 2073.219       | 2074.227        | 2072.211 | I 20  |
| A 11  | 1196.609        | 1976.154 | 1960.135       | 1961.143        | 1959.127 | A 19  |
| Q 12  | 1324.887        | 1925.111 | 1889.088       | 1890.106        | 1888.090 | Q 18  |
| G 13  | 1381.889        | 1777.058 | 1761.039       | 1762.047        | 1760.032 | G 17  |
| G 14  | 1438.910        | 1720.037 | 1704.018       | 1705.026        | 1703.010 | G 16  |
| V 15  | <b>1537.979</b> | 1663.015 | 1646.997       | 1648.004        | 1646.989 | V 15  |
| L 16  | 1651.063        | 1563.947 | 1547.928       | <b>1548.936</b> | 1546.920 | L 14  |
| P 17  | 1748.116        | 1450.863 | 1434.844       | 1435.852        | 1433.836 | P 13  |
| TW 18 | 1862.159        | 1353.810 | 1337.790       | <b>1338.799</b> | 1336.783 | TW 12 |
| I 19  | 1975.243        | 1239.787 | 1223.768       | 1224.776        | 1222.761 | I 11  |
| Q 20  | 2103.301        | 1120.683 | 1110.664       | 1111.672        | 1109.656 | Q 10  |
| A 21  | 2174.338        | 998.624  | <b>982.606</b> | <b>983.614</b>  | 981.598  | A 9   |
| V 22  | 2273.407        | 827.587  | 911.569        | 912.576         | 910.561  | V 8   |
| L 23  | 2386.491        | 628.519  | 812.500        | 813.508         | 811.492  | L 7   |
| L 24  | 2499.576        | 435.435  | <b>695.416</b> | <b>700.424</b>  | 698.408  | L 6   |
| T 25  | 2599.638        | 602.351  | 586.332        | 587.340         | 585.324  | T 5   |
| K 26  | 2724.723        | 505.298  | 489.279        | 490.287         | 488.271  | K 4   |
| K 27  | 2852.818        | 377.203  | 361.184        | 362.192         | 360.177  | K 3   |
| T 28  | 2963.865        | 249.108  | 233.089        | 234.097         | 232.082  | T 2   |
| E 29  | 3082.908        | 148.060  | 132.942        | 133.950         | 131.934  | E 1   |

# sp | Q6GSS7 | H2A2A\_MOUSE

LNKLLGK <sup>Dimethyl</sup> <sub>28.03</sub> VTIAQGGVLPNIQAVLLPKKTE

- ▶ fragmentation table for charge state 2+
- ▶ specType=etd
- ▶ score=32.53
- ▶ F104920.dat
- ▶ query=q2468\_p1
- ▶ precursor=1028.630600
- ▶ chargePrecursor=3
- ▶ itol=0.8

| AA  | c               | y               | z+1             | z+2             | z               | AA   |
|-----|-----------------|-----------------|-----------------|-----------------|-----------------|------|
| L1  | 66.053          | <b>1542.450</b> | <b>1534.440</b> | 9.504           | 533.930         | L120 |
| N12 | 123.054         | 1485.905        | <b>1477.898</b> | <b>1478.402</b> | <b>1477.394</b> | N020 |
| K13 | 187.132         | 1428.889        | <b>1420.877</b> | <b>1421.381</b> | <b>1420.373</b> | K027 |
| L14 | 243.674         | 1364.839        | <b>1356.829</b> | <b>1357.333</b> | <b>1356.325</b> | L126 |
| L15 | 300.216         | 1308.297        | 1300.287        | 1300.791        | 1299.783        | L125 |
| G16 | 358.759         | 1251.755        | 1243.745        | <b>1244.249</b> | 1243.241        | G024 |
| K17 | 406.799         | 1223.244        | 1215.234        | 1215.738        | 1214.731        | K023 |
| V18 | 456.324         | 1145.181        | 1137.171        | 1137.675        | 1136.667        | V022 |
| F19 | 506.849         | 1095.646        | 1087.637        | 1088.141        | 1087.133        | F121 |
| T10 | 563.390         | 1045.123        | 1037.113        | 1037.617        | 1036.609        | T020 |
| A11 | <b>598.908</b>  | 988.581         | 980.571         | 981.075         | 980.067         | A119 |
| G12 | 662.937         | 953.065         | 945.055         | 945.559         | 944.551         | G118 |
| G13 | 691.448         | 889.033         | 881.023         | 881.527         | 880.519         | G117 |
| G14 | 719.959         | 860.522         | 852.513         | 853.017         | 852.009         | G116 |
| V15 | 769.493         | 832.011         | 824.002         | 824.506         | 823.498         | V115 |
| L16 | 826.035         | 782.477         | 774.468         | 774.972         | 773.964         | L114 |
| F17 | 874.581         | 728.935         | 720.925         | 721.429         | 720.421         | F113 |
| N18 | 931.583         | 677.400         | 669.390         | 669.893         | 668.885         | N112 |
| I19 | 988.125         | 620.867         | 612.857         | 613.361         | 612.353         | I111 |
| Q20 | 1052.154        | 563.845         | 555.836         | 556.340         | 555.332         | Q110 |
| A21 | 1087.673        | 499.816         | 491.807         | 492.311         | 491.303         | A10  |
| V22 | 1127.207        | 484.297         | 476.288         | 476.792         | 475.784         | V10  |
| L23 | 1193.749        | 414.763         | 406.754         | 407.258         | 406.250         | L11  |
| L24 | 1250.291        | 358.221         | 350.212         | 350.716         | 349.708         | L10  |
| P25 | 1298.817        | 301.679         | 293.670         | 294.174         | 293.166         | P10  |
| K26 | <b>1362.865</b> | 253.153         | 245.143         | 245.647         | 244.639         | K10  |
| K27 | <b>1426.912</b> | 189.105         | 181.096         | 181.600         | 180.592         | K10  |
| T28 | <b>1477.436</b> | 125.058         | 117.048         | 117.552         | 116.544         | T10  |
| E29 | <b>1541.958</b> | 74.534          | 66.524          | 67.028          | 66.021          | E10  |

# sp | Q6GSS7 | H2A2A\_MOUSE

ELNKLLGK<sup>Dimethyl</sup>VTIAQGGVLPNIQAVLLPKKTE  
28.03

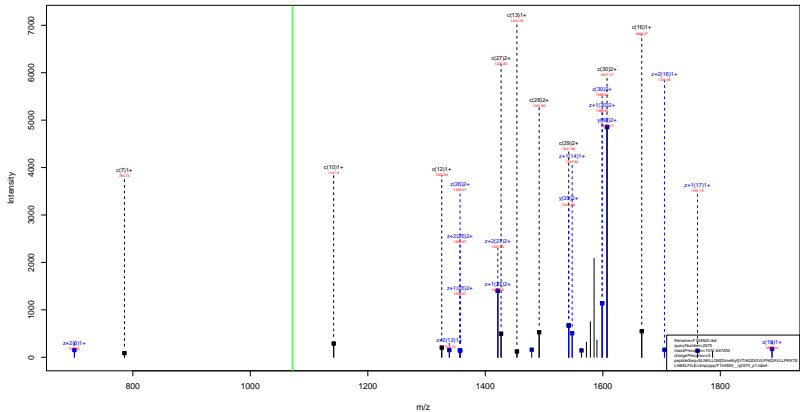



# sp | Q6GSS7 | H2A2A\_MOUSE

ELNKLKLGK<sup>Dimethyl</sup><sub>28.03</sub>VTIAQGGVLPNIQAVLLPKKTE

- ▶ fragmentation table for charge state 1+
- ▶ specType=etd
- ▶ score=34.48
- ▶ F104920.dat
- ▶ query=q2570\_p1
- ▶ precursor=1071.647200
- ▶ chargePrecursor=3
- ▶ itol=0.8

| AA | c  | y               | z+1             | z+2             | z               | AA              |   |    |
|----|----|-----------------|-----------------|-----------------|-----------------|-----------------|---|----|
| E  | 1  | 147.076         | 3211.934        | 3196.918        | 0.000           | 3195.908        | E | 30 |
| L  | 2  | 260.150         | 3083.962        | 3067.913        | 0.000           | 3066.905        | L | 29 |
| N  | 3  | 374.203         | 2970.808        | 2954.789        | 2955.707        | 2953.781        | N | 28 |
| K  | 4  | 502.298         | 2856.705        | 2840.748        | 2841.754        | 2839.730        | K | 27 |
| L  | 5  | 615.352         | 2728.670        | 2712.651        | 2713.659        | 2711.641        | L | 26 |
| L  | 6  | 728.446         | 2615.586        | 2599.587        | 2600.575        | 2598.559        | L | 25 |
| G  | 7  | <b>785.488</b>  | 2502.502        | 2486.483        | 2487.491        | 2485.475        | G | 24 |
| K  | 8  | 941.614         | 2345.480        | 2329.462        | 2330.469        | 2328.454        | K | 23 |
| V  | 9  | 1050.663        | 2239.354        | 2223.335        | 2224.343        | 2222.327        | V | 22 |
| T  | 10 | <b>1141.730</b> | 2160.286        | 2144.267        | 2145.275        | 2143.259        | T | 21 |
| I  | 11 | 1254.814        | 2089.235        | 2073.216        | 2074.222        | 2072.211        | I | 20 |
| A  | 12 | <b>1325.851</b> | 1976.154        | 1960.135        | 1961.143        | 1959.127        | A | 19 |
| Q  | 13 | <b>1453.910</b> | 1905.117        | 1889.098        | 1890.106        | <b>1888.090</b> | Q | 18 |
| G  | 14 | 1510.932        | 1777.058        | <b>1761.039</b> | 1762.047        | 1760.032        | G | 17 |
| C  | 15 | 1587.963        | 1720.037        | 1704.018        | <b>1705.026</b> | 1703.010        | C | 16 |
| V  | 16 | <b>1667.021</b> | 1663.015        | 1646.997        | 1648.004        | 1646.989        | V | 15 |
| L  | 17 | 1780.105        | <b>1563.947</b> | <b>1547.928</b> | 1548.936        | 1546.920        | L | 14 |
| P  | 18 | 1877.158        | 1450.861        | 1434.844        | 1435.852        | 1433.836        | P | 13 |
| N  | 19 | 1991.201        | 1353.810        | 1337.791        | <b>1338.799</b> | 1336.783        | N | 12 |
| I  | 20 | 2104.285        | 1239.767        | 1223.748        | 1224.756        | 1222.741        | I | 11 |
| Q  | 21 | 2232.344        | 1126.683        | 1110.664        | 1111.672        | 1109.656        | Q | 10 |
| A  | 22 | 2303.351        | 1088.624        | 1072.605        | 1073.614        | 1071.598        | A | 9  |
| V  | 23 | 2402.449        | 927.587         | 911.569         | 912.576         | 910.561         | V | 8  |
| L  | 24 | 2515.533        | 828.519         | 812.500         | 813.508         | 811.492         | L | 7  |
| L  | 25 | 2628.617        | 715.435         | 699.416         | <b>700.424</b>  | 698.408         | L | 6  |
| T  | 26 | 2725.670        | 602.381         | 586.362         | 587.370         | 585.354         | T | 5  |
| K  | 27 | 3853.765        | 595.295         | 489.276         | 490.282         | 488.277         | K | 4  |
| K  | 28 | 2981.860        | 377.263         | 361.244         | 362.252         | 360.237         | K | 3  |
| T  | 29 | 3082.908        | 249.198         | 233.180         | 234.187         | 232.182         | T | 2  |
| E  | 30 | 3211.950        | 148.060         | 132.042         | 133.050         | 131.034         | E | 1  |

# sp | Q6GSS7 | H2A2A\_MOUSE

ELNKLKLGK<sup>Dimethyl</sup>VTIAQGGVLPNIQAVLLPKKTE  
28.03

- ▶ fragmentation table for charge state 2+
- ▶ specType=etd
- ▶ score=34.48
- ▶ F104920.dat
- ▶ query=q2570\_p1
- ▶ precursor=1071.647200
- ▶ chargePrecursor=3
- ▶ itol=0.8

| AA   | c               | y               | z+1             | z+2             | z               | AA   |
|------|-----------------|-----------------|-----------------|-----------------|-----------------|------|
| E 1  | 74.042          | <b>1606.971</b> | <b>1598.962</b> | 0.504           | <b>1598.458</b> | E 30 |
| L 2  | 130.504         | <b>1542.450</b> | 1534.440        | 0.504           | 1533.930        | L 29 |
| N 3  | 187.605         | 1485.908        | 1477.898        | <b>1478.402</b> | 1477.391        | N 28 |
| K 4  | 251.653         | 1428.889        | <b>1429.877</b> | <b>1421.361</b> | 1420.371        | K 27 |
| L 5  | 308.136         | 1364.830        | <b>1356.829</b> | <b>1357.333</b> | <b>1356.325</b> | L 26 |
| L 6  | 364.737         | 1308.297        | 1300.287        | 1300.791        | 1299.783        | L 25 |
| G 7  | 381.240         | 1251.735        | 1243.745        | 1244.249        | 1243.241        | G 24 |
| K 8  | 471.311         | 1223.244        | 1215.234        | 1215.738        | 1214.731        | K 23 |
| V 9  | 520.845         | 1148.181        | 1137.171        | 1137.675        | 1136.667        | V 22 |
| T 10 | 573.369         | 1095.646        | 1087.637        | 1088.141        | 1087.133        | T 21 |
| I 11 | 627.911         | 1045.123        | 1037.113        | 1037.617        | 1036.609        | I 20 |
| A 12 | 683.429         | 988.581         | 980.571         | 981.075         | 980.067         | A 19 |
| Q 13 | 727.450         | 933.062         | 945.053         | 945.557         | 944.549         | Q 18 |
| G 14 | 755.969         | 889.033         | 881.023         | 881.527         | 880.519         | G 17 |
| C 15 | 784.480         | 860.522         | 862.513         | 863.017         | 862.009         | C 16 |
| V 16 | 834.014         | 832.011         | 824.002         | 824.506         | 823.497         | V 15 |
| L 17 | 890.556         | 782.477         | 774.468         | 774.972         | 773.964         | L 14 |
| F 18 | 936.083         | 725.935         | 717.926         | 718.430         | 717.422         | F 13 |
| N 19 | 996.104         | 677.409         | 669.399         | 669.903         | 668.895         | N 12 |
| I 20 | 1052.646        | 620.387         | 612.378         | 612.882         | 611.874         | I 11 |
| Q 21 | 1118.678        | 563.845         | 565.836         | 566.340         | 565.332         | Q 10 |
| A 22 | 1152.194        | 499.816         | 491.807         | 492.310         | 491.303         | A 9  |
| V 23 | 1201.728        | 464.297         | 456.288         | 456.792         | 455.784         | V 8  |
| L 24 | 1258.270        | 414.763         | 406.754         | 407.258         | 406.250         | L 7  |
| L 25 | 1314.812        | 358.221         | 350.212         | 350.716         | 349.708         | L 6  |
| T 26 | 1353.328        | 306.679         | 298.670         | 299.174         | 298.166         | T 5  |
| K 27 | <b>1427.386</b> | 251.153         | 243.143         | 243.647         | 242.639         | K 4  |
| K 28 | <b>1491.434</b> | 189.055         | 181.046         | 181.550         | 180.542         | K 3  |
| T 29 | <b>1541.958</b> | 125.058         | 117.048         | 117.552         | 116.544         | T 2  |
| E 30 | <b>1606.479</b> | 74.534          | 66.524          | 67.028          | 66.021          | E 1  |



# sp | Q6GSS7 | H2A2A\_MOUSE

ELNKLKLGK<sup>Dimethyl</sup>VTIAQGGVLPNIQAVLLPKKTE  
28.03

- ▶ fragmentation table for charge state 1+
- ▶ specType=etd
- ▶ score=135.22
- ▶ F104920.dat
- ▶ query=q2571\_p1
- ▶ precursor=803.988030
- ▶ chargePrecursor=4
- ▶ itol=0.8

| AA   | c               | y               | z+1             | z+2             | z              | AA   |
|------|-----------------|-----------------|-----------------|-----------------|----------------|------|
| E 1  | 147.076         | 3212.934        | 3106.916        | 0.000           | 3195.908       | E 30 |
| L 2  | 200.160         | 3083.892        | 3067.873        | 0.000           | 3056.855       | L 29 |
| N 3  | 314.203         | 2970.808        | 2954.789        | 2935.797        | 2953.781       | N 28 |
| K 4  | <b>502.298</b>  | 2856.765        | 2840.746        | 2841.754        | 2839.735       | K 27 |
| L 5  | 615.382         | 2728.670        | 2712.651        | 2713.659        | 2711.643       | L 26 |
| L 6  | <b>728.466</b>  | 2615.586        | 2599.567        | 2600.575        | 2598.559       | L 25 |
| G 7  | <b>785.488</b>  | 2502.500        | 2486.481        | 2487.491        | 2485.475       | G 24 |
| K 8  | 941.614         | 2445.480        | 2429.462        | 2430.469        | 2428.454       | K 23 |
| V 9  | <b>1040.663</b> | 2289.354        | 2273.335        | 2274.343        | 2272.327       | V 22 |
| T 10 | <b>1141.730</b> | 2190.288        | 2174.267        | 2175.275        | 2173.259       | T 21 |
| N 11 | <b>1254.814</b> | 2089.238        | 2073.219        | 2074.227        | 2072.211       | N 20 |
| A 12 | <b>1325.851</b> | 1976.154        | 1960.135        | <b>1961.143</b> | 1959.127       | A 19 |
| Q 13 | <b>1453.910</b> | 1905.117        | 1889.098        | <b>1890.106</b> | 1888.090       | Q 18 |
| G 14 | <b>1510.932</b> | 1777.050        | 1761.030        | 1762.047        | 1760.032       | G 17 |
| G 15 | <b>1567.953</b> | 1720.010        | 1704.000        | <b>1705.026</b> | 1703.010       | G 16 |
| V 16 | <b>1667.023</b> | 1663.013        | 1649.007        | <b>1648.004</b> | 1645.989       | V 15 |
| L 17 | 1780.108        | <b>1563.947</b> | <b>1547.928</b> | 1548.938        | 1546.920       | L 14 |
| P 18 | <b>1877.158</b> | 1450.863        | 1434.844        | 1435.852        | 1433.836       | P 13 |
| N 19 | 1991.201        | 1353.810        | <b>1337.791</b> | 1338.799        | 1336.783       | N 12 |
| T 20 | 2104.285        | 1239.767        | <b>1223.748</b> | 1224.756        | 1222.741       | T 11 |
| Q 21 | 2232.244        | 1126.683        | <b>1110.664</b> | 1111.672        | 1109.655       | Q 10 |
| A 22 | 2303.261        | 999.624         | <b>982.606</b>  | <b>983.614</b>  | <b>981.598</b> | A 9  |
| V 23 | 2402.449        | 927.587         | 911.569         | 912.576         | 910.561        | V 8  |
| L 24 | 2515.533        | 828.519         | <b>812.500</b>  | 813.508         | 811.492        | L 7  |
| L 25 | 2628.617        | 715.435         | <b>699.416</b>  | 700.424         | 698.408        | L 6  |
| P 26 | 2725.670        | 602.351         | 586.333         | 587.340         | 585.324        | P 5  |
| K 27 | 2833.705        | 509.266         | <b>489.249</b>  | 490.257         | 488.241        | K 4  |
| K 28 | 2981.800        | 377.203         | <b>361.184</b>  | 362.192         | 360.177        | K 3  |
| T 29 | 3062.908        | 249.108         | 233.089         | 234.097         | 232.082        | T 2  |
| E 30 | 3211.950        | 148.060         | 132.042         | 133.050         | 131.034        | E 1  |

# sp | Q6GSS7 | H2A2A\_MOUSE

ELNKLKLGK<sup>Dimethyl</sup>VTIAQGGVLPNIQAVLLPKKTE  
28.03

- ▶ fragmentation table for charge state 2+
- ▶ specType=etd
- ▶ score=135.22
- ▶ F104920.dat
- ▶ query=q2571\_p1
- ▶ precursor=803.988030
- ▶ chargePrecursor=4
- ▶ itol=0.8

| AA   | c               | y               | z+1             | z+2             | z               | AA   |
|------|-----------------|-----------------|-----------------|-----------------|-----------------|------|
| E 1  | 74.042          | <b>1606.971</b> | <b>1598.962</b> | 0.504           | <b>1598.458</b> | E 30 |
| L 2  | 130.504         | <b>1542.450</b> | 1534.440        | 0.504           | 1533.930        | L 29 |
| N 3  | 187.605         | 1485.908        | <b>1477.898</b> | <b>1470.402</b> | <b>1477.394</b> | N 28 |
| K 4  | 251.653         | 1428.889        | <b>1420.877</b> | <b>1413.381</b> | 1413.371        | K 27 |
| L 5  | 308.195         | 1364.830        | <b>1356.820</b> | <b>1357.333</b> | <b>1356.325</b> | L 26 |
| L 6  | 364.737         | 1308.297        | <b>1300.287</b> | <b>1300.791</b> | 1299.783        | L 25 |
| G 7  | 381.240         | 1251.735        | <b>1243.745</b> | <b>1244.249</b> | 1243.241        | G 24 |
| K 8  | 471.311         | <b>1223.244</b> | <b>1215.234</b> | <b>1215.738</b> | <b>1214.731</b> | K 23 |
| V 9  | 530.845         | 1145.181        | 1137.171        | 1137.675        | 1138.967        | V 22 |
| T 10 | 573.389         | 1095.646        | <b>1087.637</b> | <b>1088.141</b> | <b>1087.133</b> | T 21 |
| I 11 | 627.931         | 1045.123        | <b>1037.113</b> | <b>1037.617</b> | 1039.009        | I 20 |
| A 12 | 683.470         | 988.581         | <b>980.571</b>  | <b>981.075</b>  | <b>980.067</b>  | A 19 |
| Q 13 | 727.459         | 933.062         | <b>945.053</b>  | <b>945.557</b>  | <b>944.549</b>  | Q 18 |
| G 14 | 755.969         | 889.033         | <b>881.023</b>  | <b>881.527</b>  | <b>880.519</b>  | G 17 |
| G 15 | 794.480         | 869.522         | <b>852.513</b>  | <b>853.017</b>  | 852.009         | G 16 |
| V 16 | <b>834.014</b>  | 832.011         | <b>824.002</b>  | <b>824.506</b>  | <b>823.498</b>  | V 15 |
| L 17 | 890.556         | 782.477         | <b>774.468</b>  | <b>774.972</b>  | 773.964         | L 14 |
| F 18 | <b>939.083</b>  | 725.935         | 717.926         | 718.430         | 717.422         | F 13 |
| N 19 | <b>996.104</b>  | 677.409         | 669.399         | 669.903         | 668.895         | N 12 |
| I 20 | <b>1052.646</b> | 620.387         | 612.378         | 612.882         | 611.874         | I 11 |
| Q 21 | <b>1116.676</b> | 563.845         | 555.836         | 556.340         | 555.332         | Q 10 |
| A 22 | <b>1152.194</b> | 499.816         | 491.807         | 492.310         | 491.302         | A 9  |
| V 23 | <b>1201.728</b> | 464.297         | 456.288         | 456.792         | 455.784         | V 8  |
| L 24 | <b>1258.270</b> | 414.763         | 406.754         | 407.258         | 406.250         | L 7  |
| L 25 | 1314.812        | 358.221         | 350.212         | 350.716         | 349.708         | L 6  |
| T 26 | <b>1363.339</b> | 301.679         | 293.670         | 294.174         | 293.166         | T 5  |
| K 27 | <b>1427.386</b> | 253.153         | 245.143         | 245.647         | 244.639         | K 4  |
| K 28 | <b>1491.434</b> | 189.105         | 181.096         | 181.600         | 180.592         | K 3  |
| T 29 | <b>1541.958</b> | 125.058         | 117.048         | 117.552         | 116.544         | T 2  |
| E 30 | 1606.479        | 74.534          | 66.524          | 67.028          | 66.021          | E 1  |

# sp | Q6GSS7 | H2A2A\_MOUSE

ELNKLKLGK<sup>Dimethyl</sup>VTIAQGGVLPNIQAVLLPKKTE  
28.03

- ▶ fragmentation table for charge state 3+
- ▶ specType=etd
- ▶ score=135.22
- ▶ F104920.dat
- ▶ query=q2571\_p1
- ▶ precursor=803.988030
- ▶ chargePrecursor=4
- ▶ itol=0.8

| AA | c  | y        | z+1      | z+2      | z     | AA       |       |
|----|----|----------|----------|----------|-------|----------|-------|
| E  | 1  | 49.697   | 1071.650 | 1066.310 | 0.672 | 1065.974 | E[30] |
| L  | 2  | 87.302   | 1028.635 | 1023.296 | 0.672 | 1022.960 | L[29] |
| K  | 3  | 125.406  | 990.941  | 985.601  | 0.672 | 985.265  | K[28] |
| R  | 4  | 168.204  | 952.926  | 947.587  | 0.672 | 947.251  | R[27] |
| L  | 5  | 205.799  | 910.228  | 904.889  | 0.672 | 904.553  | L[26] |
| L  | 6  | 243.494  | 872.531  | 867.194  | 0.672 | 866.858  | L[25] |
| G  | 7  | 282.501  | 834.839  | 829.499  | 0.672 | 829.163  | G[24] |
| K  | 8  | 314.543  | 815.832  | 810.492  | 0.672 | 810.156  | K[23] |
| V  | 9  | 347.566  | 783.790  | 778.450  | 0.672 | 778.114  | V[22] |
| T  | 10 | 381.248  | 750.767  | 745.427  | 0.672 | 745.091  | T[21] |
| I  | 11 | 418.943  | 697.084  | 691.744  | 0.672 | 691.408  | I[20] |
| A  | 12 | 442.622  | 659.389  | 654.050  | 0.672 | 653.714  | A[19] |
| Q  | 13 | 485.308  | 635.711  | 630.371  | 0.672 | 630.035  | Q[18] |
| G  | 14 | 504.315  | 593.024  | 587.685  | 0.672 | 587.349  | G[17] |
| G  | 15 | 523.223  | 574.017  | 568.678  | 0.672 | 568.342  | G[16] |
| V  | 16 | 556.345  | 559.011  | 549.670  | 0.672 | 549.334  | V[15] |
| L  | 17 | 594.040  | 521.987  | 516.648  | 0.672 | 516.312  | L[14] |
| P  | 18 | 626.891  | 484.202  | 478.863  | 0.672 | 478.527  | P[13] |
| N  | 19 | 664.405  | 451.942  | 446.602  | 0.672 | 446.266  | N[12] |
| I  | 20 | 702.100  | 413.927  | 408.588  | 0.672 | 408.252  | I[11] |
| Q  | 21 | 744.786  | 376.213  | 370.873  | 0.672 | 370.537  | Q[10] |
| A  | 22 | 788.465  | 333.546  | 328.207  | 0.672 | 327.871  | A[9]  |
| V  | 23 | 801.488  | 309.961  | 304.622  | 0.672 | 304.286  | V[8]  |
| L  | 24 | 839.183  | 276.844  | 271.505  | 0.672 | 271.169  | L[7]  |
| L  | 25 | 876.877  | 239.150  | 233.811  | 0.672 | 233.474  | L[6]  |
| P  | 26 | 909.228  | 201.455  | 196.116  | 0.672 | 195.780  | P[5]  |
| K  | 27 | 873.827  | 189.104  | 183.765  | 0.672 | 183.429  | K[4]  |
| K  | 28 | 994.625  | 129.420  | 124.081  | 0.672 | 123.745  | K[3]  |
| T  | 29 | 1028.307 | 83.708   | 78.368   | 0.672 | 78.032   | T[2]  |
| E  | 30 | 1071.822 | 50.025   | 44.685   | 0.672 | 44.349   | E[1]  |



# sp | Q6GSS7 | H2A2A\_MOUSE

LNKLLGK <sup>Dimethyl</sup> <sub>28.03</sub> VTIAQGGVLPNIQAVLLPKKTE

- ▶ fragmentation table for charge state 1+
- ▶ specType=etd
- ▶ score=33.10
- ▶ F104921.dat
- ▶ query=q2048\_p1
- ▶ precursor=1028.634200
- ▶ chargePrecursor=3
- ▶ itol=0.8

| AA   | c               | y        | z+1            | z+2             | z        | AA   |
|------|-----------------|----------|----------------|-----------------|----------|------|
| L1   | 131.118         | 2083.892 | 2067.873       | 0.000           | 2066.865 | L29  |
| N2   | 245.161         | 2970.808 | 2954.789       | 2955.797        | 2953.781 | N28  |
| K3   | 373.256         | 2856.765 | 2840.746       | 2841.754        | 2839.738 | K27  |
| L4   | 488.240         | 2728.670 | 2712.651       | 2713.659        | 2711.643 | L26  |
| L5   | <b>599.424</b>  | 2615.585 | 2599.567       | 2600.575        | 2598.559 | L25  |
| G6   | <b>656.445</b>  | 2502.500 | 2486.481       | 2487.491        | 2485.475 | G24  |
| K7   | 812.572         | 2445.468 | 2429.450       | 2430.459        | 2428.454 | K23  |
| V8   | <b>911.640</b>  | 2289.354 | 2273.335       | 2274.343        | 2272.327 | V22  |
| I9   | <b>1012.688</b> | 2130.288 | 2114.269       | 2115.275        | 2113.259 | I21  |
| I10  | <b>1125.772</b> | 2089.239 | 2073.219       | 2074.227        | 2072.211 | I20  |
| A11  | 1196.609        | 1976.154 | 1960.135       | 1961.143        | 1959.127 | A19  |
| Q12  | 1224.887        | 1925.111 | 1889.090       | 1890.106        | 1888.090 | Q19  |
| G13  | 1381.889        | 1777.058 | 1761.039       | 1762.047        | 1760.032 | G17  |
| G14  | 1438.910        | 1720.037 | 1704.018       | 1705.026        | 1703.010 | G16  |
| V15  | 1537.879        | 1663.015 | 1646.997       | 1648.004        | 1646.989 | V15  |
| L16  | 1651.063        | 1563.947 | 1547.928       | 1548.936        | 1546.920 | L14  |
| P17  | 1748.116        | 1450.863 | 1434.844       | 1435.852        | 1433.836 | P13  |
| TW18 | <b>1862.159</b> | 1353.810 | 1337.790       | <b>1338.799</b> | 1336.783 | TW12 |
| I19  | 2075.243        | 1239.787 | 1223.768       | 1224.776        | 1222.761 | I11  |
| Q20  | 2103.301        | 1120.683 | 1110.664       | 1111.672        | 1109.656 | Q10  |
| A21  | 2174.338        | 998.624  | 982.606        | <b>983.614</b>  | 981.598  | A9   |
| V22  | 2273.407        | 827.587  | <b>911.569</b> | 912.576         | 910.561  | V8   |
| L23  | 2386.491        | 628.519  | 812.500        | 813.508         | 811.492  | L7   |
| L24  | 2489.576        | 435.435  | <b>695.416</b> | <b>700.424</b>  | 698.408  | L6   |
| L25  | 2599.638        | 602.351  | 586.332        | 587.340         | 585.324  | L5   |
| K26  | 2724.723        | 505.295  | 489.279        | 490.287         | 488.271  | K4   |
| K27  | 2852.818        | 377.203  | 361.184        | 362.192         | 360.177  | K3   |
| T28  | 2963.865        | 249.108  | 233.089        | 234.097         | 232.082  | T2   |
| E29  | 3082.908        | 148.060  | 132.942        | 133.950         | 131.934  | E1   |



# sp | Q6GSS7 | H2A2A\_MOUSE

LNKLLGK <sup>Dimethyl</sup><sub>28.03</sub> VTIAQGGVLPNIQAVLLPKKTE

- ▶ fragmentation table for charge state 2+
- ▶ specType=etd
- ▶ score=33.10
- ▶ F104921.dat
- ▶ query=q2048\_p1
- ▶ precursor=1028.634200
- ▶ chargePrecursor=3
- ▶ itol=0.8

| AA  | c               | y               | z+1             | z+2             | z               | AA   |
|-----|-----------------|-----------------|-----------------|-----------------|-----------------|------|
| L1  | 66.053          | <b>1542.450</b> | <b>1534.440</b> | 9.504           | 1533.930        | L120 |
| N12 | 123.054         | 1485.905        | <b>1477.898</b> | <b>1478.402</b> | 1477.304        | N120 |
| K13 | 187.132         | 1428.889        | <b>1420.877</b> | <b>1421.381</b> | <b>1420.373</b> | K127 |
| L14 | 243.674         | 1364.839        | <b>1356.829</b> | <b>1357.333</b> | 1356.325        | L126 |
| L15 | 300.216         | 1308.297        | 1300.287        | 1300.791        | 1299.783        | L125 |
| G16 | 358.759         | 1251.755        | 1243.745        | <b>1244.249</b> | 1243.241        | G124 |
| K17 | 406.799         | 1223.244        | 1215.234        | 1215.738        | 1214.731        | K123 |
| V18 | 456.324         | 1145.181        | 1137.171        | 1137.675        | 1136.667        | V122 |
| F19 | 506.849         | 1095.646        | 1087.637        | 1088.141        | 1087.133        | F121 |
| T10 | 563.390         | 1045.123        | 1037.113        | 1037.617        | 1036.609        | T20  |
| A11 | <b>598.908</b>  | 988.581         | 980.571         | 981.075         | 980.067         | A119 |
| G12 | 662.937         | 933.065         | 925.055         | 925.559         | 924.551         | G118 |
| G13 | 691.448         | 889.033         | 881.023         | 881.527         | 880.519         | G117 |
| G14 | 719.959         | 860.522         | 852.513         | 853.017         | 852.009         | G116 |
| V15 | 769.493         | 832.011         | 824.002         | 824.506         | 823.498         | V115 |
| L16 | 826.035         | 782.477         | 774.468         | 774.972         | 773.964         | L114 |
| F17 | 874.581         | 728.935         | 720.925         | 721.429         | 720.421         | F113 |
| N18 | 931.583         | 677.400         | 669.390         | 669.893         | 668.885         | N112 |
| I19 | 988.125         | 620.867         | 612.857         | 613.361         | 612.353         | I111 |
| Q10 | 1052.154        | 563.845         | 555.836         | 556.340         | 555.332         | Q110 |
| A11 | 1087.673        | 499.816         | 491.807         | 492.311         | 491.303         | A10  |
| V12 | 1127.207        | 484.297         | 476.288         | 476.792         | 475.784         | V10  |
| L13 | 1193.769        | 414.763         | 406.754         | 407.258         | 406.250         | L11  |
| L14 | 1250.291        | 358.221         | 350.212         | 350.716         | 349.708         | L10  |
| P15 | 1298.817        | 301.679         | 293.670         | 294.174         | 293.166         | P10  |
| K16 | <b>1362.865</b> | 253.153         | 245.143         | 245.647         | 244.639         | K14  |
| K17 | <b>1426.912</b> | 189.105         | 181.096         | 181.600         | 180.592         | K13  |
| T18 | <b>1477.436</b> | 125.058         | 117.048         | 117.552         | 116.544         | T12  |
| E19 | <b>1541.958</b> | 74.534          | 66.524          | 67.028          | 66.021          | E11  |

# sp | Q6GSS7 | H2A2A\_MOUSE

LNKLLGK <sup>Dimethyl</sup>VTIAQGGVLPNIQAVLLPKKTE  
28.03

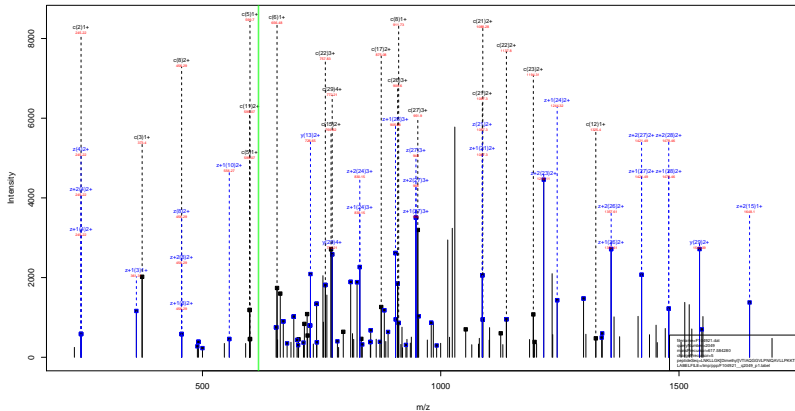

# sp | Q6GSS7 | H2A2A\_MOUSE

LNKLLGK <sup>Dimethyl</sup> 28.03 VTIAQGGVLPNIQAVLLPKKTE

- ▶ fragmentation table for charge state 1+
- ▶ specType=etd
- ▶ score=72.31
- ▶ F104921.dat
- ▶ query=q2049\_p1
- ▶ precursor=617.584280
- ▶ chargePrecursor=5
- ▶ itol=0.8

| AA     | c               | y              | z+1             | z+2             | z              | AA     |
|--------|-----------------|----------------|-----------------|-----------------|----------------|--------|
| L[1]   | 131.118         | 3081.892       | 3067.873        | 0.000           | 3066.865       | L[29]  |
| N[2]   | <b>245.161</b>  | 2970.808       | 2954.789        | 2955.797        | 2951.781       | N[28]  |
| K[3]   | <b>373.256</b>  | 2856.705       | 2840.746        | 2841.754        | 2839.738       | K[27]  |
| L[4]   | 486.340         | 2728.670       | 2712.651        | 2713.659        | 2711.643       | L[26]  |
| L[5]   | <b>599.424</b>  | 2615.585       | 2599.567        | 2600.575        | 2598.559       | L[25]  |
| G[6]   | <b>656.445</b>  | 2502.502       | 2486.483        | 2487.491        | 2485.475       | G[24]  |
| K[7]   | 812.572         | 2445.480       | 2429.462        | 2430.469        | 2428.454       | K[23]  |
| V[8]   | <b>911.640</b>  | 2388.354       | 2373.335        | 2374.343        | 2372.327       | V[22]  |
| T[9]   | 1017.688        | 2190.288       | 2174.269        | 2175.275        | 2173.259       | T[21]  |
| I[10]  | <b>1125.772</b> | 2089.238       | 2073.219        | 2074.227        | 2072.211       | I[20]  |
| A[11]  | <b>1195.869</b> | 1976.154       | 1960.135        | 1961.143        | 1959.127       | A[19]  |
| Q[12]  | <b>1324.867</b> | 1895.111       | 1889.093        | 1890.106        | 1888.090       | Q[18]  |
| G[13]  | 1381.889        | 1777.055       | 1761.036        | 1762.047        | 1760.032       | G[17]  |
| G[14]  | 1438.910        | 1720.037       | 1704.018        | 1705.026        | 1703.010       | G[16]  |
| V[15]  | 1537.879        | 1663.015       | 1646.997        | <b>1648.004</b> | 1645.989       | V[15]  |
| L[16]  | 1651.063        | 1563.947       | <b>1547.928</b> | 1548.936        | 1546.920       | L[14]  |
| P[17]  | 1748.116        | 1450.893       | 1434.874        | 1435.882        | 1433.866       | P[13]  |
| Tu[18] | 1852.159        | 1383.810       | <b>1337.791</b> | <b>1338.799</b> | 1336.783       | Tu[12] |
| I[19]  | 1975.243        | 1239.767       | 1223.748        | 1224.756        | 1222.741       | I[11]  |
| Q[20]  | 2103.301        | 1126.683       | 1110.664        | 1111.672        | 1109.656       | Q[10]  |
| A[21]  | 2174.336        | 998.624        | 982.606         | 983.614         | 981.598        | A[9]   |
| V[22]  | 2273.407        | <b>927.587</b> | <b>911.569</b>  | 912.576         | 910.561        | V[8]   |
| L[23]  | 2386.491        | 828.519        | 812.500         | 813.508         | <b>811.492</b> | L[7]   |
| L[24]  | 2499.575        | 715.435        | 699.416         | <b>700.424</b>  | <b>698.408</b> | L[6]   |
| P[25]  | 2596.626        | 602.351        | 586.332         | 587.340         | 585.324        | P[5]   |
| K[26]  | 2724.723        | 505.268        | <b>489.279</b>  | 490.287         | 488.271        | K[4]   |
| K[27]  | 2852.816        | 377.203        | <b>361.184</b>  | 362.192         | 360.177        | K[3]   |
| T[28]  | 2951.895        | 249.108        | 233.089         | 234.097         | 232.082        | T[2]   |
| E[29]  | 3087.938        | 148.060        | 132.042         | 133.050         | 131.034        | E[1]   |

# sp | Q6GSS7 | H2A2A\_MOUSE

LNKLLGK <sup>Dimethyl</sup><sub>28.03</sub> VTIAQGGVLPNIQAVLLPKKTE

- ▶ fragmentation table for charge state 2+
- ▶ specType=etd
- ▶ score=72.31
- ▶ F104921.dat
- ▶ query=q2049\_p1
- ▶ precursor=617.584280
- ▶ chargePrecursor=5
- ▶ itol=0.8

| AA  | c               | y               | z+1             | z+2             | z               | AA   |
|-----|-----------------|-----------------|-----------------|-----------------|-----------------|------|
| L1  | 66.053          | <b>1542.450</b> | 1534.440        | 9.504           | 1533.930        | L126 |
| N12 | 123.054         | 1485.905        | <b>1477.898</b> | <b>1478.402</b> | 1477.304        | N020 |
| K13 | 157.132         | 1428.889        | <b>1420.877</b> | <b>1421.381</b> | 1420.373        | K027 |
| L14 | 243.674         | 1364.839        | <b>1356.829</b> | <b>1357.333</b> | 1356.325        | L126 |
| L15 | 300.216         | 1308.297        | <b>1300.287</b> | 1300.791        | <b>1299.783</b> | L125 |
| G16 | 339.759         | 1251.755        | <b>1243.745</b> | <b>1244.249</b> | 1243.241        | G049 |
| K17 | 406.799         | 1223.244        | 1215.234        | <b>1215.738</b> | 1214.731        | K023 |
| V18 | <b>456.324</b>  | 1145.181        | <b>1137.171</b> | <b>1137.675</b> | 1136.667        | V022 |
| F19 | 506.640         | 1095.646        | <b>1087.637</b> | <b>1088.141</b> | <b>1087.133</b> | F121 |
| T10 | 563.390         | 1045.123        | 1037.113        | 1037.617        | 1036.609        | T020 |
| A11 | <b>596.908</b>  | 1008.211        | <b>990.571</b>  | 991.075         | <b>990.067</b>  | A119 |
| G12 | <b>602.837</b>  | <b>953.062</b>  | 945.053         | 945.557         | 944.549         | G118 |
| G13 | <b>691.448</b>  | <b>889.033</b>  | <b>881.023</b>  | <b>881.527</b>  | 880.519         | G117 |
| G14 | <b>719.959</b>  | 860.522         | <b>852.513</b>  | <b>853.017</b>  | <b>852.009</b>  | G116 |
| V15 | <b>769.493</b>  | 832.011         | <b>824.002</b>  | <b>824.506</b>  | 823.498         | V115 |
| L16 | 838.035         | <b>782.477</b>  | 774.468         | 774.972         | 773.964         | L114 |
| F17 | <b>874.561</b>  | <b>725.935</b>  | 717.926         | 718.430         | 717.422         | F113 |
| N18 | 931.553         | <b>677.409</b>  | <b>669.399</b>  | <b>669.903</b>  | <b>668.895</b>  | N012 |
| I19 | 988.125         | 620.387         | 612.378         | 612.882         | 611.874         | I011 |
| Q10 | <b>1052.154</b> | 563.845         | <b>555.836</b>  | <b>556.340</b>  | 555.332         | Q110 |
| A11 | <b>1087.673</b> | <b>499.816</b>  | <b>491.807</b>  | 492.311         | <b>491.303</b>  | A10  |
| V22 | <b>1137.207</b> | 484.297         | <b>456.288</b>  | <b>456.792</b>  | <b>455.784</b>  | V18  |
| L23 | <b>1193.749</b> | 414.763         | 406.753         | 407.257         | 406.250         | L17  |
| L24 | 1250.291        | 358.221         | 350.212         | 350.716         | 349.708         | L16  |
| P25 | 1298.817        | 301.679         | 293.670         | 294.174         | 293.166         | P15  |
| K26 | 1362.895        | 253.153         | <b>245.143</b>  | <b>245.647</b>  | <b>244.639</b>  | K14  |
| K27 | 1426.912        | 199.105         | 181.096         | 181.600         | 180.592         | K13  |
| T28 | 1477.436        | 125.058         | 117.049         | 117.552         | 116.544         | T12  |
| E29 | 1541.958        | 74.534          | 66.524          | 67.028          | 66.021          | E11  |

# sp | Q6GSS7 | H2A2A\_MOUSE

LNKLLGK <sup>Dimethyl</sup> <sub>28.03</sub> VTIAQGGVLPNIQAVLLPKKTE

- ▶ fragmentation table for charge state 3+
- ▶ specType=etd
- ▶ score=72.31
- ▶ F104921.dat
- ▶ query=q2049\_p1
- ▶ precursor=617.584280
- ▶ chargePrecursor=5
- ▶ itol=0.8

| AA  | c              | y              | z+1            | z+2            | z              | AA  |
|-----|----------------|----------------|----------------|----------------|----------------|-----|
| L1  | 44.377         | 1028.035       | 1021.295       | 0.672          | 1022.960       | L29 |
| N2  | 82.302         | <b>990.941</b> | 985.601        | 985.937        | 985.265        | N28 |
| K3  | 125.090        | <b>952.926</b> | <b>947.587</b> | <b>947.923</b> | <b>947.251</b> | K27 |
| L4  | 163.385        | <b>910.228</b> | <b>904.889</b> | <b>905.225</b> | <b>904.553</b> | L26 |
| L5  | 200.479        | <b>872.533</b> | 867.194        | 867.530        | 866.858        | L25 |
| G6  | 239.487        | <b>834.839</b> | <b>829.499</b> | <b>829.835</b> | 829.163        | G24 |
| K7  | 271.529        | 815.832        | <b>810.492</b> | <b>810.828</b> | 810.156        | K23 |
| V8  | 304.552        | 793.790        | <b>758.450</b> | 758.786        | <b>758.114</b> | V22 |
| Y9  | 338.234        | 730.767        | <b>725.427</b> | <b>725.763</b> | <b>725.091</b> | Y21 |
| V10 | 375.929        | 697.084        | <b>691.745</b> | <b>692.081</b> | <b>691.409</b> | V20 |
| A11 | 399.608        | 659.389        | <b>654.050</b> | <b>654.386</b> | <b>653.714</b> | A19 |
| Q12 | 442.294        | 635.710        | 592.711        | 630.707        | 630.336        | Q18 |
| G13 | 461.301        | 593.024        | 587.685        | 588.021        | 587.349        | G17 |
| G14 | 480.308        | 574.017        | 568.678        | 569.013        | 568.343        | G16 |
| V15 | 513.331        | 555.010        | 549.670        | 550.006        | 549.334        | V15 |
| L16 | 551.026        | 521.987        | 516.648        | 516.984        | 516.312        | L14 |
| P17 | 583.377        | 484.202        | 478.953        | 479.289        | 478.617        | P13 |
| N18 | 621.391        | 451.942        | 446.602        | 446.938        | 446.266        | N12 |
| T19 | 659.086        | 413.927        | 408.588        | 408.924        | 408.252        | T11 |
| Q20 | <b>701.772</b> | 376.231        | 370.893        | 371.229        | 370.567        | Q10 |
| A21 | <b>725.451</b> | 333.546        | 328.207        | 328.543        | 327.871        | A9  |
| V22 | <b>758.474</b> | 309.807        | 304.528        | 304.864        | 304.192        | V8  |
| L23 | <b>796.168</b> | 276.844        | 271.505        | 271.841        | 271.169        | L7  |
| L24 | <b>833.863</b> | 239.150        | 233.810        | 234.146        | 233.474        | L6  |
| P25 | 866.214        | 201.455        | 196.116        | 196.451        | 195.780        | P5  |
| K26 | <b>908.912</b> | 169.104        | 163.765        | 164.101        | 163.429        | K4  |
| K27 | <b>951.611</b> | 126.806        | 121.468        | 121.802        | 120.790        | K3  |
| L28 | 985.293        | 83.709         | 78.369         | 78.704         | 78.032         | L2  |
| E29 | 1028.307       | 50.025         | 44.685         | 45.021         | 44.349         | E1  |

# sp | Q6GSS7 | H2A2A\_MOUSE

LNKLLGK <sup>Dimethyl</sup> <sub>28.03</sub> VTIAQGGVLPNIQAVLLPKKTE

- ▶ fragmentation table for charge state 4+
- ▶ specType=etd
- ▶ score=72.31
- ▶ F104921.dat
- ▶ query=q2049\_p1
- ▶ precursor=617.584280
- ▶ chargePrecursor=5
- ▶ itol=0.8

| AA |    | c              | y              | z+1            | z+2            | z              | AA |    |
|----|----|----------------|----------------|----------------|----------------|----------------|----|----|
| L  | 1  | 33.535         | <b>771.728</b> | 767.724        | 0.756          | 767.472        | L  | 29 |
| N  | 2  | 62.046         | 743.451        | <b>739.453</b> | <b>739.705</b> | <b>739.201</b> | N  | 28 |
| K  | 3  | 94.059         | 714.947        | 710.942        | <b>711.194</b> | 710.690        | K  | 27 |
| L  | 4  | 122.340        | 687.923        | 678.918        | 678.170        | 678.666        | L  | 26 |
| L  | 5  | 150.611        | <b>654.652</b> | 650.647        | 650.899        | 650.395        | L  | 25 |
| G  | 6  | 164.867        | 626.381        | 622.376        | 622.628        | 622.124        | G  | 24 |
| K  | 7  | 203.898        | 612.126        | 608.121        | 608.373        | 607.869        | K  | 23 |
| V  | 8  | 228.665        | 573.094        | 569.089        | 569.341        | 568.837        | V  | 22 |
| T  | 9  | 253.927        | 548.327        | 544.322        | 544.574        | 544.070        | T  | 21 |
| T  | 10 | 262.198        | 523.065        | 519.060        | 519.312        | 518.808        | T  | 20 |
| A  | 11 | 269.958        | 494.794        | <b>490.789</b> | <b>491.041</b> | 490.537        | A  | 19 |
| Q  | 12 | 331.972        | 477.035        | 473.030        | 473.282        | 472.778        | Q  | 18 |
| G  | 13 | 346.228        | 445.020        | 441.015        | 441.267        | 440.763        | G  | 17 |
| G  | 14 | 360.483        | 430.765        | 426.760        | 427.012        | 426.508        | G  | 16 |
| V  | 15 | 385.250        | 416.509        | 412.504        | 412.757        | 412.253        | V  | 15 |
| L  | 16 | 413.521        | 391.742        | 387.737        | 387.989        | 387.486        | L  | 14 |
| P  | 17 | 437.784        | 363.471        | 359.466        | 359.718        | 359.215        | P  | 13 |
| N  | 18 | 466.295        | 339.208        | 335.203        | 335.455        | 334.951        | N  | 12 |
| T  | 19 | 494.566        | 310.897        | 306.891        | 307.143        | 306.641        | T  | 11 |
| Q  | 20 | 526.381        | 282.426        | 278.422        | 278.673        | 278.170        | Q  | 10 |
| A  | 21 | 544.340        | 250.412        | 246.407        | 246.659        | 246.155        | A  | 9  |
| V  | 22 | 569.107        | 232.652        | 228.646        | 228.898        | 228.395        | V  | 8  |
| L  | 23 | 597.378        | 207.885        | 203.881        | 204.132        | 203.629        | L  | 7  |
| L  | 24 | 625.649        | 179.614        | 175.609        | 175.861        | 175.358        | L  | 6  |
| P  | 25 | 649.912        | 151.343        | 147.338        | 147.590        | 147.087        | P  | 5  |
| K  | 26 | 681.936        | 127.080        | 123.075        | 123.327        | 122.823        | K  | 4  |
| K  | 27 | <b>713.960</b> | 95.056         | 91.052         | 91.304         | 90.800         | K  | 3  |
| T  | 28 | <b>739.222</b> | 63.032         | 59.028         | 59.280         | 58.776         | T  | 2  |
| E  | 29 | <b>771.482</b> | 37.771         | 33.766         | 34.018         | 33.514         | E  | 1  |



# sp | Q6GSS7 | H2A2A\_MOUSE

LNKLLGK <sup>Dimethyl</sup><sub>28.03</sub> VTIAQGGVLPNIQAVLLPKKTE

- ▶ fragmentation table for charge state 1+
- ▶ specType=etd
- ▶ score=84.23
- ▶ F104921.dat
- ▶ query=q2050\_p1
- ▶ precursor=771.728780
- ▶ chargePrecursor=4
- ▶ itol=0.8

| AA     | c               | y        | z+1             | z+2             | z        | AA     |
|--------|-----------------|----------|-----------------|-----------------|----------|--------|
| L[1]   | 131.118         | 3081.892 | 3067.873        | 0.000           | 3066.895 | L[29]  |
| N[2]   | 345.161         | 2970.808 | 2954.789        | 2955.797        | 2951.781 | N[28]  |
| K[3]   | <b>373.256</b>  | 2856.765 | 2840.746        | 2841.754        | 2839.738 | K[27]  |
| L[4]   | 486.340         | 2728.670 | 2712.651        | 2713.659        | 2711.643 | L[26]  |
| L[5]   | <b>599.424</b>  | 2615.585 | 2599.567        | 2600.575        | 2598.560 | L[25]  |
| Q[6]   | <b>656.445</b>  | 2502.502 | 2486.483        | 2487.491        | 2485.475 | Q[24]  |
| K[7]   | <b>812.572</b>  | 2345.480 | 2429.462        | 2430.469        | 2428.454 | K[23]  |
| V[8]   | <b>911.640</b>  | 2288.354 | 2273.335        | 2274.343        | 2272.327 | V[22]  |
| T[9]   | 1017.688        | 2190.286 | 2174.267        | 2175.275        | 2173.259 | T[21]  |
| I[10]  | <b>1125.772</b> | 2089.238 | 2073.219        | 2074.227        | 2072.211 | I[20]  |
| A[11]  | <b>1196.809</b> | 1976.154 | <b>1960.135</b> | 1961.143        | 1959.127 | A[19]  |
| Q[12]  | <b>1324.867</b> | 1895.111 | <b>1889.098</b> | 1890.106        | 1888.090 | Q[18]  |
| G[13]  | 1381.889        | 1777.058 | 1761.039        | 1762.047        | 1760.032 | G[17]  |
| G[14]  | 1438.910        | 1720.937 | 1704.918        | 1705.926        | 1703.910 | G[16]  |
| V[15]  | 1537.879        | 1663.015 | 1646.997        | 1646.004        | 1645.989 | V[15]  |
| L[16]  | 1651.063        | 1563.947 | 1547.928        | <b>1548.936</b> | 1546.920 | L[14]  |
| F[17]  | <b>1748.116</b> | 1450.863 | 1434.844        | 1435.852        | 1433.836 | F[13]  |
| TW[18] | 1867.159        | 1383.810 | <b>1337.791</b> | 1338.799        | 1336.783 | TW[12] |
| I[19]  | 1975.243        | 1236.767 | <b>1223.748</b> | 1224.756        | 1222.741 | I[11]  |
| Q[20]  | 2103.301        | 1126.683 | <b>1110.664</b> | 1111.672        | 1109.656 | Q[10]  |
| A[21]  | 2174.336        | 998.624  | 982.606         | 981.614         | 981.598  | A[9]   |
| V[22]  | 2273.407        | 927.587  | <b>911.569</b>  | 912.576         | 910.561  | V[8]   |
| L[23]  | 2386.491        | 828.519  | <b>812.500</b>  | 813.508         | 811.492  | L[7]   |
| L[24]  | 2499.575        | 715.435  | <b>699.415</b>  | <b>700.424</b>  | 698.408  | L[6]   |
| P[25]  | 2596.626        | 602.351  | 586.332         | 587.340         | 585.324  | P[5]   |
| K[26]  | 2724.723        | 505.298  | <b>489.279</b>  | <b>490.287</b>  | 488.271  | K[4]   |
| K[27]  | 2852.816        | 377.203  | <b>361.184</b>  | 362.192         | 360.177  | K[3]   |
| T[28]  | 2951.905        | 249.108  | 233.089         | 234.097         | 232.082  | T[2]   |
| E[29]  | 3087.938        | 148.060  | 132.042         | 133.050         | 131.034  | E[1]   |



# sp | Q6GSS7 | H2A2A\_MOUSE

LNKLLGK <sup>Dimethyl</sup> <sub>28.03</sub> VTIAQGGVLPNIQAVLLPKKTE

- ▶ fragmentation table for charge state 2+
- ▶ specType=etd
- ▶ score=84.23
- ▶ F104921.dat
- ▶ query=q2050\_p1
- ▶ precursor=771.728780
- ▶ chargePrecursor=4
- ▶ itol=0.8

| AA | c               | y               | z+1             | z+2             | z               | AA   |
|----|-----------------|-----------------|-----------------|-----------------|-----------------|------|
| L1 | 66.053          | <b>1542.450</b> | 1534.440        | 9.504           | 1533.930        | L120 |
| N1 | 123.054         | 1485.905        | <b>1477.898</b> | 1478.402        | <b>1477.394</b> | N120 |
| K1 | 187.132         | 1428.889        | <b>1420.877</b> | <b>1421.381</b> | <b>1420.373</b> | K127 |
| L1 | 243.674         | 1364.839        | <b>1356.829</b> | <b>1357.333</b> | <b>1356.325</b> | L126 |
| L1 | 300.216         | 1308.297        | 1300.287        | 1300.791        | <b>1299.783</b> | L125 |
| G1 | 358.758         | 1251.755        | 1243.745        | 1244.249        | 1243.751        | G124 |
| K1 | 406.799         | <b>1223.244</b> | <b>1215.234</b> | <b>1215.738</b> | <b>1214.731</b> | K123 |
| V1 | 456.324         | 1145.181        | <b>1137.171</b> | <b>1137.675</b> | 1136.667        | V122 |
| F1 | <b>506.848</b>  | 1095.646        | <b>1087.637</b> | <b>1088.141</b> | 1087.133        | F121 |
| T1 | 563.390         | 1045.123        | 1037.113        | 1037.617        | 1036.609        | T120 |
| A1 | <b>598.908</b>  | 988.581         | <b>980.571</b>  | <b>981.075</b>  | <b>980.067</b>  | A119 |
| G1 | 662.937         | 933.065         | <b>925.053</b>  | <b>925.557</b>  | <b>924.549</b>  | G118 |
| G1 | 691.448         | 889.033         | <b>881.023</b>  | <b>881.527</b>  | 880.519         | G117 |
| G1 | 719.959         | <b>860.522</b>  | <b>852.513</b>  | <b>853.017</b>  | <b>852.009</b>  | G116 |
| V1 | 769.493         | 832.011         | 824.002         | 824.506         | 823.498         | V115 |
| L1 | 826.035         | 782.477         | <b>774.468</b>  | <b>774.972</b>  | 773.964         | L114 |
| F1 | 874.581         | 728.935         | 721.925         | 722.429         | 721.421         | F113 |
| N1 | <b>931.583</b>  | 677.402         | 669.392         | 669.896         | 668.888         | N112 |
| I1 | 988.125         | 620.867         | 612.857         | 613.361         | 612.353         | I111 |
| Q1 | <b>1052.154</b> | 563.845         | 555.835         | 556.340         | 555.332         | Q110 |
| A1 | <b>1087.673</b> | 499.816         | 491.807         | 492.311         | 491.303         | A10  |
| V1 | <b>1137.207</b> | 484.297         | 476.288         | 476.792         | 475.784         | V10  |
| L1 | <b>1193.749</b> | 414.763         | 406.754         | 407.258         | 406.250         | L10  |
| L1 | 1250.291        | 358.221         | 350.212         | 350.716         | 349.708         | L10  |
| P1 | <b>1298.817</b> | 301.679         | 293.670         | 294.174         | 293.166         | P10  |
| K1 | <b>1362.865</b> | 253.153         | 245.143         | 245.647         | 244.639         | K10  |
| K1 | <b>1426.912</b> | 189.105         | 181.096         | 181.600         | 180.592         | K10  |
| T1 | <b>1477.436</b> | 125.058         | 117.049         | 117.553         | 116.545         | T10  |
| E1 | <b>1541.958</b> | 74.534          | 66.524          | 67.028          | 66.021          | E10  |

# sp | Q6GSS7 | H2A2A\_MOUSE

LNKLLGK <sup>Dimethyl</sup> <sub>28.03</sub> VTIAQGGVLPNIQAVLLPKKTE

- ▶ fragmentation table for charge state 3+
- ▶ specType=etd
- ▶ score=84.23
- ▶ F104921.dat
- ▶ query=q2050\_p1
- ▶ precursor=771.728780
- ▶ chargePrecursor=4
- ▶ itol=0.8

| AA    | c               | y               | z+1             | z+2            | z               | AA    |
|-------|-----------------|-----------------|-----------------|----------------|-----------------|-------|
| L[1]  | 44.377          | <b>1028.635</b> | <b>1023.296</b> | 0.672          | <b>1022.960</b> | L[20] |
| N[2]  | 82.392          | <b>990.941</b>  | <b>985.601</b>  | <b>985.937</b> | <b>985.265</b>  | N[20] |
| K[3]  | 129.090         | 952.926         | <b>947.587</b>  | <b>947.923</b> | 947.251         | K[27] |
| L[4]  | 162.785         | 910.228         | 904.889         | 905.225        | 904.553         | L[26] |
| L[5]  | 200.479         | 872.533         | 867.194         | 867.530        | 866.898         | L[25] |
| Q[6]  | 219.487         | 834.839         | 829.499         | 829.835        | 829.163         | Q[24] |
| K[7]  | 271.529         | 815.832         | 810.492         | 810.828        | 810.156         | K[23] |
| V[8]  | 304.552         | 783.790         | 778.450         | 778.786        | 778.114         | V[22] |
| T[9]  | 338.234         | 736.767         | 731.427         | 731.763        | 731.091         | T[21] |
| I[10] | 375.929         | 697.084         | 691.745         | 692.081        | 691.409         | I[20] |
| A[11] | 399.608         | 659.389         | 654.050         | 654.386        | 653.714         | A[19] |
| Q[12] | 442.294         | 639.713         | 634.374         | 634.709        | 634.035         | Q[19] |
| G[13] | 461.301         | 593.024         | 587.685         | 588.021        | 587.349         | G[17] |
| G[14] | 480.308         | 574.017         | 568.678         | 569.013        | 568.342         | G[16] |
| V[15] | 513.331         | 555.010         | 549.670         | 550.006        | 549.334         | V[15] |
| L[16] | 551.026         | 521.987         | 516.648         | 516.984        | 516.312         | L[14] |
| F[17] | 563.177         | 484.262         | 478.923         | 479.259        | 478.587         | F[13] |
| T[18] | 621.391         | 451.942         | 446.603         | 446.938        | 446.266         | T[12] |
| I[19] | 659.086         | 413.927         | 408.588         | 408.924        | 408.252         | I[11] |
| Q[20] | 701.772         | 376.233         | 370.893         | 371.229        | 370.557         | Q[10] |
| A[21] | 729.461         | 333.540         | 328.201         | 328.537        | 327.871         | A[9]  |
| V[22] | 758.474         | 309.867         | 304.528         | 304.864        | 304.192         | V[9]  |
| L[23] | 796.168         | 276.844         | 271.505         | 271.841        | 271.169         | L[7]  |
| L[24] | 833.863         | 239.159         | 233.819         | 234.156        | 233.484         | L[6]  |
| P[25] | 866.214         | 201.455         | 196.116         | 196.451        | 195.780         | P[5]  |
| K[26] | 908.912         | 169.104         | 163.765         | 164.101        | 163.429         | K[4]  |
| K[27] | <b>951.611</b>  | 126.400         | 121.061         | 121.402        | 120.730         | K[3]  |
| T[28] | <b>985.293</b>  | 83.700          | 78.366          | 78.704         | 78.032          | T[2]  |
| E[29] | <b>1028.307</b> | 50.025          | 44.685          | 45.021         | 44.349          | E[1]  |



# sp | P68433 | H31\_MOUSE

IAQDFK<sup>Dimethyl</sup> TD  
28.03

- ▶ fragmentation table for charge state 1+
- ▶ specType=etd
- ▶ score=49.02
- ▶ F104921.dat
- ▶ query=q397\_p1
- ▶ precursor=483.250220
- ▶ chargePrecursor=2
- ▶ itol=0.8

| AA  | c              | y              | z+1            | z+2            | z       | AA  |
|-----|----------------|----------------|----------------|----------------|---------|-----|
| I 1 | 131.118        | <b>965.494</b> | <b>949.475</b> | 0.000          | 948.467 | I 8 |
| A 2 | 202.155        | 852.410        | <b>836.391</b> | 0.000          | 835.383 | A 7 |
| Q 3 | 330.214        | 781.373        | <b>765.354</b> | 766.362        | 764.346 | Q 6 |
| D 4 | 445.241        | 653.314        | <b>637.295</b> | <b>638.303</b> | 636.288 | D 5 |
| F 5 | 592.309        | 538.287        | <b>522.268</b> | <b>523.276</b> | 521.261 | F 4 |
| K 6 | <b>748.435</b> | 391.219        | <b>375.200</b> | <b>376.208</b> | 374.192 | K 3 |
| T 7 | <b>849.483</b> | 235.092        | 219.074        | 220.082        | 218.066 | T 2 |
| D 8 | 964.510        | 134.045        | 118.026        | 119.034        | 117.018 | D 1 |



# sp | Q6GSS7 | H2A2A\_MOUSE

LNKLLGK <sup>Dimethyl</sup> <sub>28.03</sub> VTIAQGGVLPNIQAVLLPKKTE

- ▶ fragmentation table for charge state 1+
- ▶ specType=etd
- ▶ score=87.86
- ▶ F104923.dat
- ▶ query=q1944\_p1
- ▶ precursor=771.724200
- ▶ chargePrecursor=4
- ▶ itol=0.8

| AA    | c               | y               | z+1             | z+2             | z        | AA    |
|-------|-----------------|-----------------|-----------------|-----------------|----------|-------|
| L[1]  | 131.118         | 3083.892        | 3067.873        | 0.000           | 3066.865 | L[20] |
| N[2]  | 245.161         | 2970.808        | 2954.789        | 2955.797        | 2953.781 | N[20] |
| K[3]  | <b>373.256</b>  | 2856.765        | 2840.746        | 2841.754        | 2839.738 | K[27] |
| L[4]  | 488.340         | 2738.670        | 2712.651        | 2713.659        | 2711.643 | L[26] |
| L[5]  | <b>699.424</b>  | 2615.585        | 2589.567        | 2600.575        | 2598.559 | L[25] |
| G[6]  | <b>658.445</b>  | 2502.500        | 2486.483        | 2487.491        | 2485.475 | G[24] |
| K[7]  | <b>812.572</b>  | 2445.480        | 2429.462        | 2430.469        | 2428.454 | K[23] |
| V[8]  | <b>911.640</b>  | 2289.354        | 2273.335        | 2274.343        | 2272.327 | V[22] |
| T[9]  | 1012.688        | 2190.288        | 2174.267        | 2175.275        | 2173.259 | T[21] |
| I[10] | <b>1125.772</b> | 2089.230        | 2073.210        | 2074.227        | 2072.211 | I[20] |
| A[11] | <b>1196.809</b> | 1976.154        | 1960.133        | 1961.141        | 1959.127 | A[19] |
| Q[12] | <b>1244.867</b> | 1905.111        | <b>1889.098</b> | 1890.106        | 1888.090 | Q[18] |
| G[13] | <b>1381.889</b> | 1777.058        | <b>1761.039</b> | 1762.047        | 1760.032 | G[17] |
| G[14] | 1438.910        | 1720.037        | 1704.018        | <b>1705.026</b> | 1703.010 | G[16] |
| V[15] | 1537.979        | 1663.015        | 1646.997        | 1648.004        | 1646.989 | V[15] |
| L[16] | 1651.063        | 1563.947        | 1547.928        | <b>1548.936</b> | 1546.920 | L[14] |
| F[17] | <b>1748.116</b> | 1490.863        | 1474.844        | 1475.852        | 1473.836 | F[13] |
| N[18] | 1862.959        | 1353.810        | <b>1337.791</b> | 1338.799        | 1336.783 | N[12] |
| I[19] | 1975.243        | 1239.767        | 1223.748        | 1224.756        | 1222.741 | I[11] |
| Q[20] | 2103.301        | <b>1126.683</b> | 1110.664        | 1111.672        | 1109.656 | Q[10] |
| A[21] | 2174.338        | 998.624         | 982.606         | 983.614         | 981.598  | A[9]  |
| V[22] | 2273.407        | 927.587         | <b>911.569</b>  | 912.576         | 910.561  | V[8]  |
| L[23] | 2389.491        | 808.513         | <b>813.500</b>  | 813.508         | 811.492  | L[7]  |
| L[24] | 2499.575        | 715.435         | <b>699.416</b>  | <b>700.424</b>  | 698.408  | L[6]  |
| P[25] | 2596.628        | 602.351         | 586.332         | 587.340         | 585.324  | P[5]  |
| K[26] | 2724.723        | 505.268         | <b>489.279</b>  | 490.287         | 488.271  | K[4]  |
| K[27] | 2852.818        | 377.203         | <b>361.184</b>  | 362.192         | 360.177  | K[3]  |
| T[28] | 2953.865        | 249.106         | 233.089         | 234.097         | 232.082  | T[2]  |
| E[29] | 3082.008        | 148.060         | 132.042         | 133.050         | 131.034  | E[1]  |

# sp | Q6GSS7 | H2A2A\_MOUSE

LNKLLGK <sup>Dimethyl</sup> <sub>28.03</sub> VTIAQGGVLPNIQAVLLPKKTE

- ▶ fragmentation table for charge state 2+
- ▶ specType=etd
- ▶ score=87.86
- ▶ F104923.dat
- ▶ query=q1944\_p1
- ▶ precursor=771.724200
- ▶ chargePrecursor=4
- ▶ itol=0.8

| AA | c  | y               | z+1             | z+2             | z               | AA              |       |
|----|----|-----------------|-----------------|-----------------|-----------------|-----------------|-------|
| L  | 1  | 66.093          | <b>1542.450</b> | <b>1534.440</b> | 9.504           | <b>1533.936</b> | L(28) |
| N  | 2  | 123.084         | 1485.905        | <b>1477.898</b> | <b>1478.402</b> | <b>1477.394</b> | N(28) |
| K  | 3  | 187.132         | 1428.886        | 1420.877        | <b>1421.381</b> |                 | K(27) |
| L  | 4  | 243.674         | 1364.839        | <b>1356.829</b> | <b>1357.333</b> | <b>1356.325</b> | L(26) |
| L  | 5  | 300.216         | 1308.297        | 1300.287        | <b>1300.791</b> | <b>1299.783</b> | L(25) |
| G  | 6  | 356.758         | 1251.750        | <b>1243.745</b> | <b>1244.249</b> |                 | G(24) |
| K  | 7  | 406.790         | 1223.244        | <b>1215.234</b> | <b>1215.738</b> | <b>1214.731</b> | K(23) |
| V  | 8  | 456.324         | 1145.181        | 1137.171        | <b>1137.675</b> | 1136.667        | V(22) |
| F  | 9  | 506.840         | 1095.646        | <b>1087.637</b> | <b>1088.141</b> | <b>1087.133</b> | F(21) |
| T  | 10 | 563.390         | 1045.123        | <b>1037.113</b> | <b>1037.617</b> | 1036.609        | T(20) |
| A  | 11 | <b>598.908</b>  | 988.581         | <b>980.571</b>  | <b>981.075</b>  | <b>980.067</b>  | A(19) |
| Q  | 12 | 662.937         | 933.060         | <b>943.053</b>  | <b>943.557</b>  | 944.549         | Q(18) |
| G  | 13 | 691.448         | 889.033         | <b>881.023</b>  | <b>881.527</b>  | 880.519         | G(17) |
| G  | 14 | 719.959         | 860.522         | <b>852.513</b>  | <b>853.017</b>  | <b>852.009</b>  | G(16) |
| V  | 15 | 769.493         | 832.011         | 824.002         | 824.506         | 823.498         | V(15) |
| L  | 16 | 820.035         | 782.477         | <b>774.468</b>  | <b>774.972</b>  | 773.964         | L(14) |
| F  | 17 | <b>874.561</b>  | 728.935         | 717.925         | 718.430         | 717.422         | F(13) |
| N  | 18 | <b>931.583</b>  | 677.400         | 665.390         | 665.903         | 664.895         | N(12) |
| I  | 19 | 988.125         | 620.867         | 612.858         | 612.862         | 611.874         | I(11) |
| Q  | 20 | <b>1052.154</b> | 563.845         | 555.836         | 556.340         | 555.332         | Q(10) |
| A  | 21 | <b>1087.673</b> | 499.816         | 491.807         | 492.310         | 491.303         | A(9)  |
| V  | 22 | 1167.267        | 484.297         | 456.288         | 456.792         | 455.784         | V(8)  |
| L  | 23 | <b>1193.749</b> | 414.763         | 406.754         | 407.258         | 406.250         | L(7)  |
| L  | 24 | 1250.291        | 358.221         | 350.212         | 350.716         | 349.708         | L(6)  |
| P  | 25 | <b>1298.817</b> | 301.679         | 293.670         | 294.174         | 293.166         | P(5)  |
| K  | 26 | <b>1362.805</b> | 253.153         | 245.143         | 245.647         | 244.639         | K(4)  |
| K  | 27 | <b>1426.912</b> | 189.105         | 181.096         | 181.600         | 180.592         | K(3)  |
| T  | 28 | <b>1477.436</b> | 125.058         | 117.048         | 117.552         | 116.544         | T(2)  |
| E  | 29 | <b>1541.958</b> | 74.534          | 66.524          | 67.028          | 66.021          | E(1)  |

# sp | Q6GSS7 | H2A2A\_MOUSE

LNKLLGK <sup>Dimethyl</sup> 28.03 VTIAQGGVLPNIQAVLLPKKTE

- ▶ fragmentation table for charge state 3+
- ▶ specType=etd
- ▶ score=87.86
- ▶ F104923.dat
- ▶ query=q1944\_p1
- ▶ precursor=771.724200
- ▶ chargePrecursor=4
- ▶ itol=0.8

| AA    | c              | y               | z+1             | z+2            | z       | AA                   |
|-------|----------------|-----------------|-----------------|----------------|---------|----------------------|
| L 1   | 44.377         | <b>1028.635</b> | <b>1023.296</b> |                | 0.672   | <b>1022.960</b> L 29 |
| N 2   | 62.392         | <b>990.941</b>  | <b>985.601</b>  | <b>985.937</b> |         | <b>985.265</b> N 28  |
| K 3   | 125.090        | 952.026         | <b>947.587</b>  | <b>947.923</b> |         | <b>947.251</b> K 27  |
| L 4   | 162.795        | 910.229         | 904.889         | 905.225        | 904.553 | L 26                 |
| L 5   | 200.479        | 872.523         | 867.184         | 867.520        | 866.855 | L 25                 |
| G 6   | 219.487        | 834.839         | 829.499         | 829.835        | 829.163 | G 24                 |
| K 7   | 271.529        | 815.832         | 810.492         | 810.828        | 810.156 | K 23                 |
| V 8   | 304.552        | 783.790         | 778.450         | 778.786        | 778.114 | V 22                 |
| T 9   | 338.234        | 730.767         | 725.427         | 725.763        | 725.091 | T 21                 |
| I 10  | 375.929        | 697.084         | 691.745         | 692.081        | 691.409 | I 20                 |
| A 11  | 399.608        | 659.389         | 654.050         | 654.386        | 653.714 | A 19                 |
| Q 12  | 442.294        | 636.720         | 630.374         | 630.707        | 630.035 | Q 18                 |
| G 13  | 461.301        | 593.024         | 587.685         | 588.021        | 587.349 | G 17                 |
| G 14  | 480.308        | 574.017         | 568.678         | 569.013        | 568.342 | G 16                 |
| V 15  | 513.331        | 555.010         | 549.670         | 550.006        | 549.334 | V 15                 |
| L 16  | 551.026        | 521.987         | 516.648         | 516.984        | 516.312 | L 14                 |
| F 17  | 583.377        | 484.292         | 478.953         | 479.289        | 478.617 | F 13                 |
| Tu 18 | 621.391        | 451.942         | 446.603         | 446.939        | 446.267 | Tu 12                |
| I 19  | 659.086        | 413.927         | 408.588         | 408.924        | 408.252 | I 11                 |
| Q 20  | 701.772        | 376.213         | 370.893         | 371.229        | 370.557 | Q 10                 |
| A 21  | 725.451        | 333.546         | 328.207         | 328.543        | 327.871 | A 9                  |
| V 22  | 758.474        | 309.867         | 304.528         | 304.864        | 304.192 | V 8                  |
| L 23  | 796.168        | 276.844         | 271.505         | 271.841        | 271.169 | L 7                  |
| L 24  | 833.863        | 239.350         | 233.991         | 234.326        | 233.654 | L 6                  |
| P 25  | 866.214        | 201.655         | 196.116         | 196.451        | 195.779 | P 5                  |
| K 26  | 908.912        | 169.104         | 163.765         | 164.101        | 163.429 | K 4                  |
| K 27  | <b>951.611</b> | 126.406         | 121.066         | 121.402        | 120.730 | K 3                  |
| T 28  | <b>985.293</b> | 83.708          | 78.368          | 78.704         | 78.032  | T 2                  |
| E 29  | 1028.307       | 50.025          | 44.685          | 45.021         | 44.349  | E 1                  |



# sp | Q6GSS7 | H2A2A\_MOUSE

LNKLLGK <sup>Dimethyl</sup>VTIAQGGVLPNIQAVLLPKKTE  
28.03

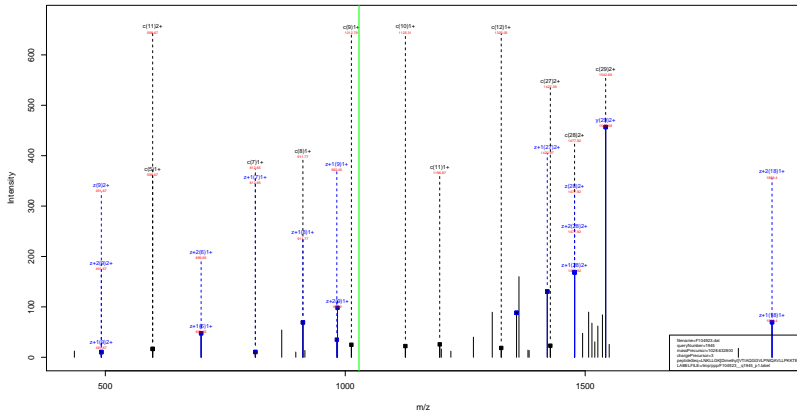

# sp | Q6GSS7 | H2A2A\_MOUSE

LNKLLGK <sup>Dimethyl</sup> <sub>28.03</sub> VTIAQGGVLPNIQAVLLPKKTE

- ▶ fragmentation table for charge state 1+
- ▶ specType=etd
- ▶ score=27.97
- ▶ F104923.dat
- ▶ query=q1945\_p1
- ▶ precursor=1028.632800
- ▶ chargePrecursor=3
- ▶ itol=0.8

| AA  | c               | y        | z+1             | z+2             | z        | AA   |
|-----|-----------------|----------|-----------------|-----------------|----------|------|
| L1  | 131.118         | 3081.892 | 3067.873        | 0.000           | 3066.895 | L129 |
| N2  | 345.161         | 2970.808 | 2954.789        | 2955.797        | 2951.781 | N28  |
| K3  | 373.256         | 2856.765 | 2840.746        | 2841.754        | 2839.738 | K27  |
| L4  | 486.340         | 2728.670 | 2712.651        | 2713.659        | 2711.643 | L26  |
| L5  | <b>599.424</b>  | 2615.585 | 2599.567        | 2600.575        | 2598.559 | L25  |
| Q6  | 614.448         | 2502.502 | 2486.483        | 2487.491        | 2485.475 | Q24  |
| K7  | <b>712.572</b>  | 2345.480 | 2429.462        | 2430.469        | 2428.454 | K23  |
| V8  | <b>911.640</b>  | 2248.394 | 2273.335        | 2274.343        | 2272.327 | V22  |
| T9  | <b>1012.688</b> | 2100.288 | 2174.267        | 2175.275        | 2173.259 | T21  |
| I10 | <b>1125.772</b> | 2089.238 | 2073.219        | 2074.227        | 2072.211 | I20  |
| A11 | <b>1196.809</b> | 1976.154 | 1960.135        | 1961.143        | 1959.127 | A19  |
| Q12 | <b>1324.867</b> | 1805.111 | <b>1889.098</b> | <b>1890.106</b> | 1888.090 | Q18  |
| G13 | 1381.889        | 1777.058 | 1761.039        | 1762.047        | 1760.032 | G17  |
| G14 | 1438.910        | 1720.937 | 1704.918        | 1705.926        | 1703.910 | G16  |
| V15 | 1537.879        | 1663.015 | 1646.997        | 1648.004        | 1645.989 | V15  |
| L16 | 1651.063        | 1563.947 | 1547.928        | 1548.936        | 1546.920 | L14  |
| F17 | 1748.116        | 1450.863 | 1434.844        | 1435.852        | 1433.836 | F13  |
| T18 | 1852.159        | 1383.810 | 1337.791        | 1338.799        | 1336.783 | T12  |
| I19 | 1975.243        | 1238.767 | 1223.748        | 1224.756        | 1222.741 | I11  |
| Q20 | 2103.301        | 1126.683 | 1110.664        | 1111.672        | 1109.656 | Q10  |
| A21 | 2174.336        | 998.624  | <b>982.606</b>  | <b>983.614</b>  | 981.598  | A9   |
| V22 | 2273.407        | 927.587  | <b>911.569</b>  | 912.576         | 910.561  | V8   |
| L23 | 2386.491        | 828.519  | <b>812.500</b>  | 813.508         | 811.492  | L7   |
| L24 | 2499.575        | 715.435  | <b>699.415</b>  | <b>700.424</b>  | 698.408  | L6   |
| P25 | 2596.626        | 602.351  | 586.332         | 587.340         | 585.324  | P5   |
| K26 | 2724.723        | 505.298  | 489.279         | 490.287         | 488.271  | K4   |
| K27 | 2852.816        | 377.203  | 361.184         | 362.192         | 360.177  | K3   |
| T28 | 2951.895        | 249.108  | 233.089         | 234.097         | 232.082  | T2   |
| E29 | 3082.938        | 148.060  | 132.042         | 133.050         | 131.034  | E1   |

# sp | Q6GSS7 | H2A2A\_MOUSE

LNKLLGK <sup>Dimethyl</sup> <sub>28.03</sub> VTIAQGGVLPNIQAVLLPKKTE

- ▶ fragmentation table for charge state 2+
- ▶ specType=etd
- ▶ score=27.97
- ▶ F104923.dat
- ▶ query=q1945\_p1
- ▶ precursor=1028.632800
- ▶ chargePrecursor=3
- ▶ itol=0.8

| AA  | c               | y               | z+1             | z+2             | z               | AA  |
|-----|-----------------|-----------------|-----------------|-----------------|-----------------|-----|
| L1  | 66.053          | <b>1542.450</b> | 1524.440        | 9.504           | 1533.930        | L19 |
| N12 | 123.054         | 1485.905        | <b>1477.898</b> | <b>1478.402</b> | <b>1477.898</b> | N20 |
| K13 | 187.132         | 1428.889        | <b>1420.877</b> | <b>1421.381</b> | <b>1420.373</b> | K27 |
| L14 | 243.674         | 1364.839        | <b>1356.829</b> | <b>1357.333</b> | <b>1356.325</b> | L26 |
| L15 | 300.216         | 1308.297        | 1300.287        | 1300.791        | 1299.783        | L25 |
| G16 | 358.750         | 1251.755        | 1243.745        | 1244.249        | 1243.241        | G24 |
| K17 | 406.790         | 1223.244        | 1215.234        | 1215.738        | 1214.731        | K23 |
| V18 | 456.324         | 1145.181        | 1137.171        | 1137.675        | 1136.667        | V22 |
| F19 | 506.840         | 1095.646        | 1087.637        | 1088.141        | 1087.133        | F21 |
| T10 | 563.390         | 1045.123        | 1037.113        | 1037.617        | 1036.609        | T20 |
| A11 | <b>596.908</b>  | 988.581         | 980.571         | 981.075         | 980.067         | A19 |
| Q12 | 662.937         | 933.065         | 925.055         | 925.559         | 924.551         | Q18 |
| G13 | 691.448         | 889.033         | 881.023         | 881.527         | 880.519         | G17 |
| G14 | 719.959         | 860.522         | 852.512         | 853.017         | 852.009         | G16 |
| V15 | 769.493         | 832.011         | 824.002         | 824.506         | 823.498         | V15 |
| L16 | 826.035         | 782.477         | 774.468         | 774.972         | 773.964         | L14 |
| F17 | 874.581         | 728.935         | 720.925         | 721.429         | 720.421         | F13 |
| N18 | 931.583         | 677.400         | 669.390         | 669.893         | 668.885         | N12 |
| I19 | 988.125         | 620.867         | 612.857         | 613.361         | 612.353         | I11 |
| Q20 | 1052.154        | 563.845         | 555.835         | 556.340         | 555.332         | Q10 |
| A21 | 1087.673        | 499.816         | <b>491.807</b>  | <b>492.310</b>  | <b>491.303</b>  | A0  |
| V22 | 1127.207        | 484.297         | 476.288         | 476.792         | 475.784         | V8  |
| L23 | 1193.749        | 414.763         | 406.753         | 407.257         | 406.250         | L17 |
| L24 | 1250.291        | 358.221         | 350.211         | 350.715         | 349.708         | L16 |
| P25 | 1298.817        | 301.679         | 293.670         | 294.174         | 293.166         | P5  |
| K26 | 1362.805        | 253.153         | 245.143         | 245.647         | 244.639         | K4  |
| K27 | <b>1426.912</b> | 189.105         | 181.095         | 181.600         | 180.592         | K3  |
| T28 | <b>1471.436</b> | 125.058         | 117.048         | 117.552         | 116.544         | T12 |
| E29 | <b>1541.958</b> | 74.534          | 66.524          | 67.028          | 66.021          | E1  |

# sp | P70696 | H2B1A\_MOUSE

GTK <sup>Acetyl</sup> AVTKYTSSK  
42.01

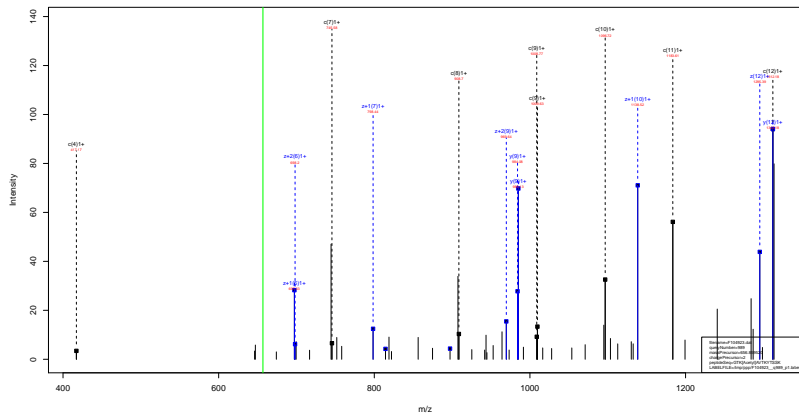

# sp | P70696 | H2B1A\_MOUSE

GTK<sup>Acetyl</sup> 42.01 AVTKYTSSK

- ▶ fragmentation table for charge state 1+
- ▶ specType=etd
- ▶ score=33.02
- ▶ F104923.dat
- ▶ query=q989\_p1
- ▶ precursor=656.859520
- ▶ chargePrecursor=2
- ▶ itol=0.8

| AA     | c               | y               | z+1             | z+2            | z               | AA     |
|--------|-----------------|-----------------|-----------------|----------------|-----------------|--------|
| G [1]  | 75.055          | <b>1312.711</b> | 1296.692        | 0.000          | <b>1295.084</b> | G [12] |
| T [2]  | 178.103         | 1292.683        | 1279.674        | 0.000          | 1278.963        | T [11] |
| K [3]  | 266.208         | 1154.962        | <b>1139.623</b> | 1139.613       | 1137.613        | K [10] |
| A [4]  | <b>417.246</b>  | <b>904.536</b>  | 898.517         | <b>909.525</b> | 907.509         | A [9]  |
| V [5]  | 516.314         | 913.499         | <b>897.480</b>  | 896.468        | 896.472         | V [8]  |
| T [6]  | 617.302         | <b>814.431</b>  | <b>798.412</b>  | 799.420        | 797.405         | T [7]  |
| K [7]  | <b>745.457</b>  | 713.383         | <b>697.364</b>  | <b>698.372</b> | 696.356         | K [6]  |
| V [8]  | <b>909.520</b>  | 589.288         | 589.289         | 570.277        | 569.261         | V [5]  |
| T [9]  | <b>1009.568</b> | 422.225         | 408.206         | 407.214        | 405.190         | T [4]  |
| S [10] | <b>1096.600</b> | 321.177         | 305.158         | 306.166        | 304.150         | S [3]  |
| S [11] | <b>1183.632</b> | 234.145         | 218.126         | 219.134        | 217.118         | S [2]  |
| R [12] | <b>1311.727</b> | 147.113         | 131.094         | 132.102        | 130.086         | R [1]  |

# sp | Q6GSS7 | H2A2A\_MOUSE

LNKLLGK <sup>Dimethyl</sup>VTIAQGGVLPNIQAVLLPKKTE  
28.03

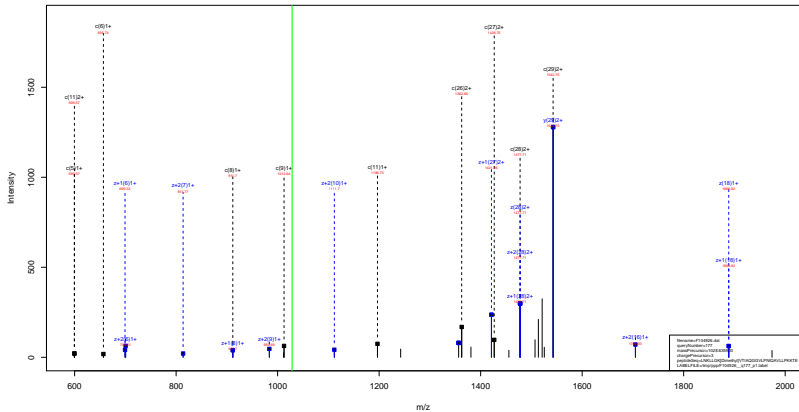

# sp | Q6GSS7 | H2A2A\_MOUSE

LNKLLGK <sup>Dimethyl</sup>VTIAQGGVLPNIQAVLLPKKTE  
28.03

- ▶ fragmentation table for charge state 1+
- ▶ specType=etd
- ▶ score=30.66
- ▶ F104926.dat
- ▶ query=q177\_p1
- ▶ precursor=1028.635900
- ▶ chargePrecursor=3
- ▶ itol=0.8

| AA    | c               | y        | z+1             | z+2             | z               | AA    |
|-------|-----------------|----------|-----------------|-----------------|-----------------|-------|
| L[1]  | 131.118         | 3083.802 | 2067.873        | 0.000           | 3066.865        | L[26] |
| N[2]  | 245.161         | 2970.808 | 2954.789        | 2955.797        | 2953.781        | N[28] |
| K[3]  | 373.256         | 2856.765 | 2840.740        | 2841.754        | 2839.738        | K[27] |
| L[4]  | 488.340         | 2728.670 | 2712.651        | 2713.659        | 2711.643        | L[26] |
| L[5]  | <b>999.424</b>  | 2615.586 | 2599.567        | 2600.575        | 2598.559        | L[25] |
| G[6]  | <b>656.445</b>  | 2502.502 | 2486.483        | 2487.491        | 2485.475        | G[24] |
| K[7]  | 812.542         | 2445.480 | 2429.462        | 2430.469        | 2428.454        | K[23] |
| V[8]  | <b>911.640</b>  | 2389.354 | 2373.335        | 2374.343        | 2372.327        | V[22] |
| T[9]  | <b>1012.688</b> | 2190.266 | 2174.267        | 2175.275        | 2173.259        | T[21] |
| T[10] | 1125.772        | 2089.238 | 2073.219        | 2074.227        | 2072.211        | T[20] |
| A[11] | <b>1196.809</b> | 1976.154 | 1960.135        | 1961.143        | 1959.127        | A[19] |
| Q[12] | 1214.857        | 1909.111 | <b>1893.098</b> | 1894.106        | <b>1888.090</b> | Q[18] |
| G[13] | 1381.889        | 1777.058 | 1761.039        | 1762.047        | 1760.032        | G[17] |
| G[14] | 1438.910        | 1720.037 | 1704.018        | <b>1705.026</b> | 1703.010        | G[16] |
| V[15] | 1537.979        | 1603.015 | 1648.997        | 1648.004        | 1645.989        | V[15] |
| L[16] | 1651.063        | 1563.947 | 1547.928        | 1548.936        | 1546.920        | L[14] |
| T[17] | 1768.116        | 1450.863 | 1434.844        | 1435.852        | 1433.836        | T[13] |
| N[18] | 1862.159        | 1353.810 | 1337.791        | 1338.799        | 1336.783        | N[12] |
| I[19] | 1975.243        | 1239.767 | 1223.748        | 1224.756        | 1222.741        | I[11] |
| Q[20] | 2103.301        | 1126.683 | 1110.664        | <b>1111.672</b> | 1109.656        | Q[10] |
| A[21] | 2174.338        | 998.624  | 982.605         | <b>983.614</b>  | 981.598         | A[9]  |
| V[22] | 2273.407        | 827.587  | <b>911.569</b>  | 912.576         | 910.561         | V[8]  |
| L[23] | 2389.491        | 626.519  | 610.500         | <b>613.508</b>  | 611.492         | L[7]  |
| L[24] | 2499.575        | 715.435  | <b>695.416</b>  | <b>700.424</b>  | 698.408         | L[6]  |
| P[25] | 2596.628        | 602.351  | 586.332         | 587.340         | 585.324         | P[5]  |
| K[26] | 2724.723        | 505.298  | 489.279         | 490.287         | 488.271         | K[4]  |
| K[27] | 2852.818        | 377.203  | 361.184         | 362.192         | 360.177         | K[3]  |
| T[28] | 2953.865        | 249.108  | 233.089         | 234.097         | 232.082         | T[2]  |
| E[29] | 3082.008        | 148.060  | 132.042         | 133.050         | 131.034         | E[1]  |

# sp | Q6GSS7 | H2A2A\_MOUSE

LNKLLGK <sup>Dimethyl</sup> <sub>28.03</sub> VTIAQGGVLPNIQAVLLPKKTE

- ▶ fragmentation table for charge state 2+
- ▶ specType=etd
- ▶ score=30.66
- ▶ F104926.dat
- ▶ query=q177\_p1
- ▶ precursor=1028.635900
- ▶ chargePrecursor=3
- ▶ itol=0.8

| AA | c               | y               | z+1             | z+2             | z               | AA   |
|----|-----------------|-----------------|-----------------|-----------------|-----------------|------|
| L1 | 66.053          | <b>1542.450</b> | 1524.440        | 9.504           | 1533.930        | L120 |
| N1 | 123.054         | 1485.905        | <b>1477.898</b> | <b>1478.402</b> | <b>1477.394</b> | N120 |
| K1 | 187.132         | 1428.889        | <b>1420.877</b> | <b>1421.381</b> | 1420.373        | K127 |
| L1 | 243.674         | 1364.839        | <b>1356.829</b> | <b>1357.333</b> | <b>1356.325</b> | L126 |
| L1 | 300.216         | 1308.297        | 1300.287        | 1300.791        | 1299.783        | L125 |
| G1 | 358.750         | 1251.755        | 1243.745        | 1244.249        | 1243.241        | G124 |
| K1 | 406.790         | 1223.244        | 1215.234        | 1215.738        | 1214.731        | K123 |
| V1 | 456.324         | 1145.181        | 1137.171        | 1137.675        | 1136.667        | V122 |
| F1 | 506.840         | 1095.646        | 1087.637        | 1088.141        | 1087.133        | F121 |
| T1 | 563.390         | 1045.123        | 1037.113        | 1037.617        | 1036.609        | T120 |
| A1 | <b>598.908</b>  | 988.581         | 980.571         | 981.075         | 980.067         | A119 |
| Q1 | 662.937         | 933.060         | 925.050         | 925.554         | 924.546         | Q118 |
| G1 | 691.448         | 889.033         | 881.023         | 881.527         | 880.519         | G117 |
| G1 | 719.959         | 860.522         | 852.512         | 853.017         | 852.009         | G116 |
| V1 | 769.493         | 832.011         | 824.002         | 824.506         | 823.498         | V115 |
| L1 | 826.035         | 782.477         | 774.468         | 774.972         | 773.964         | L114 |
| F1 | 874.581         | 728.935         | 720.925         | 721.429         | 720.421         | F113 |
| N1 | 931.583         | 677.400         | 669.390         | 669.893         | 668.885         | N112 |
| I1 | 988.125         | 620.867         | 612.857         | 613.361         | 612.353         | I111 |
| Q1 | 1052.154        | 563.845         | 555.835         | 556.340         | 555.332         | Q110 |
| A1 | 1087.673        | 499.816         | 491.807         | 492.311         | 491.303         | A10  |
| V1 | 1127.207        | 484.297         | 476.288         | 476.792         | 475.784         | V10  |
| L1 | 1193.769        | 414.763         | 406.753         | 407.257         | 406.250         | L11  |
| L1 | 1250.291        | 358.221         | 350.211         | 350.715         | 349.708         | L10  |
| P1 | 1298.817        | 301.679         | 293.670         | 294.174         | 293.166         | P10  |
| K1 | <b>1362.865</b> | 253.153         | 245.143         | 245.647         | 244.639         | K10  |
| K1 | <b>1426.912</b> | 189.105         | 181.096         | 181.600         | 180.592         | K10  |
| T1 | <b>1477.436</b> | 125.058         | 117.048         | 117.552         | 116.544         | T10  |
| E1 | <b>1541.958</b> | 74.534          | 66.524          | 67.028          | 66.021          | E10  |



# sp | Q6GSS7 | H2A2A\_MOUSE

LNKLLGK<sup>Dimethyl</sup>VTIAQGGVLPNIQAVLLPKKTE  
28.03

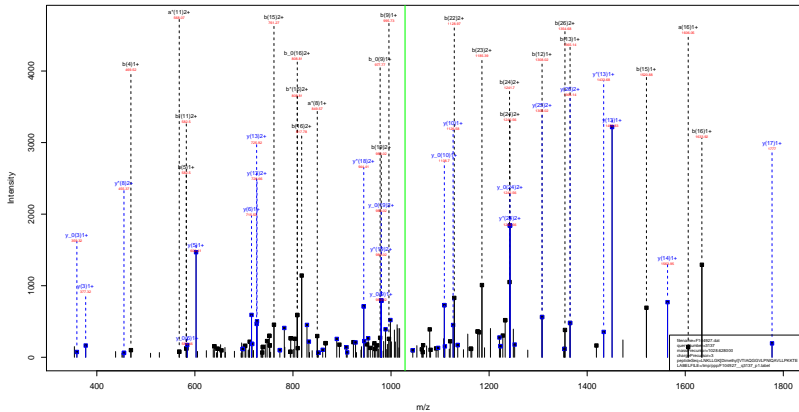

# sp | Q6GSS7 | H2A2A\_MOUSE

LNKLLGK <sup>Dimethyl</sup>VTIAQGGVLPNIQAVLLPKKTE  
28.03

- ▶ fragmentation table for charge state 1+
- ▶ specType=cid
- ▶ score=29.21
- ▶ F104927.dat
- ▶ query=q3137\_p1
- ▶ precursor=1028.628000
- ▶ chargePrecursor=3
- ▶ itol=0.8

| AA   | a        | a*       | a,0      | b        | b*       | b,0      | r     | y*       | y,0      | AA   |
|------|----------|----------|----------|----------|----------|----------|-------|----------|----------|------|
| L13  | 26.000   | 0.000    | 0.000    | 114.000  | 0.000    | 0.000    | 0.000 | 0.000    | 0.000    | L129 |
| N12  | 22.000   | 0.000    | 0.000    | 128.000  | 0.000    | 0.000    | 0.000 | 0.000    | 0.000    | N104 |
| K13  | 128.000  | 351.200  | 0.000    | 355.200  | 0.000    | 0.000    | 0.000 | 2878.700 | 2878.700 | K129 |
| L14  | 441.110  | 624.200  | 0.000    | 449.310  | 441.200  | 0.000    | 0.000 | 2738.670 | 2738.640 | L128 |
| L15  | 324.000  | 581.300  | 0.000    | 581.300  | 0.000    | 0.000    | 0.000 | 2688.200 | 2688.200 | L120 |
| G16  | 312.000  | 356.200  | 0.000    | 320.210  | 320.200  | 0.000    | 0.000 | 2550.000 | 2550.000 | G104 |
| K17  | 187.000  | 400.300  | 0.000    | 705.340  | 778.310  | 0.000    | 0.000 | 3440.480 | 3440.400 | K123 |
| V18  | 860.610  | 840.500  | 0.000    | 894.610  | 877.580  | 0.000    | 0.000 | 2272.920 | 2272.940 | V122 |
| T19  | 107.000  | 920.640  | 0.000    | 905.640  | 108.630  | 0.000    | 0.000 | 417.000  | 417.000  | T121 |
| I10  | 1080.750 | 1067.700 | 1067.700 | 1108.740 | 1091.710 | 1066.710 | 0.000 | 3087.310 | 3087.300 | I100 |
| A111 | 1151.700 | 1124.700 | 1124.700 | 1179.700 | 1162.730 | 1161.700 | 0.000 | 1819.120 | 1819.120 | A109 |
| Q121 | 1076.000 | 1020.400 | 1020.400 | 1081.840 | 1076.840 | 1076.840 | 0.000 | 1800.110 | 1800.000 | Q103 |
| G113 | 1138.800 | 1103.840 | 1103.840 | 1164.860 | 1161.830 | 1161.830 | 0.000 | 1777.650 | 1776.630 | G107 |
| G14  | 1181.800 | 1150.860 | 1150.860 | 1204.870 | 1200.870 | 1200.870 | 0.000 | 1740.600 | 1740.600 | G106 |
| V15  | 1400.000 | 1429.910 | 1429.910 | 1420.920 | 1400.910 | 1400.910 | 0.000 | 1664.910 | 1664.910 | V100 |
| L108 | 1006.041 | 1000.000 | 1000.000 | 1024.030 | 1017.010 | 1016.000 | 0.000 | 1561.047 | 1548.000 | L104 |
| P117 | 1103.000 | 1088.000 | 1088.000 | 1121.000 | 1114.000 | 1113.000 | 0.000 | 1450.863 | 1433.830 | P115 |
| N108 | 1011.000 | 1000.000 | 1000.000 | 1020.000 | 1010.000 | 1009.000 | 0.000 | 1335.800 | 1335.800 | N100 |
| I109 | 1130.210 | 1082.110 | 1082.110 | 1095.210 | 1094.190 | 1093.210 | 0.000 | 1322.741 | 1321.797 | I101 |
| Q120 | 1088.000 | 1061.200 | 1061.200 | 1080.000 | 1069.200 | 1068.000 | 0.000 | 1120.481 | 1108.650 | Q118 |
| A121 | 1000.011 | 1000.000 | 1000.000 | 1000.000 | 1000.000 | 1000.000 | 0.000 | 900.000  | 900.000  | A101 |
| V102 | 1028.500 | 1001.500 | 1001.500 | 1020.500 | 1009.500 | 1008.500 | 0.000 | 827.587  | 810.561  | V100 |
| L123 | 1041.000 | 1021.400 | 1021.400 | 1030.400 | 1021.400 | 1021.400 | 0.000 | 820.510  | 810.000  | L107 |
| L124 | 1028.000 | 1017.000 | 1017.000 | 1020.000 | 1010.000 | 1009.000 | 0.000 | 711.438  | 698.400  | L106 |
| P106 | 1001.000 | 1000.000 | 1000.000 | 1000.000 | 1000.000 | 1000.000 | 0.000 | 600.000  | 600.000  | P100 |
| K126 | 1019.011 | 1001.000 | 1001.000 | 1000.000 | 1000.000 | 1000.000 | 0.000 | 500.000  | 499.277  | K104 |
| K127 | 1001.000 | 1000.000 | 1000.000 | 1000.000 | 1000.000 | 1000.000 | 0.000 | 377.203  | 360.177  | K103 |
| L128 | 1000.000 | 1000.000 | 1000.000 | 1000.000 | 1000.000 | 1000.000 | 0.000 | 200.000  | 200.000  | L102 |
| E104 | 1000.000 | 1000.000 | 1000.000 | 1000.000 | 1000.000 | 1000.000 | 0.000 | 100.000  | 100.000  | E101 |

# sp | Q6GSS7 | H2A2A\_MOUSE

LNKLLGK <sup>Dimethyl</sup> <sub>28.03</sub> VTIAQGGVLPNIQAVLLPKKTE

- ▶ fragmentation table for charge state 2+
- ▶ specType=cid
- ▶ score=29.21
- ▶ F104927.dat
- ▶ query=q3137\_p1
- ▶ precursor=1028.628000
- ▶ chargePrecursor=3
- ▶ itol=0.8

| AA   | a               | a'              | a,Δ             | b               | b'              | b,Δ             | y              | y'              | y,Δ             | AA              |      |
|------|-----------------|-----------------|-----------------|-----------------|-----------------|-----------------|----------------|-----------------|-----------------|-----------------|------|
| L1   | 45              | 501             | 0.500           | 0.500           | 07949           | 0.504           | 0.500          | 1561.450        | 1113.016        | 413.444         | L129 |
| N1   | 102             | 517             | 0.500           | 0.504           | 114371          | 0.500           | 0.504          | 1481.580        | 1471.584        | 1471.584        | N29  |
| K1   | 119             | 512             | 0.504           | 0.504           | 119103          | 0.500           | 0.504          | 1523.502        | 1425.211        | 1471.611        | K27  |
| L14  | 221             | 481             | 0.514           | 0.504           | 238180          | 0.284           | 0.504          | <b>1384.630</b> | 1386.120        | 1310.611        | L128 |
| L15  | 227             | 490             | 0.500           | 0.504           | 240730          | 0.284           | 0.504          | <b>1386.390</b> | 1386.120        | 1386.261        | L124 |
| G16  | 236             | 492             | 0.504           | 0.504           | 242441          | 0.284           | 0.504          | <b>1251.750</b> | 1243.241        | <b>1342.740</b> | G24  |
| K17  | 384             | 478             | 0.794           | 0.504           | 388170          | 0.084           | 0.504          | <b>1223.244</b> | 1224.731        | 1124.239        | K122 |
| V18  | 431             | 511             | 0.500           | 0.504           | 447181          | 0.284           | 0.504          | 1170.170        | <b>1136.667</b> | <b>1136.175</b> | V22  |
| T19  | 458             | 510             | 0.510           | 0.510           | 469124          | 0.084           | 0.510          | <b>1075.640</b> | <b>1075.640</b> | <b>1075.640</b> | T121 |
| E19  | 460             | 510             | 0.500           | 0.510           | 464891          | 0.084           | 0.510          | <b>1045.123</b> | 1046.609        | 1046.111        | E26  |
| A11  | 637             | 427             | <b>567.884</b>  | <b>567.392</b>  | 705107          | <b>581.082</b>  | <b>567.392</b> | <b>916.181</b>  | <b>900.181</b>  | <b>079.375</b>  | A119 |
| G13  | 640             | 427             | 0.510           | 0.510           | <b>654.425</b>  | <b>646.711</b>  | <b>645.419</b> | <b>951.062</b>  | <b>944.549</b>  | <b>944.542</b>  | G110 |
| G15  | 668             | 429             | 0.500           | 0.510           | 669191          | 0.084           | 0.510          | <b>816.031</b>  | 816.031         | 816.031         | G127 |
| G14  | <b>687.448</b>  | 427             | 0.510           | 0.510           | <b>711.446</b>  | <b>702.932</b>  | <b>702.440</b> | <b>880.522</b>  | <b>852.009</b>  | <b>051.517</b>  | G116 |
| V125 | <b>746.982</b>  | <b>738.480</b>  | <b>737.977</b>  | <b>746.980</b>  | <b>732.462</b>  | <b>731.974</b>  | <b>832.011</b> | 832.011         | 832.011         | 832.011         | V125 |
| L168 | <b>883.524</b>  | <b>786.011</b>  | <b>784.510</b>  | <b>817.520</b>  | <b>800.009</b>  | <b>808.517</b>  | <b>782.477</b> | <b>771.964</b>  | <b>771.472</b>  | L114            |      |
| P117 | <b>852.051</b>  | 843.517         | 843.040         | <b>886.048</b>  | 857.515         | 857.043         | <b>725.935</b> | <b>717.422</b>  | <b>716.930</b>  | P113            |      |
| N118 | <b>910.172</b>  | 900.500         | 900.000         | <b>914.910</b>  | 884.906         | 884.906         | 877.420        | 877.420         | 877.420         | N123            |      |
| E19  | <b>985.614</b>  | <b>857.181</b>  | 856.691         | <b>979.612</b>  | <b>971.098</b>  | 970.599         | 956.197        | 951.271         | 951.271         | E111            |      |
| Q120 | 1020.644        | 1021.130        | 1020.630        | <b>1043.641</b> | 1035.120        | 1034.630        | 1013.641       | 1013.131        | 1013.640        | Q118            |      |
| A119 | <b>1085.182</b> | 1086.667        | 1086.160        | <b>1170.180</b> | 1160.660        | 1160.160        | 1090.667       | 1090.160        | 1090.667        | A114            |      |
| V122 | 1114.170        | 1100.170        | 1100.170        | <b>1126.684</b> | <b>1120.180</b> | 1119.680        | 104.170        | <b>455.784</b>  | <b>455.282</b>  | V110            |      |
| L123 | 1117.720        | <b>1162.725</b> | <b>1162.233</b> | <b>1185.230</b> | <b>1176.727</b> | <b>1176.230</b> | 814.721        | 810.230         | 810.730         | L117            |      |
| L124 | <b>1127.740</b> | 1120.740        | 1120.740        | <b>1241.778</b> | <b>1233.265</b> | <b>1242.741</b> | 100.740        | 100.740         | 100.740         | L118            |      |
| P121 | 1177.720        | 1170.720        | 1170.720        | <b>1241.778</b> | <b>1233.265</b> | <b>1242.741</b> | 101.720        | 101.720         | 101.720         | P115            |      |
| K130 | 1240.154        | 1231.642        | 1231.150        | <b>1334.362</b> | 1347.610        | 1346.150        | 1251.153       | 1244.610        | 1244.147        | K114            |      |
| K127 | 1242.410        | 1233.898        | 1233.400        | <b>1418.396</b> | 1431.640        | 1430.190        | 1341.410       | 1334.898        | 1334.410        | K111            |      |
| L128 | 1454.520        | 1446.010        | 1445.520        | <b>1418.396</b> | 1430.610        | 1429.110        | 1351.520       | 1345.010        | 1344.520        | L112            |      |
| E129 | 1510.410        | 1500.898        | 1500.400        | 1510.410        | 1524.610        | 1524.110        | 1434.410       | 1427.898        | 1427.410        | E111            |      |

# sp | Q6GSS7 | H2A2A\_MOUSE

LNKLLGK <sup>Dimethyl</sup>VTIAQGGVLPNIQAVLLPKKTE  
28.03

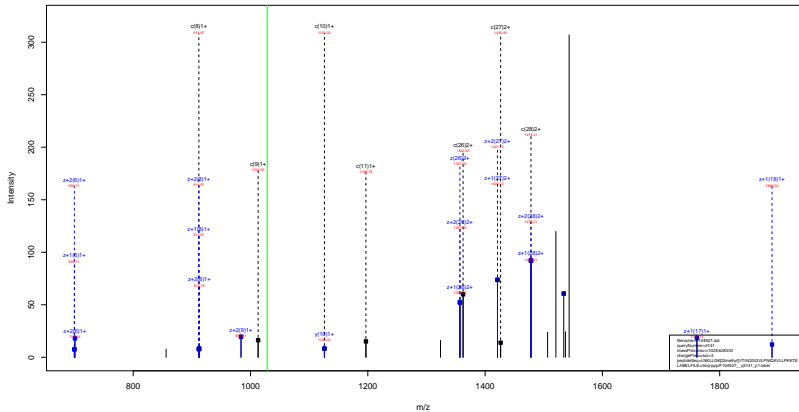

# sp | Q6GSS7 | H2A2A\_MOUSE

LNKLLGK <sup>Dimethyl</sup> <sub>28.03</sub> VTIAQGGVLPNIQAVLLPKKTE

- ▶ fragmentation table for charge state 1+
- ▶ specType=etd
- ▶ score=32.14
- ▶ F104927.dat
- ▶ query=q3141\_p1
- ▶ precursor=1028.628300
- ▶ chargePrecursor=3
- ▶ itol=0.8

| AA  | c               | y               | z+1             | z+2            | z        | AA  |
|-----|-----------------|-----------------|-----------------|----------------|----------|-----|
| L1  | 131.118         | 3081.892        | 3067.873        | 0.000          | 3066.895 | L29 |
| N2  | 345.161         | 2970.808        | 2954.789        | 2955.797       | 2951.781 | N38 |
| K3  | 373.256         | 2956.795        | 2940.746        | 2941.754       | 2939.738 | K27 |
| L4  | 486.340         | 2728.670        | 2712.651        | 2713.659       | 2711.643 | L26 |
| L5  | 509.424         | 2615.586        | 2599.567        | 2600.575       | 2598.560 | L25 |
| Q6  | 656.445         | 2302.502        | 2488.483        | 2487.491       | 2485.475 | Q24 |
| K7  | 812.572         | 2445.480        | 2429.462        | 2430.469       | 2428.454 | K23 |
| V8  | <b>911.640</b>  | 2289.354        | 2273.335        | 2274.343       | 2272.327 | V22 |
| T9  | <b>1012.688</b> | 2196.268        | 2174.267        | 2175.275       | 2173.259 | T21 |
| I10 | <b>1125.772</b> | 2089.238        | 2073.219        | 2074.227       | 2072.211 | I20 |
| A11 | <b>1196.809</b> | 1976.154        | 1960.135        | 1961.143       | 1959.127 | A19 |
| Q12 | 1324.857        | 1909.117        | <b>1859.098</b> | 1908.108       | 1888.090 | Q18 |
| G13 | 1381.889        | 1777.058        | <b>1761.039</b> | 1762.047       | 1760.032 | G17 |
| G14 | 1438.910        | 1720.037        | 1704.018        | 1705.026       | 1703.010 | G16 |
| V15 | 1537.879        | 1663.015        | 1646.997        | 1648.004       | 1645.989 | V15 |
| L16 | 1651.063        | 1561.947        | 1547.928        | 1548.936       | 1546.920 | L14 |
| P17 | 1748.116        | 1456.863        | 1434.844        | 1435.852       | 1433.836 | P13 |
| T18 | 1852.159        | 1393.810        | 1377.791        | 1378.799       | 1376.783 | T12 |
| I19 | 1975.243        | 1239.767        | 1223.748        | 1224.756       | 1222.741 | I11 |
| Q20 | 2103.301        | <b>1126.683</b> | 1110.664        | 1111.672       | 1109.656 | Q10 |
| A21 | 2174.338        | 998.624         | 982.606         | <b>983.614</b> | 981.598  | A9  |
| V22 | 2273.407        | 927.587         | <b>911.569</b>  | <b>912.576</b> | 910.561  | V8  |
| L23 | 2386.491        | 828.519         | 812.500         | 813.508        | 811.492  | L7  |
| L24 | 2499.575        | 715.435         | <b>699.416</b>  | <b>700.424</b> | 698.408  | L6  |
| P25 | 2596.626        | 602.351         | 586.332         | 587.340        | 585.324  | P5  |
| K26 | 2724.723        | 505.268         | 489.249         | 490.257        | 488.241  | K4  |
| K27 | 2852.818        | 377.203         | 361.184         | 362.192        | 360.177  | K3  |
| T28 | 2951.895        | 249.108         | 233.089         | 234.097        | 232.082  | T2  |
| E29 | 3087.938        | 148.060         | 132.042         | 133.050        | 131.034  | E1  |

# sp | Q6GSS7 | H2A2A\_MOUSE

LNKLLGK <sup>Dimethyl</sup> <sub>28.03</sub> VTIAQGGVLPNIQAVLLPKKTE

- ▶ fragmentation table for charge state 2+
- ▶ specType=etd
- ▶ score=32.14
- ▶ F104927.dat
- ▶ query=q3141\_p1
- ▶ precursor=1028.628300
- ▶ chargePrecursor=3
- ▶ itol=0.8

| AA    | c               | y        | z+1             | z+2             | z               | AA    |
|-------|-----------------|----------|-----------------|-----------------|-----------------|-------|
| L[1]  | 66.063          | 1542.450 | <b>1534.440</b> | 0.504           | <b>1533.930</b> | L[26] |
| N[2]  | 123.084         | 1485.908 | <b>1477.898</b> | <b>1478.402</b> | 1477.354        | N[28] |
| K[3]  | 187.132         | 1436.886 | <b>1420.877</b> | <b>1421.381</b> | <b>1420.373</b> | K[27] |
| L[4]  | 243.674         | 1364.839 | <b>1356.829</b> | <b>1357.333</b> | <b>1356.325</b> | L[26] |
| L[5]  | 300.216         | 1308.297 | 1300.287        | 1300.791        | 1299.783        | L[25] |
| G[6]  | 339.729         | 1251.755 | 1243.745        | 1244.249        | 1243.241        | G[24] |
| K[7]  | 406.789         | 1223.244 | 1215.234        | 1215.738        | 1214.731        | K[23] |
| V[8]  | 456.324         | 1145.181 | 1137.171        | 1137.675        | 1136.667        | V[22] |
| T[9]  | 506.846         | 1095.646 | 1087.637        | 1088.141        | 1087.133        | T[21] |
| I[10] | 563.390         | 1045.123 | 1037.113        | 1037.617        | 1036.609        | I[20] |
| A[11] | 608.608         | 988.581  | 980.571         | 981.075         | 980.067         | A[19] |
| Q[12] | 662.937         | 933.062  | 925.052         | 925.557         | 924.549         | Q[18] |
| G[13] | 691.448         | 889.033  | 881.023         | 881.527         | 880.519         | G[17] |
| G[14] | 719.959         | 860.522  | 852.512         | 853.017         | 852.009         | G[16] |
| V[15] | 769.493         | 832.011  | 824.002         | 824.506         | 823.498         | V[15] |
| L[16] | 826.035         | 782.477  | 774.468         | 774.972         | 773.964         | L[14] |
| T[17] | 874.561         | 725.935  | 717.926         | 718.430         | 717.422         | T[13] |
| N[18] | 911.983         | 671.409  | 663.400         | 663.903         | 662.895         | N[12] |
| I[19] | 968.125         | 626.867  | 618.858         | 619.362         | 618.354         | I[11] |
| Q[20] | 1052.154        | 563.945  | 555.936         | 556.440         | 555.432         | Q[10] |
| A[21] | 1087.673        | 499.616  | 491.607         | 492.110         | 491.102         | A[9]  |
| V[22] | 1137.207        | 464.297  | 456.288         | 456.792         | 455.784         | V[8]  |
| L[23] | 1183.749        | 414.763  | 406.754         | 407.258         | 406.250         | L[17] |
| L[24] | 1250.291        | 358.221  | 350.211         | 350.715         | 349.707         | L[6]  |
| P[25] | 1298.817        | 301.679  | 293.670         | 294.174         | 293.166         | P[5]  |
| K[26] | <b>1362.865</b> | 253.153  | 245.143         | 245.647         | 244.639         | K[4]  |
| K[27] | <b>1426.912</b> | 189.105  | 181.096         | 181.600         | 180.592         | K[3]  |
| T[28] | <b>1477.436</b> | 125.058  | 117.048         | 117.552         | 116.544         | T[2]  |
| E[29] | 1541.959        | 74.534   | 66.524          | 67.028          | 66.021          | E[1]  |

# sp | Q6GSS7 | H2A2A\_MOUSE

LNKLLGK<sup>Dimethyl</sup>VTIAQGGVLPNIQAVLLPKKTE  
28.03

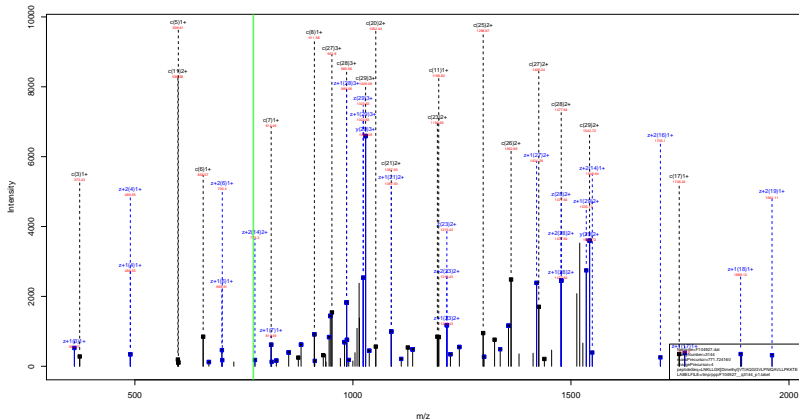

# sp | Q6GSS7 | H2A2A\_MOUSE

LNKLLGK <sup>Dimethyl</sup> <sub>28.03</sub> VTIAQGGVLPNIQAVLLPKKTE

- ▶ fragmentation table for charge state 1+
- ▶ specType=etd
- ▶ score=107.08
- ▶ F104927.dat
- ▶ query=q3144\_p1
- ▶ precursor=771.724160
- ▶ chargePrecursor=4
- ▶ itol=0.8

| AA  | c               | y        | z+1             | z+2             | z        | AA  |
|-----|-----------------|----------|-----------------|-----------------|----------|-----|
| L1  | 131.118         | 3081.892 | 3067.873        | 0.000           | 3066.895 | L29 |
| N2  | 345.161         | 2970.808 | 2954.789        | 2955.797        | 2951.781 | N38 |
| K3  | <b>373.256</b>  | 2856.765 | 2840.746        | 2841.754        | 2839.738 | K27 |
| L4  | 486.340         | 2728.670 | 2712.651        | 2713.659        | 2711.643 | L26 |
| L5  | <b>509.424</b>  | 2615.585 | 2599.567        | 2600.575        | 2598.560 | L25 |
| Q6  | <b>656.445</b>  | 2502.502 | 2486.483        | 2487.491        | 2485.475 | Q24 |
| K7  | <b>812.572</b>  | 2345.480 | 2429.462        | 2430.469        | 2428.454 | K23 |
| V8  | <b>911.640</b>  | 2288.354 | 2273.335        | 2274.343        | 2272.327 | V22 |
| T9  | 1017.688        | 2190.286 | 2174.267        | 2175.275        | 2173.259 | T21 |
| I10 | <b>1125.772</b> | 2089.238 | 2073.219        | 2074.227        | 2072.211 | I20 |
| A11 | <b>1196.809</b> | 1976.154 | 1960.135        | <b>1961.143</b> | 1959.127 | A19 |
| Q12 | <b>1324.867</b> | 1895.111 | <b>1889.098</b> | 1890.106        | 1888.090 | Q18 |
| G13 | 1381.889        | 1777.058 | <b>1761.039</b> | 1762.047        | 1760.032 | G17 |
| G14 | <b>1438.910</b> | 1720.937 | 1704.918        | <b>1705.926</b> | 1703.910 | G16 |
| V15 | 1537.879        | 1663.015 | 1646.997        | 1646.004        | 1645.989 | V15 |
| L16 | 1651.063        | 1563.947 | 1547.928        | <b>1548.936</b> | 1546.920 | L14 |
| F17 | <b>1748.116</b> | 1450.863 | 1434.844        | 1435.852        | 1433.836 | F13 |
| T18 | 1862.159        | 1383.810 | <b>1337.791</b> | 1338.799        | 1336.783 | T12 |
| I19 | 1975.243        | 1236.767 | <b>1223.748</b> | 1224.756        | 1222.741 | I11 |
| Q20 | 2103.301        | 1126.683 | <b>1110.664</b> | 1111.672        | 1109.656 | Q10 |
| A21 | 2174.336        | 998.624  | 982.606         | 981.614         | 981.598  | A9  |
| V22 | 2273.407        | 927.587  | <b>911.569</b>  | <b>912.576</b>  | 910.561  | V8  |
| L23 | 2386.491        | 828.519  | <b>812.500</b>  | <b>813.508</b>  | 811.492  | L7  |
| L24 | 2499.575        | 715.435  | <b>699.415</b>  | <b>700.424</b>  | 698.408  | L6  |
| P25 | 2596.626        | 602.351  | 586.332         | 587.340         | 585.324  | P5  |
| K26 | 2724.723        | 505.298  | <b>489.279</b>  | <b>490.287</b>  | 488.271  | K4  |
| K27 | 2852.816        | 377.203  | <b>361.184</b>  | 362.192         | 360.177  | K3  |
| T28 | 2953.895        | 249.108  | 233.089         | 234.097         | 232.082  | T2  |
| E29 | 3082.938        | 148.060  | 132.042         | 133.050         | 131.034  | E1  |



# sp | Q6GSS7 | H2A2A\_MOUSE

LNKLLGK <sup>Dimethyl</sup><sub>28.03</sub> VTIAQGGVLPNIQAVLLPKKTE

- ▶ fragmentation table for charge state 2+
- ▶ specType=etd
- ▶ score=107.08
- ▶ F104927.dat
- ▶ query=q3144\_p1
- ▶ precursor=771.724160
- ▶ chargePrecursor=4
- ▶ itol=0.8

| AA  | c               | y               | z+1             | z+2             | z               | AA   |
|-----|-----------------|-----------------|-----------------|-----------------|-----------------|------|
| L1  | 66.093          | <b>1542.450</b> | <b>1534.440</b> | 8.504           | 1533.930        | L198 |
| N12 | 123.084         | 1485.905        | <b>1477.898</b> | <b>1478.402</b> | <b>1477.394</b> | N20  |
| K3  | 187.132         | 1428.889        | <b>1420.877</b> | <b>1421.381</b> | 1420.373        | K27  |
| L4  | 243.674         | 1364.839        | <b>1356.829</b> | <b>1357.333</b> | <b>1356.325</b> | L26  |
| L5  | 300.216         | 1308.297        | <b>1300.287</b> | <b>1300.791</b> | 1299.783        | L25  |
| G6  | 358.758         | 1251.795        | <b>1243.745</b> | <b>1244.249</b> | 1243.241        | G24  |
| K7  | 406.799         | <b>1223.244</b> | <b>1215.234</b> | <b>1215.738</b> | <b>1214.731</b> | K23  |
| V8  | 456.324         | 1145.181        | <b>1137.171</b> | <b>1137.675</b> | <b>1136.667</b> | V22  |
| F9  | 506.840         | 1095.646        | <b>1087.637</b> | <b>1088.141</b> | 1087.133        | F21  |
| T10 | 563.390         | 1045.123        | <b>1037.113</b> | <b>1037.617</b> | 1036.609        | T20  |
| A11 | <b>598.908</b>  | 998.581         | <b>990.571</b>  | <b>991.075</b>  | <b>990.067</b>  | A19  |
| Q12 | 662.937         | 953.060         | <b>945.053</b>  | <b>945.557</b>  | 944.549         | Q18  |
| G13 | 691.448         | 899.033         | <b>891.023</b>  | <b>891.527</b>  | <b>890.519</b>  | G17  |
| G14 | 719.959         | 860.522         | <b>852.513</b>  | <b>853.017</b>  | <b>852.009</b>  | G16  |
| V15 | 769.493         | 832.011         | <b>824.002</b>  | <b>824.506</b>  | 823.498         | V15  |
| L16 | 820.035         | 782.477         | 774.468         | <b>774.972</b>  | 773.964         | L14  |
| F17 | <b>874.561</b>  | 728.935         | 721.926         | 713.917         | 712.910         | F13  |
| N18 | <b>931.583</b>  | 677.400         | <b>669.390</b>  | <b>669.903</b>  | 668.895         | N12  |
| I19 | 988.125         | 620.887         | 612.878         | 612.882         | 611.874         | I11  |
| Q20 | <b>1052.154</b> | 563.845         | 555.836         | 556.340         | 555.332         | Q10  |
| A21 | <b>1087.673</b> | 499.816         | 491.807         | 492.310         | 491.303         | A0   |
| V22 | <b>1137.207</b> | 494.297         | 486.288         | 486.792         | 485.784         | V8   |
| L23 | <b>1193.749</b> | 434.763         | 426.754         | 427.258         | 426.251         | L17  |
| L24 | 1250.291        | 358.221         | 350.212         | 350.716         | 349.708         | L6   |
| P25 | <b>1298.817</b> | 301.679         | 293.670         | 294.174         | 293.166         | P5   |
| K26 | <b>1362.865</b> | 253.153         | 245.143         | 245.647         | 244.639         | K4   |
| K27 | <b>1426.912</b> | 189.105         | 181.096         | 181.600         | 180.592         | K3   |
| T28 | <b>1477.436</b> | 125.058         | 117.048         | 117.552         | 116.544         | T2   |
| E29 | <b>1541.958</b> | 74.534          | 66.524          | 67.028          | 66.021          | E1   |

# sp | Q6GSS7 | H2A2A\_MOUSE

LNKLLGK <sup>Dimethyl</sup> <sub>28.03</sub> VTIAQGGVLPNIQAVLLPKKTE

- ▶ fragmentation table for charge state 3+
- ▶ specType=etd
- ▶ score=107.08
- ▶ F104927.dat
- ▶ query=q3144\_p1
- ▶ precursor=771.724160
- ▶ chargePrecursor=4
- ▶ itol=0.8

| AA    | c               | y               | z+1             | z+2            | z               | AA    |
|-------|-----------------|-----------------|-----------------|----------------|-----------------|-------|
| L[1]  | 44.377          | <b>1028.635</b> | <b>1023.296</b> | 0.672          | <b>1022.960</b> | L[20] |
| N[2]  | 82.302          | <b>990.941</b>  | <b>985.931</b>  | <b>985.265</b> | <b>985.265</b>  | N[20] |
| K[3]  | 129.090         | 952.926         | <b>947.587</b>  | <b>947.923</b> | <b>947.251</b>  | K[27] |
| L[4]  | 162.785         | 910.228         | 904.889         | 905.225        | 904.553         | L[26] |
| L[5]  | 200.479         | 872.533         | 867.104         | 867.530        | 866.898         | L[25] |
| Q[6]  | 219.487         | 834.839         | 829.499         | 829.935        | 829.163         | Q[24] |
| K[7]  | 271.529         | 815.832         | 810.492         | 810.828        | 810.156         | K[23] |
| V[8]  | 304.552         | 783.790         | 778.450         | 778.786        | 778.114         | V[22] |
| T[9]  | 338.234         | 736.767         | 725.427         | 725.763        | 725.091         | T[21] |
| I[10] | 375.929         | 697.084         | 691.745         | 692.081        | 691.409         | I[20] |
| A[11] | 399.608         | 659.389         | 654.050         | 654.386        | 653.714         | A[19] |
| Q[12] | 442.294         | 639.713         | 630.374         | 630.707        | 630.035         | Q[19] |
| G[13] | 461.301         | 593.024         | 587.685         | 588.021        | 587.349         | G[17] |
| G[14] | 480.308         | 574.017         | 568.678         | 569.013        | 568.342         | G[16] |
| V[15] | 513.331         | 555.010         | 549.670         | 550.006        | 549.334         | V[15] |
| L[16] | 551.026         | 521.987         | 516.648         | 516.984        | 516.312         | L[14] |
| F[17] | 563.177         | 484.262         | 478.923         | 479.259        | 478.587         | F[13] |
| T[18] | 621.391         | 451.942         | 446.603         | 446.939        | 446.267         | T[12] |
| I[19] | 659.086         | 413.927         | 408.588         | 408.924        | 408.252         | I[11] |
| Q[20] | 701.772         | 376.233         | 370.893         | 371.229        | 370.557         | Q[10] |
| A[21] | 729.461         | 333.540         | 328.201         | 328.537        | 327.865         | A[9]  |
| V[22] | 758.474         | 309.867         | 304.528         | 304.864        | 304.192         | V[9]  |
| L[23] | 796.168         | 276.844         | 271.505         | 271.841        | 271.169         | L[7]  |
| L[24] | 833.863         | 239.159         | 233.819         | 234.148        | 233.476         | L[6]  |
| P[25] | 866.214         | 201.455         | 196.116         | 196.451        | 195.779         | P[5]  |
| K[26] | 908.912         | 169.104         | 163.765         | 164.101        | 163.429         | K[4]  |
| K[27] | <b>951.611</b>  | 126.400         | 121.061         | 121.402        | 120.730         | K[3]  |
| T[28] | <b>985.293</b>  | 83.708          | 78.368          | 78.704         | 78.032          | T[2]  |
| E[29] | <b>1028.307</b> | 50.025          | 44.685          | 45.021         | 44.349          | E[1]  |



# sp | Q6GSS7 | H2A2A\_MOUSE

LNKLLGK <sup>Dimethyl</sup> <sub>28.03</sub> VTIAQGGVLPNIQAVLLPKKTE

- ▶ fragmentation table for charge state 1+
- ▶ specType=etd
- ▶ score=114.45
- ▶ F104927.dat
- ▶ query=q3145\_p1
- ▶ precursor=617.582820
- ▶ chargePrecursor=5
- ▶ itol=0.8

| AA    | c               | y               | z+1             | z+2             | z              | AA    |
|-------|-----------------|-----------------|-----------------|-----------------|----------------|-------|
| L[1]  | 131.118         | 3083.892        | 3067.873        | 0.000           | 3066.865       | L[26] |
| N[2]  | <b>245.161</b>  | 2970.808        | 2954.789        | 2955.797        | 2953.781       | N[28] |
| K[3]  | <b>373.256</b>  | 2856.765        | 2840.746        | 2841.754        | 2839.738       | K[27] |
| L[4]  | <b>486.340</b>  | 2738.670        | 2722.651        | 2713.659        | 2711.643       | L[26] |
| L[5]  | <b>599.424</b>  | 2615.585        | 2599.567        | 2600.575        | 2598.559       | L[25] |
| G[6]  | <b>638.445</b>  | 2502.500        | 2486.483        | 2487.491        | 2485.475       | G[24] |
| K[7]  | <b>812.572</b>  | 2445.480        | 2429.462        | 2430.469        | 2428.454       | K[23] |
| V[8]  | <b>911.640</b>  | 2289.354        | 2273.335        | 2274.343        | 2272.327       | V[22] |
| T[9]  | 1012.688        | 2190.288        | 2174.267        | 2175.275        | 2173.259       | T[21] |
| I[10] | <b>1125.772</b> | 2089.230        | 2073.210        | 2074.227        | 2072.211       | I[20] |
| A[11] | <b>1196.809</b> | 1976.154        | 1960.135        | 1961.143        | 1959.127       | A[19] |
| Q[12] | 1214.857        | 1905.111        | 1889.098        | 1890.106        | 1888.090       | Q[18] |
| G[13] | 1381.889        | 1777.058        | 1761.039        | <b>1762.047</b> | 1760.032       | G[17] |
| G[14] | 1438.910        | 1720.037        | 1704.018        | 1705.026        | 1703.010       | G[16] |
| V[15] | 1537.979        | 1663.015        | 1646.997        | 1648.004        | 1646.989       | V[15] |
| L[16] | 1651.063        | 1583.947        | <b>1547.928</b> | 1548.936        | 1546.920       | L[14] |
| F[17] | 1708.916        | <b>1450.863</b> | 1434.844        | 1435.852        | 1433.836       | F[13] |
| N[18] | <b>1862.159</b> | 1383.819        | 1337.791        | 1338.799        | 1336.783       | N[12] |
| I[19] | 1975.243        | 1239.761        | <b>1223.748</b> | 1224.756        | 1222.741       | I[11] |
| Q[20] | 2103.301        | <b>1126.683</b> | 1110.664        | 1111.672        | 1109.656       | Q[10] |
| A[21] | 2174.338        | 998.624         | 982.606         | 983.614         | 981.598        | A[9]  |
| V[22] | 2273.407        | 927.587         | <b>911.569</b>  | <b>912.576</b>  | <b>910.561</b> | V[8]  |
| L[23] | 2389.491        | 808.513         | <b>813.500</b>  | 814.508         | <b>811.492</b> | L[7]  |
| L[24] | 2499.575        | 715.435         | <b>699.416</b>  | <b>700.424</b>  | 698.408        | L[6]  |
| P[25] | 2596.628        | 602.351         | 586.332         | 587.340         | 585.324        | P[5]  |
| K[26] | 2724.723        | 505.268         | 489.249         | <b>490.287</b>  | 488.271        | K[4]  |
| K[27] | 2852.818        | 377.203         | <b>361.184</b>  | 362.192         | 360.177        | K[3]  |
| T[28] | 2953.865        | 249.108         | 233.089         | 234.097         | 232.082        | T[2]  |
| E[29] | 3082.008        | 148.060         | 132.042         | 133.050         | 131.034        | E[1]  |

# sp | Q6GSS7 | H2A2A\_MOUSE

LNKLLGK <sup>Dimethyl</sup> <sub>28.03</sub> VTIAQGGVLPNIQAVLLPKKTE

- ▶ fragmentation table for charge state 2+
- ▶ specType=etd
- ▶ score=114.45
- ▶ F104927.dat
- ▶ query=q3145\_p1
- ▶ precursor=617.582820
- ▶ chargePrecursor=5
- ▶ itol=0.8

| AA   | c               | y               | z+1             | z+2             | z               | AA   |
|------|-----------------|-----------------|-----------------|-----------------|-----------------|------|
| L 1  | 66.093          | 1542.850        | <b>1534.440</b> | 9.504           | 1533.990        | L 20 |
| N 2  | 123.084         | 1485.908        | <b>1477.898</b> | <b>1478.402</b> | 1477.304        | N 20 |
| K 3  | 187.132         | 1428.888        | 1420.877        | <b>1421.381</b> | 1420.373        | K 27 |
| L 4  | 243.674         | <b>1364.839</b> | 1356.829        | <b>1357.333</b> | 1356.325        | L 26 |
| L 5  | 300.216         | 1308.297        | 1300.287        | 1300.791        | <b>1299.783</b> | L 25 |
| G 6  | 358.298         | 1251.795        | 1243.785        | <b>1244.289</b> | 1243.281        | G 24 |
| K 7  | <b>404.789</b>  | <b>1223.244</b> | <b>1215.234</b> | <b>1215.738</b> | <b>1214.731</b> | K 23 |
| V 8  | <b>456.324</b>  | 1145.181        | <b>1137.171</b> | <b>1137.675</b> | 1136.667        | V 22 |
| T 9  | <b>506.848</b>  | 1095.646        | <b>1087.637</b> | <b>1088.141</b> | <b>1087.133</b> | T 21 |
| T 10 | 563.390         | 1045.123        | 1037.113        | <b>1037.617</b> | 1036.609        | T 20 |
| A 11 | <b>598.908</b>  | <b>980.581</b>  | <b>980.571</b>  | <b>981.075</b>  | <b>980.067</b>  | A 19 |
| G 12 | <b>662.817</b>  | <b>953.062</b>  | 945.053         | <b>945.557</b>  | 944.549         | G 18 |
| G 13 | <b>691.448</b>  | 899.033         | <b>881.023</b>  | <b>881.527</b>  | 880.519         | G 17 |
| G 14 | <b>719.959</b>  | 860.522         | <b>852.513</b>  | <b>853.017</b>  | <b>852.009</b>  | G 16 |
| V 15 | <b>769.493</b>  | 832.011         | <b>824.002</b>  | <b>824.506</b>  | <b>823.498</b>  | V 15 |
| L 16 | 826.935         | <b>782.477</b>  | 774.468         | 774.972         | 773.964         | L 14 |
| T 17 | <b>874.561</b>  | <b>725.935</b>  | 717.926         | 718.430         | 717.422         | T 13 |
| N 18 | <b>931.583</b>  | 677.425         | <b>669.399</b>  | <b>669.903</b>  | 668.895         | N 12 |
| I 19 | <b>988.125</b>  | 630.907         | <b>612.378</b>  | <b>612.882</b>  | 611.874         | I 11 |
| Q 20 | <b>1052.154</b> | 583.849         | 575.839         | 576.343         | 575.335         | Q 10 |
| A 21 | <b>1087.673</b> | 499.816         | <b>491.807</b>  | <b>492.310</b>  | <b>491.303</b>  | A 0  |
| V 22 | <b>1137.207</b> | 484.297         | <b>456.268</b>  | <b>456.792</b>  | 455.785         | V 8  |
| L 23 | <b>1193.749</b> | 414.763         | <b>406.754</b>  | <b>407.258</b>  | <b>406.250</b>  | L 7  |
| L 24 | 1250.291        | 358.221         | 350.212         | 350.716         | 349.708         | L 6  |
| P 25 | <b>1298.817</b> | 301.678         | 293.670         | 294.174         | 293.166         | P 5  |
| K 26 | <b>1362.865</b> | 253.153         | <b>245.143</b>  | <b>245.647</b>  | <b>244.639</b>  | K 4  |
| K 27 | 1428.912        | 189.105         | 181.096         | 181.600         | 180.592         | K 3  |
| T 28 | 1477.436        | 125.058         | 117.049         | 117.552         | 116.544         | T 2  |
| E 29 | 1541.958        | 74.534          | 66.524          | 67.028          | 66.021          | E 1  |

# sp | Q6GSS7 | H2A2A\_MOUSE

LNKLLGK <sup>Dimethyl</sup> <sub>28.03</sub> VTIAQGGVLPNIQAVLLPKKTE

- ▶ fragmentation table for charge state 3+
- ▶ specType=etd
- ▶ score=114.45
- ▶ F104927.dat
- ▶ query=q3145\_p1
- ▶ precursor=617.582820
- ▶ chargePrecursor=5
- ▶ itol=0.8

| AA | c  | y              | z+1            | z+2             | z              | AA             |   |    |
|----|----|----------------|----------------|-----------------|----------------|----------------|---|----|
| L  | 1  | 44.377         | 1028.635       | <b>1023.296</b> | 0.672          | 1022.960       | L | 29 |
| N  | 2  | 82.392         | 990.941        | <b>985.601</b>  | <b>985.937</b> | <b>985.265</b> | N | 28 |
| K  | 3  | 125.090        | <b>952.926</b> | <b>947.587</b>  | <b>947.923</b> | 947.251        | K | 27 |
| L  | 4  | 162.795        | <b>910.228</b> | <b>904.889</b>  | <b>905.225</b> | <b>904.553</b> | L | 26 |
| L  | 5  | 200.479        | 872.533        | <b>867.194</b>  | <b>867.530</b> | 866.856        | L | 25 |
| G  | 6  | 219.487        | 834.839        | <b>829.499</b>  | <b>829.835</b> | <b>829.163</b> | G | 24 |
| K  | 7  | 271.529        | 815.832        | <b>810.492</b>  | <b>810.828</b> | 810.156        | K | 23 |
| V  | 8  | 304.952        | 761.790        | <b>756.450</b>  | <b>756.786</b> | <b>756.114</b> | V | 22 |
| T  | 9  | 338.214        | 730.767        | <b>725.427</b>  | <b>725.763</b> | <b>725.091</b> | T | 21 |
| I  | 10 | 375.929        | 697.084        | <b>691.745</b>  | <b>692.081</b> | <b>691.409</b> | I | 20 |
| A  | 11 | 399.698        | 659.389        | 654.050         | 654.386        | 653.714        | A | 19 |
| Q  | 12 | 442.294        | 638.710        | 630.371         | 630.707        | 630.035        | Q | 18 |
| G  | 13 | 461.301        | 593.024        | 587.685         | 588.021        | 587.349        | G | 17 |
| G  | 14 | 480.308        | 574.017        | 568.678         | 569.013        | 568.342        | G | 16 |
| V  | 15 | 513.331        | 555.010        | 549.670         | 550.006        | 549.334        | V | 15 |
| L  | 16 | 551.026        | 521.987        | 516.648         | 516.984        | 516.312        | L | 14 |
| P  | 17 | 583.377        | 484.292        | 478.953         | 479.289        | 478.617        | P | 13 |
| N  | 18 | 621.391        | 451.942        | 446.602         | 446.938        | 446.266        | N | 12 |
| I  | 19 | 659.098        | 413.927        | 408.588         | 408.924        | 408.252        | I | 11 |
| Q  | 20 | <b>701.772</b> | 376.233        | 370.893         | 371.229        | 370.557        | Q | 10 |
| A  | 21 | <b>725.451</b> | 333.548        | 328.207         | 328.543        | 327.871        | A | 9  |
| V  | 22 | <b>758.474</b> | 309.867        | 304.528         | 304.864        | 304.192        | V | 8  |
| L  | 23 | <b>796.168</b> | 276.844        | 271.505         | 271.841        | 271.169        | L | 7  |
| L  | 24 | 833.861        | 239.150        | 233.810         | 234.146        | 233.474        | L | 6  |
| P  | 25 | 866.214        | 201.455        | 196.116         | 196.451        | 195.780        | P | 5  |
| K  | 26 | 928.912        | 169.104        | 163.765         | 164.101        | 163.429        | K | 4  |
| K  | 27 | <b>951.611</b> | 126.406        | 121.066         | 121.402        | 120.730        | K | 3  |
| T  | 28 | <b>985.293</b> | 83.708         | 78.368          | 78.704         | 78.032         | T | 2  |
| E  | 29 | 1028.397       | 50.025         | 44.685          | 45.021         | 44.349         | E | 1  |

# sp | Q6GSS7 | H2A2A\_MOUSE

LNKLLGK <sup>Dimethyl</sup> <sub>28.03</sub> VTIAQGGVLPNIQAVLLPKKTE

- ▶ fragmentation table for charge state 4+
- ▶ specType=etd
- ▶ score=114.45
- ▶ F104927.dat
- ▶ query=q3145\_p1
- ▶ precursor=617.582820
- ▶ chargePrecursor=5
- ▶ itol=0.8

| AA |    | c              | y              | z+1            | z+2            | z              | AA |    |
|----|----|----------------|----------------|----------------|----------------|----------------|----|----|
| L  | 1  | 33.535         | <b>771.726</b> | 769.724        | 0.756          | 769.972        | L  | 29 |
| N  | 2  | 62.046         | 743.451        | <b>739.453</b> | <b>739.705</b> | <b>739.201</b> | N  | 28 |
| K  | 3  | 94.059         | 714.947        | <b>710.942</b> | <b>711.194</b> | <b>710.690</b> | K  | 27 |
| L  | 4  | 122.340        | 687.923        | 678.918        | 679.170        | 678.666        | L  | 26 |
| L  | 5  | 150.611        | 654.652        | 650.647        | 650.899        | 650.395        | L  | 25 |
| G  | 6  | 164.867        | 626.381        | 622.376        | 622.628        | 622.124        | G  | 24 |
| K  | 7  | 203.898        | <b>612.126</b> | 608.121        | 608.373        | 607.869        | K  | 23 |
| V  | 8  | 228.665        | 573.094        | 569.089        | 569.341        | 568.837        | V  | 22 |
| T  | 9  | 253.927        | 548.327        | 544.322        | 544.574        | 544.070        | T  | 21 |
| I  | 10 | 262.198        | 523.065        | 519.060        | 519.312        | 518.808        | I  | 20 |
| A  | 11 | 269.958        | 494.794        | <b>490.789</b> | <b>491.041</b> | <b>490.537</b> | A  | 19 |
| Q  | 12 | 331.972        | 477.036        | 473.030        | 473.282        | 472.778        | Q  | 18 |
| G  | 13 | 346.228        | 445.020        | 441.015        | 441.267        | 440.763        | G  | 17 |
| G  | 14 | 360.483        | 430.765        | 426.760        | 427.012        | 426.508        | G  | 16 |
| V  | 15 | 385.250        | 416.509        | 412.504        | 412.757        | 412.253        | V  | 15 |
| L  | 16 | 413.521        | 391.742        | 387.737        | 387.989        | 387.486        | L  | 14 |
| P  | 17 | 437.784        | 363.471        | 359.466        | 359.718        | 359.215        | P  | 13 |
| N  | 18 | 466.295        | 339.208        | 335.203        | 335.455        | 334.951        | N  | 12 |
| I  | 19 | 494.566        | 310.897        | 306.891        | 306.945        | 306.441        | I  | 11 |
| Q  | 20 | 526.381        | 282.426        | 278.422        | 278.673        | 278.170        | Q  | 10 |
| A  | 21 | 544.340        | 250.412        | 246.407        | 246.659        | 246.155        | A  | 9  |
| V  | 22 | 569.107        | 232.652        | 228.646        | 228.900        | 228.396        | V  | 8  |
| L  | 23 | 597.378        | 207.885        | 203.881        | 204.132        | 203.629        | L  | 7  |
| L  | 24 | 625.649        | 179.614        | 175.609        | 175.861        | 175.358        | L  | 6  |
| P  | 25 | 649.912        | 151.343        | 147.338        | 147.590        | 147.087        | P  | 5  |
| K  | 26 | 681.936        | 127.080        | 123.075        | 123.327        | 122.823        | K  | 4  |
| K  | 27 | <b>713.960</b> | 95.056         | 91.052         | 91.304         | 90.800         | K  | 3  |
| T  | 28 | <b>739.222</b> | 63.032         | 59.028         | 59.280         | 58.776         | T  | 2  |
| E  | 29 | <b>771.482</b> | 37.771         | 33.766         | 34.018         | 33.514         | E  | 1  |

# sp | Q6GSS7 | H2A2A\_MOUSE

LNKLLGK<sup>Dimethyl</sup>VTIAQGGVLPNIQAVLLPKKTE  
28.03

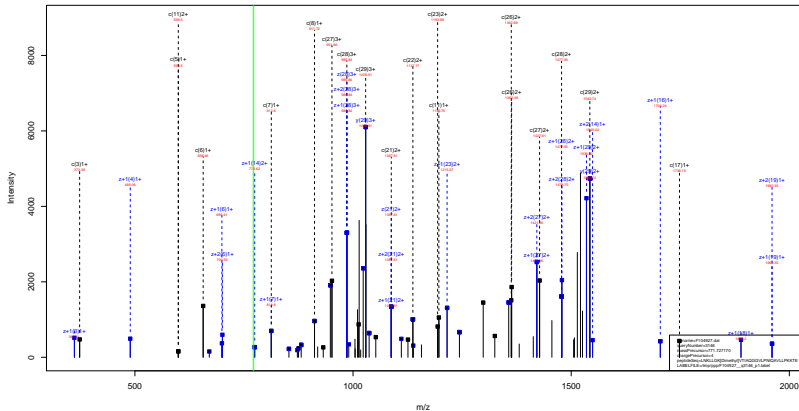



# sp | Q6GSS7 | H2A2A\_MOUSE

LNKLLGK <sup>Dimethyl</sup><sub>28.03</sub> VTIAQGGVLPNIQAVLLPKKTE

- ▶ fragmentation table for charge state 1+
- ▶ specType=etd
- ▶ score=89.31
- ▶ F104927.dat
- ▶ query=q3146\_p1
- ▶ precursor=771.727170
- ▶ chargePrecursor=4
- ▶ itol=0.8

| AA    | c               | y        | z+1             | z+2             | z        | AA    |
|-------|-----------------|----------|-----------------|-----------------|----------|-------|
| L[1]  | 131.118         | 3081.892 | 3067.873        | 0.000           | 3066.895 | L[29] |
| N[2]  | 345.161         | 2970.808 | 2954.789        | 2955.797        | 2951.781 | N[28] |
| K[3]  | <b>373.256</b>  | 2856.765 | 2840.746        | 2841.754        | 2839.738 | K[27] |
| L[4]  | 486.340         | 2728.670 | 2712.651        | 2713.659        | 2711.643 | L[26] |
| L[5]  | <b>599.424</b>  | 2615.585 | 2599.567        | 2600.575        | 2598.560 | L[25] |
| Q[6]  | <b>656.445</b>  | 2502.502 | 2486.483        | 2487.491        | 2485.475 | Q[24] |
| K[7]  | <b>812.572</b>  | 2345.480 | 2429.462        | 2430.469        | 2428.454 | K[23] |
| V[8]  | <b>911.640</b>  | 2288.354 | 2273.335        | 2274.343        | 2272.327 | V[22] |
| T[9]  | <b>1012.688</b> | 2190.286 | 2174.267        | 2175.275        | 2173.259 | T[21] |
| I[10] | <b>1125.772</b> | 2089.238 | 2073.219        | 2074.227        | 2072.211 | I[20] |
| A[11] | <b>1196.809</b> | 1976.154 | <b>1960.135</b> | <b>1961.143</b> | 1959.127 | A[19] |
| Q[12] | <b>1324.867</b> | 1895.111 | <b>1889.098</b> |                 |          | Q[18] |
| G[13] | 1381.889        | 1777.058 | 1761.039        | 1762.047        | 1760.032 | G[17] |
| G[14] | 1438.910        | 1720.937 | <b>1704.918</b> | <b>1705.926</b> | 1703.910 | G[16] |
| V[15] | 1537.879        | 1663.915 | 1646.907        | 1646.904        | 1645.909 | V[15] |
| L[16] | 1651.963        | 1563.947 | 1547.928        | <b>1548.936</b> | 1546.920 | L[14] |
| P[17] | <b>1748.116</b> | 1450.893 | 1434.864        | 1435.852        | 1433.836 | P[13] |
| T[18] | 1867.159        | 1383.810 | 1367.791        | 1368.799        | 1366.783 | T[12] |
| I[19] | 1975.243        | 1298.767 | 1283.748        | 1284.756        | 1282.741 | I[11] |
| Q[20] | 2103.301        | 1126.683 | <b>1110.664</b> | 1111.672        | 1109.656 | Q[10] |
| A[21] | 2174.336        | 998.624  | 983.606         | 983.614         | 981.598  | A[9]  |
| V[22] | 2273.407        | 927.587  | <b>911.569</b>  | 912.576         | 910.561  | V[8]  |
| L[23] | 2386.491        | 828.519  | <b>812.500</b>  | 813.508         | 811.492  | L[7]  |
| L[24] | 2499.575        | 715.435  | <b>699.415</b>  | <b>700.424</b>  | 698.408  | L[6]  |
| P[25] | 2596.626        | 602.351  | 586.332         | 587.340         | 585.324  | P[5]  |
| K[26] | 2724.723        | 505.298  | <b>489.279</b>  | 490.287         | 488.271  | K[4]  |
| K[27] | 2852.816        | 377.203  | <b>361.184</b>  | 362.192         | 360.177  | K[3]  |
| T[28] | 2953.905        | 249.108  | 233.089         | 234.097         | 232.082  | T[2]  |
| E[29] | 3087.938        | 148.060  | 132.042         | 133.050         | 131.034  | E[1]  |

# sp | Q6GSS7 | H2A2A\_MOUSE

LNKLLGK <sup>Dimethyl</sup><sub>28.03</sub> VTIAQGGVLPNIQAVLLPKKTE

- ▶ fragmentation table for charge state 2+
- ▶ specType=etd
- ▶ score=89.31
- ▶ F104927.dat
- ▶ query=q3146\_p1
- ▶ precursor=771.727170
- ▶ chargePrecursor=4
- ▶ itol=0.8

| AA  | c               | y               | z+1             | z+2             | z               | AA   |
|-----|-----------------|-----------------|-----------------|-----------------|-----------------|------|
| L1  | 66.093          | <b>1542.450</b> | <b>1534.440</b> | 9.504           | 533.930         | L120 |
| N12 | 123.084         | 1485.905        | <b>1477.898</b> | <b>1478.402</b> | <b>1477.394</b> | N08  |
| K13 | 187.132         | 1428.889        | <b>1420.877</b> | <b>1421.381</b> | 1420.373        | K27  |
| L14 | 243.674         | 1364.839        | <b>1356.829</b> | <b>1357.333</b> | <b>1356.325</b> | L26  |
| L15 | 300.216         | 1308.297        | 1300.287        | 1300.791        | 1299.783        | L25  |
| G16 | 358.709         | 1251.795        | <b>1243.745</b> | <b>1244.249</b> | <b>1243.241</b> | G24  |
| K17 | 406.759         | 1223.244        | <b>1215.234</b> | <b>1215.738</b> | 1214.731        | K23  |
| V18 | 456.324         | 1145.181        | <b>1137.171</b> | <b>1137.675</b> | <b>1136.667</b> | V22  |
| T19 | 506.840         | 1095.646        | <b>1087.637</b> | <b>1088.141</b> | <b>1087.133</b> | T21  |
| T10 | 563.390         | 1045.123        | <b>1037.113</b> | <b>1037.617</b> | <b>1036.609</b> | T20  |
| A11 | <b>598.908</b>  | 988.581         | 980.571         | 981.075         | 980.067         | A19  |
| G12 | 662.937         | 933.060         | 925.053         | 925.557         | 924.549         | G18  |
| G13 | 691.448         | 889.033         | <b>881.023</b>  | <b>881.527</b>  | <b>880.519</b>  | G17  |
| G14 | 719.959         | 860.522         | <b>852.513</b>  | <b>853.017</b>  | 852.009         | G16  |
| V15 | 769.493         | 832.011         | 824.002         | 824.506         | 823.498         | V15  |
| L16 | 820.035         | 782.477         | <b>774.468</b>  | <b>774.972</b>  | <b>773.964</b>  | L14  |
| T17 | <b>874.561</b>  | 728.935         | 721.928         | 722.432         | 721.424         | T13  |
| N18 | <b>931.583</b>  | 677.400         | 669.390         | <b>669.903</b>  | 668.895         | N12  |
| I19 | 988.125         | 620.867         | 612.858         | 612.862         | 611.874         | I11  |
| Q20 | <b>1052.154</b> | 563.845         | 555.836         | 556.340         | 555.332         | Q10  |
| A21 | <b>1087.673</b> | 499.816         | 491.807         | 492.310         | 491.303         | A0   |
| V22 | <b>1137.207</b> | 484.297         | 476.288         | 476.792         | 475.784         | V8   |
| L23 | <b>1193.749</b> | 414.763         | 406.754         | 407.258         | 406.250         | L17  |
| L24 | 1250.291        | 358.221         | 350.212         | 350.716         | 349.708         | L16  |
| P25 | <b>1298.817</b> | 301.679         | 293.670         | 294.174         | 293.166         | P5   |
| K26 | <b>1362.865</b> | 253.153         | 245.143         | 245.647         | 244.639         | K4   |
| K27 | <b>1426.912</b> | 189.105         | 181.096         | 181.600         | 180.592         | K3   |
| T28 | <b>1477.436</b> | 125.058         | 117.048         | 117.552         | 116.544         | T2   |
| E29 | <b>1541.958</b> | 74.534          | 66.524          | 67.028          | 66.021          | E1   |

# sp | Q6GSS7 | H2A2A\_MOUSE

LNKLLGK <sup>Dimethyl</sup> <sub>28.03</sub> VTIAQGGVLPNIQAVLLPKKTE

- ▶ fragmentation table for charge state 3+
- ▶ specType=etd
- ▶ score=89.31
- ▶ F104927.dat
- ▶ query=q3146\_p1
- ▶ precursor=771.727170
- ▶ chargePrecursor=4
- ▶ itol=0.8

| AA    | c               | y               | z+1             | z+2            | z               | AA    |
|-------|-----------------|-----------------|-----------------|----------------|-----------------|-------|
| L[1]  | 44.377          | <b>1028.635</b> | <b>1023.296</b> | 0.672          | <b>1022.960</b> | L[20] |
| N[2]  | 82.302          | <b>990.941</b>  | <b>985.601</b>  | <b>985.937</b> | <b>985.265</b>  | N[20] |
| K[3]  | 125.090         | 952.926         | <b>947.587</b>  | <b>947.923</b> | <b>947.251</b>  | K[27] |
| L[4]  | 162.785         | 910.228         | 904.889         | 905.225        | 904.553         | L[26] |
| L[5]  | 200.479         | <b>872.533</b>  | 867.194         | 867.530        | 866.856         | L[25] |
| Q[6]  | 239.887         | 824.337         | 820.499         | 820.835        | 820.161         | Q[24] |
| K[7]  | 271.529         | 815.832         | 810.492         | 810.828        | 810.154         | K[23] |
| V[8]  | 304.552         | 783.700         | 778.450         | 778.786        | 778.114         | V[22] |
| T[9]  | 338.234         | 736.767         | 725.427         | 725.763        | 725.091         | T[21] |
| T[10] | 375.920         | 697.084         | 691.745         | 692.081        | 691.409         | T[20] |
| A[11] | 399.608         | 699.380         | 654.050         | 654.386        | 653.714         | A[19] |
| Q[12] | 442.294         | 635.711         | 630.371         | 630.707        | 630.035         | Q[18] |
| G[13] | 461.301         | 593.024         | 587.685         | 588.021        | 587.349         | G[17] |
| G[14] | 480.308         | 574.017         | 568.678         | 569.013        | 568.342         | G[16] |
| V[15] | 513.331         | 555.010         | 549.670         | 550.006        | 549.334         | V[15] |
| L[16] | 551.026         | 521.987         | 516.648         | 516.984        | 516.312         | L[14] |
| F[17] | 583.177         | 484.262         | 478.923         | 479.259        | 478.587         | F[13] |
| T[18] | 621.391         | 451.942         | 446.603         | 446.939        | 446.267         | T[12] |
| T[19] | 659.086         | 413.927         | 408.588         | 408.924        | 408.252         | T[11] |
| Q[20] | 701.772         | 376.233         | 370.893         | 371.229        | 370.557         | Q[10] |
| A[21] | 725.451         | 333.540         | 328.201         | 328.537        | 327.865         | A[9]  |
| V[22] | 758.474         | 309.867         | 304.528         | 304.864        | 304.192         | V[9]  |
| L[23] | 796.168         | 276.844         | 271.505         | 271.841        | 271.169         | L[7]  |
| L[24] | 833.863         | 239.159         | 233.819         | 234.156        | 233.484         | L[6]  |
| P[25] | 866.214         | 201.455         | 196.116         | 196.451        | 195.779         | P[5]  |
| K[26] | 908.912         | 169.104         | 163.765         | 164.101        | 163.429         | K[4]  |
| K[27] | <b>951.611</b>  | 126.406         | 121.066         | 121.402        | 120.730         | K[3]  |
| T[28] | <b>985.293</b>  | 83.700          | 78.360          | 78.704         | 78.032          | T[2]  |
| E[29] | <b>1028.307</b> | 50.025          | 44.685          | 45.021         | 44.349          | E[1]  |

# sp | Q6GSS7 | H2A2A\_MOUSE

ELNKLLGK<sup>Dimethyl</sup>VTIAQGGVLPNIQAVLLPKKTE  
28.03

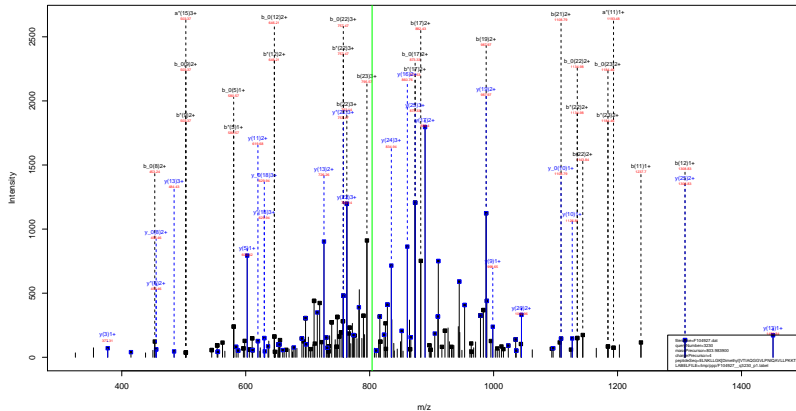

# sp | Q6GSS7 | H2A2A\_MOUSE

ELNKLKLGK<sup>Dimethyl</sup><sub>28.03</sub>VTIAQGGVLPNIQAVLLPKKTE

- ▶ fragmentation table for charge state 1+
- ▶ specType=cid
- ▶ score=30.71
- ▶ F104927.dat
- ▶ query=q3230\_p1
- ▶ precursor=803.983900
- ▶ chargePrecursor=4
- ▶ itol=0.8

| AA | a  | a*             | a.D             | b              | b*              | b.D            | v               | s*             | q.D            | AA |
|----|----|----------------|-----------------|----------------|-----------------|----------------|-----------------|----------------|----------------|----|
| E  | 1  | 205.078        | 205.078         | 146.063        | 146.063         | 0.000          | 1.174           | 1.11           | 1.01           | E  |
| L  | 2  | 225.129        | 0.000           | 197.129        | 243.129         | 0.000          | 2.05            | 2.23           | 3.03           | L  |
| N  | 3  | 245.182        | 0.11            | 181.111        | 187.177         | 140.150        | 4.39            | 3.69           | 3.03           | N  |
| R  | 4  | 265.234        | 0.00            | 139.000        | 145.066         | 100.044        | 10.17           | 1.01           | 1.01           | R  |
| L  | 5  | 275.287        | <b>553.334</b>  | 252.355        | <b>508.355</b>  | <b>581.320</b> | <b>500.345</b>  | 2.73           | 2.73           | L  |
| L  | 6  | 285.340        | 106.478         | <b>665.434</b> | <b>711.440</b>  | 104.471        | <b>693.420</b>  | 1.01           | 1.01           | L  |
| G  | 7  | 295.393        | 223.445         | <b>722.456</b> | 186.461         | <b>751.435</b> | <b>750.451</b>  | 2.02           | 2.02           | G  |
| R  | 8  | <b>305.446</b> | 179.508         | 138.500        | 144.500         | 100.514        | 1.01            | 1.01           | 1.01           | R  |
| V  | 9  | <b>305.446</b> | <b>678.435</b>  | 197.465        | <b>1024.658</b> | 1056.630       | <b>1005.616</b> | 2.00           | 2.00           | V  |
| T  | 10 | <b>309.470</b> | 109.520         | 202.690        | <b>1128.704</b> | 1107.677       | <b>1106.695</b> | 2.00           | 2.00           | T  |
| L  | 11 | 319.523        | <b>1182.746</b> | 232.811        | <b>1337.781</b> | 1305.713       | 1.01            | 1.01           | 1.01           | L  |
| A  | 12 | 329.576        | 138.630         | 130.630        | 136.630         | 100.614        | 1.01            | 1.01           | 1.01           | A  |
| Q  | 13 | 349.629        | 159.683         | 150.683        | 156.683         | 110.619        | 1.01            | 1.01           | 1.01           | Q  |
| G  | 14 | 359.682        | 179.736         | 170.736        | 176.736         | 120.624        | 1.01            | 1.01           | 1.01           | G  |
| G  | 15 | 369.735        | 199.789         | 190.789        | 196.789         | 130.629        | 1.01            | 1.01           | 1.01           | G  |
| V  | 16 | 379.788        | 219.842         | 210.842        | 216.842         | 140.634        | 1.01            | 1.01           | 1.01           | V  |
| L  | 17 | 389.841        | 239.895         | 230.895        | 236.895         | 150.639        | 1.01            | 1.01           | 1.01           | L  |
| P  | 18 | 399.894        | 259.948         | 250.948        | 256.948         | 160.644        | 1.01            | 1.01           | 1.01           | P  |
| N  | 19 | 409.947        | 279.001         | 270.001        | 276.001         | 170.649        | 1.01            | 1.01           | 1.01           | N  |
| E  | 20 | 419.954        | 299.054         | 290.054        | 296.054         | 180.654        | 1.01            | 1.01           | 1.01           | E  |
| A  | 21 | 429.959        | 319.107         | 310.107        | 316.107         | 190.659        | 1.01            | 1.01           | 1.01           | A  |
| A  | 22 | 439.964        | 339.160         | 330.160        | 336.160         | 200.664        | <b>908.624</b>  | 1.01           | 1.01           | A  |
| V  | 23 | 449.969        | 359.213         | 350.213        | 356.213         | 210.669        | <b>918.563</b>  | 1.01           | 1.01           | V  |
| L  | 24 | 459.974        | 379.266         | 370.266        | 376.266         | 220.674        | <b>828.519</b>  | 1.01           | 1.01           | L  |
| L  | 25 | 469.979        | 399.319         | 390.319        | 396.319         | 230.679        | <b>715.435</b>  | 1.01           | 1.01           | L  |
| P  | 26 | 479.984        | 419.372         | 410.372        | 416.372         | 240.684        | 1.01            | 1.01           | 1.01           | P  |
| A  | 27 | 489.989        | 439.425         | 430.425        | 436.425         | 250.689        | <b>682.551</b>  | <b>585.324</b> | <b>584.340</b> | A  |
| R  | 28 | 499.994        | 459.478         | 450.478        | 456.478         | 260.694        | 1.01            | 1.01           | 1.01           | R  |
| R  | 29 | 509.999        | 479.531         | 470.531        | 476.531         | 270.699        | <b>377.203</b>  | 1.01           | 1.01           | R  |
| T  | 30 | 519.004        | 499.584         | 490.584        | 496.584         | 280.704        | 1.01            | 1.01           | 1.01           | T  |
| E  | 31 | 529.009        | 519.637         | 510.637        | 516.637         | 290.709        | 1.01            | 1.01           | 1.01           | E  |

# sp | Q6GSS7 | H2A2A\_MOUSE

ELNKLKLGK<sup>Dimethyl</sup>VTIAQGGVLPNIQAVLLPKKTE  
28.03

- ▶ fragmentation table for charge state 2+
- ▶ specType=cid
- ▶ score=30.71
- ▶ F104927.dat
- ▶ query=q3230\_p1
- ▶ precursor=803.983900
- ▶ chargePrecursor=4
- ▶ itol=0.8

| AA | a      | a*    | a:z    | b      | b*    | b:z    | y      | y*     | y:z    | AA  |
|----|--------|-------|--------|--------|-------|--------|--------|--------|--------|-----|
| E  | 31.031 | 0.304 | 42.528 | 46.262 | 0.304 | 36.353 | 30.871 | 13.848 | 13.077 | E34 |
| L  | 27.014 | 0.304 | 39.059 | 42.814 | 0.304 | 33.593 | 29.424 | 13.133 | 12.362 | L29 |
| N  | 33.059 | 0.304 | 44.569 | 48.302 | 0.304 | 38.783 | 32.059 | 14.474 | 13.702 | N28 |
| K  | 22.042 | 0.304 | 33.539 | 37.281 | 0.304 | 30.124 | 24.888 | 12.037 | 11.265 | K27 |
| L  | 32.058 | 0.304 | 43.553 | 47.500 | 0.304 | 37.008 | 31.833 | 13.926 | 13.154 | L26 |
| G  | 31.037 | 0.304 | 42.532 | 46.267 | 0.304 | 36.357 | 30.874 | 13.849 | 13.077 | G24 |
| N  | 33.059 | 0.304 | 44.569 | 48.302 | 0.304 | 38.783 | 32.059 | 14.474 | 13.702 | N25 |
| V  | 30.018 | 0.304 | 41.518 | 45.257 | 0.304 | 35.368 | 29.389 | 13.349 | 12.577 | V22 |
| T  | 34.068 | 0.304 | 45.578 | 49.517 | 0.304 | 39.838 | 33.108 | 14.811 | 14.039 | T21 |
| A  | 12.010 | 0.304 | 13.010 | 14.010 | 0.304 | 13.010 | 14.010 | 1.010  | 1.010  | A19 |
| Q  | 31.031 | 0.304 | 42.528 | 46.262 | 0.304 | 36.353 | 30.871 | 13.848 | 13.077 | Q18 |
| G  | 31.031 | 0.304 | 42.528 | 46.262 | 0.304 | 36.353 | 30.871 | 13.848 | 13.077 | G17 |
| L  | 32.058 | 0.304 | 43.553 | 47.500 | 0.304 | 37.008 | 31.833 | 13.926 | 13.154 | L16 |
| V  | 30.018 | 0.304 | 41.518 | 45.257 | 0.304 | 35.368 | 29.389 | 13.349 | 12.577 | V15 |
| T  | 34.068 | 0.304 | 45.578 | 49.517 | 0.304 | 39.838 | 33.108 | 14.811 | 14.039 | T14 |
| P  | 31.031 | 0.304 | 42.528 | 46.262 | 0.304 | 36.353 | 30.871 | 13.848 | 13.077 | P13 |
| N  | 33.059 | 0.304 | 44.569 | 48.302 | 0.304 | 38.783 | 32.059 | 14.474 | 13.702 | N12 |
| E  | 31.031 | 0.304 | 42.528 | 46.262 | 0.304 | 36.353 | 30.871 | 13.848 | 13.077 | E11 |
| Q  | 31.031 | 0.304 | 42.528 | 46.262 | 0.304 | 36.353 | 30.871 | 13.848 | 13.077 | Q10 |
| A  | 12.010 | 0.304 | 13.010 | 14.010 | 0.304 | 13.010 | 14.010 | 1.010  | 1.010  | A9  |
| V  | 30.018 | 0.304 | 41.518 | 45.257 | 0.304 | 35.368 | 29.389 | 13.349 | 12.577 | V8  |
| L  | 32.058 | 0.304 | 43.553 | 47.500 | 0.304 | 37.008 | 31.833 | 13.926 | 13.154 | L7  |
| L  | 32.058 | 0.304 | 43.553 | 47.500 | 0.304 | 37.008 | 31.833 | 13.926 | 13.154 | L6  |
| P  | 31.031 | 0.304 | 42.528 | 46.262 | 0.304 | 36.353 | 30.871 | 13.848 | 13.077 | P5  |
| K  | 22.042 | 0.304 | 33.539 | 37.281 | 0.304 | 30.124 | 24.888 | 12.037 | 11.265 | K4  |
| T  | 34.068 | 0.304 | 45.578 | 49.517 | 0.304 | 39.838 | 33.108 | 14.811 | 14.039 | T3  |
| L  | 32.058 | 0.304 | 43.553 | 47.500 | 0.304 | 37.008 | 31.833 | 13.926 | 13.154 | L2  |

# sp | Q6GSS7 | H2A2A\_MOUSE

ELNKLKLGK<sup>Dimethyl</sup><sub>28.03</sub> VTIAGGGVLPNIQAVLLPKKTE

- ▶ fragmentation table for charge state 3+
- ▶ specType=cid
- ▶ score=30.71
- ▶ F104927.dat
- ▶ query=q3230\_p1
- ▶ precursor=803.983900
- ▶ chargePrecursor=4
- ▶ itol=0.8

| AA   | a        | a*       | a.D     | b        | b*       | b.D      | a'       | a'*      | a'.D     | AA   |
|------|----------|----------|---------|----------|----------|----------|----------|----------|----------|------|
| E1   | 32.384   | 0.72     | 28.38   | 44.314   | 0.7      | 33.31    | 1001.525 | 1000.804 | 1000.525 | E150 |
| L1   | 22.384   | 0.69     | 18.38   | 34.314   | 0.69     | 23.31    | 1002.960 | 1002.239 | 1001.960 | L150 |
| K1   | 110.389  | 104.233  | 104.38  | 119.230  | 114.055  | 113.23   | 1113.273 | 1055.255 | 104.307  | K150 |
| R1   | 103.387  | 107.44   | 107.583 | 112.426  | 107.251  | 106.44   | 1071.635 | 1017.251 | 104.623  | R150 |
| L1   | 100.792  | 105.116  | 104.793 | 109.123  | 104.446  | 104.123  | 1010.228 | 104.553  | 104.223  | L150 |
| L1   | 22.487   | 0.72     | 18.48   | 34.414   | 0.72     | 23.41    | 1011.601 | 1010.880 | 1010.601 | L151 |
| G1   | 247.484  | 241.233  | 241.48  | 256.230  | 251.055  | 250.23   | 2529.612 | 234.429  | 234.102  | G151 |
| R1   | 239.138  | 234.963  | 235.13  | 244.963  | 240.788  | 240.13   | 2412.912 | 215.963  | 215.636  | R151 |
| V1   | 132.508  | 126.352  | 126.51  | 131.348  | 126.173  | 125.35   | 1311.881 | 121.348  | 121.021  | V151 |
| T110 | 306.241  | 300.356  | 300.24  | 315.312  | 309.427  | 308.59   | 309.359  | 330.767  | 325.960  | T121 |
| T11  | 403.306  | 396.265  | 397.409 | 413.264  | 407.902  | 407.306  | 407.084  | 427.084  | 421.409  | T121 |
| A12  | 427.015  | 421.359  | 421.01  | 436.947  | 431.272  | 430.513  | 430.343  | 450.309  | 445.114  | A119 |
| Q13  | 470.301  | 464.426  | 464.30  | 479.413  | 473.537  | 473.03   | 473.03   | 493.710  | 488.035  | Q118 |
| Q14  | 489.308  | 483.433  | 483.30  | 498.540  | 492.664  | 492.08   | 492.08   | 512.611  | 507.249  | Q117 |
| Q15  | 508.315  | 502.440  | 502.31  | 517.647  | 511.771  | 511.443  | 514.01   | 514.01   | 508.714  | Q116 |
| V16  | 541.138  | 535.463  | 535.13  | 550.670  | 544.994  | 544.666  | 545.010  | 565.134  | 560.036  | V115 |
| L17  | 574.134  | 568.459  | 568.13  | 583.364  | 577.489  | 577.161  | 577.161  | 597.516  | 592.422  | L114 |
| P181 | 611.384  | 605.708  | 605.38  | 620.713  | 615.038  | 614.314  | 614.314  | 634.292  | 629.104  | P113 |
| R19  | 649.389  | 643.713  | 643.38  | 658.720  | 653.044  | 652.226  | 652.226  | 672.044  | 666.856  | R112 |
| T20  | 687.397  | 681.721  | 681.39  | 696.454  | 690.778  | 689.951  | 689.951  | 709.778  | 704.590  | T111 |
| Q21  | 726.778  | 721.102  | 720.77  | 735.111  | 729.435  | 728.707  | 728.707  | 748.611  | 743.423  | Q110 |
| A22  | 751.158  | 745.482  | 745.15  | 760.591  | 754.915  | 754.187  | 754.187  | 774.611  | 769.423  | A109 |
| V23  | 780.401  | 774.725  | 774.40  | 789.872  | 784.196  | 783.468  | 783.468  | 803.291  | 798.103  | V108 |
| L24  | 824.779  | 819.103  | 818.77  | 834.212  | 828.536  | 827.808  | 827.808  | 847.631  | 842.443  | L107 |
| L25  | 860.149  | 854.473  | 854.14  | 869.654  | 863.978  | 863.250  | 863.250  | 883.671  | 878.483  | L106 |
| L26  | 894.221  | 888.545  | 888.22  | 903.687  | 898.011  | 897.283  | 897.283  | 917.506  | 912.318  | L105 |
| K27  | 930.519  | 924.843  | 924.51  | 940.126  | 934.450  | 933.722  | 933.722  | 953.643  | 948.455  | K104 |
| R28  | 970.118  | 964.442  | 964.11  | 981.565  | 975.889  | 975.161  | 975.161  | 995.664  | 990.476  | R103 |
| L29  | 1013.310 | 1007.634 | 1007.31 | 1021.611 | 1015.935 | 1015.207 | 1015.207 | 1035.828 | 1030.640 | L102 |
| E30  | 1056.315 | 1050.639 | 1050.31 | 1066.648 | 1060.972 | 1060.244 | 1060.244 | 1080.865 | 1075.677 | E101 |

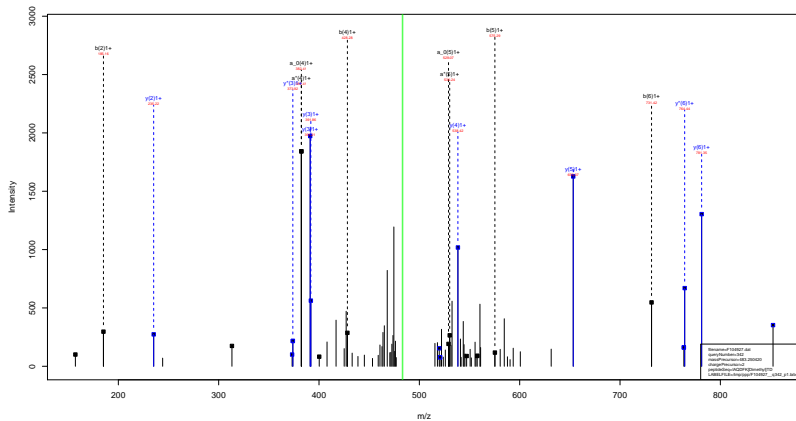



# sp | P68433 | H31\_MOUSE

IAQDFK<sup>Dimethyl</sup>TD  
28.03

- ▶ fragmentation table for charge state 1+
- ▶ specType=cid
- ▶ score=35.61
- ▶ F104927.dat
- ▶ query=q342\_p1
- ▶ precursor=483.250420
- ▶ chargePrecursor=2
- ▶ itol=0.8

| AA  | a              | y*             | a $\beta$      | b              | b*             | b $\beta$      | y              | y*             | y $\beta$      | AA |
|-----|----------------|----------------|----------------|----------------|----------------|----------------|----------------|----------------|----------------|----|
| T 1 | 483.250        | 0.000          | 0.000          | 114.073        | 0.000          | 0.000          | 852.410        | 0.000          | 0.000          | T8 |
| A 2 | <b>157.134</b> | 0.000          | 0.000          | <b>185.128</b> | 0.000          | 0.000          | <b>852.410</b> | 0.000          | 0.000          | A7 |
| Q 3 | 295.192        | 298.195        | 0.000          | <b>313.187</b> | 296.160        | 0.000          | <b>781.373</b> | <b>764.346</b> | <b>763.362</b> | Q6 |
| D 4 | <b>400.219</b> | <b>383.193</b> | <b>382.208</b> | <b>428.214</b> | 411.187        | 411.201        | <b>653.314</b> | 636.288        | 635.304        | D5 |
| F 5 | <b>547.287</b> | <b>530.261</b> | <b>529.277</b> | <b>515.282</b> | <b>558.256</b> | <b>557.272</b> | <b>538.287</b> | <b>521.261</b> | <b>520.277</b> | F4 |
| R 6 | 713.314        | 695.288        | 695.302        | <b>731.409</b> | 714.383        | 713.398        | <b>301.219</b> | <b>315.192</b> | <b>314.208</b> | R3 |
| T 7 | 304.461        | 787.435        | 786.451        | 823.456        | 815.430        | 814.446        | <b>235.092</b> | 0.000          | 217.082        | T2 |
| D 8 | 913.488        | 892.462        | 891.478        | 943.483        | 935.457        | 934.473        | 138.193        | 0.000          | 118.034        | D3 |

sp | P62806 | H4\_MOUSE

[Acetyl]SGRGKGGKGL

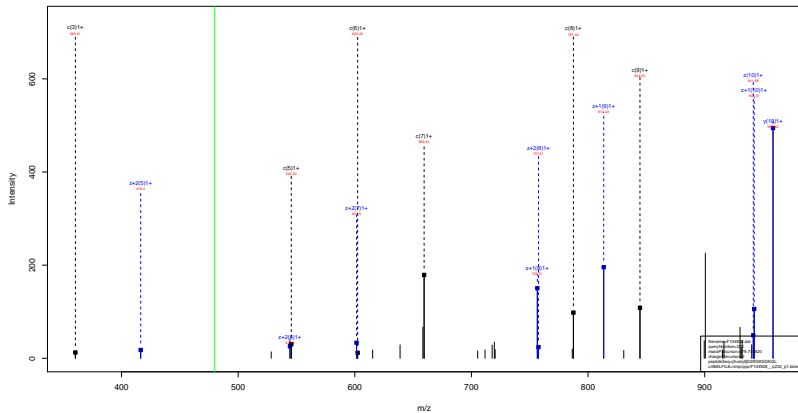

# sp | P62806 | H4\_MOUSE

[Acetyl]SGRGKGGKGL

- ▶ fragmentation table for charge state 1+
- ▶ specType=etd
- ▶ score=35.03
- ▶ F104928.dat
- ▶ query=q232\_p1
- ▶ precursor=479.774820
- ▶ chargePrecursor=2
- ▶ itol=0.8

| AA    | c              | y              | z+1            | z+2            | z              | AA    |
|-------|----------------|----------------|----------------|----------------|----------------|-------|
| S[1]  | 147.076        | <b>958.543</b> | <b>942.524</b> | 0.000          | <b>941.516</b> | S[10] |
| G[2]  | 204.098        | 829.500        | <b>813.482</b> | 0.000          | 812.474        | G[9]  |
| R[3]  | <b>360.199</b> | 772.479        | <b>756.460</b> | <b>757.468</b> | 755.452        | R[8]  |
| Q[4]  | 417.220        | 616.378        | 600.359        | <b>601.367</b> | 599.351        | Q[7]  |
| K[5]  | <b>545.315</b> | 559.356        | 543.337        | <b>544.345</b> | 542.330        | K[6]  |
| G[6]  | <b>602.337</b> | 431.261        | 415.243        | <b>416.250</b> | 414.235        | G[5]  |
| G[7]  | <b>659.358</b> | 374.240        | 358.221        | 359.229        | 357.213        | G[4]  |
| K[8]  | <b>787.453</b> | 317.218        | 301.200        | 302.207        | 300.192        | K[3]  |
| G[9]  | <b>844.475</b> | 389.123        | 373.105        | 374.112        | 372.097        | G[2]  |
| L[10] | 957.559        | 132.102        | 116.083        | 117.091        | 115.075        | L[1]  |

# sp | P62806 | H4\_MOUSE

[Acetyl]SGRGKGGKGL

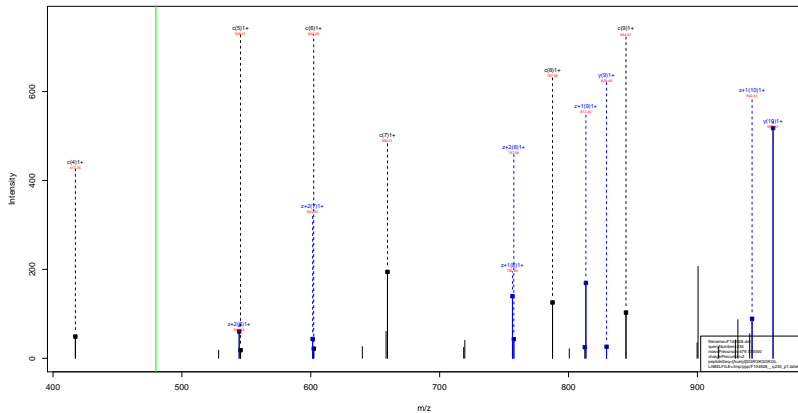

# sp | P62806 | H4\_MOUSE

[Acetyl]SGRGKGGKGL

- ▶ fragmentation table for charge state 1+
- ▶ specType=etd
- ▶ score=44.34
- ▶ F104928.dat
- ▶ query=q235\_p1
- ▶ precursor=479.775050
- ▶ chargePrecursor=2
- ▶ itol=0.8

| AA    | c              | y              | z+1            | z+2            | z              | AA    |
|-------|----------------|----------------|----------------|----------------|----------------|-------|
| S[1]  | 147.076        | <b>958.543</b> | <b>942.524</b> | 0.000          | 941.516        | S[10] |
| G[2]  | 204.098        | <b>829.500</b> | <b>813.482</b> | 0.000          | <b>812.474</b> | G[9]  |
| R[3]  | 360.199        | 772.479        | <b>756.460</b> | <b>757.468</b> | 755.452        | R[8]  |
| Q[4]  | <b>417.220</b> | 616.378        | 600.359        | <b>601.367</b> | 599.351        | Q[7]  |
| K[5]  | <b>545.315</b> | 559.356        | 543.337        | <b>544.345</b> | 542.330        | K[6]  |
| G[6]  | <b>602.337</b> | 431.261        | 415.243        | 416.250        | 414.235        | G[5]  |
| G[7]  | <b>659.358</b> | 374.240        | 358.221        | 359.229        | 357.213        | G[4]  |
| K[8]  | <b>787.453</b> | 317.218        | 301.200        | 302.207        | 300.192        | K[3]  |
| G[9]  | <b>844.475</b> | 389.123        | 373.105        | 374.112        | 372.097        | G[2]  |
| L[10] | 957.559        | 132.102        | 116.083        | 117.091        | 115.075        | L[1]  |

sp | P62806 | H4\_MOUSE

[Acetyl]SGRGKGGKGL

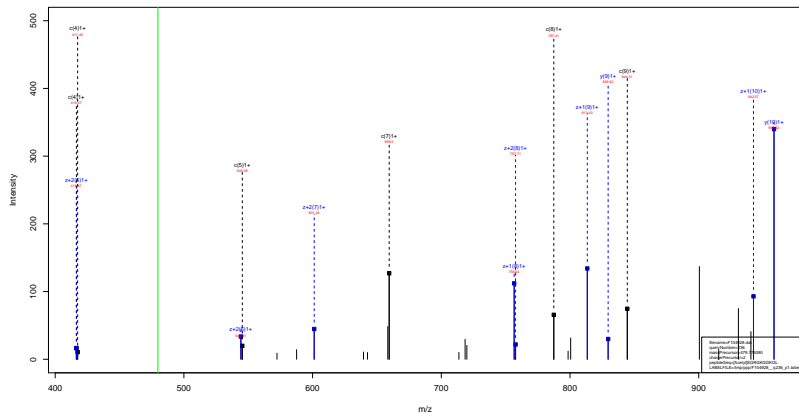

# sp | P62806 | H4\_MOUSE

[Acetyl]SGRGKGGKGL

- ▶ fragmentation table for charge state 1+
- ▶ specType=etd
- ▶ score=34.26
- ▶ F104928.dat
- ▶ query=q236\_p1
- ▶ precursor=479.775080
- ▶ chargePrecursor=2
- ▶ itol=0.8

| AA    | c              | y              | z+1            | z+2            | z       | AA    |
|-------|----------------|----------------|----------------|----------------|---------|-------|
| S[1]  | 147.076        | <b>958.543</b> | <b>942.524</b> | 0.000          | 941.518 | S[10] |
| G[2]  | 204.098        | <b>829.500</b> | <b>813.482</b> | 0.000          | 812.474 | G[9]  |
| R[3]  | 360.199        | 772.479        | <b>756.460</b> | <b>757.468</b> | 755.452 | R[8]  |
| G[4]  | <b>417.220</b> | 616.378        | 600.359        | <b>601.367</b> | 599.351 | G[7]  |
| K[5]  | <b>545.315</b> | 559.356        | 543.337        | <b>544.345</b> | 542.330 | K[6]  |
| G[6]  | 602.337        | 431.261        | 415.243        | <b>416.250</b> | 414.235 | G[5]  |
| G[7]  | <b>659.358</b> | 374.240        | 358.221        | 359.229        | 357.213 | G[4]  |
| K[8]  | <b>787.453</b> | 317.218        | 301.200        | 302.207        | 300.192 | K[3]  |
| G[9]  | <b>844.475</b> | 189.123        | 173.105        | 174.112        | 172.097 | G[2]  |
| L[10] | 937.559        | 132.102        | 116.083        | 117.091        | 115.075 | L[1]  |





# sp | P62806 | H4\_MOUSE

[Acetyl]SGRGKGGKGL

- ▶ fragmentation table for charge state 1+
- ▶ specType=etd
- ▶ score=49.23
- ▶ F104928.dat
- ▶ query=q238\_p1
- ▶ precursor=479.775270
- ▶ chargePrecursor=2
- ▶ itol=0.8

| AA    | c              | y              | z+1            | z+2            | z              | AA    |
|-------|----------------|----------------|----------------|----------------|----------------|-------|
| S[1]  | 147.076        | <b>958.543</b> | <b>942.524</b> | 0.000          | <b>941.516</b> | S[10] |
| G[2]  | 204.098        | <b>829.500</b> | <b>813.482</b> | 0.000          | 812.474        | G[9]  |
| R[3]  | <b>360.199</b> | 772.479        | <b>756.460</b> | <b>757.468</b> | 755.452        | R[8]  |
| Q[4]  | <b>417.220</b> | 616.378        | <b>600.359</b> | <b>601.367</b> | 599.351        | Q[7]  |
| K[5]  | <b>545.315</b> | 559.356        | 543.337        | <b>544.345</b> | 542.330        | K[6]  |
| G[6]  | <b>602.337</b> | 431.261        | 415.243        | 416.250        | 414.235        | G[5]  |
| G[7]  | <b>659.358</b> | 374.240        | 358.221        | 359.229        | 357.213        | G[4]  |
| K[8]  | <b>787.453</b> | 317.218        | 301.200        | 302.207        | 300.192        | K[3]  |
| G[9]  | <b>844.475</b> | 389.123        | 373.105        | 374.112        | 372.097        | G[2]  |
| L[10] | 957.559        | 132.102        | 116.083        | 117.091        | 115.075        | L[1]  |



# sp | P62806 | H4\_MOUSE

[Acetyl]SGRGKGGKGL

- ▶ fragmentation table for charge state 1+
- ▶ specType=etd
- ▶ score=46.15
- ▶ F104928.dat
- ▶ query=q239\_p1
- ▶ precursor=320.186780
- ▶ chargePrecursor=3
- ▶ itol=0.8

| AA    | c              | y              | z+1            | z+2            | z              | AA    |
|-------|----------------|----------------|----------------|----------------|----------------|-------|
| S[1]  | 147.076        | <b>958.543</b> | 942.524        | 0.000          | <b>941.516</b> | S[10] |
| G[2]  | 204.098        | 829.500        | <b>813.482</b> | 0.000          | 812.474        | G[9]  |
| R[3]  | <b>360.199</b> | 772.479        | <b>756.460</b> | <b>757.468</b> | 755.452        | R[8]  |
| Q[4]  | <b>417.220</b> | 616.378        | <b>600.359</b> | 601.367        | 599.351        | Q[7]  |
| K[5]  | <b>545.315</b> | 559.356        | <b>543.337</b> | 544.345        | 542.330        | K[6]  |
| G[6]  | <b>602.337</b> | 431.261        | <b>415.243</b> | 416.250        | 414.235        | G[5]  |
| G[7]  | <b>659.358</b> | 374.240        | 358.221        | <b>359.229</b> | 357.213        | G[4]  |
| K[8]  | <b>787.453</b> | 317.218        | <b>301.200</b> | <b>302.207</b> | 300.192        | K[3]  |
| G[9]  | <b>844.475</b> | 189.123        | 173.105        | <b>174.112</b> | 172.097        | G[2]  |
| L[10] | 957.559        | 132.102        | 116.083        | 117.091        | 115.075        | L[1]  |

# sp | P62806 | H4\_MOUSE

[Acetyl]SGRGKGGKGL

- ▶ fragmentation table for charge state 2+
- ▶ specType=etd
- ▶ score=46.15
- ▶ F104928.dat
- ▶ query=q239\_p1
- ▶ precursor=320.186780
- ▶ chargePrecursor=3
- ▶ itol=0.8

| AA    | c              | y              | z+1            | z+2            | z              | AA    |
|-------|----------------|----------------|----------------|----------------|----------------|-------|
| S[1]  | 74.042         | <b>479.775</b> | <b>471.766</b> | 0.504          | <b>471.262</b> | S[10] |
| G[2]  | 102.553        | <b>415.254</b> | <b>407.244</b> | 0.504          | 406.740        | G[9]  |
| R[3]  | 180.603        | 386.743        | <b>378.734</b> | <b>379.238</b> | <b>378.230</b> | R[8]  |
| G[4]  | 209.114        | 308.092        | <b>300.683</b> | <b>301.187</b> | 300.179        | G[7]  |
| K[5]  | 273.161        | 280.182        | 272.172        | 272.676        | 271.668        | K[6]  |
| G[6]  | <b>301.672</b> | 216.134        | 208.125        | 208.629        | 207.621        | G[5]  |
| G[7]  | 330.183        | 187.624        | 179.614        | 180.118        | 179.110        | G[4]  |
| K[8]  | <b>394.230</b> | 139.114        | 131.103        | 131.607        | 130.600        | K[3]  |
| G[9]  | <b>422.741</b> | 95.065         | 87.056         | 87.560         | 86.552         | G[2]  |
| L[10] | <b>479.283</b> | 66.555         | 58.545         | 59.049         | 58.041         | L[1]  |

# sp | P43274 | H14\_MOUSE

[Acetyl]SETAPAAPAAPAPAEKTPVKKKARKAAGGAKRKTSGPPVSEL

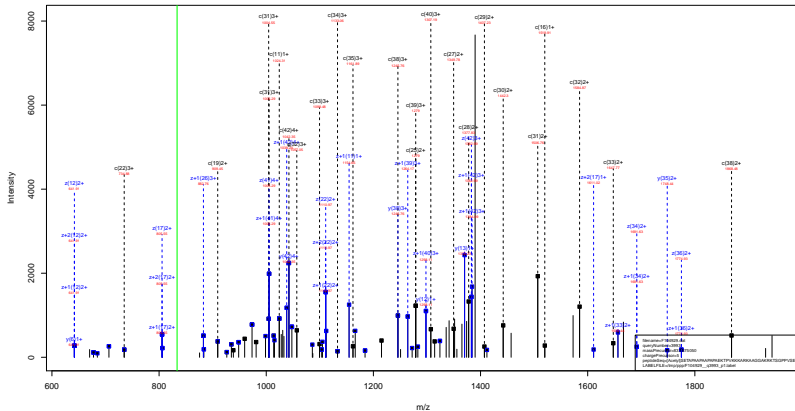

# sp | P43274 | H14\_MOUSE

[Acetyl]SETAPAAPAAPAPAEKTPVKKKARKAAGGAKRKTSGPPVSEL

- ▶ fragmentation table for charge state 1+
- ▶ specType=etd
- ▶ score=47.24
- ▶ F104929.dat
- ▶ query=q3993.p1
- ▶ precursor=833.675050
- ▶ chargePrecursor=5
- ▶ itol=0.8

| AA | c  | y               | z+1             | z+2             | z     | AA              |       |
|----|----|-----------------|-----------------|-----------------|-------|-----------------|-------|
| S  | 1  | 147.076         | 4164.825        | 4148.306        | 0.000 | 4147.200        | S[42] |
| E  | 2  | 276.119         | 4035.283        | 4019.264        | 0.000 | 4018.250        | E[41] |
| L  | 3  | 377.167         | 3906.240        | 3890.221        | 0.000 | 3889.213        | L[40] |
| A  | 4  | 449.204         | 3805.192        | 3789.174        | 0.000 | 3788.166        | A[39] |
| P  | 5  | 545.257         | 3734.155        | 3718.136        | 0.000 | 3717.129        | P[38] |
| A  | 6  | 616.294         | 3637.102        | 3621.084        | 0.000 | 3620.076        | A[37] |
| A  | 7  | 667.331         | 3566.065        | 3550.047        | 0.000 | 3549.039        | A[36] |
| P  | 8  | 764.384         | 3495.028        | 3479.009        | 0.000 | 3478.001        | P[35] |
| A  | 9  | 852.421         | 3397.975        | 3381.957        | 0.000 | 3380.949        | A[34] |
| A  | 10 | <b>926.458</b>  | 3326.938        | 3310.920        | 0.000 | 3309.912        | A[33] |
| P  | 11 | <b>1023.511</b> | 3255.901        | 3239.882        | 0.000 | 3238.875        | P[32] |
| A  | 12 | 1094.548        | 3158.848        | 3142.830        | 0.000 | 3141.822        | A[31] |
| P  | 13 | 1161.600        | 3087.811        | 3071.793        | 0.000 | 3070.785        | P[30] |
| A  | 14 | 1262.638        | 2990.759        | 2974.740        | 0.000 | 2973.732        | A[29] |
| E  | 15 | 1307.680        | 2919.721        | 2903.703        | 0.000 | 2902.695        | E[28] |
| R  | 16 | <b>1519.775</b> | 2790.678        | 2774.660        | 0.000 | 2773.652        | R[27] |
| L  | 17 | 1620.823        | 2682.584        | 2646.565        | 0.000 | 2645.557        | L[26] |
| P  | 18 | 1717.876        | 2601.536        | 2545.517        | 0.000 | 2544.510        | P[25] |
| V  | 19 | 1816.944        | 2464.483        | 2448.465        | 0.000 | 2447.457        | V[24] |
| K  | 20 | 1945.030        | 2305.415        | 2349.396        | 0.000 | 2348.388        | K[23] |
| K  | 21 | 2073.124        | 2237.360        | 2221.341        | 0.000 | 2220.334        | K[22] |
| K  | 22 | 2201.229        | 2109.295        | 2093.276        | 0.000 | 2092.269        | K[21] |
| A  | 23 | 2272.266        | 1981.130        | 1965.111        | 0.000 | 1964.104        | A[20] |
| R  | 24 | 2438.367        | 1910.083        | 1894.074        | 0.000 | 1893.066        | R[19] |
| K  | 25 | 2556.462        | 1753.992        | 1737.973        | 0.000 | 1736.965        | K[18] |
| A  | 26 | 2627.499        | 1625.897        | 1609.878        | 0.000 | 1608.870        | A[17] |
| A  | 27 | 2688.536        | 1524.860        | 1538.841        | 0.000 | 1537.833        | A[16] |
| G  | 28 | 2755.588        | 1483.823        | 1467.804        | 0.000 | 1466.796        | G[15] |
| G  | 29 | 2812.579        | 1428.801        | 1410.783        | 0.000 | 1411.790        | G[14] |
| A  | 30 | 2883.616        | <b>1369.780</b> | 1353.761        | 0.000 | 1352.753        | A[13] |
| K  | 31 | 3011.711        | <b>1298.743</b> | <b>1282.724</b> | 0.000 | <b>1283.732</b> | K[12] |
| R  | 32 | 3167.812        | 1170.649        | <b>1154.629</b> | 0.000 | 1153.621        | R[11] |
| R  | 33 | 3295.907        | <b>1014.547</b> | <b>998.528</b>  | 0.000 | 997.520         | R[10] |
| L  | 34 | 3398.955        | 896.482         | 870.463         | 0.000 | 871.441         | L[9]  |
| S  | 35 | 3483.987        | 785.404         | 769.385         | 0.000 | 770.363         | S[8]  |
| G  | 36 | 3541.009        | 698.372         | 682.353         | 0.000 | 683.361         | G[7]  |
| P  | 37 | 3638.061        | <b>641.350</b>  | 625.332         | 0.000 | 626.340         | P[6]  |
| P  | 38 | 3735.114        | 544.288         | 528.270         | 0.000 | 529.287         | P[5]  |
| V  | 39 | 3834.182        | 447.245         | 431.226         | 0.000 | 432.234         | V[4]  |
| S  | 40 | 3921.214        | 348.177         | 332.158         | 0.000 | 333.166         | S[3]  |
| E  | 41 | 4050.257        | 261.144         | 245.126         | 0.000 | 246.134         | E[2]  |
| L  | 42 | 4183.341        | 132.100         | 116.083         | 0.000 | 117.091         | L[1]  |

# sp | P43274 | H14\_MOUSE

[Acetyl]SETAPAAPAAPAPAEKTPVKKKARKAAGGAKRKTSGPPVSEL

- ▶ fragmentation table for charge state 2+
- ▶ specType=etd
- ▶ score=47.24
- ▶ F104929.dat
- ▶ query=q3993.p1
- ▶ precursor=833.675050
- ▶ chargePrecursor=5
- ▶ itol=0.8

| AA | c  | y               | z+1             | z+2             | z               | AA              |       |
|----|----|-----------------|-----------------|-----------------|-----------------|-----------------|-------|
| S  | 1  | 74.042          | 2082.666        | 2074.657        | 0.504           | 2074.153        | S[42] |
| E  | 2  | 138.563         | 2018.145        | 2010.136        | 0.504           | 2006.632        | E[41] |
| T  | 3  | 189.087         | 1953.624        | 1945.614        | 0.504           | 1945.110        | T[40] |
| A  | 4  | 224.206         | 1893.103        | 1885.093        | 0.504           | 1884.583        | A[39] |
| F  | 5  | 293.132         | 1829.581        | 1821.572        | 0.504           | 1820.056        | F[38] |
| A  | 6  | 358.650         | 1819.055        | 1811.045        | 0.504           | 1810.542        | A[37] |
| A  | 7  | 344.169         | 1783.536        | <b>1775.527</b> | 0.504           | <b>1775.023</b> | A[36] |
| F  | 8  | 392.695         | <b>1748.018</b> | 1740.008        | 0.504           | 1739.504        | F[35] |
| A  | 9  | 428.214         | 1699.491        | <b>1691.482</b> | 0.504           | <b>1690.978</b> | A[34] |
| A  | 10 | 463.733         | 1653.973        | <b>1655.963</b> | 0.504           | 1655.459        | A[33] |
| P  | 11 | 532.259         | 1628.454        | 1620.443        | 0.504           | 1619.941        | P[32] |
| A  | 12 | 547.777         | 1579.928        | 1571.918        | 0.504           | 1571.415        | A[31] |
| F  | 13 | 596.304         | 1544.409        | 1536.400        | 0.504           | 1535.896        | F[30] |
| A  | 14 | 631.822         | 1495.883        | 1487.874        | 0.504           | 1487.370        | A[29] |
| E  | 15 | 666.344         | 1460.364        | 1452.353        | 0.504           | 1451.851        | E[28] |
| R  | 16 | 700.393         | 1396.843        | 1388.834        | 1.008           | 1387.330        | R[27] |
| T  | 17 | 810.915         | 1331.796        | <b>1323.786</b> | <b>1324.790</b> | 1323.282        | T[26] |
| F  | 18 | 859.441         | 1281.272        | 1273.262        | 1273.766        | <b>1272.758</b> | F[25] |
| V  | 19 | <b>908.976</b>  | 1232.745        | 1224.736        | 1225.240        | 1224.732        | V[24] |
| K  | 20 | <b>973.023</b>  | 1183.211        | 1175.202        | 1175.706        | 1174.696        | K[23] |
| R  | 21 | 1023.977        | 1139.364        | <b>1111.154</b> | <b>1111.658</b> | <b>1110.650</b> | R[22] |
| K  | 22 | 1103.118        | 1055.116        | <b>1047.107</b> | <b>1047.611</b> | 1046.603        | K[21] |
| A  | 23 | 1136.637        | 991.069         | 983.059         | 983.563         | 982.556         | A[20] |
| R  | 24 | <b>1214.687</b> | 935.550         | 947.541         | <b>948.045</b>  | 947.037         | R[19] |
| K  | 25 | <b>1278.735</b> | 877.500         | 889.490         | 889.994         | 888.986         | K[18] |
| A  | 26 | <b>1314.253</b> | 813.492         | <b>805.443</b>  | <b>805.947</b>  | <b>804.939</b>  | A[17] |
| A  | 27 | <b>1349.772</b> | 749.334         | 759.324         | 759.828         | 758.820         | A[16] |
| G  | 28 | <b>1378.283</b> | 742.435         | <b>734.406</b>  | <b>734.910</b>  | 733.902         | G[15] |
| G  | 29 | <b>1406.793</b> | 713.904         | <b>705.895</b>  | <b>706.399</b>  | 705.391         | G[14] |
| A  | 30 | <b>1442.312</b> | <b>685.394</b>  | <b>677.384</b>  | <b>677.888</b>  | <b>676.880</b>  | A[13] |
| K  | 31 | <b>1506.359</b> | 649.875         | <b>641.866</b>  | <b>642.370</b>  | <b>641.362</b>  | K[12] |
| R  | 32 | <b>1584.410</b> | 585.807         | 577.818         | 578.322         | 577.314         | R[11] |
| R  | 33 | <b>1648.457</b> | 507.777         | 499.788         | 500.791         | 499.783         | R[10] |
| T  | 34 | 1698.981        | 443.728         | 435.739         | 436.244         | 435.236         | T[9]  |
| S  | 35 | 1742.497        | 393.206         | 385.196         | 385.700         | 384.692         | S[8]  |
| G  | 36 | 1771.028        | 349.690         | 341.680         | 342.184         | 341.176         | G[7]  |
| F  | 37 | 1819.234        | 321.179         | 313.170         | 313.673         | 312.666         | F[6]  |
| F  | 38 | <b>1868.061</b> | 272.862         | 264.843         | 265.347         | 264.339         | F[5]  |
| V  | 39 | 1917.595        | 224.120         | 216.111         | 216.621         | 215.612         | V[4]  |
| S  | 40 | 1961.111        | 174.592         | 166.583         | 167.086         | 166.078         | S[3]  |
| E  | 41 | 2025.632        | 131.076         | 123.067         | 123.570         | 122.562         | E[2]  |
| L  | 42 | 2082.174        | 66.555          | 58.545          | 59.049          | 58.041          | L[1]  |

# sp | P43274 | H14\_MOUSE

[Acetyl]SETAPAAPAAPAPAEKTPVKKKARKAAGGAKRKTSGPPVSEL

- ▶ fragmentation table for charge state 3+
- ▶ specType=etd
- ▶ score=47.24
- ▶ F104929.dat
- ▶ query=q3993.p1
- ▶ precursor=833.675050
- ▶ chargePrecursor=5
- ▶ itol=0.8

| AA   | c               | y               | z+1             | z+2            | z               | AA   |
|------|-----------------|-----------------|-----------------|----------------|-----------------|------|
| S 1  | 49.697          | 1388.760        | <b>1383.440</b> | 0.672          | <b>1383.104</b> | S 42 |
| E 2  | 92.711          | 1345.760        | 1340.426        | 0.672          | 1340.090        | E 41 |
| T 3  | 126.394         | 1302.762        | <b>1297.412</b> | 0.672          | 1297.076        | T 40 |
| A 4  | 150.073         | 1260.760        | <b>1263.729</b> | 0.672          | <b>1263.393</b> | A 39 |
| P 5  | 182.424         | <b>1245.390</b> | 1240.050        | 0.672          | 1239.714        | P 38 |
| A 6  | 206.103         | 1213.030        | 1207.699        | 0.672          | 1207.363        | A 37 |
| A 7  | 229.782         | 1189.360        | <b>1184.020</b> | 0.672          | <b>1183.684</b> | A 36 |
| P 8  | 262.133         | <b>1165.681</b> | 1160.341        | 0.672          | 1160.005        | P 35 |
| A 9  | 285.812         | <b>1133.330</b> | 1127.990        | 0.672          | 1127.654        | A 34 |
| A 10 | 309.491         | 1109.051        | <b>1104.311</b> | 0.672          | <b>1103.975</b> | A 33 |
| P 11 | 341.842         | <b>1085.972</b> | 1080.632        | 0.672          | 1080.296        | P 32 |
| A 12 | 365.521         | 1051.621        | <b>1048.281</b> | 0.672          | <b>1047.945</b> | A 31 |
| P 13 | 397.872         | 1029.942        | <b>1024.602</b> | 0.672          | <b>1024.266</b> | P 30 |
| A 14 | 421.551         | 997.591         | 992.251         | 0.672          | 991.916         | A 29 |
| E 15 | 464.205         | <b>973.912</b>  | 968.572         | 0.672          | 968.236         | E 28 |
| R 16 | 607.283         | 939.960         | 934.620         | <b>925.894</b> | 925.222         | R 27 |
| T 17 | 540.946         | 885.199         | <b>882.860</b>  | <b>883.196</b> | <b>882.524</b>  | T 26 |
| P 18 | 573.297         | 854.517         | 849.177         | 849.513        | 848.841         | P 25 |
| V 19 | 606.320         | 822.160         | 816.820         | 817.162        | 816.490         | V 24 |
| K 20 | 649.018         | 789.143         | 783.804         | 784.140        | 783.468         | K 23 |
| K 21 | 687.126         | 746.445         | 741.105         | 741.441        | 740.769         | K 22 |
| K 22 | <b>734.414</b>  | 703.747         | 698.407         | 698.743        | 698.071         | K 21 |
| A 23 | 735.094         | 661.048         | 655.709         | 656.045        | 655.373         | A 20 |
| R 24 | 810.127         | 637.309         | 632.030         | 632.366        | 631.694         | R 19 |
| K 25 | 852.826         | 585.139         | 579.696         | 580.332        | 579.660         | K 18 |
| A 26 | 876.505         | 542.637         | 537.298         | 537.634        | 536.962         | A 17 |
| A 27 | 900.184         | 518.958         | 513.619         | 513.954        | 513.282         | A 16 |
| G 28 | 918.191         | 495.279         | 489.940         | 490.276        | 489.604         | G 15 |
| G 29 | <b>938.198</b>  | 475.272         | 470.932         | 471.268        | 470.596         | G 14 |
| A 30 | 961.877         | 457.265         | 451.925         | 452.261        | 451.589         | A 13 |
| K 31 | <b>1004.575</b> | 413.588         | 408.248         | 408.582        | 407.910         | K 12 |
| R 32 | <b>1056.609</b> | 390.887         | 385.548         | 385.884        | 385.212         | R 11 |
| K 33 | <b>1099.307</b> | 338.854         | 333.514         | 333.850        | 333.178         | K 10 |
| T 34 | <b>1112.590</b> | 296.151         | 290.811         | 291.152        | 290.480         | T 9  |
| S 35 | <b>1162.601</b> | 262.473         | 257.133         | 257.469        | 256.797         | S 8  |
| G 36 | 1181.008        | 233.462         | 228.123         | 228.459        | 227.787         | G 7  |
| P 37 | 1213.359        | 214.455         | 209.115         | 209.451        | 208.779         | P 6  |
| P 38 | <b>1245.710</b> | 182.104         | 176.765         | 177.100        | 176.429         | P 5  |
| V 39 | <b>1278.732</b> | 149.753         | 144.414         | 144.750        | 144.078         | V 4  |
| S 40 | <b>1307.743</b> | 116.780         | 111.439         | 111.777        | 111.105         | S 3  |
| E 41 | 1355.757        | 87.220          | 82.380          | 82.716         | 82.044          | E 2  |
| L 42 | 1388.452        | 44.705          | 39.366          | 39.702         | 39.030          | L 1  |



# sp | P43274 | H14\_MOUSE

[Acetyl]SETAPAAPAAPAPAEKTPVKKKARKAAGGAKRKTSGPPVSEL

- ▶ fragmentation table for charge state 4+
- ▶ specType=etd
- ▶ score=47.24
- ▶ F104929.dat
- ▶ query=q3993.p1
- ▶ precursor=833.675050
- ▶ chargePrecursor=5
- ▶ itol=0.8

| AA | c  | y               | a+1             | a+2             | z     | AA              |       |
|----|----|-----------------|-----------------|-----------------|-------|-----------------|-------|
| S  | 1  | 37.525          | <b>1041.837</b> | <b>1037.832</b> | 0.755 | <b>1037.580</b> | S[42] |
| E  | 2  | 69.785          | 1005.576        | <b>1005.571</b> | 0.755 | <b>1005.319</b> | E[41] |
| T  | 3  | 95.047          | 977.315         | <b>973.311</b>  | 0.755 | <b>973.059</b>  | T[40] |
| A  | 4  | 112.506         | 952.054         | <b>948.049</b>  | 0.755 | <b>947.797</b>  | A[39] |
| P  | 5  | 137.070         | <b>934.294</b>  | 930.290         | 0.755 | 930.038         | P[38] |
| A  | 6  | 154.829         | <b>910.031</b>  | 906.026         | 0.755 | 905.774         | A[37] |
| A  | 7  | 172.588         | 892.272         | 888.267         | 0.755 | 888.015         | A[36] |
| P  | 8  | 190.351         | 874.513         | 870.508         | 0.755 | 870.256         | P[35] |
| A  | 9  | 214.811         | 859.249         | 855.245         | 0.755 | 855.003         | A[34] |
| A  | 10 | 232.570         | 832.490         | 828.485         | 0.755 | 828.233         | A[33] |
| P  | 11 | 256.633         | 814.731         | 810.726         | 0.755 | 810.474         | P[32] |
| A  | 12 | 274.392         | 790.468         | 786.463         | 0.755 | 786.211         | A[31] |
| P  | 13 | 298.656         | 772.709         | 768.704         | 0.755 | 768.452         | P[30] |
| A  | 14 | 316.415         | 748.445         | 744.440         | 0.755 | 744.188         | A[29] |
| E  | 15 | 348.675         | 730.686         | 726.681         | 0.755 | 726.429         | E[28] |
| K  | 16 | 380.699         | 699.423         | 694.420         | 0.755 | 694.169         | K[27] |
| T  | 17 | 405.961         | 666.403         | 662.397         | 0.755 | 662.145         | T[26] |
| P  | 18 | 430.224         | <b>641.140</b>  | 637.135         | 0.755 | 636.883         | P[25] |
| V  | 19 | 454.991         | 616.876         | 612.872         | 0.755 | 612.620         | V[24] |
| K  | 20 | 487.015         | 592.100         | 588.105         | 0.755 | 587.853         | K[23] |
| K  | 21 | 519.039         | 566.085         | 562.081         | 0.755 | 561.833         | K[22] |
| K  | 22 | 551.063         | 539.060         | 534.057         | 0.755 | 533.809         | K[21] |
| A  | 23 | 568.522         | 496.030         | 492.033         | 0.755 | 491.781         | A[20] |
| R  | 24 | 607.847         | 478.279         | 474.274         | 0.755 | 474.022         | R[19] |
| K  | 25 | 639.871         | 439.253         | 435.249         | 0.755 | 434.997         | K[18] |
| A  | 26 | 657.630         | 407.230         | 403.225         | 0.755 | 402.973         | A[17] |
| A  | 27 | 675.390         | 389.470         | 385.466         | 0.755 | 385.214         | A[16] |
| E  | 28 | 699.245         | 371.711         | 367.706         | 0.755 | 367.454         | E[15] |
| G  | 29 | 703.900         | 357.450         | 353.451         | 0.755 | 353.199         | G[14] |
| A  | 30 | 721.660         | 343.200         | 339.196         | 0.755 | 338.944         | A[13] |
| K  | 31 | 753.683         | 325.441         | 321.436         | 0.755 | 321.184         | K[12] |
| R  | 32 | 792.709         | 293.417         | 289.413         | 0.755 | 289.161         | R[11] |
| K  | 33 | 824.732         | 254.392         | 250.387         | 0.755 | 250.139         | K[10] |
| T  | 34 | 849.094         | 222.368         | 218.364         | 0.755 | 218.112         | T[9]  |
| S  | 35 | 871.752         | 191.100         | 187.102         | 0.755 | 186.850         | S[8]  |
| G  | 36 | 886.908         | 175.348         | 171.344         | 0.755 | 171.092         | G[7]  |
| P  | 37 | 910.271         | 161.093         | 157.088         | 0.755 | 156.836         | P[6]  |
| P  | 38 | <b>934.534</b>  | 136.830         | 132.825         | 0.755 | 132.573         | P[5]  |
| V  | 39 | <b>959.301</b>  | 112.567         | 108.562         | 0.755 | 108.310         | V[4]  |
| S  | 40 | <b>981.059</b>  | 87.800          | 83.795          | 0.755 | 83.543          | S[3]  |
| E  | 41 | <b>1013.320</b> | 66.943          | 62.937          | 0.755 | 62.705          | E[2]  |
| L  | 42 | <b>1041.591</b> | 33.781          | 29.776          | 0.755 | 29.524          | L[1]  |



# sp | P43274 | H14\_MOUSE

S<sup>(Phospho)</sup><sub>(79.97)</sub> ETAPAAPAAPAPAEKTPVKKKARKAAGGAKRKTSGPPVSEL

- ▶ fragmentation table for charge state 1+
- ▶ specType=etd
- ▶ score=46.73
- ▶ F104929.dat
- ▶ query=q4002\_p1
- ▶ precursor=841.263200
- ▶ chargePrecursor=5
- ▶ itol=0.8

| AA | c  | y               | z+1             | z+2             | z               | AA              |       |
|----|----|-----------------|-----------------|-----------------|-----------------|-----------------|-------|
| S  | 1  | 185.932         | 4302.261        | 4188.262        | 0.000           | 4185.254        | S[42] |
| E  | 2  | 314.075         | 4035.263        | 4019.264        | 0.000           | 4018.256        | E[41] |
| T  | 3  | 415.122         | 3936.240        | 3890.231        | 0.000           | 3889.213        | T[40] |
| A  | 4  | 486.160         | 3805.192        | 3789.174        | 0.000           | 3788.166        | A[39] |
| P  | 5  | 553.212         | 3734.155        | 3718.148        | 0.000           | 3717.120        | P[38] |
| A  | 6  | <b>654.248</b>  | 3637.102        | 3621.094        | 0.000           | 3620.076        | A[37] |
| A  | 7  | <b>725.287</b>  | 3566.065        | 3550.047        | 0.000           | 3549.039        | A[36] |
| F  | 8  | <b>822.339</b>  | 3495.028        | 3479.009        | 0.000           | 3478.000        | F[35] |
| A  | 9  | <b>893.376</b>  | 3397.075        | 3381.057        | 0.000           | 3380.040        | A[34] |
| A  | 10 | <b>954.414</b>  | 3326.038        | 3310.020        | 0.000           | 3309.012        | A[33] |
| P  | 11 | <b>1061.466</b> | 3255.001        | 3239.002        | 0.000           | 3238.000        | P[32] |
| A  | 12 | 1132.503        | 3158.048        | 3142.030        | 0.000           | 3141.022        | A[31] |
| F  | 13 | 1226.556        | 3087.011        | 3071.003        | 0.000           | 3070.000        | F[30] |
| A  | 14 | <b>1306.593</b> | 3090.959        | 3074.940        | 0.000           | 3073.932        | A[29] |
| E  | 15 | 1420.616        | 2919.721        | 2903.703        | 0.000           | 2902.695        | E[28] |
| K  | 16 | <b>1557.731</b> | 2790.079        | 2774.060        | 2775.068        | 2773.050        | K[27] |
| T  | 17 | 1669.719        | 2692.564        | 2686.555        | 2687.573        | 2685.557        | T[26] |
| F  | 18 | 1755.811        | 2561.536        | 2545.517        | 2546.525        | 2544.510        | F[25] |
| V  | 19 | 1834.900        | 2464.483        | 2448.465        | 2449.473        | 2447.457        | V[24] |
| K  | 20 | 1982.995        | 2305.415        | 2289.396        | 2290.404        | 2288.388        | K[23] |
| K  | 21 | 2111.090        | 2237.340        | 2221.321        | 2222.309        | 2220.294        | K[22] |
| K  | 22 | 2239.188        | 2109.225        | 2093.206        | 2094.214        | 2092.198        | K[21] |
| A  | 23 | 2310.222        | 1981.130        | 1965.111        | 1966.119        | 1964.104        | A[20] |
| R  | 24 | 2466.323        | 1910.093        | 1894.074        | 1895.082        | 1893.066        | R[19] |
| K  | 25 | 2594.410        | 1753.960        | 1737.973        | 1738.981        | 1736.965        | K[18] |
| A  | 26 | 2665.455        | 1625.897        | 1609.878        | 1610.886        | 1608.870        | A[17] |
| A  | 27 | 2736.492        | 1524.860        | 1508.841        | 1509.849        | 1507.833        | A[16] |
| G  | 28 | 2793.513        | 1483.823        | 1467.804        | 1468.812        | 1466.796        | G[15] |
| G  | 29 | 2850.535        | 1426.801        | 1410.783        | 1411.790        | 1409.775        | G[14] |
| A  | 30 | 2901.572        | <b>1369.780</b> | <b>1353.761</b> | 1354.769        | <b>1352.753</b> | A[13] |
| K  | 31 | 3049.667        | <b>1298.743</b> | 1282.724        | 1283.732        | <b>1281.716</b> | K[12] |
| R  | 32 | 3205.768        | 1170.648        | <b>1154.629</b> | <b>1155.637</b> | 1153.621        | R[11] |
| K  | 33 | 3333.863        | 1014.547        | 998.528         | <b>999.536</b>  | 997.520         | K[10] |
| T  | 34 | 3434.911        | 898.462         | 879.433         | 879.441         | 895.425         | T[9]  |
| S  | 35 | 3521.943        | 795.404         | 780.385         | 779.393         | 798.377         | S[8]  |
| G  | 36 | 3578.964        | 698.372         | 682.353         | 683.361         | 681.345         | G[7]  |
| F  | 37 | 3676.017        | 641.350         | 625.332         | 626.340         | 624.324         | F[6]  |
| P  | 38 | 3773.070        | 544.298         | 528.279         | 529.287         | 527.271         | P[5]  |
| V  | 39 | 3872.118        | 447.245         | 431.226         | 432.234         | 430.218         | V[4]  |
| S  | 40 | 3959.170        | 348.177         | 332.158         | 333.166         | 331.150         | S[3]  |
| E  | 41 | 4088.213        | 261.144         | 245.126         | 246.134         | 244.118         | E[2]  |
| L  | 42 | 4201.297        | 132.102         | 116.083         | 117.091         | 115.075         | L[1]  |

# sp | P43274 | H14\_MOUSE

S<sup>(Phospho)</sup><sub>(79.97)</sub> ETAPAAPAAPAPAEKTPVKKKARKAAGGAKRKTSGPPVSEL

- ▶ fragmentation table for charge state 2+
- ▶ specType=etd
- ▶ score=46.73
- ▶ F104929.dat
- ▶ query=q4002.p1
- ▶ precursor=841.263200
- ▶ chargePrecursor=5
- ▶ itol=0.8

| AA | c  | y               | z-1             | z+2             | z               | AA              |       |
|----|----|-----------------|-----------------|-----------------|-----------------|-----------------|-------|
| S  | 1  | 93.020          | 2101.644        | 2091.639        | 0.504           | 2091.131        | S[42] |
| E  | 2  | 157.541         | 2018.145        | 2010.136        | 0.504           | 2009.632        | E[41] |
| T  | 3  | 208.005         | 1953.624        | 1945.614        | 0.504           | 1945.110        | T[40] |
| A  | 4  | 243.583         | 1901.100        | 1895.090        | 0.504           | 1894.587        | A[39] |
| P  | 5  | 282.110         | 1867.581        | 1860.572        | 0.504           | 1859.066        | P[38] |
| A  | 6  | 327.658         | 1819.055        | 1811.045        | 0.504           | 1810.542        | A[37] |
| A  | 7  | 383.147         | 1783.536        | <b>1775.527</b> | 0.504           | 1775.023        | A[36] |
| F  | 8  | 411.673         | 1748.018        | 1740.008        | 0.504           | 1739.504        | F[35] |
| A  | 9  | 447.192         | 1699.491        | <b>1691.482</b> | 0.504           | 1690.978        | A[34] |
| A  | 10 | 482.710         | 1663.972        | <b>1655.963</b> | 0.504           | <b>1655.460</b> | A[33] |
| P  | 11 | 519.289         | 1628.454        | 1620.445        | 0.504           | 1619.941        | P[32] |
| A  | 12 | 566.755         | 1579.928        | 1571.918        | 0.504           | 1571.415        | A[31] |
| F  | 13 | 615.282         | 1544.409        | 1536.400        | 0.504           | 1535.896        | F[30] |
| A  | 14 | 650.800         | 1495.883        | <b>1487.874</b> | 0.504           | 1487.370        | A[29] |
| E  | 15 | 715.322         | 1460.364        | 1452.355        | 0.504           | 1451.851        | E[28] |
| K  | 16 | <b>779.369</b>  | 1399.843        | <b>1387.834</b> | <b>1388.338</b> | 1387.336        | K[27] |
| T  | 17 | 809.893         | 1331.306        | <b>1323.786</b> | <b>1324.290</b> | 1323.282        | T[26] |
| F  | 18 | 878.419         | <b>1281.272</b> | 1273.262        | 1273.766        | 1272.758        | F[25] |
| V  | 19 | 927.953         | <b>1232.745</b> | 1224.736        | 1225.240        | 1224.232        | V[24] |
| K  | 20 | <b>992.001</b>  | 1183.211        | 1175.202        | 1175.706        | 1174.698        | K[23] |
| K  | 21 | <b>1056.048</b> | <b>1119.164</b> | <b>1111.154</b> | <b>1111.658</b> | 1110.650        | K[22] |
| K  | 22 | 1120.568        | 1078.110        | <b>1047.107</b> | <b>1047.611</b> | 1046.603        | K[21] |
| A  | 23 | <b>1155.615</b> | <b>991.068</b>  | <b>983.059</b>  | <b>983.563</b>  | <b>982.555</b>  | A[20] |
| R  | 24 | <b>1233.665</b> | 935.500         | 947.541         | 948.045         | 947.037         | R[19] |
| K  | 25 | <b>1297.713</b> | 877.500         | 890.490         | 890.994         | 889.986         | K[18] |
| A  | 26 | 1333.211        | 813.452         | 805.443         | 805.947         | 804.939         | A[17] |
| A  | 27 | 1388.750        | 777.934         | 769.925         | 770.429         | 769.421         | A[16] |
| G  | 28 | 1397.260        | 742.415         | 734.406         | 734.910         | 733.902         | G[15] |
| G  | 29 | <b>1425.771</b> | 713.004         | <b>705.895</b>  | <b>706.399</b>  | 705.391         | G[14] |
| A  | 30 | <b>1461.290</b> | 685.394         | 677.384         | 677.888         | 676.880         | A[13] |
| K  | 31 | <b>1525.337</b> | 649.875         | 641.866         | 642.370         | 641.362         | K[12] |
| R  | 32 | <b>1603.388</b> | 585.807         | 577.818         | 578.322         | 577.314         | R[11] |
| K  | 33 | 1667.925        | 550.777         | 498.788         | 500.274         | 499.266         | K[10] |
| T  | 34 | 1717.959        | 443.725         | 435.730         | 436.234         | 435.230         | T[9]  |
| S  | 35 | 1761.475        | 393.206         | 385.196         | 385.700         | 384.692         | S[8]  |
| G  | 36 | 1789.986        | 349.690         | 341.680         | 342.184         | 341.176         | G[7]  |
| F  | 37 | 1838.512        | 321.179         | 313.170         | 313.673         | 312.666         | F[6]  |
| P  | 38 | 1887.039        | 272.662         | 264.643         | 265.147         | 264.139         | P[5]  |
| V  | 39 | 1936.573        | 224.156         | 216.117         | 216.621         | 215.613         | V[4]  |
| S  | 40 | 1980.080        | 174.592         | 166.583         | 167.086         | 166.078         | S[3]  |
| E  | 41 | 2044.610        | 131.076         | 123.070         | 123.570         | 122.563         | E[2]  |
| L  | 42 | 2101.152        | 66.555          | 58.545          | 59.049          | 58.041          | L[1]  |

# sp | P43274 | H14\_MOUSE

S<sup>(Phospho)</sup><sub>(79.97)</sub> ETAPAAPAAPAPAEEKTPVKKKARKAAGGAKRKTSGPPVSEL

- ▶ fragmentation table for charge state 3+
- ▶ specType=etd
- ▶ score=46.73
- ▶ F104929.dat
- ▶ query=q4002.p1
- ▶ precursor=841.263200
- ▶ chargePrecursor=5
- ▶ itol=0.8

| AA   | c               | y               | z+1             | z+2            | z               | AA   |
|------|-----------------|-----------------|-----------------|----------------|-----------------|------|
| S 1  | 62.349          | <b>1401.432</b> | 1396.002        | 0.672          | 1395.756        | S 42 |
| E 2  | 105.303         | 1345.766        | 1340.426        | 0.672          | 1340.050        | E 41 |
| T 3  | 139.046         | 1300.791        | <b>1297.412</b> | 0.672          | 1297.076        | T 40 |
| A 4  | 182.276         | <b>1254.869</b> | 1249.729        | 0.672          | 1249.391        | A 39 |
| P 5  | 195.076         | 1240.390        | 1240.050        | 0.672          | 1239.714        | P 38 |
| A 6  | 218.795         | 1213.030        | 1207.609        | 0.672          | 1207.363        | A 37 |
| A 7  | 242.434         | 1189.360        | <b>1184.020</b> | 0.672          | 1183.684        | A 36 |
| P 8  | 274.785         | 1165.681        | 1160.341        | 0.672          | 1160.005        | P 35 |
| A 9  | 298.464         | 1133.130        | <b>1127.990</b> | 0.672          | <b>1127.654</b> | A 34 |
| A 10 | 322.143         | 1109.651        | <b>1104.311</b> | 0.672          | <b>1103.975</b> | A 33 |
| P 11 | 354.494         | 1085.972        | 1080.632        | 0.672          | 1080.296        | P 32 |
| A 12 | 378.173         | 1053.621        | <b>1048.281</b> | 0.672          | <b>1047.945</b> | A 31 |
| P 13 | 410.524         | 1029.942        | 1024.602        | 0.672          | 1024.266        | P 30 |
| A 14 | 434.203         | 997.591         | <b>992.251</b>  | 0.672          | <b>991.916</b>  | A 29 |
| E 15 | 477.217         | 973.912         | <b>968.572</b>  | 0.672          | <b>968.236</b>  | E 28 |
| K 16 | 519.915         | 950.666         | 945.326         | 0.672          | 944.990         | K 27 |
| V 17 | 553.596         | 928.190         | <b>882.860</b>  | <b>853.196</b> | <b>882.524</b>  | V 26 |
| P 18 | 585.949         | 884.517         | 849.177         | 849.513        | 848.841         | P 25 |
| V 19 | 618.971         | <b>822.166</b>  | 816.826         | 817.162        | 816.496         | V 24 |
| K 20 | 661.670         | 789.143         | 783.804         | 784.140        | 783.466         | K 23 |
| K 21 | 704.368         | 746.445         | 741.105         | 741.441        | 740.769         | K 22 |
| K 22 | 747.066         | 703.747         | 698.407         | 698.743        | 698.071         | K 21 |
| A 23 | 779.745         | 661.048         | 655.708         | 656.045        | 655.371         | A 20 |
| R 24 | <b>822.779</b>  | 637.369         | 632.030         | 632.366        | 631.694         | R 19 |
| K 25 | 865.477         | 585.135         | 579.996         | 580.332        | 579.660         | K 18 |
| A 26 | 889.156         | 542.637         | 537.298         | 537.634        | 536.962         | A 17 |
| A 27 | 912.836         | 518.958         | 513.619         | 513.954        | 513.283         | A 16 |
| G 28 | 931.813         | 495.379         | 489.940         | 490.276        | 489.604         | G 15 |
| G 29 | 950.550         | 470.277         | 470.912         | 471.268        | 470.596         | G 14 |
| A 30 | <b>974.529</b>  | 467.265         | 451.925         | 452.261        | 451.589         | A 13 |
| K 31 | <b>1017.227</b> | 433.588         | 428.248         | 428.582        | 427.910         | K 12 |
| R 32 | <b>1069.261</b> | 390.897         | 385.548         | 385.884        | 385.217         | R 11 |
| K 33 | <b>1111.959</b> | 338.954         | 333.514         | 333.850        | 333.179         | K 10 |
| T 34 | 1153.842        | 296.155         | 290.816         | 291.152        | 290.480         | T 9  |
| S 35 | 1174.052        | 262.471         | 257.133         | 257.469        | 256.797         | S 8  |
| G 36 | 1193.660        | 233.462         | 228.123         | 228.459        | 227.797         | G 7  |
| P 37 | 1226.011        | 214.455         | 209.115         | 209.451        | 208.779         | P 6  |
| P 38 | <b>1258.361</b> | 182.104         | 176.765         | 177.100        | 176.429         | P 5  |
| V 39 | <b>1291.384</b> | 149.753         | 144.414         | 144.750        | 144.078         | V 4  |
| S 40 | 1320.995        | 116.730         | 111.391         | 111.727        | 111.055         | S 3  |
| E 41 | 1393.209        | 81.429          | 82.389          | 82.118         | 82.044          | E 2  |
| L 42 | <b>1401.104</b> | 44.705          | 39.366          | 39.702         | 39.030          | L 1  |

# sp | P43274 | H14\_MOUSE

S<sup>(Phospho)</sup><sub>(79.97)</sub> ETAPAAPAAPAPAEKTPVKKKARKAAGGAKRKTSGPPVSEL

- ▶ fragmentation table for charge state 4+
- ▶ specType=etd
- ▶ score=46.73
- ▶ F104929.dat
- ▶ query=q4002.p1
- ▶ precursor=841.263200
- ▶ chargePrecursor=5
- ▶ itol=0.8

| AA |    | c               | y               | z+1             | z+2   | z               | AA    |
|----|----|-----------------|-----------------|-----------------|-------|-----------------|-------|
| S  | 1  | 47.034          | <b>1051.326</b> | <b>1047.321</b> | 0.755 | <b>1047.069</b> | S[42] |
| E  | 2  | 79.274          | 1000.570        | 1005.571        | 0.755 | 1005.319        | E[41] |
| T  | 3  | 104.536         | 977.315         | 973.311         | 0.755 | 973.060         | T[40] |
| A  | 4  | 122.205         | 952.564         | 948.569         | 0.755 | 947.791         | A[39] |
| F  | 5  | 146.559         | 934.294         | 930.290         | 0.755 | 930.038         | F[38] |
| A  | 6  | 164.318         | <b>910.031</b>  | 906.026         | 0.755 | 905.774         | A[37] |
| A  | 7  | 182.077         | 892.272         | 888.267         | 0.755 | 888.015         | A[36] |
| P  | 8  | 200.340         | 874.513         | 870.508         | 0.755 | 870.250         | P[35] |
| A  | 9  | 224.100         | 856.249         | 846.245         | 0.755 | 845.993         | A[34] |
| A  | 10 | 241.859         | 833.490         | 828.485         | 0.755 | 828.231         | A[33] |
| P  | 11 | 266.122         | 814.731         | 810.726         | 0.755 | 810.474         | P[32] |
| A  | 12 | 283.881         | 790.468         | 786.463         | 0.755 | 786.211         | A[31] |
| P  | 13 | 308.145         | 772.708         | 768.704         | 0.755 | 768.451         | P[30] |
| A  | 14 | 325.904         | 748.445         | 744.440         | 0.755 | 744.188         | A[29] |
| E  | 15 | 358.164         | 730.686         | <b>726.681</b>  | 0.755 | <b>726.429</b>  | E[28] |
| K  | 16 | 390.138         | 698.423         | 694.420         | 0.684 | 694.167         | K[27] |
| L  | 17 | 415.450         | 666.401         | 662.397         | 0.622 | 662.145         | L[26] |
| P  | 18 | 430.713         | 641.140         | 637.135         | 0.637 | 636.883         | P[25] |
| V  | 19 | 464.480         | 616.870         | 612.872         | 0.613 | 612.620         | V[24] |
| K  | 20 | 496.504         | 592.100         | 588.105         | 0.588 | 587.853         | K[23] |
| K  | 21 | 528.528         | 560.085         | 556.081         | 0.556 | 555.829         | K[22] |
| K  | 22 | 560.552         | 528.062         | 524.057         | 0.524 | 523.805         | K[21] |
| K  | 23 | 578.311         | 496.039         | 492.033         | 0.492 | 491.781         | K[20] |
| R  | 24 | 617.336         | 478.279         | 474.274         | 0.474 | 474.022         | R[19] |
| K  | 25 | 649.360         | 438.253         | 435.249         | 0.435 | 434.997         | K[18] |
| A  | 26 | 667.119         | 407.230         | 403.225         | 0.403 | 402.973         | A[17] |
| A  | 27 | 684.878         | 389.470         | 385.466         | 0.385 | 385.214         | A[16] |
| G  | 28 | 699.134         | 371.711         | 367.706         | 0.367 | 367.454         | G[15] |
| G  | 29 | 713.389         | 357.456         | 353.451         | 0.353 | 353.199         | G[14] |
| A  | 30 | 731.148         | 343.200         | 339.196         | 0.339 | 338.944         | A[13] |
| K  | 31 | 763.172         | 325.441         | 321.436         | 0.321 | 321.184         | K[12] |
| R  | 32 | 802.197         | 293.417         | 289.413         | 0.289 | 289.161         | R[11] |
| K  | 33 | 834.221         | 254.392         | 250.387         | 0.250 | 250.135         | K[10] |
| V  | 34 | 850.483         | 222.368         | 218.364         | 0.218 | 218.112         | V[9]  |
| S  | 35 | 882.241         | 197.309         | 193.302         | 0.193 | 193.054         | S[8]  |
| G  | 36 | 895.697         | 175.340         | 171.344         | 0.171 | 171.092         | G[7]  |
| P  | 37 | 910.760         | 161.093         | 157.088         | 0.157 | 156.836         | P[6]  |
| F  | 38 | <b>944.023</b>  | 138.830         | 132.825         | 0.133 | 132.573         | F[5]  |
| V  | 39 | <b>968.790</b>  | 112.567         | 108.562         | 0.108 | 108.310         | V[4]  |
| S  | 40 | <b>990.548</b>  | 87.800          | 83.795          | 0.084 | 83.543          | S[3]  |
| E  | 41 | <b>1022.809</b> | 66.042          | 62.037          | 0.062 | 61.785          | E[2]  |
| L  | 42 | <b>1051.080</b> | 33.783          | 29.778          | 0.033 | 29.524          | L[1]  |



# sp | P43277 | H13\_MOUSE

[Acetyl]SETAPAAPAAPAVEKTPVKKKAKKTGAAAGKRKASGPPVSEL

- ▶ fragmentation table for charge state 1+
- ▶ specType=etd
- ▶ score=44.16
- ▶ F104929.dat
- ▶ query=q4008\_p1
- ▶ precursor=706.740390
- ▶ chargePrecursor=6
- ▶ itol=0.8

| AA | c  | y               | z+1             | z+2             | z               | AA             |       |
|----|----|-----------------|-----------------|-----------------|-----------------|----------------|-------|
| S  | 1  | 147.076         | 4235.367        | 4219.369        | 0.000           | 4218.362       | S[43] |
| E  | 3  | 278.119         | 4106.345        | 4090.355        | 0.000           | 4089.315       | E[43] |
| T  | 3  | 377.167         | 3977.362        | 3961.294        | 0.000           | 3960.270       | T[41] |
| A  | 4  | 448.204         | 3870.255        | 3860.230        | 0.000           | 3859.238       | A[40] |
| P  | 5  | 545.257         | 3805.217        | 3789.199        | 0.000           | 3788.191       | P[39] |
| A  | 6  | 616.294         | 3708.165        | 3692.146        | 0.000           | 3691.138       | A[38] |
| A  | 7  | 687.331         | 3637.126        | 3621.109        | 0.000           | 3620.101       | A[37] |
| P  | 8  | <b>784.384</b>  | 3566.090        | 3550.072        | 0.000           | 3549.064       | P[36] |
| A  | 9  | <b>855.421</b>  | 3489.038        | 3473.019        | 0.000           | 3472.011       | A[35] |
| A  | 10 | 926.458         | 3398.001        | 3381.982        | 0.000           | 3380.974       | A[34] |
| P  | 11 | <b>1023.511</b> | 3326.963        | 3310.944        | 0.000           | 3309.937       | P[33] |
| A  | 12 | 1094.548        | 3229.911        | 3213.892        | 0.000           | 3212.884       | A[32] |
| P  | 13 | 1165.600        | 3158.874        | 3142.855        | 0.000           | 3141.847       | P[31] |
| V  | 14 | 1236.669        | 3081.821        | 3065.803        | 0.000           | 3064.794       | V[30] |
| E  | 15 | <b>1419.711</b> | 2982.752        | 2966.734        | 0.000           | 2965.726       | E[29] |
| K  | 16 | <b>1547.806</b> | 2833.710        | 2817.691        | 2818.699        | 2816.683       | K[28] |
| T  | 17 | 1648.854        | 2705.615        | 2689.596        | 2690.604        | 2688.588       | T[27] |
| P  | 18 | 1745.907        | 2604.567        | 2588.548        | 2589.556        | 2587.541       | P[26] |
| V  | 19 | 1844.975        | 2507.514        | 2491.496        | 2492.504        | 2490.488       | V[25] |
| R  | 20 | 1973.078        | 2408.446        | 2392.427        | 2393.436        | 2391.419       | R[24] |
| K  | 21 | 2101.105        | 2280.351        | 2264.332        | 2265.340        | 2263.324       | K[23] |
| R  | 22 | 2229.200        | 2152.258        | 2136.239        | 2137.247        | 2135.230       | R[22] |
| A  | 23 | 2300.297        | 2024.161        | 2008.142        | 2009.150        | 2007.134       | A[21] |
| K  | 24 | 2428.392        | 1953.124        | 1937.105        | 1938.113        | 1936.097       | K[20] |
| K  | 25 | 2526.467        | <b>1825.029</b> | 1809.010        | 1810.018        | 1808.002       | K[19] |
| T  | 26 | 2657.538        | 1808.934        | 1800.915        | 1801.923        | 1800.906       | T[18] |
| G  | 27 | 2714.556        | 1595.888        | <b>1579.868</b> | 1580.875        | 1578.860       | G[17] |
| A  | 28 | 2785.593        | 1538.885        | 1522.846        | <b>1523.854</b> | 1521.838       | A[16] |
| A  | 29 | 2856.631        | 1467.828        | 1451.809        | 1452.817        | 1450.801       | A[15] |
| A  | 30 | 2927.668        | 1396.791        | 1380.772        | 1381.780        | 1379.764       | A[14] |
| C  | 31 | 2984.689        | 1325.754        | 1309.735        | 1310.743        | 1308.727       | C[13] |
| K  | 32 | 3112.784        | <b>1268.732</b> | 1252.713        | 1253.721        | 1251.706       | K[12] |
| R  | 33 | 3268.888        | <b>1140.637</b> | <b>1124.618</b> | 1125.626        | 1123.611       | R[11] |
| K  | 34 | 3386.980        | 984.538         | <b>968.517</b>  | <b>969.525</b>  | 967.509        | K[10] |
| A  | 35 | 3488.017        | 856.441         | <b>840.422</b>  | <b>841.430</b>  | <b>839.415</b> | A[9]  |
| S  | 36 | 3555.049        | <b>785.404</b>  | 780.385         | 779.393         | 788.377        | S[8]  |
| G  | 37 | 3632.071        | <b>698.372</b>  | 693.353         | 692.361         | 691.345        | G[7]  |
| P  | 38 | 3709.124        | 641.366         | 625.312         | <b>626.340</b>  | 624.325        | P[6]  |
| P  | 39 | 3806.176        | 544.298         | 528.279         | 529.287         | 527.271        | P[5]  |
| V  | 40 | 3905.245        | 447.245         | <b>431.226</b>  | 432.234         | 430.218        | V[4]  |
| S  | 41 | 3992.277        | 348.177         | 332.158         | 333.166         | 331.150        | S[3]  |
| E  | 42 | 4121.319        | 261.144         | 245.126         | 246.134         | 244.118        | E[2]  |
| L  | 43 | 4234.403        | 132.102         | 118.083         | 117.091         | 115.075        | L[1]  |



# sp | P43277 | H13\_MOUSE

[Acetyl]SETAPAAPAAPAPVEKTPVKKKAKKTGAAAGKRKASGPPVSEL

- ▶ fragmentation table for charge state 2+
- ▶ specType=etd
- ▶ score=44.16
- ▶ F104929.dat
- ▶ query=q4008.p1
- ▶ precursor=706.740390
- ▶ chargePrecursor=6
- ▶ itol=0.8

| AA | c  | y               | z+1             | z+2             | z               | AA              |       |
|----|----|-----------------|-----------------|-----------------|-----------------|-----------------|-------|
| S  | 1  | 74.042          | 2118.197        | 2110.188        | 0.504           | 2109.685        | S(43) |
| E  | 2  | 138.563         | 1833.076        | 2045.047        | 0.504           | 2045.161        | E(42) |
| T  | 3  | 189.087         | <b>1989.155</b> | <b>1981.145</b> | 0.504           | 1980.941        | T(41) |
| A  | 4  | 224.606         | 1936.931        | 1930.622        | 0.504           | 1930.118        | A(40) |
| F  | 5  | 273.132         | 1903.112        | 1895.103        | 0.504           | 1894.509        | F(39) |
| A  | 6  | 308.650         | 1854.586        | 1846.577        | 0.504           | 1846.073        | A(38) |
| A  | 7  | 344.169         | 1819.067        | 1811.058        | 0.504           | 1810.554        | A(37) |
| P  | 8  | 382.695         | 1783.549        | 1775.540        | 0.504           | 1775.036        | P(36) |
| A  | 9  | 429.214         | 1748.022        | 1747.013        | 0.504           | 1746.509        | A(35) |
| A  | 10 | 463.733         | 1699.504        | <b>1691.495</b> | 0.504           | 1690.991        | A(34) |
| F  | 11 | 512.259         | 1663.985        | 1655.976        | 0.504           | 1655.472        | F(33) |
| A  | 12 | 547.777         | 1615.469        | <b>1607.450</b> | 0.504           | <b>1606.946</b> | A(32) |
| F  | 13 | 586.304         | <b>1579.940</b> | 1571.930        | 0.504           | 1571.427        | F(31) |
| V  | 14 | 645.838         | 1533.424        | <b>1522.405</b> | 0.504           | <b>1522.901</b> | V(30) |
| E  | 15 | 710.359         | 1488.908        | <b>1473.870</b> | 0.504           | 1473.367        | E(29) |
| K  | 16 | <b>774.407</b>  | 1441.399        | 1439.349        | 1409.853        | 1408.845        | K(28) |
| T  | 17 | <b>824.931</b>  | 1383.311        | <b>1345.302</b> | <b>1345.806</b> | 1344.798        | T(27) |
| F  | 18 | 873.457         | 1332.787        | <b>1294.778</b> | 1295.262        | <b>1294.274</b> | F(26) |
| V  | 19 | 922.994         | <b>1254.261</b> | 1246.251        | 1246.755        | 1245.747        | V(25) |
| K  | 20 | <b>987.039</b>  | 1208.244        | 1199.717        | <b>1197.221</b> | 1199.213        | K(24) |
| K  | 21 | <b>1051.086</b> | <b>1140.679</b> | <b>1132.670</b> | <b>1133.174</b> | <b>1132.166</b> | K(23) |
| K  | 22 | <b>1115.134</b> | 1078.632        | <b>1068.622</b> | <b>1069.126</b> | <b>1068.118</b> | K(22) |
| K  | 23 | <b>1156.652</b> | <b>1012.584</b> | 1004.575        | 1005.079        | 1004.071        | A(21) |
| K  | 24 | 1214.700        | <b>977.066</b>  | <b>965.056</b>  | <b>966.560</b>  | <b>968.552</b>  | K(20) |
| K  | 25 | 1278.748        | <b>913.018</b>  | <b>903.009</b>  | <b>905.513</b>  | 904.199         | K(19) |
| T  | 26 | <b>1329.271</b> | 845.971         | <b>840.961</b>  | <b>841.465</b>  | <b>840.457</b>  | T(18) |
| G  | 27 | 1387.782        | <b>798.447</b>  | <b>790.437</b>  | <b>790.941</b>  | 789.934         | G(17) |
| A  | 28 | <b>1393.300</b> | 769.936         | <b>761.927</b>  | <b>762.431</b>  | 761.423         | A(16) |
| A  | 29 | <b>1428.819</b> | 734.418         | <b>726.408</b>  | <b>726.912</b>  | 725.904         | A(15) |
| A  | 30 | <b>1464.337</b> | <b>698.899</b>  | <b>690.890</b>  | <b>691.394</b>  | <b>690.386</b>  | A(14) |
| C  | 31 | <b>1492.848</b> | 663.386         | 655.377         | 655.879         | 654.871         | C(13) |
| K  | 32 | <b>1556.896</b> | 634.870         | <b>626.860</b>  | <b>627.364</b>  | <b>626.356</b>  | K(12) |
| R  | 33 | 1634.946        | 603.822         | <b>562.813</b>  | <b>563.317</b>  | 562.309         | R(11) |
| K  | 34 | 1698.994        | 492.772         | 484.762         | 485.266         | 484.258         | K(10) |
| A  | 35 | 1734.512        | 428.724         | 420.715         | 421.219         | 420.211         | A(9)  |
| S  | 36 | 1778.628        | 363.206         | 361.189         | 361.703         | 360.695         | S(8)  |
| G  | 37 | 1806.530        | 349.690         | 341.680         | 342.184         | 341.176         | G(7)  |
| F  | 38 | 1855.065        | 321.179         | 313.170         | 313.673         | 312.666         | F(6)  |
| F  | 39 | <b>1903.592</b> | 272.652         | 264.643         | 265.147         | 264.139         | F(5)  |
| V  | 40 | 1953.126        | 254.129         | 246.117         | 246.621         | 245.613         | V(4)  |
| S  | 41 | 1986.642        | 174.592         | 166.583         | 167.086         | 166.078         | S(3)  |
| E  | 42 | 2003.683        | 118.076         | 123.987         | 124.479         | 123.469         | E(2)  |
| L  | 43 | 2117.705        | 66.555          | 58.545          | 59.049          | 58.041          | L(1)  |

# sp | P43277 | H13\_MOUSE

[Acetyl]SETAPAAPAAPAVEKTPVKKKAKKTGAAAGKRKASGPPVSEL

- ▶ fragmentation table for charge state 3+
- ▶ specType=etd
- ▶ score=44.16
- ▶ F104929.dat
- ▶ query=q4008\_p1
- ▶ precursor=706.740390
- ▶ chargePrecursor=6
- ▶ itol=0.8

| AA | c  | y               | z               | z+1             | z+2            | z               | AA    |
|----|----|-----------------|-----------------|-----------------|----------------|-----------------|-------|
| S  | 1  | 60.697          | <b>1412.467</b> | <b>1407.128</b> | 0.672          | <b>1406.792</b> | S[42] |
| E  | 2  | 62.711          | <b>1399.451</b> | <b>1364.714</b> | 0.672          | <b>1363.776</b> | E[24] |
| T  | 3  | 126.594         | 1325.439        | <b>1321.099</b> | 0.672          | 1320.763        | T[41] |
| A  | 4  | 150.073         | 1292.756        | 1287.417        | 0.672          | 1287.081        | A[40] |
| P  | 5  | 162.424         | <b>1269.077</b> | <b>1263.738</b> | 0.672          | 1263.402        | P[39] |
| A  | 6  | 206.103         | 1236.720        | 1231.387        | 0.672          | 1231.051        | A[38] |
| A  | 7  | 229.782         | 1211.047        | 1207.708        | 0.672          | 1207.372        | A[37] |
| P  | 8  | 262.133         | 1189.560        | 1184.229        | 0.672          | 1183.693        | P[36] |
| A  | 9  | 285.812         | <b>1157.017</b> | 1151.678        | 0.672          | <b>1151.342</b> | A[35] |
| A  | 10 | 309.491         | <b>1133.338</b> | <b>1127.999</b> | 0.672          | <b>1127.663</b> | A[34] |
| P  | 11 | 341.842         | 1109.059        | 1104.320        | 0.672          | 1103.984        | P[33] |
| A  | 12 | 365.521         | <b>1077.308</b> | <b>1071.969</b> | 0.672          | 1071.633        | A[32] |
| P  | 13 | 397.872         | 1051.620        | <b>1046.290</b> | 0.672          | <b>1047.954</b> | P[31] |
| V  | 14 | <b>430.694</b>  | 1021.371        | <b>1015.939</b> | 0.672          | 1015.560        | V[30] |
| E  | 15 | 474.009         | 988.250         | 982.910         | 0.672          | 982.550         | E[29] |
| K  | 16 | 516.607         | 945.241         | <b>939.902</b>  | <b>940.238</b> | <b>939.566</b>  | K[28] |
| T  | 17 | 550.290         | 902.547         | <b>897.204</b>  | <b>897.539</b> | <b>896.868</b>  | T[27] |
| P  | 18 | 582.640         | 868.861         | 863.521         | 863.857        | 863.189         | P[26] |
| V  | 19 | 615.663         | <b>836.510</b>  | 831.170         | 831.506        | 830.829         | V[25] |
| K  | 20 | 658.302         | 803.467         | <b>798.147</b>  | <b>798.483</b> | <b>797.811</b>  | K[24] |
| K  | 21 | 701.000         | 760.789         | <b>755.449</b>  | <b>755.785</b> | <b>755.113</b>  | K[23] |
| K  | 22 | 743.758         | <b>718.090</b>  | <b>712.751</b>  | <b>713.087</b> | <b>712.415</b>  | K[22] |
| A  | 23 | 767.437         | 675.392         | <b>670.052</b>  | <b>670.388</b> | 669.716         | A[21] |
| K  | 24 | 810.136         | 651.713         | 646.373         | 646.709        | 646.037         | K[20] |
| K  | 25 | 852.834         | 609.015         | 603.675         | 604.011        | 603.339         | K[19] |
| T  | 26 | 894.916         | 566.310         | 560.977         | 561.313        | 560.641         | T[18] |
| G  | 27 | <b>905.524</b>  | 533.034         | 527.204         | 527.630        | 526.958         | G[17] |
| A  | 28 | 929.203         | 513.626         | 508.287         | 508.623        | 507.951         | A[16] |
| A  | 29 | <b>952.882</b>  | 489.947         | 484.608         | 484.944        | 484.272         | A[15] |
| A  | 30 | 976.561         | 466.260         | 460.920         | 461.265        | 460.591         | A[14] |
| G  | 31 | <b>995.568</b>  | 442.580         | 437.250         | 437.586        | 436.914         | G[13] |
| K  | 32 | <b>1038.266</b> | 423.587         | 418.243         | 418.579        | 417.907         | K[12] |
| R  | 33 | <b>1090.300</b> | 380.884         | 375.544         | 375.880        | 375.208         | R[11] |
| K  | 34 | <b>1132.998</b> | 328.850         | 323.511         | 323.847        | 323.175         | K[10] |
| A  | 35 | <b>1156.677</b> | 286.157         | 280.812         | 281.148        | 280.476         | A[0]  |
| S  | 36 | 1185.688        | 262.473         | 257.133         | 257.469        | 256.797         | S[8]  |
| G  | 37 | 1204.695        | 211.462         | 206.123         | 206.459        | 205.787         | G[7]  |
| P  | 38 | 1237.046        | 214.451         | 209.115         | 209.451        | 208.779         | P[6]  |
| P  | 39 | <b>1269.397</b> | 182.104         | 176.765         | 177.100        | 176.425         | P[5]  |
| V  | 40 | 1302.420        | 149.753         | 144.414         | 144.750        | 144.078         | V[4]  |
| S  | 41 | <b>1331.430</b> | 116.730         | 111.391         | 111.727        | 111.055         | S[3]  |
| E  | 42 | 1374.445        | 87.720          | 82.380          | 82.716         | 82.044          | E[2]  |
| L  | 43 | 1412.139        | 44.705          | 39.366          | 39.702         | 39.030          | L[1]  |

# sp | P43277 | H13\_MOUSE

[Acetyl]SETAPAAPAAPAPVEKTPVKKKAKKTGAAAGKRKASGPPVSEL

- ▶ fragmentation table for charge state 4+
- ▶ specType=etd
- ▶ score=44.16
- ▶ F104929.dat
- ▶ query=q4008\_p1
- ▶ precursor=706.740390
- ▶ chargePrecursor=6
- ▶ itol=0.8

| AA    | c              | y              | z+1             | z+2            | z               | AA    |
|-------|----------------|----------------|-----------------|----------------|-----------------|-------|
| S[1]  | 37.525         | 1059.602       | <b>1055.598</b> | 0.755          | <b>1065.346</b> | S[43] |
| E[2]  | 69.785         | 1027.342       | <b>1023.337</b> | 0.755          | <b>1023.085</b> | E[42] |
| T[3]  | 95.047         | 995.081        | <b>991.076</b>  | 0.755          | <b>990.824</b>  | T[41] |
| A[4]  | 112.806        | <b>969.819</b> | 965.814         | 0.755          | 965.562         | A[40] |
| P[5]  | 137.070        | <b>952.060</b> | 948.055         | 0.755          | 947.803         | P[39] |
| A[6]  | 154.829        | 927.797        | 923.792         | 0.755          | 923.540         | A[38] |
| A[7]  | 172.588        | 903.537        | <b>906.033</b>  | 0.755          | <b>905.781</b>  | A[37] |
| P[8]  | 190.251        | 882.278        | 882.273         | 0.755          | <b>888.021</b>  | P[36] |
| A[9]  | 214.611        | 868.015        | 864.010         | 0.755          | 863.758         | A[35] |
| A[10] | 232.370        | 850.256        | <b>846.251</b>  | 0.755          | <b>845.999</b>  | A[34] |
| P[11] | 256.633        | 832.496        | <b>828.492</b>  | 0.755          | <b>828.240</b>  | P[33] |
| A[12] | 274.392        | 828.233        | <b>804.228</b>  | 0.755          | <b>803.976</b>  | A[32] |
| P[13] | 298.656        | <b>790.474</b> | 787.469         | 0.755          | <b>786.212</b>  | P[31] |
| V[14] | 323.423        | <b>766.211</b> | <b>762.206</b>  | 0.755          | <b>761.954</b>  | V[30] |
| E[15] | 355.683        | 741.444        | 737.439         | 0.755          | 737.187         | E[29] |
| K[16] | 387.707        | 709.183        | 705.178         | 705.430        | 704.926         | K[28] |
| T[17] | 412.969        | 677.159        | <b>673.154</b>  | <b>673.406</b> | <b>672.903</b>  | T[27] |
| P[18] | 437.232        | 651.897        | 647.893         | 648.145        | 647.641         | P[26] |
| V[19] | 461.999        | <b>627.634</b> | 623.629         | 623.881        | 623.377         | V[25] |
| K[20] | 494.023        | 602.897        | 598.892         | 599.114        | 598.610         | K[24] |
| K[21] | 526.047        | 579.243        | 569.230         | 567.000        | 566.597         | K[23] |
| K[22] | 558.070        | 538.819        | 534.815         | 535.067        | 534.561         | K[22] |
| A[23] | 575.830        | 506.796        | 502.791         | 503.043        | 503.539         | A[21] |
| K[24] | 607.854        | 489.036        | 485.032         | 485.284        | 484.780         | K[20] |
| K[25] | <b>639.877</b> | 457.013        | 453.008         | 453.260        | 452.756         | K[19] |
| T[26] | 665.139        | 434.889        | 420.964         | 423.236        | 420.732         | T[18] |
| A[27] | 673.385        | 399.727        | 395.723         | 395.914        | 395.470         | A[17] |
| A[28] | 697.154        | 385.472        | 381.467         | 381.719        | 381.215         | A[16] |
| A[29] | 714.913        | 367.712        | 363.708         | 363.960        | 363.456         | A[15] |
| A[30] | 732.672        | 349.953        | 345.948         | 346.200        | 345.696         | A[14] |
| G[31] | 749.928        | 332.194        | 328.189         | 328.441        | 327.937         | G[13] |
| K[32] | 778.951        | 317.938        | 313.934         | 314.186        | 313.682         | K[12] |
| K[33] | <b>817.977</b> | 285.915        | 281.910         | 282.162        | 281.658         | K[11] |
| A[34] | 836.661        | 268.889        | 264.884         | 265.117        | 264.613         | A[10] |
| A[35] | 857.790        | 214.866        | 210.861         | 211.113        | 210.609         | A[9]  |
| S[36] | <b>889.518</b> | 197.106        | 193.102         | 193.354        | 192.850         | S[8]  |
| G[37] | 903.773        | 175.948        | 171.944         | 171.506        | 171.002         | G[7]  |
| P[38] | 928.036        | 161.093        | 157.088         | 157.340        | 156.836         | P[6]  |
| P[39] | <b>952.300</b> | 136.830        | 132.825         | 133.077        | 132.573         | P[5]  |
| V[40] | <b>977.067</b> | 112.567        | 108.562         | 108.814        | 108.310         | V[4]  |
| S[41] | <b>998.825</b> | 87.800         | 83.795          | 84.047         | 83.543          | S[3]  |
| E[42] | 1031.085       | 66.042         | 62.037          | 62.289         | 61.785          | E[2]  |
| L[43] | 1059.356       | 33.781         | 29.776          | 30.028         | 29.524          | L[1]  |

# sp | P43277 | H13\_MOUSE

[Acetyl]SETAPAAPAAPAPVEKTPVKKKAKKTGAAAGKRKASGPPVSEL

- ▶ fragmentation table for charge state 5+
- ▶ specType=etd
- ▶ score=44.16
- ▶ F104929.dat
- ▶ query=q4008\_p1
- ▶ precursor=706.740390
- ▶ chargePrecursor=6
- ▶ itol=0.8

| AA    | c              | y              | z+1            | z+2     | z              | AA    |
|-------|----------------|----------------|----------------|---------|----------------|-------|
| S[1]  | 30.221         | 847.883        | <b>844.600</b> | 0.806   | <b>844.478</b> | S[43] |
| E[2]  | 56.030         | 827.075        | <b>818.871</b> | 0.806   | <b>818.669</b> | E[42] |
| Y[3]  | 76.239         | <b>796.266</b> | <b>793.063</b> | 0.806   | <b>792.861</b> | Y[41] |
| A[4]  | 90.447         | 776.051        | <b>772.853</b> | 0.806   | <b>772.651</b> | A[40] |
| P[5]  | 109.857        | <b>761.849</b> | 758.646        | 0.806   | 758.444        | P[39] |
| A[6]  | 124.065        | 742.439        | 739.235        | 0.806   | 739.033        | A[38] |
| A[7]  | 138.272        | <b>728.231</b> | 725.028        | 0.806   | 724.826        | A[37] |
| P[8]  | 157.683        | 714.024        | 710.820        | 0.806   | 710.619        | P[36] |
| A[9]  | 171.890        | 694.613        | <b>691.410</b> | 0.806   | <b>691.208</b> | A[35] |
| A[10] | 186.097        | 680.406        | 677.202        | 0.806   | 677.001        | A[34] |
| P[11] | 203.308        | 666.199        | 662.995        | 0.806   | 662.793        | P[33] |
| A[12] | 219.715        | 646.789        | 643.584        | 0.806   | 643.383        | A[32] |
| P[13] | 239.126        | 632.581        | 629.377        | 0.806   | 629.175        | P[31] |
| V[14] | 258.940        | 613.170        | 609.966        | 0.806   | 609.765        | V[30] |
| E[15] | 284.748        | 593.356        | 590.153        | 0.806   | 589.951        | E[29] |
| K[16] | 310.367        | 567.548        | 564.344        | 564.344 | 564.142        | K[28] |
| T[17] | 330.577        | 541.929        | 538.725        | 538.927 | 538.523        | T[27] |
| P[18] | 349.967        | 521.719        | 518.516        | 518.717 | 518.314        | P[26] |
| V[19] | 369.801        | 502.309        | 499.105        | 499.307 | 498.903        | V[25] |
| K[20] | 395.420        | 482.495        | 479.291        | 479.493 | 479.090        | K[24] |
| K[21] | 421.839        | 456.878        | 453.672        | 453.874 | 453.471        | K[23] |
| K[22] | 446.058        | <b>431.257</b> | 428.053        | 428.254 | 427.852        | K[22] |
| A[23] | 460.365        | 405.630        | 402.424        | 402.626 | 402.223        | A[21] |
| K[24] | 486.484        | 391.431        | 388.227        | 388.428 | 388.025        | K[20] |
| K[25] | 512.103        | 365.812        | 362.608        | 362.809 | 362.406        | K[19] |
| T[26] | 532.313        | 340.193        | 336.989        | 337.190 | 336.787        | T[18] |
| G[27] | 543.717        | 319.983        | 316.779        | 316.981 | 316.578        | G[17] |
| A[28] | 557.925        | 308.579        | 305.375        | 305.577 | 305.173        | A[16] |
| A[29] | 572.132        | 294.371        | 291.168        | 291.369 | 290.966        | A[15] |
| A[30] | 586.339        | 280.164        | 276.960        | 277.162 | 276.759        | A[14] |
| G[31] | 597.744        | 265.957        | 262.753        | 262.954 | 262.551        | G[13] |
| K[32] | 623.363        | 254.552        | 251.348        | 251.550 | 251.147        | K[12] |
| R[33] | 654.583        | 228.933        | 225.730        | 225.931 | 225.528        | R[11] |
| K[34] | 680.202        | 197.713        | 194.509        | 194.711 | 194.308        | K[10] |
| A[35] | 694.409        | 172.094        | 168.890        | 169.092 | 168.689        | A[9]  |
| S[36] | 711.816        | 157.887        | 154.683        | 154.884 | 154.481        | S[8]  |
| G[37] | 723.220        | 140.480        | 137.276        | 137.478 | 137.075        | G[7]  |
| P[38] | 742.631        | 129.076        | 125.872        | 126.074 | 125.671        | P[6]  |
| P[39] | <b>762.041</b> | 109.665        | 106.462        | 106.663 | 106.260        | P[5]  |
| V[40] | 781.855        | 90.255         | 87.051         | 87.253  | 86.849         | V[4]  |
| S[41] | <b>799.261</b> | 70.844         | 67.237         | 67.439  | 67.036         | S[3]  |
| E[42] | <b>825.070</b> | 53.035         | 49.831         | 50.033  | 49.629         | E[2]  |
| L[43] | 847.687        | 37.226         | 34.022         | 34.224  | 33.821         | L[1]  |

# sp | P43277 | H13\_MOUSE

[Acetyl]SETAPAAPAAPAPVEKTPVKKKAKKTGAAAGKRKASGPPVSEL

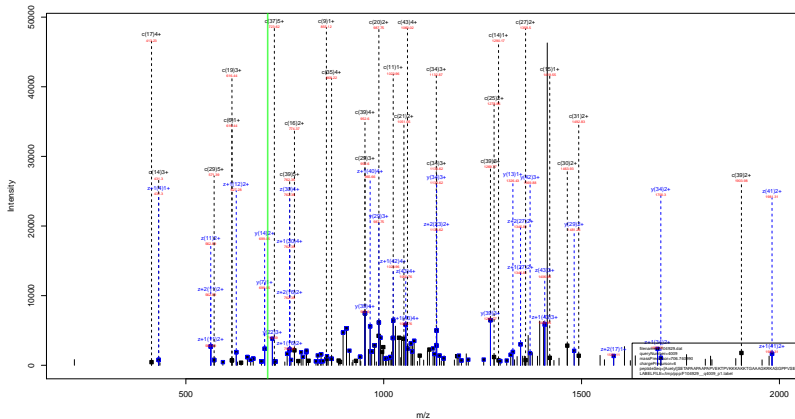

# sp | P43277 | H13\_MOUSE

[Acetyl]SETAPAAPAAPAVEKTPVKKKAKKTGAAAGKRKASGPPVSEL

- ▶ fragmentation table for charge state 1+
- ▶ specType=etd
- ▶ score=45.31
- ▶ F104929.dat
- ▶ query=q4009\_p1
- ▶ precursor=706.740990
- ▶ chargePrecursor=6
- ▶ itol=0.8

| AA |    | c               | y               | z+1             | z+2             | z        | AA    |
|----|----|-----------------|-----------------|-----------------|-----------------|----------|-------|
| S  | 1  | 147.076         | 4235.387        | 4219.369        | 0.000           | 4218.362 | S[43] |
| E  | 2  | 278.319         | 4198.345        | 4030.335        | 0.000           | 4039.315 | E[42] |
| T  | 3  | 377.167         | 3977.302        | 3951.294        | 0.000           | 3960.270 | T[41] |
| A  | 4  | 448.204         | 3870.255        | 3850.236        | 0.000           | 3859.228 | A[40] |
| F  | 5  | 545.257         | 3805.217        | 3789.199        | 0.000           | 3788.191 | F[39] |
| A  | 6  | <b>616.294</b>  | 3708.165        | 3692.146        | 0.000           | 3691.138 | A[38] |
| A  | 7  | 657.231         | 3637.125        | 3621.109        | 0.000           | 3620.101 | A[37] |
| P  | 8  | <b>784.284</b>  | 3556.090        | 3530.072        | 0.000           | 3549.064 | P[36] |
| A  | 9  | <b>855.421</b>  | 3469.038        | 3453.019        | 0.000           | 3452.011 | A[35] |
| A  | 10 | 926.458         | 3398.001        | 3381.982        | 0.000           | 3380.974 | A[34] |
| P  | 11 | <b>1023.511</b> | 3326.963        | 3310.944        | 0.000           | 3309.937 | P[33] |
| A  | 12 | 1094.548        | 3259.911        | 3243.892        | 0.000           | 3242.884 | A[32] |
| P  | 13 | 1167.600        | 3198.874        | 3182.855        | 0.000           | 3181.847 | P[31] |
| V  | 14 | <b>1290.669</b> | 3091.821        | 3085.803        | 0.000           | 3084.795 | V[30] |
| E  | 15 | <b>1419.711</b> | 2992.752        | 2986.734        | 0.000           | 2985.726 | E[29] |
| K  | 16 | 1547.806        | 2833.710        | 2817.691        | 2818.699        | 2816.683 | K[28] |
| T  | 17 | 1648.854        | 2705.615        | 2689.596        | 2690.604        | 2688.588 | T[27] |
| P  | 18 | 1745.907        | 2604.567        | 2588.548        | 2589.556        | 2587.541 | P[26] |
| V  | 19 | 1844.975        | 2507.514        | 2491.496        | 2492.504        | 2490.488 | V[25] |
| R  | 20 | 1973.078        | 2408.446        | 2392.427        | 2393.435        | 2391.418 | R[24] |
| K  | 21 | 2101.105        | 2280.351        | 2264.332        | 2265.340        | 2263.324 | K[23] |
| K  | 22 | 2229.200        | 2152.258        | 2136.239        | 2137.247        | 2135.230 | K[22] |
| A  | 23 | 2300.297        | 2024.161        | 2008.142        | 2009.150        | 2007.134 | A[21] |
| K  | 24 | 2428.392        | 1953.124        | 1937.105        | 1938.113        | 1936.097 | K[20] |
| K  | 25 | 2526.487        | 1825.020        | 1809.001        | 1810.010        | 1808.002 | K[19] |
| T  | 26 | 2657.538        | 1706.934        | 1690.915        | 1691.923        | 1689.906 | T[18] |
| G  | 27 | 2714.556        | 1595.888        | 1579.868        | <b>1580.875</b> | 1578.860 | G[17] |
| A  | 28 | 2785.593        | 1538.885        | 1522.866        | 1523.874        | 1521.858 | A[16] |
| A  | 29 | 2856.631        | 1467.828        | 1451.809        | 1452.817        | 1450.801 | A[15] |
| A  | 30 | 2927.668        | 1396.791        | 1380.772        | 1381.780        | 1379.764 | A[14] |
| C  | 31 | 2984.689        | <b>1325.754</b> | 1309.735        | <b>1310.743</b> | 1308.727 | C[13] |
| K  | 32 | 3112.784        | 1208.724        | <b>1252.713</b> | 1253.721        | 1251.706 | K[12] |
| R  | 33 | 3268.888        | <b>1140.637</b> | <b>1124.618</b> | 1125.626        | 1123.611 | R[11] |
| K  | 34 | 3396.980        | 984.538         | 968.517         | <b>969.525</b>  | 967.509  | K[10] |
| A  | 35 | 3488.017        | <b>856.441</b>  | <b>840.422</b>  | <b>841.430</b>  | 839.413  | A[9]  |
| S  | 36 | 3555.049        | 735.404         | 719.385         | 720.393         | 718.377  | S[8]  |
| G  | 37 | 3632.071        | <b>698.372</b>  | 682.353         | 683.361         | 681.345  | G[7]  |
| P  | 38 | 3709.124        | 641.306         | 625.287         | 626.295         | 624.279  | P[6]  |
| P  | 39 | 3806.176        | 544.298         | 528.279         | 529.287         | 527.271  | P[5]  |
| V  | 40 | 3905.245        | 447.245         | <b>431.226</b>  | 432.234         | 430.218  | V[4]  |
| S  | 41 | 3992.277        | 348.177         | 332.158         | 333.166         | 331.150  | S[3]  |
| E  | 42 | 4121.319        | 261.144         | 245.125         | 246.134         | 244.118  | E[2]  |
| L  | 43 | 4234.403        | 132.102         | 116.083         | 117.091         | 115.075  | L[1]  |

# sp | P43277 | H13\_MOUSE

[Acetyl]SETAPAAPAAPAVEKTPVKKKAKKTGAAAGKRKASGPPVSEL

- ▶ fragmentation table for charge state 2+
- ▶ specType=etd
- ▶ score=45.31
- ▶ F104929.dat
- ▶ query=q4009\_p1
- ▶ precursor=706.740990
- ▶ chargePrecursor=6
- ▶ itol=0.8

| AA | c  | y               | z+1             | z+2             | z               | AA              |       |
|----|----|-----------------|-----------------|-----------------|-----------------|-----------------|-------|
| E  | 1  | 74.042          | 2118.197        | 2110.188        | 0.504           | 2109.686        | E[43] |
| E  | 2  | 138.563         | 2051.676        | 2043.667        | 0.504           | 2043.163        | E[42] |
| T  | 3  | 189.087         | 1988.155        | <b>1981.145</b> | 0.504           | <b>1980.641</b> | T[41] |
| A  | 4  | 224.606         | 1928.631        | 1920.622        | 0.504           | 1920.118        | A[40] |
| F  | 5  | 273.132         | 1903.112        | 1895.103        | 0.504           | 1894.599        | F[39] |
| A  | 6  | 308.650         | 1834.586        | 1826.577        | 0.504           | 1826.073        | A[38] |
| A  | 7  | 344.169         | 1819.067        | 1811.058        | 0.504           | 1810.554        | A[37] |
| F  | 8  | 382.695         | 1783.549        | 1775.540        | 0.504           | 1775.036        | F[36] |
| A  | 9  | 428.214         | 1755.022        | 1747.013        | 0.504           | 1746.509        | A[35] |
| A  | 10 | 463.733         | <b>1699.504</b> | <b>1691.495</b> | 0.504           | 1690.991        | A[34] |
| F  | 11 | 512.259         | 1663.965        | 1655.956        | 0.504           | 1655.452        | F[33] |
| A  | 12 | 547.777         | 1615.439        | 1607.430        | 0.504           | 1606.926        | A[32] |
| F  | 13 | 586.304         | 1579.940        | 1571.931        | 0.504           | 1571.427        | F[31] |
| V  | 14 | 645.338         | 1533.414        | 1525.405        | 0.504           | 1524.901        | V[30] |
| E  | 15 | 710.359         | <b>1481.880</b> | 1473.870        | 0.504           | 1473.367        | E[29] |
| K  | 16 | <b>774.407</b>  | 1417.359        | 1409.349        | 1409.853        | 1408.848        | K[28] |
| T  | 17 | 824.911         | 1353.311        | <b>1345.302</b> | <b>1345.806</b> | 1344.798        | T[27] |
| F  | 18 | 873.437         | 1302.787        | <b>1294.778</b> | 1295.282        | <b>1294.274</b> | F[26] |
| V  | 19 | 922.954         | 1254.261        | 1246.251        | 1246.755        | 1245.748        | V[25] |
| K  | 20 | <b>987.039</b>  | 1204.727        | <b>1196.717</b> | 1197.221        | <b>1196.213</b> | K[24] |
| K  | 21 | <b>1051.086</b> | <b>1140.679</b> | <b>1132.670</b> | <b>1133.174</b> | <b>1132.166</b> | K[23] |
| K  | 22 | <b>1115.134</b> | <b>1076.632</b> | <b>1068.622</b> | <b>1069.126</b> | <b>1068.118</b> | K[22] |
| A  | 23 | <b>1150.652</b> | <b>1012.584</b> | <b>1004.575</b> | <b>1005.079</b> | <b>1004.071</b> | A[21] |
| K  | 24 | 1214.700        | <b>977.066</b>  | <b>969.056</b>  | <b>969.560</b>  | 968.552         | K[20] |
| K  | 25 | <b>1278.747</b> | <b>913.018</b>  | 905.008         | <b>905.513</b>  | 904.505         | K[19] |
| T  | 26 | 1320.271        | 848.971         | <b>840.961</b>  | <b>841.465</b>  | <b>840.457</b>  | T[18] |
| G  | 27 | <b>1357.782</b> | 798.447         | 790.437         | <b>790.941</b>  | 789.934         | G[17] |
| A  | 28 | 1383.300        | 769.936         | <b>761.927</b>  | <b>762.431</b>  | 761.423         | A[16] |
| A  | 29 | 1428.819        | 734.419         | <b>726.408</b>  | <b>726.912</b>  | <b>725.904</b>  | A[15] |
| A  | 30 | <b>1464.337</b> | <b>690.099</b>  | <b>690.603</b>  | <b>691.107</b>  | <b>690.388</b>  | A[14] |
| C  | 31 | <b>1492.848</b> | <b>663.380</b>  | <b>655.371</b>  | <b>655.875</b>  | <b>654.867</b>  | C[13] |
| K  | 32 | 1556.896        | 634.978         | <b>626.860</b>  | <b>627.364</b>  | 626.356         | K[12] |
| R  | 33 | 1634.946        | <b>570.822</b>  | <b>562.813</b>  | <b>563.317</b>  | <b>562.309</b>  | R[11] |
| K  | 34 | 1698.994        | 492.772         | 484.762         | 485.266         | 484.258         | K[10] |
| A  | 35 | 1734.512        | 428.724         | 420.715         | 421.219         | 420.211         | A[9]  |
| S  | 36 | 1778.028        | 393.205         | 385.195         | 385.700         | 384.692         | S[8]  |
| G  | 37 | 1806.539        | 349.689         | 341.680         | 342.184         | 341.176         | G[7]  |
| F  | 38 | 1855.065        | 321.179         | 313.170         | 313.673         | 312.666         | F[6]  |
| F  | 39 | <b>1903.592</b> | 272.652         | 264.643         | 265.147         | 264.139         | F[5]  |
| V  | 40 | 1953.126        | 234.129         | 218.117         | 218.621         | 215.613         | V[4]  |
| S  | 41 | 1986.642        | 174.592         | 166.583         | 167.086         | 166.078         | S[3]  |
| E  | 42 | 2003.163        | 118.076         | 123.067         | 123.570         | 122.562         | E[2]  |
| L  | 43 | 2117.705        | 66.555          | 58.545          | 59.049          | 58.041          | L[1]  |

# sp | P43277 | H13\_MOUSE

[Acetyl]SETAPAAPAAPAVEKTPVKKKAKKTGAAAGKRKASGPPVSEL

- ▶ fragmentation table for charge state 3+
- ▶ specType=etd
- ▶ score=45.31
- ▶ F104929.dat
- ▶ query=q4009\_p1
- ▶ precursor=706.740990
- ▶ chargePrecursor=6
- ▶ itol=0.8

| AA    | c               | y               | z+1             | z+2            | z               | AA    |
|-------|-----------------|-----------------|-----------------|----------------|-----------------|-------|
| S[1]  | 60.697          | 1412.498        | <b>1407.128</b> | 0.672          | <b>1406.792</b> | S[42] |
| S[2]  | 62.711          | <b>1369.453</b> | 1369.414        | 0.672          | 1369.078        | S[43] |
| T[3]  | 126.394         | <b>1326.439</b> | <b>1321.099</b> | 0.672          | <b>1320.763</b> | T[41] |
| A[4]  | 150.073         | 1292.756        | 1287.417        | 0.672          | 1287.081        | A[40] |
| F[5]  | 162.424         | <b>1269.077</b> | 1263.738        | 0.672          | 1263.402        | F[39] |
| A[6]  | 206.103         | 1238.720        | 1231.387        | 0.672          | 1231.051        | A[38] |
| A[7]  | 229.782         | <b>1213.047</b> | 1207.708        | 0.672          | 1207.372        | A[37] |
| F[8]  | 262.133         | <b>1189.368</b> | 1184.029        | 0.672          | 1183.693        | F[36] |
| A[9]  | 285.812         | 1157.017        | <b>1151.678</b> | 0.672          | <b>1151.342</b> | A[35] |
| A[10] | 309.491         | <b>1133.338</b> | <b>1127.999</b> | 0.672          | <b>1127.663</b> | A[34] |
| F[11] | 341.842         | 1109.659        | 1104.320        | 0.672          | 1103.984        | F[33] |
| A[12] | 365.521         | <b>1077.308</b> | <b>1071.969</b> | 0.672          | <b>1071.633</b> | A[32] |
| P[13] | 397.872         | 1053.629        | 1048.290        | 0.672          | 1047.954        | P[31] |
| V[14] | <b>430.694</b>  | 1031.278        | <b>1015.939</b> | 0.672          | <b>1015.603</b> | V[30] |
| E[15] | 474.909         | <b>988.256</b>  | 982.916         | 0.672          | 982.580         | E[29] |
| K[16] | 516.607         | 945.261         | <b>939.902</b>  | <b>940.238</b> | <b>939.566</b>  | K[28] |
| T[17] | 550.290         | 902.547         | <b>897.204</b>  | <b>897.539</b> | <b>896.868</b>  | T[27] |
| P[18] | 582.640         | <b>868.861</b>  | 863.521         | 863.857        | 863.185         | P[26] |
| V[19] | <b>615.663</b>  | 826.519         | 821.179         | 821.506        | 820.834         | V[25] |
| K[20] | 658.302         | <b>803.487</b>  | 798.147         | 798.483        | 797.811         | K[24] |
| K[21] | 701.090         | 760.789         | <b>755.449</b>  | <b>755.785</b> | 755.113         | K[23] |
| K[22] | 743.758         | <b>718.090</b>  | 712.751         | 713.087        | 712.415         | K[22] |
| A[23] | 787.437         | 675.392         | <b>670.052</b>  | <b>670.388</b> | <b>669.716</b>  | A[21] |
| K[24] | <b>810.136</b>  | 651.713         | 646.373         | 646.709        | 646.037         | K[20] |
| K[25] | 852.824         | 609.015         | 603.675         | 604.011        | 603.339         | K[19] |
| T[26] | <b>886.516</b>  | 566.316         | 560.977         | 561.313        | 560.641         | T[18] |
| G[27] | <b>905.524</b>  | 533.636         | 527.296         | 527.632        | 526.960         | G[17] |
| A[28] | <b>929.203</b>  | 513.626         | 508.287         | 508.623        | 507.951         | A[16] |
| A[29] | <b>952.882</b>  | 489.947         | 484.608         | 484.944        | 484.272         | A[15] |
| A[30] | <b>976.561</b>  | 466.269         | 460.929         | 461.265        | 460.593         | A[14] |
| G[31] | <b>995.568</b>  | 442.589         | 437.250         | 437.586        | 436.914         | G[13] |
| K[32] | <b>1038.266</b> | 423.587         | 418.248         | 418.579        | 417.907         | K[12] |
| R[33] | <b>1090.300</b> | 380.884         | 375.544         | 375.880        | 375.208         | R[11] |
| K[34] | <b>1132.998</b> | 328.850         | 323.511         | 323.847        | 323.175         | K[10] |
| A[35] | 1156.677        | 286.157         | 280.817         | 281.148        | 280.476         | A[0]  |
| S[36] | <b>1185.688</b> | 262.473         | 257.133         | 257.469        | 256.797         | S[8]  |
| G[37] | 1204.695        | 213.462         | 208.123         | 208.459        | 207.787         | G[7]  |
| F[38] | 1237.046        | 214.451         | <b>209.115</b>  | <b>209.451</b> | 208.779         | F[6]  |
| F[39] | <b>1269.397</b> | 182.104         | 176.765         | 177.100        | 176.429         | F[5]  |
| V[40] | 1302.420        | 149.753         | 144.414         | 144.750        | 144.078         | V[4]  |
| S[41] | 1331.430        | 116.730         | 111.391         | 111.727        | 111.055         | S[3]  |
| E[42] | 1374.445        | 87.720          | 82.380          | 82.716         | 82.044          | E[2]  |
| L[43] | 1412.139        | 44.705          | 39.366          | 39.702         | 39.030          | L[1]  |



# sp | P43277 | H13\_MOUSE

[Acetyl]SETAPAAPAAPAPVEKTPVKKKAKKTGAAAGKRKASGPPVSEL

- ▶ fragmentation table for charge state 4+
- ▶ specType=etd
- ▶ score=45.31
- ▶ F104929.dat
- ▶ query=q4009\_p1
- ▶ precursor=706.740990
- ▶ chargePrecursor=6
- ▶ itol=0.8

| AA   | c               | y               | z+1             | z+2     | z               | AA   |
|------|-----------------|-----------------|-----------------|---------|-----------------|------|
| S 1  | 37.525          | <b>1059.602</b> | <b>1055.598</b> | 0.755   | <b>1055.346</b> | S 42 |
| E 2  | 69.785          | 1027.342        | <b>1023.337</b> | 0.755   | <b>1023.085</b> | E 42 |
| T 3  | 95.047          | 995.081         | <b>991.076</b>  | 0.755   | <b>990.824</b>  | T 41 |
| A 4  | 112.806         | <b>969.819</b>  | <b>965.814</b>  | 0.755   | <b>965.562</b>  | A 40 |
| P 5  | 127.070         | <b>952.060</b>  | 948.055         | 0.755   | 947.803         | P 39 |
| A 6  | 154.820         | 927.797         | 923.792         | 0.755   | 923.540         | A 38 |
| A 7  | 172.588         | 910.037         | <b>906.033</b>  | 0.755   | <b>905.781</b>  | A 37 |
| P 8  | 196.251         | 892.276         | 888.271         | 0.755   | 888.019         | P 36 |
| A 9  | 214.811         | <b>868.015</b>  | 864.010         | 0.755   | 863.758         | A 35 |
| A 10 | 232.570         | 850.250         | <b>846.251</b>  | 0.755   | <b>845.999</b>  | A 34 |
| P 11 | 256.633         | <b>832.496</b>  | <b>828.492</b>  | 0.755   | <b>828.240</b>  | P 33 |
| A 12 | 274.302         | 808.233         | <b>804.228</b>  | 0.755   | <b>803.976</b>  | A 32 |
| P 13 | 298.056         | 790.473         | 786.468         | 0.755   | 786.216         | P 31 |
| V 14 | 323.423         | <b>766.211</b>  | <b>762.206</b>  | 0.755   | <b>761.954</b>  | V 30 |
| E 15 | 353.683         | 743.444         | 739.439         | 0.755   | 739.187         | E 29 |
| K 16 | 387.707         | 709.183         | 705.178         | 705.430 | 704.926         | K 28 |
| T 17 | <b>412.969</b>  | 677.159         | 673.154         | 673.406 | 672.903         | T 27 |
| P 18 | 437.232         | 651.897         | 647.893         | 648.145 | 647.641         | P 26 |
| V 19 | 461.999         | <b>627.634</b>  | 623.629         | 623.881 | 623.377         | V 25 |
| K 20 | 494.023         | 600.267         | 598.002         | 599.114 | 598.913         | K 24 |
| K 21 | 526.047         | <b>570.843</b>  | 566.839         | 567.090 | 566.587         | K 23 |
| K 22 | 558.070         | 538.819         | 534.815         | 535.067 | 534.563         | K 22 |
| A 23 | 578.830         | 506.796         | 502.791         | 503.043 | 502.539         | A 21 |
| K 24 | 607.854         | 489.030         | 485.032         | 485.284 | 484.780         | K 20 |
| K 25 | <b>639.877</b>  | 457.013         | 453.008         | 453.260 | 452.756         | K 19 |
| T 26 | 665.139         | 434.989         | 430.984         | 431.236 | 430.732         | T 18 |
| G 27 | 679.395         | 395.727         | 395.727         | 395.974 | 395.470         | G 17 |
| A 28 | 697.154         | 385.472         | 381.467         | 381.719 | 381.215         | A 16 |
| A 29 | 714.913         | 367.712         | 363.708         | 363.960 | 363.456         | A 15 |
| A 30 | 732.672         | 349.953         | 345.948         | 346.200 | 345.696         | A 14 |
| G 31 | 746.928         | 332.194         | 328.189         | 328.441 | 327.937         | G 13 |
| K 32 | 778.951         | 317.698         | 313.694         | 313.946 | 313.442         | K 12 |
| K 33 | 817.974         | 289.911         | 281.910         | 282.162 | 281.658         | K 11 |
| K 34 | 850.001         | 246.889         | 242.885         | 243.137 | 242.633         | K 10 |
| A 35 | <b>867.760</b>  | 214.899         | 210.891         | 211.113 | 210.609         | A 9  |
| S 36 | <b>889.518</b>  | 197.100         | 193.102         | 193.354 | 192.850         | S 8  |
| G 37 | 903.773         | 175.348         | 171.344         | 171.596 | 171.092         | G 7  |
| P 38 | 926.036         | 161.093         | 157.088         | 157.340 | 156.836         | P 6  |
| P 39 | <b>952.300</b>  | 139.839         | 132.826         | 133.077 | 132.573         | P 5  |
| V 40 | <b>977.067</b>  | 112.507         | 108.502         | 108.814 | 108.310         | V 4  |
| S 41 | <b>998.825</b>  | 87.800          | 83.795          | 84.047  | 83.543          | S 3  |
| E 42 | 1031.085        | 66.042          | 62.037          | 62.289  | 61.785          | E 2  |
| L 43 | <b>1059.356</b> | 33.781          | 29.776          | 30.028  | 29.524          | L 1  |

# sp | P43277 | H13\_MOUSE

[Acetyl]SETAPAAPAAPAPVEKTPVKKKAKKTGAAAGKRKASGPPVSEL

- ▶ fragmentation table for charge state 5+
- ▶ specType=etd
- ▶ score=45.31
- ▶ F104929.dat
- ▶ query=q4009\_p1
- ▶ precursor=706.740990
- ▶ chargePrecursor=6
- ▶ itol=0.8

| AA    | c              | y              | z+1            | z+2     | z              | AA    |
|-------|----------------|----------------|----------------|---------|----------------|-------|
| S[1]  | 30.221         | 847.883        | 844.680        | 0.806   | 844.478        | S[43] |
| E[2]  | 56.030         | 822.075        | 818.871        | 0.806   | 818.669        | E[42] |
| Y[3]  | 76.239         | <b>796.266</b> | 793.063        | 0.806   | 792.861        | Y[41] |
| A[4]  | 90.447         | 776.051        | 772.853        | 0.806   | 772.651        | A[40] |
| P[5]  | 109.857        | <b>761.849</b> | 758.646        | 0.806   | 758.444        | P[39] |
| A[6]  | 124.065        | 742.439        | 739.235        | 0.806   | 739.033        | A[38] |
| A[7]  | 138.272        | 728.231        | 725.028        | 0.806   | 724.826        | A[37] |
| P[8]  | 157.683        | 714.024        | 710.820        | 0.806   | 710.619        | P[36] |
| A[9]  | 171.890        | 694.613        | <b>691.410</b> | 0.806   | <b>691.208</b> | A[35] |
| A[10] | 186.097        | 680.406        | 677.202        | 0.806   | 677.001        | A[34] |
| T[11] | 203.308        | 666.199        | <b>662.995</b> | 0.806   | 662.793        | T[33] |
| A[12] | 219.715        | 646.789        | 643.584        | 0.806   | 643.383        | A[32] |
| P[13] | 239.126        | 632.581        | 629.377        | 0.806   | 629.175        | P[31] |
| V[14] | 258.940        | 613.170        | 609.966        | 0.806   | 609.765        | V[30] |
| E[15] | 284.748        | <b>593.356</b> | 590.153        | 0.806   | 589.951        | E[29] |
| K[16] | 310.367        | 567.948        | 564.744        | 564.546 | 564.342        | K[28] |
| T[17] | 330.577        | 541.929        | 538.725        | 538.927 | 538.523        | T[27] |
| P[18] | 349.987        | 521.719        | 518.516        | 518.717 | 518.314        | P[26] |
| V[19] | 369.801        | 502.309        | 499.105        | 499.307 | 498.903        | V[25] |
| K[20] | 395.420        | 482.895        | 479.291        | 479.493 | 479.090        | K[24] |
| K[21] | 421.839        | 456.878        | 453.672        | 453.874 | 453.471        | K[23] |
| K[22] | 446.058        | <b>431.257</b> | 428.053        | 428.254 | 427.852        | K[22] |
| A[23] | 460.365        | 405.638        | 402.434        | 402.636 | 402.233        | A[21] |
| K[24] | 486.484        | 391.431        | 388.227        | 388.428 | 388.025        | K[20] |
| K[25] | 512.103        | 365.812        | 362.608        | 362.809 | 362.406        | K[19] |
| T[26] | 532.313        | 340.193        | 336.989        | 337.190 | 336.787        | T[18] |
| G[27] | 543.717        | 319.983        | 316.779        | 316.981 | 316.578        | G[17] |
| A[28] | 557.925        | 308.579        | 305.375        | 305.577 | 305.173        | A[16] |
| A[29] | <b>572.132</b> | 294.371        | 291.168        | 291.369 | 290.966        | A[15] |
| A[30] | 586.339        | 280.164        | 276.960        | 277.162 | 276.759        | A[14] |
| G[31] | 597.744        | 265.957        | 262.753        | 262.954 | 262.551        | G[13] |
| K[32] | 623.363        | 254.552        | 251.348        | 251.550 | 251.147        | K[12] |
| R[13] | 654.583        | 228.933        | 225.730        | 225.931 | 225.528        | R[11] |
| K[34] | 680.202        | 197.713        | 194.509        | 194.711 | 194.308        | K[10] |
| A[35] | 694.409        | 172.094        | 168.890        | 169.092 | 168.689        | A[9]  |
| S[36] | 711.816        | 157.887        | 154.683        | 154.884 | 154.481        | S[8]  |
| G[37] | <b>723.220</b> | 140.480        | 137.276        | 137.478 | 137.075        | G[7]  |
| P[38] | 742.631        | 129.076        | 125.872        | 126.074 | 125.671        | P[6]  |
| P[39] | <b>762.041</b> | 109.665        | 106.462        | 106.663 | 106.260        | P[5]  |
| V[40] | 781.855        | 90.255         | 87.051         | 87.253  | 86.849         | V[4]  |
| S[41] | 799.261        | 70.441         | 67.237         | 67.439  | 67.036         | S[3]  |
| E[42] | 825.070        | 53.035         | 49.831         | 50.033  | 49.629         | E[2]  |
| L[43] | 847.687        | 37.226         | 34.022         | 34.224  | 33.821         | L[1]  |

# sp | P43277 | H13\_MOUSE

[Acetyl]SETAPAAPAAPAPVEKTPVKKKAKKTGAAAGKRKASGPPVSEL

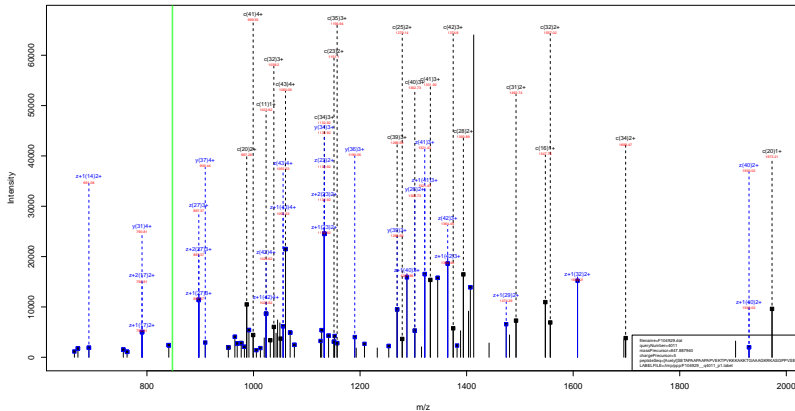

# sp | P43277 | H13\_MOUSE

[Acetyl]SETAPAAPAAPAVEKTPVKKKAKKTGAAAGKRKASGPPVSEL

- ▶ fragmentation table for charge state 1+
- ▶ specType=etd
- ▶ score=35.60
- ▶ F104929.dat
- ▶ query=q4011.p1
- ▶ precursor=847.887940
- ▶ chargePrecursor=5
- ▶ itol=0.8

| AA | c  | y               | z+1             | z+2            | z               | AA       |       |
|----|----|-----------------|-----------------|----------------|-----------------|----------|-------|
| S  | 1  | 147.076         | 4235.361        | 4218.360       | 0.000           | 4218.361 | S[43] |
| E  | 2  | 276.119         | 4190.345        | 4090.130       | 0.000           | 4089.310 | E[42] |
| T  | 3  | 377.167         | 3077.302        | 3961.294       | 0.000           | 3960.276 | T[41] |
| A  | 4  | 448.204         | 3676.255        | 3860.236       | 0.000           | 3859.228 | A[40] |
| F  | 5  | 545.257         | 3805.217        | 3789.199       | 0.000           | 3788.191 | F[39] |
| A  | 6  | 616.294         | 3708.165        | 3692.146       | 0.000           | 3691.138 | A[38] |
| A  | 7  | 667.331         | 3837.128        | 3621.109       | 0.000           | 3620.101 | A[37] |
| P  | 8  | 784.384         | 3560.090        | 3550.072       | 0.000           | 3549.064 | P[36] |
| A  | 9  | 895.421         | 3469.038        | 3451.019       | 0.000           | 3450.011 | A[35] |
| A  | 10 | 926.458         | 3398.001        | 3381.982       | 0.000           | 3380.974 | A[34] |
| P  | 11 | <b>1023.511</b> | 3326.963        | 3310.945       | 0.000           | 3309.937 | P[33] |
| A  | 12 | 1094.548        | 3229.911        | 3213.892       | 0.000           | 3212.884 | A[32] |
| P  | 13 | 1191.600        | 3158.874        | 3142.855       | 0.000           | 3141.847 | P[31] |
| V  | 14 | 1290.669        | 3081.821        | 3045.802       | 0.000           | 3044.794 | V[30] |
| E  | 15 | 1410.711        | 2962.752        | 2946.734       | 0.000           | 2945.726 | E[29] |
| K  | 16 | <b>1547.806</b> | 2833.710        | 2817.691       | 281.869         | 2816.683 | K[28] |
| V  | 17 | 1648.854        | 2705.615        | 2689.596       | 2690.604        | 2688.588 | V[27] |
| P  | 18 | 1745.907        | 2604.567        | 2588.548       | 2589.556        | 2587.541 | P[26] |
| V  | 19 | 1844.976        | 2507.514        | 2491.495       | 2492.504        | 2490.488 | V[25] |
| K  | 20 | <b>1973.070</b> | 2409.440        | 2393.421       | 2393.436        | 2391.413 | K[24] |
| K  | 21 | 2101.165        | 2280.351        | 2264.332       | 2265.340        | 2263.324 | K[23] |
| K  | 22 | 2229.260        | 2152.256        | 2136.237       | 2137.245        | 2135.230 | K[22] |
| A  | 23 | 2300.297        | 2024.161        | 2008.142       | 2009.150        | 2007.135 | A[21] |
| K  | 24 | 2428.392        | 1953.124        | 1937.105       | 1938.113        | 1936.097 | K[20] |
| K  | 25 | 2556.487        | 1825.029        | 1809.010       | 1810.018        | 1808.002 | K[19] |
| T  | 26 | 2657.536        | 1766.934        | 1680.915       | 1681.923        | 1679.906 | T[18] |
| G  | 27 | 2714.556        | 1595.880        | 1579.860       | 1580.875        | 1578.860 | G[17] |
| A  | 28 | 2785.593        | 1518.860        | 1522.840       | 1523.854        | 1521.838 | A[16] |
| A  | 29 | 2856.631        | 1467.828        | 1451.809       | 1452.817        | 1450.801 | A[15] |
| A  | 30 | 2927.668        | 1396.791        | 1380.772       | <b>1381.780</b> | 1379.764 | A[14] |
| G  | 31 | 2984.689        | 1325.754        | 1309.735       | 1310.743        | 1308.727 | G[13] |
| K  | 32 | 3112.784        | 1266.715        | 1250.713       | <b>1253.721</b> | 1251.705 | K[12] |
| R  | 33 | 3268.885        | <b>1140.637</b> | 1124.618       | <b>1125.626</b> | 1123.611 | R[11] |
| K  | 34 | 3396.980        | 984.530         | 968.517        | <b>969.525</b>  | 967.509  | K[10] |
| A  | 35 | 3468.017        | 856.441         | <b>840.422</b> | <b>841.430</b>  | 839.415  | A[0]  |
| S  | 36 | 3555.049        | 785.404         | 769.385        | 770.393         | 768.377  | S[0]  |
| G  | 37 | 3612.071        | 698.372         | 682.353        | 683.361         | 681.345  | G[0]  |
| P  | 38 | 3700.124        | 641.360         | 625.339        | 626.346         | 624.330  | P[0]  |
| P  | 39 | 3808.178        | 544.266         | 528.270        | 529.287         | 527.271  | P[0]  |
| V  | 40 | 3905.245        | 447.245         | 431.226        | 432.234         | 430.218  | V[0]  |
| S  | 41 | 3992.277        | 348.177         | 332.158        | 333.166         | 331.150  | S[0]  |
| E  | 42 | 4121.319        | 261.144         | 245.125        | 246.134         | 244.118  | E[0]  |
| L  | 43 | 4234.403        | 132.102         | 116.083        | 117.091         | 115.075  | L[0]  |

# sp | P43277 | H13\_MOUSE

[Acetyl]SETAPAAPAAPAVEKTPVKKKAKKTGAAAGKRKASGPPVSEL

- ▶ fragmentation table for charge state 2+
- ▶ specType=etd
- ▶ score=35.60
- ▶ F104929.dat
- ▶ query=q4011\_p1
- ▶ precursor=847.887940
- ▶ chargePrecursor=5
- ▶ itol=0.8

| AA | c  | y               | z+1             | z+2             | z               | AA              |       |
|----|----|-----------------|-----------------|-----------------|-----------------|-----------------|-------|
| S  | 1  | 74.042          | 2118.197        | 2110.188        | 0.504           | 2109.684        | E[43] |
| E  | 2  | 188.563         | 2051.676        | 2045.667        | 0.504           | 2045.163        | E[42] |
| T  | 3  | 189.087         | 1988.355        | 1981.145        | 0.504           | 1980.641        | F[41] |
| A  | 4  | 224.606         | 1918.631        | <b>1930.622</b> | 0.504           | <b>1930.118</b> | A[40] |
| F  | 5  | 273.132         | 1903.112        | 1895.103        | 0.504           | 1894.599        | F[39] |
| A  | 6  | 308.650         | 1834.586        | 1846.577        | 0.504           | 1846.073        | A[38] |
| A  | 7  | 344.169         | 1819.067        | 1811.058        | 0.504           | 1810.554        | A[37] |
| F  | 8  | 382.695         | 1783.549        | 1775.540        | 0.504           | 1775.036        | F[36] |
| A  | 9  | 428.214         | 1735.022        | 1727.013        | 0.504           | 1726.509        | A[35] |
| A  | 10 | 463.733         | 1699.504        | 1691.495        | 0.504           | 1690.991        | A[34] |
| F  | 11 | 512.259         | 1663.985        | 1655.976        | 0.504           | 1655.472        | F[33] |
| A  | 12 | 547.777         | 1615.459        | <b>1607.450</b> | 0.504           | 1606.946        | A[32] |
| F  | 13 | 586.304         | 1579.940        | 1571.931        | 0.504           | 1571.427        | F[31] |
| V  | 14 | 645.838         | 1538.424        | 1530.415        | 0.504           | 1529.911        | V[30] |
| E  | 15 | 710.359         | 1489.898        | <b>1473.870</b> | 0.504           | 1473.367        | E[29] |
| K  | 16 | 774.407         | 1441.369        | 1439.349        | 1409.853        | 1408.845        | K[28] |
| T  | 17 | 804.911         | 1383.311        | <b>1345.302</b> | <b>1345.806</b> | 1344.798        | T[27] |
| F  | 18 | 873.457         | <b>1302.787</b> | 1294.778        | 1295.262        | 1294.254        | F[26] |
| V  | 19 | 927.974         | <b>1254.261</b> | 1246.252        | 1246.756        | 1245.748        | V[25] |
| K  | 20 | <b>987.039</b>  | 1204.244        | 1196.237        | 1197.241        | 1196.233        | K[24] |
| K  | 21 | <b>1051.086</b> | <b>1140.679</b> | <b>1132.670</b> | <b>1133.174</b> | <b>1132.166</b> | K[23] |
| K  | 22 | 1115.134        | <b>1076.632</b> | <b>1068.622</b> | <b>1069.126</b> | <b>1068.118</b> | K[22] |
| A  | 23 | <b>1150.652</b> | <b>1012.584</b> | 1004.575        | <b>1005.079</b> | 1004.071        | A[21] |
| K  | 24 | 1214.700        | <b>977.066</b>  | <b>968.056</b>  | <b>968.560</b>  | 968.552         | K[20] |
| K  | 25 | <b>1278.747</b> | 913.018         | 905.009         | 905.513         | 904.505         | K[19] |
| T  | 26 | 1320.271        | 848.971         | <b>840.961</b>  | <b>841.465</b>  | <b>840.457</b>  | T[18] |
| G  | 27 | 1357.782        | 798.447         | <b>790.437</b>  | <b>790.941</b>  | 789.934         | G[17] |
| A  | 28 | <b>1393.300</b> | 769.916         | <b>761.927</b>  | <b>762.431</b>  | 761.423         | A[16] |
| A  | 29 | 1428.810        | 734.419         | 728.408         | 726.912         | 725.904         | A[15] |
| A  | 30 | 1454.327        | 699.899         | <b>690.890</b>  | <b>691.394</b>  | <b>690.386</b>  | A[14] |
| G  | 31 | <b>1492.848</b> | <b>663.380</b>  | 655.371         | 655.875         | 654.867         | G[13] |
| K  | 32 | <b>1556.896</b> | 634.870         | 628.859         | 627.364         | 626.356         | K[12] |
| R  | 33 | 1634.946        | 670.822         | 562.813         | 563.317         | 562.309         | R[11] |
| K  | 34 | <b>1698.994</b> | 692.772         | 484.762         | 485.266         | 484.258         | K[10] |
| A  | 35 | 1734.512        | 428.724         | 420.715         | 421.219         | 420.211         | A[9]  |
| S  | 36 | 1778.628        | 393.206         | 385.197         | 385.701         | 384.693         | S[8]  |
| G  | 37 | 1895.519        | 349.689         | 341.680         | 342.184         | 341.176         | G[7]  |
| F  | 38 | 1955.065        | 321.179         | 313.170         | 313.673         | 312.666         | F[6]  |
| F  | 39 | 1983.592        | 272.652         | 264.643         | 265.147         | 264.139         | F[5]  |
| V  | 40 | 1953.126        | 254.126         | 218.117         | 218.621         | 215.613         | V[4]  |
| S  | 41 | 1986.642        | 174.592         | 166.583         | 167.086         | 166.078         | S[3]  |
| E  | 42 | 2003.683        | 113.076         | 123.987         | 124.491         | 123.483         | E[2]  |
| L  | 43 | 2117.705        | 66.555          | 58.545          | 59.049          | 58.041          | L[1]  |

# sp | P43277 | H13\_MOUSE

[Acetyl]SETAPAAPAAPAVEKTPVKKKAKKTGAAAGKRKASGPPVSEL

- ▶ fragmentation table for charge state 3+
- ▶ specType=etd
- ▶ score=35.60
- ▶ F104929.dat
- ▶ query=q4011\_p1
- ▶ precursor=847.887940
- ▶ chargePrecursor=5
- ▶ itol=0.8

| AA    | c               | y               | z+1             | z+2            | z               | AA    |
|-------|-----------------|-----------------|-----------------|----------------|-----------------|-------|
| S[1]  | 60.697          | 1412.461        | <b>1407.128</b> | 0.672          | <b>1406.702</b> | S[42] |
| E[2]  | 62.711          | 1309.451        | <b>1364.114</b> | 0.672          | <b>1363.776</b> | E[42] |
| T[3]  | 126.594         | 1326.430        | <b>1321.099</b> | 0.672          | <b>1320.763</b> | T[41] |
| A[4]  | 150.073         | 1292.756        | <b>1287.417</b> | 0.672          | 1287.081        | A[40] |
| F[5]  | 162.424         | <b>1269.077</b> | 1263.738        | 0.672          | 1263.402        | F[39] |
| A[6]  | 206.103         | 1236.726        | 1231.387        | 0.672          | 1231.051        | A[38] |
| A[7]  | 229.762         | 1213.041        | <b>1207.708</b> | 0.672          | 1207.372        | A[37] |
| P[8]  | 262.133         | <b>1189.368</b> | 1184.029        | 0.672          | 1183.693        | P[36] |
| A[9]  | 285.812         | <b>1157.017</b> | <b>1151.678</b> | 0.672          | <b>1151.342</b> | A[35] |
| A[10] | 309.491         | <b>1133.338</b> | <b>1127.999</b> | 0.672          | <b>1127.663</b> | A[34] |
| P[11] | 341.842         | 1109.659        | 1104.320        | 0.672          | 1103.984        | P[33] |
| A[12] | 365.521         | <b>1077.308</b> | 1071.969        | 0.672          | 1071.633        | A[32] |
| P[13] | 397.872         | 1053.620        | 1048.280        | 0.672          | 1047.954        | P[31] |
| V[14] | 430.224         | 1031.273        | 1015.639        | 0.672          | 1015.303        | V[30] |
| E[15] | 473.909         | 988.250         | <b>982.916</b>  | 0.672          | <b>982.580</b>  | E[29] |
| K[16] | 516.607         | 945.241         | 939.902         | 940.238        | 939.566         | K[28] |
| T[17] | 550.290         | 902.547         | <b>897.204</b>  | <b>897.539</b> | <b>896.868</b>  | T[27] |
| P[18] | 582.640         | 868.861         | 863.521         | 863.857        | 863.185         | P[26] |
| V[19] | 615.663         | 836.510         | 831.170         | 831.506        | 830.834         | V[25] |
| K[20] | 658.302         | 803.467         | 798.147         | 798.483        | 797.811         | K[24] |
| K[21] | 701.000         | 760.789         | <b>755.449</b>  | <b>755.785</b> | <b>755.113</b>  | K[23] |
| K[22] | 743.758         | 718.000         | 712.751         | 713.087        | 712.415         | K[22] |
| A[23] | 767.437         | 675.392         | <b>670.052</b>  | <b>670.388</b> | <b>669.716</b>  | A[21] |
| K[24] | 810.136         | 651.713         | 646.373         | 646.709        | 646.037         | K[20] |
| K[25] | 852.834         | 609.015         | 603.675         | 604.011        | 603.339         | K[19] |
| T[26] | 896.516         | 566.316         | 560.977         | 561.313        | 560.641         | T[18] |
| G[27] | 905.524         | 533.634         | 527.294         | 527.630        | 526.958         | G[17] |
| A[28] | 929.203         | 513.626         | 508.287         | 508.623        | 507.951         | A[16] |
| A[29] | <b>952.882</b>  | 469.947         | 464.608         | 464.944        | 464.272         | A[15] |
| A[30] | <b>976.561</b>  | 466.260         | 460.920         | 461.255        | 460.591         | A[14] |
| G[31] | 965.568         | 442.580         | 437.250         | 437.586        | 436.914         | G[13] |
| K[32] | <b>1038.266</b> | 423.587         | 418.243         | 418.579        | 417.907         | K[12] |
| R[33] | 1050.300        | 380.884         | 375.544         | 375.880        | 375.208         | R[11] |
| K[34] | <b>1132.998</b> | 328.850         | 323.511         | 323.847        | 323.175         | K[10] |
| A[35] | <b>1156.677</b> | 286.157         | 280.812         | 281.148        | 280.476         | A[0]  |
| S[36] | 1185.688        | 262.473         | 257.133         | 257.469        | 256.797         | S[8]  |
| G[37] | 1204.695        | 213.462         | 208.123         | 208.459        | 207.787         | G[7]  |
| P[38] | 1237.046        | 214.453         | 209.115         | 209.451        | 208.779         | P[6]  |
| P[39] | <b>1269.397</b> | 182.104         | 176.765         | 177.100        | 176.425         | P[5]  |
| V[40] | <b>1302.420</b> | 149.753         | 144.414         | 144.750        | 144.078         | V[4]  |
| S[41] | <b>1331.430</b> | 116.730         | 111.391         | 111.727        | 111.055         | S[3]  |
| E[42] | <b>1374.445</b> | 87.720          | 82.380          | 82.716         | 82.044          | E[2]  |
| L[43] | 1412.139        | 44.705          | 39.366          | 39.702         | 39.030          | L[1]  |

# sp | P43277 | H13\_MOUSE

[Acetyl]SETAPAAPAAPAPVEKTPVKKKAKKTGAAAGKRKASGPPVSEL

- ▶ fragmentation table for charge state 4+
- ▶ specType=etd
- ▶ score=35.60
- ▶ F104929.dat
- ▶ query=q4011.p1
- ▶ precursor=847.887940
- ▶ chargePrecursor=5
- ▶ itol=0.8

| AA   | c               | y               | z+1             | z+2     | z               | AA   |
|------|-----------------|-----------------|-----------------|---------|-----------------|------|
| S 1  | 37.925          | <b>1059.602</b> | <b>1055.598</b> | 0.755   | <b>1055.346</b> | S 42 |
| E 2  | 69.785          | 1027.342        | <b>1023.337</b> | 0.755   | <b>1023.085</b> | E 42 |
| T 3  | 95.047          | 995.081         | <b>991.076</b>  | 0.755   | <b>990.824</b>  | T 41 |
| A 4  | 112.806         | <b>969.819</b>  | <b>965.814</b>  | 0.755   | <b>965.562</b>  | A 40 |
| P 5  | 127.070         | <b>952.060</b>  | 948.055         | 0.755   | 947.803         | P 39 |
| A 6  | 154.820         | 927.797         | 923.792         | 0.755   | 923.540         | A 38 |
| A 7  | 172.588         | <b>910.837</b>  | 906.833         | 0.755   | 906.581         | A 37 |
| P 8  | 190.351         | 890.270         | 886.273         | 0.755   | 886.021         | P 36 |
| A 9  | 214.611         | 868.015         | 864.010         | 0.755   | 863.758         | A 35 |
| A 10 | 232.370         | 850.250         | 846.251         | 0.755   | 845.999         | A 34 |
| P 11 | 256.633         | 832.490         | 828.492         | 0.755   | 828.240         | P 33 |
| A 12 | 274.392         | 808.233         | 804.238         | 0.755   | 803.976         | A 32 |
| P 13 | 298.656         | <b>790.474</b>  | 786.469         | 0.755   | 786.217         | P 31 |
| V 14 | 323.423         | 766.211         | <b>762.206</b>  | 0.755   | <b>761.954</b>  | V 30 |
| E 15 | 355.683         | 741.444         | 737.439         | 0.755   | 737.187         | E 29 |
| K 16 | 387.707         | 709.183         | 705.178         | 705.430 | 704.926         | K 28 |
| T 17 | 412.969         | 677.159         | 673.154         | 673.406 | 672.903         | T 27 |
| P 18 | 437.232         | 651.897         | 647.893         | 648.145 | 647.641         | P 26 |
| V 19 | 461.999         | 627.634         | 623.629         | 623.881 | 623.377         | V 25 |
| K 20 | 484.423         | 602.967         | 598.962         | 599.114 | 598.611         | K 24 |
| K 21 | 526.047         | 570.843         | 566.839         | 567.090 | 566.587         | K 23 |
| K 22 | 558.070         | 538.819         | 534.815         | 535.067 | 534.563         | K 22 |
| A 23 | 578.830         | 506.796         | 502.791         | 503.043 | 502.539         | A 21 |
| K 24 | 607.854         | 489.030         | 485.032         | 485.284 | 484.780         | K 20 |
| K 25 | 639.877         | 457.013         | 453.008         | 453.260 | 452.756         | K 19 |
| T 26 | 665.139         | 434.989         | 430.984         | 431.236 | 430.732         | T 18 |
| G 27 | 679.395         | 395.727         | 395.727         | 395.974 | 395.470         | G 17 |
| A 28 | 697.154         | 385.472         | 381.467         | 381.719 | 381.215         | A 16 |
| A 29 | 714.913         | 367.712         | 363.708         | 363.960 | 363.456         | A 15 |
| A 30 | 732.672         | 349.953         | 345.948         | 346.200 | 345.696         | A 14 |
| G 31 | 746.928         | 332.194         | 328.189         | 328.441 | 327.937         | G 13 |
| K 32 | 778.951         | 317.698         | 313.694         | 313.946 | 313.442         | K 12 |
| K 33 | 817.974         | 285.915         | 281.910         | 282.162 | 281.658         | K 11 |
| K 34 | 850.001         | 246.889         | 242.885         | 243.137 | 242.633         | K 10 |
| A 35 | 867.760         | 214.899         | 210.891         | 211.113 | 210.609         | A 9  |
| S 36 | 889.518         | 197.100         | 193.102         | 193.354 | 192.850         | S 8  |
| G 37 | 903.773         | 175.348         | 171.344         | 171.596 | 171.092         | G 7  |
| P 38 | 924.626         | 161.093         | 157.088         | 157.340 | 156.836         | P 6  |
| P 39 | <b>952.300</b>  | 139.839         | 132.826         | 133.077 | 132.573         | P 5  |
| V 40 | <b>977.067</b>  | 112.507         | 108.502         | 108.814 | 108.310         | V 4  |
| S 41 | <b>998.825</b>  | 87.800          | 83.795          | 84.047  | 83.543          | S 3  |
| E 42 | <b>1031.085</b> | 66.042          | 62.037          | 62.289  | 61.785          | E 2  |
| L 43 | <b>1059.356</b> | 33.781          | 29.776          | 30.028  | 29.524          | L 1  |





# sp | P43277 | H13\_MOUSE

[Acetyl]SETAPAAPAAPAVEKTPVKKKAKKTGAAAGKRKASGPPVSEL

- ▶ fragmentation table for charge state 1+
- ▶ specType=etd
- ▶ score=36.17
- ▶ F104929.dat
- ▶ query=q4012.p1
- ▶ precursor=1059.608400
- ▶ chargePrecursor=4
- ▶ itol=0.8

| AA | c  | y        | z+1      | z+2             | z               | AA              |       |
|----|----|----------|----------|-----------------|-----------------|-----------------|-------|
| S  | 1  | 147.070  | 4235.397 | 4219.386        | 0.000           | 4218.361        | S[43] |
| E  | 2  | 276.110  | 4106.345 | 4090.326        | 0.000           | 4089.310        | E[42] |
| T  | 3  | 377.167  | 3977.302 | 3961.284        | 0.000           | 3960.276        | T[41] |
| A  | 4  | 448.204  | 3876.255 | 3860.236        | 0.000           | 3859.228        | A[40] |
| P  | 5  | 545.257  | 3805.217 | 3789.199        | 0.000           | 3788.191        | P[39] |
| A  | 6  | 616.294  | 3708.165 | 3692.146        | 0.000           | 3691.139        | A[38] |
| A  | 7  | 687.331  | 3617.128 | 3601.109        | 0.000           | 3600.101        | A[37] |
| P  | 8  | 784.384  | 3566.093 | 3550.072        | 0.000           | 3549.064        | P[36] |
| A  | 9  | 855.421  | 3469.038 | 3453.019        | 0.000           | 3452.011        | A[35] |
| A  | 10 | 926.458  | 3398.001 | 3381.982        | 0.000           | 3380.974        | A[34] |
| P  | 11 | 1023.511 | 3328.963 | 3312.945        | 0.000           | 3309.937        | P[33] |
| A  | 12 | 1094.548 | 3229.911 | 3213.892        | 0.000           | 3212.884        | A[32] |
| P  | 13 | 1190.600 | 3158.874 | 3142.855        | 0.000           | 3141.847        | P[31] |
| V  | 14 | 1260.669 | 3061.821 | 3045.802        | 0.000           | 3044.794        | V[30] |
| E  | 15 | 1419.711 | 2962.782 | 2946.764        | 0.000           | 2945.756        | E[29] |
| K  | 16 | 1547.806 | 2833.710 | 2817.691        | 2818.699        | 2816.683        | K[28] |
| T  | 17 | 1648.854 | 2705.615 | 2689.596        | 2690.604        | 2688.588        | T[27] |
| P  | 18 | 1745.907 | 2604.567 | 2588.548        | 2589.556        | 2587.541        | P[26] |
| V  | 19 | 1844.075 | 2507.514 | 2491.495        | 2492.504        | 2490.488        | V[25] |
| K  | 20 | 1973.070 | 2408.448 | 2392.427        | 2393.435        | 2391.421        | K[24] |
| K  | 21 | 2101.185 | 2280.351 | 2264.332        | 2265.340        | 2263.324        | K[23] |
| K  | 22 | 2229.280 | 2152.256 | 2136.237        | 2137.245        | 2135.230        | K[22] |
| A  | 23 | 2300.297 | 2034.161 | 2008.142        | 2009.150        | 2007.135        | A[21] |
| K  | 24 | 2428.392 | 1953.124 | 1937.105        | <b>1938.113</b> | 1936.097        | K[20] |
| K  | 25 | 2556.487 | 1825.029 | 1809.010        | 1810.018        | 1808.002        | K[19] |
| T  | 26 | 2675.535 | 1696.934 | 1680.913        | 1681.922        | 1679.906        | T[18] |
| G  | 27 | 2714.556 | 1595.888 | <b>1579.868</b> | 1580.875        | <b>1578.860</b> | G[17] |
| A  | 28 | 2795.593 | 1538.805 | 1522.846        | 1523.854        | 1521.838        | A[16] |
| A  | 29 | 2856.631 | 1467.828 | 1451.809        | <b>1452.817</b> | 1450.801        | A[15] |
| A  | 30 | 2927.668 | 1396.791 | 1380.772        | 1381.780        | 1379.764        | A[14] |
| G  | 31 | 2984.689 | 1325.754 | 1309.735        | 1310.743        | 1308.727        | G[13] |
| R  | 32 | 3112.784 | 1208.732 | 1252.711        | 1253.721        | 1251.705        | R[12] |
| R  | 33 | 3268.885 | 1140.637 | 1124.618        | <b>1125.626</b> | 1123.611        | R[11] |
| K  | 34 | 3396.980 | 984.536  | 968.517         | 969.525         | 967.509         | K[10] |
| A  | 35 | 3468.017 | 856.441  | 840.422         | 841.430         | 839.415         | A[9]  |
| S  | 36 | 3555.049 | 785.404  | 769.385         | 770.393         | 768.377         | S[8]  |
| G  | 37 | 3612.071 | 698.372  | 682.353         | 683.361         | 681.345         | G[7]  |
| S  | 38 | 3709.124 | 647.356  | 625.337         | 626.345         | 624.329         | S[6]  |
| P  | 39 | 3805.178 | 544.298  | 528.279         | 529.287         | 527.271         | P[5]  |
| V  | 40 | 3905.245 | 447.245  | 431.226         | 432.234         | 430.218         | V[4]  |
| S  | 41 | 3992.277 | 348.177  | 332.158         | 333.166         | 331.150         | S[3]  |
| E  | 42 | 4121.319 | 261.144  | 245.125         | 246.134         | 244.118         | E[2]  |
| L  | 43 | 4234.403 | 132.102  | 116.083         | 117.091         | 115.075         | L[1]  |

# sp | P43277 | H13\_MOUSE

[Acetyl]SETAPAAPAAPAVEKTPVKKKAKKTGAAAGKRKASGPPVSEL

- ▶ fragmentation table for charge state 2+
- ▶ specType=etd
- ▶ score=36.17
- ▶ F104929.dat
- ▶ query=q4012.p1
- ▶ precursor=1059.608400
- ▶ chargePrecursor=4
- ▶ itol=0.8

| AA | c  | y               | z+1             | z+2             | z               | AA              |       |
|----|----|-----------------|-----------------|-----------------|-----------------|-----------------|-------|
| S  | 1  | 74.042          | 2118.197        | 2110.188        | 0.504           | 2109.686        | S[43] |
| E  | 2  | 138.563         | 1933.070        | 2045.667        | 0.504           | 2045.163        | E[42] |
| T  | 3  | 189.087         | <b>1909.155</b> | 1981.143        | 0.504           | 1980.541        | T[41] |
| A  | 4  | 224.606         | <b>1938.631</b> | 1930.622        | 0.504           | 1930.118        | A[40] |
| F  | 5  | 273.132         | <b>1903.112</b> | 1895.103        | 0.504           | 1894.599        | F[39] |
| A  | 6  | 308.650         | <b>1854.586</b> | 1846.577        | 0.504           | 1846.073        | A[38] |
| A  | 7  | 344.169         | <b>1819.067</b> | <b>1811.058</b> | 0.504           | <b>1810.554</b> | A[37] |
| F  | 8  | 382.695         | <b>1783.549</b> | 1775.540        | 0.504           | 1775.036        | F[36] |
| A  | 9  | 420.214         | 1739.022        | 1727.013        | 0.504           | 1726.509        | A[35] |
| A  | 10 | 463.733         | 1699.504        | 1691.495        | 0.504           | 1690.991        | A[34] |
| F  | 11 | 512.250         | 1663.985        | 1655.976        | 0.504           | 1655.472        | F[33] |
| A  | 12 | 547.777         | 1615.469        | <b>1607.450</b> | 0.504           | <b>1606.946</b> | A[32] |
| F  | 13 | 586.304         | <b>1579.940</b> | 1571.931        | 0.504           | 1571.427        | F[31] |
| V  | 14 | 645.830         | 1534.424        | 1526.415        | 0.504           | 1525.911        | V[30] |
| E  | 15 | 710.359         | 1481.880        | <b>1473.870</b> | 0.504           | 1473.367        | E[29] |
| K  | 16 | 774.407         | 1417.359        | 1409.349        | 1409.853        | 1408.848        | K[28] |
| T  | 17 | 824.911         | 1353.311        | <b>1345.302</b> | <b>1345.806</b> | 1344.798        | T[27] |
| F  | 18 | 873.457         | <b>1302.787</b> | 1294.778        | 1295.282        | 1294.271        | F[26] |
| V  | 19 | 922.994         | 1254.261        | <b>1246.251</b> | <b>1246.755</b> | <b>1245.748</b> | V[25] |
| K  | 20 | 997.039         | 1204.227        | 1195.217        | 1195.721        | 1194.713        | K[24] |
| K  | 21 | 1051.086        | 1140.679        | <b>1132.670</b> | <b>1133.174</b> | 1132.166        | K[23] |
| K  | 22 | 1115.134        | 1078.632        | 1068.622        | 1069.126        | 1068.118        | K[22] |
| A  | 23 | 1180.652        | 1012.584        | 1004.575        | 1005.079        | 1004.071        | A[21] |
| K  | 24 | <b>1214.700</b> | 977.066         | 969.056         | 969.560         | 968.552         | K[20] |
| K  | 25 | 1278.747        | 913.018         | 905.009         | 905.513         | 904.505         | K[19] |
| T  | 26 | 1320.271        | 848.971         | 840.961         | 841.465         | 840.457         | T[18] |
| G  | 27 | 1357.782        | 798.447         | 790.437         | 790.941         | 789.934         | G[17] |
| A  | 28 | <b>1393.300</b> | 769.936         | 761.927         | 762.431         | 761.423         | A[16] |
| A  | 29 | 1428.819        | 734.419         | 726.408         | 726.912         | 725.904         | A[15] |
| A  | 30 | 1454.337        | 698.899         | 690.889         | 691.394         | 690.386         | A[14] |
| C  | 31 | 1492.860        | 663.380         | 655.371         | 655.875         | 654.867         | C[13] |
| K  | 32 | <b>1556.896</b> | 634.870         | 626.860         | 627.364         | 626.356         | K[12] |
| R  | 33 | <b>1634.946</b> | 610.822         | 602.813         | 603.317         | 602.309         | R[11] |
| K  | 34 | 1698.994        | 492.772         | 484.762         | 485.266         | 484.258         | K[10] |
| A  | 35 | 1734.512        | 428.724         | 420.715         | 421.219         | 420.211         | A[9]  |
| S  | 36 | 1778.028        | 363.206         | 355.197         | 355.701         | 354.693         | S[8]  |
| G  | 37 | 1809.539        | 349.690         | 341.680         | 342.184         | 341.177         | G[7]  |
| F  | 38 | <b>1855.065</b> | 321.179         | 313.170         | 313.673         | 312.666         | F[6]  |
| F  | 39 | <b>1903.592</b> | 272.652         | 264.643         | 265.147         | 264.139         | F[5]  |
| V  | 40 | 1953.126        | 254.129         | 246.119         | 246.623         | 245.615         | V[4]  |
| S  | 41 | 1986.642        | 174.592         | 166.583         | 167.087         | 166.079         | S[3]  |
| L  | 42 | 2003.153        | 131.076         | 123.067         | 123.570         | 122.562         | L[2]  |
| L  | 43 | 2117.705        | 66.555          | 58.545          | 59.049          | 58.041          | L[1]  |

# sp | P43277 | H13\_MOUSE

[Acetyl]SETAPAAPAAPAPVEKTPVKKKAKKTGAAAGKRKASGPPVSEL

- ▶ fragmentation table for charge state 3+
- ▶ specType=etd
- ▶ score=36.17
- ▶ F104929.dat
- ▶ query=q4012.p1
- ▶ precursor=1059.608400
- ▶ chargePrecursor=4
- ▶ itol=0.8

| AA  | c               | y               | z+1             | z+2     | z               | AA    |
|-----|-----------------|-----------------|-----------------|---------|-----------------|-------|
| S1  | 49.607          | <b>1412.467</b> | <b>1407.128</b> | 0.672   | <b>1406.792</b> | S[42] |
| E2  | 92.711          | 1309.451        | 1304.114        | 0.672   | 1303.778        | E[42] |
| T3  | 126.994         | 1326.439        | <b>1321.099</b> | 0.672   | <b>1320.763</b> | T[41] |
| A4  | 150.073         | 1202.796        | <b>1287.417</b> | 0.672   | 1287.081        | A[40] |
| P5  | 182.424         | <b>1269.077</b> | 1263.738        | 0.672   | 1263.402        | P[39] |
| A6  | 206.103         | 1236.726        | 1231.387        | 0.672   | 1231.051        | A[38] |
| A7  | 229.782         | 1213.047        | 1207.708        | 0.672   | 1207.372        | A[37] |
| P8  | 262.133         | 1199.369        | 1194.029        | 0.672   | 1193.693        | P[36] |
| A9  | 285.812         | 1157.017        | 1151.678        | 0.672   | 1151.342        | A[35] |
| A10 | 309.491         | <b>1133.338</b> | <b>1127.999</b> | 0.672   | 1127.663        | A[34] |
| P11 | 341.842         | 1109.659        | 1104.320        | 0.672   | 1103.984        | P[33] |
| A12 | 365.521         | 1077.308        | 1071.969        | 0.672   | 1071.633        | A[32] |
| P13 | 389.212         | 1053.629        | 1048.290        | 0.672   | 1047.954        | P[31] |
| V14 | 430.894         | 1021.279        | 1015.939        | 0.672   | 1015.603        | V[30] |
| E15 | 473.909         | 988.256         | 982.916         | 0.672   | 982.580         | E[29] |
| K16 | 516.607         | 945.241         | 939.902         | 940.238 | 939.566         | K[28] |
| T17 | 550.290         | 902.543         | 897.204         | 897.539 | 896.803         | T[27] |
| P18 | 582.640         | 868.861         | 863.521         | 863.857 | 863.189         | P[26] |
| V19 | 615.663         | 836.510         | 831.170         | 831.506 | 830.834         | V[25] |
| K20 | 658.302         | 803.487         | 798.147         | 798.483 | 797.811         | K[24] |
| K21 | 701.000         | 760.789         | 755.449         | 755.785 | 755.113         | K[23] |
| K22 | 743.798         | 718.090         | 712.751         | 713.087 | 712.415         | K[22] |
| A23 | 787.437         | 675.392         | 670.052         | 670.388 | 669.716         | A[21] |
| K24 | 810.136         | 651.713         | 646.373         | 646.709 | 646.037         | K[20] |
| K25 | 852.834         | 609.015         | 603.675         | 604.011 | 603.339         | K[19] |
| T26 | 895.516         | 566.319         | 560.979         | 561.315 | 560.643         | T[18] |
| G27 | 905.524         | 532.634         | 527.294         | 527.630 | 526.958         | G[17] |
| A28 | 929.203         | 513.266         | 508.287         | 508.623 | 507.951         | A[16] |
| A29 | 952.882         | 489.947         | 484.608         | 484.944 | 484.272         | A[15] |
| A30 | 976.561         | 466.268         | 460.929         | 461.265 | 460.593         | A[14] |
| G31 | 995.568         | 442.589         | 437.250         | 437.586 | 436.914         | G[13] |
| K32 | 1038.266        | 423.882         | 418.243         | 418.579 | 417.907         | K[12] |
| K33 | 1099.308        | 389.984         | 384.344         | 384.680 | 384.008         | K[11] |
| K34 | <b>1132.998</b> | 328.850         | 323.511         | 323.847 | 323.175         | K[10] |
| A35 | 1156.077        | 288.152         | 280.812         | 281.148 | 280.476         | A[9]  |
| S36 | 1185.688        | 262.473         | 257.133         | 257.469 | 256.797         | S[8]  |
| G37 | 1204.695        | 233.462         | 228.123         | 228.459 | 227.787         | G[7]  |
| P38 | 1237.646        | 214.455         | 208.115         | 208.451 | 207.779         | P[6]  |
| P39 | <b>1269.297</b> | 182.104         | 176.765         | 177.101 | 176.429         | P[5]  |
| V40 | <b>1302.420</b> | 149.753         | 144.414         | 144.750 | 144.078         | V[4]  |
| S41 | <b>1331.430</b> | 116.739         | 111.391         | 111.727 | 111.055         | S[3]  |
| E42 | <b>1374.445</b> | 87.720          | 82.380          | 82.716  | 82.044          | E[2]  |
| L43 | 1412.139        | 44.705          | 39.366          | 39.702  | 39.030          | L[1]  |



# sp | P43276 | H15\_MOUSE

[Acetyl]SETAPAETAAPAPVEKSPAKKKTTKKAGAAKRKATGPPVSEL

- ▶ fragmentation table for charge state 1+
- ▶ specType=etd
- ▶ score=64.76
- ▶ F104929.dat
- ▶ query=q4014\_p1
- ▶ precursor=849.278800
- ▶ chargePrecursor=5
- ▶ itol=0.8

| AA | c  | y               | z+1             | z+2             | z               | AA       |       |
|----|----|-----------------|-----------------|-----------------|-----------------|----------|-------|
| S  | 1  | 147.076         | 4242.946        | 4226.537        | 0.000           | 4225.319 | S[42] |
| E  | 2  | 276.119         | 4113.303        | 4097.284        | 0.000           | 4096.270 | E[41] |
| L  | 3  | 377.167         | 3984.260        | 3968.242        | 0.000           | 3967.234 | L[40] |
| A  | 4  | 449.204         | 3863.211        | 3847.194        | 0.000           | 3846.186 | A[39] |
| P  | 5  | 545.257         | 3812.170        | 3796.157        | 0.000           | 3795.149 | P[38] |
| A  | 6  | 616.294         | 3715.123        | 3699.104        | 0.000           | 3698.096 | A[37] |
| E  | 7  | 745.336         | 3644.088        | 3628.067        | 0.000           | 3627.059 | E[36] |
| T  | 8  | 846.384         | 3515.043        | 3499.024        | 0.000           | 3498.017 | T[35] |
| A  | 9  | 917.421         | 3413.995        | 3397.977        | 0.000           | 3396.969 | A[34] |
| A  | 10 | 988.458         | 3342.958        | 3326.940        | 0.000           | 3325.932 | A[33] |
| P  | 11 | 1085.511        | 3271.921        | 3255.903        | 0.000           | 3254.895 | P[32] |
| A  | 12 | 1156.548        | 3174.888        | 3158.850        | 0.000           | 3157.842 | A[31] |
| P  | 13 | 1253.601        | 3103.831        | 3087.813        | 0.000           | 3086.805 | P[30] |
| V  | 14 | 1352.669        | 3006.779        | 2990.760        | 0.000           | 2989.752 | V[29] |
| E  | 15 | 1451.722        | 2907.710        | 2891.691        | 0.000           | 2890.684 | E[28] |
| R  | 16 | <b>1609.807</b> | 2778.666        | 2762.649        | 0.000           | 2761.641 | R[27] |
| S  | 17 | 1698.839        | 2690.573        | 2674.554        | 20.35           | 2673.546 | S[26] |
| P  | 18 | <b>1793.892</b> | 2563.541        | 2547.522        | 2548.530        | 2546.514 | P[25] |
| A  | 19 | 1864.929        | 2466.488        | 2450.469        | 2451.477        | 2449.461 | A[24] |
| R  | 20 | <b>1993.024</b> | 2395.451        | 2379.432        | 2380.440        | 2378.424 | R[23] |
| R  | 21 | 2121.119        | 2287.366        | 2271.347        | 2282.345        | 2280.329 | R[22] |
| R  | 22 | 2269.214        | 2139.261        | 2123.242        | 2124.250        | 2122.234 | R[21] |
| T  | 23 | 2350.261        | 2031.166        | 1995.147        | <b>1996.155</b> | 1994.139 | T[20] |
| T  | 24 | 2451.309        | 1910.118        | 1894.099        | 1895.107        | 1893.092 | T[19] |
| R  | 25 | 2579.404        | 1809.070        | 1793.052        | <b>1794.060</b> | 1792.044 | R[18] |
| R  | 26 | 2707.499        | 1688.020        | 1664.957        | 1665.965        | 1663.949 | R[17] |
| A  | 27 | 2778.536        | <b>1552.861</b> | 1536.862        | 1537.870        | 1535.854 | A[16] |
| A  | 28 | 2838.557        | 1441.841        | 1405.825        | 1406.833        | 1404.817 | A[15] |
| A  | 29 | 2906.595        | 1424.822        | <b>1408.803</b> | <b>1409.811</b> | 1407.795 | A[14] |
| A  | 30 | 2977.632        | <b>1353.785</b> | 1337.766        | 1338.774        | 1336.758 | A[13] |
| R  | 31 | 3105.727        | 1282.748        | 1266.729        | 1267.737        | 1265.721 | R[12] |
| R  | 32 | 3261.828        | <b>1154.653</b> | <b>1138.634</b> | <b>1139.642</b> | 1137.626 | R[11] |
| R  | 33 | 3389.923        | <b>998.552</b>  | <b>982.533</b>  | 983.541         | 981.525  | R[10] |
| A  | 34 | 3460.960        | 870.457         | 854.438         | 855.446         | 853.430  | A[9]  |
| T  | 35 | 3562.008        | 799.420         | 783.401         | 784.409         | 782.393  | T[8]  |
| G  | 36 | 3616.029        | 698.372         | 682.353         | 683.361         | 681.345  | G[7]  |
| P  | 37 | 3718.082        | 641.350         | 625.332         | 626.340         | 624.324  | P[6]  |
| P  | 38 | 3813.135        | 544.298         | 528.279         | 529.287         | 527.271  | P[5]  |
| V  | 39 | 3912.203        | 447.245         | 431.226         | 432.234         | 430.218  | V[4]  |
| S  | 40 | 3999.235        | 348.177         | 332.158         | 333.166         | 331.150  | S[3]  |
| E  | 41 | 4128.278        | 261.144         | 245.126         | 246.134         | 244.118  | E[2]  |
| L  | 42 | 4241.302        | 132.100         | 116.083         | 117.091         | 115.075  | L[1]  |

# sp | P43276 | H15\_MOUSE

[Acetyl]SETAPAETAAPAPVEKSPAKKKTTKKAGAAKRKATGPPVSEL

- ▶ fragmentation table for charge state 2+
- ▶ specType=etd
- ▶ score=64.76
- ▶ F104929.dat
- ▶ query=q4014\_p1
- ▶ precursor=849.278800
- ▶ chargePrecursor=5
- ▶ itol=0.8

| AA | c  | y               | z+1             | z+2             | z               | AA              |       |
|----|----|-----------------|-----------------|-----------------|-----------------|-----------------|-------|
| S  | 1  | 74.042          | 2121.676        | 2113.667        | 0.504           | 2113.163        | S(42) |
| E  | 2  | 138.563         | 2057.155        | 2049.146        | 0.504           | 2048.642        | E(41) |
| T  | 3  | 189.087         | <b>1992.634</b> | 1984.624        | 0.504           | 1984.121        | T(40) |
| A  | 4  | 224.606         | 1942.110        | 1934.101        | 0.504           | 1933.596        | A(39) |
| P  | 5  | 293.132         | 1896.591        | 1888.582        | 0.504           | 1888.078        | P(38) |
| A  | 6  | 358.650         | 1850.065        | 1842.056        | 0.504           | 1841.552        | A(37) |
| E  | 7  | 373.172         | 1822.547        | 1814.537        | 0.504           | 1814.033        | E(36) |
| T  | 8  | 423.696         | 1778.025        | 1770.016        | 0.504           | 1769.512        | T(35) |
| A  | 9  | 459.214         | 1707.501        | 1699.492        | 0.504           | 1698.988        | A(34) |
| A  | 10 | 494.733         | 1671.983        | 1663.973        | 0.504           | 1663.470        | A(33) |
| P  | 11 | 543.259         | 1626.464        | 1618.455        | 0.504           | 1617.951        | P(32) |
| A  | 12 | 578.778         | 1587.938        | <b>1579.929</b> | 0.504           | 1579.425        | A(31) |
| P  | 13 | 607.304         | 1552.419        | 1544.410        | 0.504           | 1543.906        | P(30) |
| V  | 14 | 676.830         | 1503.893        | 1495.884        | 0.504           | 1495.380        | V(29) |
| E  | 15 | 741.360         | <b>1454.359</b> | 1446.349        | 0.504           | 1445.845        | E(28) |
| T  | 16 | 805.887         | 1399.837        | <b>1391.828</b> | 0.504           | 1391.324        | T(27) |
| S  | 17 | 848.923         | 1325.360        | <b>1317.781</b> | <b>1318.285</b> | 1311.277        | S(26) |
| P  | 18 | <b>897.449</b>  | 1282.274        | 1274.265        | <b>1274.768</b> | 1273.761        | P(25) |
| A  | 19 | 932.968         | <b>1233.748</b> | 1225.739        | 1226.242        | 1225.234        | A(24) |
| K  | 20 | <b>997.015</b>  | 1188.229        | <b>1190.220</b> | <b>1190.724</b> | 1189.716        | K(23) |
| K  | 21 | <b>1061.063</b> | <b>1134.182</b> | <b>1126.172</b> | <b>1126.676</b> | <b>1125.668</b> | K(22) |
| K  | 22 | <b>1125.110</b> | 1070.134        | <b>1062.125</b> | <b>1062.629</b> | <b>1061.621</b> | K(21) |
| T  | 23 | <b>1175.614</b> | <b>1006.087</b> | <b>998.077</b>  | <b>998.581</b>  | <b>997.573</b>  | T(20) |
| T  | 24 | 1226.159        | 955.563         | <b>947.553</b>  | <b>948.057</b>  | <b>947.049</b>  | T(19) |
| K  | 25 | <b>1290.206</b> | 905.039         | <b>897.030</b>  | <b>897.533</b>  | 896.526         | K(18) |
| K  | 26 | <b>1354.253</b> | 840.991         | <b>832.982</b>  | <b>833.486</b>  | <b>832.478</b>  | K(17) |
| A  | 27 | 1383.772        | 776.944         | 768.935         | 769.438         | 768.431         | A(16) |
| G  | 28 | 1418.292        | 741.425         | <b>733.416</b>  | <b>733.920</b>  | 732.912         | G(15) |
| A  | 29 | <b>1453.801</b> | 712.915         | <b>704.905</b>  | <b>705.409</b>  | <b>704.401</b>  | A(14) |
| A  | 30 | <b>1489.319</b> | 677.396         | <b>669.387</b>  | <b>669.891</b>  | 668.884         | A(13) |
| K  | 31 | <b>1553.367</b> | 641.878         | <b>633.868</b>  | <b>634.372</b>  | 633.364         | K(12) |
| R  | 32 | <b>1633.418</b> | 677.830         | 669.821         | 670.325         | 669.317         | R(11) |
| K  | 33 | <b>1695.465</b> | 609.779         | 601.770         | 602.274         | 601.266         | K(10) |
| A  | 34 | 1730.984        | 435.752         | 427.743         | 428.247         | 427.239         | A(9)  |
| T  | 35 | 1781.507        | 400.213         | 392.204         | 392.708         | 391.700         | T(8)  |
| G  | 36 | 1816.018        | 349.690         | 341.680         | 342.184         | 341.176         | G(7)  |
| P  | 37 | 1858.545        | 321.179         | 313.170         | 313.673         | 312.666         | P(6)  |
| P  | 38 | 1897.673        | 272.652         | 264.643         | 265.147         | 264.139         | P(5)  |
| V  | 39 | 1956.605        | 224.126         | 216.117         | 216.621         | 215.613         | V(4)  |
| S  | 40 | 2000.121        | 174.592         | 166.583         | 167.086         | 166.078         | S(3)  |
| E  | 41 | 2064.642        | 131.076         | 123.067         | 123.570         | 122.562         | E(2)  |
| L  | 42 | 2121.184        | 66.555          | 58.545          | 59.049          | 58.041          | L(1)  |

# sp | P43276 | H15\_MOUSE

[Acetyl]SETAPAETAAPAPVEKSPAKKTTKKAGAAKRKATGPPVSEL

- ▶ fragmentation table for charge state 3+
- ▶ specType=etd
- ▶ score=64.76
- ▶ F104929.dat
- ▶ query=q4014\_p1
- ▶ precursor=849.278800
- ▶ chargePrecursor=5
- ▶ itol=0.8

| AA   | c               | y               | z+1             | z+2            | z               | AA   |
|------|-----------------|-----------------|-----------------|----------------|-----------------|------|
| S 1  | 49.697          | 1414.767        | <b>1409.447</b> | 0.672          | <b>1409.111</b> | S 42 |
| E 2  | 92.711          | <b>1371.773</b> | <b>1366.433</b> | 0.672          | 1366.097        | E 41 |
| T 3  | 126.394         | 1226.767        | 1221.401        | 0.672          | 1221.065        | T 40 |
| A 4  | 150.974         | <b>1295.076</b> | <b>1289.736</b> | 0.672          | <b>1289.400</b> | A 39 |
| P 5  | 182.424         | 1271.307        | 1266.057        | 0.672          | 1265.721        | P 38 |
| A 6  | 206.103         | 1239.048        | <b>1233.706</b> | 0.672          | <b>1233.370</b> | A 37 |
| E 7  | 269.117         | 1215.367        | <b>1210.027</b> | 0.672          | <b>1209.691</b> | E 36 |
| T 8  | 282.800         | 1172.353        | <b>1167.013</b> | 0.672          | 1166.677        | T 35 |
| A 9  | 306.470         | <b>1138.670</b> | <b>1133.330</b> | 0.672          | 1132.994        | A 34 |
| A 10 | 330.158         | 1114.991        | <b>1109.651</b> | 0.672          | <b>1109.315</b> | A 33 |
| P 11 | 352.508         | 1091.312        | 1085.972        | 0.672          | 1085.636        | P 32 |
| A 12 | 386.188         | 1058.961        | <b>1053.621</b> | 0.672          | 1053.285        | A 31 |
| P 13 | 418.538         | 1035.282        | 1029.942        | 0.672          | 1029.606        | P 30 |
| V 14 | 451.561         | 1002.931        | <b>997.591</b>  | 0.672          | <b>997.256</b>  | V 29 |
| E 15 | 484.275         | 969.303         | 964.589         | 0.672          | 964.213         | E 28 |
| R 16 | 517.274         | 936.894         | <b>921.554</b>  | <b>921.890</b> | 921.310         | R 27 |
| S 17 | 556.284         | 884.195         | <b>878.856</b>  | <b>879.192</b> | <b>878.520</b>  | S 26 |
| P 18 | 598.635         | 855.185         | 849.845         | 850.181        | 849.510         | P 25 |
| A 19 | 622.314         | 822.834         | 817.495         | 817.831        | 817.150         | A 24 |
| K 20 | 665.613         | 799.155         | 793.816         | 794.151        | 793.480         | K 23 |
| K 21 | 707.721         | 756.457         | 751.117         | 751.453        | 750.781         | K 22 |
| K 22 | 750.409         | 713.758         | 708.419         | 708.755        | 708.081         | K 21 |
| T 23 | 784.092         | 671.060         | 665.721         | 666.057        | 665.385         | T 20 |
| T 24 | 817.774         | 637.378         | 632.038         | 632.374        | 631.702         | T 19 |
| K 25 | 860.473         | 603.669         | 598.355         | 598.691        | 598.019         | K 18 |
| K 26 | 903.171         | 560.997         | 555.657         | 555.993        | 555.321         | K 17 |
| A 27 | 926.850         | 518.298         | 512.959         | 513.295        | 512.623         | A 16 |
| G 28 | 945.257         | 494.817         | 489.280         | 489.616        | 488.944         | G 15 |
| A 29 | 969.536         | 475.612         | 470.273         | 470.609        | 469.937         | A 14 |
| A 30 | <b>993.215</b>  | 451.933         | 446.594         | 446.930        | 446.258         | A 13 |
| K 31 | <b>1035.914</b> | 428.254         | 422.915         | 423.250        | 422.579         | K 12 |
| R 32 | <b>1087.947</b> | 385.550         | 380.210         | 380.552        | 379.880         | R 11 |
| K 33 | <b>1130.646</b> | 343.522         | 338.183         | 338.518        | 337.844         | K 10 |
| A 34 | <b>1154.325</b> | 290.824         | 285.484         | 285.820        | 285.144         | A 9  |
| T 35 | <b>1188.007</b> | 267.143         | 261.803         | 262.141        | 261.466         | T 8  |
| G 36 | 1207.015        | 233.462         | 228.123         | 228.459        | 227.787         | G 7  |
| P 37 | 1239.305        | 214.455         | 209.115         | 209.451        | 208.779         | P 6  |
| P 38 | 1271.716        | 182.104         | 176.765         | 177.100        | 176.429         | P 5  |
| V 39 | <b>1304.739</b> | 149.753         | 144.414         | 144.750        | 144.075         | V 4  |
| S 40 | <b>1333.750</b> | 116.738         | 111.399         | 111.737        | 111.065         | S 3  |
| E 41 | 1376.764        | 87.220          | 82.380          | 82.716         | 82.044          | E 2  |
| L 42 | 1414.450        | 44.705          | 39.366          | 39.702         | 39.030          | L 1  |

# sp | P43276 | H15\_MOUSE

[Acetyl]SETAPAETAAPAPVEKSPAKKKTTKKAGAAKRKATGPPVSEL

- ▶ fragmentation table for charge state 4+
- ▶ specType=etd
- ▶ score=64.76
- ▶ F104929.dat
- ▶ query=q4014\_p1
- ▶ precursor=849.278800
- ▶ chargePrecursor=5
- ▶ itol=0.8

| AA    | c               | y               | a+1             | a+2     | z               | AA    |
|-------|-----------------|-----------------|-----------------|---------|-----------------|-------|
| S[1]  | 37.525          | <b>1061.342</b> | 1057.337        | 0.755   | 1057.089        | S[42] |
| E[2]  | 69.785          | 1029.881        | <b>1025.077</b> | 0.755   | <b>1024.825</b> | E[41] |
| T[3]  | 95.047          | <b>996.821</b>  | <b>992.016</b>  | 0.755   | <b>992.564</b>  | T[40] |
| A[4]  | 112.506         | <b>971.559</b>  | <b>967.554</b>  | 0.755   | <b>967.302</b>  | A[39] |
| P[5]  | 137.070         | 953.799         | 949.795         | 0.755   | 949.543         | P[38] |
| A[6]  | 154.829         | 929.539         | 925.531         | 0.755   | 925.280         | A[37] |
| E[7]  | 187.090         | 913.777         | 907.772         | 0.755   | 907.520         | E[36] |
| T[8]  | 212.351         | <b>879.516</b>  | 875.512         | 0.755   | 875.260         | T[35] |
| A[9]  | 230.111         | 854.258         | 850.250         | 0.755   | 849.999         | A[34] |
| A[10] | 247.870         | 830.499         | <b>832.490</b>  | 0.755   | 832.235         | A[33] |
| P[11] | 272.133         | 818.736         | 814.731         | 0.755   | 814.479         | P[32] |
| A[12] | 289.892         | 794.473         | 790.468         | 0.755   | 790.216         | A[31] |
| P[13] | 314.156         | 778.713         | 772.709         | 0.755   | 772.457         | P[30] |
| V[14] | 338.923         | 752.450         | 748.445         | 0.755   | 748.193         | V[29] |
| E[15] | 371.183         | 727.683         | 723.678         | 0.755   | 723.426         | E[28] |
| R[16] | 403.207         | 699.422         | 691.418         | 691.670 | 691.166         | R[27] |
| S[17] | 424.965         | 663.359         | 659.394         | 659.646 | 659.142         | S[26] |
| P[18] | 449.228         | 641.641         | 637.636         | 637.888 | 637.384         | P[25] |
| A[19] | 466.988         | 617.377         | 613.373         | 613.625 | 613.121         | A[24] |
| K[20] | 499.011         | 599.618         | 595.613         | 595.605 | 595.362         | K[23] |
| K[21] | 531.035         | 567.394         | 563.590         | 563.842 | 563.338         | K[22] |
| K[22] | 563.059         | 539.571         | 533.566         | 531.818 | 531.314         | K[21] |
| T[23] | 588.321         | 503.547         | 499.542         | 499.794 | 499.290         | T[20] |
| T[24] | 613.583         | 478.285         | 474.280         | 474.532 | 474.028         | T[19] |
| K[25] | 645.606         | 453.023         | 449.018         | 449.270 | 448.766         | K[18] |
| K[26] | 677.630         | 429.990         | 426.995         | 427.247 | 426.743         | K[17] |
| A[27] | 695.389         | 388.976         | 384.971         | 385.223 | 384.719         | A[16] |
| T[28] | 709.845         | 371.218         | 367.212         | 367.464 | 366.960         | T[15] |
| A[29] | 727.604         | 356.961         | 352.956         | 353.208 | 352.704         | A[14] |
| A[30] | 745.103         | 339.202         | 335.197         | 335.449 | 334.945         | A[13] |
| K[31] | 777.167         | 321.442         | 317.438         | 317.690 | 317.186         | K[12] |
| R[32] | 816.212         | 289.410         | 285.414         | 285.666 | 285.162         | R[11] |
| K[33] | 848.236         | 250.393         | 246.389         | 246.641 | 246.137         | K[10] |
| A[34] | 865.995         | 218.370         | 214.365         | 214.617 | 214.113         | A[9]  |
| T[35] | 891.257         | 200.610         | 196.606         | 196.858 | 196.354         | T[9]  |
| G[36] | 905.513         | 175.348         | 171.344         | 171.596 | 171.092         | G[7]  |
| P[37] | 929.776         | 161.093         | 157.088         | 157.340 | 156.836         | P[6]  |
| P[38] | 954.039         | 136.830         | 132.825         | 133.077 | 132.573         | P[5]  |
| V[39] | <b>978.806</b>  | 112.507         | 108.502         | 108.814 | 108.310         | V[4]  |
| S[40] | <b>1005.564</b> | 87.800          | 83.795          | 84.047  | 83.543          | S[3]  |
| E[41] | <b>1032.825</b> | 66.943          | 62.937          | 63.289  | 63.785          | E[2]  |
| L[42] | <b>1061.096</b> | 33.781          | 29.776          | 30.028  | 29.524          | L[1]  |





# sp | P43274 | H14\_MOUSE

[Acetyl]SETAPAAPAAPAPAEKT<sup>Phospho 79.97</sup>PVKKKARKAAGAKRKTSGPPVSEL

- ▶ fragmentation table for charge state 1+
- ▶ specType=etd
- ▶ score=54.41
- ▶ F104929.dat
- ▶ query=q4017\_p1
- ▶ precursor=849.668400
- ▶ chargePrecursor=5
- ▶ itol=0.8

| AA | c  | y               | z+1             | z+2             | z               | AA              |       |
|----|----|-----------------|-----------------|-----------------|-----------------|-----------------|-------|
| S  | 1  | 147.076         | 4244.201        | 4226.273        | 0.000           | 4227.266        | S[42] |
| E  | 2  | 276.119         | 4115.249        | 4099.230        | 0.000           | 4096.222        | E[41] |
| T  | 3  | 377.167         | 3998.206        | 3970.188        | 0.000           | 3969.180        | T[40] |
| A  | 4  | 448.204         | 3885.159        | 3860.140        | 0.000           | 3860.132        | A[39] |
| F  | 5  | 585.207         | 3814.122        | 3798.103        | 0.000           | 3797.096        | F[38] |
| A  | 6  | 616.204         | 3717.085        | 3701.050        | 0.000           | 3700.042        | A[37] |
| A  | 7  | 687.211         | 3646.032        | 3630.013        | 0.000           | 3629.005        | A[36] |
| F  | 8  | 784.204         | 3574.995        | 3558.976        | 0.000           | 3557.968        | F[35] |
| A  | 9  | 855.211         | 3477.942        | 3461.923        | 0.000           | 3460.915        | A[34] |
| A  | 10 | 926.204         | 3406.905        | 3390.887        | 0.000           | 3389.879        | A[33] |
| P  | 11 | <b>1023.511</b> | 3335.868        | 3319.849        | 0.000           | 3318.841        | P[32] |
| A  | 12 | 1094.548        | 3238.815        | 3222.796        | 0.000           | 3221.788        | A[31] |
| F  | 13 | 1161.600        | 3167.778        | 3151.759        | 0.000           | 3150.751        | F[30] |
| A  | 14 | 1262.633        | 3070.725        | 3054.706        | 0.000           | 3053.698        | A[29] |
| E  | 15 | <b>1391.680</b> | 2999.688        | 2983.669        | 0.000           | 2982.661        | E[28] |
| K  | 16 | 1519.775        | 2970.645        | 2954.626        | 2865.614        | 2853.603        | K[27] |
| T  | 17 | 1700.789        | 2742.580        | 2726.531        | 2727.539        | 2725.524        | T[26] |
| F  | 18 | 1797.842        | 2661.536        | 2645.517        | 2646.525        | 2644.510        | F[25] |
| V  | 19 | 1896.910        | 2664.483        | 2648.465        | 2649.473        | 2647.457        | V[24] |
| K  | 20 | 2025.005        | 2365.415        | 2349.396        | 2350.404        | 2348.388        | K[23] |
| K  | 21 | 2153.100        | 2237.300        | 2221.281        | 2222.289        | 2220.274        | K[22] |
| K  | 22 | 2281.195        | 2109.225        | 2093.206        | 2094.214        | 2092.199        | K[21] |
| A  | 23 | 2352.232        | 1981.130        | 1965.111        | 1966.119        | 1964.104        | A[20] |
| R  | 24 | 2508.333        | 1910.093        | 1894.074        | 1895.082        | 1893.066        | R[19] |
| K  | 25 | 2636.428        | 1753.992        | 1737.973        | 1738.981        | 1736.965        | K[18] |
| A  | 26 | 2707.465        | 1625.897        | 1609.878        | <b>1610.886</b> | 1608.870        | A[17] |
| A  | 27 | 2778.502        | 1354.860        | 1338.841        | 1339.849        | 1337.833        | A[16] |
| G  | 28 | 2835.524        | 1481.823        | 1465.804        | <b>1468.812</b> | 1466.796        | G[15] |
| G  | 29 | 2892.546        | 1420.801        | <b>1410.783</b> | 1411.790        | <b>1409.775</b> | G[14] |
| A  | 30 | 2963.583        | 1369.789        | 1353.761        | <b>1354.769</b> | 1352.753        | A[13] |
| K  | 31 | 3091.676        | <b>1298.743</b> | 1282.724        | 1283.732        | 1281.716        | K[12] |
| K  | 32 | 3247.779        | 1170.648        | <b>1154.629</b> | <b>1155.637</b> | 1153.621        | K[11] |
| K  | 33 | 3376.874        | 1014.547        | <b>998.528</b>  | 999.536         | 997.520         | K[10] |
| T  | 34 | 3476.921        | 886.462         | 870.433         | 871.441         | 869.425         | T[9]  |
| S  | 35 | 3563.953        | 785.404         | <b>769.385</b>  | <b>770.393</b>  | 768.377         | S[8]  |
| G  | 36 | 3620.975        | 698.372         | 682.353         | 683.361         | 681.345         | G[7]  |
| F  | 37 | 3718.028        | <b>641.350</b>  | 625.332         | 626.340         | 624.324         | F[6]  |
| F  | 38 | 3813.080        | 544.296         | 528.277         | 529.285         | 527.271         | F[5]  |
| V  | 39 | 3914.149        | 447.245         | 431.226         | 432.234         | 430.218         | V[4]  |
| S  | 40 | 4001.181        | 348.177         | 332.158         | 333.166         | 331.150         | S[3]  |
| E  | 41 | 4110.223        | 261.144         | 245.126         | 246.134         | 244.118         | E[2]  |
| L  | 42 | 4243.307        | 132.102         | 116.083         | 117.091         | 115.075         | L[1]  |

# sp | P43274 | H14\_MOUSE

[Acetyl]SETAPAAPAAPAPAEKT<sup>Phospho 79.97</sup>PVKKKARKAAGGAKRKTSGPPVSEL

- ▶ fragmentation table for charge state 2+
- ▶ specType=etd
- ▶ score=54.41
- ▶ F104929.dat
- ▶ query=q4017\_p1
- ▶ precursor=849.668400
- ▶ chargePrecursor=5
- ▶ itol=0.8

| AA | c  | y               | z+1      | z+2             | z               | AA              |       |
|----|----|-----------------|----------|-----------------|-----------------|-----------------|-------|
| S  | 1  | 74.042          | 2122.640 | 2114.640        | 0.504           | 2114.136        | S[42] |
| E  | 2  | 138.563         | 2058.128 | 2050.110        | 0.504           | 2049.615        | E[41] |
| L  | 3  | 189.087         | 1993.607 | 1985.597        | 0.504           | 1985.084        | L[40] |
| A  | 4  | 234.608         | 1929.083 | 1921.071        | 0.504           | 1924.576        | A[39] |
| P  | 5  | 273.132         | 1867.564 | 1859.555        | 0.504           | 1859.051        | P[38] |
| A  | 6  | 308.650         | 1809.038 | 1801.029        | 0.504           | 1805.525        | A[37] |
| A  | 7  | 344.169         | 1823.519 | 1815.510        | 0.504           | 1815.000        | A[36] |
| P  | 8  | 392.695         | 1758.001 | 1750.992        | 0.504           | 1759.488        | P[35] |
| A  | 9  | 428.214         | 1730.479 | 1721.465        | 0.504           | 1730.961        | A[34] |
| A  | 10 | 483.733         | 1703.956 | 1695.947        | 0.504           | 1699.441        | A[33] |
| P  | 11 | 512.259         | 1668.437 | 1660.428        | 0.504           | 1659.924        | P[32] |
| A  | 12 | 547.777         | 1619.911 | <b>1611.902</b> | 0.504           | <b>1611.398</b> | A[31] |
| P  | 13 | 596.304         | 1594.392 | 1576.383        | 0.504           | 1575.879        | P[30] |
| A  | 14 | 631.822         | 1535.866 | 1527.857        | 0.504           | 1527.351        | A[29] |
| E  | 15 | 666.344         | 1500.348 | <b>1492.338</b> | 0.504           | 1491.834        | E[28] |
| R  | 16 | 709.391         | 1435.826 | 1427.817        | 1429.321        | 1427.311        | R[27] |
| L  | 17 | 850.898         | 1371.729 | <b>1363.760</b> | <b>1364.273</b> | <b>1363.265</b> | L[26] |
| P  | 18 | 899.425         | 1381.272 | <b>1273.262</b> | 1273.766        | <b>1272.758</b> | P[25] |
| V  | 19 | 948.959         | 1232.745 | 1224.736        | 1225.240        | 1224.232        | V[24] |
| K  | 20 | <b>1013.006</b> | 1183.211 | 1175.202        | 1175.706        | 1174.698        | K[23] |
| R  | 21 | <b>1077.054</b> | 1110.684 | <b>1111.154</b> | <b>1111.658</b> | 1110.650        | R[22] |
| K  | 22 | 1143.193        | 1058.116 | <b>1047.107</b> | <b>1047.611</b> | 1046.602        | K[21] |
| A  | 23 | 1176.620        | 991.069  | 983.059         | <b>983.563</b>  | 982.555         | A[20] |
| R  | 24 | <b>1254.670</b> | 955.550  | 947.541         | 948.045         | 947.037         | R[19] |
| K  | 25 | <b>1318.718</b> | 877.520  | 869.490         | 869.994         | 868.986         | K[18] |
| A  | 26 | <b>1354.236</b> | 813.452  | <b>805.443</b>  | <b>805.947</b>  | <b>804.939</b>  | A[17] |
| G  | 27 | 1389.755        | 777.024  | <b>769.928</b>  | <b>770.428</b>  | <b>769.420</b>  | G[16] |
| G  | 28 | 1418.266        | 742.415  | <b>734.406</b>  | <b>734.910</b>  | 733.902         | G[15] |
| G  | 29 | <b>1446.776</b> | 715.904  | <b>705.895</b>  | <b>706.399</b>  | <b>705.391</b>  | G[14] |
| A  | 30 | <b>1482.295</b> | 685.394  | <b>677.384</b>  | <b>677.888</b>  | <b>676.880</b>  | A[13] |
| K  | 31 | <b>1546.342</b> | 649.875  | <b>641.866</b>  | <b>642.370</b>  | <b>641.362</b>  | K[12] |
| R  | 32 | <b>1624.393</b> | 585.827  | <b>577.818</b>  | <b>578.322</b>  | <b>577.314</b>  | R[11] |
| K  | 33 | <b>1688.440</b> | 507.792  | 499.788         | 500.291         | 499.283         | K[10] |
| L  | 34 | 1738.954        | 445.729  | 437.720         | 438.224         | 437.217         | L[9]  |
| S  | 35 | 1782.480        | 393.206  | 385.196         | 385.700         | 384.692         | S[8]  |
| G  | 36 | 1810.991        | 349.690  | 341.680         | 342.184         | 341.176         | G[7]  |
| P  | 37 | 1859.517        | 317.179  | 313.170         | 313.673         | 312.666         | P[6]  |
| P  | 38 | 1908.044        | 272.652  | 264.643         | 265.147         | 264.139         | P[5]  |
| V  | 39 | 1957.578        | 224.136  | 216.127         | 216.631         | 215.623         | V[4]  |
| S  | 40 | 2001.094        | 174.582  | 166.573         | 167.088         | 166.079         | S[3]  |
| E  | 41 | 2065.615        | 131.070  | 123.060         | 123.570         | 122.561         | E[2]  |
| L  | 42 | 2122.157        | 66.555   | 58.546          | 59.049          | 58.041          | L[1]  |

# sp | P43274 | H14\_MOUSE

[Acetyl]SETAPAAPAAPAPAEKT<sup>Phospho 79.97</sup>PVKKKARKAAGGAKRKTSGPPVSEL

- ▶ fragmentation table for charge state 3+
- ▶ specType=etd
- ▶ score=54.41
- ▶ F104929.dat
- ▶ query=q4017\_p1
- ▶ precursor=849.668400
- ▶ chargePrecursor=5
- ▶ itol=0.8

| AA | c  | y               | z+1             | z+2             | z              | AA              |       |
|----|----|-----------------|-----------------|-----------------|----------------|-----------------|-------|
| S  | 1  | 49.697          | 1415.435        | <b>1410.096</b> | 0.672          | <b>1409.760</b> | S[42] |
| E  | 2  | 92.711          | 1372.421        | <b>1367.082</b> | 0.672          | 1366.740        | E[41] |
| T  | 3  | 126.394         | 1329.407        | <b>1324.067</b> | 0.672          | 1323.731        | T[40] |
| A  | 4  | 150.078         | 1286.391        | 1280.385        | 0.672          | 1280.040        | A[39] |
| P  | 5  | 182.424         | 1272.045        | 1266.706        | 0.672          | 1266.370        | P[38] |
| A  | 6  | 206.103         | 1239.684        | <b>1234.355</b> | 0.672          | <b>1234.019</b> | A[37] |
| A  | 7  | 229.782         | 1216.015        | 1210.676        | 0.672          | 1210.340        | A[36] |
| P  | 8  | 262.133         | 1192.330        | 1186.997        | 0.672          | 1186.661        | P[35] |
| A  | 9  | 285.812         | <b>1159.985</b> | <b>1154.646</b> | 0.672          | <b>1154.310</b> | A[34] |
| A  | 10 | 309.491         | 1136.300        | 1130.967        | 0.672          | 1130.631        | A[33] |
| P  | 11 | 341.842         | 1112.627        | 1107.288        | 0.672          | 1106.952        | P[32] |
| A  | 12 | 365.521         | 1080.276        | 1074.937        | 0.672          | 1074.601        | A[31] |
| P  | 13 | 397.872         | 1056.597        | <b>1051.258</b> | 0.672          | <b>1050.922</b> | P[30] |
| A  | 14 | 421.551         | 1024.240        | 1018.907        | 0.672          | 1018.571        | A[29] |
| E  | 15 | 464.505         | <b>1000.567</b> | 995.226         | 0.672          | 994.892         | E[28] |
| R  | 16 | 607.263         | 971.561         | 967.214         | 0.672          | 966.879         | R[27] |
| T  | 17 | 587.601         | 914.855         | <b>909.515</b>  | <b>909.851</b> | 909.179         | T[26] |
| P  | 18 | 599.952         | 854.517         | 849.177         | 849.513        | 848.841         | P[25] |
| V  | 19 | 632.975         | 822.160         | 816.820         | 817.162        | 816.490         | V[24] |
| K  | 20 | 675.673         | 789.143         | 783.804         | 784.140        | 783.468         | K[23] |
| K  | 21 | 738.372         | 746.445         | 741.105         | 741.441        | 740.769         | K[22] |
| K  | 22 | 761.070         | 703.747         | 698.407         | 698.743        | 698.071         | K[21] |
| A  | 23 | 784.749         | 661.048         | 655.709         | 656.045        | 655.373         | A[20] |
| R  | 24 | 836.783         | 637.309         | 632.030         | 632.366        | 631.694         | R[19] |
| K  | 25 | 879.481         | 585.135         | 579.666         | 580.332        | 579.666         | K[18] |
| A  | 26 | 903.160         | 542.637         | 537.298         | 537.634        | 536.967         | A[17] |
| A  | 27 | 926.839         | 519.895         | 513.619         | 513.954        | 513.283         | A[16] |
| G  | 28 | 945.246         | 495.379         | 489.980         | 490.278        | 489.604         | G[15] |
| G  | 29 | 964.853         | 475.272         | 470.532         | 471.268        | 470.596         | G[14] |
| A  | 30 | 988.532         | 457.205         | 451.925         | 452.261        | 451.589         | A[13] |
| K  | 31 | <b>1031.231</b> | 433.589         | 428.246         | 428.582        | 427.910         | K[12] |
| R  | 32 | <b>1083.264</b> | 390.887         | 385.548         | 385.884        | 385.212         | R[11] |
| K  | 33 | <b>1125.963</b> | 338.854         | 333.514         | 333.850        | 333.176         | K[10] |
| T  | 34 | <b>1159.645</b> | 296.151         | 290.816         | 291.152        | 290.480         | T[9]  |
| S  | 35 | 1188.656        | 262.473         | 257.133         | 257.469        | 256.797         | S[8]  |
| G  | 36 | 1207.663        | 233.462         | 228.123         | 228.459        | 227.787         | G[7]  |
| P  | 37 | 1240.014        | 214.455         | 209.115         | 209.451        | 208.779         | P[6]  |
| P  | 38 | <b>1272.365</b> | 182.104         | 176.765         | 177.100        | 176.429         | P[5]  |
| V  | 39 | <b>1305.388</b> | 149.753         | 144.414         | 144.750        | 144.078         | V[4]  |
| S  | 40 | <b>1334.398</b> | 116.780         | 111.393         | 111.727        | 111.055         | S[3]  |
| E  | 41 | <b>1377.413</b> | 87.220          | 82.380          | 82.716         | 82.044          | E[2]  |
| L  | 42 | 1415.107        | 44.705          | 39.366          | 39.702         | 39.030          | L[1]  |

# sp | P43274 | H14\_MOUSE

[Acetyl]SETAPAAPAAPAPAEKT<sup>Phospho 79.97</sup>PVKKKARKAAGGAKRKTSGPPVSEL

- ▶ fragmentation table for charge state 4+
- ▶ specType=etd
- ▶ score=54.41
- ▶ F104929.dat
- ▶ query=q4017\_p1
- ▶ precursor=849.668400
- ▶ chargePrecursor=5
- ▶ itol=0.8

| AA | c  | y               | z+1             | z+2            | z     | AA             |       |
|----|----|-----------------|-----------------|----------------|-------|----------------|-------|
| S  | 1  | 37.525          | <b>1061.828</b> | 1057.824       | 0.755 | 1057.572       | S[42] |
| E  | 2  | 69.785          | 1029.568        | 1025.563       | 0.755 | 1025.311       | E[41] |
| T  | 3  | 95.047          | 997.307         | 993.302        | 0.755 | 993.050        | T[40] |
| A  | 4  | 112.805         | 972.045         | <b>968.040</b> | 0.755 | <b>967.788</b> | A[39] |
| P  | 5  | 137.070         | 954.286         | 950.281        | 0.755 | 950.029        | P[38] |
| A  | 6  | 154.829         | 930.023         | 926.018        | 0.755 | 925.766        | A[37] |
| A  | 7  | 172.588         | 912.263         | 908.259        | 0.755 | 908.007        | A[36] |
| T  | 8  | 196.351         | 894.504         | 890.499        | 0.755 | 890.247        | T[35] |
| A  | 9  | 214.111         | 870.241         | 866.236        | 0.755 | 865.984        | A[34] |
| A  | 10 | 232.170         | 852.482         | 848.477        | 0.755 | 848.225        | A[33] |
| P  | 11 | 256.633         | 834.722         | 830.718        | 0.755 | 830.466        | P[32] |
| A  | 12 | 274.392         | 810.459         | 806.454        | 0.755 | <b>806.203</b> | A[31] |
| P  | 13 | 298.650         | 792.700         | 788.695        | 0.755 | 788.443        | P[30] |
| A  | 14 | 316.415         | 768.437         | 764.432        | 0.755 | 764.180        | A[29] |
| E  | 15 | 348.675         | 750.677         | 746.673        | 0.755 | 746.421        | E[28] |
| K  | 16 | 380.939         | 732.417         | 728.412        | 0.755 | 728.160        | K[27] |
| T  | 17 | 425.953         | 688.393         | 684.388        | 0.755 | 684.136        | T[26] |
| P  | 18 | 460.216         | <b>641.140</b>  | 637.135        | 0.755 | 636.883        | P[25] |
| V  | 19 | 474.983         | 616.876         | 612.872        | 0.755 | 612.620        | V[24] |
| K  | 20 | 507.007         | 592.109         | 588.105        | 0.755 | 587.853        | K[23] |
| K  | 21 | 539.031         | 560.085         | 556.081        | 0.755 | 555.829        | K[22] |
| K  | 22 | 571.054         | 528.062         | 524.057        | 0.755 | 523.805        | K[21] |
| R  | 23 | 588.814         | 496.838         | 492.833        | 0.755 | 492.581        | R[20] |
| R  | 24 | 627.839         | 478.279         | 474.274        | 0.755 | 474.022        | R[19] |
| K  | 25 | 659.063         | 439.253         | 435.249        | 0.755 | 434.997        | K[18] |
| A  | 26 | <b>677.622</b>  | 407.230         | 403.225        | 0.755 | 402.973        | A[17] |
| A  | 27 | 695.381         | 389.470         | 385.466        | 0.755 | 385.214        | A[16] |
| G  | 28 | 709.636         | 371.711         | 367.706        | 0.755 | 367.454        | G[15] |
| G  | 29 | 723.892         | 357.456         | 353.451        | 0.755 | 353.199        | G[14] |
| A  | 30 | 741.851         | 341.693         | 337.688        | 0.755 | 337.444        | A[13] |
| K  | 31 | 773.075         | 323.441         | 321.436        | 0.755 | 321.188        | K[12] |
| R  | 32 | 812.700         | 291.417         | 289.413        | 0.755 | 289.161        | R[11] |
| K  | 33 | 844.724         | 254.392         | 250.387        | 0.755 | 250.135        | K[10] |
| T  | 34 | 869.986         | 222.368         | 218.364        | 0.755 | 218.112        | T[9]  |
| S  | 35 | 891.744         | 197.105         | 193.102        | 0.755 | 192.850        | S[8]  |
| G  | 36 | 905.999         | 175.348         | 171.344        | 0.755 | 171.092        | G[7]  |
| P  | 37 | 930.262         | 161.093         | 157.088        | 0.755 | 156.836        | P[6]  |
| P  | 38 | 954.526         | 136.830         | 132.825        | 0.755 | 132.573        | P[5]  |
| V  | 39 | 979.293         | 112.567         | 108.562        | 0.755 | 108.310        | V[4]  |
| S  | 40 | <b>1001.051</b> | 87.800          | 83.795         | 0.755 | 83.543         | S[3]  |
| E  | 41 | <b>1033.311</b> | 66.042          | 62.037         | 0.755 | 61.785         | E[2]  |
| L  | 42 | <b>1061.582</b> | 33.781          | 29.776         | 0.755 | 29.524         | L[1]  |

# sp | P43277 | H13\_MOUSE

S (Phospho) ETAPAAPAAPAPVEKTPVKKKAKKTGAAAGKRKASGPPVSEL  
(79.97)

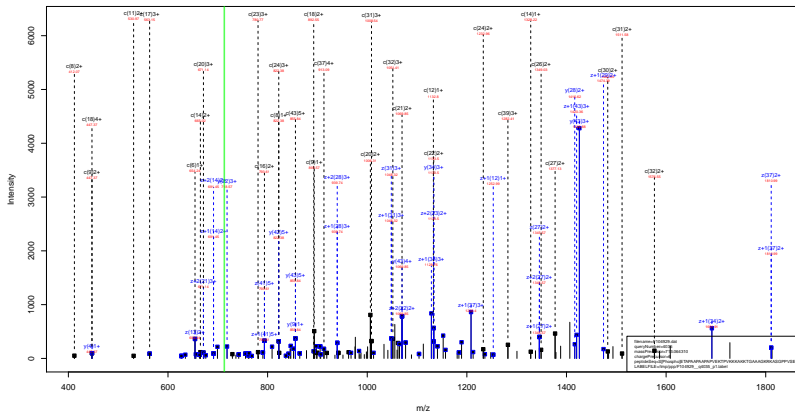

# sp | P43277 | H13\_MOUSE

S<sup>(Phospho)</sup><sub>(79.97)</sub> ETAPAAPAAPAPVEKTPVKKKAKKTGAAAGKRKASGPPVSEL

- ▶ fragmentation table for charge state 1+
- ▶ specType=etd
- ▶ score=55.37
- ▶ F104929.dat
- ▶ query=q4035\_p1
- ▶ precursor=713.064310
- ▶ chargePrecursor=6
- ▶ itol=0.8

| AA | c  | y               | z+1             | z+2             | z               | AA             |       |
|----|----|-----------------|-----------------|-----------------|-----------------|----------------|-------|
| S  | 1  | 185.032         | 4273.343        | 4257.324        | 0.000           | 4256.317       | S[43] |
| E  | 2  | 314.075         | 4198.345        | 4090.208        | 0.000           | 4089.310       | E[42] |
| T  | 3  | 413.122         | 3977.302        | 3961.264        | 0.000           | 3960.270       | T[41] |
| A  | 4  | 498.160         | 3876.255        | 3860.216        | 0.000           | 3859.228       | A[40] |
| P  | 5  | 583.212         | 3805.217        | 3789.199        | 0.000           | 3788.191       | P[39] |
| A  | 6  | <b>654.249</b>  | 3708.165        | 3692.146        | 0.000           | 3691.138       | A[38] |
| A  | 7  | 725.287         | 3637.128        | 3621.109        | 0.000           | 3620.101       | A[37] |
| P  | 8  | <b>822.319</b>  | 3540.080        | 3524.072        | 0.000           | 3523.064       | P[36] |
| A  | 9  | <b>893.376</b>  | 3449.030        | 3433.019        | 0.000           | 3432.011       | A[35] |
| A  | 10 | 964.414         | 3388.001        | 3381.982        | 0.000           | 3380.974       | A[34] |
| P  | 11 | <b>1061.466</b> | 3326.963        | 3310.945        | 0.000           | 3309.937       | P[33] |
| A  | 12 | <b>1132.503</b> | 3229.911        | 3213.892        | 0.000           | 3212.884       | A[32] |
| P  | 13 | 1209.558        | 3158.874        | 3142.855        | 0.000           | 3141.847       | P[31] |
| V  | 14 | <b>1328.625</b> | 3081.821        | 3065.802        | 0.000           | 3064.794       | V[30] |
| E  | 15 | 1457.667        | 2982.752        | 2966.734        | 0.000           | 2965.726       | E[29] |
| K  | 16 | 1585.762        | 2833.710        | 2817.691        | 2818.699        | 2818.681       | K[28] |
| T  | 17 | 1686.810        | 2705.615        | 2689.596        | 2690.604        | 2688.588       | T[27] |
| P  | 18 | 1781.863        | 2604.567        | 2588.548        | 2589.556        | 2587.541       | P[26] |
| V  | 19 | 1882.931        | 2507.514        | 2491.495        | 2492.504        | 2490.488       | V[25] |
| K  | 20 | 2011.028        | 2408.446        | 2392.427        | 2393.435        | 2391.411       | K[24] |
| K  | 21 | 2139.121        | 2308.351        | 2294.332        | 2295.340        | 2293.324       | K[23] |
| K  | 22 | 2267.216        | 2152.256        | 2136.237        | 2137.245        | 2135.230       | K[22] |
| A  | 23 | 2386.263        | 2004.161        | 2008.142        | 2009.150        | 2007.135       | A[21] |
| K  | 24 | 2499.348        | 1933.128        | 1937.105        | 1938.113        | 1936.107       | K[20] |
| K  | 25 | 2594.443        | 1825.029        | 1809.010        | 1810.018        | 1808.002       | K[19] |
| T  | 26 | 2695.491        | 1696.924        | 1680.915        | 1681.923        | 1679.906       | T[18] |
| G  | 27 | 2752.512        | 1595.888        | 1579.888        | 1580.875        | 1579.860       | G[17] |
| A  | 28 | 2823.549        | 1538.865        | 1522.846        | 1523.854        | 1521.838       | A[16] |
| A  | 29 | 2894.586        | 1467.828        | 1451.809        | 1452.817        | 1450.801       | A[15] |
| A  | 30 | 2965.623        | 1396.791        | 1380.772        | 1381.780        | 1379.764       | A[14] |
| G  | 31 | 3022.645        | 1325.754        | 1309.735        | 1310.743        | 1308.727       | G[13] |
| R  | 32 | 3189.748        | 1268.721        | <b>1253.713</b> | <b>1253.721</b> | 1251.706       | R[12] |
| R  | 33 | 3306.841        | <b>1140.637</b> | 1124.618        | 1125.626        | 1123.611       | R[11] |
| K  | 34 | 3434.936        | 984.538         | 968.517         | 969.525         | <b>967.509</b> | K[10] |
| A  | 35 | 3505.973        | <b>856.441</b>  | 840.422         | <b>841.430</b>  | 839.415        | A[9]  |
| S  | 36 | 3593.005        | 785.404         | 769.385         | 770.393         | <b>768.377</b> | S[8]  |
| G  | 37 | 3650.027        | 698.372         | 682.353         | 683.361         | 681.345        | G[7]  |
| P  | 38 | 3747.078        | 641.352         | 625.333         | <b>626.340</b>  | 624.324        | P[6]  |
| P  | 39 | 3844.132        | 544.298         | 528.279         | 529.287         | 527.271        | P[5]  |
| V  | 40 | 3943.200        | <b>447.245</b>  | 431.226         | 432.234         | 430.218        | V[4]  |
| S  | 41 | 4030.233        | 348.177         | 332.158         | 333.166         | 331.150        | S[3]  |
| E  | 42 | 4199.275        | 261.144         | 245.126         | 246.134         | 244.118        | E[2]  |
| L  | 43 | 4272.289        | 132.102         | 116.083         | 117.091         | 115.075        | L[1]  |

# sp | P43277 | H13\_MOUSE

S<sup>(Phospho)</sup><sub>(79.97)</sub> ETAPAAPAAPAPVEKTPVKKKAKKTGAAAGKRKASGPPVSEL

- ▶ fragmentation table for charge state 2+
- ▶ specType=etd
- ▶ score=55.37
- ▶ F104929.dat
- ▶ query=q4035.p1
- ▶ precursor=713.064310
- ▶ chargePrecursor=6
- ▶ itol=0.8

| AA | c  | y               | z+1             | z+2             | z               | AA              |       |
|----|----|-----------------|-----------------|-----------------|-----------------|-----------------|-------|
| S  | 1  | 63.600          | 2137.175        | 2126.160        | 0.504           | 2126.660        | E[43] |
| E  | 2  | 157.541         | 2053.676        | 2045.667        | 0.504           | 2045.161        | E[42] |
| T  | 3  | 268.998         | 1969.725        | 1961.748        | 0.504           | 1960.641        | F[41] |
| A  | 4  | 263.583         | 1938.631        | 1930.627        | 0.504           | 1930.110        | A[40] |
| F  | 5  | 292.110         | 1903.112        | 1895.103        | 0.504           | 1894.590        | F[39] |
| A  | 6  | 327.620         | 1854.506        | 1846.577        | 0.504           | 1846.073        | A[38] |
| A  | 7  | 363.147         | 1810.087        | <b>1811.058</b> | 0.504           | <b>1810.554</b> | A[37] |
| F  | 8  | <b>411.673</b>  | 1783.549        | 1775.540        | 0.504           | 1775.036        | F[36] |
| A  | 9  | <b>447.192</b>  | 1735.022        | 1727.013        | 0.504           | 1726.509        | A[35] |
| A  | 10 | 482.710         | 1690.504        | <b>1691.485</b> | 0.504           | 1690.991        | A[34] |
| F  | 11 | <b>531.237</b>  | 1663.985        | 1655.976        | 0.504           | 1655.472        | F[33] |
| A  | 12 | 566.755         | 1615.459        | 1607.450        | 0.504           | 1606.946        | A[32] |
| F  | 13 | 615.282         | 1579.940        | 1571.931        | 0.504           | 1571.427        | F[31] |
| V  | 14 | <b>664.816</b>  | 1531.414        | 1523.402        | 0.504           | 1522.900        | V[30] |
| E  | 15 | <b>729.337</b>  | 1493.893        | <b>1473.870</b> | 0.504           | 1473.366        | E[29] |
| K  | 16 | <b>791.385</b>  | <b>1417.359</b> | 1409.349        | 1409.853        | 1408.845        | K[28] |
| T  | 17 | 843.909         | 1353.311        | <b>1345.302</b> | <b>1345.806</b> | <b>1344.798</b> | T[27] |
| F  | 18 | <b>892.435</b>  | 1302.787        | 1294.778        | 1295.282        | 1294.274        | F[26] |
| V  | 19 | <b>941.969</b>  | 1254.261        | 1246.251        | 1246.755        | 1245.747        | V[25] |
| K  | 20 | <b>1006.017</b> | 1204.744        | 1196.737        | 1197.241        | 1196.233        | K[24] |
| K  | 21 | <b>1070.064</b> | <b>1140.678</b> | <b>1132.670</b> | <b>1133.174</b> | <b>1132.166</b> | K[23] |
| K  | 22 | <b>1134.112</b> | <b>1076.632</b> | 1068.622        | <b>1069.126</b> | 1068.118        | K[22] |
| A  | 23 | 1189.630        | <b>1012.584</b> | 1004.576        | 1005.079        | 1004.071        | A[21] |
| K  | 24 | <b>1233.678</b> | 977.066         | 969.056         | 969.560         | 968.552         | K[20] |
| K  | 25 | <b>1277.725</b> | <b>913.018</b>  | <b>905.009</b>  | <b>905.513</b>  | 904.505         | K[19] |
| T  | 26 | <b>1348.249</b> | 858.591         | 850.583         | <b>841.665</b>  | 840.657         | T[18] |
| G  | 27 | <b>1376.760</b> | 798.447         | <b>790.437</b>  | <b>790.941</b>  | <b>789.934</b>  | G[17] |
| A  | 28 | 1432.278        | 769.630         | <b>761.927</b>  | <b>762.431</b>  | <b>761.423</b>  | A[16] |
| A  | 29 | 1447.797        | 734.418         | 726.408         | 726.912         | 725.904         | A[15] |
| A  | 30 | <b>1483.315</b> | <b>698.899</b>  | <b>690.890</b>  | <b>691.394</b>  | 690.386         | A[14] |
| G  | 31 | <b>1511.856</b> | <b>663.386</b>  | <b>655.371</b>  | <b>655.875</b>  | <b>654.867</b>  | G[13] |
| K  | 32 | <b>1575.874</b> | <b>634.870</b>  | <b>626.860</b>  | <b>627.364</b>  | <b>626.356</b>  | K[12] |
| R  | 33 | 1653.924        | 570.822         | <b>562.813</b>  | <b>563.317</b>  | 562.309         | R[11] |
| K  | 34 | 1717.972        | 492.772         | 484.762         | 485.266         | 484.258         | K[10] |
| A  | 35 | 1753.490        | 428.724         | 420.715         | 421.219         | 420.211         | A[9]  |
| S  | 36 | 1787.206        | 393.206         | 385.198         | 385.702         | 384.694         | S[8]  |
| G  | 37 | 1825.517        | 349.690         | 341.680         | 342.184         | 341.176         | G[7]  |
| F  | 38 | 1874.043        | 321.175         | 313.170         | 313.673         | 312.666         | F[6]  |
| F  | 39 | 1922.570        | 272.652         | 264.643         | 265.147         | 264.139         | F[5]  |
| V  | 40 | 1972.104        | 224.136         | 216.117         | 216.621         | 215.613         | V[4]  |
| S  | 41 | 2015.630        | 174.592         | 166.583         | 167.086         | 166.079         | S[3]  |
| E  | 42 | 2080.141        | 131.076         | 123.067         | 123.570         | 122.562         | E[2]  |
| L  | 43 | 2138.663        | 66.555          | 58.545          | 59.049          | 58.041          | L[1]  |



# sp | P43277 | H13\_MOUSE

S (Phospho) (79.97) ETAPAAPAAPAPVEKTPVKKKAKKTGAAAGKRKASGPPVSEL

- ▶ fragmentation table for charge state 3+
- ▶ specType=etd
- ▶ score=55.37
- ▶ F104929.dat
- ▶ query=q4035\_p1
- ▶ precursor=713.064310
- ▶ chargePrecursor=6
- ▶ itol=0.8

| AA | c  | y               | a+1             | a+2             | z              | AA              |       |
|----|----|-----------------|-----------------|-----------------|----------------|-----------------|-------|
| S  | 1  | 62.340          | <b>1425.119</b> | <b>1419.780</b> | 0.672          | 1419.444        | S[43] |
| E  | 3  | 105.983         | 1389.453        | 1384.114        | 0.672          | 1383.776        | E[42] |
| I  | 3  | 139.046         | 1320.430        | 1321.099        | 0.672          | 1320.761        | I[41] |
| A  | 4  | 162.725         | 1262.756        | 1267.417        | 0.672          | 1267.081        | A[40] |
| F  | 5  | 195.076         | 1209.077        | 1203.738        | 0.672          | 1203.400        | F[39] |
| A  | 6  | 218.755         | <b>1236.726</b> | 1231.387        | 0.672          | 1231.051        | A[38] |
| A  | 7  | 242.434         | <b>1213.047</b> | <b>1207.708</b> | 0.672          | 1207.372        | A[37] |
| P  | 8  | 274.785         | <b>1189.368</b> | <b>1184.029</b> | 0.672          | <b>1183.693</b> | P[36] |
| A  | 9  | 298.464         | <b>1157.017</b> | <b>1151.678</b> | 0.672          | 1151.342        | A[35] |
| A  | 10 | 322.143         | <b>1133.338</b> | <b>1127.999</b> | 0.672          | 1127.663        | A[34] |
| P  | 11 | 354.494         | 1109.659        | <b>1104.320</b> | 0.672          | <b>1103.984</b> | P[33] |
| A  | 12 | 378.173         | <b>1077.308</b> | 1071.969        | 0.672          | 1071.633        | A[32] |
| P  | 13 | 410.524         | 1053.620        | <b>1048.290</b> | 0.672          | <b>1047.954</b> | P[31] |
| V  | 14 | 443.546         | 1021.276        | 1023.959        | 0.672          | 1023.623        | V[30] |
| E  | 15 | 486.561         | 989.256         | <b>982.916</b>  | 0.672          | 982.580         | E[29] |
| K  | 16 | 529.299         | 948.241         | <b>939.902</b>  | <b>940.238</b> | <b>939.566</b>  | K[28] |
| T  | 17 | <b>562.941</b>  | 907.543         | <b>897.204</b>  | <b>897.539</b> | 896.868         | T[27] |
| P  | 18 | 595.292         | 868.861         | 863.521         | <b>863.857</b> | 863.185         | P[26] |
| V  | 19 | 627.915         | <b>836.510</b>  | 831.170         | 831.506        | 830.834         | V[25] |
| K  | 20 | <b>671.014</b>  | 793.467         | 788.147         | 788.483        | 787.811         | K[24] |
| K  | 21 | <b>713.712</b>  | <b>760.789</b>  | <b>755.449</b>  | <b>755.785</b> | <b>755.113</b>  | K[23] |
| K  | 22 | <b>756.410</b>  | <b>718.090</b>  | 712.751         | 713.087        | 712.415         | K[22] |
| A  | 23 | <b>780.089</b>  | <b>675.392</b>  | 670.052         | <b>670.388</b> | 669.716         | A[21] |
| K  | 24 | <b>822.788</b>  | 651.713         | 646.373         | 646.709        | 646.037         | K[20] |
| K  | 25 | 865.466         | 609.015         | 603.675         | 604.011        | 603.339         | K[19] |
| T  | 26 | <b>899.168</b>  | 566.310         | 560.970         | 561.310        | 560.641         | T[18] |
| G  | 27 | <b>918.176</b>  | 530.430         | 527.294         | 527.630        | 526.959         | G[17] |
| A  | 28 | <b>941.855</b>  | 513.626         | 508.287         | 508.623        | 507.951         | A[16] |
| A  | 29 | 985.534         | 489.847         | 484.608         | 484.944        | 484.272         | A[15] |
| A  | 30 | 989.213         | 466.268         | 460.929         | 461.265        | 460.593         | A[14] |
| G  | 31 | <b>1068.220</b> | 442.589         | 437.250         | 437.586        | 436.914         | G[13] |
| K  | 32 | <b>1065.918</b> | 423.569         | 418.289         | 418.579        | 417.907         | K[12] |
| R  | 33 | 1102.954        | 380.884         | 375.544         | 375.880        | 375.209         | R[11] |
| K  | 34 | 1145.650        | 328.850         | 323.511         | 323.847        | 323.175         | K[10] |
| A  | 35 | 1169.329        | 286.152         | 280.812         | 281.148        | 280.476         | A[0]  |
| S  | 36 | 1198.340        | 262.473         | 257.133         | 257.469        | 256.797         | S[8]  |
| G  | 37 | 1217.347        | 233.462         | 228.123         | 228.459        | 227.787         | G[7]  |
| P  | 38 | 1249.076        | 214.455         | 209.115         | 209.451        | 208.779         | P[6]  |
| P  | 39 | <b>1282.049</b> | 182.194         | 176.795         | 177.193        | 176.425         | P[5]  |
| V  | 40 | 1315.072        | 149.753         | 144.414         | 144.750        | 144.078         | V[4]  |
| S  | 41 | 1344.082        | 116.730         | 111.391         | 111.727        | 111.055         | S[3]  |
| E  | 42 | 1387.097        | 87.720          | 82.380          | 82.716         | 82.044          | E[2]  |
| L  | 43 | 1424.791        | 44.705          | 39.366          | 39.702         | 39.030          | L[1]  |

# sp | P43277 | H13\_MOUSE

S (Phospho) ETAPAAPAAPAPVEKTPVKKKAKKTGAAAGKRKASGPPVSEL  
(79.97)

- ▶ fragmentation table for charge state 4+
- ▶ specType=etd
- ▶ score=55.37
- ▶ F104929.dat
- ▶ query=q4035\_p1
- ▶ precursor=713.064310
- ▶ chargePrecursor=6
- ▶ itol=0.8

| AA   | c               | y               | z+1             | z+2     | z               | AA   |
|------|-----------------|-----------------|-----------------|---------|-----------------|------|
| S 1  | 47.034          | <b>1069.091</b> | <b>1065.087</b> | 0.755   | <b>1064.835</b> | S 43 |
| E 2  | 19.274          | 1057.842        | 1053.837        | 0.755   | 1053.585        | E 42 |
| T 3  | 104.536         | 995.081         | 991.076         | 0.755   | 990.824         | T 41 |
| A 4  | 122.295         | 969.819         | 965.814         | 0.755   | 965.562         | A 40 |
| F 5  | 146.559         | 952.060         | 948.055         | 0.755   | 947.803         | F 39 |
| A 6  | 164.318         | 927.797         | 923.792         | 0.755   | 923.540         | A 38 |
| A 7  | 182.077         | 910.037         | <b>906.033</b>  | 0.755   | <b>905.781</b>  | A 37 |
| F 8  | 208.340         | <b>892.278</b>  | 888.273         | 0.755   | 888.021         | F 36 |
| A 9  | 224.100         | 868.015         | <b>864.010</b>  | 0.755   | <b>863.758</b>  | A 35 |
| A 10 | 241.859         | 850.256         | <b>846.251</b>  | 0.755   | <b>845.999</b>  | A 34 |
| F 11 | 266.122         | 832.496         | 828.492         | 0.755   | 828.240         | F 33 |
| A 12 | 283.881         | <b>808.233</b>  | 804.228         | 0.755   | 803.976         | A 32 |
| F 13 | 308.145         | <b>790.474</b>  | 786.469         | 0.755   | 786.217         | F 31 |
| V 14 | 333.912         | 766.211         | <b>762.206</b>  | 0.755   | <b>761.954</b>  | V 30 |
| E 15 | 355.172         | <b>741.444</b>  | 737.439         | 0.755   | 737.187         | E 29 |
| K 16 | 367.196         | 708.181         | 705.176         | 705.430 | 704.928         | K 28 |
| T 17 | 422.458         | 677.159         | 673.154         | 673.406 | 672.903         | T 27 |
| F 18 | <b>446.721</b>  | 651.897         | 647.893         | 648.145 | 647.641         | F 26 |
| V 19 | 471.488         | <b>627.634</b>  | 623.629         | 623.881 | 623.377         | V 25 |
| K 20 | 503.512         | 602.867         | 598.862         | 599.114 | 598.611         | K 24 |
| K 21 | 535.536         | 570.841         | 566.836         | 567.090 | 566.587         | K 23 |
| K 22 | 567.559         | 538.819         | 534.815         | 535.067 | 534.561         | K 22 |
| A 23 | 585.119         | 506.799         | 502.794         | 503.043 | 502.539         | A 21 |
| K 24 | 617.342         | 489.038         | 485.032         | 485.284 | 484.781         | K 20 |
| K 25 | 649.366         | 457.013         | 453.008         | 453.260 | 452.756         | K 19 |
| T 26 | 674.628         | 424.989         | 420.984         | 421.236 | 420.732         | T 18 |
| E 27 | 688.883         | 399.727         | 395.722         | 395.974 | 395.471         | E 17 |
| A 28 | 706.643         | 385.472         | 381.467         | 381.719 | 381.215         | A 16 |
| A 29 | 724.402         | 367.712         | 363.708         | 363.960 | 363.456         | A 15 |
| A 30 | <b>742.161</b>  | 349.953         | 345.948         | 346.200 | 345.696         | A 14 |
| G 31 | <b>756.417</b>  | 332.194         | 328.189         | 328.441 | 327.937         | G 13 |
| K 32 | 788.440         | 317.938         | 313.934         | 314.186 | 313.682         | K 12 |
| R 33 | 827.886         | 295.915         | 291.910         | 292.162 | 291.658         | R 11 |
| K 34 | 859.689         | 246.889         | 242.885         | 243.137 | 242.633         | K 10 |
| A 35 | 877.249         | 214.866         | 210.861         | 211.113 | 210.609         | A 9  |
| S 36 | <b>899.007</b>  | 197.109         | 193.102         | 193.354 | 192.850         | S 8  |
| G 37 | <b>913.262</b>  | 175.360         | 171.344         | 171.596 | 171.092         | G 7  |
| F 38 | 937.525         | 161.093         | 157.088         | 157.340 | 156.836         | F 6  |
| F 39 | <b>961.788</b>  | 136.830         | 132.825         | 133.077 | 132.573         | F 5  |
| V 40 | 113.567         | 108.369         | 108.114         | 108.366 | 107.862         | V 4  |
| S 41 | <b>1008.314</b> | 87.800          | 83.795          | 84.047  | 83.543          | S 3  |
| E 42 | 1040.574        | 66.042          | 62.037          | 62.289  | 61.785          | E 2  |
| L 43 | 1068.845        | 33.781          | 29.776          | 30.028  | 29.524          | L 1  |

# sp | P43277 | H13\_MOUSE

S (Phospho)  
(79.97) ETAPAAPAAPAPVEKTPVKKKKAKKTGAAAGKRKASGPPVSEL

- ▶ fragmentation table for charge state 5+
- ▶ specType=etd
- ▶ score=55.37
- ▶ F104929.dat
- ▶ query=q4035\_p1
- ▶ precursor=713.064310
- ▶ chargePrecursor=6
- ▶ itol=0.8

| AA    | c              | y              | z+1            | z+2     | z              | AA    |
|-------|----------------|----------------|----------------|---------|----------------|-------|
| S[1]  | 37.812         | <b>855.474</b> | <b>852.271</b> | 0.806   | <b>852.069</b> | S[43] |
| E[2]  | 63.021         | <b>822.075</b> | 818.371        | 0.806   | 818.569        | E[42] |
| T[3]  | 81.230         | 795.256        | <b>791.063</b> | 0.806   | <b>792.861</b> | T[41] |
| A[4]  | 98.038         | 776.057        | 772.853        | 0.806   | 772.851        | A[40] |
| P[5]  | 117.448        | <b>761.849</b> | 758.646        | 0.806   | 758.444        | P[39] |
| A[6]  | 131.656        | <b>742.439</b> | 739.235        | 0.806   | 739.033        | A[38] |
| A[7]  | 145.863        | 728.231        | 725.028        | 0.806   | 724.826        | A[37] |
| P[8]  | 165.274        | 714.024        | 710.820        | 0.806   | 710.619        | P[36] |
| A[9]  | 179.481        | 694.613        | <b>691.410</b> | 0.806   | <b>691.208</b> | A[35] |
| A[10] | 193.689        | 680.406        | 677.202        | 0.806   | 677.001        | A[34] |
| P[11] | 213.099        | 666.199        | <b>662.995</b> | 0.806   | <b>662.793</b> | P[33] |
| A[12] | 227.307        | 646.788        | 643.584        | 0.806   | 643.383        | A[32] |
| P[13] | 246.717        | 632.581        | 629.377        | 0.806   | 629.175        | P[31] |
| V[14] | 266.531        | 613.170        | 609.966        | 0.806   | 609.765        | V[30] |
| E[15] | 262.139        | 593.356        | 590.153        | 0.806   | 589.951        | E[29] |
| K[10] | 317.988        | 567.548        | 564.344        | 564.546 | 564.142        | K[28] |
| T[17] | 338.168        | 541.929        | 538.725        | 538.927 | 538.523        | T[27] |
| P[18] | 357.578        | 521.719        | 518.516        | 518.717 | 518.314        | P[26] |
| V[19] | 377.392        | 502.309        | 499.105        | 499.307 | 498.903        | V[25] |
| K[20] | 403.011        | 482.495        | 479.291        | 479.493 | 479.090        | K[24] |
| K[21] | 426.630        | 456.876        | 453.672        | 453.874 | 453.471        | K[23] |
| K[22] | 454.249        | 431.257        | 428.053        | 428.255 | 427.852        | K[22] |
| A[24] | 468.456        | 405.638        | 402.434        | 402.636 | 402.233        | A[21] |
| K[24] | 494.075        | 391.431        | 388.227        | 388.428 | 388.025        | K[20] |
| K[25] | 519.694        | 365.812        | 362.608        | 362.809 | 362.406        | K[19] |
| T[26] | 539.904        | 340.193        | 336.989        | 337.190 | 336.787        | T[18] |
| G[27] | 551.308        | 319.983        | 316.779        | 316.981 | 316.578        | G[17] |
| A[28] | 565.516        | 308.579        | 305.375        | 305.577 | 305.173        | A[16] |
| A[29] | 579.723        | 294.371        | 291.168        | 291.369 | 290.966        | A[15] |
| A[30] | 593.931        | 280.164        | 276.960        | 277.162 | 276.759        | A[14] |
| G[31] | 605.135        | 265.957        | 262.753        | 262.954 | 262.551        | G[13] |
| K[32] | 630.354        | 234.352        | 231.148        | 231.350 | 231.147        | K[12] |
| K[33] | 662.174        | 208.931        | 205.727        | 205.911 | 205.528        | K[11] |
| K[34] | 687.793        | 197.713        | 194.509        | 194.711 | 194.308        | K[10] |
| A[35] | 702.000        | 172.094        | 168.890        | 169.092 | 168.689        | A[9]  |
| S[36] | 719.407        | 157.887        | 154.683        | 154.884 | 154.481        | S[8]  |
| G[37] | 730.811        | 140.480        | 137.276        | 137.478 | 137.075        | G[7]  |
| P[38] | 750.222        | 129.076        | 125.872        | 126.074 | 125.671        | P[6]  |
| P[39] | 769.632        | 109.665        | 106.462        | 106.663 | 106.260        | P[5]  |
| V[40] | 789.446        | 90.255         | 87.051         | 87.253  | 86.849         | V[4]  |
| S[41] | 806.852        | 70.441         | 67.237         | 67.439  | 67.036         | S[3]  |
| E[42] | 832.661        | 53.035         | 49.831         | 50.033  | 49.629         | E[2]  |
| L[43] | <b>855.278</b> | 37.226         | 34.022         | 34.224  | 33.821         | L[1]  |

# sp | P43276 | H15\_MOUSE

[Acetyl]SETAPAETAAPAPVEKS<sup>Phospho</sup> PAKKKTTKKAGAAKRKATGPPVSEL<sub>79.97</sub>

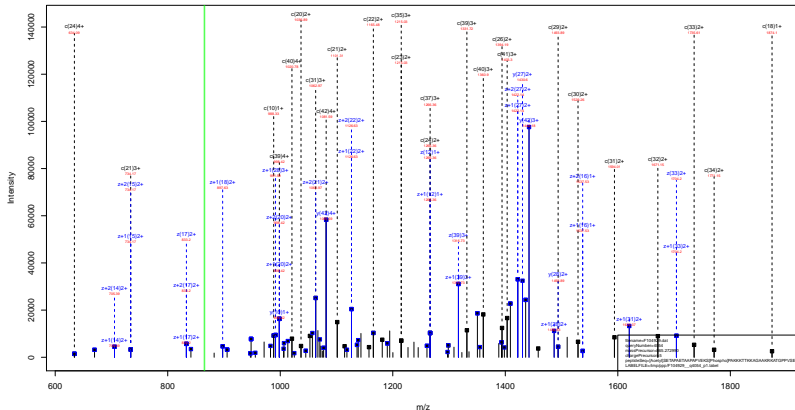

# sp | P43276 | H15\_MOUSE

[Acetyl]SETAPAETAAPAPVEKS <sup>Phospho</sup> PAKKKTTKKAGAAKRKATGPPVSEL <sub>79.97</sub>

- ▶ fragmentation table for charge state 1+
- ▶ specType=etd
- ▶ score=82.33
- ▶ F104929.dat
- ▶ query=q4054\_p1
- ▶ precursor=865.272990
- ▶ chargePrecursor=5
- ▶ itol=0.8

| AA | c  | y               | z+1            | z+2             | z               | AA              |       |
|----|----|-----------------|----------------|-----------------|-----------------|-----------------|-------|
| S  | 1  | 147.079         | 4322.312       | 4306.293        | 0.000           | 4305.285        | S[42] |
| E  | 2  | 276.119         | 4193.269       | 4177.251        | 0.000           | 4176.243        | E[41] |
| T  | 3  | 377.167         | 4064.227       | 4048.208        | 0.000           | 4047.200        | T[40] |
| A  | 4  | 448.204         | 3935.179       | 3919.160        | 0.000           | 3918.152        | A[39] |
| P  | 5  | 545.257         | 3802.142       | 3786.123        | 0.000           | 3785.115        | P[38] |
| A  | 6  | 616.294         | 3705.089       | 3779.070        | 0.000           | 3778.063        | A[37] |
| E  | 7  | 745.336         | 3724.052       | 3708.033        | 0.000           | 3707.026        | E[36] |
| T  | 8  | 846.384         | 3595.009       | 3579.991        | 0.000           | 3577.983        | T[35] |
| A  | 9  | 817.421         | 3493.962       | 3477.943        | 0.000           | 3476.935        | A[34] |
| A  | 10 | <b>908.458</b>  | 3422.925       | 3406.906        | 0.000           | 3405.898        | A[33] |
| P  | 11 | 1085.511        | 3351.888       | 3335.869        | 0.000           | 3334.861        | P[32] |
| A  | 12 | 1156.548        | 3254.835       | 3238.816        | 0.000           | 3237.808        | A[31] |
| P  | 13 | 1253.601        | 3183.798       | 3167.779        | 0.000           | 3166.771        | P[30] |
| V  | 14 | 1352.669        | 3086.745       | 3070.726        | 0.000           | 3069.718        | V[29] |
| E  | 15 | 1481.712        | 2987.677       | 2971.658        | 0.000           | 2970.650        | E[28] |
| R  | 16 | 1609.807        | 2938.634       | 2922.615        | 2683.623        | 2841.607        | R[27] |
| S  | 17 | 1776.806        | 2730.539       | 2714.520        | 2715.528        | 2713.512        | S[26] |
| P  | 18 | <b>1873.858</b> | 2563.541       | 2547.522        | 2548.530        | 2546.514        | P[25] |
| A  | 19 | 1964.895        | 2466.488       | 2450.469        | 2451.477        | 2449.461        | A[24] |
| K  | 20 | 2072.960        | 2395.451       | 2379.432        | 2380.440        | 2378.424        | K[23] |
| K  | 21 | 2201.085        | 2297.398       | 2281.379        | 2282.385        | 2280.370        | K[22] |
| R  | 22 | 2329.189        | 2139.301       | 2123.282        | 2124.290        | 2122.274        | R[21] |
| T  | 23 | 2430.228        | 2011.166       | 1995.147        | 1996.155        | 1994.139        | T[20] |
| T  | 24 | 2531.275        | 1910.118       | 1894.099        | 1895.107        | 1893.092        | T[19] |
| K  | 25 | 2659.370        | 1809.070       | 1793.052        | 1794.060        | 1792.044        | K[18] |
| K  | 26 | 2787.465        | 1680.976       | 1664.957        | 1665.965        | 1663.949        | K[17] |
| K  | 27 | 2838.502        | 1532.880       | <b>1536.862</b> | <b>1537.870</b> | 1535.854        | K[16] |
| G  | 28 | 2915.524        | 1493.843       | 1477.824        | 1478.832        | 1476.816        | G[15] |
| A  | 29 | 2986.561        | 1424.822       | <b>1408.803</b> | <b>1409.811</b> | 1407.795        | A[14] |
| A  | 30 | 3057.598        | 1353.785       | 1337.766        | 1338.774        | 1336.758        | A[13] |
| K  | 31 | 3185.693        | 1292.748       | <b>1266.729</b> | 1267.737        | <b>1265.721</b> | K[12] |
| R  | 32 | 3341.794        | 1154.653       | <b>1138.634</b> | 1139.642        | 1137.626        | R[11] |
| K  | 33 | 3469.899        | <b>908.552</b> | <b>982.533</b>  | 983.541         | 981.525         | K[10] |
| A  | 34 | 3560.926        | 779.457        | 763.438         | 764.446         | 762.430         | A[9]  |
| T  | 35 | 3641.974        | 799.420        | 783.401         | 784.409         | 782.393         | T[8]  |
| G  | 36 | 3686.995        | 698.372        | 682.353         | 683.361         | 681.345         | G[7]  |
| P  | 37 | 3798.048        | 641.330        | 625.312         | 626.320         | 624.304         | P[6]  |
| P  | 38 | 3893.101        | 544.288        | 528.270         | 529.278         | 527.271         | P[5]  |
| V  | 39 | 3992.159        | 447.245        | 431.226         | 432.234         | 430.218         | V[4]  |
| S  | 40 | 4079.201        | 348.177        | 332.158         | 333.166         | 331.150         | S[3]  |
| E  | 41 | 4208.244        | 261.144        | 245.126         | 246.134         | 244.118         | E[2]  |
| L  | 42 | 4321.228        | 132.022        | 116.003         | 117.011         | 115.005         | L[1]  |

# sp | P43276 | H15\_MOUSE

[Acetyl]SETAPAETAAPAPVEKS <sup>Phospho</sup>79.97 PAKKKTTKKAGAAKRKATGPPVSEL

- ▶ fragmentation table for charge state 2+
- ▶ specType=etd
- ▶ score=82.33
- ▶ F104929.dat
- ▶ query=q4054\_p1
- ▶ precursor=865.272990
- ▶ chargePrecursor=5
- ▶ itol=0.8

| AA | c  | y               | z+1             | z+2             | z               | AA              |       |
|----|----|-----------------|-----------------|-----------------|-----------------|-----------------|-------|
| S  | 1  | 74.042          | 2161.660        | 2153.650        | 0.504           | 2153.140        | S(42) |
| E  | 2  | 138.563         | 2097.138        | 2089.129        | 0.504           | 2088.625        | E(41) |
| T  | 3  | 189.087         | 2032.617        | 2024.608        | 0.504           | 2024.104        | T(40) |
| A  | 4  | 224.206         | 1968.093        | 1974.084        | 0.504           | 1973.580        | A(39) |
| P  | 5  | 293.133         | 1846.579        | 1838.569        | 0.504           | 1838.066        | P(38) |
| A  | 6  | 358.650         | 1880.048        | 1890.039        | 0.504           | 1889.535        | A(37) |
| E  | 7  | 373.172         | 1864.530        | 1854.520        | 0.504           | 1854.010        | E(36) |
| T  | 8  | 423.696         | 1798.008        | 1789.999        | 0.504           | 1789.495        | T(35) |
| A  | 9  | 459.214         | 1747.485        | 1739.475        | 0.504           | 1738.971        | A(34) |
| A  | 10 | 494.733         | 1711.966        | <b>1703.957</b> | 0.504           | <b>1703.453</b> | A(33) |
| P  | 11 | 543.259         | 1676.447        | 1656.438        | 0.504           | 1655.935        | P(32) |
| A  | 12 | 578.778         | 1627.021        | <b>1619.912</b> | 0.504           | 1619.408        | A(31) |
| P  | 13 | 607.304         | 1592.402        | 1584.393        | 0.504           | 1583.889        | P(30) |
| V  | 14 | 676.830         | 1543.876        | 1535.867        | 0.504           | 1535.363        | V(29) |
| E  | 15 | 741.360         | <b>1494.342</b> | <b>1486.333</b> | 0.504           | 1485.820        | E(28) |
| T  | 16 | 805.887         | <b>1429.821</b> | <b>1421.811</b> | <b>1422.315</b> | 1421.309        | T(27) |
| S  | 17 | 888.906         | 1488.343        | 1357.334        | 1358.268        | 1351.260        | S(26) |
| P  | 18 | 937.433         | 1282.274        | 1274.265        | 1274.768        | 1273.761        | P(25) |
| A  | 19 | 972.951         | 1233.748        | 1225.739        | 1226.242        | 1225.234        | A(24) |
| K  | 20 | <b>1036.999</b> | 1198.220        | <b>1190.220</b> | <b>1190.724</b> | <b>1189.716</b> | K(23) |
| K  | 21 | <b>1101.046</b> | 1134.303        | <b>1126.172</b> | <b>1126.076</b> | 1125.069        | K(22) |
| R  | 22 | <b>1165.094</b> | <b>1070.134</b> | 1062.115        | <b>1062.629</b> | 1061.621        | R(21) |
| T  | 23 | <b>1215.617</b> | <b>1006.087</b> | <b>998.077</b>  | <b>998.581</b>  | 997.573         | T(20) |
| T  | 24 | <b>1266.141</b> | <b>955.563</b>  | <b>947.553</b>  | <b>948.057</b>  | <b>947.049</b>  | T(19) |
| K  | 25 | 1330.189        | <b>905.039</b>  | <b>897.030</b>  | <b>897.533</b>  | 896.526         | K(18) |
| K  | 26 | <b>1394.236</b> | <b>840.991</b>  | <b>832.982</b>  | <b>833.486</b>  | <b>832.478</b>  | K(17) |
| A  | 27 | 1443.855        | 776.344         | 766.335         | 766.838         | 765.831         | A(16) |
| G  | 28 | <b>1458.266</b> | 741.825         | <b>733.416</b>  | <b>733.920</b>  | 732.912         | G(15) |
| A  | 29 | <b>1493.784</b> | 712.915         | <b>704.905</b>  | <b>705.409</b>  | 704.401         | A(14) |
| A  | 30 | <b>1529.303</b> | 677.396         | <b>669.387</b>  | <b>669.891</b>  | 668.883         | A(13) |
| K  | 31 | <b>1593.350</b> | 641.879         | <b>633.868</b>  | <b>634.372</b>  | <b>633.364</b>  | K(12) |
| R  | 32 | <b>1671.401</b> | 677.890         | 669.881         | 670.385         | 669.377         | R(11) |
| K  | 33 | <b>1735.448</b> | 609.779         | 601.770         | 602.274         | 601.266         | K(10) |
| A  | 34 | <b>1770.967</b> | 435.752         | 427.743         | 428.247         | 427.239         | A(9)  |
| T  | 35 | 1821.491        | 400.213         | 392.204         | 392.708         | 391.700         | T(8)  |
| G  | 36 | 1890.001        | 349.690         | 341.680         | 342.184         | 341.176         | G(7)  |
| P  | 37 | 1888.526        | 321.179         | 313.170         | 313.673         | 312.666         | P(6)  |
| P  | 38 | 1887.064        | 272.862         | 264.853         | 265.357         | 264.350         | P(5)  |
| V  | 39 | 1996.588        | 224.120         | 216.111         | 216.615         | 215.612         | V(4)  |
| S  | 40 | 2040.104        | 174.592         | 166.583         | 167.086         | 166.079         | S(3)  |
| E  | 41 | 2104.626        | 131.076         | 123.067         | 123.570         | 122.563         | E(2)  |
| L  | 42 | 2161.168        | 66.555          | 58.545          | 59.049          | 58.041          | L(1)  |

# sp | P43276 | H15\_MOUSE

[Acetyl]SETAPAETAAPAPVEKS <sup>Phospho</sup> PAKKKTTKKAGAAKRKATGPPVSEL <sub>79.97</sub>

- ▶ fragmentation table for charge state 3+
- ▶ specType=etd
- ▶ score=82.33
- ▶ F104929.dat
- ▶ query=q4054\_p1
- ▶ precursor=865.272990
- ▶ chargePrecursor=5
- ▶ itol=0.8

| AA   | c               | y               | z+1             | z+2            | z               | AA   |
|------|-----------------|-----------------|-----------------|----------------|-----------------|------|
| S 1  | 49.697          | <b>1441.442</b> | <b>1436.103</b> | 0.672          | <b>1435.767</b> | S 42 |
| E 2  | 92.711          | <b>1398.429</b> | <b>1393.086</b> | 0.672          | <b>1392.752</b> | E 41 |
| T 3  | 126.394         | <b>1355.414</b> | <b>1350.074</b> | 0.672          | <b>1349.738</b> | T 40 |
| A 4  | 150.073         | 1312.751        | <b>1316.392</b> | 0.672          | <b>1316.056</b> | A 39 |
| P 5  | 182.424         | <b>1298.052</b> | 1292.713        | 0.672          | 1292.377        | P 38 |
| A 6  | 206.103         | <b>1265.701</b> | <b>1260.362</b> | 0.672          | <b>1260.026</b> | A 37 |
| E 7  | 269.117         | 1242.027        | 1236.663        | 0.672          | 1236.347        | E 36 |
| T 8  | 282.800         | 1199.000        | 1193.666        | 0.672          | 1193.332        | T 35 |
| A 9  | 306.479         | <b>1165.325</b> | 1159.989        | 0.672          | 1159.655        | A 34 |
| A 10 | 330.158         | 1141.646        | <b>1136.307</b> | 0.672          | <b>1135.971</b> | A 33 |
| P 11 | 362.508         | <b>1117.967</b> | 1112.628        | 0.672          | 1112.292        | P 32 |
| A 12 | 386.188         | 1085.616        | 1080.277        | 0.672          | 1079.941        | A 31 |
| P 13 | 418.538         | 1061.937        | <b>1056.598</b> | 0.672          | 1056.262        | P 30 |
| V 14 | 451.561         | 1029.589        | <b>1024.247</b> | 0.672          | 1023.911        | V 29 |
| E 15 | 484.275         | 996.364         | <b>991.224</b>  | 0.672          | <b>990.888</b>  | E 28 |
| R 16 | 517.274         | 963.540         | <b>948.210</b>  | <b>948.546</b> | <b>947.874</b>  | R 27 |
| S 17 | 552.940         | 910.851         | <b>905.512</b>  | <b>905.848</b> | <b>905.176</b>  | S 26 |
| P 18 | 625.291         | 855.185         | 849.845         | 850.181        | 849.510         | P 25 |
| A 19 | 648.970         | 822.834         | 817.495         | 817.831        | 817.150         | A 24 |
| K 20 | 691.668         | 799.155         | 793.816         | 794.151        | 793.480         | K 23 |
| K 21 | <b>734.367</b>  | 756.457         | 751.117         | 751.453        | 750.781         | K 22 |
| K 22 | 777.665         | 713.754         | 708.419         | 708.755        | 708.081         | K 21 |
| T 23 | 810.747         | 671.060         | 665.721         | 666.057        | 665.381         | T 20 |
| T 24 | 844.430         | 637.378         | 632.038         | 632.374        | 631.702         | T 19 |
| K 25 | 887.126         | 603.697         | 598.358         | 598.691        | 598.019         | K 18 |
| K 26 | 929.827         | 560.997         | 555.657         | 555.993        | 555.321         | K 17 |
| A 27 | 953.506         | 518.296         | 512.959         | 513.295        | 512.622         | A 16 |
| G 28 | 972.513         | 484.813         | 479.280         | 479.616        | 478.944         | G 15 |
| A 29 | 996.192         | 475.612         | 470.273         | 470.609        | 469.937         | A 14 |
| A 30 | 1019.871        | 451.933         | 446.594         | 446.930        | 446.258         | A 13 |
| K 31 | <b>1062.569</b> | 428.254         | 422.915         | 423.250        | 422.579         | K 12 |
| R 32 | <b>1114.603</b> | 385.550         | 380.210         | 380.552        | 379.880         | R 11 |
| K 33 | <b>1157.301</b> | 313.522         | 308.183         | 308.518        | 307.844         | K 10 |
| A 34 | <b>1189.580</b> | 290.824         | 285.484         | 285.820        | 285.144         | A 9  |
| T 35 | <b>1214.663</b> | 267.145         | 261.805         | 262.141        | 261.469         | T 8  |
| G 36 | 1233.670        | 233.462         | 228.123         | 228.459        | 227.787         | G 7  |
| P 37 | <b>1266.021</b> | 214.455         | 209.115         | 209.451        | 208.779         | P 6  |
| P 38 | <b>1298.372</b> | 182.104         | 176.765         | 177.100        | 176.429         | P 5  |
| V 39 | <b>1331.295</b> | 149.753         | 144.414         | 144.750        | 144.076         | V 4  |
| S 40 | <b>1360.405</b> | 116.783         | 111.403         | 111.727        | 111.053         | S 3  |
| E 41 | <b>1403.419</b> | 87.220          | 82.380          | 82.716         | 82.044          | E 2  |
| L 42 | 1441.114        | 44.705          | 39.366          | 39.702         | 39.030          | L 1  |

# sp | P43276 | H15\_MOUSE

[Acetyl]SETAPAETAAPAPVEKS <sup>Phospho</sup> PAKKKTTKKAGAAKRKATGPPVSEL <sub>79.97</sub>

- ▶ fragmentation table for charge state 4+
- ▶ specType=etd
- ▶ score=82.33
- ▶ F104929.dat
- ▶ query=q4054.p1
- ▶ precursor=865.272990
- ▶ chargePrecursor=5
- ▶ itol=0.8

| AA | c  | y               | a+1             | a+2             | z     | AA              |       |
|----|----|-----------------|-----------------|-----------------|-------|-----------------|-------|
| S  | 1  | 37.525          | <b>1081.333</b> | <b>1077.329</b> | 0.755 | <b>1077.077</b> | S[42] |
| E  | 2  | 69.785          | 1049.073        | <b>1045.060</b> | 0.755 | <b>1044.816</b> | E[41] |
| T  | 3  | 95.047          | 1019.813        | <b>1012.807</b> | 0.755 | 1012.559        | T[40] |
| A  | 4  | 112.506         | <b>991.550</b>  | <b>987.546</b>  | 0.755 | 987.296         | A[39] |
| P  | 5  | 137.070         | 973.791         | 969.786         | 0.755 | 969.534         | P[38] |
| A  | 6  | 154.829         | 949.529         | 945.523         | 0.755 | 945.271         | A[37] |
| E  | 7  | 187.090         | 931.769         | 927.764         | 0.755 | 927.512         | E[36] |
| T  | 8  | 212.351         | 899.509         | 895.503         | 0.755 | 895.251         | T[35] |
| A  | 9  | 230.111         | 874.249         | 870.243         | 0.755 | 869.991         | A[34] |
| A  | 10 | 247.870         | 856.487         | 852.482         | 0.755 | 852.230         | A[33] |
| P  | 11 | 272.133         | 838.727         | 834.723         | 0.755 | 834.471         | P[32] |
| A  | 12 | 289.892         | 814.464         | 810.459         | 0.755 | 810.208         | A[31] |
| P  | 13 | 314.156         | 796.705         | 792.700         | 0.755 | 792.448         | P[30] |
| V  | 14 | 338.923         | 772.442         | 768.437         | 0.755 | 768.185         | V[29] |
| E  | 15 | 371.183         | 747.675         | 743.670         | 0.755 | 743.418         | E[28] |
| R  | 16 | 403.207         | 719.416         | 711.409         | 0.755 | 711.157         | R[27] |
| S  | 17 | 444.957         | 683.350         | 679.346         | 0.755 | 679.134         | S[26] |
| P  | 18 | 469.220         | 641.641         | 637.636         | 0.755 | 637.384         | P[25] |
| A  | 19 | 486.979         | 617.377         | 613.373         | 0.755 | 613.121         | A[24] |
| K  | 20 | 519.003         | 599.618         | 595.613         | 0.755 | 595.362         | K[23] |
| K  | 21 | 551.027         | 567.399         | 563.394         | 0.755 | 563.142         | K[22] |
| K  | 22 | 583.050         | 535.571         | 531.566         | 0.755 | 531.314         | K[21] |
| T  | 23 | 608.312         | 503.547         | 499.542         | 0.755 | 499.290         | T[20] |
| T  | 24 | <b>633.574</b>  | 478.285         | 474.280         | 0.755 | 474.028         | T[19] |
| K  | 25 | 665.598         | 453.023         | 449.018         | 0.755 | 448.766         | K[18] |
| K  | 26 | 697.622         | 420.990         | 416.985         | 0.755 | 416.733         | K[17] |
| A  | 27 | 715.381         | 388.976         | 384.971         | 0.755 | 384.719         | A[16] |
| T  | 28 | 729.836         | 371.218         | 367.212         | 0.755 | 366.960         | T[15] |
| A  | 29 | 747.596         | 356.961         | 352.956         | 0.755 | 352.704         | A[14] |
| K  | 30 | 765.155         | 339.202         | 335.197         | 0.755 | 334.945         | K[13] |
| R  | 31 | 797.179         | 321.442         | 317.438         | 0.755 | 317.186         | R[12] |
| R  | 32 | 836.204         | 289.410         | 285.414         | 0.755 | 285.162         | R[11] |
| K  | 33 | 868.228         | 250.393         | 246.389         | 0.755 | 246.137         | K[10] |
| A  | 34 | 885.987         | 218.370         | 214.365         | 0.755 | 214.113         | A[9]  |
| T  | 35 | 911.249         | 200.610         | 196.606         | 0.755 | 196.354         | T[8]  |
| G  | 36 | 925.504         | 175.348         | 171.344         | 0.755 | 171.092         | G[7]  |
| P  | 37 | 949.767         | 161.093         | 157.088         | 0.755 | 156.836         | P[6]  |
| P  | 38 | 974.031         | 136.830         | 132.825         | 0.755 | 132.573         | P[5]  |
| V  | 39 | <b>998.798</b>  | 112.507         | 108.502         | 0.755 | 108.250         | V[4]  |
| S  | 40 | <b>1020.556</b> | 87.800          | 83.795          | 0.755 | 83.543          | S[3]  |
| E  | 41 | <b>1032.816</b> | 66.943          | 62.937          | 0.755 | 62.705          | E[2]  |
| L  | 42 | <b>1081.087</b> | 33.751          | 29.776          | 0.755 | 29.524          | L[1]  |



# sp | P43275 | H11\_MOUSE

[Acetyl]SETAPVAQAAS~~T~~ATEKPA~~A~~AKKTKKPAKAAAPRKKPAGPSVSEL

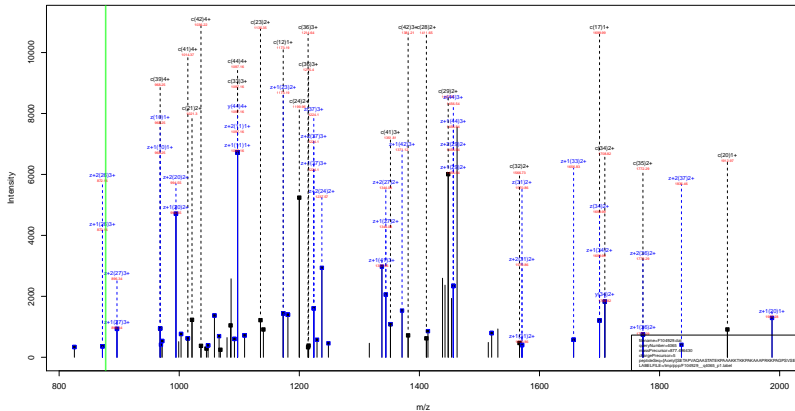

# sp | P43275 | H11\_MOUSE

[Acetyl]SETAPVAQAASSTATEKPAAAKTKKPAKAAAPRKKPAGPSVSEL

- ▶ fragmentation table for charge state 1+
- ▶ specType=etd
- ▶ score=54.14
- ▶ F104929.dat
- ▶ query=q4065\_p1
- ▶ precursor=877.496430
- ▶ chargePrecursor=5
- ▶ itol=0.8

| AA | c  | y               | z+1      | z+2             | z               | AA             |       |
|----|----|-----------------|----------|-----------------|-----------------|----------------|-------|
| S  | 1  | 147.076         | 4383.438 | 4387.417        | 0.000           | 4386.408       | S[44] |
| E  | 2  | 276.119         | 4254.903 | 4236.375        | 0.000           | 4237.367       | E[43] |
| T  | 3  | 377.107         | 4125.351 | 4109.332        | 0.000           | 4108.324       | T[42] |
| A  | 4  | 448.204         | 4024.303 | 4008.284        | 0.000           | 4007.276       | A[41] |
| P  | 5  | 545.257         | 3883.266 | 3872.247        | 0.000           | 3870.239       | P[40] |
| V  | 6  | 644.275         | 3766.213 | 3646.194        | 0.000           | 3659.187       | V[39] |
| A  | 7  | 715.362         | 3757.145 | 3741.126        | 0.000           | 3740.118       | A[38] |
| Q  | 8  | 843.421         | 3688.108 | 3670.089        | 3671.097        | 3669.081       | Q[37] |
| A  | 9  | 914.458         | 3558.049 | 3542.030        | 3543.038        | 3541.022       | A[36] |
| A  | 10 | 985.495         | 3487.012 | 3470.993        | 3472.001        | 3469.985       | A[35] |
| S  | 11 | 1077.557        | 3415.975 | 3399.956        | 3400.964        | 3399.948       | S[34] |
| I  | 12 | <b>1173.575</b> | 3328.943 | 3312.924        | 3313.932        | 3311.916       | I[33] |
| A  | 13 | 1244.612        | 3227.895 | 3211.876        | 3212.884        | 3211.868       | A[32] |
| T  | 14 | 1345.659        | 3158.858 | 3140.839        | 3141.847        | 3139.831       | T[31] |
| E  | 15 | 1474.702        | 3025.810 | 3030.797        | 3040.799        | 3038.784       | E[30] |
| K  | 16 | 1602.797        | 2926.768 | 2910.749        | 2911.757        | 2909.741       | K[29] |
| P  | 17 | <b>1699.850</b> | 2798.673 | 2782.654        | 2783.662        | 2781.646       | P[28] |
| A  | 18 | 1770.887        | 2703.626 | 2686.601        | 2688.609        | 2684.594       | A[27] |
| A  | 19 | 1841.924        | 2630.583 | 2614.564        | 2615.572        | 2613.556       | A[26] |
| A  | 20 | <b>1912.961</b> | 2559.546 | 2543.527        | 2544.535        | 2542.519       | A[25] |
| K  | 21 | 2041.056        | 2488.509 | 2472.490        | 2473.498        | 2471.482       | K[24] |
| K  | 22 | 2180.151        | 2360.414 | 2344.395        | 2345.403        | 2343.387       | K[23] |
| T  | 23 | 2270.199        | 2232.319 | 2216.300        | 2217.308        | 2215.292       | T[22] |
| K  | 24 | 2388.254        | 2111.271 | 2115.252        | 2116.260        | 2114.244       | K[21] |
| K  | 25 | 2526.389        | 2003.176 | <b>1987.157</b> | 1988.165        | 1986.149       | K[20] |
| P  | 26 | 2623.441        | 1875.081 | 1859.062        | 1860.070        | 1858.054       | P[19] |
| A  | 27 | 2694.476        | 1778.038 | 1762.019        | 1763.027        | 1761.011       | A[18] |
| K  | 28 | 2822.573        | 1706.991 | 1690.972        | 1691.980        | 1689.964       | K[17] |
| A  | 29 | 2893.611        | 1578.896 | 1562.877        | 1563.885        | 1561.870       | A[16] |
| A  | 30 | 2964.648        | 1397.859 | 1401.840        | 1402.848        | 1400.832       | A[15] |
| A  | 31 | 3035.685        | 1436.822 | 1420.803        | 1421.811        | 1419.795       | A[14] |
| P  | 32 | 3132.738        | 1395.785 | 1349.766        | 1350.774        | 1348.758       | P[13] |
| R  | 33 | 3288.839        | 1368.732 | 1252.713        | 1253.721        | 1251.705       | R[12] |
| K  | 34 | 3416.934        | 1112.631 | <b>1096.612</b> | <b>1097.620</b> | 1095.604       | K[11] |
| K  | 35 | 3545.029        | 884.536  | <b>968.517</b>  | <b>969.525</b>  | <b>967.509</b> | K[10] |
| P  | 36 | 3642.081        | 856.441  | 840.422         | 841.430         | 839.414        | P[9]  |
| A  | 37 | 3713.118        | 759.388  | 743.370         | 744.377         | 742.361        | A[8]  |
| G  | 38 | 3770.140        | 688.351  | 672.332         | 673.340         | 671.324        | G[7]  |
| P  | 39 | 3867.193        | 631.330  | 615.311         | 616.319         | 614.303        | P[6]  |
| S  | 40 | 3954.225        | 634.277  | 518.258         | 519.266         | 517.250        | S[5]  |
| V  | 41 | 4053.293        | 447.245  | 431.226         | 432.234         | 430.218        | V[4]  |
| V  | 42 | 4100.225        | 348.177  | 332.158         | 333.166         | 331.150        | V[3]  |
| E  | 43 | 4209.268        | 293.144  | 285.125         | 286.134         | 284.118        | E[2]  |
| L  | 44 | 4382.482        | 132.102  | 118.083         | 117.091         | 115.075        | L[1]  |

# sp | P43275 | H11\_MOUSE

[Acetyl]SETAPVAQAASSTATEKPAAAKTKKPAKAAAPRKKPAGPSVSEL

- ▶ fragmentation table for charge state 2+
- ▶ specType=etd
- ▶ score=54.14
- ▶ F104929.dat
- ▶ query=q4065\_p1
- ▶ precursor=877.496430
- ▶ chargePrecursor=5
- ▶ itol=0.8

| AA | c  | y               | z+1             | z+2             | z               | AA              |     |
|----|----|-----------------|-----------------|-----------------|-----------------|-----------------|-----|
| S  | 1  | 74.063          | 202.222         | 2184.713        | 0.504           | 2183.704        | S44 |
| E  | 2  | 138.553         | 2127.700        | 2219.691        | 0.504           | 2219.187        | E43 |
| T  | 3  | 189.087         | 2063.179        | 2055.170        | 0.504           | 2054.666        | T42 |
| A  | 4  | 224.606         | 2012.655        | 2004.649        | 0.504           | 2004.142        | A41 |
| P  | 5  | 273.132         | 1977.137        | 1969.127        | 0.504           | 1968.623        | P40 |
| V  | 6  | 322.666         | 1940.616        | 1942.603        | 0.504           | 1942.597        | V39 |
| A  | 7  | 368.185         | 1879.076        | 1871.067        | 0.504           | 1870.561        | A28 |
| Q  | 8  | 422.214         | 1843.557        | 1835.548        | <b>1836.052</b> | 1835.044        | Q37 |
| A  | 9  | 457.733         | 1779.528        | <b>1771.519</b> | <b>1772.023</b> | 1771.015        | A36 |
| A  | 10 | 493.251         | 1744.010        | 1736.000        | 1736.504        | 1735.490        | A35 |
| S  | 11 | 536.767         | <b>1708.491</b> | <b>1700.482</b> | 1700.986        | <b>1699.978</b> | S34 |
| T  | 12 | 587.291         | 1654.975        | <b>1656.968</b> | <b>1657.470</b> | <b>1656.462</b> | T33 |
| A  | 13 | 622.809         | 1614.451        | 1606.444        | 1606.946        | 1605.931        | A32 |
| T  | 14 | 673.333         | 1578.933        | <b>1570.923</b> | <b>1571.427</b> | <b>1570.419</b> | T31 |
| E  | 15 | 727.855         | 1528.409        | <b>1520.399</b> | <b>1520.903</b> | <b>1519.895</b> | E30 |
| K  | 16 | 801.902         | 1463.887        | <b>1455.878</b> | <b>1456.382</b> | 1455.374        | K29 |
| P  | 17 | 850.426         | 1399.361        | 1391.351        | 1391.855        | 1391.347        | P28 |
| A  | 18 | 885.947         | <b>1351.314</b> | <b>1343.304</b> | <b>1343.808</b> | 1342.800        | A27 |
| A  | 19 | 921.466         | 1315.785        | 1307.776        | 1308.280        | 1307.272        | A26 |
| A  | 20 | 956.984         | 1280.276        | 1272.267        | 1272.771        | 1271.763        | A25 |
| K  | 21 | <b>1021.032</b> | 1244.759        | 1236.749        | <b>1237.252</b> | 1236.245        | K24 |
| K  | 22 | <b>1085.079</b> | <b>1180.710</b> | <b>1172.701</b> | <b>1173.205</b> | 1172.197        | K23 |
| K  | 23 | <b>1135.503</b> | <b>1108.654</b> | <b>1100.644</b> | <b>1101.148</b> | <b>1100.150</b> | K22 |
| K  | 24 | <b>1199.650</b> | <b>1066.139</b> | <b>1058.130</b> | <b>1058.634</b> | 1057.626        | K21 |
| K  | 25 | 1263.698        | 1002.092        | <b>994.082</b>  | <b>994.586</b>  | 993.578         | K20 |
| P  | 26 | 1312.224        | 938.044         | 930.035         | 930.539         | 929.531         | P19 |
| A  | 27 | 1347.743        | 889.518         | 881.508         | 882.012         | 881.005         | A18 |
| K  | 28 | <b>1411.790</b> | 853.999         | 845.990         | 846.494         | 845.486         | K17 |
| A  | 29 | <b>1447.309</b> | 789.952         | 781.942         | 782.446         | 781.438         | A16 |
| A  | 30 | 1482.827        | 754.433         | 746.424         | 746.928         | 745.920         | A15 |
| A  | 31 | 1518.346        | 718.915         | 710.905         | 711.409         | 710.401         | A14 |
| P  | 32 | <b>1566.872</b> | 683.396         | 675.387         | 675.891         | 674.883         | P13 |
| R  | 33 | 1644.923        | 634.870         | 626.860         | 627.364         | 626.356         | R12 |
| K  | 34 | <b>1708.970</b> | 550.939         | 542.930         | 543.434         | 542.426         | K11 |
| K  | 35 | <b>1773.018</b> | 492.172         | 484.162         | 484.666         | 483.658         | K10 |
| P  | 36 | 1821.544        | 428.724         | 420.715         | 421.219         | 420.211         | P0  |
| A  | 37 | 1857.063        | 380.198         | 372.188         | 372.692         | 371.685         | A0  |
| G  | 38 | 1885.574        | 344.679         | 336.670         | 337.174         | 336.166         | G7  |
| P  | 39 | 1924.100        | 310.169         | 302.159         | 302.663         | 301.655         | P0  |
| S  | 40 | 1977.616        | 287.542         | 280.533         | 281.037         | 280.029         | S0  |
| V  | 41 | 2027.150        | 224.126         | 216.117         | 216.621         | 215.613         | V0  |
| S  | 42 | 2070.666        | 174.592         | 166.583         | 167.087         | 166.079         | S0  |
| E  | 43 | 2125.188        | 131.076         | 123.067         | 123.570         | 122.562         | E0  |
| L  | 44 | 2181.710        | 66.555          | 58.545          | 59.049          | 58.041          | L0  |

# sp | P43275 | H11\_MOUSE

[Acetyl]SETAPVAQAASSTATEKPAAAKTKKPAKAAAPRKKPAGPSVSEL

- ▶ fragmentation table for charge state 3+
- ▶ specType=etd
- ▶ score=54.14
- ▶ F104929.dat
- ▶ query=q4065\_p1
- ▶ precursor=877.496430
- ▶ chargePrecursor=5
- ▶ itol=0.8

| AA | c  | y               | z+1             | z+2             | z               | AA              |     |
|----|----|-----------------|-----------------|-----------------|-----------------|-----------------|-----|
| S  | 1  | 48.697          | 1461.817        | <b>1456.477</b> | 0.672           | <b>1456.141</b> | S44 |
| E  | 2  | 92.711          | 1418.803        | <b>1413.463</b> | 0.672           | 1413.127        | E43 |
| T  | 3  | 126.394         | 1375.788        | <b>1370.449</b> | 0.672           | 1370.113        | T42 |
| A  | 4  | 150.073         | 1332.766        | <b>1327.426</b> | 0.672           | 1327.090        | A41 |
| P  | 5  | 182.424         | 1318.427        | 1313.087        | 0.672           | 1312.751        | P40 |
| V  | 6  | 215.447         | 1286.016        | 1280.737        | 0.672           | 1280.400        | V39 |
| A  | 7  | 239.126         | 1253.051        | <b>1247.713</b> | 0.672           | 1247.377        | A28 |
| Q  | 8  | 261.812         | <b>1229.374</b> | <b>1224.034</b> | <b>1224.370</b> | <b>1223.099</b> | Q37 |
| A  | 9  | 305.491         | 1186.688        | <b>1181.348</b> | <b>1181.684</b> | <b>1181.012</b> | A36 |
| A  | 10 | 329.170         | 1163.009        | 1157.669        | 1158.005        | 1157.331        | A35 |
| S  | 11 | 358.180         | 1130.330        | 1113.990        | 1134.326        | 1133.054        | S34 |
| T  | 12 | 391.863         | 1102.319        | 1104.989        | 1126.315        | 1104.644        | T33 |
| A  | 13 | 415.542         | 1076.637        | 1071.297        | 1071.633        | 1070.901        | A32 |
| T  | 14 | 449.225         | 1052.957        | <b>1047.618</b> | <b>1047.954</b> | <b>1047.282</b> | T31 |
| E  | 15 | 462.239         | 1019.275        | <b>1013.935</b> | <b>1014.271</b> | <b>1013.599</b> | E30 |
| K  | 16 | 534.937         | 976.261         | <b>970.921</b>  | <b>971.257</b>  | 970.591         | K29 |
| P  | 17 | 567.268         | 933.562         | 928.222         | 928.559         | 927.881         | P28 |
| A  | 18 | 599.967         | 892.211         | <b>895.872</b>  | <b>896.208</b>  | 895.530         | A27 |
| A  | 19 | 614.646         | 877.532         | <b>872.193</b>  | <b>872.529</b>  | <b>871.857</b>  | A26 |
| A  | 20 | 638.325         | 853.853         | 848.514         | 848.850         | 848.178         | A25 |
| K  | 21 | 661.024         | 830.174         | <b>824.835</b>  | <b>825.171</b>  | 824.499         | K24 |
| K  | 22 | 723.722         | 787.476         | 782.136         | 782.472         | 781.801         | K23 |
| T  | 23 | 787.808         | 744.778         | 739.438         | 739.774         | 739.103         | T22 |
| K  | 24 | 830.103         | 711.095         | 705.755         | 706.092         | 705.420         | K21 |
| K  | 25 | 842.801         | 668.397         | 663.057         | 663.393         | 662.721         | K20 |
| P  | 26 | 878.152         | 625.699         | 620.359         | 620.695         | 620.023         | P19 |
| A  | 27 | 908.831         | 593.348         | 588.008         | 588.344         | 587.672         | A18 |
| K  | 28 | 941.529         | 560.669         | 554.329         | 554.665         | 554.001         | K17 |
| A  | 29 | 965.208         | 528.970         | 523.631         | 523.967         | 523.295         | A16 |
| A  | 30 | 988.887         | 503.291         | 497.952         | 498.288         | 497.616         | A15 |
| A  | 31 | 1012.566        | 479.612         | 474.273         | 474.609         | 473.937         | A14 |
| P  | 32 | <b>1044.917</b> | 455.913         | 450.574         | 450.910         | 450.238         | P13 |
| K  | 33 | <b>1096.951</b> | 423.582         | 418.243         | 418.579         | 417.907         | K12 |
| K  | 34 | <b>1139.649</b> | 371.549         | 366.209         | 366.545         | 365.873         | K11 |
| K  | 35 | 1152.988        | 329.850         | 323.511         | 323.847         | 323.175         | K10 |
| P  | 36 | <b>1214.699</b> | 286.152         | 280.812         | 281.148         | 280.476         | P10 |
| A  | 37 | 1238.378        | 251.801         | 246.461         | 246.797         | 246.125         | A10 |
| G  | 38 | 1257.385        | 230.122         | 224.782         | 225.118         | 224.446         | G17 |
| P  | 39 | 1289.736        | 211.115         | 205.775         | 206.111         | 205.439         | P16 |
| S  | 40 | 1318.746        | 176.984         | 171.644         | 171.980         | 171.308         | S15 |
| V  | 41 | <b>1351.769</b> | 149.753         | 144.414         | 144.750         | 144.078         | V14 |
| S  | 42 | <b>1380.780</b> | 116.730         | 111.391         | 111.727         | 111.055         | S13 |
| E  | 43 | 1423.794        | 87.200          | 82.360          | 82.716          | 82.044          | E12 |
| L  | 44 | 1461.489        | 44.705          | 39.366          | 39.702          | 39.030          | L11 |

# sp | P43275 | H11\_MOUSE

[Acetyl]SETAPVAQAASTATEKPAAAKTKKPAKAAAPRKKPAGPSVSEL

- ▶ fragmentation table for charge state 4+
- ▶ specType=etd
- ▶ score=54.14
- ▶ F104929.dat
- ▶ query=q4065\_p1
- ▶ precursor=877.496430
- ▶ chargePrecursor=5
- ▶ itol=0.8

| AA   | c               | y               | z+1             | z+2     | z               | AA   |
|------|-----------------|-----------------|-----------------|---------|-----------------|------|
| S 1  | 37.525          | <b>1096.614</b> | <b>1092.610</b> | 0.755   | <b>1092.358</b> | S 44 |
| E 2  | 69.785          | 1064.354        | 1060.349        | 0.755   | 1060.099        | E 43 |
| T 3  | 95.047          | 1032.093        | 1028.088        | 0.755   | 1027.839        | T 42 |
| A 4  | 112.506         | 1000.831        | <b>1002.827</b> | 0.755   | <b>1002.575</b> | A 41 |
| F 5  | 137.076         | 969.072         | <b>965.067</b>  | 0.755   | <b>964.315</b>  | F 40 |
| V 6  | 161.537         | 934.820         | 930.804         | 0.755   | 930.552         | V 39 |
| A 7  | 179.596         | 946.042         | 936.037         | 0.755   | 935.785         | A 38 |
| Q 8  | 211.611         | 922.282         | 918.278         | 918.530 | 918.026         | Q 37 |
| A 9  | 229.370         | 890.268         | 886.263         | 886.515 | 886.011         | A 36 |
| A 10 | 247.129         | <b>872.508</b>  | 868.504         | 868.756 | 868.252         | A 35 |
| S 11 | 268.887         | 854.749         | 850.744         | 850.996 | 850.493         | S 34 |
| T 12 | 294.149         | 833.901         | 828.988         | 829.238 | 828.735         | T 33 |
| A 13 | 311.908         | 807.229         | 803.225         | 803.976 | 803.473         | A 32 |
| T 14 | 337.170         | 789.970         | 785.965         | 786.217 | 785.713         | T 31 |
| E 15 | 369.431         | 764.708         | 760.703         | 760.955 | 760.451         | E 30 |
| K 16 | 401.455         | 732.447         | 728.443         | 728.695 | 728.191         | K 29 |
| F 17 | 425.718         | 706.424         | 696.419         | 696.671 | 696.167         | F 28 |
| A 18 | 443.077         | 679.160         | 672.156         | 672.408 | 671.904         | A 27 |
| A 19 | 461.236         | 658.401         | 654.396         | 654.648 | 654.145         | A 26 |
| A 20 | 478.996         | 640.642         | 636.637         | 636.889 | 636.385         | A 25 |
| K 21 | 511.019         | 622.883         | 618.878         | 619.130 | 618.626         | K 24 |
| K 22 | 543.043         | 590.850         | 586.854         | 587.106 | 586.602         | K 23 |
| T 23 | 568.305         | 568.835         | 564.830         | 565.082 | 564.578         | T 22 |
| K 24 | 600.228         | 533.571         | 529.566         | 529.820 | 529.315         | K 21 |
| K 25 | 632.353         | 502.540         | 497.545         | 497.797 | 497.293         | K 20 |
| P 26 | 666.616         | 469.256         | 465.251         | 465.773 | 465.269         | P 19 |
| A 27 | 674.375         | 445.263         | 441.258         | 441.510 | 441.006         | A 18 |
| K 28 | 706.399         | 427.503         | 423.499         | 423.751 | 423.247         | K 17 |
| A 29 | 724.158         | 395.480         | 391.475         | 391.727 | 391.223         | A 16 |
| A 30 | 741.917         | 372.220         | 367.216         | 367.468 | 366.964         | A 15 |
| A 31 | 759.077         | 359.961         | 355.956         | 356.208 | 355.705         | A 14 |
| P 32 | 783.940         | 342.202         | 338.197         | 338.449 | 337.945         | P 31 |
| R 33 | 822.965         | 317.938         | 313.934         | 314.186 | 313.682         | R 12 |
| K 34 | 854.989         | 278.913         | 274.909         | 275.160 | 274.657         | K 11 |
| K 35 | 887.013         | 246.889         | 242.885         | 243.137 | 242.633         | K 10 |
| P 36 | 911.276         | 214.866         | 210.861         | 211.113 | 210.609         | P 9  |
| A 37 | 924.035         | 199.601         | 195.596         | 195.848 | 195.344         | A 9  |
| G 38 | 943.290         | 172.843         | 168.839         | 169.091 | 168.587         | G 7  |
| P 39 | <b>967.554</b>  | 158.588         | 154.583         | 154.835 | 154.331         | P 6  |
| S 40 | 989.312         | 134.325         | 130.320         | 130.572 | 130.068         | S 5  |
| V 41 | <b>1014.079</b> | 112.567         | 108.562         | 108.814 | 108.310         | V 4  |
| S 42 | <b>1035.837</b> | 87.800          | 83.795          | 84.047  | 83.543          | S 3  |
| E 43 | <b>1048.097</b> | 66.047          | 62.037          | 62.289  | 61.785          | E 2  |
| L 44 | <b>1096.368</b> | 33.781          | 29.776          | 30.028  | 29.524          | L 1  |



# sp | P15864 | H12\_MOUSE

[Acetyl]SEAAPAAPAAAPPAEKAPAKKKAAKKPAGVRRKASGPPVSEL

- ▶ fragmentation table for charge state 1+
- ▶ specType=etd
- ▶ score=35.51
- ▶ F104930.dat
- ▶ query=q4362\_p1
- ▶ precursor=823.673160
- ▶ chargePrecursor=5
- ▶ itol=0.8

| AA | c  | y               | z+1      | z+2             | z               | AA              |       |
|----|----|-----------------|----------|-----------------|-----------------|-----------------|-------|
| S  | 1  | 147.079         | 4114.325 | 4098.306        | 0.000           | 4097.206        | S[42] |
| E  | 2  | 276.119         | 3985.282 | 3969.263        | 0.000           | 3968.256        | E[41] |
| A  | 3  | 347.156         | 3856.240 | 3840.221        | 0.000           | 3839.213        | A[40] |
| A  | 4  | 418.193         | 3727.198 | 3711.179        | 0.000           | 3710.171        | A[39] |
| P  | 5  | 515.246         | 3714.165 | 3698.147        | 0.000           | 3697.139        | P[38] |
| A  | 6  | 598.283         | 3617.133 | 3601.094        | 0.000           | 3600.086        | A[37] |
| A  | 7  | 657.320         | 3546.075 | 3530.057        | 0.000           | 3529.049        | A[36] |
| P  | 8  | 754.373         | 3475.038 | 3459.020        | 0.000           | 3458.012        | P[35] |
| A  | 9  | 825.410         | 3377.998 | 3361.967        | 0.000           | 3360.959        | A[34] |
| A  | 10 | 896.447         | 3306.948 | 3290.930        | 0.000           | 3289.922        | A[33] |
| A  | 11 | 967.484         | 3235.911 | 3219.891        | 0.000           | 3218.885        | A[32] |
| P  | 12 | 1064.537        | 3164.874 | 3148.856        | 0.000           | 3147.848        | P[31] |
| P  | 13 | 1161.590        | 3093.837 | 3077.803        | 0.000           | 3076.795        | P[30] |
| A  | 14 | 1232.627        | 2970.769 | 2954.750        | 0.000           | 2953.742        | A[29] |
| E  | 15 | 1303.664        | 2899.732 | 2883.713        | 0.000           | 2882.705        | E[28] |
| R  | 16 | <b>1489.765</b> | 2770.689 | 2754.670        | 2755.678        | 2753.666        | R[27] |
| A  | 17 | 1560.802        | 2642.594 | 2626.575        | 2627.583        | 2625.568        | A[26] |
| P  | 18 | 1657.854        | 2571.557 | 2555.538        | 2556.546        | 2554.530        | P[25] |
| A  | 19 | 1728.892        | 2474.504 | 2458.485        | 2459.493        | 2457.478        | A[24] |
| K  | 20 | 1856.988        | 2403.467 | 2387.448        | 2388.456        | 2386.441        | K[23] |
| K  | 21 | <b>1985.081</b> | 2275.372 | 2259.353        | 2260.361        | 2258.346        | K[22] |
| K  | 22 | 2113.178        | 2147.277 | 2131.258        | 2132.266        | 2130.251        | K[21] |
| A  | 23 | 2184.214        | 2019.182 | 2003.163        | 2004.171        | 2002.156        | A[20] |
| A  | 24 | 2255.251        | 1948.145 | 1932.126        | 1933.134        | 1931.119        | A[19] |
| K  | 25 | 2363.346        | 1877.098 | 1861.079        | 1862.087        | 1860.068        | K[18] |
| K  | 26 | 2511.441        | 1749.013 | 1733.994        | <b>1734.002</b> | 1731.989        | K[17] |
| P  | 27 | 2628.493        | 1620.918 | 1604.899        | 1605.907        | 1603.891        | P[16] |
| A  | 28 | 2679.530        | 1523.868 | 1507.849        | 1508.854        | 1506.839        | A[15] |
| G  | 29 | 2726.552        | 1452.828 | 1436.809        | 1437.817        | 1435.802        | G[14] |
| V  | 30 | 2835.620        | 1395.807 | 1379.788        | 1380.796        | <b>1378.780</b> | V[13] |
| R  | 31 | 2991.721        | 1296.738 | <b>1280.720</b> | 1281.727        | 1279.712        | R[12] |
| R  | 32 | 3147.823        | 1140.637 | 1124.618        | <b>1125.626</b> | 1123.611        | R[11] |
| R  | 33 | 3275.918        | 894.536  | <b>968.517</b>  | <b>969.525</b>  | 967.509         | R[10] |
| A  | 34 | 3268.955        | 856.441  |                 | 841.430         | 839.415         | A[9]  |
| S  | 35 | 3433.987        | 795.404  | 769.385         | 770.393         | 768.377         | S[8]  |
| G  | 36 | 3491.008        | 698.372  | 682.353         | 683.361         | 681.345         | G[7]  |
| P  | 37 | 3588.051        | 641.330  | 625.312         | 626.320         | 624.304         | P[6]  |
| P  | 38 | 3685.114        | 544.298  | 528.279         | 529.287         | 527.271         | P[5]  |
| V  | 39 | <b>3784.182</b> | 447.265  | 431.246         | 432.254         | 430.238         | V[4]  |
| S  | 40 | 3871.214        | 348.177  | 332.158         | 333.166         | 331.150         | S[3]  |
| E  | 41 | 4000.257        | 261.144  | 245.126         | 246.134         | 244.118         | E[2]  |
| L  | 42 | 4113.341        | 132.022  | 116.003         | 117.011         | 115.075         | L[1]  |

# sp | P15864 | H12\_MOUSE

[Acetyl]SEAAPAAPAAAPPAEKAPAKKKAAKKPAGVRRKASGPPVSEL

- ▶ fragmentation table for charge state 2+
- ▶ specType=etd
- ▶ score=35.51
- ▶ F104930.dat
- ▶ query=q4362\_p1
- ▶ precursor=823.673160
- ▶ chargePrecursor=5
- ▶ itol=0.8

| AA | c  | y               | z+1             | z+2             | z               | AA              |       |
|----|----|-----------------|-----------------|-----------------|-----------------|-----------------|-------|
| S  | 1  | 74.042          | 2057.666        | 2049.657        | 0.504           | 2049.153        | S(42) |
| E  | 2  | 138.563         | 1093.145        | <b>1985.135</b> | 0.504           | 1984.631        | E(41) |
| A  | 3  | 174.082         | 1028.623        | 1020.614        | 0.504           | 1020.110        | A(40) |
| A  | 4  | 269.600         | 1093.165        | 1085.085        | 0.504           | 1084.562        | A(39) |
| T  | 5  | 298.122         | 1057.565        | 1049.517        | 0.504           | 1049.011        | T(38) |
| A  | 6  | 293.645         | 1050.060        | 1041.051        | 0.504           | 1040.547        | A(37) |
| A  | 7  | 336.164         | 1773.541        | 1765.532        | 0.504           | 1765.028        | A(36) |
| F  | 8  | 377.690         | <b>1738.023</b> | 1730.013        | 0.504           | 1729.510        | F(35) |
| A  | 9  | 413.209         | 1059.496        | 1051.457        | 0.504           | 1050.953        | A(34) |
| A  | 10 | 448.727         | 1053.978        | 1045.989        | 0.504           | 1045.485        | A(33) |
| A  | 11 | 484.246         | 1018.459        | 1010.430        | 0.504           | 1009.946        | A(32) |
| F  | 12 | 532.772         | 1582.941        | <b>1574.931</b> | 0.504           | <b>1574.427</b> | F(31) |
| F  | 13 | 581.290         | 1534.414        | 1526.405        | 0.504           | 1525.901        | F(30) |
| A  | 14 | 616.817         | 1485.888        | 1477.879        | 0.504           | 1477.375        | A(29) |
| E  | 15 | 661.336         | 1450.369        | 1442.359        | 0.504           | 1441.856        | E(28) |
| R  | 16 | 745.386         | 1386.840        | <b>1377.829</b> | 0.504           | <b>1377.325</b> | R(27) |
| A  | 17 | 780.904         | 1321.301        | <b>1313.791</b> | <b>1314.295</b> | 1313.287        | A(26) |
| F  | 18 | 829.431         | 1286.362        | 1278.275        | 1278.777        | 1277.769        | F(25) |
| A  | 19 | 864.949         | 1237.756        | <b>1229.746</b> | <b>1230.250</b> | <b>1229.242</b> | A(24) |
| K  | 20 | <b>928.997</b>  | <b>1202.237</b> | 1194.228        | 1194.732        | 1193.724        | K(23) |
| K  | 21 | <b>993.044</b>  | <b>1136.190</b> | <b>1130.180</b> | <b>1130.684</b> | 1129.676        | K(22) |
| K  | 22 | <b>1057.092</b> | <b>1074.142</b> | <b>1066.133</b> | <b>1066.637</b> | 1065.629        | K(21) |
| A  | 23 | <b>1092.610</b> | 1010.095        | <b>1002.085</b> | <b>1002.589</b> | <b>1001.581</b> | A(20) |
| A  | 24 | 1138.120        | 974.576         | 966.567         | 967.071         | 966.063         | A(19) |
| K  | 25 | <b>1192.176</b> | 939.050         | 931.040         | 931.542         | <b>930.544</b>  | K(18) |
| K  | 26 | 1269.228        | 875.010         | <b>867.001</b>  | <b>867.505</b>  | <b>866.497</b>  | K(17) |
| F  | 27 | <b>1304.750</b> | 810.983         | 802.973         | 803.477         | 802.469         | F(16) |
| A  | 28 | <b>1340.269</b> | 767.435         | 759.427         | 759.931         | 758.923         | A(15) |
| G  | 29 | 1388.780        | 726.918         | 718.908         | 719.412         | 718.404         | G(14) |
| V  | 30 | <b>1418.314</b> | 698.407         | <b>690.398</b>  | <b>690.902</b>  | 689.894         | V(13) |
| R  | 31 | <b>1496.364</b> | 648.873         | 640.863         | 641.367         | 640.359         | R(12) |
| R  | 32 | <b>1574.415</b> | 610.822         | 602.813         | 603.317         | 602.309         | R(11) |
| R  | 33 | 1633.442        | 602.772         | 604.762         | 605.266         | 604.258         | R(10) |
| A  | 34 | 1673.961        | 428.724         | 420.715         | 421.219         | 420.211         | A(9)  |
| S  | 35 | 1717.497        | 391.206         | 383.196         | 383.700         | 382.692         | S(8)  |
| G  | 36 | 1746.028        | 349.690         | 341.680         | 342.184         | 341.176         | G(7)  |
| F  | 37 | 1764.534        | 321.179         | 313.170         | 313.673         | 312.666         | F(6)  |
| F  | 38 | 1843.680        | 272.652         | 264.643         | 265.147         | 264.139         | F(5)  |
| V  | 39 | 1892.595        | 224.126         | 216.117         | 216.621         | 215.613         | V(4)  |
| S  | 40 | <b>1936.111</b> | 174.592         | 166.583         | 167.086         | 166.078         | S(3)  |
| E  | 41 | 2000.632        | 131.076         | 123.067         | 123.570         | 122.562         | E(2)  |
| L  | 42 | 2057.174        | 66.555          | 58.545          | 59.049          | 58.041          | L(1)  |



# sp | P15864 | H12\_MOUSE

[Acetyl]SEAAPAAPAAAPPAEKAPAKKKAACKKPAGVRRKASGPPVSEL

- ▶ fragmentation table for charge state 3+
- ▶ specType=etd
- ▶ score=35.51
- ▶ F104930.dat
- ▶ query=q4362\_p1
- ▶ precursor=823.673160
- ▶ chargePrecursor=5
- ▶ itol=0.8

| AA | c  | y               | z+1             | z+2             | z              | AA              |       |
|----|----|-----------------|-----------------|-----------------|----------------|-----------------|-------|
| S  | 1  | 49.697          | 1372.113        | <b>1366.774</b> | 0.672          | <b>1366.438</b> | S[42] |
| E  | 2  | 92.711          | 1329.099        | 1323.759        | 0.672          | 1323.421        | E[41] |
| A  | 3  | 126.390         | 1286.085        | <b>1280.745</b> | 0.672          | <b>1280.409</b> | A[40] |
| A  | 4  | 160.069         | <b>1242.406</b> | 1237.066        | 0.672          | 1236.730        | A[39] |
| P  | 5  | 172.420         | 1238.722        | 1233.387        | 0.672          | 1233.051        | P[38] |
| A  | 6  | 196.099         | 1206.376        | 1201.036        | 0.672          | 1200.700        | A[37] |
| A  | 7  | 219.778         | 1182.697        | <b>1177.357</b> | 0.672          | <b>1177.021</b> | A[36] |
| P  | 8  | 252.129         | 1159.018        | 1153.678        | 0.672          | 1153.342        | P[35] |
| A  | 9  | 275.808         | 1126.667        | 1121.327        | 0.672          | 1120.991        | A[34] |
| A  | 10 | 299.487         | 1102.988        | 1097.648        | 0.672          | 1097.312        | A[33] |
| A  | 11 | 323.166         | 1079.309        | <b>1073.969</b> | 0.672          | 1073.633        | A[32] |
| P  | 12 | 355.517         | 1055.630        | 1050.290        | 0.672          | 1049.954        | P[31] |
| P  | 13 | 387.898         | 1023.279        | 1017.939        | 0.672          | 1017.603        | P[30] |
| A  | 14 | 411.547         | 999.928         | <b>985.588</b>  | 0.672          | 985.252         | A[29] |
| E  | 15 | 454.301         | 967.249         | <b>961.909</b>  | 0.672          | <b>961.573</b>  | E[28] |
| R  | 16 | 497.260         | 924.339         | <b>918.895</b>  | <b>919.231</b> | <b>918.559</b>  | R[27] |
| A  | 17 | 520.939         | 881.538         | <b>876.197</b>  | <b>876.533</b> | <b>875.861</b>  | A[26] |
| P  | 18 | 553.290         | 857.857         | 852.518         | 852.854        | 852.182         | P[25] |
| A  | 19 | 576.969         | 825.508         | <b>820.167</b>  | <b>820.503</b> | <b>819.831</b>  | A[24] |
| K  | 20 | 619.667         | 801.827         | 796.488         | 796.824        | 796.152         | K[23] |
| K  | 21 | 662.365         | 759.129         | 753.789         | 754.125        | 753.453         | K[22] |
| K  | 22 | 705.064         | 716.431         | 711.091         | 711.427        | 710.751         | K[21] |
| A  | 23 | 728.743         | 673.732         | 668.393         | 668.729        | 668.053         | A[20] |
| A  | 24 | 752.422         | 650.053         | 644.714         | 645.050        | 644.378         | A[19] |
| K  | 25 | 795.120         | 626.374         | 621.035         | 621.371        | 620.699         | K[18] |
| K  | 26 | 837.818         | 583.676         | 578.336         | 578.672        | 578.000         | K[17] |
| P  | 27 | 880.516         | 540.978         | 535.638         | 535.974        | 535.302         | P[16] |
| K  | 28 | <b>893.848</b>  | 508.927         | 503.587         | 503.923        | 503.251         | K[15] |
| G  | 29 | 912.355         | 484.948         | 479.608         | 479.944        | 479.272         | G[14] |
| V  | 30 | 945.878         | 465.940         | 460.601         | 460.937        | 460.265         | V[13] |
| R  | 31 | <b>997.912</b>  | 432.918         | 427.578         | 427.914        | 427.242         | R[12] |
| R  | 32 | 1040.946        | 389.884         | 375.544         | 375.880        | 375.208         | R[11] |
| K  | 33 | <b>1092.644</b> | 358.860         | 353.511         | 353.847        | 353.175         | K[10] |
| A  | 34 | <b>1118.323</b> | 286.152         | 280.812         | 281.148        | 280.476         | A[9]  |
| S  | 35 | <b>1145.334</b> | 262.473         | 257.133         | 257.469        | 256.797         | S[8]  |
| G  | 36 | 1184.341        | 233.462         | 228.123         | 228.459        | 227.787         | G[7]  |
| P  | 37 | 1198.692        | 214.455         | 209.115         | 209.451        | 208.779         | P[6]  |
| P  | 38 | <b>1229.043</b> | 182.194         | 176.705         | 177.041        | 176.429         | P[5]  |
| V  | 39 | <b>1262.066</b> | 149.753         | 144.414         | 144.750        | 144.078         | V[4]  |
| S  | 40 | 1291.076        | 116.739         | 111.399         | 111.737        | 111.065         | S[3]  |
| E  | 41 | 1334.090        | 87.220          | 82.380          | 82.716         | 82.044          | E[2]  |
| L  | 42 | 1371.705        | 44.705          | 39.366          | 39.702         | 39.030          | L[1]  |

# sp | P15864 | H12\_MOUSE

[Acetyl]SEAAPAAPAAAPPAEKAPAKKKAACKKAGVRRKASGPPVSEL

- ▶ fragmentation table for charge state 4+
- ▶ specType=etd
- ▶ score=35.51
- ▶ F104930.dat
- ▶ query=q4362.p1
- ▶ precursor=823.673160
- ▶ chargePrecursor=5
- ▶ itol=0.8

| AA |    | c               | y               | z+1             | z+2     | z              | AA |    |
|----|----|-----------------|-----------------|-----------------|---------|----------------|----|----|
| S  | 1  | 37.525          | <b>1029.337</b> | <b>1025.332</b> | 0.755   | 1026.090       | S  | 42 |
| E  | 2  | 69.785          | <b>997.076</b>  | <b>993.071</b>  | 0.755   | <b>992.815</b> | E  | 41 |
| A  | 3  | 87.544          | 954.815         | <b>950.811</b>  | 0.755   | <b>946.559</b> | A  | 40 |
| A  | 4  | 105.904         | <b>947.056</b>  | 943.051         | 0.755   | 942.799        | A  | 39 |
| P  | 5  | 120.567         | <b>929.297</b>  | 925.292         | 0.755   | 925.040        | P  | 38 |
| A  | 6  | 147.326         | 905.034         | 901.029         | 0.755   | 900.777        | A  | 37 |
| A  | 7  | 165.086         | 887.274         | 883.270         | 0.755   | 883.019        | A  | 36 |
| P  | 8  | 189.349         | 866.515         | 865.510         | 0.755   | 865.256        | P  | 35 |
| A  | 9  | 207.108         | 849.252         | 841.247         | 0.755   | 840.999        | A  | 34 |
| A  | 10 | 224.867         | 827.493         | 823.488         | 0.755   | 823.235        | A  | 33 |
| A  | 11 | 242.627         | 809.733         | 805.729         | 0.755   | 805.477        | A  | 32 |
| P  | 12 | 266.890         | 791.974         | 787.969         | 0.755   | 787.717        | P  | 31 |
| P  | 13 | 291.153         | 767.711         | 763.706         | 0.755   | 763.454        | P  | 30 |
| A  | 14 | 308.912         | 743.448         | 739.443         | 0.755   | 739.191        | A  | 29 |
| E  | 15 | 341.173         | 725.688         | 721.684         | 0.755   | 721.432        | E  | 28 |
| K  | 16 | 373.197         | 691.423         | 689.423         | 689.075 | 689.171        | K  | 27 |
| A  | 17 | 390.956         | 661.404         | 657.399         | 657.051 | 657.147        | A  | 26 |
| P  | 18 | 415.219         | 643.645         | 639.640         | 639.692 | 639.388        | P  | 25 |
| A  | 19 | 432.978         | 619.381         | 615.377         | 615.620 | 615.125        | A  | 24 |
| K  | 20 | 465.002         | 601.622         | 597.618         | 597.669 | 597.366        | K  | 23 |
| K  | 21 | 497.026         | 569.598         | 565.594         | 565.646 | 565.342        | K  | 22 |
| K  | 22 | 529.050         | 537.573         | 533.570         | 533.622 | 533.318        | K  | 21 |
| A  | 23 | 546.809         | 505.551         | 501.546         | 501.789 | 501.294        | A  | 20 |
| A  | 24 | 564.568         | 467.792         | 463.787         | 464.030 | 463.535        | A  | 19 |
| K  | 25 | 596.592         | 470.032         | 466.028         | 466.280 | 465.776        | K  | 18 |
| K  | 26 | 628.616         | 438.009         | 434.004         | 434.256 | 433.752        | K  | 17 |
| P  | 27 | 652.879         | 405.985         | <b>401.980</b>  | 402.232 | <b>401.728</b> | P  | 16 |
| A  | 28 | 670.638         | 381.722         | 377.717         | 377.969 | 377.465        | A  | 15 |
| G  | 29 | 684.893         | 363.963         | 359.958         | 360.210 | 359.705        | G  | 14 |
| V  | 30 | 709.661         | 349.707         | 345.702         | 345.954 | 345.450        | V  | 13 |
| R  | 31 | 748.686         | 324.940         | 320.935         | 321.187 | 320.683        | R  | 12 |
| R  | 32 | 787.711         | 285.915         | 281.910         | 282.162 | 281.658        | R  | 11 |
| K  | 33 | <b>819.735</b>  | 246.889         | 242.885         | 243.137 | 242.633        | K  | 10 |
| A  | 34 | 837.494         | 214.866         | 210.861         | 211.113 | 210.609        | A  | 9  |
| S  | 35 | 859.252         | 197.100         | 193.102         | 193.354 | 192.850        | S  | 8  |
| G  | 36 | 873.867         | 175.349         | 171.344         | 171.596 | 171.092        | G  | 7  |
| P  | 37 | 897.771         | 161.093         | 157.088         | 157.340 | 156.836        | P  | 6  |
| P  | 38 | 922.034         | 136.830         | 132.825         | 133.077 | 132.573        | P  | 5  |
| V  | 39 | <b>946.801</b>  | 112.567         | 108.562         | 108.814 | 108.310        | V  | 4  |
| S  | 40 | <b>968.559</b>  | 87.800          | 83.795          | 84.047  | 83.543         | S  | 3  |
| E  | 41 | 1030.620        | 66.042          | 62.037          | 62.289  | 61.785         | E  | 2  |
| L  | 42 | <b>1029.091</b> | 33.781          | 29.776          | 30.028  | 29.524         | L  | 1  |



# sp | P43277 | H13\_MOUSE

[Acetyl]SETAPAAPAAPAVEKTPVKKKAKKTGAAAGKRKASGPPVSEL

- ▶ fragmentation table for charge state 1+
- ▶ specType=etd
- ▶ score=50.44
- ▶ F104930.dat
- ▶ query=q4399\_p1
- ▶ precursor=847.885670
- ▶ chargePrecursor=5
- ▶ itol=0.8

| AA |    | c               | y               | z+1             | z+2             | z        | AA    |
|----|----|-----------------|-----------------|-----------------|-----------------|----------|-------|
| S  | 1  | 147.076         | 4235.387        | 4219.369        | 0.000           | 4218.362 | A[43] |
| E  | 3  | 278.119         | 4198.345        | 4030.335        | 0.000           | 4089.315 | E[43] |
| T  | 3  | 377.167         | 3977.362        | 3961.294        | 0.000           | 3960.270 | T[41] |
| A  | 4  | 448.204         | 3870.255        | 3860.230        | 0.000           | 3859.238 | A[40] |
| P  | 5  | 545.257         | 3805.217        | 3789.199        | 0.000           | 3788.191 | P[39] |
| A  | 6  | 616.294         | 3708.165        | 3692.146        | 0.000           | 3691.138 | A[38] |
| A  | 7  | 667.331         | 3637.126        | 3621.109        | 0.000           | 3620.101 | A[37] |
| P  | 8  | 784.384         | 3566.090        | 3550.072        | 0.000           | 3549.064 | P[36] |
| A  | 9  | 855.421         | 3469.038        | 3453.019        | 0.000           | 3452.011 | A[35] |
| A  | 10 | 926.458         | 3398.001        | 3381.982        | 0.000           | 3380.974 | A[34] |
| P  | 11 | <b>1023.511</b> | 3326.963        | 3310.944        | 0.000           | 3309.935 | P[33] |
| A  | 12 | 1094.548        | 3229.911        | 3213.892        | 0.000           | 3212.884 | A[32] |
| P  | 13 | 1161.600        | 3138.874        | 3142.855        | 0.000           | 3141.847 | P[31] |
| V  | 14 | 1290.669        | 3061.821        | 3045.803        | 0.000           | 3044.794 | V[30] |
| E  | 15 | 1419.711        | 2962.752        | 2946.734        | 0.000           | 2945.726 | E[29] |
| K  | 16 | <b>1547.806</b> | 2833.710        | 2817.691        | 2818.699        | 2816.683 | K[28] |
| T  | 17 | 1648.854        | 2705.615        | 2689.596        | 2690.604        | 2688.588 | T[27] |
| P  | 18 | 1745.907        | 2604.567        | 2588.548        | 2589.556        | 2587.541 | P[26] |
| V  | 19 | 1844.975        | 2507.514        | 2491.496        | 2492.504        | 2490.488 | V[25] |
| R  | 20 | 1973.078        | 2408.446        | 2392.427        | 2393.435        | 2391.418 | R[24] |
| K  | 21 | 2101.105        | 2280.351        | 2264.332        | 2265.340        | 2263.324 | K[23] |
| K  | 22 | 2229.200        | 2152.258        | 2136.239        | 2137.247        | 2135.230 | K[22] |
| A  | 23 | 2300.297        | 2024.161        | 2008.142        | 2009.150        | 2007.134 | A[21] |
| K  | 24 | 2428.392        | 1953.124        | 1937.105        | 1938.113        | 1936.097 | K[20] |
| K  | 25 | 2526.487        | 1825.020        | 1809.001        | 1810.010        | 1808.002 | K[19] |
| T  | 26 | 2657.538        | 1706.934        | 1690.915        | 1691.923        | 1689.906 | T[18] |
| G  | 27 | 2714.556        | 1595.888        | 1579.868        | 1580.875        | 1578.860 | G[17] |
| A  | 28 | 2785.593        | 1538.885        | <b>1522.846</b> | 1523.854        | 1521.838 | A[16] |
| A  | 29 | 2856.631        | 1467.828        | 1451.809        | 1452.817        | 1450.801 | A[15] |
| A  | 30 | 2927.668        | 1396.791        | 1380.772        | 1381.780        | 1379.764 | A[14] |
| G  | 31 | 2984.689        | 1325.754        | 1309.735        | <b>1310.743</b> | 1308.727 | G[13] |
| K  | 32 | 3112.784        | 1268.732        | 1252.713        | <b>1253.721</b> | 1251.706 | K[12] |
| R  | 33 | 3268.888        | <b>1140.637</b> | <b>1124.618</b> | 1125.625        | 1123.610 | R[11] |
| K  | 34 | 3396.980        | 984.538         | 968.519         | <b>969.525</b>  | 967.509  | K[10] |
| A  | 35 | 3488.017        | 856.441         | 840.422         | <b>841.430</b>  | 839.413  | A[9]  |
| S  | 36 | 3555.049        | 785.404         | 769.385         | 770.393         | 768.377  | S[8]  |
| G  | 37 | 3632.071        | <b>698.372</b>  | 682.353         | 683.361         | 681.345  | G[7]  |
| P  | 38 | 3709.124        | 641.366         | 625.347         | 626.354         | 624.339  | P[6]  |
| P  | 39 | 3806.176        | 544.298         | 528.279         | 529.287         | 527.271  | P[5]  |
| V  | 40 | 3905.245        | 447.245         | 431.226         | 432.234         | 430.218  | V[4]  |
| S  | 41 | 3992.277        | 348.177         | 332.158         | 333.166         | 331.150  | S[3]  |
| E  | 42 | 4121.319        | 261.144         | 245.125         | 246.134         | 244.118  | E[2]  |
| L  | 43 | 4234.403        | 132.102         | 116.083         | 117.091         | 115.075  | L[1]  |

# sp | P43277 | H13\_MOUSE

[Acetyl]SETAPAAPAAPAVEKTPVKKKAKKTGAAAGKRKASGPPVSEL

- ▶ fragmentation table for charge state 2+
- ▶ specType=etd
- ▶ score=50.44
- ▶ F104930.dat
- ▶ query=q4399.p1
- ▶ precursor=847.885670
- ▶ chargePrecursor=5
- ▶ itol=0.8

| AA | c  | y               | z+1             | z+2             | z               | AA              |       |
|----|----|-----------------|-----------------|-----------------|-----------------|-----------------|-------|
| S  | 1  | 74.042          | 2118.197        | 2110.188        | 0.504           | 2109.684        | E[43] |
| E  | 2  | 138.563         | 2051.076        | 2045.667        | 0.504           | 2045.163        | E[42] |
| T  | 3  | 189.087         | 1988.355        | 1981.143        | 0.504           | 1980.641        | F[41] |
| A  | 4  | 224.606         | 1930.631        | 1930.622        | 0.504           | 1930.118        | A[40] |
| F  | 5  | 273.132         | <b>1903.112</b> | 1895.103        | 0.504           | 1894.599        | F[39] |
| A  | 6  | 308.650         | 1854.586        | 1846.577        | 0.504           | 1846.073        | A[38] |
| A  | 7  | 344.169         | 1819.067        | 1811.058        | 0.504           | 1810.554        | A[37] |
| F  | 8  | 382.695         | <b>1783.549</b> | 1775.540        | 0.504           | 1775.036        | F[36] |
| A  | 9  | 428.214         | 1759.105        | 1757.093        | 0.504           | 1756.589        | A[35] |
| A  | 10 | 463.733         | <b>1699.504</b> | <b>1691.495</b> | 0.504           | 1690.991        | A[34] |
| F  | 11 | 512.259         | 1663.965        | 1655.976        | 0.504           | 1655.472        | F[33] |
| A  | 12 | 547.777         | 1615.459        | <b>1607.450</b> | 0.504           | <b>1606.946</b> | A[32] |
| F  | 13 | 586.304         | 1579.940        | 1571.930        | 0.504           | 1571.427        | F[31] |
| V  | 14 | 645.838         | 1538.424        | <b>1522.405</b> | 0.504           | <b>1522.901</b> | V[30] |
| E  | 15 | 710.359         | 1489.880        | <b>1473.870</b> | 0.504           | <b>1473.367</b> | E[29] |
| K  | 16 | 774.407         | 1447.359        | 1439.349        | 1409.853        | 1408.845        | K[28] |
| T  | 17 | 804.911         | 1383.311        | <b>1345.302</b> | <b>1345.806</b> | 1344.798        | T[27] |
| F  | 18 | 873.457         | <b>1302.787</b> | 1294.778        | 1295.262        | 1294.271        | F[26] |
| V  | 19 | 927.974         | <b>1254.261</b> | 1246.251        | 1246.755        | 1245.746        | V[25] |
| K  | 20 | <b>987.039</b>  | 1204.244        | 1196.237        | 1197.241        | 1196.231        | K[24] |
| K  | 21 | <b>1051.086</b> | <b>1140.679</b> | <b>1132.670</b> | <b>1133.174</b> | 1132.166        | K[23] |
| K  | 22 | 1115.134        | <b>1076.632</b> | <b>1068.622</b> | <b>1069.126</b> | <b>1068.118</b> | K[22] |
| A  | 23 | 1180.652        | 1012.584        | 1004.575        | 1005.079        | 1004.071        | A[21] |
| K  | 24 | <b>1214.700</b> | <b>977.066</b>  | <b>969.056</b>  | <b>969.560</b>  | 968.552         | K[20] |
| K  | 25 | 1278.141        | 913.018         | <b>905.009</b>  | <b>905.513</b>  | <b>904.505</b>  | K[19] |
| T  | 26 | 1320.271        | 848.971         | <b>840.961</b>  | <b>841.465</b>  | 840.457         | T[18] |
| G  | 27 | 1357.782        | 798.447         | <b>790.437</b>  | <b>790.941</b>  | <b>789.934</b>  | G[17] |
| A  | 28 | <b>1393.300</b> | 769.936         | <b>761.927</b>  | <b>762.431</b>  | <b>761.423</b>  | A[16] |
| A  | 29 | 1428.819        | 734.419         | 726.408         | 726.912         | 725.904         | A[15] |
| A  | 30 | <b>1454.337</b> | <b>698.099</b>  | 690.089         | 691.094         | 690.086         | A[14] |
| C  | 31 | <b>1492.848</b> | <b>663.380</b>  | <b>655.371</b>  | <b>655.875</b>  | 654.867         | C[13] |
| K  | 32 | <b>1556.896</b> | 634.970         | 626.959         | 627.964         | 626.956         | K[12] |
| R  | 33 | 1634.946        | 670.822         | 562.813         | 563.817         | 562.809         | R[11] |
| K  | 34 | <b>1698.994</b> | 692.772         | 484.762         | 485.266         | 484.259         | K[10] |
| A  | 35 | 1734.512        | 428.724         | 420.715         | 421.219         | 420.211         | A[9]  |
| S  | 36 | 1778.028        | 393.206         | 385.197         | 386.202         | 385.194         | S[8]  |
| G  | 37 | 1895.539        | 349.689         | 341.680         | 342.184         | 341.177         | G[7]  |
| F  | 38 | 1855.065        | 321.179         | 313.170         | 313.673         | 312.666         | F[6]  |
| F  | 39 | <b>1903.592</b> | 272.652         | 264.643         | 265.147         | 264.139         | F[5]  |
| V  | 40 | 1953.126        | 254.129         | 246.119         | 246.623         | 245.615         | V[4]  |
| S  | 41 | 1986.642        | 174.592         | 166.583         | 167.086         | 166.078         | S[3]  |
| E  | 42 | 2003.183        | 133.076         | 125.067         | 125.570         | 124.562         | E[2]  |
| L  | 43 | 2117.705        | 66.555          | 58.545          | 59.049          | 58.041          | L[1]  |

# sp | P43277 | H13\_MOUSE

[Acetyl]SETAPAAPAAPAVEKTPVKKKAKKTGAAAGKRKASGPPVSEL

- ▶ fragmentation table for charge state 3+
- ▶ specType=etd
- ▶ score=50.44
- ▶ F104930.dat
- ▶ query=q4399\_p1
- ▶ precursor=847.885670
- ▶ chargePrecursor=5
- ▶ itol=0.8

| AA   | c               | y               | z+1             | z+2            | z               | AA   |
|------|-----------------|-----------------|-----------------|----------------|-----------------|------|
| S 1  | 60.697          | 1412.461        | <b>1407.126</b> | 0.672          | <b>1406.792</b> | S 42 |
| E 2  | 62.711          | 1309.451        | <b>1364.114</b> | 0.672          | 1363.474        | E 43 |
| T 3  | 126.594         | 1325.430        | <b>1321.099</b> | 0.672          | 1320.763        | T 41 |
| A 4  | 150.073         | 1292.756        | <b>1287.417</b> | 0.672          | 1287.081        | A 40 |
| P 5  | 162.424         | 1269.077        | 1263.738        | 0.672          | 1263.402        | P 39 |
| A 6  | 206.103         | 1236.720        | 1231.387        | 0.672          | 1231.051        | A 38 |
| A 7  | 229.782         | 1213.047        | <b>1207.708</b> | 0.672          | 1207.372        | A 37 |
| P 8  | 262.133         | 1199.560        | 1194.225        | 0.672          | 1193.890        | P 36 |
| A 9  | 285.812         | <b>1157.017</b> | 1151.678        | 0.672          | 1151.342        | A 35 |
| A 10 | 309.491         | <b>1133.338</b> | <b>1127.999</b> | 0.672          | <b>1127.663</b> | A 34 |
| P 11 | 341.842         | <b>1109.659</b> | 1104.320        | 0.672          | 1103.984        | P 33 |
| A 12 | 365.521         | <b>1077.308</b> | 1071.969        | 0.672          | 1071.633        | A 32 |
| P 13 | 397.872         | 1053.620        | <b>1048.290</b> | 0.672          | <b>1047.954</b> | P 31 |
| V 14 | 430.094         | 1021.373        | 1015.935        | 0.672          | 1015.600        | V 30 |
| E 15 | 473.909         | 988.250         | <b>982.916</b>  | 0.672          | <b>982.580</b>  | E 29 |
| K 16 | 516.607         | 945.241         | 939.902         | 940.238        | 939.566         | K 28 |
| T 17 | 550.290         | 902.547         | <b>897.204</b>  | <b>897.539</b> | <b>896.868</b>  | T 27 |
| P 18 | 582.640         | 868.861         | 863.521         | 863.857        | 863.189         | P 26 |
| V 19 | 615.663         | 836.510         | 831.170         | 831.506        | 830.834         | V 25 |
| K 20 | 658.302         | 803.467         | 798.147         | 798.483        | 797.811         | K 24 |
| K 21 | 701.000         | 760.789         | 755.449         | 755.785        | 755.113         | K 23 |
| K 22 | 743.758         | 718.000         | 712.751         | 713.087        | 712.415         | K 22 |
| A 23 | 767.437         | 675.392         | <b>670.052</b>  | <b>670.388</b> | <b>669.716</b>  | A 21 |
| K 24 | 810.136         | 651.713         | 646.373         | 646.709        | 646.037         | K 20 |
| K 25 | 852.834         | 609.015         | 603.675         | 604.011        | 603.339         | K 19 |
| T 26 | 894.916         | 566.318         | 560.977         | 561.313        | 560.641         | T 18 |
| G 27 | <b>905.524</b>  | 533.634         | 527.294         | 527.630        | 526.958         | G 17 |
| A 28 | 929.203         | 513.626         | 508.287         | 508.623        | 507.951         | A 16 |
| A 29 | <b>952.882</b>  | 489.947         | 484.608         | 484.944        | 484.272         | A 15 |
| A 30 | <b>976.561</b>  | 466.260         | 460.920         | 461.255        | 460.583         | A 14 |
| G 31 | <b>995.568</b>  | 442.580         | 437.240         | 437.576        | 436.904         | G 13 |
| K 32 | <b>1038.256</b> | 423.587         | 418.243         | 418.579        | 417.907         | K 12 |
| R 33 | 1050.300        | 380.884         | 375.544         | 375.880        | 375.208         | R 11 |
| K 34 | <b>1132.998</b> | 328.850         | 323.511         | 323.847        | 323.175         | K 10 |
| A 35 | <b>1156.677</b> | 286.157         | 280.812         | 281.148        | 280.476         | A 0  |
| S 36 | <b>1185.688</b> | 262.473         | 257.133         | 257.469        | 256.797         | S 8  |
| G 37 | 1204.695        | 233.462         | 228.123         | 228.459        | 227.787         | G 7  |
| P 38 | 1237.046        | 214.451         | 209.115         | 209.451        | 208.779         | P 6  |
| P 39 | <b>1269.397</b> | 182.104         | 176.765         | 177.100        | 176.429         | P 5  |
| V 40 | <b>1302.420</b> | 149.753         | 144.414         | 144.750        | 144.078         | V 4  |
| S 41 | <b>1331.430</b> | 116.730         | 111.391         | 111.727        | 111.055         | S 3  |
| E 42 | <b>1374.445</b> | 87.720          | 82.380          | 82.716         | 82.044          | E 2  |
| L 43 | 1412.139        | 44.705          | 39.366          | 39.702         | 39.030          | L 1  |

# sp | P43277 | H13\_MOUSE

[Acetyl]SETAPAAPAAPAPVEKTPVKKKAKKTGAAAGKRKASGPPVSEL

- ▶ fragmentation table for charge state 4+
- ▶ specType=etd
- ▶ score=50.44
- ▶ F104930.dat
- ▶ query=q4399.p1
- ▶ precursor=847.885670
- ▶ chargePrecursor=5
- ▶ itol=0.8

| AA   | c               | y               | z+1             | z+2     | z               | AA   |
|------|-----------------|-----------------|-----------------|---------|-----------------|------|
| S 1  | 37.925          | <b>1059.602</b> | <b>1055.598</b> | 0.755   | <b>1055.346</b> | S 42 |
| E 2  | 69.785          | 1027.352        | <b>1023.337</b> | 0.755   | <b>1023.085</b> | E 42 |
| T 3  | 95.047          | <b>995.081</b>  | <b>991.076</b>  | 0.755   | <b>990.824</b>  | T 41 |
| A 4  | 112.806         | <b>969.819</b>  | <b>965.814</b>  | 0.755   | <b>965.562</b>  | A 40 |
| P 5  | 127.070         | <b>952.060</b>  | 948.055         | 0.755   | 947.803         | P 39 |
| A 6  | 154.820         | 927.797         | 923.792         | 0.755   | 923.540         | A 38 |
| A 7  | 172.588         | <b>910.837</b>  | 906.833         | 0.755   | <b>905.781</b>  | A 37 |
| P 8  | 196.851         | 892.576         | 888.573         | 0.755   | 888.321         | P 36 |
| A 9  | 214.611         | 868.015         | 864.010         | 0.755   | 863.758         | A 35 |
| A 10 | 232.370         | 850.250         | 846.251         | 0.755   | 845.999         | A 34 |
| P 11 | 256.633         | 832.490         | 828.492         | 0.755   | 828.240         | P 33 |
| A 12 | 274.392         | 808.233         | 804.238         | 0.755   | 803.976         | A 32 |
| P 13 | 298.656         | <b>790.474</b>  | 786.469         | 0.755   | 786.217         | P 31 |
| V 14 | 323.423         | 766.211         | <b>762.206</b>  | 0.755   | <b>761.954</b>  | V 30 |
| E 15 | 355.683         | 741.444         | 737.439         | 0.755   | 737.187         | E 29 |
| K 16 | 387.707         | 709.183         | 705.178         | 705.430 | 704.926         | K 28 |
| T 17 | 412.969         | 677.159         | 673.154         | 673.406 | 672.903         | T 27 |
| P 18 | 437.232         | 651.897         | 647.893         | 648.145 | 647.641         | P 26 |
| V 19 | 461.999         | 627.634         | 623.629         | 623.881 | 623.377         | V 25 |
| K 20 | 484.223         | 602.967         | 598.962         | 599.114 | 598.611         | K 24 |
| K 21 | 526.047         | 570.843         | 566.839         | 567.090 | 566.587         | K 23 |
| K 22 | 558.070         | 538.819         | 534.815         | 535.067 | 534.563         | K 22 |
| A 23 | 578.830         | 506.796         | 502.791         | 503.043 | 502.539         | A 21 |
| K 24 | 607.854         | 489.030         | 485.032         | 485.284 | 484.780         | K 20 |
| K 25 | 639.877         | 457.013         | 453.008         | 453.260 | 452.756         | K 19 |
| T 26 | 665.139         | 434.989         | 430.984         | 431.236 | 430.732         | T 18 |
| K 27 | 679.395         | 395.727         | 395.722         | 395.974 | 395.470         | K 17 |
| A 28 | 697.154         | 385.472         | 381.467         | 381.719 | 381.215         | A 16 |
| A 29 | 714.913         | 367.712         | 363.708         | 363.960 | 363.456         | A 15 |
| A 30 | 732.672         | 349.953         | 345.948         | 346.200 | 345.696         | A 14 |
| G 31 | 746.928         | 332.194         | 328.189         | 328.441 | 327.937         | G 13 |
| K 32 | 778.951         | 317.698         | 313.694         | 313.946 | 313.442         | K 12 |
| K 33 | 817.974         | 285.915         | 281.910         | 282.162 | 281.658         | K 11 |
| K 34 | 850.001         | 246.889         | 242.885         | 243.137 | 242.633         | K 10 |
| A 35 | 867.760         | 214.899         | 210.891         | 211.113 | 210.609         | A 9  |
| S 36 | 889.518         | 197.100         | 193.102         | 193.354 | 192.850         | S 8  |
| G 37 | 903.773         | 175.348         | 171.344         | 171.596 | 171.092         | G 7  |
| P 38 | 924.026         | 161.093         | 157.088         | 157.340 | 156.836         | P 6  |
| V 39 | <b>952.300</b>  | 139.839         | 132.826         | 133.077 | 132.573         | V 5  |
| V 40 | <b>977.067</b>  | 112.507         | 108.502         | 108.814 | 108.310         | V 4  |
| S 41 | <b>998.825</b>  | 87.800          | 83.795          | 84.047  | 83.543          | S 3  |
| E 42 | <b>1031.085</b> | 66.042          | 62.037          | 62.289  | 61.785          | E 2  |
| L 43 | <b>1059.356</b> | 33.781          | 29.776          | 30.028  | 29.524          | L 1  |





# sp | P43277 | H13\_MOUSE

[Acetyl]SETAPAAPAAPAVEKTPVKKKAKKTGAAAGKRKASGPPVSEL

- ▶ fragmentation table for charge state 1+
- ▶ specType=etd
- ▶ score=37.40
- ▶ F104930.dat
- ▶ query=q4401\_p1
- ▶ precursor=847.886180
- ▶ chargePrecursor=5
- ▶ itol=0.8

| AA | c  | y               | a+1             | a+2             | z              | AA              |       |
|----|----|-----------------|-----------------|-----------------|----------------|-----------------|-------|
| S  | 1  | 147.076         | 4236.387        | 4219.369        | 0.000          | 4218.362        | A[43] |
| E  | 3  | 278.119         | 4198.345        | 4099.336        | 0.000          | 4099.311        | E[43] |
| T  | 3  | 377.167         | 3977.362        | 3961.204        | 0.000          | 3960.270        | T[41] |
| A  | 4  | 448.204         | 3876.255        | 3860.236        | 0.000          | 3859.238        | A[40] |
| P  | 5  | 545.257         | 3805.217        | 3789.199        | 0.000          | 3788.191        | P[39] |
| A  | 6  | 616.294         | 3708.165        | 3692.146        | 0.000          | 3691.138        | A[38] |
| A  | 7  | 667.331         | 3637.126        | 3621.108        | 0.000          | 3620.101        | A[37] |
| P  | 8  | 784.384         | 3566.090        | 3550.072        | 0.000          | 3549.064        | P[36] |
| A  | 9  | 855.421         | 3469.038        | 3453.019        | 0.000          | 3452.011        | A[35] |
| A  | 10 | 926.458         | 3398.001        | 3381.982        | 0.000          | 3380.974        | A[34] |
| P  | 11 | <b>1023.511</b> | 3326.963        | 3310.944        | 0.000          | 3309.937        | P[33] |
| A  | 12 | 1094.548        | 3229.911        | 3213.892        | 0.000          | 3212.884        | A[32] |
| P  | 13 | 1161.600        | 3138.874        | 3142.855        | 0.000          | 3141.847        | P[31] |
| V  | 14 | 1290.669        | 3061.821        | 3045.803        | 0.000          | 3044.796        | V[30] |
| E  | 15 | 1419.711        | 2962.752        | 2946.734        | 0.000          | 2945.726        | E[29] |
| K  | 16 | <b>1547.806</b> | 2833.710        | 2817.691        | 2818.699       | 2816.683        | K[28] |
| V  | 17 | 1648.854        | 2705.615        | 2689.596        | 2690.604       | 2688.589        | V[27] |
| P  | 18 | 1745.907        | 2604.567        | 2588.548        | 2589.556       | 2587.541        | P[26] |
| V  | 19 | 1844.975        | 2507.514        | 2491.496        | 2492.504       | 2490.488        | V[25] |
| R  | 20 | 1973.078        | 2408.446        | 2392.427        | 2393.435       | 2391.418        | R[24] |
| K  | 21 | 2101.105        | 2280.353        | 2264.334        | 2265.340       | 2263.324        | K[23] |
| R  | 22 | 2229.200        | 2152.258        | 2136.239        | 2137.245       | 2135.230        | R[22] |
| A  | 23 | 2300.297        | 2024.161        | 2008.142        | 2009.150       | 2007.135        | A[21] |
| K  | 24 | 2428.392        | 1953.124        | 1937.105        | 1938.113       | 1936.097        | K[20] |
| K  | 25 | 2526.487        | 1825.029        | 1809.010        | 1810.018       | 1808.002        | K[19] |
| T  | 26 | 2657.538        | 1706.934        | 1690.915        | 1691.923       | 1689.907        | T[18] |
| G  | 27 | 2714.556        | 1595.888        | 1579.868        | 1580.875       | 1578.860        | G[17] |
| A  | 28 | 2785.593        | 1538.885        | 1522.866        | 1523.874       | 1521.858        | A[16] |
| A  | 29 | 2856.631        | 1467.828        | 1451.809        | 1452.817       | 1450.801        | A[15] |
| A  | 30 | 2927.668        | 1396.791        | 1380.772        | 1381.780       | <b>1379.764</b> | A[14] |
| C  | 31 | 2984.689        | 1325.754        | 1309.735        | 1310.743       | 1308.727        | C[13] |
| K  | 32 | 3112.784        | 1268.732        | 1252.713        | 1253.721       | 1251.706        | K[12] |
| R  | 33 | 3268.888        | <b>1140.637</b> | <b>1124.618</b> | 1125.626       | 1123.611        | R[11] |
| K  | 34 | 3396.980        | 984.538         | 968.517         | <b>969.525</b> | 967.509         | K[10] |
| A  | 35 | 3488.017        | 856.441         | 840.422         | 841.430        | 839.413         | A[9]  |
| S  | 36 | 3555.049        | 785.404         | 769.385         | 770.393        | 768.377         | S[8]  |
| C  | 37 | 3612.074        | 698.375         | 682.356         | 683.363        | 681.347         | C[7]  |
| P  | 38 | 3709.124        | 641.350         | 625.331         | 626.340        | 624.323         | P[6]  |
| P  | 39 | 3806.176        | 544.298         | 528.279         | 529.287        | 527.271         | P[5]  |
| V  | 40 | 3905.245        | 447.245         | <b>431.226</b>  | 432.234        | 430.218         | V[4]  |
| S  | 41 | 3992.277        | 348.177         | 332.158         | 333.166        | 331.150         | S[3]  |
| E  | 42 | 4121.319        | 261.144         | 245.126         | 246.134        | 244.118         | E[2]  |
| L  | 43 | 4234.403        | 132.102         | 116.083         | 117.091        | 115.075         | L[1]  |

# sp | P43277 | H13\_MOUSE

[Acetyl]SETAPAAPAAPAVEKTPVKKKAKKTGAAAGKRKASGPPVSEL

- ▶ fragmentation table for charge state 2+
- ▶ specType=etd
- ▶ score=37.40
- ▶ F104930.dat
- ▶ query=q4401\_p1
- ▶ precursor=847.886180
- ▶ chargePrecursor=5
- ▶ itol=0.8

| AA | c  | y               | z+1             | z+2             | z               | AA              |       |
|----|----|-----------------|-----------------|-----------------|-----------------|-----------------|-------|
| S  | 1  | 74.042          | 2118.197        | 2110.188        | 0.504           | 2109.686        | E[43] |
| E  | 2  | 138.563         | 2051.676        | 2045.667        | 0.504           | 2045.163        | E[42] |
| T  | 3  | 189.087         | 1988.355        | 1981.345        | 0.504           | 1980.841        | F[41] |
| A  | 4  | 224.606         | 1928.631        | 1920.622        | 0.504           | 1920.118        | A[40] |
| F  | 5  | 273.132         | 1903.112        | 1895.103        | 0.504           | 1894.599        | F[39] |
| A  | 6  | 308.650         | 1854.586        | 1846.577        | 0.504           | 1846.073        | A[38] |
| A  | 7  | 344.169         | 1819.067        | 1811.058        | 0.504           | 1810.554        | A[37] |
| F  | 8  | 382.695         | 1783.549        | 1775.540        | 0.504           | 1775.036        | F[36] |
| A  | 9  | 428.214         | 1755.022        | 1747.013        | 0.504           | 1746.509        | A[35] |
| A  | 10 | 463.733         | <b>1699.504</b> | 1691.495        | 0.504           | 1690.991        | A[34] |
| F  | 11 | 512.259         | 1663.985        | 1655.976        | 0.504           | 1655.472        | F[33] |
| A  | 12 | 547.777         | 1615.459        | <b>1607.450</b> | 0.504           | <b>1606.946</b> | A[32] |
| F  | 13 | 586.304         | 1579.940        | 1571.931        | 0.504           | 1571.427        | F[31] |
| V  | 14 | 645.838         | 1533.414        | 1525.405        | 0.504           | 1524.901        | V[30] |
| E  | 15 | 710.359         | <b>1481.880</b> | <b>1473.870</b> | 0.504           | 1473.367        | E[29] |
| K  | 16 | 774.407         | 1447.359        | 1439.349        | 1409.853        | 1408.848        | K[28] |
| T  | 17 | 804.911         | 1383.311        | <b>1345.302</b> | <b>1345.806</b> | <b>1344.798</b> | T[27] |
| F  | 18 | 873.457         | <b>1302.787</b> | 1294.778        | 1295.282        | 1294.271        | F[26] |
| V  | 19 | 927.974         | 1254.261        | 1246.251        | 1246.755        | 1245.746        | V[25] |
| K  | 20 | <b>987.039</b>  | 1204.991        | 1196.977        | 1197.241        | 1195.231        | K[24] |
| K  | 21 | <b>1051.086</b> | <b>1140.679</b> | <b>1132.670</b> | <b>1133.174</b> | 1132.166        | K[23] |
| K  | 22 | <b>1115.134</b> | 1078.632        | <b>1068.622</b> | <b>1069.126</b> | <b>1068.118</b> | K[22] |
| A  | 23 | <b>1156.652</b> | 1012.584        | <b>1004.575</b> | <b>1005.079</b> | <b>1004.071</b> | A[21] |
| K  | 24 | <b>1214.700</b> | <b>977.066</b>  | <b>969.056</b>  | <b>969.560</b>  | 968.552         | K[20] |
| K  | 25 | <b>1278.747</b> | 913.018         | <b>905.009</b>  | <b>905.513</b>  | <b>904.505</b>  | K[19] |
| T  | 26 | 1320.271        | 848.971         | 840.961         | 841.965         | 840.957         | T[18] |
| G  | 27 | <b>1357.782</b> | <b>798.447</b>  | <b>790.437</b>  | <b>790.941</b>  | 789.934         | G[17] |
| A  | 28 | <b>1393.300</b> | 769.936         | <b>761.927</b>  | <b>762.431</b>  | <b>761.423</b>  | A[16] |
| A  | 29 | 1428.819        | 734.419         | <b>726.408</b>  | <b>726.912</b>  | <b>725.904</b>  | A[15] |
| A  | 30 | 1454.337        | <b>698.899</b>  | 690.889         | 691.394         | 690.386         | A[14] |
| C  | 31 | <b>1492.848</b> | <b>663.380</b>  | 655.371         | 655.875         | 654.867         | C[13] |
| K  | 32 | <b>1556.896</b> | 634.910         | 626.898         | 627.394         | 626.386         | K[12] |
| R  | 33 | 1634.946        | 670.822         | 562.813         | 563.317         | 562.309         | R[11] |
| K  | 34 | <b>1698.994</b> | 692.772         | 684.762         | 685.266         | 684.258         | K[10] |
| A  | 35 | 1734.512        | 428.724         | 420.715         | 421.219         | 420.211         | A[9]  |
| S  | 36 | <b>1778.628</b> | 393.205         | 385.195         | 385.700         | 384.692         | S[8]  |
| G  | 37 | 1808.510        | 349.690         | 341.680         | 342.184         | 341.176         | G[7]  |
| F  | 38 | 1855.005        | 321.179         | 313.170         | 313.673         | 312.666         | F[6]  |
| F  | 39 | 1903.592        | 272.652         | 264.643         | 265.147         | 264.139         | F[5]  |
| V  | 40 | 1953.126        | 254.129         | 246.119         | 246.621         | 245.613         | V[4]  |
| S  | 41 | 1996.642        | 174.592         | 166.583         | 167.086         | 166.078         | S[3]  |
| E  | 42 | 2003.183        | 133.076         | 125.067         | 125.570         | 124.562         | E[2]  |
| L  | 43 | 2117.705        | 66.555          | 58.545          | 59.049          | 58.041          | L[1]  |

# sp | P43277 | H13\_MOUSE

[Acetyl]SETAPAAPAAPAVEKTPVKKKAKKTGAAAGKRKASGPPVSEL

- ▶ fragmentation table for charge state 3+
- ▶ specType=etd
- ▶ score=37.40
- ▶ F104930.dat
- ▶ query=q4401\_p1
- ▶ precursor=847.886180
- ▶ chargePrecursor=5
- ▶ itol=0.8

| AA |    | c               | y               | z+1             | z+2            | z               | AA    |
|----|----|-----------------|-----------------|-----------------|----------------|-----------------|-------|
| S  | 1  | 60.697          | <b>1412.467</b> | <b>1407.126</b> | 0.672          | <b>1406.792</b> | S[42] |
| T  | 2  | 62.711          | 1359.451        | <b>1364.114</b> | 0.672          | 1363.442        | T[43] |
| T  | 3  | 126.594         | 1325.432        | <b>1321.099</b> | 0.672          | <b>1320.763</b> | T[41] |
| A  | 4  | 150.073         | <b>1292.756</b> | <b>1287.417</b> | 0.672          | <b>1287.081</b> | A[40] |
| P  | 5  | 162.424         | <b>1269.077</b> | 1263.738        | 0.672          | 1263.402        | P[39] |
| A  | 6  | 206.103         | 1236.720        | <b>1231.367</b> | 0.672          | 1231.051        | A[38] |
| A  | 7  | 229.162         | 1213.041        | <b>1207.708</b> | 0.672          | 1207.372        | A[37] |
| P  | 8  | 262.133         | <b>1189.368</b> | 1184.629        | 0.672          | 1183.993        | P[36] |
| A  | 9  | 285.812         | <b>1157.017</b> | <b>1151.678</b> | 0.672          | <b>1151.342</b> | A[35] |
| A  | 10 | 309.491         | <b>1133.338</b> | 1127.999        | 0.672          | 1127.663        | A[34] |
| P  | 11 | 341.842         | 1109.659        | 1104.920        | 0.672          | 1103.984        | P[33] |
| A  | 12 | 365.521         | 1077.300        | <b>1071.969</b> | 0.672          | 1071.633        | A[32] |
| P  | 13 | 397.872         | 1053.620        | 1048.869        | 0.672          | 1047.954        | P[31] |
| V  | 14 | <b>430.694</b>  | <b>1021.278</b> | <b>1015.939</b> | 0.672          | <b>1015.603</b> | V[30] |
| E  | 15 | 473.909         | <b>988.256</b>  | <b>982.916</b>  | 0.672          | <b>982.580</b>  | E[29] |
| K  | 16 | 516.607         | 945.241         | <b>939.902</b>  | <b>940.238</b> | 0.93556         | K[28] |
| T  | 17 | 559.290         | 902.547         | <b>897.204</b>  | <b>897.539</b> | <b>896.868</b>  | T[27] |
| P  | 18 | 582.640         | 868.861         | 863.521         | 863.857        | 863.189         | P[26] |
| V  | 19 | 615.663         | 836.510         | 831.170         | 831.506        | 830.834         | V[25] |
| K  | 20 | 658.382         | 803.467         | <b>798.147</b>  | <b>798.483</b> | 797.811         | K[24] |
| K  | 21 | 701.090         | 760.789         | <b>755.449</b>  | <b>755.785</b> | <b>755.113</b>  | K[23] |
| K  | 22 | 743.758         | 718.090         | 712.751         | 713.087        | 712.415         | K[22] |
| A  | 23 | 767.437         | 675.392         | <b>670.052</b>  | <b>670.388</b> | 669.716         | A[21] |
| K  | 24 | 810.136         | 651.713         | 646.373         | 646.709        | 646.037         | K[20] |
| K  | 25 | 852.834         | 609.015         | 603.675         | 604.011        | 603.339         | K[19] |
| T  | 26 | 895.536         | 566.316         | 560.977         | 561.313        | 560.641         | T[18] |
| G  | 27 | <b>905.524</b>  | 533.634         | 527.294         | 527.630        | 526.958         | G[17] |
| A  | 28 | 929.203         | 513.626         | 508.287         | 508.623        | 507.951         | A[16] |
| A  | 29 | <b>952.882</b>  | 489.947         | 484.608         | 484.944        | 484.272         | A[15] |
| A  | 30 | 976.561         | 466.269         | 460.929         | 461.265        | 460.593         | A[14] |
| G  | 31 | <b>995.568</b>  | 442.589         | 437.250         | 437.586        | 436.914         | G[13] |
| K  | 32 | <b>1038.256</b> | 423.587         | 418.248         | 418.579        | 417.907         | K[12] |
| R  | 33 | <b>1090.300</b> | 380.884         | 375.544         | 375.880        | 375.208         | R[11] |
| K  | 34 | <b>1132.998</b> | 328.850         | 323.511         | 323.847        | 323.175         | K[10] |
| A  | 35 | <b>1156.677</b> | 286.157         | 280.812         | 281.148        | 280.476         | A[0]  |
| S  | 36 | 1185.688        | 262.473         | 257.133         | 257.469        | 256.797         | S[8]  |
| G  | 37 | 1204.695        | 233.462         | 228.123         | 228.459        | 227.787         | G[7]  |
| P  | 38 | 1237.046        | 214.453         | 209.115         | 209.451        | 208.779         | P[6]  |
| P  | 39 | <b>1269.397</b> | 182.104         | 176.765         | 177.100        | 176.429         | P[5]  |
| V  | 40 | <b>1302.420</b> | 149.753         | 144.414         | 144.750        | 144.078         | V[4]  |
| S  | 41 | <b>1331.430</b> | 116.730         | 111.391         | 111.727        | 111.055         | S[3]  |
| E  | 42 | <b>1374.445</b> | 87.720          | 82.380          | 82.716         | 82.044          | E[2]  |
| L  | 43 | <b>1412.139</b> | 44.705          | 39.366          | 39.702         | 39.030          | L[1]  |

# sp | P43277 | H13\_MOUSE

[Acetyl]SETAPAAPAAPAPVEKTPVKKKAKKTGAAAGKRKASGPPVSEL

- ▶ fragmentation table for charge state 4+
- ▶ specType=etd
- ▶ score=37.40
- ▶ F104930.dat
- ▶ query=q4401.p1
- ▶ precursor=847.886180
- ▶ chargePrecursor=5
- ▶ itol=0.8

| AA  | c               | y               | z+1             | z+2            | z               | AA    |
|-----|-----------------|-----------------|-----------------|----------------|-----------------|-------|
| S1  | 37.525          | <b>1059.602</b> | <b>1055.598</b> | 0.755          | <b>1055.346</b> | S[42] |
| E12 | 69.785          | <b>1027.342</b> | <b>1023.337</b> | 0.755          | <b>1023.085</b> | E[42] |
| T13 | 95.047          | <b>995.081</b>  | <b>991.076</b>  | 0.755          | <b>990.824</b>  | T[41] |
| A14 | 112.806         | <b>969.819</b>  | <b>965.814</b>  | 0.755          | <b>965.562</b>  | A[40] |
| P15 | 127.070         | <b>952.060</b>  | <b>948.055</b>  | 0.755          | <b>947.803</b>  | P[39] |
| A16 | 154.820         | <b>927.797</b>  | <b>923.792</b>  | 0.755          | <b>923.540</b>  | A[38] |
| A17 | 172.588         | <b>910.837</b>  | <b>906.833</b>  | 0.755          | <b>905.781</b>  | A[37] |
| P18 | 196.351         | <b>899.270</b>  | <b>895.265</b>  | 0.755          | <b>895.021</b>  | P[36] |
| A19 | 214.611         | <b>888.015</b>  | <b>884.010</b>  | 0.755          | <b>883.758</b>  | A[35] |
| A10 | 232.370         | <b>850.250</b>  | <b>846.251</b>  | 0.755          | <b>845.999</b>  | A[34] |
| P11 | 256.633         | <b>832.490</b>  | <b>828.492</b>  | 0.755          | <b>828.240</b>  | P[33] |
| A12 | 274.392         | <b>808.233</b>  | <b>804.238</b>  | 0.755          | <b>803.976</b>  | A[32] |
| T13 | 298.656         | <b>790.474</b>  | <b>786.469</b>  | 0.755          | <b>786.211</b>  | T[31] |
| V14 | 323.423         | <b>776.211</b>  | <b>762.206</b>  | 0.755          | <b>761.954</b>  | V[30] |
| E15 | 355.683         | <b>741.444</b>  | <b>737.439</b>  | 0.755          | <b>737.181</b>  | E[29] |
| K16 | 387.707         | <b>709.183</b>  | <b>705.178</b>  | <b>705.430</b> | <b>704.928</b>  | K[28] |
| T17 | 412.969         | <b>677.159</b>  | <b>673.154</b>  | <b>673.406</b> | <b>672.903</b>  | T[27] |
| P18 | 437.232         | <b>651.897</b>  | <b>647.893</b>  | <b>648.145</b> | <b>647.641</b>  | P[26] |
| V19 | 461.999         | <b>627.634</b>  | <b>623.629</b>  | <b>623.881</b> | <b>623.377</b>  | V[25] |
| K20 | 494.023         | <b>602.367</b>  | <b>598.362</b>  | <b>599.114</b> | <b>598.611</b>  | K[24] |
| K21 | 526.047         | <b>570.843</b>  | <b>566.839</b>  | <b>567.090</b> | <b>566.587</b>  | K[23] |
| K22 | 558.070         | <b>538.819</b>  | <b>534.815</b>  | <b>535.067</b> | <b>534.563</b>  | K[22] |
| A23 | 578.830         | <b>506.796</b>  | <b>502.791</b>  | <b>503.043</b> | <b>502.539</b>  | A[21] |
| K24 | 607.854         | <b>489.030</b>  | <b>485.032</b>  | <b>485.284</b> | <b>484.780</b>  | K[20] |
| K25 | 639.877         | <b>457.013</b>  | <b>453.008</b>  | <b>453.260</b> | <b>452.756</b>  | K[19] |
| T26 | 669.239         | <b>434.989</b>  | <b>430.984</b>  | <b>431.236</b> | <b>430.732</b>  | T[18] |
| G27 | 679.395         | <b>399.727</b>  | <b>395.722</b>  | <b>395.974</b> | <b>395.470</b>  | G[17] |
| A28 | 697.154         | <b>385.472</b>  | <b>381.467</b>  | <b>381.719</b> | <b>381.215</b>  | A[16] |
| A29 | 714.913         | <b>367.712</b>  | <b>363.708</b>  | <b>363.960</b> | <b>363.456</b>  | A[15] |
| A30 | 732.672         | <b>349.953</b>  | <b>345.948</b>  | <b>346.200</b> | <b>345.696</b>  | A[14] |
| G31 | 746.928         | <b>332.194</b>  | <b>328.189</b>  | <b>328.441</b> | <b>327.937</b>  | G[13] |
| K32 | 778.951         | <b>317.638</b>  | <b>313.634</b>  | <b>313.886</b> | <b>313.382</b>  | K[12] |
| K33 | 817.974         | <b>289.915</b>  | <b>285.910</b>  | <b>286.162</b> | <b>285.658</b>  | K[11] |
| K34 | 850.001         | <b>246.889</b>  | <b>242.885</b>  | <b>243.137</b> | <b>242.633</b>  | K[10] |
| A35 | 867.760         | <b>214.899</b>  | <b>210.891</b>  | <b>211.113</b> | <b>210.609</b>  | A[9]  |
| S36 | 889.518         | <b>197.100</b>  | <b>193.102</b>  | <b>193.354</b> | <b>192.850</b>  | S[8]  |
| G37 | 903.773         | <b>175.348</b>  | <b>171.344</b>  | <b>171.596</b> | <b>171.092</b>  | G[7]  |
| P38 | 924.026         | <b>161.093</b>  | <b>157.088</b>  | <b>157.340</b> | <b>156.836</b>  | P[6]  |
| P39 | <b>952.300</b>  | <b>139.839</b>  | <b>135.826</b>  | <b>136.077</b> | <b>135.573</b>  | P[5]  |
| V40 | <b>977.067</b>  | <b>112.507</b>  | <b>108.502</b>  | <b>108.814</b> | <b>108.310</b>  | V[4]  |
| S41 | <b>998.825</b>  | <b>87.800</b>   | <b>83.795</b>   | <b>84.047</b>  | <b>83.543</b>   | S[3]  |
| E42 | <b>1031.085</b> | <b>66.042</b>   | <b>62.037</b>   | <b>62.289</b>  | <b>61.785</b>   | E[2]  |
| L43 | <b>1059.356</b> | <b>33.781</b>   | <b>29.776</b>   | <b>30.028</b>  | <b>29.524</b>   | L[1]  |



# sp | P43277 | H13\_MOUSE

[Acetyl]SETAPAAPAAPAPVEKTPVKKKAKKTGAAAGKRKASGPPVSEL

- ▶ fragmentation table for charge state 1+
- ▶ specType=etd
- ▶ score=64.25
- ▶ F104930.dat
- ▶ query=q4402\_p1
- ▶ precursor=706.739730
- ▶ chargePrecursor=6
- ▶ itol=0.8

| AA | c  | y               | z+1             | z+2             | z               | AA             |       |
|----|----|-----------------|-----------------|-----------------|-----------------|----------------|-------|
| S  | 1  | 147.076         | 4235.367        | 4219.369        | 0.000           | 4218.361       | S[43] |
| E  | 3  | 278.119         | 4106.341        | 4030.335        | 0.000           | 4089.313       | E[43] |
| T  | 3  | <b>377.167</b>  | 3977.302        | 3951.294        | 0.000           | 3940.270       | T[41] |
| A  | 4  | 448.204         | 3870.255        | 3850.230        | 0.000           | 3859.238       | A[40] |
| P  | 5  | 545.257         | 3805.217        | 3789.199        | 0.000           | 3788.191       | P[39] |
| A  | 6  | 616.294         | 3708.165        | 3692.146        | 0.000           | 3691.138       | A[38] |
| A  | 7  | 667.311         | 3637.126        | 3621.109        | 0.000           | 3620.101       | A[37] |
| P  | 8  | <b>784.384</b>  | 3566.090        | 3550.072        | 0.000           | 3549.064       | P[36] |
| A  | 9  | 855.421         | 3469.038        | 3453.019        | 0.000           | 3452.011       | A[35] |
| A  | 10 | 926.458         | 3398.001        | 3381.982        | 0.000           | 3380.974       | A[34] |
| P  | 11 | <b>1023.511</b> | 3326.963        | 3310.944        | 0.000           | 3309.937       | P[33] |
| A  | 12 | 1094.548        | 3229.911        | 3213.892        | 0.000           | 3212.884       | A[32] |
| P  | 13 | 1165.600        | 3138.874        | 3142.855        | 0.000           | 3141.847       | P[31] |
| V  | 14 | 1236.659        | 3041.821        | 3045.803        | 0.000           | 3044.794       | V[30] |
| E  | 15 | <b>1419.711</b> | 2962.752        | 2946.734        | 0.000           | 2945.726       | E[29] |
| K  | 16 | <b>1547.806</b> | 2833.710        | 2817.691        | 2818.699        | 2810.683       | K[28] |
| V  | 17 | 1648.854        | 2705.615        | 2689.596        | 2690.604        | 2688.588       | V[27] |
| P  | 18 | 1745.907        | 2604.567        | 2588.548        | 2589.556        | 2587.541       | P[26] |
| V  | 19 | 1843.976        | 2507.514        | 2491.496        | 2492.504        | 2490.488       | V[25] |
| K  | 20 | <b>1973.070</b> | 2408.446        | 2392.427        | 2393.435        | 2391.418       | K[24] |
| K  | 21 | 2101.105        | 2280.351        | 2264.332        | 2265.340        | 2263.324       | K[23] |
| K  | 22 | 2229.200        | 2152.258        | 2136.239        | 2137.247        | 2135.230       | K[22] |
| A  | 23 | 2300.297        | 2024.161        | 2008.142        | 2009.150        | 2007.134       | A[21] |
| K  | 24 | 2428.392        | 1953.124        | 1937.105        | 1938.113        | 1936.097       | K[20] |
| K  | 25 | 2526.487        | 1825.020        | 1809.001        | 1810.010        | 1808.002       | K[19] |
| T  | 26 | 2657.538        | 1706.934        | 1690.915        | 1691.923        | 1689.906       | T[18] |
| G  | 27 | 2714.556        | 1595.888        | 1579.868        | 1580.875        | 1578.860       | G[17] |
| A  | 28 | 2785.593        | 1538.885        | 1522.846        | 1523.854        | 1521.838       | A[16] |
| A  | 29 | 2856.631        | 1467.828        | 1451.809        | 1452.817        | 1450.801       | A[15] |
| A  | 30 | 2927.668        | 1396.791        | 1380.772        | 1381.780        | 1379.764       | A[14] |
| C  | 31 | 2984.689        | <b>1325.754</b> | 1309.735        | 1310.743        | 1308.727       | C[13] |
| K  | 32 | 3112.784        | 1206.722        | 1190.713        | 1191.721        | 1189.704       | K[12] |
| R  | 33 | 3268.885        | <b>1140.637</b> | <b>1124.618</b> | <b>1125.626</b> | 1123.610       | R[11] |
| K  | 34 | 3396.980        | 984.538         | 968.517         | <b>969.525</b>  | 967.509        | K[10] |
| A  | 35 | 3488.017        | 856.441         | <b>840.422</b>  | <b>841.430</b>  | 839.413        | A[9]  |
| S  | 36 | 3555.049        | <b>785.404</b>  | 769.385         | 770.393         | <b>768.377</b> | S[8]  |
| G  | 37 | 3632.071        | <b>698.372</b>  | 682.353         | 683.361         | 681.345        | G[7]  |
| P  | 38 | 3709.124        | 641.304         | 625.282         | 626.290         | 624.274        | P[6]  |
| P  | 39 | 3806.176        | 544.298         | 528.279         | 529.287         | 527.271        | P[5]  |
| V  | 40 | 3905.245        | 447.245         | <b>431.226</b>  | 432.234         | 430.218        | V[4]  |
| S  | 41 | 3992.277        | 348.177         | 332.158         | 333.166         | 331.150        | S[3]  |
| E  | 42 | 4121.319        | 261.144         | 245.126         | 246.134         | 244.118        | E[2]  |
| L  | 43 | 4234.403        | 132.102         | 116.083         | 117.091         | 115.075        | L[1]  |

# sp | P43277 | H13\_MOUSE

[Acetyl]SETAPAAPAAPAVEKTPVKKKAKKTGAAAGKRKASGPPVSEL

- ▶ fragmentation table for charge state 2+
- ▶ specType=etd
- ▶ score=64.25
- ▶ F104930.dat
- ▶ query=q4402\_p1
- ▶ precursor=706.739730
- ▶ chargePrecursor=6
- ▶ itol=0.8

| AA | c  | y               | z+1             | z+2             | z               | AA              |       |
|----|----|-----------------|-----------------|-----------------|-----------------|-----------------|-------|
| S  | 1  | 74.042          | 2118.197        | 2110.188        | 0.504           | 2109.684        | E[43] |
| E  | 2  | 138.563         | 2051.676        | 2045.667        | 0.504           | 2045.163        | E[42] |
| T  | 3  | 189.087         | 1988.355        | 1981.345        | 0.504           | 1980.841        | F[41] |
| A  | 4  | 224.606         | 1928.631        | 1920.622        | 0.504           | 1920.118        | A[40] |
| F  | 5  | 273.132         | 1903.112        | 1895.103        | 0.504           | 1894.599        | F[39] |
| A  | 6  | 308.650         | 1854.586        | 1846.577        | 0.504           | 1846.073        | A[38] |
| A  | 7  | 344.169         | 1819.067        | 1811.058        | 0.504           | 1810.554        | A[37] |
| F  | 8  | 382.695         | 1783.549        | 1775.540        | 0.504           | 1775.036        | F[36] |
| A  | 9  | 420.214         | 1745.022        | <b>1727.013</b> | 0.504           | 1726.509        | A[35] |
| A  | 10 | 463.733         | 1699.504        | 1691.495        | 0.504           | 1690.991        | A[34] |
| F  | 11 | 512.259         | 1663.985        | 1655.976        | 0.504           | 1655.472        | F[33] |
| A  | 12 | 547.777         | 1615.459        | <b>1607.450</b> | 0.504           | 1606.946        | A[32] |
| F  | 13 | 586.304         | 1579.940        | 1571.931        | 0.504           | 1571.427        | F[31] |
| V  | 14 | 645.838         | 1538.424        | 1530.415        | 0.504           | 1529.911        | V[30] |
| E  | 15 | 710.359         | 1488.880        | 1473.870        | 0.504           | 1473.367        | E[29] |
| K  | 16 | <b>774.407</b>  | 1417.359        | 1409.349        | 1409.853        | 1408.848        | K[28] |
| T  | 17 | 824.911         | 1353.311        | <b>1345.302</b> | <b>1345.806</b> | 1344.799        | T[27] |
| F  | 18 | 873.457         | 1302.787        | <b>1294.778</b> | <b>1295.282</b> | <b>1294.274</b> | F[26] |
| V  | 19 | 922.994         | <b>1254.261</b> | <b>1246.251</b> | <b>1246.755</b> | 1245.748        | V[25] |
| K  | 20 | <b>987.039</b>  | 1193.241        | <b>1196.717</b> | <b>1197.221</b> | 1196.214        | K[24] |
| K  | 21 | <b>1051.086</b> | <b>1140.679</b> | <b>1132.670</b> | <b>1133.174</b> | 1132.166        | K[23] |
| K  | 22 | <b>1115.134</b> | <b>1076.632</b> | <b>1068.622</b> | <b>1069.126</b> | 1068.118        | K[22] |
| A  | 23 | <b>1150.652</b> | <b>1012.584</b> | <b>1004.575</b> | <b>1005.079</b> | <b>1004.071</b> | A[21] |
| K  | 24 | <b>1214.700</b> | <b>977.066</b>  | 969.056         | <b>969.560</b>  | 968.553         | K[20] |
| K  | 25 | 1278.711        | <b>913.018</b>  | 905.009         | <b>905.513</b>  | <b>904.505</b>  | K[19] |
| T  | 26 | 1320.271        | 845.911         | <b>840.961</b>  | <b>841.465</b>  | <b>840.457</b>  | T[18] |
| G  | 27 | <b>1357.782</b> | 798.447         | <b>790.437</b>  | <b>790.941</b>  | 789.934         | G[17] |
| A  | 28 | <b>1393.300</b> | 769.936         | <b>761.927</b>  | <b>762.431</b>  | <b>761.423</b>  | A[16] |
| A  | 29 | <b>1428.819</b> | 734.419         | <b>726.408</b>  | <b>726.912</b>  | 725.904         | A[15] |
| A  | 30 | 1454.237        | <b>698.899</b>  | <b>690.890</b>  | <b>691.394</b>  | <b>690.386</b>  | A[14] |
| C  | 31 | 1492.888        | <b>663.380</b>  | <b>655.371</b>  | <b>655.875</b>  | <b>654.867</b>  | C[13] |
| K  | 32 | 1556.896        | <b>634.870</b>  | <b>626.860</b>  | <b>627.364</b>  | 626.356         | K[12] |
| R  | 33 | 1634.946        | 670.823         | <b>662.813</b>  | <b>663.317</b>  | 662.309         | R[11] |
| K  | 34 | 1698.994        | 632.772         | 624.762         | 625.266         | 624.258         | K[10] |
| A  | 35 | 1734.512        | 428.724         | 420.715         | 421.219         | 420.211         | A[9]  |
| S  | 36 | 1778.628        | 393.206         | 385.197         | 385.700         | 384.692         | S[8]  |
| G  | 37 | 1830.539        | 349.689         | 341.680         | 342.184         | 341.176         | G[7]  |
| F  | 38 | 1855.065        | 321.179         | 313.170         | 313.673         | 312.666         | F[6]  |
| F  | 39 | 1903.592        | 272.652         | 264.643         | 265.147         | 264.139         | F[5]  |
| V  | 40 | 1953.126        | 234.129         | 218.117         | 218.621         | 217.613         | V[4]  |
| S  | 41 | 1996.642        | 174.592         | 166.583         | 167.086         | 166.078         | S[3]  |
| E  | 42 | 2061.613        | 133.076         | 125.067         | 125.570         | 124.562         | E[2]  |
| L  | 43 | 2117.705        | 66.555          | 58.545          | 59.049          | 58.041          | L[1]  |

# sp | P43277 | H13\_MOUSE

[Acetyl]SETAPAAPAAPAVEKTPVKKKAKKTGAAAGKRKASGPPVSEL

- ▶ fragmentation table for charge state 3+
- ▶ specType=etd
- ▶ score=64.25
- ▶ F104930.dat
- ▶ query=q4402\_p1
- ▶ precursor=706.739730
- ▶ chargePrecursor=6
- ▶ itol=0.8

| AA   | c               | y               | z+1             | z+2            | z               | AA   |
|------|-----------------|-----------------|-----------------|----------------|-----------------|------|
| S 1  | 60.697          | <b>1412.467</b> | <b>1407.128</b> | 0.672          | <b>1406.792</b> | S 43 |
| S 2  | 62.111          | <b>1369.453</b> | 1364.114        | 0.672          | 1363.737        | S 42 |
| T 3  | 126.594         | 1320.430        | 1321.099        | 0.672          | 1320.763        | T 41 |
| A 4  | 150.073         | 1292.758        | <b>1287.417</b> | 0.672          | 1287.081        | A 40 |
| F 5  | 162.424         | <b>1269.077</b> | 1263.738        | 0.672          | 1263.402        | F 39 |
| A 6  | 206.103         | 1236.720        | 1231.387        | 0.672          | 1231.051        | A 38 |
| A 7  | 229.782         | 1211.041        | <b>1207.708</b> | 0.672          | 1207.372        | A 37 |
| P 8  | 262.133         | 1189.560        | 1184.225        | 0.672          | 1183.890        | P 36 |
| A 9  | 285.812         | <b>1157.017</b> | <b>1151.678</b> | 0.672          | <b>1151.342</b> | A 35 |
| A 10 | 309.491         | <b>1133.338</b> | <b>1127.999</b> | 0.672          | 1127.663        | A 34 |
| P 11 | 341.842         | 1109.659        | 1104.320        | 0.672          | 1103.984        | P 33 |
| A 12 | 365.521         | <b>1077.308</b> | <b>1071.969</b> | 0.672          | 1071.633        | A 32 |
| P 13 | 387.872         | 1051.620        | 1046.290        | 0.672          | 1047.954        | P 31 |
| V 14 | <b>430.694</b>  | 1021.370        | 1015.639        | 0.672          | 1015.660        | V 30 |
| E 15 | 473.009         | 988.250         | <b>982.916</b>  | 0.672          | <b>982.580</b>  | E 29 |
| K 16 | 516.607         | 945.241         | <b>939.902</b>  | <b>940.238</b> | 939.566         | K 28 |
| T 17 | 550.290         | 902.547         | <b>897.204</b>  | <b>897.539</b> | 896.869         | T 27 |
| P 18 | 582.640         | <b>868.861</b>  | 863.521         | 863.857        | 863.189         | P 26 |
| V 19 | 615.663         | <b>836.510</b>  | 831.170         | 831.506        | 830.834         | V 25 |
| K 20 | 658.302         | 793.467         | 788.147         | 788.483        | 787.811         | K 24 |
| K 21 | 701.090         | 760.789         | <b>755.449</b>  | <b>755.785</b> | <b>755.113</b>  | K 23 |
| K 22 | 743.758         | <b>718.090</b>  | <b>712.751</b>  | <b>713.087</b> | 712.415         | K 22 |
| A 23 | <b>767.437</b>  | <b>675.392</b>  | 670.052         | 670.388        | 669.716         | A 21 |
| K 24 | 810.136         | 651.713         | 646.373         | 646.709        | 646.037         | K 20 |
| K 25 | 852.824         | 609.015         | 603.675         | 604.011        | 603.339         | K 19 |
| T 26 | <b>896.516</b>  | 566.310         | 560.977         | 561.313        | 560.641         | T 18 |
| G 27 | <b>905.524</b>  | 533.634         | 527.294         | 527.630        | 526.958         | G 17 |
| A 28 | 929.203         | 513.626         | 508.287         | 508.623        | 507.951         | A 16 |
| A 29 | <b>952.882</b>  | 469.947         | 464.608         | 464.944        | 464.272         | A 15 |
| A 30 | 976.561         | 466.260         | 460.920         | 461.255        | 460.591         | A 14 |
| G 31 | <b>985.568</b>  | 442.580         | 437.250         | 437.586        | 436.914         | G 13 |
| K 32 | <b>1038.266</b> | 423.587         | 418.243         | 418.579        | 417.907         | K 22 |
| R 33 | <b>1090.300</b> | 380.884         | 375.544         | 375.880        | 375.208         | R 11 |
| K 34 | <b>1132.998</b> | 328.850         | 323.511         | 323.847        | 323.175         | K 10 |
| A 35 | <b>1156.677</b> | 286.157         | 280.812         | 281.148        | 280.476         | A 0  |
| S 36 | 1185.688        | 262.473         | 257.133         | 257.469        | 256.797         | S 8  |
| G 37 | 1204.695        | 231.462         | 226.123         | 226.459        | 225.787         | G 7  |
| P 38 | 1237.046        | 214.451         | 209.115         | 209.451        | 208.779         | P 6  |
| P 39 | <b>1269.397</b> | 182.104         | 176.765         | 177.100        | 176.425         | P 5  |
| V 40 | 1302.420        | 149.753         | 144.414         | 144.750        | 144.078         | V 4  |
| S 41 | 1331.430        | 116.730         | 111.391         | 111.727        | 111.055         | S 3  |
| E 42 | <b>1374.445</b> | 87.720          | 82.380          | 82.716         | 82.044          | E 2  |
| L 43 | 1412.139        | 44.705          | 39.366          | 39.702         | 39.030          | L 1  |



# sp | P43277 | H13\_MOUSE

[Acetyl]SETAPAAPAAPAPVEKTPVKKKAKKTGAAAGKRKASGPPVSEL

- ▶ fragmentation table for charge state 4+
- ▶ specType=etd
- ▶ score=64.25
- ▶ F104930.dat
- ▶ query=q4402.p1
- ▶ precursor=706.739730
- ▶ chargePrecursor=6
- ▶ itol=0.8

| AA    | c               | y              | z+1             | z+2   | z               | AA    |
|-------|-----------------|----------------|-----------------|-------|-----------------|-------|
| S[1]  | 97.525          | 1059.602       | <b>1055.598</b> | 0.755 | <b>1055.346</b> | S[43] |
| E[2]  | 69.785          | 1027.342       | <b>1023.337</b> | 0.755 | <b>1023.085</b> | E[42] |
| T[3]  | 95.047          | <b>995.081</b> | <b>991.076</b>  | 0.755 | <b>990.824</b>  | T[41] |
| A[4]  | 112.806         | <b>969.819</b> | <b>965.814</b>  | 0.755 | <b>965.562</b>  | A[40] |
| P[5]  | 137.070         | <b>952.060</b> | 948.055         | 0.755 | 947.803         | P[39] |
| A[6]  | 154.826         | 927.797        | <b>923.792</b>  | 0.755 | 923.540         | A[38] |
| A[7]  | 172.588         | 910.037        | 906.033         | 0.755 | <b>905.781</b>  | A[37] |
| P[8]  | 198.851         | <b>892.278</b> | 888.273         | 0.755 | 888.021         | P[36] |
| A[9]  | 214.611         | 868.015        | 864.010         | 0.755 | 863.758         | A[35] |
| A[10] | 232.370         | 850.256        | 846.251         | 0.755 | 845.999         | A[34] |
| P[11] | 258.633         | 832.496        | 828.492         | 0.755 | 828.240         | P[33] |
| A[12] | 274.392         | 808.233        | <b>804.228</b>  | 0.755 | 803.976         | A[32] |
| P[13] | 298.656         | <b>790.474</b> | 786.469         | 0.755 | 786.217         | P[31] |
| V[14] | 323.423         | <b>762.211</b> | <b>762.206</b>  | 0.755 | <b>761.954</b>  | V[30] |
| E[15] | 355.683         | 741.444        | 737.439         | 0.755 | 737.187         | E[29] |
| K[16] | 387.707         | 709.183        | 705.178         | 0.755 | 704.926         | K[28] |
| T[17] | <b>412.969</b>  | 677.159        | 673.154         | 0.755 | 672.903         | T[27] |
| P[18] | 437.232         | 651.897        | 647.893         | 0.755 | 647.641         | P[26] |
| V[19] | 461.999         | <b>627.634</b> | 623.629         | 0.755 | 623.377         | V[25] |
| K[20] | 494.223         | 602.899        | 598.894         | 0.755 | 598.642         | K[24] |
| K[21] | 526.047         | 570.843        | 566.838         | 0.755 | 566.586         | K[23] |
| K[22] | 558.070         | 538.819        | 534.815         | 0.755 | 534.563         | K[22] |
| A[23] | 575.830         | 506.796        | 502.791         | 0.755 | 502.539         | A[21] |
| K[24] | 607.854         | 489.036        | 485.032         | 0.755 | 484.780         | K[20] |
| K[25] | 639.877         | 457.013        | 453.008         | 0.755 | 452.756         | K[19] |
| T[26] | 665.139         | 424.989        | 420.984         | 0.755 | 420.732         | T[18] |
| G[27] | 679.895         | 399.727        | 395.723         | 0.755 | 395.471         | G[17] |
| A[28] | 697.154         | 385.472        | 381.467         | 0.755 | 381.215         | A[16] |
| A[29] | 714.913         | 367.712        | 363.708         | 0.755 | 363.456         | A[15] |
| A[30] | 732.672         | 349.953        | 345.948         | 0.755 | 345.696         | A[14] |
| G[31] | 746.928         | 332.194        | 328.189         | 0.755 | 327.937         | G[13] |
| K[32] | 778.951         | 317.938        | 313.934         | 0.755 | 313.682         | K[12] |
| K[33] | <b>817.977</b>  | 285.915        | 281.910         | 0.755 | 281.658         | K[11] |
| G[34] | 850.911         | 246.889        | 242.885         | 0.755 | 242.633         | G[10] |
| A[36] | 867.790         | 214.865        | 210.861         | 0.755 | 210.609         | A[9]  |
| S[36] | 889.518         | 197.106        | 193.102         | 0.755 | 192.850         | S[0]  |
| G[37] | 903.773         | 175.348        | 171.344         | 0.755 | 171.092         | G[7]  |
| P[38] | 928.036         | 161.093        | 157.089         | 0.755 | 156.836         | P[6]  |
| P[39] | <b>952.308</b>  | 136.830        | 132.825         | 0.755 | 132.573         | P[5]  |
| V[40] | <b>977.067</b>  | 112.567        | 108.562         | 0.755 | 108.310         | V[4]  |
| S[41] | <b>998.325</b>  | 87.800         | 83.795          | 0.755 | 83.543          | S[1]  |
| E[42] | <b>1031.085</b> | 66.042         | 62.037          | 0.755 | 61.785          | E[2]  |
| L[43] | 1059.356        | 33.781         | 29.776          | 0.755 | 29.524          | L[1]  |

# sp | P43277 | H13\_MOUSE

[Acetyl]SETAPAAPAAPAPVEKTPVKKKAKKTGAAAGKRKASGPPVSEL

- ▶ fragmentation table for charge state 5+
- ▶ specType=etd
- ▶ score=64.25
- ▶ F104930.dat
- ▶ query=q4402\_p1
- ▶ precursor=706.739730
- ▶ chargePrecursor=6
- ▶ itol=0.8

| AA    | c              | y              | z+1            | z+2     | z              | AA    |
|-------|----------------|----------------|----------------|---------|----------------|-------|
| S[1]  | 30.221         | 847.883        | <b>844.600</b> | 0.806   | <b>844.478</b> | S[43] |
| E[2]  | 56.030         | 822.075        | <b>818.871</b> | 0.806   | <b>818.669</b> | E[42] |
| Y[3]  | 76.239         | 796.266        | <b>793.063</b> | 0.806   | <b>792.861</b> | Y[41] |
| A[4]  | 90.447         | 776.051        | 772.853        | 0.806   | 772.651        | A[40] |
| P[5]  | 109.857        | <b>761.849</b> | 758.646        | 0.806   | 758.444        | P[39] |
| A[6]  | 124.065        | 742.439        | 739.235        | 0.806   | 739.033        | A[38] |
| A[7]  | 138.272        | 728.231        | 725.028        | 0.806   | 724.826        | A[37] |
| P[8]  | 157.683        | <b>714.024</b> | 710.820        | 0.806   | 710.619        | P[36] |
| A[9]  | 171.890        | 694.613        | <b>691.410</b> | 0.806   | <b>691.208</b> | A[35] |
| A[10] | 186.097        | 680.406        | 677.202        | 0.806   | 677.001        | A[34] |
| P[11] | 203.308        | 666.199        | 662.995        | 0.806   | 662.793        | P[33] |
| A[12] | 219.715        | 646.789        | 643.584        | 0.806   | 643.383        | A[32] |
| P[13] | 239.126        | 632.581        | 629.377        | 0.806   | 629.175        | P[31] |
| V[14] | 258.940        | 613.170        | 609.966        | 0.806   | 609.765        | V[30] |
| E[15] | 284.748        | <b>593.356</b> | 590.153        | 0.806   | 589.951        | E[29] |
| K[16] | 310.367        | 567.948        | 564.744        | 564.546 | 564.342        | K[28] |
| T[17] | 330.577        | 541.929        | 538.725        | 538.927 | 538.523        | T[27] |
| P[18] | 349.987        | 521.719        | 518.516        | 518.717 | 518.314        | P[26] |
| V[19] | 369.801        | 502.309        | 499.105        | 499.307 | 498.903        | V[25] |
| K[20] | 395.420        | 482.895        | 479.291        | 479.493 | 479.090        | K[24] |
| K[21] | 421.839        | 456.876        | 453.672        | 453.874 | 453.471        | K[23] |
| K[22] | 448.058        | <b>431.257</b> | 428.053        | 428.254 | 427.852        | K[22] |
| A[23] | 460.365        | 405.638        | 402.434        | 402.636 | 402.233        | A[21] |
| K[24] | 486.484        | 391.431        | 388.227        | 388.428 | 388.025        | K[20] |
| K[25] | 512.103        | 365.812        | 362.608        | 362.809 | 362.406        | K[19] |
| T[26] | 532.313        | 340.193        | 336.989        | 337.190 | 336.787        | T[18] |
| G[27] | 543.717        | 319.983        | 316.779        | 316.981 | 316.578        | G[17] |
| A[28] | 557.925        | 308.579        | 305.375        | 305.577 | 305.173        | A[16] |
| A[29] | 572.132        | 294.371        | 291.168        | 291.369 | 290.966        | A[15] |
| A[30] | 586.339        | 280.164        | 276.960        | 277.162 | 276.759        | A[14] |
| G[31] | 597.744        | 265.957        | 262.753        | 262.954 | 262.551        | G[13] |
| K[32] | 623.363        | 254.552        | 251.348        | 251.550 | 251.147        | K[12] |
| R[13] | 654.583        | 228.931        | 225.730        | 225.931 | 225.528        | R[11] |
| K[34] | 680.202        | 197.713        | 194.509        | 194.711 | 194.308        | K[10] |
| A[35] | 694.409        | 172.094        | 168.890        | 169.092 | 168.689        | A[9]  |
| S[36] | 711.816        | 157.887        | 154.683        | 154.884 | 154.481        | S[8]  |
| G[37] | 723.220        | 140.480        | 137.276        | 137.478 | 137.075        | G[7]  |
| P[38] | 742.631        | 129.076        | 125.872        | 126.074 | 125.671        | P[6]  |
| P[39] | <b>762.041</b> | 109.665        | 106.462        | 106.663 | 106.260        | P[5]  |
| V[40] | 781.855        | 90.255         | 87.051         | 87.253  | 86.849         | V[4]  |
| S[41] | <b>799.261</b> | 70.841         | 67.237         | 67.439  | 67.036         | S[3]  |
| E[42] | 825.070        | 53.035         | 49.831         | 50.033  | 49.629         | E[2]  |
| L[43] | 847.687        | 37.226         | 34.022         | 34.224  | 33.821         | L[1]  |

# sp | P43276 | H15\_MOUSE

[Acetyl]SETAPAETAAPAPVEKSPAKKTTTKAGAAKRKATGPPVSEL

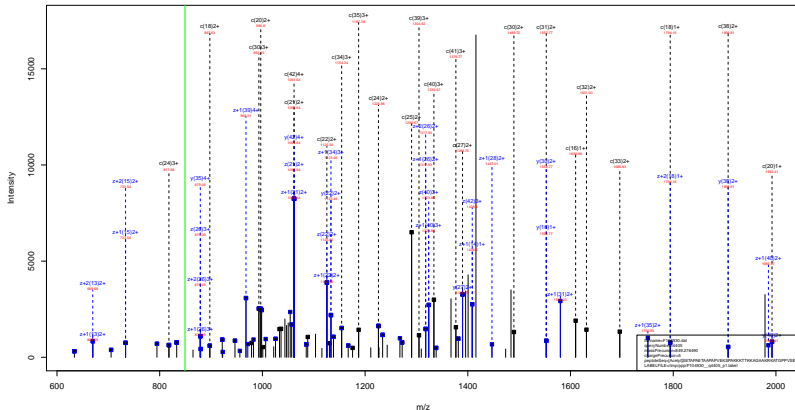

# sp | P43276 | H15\_MOUSE

[Acetyl]SETAPAETAAPAPVEKSPAKKKTTKKAGAAKRKATGPPVSEL

- ▶ fragmentation table for charge state 1+
- ▶ specType=etd
- ▶ score=85.81
- ▶ F104930.dat
- ▶ query=q4405\_p1
- ▶ precursor=849.276490
- ▶ chargePrecursor=5
- ▶ itol=0.8

| AA | c  | y               | z+1             | z+2             | z               | AA       |       |
|----|----|-----------------|-----------------|-----------------|-----------------|----------|-------|
| S  | 1  | 147.076         | 4242.946        | 4226.537        | 0.000           | 4225.319 | S[42] |
| E  | 2  | 276.119         | 4113.303        | 4097.284        | 0.000           | 4096.270 | E[41] |
| L  | 3  | 377.167         | 3984.260        | 3968.242        | 0.000           | 3967.234 | L[40] |
| A  | 4  | 449.204         | 3863.211        | 3847.194        | 0.000           | 3846.184 | A[39] |
| P  | 5  | 545.257         | 3812.170        | 3796.157        | 0.000           | 3795.149 | P[38] |
| A  | 6  | 616.294         | 3715.123        | 3699.104        | 0.000           | 3698.096 | A[37] |
| E  | 7  | 745.336         | 3644.088        | 3628.067        | 0.000           | 3627.059 | E[36] |
| T  | 8  | 846.384         | 3515.043        | 3499.024        | 0.000           | 3498.017 | T[35] |
| A  | 9  | 917.421         | 3413.995        | 3397.977        | 0.000           | 3396.969 | A[34] |
| A  | 10 | 988.458         | 3342.958        | 3326.940        | 0.000           | 3325.932 | A[33] |
| P  | 11 | <b>1085.511</b> | 3271.921        | 3255.903        | 0.000           | 3254.895 | P[32] |
| A  | 12 | 1156.548        | 3174.868        | 3158.850        | 0.000           | 3157.842 | A[31] |
| P  | 13 | 1253.601        | 3103.831        | 3087.813        | 0.000           | 3086.805 | P[30] |
| V  | 14 | 1352.669        | 3006.779        | 2990.760        | 0.000           | 2989.752 | V[29] |
| E  | 15 | 1451.722        | 2907.710        | 2891.691        | 0.000           | 2890.684 | E[28] |
| R  | 16 | <b>1609.807</b> | 2778.666        | 2762.649        | 0.000           | 2761.641 | R[27] |
| S  | 17 | 1698.839        | 2690.573        | 2674.554        | 20.35           | 2673.546 | S[26] |
| P  | 18 | <b>1793.892</b> | 2563.541        | 2547.522        | 2548.530        | 2546.514 | P[25] |
| A  | 19 | 1864.929        | 2466.488        | 2450.469        | 2451.477        | 2449.461 | A[24] |
| R  | 20 | <b>1993.024</b> | 2395.451        | 2379.432        | 2380.440        | 2378.424 | R[23] |
| R  | 21 | 2121.119        | 2287.366        | 2271.347        | 2282.345        | 2280.329 | R[22] |
| R  | 22 | 2269.214        | 2139.291        | 2123.272        | 2124.280        | 2122.264 | R[21] |
| T  | 23 | 2350.261        | 2011.166        | 1995.147        | 1996.155        | 1994.139 | T[20] |
| T  | 24 | 2451.309        | 1910.118        | 1894.099        | 1895.107        | 1893.092 | T[19] |
| R  | 25 | 2579.404        | 1809.070        | 1793.052        | <b>1794.060</b> | 1792.044 | R[18] |
| R  | 26 | 2707.499        | 1688.070        | 1664.057        | 1665.065        | 1663.049 | R[17] |
| A  | 27 | 2778.536        | <b>1552.861</b> | 1536.842        | 1537.870        | 1535.854 | A[16] |
| G  | 28 | 2835.557        | 1441.841        | 1425.826        | 1426.833        | 1424.817 | G[15] |
| A  | 29 | 2906.595        | 1424.822        | <b>1408.803</b> | 1409.811        | 1407.795 | A[14] |
| A  | 30 | 2977.632        | 1383.785        | <b>1337.766</b> | <b>1338.774</b> | 1336.758 | A[13] |
| R  | 31 | 3105.727        | 1282.748        | 1266.729        | <b>1267.737</b> | 1265.721 | R[12] |
| R  | 32 | 3261.828        | <b>1154.653</b> | <b>1138.634</b> | 1139.642        | 1137.626 | R[11] |
| R  | 33 | 3389.923        | <b>998.552</b>  | <b>982.533</b>  | 983.541         | 981.525  | R[10] |
| A  | 34 | 3460.960        | 870.457         | 854.438         | 855.446         | 853.430  | A[9]  |
| T  | 35 | 3562.008        | 799.420         | 783.401         | 784.409         | 782.393  | T[8]  |
| G  | 36 | 3616.029        | 698.372         | 682.353         | 683.361         | 681.345  | G[7]  |
| P  | 37 | 3718.082        | 641.350         | 625.332         | 626.340         | 624.324  | P[6]  |
| P  | 38 | 3813.135        | 544.296         | 528.279         | 529.287         | 527.271  | P[5]  |
| V  | 39 | 3912.203        | 447.245         | 431.228         | 432.234         | 430.218  | V[4]  |
| S  | 40 | 3999.235        | 348.177         | 332.158         | 333.166         | 331.150  | S[3]  |
| E  | 41 | 4128.278        | 261.144         | 245.126         | 246.134         | 244.118  | E[2]  |
| L  | 42 | 4241.302        | 132.100         | 116.083         | 117.091         | 115.075  | L[1]  |

# sp | P43276 | H15\_MOUSE

[Acetyl]SETAPAETAAPAPVEKSPAKKKTTKKAGAAKRKATGPPVSEL

- ▶ fragmentation table for charge state 2+
- ▶ specType=etd
- ▶ score=85.81
- ▶ F104930.dat
- ▶ query=q4405\_p1
- ▶ precursor=849.276490
- ▶ chargePrecursor=5
- ▶ itol=0.8

| AA | c  | y               | z+1             | z+2             | z               | AA              |       |
|----|----|-----------------|-----------------|-----------------|-----------------|-----------------|-------|
| S  | 1  | 74.042          | 2121.676        | 2113.667        | 0.504           | 2113.163        | S(42) |
| E  | 2  | 138.563         | 2057.155        | 2049.146        | 0.504           | 2048.642        | E(41) |
| T  | 3  | 189.087         | <b>1992.634</b> | <b>1984.624</b> | 0.504           | 1984.121        | T(40) |
| A  | 4  | 224.206         | 1824.110        | 1816.101        | 0.504           | 1815.596        | A(39) |
| P  | 5  | 293.135         | <b>1906.591</b> | 1898.582        | 0.504           | 1898.076        | P(38) |
| A  | 6  | 358.650         | 1858.065        | 1850.056        | 0.504           | 1849.552        | A(37) |
| E  | 7  | 373.172         | 1822.547        | 1814.537        | 0.504           | 1814.033        | E(36) |
| T  | 8  | 423.696         | 1758.025        | <b>1750.016</b> | 0.504           | 1749.512        | T(35) |
| A  | 9  | 459.214         | 1707.501        | 1699.492        | 0.504           | 1698.988        | A(34) |
| A  | 10 | 494.733         | 1671.983        | 1663.973        | 0.504           | 1663.470        | A(33) |
| P  | 11 | 543.259         | 1636.464        | 1628.455        | 0.504           | 1627.951        | P(32) |
| A  | 12 | 578.778         | 1587.938        | <b>1579.929</b> | 0.504           | 1579.425        | A(31) |
| P  | 13 | 627.304         | <b>1552.419</b> | 1544.410        | 0.504           | 1543.906        | P(30) |
| V  | 14 | 676.830         | 1503.893        | 1495.884        | 0.504           | 1495.380        | V(29) |
| E  | 15 | 741.360         | 1434.369        | <b>1446.349</b> | 0.504           | 1445.845        | E(28) |
| T  | 16 | 805.887         | <b>1389.837</b> | <b>1381.828</b> | 1383.312        | <b>1381.324</b> | T(27) |
| S  | 17 | 848.423         | 1325.300        | <b>1317.781</b> | <b>1318.285</b> | <b>1317.277</b> | S(26) |
| P  | 18 | <b>897.449</b>  | 1282.274        | 1274.265        | 1274.768        | 1273.761        | P(25) |
| A  | 19 | 932.968         | <b>1233.748</b> | <b>1225.738</b> | <b>1226.242</b> | <b>1225.234</b> | A(24) |
| K  | 20 | <b>997.015</b>  | 1198.229        | 1190.220        | 1190.724        | 1189.717        | K(23) |
| K  | 21 | <b>1061.063</b> | <b>1134.182</b> | <b>1126.172</b> | 1126.676        | <b>1125.668</b> | K(22) |
| K  | 22 | <b>1125.110</b> | 1070.134        | <b>1062.125</b> | 1062.629        | <b>1061.621</b> | K(21) |
| T  | 23 | <b>1175.514</b> | <b>1006.087</b> | <b>998.077</b>  | <b>998.581</b>  | <b>997.573</b>  | T(20) |
| T  | 24 | <b>1226.158</b> | <b>955.563</b>  | 947.553         | 948.057         | <b>947.049</b>  | T(19) |
| K  | 25 | <b>1290.206</b> | 905.019         | <b>897.030</b>  | <b>897.533</b>  | 896.526         | K(18) |
| K  | 26 | 1354.253        | 840.991         | <b>832.982</b>  | <b>833.486</b>  | <b>832.478</b>  | K(17) |
| A  | 27 | <b>1389.772</b> | 776.944         | 768.935         | 769.438         | 768.431         | A(16) |
| G  | 28 | 1448.282        | 741.425         | <b>733.416</b>  | <b>733.920</b>  | <b>732.912</b>  | G(15) |
| A  | 29 | 1453.801        | 712.915         | <b>704.905</b>  | <b>705.409</b>  | 704.401         | A(14) |
| A  | 30 | <b>1489.319</b> | 677.396         | <b>669.387</b>  | <b>669.891</b>  | 668.883         | A(13) |
| K  | 31 | <b>1553.367</b> | 641.879         | <b>633.868</b>  | <b>634.372</b>  | <b>633.364</b>  | K(12) |
| K  | 32 | <b>1631.418</b> | 677.830         | 669.821         | 670.325         | 669.317         | K(11) |
| K  | 33 | <b>1695.465</b> | 609.779         | 601.770         | 602.274         | 601.266         | K(10) |
| A  | 34 | 1730.984        | 435.732         | 427.723         | 428.227         | 427.219         | A(9)  |
| T  | 35 | 1781.507        | 400.213         | 392.204         | 392.708         | 391.700         | T(8)  |
| G  | 36 | 1816.018        | 349.690         | 341.680         | 342.184         | 341.176         | G(7)  |
| P  | 37 | 1868.545        | 321.179         | 313.170         | 313.673         | 312.666         | P(6)  |
| P  | 38 | <b>1907.071</b> | 272.652         | 264.643         | 265.147         | 264.139         | P(5)  |
| V  | 39 | 1959.602        | 224.120         | 216.111         | 216.615         | 215.607         | V(4)  |
| S  | 40 | 2000.121        | 174.592         | 166.583         | 167.086         | 166.078         | S(3)  |
| E  | 41 | 2064.642        | 131.076         | 123.067         | 123.570         | 122.562         | E(2)  |
| L  | 42 | 2121.184        | 66.555          | 58.545          | 59.049          | 58.041          | L(1)  |

# sp | P43276 | H15\_MOUSE

[Acetyl]SETAPAETAAPAPVEKSPAKKTTKKAGAAKRKATGPPVSEL

- ▶ fragmentation table for charge state 3+
- ▶ specType=etd
- ▶ score=85.81
- ▶ F104930.dat
- ▶ query=q4405\_p1
- ▶ precursor=849.276490
- ▶ chargePrecursor=5
- ▶ itol=0.8

| AA | c  | y               | z+1             | z+2             | z              | AA              |       |
|----|----|-----------------|-----------------|-----------------|----------------|-----------------|-------|
| S  | 1  | 49.697          | 1414.767        | 1409.447        | 0.672          | <b>1409.111</b> | E[42] |
| E  | 2  | 92.711          | 1371.773        | 1366.433        | 0.672          | 1366.097        | E[41] |
| T  | 3  | 126.394         | 1328.756        | <b>1323.419</b> | 0.672          | <b>1323.083</b> | T[40] |
| A  | 4  | 159.073         | 1285.770        | 1280.430        | 0.672          | 1280.093        | A[39] |
| F  | 5  | 192.424         | <b>1271.397</b> | 1266.057        | 0.672          | 1265.721        | F[38] |
| A  | 6  | 206.103         | 1239.048        | <b>1233.706</b> | 0.672          | <b>1233.370</b> | A[37] |
| E  | 7  | 269.117         | 1215.367        | 1210.027        | 0.672          | 1209.691        | E[36] |
| T  | 8  | 282.800         | 1172.353        | <b>1167.013</b> | 0.672          | <b>1166.677</b> | T[35] |
| A  | 9  | 306.470         | <b>1138.670</b> | <b>1133.330</b> | 0.672          | <b>1132.994</b> | A[34] |
| A  | 10 | 330.158         | 1114.991        | 1109.651        | 0.672          | 1109.315        | A[33] |
| P  | 11 | 362.508         | 1091.312        | <b>1085.972</b> | 0.672          | <b>1085.636</b> | P[32] |
| A  | 12 | 386.188         | 1058.961        | <b>1053.621</b> | 0.672          | 1053.285        | A[31] |
| F  | 13 | 418.538         | 1035.262        | 1029.942        | 0.672          | 1029.606        | F[30] |
| V  | 14 | 451.561         | 1002.931        | <b>997.591</b>  | 0.672          | <b>997.256</b>  | V[29] |
| E  | 15 | 484.275         | 969.303         | 964.963         | 0.672          | 964.227         | E[28] |
| R  | 16 | 517.274         | 936.894         | <b>921.554</b>  | <b>921.890</b> | <b>921.219</b>  | R[27] |
| S  | 17 | 566.284         | 884.195         | <b>878.856</b>  | <b>879.192</b> | <b>878.520</b>  | S[26] |
| P  | 18 | 598.635         | 855.185         | 849.845         | 850.181        | 849.510         | P[25] |
| A  | 19 | 622.314         | 822.834         | <b>817.495</b>  | <b>817.831</b> | 817.150         | A[24] |
| K  | 20 | 665.013         | 799.155         | 793.816         | <b>794.151</b> | 793.480         | K[23] |
| K  | 21 | 707.711         | 766.457         | 761.117         | 761.453        | 760.781         | K[22] |
| K  | 22 | 750.409         | 733.754         | 728.419         | 728.755        | 728.081         | K[21] |
| T  | 23 | 784.092         | 671.060         | 665.721         | 666.057        | 665.385         | T[20] |
| T  | 24 | <b>817.774</b>  | 637.378         | 632.038         | 632.374        | 631.702         | T[19] |
| K  | 25 | 860.473         | 603.695         | 598.355         | 598.691        | 598.019         | K[18] |
| K  | 26 | 903.171         | 569.997         | 565.657         | 565.993        | 565.321         | K[17] |
| A  | 27 | 945.869         | 536.298         | 531.959         | 532.295        | 531.623         | A[16] |
| C  | 28 | <b>945.857</b>  | 494.817         | 489.480         | 489.816        | 489.144         | C[15] |
| A  | 29 | 989.536         | 475.612         | 470.273         | 470.609        | 469.937         | A[14] |
| A  | 30 | <b>993.215</b>  | 451.933         | 446.594         | 446.930        | 446.258         | A[13] |
| K  | 31 | <b>1035.914</b> | 428.254         | 422.915         | 423.250        | 422.578         | K[12] |
| R  | 32 | <b>1067.947</b> | 385.550         | 380.210         | 380.552        | 379.880         | R[11] |
| K  | 33 | <b>1130.646</b> | 333.522         | 328.183         | 328.518        | 327.847         | K[10] |
| A  | 34 | <b>1154.325</b> | 290.824         | 285.484         | 285.820        | 285.149         | A[9]  |
| T  | 35 | <b>1188.007</b> | 267.145         | 261.805         | 262.141        | 261.469         | T[8]  |
| G  | 36 | 1207.015        | 233.462         | 228.123         | 228.459        | 227.787         | G[7]  |
| P  | 37 | 1239.305        | 214.455         | 209.115         | 209.451        | 208.779         | P[6]  |
| P  | 38 | <b>1271.716</b> | 182.104         | 176.765         | 177.100        | 176.429         | P[5]  |
| V  | 39 | <b>1304.739</b> | 149.753         | 144.414         | 144.750        | 144.078         | V[4]  |
| S  | 40 | <b>1333.750</b> | 116.783         | 111.443         | 111.777        | 111.095         | S[3]  |
| E  | 41 | <b>1376.764</b> | 87.220          | 82.380          | 82.716         | 82.044          | E[2]  |
| L  | 42 | 1414.459        | 44.705          | 39.366          | 39.702         | 39.030          | L[1]  |

# sp | P43276 | H15\_MOUSE

[Acetyl]SETAPAETAAPAPVEKSPAKKKTTKKAGAAKRKATGPPVSEL

- ▶ fragmentation table for charge state 4+
- ▶ specType=etd
- ▶ score=85.81
- ▶ F104930.dat
- ▶ query=q4405\_p1
- ▶ precursor=849.276490
- ▶ chargePrecursor=5
- ▶ itol=0.8

| AA | c  | y               | a+1             | a+2             | z       | AA              |       |
|----|----|-----------------|-----------------|-----------------|---------|-----------------|-------|
| S  | 1  | 37.525          | <b>1061.342</b> | <b>1057.337</b> | 0.755   | <b>1057.085</b> | S[42] |
| E  | 2  | 69.785          | 1029.861        | <b>1025.077</b> | 0.755   | <b>1024.825</b> | E[41] |
| T  | 3  | 95.047          | <b>996.821</b>  | <b>992.816</b>  | 0.755   | <b>992.564</b>  | T[40] |
| A  | 4  | 112.506         | <b>971.559</b>  | <b>967.554</b>  | 0.755   | <b>967.302</b>  | A[39] |
| P  | 5  | 137.070         | 953.799         | 949.795         | 0.755   | 949.543         | P[38] |
| A  | 6  | 154.829         | 929.539         | 925.531         | 0.755   | 925.280         | A[37] |
| E  | 7  | 187.090         | 913.777         | 907.772         | 0.755   | 907.520         | E[36] |
| T  | 8  | 212.351         | <b>879.516</b>  | 875.512         | 0.755   | 875.260         | T[35] |
| A  | 9  | 230.111         | 854.258         | 850.250         | 0.755   | 849.999         | A[34] |
| A  | 10 | 247.870         | 839.495         | <b>832.490</b>  | 0.755   | 832.239         | A[33] |
| P  | 11 | 272.133         | <b>818.736</b>  | 814.731         | 0.755   | 814.479         | P[32] |
| A  | 12 | 289.892         | <b>794.473</b>  | 790.468         | 0.755   | 790.216         | A[31] |
| P  | 13 | 314.156         | 778.713         | 772.709         | 0.755   | 772.457         | P[30] |
| V  | 14 | 338.923         | 752.450         | 748.445         | 0.755   | 748.193         | V[29] |
| E  | 15 | 371.183         | 727.683         | 723.678         | 0.755   | 723.426         | E[28] |
| R  | 16 | 403.207         | 699.422         | 693.418         | 691.670 | 691.166         | R[27] |
| S  | 17 | 424.965         | 663.359         | 659.394         | 659.646 | 659.142         | S[26] |
| P  | 18 | 449.228         | 641.641         | 637.636         | 637.888 | 637.384         | P[25] |
| A  | 19 | 466.988         | 617.377         | 613.373         | 613.625 | 613.121         | A[24] |
| K  | 20 | 499.011         | 599.618         | 595.613         | 595.905 | 595.362         | K[23] |
| K  | 21 | 531.035         | 567.399         | 563.590         | 563.842 | 563.338         | K[22] |
| K  | 22 | 563.059         | 539.571         | 533.566         | 531.818 | 531.314         | K[21] |
| T  | 23 | 588.321         | 503.547         | 499.542         | 499.794 | 499.290         | T[20] |
| T  | 24 | 613.583         | 478.285         | 474.280         | 474.532 | 474.028         | T[19] |
| K  | 25 | 645.606         | 453.023         | 449.018         | 449.270 | 448.766         | K[18] |
| K  | 26 | 677.630         | 429.990         | 426.990         | 426.995 | 427.247         | K[17] |
| A  | 27 | 695.389         | 388.976         | 384.971         | 385.223 | 384.719         | A[16] |
| T  | 28 | 709.845         | 371.218         | 367.212         | 367.464 | 366.960         | T[15] |
| A  | 29 | 727.404         | 356.961         | 352.956         | 353.208 | 352.704         | A[14] |
| K  | 30 | 745.103         | 339.202         | 335.197         | 335.449 | 334.945         | K[13] |
| R  | 31 | 777.167         | 321.442         | 317.438         | 317.690 | 317.186         | R[12] |
| R  | 32 | 816.212         | 289.410         | 285.414         | 285.666 | 285.162         | R[11] |
| K  | 33 | 848.236         | 250.393         | 246.389         | 246.641 | 246.137         | K[10] |
| A  | 34 | 885.995         | 218.370         | 214.365         | 214.617 | 214.113         | A[9]  |
| T  | 35 | 891.257         | 200.610         | 196.606         | 196.858 | 196.354         | T[9]  |
| G  | 36 | 905.513         | 175.348         | 171.344         | 171.596 | 171.092         | G[7]  |
| P  | 37 | 929.776         | 161.093         | 157.088         | 157.340 | 156.836         | P[6]  |
| P  | 38 | 954.039         | 136.830         | 132.825         | 133.077 | 132.573         | P[5]  |
| V  | 39 | <b>978.806</b>  | 112.507         | 108.502         | 108.814 | 108.310         | V[4]  |
| S  | 40 | <b>1005.564</b> | 87.800          | 83.795          | 84.047  | 83.543          | S[3]  |
| E  | 41 | <b>1032.825</b> | 66.943          | 62.937          | 63.289  | 62.785          | E[2]  |
| L  | 42 | <b>1061.096</b> | 33.781          | 29.776          | 30.028  | 29.524          | L[1]  |





# sp | P43276 | H15\_MOUSE

[Acetyl]SETAPAETAAPAPVEKSPAKKKTTKKAGAAKRKATGPPVSEL

- ▶ fragmentation table for charge state 1+
- ▶ specType=etd
- ▶ score=35.84
- ▶ F104930.dat
- ▶ query=q4407\_p1
- ▶ precursor=707.898920
- ▶ chargePrecursor=6
- ▶ itol=0.8

| AA | c               | y              | z+1             | z+2             | z               | AA    |
|----|-----------------|----------------|-----------------|-----------------|-----------------|-------|
| S  | 147.079         | 4342.346       | 4226.327        | 0.000           | 4225.319        | S[42] |
| E  | 276.119         | 4113.303       | 4097.284        | 0.000           | 4096.270        | E[41] |
| L  | 377.167         | 3894.260       | 3968.242        | 0.000           | 3967.234        | L[40] |
| A  | 449.204         | 3683.213       | 3661.194        | 0.000           | 3660.186        | A[39] |
| P  | 545.257         | 3512.170       | 3490.157        | 0.000           | 3489.149        | P[38] |
| A  | 616.294         | 3715.123       | 3699.104        | 0.000           | 3698.096        | A[37] |
| E  | 745.336         | 3644.086       | 3628.067        | 0.000           | 3627.059        | E[36] |
| Y  | <b>846.384</b>  | 3515.043       | 3499.024        | 0.000           | 3498.017        | Y[35] |
| A  | 917.421         | 3413.995       | 3397.977        | 0.000           | 3396.969        | A[34] |
| A  | <b>988.458</b>  | 3342.958       | 3328.940        | 0.000           | 3327.932        | A[33] |
| P  | <b>1085.511</b> | 3271.921       | 3255.903        | 0.000           | 3254.895        | P[32] |
| A  | 1156.548        | 3174.868       | 3158.850        | 0.000           | 3157.842        | A[31] |
| P  | 1253.601        | 3103.831       | 3087.813        | 0.000           | 3086.805        | P[30] |
| V  | 1352.669        | 3036.779       | 2999.760        | 0.000           | 2998.752        | V[29] |
| E  | 1451.722        | 2967.740       | 2891.691        | 0.000           | 2890.684        | E[28] |
| R  | <b>1609.807</b> | 2778.668       | 2762.649        | 2763.657        | 2761.641        | R[27] |
| S  | 1698.839        | 2650.573       | 2634.554        | 2635.562        | 2633.546        | S[26] |
| P  | 1793.892        | 2563.541       | 2547.522        | 2548.530        | 2546.514        | P[25] |
| A  | 1864.929        | 2466.498       | 2450.469        | 2451.477        | 2449.461        | A[24] |
| K  | 1993.024        | 2395.451       | 2379.432        | 2380.440        | 2378.424        | K[23] |
| K  | 2121.119        | 2297.398       | 2281.379        | 2282.386        | 2280.370        | K[22] |
| K  | 2269.214        | 2139.351       | 2123.342        | 2124.350        | 2122.344        | K[21] |
| T  | 2350.261        | 2011.166       | 1995.147        | 1996.155        | <b>1994.139</b> | T[20] |
| T  | 2451.309        | 1910.118       | 1894.099        | 1895.107        | 1893.092        | T[19] |
| K  | 2579.404        | 1809.070       | 1793.052        | 1794.060        | 1792.044        | K[18] |
| K  | 2707.499        | 1680.976       | 1664.957        | 1665.965        | 1663.949        | K[17] |
| K  | 2778.536        | 1532.881       | 1516.862        | 1517.870        | 1515.854        | K[16] |
| G  | 2838.557        | 1493.843       | 1485.825        | 1486.833        | 1484.817        | G[15] |
| A  | 2906.595        | 1424.822       | <b>1408.803</b> | <b>1409.811</b> | 1407.795        | A[14] |
| A  | 2977.632        | 1353.785       | 1337.766        | 1338.774        | 1336.758        | A[13] |
| K  | 3105.727        | 1292.748       | 1266.729        | 1267.737        | 1265.721        | K[12] |
| R  | 3261.826        | 1154.653       | <b>1138.634</b> | 1139.642        | 1137.626        | R[11] |
| R  | 3369.823        | <b>998.552</b> | <b>982.533</b>  | 983.541         | 981.525         | R[10] |
| A  | 3460.969        | 929.529        | <b>854.438</b>  | <b>855.446</b>  | 853.430         | A[9]  |
| T  | 3562.008        | 799.420        | 783.401         | 784.409         | 782.393         | T[8]  |
| G  | 3616.029        | 698.372        | 682.353         | 683.361         | 681.345         | G[7]  |
| P  | 3718.082        | 641.350        | 625.332         | 626.340         | 624.324         | P[6]  |
| P  | 3813.135        | 544.298        | 528.279         | 529.287         | 527.271         | P[5]  |
| V  | 3912.202        | 447.246        | <b>431.226</b>  | 432.234         | 430.218         | V[4]  |
| S  | 3999.235        | 348.177        | 332.158         | 333.166         | 331.150         | S[3]  |
| E  | 4128.278        | 261.144        | 245.126         | 246.134         | 244.118         | E[2]  |
| L  | 4241.302        | 132.022        | 116.003         | 117.011         | 115.975         | L[1]  |

# sp | P43276 | H15\_MOUSE

[Acetyl]SETAPAETAAPAPVEKSPAKKKTTKKAGAAKRKATGPPVSEL

- ▶ fragmentation table for charge state 2+
- ▶ specType=etd
- ▶ score=35.84
- ▶ F104930.dat
- ▶ query=q4407\_p1
- ▶ precursor=707.898920
- ▶ chargePrecursor=6
- ▶ itol=0.8

| AA | c  | y               | z+1             | z+2             | z               | AA              |       |
|----|----|-----------------|-----------------|-----------------|-----------------|-----------------|-------|
| S  | 1  | 74.042          | 2121.676        | 2113.667        | 0.504           | 2113.163        | S(42) |
| E  | 2  | 138.563         | 2057.155        | 2049.146        | 0.504           | 2048.642        | E(41) |
| T  | 3  | 189.087         | 1992.634        | 1984.624        | 0.504           | 1984.121        | T(40) |
| A  | 4  | 224.206         | 1928.113        | 1920.103        | 0.504           | 1919.599        | A(39) |
| P  | 5  | 293.135         | <b>1906.591</b> | 1898.582        | 0.504           | 1898.078        | P(38) |
| A  | 6  | 308.650         | 1858.065        | 1850.056        | 0.504           | 1849.552        | A(37) |
| E  | 7  | 373.172         | 1822.547        | 1814.537        | 0.504           | 1814.033        | E(36) |
| T  | 8  | 423.696         | 1758.025        | 1750.016        | 0.504           | 1749.512        | T(35) |
| A  | 9  | 459.214         | 1707.501        | 1699.492        | 0.504           | 1698.988        | A(34) |
| A  | 10 | 494.733         | 1671.983        | 1663.973        | 0.504           | 1663.470        | A(33) |
| P  | 11 | 543.259         | 1608.464        | 1600.455        | 0.504           | 1602.951        | P(32) |
| A  | 12 | 578.778         | 1587.938        | 1579.929        | 0.504           | 1579.425        | A(31) |
| P  | 13 | 607.304         | 1552.419        | 1544.410        | 0.504           | 1543.906        | P(30) |
| V  | 14 | 676.830         | 1503.893        | 1495.884        | 0.504           | 1495.380        | V(29) |
| E  | 15 | 741.269         | 1454.367        | 1446.358        | 0.504           | 1445.854        | E(28) |
| T  | 16 | <b>805.407</b>  | <b>1389.837</b> | 1381.828        | 1383.332        | 1383.332        | T(27) |
| S  | 17 | 848.923         | 1325.360        | <b>1317.781</b> | <b>1318.285</b> | <b>1317.277</b> | S(26) |
| P  | 18 | <b>897.449</b>  | 1282.274        | 1274.265        | 1274.768        | 1273.761        | P(25) |
| A  | 19 | 932.968         | 1233.748        | <b>1225.738</b> | <b>1226.242</b> | <b>1225.234</b> | A(24) |
| K  | 20 | <b>997.015</b>  | 1188.220        | 1180.210        | 1180.724        | 1180.716        | K(23) |
| K  | 21 | <b>1067.063</b> | <b>1134.182</b> | <b>1126.172</b> | <b>1126.676</b> | <b>1125.668</b> | K(22) |
| K  | 22 | <b>1125.110</b> | 1070.134        | <b>1062.125</b> | <b>1062.629</b> | <b>1061.621</b> | K(21) |
| T  | 23 | 1175.634        | <b>1006.087</b> | <b>998.077</b>  | <b>998.581</b>  | <b>997.573</b>  | T(20) |
| T  | 24 | <b>1226.158</b> | 955.563         | <b>947.553</b>  | <b>948.057</b>  | <b>947.049</b>  | T(19) |
| K  | 25 | <b>1290.206</b> | <b>905.039</b>  | <b>897.030</b>  | <b>897.533</b>  | <b>896.526</b>  | K(18) |
| K  | 26 | 1354.253        | <b>840.991</b>  | <b>832.982</b>  | <b>833.486</b>  | <b>832.478</b>  | K(17) |
| A  | 27 | <b>1389.772</b> | 776.944         | <b>768.935</b>  | <b>769.438</b>  | 768.431         | A(16) |
| G  | 28 | 1438.292        | 741.425         | <b>733.416</b>  | <b>733.920</b>  | 732.912         | G(15) |
| A  | 29 | 1453.801        | 712.915         | 704.905         | 705.409         | 704.401         | A(14) |
| A  | 30 | 1489.319        | 677.396         | <b>669.387</b>  | <b>669.891</b>  | 668.883         | A(13) |
| K  | 31 | <b>1553.367</b> | 641.876         | <b>633.868</b>  | <b>634.372</b>  | <b>633.364</b>  | K(12) |
| K  | 32 | <b>1623.416</b> | 677.890         | <b>669.821</b>  | <b>670.325</b>  | <b>669.317</b>  | K(11) |
| K  | 33 | 1663.453        | 609.770         | 601.760         | 602.274         | 601.266         | K(10) |
| A  | 34 | 1730.984        | 435.752         | 427.743         | 428.227         | 427.219         | A(9)  |
| T  | 35 | 1781.507        | 400.213         | 392.204         | 392.708         | 391.700         | T(8)  |
| G  | 36 | 1818.018        | 349.690         | 341.680         | 342.184         | 341.176         | G(7)  |
| P  | 37 | 1888.545        | 231.179         | 223.170         | 223.673         | 222.666         | P(6)  |
| P  | 38 | <b>1907.071</b> | 272.862         | 264.853         | 265.357         | 264.350         | P(5)  |
| V  | 39 | 1958.602        | 224.120         | 216.111         | 216.621         | 215.612         | V(4)  |
| S  | 40 | 2000.121        | 174.592         | 166.583         | 167.086         | 166.079         | S(3)  |
| E  | 41 | 2064.642        | 131.076         | 123.067         | 123.570         | 122.563         | E(2)  |
| L  | 42 | 2121.184        | 66.555          | 58.545          | 59.049          | 58.041          | L(1)  |

# sp | P43276 | H15\_MOUSE

[Acetyl]SETAPAETAAPAPVEKSPAKKTTKKAGAAKRKATGPPVSEL

- ▶ fragmentation table for charge state 3+
- ▶ specType=etd
- ▶ score=35.84
- ▶ F104930.dat
- ▶ query=q4407\_p1
- ▶ precursor=707.898920
- ▶ chargePrecursor=6
- ▶ itol=0.8

| AA     | c               | y               | z+1             | z+2            | z               | AA   |
|--------|-----------------|-----------------|-----------------|----------------|-----------------|------|
| S   1  | 49.697          | 1414.767        | <b>1409.447</b> | 0.672          | <b>1409.111</b> | S 42 |
| E   2  | 92.711          | <b>1371.773</b> | <b>1366.433</b> | 0.672          | <b>1366.097</b> | E 41 |
| T   3  | 126.394         | 1226.767        | 1221.070        | 0.672          | 1220.734        | T 40 |
| A   4  | 150.974         | <b>1295.076</b> | <b>1289.736</b> | 0.672          | <b>1289.400</b> | A 39 |
| P   5  | 182.424         | <b>1271.397</b> | 1266.057        | 0.672          | 1265.721        | P 38 |
| A   6  | 206.103         | 1239.048        | 1233.706        | 0.672          | 1233.370        | A 37 |
| E   7  | 269.117         | 1215.367        | <b>1210.027</b> | 0.672          | <b>1209.691</b> | E 36 |
| T   8  | 282.800         | 1172.353        | <b>1167.013</b> | 0.672          | <b>1166.677</b> | T 35 |
| A   9  | 306.470         | <b>1138.670</b> | 1133.330        | 0.672          | 1132.994        | A 34 |
| A   10 | 330.158         | 1114.991        | 1109.651        | 0.672          | 1109.315        | A 33 |
| P   11 | 352.508         | 1091.312        | <b>1085.972</b> | 0.672          | <b>1085.636</b> | P 32 |
| A   12 | 386.188         | 1058.961        | <b>1053.621</b> | 0.672          | <b>1053.285</b> | A 31 |
| P   13 | 418.538         | <b>1035.282</b> | <b>1029.942</b> | 0.672          | <b>1029.606</b> | P 30 |
| V   14 | 451.561         | 1002.931        | <b>997.591</b>  | 0.672          | <b>997.256</b>  | V 29 |
| E   15 | 484.575         | 969.508         | 964.168         | 0.672          | 963.832         | E 28 |
| R   16 | 517.274         | <b>926.894</b>  | <b>921.554</b>  | <b>921.890</b> | 921.310         | R 27 |
| S   17 | 566.284         | 884.190         | <b>878.856</b>  | <b>879.192</b> | <b>878.520</b>  | S 26 |
| P   18 | 598.635         | <b>855.185</b>  | 849.845         | 850.181        | 849.510         | P 25 |
| A   19 | 622.314         | 822.834         | <b>817.495</b>  | <b>817.831</b> | <b>817.159</b>  | A 24 |
| K   20 | 665.013         | 799.155         | <b>793.816</b>  | <b>794.151</b> | 793.480         | K 23 |
| K   21 | 707.741         | 766.457         | <b>751.117</b>  | <b>751.453</b> | <b>750.781</b>  | K 22 |
| K   22 | 750.469         | 733.751         | 728.410         | 728.746        | 728.380         | K 21 |
| T   23 | 784.092         | <b>671.060</b>  | <b>665.721</b>  | <b>666.057</b> | <b>665.385</b>  | T 20 |
| T   24 | <b>817.774</b>  | 637.378         | <b>632.038</b>  | <b>632.374</b> | 631.702         | T 19 |
| K   25 | <b>860.473</b>  | 603.699         | 598.359         | 598.691        | 598.019         | K 18 |
| K   26 | 903.171         | 560.997         | 555.657         | 555.993        | 555.321         | K 17 |
| A   27 | <b>926.850</b>  | 518.206         | 512.959         | 513.295        | 512.623         | A 16 |
| G   28 | <b>945.857</b>  | 484.817         | 479.580         | 479.916        | 479.244         | G 15 |
| A   29 | 989.536         | 475.612         | 470.273         | 470.609        | 469.937         | A 14 |
| A   30 | <b>993.215</b>  | 451.933         | 446.594         | 446.930        | 446.258         | A 13 |
| K   31 | <b>1035.914</b> | 428.254         | 422.915         | 423.250        | 422.578         | K 12 |
| R   32 | <b>1087.947</b> | 385.550         | 380.210         | 380.552        | 379.880         | R 11 |
| K   33 | <b>1130.646</b> | 343.522         | 338.183         | 338.518        | 337.844         | K 10 |
| A   34 | <b>1154.325</b> | 290.824         | 285.484         | 285.820        | 285.148         | A 9  |
| T   35 | 1188.097        | 267.145         | 261.805         | 262.141        | 261.469         | T 8  |
| G   36 | 1207.015        | 233.462         | 228.123         | 228.459        | 227.787         | G 7  |
| P   37 | 1239.305        | 214.455         | 209.115         | 209.451        | 208.779         | P 6  |
| P   38 | <b>1271.716</b> | 182.104         | 176.765         | 177.100        | 176.429         | P 5  |
| V   39 | 1304.739        | 149.753         | 144.414         | 144.750        | 144.078         | V 4  |
| S   40 | 1333.262        | 116.738         | 111.399         | 111.737        | 111.065         | S 3  |
| E   41 | <b>1376.764</b> | 87.220          | 82.380          | 82.716         | 82.044          | E 2  |
| L   42 | 1414.459        | 44.705          | 39.366          | 39.702         | 39.030          | L 1  |

# sp | P43276 | H15\_MOUSE

[Acetyl]SETAPAETAAPAPVEKSPAKKKTTKKAGAAKRKATGPPVSEL

- ▶ fragmentation table for charge state 4+
- ▶ specType=etd
- ▶ score=35.84
- ▶ F104930.dat
- ▶ query=q4407\_p1
- ▶ precursor=707.898920
- ▶ chargePrecursor=6
- ▶ itol=0.8

| AA | c  | y               | z+1             | z+2             | z              | AA              |       |
|----|----|-----------------|-----------------|-----------------|----------------|-----------------|-------|
| S  | 1  | 37.525          | <b>1061.342</b> | <b>1057.337</b> | 0.755          | <b>1057.085</b> | S[42] |
| E  | 2  | 69.785          | <b>1029.081</b> | 1025.077        | 0.755          | 1024.825        | E[41] |
| T  | 3  | 95.047          | <b>996.821</b>  | <b>992.816</b>  | 0.755          | <b>992.564</b>  | T[40] |
| A  | 4  | 112.808         | 971.561         | <b>967.554</b>  | 0.755          | 967.302         | A[39] |
| F  | 5  | 137.070         | <b>951.799</b>  | 949.795         | 0.755          | 949.543         | F[38] |
| A  | 6  | 154.829         | 929.538         | <b>925.531</b>  | 0.755          | <b>925.280</b>  | A[37] |
| E  | 7  | 187.090         | 911.777         | 907.772         | 0.755          | 907.520         | E[36] |
| T  | 8  | 212.351         | <b>879.516</b>  | 875.512         | 0.755          | 875.260         | T[35] |
| A  | 9  | 239.111         | <b>854.255</b>  | 850.250         | 0.755          | 849.999         | A[34] |
| A  | 10 | 267.870         | <b>836.495</b>  | <b>832.490</b>  | 0.755          | <b>832.238</b>  | A[33] |
| P  | 11 | 292.133         | <b>818.736</b>  | 814.731         | 0.755          | 814.479         | P[32] |
| A  | 12 | 299.892         | <b>794.473</b>  | <b>790.468</b>  | 0.755          | <b>790.216</b>  | A[31] |
| F  | 13 | 314.156         | 776.713         | 772.709         | 0.755          | 772.457         | F[30] |
| V  | 14 | 338.923         | <b>752.450</b>  | 748.445         | 0.755          | 748.193         | V[29] |
| E  | 15 | 371.183         | 727.883         | <b>723.878</b>  | 0.755          | 723.626         | E[28] |
| R  | 16 | 403.207         | 699.421         | 695.416         | 0.755          | 695.164         | R[27] |
| S  | 17 | 424.965         | 681.359         | <b>659.394</b>  | <b>659.646</b> | <b>659.142</b>  | S[26] |
| P  | 18 | 449.228         | 641.641         | 637.636         | 637.888        | 637.384         | P[25] |
| A  | 19 | 466.988         | 617.377         | 613.373         | 613.625        | 613.123         | A[24] |
| K  | 20 | 499.011         | 599.618         | 595.613         | 595.865        | 595.362         | K[23] |
| K  | 21 | 531.035         | 587.394         | 583.390         | 583.642        | 583.139         | K[22] |
| K  | 22 | 563.059         | 579.571         | 575.566         | 575.818        | 575.314         | K[21] |
| T  | 23 | 588.321         | 503.547         | 499.542         | 499.794        | 499.290         | T[20] |
| T  | 24 | 613.583         | 478.285         | 474.280         | 474.532        | 474.028         | T[19] |
| K  | 25 | 645.606         | 453.023         | 449.018         | 449.270        | 448.766         | K[18] |
| K  | 26 | 677.630         | 429.999         | 425.995         | 427.247        | 426.743         | K[17] |
| A  | 27 | 695.389         | 389.976         | 384.971         | 385.223        | 384.719         | A[16] |
| G  | 28 | 709.648         | 371.219         | 367.212         | 367.464        | 366.960         | G[15] |
| A  | 29 | 727.404         | 356.961         | 352.956         | 353.208        | 352.704         | A[14] |
| A  | 30 | 745.163         | 339.202         | 335.197         | 335.449        | 334.945         | A[13] |
| K  | 31 | 777.187         | 321.442         | 317.436         | 317.690        | 317.186         | K[12] |
| R  | 32 | <b>816.212</b>  | 289.419         | 285.414         | 285.666        | 285.162         | R[11] |
| K  | 33 | 848.236         | 295.393         | 246.389         | 246.641        | 246.137         | K[10] |
| A  | 34 | 885.995         | 219.379         | 214.369         | 214.617        | 214.113         | A[9]  |
| T  | 35 | 891.257         | 200.610         | 196.606         | 196.858        | 196.354         | T[8]  |
| G  | 36 | 905.513         | 175.348         | 171.344         | 171.596        | 171.092         | G[7]  |
| F  | 37 | 929.776         | 161.097         | 157.088         | 157.340        | 156.836         | F[6]  |
| P  | 38 | <b>954.039</b>  | 136.830         | 132.825         | 133.077        | 132.573         | P[5]  |
| V  | 39 | <b>973.806</b>  | 112.567         | 108.562         | 108.814        | 108.310         | V[4]  |
| S  | 40 | <b>1000.564</b> | 87.800          | 83.795          | 84.047         | 83.543          | S[3]  |
| E  | 41 | <b>1032.825</b> | 65.042          | 62.037          | 62.289         | 61.785          | E[2]  |
| L  | 42 | <b>1061.096</b> | 33.781          | 29.776          | 30.028         | 29.524          | L[1]  |

# sp | P43276 | H15\_MOUSE

[Acetyl]SETAPAETAAPAPVEKSPAKKKTTKKAGAAKRKATGPPVSEL

- ▶ fragmentation table for charge state 5+
- ▶ specType=etd
- ▶ score=35.84
- ▶ F104930.dat
- ▶ query=q4407\_p1
- ▶ precursor=707.898920
- ▶ chargePrecursor=6
- ▶ itol=0.8

| AA    | c              | y              | z+1            | z+2     | z              | AA    |
|-------|----------------|----------------|----------------|---------|----------------|-------|
| S[1]  | 30.221         | 849.275        | <b>846.071</b> | 0.806   | <b>845.870</b> | S[42] |
| E[2]  | 56.030         | 823.466        | 820.263        | 0.806   | 820.061        | E[41] |
| T[3]  | 76.239         | <b>797.858</b> | <b>794.454</b> | 0.806   | <b>794.253</b> | T[40] |
| N[4]  | 87.447         | <b>777.548</b> | 774.245        | 0.806   | 774.243        | N[39] |
| P[5]  | 109.357        | 743.241        | 740.037        | 0.806   | 739.836        | P[38] |
| A[6]  | 124.065        | 743.830        | 740.627        | 0.806   | 740.425        | A[37] |
| E[7]  | 149.873        | 729.623        | 726.419        | 0.806   | 726.218        | E[36] |
| T[8]  | 170.083        | 703.814        | 700.611        | 0.806   | 700.409        | T[35] |
| A[9]  | 184.290        | 683.605        | 680.401        | 0.806   | 680.200        | A[34] |
| A[10] | 198.497        | <b>669.397</b> | <b>666.194</b> | 0.806   | <b>665.992</b> | A[33] |
| P[11] | 217.908        | 655.190        | 651.986        | 0.806   | 651.785        | P[32] |
| A[12] | 232.115        | 635.780        | <b>632.576</b> | 0.806   | <b>632.374</b> | A[31] |
| P[13] | 251.526        | 621.572        | 618.368        | 0.806   | 618.167        | P[30] |
| V[14] | 271.340        | 602.162        | 598.958        | 0.806   | 598.756        | V[29] |
| E[15] | 297.148        | 582.346        | 579.144        | 0.806   | 578.943        | E[28] |
| K[16] | 322.767        | 556.539        | 553.336        | 583.537 | 553.134        | K[27] |
| S[17] | 340.174        | 530.920        | 527.717        | 527.918 | 527.515        | S[26] |
| P[18] | 359.584        | 513.514        | 510.310        | 510.512 | 510.109        | P[25] |
| A[19] | 373.792        | 494.103        | 490.900        | 491.101 | 490.698        | A[24] |
| K[20] | 399.411        | 479.696        | 476.492        | 476.894 | 476.491        | K[23] |
| K[21] | 425.030        | 454.277        | 451.073        | 451.275 | 450.872        | K[22] |
| K[22] | 450.649        | 428.658        | 425.454        | 425.656 | 425.253        | K[21] |
| T[23] | 470.858        | 403.039        | 399.835        | 400.037 | 399.634        | T[20] |
| T[24] | 491.068        | 382.829        | 379.626        | 379.827 | 379.424        | T[19] |
| K[25] | 518.687        | 362.620        | 359.416        | 359.618 | 359.215        | K[18] |
| K[26] | 542.806        | 337.001        | 333.797        | 333.999 | 333.596        | K[17] |
| A[27] | 556.513        | 311.382        | 308.178        | 308.380 | 307.977        | A[16] |
| G[28] | 567.917        | 297.175        | 293.971        | 294.172 | 293.769        | G[15] |
| A[29] | 582.125        | 285.770        | 282.566        | 282.768 | 282.365        | A[14] |
| A[30] | 596.332        | 271.563        | 268.359        | 268.561 | 268.157        | A[13] |
| K[31] | 621.951        | 257.355        | 254.152        | 254.353 | 253.950        | K[12] |
| R[32] | 653.171        | 231.736        | 228.533        | 228.734 | 228.331        | R[11] |
| K[33] | 678.790        | 200.516        | 197.312        | 197.514 | 197.111        | K[10] |
| A[34] | 692.998        | 174.897        | 171.693        | 171.895 | 171.492        | A[9]  |
| V[35] | 713.207        | 160.690        | 157.486        | 157.688 | 157.284        | V[8]  |
| G[36] | <b>724.612</b> | 140.480        | 137.276        | 137.478 | 137.075        | G[7]  |
| P[37] | 744.022        | 129.076        | 125.872        | 126.074 | 125.671        | P[6]  |
| P[38] | <b>763.433</b> | 100.665        | 106.462        | 106.663 | 106.260        | P[5]  |
| V[39] | 783.246        | 90.255         | 87.051         | 87.253  | 86.849         | V[4]  |
| S[40] | <b>800.653</b> | 70.441         | 67.237         | 67.439  | 67.036         | S[3]  |
| E[41] | <b>826.461</b> | 53.035         | 49.831         | 50.033  | 49.629         | E[2]  |
| L[42] | 849.078        | 27.226         | 24.022         | 24.224  | 23.821         | L[1]  |

# sp | P43276 | H15\_MOUSE

[Acetyl]SETAPAETAAPAPVEKS <sup>Phospho</sup> PAKKKTTKKAGAAKRKATGPPVSEL  
79.97

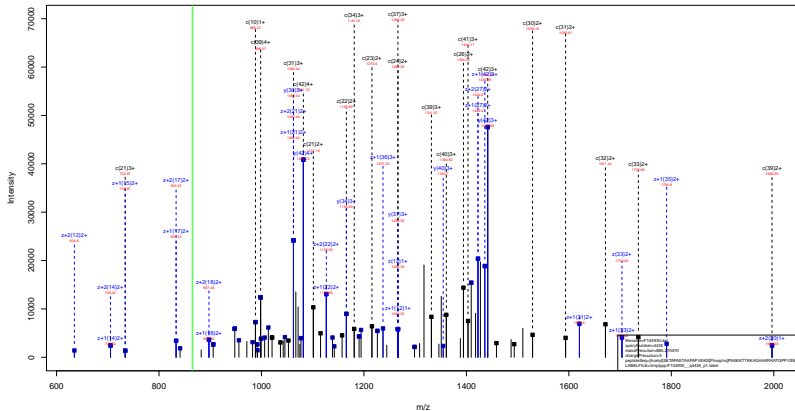

# sp | P43276 | H15\_MOUSE

[Acetyl]SETAPAETAAPAPVEKS <sup>Phospho</sup> PAKKKTTKKAGAAKRKATGPPVSEL <sub>79.97</sub>

- ▶ fragmentation table for charge state 1+
- ▶ specType=etd
- ▶ score=85.43
- ▶ F104930.dat
- ▶ query=q4435\_p1
- ▶ precursor=865.270470
- ▶ chargePrecursor=5
- ▶ itol=0.8

| AA | c  | y              | z+1            | z+2             | z               | AA              |       |
|----|----|----------------|----------------|-----------------|-----------------|-----------------|-------|
| E  | 1  | 147.076        | 4322.312       | 4306.293        | 0.000           | 4305.285        | S[42] |
| E  | 2  | 276.119        | 4193.269       | 4177.251        | 0.000           | 4176.243        | E[41] |
| T  | 3  | 377.187        | 4064.227       | 4048.209        | 0.000           | 4047.201        | T[40] |
| A  | 4  | 445.204        | 3903.179       | 3947.160        | 0.000           | 3946.153        | A[39] |
| P  | 5  | 545.257        | 3892.142       | 3876.123        | 0.000           | 3875.115        | P[38] |
| A  | 6  | 616.294        | 3795.089       | 3779.070        | 0.000           | 3778.063        | A[37] |
| E  | 7  | 745.330        | 3724.052       | 3708.033        | 0.000           | 3707.026        | E[36] |
| T  | 8  | 846.384        | 3595.009       | 3579.991        | 0.000           | 3577.983        | T[35] |
| A  | 9  | 917.421        | 3493.962       | 3477.943        | 0.000           | 3476.935        | A[34] |
| A  | 10 | <b>988.458</b> | 3422.925       | 3406.906        | 0.000           | 3405.898        | A[33] |
| P  | 11 | 1085.511       | 3351.888       | 3335.869        | 0.000           | 3334.861        | P[32] |
| A  | 12 | 1156.548       | 3254.835       | 3238.816        | 0.000           | 3237.808        | A[31] |
| F  | 13 | 1253.601       | 3183.798       | 3167.779        | 0.000           | 3166.771        | F[30] |
| V  | 14 | 1352.665       | 3096.745       | 3070.726        | 0.000           | 3069.718        | V[29] |
| E  | 15 | 1461.712       | 2967.677       | 2971.658        | 0.000           | 2970.650        | E[28] |
| R  | 16 | 1609.807       | 2898.634       | 2842.615        | 2843.623        | 2841.607        | R[27] |
| S  | 17 | 1776.895       | 2730.539       | 2714.520        | 2715.528        | 2713.512        | S[26] |
| P  | 18 | 1873.858       | 2563.541       | 2547.522        | 2548.530        | 2546.514        | P[25] |
| A  | 19 | 1944.895       | 2466.488       | 2450.469        | 2451.477        | 2449.461        | A[24] |
| K  | 20 | 2072.990       | 2395.451       | 2379.432        | 2380.440        | 2378.424        | K[23] |
| K  | 21 | 2201.085       | 2267.396       | 2251.337        | 2252.345        | 2250.329        | K[22] |
| R  | 22 | 2329.189       | 2199.361       | 2123.241        | 2124.250        | 2122.234        | R[21] |
| T  | 23 | 2430.226       | 2071.166       | 1995.147        | <b>1996.155</b> | 1994.130        | T[20] |
| T  | 24 | 2531.275       | 1910.118       | 1894.099        | 1895.107        | 1893.092        | T[19] |
| K  | 25 | 2659.370       | 1809.070       | 1793.051        | 1794.060        | 1792.044        | K[18] |
| K  | 26 | 2787.465       | 1680.976       | 1664.957        | 1665.965        | 1663.949        | K[17] |
| A  | 27 | 2885.502       | 1552.881       | 1536.862        | 1537.870        | 1535.854        | A[16] |
| A  | 28 | 2915.524       | 1491.843       | 1465.824        | 1466.833        | 1464.817        | A[15] |
| A  | 29 | 2985.581       | 1424.822       | <b>1408.803</b> | <b>1409.811</b> | 1407.795        | A[14] |
| A  | 30 | 3057.598       | 1363.795       | 1337.766        | 1338.774        | 1336.758        | A[13] |
| K  | 31 | 3185.693       | 1262.748       | <b>1266.729</b> | 1267.737        | <b>1265.721</b> | K[12] |
| R  | 32 | 3341.794       | 1154.653       | <b>1138.634</b> | 1139.642        | 1137.626        | R[11] |
| K  | 33 | 3469.899       | <b>998.552</b> | <b>982.533</b>  | 983.541         | 981.525         | K[10] |
| A  | 34 | 3540.928       | 876.437        | 874.430         | 883.446         | 883.438         | A[9]  |
| T  | 35 | 3641.974       | 799.420        | 783.401         | 784.409         | 782.393         | T[8]  |
| G  | 36 | 3698.995       | 698.372        | 682.353         | 683.361         | 681.345         | G[7]  |
| P  | 37 | 3796.048       | 641.350        | 625.332         | 626.340         | 624.324         | P[6]  |
| F  | 38 | 3893.101       | 544.298        | 528.279         | 529.287         | 527.271         | F[5]  |
| V  | 39 | 3992.160       | 447.245        | 431.226         | 432.234         | 430.218         | V[4]  |
| S  | 40 | 4079.201       | 368.177        | 352.158         | 353.166         | 351.150         | S[3]  |
| E  | 41 | 4208.244       | 283.144        | 245.126         | 246.134         | 244.118         | E[2]  |
| L  | 42 | 4321.228       | 132.102        | 116.083         | 117.091         | 115.075         | L[1]  |

# sp | P43276 | H15\_MOUSE

[Acetyl]SETAPAETAAPAPVEKS <sup>Phospho</sup> PAKKKTTKKAGAAR<sub>79.97</sub>KRATGPPVSEL

- ▶ fragmentation table for charge state 2+
- ▶ specType=etd
- ▶ score=85.43
- ▶ F104930.dat
- ▶ query=q4435\_p1
- ▶ precursor=865.270470
- ▶ chargePrecursor=5
- ▶ itol=0.8

| AA | c  | y               | z+1             | z+2             | z               | AA              |       |
|----|----|-----------------|-----------------|-----------------|-----------------|-----------------|-------|
| S  | 1  | 74.042          | 2161.660        | 2153.650        | 0.504           | 2153.140        | S(42) |
| E  | 2  | 138.563         | 2097.138        | 2089.129        | 0.504           | 2088.625        | E(41) |
| T  | 3  | 189.087         | 2032.617        | 2024.608        | 0.504           | 2024.104        | T(40) |
| A  | 4  | 224.206         | 1968.093        | 1974.084        | 0.504           | 1973.580        | A(39) |
| P  | 5  | 293.133         | 1946.579        | 1938.569        | 0.504           | 1938.065        | P(38) |
| A  | 6  | 358.650         | 1880.048        | 1890.039        | 0.504           | 1889.535        | A(37) |
| E  | 7  | 373.172         | 1864.530        | 1854.520        | 0.504           | 1854.010        | E(36) |
| T  | 8  | 423.696         | 1798.008        | <b>1789.999</b> | 0.504           | 1789.495        | T(35) |
| A  | 9  | 459.214         | 1747.485        | 1739.475        | 0.504           | 1738.971        | A(34) |
| A  | 10 | 494.733         | 1711.966        | <b>1703.957</b> | 0.504           | <b>1703.453</b> | A(33) |
| P  | 11 | 543.259         | 1676.447        | 1656.438        | 0.504           | 1657.934        | P(32) |
| A  | 12 | 578.778         | 1627.021        | <b>1619.912</b> | 0.504           | 1619.408        | A(31) |
| P  | 13 | 607.304         | 1592.402        | 1584.393        | 0.504           | 1583.889        | P(30) |
| V  | 14 | 676.830         | 1543.876        | 1535.867        | 0.504           | 1535.363        | V(29) |
| E  | 15 | 741.360         | 1494.342        | 1486.333        | 0.504           | 1485.829        | E(28) |
| T  | 16 | 809.407         | 1459.821        | <b>1421.811</b> | <b>1422.315</b> | 1421.307        | T(27) |
| S  | 17 | 888.906         | 1385.773        | 1357.764        | 1358.268        | 1357.260        | S(26) |
| P  | 18 | 937.433         | 1282.274        | 1274.265        | 1274.768        | 1273.761        | P(25) |
| A  | 19 | 972.951         | 1233.748        | <b>1225.738</b> | <b>1226.242</b> | 1225.234        | A(24) |
| K  | 20 | <b>1036.999</b> | 1198.220        | <b>1190.220</b> | <b>1190.724</b> | <b>1189.716</b> | K(23) |
| K  | 21 | <b>1101.956</b> | 1134.382        | <b>1126.172</b> | <b>1126.676</b> | 1125.669        | K(22) |
| K  | 22 | <b>1165.094</b> | 1070.134        | <b>1062.125</b> | <b>1062.629</b> | 1061.621        | K(21) |
| T  | 23 | <b>1215.517</b> | <b>1006.087</b> | <b>998.077</b>  | <b>998.581</b>  | <b>997.573</b>  | T(20) |
| T  | 24 | <b>1266.141</b> | <b>955.563</b>  | <b>947.553</b>  | <b>948.057</b>  | 947.049         | T(19) |
| K  | 25 | 1330.189        | <b>905.039</b>  | <b>897.030</b>  | <b>897.533</b>  | 896.526         | K(18) |
| K  | 26 | <b>1394.236</b> | <b>840.991</b>  | <b>832.982</b>  | <b>833.486</b>  | 832.478         | K(17) |
| A  | 27 | 1443.855        | 776.344         | 768.335         | 768.838         | 768.431         | A(16) |
| G  | 28 | <b>1458.266</b> | 741.425         | <b>733.416</b>  | <b>733.920</b>  | 732.912         | G(15) |
| A  | 29 | <b>1493.784</b> | 712.915         | <b>704.905</b>  | <b>705.409</b>  | 704.401         | A(14) |
| A  | 30 | <b>1529.303</b> | 677.396         | 669.387         | 669.891         | 668.883         | A(13) |
| K  | 31 | <b>1593.350</b> | 641.878         | 633.868         | <b>634.372</b>  | 633.364         | K(12) |
| K  | 32 | <b>1671.401</b> | 677.830         | 669.821         | 670.325         | 669.317         | K(11) |
| K  | 33 | <b>1735.448</b> | 609.779         | 601.770         | 602.274         | 601.266         | K(10) |
| A  | 34 | 1770.967        | 435.752         | 427.743         | 428.247         | 427.239         | A(9)  |
| T  | 35 | 1821.491        | 400.213         | 392.204         | 392.708         | 391.700         | T(8)  |
| G  | 36 | 1898.001        | 349.690         | 341.680         | 342.184         | 341.176         | G(7)  |
| P  | 37 | 1888.526        | 321.179         | 313.170         | 313.673         | 312.665         | P(6)  |
| P  | 38 | 1847.064        | 272.862         | 264.853         | 265.357         | 264.349         | P(5)  |
| V  | 39 | <b>1996.588</b> | 224.120         | 216.111         | 216.615         | 215.612         | V(4)  |
| S  | 40 | 2040.104        | 174.592         | 166.583         | 167.086         | 166.078         | S(3)  |
| E  | 41 | 2104.626        | 131.076         | 123.067         | 123.570         | 122.562         | E(2)  |
| L  | 42 | 2161.168        | 66.555          | 58.545          | 59.049          | 58.041          | L(1)  |



# sp | P43276 | H15\_MOUSE

[Acetyl]SETAPAETAAPAPVEKS <sup>Phospho</sup>79.97 PAKKKTTKKAGAAKRKATGPPVSEL

- ▶ fragmentation table for charge state 3+
- ▶ specType=etd
- ▶ score=85.43
- ▶ F104930.dat
- ▶ query=q4435\_p1
- ▶ precursor=865.270470
- ▶ chargePrecursor=5
- ▶ itol=0.8

| AA   | c               | y               | z+1             | z+2            | z               | AA   |
|------|-----------------|-----------------|-----------------|----------------|-----------------|------|
| S 1  | 49.697          | <b>1441.442</b> | <b>1436.103</b> | 0.672          | <b>1435.767</b> | S 42 |
| E 2  | 92.711          | 1398.429        | 1393.088        | 0.672          | 1392.752        | E 41 |
| T 3  | 126.394         | <b>1355.414</b> | 1350.074        | 0.672          | 1349.738        | T 40 |
| A 4  | 150.073         | 1312.71         | 1310.362        | 0.672          | 1310.362        | A 39 |
| F 5  | 182.424         | <b>1298.052</b> | 1292.713        | 0.672          | 1292.377        | F 38 |
| A 6  | 206.103         | <b>1265.701</b> | 1260.362        | 0.672          | 1260.026        | A 37 |
| E 7  | 269.117         | 1242.022        | <b>1236.683</b> | 0.672          | 1236.347        | E 36 |
| T 8  | 282.800         | 1199.000        | <b>1193.668</b> | 0.672          | 1193.332        | T 35 |
| A 9  | 306.479         | <b>1165.325</b> | 1159.986        | 0.672          | 1159.650        | A 34 |
| A 10 | 330.158         | <b>1141.546</b> | 1136.207        | 0.672          | 1135.971        | A 33 |
| P 11 | 362.508         | 1117.967        | 1112.628        | 0.672          | 1112.292        | P 32 |
| A 12 | 386.188         | 1085.616        | 1080.277        | 0.672          | 1079.941        | A 31 |
| F 13 | 418.538         | <b>1061.937</b> | 1056.598        | 0.672          | 1056.262        | F 30 |
| V 14 | 451.561         | 1029.580        | 1024.241        | 0.672          | 1023.911        | V 29 |
| E 15 | 484.275         | 996.364         | <b>991.224</b>  | 0.672          | <b>990.888</b>  | E 28 |
| R 16 | 517.274         | 963.540         | <b>948.210</b>  | <b>948.546</b> | <b>947.874</b>  | R 27 |
| S 17 | 552.940         | 910.851         | <b>905.512</b>  | <b>905.848</b> | <b>905.176</b>  | S 26 |
| P 18 | 625.291         | 855.185         | 849.845         | 850.181        | 849.510         | P 25 |
| A 19 | 648.970         | 822.834         | 817.495         | 817.831        | 817.150         | A 24 |
| K 20 | 691.668         | 799.155         | 793.816         | 794.151        | 793.480         | K 23 |
| K 21 | <b>734.367</b>  | 756.457         | 751.117         | 751.453        | 750.781         | K 22 |
| K 22 | 777.689         | 713.754         | 708.415         | 708.750        | 708.081         | K 21 |
| T 23 | 810.747         | 671.060         | 665.721         | 666.057        | 665.385         | T 20 |
| T 24 | 844.430         | 637.378         | 632.038         | 632.374        | 631.702         | T 19 |
| K 25 | 887.126         | 603.695         | 598.355         | 598.691        | 598.019         | K 18 |
| K 26 | 929.827         | 560.997         | 555.657         | 555.993        | 555.321         | K 17 |
| A 27 | 953.506         | 518.206         | 512.866         | 513.202        | 512.622         | A 16 |
| G 28 | 972.513         | 484.817         | 479.478         | 479.814        | 479.144         | G 15 |
| A 29 | 996.192         | 475.612         | 470.273         | 470.609        | 469.937         | A 14 |
| A 30 | <b>1019.871</b> | 451.933         | 446.594         | 446.930        | 446.258         | A 13 |
| K 31 | <b>1062.569</b> | 428.254         | 422.915         | 423.250        | 422.579         | K 12 |
| R 32 | <b>1114.603</b> | 385.550         | 380.210         | 380.552        | 379.880         | R 11 |
| K 33 | <b>1157.301</b> | 343.522         | 338.183         | 338.518        | 337.844         | K 10 |
| A 34 | <b>1189.580</b> | 290.824         | 285.484         | 285.820        | 285.144         | A 9  |
| T 35 | 1214.663        | 267.145         | 261.805         | 262.141        | 261.469         | T 8  |
| G 36 | 1233.670        | 233.462         | 228.123         | 228.459        | 227.787         | G 7  |
| F 37 | <b>1266.021</b> | 214.455         | 209.115         | 209.451        | 208.779         | F 6  |
| P 38 | <b>1298.372</b> | 182.104         | 176.765         | 177.100        | 176.429         | P 5  |
| V 39 | <b>1331.395</b> | 149.753         | 144.414         | 144.750        | 144.074         | V 4  |
| S 40 | <b>1360.405</b> | 116.783         | 111.443         | 111.777        | 111.095         | S 3  |
| E 41 | <b>1403.419</b> | 87.220          | 82.380          | 82.716         | 82.044          | E 2  |
| L 42 | <b>1441.114</b> | 44.705          | 39.366          | 39.702         | 39.030          | L 1  |

# sp | P43276 | H15\_MOUSE

[Acetyl]SETAPAETAAPAPVEKS <sup>Phospho</sup> PAKKKTTKKAGAAKRKATGPPVSEL <sub>79.97</sub>

- ▶ fragmentation table for charge state 4+
- ▶ specType=etd
- ▶ score=85.43
- ▶ F104930.dat
- ▶ query=q4435.p1
- ▶ precursor=865.270470
- ▶ chargePrecursor=5
- ▶ itol=0.8

| AA | c  | y               | a+1             | a+2             | z     | AA              |       |
|----|----|-----------------|-----------------|-----------------|-------|-----------------|-------|
| S  | 1  | 37.525          | <b>1081.333</b> | <b>1077.329</b> | 0.755 | <b>1077.077</b> | S[42] |
| E  | 2  | 69.785          | 1049.073        | <b>1045.060</b> | 0.755 | 1044.810        | E[41] |
| T  | 3  | 95.047          | 1019.813        | <b>1012.807</b> | 0.755 | 1012.550        | T[40] |
| A  | 4  | 112.506         | <b>991.550</b>  | <b>987.546</b>  | 0.755 | 987.290         | A[39] |
| P  | 5  | 137.070         | 973.791         | 969.786         | 0.755 | 969.534         | P[38] |
| A  | 6  | 154.829         | 949.528         | 945.523         | 0.755 | 945.271         | A[37] |
| E  | 7  | 187.090         | 931.769         | 927.764         | 0.755 | 927.512         | E[36] |
| T  | 8  | 212.351         | 899.508         | 895.503         | 0.755 | 895.251         | T[35] |
| A  | 9  | 230.111         | 874.249         | 870.244         | 0.755 | 869.990         | A[34] |
| A  | 10 | 247.870         | 856.487         | 852.482         | 0.755 | 852.230         | A[33] |
| P  | 11 | 272.133         | 838.727         | 834.723         | 0.755 | 834.471         | P[32] |
| A  | 12 | 289.892         | 814.464         | 810.459         | 0.755 | 810.208         | A[31] |
| P  | 13 | 314.156         | 796.705         | 792.700         | 0.755 | 792.448         | P[30] |
| V  | 14 | 338.923         | 772.442         | 768.437         | 0.755 | 768.185         | V[29] |
| E  | 15 | 371.183         | 747.675         | 743.670         | 0.755 | 743.418         | E[28] |
| R  | 16 | 403.207         | 719.416         | 711.409         | 0.755 | 711.157         | R[27] |
| S  | 17 | 444.957         | 683.350         | 679.346         | 0.755 | 679.134         | S[26] |
| P  | 18 | 469.220         | 641.641         | 637.636         | 0.755 | 637.384         | P[25] |
| A  | 19 | 486.979         | 617.377         | 613.373         | 0.755 | 613.121         | A[24] |
| K  | 20 | 519.003         | 599.618         | 595.613         | 0.755 | 595.362         | K[23] |
| K  | 21 | 551.027         | 567.399         | 563.394         | 0.755 | 563.142         | K[22] |
| K  | 22 | 583.050         | 535.571         | 531.566         | 0.755 | 531.314         | K[21] |
| T  | 23 | 608.312         | 503.547         | 499.542         | 0.755 | 499.290         | T[20] |
| T  | 24 | 633.574         | 478.285         | 474.280         | 0.755 | 474.028         | T[19] |
| K  | 25 | 665.598         | 453.023         | 449.018         | 0.755 | 448.766         | K[18] |
| K  | 26 | 697.622         | 429.990         | 426.985         | 0.755 | 426.733         | K[17] |
| A  | 27 | 715.381         | 388.976         | 384.971         | 0.755 | 384.719         | A[16] |
| T  | 28 | 729.836         | 371.218         | 367.213         | 0.755 | 366.961         | T[15] |
| A  | 29 | 747.596         | 356.961         | 352.956         | 0.755 | 352.704         | A[14] |
| K  | 30 | 765.155         | 339.202         | 335.197         | 0.755 | 334.945         | K[13] |
| R  | 31 | 797.179         | 321.442         | 317.438         | 0.755 | 317.186         | R[12] |
| R  | 32 | 836.204         | 289.410         | 285.414         | 0.755 | 285.162         | R[11] |
| K  | 33 | 868.228         | 250.393         | 246.389         | 0.755 | 246.137         | K[10] |
| A  | 34 | 885.987         | 218.370         | 214.365         | 0.755 | 214.113         | A[9]  |
| T  | 35 | 911.249         | 200.610         | 196.606         | 0.755 | 196.354         | T[8]  |
| G  | 36 | 925.504         | 175.348         | 171.344         | 0.755 | 171.092         | G[7]  |
| P  | 37 | 949.767         | 161.093         | 157.088         | 0.755 | 156.836         | P[6]  |
| P  | 38 | 974.031         | 136.830         | 132.825         | 0.755 | 132.573         | P[5]  |
| V  | 39 | <b>998.798</b>  | 112.507         | 108.502         | 0.755 | 108.250         | V[4]  |
| S  | 40 | <b>1020.356</b> | 87.800          | 83.795          | 0.755 | 83.543          | S[3]  |
| E  | 41 | <b>1032.816</b> | 66.943          | 62.937          | 0.755 | 62.705          | E[2]  |
| L  | 42 | <b>1081.087</b> | 33.751          | 29.776          | 0.755 | 29.524          | L[1]  |

# sp | P43276 | H15\_MOUSE

[Acetyl]SETAPAETAAPAPVEKS <sup>Phospho</sup> PAKKKTTKKAGAAKRKATGPPVSEL  
79.97

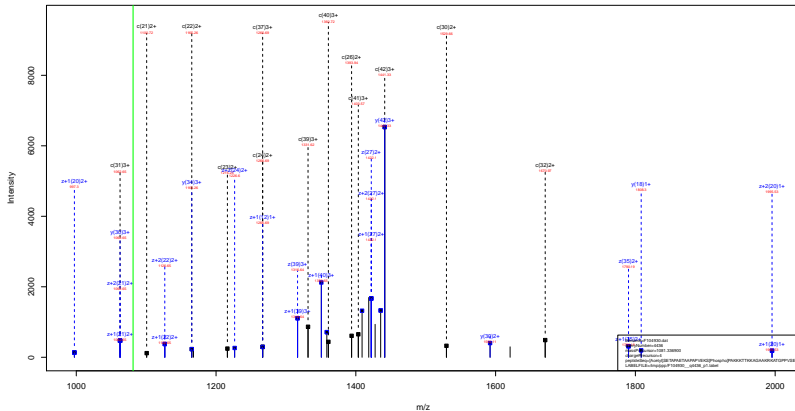

# sp | P43276 | H15\_MOUSE

[Acetyl]SETAPAETAAPAPVEKS <sup>Phospho</sup> PAKKKTTKKAGAAKRKATGPPVSEL <sub>79.97</sub>

- ▶ fragmentation table for charge state 1+
- ▶ specType=etd
- ▶ score=44.00
- ▶ F104930.dat
- ▶ query=q4436\_p1
- ▶ precursor=1081.336900
- ▶ chargePrecursor=4
- ▶ itol=0.8

| AA | c  | y        | z+1             | z+2             | z               | AA       |       |
|----|----|----------|-----------------|-----------------|-----------------|----------|-------|
| S  | 1  | 147.076  | 4322.312        | 4306.293        | 0.000           | 4305.285 | S[42] |
| E  | 2  | 276.119  | 4101.269        | 4177.251        | 0.000           | 4176.243 | E[41] |
| T  | 3  | 377.187  | 4384.227        | 4046.209        | 0.000           | 4247.200 | T[40] |
| A  | 4  | 445.204  | 3953.179        | 3947.100        | 0.000           | 3945.153 | A[39] |
| P  | 5  | 545.257  | 3892.142        | 3876.123        | 0.000           | 3875.115 | P[38] |
| A  | 6  | 616.294  | 3795.089        | 3779.070        | 0.000           | 3778.063 | A[37] |
| E  | 7  | 745.330  | 3724.052        | 3708.033        | 0.000           | 3707.026 | E[36] |
| T  | 8  | 846.384  | 3595.009        | 3578.991        | 0.000           | 3577.983 | T[35] |
| A  | 9  | 917.421  | 3493.962        | 3477.943        | 0.000           | 3476.935 | A[34] |
| A  | 10 | 988.458  | 3422.925        | 3406.906        | 0.000           | 3405.898 | A[33] |
| P  | 11 | 1085.511 | 3351.888        | 3335.869        | 0.000           | 3334.861 | P[32] |
| A  | 12 | 1156.548 | 3254.835        | 3238.816        | 0.000           | 3237.808 | A[31] |
| F  | 13 | 1253.601 | 3183.788        | 3167.770        | 0.000           | 3166.771 | F[30] |
| V  | 14 | 1352.665 | 3086.745        | 3070.726        | 0.000           | 3069.718 | V[29] |
| E  | 15 | 1481.712 | 2487.677        | 2471.658        | 0.000           | 2470.650 | E[28] |
| R  | 16 | 1609.807 | 2858.634        | 2842.615        | 2841.623        | 2841.607 | R[27] |
| S  | 17 | 1778.856 | 2730.539        | 2714.520        | 2713.528        | 2713.512 | S[26] |
| P  | 18 | 1873.858 | 2563.541        | 2547.522        | 2546.530        | 2546.514 | P[25] |
| A  | 19 | 1944.895 | 2466.488        | 2450.469        | 2451.477        | 2449.461 | A[24] |
| K  | 20 | 2072.990 | 2395.451        | 2379.432        | 2380.440        | 2378.424 | K[23] |
| K  | 21 | 2201.085 | 2287.396        | 2261.377        | 2252.385        | 2250.320 | K[22] |
| K  | 22 | 2329.180 | 2139.361        | 2123.342        | 2124.350        | 2122.284 | K[21] |
| T  | 23 | 2430.226 | 2011.365        | <b>1995.147</b> | <b>1996.155</b> | 1994.130 | T[20] |
| T  | 24 | 2531.275 | 1910.318        | 1894.009        | 1895.107        | 1893.092 | T[19] |
| K  | 25 | 2659.370 | <b>1809.070</b> | 1793.052        | 1794.000        | 1792.044 | K[18] |
| K  | 26 | 2787.465 | 1680.976        | 1664.957        | 1665.965        | 1663.949 | K[17] |
| A  | 27 | 2885.502 | 1552.881        | 1536.862        | 1537.870        | 1535.854 | A[16] |
| G  | 28 | 2913.524 | 1483.843        | 1467.824        | 1468.833        | 1466.817 | G[15] |
| A  | 29 | 2958.581 | 1424.822        | <b>1408.803</b> | 1409.811        | 1407.795 | A[14] |
| A  | 30 | 3057.598 | 1353.785        | 1337.766        | 1338.774        | 1336.758 | A[13] |
| K  | 31 | 3185.693 | 1282.748        | <b>1266.729</b> | 1267.737        | 1265.721 | K[12] |
| R  | 32 | 3341.794 | 1154.653        | 1138.634        | 1139.642        | 1137.626 | R[11] |
| K  | 33 | 3469.889 | 998.552         | 982.533         | 983.541         | 981.525  | K[10] |
| A  | 34 | 3540.926 | 876.497         | 860.478         | 861.486         | 859.470  | A[9]  |
| T  | 35 | 3641.974 | 789.420         | 783.401         | 784.409         | 782.393  | T[8]  |
| G  | 36 | 3698.995 | 696.372         | 682.353         | 683.361         | 681.345  | G[7]  |
| P  | 37 | 3796.048 | 641.350         | 625.332         | 626.340         | 624.324  | P[6]  |
| F  | 38 | 3893.101 | 544.298         | 528.279         | 529.287         | 527.271  | F[5]  |
| V  | 39 | 3992.160 | 447.245         | 431.226         | 432.234         | 430.218  | V[4]  |
| S  | 40 | 4079.201 | 348.177         | 332.158         | 333.166         | 331.150  | S[3]  |
| E  | 41 | 4208.244 | 261.144         | 245.125         | 246.134         | 244.118  | E[2]  |
| L  | 42 | 4321.228 | 132.102         | 116.083         | 117.091         | 115.075  | L[1]  |

# sp | P43276 | H15\_MOUSE

[Acetyl]SETAPAETAAPAPVEKS <sup>Phospho</sup> PAKKKTTKKAGAAKRKATGPPVSEL  
79.97

- ▶ fragmentation table for charge state 2+
- ▶ specType=etd
- ▶ score=44.00
- ▶ F104930.dat
- ▶ query=q4436\_p1
- ▶ precursor=1081.336900
- ▶ chargePrecursor=4
- ▶ itol=0.8

| AA | c  | y               | z+1             | z+2             | z               | AA              |       |
|----|----|-----------------|-----------------|-----------------|-----------------|-----------------|-------|
| S  | 1  | 74.042          | 2161.660        | 2153.650        | 0.504           | 2153.140        | S(42) |
| E  | 2  | 138.563         | 2097.138        | 2089.129        | 0.504           | 2088.625        | E(41) |
| T  | 3  | 189.087         | 2032.617        | 2024.608        | 0.504           | 2024.104        | T(40) |
| A  | 4  | 224.206         | 1968.093        | 1974.084        | 0.504           | 1973.580        | A(39) |
| P  | 5  | 293.135         | 1846.579        | 1838.569        | 0.504           | 1838.065        | P(38) |
| A  | 6  | 358.650         | 1898.048        | 1890.039        | 0.504           | 1889.535        | A(37) |
| E  | 7  | 373.172         | 1863.530        | 1854.520        | 0.504           | 1854.016        | E(36) |
| T  | 8  | 423.696         | 1798.008        | <b>1789.999</b> | 0.504           | <b>1789.495</b> | T(35) |
| A  | 9  | 459.214         | 1747.485        | 1739.475        | 0.504           | 1738.971        | A(34) |
| A  | 10 | 494.733         | 1711.966        | 1703.957        | 0.504           | 1703.453        | A(33) |
| P  | 11 | 543.259         | 1676.447        | 1668.438        | 0.504           | 1667.934        | P(32) |
| A  | 12 | 578.778         | 1627.021        | 1619.012        | 0.504           | 1618.508        | A(31) |
| P  | 13 | 627.304         | <b>1592.402</b> | 1584.393        | 0.504           | 1583.889        | P(30) |
| V  | 14 | 676.830         | 1543.876        | 1535.867        | 0.504           | 1535.363        | V(29) |
| E  | 15 | 741.360         | 1494.342        | 1486.333        | 0.504           | 1485.829        | E(28) |
| T  | 16 | 805.887         | 1459.821        | <b>1421.811</b> | <b>1422.315</b> | <b>1421.307</b> | T(27) |
| S  | 17 | 888.906         | 1385.773        | <b>1357.764</b> | <b>1358.268</b> | 1357.260        | S(26) |
| P  | 18 | 937.433         | 1282.274        | 1274.265        | 1274.768        | 1273.761        | P(25) |
| A  | 19 | 972.951         | 1233.748        | 1225.739        | <b>1226.242</b> | 1225.234        | A(24) |
| K  | 20 | 1036.999        | 1198.229        | 1190.220        | 1190.724        | 1189.716        | K(23) |
| K  | 21 | <b>1101.046</b> | 1134.382        | <b>1126.172</b> | <b>1126.676</b> | 1125.669        | K(22) |
| R  | 22 | <b>1165.094</b> | 1070.134        | <b>1062.125</b> | <b>1062.629</b> | 1061.621        | R(21) |
| T  | 23 | <b>1215.617</b> | 1006.087        | <b>998.077</b>  | 998.581         | <b>997.573</b>  | T(20) |
| T  | 24 | <b>1266.141</b> | 955.563         | 947.553         | 948.057         | 947.049         | T(19) |
| K  | 25 | 1330.189        | 905.039         | 897.030         | 897.533         | 896.526         | K(18) |
| K  | 26 | <b>1394.236</b> | 840.991         | 832.982         | 833.486         | 832.478         | K(17) |
| A  | 27 | 1443.355        | 776.844         | 768.835         | 769.338         | 768.331         | A(16) |
| G  | 28 | 1458.266        | 741.425         | 733.416         | 733.920         | 732.912         | G(15) |
| A  | 29 | 1493.784        | 712.915         | 704.905         | 705.409         | 704.401         | A(14) |
| A  | 30 | <b>1529.303</b> | 677.396         | 669.387         | 669.891         | 668.883         | A(13) |
| K  | 31 | 1593.350        | 641.876         | 633.868         | 634.372         | 633.364         | K(12) |
| R  | 32 | <b>1671.401</b> | 677.830         | 669.821         | 670.325         | 669.317         | R(11) |
| K  | 33 | 1735.448        | 609.779         | 601.770         | 602.274         | 601.266         | K(10) |
| A  | 34 | 1770.967        | 435.732         | 427.723         | 428.227         | 427.219         | A(9)  |
| T  | 35 | 1821.491        | 400.213         | 392.204         | 392.708         | 391.700         | T(8)  |
| G  | 36 | 1898.021        | 349.690         | 341.680         | 342.184         | 341.176         | G(7)  |
| P  | 37 | 1888.526        | 321.179         | 313.170         | 313.673         | 312.666         | P(6)  |
| P  | 38 | 1887.664        | 272.852         | 264.843         | 265.347         | 264.339         | P(5)  |
| V  | 39 | 1996.588        | 224.120         | 216.111         | 216.621         | 215.612         | V(4)  |
| S  | 40 | 2040.104        | 174.592         | 166.583         | 167.086         | 166.078         | S(3)  |
| E  | 41 | 2104.626        | 131.076         | 123.067         | 123.570         | 122.562         | E(2)  |
| L  | 42 | 2161.168        | 66.555          | 58.545          | 59.049          | 58.041          | L(1)  |

# sp | P43276 | H15\_MOUSE

[Acetyl]SETAPAETAAPAPVEKS <sup>Phospho</sup> PAKKKTTKKAGAAKRKATGPPVSEL <sub>79.97</sub>

- ▶ fragmentation table for charge state 3+
- ▶ specType=etd
- ▶ score=44.00
- ▶ F104930.dat
- ▶ query=q4436.p1
- ▶ precursor=1081.336900
- ▶ chargePrecursor=4
- ▶ itol=0.8

| AA | c  | y               | a+1             | a+2             | z     | AA              |       |
|----|----|-----------------|-----------------|-----------------|-------|-----------------|-------|
| S  | 1  | 49.697          | <b>1441.442</b> | <b>1436.103</b> | 0.672 | <b>1435.767</b> | S[42] |
| E  | 2  | 62.711          | 1398.428        | 1377.086        | 0.672 | 1392.752        | E[41] |
| T  | 3  | 139.284         | 1359.419        | <b>1350.074</b> | 0.672 | 1349.715        | T[40] |
| A  | 4  | 150.073         | 1327.731        | <b>1316.392</b> | 0.672 | <b>1316.056</b> | A[39] |
| P  | 5  | 182.424         | 1298.652        | 1292.713        | 0.672 | 1292.377        | P[38] |
| A  | 6  | 206.101         | 1265.701        | 1260.362        | 0.672 | 1260.026        | A[37] |
| E  | 7  | 249.117         | 1242.022        | 1236.683        | 0.672 | 1236.347        | E[36] |
| T  | 8  | 282.800         | 1199.008        | 1193.668        | 0.672 | 1193.332        | T[35] |
| A  | 9  | 306.479         | <b>1165.325</b> | 1159.986        | 0.672 | 1159.650        | A[34] |
| A  | 10 | 310.158         | 1144.668        | 1138.307        | 0.672 | 1135.971        | A[33] |
| P  | 11 | 362.508         | 1117.967        | 1112.628        | 0.672 | 1112.292        | P[32] |
| A  | 12 | 386.188         | 1085.619        | 1080.277        | 0.672 | 1079.941        | A[31] |
| P  | 13 | 418.538         | <b>1061.937</b> | 1056.598        | 0.672 | 1056.262        | P[30] |
| V  | 14 | 451.561         | 1029.580        | 1024.247        | 0.672 | 1023.911        | V[29] |
| E  | 15 | 484.375         | <b>996.564</b>  | 991.224         | 0.672 | 990.888         | E[28] |
| K  | 16 | 517.274         | 953.569         | 948.230         | 0.672 | 947.874         | K[27] |
| S  | 17 | 592.940         | 910.851         | 905.512         | 0.672 | 905.176         | S[26] |
| P  | 18 | 625.291         | 855.189         | 849.845         | 0.672 | 849.510         | P[25] |
| A  | 19 | 648.970         | 822.834         | 817.495         | 0.672 | 817.159         | A[24] |
| K  | 20 | 691.668         | 799.155         | 793.816         | 0.672 | 793.480         | K[23] |
| K  | 21 | 734.367         | 756.457         | 751.117         | 0.672 | 750.781         | K[22] |
| K  | 22 | 777.065         | 713.758         | 708.419         | 0.672 | 708.083         | K[21] |
| T  | 23 | 810.747         | 671.060         | 665.721         | 0.672 | 665.385         | T[20] |
| T  | 24 | 844.430         | 637.378         | 632.038         | 0.672 | 631.702         | T[19] |
| K  | 25 | 887.128         | 603.695         | 598.355         | 0.672 | 598.019         | K[18] |
| K  | 26 | 929.827         | 560.997         | 555.657         | 0.672 | 555.321         | K[17] |
| A  | 27 | 953.506         | 518.298         | 512.959         | 0.672 | 512.623         | A[16] |
| T  | 28 | 977.213         | 498.619         | 493.279         | 0.672 | 492.943         | T[15] |
| A  | 29 | 996.192         | 475.617         | 470.277         | 0.672 | 469.941         | A[14] |
| A  | 30 | 1019.871        | 451.933         | 446.594         | 0.672 | 446.258         | A[13] |
| K  | 31 | <b>1062.569</b> | 428.254         | 422.915         | 0.672 | 422.579         | K[12] |
| R  | 32 | 1114.603        | 385.590         | 380.250         | 0.672 | 379.988         | R[11] |
| K  | 33 | 1157.301        | 333.522         | 328.183         | 0.672 | 327.847         | K[10] |
| A  | 34 | 1180.980        | 290.824         | 285.484         | 0.672 | 285.148         | A[9]  |
| T  | 35 | 1214.663        | 267.142         | 261.802         | 0.672 | 261.466         | T[8]  |
| G  | 36 | 1233.670        | 233.462         | 228.123         | 0.672 | 227.787         | G[7]  |
| P  | 37 | <b>1266.021</b> | 214.459         | 209.119         | 0.672 | 208.779         | P[6]  |
| P  | 38 | 1298.372        | 182.104         | 176.765         | 0.672 | 176.429         | P[5]  |
| V  | 39 | <b>1331.395</b> | 149.753         | 144.414         | 0.672 | 144.078         | V[4]  |
| S  | 40 | <b>1366.405</b> | 116.730         | 111.391         | 0.672 | 111.055         | S[3]  |
| E  | 41 | <b>1403.419</b> | 87.728          | 82.388          | 0.672 | 82.044          | E[2]  |
| L  | 42 | <b>1441.114</b> | 44.705          | 39.366          | 0.672 | 39.030          | L[1]  |

# sp | P43275 | H11\_MOUSE

[Acetyl]SETAPVAQAAS~~T~~ATEKPA~~A~~AKKTKKPAKAAAPRKKPAGPSVSEL

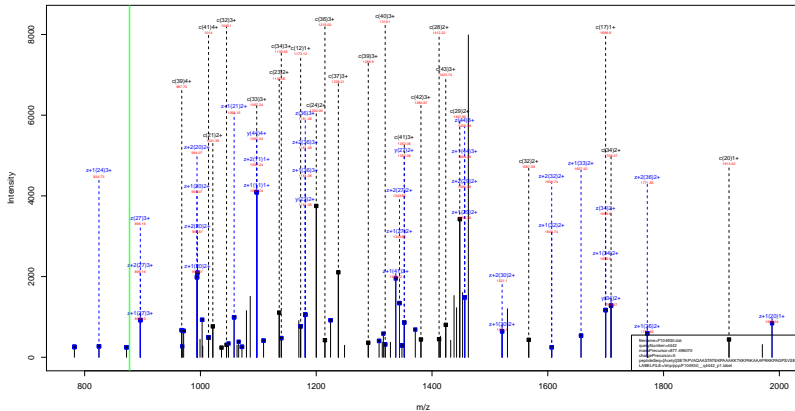

# sp | P43275 | H11\_MOUSE

[Acetyl]SETAPVAQAASSTATEKPAAAKTKKPAKAAAPRKKPAGPSVSEL

- ▶ fragmentation table for charge state 1+
- ▶ specType=etd
- ▶ score=52.75
- ▶ F104930.dat
- ▶ query=q4442.p1
- ▶ precursor=877.496070
- ▶ chargePrecursor=5
- ▶ itol=0.8

| AA | c  | y               | z+1      | z+2             | z               | AA              |       |
|----|----|-----------------|----------|-----------------|-----------------|-----------------|-------|
| S  | 1  | 147.076         | 4363.436 | 4367.437        | 0.000           | 4365.405        | S[44] |
| E  | 2  | 276.119         | 4354.993 | 4236.575        | 0.000           | 4237.367        | E[43] |
| T  | 3  | 377.167         | 4125.951 | 4109.332        | 0.000           | 4108.324        | T[42] |
| A  | 4  | 448.204         | 4024.903 | 4006.284        | 0.000           | 4007.276        | A[41] |
| P  | 5  | 545.257         | 3851.366 | 3837.347        | 0.000           | 3836.239        | P[40] |
| V  | 6  | 644.226         | 3636.213 | 3640.194        | 0.000           | 3639.187        | V[39] |
| A  | 7  | 715.362         | 3757.145 | 3741.126        | 0.000           | 3740.118        | A[38] |
| Q  | 8  | 843.421         | 3686.108 | 3670.089        | 3671.097        | 3669.081        | Q[37] |
| A  | 9  | 914.458         | 3558.049 | 3542.030        | 3543.038        | 3541.022        | A[36] |
| A  | 10 | 985.495         | 3487.012 | 3471.993        | 3472.001        | 3469.985        | A[35] |
| S  | 11 | 1072.527        | 3415.975 | 3399.956        | 3400.964        | 3398.948        | S[34] |
| T  | 12 | <b>1173.578</b> | 3328.943 | 3312.924        | 3313.932        | 3311.916        | T[33] |
| A  | 13 | 1244.612        | 3227.895 | 3211.876        | 3212.884        | 3210.868        | A[32] |
| T  | 14 | 1345.659        | 3156.858 | 3140.839        | 3141.847        | 3139.831        | T[31] |
| E  | 15 | 1474.702        | 3055.810 | 3039.791        | 3040.799        | 3038.784        | E[30] |
| K  | 16 | 1502.797        | 2926.768 | 2910.749        | 2911.757        | 2909.741        | K[29] |
| P  | 17 | <b>1699.850</b> | 2796.673 | 2782.654        | 2783.662        | 2781.646        | P[28] |
| A  | 18 | 1770.887        | 2701.626 | 2685.607        | 2686.615        | 2684.600        | A[27] |
| A  | 19 | 1841.924        | 2630.583 | 2614.564        | 2615.572        | 2613.556        | A[26] |
| A  | 20 | <b>1912.961</b> | 2559.546 | 2543.527        | 2544.535        | 2542.519        | A[25] |
| K  | 21 | 2041.056        | 2488.509 | 2472.490        | 2473.498        | 2471.482        | K[24] |
| K  | 22 | 2169.151        | 2360.414 | 2344.395        | 2345.403        | 2343.387        | K[23] |
| T  | 23 | 2278.199        | 2232.369 | 2216.350        | 2217.358        | 2215.342        | T[22] |
| K  | 24 | 2388.248        | 2131.321 | 2115.302        | 2116.310        | 2114.294        | K[21] |
| K  | 25 | 2526.389        | 2003.176 | <b>1987.157</b> | 1988.165        | 1986.149        | K[20] |
| P  | 26 | 2623.441        | 1875.081 | 1859.062        | 1860.070        | 1858.055        | P[19] |
| A  | 27 | 2694.478        | 1778.028 | 1762.009        | 1763.017        | 1761.001        | A[18] |
| K  | 28 | 2822.573        | 1706.901 | 1690.872        | 1691.880        | 1689.865        | K[17] |
| A  | 29 | 2893.611        | 1619.866 | 1603.847        | 1604.855        | 1602.839        | A[16] |
| A  | 30 | 2964.648        | 1507.819 | 1491.800        | 1492.808        | 1490.793        | A[15] |
| A  | 31 | 3035.685        | 1436.822 | 1420.803        | 1421.811        | 1419.795        | A[14] |
| P  | 32 | 3132.738        | 1365.785 | 1349.766        | 1350.774        | <b>1348.758</b> | P[13] |
| R  | 33 | 3288.839        | 1268.732 | 1252.713        | 1253.721        | 1251.706        | R[12] |
| K  | 34 | 3416.934        | 1117.631 | <b>1096.612</b> | <b>1097.620</b> | 1095.605        | K[11] |
| K  | 35 | 3545.029        | 984.578  | <b>968.517</b>  | 969.525         | <b>967.509</b>  | K[10] |
| P  | 36 | 3642.082        | 856.441  | 840.422         | 841.430         | 839.415         | P[9]  |
| A  | 37 | 3713.118        | 759.388  | 743.370         | 744.377         | 742.362         | A[8]  |
| G  | 38 | 3770.140        | 688.351  | 672.332         | 673.340         | 671.325         | G[7]  |
| P  | 39 | 3867.193        | 631.330  | 615.311         | 616.319         | 614.303         | P[6]  |
| S  | 40 | 3954.225        | 534.277  | 518.258         | 519.266         | 517.250         | S[5]  |
| V  | 41 | 4053.293        | 447.268  | 431.249         | 432.257         | 430.241         | V[4]  |
| S  | 42 | 4140.325        | 348.177  | 332.158         | 333.166         | 331.150         | S[3]  |
| E  | 43 | 4269.368        | 261.144  | 245.126         | 246.134         | 244.118         | E[2]  |
| L  | 44 | 4362.402        | 132.027  | 116.009         | 117.017         | 115.001         | L[1]  |



# sp | P43275 | H11\_MOUSE

[Acetyl]SETAPVAQAASSTATEKPAAAKTKKPAKAAAPRKKPAGPSVSEL

- ▶ fragmentation table for charge state 2+
- ▶ specType=etd
- ▶ score=52.75
- ▶ F104930.dat
- ▶ query=q4442\_p1
- ▶ precursor=877.496070
- ▶ chargePrecursor=5
- ▶ itol=0.8

| AA | c  | y               | z+1             | z+2             | z               | AA              |       |
|----|----|-----------------|-----------------|-----------------|-----------------|-----------------|-------|
| S  | 1  | 74.063          | 2092.222        | 2184.733        | 0.504           | 2183.704        | S[44] |
| E  | 2  | 138.553         | 2127.700        | 2219.091        | 0.504           | 2219.187        | E[43] |
| T  | 3  | 189.087         | 2063.179        | 2055.170        | 0.504           | 2054.660        | T[42] |
| A  | 4  | 224.606         | 2012.655        | 2004.649        | 0.504           | 2004.142        | A[41] |
| P  | 5  | 273.132         | 1977.137        | 1969.127        | 0.504           | 1968.623        | P[40] |
| V  | 6  | 322.660         | 1926.610        | 1920.603        | 0.504           | 1920.500        | V[39] |
| A  | 7  | 368.185         | 1879.076        | 1871.067        | 0.504           | 1870.561        | A[38] |
| Q  | 8  | 422.214         | 1843.557        | 1835.548        | 1836.052        | 1835.044        | Q[37] |
| A  | 9  | 457.733         | 1770.528        | <b>1771.519</b> | <b>1772.023</b> | 1771.015        | A[36] |
| A  | 10 | 493.251         | 1744.010        | 1736.000        | 1736.504        | 1735.490        | A[35] |
| S  | 11 | 536.767         | <b>1708.491</b> | <b>1700.482</b> | 1700.986        | <b>1699.978</b> | S[34] |
| T  | 12 | 587.291         | 1658.975        | <b>1656.966</b> | <b>1657.470</b> | 1656.461        | T[33] |
| A  | 13 | 622.809         | 1614.451        | <b>1616.442</b> | <b>1616.946</b> | 1615.935        | A[32] |
| T  | 14 | 673.333         | 1578.933        | 1570.923        | 1571.427        | 1570.410        | T[31] |
| E  | 15 | 727.855         | 1528.409        | <b>1520.399</b> | <b>1520.903</b> | 1519.890        | E[30] |
| K  | 16 | 801.902         | 1463.887        | <b>1455.878</b> | <b>1456.382</b> | 1455.374        | K[29] |
| P  | 17 | 850.426         | 1399.361        | 1391.351        | 1391.855        | 1390.847        | P[28] |
| A  | 18 | 893.947         | <b>1351.314</b> | <b>1343.304</b> | <b>1343.808</b> | 1342.800        | A[27] |
| A  | 19 | 921.466         | <b>1315.795</b> | <b>1307.786</b> | <b>1308.290</b> | 1307.282        | A[26] |
| A  | 20 | 956.984         | 1280.276        | 1272.267        | 1272.771        | 1271.763        | A[25] |
| K  | 21 | <b>1021.032</b> | 1244.758        | 1236.749        | 1237.252        | 1236.244        | K[24] |
| K  | 22 | 1056.079        | <b>1180.710</b> | <b>1172.701</b> | <b>1173.205</b> | 1172.197        | K[23] |
| K  | 23 | <b>1135.603</b> | 1145.192        | <b>1108.654</b> | <b>1109.158</b> | 1108.150        | K[22] |
| K  | 24 | <b>1199.650</b> | <b>1066.139</b> | <b>1058.130</b> | <b>1058.634</b> | <b>1057.626</b> | K[21] |
| K  | 25 | 1263.698        | 1002.092        | <b>994.082</b>  | <b>994.586</b>  | <b>993.578</b>  | K[20] |
| P  | 26 | 1323.224        | 938.044         | 930.035         | 930.539         | 929.531         | P[19] |
| A  | 27 | <b>1347.743</b> | 889.518         | 881.508         | 882.012         | 881.005         | A[18] |
| K  | 28 | <b>1411.790</b> | 853.999         | 845.989         | 846.493         | 845.486         | K[17] |
| A  | 29 | <b>1447.309</b> | 789.962         | <b>781.942</b>  | <b>782.446</b>  | 781.439         | A[16] |
| A  | 30 | 1482.827        | 754.433         | 746.424         | 746.928         | 745.920         | A[15] |
| A  | 31 | 1518.346        | 718.915         | 710.905         | 711.409         | 710.401         | A[14] |
| P  | 32 | <b>1566.872</b> | 683.396         | 675.387         | 675.891         | 674.883         | P[13] |
| K  | 33 | 1644.923        | 634.870         | 626.860         | 627.364         | 626.356         | K[12] |
| K  | 34 | <b>1708.970</b> | 550.839         | 542.830         | 543.334         | 542.326         | K[11] |
| K  | 35 | 1773.018        | 492.172         | 484.162         | 484.666         | 483.658         | K[10] |
| P  | 36 | 1821.544        | 428.724         | 420.715         | 421.219         | 420.211         | P[9]  |
| A  | 37 | 1857.063        | 380.198         | 372.188         | 372.692         | 371.685         | A[8]  |
| G  | 38 | 1885.574        | 344.670         | 336.670         | 337.174         | 336.166         | G[7]  |
| P  | 39 | 1924.100        | 310.169         | 302.159         | 302.663         | 301.655         | P[6]  |
| S  | 40 | 1977.616        | 289.542         | 281.533         | 282.037         | 281.029         | S[5]  |
| V  | 41 | 2027.150        | 224.126         | 216.117         | 216.621         | 215.613         | V[4]  |
| S  | 42 | 2070.666        | 174.592         | 166.583         | 167.086         | 166.079         | S[3]  |
| E  | 43 | 2125.188        | 131.076         | 123.067         | 123.570         | 122.563         | E[2]  |
| L  | 44 | 2181.710        | 66.555          | 58.545          | 59.049          | 58.041          | L[1]  |

# sp | P43275 | H11\_MOUSE

[Acetyl]SETAPVAQAASSTATEKPA~~AA~~AKKTKKPAKAAAPRKKPAGPSVSEL

- ▶ fragmentation table for charge state 3+
- ▶ specType=etd
- ▶ score=52.75
- ▶ F104930.dat
- ▶ query=q4442\_p1
- ▶ precursor=877.496070
- ▶ chargePrecursor=5
- ▶ itol=0.8

| AA | c  | y               | z=1             | z=2             | z               | AA              |       |
|----|----|-----------------|-----------------|-----------------|-----------------|-----------------|-------|
| S  | 1  | 48.697          | 1461.817        | <b>1456.477</b> | 0.672           | <b>1456.141</b> | S[44] |
| E  | 2  | 92.711          | 1418.803        | 1413.463        | 0.672           | 1413.127        | E[43] |
| T  | 3  | 126.394         | 1375.788        | <b>1370.449</b> | 0.672           | 1370.113        | T[42] |
| A  | 4  | 150.073         | 1332.766        | <b>1327.427</b> | 0.672           | 1327.091        | A[41] |
| P  | 5  | 182.424         | <b>1318.427</b> | 1313.087        | 0.672           | 1312.751        | P[40] |
| V  | 6  | 215.447         | 1280.076        | 1280.738        | 0.672           | 1280.402        | V[39] |
| A  | 7  | 239.126         | 1253.053        | 1247.713        | 0.672           | 1247.377        | A[28] |
| Q  | 8  | 261.812         | 1220.974        | <b>1224.034</b> | <b>1224.370</b> | 1223.699        | Q[37] |
| A  | 9  | 305.491         | 1186.688        | <b>1181.348</b> | <b>1181.684</b> | <b>1181.012</b> | A[36] |
| A  | 10 | 329.170         | 1163.009        | 1157.669        | 1158.005        | 1157.331        | A[35] |
| S  | 11 | 358.180         | <b>1139.330</b> | 1133.990        | 1134.326        | 1133.654        | S[34] |
| T  | 12 | 391.893         | 1102.319        | 1104.989        | 1106.315        | 1104.664        | T[33] |
| A  | 13 | 415.542         | 1070.637        | <b>1071.297</b> | <b>1071.633</b> | <b>1070.961</b> | A[32] |
| T  | 14 | 449.225         | 1052.957        | 1047.618        | <b>1047.954</b> | 1047.282        | T[31] |
| E  | 15 | 462.230         | 1019.275        | <b>1013.935</b> | <b>1014.271</b> | <b>1013.599</b> | E[30] |
| K  | 16 | 534.937         | 970.261         | <b>970.921</b>  | <b>971.257</b>  | <b>970.585</b>  | K[29] |
| F  | 17 | 567.268         | 933.562         | 936.722         | 939.882         | 937.041         | F[28] |
| A  | 18 | 599.967         | 893.211         | <b>895.872</b>  | <b>896.208</b>  | <b>895.536</b>  | A[27] |
| A  | 19 | 614.646         | 877.532         | <b>872.193</b>  | <b>872.529</b>  | <b>871.857</b>  | A[26] |
| A  | 20 | 638.325         | 853.853         | 848.514         | 848.850         | 848.178         | A[25] |
| K  | 21 | 661.024         | 830.174         | <b>824.835</b>  | <b>825.171</b>  | <b>824.499</b>  | K[24] |
| K  | 22 | 723.722         | 787.476         | <b>782.136</b>  | <b>782.472</b>  | <b>781.801</b>  | K[23] |
| T  | 23 | 787.868         | 744.778         | 749.438         | 753.774         | 748.303         | T[22] |
| K  | 24 | 830.103         | 711.095         | 705.756         | 706.092         | 705.420         | K[21] |
| K  | 25 | 842.801         | 668.397         | 663.057         | 663.393         | 662.721         | K[20] |
| F  | 26 | 878.152         | 625.699         | 620.359         | 620.695         | 620.023         | F[19] |
| A  | 27 | 908.831         | 593.348         | 588.008         | 588.344         | 587.672         | A[18] |
| K  | 28 | 941.520         | 560.669         | 564.329         | 564.665         | 563.993         | K[17] |
| A  | 29 | 985.208         | 526.970         | 521.631         | 521.967         | 521.295         | A[16] |
| A  | 30 | 988.887         | 503.291         | 497.952         | 498.288         | 497.616         | A[15] |
| A  | 31 | 1012.566        | 479.612         | 474.273         | 474.609         | 473.937         | A[14] |
| F  | 32 | <b>1044.917</b> | 435.913         | 430.574         | 430.910         | 430.238         | F[13] |
| K  | 33 | <b>1096.951</b> | 423.582         | 418.243         | 418.579         | 417.907         | K[12] |
| K  | 34 | <b>1139.649</b> | 371.549         | 366.210         | 366.545         | 365.873         | K[11] |
| K  | 35 | 1192.948        | 328.850         | 323.511         | 323.847         | 323.175         | K[10] |
| F  | 36 | <b>1214.699</b> | 286.152         | 280.812         | 281.148         | 280.476         | F[9]  |
| A  | 37 | <b>1238.378</b> | 251.801         | 246.461         | 246.797         | 246.125         | A[8]  |
| G  | 38 | 1297.385        | 230.122         | 224.782         | 225.118         | 224.446         | G[7]  |
| F  | 39 | <b>1389.736</b> | 211.115         | 205.775         | 206.111         | 205.439         | F[6]  |
| S  | 40 | <b>1313.746</b> | 176.984         | 171.644         | 171.980         | 171.308         | S[5]  |
| V  | 41 | <b>1351.769</b> | 149.753         | 144.414         | 144.750         | 144.078         | V[4]  |
| S  | 42 | <b>1380.780</b> | 116.730         | 111.391         | 111.727         | 111.055         | S[3]  |
| E  | 43 | <b>1423.794</b> | 87.720          | 82.380          | 82.716          | 82.044          | E[2]  |
| L  | 44 | 1461.489        | 44.705          | 39.366          | 39.702          | 39.030          | L[1]  |

# sp | P43275 | H11\_MOUSE

[Acetyl]SETAPVAQAASSTATEKPAAAKTKKPAKAAAPRKKPAGPSVSEL

- ▶ fragmentation table for charge state 4+
- ▶ specType=etd
- ▶ score=52.75
- ▶ F104930.dat
- ▶ query=q4442\_p1
- ▶ precursor=877.496070
- ▶ chargePrecursor=5
- ▶ itol=0.8

| AA    | c               | y               | z+1             | z+2   | z               | AA    |
|-------|-----------------|-----------------|-----------------|-------|-----------------|-------|
| S[1]  | 37.525          | <b>1096.614</b> | 1092.610        | 0.755 | 1092.358        | S[44] |
| E[2]  | 69.785          | 1064.354        | 1060.349        | 0.755 | 1060.097        | E[43] |
| T[3]  | 95.047          | 1032.093        | 1028.088        | 0.755 | 1027.836        | T[42] |
| A[4]  | 112.506         | 1000.831        | <b>1002.827</b> | 0.755 | <b>1002.575</b> | A[41] |
| F[5]  | 137.076         | 969.072         | 965.067         | 0.755 | 964.815         | F[40] |
| V[6]  | 161.537         | 938.810         | 934.804         | 0.755 | 934.552         | V[39] |
| A[7]  | 179.596         | 908.042         | 904.037         | 0.755 | 903.785         | A[38] |
| Q[8]  | 211.611         | 877.282         | 873.276         | 0.755 | 873.024         | Q[37] |
| A[9]  | 229.370         | 846.514         | 842.508         | 0.755 | 842.256         | A[36] |
| A[10] | 247.129         | <b>815.508</b>  | 811.502         | 0.755 | 811.250         | A[35] |
| S[11] | 268.887         | 784.749         | 780.743         | 0.755 | 780.491         | S[34] |
| T[12] | 294.149         | 753.989         | 749.983         | 0.755 | 749.731         | T[33] |
| A[13] | 311.908         | 723.229         | 719.223         | 0.755 | 718.971         | A[32] |
| T[14] | 337.170         | 692.469         | 688.463         | 0.755 | 688.211         | T[31] |
| E[15] | 369.431         | 661.708         | 657.702         | 0.755 | 657.450         | E[30] |
| K[16] | 401.455         | 630.947         | 626.941         | 0.755 | 626.689         | K[29] |
| F[17] | 425.718         | 600.187         | 596.181         | 0.755 | 595.929         | F[28] |
| A[18] | 443.077         | 570.160         | 566.154         | 0.755 | 565.902         | A[27] |
| A[19] | 461.236         | 540.141         | 536.135         | 0.755 | 535.883         | A[26] |
| A[20] | 478.996         | 510.122         | 506.116         | 0.755 | 505.864         | A[25] |
| K[21] | 511.019         | 479.361         | 475.355         | 0.755 | 475.103         | K[24] |
| K[22] | 543.043         | 448.600         | 444.594         | 0.755 | 444.342         | K[23] |
| T[23] | 568.305         | 417.839         | 413.833         | 0.755 | 413.581         | T[22] |
| K[24] | 600.229         | 387.078         | 383.072         | 0.755 | 382.820         | K[21] |
| K[25] | 632.353         | 356.317         | 352.311         | 0.755 | 352.059         | K[20] |
| P[26] | 666.616         | 325.556         | 321.550         | 0.755 | 321.302         | P[19] |
| A[27] | 674.375         | 300.000         | 296.000         | 0.755 | 295.750         | A[18] |
| K[28] | 706.399         | 269.239         | 265.233         | 0.755 | 264.981         | K[17] |
| A[29] | 724.158         | 238.478         | 234.472         | 0.755 | 234.220         | A[16] |
| A[30] | 741.917         | 207.717         | 203.711         | 0.755 | 203.459         | A[15] |
| A[31] | 759.077         | 176.956         | 172.950         | 0.755 | 172.702         | A[14] |
| P[32] | 783.940         | 146.195         | 142.189         | 0.755 | 141.937         | P[13] |
| R[33] | 822.965         | 115.434         | 111.428         | 0.755 | 111.180         | R[12] |
| K[34] | 854.989         | 78.673          | 74.667          | 0.755 | 74.415          | K[11] |
| K[35] | 887.013         | 240.889         | 236.883         | 0.755 | 236.631         | K[10] |
| P[36] | 911.276         | 214.866         | 210.860         | 0.755 | 210.608         | P[9]  |
| A[37] | 924.035         | 189.605         | 185.599         | 0.755 | 185.347         | A[9]  |
| G[38] | 943.290         | 172.843         | 168.837         | 0.755 | 168.585         | G[7]  |
| P[39] | <b>967.554</b>  | 158.588         | 154.582         | 0.755 | 154.330         | P[6]  |
| S[40] | 989.312         | 134.325         | 130.319         | 0.755 | 130.067         | S[5]  |
| V[41] | <b>1014.079</b> | 112.567         | 108.561         | 0.755 | 108.310         | V[4]  |
| S[42] | <b>1035.837</b> | 87.800          | 83.794          | 0.755 | 83.542          | S[3]  |
| E[43] | 1068.897        | 66.042          | 62.036          | 0.755 | 61.784          | E[2]  |
| L[44] | 1096.358        | 33.781          | 29.775          | 0.755 | 29.523          | L[1]  |

# sp | P62806 | H4\_MOUSE

[Acetyl]SGRGKGGKGL

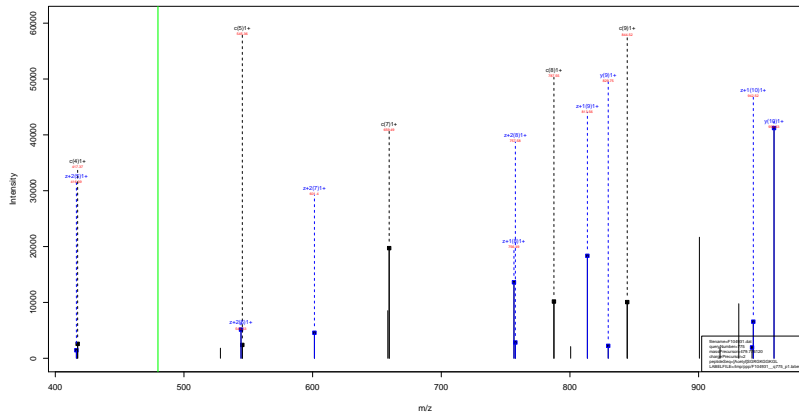

# sp | P62806 | H4\_MOUSE

[Acetyl]SGRGKGGKGL

- ▶ fragmentation table for charge state 1+
- ▶ specType=etd
- ▶ score=39.26
- ▶ F104931.dat
- ▶ query=q775\_p1
- ▶ precursor=479.776120
- ▶ chargePrecursor=2
- ▶ itol=0.8

| AA    | c              | y              | z+1            | z+2            | z              | AA    |
|-------|----------------|----------------|----------------|----------------|----------------|-------|
| S[1]  | 147.076        | <b>958.543</b> | <b>942.524</b> | 0.000          | <b>941.516</b> | S[10] |
| G[2]  | 204.098        | <b>829.500</b> | <b>813.482</b> | 0.000          | 812.474        | G[9]  |
| R[3]  | 360.199        | 772.479        | <b>756.460</b> | <b>757.468</b> | 755.452        | R[8]  |
| Q[4]  | <b>417.220</b> | 616.378        | 600.359        | <b>601.367</b> | 599.351        | Q[7]  |
| K[5]  | <b>545.315</b> | 559.356        | 543.337        | <b>544.345</b> | 542.330        | K[6]  |
| G[6]  | 602.337        | 431.261        | 415.243        | <b>416.250</b> | 414.235        | G[5]  |
| G[7]  | <b>659.358</b> | 374.240        | 358.221        | 359.229        | 357.213        | G[4]  |
| K[8]  | <b>787.453</b> | 317.218        | 301.200        | 302.207        | 300.192        | K[3]  |
| G[9]  | <b>844.475</b> | 389.123        | 373.105        | 374.112        | 372.097        | G[2]  |
| L[10] | 957.559        | 132.102        | 116.083        | 117.091        | 115.075        | L[1]  |



# sp | P62806 | H4\_MOUSE

[Acetyl]SGRGKGGKGL

- ▶ fragmentation table for charge state 1+
- ▶ specType=etd
- ▶ score=59.03
- ▶ F104931.dat
- ▶ query=q776-p1
- ▶ precursor=320.186590
- ▶ chargePrecursor=3
- ▶ itol=0.8

| AA    | c              | y              | z+1            | z+2            | z       | AA    |
|-------|----------------|----------------|----------------|----------------|---------|-------|
| S[1]  | 147.076        | <b>958.543</b> | <b>942.524</b> | 0.000          | 941.518 | S[10] |
| G[2]  | 204.098        | 829.500        | <b>813.482</b> | 0.000          | 812.474 | G[9]  |
| R[3]  | <b>360.199</b> | 772.479        | <b>756.460</b> | <b>757.468</b> | 755.452 | R[8]  |
| G[4]  | <b>417.220</b> | 616.378        | <b>600.359</b> | 601.367        | 599.351 | G[7]  |
| K[5]  | <b>545.315</b> | 559.358        | <b>543.337</b> | <b>544.345</b> | 542.330 | K[6]  |
| G[6]  | <b>602.337</b> | 431.261        | <b>415.243</b> | 416.250        | 414.235 | G[5]  |
| G[7]  | <b>659.358</b> | 374.240        | <b>358.221</b> | <b>359.229</b> | 357.213 | G[4]  |
| K[8]  | <b>787.453</b> | 317.218        | <b>301.200</b> | 302.207        | 300.192 | K[3]  |
| G[9]  | <b>844.475</b> | 189.123        | 173.105        | 174.112        | 172.097 | G[2]  |
| L[10] | 937.559        | 132.102        | 116.083        | 117.091        | 115.075 | L[1]  |

# sp | P62806 | H4\_MOUSE

[Acetyl]SGRGKGGKGL

- ▶ fragmentation table for charge state 2+
- ▶ specType=etd
- ▶ score=59.03
- ▶ F104931.dat
- ▶ query=q776-p1
- ▶ precursor=320.186590
- ▶ chargePrecursor=3
- ▶ itol=0.8

| AA    | c              | y              | z+1            | z+2            | z              | AA    |
|-------|----------------|----------------|----------------|----------------|----------------|-------|
| S[1]  | 74.042         | <b>479.775</b> | <b>471.766</b> | 0.504          | <b>471.262</b> | S[10] |
| G[2]  | 102.553        | <b>415.254</b> | <b>407.244</b> | 0.504          | <b>406.740</b> | G[9]  |
| R[3]  | 180.603        | 386.743        | <b>378.734</b> | <b>379.238</b> | <b>378.230</b> | R[8]  |
| G[4]  | 209.114        | 308.092        | <b>300.683</b> | <b>301.187</b> | 300.179        | G[7]  |
| K[5]  | 273.161        | 280.182        | 272.172        | 272.676        | 271.668        | K[6]  |
| G[6]  | <b>301.672</b> | 216.134        | 208.125        | 208.629        | 207.621        | G[5]  |
| G[7]  | 330.183        | 187.624        | 179.614        | 180.118        | 179.110        | G[4]  |
| K[8]  | <b>394.230</b> | 139.114        | 131.103        | 131.607        | 130.600        | K[3]  |
| G[9]  | <b>422.741</b> | 95.065         | 87.056         | 87.560         | 86.552         | G[2]  |
| L[10] | <b>479.283</b> | 56.555         | 58.545         | 59.049         | 58.041         | L[1]  |



# sp | P62806 | H4\_MOUSE

[Acetyl]SGRGKGGK <sup>Acetyl</sup>GL  
42.01

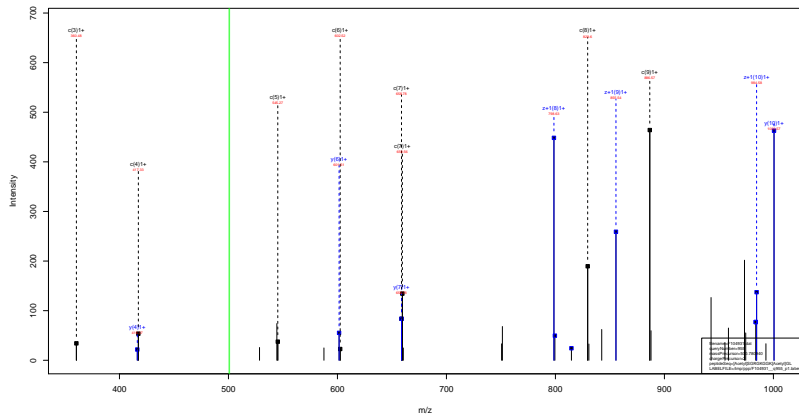

# sp | P62806 | H4\_MOUSE

[Acetyl]SGRGKGGK<sup>Acetyl</sup>GL  
42.01

- ▶ fragmentation table for charge state 1+
- ▶ specType=etd
- ▶ score=43.32
- ▶ F104931.dat
- ▶ query=q955\_p1
- ▶ precursor=500.780940
- ▶ chargePrecursor=2
- ▶ itol=0.8

| AA    | c              | y               | z+1            | z+2            | z              | AA    |
|-------|----------------|-----------------|----------------|----------------|----------------|-------|
| S[1]  | 147.076        | <b>1000.553</b> | <b>984.535</b> | 0.000          | <b>983.527</b> | S[10] |
| G[2]  | 204.098        | 871.511         | <b>855.492</b> | 0.000          | 854.484        | G[9]  |
| R[3]  | <b>360.199</b> | <b>814.489</b>  | <b>798.471</b> | <b>799.478</b> | 797.463        | R[8]  |
| G[4]  | <b>417.220</b> | <b>658.388</b>  | 642.370        | 643.377        | 641.362        | G[7]  |
| K[5]  | <b>545.315</b> | <b>601.367</b>  | 585.348        | 586.356        | 584.340        | K[6]  |
| G[6]  | <b>602.337</b> | 473.272         | 457.253        | 458.261        | 456.245        | G[5]  |
| G[7]  | <b>659.358</b> | <b>416.250</b>  | 400.232        | 401.239        | 399.224        | G[4]  |
| K[8]  | <b>829.464</b> | 399.220         | 383.210        | 384.218        | 382.202        | K[3]  |
| G[9]  | <b>888.485</b> | 189.121         | 173.105        | 174.112        | 172.097        | G[2]  |
| L[10] | 959.509        | 132.102         | 116.083        | 117.091        | 115.075        | L[1]  |

# sp | P68433 | H31\_MOUSE

K<sup>Dimethyl</sup> TDLRF  
28.03

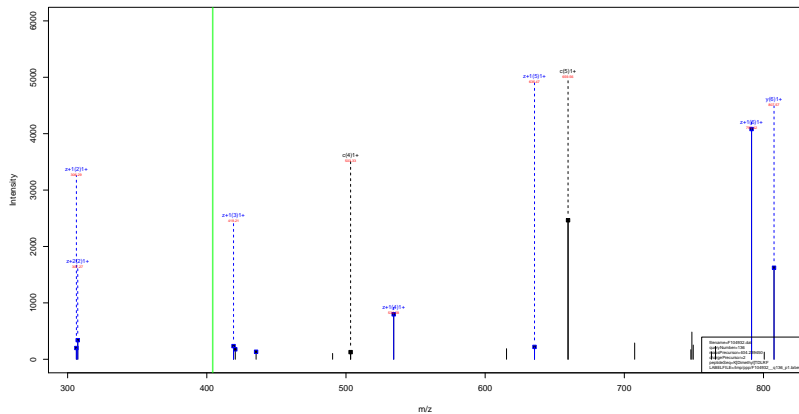

# sp | P68433 | H31\_MOUSE

K<sup>Dimethyl</sup> TDLRF  
28.03

- ▶ fragmentation table for charge state 1+
- ▶ specType=etd
- ▶ score=33.88
- ▶ F104932.dat
- ▶ query=q136\_p1
- ▶ precursor=404.239450
- ▶ chargePrecursor=2
- ▶ itol=0.8

| AA   | c              | y              | z+1            | z+2            | z       | AA   |
|------|----------------|----------------|----------------|----------------|---------|------|
| K[1] | 174.160        | <b>807.472</b> | <b>791.454</b> | 792.461        | 790.446 | K[6] |
| Y[2] | 275.208        | 651.346        | <b>635.327</b> | 636.335        | 634.320 | Y[5] |
| D[3] | 390.235        | 650.298        | <b>534.280</b> | 535.287        | 533.272 | D[4] |
| L[4] | <b>503.319</b> | <b>435.271</b> | <b>419.253</b> | <b>420.261</b> | 418.245 | L[3] |
| R[5] | <b>659.420</b> | 322.187        | <b>306.169</b> | <b>307.176</b> | 305.161 | R[2] |
| F[6] | 806.488        | 166.086        | 150.068        | 151.075        | 149.060 | F[1] |

sp | P62806 | H4\_MOUSE

[Acetyl]SGRGKGGKGL

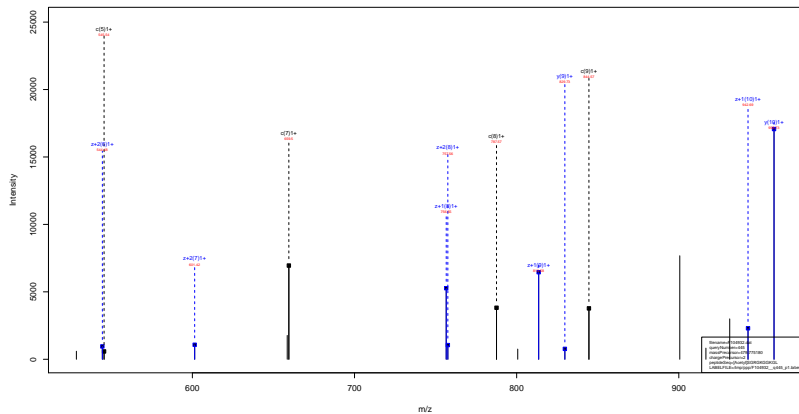

# sp | P62806 | H4\_MOUSE

[Acetyl]SGRGKGGKGL

- ▶ fragmentation table for charge state 1+
- ▶ specType=etd
- ▶ score=34.52
- ▶ F104932.dat
- ▶ query=q445-p1
- ▶ precursor=479.775180
- ▶ chargePrecursor=2
- ▶ itol=0.8

| AA    | c              | y              | z+1            | z+2            | z       | AA    |
|-------|----------------|----------------|----------------|----------------|---------|-------|
| S[1]  | 147.076        | <b>958.543</b> | <b>942.524</b> | 0.000          | 941.518 | S[10] |
| G[2]  | 204.098        | <b>829.500</b> | <b>813.482</b> | 0.000          | 812.474 | G[9]  |
| R[3]  | 360.199        | 772.479        | <b>756.460</b> | <b>757.468</b> | 755.452 | R[8]  |
| G[4]  | 417.220        | 616.378        | 600.359        | <b>601.367</b> | 599.351 | G[7]  |
| K[5]  | <b>545.315</b> | 559.356        | 543.337        | <b>544.345</b> | 542.330 | K[6]  |
| G[6]  | 602.337        | 431.261        | 415.243        | 416.250        | 414.235 | G[5]  |
| G[7]  | <b>659.358</b> | 374.240        | 358.221        | 359.229        | 357.213 | G[4]  |
| K[8]  | <b>787.453</b> | 317.218        | 301.200        | 302.207        | 300.192 | K[3]  |
| G[9]  | <b>844.475</b> | 260.123        | 273.135        | 274.112        | 272.097 | G[2]  |
| L[10] | 937.559        | 132.102        | 116.083        | 117.091        | 115.075 | L[1]  |

# sp | P62806 | H4\_MOUSE

[Acetyl]SGRGKGGKGL

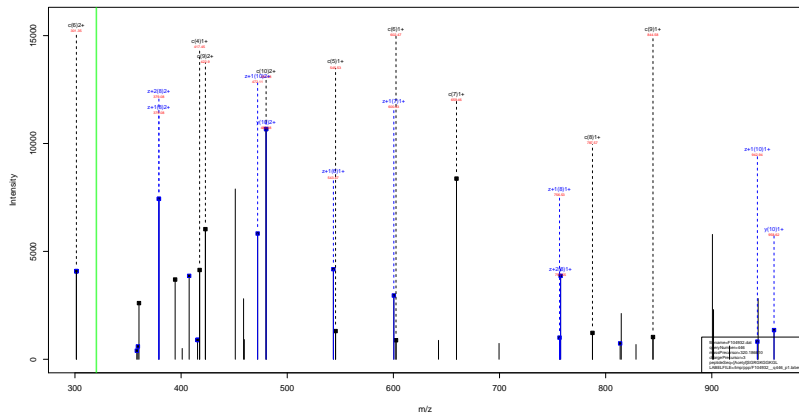

# sp | P62806 | H4\_MOUSE

[Acetyl]SGRGKGGKGL

- ▶ fragmentation table for charge state 1+
- ▶ specType=etd
- ▶ score=60.89
- ▶ F104932.dat
- ▶ query=q446\_p1
- ▶ precursor=320.186610
- ▶ chargePrecursor=3
- ▶ itol=0.8

| AA    | c              | y              | z+1            | z+2            | z       | AA    |
|-------|----------------|----------------|----------------|----------------|---------|-------|
| S[1]  | 147.076        | <b>958.543</b> | <b>942.524</b> | 0.000          | 941.518 | S[10] |
| G[2]  | 204.098        | 829.500        | <b>813.482</b> | 0.000          | 812.474 | G[9]  |
| R[3]  | <b>360.199</b> | 772.479        | <b>756.460</b> | <b>757.468</b> | 755.452 | R[8]  |
| G[4]  | <b>417.220</b> | 616.378        | <b>600.359</b> | 601.367        | 599.351 | G[7]  |
| K[5]  | <b>545.315</b> | 559.356        | <b>543.337</b> | 544.345        | 542.330 | K[6]  |
| G[6]  | <b>602.337</b> | 431.261        | <b>415.243</b> | <b>416.250</b> | 414.235 | G[5]  |
| G[7]  | <b>659.358</b> | 374.240        | <b>358.221</b> | <b>359.229</b> | 357.213 | G[4]  |
| K[8]  | <b>787.453</b> | 317.218        | <b>301.200</b> | 302.207        | 300.192 | K[3]  |
| G[9]  | <b>844.475</b> | 289.123        | 373.105        | 374.112        | 372.097 | G[2]  |
| L[10] | 937.559        | 132.102        | 118.083        | 117.091        | 115.075 | L[1]  |



# sp | P62806 | H4\_MOUSE

[Acetyl]SGRGKGGKGL

- ▶ fragmentation table for charge state 2+
- ▶ specType=etd
- ▶ score=60.89
- ▶ F104932.dat
- ▶ query=q446-p1
- ▶ precursor=320.186610
- ▶ chargePrecursor=3
- ▶ itol=0.8

| AA    | c              | y              | z+1            | z+2            | z       | AA    |
|-------|----------------|----------------|----------------|----------------|---------|-------|
| S[1]  | 74.042         | <b>479.775</b> | <b>471.766</b> | 0.504          | 471.262 | S[10] |
| G[2]  | 102.553        | <b>415.254</b> | <b>407.244</b> | 0.504          | 406.740 | G[9]  |
| R[3]  | 180.603        | 386.743        | <b>378.734</b> | <b>379.238</b> | 378.230 | R[8]  |
| G[4]  | 209.114        | 308.692        | <b>300.683</b> | <b>301.187</b> | 300.179 | G[7]  |
| K[5]  | 273.161        | 280.182        | 272.172        | 272.676        | 271.668 | K[6]  |
| G[6]  | <b>301.672</b> | 216.134        | 208.125        | 208.629        | 207.621 | G[5]  |
| G[7]  | 330.183        | 187.624        | 179.614        | 180.118        | 179.110 | G[4]  |
| K[8]  | <b>394.230</b> | 159.113        | 151.103        | 151.607        | 150.600 | K[3]  |
| G[9]  | <b>422.741</b> | 95.065         | 87.056         | 87.560         | 86.552  | G[2]  |
| L[10] | <b>479.283</b> | 66.553         | 58.545         | 59.049         | 58.041  | L[1]  |

# sp | P62806 | H4\_MOUSE

[Acetyl]SGR<sup>Acetyl</sup>RGK<sub>42.01</sub> GGKGL

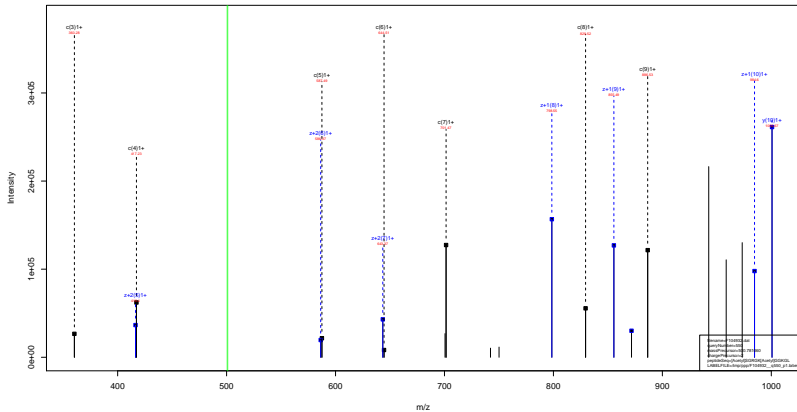

# sp | P62806 | H4\_MOUSE

[Acetyl]SGR<sup>Acetyl</sup>RGK<sub>42.01</sub> GGKGL

- ▶ fragmentation table for charge state 1+
- ▶ specType=etd
- ▶ score=55.67
- ▶ F104932.dat
- ▶ query=q550\_p1
- ▶ precursor=500.781060
- ▶ chargePrecursor=2
- ▶ itol=0.8

| AA |    | c              | y               | z+1            | z+2            | z       | AA |    |
|----|----|----------------|-----------------|----------------|----------------|---------|----|----|
| S  | 1  | 147.076        | <b>1000.553</b> | <b>984.535</b> | 0.000          | 983.527 | S  | 10 |
| G  | 2  | 204.098        | <b>871.511</b>  | <b>855.492</b> | 0.000          | 854.484 | G  | 9  |
| R  | 3  | <b>360.199</b> | 814.489         | <b>798.471</b> | 799.478        | 797.463 | R  | 8  |
| G  | 4  | <b>417.220</b> | 658.380         | 642.370        | <b>643.377</b> | 641.362 | G  | 7  |
| K  | 5  | <b>587.326</b> | 601.367         | 585.348        | <b>586.356</b> | 584.340 | K  | 6  |
| G  | 6  | <b>644.347</b> | 431.261         | 415.243        | <b>416.250</b> | 414.235 | G  | 5  |
| G  | 7  | <b>701.369</b> | 374.240         | 358.221        | 359.229        | 357.213 | G  | 4  |
| K  | 8  | <b>829.464</b> | 317.218         | 301.200        | 302.207        | 300.192 | K  | 3  |
| G  | 9  | <b>886.485</b> | 260.123         | 243.105        | 244.112        | 242.097 | G  | 2  |
| L  | 10 | 999.509        | 132.102         | 116.083        | 117.091        | 115.075 | L  | 1  |

# sp | P62806 | H4\_MOUSE

[Acetyl]SGR<sup>Dimethyl</sup> 28.03 GKGGK<sup>Acetyl</sup> 42.01 GL

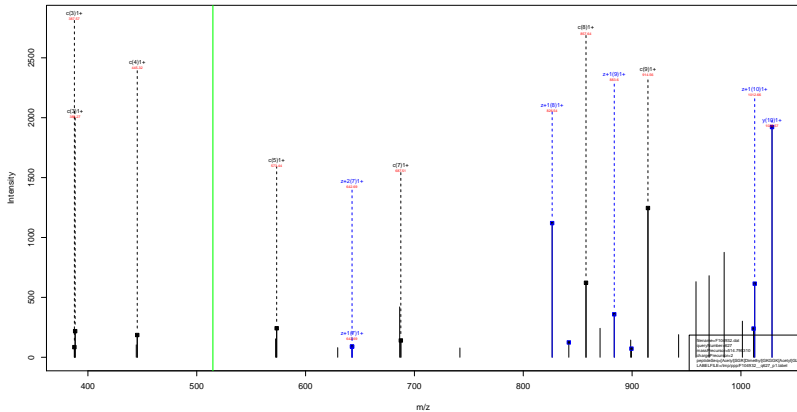

# sp | P62806 | H4\_MOUSE

[Acetyl]SGR<sup>Dimethyl</sup> 28.03 GKGGK<sup>Acetyl</sup> 42.01 GL

- ▶ fragmentation table for charge state 1+
- ▶ specType=etd
- ▶ score=40.20
- ▶ F104932.dat
- ▶ query=q627\_p1
- ▶ precursor=514.795310
- ▶ chargePrecursor=2
- ▶ itol=0.8

| AA    | c              | y               | z+1             | z+2            | z               | AA    |
|-------|----------------|-----------------|-----------------|----------------|-----------------|-------|
| S[1]  | 147.070        | <b>1028.585</b> | <b>1012.566</b> | 0.000          | <b>1011.558</b> | S[10] |
| G[2]  | 204.098        | <b>899.542</b>  | <b>883.521</b>  | 0.000          | 882.510         | G[9]  |
| R[3]  | <b>388.230</b> | <b>842.521</b>  | <b>826.502</b>  | 827.510        | 825.494         | R[8]  |
| G[4]  | <b>445.252</b> | 658.388         | <b>642.370</b>  | <b>643.377</b> | 641.362         | G[7]  |
| K[5]  | <b>573.347</b> | 601.367         | 585.348         | 589.356        | 584.340         | K[6]  |
| G[6]  | 630.368        | 473.272         | 457.253         | 458.261        | 456.245         | G[5]  |
| G[7]  | <b>687.390</b> | 416.250         | 400.232         | 401.239        | 399.223         | G[4]  |
| K[8]  | <b>851.495</b> | 359.229         | 343.210         | 344.218        | 342.202         | K[3]  |
| G[9]  | <b>914.517</b> | 189.123         | 173.106         | 174.112        | 172.097         | G[2]  |
| L[10] | 1027.601       | 132.102         | 116.083         | 117.091        | 115.075         | L[1]  |

# sp | P62806 | H4\_MOUSE

[Acetyl]SGRGKGGKGL

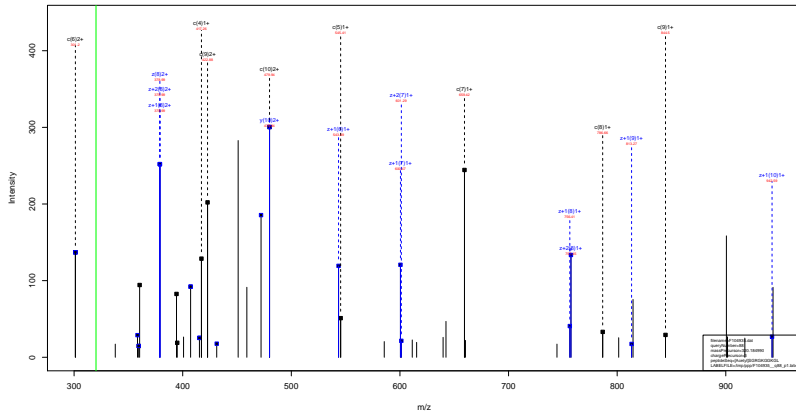

# sp | P62806 | H4\_MOUSE

[Acetyl]SGRGKGGKGL

- ▶ fragmentation table for charge state 1+
- ▶ specType=etd
- ▶ score=51.48
- ▶ F104935.dat
- ▶ query=q88.p1
- ▶ precursor=320.184990
- ▶ chargePrecursor=3
- ▶ itol=0.8

| AA    | c              | y              | z+1            | z+2            | z       | AA    |
|-------|----------------|----------------|----------------|----------------|---------|-------|
| S[1]  | 147.076        | 998.943        | <b>942.524</b> | 0.000          | 941.918 | S[10] |
| G[2]  | 204.098        | 829.900        | <b>813.482</b> | 0.000          | 812.474 | G[9]  |
| R[3]  | <b>360.199</b> | 772.479        | <b>756.460</b> | <b>757.468</b> | 755.452 | R[8]  |
| G[4]  | <b>417.220</b> | 616.978        | <b>600.359</b> | <b>601.367</b> | 599.951 | G[7]  |
| K[5]  | <b>545.315</b> | 559.956        | <b>543.337</b> | 544.345        | 542.330 | K[6]  |
| G[6]  | 602.337        | <b>431.261</b> | <b>415.243</b> | 416.250        | 414.235 | G[5]  |
| G[7]  | <b>659.358</b> | 374.240        | <b>358.221</b> | <b>359.229</b> | 357.213 | G[4]  |
| K[8]  | <b>787.453</b> | 317.218        | <b>301.200</b> | 302.207        | 300.192 | K[3]  |
| G[9]  | <b>844.475</b> | 189.123        | 173.105        | 174.112        | 172.997 | G[2]  |
| L[10] | 937.559        | 132.102        | 116.083        | 117.091        | 115.075 | L[1]  |

# sp | P62806 | H4\_MOUSE

[Acetyl]SGRGKGGKGL

- ▶ fragmentation table for charge state 2+
- ▶ specType=etd
- ▶ score=51.48
- ▶ F104935.dat
- ▶ query=q88.p1
- ▶ precursor=320.184990
- ▶ chargePrecursor=3
- ▶ itol=0.8

| AA    | c              | y              | z+1            | z+2            | z              | AA    |
|-------|----------------|----------------|----------------|----------------|----------------|-------|
| S[1]  | 74.042         | <b>479.775</b> | <b>471.766</b> | 0.504          | 471.263        | S[10] |
| G[2]  | 102.553        | <b>415.254</b> | <b>407.244</b> | 0.504          | <b>406.740</b> | G[9]  |
| R[3]  | 180.603        | 386.743        | <b>378.734</b> | <b>379.238</b> | <b>378.230</b> | R[8]  |
| Q[4]  | 209.114        | 308.092        | <b>300.683</b> | <b>301.187</b> | 300.179        | Q[7]  |
| K[5]  | 273.161        | 280.182        | 272.172        | 272.676        | 271.668        | K[6]  |
| G[6]  | <b>301.672</b> | 216.134        | 208.125        | 208.629        | 207.621        | G[5]  |
| G[7]  | 330.183        | 187.624        | 179.614        | 180.118        | 179.110        | G[4]  |
| K[8]  | <b>384.230</b> | 139.114        | 131.103        | 131.607        | 130.600        | K[3]  |
| G[9]  | <b>422.741</b> | 95.065         | 87.056         | 87.560         | 86.552         | G[2]  |
| L[10] | <b>479.283</b> | 56.555         | 58.545         | 59.049         | 58.041         | L[1]  |



# sp | P62806 | H4\_MOUSE

[Acetyl]SGRGKGGKGL

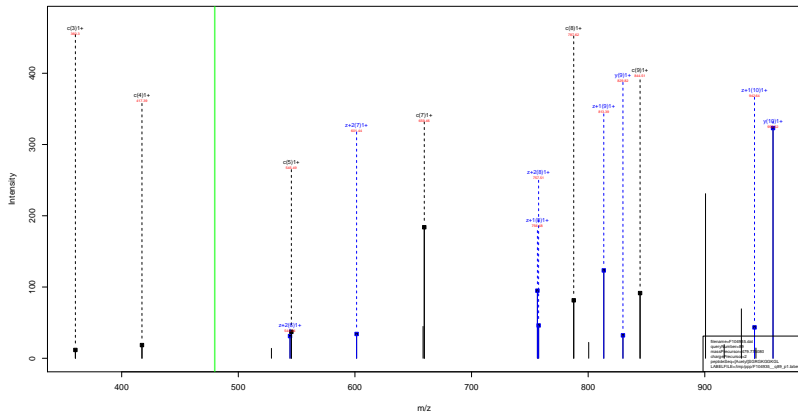

# sp | P62806 | H4\_MOUSE

[Acetyl]SGRGKGGKGL

- ▶ fragmentation table for charge state 1+
- ▶ specType=etd
- ▶ score=50.12
- ▶ F104935.dat
- ▶ query=q89\_p1
- ▶ precursor=479.775080
- ▶ chargePrecursor=2
- ▶ itol=0.8

| AA    | c              | y              | z+1            | z+2            | z       | AA    |
|-------|----------------|----------------|----------------|----------------|---------|-------|
| S[1]  | 147.076        | <b>958.543</b> | <b>942.524</b> | 0.000          | 941.518 | S[10] |
| G[2]  | 204.098        | <b>829.500</b> | <b>813.482</b> | 0.000          | 812.474 | G[9]  |
| R[3]  | <b>360.199</b> | 772.479        | <b>756.460</b> | <b>757.468</b> | 755.452 | R[8]  |
| G[4]  | <b>417.220</b> | 616.378        | 600.359        | <b>601.367</b> | 599.351 | G[7]  |
| K[5]  | <b>545.315</b> | 559.356        | 543.337        | <b>544.345</b> | 542.330 | K[6]  |
| G[6]  | 602.337        | 431.261        | 415.243        | 416.250        | 414.235 | G[5]  |
| G[7]  | <b>659.358</b> | 374.240        | 358.221        | 359.229        | 357.213 | G[4]  |
| K[8]  | <b>787.453</b> | 317.218        | 301.200        | 302.207        | 300.192 | K[3]  |
| G[9]  | <b>844.475</b> | 289.123        | 273.105        | 274.112        | 272.097 | G[2]  |
| L[10] | 937.559        | 132.102        | 116.083        | 117.091        | 115.075 | L[1]  |

# sp | P62806 | H4\_MOUSE

[Acetyl]SGRGKGGKGL

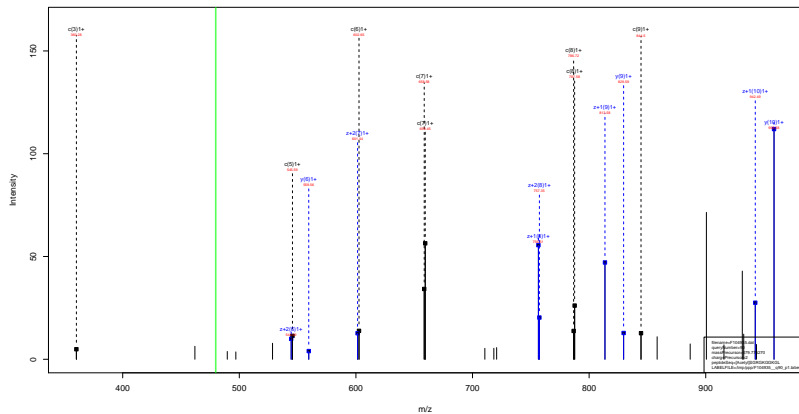

# sp | P62806 | H4\_MOUSE

[Acetyl]SGRGKGGKGL

- ▶ fragmentation table for charge state 1+
- ▶ specType=etd
- ▶ score=42.18
- ▶ F104935.dat
- ▶ query=q90\_p1
- ▶ precursor=479.775270
- ▶ chargePrecursor=2
- ▶ itol=0.8

| AA    | c              | y              | z+1            | z+2            | z       | AA    |
|-------|----------------|----------------|----------------|----------------|---------|-------|
| S[1]  | 147.076        | <b>958.543</b> | <b>942.524</b> | 0.000          | 941.518 | S[10] |
| G[2]  | 204.098        | <b>829.500</b> | <b>813.482</b> | 0.000          | 812.474 | G[9]  |
| R[3]  | <b>360.199</b> | 772.479        | <b>756.460</b> | <b>757.468</b> | 755.452 | R[8]  |
| G[4]  | 417.220        | 616.378        | 600.359        | <b>601.367</b> | 599.351 | G[7]  |
| K[5]  | <b>545.315</b> | <b>559.356</b> | 543.337        | <b>544.345</b> | 542.330 | K[6]  |
| G[6]  | <b>602.337</b> | 431.261        | 415.243        | 416.250        | 414.235 | G[5]  |
| G[7]  | <b>659.358</b> | 374.240        | 358.221        | 359.229        | 357.213 | G[4]  |
| K[8]  | <b>787.453</b> | 317.218        | 301.200        | 302.207        | 300.192 | K[3]  |
| G[9]  | <b>844.475</b> | 189.123        | 173.105        | 174.112        | 172.097 | G[2]  |
| L[10] | 937.559        | 132.102        | 116.083        | 117.091        | 115.075 | L[1]  |

sp | P62806 | H4\_MOUSE

[Acetyl]SGRGKGGKGL

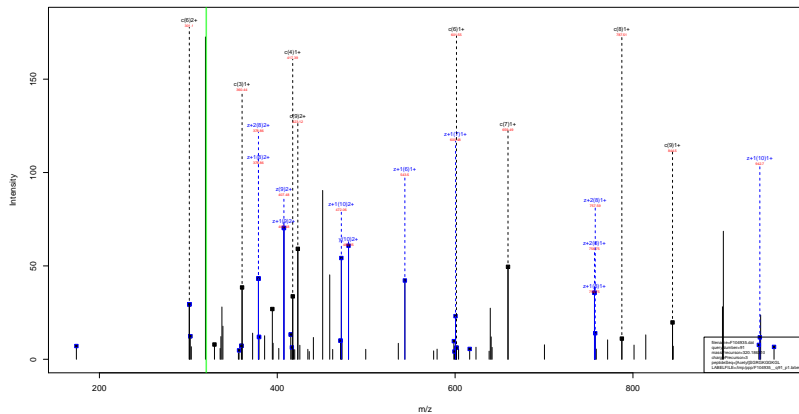

# sp | P62806 | H4\_MOUSE

[Acetyl]SGRGKGGKGL

- ▶ fragmentation table for charge state 1+
- ▶ specType=etd
- ▶ score=33.99
- ▶ F104935.dat
- ▶ query=q91\_p1
- ▶ precursor=320.186310
- ▶ chargePrecursor=3
- ▶ itol=0.8

| AA    | c              | y              | z+1            | z+2            | z              | AA    |
|-------|----------------|----------------|----------------|----------------|----------------|-------|
| S[1]  | 147.076        | <b>958.543</b> | <b>942.524</b> | 0.000          | <b>941.516</b> | S[10] |
| G[2]  | 204.098        | 829.500        | 813.482        | 0.000          | 812.474        | G[9]  |
| R[3]  | <b>360.199</b> | 772.479        | <b>756.460</b> | <b>757.468</b> | 755.452        | R[8]  |
| Q[4]  | <b>417.220</b> | <b>616.378</b> | <b>600.359</b> | <b>601.367</b> | <b>599.351</b> | Q[7]  |
| K[5]  | 545.315        | 559.356        | <b>543.337</b> | 544.345        | 542.330        | K[6]  |
| G[6]  | <b>602.337</b> | 431.261        | <b>415.243</b> | <b>416.250</b> | 414.235        | G[5]  |
| G[7]  | <b>659.358</b> | 374.240        | 358.221        | <b>359.229</b> | <b>357.213</b> | G[4]  |
| K[8]  | <b>787.453</b> | 317.218        | <b>301.200</b> | <b>302.207</b> | 300.192        | K[3]  |
| G[9]  | <b>844.475</b> | 189.123        | 173.105        | <b>174.112</b> | 172.097        | G[2]  |
| L[10] | 997.559        | 132.102        | 116.083        | 117.091        | 115.075        | L[1]  |

# sp | P62806 | H4\_MOUSE

[Acetyl]SGRGKGGKGL

- ▶ fragmentation table for charge state 2+
- ▶ specType=etd
- ▶ score=33.99
- ▶ F104935.dat
- ▶ query=q91\_p1
- ▶ precursor=320.186310
- ▶ chargePrecursor=3
- ▶ itol=0.8

| AA    | c              | y              | z+1            | z+2            | z              | AA    |
|-------|----------------|----------------|----------------|----------------|----------------|-------|
| S[1]  | 74.042         | <b>479.775</b> | <b>471.766</b> | 0.504          | <b>471.262</b> | S[10] |
| G[2]  | 102.553        | <b>415.254</b> | <b>407.244</b> | 0.504          | <b>406.740</b> | G[9]  |
| R[3]  | 180.603        | 386.743        | <b>378.734</b> | <b>379.238</b> | <b>378.230</b> | R[8]  |
| Q[4]  | 209.114        | 308.092        | <b>300.683</b> | <b>301.187</b> | 300.179        | Q[7]  |
| K[5]  | 273.161        | 280.182        | 272.172        | 272.676        | 271.668        | K[6]  |
| G[6]  | <b>301.672</b> | 216.134        | 208.125        | 208.629        | 207.621        | G[5]  |
| G[7]  | <b>330.183</b> | 187.624        | 179.614        | 180.118        | 179.110        | G[4]  |
| K[8]  | <b>394.230</b> | 139.114        | 131.103        | 131.607        | 130.600        | K[3]  |
| G[9]  | <b>422.741</b> | 95.065         | 87.056         | 87.560         | 86.552         | G[2]  |
| L[10] | 479.203        | 56.555         | 58.545         | 59.049         | 58.041         | L[1]  |

# sp | P68433 | H31\_MOUSE

DTNLCAIHAKE Acetyl RVTIMPK  
42.01

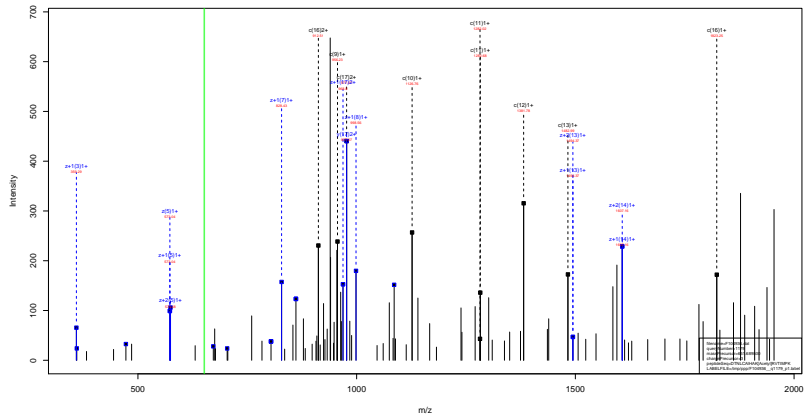



# sp | P68433 | H31\_MOUSE

DTNLCAIHAK <sup>Acetyl</sup> 42.01 RVTIMPK

- ▶ fragmentation table for charge state 1+
- ▶ specType=etd
- ▶ score=29.58
- ▶ F104936.dat
- ▶ query=q1179\_p1
- ▶ precursor=651.689500
- ▶ chargePrecursor=3
- ▶ itol=0.8

| AA |    | e               | y               | z+1             | z+2             | z              | AA |
|----|----|-----------------|-----------------|-----------------|-----------------|----------------|----|
| D  | 1  | 133.061         | 1953.041        | 1937.022        | 0.000           | 1936.014       | D  |
| T  | 2  | 234.108         | 1838.014        | 1821.995        | 0.000           | 1820.987       | T  |
| N  | 3  | 348.151         | 1730.966        | 1720.948        | 1721.955        | 1719.940       | N  |
| L  | 4  | 461.235         | 1622.921        | <b>1606.905</b> | <b>1607.912</b> | 1605.897       | L  |
| C  | 5  | 564.245         | 1509.830        | <b>1493.821</b> | <b>1494.828</b> | 1492.811       | C  |
| A  | 6  | 635.282         | 1406.830        | 1390.811        | 1391.819        | 1389.804       | A  |
| I  | 7  | 748.366         | 1335.793        | 1319.774        | 1320.782        | 1318.766       | I  |
| H  | 8  | 889.426         | 1222.709        | 1208.690        | 1207.698        | 1205.682       | H  |
| A  | 9  | <b>956.462</b>  | <b>1108.650</b> | 1099.631        | 1070.630        | 1065.623       | A  |
| R  | 10 | <b>1126.567</b> | 1014.613        | <b>998.594</b>  | 999.602         | 997.588        | R  |
| R  | 11 | <b>1282.668</b> | 944.507         | <b>826.489</b>  | 829.496         | 827.481        | R  |
| V  | 12 | <b>1381.737</b> | 888.400         | <b>672.387</b>  | 673.395         | 671.380        | V  |
| T  | 13 | <b>1482.785</b> | 800.330         | <b>573.319</b>  | <b>574.327</b>  | <b>572.311</b> | T  |
| I  | 14 | 1509.809        | 800.290         | <b>472.271</b>  | 473.279         | 471.264        | I  |
| M  | 15 | 1726.909        | 375.200         | <b>359.187</b>  | <b>360.195</b>  | 358.180        | M  |
| F  | 16 | <b>1823.962</b> | 244.160         | 228.147         | 229.155         | 227.139        | F  |
| K  | 17 | 1952.097        | 147.113         | 131.094         | 132.102         | 130.086        | K  |

# sp | P68433 | H31\_MOUSE

DTNLCAIHAK<sup>Acetyl</sup>RVTIMPK  
42.01

- ▶ fragmentation table for charge state 2+
- ▶ specType=etd
- ▶ score=29.58
- ▶ F104936.dat
- ▶ query=q1179\_p1
- ▶ precursor=651.689500
- ▶ chargePrecursor=3
- ▶ itol=0.8

| AA    | c              | y              | z+1            | z+2            | z              | AA    |
|-------|----------------|----------------|----------------|----------------|----------------|-------|
| D[1]  | 67.034         | <b>977.024</b> | <b>969.015</b> | 0.504          | <b>968.511</b> | D[17] |
| Y[2]  | 117.558        | 919.511        | 911.501        | 0.504          | 910.997        | Y[16] |
| N[3]  | 174.579        | 868.967        | <b>860.977</b> | <b>861.481</b> | <b>860.473</b> | N[15] |
| L[4]  | 231.121        | 811.965        | <b>803.956</b> | <b>804.460</b> | <b>803.452</b> | L[14] |
| C[5]  | 282.626        | 750.423        | 747.414        | 747.918        | 746.910        | C[13] |
| A[6]  | 318.145        | <b>703.919</b> | 695.909        | 696.413        | 695.405        | A[12] |
| V[7]  | 374.687        | 650.406        | 650.201        | 650.895        | 650.887        | V[11] |
| H[8]  | 443.216        | 611.898        | 603.889        | 604.393        | 603.384        | H[10] |
| A[9]  | 478.735        | 543.329        | 535.319        | 535.823        | 534.815        | A[9]  |
| K[10] | 563.787        | 507.810        | 499.801        | 500.305        | 499.297        | K[8]  |
| R[11] | 641.838        | 422.757        | 414.748        | 415.252        | 414.244        | R[7]  |
| V[12] | 691.372        | 344.707        | 336.697        | 337.201        | 336.193        | V[6]  |
| Y[13] | 741.896        | 295.173        | 287.163        | 287.667        | 286.659        | Y[5]  |
| V[14] | 798.438        | 244.649        | 236.639        | 237.143        | 236.135        | V[4]  |
| M[15] | 853.958        | 188.107        | 180.097        | 180.601        | 179.593        | M[3]  |
| Y[16] | <b>912.485</b> | 122.585        | 114.577        | 115.081        | 114.073        | Y[2]  |
| K[17] | <b>976.532</b> | 74.050         | 66.051         | 66.555         | 65.547         | K[1]  |

# sp | P62806 | H4\_MOUSE

[Acetyl]SGRGKGGKGLGKGGAK <sup>Acetyl</sup>RHRK <sup>Dimethyl</sup>VLR  
42.01 28.03

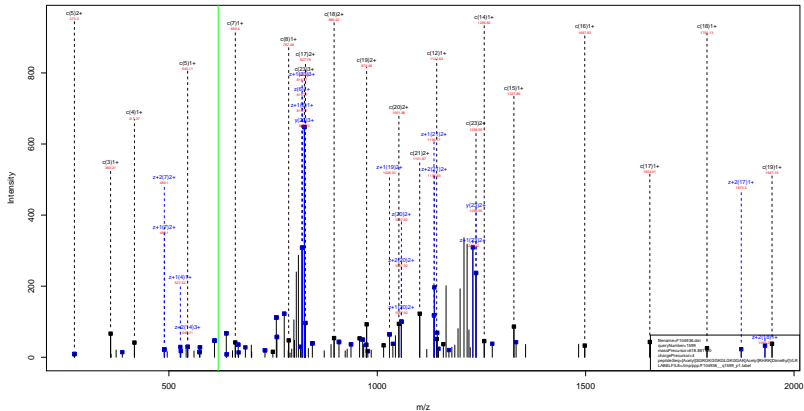

# sp | P62806 | H4\_MOUSE

[Acetyl]SGRGKGGKGLGKGGAK<sup>Acetyl</sup> RHRK<sup>Dimethyl</sup> VLR<sup>28.03</sup>

- ▶ fragmentation table for charge state 1+
- ▶ specType=etd
- ▶ score=95.30
- ▶ F104936.dat
- ▶ query=q1599\_p1
- ▶ precursor=618.881120
- ▶ chargePrecursor=4
- ▶ itol=0.8

| AA    | c               | y        | z+1             | z+2             | z              | AA    |
|-------|-----------------|----------|-----------------|-----------------|----------------|-------|
| S[1]  | 147.076         | 2472.488 | 2456.469        | 0.000           | 2455.450       | S[23] |
| G[2]  | 304.098         | 2343.443 | 2327.425        | 0.000           | 2326.411       | G[22] |
| R[3]  | <b>360.199</b>  | 2208.422 | 2270.403        | 2271.411        | 2269.395       | R[21] |
| G[4]  | <b>417.220</b>  | 2130.321 | 2114.302        | 2115.310        | 2113.294       | G[20] |
| K[5]  | <b>545.315</b>  | 2073.299 | 2057.280        | 2058.288        | 2056.273       | K[19] |
| G[6]  | 603.337         | 1945.204 | 1929.185        | <b>1930.193</b> | 1928.176       | G[18] |
| G[7]  | <b>659.358</b>  | 1888.183 | 1872.164        | <b>1873.172</b> | 1871.156       | G[17] |
| K[8]  | <b>787.453</b>  | 1831.161 | 1815.143        | 1816.150        | 1814.135       | K[16] |
| G[9]  | <b>844.475</b>  | 1773.066 | 1687.048        | 1688.055        | 1686.040       | G[15] |
| L[10] | <b>957.559</b>  | 1646.045 | 1630.026        | 1631.034        | 1629.018       | L[14] |
| G[11] | <b>1014.580</b> | 1532.961 | 1516.942        | 1517.950        | 1515.934       | G[13] |
| R[12] | <b>1142.675</b> | 1475.939 | 1459.921        | 1460.928        | 1458.913       | R[12] |
| G[13] | 1199.697        | 1347.844 | 1331.826        | <b>1332.833</b> | 1330.818       | G[11] |
| G[14] | <b>1256.718</b> | 1290.823 | 1274.804        | <b>1275.812</b> | 1273.796       | G[10] |
| A[15] | <b>1327.755</b> | 1233.801 | 1217.783        | 1218.791        | 1216.775       | A[9]  |
| K[16] | <b>1497.861</b> | 1182.784 | <b>1146.746</b> | 1147.753        | 1145.738       | K[8]  |
| R[17] | <b>1653.962</b> | 992.659  | <b>976.640</b>  | <b>977.648</b>  | 976.633        | R[7]  |
| R[18] | <b>1791.021</b> | 836.536  | <b>825.539</b>  | 821.547         | <b>819.531</b> | R[6]  |
| R[19] | <b>1947.122</b> | 699.499  | <b>683.480</b>  | 684.488         | 682.472        | R[5]  |
| K[20] | 2103.248        | 543.398  | <b>527.379</b>  | <b>528.387</b>  | 526.371        | K[4]  |
| V[21] | 2202.317        | 387.271  | 371.253         | 372.261         | 370.245        | V[3]  |
| L[22] | 2315.401        | 288.203  | 272.184         | <b>273.192</b>  | 271.176        | L[2]  |
| R[23] | 2471.502        | 178.119  | 158.100         | 160.108         | 158.082        | R[1]  |

# sp | P62806 | H4\_MOUSE

[Acetyl]SGRGKGGKGLGKGGAK<sup>Acetyl</sup> RHRK<sup>Dimethyl</sup> VLR<sup>28.03</sup>

- ▶ fragmentation table for charge state 2+
- ▶ specType=etd
- ▶ score=95.30
- ▶ F104936.dat
- ▶ query=q1599\_p1
- ▶ precursor=618.881120
- ▶ chargePrecursor=4
- ▶ itol=0.8

| AA   | c               | y               | z+1             | z+2             | z               | AA   |
|------|-----------------|-----------------|-----------------|-----------------|-----------------|------|
| S 1  | 74.042          | <b>1236.747</b> | <b>1228.737</b> | 0.904           | 1228.231        | S 21 |
| G 2  | 102.553         | <b>1172.225</b> | 1164.216        | 0.904           | 1163.712        | G 20 |
| R 3  | 180.603         | <b>1143.715</b> | <b>1135.705</b> | <b>1136.209</b> | 1135.201        | R 21 |
| G 4  | 209.114         | 1095.664        | <b>1057.655</b> | <b>1058.159</b> | <b>1057.151</b> | G 20 |
| K 5  | <b>273.161</b>  | <b>1037.153</b> | <b>1029.144</b> | <b>1029.648</b> | <b>1028.640</b> | K 19 |
| G 6  | 301.672         | <b>971.106</b>  | 963.096         | <b>965.090</b>  | <b>964.592</b>  | G 18 |
| G 7  | 330.183         | 944.595         | <b>938.586</b>  | <b>937.090</b>  | 936.082         | G 17 |
| K 8  | 394.230         | 916.084         | <b>908.075</b>  | <b>908.579</b>  | <b>907.571</b>  | K 18 |
| G 9  | 422.741         | 852.031         | <b>844.027</b>  | <b>844.531</b>  | <b>843.524</b>  | G 15 |
| L 10 | 479.283         | 823.520         | <b>815.517</b>  | <b>816.021</b>  | 815.013         | L 14 |
| G 11 | 507.794         | 768.067         | <b>759.975</b>  | <b>759.479</b>  | <b>758.471</b>  | G 13 |
| K 12 | 571.844         | 728.875         | <b>730.404</b>  | <b>730.908</b>  | <b>729.900</b>  | K 12 |
| G 13 | 600.352         | 674.426         | <b>666.416</b>  | <b>666.920</b>  | <b>665.913</b>  | G 11 |
| G 14 | 638.863         | 645.915         | <b>637.906</b>  | <b>638.410</b>  | <b>637.402</b>  | G 10 |
| A 15 | 664.361         | 617.404         | <b>609.395</b>  | <b>609.899</b>  | <b>608.891</b>  | A 9  |
| K 16 | <b>749.434</b>  | 581.896         | <b>573.876</b>  | <b>574.380</b>  | <b>573.373</b>  | K 8  |
| R 17 | <b>827.485</b>  | 498.833         | <b>488.824</b>  | <b>489.328</b>  | <b>488.320</b>  | R 7  |
| H 18 | <b>856.014</b>  | 418.782         | 410.773         | 411.277         | 410.269         | H 6  |
| R 19 | <b>974.065</b>  | 350.253         | 342.244         | 342.748         | 341.740         | R 5  |
| K 20 | <b>1052.128</b> | 272.202         | 264.193         | 264.697         | 263.689         | K 4  |
| V 21 | <b>1101.662</b> | 194.139         | 186.130         | 186.634         | 185.626         | V 9  |
| L 22 | <b>1158.204</b> | 144.065         | 136.056         | 137.060         | 136.052         | L 8  |
| R 23 | <b>1236.255</b> | 98.051          | 90.042          | 90.546          | 89.538          | R 1  |

# sp | P62806 | H4\_MOUSE

[Acetyl]SGRGKGGKGLGKGGAK<sup>Acetyl</sup> RHRK<sup>Dimethyl</sup> VLR<sup>28.03</sup>

- ▶ fragmentation table for charge state 3+
- ▶ specType=etd
- ▶ score=95.30
- ▶ F104936.dat
- ▶ query=q1599\_p1
- ▶ precursor=618.881120
- ▶ chargePrecursor=4
- ▶ itol=0.8

| AA |      | c              | y              | z+1            | z+2            | z              | AA    |
|----|------|----------------|----------------|----------------|----------------|----------------|-------|
| S  | [1]  | 49.697         | <b>824.833</b> | <b>819.494</b> | 0.672          | <b>819.158</b> | S[2]  |
| G  | [2]  | 68.704         | 781.819        | <b>776.480</b> | 0.672          | <b>776.144</b> | G[2]  |
| R  | [3]  | 120.738        | 762.812        | <b>757.473</b> | <b>757.808</b> | <b>757.137</b> | R[2]  |
| G  | [4]  | 139.743        | 710.778        | 705.439        | 705.773        | 705.103        | G[2]  |
| K  | [5]  | 182.443        | 691.771        | 686.432        | 686.768        | 686.096        | K[19] |
| G  | [6]  | 201.450        | 649.073        | 643.733        | 644.069        | 643.397        | G[18] |
| G  | [7]  | 220.458        | 630.066        | 624.726        | 625.062        | 624.390        | G[17] |
| K  | [8]  | 263.156        | 611.059        | 605.719        | 606.055        | 605.383        | K[16] |
| G  | [9]  | 282.163        | 568.360        | 563.021        | 563.357        | 562.685        | G[15] |
| L  | [10] | 319.658        | 549.353        | 544.014        | <b>544.350</b> | 543.678        | L[14] |
| G  | [11] | 338.665        | 511.658        | 506.319        | 506.655        | 505.983        | G[13] |
| K  | [12] | 381.363        | 492.651        | 487.312        | 487.648        | 486.976        | K[12] |
| G  | [13] | 400.370        | 449.953        | 444.613        | 444.949        | 444.277        | G[11] |
| G  | [14] | 419.378        | 430.946        | 425.606        | 425.942        | 425.270        | G[10] |
| A  | [15] | 443.257        | 411.939        | 406.599        | 406.935        | 406.263        | A[9]  |
| K  | [16] | 499.958        | <b>388.260</b> | 382.920        | 383.256        | 382.584        | K[8]  |
| R  | [17] | 551.992        | 351.558        | 346.218        | 346.554        | 345.882        | R[7]  |
| H  | [18] | 597.678        | 279.524        | 274.185        | 274.520        | <b>273.849</b> | H[6]  |
| R  | [19] | 649.712        | 233.838        | 228.498        | 228.834        | 228.162        | R[5]  |
| K  | [20] | 701.754        | 181.804        | 176.465        | 176.800        | 176.129        | K[4]  |
| V  | [21] | 754.777        | 129.762        | 124.422        | 124.758        | 124.086        | V[9]  |
| L  | [22] | 772.872        | 96.739         | 91.400         | 91.736         | 91.064         | L[2]  |
| R  | [23] | <b>824.505</b> | 59.043         | 53.703         | 54.041         | 53.369         | R[1]  |

# sp | P62806 | H4\_MOUSE

[Acetyl]SGRGKGGKGLGKGGAK Acetyl 42.01 RHRK Dimethyl 28.03 VLR

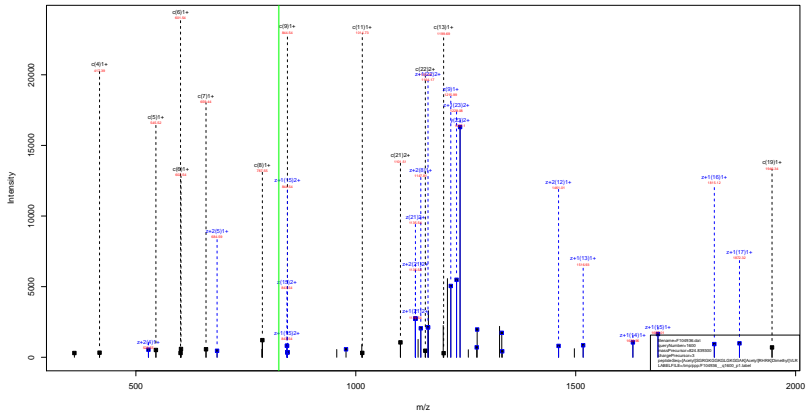

# sp | P62806 | H4\_MOUSE

[Acetyl]SGRGKGGKGLGKGGAK<sup>Acetyl</sup>42.01 RHRK<sup>Dimethyl</sup>28.03 VLR

- ▶ fragmentation table for charge state 1+
- ▶ specType=etd
- ▶ score=69.76
- ▶ F104936.dat
- ▶ query=q1600\_p1
- ▶ precursor=824.839300
- ▶ chargePrecursor=3
- ▶ itol=0.8

| AA    | c               | y        | z+1             | z+2             | z               | AA    |
|-------|-----------------|----------|-----------------|-----------------|-----------------|-------|
| S[1]  | 147.076         | 2472.486 | 2456.467        | 0.000           | 2455.450        | S[23] |
| G[2]  | 204.098         | 2343.443 | 2327.425        | 0.000           | 2326.417        | G[22] |
| R[3]  | <b>360.199</b>  | 2286.422 | 2270.403        | 2271.411        | 2269.395        | R[21] |
| G[4]  | <b>417.220</b>  | 2130.321 | 2114.302        | 2115.310        | 2113.294        | G[20] |
| K[5]  | <b>545.315</b>  | 2073.299 | 2057.280        | 2058.288        | 2056.273        | K[19] |
| G[6]  | <b>602.337</b>  | 1945.284 | 1929.265        | 1930.273        | 1928.257        | G[18] |
| G[7]  | <b>659.358</b>  | 1888.183 | <b>1872.164</b> | 1873.172        | 1871.156        | G[17] |
| K[8]  | <b>787.453</b>  | 1831.161 | <b>1815.143</b> | 1816.150        | 1814.135        | K[16] |
| G[9]  | <b>844.475</b>  | 1770.056 | <b>1587.040</b> | 1688.055        | 1686.040        | G[15] |
| L[10] | 957.559         | 1646.045 | <b>1630.026</b> | 1631.034        | 1629.018        | L[14] |
| G[11] | <b>1014.580</b> | 1532.061 | <b>1516.042</b> | 1517.050        | 1515.034        | G[13] |
| R[12] | 1143.675        | 1475.039 | 1459.021        | <b>1460.029</b> | 1458.013        | R[12] |
| G[13] | <b>1199.697</b> | 1347.044 | <b>1331.026</b> | <b>1332.033</b> | 1330.018        | G[11] |
| G[14] | 1256.718        | 1290.023 | <b>1274.004</b> | <b>1275.012</b> | 1273.000        | G[10] |
| A[15] | 1327.755        | 1233.001 | 1217.083        | 1218.091        | <b>1216.775</b> | A[9]  |
| R[16] | 1497.861        | 1162.764 | 1146.746        | <b>1147.753</b> | 1145.738        | R[8]  |
| R[17] | 1653.062        | 692.659  | 676.640         | <b>677.648</b>  | 675.633         | R[7]  |
| R[18] | 1791.074        | 638.556  | 622.537         | 623.545         | 621.530         | R[6]  |
| R[19] | <b>1947.122</b> | 609.499  | 603.480         | <b>604.488</b>  | 602.472         | R[5]  |
| K[20] | 2103.248        | 543.398  | 527.379         | <b>528.387</b>  | 526.371         | K[4]  |
| V[21] | 2202.317        | 497.274  | 491.255         | 492.263         | 490.245         | V[3]  |
| L[22] | 2315.401        | 388.203  | 372.184         | 373.192         | 371.176         | L[2]  |
| R[23] | 2471.502        | 175.119  | 159.100         | 160.108         | 158.092         | R[1]  |



# sp | P62806 | H4\_MOUSE

[Acetyl]SGRGKGGKGLGKGGAK<sup>Acetyl</sup> RHRK<sup>Dimethyl</sup> VLR<sup>28.03</sup>

- ▶ fragmentation table for charge state 2+
- ▶ specType=etd
- ▶ score=69.76
- ▶ F104936.dat
- ▶ query=q1600\_p1
- ▶ precursor=824.839300
- ▶ chargePrecursor=3
- ▶ itol=0.8

| AA   | c               | y               | z+1             | z+2             | z               | AA   |
|------|-----------------|-----------------|-----------------|-----------------|-----------------|------|
| S 1  | 74.042          | <b>1236.747</b> | <b>1228.737</b> | 0.504           | 1226.231        | S 21 |
| G 2  | 102.553         | 1172.225        | <b>1164.216</b> | 0.504           | <b>1163.712</b> | G 22 |
| R 3  | 180.603         | 1143.715        | <b>1135.705</b> | <b>1136.209</b> | <b>1135.201</b> | R 21 |
| G 4  | 209.114         | 1095.664        | 1057.655        | 1058.159        | 1057.151        | G 20 |
| K 5  | 273.161         | 1037.153        | 1029.144        | 1029.648        | 1028.640        | K 19 |
| G 6  | 301.672         | 978.100         | 965.090         | 965.593         | 964.585         | G 18 |
| G 7  | 330.183         | 944.595         | 936.586         | 937.090         | 936.082         | G 17 |
| K 8  | 394.230         | 916.084         | 908.075         | 908.579         | 907.571         | K 16 |
| G 9  | 422.741         | 852.031         | <b>844.027</b>  | <b>844.531</b>  | <b>843.524</b>  | G 15 |
| L 10 | 479.283         | 823.526         | 815.517         | 816.021         | 815.013         | L 14 |
| G 11 | 507.794         | 768.064         | 758.075         | 759.079         | 758.471         | G 13 |
| K 12 | 571.841         | 728.873         | 720.864         | 721.868         | 720.860         | K 12 |
| G 13 | 600.352         | 674.426         | 666.418         | 666.920         | 665.913         | G 11 |
| G 14 | 638.863         | 645.915         | 637.906         | 638.410         | 637.402         | G 10 |
| A 15 | 664.371         | 617.404         | 609.395         | 609.899         | 608.891         | A 9  |
| K 16 | 749.414         | 581.896         | 573.876         | 574.380         | 573.373         | K 8  |
| R 17 | 817.465         | 498.833         | 488.823         | 489.328         | 488.321         | R 7  |
| H 18 | 856.014         | 418.782         | 410.773         | 411.277         | 410.269         | H 6  |
| R 19 | 874.025         | 350.253         | 342.244         | 342.748         | 341.740         | R 5  |
| K 20 | 1052.126        | 272.202         | 264.193         | 264.697         | 263.689         | K 4  |
| V 21 | <b>1101.662</b> | 194.139         | 186.130         | 186.634         | 185.626         | V 3  |
| L 22 | <b>1158.204</b> | 144.605         | 136.596         | 137.100         | 136.092         | L 1  |
| R 23 | 1238.255        | 98.051          | 89.044          | 89.558          | 79.550          | R 1  |



# sp | Q6ZWY9 | H2B1C\_MOUSE

PEPAKSAPAPKK <sup>Acetyl</sup><sub>42.01</sub> GSKKAVTKAQKK

- ▶ fragmentation table for charge state 1+
- ▶ specType=etd
- ▶ score=50.57
- ▶ F104936.dat
- ▶ query=q1661\_p1
- ▶ precursor=504.306380
- ▶ chargePrecursor=5
- ▶ itol=0.8

| AA  | c               | y               | z+1            | z+2             | z              | AA  |
|-----|-----------------|-----------------|----------------|-----------------|----------------|-----|
| P1  | 115.007         | 2517.488        | 2501.469       | 0.000           | 2500.461       | P24 |
| E2  | 244.129         | 2420.433        | 2404.416       | 0.000           | 2403.408       | E23 |
| P3  | <b>341.182</b>  | 2201.362        | 2275.373       | 0.000           | 2274.366       | P22 |
| A4  | 412.319         | 2194.330        | 2178.321       | 0.000           | 2177.313       | A21 |
| K5  | <b>540.314</b>  | 2123.302        | 2107.284       | 2108.291        | 2106.276       | K20 |
| S6  | <b>627.346</b>  | 1995.207        | 1979.189       | 1980.196        | 1978.181       | S19 |
| A7  | 698.393         | 1908.175        | 1892.157       | 1893.164        | 1891.149       | A18 |
| P8  | 795.436         | 1837.138        | 1821.119       | 1822.127        | 1820.112       | P17 |
| A9  | 869.473         | 1746.085        | 1724.067       | 1725.075        | 1723.060       | A16 |
| P10 | <b>961.526</b>  | 1669.049        | 1653.030       | 1654.037        | 1652.022       | P15 |
| K11 | <b>1091.621</b> | 1571.998        | 1555.977       | 1556.985        | 1554.969       | K14 |
| K12 | 1261.728        | 1443.901        | 1427.880       | <b>1428.890</b> | 1426.874       | K13 |
| G13 | 1318.746        | 1273.795        | 1257.776       | 1258.784        | 1256.768       | G12 |
| S14 | 1405.780        | 1216.774        | 1200.755       | 1201.763        | 1199.747       | S11 |
| K15 | 1633.878        | 1125.742        | 1113.723       | 1114.731        | 1112.715       | K10 |
| K16 | 1661.976        | <b>1001.647</b> | 985.628        | 986.636         | 984.620        | K9  |
| A17 | 1733.007        | 873.552         | <b>857.533</b> | 858.541         | <b>856.525</b> | A8  |
| V18 | 1832.075        | <b>802.515</b>  | 786.496        | 787.504         | <b>785.488</b> | V7  |
| T19 | 1933.123        | <b>703.446</b>  | <b>687.427</b> | <b>688.435</b>  | 686.420        | T6  |
| K20 | 2061.218        | <b>602.398</b>  | <b>586.380</b> | 587.388         | 585.372        | K5  |
| A21 | 2132.255        | 474.303         | <b>458.285</b> | 459.293         | 457.277        | A4  |
| Q22 | 2260.314        | 403.265         | <b>387.248</b> | 388.256         | 386.240        | Q3  |
| K23 | 2388.409        | <b>275.208</b>  | <b>259.189</b> | 260.197         | 258.181        | K2  |
| K24 | 2516.504        | 147.113         | 131.094        | 132.102         | 130.086        | K1  |

# sp | Q6ZWY9 | H2B1C\_MOUSE

PEPAKSAPAPKK <sup>Acetyl</sup> GSKKAVTKAQKK  
42.01

- ▶ fragmentation table for charge state 2+
- ▶ specType=etd
- ▶ score=50.57
- ▶ F104936.dat
- ▶ query=q1661\_p1
- ▶ precursor=504.306380
- ▶ chargePrecursor=5
- ▶ itol=0.8

| AA   | c               | y               | z+1             | z+2             | z               | AA   |
|------|-----------------|-----------------|-----------------|-----------------|-----------------|------|
| F 1  | 48.043          | <b>1259.247</b> | 1251.238        | 0.504           | 1250.734        | P 20 |
| E 2  | 122.568         | 1210.721        | <b>1202.712</b> | 0.504           | 1202.208        | E 23 |
| F 3  | 171.095         | 1146.200        | <b>1138.190</b> | 0.504           | <b>1137.686</b> | P 22 |
| A 4  | 358.611         | 1097.673        | <b>1089.664</b> | 0.504           | <b>1089.160</b> | A 21 |
| K 5  | 270.661         | 1052.155        | <b>1054.145</b> | <b>1054.649</b> | 1053.644        | K 20 |
| S 6  | 314.177         | 998.107         | <b>990.098</b>  | <b>990.602</b>  | 989.594         | S 19 |
| A 7  | 349.695         | 954.591         | <b>946.582</b>  | <b>947.086</b>  | 946.070         | A 18 |
| F 8  | 398.222         | 919.073         | 911.063         | 911.567         | 910.559         | P 17 |
| A 9  | 433.740         | 870.549         | <b>862.537</b>  | <b>863.041</b>  | <b>862.033</b>  | A 16 |
| T 10 | 493.269         | <b>835.028</b>  | <b>827.018</b>  | 827.523         | <b>826.515</b>  | T 15 |
| K 11 | <b>546.314</b>  | 786.501         | <b>778.492</b>  | <b>778.996</b>  | <b>777.988</b>  | K 14 |
| K 12 | <b>631.367</b>  | <b>722.454</b>  | <b>714.445</b>  | <b>714.948</b>  | 713.941         | K 13 |
| G 13 | <b>659.878</b>  | <b>637.401</b>  | 629.392         | 629.896         | 628.888         | G 12 |
| S 14 | <b>703.364</b>  | 608.890         | <b>600.881</b>  | <b>601.385</b>  | <b>600.377</b>  | S 11 |
| K 15 | <b>707.441</b>  | 568.374         | <b>557.365</b>  | <b>557.869</b>  | <b>556.861</b>  | K 10 |
| K 16 | <b>831.488</b>  | <b>501.327</b>  | <b>493.318</b>  | <b>493.821</b>  | 492.814         | K 9  |
| A 17 | 887.009         | 437.276         | <b>429.270</b>  | <b>429.774</b>  | <b>428.766</b>  | A 8  |
| V 18 | <b>916.541</b>  | 401.761         | 393.752         | 394.256         | 393.248         | V 7  |
| T 19 | 967.085         | 352.237         | 344.227         | 344.731         | 343.723         | T 6  |
| K 20 | <b>1031.113</b> | 301.703         | 293.693         | 294.197         | 293.190         | K 5  |
| A 21 | 1058.611        | 237.655         | 229.646         | 230.150         | 229.142         | A 4  |
| Q 22 | 1130.660        | 202.137         | 194.127         | 194.631         | 193.624         | Q 3  |
| K 23 | <b>1194.708</b> | 138.108         | 130.098         | 130.602         | 129.594         | K 2  |
| K 24 | 1258.755        | 74.060          | 66.051          | 66.555          | 65.547          | K 1  |

# sp | Q6ZWY9 | H2B1C\_MOUSE

PEPAKSAPAPKK <sup>Acetyl</sup>42.01 GSKKAVTKAQKK

- ▶ fragmentation table for charge state 3+
- ▶ specType=etd
- ▶ score=50.57
- ▶ F104936.dat
- ▶ query=q1661.p1
- ▶ precursor=504.306380
- ▶ chargePrecursor=5
- ▶ itol=0.8

| AA    | c              | y              | z+1            | z+2            | z              | AA    |
|-------|----------------|----------------|----------------|----------------|----------------|-------|
| P[1]  | 39.034         | <b>839.834</b> | <b>834.494</b> | 0.672          | <b>834.159</b> | P[24] |
| E[2]  | 82.048         | <b>807.483</b> | <b>802.144</b> | 0.672          | <b>801.808</b> | E[23] |
| P[3]  | 114.399        | 764.466        | 756.129        | 0.672          | 758.793        | P[22] |
| A[4]  | 138.078        | 732.118        | 726.778        | 0.672          | 726.442        | A[21] |
| K[5]  | 180.776        | 708.439        | <b>703.099</b> | <b>703.435</b> | <b>702.763</b> | K[20] |
| S[6]  | 209.787        | <b>665.741</b> | <b>660.401</b> | <b>660.737</b> | <b>660.065</b> | S[19] |
| A[7]  | 233.466        | 636.730        | <b>631.390</b> | <b>631.726</b> | <b>631.054</b> | A[18] |
| F[8]  | 265.817        | 613.051        | 607.711        | 608.047        | 607.379        | F[17] |
| A[9]  | 289.496        | 588.705        | <b>575.360</b> | <b>575.696</b> | <b>575.024</b> | A[16] |
| P[10] | 321.947        | <b>557.021</b> | 551.681        | 552.017        | 551.349        | P[15] |
| K[11] | 364.545        | <b>524.670</b> | <b>519.330</b> | <b>519.666</b> | <b>518.995</b> | K[14] |
| K[12] | 421.247        | 481.972        | 476.632        | 476.968        | 476.296        | K[13] |
| G[13] | 440.254        | 425.270        | 419.930        | 420.266        | 419.594        | G[12] |
| S[14] | 469.265        | 406.263        | 400.923        | 401.259        | 400.587        | S[11] |
| K[15] | 511.963        | 377.262        | 371.922        | 372.248        | 371.577        | K[10] |
| K[16] | 554.661        | 334.554        | 329.214        | 329.550        | 328.878        | K[9]  |
| A[17] | 578.340        | -91.895        | 286.518        | 286.852        | 286.180        | A[8]  |
| V[18] | <b>611.363</b> | 268.176        | 262.837        | 263.173        | 262.501        | V[7]  |
| T[19] | <b>643.046</b> | 235.156        | 229.814        | 230.150        | 229.478        | T[6]  |
| K[20] | <b>687.744</b> | 201.471        | 196.131        | 196.467        | 195.795        | K[5]  |
| A[21] | <b>711.423</b> | 158.773        | 153.433        | 153.769        | 153.097        | A[4]  |
| Q[22] | <b>754.109</b> | 135.094        | 129.754        | 130.090        | 129.418        | Q[3]  |
| K[23] | <b>796.808</b> | 92.407         | 87.068         | 87.404         | 86.732         | K[2]  |
| K[24] | 839.506        | 49.709         | 44.370         | 44.705         | 44.034         | K[1]  |

# sp | Q6ZWY9 | H2B1C\_MOUSE

PEPAKSAPAPKK <sup>Acetyl</sup><sub>42.01</sub> GSKKAVTKAQKK

- ▶ fragmentation table for charge state 4+
- ▶ specType=etd
- ▶ score=50.57
- ▶ F104936.dat
- ▶ query=q1661.p1
- ▶ precursor=504.306380
- ▶ chargePrecursor=5
- ▶ itol=0.8

| AA |    | c              | y              | z+1            | z+2     | z              | AA    |
|----|----|----------------|----------------|----------------|---------|----------------|-------|
| P  | 1  | 29.527         | <b>630.127</b> | <b>626.123</b> | 0.755   | <b>625.071</b> | P[24] |
| E  | 2  | 51.788         | 505.054        | <b>601.859</b> | 0.755   | <b>601.608</b> | E[23] |
| P  | 3  | 96.051         | 573.603        | 569.599        | 0.755   | 569.347        | P[22] |
| A  | 4  | 103.810        | 549.340        | 545.336        | 0.755   | 545.084        | A[21] |
| K  | 5  | 135.834        | 531.581        | 527.576        | 527.828 | 527.524        | K[20] |
| S  | 6  | 157.592        | 499.557        | 495.553        | 495.805 | 495.501        | S[19] |
| A  | 7  | 175.351        | 477.799        | 473.795        | 474.047 | 473.543        | A[18] |
| P  | 8  | 199.614        | 460.040        | 456.035        | 456.287 | 455.783        | P[17] |
| A  | 9  | <b>217.374</b> | 438.777        | 434.772        | 432.024 | 431.520        | A[16] |
| P  | 10 | 241.637        | 418.011        | 414.013        | 418.265 | 413.761        | P[15] |
| K  | 11 | 273.561        | 393.754        | 389.750        | 390.002 | 389.498        | K[14] |
| K  | 12 | 316.187        | 361.731        | 357.726        | 357.978 | 357.474        | K[13] |
| G  | 13 | 330.442        | 319.204        | 315.200        | 315.451 | 314.948        | G[12] |
| S  | 14 | 352.200        | 304.949        | 300.944        | 301.196 | 300.692        | S[11] |
| K  | 15 | 384.234        | 283.191        | 279.186        | 279.438 | 278.934        | K[10] |
| K  | 16 | 416.248        | 251.167        | 247.162        | 247.414 | 246.910        | K[9]  |
| A  | 17 | 434.007        | 219.143        | 215.139        | 215.391 | 214.887        | A[8]  |
| V  | 18 | <b>458.774</b> | 201.384        | 197.379        | 197.631 | 197.127        | V[7]  |
| T  | 19 | 484.036        | 176.617        | 172.612        | 172.864 | 172.360        | T[6]  |
| K  | 20 | 516.050        | 151.355        | 147.350        | 147.602 | 147.098        | K[5]  |
| A  | 21 | 533.819        | 119.331        | 115.327        | 115.579 | 115.075        | A[4]  |
| Q  | 22 | 565.834        | 101.572        | 97.567         | 97.819  | 97.315         | Q[3]  |
| K  | 23 | 597.898        | 69.957         | 65.953         | 66.805  | 65.801         | K[2]  |
| K  | 24 | 629.881        | 37.534         | 33.529         | 33.781  | 33.277         | K[1]  |



# sp | P62806 | H4\_MOUSE

[Acetyl]SGRGKGGK<sub>42.01</sub> Acetyl GLGK<sub>42.01</sub> Acetyl GGAK<sub>42.01</sub> Acetyl RHRK<sub>28.03</sub> Dimethyl VLR

- ▶ fragmentation table for charge state 1+
- ▶ specType=etd
- ▶ score=99.07
- ▶ F104936.dat
- ▶ query=q1708\_p1
- ▶ precursor=639.886870
- ▶ chargePrecursor=4
- ▶ itol=0.8

| AA    | c               | y        | z+1             | z+2             | z              | AA    |
|-------|-----------------|----------|-----------------|-----------------|----------------|-------|
| S[1]  | 147.076         | 2556.507 | 2540.488        | 0.000           | 2539.468       | S[23] |
| G[2]  | 304.098         | 2427.464 | 2411.446        | 0.000           | 2410.438       | G[22] |
| R[3]  | <b>360.199</b>  | 2370.443 | 2354.424        | 2355.432        | 2353.416       | R[21] |
| G[4]  | <b>417.220</b>  | 2214.342 | 2198.323        | 2199.331        | 2197.315       | G[20] |
| K[5]  | <b>543.315</b>  | 2137.320 | 2121.302        | 2142.309        | 2140.293       | K[19] |
| G[6]  | <b>602.137</b>  | 2039.225 | 2013.207        | 2014.214        | 2012.199       | G[18] |
| G[7]  | <b>659.358</b>  | 1972.204 | <b>1956.185</b> | 1957.193        | 1955.177       | G[17] |
| K[8]  | 829.464         | 1915.182 | 1899.164        | 1900.172        | 1898.156       | K[16] |
| G[9]  | <b>886.485</b>  | 1745.077 | 1729.058        | <b>1730.066</b> | 1728.050       | G[15] |
| L[10] | <b>999.569</b>  | 1688.055 | <b>1672.037</b> | <b>1673.045</b> | 1671.029       | L[14] |
| G[11] | <b>1056.591</b> | 1574.071 | <b>1558.953</b> | <b>1559.960</b> | 1557.945       | G[13] |
| R[12] | <b>1228.696</b> | 1317.956 | 1301.937        | 1302.946        | 1300.931       | R[12] |
| G[13] | <b>1283.718</b> | 1247.844 | 1231.826        | <b>1232.833</b> | 1230.818       | G[11] |
| G[14] | <b>1340.739</b> | 1200.823 | <b>1274.804</b> | 1275.812        | 1273.796       | G[10] |
| A[15] | 1441.776        | 1233.801 | 1217.783        | <b>1218.791</b> | 1216.775       | A[0]  |
| K[16] | 1581.882        | 1162.764 | 1146.746        | <b>1147.753</b> | 1145.738       | K[8]  |
| R[17] | 1737.983        | 992.659  | 976.640         | <b>977.648</b>  | 975.633        | R[7]  |
| T[18] | <b>1875.042</b> | 836.598  | <b>820.539</b>  | 821.547         | <b>819.531</b> | T[6]  |
| R[19] | 2031.143        | 699.499  | <b>683.480</b>  | <b>684.488</b>  | 682.472        | R[5]  |
| K[20] | 2187.269        | 543.398  | <b>527.379</b>  | <b>528.387</b>  | 526.371        | K[4]  |
| V[21] | 2286.338        | 387.271  | 371.253         | 372.261         | 370.245        | V[3]  |
| L[22] | 2399.422        | 288.203  | 272.184         | 273.192         | 271.176        | L[2]  |
| R[23] | 2555.523        | 178.119  | 159.100         | 160.108         | 158.082        | R[1]  |



# sp | P62806 | H4\_MOUSE

[Acetyl]SGRGKGGK <sup>Acetyl</sup><sub>42.01</sub> GLGK <sup>Acetyl</sup><sub>42.01</sub> GGAK <sup>Acetyl</sup><sub>42.01</sub> RHRK <sup>Dimethyl</sup><sub>28.03</sub> VLR

- ▶ fragmentation table for charge state 2+
- ▶ specType=etd
- ▶ score=99.07
- ▶ F104936.dat
- ▶ query=q1708\_p1
- ▶ precursor=639.886870
- ▶ chargePrecursor=4
- ▶ itol=0.8

| AA   | c               | y               | z+1             | z+2             | z               | AA   |
|------|-----------------|-----------------|-----------------|-----------------|-----------------|------|
| S 1  | 74.042          | <b>1278.757</b> | 1278.740        | 0.504           | 1278.244        | S 21 |
| G 2  | 102.553         | 1214.238        | <b>1206.226</b> | 0.504           | 1205.723        | G 22 |
| R 3  | 186.603         | 1185.725        | <b>1177.716</b> | <b>1178.220</b> | 1177.212        | R 21 |
| G 4  | 209.114         | 1107.675        | <b>1099.665</b> | <b>1100.169</b> | <b>1099.161</b> | G 20 |
| K 5  | 273.161         | 1079.164        | <b>1071.154</b> | <b>1071.658</b> | <b>1070.651</b> | K 19 |
| G 6  | 301.674         | 1015.235        | 1007.137        | 1007.611        | <b>1006.503</b> | G 18 |
| G 7  | 330.183         | 988.695         | <b>978.596</b>  | <b>979.100</b>  | <b>978.092</b>  | G 17 |
| K 8  | 415.236         | 958.095         | <b>950.085</b>  | <b>950.589</b>  | <b>949.582</b>  | K 16 |
| G 9  | 443.746         | 873.042         | <b>865.033</b>  | <b>865.537</b>  | 864.529         | G 15 |
| L 10 | 500.288         | 844.511         | 836.522         | 837.026         | 836.010         | L 14 |
| G 11 | <b>528.799</b>  | 787.069         | <b>775.980</b>  | <b>780.484</b>  | <b>778.476</b>  | G 13 |
| K 12 | 613.852         | 759.672         | <b>751.409</b>  | <b>751.973</b>  | <b>750.965</b>  | K 12 |
| G 13 | 642.363         | 674.426         | <b>666.416</b>  | <b>666.920</b>  | 665.913         | G 11 |
| G 14 | 670.873         | 645.915         | 637.906         | 638.410         | 637.402         | G 10 |
| A 15 | 708.382         | 617.404         | <b>609.395</b>  | <b>609.899</b>  | <b>608.891</b>  | A 9  |
| K 16 | <b>791.445</b>  | 581.886         | <b>573.876</b>  | <b>574.380</b>  | <b>573.373</b>  | K 8  |
| R 17 | <b>869.495</b>  | 498.833         | <b>488.824</b>  | <b>489.328</b>  | <b>488.320</b>  | R 7  |
| H 18 | <b>938.025</b>  | 418.782         | 410.773         | 411.277         | 410.269         | H 6  |
| R 19 | <b>1016.075</b> | 350.253         | 342.244         | 342.748         | 341.740         | R 5  |
| K 20 | <b>1094.138</b> | 272.202         | 264.193         | 264.697         | 263.689         | K 4  |
| V 21 | <b>1143.673</b> | 194.139         | 186.130         | 186.634         | 185.626         | V 3  |
| L 22 | <b>1280.215</b> | 144.065         | 136.056         | 137.060         | 136.052         | L 1  |
| R 23 | <b>1278.265</b> | 98.051          | 89.042          | 89.556          | 79.550          | R 1  |

# sp | P62806 | H4\_MOUSE

[Acetyl]SGRGKGGK <sup>Acetyl</sup><sub>42.01</sub> GLGK <sup>Acetyl</sup><sub>42.01</sub> GGAK <sup>Acetyl</sup><sub>42.01</sub> RHRK <sup>Dimethyl</sup><sub>28.03</sub> VLR

- ▶ fragmentation table for charge state 3+
- ▶ specType=etd
- ▶ score=99.07
- ▶ F104936.dat
- ▶ query=q1708\_p1
- ▶ precursor=639.886870
- ▶ chargePrecursor=4
- ▶ itol=0.8

| AA |      | c              | y              | z+1            | z+2            | z              | AA    |
|----|------|----------------|----------------|----------------|----------------|----------------|-------|
| S  | [1]  | 49.697         | <b>852.841</b> | <b>847.501</b> | 0.672          | <b>847.165</b> | S[23] |
| G  | [2]  | 68.704         | 809.826        | 804.487        | 0.672          | 804.151        | G[22] |
| R  | [3]  | 120.738        | 790.819        | <b>785.480</b> | <b>785.816</b> | <b>785.144</b> | R[21] |
| G  | [4]  | 139.143        | 738.785        | 733.446        | 733.762        | 733.110        | G[20] |
| K  | [5]  | 182.443        | 719.778        | 714.439        | 714.775        | 714.103        | K[19] |
| G  | [6]  | 201.450        | 677.080        | 671.740        | 672.076        | 671.404        | G[18] |
| G  | [7]  | 220.458        | 658.073        | 652.733        | 653.069        | 652.397        | G[17] |
| K  | [8]  | 277.159        | 639.066        | 633.726        | 634.062        | 633.390        | K[16] |
| G  | [9]  | 296.167        | 582.364        | <b>577.024</b> | <b>577.360</b> | 576.688        | G[15] |
| L  | [10] | 333.661        | 563.357        | 558.017        | 558.353        | 557.681        | L[14] |
| G  | [11] | 352.668        | 525.662        | 520.322        | 520.658        | 519.986        | G[13] |
| K  | [12] | 409.570        | 506.655        | 501.315        | 501.651        | 500.979        | K[12] |
| G  | [13] | 428.577        | 449.953        | 444.613        | 444.949        | 444.277        | G[11] |
| G  | [14] | 447.585        | 430.946        | 425.606        | 425.942        | 425.270        | G[10] |
| A  | [15] | 471.264        | 411.939        | 406.599        | 406.935        | 406.263        | A[9]  |
| K  | [10] | <b>527.966</b> | 388.260        | 382.920        | 383.256        | 382.584        | K[8]  |
| R  | [17] | 579.999        | 331.558        | 326.218        | 326.554        | 325.882        | R[7]  |
| H  | [16] | 625.686        | 279.524        | 274.185        | 274.520        | 273.849        | H[6]  |
| R  | [19] | 677.719        | 233.838        | 228.498        | 228.834        | 228.162        | R[5]  |
| K  | [20] | 729.761        | 181.804        | 176.465        | 176.800        | 176.129        | K[4]  |
| V  | [21] | 762.784        | 129.762        | 124.422        | 124.758        | 124.086        | V[9]  |
| L  | [22] | 800.879        | 86.739         | 81.400         | 81.736         | 81.064         | L[2]  |
| R  | [23] | <b>852.513</b> | 39.043         | 33.703         | 34.041         | 33.369         | R[1]  |



# sp | P62806 | H4\_MOUSE

[Acetyl]SGRGK<sup>Acetyl</sup><sub>42.01</sub> GGK<sup>Acetyl</sup><sub>42.01</sub> GLGK<sup>Acetyl</sup><sub>42.01</sub> GGAK<sup>Acetyl</sup><sub>42.01</sub> RHRK<sup>Dimethyl</sup><sub>28.03</sub> VLR

- ▶ fragmentation table for charge state 1+
- ▶ specType=etd
- ▶ score=128.02
- ▶ F104936.dat
- ▶ query=q1754\_p1
- ▶ precursor=650.389230
- ▶ chargePrecursor=4
- ▶ itol=0.8

| AA    | c               | y              | z+1             | z+2             | z        | AA    |
|-------|-----------------|----------------|-----------------|-----------------|----------|-------|
| S[1]  | 147.676         | 2598.518       | 2582.499        | 0.0000          | 2681.491 | S[23] |
| G[2]  | 304.098         | 2469.475       | 2453.456        | 0.0000          | 2452.448 | G[22] |
| R[3]  | <b>360.199</b>  | 2412.453       | 2396.435        | 2397.443        | 2395.427 | R[21] |
| G[4]  | <b>417.220</b>  | 2256.352       | 2240.334        | 2241.341        | 2239.326 | G[20] |
| K[5]  | <b>587.326</b>  | 2190.331       | 2183.312        | 2184.320        | 2182.305 | K[19] |
| G[6]  | <b>644.347</b>  | 2029.225       | 2013.207        | 2014.214        | 2012.199 | G[18] |
| G[7]  | <b>701.369</b>  | 1972.204       | 1956.185        | <b>1957.193</b> | 1955.177 | G[17] |
| K[8]  | <b>871.474</b>  | 1915.182       | 1899.164        | <b>1900.172</b> | 1898.156 | K[16] |
| G[9]  | <b>928.496</b>  | 1745.077       | 1729.059        | <b>1730.066</b> | 1728.050 | G[15] |
| L[10] | <b>1041.580</b> | 1688.055       | 1672.037        | 1673.045        | 1671.029 | L[14] |
| G[11] | <b>1098.601</b> | 1574.971       | <b>1558.953</b> | 1559.960        | 1557.945 | G[13] |
| R[12] | <b>1268.707</b> | 1517.950       | 1501.931        | <b>1502.939</b> | 1500.924 | R[12] |
| G[13] | <b>1325.728</b> | 1347.844       | 1331.826        | <b>1332.833</b> | 1330.818 | G[11] |
| G[14] | <b>1382.750</b> | 1290.823       | 1274.804        | <b>1275.812</b> | 1273.796 | G[10] |
| A[15] | <b>1453.787</b> | 1233.801       | 1217.783        | <b>1218.791</b> | 1216.775 | A[9]  |
| K[16] | <b>1623.893</b> | 1162.764       | 1146.745        | <b>1147.753</b> | 1145.738 | K[8]  |
| R[17] | <b>1779.994</b> | 992.699        | 976.680         | <b>977.688</b>  | 975.672  | R[7]  |
| T[18] | 1817.053        | <b>836.558</b> | <b>820.539</b>  | <b>821.547</b>  | 819.531  | T[6]  |
| R[19] | 2073.154        | 699.459        | <b>683.480</b>  | 684.488         | 682.472  | R[5]  |
| K[20] | 2229.260        | 543.398        | <b>527.379</b>  | <b>528.387</b>  | 526.371  | K[4]  |
| V[21] | 2328.348        | 387.271        | 371.253         | 372.261         | 370.245  | V[3]  |
| L[22] | 2441.432        | 288.203        | 272.184         | 273.192         | 271.176  | L[2]  |
| R[23] | 2597.534        | 175.119        | 159.100         | 160.108         | 158.082  | R[1]  |

# sp | P62806 | H4\_MOUSE

[Acetyl]SGR**GGK**<sup>Acetyl</sup><sub>42.01</sub> **GGK**<sup>Acetyl</sup><sub>42.01</sub> **GLGK**<sup>Acetyl</sup><sub>42.01</sub> **GGAK**<sup>Acetyl</sup><sub>42.01</sub> **RHRK**<sup>Dimethyl</sup><sub>28.03</sub> **VLR**

- ▶ fragmentation table for charge state 2+
- ▶ specType=etd
- ▶ score=128.02
- ▶ F104936.dat
- ▶ query=q1754\_p1
- ▶ precursor=650.389230
- ▶ chargePrecursor=4
- ▶ itol=0.8

| AA   | c               | y               | z+1             | z+2             | z               | AA   |
|------|-----------------|-----------------|-----------------|-----------------|-----------------|------|
| S 1  | 74.042          | <b>1299.762</b> | <b>1291.753</b> | 0.504           | 1291.260        | S 21 |
| G 2  | 102.553         | 1235.241        | <b>1227.232</b> | 0.504           | 1226.739        | G 22 |
| R 3  | 180.603         | 1206.730        | <b>1198.721</b> | <b>1199.225</b> | 1198.217        | R 21 |
| G 4  | 209.114         | 1128.680        | <b>1120.670</b> | <b>1121.174</b> | 1120.167        | G 20 |
| K 5  | 288.167         | 1100.169        | <b>1092.160</b> | <b>1092.664</b> | <b>1091.656</b> | K 19 |
| G 6  | 322.679         | 1035.135        | <b>1007.107</b> | <b>1007.611</b> | <b>1006.603</b> | G 18 |
| G 7  | 351.188         | 988.605         | <b>978.596</b>  | <b>979.100</b>  | <b>978.092</b>  | G 17 |
| K 8  | 430.241         | <b>958.095</b>  | <b>950.085</b>  | <b>950.589</b>  | <b>949.582</b>  | K 16 |
| G 9  | 464.752         | 873.042         | 865.033         | 865.537         | 864.529         | G 15 |
| L 10 | 521.294         | 844.511         | <b>836.522</b>  | <b>837.026</b>  | <b>836.018</b>  | L 14 |
| G 11 | 569.804         | 787.989         | <b>775.980</b>  | <b>780.484</b>  | 779.476         | G 13 |
| K 12 | 634.857         | 759.479         | <b>751.469</b>  | <b>751.973</b>  | <b>750.965</b>  | K 12 |
| G 13 | 663.368         | 674.426         | <b>666.416</b>  | <b>666.920</b>  | 665.913         | G 11 |
| G 14 | 691.879         | 645.915         | <b>637.906</b>  | <b>638.410</b>  | <b>637.402</b>  | G 10 |
| A 15 | 727.397         | 617.404         | <b>609.395</b>  | <b>609.899</b>  | 608.891         | A 9  |
| K 16 | 812.450         | 581.886         | <b>573.876</b>  | <b>574.380</b>  | 573.373         | K 8  |
| R 17 | <b>898.500</b>  | 498.833         | <b>488.824</b>  | <b>489.328</b>  | 488.321         | R 7  |
| H 18 | <b>959.030</b>  | 418.782         | 410.773         | 411.277         | 410.269         | H 6  |
| R 19 | <b>1037.080</b> | 350.253         | 342.244         | 342.748         | 341.740         | R 5  |
| K 20 | <b>1115.144</b> | 272.202         | 264.193         | 264.697         | 263.689         | K 4  |
| V 21 | <b>1164.678</b> | 194.139         | 186.130         | 186.634         | 185.626         | V 3  |
| L 22 | <b>1221.220</b> | 144.065         | 136.056         | 137.060         | 136.052         | L 1  |
| R 23 | 1269.270        | 88.051          | 80.042          | 80.546          | 79.538          | R 1  |

# sp | P62806 | H4\_MOUSE

[Acetyl]SGR**GRK**<sup>Acetyl</sup><sub>42.01</sub> **GGK**<sup>Acetyl</sup><sub>42.01</sub> **GLGK**<sup>Acetyl</sup><sub>42.01</sub> **GGAK**<sup>Acetyl</sup><sub>42.01</sub> **RHRK**<sup>Dimethyl</sup><sub>28.03</sub> **VLR**

- ▶ fragmentation table for charge state 3+
- ▶ specType=etd
- ▶ score=128.02
- ▶ F104936.dat
- ▶ query=q1754\_p1
- ▶ precursor=650.389230
- ▶ chargePrecursor=4
- ▶ itol=0.8

| AA |      | c              | y              | z+1            | z+2            | z              | AA    |
|----|------|----------------|----------------|----------------|----------------|----------------|-------|
| S  | [1]  | 49.697         | <b>866.844</b> | <b>861.504</b> | 0.672          | <b>861.169</b> | S[23] |
| G  | [2]  | 68.704         | 823.830        | <b>818.490</b> | 0.672          | <b>818.154</b> | G[22] |
| R  | [3]  | 120.738        | 804.823        | <b>799.483</b> | <b>799.819</b> | <b>799.147</b> | R[21] |
| G  | [4]  | 139.743        | 752.789        | 747.449        | 747.783        | 747.113        | G[20] |
| K  | [5]  | 196.447        | 733.782        | 728.442        | 728.778        | 728.106        | K[19] |
| G  | [6]  | 215.454        | 677.080        | 671.740        | 672.076        | 671.404        | G[18] |
| G  | [7]  | 234.461        | 658.073        | 652.733        | 653.069        | 652.397        | G[17] |
| K  | [8]  | 291.163        | <b>639.066</b> | 633.726        | 634.062        | 633.390        | K[16] |
| G  | [9]  | 310.170        | 582.964        | 577.624        | 577.960        | 576.688        | G[15] |
| L  | [10] | 347.885        | 563.357        | 558.017        | 558.353        | 557.681        | L[14] |
| G  | [11] | 366.872        | 525.662        | 520.322        | 520.658        | 519.986        | G[13] |
| K  | [12] | 423.574        | 506.655        | 501.315        | 501.651        | 500.979        | K[12] |
| G  | [13] | 442.581        | 449.953        | 444.613        | 444.949        | 444.277        | G[11] |
| G  | [14] | 461.588        | 430.946        | 425.606        | 425.942        | 425.270        | G[10] |
| A  | [15] | 485.267        | 411.939        | 406.599        | 406.935        | 406.263        | A[9]  |
| K  | [16] | 541.969        | 388.260        | 382.920        | 383.256        | 382.584        | K[8]  |
| R  | [17] | 594.063        | 331.558        | 326.218        | 326.554        | 325.882        | R[7]  |
| H  | [18] | <b>639.689</b> | 279.524        | 274.185        | 274.520        | 273.849        | H[6]  |
| R  | [19] | 691.723        | 233.838        | 228.498        | 228.834        | 228.162        | R[5]  |
| K  | [20] | 743.765        | 181.804        | 176.465        | 176.800        | 176.129        | K[4]  |
| V  | [21] | 776.788        | 129.762        | 124.422        | 124.758        | 124.086        | V[3]  |
| L  | [22] | 814.882        | 96.739         | 91.400         | 91.736         | 91.064         | L[2]  |
| R  | [23] | <b>866.516</b> | 59.043         | 53.703         | 54.041         | 53.369         | R[1]  |



# sp | P62806 | H4\_MOUSE

[Acetyl]SGRGK Acetyl  
42.01 **GGK** Acetyl  
42.01 **GLGK** Acetyl  
42.01 **GGAK** Acetyl  
42.01 **RHRK** Dimethyl  
28.03 **VLR**

- ▶ fragmentation table for charge state 1+
- ▶ specType=etd
- ▶ score=49.82
- ▶ F104936.dat
- ▶ query=q1755\_p1
- ▶ precursor=866.850870
- ▶ chargePrecursor=3
- ▶ itol=0.8

| AA    | c               | y        | z+1             | z+2             | z        | AA    |
|-------|-----------------|----------|-----------------|-----------------|----------|-------|
| S[1]  | 147.076         | 2586.518 | 2582.499        | 0.000           | 2581.491 | S[23] |
| G[2]  | 304.058         | 2469.475 | 2453.456        | 0.000           | 2452.448 | G[22] |
| R[3]  | 360.199         | 2412.453 | 2396.435        | 2397.443        | 2395.427 | R[21] |
| G[4]  | <b>417.220</b>  | 2256.352 | 2240.334        | 2241.341        | 2239.326 | G[20] |
| K[5]  | <b>587.326</b>  | 2190.331 | 2183.312        | 2184.320        | 2182.305 | K[19] |
| G[6]  | <b>644.347</b>  | 2079.225 | 2013.207        | 2014.214        | 2012.199 | G[18] |
| G[7]  | <b>701.369</b>  | 1972.204 | <b>1956.185</b> | 1957.193        | 1955.177 | G[17] |
| K[8]  | <b>871.474</b>  | 1915.182 | <b>1899.164</b> | 1900.172        | 1898.156 | K[16] |
| G[9]  | <b>928.496</b>  | 1745.077 | <b>1729.058</b> | 1730.066        | 1728.050 | G[15] |
| L[10] | <b>1041.580</b> | 1688.055 | <b>1672.037</b> | 1673.045        | 1671.029 | L[14] |
| G[11] | 1098.601        | 1574.971 | 1558.952        | 1559.960        | 1557.945 | G[13] |
| R[12] | 1268.707        | 1317.950 | <b>1301.931</b> | 1302.939        | 1300.923 | R[12] |
| G[13] | 1325.728        | 1247.844 | <b>1331.826</b> | 1332.833        | 1330.818 | G[11] |
| G[14] | 1382.750        | 1200.823 | 1274.804        | 1275.812        | 1273.796 | G[10] |
| A[15] | 1453.787        | 1233.801 | 1217.783        | <b>1218.791</b> | 1216.775 | A[0]  |
| K[16] | 1523.893        | 1162.764 | 1146.746        | <b>1147.753</b> | 1145.738 | K[8]  |
| R[17] | 1779.894        | 992.659  | 976.640         | 977.648         | 975.632  | R[7]  |
| T[18] | <b>1917.053</b> | 836.568  | 820.539         | <b>821.547</b>  | 819.531  | T[6]  |
| R[19] | 2073.154        | 699.499  | 683.480         | <b>684.488</b>  | 682.472  | R[5]  |
| K[20] | 2229.260        | 543.398  | 527.379         | <b>528.387</b>  | 526.371  | K[4]  |
| V[21] | 2328.346        | 387.271  | 371.253         | 372.261         | 370.245  | V[3]  |
| L[22] | 2441.432        | 288.203  | 272.184         | 273.192         | 271.176  | L[2]  |
| R[23] | 2597.534        | 175.119  | 159.100         | 160.108         | 158.082  | R[1]  |



# sp | P62806 | H4\_MOUSE

[Acetyl]SGRGK Acetyl  
42.01 **GGK** Acetyl  
42.01 **GLGK** Acetyl  
42.01 **GGAK** Acetyl  
42.01 **RHRK** Dimethyl  
28.03 **VLR**

- ▶ fragmentation table for charge state 2+
- ▶ specType=etd
- ▶ score=49.82
- ▶ F104936.dat
- ▶ query=q1755\_p1
- ▶ precursor=866.850870
- ▶ chargePrecursor=3
- ▶ itol=0.8

| AA   | c               | y               | z+1             | z+2             | z               | AA   |
|------|-----------------|-----------------|-----------------|-----------------|-----------------|------|
| S 1  | 74.042          | <b>1299.762</b> | <b>1291.753</b> | 0.504           | <b>1291.249</b> | S 21 |
| G 2  | 102.553         | 1235.241        | <b>1227.232</b> | 0.504           | <b>1226.728</b> | G 20 |
| R 3  | 180.603         | 1206.730        | <b>1198.721</b> | 1.199.225       | <b>1198.217</b> | R 21 |
| G 4  | 209.114         | 1128.680        | <b>1120.670</b> | <b>1121.174</b> | <b>1120.167</b> | G 20 |
| K 5  | 298.167         | 1100.169        | <b>1092.160</b> | <b>1092.664</b> | <b>1091.656</b> | K 19 |
| G 6  | 322.678         | 1035.135        | 1007.137        | 1007.613        | 1006.597        | G 18 |
| G 7  | 351.188         | 988.605         | 978.595         | 979.100         | 975.052         | G 17 |
| K 8  | 436.241         | 958.095         | 950.085         | 950.589         | 949.582         | K 16 |
| G 9  | 464.752         | 873.042         | 865.033         | 865.537         | 864.529         | G 15 |
| L 10 | 521.294         | 844.511         | 836.522         | 837.026         | 836.018         | L 14 |
| G 11 | 569.804         | 787.989         | 779.980         | 780.484         | 779.476         | G 13 |
| K 12 | 634.857         | 759.479         | 751.469         | 751.973         | 750.965         | K 12 |
| G 13 | 663.368         | 674.425         | 666.416         | 666.920         | 665.913         | G 11 |
| G 14 | 691.879         | 645.915         | 637.906         | 638.410         | 637.402         | G 10 |
| A 15 | 727.397         | 617.404         | 609.395         | 609.899         | 608.891         | A 9  |
| K 16 | 812.450         | 581.886         | 573.876         | 574.380         | 573.373         | K 8  |
| R 17 | 880.500         | 496.833         | 488.823         | 489.328         | 488.321         | R 7  |
| H 18 | 959.030         | 418.782         | 410.773         | 411.277         | 410.269         | H 6  |
| R 19 | 1037.080        | 350.253         | 342.244         | 342.748         | 341.740         | R 5  |
| K 20 | <b>1115.144</b> | 272.202         | 264.193         | 264.697         | 263.689         | K 4  |
| V 21 | <b>1164.678</b> | 194.139         | 186.130         | 186.634         | 185.626         | V 9  |
| L 22 | 1221.220        | 144.665         | 136.656         | 137.160         | 136.152         | L 8  |
| R 23 | <b>1299.270</b> | 98.051          | 89.044          | 89.558          | 79.550          | R 1  |

# sp | Q3THW5 | H2AV\_MOUSE

DSLKATIAGGGVIPHIHKSLIGKKGQQK <sup>Dimethyl</sup> TA  
28.03

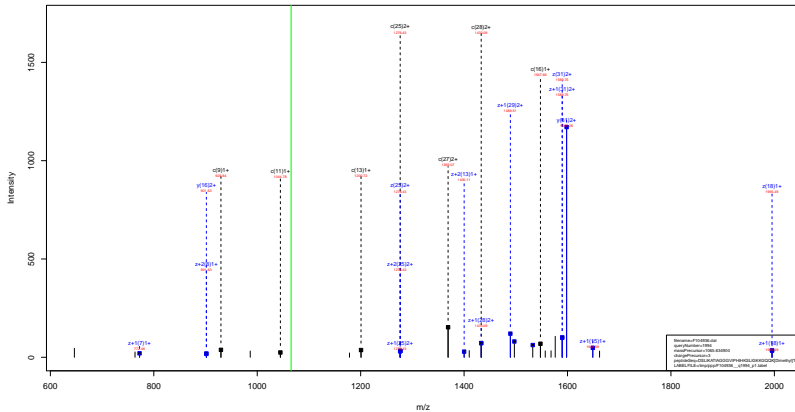

# sp | Q3THW5 | H2AV\_MOUSE

DSLKATIAGGGVIPHIHKSLIGKKGQQK <sup>Dimethyl</sup>TA  
28.03

- ▶ fragmentation table for charge state 1+
- ▶ specType=etd
- ▶ score=25.93
- ▶ F104936.dat
- ▶ query=q1994\_p1
- ▶ precursor=1065.634900
- ▶ chargePrecursor=3
- ▶ itol=0.8

| AA | c  | y               | a+1      | a+2             | z               | AA              |   |    |
|----|----|-----------------|----------|-----------------|-----------------|-----------------|---|----|
| D  | 1  | 133.061         | 1194.874 | 3176.855        | 0.000           | 3177.847        | D | 31 |
| S  | 3  | 333.093         | 3179.849 | 3943.829        | 0.000           | 3942.820        | S | 30 |
| L  | 3  | 333.177         | 2992.835 | 2976.790        | 0.000           | 2975.782        | L | 29 |
| I  | 4  | 446.261         | 2879.731 | 2863.712        | 0.000           | 2862.704        | I | 28 |
| K  | 5  | 574.356         | 2766.646 | 2750.628        | 2751.636        | 2749.620        | K | 27 |
| A  | 6  | 645.393         | 2638.552 | 2622.533        | 2623.541        | 2621.525        | A | 26 |
| T  | 7  | 746.441         | 2567.514 | 2551.490        | 2552.504        | 2550.488        | T | 25 |
| I  | 8  | 869.576         | 2466.467 | 2450.443        | 2451.456        | 2449.440        | I | 24 |
| A  | 9  | <b>930.562</b>  | 2353.383 | 2337.354        | 2338.372        | 2336.356        | A | 23 |
| G  | 10 | 987.583         | 2282.346 | 2266.327        | 2267.335        | 2265.310        | G | 22 |
| G  | 11 | <b>1044.605</b> | 2225.324 | 2209.305        | 2210.313        | 2208.290        | G | 21 |
| G  | 12 | 1101.626        | 2168.303 | 2152.284        | 2153.292        | 2151.276        | G | 20 |
| V  | 13 | <b>1200.695</b> | 2111.281 | 2095.262        | 2096.270        | 2094.253        | V | 19 |
| I  | 14 | 1213.719        | 2032.233 | <b>1996.194</b> | 1997.202        | <b>1995.186</b> | I | 18 |
| P  | 15 | 1410.831        | 1899.129 | 1883.110        | 1884.118        | 1882.102        | P | 17 |
| H  | 16 | <b>1547.890</b> | 1802.076 | 1786.057        | 1787.065        | 1785.049        | H | 16 |
| I  | 17 | 1660.974        | 1695.017 | <b>1648.998</b> | 1650.006        | 1647.990        | I | 15 |
| H  | 18 | 1798.033        | 1551.933 | 1535.914        | 1536.922        | 1534.906        | H | 14 |
| K  | 19 | 1826.128        | 1414.874 | 1398.855        | <b>1399.863</b> | 1397.847        | K | 13 |
| S  | 20 | 2013.160        | 1298.779 | 1279.760        | 1279.768        | 1296.751        | S | 12 |
| L  | 21 | 2126.244        | 1199.747 | 1183.728        | 1184.736        | 1182.720        | L | 11 |
| I  | 22 | 2239.328        | 1086.663 | 1070.644        | 1071.652        | 1069.636        | I | 10 |
| G  | 23 | 2296.359        | 973.579  | 957.560         | 958.568         | 956.552         | G | 9  |
| K  | 24 | 2424.445        | 916.557  | 900.539         | <b>901.547</b>  | 899.531         | K | 8  |
| T  | 25 | 2632.540        | 798.462  | <b>772.444</b>  | 773.452         | 771.436         | T | 7  |
| G  | 26 | 2699.561        | 699.366  | 684.347         | 685.355         | 683.340         | G | 6  |
| Q  | 27 | 2737.620        | 601.348  | 587.329         | 588.336         | 586.320         | Q | 5  |
| Q  | 28 | 2865.679        | 475.287  | 459.269         | 460.277         | 458.261         | Q | 4  |
| K  | 29 | 3021.805        | 347.229  | 331.210         | 332.218         | 330.202         | K | 3  |
| T  | 30 | 3122.852        | 191.103  | 175.084         | 176.092         | 174.076         | T | 2  |
| A  | 31 | 3193.890        | 90.059   | 74.039          | 75.044          | 73.028          | A | 1  |

# sp | Q3THW5 | H2AV\_MOUSE

DSLKATIAGGGVIPHIHKSLIGKKGQQK <sup>Dimethyl</sup>TA  
28.03

- ▶ fragmentation table for charge state 2+
- ▶ specType=etd
- ▶ score=25.93
- ▶ F104936.dat
- ▶ query=q1994\_p1
- ▶ precursor=1065.634900
- ▶ chargePrecursor=3
- ▶ itol=0.8

| AA | c  | y               | z+1             | z+2             | z               | AA              |       |
|----|----|-----------------|-----------------|-----------------|-----------------|-----------------|-------|
| D  | 1  | 67.034          | <b>1597.940</b> | <b>1589.931</b> | 0.504           | <b>1589.427</b> | D[31] |
| S  | 2  | 116.550         | 1540.471        | <b>1532.418</b> | 0.504           | 1531.914        | S[30] |
| L  | 3  | 167.062         | <b>1499.911</b> | <b>1488.902</b> | 0.504           | 1488.396        | L[29] |
| I  | 4  | 223.434         | 1440.369        | <b>1432.360</b> | 0.504           | 1431.850        | I[28] |
| K  | 5  | 287.682         | 1383.827        | 1375.818        | 1376.321        | 1375.314        | K[27] |
| A  | 6  | 323.200         | 1319.779        | 1311.770        | 1312.274        | 1311.266        | A[26] |
| T  | 7  | 373.724         | 1284.261        | <b>1276.251</b> | <b>1276.755</b> | <b>1276.748</b> | T[25] |
| I  | 8  | 430.266         | 1233.731        | 1225.723        | 1226.212        | 1225.204        | I[24] |
| A  | 9  | 485.785         | 1177.195        | 1169.186        | 1169.690        | 1168.682        | A[23] |
| G  | 10 | 494.295         | 1141.676        | 1133.667        | 1134.171        | 1133.163        | G[22] |
| G  | 11 | 542.806         | 1113.166        | 1105.156        | 1105.660        | 1104.652        | G[21] |
| G  | 12 | 551.317         | 1084.655        | 1076.646        | 1077.149        | 1076.142        | G[20] |
| V  | 13 | 606.851         | 1056.144        | 1048.135        | 1048.639        | 1047.631        | V[19] |
| I  | 14 | 657.363         | 1006.610        | 998.601         | 999.105         | 998.097         | I[18] |
| F  | 15 | 705.919         | 950.068         | 942.059         | 942.563         | 941.555         | F[17] |
| H  | 16 | 774.449         | <b>901.542</b>  | 893.532         | 894.036         | 893.028         | H[16] |
| I  | 17 | 839.991         | 833.012         | 825.003         | 825.507         | 824.499         | I[15] |
| H  | 18 | 899.520         | 776.470         | 768.461         | 768.965         | 767.957         | H[14] |
| K  | 19 | 953.968         | 707.943         | 699.933         | 700.438         | 699.431         | K[13] |
| S  | 20 | 1007.284        | 643.933         | 635.924         | 636.428         | 635.421         | S[12] |
| L  | 21 | 1063.626        | 600.377         | 592.368         | 592.872         | 591.864         | L[11] |
| I  | 22 | 1100.168        | 543.835         | 535.826         | 536.330         | 535.322         | I[10] |
| G  | 23 | 1148.679        | 487.293         | 479.284         | 479.788         | 478.780         | G[9]  |
| K  | 24 | 1172.764        | 458.762         | 450.753         | 451.257         | 450.250         | K[8]  |
| K  | 25 | <b>1276.774</b> | 394.735         | 386.726         | 387.230         | 386.222         | K[7]  |
| G  | 26 | 1305.284        | 330.687         | 322.678         | 323.182         | 322.174         | G[6]  |
| Q  | 27 | <b>1369.314</b> | 303.177         | 294.167         | 294.671         | 293.663         | Q[5]  |
| Q  | 28 | <b>1433.343</b> | 238.147         | 230.138         | 230.642         | 229.634         | Q[4]  |
| K  | 29 | 1511.836        | 174.119         | 166.109         | 166.613         | 165.605         | K[3]  |
| T  | 30 | 1603.930        | 98.085          | 88.080          | 88.584          | 87.543          | T[2]  |
| A  | 31 | 1597.448        | 48.531          | 37.522          | 38.026          | 37.018          | A[1]  |



# sp | Q6GSS7 | H2A2A\_MOUSE

DEELNKLLGK <sup>Dimethyl</sup> <sub>28.03</sub> VTIAQGGVLPNIQAVLLPKKTESHKAKGK

- ▶ fragmentation table for charge state 1+
- ▶ specType=etd
- ▶ score=42.48
- ▶ F104936.dat
- ▶ query=q2207\_p1
- ▶ precursor=619.505050
- ▶ chargePrecursor=7
- ▶ itol=0.8

| AA  | c               | y               | z+1             | z+2             | z              | AA  |
|-----|-----------------|-----------------|-----------------|-----------------|----------------|-----|
| D 1 | 1511.061        | 4330.497        | 4314.479        | 0.000           | 4313.477       | D40 |
| E 2 | <b>262.103</b>  | 4232.476        | 4199.462        | 0.000           | 4198.464       | E39 |
| E 3 | <b>391.146</b>  | 4036.425        | 4070.409        | 0.000           | 4059.407       | E18 |
| L 4 | <b>504.230</b>  | 3957.385        | 3941.366        | 0.000           | 3940.359       | L37 |
| N 5 | <b>618.273</b>  | 3844.301        | 3838.282        | 0.000           | 3829.290       | N36 |
| K 6 | 798.308         | 3730.258        | 3714.239        | 3715.247        | 3713.232       | K35 |
| L 7 | <b>859.452</b>  | 3602.163        | 3586.144        | 3587.152        | 3585.137       | L34 |
| L 8 | <b>972.536</b>  | 3489.079        | 3473.060        | 3474.068        | 3472.051       | L33 |
| G 9 | <b>1029.558</b> | 3375.995        | 3359.976        | 3360.984        | 3358.969       | G32 |
| K10 | <b>1185.684</b> | 3318.974        | 3302.955        | 3303.963        | 3301.947       | K31 |
| V11 | <b>1284.752</b> | 3162.847        | 3146.829        | 3147.836        | 3145.821       | V30 |
| T12 | 1385.800        | 3063.779        | 3047.760        | 3048.768        | 3046.752       | T29 |
| L13 | <b>1498.884</b> | 2962.731        | 2946.713        | 2947.720        | 2945.705       | L28 |
| A14 | 1569.921        | 2849.647        | 2833.628        | 2834.636        | 2832.621       | A27 |
| Q15 | 1697.989        | 2738.610        | 2722.591        | 2723.599        | 2721.584       | Q26 |
| G16 | 1755.001        | 2650.552        | 2634.533        | 2635.541        | 2633.525       | G25 |
| G17 | 1812.023        | 2593.530        | 2577.511        | 2578.519        | 2576.504       | G24 |
| V18 | 1911.091        | 2536.509        | 2520.490        | 2521.498        | 2519.482       | V23 |
| L19 | 2024.175        | 2437.468        | 2421.449        | 2422.457        | 2420.441       | L22 |
| P20 | 2121.258        | 2324.356        | 2308.337        | 2309.345        | 2307.330       | P21 |
| N21 | 2235.371        | 2227.303        | 2211.285        | 2212.292        | 2210.277       | N20 |
| I22 | 2348.355        | 2113.260        | 2097.242        | 2098.250        | 2096.234       | I19 |
| Q23 | 2476.413        | 2000.178        | 1984.159        | 1985.167        | 1983.151       | Q18 |
| A24 | 2547.450        | 1872.118        | 1856.099        | 1857.107        | 1855.091       | A17 |
| V25 | 2646.519        | 1801.081        | 1785.062        | 1786.070        | 1784.054       | V16 |
| L26 | 2759.603        | 1702.012        | 1685.994        | 1687.001        | 1684.985       | L15 |
| L27 | 2872.687        | 1588.928        | 1572.909        | <b>1573.917</b> | 1571.902       | L14 |
| P28 | 2969.740        | 1475.844        | 1459.825        | 1460.833        | 1458.818       | P13 |
| K29 | 3097.835        | 1378.791        | 1362.773        | <b>1363.780</b> | 1361.765       | K12 |
| K30 | 3225.930        | <b>1250.696</b> | 1234.678        | <b>1235.685</b> | 1233.670       | K11 |
| I31 | 3358.977        | 1122.607        | <b>1106.583</b> |                 | 1105.575       | I10 |
| E32 | 3456.020        | 1021.554        | <b>1005.535</b> | <b>1006.543</b> | 1004.527       | E9  |
| S33 | 3543.052        | <b>892.511</b>  | <b>876.492</b>  | <b>877.500</b>  | 875.485        | S8  |
| H34 | 3680.111        | 805.479         | <b>789.460</b>  | 790.468         | <b>788.453</b> | H7  |
| H35 | 3817.170        | 668.420         | <b>652.401</b>  | <b>653.409</b>  | 651.394        | H6  |
| K36 | 3945.265        | 531.361         | <b>515.343</b>  | 516.350         | 514.335        | K5  |
| A37 | 4019.302        | 403.356         | <b>387.348</b>  |                 | 388.355        | A4  |
| K38 | 4144.397        | 332.220         | <b>316.211</b>  | 317.218         | 315.202        | K3  |
| G39 | 4201.418        | 204.134         | <b>188.116</b>  | 189.123         | 187.108        | G2  |
| K40 | 4329.513        | 147.113         | 131.094         | 132.102         | 130.089        | K1  |

# sp | Q6GSS7 | H2A2A\_MOUSE

DEELNKLLGK <sup>Dimethyl</sup>VTIAQGGVLPNIQAVLLPKKTESHKAKGK <sub>28.03</sub>

- ▶ fragmentation table for charge state 2+
- ▶ specType=etd
- ▶ score=42.48
- ▶ F104936.dat
- ▶ query=q2207\_p1
- ▶ precursor=619.505050
- ▶ chargePrecursor=7
- ▶ itol=0.8

| AA | c  | y               | z+1             | z+2             | z               | AA              |       |
|----|----|-----------------|-----------------|-----------------|-----------------|-----------------|-------|
| D  | 1  | 67.034          | 2165.752        | 2157.743        | 0.504           | 2157.239        | D[40] |
| E  | 2  | 131.555         | 2108.239        | 2100.229        | 0.504           | 2099.726        | E[39] |
| E  | 3  | 188.077         | 2043.715        | 2035.705        | 0.504           | 2035.201        | E[38] |
| L  | 4  | 252.619         | 1979.190        | 1971.187        | 0.504           | 1970.683        | L[37] |
| N  | 5  | 309.640         | 1922.654        | 1914.645        | 1915.140        | 1914.141        | N[36] |
| K  | 6  | 374.668         | 1865.633        | 1857.623        | 1858.127        | 1857.119        | K[35] |
| L  | 7  | 430.230         | 1801.585        | 1793.576        | 1794.080        | 1793.072        | L[34] |
| L  | 8  | 486.772         | 1748.043        | 1740.034        | 1737.538        | 1736.530        | L[33] |
| G  | 9  | <b>515.282</b>  | 1708.501        | 1699.492        | 1698.986        | 1697.980        | G[32] |
| K  | 10 | <b>593.346</b>  | 1659.990        | <b>1651.981</b> | <b>1652.485</b> | 1651.477        | K[31] |
| V  | 11 | <b>642.880</b>  | 1581.027        | <b>1573.918</b> | <b>1574.422</b> | <b>1573.414</b> | V[30] |
| T  | 12 | <b>693.404</b>  | 1532.393        | 1524.384        | 1524.888        | 1523.880        | T[29] |
| T  | 13 | <b>749.946</b>  | 1484.059        | 1473.050        | <b>1474.364</b> | 1473.356        | T[28] |
| A  | 14 | <b>785.464</b>  | <b>1425.327</b> | 1417.318        | <b>1417.822</b> | 1416.814        | A[27] |
| G  | 15 | <b>849.493</b>  | 1359.809        | <b>1381.799</b> | <b>1382.303</b> | <b>1381.295</b> | G[26] |
| G  | 16 | <b>878.004</b>  | 1325.779        | 1317.770        | 1318.274        | 1317.266        | G[25] |
| G  | 17 | <b>906.515</b>  | 1297.266        | 1289.259        | 1289.763        | 1288.755        | G[24] |
| V  | 18 | <b>956.049</b>  | 1268.758        | 1260.749        | <b>1261.252</b> | 1260.245        | V[23] |
| L  | 19 | 1025.547        | 1219.224        | <b>1211.214</b> | <b>1211.718</b> | 1210.710        | L[22] |
| P  | 20 | <b>1061.118</b> | 1182.682        | 1174.673        | 1175.176        | 1174.168        | P[21] |
| N  | 21 | 1118.139        | 1114.155        | <b>1106.146</b> | <b>1106.650</b> | 1105.642        | N[20] |
| I  | 22 | 1174.681        | 1057.134        | 1049.124        | 1049.628        | 1048.621        | I[19] |
| Q  | 23 | 1238.710        | <b>1000.592</b> | <b>992.582</b>  | <b>993.086</b>  | 992.079         | Q[18] |
| A  | 24 | <b>1274.229</b> | 936.563         | <b>928.553</b>  | <b>929.057</b>  | 928.049         | A[17] |
| V  | 25 | 1313.767        | 869.044         | <b>893.035</b>  | <b>893.539</b>  | <b>892.531</b>  | V[16] |
| L  | 26 | 1380.305        | 851.510         | <b>843.500</b>  | <b>844.004</b>  | 843.000         | L[15] |
| L  | 27 | 1436.847        | <b>794.968</b>  | <b>786.958</b>  | <b>787.462</b>  | <b>786.454</b>  | L[14] |
| P  | 28 | <b>1465.374</b> | <b>738.426</b>  | 730.416         | 730.920         | 729.912         | P[13] |
| K  | 29 | <b>1549.421</b> | 669.899         | 661.890         | <b>662.394</b>  | 661.386         | K[12] |
| K  | 30 | 1613.668        | <b>625.852</b>  | <b>617.842</b>  | <b>618.346</b>  | 617.338         | K[11] |
| T  | 31 | 1663.992        | 561.834         | <b>553.795</b>  | <b>554.299</b>  | <b>553.291</b>  | T[10] |
| E  | 32 | <b>1728.514</b> | 511.261         | <b>503.271</b>  | <b>503.775</b>  | <b>502.767</b>  | E[9]  |
| S  | 33 | <b>1772.030</b> | <b>446.759</b>  | <b>438.750</b>  | <b>439.254</b>  | 438.246         | S[8]  |
| H  | 34 | 1840.559        | 403.243         | <b>395.234</b>  | <b>395.738</b>  | <b>394.730</b>  | H[7]  |
| H  | 35 | 1899.089        | 334.714         | 326.704         | 327.208         | 326.200         | H[6]  |
| K  | 36 | 1973.136        | 368.184         | 280.175         | 280.679         | 279.671         | K[5]  |
| A  | 37 | 2058.655        | 202.137         | 194.127         | 194.631         | 193.624         | A[4]  |
| K  | 38 | 2072.702        | 166.618         | 158.609         | 159.113         | 158.105         | K[3]  |
| G  | 39 | 2161.211        | 102.571         | 94.561          | 95.065          | 94.057          | G[2]  |
| K  | 40 | 2185.260        | 74.060          | 66.051          | 66.555          | 65.547          | K[1]  |

# sp | Q6GSS7 | H2A2A\_MOUSE

DEELNKLLGK <sup>Dimethyl</sup> <sub>28.03</sub> VTIAQGGVLPNIQAVLLPKKTESHKAKGK

- ▶ fragmentation table for charge state 3+
- ▶ specType=etd
- ▶ score=42.48
- ▶ F104936.dat
- ▶ query=q2207\_p1
- ▶ precursor=619.505050
- ▶ chargePrecursor=7
- ▶ itol=0.8

| AA | c  | y               | z+1             | z+2             | z               | AA              |       |
|----|----|-----------------|-----------------|-----------------|-----------------|-----------------|-------|
| D  | 1  | 45.025          | 1444.171        | 1438.831        | 0.672           | 1438.495        | D[40] |
| E  | 2  | 88.039          | 1405.628        | <b>1400.489</b> | 0.672           | 1400.153        | E[39] |
| E  | 3  | 131.054         | 1362.814        | 1357.475        | 0.672           | 1357.139        | E[38] |
| L  | 4  | 188.748         | 1319.800        | 1314.460        | 0.672           | 1314.124        | L[37] |
| N  | 5  | 206.762         | 1282.105        | 1276.766        | 1277.102        | 1276.430        | N[36] |
| K  | 6  | 249.401         | 1244.091        | 1238.751        | <b>1239.087</b> | 1238.415        | K[35] |
| L  | 7  | 287.156         | 1201.393        | 1196.053        | 1196.389        | 1195.717        | L[34] |
| L  | 8  | 324.850         | 1163.099        | 1158.769        | 1158.894        | 1158.622        | L[33] |
| G  | 9  | 343.357         | 1128.003        | 1123.694        | 1121.000        | 1120.326        | G[32] |
| K  | 10 | <b>395.899</b>  | <b>1106.996</b> | 1101.656        | 1101.992        | 1101.321        | K[31] |
| V  | 11 | 438.922         | 1054.954        | 1049.614        | <b>1049.950</b> | 1049.277        | V[30] |
| T  | 12 | 482.605         | 1017.931        | <b>1016.592</b> | <b>1016.928</b> | <b>1016.256</b> | T[29] |
| L  | 13 | 500.259         | <b>988.249</b>  | <b>982.909</b>  | <b>983.245</b>  | 982.573         | L[28] |
| A  | 14 | 523.979         | 958.594         | 954.212         | <b>945.550</b>  | <b>944.878</b>  | A[27] |
| Q  | 15 | 566.695         | 920.875         | <b>921.535</b>  | <b>921.871</b>  | <b>921.199</b>  | Q[26] |
| G  | 16 | 585.672         | <b>884.189</b>  | <b>878.849</b>  | <b>879.185</b>  | <b>878.513</b>  | G[25] |
| G  | 17 | 604.679         | 865.182         | 859.842         | <b>860.178</b>  | <b>859.506</b>  | G[24] |
| V  | 18 | 637.702         | 846.174         | <b>840.835</b>  | <b>841.171</b>  | <b>840.499</b>  | V[23] |
| L  | 19 | 675.397         | <b>813.152</b>  | <b>807.812</b>  | <b>808.148</b>  | <b>807.476</b>  | L[22] |
| T  | 20 | <b>707.747</b>  | <b>775.457</b>  | 770.117         | 770.553         | 769.881         | T[21] |
| N  | 21 | 748.762         | 743.108         | <b>737.766</b>  | <b>738.102</b>  | <b>737.430</b>  | N[20] |
| I  | 22 | <b>783.456</b>  | 705.092         | <b>699.752</b>  | <b>700.088</b>  | 699.416         | I[19] |
| Q  | 23 | <b>826.143</b>  | 667.397         | <b>662.057</b>  | <b>662.393</b>  | 661.721         | Q[18] |
| A  | 24 | <b>849.822</b>  | 634.711         | 630.371         | 630.707         | 630.035         | A[17] |
| V  | 25 | <b>882.844</b>  | 603.035         | <b>595.692</b>  | <b>596.028</b>  | <b>595.356</b>  | V[16] |
| L  | 26 | 905.519         | 568.009         | <b>562.669</b>  | <b>563.005</b>  | <b>562.333</b>  | L[15] |
| L  | 27 | 958.234         | 530.314         | <b>524.975</b>  | <b>525.311</b>  | <b>524.639</b>  | L[14] |
| F  | 28 | <b>990.585</b>  | 492.620         | 487.280         | 487.616         | 486.944         | F[13] |
| K  | 29 | <b>1033.283</b> | 460.289         | 454.929         | 455.265         | 454.593         | K[12] |
| K  | 30 | 1075.981        | 429.576         | 424.236         | 424.567         | 423.895         | K[11] |
| T  | 31 | <b>1109.664</b> | 374.872         | 369.532         | 369.868         | 369.196         | T[10] |
| E  | 32 | <b>1152.678</b> | 341.188         | 335.850         | 336.186         | 335.514         | E[9]  |
| S  | 33 | <b>1181.689</b> | 298.175         | 292.836         | 293.172         | 292.500         | S[8]  |
| H  | 34 | <b>1227.375</b> | 269.185         | 263.825         | 264.161         | 263.489         | H[7]  |
| H  | 35 | 1273.063        | 223.478         | <b>218.139</b>  | <b>218.475</b>  | <b>217.803</b>  | H[6]  |
| K  | 36 | <b>1315.760</b> | 177.762         | 172.483         | 172.768         | 172.110         | K[5]  |
| A  | 37 | <b>1339.439</b> | 135.094         | 129.754         | 130.090         | 129.418         | A[4]  |
| K  | 38 | <b>1382.137</b> | 111.415         | 106.075         | 106.411         | 105.739         | K[3]  |
| G  | 39 | <b>1461.144</b> | 68.716          | 63.377          | 63.713          | 63.041          | G[2]  |
| K  | 40 | 1443.643        | 49.709          | 44.370          | 44.705          | 44.034          | K[1]  |



# sp | Q6GSS7 | H2A2A\_MOUSE

DEELNKLLGK <sup>Dimethyl</sup>VTIAQGGVLPNIQAVLLPKKTESHKAKGK <sub>28.03</sub>

- ▶ fragmentation table for charge state 4+
- ▶ specType=etd
- ▶ score=42.48
- ▶ F104936.dat
- ▶ query=q2207\_p1
- ▶ precursor=619.505050
- ▶ chargePrecursor=7
- ▶ itol=0.8

| AA | c  | y               | a=1             | a=2             | z              | AA              |       |
|----|----|-----------------|-----------------|-----------------|----------------|-----------------|-------|
| D  | 1  | 34.621          | <b>1083.380</b> | <b>1079.375</b> | 0.755          | 1079.712        | L(40) |
| E  | 2  | 66.281          | 1084.127        | <b>1050.618</b> | 0.755          | <b>1050.366</b> | L(39) |
| E  | 3  | 98.542          | 1022.362        | <b>1018.358</b> | 0.755          | 1018.100        | E(38) |
| L  | 4  | 126.813         | <b>990.102</b>  | <b>986.097</b>  | 0.755          | 985.848         | L(37) |
| N  | 5  | 155.324         | 961.831         | 957.826         | 958.076        | 957.574         | N(36) |
| K  | 6  | 187.347         | 933.320         | <b>929.315</b>  | <b>929.567</b> | <b>929.063</b>  | K(35) |
| L  | 7  | 215.618         | 901.296         | 897.292         | <b>897.544</b> | 897.040         | L(34) |
| L  | 8  | 243.889         | 873.026         | 869.021         | 869.773        | 869.769         | L(33) |
| G  | 9  | 258.145         | <b>844.754</b>  | <b>840.750</b>  | <b>841.002</b> | <b>840.498</b>  | G(32) |
| K  | 10 | 297.176         | 830.499         | <b>826.494</b>  | <b>826.746</b> | <b>826.242</b>  | K(31) |
| V  | 11 | 321.944         | 791.467         | <b>787.461</b>  | <b>787.715</b> | <b>787.211</b>  | V(30) |
| T  | 12 | 347.205         | 766.700         | <b>762.696</b>  | <b>762.947</b> | <b>762.444</b>  | T(29) |
| L  | 13 | 375.476         | 741.438         | <b>737.434</b>  | <b>737.686</b> | <b>737.182</b>  | L(28) |
| A  | 14 | 392.736         | 713.167         | <b>705.163</b>  | <b>705.415</b> | <b>705.911</b>  | A(27) |
| Q  | 15 | 425.250         | 695.408         | <b>691.403</b>  | <b>691.655</b> | <b>691.151</b>  | Q(26) |
| G  | 16 | <b>439.506</b>  | <b>663.393</b>  | 659.389         | 659.641        | 659.137         | G(25) |
| G  | 17 | 453.701         | 649.138         | <b>645.133</b>  | <b>645.385</b> | <b>644.881</b>  | G(24) |
| V  | 18 | 478.526         | 634.883         | <b>630.878</b>  | <b>631.130</b> | <b>630.626</b>  | V(23) |
| L  | 19 | 506.799         | 610.116         | <b>606.111</b>  | <b>606.363</b> | 605.859         | L(22) |
| P  | 20 | 531.062         | 581.844         | 577.840         | 578.092        | 577.588         | P(21) |
| N  | 21 | 559.575         | 557.581         | <b>553.577</b>  | <b>553.829</b> | <b>553.325</b>  | N(20) |
| I  | 22 | 587.844         | 529.071         | <b>525.066</b>  | <b>525.318</b> | <b>524.814</b>  | I(19) |
| Q  | 23 | 619.859         | 500.800         | 496.795         | 497.047        | 496.543         | Q(18) |
| A  | 24 | 637.618         | 468.785         | 464.780         | 465.032        | 464.528         | A(17) |
| V  | 25 | <b>662.385</b>  | 451.020         | <b>447.021</b>  | <b>447.273</b> | <b>446.769</b>  | V(16) |
| L  | 26 | 690.656         | 426.759         | 422.754         | 422.999        | 422.495         | L(15) |
| L  | 27 | 718.927         | 397.868         | 393.863         | 394.135        | 393.731         | L(14) |
| P  | 28 | 743.190         | 369.710         | 365.712         | 365.964        | 365.460         | P(13) |
| K  | 29 | <b>775.214</b>  | 345.453         | 341.449         | 341.701        | 341.197         | K(12) |
| K  | 30 | <b>807.238</b>  | 313.430         | 309.425         | 309.677        | 309.173         | K(11) |
| T  | 31 | <b>832.500</b>  | 281.406         | 277.401         | 277.653        | 277.149         | T(10) |
| E  | 32 | <b>864.760</b>  | 259.144         | 255.139         | 255.391        | 254.887         | E(9)  |
| S  | 33 | <b>896.518</b>  | 223.883         | 219.879         | 220.131        | 219.627         | S(8)  |
| H  | 34 | <b>920.783</b>  | 202.125         | 198.121         | 198.373        | 197.869         | H(7)  |
| H  | 35 | <b>955.046</b>  | 167.861         | 163.856         | 164.108        | 163.604         | H(6)  |
| K  | 36 | <b>987.072</b>  | 133.590         | 129.581         | 129.843        | 129.339         | K(5)  |
| A  | 37 | <b>1004.831</b> | 101.575         | 97.567          | 97.819         | 97.315          | A(4)  |
| K  | 38 | 1026.858        | 83.811          | 79.808          | 80.060         | 79.556          | K(3)  |
| G  | 39 | <b>1051.110</b> | 51.789          | 47.784          | 48.036         | 47.532          | G(2)  |
| K  | 40 | 1083.134        | 37.534          | 33.529          | 33.781         | 33.277          | K(1)  |

# sp | Q6GSS7 | H2A2A\_MOUSE

DEELNKLLGK<sup>Dimethyl</sup>VTIAQGGVLPNIQAVLLPKKTESHKAKGK<sup>28.03</sup>

- ▶ fragmentation table for charge state 5+
- ▶ specType=etd
- ▶ score=42.48
- ▶ F104936.dat
- ▶ query=q2207\_p1
- ▶ precursor=619.505050
- ▶ chargePrecursor=7
- ▶ itol=0.8

| AA    | c              | y              | z+1            | z+2            | z              | AA    |
|-------|----------------|----------------|----------------|----------------|----------------|-------|
| D[1]  | 27.418         | <b>866.905</b> | <b>863.702</b> | 0.806          | 863.900        | D[40] |
| E[2]  | 83.226         | <b>843.900</b> | <b>840.696</b> | 0.806          | 840.895        | E[39] |
| E[3]  | 79.035         | 818.093        | <b>814.889</b> | 0.806          | <b>814.686</b> | E[38] |
| L[4]  | 101.052        | 792.261        | <b>789.079</b> | 0.806          | <b>788.878</b> | L[37] |
| N[5]  | 124.460        | 769.666        | 766.462        | 766.664        | 766.261        | N[36] |
| K[6]  | 150.079        | <b>746.857</b> | 743.654        | 743.855        | 743.452        | K[35] |
| L[7]  | 172.686        | 721.238        | 718.035        | 718.236        | 717.833        | L[34] |
| L[8]  | 198.313        | 698.622        | 695.419        | 695.619        | 695.216        | L[33] |
| G[9]  | 206.717        | 676.005        | 672.801        | 673.003        | 672.600        | G[32] |
| K[10] | 237.943        | 664.601        | 661.397        | 661.598        | 661.195        | K[31] |
| V[11] | 257.756        | 633.375        | <b>630.172</b> | <b>630.373</b> | 629.970        | V[30] |
| T[12] | 277.966        | 613.965        | 610.762        | 610.963        | 610.560        | T[29] |
| I[13] | 300.583        | <b>593.352</b> | 590.149        | 590.350        | 589.947        | I[28] |
| A[14] | 314.790        | 570.735        | 567.532        | 567.733        | 567.330        | A[27] |
| Q[15] | 340.402        | 556.528        | <b>553.324</b> | <b>553.526</b> | 553.123        | Q[26] |
| G[16] | 351.806        | 530.916        | 527.712        | 527.914        | 527.511        | G[25] |
| G[17] | 363.210        | 519.512        | 516.308        | 516.510        | <b>516.107</b> | G[24] |
| V[18] | 383.024        | 508.108        | <b>504.904</b> | 505.105        | <b>504.702</b> | V[23] |
| L[19] | 405.641        | 488.294        | 485.090        | 485.292        | 484.889        | L[22] |
| P[20] | 425.051        | 468.677        | 465.473        | 465.675        | 465.272        | P[21] |
| N[21] | 447.880        | <b>446.266</b> | 443.063        | 443.264        | 442.861        | N[20] |
| L[22] | 470.477        | 423.456        | 420.254        | 420.456        | 420.053        | L[19] |
| Q[23] | 496.088        | 400.841        | 397.637        | 397.839        | 397.436        | Q[18] |
| A[24] | 510.296        | 375.228        | 372.026        | 372.227        | 371.824        | A[17] |
| V[25] | 530.110        | 361.022        | 357.819        | 358.020        | 357.617        | V[16] |
| L[26] | 552.726        | 341.208        | 338.005        | 338.206        | 337.803        | L[15] |
| L[27] | 575.343        | 318.591        | 315.388        | <b>315.589</b> | 315.186        | L[14] |
| P[28] | <b>594.754</b> | 295.975        | 292.771        | 292.972        | 292.569        | P[13] |
| K[29] | 630.373        | 276.564        | 273.360        | 273.562        | 273.159        | K[12] |
| K[30] | 685.992        | 250.945        | 247.741        | 247.943        | 247.540        | K[11] |
| V[31] | 699.204        | 229.326        | 226.123        | 226.324        | 225.921        | V[10] |
| E[32] | <b>692.010</b> | 205.117        | 201.913        | 202.114        | 201.711        | E[9]  |
| S[33] | <b>709.416</b> | 179.308        | 176.104        | 176.306        | 175.903        | S[8]  |
| H[34] | <b>736.828</b> | 161.902        | 158.699        | 158.899        | 158.496        | H[7]  |
| H[35] | <b>764.240</b> | 134.490        | 131.286        | 131.488        | 131.085        | H[6]  |
| K[36] | <b>789.859</b> | 107.078        | 103.874        | 104.076        | 103.673        | K[5]  |
| A[37] | 804.066        | 81.459         | 78.255         | 78.457         | 78.054         | A[4]  |
| K[38] | 820.685        | 67.252         | 64.048         | 64.249         | 63.846         | K[3]  |
| G[39] | <b>841.089</b> | 41.633         | 38.429         | 38.630         | 38.227         | G[2]  |
| K[40] | <b>866.708</b> | 30.228         | 27.025         | 27.226         | 26.823         | K[1]  |

# sp | Q6GSS7 | H2A2A\_MOUSE

DEELNKLLGK<sup>Dimethyl</sup>VTIAQGGVLPNIQAVLLPKKTESHKAKGK<sup>28.03</sup>

- ▶ fragmentation table for charge state 6+
- ▶ specType=etd
- ▶ score=42.48
- ▶ F104936.dat
- ▶ query=q2207\_p1
- ▶ precursor=619.505050
- ▶ chargePrecursor=7
- ▶ itol=0.8

| AA    | c              | y              | z+1            | z+2            | z              | AA    |
|-------|----------------|----------------|----------------|----------------|----------------|-------|
| D[1]  | 23.016         | <b>722.589</b> | 719.919        | 0.839          | 719.751        | D[40] |
| E[2]  | 44.523         | 703.418        | <b>700.748</b> | 0.839          | <b>700.580</b> | E[39] |
| E[3]  | 68.030         | <b>681.943</b> | 679.247        | 0.839          | 679.073        | E[38] |
| L[4]  | 84.378         | 660.404        | 657.734        | 0.839          | 657.566        | L[37] |
| N[5]  | 103.885        | 641.556        | 638.886        | 639.054        | 638.718        | N[36] |
| K[6]  | 125.234        | 622.949        | 619.879        | 620.047        | 619.711        | K[35] |
| L[7]  | 144.081        | 601.200        | 598.530        | 598.698        | 598.362        | L[34] |
| L[8]  | 162.929        | 582.933        | 579.683        | 579.851        | 579.515        | L[33] |
| G[9]  | 172.432        | <b>563.505</b> | 560.835        | 561.003        | 560.667        | G[32] |
| K[10] | 198.453        | <b>554.002</b> | 551.332        | 551.500        | 551.164        | K[31] |
| V[11] | 214.965        | 527.981        | <b>525.311</b> | <b>525.479</b> | <b>525.143</b> | V[30] |
| N[12] | 233.806        | 511.469        | 508.799        | 508.967        | 508.631        | N[29] |
| I[13] | 250.053        | 494.629        | 491.959        | 492.126        | 491.790        | I[28] |
| A[14] | <b>262.493</b> | 475.781        | 473.111        | 473.279        | 472.943        | A[27] |
| Q[15] | 283.836        | 463.941        | 461.271        | 461.439        | 461.103        | Q[26] |
| G[16] | 293.340        | 442.598        | 439.928        | 440.096        | <b>439.760</b> | G[25] |
| G[17] | 302.843        | 433.094        | 430.425        | 430.593        | 430.257        | G[24] |
| V[18] | 319.355        | 423.591        | 420.921        | 421.089        | 420.753        | V[23] |
| L[19] | 338.202        | 407.079        | 404.410        | 404.578        | 404.242        | L[22] |
| P[20] | 354.377        | 388.232        | 385.562        | 385.730        | 385.394        | P[21] |
| N[21] | 373.385        | 372.091        | 369.387        | 369.555        | 369.219        | N[20] |
| L[22] | 392.232        | 353.049        | 350.380        | 350.548        | 350.212        | L[19] |
| Q[23] | 413.575        | 334.202        | 331.532        | 331.700        | 331.364        | Q[18] |
| A[24] | 435.414        | 312.858        | 310.189        | 310.357        | 310.021        | A[17] |
| V[25] | 441.926        | 301.020        | 298.350        | 298.518        | 298.182        | V[16] |
| L[26] | 460.773        | 284.508        | 281.838        | 282.006        | 281.670        | L[15] |
| L[27] | 479.621        | 265.661        | 262.991        | 263.159        | <b>262.823</b> | L[14] |
| P[28] | 495.796        | 246.813        | 244.144        | 244.312        | 243.976        | P[13] |
| K[29] | 517.145        | 230.638        | 227.968        | 228.136        | 227.800        | K[12] |
| K[30] | 538.494        | 209.289        | 206.619        | 206.787        | 206.451        | K[11] |
| I[31] | <b>555.336</b> | <b>187.940</b> | 185.270        | 185.438        | 185.102        | I[10] |
| L[32] | 576.843        | 171.095        | 168.425        | 168.593        | 168.257        | E[9]  |
| S[33] | 591.948        | 149.591        | 146.921        | 147.089        | 146.753        | S[8]  |
| H[34] | 614.191        | 135.086        | 132.416        | 132.584        | 132.248        | H[7]  |
| H[35] | 637.034        | 112.243        | 109.573        | 109.741        | 109.405        | H[6]  |
| K[36] | 658.384        | 89.400         | 86.730         | 86.898         | 86.562         | K[5]  |
| A[37] | 670.223        | 68.050         | 65.381         | 65.549         | 65.213         | A[4]  |
| K[38] | <b>691.572</b> | 56.211         | 53.541         | 53.709         | 53.373         | K[3]  |
| G[39] | <b>701.076</b> | 34.862         | 32.192         | 32.360         | 32.024         | G[2]  |
| K[40] | <b>722.425</b> | 25.356         | 22.686         | 22.854         | 22.520         | K[1]  |



# sp | Q6GSS7 | H2A2A\_MOUSE

DEELNKLLGK <sup>Dimethyl</sup>VTIAQGGVLPNIQAVLLPKKTESHHKAKGK <sub>28.03</sub>

- ▶ fragmentation table for charge state 1+
- ▶ specType=etd
- ▶ score=95.75
- ▶ F104936.dat
- ▶ query=q2209.p1
- ▶ precursor=866.904480
- ▶ chargePrecursor=5
- ▶ itol=0.8

| AA | c  | y               | z=1             | z=2             | z               | AA              |       |
|----|----|-----------------|-----------------|-----------------|-----------------|-----------------|-------|
| D  | 1  | 133.061         | 4330.497        | 4334.479        | 0.000           | 4313.471        | D[40] |
| E  | 2  | 262.103         | 4215.470        | 4199.452        | 0.000           | 4198.444        | E[39] |
| E  | 3  | 391.146         | 6058.425        | 6070.409        | 0.000           | 6059.401        | E[38] |
| L  | 4  | 504.230         | 3957.385        | 3941.368        | 0.000           | 3940.359        | L[37] |
| N  | 5  | <b>618.273</b>  | 3844.301        | 3828.282        | 3829.260        | 3827.275        | N[36] |
| K  | 6  | <b>746.368</b>  | 8730.258        | 8744.239        | 8715.247        | 8713.237        | K[35] |
| L  | 7  | 859.452         | 3602.163        | 3586.144        | 3587.152        | 3585.137        | L[34] |
| L  | 8  | <b>972.536</b>  | 3489.079        | 3473.060        | 3474.068        | 3472.051        | L[33] |
| Q  | 9  | <b>1029.558</b> | 3375.995        | 3359.976        | 3360.984        | 3358.969        | Q[32] |
| K  | 10 | <b>1185.684</b> | 3118.074        | 3102.055        | 3103.063        | 3101.947        | K[31] |
| V  | 11 | <b>1284.752</b> | 3162.847        | 3146.828        | 3147.836        | 3145.821        | V[30] |
| T  | 12 | <b>1385.800</b> | 3053.779        | 3047.760        | 3048.768        | 3046.752        | T[29] |
| L  | 13 | 1486.884        | 2962.731        | 2946.712        | 2947.720        | 2945.705        | L[28] |
| A  | 14 | <b>1568.921</b> | 2849.647        | 2833.628        | 2834.636        | 2832.621        | A[27] |
| Q  | 15 | <b>1697.980</b> | 2778.610        | 2762.591        | 2763.599        | 2761.583        | Q[26] |
| G  | 16 | 1755.001        | 2650.552        | 2634.533        | 2635.541        | 2633.525        | G[25] |
| G  | 17 | 1812.021        | 2563.530        | 2547.511        | 2548.519        | 2546.504        | G[24] |
| V  | 18 | <b>1911.091</b> | 2535.509        | 2520.490        | 2521.498        | 2519.482        | V[23] |
| L  | 19 | 2024.175        | 2437.440        | 2421.421        | 2422.429        | 2420.414        | L[22] |
| T  | 20 | 2121.208        | 2324.355        | 2308.337        | 2309.345        | 2307.330        | T[21] |
| N  | 21 | 2218.271        | 2227.303        | 2211.285        | 2212.292        | 2210.277        | N[20] |
| I  | 22 | 2348.355        | 2113.260        | 2097.242        | 2098.250        | 2096.234        | I[19] |
| Q  | 23 | 2478.413        | 2000.175        | 1984.158        | 1985.165        | 1983.150        | Q[18] |
| A  | 24 | 2547.450        | 1872.118        | 1856.099        | 1857.107        | 1855.091        | A[17] |
| V  | 25 | 2648.519        | 1804.081        | 1788.062        | 1789.070        | 1787.054        | V[16] |
| L  | 26 | 2759.603        | 1702.012        | 1685.994        | 1687.001        | 1684.985        | L[15] |
| L  | 27 | 2872.687        | 1608.928        | 1592.909        | <b>1573.917</b> | 1571.901        | L[14] |
| P  | 28 | 2969.740        | 1475.844        | 1459.825        | 1460.833        | <b>1458.818</b> | P[13] |
| K  | 29 | 3097.815        | 1378.791        | 1362.773        | 1363.780        | 1361.765        | K[12] |
| K  | 30 | 3225.930        | <b>1250.696</b> | <b>1234.618</b> | 1235.626        | 1233.610        | K[11] |
| T  | 31 | 3328.977        | 1122.601        | <b>1106.503</b> | 1107.511        | 1105.575        | T[10] |
| E  | 32 | 3456.020        | 1021.554        | <b>1005.535</b> | 1006.543        | 1004.527        | E[9]  |
| S  | 33 | 3543.052        | <b>892.511</b>  | <b>876.492</b>  | 877.500         | 875.485         | S[8]  |
| H  | 34 | 3680.111        | 805.479         | <b>789.460</b>  | 790.468         | 788.453         | H[7]  |
| H  | 35 | 3817.170        | 698.420         | <b>682.401</b>  | <b>663.409</b>  | 661.394         | H[6]  |
| K  | 36 | 3945.266        | 633.361         | <b>615.343</b>  | <b>618.350</b>  | 614.335         | K[5]  |
| A  | 37 | 4016.302        | 483.265         | 487.248         | 488.255         | 486.240         | A[4]  |
| K  | 38 | 4144.397        | 332.229         | <b>316.211</b>  | 317.218         | 315.203         | K[3]  |
| G  | 39 | 4261.416        | 204.134         | 198.116         | 199.123         | 197.106         | G[2]  |
| K  | 40 | 4320.513        | 147.113         | 131.094         | 132.102         | 130.086         | K[1]  |

# sp | Q6GSS7 | H2A2A\_MOUSE

DEELNKLLGK <sup>Dimethyl</sup> <sub>28.03</sub> VTIAQGGVLPNIQAVLLPKKTESHKAKGK

- ▶ fragmentation table for charge state 2+
- ▶ specType=etd
- ▶ score=95.75
- ▶ F104936.dat
- ▶ query=q2209\_p1
- ▶ precursor=866.904480
- ▶ chargePrecursor=5
- ▶ itol=0.8

| AA  | c               | y              | z+1             | z+2             | z               | AA  |
|-----|-----------------|----------------|-----------------|-----------------|-----------------|-----|
| L1  | 67.034          | 2165.752       | 2157.743        | 0.504           | 2157.239        | Q40 |
| E2  | 131.955         | 2158.238       | 2150.229        | 0.504           | 2099.720        | E30 |
| E3  | 195.077         | 2043.718       | 2035.709        | 0.504           | 2035.205        | E38 |
| L4  | 252.619         | 1979.199       | 1971.187        | 0.504           | 1970.683        | L37 |
| N5  | 309.640         | 1922.654       | 1914.645        | 1915.149        | 1914.141        | N36 |
| K6  | 373.688         | 1895.633       | 1887.623        | 1888.127        | 1887.119        | K35 |
| L7  | 430.230         | 1801.585       | <b>1793.576</b> | <b>1794.080</b> | <b>1793.072</b> | L34 |
| L8  | 489.772         | 1745.043       | 1737.034        | 1737.538        | 1736.530        | L33 |
| G9  | <b>515.282</b>  | 1688.501       | <b>1680.492</b> | <b>1680.996</b> | 1679.989        | G32 |
| K10 | 591.346         | 1659.990       | 1651.981        | <b>1652.485</b> | 1651.477        | K31 |
| V11 | 642.880         | 1581.927       | <b>1573.918</b> | <b>1574.422</b> | 1573.414        | V30 |
| T12 | 693.404         | 1531.393       | <b>1524.384</b> | <b>1524.888</b> | <b>1523.880</b> | T29 |
| L13 | 749.946         | 1451.899       | <b>1473.860</b> | <b>1474.364</b> | 1473.356        | L28 |
| A14 | 788.464         | 1425.327       | <b>1417.318</b> | 1417.822        | <b>1416.814</b> | A27 |
| Q15 | <b>849.493</b>  | 1389.809       | <b>1381.799</b> | <b>1382.303</b> | <b>1381.295</b> | Q26 |
| G16 | 878.004         | 1325.779       | <b>1317.770</b> | <b>1318.274</b> | 1317.266        | G25 |
| G17 | 906.515         | 1297.269       | <b>1289.259</b> | <b>1289.763</b> | 1288.755        | G24 |
| V18 | <b>956.049</b>  | 1268.758       | 1260.749        | 1261.252        | 1260.245        | V23 |
| L19 | 1012.307        | 1219.244       | <b>1211.214</b> | <b>1211.718</b> | <b>1210.710</b> | L22 |
| P20 | <b>1061.118</b> | 1182.662       | 1154.652        | 1155.156        | 1154.149        | P21 |
| N21 | <b>1118.139</b> | 1114.155       | <b>1106.146</b> | <b>1106.650</b> | 1105.642        | N20 |
| I22 | 1174.681        | 1057.134       | 1049.124        | <b>1049.628</b> | 1048.621        | I19 |
| Q23 | <b>1238.710</b> | 1000.592       | 992.582         | 993.086         | 992.079         | Q18 |
| A24 | <b>1274.229</b> | 936.503        | <b>928.553</b>  | <b>929.057</b>  | <b>928.049</b>  | A17 |
| V25 | <b>1323.763</b> | 890.244        | <b>893.035</b>  | <b>893.539</b>  | <b>892.531</b>  | V16 |
| L26 | 1389.305        | 851.510        | <b>843.500</b>  | <b>844.004</b>  | 842.996         | L15 |
| L27 | 1436.847        | <b>794.968</b> | <b>786.958</b>  | <b>787.462</b>  | 786.454         | L14 |
| P28 | <b>1485.374</b> | 738.426        | 730.416         | 730.920         | 729.912         | P13 |
| K29 | <b>1549.421</b> | 699.899        | <b>681.890</b>  | <b>682.394</b>  | <b>681.386</b>  | K12 |
| K30 | <b>1613.468</b> | 635.852        | <b>617.842</b>  | <b>618.346</b>  | <b>617.339</b>  | K11 |
| I31 | <b>1663.992</b> | 581.804        | 553.795         | 554.299         | 553.291         | I10 |
| E32 | <b>1728.514</b> | 511.281        | 503.271         | 503.775         | 502.767         | E8  |
| S33 | 1772.030        | 446.759        | 438.750         | 439.254         | 438.246         | S10 |
| H34 | <b>1840.559</b> | 401.243        | 393.234         | 393.738         | 392.730         | H7  |
| H35 | <b>1909.089</b> | 334.714        | 326.704         | 327.208         | 326.200         | H6  |
| K36 | <b>1973.136</b> | 286.184        | 288.175         | 288.679         | 287.671         | K5  |
| A37 | 2008.655        | 202.139        | 194.129         | 194.633         | 193.625         | A4  |
| K38 | 2072.702        | 168.618        | 158.609         | 159.113         | 158.105         | K3  |
| G39 | 2101.213        | 102.571        | 94.561          | 95.065          | 94.057          | G2  |
| K40 | 2165.260        | 74.060         | 66.051          | 66.555          | 65.547          | K1  |

# sp | Q6GSS7 | H2A2A\_MOUSE

DEELNKLLGK <sup>Dimethyl</sup>VTIAQGGVLPNIQAVLLPKKTESHKAKGK <sub>28.03</sub>

- ▶ fragmentation table for charge state 3+
- ▶ specType=etd
- ▶ score=95.75
- ▶ F104936.dat
- ▶ query=q2209.p1
- ▶ precursor=866.904480
- ▶ chargePrecursor=5
- ▶ itol=0.8

| AA   | c               | y               | z=1             | z=2             | z               | AA   |
|------|-----------------|-----------------|-----------------|-----------------|-----------------|------|
| D 1  | 45.025          | <b>1444.171</b> | <b>1438.831</b> | 0.672           | <b>1438.495</b> | D 40 |
| E 2  | 68.039          | 1405.628        | <b>1400.489</b> | 0.672           | <b>1400.153</b> | E 39 |
| E 3  | 113.054         | 1362.814        | <b>1357.475</b> | 0.672           | 1357.139        | E 38 |
| L 4  | 158.748         | 1319.800        | <b>1314.460</b> | 0.672           | 1314.124        | L 37 |
| N 5  | 206.762         | 1282.105        | 1276.766        | 1277.102        | 1276.430        | N 36 |
| K 6  | 249.401         | 1244.091        | <b>1238.751</b> | <b>1239.087</b> | 1238.415        | K 35 |
| L 7  | 287.156         | 1201.393        | <b>1196.053</b> | <b>1196.389</b> | <b>1195.717</b> | L 34 |
| L 8  | 324.860         | 1163.098        | 1156.762        | 1156.894        | 1156.622        | L 33 |
| G 9  | 363.327         | 1126.003        | 1120.664        | 1121.000        | 1120.664        | G 32 |
| K 10 | 395.699         | <b>1106.996</b> | <b>1101.656</b> | <b>1101.992</b> | <b>1101.321</b> | K 31 |
| V 11 | 438.602         | <b>1054.954</b> | <b>1049.614</b> | <b>1049.950</b> | 1049.277        | V 30 |
| T 12 | 482.605         | 1021.931        | 1016.592        | 1016.928        | 1016.250        | T 29 |
| L 13 | 500.299         | 998.205         | <b>982.969</b>  | <b>983.245</b>  | <b>982.573</b>  | L 28 |
| A 14 | 523.979         | <b>950.554</b>  | <b>945.214</b>  | <b>945.550</b>  | 944.879         | A 27 |
| Q 15 | 566.695         | 916.975         | <b>921.535</b>  | <b>921.871</b>  | 921.192         | Q 26 |
| G 16 | 585.672         | 884.189         | <b>878.849</b>  | <b>879.185</b>  | <b>878.513</b>  | G 25 |
| G 17 | 604.679         | 865.182         | 859.842         | 860.178         | 859.500         | G 24 |
| V 18 | 637.702         | 846.174         | 840.835         | 841.171         | 840.499         | V 23 |
| L 19 | 678.397         | 813.152         | <b>807.812</b>  | <b>808.148</b>  | <b>807.476</b>  | L 22 |
| F 20 | 707.747         | 775.821         | 770.482         | 770.818         | 769.141         | F 21 |
| N 21 | <b>745.762</b>  | 743.106         | 737.766         | 738.102         | 737.430         | N 20 |
| I 22 | 781.456         | 705.002         | 699.662         | 700.000         | 699.411         | I 19 |
| Q 23 | 826.143         | 667.397         | 662.057         | 662.393         | 661.721         | Q 18 |
| A 24 | <b>848.822</b>  | 634.711         | 629.371         | 629.707         | 629.035         | A 17 |
| V 25 | 882.844         | 603.035         | 598.695         | 599.030         | 598.358         | V 16 |
| L 26 | 920.539         | 568.009         | 562.669         | 563.005         | 562.333         | L 15 |
| L 27 | 958.234         | 530.314         | 524.975         | 525.311         | 524.639         | L 14 |
| F 28 | 990.505         | 492.620         | 487.280         | 487.616         | 486.944         | F 13 |
| K 29 | <b>1033.283</b> | 460.289         | 454.929         | 455.265         | 454.593         | K 12 |
| K 30 | 1075.981        | 427.970         | 422.630         | 422.966         | 422.294         | K 11 |
| T 31 | <b>1109.664</b> | 374.872         | 369.532         | 369.868         | 369.196         | T 10 |
| E 32 | <b>1152.678</b> | 341.180         | 335.840         | 336.180         | 335.514         | E 9  |
| S 33 | 1181.689        | 298.175         | 292.835         | 293.172         | 292.500         | S 8  |
| H 34 | <b>1227.375</b> | 269.185         | 263.825         | 264.161         | 263.489         | H 7  |
| H 35 | 1277.063        | 223.478         | 218.138         | 218.475         | 217.803         | H 6  |
| K 36 | <b>1315.760</b> | 177.762         | 172.422         | 172.762         | 172.110         | K 5  |
| A 37 | <b>1339.439</b> | 135.094         | 129.754         | 130.090         | 129.418         | A 4  |
| K 38 | <b>1382.137</b> | 111.415         | 106.075         | 106.411         | 105.739         | K 3  |
| G 39 | <b>1461.144</b> | 68.716          | 63.377          | 63.713          | 63.041          | G 2  |
| K 40 | <b>1443.843</b> | 49.709          | 44.370          | 44.705          | 44.034          | K 1  |

# sp | Q6GSS7 | H2A2A\_MOUSE

DEELNKLLGK <sup>Dimethyl</sup> <sub>28.03</sub> VTIAQGGVLPNIQAVLLPKKTESHKAKGK

- ▶ fragmentation table for charge state 4+
- ▶ specType=etd
- ▶ score=95.75
- ▶ F104936.dat
- ▶ query=q2209\_p1
- ▶ precursor=866.904480
- ▶ chargePrecursor=5
- ▶ itol=0.8

| AA  | c               | y               | z+1             | z+2             | AA                    |
|-----|-----------------|-----------------|-----------------|-----------------|-----------------------|
| D1  | 34.621          | <b>1083.369</b> | <b>1079.375</b> | 0.755           | <b>1078.123</b> L[40] |
| E12 | 66.201          | 1054.927        | 1051.755        | <b>1050.368</b> | L[39]                 |
| E13 | 98.542          | 1022.362        | <b>1018.358</b> | 0.755           | <b>1018.106</b> E[38] |
| L14 | 126.813         | 990.102         | 986.097         | 0.755           | 985.845 L[37]         |
| N15 | 155.324         | 961.831         | 957.826         | 958.076         | 957.574 N[36]         |
| K16 | 187.347         | 933.320         | <b>929.315</b>  | <b>929.567</b>  | <b>929.063</b> K[35]  |
| L17 | 215.818         | 901.296         | 897.292         | 897.544         | 897.040 L[34]         |
| L18 | 243.889         | 873.025         | 869.021         | 869.273         | 868.769 L[33]         |
| G19 | 258.145         | 844.754         | 840.750         | 841.002         | 840.495 G[32]         |
| K10 | 297.176         | 830.490         | 826.484         | 826.746         | 826.242 K[31]         |
| V11 | 321.944         | 791.467         | <b>787.463</b>  | <b>787.715</b>  | <b>787.211</b> V[30]  |
| T12 | 347.205         | 766.700         | 762.696         | 762.947         | 762.444 T[29]         |
| L13 | 375.476         | 741.438         | 737.434         | 737.686         | 737.182 L[28]         |
| A14 | 399.236         | 713.167         | 709.163         | 709.415         | 708.911 A[27]         |
| Q15 | 425.290         | 695.408         | 691.403         | 691.655         | 691.151 Q[26]         |
| G16 | 439.506         | 663.381         | 659.389         | 659.641         | 659.133 G[25]         |
| G17 | 453.761         | 649.138         | 645.133         | 645.385         | 644.881 G[24]         |
| V18 | 478.526         | 634.883         | 630.878         | 631.130         | 630.626 V[23]         |
| L19 | 506.799         | 610.116         | 606.111         | 606.363         | 605.859 L[22]         |
| P20 | 531.062         | 581.844         | 577.840         | 578.092         | 577.588 P[21]         |
| N21 | 559.573         | 557.581         | 553.577         | 553.829         | 553.325 N[20]         |
| I22 | 587.844         | 529.071         | 525.066         | 525.318         | 524.814 I[19]         |
| Q23 | 619.859         | 500.800         | 496.795         | 497.047         | 496.543 Q[18]         |
| A24 | 637.618         | 468.785         | 464.780         | 465.032         | 464.528 A[17]         |
| V25 | 662.385         | 451.020         | 447.021         | 447.273         | 446.769 V[16]         |
| L26 | 689.656         | 426.759         | 422.754         | 422.999         | 422.495 L[15]         |
| L27 | 718.927         | 397.985         | 393.983         | 394.235         | 393.731 L[14]         |
| F28 | 743.190         | 369.716         | 365.712         | 365.964         | 365.460 F[13]         |
| K29 | 775.214         | 345.453         | 341.449         | 341.701         | 341.197 K[12]         |
| K30 | <b>807.238</b>  | 313.430         | 309.425         | 309.677         | 309.173 K[11]         |
| T31 | 832.500         | 281.400         | 277.401         | 277.653         | 277.149 T[10]         |
| E32 | 854.768         | 256.144         | 252.139         | 252.391         | 251.887 E[9]          |
| S33 | 886.518         | 223.883         | 219.879         | 220.131         | 219.627 S[8]          |
| H34 | 920.783         | 202.125         | 198.121         | 198.373         | 197.869 H[7]          |
| H35 | 955.046         | 167.861         | 163.856         | 164.108         | 163.604 H[6]          |
| K36 | <b>987.072</b>  | 133.590         | 129.591         | 129.843         | 129.339 K[5]          |
| A37 | <b>1064.831</b> | 101.373         | 97.367          | 97.619          | 97.115 A[4]           |
| K38 | <b>1036.855</b> | 83.811          | 79.808          | 80.060          | 79.556 K[3]           |
| G39 | <b>1051.110</b> | 51.789          | 47.784          | 48.036          | 47.532 G[2]           |
| K40 | <b>1083.134</b> | 37.534          | 33.529          | 33.781          | 33.277 K[1]           |





# sp | Q6GSS7 | H2A2A\_MOUSE

DEELNKLLGK <sup>Dimethyl</sup>VTIAQGGVLPNIQAVLLPKKTESHKAKGK <sub>28.03</sub>

- ▶ fragmentation table for charge state 1+
- ▶ specType=etd
- ▶ score=71.51
- ▶ F104936.dat
- ▶ query=q2213\_p1
- ▶ precursor=1083.379900
- ▶ chargePrecursor=4
- ▶ itol=0.8

| AA  | c               | y        | z=1             | z=2             | z        | AA   |
|-----|-----------------|----------|-----------------|-----------------|----------|------|
| D1  | 133.083         | 4330.497 | 4314.479        | 0.000           | 4313.471 | D140 |
| E12 | 282.103         | 4215.470 | 4199.452        | 0.000           | 4198.444 | E130 |
| E13 | 391.146         | 4086.428 | 4070.409        | 0.000           | 4069.401 | E138 |
| L14 | 594.230         | 3957.385 | 3941.366        | 0.000           | 3940.359 | L137 |
| N15 | 618.273         | 3844.301 | 3828.282        | 3829.290        | 3827.273 | N136 |
| K16 | <b>746.368</b>  | 3730.259 | 3714.239        | 3715.247        | 3713.231 | K135 |
| L17 | 859.452         | 3602.163 | 3586.144        | 3587.152        | 3585.131 | L134 |
| L18 | 974.538         | 3469.079 | 3453.060        | 3454.068        | 3452.051 | L133 |
| G19 | 1029.558        | 3375.095 | 3359.076        | 3360.084        | 3358.069 | G132 |
| K10 | 1185.684        | 3318.974 | 3302.955        | 3303.963        | 3301.947 | K131 |
| V11 | 1284.752        | 3162.847 | 3146.829        | 3147.836        | 3145.821 | V130 |
| T12 | 1385.800        | 3063.779 | 3047.760        | 3048.768        | 3046.752 | T129 |
| I13 | <b>1498.884</b> | 2962.731 | 2946.713        | 2947.720        | 2945.705 | I128 |
| A14 | <b>1569.921</b> | 2861.684 | 2845.665        | 2846.673        | 2844.657 | A127 |
| Q15 | 1697.980        | 2778.610 | 2762.591        | 2763.599        | 2761.584 | Q126 |
| G16 | 1755.001        | 2650.562 | 2634.543        | 2635.541        | 2633.525 | G125 |
| G17 | 1812.023        | 2593.530 | 2577.511        | 2578.519        | 2576.504 | G124 |
| V18 | 1911.091        | 2536.509 | 2520.490        | 2521.498        | 2519.482 | V123 |
| L19 | 2024.175        | 2437.440 | 2421.421        | 2422.429        | 2420.414 | L122 |
| T20 | 2117.228        | 2324.395 | 2308.377        | 2309.385        | 2307.370 | T121 |
| N21 | 2235.271        | 2227.363 | 2211.345        | 2212.352        | 2210.337 | N120 |
| I22 | 2348.355        | 2113.300 | 2097.282        | 2098.290        | 2096.274 | I119 |
| Q23 | 2476.413        | 2000.176 | 1984.158        | 1985.165        | 1983.150 | Q118 |
| A24 | 2547.450        | 1872.118 | 1856.099        | 1857.107        | 1855.091 | A117 |
| V25 | 2646.519        | 1801.081 | 1785.062        | 1786.070        | 1784.054 | V116 |
| L26 | 2759.603        | 1702.012 | 1686.004        | 1687.001        | 1684.989 | L115 |
| L27 | 2872.687        | 1598.935 | <b>1572.909</b> | 1573.917        | 1571.902 | L114 |
| P28 | 2969.740        | 1475.844 | 1459.825        | 1460.833        | 1458.818 | P113 |
| K29 | 3097.835        | 1378.791 | 1362.773        | 1363.780        | 1361.765 | K112 |
| K30 | 3225.930        | 1250.696 | <b>1234.678</b> | 1235.685        | 1233.670 | K111 |
| T31 | 3326.977        | 1122.601 | 1106.583        | <b>1107.591</b> | 1105.575 | T110 |
| E32 | 3459.030        | 1011.544 | 1005.525        | 1006.543        | 1004.521 | E109 |
| S33 | 3543.052        | 892.511  | 876.492         | 877.500         | 875.485  | S108 |
| H34 | 3680.111        | 805.479  | <b>789.460</b>  | <b>790.468</b>  | 788.453  | H107 |
| H35 | 3817.170        | 668.420  | 652.401         | 653.409         | 651.394  | H106 |
| K36 | 3945.205        | 531.301  | <b>515.343</b>  | <b>516.350</b>  | 514.335  | K105 |
| A37 | 4016.302        | 403.266  | 387.248         | 388.255         | 386.240  | A104 |
| K38 | 4144.397        | 332.229  | 316.211         | 317.218         | 315.203  | K103 |
| G39 | 4201.418        | 204.134  | 188.116         | 189.123         | 187.105  | G102 |
| K40 | 4329.513        | 147.113  | 131.094         | 132.102         | 130.086  | K101 |

# sp | Q6GSS7 | H2A2A\_MOUSE

DEELNKLLGK<sup>Dimethyl</sup><sub>28.03</sub>VTIAQGGVLPNIQAVLLPKKTESHKAKGK

- ▶ fragmentation table for charge state 2+
- ▶ specType=etd
- ▶ score=71.51
- ▶ F104936.dat
- ▶ query=q2213\_p1
- ▶ precursor=1083.379900
- ▶ chargePrecursor=4
- ▶ itol=0.8

| AA  | c               | y        | z+1             | z+2             | z               | AA   |
|-----|-----------------|----------|-----------------|-----------------|-----------------|------|
| L1  | 67.034          | 2165.752 | 2157.743        | 0.504           | 2157.239        | Q40  |
| E12 | 131.955         | 2158.238 | 2150.229        | 0.504           | 2099.720        | E390 |
| E13 | 195.077         | 2043.718 | 2035.709        | 0.504           | 2035.205        | E130 |
| L14 | 252.619         | 1976.190 | 1971.187        | 0.504           | 1970.683        | L137 |
| N15 | 309.640         | 1922.654 | 1914.645        | 1915.149        | 1914.141        | N130 |
| K16 | 373.688         | 1895.633 | <b>1857.623</b> | <b>1858.127</b> | 1857.119        | K135 |
| L17 | 430.230         | 1801.585 | <b>1793.576</b> | <b>1794.080</b> | 1793.072        | L134 |
| L18 | 489.772         | 1745.043 | <b>1737.034</b> | <b>1737.538</b> | <b>1736.530</b> | L133 |
| G19 | <b>515.282</b>  | 1688.501 | 1680.492        | 1680.996        | 1679.989        | G132 |
| K10 | 591.348         | 1659.990 | 1651.981        | 1652.485        | 1651.477        | K131 |
| V11 | 642.880         | 1581.627 | 1573.618        | 1574.422        | <b>1573.414</b> | V130 |
| T12 | 693.404         | 1512.303 | 1524.384        | 1524.888        | 1523.880        | T129 |
| L13 | 749.946         | 1451.899 | 1473.880        | 1474.384        | 1473.255        | L128 |
| A14 | 785.464         | 1425.327 | <b>1417.318</b> | <b>1417.822</b> | <b>1416.814</b> | A127 |
| Q15 | 849.493         | 1389.809 | <b>1381.799</b> | <b>1382.303</b> | <b>1381.295</b> | Q126 |
| G16 | 878.004         | 1325.779 | <b>1317.770</b> | <b>1318.274</b> | 1317.266        | G125 |
| G17 | 906.515         | 1297.269 | <b>1289.259</b> | <b>1289.763</b> | <b>1288.755</b> | G124 |
| V18 | 956.049         | 1268.758 | 1260.749        | <b>1261.252</b> | 1260.245        | V123 |
| L19 | 1012.591        | 1219.244 | <b>1211.234</b> | <b>1211.738</b> | <b>1210.730</b> | L122 |
| P20 | 1061.118        | 1162.662 | 1154.653        | 1155.157        | 1154.160        | P121 |
| N21 | 1118.139        | 1114.155 | 1106.146        | 1106.650        | 1105.642        | N120 |
| I22 | 1174.681        | 1057.134 | 1049.124        | <b>1049.628</b> | 1048.621        | I119 |
| Q23 | <b>1238.710</b> | 1000.592 | 992.582         | 993.086         | 992.079         | Q118 |
| A14 | 1274.229        | 936.563  | <b>928.553</b>  | 929.057         | <b>928.049</b>  | A117 |
| V15 | <b>1323.763</b> | 891.044  | 883.035         | 883.539         | 882.531         | V116 |
| L16 | <b>1380.305</b> | 851.510  | 843.500         | 844.004         | 843.006         | L115 |
| L17 | 1436.847        | 794.968  | 786.958         | 787.462         | 786.454         | L114 |
| P18 | <b>1485.374</b> | 738.426  | 730.416         | 730.920         | 729.912         | P113 |
| K19 | <b>1549.421</b> | 699.899  | 681.890         | 682.394         | 681.386         | K112 |
| K30 | <b>1613.468</b> | 625.852  | 617.842         | 618.346         | 617.339         | K111 |
| T11 | <b>1663.992</b> | 581.804  | 573.794         | 574.298         | 573.291         | T110 |
| E12 | <b>1728.514</b> | 511.281  | 503.271         | 503.775         | 502.767         | E109 |
| S13 | <b>1772.030</b> | 446.759  | 438.750         | 439.254         | 438.246         | S108 |
| H14 | <b>1840.559</b> | 401.243  | 393.234         | 393.738         | 392.730         | H107 |
| H15 | 1909.089        | 334.714  | 326.704         | 327.208         | 326.200         | H106 |
| K16 | <b>1973.136</b> | 286.184  | 278.175         | 278.679         | 277.671         | K105 |
| A17 | 2009.655        | 202.139  | 194.129         | 194.633         | 193.625         | A104 |
| K18 | 2072.702        | 168.618  | 158.609         | 159.113         | 158.105         | K103 |
| G19 | 2101.213        | 102.571  | 94.561          | 95.065          | 94.057          | G102 |
| K40 | 2165.260        | 74.060   | 66.051          | 66.555          | 65.547          | K101 |

# sp | Q6GSS7 | H2A2A\_MOUSE

DEELNKLLGK<sup>Dimethyl</sup>VTIAQGGVLPNIQAVLLPKKTESHKAKGK<sup>28.03</sup>

- ▶ fragmentation table for charge state 3+
- ▶ specType=etd
- ▶ score=71.51
- ▶ F104936.dat
- ▶ query=q2213.p1
- ▶ precursor=1083.379900
- ▶ chargePrecursor=4
- ▶ itol=0.8

| AA | c  | y               | z=1             | z=2             | z               | AA              |       |
|----|----|-----------------|-----------------|-----------------|-----------------|-----------------|-------|
| D  | 1  | 45.025          | <b>1444.171</b> | 1438.831        | 0.672           | 1439.495        | D[40] |
| E  | 2  | 68.039          | 1405.228        | <b>1408.489</b> | 0.672           | <b>1408.153</b> | E[39] |
| E  | 3  | 113.654         | 1362.814        | 1357.475        | 0.672           | 1357.139        | E[38] |
| L  | 4  | 158.748         | 1319.800        | <b>1314.460</b> | 0.672           | <b>1314.124</b> | L[37] |
| N  | 5  | 206.762         | 1282.105        | 1276.766        | 1277.102        | 1276.430        | N[36] |
| K  | 6  | 249.401         | 1244.091        | <b>1238.751</b> | <b>1239.087</b> | <b>1238.415</b> | K[35] |
| L  | 7  | 287.156         | 1201.393        | 1196.053        | 1196.389        | 1195.717        | L[34] |
| L  | 8  | 324.869         | 1163.099        | 1158.768        | 1158.894        | 1158.622        | L[33] |
| G  | 9  | 343.957         | 1128.003        | 1120.694        | 1121.008        | 1120.520        | G[32] |
| K  | 10 | 395.899         | <b>1106.996</b> | 1101.656        | 1101.992        | 1101.321        | K[31] |
| V  | 11 | 438.922         | 1054.954        | <b>1049.614</b> | <b>1049.950</b> | <b>1049.278</b> | V[30] |
| T  | 12 | 482.605         | 1021.931        | 1016.592        | 1016.928        | 1016.250        | T[29] |
| L  | 13 | 500.299         | 988.249         | 982.909         | 983.246         | 982.573         | L[28] |
| A  | 14 | 523.979         | 950.554         | 945.214         | 945.550         | 944.877         | A[27] |
| Q  | 15 | 566.695         | 926.875         | 921.535         | 921.871         | 921.199         | Q[26] |
| G  | 16 | 585.672         | 884.189         | 878.849         | 879.185         | 878.513         | G[25] |
| G  | 17 | 604.679         | 845.182         | 839.842         | 840.178         | 839.500         | G[24] |
| V  | 18 | 637.702         | 846.174         | 840.835         | 841.171         | 840.499         | V[23] |
| L  | 19 | 678.397         | 813.152         | 807.812         | 808.148         | 807.471         | L[22] |
| F  | 20 | 707.747         | 775.821         | 770.481         | 770.817         | 769.761         | F[21] |
| N  | 21 | <b>745.762</b>  | 743.106         | 737.766         | 738.102         | 737.430         | N[20] |
| I  | 22 | 781.456         | 705.002         | 699.662         | 700.000         | 699.411         | I[19] |
| Q  | 23 | 826.143         | 667.397         | 662.057         | 662.393         | 661.721         | Q[18] |
| A  | 24 | 849.827         | 624.711         | 619.371         | 619.707         | 619.035         | A[17] |
| V  | 25 | 882.844         | 603.035         | 597.695         | 598.030         | 597.358         | V[16] |
| L  | 26 | 920.539         | 568.009         | 562.669         | 563.005         | 562.333         | L[15] |
| L  | 27 | 958.234         | <b>530.314</b>  | 524.975         | 525.311         | 524.639         | L[14] |
| F  | 28 | 990.505         | 492.620         | 487.280         | 487.616         | 486.944         | F[13] |
| K  | 29 | 1033.283        | 460.289         | 454.929         | 455.265         | 454.593         | K[12] |
| K  | 30 | 1075.983        | 427.970         | 422.630         | 422.967         | 422.295         | K[11] |
| T  | 31 | 1109.664        | 374.872         | 369.532         | 369.868         | 369.190         | T[10] |
| E  | 32 | 1152.678        | 341.188         | 335.850         | 336.186         | 335.514         | E[9]  |
| S  | 33 | 1181.689        | 298.175         | 292.836         | 293.172         | 292.500         | S[8]  |
| H  | 34 | 1227.375        | 269.185         | 263.825         | 264.161         | 263.489         | H[7]  |
| H  | 35 | 1273.061        | 223.478         | 218.139         | 218.475         | 217.803         | H[6]  |
| K  | 36 | 1318.798        | 177.762         | 172.423         | 172.758         | 172.110         | K[5]  |
| A  | 37 | 1339.439        | 135.094         | 129.754         | 130.090         | 129.411         | A[4]  |
| K  | 38 | <b>1382.137</b> | 111.415         | 106.075         | 106.411         | 105.739         | K[3]  |
| G  | 39 | <b>1461.144</b> | 68.716          | 63.377          | 63.713          | 63.041          | G[2]  |
| K  | 40 | 1443.843        | 49.709          | 44.370          | 44.705          | 44.034          | K[1]  |

# sp | Q6GSS7 | H2A2A\_MOUSE

DEELNKLLGKVTIAQGGVLPNIQAVLLPKKTESHHKAKGK (Acetyl)  
(42.01)

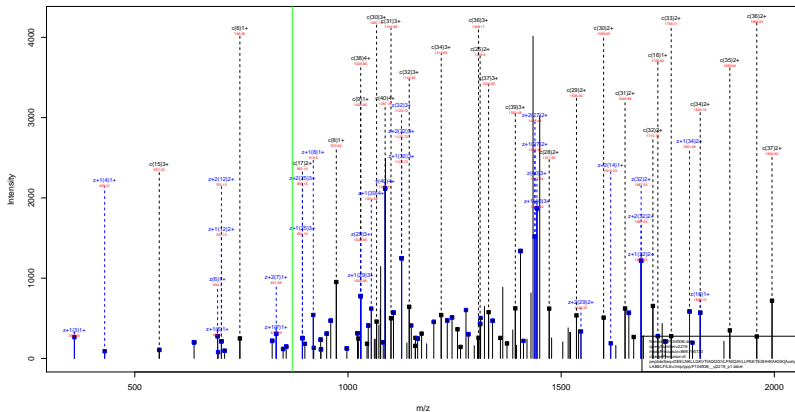

# sp | Q6GSS7 | H2A2A\_MOUSE

DEELNKLLGKVTIAQGGVLPNIQAVLLPKKTESHHKAKGK (Acetyl)  
(42.01)

- ▶ fragmentation table for charge state 1+
- ▶ specType=etd
- ▶ score=63.33
- ▶ F104936.dat
- ▶ query=q2219\_p1
- ▶ precursor=869.705730
- ▶ chargePrecursor=5
- ▶ itol=0.8

| AA | c  | y               | z=1             | z=2             | z               | AA              |       |
|----|----|-----------------|-----------------|-----------------|-----------------|-----------------|-------|
| D  | 1  | 131.001         | 4344.477        | 4328.458        | 0.000           | 4327.450        | D(40) |
| E  | 2  | 262.103         | 4329.450        | 4213.431        | 0.000           | 4212.423        | E(39) |
| E  | 3  | 393.146         | 4304.407        | 4084.388        | 0.000           | 4083.380        | E(38) |
| L  | 4  | 524.230         | 3971.364        | 3955.345        | 0.000           | 3954.337        | L(17) |
| N  | 5  | 618.273         | 3958.260        | 3842.242        | 3843.269        | 3841.254        | N(36) |
| K  | 6  | <b>746.368</b>  | 3744.237        | 3728.219        | 3729.227        | 3727.211        | K(35) |
| L  | 7  | 899.452         | 3818.142        | 3800.124        | 3801.132        | 3800.116        | L(34) |
| L  | 8  | <b>972.536</b>  | 3503.058        | 3487.040        | 3488.048        | 3488.032        | L(33) |
| G  | 9  | <b>1029.556</b> | 3399.974        | 3379.956        | 3374.963        | 3372.946        | G(25) |
| K  | 10 | <b>1157.652</b> | 3332.953        | 3318.934        | 3317.942        | 3315.926        | K(31) |
| V  | 11 | <b>1256.721</b> | 3204.858        | 3188.839        | 3189.847        | 3187.831        | V(30) |
| T  | 12 | <b>1357.769</b> | 3105.790        | 3089.771        | 3090.779        | 3088.763        | T(29) |
| L  | 13 | 1470.853        | 3004.742        | 2988.723        | 2989.731        | 2987.715        | L(28) |
| A  | 14 | 1543.894        | 2894.698        | 2875.679        | 2876.687        | 2874.671        | A(27) |
| A  | 15 | <b>1609.948</b> | 2820.621        | 2804.602        | 2805.610        | 2803.594        | A(26) |
| G  | 16 | <b>1726.970</b> | 2692.562        | 2676.543        | 2677.551        | 2675.535        | G(25) |
| G  | 17 | 1783.991        | 2635.541        | 2619.522        | 2620.530        | 2618.514        | G(24) |
| V  | 18 | 1883.080        | 2578.519        | 2562.500        | 2563.508        | 2561.493        | V(23) |
| L  | 19 | 1996.144        | 2479.451        | 2463.432        | 2464.440        | 2462.424        | L(22) |
| F  | 20 | 2033.168        | 2368.397        | 2352.378        | 2353.386        | 2351.369        | F(21) |
| N  | 21 | 2207.239        | 2289.314        | 2273.295        | 2274.303        | 2272.287        | N(20) |
| I  | 22 | 2330.323        | 2155.271        | 2139.252        | 2140.260        | 2138.244        | I(19) |
| Q  | 23 | 2448.392        | 2042.181        | 2026.168        | 2027.176        | 2025.160        | Q(18) |
| A  | 24 | 2518.419        | 1914.129        | 1898.110        | 1899.117        | 1897.102        | A(17) |
| V  | 25 | 2614.468        | 1791.091        | 1782.073        | 1783.080        | <b>1826.065</b> | V(16) |
| L  | 26 | 2731.572        | <b>1744.023</b> | 1728.004        | 1729.012        | <b>1726.996</b> | L(15) |
| L  | 27 | 2844.656        | 1630.938        | 1614.920        | <b>1615.928</b> | 1613.912        | L(14) |
| F  | 28 | 2941.708        | 1517.855        | 1501.836        | 1502.844        | 1500.828        | F(13) |
| K  | 29 | 3099.803        | 1420.802        | <b>1404.783</b> | 1405.791        | 1403.775        | K(12) |
| K  | 30 | 3197.898        | 1292.707        | <b>1276.688</b> | 1277.696        | 1275.680        | K(11) |
| T  | 31 | 3298.946        | 1184.612        | <b>1148.593</b> | 1149.601        | 1147.585        | T(10) |
| E  | 32 | 3427.989        | 1083.564        | <b>1047.546</b> | 1048.553        | 1046.537        | E(9)  |
| S  | 33 | 3535.021        | 934.522         | <b>918.503</b>  | <b>919.511</b>  | 917.495         | S(8)  |
| H  | 34 | 3652.080        | <b>847.490</b>  | <b>831.471</b>  | <b>832.479</b>  | 830.463         | H(7)  |
| H  | 35 | 3789.139        | <b>710.431</b>  | <b>694.412</b>  | <b>695.420</b>  | <b>693.404</b>  | H(6)  |
| K  | 36 | 3817.233        | 678.372         | <b>557.353</b>  | 558.361         | 556.345         | K(5)  |
| A  | 37 | 3958.274        | 645.271         | <b>429.208</b>  | 430.216         | 428.200         | A(4)  |
| K  | 38 | 4118.366        | 374.240         | <b>358.221</b>  | 359.229         | 357.213         | K(3)  |
| G  | 39 | 4173.397        | 246.145         | 246.138         | 247.144         | 246.131         | G(2)  |
| K  | 40 | 4343.493        | 189.123         | 173.105         | 174.112         | 172.097         | K(1)  |

# sp | Q6GSS7 | H2A2A\_MOUSE

DEELNKLLGKVTIAQGGVLPNIQAVLLPKKTESHHKAKGK (Acetyl)  
(42.01)

- ▶ fragmentation table for charge state 2+
- ▶ specType=etd
- ▶ score=63.33
- ▶ F104936.dat
- ▶ query=q2219\_p1
- ▶ precursor=869.705730
- ▶ chargePrecursor=5
- ▶ itol=0.8

| AA | c  | y               | z=1             | z=2             | z               | AA              |       |
|----|----|-----------------|-----------------|-----------------|-----------------|-----------------|-------|
| D  | 1  | 87.634          | 2172.742        | 2164.733        | 0.504           | 2164.250        | D(40) |
| E  | 2  | 131.555         | 2115.229        | 2107.219        | 0.504           | 2108.715        | E(39) |
| E  | 3  | 189.277         | 2050.707        | 2042.698        | 0.504           | 2042.194        | E(38) |
| L  | 4  | 252.619         | 1986.186        | 1978.176        | 0.504           | 1977.671        | L(17) |
| N  | 5  | 309.640         | 1929.644        | 1921.634        | 1922.136        | 1921.131        | N(36) |
| K  | 6  | 373.688         | 1872.622        | 1864.613        | 1865.117        | 1864.109        | K(35) |
| L  | 7  | 430.230         | <b>1808.575</b> | <b>1800.566</b> | <b>1801.069</b> | 1800.067        | L(34) |
| L  | 8  | 486.772         | 1752.011        | <b>1744.023</b> | <b>1744.527</b> | <b>1743.520</b> | L(33) |
| G  | 9  | 545.282         | 1695.491        | <b>1687.401</b> | <b>1687.905</b> | <b>1686.978</b> | G(25) |
| K  | 10 | 579.330         | 1666.980        | <b>1658.971</b> | <b>1659.475</b> | <b>1658.467</b> | K(31) |
| V  | 11 | 638.884         | 1602.933        | 1594.923        | 1595.427        | 1594.419        | V(30) |
| T  | 12 | 679.358         | 1553.368        | 1545.359        | <b>1545.893</b> | 1544.885        | T(29) |
| L  | 13 | 735.910         | 1502.875        | 1494.865        | 1495.369        | 1494.361        | L(28) |
| A  | 14 | 771.449         | 1446.313        | <b>1438.323</b> | <b>1438.827</b> | <b>1437.819</b> | A(27) |
| A  | 15 | 818.478         | <b>1410.814</b> | 1402.804        | 1403.308        | 1402.300        | A(26) |
| G  | 16 | 861.989         | 1346.785        | <b>1338.775</b> | <b>1339.279</b> | 1338.271        | G(25) |
| G  | 17 | <b>892.499</b>  | 1318.274        | <b>1310.265</b> | <b>1310.768</b> | <b>1309.761</b> | G(24) |
| V  | 18 | 942.033         | 1289.763        | <b>1281.754</b> | <b>1282.258</b> | 1281.250        | V(23) |
| L  | 19 | 992.575         | 1240.259        | <b>1232.250</b> | <b>1232.754</b> | 1231.746        | L(22) |
| F  | 20 | <b>1047.102</b> | 1183.697        | 1175.687        | 1176.192        | 1175.174        | F(21) |
| N  | 21 | 1104.132        | 1135.181        | 1127.151        | 1127.655        | 1126.647        | N(20) |
| I  | 22 | 1160.665        | 1078.139        | 1070.130        | 1070.634        | 1069.626        | I(19) |
| Q  | 23 | 1224.695        | <b>1021.597</b> | 1013.588        | 1014.092        | 1013.084        | Q(18) |
| A  | 24 | 1280.213        | 957.568         | <b>949.558</b>  | <b>950.062</b>  | 949.055         | A(17) |
| V  | 25 | <b>1309.747</b> | 922.049         | 914.040         | 914.544         | 913.536         | V(16) |
| L  | 26 | 1375.289        | 872.515         | 864.506         | 865.010         | 864.002         | L(15) |
| L  | 27 | 1422.811        | 815.973         | 807.964         | 808.468         | 807.460         | L(14) |
| F  | 28 | <b>1471.358</b> | 759.431         | 751.422         | 751.926         | 750.918         | F(13) |
| K  | 29 | <b>1535.405</b> | <b>710.905</b>  | <b>702.895</b>  | <b>703.399</b>  | <b>702.391</b>  | K(12) |
| K  | 30 | <b>1599.453</b> | 648.957         | <b>638.848</b>  | <b>639.352</b>  | <b>638.344</b>  | K(11) |
| T  | 31 | <b>1649.917</b> | 589.816         | 581.807         | 582.311         | 581.303         | T(10) |
| E  | 32 | <b>1714.498</b> | 532.285         | 524.276         | 524.780         | 523.772         | E(9)  |
| S  | 33 | <b>1758.014</b> | 467.795         | 459.785         | 460.289         | 459.251         | S(8)  |
| H  | 34 | <b>1826.543</b> | 424.248         | 416.239         | 416.743         | 415.735         | H(7)  |
| H  | 35 | <b>1895.073</b> | 355.719         | 347.710         | 348.214         | 347.206         | H(6)  |
| K  | 36 | <b>1959.120</b> | 289.180         | 281.170         | 281.674         | 280.670         | K(5)  |
| A  | 37 | <b>1994.139</b> | 223.142         | 215.133         | 215.637         | 214.630         | A(4)  |
| K  | 38 | 2058.686        | 187.624         | 179.614         | 180.118         | 179.110         | K(3)  |
| G  | 39 | 2087.197        | 123.576         | 115.567         | 116.071         | 115.065         | G(2)  |
| K  | 40 | 2172.250        | 95.065          | 87.056          | 87.560          | 86.552          | K(1)  |

# sp | Q6GSS7 | H2A2A\_MOUSE

DEELNKLLGKVTIAQGGVLPNIQAVLLPKKTESHHKAKGK (Acetyl)  
(42.01)

- ▶ fragmentation table for charge state 3+
- ▶ specType=etd
- ▶ score=63.33
- ▶ F104936.dat
- ▶ query=q2219\_p1
- ▶ precursor=869.705730
- ▶ chargePrecursor=5
- ▶ itol=0.8

| AA   | c               | y              | z+1             | z+2             | z               | AA   |
|------|-----------------|----------------|-----------------|-----------------|-----------------|------|
| D 1  | 45.025          | 1448.830       | <b>1443.491</b> | 0.672           | <b>1443.155</b> | D 40 |
| E 2  | 88.039          | 1410.488       | <b>1405.148</b> | 0.672           | <b>1404.813</b> | E 39 |
| E 3  | 131.054         | 1389.474       | 1384.134        | 0.672           | 1383.798        | E 38 |
| L 4  | 168.748         | 1324.460       | 1319.120        | 0.672           | 1318.784        | L 37 |
| N 5  | 206.762         | 1288.765       | 1283.425        | <b>1281.761</b> | 1281.089        | N 36 |
| K 6  | 269.461         | 1246.751       | <b>1243.411</b> | <b>1243.747</b> | 1243.075        | K 35 |
| L 7  | 287.156         | 1206.052       | <b>1200.713</b> | <b>1201.049</b> | 1200.377        | L 34 |
| L 8  | 324.850         | 1188.758       | <b>1183.018</b> | <b>1183.354</b> | 1182.682        | L 33 |
| G 9  | 343.957         | 1130.063       | <b>1125.323</b> | <b>1125.659</b> | 1124.987        | G 32 |
| K 10 | 386.556         | 1111.050       | <b>1106.316</b> | <b>1106.652</b> | 1105.980        | K 31 |
| V 11 | 419.578         | 1068.957       | 1063.619        | 1063.954        | 1063.282        | V 30 |
| T 12 | 453.201         | 1035.935       | <b>1030.595</b> | 1030.931        | <b>1030.259</b> | T 29 |
| T 13 | 490.956         | 1002.252       | <b>996.913</b>  | <b>997.248</b>  | 996.577         | T 28 |
| A 14 | 514.835         | 984.592        | <b>959.218</b>  | <b>959.554</b>  | <b>958.882</b>  | A 27 |
| Q 15 | <b>557.321</b>  | 960.910        | <b>935.530</b>  | <b>935.875</b>  | <b>935.203</b>  | Q 26 |
| G 16 | 578.328         | <b>898.192</b> | <b>892.853</b>  | <b>893.189</b>  | <b>892.517</b>  | G 25 |
| G 17 | 595.335         | 879.185        | 873.845         | 874.181         | 873.510         | G 24 |
| V 18 | 628.358         | 860.178        | <b>854.838</b>  | <b>855.174</b>  | <b>854.502</b>  | V 23 |
| L 19 | 666.051         | 827.155        | <b>821.816</b>  | <b>822.151</b>  | <b>821.480</b>  | L 22 |
| T 20 | 698.404         | 799.460        | 794.121         | 794.457         | 793.785         | T 21 |
| N 21 | 738.418         | 757.109        | 751.770         | 752.106         | 751.434         | N 20 |
| I 22 | 774.113         | 719.095        | 713.756         | 714.092         | 713.420         | I 19 |
| Q 23 | 816.799         | 681.400        | 676.061         | 676.397         | 675.725         | Q 18 |
| A 24 | 860.478         | <b>638.714</b> | 633.375         | 633.711         | 633.039         | A 17 |
| V 25 | 873.501         | 615.035        | 609.696         | 610.032         | 609.360         | V 16 |
| L 26 | 911.038         | 532.032        | 526.693         | 527.029         | 526.357         | L 15 |
| L 27 | 948.890         | 544.318        | 538.979         | 539.314         | 538.642         | L 14 |
| F 28 | 981.241         | 506.623        | 501.284         | 501.619         | 500.948         | F 13 |
| K 29 | <b>1023.939</b> | 474.272        | 468.933         | 469.269         | 468.597         | K 12 |
| K 30 | <b>1066.638</b> | 431.574        | 426.234         | 426.570         | 425.898         | K 11 |
| F 31 | <b>1100.320</b> | 388.876        | 383.536         | 383.872         | 383.200         | F 10 |
| E 32 | <b>1143.324</b> | 358.109        | 349.863         | 350.199         | 349.511         | E 9  |
| S 33 | <b>1172.345</b> | 312.179        | 306.839         | 307.175         | 306.503         | S 8  |
| H 34 | <b>1218.031</b> | 283.168        | 277.829         | 278.164         | 277.493         | H 7  |
| H 35 | <b>1263.718</b> | 237.482        | 232.142         | 232.478         | 231.806         | H 6  |
| K 36 | <b>1306.416</b> | 191.795        | 186.455         | 186.792         | 186.120         | K 5  |
| A 37 | <b>1330.895</b> | 149.097        | 143.758         | 144.094         | 143.422         | A 4  |
| K 38 | <b>1372.793</b> | 128.418        | 123.079         | 123.414         | 122.743         | K 3  |
| G 39 | <b>1391.801</b> | 82.720         | 77.381          | 77.716          | 77.044          | G 2  |
| K 40 | 1448.502        | 63.713         | 58.373          | 58.709          | 58.033          | K 1  |



# sp | Q6GSS7 | H2A2A\_MOUSE

DEELNKLLGKVTIAQGGVLPNIQAVLLPKKTESHHKAKGK (Acetyl)  
(42.01)

- ▶ fragmentation table for charge state 4+
- ▶ specType=etd
- ▶ score=63.33
- ▶ F104936.dat
- ▶ query=q2219\_p1
- ▶ precursor=869.705730
- ▶ chargePrecursor=5
- ▶ itol=0.8

| AA | c  | y               | z+1             | z+2             | z       | AA              |       |
|----|----|-----------------|-----------------|-----------------|---------|-----------------|-------|
| D  | 1  | 34.621          | <b>1086.875</b> | <b>1082.870</b> | 0.755   | <b>1082.618</b> | O[40] |
| E  | 2  | 66.281          | 1056.113        | <b>1054.113</b> | 0.755   | 1054.361        | E[38] |
| E  | 3  | 98.542          | 1025.857        | <b>1021.853</b> | 0.755   | <b>1021.601</b> | E[38] |
| L  | 4  | 126.813         | 993.597         | 989.592         | 0.755   | 989.340         | L[37] |
| N  | 5  | 155.324         | 965.326         | 961.321         | 961.573 | 961.069         | N[36] |
| K  | 6  | 187.347         | <b>936.815</b>  | 932.810         | 933.062 | 932.559         | K[35] |
| L  | 7  | 215.818         | 904.791         | 900.786         | 901.038 | 900.534         | L[34] |
| L  | 8  | 243.889         | 873.520         | 872.315         | 872.567 | 872.261         | L[33] |
| G  | 9  | 258.145         | <b>848.240</b>  | 844.244         | 844.496 | 843.992         | G[32] |
| K  | 10 | 290.169         | 813.994         | 809.989         | 810.241 | 809.737         | K[31] |
| V  | 11 | 314.936         | 801.970         | 797.965         | 798.217 | 797.713         | V[30] |
| T  | 12 | 340.198         | 777.203         | 773.198         | 773.450 | 772.946         | T[29] |
| I  | 13 | 368.469         | 751.941         | 747.936         | 748.188 | 747.684         | I[28] |
| A  | 14 | 398.226         | 723.670         | 719.665         | 719.917 | 719.413         | A[27] |
| Q  | 15 | 418.243         | 705.911         | 701.906         | 702.158 | 701.654         | Q[26] |
| G  | 16 | 432.498         | 673.890         | 669.891         | 670.143 | 669.639         | G[25] |
| G  | 17 | 446.753         | 659.641         | 655.636         | 655.888 | 655.384         | G[24] |
| V  | 18 | 471.520         | 645.385         | 641.381         | 641.633 | 641.129         | V[23] |
| L  | 19 | 499.791         | 620.618         | 616.613         | 616.865 | 616.362         | L[22] |
| P  | 20 | 524.056         | 592.347         | 588.342         | 588.594 | 588.090         | P[21] |
| N  | 21 | 552.905         | 568.084         | 564.079         | 564.331 | 563.827         | N[20] |
| I  | 22 | 580.836         | 539.573         | 535.569         | 535.820 | 535.317         | I[19] |
| Q  | 23 | 612.851         | 511.302         | 507.298         | 507.549 | 507.046         | Q[18] |
| A  | 24 | 630.610         | 479.288         | 475.283         | 475.535 | 475.031         | A[17] |
| V  | 25 | 655.777         | 461.528         | 457.524         | 457.776 | 457.272         | V[16] |
| L  | 26 | 683.648         | 436.761         | 432.756         | 433.008 | 432.505         | L[15] |
| L  | 27 | 713.919         | 405.460         | 401.455         | 401.707 | 401.204         | L[14] |
| P  | 28 | 736.183         | 380.210         | 376.214         | 376.466 | 375.962         | P[13] |
| K  | 29 | 768.206         | 355.959         | 351.951         | 352.203 | 351.699         | K[12] |
| K  | 30 | 800.230         | 323.932         | 319.928         | 320.179 | 319.676         | K[11] |
| T  | 31 | 825.492         | 291.908         | 287.904         | 288.156 | 287.652         | T[10] |
| E  | 32 | 857.753         | 266.647         | 262.642         | 262.894 | 262.390         | E[9]  |
| S  | 33 | 879.511         | 234.389         | 230.383         | 230.635 | 230.130         | S[8]  |
| H  | 34 | 913.775         | 212.622         | 208.623         | 208.875 | 208.371         | H[7]  |
| H  | 35 | 948.040         | 178.361         | 174.358         | 174.610 | 174.107         | H[6]  |
| K  | 36 | 980.064         | 144.094         | 140.094         | 140.346 | 139.842         | K[5]  |
| A  | 37 | <b>997.823</b>  | 112.075         | 108.070         | 108.322 | 107.818         | A[4]  |
| K  | 38 | <b>1029.847</b> | 94.315          | 90.311          | 90.563  | 90.059          | K[3]  |
| C  | 39 | <b>1044.102</b> | 62.292          | 58.287          | 58.539  | 58.035          | C[2]  |
| K  | 40 | <b>1086.629</b> | 48.030          | 44.032          | 44.284  | 43.780          | K[1]  |



# sp | P43276 | H15\_MOUSE

TAAPAPVEKSPAKK <sup>Methyl</sup> 14.02 KTTKKAGAAKRKATGPPVSE

- ▶ fragmentation table for charge state 1+
- ▶ specType=etd
- ▶ score=40.52
- ▶ F104937.dat
- ▶ query=q2476\_p1
- ▶ precursor=683.999620
- ▶ chargePrecursor=5
- ▶ itol=0.8

| AA | c               | y               | z+1             | z+2             | z               | AA    |
|----|-----------------|-----------------|-----------------|-----------------|-----------------|-------|
| T  | 118.082         | 3415.975        | 1399.956        | 0.000           | 1399.948        | R[34] |
| A  | 180.119         | 1014.927        | 2096.908        | 0.000           | 1207.960        | A[33] |
| A  | 283.156         | 3243.990        | 3277.911        | 0.000           | 1229.961        | A[32] |
| F  | 358.208         | 3172.853        | 3156.834        | 0.000           | 3155.826        | P[31] |
| A  | 439.246         | 3075.800        | 3056.791        | 0.000           | 3058.774        | A[30] |
| F  | 528.298         | 3004.763        | 2988.744        | 0.000           | 2987.736        | P[29] |
| V  | 623.367         | 2907.710        | 2891.691        | 0.000           | 2890.684        | V[28] |
| T  | <b>754.409</b>  | 3898.642        | 2792.623        | 0.000           | 2791.615        | E[27] |
| R  | <b>851.504</b>  | 3879.599        | 2651.530        | 2664.588        | 2652.571        | R[26] |
| S  | <b>969.536</b>  | 2951.504        | 2535.486        | 2536.493        | 2534.476        | S[25] |
| F  | 1066.589        | 2864.472        | 2448.453        | 2449.461        | 2447.446        | P[24] |
| A  | 1137.626        | 2367.419        | 2351.401        | 2352.409        | 2350.391        | A[23] |
| R  | <b>1265.721</b> | 2296.362        | 2280.354        | 2281.371        | 2279.356        | R[22] |
| R  | <b>1407.832</b> | 2168.261        | 2152.269        | 2153.276        | 2151.261        | R[21] |
| R  | 1535.927        | 2028.177        | 2010.158        | 2011.166        | 2009.150        | R[20] |
| T  | 1636.974        | 1898.082        | 1882.063        | 1883.071        | 1881.055        | T[19] |
| T  | 1738.022        | 1797.034        | 1781.015        | 1782.023        | 1780.006        | T[18] |
| R  | 1866.117        | 1695.986        | <b>1679.968</b> | <b>1680.976</b> | 1678.960        | R[17] |
| R  | 1868.212        | 1587.901        | 1571.873        | 1572.881        | 1570.865        | R[16] |
| A  | 2005.269        | 1479.791        | 1463.773        | 1464.780        | 1462.755        | A[15] |
| G  | 2122.271        | <b>1368.759</b> | <b>1352.741</b> | <b>1353.748</b> | <b>1351.733</b> | G[14] |
| A  | 2183.308        | 1311.738        | <b>1295.719</b> | <b>1296.727</b> | 1294.711        | A[13] |
| A  | 2284.345        | 1240.701        | 1224.682        | <b>1225.690</b> | 1223.674        | A[12] |
| R  | 2382.440        | 1109.664        | 1103.645        | 1104.653        | 1102.637        | R[11] |
| R  | 2518.541        | <b>1041.569</b> | <b>1025.550</b> | 1026.558        | 1024.542        | R[10] |
| R  | 2676.636        | 885.465         | <b>869.449</b>  | 870.457         | 868.441         | R[9]  |
| A  | 2747.673        | 757.373         | 741.354         | <b>742.362</b>  | 740.346         | A[8]  |
| T  | 2848.721        | 686.336         | 670.317         | 671.325         | 669.309         | T[7]  |
| G  | 2905.742        | 585.289         | 569.269         | 570.277         | 568.261         | G[6]  |
| P  | 3022.795        | 528.266         | 512.248         | 513.256         | 511.240         | P[5]  |
| P  | 3099.848        | 431.214         | 415.195         | 416.203         | 414.187         | P[4]  |
| V  | 3198.916        | 194.161         | 318.142         | 319.150         | 317.134         | V[3]  |
| S  | 3285.948        | 235.092         | 219.074         | 220.082         | 218.066         | S[2]  |
| E  | 3414.991        | 148.060         | 132.042         | 133.050         | 131.034         | E[1]  |

# sp | P43276 | H15\_MOUSE

TAAPAPVEKSPAKK <sup>Methyl</sup> 14.02 KTTKKAGAAKRKATGPPVSE

- ▶ fragmentation table for charge state 2+
- ▶ specType=etd
- ▶ score=40.52
- ▶ F104937.dat
- ▶ query=q2476\_p1
- ▶ precursor=683.999620
- ▶ chargePrecursor=5
- ▶ itol=0.8

| AA | c  | y               | z+1             | z+2             | z               | AA              |       |
|----|----|-----------------|-----------------|-----------------|-----------------|-----------------|-------|
| T  | 1  | 60.044          | 1708.491        | <b>1700.482</b> | 0.504           | <b>1699.978</b> | T[34] |
| A  | 2  | 85.263          | 1057.901        | 1074.792        | 0.504           | 1049.452        | A[33] |
| A  | 3  | 131.682         | 1032.446        | <b>1614.439</b> | 0.504           | 1613.935        | A[32] |
| F  | 4  | 179.608         | 1586.030        | 1578.521        | 0.504           | 1578.417        | F[31] |
| A  | 5  | 215.126         | 1538.404        | 1530.394        | 0.504           | 1529.890        | A[30] |
| F  | 6  | 263.651         | 1502.885        | 1494.876        | 0.504           | 1494.372        | F[29] |
| V  | 7  | 313.167         | 1454.359        | 1446.349        | 0.504           | 1445.845        | V[28] |
| E  | 8  | 377.398         | 1404.825        | 1396.815        | 0.504           | 1396.311        | E[27] |
| K  | 9  | 441.758         | 1340.303        | <b>1332.294</b> | <b>1332.798</b> | <b>1331.790</b> | K[26] |
| S  | 10 | 485.272         | 1270.256        | 1268.246        | <b>1268.750</b> | 1267.742        | S[25] |
| F  | 11 | 533.799         | 1232.740        | 1224.730        | 1225.234        | 1224.226        | F[24] |
| A  | 12 | 589.317         | 1184.213        | 1178.204        | 1176.708        | 1175.700        | A[23] |
| K  | 13 | 613.864         | 1148.695        | <b>1140.685</b> | <b>1141.189</b> | <b>1140.182</b> | K[22] |
| R  | 14 | <b>704.420</b>  | <b>1084.647</b> | <b>1076.638</b> | <b>1077.142</b> | <b>1076.134</b> | R[21] |
| K  | 15 | <b>768.467</b>  | 1013.562        | <b>1005.583</b> | <b>1006.087</b> | 1005.079        | K[20] |
| T  | 16 | 818.991         | <b>949.545</b>  | <b>941.535</b>  | <b>942.039</b>  | 941.031         | T[19] |
| T  | 17 | <b>869.515</b>  | 899.021         | <b>891.011</b>  | <b>891.515</b>  | 890.507         | T[18] |
| K  | 18 | <b>933.562</b>  | 848.497         | <b>840.487</b>  | <b>840.991</b>  | <b>839.984</b>  | K[17] |
| K  | 19 | 987.910         | <b>784.449</b>  | <b>776.440</b>  | <b>776.944</b>  | <b>775.936</b>  | K[16] |
| A  | 20 | 1033.138        | 720.560         | 713.553         | 712.056         | 711.048         | A[15] |
| G  | 21 | <b>1061.639</b> | 684.883         | 676.874         | 677.378         | 676.370         | G[14] |
| A  | 22 | <b>1097.158</b> | 656.373         | <b>648.363</b>  | <b>648.867</b>  | <b>647.859</b>  | A[13] |
| A  | 23 | 1132.676        | 620.854         | <b>612.845</b>  | <b>613.349</b>  | <b>612.341</b>  | A[12] |
| K  | 24 | <b>1196.724</b> | 585.335         | <b>577.326</b>  | <b>577.830</b>  | <b>576.822</b>  | K[11] |
| K  | 25 | 1247.814        | 563.268         | 543.219         | 543.723         | 542.715         | K[10] |
| K  | 26 | <b>1338.822</b> | 443.237         | 435.228         | 435.732         | 434.724         | K[9]  |
| A  | 27 | <b>1374.340</b> | 379.190         | 371.181         | 371.685         | 370.677         | A[8]  |
| T  | 28 | 1424.864        | 343.671         | 335.662         | 336.166         | 335.158         | T[7]  |
| G  | 29 | 1453.375        | 293.149         | 285.138         | 285.642         | 284.634         | G[6]  |
| F  | 30 | 1503.894        | 284.630         | 276.621         | 277.125         | 276.117         | F[5]  |
| F  | 31 | 1550.427        | 218.110         | 209.101         | 209.605         | 208.597         | F[4]  |
| V  | 32 | 1599.962        | 167.584         | 159.575         | 160.079         | 159.071         | V[3]  |
| S  | 33 | <b>1643.478</b> | 118.050         | 110.041         | 110.544         | 109.537         | S[2]  |
| E  | 34 | 1707.999        | 74.534          | 66.524          | 67.028          | 66.021          | E[1]  |

# sp | P43276 | H15\_MOUSE

TAAPAPVEKSPAKK <sup>Methyl</sup> 14.02 KTTKKAGAAKRKATGPPVSE

- ▶ fragmentation table for charge state 3+
- ▶ specType=etd
- ▶ score=40.52
- ▶ F104937.dat
- ▶ query=q2476\_p1
- ▶ precursor=683.999620
- ▶ chargePrecursor=5
- ▶ itol=0.8

| AA | c  | y              | z+1             | z+2             | z              | AA              |       |
|----|----|----------------|-----------------|-----------------|----------------|-----------------|-------|
| T  | 1  | 48.395         | 1139.330        | <b>1133.990</b> | 0.672          | <b>1133.654</b> | T[9]  |
| A  | 2  | 64.044         | 1105.647        | 1100.338        | 0.672          | 1099.972        | A[33] |
| A  | 3  | 87.723         | 1081.968        | <b>1076.629</b> | 0.672          | <b>1076.293</b> | A[32] |
| P  | 4  | 120.074        | 1058.289        | 1052.950        | 0.672          | 1052.614        | P[31] |
| A  | 5  | 143.753        | <b>1025.938</b> | <b>1020.599</b> | 0.672          | <b>1020.263</b> | A[30] |
| P  | 6  | 176.104        | 1002.259        | 996.920         | 0.672          | 996.584         | P[29] |
| V  | 7  | 209.127        | 969.968         | 964.589         | 0.672          | 964.233         | V[28] |
| E  | 8  | 252.141        | 936.885         | 931.546         | 0.672          | 931.211         | E[27] |
| K  | 9  | 294.940        | <b>893.871</b>  | <b>888.532</b>  | <b>888.808</b> | <b>888.196</b>  | K[26] |
| S  | 10 | 323.850        | <b>851.173</b>  | <b>845.833</b>  | <b>846.109</b> | <b>845.497</b>  | S[25] |
| P  | 11 | 356.201        | <b>822.162</b>  | 816.823         | 817.159        | 816.481         | P[24] |
| A  | 12 | 379.880        | 789.811         | 784.472         | 784.808        | <b>784.136</b>  | A[23] |
| K  | 13 | 422.578        | 766.132         | 760.793         | 761.129        | 760.457         | K[22] |
| R  | 14 | 469.968        | 723.434         | 718.094         | 718.430        | 717.755         | R[21] |
| K  | 15 | 512.647        | 676.064         | 670.724         | 671.060        | 670.385         | K[20] |
| T  | 16 | 546.330        | 633.305         | 628.026         | 628.362        | 627.690         | T[19] |
| T  | 17 | 580.012        | 599.663         | 594.343         | 594.679        | 594.007         | T[18] |
| K  | 18 | 622.711        | 566.000         | 560.661         | 560.997        | 560.325         | K[17] |
| K  | 19 | 665.409        | 523.302         | 517.962         | 518.298        | 517.626         | K[16] |
| A  | 20 | 689.088        | 488.504         | 483.204         | 483.600        | 482.923         | A[15] |
| G  | 21 | 708.095        | 456.925         | 451.585         | 451.921        | 451.249         | G[14] |
| A  | 22 | 731.774        | 437.017         | 432.578         | 432.914        | 432.242         | A[13] |
| A  | 23 | 755.453        | 414.238         | 408.899         | 409.235        | 408.563         | A[12] |
| K  | 24 | <b>798.151</b> | 390.599         | 385.220         | 385.556        | 384.884         | K[11] |
| R  | 25 | <b>850.185</b> | 347.861         | 342.522         | 342.857        | 342.189         | R[10] |
| K  | 26 |                | 295.827         | 290.488         | 290.824        | 290.152         | K[9]  |
| A  | 27 | <b>916.563</b> | 253.129         | 247.789         | 248.125        | 247.454         | A[8]  |
| T  | 28 | 950.245        | 229.480         | 224.110         | 224.446        | 223.775         | T[7]  |
| G  | 29 | <b>969.252</b> | 195.767         | 190.428         | 190.764        | 190.092         | G[6]  |
| P  | 30 | 1001.603       | 176.760         | 171.421         | 171.757        | 171.085         | P[5]  |
| P  | 31 | 1033.954       | 144.409         | 139.070         | 139.406        | 138.734         | P[4]  |
| V  | 32 | 1066.977       | 112.098         | 106.739         | 107.055        | 106.383         | V[3]  |
| S  | 33 | 1095.988       | 79.536          | 73.688          | 74.032         | 73.360          | S[2]  |
| E  | 34 | 1139.002       | 50.025          | 44.685          | 45.021         | 44.349          | E[1]  |

# sp | P43276 | H15\_MOUSE

TAAPAPVEKSPAKK <sup>Methyl</sup> 14.02 KTTKKAGAAKRKATGPPVSE

- ▶ fragmentation table for charge state 4+
- ▶ specType=etd
- ▶ score=40.52
- ▶ F104937.dat
- ▶ query=q2476\_p1
- ▶ precursor=683.999620
- ▶ chargePrecursor=5
- ▶ itol=0.8

| AA | c  | y              | z+1            | z+2            | z              | AA             |   |    |
|----|----|----------------|----------------|----------------|----------------|----------------|---|----|
| T  | 1  | 30.526         | <b>854.749</b> | <b>850.744</b> | 0.755          | <b>850.493</b> | T | 34 |
| A  | 2  | 48.285         | 829.487        | 825.483        | 0.755          | 825.231        | A | 33 |
| A  | 3  | 66.044         | <b>811.738</b> | <b>807.723</b> | 0.755          | <b>807.471</b> | A | 32 |
| P  | 4  | 83.803         | <b>793.969</b> | 789.964        | 0.755          | 789.712        | P | 31 |
| A  | 5  | 101.562        | 768.705        | 765.701        | 0.755          | 765.449        | A | 30 |
| P  | 6  | 119.321        | 751.946        | <b>747.942</b> | 0.755          | <b>747.690</b> | P | 29 |
| V  | 7  | 157.097        | 727.683        | 723.678        | 0.755          | 723.426        | V | 28 |
| E  | 8  | 189.358        | 702.916        | 698.911        | 0.755          | 698.659        | E | 27 |
| K  | 9  | 221.382        | 678.655        | 666.651        | 666.903        | 666.399        | K | 26 |
| S  | 10 | 243.140        | 638.632        | 634.627        | 634.879        | 634.375        | S | 25 |
| P  | 11 | 267.403        | 616.874        | <b>612.869</b> | <b>613.121</b> | <b>612.617</b> | P | 24 |
| A  | 12 | 285.162        | 592.610        | 588.606        | 588.858        | 588.354        | A | 23 |
| K  | 13 | 317.186        | 574.351        | 570.346        | 570.598        | 570.094        | K | 22 |
| K  | 14 | 352.713        | 542.827        | 538.823        | 539.075        | 538.571        | K | 21 |
| K  | 15 | 384.737        | 507.300        | 503.295        | 503.547        | 503.043        | K | 20 |
| T  | 16 | 409.999        | 475.276        | 471.271        | 471.523        | 471.019        | T | 19 |
| T  | 17 | 435.261        | 450.014        | 446.009        | 446.261        | 445.757        | T | 18 |
| K  | 18 | 467.285        | 424.752        | 420.747        | 420.999        | 420.495        | K | 17 |
| K  | 19 | 499.308        | 392.728        | 388.724        | 388.976        | 388.472        | K | 16 |
| A  | 20 | 517.068        | 360.705        | 356.700        | 356.952        | 356.448        | A | 15 |
| G  | 21 | 531.323        | 342.945        | 339.941        | 339.193        | 338.689        | G | 14 |
| A  | 22 | 549.082        | 328.690        | 324.685        | 324.937        | 324.433        | A | 13 |
| A  | 23 | 568.842        | 310.931        | 306.926        | 307.178        | 306.674        | A | 12 |
| K  | 24 | 598.885        | 293.171        | 289.167        | 289.419        | 288.915        | K | 11 |
| R  | 25 | 637.891        | 261.148        | 257.143        | 257.395        | 256.891        | R | 10 |
| K  | 26 | 669.914        | 222.122        | 218.118        | 218.370        | 217.866        | K | 9  |
| A  | 27 | 687.674        | 190.099        | 186.094        | 186.346        | 185.842        | A | 8  |
| T  | 28 | 712.696        | 172.339        | 168.335        | 168.587        | 168.083        | T | 7  |
| G  | 29 | 727.191        | 147.077        | 143.073        | 143.325        | 142.821        | G | 6  |
| P  | 30 | 751.454        | 132.822        | 128.817        | 129.069        | 128.565        | P | 5  |
| P  | 31 | <b>775.717</b> | 108.559        | 104.554        | 104.806        | 104.302        | P | 4  |
| V  | 32 | 867.804        | 84.296         | 80.291         | 80.543         | 80.039         | V | 3  |
| S  | 33 | <b>822.242</b> | 59.529         | 55.524         | 55.776         | 55.272         | S | 2  |
| E  | 34 | 854.503        | 37.771         | 33.766         | 34.018         | 33.514         | E | 1  |

# sp | P43276 | H15\_MOUSE

TAAPAPVEKSPAKK <sup>Methyl</sup> KTTKKAGAAKRKATGPPVSE  
14.02

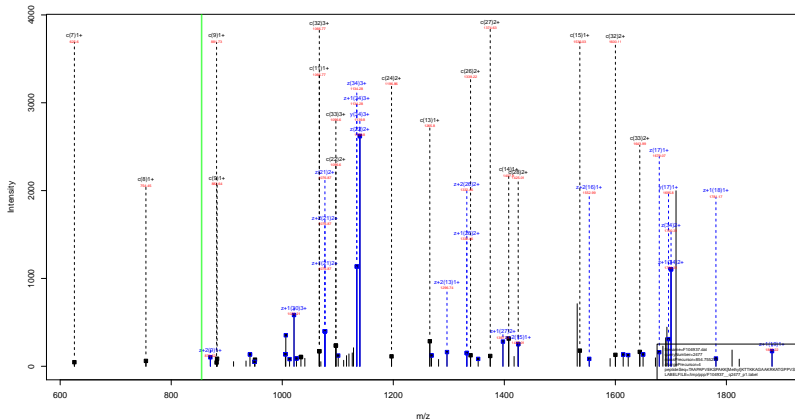

# sp | P43276 | H15\_MOUSE

TAAPAPVEKSPAKK<sup>Methyl</sup> KTTKKAGAAKRKATGPPVSE  
14.02

- ▶ fragmentation table for charge state 1+
- ▶ specType=etd
- ▶ score=48.86
- ▶ F104937.dat
- ▶ query=q2477\_p1
- ▶ precursor=854.755270
- ▶ chargePrecursor=4
- ▶ itol=0.8

| AA | c               | y               | z=1             | z=2             | z               | AA    |
|----|-----------------|-----------------|-----------------|-----------------|-----------------|-------|
| T  | 118.082         | 3415.975        | 1399.956        | 0.000           | 1399.948        | A[34] |
| A  | 180.119         | 3314.927        | 2098.908        | 0.000           | 1207.960        | A[33] |
| A  | 283.156         | 3243.880        | 3227.871        | 0.000           | 1229.966        | A[32] |
| F  | 358.208         | 3172.833        | 4356.834        | 0.000           | 3155.826        | P[31] |
| A  | 439.246         | 3075.800        | 5056.781        | 0.000           | 3058.774        | A[30] |
| F  | 528.298         | 3004.753        | 2688.744        | 0.000           | 2987.736        | P[29] |
| V  | <b>625.367</b>  | 2907.710        | 2891.691        | 0.000           | 2890.684        | V[28] |
| T  | <b>754.409</b>  | 2808.642        | 2792.623        | 0.000           | 2793.615        | T[27] |
| R  | <b>852.504</b>  | 2679.599        | 2651.530        | 2664.588        | 2652.573        | R[26] |
| S  | 969.536         | 2551.504        | 2535.486        | 2536.493        | 2534.476        | S[25] |
| F  | <b>1066.589</b> | 2464.472        | 2448.453        | 2449.461        | 2447.446        | P[24] |
| A  | 1137.626        | 2367.419        | 2351.401        | 2352.409        | 2350.391        | A[23] |
| R  | <b>1265.721</b> | 2296.362        | 2280.354        | 2281.371        | 2279.356        | R[22] |
| R  | <b>1407.832</b> | 2168.291        | 2152.289        | 2153.276        | 2151.286        | R[21] |
| R  | <b>1535.927</b> | 2028.177        | 2010.158        | 2011.166        | 2009.150        | R[20] |
| T  | 1636.974        | 1898.082        | <b>1882.063</b> | 1883.071        | 1881.055        | T[19] |
| T  | 1738.022        | 1797.034        | <b>1781.015</b> | 1782.023        | 1780.006        | T[18] |
| R  | 1866.117        | <b>1695.986</b> | 1679.968        | 1680.976        | <b>1678.960</b> | R[17] |
| R  | 1964.212        | 1587.901        | 1571.873        | <b>1552.881</b> | 1558.865        | R[16] |
| A  | 2095.269        | 1439.797        | 1423.773        | <b>1424.786</b> | 1422.770        | A[15] |
| G  | 2122.271        | 1368.759        | <b>1352.741</b> | 1353.748        | 1351.733        | G[14] |
| A  | 2193.308        | 1311.738        | 1295.719        | <b>1296.727</b> | 1294.711        | A[13] |
| A  | 2284.345        | 1240.701        | 1224.682        | 1225.690        | 1223.674        | A[12] |
| R  | 2362.440        | 1169.664        | 1153.645        | 1154.653        | 1152.637        | R[11] |
| R  | 2458.543        | 1094.599        | <b>1025.550</b> | 1026.558        | 1024.542        | R[10] |
| R  | 2676.636        | 885.465         | 869.449         | <b>870.457</b>  | 868.441         | R[9]  |
| A  | 2747.673        | 757.373         | 741.354         | 742.362         | 740.346         | A[8]  |
| T  | 2848.721        | 686.336         | 670.317         | 671.325         | 669.309         | T[7]  |
| G  | 2905.742        | 585.289         | 569.269         | 570.277         | 568.261         | G[6]  |
| P  | 3022.795        | 528.266         | 512.248         | 513.256         | 511.240         | P[5]  |
| P  | 3099.848        | 433.214         | 415.195         | 416.203         | 414.187         | P[4]  |
| V  | 3198.916        | 334.161         | 318.142         | 319.150         | 317.134         | V[3]  |
| S  | 3285.948        | 235.092         | 219.074         | 220.082         | 218.066         | S[2]  |
| E  | 3414.991        | 148.060         | 132.042         | 133.050         | 131.034         | E[1]  |



# sp | P43276 | H15\_MOUSE

TAAPAPVEKSPAKK <sup>Methyl</sup> 14.02 KTTKKAGAAKRKATGPPVSE

- ▶ fragmentation table for charge state 2+
- ▶ specType=etd
- ▶ score=48.86
- ▶ F104937.dat
- ▶ query=q2477\_p1
- ▶ precursor=854.755270
- ▶ chargePrecursor=4
- ▶ itol=0.8

| AA     | c               | y               | z+1             | z+2             | z               | AA   |
|--------|-----------------|-----------------|-----------------|-----------------|-----------------|------|
| T   1  | 60.044          | 1708.491        | <b>1700.482</b> | 0.504           | <b>1699.978</b> | T 94 |
| A   2  | 85.263          | 1857.901        | <b>1849.958</b> | 0.504           | <b>1849.454</b> | A 30 |
| A   3  | 131.682         | <b>1622.449</b> | <b>1614.439</b> | 0.504           | <b>1613.935</b> | A 32 |
| F   4  | 179.608         | 1896.930        | 1878.921        | 0.504           | 1878.417        | F 31 |
| A   5  | 218.126         | 1838.404        | 1830.394        | 0.504           | 1829.890        | A 30 |
| F   6  | 263.651         | 1802.885        | 1494.876        | 0.504           | 1494.372        | F 29 |
| V   7  | 313.167         | 1454.359        | 1446.350        | 0.504           | 1445.846        | V 28 |
| T   8  | 377.398         | 1404.825        | <b>1396.815</b> | 0.504           | 1396.311        | T 27 |
| R   9  | 441.758         | 1340.303        | <b>1332.294</b> | <b>1332.798</b> | <b>1331.790</b> | R 26 |
| S   10 | 486.272         | 1276.256        | <b>1268.246</b> | <b>1268.750</b> | 1267.742        | S 25 |
| F   11 | 533.798         | 1232.740        | 1224.730        | 1225.234        | 1224.226        | F 24 |
| A   12 | 569.317         | 1184.213        | 1176.204        | 1176.708        | 1175.700        | A 23 |
| R   13 | 633.264         | 1148.695        | 1140.685        | 1141.189        | <b>1140.182</b> | R 22 |
| R   14 | 704.420         | 1094.641        | <b>1076.638</b> | <b>1077.142</b> | <b>1076.134</b> | R 21 |
| R   15 | 768.487         | <b>1013.592</b> | <b>1005.583</b> | <b>1006.087</b> | <b>1005.079</b> | R 20 |
| T   16 | 818.991         | <b>949.545</b>  | <b>941.535</b>  | <b>942.039</b>  | 941.031         | T 19 |
| T   17 | 869.515         | 899.021         | 891.011         | 891.515         | 890.507         | T 18 |
| R   18 | 933.562         | 848.497         | 840.487         | 840.991         | 839.984         | R 17 |
| R   19 | 997.610         | 794.440         | 776.440         | 776.944         | 775.936         | R 16 |
| A   20 | <b>1033.128</b> | 720.462         | 712.451         | 712.955         | 711.948         | A 15 |
| G   21 | 1081.639        | 684.883         | 676.874         | 677.378         | 676.370         | G 14 |
| A   22 | <b>1097.158</b> | 656.373         | 648.363         | 648.867         | 647.859         | A 13 |
| A   23 | 1132.676        | 620.854         | 612.845         | 613.349         | 612.341         | A 12 |
| R   24 | <b>1196.724</b> | 585.335         | 577.325         | 577.830         | 576.822         | R 11 |
| R   25 | 1274.814        | 503.288         | 495.279         | 495.783         | 494.775         | R 10 |
| R   26 | <b>1338.822</b> | 443.237         | 435.228         | 435.732         | 434.724         | R 9  |
| A   27 | <b>1374.340</b> | 379.190         | 371.181         | 371.685         | 370.677         | A 8  |
| T   28 | <b>1424.864</b> | 343.671         | 335.662         | 336.166         | 335.158         | T 7  |
| G   29 | 1453.375        | 293.140         | 285.138         | 285.642         | 284.634         | G 6  |
| F   30 | 1501.964        | 284.607         | 256.627         | 257.131         | 256.124         | F 5  |
| F   31 | 1550.437        | 218.110         | 209.101         | 209.605         | 207.587         | F 4  |
| V   32 | <b>1599.962</b> | 167.584         | 159.575         | 160.079         | 159.071         | V 3  |
| S   33 | <b>1643.478</b> | 118.050         | 110.041         | 110.544         | 109.537         | S 2  |
| E   34 | 1707.999        | 74.534          | 66.524          | 67.028          | 66.021          | E 1  |

# sp | P43276 | H15\_MOUSE

TAAPAPVEKSPAKK <sup>Methyl</sup> KTTKKAGAAKRKATGPPVSE  
14.02

- ▶ fragmentation table for charge state 3+
- ▶ specType=etd
- ▶ score=48.86
- ▶ F104937.dat
- ▶ query=q2477\_p1
- ▶ precursor=854.755270
- ▶ chargePrecursor=4
- ▶ itol=0.8

| AA    | c               | y               | z+1             | z+2     | z               | AA   |
|-------|-----------------|-----------------|-----------------|---------|-----------------|------|
| T   1 | 40.385          | <b>1139.330</b> | <b>1133.990</b> | 0.672   | <b>1133.654</b> | T 9  |
| A   2 | 64.044          | 1105.647        | <b>1100.308</b> | 0.672   | 1099.972        | A 33 |
| A   3 | 67.723          | 1081.969        | <b>1076.629</b> | 0.672   | <b>1076.293</b> | A 32 |
| F   4 | 120.074         | 1058.289        | 1052.950        | 0.672   | 1052.614        | F 31 |
| A   5 | 143.753         | <b>1025.938</b> | <b>1020.599</b> | 0.672   | 1020.263        | A 30 |
| P   6 | 176.104         | 1002.259        | 996.920         | 0.672   | 996.584         | P 29 |
| V   7 | 209.127         | 978.580         | 973.240         | 0.672   | 968.233         | V 28 |
| E   8 | 252.141         | 954.899         | 949.546         | 0.672   | 941.211         | E 27 |
| K   9 | 294.840         | 893.871         | 888.532         | 888.808 | 888.106         | K 26 |
| S 10  | 323.850         | 851.173         | 845.833         | 846.169 | 845.407         | S 25 |
| F 11  | 356.201         | 827.462         | 816.823         | 817.159 | 816.487         | F 24 |
| A 12  | 379.880         | 789.811         | 784.472         | 784.808 | 784.134         | A 23 |
| K 13  | 422.579         | 766.132         | 760.791         | 761.129 | 760.457         | K 22 |
| R 14  | 469.949         | 723.431         | 718.094         | 718.430 | 717.756         | R 21 |
| R 15  | 512.647         | 679.064         | 673.724         | 674.060 | 673.388         | R 20 |
| T 16  | 546.130         | 633.395         | 628.026         | 628.362 | 627.690         | T 19 |
| T 17  | 580.012         | 599.663         | 594.343         | 594.679 | 594.007         | T 18 |
| K 18  | 622.711         | 566.000         | 560.661         | 560.997 | 560.325         | K 17 |
| K 19  | 665.409         | 523.302         | 517.962         | 518.298 | 517.626         | K 16 |
| A 20  | 689.088         | 488.604         | 475.254         | 475.600 | 474.923         | A 15 |
| G 21  | 708.098         | 456.925         | 451.585         | 451.921 | 451.249         | G 14 |
| A 22  | 731.774         | 437.917         | 432.578         | 432.914 | 432.242         | A 13 |
| A 23  | 755.451         | 414.238         | 408.899         | 409.235 | 408.563         | A 12 |
| K 24  | 798.151         | 390.559         | 385.220         | 385.556 | 384.884         | K 11 |
| R 25  | 850.185         | 347.861         | 342.522         | 342.857 | 342.186         | R 10 |
| R 26  | 892.883         | 295.823         | 290.488         | 290.824 | 290.151         | R 9  |
| A 27  | 916.563         | 263.120         | 257.789         | 258.125 | 257.455         | A 8  |
| T 28  | <b>950.245</b>  | 228.450         | 224.110         | 224.446 | 223.775         | T 7  |
| G 29  | 969.252         | 195.767         | 190.428         | 190.764 | 190.092         | G 6  |
| F 30  | 1001.603        | 176.760         | 171.421         | 171.757 | 171.085         | F 5  |
| P 31  | <b>1033.954</b> | 144.400         | 139.070         | 139.406 | 138.734         | P 4  |
| V 32  | <b>1065.977</b> | 112.098         | 106.719         | 107.055 | 106.383         | V 3  |
| S 33  | <b>1095.588</b> | 79.039          | 73.696          | 74.032  | 73.360          | S 2  |
| E 34  | 1139.092        | 50.025          | 44.685          | 45.021  | 44.349          | E 1  |

# sp | P43274 | H14\_MOUSE

TAPAAPAAPAEKTPVKKKARK (Methyl)  
(14.02) AAGGAKRKTSGPPVSE

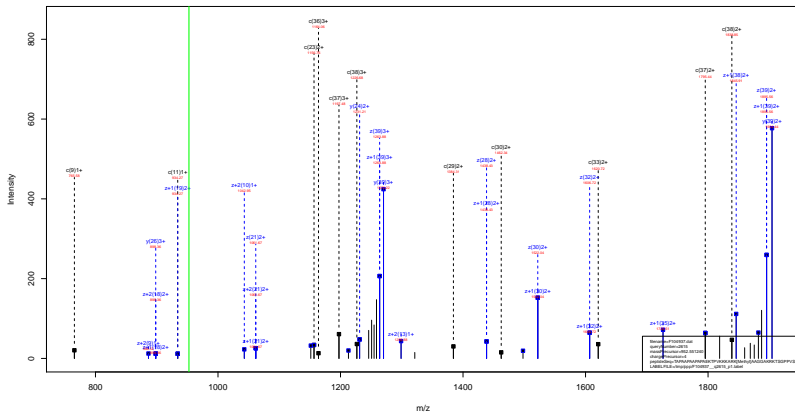

# sp | P43274 | H14\_MOUSE

TAPAAPAAPAPAEKTPVKKKARK <sup>(Methyl)</sup><sub>(14.02)</sub> AAGGAKRKTS GPPVSE

- ▶ fragmentation table for charge state 1+
- ▶ specType=etd
- ▶ score=44.24
- ▶ F104937.dat
- ▶ query=q2615\_p1
- ▶ precursor=952.551240
- ▶ chargePrecursor=4
- ▶ itol=0.8

| AA | c       | y              | z+1             | z+2             | z               | AA       |     |     |
|----|---------|----------------|-----------------|-----------------|-----------------|----------|-----|-----|
| T  | 119.082 | 3807.172       | 3791.153        | 0.000           | 3790.145        | T        | B30 |     |
| A  | 2       | 190.110        | 3706.124        | 3690.105        | 0.000           | 3689.097 | A   | B38 |
| P  | 3       | 287.171        | 3635.087        | 3619.068        | 0.000           | 3618.060 | P   | B77 |
| A  | 4       | 358.238        | 3538.074        | 3522.035        | 0.000           | 3521.027 | A   | B26 |
| A  | 5       | 429.246        | 3466.097        | 3450.078        | 0.000           | 3449.070 | A   | B35 |
| P  | 6       | 526.298        | 3395.960        | 3379.941        | 0.000           | 3378.933 | P   | B34 |
| A  | 7       | 597.335        | 3326.007        | 3310.888        | 0.000           | 3310.880 | A   | B33 |
| A  | 8       | 668.373        | 3227.870        | 3211.851        | 0.000           | 3210.843 | A   | B32 |
| P  | 9       | <b>765.425</b> | 3156.833        | 3140.814        | 0.000           | 3139.806 | P   | B31 |
| A  | 10      | 836.462        | 3059.786        | 3043.767        | 0.000           | 3042.759 | A   | B30 |
| P  | 11      | <b>933.515</b> | 2988.743        | 2972.724        | 0.000           | 2971.716 | P   | B29 |
| A  | 12      | 1004.552       | 2891.690        | 2875.671        | 0.000           | 2874.664 | A   | B28 |
| E  | 13      | 1133.595       | 2820.653        | 2804.634        | 0.000           | 2803.626 | E   | B27 |
| K  | 14      | 1261.690       | 2691.610        | 2675.592        | 2676.600        | 2674.584 | K   | B26 |
| T  | 15      | 1362.738       | 2563.515        | 2547.497        | 2548.505        | 2546.489 | T   | B25 |
| P  | 16      | 1459.789       | 2452.568        | 2446.489        | 2447.497        | 2445.481 | P   | B24 |
| V  | 17      | 1558.850       | 2365.415        | 2349.396        | 2350.404        | 2348.388 | V   | B23 |
| K  | 18      | 1686.954       | 2266.347        | 2250.328        | 2251.336        | 2249.320 | K   | B22 |
| K  | 19      | 1815.049       | 2138.252        | 2122.233        | 2123.241        | 2121.225 | K   | B21 |
| K  | 20      | 1943.144       | 2010.157        | 1994.138        | 1995.146        | 1993.130 | K   | B20 |
| A  | 21      | 2014.181       | <b>1882.062</b> | 1866.043        | 1867.051        | 1865.035 | A   | B19 |
| K  | 22      | 2170.282       | 1811.025        | <b>1795.006</b> | <b>1796.014</b> | 1793.998 | K   | B18 |
| K  | 23      | 2312.392       | 1654.923        | 1638.903        | 1639.911        | 1637.895 | K   | B17 |
| A  | 24      | 2383.430       | 1512.813        | 1496.794        | <b>1497.802</b> | 1495.786 | A   | B16 |
| A  | 25      | 2454.467       | 1441.776        | 1425.757        | 1426.765        | 1424.749 | A   | B15 |
| G  | 26      | 2511.488       | 1370.739        | 1354.720        | 1355.728        | 1353.712 | G   | B14 |
| G  | 27      | 2568.510       | 1313.717        | 1297.698        | <b>1298.706</b> | 1296.691 | G   | B13 |
| A  | 28      | 2639.547       | 1256.696        | 1240.677        | 1241.685        | 1239.669 | A   | B12 |
| I  | 29      | 2707.642       | 1185.659        | 1169.640        | 1170.648        | 1168.632 | I   | B11 |
| R  | 30      | 2823.743       | 1057.564        | 1041.545        | <b>1042.553</b> | 1040.537 | R   | B10 |
| K  | 31      | 3051.838       | 901.463         | 885.444         | <b>886.452</b>  | 884.436  | K   | B9  |
| T  | 32      | 3152.885       | 773.368         | 757.349         | 758.357         | 756.341  | T   | B8  |
| S  | 33      | 3239.918       | 672.320         | 656.301         | 657.309         | 655.293  | S   | B7  |
| G  | 34      | 3296.039       | 585.288         | 569.269         | 570.277         | 568.261  | G   | B6  |
| P  | 35      | 3391.992       | 508.266         | 492.248         | 493.256         | 491.240  | P   | B5  |
| P  | 36      | 3461.045       | 431.214         | 415.195         | 416.203         | 414.187  | P   | B4  |
| V  | 37      | 3590.113       | 334.161         | 318.142         | 319.150         | 317.134  | V   | B3  |
| S  | 38      | 3677.145       | 235.092         | 219.074         | 220.082         | 218.066  | S   | B2  |
| E  | 39      | 3806.188       | 148.060         | 132.042         | 133.050         | 131.034  | E   | B1  |

# sp | P43274 | H14\_MOUSE

TAPAAPAAPAPAEKTPVKKKARK <sup>(Methyl)</sup> AAGGAKRKTSGPPVSE <sub>(14.02)</sub>

- ▶ fragmentation table for charge state 2+
- ▶ specType=etd
- ▶ score=44.24
- ▶ F104937.dat
- ▶ query=q2615\_p1
- ▶ precursor=952.551240
- ▶ chargePrecursor=4
- ▶ itol=0.8

| AA   | c               | y               | z+1             | z               | z-2             | AA   |
|------|-----------------|-----------------|-----------------|-----------------|-----------------|------|
| T 1  | 50.044          | <b>1904.089</b> | <b>1896.080</b> | 0.504           | <b>1895.576</b> | T 30 |
| A 2  | 95.563          | 1853.566        | <b>1845.556</b> | 0.504           | 1845.052        | A 38 |
| F 3  | 144.089         | 1818.047        | 1810.038        | 0.504           | 1809.534        | F 37 |
| A 4  | 179.608         | 1769.521        | 1763.511        | 0.504           | 1761.001        | A 36 |
| A 5  | 215.128         | 1734.002        | <b>1725.993</b> | 0.504           | 1725.489        | A 35 |
| F 6  | 253.653         | 1698.484        | 1698.474        | 0.504           | 1689.970        | F 34 |
| A 7  | 299.171         | 1649.957        | 1641.948        | 0.504           | 1641.444        | A 33 |
| A 8  | 334.690         | 1614.439        | <b>1606.429</b> | 0.504           | <b>1605.925</b> | A 32 |
| F 9  | 383.216         | 1578.920        | 1570.911        | 0.504           | 1570.407        | F 31 |
| A 10 | 418.735         | 1539.394        | <b>1522.384</b> | 0.504           | <b>1521.880</b> | A 30 |
| F 11 | 467.261         | 1494.875        | 1494.865        | 0.504           | 1486.356        | F 29 |
| A 12 | 502.780         | 1446.348        | <b>1438.339</b> | 0.504           | <b>1437.835</b> | A 28 |
| E 13 | 567.301         | 1410.830        | 1402.821        | 0.504           | 1402.317        | E 27 |
| K 14 | 631.349         | 1346.309        | 1338.299        | 1338.803        | 1337.796        | K 26 |
| T 15 | 681.872         | 1297.283        | 1274.252        | 1274.756        | 1273.748        | T 25 |
| F 16 | 730.399         | <b>1231.738</b> | 1223.728        | 1224.232        | 1223.225        | F 24 |
| V 17 | 779.933         | 1183.211        | 1175.202        | 1175.706        | 1174.698        | V 23 |
| K 18 | 843.961         | 1133.677        | 1125.668        | 1126.171        | 1125.164        | K 22 |
| K 19 | 908.026         | 1089.629        | <b>1061.620</b> | <b>1062.124</b> | <b>1061.116</b> | K 21 |
| K 20 | 972.075         | 1035.582        | 997.573         | 998.077         | 997.070         | K 20 |
| A 21 | 1067.594        | 941.534         | <b>933.525</b>  | <b>934.029</b>  | 933.021         | A 19 |
| R 22 | 1093.646        | 906.016         | <b>898.007</b>  | <b>898.510</b>  | 897.502         | R 18 |
| K 23 | <b>1156.700</b> | 827.965         | 819.956         | 820.460         | 819.452         | K 17 |
| A 24 | 1162.218        | 756.910         | 748.901         | 749.405         | 748.397         | A 16 |
| A 25 | 1227.737        | 721.392         | 713.382         | 713.886         | 712.878         | A 15 |
| C 26 | 1256.248        | 685.873         | 677.864         | 678.368         | 677.360         | C 14 |
| G 27 | 1284.758        | 629.355         | 649.345         | 649.849         | 648.841         | G 17 |
| A 28 | 1320.277        | 628.850         | 620.842         | 621.346         | 620.338         | A 12 |
| K 29 | <b>1384.325</b> | 593.313         | 585.304         | 585.807         | 584.800         | K 11 |
| R 30 | <b>1462.375</b> | 529.285         | 521.276         | 521.780         | 520.772         | R 10 |
| K 31 | 1526.423        | 451.235         | 443.226         | 443.729         | 442.722         | K 9  |
| T 32 | 1578.944        | 387.187         | 379.178         | 379.682         | 378.674         | T 8  |
| S 33 | <b>1628.462</b> | 336.664         | 328.654         | 329.158         | 328.150         | S 7  |
| G 34 | 1648.973        | 293.148         | 285.138         | 285.642         | 284.634         | G 6  |
| F 35 | 1689.500        | 264.637         | 256.627         | 257.131         | 256.124         | F 5  |
| F 36 | 1746.026        | 216.110         | 208.101         | 208.605         | 207.597         | F 4  |
| V 37 | <b>1795.560</b> | 167.584         | 159.575         | 160.079         | 159.071         | V 3  |
| S 38 | <b>1839.076</b> | 118.060         | 110.041         | 110.544         | 109.536         | S 2  |
| E 39 | 1903.597        | 74.534          | 66.524          | 67.028          | 66.021          | E 1  |

# sp | P43274 | H14\_MOUSE

TAPAAPAAPAPAEKTPVKKKARK <sup>(Methyl)</sup><sub>(14.02)</sub> AAGGAKRKTSGPPVSE

- ▶ fragmentation table for charge state 3+
- ▶ specType=etd
- ▶ score=44.24
- ▶ F104937.dat
- ▶ query=q2615\_p1
- ▶ precursor=952.551240
- ▶ chargePrecursor=4
- ▶ itol=0.8

| AA | c  | y               | z+1             | z+2             | z       | AA              |   |
|----|----|-----------------|-----------------|-----------------|---------|-----------------|---|
| T  | 1  | 40.305          | <b>1269.729</b> | <b>1264.389</b> | 0.672   | <b>1264.053</b> | T |
| A  | 2  | 04.044          | 1239.040        | <b>1230.707</b> | 0.672   | 1230.371        | A |
| P  | 3  | 96.395          | <b>1212.367</b> | 1207.028        | 0.672   | 1206.662        | P |
| A  | 4  | 130.074         | 1199.059        | 1174.077        | 0.672   | 1174.361        | A |
| A  | 5  | 143.753         | <b>1156.337</b> | <b>1150.998</b> | 0.672   | 1150.062        | A |
| P  | 6  | 176.104         | 1132.659        | 1127.319        | 0.672   | 1126.983        | P |
| A  | 7  | 199.783         | 1100.307        | 1094.968        | 0.672   | 1094.033        | A |
| A  | 8  | 223.462         | 1076.628        | 1071.289        | 0.672   | 1070.953        | A |
| P  | 9  | 255.813         | 1052.949        | 1047.610        | 0.672   | 1047.274        | P |
| A  | 10 | 279.492         | 1029.589        | 1033.259        | 0.672   | 1034.923        | A |
| P  | 11 | 311.843         | 999.910         | 991.580         | 0.672   | 991.244         | P |
| A  | 12 | 335.522         | 964.568         | 959.229         | 0.672   | 958.893         | A |
| E  | 13 | 378.537         | 940.889         | 935.550         | 0.672   | 935.214         | E |
| K  | 14 | 421.235         | <b>897.875</b>  | 892.535         | 892.871 | 892.199         | K |
| T  | 15 | 454.917         | 855.177         | 849.837         | 850.173 | 849.501         | T |
| T  | 16 | 487.256         | 821.494         | 816.355         | 815.490 | 815.213         | T |
| V  | 17 | 520.791         | 789.143         | 783.804         | 784.140 | 783.465         | V |
| K  | 18 | 562.989         | 756.120         | 750.781         | 751.117 | 750.445         | K |
| K  | 19 | 605.688         | 713.422         | 708.082         | 708.418 | 707.747         | K |
| K  | 20 | 648.386         | 670.724         | 665.384         | 665.720 | 665.048         | K |
| A  | 21 | 672.065         | 629.025         | 622.686         | 623.022 | 622.350         | A |
| K  | 22 | 724.059         | 604.340         | 599.000         | 599.343 | 598.671         | K |
| K  | 23 | 771.409         | 552.313         | 546.973         | 547.309 | 546.637         | K |
| A  | 24 | 795.148         | 504.942         | 499.603         | 499.939 | 499.267         | A |
| A  | 25 | 818.827         | 481.263         | 475.924         | 476.260 | 475.588         | A |
| G  | 26 | 837.834         | 457.594         | 452.245         | 452.581 | 451.909         | G |
| G  | 27 | 856.841         | 438.577         | 433.238         | 433.574 | 432.902         | G |
| A  | 28 | 880.520         | 419.570         | 414.231         | 414.566 | 413.895         | A |
| K  | 29 | 923.219         | 395.891         | 390.551         | 390.887 | 390.215         | K |
| R  | 30 | 975.252         | 353.193         | 347.853         | 348.189 | 347.517         | R |
| K  | 31 | 1017.951        | 301.159         | 295.819         | 296.155 | 295.484         | K |
| T  | 32 | 1051.633        | 258.461         | 253.121         | 253.457 | 252.785         | T |
| S  | 33 | 1080.644        | 224.778         | 219.439         | 219.775 | 219.103         | S |
| G  | 34 | 1099.651        | 195.767         | 190.428         | 190.764 | 190.092         | G |
| P  | 35 | 1122.002        | 176.760         | 171.421         | 171.757 | 171.085         | P |
| P  | 36 | <b>1164.353</b> | 149.400         | 139.070         | 139.406 | 138.734         | P |
| V  | 37 | <b>1197.376</b> | 112.058         | 106.719         | 107.055 | 106.383         | V |
| S  | 38 | <b>1226.386</b> | 79.036          | 73.696          | 74.032  | 73.360          | S |
| E  | 39 | 1269.401        | 50.025          | 44.685          | 45.021  | 44.349          | E |



# sp | P43276 | H15\_MOUSE

TAPAETAAPAPVEKSPAKK <sup>Methyl</sup> <sub>14.02</sub> KTTKKAGAAKRKATGPPVSE

- ▶ fragmentation table for charge state 1+
- ▶ specType=etd
- ▶ score=80.53
- ▶ F104937.dat
- ▶ query=q2650.p1
- ▶ precursor=777.848600
- ▶ chargePrecursor=5
- ▶ itol=0.8

| AA   | c               | y        | z+1             | z+2             | z               | AA   |
|------|-----------------|----------|-----------------|-----------------|-----------------|------|
| T 1  | 116.062         | 3695.192 | 8989.173        | 0.000           | 3696.165        | T 10 |
| A 2  | 190.119         | 3784.144 | 3766.120        | 0.000           | 3767.118        | A 38 |
| F 3  | 267.171         | 3713.107 | 3697.080        | 0.000           | 3698.081        | F 37 |
| A 4  | 358.208         | 3616.054 | 3600.030        | 0.000           | 3599.023        | A 26 |
| E 5  | 487.251         | 3545.017 | 3528.990        | 0.000           | 3527.991        | E 35 |
| T 6  | <b>588.299</b>  | 3415.975 | 3399.950        | 0.000           | 3398.948        | T 34 |
| A 7  | 659.336         | 3314.927 | 3298.908        | 0.000           | 3297.901        | A 33 |
| A 8  | 730.373         | 3243.890 | 3227.871        | 0.000           | 3226.863        | A 32 |
| F 9  | <b>827.426</b>  | 3172.853 | 3156.830        | 0.000           | 3155.826        | F 31 |
| A 10 | 898.463         | 3075.808 | 3059.781        | 0.000           | 3058.774        | A 20 |
| F 11 | 969.516         | 3004.763 | 2988.744        | 0.000           | 2987.736        | F 29 |
| V 12 | 1094.584        | 2907.710 | 2891.691        | 0.000           | 2890.684        | V 28 |
| E 13 | <b>1223.627</b> | 2808.642 | 2792.623        | 0.000           | 2791.615        | E 27 |
| K 14 | <b>1351.722</b> | 2679.599 | 2663.580        | 2664.588        | 2662.573        | K 26 |
| S 15 | 1428.674        | 2651.594 | 2535.488        | 2536.493        | 2534.478        | S 25 |
| F 16 | <b>1535.806</b> | 2604.472 | 2448.451        | 2449.451        | 2447.446        | F 24 |
| A 17 | 1608.844        | 2367.419 | 2351.401        | 2352.409        | 2350.393        | A 23 |
| K 18 | 1734.938        | 2296.362 | 2280.364        | 2281.371        | 2279.356        | K 22 |
| K 19 | 1877.049        | 2108.287 | 2152.269        | 2153.276        | 2151.261        | K 21 |
| K 20 | 3005.144        | 2026.177 | 2010.158        | 2011.166        | 2009.150        | K 20 |
| T 21 | 2106.192        | 1898.082 | 1882.063        | 1883.071        | 1881.055        | T 19 |
| T 22 | 2207.239        | 1797.034 | 1793.015        | 1792.023        | 1790.008        | T 18 |
| K 23 | 2335.134        | 1695.986 | 1679.968        | 1680.976        | 1678.960        | K 17 |
| K 24 | 2483.429        | 1567.891 | <b>1551.873</b> | 1552.881        | 1550.865        | K 16 |
| A 25 | 2534.466        | 1439.797 | 1423.779        | 1424.786        | 1422.770        | A 15 |
| G 26 | 2591.488        | 1368.759 | 1352.741        | 1353.748        | <b>1351.733</b> | G 14 |
| A 27 | 2662.525        | 1311.708 | <b>1295.719</b> | <b>1296.727</b> | 1294.711        | A 13 |
| A 28 | 2713.562        | 1246.661 | 1226.646        | 1227.659        | <b>1223.674</b> | A 12 |
| K 29 | 2891.657        | 1109.604 | 1153.645        | 1154.653        | 1152.637        | K 11 |
| R 30 | 3017.758        | 1041.569 | <b>1025.550</b> | 1026.558        | 1024.542        | R 10 |
| K 31 | 3145.853        | 895.468  | <b>869.449</b>  | 870.457         | <b>868.441</b>  | K 9  |
| A 32 | 3216.890        | 757.373  | 741.354         | 742.362         | 740.346         | A 8  |
| T 33 | 3317.936        | 698.336  | 678.317         | 679.325         | 669.309         | T 7  |
| G 34 | 3374.959        | 585.288  | 569.269         | 570.277         | 569.261         | G 6  |
| F 35 | 3472.012        | 528.246  | 512.248         | 513.256         | 511.240         | F 5  |
| F 36 | 3569.065        | 431.214  | 415.195         | 416.203         | 414.187         | F 4  |
| V 37 | 3668.113        | 334.161  | 318.142         | 319.150         | 317.134         | V 3  |
| S 38 | 3765.165        | 235.092  | 219.074         | 220.082         | 218.066         | S 2  |
| E 39 | 3864.208        | 148.050  | 132.042         | 133.050         | 131.034         | E 1  |



# sp | P43276 | H15\_MOUSE

TAPAETAAPAPVEKSPAKK <sup>Methyl</sup> <sub>14.02</sub> KTTKKAGAAKRKATGPPVSE

- ▶ fragmentation table for charge state 2+
- ▶ specType=etd
- ▶ score=80.53
- ▶ F104937.dat
- ▶ query=q2650.p1
- ▶ precursor=777.848600
- ▶ chargePrecursor=5
- ▶ itol=0.8

| AA    | c               | y               | z+1             | z+2             | z               | AA    |
|-------|-----------------|-----------------|-----------------|-----------------|-----------------|-------|
| F[1]  | 60.044          | 1043.105        | <b>1935.090</b> | 0.504           | <b>1934.586</b> | T[30] |
| A[2]  | 65.563          | 1092.576        | <b>1884.566</b> | 0.504           | <b>1884.063</b> | A[38] |
| F[3]  | 144.089         | 1857.057        | 1849.048        | 0.504           | 1848.541        | P[37] |
| A[4]  | 179.858         | 1898.531        | 1800.522        | 0.504           | 1800.019        | A[30] |
| E[5]  | 244.129         | 1773.015        | 1765.003        | 0.504           | 1764.499        | E[35] |
| T[6]  | 294.653         | 1708.461        | 1700.452        | 0.504           | 1699.978        | T[34] |
| A[7]  | 330.172         | 1657.967        | <b>1649.958</b> | 0.504           | 1649.454        | A[33] |
| A[8]  | 365.690         | 1622.449        | 1614.439        | 0.504           | 1613.935        | A[32] |
| F[9]  | 414.217         | 1586.930        | 1578.921        | 0.504           | 1578.417        | F[31] |
| A[10] | 449.735         | 1538.404        | <b>1530.394</b> | 0.504           | 1529.890        | A[30] |
| F[11] | 498.261         | 1552.885        | 1494.875        | 0.504           | 1494.371        | F[29] |
| V[12] | 547.796         | 1454.359        | 1446.349        | 0.504           | 1445.845        | V[28] |
| E[13] | <b>612.317</b>  | 1404.825        | <b>1396.815</b> | 0.504           | 1396.311        | E[27] |
| K[14] | 676.364         | 1340.303        | <b>1332.294</b> | 1332.793        | <b>1331.790</b> | K[26] |
| S[15] | 719.889         | <b>1276.256</b> | <b>1268.246</b> | <b>1268.750</b> |                 | S[25] |
| F[16] | 768.407         | <b>1232.740</b> | 1224.730        | 1225.234        | <b>1224.229</b> | F[24] |
| A[17] | 803.925         | 1184.213        | <b>1176.204</b> | <b>1176.708</b> | <b>1175.700</b> | A[23] |
| K[18] | <b>867.973</b>  | 1148.695        | <b>1140.685</b> | <b>1141.189</b> | 1140.182        | K[22] |
| K[19] | <b>939.028</b>  | <b>1084.647</b> | <b>1076.638</b> | <b>1077.142</b> | 1076.134        | K[21] |
| K[20] | <b>1003.076</b> | <b>1013.592</b> | <b>1005.583</b> | <b>1006.087</b> | <b>1005.079</b> | K[20] |
| T[21] | <b>1053.660</b> | <b>949.545</b>  | <b>941.535</b>  | 942.039         | <b>941.031</b>  | T[19] |
| T[22] | <b>1104.123</b> | <b>899.021</b>  | 891.011         | 891.515         | <b>890.507</b>  | T[18] |
| K[23] | <b>1168.171</b> | 848.497         | 840.487         | 840.991         | 839.984         | K[17] |
| K[24] | <b>1232.218</b> | <b>784.449</b>  | 776.440         | 776.944         | 775.938         | K[16] |
| A[25] | 1267.737        | 730.402         | 712.393         | 712.896         | 711.889         | A[15] |
| C[26] | <b>1296.248</b> | 684.883         | 676.873         | 677.378         | 676.370         | C[14] |
| A[27] | <b>1331.766</b> | 636.312         | <b>648.363</b>  | <b>648.867</b>  | 647.860         | A[13] |
| A[28] | <b>1367.285</b> | 620.854         | <b>612.845</b>  | <b>613.349</b>  | <b>612.341</b>  | A[12] |
| K[29] | <b>1431.332</b> | 585.335         | 577.326         | 577.830         | 576.822         | K[11] |
| R[30] | <b>1509.383</b> | 521.288         | 513.279         | 513.783         | 512.775         | R[10] |
| K[31] | 1573.430        | 445.237         | 435.228         | 435.732         | 434.724         | K[9]  |
| A[32] | <b>1608.949</b> | 379.180         | 371.171         | 371.675         | 370.667         | A[8]  |
| T[33] | 1699.478        | 343.671         | 335.662         | 336.166         | 335.158         | T[7]  |
| G[34] | 1887.983        | 293.148         | 285.138         | 285.642         | 284.634         | G[6]  |
| F[35] | 1736.510        | 264.637         | 256.627         | 257.131         | 256.124         | F[5]  |
| F[36] | 1785.036        | 216.110         | 208.101         | 208.605         | 207.597         | F[4]  |
| V[37] | 1834.570        | 187.584         | 159.575         | 160.079         | 159.071         | V[3]  |
| S[38] | 1878.988        | 118.056         | 110.047         | 110.544         | 109.537         | S[2]  |
| E[39] | 1942.928        | 74.534          | 66.524          | 67.028          | 66.021          | E[1]  |

# sp | P43276 | H15\_MOUSE

TAPAETAAPAPVEKSPAKK<sup>Methyl</sup><sub>14.02</sub> KTTKKAGAAKRKATGPPVSE

- ▶ fragmentation table for charge state 3+
- ▶ specType=etd
- ▶ score=80.53
- ▶ F104937.dat
- ▶ query=q2650.p1
- ▶ precursor=777.848600
- ▶ chargePrecursor=5
- ▶ itol=0.8

| AA | c  | y               | z-1             | z-2             | z              | AA              |   |    |
|----|----|-----------------|-----------------|-----------------|----------------|-----------------|---|----|
| T  | 1  | 40.305          | <b>1295.736</b> | <b>1290.396</b> | 0.672          | <b>1290.060</b> | T | 30 |
| A  | 2  | 04.044          | 1262.051        | <b>1256.713</b> | 0.672          | 1256.377        | A | 38 |
| P  | 3  | 06.395          | 1238.374        | <b>1233.014</b> | 0.672          | <b>1232.698</b> | P | 37 |
| A  | 4  | 120.074         | 1206.021        | 1200.667        | 0.672          | 1200.347        | A | 26 |
| E  | 5  | 103.089         | 1182.344        | 1177.004        | 0.672          | <b>1176.068</b> | E | 35 |
| T  | 6  | 196.771         | 1139.330        | <b>1133.990</b> | 0.672          | <b>1133.054</b> | T | 34 |
| A  | 7  | 220.450         | <b>1105.647</b> | <b>1100.308</b> | 0.672          | <b>1099.972</b> | A | 33 |
| A  | 8  | 244.129         | 1081.950        | <b>1076.629</b> | 0.672          | <b>1076.293</b> | A | 32 |
| P  | 9  | 278.480         | <b>1058.269</b> | 1052.929        | 0.672          | 1052.613        | P | 31 |
| A  | 10 | 300.159         | <b>1025.938</b> | <b>1020.599</b> | 0.672          | <b>1020.263</b> | A | 30 |
| P  | 11 | 332.510         | <b>1002.259</b> | 996.920         | 0.672          | 996.584         | P | 29 |
| V  | 12 | 365.533         | 969.908         | 964.569         | 0.672          | 964.233         | V | 28 |
| E  | 13 | 408.547         | 936.885         | <b>931.546</b>  | 0.672          | 931.210         | E | 27 |
| K  | 14 | 451.245         | 893.871         | <b>888.532</b>  | <b>888.868</b> | 888.190         | K | 26 |
| S  | 15 | 489.256         | 861.173         | <b>845.833</b>  | <b>846.169</b> | <b>845.497</b>  | S | 25 |
| P  | 16 | 512.607         | 822.162         | 818.813         | 814.159        | 810.487         | P | 24 |
| A  | 17 | 536.286         | 789.811         | <b>784.472</b>  | <b>784.808</b> | <b>784.136</b>  | A | 23 |
| K  | 18 | 578.984         | 766.132         | 760.793         | 761.129        | 760.451         | K | 22 |
| K  | 19 | 608.355         | 723.434         | 718.094         | 718.430        | 717.758         | K | 21 |
| K  | 20 | 669.053         | 676.064         | 670.724         | 671.060        | 670.388         | K | 20 |
| P  | 21 | 702.730         | 633.365         | 628.026         | 628.362        | 627.686         | P | 19 |
| T  | 22 | 736.418         | 599.681         | 594.343         | 594.679        | 594.001         | T | 18 |
| K  | 23 | 779.116         | 566.000         | 560.661         | 560.997        | 560.325         | K | 17 |
| K  | 24 | 821.815         | 523.300         | 517.962         | 518.298        | 517.626         | K | 16 |
| A  | 25 | <b>845.494</b>  | 480.604         | 475.264         | 475.600        | 474.928         | A | 15 |
| G  | 26 | <b>864.501</b>  | 456.925         | 451.585         | 451.921        | 451.249         | G | 14 |
| A  | 27 | 888.180         | 437.917         | 432.578         | 432.914        | 432.242         | A | 13 |
| A  | 28 | 911.859         | 414.738         | 409.399         | 409.735        | 409.063         | A | 12 |
| K  | 29 | <b>954.557</b>  | 390.550         | 385.210         | 385.546        | 384.884         | K | 11 |
| R  | 30 | <b>1006.591</b> | 347.861         | 342.522         | 342.857        | 342.188         | R | 10 |
| K  | 31 | <b>1049.289</b> | 295.827         | 290.488         | 290.824        | 290.151         | K | 9  |
| A  | 32 | <b>1072.968</b> | 253.129         | 247.789         | 248.125        | 247.454         | A | 8  |
| T  | 33 | <b>1106.651</b> | 229.450         | 224.110         | 224.446        | 223.775         | T | 7  |
| G  | 34 | 1129.938        | 195.761         | 190.422         | 190.754        | 190.082         | G | 6  |
| P  | 35 | 1158.009        | 175.760         | 171.421         | 171.757        | 171.085         | P | 5  |
| P  | 36 | 1190.360        | 144.400         | 139.070         | 139.406        | 138.734         | P | 4  |
| V  | 37 | <b>1223.383</b> | 112.050         | 106.719         | 107.055        | 106.383         | V | 3  |
| S  | 38 | <b>1252.393</b> | 79.030          | 73.696          | 74.032         | 73.360          | S | 2  |
| E  | 39 | 1295.408        | 50.025          | 44.685          | 45.021         | 44.349          | E | 1  |

# sp | P43276 | H15\_MOUSE

TAPAETAAPAPVEKSPAKK <sup>Methyl</sup> 14.02 KTTKKAGAAKRKATGPPVSE

- ▶ fragmentation table for charge state 4+
- ▶ specType=etd
- ▶ score=80.53
- ▶ F104937.dat
- ▶ query=q2650\_p1
- ▶ precursor=777.848600
- ▶ chargePrecursor=5
- ▶ itol=0.8

| AA | c  | y              | z+1            | z+2            | z              | AA             |   |    |
|----|----|----------------|----------------|----------------|----------------|----------------|---|----|
| T  | 1  | 30.526         | <b>972.053</b> | <b>968.049</b> | 0.755          | <b>967.797</b> | T | 30 |
| A  | 2  | 48.285         | 946.792        | <b>942.787</b> | 0.755          | <b>942.535</b> | A | 38 |
| P  | 3  | 72.548         | <b>929.032</b> | 925.028        | 0.755          | 924.776        | P | 37 |
| A  | 4  | 90.308         | 904.769        | 900.764        | 0.755          | 900.512        | A | 36 |
| E  | 5  | 122.568        | 887.010        | 883.005        | 0.755          | 882.753        | E | 35 |
| T  | 6  | 147.830        | 854.749        | 850.744        | 0.755          | 850.493        | T | 34 |
| A  | 7  | 165.589        | 829.487        | 825.483        | 0.755          | 825.231        | A | 33 |
| A  | 8  | 193.349        | 811.728        | 807.723        | 0.755          | 807.471        | A | 32 |
| P  | 9  | 207.612        | 793.969        | 789.964        | 0.755          | 789.712        | P | 31 |
| A  | 10 | 225.371        | 769.705        | 765.701        | 0.755          | 765.449        | A | 30 |
| P  | 11 | 249.634        | 751.946        | 747.942        | 0.755          | 747.690        | P | 29 |
| V  | 12 | 274.401        | 727.683        | 723.678        | 0.755          | 723.426        | V | 28 |
| E  | 13 | 308.662        | 702.916        | 698.911        | 0.755          | 698.659        | E | 27 |
| K  | 14 | 338.686        | 670.655        | 666.651        | 666.903        | 666.399        | K | 26 |
| S  | 15 | 380.434        | 638.042        | 634.037        | 633.879        | 634.375        | S | 25 |
| P  | 16 | 394.707        | 616.874        | <b>612.869</b> | <b>613.121</b> | <b>612.617</b> | P | 24 |
| A  | 17 | 402.466        | 597.610        | <b>588.606</b> | <b>589.858</b> | <b>588.354</b> | A | 23 |
| K  | 18 | 434.490        | 574.851        | 570.846        | 571.098        | 570.594        | K | 22 |
| K  | 19 | 470.018        | 542.827        | 538.823        | 539.075        | 538.571        | K | 21 |
| K  | 20 | 502.041        | 507.300        | 503.295        | 503.547        | 503.043        | K | 20 |
| T  | 21 | 527.303        | 475.276        | 471.271        | 471.523        | 471.019        | T | 19 |
| T  | 22 | 552.565        | 450.014        | 446.009        | 446.261        | 445.757        | T | 18 |
| K  | 23 | 584.589        | 424.752        | 420.747        | 420.999        | 420.495        | K | 17 |
| K  | 24 | 616.613        | 392.728        | 388.724        | 388.976        | 388.472        | K | 16 |
| A  | 25 | 634.372        | 366.705        | 362.700        | 362.952        | 362.448        | A | 15 |
| G  | 26 | <b>648.627</b> | 342.945        | 338.941        | 339.193        | 338.689        | G | 14 |
| A  | 27 | 666.387        | 328.690        | 324.685        | 324.937        | 324.433        | A | 13 |
| A  | 28 | 684.146        | 310.931        | 306.926        | 307.178        | 306.674        | A | 12 |
| K  | 29 | 716.170        | 293.171        | 289.167        | 289.419        | 288.915        | K | 11 |
| R  | 30 | 750.195        | 261.148        | 257.143        | 257.395        | 256.891        | R | 10 |
| K  | 31 | 787.219        | 222.122        | 218.118        | 218.370        | 217.866        | K | 9  |
| A  | 32 | 804.978        | 190.099        | 186.094        | 186.346        | 185.842        | A | 8  |
| T  | 33 | 830.240        | 172.339        | 168.335        | 168.587        | 168.083        | T | 7  |
| G  | 34 | 844.895        | 147.071        | 143.067        | 143.320        | 142.816        | G | 6  |
| P  | 35 | <b>868.759</b> | 132.822        | 128.817        | 129.069        | 128.565        | P | 5  |
| P  | 36 | 893.022        | 108.555        | 104.551        | 104.803        | 104.300        | P | 4  |
| V  | 37 | <b>917.789</b> | 84.296         | 80.291         | 80.543         | 80.039         | V | 3  |
| S  | 38 | <b>939.547</b> | 59.529         | 55.524         | 55.776         | 55.272         | S | 2  |
| E  | 39 | <b>971.807</b> | 37.771         | 33.766         | 34.018         | 33.514         | E | 1  |

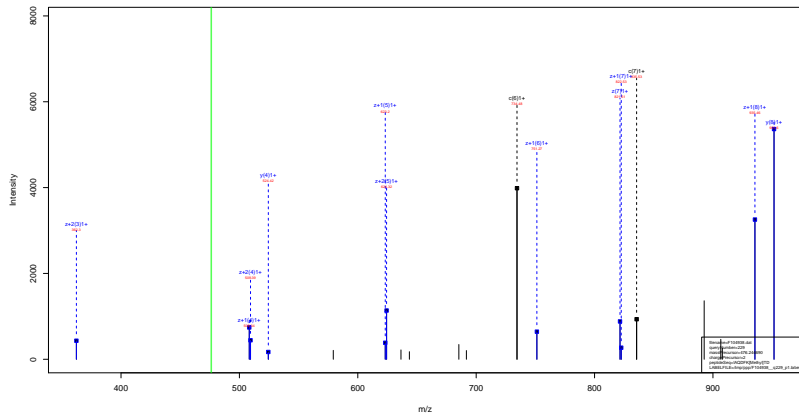

# sp | P68433 | H31\_MOUSE

IAQDFK<sup>Methyl</sup>TD  
14.02

- ▶ fragmentation table for charge state 1+
- ▶ specType=etd
- ▶ score=31.03
- ▶ F104938.dat
- ▶ query=q229\_p1
- ▶ precursor=476.244690
- ▶ chargePrecursor=2
- ▶ itol=0.8

| AA  | c              | y              | z+1            | z+2            | z              | AA  |
|-----|----------------|----------------|----------------|----------------|----------------|-----|
| I 1 | 131.118        | <b>951.478</b> | <b>935.459</b> | 0.000          | 934.452        | I 8 |
| A 2 | 202.155        | 838.394        | <b>822.375</b> | 0.000          | <b>821.368</b> | A 7 |
| Q 3 | 330.214        | 767.357        | <b>751.338</b> | 752.346        | 750.330        | Q 6 |
| D 4 | 445.241        | 639.298        | <b>623.280</b> | <b>624.288</b> | 622.272        | D 5 |
| F 5 | 592.309        | <b>524.271</b> | <b>508.253</b> | <b>509.261</b> | 507.245        | F 4 |
| R 6 | <b>734.420</b> | 377.203        | 361.194        | <b>362.192</b> | 360.177        | R 3 |
| T 7 | <b>835.467</b> | 235.092        | 219.074        | 220.082        | 218.066        | T 2 |
| D 8 | 950.494        | 134.045        | 118.026        | 119.034        | 117.018        | D 1 |

sp | Q64478 | H2B1H\_MOUSE

PEPAKSAPAPKKGSKKALTKAQKKDGKKRKRSRKE

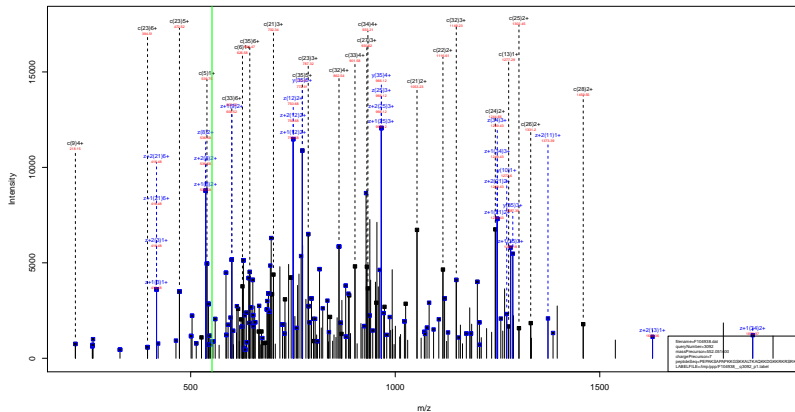

# sp | Q64478 | H2B1H\_MOUSE

## PEPAKSAPAPKKGSKKALTKAQKKDGKKRKRSRKE

- ▶ fragmentation table for charge state 1+
- ▶ specType=etd
- ▶ score=44.50
- ▶ F104938.dat
- ▶ query=q3092\_p1
- ▶ precursor=552.051400
- ▶ chargePrecursor=7
- ▶ itol=0.8

| AA | c               | y               | ±1              | ±2              | z               | AA   |
|----|-----------------|-----------------|-----------------|-----------------|-----------------|------|
| P1 | 115.087         | 3858.299        | 3842.280        | 0.000           | 3841.271        | P10  |
| E1 | 244.129         | 3761.245        | 3745.227        | 0.000           | 3744.220        | E14  |
| F1 | 341.182         | 3632.203        | 3616.185        | 0.000           | 3615.177        | F13  |
| A1 | 412.219         | 3535.151        | 3519.132        | 0.000           | 3518.124        | A12  |
| K1 | <b>540.314</b>  | 3464.114        | 3448.095        | 3440.103        | 3447.087        | K131 |
| S1 | <b>627.346</b>  | 3336.079        | 3320.060        | 3327.068        | 3318.962        | S10  |
| A1 | <b>698.383</b>  | 3248.987        | 3232.968        | 3233.976        | 3211.950        | A129 |
| F1 | <b>795.436</b>  | 3177.948        | 3161.931        | 3162.939        | 3160.921        | F128 |
| A1 | <b>866.473</b>  | 3080.897        | 3064.878        | 3065.886        | 3063.870        | A127 |
| P1 | 903.520         | 3009.860        | 2993.841        | 2994.849        | 2992.833        | P126 |
| K1 | 1091.821        | 2912.807        | 2896.788        | 2897.796        | 2895.780        | K125 |
| K1 | 1219.719        | 2824.722        | 2808.693        | 2809.701        | 2767.685        | K124 |
| G1 | <b>1276.737</b> | 2636.617        | 2620.598        | 2641.606        | 2633.590        | G123 |
| S1 | 1383.769        | 2599.595        | 2583.577        | 2584.585        | 2582.569        | S122 |
| K1 | 1491.664        | 2512.563        | 2496.545        | 2497.553        | 2495.537        | K121 |
| K1 | 1619.959        | 2384.468        | 2368.450        | 2369.458        | 2367.442        | K120 |
| A1 | 1880.998        | 2256.373        | 2240.355        | 2241.363        | 2239.347        | A119 |
| L1 | 1894.080        | 2185.335        | 2169.317        | 2170.325        | 2168.310        | L118 |
| T1 | 1998.128        | 2072.252        | 2056.234        | 2057.241        | 2055.226        | T117 |
| K1 | 2031.223        | 1971.205        | 1955.188        | 1956.194        | 1954.179        | K116 |
| A1 | 2194.260        | 1843.110        | 1827.091        | 1828.099        | 1826.083        | A115 |
| Q1 | 2232.219        | 1772.072        | 1756.054        | 1757.062        | 1755.046        | Q114 |
| K1 | 2380.414        | 1644.014        | 1627.995        | <b>1639.003</b> | 1629.987        | K113 |
| K1 | 2488.509        | 1515.915        | 1499.900        | 1500.908        | 1498.892        | K112 |
| D1 | 2603.536        | 1387.824        | 1371.805        | <b>1372.813</b> | 1370.798        | D111 |
| G1 | 2660.557        | <b>1277.797</b> | 1261.779        | <b>1277.786</b> | 1255.771        | G110 |
| K1 | 2788.652        | 1215.776        | 1199.757        | <b>1200.765</b> | 1198.749        | K109 |
| K1 | 2818.719        | 1029.681        | <b>1071.662</b> | <b>1072.670</b> | <b>1070.654</b> | K108 |
| R1 | 3072.848        | 959.590         | 943.572         | <b>944.575</b>  | 942.559         | R107 |
| K1 | 3290.943        | <b>803.485</b>  | <b>787.466</b>  | <b>788.474</b>  | 786.458         | K106 |
| R1 | 3357.044        | <b>675.390</b>  | 659.371         | 660.379         | <b>658.363</b>  | R105 |
| S1 | 3444.076        | 519.289         | <b>503.270</b>  | 504.278         | 502.262         | S104 |
| R1 | 3600.177        | 432.257         | <b>416.238</b>  | <b>417.246</b>  | 415.230         | R103 |
| K1 | 3728.672        | 278.195         | <b>260.137</b>  | <b>261.144</b>  | <b>259.129</b>  | K102 |
| E1 | 3857.315        | 148.060         | 132.042         | 133.050         | 131.034         | E101 |

# sp | Q64478 | H2B1H\_MOUSE

## PEPAKSAPAPKKGSKKALTKAQKKDGKKRKRSRKE

- ▶ fragmentation table for charge state 2+
- ▶ specType=etd
- ▶ score=44.50
- ▶ F104938.dat
- ▶ query=q3092\_p1
- ▶ precursor=552.051400
- ▶ chargePrecursor=7
- ▶ itol=0.8

| AA  | c               | y               | #s1             | #s2             | z               | AA   |
|-----|-----------------|-----------------|-----------------|-----------------|-----------------|------|
| P1  | 58.047          | 1029.653        | 1021.644        | 0.504           | 1821.146        | P128 |
| E1  | 122.508         | 1081.127        | <b>1873.117</b> | 0.504           | 1872.613        | E134 |
| F1  | 171.095         | 1816.605        | 1808.596        | 0.504           | 1808.002        | F133 |
| A1  | 208.613         | 1748.079        | 1760.010        | 0.504           | 1759.566        | A132 |
| K1  | 270.661         | 1732.560        | 1724.551        | 1725.055        | 1724.047        | K131 |
| S1  | 314.177         | 1698.513        | 1690.504        | 1691.007        | 1690.499        | S130 |
| A17 | 369.695         | 1624.997        | 1616.988        | 1617.491        | 1616.981        | A129 |
| F1  | 398.222         | 1589.478        | 1581.469        | 1581.973        | 1580.965        | F128 |
| A1  | 433.740         | 1540.953        | 1532.943        | 1533.447        | 1532.439        | A127 |
| P10 | 482.267         | 1505.433        | 1497.424        | 1497.928        | 1496.920        | P126 |
| K11 | <b>546.314</b>  | 1456.907        | 1448.898        | 1449.402        | 1448.394        | K125 |
| K12 | 610.383         | 1392.886        | 1384.878        | <b>1385.384</b> | 1384.376        | K124 |
| G13 | 638.912         | 1328.912        | 1320.903        | 1321.407        | 1320.399        | G123 |
| S14 | <b>682.388</b>  | 1300.301        | 1292.292        | 1292.796        | 1291.788        | S122 |
| K15 | <b>746.436</b>  | 1256.785        | <b>1248.776</b> | <b>1249.280</b> | 1248.272        | K121 |
| K16 | <b>810.483</b>  | 1192.758        | <b>1184.729</b> | <b>1185.232</b> | <b>1184.225</b> | K120 |
| A17 | 868.922         | <b>1128.690</b> | <b>1120.681</b> | <b>1121.185</b> | <b>1120.177</b> | A119 |
| L18 | 907.544         | <b>1093.172</b> | 1085.163        | 1085.666        | 1084.658        | L118 |
| T19 | <b>953.068</b>  | 1036.630        | 1028.620        | 1029.124        | 1028.117        | T117 |
| K20 | 1017.115        | <b>986.106</b>  | 978.097         | <b>978.601</b>  | 977.593         | K116 |
| A21 | <b>1052.634</b> | 922.058         | 914.049         | 914.553         | 913.545         | A115 |
| Q22 | <b>1116.663</b> | 868.540         | <b>878.531</b>  | <b>879.034</b>  | 878.027         | Q114 |
| K23 | 1189.710        | <b>822.511</b>  | <b>814.501</b>  | <b>815.005</b>  | 813.997         | K113 |
| K24 | <b>1244.758</b> | <b>758.463</b>  | <b>750.454</b>  | <b>750.958</b>  | <b>749.950</b>  | K112 |
| D25 | <b>1302.271</b> | <b>694.416</b>  | <b>686.406</b>  | <b>686.910</b>  | <b>685.902</b>  | D111 |
| G26 | <b>1330.782</b> | <b>636.902</b>  | <b>628.893</b>  | <b>629.397</b>  | <b>628.389</b>  | G110 |
| K27 | 1394.830        | 608.391         | <b>600.382</b>  | <b>600.886</b>  | <b>599.878</b>  | K109 |
| T28 | <b>1458.877</b> | <b>544.344</b>  | <b>536.335</b>  | <b>536.839</b>  | <b>535.831</b>  | T108 |
| R29 | 1538.828        | 480.295         | <b>472.287</b>  | <b>472.791</b>  | <b>471.783</b>  | R107 |
| K30 | 1600.975        | 402.246         | <b>394.237</b>  | <b>394.740</b>  | <b>393.733</b>  | K106 |
| R31 | 1678.020        | 338.198         | 330.189         | 330.693         | 329.685         | R105 |
| S32 | 1722.542        | <b>260.148</b>  | 252.139         | 252.642         | 251.635         | S104 |
| R33 | 1800.592        | 216.632         | 208.623         | 209.126         | 208.119         | R103 |
| K34 | 1884.640        | 138.581         | 130.572         | 131.076         | 129.968         | K102 |
| E35 | 1929.181        | 74.534          | 66.524          | 67.028          | 65.921          | E101 |



# sp | Q64478 | H2B1H\_MOUSE

## PEPAKSAPAPKKGSKKALTKAQKKDGKKRKRSRKE

- ▶ fragmentation table for charge state 3+
- ▶ specType=etd
- ▶ score=44.50
- ▶ F104938.dat
- ▶ query=q3092\_p1
- ▶ precursor=552.051400
- ▶ chargePrecursor=7
- ▶ itol=0.8

| AA   | c               | y               | z+1             | z+2             | z               | AA   |
|------|-----------------|-----------------|-----------------|-----------------|-----------------|------|
| P 1  | 39.034          | <b>1286.771</b> | <b>1281.432</b> | 0.672           | 1281.090        | P 28 |
| E 2  | 82.048          | 1254.520        | <b>1249.081</b> | 0.672           | <b>1248.745</b> | E 34 |
| F 3  | 114.399         | 1211.408        | <b>1206.066</b> | 0.672           | <b>1205.730</b> | F 33 |
| A 4  | 138.078         | 1179.055        | <b>1173.716</b> | 0.672           | <b>1173.380</b> | A 32 |
| K 5  | 180.776         | <b>1155.376</b> | 1150.036        | 1150.372        | <b>1149.701</b> | K 31 |
| S 6  | 209.787         | 1122.121        | 1107.133        | 1107.874        | <b>1107.062</b> | S 30 |
| A 7  | 233.466         | <b>1083.667</b> | <b>1078.327</b> | 1078.963        | <b>1077.992</b> | A 29 |
| F 8  | 265.817         | 1059.988        | 1054.648        | 1054.984        | 1054.312        | F 28 |
| A 9  | 289.496         | 1027.617        | <b>1022.298</b> | <b>1022.633</b> | <b>1021.962</b> | A 27 |
| P 10 | 321.847         | 1003.958        | 998.618         | 998.954         | 998.283         | P 26 |
| K 11 | 364.545         | <b>971.607</b>  | <b>966.268</b>  | <b>966.603</b>  | <b>965.932</b>  | K 25 |
| K 12 | 407.243         | <b>938.909</b>  | <b>923.569</b>  | <b>923.905</b>  | 923.234         | K 24 |
| G 13 | 426.251         | <b>886.210</b>  |                 | 881.207         | <b>880.535</b>  | G 23 |
| S 14 | 455.261         | <b>867.203</b>  | <b>861.864</b>  | <b>862.200</b>  | 861.539         | S 22 |
| K 15 | 497.960         | <b>838.193</b>  | 832.853         | 833.189         | 832.517         | K 21 |
| K 16 | 540.658         | <b>795.494</b>  | 790.155         | <b>790.491</b>  | 789.819         | K 20 |
| A 17 | 584.357         | 762.795         | 747.482         | 747.762         | 747.120         | A 19 |
| L 18 | 602.932         | <b>729.117</b>  | <b>723.777</b>  | <b>724.113</b>  | 723.441         | L 18 |
| T 19 | <b>635.714</b>  | 691.422         | <b>686.083</b>  | <b>686.419</b>  | <b>685.747</b>  | T 17 |
| K 20 | <b>678.413</b>  | <b>657.740</b>  | <b>652.400</b>  | <b>652.736</b>  | <b>652.064</b>  | K 16 |
| A 21 | <b>702.092</b>  | 615.041         | 609.702         | 610.038         | 609.369         | A 15 |
| Q 22 | 744.773         | <b>591.362</b>  | <b>586.023</b>  | <b>586.359</b>  | <b>585.687</b>  | Q 14 |
| K 23 | <b>787.476</b>  | <b>548.676</b>  | <b>543.337</b>  | <b>543.673</b>  | <b>543.001</b>  | K 13 |
| K 24 | 830.174         | 505.975         | <b>500.638</b>  | <b>500.974</b>  | <b>500.302</b>  | K 12 |
| D 25 | <b>868.517</b>  | <b>463.280</b>  | 457.940         | 458.276         | 457.604         | D 11 |
| G 26 | <b>887.524</b>  | 424.917         | 419.598         | <b>419.934</b>  | 419.261         | G 10 |
| K 27 | <b>930.222</b>  | 405.930         | 400.590         | 400.926         | 400.255         | K 9  |
| K 28 | <b>972.920</b>  | 383.232         | 387.892         | 388.228         | 387.556         | K 8  |
| R 29 | <b>1024.954</b> | 320.533         | 315.194         | 315.530         | 314.858         | R 7  |
| K 30 | 1067.653        | 268.500         | 263.160         | 263.496         | 262.824         | K 6  |
| R 31 | 1119.689        | 225.801         | 220.462         | 220.798         | 220.126         | R 5  |
| S 32 | <b>1148.697</b> | 173.768         | 168.428         | 168.764         | 168.092         | S 4  |
| K 33 | <b>1200.731</b> | 144.757         | 139.417         | 139.753         | 139.082         | K 3  |
| K 34 | 1243.433        | 90.723          | 85.384          | 85.720          | 85.048          | K 2  |
| E 35 | 1286.443        | 50.025          | 44.685          | 45.021          | 44.349          | E 1  |

# sp | Q64478 | H2B1H\_MOUSE

## PEPAKSAPAPKKGSKKALTKAQKKDGKKRKRSRKE

- ▶ fragmentation table for charge state 4+
- ▶ specType=etd
- ▶ score=44.50
- ▶ F104938.dat
- ▶ query=q3092.p1
- ▶ precursor=552.051400
- ▶ chargePrecursor=7
- ▶ itol=0.8

| AA    | c              | y              | z+1            | z+2            | z              | AA    |
|-------|----------------|----------------|----------------|----------------|----------------|-------|
| P[1]  | 29.527         | <b>965.130</b> | <b>961.125</b> | 0.735          | 881.074        | P[15] |
| L[2]  | 61.788         | 941.507        | <b>937.062</b> | 0.735          | <b>936.810</b> | L[34] |
| P[3]  | 96.051         | 908.806        | 908.802        | 0.735          | 904.550        | P[13] |
| A[4]  | 103.810        | 894.943        | <b>890.530</b> | 0.735          | <b>890.286</b> | A[32] |
| K[5]  | 135.834        | <b>866.784</b> | <b>862.779</b> | <b>863.031</b> | <b>862.527</b> | K[31] |
| S[6]  | 157.592        | <b>834.760</b> | 830.755        | 831.007        | 830.503        | S[30] |
| A[7]  | 175.351        | 811.002        | 808.997        | <b>809.249</b> | 808.745        | A[29] |
| P[8]  | 199.614        | <b>795.243</b> | <b>791.238</b> | <b>791.490</b> | <b>790.986</b> | P[28] |
| A[9]  | <b>217.374</b> | 770.980        | 766.975        | 767.227        | 766.723        | A[27] |
| P[10] | 241.837        | 753.220        | 749.215        | 749.468        | 748.964        | P[26] |
| K[11] | 273.081        | <b>728.957</b> | <b>724.952</b> | <b>725.204</b> | <b>724.701</b> | K[25] |
| K[12] | 305.284        | <b>696.933</b> | <b>692.929</b> | <b>693.181</b> | <b>692.677</b> | K[24] |
| G[13] | 319.940        | 664.910        | 660.905        | 661.157        | 660.653        | G[23] |
| S[14] | 341.698        | 650.654        | 646.650        | <b>646.902</b> | 646.398        | S[22] |
| K[15] | 373.722        | <b>628.896</b> | <b>624.892</b> | <b>625.144</b> | 624.640        | K[21] |
| K[16] | 405.745        | <b>596.873</b> | 592.868        | 593.120        | 592.616        | K[20] |
| A[17] | 423.505        | 564.849        | 560.844        | 561.096        | <b>560.592</b> | A[19] |
| L[18] | 451.776        | <b>547.090</b> | <b>543.085</b> | <b>543.337</b> | 542.833        | L[18] |
| T[19] | 477.037        | 518.819        | 514.814        | 515.066        | 514.562        | T[17] |
| L[20] | 509.081        | 493.557        | 489.552        | 489.804        | 489.300        | L[16] |
| A[21] | <b>526.820</b> | 461.533        | 457.528        | 457.780        | 457.276        | A[15] |
| Q[22] | 558.835        | 443.774        | 439.769        | 440.021        | 439.517        | Q[14] |
| K[23] | <b>590.859</b> | 411.759        | 407.754        | 408.006        | 407.502        | K[13] |
| K[24] | <b>622.883</b> | 379.735        | 375.731        | 375.982        | 375.479        | K[12] |
| D[25] | <b>651.639</b> | 347.711        | 343.707        | 343.959        | 343.455        | D[11] |
| G[26] | <b>665.895</b> | 318.955        | 314.950        | 315.202        | 314.698        | G[10] |
| K[27] | <b>697.918</b> | 304.699        | 300.695        | 300.947        | 300.443        | K[9]  |
| K[28] | <b>729.942</b> | 272.676        | 268.671        | 268.923        | 268.419        | K[8]  |
| R[29] | 765.997        | 240.652        | 236.647        | 236.899        | 236.395        | R[1]  |
| K[30] | <b>800.991</b> | 201.627        | 197.622        | 197.874        | 197.370        | K[6]  |
| R[31] | <b>840.016</b> | 169.603        | 165.598        | 165.850        | 165.346        | R[5]  |
| S[32] | <b>861.774</b> | 138.578        | 134.573        | 134.825        | 134.321        | S[4]  |
| R[33] | <b>900.800</b> | 108.620        | 104.615        | 104.867        | 104.363        | R[3]  |
| K[34] | <b>932.824</b> | 69.794         | 65.790         | 66.042         | 65.538         | K[2]  |
| E[35] | 965.084        | 37.771         | 33.766         | 34.018         | 33.514         | E[1]  |

# sp | Q64478 | H2B1H\_MOUSE

PEPAKSAPAPKKGSKKALTKAQKKDGGKRRKRSRKE

- ▶ fragmentation table for charge state 5+
- ▶ specType=etd
- ▶ score=44.50
- ▶ F104938.dat
- ▶ query=q3092.p1
- ▶ precursor=552.051400
- ▶ chargePrecursor=7
- ▶ itol=0.8

| AA |    | c              | y              | z+1            | z+2            | z              | AA    |
|----|----|----------------|----------------|----------------|----------------|----------------|-------|
| P  | 1  | 23.823         | <b>772.466</b> | <b>769.262</b> | 0.806          | 109.090        | P[18] |
| L  | 2  | 49.632         | 753.055        | 749.851        | 0.806          | 749.050        | L[34] |
| P  | 3  | 69.042         | 727.247        | <b>724.043</b> | 0.806          | <b>723.841</b> | P[13] |
| A  | 4  | 83.290         | 707.836        | 704.632        | 0.806          | 704.431        | A[32] |
| K  | 5  | 108.869        | 693.629        | <b>690.425</b> | <b>690.626</b> | <b>690.223</b> | K[31] |
| S  | 6  | 126.275        | <b>668.010</b> | 664.806        | 665.007        | 664.604        | S[30] |
| A  | 7  | 140.482        | 650.603        | <b>647.399</b> | <b>647.601</b> | <b>647.198</b> | A[29] |
| P  | 8  | 159.893        | <b>636.396</b> | <b>633.192</b> | <b>633.394</b> | <b>632.990</b> | P[28] |
| A  | 9  | 174.100        | 616.985        | 613.781        | 613.983        | <b>613.580</b> | A[27] |
| F  | 10 | 193.511        | 602.778        | 599.573        | <b>599.776</b> | 599.372        | F[26] |
| K  | 11 | 219.130        | 583.361        | 580.157        | 580.359        | 579.962        | K[25] |
| K  | 12 | 244.749        | 557.745        | <b>554.544</b> | <b>554.746</b> | <b>554.343</b> | K[24] |
| G  | 13 | 256.153        | 532.129        | 528.925        | 529.127        | 528.724        | G[23] |
| S  | 14 | 273.560        | 520.725        | 517.521        | 517.723        | 517.320        | S[22] |
| K  | 15 | 299.179        | <b>503.319</b> | 500.115        | <b>500.316</b> | 499.913        | K[21] |
| K  | 16 | 324.798        | 477.700        | 474.496        | 474.697        | 474.294        | K[20] |
| A  | 17 | 339.005        | 452.081        | 448.877        | 449.078        | 448.675        | A[19] |
| L  | 18 | 361.622        | 437.873        | 434.669        | 434.871        | 434.468        | L[18] |
| F  | 19 | 383.831        | 413.256        | 412.053        | 412.254        | 411.851        | F[17] |
| K  | 20 | 407.950        | <b>395.047</b> | 391.843        | 392.045        | 391.641        | K[16] |
| A  | 21 | 421.658        | 369.430        | 366.224        | 366.426        | 366.022        | A[15] |
| Q  | 22 | 447.270        | 355.220        | 352.017        | 352.218        | 351.815        | Q[14] |
| K  | 23 | <b>472.889</b> | 329.609        | <b>326.405</b> | <b>326.606</b> | 326.203        | K[13] |
| K  | 24 | 498.508        | 303.990        | 300.786        | 300.987        | 300.584        | K[12] |
| D  | 25 | 521.513        | 278.371        | 275.167        | 275.368        | 274.965        | D[11] |
| G  | 26 | 532.917        | 255.365        | 252.161        | 252.363        | 251.960        | G[10] |
| K  | 27 | 558.536        | 243.961        | 240.757        | 240.959        | 240.556        | K[9]  |
| K  | 28 | 584.155        | <b>218.342</b> | 215.138        | 215.340        | 214.937        | K[8]  |
| K  | 29 | <b>615.375</b> | 192.723        | 189.519        | 189.721        | 189.318        | K[7]  |
| K  | 30 | <b>640.994</b> | 161.503        | 158.299        | 158.501        | 158.097        | K[6]  |
| R  | 31 | <b>672.215</b> | 135.884        | 132.680        | 132.882        | 132.478        | R[5]  |
| S  | 32 | <b>689.621</b> | 104.664        | 101.460        | 101.661        | 101.258        | S[4]  |
| R  | 33 | 720.841        | 87.257         | 84.053         | 84.255         | 83.852         | R[3]  |
| K  | 34 | <b>746.460</b> | 56.037         | 52.833         | 53.035         | 52.632         | K[2]  |
| E  | 35 | <b>772.269</b> | 30.418         | 27.214         | 27.416         | 27.013         | E[1]  |

# sp | Q64478 | H2B1H\_MOUSE

## PEPAKSAPAPKKGSKKALTKAQKKDGKKRKRSRKE

- ▶ fragmentation table for charge state 6+
- ▶ specType=etd
- ▶ score=44.50
- ▶ F104938.dat
- ▶ query=q3092.p1
- ▶ precursor=552.051400
- ▶ chargePrecursor=7
- ▶ itol=0.8

| AA    | c              | y              | z+1            | z+2            | z              | AA    |
|-------|----------------|----------------|----------------|----------------|----------------|-------|
| P[1]  | 30.020         | <b>643.889</b> | <b>641.219</b> | 0.839          | <b>641.051</b> | P[15] |
| L[2]  | 41.528         | 527.714        | <b>625.044</b> | 0.839          | <b>624.876</b> | L[34] |
| P[3]  | 57.703         | 606.207        | <b>603.537</b> | 0.839          | <b>603.369</b> | P[13] |
| A[4]  | 69.543         | 590.031        | <b>587.361</b> | 0.839          | <b>587.193</b> | A[32] |
| K[5]  | 90.892         | 578.192        | 575.522        | 575.690        | 575.354        | K[31] |
| S[6]  | 109.397        | 556.842        | <b>554.173</b> | <b>554.341</b> | <b>554.005</b> | S[30] |
| A[7]  | 117.237        | 542.137        | <b>539.667</b> | <b>539.835</b> | <b>539.499</b> | A[29] |
| P[8]  | 133.412        | 530.498        | 527.828        | 527.996        | 527.660        | P[28] |
| A[9]  | 145.252        | <b>514.322</b> | 511.652        | 511.820        | 511.484        | A[27] |
| F[10] | 181.427        | 522.453        | 499.813        | 499.981        | 499.645        | F[26] |
| K[11] | 182.778        | 486.307        | 483.637        | 483.805        | 483.469        | K[25] |
| K[12] | 204.125        | 464.958        | 462.288        | 462.456        | 462.120        | K[24] |
| G[13] | 213.629        | 443.609        | 440.939        | 441.107        | 440.771        | G[23] |
| S[14] | 226.134        | 434.105        | 431.436        | 431.603        | 431.268        | S[22] |
| K[15] | 249.483        | 419.600        | <b>416.930</b> | <b>417.098</b> | <b>416.762</b> | K[21] |
| K[16] | 270.833        | 398.251        | 395.581        | 395.749        | 395.413        | K[20] |
| A[17] | 282.672        | 376.902        | 374.232        | 374.400        | 374.064        | A[19] |
| L[18] | 301.519        | 365.062        | 362.392        | 362.560        | 362.224        | L[18] |
| F[19] | 318.361        | 346.215        | 343.545        | 343.713        | 343.377        | F[17] |
| K[20] | 339.710        | 329.374        | <b>326.704</b> | <b>326.872</b> | <b>326.536</b> | K[16] |
| A[21] | 351.549        | 308.024        | 305.354        | 305.523        | 305.187        | A[15] |
| Q[22] | 372.893        | 296.185        | 293.515        | 293.683        | 293.347        | Q[14] |
| K[23] | <b>394.242</b> | 274.842        | 272.172        | 272.340        | 272.004        | K[13] |
| K[24] | 415.591        | 253.493        | 250.823        | 250.991        | 250.655        | K[12] |
| D[25] | 434.762        | 232.143        | 229.474        | 229.642        | 229.306        | D[11] |
| G[26] | 444.266        | 212.972        | 210.302        | 210.470        | 210.134        | G[10] |
| K[27] | 465.615        | 203.469        | 200.799        | 200.967        | 200.631        | K[9]  |
| K[28] | 489.964        | 182.120        | 179.450        | 179.618        | 179.282        | K[8]  |
| K[29] | <b>512.981</b> | 160.770        | 158.100        | 158.269        | 157.933        | K[7]  |
| K[30] | 534.130        | 134.753        | 132.084        | 132.252        | 131.916        | K[6]  |
| R[31] | <b>560.347</b> | 113.404        | 110.735        | 110.903        | 110.567        | R[5]  |
| S[32] | 574.652        | 87.387         | 84.718         | 84.886         | 84.550         | S[4]  |
| R[33] | <b>600.869</b> | 72.882         | 70.212         | 70.380         | 70.044         | R[3]  |
| K[34] | 622.218        | 46.865         | 44.196         | 44.363         | 44.028         | K[2]  |
| E[35] | <b>643.725</b> | 25.516         | 22.846         | 23.014         | 22.678         | E[1]  |

# sp | Q6ZWY9 | H2B1C\_MOUSE

PEPAKSAPAPKK Trimethyl GSKKAVTKAQKKDGKKRKRSRKE  
42.05

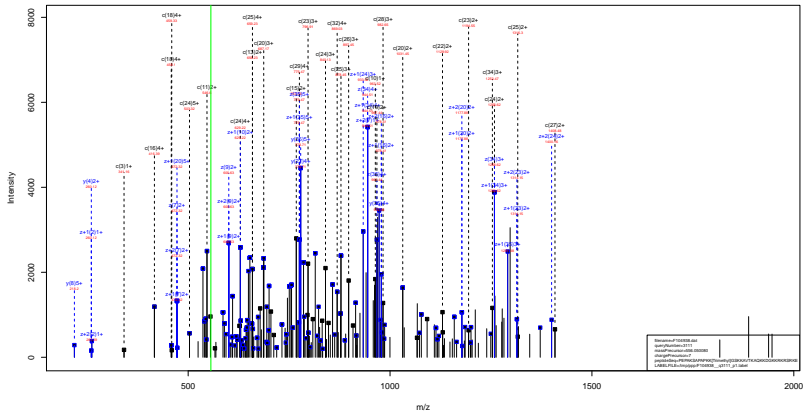

# sp | Q6ZWY9 | H2B1C\_MOUSE

PEPAKSAPAPKK <sup>Trimethyl</sup> 42.05 GSKKAVTKAQKKDGKKRKRSRKE

- ▶ fragmentation table for charge state 1+
- ▶ specType=etd
- ▶ score=63.22
- ▶ F104938.dat
- ▶ query=q31111.p1
- ▶ precursor=556.050080
- ▶ chargePrecursor=7
- ▶ itol=0.8

| AA   | c               | y        | z+1             | z+2             | z               | AA   |
|------|-----------------|----------|-----------------|-----------------|-----------------|------|
| P 1  | 115.087         | 8386.182 | 3870.311        | 0.000           | 3869.304        | P 35 |
| E 2  | 244.129         | 3789.277 | 3773.259        | 0.000           | 3772.251        | E 34 |
| P 3  | <b>341.182</b>  | 3660.235 | 3644.210        | 0.000           | 3643.208        | P 33 |
| A 4  | 412.219         | 3561.182 | 3547.163        | 0.000           | 3546.155        | A 32 |
| K 5  | <b>540.314</b>  | 3492.145 | 3476.120        | 3477.134        | 3475.116        | K 31 |
| S 6  | <b>627.340</b>  | 3394.050 | 3348.031        | 3349.039        | 3347.023        | S 30 |
| A 7  | 698.383         | 3277.018 | 3260.990        | 3262.007        | 3259.981        | A 29 |
| P 8  | <b>795.436</b>  | 3205.981 | 3189.962        | 3190.970        | 3188.954        | P 28 |
| A 9  | 866.473         | 3108.928 | 3092.909        | 3091.917        | 3091.901        | A 27 |
| P 10 | <b>963.526</b>  | 3037.891 | 3021.872        | 3022.880        | 3020.864        | P 26 |
| K 11 | <b>1091.621</b> | 2940.838 | 2924.810        | 2925.827        | 2923.812        | K 25 |
| K 12 | 1261.763        | 2812.743 | 2796.724        | 2797.732        | 2795.711        | K 24 |
| G 13 | 1318.784        | 2642.601 | 2626.581        | 2627.590        | 2625.575        | G 23 |
| S 14 | 1405.816        | 2585.580 | 2569.561        | 2570.569        | 2568.553        | S 22 |
| K 15 | 1531.911        | 2496.548 | 2480.529        | 2481.537        | 2480.521        | K 21 |
| K 16 | 1662.006        | 2370.453 | 2354.434        | 2355.442        | 2353.426        | K 20 |
| A 17 | 1733.043        | 2242.358 | 2226.339        | 2227.347        | 2225.331        | A 19 |
| V 18 | 1832.112        | 2171.311 | 2155.292        | 2156.310        | 2154.294        | V 18 |
| V 19 | 1933.159        | 2072.262 | 2056.243        | 2057.241        | 2055.226        | V 17 |
| K 20 | 2061.264        | 1971.205 | 1955.186        | 1956.194        | 1954.178        | K 16 |
| A 21 | 2132.291        | 1843.110 | 1827.091        | 1828.099        | 1826.083        | A 15 |
| Q 22 | 2260.350        | 1772.073 | 1756.054        | 1757.062        | 1755.046        | Q 14 |
| K 23 | 2388.445        | 1644.014 | 1627.995        | 1629.003        | 1626.987        | K 13 |
| K 24 | 2516.540        | 1515.919 | 1499.900        | 1500.908        | 1498.892        | K 12 |
| D 25 | 2611.567        | 1387.824 | <b>1371.805</b> | 1372.813        | 1370.796        | D 11 |
| G 26 | 2688.588        | 1272.797 | 1256.778        | 1257.786        | 1255.771        | G 10 |
| K 27 | 2816.683        | 1215.770 | <b>1199.757</b> | <b>1200.765</b> | <b>1198.749</b> | K 0  |
| K 28 | 2944.778        | 1087.681 | 1071.662        | <b>1072.670</b> | 1070.654        | K 8  |
| R 29 | 3100.879        | 979.588  | 943.569         | <b>944.575</b>  | 942.559         | R 7  |
| K 30 | 3278.974        | 893.485  | <b>787.466</b>  | 788.474         | <b>786.458</b>  | K 6  |
| R 31 | 3385.075        | 875.390  | <b>659.371</b>  | <b>660.379</b>  | <b>658.363</b>  | R 5  |
| S 32 | 3472.107        | 819.289  | <b>503.270</b>  | 504.278         | 502.262         | S 4  |
| R 33 | 3628.209        | 632.257  | <b>416.238</b>  | 417.246         | 415.230         | R 3  |
| K 34 | 3756.304        | 276.155  | <b>260.137</b>  | <b>261.144</b>  | 259.128         | K 2  |
| E 35 | 3885.346        | 148.060  | 132.040         | 133.050         | 131.034         | E 1  |

# sp | Q6ZWY9 | H2B1C\_MOUSE

PEPAKSAPAPKK <sup>Trimethyl</sup> 42.05 GSKKAVTKAQKKDGGKRRSRKE

- ▶ fragmentation table for charge state 2+
- ▶ specType=etd
- ▶ score=63.22
- ▶ F104938.dat
- ▶ query=q3111.p1
- ▶ precursor=556.050080
- ▶ chargePrecursor=7
- ▶ itol=0.8

| AA | c  | y               | #±1             | #±2             | z               | AA              |       |
|----|----|-----------------|-----------------|-----------------|-----------------|-----------------|-------|
| F  | 1  | 58.047          | 1043.699        | 1035.699        | 0.504           | 1935.151        | F(28) |
| E  | 2  | 122.508         | 1095.142        | 1087.133        | 0.504           | 1889.629        | E(34) |
| F  | 3  | 171.095         | 1830.621        | 1822.612        | 0.504           | 1822.108        | F(33) |
| A  | 4  | 208.613         | 1782.095        | 1774.085        | 0.504           | 1773.581        | A(32) |
| K  | 5  | 270.661         | 1746.576        | 1738.567        | 1739.071        | 1739.063        | K(31) |
| S  | 6  | 314.177         | 1698.529        | 1694.519        | 1675.023        | 1674.015        | S(30) |
| A  | 7  | 369.696         | 1639.013        | 1631.003        | 1631.507        | 1630.499        | A(29) |
| F  | 8  | 398.222         | 1603.494        | 1595.485        | 1595.989        | 1594.981        | F(28) |
| A  | 9  | 433.740         | 1554.968        | 1546.958        | 1547.462        | 1546.454        | A(27) |
| F  | 10 | 482.267         | 1519.449        | 1511.440        | 1511.944        | 1510.936        | F(26) |
| K  | 11 | <b>546.314</b>  | 1470.923        | 1462.913        | 1463.417        | 1462.409        | K(25) |
| K  | 12 | <b>631.385</b>  | 1408.875        | 1398.868        | <b>1399.370</b> | 1398.362        | K(24) |
| G  | 13 | <b>659.896</b>  | 1331.804        | <b>1313.795</b> | <b>1314.299</b> | 1313.291        | G(23) |
| S  | 14 | 703.412         | 1293.294        | 1285.284        | 1285.788        | 1284.780        | S(22) |
| K  | 15 | <b>767.459</b>  | <b>1249.778</b> | 1241.769        | 1242.272        | 1241.264        | K(21) |
| K  | 16 | <b>831.507</b>  | <b>1185.730</b> | <b>1177.721</b> | <b>1178.225</b> | <b>1177.217</b> | K(20) |
| A  | 17 | 897.925         | <b>1121.683</b> | <b>1113.673</b> | <b>1114.177</b> | <b>1113.169</b> | A(19) |
| V  | 18 | <b>914.559</b>  | <b>1038.555</b> | <b>1078.155</b> | <b>1078.659</b> | <b>1077.651</b> | V(18) |
| T  | 19 | <b>967.983</b>  | 1039.630        | 1028.630        | 1029.134        | 1028.117        | T(17) |
| K  | 20 | <b>1031.131</b> | <b>986.106</b>  | <b>978.097</b>  | <b>978.601</b>  | 977.593         | K(16) |
| A  | 21 | <b>1066.649</b> | 922.058         | <b>914.049</b>  | <b>914.553</b>  | 913.545         | A(15) |
| Q  | 22 | <b>1130.679</b> | 898.540         | <b>878.531</b>  | <b>879.034</b>  | <b>878.027</b>  | Q(14) |
| R  | 23 | <b>1194.726</b> | <b>822.511</b>  | 814.503         | <b>815.005</b>  | <b>813.997</b>  | R(13) |
| K  | 24 | <b>1258.774</b> | <b>758.463</b>  | <b>750.454</b>  | <b>750.958</b>  | <b>749.950</b>  | K(12) |
| D  | 25 | <b>1316.287</b> | <b>694.416</b>  | <b>686.406</b>  | <b>686.910</b>  | <b>685.902</b>  | D(11) |
| G  | 26 | 1364.799        | <b>636.902</b>  | <b>628.893</b>  | <b>629.397</b>  | 628.389         | G(10) |
| K  | 27 | <b>1408.845</b> | <b>608.391</b>  | <b>600.382</b>  | <b>600.886</b>  | <b>599.878</b>  | K(9)  |
| K  | 28 | 1472.873        | <b>544.344</b>  | <b>536.335</b>  | <b>536.839</b>  | <b>535.831</b>  | K(8)  |
| R  | 29 | 1550.943        | 493.296         | <b>472.287</b>  | <b>472.791</b>  | <b>471.783</b>  | R(7)  |
| K  | 30 | 1614.991        | 402.246         | 394.237         | 394.740         | 393.733         | K(6)  |
| R  | 31 | 1681.041        | 338.198         | 330.189         | 330.693         | 329.685         | R(5)  |
| S  | 32 | 1738.557        | <b>260.148</b>  | 252.139         | 252.642         | 251.635         | S(4)  |
| R  | 33 | 1814.608        | 216.632         | 208.623         | 209.126         | 208.119         | R(3)  |
| K  | 34 | 1878.666        | 138.561         | 130.552         | 131.056         | 130.048         | K(2)  |
| E  | 35 | 1943.177        | 74.534          | 66.524          | 67.028          | 66.021          | E(1)  |

# sp | Q6ZWY9 | H2B1C\_MOUSE

PEPAKSAPAPKK <sup>Trimethyl</sup> 42.05 GSKKAVTKAQKKDGKKRKRSRKE

- ▶ fragmentation table for charge state 3+
- ▶ specType=etd
- ▶ score=63.22
- ▶ F104938.dat
- ▶ query=q3111.p1
- ▶ precursor=556.050080
- ▶ chargePrecursor=7
- ▶ itol=0.8

| AA   | c               | y               | z+1             | z+2             | z               | AA   |
|------|-----------------|-----------------|-----------------|-----------------|-----------------|------|
| F 1  | 39.034          | 1206.125        | <b>1290.775</b> | 0.672           | 1290.430        | F 28 |
| E 2  | 82.048          | 1263.764        | <b>1258.424</b> | 0.672           | <b>1258.088</b> | E 34 |
| F 3  | 114.399         | 1220.750        | 1215.410        | 0.672           | 1215.074        | F 33 |
| A 4  | 138.078         | 1188.309        | 1183.059        | 0.672           | 1182.723        | A 32 |
| K 5  | 180.776         | <b>1164.720</b> | <b>1159.380</b> | <b>1159.716</b> | <b>1159.044</b> | K 31 |
| S 6  | 209.287         | 1122.021        | <b>1116.682</b> | <b>1117.018</b> | 1116.346        | S 30 |
| A 7  | 213.466         | 1093.011        | 1087.671        | 1088.307        | 1087.335        | A 29 |
| F 8  | 265.817         | 1069.332        | 1063.992        | 1064.128        | 1063.656        | F 28 |
| A 9  | 289.490         | 1036.981        | <b>1031.641</b> | <b>1031.977</b> | <b>1031.305</b> | A 27 |
| F 10 | 321.847         | 1013.302        | 1007.962        | 1008.298        | 1007.620        | F 26 |
| K 11 | 364.545         | 980.951         | 975.611         | <b>975.947</b>  | 975.275         | K 25 |
| K 12 | 411.269         | 938.253         | <b>932.913</b>  | <b>933.249</b>  | 932.577         | K 24 |
| G 13 | 440.206         | 891.530         | 885.190         | <b>876.535</b>  | 875.863         | G 23 |
| S 14 | 489.277         | <b>862.531</b>  | <b>857.192</b>  | <b>857.528</b>  | <b>856.856</b>  | S 22 |
| K 15 | 511.075         | <b>833.521</b>  | <b>828.181</b>  | <b>828.517</b>  | <b>827.845</b>  | K 21 |
| K 16 | <b>554.674</b>  | <b>790.822</b>  | <b>785.483</b>  | <b>785.819</b>  | <b>785.147</b>  | K 20 |
| A 17 | 578.253         | 746.124         | 742.785         | 743.120         | 742.449         | A 19 |
| V 18 | 611.375         | 724.445         | <b>719.106</b>  | <b>719.441</b>  | <b>718.770</b>  | V 18 |
| T 19 | <b>645.958</b>  | 691.422         | <b>686.083</b>  | <b>686.419</b>  | <b>685.747</b>  | T 17 |
| K 20 | <b>687.756</b>  | <b>657.740</b>  | <b>652.400</b>  | <b>652.736</b>  | <b>652.064</b>  | K 16 |
| A 21 | <b>711.435</b>  | <b>615.041</b>  | <b>609.702</b>  | <b>610.038</b>  | <b>609.366</b>  | A 15 |
| Q 22 | <b>754.122</b>  | 591.362         | <b>586.023</b>  | <b>586.359</b>  | <b>585.687</b>  | Q 14 |
| R 23 | <b>796.820</b>  | 568.676         | <b>563.337</b>  | <b>563.673</b>  | <b>563.001</b>  | R 13 |
| K 24 | <b>839.518</b>  | 505.975         | 500.635         | 500.974         | 500.302         | K 12 |
| D 25 | <b>877.860</b>  | 463.280         | <b>457.940</b>  | <b>458.276</b>  | <b>457.604</b>  | D 11 |
| G 26 | <b>896.868</b>  | 424.937         | 419.598         | 419.934         | 419.262         | G 10 |
| K 27 | 939.568         | 405.930         | 400.590         | 400.926         | 400.254         | K 9  |
| K 28 | <b>982.264</b>  | 363.232         | 357.892         | 358.228         | 357.556         | K 7  |
| R 29 | 1014.236        | 320.533         | 315.194         | 315.530         | 314.858         | R 7  |
| K 30 | <b>1076.996</b> | 268.500         | 263.160         | 263.496         | 262.824         | K 6  |
| R 31 | 1129.630        | 225.801         | 220.462         | 220.798         | 220.126         | R 5  |
| S 32 | 1158.041        | 173.768         | 168.428         | 168.764         | 168.092         | S 4  |
| R 33 | 1210.074        | 144.757         | 139.417         | 139.753         | 139.081         | R 3  |
| T 34 | <b>1253.773</b> | 92.721          | 87.381          | 87.718          | 87.046          | T 3  |
| E 35 | 1295.757        | 50.025          | 44.685          | 45.021          | 44.349          | E 1  |



# sp | Q6ZWY9 | H2B1C\_MOUSE

PEPAKSAPAPKK <sup>Trimethyl</sup> 42.05 GSKKAVTKAQKKDGGKRRKRSRKE

- ▶ fragmentation table for charge state 4+
- ▶ specType=etd
- ▶ score=63.22
- ▶ F104938.dat
- ▶ query=q3111.p1
- ▶ precursor=556.050080
- ▶ chargePrecursor=7
- ▶ itol=0.8

| AA    | c              | y              | z+1            | z+2            | z              | AA    |
|-------|----------------|----------------|----------------|----------------|----------------|-------|
| P[1]  | 29.527         | <b>972.138</b> | 958.133        | 0.755          | <b>958.081</b> | P[15] |
| E[2]  | 61.788         | 948.075        | <b>944.070</b> | 0.755          | <b>943.818</b> | E[34] |
| P[3]  | 86.051         | <b>915.814</b> | 911.809        | 0.755          | 911.558        | P[13] |
| A[4]  | 103.810        | 891.951        | <b>887.546</b> | 0.755          | <b>887.294</b> | A[32] |
| K[5]  | 135.834        | 873.792        | <b>869.787</b> | 870.039        | <b>869.535</b> | K[31] |
| S[6]  | 157.592        | 841.768        | 837.763        | 838.015        | 837.511        | S[30] |
| A[7]  | 175.351        | <b>820.010</b> | 816.005        | 816.257        | 815.753        | A[29] |
| P[8]  | 199.614        | <b>802.251</b> | <b>798.246</b> | <b>798.498</b> | <b>797.994</b> | P[28] |
| A[9]  | 217.374        | <b>777.987</b> | <b>773.983</b> | <b>774.235</b> | <b>773.731</b> | A[27] |
| T[10] | 243.837        | 760.228        | <b>756.224</b> | <b>756.475</b> | <b>755.972</b> | T[26] |
| K[11] | 273.061        | 735.965        | <b>731.960</b> | <b>732.212</b> | <b>731.708</b> | K[25] |
| K[12] | 316.196        | 703.941        | <b>699.937</b> | <b>700.189</b> | <b>699.685</b> | K[24] |
| G[13] | 350.451        | <b>661.406</b> | <b>657.401</b> | <b>657.653</b> | <b>657.149</b> | G[23] |
| S[14] | 382.210        | 647.150        | <b>643.146</b> | <b>643.398</b> | <b>642.894</b> | S[22] |
| K[15] | 394.233        | 625.992        | <b>621.988</b> | <b>621.640</b> | <b>621.136</b> | K[21] |
| K[16] | <b>416.257</b> | <b>593.369</b> | <b>589.364</b> | <b>589.616</b> | <b>589.112</b> | K[20] |
| A[17] | 434.016        | 561.345        | 557.340        | 557.592        | 557.088        | A[19] |
| V[18] | <b>458.783</b> | <b>543.586</b> | <b>539.581</b> | <b>539.833</b> | 539.329        | V[18] |
| T[19] | 484.045        | 518.819        | 514.814        | 515.066        | 514.562        | T[17] |
| K[20] | 518.069        | 493.591        | 489.587        | 489.838        | 489.300        | K[16] |
| A[21] | 533.828        | 461.533        | <b>457.528</b> | <b>457.780</b> | 457.276        | A[19] |
| Q[22] | <b>565.843</b> | 443.774        | 439.769        | 440.021        | 439.517        | Q[14] |
| K[23] | 597.867        | 411.759        | 407.754        | 408.006        | 407.502        | K[13] |
| K[24] | <b>629.890</b> | 379.735        | 375.731        | 375.982        | 375.479        | K[12] |
| D[25] | <b>658.647</b> | 347.711        | 343.707        | 343.959        | 343.455        | D[11] |
| G[26] | <b>672.903</b> | 318.955        | 314.950        | 315.202        | 314.698        | G[10] |
| K[27] | <b>704.926</b> | 304.699        | 300.695        | 300.947        | 300.443        | K[9]  |
| K[28] | 730.950        | 272.676        | 268.671        | 268.923        | 268.419        | K[9]  |
| K[29] | <b>775.975</b> | 240.652        | 236.647        | 236.899        | 236.395        | K[1]  |
| K[30] | <b>807.999</b> | 201.627        | 197.622        | 197.874        | 197.370        | K[0]  |
| R[31] | <b>847.024</b> | 169.603        | 165.598        | 165.850        | 165.346        | R[9]  |
| S[32] | <b>868.782</b> | 130.578        | 126.573        | 126.825        | 126.321        | S[4]  |
| R[33] | <b>907.808</b> | 108.620        | 104.615        | 104.867        | 104.363        | R[3]  |
| K[34] | 939.831        | 69.794         | 65.790         | 66.042         | 65.538         | K[2]  |
| E[35] | 972.092        | 37.771         | 33.766         | 34.018         | 33.514         | E[1]  |

# sp | Q6ZWH9 | H2B1C\_MOUSE

PEPAKSAPAPKK <sup>Trimethyl</sup>42.05 GSKKAVTKAQKKDGKKRKRSRKE

- ▶ fragmentation table for charge state 5+
- ▶ specType=etd
- ▶ score=63.22
- ▶ F104938.dat
- ▶ query=q3111.p1
- ▶ precursor=556.050080
- ▶ chargePrecursor=7
- ▶ itol=0.8

| AA    | c              | y              | z+1            | z+2            | z              | AA    |
|-------|----------------|----------------|----------------|----------------|----------------|-------|
| P[1]  | 23.823         | <b>778.072</b> | <b>774.858</b> | 0.806          | <b>774.667</b> | P[15] |
| E[2]  | 40.032         | <b>758.661</b> | <b>755.458</b> | 0.806          | <b>755.256</b> | E[34] |
| P[3]  | 60.042         | <b>732.853</b> | 729.649        | 0.806          | 729.447        | P[13] |
| A[4]  | 83.250         | 713.442        | 710.238        | 0.806          | 710.037        | A[32] |
| K[5]  | 108.869        | <b>699.235</b> | <b>696.031</b> | <b>696.233</b> | <b>695.829</b> | K[31] |
| S[6]  | 126.275        | <b>673.616</b> | <b>670.412</b> | <b>670.614</b> | <b>670.210</b> | S[30] |
| A[7]  | 140.482        | 656.209        | <b>653.006</b> | <b>653.207</b> | <b>652.804</b> | A[29] |
| P[8]  | 159.693        | <b>642.002</b> | <b>638.798</b> | <b>639.000</b> | <b>638.597</b> | P[28] |
| A[9]  | 174.100        | 622.591        | <b>619.388</b> | <b>619.589</b> | <b>619.186</b> | A[27] |
| T[10] | 193.511        | <b>608.384</b> | 605.180        | 605.382        | <b>604.979</b> | T[26] |
| K[11] | 219.130        | <b>588.973</b> | <b>585.770</b> | <b>585.971</b> | <b>585.568</b> | K[25] |
| K[12] | 253.158        | 563.354        | 560.151        | 560.352        | 559.949        | K[24] |
| G[13] | 264.563        | 529.826        | 526.122        | 526.324        | 525.921        | G[23] |
| S[14] | 281.969        | 517.922        | 514.718        | 514.920        | 514.516        | S[22] |
| K[15] | 307.588        | 500.515        | 497.312        | 497.513        | 497.110        | K[21] |
| K[16] | 333.207        | 474.896        | <b>471.693</b> | <b>471.894</b> | 471.491        | K[20] |
| A[17] | 347.414        | 449.277        | 446.074        | 446.275        | 445.872        | A[19] |
| V[18] | 367.228        | 435.070        | 431.866        | 432.068        | 431.665        | V[18] |
| T[19] | 387.438        | 415.256        | 412.053        | 412.254        | 411.851        | T[17] |
| K[20] | 413.057        | 395.041        | 391.843        | 392.045        | 391.641        | K[16] |
| A[21] | 427.264        | 369.428        | 366.224        | 366.426        | 366.022        | A[15] |
| Q[22] | 452.876        | 355.220        | 352.017        | 352.218        | 351.815        | Q[14] |
| K[23] | 478.495        | 329.609        | 326.406        | 326.608        | 326.203        | K[13] |
| K[24] | <b>504.114</b> | 303.990        | 300.786        | 300.987        | 300.584        | K[12] |
| D[25] | 527.119        | 278.371        | 275.167        | 275.368        | 274.965        | D[11] |
| G[26] | 538.523        | 255.365        | 252.161        | 252.363        | 251.960        | G[10] |
| K[27] | 564.142        | 243.961        | 240.757        | 240.959        | 240.556        | K[9]  |
| K[28] | <b>589.761</b> | <b>218.342</b> | 215.138        | 215.340        | 214.937        | K[8]  |
| K[29] | <b>620.982</b> | 192.722        | 189.519        | 189.721        | 189.318        | K[7]  |
| K[30] | <b>646.601</b> | 161.503        | 158.299        | 158.501        | 158.097        | K[6]  |
| R[31] | <b>677.821</b> | 135.884        | 132.680        | 132.882        | 132.478        | R[5]  |
| S[32] | <b>695.227</b> | 104.664        | 101.460        | 101.661        | 101.258        | S[4]  |
| R[33] | 726.448        | 87.257         | 84.053         | 84.255         | 83.852         | R[3]  |
| K[34] | 752.067        | 56.037         | 52.833         | 53.035         | 52.632         | K[2]  |
| E[35] | 777.875        | 30.418         | 27.214         | 27.416         | 27.013         | E[1]  |

# sp | Q6ZWY9 | H2B1C\_MOUSE

PEPAKSAPAPKK <sup>Trimethyl</sup>42.05 GSKKAVTKAQKKDGGKRRKRSRKE

- ▶ fragmentation table for charge state 6+
- ▶ specType=etd
- ▶ score=63.22
- ▶ F104938.dat
- ▶ query=q3111.p1
- ▶ precursor=556.050080
- ▶ chargePrecursor=7
- ▶ itol=0.8

| AA    | c              | y              | z+1            | z+2            | z              | AA    |
|-------|----------------|----------------|----------------|----------------|----------------|-------|
| P[1]  | 30.020         | <b>648.561</b> | <b>645.891</b> | 0.839          | <b>645.723</b> | P[15] |
| E[2]  | 41.528         | <b>632.386</b> | <b>629.716</b> | 0.839          | <b>629.548</b> | E[34] |
| P[3]  | 57.703         | 610.379        | <b>608.209</b> | 0.839          | <b>608.041</b> | P[33] |
| A[4]  | 69.543         | 594.703        | 592.033        | 0.839          | 591.865        | A[32] |
| K[5]  | 90.692         | 582.864        | 580.194        | 580.362        | 580.026        | K[31] |
| S[6]  | 109.397        | 561.514        | 558.845        | 559.013        | 558.677        | S[30] |
| A[7]  | 117.237        | <b>547.009</b> | <b>544.339</b> | <b>544.507</b> | <b>544.171</b> | A[29] |
| P[8]  | 133.412        | 535.170        | 532.500        | 532.668        | 532.332        | P[28] |
| A[9]  | 145.252        | 518.994        | 516.324        | 516.492        | 516.156        | A[27] |
| P[10] | 161.427        | 507.155        | 505.485        | 505.653        | 505.317        | P[26] |
| K[11] | 182.776        | 490.979        | 489.309        | 489.477        | 489.141        | K[25] |
| K[12] | 211.133        | 469.630        | 468.960        | 469.128        | 468.792        | K[24] |
| G[13] | 220.637        | 441.273        | 438.603        | 438.771        | 438.435        | G[23] |
| S[14] | 235.142        | 431.769        | 429.100        | 429.268        | 428.932        | S[22] |
| K[15] | 256.491        | 417.264        | 414.594        | 414.762        | 414.426        | K[21] |
| K[16] | 277.840        | 395.915        | 393.245        | 393.413        | 393.077        | K[20] |
| A[17] | 289.680        | 374.566        | 371.896        | 372.064        | 371.728        | A[19] |
| V[18] | 306.191        | 362.726        | 360.056        | 360.224        | 359.888        | V[18] |
| I[19] | 323.033        | 346.215        | 343.545        | 343.713        | 343.377        | I[17] |
| L[20] | 344.382        | 329.374        | 326.704        | 326.872        | 326.536        | L[16] |
| A[21] | 356.221        | 308.024        | 305.354        | 305.522        | 305.187        | A[15] |
| Q[22] | 377.564        | 296.185        | 293.515        | 293.683        | 293.347        | Q[14] |
| K[23] | 398.914        | 274.842        | 272.172        | 272.340        | 272.004        | K[13] |
| K[24] | 420.263        | 253.493        | 250.823        | 250.991        | 250.655        | K[12] |
| D[25] | 439.434        | 232.143        | 229.474        | 229.642        | 229.306        | D[11] |
| G[26] | 448.937        | 212.972        | 210.302        | 210.470        | 210.134        | G[10] |
| K[27] | 470.287        | 203.469        | 200.799        | 200.967        | 200.631        | K[9]  |
| K[28] | 481.636        | 182.120        | 179.450        | 179.618        | 179.282        | K[8]  |
| K[29] | 517.653        | 160.770        | 158.100        | 158.269        | 157.933        | K[7]  |
| K[30] | 539.002        | 134.753        | 132.084        | 132.252        | 131.916        | K[6]  |
| R[31] | 565.019        | 113.404        | 110.734        | 110.903        | 110.567        | R[5]  |
| S[32] | 579.524        | 87.387         | 84.718         | 84.886         | 84.550         | S[4]  |
| R[33] | 605.541        | 72.882         | 70.212         | 70.380         | 70.044         | R[3]  |
| K[34] | <b>626.890</b> | 46.865         | 44.196         | 44.363         | 44.028         | K[2]  |
| E[35] | 648.397        | 25.516         | 22.846         | 23.014         | 22.679         | E[1]  |

# sp | Q6ZWY9 | H2B1C\_MOUSE

PEPAKSAPAPKK Trimethyl GSKKAVTKAQKKDGKKRKRSRKE  
42.05

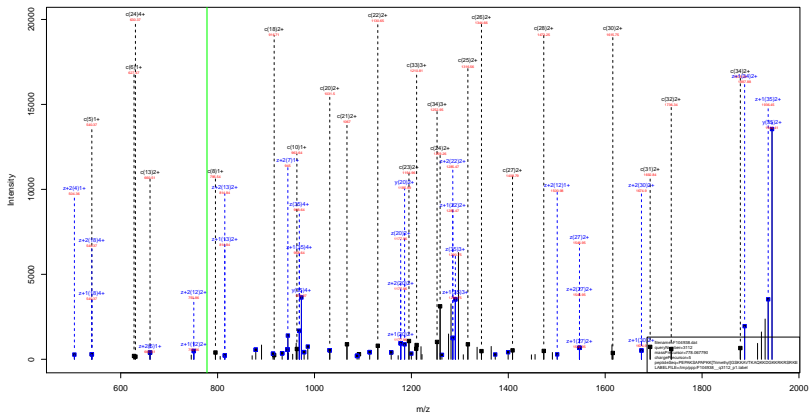

# sp | Q6ZWH9 | H2B1C\_MOUSE

PEPAKSAPAPKK <sup>Trimethyl</sup> 42.05 GSKKAVTKAQKKDKKKRKRSRKE

- ▶ fragmentation table for charge state 1+
- ▶ specType=etd
- ▶ score=75.30
- ▶ F104938.dat
- ▶ query=q3112.p1
- ▶ precursor=778.067790
- ▶ chargePrecursor=5
- ▶ itol=0.8

| AA   | c               | y               | z+1             | z+2             | z        | AA   |
|------|-----------------|-----------------|-----------------|-----------------|----------|------|
| P11  | 115.087         | 3885.130        | 3870.311        | 0.000           | 3885.304 | P135 |
| E12  | 244.129         | 3789.277        | 3773.259        | 0.000           | 3772.251 | E134 |
| F13  | 341.182         | 3660.235        | 3644.216        | 0.000           | 3643.208 | F133 |
| A14  | 412.219         | 3583.182        | 3547.163        | 0.000           | 3546.155 | A132 |
| K15  | <b>549.314</b>  | 3492.145        | 3476.126        | 3477.134        | 3475.116 | K131 |
| S16  | <b>627.340</b>  | 3384.050        | 3348.031        | 3349.039        | 3347.023 | S130 |
| A17  | 698.383         | 3277.018        | 3260.999        | 3262.007        | 3259.991 | A129 |
| P18  | <b>795.436</b>  | 3205.981        | 3189.962        | 3190.970        | 3188.954 | P128 |
| A19  | 866.473         | 3108.929        | 3092.909        | 3093.917        | 3091.901 | A127 |
| P110 | <b>963.526</b>  | 3037.891        | 3021.872        | 3022.880        | 3020.864 | P126 |
| K111 | <b>1091.621</b> | 2940.836        | 2924.819        | 2925.827        | 2923.812 | K125 |
| K112 | 1261.763        | 2812.741        | 2796.724        | 2797.732        | 2795.711 | K124 |
| G113 | 1318.794        | 2642.663        | 2626.643        | 2627.650        | 2625.635 | G123 |
| S114 | 1405.816        | 2585.580        | 2569.561        | 2570.569        | 2568.553 | S122 |
| K115 | 1531.911        | 2498.544        | 2482.529        | 2483.537        | 2481.521 | K121 |
| K116 | 1662.006        | 2370.453        | 2354.434        | 2355.442        | 2353.426 | K120 |
| A117 | 1733.043        | 2242.365        | 2226.348        | 2227.347        | 2225.331 | A119 |
| V118 | 1832.112        | 2171.321        | 2155.303        | 2156.310        | 2154.294 | V118 |
| T119 | 1933.159        | 2072.252        | 2056.234        | 2057.241        | 2055.226 | T117 |
| K120 | 2061.264        | 1971.205        | 1955.186        | 1956.194        | 1954.178 | K116 |
| A121 | 2132.291        | 1843.110        | 1827.091        | 1828.099        | 1826.083 | A115 |
| Q122 | 2260.350        | 1772.073        | 1756.054        | 1757.062        | 1755.046 | Q114 |
| K123 | 2388.445        | 1644.014        | 1627.995        | 1628.993        | 1626.981 | K113 |
| K124 | 2516.540        | 1515.917        | 1499.893        | <b>1500.908</b> | 1498.882 | K112 |
| D125 | 2631.567        | 1387.824        | 1371.805        | <b>1372.813</b> | 1370.798 | D111 |
| G126 | 2688.588        | 1272.797        | 1256.778        | 1257.786        | 1255.771 | G110 |
| K127 | 2816.683        | 1215.778        | <b>1199.757</b> | 1200.765        | 1198.749 | K109 |
| K128 | 2944.778        | <b>1087.681</b> | 1071.663        | 1072.670        | 1070.654 | K108 |
| T129 | 3100.879        | 959.588         | <b>943.567</b>  | <b>944.575</b>  | 942.559  | T107 |
| K130 | 3238.974        | 833.485         | 787.466         | 788.474         | 786.458  | K106 |
| R131 | 3385.075        | 675.390         | 659.371         | <b>660.379</b>  | 658.363  | R105 |
| S132 | 3472.107        | 619.289         | 593.270         | <b>594.278</b>  | 592.262  | S104 |
| R133 | 3628.209        | 432.257         | 416.238         | 417.246         | 415.230  | R103 |
| K134 | 3756.304        | 276.155         | 260.137         | 261.144         | 259.128  | K102 |
| E135 | 3885.346        | 148.060         | 132.042         | 133.050         | 131.034  | E101 |

# sp | Q6ZWH9 | H2B1C\_MOUSE

PEPAKSAPAPKK <sup>Trimethyl</sup> 42.05 GSKKAVTKAQKKDGKKRKRSRKE

- ▶ fragmentation table for charge state 2+
- ▶ specType=etd
- ▶ score=75.30
- ▶ F104938.dat
- ▶ query=q3112\_p1
- ▶ precursor=778.067790
- ▶ chargePrecursor=5
- ▶ itol=0.8

| AA  | c               | y               | #+1             | #+2             | z               | AA   |
|-----|-----------------|-----------------|-----------------|-----------------|-----------------|------|
| P1  | 58.047          | <b>1943.669</b> | <b>1935.659</b> | 0.504           | 1935.151        | P129 |
| E1  | 122.508         | 1895.142        | <b>1887.133</b> | 0.504           | 1886.629        | E134 |
| F1  | 171.095         | 1830.621        | 1822.612        | 0.504           | 1822.108        | F133 |
| A1  | 208.613         | 1782.095        | 1774.085        | 0.504           | 1773.581        | A132 |
| K1  | 270.661         | 1746.576        | 1738.567        | 1739.071        | 1739.063        | K131 |
| S1  | 314.177         | 1698.529        | <b>1674.519</b> | <b>1675.023</b> | 1674.015        | S130 |
| A17 | 369.696         | 1639.013        | 1631.003        | 1631.507        | 1630.499        | A129 |
| F1  | 398.222         | 1603.494        | 1595.485        | 1595.989        | 1594.981        | F128 |
| A1  | 433.740         | 1554.968        | <b>1546.958</b> | <b>1547.462</b> | <b>1546.454</b> | A127 |
| P10 | 482.267         | 1519.449        | 1511.440        | 1511.944        | 1510.936        | P126 |
| K11 | 546.314         | 1470.923        | 1462.913        | 1463.417        | 1462.409        | K125 |
| K12 | 613.388         | 1408.876        | 1398.868        | <b>1399.370</b> | 1398.362        | K124 |
| G13 | <b>659.896</b>  | 1332.804        | 1313.795        | 1314.299        | 1313.291        | G123 |
| S14 | 703.412         | 1293.294        | <b>1285.284</b> | <b>1285.788</b> | <b>1284.780</b> | S122 |
| K15 | 767.459         | 1249.778        | 1241.768        | 1242.272        | 1241.264        | K121 |
| K16 | 831.507         | <b>1185.730</b> | <b>1177.721</b> | <b>1178.225</b> | <b>1177.217</b> | K120 |
| A17 | 897.028         | 1121.063        | <b>1113.053</b> | <b>1114.177</b> | <b>1113.169</b> | A119 |
| V18 | <b>914.559</b>  | 1068.154        | 1058.145        | 1058.649        | 1057.641        | V118 |
| T19 | 967.083         | 1036.630        | 1028.620        | 1029.124        | 1028.117        | T117 |
| K20 | <b>1031.131</b> | <b>986.106</b>  | <b>978.097</b>  | <b>978.601</b>  | 977.593         | K116 |
| A21 | <b>1066.649</b> | 922.058         | <b>914.049</b>  | <b>914.553</b>  | 913.545         | A115 |
| Q22 | <b>1130.679</b> | 886.540         | <b>878.531</b>  | <b>879.034</b>  | <b>878.027</b>  | Q114 |
| K23 | <b>1194.726</b> | 822.013         | <b>814.003</b>  | <b>815.005</b>  | 814.997         | K113 |
| K24 | <b>1258.774</b> | 758.483         | <b>750.474</b>  | <b>750.978</b>  | 749.970         | K112 |
| D25 | <b>1316.287</b> | 694.418         | 686.408         | 686.910         | 685.902         | D111 |
| G26 | <b>1344.798</b> | 636.902         | 628.893         | 629.397         | 628.389         | G110 |
| K27 | <b>1408.845</b> | 608.391         | 600.382         | 600.886         | 599.878         | K109 |
| K28 | <b>1472.893</b> | 544.344         | 536.335         | 536.839         | 535.831         | K108 |
| R29 | 1550.619        | 480.296         | 472.287         | 472.791         | 471.783         | R107 |
| K30 | <b>1614.991</b> | 402.246         | 394.237         | 394.740         | 393.733         | K106 |
| R31 | <b>1693.041</b> | 338.198         | 330.189         | 330.693         | 329.685         | R105 |
| S32 | <b>1736.557</b> | 260.148         | 252.139         | 252.642         | 251.635         | S104 |
| R33 | 1814.608        | 216.632         | 208.623         | 209.126         | 208.119         | R103 |
| K34 | <b>1878.655</b> | 138.583         | 130.573         | 131.076         | 130.068         | K102 |
| E35 | 1943.177        | 74.534          | 66.524          | 67.028          | 66.021          | E101 |

# sp | Q6ZWY9 | H2B1C\_MOUSE

PEPAKSAPAPKK <sup>Trimethyl</sup> 42.05 GSKKAVTKAQKKDGGKRRKRSRKE

- ▶ fragmentation table for charge state 3+
- ▶ specType=etd
- ▶ score=75.30
- ▶ F104938.dat
- ▶ query=q3112.p1
- ▶ precursor=778.067790
- ▶ chargePrecursor=5
- ▶ itol=0.8

| AA | c               | y               | #s1             | #s2             | z               | AA  |
|----|-----------------|-----------------|-----------------|-----------------|-----------------|-----|
| P1 | 39.034          | 1206.112        | <b>1290.775</b> | 0.672           | <b>1290.439</b> | P10 |
| E1 | 82.048          | <b>1263.764</b> | 1258.424        | 0.672           | 1258.085        | E14 |
| F1 | 114.399         | 1220.750        | 1215.410        | 0.672           | 1215.074        | F13 |
| A1 | 138.076         | 1188.309        | 1181.059        | 0.672           | 1181.723        | A12 |
| K1 | 180.776         | 1164.720        | 1159.380        | 1159.716        | <b>1159.044</b> | K11 |
| S1 | 209.467         | 1122.021        | 1118.682        | 1117.038        | 1118.395        | S10 |
| A1 | 214.466         | 1093.011        | <b>1087.671</b> | <b>1088.007</b> | <b>1087.335</b> | A19 |
| F1 | 265.817         | 1069.332        | 1061.992        | 1064.328        | 1061.656        | F18 |
| A1 | 289.490         | 1036.981        | <b>1031.641</b> | <b>1031.977</b> | <b>1031.305</b> | A17 |
| P1 | 321.847         | 1013.302        | 1007.962        | 1008.298        | 1007.620        | P16 |
| K1 | 364.545         | 980.951         | 975.611         | 975.947         | 975.275         | K15 |
| K1 | 411.269         | 938.251         | <b>932.913</b>  | <b>933.249</b>  | <b>932.577</b>  | K14 |
| G1 | 440.206         | 891.530         | 887.190         | 876.535         | 875.961         | G13 |
| S1 | 469.277         | 862.531         | 857.192         | 857.528         | 856.856         | S12 |
| K1 | 511.975         | 833.521         | 828.181         | 828.517         | 827.845         | K11 |
| K1 | 554.674         | 790.822         | 785.483         | 785.819         | 785.147         | K10 |
| A1 | 578.353         | 748.124         | 742.785         | 743.120         | 742.448         | A10 |
| V1 | 611.375         | 724.445         | 719.106         | 719.441         | 718.770         | V18 |
| T1 | 645.058         | 691.422         | 686.083         | 686.419         | 685.747         | T17 |
| K1 | 687.750         | 657.740         | 652.400         | 652.736         | 652.064         | K16 |
| A1 | 711.435         | 615.041         | 609.702         | 610.038         | 609.366         | A15 |
| Q1 | 754.122         | 591.362         | 586.023         | 586.359         | 585.687         | Q14 |
| K1 | 796.820         | 548.676         | 543.337         | 543.673         | 543.001         | K13 |
| K1 | 839.518         | 505.975         | 500.636         | 500.974         | 500.302         | K12 |
| D1 | 877.880         | 463.280         | 457.940         | 458.276         | 457.604         | D11 |
| G1 | 896.660         | 424.917         | 419.578         | 419.914         | 419.242         | G10 |
| K1 | 939.566         | 405.930         | 400.590         | 400.926         | 400.254         | K10 |
| K1 | 982.264         | 363.232         | 357.893         | 358.229         | 357.557         | K10 |
| R1 | 1034.208        | 320.531         | 315.194         | 315.530         | 314.858         | R17 |
| K1 | 1076.906        | 288.500         | 283.160         | 283.496         | 282.824         | K16 |
| R1 | 1129.630        | 245.801         | 240.462         | 240.798         | 240.126         | R15 |
| S1 | <b>1158.041</b> | 173.768         | 168.428         | 168.764         | 168.092         | S14 |
| K1 | <b>1210.074</b> | 144.757         | 139.417         | 139.753         | 139.082         | K13 |
| K1 | <b>1252.773</b> | 92.721          | 87.381          | 87.716          | 87.044          | K12 |
| E1 | 1295.197        | 50.025          | 44.685          | 45.021          | 44.349          | E11 |

# sp | Q6ZWH9 | H2B1C\_MOUSE

PEPAKSAPAPKK <sup>Trimethyl</sup> 42.05 GSKKAVTKAQKKDGKKRKRSRKE

- ▶ fragmentation table for charge state 4+
- ▶ specType=etd
- ▶ score=75.30
- ▶ F104938.dat
- ▶ query=q3112.p1
- ▶ precursor=778.067790
- ▶ chargePrecursor=5
- ▶ itol=0.8

| AA    | c              | y              | z+1            | z+2            | z              | AA    |
|-------|----------------|----------------|----------------|----------------|----------------|-------|
| P[1]  | 29.527         | <b>972.138</b> | <b>968.333</b> | 0.755          | <b>958.081</b> | P[15] |
| E[2]  | 61.788         | 948.075        | <b>944.070</b> | 0.755          | <b>943.818</b> | E[34] |
| P[3]  | 86.051         | 915.814        | 911.809        | 0.755          | 911.558        | P[13] |
| A[4]  | 103.810        | 891.551        | 887.546        | 0.755          | 887.294        | A[32] |
| K[5]  | 135.834        | 873.792        | 869.787        | 870.039        | 869.535        | K[31] |
| S[6]  | 157.592        | 841.768        | 837.763        | 838.015        | 837.511        | S[30] |
| A[7]  | 175.351        | 820.010        | 816.005        | 816.257        | 815.753        | A[29] |
| P[8]  | 199.614        | 802.251        | 798.246        | 798.498        | 797.994        | P[28] |
| A[9]  | 217.374        | 777.987        | 773.983        | 774.235        | 773.731        | A[27] |
| P[10] | 243.837        | 760.228        | 756.223        | 756.475        | 755.972        | P[26] |
| K[11] | 273.061        | 735.965        | 731.960        | 732.212        | 731.708        | K[25] |
| K[12] | 316.196        | 703.941        | 699.937        | 700.189        | 699.685        | K[24] |
| G[13] | 330.451        | 691.406        | 687.401        | 687.653        | 687.149        | G[23] |
| S[14] | 352.210        | 647.150        | 643.146        | 643.398        | 642.894        | S[22] |
| K[15] | 384.233        | 625.902        | 621.898        | 621.640        | 621.136        | K[21] |
| K[16] | 416.257        | 593.369        | 589.364        | 589.616        | 589.112        | K[20] |
| A[17] | 434.016        | 561.345        | 557.340        | 557.592        | 557.088        | A[19] |
| V[18] | 458.783        | 543.586        | <b>539.581</b> | <b>539.833</b> | 539.329        | V[18] |
| I[19] | 484.045        | 518.819        | 514.814        | 515.066        | 514.562        | I[17] |
| K[20] | 518.069        | 493.551        | 489.547        | 489.804        | 489.300        | K[16] |
| A[21] | 533.828        | 461.533        | 457.528        | 457.780        | 457.276        | A[15] |
| Q[22] | 565.843        | 443.774        | 439.769        | 440.021        | 439.517        | Q[14] |
| K[23] | 597.867        | 411.759        | 407.754        | 408.006        | 407.502        | K[13] |
| K[24] | <b>629.890</b> | 379.735        | 375.731        | 375.982        | 375.479        | K[12] |
| D[25] | 658.647        | 347.711        | 343.707        | 343.959        | 343.455        | D[11] |
| G[26] | 672.903        | 318.955        | 314.950        | 315.202        | 314.698        | G[10] |
| K[27] | 704.926        | 304.699        | 300.695        | 300.947        | 300.443        | K[9]  |
| K[28] | 736.950        | 272.676        | 268.671        | 268.923        | 268.419        | K[8]  |
| K[29] | 773.978        | 240.652        | 236.647        | 236.899        | 236.395        | K[7]  |
| K[30] | 807.999        | 201.627        | 197.622        | 197.874        | 197.370        | K[6]  |
| R[31] | 847.024        | 169.603        | 165.598        | 165.850        | 165.346        | R[5]  |
| S[32] | 888.782        | 130.578        | 126.573        | 126.825        | 126.321        | S[4]  |
| R[33] | 907.808        | 108.620        | 104.615        | 104.867        | 104.363        | R[3]  |
| K[34] | 939.831        | 69.794         | 65.790         | 66.042         | 65.538         | K[2]  |
| E[35] | 972.092        | 37.771         | 33.766         | 34.018         | 33.514         | E[1]  |





# sp | Q6GSS7 | H2A2A\_MOUSE

SGR<sup>Trimethyl</sup><sub>42.05</sub> GKQGGKARAKAKSRSSRAGLQFPVGRVHLLLRKGN<sup>YAE</sup>

- ▶ fragmentation table for charge state 1+
- ▶ specType=etd
- ▶ score=48.34
- ▶ F104938.dat
- ▶ query=q3277\_p1
- ▶ precursor=747.095730
- ▶ chargePrecursor=6
- ▶ itol=0.8

| AA | c  | y               | #±1             | #±2             | z               | AA              |       |
|----|----|-----------------|-----------------|-----------------|-----------------|-----------------|-------|
| S  | 1  | 105.960         | 4477.546        | 4461.533        | 0.000           | 4460.520        | S[41] |
| G  | 2  | 102.087         | 4390.514        | 4374.499        | 0.000           | 4373.482        | G[40] |
| R  | 3  | <b>360.235</b>  | 4333.493        | 4317.474        | 4318.482        | 4318.460        | R[39] |
| G  | 4  | <b>417.257</b>  | 4135.345        | 4119.320        | 4120.334        | 4118.310        | G[38] |
| K  | 5  | <b>545.352</b>  | 4078.323        | 4062.305        | 4063.313        | 4061.297        | K[37] |
| G  | 6  | <b>673.410</b>  | 3950.228        | 3934.210        | 3935.218        | 3933.202        | G[36] |
| G  | 7  | <b>730.432</b>  | 3932.170        | 3899.151        | 3907.159        | 3895.141        | G[35] |
| G  | 8  | 787.453         | 3765.148        | 3749.130        | 3750.138        | 3748.122        | G[34] |
| K  | 9  | <b>915.548</b>  | 3708.127        | 3692.108        | 3693.116        | 3691.100        | K[33] |
| A  | 10 | <b>980.585</b>  | 3380.032        | 3364.013        | 3365.021        | 3363.005        | A[32] |
| R  | 11 | 1142.660        | 3538.995        | 3492.970        | 3493.984        | 3491.968        | R[31] |
| A  | 12 | <b>1213.724</b> | 3382.984        | 3336.955        | 3337.968        | 3335.950        | A[30] |
| K  | 13 | <b>1341.819</b> | 3281.857        | 3265.838        | 3266.846        | 3264.830        | K[29] |
| A  | 14 | 1442.858        | 3153.762        | 3137.743        | 3138.751        | 3136.735        | A[28] |
| K  | 15 | 1540.951        | 3022.725        | 3006.706        | 3007.714        | 3005.699        | K[27] |
| S  | 16 | 1627.003        | 2954.630        | 2938.611        | 2939.619        | 2937.603        | S[26] |
| R  | 17 | 1784.094        | 2897.598        | 2881.579        | 2882.587        | 2880.571        | R[25] |
| S  | 18 | 1871.116        | 2713.496        | 2696.475        | 2696.486        | 2694.470        | S[24] |
| S  | 19 | 1958.148        | 2634.464        | 2608.446        | 2609.454        | 2607.438        | S[23] |
| R  | 20 | 2114.349        | 2537.432        | 2521.414        | 2522.422        | 2520.406        | R[22] |
| A  | 21 | 2185.388        | 2381.311        | 2365.293        | 2366.300        | 2364.285        | A[21] |
| G  | 22 | 2242.308        | 2310.294        | 2294.275        | 2295.283        | 2293.267        | G[20] |
| L  | 23 | 2385.382        | 2253.271        | 2237.254        | 2238.262        | 2236.246        | L[19] |
| G  | 24 | 2483.450        | 2140.185        | 2124.170        | 2125.178        | 2123.162        | G[18] |
| F  | 25 | 2630.519        | 2012.130        | 1996.111        | <b>1997.119</b> | 1995.104        | F[17] |
| F  | 26 | 2727.571        | 1895.062        | 1849.043        | 1850.051        | 1848.035        | F[16] |
| V  | 27 | 2826.640        | 1768.009        | 1751.990        | 1752.998        | 1750.982        | V[15] |
| G  | 28 | 2883.661        | 1698.945        | 1682.922        | 1683.930        | 1681.914        | G[14] |
| K  | 29 | 3039.763        | 1611.919        | 1595.900        | <b>1596.908</b> | 1594.890        | K[13] |
| V  | 30 | 3138.811        | 1455.815        | 1439.799        | 1440.807        | 1438.791        | V[12] |
| H  | 31 | 3275.890        | 1358.749        | 1340.731        | <b>1341.739</b> | 1339.723        | H[11] |
| R  | 32 | 3431.991        | 1219.691        | <b>1203.672</b> | <b>1204.680</b> | 1202.664        | R[10] |
| L  | 33 | 3545.075        | <b>1063.589</b> | <b>1047.571</b> | 1048.579        | <b>1046.563</b> | L[9]  |
| L  | 34 | 3688.150        | 950.505         | 934.487         | 935.495         | 933.479         | L[8]  |
| R  | 35 | 3814.262        | 837.422         | 821.403         | 822.410         | 820.395         | R[7]  |
| K  | 36 | 3942.355        | 681.320         | 665.302         | 666.309         | 664.294         | K[6]  |
| G  | 37 | 3999.376        | 553.225         | 537.207         | 538.214         | 536.199         | G[5]  |
| N  | 38 | 4113.419        | 496.204         | 480.185         | 481.193         | 479.177         | N[4]  |
| V  | 39 | 4276.463        | 382.161         | 366.142         | 367.150         | 365.134         | V[3]  |
| A  | 40 | 4387.500        | 219.096         | 203.079         | 204.086         | 202.070         | A[2]  |
| E  | 41 | 4476.562        | 148.060         | 132.042         | 133.050         | 131.034         | E[1]  |

# sp | Q6GSS7 | H2A2A\_MOUSE

SGR<sup>Trimethyl</sup><sub>42.05</sub> GKQGGKARAKAKSRSSRAGLQFPVGRVHLLLRKGN<sup>YAE</sup>

- ▶ fragmentation table for charge state 2+
- ▶ specType=etd
- ▶ score=48.34
- ▶ F104938.dat
- ▶ query=q3277\_p1
- ▶ precursor=747.095730
- ▶ chargePrecursor=6
- ▶ itol=0.8

| AA | c  | y               | #s1             | #s2             | z               | AA              |       |
|----|----|-----------------|-----------------|-----------------|-----------------|-----------------|-------|
| S  | 1  | 513.037         | 2239.771        | 2231.267        | 8.304           | 2230.764        | S[41] |
| G  | 2  | 81.547          | 2195.761        | 2187.751        | 0.504           | 2187.246        | G[40] |
| R  | 3  | 180.621         | 2167.250        | 2159.241        | 2159.745        | 2158.737        | R[39] |
| G  | 4  | 209.132         | 2088.176        | 2080.167        | 2080.671        | 2059.663        | G[38] |
| K  | 5  | 273.180         | 2039.665        | 2031.656        | 2032.160        | 2031.152        | K[37] |
| Q  | 6  | 337.209         | 1975.618        | 1967.609        | 1968.112        | 1967.105        | Q[36] |
| G  | 7  | 385.720         | 1911.589        | <b>1903.579</b> | <b>1904.083</b> | 1903.075        | G[35] |
| G  | 8  | 394.230         | 1883.078        | <b>1875.068</b> | <b>1875.572</b> | <b>1874.565</b> | G[34] |
| K  | 9  | 458.278         | 1854.567        | 1846.558        | 1847.062        | 1846.054        | K[33] |
| A  | 10 | 493.796         | 1790.520        | 1782.510        | 1783.014        | 1782.006        | A[32] |
| R  | 11 | 572.847         | 1735.001        | 1726.992        | 1727.496        | 1726.488        | R[31] |
| A  | 12 | <b>607.365</b>  | 1676.951        | 1668.941        | 1669.446        | 1668.438        | A[30] |
| R  | 13 | <b>671.413</b>  | 1643.432        | 1635.423        | 1635.927        | 1634.919        | R[29] |
| A  | 14 | <b>706.931</b>  | 1577.384        | 1569.375        | 1569.879        | 1568.871        | A[28] |
| K  | 15 | <b>770.979</b>  | <b>1541.866</b> | 1533.857        | 1534.360        | 1533.351        | K[27] |
| S  | 16 | <b>814.495</b>  | 1477.818        | <b>1469.809</b> | <b>1470.313</b> | <b>1469.305</b> | S[26] |
| R  | 17 | 862.546         | 1434.302        | <b>1426.293</b> | <b>1426.797</b> | <b>1425.789</b> | R[25] |
| S  | 18 | 938.602         | <b>1356.252</b> | 1348.243        | <b>1348.746</b> | 1347.739        | S[24] |
| S  | 19 | <b>970.578</b>  | <b>1312.736</b> | <b>1304.726</b> | <b>1305.230</b> | 1304.223        | S[23] |
| R  | 20 | 1057.628        | 1269.220        | 1261.210        | <b>1261.714</b> | 1260.707        | R[22] |
| A  | 21 | <b>1093.147</b> | 1191.169        | <b>1183.160</b> | <b>1183.664</b> | <b>1182.656</b> | A[21] |
| Q  | 22 | 1121.657        | 1135.051        | 1127.041        | 1128.545        | 1127.537        | Q[20] |
| L  | 23 | 1178.908        | 1119.140        | 1111.130        | 1111.634        | 1110.626        | L[19] |
| Q  | 24 | <b>1242.229</b> | <b>1070.598</b> | <b>1062.589</b> | <b>1063.093</b> | 1062.085        | Q[18] |
| F  | 25 | 1315.763        | 1006.590        | <b>998.559</b>  | <b>999.063</b>  | <b>998.055</b>  | F[17] |
| F  | 26 | 1364.289        | 933.034         | <b>925.025</b>  | 925.529         | <b>924.521</b>  | F[16] |
| V  | 27 | <b>1413.824</b> | 884.506         | 876.496         | 877.000         | 875.992         | V[15] |
| Q  | 28 | 1442.134        | 834.974         | 826.964         | 827.468         | 826.460         | Q[14] |
| R  | 29 | 1500.305        | 806.463         | <b>798.454</b>  | <b>798.958</b>  | <b>797.950</b>  | R[13] |
| V  | 30 | 1569.919        | 729.413         | 720.403         | 720.907         | 719.899         | V[12] |
| H  | 31 | 1638.448        | 678.878         | <b>670.869</b>  | <b>671.373</b>  | 670.365         | H[11] |
| R  | 32 | 1716.499        | 610.349         | 602.340         | 602.843         | 601.835         | R[10] |
| L  | 33 | 1773.041        | 532.299         | 524.289         | 524.793         | 523.785         | L[9]  |
| L  | 34 | 1839.583        | 478.756         | 469.747         | 469.251         | 468.243         | L[8]  |
| R  | 35 | 1907.634        | 419.214         | 411.205         | 411.709         | 410.701         | R[7]  |
| K  | 36 | 1971.681        | 341.164         | 333.154         | 333.658         | 332.650         | K[6]  |
| G  | 37 | 2000.192        | 277.116         | 269.107         | 269.611         | 268.603         | G[5]  |
| N  | 38 | 2057.213        | 248.606         | 240.596         | 241.100         | 240.092         | N[4]  |
| V  | 39 | 2136.745        | 181.564         | 183.575         | 184.079         | 183.071         | V[3]  |
| A  | 40 | 2114.264        | 110.052         | 102.043         | 102.547         | 101.539         | A[2]  |
| E  | 41 | 2238.785        | 74.534          | 66.524          | 67.028          | 66.021          | E[1]  |

# sp | Q6GSS7 | H2A2A\_MOUSE

SGR<sup>Trimethyl</sup><sub>42.05</sub> GKQGGKARAKAKSRSSRAGLQFPVGRVHLLRKGNYAE

- ▶ fragmentation table for charge state 3+
- ▶ specType=etd
- ▶ score=48.34
- ▶ F104938.dat
- ▶ query=q3277\_p1
- ▶ precursor=747.095730
- ▶ chargePrecursor=6
- ▶ itol=0.8

| AA | c  | y               | #±1             | #±2             | z               | AA              |       |
|----|----|-----------------|-----------------|-----------------|-----------------|-----------------|-------|
| S  | 1  | 35.993          | 1493.147        | 1487.867        | 0.672           | 1487.511        | S[41] |
| G  | 2  | 54.702          | 1464.175        | 1458.837        | 0.672           | 1458.501        | G[40] |
| R  | 3  | 130.750         | <b>1445.169</b> | 1439.830        | 1440.586        | 1439.494        | R[39] |
| G  | 4  | 139.757         | 1379.120        | <b>1373.780</b> | <b>1374.116</b> | 1373.444        | G[38] |
| K  | 5  | 182.455         | 1360.113        | 1354.773        | <b>1355.109</b> | 1354.437        | K[37] |
| G  | 6  | 225.142         | 1317.414        | <b>1312.075</b> | <b>1312.411</b> | <b>1311.739</b> | G[36] |
| G  | 7  | 244.149         | 1274.725        | 1269.387        | 1269.729        | 1269.061        | G[35] |
| G  | 8  | 263.156         | 1235.921        | <b>1250.381</b> | <b>1250.717</b> | <b>1250.045</b> | G[34] |
| K  | 9  | 305.654         | 1236.714        | 1231.374        | <b>1231.710</b> | 1231.038        | K[33] |
| A  | 10 | 329.513         | 1194.016        | 1188.676        | 1189.012        | 1188.340        | A[32] |
| R  | 11 | 381.567         | <b>1170.336</b> | 1164.997        | 1165.333        | 1164.661        | R[31] |
| A  | 12 | 405.266         | 1133.303        | 1127.963        | 1128.300        | 1127.624        | A[30] |
| R  | 13 | 447.944         | 1094.624        | <b>1089.284</b> | <b>1089.620</b> | <b>1088.948</b> | R[29] |
| A  | 14 | 491.623         | 1051.925        | <b>1046.586</b> | <b>1046.922</b> | 1046.250        | A[28] |
| K  | 15 | 514.322         | 1028.246        | <b>1022.907</b> | <b>1023.243</b> | <b>1022.571</b> | K[27] |
| S  | 16 | 543.312         | <b>985.548</b>  | <b>980.208</b>  | <b>980.544</b>  | <b>979.873</b>  | S[26] |
| R  | 17 | 595.366         | 946.531         | <b>951.198</b>  | <b>951.534</b>  | <b>950.862</b>  | R[25] |
| S  | 18 | 624.319         | 904.504         | 900.164         | 900.500         | 900.836         | S[24] |
| S  | 19 | <b>653.387</b>  | 875.493         | <b>870.153</b>  | <b>870.489</b>  | <b>869.817</b>  | S[23] |
| R  | 20 | 705.421         | 846.482         | 841.143         | 841.479         | 840.807         | R[22] |
| A  | 21 | 729.100         | 794.449         | 789.109         | 789.445         | 788.773         | A[21] |
| G  | 22 | 748.107         | <b>770.770</b>  | 765.430         | 765.766         | 765.094         | G[20] |
| L  | 23 | <b>785.802</b>  | 734.762         | 729.423         | 729.759         | 729.087         | L[19] |
| Q  | 24 | <b>828.488</b>  | 714.685         | 709.345         | 709.684         | 709.012         | Q[18] |
| F  | 25 | 877.511         | <b>671.382</b>  | 666.042         | 666.378         | 665.706         | F[17] |
| P  | 26 | 909.902         | 622.359         | 617.019         | 617.355         | 616.683         | P[16] |
| V  | 27 | 942.685         | 590.006         | 584.666         | 585.004         | 584.332         | V[15] |
| G  | 28 | <b>961.892</b>  | 556.985         | 551.645         | 551.981         | 551.309         | G[14] |
| R  | 29 | 1013.026        | 537.916         | 532.576         | 532.914         | 532.242         | R[13] |
| V  | 30 | <b>1046.948</b> | 485.944         | 480.604         | 480.941         | 480.269         | V[12] |
| H  | 31 | <b>1092.635</b> | 452.921         | 447.581         | 447.918         | 447.246         | H[11] |
| R  | 32 | <b>1144.668</b> | 407.235         | 401.895         | 402.231         | 401.560         | R[10] |
| L  | 33 | <b>1188.363</b> | 355.201         | 349.862         | 350.198         | 349.526         | L[9]  |
| L  | 34 | 1230.058        | 312.509         | 307.169         | 307.505         | 306.833         | L[8]  |
| R  | 35 | 1272.062        | 279.812         | 274.472         | 274.808         | 274.136         | R[7]  |
| K  | 36 | 1314.790        | 227.778         | 222.439         | 222.775         | 222.103         | K[6]  |
| G  | 37 | 1333.797        | 185.880         | 179.740         | 180.076         | 179.404         | G[5]  |
| N  | 38 | 1371.811        | 146.873         | 140.733         | 141.069         | 140.397         | N[4]  |
| V  | 39 | <b>1426.166</b> | 108.998         | 102.719         | 103.055         | 102.383         | V[3]  |
| A  | 40 | 1449.845        | 73.348          | 66.384          | 66.720          | 66.048          | A[2]  |
| E  | 41 | 1492.859        | 30.025          | 44.638          | 45.021          | 44.349          | E[1]  |

# sp | Q6GSS7 | H2A2A\_MOUSE

SGR<sup>Trimethyl</sup><sub>42.05</sub> GKQGGKARAKAKSRSSRAGLQFPVGRVHLLLRKGN<sup>YAE</sup>

- ▶ fragmentation table for charge state 4+
- ▶ specType=etd
- ▶ score=48.34
- ▶ F104938.dat
- ▶ query=q3277\_p1
- ▶ precursor=747.095730
- ▶ chargePrecursor=6
- ▶ itol=0.8

| AA |    | c               | y               | #=1             | #=2             | #=3             | AA    |
|----|----|-----------------|-----------------|-----------------|-----------------|-----------------|-------|
| S  | 1  | 212.022         | <b>1120.142</b> | <b>1116.137</b> | 0.705           | <b>1115.985</b> | S[41] |
| G  | 2  | 41.277          | 1026.384        | 1024.370        | 0.795           | <b>1094.127</b> | G[40] |
| R  | 3  | 90.814          | <b>1084.129</b> | 1080.124        | 1080.376        | 1079.872        | R[39] |
| G  | 4  | 109.070         | 1034.592        | <b>1030.587</b> | <b>1030.839</b> | <b>1030.335</b> | G[38] |
| K  | 5  | 137.093         | 1020.336        | 1018.332        | 1016.304        | 1016.080        | K[37] |
| G  | 6  | 169.108         | 998.312         | <b>994.308</b>  | <b>984.560</b>  | 983.270         | G[36] |
| G  | 7  | 183.983         | 956.296         | <b>952.293</b>  | 952.546         | <b>952.041</b>  | G[35] |
| G  | 8  | 197.810         | 942.043         | <b>938.038</b>  | <b>938.290</b>  | <b>937.786</b>  | G[34] |
| K  | 9  | 229.643         | 927.787         | <b>923.783</b>  | <b>924.034</b>  | <b>923.531</b>  | K[33] |
| A  | 10 | 247.402         | 895.763         | 891.759         | 892.011         | 891.507         | A[32] |
| R  | 11 | 286.427         | 878.004         | 873.999         | 874.251         | 873.748         | R[31] |
| A  | 12 | 304.186         | 838.978         | 834.974         | 835.226         | 834.723         | A[30] |
| K  | 13 | 336.210         | 821.220         | <b>817.215</b>  | <b>817.467</b>  | 816.964         | K[29] |
| A  | 14 | 353.969         | 789.199         | <b>785.191</b>  | <b>785.443</b>  | 784.939         | A[28] |
| K  | 15 | 385.993         | <b>771.437</b>  | 767.432         | 767.684         | 767.180         | K[27] |
| S  | 16 | 407.751         | 739.413         | 735.408         | 735.660         | 735.156         | S[26] |
| R  | 17 | 446.776         | 721.655         | 717.650         | 717.902         | 717.398         | R[25] |
| S  | 18 | 468.518         | 678.930         | 674.925         | 674.977         | 674.974         | S[24] |
| S  | 19 | 490.292         | 656.672         | 652.667         | 653.119         | 652.615         | S[23] |
| R  | 20 | 526.318         | 635.114         | 631.109         | 631.361         | 630.857         | R[22] |
| A  | 21 | 547.077         | 596.089         | 592.084         | 592.336         | 591.832         | A[21] |
| G  | 22 | 561.332         | 578.329         | 574.324         | 574.576         | 574.072         | G[20] |
| L  | 23 | 589.603         | 654.074         | 650.069         | 650.321         | 649.817         | L[19] |
| Q  | 24 | 621.818         | 535.803         | 531.798         | 532.050         | 531.546         | Q[18] |
| F  | 25 | 658.305         | 503.789         | 499.783         | 500.035         | 499.531         | F[17] |
| F  | 26 | 682.646         | 467.021         | 463.016         | 463.268         | 462.764         | F[16] |
| V  | 27 | <b>707.415</b>  | 442.750         | 438.753         | 439.005         | 438.501         | V[15] |
| G  | 28 | 721.671         | <b>417.991</b>  | 413.985         | 414.238         | 413.734         | G[14] |
| R  | 29 | 760.696         | 403.736         | 399.711         | 399.963         | 399.459         | R[13] |
| V  | 30 | <b>785.463</b>  | 364.710         | <b>360.705</b>  | <b>360.957</b>  | <b>360.453</b>  | V[12] |
| H  | 31 | 816.728         | 338.643         | 335.938         | 336.190         | 335.686         | H[11] |
| R  | 32 | 858.753         | 305.678         | 301.673         | 301.925         | 301.421         | R[10] |
| L  | 33 | 887.024         | 266.653         | 262.648         | 262.900         | 262.396         | L[9]  |
| L  | 34 | <b>915.295</b>  | 238.362         | 234.357         | 234.609         | 234.105         | L[8]  |
| R  | 35 | 924.323         | 210.111         | 206.106         | 206.358         | 205.854         | R[7]  |
| K  | 36 | <b>966.344</b>  | 171.088         | 167.083         | 167.335         | 166.829         | K[6]  |
| G  | 37 | <b>1006.600</b> | 139.063         | 135.057         | 135.309         | 134.805         | G[5]  |
| N  | 38 | <b>1029.110</b> | 124.806         | 120.802         | 121.054         | 120.550         | N[4]  |
| Y  | 39 | <b>1069.876</b> | 96.296          | 92.291          | 92.543          | 92.039          | Y[3]  |
| A  | 40 | <b>1087.835</b> | 58.530          | 54.525          | 54.777          | 54.273          | A[2]  |
| E  | 41 | <b>1119.896</b> | 37.771          | 33.766          | 34.018          | 33.514          | E[1]  |

# sp | Q6GSS7 | H2A2A\_MOUSE

SGR<sup>Trimethyl</sup><sub>42.05</sub> GKQGKARAKAKSRSSRAGLQFPVGRVHLLLRKGN<sup>YAE</sup>

- ▶ fragmentation table for charge state 5+
- ▶ specType=etd
- ▶ score=48.34
- ▶ F104938.dat
- ▶ query=q3277.p1
- ▶ precursor=747.095730
- ▶ chargePrecursor=6
- ▶ itol=0.8

| AA    | c              | y              | z#1            | z#2            | z              | AA    |
|-------|----------------|----------------|----------------|----------------|----------------|-------|
| S[1]  | 21.819         | <b>896.315</b> | 893.111        | 0.806          | 892.910        | S[41] |
| G[2]  | 33.223         | 878.909        | 875.705        | 0.806          | 875.503        | G[40] |
| R[3]  | 72.853         | 867.504        | 864.301        | 864.502        | 864.099        | R[39] |
| G[4]  | 84.257         | 827.875        | 824.671        | 824.873        | 824.469        | G[38] |
| K[5]  | 109.876        | 816.471        | 813.267        | 813.468        | 813.065        | K[37] |
| Q[6]  | 135.488        | 790.852        | 787.648        | 787.849        | 787.446        | Q[36] |
| G[7]  | 146.892        | 765.240        | 762.036        | 762.238        | 761.834        | G[35] |
| G[8]  | 158.296        | 753.836        | 750.632        | 750.833        | 750.430        | G[34] |
| K[9]  | 183.915        | 742.431        | 739.227        | 739.429        | 739.026        | K[33] |
| A[10] | 198.123        | 716.812        | 713.608        | 713.810        | 713.407        | A[32] |
| R[11] | 229.343        | 702.605        | 699.401        | 699.603        | 699.199        | R[31] |
| A[12] | 243.551        | <b>671.385</b> | 668.181        | 668.382        | 667.979        | A[30] |
| K[13] | 269.170        | 657.177        | <b>653.973</b> | <b>654.175</b> | <b>653.772</b> | K[29] |
| A[14] | 283.377        | 631.558        | 628.354        | 628.556        | 628.153        | A[28] |
| K[15] | 308.996        | 617.351        | 614.147        | 614.349        | 613.945        | K[27] |
| S[16] | 326.402        | 591.732        | 588.528        | 588.730        | 588.326        | S[26] |
| R[17] | 357.623        | 574.325        | 571.122        | 571.323        | 570.920        | R[25] |
| S[18] | 375.029        | 548.105        | 539.901        | 540.103        | 539.700        | S[24] |
| S[19] | 392.438        | 525.699        | 522.495        | 522.697        | 522.293        | S[23] |
| R[20] | 423.656        | 508.292        | 505.089        | 505.290        | 504.887        | R[22] |
| A[21] | 437.863        | 477.072        | 473.868        | 474.070        | 473.667        | A[21] |
| G[22] | 449.267        | 462.865        | 459.661        | 459.862        | 459.459        | G[20] |
| L[23] | 471.884        | 451.460        | 448.257        | 448.458        | 448.055        | L[19] |
| Q[24] | 497.496        | 428.844        | 425.640        | 425.841        | 425.438        | Q[18] |
| F[25] | 538.910        | 403.232        | 400.028        | 400.230        | 399.827        | F[17] |
| P[26] | 546.320        | 373.816        | 370.614        | 370.816        | 370.413        | P[16] |
| V[27] | 665.134        | 354.408        | 351.204        | 351.405        | 351.002        | V[15] |
| G[28] | 677.538        | 334.994        | 331.790        | 331.992        | 331.589        | G[14] |
| R[29] | <b>608.758</b> | 323.190        | 319.986        | 320.187        | 319.784        | R[13] |
| V[30] | 628.572        | 291.969        | 288.766        | 288.967        | 288.564        | V[12] |
| H[31] | 655.984        | 272.156        | 268.952        | 269.154        | 268.750        | H[11] |
| K[32] | 687.204        | 244.744        | 241.540        | 241.742        | 241.339        | K[10] |
| L[33] | 709.821        | 213.524        | 210.320        | 210.522        | 210.118        | L[9]  |
| L[34] | 732.438        | 190.907        | 187.703        | 187.905        | 187.502        | L[8]  |
| R[35] | 763.658        | 168.290        | 165.086        | 165.288        | 164.885        | R[7]  |
| R[36] | 789.277        | 137.070        | 133.866        | 134.068        | 133.665        | R[6]  |
| G[37] | 839.681        | 111.451        | 108.247        | 108.449        | 108.046        | G[5]  |
| N[38] | 823.490        | 100.047        | 96.843         | 97.044         | 96.641         | N[4]  |
| V[39] | <b>856.102</b> | 77.238         | 74.034         | 74.236         | 73.833         | V[3]  |
| A[40] | <b>870.310</b> | 44.625         | 41.422         | 41.623         | 41.220         | A[2]  |
| E[41] | <b>896.118</b> | 30.418         | 27.214         | 27.416         | 27.013         | E[1]  |



# sp | Q6GSS7 | H2A2A\_MOUSE

SGR<sup>Trimethyl</sup><sub>42.05</sub> GKQGGKARAKAKSRSSRAGLQFPVGRVHLLLRKGN<sup>YAE</sup>

- ▶ fragmentation table for charge state 1+
- ▶ specType=etd
- ▶ score=64.46
- ▶ F104939.dat
- ▶ query=q2799\_p1
- ▶ precursor=747.095010
- ▶ chargePrecursor=6
- ▶ itol=0.8

| AA | c  | y               | #±1             | #±2             | z               | AA              |       |
|----|----|-----------------|-----------------|-----------------|-----------------|-----------------|-------|
| S  | 1  | 105.960         | 4477.546        | 4461.531        | 0.000           | 4460.525        | S[1]  |
| G  | 2  | 102.087         | 4390.514        | 4374.499        | 0.000           | 4373.484        | G[2]  |
| R  | 3  | <b>360.235</b>  | 4333.493        | 4317.474        | 4318.482        | 4318.460        | R[3]  |
| G  | 4  | <b>417.257</b>  | 4135.345        | 4119.320        | 4120.334        | 4118.310        | G[4]  |
| K  | 5  | <b>545.352</b>  | 4078.323        | 4062.305        | 4063.313        | 4061.297        | K[5]  |
| G  | 6  | <b>673.410</b>  | 3950.228        | 3934.210        | 3935.218        | 3933.202        | G[6]  |
| G  | 7  | <b>730.432</b>  | 3922.170        | 3899.151        | 3907.159        | 3895.141        | G[7]  |
| G  | 8  | <b>787.453</b>  | 3765.148        | 3749.130        | 3750.138        | 3748.122        | G[8]  |
| K  | 9  | <b>915.548</b>  | 3708.127        | 3692.108        | 3693.116        | 3691.100        | K[9]  |
| A  | 10 | 908.505         | 3580.032        | 3564.013        | 3565.021        | 3563.005        | A[10] |
| R  | 11 | 1142.688        | 3538.995        | 3492.976        | 3493.984        | 3491.968        | R[11] |
| A  | 12 | 1213.924        | 3382.964        | 3358.945        | 3357.953        | 3355.937        | A[12] |
| K  | 13 | 1341.819        | 3281.857        | 3265.838        | 3266.846        | 3264.830        | K[13] |
| A  | 14 | 1442.856        | 3153.762        | 3137.743        | 3138.751        | 3136.735        | A[14] |
| K  | 15 | <b>1540.951</b> | 3082.725        | 3066.706        | 3067.714        | 3065.698        | K[15] |
| S  | 16 | 1627.983        | 2954.630        | 2938.611        | 2939.619        | 2937.603        | S[16] |
| R  | 17 | 1784.094        | 2897.598        | 2861.579        | 2852.587        | 2850.571        | R[17] |
| S  | 18 | 1871.116        | 2713.496        | 2696.475        | 2696.488        | 2694.471        | S[18] |
| S  | 19 | <b>1958.148</b> | 2634.464        | 2608.446        | 2609.454        | 2607.438        | S[19] |
| R  | 20 | 2114.349        | 2537.432        | 2521.414        | 2522.422        | 2520.406        | R[20] |
| A  | 21 | 2185.386        | 2381.311        | 2365.293        | 2366.300        | 2364.284        | A[21] |
| G  | 22 | 2242.358        | 2310.294        | 2294.275        | 2295.283        | 2293.267        | G[22] |
| L  | 23 | 2355.392        | 2253.271        | 2237.254        | 2238.262        | 2236.246        | L[23] |
| Q  | 24 | 2463.420        | 2140.185        | 2124.170        | 2125.178        | 2123.162        | Q[24] |
| F  | 25 | 2630.519        | 2012.130        | 1996.111        | <b>1997.119</b> | 1995.104        | F[25] |
| F  | 26 | 2747.571        | 1895.062        | 1849.043        | 1850.051        | 1848.035        | F[26] |
| V  | 27 | 2826.640        | 1768.009        | 1751.990        | 1752.998        | 1750.982        | V[27] |
| G  | 28 | 2883.661        | 1698.945        | 1682.922        | 1683.930        | 1681.914        | G[28] |
| K  | 29 | 3039.763        | 1511.915        | 1505.900        | <b>1506.908</b> | 1504.892        | K[29] |
| V  | 30 | 3138.811        | <b>1455.818</b> | 1439.799        | 1440.807        | 1438.791        | V[30] |
| H  | 31 | 3275.890        | 1358.749        | <b>1340.731</b> | 1341.739        | 1339.723        | H[31] |
| R  | 32 | 3431.991        | 1219.691        | 1203.672        | 1204.680        | 1202.664        | R[32] |
| L  | 33 | 3545.075        | <b>1063.589</b> | <b>1047.571</b> | 1048.579        | <b>1046.563</b> | L[33] |
| L  | 34 | 3688.150        | 950.505         | 934.487         | 935.495         | 933.479         | L[34] |
| R  | 35 | 3814.262        | 837.422         | 821.403         | 822.410         | <b>820.395</b>  | R[35] |
| K  | 36 | 3942.355        | 681.320         | 665.302         | 666.309         | 664.294         | K[36] |
| G  | 37 | 3999.376        | 553.225         | 537.207         | 538.214         | 536.199         | G[37] |
| N  | 38 | 4113.419        | 496.204         | 480.185         | 481.193         | 479.177         | N[38] |
| V  | 39 | 4276.463        | 382.161         | 366.142         | 367.150         | 365.134         | V[39] |
| A  | 40 | 4367.500        | 219.096         | 203.078         | 204.086         | 202.070         | A[40] |
| E  | 41 | 4476.562        | 148.060         | 132.042         | 133.050         | 131.034         | E[41] |



# sp | Q6GSS7 | H2A2A\_MOUSE

SGR<sup>Trimethyl</sup><sub>42.05</sub> GKQGGKARAKAKSRSSRAGLQFPVGRVHLLLRKGN<sup>YAE</sup>

- ▶ fragmentation table for charge state 2+
- ▶ specType=etd
- ▶ score=64.46
- ▶ F104939.dat
- ▶ query=q2799\_p1
- ▶ precursor=747.095010
- ▶ chargePrecursor=6
- ▶ itol=0.8

| AA | c  | y               | #=1             | #=2             | z               | AA              |       |
|----|----|-----------------|-----------------|-----------------|-----------------|-----------------|-------|
| S  | 1  | 513.037         | 2239.271        | 2231.867        | 0.804           | 2230.767        | S[41] |
| G  | 2  | 81.547          | 2195.761        | 2187.751        | 0.804           | 2187.240        | G[40] |
| R  | 3  | 180.621         | 2167.250        | 2159.241        | 2159.945        | 2158.737        | R[39] |
| G  | 4  | 209.132         | 2098.176        | 2090.167        | 2090.671        | 2099.663        | G[38] |
| K  | 5  | 273.180         | 2039.665        | 2031.656        | 2032.160        | 2031.152        | K[37] |
| Q  | 6  | 337.209         | 1975.618        | 1967.608        | <b>1968.112</b> | 1967.205        | Q[36] |
| G  | 7  | 385.720         | 1911.589        | 1903.579        | <b>1904.083</b> | 1903.073        | G[35] |
| G  | 8  | 394.230         | 1883.078        | 1875.068        | <b>1875.572</b> | 1874.565        | G[34] |
| K  | 9  | 458.278         | 1854.567        | 1846.558        | 1847.062        | 1846.054        | K[33] |
| A  | 10 | 493.796         | 1790.520        | 1782.510        | 1783.014        | 1782.006        | A[32] |
| R  | 11 | <b>571.847</b>  | 1735.001        | <b>1746.952</b> | <b>1747.496</b> | <b>1746.488</b> | R[31] |
| A  | 12 | <b>607.355</b>  | 1678.963        | 1670.953        | 1671.456        | 1670.447        | A[30] |
| K  | 13 | <b>671.413</b>  | 1643.433        | 1635.423        | 1635.927        | 1634.919        | K[29] |
| A  | 14 | <b>706.931</b>  | 1577.384        | <b>1569.375</b> | <b>1569.879</b> | 1568.871        | A[28] |
| K  | 15 | <b>770.979</b>  | <b>1541.866</b> | 1533.857        | 1534.360        | 1533.351        | K[27] |
| S  | 16 | <b>814.495</b>  | 1477.818        | <b>1469.809</b> | <b>1470.313</b> | <b>1469.305</b> | S[26] |
| R  | 17 | 862.546         | 1434.302        | <b>1425.293</b> | <b>1426.797</b> | <b>1425.789</b> | R[25] |
| S  | 18 | 938.602         | <b>1356.252</b> | <b>1348.243</b> | <b>1348.746</b> | <b>1347.739</b> | S[24] |
| S  | 19 | <b>979.578</b>  | <b>1312.736</b> | 1304.726        | <b>1305.230</b> | 1304.223        | S[23] |
| R  | 20 | 1057.628        | <b>1269.220</b> | <b>1261.210</b> | <b>1261.714</b> | 1260.707        | R[22] |
| A  | 21 | <b>1093.147</b> | 1191.169        | <b>1183.160</b> | <b>1183.664</b> | <b>1182.656</b> | A[21] |
| Q  | 22 | 1121.657        | 1135.051        | 1147.641        | 1148.145        | 1147.137        | Q[20] |
| L  | 23 | 1178.908        | 1119.140        | 1129.130        | <b>1119.635</b> | 1118.627        | L[19] |
| Q  | 24 | <b>1242.229</b> | <b>1070.598</b> | <b>1062.589</b> | <b>1063.093</b> | 1062.085        | Q[18] |
| F  | 25 | 1315.763        | 1008.599        | <b>998.559</b>  | <b>999.063</b>  | <b>998.055</b>  | F[17] |
| F  | 26 | 1364.289        | 933.034         | 925.025         | 925.529         | 924.521         | F[16] |
| V  | 27 | 1413.824        | <b>884.508</b>  | 876.499         | 877.003         | 875.995         | V[15] |
| Q  | 28 | 1462.334        | 834.974         | 826.965         | 827.468         | 826.461         | Q[14] |
| R  | 29 | 1520.305        | 808.483         | <b>798.454</b>  | <b>798.958</b>  | <b>797.950</b>  | R[13] |
| V  | 30 | <b>1569.919</b> | 728.413         | 720.403         | 720.907         | 719.899         | V[12] |
| H  | 31 | 1636.448        | 678.878         | 670.869         | <b>671.373</b>  | 670.365         | H[11] |
| R  | 32 | 1716.499        | 610.349         | 602.340         | 602.843         | 601.835         | R[10] |
| L  | 33 | 1773.041        | 532.289         | 524.280         | 524.783         | 523.775         | L[9]  |
| L  | 34 | 1839.583        | 478.756         | 469.747         | 469.250         | 468.242         | L[8]  |
| R  | 35 | 1907.634        | 419.214         | 411.205         | 411.708         | 410.701         | R[7]  |
| K  | 36 | 1971.681        | 341.164         | 333.154         | 333.658         | 332.650         | K[6]  |
| G  | 37 | 2000.192        | 277.116         | 269.107         | 269.611         | 268.603         | G[5]  |
| N  | 38 | 2057.213        | 248.606         | 240.596         | 241.100         | 240.092         | N[4]  |
| V  | 39 | 2136.745        | 181.564         | 183.575         | 184.079         | 183.071         | V[3]  |
| A  | 40 | 2114.264        | 110.026         | 102.017         | 102.520         | 101.512         | A[2]  |
| E  | 41 | 2238.785        | 74.534          | 66.524          | 67.028          | 66.021          | E[1]  |

# sp | Q6GSS7 | H2A2A\_MOUSE

SGR<sup>Trimethyl</sup><sub>42.05</sub> GKQGGKARAKAKSRSSRAGLQFPVGRVHLLRKGNYAE

- ▶ fragmentation table for charge state 3+
- ▶ specType=etd
- ▶ score=64.46
- ▶ F104939.dat
- ▶ query=q2799\_p1
- ▶ precursor=747.095010
- ▶ chargePrecursor=6
- ▶ itol=0.8

| AA | c  | y               | #±1             | #±2             | z               | AA              |       |
|----|----|-----------------|-----------------|-----------------|-----------------|-----------------|-------|
| S  | 1  | 35.993          | <b>1493.187</b> | 1487.857        | 0.872           | 1487.511        | S(41) |
| G  | 2  | 54.702          | 1486.170        | <b>1458.837</b> | 0.872           | 1458.501        | G(40) |
| R  | 3  | 130.750         | <b>1445.169</b> | 1439.830        | 1440.186        | 1439.494        | R(39) |
| G  | 4  | 139.757         | 1379.120        | 1373.780        | <b>1374.116</b> | 1373.444        | G(38) |
| K  | 5  | 182.415         | 1360.113        | <b>1354.773</b> | <b>1355.109</b> | 1354.437        | K(37) |
| G  | 6  | 225.142         | 1337.414        | <b>1312.075</b> | <b>1312.411</b> | 1311.779        | G(36) |
| G  | 7  | 284.189         | 1314.725        | <b>1269.389</b> | <b>1269.725</b> | 1269.053        | G(35) |
| G  | 8  | 283.156         | 1295.721        | <b>1250.381</b> | <b>1250.717</b> | 1250.045        | G(34) |
| K  | 9  | 305.854         | 1236.714        | 1231.374        | 1231.710        | 1231.038        | K(33) |
| A  | 10 | 329.513         | 1194.016        | 1189.076        | <b>1189.012</b> | 1188.340        | A(32) |
| R  | 11 | 381.567         | 1170.338        | <b>1164.997</b> | <b>1165.333</b> | 1164.661        | R(31) |
| A  | 12 | 489.266         | 1138.383        | 1133.903        | 1133.969        | 1133.297        | A(30) |
| K  | 13 | 447.944         | 1094.624        | 1089.284        | <b>1089.620</b> | <b>1089.948</b> | K(29) |
| A  | 14 | 471.623         | 1051.925        | <b>1046.586</b> | <b>1046.922</b> | 1046.250        | A(28) |
| K  | 15 | 514.322         | 1028.246        | 1022.907        | <b>1023.243</b> | 1022.571        | K(27) |
| S  | 16 | 543.312         | <b>985.548</b>  | <b>980.208</b>  | <b>980.544</b>  | <b>979.873</b>  | S(26) |
| R  | 17 | 595.266         | 956.537         | <b>951.198</b>  | <b>951.534</b>  | <b>950.862</b>  | R(25) |
| S  | 18 | 624.373         | 904.504         | 899.164         | 899.500         | 898.828         | S(24) |
| S  | 19 | 653.357         | 875.493         | <b>870.153</b>  | <b>870.489</b>  | 869.817         | S(23) |
| R  | 20 | <b>705.421</b>  | 846.482         | <b>841.143</b>  | <b>841.479</b>  | 840.807         | R(22) |
| A  | 21 | <b>729.100</b>  | 794.449         | 789.109         | 789.445         | 788.773         | A(21) |
| C  | 22 | 748.107         | <b>770.770</b>  | 765.430         | 765.766         | 765.094         | C(20) |
| L  | 23 | <b>785.882</b>  | 734.762         | 729.423         | 729.759         | 729.087         | L(19) |
| C  | 24 | <b>828.488</b>  | 714.685         | 709.345         | 709.681         | 709.009         | C(18) |
| F  | 25 | 877.511         | <b>671.382</b>  | 666.042         | 666.378         | 665.706         | F(17) |
| F  | 26 | 909.982         | 622.359         | 617.019         | 617.355         | 616.683         | F(16) |
| V  | 27 | <b>942.885</b>  | 590.006         | 584.666         | 585.004         | 584.332         | V(15) |
| C  | 28 | <b>961.892</b>  | 558.985         | 553.645         | 553.981         | 553.309         | C(14) |
| R  | 29 | 1013.874        | 537.978         | 532.638         | 532.974         | 532.302         | R(13) |
| V  | 30 | <b>1046.948</b> | 485.944         | 480.604         | 480.941         | 480.269         | V(12) |
| H  | 31 | <b>1092.635</b> | 453.921         | 447.581         | 447.918         | 447.246         | H(11) |
| R  | 32 | <b>1144.668</b> | 407.235         | 401.895         | 402.231         | 401.560         | R(10) |
| L  | 33 | <b>1182.363</b> | 355.201         | 349.862         | 350.198         | 349.526         | L(9)  |
| L  | 34 | <b>1220.058</b> | 313.509         | 307.169         | 307.505         | 306.833         | L(8)  |
| R  | 35 | 1272.982        | 279.812         | 274.472         | 274.808         | 274.136         | R(7)  |
| K  | 36 | 1314.790        | 227.778         | 222.438         | 222.775         | 222.103         | K(6)  |
| G  | 37 | 1333.797        | 185.880         | 179.740         | 180.076         | 179.404         | G(5)  |
| N  | 38 | 1371.811        | 166.873         | 160.733         | 161.069         | 160.397         | N(4)  |
| V  | 39 | <b>1426.166</b> | 138.998         | 132.719         | 133.055         | 132.383         | V(3)  |
| A  | 40 | 1449.845        | 97.348          | 91.064          | 91.400          | 90.728          | A(2)  |
| E  | 41 | 1492.859        | 50.025          | 44.685          | 45.021          | 44.349          | E(1)  |

# sp | Q6GSS7 | H2A2A\_MOUSE

SGR<sup>Trimethyl</sup><sub>42.05</sub> GKQGGKARAKAKSRSSRAGLQFPVGRVHLLLRKGN<sup>YAE</sup>

- ▶ fragmentation table for charge state 4+
- ▶ specType=etd
- ▶ score=64.46
- ▶ F104939.dat
- ▶ query=q2799\_p1
- ▶ precursor=747.095010
- ▶ chargePrecursor=6
- ▶ itol=0.8

| AA |    | c               | y               | #=1             | #=2             | #=3             | #=4   | AA  |
|----|----|-----------------|-----------------|-----------------|-----------------|-----------------|-------|-----|
| S  | 1  | 212.022         | <b>1120.142</b> | <b>1116.137</b> | 0.755           | <b>1115.885</b> | 0.541 | G49 |
| G  | 2  | 41.277          | 1026.384        | 1024.378        | 0.755           | 1024.127        | 0.469 | R30 |
| R  | 3  | 90.814          | <b>1084.129</b> | 1080.124        | 1080.376        | 1079.872        | 0.439 | G38 |
| G  | 4  | 109.070         | 1034.592        | <b>1030.587</b> | <b>1030.839</b> | 1030.135        | 0.438 | K37 |
| K  | 5  | 137.093         | 1020.139        | 1018.332        | 1016.584        | 1016.080        | 0.438 | Q36 |
| Q  | 6  | 169.109         | 998.312         | <b>994.308</b>  | <b>994.560</b>  | 993.856         | 0.435 | G35 |
| G  | 7  | 183.983         | 956.296         | <b>952.293</b>  | 951.545         | <b>952.041</b>  | 0.434 | K33 |
| G  | 8  | 197.810         | 942.043         | <b>938.038</b>  | <b>938.290</b>  | <b>937.786</b>  | 0.432 | R31 |
| K  | 9  | 229.643         | 927.787         | 923.783         | 924.034         | 923.531         | 0.430 | A32 |
| A  | 10 | 247.402         | 895.763         | 891.759         | 892.011         | 891.507         | 0.428 | R31 |
| R  | 11 | 266.427         | 878.004         | 873.999         | 874.251         | 873.748         | 0.426 | A30 |
| A  | 12 | 304.186         | 838.979         | 834.974         | 835.226         | 834.722         | 0.424 | K29 |
| K  | 13 | 336.210         | 821.220         | 817.215         | 817.467         | 816.964         | 0.422 | A28 |
| A  | 14 | 353.989         | 789.199         | 785.195         | 785.443         | 784.939         | 0.420 | K27 |
| K  | 15 | 385.993         | <b>771.437</b>  | 767.432         | 767.684         | 767.180         | 0.418 | S26 |
| S  | 16 | 407.751         | 739.413         | 735.408         | 735.660         | 735.156         | 0.416 | R25 |
| R  | 17 | 446.776         | 717.655         | 713.650         | 713.902         | 713.398         | 0.414 | S24 |
| S  | 18 | 468.518         | 678.930         | 674.925         | 674.977         | 674.473         | 0.412 | S23 |
| S  | 19 | 490.292         | 656.672         | 652.667         | 652.919         | 652.415         | 0.410 | R22 |
| R  | 20 | 526.318         | 635.114         | 631.109         | 631.361         | 630.857         | 0.408 | A21 |
| A  | 21 | 547.077         | 596.089         | 592.084         | 592.336         | 591.832         | 0.406 | Q20 |
| Q  | 22 | 561.332         | 578.329         | 574.324         | 574.576         | 574.072         | 0.404 | L19 |
| L  | 23 | 589.683         | 654.074         | 650.069         | 650.321         | 649.817         | 0.402 | Q18 |
| Q  | 24 | 621.918         | 535.803         | 531.798         | 532.050         | 531.546         | 0.400 | F17 |
| F  | 25 | 658.385         | 503.788         | 499.783         | 500.035         | 499.531         | 0.398 | P16 |
| P  | 26 | 682.646         | 467.021         | 463.016         | 463.268         | 462.764         | 0.396 | V15 |
| V  | 27 | <b>707.415</b>  | 442.750         | 438.753         | 439.005         | 438.501         | 0.394 | Q14 |
| Q  | 28 | 721.671         | <b>417.991</b>  | 413.985         | 414.238         | 413.734         | 0.392 | R13 |
| R  | 29 | 760.696         | 483.736         | 479.731         | 479.983         | 479.479         | 0.390 | R12 |
| R  | 30 | 785.463         | 364.710         | <b>360.705</b>  | <b>360.957</b>  | <b>360.453</b>  | 0.388 | H11 |
| H  | 31 | <b>819.728</b>  | 339.643         | 335.638         | 335.890         | 335.386         | 0.386 | R10 |
| R  | 32 | 858.753         | 305.678         | 301.673         | 301.925         | 301.421         | 0.384 | L9  |
| L  | 33 | 887.024         | 266.653         | 262.648         | 262.900         | 262.396         | 0.382 | R7  |
| R  | 34 | <b>915.295</b>  | 238.362         | 234.357         | 234.609         | 234.105         | 0.380 | R7  |
| R  | 35 | 944.320         | 210.111         | 206.106         | 206.358         | 205.854         | 0.378 | K6  |
| K  | 36 | 986.344         | 171.086         | 167.081         | 167.333         | 166.829         | 0.376 | G5  |
| G  | 37 | <b>1006.600</b> | 139.062         | 135.057         | 135.309         | 134.805         | 0.374 | N4  |
| N  | 38 | <b>1029.110</b> | 124.806         | 120.802         | 121.054         | 120.550         | 0.372 | V3  |
| V  | 39 | <b>1059.876</b> | 96.296          | 92.291          | 92.543          | 92.039          | 0.370 | A2  |
| A  | 40 | <b>1087.635</b> | 58.530          | 54.525          | 54.777          | 54.273          | 0.368 | E1  |
| E  | 41 | <b>1119.896</b> | 37.771          | 33.766          | 34.018          | 33.514          | 0.366 |     |

# sp | Q6GSS7 | H2A2A\_MOUSE

SGR<sup>Trimethyl</sup><sub>42.05</sub> GKQGKARAKAKSRSSRAGLQFPVGRVHLLLRKGN<sup>YAE</sup>

- ▶ fragmentation table for charge state 5+
- ▶ specType=etd
- ▶ score=64.46
- ▶ F104939.dat
- ▶ query=q2799\_p1
- ▶ precursor=747.095010
- ▶ chargePrecursor=6
- ▶ itol=0.8

| AA    | c              | y              | z+1            | z#2            | z              | AA    |
|-------|----------------|----------------|----------------|----------------|----------------|-------|
| S[1]  | 21.819         | <b>896.315</b> | 893.111        | 0.806          | 892.910        | S[41] |
| G[2]  | 33.223         | 878.909        | 875.705        | 0.806          | 875.503        | G[40] |
| R[3]  | 72.853         | 867.504        | 864.301        | 864.502        | 864.099        | R[39] |
| G[4]  | 84.257         | 827.875        | 824.671        | 824.873        | 824.469        | G[38] |
| K[5]  | 109.876        | 816.471        | 813.267        | 813.468        | 813.065        | K[37] |
| Q[6]  | 135.488        | 790.952        | <b>787.548</b> | <b>787.849</b> | <b>787.445</b> | Q[36] |
| G[7]  | 146.892        | 765.240        | 762.036        | 762.238        | 761.834        | G[35] |
| G[8]  | 158.296        | 753.836        | 750.632        | 750.833        | 750.430        | G[34] |
| K[9]  | 183.915        | 742.431        | 739.227        | 739.429        | 739.026        | K[33] |
| A[10] | 198.123        | 716.812        | 713.608        | 713.810        | 713.407        | A[32] |
| R[11] | 229.343        | 702.605        | 699.401        | 699.603        | 699.199        | R[31] |
| A[12] | 243.551        | <b>671.385</b> | 668.181        | 668.382        | 667.979        | A[30] |
| K[13] | 269.170        | 657.177        | 653.973        | 654.175        | 653.772        | K[29] |
| A[14] | 283.377        | 631.558        | 628.354        | 628.556        | 628.153        | A[28] |
| K[15] | 308.996        | 617.351        | 614.147        | 614.349        | 613.945        | K[27] |
| S[16] | 326.402        | 591.732        | 588.528        | 588.730        | 588.326        | S[26] |
| R[17] | 357.623        | 574.325        | 571.122        | 571.323        | 570.920        | R[25] |
| S[18] | 375.029        | 548.105        | 539.901        | 540.103        | 539.700        | S[24] |
| S[19] | 392.438        | 525.699        | 522.495        | 522.697        | 522.293        | S[23] |
| R[20] | 423.656        | 508.292        | 505.089        | 505.290        | 504.887        | R[22] |
| A[21] | 437.863        | 477.072        | 473.868        | 474.070        | 473.667        | A[21] |
| G[22] | 449.267        | 462.865        | 459.661        | 459.862        | 459.459        | G[20] |
| L[23] | 471.884        | 451.460        | 448.257        | 448.458        | 448.055        | L[19] |
| Q[24] | 497.496        | 428.844        | 425.640        | 425.841        | 425.438        | Q[18] |
| F[25] | 538.910        | 403.232        | 400.028        | 400.230        | 399.827        | F[17] |
| P[26] | 546.320        | 373.818        | 370.614        | 370.816        | 370.413        | P[16] |
| V[27] | 565.134        | 354.408        | 351.204        | 351.405        | 351.002        | V[15] |
| G[28] | 573.538        | 334.994        | 331.790        | 331.992        | 331.589        | G[14] |
| R[29] | 608.758        | 323.190        | 319.986        | 320.187        | 319.784        | R[13] |
| V[30] | 628.572        | 291.969        | 288.766        | 288.967        | 288.564        | V[12] |
| H[31] | 655.984        | 272.156        | 268.952        | 269.154        | 268.750        | H[11] |
| K[32] | 687.204        | 244.744        | 241.540        | 241.742        | 241.339        | K[10] |
| L[33] | 709.821        | 213.524        | 210.320        | 210.522        | 210.118        | L[9]  |
| L[34] | 732.438        | 190.907        | 187.703        | 187.905        | 187.502        | L[8]  |
| R[35] | 763.658        | 168.290        | 165.086        | 165.288        | 164.885        | R[7]  |
| K[36] | 789.277        | 137.070        | 133.866        | 134.068        | 133.665        | K[6]  |
| G[37] | 839.681        | 111.451        | 108.247        | 108.449        | 108.046        | G[5]  |
| N[38] | 823.490        | 100.047        | 96.843         | 97.044         | 96.641         | N[4]  |
| V[39] | <b>856.102</b> | 77.238         | 74.034         | 74.236         | 73.833         | V[3]  |
| A[40] | <b>870.310</b> | 44.625         | 41.422         | 41.623         | 41.220         | A[2]  |
| E[41] | <b>896.118</b> | 30.418         | 27.214         | 27.416         | 27.013         | E[1]  |



# sp | Q8BFU2 | H2A3\_MOUSE

SGR<sup>Trimethyl</sup><sub>42.05</sub> GKQGGKARAKAKSRSSRAGLQFPVGRVHLLRKGNYSE

- ▶ fragmentation table for charge state 1+
- ▶ specType=etd
- ▶ score=50.34
- ▶ F104939.dat
- ▶ query=q2804\_p1
- ▶ precursor=749.761700
- ▶ chargePrecursor=6
- ▶ itol=0.8

| AA   | c               | y        | z+1             | z+2             | z        | AA   |
|------|-----------------|----------|-----------------|-----------------|----------|------|
| S 1  | 105.066         | 4493.941 | 4477.533        | 0.000           | 4476.915 | S 41 |
| G 2  | 162.087         | 4406.509 | 4390.491        | 0.000           | 4389.483 | G 40 |
| R 3  | <b>360.235</b>  | 4349.488 | 4331.460        | 4334.477        | 4332.461 | R 39 |
| G 4  | <b>417.257</b>  | 4151.340 | 4135.321        | 4136.329        | 4134.313 | G 38 |
| K 5  | <b>545.352</b>  | 4094.310 | 4078.300        | 4079.307        | 4077.292 | K 37 |
| Q 6  | <b>673.410</b>  | 3996.273 | 3980.265        | 3951.212        | 3940.191 | Q 36 |
| G 7  | <b>730.432</b>  | 3836.165 | 3822.146        | 3823.154        | 3821.138 | G 35 |
| G 8  | 787.453         | 3781.143 | 3765.125        | 3766.132        | 3764.117 | G 34 |
| K 9  | <b>915.548</b>  | 3724.122 | 3708.103        | 3709.111        | 3707.095 | K 33 |
| A 10 | <b>986.585</b>  | 3666.027 | 3650.008        | 3651.016        | 3649.000 | A 32 |
| R 11 | 1147.586        | 3524.990 | 3508.971        | 3530.979        | 3507.963 | R 31 |
| A 12 | <b>1213.724</b> | 3368.959 | 3352.939        | 3353.978        | 3351.962 | A 30 |
| K 13 | <b>1341.819</b> | 3297.852 | 3281.833        | 3282.841        | 3280.825 | K 29 |
| A 14 | 1412.856        | 3169.757 | 3153.738        | 3154.746        | 3152.730 | A 28 |
| K 15 | 1540.951        | 3098.719 | 3082.701        | 3083.709        | 3081.693 | K 27 |
| S 16 | 1627.983        | 2970.625 | 2954.606        | 2955.614        | 2953.598 | S 26 |
| R 17 | 1784.084        | 2883.562 | 2867.544        | 2868.562        | 2866.546 | R 25 |
| S 18 | 1873.116        | 2727.491 | 2711.473        | 2712.480        | 2710.465 | S 24 |
| S 19 | 1958.148        | 2640.455 | 2624.441        | 2625.448        | 2623.433 | S 23 |
| R 20 | 2114.249        | 2553.427 | 2537.409        | 2538.416        | 2536.401 | R 22 |
| A 21 | 2185.286        | 2497.326 | 2481.307        | 2482.315        | 2480.300 | A 21 |
| G 22 | 2242.308        | 2426.289 | 2410.270        | 2411.278        | 2409.263 | G 20 |
| L 23 | 2355.392        | 2269.268 | 2253.249        | 2254.257        | 2252.241 | L 19 |
| Q 24 | 2483.450        | 2156.184 | 2140.165        | 2141.173        | 2139.157 | Q 18 |
| F 25 | 2638.519        | 2028.125 | 2012.106        | 2013.114        | 2011.098 | F 17 |
| P 26 | 2727.571        | 1881.057 | 1865.038        | 1866.046        | 1864.030 | P 16 |
| V 27 | 2826.640        | 1784.004 | 1767.985        | 1768.993        | 1766.977 | V 15 |
| G 28 | 2883.661        | 1684.935 | 1668.917        | 1669.924        | 1667.909 | G 14 |
| R 29 | 3039.762        | 1627.914 | 1611.895        | <b>1612.903</b> | 1610.887 | R 13 |
| V 30 | 3138.811        | 1491.833 | 1475.814        | 1476.822        | 1474.807 | V 12 |
| H 31 | 3275.900        | 1372.744 | <b>1356.726</b> | <b>1357.734</b> | 1355.718 | H 11 |
| R 32 | 3431.991        | 1235.685 | 1219.667        | <b>1220.675</b> | 1218.659 | R 10 |
| L 33 | 3545.075        | 1079.584 | 1063.566        | 1064.573        | 1062.558 | L 9  |
| L 34 | 3658.159        | 966.500  | 950.482         | 951.489         | 949.474  | L 8  |
| R 35 | 3814.260        | 853.416  | 837.398         | 838.405         | 836.390  | R 7  |
| K 36 | 3932.335        | 697.315  | 681.298         | 682.304         | 680.289  | K 6  |
| G 37 | 3999.376        | 569.220  | 553.201         | 554.209         | 552.194  | G 5  |
| N 38 | 4113.419        | 512.109  | 496.100         | 497.108         | 495.172  | N 4  |
| Y 39 | 4276.481        | 396.156  | 380.137         | 381.145         | 381.129  | Y 3  |
| S 40 | 4363.515        | 235.092  | 219.074         | 220.082         | 218.066  | S 2  |
| E 41 | 4492.557        | 148.060  | 132.042         | 133.050         | 131.034  | E 1  |

# sp | Q8BFU2 | H2A3\_MOUSE

SGR<sup>Trimethyl</sup><sub>42.05</sub> GKQGGKARAKAKSRSSRAGLQFPVGRVHLLRKGNYSE

- ▶ fragmentation table for charge state 2+
- ▶ specType=etd
- ▶ score=50.34
- ▶ F104939.dat
- ▶ query=q2804\_p1
- ▶ precursor=749.761700
- ▶ chargePrecursor=6
- ▶ itol=0.8

| AA   | c               | y              | z+1             | z+2             | z               | AA   |
|------|-----------------|----------------|-----------------|-----------------|-----------------|------|
| S 1  | 53.037          | 2347.274       | 2239.265        | 0.504           | 2239.761        | S 41 |
| G 2  | 61.547          | 2261.758       | 2195.749        | 0.504           | 2195.245        | G 40 |
| R 3  | 180.621         | 2175.948       | 2167.238        | 2167.742        | 2166.734        | R 39 |
| G 4  | 209.132         | 2076.174       | 2068.164        | 2068.668        | 2067.660        | G 38 |
| K 5  | 273.190         | 2047.663       | 2039.653        | 2040.157        | 2039.150        | K 37 |
| Q 6  | 337.269         | 1983.616       | <b>1975.406</b> | <b>1976.110</b> | <b>1975.102</b> | Q 36 |
| G 7  | 385.720         | 1919.568       | <b>1911.577</b> | <b>1912.081</b> | 1911.075        | G 35 |
| G 8  | 394.230         | 1891.075       | <b>1883.066</b> | <b>1883.570</b> | 1882.562        | G 34 |
| K 9  | 458.276         | 1862.565       | 1854.555        | 1855.059        | 1854.051        | K 33 |
| A 10 | 493.796         | 1798.517       | 1790.508        | 1791.012        | 1790.004        | A 32 |
| R 11 | <b>571.847</b>  | 1762.099       | 1754.089        | 1755.493        | 1754.485        | R 31 |
| A 12 | <b>607.365</b>  | 1698.048       | 1679.937        | 1677.943        | 1676.935        | A 30 |
| R 13 | <b>671.413</b>  | 1649.429       | <b>1641.420</b> | <b>1641.924</b> | <b>1640.916</b> | R 29 |
| A 14 | <b>706.931</b>  | 1585.382       | 1577.373        | 1577.876        | 1576.869        | A 28 |
| K 15 | <b>770.979</b>  | 1549.603       | <b>1541.654</b> | <b>1542.358</b> | <b>1541.350</b> | K 27 |
| S 16 | <b>814.495</b>  | 1485.616       | 1477.607        | 1478.110        | 1477.103        | S 26 |
| R 17 | <b>892.546</b>  | 1442.300       | 1434.290        | <b>1434.794</b> | 1433.787        | R 25 |
| S 18 | <b>936.662</b>  | 1384.249       | <b>1356.240</b> | <b>1356.744</b> | 1355.736        | S 24 |
| S 19 | <b>979.578</b>  | 1320.733       | 1312.724        | 1313.228        | 1312.220        | S 23 |
| R 20 | <b>1057.628</b> | 1277.217       | <b>1269.208</b> | <b>1269.712</b> | 1268.704        | R 22 |
| A 21 | <b>1093.147</b> | 1199.067       | <b>1191.157</b> | <b>1191.661</b> | 1190.653        | A 21 |
| Q 22 | 1121.657        | 1163.648       | <b>1155.639</b> | <b>1156.143</b> | 1155.135        | Q 20 |
| L 23 | 1178.399        | 1136.137       | 1127.128        | 1127.632        | 1126.624        | L 19 |
| Q 24 | <b>1242.229</b> | 1078.595       | <b>1070.586</b> | <b>1071.090</b> | <b>1070.082</b> | Q 19 |
| F 25 | 1315.763        | 1014.566       | <b>1006.557</b> | <b>1007.061</b> | <b>1006.053</b> | F 17 |
| F 26 | 1364.289        | 941.032        | 933.023         | 933.526         | 932.519         | F 16 |
| V 27 | 1413.824        | <b>892.506</b> | 884.496         | 885.000         | 883.992         | V 15 |
| G 28 | <b>1442.334</b> | 842.071        | <b>834.962</b>  | <b>835.466</b>  | <b>834.458</b>  | G 14 |
| D 29 | 1520.285        | <b>814.461</b> | <b>806.451</b>  | <b>806.955</b>  | 805.947         | D 13 |
| V 30 | 1569.919        | 738.410        | 729.401         | 729.904         | 727.897         | V 12 |
| H 31 | 1638.448        | 686.876        | 678.866         | 679.370         | 678.363         | H 11 |
| R 32 | 1716.499        | 618.346        | 610.337         | 610.841         | 609.833         | R 10 |
| L 33 | 1773.041        | 540.290        | 532.280         | 532.784         | 531.777         | L 9  |
| L 34 | 1829.583        | 483.754        | 475.744         | 476.248         | 475.241         | L 8  |
| R 35 | 1867.634        | 427.212        | 419.202         | 419.706         | 418.699         | R 7  |
| R 36 | 1971.681        | 349.161        | 341.152         | 341.656         | 340.648         | R 6  |
| G 37 | 2000.192        | 295.114        | 277.104         | 277.608         | 276.600         | G 5  |
| N 38 | 2067.213        | 256.603        | 248.594         | 249.098         | 248.090         | N 4  |
| V 39 | 2138.745        | 199.582        | 191.573         | 192.076         | 191.069         | V 3  |
| S 40 | 2182.261        | 118.050        | 110.041         | 110.544         | 109.537         | S 2  |
| E 41 | 2246.782        | 74.534         | 66.524          | 67.028          | 66.021          | E 1  |

# sp | Q8BFU2 | H2A3\_MOUSE

SGR<sup>Trimethyl</sup><sub>42.05</sub> GKQGGKARAKAKSRSSRAGLQFPVGRVHLLLRKGNYS

- ▶ fragmentation table for charge state 3+
- ▶ specType=etd
- ▶ score=50.34
- ▶ F104939.dat
- ▶ query=q2804\_p1
- ▶ precursor=749.761700
- ▶ chargePrecursor=6
- ▶ itol=0.8

| AA | c  | y               | #s1             | #s2             | z               | AA              |       |
|----|----|-----------------|-----------------|-----------------|-----------------|-----------------|-------|
| S  | 1  | 35.993          | <b>1498.519</b> | 1483.175        | 0.872           | 1482.844        | S[41] |
| G  | 2  | 54.702          | 1489.926        | 1464.168        | 0.672           | 1463.832        | G[40] |
| R  | 3  | 130.750         | <b>1450.501</b> | 1445.161        | 1445.497        | 1444.825        | R[39] |
| G  | 4  | 139.757         | 1384.451        | <b>1379.112</b> | <b>1379.448</b> | 1378.770        | G[38] |
| K  | 5  | 182.415         | 1305.444        | <b>1360.105</b> | <b>1360.441</b> | 1359.763        | K[37] |
| G  | 6  | 225.142         | 1322.746        | 1317.462        | <b>1317.742</b> | 1317.070        | G[36] |
| G  | 7  | 244.149         | 1300.090        | <b>1274.720</b> | <b>1275.056</b> | <b>1274.384</b> | G[35] |
| G  | 8  | 263.156         | 1261.051        | 1255.713        | <b>1256.049</b> | 1255.377        | G[34] |
| K  | 9  | 305.654         | <b>1242.045</b> | <b>1236.706</b> | <b>1237.042</b> | <b>1236.370</b> | K[33] |
| A  | 10 | 329.513         | 1199.347        | <b>1194.008</b> | <b>1194.344</b> | 1193.672        | A[32] |
| R  | 11 | 381.567         | 1175.668        | <b>1170.329</b> | <b>1170.664</b> | 1169.993        | R[31] |
| A  | 12 | 405.266         | 1123.834        | 1119.307        | 1119.971        | 1119.295        | A[30] |
| K  | 13 | 447.944         | 1090.955        | <b>1094.616</b> | <b>1094.952</b> | 1094.280        | K[29] |
| A  | 14 | 491.623         | <b>1057.257</b> | 1051.917        | 1052.581        | 1051.905        | A[28] |
| K  | 15 | 514.322         | 1033.578        | <b>1028.238</b> | <b>1028.574</b> | <b>1027.902</b> | K[27] |
| S  | 16 | 543.312         | 990.887         | <b>985.540</b>  | <b>985.876</b>  | <b>985.204</b>  | S[26] |
| R  | 17 | 585.266         | <b>961.869</b>  | <b>956.529</b>  | <b>956.865</b>  | 956.193         | R[25] |
| S  | 18 | 624.379         | 959.839         | 954.488         | 954.833         | 954.160         | S[24] |
| S  | 19 | 653.357         | 980.825         | <b>875.485</b>  | <b>875.821</b>  | <b>875.149</b>  | S[23] |
| R  | 20 | 705.421         | 851.814         | <b>846.474</b>  | <b>846.810</b>  | <b>846.138</b>  | R[22] |
| A  | 21 | 729.100         | 799.780         | 794.441         | 794.777         | 794.105         | A[21] |
| G  | 22 | 748.107         | 776.101         | <b>770.762</b>  | <b>771.098</b>  | 770.426         | G[20] |
| L  | 23 | <b>785.882</b>  | 759.094         | 753.754         | 754.090         | 753.418         | L[19] |
| Q  | 24 | <b>828.488</b>  | 733.305         | 724.960         | 724.396         | 723.724         | Q[18] |
| F  | 25 | 877.511         | 676.713         | <b>671.374</b>  | <b>671.710</b>  | <b>671.038</b>  | F[17] |
| F  | 26 | 909.982         | 627.600         | 622.261         | 622.607         | 622.015         | F[16] |
| V  | 27 | <b>942.885</b>  | 595.139         | 590.000         | 590.336         | 589.664         | V[15] |
| G  | 28 | <b>961.892</b>  | 562.317         | 556.977         | 557.313         | 556.641         | G[14] |
| R  | 29 | 1013.974        | 443.309         | 437.970         | 438.306         | 437.634         | R[13] |
| V  | 30 | <b>1046.948</b> | 401.275         | 405.936         | 406.272         | 405.600         | V[12] |
| H  | 31 | <b>1092.635</b> | 458.253         | 452.913         | 453.249         | 452.577         | H[11] |
| R  | 32 | <b>1144.668</b> | 412.967         | 407.227         | 407.563         | 406.891         | R[10] |
| L  | 33 | <b>1182.363</b> | <b>360.533</b>  | 355.193         | 355.529         | 354.857         | L[9]  |
| L  | 34 | 1230.658        | 322.876         | 317.489         | 317.825         | 317.153         | L[8]  |
| R  | 35 | 1272.062        | 285.144         | 279.804         | 280.140         | 279.468         | R[7]  |
| K  | 36 | 1314.790        | 233.110         | 227.770         | 228.106         | 227.434         | K[6]  |
| G  | 37 | 1333.797        | 190.412         | 185.072         | 185.408         | 184.736         | G[5]  |
| N  | 38 | 1371.811        | 171.404         | 166.065         | 166.401         | 165.729         | N[4]  |
| V  | 39 | 1426.166        | 133.290         | 128.051         | 128.386         | 127.715         | V[3]  |
| S  | 40 | 1455.176        | 99.036          | 93.696          | 94.032          | 93.360          | S[2]  |
| E  | 41 | <b>1498.191</b> | 50.025          | 44.685          | 45.021          | 44.349          | E[1]  |



# sp | Q8BFU2 | H2A3\_MOUSE

SGR<sup>Trimethyl</sup><sub>42.05</sub> GKQGGKARAKAKSRSSRAGLQFPVGRVHLLLRKGNYS

- ▶ fragmentation table for charge state 4+
- ▶ specType=etd
- ▶ score=50.34
- ▶ F104939.dat
- ▶ query=q2804\_p1
- ▶ precursor=749.761700
- ▶ chargePrecursor=6
- ▶ itol=0.8

| AA |    | c               | y               | #s=1            | #s=2            | #s=3            | AA    |
|----|----|-----------------|-----------------|-----------------|-----------------|-----------------|-------|
| S  | 1  | 212.022         | <b>1124.141</b> | <b>1120.136</b> | 0.705           | <b>1110.884</b> | S[41] |
| G  | 2  | 41.277          | 1102.381        | 1098.175        | 0.795           | 1098.120        | G[40] |
| R  | 3  | 90.814          | <b>1088.127</b> | 1084.123        | 1084.375        | 1083.871        | R[39] |
| G  | 4  | 109.070         | 1038.500        | <b>1034.506</b> | <b>1034.838</b> | <b>1034.334</b> | G[38] |
| K  | 5  | 137.093         | 1024.335        | <b>1020.330</b> | <b>1020.582</b> | <b>1020.078</b> | K[37] |
| G  | 6  | 169.108         | 992.311         | <b>988.307</b>  | <b>988.559</b>  | <b>988.055</b>  | G[36] |
| G  | 7  | 183.983         | 960.297         | <b>956.292</b>  | <b>956.544</b>  | 955.940         | G[35] |
| G  | 8  | 197.810         | 948.041         | <b>942.037</b>  | <b>942.289</b>  | <b>941.785</b>  | G[34] |
| K  | 9  | 229.643         | 931.786         | 927.781         | 928.033         | 927.529         | K[33] |
| A  | 10 | 247.402         | <b>899.762</b>  | 895.757         | 896.009         | 895.500         | A[32] |
| R  | 11 | 286.427         | 882.003         | 877.998         | 878.250         | 877.746         | R[31] |
| A  | 12 | 304.186         | 842.918         | 838.913         | 839.205         | 838.711         | A[30] |
| K  | 13 | 336.210         | 825.215         | <b>821.214</b>  | 821.466         | <b>820.962</b>  | K[29] |
| A  | 14 | 353.969         | 793.195         | 789.190         | 789.442         | 788.938         | A[28] |
| K  | 15 | 385.993         | 775.435         | <b>771.431</b>  | <b>771.683</b>  | <b>771.179</b>  | K[27] |
| S  | 16 | 407.751         | 743.412         | 739.407         | 739.659         | 739.155         | S[26] |
| R  | 17 | 446.776         | 721.954         | 717.949         | 717.901         | 717.300         | R[25] |
| S  | 18 | 468.514         | 692.626         | 688.621         | 688.876         | 688.372         | S[24] |
| S  | 19 | 490.292         | 660.870         | 656.866         | 657.118         | 656.614         | S[23] |
| R  | 20 | 526.318         | 638.112         | 634.108         | 635.360         | 634.856         | R[22] |
| A  | 21 | 547.077         | 600.087         | 596.082         | 596.334         | 595.830         | A[21] |
| G  | 22 | 561.332         | 582.328         | 578.323         | 578.575         | 578.071         | G[20] |
| L  | 23 | 589.683         | 568.072         | 564.068         | 564.320         | 563.816         | L[19] |
| Q  | 24 | 621.818         | 539.801         | 535.797         | 536.049         | 535.545         | Q[18] |
| F  | 25 | 658.305         | 507.787         | 503.782         | 504.034         | 503.530         | F[17] |
| P  | 26 | 682.646         | 471.020         | 467.015         | 467.267         | 466.763         | P[16] |
| V  | 27 | <b>707.415</b>  | 446.756         | 442.752         | 443.004         | 442.500         | V[15] |
| G  | 28 | 721.671         | 421.989         | <b>417.985</b>  | 418.237         | <b>417.733</b>  | G[14] |
| R  | 29 | 750.606         | 389.734         | 385.729         | 385.981         | 385.477         | R[13] |
| V  | 30 | <b>785.463</b>  | 368.705         | 364.704         | 364.956         | 364.452         | V[12] |
| H  | 31 | <b>819.728</b>  | 343.942         | 339.937         | 340.189         | 339.685         | H[11] |
| R  | 32 | 858.753         | 309.677         | 305.672         | 305.924         | 305.420         | R[10] |
| L  | 33 | 897.624         | 270.652         | 266.647         | 266.899         | 266.395         | L[9]  |
| L  | 34 | <b>915.295</b>  | 242.381         | 238.376         | 238.628         | 238.124         | L[8]  |
| R  | 35 | 924.323         | 214.110         | 210.105         | 210.357         | 209.853         | R[7]  |
| K  | 36 | <b>966.344</b>  | 175.084         | 171.080         | 171.332         | 170.828         | K[6]  |
| G  | 37 | <b>1006.600</b> | 143.061         | 139.056         | 139.308         | 138.804         | G[5]  |
| N  | 38 | <b>1029.110</b> | 128.805         | 124.800         | 125.052         | 124.548         | N[4]  |
| V  | 39 | <b>1069.876</b> | 100.294         | 96.289          | 96.542          | 96.038          | V[3]  |
| S  | 40 | 1091.814        | 98.529          | 94.524          | 94.776          | 94.272          | S[2]  |
| E  | 41 | <b>1123.895</b> | 37.771          | 33.766          | 34.018          | 33.514          | E[1]  |

# sp | Q8BFU2 | H2A3\_MOUSE

SGR<sup>Trimethyl</sup><sub>42.05</sub> GKQGGKARAKAKSRSSRAGLQFPVGRVHLLRKGNYSE

- ▶ fragmentation table for charge state 5+
- ▶ specType=etd
- ▶ score=50.34
- ▶ F104939.dat
- ▶ query=q2804\_p1
- ▶ precursor=749.761700
- ▶ chargePrecursor=6
- ▶ itol=0.8

| AA | c  | y              | z+1            | z#2            | z              | AA             |       |
|----|----|----------------|----------------|----------------|----------------|----------------|-------|
| S  | 1  | 21 819         | <b>899.514</b> | 899.310        | 0.806          | 896.109        | S[41] |
| G  | 2  | 33.223         | 882.108        | 878.904        | 0.806          | 878.702        | G[40] |
| R  | 3  | 72.853         | <b>870.703</b> | 867.500        | 867.701        | 867.298        | R[39] |
| G  | 4  | 84.257         | 831.074        | 827.870        | <b>828.072</b> | 827.668        | G[38] |
| K  | 5  | 109.876        | <b>819.569</b> | 816.466        | 816.667        | 816.264        | K[37] |
| Q  | 6  | 135.488        | 794.050        | 790.847        | 791.048        | 790.645        | Q[36] |
| G  | 7  | 146.892        | 768.439        | 765.235        | 765.437        | 765.033        | G[35] |
| G  | 8  | 158.296        | 757.034        | 753.831        | 754.032        | 753.629        | G[34] |
| K  | 9  | 183.915        | 745.930        | 742.428        | 742.628        | 742.225        | K[33] |
| A  | 10 | 198.123        | 720.011        | 716.807        | 717.009        | 716.606        | A[32] |
| R  | 11 | 229.343        | 705.804        | 702.600        | 702.802        | 702.398        | R[31] |
| A  | 12 | 243.551        | 674.984        | <b>671.380</b> | <b>671.581</b> | <b>671.178</b> | A[30] |
| K  | 13 | 269.170        | 660.376        | 657.172        | 657.374        | 656.971        | K[29] |
| A  | 14 | 283.377        | 634.757        | 631.553        | 631.755        | 631.352        | A[28] |
| K  | 15 | 308.996        | 620.550        | 617.346        | 617.548        | 617.144        | K[27] |
| S  | 16 | 326.402        | 594.931        | 591.727        | 591.929        | 591.525        | S[26] |
| R  | 17 | 357.623        | 577.524        | 574.321        | 574.522        | 574.119        | R[25] |
| S  | 18 | 375.029        | 546.304        | 543.100        | 543.302        | 542.899        | S[24] |
| S  | 19 | 392.435        | 528.898        | 525.694        | 525.896        | 525.492        | S[23] |
| R  | 20 | 423.656        | 511.491        | 508.288        | 508.489        | 508.086        | R[22] |
| A  | 21 | 437.863        | 480.271        | 477.067        | 477.269        | 476.866        | A[21] |
| G  | 22 | 449.267        | 466.064        | 462.860        | 463.061        | 462.658        | G[20] |
| L  | 23 | 471.884        | 494.659        | 451.456        | 451.657        | 451.254        | L[19] |
| Q  | 24 | 497.496        | 432.043        | 428.839        | 429.040        | 428.637        | Q[18] |
| F  | 25 | 528.910        | 406.431        | 403.227        | 403.429        | 403.026        | F[17] |
| P  | 26 | 546.320        | 377.017        | 373.813        | 374.015        | 373.612        | P[16] |
| V  | 27 | 565.134        | 357.807        | 354.603        | 354.804        | 354.201        | V[15] |
| G  | 28 | 577.538        | 337.793        | 334.589        | 334.791        | 334.388        | G[14] |
| R  | 29 | 608.758        | 326.389        | 323.185        | 323.386        | 322.983        | R[13] |
| V  | 30 | 628.572        | 295.168        | 291.965        | 292.166        | 291.763        | V[12] |
| H  | 31 | 658.984        | 275.355        | 272.151        | 272.353        | 271.949        | H[11] |
| R  | 32 | 687.204        | 247.943        | 244.739        | 244.941        | 244.538        | R[10] |
| L  | 33 | 709.821        | 216.723        | 213.519        | 213.721        | 213.317        | L[9]  |
| L  | 34 | 732.438        | 194.109        | 190.902        | 191.104        | 190.701        | L[8]  |
| R  | 35 | 763.658        | 171.489        | 168.283        | 168.487        | 168.084        | R[7]  |
| K  | 36 | 789.277        | 140.269        | 137.065        | 137.267        | 136.864        | K[6]  |
| G  | 37 | 830.681        | 114.650        | 111.446        | 111.648        | 111.245        | G[5]  |
| N  | 38 | 823.490        | 103.246        | 100.042        | 100.243        | 99.840         | N[4]  |
| V  | 39 | 856.102        | 80.437         | 77.233         | 77.435         | 77.032         | V[3]  |
| S  | 40 | 873.509        | 47.824         | 44.621         | 44.822         | 44.419         | S[2]  |
| E  | 41 | <b>899.317</b> | 30.418         | 27.214         | 27.416         | 27.013         | E[1]  |



# sp | Q8CGP5 | H2A1F\_MOUSE

SGR<sup>Trimethyl</sup><sub>42.05</sub> GKQGGKARAKAKTRSSRAGLQFPVGRVHLLRKGNYSE

- ▶ fragmentation table for charge state 1+
- ▶ specType=etd
- ▶ score=43.25
- ▶ F104939.dat
- ▶ query=q2811\_p1
- ▶ precursor=644.797580
- ▶ chargePrecursor=7
- ▶ itol=0.8

| AA   | c              | y               | z+1             | z+2             | z               | AA   |
|------|----------------|-----------------|-----------------|-----------------|-----------------|------|
| S 1  | 105.060        | 4507.557        | 4493.530        | 0.000           | 4490.530        | S 41 |
| G 2  | 182.087        | 4420.525        | 4404.506        | 0.000           | 4403.496        | G 40 |
| R 3  | <b>360.235</b> | 4301.504        | 4347.485        | 4348.493        | 4346.477        | R 39 |
| G 4  | <b>417.257</b> | 4165.355        | 4149.337        | 4150.345        | 4148.329        | G 38 |
| K 5  | <b>545.352</b> | 4108.134        | 4092.315        | 4093.323        | 4091.307        | K 37 |
| Q 6  | <b>673.410</b> | 3980.239        | 3964.221        | 3965.228        | 3963.211        | Q 36 |
| G 7  | <b>730.432</b> | 3852.083        | 3836.101        | 3837.110        | 3835.104        | G 35 |
| G 8  | <b>787.453</b> | 3795.159        | 3779.140        | 3780.148        | 3778.132        | G 34 |
| K 9  | <b>915.548</b> | 3736.138        | 3722.119        | 3723.127        | 3721.111        | K 33 |
| A 10 | <b>986.585</b> | 3610.043        | 3594.024        | 3595.032        | 3593.016        | A 32 |
| R 11 | 1142.686       | 3539.006        | 3523.987        | 3523.995        | 3521.979        | R 31 |
| A 12 | 1213.723       | 3382.904        | 3366.885        | 3367.893        | 3365.877        | A 30 |
| R 13 | 1341.819       | 3311.867        | 3295.848        | 3296.856        | 3294.841        | R 29 |
| A 14 | 1412.856       | 3183.772        | 3167.754        | 3168.761        | 3166.746        | A 28 |
| K 15 | 1540.951       | 3112.735        | 3096.710        | 3097.724        | 3095.709        | K 27 |
| T 16 | 1641.998       | 2984.640        | 2968.621        | 2969.629        | 2967.614        | T 26 |
| R 17 | 1780.059       | 2883.592        | 2867.573        | 2868.582        | 2866.566        | R 25 |
| S 18 | 1889.131       | 2797.494        | 2781.475        | 2782.483        | 2780.467        | S 24 |
| S 19 | 1972.183       | 2640.459        | 2624.441        | 2625.448        | 2623.433        | S 23 |
| R 20 | 2128.285       | 2553.421        | 2537.402        | 2538.416        | 2536.401        | R 22 |
| A 21 | 2199.302       | 2397.326        | 2381.307        | 2382.315        | 2380.300        | A 21 |
| Q 22 | 2256.323       | 2326.289        | 2310.270        | 2311.278        | 2309.263        | Q 20 |
| L 23 | 2309.407       | 2209.260        | 2203.240        | 2204.247        | 2202.241        | L 19 |
| Q 24 | 2407.400       | 2158.184        | 2142.165        | 2143.173        | 2141.157        | Q 19 |
| F 25 | 2644.534       | 2028.125        | 2012.106        | 2013.114        | 2011.099        | F 17 |
| F 26 | 2741.587       | 1881.057        | 1865.038        | 1866.046        | 1864.030        | F 16 |
| V 27 | 2840.655       | 1784.004        | 1767.985        | 1768.993        | 1766.977        | V 15 |
| G 28 | 2897.677       | <b>1664.935</b> | <b>1668.917</b> | 1669.924        | 1667.909        | G 14 |
| R 29 | 3093.778       | 1637.814        | 1631.795        | 1632.803        | 1630.787        | R 13 |
| V 30 | 3152.840       | 1471.613        | <b>1455.794</b> | 1456.802        | 1454.786        | V 12 |
| H 31 | 3289.905       | 1372.744        | 1366.726        | <b>1357.734</b> | 1355.718        | H 11 |
| R 32 | 3446.006       | 1235.685        | <b>1219.667</b> | 1220.675        | 1218.659        | R 10 |
| L 33 | 3559.090       | 1079.584        | <b>1063.566</b> | <b>1064.573</b> | <b>1062.558</b> | L 9  |
| L 34 | 3672.175       | <b>966.500</b>  | 960.482         | 961.489         | 949.474         | L 8  |
| R 35 | 3828.273       | 833.416         | 827.398         | 828.405         | 826.389         | R 7  |
| K 36 | 3956.371       | 697.315         | 691.296         | 692.304         | 680.289         | K 6  |
| G 37 | 4013.392       | 569.220         | 553.201         | 554.209         | 552.194         | G 5  |
| N 38 | 4127.435       | 512.109         | 496.100         | 497.108         | 495.172         | N 4  |
| V 39 | 4290.498       | 398.156         | 382.137         | 383.145         | 381.129         | V 3  |
| S 40 | 4377.530       | 235.082         | 219.074         | 220.082         | 218.066         | S 2  |
| E 41 | 4566.573       | 148.060         | 132.043         | 133.050         | 131.034         | E 1  |

# sp | Q8CGP5 | H2A1F\_MOUSE

SGR<sup>Trimethyl</sup><sub>42.05</sub> GKQGGKARAKAKTRSSRAGLQFPVGRVHLLLRKGNYS

- ▶ fragmentation table for charge state 2+
- ▶ specType=etd
- ▶ score=43.25
- ▶ F104939.dat
- ▶ query=q2811\_p1
- ▶ precursor=644.797580
- ▶ chargePrecursor=7
- ▶ itol=0.8

| AA | c  | w               | #s1             | #s2             | z               | AA              |       |
|----|----|-----------------|-----------------|-----------------|-----------------|-----------------|-------|
| S  | 1  | 513.037         | 2254.274        | 2266.273        | 0.504           | 2245.167        | S(41) |
| G  | 2  | 81.547          | 2210.766        | 2202.757        | 0.504           | 2202.251        | G(40) |
| R  | 3  | 180.621         | 2182.255        | 2174.246        | 2174.750        | 2173.742        | R(39) |
| G  | 4  | 209.132         | 2083.181        | 2075.172        | 2075.676        | 2074.668        | G(38) |
| K  | 5  | 273.180         | 2054.671        | 2046.661        | 2047.165        | 2046.157        | K(37) |
| Q  | 6  | 337.209         | 1990.622        | 1982.614        | 1983.118        | 1982.110        | Q(36) |
| G  | 7  | 385.720         | 1926.594        | 1918.584        | 1919.088        | 1918.080        | G(35) |
| G  | 8  | 394.230         | 1898.083        | 1890.074        | 1890.578        | 1889.570        | G(34) |
| K  | 9  | 458.278         | 1869.572        | 1861.563        | 1862.067        | 1861.059        | K(33) |
| A  | 10 | <b>493.796</b>  | 1805.525        | 1797.516        | 1798.019        | 1797.012        | A(32) |
| R  | 11 | <b>571.847</b>  | 1737.008        | 1729.000        | 1729.503        | 1728.495        | R(31) |
| A  | 12 | <b>607.365</b>  | 1692.959        | 1684.950        | <b>1684.450</b> | 1683.443        | A(30) |
| R  | 13 | <b>671.413</b>  | 1626.437        | 1618.428        | 1618.932        | 1617.924        | R(29) |
| A  | 14 | <b>706.931</b>  | 1592.900        | 1584.890        | 1584.884        | 1583.876        | A(28) |
| K  | 15 | <b>770.979</b>  | 1526.871        | <b>1548.862</b> | <b>1549.366</b> | <b>1548.358</b> | K(27) |
| T  | 16 | <b>821.503</b>  | <b>1492.824</b> | <b>1484.814</b> | <b>1485.318</b> | <b>1484.310</b> | T(26) |
| R  | 17 | <b>899.553</b>  | <b>1442.300</b> | <b>1434.291</b> | <b>1434.794</b> | 1433.786        | R(25) |
| S  | 18 | 913.059         | 1384.249        | 1376.240        | 1376.744        | 1375.736        | S(24) |
| S  | 19 | <b>986.585</b>  | 1320.733        | <b>1312.724</b> | <b>1313.228</b> | 1312.220        | S(23) |
| R  | 20 | <b>1064.636</b> | 1277.217        | 1269.208        | <b>1269.712</b> | 1268.704        | R(22) |
| A  | 21 | <b>1100.155</b> | <b>1199.167</b> | <b>1191.157</b> | <b>1191.661</b> | 1190.653        | A(21) |
| C  | 22 | <b>1128.665</b> | 1153.148        | <b>1155.639</b> | <b>1156.143</b> | 1155.135        | C(20) |
| Q  | 23 | <b>1185.207</b> | 1108.131        | 1100.122        | <b>1127.632</b> | 1126.624        | Q(19) |
| Q  | 24 | <b>1249.237</b> | 1073.595        | <b>1070.586</b> | <b>1071.090</b> | <b>1070.082</b> | Q(18) |
| F  | 25 | <b>1322.771</b> | 1014.568        | <b>1006.557</b> | <b>1007.061</b> | 1006.053        | F(17) |
| F  | 26 | 1371.297        | 941.053         | 933.043         | 933.546         | 932.538         | F(16) |
| V  | 27 | 1420.811        | 892.506         | 884.496         | 885.000         | 884.992         | V(15) |
| C  | 28 | <b>1449.342</b> | 846.971         | <b>838.962</b>  | <b>835.466</b>  | 834.458         | C(14) |
| R  | 29 | 1527.873        | <b>814.461</b>  | <b>806.451</b>  | <b>805.955</b>  | 805.947         | R(13) |
| V  | 30 | 1576.927        | 736.410         | 728.401         | 728.905         | 727.897         | V(12) |
| H  | 31 | 1645.456        | 688.876         | 678.868         | 679.372         | 678.364         | H(11) |
| R  | 32 | 1723.507        | 618.346         | 610.337         | 610.841         | 609.833         | R(10) |
| L  | 33 | 1780.049        | 540.296         | 532.286         | 532.790         | 531.782         | L(9)  |
| L  | 34 | 1838.599        | 483.754         | 473.743         | 474.246         | 473.238         | L(8)  |
| R  | 35 | 1914.641        | 427.212         | 419.202         | 419.706         | 418.698         | R(7)  |
| K  | 36 | 1978.689        | 349.161         | 341.152         | 341.656         | 340.648         | K(6)  |
| G  | 37 | 2067.200        | 285.114         | 277.104         | 277.608         | 276.600         | G(5)  |
| N  | 38 | 2094.221        | 256.603         | 248.594         | 249.098         | 248.090         | N(4)  |
| V  | 39 | 2145.753        | 199.562         | 191.552         | 192.056         | 191.048         | V(3)  |
| S  | 40 | 2189.266        | 118.056         | 110.046         | 110.549         | 109.541         | S(2)  |
| E  | 41 | 2253.790        | 74.534          | 66.524          | 67.028          | 66.021          | E(1)  |

# sp | Q8CGP5 | H2A1F\_MOUSE

SGR<sup>Trimethyl</sup><sub>42.05</sub> GKQGGKARAKAKTRSSRAGLQFPVGRVHLLLRKGNYS

- ▶ fragmentation table for charge state 3+
- ▶ specType=etd
- ▶ score=43.25
- ▶ F104939.dat
- ▶ query=q2811\_p1
- ▶ precursor=644.797580
- ▶ chargePrecursor=7
- ▶ itol=0.8

| AA | c  | y               | #s1             | #s2             | #s              | AA              |       |
|----|----|-----------------|-----------------|-----------------|-----------------|-----------------|-------|
| S  | 1  | 35.693          | <b>1503.191</b> | 1467.851        | 0.872           | 1467.511        | S(41) |
| G  | 2  | 54.702          | 1474.185        | 1468.840        | 0.672           | 1468.504        | G(40) |
| R  | 3  | 130.750         | <b>1455.173</b> | <b>1449.833</b> | <b>1450.169</b> | <b>1449.497</b> | R(39) |
| G  | 4  | 139.757         | 1389.123        | 1383.784        | <b>1384.120</b> | 1383.440        | G(38) |
| K  | 5  | 182.455         | 1370.116        | <b>1364.777</b> | <b>1365.113</b> | 1364.441        | K(37) |
| G  | 6  | 225.142         | 1327.418        | <b>1322.078</b> | <b>1322.414</b> | 1321.742        | G(36) |
| G  | 7  | 264.189         | 1284.723        | <b>1279.382</b> | <b>1279.720</b> | 1279.050        | G(35) |
| G  | 8  | 263.156         | 1265.725        | 1260.385        | <b>1260.721</b> | 1260.049        | G(34) |
| K  | 9  | 305.654         | 1246.717        | <b>1241.378</b> | <b>1241.714</b> | <b>1241.042</b> | K(33) |
| A  | 10 | 329.513         | 1204.019        | <b>1198.679</b> | <b>1199.015</b> | 1198.344        | A(32) |
| R  | 11 | 381.567         | 1180.340        | 1175.003        | 1175.336        | 1174.664        | R(31) |
| A  | 12 | 405.206         | <b>1128.206</b> | 1123.907        | 1123.908        | 1123.903        | A(30) |
| R  | 13 | 447.944         | 1104.627        | <b>1099.288</b> | <b>1099.624</b> | <b>1098.952</b> | R(29) |
| A  | 14 | 491.623         | 1081.029        | <b>1056.509</b> | <b>1056.925</b> | <b>1056.253</b> | A(28) |
| K  | 15 | 514.322         | <b>1038.250</b> | <b>1032.910</b> | <b>1033.246</b> | <b>1032.574</b> | K(27) |
| T  | 16 | 548.004         | 995.552         | <b>990.212</b>  | <b>990.548</b>  | 989.870         | T(26) |
| R  | 17 | 600.028         | 981.869         | <b>956.529</b>  | <b>956.865</b>  | 956.183         | R(25) |
| S  | 18 | <b>629.049</b>  | 959.835         | 954.425         | 954.833         | 954.160         | S(24) |
| S  | 19 | <b>658.959</b>  | 938.025         | <b>875.485</b>  | <b>875.821</b>  | <b>875.149</b>  | S(23) |
| R  | 20 | <b>710.093</b>  | 951.814         | <b>846.474</b>  | <b>846.810</b>  | 846.138         | R(22) |
| A  | 21 | 733.772         | 799.789         | <b>794.441</b>  | <b>794.777</b>  | <b>794.105</b>  | A(21) |
| G  | 22 | <b>752.779</b>  | 778.101         | <b>770.762</b>  | <b>771.098</b>  | <b>770.426</b>  | G(20) |
| L  | 23 | <b>790.474</b>  | <b>737.094</b>  | <b>751.754</b>  | <b>752.090</b>  | <b>751.419</b>  | L(19) |
| Q  | 24 | <b>833.160</b>  | 713.355         | <b>714.060</b>  | <b>714.396</b>  | <b>713.724</b>  | Q(18) |
| F  | 25 | <b>882.183</b>  | 676.713         | <b>671.374</b>  | <b>671.710</b>  | <b>671.038</b>  | F(17) |
| F  | 26 | 914.534         | 627.600         | 622.351         | 622.887         | 622.015         | F(16) |
| V  | 27 | 947.657         | 595.139         | 590.000         | 590.336         | 589.664         | V(15) |
| G  | 28 | <b>966.564</b>  | 562.317         | 556.977         | 557.313         | 556.641         | G(14) |
| R  | 29 | 1010.598        | 543.309         | 537.970         | 538.306         | 537.634         | R(13) |
| V  | 30 | <b>1051.620</b> | 490.276         | 485.038         | 486.272         | 485.600         | V(12) |
| H  | 31 | 1097.307        | 458.253         | 452.913         | 453.249         | 452.577         | H(11) |
| R  | 32 | 1149.340        | 412.967         | 407.227         | 407.563         | 406.891         | R(10) |
| L  | 33 | 1187.035        | <b>360.533</b>  | 355.193         | 355.529         | 354.857         | L(9)  |
| L  | 34 | 1224.730        | 322.576         | 317.489         | 317.825         | 317.153         | L(8)  |
| R  | 35 | 1276.763        | 285.144         | 279.804         | 280.140         | 279.468         | R(7)  |
| K  | 36 | 1319.462        | 233.110         | 227.770         | 228.106         | 227.434         | K(6)  |
| G  | 37 | 1338.469        | 190.412         | 185.072         | 185.408         | 184.736         | G(5)  |
| N  | 38 | 1376.483        | 171.404         | 166.065         | 166.401         | 165.729         | N(4)  |
| V  | 39 | 1430.838        | 133.390         | 128.051         | 128.386         | 127.715         | V(3)  |
| S  | 40 | 1459.846        | 99.136          | 93.796          | 94.132          | 93.460          | S(2)  |
| E  | 41 | 1502.863        | 50.025          | 44.685          | 45.021          | 44.349          | E(1)  |

# sp | Q8CGP5 | H2A1F\_MOUSE

SGR<sup>Trimethyl</sup><sub>42.05</sub> GKQGGKARAKAKTRSSRAGLQFPVGRVHLLLRKGNYS

- ▶ fragmentation table for charge state 4+
- ▶ specType=etd
- ▶ score=43.25
- ▶ F104939.dat
- ▶ query=q2811\_p1
- ▶ precursor=644.797580
- ▶ chargePrecursor=7
- ▶ itol=0.8

| AA   | c               | y               | #+1             | #+2             | #               | AA   |
|------|-----------------|-----------------|-----------------|-----------------|-----------------|------|
| S 1  | 217.022         | <b>1127.645</b> | <b>1123.640</b> | 0.705           | <b>1123.380</b> | S 41 |
| G 2  | 43.277          | 1125.887        | 1121.882        | 0.795           | 1121.630        | G 40 |
| R 3  | 90.814          | <b>1091.631</b> | 1087.627        | 1087.870        | 1087.375        | R 39 |
| G 4  | 109.070         | 1042.094        | <b>1038.090</b> | <b>1038.342</b> | <b>1037.838</b> | G 38 |
| K 5  | 137.093         | 1027.839        | 1023.834        | 1024.086        | 1023.582        | K 37 |
| G 6  | 169.138         | 995.915         | 991.911         | 992.262         | <b>991.559</b>  | G 36 |
| G 7  | 183.983         | 983.903         | 979.739         |                 | <b>980.048</b>  | G 35 |
| G 8  | 197.810         | 949.945         | <b>945.541</b>  | <b>945.792</b>  | <b>945.289</b>  | G 34 |
| K 9  | 229.643         | <b>935.290</b>  | <b>931.285</b>  | <b>931.537</b>  | <b>931.033</b>  | K 33 |
| A 10 | 247.402         | <b>903.266</b>  | <b>899.261</b>  | <b>899.513</b>  | <b>899.009</b>  | A 32 |
| R 11 | 266.427         | 898.507         | <b>881.502</b>  | <b>881.754</b>  | <b>881.250</b>  | R 31 |
| A 12 | 304.186         | <b>846.482</b>  | 842.477         | 842.729         | 842.225         | A 30 |
| K 13 | 336.210         | 828.722         | <b>824.718</b>  | <b>824.970</b>  | <b>824.466</b>  | K 29 |
| A 14 | 353.989         | 796.699         | 792.694         | 792.946         | 792.442         | A 28 |
| K 15 | 388.993         | 778.939         | 774.935         | 775.187         | 774.683         | K 27 |
| T 16 | 411.255         | 746.915         | <b>742.911</b>  | <b>743.163</b>  | <b>742.659</b>  | T 26 |
| R 17 | 458.280         | 721.954         | 717.949         | 717.901         | 717.30          | R 25 |
| S 18 | 474.918         | 692.628         | 688.624         | 688.876         | 688.372         | S 24 |
| S 19 | <b>493.796</b>  | 660.970         | 656.966         | 657.118         | 656.614         | S 23 |
| R 20 | 532.822         | 638.112         | 634.108         | 635.360         | 634.856         | R 22 |
| A 21 | 550.581         | 600.087         | 596.082         | 596.334         | 595.830         | A 21 |
| G 22 | 564.836         | 582.328         | 578.323         | 578.575         | 578.071         | G 20 |
| L 23 | 603.887         | 658.072         | 644.068         | 644.320         | 643.816         | L 19 |
| Q 24 | <b>625.122</b>  | 639.803         | 635.797         | 636.049         | 635.545         | Q 18 |
| F 25 | 661.889         | 597.787         | 593.782         | 594.034         | 593.530         | F 17 |
| F 26 | 668.152         | 471.020         | 467.015         | 467.267         | 466.763         | F 16 |
| V 27 | <b>710.919</b>  | 446.756         | 442.752         | 443.004         | 442.500         | V 15 |
| G 28 | <b>725.175</b>  | 421.989         | <b>417.985</b>  | 418.237         | <b>417.733</b>  | G 14 |
| R 29 | 764.819         | 389.734         | 385.729         | 403.981         | 403.477         | R 13 |
| V 30 | 788.957         | 368.709         | 364.704         | 364.956         | 364.452         | V 12 |
| H 31 | <b>823.232</b>  | 343.942         | 339.937         | 340.189         | 339.685         | H 11 |
| R 32 | 862.257         | 309.677         | 305.672         | 305.924         | 305.420         | R 10 |
| L 33 | <b>890.528</b>  | 270.652         | 266.647         | 266.899         | 266.395         | L 9  |
| L 34 | <b>918.799</b>  | 242.361         | 238.356         | 238.608         | 238.104         | L 8  |
| R 35 | <b>957.824</b>  | 214.110         | 210.105         | 210.357         | 209.853         | R 7  |
| K 36 | 989.848         | 175.084         | 171.079         | 171.331         | 170.827         | K 6  |
| G 37 | 1064.103        | 143.061         | 139.056         | 139.308         | 138.804         | G 5  |
| N 38 | <b>1032.614</b> | 128.805         | 124.800         | 125.052         | 124.548         | N 4  |
| V 39 | 1078.280        | 100.294         | 96.289          | 96.541          | 96.037          | V 3  |
| S 40 | 1098.138        | 98.529          | 94.524          | 94.776          | 94.272          | S 2  |
| E 41 | <b>1127.399</b> | 97.771          | 93.766          | 94.018          | 93.514          | E 1  |

# sp | Q8CGP5 | H2A1F\_MOUSE

SGR<sup>Trimethyl</sup><sub>42.05</sub> GKQG GKARAKAKTRSSRAGLQFPVGRVHLLLRKGNYS

- ▶ fragmentation table for charge state 5+
- ▶ specType=etd
- ▶ score=43.25
- ▶ F104939.dat
- ▶ query=q2811.p1
- ▶ precursor=644.797580
- ▶ chargePrecursor=7
- ▶ itol=0.8

| AA |    | c              | y              | z+1            | z#2            | z              | AA    |
|----|----|----------------|----------------|----------------|----------------|----------------|-------|
| S  | 1  | 21.819         | <b>902.317</b> | <b>899.113</b> | 0.806          | 898.912        | S[41] |
| G  | 2  | 33.223         | 894.911        | <b>881.707</b> | 0.806          | <b>881.506</b> | G[40] |
| R  | 3  | 72.853         | 873.507        | 870.303        | 870.504        | 870.101        | R[39] |
| G  | 4  | 84.257         | <b>833.877</b> | 830.673        | 830.875        | 830.472        | G[38] |
| K  | 5  | 109.876        | <b>822.473</b> | 819.269        | 819.470        | 819.067        | K[37] |
| Q  | 6  | 135.488        | 796.854        | 793.650        | <b>793.851</b> | 793.448        | Q[36] |
| G  | 7  | 146.692        | <b>771.242</b> | 768.038        | 768.240        | 767.837        | G[35] |
| G  | 8  | 158.296        | 759.838        | <b>756.634</b> | <b>756.835</b> | <b>756.432</b> | G[34] |
| K  | 9  | 183.915        | 748.833        | <b>745.230</b> | <b>745.431</b> | <b>745.028</b> | K[33] |
| A  | 10 | 198.123        | 722.814        | 719.611        | 719.812        | 719.409        | A[32] |
| R  | 11 | 229.343        | 708.607        | 705.403        | 705.605        | 705.202        | R[31] |
| A  | 12 | 243.551        | 677.387        | <b>674.183</b> | 674.385        | <b>673.981</b> | A[30] |
| K  | 13 | 269.170        | 663.179        | <b>659.976</b> | 660.177        | <b>659.774</b> | K[29] |
| A  | 14 | 283.377        | 637.560        | 634.357        | 634.558        | 634.155        | A[28] |
| K  | 15 | 308.996        | 623.353        | 620.149        | 620.351        | 619.948        | K[27] |
| T  | 16 | 329.205        | 597.734        | 594.530        | 594.732        | 594.329        | T[26] |
| R  | 17 | <b>360.426</b> | 577.524        | 574.321        | 574.522        | 574.119        | R[25] |
| S  | 18 | 377.832        | <b>546.304</b> | 543.100        | 543.302        | 542.899        | S[24] |
| S  | 19 | 399.239        | 528.896        | 525.691        | 525.896        | 525.492        | S[23] |
| R  | 20 | 426.459        | 511.491        | 508.288        | 508.489        | 508.086        | R[22] |
| A  | 21 | 440.666        | 480.271        | 477.067        | 477.269        | 476.866        | A[21] |
| G  | 22 | 452.070        | 466.064        | 462.860        | 463.061        | 462.658        | G[20] |
| L  | 23 | 474.687        | 494.659        | 451.456        | 451.657        | 451.254        | L[19] |
| Q  | 24 | 500.299        | 432.043        | 428.839        | 429.040        | 428.637        | Q[18] |
| F  | 25 | 529.713        | 406.831        | 403.227        | 403.429        | 403.026        | F[17] |
| P  | 26 | 549.123        | 377.017        | 373.813        | 374.015        | 373.612        | P[16] |
| V  | 27 | 568.837        | 357.607        | 354.403        | 354.604        | 354.201        | V[15] |
| G  | 28 | 589.241        | 337.793        | 334.589        | 334.791        | 334.388        | G[14] |
| R  | 29 | 611.561        | 326.389        | 323.185        | 323.386        | 322.983        | R[13] |
| V  | 30 | 631.375        | 295.168        | 291.965        | 292.166        | 291.763        | V[12] |
| H  | 31 | <b>658.787</b> | 275.355        | 272.151        | 272.353        | 271.949        | H[11] |
| R  | 32 | 690.007        | 247.943        | 244.739        | 244.941        | 244.538        | R[10] |
| L  | 33 | 712.624        | 216.723        | 213.519        | 213.721        | 213.317        | L[9]  |
| L  | 34 | 735.241        | 194.109        | 190.902        | 191.104        | 190.701        | L[8]  |
| R  | 35 | 766.461        | 171.489        | 168.283        | 168.487        | 168.084        | R[7]  |
| K  | 36 | 782.080        | 140.269        | 137.065        | 137.267        | 136.864        | K[6]  |
| G  | 37 | 803.884        | 114.650        | 111.446        | 111.648        | 111.245        | G[5]  |
| N  | 38 | 826.293        | 103.246        | 100.042        | 100.243        | 99.840         | N[4]  |
| V  | 39 | <b>858.905</b> | 80.437         | 77.233         | 77.435         | 77.032         | V[3]  |
| S  | 40 | <b>876.312</b> | 47.824         | 44.621         | 44.822         | 44.419         | S[2]  |
| E  | 41 | 902.120        | 30.418         | 27.214         | 27.416         | 27.013         | E[1]  |



# sp | Q8CGP5 | H2A1F\_MOUSE

SGR<sup>Trimethyl</sup><sub>42.05</sub> GKQGGKARAKAKTRSSRAGLQFPVGRVHLLLRKGNYS

- ▶ fragmentation table for charge state 6+
- ▶ specType=etd
- ▶ score=43.25
- ▶ F104939.dat
- ▶ query=q2811.p1
- ▶ precursor=644.797580
- ▶ chargePrecursor=7
- ▶ itol=0.8

| AA | c  | y              | z#1            | z#2            | z              | AA             |   |    |
|----|----|----------------|----------------|----------------|----------------|----------------|---|----|
| S  | 1  | 18.350         | <b>752.099</b> | 749.420        | 0.839          | 149.261        | S | 41 |
| G  | 2  | 27.854         | 737.594        | 734.924        | 0.839          | 734.756        | G | 40 |
| R  | 3  | 60.879         | 728.090        | <b>725.420</b> | <b>725.508</b> | <b>725.252</b> | R | 39 |
| G  | 4  | 70.382         | 695.005        | 692.396        | 692.563        | 692.238        | G | 38 |
| K  | 5  | 91.731         | 685.562        | 682.892        | 683.060        | 682.724        | K | 37 |
| Q  | 6  | 113.074        | 674.213        | 661.543        | 661.711        | 661.375        | Q | 36 |
| G  | 7  | 122.578        | 642.869        | 640.200        | 640.368        | 640.032        | G | 35 |
| G  | 8  | 132.082        | 631.366        | 630.696        | 630.864        | 630.528        | G | 34 |
| K  | 9  | 153.431        | 623.862        | 621.193        | 621.360        | 621.025        | K | 33 |
| A  | 10 | 165.270        | 602.513        | 599.843        | 600.011        | 599.675        | A | 32 |
| R  | 11 | 191.387        | 590.674        | 588.004        | 588.172        | 587.836        | R | 31 |
| A  | 12 | 203.127        | 564.657        | 561.987        | 562.155        | 561.819        | A | 30 |
| K  | 13 | 224.476        | 552.817        | 550.147        | 550.315        | 549.980        | K | 29 |
| A  | 14 | 236.315        | 531.468        | 528.798        | 528.966        | 528.630        | A | 28 |
| K  | 15 | 257.665        | 519.629        | 516.959        | 517.127        | 516.791        | K | 27 |
| T  | 16 | 274.506        | 498.279        | 495.610        | 495.778        | 495.442        | T | 26 |
| R  | 17 | 300.523        | 481.438        | 478.768        | 478.936        | 478.600        | R | 25 |
| S  | 18 | 313.028        | 435.421        | 432.752        | 432.919        | 432.584        | S | 24 |
| S  | 19 | 329.533        | 440.916        | 438.246        | 438.414        | 438.078        | S | 23 |
| R  | 20 | 355.550        | 426.411        | 423.741        | 423.909        | 423.573        | R | 22 |
| A  | 21 | 367.390        | 400.994        | 397.724        | 397.892        | 397.556        | A | 21 |
| G  | 22 | 376.893        | 388.554        | 385.884        | 386.052        | 385.716        | G | 20 |
| L  | 23 | 395.741        | 379.051        | 376.381        | 376.549        | 376.213        | L | 19 |
| Q  | 24 | <b>417.084</b> | <b>360.203</b> | 357.534        | 357.702        | 357.366        | Q | 18 |
| F  | 25 | 441.595        | 338.880        | 336.190        | 336.358        | 336.022        | F | 17 |
| P  | 26 | 457.771        | 314.346        | 311.676        | 311.844        | 311.511        | P | 16 |
| V  | 27 | 474.282        | 298.173        | 295.503        | 295.672        | 295.336        | V | 15 |
| G  | 28 | 483.786        | 281.662        | 278.992        | 279.160        | 278.824        | G | 14 |
| R  | 29 | 509.802        | 272.158        | 269.488        | 269.657        | 269.321        | R | 13 |
| V  | 30 | 526.314        | 246.142        | 243.472        | 243.640        | 243.304        | V | 12 |
| H  | 31 | 549.157        | 229.630        | 226.960        | 227.128        | 226.792        | H | 11 |
| R  | 32 | 575.174        | 206.787        | 204.117        | 204.285        | 203.949        | R | 10 |
| L  | 33 | 594.021        | 180.770        | 178.100        | 178.268        | 177.932        | L | 9  |
| L  | 34 | 612.868        | 161.923        | 159.253        | 159.421        | 159.085        | L | 8  |
| R  | 35 | 638.885        | 143.075        | 140.405        | 140.574        | 140.238        | R | 7  |
| R  | 36 | 660.235        | 117.059        | 114.389        | 114.557        | 114.221        | R | 6  |
| G  | 37 | 669.738        | 95.709         | 93.040         | 93.208         | 92.872         | G | 5  |
| N  | 38 | 688.745        | 86.206         | 83.536         | 83.704         | 83.368         | N | 4  |
| V  | 39 | 715.922        | 67.199         | 64.529         | 64.697         | 64.361         | V | 3  |
| S  | 40 | <b>730.428</b> | 40.021         | 37.352         | 37.520         | 37.184         | S | 2  |
| E  | 41 | <b>751.935</b> | 25.516         | 22.846         | 23.014         | 22.678         | E | 1  |

# sp | Q8CGP5 | H2A1F\_MOUSE

SGR<sup>Trimethyl</sup><sub>42.05</sub> GKQGKARAKAKTRSSRAGLQFPVGRVHLLLRKGNYS

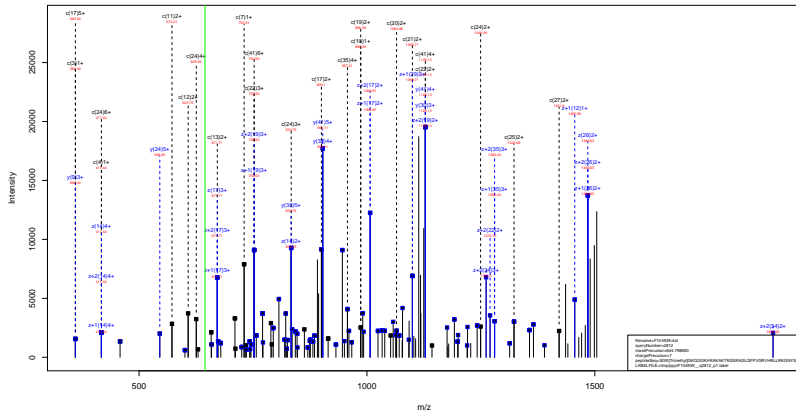

# sp | Q8CGP5 | H2A1F\_MOUSE

SGR<sup>Trimethyl</sup><sub>42.05</sub> GKQGGKARAKAKTRSSRAGLQFPVGRVHLLLRKGNYS

- ▶ fragmentation table for charge state 1+
- ▶ specType=etd
- ▶ score=46.17
- ▶ F104939.dat
- ▶ query=q2812\_p1
- ▶ precursor=644.798680
- ▶ chargePrecursor=7
- ▶ itol=0.8

| AA | c  | y               | z+1            | z+2             | z               | AA              |       |
|----|----|-----------------|----------------|-----------------|-----------------|-----------------|-------|
| S  | 1  | 105.066         | 4507.557       | 4491.530        | 0.000           | 4490.530        | S[41] |
| G  | 2  | 162.087         | 4420.525       | 4404.506        | 0.000           | 4403.496        | G[40] |
| R  | 3  | <b>360.235</b>  | 4301.504       | 4347.485        | 4348.493        | 4346.477        | R[30] |
| G  | 4  | <b>417.257</b>  | 4165.355       | 4149.337        | 4150.345        | 4148.329        | G[38] |
| K  | 5  | <b>545.352</b>  | 4108.334       | 4092.315        | 4093.323        | 4091.307        | K[37] |
| Q  | 6  | <b>673.410</b>  | 3980.320       | 3964.302        | 3965.310        | 3963.294        | Q[36] |
| G  | 7  | <b>730.432</b>  | 3852.305       | 3836.287        | 3837.295        | 3835.279        | G[35] |
| G  | 8  | 787.453         | 3795.289       | 3779.270        | 3780.278        | 3778.262        | G[34] |
| K  | 9  | <b>915.548</b>  | 3736.270       | 3720.251        | 3721.259        | 3719.243        | K[33] |
| A  | 10 | <b>966.585</b>  | 3610.243       | 3594.224        | 3595.232        | 3593.216        | A[32] |
| R  | 11 | <b>1142.686</b> | 3539.095       | 3522.987        | 3523.995        | 3521.979        | R[31] |
| A  | 12 | 1213.724        | 3382.004       | 3366.985        | 3367.993        | 3365.977        | A[30] |
| R  | 13 | 1341.819        | 3311.987       | 3295.840        | 3296.856        | 3294.841        | R[29] |
| A  | 14 | 1412.856        | 3183.772       | 3167.754        | 3168.761        | 3166.746        | A[28] |
| K  | 15 | 1540.951        | 3112.735       | 3096.710        | 3097.724        | 3095.709        | K[27] |
| T  | 16 | 1641.998        | 2984.640       | 2968.621        | 2969.629        | 2967.614        | T[26] |
| R  | 17 | 1768.099        | 2853.592       | 2837.573        | 2838.582        | 2836.566        | R[25] |
| S  | 18 | 1885.133        | 2797.494       | 2781.474        | 2782.483        | 2780.467        | S[24] |
| S  | 19 | 1972.163        | 2640.450       | 2624.441        | 2625.448        | 2623.433        | S[23] |
| R  | 20 | 2138.265        | 2553.427       | 2537.409        | 2538.416        | 2536.401        | R[22] |
| A  | 21 | 2199.302        | 2497.326       | 2481.307        | 2482.315        | 2480.300        | A[21] |
| G  | 22 | 2256.323        | 2326.289       | 2310.270        | 2311.278        | 2309.262        | G[20] |
| L  | 23 | 2309.407        | 2209.260       | 2193.240        | 2194.247        | 2192.241        | L[19] |
| Q  | 24 | 2407.468        | 2158.184       | 2142.165        | 2143.173        | 2141.157        | Q[18] |
| F  | 25 | 2644.534        | 2028.125       | 2012.106        | 2013.114        | 2011.099        | F[17] |
| P  | 26 | 2741.587        | 1881.057       | 1865.038        | 1866.046        | 1864.030        | P[16] |
| V  | 27 | 2840.625        | 1794.004       | 1767.985        | 1768.993        | 1766.977        | V[15] |
| G  | 28 | 2897.677        | 1684.935       | 1668.917        | 1669.924        | 1667.909        | G[14] |
| T  | 29 | 2953.776        | 1627.824       | 1611.805        | 1612.813        | 1610.797        | T[13] |
| V  | 30 | 3152.846        | 1471.613       | <b>1455.794</b> | 1456.802        | 1454.786        | V[12] |
| H  | 31 | 3289.905        | 1372.744       | <b>1356.726</b> | 1357.734        | 1355.718        | H[11] |
| R  | 32 | 3446.006        | 1235.685       | <b>1219.667</b> | <b>1220.675</b> | 1218.659        | R[10] |
| L  | 33 | 3559.090        | 1079.584       | <b>1063.566</b> | <b>1064.573</b> | <b>1062.558</b> | L[9]  |
| L  | 34 | 3672.175        | <b>966.500</b> | <b>950.482</b>  | 951.489         | 949.473         | L[8]  |
| T  | 35 | 3839.276        | 833.416        | 817.398         | 818.405         | <b>836.390</b>  | T[7]  |
| K  | 36 | 3956.371        | 697.315        | 681.296         | 682.304         | 680.289         | K[6]  |
| G  | 37 | 4013.392        | 569.220        | 553.201         | 554.209         | 552.194         | G[5]  |
| N  | 38 | 4127.435        | 512.099        | 496.180         | 497.188         | 495.172         | N[4]  |
| V  | 39 | 4290.498        | 398.156        | 382.137         | 383.145         | 381.129         | V[3]  |
| S  | 40 | 4377.530        | 235.082        | 219.074         | 220.082         | 218.066         | S[2]  |
| E  | 41 | 4406.573        | 148.060        | 132.043         | 133.050         | 131.034         | E[1]  |

# sp | Q8CGP5 | H2A1F\_MOUSE

SGR<sup>Trimethyl</sup><sub>42.05</sub> GKQGGKARAKAKTRSSRAGLQFPVGRVHLLLRKGNYS

- ▶ fragmentation table for charge state 2+
- ▶ specType=etd
- ▶ score=46.17
- ▶ F104939.dat
- ▶ query=q2812\_p1
- ▶ precursor=644.798680
- ▶ chargePrecursor=7
- ▶ itol=0.8

| AA | c  | w               | s±1             | s±2             | z               | AA              |       |
|----|----|-----------------|-----------------|-----------------|-----------------|-----------------|-------|
| S  | 1  | 81.037          | 2254.274        | 2266.273        | 0.804           | 2245.167        | S[41] |
| G  | 2  | 81.547          | 2210.966        | 2202.757        | 0.904           | 2202.251        | G[40] |
| R  | 3  | 180.621         | 2182.295        | 2174.246        | 2174.790        | 2173.742        | R[39] |
| G  | 4  | 209.132         | 2083.181        | 2075.172        | 2075.676        | 2074.668        | G[38] |
| K  | 5  | 273.180         | 2054.671        | 2046.661        | 2047.165        | 2046.157        | K[37] |
| G  | 6  | 337.209         | 1990.622        | 1982.614        | 1983.118        | 1982.110        | G[36] |
| G  | 7  | 385.720         | 1926.594        | 1918.584        | 1919.088        | 1918.080        | G[35] |
| G  | 8  | 394.230         | 1898.083        | 1890.074        | <b>1890.578</b> | 1889.570        | G[34] |
| K  | 9  | <b>458.278</b>  | 1869.572        | 1861.563        | 1862.067        | 1861.059        | K[33] |
| A  | 10 | 493.796         | 1805.525        | 1797.516        | 1798.019        | 1797.012        | A[32] |
| R  | 11 | <b>571.847</b>  | 1770.008        | 1761.997        | 1762.501        | 1761.493        | R[31] |
| A  | 12 | <b>607.365</b>  | 1692.995        | 1684.983        | 1685.486        | 1684.478        | A[30] |
| R  | 13 | <b>671.413</b>  | 1656.437        | 1648.428        | 1648.932        | 1647.924        | R[29] |
| A  | 14 | 706.931         | 1592.900        | 1584.889        | 1584.884        | 1583.876        | A[28] |
| K  | 15 | <b>770.979</b>  | 1556.871        | 1548.860        | 1549.366        | 1548.358        | K[27] |
| T  | 16 | <b>821.503</b>  | 1492.824        | <b>1484.814</b> | <b>1485.318</b> | <b>1484.310</b> | T[26] |
| R  | 17 | <b>899.553</b>  | 1442.800        | 1434.787        | 1435.291        | 1434.283        | R[25] |
| S  | 18 | 933.699         | 1384.249        | <b>1356.240</b> | <b>1356.744</b> | 1355.736        | S[24] |
| S  | 19 | <b>986.585</b>  | 1320.733        | <b>1312.724</b> | <b>1313.228</b> | 1312.220        | S[23] |
| R  | 20 | <b>1064.636</b> | 1277.217        | 1269.208        | <b>1269.712</b> | 1268.704        | R[22] |
| A  | 21 | <b>1100.155</b> | <b>1199.167</b> | <b>1191.157</b> | <b>1191.661</b> | 1190.653        | A[21] |
| G  | 22 | <b>1128.665</b> | 1153.648        | 1145.639        | 1146.143        | 1145.135        | G[20] |
| L  | 23 | 1157.677        | 1104.131        | 1096.120        | <b>1127.632</b> | 1126.624        | L[19] |
| Q  | 24 | <b>1249.237</b> | <b>1078.595</b> | <b>1070.586</b> | <b>1071.090</b> | <b>1070.082</b> | Q[18] |
| F  | 25 | <b>1322.771</b> | 1014.569        | <b>1006.557</b> | <b>1007.061</b> | 1006.053        | F[17] |
| F  | 26 | 1371.297        | 941.053         | 933.043         | 933.546         | <b>932.519</b>  | F[16] |
| V  | 27 | <b>1420.831</b> | 892.506         | <b>884.496</b>  | <b>885.000</b>  | 883.992         | V[15] |
| G  | 28 | 1469.342        | <b>842.971</b>  | 834.961         | <b>835.466</b>  | <b>834.458</b>  | G[14] |
| R  | 29 | 1527.893        | 814.443         | <b>806.431</b>  | <b>806.935</b>  | 805.927         | R[13] |
| V  | 30 | 1576.927        | 736.410         | 728.401         | 728.905         | 727.897         | V[12] |
| H  | 31 | 1645.456        | 688.876         | <b>678.866</b>  | <b>679.370</b>  | 678.363         | H[11] |
| R  | 32 | 1723.507        | 618.346         | 610.337         | 610.841         | 609.833         | R[10] |
| L  | 33 | 1780.049        | 540.296         | 532.286         | 532.790         | 531.783         | L[9]  |
| L  | 34 | 1838.599        | 469.794         | 461.783         | 462.286         | 461.278         | L[8]  |
| R  | 35 | 1914.641        | 427.212         | 419.202         | 419.706         | 418.698         | R[7]  |
| K  | 36 | 1978.689        | 349.161         | 341.152         | 341.656         | 340.648         | K[6]  |
| G  | 37 | 2067.200        | 285.114         | 277.104         | 277.608         | 276.600         | G[5]  |
| N  | 38 | 2094.221        | 256.603         | 248.594         | 249.098         | 248.090         | N[4]  |
| V  | 39 | 2145.753        | 199.562         | 191.552         | 192.056         | 191.048         | V[3]  |
| S  | 40 | 2199.266        | 118.056         | 110.046         | 110.549         | 109.541         | S[2]  |
| E  | 41 | 2253.790        | 74.534          | 66.524          | 67.028          | 66.021          | E[1]  |

# sp | Q8CGP5 | H2A1F\_MOUSE

SGR<sup>Trimethyl</sup><sub>42.05</sub> GKQG GKARAKAKTRSSRAGLQFPVGRVHLLRKGNYSE

- ▶ fragmentation table for charge state 3+
- ▶ specType=etd
- ▶ score=46.17
- ▶ F104939.dat
- ▶ query=q2812\_p1
- ▶ precursor=644.798680
- ▶ chargePrecursor=7
- ▶ itol=0.8

| AA | c  | y               | #s1             | #s2             | z               | AA              |       |
|----|----|-----------------|-----------------|-----------------|-----------------|-----------------|-------|
| S  | 1  | 35.993          | 1502.194        | 1497.831        | 0.572           | 1497.511        | S(41) |
| G  | 2  | 54.702          | 1474.180        | 1468.840        | 0.672           | 1468.504        | G(40) |
| R  | 3  | 130.750         | <b>1455.173</b> | 1449.833        | 1450.169        | 1449.497        | R(39) |
| G  | 4  | 139.757         | <b>1389.123</b> | 1383.784        | 1384.420        | 1383.446        | G(38) |
| K  | 5  | 182.455         | 1370.116        | <b>1364.777</b> | <b>1365.113</b> | 1364.441        | K(37) |
| G  | 6  | 225.142         | 1327.418        | <b>1322.078</b> | <b>1322.414</b> | 1321.742        | G(36) |
| G  | 7  | 264.189         | 1284.733        | <b>1279.392</b> | <b>1279.728</b> | 1279.056        | G(35) |
| G  | 8  | 263.156         | 1265.925        | 1266.265        | <b>1260.721</b> | 1260.049        | G(34) |
| K  | 9  | 305.654         | 1246.717        | <b>1241.378</b> | <b>1241.714</b> | <b>1241.042</b> | K(33) |
| A  | 10 | 329.513         | 1204.019        | <b>1198.679</b> | <b>1199.015</b> | <b>1198.344</b> | A(32) |
| R  | 11 | 381.567         | 1180.340        | 1175.000        | <b>1175.336</b> | 1174.664        | R(31) |
| A  | 12 | 405.266         | <b>1128.306</b> | 1128.997        | 1127.301        | 1127.931        | A(30) |
| K  | 13 | 447.944         | 1104.627        | <b>1099.288</b> | <b>1099.624</b> | <b>1098.952</b> | K(29) |
| A  | 14 | 491.623         | 1081.929        | 1056.539        | <b>1056.925</b> | 1056.251        | A(28) |
| K  | 15 | 514.322         | <b>1038.250</b> | <b>1032.910</b> | <b>1033.246</b> | <b>1032.574</b> | K(27) |
| T  | 16 | 548.024         | 995.552         | <b>990.212</b>  | <b>990.548</b>  | 989.870         | T(26) |
| R  | 17 | <b>600.838</b>  | 981.869         | <b>956.529</b>  | <b>956.865</b>  | 956.183         | R(25) |
| S  | 18 | <b>629.049</b>  | 959.875         | 964.425         | 964.819         | 964.160         | S(24) |
| S  | 19 | <b>658.959</b>  | <b>880.825</b>  | <b>875.485</b>  | <b>875.821</b>  | <b>875.149</b>  | S(23) |
| R  | 20 | <b>710.093</b>  | 851.614         | <b>846.474</b>  | <b>846.810</b>  | <b>846.138</b>  | R(22) |
| A  | 21 | <b>733.772</b>  | 799.789         | <b>794.441</b>  | <b>794.777</b>  | <b>794.105</b>  | A(21) |
| G  | 22 | <b>752.779</b>  | 778.101         | <b>770.762</b>  | <b>771.098</b>  | <b>770.426</b>  | G(20) |
| L  | 23 | <b>790.474</b>  | <b>757.094</b>  | <b>751.754</b>  | <b>752.090</b>  | 751.417         | L(19) |
| Q  | 24 | <b>833.160</b>  | 719.359         | 744.386         | 744.770         | 744.121         | Q(18) |
| F  | 25 | <b>882.183</b>  | 676.713         | <b>671.374</b>  | <b>671.710</b>  | <b>671.038</b>  | F(17) |
| F  | 26 | <b>914.534</b>  | 627.600         | 622.351         | 622.687         | 622.015         | F(16) |
| V  | 27 | 947.557         | 595.139         | 590.000         | 590.336         | 589.664         | V(15) |
| G  | 28 | <b>966.564</b>  | 562.317         | 556.977         | 557.313         | 556.641         | G(14) |
| R  | 29 | 1015.508        | 543.309         | 537.910         | 538.298         | 537.624         | R(13) |
| V  | 30 | <b>1051.620</b> | 491.276         | 485.938         | 486.272         | 485.600         | V(12) |
| H  | 31 | 1097.397        | <b>458.253</b>  | 452.913         | 453.249         | 452.577         | H(11) |
| R  | 32 | 1149.340        | 412.967         | 407.227         | 407.563         | 406.891         | R(10) |
| L  | 33 | 1187.035        | <b>360.533</b>  | 355.193         | 355.529         | 354.857         | L(9)  |
| L  | 34 | 1224.730        | 322.576         | 317.489         | 317.826         | 317.161         | L(8)  |
| L  | 35 | 1276.763        | 285.144         | 279.804         | 280.140         | 279.466         | L(7)  |
| K  | 36 | 1319.462        | 233.110         | 227.770         | 228.106         | 227.434         | K(6)  |
| G  | 37 | 1338.469        | 190.412         | 185.072         | 185.408         | 184.736         | G(5)  |
| N  | 38 | 1376.483        | 171.404         | 166.065         | 166.401         | 165.729         | N(4)  |
| V  | 39 | 1430.836        | 133.290         | 128.051         | 128.386         | 127.715         | V(3)  |
| S  | 40 | 1459.846        | 99.139          | 93.900          | 94.232          | 93.560          | S(2)  |
| E  | 41 | 1502.863        | 50.025          | 44.685          | 45.021          | 44.349          | E(1)  |

# sp | Q8CGP5 | H2A1F\_MOUSE

SGR<sup>Trimethyl</sup><sub>42.05</sub> GKQGGKARAKAKTRSSRAGLQFPVGRVHLLLRKGNYS

- ▶ fragmentation table for charge state 4+
- ▶ specType=etd
- ▶ score=46.17
- ▶ F104939.dat
- ▶ query=q2812\_p1
- ▶ precursor=644.798680
- ▶ chargePrecursor=7
- ▶ itol=0.8

| AA | c  | y               | #=1             | #=2             | #=3             | #=4             | AA   |
|----|----|-----------------|-----------------|-----------------|-----------------|-----------------|------|
| S  | 1  | 217.020         | <b>1127.645</b> | 1123.660        | 0.759           | 1123.361        | S(4) |
| G  | 2  | 43.277          | 1125.887        | 1121.882        | 0.755           | 1121.630        | G(4) |
| R  | 3  | 90.814          | <b>1091.631</b> | 1087.627        | 1087.870        | 1087.375        | R(3) |
| G  | 4  | 109.070         | 1042.094        | 1038.090        | <b>1038.342</b> | 1037.839        | G(3) |
| K  | 5  | 137.093         | 1027.839        | <b>1023.834</b> | <b>1024.086</b> | <b>1023.582</b> | K(3) |
| G  | 6  | 169.138         | 995.915         | 991.911         | <b>992.062</b>  | <b>991.559</b>  | G(2) |
| G  | 7  | 183.983         | 983.903         | <b>959.796</b>  | <b>960.048</b>  | 959.544         | G(2) |
| G  | 8  | 197.810         | 949.945         | <b>945.541</b>  | <b>945.792</b>  | 945.289         | G(4) |
| K  | 9  | 229.643         | 935.290         | <b>931.285</b>  | <b>931.537</b>  | 931.033         | K(3) |
| A  | 10 | 247.402         | <b>903.266</b>  | 899.261         | <b>899.513</b>  | 899.009         | A(3) |
| R  | 11 | 266.427         | <b>885.507</b>  | <b>881.502</b>  | <b>881.754</b>  | <b>881.250</b>  | R(3) |
| A  | 12 | 284.186         | <b>846.482</b>  | <b>842.477</b>  | <b>842.729</b>  | <b>842.225</b>  | A(3) |
| K  | 13 | 336.210         | 828.722         | <b>824.718</b>  | <b>824.970</b>  | <b>824.466</b>  | K(2) |
| A  | 14 | 353.969         | 796.699         | 792.694         | 792.946         | 792.442         | A(2) |
| K  | 15 | 385.993         | 778.939         | 774.935         | 775.187         | 774.683         | K(2) |
| T  | 16 | 411.255         | 746.915         | <b>742.911</b>  | <b>743.163</b>  | <b>742.659</b>  | T(2) |
| R  | 17 | 459.280         | 721.954         | <b>717.949</b>  | <b>718.201</b>  | 717.700         | R(2) |
| S  | 18 | 472.938         | 692.628         | <b>678.624</b>  | <b>678.876</b>  | 678.372         | S(4) |
| S  | 19 | 493.796         | 660.970         | 656.966         | 657.218         | 656.714         | S(3) |
| R  | 20 | 532.622         | 639.112         | 635.108         | 635.360         | 634.856         | R(2) |
| A  | 21 | 550.581         | <b>600.087</b>  | 596.082         | 596.334         | 595.830         | A(2) |
| G  | 22 | 564.836         | 582.328         | 578.323         | 578.575         | 578.071         | G(2) |
| L  | 23 | 603.887         | 568.072         | 564.068         | 564.320         | 563.816         | L(3) |
| Q  | 24 | <b>625.122</b>  | 539.803         | 535.797         | 536.049         | 535.545         | Q(1) |
| F  | 25 | 661.889         | 507.787         | 503.782         | 504.034         | 503.530         | F(1) |
| F  | 26 | 698.152         | 471.020         | 467.015         | 467.267         | 466.763         | F(1) |
| V  | 27 | <b>710.919</b>  | 446.756         | 442.752         | 443.004         | 442.500         | V(1) |
| G  | 28 | <b>725.175</b>  | 421.989         | <b>417.985</b>  | <b>418.237</b>  | <b>417.733</b>  | G(4) |
| R  | 29 | 764.937         | 389.734         | 385.729         | 385.981         | 385.477         | R(1) |
| V  | 30 | <b>788.967</b>  | 368.709         | 364.704         | 364.956         | 364.452         | V(1) |
| H  | 31 | <b>823.232</b>  | 343.942         | 339.937         | 340.189         | 339.685         | H(1) |
| R  | 32 | <b>862.257</b>  | 309.677         | 305.672         | 305.924         | 305.420         | R(1) |
| L  | 33 | 890.528         | 270.652         | 266.647         | 266.899         | 266.395         | L(1) |
| L  | 34 | 919.989         | 242.981         | 238.976         | 239.228         | 238.724         | L(1) |
| R  | 35 | <b>957.824</b>  | 214.110         | 210.105         | 210.357         | 209.853         | R(1) |
| K  | 36 | 989.848         | 175.084         | 171.079         | 171.331         | 170.827         | K(1) |
| G  | 37 | 1004.103        | 143.061         | 139.056         | 139.308         | 138.804         | G(1) |
| N  | 38 | <b>1032.614</b> | 128.805         | 124.800         | 125.052         | 124.548         | N(4) |
| V  | 39 | 1074.280        | 100.294         | 96.289          | 96.541          | 96.037          | V(1) |
| S  | 40 | 1098.138        | 99.529          | 95.524          | 95.776          | 95.272          | S(1) |
| E  | 41 | <b>1127.399</b> | 97.771          | 93.766          | 94.018          | 93.514          | E(1) |

# sp | Q8CGP5 | H2A1F\_MOUSE

SGR<sup>Trimethyl</sup><sub>42.05</sub> GKQG GKARAKAKTRSSRAGLQFPVGRVHLLRKGNYSE

- ▶ fragmentation table for charge state 5+
- ▶ specType=etd
- ▶ score=46.17
- ▶ F104939.dat
- ▶ query=q2812.p1
- ▶ precursor=644.798680
- ▶ chargePrecursor=7
- ▶ itol=0.8

| AA |    | c              | y              | z+1            | z#2            | z              | AA    |
|----|----|----------------|----------------|----------------|----------------|----------------|-------|
| S  | 1  | 21.819         | <b>902.317</b> | 899.113        | 0.806          | 898.912        | S[41] |
| G  | 2  | 33.223         | <b>884.911</b> | <b>881.707</b> | 0.806          | <b>881.506</b> | G[40] |
| R  | 3  | 72.853         | <b>873.507</b> | <b>870.303</b> | <b>870.504</b> | <b>870.101</b> | R[39] |
| G  | 4  | 84.257         | <b>833.877</b> | 830.673        | 830.875        | 830.472        | G[38] |
| K  | 5  | 109.876        | <b>822.473</b> | <b>819.269</b> | <b>819.470</b> | <b>819.067</b> | K[37] |
| Q  | 6  | 135.488        | 796.954        | 793.650        | <b>793.851</b> | 793.448        | Q[36] |
| G  | 7  | 146.692        | <b>771.242</b> | 768.038        | 768.240        | 767.837        | G[35] |
| G  | 8  | 158.296        | 759.838        | <b>756.634</b> | <b>756.835</b> | <b>756.432</b> | G[34] |
| K  | 9  | 183.915        | 748.833        | <b>745.230</b> | <b>745.431</b> | <b>745.028</b> | K[33] |
| A  | 10 | 198.123        | 722.814        | 719.611        | 719.812        | 719.409        | A[32] |
| R  | 11 | 229.343        | 708.607        | 705.403        | 705.605        | 705.202        | R[31] |
| A  | 12 | 243.551        | 677.387        | <b>674.183</b> | 674.385        | <b>673.981</b> | A[30] |
| K  | 13 | 269.170        | 663.179        | 659.976        | 660.177        | <b>659.774</b> | K[29] |
| A  | 14 | 283.377        | 637.960        | 634.357        | 634.558        | 634.155        | A[28] |
| K  | 15 | 308.996        | 623.353        | 620.149        | 620.351        | 619.948        | K[27] |
| T  | 16 | 329.205        | 597.734        | 594.530        | 594.732        | 594.329        | T[26] |
| R  | 17 | <b>360.426</b> | 577.524        | 574.321        | 574.522        | 574.119        | R[25] |
| S  | 18 | 377.832        | <b>546.304</b> | 543.100        | 543.302        | 542.899        | S[24] |
| S  | 19 | 399.239        | 529.996        | 525.694        | 525.896        | 525.492        | S[23] |
| R  | 20 | 426.459        | 511.491        | 508.288        | 508.489        | 508.086        | R[22] |
| A  | 21 | 440.666        | 480.271        | 477.067        | 477.269        | 476.866        | A[21] |
| G  | 22 | 452.070        | 466.064        | 462.860        | 463.061        | 462.658        | G[20] |
| L  | 23 | 474.687        | 494.659        | 451.456        | 451.657        | 451.254        | L[19] |
| Q  | 24 | 500.299        | 432.043        | 428.839        | 429.040        | 428.637        | Q[18] |
| F  | 25 | 529.713        | 406.831        | 403.227        | 403.429        | 403.026        | F[17] |
| P  | 26 | 549.123        | 377.017        | 373.813        | 374.015        | 373.612        | P[16] |
| V  | 27 | 568.837        | 357.607        | 354.403        | 354.604        | 354.201        | V[15] |
| G  | 28 | 589.241        | 337.793        | 334.589        | 334.791        | 334.388        | G[14] |
| R  | 29 | 611.561        | 326.389        | 323.185        | 323.386        | 322.983        | R[13] |
| V  | 30 | 631.375        | 295.168        | 291.965        | 292.166        | 291.763        | V[12] |
| H  | 31 | <b>658.787</b> | 275.355        | 272.151        | 272.353        | 271.949        | H[11] |
| R  | 32 | 690.007        | 247.943        | 244.739        | 244.941        | 244.538        | R[10] |
| L  | 33 | 712.624        | 216.723        | 213.519        | 213.721        | 213.317        | L[9]  |
| L  | 34 | <b>735.241</b> | 194.109        | 190.902        | 191.104        | 190.701        | L[8]  |
| R  | 35 | 766.461        | 171.489        | 168.283        | 168.487        | 168.084        | R[7]  |
| K  | 36 | 782.080        | 140.269        | 137.065        | 137.267        | 136.864        | K[6]  |
| G  | 37 | 803.884        | 114.650        | 111.446        | 111.648        | 111.245        | G[5]  |
| N  | 38 | <b>826.293</b> | 101.246        | 100.042        | 100.243        | 99.840         | N[4]  |
| V  | 39 | 858.905        | 80.437         | 77.233         | 77.435         | 77.032         | V[3]  |
| S  | 40 | <b>876.312</b> | 47.824         | 44.621         | 44.822         | 44.419         | S[2]  |
| E  | 41 | 902.120        | 30.418         | 27.214         | 27.416         | 27.013         | E[1]  |

# sp | Q8CGP5 | H2A1F\_MOUSE

SGR<sup>Trimethyl</sup><sub>42.05</sub> GKQGKARAKAKTRSSRAGLQFPVGRVHLLLRKGNYS

- ▶ fragmentation table for charge state 6+
- ▶ specType=etd
- ▶ score=46.17
- ▶ F104939.dat
- ▶ query=q2812.p1
- ▶ precursor=644.798680
- ▶ chargePrecursor=7
- ▶ itol=0.8

| AA    | c              | y              | z#1            | z#2            | z              | AA    |
|-------|----------------|----------------|----------------|----------------|----------------|-------|
| S[1]  | 18.350         | <b>752.099</b> | 749.420        | 0.839          | 749.261        | S[41] |
| G[2]  | 27.854         | 737.594        | <b>734.924</b> | 0.839          | <b>734.756</b> | G[40] |
| R[3]  | 60.879         | 728.090        | <b>725.420</b> | <b>725.508</b> | <b>725.252</b> | R[39] |
| G[4]  | 70.382         | 695.005        | 692.396        | 692.563        | 692.238        | G[38] |
| K[5]  | 91.731         | 685.562        | 682.892        | 683.060        | 682.724        | K[37] |
| Q[6]  | 113.074        | 674.213        | 661.543        | 661.711        | 661.375        | Q[36] |
| G[7]  | 122.578        | 642.869        | 640.200        | 640.368        | 640.032        | G[35] |
| G[8]  | 132.082        | 633.366        | 630.696        | 630.864        | 630.528        | G[34] |
| K[9]  | 153.431        | 623.862        | 621.193        | 621.360        | 621.025        | K[33] |
| A[10] | 165.270        | 602.513        | 599.843        | <b>600.011</b> | 599.675        | A[32] |
| R[11] | 191.287        | 590.674        | 588.004        | 588.172        | 587.836        | R[31] |
| A[12] | 203.127        | 564.657        | 561.987        | 562.155        | 561.819        | A[30] |
| K[13] | 224.476        | 552.817        | 550.147        | 550.315        | 549.980        | K[29] |
| A[14] | 236.315        | 531.468        | 528.798        | 528.966        | 528.630        | A[28] |
| K[15] | 257.665        | 519.629        | 516.959        | 517.127        | 516.791        | K[27] |
| T[16] | 274.506        | 498.279        | 495.610        | 495.778        | 495.442        | T[26] |
| R[17] | 300.523        | 481.438        | 478.768        | 478.936        | 478.600        | R[25] |
| S[18] | 313.028        | 435.421        | 432.752        | 432.919        | 432.584        | S[24] |
| S[19] | 329.533        | 440.916        | 438.246        | 438.414        | 438.078        | S[23] |
| R[20] | 355.550        | 426.411        | 423.741        | 423.909        | 423.573        | R[22] |
| A[21] | 367.390        | 400.994        | 397.724        | 397.892        | 397.556        | A[21] |
| G[22] | 376.893        | 388.554        | 385.884        | 386.052        | 385.716        | G[20] |
| L[23] | 395.741        | 379.051        | 376.381        | 376.549        | 376.213        | L[19] |
| Q[24] | <b>417.084</b> | <b>360.203</b> | 357.534        | 357.702        | 357.366        | Q[18] |
| P[25] | 441.595        | 338.880        | 336.190        | 336.358        | 336.022        | P[17] |
| P[26] | <b>457.771</b> | 314.346        | 311.679        | 311.847        | 311.511        | P[16] |
| V[27] | 474.282        | 298.173        | 295.503        | 295.672        | 295.336        | V[15] |
| G[28] | 483.786        | 281.662        | 278.992        | 279.160        | 278.824        | G[14] |
| R[29] | 509.802        | 272.158        | 269.489        | 269.657        | 269.321        | R[13] |
| V[30] | 526.314        | 246.142        | 243.472        | 243.640        | 243.304        | V[12] |
| H[31] | 549.157        | 229.630        | 226.960        | 227.128        | 226.792        | H[11] |
| R[32] | 575.174        | 206.787        | 204.117        | 204.285        | 203.949        | R[10] |
| L[33] | 594.021        | 180.770        | 178.100        | 178.268        | 177.932        | L[9]  |
| L[34] | 612.868        | 161.923        | 159.253        | 159.421        | 159.085        | L[8]  |
| R[35] | 638.885        | 143.075        | 140.406        | 140.574        | 140.238        | R[7]  |
| R[36] | 660.235        | 117.059        | 114.389        | 114.557        | 114.221        | R[6]  |
| G[37] | 669.738        | 95.709         | 93.040         | 93.208         | 92.872         | G[5]  |
| N[38] | 688.745        | 86.206         | 83.536         | 83.704         | 83.368         | N[4]  |
| V[39] | 715.922        | 67.199         | 64.529         | 64.697         | 64.361         | V[3]  |
| S[40] | <b>730.428</b> | 40.021         | 37.352         | 37.520         | 37.184         | S[2]  |
| E[41] | <b>751.935</b> | 25.516         | 22.846         | 23.014         | 22.678         | E[1]  |





# sp | Q8CGP5 | H2A1F\_MOUSE

SGR<sup>Trimethyl</sup><sub>42.05</sub> GKQGGKARAKAKTRSSRAGLQFPVGRVHLLLRKGNYS

- ▶ fragmentation table for charge state 1+
- ▶ specType=etd
- ▶ score=103.60
- ▶ F104939.dat
- ▶ query=q2813\_p1
- ▶ precursor=902.315370
- ▶ chargePrecursor=5
- ▶ itol=0.8

| AA | c  | y               | z+1            | z+2             | z               | AA              |       |
|----|----|-----------------|----------------|-----------------|-----------------|-----------------|-------|
| S  | 1  | 105.066         | 4507.557       | 4491.530        | 0.000           | 4490.530        | S[41] |
| G  | 2  | 162.087         | 4420.525       | 4404.506        | 0.000           | 4403.496        | G[40] |
| R  | 3  | <b>360.235</b>  | 4301.504       | 4347.485        | 4348.493        | 4346.477        | R[39] |
| G  | 4  | <b>417.257</b>  | 4165.355       | 4149.337        | 4150.345        | 4148.329        | G[38] |
| K  | 5  | <b>545.352</b>  | 4108.334       | 4092.315        | 4093.323        | 4091.307        | K[37] |
| Q  | 6  | <b>673.410</b>  | 3989.320       | 3994.322        | 3995.328        | 3993.311        | Q[36] |
| G  | 7  | <b>730.432</b>  | 3852.480       | 3836.462        | 3837.470        | 3835.454        | G[35] |
| G  | 8  | 787.453         | 3795.159       | 3779.140        | 3780.148        | 3778.132        | G[34] |
| K  | 9  | 915.546         | 3736.138       | 3722.119        | 3723.127        | 3721.111        | K[33] |
| A  | 10 | <b>986.585</b>  | 3610.043       | 3594.024        | 3595.032        | 3593.016        | A[32] |
| R  | 11 | 1142.686        | 3539.006       | 3522.987        | 3523.995        | 3521.979        | R[31] |
| A  | 12 | 1213.724        | 3382.904       | 3366.885        | 3367.893        | 3365.877        | A[30] |
| R  | 13 | <b>1341.819</b> | 3311.867       | 3295.848        | 3296.856        | 3294.841        | R[29] |
| A  | 14 | <b>1412.856</b> | 3183.722       | 3167.704        | 3168.701        | 3166.746        | A[28] |
| K  | 15 | 1540.951        | 3112.735       | 3096.716        | 3097.724        | 3095.709        | K[27] |
| T  | 16 | 1841.998        | 2984.640       | 2968.621        | 2969.629        | 2967.614        | T[26] |
| R  | 17 | <b>1798.099</b> | 2863.592       | 2847.573        | 2848.582        | 2846.566        | R[25] |
| S  | 18 | 1889.131        | 2797.494       | 2781.475        | 2782.483        | 2780.467        | S[24] |
| S  | 19 | 1972.163        | 2640.459       | 2624.441        | 2625.448        | 2623.433        | S[23] |
| R  | 20 | 2138.265        | 2553.427       | 2537.409        | 2538.416        | 2536.401        | R[22] |
| A  | 21 | 2199.302        | 2497.326       | 2481.307        | 2482.315        | 2480.300        | A[21] |
| G  | 22 | 2256.323        | 2326.289       | 2310.270        | 2311.278        | 2309.263        | G[20] |
| L  | 23 | 2309.407        | 2209.260       | 2203.240        | 2204.247        | 2202.241        | L[19] |
| Q  | 24 | 3007.468        | 2158.184       | 2142.165        | 2143.173        | 2139.157        | Q[18] |
| F  | 25 | 3644.534        | 2028.125       | 2012.106        | 2013.114        | 2011.099        | F[17] |
| P  | 26 | 2741.587        | 1881.057       | 1865.038        | 1866.046        | 1864.030        | P[16] |
| V  | 27 | 2840.625        | 1784.004       | 1767.985        | 1768.993        | 1766.977        | V[15] |
| G  | 28 | 2897.677        | 1684.935       | <b>1668.917</b> | 1669.924        | 1667.909        | G[14] |
| R  | 29 | 3653.776        | 1627.824       | <b>1611.805</b> | 1612.803        | 1610.787        | R[13] |
| V  | 30 | 3152.846        | 1471.813       | <b>1455.794</b> | 1456.802        | 1454.786        | V[12] |
| H  | 31 | 3289.905        | 1372.744       | <b>1356.726</b> | 1357.734        | <b>1355.718</b> | H[11] |
| R  | 32 | 3446.006        | 1235.685       | 1219.667        | 1220.675        | 1218.659        | R[10] |
| L  | 33 | 3559.090        | 1079.584       | 1063.566        | <b>1064.573</b> | 1062.558        | L[9]  |
| L  | 34 | 3672.175        | <b>966.500</b> | 950.482         | 951.489         | 949.474         | L[8]  |
| R  | 35 | 3839.276        | 853.416        | 837.398         | <b>838.405</b>  | 836.390         | R[7]  |
| K  | 36 | 3956.371        | 697.315        | 681.296         | 682.304         | 680.289         | K[6]  |
| G  | 37 | 4013.392        | 549.220        | 533.201         | 534.209         | 532.194         | G[5]  |
| N  | 38 | 4127.435        | 512.099        | 496.180         | 497.188         | 495.172         | N[4]  |
| V  | 39 | 4290.498        | 398.156        | 382.137         | 383.145         | 381.129         | V[3]  |
| S  | 40 | 4377.530        | 235.082        | 219.074         | 220.082         | 218.066         | S[2]  |
| E  | 41 | 4406.573        | 144.960        | 132.043         | 133.050         | 131.034         | E[1]  |

# sp | Q8CGP5 | H2A1F\_MOUSE

SGR<sup>Trimethyl</sup><sub>42.05</sub> GKQGGKARAKAKTRSSRAGLQFPVGRVHLLLRKGNYS

- ▶ fragmentation table for charge state 2+
- ▶ specType=etd
- ▶ score=103.60
- ▶ F104939.dat
- ▶ query=q2813\_p1
- ▶ precursor=902.315370
- ▶ chargePrecursor=5
- ▶ itol=0.8

| AA | c  | w               | #s1             | #s2             | c               | AA              |       |
|----|----|-----------------|-----------------|-----------------|-----------------|-----------------|-------|
| S  | 1  | 81.037          | 2254.274        | 2268.273        | 0.504           | 2245.767        | S[41] |
| G  | 2  | 81.547          | 2210.766        | 2203.757        | 0.504           | 2202.251        | G[40] |
| R  | 3  | 180.621         | 2182.255        | 2174.246        | 2174.750        | 2173.742        | R[39] |
| G  | 4  | 209.132         | 2083.181        | 2075.172        | 2075.676        | 2074.668        | G[38] |
| K  | 5  | 273.180         | 2054.671        | 2048.661        | 2047.165        | 2046.157        | K[37] |
| G  | 6  | 337.209         | 1990.622        | <b>1982.614</b> | <b>1983.118</b> | 1982.110        | G[36] |
| G  | 7  | 385.720         | 1926.594        | 1918.585        |                 | <b>1919.088</b> | G[35] |
| G  | 8  | 394.230         | 1898.081        | <b>1890.074</b> | <b>1890.578</b> | <b>1889.570</b> | G[34] |
| K  | 9  | 458.278         | 1869.572        | <b>1861.563</b> | <b>1862.067</b> | 1861.059        | K[33] |
| A  | 10 | 493.796         | 1805.525        | <b>1797.516</b> | <b>1798.019</b> | 1797.012        | A[32] |
| R  | 11 | 571.847         | 1770.008        | <b>1761.997</b> | <b>1762.501</b> | 1761.493        | R[31] |
| A  | 12 | 607.906         | 1692.959        | <b>1683.949</b> | <b>1684.450</b> | <b>1683.443</b> | A[30] |
| R  | 13 | <b>671.413</b>  | 1656.437        | <b>1648.428</b> | <b>1648.932</b> | 1647.924        | R[29] |
| A  | 14 | <b>706.931</b>  | 1592.900        | <b>1584.890</b> | <b>1584.894</b> | 1583.876        | A[28] |
| K  | 15 | 770.979         | 1556.871        | <b>1548.862</b> | <b>1549.366</b> | 1548.358        | K[27] |
| T  | 16 | <b>821.503</b>  | 1492.824        | <b>1484.814</b> | 1483.318        | <b>1484.310</b> | T[26] |
| R  | 17 | 899.933         | 1452.291        | <b>1434.291</b> | <b>1434.794</b> | 1433.787        | R[25] |
| S  | 18 | <b>943.009</b>  | <b>1364.249</b> | <b>1356.240</b> | <b>1356.744</b> | <b>1355.736</b> | S[24] |
| S  | 19 | <b>986.585</b>  | 1320.713        | 1312.724        | 1311.228        | 1310.220        | S[23] |
| R  | 20 | <b>1064.636</b> | 1277.217        | 1269.228        | <b>1269.712</b> | 1268.704        | R[22] |
| A  | 21 | <b>1100.155</b> | 1199.161        | <b>1191.157</b> | <b>1191.661</b> | 1190.653        | A[21] |
| G  | 22 | <b>1128.665</b> | 1163.648        | 1155.659        | 1156.163        | 1155.155        | G[20] |
| L  | 23 | 1187.981        | 1128.137        | <b>1127.128</b> | <b>1127.632</b> | 1126.624        | L[19] |
| G  | 24 | <b>1249.237</b> | 1073.595        | 1065.606        | 1064.109        | 1063.092        | G[18] |
| F  | 25 | <b>1322.771</b> | 1014.568        | <b>1006.557</b> | <b>1007.061</b> | <b>1006.053</b> | F[17] |
| F  | 26 | <b>1371.297</b> | 941.033         | 933.043         | 933.546         | 932.539         | F[16] |
| V  | 27 | <b>1420.831</b> | 892.500         | 884.496         | 885.000         | 883.992         | V[15] |
| G  | 28 | <b>1449.342</b> | 842.971         | 834.962         | 835.466         | 834.458         | G[14] |
| R  | 29 | 1517.853        | 814.481         | 806.471         | 806.975         | 805.967         | R[13] |
| V  | 30 | <b>1576.927</b> | 736.410         | 728.401         | 728.905         | 727.897         | V[12] |
| H  | 31 | <b>1645.456</b> | 688.876         | 678.866         | 679.370         | 678.363         | H[11] |
| R  | 32 | 1723.967        | 618.346         | 610.337         | 610.841         | 609.833         | R[10] |
| L  | 33 | 1780.049        | 540.296         | 532.286         | 532.790         | 531.783         | L[9]  |
| L  | 34 | 1838.979        | 489.794         | 479.783         | 479.286         | 478.280         | L[8]  |
| R  | 35 | 1914.641        | 427.212         | 419.202         | 419.706         | 418.699         | R[7]  |
| K  | 36 | 1978.689        | 349.161         | 341.152         | 341.656         | 340.648         | K[6]  |
| G  | 37 | 2067.200        | 285.114         | 277.104         | 277.608         | 276.600         | G[5]  |
| N  | 38 | 2094.221        | 256.603         | 248.594         | 249.098         | 248.090         | N[4]  |
| V  | 39 | 2145.753        | 199.562         | 191.552         | 192.056         | 191.048         | V[3]  |
| S  | 40 | 2189.266        | 118.050         | 110.041         | 110.544         | 109.537         | S[2]  |
| E  | 41 | 2253.790        | 74.534          | 66.524          | 67.028          | 66.021          | E[1]  |

# sp | Q8CGP5 | H2A1F\_MOUSE

SGR<sup>Trimethyl</sup><sub>42.05</sub> GKQG GKARAKAKTRSSRAGLQFPVGRVHRLLRKGNYS

- ▶ fragmentation table for charge state 3+
- ▶ specType=etd
- ▶ score=103.60
- ▶ F104939.dat
- ▶ query=q2813\_p1
- ▶ precursor=902.315370
- ▶ chargePrecursor=5
- ▶ itol=0.8

| AA |    | c               | y               | #s1             | #s2             | #s              | AA    |
|----|----|-----------------|-----------------|-----------------|-----------------|-----------------|-------|
| S  | 1  | 35.693          | <b>1503.191</b> | <b>1407.851</b> | 0.872           | <b>1407.515</b> | S(4)  |
| G  | 2  | 54.702          | 1474.185        | 1468.840        | 0.672           | 1468.503        | G(6)  |
| R  | 3  | 130.750         | <b>1455.173</b> | <b>1449.833</b> | <b>1450.169</b> | <b>1449.497</b> | R(3)  |
| G  | 4  | 139.757         | 1389.123        | <b>1383.784</b> | <b>1384.120</b> | <b>1383.448</b> | G(38) |
| K  | 5  | 182.455         | 1370.116        | <b>1364.777</b> | <b>1365.113</b> | <b>1364.441</b> | K(37) |
| G  | 6  | 225.142         | 1327.418        | <b>1322.078</b> | <b>1322.414</b> | <b>1321.742</b> | G(36) |
| G  | 7  | 264.189         | 1284.723        | <b>1279.382</b> | <b>1279.728</b> | <b>1279.056</b> | G(35) |
| G  | 8  | 263.156         | 1265.725        | <b>1260.385</b> | <b>1260.721</b> | 1260.049        | G(34) |
| K  | 9  | 305.654         | 1246.717        | 1241.578        | 1241.714        | 1241.042        | K(33) |
| A  | 10 | 329.513         | 1204.019        | 1198.079        | 1199.015        | 1198.344        | A(32) |
| R  | 11 | 381.567         | 1180.310        | <b>1175.000</b> | <b>1175.336</b> | 1174.664        | R(31) |
| A  | 12 | 405.266         | <b>1128.306</b> | 1123.167        | 1123.303        | 1122.631        | A(30) |
| K  | 13 | 447.844         | 1104.627        | <b>1099.288</b> | <b>1099.624</b> | 1098.952        | K(29) |
| A  | 14 | 491.823         | 1081.929        | 1056.539        | <b>1056.925</b> | 1056.251        | A(28) |
| K  | 15 | 514.322         | 1038.250        | <b>1032.910</b> | <b>1033.246</b> | <b>1032.574</b> | K(27) |
| T  | 16 | 548.004         | 995.552         | <b>990.212</b>  | <b>990.548</b>  | <b>989.876</b>  | T(26) |
| R  | 17 | 600.026         | 981.869         | 956.529         | 956.865         | 956.191         | R(25) |
| S  | 18 | 629.049         | 959.835         | 924.485         | 924.821         | 924.146         | S(24) |
| S  | 19 | 658.059         | 980.825         | 875.485         | 875.821         | 875.149         | S(23) |
| R  | 20 | 710.093         | 951.814         | 846.474         | 846.810         | 846.136         | R(22) |
| A  | 21 | 733.772         | 799.780         | 794.441         | 794.777         | 794.101         | A(21) |
| G  | 22 | 752.779         | 776.101         | 770.762         | 771.098         | 770.426         | G(20) |
| L  | 23 | 780.474         | 759.094         | 753.754         | 754.090         | 753.418         | L(19) |
| Q  | 24 | 833.150         | 739.366         | 734.026         | 734.362         | 733.690         | Q(18) |
| F  | 25 | 882.183         | 676.713         | <b>671.374</b>  | <b>671.710</b>  | <b>671.038</b>  | F(17) |
| F  | 26 | 914.534         | 627.600         | 622.261         | 622.597         | 621.921         | F(16) |
| V  | 27 | <b>947.557</b>  | 595.139         | 590.000         | 590.336         | 589.664         | V(15) |
| G  | 28 | <b>966.564</b>  | 562.317         | 556.977         | 557.313         | 556.641         | G(14) |
| R  | 29 | 1013.558        | 543.309         | 537.970         | 538.306         | 537.634         | R(13) |
| V  | 30 | <b>1051.620</b> | 490.276         | 485.038         | 486.272         | 485.600         | V(12) |
| H  | 31 | <b>1097.307</b> | 458.253         | 452.913         | 453.249         | 452.577         | H(11) |
| R  | 32 | 1149.340        | 412.967         | 407.227         | 407.563         | 406.891         | R(10) |
| L  | 33 | 1187.035        | <b>360.533</b>  | 355.193         | 355.529         | 354.857         | L(9)  |
| L  | 34 | 1234.730        | 322.576         | 317.489         | 317.825         | 317.153         | L(8)  |
| R  | 35 | 1276.763        | 285.144         | 279.804         | 280.140         | 279.468         | R(7)  |
| K  | 36 | 1319.462        | 233.110         | 227.770         | 228.106         | 227.434         | K(6)  |
| G  | 37 | 1338.469        | 190.412         | 185.072         | 185.408         | 184.736         | G(5)  |
| N  | 38 | 1376.483        | 171.404         | 166.065         | 166.401         | 165.729         | N(4)  |
| V  | 39 | 1430.838        | 133.390         | 128.051         | 128.386         | 127.715         | V(3)  |
| S  | 40 | 1459.846        | 99.136          | 93.796          | 94.132          | 93.460          | S(2)  |
| E  | 41 | <b>1502.863</b> | 50.025          | 44.685          | 45.021          | 44.349          | E(1)  |

# sp | Q8CGP5 | H2A1F\_MOUSE

SGR<sup>Trimethyl</sup><sub>42.05</sub> GKQGGKARAKAKTRSSRAGLQFPVGRVHLLLRKGNYS

- ▶ fragmentation table for charge state 4+
- ▶ specType=etd
- ▶ score=103.60
- ▶ F104939.dat
- ▶ query=q2813\_p1
- ▶ precursor=902.315370
- ▶ chargePrecursor=5
- ▶ itol=0.8

| AA    | c               | y               | z+1            | z+2       | z              | AA    |
|-------|-----------------|-----------------|----------------|-----------|----------------|-------|
| S[1]  | 27.622          | <b>1127.645</b> | 1123.640       | 0.795     | 1123.888       | S[41] |
| G[2]  | 41.277          | 1105.887        | 1101.882       | 0.795     | 1101.630       | G[40] |
| R[3]  | 90.814          | <b>1091.631</b> | 1087.627       | 1.087.879 | 1087.375       | R[39] |
| C[4]  | 105.070         | 1042.094        | 1038.090       | 1.038.342 | 1037.838       | C[38] |
| K[5]  | 137.993         | 1027.839        | 1023.834       | 1.024.086 | 1023.582       | K[37] |
| Q[6]  | 169.108         | 995.815         | 991.811        | 992.062   | 991.559        | Q[36] |
| G[7]  | 183.363         | 963.801         | 959.796        | 960.048   | 959.544        | G[35] |
| G[8]  | 197.619         | 949.545         | 945.541        | 945.792   | 945.289        | G[34] |
| K[9]  | 229.643         | 935.290         | 931.285        | 931.537   | 931.033        | K[33] |
| A[10] | 247.402         | 903.266         | 899.261        | 899.513   | 899.009        | A[32] |
| R[11] | 288.427         | 889.009         | 885.004        | 885.256   | 884.752        | R[31] |
| A[12] | 304.186         | 848.481         | 844.477        | 844.729   | 844.225        | A[30] |
| K[13] | 336.210         | 828.722         | 824.718        | 824.970   | 824.466        | K[29] |
| A[14] | 353.969         | 798.699         | 794.694        | 794.946   | 794.442        | A[28] |
| K[15] | 385.993         | 778.939         | 774.935        | 775.187   | 774.683        | K[27] |
| T[16] | 411.255         | 746.915         | 742.911        | 743.163   | 742.659        | T[26] |
| K[17] | 450.280         | 724.654         | 720.649        | 720.901   | 720.397        | K[25] |
| S[18] | 472.038         | 682.628         | 678.624        | 678.876   | 678.372        | S[24] |
| S[19] | 493.796         | 650.870         | 646.866        | 647.118   | 646.614        | S[23] |
| R[20] | 532.822         | 639.112         | 635.108        | 635.360   | 634.856        | R[22] |
| A[21] | 590.581         | 600.087         | 596.082        | 596.334   | 595.830        | A[21] |
| G[22] | 564.836         | 582.320         | 578.315        | 578.575   | 578.071        | G[20] |
| L[23] | 593.107         | 568.072         | 564.068        | 564.320   | 563.816        | L[19] |
| Q[24] | 625.122         | 539.867         | 535.862        | 536.109   | 535.545        | Q[18] |
| F[25] | 661.889         | 507.797         | 503.792        | 504.034   | 503.530        | F[17] |
| P[26] | 688.152         | 471.020         | 467.015        | 467.267   | 466.763        | P[16] |
| V[27] | 710.918         | 448.756         | 444.752        | 445.004   | 444.500        | V[15] |
| G[28] | 725.175         | 421.969         | <b>417.985</b> | 418.237   | <b>417.733</b> | G[14] |
| R[29] | 764.200         | 407.734         | 403.729        | 403.981   | 403.477        | R[13] |
| V[30] | 788.967         | 388.700         | 384.704        | 384.956   | 384.452        | V[12] |
| I[31] | 823.232         | 343.942         | 339.937        | 340.189   | 339.685        | I[11] |
| R[32] | 862.257         | 329.677         | 325.672        | 325.924   | 325.420        | R[10] |
| L[33] | 890.528         | 270.652         | 266.647        | 266.899   | 266.395        | L[9]  |
| L[34] | 918.799         | 247.381         | 243.376        | 243.628   | 243.124        | L[8]  |
| R[35] | 957.824         | 214.110         | 210.105        | 210.357   | 209.853        | R[7]  |
| K[36] | <b>989.848</b>  | 175.084         | 171.080        | 171.332   | 170.828        | K[6]  |
| C[37] | <b>1004.103</b> | 143.061         | 139.056        | 139.308   | 138.804        | C[5]  |
| N[38] | <b>1032.614</b> | 128.800         | 124.800        | 125.052   | 124.548        | N[4]  |
| V[39] | <b>1073.180</b> | 100.294         | 96.290         | 96.542    | 96.038         | V[3]  |
| S[40] | 1096.138        | 89.529          | 85.524         | 85.776    | 85.272         | S[2]  |
| E[41] | <b>1127.399</b> | 87.771          | 83.766         | 84.018    | 83.514         | E[1]  |

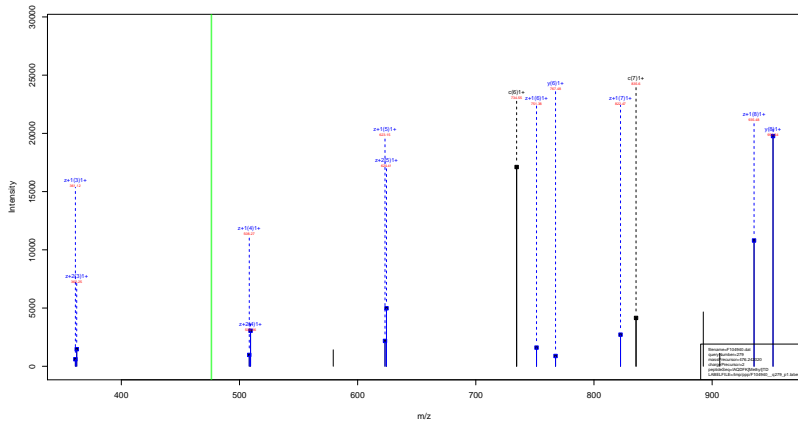

# sp | P68433 | H31\_MOUSE

IAQDFK<sup>Methyl</sup>TD  
14.02

- ▶ fragmentation table for charge state 1+
- ▶ specType=etd
- ▶ score=49.32
- ▶ F104940.dat
- ▶ query=q279\_p1
- ▶ precursor=476.242020
- ▶ chargePrecursor=2
- ▶ itol=0.8

| AA  | c              | y              | z+1            | z+2            | z       | AA  |
|-----|----------------|----------------|----------------|----------------|---------|-----|
| I 1 | 131.118        | <b>951.478</b> | <b>935.459</b> | 0.000          | 934.452 | I 8 |
| A 2 | 202.155        | 838.394        | <b>822.375</b> | 0.000          | 821.368 | A 7 |
| Q 3 | 330.214        | <b>767.357</b> | <b>751.338</b> | 752.346        | 750.330 | Q 6 |
| D 4 | 445.241        | 639.298        | <b>623.280</b> | <b>624.288</b> | 622.272 | D 5 |
| F 5 | 592.309        | 624.271        | <b>508.253</b> | <b>509.261</b> | 507.245 | F 4 |
| K 6 | <b>734.420</b> | 377.203        | <b>361.184</b> | <b>362.192</b> | 360.177 | K 3 |
| T 7 | <b>835.467</b> | 235.062        | 219.074        | 220.082        | 218.066 | T 2 |
| D 8 | 950.494        | 134.045        | 118.026        | 119.034        | 117.018 | D 1 |





# sp | P68433 | H31\_MOUSE

IAQDFK<sup>Methyl</sup>TD  
14.02

- ▶ fragmentation table for charge state 1+
- ▶ specType=etd
- ▶ score=41.92
- ▶ F104940.dat
- ▶ query=q280\_p1
- ▶ precursor=476.242790
- ▶ chargePrecursor=2
- ▶ itol=0.8

| AA  | c              | y              | z+1            | z+2            | z       | AA  |
|-----|----------------|----------------|----------------|----------------|---------|-----|
| I 1 | 131.118        | <b>951.478</b> | <b>935.459</b> | 0.000          | 934.452 | I 8 |
| A 2 | 202.155        | 838.394        | <b>822.375</b> | 0.000          | 821.368 | A 7 |
| Q 3 | 330.214        | <b>767.357</b> | <b>751.338</b> | 752.346        | 750.330 | Q 6 |
| D 4 | 445.241        | 639.298        | <b>623.280</b> | <b>624.288</b> | 622.272 | D 5 |
| F 5 | 592.309        | <b>524.271</b> | <b>508.253</b> | <b>509.261</b> | 507.245 | F 4 |
| K 6 | <b>734.420</b> | 377.203        | 361.184        | <b>362.192</b> | 360.177 | K 3 |
| T 7 | <b>835.467</b> | 235.092        | 219.074        | 220.082        | 218.066 | T 2 |
| D 8 | 950.494        | 134.045        | 118.026        | 119.034        | 117.018 | D 1 |

# sp | P27661 | H2AX\_MOUSE

SGR<sup>Trimethyl</sup><sub>42.05</sub> GKTGGKARAKAKSRSSRAGLQFPVGRVHLLRKGHYAE

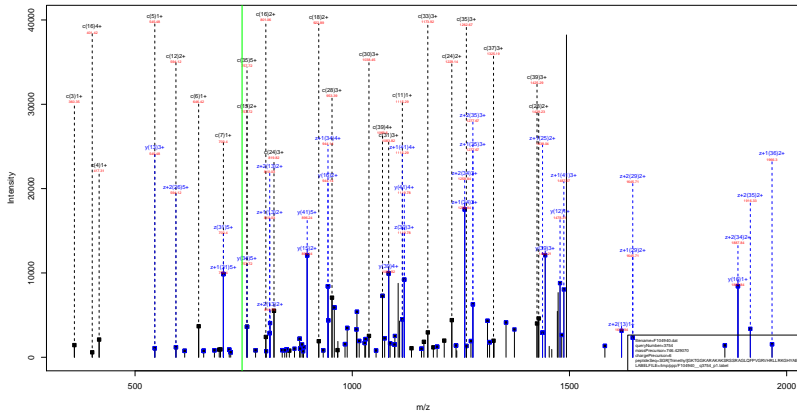

# sp | P27661 | H2AX\_MOUSE

SGR<sup>Trimethyl</sup><sub>42.05</sub> GKTGGKARAKAKSRSSRAGLQFPVGRVHLLRKGYAE

- ▶ fragmentation table for charge state 1+
- ▶ specType=etd
- ▶ score=61.83
- ▶ F104940.dat
- ▶ query=q3754\_p1
- ▶ precursor=746.429070
- ▶ chargePrecursor=6
- ▶ itol=0.8

| AA   | c               | y               | z+1            | z+2             | z               | AA   |
|------|-----------------|-----------------|----------------|-----------------|-----------------|------|
| S 1  | 105.068         | 4473.952        | 4457.533       | 0.000           | 4456.929        | S 41 |
| G 2  | 162.087         | 4388.519        | 4370.501       | 0.000           | 4369.493        | G 40 |
| R 3  | <b>360.235</b>  | 4329.408        | 4313.479       | 4314.487        | 4312.477        | R 39 |
| G 4  | <b>417.257</b>  | 4131.350        | 4115.331       | 4116.339        | 4114.323        | G 38 |
| K 5  | <b>545.352</b>  | 4074.326        | 4058.310       | 4059.318        | 4057.302        | K 37 |
| T 6  | <b>648.399</b>  | 3946.234        | 3930.215       | 3931.223        | 3929.207        | T 36 |
| G 7  | <b>703.421</b>  | 3845.185        | 3829.165       | 3830.175        | 3828.159        | G 35 |
| G 8  | 760.442         | 3788.164        | 3772.146       | 3773.153        | 3771.138        | G 34 |
| K 9  | <b>888.537</b>  | 3731.143        | 3715.124       | 3716.132        | 3714.116        | K 33 |
| A 10 | 959.574         | 3603.048        | 3587.029       | 3588.037        | 3586.021        | A 32 |
| R 11 | <b>1115.676</b> | 3532.011        | 3515.992       | 3517.000        | 3514.984        | R 31 |
| A 12 | <b>1188.713</b> | 3375.911        | 3359.891       | 3360.899        | 3358.883        | A 30 |
| R 13 | 1314.838        | 3304.873        | 3288.854       | 3289.862        | 3287.846        | R 29 |
| A 14 | 1385.845        | 3176.778        | 3160.759       | 3161.767        | 3159.751        | A 28 |
| K 15 | 1513.940        | 3105.741        | 3089.722       | 3090.730        | 3088.714        | K 27 |
| S 16 | 1600.972        | 2977.646        | 2961.627       | 2962.635        | 2960.619        | S 26 |
| R 17 | 1757.073        | 2890.614        | 2874.595       | 2875.603        | 2873.587        | R 25 |
| S 18 | 1844.108        | 2744.513        | 2728.494       | 2729.502        | 2727.486        | S 24 |
| S 19 | 1931.137        | 2647.480        | 2631.461       | 2632.470        | 2630.454        | S 23 |
| R 20 | 2087.238        | 2560.448        | 2544.430       | 2545.437        | 2543.421        | R 22 |
| A 21 | 2158.275        | 2404.347        | 2388.329       | 2389.336        | 2387.321        | A 21 |
| G 22 | 2215.297        | 2333.310        | 2317.291       | 2318.299        | 2316.284        | G 20 |
| L 23 | 2328.381        | 2278.280        | 2262.260       | 2263.270        | 2261.254        | L 19 |
| Q 24 | 2456.439        | 2163.259        | 2147.240       | 2148.248        | 2146.232        | Q 19 |
| F 25 | 2603.508        | 2035.146        | 2019.127       | 2020.135        | 2018.120        | F 17 |
| P 26 | 2700.560        | <b>1888.078</b> | 1872.059       | 1873.067        | 1871.051        | P 16 |
| V 27 | 2709.629        | 1791.025        | 1775.006       | 1776.014        | 1773.998        | V 15 |
| G 28 | 2856.650        | 1691.956        | 1675.938       | 1676.946        | 1674.930        | G 14 |
| R 29 | 2832.751        | 1534.878        | 1518.858       | <b>1619.824</b> | 1517.842        | R 13 |
| V 30 | 3111.820        | <b>1478.834</b> | 1462.814       | 1463.822        | 1461.807        | V 12 |
| H 31 | 3248.879        | 1319.765        | 1303.747       | 1304.755        | 1302.739        | H 11 |
| R 32 | 3404.980        | 1242.707        | 1226.688       | 1227.696        | 1225.680        | R 10 |
| L 33 | 3518.064        | <b>1086.605</b> | 1070.587       | 1071.595        | <b>1069.579</b> | L 9  |
| L 34 | 3631.148        | 973.521         | 957.503        | <b>958.510</b>  | 956.495         | L 8  |
| R 35 | 3787.249        | 860.431         | <b>844.419</b> | 845.426         | 843.411         | R 7  |
| K 36 | 3915.344        | 704.335         | 688.319        | 689.325         | 687.310         | K 6  |
| G 37 | 3972.366        | 576.241         | 560.221        | 561.230         | 559.215         | G 5  |
| H 38 | 4109.424        | 519.220         | 503.200        | 504.209         | 502.193         | H 4  |
| V 39 | 4272.488        | 382.161         | 366.143        | 367.150         | 365.134         | V 3  |
| A 40 | 4343.525        | 219.086         | 203.070        | 204.087         | 202.071         | A 2  |
| E 41 | 4472.587        | 148.060         | 132.043        | 133.050         | 131.034         | E 1  |

# sp | P27661 | H2AX\_MOUSE

SGR<sup>Trimethyl</sup><sub>42.05</sub> GKTGGKARAKAKSRSSRAGLQFPVGRVHLLRKGHYAE

- ▶ fragmentation table for charge state 2+
- ▶ specType=etd
- ▶ score=61.83
- ▶ F104940.dat
- ▶ query=q3754\_p1
- ▶ precursor=746.429070
- ▶ chargePrecursor=6
- ▶ itol=0.8

| AA   | c               | y              | z+1             | z+2             | z               | AA   |
|------|-----------------|----------------|-----------------|-----------------|-----------------|------|
| S 1  | 53.037          | 2337.279       | 2229.270        | 0.504           | 2228.766        | S 41 |
| G 2  | 61.547          | 2193.763       | 2185.754        | 0.504           | 2185.250        | G 40 |
| R 3  | 180.621         | 2105.953       | 2157.243        | 2157.747        | 2156.739        | R 39 |
| G 4  | 209.132         | 2096.179       | 2058.169        | 2058.673        | 2057.665        | G 38 |
| K 5  | 273.180         | 2037.668       | 2009.659        | 2009.162        | 2009.155        | K 37 |
| T 6  | 323.903         | 1973.620       | <b>1965.611</b> | <b>1966.115</b> | 1966.107        | T 36 |
| G 7  | 352.214         | 1923.997       | 1915.988        | <b>1915.591</b> | 1914.582        | G 35 |
| G 8  | 380.725         | 1894.586       | 1886.576        | <b>1887.080</b> | 1886.073        | G 34 |
| K 9  | 444.172         | 1866.075       | <b>1858.066</b> | 1858.570        | <b>1857.562</b> | K 33 |
| A 10 | 480.291         | 1802.028       | 1794.018        | 1794.522        | 1793.514        | A 32 |
| R 11 | 521.343         | 1756.509       | 1738.500        | 1739.004        | 1737.996        | R 31 |
| A 12 | <b>591.860</b>  | 1698.459       | 1689.449        | 1689.953        | 1689.945        | A 30 |
| R 13 | <b>657.507</b>  | 1652.940       | <b>1644.931</b> | <b>1645.435</b> | 1644.427        | R 29 |
| A 14 | <b>693.426</b>  | 1588.892       | <b>1580.883</b> | <b>1581.387</b> | 1580.379        | A 28 |
| K 15 | <b>757.474</b>  | 1503.374       | 1545.365        | 1545.868        | 1544.861        | K 27 |
| S 16 | <b>800.990</b>  | 1489.326       | 1481.317        | <b>1481.821</b> | 1480.813        | S 26 |
| R 17 | <b>879.040</b>  | 1445.810       | <b>1437.801</b> | <b>1438.305</b> | <b>1437.297</b> | R 25 |
| S 18 | <b>922.550</b>  | 1397.760       | 1389.750        | 1389.754        | 1389.744        | S 24 |
| S 19 | <b>966.072</b>  | 1324.244       | <b>1316.234</b> | <b>1316.738</b> | <b>1315.731</b> | S 23 |
| R 20 | 1044.123        | 1280.728       | <b>1272.718</b> | <b>1273.222</b> | 1272.215        | R 22 |
| A 21 | 1079.641        | 1202.677       | <b>1194.668</b> | <b>1195.172</b> | 1194.164        | A 21 |
| G 22 | 1108.152        | 1167.159       | <b>1159.149</b> | <b>1159.653</b> | <b>1158.645</b> | G 20 |
| L 23 | <b>1164.694</b> | 1126.648       | 1118.639        | 1117.643        | 1116.151        | L 19 |
| G 24 | <b>1228.723</b> | 1082.106       | <b>1074.097</b> | <b>1074.601</b> | 1073.593        | G 19 |
| F 25 | 1402.257        | 1018.077       | <b>1010.067</b> | <b>1010.571</b> | <b>1009.563</b> | F 17 |
| P 26 | 1350.784        | <b>944.542</b> | 938.533         | 937.037         | 936.029         | P 16 |
| V 27 | 1400.318        | <b>896.016</b> | <b>888.007</b>  | <b>888.511</b>  | <b>887.503</b>  | V 15 |
| G 28 | <b>1428.829</b> | 846.482        | <b>838.473</b>  | <b>838.976</b>  | 837.969         | G 14 |
| R 29 | 1500.879        | 817.974        | <b>809.962</b>  | <b>810.466</b>  | <b>809.458</b>  | R 13 |
| V 30 | 1586.414        | 739.923        | 733.913         | 732.415         | 731.407         | V 12 |
| H 31 | 1624.943        | 690.385        | <b>682.377</b>  | <b>682.881</b>  | 681.873         | H 11 |
| R 32 | 1702.994        | 611.857        | <b>613.848</b>  | <b>614.351</b>  | 613.344         | R 10 |
| L 33 | 1759.536        | 543.808        | 535.797         | 536.301         | 535.293         | L 9  |
| L 34 | 1816.078        | 487.264        | 479.255         | 479.759         | 478.751         | L 8  |
| R 35 | 1894.228        | 436.722        | 427.713         | 423.217         | 422.209         | R 7  |
| K 36 | 1958.176        | 352.672        | 344.662         | 345.166         | 344.158         | K 6  |
| G 37 | 1986.686        | 288.624        | 280.615         | 281.119         | 280.111         | G 5  |
| H 38 | 2065.216        | 260.114        | 252.104         | 252.608         | 251.600         | H 4  |
| V 39 | 2136.748        | 191.984        | 183.975         | 184.079         | 183.071         | V 3  |
| A 40 | 2172.266        | 110.052        | 102.043         | 102.547         | 101.539         | A 2  |
| E 41 | 2236.787        | 74.534         | 66.524          | 67.028          | 66.021          | E 1  |

# sp | P27661 | H2AX\_MOUSE

SGR<sup>Trimethyl</sup><sub>42.05</sub> GKTGGKARAKAKSRSSRAGLQFPVGRVHLLLRKGHYAE

- ▶ fragmentation table for charge state 3+
- ▶ specType=etd
- ▶ score=61.83
- ▶ F104940.dat
- ▶ query=q3754\_p1
- ▶ precursor=746.429070
- ▶ chargePrecursor=6
- ▶ itol=0.8

| AA | c  | y               | #s1             | #s2             | z               | AA              |       |
|----|----|-----------------|-----------------|-----------------|-----------------|-----------------|-------|
| S  | 1  | 35.693          | 1491.833        | <b>1486.516</b> | 0.872           | 1488.187        | S[41] |
| G  | 2  | 54.702          | 1462.845        | 1457.505        | 0.872           | 1457.160        | G[40] |
| R  | 3  | 130.750         | <b>1443.838</b> | <b>1438.498</b> | <b>1438.834</b> | <b>1438.162</b> | R[39] |
| G  | 4  | 139.757         | 1377.788        | 1372.449        | <b>1372.785</b> | 1372.111        | G[38] |
| K  | 5  | 182.455         | 1338.781        | <b>1353.441</b> | <b>1353.777</b> | 1353.105        | K[37] |
| T  | 6  | 216.138         | <b>1316.083</b> | <b>1310.743</b> | <b>1311.079</b> | 1310.401        | T[36] |
| G  | 7  | 255.145         | 1268.64         | <b>1277.061</b> | <b>1277.397</b> | 1276.723        | G[35] |
| G  | 8  | 254.152         | <b>1263.393</b> | <b>1258.053</b> | <b>1258.389</b> | 1257.717        | G[34] |
| K  | 9  | 296.651         | 1244.388        | <b>1239.046</b> | <b>1239.382</b> | <b>1238.710</b> | K[33] |
| A  | 10 | 320.530         | 1201.688        | 1196.348        | 1196.684        | <b>1196.012</b> | A[32] |
| R  | 11 | 372.563         | 1178.008        | 1172.669        | 1173.005        | 1172.333        | R[31] |
| A  | 12 | 389.592         | 1128.935        | 1123.595        | 1123.931        | <b>1123.259</b> | A[30] |
| R  | 13 | 438.941         | 1102.296        | <b>1096.956</b> | <b>1097.292</b> | <b>1096.620</b> | R[29] |
| A  | 14 | 482.620         | 1059.597        | <b>1054.258</b> | <b>1054.594</b> | 1053.922        | A[28] |
| K  | 15 | 509.318         | 1035.918        | <b>1030.579</b> | <b>1030.915</b> | <b>1030.243</b> | K[27] |
| S  | 16 | 534.320         | 993.220         | <b>987.880</b>  | <b>988.216</b>  | <b>987.545</b>  | S[26] |
| R  | 17 | 586.362         | 984.200         | <b>958.870</b>  | <b>959.206</b>  | <b>958.534</b>  | R[25] |
| S  | 18 | 618.378         | 932.376         | 926.935         | 927.271         | 926.600         | S[24] |
| S  | 19 | 644.384         | 883.165         | 877.825         | <b>878.161</b>  | 877.489         | S[23] |
| R  | 20 | <b>696.418</b>  | 854.154         | <b>848.815</b>  | <b>849.151</b>  | <b>848.479</b>  | R[22] |
| A  | 21 | <b>720.097</b>  | <b>802.121</b>  | 796.781         | 797.117         | 796.445         | A[21] |
| G  | 22 | 739.104         | 778.442         | 773.102         | 773.438         | 772.766         | G[20] |
| L  | 23 | <b>776.798</b>  | 759.434         | 754.092         | 754.428         | 753.756         | L[19] |
| Q  | 24 | <b>819.485</b>  | 721.740         | <b>716.400</b>  | <b>716.736</b>  | <b>716.064</b>  | Q[18] |
| F  | 25 | 868.507         | 679.054         | 673.714         | 674.050         | 673.378         | F[17] |
| F  | 26 | 900.858         | 630.031         | 624.691         | 625.027         | 624.355         | F[16] |
| V  | 27 | <b>933.881</b>  | 597.680         | 592.340         | 592.676         | 592.004         | V[15] |
| G  | 28 | <b>952.888</b>  | 556.051         | 550.711         | 551.047         | 550.375         | G[14] |
| R  | 29 | 1004.929        | <b>545.650</b>  | 540.310         | 540.646         | 539.974         | R[13] |
| V  | 30 | <b>1037.945</b> | 491.616         | 486.277         | 486.613         | 485.941         | V[12] |
| H  | 31 | <b>1083.631</b> | 460.593         | 455.254         | 455.590         | 454.918         | H[11] |
| R  | 32 | <b>1135.665</b> | 414.907         | 409.567         | 409.903         | 409.231         | R[10] |
| L  | 33 | <b>1173.360</b> | 362.872         | 357.534         | 357.870         | 357.198         | L[9]  |
| L  | 34 | <b>1211.054</b> | 328.178         | 322.839         | 323.175         | 322.503         | L[8]  |
| R  | 35 | <b>1263.088</b> | 287.484         | 282.144         | 282.480         | 281.808         | R[7]  |
| K  | 36 | 1305.788        | 235.460         | 230.121         | 230.447         | 229.775         | K[6]  |
| G  | 37 | <b>1324.793</b> | 192.752         | 187.412         | 187.748         | 187.076         | G[5]  |
| H  | 38 | 1370.480        | 173.745         | 168.405         | 168.741         | 168.069         | H[4]  |
| V  | 39 | <b>1424.834</b> | 128.098         | 122.758         | 123.094         | 122.422         | V[3]  |
| A  | 40 | 1448.513        | 83.304          | 77.964          | 78.300          | 77.628          | A[2]  |
| E  | 41 | 1491.527        | 50.025          | 44.685          | 45.021          | 44.349          | E[1]  |

# sp | P27661 | H2AX\_MOUSE

SGR<sup>Trimethyl</sup><sub>42.05</sub> GKTGGKARAKAKSRSSRAGLQFPVGRVHLLLRKGHYAE

- ▶ fragmentation table for charge state 4+
- ▶ specType=etd
- ▶ score=61.83
- ▶ F104940.dat
- ▶ query=q3754\_p1
- ▶ precursor=746.429070
- ▶ chargePrecursor=6
- ▶ itol=0.8

| AA | c  | y               | #s1             | #s2             | z               | AA              |       |
|----|----|-----------------|-----------------|-----------------|-----------------|-----------------|-------|
| S  | 1  | 217.022         | <b>1119.143</b> | <b>1115.139</b> | 0.765           | <b>1114.887</b> | S[41] |
| G  | 2  | 41.277          | <b>1097.385</b> | 1063.361        | 0.765           | 1025.120        | G[40] |
| R  | 3  | 90.814          | <b>1083.130</b> | 1079.125        | 1079.377        | 1078.871        | R[39] |
| G  | 4  | 109.070         | 1033.593        | <b>1029.588</b> | 1029.840        | <b>1029.336</b> | G[38] |
| K  | 5  | 137.093         | 1019.139        | <b>1015.333</b> | <b>1015.585</b> | 1015.081        | K[37] |
| T  | 6  | 162.255         | 997.314         | <b>983.309</b>  | <b>983.561</b>  | <b>983.057</b>  | T[36] |
| G  | 7  | 178.811         | 952.052         | <b>958.047</b>  | <b>958.299</b>  | 957.795         | G[35] |
| G  | 8  | 190.856         | 947.797         | <b>943.792</b>  | <b>944.044</b>  | <b>943.540</b>  | G[34] |
| K  | 9  | 222.890         | <b>933.541</b>  | 929.537         | 929.788         | 929.285         | K[33] |
| A  | 10 | 240.649         | 901.517         | 897.513         | 897.765         | 897.261         | A[32] |
| R  | 11 | 279.674         | <b>883.758</b>  | <b>879.753</b>  | <b>880.005</b>  | <b>879.502</b>  | R[31] |
| A  | 12 | 297.438         | <b>844.733</b>  | 840.728         | 840.980         | 840.476         | A[30] |
| K  | 13 | 329.457         | 826.974         | 822.969         | 823.221         | 822.717         | K[29] |
| A  | 14 | 347.217         | 794.950         | 790.945         | 791.197         | 790.693         | A[28] |
| K  | 15 | 379.240         | <b>777.191</b>  | 773.186         | 773.438         | 772.934         | K[27] |
| S  | 16 | <b>400.998</b>  | 745.167         | 741.162         | 741.414         | 740.910         | S[26] |
| R  | 17 | 440.224         | 723.409         | <b>719.404</b>  | <b>719.656</b>  | 719.152         | R[25] |
| S  | 18 | 483.782         | 694.384         | 690.379         | 690.631         | 690.127         | S[24] |
| S  | 19 | 483.540         | 662.626         | <b>658.621</b>  | 658.873         | <b>658.369</b>  | S[23] |
| R  | 20 | 522.595         | 640.868         | 636.863         | 637.115         | 636.611         | R[22] |
| A  | 21 | 540.324         | 601.842         | 597.837         | 598.090         | 597.586         | A[21] |
| C  | 22 | 554.580         | 584.087         | 580.078         | 580.330         | 579.826         | C[20] |
| L  | 23 | 572.883         | 609.826         | 605.823         | 606.075         | 605.571         | L[19] |
| Q  | 24 | <b>614.865</b>  | 543.557         | 537.552         | 537.804         | 537.300         | Q[18] |
| F  | 25 | 651.632         | 500.542         | 506.537         | 505.789         | 505.285         | F[17] |
| F  | 26 | 678.996         | 472.775         | 468.770         | 469.022         | 468.518         | F[16] |
| V  | 27 | 700.663         | 448.512         | 444.507         | 444.759         | 444.255         | V[15] |
| C  | 28 | 724.018         | 422.745         | 419.740         | 419.992         | 419.488         | C[14] |
| R  | 29 | 753.943         | 409.809         | 405.805         | 406.739         | 405.231         | R[13] |
| V  | 30 | 778.710         | 370.464         | 366.459         | 366.711         | 366.207         | V[12] |
| H  | 31 | 812.975         | 345.697         | 341.692         | 341.944         | 341.440         | H[11] |
| R  | 32 | 852.000         | 311.432         | 307.427         | 307.679         | 307.175         | R[10] |
| L  | 33 | <b>880.271</b>  | 272.407         | 268.402         | 268.654         | 268.150         | L[9]  |
| L  | 34 | 885.947         | 244.178         | 240.173         | 240.893         | 239.870         | L[8]  |
| R  | 35 | 947.598         | 215.885         | 211.880         | 212.112         | 211.605         | R[7]  |
| K  | 36 | 979.591         | 176.840         | 172.835         | 173.087         | 172.583         | K[6]  |
| G  | 37 | 993.647         | 144.816         | 140.811         | 141.063         | 140.559         | G[5]  |
| H  | 38 | <b>1028.112</b> | 130.560         | 126.556         | 126.808         | 126.304         | H[4]  |
| V  | 39 | <b>1068.877</b> | 96.296          | 92.291          | 92.543          | 92.039          | V[3]  |
| A  | 40 | <b>1086.637</b> | 58.130          | 54.125          | 54.377          | 53.873          | A[2]  |
| E  | 41 | 1118.897        | 37.771          | 33.766          | 34.018          | 33.514          | E[1]  |

# sp | P27661 | H2AX\_MOUSE

SGR<sup>Trimethyl</sup><sub>42.05</sub> GKTGGKARAKAKSRSSRAGLQFPVGRVHLLLRKGYAE

- ▶ fragmentation table for charge state 5+
- ▶ specType=etd
- ▶ score=61.83
- ▶ F104940.dat
- ▶ query=q3754\_p1
- ▶ precursor=746.429070
- ▶ chargePrecursor=6
- ▶ itol=0.8

| AA    | c              | y              | z+1            | z#2            | z              | AA    |
|-------|----------------|----------------|----------------|----------------|----------------|-------|
| S[1]  | 21.819         | <b>895.516</b> | 892.312        | 0.806          | 892.111        | S[41] |
| G[2]  | 33.223         | 878.110        | 874.906        | 0.806          | 874.704        | G[40] |
| R[3]  | 72.853         | <b>866.705</b> | 863.502        | 863.703        | 863.300        | R[39] |
| G[4]  | 84.257         | 827.076        | 823.872        | 824.074        | 823.671        | G[38] |
| K[5]  | 109.876        | 815.672        | 812.468        | 812.669        | 812.266        | K[37] |
| T[6]  | 130.086        | 790.053        | 786.849        | 787.050        | 786.647        | T[36] |
| G[7]  | 141.490        | 769.843        | 766.639        | 766.841        | 766.438        | G[35] |
| G[8]  | 152.894        | <b>758.439</b> | 755.235        | 755.437        | 755.033        | G[34] |
| K[9]  | 178.513        | 747.038        | 743.833        | 744.032        | 743.629        | K[33] |
| A[10] | 192.721        | 721.415        | 718.212        | 718.413        | 718.010        | A[32] |
| R[11] | 223.941        | 707.206        | <b>704.004</b> | 704.206        | <b>703.803</b> | R[31] |
| A[12] | 238.148        | 675.988        | 672.784        | 672.986        | 672.582        | A[30] |
| K[13] | 263.767        | 661.780        | <b>658.577</b> | <b>658.778</b> | <b>658.375</b> | K[29] |
| A[14] | 277.975        | 636.161        | 632.958        | 633.159        | 632.756        | A[28] |
| K[15] | 303.594        | 621.954        | 618.750        | 618.952        | 618.549        | K[27] |
| S[16] | 321.000        | 596.335        | 593.131        | <b>593.333</b> | 592.930        | S[26] |
| R[17] | 352.220        | 578.929        | 575.725        | 575.926        | 575.523        | R[25] |
| S[18] | 389.627        | 547.708        | 544.503        | <b>544.706</b> | 544.303        | S[24] |
| S[19] | 397.033        | 530.302        | 527.098        | 527.299        | 526.897        | S[23] |
| R[20] | 418.253        | 512.895        | 509.692        | 509.893        | 509.490        | R[22] |
| A[21] | 432.461        | 481.675        | 478.472        | 478.673        | 478.270        | A[21] |
| G[22] | 443.865        | 467.468        | 464.264        | 464.466        | 464.063        | G[20] |
| L[23] | 466.482        | 456.064        | 452.860        | 453.061        | 452.658        | L[19] |
| Q[24] | 492.094        | 433.447        | 430.243        | 430.445        | 430.041        | Q[18] |
| F[25] | 521.507        | 407.835        | 404.631        | 404.833        | 404.430        | F[17] |
| P[26] | 540.618        | 378.421        | 375.218        | 375.419        | 375.016        | P[16] |
| V[27] | 560.732        | 359.011        | 355.807        | 356.009        | 355.605        | V[15] |
| G[28] | 572.136        | 339.191        | 335.987        | 336.189        | 335.782        | G[14] |
| R[29] | 603.356        | 327.793        | 324.589        | 324.791        | 324.388        | R[13] |
| V[30] | 623.170        | 296.573        | 293.369        | 293.570        | 293.167        | V[12] |
| H[31] | 650.582        | 276.759        | 273.555        | 273.757        | 273.354        | H[11] |
| R[32] | 681.802        | 249.347        | 246.143        | 246.345        | 245.942        | R[10] |
| L[33] | 704.419        | 218.127        | 214.923        | 215.125        | 214.722        | L[9]  |
| L[34] | 727.035        | 195.510        | 192.306        | 192.508        | 192.105        | L[8]  |
| R[35] | <b>758.256</b> | 172.893        | 169.689        | 169.891        | 169.488        | R[7]  |
| K[36] | 783.875        | 141.673        | 138.469        | 138.671        | 138.268        | K[6]  |
| G[37] | 795.279        | 116.054        | 112.850        | 113.052        | 112.649        | G[5]  |
| H[38] | 822.691        | 104.650        | 101.446        | 101.648        | 101.244        | H[4]  |
| V[39] | <b>855.303</b> | 77.235         | 74.034         | 74.236         | 73.833         | V[3]  |
| A[40] | 869.511        | 44.825         | 41.622         | 41.823         | 41.420         | A[2]  |
| E[41] | 895.319        | 30.418         | 27.214         | 27.416         | 27.013         | E[1]  |

# sp | Q6GSS7 | H2A2A\_MOUSE

SGR<sup>Trimethyl</sup><sub>42.05</sub> GKQGKARAKAKSRSSRAGLQFPVGRVHLLRKGNYAE

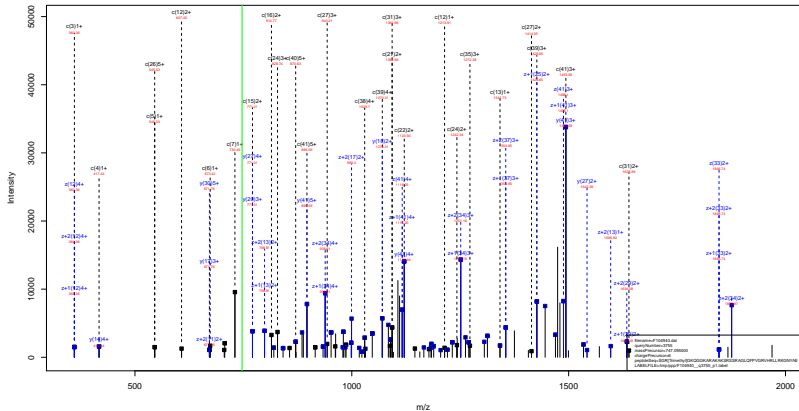



# sp | Q6GSS7 | H2A2A\_MOUSE

SGR<sup>Trimethyl</sup><sub>42.05</sub> GKQGGKARAKAKSRSSRAGLQFPVGRVHLLLRKGN<sup>YAE</sup>

- ▶ fragmentation table for charge state 1+
- ▶ specType=etd
- ▶ score=48.69
- ▶ F104940.dat
- ▶ query=q3755\_p1
- ▶ precursor=747.095500
- ▶ chargePrecursor=6
- ▶ itol=0.8

| AA | c  | y               | #±1             | #±2             | z               | AA              |       |
|----|----|-----------------|-----------------|-----------------|-----------------|-----------------|-------|
| S  | 1  | 105.960         | 4477.546        | 4461.531        | 4.800           | 4460.525        | S[41] |
| G  | 2  | 102.087         | 4390.514        | 4374.499        | 0.000           | 4373.484        | G[40] |
| R  | 3  | <b>360.235</b>  | 4333.493        | 4317.474        | 4318.482        | 4318.460        | R[39] |
| G  | 4  | <b>417.257</b>  | 4135.345        | 4119.320        | 4120.334        | 4118.310        | G[38] |
| K  | 5  | <b>545.352</b>  | 4078.323        | 4062.305        | 4063.313        | 4061.297        | K[37] |
| G  | 6  | <b>673.410</b>  | 3950.228        | 3934.210        | 3935.218        | 3933.202        | G[36] |
| G  | 7  | <b>730.432</b>  | 3922.170        | 3899.151        | 3907.159        | 3895.141        | G[35] |
| G  | 8  | 787.453         | 3765.148        | 3749.130        | 3750.138        | 3748.122        | G[34] |
| K  | 9  | <b>915.548</b>  | 3708.127        | 3692.108        | 3693.116        | 3691.100        | K[33] |
| A  | 10 | <b>980.585</b>  | 3580.032        | 3564.013        | 3565.021        | 3563.005        | A[32] |
| R  | 11 | 1142.687        | 3538.995        | 3492.976        | 3493.984        | 3491.968        | R[31] |
| A  | 12 | <b>1213.724</b> | 3382.984        | 3336.965        | 3337.973        | 3335.957        | A[30] |
| K  | 13 | <b>1341.819</b> | 3281.857        | 3265.838        | 3266.846        | 3264.830        | K[29] |
| A  | 14 | 1442.858        | 3153.762        | 3137.743        | 3138.751        | 3136.735        | A[28] |
| K  | 15 | 1540.951        | 3022.725        | 3006.706        | 3007.714        | 3005.699        | K[27] |
| S  | 16 | 1627.003        | 2954.630        | 2938.611        | 2939.619        | 2937.603        | S[26] |
| R  | 17 | 1784.084        | 2897.598        | 2881.579        | 2882.587        | 2880.571        | R[25] |
| S  | 18 | 1871.116        | 2713.496        | 2696.478        | 2696.486        | 2694.470        | S[24] |
| S  | 19 | 1958.148        | 2634.464        | 2608.446        | 2609.454        | 2607.438        | S[23] |
| R  | 20 | 2114.349        | 2537.432        | 2521.414        | 2522.422        | 2520.406        | R[22] |
| A  | 21 | 2185.388        | 2381.311        | 2365.293        | 2366.300        | 2364.284        | A[21] |
| G  | 22 | 2242.308        | 2310.294        | 2294.275        | 2295.283        | 2293.267        | G[20] |
| L  | 23 | 2355.362        | 2253.271        | 2237.254        | 2238.262        | 2236.246        | L[19] |
| Q  | 24 | 2463.450        | 2140.185        | 2124.170        | 2125.178        | 2123.162        | Q[18] |
| F  | 25 | 2630.519        | 2012.130        | 1996.111        | 1997.119        | 1995.104        | F[17] |
| F  | 26 | 2727.571        | 1895.062        | 1849.043        | 1850.051        | 1848.035        | F[16] |
| V  | 27 | 2826.640        | 1768.009        | 1751.990        | 1752.998        | 1750.982        | V[15] |
| G  | 28 | 2883.661        | 1698.945        | 1682.925        | 1683.933        | 1681.914        | G[14] |
| K  | 29 | 3039.763        | 1611.919        | 1595.900        | <b>1596.908</b> | 1594.890        | K[13] |
| V  | 30 | 3138.811        | 1455.815        | 1439.799        | 1440.807        | 1438.791        | V[12] |
| H  | 31 | 3275.890        | 1358.749        | 1340.731        | <b>1341.739</b> | 1339.723        | H[11] |
| R  | 32 | 3431.991        | <b>1219.691</b> | 1203.672        | <b>1204.680</b> | 1202.664        | R[10] |
| L  | 33 | 3545.075        | 1083.589        | <b>1047.571</b> | 1048.579        | <b>1046.563</b> | L[9]  |
| L  | 34 | 3688.150        | 958.505         | <b>934.487</b>  | 935.495         | <b>933.479</b>  | L[8]  |
| R  | 35 | 3814.262        | 837.422         |                 | 822.410         | <b>820.392</b>  | R[7]  |
| K  | 36 | 3942.355        | 681.320         | 665.302         | 666.309         | 664.294         | K[6]  |
| G  | 37 | 3999.376        | 553.225         | 537.207         | 538.214         | 536.199         | G[5]  |
| N  | 38 | 4113.419        | 496.204         | 480.185         | 481.193         | 479.177         | N[4]  |
| V  | 39 | 4276.463        | 382.161         | 366.142         | 367.150         | 365.134         | V[3]  |
| A  | 40 | 4387.500        | 219.096         | 203.079         | 204.086         | 202.070         | A[2]  |
| E  | 41 | 4476.562        | 148.060         | 132.042         | 133.050         | 131.034         | E[1]  |

# sp | Q6GSS7 | H2A2A\_MOUSE

SGR<sup>Trimethyl</sup><sub>42.05</sub> GKQGGKARAKAKSRSSRAGLQFPVGRVHLLLRKGN<sup>YAE</sup>

- ▶ fragmentation table for charge state 2+
- ▶ specType=etd
- ▶ score=48.69
- ▶ F104940.dat
- ▶ query=q3755\_p1
- ▶ precursor=747.095500
- ▶ chargePrecursor=6
- ▶ itol=0.8

| AA | c  | y               | #±1             | #±2             | z               | AA              |       |
|----|----|-----------------|-----------------|-----------------|-----------------|-----------------|-------|
| S  | 1  | 513.037         | 2239.271        | 2231.267        | 0.804           | 2230.761        | S[41] |
| G  | 2  | 81.547          | 2195.761        | 2187.751        | 0.804           | 2187.240        | G[40] |
| R  | 3  | 180.621         | 2167.250        | 2159.241        | 2159.945        | 2158.737        | R[39] |
| G  | 4  | 209.132         | 2098.176        | 2090.167        | 2090.671        | 2099.663        | G[38] |
| K  | 5  | 273.180         | 2039.665        | 2031.656        | 2032.160        | 2031.152        | K[37] |
| G  | 6  | 337.209         | 1975.618        | 1967.608        | 1968.112        | 1967.105        | G[36] |
| G  | 7  | 385.720         | 1911.589        | 1903.579        | 1904.083        | 1903.075        | G[35] |
| G  | 8  | 394.230         | 1883.078        | 1875.068        | <b>1875.572</b> | 1874.565        | G[34] |
| K  | 9  | 458.278         | 1854.567        | <b>1846.558</b> | <b>1847.062</b> | <b>1846.054</b> | K[33] |
| A  | 10 | 493.796         | 1790.520        | 1782.510        | 1783.014        | 1782.006        | A[32] |
| R  | 11 | 571.847         | 1735.001        | 1726.992        | 1727.496        | 1726.488        | R[31] |
| A  | 12 | <b>607.365</b>  | 1678.961        | 1669.951        | 1669.456        | 1668.449        | A[30] |
| K  | 13 | <b>671.413</b>  | 1641.433        | <b>1633.423</b> | <b>1633.927</b> | 1632.919        | K[29] |
| A  | 14 | <b>706.931</b>  | 1577.384        | 1569.375        | 1569.879        | 1568.871        | A[28] |
| K  | 15 | <b>770.979</b>  | <b>1541.866</b> | <b>1533.857</b> | <b>1534.360</b> | 1533.351        | K[27] |
| S  | 16 | <b>814.495</b>  | 1477.818        | <b>1469.809</b> | <b>1470.313</b> | <b>1469.305</b> | S[26] |
| R  | 17 | 862.546         | 1434.302        | <b>1426.293</b> | <b>1426.797</b> | 1425.789        | R[25] |
| S  | 18 | 938.602         | 1359.263        | 1349.243        | 1350.746        | 1349.739        | S[24] |
| S  | 19 | <b>979.578</b>  | <b>1312.736</b> | 1304.726        | <b>1305.230</b> | 1304.223        | S[23] |
| R  | 20 | 1057.628        | <b>1269.220</b> | 1261.210        | <b>1261.714</b> | 1260.707        | R[22] |
| A  | 21 | <b>1093.147</b> | 1191.169        | <b>1183.160</b> | <b>1183.664</b> | <b>1182.656</b> | A[21] |
| G  | 22 | <b>1121.657</b> | 1135.051        | 1127.041        | 1128.545        | 1127.537        | G[20] |
| L  | 23 | <b>1178.199</b> | 1127.140        | 1119.130        | 1119.634        | 1118.627        | L[19] |
| Q  | 24 | <b>1242.229</b> | <b>1070.598</b> | 1062.588        | 1063.093        | 1062.085        | Q[18] |
| F  | 25 | 1315.763        | 1006.590        | <b>998.559</b>  | <b>999.063</b>  | <b>998.055</b>  | F[17] |
| F  | 26 | 1364.289        | <b>933.034</b>  | 925.025         | 925.529         | 924.521         | F[16] |
| V  | 27 | <b>1413.824</b> | <b>884.508</b>  | 876.499         | 877.003         | 875.995         | V[15] |
| G  | 28 | 1442.134        | 834.974         | 826.964         | 827.468         | 826.461         | G[14] |
| R  | 29 | 1520.305        | 806.483         | <b>798.454</b>  | <b>798.958</b>  | 797.950         | R[13] |
| V  | 30 | 1569.819        | 728.413         | 720.403         | 720.907         | 719.899         | V[12] |
| H  | 31 | <b>1638.448</b> | 678.878         | 670.868         | <b>671.373</b>  | 670.365         | H[11] |
| R  | 32 | 1716.499        | 610.349         | 602.340         | 602.843         | 601.835         | R[10] |
| L  | 33 | 1773.041        | 532.269         | 524.260         | 524.763         | 523.755         | L[9]  |
| L  | 34 | 1839.583        | 478.756         | 469.747         | 469.251         | 468.243         | L[8]  |
| R  | 35 | 1907.634        | 419.234         | 411.225         | 411.729         | 410.721         | R[7]  |
| K  | 36 | 1971.681        | 341.164         | 333.154         | 333.658         | 332.650         | K[6]  |
| G  | 37 | 2000.192        | 277.116         | 269.107         | 269.611         | 268.603         | G[5]  |
| M  | 38 | 2057.213        | 248.606         | 240.596         | 241.100         | 240.092         | M[4]  |
| V  | 39 | 2136.745        | 181.564         | 183.575         | 184.079         | 183.071         | V[3]  |
| A  | 40 | 2114.264        | 110.024         | 102.013         | 102.517         | 101.509         | A[2]  |
| E  | 41 | 2238.785        | 74.534          | 66.524          | 67.028          | 66.021          | E[1]  |

# sp | Q6GSS7 | H2A2A\_MOUSE

SGR<sup>Trimethyl</sup><sub>42.05</sub> GKQGGKARAKAKSRSSRAGLQFPVGRVHLLLRKGN<sup>YAE</sup>

- ▶ fragmentation table for charge state 3+
- ▶ specType=etd
- ▶ score=48.69
- ▶ F104940.dat
- ▶ query=q3755\_p1
- ▶ precursor=747.095500
- ▶ chargePrecursor=6
- ▶ itol=0.8

| AA |    | c               | y               | #s1             | #s2             | #s              | AA   |
|----|----|-----------------|-----------------|-----------------|-----------------|-----------------|------|
| S  | 1  | 35.693          | <b>1493.187</b> | <b>1487.847</b> | 0.872           | <b>1487.511</b> | S(4) |
| G  | 2  | 54.702          | 1486.175        | 1458.837        | 0.872           | 1458.501        | G(4) |
| R  | 3  | 130.750         | <b>1445.169</b> | 1439.830        | 1440.866        | 1439.494        | R(3) |
| G  | 4  | 139.757         | 1379.120        | 1373.780        | 1374.816        | 1373.444        | G(3) |
| K  | 5  | 182.455         | 1360.113        | <b>1354.773</b> | <b>1355.109</b> | <b>1354.437</b> | K(3) |
| G  | 6  | 225.142         | 1317.414        | <b>1312.075</b> | <b>1312.411</b> | <b>1311.779</b> | G(3) |
| G  | 7  | 284.189         | 1274.725        | <b>1269.389</b> | <b>1269.725</b> | <b>1269.053</b> | G(3) |
| G  | 8  | 283.156         | 1255.721        | <b>1250.381</b> | <b>1250.717</b> | 1250.045        | G(3) |
| K  | 9  | 305.654         | 1236.714        | <b>1231.374</b> | <b>1231.710</b> | <b>1231.038</b> | K(3) |
| A  | 10 | 329.513         | 1194.016        | <b>1188.676</b> | <b>1189.012</b> | <b>1188.340</b> | A(3) |
| R  | 11 | 381.567         | 1170.336        | 1154.907        | <b>1165.333</b> | 1164.661        | R(3) |
| A  | 12 | 485.266         | 1118.303        | 1113.903        | 1113.906        | 1113.909        | A(3) |
| R  | 13 | 447.944         | 1094.624        | <b>1089.284</b> | <b>1089.620</b> | <b>1088.948</b> | R(3) |
| A  | 14 | 471.623         | 1051.925        | <b>1046.586</b> | <b>1046.922</b> | 1046.550        | A(3) |
| K  | 15 | 514.322         | 1028.246        | <b>1022.907</b> | <b>1023.243</b> | <b>1022.571</b> | K(3) |
| S  | 16 | 543.312         | 985.548         | <b>980.208</b>  | <b>980.544</b>  | <b>979.873</b>  | S(3) |
| R  | 17 | 585.266         | 956.537         | 951.138         | <b>951.534</b>  | 950.862         | R(3) |
| S  | 18 | 624.319         | 904.504         | 899.104         | 899.108         | 899.520         | S(3) |
| S  | 19 | 653.357         | 875.493         | <b>870.153</b>  | <b>870.489</b>  | 869.817         | S(3) |
| R  | 20 | <b>705.421</b>  | 846.483         | <b>841.143</b>  | <b>841.479</b>  | <b>840.807</b>  | R(3) |
| A  | 21 | 729.100         | 794.449         | 789.109         | 789.445         | 788.773         | A(3) |
| G  | 22 | 748.107         | <b>770.770</b>  | 765.430         | 765.766         | 765.094         | G(3) |
| L  | 23 | 785.882         | 742.762         | 740.423         | 740.759         | 740.087         | L(3) |
| G  | 24 | <b>828.488</b>  | 714.685         | 709.235         | 709.564         | 708.922         | G(3) |
| F  | 25 | 877.511         | <b>671.382</b>  | 666.042         | 666.378         | 665.706         | F(3) |
| F  | 26 | 909.982         | 622.359         | 617.019         | 617.355         | 616.683         | F(3) |
| V  | 27 | <b>942.885</b>  | 590.006         | 584.668         | 585.004         | 584.332         | V(3) |
| G  | 28 | <b>961.892</b>  | 558.985         | 553.645         | 553.981         | 553.309         | G(3) |
| R  | 29 | 1013.926        | 519.976         | 514.636         | 514.974         | 514.302         | R(3) |
| V  | 30 | <b>1046.948</b> | 485.944         | 480.605         | 480.941         | 480.269         | V(3) |
| H  | 31 | <b>1092.635</b> | 453.921         | 447.582         | 447.918         | 447.246         | H(3) |
| R  | 32 | <b>1144.668</b> | 407.235         | 401.895         | 402.231         | 401.560         | R(3) |
| L  | 33 | <b>1182.363</b> | 355.201         | 349.862         | 350.198         | 349.526         | L(3) |
| L  | 34 | <b>1220.658</b> | 312.509         | 307.169         | 307.505         | 306.833         | L(3) |
| R  | 35 | <b>1272.092</b> | 279.812         | 274.472         | 274.808         | 274.136         | R(3) |
| K  | 36 | 1314.790        | 227.778         | 222.439         | 222.775         | 222.103         | K(3) |
| G  | 37 | 1331.797        | 185.880         | 179.740         | 180.076         | 179.404         | G(3) |
| N  | 38 | 1371.811        | 146.873         | 140.733         | 141.069         | 140.397         | N(3) |
| V  | 39 | <b>1426.166</b> | 108.998         | 102.719         | 103.055         | 102.383         | V(3) |
| A  | 40 | 1443.945        | 73.304          | 68.384          | 68.720          | 68.048          | A(3) |
| E  | 41 | <b>1492.859</b> | 30.025          | 44.635          | 45.021          | 44.349          | E(3) |

# sp | Q6GSS7 | H2A2A\_MOUSE

SGR<sup>Trimethyl</sup><sub>42.05</sub> GKQGGKARAKAKSRSSRAGLQFPVGRVHLLRKGNYAE

- ▶ fragmentation table for charge state 4+
- ▶ specType=etd
- ▶ score=48.69
- ▶ F104940.dat
- ▶ query=q3755\_p1
- ▶ precursor=747.095500
- ▶ chargePrecursor=6
- ▶ itol=0.8

| AA    | c               | y               | #=1             | #=2             | #=3             | #=4 | AA    |
|-------|-----------------|-----------------|-----------------|-----------------|-----------------|-----|-------|
| S[1]  | 212.022         | <b>1120.142</b> | <b>1116.137</b> | 0.755           | <b>1115.885</b> |     | S[41] |
| G[2]  | 41.277          | 1026.384        | 1024.378        | 0.755           | 1024.127        |     | G[40] |
| R[3]  | 90.814          | <b>1084.129</b> | 1080.124        | 1080.376        | 1079.872        |     | R[39] |
| G[4]  | 109.070         | 1034.592        | 1030.587        | <b>1030.839</b> | <b>1030.335</b> |     | G[38] |
| K[5]  | 137.093         | 1020.339        | 1016.332        | <b>1016.584</b> | 1016.080        |     | K[37] |
| G[6]  | 169.109         | 998.312         | <b>994.308</b>  | <b>994.260</b>  | <b>994.056</b>  |     | G[36] |
| G[7]  | 183.983         | 956.296         | <b>953.293</b>  | <b>952.945</b>  | <b>952.041</b>  |     | G[35] |
| G[8]  | 197.816         | 942.043         | <b>938.038</b>  | <b>938.290</b>  | 937.795         |     | G[34] |
| K[9]  | 229.643         | 927.787         | 923.783         | 924.034         | 923.531         |     | K[33] |
| A[10] | 247.402         | 895.763         | 891.759         | 892.011         | 891.507         |     | A[32] |
| R[11] | 286.427         | 878.004         | 873.999         | 874.251         | 873.748         |     | R[31] |
| A[12] | 304.186         | 838.979         | 834.974         | 835.226         | 834.722         |     | A[30] |
| K[13] | 336.210         | 821.220         | 817.215         | 817.467         | 816.963         |     | K[29] |
| A[14] | 353.969         | 789.199         | 785.195         | 785.443         | 784.939         |     | A[28] |
| K[15] | 389.993         | <b>771.437</b>  | 767.432         | 767.684         | 767.180         |     | K[27] |
| S[16] | 407.751         | 739.413         | 735.408         | 735.660         | 735.156         |     | S[26] |
| R[17] | 446.776         | 717.955         | 713.950         | 714.202         | 713.698         |     | R[25] |
| S[18] | 468.534         | 678.930         | 674.925         | 674.977         | 674.373         |     | S[24] |
| S[19] | 490.292         | 656.672         | 652.667         | 653.119         | 652.615         |     | S[23] |
| R[20] | 529.318         | 635.114         | 631.109         | 631.361         | 630.857         |     | R[22] |
| A[21] | 547.077         | 596.089         | 592.084         | 592.336         | 591.832         |     | A[21] |
| G[22] | 561.332         | 578.329         | 574.324         | 574.576         | 574.072         |     | G[20] |
| L[23] | 589.083         | 648.074         | 644.069         | 644.321         | 643.817         |     | L[19] |
| Q[24] | 621.818         | 535.803         | 531.798         | 532.050         | 531.546         |     | Q[18] |
| F[25] | 658.305         | 503.789         | 499.783         | 500.035         | 499.531         |     | F[17] |
| F[26] | 682.646         | 467.021         | 463.016         | 463.268         | 462.764         |     | F[16] |
| V[27] | <b>707.415</b>  | <b>442.750</b>  | 438.743         | 439.005         | 438.501         |     | V[15] |
| G[28] | 721.671         | <b>417.991</b>  | 413.985         | 414.238         | 413.734         |     | G[14] |
| R[29] | 760.696         | 403.736         | 399.731         | 399.983         | 399.479         |     | R[13] |
| V[30] | 785.463         | 364.710         | <b>360.705</b>  | <b>360.957</b>  | <b>360.453</b>  |     | V[12] |
| H[31] | <b>819.728</b>  | 339.643         | 335.638         | 335.890         | 335.636         |     | H[11] |
| R[32] | 858.753         | 305.678         | 301.673         | 301.925         | 301.421         |     | R[10] |
| L[33] | 887.024         | 266.653         | 262.648         | 262.900         | 262.396         |     | L[9]  |
| L[34] | <b>915.295</b>  | 238.362         | 234.357         | 234.609         | 234.105         |     | L[8]  |
| R[35] | 954.320         | 210.111         | 206.106         | 206.358         | 205.854         |     | R[7]  |
| K[36] | <b>986.344</b>  | 171.086         | 167.081         | 167.333         | 166.829         |     | K[6]  |
| G[37] | 1000.600        | 139.064         | 135.059         | 135.309         | 134.805         |     | G[5]  |
| N[38] | <b>1029.110</b> | 124.806         | 120.802         | 121.054         | 120.550         |     | N[4]  |
| V[39] | <b>1069.876</b> | 96.296          | 92.291          | 92.543          | 92.039          |     | V[3]  |
| A[40] | <b>1087.635</b> | 58.530          | 54.525          | 54.777          | 54.273          |     | A[2]  |
| E[41] | 1119.896        | 37.771          | 33.766          | 34.018          | 33.514          |     | E[1]  |

# sp | Q6GSS7 | H2A2A\_MOUSE

SGR<sup>Trimethyl</sup><sub>42.05</sub> GKQGGKARAKAKSRSSRAGLQFPVGRVHLLLRKGNAYE

- ▶ fragmentation table for charge state 5+
- ▶ specType=etd
- ▶ score=48.69
- ▶ F104940.dat
- ▶ query=q3755\_p1
- ▶ precursor=747.095500
- ▶ chargePrecursor=6
- ▶ itol=0.8

| AA    | c              | y              | z+1     | z+2     | z       | AA    |
|-------|----------------|----------------|---------|---------|---------|-------|
| S[1]  | 21.819         | <b>896.315</b> | 893.111 | 0.806   | 892.910 | S[41] |
| G[2]  | 33.223         | 878.909        | 875.705 | 0.806   | 875.503 | G[40] |
| R[3]  | 72.853         | 867.504        | 864.301 | 864.502 | 864.099 | R[39] |
| G[4]  | 84.257         | 827.875        | 824.671 | 824.873 | 824.469 | G[38] |
| K[5]  | 109.876        | 816.471        | 813.267 | 813.468 | 813.065 | K[37] |
| G[6]  | 135.488        | 790.823        | 787.620 | 787.820 | 787.416 | G[36] |
| G[7]  | 146.892        | 765.240        | 762.036 | 762.238 | 761.834 | G[35] |
| G[8]  | 158.296        | 753.836        | 750.632 | 750.833 | 750.430 | G[34] |
| K[9]  | 183.915        | 742.431        | 739.227 | 739.429 | 739.026 | K[33] |
| A[10] | 198.123        | 716.812        | 713.608 | 713.810 | 713.407 | A[32] |
| R[11] | 229.343        | 702.606        | 699.401 | 699.603 | 699.199 | R[31] |
| A[12] | 243.951        | <b>671.385</b> | 668.181 | 668.382 | 667.979 | A[30] |
| K[13] | 269.170        | 657.177        | 653.973 | 654.175 | 653.772 | K[29] |
| A[14] | 283.377        | 631.558        | 628.354 | 628.556 | 628.153 | A[28] |
| K[15] | 308.996        | 617.351        | 614.147 | 614.349 | 613.945 | K[27] |
| S[16] | 326.402        | 591.732        | 588.528 | 588.730 | 588.326 | S[26] |
| R[17] | 357.623        | 574.325        | 571.122 | 571.323 | 570.920 | R[25] |
| S[18] | 378.059        | 545.108        | 542.901 | 543.103 | 542.700 | S[24] |
| S[19] | 392.435        | 525.699        | 522.493 | 522.697 | 522.293 | S[23] |
| R[20] | 423.656        | 508.292        | 505.089 | 505.290 | 504.887 | R[22] |
| A[21] | 437.863        | 477.072        | 473.868 | 474.070 | 473.667 | A[21] |
| G[22] | 449.267        | 462.865        | 459.661 | 459.862 | 459.459 | G[20] |
| L[23] | 471.884        | 451.460        | 448.257 | 448.458 | 448.055 | L[19] |
| Q[24] | 497.496        | 428.844        | 425.640 | 425.841 | 425.438 | Q[18] |
| F[25] | 526.910        | 403.232        | 400.028 | 400.230 | 399.827 | F[17] |
| P[26] | <b>546.320</b> | 373.810        | 370.614 | 370.816 | 370.413 | P[16] |
| V[27] | 566.134        | 354.408        | 351.204 | 351.405 | 351.002 | V[15] |
| G[28] | 577.538        | 334.594        | 331.390 | 331.592 | 331.189 | G[14] |
| R[29] | 608.758        | 323.190        | 319.986 | 320.187 | 319.784 | R[13] |
| V[30] | 628.572        | 291.969        | 288.766 | 288.967 | 288.564 | V[12] |
| L[31] | 635.384        | 272.158        | 268.952 | 269.154 | 268.750 | L[11] |
| R[32] | 687.394        | 244.744        | 241.540 | 241.742 | 241.339 | R[10] |
| L[33] | 709.621        | 213.524        | 210.320 | 210.522 | 210.118 | L[9]  |
| L[34] | 732.438        | 190.907        | 187.703 | 187.905 | 187.502 | L[8]  |
| R[35] | 763.658        | 168.290        | 165.086 | 165.288 | 164.885 | R[7]  |
| K[36] | 789.277        | 137.070        | 133.866 | 134.068 | 133.665 | K[6]  |
| G[37] | 800.681        | 111.451        | 108.247 | 108.449 | 108.046 | G[5]  |
| N[38] | 823.490        | 100.047        | 96.843  | 97.044  | 96.641  | N[4]  |
| Y[39] | <b>856.102</b> | 77.238         | 74.034  | 74.236  | 73.833  | Y[3]  |
| A[40] | <b>870.310</b> | 44.625         | 41.422  | 41.623  | 41.220  | A[2]  |
| E[41] | <b>896.118</b> | 30.418         | 27.214  | 27.416  | 27.013  | E[1]  |



# sp | Q8CGP5 | H2A1F\_MOUSE

SGR<sup>Trimethyl</sup><sub>42.05</sub> GKQGGKARAKAKTRSSRAGLQFPVGRVHLLLRKGNYS

- ▶ fragmentation table for charge state 1+
- ▶ specType=etd
- ▶ score=44.10
- ▶ F104940.dat
- ▶ query=q3759\_p1
- ▶ precursor=752.095880
- ▶ chargePrecursor=6
- ▶ itol=0.8

| AA   | c              | y              | z+1             | z+2             | z        | AA   |
|------|----------------|----------------|-----------------|-----------------|----------|------|
| S 1  | 105.066        | 4507.557       | 4491.538        | 0.000           | 4400.530 | S 41 |
| G 2  | 162.087        | 4420.525       | 4404.500        | 0.000           | 4403.498 | G 40 |
| R 3  | <b>360.235</b> | 4303.504       | 4347.483        | 4348.493        | 4346.477 | R 39 |
| C 4  | <b>417.257</b> | 4185.555       | 4148.337        | 4150.345        | 4148.329 | C 38 |
| K 5  | <b>545.352</b> | 4108.334       | 4092.315        | 4093.323        | 4091.307 | K 37 |
| Q 6  | <b>673.410</b> | 3980.239       | 3954.230        | 3955.228        | 3953.212 | Q 36 |
| G 7  | <b>730.432</b> | 3852.180       | 3836.162        | 3837.170        | 3835.154 | G 35 |
| G 8  | 787.453        | 3795.159       | 3779.140        | 3780.148        | 3778.132 | G 34 |
| K 9  | <b>915.548</b> | 3738.139       | 3722.119        | 3723.127        | 3721.111 | K 33 |
| A 10 | <b>985.585</b> | 3610.043       | 3594.024        | 3595.032        | 3593.016 | A 32 |
| R 11 | 1142.658       | 3539.055       | 3522.988        | 3523.995        | 3521.979 | R 31 |
| A 12 | 1213.724       | 3382.004       | 3366.880        | 3367.893        | 3365.875 | A 30 |
| K 13 | 1341.819       | 3311.987       | 3295.848        | 3296.856        | 3294.841 | K 29 |
| A 14 | 1412.856       | 3183.972       | 3167.954        | 3168.961        | 3166.946 | A 28 |
| K 15 | 1540.951       | 3112.935       | 3096.910        | 3097.924        | 3095.909 | K 27 |
| T 16 | 1641.998       | 2984.940       | 2968.921        | 2969.929        | 2967.914 | T 26 |
| R 17 | 1798.059       | 2883.922       | 2867.911        | 2868.920        | 2866.905 | R 25 |
| S 18 | 1885.113       | 2727.893       | 2711.873        | 2712.880        | 2710.865 | S 24 |
| S 19 | 1972.163       | 2648.859       | 2624.841        | 2625.848        | 2623.833 | S 23 |
| R 20 | 2128.265       | 2563.827       | 2539.809        | 2538.816        | 2536.801 | R 22 |
| A 21 | 2199.302       | 2397.826       | 2381.807        | 2382.815        | 2380.800 | A 21 |
| G 22 | 2256.323       | 2326.789       | 2310.770        | 2311.778        | 2309.763 | G 20 |
| L 23 | 2360.407       | 2269.768       | 2253.749        | 2254.757        | 2252.741 | L 19 |
| Q 24 | 2407.466       | 2156.784       | 2140.765        | 2141.774        | 2139.757 | Q 18 |
| F 25 | 2644.534       | 2028.725       | 2012.707        | 2013.714        | 2011.698 | F 17 |
| P 26 | 2741.587       | 1881.657       | 1865.638        | 1866.646        | 1864.630 | P 16 |
| V 27 | 2840.655       | 1784.604       | 1768.585        | 1769.593        | 1767.577 | V 15 |
| G 28 | 2897.677       | 1684.635       | 1668.617        | 1669.624        | 1667.609 | G 14 |
| R 29 | 3053.778       | 1627.614       | 1611.595        | <b>1612.903</b> | 1610.887 | R 13 |
| V 30 | 3152.846       | 1471.613       | <b>1455.794</b> | <b>1456.802</b> | 1454.786 | V 12 |
| I 31 | 3269.895       | 1372.744       | <b>1356.726</b> | <b>1357.734</b> | 1355.718 | I 11 |
| R 32 | 3446.006       | 1235.685       | 1219.666        | 1220.675        | 1218.659 | R 10 |
| L 33 | 3550.090       | 1079.584       | 1063.566        | <b>1064.573</b> | 1062.558 | L 9  |
| L 34 | 3672.175       | <b>966.500</b> | 950.482         | 951.489         | 949.474  | L 8  |
| R 35 | 3828.276       | 853.416        | 837.398         | 838.405         | 836.390  | R 7  |
| K 36 | 3956.371       | 697.315        | 681.296         | 682.304         | 680.289  | K 6  |
| C 37 | 4013.362       | 569.220        | 553.201         | 554.209         | 552.194  | C 5  |
| N 38 | 4127.435       | 512.199        | 496.180         | 497.188         | 495.172  | N 4  |
| V 39 | 4290.498       | 398.156        | 382.137         | 383.145         | 381.129  | V 3  |
| S 40 | 4377.530       | 235.062        | 219.074         | 220.082         | 218.066  | S 2  |
| E 41 | 4506.573       | 148.060        | 132.042         | 133.050         | 131.034  | E 1  |

# sp | Q8CGP5 | H2A1F\_MOUSE

SGR<sup>Trimethyl</sup><sub>42.05</sub> GKQGGKARAKAKTRSSRAGLQFPVGRVHLLLRKGNYS

- ▶ fragmentation table for charge state 2+
- ▶ specType=etd
- ▶ score=44.10
- ▶ F104940.dat
- ▶ query=q3759\_p1
- ▶ precursor=752.095880
- ▶ chargePrecursor=6
- ▶ itol=0.8

| AA | c  | w               | #s1             | #s2             | z               | AA              |       |
|----|----|-----------------|-----------------|-----------------|-----------------|-----------------|-------|
| S  | 1  | 513.037         | 2254.274        | 2268.273        | 0.504           | 2245.767        | S(41) |
| G  | 2  | 81.547          | 2210.766        | 2203.757        | 0.504           | 2202.251        | G(40) |
| R  | 3  | 180.621         | 2182.255        | 2174.246        | 2174.750        | 2173.742        | R(39) |
| G  | 4  | 209.132         | 2083.181        | 2075.172        | 2075.676        | 2074.668        | G(38) |
| K  | 5  | 273.180         | 2054.671        | 2046.661        | 2047.165        | 2046.157        | K(37) |
| G  | 6  | 337.209         | 1990.621        | 1992.612        | 1993.116        | 1992.110        | G(36) |
| G  | 7  | 385.730         | 1936.594        | <b>1918.584</b> | <b>1918.088</b> | 1919.086        | G(35) |
| G  | 8  | 394.230         | 1898.081        | 1899.074        | <b>1890.578</b> | 1889.570        | G(34) |
| K  | 9  | 458.278         | 1869.572        | 1861.563        | 1862.067        | 1861.059        | K(33) |
| A  | 10 | 493.796         | 1805.525        | 1797.516        | 1798.019        | 1797.012        | A(32) |
| R  | 11 | 571.847         | 1730.008        | 1761.997        | 1762.501        | 1761.493        | R(31) |
| A  | 12 | <b>607.365</b>  | 1692.956        | 1683.948        | 1684.452        | 1683.444        | A(30) |
| R  | 13 | <b>671.413</b>  | 1656.437        | 1648.428        | <b>1648.932</b> | 1647.924        | R(29) |
| A  | 14 | <b>706.931</b>  | 1592.900        | <b>1584.380</b> | <b>1584.884</b> | 1583.876        | A(28) |
| K  | 15 | <b>770.979</b>  | 1556.871        | <b>1548.862</b> | <b>1549.366</b> | 1548.358        | K(27) |
| T  | 16 | <b>821.503</b>  | 1492.824        | <b>1484.814</b> | <b>1485.318</b> | <b>1484.310</b> | T(26) |
| R  | 17 | 899.553         | 1442.800        | 1434.201        | <b>1434.704</b> | 1433.702        | R(25) |
| S  | 18 | 913.099         | 1384.249        | 1395.240        | <b>1356.744</b> | 1355.738        | S(24) |
| S  | 19 | <b>986.585</b>  | 1330.733        | <b>1312.724</b> | <b>1313.228</b> | 1312.220        | S(23) |
| R  | 20 | <b>1064.636</b> | <b>1277.217</b> | 1268.208        | <b>1269.712</b> | 1268.704        | R(22) |
| A  | 21 | <b>1100.155</b> | <b>1199.167</b> | <b>1191.157</b> | <b>1191.661</b> | 1190.653        | A(21) |
| G  | 22 | <b>1128.665</b> | 1153.648        | 1155.639        | 1156.143        | 1155.135        | G(20) |
| L  | 23 | <b>1185.207</b> | 1138.337        | 1127.328        | 1127.832        | 1126.824        | L(19) |
| Q  | 24 | <b>1249.237</b> | 1078.595        | <b>1070.586</b> | <b>1071.090</b> | <b>1070.082</b> | Q(18) |
| F  | 25 | <b>1322.771</b> | 1014.568        | <b>1006.557</b> | <b>1007.061</b> | <b>1006.053</b> | F(17) |
| P  | 26 | 1371.297        | 941.053         | 933.023         | 933.526         | 932.519         | P(16) |
| V  | 27 | 1420.811        | 892.506         | 884.496         | 885.000         | 883.992         | V(15) |
| G  | 28 | <b>1449.342</b> | 842.971         | 834.962         | 835.466         | 834.458         | G(14) |
| R  | 29 | 1507.883        | 814.461         | <b>806.451</b>  | <b>806.955</b>  | <b>805.947</b>  | R(13) |
| V  | 30 | 1576.927        | 736.410         | 728.401         | 728.905         | 727.897         | V(12) |
| H  | 31 | 1645.456        | 688.876         | 678.868         | 679.372         | 678.363         | H(11) |
| R  | 32 | 1723.507        | 618.346         | 610.337         | 610.841         | 609.833         | R(10) |
| L  | 33 | 1780.049        | 540.206         | 532.196         | 532.700         | 531.703         | L(9)  |
| L  | 34 | 1838.593        | 483.754         | 475.743         | 476.248         | 475.241         | L(8)  |
| R  | 35 | 1914.641        | 427.212         | 419.202         | 419.706         | 418.698         | R(7)  |
| K  | 36 | 1978.689        | 349.161         | 341.152         | 341.656         | 340.648         | K(6)  |
| G  | 37 | 2067.200        | 285.114         | 277.104         | 277.608         | 276.600         | G(5)  |
| N  | 38 | 2094.221        | 256.603         | 248.594         | 249.098         | 248.090         | N(4)  |
| V  | 39 | 2145.753        | 199.562         | 191.552         | 192.056         | 191.066         | V(3)  |
| S  | 40 | 2189.266        | 118.056         | 110.041         | 110.544         | 109.537         | S(2)  |
| E  | 41 | 2253.790        | 74.534          | 66.524          | 67.028          | 66.021          | E(1)  |



# sp | Q8CGP5 | H2A1F\_MOUSE

SGR<sup>Trimethyl</sup><sub>42.05</sub> GKQGGKARAKAKTRSSRAGLQFPVGRVHRLLRKGNYS

- ▶ fragmentation table for charge state 3+
- ▶ specType=etd
- ▶ score=44.10
- ▶ F104940.dat
- ▶ query=q3759\_p1
- ▶ precursor=752.095880
- ▶ chargePrecursor=6
- ▶ itol=0.8

| AA | c  | y               | #s1             | #s2             | z               | AA              |       |
|----|----|-----------------|-----------------|-----------------|-----------------|-----------------|-------|
| S  | 1  | 35.603          | 1502.141        | 1467.851        | 0.672           | 1467.511        | S[41] |
| G  | 2  | 54.702          | <b>1474.180</b> | 1468.840        | 0.672           | 1468.504        | G[40] |
| R  | 3  | 130.750         | 1455.173        | <b>1449.833</b> | <b>1450.169</b> | <b>1449.497</b> | R[39] |
| G  | 4  | 139.757         | 1389.123        | <b>1383.784</b> | <b>1384.120</b> | <b>1383.448</b> | G[38] |
| K  | 5  | 182.455         | 1370.116        | <b>1364.777</b> | <b>1365.113</b> | 1364.441        | K[37] |
| G  | 6  | 225.144         | <b>1327.418</b> | <b>1322.078</b> | <b>1322.414</b> | <b>1321.742</b> | G[36] |
| G  | 7  | 264.189         | 1294.785        | <b>1278.392</b> | <b>1278.728</b> | 1278.066        | G[35] |
| G  | 8  | 263.156         | 1265.725        | <b>1260.385</b> | <b>1260.721</b> | 1260.040        | G[34] |
| K  | 9  | 305.654         | 1246.717        | <b>1241.378</b> | <b>1241.714</b> | <b>1241.042</b> | K[33] |
| A  | 10 | 329.513         | 1204.019        | 1198.019        | <b>1199.015</b> | 1198.344        | A[32] |
| R  | 11 | 381.567         | 1180.340        | <b>1175.000</b> | <b>1175.336</b> | <b>1174.664</b> | R[31] |
| A  | 12 | 405.266         | <b>1128.306</b> | 1125.007        | 1121.007        | 1122.003        | A[30] |
| R  | 13 | 447.944         | 1104.627        | 1099.288        | <b>1099.624</b> | 1098.952        | R[29] |
| A  | 14 | 491.623         | 1081.929        | <b>1056.589</b> | <b>1056.925</b> | 1056.251        | A[28] |
| K  | 15 | 514.322         | <b>1038.250</b> | <b>1032.910</b> | <b>1033.246</b> | <b>1032.574</b> | K[27] |
| T  | 16 | 548.024         | 995.552         | <b>990.212</b>  | <b>990.548</b>  | <b>989.876</b>  | T[26] |
| R  | 17 | 600.026         | 981.869         | <b>956.529</b>  | <b>956.865</b>  | <b>956.193</b>  | R[25] |
| S  | 18 | 629.669         | 959.835         | 954.485         | 954.835         | 954.160         | S[24] |
| S  | 19 | 658.059         | 938.025         | <b>875.485</b>  | <b>875.821</b>  | <b>875.149</b>  | S[23] |
| R  | 20 | <b>710.093</b>  | 951.614         | <b>846.474</b>  | <b>846.810</b>  | 846.136         | R[22] |
| A  | 21 | 733.772         | 799.780         | 794.441         | 794.777         | 794.101         | A[21] |
| G  | 22 | 762.779         | 776.101         | <b>770.762</b>  | <b>771.098</b>  | 770.426         | G[20] |
| L  | 23 | <b>790.474</b>  | 759.094         | 751.754         | 752.090         | 751.416         | L[19] |
| Q  | 24 | <b>833.160</b>  | 733.366         | 724.000         | 724.366         | 723.722         | Q[18] |
| F  | 25 | <b>882.183</b>  | 676.713         | <b>671.374</b>  | <b>671.710</b>  | <b>671.038</b>  | F[17] |
| F  | 26 | <b>914.534</b>  | 627.600         | 622.351         | 622.687         | 622.015         | F[16] |
| V  | 27 | 947.557         | 595.139         | 590.000         | 590.336         | 589.664         | V[15] |
| G  | 28 | <b>966.564</b>  | 562.317         | 556.077         | 557.413         | 556.741         | G[14] |
| R  | 29 | 1015.855        | 543.309         | 537.910         | 538.308         | 537.636         | R[13] |
| V  | 30 | <b>1051.620</b> | 491.276         | 485.036         | 486.272         | 485.600         | V[12] |
| H  | 31 | <b>1097.307</b> | 458.253         | 452.013         | 453.249         | 452.577         | H[11] |
| R  | 32 | <b>1149.340</b> | 412.967         | 407.227         | 407.563         | 406.891         | R[10] |
| L  | 33 | 1167.015        | <b>360.533</b>  | 355.193         | 355.529         | 354.857         | L[9]  |
| L  | 34 | <b>1224.730</b> | 322.576         | 317.489         | 317.826         | 317.154         | L[8]  |
| R  | 35 | <b>1276.763</b> | 285.144         | 279.804         | 280.140         | 279.468         | R[7]  |
| K  | 36 | 1319.462        | 233.110         | 227.770         | 228.106         | 227.434         | K[6]  |
| G  | 37 | 1338.469        | 190.412         | 185.072         | 185.408         | 184.736         | G[5]  |
| N  | 38 | 1376.483        | 171.404         | 166.065         | 166.401         | 165.729         | N[4]  |
| V  | 39 | 1430.838        | 133.390         | 128.051         | 128.386         | 127.715         | V[3]  |
| S  | 40 | 1459.846        | 99.136          | 93.696          | 94.032          | 93.360          | S[2]  |
| E  | 41 | 1502.863        | 50.025          | 44.685          | 45.021          | 44.349          | E[1]  |

# sp | Q8CGP5 | H2A1F\_MOUSE

SGR<sup>Trimethyl</sup><sub>42.05</sub> GKQGGKARAKAKTRSSRAGLQFPVGRVHLLLRKGNYS

- ▶ fragmentation table for charge state 4+
- ▶ specType=etd
- ▶ score=44.10
- ▶ F104940.dat
- ▶ query=q3759\_p1
- ▶ precursor=752.095880
- ▶ chargePrecursor=6
- ▶ itol=0.8

| AA | c  | y               | z+1             | z+2             | z               | AA             |       |
|----|----|-----------------|-----------------|-----------------|-----------------|----------------|-------|
| S  | 1  | 27.022          | 1127.645        | 1123.640        | 0.755           | 1123.380       | S[41] |
| G  | 2  | 41.277          | <b>1105.007</b> | 1101.882        | 0.755           | 1101.630       | G[40] |
| R  | 3  | 90.814          | <b>1091.631</b> | 1087.827        | 1.087.819       | 1087.375       | R[30] |
| G  | 4  | 105.070         | 1042.094        | <b>1038.090</b> | <b>1038.342</b> | 1037.838       | G[38] |
| K  | 5  | 137.093         | 1027.839        | <b>1023.834</b> | <b>1024.086</b> | 1023.582       | K[37] |
| Q  | 6  | 189.308         | 995.815         | <b>991.811</b>  | <b>992.062</b>  | <b>991.559</b> | Q[30] |
| G  | 7  | 253.263         | 963.882         | <b>959.796</b>  | <b>960.048</b>  | 959.542        | G[32] |
| G  | 8  | 397.819         | 949.545         | <b>945.541</b>  | <b>945.792</b>  | 945.289        | G[34] |
| K  | 9  | 229.643         | 935.200         | 931.205         | 931.537         | 931.031        | K[33] |
| A  | 10 | 247.402         | <b>903.266</b>  | 899.261         | 899.513         | 899.009        | A[32] |
| R  | 11 | 286.427         | 889.207         | <b>881.502</b>  | <b>881.754</b>  | 881.250        | R[31] |
| A  | 12 | 304.388         | <b>846.482</b>  | 842.477         | 842.729         | 842.225        | A[30] |
| R  | 13 | 336.210         | 828.722         | 824.718         | 824.970         | 824.466        | R[29] |
| A  | 14 | 353.969         | 798.699         | 792.694         | 792.946         | 792.442        | A[28] |
| K  | 15 | 385.993         | 778.939         | 774.935         | 775.187         | 774.683        | K[27] |
| T  | 16 | 411.255         | 746.915         | 742.911         | 743.163         | 742.659        | T[26] |
| R  | 17 | 450.280         | 721.864         | 717.859         | 717.901         | 717.397        | R[25] |
| S  | 18 | 472.938         | 682.826         | 678.824         | 678.876         | 678.372        | S[24] |
| S  | 19 | 493.796         | 660.870         | 656.866         | 657.118         | 656.614        | S[23] |
| R  | 20 | 532.822         | 639.112         | 635.108         | 635.360         | 634.856        | R[22] |
| A  | 21 | 550.501         | 600.089         | 596.082         | 596.334         | 595.830        | A[21] |
| G  | 22 | 564.836         | 582.320         | 578.323         | 578.575         | 578.071        | G[20] |
| L  | 23 | 593.107         | 568.072         | 564.068         | 564.320         | 563.816        | L[19] |
| Q  | 24 | 625.122         | 539.801         | 535.797         | 536.049         | 535.545        | Q[19] |
| F  | 25 | 661.889         | 507.781         | 503.782         | 504.034         | 503.530        | F[17] |
| P  | 26 | 686.152         | 471.020         | 467.015         | 467.267         | 466.763        | P[16] |
| V  | 27 | <b>710.919</b>  | 446.750         | 442.752         | 443.004         | 442.500        | V[15] |
| G  | 28 | 725.175         | 421.989         | <b>417.985</b>  | <b>418.237</b>  | <b>417.733</b> | G[14] |
| R  | 29 | 764.200         | 407.735         | 403.729         | 403.981         | 403.477        | R[13] |
| V  | 30 | 788.967         | 388.759         | 384.764         | 384.956         | 384.452        | V[12] |
| H  | 31 | <b>823.232</b>  | 343.942         | 339.937         | 340.189         | 339.685        | H[11] |
| R  | 32 | <b>862.257</b>  | 309.677         | 305.672         | 305.924         | 305.420        | R[10] |
| L  | 33 | <b>890.528</b>  | 270.652         | 266.647         | 266.899         | 266.395        | L[9]  |
| L  | 34 | <b>918.799</b>  | 242.381         | 238.376         | 238.628         | 238.124        | L[8]  |
| R  | 35 | 867.824         | 214.113         | 210.105         | 210.357         | 209.853        | R[7]  |
| K  | 36 | 909.848         | 175.084         | 171.080         | 171.332         | 170.828        | K[6]  |
| G  | 37 | 1004.103        | 143.061         | 139.056         | 139.308         | 138.804        | G[5]  |
| N  | 38 | <b>1032.614</b> | 128.805         | 124.800         | 125.052         | 124.548        | N[4]  |
| V  | 39 | <b>1073.380</b> | 100.294         | 96.290          | 96.542          | 96.038         | V[3]  |
| S  | 40 | <b>1095.138</b> | 59.529          | 55.524          | 55.776          | 55.272         | S[2]  |
| E  | 41 | 1127.389        | 37.771          | 33.766          | 34.018          | 33.514         | E[1]  |

# sp | Q8CGP5 | H2A1F\_MOUSE

SGR<sup>Trimethyl</sup><sub>42.05</sub> GKQGGKARAKAKTRSSRAGLQFPVGRVHLLLRKGNYS

- ▶ fragmentation table for charge state 5+
- ▶ specType=etd
- ▶ score=44.10
- ▶ F104940.dat
- ▶ query=q3759\_p1
- ▶ precursor=752.095880
- ▶ chargePrecursor=6
- ▶ itol=0.8

| AA    | c              | y              | z+1            | z+2     | z              | AA    |
|-------|----------------|----------------|----------------|---------|----------------|-------|
| S[1]  | 21.819         | <b>902.317</b> | 899.113        | 0.806   | 898.912        | S[41] |
| G[2]  | 33.223         | 884.911        | <b>881.707</b> | 0.806   | <b>881.506</b> | G[40] |
| R[3]  | 72.853         | <b>873.507</b> | 870.303        | 870.504 | 870.101        | R[39] |
| G[4]  | 84.257         | <b>833.877</b> | 830.673        | 830.875 | 830.472        | G[38] |
| K[5]  | 109.876        | <b>822.473</b> | 819.269        | 819.470 | 819.067        | K[37] |
| Q[6]  | 135.488        | 795.854        | 793.650        | 793.851 | 793.448        | Q[36] |
| G[7]  | 146.892        | <b>771.242</b> | 768.038        | 768.240 | 767.837        | G[35] |
| G[8]  | 158.296        | 759.835        | 756.634        | 756.835 | 756.432        | G[34] |
| K[9]  | 183.915        | 748.431        | 745.230        | 745.431 | 745.028        | K[33] |
| A[10] | 198.123        | 722.814        | 719.611        | 719.812 | 719.409        | A[32] |
| R[11] | 229.343        | 708.007        | 705.403        | 705.605 | 705.202        | R[31] |
| A[12] | 243.551        | 677.387        | <b>674.183</b> | 674.385 | <b>673.981</b> | A[30] |
| K[13] | 269.170        | 663.170        | 659.976        | 660.177 | 659.774        | K[29] |
| A[14] | 283.377        | 637.560        | 634.357        | 634.558 | 634.155        | A[28] |
| K[15] | 308.996        | 623.353        | 620.149        | 620.351 | 619.948        | K[27] |
| T[16] | 329.205        | 597.734        | 594.530        | 594.732 | 594.329        | T[26] |
| R[17] | <b>360.426</b> | 577.524        | 574.321        | 574.522 | 574.119        | R[25] |
| S[18] | 377.832        | 546.305        | 543.100        | 543.302 | 542.899        | S[24] |
| S[19] | 399.239        | 528.898        | 525.694        | 525.896 | 525.492        | S[23] |
| R[20] | 426.459        | 511.491        | 508.288        | 508.489 | 508.086        | R[22] |
| A[21] | 440.666        | 480.271        | 477.067        | 477.269 | 476.866        | A[21] |
| G[22] | 452.070        | 466.064        | 462.860        | 463.061 | 462.658        | G[20] |
| L[23] | 474.687        | 454.659        | 451.456        | 451.657 | 451.254        | L[19] |
| Q[24] | 500.299        | 432.043        | 428.839        | 429.040 | 428.637        | Q[18] |
| F[25] | 529.713        | 406.431        | 403.227        | 403.429 | 403.026        | F[17] |
| P[26] | 549.123        | 377.017        | 373.813        | 374.015 | 373.612        | P[16] |
| V[27] | 568.937        | 357.607        | 354.403        | 354.604 | 354.201        | V[15] |
| G[28] | 589.341        | 337.793        | 334.589        | 334.791 | 334.388        | G[14] |
| K[29] | 611.961        | 326.389        | 323.185        | 323.386 | 322.983        | K[13] |
| V[30] | 631.375        | 295.165        | 291.960        | 292.166 | 291.763        | V[12] |
| H[31] | 658.787        | 275.355        | 272.151        | 272.353 | 271.949        | H[11] |
| R[32] | 690.007        | 247.943        | 244.739        | 244.941 | 244.538        | R[10] |
| L[33] | 712.624        | 216.723        | 213.519        | 213.721 | 213.317        | L[9]  |
| L[34] | 735.241        | 194.106        | 190.902        | 191.104 | 190.701        | L[8]  |
| R[35] | 766.461        | 171.489        | 168.285        | 168.487 | 168.084        | R[7]  |
| K[36] | 792.080        | 140.269        | 137.065        | 137.267 | 136.864        | K[6]  |
| G[37] | 803.484        | 114.650        | 111.446        | 111.648 | 111.245        | G[5]  |
| N[38] | 828.293        | 103.245        | 100.042        | 100.243 | 99.840         | N[4]  |
| V[39] | 858.908        | 80.431         | 77.223         | 77.425  | 77.022         | V[3]  |
| S[40] | <b>876.312</b> | 47.824         | 44.621         | 44.822  | 44.419         | S[2]  |
| E[41] | <b>902.120</b> | 30.418         | 27.214         | 27.416  | 27.013         | E[1]  |

# sp | Q8CGP5 | H2A1F\_MOUSE

SGR<sup>Trimethyl</sup><sub>42.05</sub> GKQGKARAKAKTRSSRAGLQFPVGRVHLLLRKGNYS

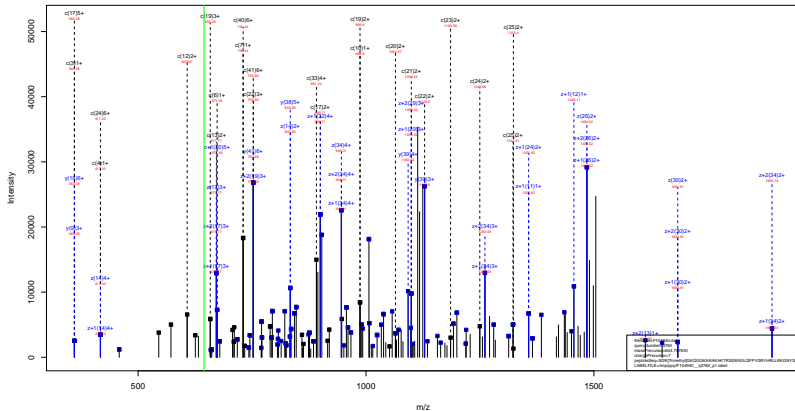

# sp | Q8CGP5 | H2A1F\_MOUSE

SGR<sup>Trimethyl</sup><sub>42.05</sub> GKQGGKARAKAKTRSSRAGLQFPVGRVHLLLRKGNYS

- ▶ fragmentation table for charge state 1+
- ▶ specType=etd
- ▶ score=42.93
- ▶ F104940.dat
- ▶ query=q3760\_p1
- ▶ precursor=644.797630
- ▶ chargePrecursor=7
- ▶ itol=0.8

| AA   | c              | y              | z+1             | z+2             | z               | AA   |
|------|----------------|----------------|-----------------|-----------------|-----------------|------|
| S 1  | 106.066        | 4507.557       | 4491.538        | 0.000           | 4490.530        | S 41 |
| G 2  | 162.087        | 4420.525       | 4404.506        | 0.000           | 4403.498        | G 40 |
| R 3  | <b>360.235</b> | 4330.504       | 4347.485        | 4348.493        | 4346.477        | R 39 |
| G 4  | <b>417.257</b> | 4105.355       | 4149.337        | 4150.345        | 4148.329        | G 38 |
| K 5  | <b>545.352</b> | 4108.334       | 4092.315        | 4093.323        | 4091.307        | K 37 |
| Q 6  | <b>673.410</b> | 3989.279       | 3964.259        | 3965.268        | 3963.251        | Q 36 |
| G 7  | <b>730.432</b> | 3852.180       | 3836.162        | 3837.170        | 3835.154        | G 35 |
| G 8  | 787.453        | 3795.159       | 3779.140        | 3780.148        | 3778.132        | G 34 |
| K 9  | <b>915.548</b> | 3738.138       | 3722.119        | 3723.127        | 3721.111        | K 33 |
| A 10 | <b>986.585</b> | 3610.043       | 3594.024        | 3595.032        | 3593.016        | A 32 |
| R 11 | 1142.058       | 3538.035       | 3522.017        | 3523.025        | 3521.009        | R 31 |
| A 12 | 1213.724       | 3382.054       | 3366.036        | 3367.043        | 3365.027        | A 30 |
| R 13 | 1341.819       | 3311.807       | 3295.848        | 3296.856        | 3294.841        | R 29 |
| A 14 | 1412.859       | 3183.772       | 3167.754        | 3168.761        | 3166.746        | A 28 |
| K 15 | 1540.951       | 3112.735       | 3096.716        | 3097.724        | 3095.709        | K 27 |
| T 16 | 1641.998       | 2984.640       | 2968.621        | 2969.629        | 2967.614        | T 26 |
| R 17 | 1798.059       | 2883.592       | 2867.574        | 2868.582        | 2866.566        | R 25 |
| S 18 | 1885.133       | 2727.491       | 2711.473        | 2712.480        | 2710.465        | S 24 |
| S 19 | 1972.183       | 2640.459       | 2624.441        | 2625.448        | 2623.433        | S 23 |
| R 20 | 2128.205       | 2533.427       | 2517.409        | 2518.416        | 2516.401        | R 22 |
| A 21 | 2199.300       | 2397.306       | 2381.287        | 2382.295        | 2380.280        | A 21 |
| G 22 | 2256.323       | 2326.289       | 2310.270        | 2311.278        | 2309.263        | G 20 |
| L 23 | 2369.407       | 2269.268       | 2253.249        | 2254.257        | 2252.241        | L 19 |
| Q 24 | 2497.468       | 2158.184       | 2142.165        | 2143.173        | 2141.157        | Q 18 |
| F 25 | 2644.534       | 2028.125       | 2012.106        | 2013.114        | 2011.099        | F 17 |
| P 26 | 2741.587       | 1881.057       | 1865.038        | 1866.046        | 1864.031        | P 16 |
| V 27 | 2840.658       | 1784.004       | 1767.985        | 1768.993        | 1766.977        | V 15 |
| G 28 | 2897.677       | 1684.935       | 1668.917        | 1669.924        | 1667.909        | G 14 |
| R 29 | 3053.778       | 1627.814       | 1611.795        | <b>1612.803</b> | 1610.787        | R 13 |
| V 30 | 3152.848       | 1471.813       | <b>1455.794</b> | <b>1456.802</b> | 1454.785        | V 12 |
| H 31 | 3259.905       | 1372.744       | <b>1356.726</b> | 1357.734        | 1355.718        | H 11 |
| R 32 | 3446.008       | 1235.685       | <b>1219.667</b> | 1220.675        | <b>1218.659</b> | R 10 |
| L 33 | 3559.090       | 1079.584       | 1063.566        | <b>1064.573</b> | 1062.558        | L 9  |
| L 34 | 3672.175       | <b>966.500</b> | 950.482         | <b>951.489</b>  | 949.474         | L 8  |
| R 35 | 3828.276       | 853.416        | 837.398         | 838.405         | <b>836.390</b>  | R 7  |
| K 36 | 3958.311       | 697.315        | 681.297         | 682.304         | 680.289         | K 6  |
| G 37 | 4013.392       | 569.220        | 553.201         | 554.209         | 552.194         | G 5  |
| N 38 | 4127.435       | 512.199        | 496.180         | 497.188         | 495.172         | N 4  |
| Y 39 | 4290.498       | 398.156        | 382.137         | 383.145         | 381.129         | Y 3  |
| S 40 | 4377.530       | 235.092        | 219.074         | 220.082         | 218.066         | S 2  |
| E 41 | 4506.573       | 148.060        | 132.042         | 133.050         | 131.034         | E 1  |

# sp | Q8CGP5 | H2A1F\_MOUSE

SGR<sup>Trimethyl</sup><sub>42.05</sub> GKQGGKARAKAKTRSSRAGLQFPVGRVHRLLRKGNYS

- ▶ fragmentation table for charge state 2+
- ▶ specType=etd
- ▶ score=42.93
- ▶ F104940.dat
- ▶ query=q3760\_p1
- ▶ precursor=644.797630
- ▶ chargePrecursor=7
- ▶ itol=0.8

| AA | c  | w               | #s1             | #s2             | c               | AA              |       |
|----|----|-----------------|-----------------|-----------------|-----------------|-----------------|-------|
| S  | 1  | 513.037         | 2254.274        | 2266.277        | 0.804           | 2245.167        | S(41) |
| G  | 2  | 81.547          | 2210.766        | 2203.757        | 0.504           | 2202.251        | G(40) |
| R  | 3  | 180.621         | 2182.255        | 2174.246        | 2174.750        | 2173.742        | R(39) |
| G  | 4  | 209.132         | 2083.181        | 2075.172        | 2075.676        | 2074.668        | G(38) |
| K  | 5  | 273.180         | 2054.671        | 2046.661        | 2047.165        | 2046.157        | K(37) |
| G  | 6  | 337.209         | 1990.622        | 1982.614        | 1983.118        | 1982.110        | G(36) |
| G  | 7  | 385.720         | 1926.594        | 1918.584        | 1919.088        | 1918.080        | G(35) |
| G  | 8  | 394.230         | 1898.081        | <b>1890.074</b> | <b>1890.578</b> | 1889.570        | G(34) |
| K  | 9  | <b>458.278</b>  | 1869.572        | 1861.563        | 1862.067        | 1861.059        | K(33) |
| A  | 10 | 493.796         | 1805.525        | 1797.516        | 1798.019        | 1797.012        | A(32) |
| R  | 11 | <b>571.847</b>  | 1770.008        | 1762.000        | 1762.503        | 1761.495        | R(31) |
| A  | 12 | <b>607.305</b>  | 1691.995        | <b>1683.986</b> | <b>1684.490</b> | <b>1683.483</b> | A(30) |
| R  | 13 | <b>671.413</b>  | 1656.437        | 1648.428        | <b>1648.932</b> | 1647.924        | R(29) |
| A  | 14 | <b>706.931</b>  | 1592.390        | 1584.380        | 1584.884        | 1583.876        | A(28) |
| K  | 15 | <b>770.979</b>  | 1556.971        | 1548.962        | 1549.466        | 1548.458        | K(27) |
| T  | 16 | <b>821.503</b>  | 1492.824        | <b>1484.814</b> | <b>1485.318</b> | <b>1484.310</b> | T(26) |
| R  | 17 | <b>899.553</b>  | 1442.360        | 1434.350        | <b>1434.794</b> | 1433.787        | R(25) |
| S  | 18 | 933.609         | 1384.249        | <b>1356.240</b> | <b>1356.744</b> | 1355.736        | S(24) |
| S  | 19 | <b>986.585</b>  | 1320.733        | <b>1312.724</b> | <b>1313.228</b> | <b>1312.220</b> | S(23) |
| R  | 20 | <b>1064.636</b> | 1277.217        | 1269.208        | 1269.712        | 1268.704        | R(22) |
| A  | 21 | <b>1100.155</b> | <b>1199.167</b> | <b>1191.157</b> | <b>1191.661</b> | 1190.653        | A(21) |
| G  | 22 | <b>1128.665</b> | <b>1163.648</b> | 1155.639        | <b>1156.143</b> | 1155.135        | G(20) |
| L  | 23 | <b>1185.207</b> | <b>1135.137</b> | 1127.128        | <b>1127.632</b> | 1126.624        | L(19) |
| Q  | 24 | <b>1249.237</b> | <b>1070.586</b> | <b>1070.586</b> | <b>1071.090</b> | 1070.082        | Q(18) |
| F  | 25 | <b>1322.771</b> | <b>1014.566</b> | <b>1006.557</b> | <b>1007.061</b> | <b>1006.053</b> | F(17) |
| F  | 26 | 1371.297        | 941.053         | 933.043         | 933.546         | 932.538         | F(16) |
| V  | 27 | 1420.811        | 892.506         | <b>884.496</b>  | <b>885.000</b>  | 883.992         | V(15) |
| G  | 28 | 1469.324        | <b>842.971</b>  | <b>834.962</b>  | <b>835.466</b>  | <b>834.458</b>  | G(14) |
| R  | 29 | 1527.838        | <b>814.461</b>  | <b>806.451</b>  | <b>806.955</b>  | <b>805.947</b>  | R(13) |
| V  | 30 | 1576.352        | 736.410         | 728.401         | 728.905         | 727.897         | V(12) |
| H  | 31 | 1645.456        | 688.876         | <b>678.866</b>  | <b>679.370</b>  | 678.363         | H(11) |
| R  | 32 | 1723.507        | 618.346         | 610.337         | 610.841         | 609.833         | R(10) |
| L  | 33 | 1780.049        | 540.296         | 532.286         | 532.790         | 531.783         | L(9)  |
| L  | 34 | 1838.563        | 469.754         | 461.744         | 462.248         | 461.241         | L(8)  |
| R  | 35 | 1914.641        | 427.212         | 419.202         | 419.706         | 418.698         | R(7)  |
| K  | 36 | 1978.689        | 349.161         | 341.152         | 341.656         | 340.648         | K(6)  |
| G  | 37 | 2067.200        | 285.114         | 277.104         | 277.608         | 276.600         | G(5)  |
| N  | 38 | 2094.221        | 256.603         | 248.594         | 249.098         | 248.090         | N(4)  |
| V  | 39 | 2145.753        | 189.562         | 181.552         | 182.056         | 181.048         | V(3)  |
| S  | 40 | 2189.266        | 118.050         | 110.041         | 110.544         | 109.536         | S(2)  |
| E  | 41 | 2253.790        | 74.534          | 66.524          | 67.028          | 66.021          | E(1)  |

# sp | Q8CGP5 | H2A1F\_MOUSE

SGR<sup>Trimethyl</sup><sub>42.05</sub> GKQGGKARAKAKTRSSRAGLQFPVGRVHLLRKGNYSE

- ▶ fragmentation table for charge state 3+
- ▶ specType=etd
- ▶ score=42.93
- ▶ F104940.dat
- ▶ query=q3760\_p1
- ▶ precursor=644.797630
- ▶ chargePrecursor=7
- ▶ itol=0.8

| AA | c  | y               | #s1             | #s2             | z               | AA              |       |
|----|----|-----------------|-----------------|-----------------|-----------------|-----------------|-------|
| S  | 1  | 35.903          | 1502.191        | 1497.831        | 0.572           | 1497.511        | S[41] |
| G  | 2  | 54.702          | 1474.180        | 1468.840        | 0.972           | 1468.504        | G[40] |
| R  | 3  | 150.750         | 1455.173        | 1449.833        | <b>1450.169</b> | 1449.407        | R[39] |
| G  | 4  | 159.757         | 1389.123        | 1383.784        | <b>1384.120</b> | 1383.440        | G[38] |
| K  | 5  | 182.455         | 1370.116        | <b>1364.777</b> | <b>1365.113</b> | <b>1364.441</b> | K[37] |
| G  | 6  | 225.142         | 1327.418        | <b>1322.078</b> | <b>1322.414</b> | <b>1321.742</b> | G[36] |
| G  | 7  | 264.189         | 1284.723        | <b>1279.382</b> | <b>1279.728</b> | 1279.056        | G[35] |
| G  | 8  | 263.156         | 1265.725        | <b>1260.385</b> | <b>1260.721</b> | 1260.040        | G[34] |
| K  | 9  | 305.654         | 1246.717        | 1241.378        | 1241.714        | 1241.042        | K[33] |
| A  | 10 | 329.513         | 1204.019        | <b>1198.679</b> | <b>1199.015</b> | 1198.344        | A[32] |
| R  | 11 | 381.567         | 1180.310        | 1175.000        | 1175.336        | 1174.664        | R[31] |
| A  | 12 | 405.266         | <b>1178.306</b> | 1172.997        | 1173.303        | 1172.631        | A[30] |
| R  | 13 | 447.844         | 1124.627        | <b>1099.288</b> | <b>1099.624</b> | <b>1098.952</b> | R[29] |
| A  | 14 | 491.623         | 1081.929        | 1076.509        | <b>1056.925</b> | 1056.251        | A[28] |
| K  | 15 | 514.322         | <b>1038.250</b> | <b>1032.910</b> | <b>1033.246</b> | 1032.574        | K[27] |
| T  | 16 | 548.024         | 995.552         | <b>990.212</b>  | <b>990.548</b>  | <b>989.876</b>  | T[26] |
| R  | 17 | 600.026         | 961.869         | <b>956.529</b>  | <b>956.865</b>  | 956.191         | R[25] |
| S  | 18 | 628.690         | 909.835         | 904.425         | 904.753         | 904.160         | S[24] |
| S  | 19 | <b>658.959</b>  | 880.825         | <b>875.485</b>  | <b>875.821</b>  | 875.149         | S[23] |
| R  | 20 | <b>710.093</b>  | 851.814         | <b>846.474</b>  | <b>846.810</b>  | <b>846.138</b>  | R[22] |
| A  | 21 | <b>733.772</b>  | 799.780         | <b>794.441</b>  | <b>794.777</b>  | <b>794.105</b>  | A[21] |
| G  | 22 | <b>752.779</b>  | 776.101         | <b>770.762</b>  | <b>771.098</b>  | <b>770.426</b>  | G[20] |
| L  | 23 | <b>790.474</b>  | 752.094         | 747.753         | <b>752.090</b>  | 751.419         | L[19] |
| Q  | 24 | <b>833.160</b>  | 719.366         | 714.990         | 715.624         | 715.251         | Q[18] |
| F  | 25 | 882.183         | 676.713         | <b>671.374</b>  | <b>671.710</b>  | <b>671.038</b>  | F[17] |
| F  | 26 | 914.534         | 627.600         | 622.351         | 622.887         | 622.015         | F[16] |
| V  | 27 | <b>947.557</b>  | 595.139         | 590.000         | 590.336         | 589.664         | V[15] |
| G  | 28 | <b>966.564</b>  | 562.317         | 556.977         | 557.313         | 556.641         | G[14] |
| R  | 29 | 1015.558        | 543.309         | 537.970         | 538.306         | 537.634         | R[13] |
| V  | 30 | <b>1051.620</b> | 491.276         | 485.938         | 486.272         | 485.600         | V[12] |
| H  | 31 | 1097.307        | <b>458.253</b>  | 452.913         | 453.249         | 452.577         | H[11] |
| R  | 32 | 1149.340        | 412.967         | 407.227         | 407.563         | 406.891         | R[10] |
| L  | 33 | 1187.035        | <b>360.533</b>  | 355.193         | 355.529         | 354.857         | L[9]  |
| L  | 34 | 1234.730        | 322.576         | 317.489         | 317.826         | 317.154         | L[8]  |
| R  | 35 | 1276.763        | 285.144         | 279.804         | 280.140         | 279.468         | R[7]  |
| K  | 36 | 1319.462        | 233.110         | 227.770         | 228.106         | 227.434         | K[6]  |
| G  | 37 | 1388.469        | 190.412         | 185.072         | 185.408         | 184.736         | G[5]  |
| N  | 38 | 1376.483        | 171.404         | 166.065         | 166.401         | 165.729         | N[4]  |
| V  | 39 | 1430.836        | 133.290         | 128.051         | 128.386         | 127.715         | V[3]  |
| S  | 40 | 1459.846        | 99.136          | 93.900          | 94.232          | 93.560          | S[2]  |
| E  | 41 | 1502.863        | 50.025          | 44.685          | 45.021          | 44.349          | E[1]  |

# sp | Q8CGP5 | H2A1F\_MOUSE

SGR<sup>Trimethyl</sup><sub>42.05</sub> GKQGGKARAKAKTRSSRAGLQFPVGRVHLLLRKGNYS

- ▶ fragmentation table for charge state 4+
- ▶ specType=etd
- ▶ score=42.93
- ▶ F104940.dat
- ▶ query=q3760\_p1
- ▶ precursor=644.797630
- ▶ chargePrecursor=7
- ▶ itol=0.8

| AA   | c              | y               | z+1             | z+2             | z               | AA   |
|------|----------------|-----------------|-----------------|-----------------|-----------------|------|
| S 1  | 27.022         | 1127.645        | 1173.640        | 0.755           | 1173.380        | S 41 |
| G 2  | 41.277         | 1105.887        | <b>1101.882</b> | 0.755           | 1101.630        | G 40 |
| R 3  | 90.814         | <b>1091.631</b> | 1087.629        | 1087.879        | 1087.375        | R 39 |
| G 4  | 105.070        | 1042.094        | <b>1038.090</b> | <b>1038.342</b> | <b>1037.838</b> | G 38 |
| K 5  | 137.083        | 1027.839        | <b>1023.834</b> | <b>1024.086</b> | <b>1023.582</b> | K 37 |
| Q 6  | 169.138        | 998.815         | 943.311         | <b>992.062</b>  | 991.559         | Q 36 |
| G 7  | 153.353        | 953.801         | <b>955.796</b>  | <b>960.048</b>  | 955.545         | G 35 |
| G 8  | 197.819        | 949.545         | <b>945.541</b>  | <b>945.792</b>  | <b>945.289</b>  | G 34 |
| K 9  | 229.643        | 935.290         | 911.285         | 931.537         | 931.031         | K 33 |
| A 10 | 247.402        | <b>903.266</b>  | <b>899.261</b>  | <b>899.513</b>  | <b>899.009</b>  | A 32 |
| R 11 | 286.427        | <b>885.507</b>  | 881.502         | 881.754         | 881.250         | R 31 |
| A 12 | 308.188        | <b>846.482</b>  | <b>842.477</b>  | <b>842.729</b>  | <b>842.225</b>  | A 30 |
| R 13 | 336.210        | 828.722         | <b>824.718</b>  | <b>824.970</b>  | <b>824.466</b>  | R 29 |
| A 14 | 353.989        | 796.699         | <b>792.694</b>  | <b>792.946</b>  | <b>792.442</b>  | A 28 |
| K 15 | 385.993        | 778.939         | 774.935         | 775.187         | 774.681         | K 27 |
| T 16 | 411.255        | 746.915         | <b>742.911</b>  | <b>743.163</b>  | <b>742.659</b>  | T 26 |
| R 17 | 450.260        | 721.694         | <b>717.689</b>  | <b>717.941</b>  | <b>717.397</b>  | R 25 |
| S 18 | 472.038        | 692.828         | <b>678.824</b>  | <b>678.876</b>  | 678.372         | S 24 |
| S 19 | 483.796        | <b>660.870</b>  | 656.865         | 657.118         | 656.614         | S 23 |
| R 20 | 512.820        | 639.112         | 635.108         | 635.360         | 634.856         | R 22 |
| A 21 | 550.541        | 600.087         | 596.082         | 596.334         | 595.830         | A 21 |
| G 22 | 564.836        | 582.126         | 578.121         | 578.375         | 578.071         | G 20 |
| L 23 | 593.107        | 556.072         | 549.068         | 549.320         | 548.816         | L 19 |
| Q 24 | <b>625.122</b> | 539.803         | 535.797         | 536.049         | 535.545         | Q 19 |
| F 25 | <b>661.889</b> | 507.787         | 503.782         | 504.034         | 503.530         | F 17 |
| F 26 | 686.192        | 471.020         | 467.015         | 467.267         | 466.763         | F 16 |
| V 27 | <b>710.919</b> | 446.756         | 442.752         | 443.004         | 442.500         | V 15 |
| G 28 | 725.175        | 421.989         | <b>417.985</b>  | 418.237         | <b>417.733</b>  | G 14 |
| R 29 | 756.322        | 407.734         | 403.729         | 403.981         | 403.477         | R 13 |
| V 30 | <b>788.967</b> | 368.769         | 364.764         | 364.996         | 364.492         | V 12 |
| H 31 | <b>823.232</b> | 343.942         | 339.937         | 340.189         | 339.685         | H 11 |
| R 32 | <b>862.257</b> | 309.677         | 305.672         | 305.924         | 305.420         | R 10 |
| L 33 | <b>890.528</b> | 270.652         | 266.647         | 266.899         | 266.395         | L 9  |
| L 34 | <b>918.799</b> | 242.381         | 238.376         | 238.628         | 238.124         | L 8  |
| H 35 | <b>957.824</b> | 214.130         | 210.125         | 210.387         | 209.883         | H 7  |
| R 36 | 992.545        | 175.084         | 171.080         | 171.332         | 170.828         | R 6  |
| G 37 | 1004.103       | 143.061         | 139.056         | 139.308         | 138.804         | G 5  |
| N 38 | 1032.614       | 128.805         | 124.800         | 125.052         | 124.548         | N 4  |
| V 39 | 1073.380       | 100.294         | 96.290          | 96.542          | 96.038          | V 3  |
| S 40 | 1095.138       | 59.529          | 55.524          | 55.776          | 55.272          | S 2  |
| E 41 | 1127.389       | 37.711          | 33.706          | 34.018          | 33.514          | E 1  |



# sp | Q8CGP5 | H2A1F\_MOUSE

SGR<sup>Trimethyl</sup><sub>42.05</sub> GKQG GKARAKAKTRSSRAGLQFPVGRVHLLLRKGNYS

- ▶ fragmentation table for charge state 5+
- ▶ specType=etd
- ▶ score=42.93
- ▶ F104940.dat
- ▶ query=q3760\_p1
- ▶ precursor=644.797630
- ▶ chargePrecursor=7
- ▶ itol=0.8

| AA   | c              | y              | z+1            | z#2            | z              | AA   |
|------|----------------|----------------|----------------|----------------|----------------|------|
| S 1  | 21.819         | <b>902.317</b> | <b>899.113</b> | 0.806          | <b>898.912</b> | S 41 |
| G 2  | 33.223         | <b>884.911</b> | 883.707        | 0.806          | 881.506        | G 40 |
| R 3  | 72.853         | <b>873.507</b> | 870.303        | 870.504        | 870.101        | R 39 |
| G 4  | 84.257         | <b>833.877</b> | 830.673        | 830.875        | 830.472        | G 38 |
| K 5  | 109.876        | <b>822.473</b> | 819.269        | 819.470        | 819.067        | K 37 |
| Q 6  | 135.488        | 796.954        | <b>793.650</b> | <b>793.851</b> | <b>793.448</b> | Q 36 |
| G 7  | 146.692        | <b>771.242</b> | 768.038        | 768.240        | 767.837        | G 35 |
| G 8  | 158.296        | 759.838        | 756.634        | 756.835        | 756.432        | G 34 |
| K 9  | 183.915        | 748.433        | <b>745.230</b> | <b>745.431</b> | <b>745.028</b> | K 33 |
| A 10 | 198.123        | 722.814        | 719.611        | 719.812        | 719.409        | A 32 |
| R 11 | 229.343        | 708.607        | 705.403        | 705.605        | 705.202        | R 31 |
| A 12 | 243.551        | 677.387        | <b>674.183</b> | 674.385        | <b>673.981</b> | A 30 |
| K 13 | 269.170        | 663.179        | <b>659.976</b> | <b>660.177</b> | <b>659.774</b> | K 29 |
| A 14 | 283.377        | 637.560        | 634.357        | 634.558        | 634.155        | A 28 |
| K 15 | 308.996        | 623.353        | 620.149        | 620.351        | 619.948        | K 27 |
| T 16 | 329.205        | 597.734        | 594.530        | 594.732        | 594.329        | T 26 |
| R 17 | <b>360.426</b> | 577.524        | 574.321        | 574.522        | 574.119        | R 25 |
| S 18 | 377.832        | 546.304        | 543.100        | 543.302        | 542.899        | S 24 |
| S 19 | 399.239        | 538.898        | 529.694        | 529.896        | 529.492        | S 23 |
| R 20 | 426.459        | 511.491        | 508.288        | 508.489        | 508.086        | R 22 |
| A 21 | 440.666        | 480.271        | 477.067        | 477.269        | 476.866        | A 21 |
| G 22 | 452.070        | 466.064        | 462.860        | 463.061        | 462.658        | G 20 |
| L 23 | 474.687        | 494.659        | 451.456        | 451.657        | 451.254        | L 19 |
| Q 24 | 500.299        | 432.043        | 428.839        | 429.040        | 428.637        | Q 18 |
| F 25 | 529.713        | 406.431        | 403.227        | 403.429        | 403.026        | F 17 |
| P 26 | 549.123        | 377.017        | 373.813        | 374.015        | 373.612        | P 16 |
| V 27 | 568.537        | 357.607        | 354.403        | 354.604        | 354.201        | V 15 |
| G 28 | 580.341        | 337.793        | 334.589        | 334.791        | 334.388        | G 14 |
| R 29 | 611.561        | 326.389        | 323.185        | 323.386        | 322.983        | R 13 |
| V 30 | 631.375        | 295.168        | 291.965        | 292.166        | 291.763        | V 12 |
| H 31 | <b>658.787</b> | 275.355        | 272.151        | 272.353        | 271.949        | H 11 |
| R 32 | 690.007        | 247.943        | 244.739        | 244.941        | 244.538        | R 10 |
| L 33 | 712.624        | 216.723        | 213.519        | 213.721        | 213.317        | L 9  |
| L 34 | 735.241        | 194.109        | 190.902        | 191.104        | 190.701        | L 8  |
| R 35 | 766.461        | 171.489        | 168.283        | 168.487        | 168.084        | R 7  |
| K 36 | 782.080        | 140.269        | 137.065        | 137.267        | 136.864        | K 6  |
| G 37 | 803.884        | 114.650        | 111.446        | 111.648        | 111.245        | G 5  |
| N 38 | 826.793        | 103.240        | 100.042        | 100.243        | 99.840         | N 4  |
| V 39 | <b>858.905</b> | 80.437         | 77.233         | 77.435         | 77.032         | V 3  |
| S 40 | <b>876.312</b> | 47.824         | 44.621         | 44.822         | 44.419         | S 2  |
| E 41 | 902.120        | 30.418         | 27.214         | 27.416         | 27.013         | E 1  |

# sp | Q8CGP5 | H2A1F\_MOUSE

SGR<sup>Trimethyl</sup><sub>42.05</sub> GKQGKARAKAKTRSSRAGLQFPVGRVHLLRKGNYSE

- ▶ fragmentation table for charge state 6+
- ▶ specType=etd
- ▶ score=42.93
- ▶ F104940.dat
- ▶ query=q3760\_p1
- ▶ precursor=644.797630
- ▶ chargePrecursor=7
- ▶ itol=0.8

| AA | c  | y              | z#1            | z#2            | z              | AA             |   |    |
|----|----|----------------|----------------|----------------|----------------|----------------|---|----|
| S  | 1  | 18.350         | <b>752.099</b> | 749.420        | 0.839          | 149.261        | S | 41 |
| G  | 2  | 27.854         | 737.594        | 734.924        | 0.839          | 734.756        | G | 40 |
| R  | 3  | 60.879         | 728.090        | 725.420        | 725.588        | 725.252        | R | 39 |
| G  | 4  | 70.382         | 695.005        | 692.396        | 692.563        | 692.228        | G | 38 |
| K  | 5  | 91.731         | 685.562        | 682.892        | 683.060        | 682.724        | K | 37 |
| Q  | 6  | 113.074        | 664.213        | <b>661.543</b> | <b>661.711</b> | <b>661.375</b> | Q | 36 |
| G  | 7  | 122.578        | 642.869        | 640.200        | 640.368        | 640.032        | G | 35 |
| G  | 8  | 132.082        | 631.366        | 630.696        | 630.864        | 630.528        | G | 34 |
| K  | 9  | 153.431        | 623.862        | 621.193        | 621.360        | 621.025        | K | 33 |
| A  | 10 | 165.270        | 602.513        | 599.843        | 600.011        | 599.675        | A | 32 |
| R  | 11 | 191.387        | 590.674        | 588.004        | 588.172        | 587.836        | R | 31 |
| A  | 12 | 203.127        | 564.657        | 561.987        | 562.155        | 561.819        | A | 30 |
| K  | 13 | 224.476        | 552.817        | 550.147        | 550.315        | 549.980        | K | 29 |
| A  | 14 | 236.315        | 531.468        | 528.798        | 528.966        | 528.630        | A | 28 |
| K  | 15 | 257.665        | 519.629        | 516.959        | 517.127        | 516.791        | K | 27 |
| T  | 16 | 274.506        | 498.279        | 495.610        | 495.778        | 495.442        | T | 26 |
| R  | 17 | 300.523        | 481.438        | 478.768        | 478.936        | 478.600        | R | 25 |
| S  | 18 | 313.028        | 455.421        | 452.752        | 452.919        | 452.584        | S | 24 |
| S  | 19 | 329.533        | 440.916        | 438.246        | 438.414        | 438.078        | S | 23 |
| R  | 20 | 355.550        | 426.411        | 423.741        | 423.909        | 423.573        | R | 22 |
| A  | 21 | 367.390        | 400.994        | 397.724        | 397.892        | 397.556        | A | 21 |
| G  | 22 | 376.893        | 388.554        | 385.884        | 386.052        | 385.716        | G | 20 |
| L  | 23 | 395.741        | 379.051        | 376.381        | 376.549        | 376.213        | L | 19 |
| Q  | 24 | <b>417.084</b> | <b>360.203</b> | 357.534        | 357.702        | 357.366        | Q | 18 |
| P  | 25 | 441.595        | 338.880        | 336.190        | 336.358        | 336.022        | P | 17 |
| P  | 26 | 457.771        | 314.346        | 311.676        | 311.844        | 311.511        | P | 16 |
| V  | 27 | 474.282        | 298.173        | 295.503        | 295.672        | 295.336        | V | 15 |
| G  | 28 | 483.786        | 281.662        | 278.992        | 279.160        | 278.824        | G | 14 |
| R  | 29 | 509.802        | 272.158        | 269.488        | 269.657        | 269.321        | R | 13 |
| V  | 30 | 526.314        | 246.142        | 243.472        | 243.640        | 243.304        | V | 12 |
| H  | 31 | 549.157        | 229.630        | 226.960        | 227.128        | 226.792        | H | 11 |
| R  | 32 | 575.174        | 206.787        | 204.117        | 204.285        | 203.949        | R | 10 |
| L  | 33 | 594.021        | 180.770        | 178.100        | 178.268        | 177.932        | L | 9  |
| L  | 34 | 612.868        | 161.923        | 159.253        | 159.421        | 159.085        | L | 8  |
| R  | 35 | 638.885        | 143.075        | 140.405        | 140.574        | 140.238        | R | 7  |
| R  | 36 | <b>660.235</b> | 117.099        | 114.389        | 114.557        | 114.221        | R | 6  |
| G  | 37 | 669.738        | 95.709         | 93.040         | 93.208         | 92.872         | G | 5  |
| N  | 38 | 688.745        | 86.206         | 83.536         | 83.704         | 83.368         | N | 4  |
| V  | 39 | 715.922        | 67.199         | 64.529         | 64.697         | 64.361         | V | 3  |
| S  | 40 | <b>730.428</b> | 40.021         | 37.352         | 37.520         | 37.184         | S | 2  |
| E  | 41 | <b>751.935</b> | 25.516         | 22.846         | 23.014         | 22.678         | E | 1  |



# sp | Q6GSS7 | H2A2A\_MOUSE

LNKLLGKVTIAQGGVLPNIQAVLLPKK<sup>Methyl</sup> TE  
14.02

- ▶ fragmentation table for charge state 1+
- ▶ specType=etd
- ▶ score=37.81
- ▶ F104941.dat
- ▶ query=q1320\_p1
- ▶ precursor=768.229700
- ▶ chargePrecursor=4
- ▶ itol=0.8

| AA    | c               | y               | z+1            | z+2             | z               | AA    |
|-------|-----------------|-----------------|----------------|-----------------|-----------------|-------|
| L[1]  | 131.118         | 3069.876        | 3053.857       | 0.000           | 3052.890        | L[26] |
| N[2]  | 245.161         | 2956.792        | 2940.773       | 2941.701        | 2939.766        | N[28] |
| K[3]  | <b>373.256</b>  | 2842.748        | 2826.730       | 2827.736        | 2825.721        | K[27] |
| L[4]  | <b>486.340</b>  | 2714.654        | 2698.636       | 2699.643        | 2697.628        | L[26] |
| L[5]  | <b>599.424</b>  | 2601.570        | 2585.551       | 2586.559        | 2584.544        | L[25] |
| G[6]  | <b>656.445</b>  | 2488.486        | 2472.467       | 2473.475        | 2471.460        | G[24] |
| K[7]  | 764.540         | 2431.465        | 2415.446       | 2416.454        | 2414.439        | K[23] |
| V[8]  | 883.609         | 2303.370        | 2287.351       | 2288.359        | 2286.343        | V[22] |
| T[9]  | <b>984.656</b>  | 2204.301        | 2188.283       | 2189.290        | 2187.275        | T[21] |
| I[10] | <b>1097.740</b> | 2103.254        | 2087.235       | 2088.243        | 2086.227        | I[20] |
| A[11] | <b>1168.778</b> | 1990.170        | 1974.151       | 1975.159        | 1973.143        | A[19] |
| Q[12] | <b>1296.836</b> | 1879.132        | 1863.113       | 1864.122        | 1862.106        | Q[18] |
| G[13] | <b>1353.858</b> | 1791.074        | 1775.055       | <b>1776.063</b> | 1774.047        | G[17] |
| G[14] | 1410.879        | 1734.052        | 1718.034       | 1719.041        | 1717.026        | G[16] |
| V[15] | 1509.948        | <b>1677.031</b> | 1661.012       | 1662.020        | 1660.004        | V[15] |
| L[16] | 1623.012        | 1577.963        | 1561.944       | <b>1562.952</b> | 1560.936        | L[14] |
| T[17] | 1720.084        | 1494.875        | 1448.860       | <b>1449.868</b> | 1447.853        | T[13] |
| N[18] | 1834.127        | 1387.826        | 1353.807       | <b>1352.815</b> | 1350.799        | N[12] |
| I[19] | 1947.211        | <b>1253.783</b> | 1237.764       | 1238.772        | <b>1236.756</b> | I[11] |
| Q[20] | 2075.270        | 1140.699        | 1124.680       | 1125.688        | <b>1123.672</b> | Q[10] |
| A[21] | 2146.307        | 1012.640        | 996.621        | <b>997.629</b>  | 995.614         | A[9]  |
| V[22] | 2245.375        | 941.603         | 925.584        | 926.592         | <b>924.576</b>  | V[8]  |
| L[23] | 2359.400        | 842.535         | 826.516        | <b>827.524</b>  | 825.509         | L[7]  |
| L[24] | 2471.544        | 759.481         | <b>713.432</b> | <b>714.440</b>  | 712.424         | L[6]  |
| P[25] | 2568.596        | 616.366         | 600.348        | 601.356         | <b>599.340</b>  | P[5]  |
| K[26] | 2696.691        | 519.314         | <b>503.295</b> | <b>504.303</b>  | 502.287         | K[4]  |
| K[27] | 2838.802        | 391.219         | <b>375.200</b> | <b>376.208</b>  | 374.192         | K[3]  |
| T[28] | 2939.850        | 249.106         | 233.089        | 234.097         | 232.082         | T[2]  |
| E[29] | 3068.892        | 149.060         | 132.942        | 133.950         | 131.934         | E[1]  |

# sp | Q6GSS7 | H2A2A\_MOUSE

LNKLLGKVTIAQGGVLPNIQAVLLPKK<sup>Methyl</sup> TE  
14.02

- ▶ fragmentation table for charge state 2+
- ▶ specType=etd
- ▶ score=37.81
- ▶ F104941.dat
- ▶ query=q1320\_p1
- ▶ precursor=768.229700
- ▶ chargePrecursor=4
- ▶ itol=0.8

| AA  | c               | y               | z+1             | z+2             | z               | AA   |
|-----|-----------------|-----------------|-----------------|-----------------|-----------------|------|
| L1  | 66.053          | <b>1535.442</b> | <b>1527.432</b> | 9.504           | <b>1526.929</b> | L129 |
| N1  | 123.084         | 1476.905        | <b>1470.890</b> | <b>1471.394</b> | <b>1470.395</b> | N20  |
| K1  | 187.132         | <b>1421.878</b> | <b>1413.869</b> | 1414.373        | <b>1413.365</b> | K27  |
| L1  | 243.674         | 1357.811        | <b>1349.821</b> | 1350.325        | <b>1349.317</b> | L26  |
| L1  | 300.216         | 1301.269        | <b>1293.279</b> | <b>1293.783</b> | <b>1292.775</b> | L25  |
| G1  | 339.709         | <b>1244.747</b> | <b>1236.737</b> | <b>1237.241</b> | <b>1236.233</b> | G24  |
| K1  | 392.774         | <b>1216.236</b> | <b>1208.227</b> | 1208.731        | 1207.723        | K23  |
| V1  | 442.308         | <b>1152.188</b> | <b>1144.179</b> | <b>1144.683</b> | <b>1143.675</b> | V22  |
| T1  | 492.832         | 1102.654        | <b>1094.645</b> | <b>1095.149</b> | <b>1094.141</b> | T21  |
| T10 | 549.374         | 1052.130        | <b>1044.121</b> | <b>1044.625</b> | 1043.617        | T20  |
| A11 | 604.892         | 995.588         | 987.579         | <b>988.083</b>  | 987.075         | A19  |
| Q1  | 648.922         | 950.070         | 942.060         | <b>942.564</b>  | 941.551         | Q18  |
| G13 | 677.432         | 898.041         | <b>888.031</b>  | <b>888.535</b>  | <b>887.527</b>  | G17  |
| G14 | 705.943         | 867.530         | 859.520         | 860.024         | 859.017         | G16  |
| V15 | 755.477         | 839.019         | 831.010         | 831.514         | 830.506         | V15  |
| L16 | 812.019         | 789.495         | <b>781.476</b>  | <b>781.979</b>  | 780.972         | L14  |
| T17 | 890.546         | 732.943         | 724.933         | 725.437         | 724.430         | T13  |
| N18 | <b>917.567</b>  | 684.416         | 676.407         | 676.911         | 675.903         | N12  |
| I19 | 974.109         | 627.995         | 619.986         | 619.990         | 618.982         | I11  |
| Q20 | 1038.139        | 570.953         | 562.944         | 563.448         | 562.440         | Q10  |
| A21 | 1073.657        | 508.824         | 498.814         | 499.318         | 498.310         | A0   |
| V22 | <b>1123.191</b> | 471.305         | 463.296         | 463.800         | 462.792         | V8   |
| L23 | 1179.713        | 423.771         | 413.762         | 414.266         | 413.258         | L17  |
| L24 | <b>1236.275</b> | 385.228         | 375.220         | 375.723         | 374.715         | L16  |
| P25 | 1284.802        | 308.687         | 300.678         | 301.181         | 300.174         | P15  |
| K26 | <b>1348.849</b> | 260.160         | 252.151         | 252.655         | 251.647         | K4   |
| K27 | 1419.905        | 196.113         | 188.104         | 188.608         | 187.600         | K3   |
| T28 | <b>1470.428</b> | 125.058         | 117.048         | 117.552         | 116.544         | T12  |
| E29 | <b>1534.960</b> | 74.534          | 66.524          | 67.028          | 66.021          | E1   |

# sp | Q6GSS7 | H2A2A\_MOUSE

LNKLLGKVTIAQGGVLPNIQAVLLPKK<sup>Methyl</sup> TE  
14.02

- ▶ fragmentation table for charge state 3+
- ▶ specType=etd
- ▶ score=37.81
- ▶ F104941.dat
- ▶ query=q1320\_p1
- ▶ precursor=768.229700
- ▶ chargePrecursor=4
- ▶ itol=0.8

| AA    | c               | y               | z+1             | z+2            | z               | AA    |
|-------|-----------------|-----------------|-----------------|----------------|-----------------|-------|
| L[1]  | 44.577          | <b>1023.904</b> | <b>1018.624</b> | 0.672          | <b>1018.288</b> | L[28] |
| N[2]  | 82.302          | 988.260         | <b>980.929</b>  | <b>981.265</b> | <b>980.593</b>  | N[28] |
| K[3]  | 125.090         | <b>948.255</b>  | <b>942.915</b>  | <b>943.251</b> | <b>942.579</b>  | K[27] |
| L[4]  | 162.785         | 905.550         | 908.217         | 900.553        | 899.881         | L[26] |
| L[5]  | 200.479         | 867.862         | 862.522         | 862.858        | 862.186         | L[25] |
| Q[6]  | 239.887         | 830.169         | 824.807         | 825.183        | 824.499         | Q[24] |
| K[7]  | 282.185         | 811.160         | 805.820         | 806.156        | 805.484         | K[23] |
| V[8]  | 395.268         | 768.461         | 763.122         | 763.458        | 762.788         | V[22] |
| T[9]  | 528.890         | 735.439         | 730.099         | 730.435        | 729.763         | T[21] |
| T[10] | 565.585         | 701.750         | 696.410         | 696.752        | 696.081         | T[20] |
| A[11] | 690.254         | 664.061         | 658.722         | 659.058        | 658.386         | A[19] |
| Q[12] | 832.950         | 640.361         | 635.023         | 635.359        | 634.701         | Q[18] |
| G[13] | 451.957         | 597.666         | 592.327         | 592.663        | 592.021         | G[17] |
| G[14] | 470.965         | 578.680         | 573.349         | 573.685        | 573.013         | G[16] |
| V[15] | <b>503.987</b>  | 559.687         | 554.342         | 554.678        | 554.009         | V[15] |
| L[16] | 541.682         | 526.650         | 521.310         | 521.655        | 520.984         | L[14] |
| F[17] | 574.833         | 488.964         | 483.625         | 483.961        | 483.289         | F[13] |
| T[18] | 613.287         | 456.811         | 451.474         | 451.810        | 451.138         | T[12] |
| T[19] | 649.742         | 418.590         | 413.250         | 413.595        | 412.924         | T[11] |
| Q[20] | 692.428         | 380.904         | <b>375.565</b>  | <b>375.901</b> | <b>375.229</b>  | Q[10] |
| A[21] | 716.407         | 338.218         | 332.879         | 333.215        | 332.543         | A[9]  |
| V[22] | 749.130         | 314.539         | 309.200         | 309.536        | 308.864         | V[9]  |
| L[23] | 786.825         | 281.516         | 276.177         | 276.513        | 275.841         | L[7]  |
| L[24] | 824.519         | 243.927         | 238.588         | 238.918        | 238.246         | L[6]  |
| P[25] | 856.870         | 206.127         | 200.787         | 201.123        | 200.451         | P[5]  |
| K[26] | 899.569         | 173.776         | 168.437         | 168.772        | 168.101         | K[4]  |
| K[27] | <b>946.939</b>  | 131.078         | 125.738         | 126.074        | 125.402         | K[3]  |
| T[28] | <b>980.621</b>  | 83.708          | 78.368          | 78.704         | 78.032          | T[2]  |
| E[29] | <b>1023.636</b> | 50.625          | 44.685          | 45.021         | 44.349          | E[1]  |

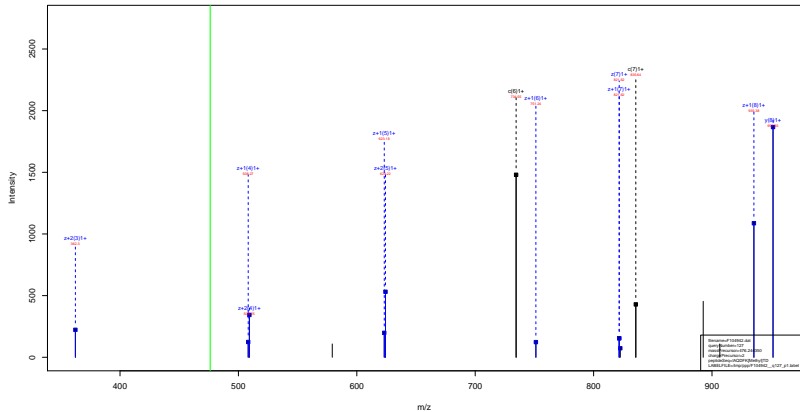

# sp | P68433 | H31\_MOUSE

IAQDFK<sup>Methyl</sup>TD  
14.02

- ▶ fragmentation table for charge state 1+
- ▶ specType=etd
- ▶ score=41.95
- ▶ F104942.dat
- ▶ query=q127\_p1
- ▶ precursor=476.244350
- ▶ chargePrecursor=2
- ▶ itol=0.8

| AA  | c              | y              | z+1            | z+2            | z              | AA  |
|-----|----------------|----------------|----------------|----------------|----------------|-----|
| I 1 | 131.118        | <b>951.478</b> | <b>935.459</b> | 0.000          | 934.452        | I 8 |
| A 2 | 202.155        | 838.394        | <b>822.375</b> | 0.000          | <b>821.368</b> | A 7 |
| Q 3 | 330.214        | 767.357        | <b>751.338</b> | 752.346        | 750.330        | Q 6 |
| D 4 | 445.241        | 639.298        | <b>623.280</b> | <b>624.288</b> | 622.272        | D 5 |
| F 5 | 592.309        | 524.271        | <b>508.253</b> | <b>509.261</b> | 507.245        | F 4 |
| R 6 | <b>734.420</b> | 377.203        | 361.194        | <b>362.192</b> | 360.177        | R 3 |
| T 7 | <b>835.467</b> | 235.092        | 219.074        | 220.082        | 218.066        | T 2 |
| D 8 | 950.494        | 134.045        | 118.026        | 119.034        | 117.018        | D 1 |





# sp | P84244 | H33\_MOUSE

IAQDFK <sup>Methyl</sup> 14.02 TDLRFQSAAGALQE

- ▶ fragmentation table for charge state 1+
- ▶ specType=etd
- ▶ score=44.93
- ▶ F104959.dat
- ▶ query=q1850\_p1
- ▶ precursor=779.413500
- ▶ chargePrecursor=3
- ▶ itol=0.8

| AA     | c               | y               | z+1             | z+2             | z        | AA    |
|--------|-----------------|-----------------|-----------------|-----------------|----------|-------|
| F [1]  | 131.118         | 2336.254        | 2336.266        | 0.000           | 2319.166 | F[21] |
| A [2]  | 202.195         | 2223.140        | 2207.172        | 0.000           | 2206.114 | A[20] |
| Q [3]  | 330.214         | 2152.103        | 2136.085        | 2137.092        | 2135.077 | Q[19] |
| D [4]  | 449.291         | 2034.045        | 2028.055        | 2000.044        | 2007.011 | D[18] |
| F [5]  | <b>592.309</b>  | <b>1909.018</b> | 1892.999        | <b>1894.007</b> | 1891.991 | F[17] |
| K [6]  | <b>734.420</b>  | 1761.949        | <b>1745.931</b> | 1746.938        | 1744.923 | K[16] |
| T [7]  | <b>835.467</b>  | 1619.839        | <b>1603.820</b> | 1604.828        | 1602.812 | T[15] |
| D [8]  | <b>950.494</b>  | 1518.791        | <b>1502.772</b> | 1503.780        | 1501.765 | D[14] |
| L [9]  | <b>1063.578</b> | 1401.704        | <b>1387.745</b> | 1388.753        | 1386.738 | L[13] |
| R [10] | <b>1218.679</b> | 1290.689        | <b>1274.661</b> | 1275.669        | 1273.654 | R[12] |
| F [11] | 1356.748        | 1134.579        | <b>1118.560</b> | 1119.568        | 1117.552 | F[11] |
| Q [12] | 1494.806        | 987.511         | 971.492         | 972.500         | 970.484  | Q[10] |
| S [13] | 1581.838        | 859.452         | 843.433         | 844.441         | 842.425  | S[9]  |
| A [14] | 1652.875        | 722.420         | 706.401         | 707.409         | 705.393  | A[8]  |
| A [15] | 1723.913        | 701.383         | 685.364         | 686.372         | 684.356  | A[7]  |
| I [16] | 1839.997        | 630.346         | 614.327         | 615.335         | 613.319  | I[6]  |
| G [17] | <b>1894.018</b> | 517.262         | 501.243         | 502.251         | 500.235  | G[5]  |
| A [18] | 1965.055        | 460.240         | 444.221         | 445.229         | 443.214  | A[4]  |
| L [19] | 2078.139        | 389.203         | 373.184         | 374.192         | 372.177  | L[3]  |
| Q [20] | 2206.198        | 276.119         | 260.100         | 261.108         | 259.092  | Q[2]  |
| E [21] | 2335.240        | 148.060         | 132.042         | 133.050         | 131.034  | E[1]  |

# sp | P84244 | H33\_MOUSE

IAQDFK <sup>Methyl</sup> 14.02 TDLRFQSAAGALQE

- ▶ fragmentation table for charge state 2+
- ▶ specType=etd
- ▶ score=44.93
- ▶ F104959.dat
- ▶ query=q1850\_p1
- ▶ precursor=779.413500
- ▶ chargePrecursor=3
- ▶ itol=0.8

| AA     | c               | y               | z+1             | z+2             | z               | AA    |
|--------|-----------------|-----------------|-----------------|-----------------|-----------------|-------|
| I [1]  | 66.093          | <b>1168.616</b> | <b>1166.607</b> | 0.504           | <b>1160.103</b> | [21]  |
| A [2]  | 101.561         | 1112.074        | <b>1104.064</b> | 0.504           | <b>1103.561</b> | A[20] |
| Q [3]  | 165.610         | 1076.555        | <b>1068.546</b> | <b>1069.050</b> | <b>1068.042</b> | Q[19] |
| D [4]  | 223.124         | 1032.526        | <b>1004.517</b> | <b>1005.021</b> | <b>1004.013</b> | D[18] |
| F [5]  | 290.628         | 955.013         | <b>947.003</b>  | <b>947.507</b>  | <b>946.499</b>  | F[17] |
| K [6]  | 367.713         | 881.478         | 871.469         | 873.973         | 872.965         | K[16] |
| T [7]  | 418.237         | 810.423         | 802.414         | 802.918         | 801.910         | T[15] |
| D [8]  | 475.751         | 759.899         | 751.890         | 752.394         | 751.386         | D[14] |
| L [9]  | 532.293         | 702.366         | 694.376         | 694.880         | 693.872         | L[13] |
| R [10] | 610.343         | 646.844         | 637.833         | 638.338         | 637.330         | R[12] |
| F [11] | 683.378         | 597.793         | 559.784         | 560.288         | 559.280         | F[11] |
| Q [12] | 747.907         | 494.259         | 486.250         | 486.753         | 485.745         | Q[10] |
| S [13] | 791.423         | 430.230         | 422.220         | 422.724         | 421.716         | S[9]  |
| A [14] | 826.941         | 396.714         | 378.704         | 379.208         | 378.200         | A[8]  |
| A [15] | <b>802.460</b>  | 351.195         | 343.188         | 343.690         | 342.682         | A[7]  |
| I [16] | <b>919.002</b>  | 315.676         | 307.667         | 308.171         | 307.163         | I[6]  |
| G [17] | <b>947.513</b>  | 269.134         | 251.125         | 251.629         | 250.621         | G[5]  |
| A [18] | <b>983.031</b>  | 230.624         | 222.614         | 223.118         | 222.110         | A[4]  |
| L [19] | <b>1039.573</b> | 195.105         | 187.096         | 187.600         | 186.592         | L[3]  |
| Q [20] | <b>1103.603</b> | 138.563         | 130.554         | 131.058         | 130.050         | Q[2]  |
| E [21] | 1188.124        | 74.834          | 68.824          | 67.828          | 68.821          | E[1]  |



# sp | P84244 | H33\_MOUSE

IAQDFK <sup>Methyl</sup> 14.02 TDLRFQSA AIGALQE

- ▶ fragmentation table for charge state 1+
- ▶ specType=etd
- ▶ score=56.36
- ▶ F104959.dat
- ▶ query=q1854.p1
- ▶ precursor=779.416000
- ▶ chargePrecursor=3
- ▶ itol=0.8

| AA    | c               | y               | z+1             | z+2             | z               | AA   |
|-------|-----------------|-----------------|-----------------|-----------------|-----------------|------|
| I   1 | 151.118         | 2336.224        | 2356.206        | 0.000           | 2316.188        | Q 1  |
| A   2 | 262.155         | 2223.140        | 2307.122        | 0.000           | 2206.114        | A 20 |
| Q   3 | 330.214         | 2152.103        | 2156.085        | 2137.062        | 2135.077        | Q 19 |
| D   4 | 445.241         | 2074.045        | 2098.030        | 2019.024        | 2007.010        | Q 18 |
| F   5 | <b>502.309</b>  | <b>1909.018</b> | <b>1892.999</b> | <b>1894.007</b> | <b>1891.991</b> | F 17 |
| K   6 | <b>734.420</b>  | 1761.948        | 1745.931        | 1746.938        | 1744.923        | K 16 |
| T   7 | <b>835.407</b>  | 1616.836        | <b>1601.820</b> | 1604.828        | 1602.811        | T 15 |
| D   8 | <b>950.494</b>  | 1518.791        | <b>1502.772</b> | 1503.780        | 1501.765        | D 14 |
| L   9 | <b>1063.578</b> | 1403.764        | <b>1387.745</b> | 1388.753        | 1386.738        | L 13 |
| R 10  | <b>1219.679</b> | 1290.690        | <b>1274.661</b> | 1275.669        | 1273.654        | R 12 |
| F 11  | 1356.748        | 1184.579        | <b>1118.560</b> | 1119.568        | 1117.552        | F 11 |
| Q 12  | 1494.806        | 987.511         | 971.492         | 972.500         | 970.484         | Q 10 |
| S 13  | 1581.838        | 859.452         | <b>843.433</b>  | 844.441         | 842.425         | S 9  |
| A 14  | 1652.875        | 722.420         | 756.401         | 757.409         | 755.393         | A 8  |
| A 15  | 1723.913        | 701.363         | 685.344         | 686.352         | 684.336         | A 7  |
| I 16  | 1836.952        | 630.346         | 614.327         | 615.335         | 613.319         | I 6  |
| G 17  | <b>1894.018</b> | 517.262         | 501.243         | 502.251         | 500.235         | G 5  |
| A 18  | 1985.055        | 460.240         | 444.221         | 445.229         | 443.214         | A 4  |
| L 19  | 2076.119        | 389.203         | 373.184         | 374.192         | 372.177         | L 3  |
| Q 20  | 2206.198        | 276.119         | 260.100         | 261.108         | 259.092         | Q 2  |
| E 21  | 2335.240        | 148.060         | 132.042         | 133.050         | 131.034         | E 1  |

# sp | P84244 | H33\_MOUSE

IAQDFK <sup>Methyl</sup> 14.02 TDLRFQSA AIGALQE

- ▶ fragmentation table for charge state 2+
- ▶ specType=etd
- ▶ score=56.36
- ▶ F104959.dat
- ▶ query=q1854.p1
- ▶ precursor=779.416000
- ▶ chargePrecursor=3
- ▶ itol=0.8

| AA     | c               | y               | z+1             | z+2             | z               | AA    |
|--------|-----------------|-----------------|-----------------|-----------------|-----------------|-------|
| I [1]  | 66.093          | <b>1168.616</b> | <b>1166.607</b> | 0.504           | <b>1160.103</b> | [21]  |
| A [2]  | 101.561         | 1112.074        | <b>1104.064</b> | 0.504           | <b>1103.561</b> | A[20] |
| Q [3]  | 165.610         | 1076.555        | <b>1066.546</b> | <b>1060.050</b> | <b>1068.042</b> | Q[19] |
| D [4]  | 223.124         | 1032.526        | <b>1004.517</b> | <b>1005.021</b> | <b>1004.013</b> | D[18] |
| F [5]  | 290.628         | 955.013         | <b>947.003</b>  | <b>947.507</b>  | <b>946.499</b>  | F[17] |
| K [6]  | 367.713         | 881.478         | 871.469         | 873.973         | 872.965         | K[16] |
| T [7]  | 418.237         | 810.423         | 802.414         | 802.918         | 801.910         | T[15] |
| D [8]  | 475.751         | 759.899         | 751.890         | 752.394         | 751.386         | D[14] |
| L [9]  | 532.293         | 702.366         | 694.376         | 694.880         | 693.872         | L[13] |
| R [10] | 610.343         | 646.844         | 637.833         | 638.338         | 637.330         | R[12] |
| F [11] | 683.378         | 597.793         | 559.784         | 560.288         | 559.280         | F[11] |
| Q [12] | 747.907         | 494.259         | 486.250         | 486.753         | 485.745         | Q[10] |
| S [13] | <b>791.423</b>  | 430.230         | 422.220         | 422.724         | 421.716         | S[9]  |
| A [14] | 826.941         | 396.714         | 378.704         | 379.208         | 378.200         | A[8]  |
| A [15] | 892.460         | 351.195         | 343.188         | 343.690         | 342.682         | A[7]  |
| I [16] | <b>919.002</b>  | 315.676         | 307.667         | 308.171         | 307.163         | I[6]  |
| G [17] | <b>947.513</b>  | 280.154         | 251.125         | 251.629         | 250.621         | G[5]  |
| A [18] | <b>983.031</b>  | 230.634         | 222.614         | 223.118         | 222.110         | A[4]  |
| L [19] | <b>1039.573</b> | 195.105         | 187.096         | 187.600         | 186.592         | L[3]  |
| Q [20] | <b>1103.603</b> | 138.563         | 130.554         | 131.058         | 130.050         | Q[2]  |
| E [21] | 1188.124        | 74.834          | 68.824          | 67.828          | 68.821          | E[1]  |

# sp | P68433 | H31\_MOUSE

IAQDFK Methyl TD  
14.02

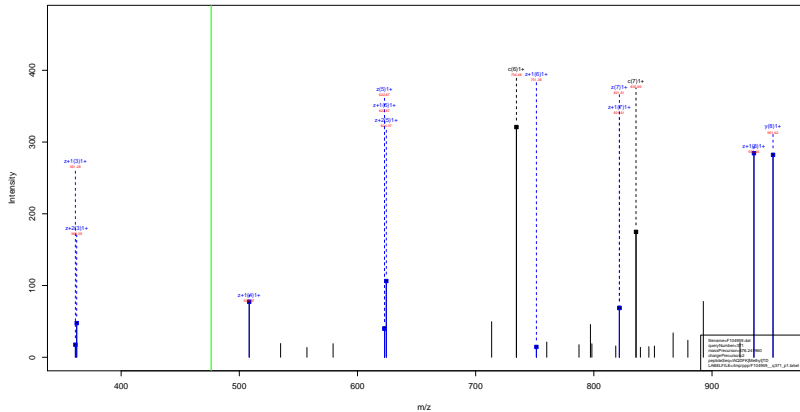

# sp | P68433 | H31\_MOUSE

IAQDFK<sup>Methyl</sup>TD  
14.02

- ▶ fragmentation table for charge state 1+
- ▶ specType=etd
- ▶ score=33.33
- ▶ F104959.dat
- ▶ query=q371\_p1
- ▶ precursor=476.241960
- ▶ chargePrecursor=2
- ▶ itol=0.8

| AA  | c              | y              | z+1            | z+2            | z              | AA  |
|-----|----------------|----------------|----------------|----------------|----------------|-----|
| I 1 | 131.118        | <b>951.478</b> | <b>935.459</b> | 0.000          | 934.452        | I 8 |
| A 2 | 202.155        | 838.394        | <b>822.375</b> | 0.000          | <b>821.368</b> | A 7 |
| Q 3 | 330.214        | 767.357        | <b>751.338</b> | 752.346        | 750.330        | Q 6 |
| D 4 | 445.241        | 639.298        | <b>623.280</b> | <b>624.288</b> | <b>622.272</b> | D 5 |
| F 5 | 592.309        | 524.271        | <b>508.253</b> | 509.261        | 507.245        | F 4 |
| R 6 | <b>734.420</b> | 377.203        | <b>361.184</b> | <b>362.192</b> | 360.177        | R 3 |
| T 7 | <b>835.467</b> | 235.092        | 219.074        | 220.082        | 218.066        | T 2 |
| D 8 | 950.494        | 134.045        | 118.026        | 119.034        | 117.018        | D 1 |



sp | P84244 | H33\_MOUSE

IAQDFK<sup>Methyl</sup> TDLRFQSAAILGALQE  
14.02

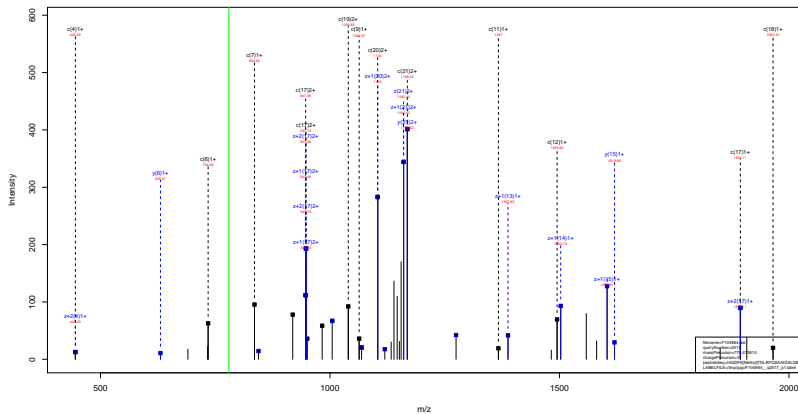

# sp | P84244 | H33\_MOUSE

IAQDFK <sup>Methyl</sup> 14.02 TDLRFQSA AIGALQE

- ▶ fragmentation table for charge state 1+
- ▶ specType=etd
- ▶ score=50.12
- ▶ F104964.dat
- ▶ query=q2517.p1
- ▶ precursor=779.413810
- ▶ chargePrecursor=3
- ▶ itol=0.8

| AA     | c               | y               | z+1             | z+2             | z        | AA    |
|--------|-----------------|-----------------|-----------------|-----------------|----------|-------|
| F [1]  | 131.118         | 2336.254        | 2330.206        | 0.000           | 2319.108 | F[21] |
| A [2]  | 202.195         | 2223.140        | 2207.172        | 0.000           | 2206.114 | A[20] |
| Q [3]  | 139.214         | 2152.103        | 2136.085        | 2137.092        | 2135.077 | Q[19] |
| D [4]  | <b>445.241</b>  | 2024.945        | 2008.935        | 2000.944        | 2007.011 | D[18] |
| F [5]  | 502.309         | 1920.012        | 1892.909        | <b>1894.007</b> | 1891.991 | F[17] |
| K [6]  | <b>734.420</b>  | 1761.940        | 1745.931        | 1746.938        | 1744.923 | K[16] |
| T [7]  | <b>835.467</b>  | <b>1619.839</b> | <b>1603.820</b> | 1604.828        | 1602.812 | T[15] |
| D [8]  | <b>950.494</b>  | 1518.791        | <b>1502.772</b> | 1503.780        | 1501.765 | D[14] |
| L [9]  | <b>1063.578</b> | 1401.704        | <b>1387.745</b> | 1388.753        | 1386.738 | L[13] |
| R [10] | 1219.679        | 1290.680        | <b>1274.661</b> | 1275.669        | 1273.654 | R[12] |
| F [11] | <b>1366.748</b> | 1134.579        | 1118.560        | <b>1119.568</b> | 1117.552 | F[11] |
| Q [12] | <b>1494.806</b> | 987.511         | 971.492         | 972.500         | 970.484  | Q[10] |
| S [13] | 1581.838        | 859.452         | 843.433         | <b>844.441</b>  | 842.425  | S[9]  |
| A [14] | 1652.875        | 722.420         | 706.401         | 707.409         | 705.393  | A[8]  |
| A [15] | 1723.913        | 603.363         | 587.344         | 588.352         | 586.336  | A[7]  |
| I [16] | 1839.997        | <b>630.348</b>  | 614.329         | 615.336         | 613.321  | I[6]  |
| G [17] | <b>1894.018</b> | 517.262         | 501.243         | 502.251         | 500.235  | G[5]  |
| A [18] | <b>1965.055</b> | 460.240         | 444.221         | <b>445.229</b>  | 443.214  | A[4]  |
| L [19] | 2078.139        | 389.207         | 373.188         | 374.192         | 372.177  | L[3]  |
| Q [20] | 2206.198        | 276.119         | 260.100         | 261.108         | 259.092  | Q[2]  |
| E [21] | 2335.240        | 148.060         | 132.042         | 133.050         | 131.034  | E[1]  |

# sp | P84244 | H33\_MOUSE

IAQDFK <sup>Methyl</sup> 14.02 TDLRFQSA AIGALQE

- ▶ fragmentation table for charge state 2+
- ▶ specType=etd
- ▶ score=50.12
- ▶ F104964.dat
- ▶ query=q2517.p1
- ▶ precursor=779.413810
- ▶ chargePrecursor=3
- ▶ itol=0.8

| AA     | c               | y               | z+1             | z+2             | z               | AA    |
|--------|-----------------|-----------------|-----------------|-----------------|-----------------|-------|
| I [1]  | 66.093          | <b>1168.616</b> | <b>1168.607</b> | 0.504           | <b>1160.103</b> | [21]  |
| A [2]  | 101.561         | 1112.074        | <b>1104.064</b> | 0.504           | <b>1103.561</b> | A[20] |
| Q [3]  | 165.610         | 1076.555        | <b>1068.546</b> | <b>1069.050</b> | <b>1068.042</b> | Q[19] |
| D [4]  | 223.124         | 1032.526        | <b>1005.517</b> | <b>1005.021</b> | 1005.011        | D[18] |
| F [5]  | 290.628         | 955.013         | <b>947.003</b>  | <b>947.507</b>  | <b>946.499</b>  | F[17] |
| K [6]  | 367.713         | 881.478         | 871.469         | 873.973         | 872.965         | K[16] |
| T [7]  | 418.237         | 810.423         | 802.414         | 802.918         | 801.910         | T[15] |
| D [8]  | 475.751         | 759.899         | 751.890         | 752.394         | 751.386         | D[14] |
| L [9]  | 532.293         | 702.366         | 694.376         | 694.880         | 693.872         | L[13] |
| R [10] | 610.343         | 646.844         | 637.833         | 638.338         | 637.330         | R[12] |
| F [11] | 683.378         | 597.793         | 559.784         | 560.288         | 559.280         | F[11] |
| Q [12] | 747.907         | 494.259         | 486.250         | 486.753         | 485.745         | Q[10] |
| S [13] | 791.423         | 430.230         | 422.220         | 422.724         | 421.716         | S[9]  |
| A [14] | 826.941         | 396.714         | 378.704         | 379.208         | 378.200         | A[8]  |
| A [15] | 882.460         | 351.195         | 343.188         | 343.690         | 342.682         | A[7]  |
| I [16] | <b>919.002</b>  | 315.676         | 307.667         | 308.171         | 307.163         | I[6]  |
| G [17] | <b>947.513</b>  | 259.134         | 251.125         | 251.629         | 250.621         | G[5]  |
| A [18] | <b>983.031</b>  | 230.624         | 222.614         | 223.118         | 222.110         | A[4]  |
| L [19] | <b>1039.573</b> | 195.105         | 187.096         | 187.600         | 186.592         | L[3]  |
| Q [20] | <b>1103.603</b> | 138.563         | 130.554         | 131.058         | 130.050         | Q[2]  |
| E [21] | <b>1168.124</b> | 74.534          | 66.524          | 67.028          | 66.021          | E[1]  |

# sp | P84244 | H33\_MOUSE

IAQDFK <sup>Methyl</sup> TDLRFQSAAILGQE  
14.02

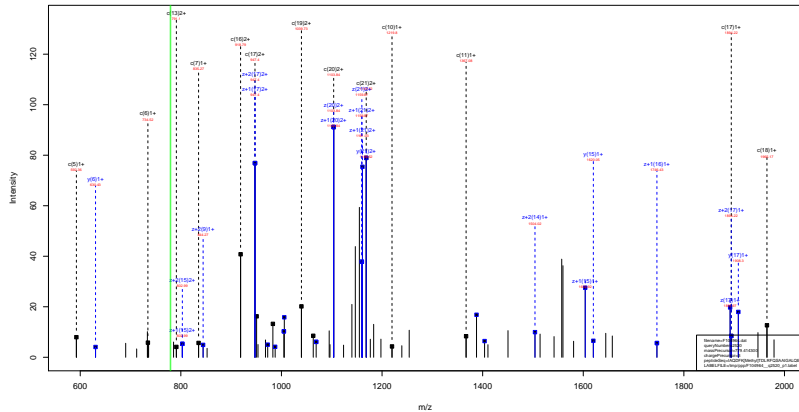

# sp | P84244 | H33\_MOUSE

IAQDFK <sup>Methyl</sup> 14.02 TDLRFQSA AIGALQE

- ▶ fragmentation table for charge state 1+
- ▶ specType=etd
- ▶ score=44.85
- ▶ F104964.dat
- ▶ query=q2520.p1
- ▶ precursor=779.414300
- ▶ chargePrecursor=3
- ▶ itol=0.8

| AA    | c               | y               | z+1             | z+2             | z               | AA   |
|-------|-----------------|-----------------|-----------------|-----------------|-----------------|------|
| I   1 | 151.118         | 2336.224        | 2336.206        | 0.000           | 2319.188        | Q 1  |
| A   2 | 202.155         | 2223.140        | 2207.122        | 0.000           | 2206.114        | A 20 |
| Q   3 | 330.214         | 2152.103        | 2136.085        | 2137.062        | 2135.077        | Q 19 |
| D   4 | 445.241         | 2074.045        | 2068.028        | 2059.974        | 2067.010        | Q 18 |
| F   5 | <b>592.309</b>  | <b>1909.018</b> | 1892.999        | <b>1894.007</b> | <b>1891.991</b> | F 17 |
| K   6 | <b>734.420</b>  | 1781.949        | <b>1745.931</b> | <b>1746.938</b> | 1744.921        | K 16 |
| T   7 | <b>835.407</b>  | <b>1619.839</b> | <b>1603.820</b> | 1604.828        | 1602.811        | T 15 |
| D   8 | <b>950.494</b>  | 1518.791        | 1502.772        | <b>1503.780</b> | 1501.765        | D 14 |
| L   9 | <b>1063.578</b> | <b>1403.764</b> | <b>1387.745</b> | 1388.751        | 1386.735        | L 13 |
| R 10  | <b>1219.679</b> | 1290.695        | 1274.683        | 1275.689        | 1273.664        | R 12 |
| F 11  | <b>1366.748</b> | 1184.579        | 1118.550        | 1119.568        | 1117.552        | F 11 |
| Q 12  | 1494.806        | <b>987.511</b>  | 971.492         | <b>972.500</b>  | 970.484         | Q 10 |
| S 13  | 1581.838        | 859.452         | 843.433         | <b>844.441</b>  | 842.425         | S 9  |
| A 14  | 1652.875        | 722.420         | 756.401         | 757.409         | 755.393         | A 8  |
| A 15  | 1723.913        | 701.371         | 685.352         | 686.372         | 684.355         | A 7  |
| I 16  | 1838.022        | <b>630.346</b>  | 624.327         | 615.335         | 613.319         | I 6  |
| G 17  | <b>1894.018</b> | 517.262         | 501.243         | 502.251         | 500.235         | G 5  |
| A 18  | <b>1965.055</b> | 460.240         | 444.221         | 445.229         | 443.214         | A 4  |
| L 19  | 2078.139        | 389.203         | 373.184         | 374.192         | 372.177         | L 3  |
| Q 20  | 2206.198        | 276.119         | 260.100         | 261.108         | 259.092         | Q 2  |
| E 21  | 2335.240        | 148.060         | 132.042         | 133.050         | 131.034         | E 1  |

# sp | P84244 | H33\_MOUSE

IAQDFK <sup>Methyl</sup> 14.02 TDLRFQSA AIGALQE

- ▶ fragmentation table for charge state 2+
- ▶ specType=etd
- ▶ score=44.85
- ▶ F104964.dat
- ▶ query=q2520.p1
- ▶ precursor=779.414300
- ▶ chargePrecursor=3
- ▶ itol=0.8

| AA     | c               | y               | z+1             | z+2             | z               | AA    |
|--------|-----------------|-----------------|-----------------|-----------------|-----------------|-------|
| I [1]  | 66.093          | <b>1168.616</b> | <b>1160.667</b> | 0.504           | <b>1160.103</b> | [21]  |
| A [2]  | 101.551         | 1112.074        | <b>1104.064</b> | 0.504           | <b>1103.561</b> | A[20] |
| Q [3]  | 165.610         | 1076.555        | <b>1066.546</b> | <b>1069.050</b> | 1069.042        | Q[19] |
| D [4]  | 223.224         | 1032.526        | <b>1004.517</b> | <b>1005.021</b> | 1004.011        | D[18] |
| F [5]  | 296.658         | 955.013         | <b>947.003</b>  | <b>947.507</b>  | 950.497         | F[17] |
| K [6]  | 367.713         | 881.478         | 871.469         | 873.973         | 872.965         | K[16] |
| T [7]  | 418.237         | 810.423         | <b>802.414</b>  | <b>802.918</b>  | 801.910         | T[15] |
| D [8]  | 475.751         | 759.899         | 751.890         | 752.394         | 751.386         | D[14] |
| L [9]  | 532.293         | 702.366         | 694.376         | 694.880         | 693.872         | L[13] |
| R [10] | 610.343         | 646.844         | 637.833         | 638.338         | 637.330         | R[12] |
| F [11] | 663.578         | 597.793         | 559.784         | 560.288         | 559.280         | F[11] |
| Q [12] | 747.907         | 494.259         | 486.250         | 486.753         | 485.745         | Q[10] |
| S [13] | <b>791.423</b>  | 430.230         | 422.220         | 422.724         | 421.716         | S[9]  |
| A [14] | 826.941         | 396.714         | 378.704         | 379.208         | 378.200         | A[8]  |
| A [15] | 852.460         | 351.195         | 343.188         | 343.690         | 342.682         | A[7]  |
| I [16] | <b>919.002</b>  | 315.676         | 307.667         | 308.171         | 307.163         | I[6]  |
| G [17] | <b>947.513</b>  | 259.134         | 251.125         | 251.629         | 250.621         | G[5]  |
| A [18] | <b>983.031</b>  | 230.624         | 222.614         | 223.118         | 222.110         | A[4]  |
| L [19] | <b>1039.573</b> | 195.105         | 187.096         | 187.600         | 186.592         | L[3]  |
| Q [20] | <b>1103.603</b> | 138.563         | 130.554         | 131.058         | 130.050         | Q[2]  |
| E [21] | <b>1168.124</b> | 74.534          | 66.524          | 67.028          | 66.021          | E[1]  |

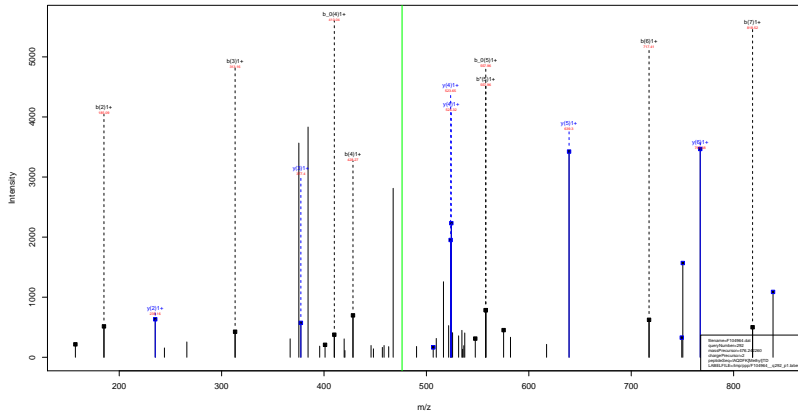

# sp | P68433 | H31\_MOUSE

IAQDFK<sup>Methyl</sup> TD  
14.02

- ▶ fragmentation table for charge state 1+
- ▶ specType=cid
- ▶ score=29.93
- ▶ F104964.dat
- ▶ query=q292\_p1
- ▶ precursor=476.242260
- ▶ chargePrecursor=2
- ▶ itol=0.8

| AA  | a              | a*      | a,d     | b              | b*             | b,d            | y              | y*             | y,d            | AA  |
|-----|----------------|---------|---------|----------------|----------------|----------------|----------------|----------------|----------------|-----|
| T 1 | 46.998         | 0.000   | 0.000   | 114.096        | 0.000          | 0.000          | 901.416        | 109.456        | 114.096        | T 1 |
| A 2 | <b>157.134</b> | 0.000   | 0.000   | <b>185.128</b> | 0.000          | 0.000          | <b>838.354</b> | 821.356        | 820.384        | A 2 |
| Q 3 | 286.192        | 286.186 | 0.000   | <b>313.187</b> | 296.160        | 0.000          | <b>767.357</b> | <b>750.330</b> | <b>749.346</b> | Q 3 |
| G 4 | <b>400.219</b> | 393.193 | 362.209 | <b>428.214</b> | 411.187        | <b>410.203</b> | <b>636.298</b> | 629.272        | 621.288        | G 4 |
| F 5 | <b>547.287</b> | 540.261 | 520.277 | <b>575.282</b> | <b>558.256</b> | <b>557.272</b> | <b>524.271</b> | <b>507.245</b> | <b>506.261</b> | F 5 |
| R 6 | 678.286        | 672.312 | 671.366 | <b>717.293</b> | 700.369        | 697.382        | <b>377.263</b> | 366.172        | 356.193        | R 6 |
| T 7 | 790.446        | 775.419 | 772.435 | <b>818.441</b> | 801.414        | 800.430        | <b>235.092</b> | 0.000          | 237.082        | T 7 |
| G 8 | 905.473        | 880.449 | 887.462 | 933.468        | 916.441        | 915.457        | 134.040        | 0.000          | 136.034        | G 8 |



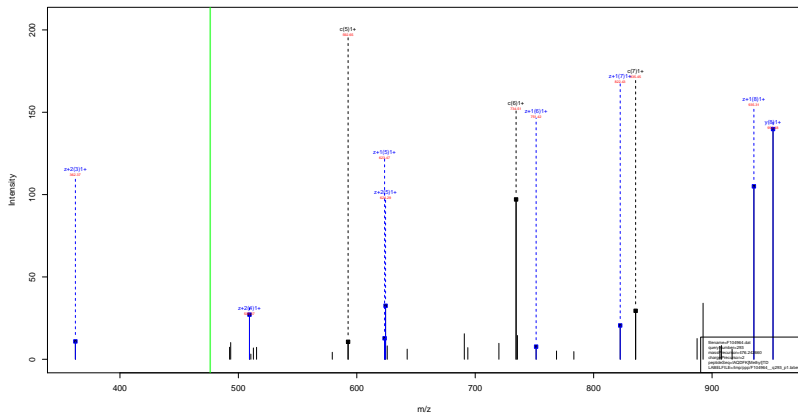

# sp | P68433 | H31\_MOUSE

IAQDFK<sup>Methyl</sup>TD  
14.02

- ▶ fragmentation table for charge state 1+
- ▶ specType=etd
- ▶ score=28.94
- ▶ F104964.dat
- ▶ query=q293-p1
- ▶ precursor=476.242660
- ▶ chargePrecursor=2
- ▶ itol=0.8

| AA    | c              | y              | z+1            | z+2            | z       | AA  |
|-------|----------------|----------------|----------------|----------------|---------|-----|
| I   1 | 131.118        | <b>951.478</b> | <b>935.459</b> | 0.000          | 934.452 | I 8 |
| A   2 | 202.155        | 838.394        | <b>822.375</b> | 0.000          | 821.368 | A 7 |
| Q   3 | 330.214        | 767.357        | <b>751.338</b> | 752.346        | 750.330 | Q 6 |
| D   4 | 445.241        | 639.298        | <b>623.280</b> | <b>624.288</b> | 622.272 | D 5 |
| F   5 | <b>592.309</b> | 524.271        | 508.253        | <b>509.261</b> | 507.245 | F 4 |
| K   6 | <b>734.420</b> | 377.203        | 361.184        | <b>362.192</b> | 360.177 | K 3 |
| T   7 | <b>835.467</b> | 235.092        | 219.074        | 220.082        | 218.066 | T 2 |
| D   8 | 950.494        | 134.045        | 118.026        | 119.034        | 117.018 | D 1 |



# sp | P68433 | H31\_MOUSE

K<sup>Methyl</sup> TDLRF  
14.02

- ▶ fragmentation table for charge state 1+
- ▶ specType=etd
- ▶ score=33.71
- ▶ F104968.dat
- ▶ query=q234\_p1
- ▶ precursor=397.232450
- ▶ chargePrecursor=2
- ▶ itol=0.8

| AA   | c              | y              | z+1            | z+2            | z       | AA   |
|------|----------------|----------------|----------------|----------------|---------|------|
| K[1] | 160.144        | <b>793.457</b> | <b>777.438</b> | 778.446        | 776.430 | K[6] |
| Y[2] | 261.192        | 651.346        | <b>635.327</b> | <b>636.335</b> | 634.320 | Y[5] |
| D[3] | 376.219        | 650.298        | <b>534.280</b> | 535.287        | 533.272 | D[4] |
| L[4] | <b>489.303</b> | 435.271        | <b>419.253</b> | <b>420.261</b> | 418.245 | L[3] |
| R[5] | <b>645.404</b> | 322.187        | <b>306.169</b> | <b>307.176</b> | 305.161 | R[2] |
| F[6] | 792.473        | 166.086        | 150.068        | 151.075        | 149.060 | F[1] |

# sp | Q6GSS7 | H2A2A\_MOUSE

DEELNK <sup>Methyl</sup> 14.02 LLGK <sup>Methyl</sup> 14.02 VTIAQGGVLPNIQAVLLPKKTESHKAKGK

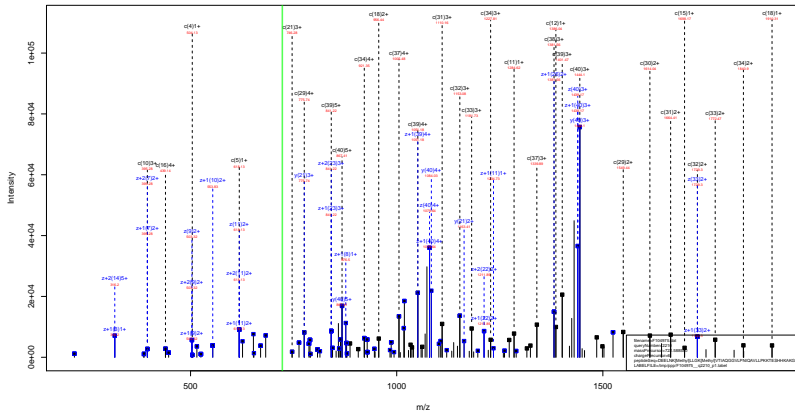

# sp | Q6GSS7 | H2A2A\_MOUSE

DEELNK <sup>Methyl</sup>14.02 LLGK <sup>Methyl</sup>14.02 VTIAQGGVLPNIQAVLLPKKTESHKAKGK

- ▶ fragmentation table for charge state 1+
- ▶ specType=etd
- ▶ score=49.83
- ▶ F104975.dat
- ▶ query=q2210\_p1
- ▶ precursor=722.588580
- ▶ chargePrecursor=6
- ▶ itol=0.8

| AA    | c               | y        | z+1             | z+2            | z              | AA    |
|-------|-----------------|----------|-----------------|----------------|----------------|-------|
| D[1]  | 153.061         | 4330.497 | 4334.470        | 0.000          | 4333.471       | D[40] |
| E[2]  | 262.103         | 4215.470 | 4199.452        | 0.000          | 4198.444       | E[30] |
| E[3]  | 391.146         | 4098.428 | 4070.409        | 0.000          | 4069.401       | E[38] |
| L[4]  | <b>504.230</b>  | 3957.385 | 3941.366        | 0.000          | 3940.359       | L[37] |
| N[5]  | <b>618.273</b>  | 3844.301 | 3828.282        | 3820.260       | 3827.275       | N[30] |
| K[6]  | 760.284         | 3730.258 | 3714.239        | 3715.247       | 3713.232       | K[35] |
| L[7]  | 873.468         | 3588.144 | 3572.139        | 3573.137       | 3571.121       | L[34] |
| L[8]  | <b>986.552</b>  | 3475.064 | 3459.045        | 3460.053       | 3458.037       | L[33] |
| G[9]  | 1043.573        | 3361.979 | 3346.961        | 3346.969       | 3344.953       | G[32] |
| K[10] | 1185.684        | 3204.958 | 3208.939        | 3209.947       | 3207.931       | K[31] |
| V[11] | <b>1284.752</b> | 3182.847 | 3146.829        | 3147.836       | 3145.821       | V[30] |
| T[12] | <b>1385.800</b> | 3063.779 | 3047.760        | 3048.768       | 3046.752       | T[29] |
| I[13] | <b>1498.884</b> | 2962.711 | 2946.713        | 2947.720       | 2945.705       | I[28] |
| A[14] | 1599.831        | 2849.641 | 2833.638        | 2834.636       | 2832.621       | A[27] |
| Q[15] | <b>1697.980</b> | 2778.610 | 2762.591        | 2763.599       | 2761.584       | Q[26] |
| G[16] | 1755.001        | 2650.552 | 2634.533        | 2635.541       | 2633.525       | G[25] |
| G[17] | 1812.023        | 2503.530 | 2577.511        | 2578.519       | 2576.504       | G[24] |
| V[18] | <b>1911.091</b> | 2539.509 | 2520.490        | 2521.498       | 2519.482       | V[23] |
| L[19] | 2024.175        | 2437.440 | 2421.421        | 2422.429       | 2420.414       | L[22] |
| F[20] | 2121.228        | 2324.356 | 2308.337        | 2309.345       | 2307.330       | F[21] |
| N[21] | 2235.271        | 2227.303 | 2211.285        | 2212.292       | 2210.277       | N[20] |
| I[22] | 2348.355        | 2113.266 | 2097.242        | 2098.250       | 2096.234       | I[19] |
| Q[23] | 2476.413        | 2000.178 | 1984.158        | 1985.165       | 1983.150       | Q[18] |
| A[24] | 2547.450        | 1872.118 | 1856.099        | 1857.107       | 1855.091       | A[17] |
| V[25] | 2646.519        | 1801.081 | 1785.062        | 1786.070       | 1784.054       | V[16] |
| L[26] | 2759.593        | 1702.012 | 1686.994        | 1687.991       | 1685.985       | L[15] |
| L[27] | 2872.687        | 1588.928 | 1572.909        | 1573.917       | 1571.901       | L[14] |
| P[28] | 2969.740        | 1475.844 | 1459.825        | 1460.833       | 1458.818       | P[13] |
| K[29] | 3097.835        | 1378.791 | 1362.773        | 1363.780       | 1361.765       | K[12] |
| K[30] | 3225.930        | 1250.696 | <b>1234.678</b> | 1235.685       | 1233.670       | K[11] |
| T[31] | 3326.977        | 1122.601 | <b>1106.583</b> | 1107.591       | 1105.575       | T[10] |
| E[32] | 3456.020        | 1021.554 | <b>1005.535</b> | 1006.543       | 1004.527       | E[9]  |
| S[33] | 3543.052        | 892.513  | <b>874.482</b>  | 875.490        | 873.485        | S[8]  |
| H[34] | 3588.111        | 805.479  | <b>789.460</b>  | <b>790.468</b> | 788.453        | H[7]  |
| H[35] | 3817.170        | 668.420  | <b>652.401</b>  | <b>653.409</b> | 651.394        | H[6]  |
| K[36] | 3945.265        | 531.361  | <b>515.343</b>  | 516.350        | 514.335        | K[5]  |
| A[37] | 4016.302        | 403.266  | <b>387.248</b>  | 388.255        | <b>386.240</b> | A[4]  |
| K[38] | 4144.397        | 332.229  | <b>316.211</b>  | 317.218        | 315.203        | K[3]  |
| G[39] | 4201.438        | 204.134  | 188.116         | 189.123        | 187.108        | G[2]  |
| K[40] | 4329.513        | 147.113  | 131.094         | 132.102        | 130.086        | K[1]  |

# sp | Q6GSS7 | H2A2A\_MOUSE

DEELNK <sup>Methyl</sup>14.02 LLGK <sup>Methyl</sup>14.02 VTIAQGGVLPNIQAVLLPKKTESHKAKGK

- ▶ fragmentation table for charge state 2+
- ▶ specType=etd
- ▶ score=49.83
- ▶ F104975.dat
- ▶ query=q2210.p1
- ▶ precursor=722.588580
- ▶ chargePrecursor=6
- ▶ itol=0.8

| AA | c  | y               | z=1             | z=2             | z               | AA              |       |
|----|----|-----------------|-----------------|-----------------|-----------------|-----------------|-------|
| D  | 1  | 87.034          | 2165.752        | 2157.743        | 0.504           | 2157.239        | D[40] |
| E  | 2  | 131.555         | 2108.239        | 2100.229        | 0.504           | 2099.726        | E[39] |
| E  | 3  | 188.077         | 2043.718        | 2035.708        | 0.504           | 2035.204        | E[38] |
| L  | 4  | 252.619         | 1979.196        | 1971.187        | 0.504           | 1970.683        | L[37] |
| N  | 5  | 309.640         | 1922.654        | 1914.645        | 1915.140        | 1914.141        | N[36] |
| K  | 6  | 388.695         | 1865.633        | 1857.623        | 1858.127        | 1857.119        | K[35] |
| L  | 7  | 437.217         | 1794.577        | 1786.568        | 1787.072        | 1786.064        | L[34] |
| L  | 8  | 484.779         | 1738.055        | <b>1730.026</b> | 1730.530        | <b>1729.522</b> | L[33] |
| G  | 9  | 522.290         | 1681.983        | 1673.989        | 1673.988        | 1673.989        | G[32] |
| K  | 10 | 593.346         | 1625.063        | 1614.978        | 1615.477        | 1614.469        | K[31] |
| V  | 11 | 642.880         | 1581.927        | 1573.918        | 1574.422        | 1573.414        | V[30] |
| T  | 12 | 693.404         | 1532.393        | <b>1524.384</b> | <b>1524.888</b> | <b>1523.880</b> | T[29] |
| L  | 13 | 740.946         | 1481.869        | 1473.860        | 1474.364        | 1473.356        | L[28] |
| A  | 14 | 785.464         | 1436.327        | 1427.318        | 1427.822        | 1426.814        | A[27] |
| G  | 15 | 849.493         | 1389.805        | <b>1381.799</b> | <b>1382.303</b> | <b>1381.295</b> | G[26] |
| G  | 16 | <b>878.004</b>  | 1325.779        | 1317.770        | 1318.274        | 1317.266        | G[25] |
| G  | 17 | <b>906.515</b>  | 1297.269        | <b>1289.259</b> | <b>1289.763</b> | 1288.755        | G[24] |
| V  | 18 | <b>956.049</b>  | 1268.758        | <b>1260.749</b> | <b>1261.252</b> | 1260.245        | V[23] |
| L  | 19 | 1025.594        | 1219.224        | <b>1211.214</b> | <b>1211.718</b> | 1210.710        | L[22] |
| P  | 20 | <b>1061.118</b> | <b>1162.682</b> | 1154.673        | 1155.176        | 1154.169        | P[21] |
| N  | 21 | 1118.139        | 1114.155        | <b>1106.146</b> | <b>1106.650</b> | 1105.642        | N[20] |
| I  | 22 | 1174.681        | 1057.134        | 1049.124        | 1049.628        | 1048.621        | I[19] |
| Q  | 23 | 1238.710        | 1000.592        | 992.582         | <b>993.086</b>  | 992.079         | Q[18] |
| A  | 24 | 1274.229        | 936.563         | <b>928.553</b>  | <b>929.057</b>  | <b>928.049</b>  | A[17] |
| V  | 25 | <b>1323.763</b> | 869.044         | 861.035         | 861.539         | 860.531         | V[16] |
| L  | 26 | 1385.305        | 851.510         | 843.500         | <b>844.004</b>  | 843.000         | L[15] |
| L  | 27 | 1436.847        | 794.968         | <b>786.958</b>  | <b>787.462</b>  | <b>786.454</b>  | L[14] |
| P  | 28 | <b>1465.374</b> | 738.426         | 730.416         | 730.920         | 729.912         | P[13] |
| K  | 29 | <b>1549.421</b> | 689.899         | <b>681.890</b>  | <b>682.394</b>  | 681.386         | K[12] |
| K  | 30 | <b>1613.468</b> | <b>625.852</b>  | <b>617.842</b>  | <b>618.346</b>  | <b>617.339</b>  | K[11] |
| T  | 31 | <b>1663.992</b> | 563.834         | <b>553.795</b>  | <b>554.299</b>  | <b>553.291</b>  | T[10] |
| E  | 32 | <b>1728.514</b> | 511.261         | <b>503.271</b>  | <b>503.775</b>  | <b>502.767</b>  | E[9]  |
| S  | 33 | <b>1772.030</b> | <b>446.759</b>  | <b>438.750</b>  | <b>439.254</b>  | 438.246         | S[8]  |
| H  | 34 | <b>1840.559</b> | 403.243         | <b>395.234</b>  | <b>395.738</b>  | <b>394.730</b>  | H[7]  |
| H  | 35 | 1899.069        | 334.714         | 326.704         | 327.208         | 326.200         | H[6]  |
| K  | 36 | 1973.136        | 366.184         | 358.175         | 358.679         | 357.671         | K[5]  |
| A  | 37 | 2058.655        | 292.137         | 284.127         | 284.631         | 283.624         | A[4]  |
| K  | 38 | 2072.702        | 166.618         | 158.609         | 159.113         | 158.105         | K[3]  |
| G  | 39 | 2161.211        | 102.571         | 94.561          | 95.065          | 94.057          | G[2]  |
| K  | 40 | 2165.260        | 74.060          | 66.051          | 66.555          | 65.547          | K[1]  |

# sp | Q6GSS7 | H2A2A\_MOUSE

DEELNK <sup>Methyl</sup>14.02 LLGK <sup>Methyl</sup>14.02 VTIAQGGVLPNIQAVLLPKKTESHKAKGK

- ▶ fragmentation table for charge state 3+
- ▶ specType=etd
- ▶ score=49.83
- ▶ F104975.dat
- ▶ query=q2210.p1
- ▶ precursor=722.588580
- ▶ chargePrecursor=6
- ▶ itol=0.8

| AA | c  | y               | z=1             | z=2             | z               | AA              |          |       |
|----|----|-----------------|-----------------|-----------------|-----------------|-----------------|----------|-------|
| D  | 1  | 45.025          | <b>1444.171</b> | <b>1438.831</b> | 0.672           | <b>1438.495</b> | D[40]    |       |
| E  | 2  | 68.039          | 1405.628        | 1400.489        | 0.672           | 1400.153        | E[39]    |       |
| E  | 3  | 113.054         | 1362.814        | 1357.475        | 0.672           | 1357.139        | E[38]    |       |
| L  | 4  | 158.748         | 1319.800        | 1314.460        | 0.672           | 1314.124        | L[37]    |       |
| N  | 5  | 206.762         | 1282.105        | 1276.766        | 1.277           | 1276.430        | N[36]    |       |
| K  | 6  | 254.113         | 1244.091        | 1238.751        | 1.239           | 1238.415        | K[35]    |       |
| L  | 7  | 291.827         | <b>1196.721</b> | 1191.381        | 1.191           | 1191.045        | L[34]    |       |
| L  | 8  | 339.522         | 1159.707        | <b>1153.686</b> | 1.154           | 1153.351        | L[33]    |       |
| Q  | 9  | 388.529         | <b>1121.331</b> | 1115.992        | 1.116           | 1115.656        | Q[32]    |       |
| K  | 10 | <b>395.899</b>  | <b>1102.124</b> | 1096.935        | 1.097           | 1096.649        | K[31]    |       |
| V  | 11 | 438.922         | 1054.954        | 1049.614        | 1.049           | 1049.277        | V[30]    |       |
| T  | 12 | 482.605         | 1021.931        | <b>1016.592</b> | <b>1016.928</b> | 1.016           | 1016.250 | T[29] |
| L  | 13 | 500.299         | 988.249         | 982.909         | <b>983.245</b>  | 982.573         | L[28]    |       |
| A  | 14 | 523.979         | 956.554         | <b>945.214</b>  | <b>945.550</b>  | 944.879         | A[27]    |       |
| Q  | 15 | 566.695         | 926.875         | <b>921.535</b>  | <b>921.871</b>  | <b>921.199</b>  | Q[26]    |       |
| G  | 16 | 585.672         | 884.189         | <b>878.849</b>  | <b>879.185</b>  | <b>878.513</b>  | G[25]    |       |
| G  | 17 | 604.679         | 865.182         | <b>859.842</b>  | <b>860.178</b>  | 859.500         | G[24]    |       |
| V  | 18 | 637.702         | 846.174         | <b>840.835</b>  | <b>841.171</b>  | <b>840.499</b>  | V[23]    |       |
| L  | 19 | 675.397         | <b>813.152</b>  | <b>807.812</b>  | <b>808.148</b>  | <b>807.476</b>  | L[22]    |       |
| P  | 20 | 707.747         | <b>775.457</b>  | 770.117         | 770.453         | 769.781         | P[21]    |       |
| N  | 21 | <b>745.762</b>  | 743.106         | 737.766         | 738.102         | 737.430         | N[20]    |       |
| I  | 22 | 781.456         | 705.002         | 699.152         | 700.488         | 699.814         | I[19]    |       |
| Q  | 23 | 826.143         | 667.397         | 662.057         | 662.393         | 661.721         | Q[18]    |       |
| A  | 24 | 849.822         | 634.711         | 619.371         | 619.707         | 619.035         | A[17]    |       |
| V  | 25 | 882.844         | 603.016         | 588.662         | 589.008         | 588.336         | V[16]    |       |
| L  | 26 | 920.539         | 568.009         | 562.669         | 563.005         | 562.333         | L[15]    |       |
| L  | 27 | 958.234         | 530.314         | <b>524.975</b>  | <b>525.311</b>  | <b>524.639</b>  | L[14]    |       |
| P  | 28 | 990.505         | 492.620         | 487.280         | 487.616         | 486.944         | P[13]    |       |
| K  | 29 | <b>1033.283</b> | 460.269         | 454.929         | 455.265         | 454.593         | K[12]    |       |
| K  | 30 | 1075.981        | 427.576         | 412.236         | 412.572         | 411.901         | K[11]    |       |
| T  | 31 | <b>1109.664</b> | 374.872         | 369.532         | 369.868         | 369.196         | T[10]    |       |
| E  | 32 | <b>1152.678</b> | 341.180         | 335.840         | 336.176         | 335.514         | E[9]     |       |
| S  | 33 | <b>1181.689</b> | 298.175         | 292.835         | 293.172         | 292.500         | S[8]     |       |
| H  | 34 | <b>1227.375</b> | 269.185         | 263.845         | 264.181         | 263.489         | H[7]     |       |
| H  | 35 | <b>1273.061</b> | 221.478         | <b>216.139</b>  | <b>216.475</b>  | <b>217.803</b>  | H[6]     |       |
| K  | 36 | <b>1315.760</b> | 177.762         | 172.422         | 172.758         | 172.110         | K[5]     |       |
| A  | 37 | <b>1339.439</b> | 135.094         | 129.754         | 130.090         | 129.418         | A[4]     |       |
| K  | 38 | <b>1382.137</b> | 111.415         | 106.075         | 106.411         | 105.739         | K[3]     |       |
| G  | 39 | <b>1461.144</b> | 68.716          | 63.377          | 63.713          | 63.041          | G[2]     |       |
| K  | 40 | <b>1443.843</b> | 49.709          | 44.370          | 44.705          | 44.034          | K[1]     |       |



# sp | Q6GSS7 | H2A2A\_MOUSE

DEELNK <sup>Methyl</sup> 14.02 LLGK <sup>Methyl</sup> 14.02 VTIAQGGVLPNIQAVLLPKKTESHKAKGK

- ▶ fragmentation table for charge state 4+
- ▶ specType=etd
- ▶ score=49.83
- ▶ F104975.dat
- ▶ query=q2210.p1
- ▶ precursor=722.588580
- ▶ chargePrecursor=6
- ▶ itol=0.8

| AA    | c               | y               | z=1             | z=2            | z               | AA    |
|-------|-----------------|-----------------|-----------------|----------------|-----------------|-------|
| D[1]  | 34.621          | <b>1083.380</b> | <b>1079.375</b> | 0.755          | <b>1079.123</b> | L[40] |
| E[2]  | 66.281          | 1054.121        | <b>1050.618</b> | 0.755          | 1050.366        | L[39] |
| E[3]  | 98.542          | 1022.362        | <b>1018.358</b> | 0.755          | <b>1018.106</b> | L[38] |
| L[4]  | 126.813         | 990.102         | <b>986.097</b>  | 0.755          | <b>985.845</b>  | L[37] |
| N[5]  | 155.324         | 961.831         | 957.820         | 958.078        | 957.574         | N[36] |
| K[6]  | 190.851         | 933.320         | <b>929.315</b>  | <b>929.567</b> | <b>929.063</b>  | K[35] |
| L[7]  | 219.122         | 897.792         | 893.788         | 894.040        | 893.536         | L[34] |
| L[8]  | 247.293         | 869.521         | 865.517         | 865.769        | 865.265         | L[33] |
| G[9]  | 281.649         | <b>841.250</b>  | 837.246         | 837.498        | 836.994         | G[32] |
| K[10] | 297.176         | 826.995         | 822.990         | 823.242        | 822.738         | K[31] |
| V[11] | 321.944         | 791.467         | <b>787.463</b>  | <b>787.715</b> | <b>787.211</b>  | V[30] |
| T[12] | 347.205         | 766.700         | <b>762.696</b>  | <b>762.947</b> | <b>762.444</b>  | T[29] |
| L[13] | 375.476         | 741.438         | 737.434         | 737.686        | 737.182         | L[28] |
| A[14] | 399.236         | 713.167         | 709.163         | 709.415        | 708.911         | A[27] |
| Q[15] | 425.290         | 695.408         | 691.403         | 691.655        | 691.151         | Q[26] |
| G[16] | <b>439.506</b>  | 663.393         | 659.389         | 659.641        | 659.137         | G[25] |
| G[17] | 453.701         | 649.130         | 645.133         | 645.385        | 644.881         | G[24] |
| V[18] | 478.528         | 634.883         | 630.878         | 631.130        | 630.626         | V[23] |
| L[19] | 506.799         | 610.116         | 606.111         | 606.363        | 605.859         | L[22] |
| P[20] | 533.062         | 581.944         | 577.940         | 578.192        | 577.688         | P[21] |
| N[21] | 559.573         | 557.381         | <b>553.577</b>  | <b>553.829</b> | <b>553.325</b>  | N[20] |
| I[22] | 587.844         | 529.071         | <b>525.066</b>  | <b>525.318</b> | <b>524.814</b>  | I[19] |
| Q[23] | 619.859         | 500.800         | 496.795         | 497.047        | 496.543         | Q[18] |
| A[24] | 637.618         | 468.795         | 464.790         | 465.032        | 464.528         | A[17] |
| V[25] | 662.385         | 451.020         | <b>447.021</b>  | <b>447.273</b> | <b>446.769</b>  | V[16] |
| L[26] | 689.656         | 426.759         | 422.754         | 422.996        | 422.492         | L[15] |
| L[27] | 718.927         | 397.865         | 393.863         | 394.105        | 393.731         | L[14] |
| P[28] | 743.190         | 369.710         | 365.712         | 365.964        | 365.460         | P[13] |
| K[29] | <b>775.214</b>  | 345.453         | 341.449         | 341.701        | 341.197         | K[12] |
| K[30] | <b>807.238</b>  | 313.430         | 309.425         | 309.677        | 309.173         | K[11] |
| T[31] | 832.500         | 281.400         | 277.401         | 277.653        | 277.149         | T[10] |
| E[32] | 854.768         | 256.144         | 252.139         | 252.391        | 251.887         | E[9]  |
| S[33] | <b>886.518</b>  | 223.883         | 219.879         | 220.131        | 219.627         | S[8]  |
| H[34] | <b>920.783</b>  | 202.125         | 198.121         | 198.373        | 197.869         | H[7]  |
| H[35] | 955.046         | 167.861         | 163.856         | 164.108        | 163.604         | H[6]  |
| K[36] | <b>987.072</b>  | 133.590         | 129.591         | 129.843        | 129.339         | K[5]  |
| A[37] | <b>1004.831</b> | 101.373         | 97.369          | 97.621         | 97.117          | A[4]  |
| K[38] | <b>1036.855</b> | 83.811          | 79.808          | 80.060         | 79.556          | K[3]  |
| G[39] | <b>1051.110</b> | 51.789          | 47.784          | 48.036         | 47.532          | G[2]  |
| K[40] | 1083.134        | 37.534          | 33.529          | 33.781         | 33.277          | K[1]  |

# sp | Q6GSS7 | H2A2A\_MOUSE

DEELNK <sup>Methyl</sup> 14.02 LLGK <sup>Methyl</sup> 14.02 VTIAQGGVLPNIQAVLLPKKTESHKAKGK

- ▶ fragmentation table for charge state 5+
- ▶ specType=etd
- ▶ score=49.83
- ▶ F104975.dat
- ▶ query=q2210\_p1
- ▶ precursor=722.588580
- ▶ chargePrecursor=6
- ▶ itol=0.8

| AA |    | c              | y              | z+1            | z+2            | z              | AA |    |
|----|----|----------------|----------------|----------------|----------------|----------------|----|----|
| D  | 1  | 27.418         | <b>866.905</b> | <b>863.702</b> | 0.806          | <b>863.500</b> | D  | 40 |
| E  | 2  | 53.226         | <b>843.900</b> | <b>840.696</b> | 0.806          | <b>840.495</b> | E  | 39 |
| E  | 3  | 79.035         | 318.091        | 315.388        | 0.806          | 314.585        | E  | 38 |
| L  | 4  | 101.052        | 792.261        | <b>789.079</b> | 0.806          | <b>788.878</b> | L  | 37 |
| N  | 5  | 124.460        | 769.666        | 766.462        | 766.664        | 766.261        | N  | 36 |
| K  | 6  | 152.883        | <b>746.857</b> | 743.654        | 743.855        | 743.452        | K  | 35 |
| L  | 7  | 175.499        | 718.435        | 715.232        | 715.433        | 715.030        | L  | 34 |
| L  | 8  | 198.116        | 695.819        | 692.615        | 692.816        | 692.413        | L  | 33 |
| G  | 9  | 209.520        | 673.202        | <b>669.998</b> | <b>670.200</b> | <b>669.796</b> | G  | 32 |
| K  | 10 | 237.943        | 661.797        | 658.594        | 658.795        | 658.392        | K  | 31 |
| V  | 11 | 257.756        | 633.375        | 630.172        | 630.373        | 629.970        | V  | 30 |
| I  | 12 | 277.966        | 613.562        | 610.358        | 610.559        | 610.156        | I  | 29 |
| I  | 13 | 300.583        | 593.352        | 590.148        | 590.350        | 589.947        | I  | 28 |
| A  | 14 | 314.790        | 570.735        | 567.532        | 567.733        | 567.330        | A  | 27 |
| Q  | 15 | 340.402        | 556.528        | <b>553.324</b> | <b>551.526</b> | <b>553.123</b> | Q  | 26 |
| G  | 16 | 351.806        | 530.916        | 527.712        | 527.914        | 527.511        | G  | 25 |
| G  | 17 | 363.210        | 519.512        | 516.308        | 516.510        | <b>516.107</b> | G  | 24 |
| V  | 18 | 383.024        | 508.108        | <b>504.904</b> | 505.105        | <b>504.702</b> | V  | 23 |
| L  | 19 | 405.641        | 488.294        | 485.090        | 485.292        | 484.889        | L  | 22 |
| P  | 20 | 425.051        | 468.677        | 465.473        | 465.675        | 465.272        | P  | 21 |
| N  | 21 | 447.890        | <b>446.266</b> | 443.063        | 443.264        | 442.861        | N  | 20 |
| I  | 22 | 470.477        | 423.456        | 420.254        | 420.456        | 420.053        | I  | 19 |
| Q  | 23 | 496.088        | 400.841        | 397.637        | 397.839        | 397.436        | Q  | 18 |
| A  | 24 | 510.296        | 375.228        | 372.026        | 372.227        | 371.824        | A  | 17 |
| V  | 25 | 530.110        | 361.022        | 357.818        | 358.020        | 357.617        | V  | 16 |
| L  | 26 | 552.726        | 341.208        | 338.005        | 338.206        | 337.803        | L  | 15 |
| L  | 27 | 575.343        | 318.591        | 315.388        | <b>315.589</b> | 315.186        | L  | 14 |
| P  | 28 | 594.754        | 295.975        | 292.771        | 292.972        | 292.569        | P  | 13 |
| K  | 29 | 630.373        | 276.564        | 273.360        | 273.562        | 273.159        | K  | 12 |
| K  | 30 | 645.992        | 250.945        | 247.741        | 247.943        | 247.540        | K  | 11 |
| I  | 31 | 669.201        | 229.326        | 226.122        | 226.324        | 225.921        | I  | 10 |
| E  | 32 | 692.010        | 205.117        | 201.913        | 202.114        | 201.711        | E  | 9  |
| S  | 33 | 709.416        | 179.308        | 176.104        | 176.306        | 175.903        | S  | 8  |
| H  | 34 | 736.828        | 161.902        | 158.699        | 158.899        | 158.496        | H  | 7  |
| H  | 35 | 764.240        | 134.490        | 131.286        | 131.488        | 131.085        | H  | 6  |
| K  | 36 | <b>789.859</b> | 107.078        | 103.874        | 104.076        | 103.673        | K  | 5  |
| A  | 37 | 804.066        | 81.459         | 78.255         | 78.457         | 78.054         | A  | 4  |
| K  | 38 | 829.685        | 67.252         | 64.048         | 64.249         | 63.846         | K  | 3  |
| G  | 39 | <b>841.089</b> | 41.633         | 38.429         | 38.630         | 38.227         | G  | 2  |
| K  | 40 | <b>866.708</b> | 30.228         | 27.025         | 27.226         | 26.823         | K  | 1  |



# sp | Q6GSS7 | H2A2A\_MOUSE

DEELNK <sup>Methyl</sup>14.02 LLGK <sup>Methyl</sup>14.02 VTIAQGGVLPNIQAVLLPKKTESHKAKGK

- ▶ fragmentation table for charge state 1+
- ▶ specType=etd
- ▶ score=51.77
- ▶ F104975.dat
- ▶ query=q2215\_p1
- ▶ precursor=619.506230
- ▶ chargePrecursor=7
- ▶ itol=0.8

| AA | c               | y        | z=1             | z=2             | z              | AA    |
|----|-----------------|----------|-----------------|-----------------|----------------|-------|
| D  | 1313.061        | 4330.497 | 4314.479        | 0.000           | 4313.477       | D[40] |
| E  | <b>262.103</b>  | 4215.470 | 4199.452        | 0.000           | 4198.444       | E[30] |
| E  | <b>391.146</b>  | 4086.428 | 4070.409        | 0.000           | 4069.401       | E[38] |
| L  | 504.230         | 3957.385 | 3941.366        | 0.000           | 3940.359       | L[37] |
| N  | <b>618.273</b>  | 3844.301 | 3828.282        | 3829.290        | 3827.273       | N[30] |
| K  | 760.384         | 3730.259 | 3714.239        | 3715.247        | 3713.231       | K[35] |
| L  | 877.406         | 3688.149 | 3672.129        | 3673.137        | 3671.121       | L[34] |
| L  | <b>906.552</b>  | 3675.064 | 3659.045        | 3660.053        | 3658.039       | L[35] |
| G  | 1043.573        | 3361.979 | 3345.961        | 3346.969        | 3344.953       | G[32] |
| K  | <b>1185.684</b> | 3304.958 | 3288.939        | 3289.947        | 3287.931       | K[31] |
| V  | 1264.752        | 3102.847 | 3146.829        | 3147.836        | 3145.821       | V[30] |
| T  | 1385.900        | 3063.779 | 3047.760        | 3048.768        | 3046.752       | T[29] |
| I  | <b>1468.884</b> | 2962.731 | 2946.713        | 2947.720        | 2945.705       | I[28] |
| A  | <b>1569.921</b> | 2949.641 | 2933.623        | 2934.630        | 2932.614       | A[27] |
| Q  | 1597.980        | 2778.610 | 2762.591        | 2763.599        | 2761.584       | Q[20] |
| G  | 1755.001        | 2650.562 | 2634.543        | 2635.541        | 2633.525       | G[25] |
| G  | 1812.023        | 2593.530 | 2577.511        | 2578.519        | 2576.504       | G[24] |
| V  | 1911.091        | 2536.509 | 2520.490        | 2521.498        | 2519.482       | V[23] |
| L  | 2024.175        | 2437.440 | 2421.421        | 2422.429        | 2420.414       | L[22] |
| T  | 2112.238        | 2324.395 | 2308.377        | 2309.385        | 2307.370       | T[21] |
| N  | 2235.271        | 2227.363 | 2211.345        | 2212.352        | 2210.337       | N[20] |
| I  | 2348.355        | 2113.260 | 2097.242        | 2098.250        | 2096.234       | I[19] |
| Q  | 2476.413        | 2000.176 | 1984.158        | 1985.165        | 1983.150       | Q[18] |
| A  | 2547.450        | 1872.118 | 1856.099        | 1857.107        | 1855.091       | A[17] |
| V  | 2646.519        | 1801.081 | 1785.062        | 1786.070        | 1784.054       | V[16] |
| L  | 2759.603        | 1702.012 | 1686.994        | 1687.991        | 1686.975       | L[15] |
| L  | 2872.687        | 1598.935 | <b>1572.909</b> | <b>1573.917</b> | 1571.902       | L[14] |
| P  | 2969.740        | 1475.844 | 1459.825        | 1460.833        | 1458.818       | P[13] |
| K  | 3097.835        | 1378.791 | <b>1362.773</b> | 1363.780        | 1361.765       | K[12] |
| K  | 3225.930        | 1250.695 | 1234.678        | 1235.685        | 1233.670       | K[11] |
| T  | 3326.977        | 1122.601 | <b>1106.583</b> | <b>1107.591</b> | 1105.575       | T[10] |
| E  | 3459.030        | 1011.544 | <b>1005.535</b> | 1006.543        | 1004.527       | E[9]  |
| S  | 3543.052        | 892.511  | <b>876.492</b>  | 877.500         | 875.485        | S[8]  |
| H  | 3680.111        | 805.479  | 789.460         | 790.468         | <b>788.453</b> | H[7]  |
| H  | 3817.170        | 668.420  | <b>652.401</b>  | <b>653.409</b>  | 651.394        | H[6]  |
| K  | 3945.205        | 531.301  | <b>515.343</b>  | <b>516.350</b>  | 514.335        | K[5]  |
| A  | 4016.302        | 403.266  | <b>387.248</b>  | 388.255         | 386.240        | A[4]  |
| K  | 4144.397        | 332.229  | <b>318.211</b>  | 319.218         | 317.203        | K[3]  |
| G  | 4201.418        | 204.134  | <b>188.116</b>  | <b>189.123</b>  | 187.109        | G[2]  |
| K  | 4329.513        | 147.113  | 131.094         | 132.102         | 130.086        | K[1]  |

# sp | Q6GSS7 | H2A2A\_MOUSE

DEELNK <sup>Methyl</sup> 14.02 LLGK <sup>Methyl</sup> 14.02 VTIAQGGVLPNIQAVLLPKKTESHKAKGK

- ▶ fragmentation table for charge state 2+
- ▶ specType=etd
- ▶ score=51.77
- ▶ F104975.dat
- ▶ query=q2215\_p1
- ▶ precursor=619.506230
- ▶ chargePrecursor=7
- ▶ itol=0.8

| AA  | c               | y              | z+1             | z+2             | z               | AA  |
|-----|-----------------|----------------|-----------------|-----------------|-----------------|-----|
| D 1 | 67.034          | 2165.752       | 2157.743        | 0.504           | 2157.239        | Q40 |
| E 2 | 133.955         | 2136.239       | 2108.229        | 0.504           | 2099.720        | E39 |
| E 3 | 196.077         | 2043.718       | 2035.709        | 0.504           | 2035.205        | E38 |
| L 4 | 252.619         | 1976.190       | 1971.187        | 0.504           | 1970.683        | L37 |
| N 5 | 309.640         | 1922.654       | 1914.645        | 1915.149        | 1914.141        | N36 |
| K 6 | 380.695         | 1895.633       | 1857.623        | 1858.127        | 1857.119        | K35 |
| L 7 | 437.237         | 1794.577       | 1798.568        | 1787.672        | 1786.664        | L34 |
| L 8 | 489.779         | 1736.058       | <b>1730.056</b> | 1730.330        | <b>1729.523</b> | L33 |
| G 9 | 522.290         | 1681.493       | 1673.484        | 1673.988        | 1672.980        | G32 |
| K10 | <b>593.346</b>  | 1652.983       | 1644.973        | 1645.477        | 1644.469        | K31 |
| V11 | <b>642.880</b>  | 1581.627       | <b>1573.918</b> | <b>1574.422</b> | <b>1573.414</b> | V30 |
| T12 | <b>693.404</b>  | 1531.303       | 1524.384        | <b>1524.888</b> | 1523.880        | T29 |
| L13 | <b>745.946</b>  | 1451.899       | 1473.880        | 1474.384        | 1473.376        | L28 |
| A14 | <b>785.464</b>  | 1425.327       | 1417.318        | 1417.822        | <b>1416.814</b> | A27 |
| Q15 | <b>849.493</b>  | 1389.809       | 1381.790        | 1382.303        | <b>1381.295</b> | Q26 |
| G16 | <b>878.004</b>  | 1325.779       | 1317.770        | 1318.274        | 1317.266        | G25 |
| G17 | <b>906.515</b>  | 1297.269       | 1289.259        | 1289.763        | 1288.755        | G24 |
| V18 | <b>956.049</b>  | 1268.758       | 1260.740        | <b>1261.252</b> | 1260.245        | V23 |
| L19 | 1027.591        | 1219.244       | 1217.243        | <b>1211.718</b> | 1210.710        | L22 |
| P20 | <b>1061.118</b> | 1192.662       | 1184.652        | 1185.156        | 1184.160        | P21 |
| N21 | <b>1118.139</b> | 1114.155       | 1106.146        | <b>1106.650</b> | 1105.642        | N20 |
| I22 | 1174.681        | 1057.134       | <b>1049.124</b> | <b>1049.628</b> | 1048.621        | I19 |
| Q23 | <b>1238.710</b> | 1000.592       | 992.582         | <b>993.086</b>  | 992.079         | Q18 |
| A24 | 1274.229        | 936.563        | <b>928.553</b>  | <b>929.057</b>  | 928.049         | A17 |
| V25 | <b>1323.763</b> | 891.044        | <b>893.035</b>  | <b>893.539</b>  | 892.531         | V16 |
| L26 | <b>1380.395</b> | 851.510        | <b>843.500</b>  | <b>844.004</b>  | 843.000         | L15 |
| L27 | 1436.947        | 794.968        | <b>786.958</b>  | <b>787.462</b>  | <b>786.454</b>  | L14 |
| P28 | 1485.374        | <b>738.426</b> | 730.416         | 730.920         | 729.912         | P13 |
| K29 | <b>1549.421</b> | 699.899        | <b>681.890</b>  | <b>682.394</b>  | 681.389         | K12 |
| K30 | 1613.468        | <b>625.852</b> | <b>617.842</b>  | <b>618.346</b>  | <b>617.339</b>  | K11 |
| I31 | 1663.992        | 561.304        | <b>553.295</b>  | <b>554.299</b>  | <b>553.291</b>  | I10 |
| E32 | 1728.514        | 511.381        | <b>503.271</b>  | <b>503.775</b>  | <b>502.767</b>  | E9  |
| S33 | <b>1772.030</b> | 446.759        | <b>438.750</b>  | <b>439.254</b>  | <b>438.246</b>  | S8  |
| H34 | 1840.559        | 401.243        | <b>395.234</b>  | <b>395.738</b>  | <b>394.730</b>  | H7  |
| H35 | 1909.089        | 334.714        | 326.704         | 327.208         | 326.200         | H6  |
| K36 | 1973.136        | 286.184        | 286.175         | 286.679         | 285.671         | K5  |
| A37 | 2008.655        | 202.139        | 196.129         | 196.633         | 195.624         | A4  |
| K38 | 2072.702        | 168.618        | 158.600         | 159.113         | 158.105         | K3  |
| G39 | 2101.213        | 102.571        | 94.561          | 95.065          | 94.057          | G2  |
| K40 | 2165.260        | 74.060         | 66.051          | 66.555          | 65.547          | K1  |

# sp | Q6GSS7 | H2A2A\_MOUSE

DEELNK <sup>Methyl</sup>14.02 LLGK <sup>Methyl</sup>14.02 VTIAQGGVLPNIQAVLLPKKTESHKAKGK

- ▶ fragmentation table for charge state 3+
- ▶ specType=etd
- ▶ score=51.77
- ▶ F104975.dat
- ▶ query=q2215\_p1
- ▶ precursor=619.506230
- ▶ chargePrecursor=7
- ▶ itol=0.8

| AA   | c               | y               | z+1             | z+2             | z               | AA   |
|------|-----------------|-----------------|-----------------|-----------------|-----------------|------|
| D 1  | 45.025          | <b>1444.171</b> | 1438.931        | 0.672           | 1438.495        | D 40 |
| E 2  | 68.039          | 1459.570        | <b>1400.489</b> | 0.672           | 1400.153        | E 39 |
| E 3  | 113.054         | <b>1362.814</b> | 1357.473        | 0.672           | 1357.139        | E 38 |
| L 4  | 158.748         | <b>1319.800</b> | 1314.450        | 0.672           | 1314.123        | L 37 |
| N 5  | 206.762         | 1282.105        | 1276.766        | 1.277           | 1276.430        | N 36 |
| K 6  | 254.113         | 1244.091        | <b>1238.751</b> | <b>1239.087</b> | <b>1238.415</b> | K 35 |
| L 7  | 291.827         | <b>1196.721</b> | 1191.381        | 1191.717        | 1191.045        | L 34 |
| L 8  | 339.522         | 1159.255        | 1153.088        | 1154.552        | <b>1153.351</b> | L 33 |
| Q 9  | 388.529         | <b>1121.331</b> | 1115.992        | 1116.258        | 1115.055        | Q 32 |
| K 10 | <b>395.899</b>  | <b>1102.124</b> | 1096.935        | 1097.321        | 1096.649        | K 31 |
| V 11 | 438.922         | 1054.954        | <b>1049.614</b> | <b>1049.950</b> | <b>1049.278</b> | V 30 |
| Y 12 | 482.605         | 1021.931        | <b>1016.592</b> | <b>1016.928</b> | 1016.250        | Y 29 |
| L 13 | 500.259         | 988.249         | <b>982.909</b>  | <b>983.245</b>  | <b>982.573</b>  | L 28 |
| A 14 | 523.979         | 956.554         | <b>945.214</b>  | <b>945.550</b>  | <b>944.878</b>  | A 27 |
| Q 15 | 566.695         | 920.875         | <b>921.535</b>  | <b>921.871</b>  | <b>921.199</b>  | Q 26 |
| G 16 | 585.672         | <b>884.189</b>  | <b>878.849</b>  | <b>879.185</b>  | <b>878.513</b>  | G 25 |
| G 17 | 604.679         | 865.182         | 859.842         | 860.178         | 859.500         | G 24 |
| V 18 | 637.702         | 846.174         | <b>840.835</b>  | <b>841.171</b>  | <b>840.499</b>  | V 23 |
| L 19 | 678.307         | 823.155         | <b>807.812</b>  | <b>808.148</b>  | <b>807.476</b>  | L 22 |
| F 20 | 707.747         | <b>775.457</b>  | 769.117         | 770.553         | 769.161         | F 21 |
| N 21 | 748.762         | 743.108         | <b>737.766</b>  | <b>738.102</b>  | <b>737.430</b>  | N 20 |
| I 22 | 781.456         | 705.092         | 699.752         | 700.888         | 699.410         | I 19 |
| Q 23 | <b>826.143</b>  | 667.397         | <b>662.057</b>  | <b>662.393</b>  | 661.721         | Q 18 |
| A 24 | <b>849.822</b>  | 634.711         | 629.371         | 630.507         | 629.035         | A 17 |
| V 25 | <b>882.844</b>  | 603.035         | <b>595.692</b>  | <b>596.028</b>  | 595.356         | V 16 |
| L 26 | <b>920.539</b>  | 568.009         | <b>562.669</b>  | <b>563.005</b>  | 562.333         | L 15 |
| L 27 | 958.234         | 530.314         | <b>524.975</b>  | <b>525.311</b>  | <b>524.639</b>  | L 14 |
| F 28 | 990.505         | 492.620         | 487.280         | 487.616         | 486.944         | F 13 |
| K 29 | <b>1033.283</b> | 460.269         | 454.929         | 455.265         | 454.593         | K 12 |
| K 30 | 1075.981        | 427.576         | 422.236         | 422.572         | 421.899         | K 11 |
| T 31 | <b>1109.664</b> | 374.872         | 369.532         | 369.868         | 369.190         | T 10 |
| E 32 | <b>1152.678</b> | 341.188         | 335.848         | 336.184         | 335.514         | E 9  |
| S 33 | <b>1181.689</b> | 298.175         | 292.835         | 293.172         | 292.500         | S 8  |
| H 34 | <b>1227.375</b> | 269.185         | 263.845         | 264.181         | 263.499         | H 7  |
| H 35 | <b>1273.061</b> | 221.478         | <b>216.139</b>  | <b>216.475</b>  | <b>215.803</b>  | H 6  |
| K 36 | <b>1315.760</b> | 177.762         | 172.423         | 172.759         | 172.110         | K 5  |
| A 37 | <b>1339.439</b> | 135.094         | 129.754         | 130.090         | 129.414         | A 4  |
| K 38 | 1382.137        | 111.415         | 106.075         | 106.411         | 105.739         | K 3  |
| G 39 | <b>1461.144</b> | 68.716          | 63.377          | 63.713          | 63.041          | G 2  |
| K 40 | <b>1443.843</b> | 49.709          | 44.370          | 44.705          | 44.034          | K 1  |

# sp | Q6GSS7 | H2A2A\_MOUSE

DEELNK <sup>Methyl</sup>14.02 LLGK <sup>Methyl</sup>14.02 VTIAQGGVLPNIQAVLLPKKTESHKAKGK

- ▶ fragmentation table for charge state 4+
- ▶ specType=etd
- ▶ score=51.77
- ▶ F104975.dat
- ▶ query=q2215\_p1
- ▶ precursor=619.506230
- ▶ chargePrecursor=7
- ▶ itol=0.8

| AA    | c               | y               | a=1             | a=2            | AA                    |
|-------|-----------------|-----------------|-----------------|----------------|-----------------------|
| D[1]  | 34.621          | <b>1083.380</b> | <b>1079.375</b> | 0.755          | <b>1078.121</b> L[40] |
| E[2]  | 66.281          | 1054.107        | <b>1050.618</b> | 0.755          | <b>1050.368</b> L[39] |
| E[3]  | 98.542          | 1022.362        | 1018.358        | 0.755          | 1018.108 E[38]        |
| L[4]  | 126.813         | 990.102         | 988.097         | 0.755          | 985.845 L[37]         |
| N[5]  | 155.324         | 961.831         | 957.820         | 958.076        | 957.574 N[36]         |
| K[6]  | 190.851         | 933.320         | <b>929.315</b>  | <b>929.567</b> | <b>929.063</b> K[35]  |
| L[7]  | 219.122         | <b>897.792</b>  | <b>893.768</b>  | <b>894.040</b> | <b>893.536</b> L[34]  |
| L[8]  | 247.993         | 869.521         | 865.517         | 865.769        | 865.260 L[33]         |
| G[9]  | <b>261.649</b>  | <b>841.250</b>  | 837.246         | 837.498        | 835.994 G[32]         |
| K[10] | 297.176         | <b>826.995</b>  | 822.990         | 823.242        | 822.738 K[31]         |
| V[11] | 321.944         | <b>791.467</b>  | <b>787.463</b>  | <b>787.715</b> | <b>787.211</b> V[30]  |
| T[12] | 347.205         | 766.700         | <b>762.696</b>  | <b>762.947</b> | <b>762.444</b> T[29]  |
| L[13] | 375.476         | 741.438         | <b>737.434</b>  | <b>737.686</b> | <b>737.182</b> L[28]  |
| A[14] | 399.238         | 713.167         | <b>709.163</b>  | <b>709.415</b> | <b>708.911</b> A[27]  |
| Q[15] | 425.290         | 695.408         | <b>691.403</b>  | <b>691.655</b> | 691.151 Q[26]         |
| G[16] | <b>439.506</b>  | <b>663.393</b>  | 659.389         | 659.641        | 659.133 G[25]         |
| G[17] | 453.701         | <b>649.138</b>  | <b>645.133</b>  | <b>645.385</b> | 644.881 G[24]         |
| V[18] | 478.528         | 634.883         | 630.878         | 631.130        | 630.620 V[23]         |
| L[19] | 506.790         | 610.718         | <b>606.111</b>  | <b>606.363</b> | 605.855 L[22]         |
| P[20] | 531.862         | <b>581.844</b>  | 577.840         | 578.092        | 577.588 P[21]         |
| N[21] | 559.573         | 557.581         | <b>553.577</b>  | <b>553.829</b> | <b>553.325</b> N[20]  |
| I[22] | 587.844         | 529.071         | <b>525.066</b>  | <b>525.318</b> | <b>524.814</b> I[19]  |
| Q[23] | 619.859         | 500.800         | 496.795         | 497.047        | 496.543 Q[18]         |
| A[24] | 637.618         | 488.785         | 484.780         | 485.032        | 484.528 A[17]         |
| V[25] | <b>662.385</b>  | 451.020         | 447.021         | 447.273        | 446.769 V[16]         |
| L[26] | 690.656         | 426.759         | 422.754         | 422.998        | 422.500 L[15]         |
| L[27] | 718.927         | 397.988         | 393.983         | 394.235        | 393.731 L[14]         |
| P[28] | 743.190         | 369.718         | 365.712         | 365.964        | 365.465 P[13]         |
| K[29] | <b>775.214</b>  | 345.453         | 341.449         | 341.701        | 341.197 K[12]         |
| K[30] | <b>807.238</b>  | 313.430         | 309.425         | 309.677        | 309.173 K[11]         |
| T[31] | <b>832.500</b>  | 281.408         | 277.401         | 277.653        | 277.148 T[10]         |
| E[32] | <b>864.760</b>  | 259.144         | 254.139         | 254.391        | 253.888 E[9]          |
| S[33] | <b>886.518</b>  | 223.883         | 219.879         | 220.131        | 219.627 S[8]          |
| H[34] | <b>920.783</b>  | 202.125         | 198.121         | 198.373        | 197.869 H[7]          |
| H[35] | <b>955.048</b>  | 167.861         | 163.856         | 164.108        | 163.604 H[6]          |
| K[36] | <b>987.072</b>  | 133.590         | 129.591         | 129.843        | 129.339 K[5]          |
| A[37] | <b>1004.831</b> | 101.373         | 97.367          | 97.619         | 97.115 A[4]           |
| K[38] | 1026.858        | 83.811          | 79.808          | 80.060         | 79.556 K[3]           |
| G[39] | <b>1051.110</b> | 51.789          | 47.784          | 48.036         | 47.532 G[2]           |
| K[40] | 1083.134        | 37.534          | 33.529          | 33.781         | 33.277 K[1]           |

# sp | Q6GSS7 | H2A2A\_MOUSE

DEELNK <sup>Methyl</sup> 14.02 LLGK <sup>Methyl</sup> 14.02 VTIAQGGVLPNIQAVLLPKKTESHKAKGK

- ▶ fragmentation table for charge state 5+
- ▶ specType=etd
- ▶ score=51.77
- ▶ F104975.dat
- ▶ query=q2215\_p1
- ▶ precursor=619.506230
- ▶ chargePrecursor=7
- ▶ itol=0.8

| AA |    | c              | y              | z+1            | z+2            | z              | AA |    |
|----|----|----------------|----------------|----------------|----------------|----------------|----|----|
| D  | 1  | 27.418         | <b>866.905</b> | <b>863.702</b> | 0.806          | 863.900        | D  | 40 |
| E  | 2  | 83.226         | <b>843.900</b> | <b>840.696</b> | 0.806          | <b>840.495</b> | E  | 39 |
| E  | 3  | 79.035         | <b>818.913</b> | <b>814.888</b> | 0.806          | 814.286        | E  | 38 |
| L  | 4  | 101.052        | <b>792.283</b> | 789.070        | 0.806          | 788.878        | L  | 37 |
| N  | 5  | 124.460        | 769.665        | 766.452        | 766.664        | 766.261        | N  | 36 |
| K  | 6  | 152.883        | 746.857        | 743.654        | 743.855        | 743.452        | K  | 35 |
| L  | 7  | 175.499        | 718.435        | 715.232        | 715.433        | 715.030        | L  | 34 |
| L  | 8  | 198.116        | 695.619        | <b>692.615</b> | <b>692.816</b> | <b>692.413</b> | L  | 33 |
| G  | 9  | 209.520        | 673.202        | 669.998        | 670.200        | 669.796        | G  | 32 |
| K  | 10 | 237.943        | 661.797        | 658.594        | 658.795        | 658.392        | K  | 31 |
| V  | 11 | 257.756        | 633.375        | 630.172        | 630.373        | 629.970        | V  | 30 |
| I  | 12 | 277.966        | 613.962        | 610.358        | 610.559        | 610.156        | I  | 29 |
| I  | 13 | 300.583        | <b>593.352</b> | 590.148        | 590.350        | 589.947        | I  | 28 |
| A  | 14 | 314.790        | 570.735        | 567.532        | 567.733        | 567.330        | A  | 27 |
| Q  | 15 | 340.402        | 556.528        | <b>553.324</b> | <b>551.526</b> | <b>553.123</b> | Q  | 26 |
| G  | 16 | 351.806        | 530.916        | 527.712        | 527.914        | 527.511        | G  | 25 |
| G  | 17 | 363.210        | 519.512        | <b>516.308</b> | <b>516.510</b> | <b>516.107</b> | G  | 24 |
| V  | 18 | 383.024        | 508.108        | 504.904        | 505.105        | 504.702        | V  | 23 |
| L  | 19 | 405.641        | 488.294        | 485.090        | 485.292        | 484.889        | L  | 22 |
| P  | 20 | 425.051        | 468.677        | 465.473        | 465.675        | 465.272        | P  | 21 |
| N  | 21 | 447.880        | 448.266        | 443.063        | 443.264        | 442.861        | N  | 20 |
| L  | 22 | 470.477        | 423.458        | 420.254        | 420.456        | 420.053        | L  | 19 |
| Q  | 23 | 496.088        | 400.841        | 397.637        | 397.839        | 397.436        | Q  | 18 |
| A  | 24 | 510.296        | 375.228        | 372.026        | 372.227        | 371.824        | A  | 17 |
| V  | 25 | 530.110        | 361.022        | 357.818        | 358.020        | 357.617        | V  | 16 |
| L  | 26 | 552.726        | 341.208        | 338.005        | 338.206        | 337.803        | L  | 15 |
| L  | 27 | 575.343        | 318.591        | 315.388        | <b>315.589</b> | 315.186        | L  | 14 |
| P  | 28 | 594.754        | 295.975        | 292.771        | 292.972        | 292.569        | P  | 13 |
| K  | 29 | 630.373        | 276.564        | 273.360        | 273.562        | 273.159        | K  | 12 |
| K  | 30 | <b>645.592</b> | 250.945        | 247.741        | 247.943        | 247.540        | K  | 11 |
| I  | 31 | 669.204        | 229.326        | 226.122        | 226.324        | 225.921        | I  | 10 |
| E  | 32 | <b>692.010</b> | 205.117        | 201.913        | 202.114        | 201.711        | E  | 9  |
| S  | 33 | <b>709.416</b> | 179.308        | 176.104        | 176.306        | 175.903        | S  | 8  |
| H  | 34 | <b>736.828</b> | 161.902        | 158.698        | 158.899        | 158.496        | H  | 7  |
| H  | 35 | 764.240        | 134.490        | 131.286        | 131.488        | 131.085        | H  | 6  |
| K  | 36 | 789.859        | 107.078        | 103.874        | 104.076        | 103.673        | K  | 5  |
| A  | 37 | <b>804.066</b> | 81.459         | 78.255         | 78.457         | 78.054         | A  | 4  |
| K  | 38 | 829.685        | 67.252         | 64.048         | 64.249         | 63.846         | K  | 3  |
| G  | 39 | <b>841.089</b> | 41.633         | 38.429         | 38.630         | 38.227         | G  | 2  |
| K  | 40 | 869.706        | 30.228         | 27.023         | 27.226         | 26.823         | K  | 1  |



# sp | Q6GSS7 | H2A2A\_MOUSE

DEELNK <sup>Methyl</sup>14.02 LLGK <sup>Methyl</sup>14.02 VTIAQGGVLPNIQAVLLPKKTESHKAKGK

- ▶ fragmentation table for charge state 6+
- ▶ specType=etd
- ▶ score=51.77
- ▶ F104975.dat
- ▶ query=q2215\_p1
- ▶ precursor=619.506230
- ▶ chargePrecursor=7
- ▶ itol=0.8

| AA    | c              | y              | z+1            | z+2            | z              | AA    |
|-------|----------------|----------------|----------------|----------------|----------------|-------|
| D[1]  | 23.016         | <b>722.589</b> | 719.919        | 0.839          | 719.751        | D[40] |
| E[2]  | 44.523         | 703.131        | 700.740        | 0.839          | 700.580        | E[39] |
| E[3]  | 68.030         | <b>681.911</b> | 679.247        | 0.839          | 679.073        | E[38] |
| L[4]  | 84.378         | 600.424        | 657.734        | 0.839          | 657.566        | L[37] |
| N[5]  | 103.585        | 641.556        | 638.856        | 639.034        | 638.718        | N[36] |
| K[6]  | 127.570        | 622.949        | 619.879        | 620.047        | 619.711        | K[35] |
| L[7]  | 146.417        | 598.864        | <b>596.194</b> | <b>596.362</b> | <b>596.026</b> | L[34] |
| L[8]  | 166.265        | 580.071        | 577.347        | 577.515        | 577.179        | L[33] |
| G[9]  | 174.768        | 561.169        | 558.500        | 558.667        | 558.332        | G[32] |
| K[10] | 198.453        | 551.666        | 548.996        | 549.164        | 548.828        | K[31] |
| V[11] | 214.965        | 527.981        | <b>525.311</b> | <b>525.479</b> | <b>525.143</b> | V[30] |
| I[12] | 233.806        | 511.469        | 508.799        | 508.967        | 508.631        | I[29] |
| I[13] | 250.053        | 494.629        | 491.959        | 492.126        | 491.790        | I[28] |
| A[14] | <b>262.493</b> | 475.781        | 473.111        | 473.279        | 472.943        | A[27] |
| Q[15] | 283.836        | 463.941        | 461.271        | 461.439        | 461.103        | Q[26] |
| G[16] | 293.340        | 442.598        | 439.928        | 440.096        | <b>439.760</b> | G[25] |
| G[17] | 302.843        | 433.094        | 430.425        | 430.593        | 430.257        | G[24] |
| V[18] | 319.355        | 423.591        | 420.921        | 421.089        | 420.753        | V[23] |
| L[19] | 338.202        | 407.079        | 404.410        | 404.578        | 404.242        | L[22] |
| P[20] | 354.377        | 388.232        | 385.562        | 385.730        | 385.394        | P[21] |
| N[21] | 373.385        | 372.091        | 369.387        | 369.555        | 369.219        | N[20] |
| L[22] | 382.232        | 353.049        | 350.360        | 350.548        | 350.212        | L[19] |
| Q[23] | 413.575        | 334.202        | 331.532        | 331.700        | 331.364        | Q[18] |
| A[24] | 425.414        | 312.858        | 310.189        | 310.357        | 310.021        | A[17] |
| V[25] | 441.926        | 301.020        | 298.350        | 298.518        | 298.182        | V[16] |
| L[26] | 460.773        | 284.508        | 281.838        | 282.006        | 281.670        | L[15] |
| L[27] | 479.621        | 265.661        | <b>262.991</b> | 263.159        | <b>262.823</b> | L[14] |
| P[28] | 495.796        | 246.813        | 244.144        | 244.312        | 243.976        | P[13] |
| K[29] | <b>517.145</b> | 230.638        | 227.968        | 228.136        | 227.800        | K[12] |
| K[30] | 538.494        | 209.289        | 206.619        | 206.787        | 206.451        | K[11] |
| I[31] | 558.236        | <b>187.940</b> | 185.270        | 185.438        | 185.102        | I[10] |
| E[32] | 576.843        | 171.059        | 168.429        | 168.597        | 168.261        | E[9]  |
| S[33] | 591.348        | 149.591        | 146.921        | 147.089        | 146.753        | S[8]  |
| H[34] | 614.191        | 135.086        | 132.416        | 132.584        | 132.248        | H[7]  |
| H[35] | 637.034        | 112.243        | 109.573        | 109.741        | 109.405        | H[6]  |
| K[36] | 658.384        | 89.400         | 86.730         | 86.898         | 86.562         | K[5]  |
| A[37] | 670.223        | 68.050         | 65.381         | 65.549         | 65.213         | A[4]  |
| K[38] | <b>691.572</b> | 56.211         | 53.541         | 53.709         | 53.373         | K[3]  |
| G[39] | 701.076        | 34.862         | 32.192         | 32.360         | 32.024         | G[2]  |
| K[40] | 722.425        | 25.358         | 22.688         | 22.856         | 22.520         | K[1]  |



# sp | P84244 | H33\_MOUSE

IAQDFK<sup>Dimethyl</sup> TDLRFQSAAIGALQE  
28.03

- ▶ fragmentation table for charge state 1+
- ▶ specType=etd
- ▶ score=53.02
- ▶ F105044.dat
- ▶ query=q1872\_p1
- ▶ precursor=784.084860
- ▶ chargePrecursor=3
- ▶ itol=0.8

| AA     | c               | y               | z+1             | z+2            | z        | AA    |
|--------|-----------------|-----------------|-----------------|----------------|----------|-------|
| I [1]  | 131.118         | 2850.240        | 2334.221        | 0.000          | 2333.214 | I[21] |
| A [2]  | 202.155         | 3237.150        | 2221.137        | 0.000          | 2220.130 | A[20] |
| Q [3]  | 330.214         | 2166.110        | 2150.100        | 2151.108       | 2149.092 | Q[19] |
| D [4]  | <b>445.241</b>  | 3038.060        | 3022.042        | 3023.040       | 3021.034 | D[18] |
| F [5]  | <b>592.309</b>  | 1923.033        | <b>1907.015</b> | 1908.023       | 1905.007 | F[17] |
| K [6]  | <b>748.435</b>  | 1775.965        | <b>1759.946</b> | 1760.954       | 1758.938 | K[16] |
| T [7]  | <b>849.483</b>  | <b>1619.839</b> | <b>1603.820</b> | 1604.828       | 1602.812 | T[15] |
| D [8]  | <b>964.510</b>  | 1518.791        | <b>1502.772</b> | 1503.780       | 1501.765 | D[14] |
| L [9]  | <b>1077.594</b> | 1401.764        | <b>1387.745</b> | 1388.753       | 1386.735 | L[13] |
| R [10] | 1213.695        | 1290.680        | <b>1274.661</b> | 1275.669       | 1273.654 | R[12] |
| F [11] | 1580.763        | 1134.570        | 1118.550        | 1119.558       | 1117.552 | F[11] |
| Q [12] | <b>1508.822</b> | 987.511         | 971.492         | 972.500        | 970.484  | Q[10] |
| S [13] | 1595.854        | 859.452         | <b>843.433</b>  | <b>844.441</b> | 842.425  | S[0]  |
| A [14] | 1666.891        | 772.420         | <b>756.401</b>  | <b>757.409</b> | 755.393  | A[8]  |
| A [15] | 1737.928        | 701.383         | 685.364         | 686.372        | 684.356  | A[7]  |
| T [16] | 1813.012        | 630.345         | 614.327         | 615.335        | 613.319  | T[6]  |
| Q [17] | 1908.034        | 517.302         | 501.283         | 502.291        | 500.275  | Q[5]  |
| A [18] | <b>1979.071</b> | 460.240         | 444.221         | <b>445.229</b> | 443.214  | A[4]  |
| L [19] | 2062.155        | 389.203         | 373.184         | 374.192        | 372.177  | L[3]  |
| Q [20] | 2220.214        | 276.110         | 260.100         | 261.108        | 259.092  | Q[2]  |
| E [21] | 2349.256        | 148.060         | 132.042         | 133.050        | 131.034  | E[1]  |

# sp | P84244 | H33\_MOUSE

IAQDFK<sup>Dimethyl</sup> TDLRFQSAAIGALQE  
28.03

- ▶ fragmentation table for charge state 2+
- ▶ specType=etd
- ▶ score=53.02
- ▶ F105044.dat
- ▶ query=q1872.p1
- ▶ precursor=784.084860
- ▶ chargePrecursor=3
- ▶ itol=0.8

| AA |    | c               | y               | z+1             | z+2             | z               | AA    |
|----|----|-----------------|-----------------|-----------------|-----------------|-----------------|-------|
| I  | 1  | 66.093          | <b>1175.624</b> | <b>1167.614</b> | 0.504           | <b>1167.110</b> | I(1)  |
| A  | 2  | 101.551         | 1119.062        | <b>1111.072</b> | 0.504           | <b>1110.568</b> | A(2)  |
| Q  | 3  | 165.610         | 1083.563        | <b>1075.554</b> | <b>1076.058</b> | 1075.050        | Q(3)  |
| D  | 4  | 223.224         | 1049.539        | <b>1011.524</b> | <b>1012.028</b> | <b>1011.021</b> | D(4)  |
| F  | 5  | 295.658         | 992.020         | <b>954.011</b>  | <b>954.515</b>  | <b>953.507</b>  | F(5)  |
| K  | 6  | 374.721         | 888.486         | 880.477         | 880.981         | 879.973         | K(6)  |
| T  | 7  | 425.245         | 810.423         | 802.414         | 802.918         | 801.910         | T(7)  |
| D  | 8  | 482.759         | 759.899         | 751.890         | 752.394         | 751.386         | D(8)  |
| L  | 9  | 539.301         | 702.386         | 694.376         | 694.880         | 693.872         | L(9)  |
| R  | 10 | 617.353         | 646.844         | 637.834         | 638.338         | 637.330         | R(10) |
| F  | 11 | 690.595         | 597.792         | 559.784         | 560.288         | 559.280         | F(11) |
| Q  | 12 | 754.915         | 494.259         | 486.250         | 486.753         | 485.745         | Q(12) |
| S  | 13 | 798.431         | 430.230         | 422.220         | 422.724         | 421.716         | S(13) |
| A  | 14 | 833.949         | 396.714         | 378.704         | 379.208         | 378.200         | A(14) |
| A  | 15 | 899.908         | 351.195         | 343.186         | 343.690         | 342.682         | A(15) |
| I  | 16 | <b>926.010</b>  | 315.676         | 307.667         | 308.171         | 307.163         | I(16) |
| G  | 17 | <b>954.521</b>  | 280.154         | 251.125         | 251.629         | 250.621         | G(17) |
| A  | 18 | <b>990.039</b>  | 230.634         | 222.614         | 223.118         | 222.110         | A(18) |
| L  | 19 | <b>1046.581</b> | 195.105         | 187.096         | 187.600         | 186.592         | L(19) |
| Q  | 20 | <b>1110.610</b> | 138.563         | 130.554         | 131.058         | 130.050         | Q(20) |
| E  | 21 | <b>1175.132</b> | 74.534          | 66.524          | 67.028          | 66.021          | E(21) |

# sp | P84244 | H33\_MOUSE

IAQDFK<sup>Dimethyl</sup>TDLRFQSAIGALQE  
28.03

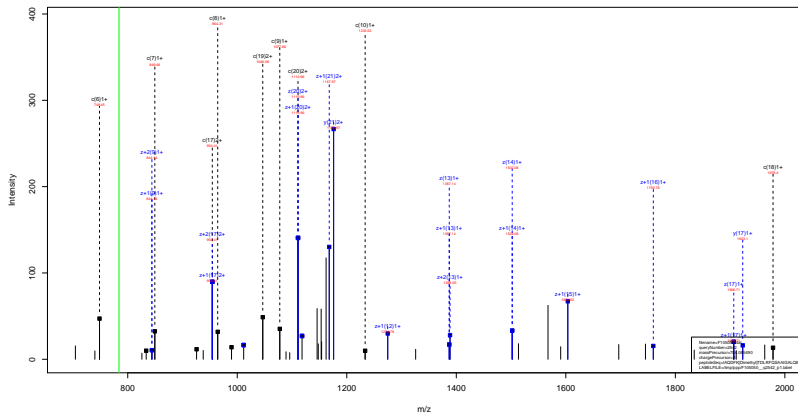

# sp | P84244 | H33\_MOUSE

IAQDFK<sup>Dimethyl</sup> TDLRFQSAAIGALQE  
28.03

- ▶ fragmentation table for charge state 1+
- ▶ specType=etd
- ▶ score=44.66
- ▶ F105050.dat
- ▶ query=q2542\_p1
- ▶ precursor=784.085490
- ▶ chargePrecursor=3
- ▶ itol=0.8

| AA     | c               | y               | z+1             | z+2             | z               | AA          |
|--------|-----------------|-----------------|-----------------|-----------------|-----------------|-------------|
| I   1  | 151.118         | 2505.248        | 2194.231        | 0.000           | 2133.214        | <b>Q</b> 21 |
| A   2  | 202.155         | 2237.156        | 2221.137        | 0.000           | 2220.130        | <b>A</b> 20 |
| Q   3  | 330.214         | 2166.119        | 2150.100        | 2151.108        | 2149.092        | <b>Q</b> 19 |
| D   4  | 445.241         | 2138.065        | 2022.042        | 2023.049        | 2021.033        | <b>D</b> 18 |
| F   5  | 592.309         | <b>1923.033</b> | <b>1907.015</b> | 1908.023        | <b>1906.007</b> | <b>F</b> 17 |
| K   6  | <b>748.435</b>  | 1775.965        | <b>1759.946</b> | 1760.954        | 1758.938        | <b>K</b> 16 |
| T   7  | <b>849.483</b>  | 1618.836        | <b>1603.820</b> | 1604.828        | 1602.811        | <b>T</b> 15 |
| D   8  | <b>964.510</b>  | 1518.791        | <b>1502.772</b> | 1503.780        | <b>1501.765</b> | <b>D</b> 14 |
| L   9  | <b>1077.594</b> | 1403.764        | <b>1387.745</b> | <b>1388.753</b> | <b>1386.738</b> | <b>L</b> 13 |
| R   10 | <b>1233.695</b> | 1290.690        | <b>1274.661</b> | 1275.669        | 1273.654        | <b>R</b> 12 |
| F   11 | 1358.753        | 1184.579        | <b>1118.560</b> | 1119.568        | <b>1117.552</b> | <b>F</b> 11 |
| Q   12 | 1508.822        | 987.511         | 971.490         | 972.500         | 970.484         | <b>Q</b> 10 |
| S   13 | 1595.854        | 859.452         | <b>843.433</b>  | <b>844.441</b>  | 842.425         | <b>S</b> 0  |
| A   14 | 1666.891        | 722.420         | 706.401         | 707.409         | 705.393         | <b>A</b> 0  |
| A   15 | 1737.928        | 593.383         | 585.368         | 586.372         | 584.356         | <b>A</b> 0  |
| I   16 | 1853.012        | 430.346         | 424.327         | 425.336         | 423.319         | <b>I</b> 0  |
| G   17 | 1908.034        | 317.282         | 301.243         | 302.251         | 300.235         | <b>G</b> 0  |
| A   18 | <b>1979.071</b> | 460.240         | 444.221         | 445.229         | 443.214         | <b>A</b> 0  |
| L   19 | 2092.155        | 389.203         | 373.184         | 374.192         | 372.177         | <b>L</b> 0  |
| Q   20 | 2220.214        | 276.119         | 260.100         | 261.108         | 259.092         | <b>Q</b> 0  |
| E   21 | 2349.256        | 148.060         | 132.042         | 133.050         | 131.034         | <b>E</b> 0  |

# sp | P84244 | H33\_MOUSE

IAQDFK<sup>Dimethyl</sup> TDLRFQSAAIGALQE  
28.03

- ▶ fragmentation table for charge state 2+
- ▶ specType=etd
- ▶ score=44.66
- ▶ F105050.dat
- ▶ query=q2542.p1
- ▶ precursor=784.085490
- ▶ chargePrecursor=3
- ▶ itol=0.8

| AA    | c               | y               | z+1             | z+2             | z               | AA    |
|-------|-----------------|-----------------|-----------------|-----------------|-----------------|-------|
| I [1] | 66.093          | <b>1175.624</b> | <b>1167.614</b> | 0.504           | 1167.110        | Q[1]  |
| A [2] | 101.501         | <b>1119.082</b> | <b>1111.072</b> | 0.504           | <b>1110.568</b> | A[20] |
| Q [3] | 165.610         | 1083.563        | 1075.554        | 1076.058        | 1075.050        | Q[19] |
| D [4] | 223.224         | 1049.538        | <b>1011.534</b> | <b>1012.028</b> | <b>1011.021</b> | Q[10] |
| F [5] | 290.658         | 982.020         | <b>954.011</b>  | <b>954.515</b>  | 953.509         | F[17] |
| K [6] | 374.721         | 888.486         | 880.477         | 880.981         | 879.973         | K[10] |
| T [7] | 425.245         | 810.423         | 802.414         | 802.918         | 801.910         | T[15] |
| D [8] | 482.759         | 759.899         | 751.890         | 752.394         | 751.386         | D[14] |
| L [9] | 539.301         | 702.366         | 694.376         | 694.880         | 693.872         | L[13] |
| R[10] | 617.363         | 646.844         | 637.833         | 638.338         | 637.330         | R[12] |
| F[11] | 690.595         | 597.793         | 589.784         | 590.288         | 589.280         | F[11] |
| Q[12] | 754.915         | 494.259         | 486.250         | 486.753         | 485.745         | Q[10] |
| S[13] | 768.431         | 430.230         | 422.220         | 422.724         | 421.716         | S[0]  |
| A[14] | <b>833.949</b>  | 396.714         | 378.704         | 379.208         | 378.200         | A[0]  |
| A[15] | 899.968         | 351.195         | 343.188         | 343.690         | 342.682         | A[7]  |
| I[16] | <b>926.010</b>  | 315.676         | 307.667         | 308.171         | 307.163         | I[6]  |
| G[17] | <b>954.521</b>  | 269.134         | 251.126         | 251.629         | 250.621         | G[6]  |
| A[18] | <b>990.039</b>  | 230.624         | 222.614         | 223.118         | 222.110         | A[4]  |
| L[19] | <b>1046.581</b> | 195.105         | 187.096         | 187.600         | 186.592         | L[3]  |
| Q[20] | <b>1110.610</b> | 138.563         | 130.554         | 131.058         | 130.050         | Q[2]  |
| E[21] | 1175.132        | 74.534          | 66.524          | 67.028          | 66.021          | E[1]  |

# sp | P84244 | H33\_MOUSE

IAQDFK<sup>Dimethyl</sup> TDLRFQSAIGALQE  
28.03

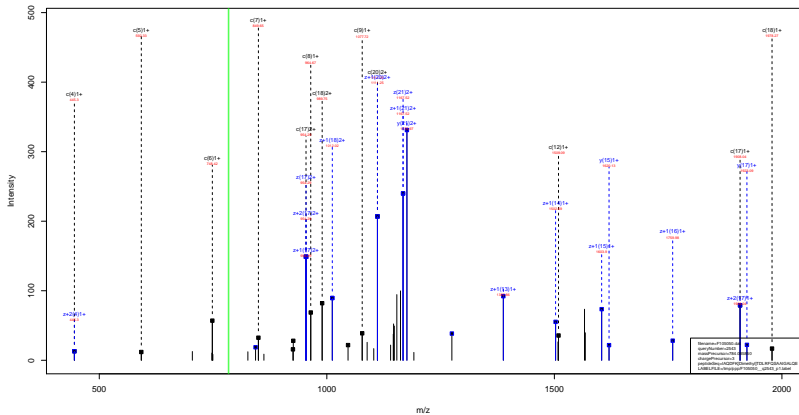



# sp | P84244 | H33\_MOUSE

IAQDFK<sup>Dimethyl</sup> TDLRFQSAAIGALQE  
28.03

- ▶ fragmentation table for charge state 1+
- ▶ specType=etd
- ▶ score=59.09
- ▶ F105050.dat
- ▶ query=q2543\_p1
- ▶ precursor=784.085850
- ▶ chargePrecursor=3
- ▶ itol=0.8

| AA   | c               | y               | z+1             | z+2             | z        | AA   |
|------|-----------------|-----------------|-----------------|-----------------|----------|------|
| F 1  | 191.118         | 2950.240        | 2334.221        | 0.000           | 2333.214 | F 21 |
| A 2  | 202.155         | 2237.156        | 2221.117        | 0.000           | 2220.130 | A 20 |
| Q 3  | 137.214         | 2166.119        | 2150.100        | 2151.108        | 2149.062 | Q 19 |
| D 4  | <b>445.241</b>  | 2038.959        | 2022.893        | 2023.949        | 2021.936 | D 18 |
| F 5  | <b>502.309</b>  | <b>1923.033</b> | 1907.915        | <b>1908.023</b> | 1906.007 | F 17 |
| K 6  | <b>748.435</b>  | 1775.905        | <b>1759.946</b> | 1760.954        | 1758.938 | K 16 |
| T 7  | <b>849.483</b>  | <b>1619.839</b> | <b>1603.820</b> | 1604.828        | 1602.812 | T 15 |
| D 8  | <b>964.510</b>  | 1518.791        | <b>1502.772</b> | 1503.780        | 1501.765 | D 14 |
| L 9  | <b>1077.594</b> | 1401.704        | <b>1387.745</b> | 1388.753        | 1386.736 | L 13 |
| R 10 | 1213.699        | 1290.680        | <b>1274.661</b> | 1275.669        | 1273.654 | R 12 |
| F 11 | 1380.763        | 1134.579        | 1118.500        | 1119.508        | 1117.552 | F 11 |
| Q 12 | <b>1508.822</b> | 987.511         | 971.492         | 972.500         | 970.484  | Q 10 |
| S 13 | 1595.854        | 859.452         | <b>843.433</b>  | 844.441         | 842.425  | S 9  |
| A 14 | 1666.891        | 722.420         | 706.401         | 707.409         | 705.391  | A 8  |
| A 15 | 1737.928        | 701.383         | 685.364         | 686.372         | 684.356  | A 7  |
| I 16 | 1851.012        | 630.340         | 614.321         | 615.329         | 613.311  | I 6  |
| G 17 | <b>1908.034</b> | 517.262         | 501.243         | 502.251         | 500.235  | G 5  |
| A 18 | <b>1979.071</b> | 460.240         | 444.221         | <b>445.229</b>  | 443.214  | A 4  |
| L 19 | 2092.155        | 389.207         | 373.188         | 374.192         | 372.177  | L 3  |
| Q 20 | 2220.214        | 276.119         | 260.100         | 261.108         | 259.092  | Q 2  |
| E 21 | 2349.256        | 148.060         | 132.042         | 133.050         | 131.034  | E 1  |

# sp | P84244 | H33\_MOUSE

IAQDFK<sup>Dimethyl</sup> TDLRFQSAIGALQE  
28.03

- ▶ fragmentation table for charge state 2+
- ▶ specType=etd
- ▶ score=59.09
- ▶ F105050.dat
- ▶ query=q2543.p1
- ▶ precursor=784.085850
- ▶ chargePrecursor=3
- ▶ itol=0.8

| AA     | c               | y               | z+1             | z+2             | z               | AA    |
|--------|-----------------|-----------------|-----------------|-----------------|-----------------|-------|
| I [1]  | 66.093          | <b>1175.624</b> | <b>1167.614</b> | 0.504           | <b>1167.110</b> | [21]  |
| A [2]  | 101.561         | 1119.062        | <b>1111.072</b> | 0.504           | <b>1110.568</b> | A[20] |
| Q [3]  | 165.610         | 1083.563        | 1075.554        | 1076.058        | 1075.050        | Q[19] |
| D [4]  | 223.124         | 1049.539        | <b>1011.534</b> | <b>1012.028</b> | 1013.021        | D[18] |
| F [5]  | 290.658         | 989.020         | <b>954.011</b>  | <b>954.515</b>  | <b>953.507</b>  | F[17] |
| K [6]  | 374.721         | 888.486         | 880.477         | 880.981         | 879.973         | K[16] |
| T [7]  | 425.245         | 810.423         | 802.414         | 802.918         | 801.910         | T[15] |
| D [8]  | 482.759         | 759.899         | 751.890         | 752.394         | 751.386         | D[14] |
| L [9]  | 539.301         | 702.366         | 694.376         | 694.880         | 693.872         | L[13] |
| R [10] | 617.363         | 646.844         | 637.833         | 638.338         | 637.330         | R[12] |
| F [11] | 690.595         | 597.793         | 559.784         | 560.288         | 559.280         | F[11] |
| Q [12] | 754.915         | 494.259         | 486.250         | 486.753         | 485.745         | Q[10] |
| S [13] | 798.431         | 430.230         | 422.220         | 422.724         | 421.716         | S[9]  |
| A [14] | 833.949         | 396.714         | 378.704         | 379.208         | 378.200         | A[8]  |
| A [15] | 899.968         | 351.195         | 343.188         | 343.690         | 342.682         | A[7]  |
| I [16] | <b>926.010</b>  | 315.676         | 307.667         | 308.171         | 307.163         | I[6]  |
| G [17] | <b>954.521</b>  | 269.134         | 251.126         | 251.629         | 250.621         | G[5]  |
| A [18] | <b>990.039</b>  | 230.624         | 222.614         | 223.118         | 222.110         | A[4]  |
| L [19] | <b>1046.581</b> | 195.105         | 187.096         | 187.600         | 186.592         | L[3]  |
| Q [20] | <b>1110.610</b> | 138.563         | 130.554         | 131.058         | 130.050         | Q[2]  |
| E [21] | 1175.132        | 74.834          | 68.824          | 67.828          | 68.821          | E[1]  |

# sp | P62806 | H4\_MOUSE

GLGK <sup>Acetyl</sup> GGAK <sup>Acetyl</sup> R  
42.01 42.01

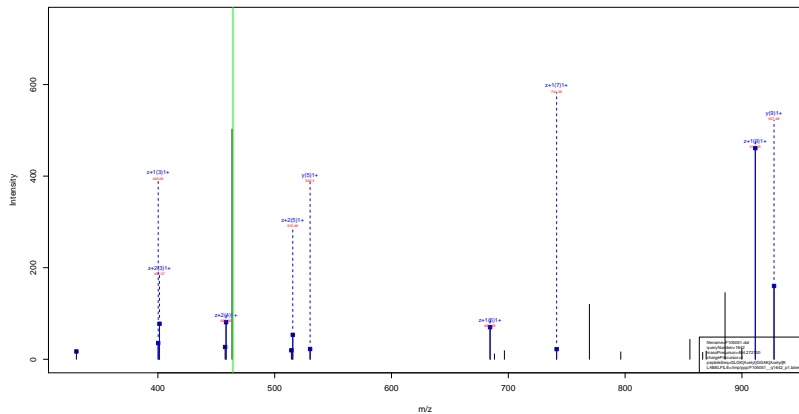

# sp | P62806 | H4\_MOUSE

GLGK<sub>Acetyl</sub> GGAK<sub>Acetyl</sub> R  
42.01 42.01

- ▶ fragmentation table for charge state 1+
- ▶ specType=etd
- ▶ score=38.69
- ▶ F105051.dat
- ▶ query=q1642\_p1
- ▶ precursor=464.272100
- ▶ chargePrecursor=2
- ▶ itol=0.6

| AA   | c       | y              | z+1            | z+2            | z       | AA   |
|------|---------|----------------|----------------|----------------|---------|------|
| G[1] | 75.055  | <b>927.537</b> | <b>911.518</b> | 0.000          | 910.510 | G[9] |
| L[2] | 188.139 | 870.316        | 551.497        | 0.000          | 353.489 | L[8] |
| G[3] | 245.161 | 737.832        | <b>741.413</b> | 0.000          | 740.405 | G[7] |
| K[4] | 415.266 | 700.410        | <b>684.391</b> | 695.399        | 583.384 | K[6] |
| G[5] | 472.288 | <b>530.305</b> | <b>514.286</b> | <b>515.294</b> | 513.278 | G[5] |
| G[6] | 529.309 | 473.283        | <b>457.264</b> | <b>458.272</b> | 456.257 | G[4] |
| A[7] | 600.346 | 416.262        | <b>400.243</b> | <b>401.251</b> | 399.235 | A[3] |
| K[8] | 770.452 | 345.224        | 329.206        | <b>330.214</b> | 328.198 | K[2] |
| R[9] | 936.553 | 175.119        | 159.100        | 160.108        | 158.092 | R[1] |



# sp | P62806 | H4\_MOUSE

GLGK<sub>Acetyl</sub><sub>42.01</sub> GGAK<sub>Acetyl</sub><sub>42.01</sub>

- ▶ fragmentation table for charge state 1+
- ▶ specType=etd
- ▶ score=41.79
- ▶ F105051.dat
- ▶ query=q1643.p1
- ▶ precursor=464.272160
- ▶ chargePrecursor=2
- ▶ itol=0.6

| AA   | c              | y              | z+1            | z+2            | z       | AA   |
|------|----------------|----------------|----------------|----------------|---------|------|
| G[1] | 75.055         | <b>927.537</b> | <b>911.518</b> | 0.000          | 910.510 | G[9] |
| L[2] | 188.139        | 870.516        | <b>854.497</b> | 0.000          | 853.489 | L[8] |
| G[3] | 283.164        | 737.432        | <b>741.413</b> | 0.000          | 740.405 | G[7] |
| K[4] | 415.266        | <b>700.410</b> | <b>684.391</b> | 685.399        | 683.384 | K[6] |
| G[5] | 472.288        | 530.305        | <b>514.286</b> | <b>515.294</b> | 513.278 | G[5] |
| L[6] | 529.309        | 473.283        | <b>457.264</b> | <b>458.272</b> | 456.257 | L[4] |
| A[7] | <b>600.346</b> | 416.262        | <b>400.243</b> | <b>401.251</b> | 399.235 | A[3] |
| R[8] | 770.452        | 345.224        | 329.206        | <b>330.214</b> | 328.198 | R[2] |
| R[9] | 926.553        | 175.119        | 159.100        | 160.108        | 158.092 | R[1] |



# sp | P62806 | H4\_MOUSE

GLGK<sub>42.01</sub> Acetyl GGAK<sub>42.01</sub> Acetyl R

- ▶ fragmentation table for charge state 1+
- ▶ specType=etd
- ▶ score=44.23
- ▶ F105051.dat
- ▶ query=q1644.p1
- ▶ precursor=464.272210
- ▶ chargePrecursor=2
- ▶ itol=0.6

| AA   | c              | y              | z+1            | z+2            | z       | AA   |
|------|----------------|----------------|----------------|----------------|---------|------|
| G[1] | 75.055         | <b>927.537</b> | <b>911.518</b> | 0.000          | 910.510 | G[9] |
| L[2] | 188.139        | 870.515        | <b>854.497</b> | 0.000          | 853.489 | L[8] |
| G[3] | 283.164        | <b>757.432</b> | <b>741.413</b> | 0.000          | 740.405 | G[7] |
| K[4] | 415.266        | 700.410        | <b>684.391</b> | 685.390        | 683.384 | K[6] |
| G[5] | 472.288        | <b>530.305</b> | <b>514.286</b> | <b>515.294</b> | 513.278 | G[5] |
| L[6] | 529.309        | 473.283        | <b>457.264</b> | <b>458.272</b> | 456.257 | L[4] |
| A[7] | <b>600.346</b> | 416.262        | <b>400.243</b> | <b>401.251</b> | 399.235 | A[3] |
| R[8] | 770.482        | 345.224        | 329.206        | <b>330.214</b> | 328.198 | R[2] |
| R[9] | 926.553        | 175.119        | 159.100        | 160.108        | 158.092 | R[1] |



# sp | P43277 | H13\_MOUSE

KPAAAAGAK <sup>Acetyl</sup> K  
42.01

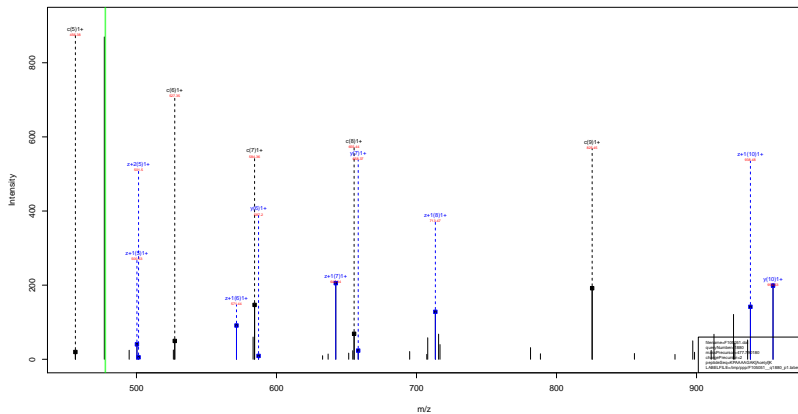

# sp | P43277 | H13\_MOUSE

KPAAAAGAK <sup>Acetyl</sup> K  
42.01

- ▶ fragmentation table for charge state 1+
- ▶ specType=etd
- ▶ score=30.99
- ▶ F105051.dat
- ▶ query=q1880\_p1
- ▶ precursor=477.790180
- ▶ chargePrecursor=2
- ▶ itol=0.6

| AA | c              | y              | z+1            | z+2            | z       | AA |
|----|----------------|----------------|----------------|----------------|---------|----|
| K  | 146.129        | <b>954.573</b> | <b>938.554</b> | 939.562        | 937.547 | K  |
| P  | 243.182        | 826.478        | 810.459        | 811.467        | 809.452 | P  |
| A  | 314.219        | 729.425        | <b>713.407</b> | 714.414        | 712.399 | A  |
| A  | 385.256        | <b>658.388</b> | <b>642.370</b> | 643.377        | 641.362 | A  |
| A  | <b>456.293</b> | <b>587.351</b> | <b>571.332</b> | 572.340        | 570.325 | A  |
| A  | <b>527.330</b> | 516.314        | <b>500.295</b> | <b>501.303</b> | 499.287 | A  |
| G  | <b>584.351</b> | 445.277        | 429.258        | 430.266        | 428.250 | G  |
| A  | <b>655.389</b> | 388.255        | 372.237        | 373.245        | 371.229 | A  |
| K  | <b>825.494</b> | 117.213        | 361.200        | 362.207        | 360.192 | K  |
| K  | 953.589        | 147.113        | 131.094        | 132.102        | 130.086 | K  |



# sp | P68433 | H31\_MOUSE

K<sup>Dimethyl</sup><sub>28.03</sub> STGGK<sup>Acetyl</sup><sub>42.01</sub> APR

- ▶ fragmentation table for charge state 1+
- ▶ specType=etd
- ▶ score=51.20
- ▶ F105051.dat
- ▶ query=q2026\_p1
- ▶ precursor=324.526020
- ▶ chargePrecursor=3
- ▶ itol=0.6

| AA | c       | y       | z+1     | z+2     | z       | AA |
|----|---------|---------|---------|---------|---------|----|
| K  | 174.160 | 971.563 | 955.545 | 956.552 | 954.537 | K  |
| S  | 261.192 | 815.437 | 799.418 | 800.426 | 798.410 | S  |
| T  | 362.240 | 728.405 | 712.386 | 713.394 | 711.378 | T  |
| G  | 419.261 | 627.357 | 611.339 | 612.346 | 610.331 | G  |
| G  | 476.283 | 570.336 | 554.317 | 555.325 | 553.309 | G  |
| K  | 646.388 | 513.314 | 497.296 | 498.303 | 496.288 | K  |
| A  | 717.425 | 343.209 | 327.190 | 328.198 | 326.182 | A  |
| P  | 814.478 | 272.172 | 256.153 | 257.161 | 255.145 | P  |
| R  | 970.579 | 175.119 | 159.100 | 160.108 | 158.092 | R  |

# sp | P68433 | H31\_MOUSE

K<sup>Dimethyl</sup><sub>28.03</sub> STGGK<sup>Acetyl</sup><sub>42.01</sub> APR

- ▶ fragmentation table for charge state 2+
- ▶ specType=etd
- ▶ score=51.20
- ▶ F105051.dat
- ▶ query=q2026\_p1
- ▶ precursor=324.526020
- ▶ chargePrecursor=3
- ▶ itol=0.6

| AA | c | y              | z+1            | z+2            | z              | AA      |   |   |
|----|---|----------------|----------------|----------------|----------------|---------|---|---|
| K  | 1 | 87.584         | <b>486.285</b> | <b>478.276</b> | <b>478.780</b> | 477.772 | K | 9 |
| S  | 2 | 131.100        | 408.222        | 400.213        | 400.717        | 399.709 | S | 8 |
| T  | 3 | 181.824        | 384.706        | 356.697        | 357.201        | 356.193 | T | 7 |
| G  | 4 | 210.134        | 314.182        | 306.173        | 306.677        | 305.669 | G | 6 |
| G  | 5 | 238.645        | 285.672        | 277.662        | 278.166        | 277.158 | G | 5 |
| K  | 6 | 323.698        | 257.161        | 249.151        | 249.655        | 248.648 | K | 4 |
| A  | 7 | 359.216        | 172.108        | 164.099        | 164.603        | 163.595 | A | 3 |
| P  | 8 | 407.743        | 136.589        | 128.580        | 129.084        | 128.076 | P | 2 |
| R  | 9 | <b>485.793</b> | 88.063         | 80.054         | 80.558         | 79.550  | R | 1 |



# sp | P68433 | H31\_MOUSE

K<sup>Acetyl</sup> 42.01 STGGK<sup>Acetyl</sup> 42.01 APR

- ▶ fragmentation table for charge state 1+
- ▶ specType=etd
- ▶ score=33.60
- ▶ F105051.dat
- ▶ query=q2157.p1
- ▶ precursor=493.274470
- ▶ chargePrecursor=2
- ▶ itol=0.6

| AA |   | c              | y              | z+1            | z+2            | z       | AA  |
|----|---|----------------|----------------|----------------|----------------|---------|-----|
| K  | 1 | 188.139        | <b>985.543</b> | <b>969.524</b> | 970.532        | 968.516 | K 9 |
| S  | 2 | 275.171        | 815.437        | <b>799.418</b> | 800.426        | 798.410 | S 8 |
| T  | 3 | 318.219        | 728.403        | <b>712.386</b> | <b>713.394</b> | 711.378 | T 7 |
| G  | 4 | 433.241        | <b>627.357</b> | <b>611.339</b> | <b>612.346</b> | 610.331 | G 6 |
| G  | 5 | 490.262        | <b>570.336</b> | 554.317        | <b>555.325</b> | 553.309 | G 5 |
| K  | 6 | 660.368        | 513.314        | <b>497.296</b> | <b>498.303</b> | 496.288 | K 4 |
| A  | 7 | 731.405        | 343.209        | 327.190        | <b>328.198</b> | 326.182 | A 3 |
| P  | 8 | <b>828.457</b> | 272.172        | 256.153        | 257.161        | 255.145 | P 2 |
| R  | 9 | 984.559        | 175.119        | 159.100        | 160.108        | 158.092 | R 1 |

# sp | P68433 | H31\_MOUSE

KQLATK <sup>Acetyl</sup>AAR  
42.01

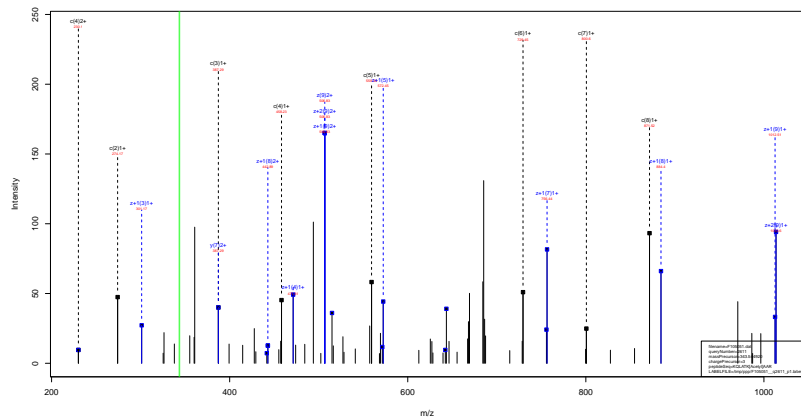



# sp | P68433 | H31\_MOUSE

KQLATK<sup>Acetyl</sup> AAR  
42.01

- ▶ fragmentation table for charge state 1+
- ▶ specType=etd
- ▶ score=39.51
- ▶ F105051.dat
- ▶ query=q2611.p1
- ▶ precursor=343.544920
- ▶ chargePrecursor=3
- ▶ itol=0.6

| AA | c              | y        | z+1             | z+2             | z              | AA   |
|----|----------------|----------|-----------------|-----------------|----------------|------|
| K  | 140.129        | 1028.621 | <b>1012.602</b> | <b>1013.610</b> | 1011.598       | K[9] |
| Q  | <b>274.197</b> | 900.520  | <b>884.567</b>  | 885.515         | 883.503        | Q[8] |
| L  | <b>387.271</b> | 772.468  | <b>756.449</b>  | 757.497         | <b>755.441</b> | L[7] |
| A  | <b>458.308</b> | 659.384  | <b>643.365</b>  | 644.373         | <b>642.357</b> | A[6] |
| T  | <b>559.356</b> | 588.340  | <b>572.328</b>  | 573.335         | <b>571.320</b> | T[5] |
| K  | <b>729.462</b> | 487.299  | <b>471.280</b>  | 472.288         | 470.273        | K[4] |
| A  | <b>800.499</b> | 317.193  | <b>301.174</b>  | 302.182         | 300.167        | A[3] |
| A  | <b>871.536</b> | 246.156  | <b>230.137</b>  | 231.145         | 229.130        | A[2] |
| R  | 1027.637       | 175.119  | 159.100         | 160.108         | 158.092        | R[1] |

# sp | P68433 | H31\_MOUSE

KQLATK<sup>Acetyl</sup> AAR  
42.01

- ▶ fragmentation table for charge state 2+
- ▶ specType=etd
- ▶ score=39.51
- ▶ F105051.dat
- ▶ query=q2611\_p1
- ▶ precursor=343.544920
- ▶ chargePrecursor=3
- ▶ itol=0.6

| AA |   | c              | y              | z+1            | z+2            | z              | AA   |
|----|---|----------------|----------------|----------------|----------------|----------------|------|
| K  | 1 | 73.568         | <b>514.814</b> | <b>506.805</b> | <b>507.309</b> | <b>506.301</b> | K[0] |
| Q  | 2 | 137.597        | 450.767        | <b>442.757</b> | <b>443.261</b> | <b>442.253</b> | Q[0] |
| L  | 3 | 194.130        | <b>386.737</b> | 376.728        | 379.232        | 376.223        | L[1] |
| A  | 4 | <b>229.658</b> | 330.195        | 322.186        | 322.690        | 321.682        | A[6] |
| T  | 5 | 280.182        | 294.677        | 286.667        | 287.171        | 286.164        | T[5] |
| K  | 6 | 365.235        | 244.153        | 236.144        | 236.648        | 235.640        | K[4] |
| A  | 7 | 400.763        | 199.100        | 191.091        | 191.595        | 190.587        | A[3] |
| A  | 8 | 436.272        | 123.582        | 115.572        | 116.076        | 115.068        | A[2] |
| R  | 9 | 514.322        | 88.063         | 80.054         | 80.558         | 79.550         | R[1] |



# sp | P68433 | H31\_MOUSE

KQLATK<sup>Acetyl</sup> AAR  
42.01

- ▶ fragmentation table for charge state 1+
- ▶ specType=etd
- ▶ score=45.12
- ▶ F105051.dat
- ▶ query=q2616\_p1
- ▶ precursor=343.545680
- ▶ chargePrecursor=3
- ▶ itol=0.6

| AA |   | c              | y              | z+1            | z+2             | z        | AA   |
|----|---|----------------|----------------|----------------|-----------------|----------|------|
| K  | 1 | 146.129        | 1028.621       | 1012.602       | <b>1013.610</b> | 1011.595 | K[0] |
| Q  | 2 | <b>274.187</b> | 900.526        | <b>884.507</b> | 885.515         | 883.500  | Q[0] |
| L  | 3 | <b>387.271</b> | 772.468        | <b>756.449</b> | 757.457         | 755.441  | L[0] |
| A  | 4 | <b>458.309</b> | 659.384        | <b>643.365</b> | 644.373         | 642.357  | A[0] |
| T  | 5 | <b>559.356</b> | 588.345        | <b>572.328</b> | 573.335         | 571.320  | T[0] |
| K  | 6 | <b>729.462</b> | 487.299        | <b>471.280</b> | 472.288         | 470.272  | K[0] |
| A  | 7 | <b>800.499</b> | <b>317.193</b> | <b>301.174</b> | 302.182         | 300.167  | A[0] |
| A  | 8 | <b>871.536</b> | 246.156        | <b>230.137</b> | 231.145         | 229.130  | A[0] |
| R  | 9 | 1027.637       | 175.119        | 159.100        | 160.108         | 158.092  | R[0] |

# sp | P68433 | H31\_MOUSE

KQLATK<sup>Acetyl</sup> AAR  
42.01

- ▶ fragmentation table for charge state 2+
- ▶ specType=etd
- ▶ score=45.12
- ▶ F105051.dat
- ▶ query=q2616\_p1
- ▶ precursor=343.545680
- ▶ chargePrecursor=3
- ▶ itol=0.6

| AA | c | y              | z+1            | z+2            | z              | AA      |   |   |
|----|---|----------------|----------------|----------------|----------------|---------|---|---|
| K  | 1 | 73.568         | <b>514.814</b> | <b>506.805</b> | <b>507.309</b> | 906.301 | K | 9 |
| Q  | 2 | 137.597        | 450.767        | <b>442.757</b> | <b>443.261</b> | 442.253 | Q | 8 |
| L  | 3 | 194.330        | <b>386.737</b> | 373.728        | 379.232        | 378.224 | L | 7 |
| A  | 4 | <b>229.658</b> | 330.196        | 322.186        | 322.690        | 321.682 | A | 6 |
| T  | 5 | 280.182        | 294.677        | 286.667        | 287.171        | 286.164 | T | 5 |
| K  | 6 | 365.235        | 244.153        | 236.144        | 236.648        | 235.640 | K | 4 |
| A  | 7 | 400.783        | 199.100        | 191.091        | 191.595        | 190.587 | A | 3 |
| A  | 8 | 436.272        | 123.582        | 115.572        | 116.076        | 115.068 | A | 2 |
| R  | 9 | 514.322        | 88.063         | 80.054         | 80.558         | 79.550  | R | 1 |



# sp | P62806 | H4\_MOUSE

GGK<sup>Acetyl</sup><sub>42.01</sub> GLGK<sup>Acetyl</sup><sub>42.01</sub> GGAK<sup>Acetyl</sup><sub>42.01</sub> R

- ▶ fragmentation table for charge state 1+
- ▶ specType=etd
- ▶ score=59.22
- ▶ F105051.dat
- ▶ query=q4439\_p1
- ▶ precursor=606.345940
- ▶ chargePrecursor=2
- ▶ itol=0.6

| AA | c  | y        | z+1             | z+2             | z              | AA       |   |    |
|----|----|----------|-----------------|-----------------|----------------|----------|---|----|
| G  | 1  | 75.055   | <b>1211.685</b> | <b>1195.667</b> | 0.000          | 1194.699 | G | 12 |
| G  | 2  | 132.077  | 1154.969        | 1139.955        | 0.990          | 1137.957 | G | 11 |
| K  | 3  | 302.182  | 1097.643        | <b>1081.624</b> | 1082.632       | 1080.618 | K | 10 |
| G  | 4  | 350.204  | 927.537         | <b>911.518</b>  | <b>912.526</b> | 910.510  | G | 9  |
| L  | 5  | 472.288  | 870.516         | <b>854.497</b>  | 855.505        | 853.489  | L | 8  |
| G  | 6  | 520.309  | 757.432         | <b>741.413</b>  | <b>742.421</b> | 740.405  | G | 7  |
| K  | 7  | 660.415  | 700.410         | <b>684.391</b>  | <b>685.399</b> | 683.384  | K | 6  |
| G  | 8  | 758.438  | 530.305         | <b>514.286</b>  | <b>515.294</b> | 513.278  | G | 5  |
| G  | 9  | 813.460  | 473.293         | 497.284         | <b>488.272</b> | 486.261  | G | 4  |
| A  | 10 | 884.490  | 416.262         | 400.243         | <b>401.251</b> | 399.235  | A | 3  |
| K  | 11 | 1054.600 | 345.224         | 329.206         | 330.214        | 328.198  | K | 2  |
| R  | 12 | 1210.701 | 175.119         | 159.100         | 160.108        | 158.092  | R | 1  |

# sp | P62806 | H4\_MOUSE

GGK<sup>Acetyl</sup><sub>42.01</sub> GLGK<sup>Acetyl</sup><sub>42.01</sub> GGAK<sup>Acetyl</sup><sub>42.01</sub> R

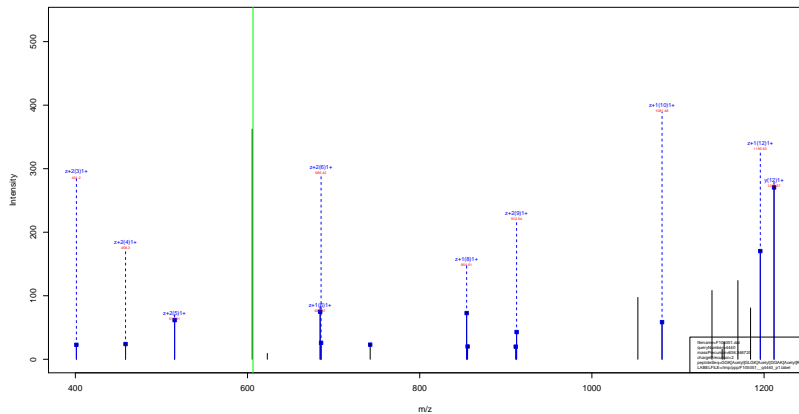



# sp | P62806 | H4\_MOUSE

GGK<sup>Acetyl</sup><sub>42.01</sub> GLGK<sup>Acetyl</sup><sub>42.01</sub> GGAK<sup>Acetyl</sup><sub>42.01</sub> R

- ▶ fragmentation table for charge state 1+
- ▶ specType=etd
- ▶ score=73.04
- ▶ F105051.dat
- ▶ query=q4440\_p1
- ▶ precursor=606.346720
- ▶ chargePrecursor=2
- ▶ itol=0.6

| AA | c  | y        | z+1             | z+2             | z              | AA       |   |    |
|----|----|----------|-----------------|-----------------|----------------|----------|---|----|
| G  | 1  | 75.055   | <b>1211.685</b> | <b>1195.667</b> | 0.000          | 1194.699 | G | 12 |
| G  | 2  | 132.077  | 1154.969        | 1139.955        | 0.990          | 1137.957 | G | 11 |
| K  | 3  | 302.182  | 1097.643        | <b>1081.624</b> | 1082.632       | 1080.618 | K | 10 |
| G  | 4  | 350.204  | 927.537         | <b>911.518</b>  | <b>912.526</b> | 910.510  | G | 9  |
| L  | 5  | 472.288  | 870.516         | <b>854.497</b>  | <b>855.505</b> | 853.489  | L | 8  |
| G  | 6  | 520.309  | 757.432         | 741.413         | <b>742.421</b> | 740.405  | G | 7  |
| K  | 7  | 690.415  | 700.410         | <b>684.391</b>  | <b>685.399</b> | 683.384  | K | 6  |
| G  | 8  | 758.438  | 530.305         | 514.286         | <b>515.294</b> | 513.278  | G | 5  |
| G  | 9  | 813.458  | 473.281         | 457.264         | <b>458.272</b> | 456.256  | G | 4  |
| A  | 10 | 884.495  | 416.262         | 400.243         | <b>401.251</b> | 399.235  | A | 3  |
| K  | 11 | 1054.600 | 345.224         | 329.206         | 320.214        | 328.198  | K | 2  |
| R  | 12 | 1210.701 | 175.119         | 159.100         | 160.108        | 158.092  | R | 1  |



# sp | Q3THW5 | H2AV\_MOUSE

AGGK<sub>42.01</sub> Acetyl AGK<sub>42.01</sub> Acetyl DSGK<sub>42.01</sub> Acetyl AK<sub>42.01</sub>

- ▶ fragmentation table for charge state 1+
- ▶ specType=etd
- ▶ score=53.12
- ▶ F105051.dat
- ▶ query=q5415.p1
- ▶ precursor=650.847140
- ▶ chargePrecursor=2
- ▶ itol=0.6

| AA    | c               | y               | a+1             | a+2             | a               | AA    |
|-------|-----------------|-----------------|-----------------|-----------------|-----------------|-------|
| A[1]  | 59.071          | <b>1300.686</b> | <b>1294.667</b> | 0.000           | <b>1283.659</b> | A[13] |
| G[2]  | 146.092         | 1229.648        | 1213.630        | 0.000           | <b>1212.622</b> | G[12] |
| G[3]  | 203.114         | 1172.627        | <b>1156.608</b> | 0.000           | 1155.600        | G[11] |
| R[4]  | <b>373.219</b>  | 1115.606        | <b>1099.587</b> | <b>1100.595</b> | 1098.579        | R[10] |
| A[5]  | 444.257         | 948.500         | <b>929.481</b>  | <b>930.489</b>  | 928.473         | A[9]  |
| G[6]  | 501.278         | 874.463         | 858.445         | <b>859.452</b>  | 857.436         | G[8]  |
| R[7]  | 671.334         | 817.441         | <b>801.423</b>  | <b>802.431</b>  | 800.415         | R[7]  |
| D[8]  | 786.410         | 647.389         | 631.371         | <b>632.325</b>  | 630.309         | D[6]  |
| S[9]  | <b>873.442</b>  | <b>532.309</b>  | 516.290         | <b>517.298</b>  | 515.282         | S[5]  |
| G[10] | <b>930.464</b>  | 445.277         | 429.258         | 430.266         | 428.250         | G[4]  |
| R[11] | <b>1180.569</b> | 388.295         | 372.277         | <b>373.245</b>  | 371.229         | R[15] |
| A[12] | <b>1171.607</b> | 218.150         | 202.131         | 203.139         | 201.123         | A[2]  |
| R[13] | 1299.702        | 147.113         | 131.094         | 132.102         | 130.086         | R[1]  |



# sp | P10922 | H10\_MOUSE

[Acetyl]TENSTSAPAAKPK

- ▶ fragmentation table for charge state 1+
- ▶ specType=etd
- ▶ score=56.75
- ▶ F105051.dat
- ▶ query=q5776.p1
- ▶ precursor=672.343890
- ▶ chargePrecursor=2
- ▶ itol=0.6

| AA    | c               | y               | z+1             | z+2            | z               | AA    |
|-------|-----------------|-----------------|-----------------|----------------|-----------------|-------|
| T[1]  | 181.092         | <b>1343.680</b> | 1327.661        | 0.000          | <b>1326.054</b> | T[13] |
| E[2]  | 290.135         | <b>1200.022</b> | <b>1184.603</b> | 0.000          | 1183.595        | E[12] |
| N[3]  | 404.178         | 1071.579        | <b>1055.561</b> | 1056.568       | 1054.551        | N[11] |
| S[4]  | 491.210         | 957.530         | <b>941.518</b>  | 942.525        | 940.510         | S[10] |
| T[5]  | 592.257         | 819.504         | <b>854.486</b>  | <b>855.493</b> | 853.478         | T[9]  |
| S[6]  | 679.289         | 709.457         | <b>713.438</b>  | <b>714.446</b> | 712.430         | S[8]  |
| A[7]  | 756.326         | 682.425         | <b>660.406</b>  | <b>667.414</b> | 665.397         | A[7]  |
| P[8]  | 847.379         | 611.388         | 596.369         | 596.377        | 594.361         | P[6]  |
| A[9]  | 918.416         | 514.335         | <b>498.316</b>  | <b>499.324</b> | 497.308         | A[5]  |
| A[10] | 989.451         | 443.290         | 427.279         | <b>428.287</b> | 426.271         | A[4]  |
| K[11] | 1117.548        | 312.261         | <b>356.242</b>  | <b>357.250</b> | 355.234         | K[3]  |
| P[12] | <b>1214.601</b> | 244.166         | 229.147         | 229.155        | 227.139         | P[2]  |
| K[13] | 1342.696        | 147.113         | 131.094         | 132.102        | 130.086         | K[1]  |



# sp | P10922 | H10\_MOUSE

[Acetyl]TENSTSAPAAKPK

- ▶ fragmentation table for charge state 1+
- ▶ specType=etd
- ▶ score=85.87
- ▶ F105051.dat
- ▶ query=q5777.p1
- ▶ precursor=672.343950
- ▶ chargePrecursor=2
- ▶ itol=0.6

| AA    | c               | y               | z+1             | z+2            | z        | AA    |
|-------|-----------------|-----------------|-----------------|----------------|----------|-------|
| T[1]  | 161.092         | <b>1343.080</b> | 1327.661        | 0.000          | 1326.054 | T[13] |
| E[2]  | 290.135         | 1200.622        | <b>1184.603</b> | 0.000          | 1183.595 | E[12] |
| N[3]  | 404.178         | 1071.570        | <b>1055.561</b> | 1056.568       | 1054.553 | N[11] |
| S[4]  | 491.210         | 957.530         | <b>941.518</b>  | <b>942.525</b> | 940.510  | S[10] |
| I[5]  | 592.257         | 870.504         | <b>854.486</b>  | <b>855.493</b> | 853.478  | I[9]  |
| S[6]  | 679.289         | 789.451         | <b>753.430</b>  | <b>754.446</b> | 752.430  | S[8]  |
| A[7]  | 750.326         | 682.425         | <b>666.406</b>  | <b>667.414</b> | 665.399  | A[7]  |
| P[8]  | 847.379         | 611.389         | <b>595.369</b>  | 596.377        | 594.361  | P[6]  |
| A[9]  | 918.416         | 514.335         | <b>498.316</b>  | <b>499.324</b> | 497.308  | A[5]  |
| A[10] | 989.453         | 443.290         | <b>427.279</b>  | <b>428.287</b> | 426.271  | A[4]  |
| K[11] | 1117.548        | 372.263         | <b>356.242</b>  | <b>357.250</b> | 355.234  | K[3]  |
| P[12] | <b>1214.601</b> | 244.169         | 228.147         | 229.155        | 227.139  | P[5]  |
| K[13] | 1342.696        | 147.113         | 131.094         | 132.102        | 130.086  | K[1]  |

# sp | P10922 | H10\_MOUSE

[Acetyl]TENSTSAPAAKPK

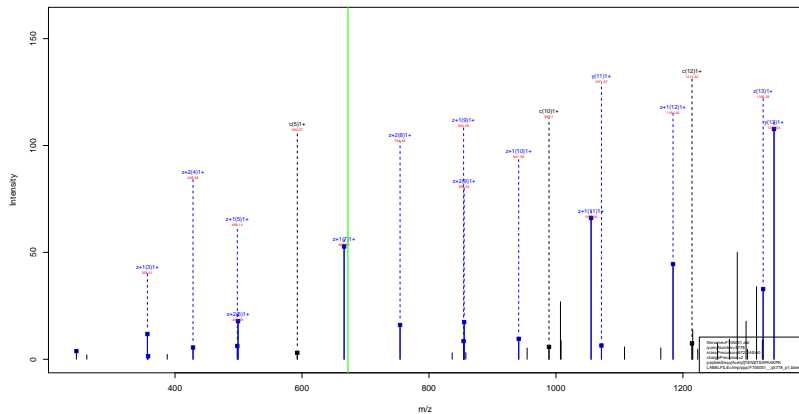



# sp | P10922 | H10\_MOUSE

[Acetyl]TENSTSAPAAKPK

- ▶ fragmentation table for charge state 1+
- ▶ specType=etd
- ▶ score=47.52
- ▶ F105051.dat
- ▶ query=q5778.p1
- ▶ precursor=672.344080
- ▶ chargePrecursor=2
- ▶ itol=0.6

| AA |    | c               | y               | z+1             | z+2            | z               | AA |    |
|----|----|-----------------|-----------------|-----------------|----------------|-----------------|----|----|
| T  | 1  | 181.092         | <b>1343.680</b> | 1327.861        | 0.000          | <b>1326.054</b> | T  | 13 |
| E  | 2  | 290.135         | 1200.622        | <b>1184.603</b> | 0.000          | 1183.595        | E  | 12 |
| N  | 3  | 404.178         | <b>1071.579</b> | <b>1055.561</b> | 1056.568       | 1054.551        | N  | 11 |
| S  | 4  | 491.210         | 957.530         | <b>941.518</b>  | 942.525        | 940.510         | S  | 10 |
| T  | 5  | <b>992.257</b>  | 810.504         | <b>854.486</b>  | <b>855.493</b> | 853.476         | T  | 9  |
| S  | 6  | 819.499         | 709.451         | 711.433         | <b>734.446</b> | 752.430         | S  | 8  |
| A  | 7  | 750.526         | 682.425         | <b>666.406</b>  | 667.414        | 665.397         | A  | 7  |
| P  | 8  | 847.379         | 611.388         | 595.309         | 596.317        | 594.301         | P  | 6  |
| A  | 9  | 918.416         | 514.335         | <b>498.316</b>  | <b>499.324</b> | 497.308         | A  | 5  |
| A  | 10 | <b>989.453</b>  | 443.290         | 427.279         | <b>428.287</b> | 426.271         | A  | 4  |
| K  | 11 | 1117.548        | 322.263         | <b>356.242</b>  | <b>357.250</b> | 355.234         | K  | 3  |
| F  | 12 | <b>1214.601</b> | <b>244.166</b>  | 228.147         | 229.155        | 227.139         | F  | 2  |
| K  | 13 | 1342.696        | 147.113         | 131.094         | 132.102        | 130.086         | K  | 1  |



# sp | P10922 | H10\_MOUSE

[Acetyl]TENSTSAPAAKPK

- ▶ fragmentation table for charge state 1+
- ▶ specType=etd
- ▶ score=56.06
- ▶ F105051.dat
- ▶ query=q5780.p1
- ▶ precursor=672.344780
- ▶ chargePrecursor=2
- ▶ itol=0.6

| AA    | c               | y               | z+1             | z+2            | z               | AA    |
|-------|-----------------|-----------------|-----------------|----------------|-----------------|-------|
| T[1]  | 181.092         | <b>1343.680</b> | 1327.861        | 0.000          | <b>1326.054</b> | T[13] |
| E[2]  | 290.135         | 1200.622        | <b>1184.603</b> | 0.000          | 1183.595        | E[12] |
| N[3]  | 404.178         | <b>1071.579</b> | <b>1055.561</b> | 1056.568       | 1054.551        | N[11] |
| S[4]  | 491.210         | 957.530         | <b>941.518</b>  | <b>942.525</b> | 940.510         | S[10] |
| T[5]  | 592.257         | 819.504         | <b>854.486</b>  | <b>855.493</b> | 853.478         | T[9]  |
| S[6]  | 679.289         | 709.451         | 751.432         | <b>754.448</b> | 752.430         | S[8]  |
| A[7]  | 756.326         | 682.425         | <b>666.406</b>  | <b>667.414</b> | 665.397         | A[7]  |
| P[8]  | 847.379         | 611.388         | 595.369         | 596.377        | 594.361         | P[6]  |
| A[9]  | 918.416         | 514.335         | <b>498.316</b>  | <b>499.324</b> | 497.308         | A[5]  |
| A[10] | 989.453         | 443.290         | <b>427.279</b>  | <b>428.287</b> | 426.271         | A[4]  |
| K[11] | 1117.548        | 312.281         | <b>356.242</b>  | <b>357.250</b> | 355.234         | K[3]  |
| F[12] | <b>1214.601</b> | 244.165         | 228.147         | 229.155        | 227.139         | F[2]  |
| K[13] | 1342.696        | 147.113         | 131.094         | 132.102        | 130.086         | K[1]  |

# sp | P68433 | H31\_MOUSE

EIAQDFK <sup>Dimethyl</sup> TDLR  
28.03

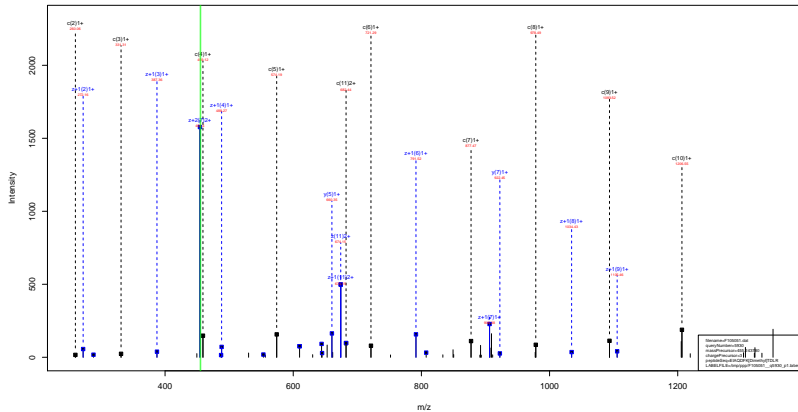

# sp | P68433 | H31\_MOUSE

EIAQDFK<sup>Dimethyl</sup><sub>28.03</sub> TDLR

- ▶ fragmentation table for charge state 1+
- ▶ specType=etd
- ▶ score=60.41
- ▶ F105051.dat
- ▶ query=q5930.p1
- ▶ precursor=455.243780
- ▶ chargePrecursor=3
- ▶ itol=0.6

| AA     | c               | y              | z+1             | z+2            | z              | AA     |
|--------|-----------------|----------------|-----------------|----------------|----------------|--------|
| E [1]  | 147.076         | 1363.722       | 1347.703        | 0.000          | 1346.695       | E [11] |
| I [2]  | <b>260.160</b>  | 1234.679       | 1218.660        | 0.000          | 1217.652       | I [10] |
| A [3]  | <b>331.198</b>  | 1121.595       | <b>1105.576</b> | 0.000          | 1104.568       | A [9]  |
| Q [4]  | <b>459.256</b>  | 1009.538       | <b>1034.539</b> | 1030.547       | 1033.531       | Q [8]  |
| D [5]  | <b>574.283</b>  | <b>822.499</b> | <b>906.481</b>  | 897.488        | 909.471        | D [7]  |
| F [6]  | <b>721.352</b>  | <b>807.472</b> | <b>791.454</b>  | 792.461        | 790.446        | F [6]  |
| K [7]  | <b>877.478</b>  | <b>660.404</b> | <b>644.385</b>  | <b>645.393</b> | 643.377        | K [5]  |
| T [8]  | <b>978.525</b>  | 504.278        | <b>488.259</b>  | 489.267        | <b>487.251</b> | T [4]  |
| D [9]  | <b>1093.552</b> | 403.230        | <b>387.211</b>  | 388.219        | 389.203        | D [3]  |
| L [10] | <b>1206.636</b> | <b>288.203</b> | <b>272.184</b>  | 273.192        | 271.176        | L [2]  |
| R [11] | 1362.738        | 175.110        | 159.100         | 160.108        | 158.092        | R [1]  |

# sp | P68433 | H31\_MOUSE

EIAQDFK<sup>Dimethyl</sup> TDLR  
28.03

- ▶ fragmentation table for charge state 2+
- ▶ specType=etd
- ▶ score=60.41
- ▶ F105051.dat
- ▶ query=q5930.p1
- ▶ precursor=455.243780
- ▶ chargePrecursor=3
- ▶ itol=0.6

| AA     | c              | y              | z+1            | z+2            | z              | AA    |
|--------|----------------|----------------|----------------|----------------|----------------|-------|
| E [1]  | 74.042         | <b>682.364</b> | <b>674.355</b> | 0.504          | <b>673.851</b> | E[11] |
| T [2]  | 130.584        | 617.843        | <b>609.834</b> | 0.504          | <b>609.330</b> | T[10] |
| A [3]  | 166.102        | 561.301        | <b>553.292</b> | 0.504          | 552.788        | A[9]  |
| Q [4]  | 230.132        | 325.783        | 317.773        | 313.277        | 317.269        | Q[8]  |
| D [5]  | 287.648        | 461.753        | 453.744        | <b>454.248</b> | 453.240        | D[7]  |
| F [6]  | 351.179        | 404.240        | 396.230        | 396.734        | 395.727        | F[6]  |
| K [7]  | 439.243        | 330.706        | 322.696        | 323.200        | 322.193        | K[5]  |
| T [8]  | 489.766        | 252.642        | 244.633        | 245.137        | 244.129        | T[4]  |
| D [9]  | 547.280        | 202.119        | 194.109        | 194.613        | 193.605        | D[3]  |
| L [10] | 603.822        | 144.605        | 136.595        | 137.100        | 136.092        | L[2]  |
| R [11] | <b>681.872</b> | 88.063         | 80.054         | 80.558         | 79.550         | R[1]  |



# sp | P68433 | H31\_MOUSE

EIAQDFK<sup>Dimethyl</sup><sub>28.03</sub> TDLR

- ▶ fragmentation table for charge state 1+
- ▶ specType=etd
- ▶ score=50.44
- ▶ F105051.dat
- ▶ query=q5933.p1
- ▶ precursor=455.245230
- ▶ chargePrecursor=3
- ▶ itol=0.6

| AA    | c               | y              | z+1             | z+2            | z        | AA    |
|-------|-----------------|----------------|-----------------|----------------|----------|-------|
| E[1]  | 147.076         | 1363.722       | 1347.703        | 0.000          | 1346.695 | E[11] |
| I[2]  | 260.100         | 1234.679       | 1238.660        | 0.000          | 1217.652 | I[10] |
| A[3]  | <b>331.198</b>  | 1121.595       | <b>1105.576</b> | 0.000          | 1104.568 | A[9]  |
| Q[4]  | <b>453.256</b>  | 1050.558       | <b>1034.539</b> | 1035.547       | 1033.531 | Q[8]  |
| D[5]  | <b>574.283</b>  | 922.499        | <b>906.481</b>  | <b>907.488</b> | 909.471  | D[7]  |
| F[6]  | <b>721.352</b>  | <b>807.472</b> | <b>791.454</b>  | 792.461        | 790.446  | F[6]  |
| K[7]  | <b>877.478</b>  | <b>660.404</b> | <b>644.385</b>  | <b>645.393</b> | 643.377  | K[5]  |
| T[8]  | <b>978.525</b>  | 504.278        | <b>488.259</b>  | 489.267        | 487.251  | T[4]  |
| D[9]  | <b>1093.552</b> | <b>403.230</b> | <b>387.211</b>  | 388.219        | 389.203  | D[3]  |
| L[10] | <b>1206.636</b> | <b>288.203</b> | <b>272.184</b>  | 273.192        | 271.176  | L[2]  |
| R[11] | 1362.738        | 175.110        | 159.100         | 160.108        | 158.092  | R[1]  |



# sp | P68433 | H31\_MOUSE

EIAQDFK<sup>Dimethyl</sup> TDLR  
28.03

- ▶ fragmentation table for charge state 2+
- ▶ specType=etd
- ▶ score=50.44
- ▶ F105051.dat
- ▶ query=q5933.p1
- ▶ precursor=455.245230
- ▶ chargePrecursor=3
- ▶ itol=0.6

| AA     | c              | y              | z+1            | z+2            | z              | AA    |
|--------|----------------|----------------|----------------|----------------|----------------|-------|
| E [1]  | 74.042         | <b>682.364</b> | <b>674.355</b> | 0.504          | <b>673.851</b> | E[11] |
| T [2]  | 130.584        | 617.843        | <b>609.834</b> | 0.504          | 609.330        | T[10] |
| A [3]  | 166.102        | <b>561.301</b> | <b>553.292</b> | 0.504          | <b>552.788</b> | A[9]  |
| Q [4]  | 239.132        | 825.783        | <b>817.773</b> | <b>818.277</b> | <b>817.269</b> | Q[8]  |
| D [5]  | <b>287.645</b> | 461.753        | <b>453.744</b> | <b>454.248</b> | 453.240        | D[7]  |
| F [6]  | 351.179        | 404.240        | 396.230        | 396.734        | 396.227        | F[6]  |
| K [7]  | 439.243        | <b>330.706</b> | 322.696        | 323.200        | 322.192        | K[5]  |
| T [8]  | 489.766        | 252.642        | 244.633        | 245.137        | 244.129        | T[4]  |
| D [9]  | 547.280        | 202.119        | 194.109        | 194.613        | 193.605        | D[3]  |
| L [10] | 603.822        | 144.605        | 136.595        | 137.100        | 136.092        | L[2]  |
| R [11] | <b>681.872</b> | 88.063         | 80.054         | 80.558         | 79.550         | R[1]  |



# sp | P68433 | H31\_MOUSE

K<sup>Dimethyl</sup><sub>28.03</sub> SAPATGGVK<sup>Dimethyl</sup><sub>28.03</sub> K<sup>PHR</sup>

- ▶ fragmentation table for charge state 1+
- ▶ specType=etd
- ▶ score=80.89
- ▶ F105051.dat
- ▶ query=q6757.p1
- ▶ precursor=373.229620
- ▶ chargePrecursor=4
- ▶ itol=0.6

| AA    | c               | y        | z+1             | z+2             | z        | AA    |
|-------|-----------------|----------|-----------------|-----------------|----------|-------|
| R[1]  | <b>174.160</b>  | 1439.935 | 1471.877        | 1474.885        | 1472.870 | R[14] |
| S[2]  | <b>261.192</b>  | 1333.770 | 1317.751        | <b>1318.799</b> | 1316.743 | S[13] |
| A[3]  | 332.279         | 1246.748 | <b>1230.719</b> | <b>1231.727</b> | 1229.711 | A[12] |
| P[4]  | <b>429.282</b>  | 1175.701 | 1158.682        | 1160.660        | 1158.674 | P[11] |
| A[5]  | <b>500.319</b>  | 1078.648 | 1062.629        | <b>1063.637</b> | 1061.621 | A[10] |
| T[6]  | <b>601.367</b>  | 1007.611 | 991.592         | <b>992.600</b>  | 990.584  | T[9]  |
| G[7]  | <b>658.398</b>  | 906.563  | 890.544         | <b>891.552</b>  | 889.537  | G[8]  |
| G[8]  | <b>715.410</b>  | 840.542  | <b>833.523</b>  | <b>834.531</b>  | 832.515  | G[7]  |
| V[9]  | <b>814.478</b>  | 780.520  | <b>775.502</b>  | <b>777.509</b>  | 775.494  | V[6]  |
| K[10] | <b>970.604</b>  | 693.452  | <b>677.433</b>  | <b>678.441</b>  | 676.425  | K[9]  |
| K[11] | 1068.690        | 537.426  | <b>521.307</b>  | 522.315         | 520.299  | K[4]  |
| P[12] | 1195.752        | 409.231  | 393.212         | 394.220         | 392.204  | P[3]  |
| H[13] | <b>1332.811</b> | 312.178  | <b>296.159</b>  | 297.167         | 295.151  | H[2]  |
| R[14] | 1488.912        | 175.119  | <b>159.100</b>  | 160.108         | 158.092  | R[1]  |

# sp | P68433 | H31\_MOUSE

K<sup>Dimethyl</sup><sub>28.03</sub> SAPATGGVK<sup>Dimethyl</sup><sub>28.03</sub> KPHR

- ▶ fragmentation table for charge state 2+
- ▶ specType=etd
- ▶ score=80.89
- ▶ F105051.dat
- ▶ query=q6757\_p1
- ▶ precursor=373.229620
- ▶ chargePrecursor=4
- ▶ itol=0.6

| AA |      | c              | y              | z+1            | z+2            | z              | AA    |
|----|------|----------------|----------------|----------------|----------------|----------------|-------|
| K  | [2]  | 87.584         | <b>745.452</b> | 737.442        | <b>737.946</b> | 736.038        | R[14] |
| S  | [2]  | 131.100        | <b>667.389</b> | <b>659.379</b> | <b>659.883</b> | <b>658.875</b> | S[13] |
| A  | [3]  | 156.618        | 623.873        | <b>615.863</b> | <b>616.367</b> | 615.359        | A[12] |
| P  | [4]  | 215.145        | 588.354        | 580.345        | 580.849        | 579.841        | P[11] |
| A  | [5]  | 250.663        | 539.828        | <b>531.818</b> | <b>532.322</b> | 531.314        | A[10] |
| T  | [6]  | 301.187        | 504.309        | 496.300        | 496.804        | 495.796        | T[9]  |
| G  | [7]  | 329.698        | <b>453.785</b> | <b>445.776</b> | <b>446.280</b> | 445.272        | G[8]  |
| G  | [8]  | 358.208        | 425.275        | <b>417.265</b> | <b>417.769</b> | 416.761        | G[7]  |
| V  | [9]  | 407.743        | 396.764        | <b>388.754</b> | <b>389.258</b> | 388.250        | V[6]  |
| K  | [10] | <b>485.806</b> | 347.230        | <b>339.220</b> | <b>339.724</b> | 338.716        | R[5]  |
| K  | [11] | 499.834        | 299.166        | <b>261.157</b> | <b>261.661</b> | <b>260.653</b> | R[4]  |
| P  | [12] | <b>598.380</b> | 205.119        | 197.110        | 197.614        | 196.606        | P[3]  |
| H  | [13] | <b>666.909</b> | 156.583        | 148.583        | 149.087        | 148.079        | H[2]  |
| R  | [14] | 744.960        | 88.063         | 80.054         | 80.558         | 79.550         | R[1]  |

# sp | P68433 | H31\_MOUSE

K<sup>Dimethyl</sup><sub>28.03</sub> SAPATGGVK<sup>Dimethyl</sup><sub>28.03</sub> KPHR

- ▶ fragmentation table for charge state 3+
- ▶ specType=etd
- ▶ score=80.89
- ▶ F105051.dat
- ▶ query=q6757.p1
- ▶ precursor=373.229620
- ▶ chargePrecursor=4
- ▶ itol=0.6

| AA    | c              | y              | z+1            | z+2            | z              | AA    |
|-------|----------------|----------------|----------------|----------------|----------------|-------|
| K[2]  | 58.725         | <b>497.304</b> | <b>491.954</b> | <b>492.300</b> | <b>491.628</b> | R[14] |
| S[2]  | 87.736         | 445.261        | 439.927        | 440.256        | 439.569        | S[13] |
| A[3]  | 111.415        | 416.251        | 410.911        | 411.247        | 410.575        | A[12] |
| P[4]  | 143.766        | 392.572        | 387.232        | 387.568        | 386.896        | P[11] |
| A[5]  | 167.445        | 360.221        | 354.881        | 355.217        | 354.545        | A[10] |
| T[6]  | 201.127        | 336.542        | 331.202        | 331.538        | 330.866        | T[9]  |
| G[7]  | 220.134        | 302.859        | 297.520        | 297.856        | 297.184        | G[8]  |
| G[8]  | 239.141        | 283.852        | 278.513        | 278.848        | 278.177        | G[7]  |
| V[9]  | 272.164        | 264.845        | 259.505        | 259.841        | 259.169        | V[6]  |
| K[10] | 324.206        | 231.822        | 226.483        | 226.819        | 226.147        | K[5]  |
| K[11] | 358.908        | 179.780        | <b>174.440</b> | <b>174.776</b> | <b>174.105</b> | K[4]  |
| P[12] | 399.256        | 137.082        | 131.742        | 132.078        | 131.406        | P[3]  |
| H[13] | 444.942        | 104.731        | 99.391         | 99.727         | 99.055         | H[2]  |
| R[14] | <b>496.976</b> | 59.045         | 53.705         | 54.041         | 53.369         | R[1]  |

# sp | P68433 | H31\_MOUSE

K Dimethyl SAPATGGVK Dimethyl KPHR  
28.03 28.03

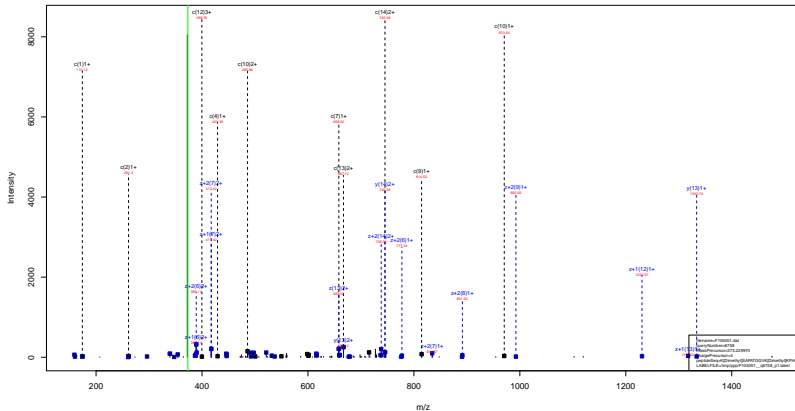

# sp | P68433 | H31\_MOUSE

K<sup>Dimethyl</sup><sub>28.03</sub> SAPATGGVK<sup>Dimethyl</sup><sub>28.03</sub> KPHR

- ▶ fragmentation table for charge state 1+
- ▶ specType=etd
- ▶ score=38.07
- ▶ F105051.dat
- ▶ query=q6758.p1
- ▶ precursor=373.229970
- ▶ chargePrecursor=4
- ▶ itol=0.6

| AA | c        | y        | z+1      | z+2      | z        | AA    |
|----|----------|----------|----------|----------|----------|-------|
| K  | 174.160  | 1489.896 | 1473.877 | 1474.885 | 1472.870 | K[14] |
| S  | 261.192  | 1333.770 | 1317.751 | 1318.759 | 1316.743 | S[13] |
| A  | 337.239  | 1246.736 | 1230.719 | 1231.727 | 1229.711 | A[12] |
| P  | 429.282  | 1175.701 | 1159.682 | 1160.690 | 1158.674 | P[11] |
| A  | 500.319  | 1078.648 | 1062.629 | 1063.637 | 1061.621 | A[10] |
| T  | 601.367  | 1007.611 | 991.592  | 992.600  | 990.584  | T[9]  |
| G  | 658.388  | 906.563  | 890.544  | 891.552  | 889.537  | G[8]  |
| G  | 715.410  | 849.542  | 833.523  | 834.531  | 832.515  | G[7]  |
| V  | 814.478  | 782.520  | 776.502  | 777.509  | 775.493  | V[6]  |
| K  | 970.604  | 693.483  | 677.463  | 678.471  | 676.455  | K[5]  |
| K  | 1058.690 | 537.326  | 521.307  | 522.315  | 520.299  | K[4]  |
| P  | 1196.752 | 409.231  | 393.212  | 394.220  | 392.204  | P[3]  |
| H  | 1332.811 | 312.178  | 296.159  | 297.167  | 295.151  | H[2]  |
| R  | 1488.912 | 175.119  | 159.100  | 160.108  | 158.092  | R[1]  |

# sp | P68433 | H31\_MOUSE

K<sup>Dimethyl</sup><sub>28.03</sub> SAPATGGVK<sup>Dimethyl</sup><sub>28.03</sub> KPHR

- ▶ fragmentation table for charge state 2+
- ▶ specType=etd
- ▶ score=38.07
- ▶ F105051.dat
- ▶ query=q6758\_p1
- ▶ precursor=373.229970
- ▶ chargePrecursor=4
- ▶ itol=0.6

| AA |      | c              | y              | z+1            | z+2            | z              | AA    |
|----|------|----------------|----------------|----------------|----------------|----------------|-------|
| K  | [2]  | 87.584         | <b>745.452</b> | <b>737.442</b> | <b>737.946</b> | <b>736.938</b> | R[14] |
| S  | [2]  | 131.100        | <b>667.389</b> | <b>659.379</b> | <b>659.883</b> | <b>658.875</b> | S[13] |
| A  | [3]  | 156.618        | 623.873        | <b>615.863</b> | <b>616.367</b> | <b>615.359</b> | A[12] |
| P  | [4]  | 215.145        | 588.354        | 580.345        | 580.849        | 579.841        | P[11] |
| A  | [5]  | 250.663        | 539.828        | <b>531.818</b> | <b>532.322</b> | 531.314        | A[10] |
| T  | [6]  | 301.187        | 504.309        | 496.300        | 496.804        | 495.796        | T[9]  |
| G  | [7]  | 329.698        | 453.785        | <b>445.776</b> | <b>446.280</b> | <b>445.272</b> | G[8]  |
| G  | [8]  | 358.208        | 425.275        | <b>417.265</b> | <b>417.769</b> | 416.761        | G[7]  |
| V  | [9]  | 407.743        | 396.764        | <b>388.754</b> | <b>389.258</b> | <b>388.250</b> | V[6]  |
| K  | [10] | <b>485.806</b> | <b>347.230</b> | <b>339.220</b> | <b>339.724</b> | 338.716        | R[5]  |
| K  | [11] | <b>549.853</b> | 299.166        | <b>291.157</b> | <b>291.661</b> | <b>290.653</b> | R[4]  |
| P  | [12] | <b>598.380</b> | 205.119        | 197.110        | 197.614        | 196.606        | P[3]  |
| H  | [13] | <b>666.909</b> | 156.583        | 148.583        | 149.087        | 148.079        | H[2]  |
| R  | [14] | <b>744.960</b> | 88.063         | 80.054         | 80.558         | 79.550         | R[1]  |



# sp | P68433 | H31\_MOUSE

K<sup>Dimethyl</sup><sub>28.03</sub> SAPATGGVK<sup>Dimethyl</sup><sub>28.03</sub> KPHR

- ▶ fragmentation table for charge state 3+
- ▶ specType=etd
- ▶ score=38.07
- ▶ F105051.dat
- ▶ query=q6758\_p1
- ▶ precursor=373.229970
- ▶ chargePrecursor=4
- ▶ itol=0.6

| AA |    | c              | y              | z+1            | z+2            | z              | AA |
|----|----|----------------|----------------|----------------|----------------|----------------|----|
| K  | 3  | 58.725         | <b>497.304</b> | <b>491.964</b> | <b>492.300</b> | <b>491.628</b> | R  |
| S  | 2  | 87.736         | <b>445.261</b> | 439.927        | 440.256        | 439.566        | S  |
| A  | 3  | 111.415        | 416.251        | 410.911        | 411.247        | 410.575        | A  |
| P  | 4  | 143.766        | 392.572        | <b>387.232</b> | <b>387.568</b> | <b>386.896</b> | P  |
| A  | 5  | 167.445        | 360.221        | 354.881        | 355.217        | <b>354.545</b> | A  |
| T  | 6  | 201.127        | 336.542        | 331.202        | 331.538        | 330.866        | T  |
| G  | 7  | 220.134        | 302.859        | 297.520        | 297.856        | 297.184        | G  |
| G  | 8  | 239.141        | 283.852        | 278.513        | 278.848        | 278.177        | G  |
| V  | 9  | 272.164        | 264.845        | 259.505        | 259.841        | 259.169        | V  |
| K  | 10 | 324.206        | 231.822        | 226.483        | 226.819        | 226.147        | K  |
| K  | 11 | 356.508        | 179.780        | <b>174.440</b> | 174.776        | <b>174.105</b> | K  |
| P  | 12 | <b>399.256</b> | 137.082        | 131.742        | 132.078        | 131.406        | P  |
| H  | 13 | 444.042        | 104.731        | 99.391         | 99.727         | 99.055         | H  |
| R  | 14 | <b>496.976</b> | 59.045         | 53.705         | 54.041         | 53.369         | R  |

sp | P10922 | H10\_MOUSE

[Acetyl]TENSTSAPAAKPKR

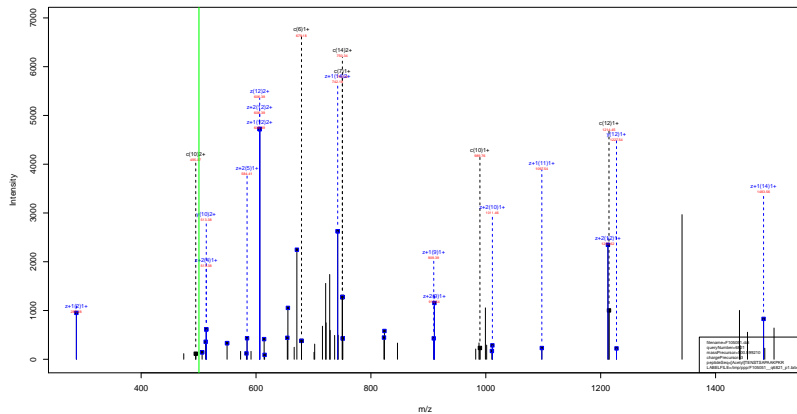

# sp | P10922 | H10\_MOUSE

[Acetyl]TENSTSAPAAKPKR

- ▶ fragmentation table for charge state 1+
- ▶ specType=etd
- ▶ score=62.48
- ▶ F105051.dat
- ▶ query=q6821\_p1
- ▶ precursor=500.599210
- ▶ chargePrecursor=3
- ▶ itol=0.6

| AA    | c               | y               | z+1             | z+2             | z              | AA    |
|-------|-----------------|-----------------|-----------------|-----------------|----------------|-------|
| T[1]  | 181.092         | 1499.783        | <b>1483.783</b> | 0.000           | 1482.755       | T[14] |
| E[2]  | 290.135         | 1356.723        | 1340.704        | 0.000           | 1339.696       | E[13] |
| R[3]  | 404.178         | <b>1227.660</b> | 1211.662        | <b>1212.670</b> | 1210.665       | R[12] |
| S[4]  | 491.219         | 1113.593        | <b>1097.619</b> | 1096.567        | 1096.611       | S[11] |
| T[5]  | 592.257         | 1026.605        | <b>1010.587</b> | <b>1011.595</b> | 1009.579       | T[10] |
| S[6]  | <b>679.289</b>  | 925.558         | <b>909.539</b>  | <b>910.547</b>  | 908.531        | S[9]  |
| A[7]  | <b>750.326</b>  | 838.526         | <b>822.507</b>  | <b>823.515</b>  | 821.499        | A[8]  |
| P[8]  | 847.379         | 767.480         | <b>751.470</b>  | 752.478         | <b>750.462</b> | P[7]  |
| A[9]  | 918.416         | 670.438         | <b>654.417</b>  | <b>655.425</b>  | 653.409        | A[6]  |
| A[10] | <b>989.453</b>  | 599.399         | <b>583.380</b>  | <b>584.388</b>  | 582.372        | A[5]  |
| K[11] | 1117.548        | 528.362         | <b>512.343</b>  | <b>513.351</b>  | 511.335        | K[4]  |
| P[12] | <b>1214.601</b> | 400.267         | 384.248         | 385.256         | 383.240        | P[3]  |
| K[13] | 1342.696        | 303.214         | <b>287.195</b>  | 288.203         | 286.187        | K[2]  |
| R[14] | 1488.797        | 175.119         | 159.100         | 160.108         | 158.092        | R[1]  |

# sp | P10922 | H10\_MOUSE

[Acetyl]TENSTSAPAAKPKR

- ▶ fragmentation table for charge state 2+
- ▶ specType=etd
- ▶ score=62.48
- ▶ F105051.dat
- ▶ query=q6821\_p1
- ▶ precursor=500.599210
- ▶ chargePrecursor=3
- ▶ itol=0.6

| AA    | c              | y              | z+1            | z+2            | z              | AA    |
|-------|----------------|----------------|----------------|----------------|----------------|-------|
| T[3]  | 81.050         | <b>750.394</b> | <b>742.385</b> | 0.504          | <b>741.881</b> | T[14] |
| E[2]  | 145.571        | <b>678.865</b> | <b>670.856</b> | 0.504          | <b>670.352</b> | E[13] |
| N[3]  | 202.592        | <b>614.344</b> | <b>606.334</b> | <b>606.838</b> | <b>605.831</b> | N[12] |
| S[4]  | 246.108        | 597.325        | <b>549.313</b> | <b>549.817</b> | 548.809        | S[11] |
| T[5]  | 296.632        | <b>513.806</b> | <b>505.797</b> | <b>506.301</b> | 505.293        | T[10] |
| S[6]  | 340.148        | 463.283        | 455.273        | 455.777        | 454.769        | S[9]  |
| A[7]  | 375.667        | 419.767        | 411.757        | 412.261        | 411.253        | A[8]  |
| P[8]  | 424.193        | 384.248        | 376.239        | 376.743        | 375.735        | P[7]  |
| A[9]  | 459.712        | 335.722        | 327.712        | 328.216        | 327.208        | A[6]  |
| A[10] | <b>495.230</b> | 300.203        | 292.194        | 292.698        | 291.690        | A[5]  |
| K[11] | 339.278        | 254.684        | 250.675        | 251.179        | 250.171        | K[4]  |
| P[12] | 607.804        | 200.637        | 192.628        | 193.132        | 192.124        | P[3]  |
| K[13] | 671.852        | 152.111        | 144.101        | 144.605        | 143.597        | K[2]  |
| R[14] | <b>749.902</b> | 88.063         | 80.054         | 80.558         | 79.550         | R[1]  |



# sp | P84244 | H33\_MOUSE

K<sup>Dimethyl</sup><sub>28.03</sub> SAPSTGGVK<sup>Dimethyl</sup><sub>28.03</sub> K<sup>PHR</sup>

- ▶ fragmentation table for charge state 1+
- ▶ specType=etd
- ▶ score=69.75
- ▶ F105051.dat
- ▶ query=q6862\_p1
- ▶ precursor=377.228130
- ▶ chargePrecursor=4
- ▶ itol=0.6

| AA    | c               | y        | z+1             | z+2             | z        | AA    |
|-------|-----------------|----------|-----------------|-----------------|----------|-------|
| R[1]  | <b>174.160</b>  | 1505.891 | 1489.873        | <b>1490.880</b> | 1488.865 | R[14] |
| S[2]  | <b>261.192</b>  | 1340.705 | <b>1333.746</b> | 1334.754        | 1332.738 | S[13] |
| A[3]  | 839.279         | 1282.723 | <b>1246.714</b> | <b>1237.722</b> | 1245.705 | A[12] |
| P[4]  | <b>429.282</b>  | 1191.696 | 1175.677        | 1176.685        | 1174.669 | P[11] |
| S[5]  | <b>516.314</b>  | 1094.643 | 1078.624        | 1079.632        | 1077.616 | S[10] |
| T[6]  | <b>617.362</b>  | 1007.611 | 991.592         | <b>992.600</b>  | 990.584  | T[9]  |
| G[7]  | <b>674.383</b>  | 906.563  | 890.544         | <b>891.552</b>  | 889.537  | G[8]  |
| G[8]  | <b>731.405</b>  | 840.542  | 833.523         | <b>834.531</b>  | 832.515  | G[7]  |
| V[9]  | <b>838.473</b>  | 786.520  | <b>776.502</b>  | <b>777.509</b>  | 775.494  | V[6]  |
| K[10] | <b>926.599</b>  | 693.462  | 677.443         | <b>678.441</b>  | 676.425  | K[5]  |
| K[11] | 1114.694        | 537.426  | <b>521.367</b>  | 522.315         | 520.299  | K[4]  |
| P[12] | 1211.747        | 409.231  | 393.212         | 394.220         | 392.204  | P[3]  |
| H[13] | <b>1348.806</b> | 312.178  | <b>296.159</b>  | 297.167         | 295.151  | H[2]  |
| R[14] | 1504.907        | 175.119  | <b>159.100</b>  | 160.108         | 158.092  | R[1]  |

# sp | P84244 | H33\_MOUSE

K<sup>Dimethyl</sup><sub>28.03</sub> SAPSTGGVK<sup>Dimethyl</sup><sub>28.03</sub> KPHR

- ▶ fragmentation table for charge state 2+
- ▶ specType=etd
- ▶ score=69.75
- ▶ F105051.dat
- ▶ query=q6862\_p1
- ▶ precursor=377.228130
- ▶ chargePrecursor=4
- ▶ itol=0.6

| AA    | c              | y              | z+1            | z+2            | z              | AA    |
|-------|----------------|----------------|----------------|----------------|----------------|-------|
| K[2]  | 57.584         | <b>753.449</b> | <b>745.440</b> | <b>743.944</b> | 144.936        | R[14] |
| S[2]  | 131.100        | <b>675.386</b> | <b>667.377</b> | <b>667.801</b> | <b>666.873</b> | S[13] |
| A[3]  | 156.618        | 631.870        | <b>623.861</b> | <b>624.365</b> | <b>623.357</b> | A[12] |
| P[4]  | 215.145        | 596.351        | 588.842        | 588.846        | 587.838        | P[11] |
| S[5]  | 258.661        | 547.825        | <b>539.816</b> | <b>540.320</b> | <b>539.312</b> | S[10] |
| T[6]  | 309.184        | 504.309        | <b>496.300</b> | <b>496.804</b> | 495.796        | T[9]  |
| G[7]  | 337.695        | 453.789        | <b>445.776</b> | <b>446.280</b> | 445.272        | G[8]  |
| G[8]  | 366.206        | 425.275        | <b>417.265</b> | <b>417.769</b> | 416.761        | G[7]  |
| V[9]  | 415.740        | 396.764        | <b>388.754</b> | <b>389.258</b> | 388.250        | V[6]  |
| K[10] | <b>493.803</b> | 347.230        | <b>339.220</b> | <b>339.724</b> | 338.716        | K[5]  |
| K[11] | 337.694        | 299.166        | <b>261.157</b> | <b>261.661</b> | <b>260.653</b> | K[4]  |
| P[12] | <b>616.377</b> | 205.119        | 197.110        | 197.214        | 196.606        | P[3]  |
| H[13] | <b>674.907</b> | 156.583        | 148.583        | 149.087        | 148.079        | H[2]  |
| R[14] | 752.957        | 88.063         | 80.054         | 80.558         | 79.950         | R[1]  |

# sp | P84244 | H33\_MOUSE

K<sup>Dimethyl</sup><sub>28.03</sub> SAPSTGGVK<sup>Dimethyl</sup><sub>28.03</sub> K<sup>PHR</sup>

- ▶ fragmentation table for charge state 3+
- ▶ specType=etd
- ▶ score=69.75
- ▶ F105051.dat
- ▶ query=q6862\_p1
- ▶ precursor=377.228130
- ▶ chargePrecursor=4
- ▶ itol=0.6

| AA    | c              | y              | z+1            | z+2            | z              | AA    |
|-------|----------------|----------------|----------------|----------------|----------------|-------|
| K[3]  | 58.725         | <b>502.635</b> | <b>497.296</b> | <b>497.632</b> | <b>496.960</b> | R[14] |
| S[2]  | 87.736         | 450.593        | 445.257        | <b>445.589</b> | 444.918        | S[13] |
| A[3]  | 111.415        | 421.582        | 416.243        | 416.579        | 415.907        | A[12] |
| P[4]  | 143.766        | 397.903        | 392.564        | 392.900        | 392.228        | P[11] |
| S[5]  | 172.776        | 365.552        | 360.213        | 360.549        | 359.877        | S[10] |
| T[6]  | 206.459        | 336.542        | 331.202        | 331.538        | 330.866        | T[9]  |
| G[7]  | 225.466        | 302.859        | 297.520        | 297.856        | 297.184        | G[8]  |
| G[8]  | 244.473        | 283.852        | 278.513        | 278.848        | 278.177        | G[7]  |
| V[9]  | 277.496        | 264.845        | 259.505        | 259.841        | 259.169        | V[6]  |
| K[10] | 329.530        | 231.822        | 226.483        | 226.819        | 226.147        | K[5]  |
| K[11] | 372.236        | 179.780        | <b>174.440</b> | <b>174.776</b> | <b>174.105</b> | K[4]  |
| P[12] | 404.587        | 137.082        | 131.742        | 132.078        | 131.406        | P[3]  |
| H[13] | 450.273        | 104.731        | 99.391         | 99.727         | 99.055         | H[2]  |
| R[14] | <b>502.307</b> | 59.045         | 53.705         | 54.041         | 53.369         | R[1]  |



# sp | P84244 | H33\_MOUSE

K<sup>Acetyl</sup> SAPSTGGVK<sup>Dimethyl</sup> KPHR<sup>28.03</sup>

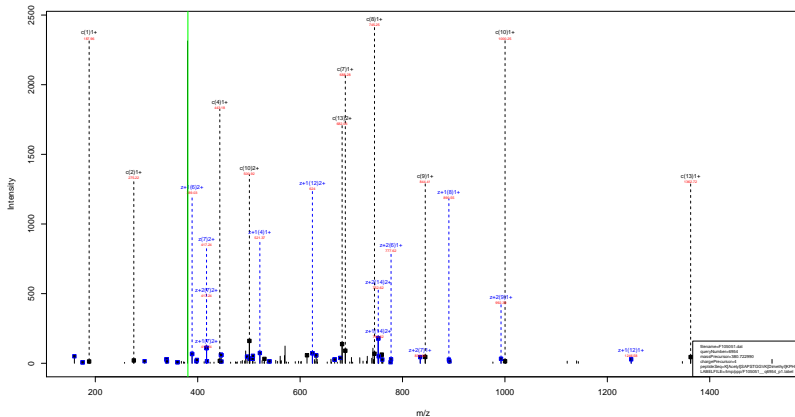

# sp | P84244 | H33\_MOUSE

K<sup>Acetyl</sup> 42.01 SAPSTGGVK<sup>Dimethyl</sup> 28.03 KPHR

- ▶ fragmentation table for charge state 1+
- ▶ specType=etd
- ▶ score=56.70
- ▶ F105051.dat
- ▶ query=q6954\_p1
- ▶ precursor=380.722990
- ▶ chargePrecursor=4
- ▶ itol=0.6

| AA |    | c               | y              | z+1             | z+2            | z        | AA    |
|----|----|-----------------|----------------|-----------------|----------------|----------|-------|
| K  | 1  | <b>188.139</b>  | 1519.870       | 1503.852        | 1504.850       | 1502.844 | K[14] |
| S  | 2  | <b>275.171</b>  | 1349.765       | 1333.766        | 1334.754       | 1332.738 | S[13] |
| A  | 3  | 349.936         | 1262.733       | <b>1246.714</b> | 1247.722       | 1245.705 | A[12] |
| P  | 4  | <b>443.261</b>  | 1191.690       | 1175.677        | 1176.685       | 1174.669 | P[11] |
| S  | 5  | <b>530.293</b>  | 1094.643       | 1078.624        | 1079.632       | 1077.616 | S[10] |
| T  | 6  | <b>631.341</b>  | 1007.611       | 991.592         | <b>992.600</b> | 990.584  | T[9]  |
| G  | 7  | <b>668.362</b>  | 926.563        | <b>890.544</b>  | <b>891.552</b> | 889.537  | G[8]  |
| G  | 8  | <b>745.384</b>  | 849.542        | 833.523         | <b>834.531</b> | 832.515  | G[7]  |
| V  | 9  | <b>854.452</b>  | 782.520        | <b>776.502</b>  | <b>777.509</b> | 775.493  | V[6]  |
| K  | 10 | <b>1000.579</b> | 693.485        | 677.463         | <b>678.441</b> | 676.425  | K[5]  |
| K  | 11 | 1128.674        | 597.320        | <b>521.307</b>  | 522.315        | 520.299  | K[4]  |
| P  | 12 | 1225.726        | 409.231        | 393.212         | 394.220        | 392.204  | P[3]  |
| H  | 13 | <b>1362.785</b> | 312.178        | <b>296.159</b>  | 297.167        | 295.151  | H[2]  |
| R  | 14 | 1518.886        | <b>175.119</b> | <b>159.100</b>  | 160.108        | 158.092  | R[1]  |

# sp | P84244 | H33\_MOUSE

K<sup>Acetyl</sup> 42.01 SAPSTGGVK<sup>Dimethyl</sup> 28.03 KPHR

- ▶ fragmentation table for charge state 2+
- ▶ specType=etd
- ▶ score=56.70
- ▶ F105051.dat
- ▶ query=q6954.p1
- ▶ precursor=380.722990
- ▶ chargePrecursor=4
- ▶ itol=0.6

| AA |      | c              | y              | z+1            | z+2            | z              | AA    |
|----|------|----------------|----------------|----------------|----------------|----------------|-------|
| K  | [2]  | 94.573         | <b>760.439</b> | <b>752.429</b> | <b>752.933</b> | 751.929        | R[14] |
| S  | [2]  | 138.089        | 875.389        | <b>667.377</b> | <b>667.881</b> | <b>666.873</b> | S[13] |
| A  | [3]  | 173.608        | <b>631.870</b> | <b>623.861</b> | <b>624.365</b> | 623.357        | A[12] |
| P  | [4]  | 222.134        | 596.351        | 588.347        | 588.846        | 587.838        | P[11] |
| S  | [5]  | 265.650        | 547.825        | <b>539.816</b> | <b>540.320</b> | 539.312        | S[10] |
| T  | [6]  | 316.174        | 504.309        | <b>496.300</b> | <b>496.804</b> | 495.796        | T[9]  |
| G  | [7]  | 344.685        | 453.789        | <b>445.776</b> | <b>446.280</b> | <b>445.272</b> | G[8]  |
| G  | [8]  | 373.196        | 425.275        | <b>417.265</b> | <b>417.769</b> | <b>416.761</b> | G[7]  |
| V  | [9]  | 422.730        | 396.764        | <b>388.754</b> | <b>389.258</b> | 388.250        | V[6]  |
| K  | [10] | <b>500.793</b> | 347.230        | <b>339.220</b> | <b>339.724</b> | <b>338.716</b> | K[5]  |
| K  | [11] | 394.840        | 299.166        | 293.157        | 293.661        | 292.653        | K[4]  |
| P  | [12] | <b>613.367</b> | 205.119        | 197.110        | 197.614        | 196.606        | P[3]  |
| H  | [13] | <b>681.896</b> | 156.583        | 148.583        | 149.087        | 148.079        | H[2]  |
| R  | [14] | <b>759.947</b> | 88.063         | 80.054         | 80.558         | 79.550         | R[1]  |

# sp | P84244 | H33\_MOUSE

K<sup>Acetyl</sup> 42.01 SAPSTGGVK<sup>Dimethyl</sup> 28.03 KPHR

- ▶ fragmentation table for charge state 3+
- ▶ specType=etd
- ▶ score=56.70
- ▶ F105051.dat
- ▶ query=q6954.p1
- ▶ precursor=380.722990
- ▶ chargePrecursor=4
- ▶ itol=0.6

| AA    | c              | y              | z+1            | z+2            | z              | AA    |
|-------|----------------|----------------|----------------|----------------|----------------|-------|
| K[2]  | 63.389         | <b>507.295</b> | <b>501.955</b> | <b>502.291</b> | <b>501.619</b> | R[14] |
| S[2]  | 92.395         | 450.593        | <b>445.254</b> | <b>445.509</b> | 444.918        | S[13] |
| A[3]  | 116.074        | 421.582        | 416.243        | 416.579        | 415.907        | A[12] |
| P[4]  | 148.425        | <b>397.903</b> | 392.564        | 392.900        | 392.228        | P[11] |
| S[5]  | 177.436        | 365.552        | <b>360.213</b> | <b>360.549</b> | 359.877        | S[10] |
| T[6]  | 211.119        | 336.542        | 331.202        | 331.538        | 330.866        | T[9]  |
| G[7]  | 230.126        | 302.859        | 297.520        | 297.856        | 297.184        | G[8]  |
| G[8]  | 249.133        | 283.852        | 278.513        | 278.848        | 278.177        | G[7]  |
| V[9]  | 282.156        | 264.845        | 259.505        | 259.841        | 259.169        | V[6]  |
| K[10] | 324.190        | 231.822        | 226.483        | 226.819        | 226.147        | K[5]  |
| K[11] | 376.996        | 179.780        | 174.440        | <b>174.776</b> | 174.105        | K[4]  |
| P[12] | 409.247        | 137.082        | 131.742        | 132.078        | 131.406        | P[3]  |
| H[13] | 454.933        | 104.731        | 99.391         | 99.727         | 99.055         | H[2]  |
| R[14] | <b>506.967</b> | 59.045         | 53.705         | 54.041         | 53.369         | R[1]  |

# sp | P43274 | H14\_MOUSE

[Acetyl]SETAPAAPAAPAPAEK <sup>Dimethyl</sup>  
28.03

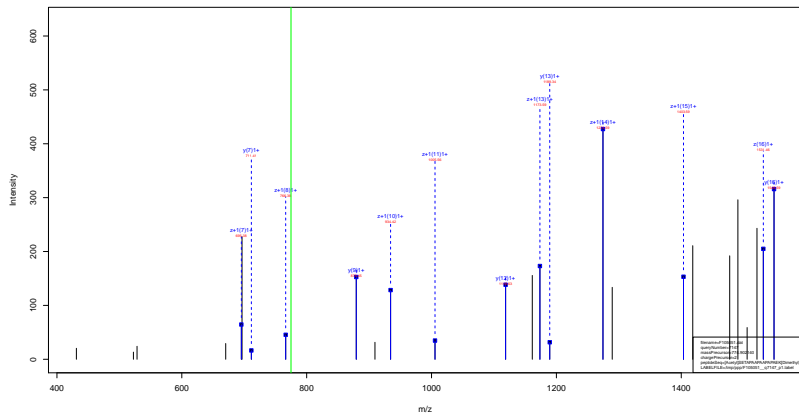

# sp | P43274 | H14\_MOUSE

[Acetyl]SETAPAAPAAPAPAEK <sup>Dimethyl</sup> 28.03

- ▶ fragmentation table for charge state 1+
- ▶ specType=etd
- ▶ score=45.52
- ▶ F105051.dat
- ▶ query=q7147.p1
- ▶ precursor=774.902140
- ▶ chargePrecursor=2
- ▶ itol=0.6

| AA | c  | y        | z+1             | z+2             | z       | AA              |       |
|----|----|----------|-----------------|-----------------|---------|-----------------|-------|
| S  | 1  | 147.076  | <b>1548.790</b> | 1532.772        | 0.000   | <b>1531.764</b> | S[16] |
| E  | 2  | 376.119  | 1419.748        | <b>1403.729</b> | 0.000   | 1402.721        | E[15] |
| I  | 3  | 377.167  | 1299.705        | <b>1274.687</b> | 0.000   | 1273.679        | I[14] |
| A  | 4  | 449.204  | <b>1189.658</b> | <b>1173.639</b> | 0.000   | 1172.631        | A[13] |
| P  | 5  | 545.257  | <b>1118.620</b> | 1102.602        | 0.000   | 1101.594        | P[12] |
| A  | 6  | 616.294  | 1021.568        | <b>1005.549</b> | 0.000   | 1004.541        | A[11] |
| A  | 7  | 687.331  | 950.531         | <b>934.512</b>  | 0.000   | 933.504         | A[10] |
| P  | 8  | 764.364  | <b>879.493</b>  | 863.475         | 0.000   | 862.467         | P[9]  |
| A  | 9  | 855.421  | 782.441         | <b>766.422</b>  | 0.000   | 765.414         | A[8]  |
| A  | 10 | 926.458  | <b>711.404</b>  | <b>695.385</b>  | 0.000   | 694.377         | A[7]  |
| P  | 11 | 1023.511 | 640.366         | 624.348         | 0.000   | 623.340         | P[6]  |
| A  | 12 | 1094.548 | 543.318         | 527.299         | 0.000   | 526.291         | A[5]  |
| P  | 13 | 1191.600 | 472.277         | 456.258         | 0.000   | 455.250         | P[4]  |
| A  | 14 | 1262.638 | 375.228         | 359.209         | 0.000   | 358.197         | A[3]  |
| E  | 15 | 1391.680 | 304.187         | 288.168         | 0.000   | 287.160         | E[2]  |
| K  | 16 | 1547.806 | 175.144         | 159.125         | 160.113 | 158.118         | K[1]  |

# sp | P68433 | H31\_MOUSE

LVREIAQDFK <sup>Dimethyl</sup> TDLR  
28.03

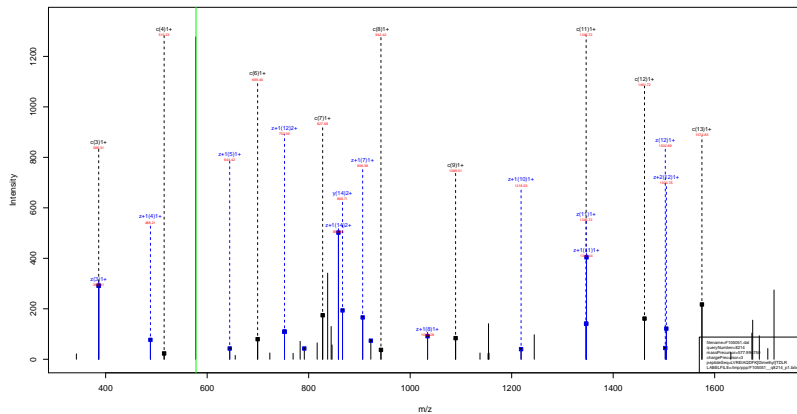

Unlabeled: P68433\_04  
 Query: Mouse\_H31\_0215  
 Label: Mouse\_H31\_0215  
 Label: Mouse\_H31\_0215  
 Label: Mouse\_H31\_0215  
 Label: Mouse\_H31\_0215

# sp | P68433 | H31\_MOUSE

LVREIAQDFK <sup>Dimethyl</sup> 28.03 TDLR

- ▶ fragmentation table for charge state 1+
- ▶ specType=etd
- ▶ score=56.17
- ▶ F105051.dat
- ▶ query=q8214.p1
- ▶ precursor=577.994750
- ▶ chargePrecursor=3
- ▶ itol=0.6

| AA    | c               | y              | z+1             | z+2             | z               | AA    |
|-------|-----------------|----------------|-----------------|-----------------|-----------------|-------|
| L[1]  | 131.118         | 1731.975       | 1715.950        | 0.000           | 1714.940        | L[14] |
| V[2]  | 230.188         | 1815.891       | 1602.872        | 0.000           | 1601.865        | V[13] |
| R[3]  | <b>388.287</b>  | 1319.824       | 1303.803        | <b>1504.812</b> | <b>1502.796</b> | R[12] |
| E[4]  | <b>515.130</b>  | 1303.722       | <b>1347.703</b> |                 | <b>1346.695</b> | E[11] |
| I[5]  | 628.414         | 1234.679       | <b>1218.660</b> | 1219.668        | 1217.652        | I[10] |
| A[6]  | <b>699.451</b>  | 1121.595       | 1108.576        | 1106.584        | 1104.568        | A[9]  |
| Q[7]  | <b>827.510</b>  | 1050.538       | <b>1034.539</b> | 1035.547        | 1033.531        | Q[8]  |
| D[8]  | <b>942.537</b>  | <b>922.499</b> | <b>906.481</b>  | 907.488         | 905.473         | D[7]  |
| T[9]  | <b>1089.605</b> | 837.472        | <b>791.454</b>  | 792.461         | 790.446         | T[6]  |
| K[10] | 1245.711        | 650.404        | <b>644.385</b>  | 645.393         | 643.377         | K[5]  |
| Y[11] | <b>1346.779</b> | 504.278        | <b>488.259</b>  | 489.267         | 487.251         | Y[4]  |
| D[12] | <b>1461.806</b> | 403.230        | 387.211         | 388.219         | <b>386.203</b>  | D[3]  |
| L[13] | <b>1574.890</b> | 388.203        | 272.184         | 273.192         | 271.176         | L[2]  |
| R[14] | 1730.991        | 175.119        | 159.100         | 160.108         | 158.092         | R[1]  |



# sp | P68433 | H31\_MOUSE

LVREIAQDFK <sup>Dimethyl</sup> 28.03 TDLR

- ▶ fragmentation table for charge state 2+
- ▶ specType=etd
- ▶ score=56.17
- ▶ F105051.dat
- ▶ query=q8214.p1
- ▶ precursor=577.994750
- ▶ chargePrecursor=3
- ▶ itol=0.6

| AA    | c       | y              | z+1            | z+2            | z              | AA    |
|-------|---------|----------------|----------------|----------------|----------------|-------|
| L[1]  | 69.063  | <b>856.491</b> | <b>858.482</b> | 0.504          | 857.978        | L[14] |
| V[2]  | 115.597 | 859.949        | 861.940        | 0.504          | 861.436        | V[13] |
| R[3]  | 193.647 | 760.415        | <b>752.406</b> | <b>752.910</b> | <b>751.902</b> | R[12] |
| E[4]  | 250.169 | 682.964        | 674.955        | 674.859        | 673.851        | E[11] |
| I[5]  | 314.711 | 617.843        | 609.834        | 610.338        | 609.330        | I[10] |
| A[6]  | 390.229 | 561.801        | 553.292        | 553.796        | 552.788        | A[9]  |
| Q[7]  | 414.289 | 525.783        | 517.773        | 518.277        | 517.269        | Q[8]  |
| D[8]  | 471.772 | 461.753        | 453.744        | 454.248        | 453.240        | D[7]  |
| F[9]  | 545.306 | 404.240        | 396.230        | 396.734        | 395.727        | F[6]  |
| K[10] | 623.369 | 330.706        | 322.696        | 323.200        | 322.192        | K[5]  |
| T[11] | 673.893 | 252.642        | 244.633        | 245.137        | 244.129        | T[4]  |
| D[12] | 751.407 | 202.119        | 194.109        | 194.613        | 193.605        | D[3]  |
| L[13] | 787.949 | 144.605        | 136.595        | 137.100        | 136.092        | L[2]  |
| R[14] | 865.999 | 88.063         | 80.054         | 80.558         | 79.550         | R[1]  |

# sp | P68433 | H31\_MOUSE

LVREIAQDFK <sup>Dimethyl</sup> TDLR  
28.03

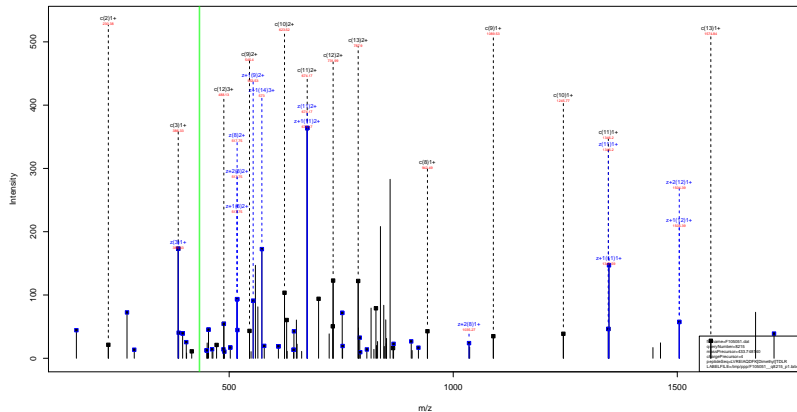

# sp | P68433 | H31\_MOUSE

LVREIAQDFK <sup>Dimethyl</sup> 28.03 TDLR

- ▶ fragmentation table for charge state 1+
- ▶ specType=etd
- ▶ score=67.55
- ▶ F105051.dat
- ▶ query=q8215\_p1
- ▶ precursor=433.748140
- ▶ chargePrecursor=4
- ▶ itol=0.6

| AA    | c               | y              | z+1             | z+2             | z               | AA    |
|-------|-----------------|----------------|-----------------|-----------------|-----------------|-------|
| L[1]  | 131.118         | 1731.875       | <b>1715.956</b> | 0.000           | 1714.940        | L[14] |
| V[2]  | <b>230.186</b>  | 1818.891       | 1802.872        | 0.000           | 1801.855        | V[13] |
| R[3]  | <b>380.287</b>  | 1819.932       | <b>1563.804</b> | <b>1564.812</b> | 1562.799        | R[12] |
| E[4]  | 315.330         | 1303.722       | <b>1347.703</b> | 1310.711        | <b>1346.695</b> | E[11] |
| I[5]  | <b>628.414</b>  | 1234.679       | 1218.660        | 1219.668        | 1217.652        | I[10] |
| A[6]  | <b>699.451</b>  | 1121.505       | 1108.576        | 1106.584        | 1104.568        | A[9]  |
| Q[7]  | <b>827.510</b>  | 1050.558       | 1034.530        | <b>1035.547</b> | 1033.531        | Q[8]  |
| D[8]  | <b>942.537</b>  | <b>922.499</b> | <b>906.481</b>  | 907.488         | 905.473         | D[7]  |
| T[9]  | <b>1089.605</b> | <b>807.472</b> | 791.454         | <b>792.461</b>  | 789.445         | T[6]  |
| K[10] | <b>1245.731</b> | 605.404        | <b>644.385</b>  | 645.393         | <b>643.377</b>  | K[5]  |
| Y[11] | <b>1346.779</b> | 504.278        | <b>488.259</b>  | <b>489.267</b>  | <b>487.251</b>  | Y[4]  |
| D[12] | 1461.806        | 403.230        | <b>387.211</b>  | 388.219         | <b>386.203</b>  | D[3]  |
| L[13] | <b>1574.890</b> | <b>288.203</b> | <b>272.184</b>  | 273.192         | 273.176         | L[2]  |
| R[14] | 1730.991        | 175.119        | <b>159.100</b>  | 160.108         | 158.092         | R[1]  |

# sp | P68433 | H31\_MOUSE

LVREIAQDFK <sup>Dimethyl</sup> 28.03 TDLR

- ▶ fragmentation table for charge state 2+
- ▶ specType=etd
- ▶ score=67.55
- ▶ F105051.dat
- ▶ query=q8215\_p1
- ▶ precursor=433.748140
- ▶ chargePrecursor=4
- ▶ itol=0.6

| AA    | c              | y              | z+1            | z+2            | z              | AA    |
|-------|----------------|----------------|----------------|----------------|----------------|-------|
| L[1]  | 66.083         | <b>866.491</b> | 858.482        | 0.504          | 857.978        | L[14] |
| V[2]  | 115.597        | 809.549        | 801.940        | 0.504          | 801.436        | V[13] |
| R[3]  | 193.647        | 760.415        | <b>752.406</b> | <b>752.910</b> | <b>751.902</b> | R[12] |
| E[4]  | 258.169        | 682.964        | <b>674.355</b> | 674.859        | <b>673.851</b> | E[11] |
| I[5]  | 314.711        | 617.843        | <b>609.834</b> | <b>610.338</b> | <b>609.330</b> | I[10] |
| A[6]  | 350.229        | 561.301        | <b>553.292</b> | <b>553.796</b> | 552.788        | A[9]  |
| Q[7]  | 414.259        | 525.783        | <b>517.773</b> | <b>518.277</b> | <b>517.269</b> | Q[8]  |
| D[8]  | <b>471.772</b> | <b>461.753</b> | <b>453.744</b> | <b>454.248</b> | 453.240        | D[7]  |
| F[9]  | <b>545.306</b> | <b>404.240</b> | <b>396.230</b> | <b>396.734</b> | <b>395.727</b> | F[6]  |
| K[10] | <b>623.369</b> | 330.705        | 322.696        | 323.200        | 322.192        | K[5]  |
| T[11] | <b>673.893</b> | 252.542        | 244.533        | 245.137        | 244.129        | T[4]  |
| D[12] | <b>731.407</b> | 202.119        | 194.109        | 194.613        | 193.605        | D[3]  |
| L[13] | <b>787.949</b> | 144.695        | 136.586        | 137.100        | 136.062        | L[2]  |
| R[14] | <b>865.999</b> | 88.063         | 80.054         | 80.558         | 79.550         | R[1]  |

# sp | P68433 | H31\_MOUSE

LVREIAQDFK <sup>Dimethyl</sup> TDLR  
28.03

- ▶ fragmentation table for charge state 3+
- ▶ specType=etd
- ▶ score=67.55
- ▶ F105051.dat
- ▶ query=q8215\_p1
- ▶ precursor=433.748140
- ▶ chargePrecursor=4
- ▶ itol=0.6

| AA    | c              | y              | z+1            | z+2            | z              | AA    |
|-------|----------------|----------------|----------------|----------------|----------------|-------|
| L[1]  | 44.377         | <b>577.997</b> | <b>572.657</b> | 0.672          | 572.321        | L[14] |
| V[2]  | 77.400         | 540.562        | 535.922        | 0.672          | 534.626        | V[13] |
| R[3]  | 129.434        | 507.279        | <b>501.940</b> | <b>502.275</b> | 501.604        | R[12] |
| E[4]  | 172.448        | 495.249        | <b>449.906</b> | <b>450.242</b> | <b>449.570</b> | E[11] |
| I[5]  | 210.143        | 412.231        | 406.892        | 407.228        | 406.556        | I[10] |
| A[6]  | 233.622        | 374.537        | 369.197        | 369.533        | 368.861        | A[9]  |
| Q[7]  | 276.508        | 350.857        | 345.518        | 345.854        | 345.182        | Q[8]  |
| D[8]  | 314.650        | 308.171        | 302.832        | 303.168        | 302.496        | D[7]  |
| F[9]  | 363.673        | 269.829        | 264.489        | 264.825        | 264.153        | F[6]  |
| K[10] | <b>415.915</b> | 220.906        | 215.467        | 215.803        | 215.131        | K[5]  |
| T[11] | <b>449.598</b> | 198.796        | 193.424        | 193.760        | 193.089        | T[4]  |
| D[12] | <b>487.940</b> | 135.082        | 129.742        | 130.078        | 129.406        | D[3]  |
| L[13] | 525.635        | 96.739         | 91.400         | 91.736         | 91.064         | L[2]  |
| R[14] | 577.669        | 59.045         | 53.705         | 54.041         | 53.369         | R[1]  |

# sp | P15864 | H12\_MOUSE

[Acetyl]SEAAPAAPAAAPPAEKAPAK

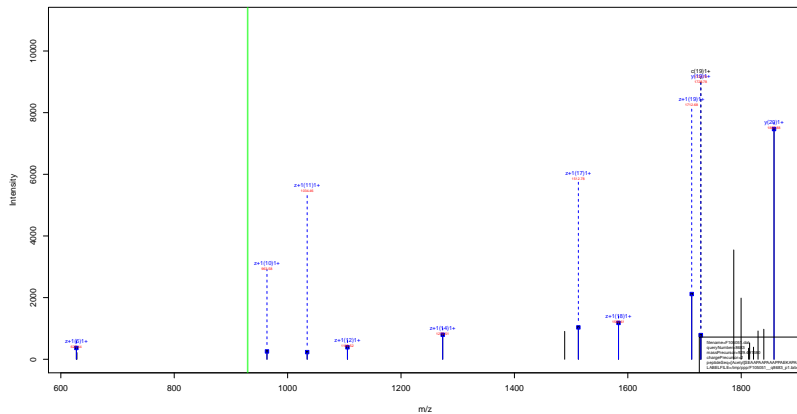

# sp | P15864 | H12\_MOUSE

## [Acetyl]SEAAPAAPAAAPPAEKAPAK

- ▶ fragmentation table for charge state 1+
- ▶ specType=etd
- ▶ score=54.33
- ▶ F105051.dat
- ▶ query=q8683\_p1
- ▶ precursor=929.491380
- ▶ chargePrecursor=2
- ▶ itol=0.6

| AA    | c               | y               | z+1             | z+2     | z        | AA    |
|-------|-----------------|-----------------|-----------------|---------|----------|-------|
| S[1]  | 147.076         | <b>1857.971</b> | 1841.952        | 0.000   | 1840.944 | S[20] |
| E[2]  | 276.119         | <b>1728.928</b> | <b>1712.909</b> | 0.000   | 1711.901 | E[19] |
| A[3]  | 347.156         | 1599.885        | <b>1583.867</b> | 0.000   | 1582.859 | A[18] |
| A[4]  | 418.193         | 1528.848        | <b>1512.829</b> | 0.000   | 1511.822 | A[17] |
| P[5]  | 515.246         | 1487.811        | 1441.792        | 0.000   | 1440.785 | P[16] |
| A[6]  | 589.283         | 1368.758        | 1344.740        | 0.000   | 1343.732 | A[15] |
| A[7]  | 657.320         | 1289.721        | <b>1273.702</b> | 0.000   | 1272.695 | A[14] |
| P[8]  | 754.373         | 1218.684        | 1202.665        | 0.000   | 1201.658 | P[13] |
| A[9]  | 825.410         | 1121.631        | <b>1105.613</b> | 0.000   | 1104.605 | A[12] |
| A[10] | 896.447         | 1050.594        | <b>1034.575</b> | 0.000   | 1033.568 | A[11] |
| A[11] | 967.484         | 979.557         | <b>963.538</b>  | 0.000   | 962.531  | A[10] |
| P[12] | 1084.537        | 908.520         | 892.501         | 0.000   | 891.493  | P[9]  |
| P[13] | 1161.590        | 831.467         | 795.448         | 0.000   | 794.441  | P[8]  |
| A[14] | 1232.627        | 714.414         | 698.396         | 0.000   | 697.388  | A[7]  |
| E[15] | 1361.670        | 643.377         | <b>627.359</b>  | 0.000   | 626.351  | E[6]  |
| K[16] | 1489.705        | 514.335         | 498.316         | 499.324 | 497.308  | K[5]  |
| A[17] | 1560.802        | 386.240         | 370.221         | 371.229 | 369.213  | A[4]  |
| P[18] | 1657.854        | 315.203         | 299.184         | 300.192 | 298.176  | P[3]  |
| A[19] | <b>1728.892</b> | 218.150         | 203.131         | 203.139 | 201.123  | A[2]  |
| K[20] | 1856.936        | 147.113         | 131.094         | 132.102 | 130.086  | K[1]  |





# sp | P15864 | H12\_MOUSE

[Acetyl]SEAAPAAPAAAPPAEKAPAKK

- ▶ fragmentation table for charge state 1+
- ▶ specType=etd
- ▶ score=47.96
- ▶ F105051.dat
- ▶ query=q9071.p1
- ▶ precursor=662.693790
- ▶ chargePrecursor=3
- ▶ itol=0.6

| AA   | c               | y               | z+1             | z+2            | z               | AA   |
|------|-----------------|-----------------|-----------------|----------------|-----------------|------|
| S 1  | 147.076         | 1906.065        | 1970.047        | 0.000          | <b>1960.039</b> | S 21 |
| E 2  | 276.119         | <b>1857.023</b> | <b>1841.004</b> | 0.000          | 1839.990        | E 20 |
| A 3  | 347.150         | <b>1727.969</b> | <b>1711.962</b> | 0.000          | 1710.954        | A 19 |
| A 4  | 418.193         | <b>1556.943</b> | 1640.924        | 0.000          | 1639.917        | A 18 |
| P 5  | 515.246         | 1585.900        | 1569.887        | 0.000          | 1568.880        | P 17 |
| A 6  | 586.283         | <b>1488.853</b> | 1472.835        | 0.000          | 1471.827        | A 16 |
| A 7  | 657.320         | 1417.818        | 1401.797        | 0.000          | 1400.790        | A 15 |
| P 8  | 754.373         | 1346.779        | 1330.760        | 0.000          | 1329.751        | P 14 |
| A 9  | <b>825.410</b>  | 1249.726        | 1233.708        | 0.000          | 1232.700        | A 13 |
| A 10 | <b>896.447</b>  | 1178.689        | 1162.670        | 0.000          | 1161.661        | A 12 |
| A 11 | 967.494         | 1107.652        | <b>1091.633</b> | 0.000          | 1090.625        | A 11 |
| P 12 | 1064.537        | 1036.615        | 1020.596        | 0.000          | 1019.588        | P 10 |
| P 13 | 1161.590        | 939.567         | 923.543         | 0.000          | 922.536         | P 9  |
| A 14 | 1232.637        | 843.509         | 828.491         | 0.000          | <b>825.483</b>  | A 8  |
| E 15 | 1361.670        | 771.472         | <b>755.454</b>  | 0.000          | 754.446         | E 7  |
| R 16 | 1489.705        | 642.430         | <b>626.411</b>  | <b>637.419</b> | 625.403         | R 6  |
| A 17 | 1580.802        | 514.332         | <b>498.316</b>  | 496.314        | 497.305         | A 5  |
| P 18 | 1657.854        | 443.290         | 427.279         | 426.267        | 426.271         | P 4  |
| A 19 | 1728.892        | 346.245         | 330.226         | <b>331.234</b> | 329.214         | A 3  |
| R 20 | <b>1856.986</b> | 275.208         | 259.189         | 260.197        | 258.181         | R 2  |
| R 21 | 1985.081        | 147.113         | 131.094         | 132.102        | 130.086         | R 1  |

# sp | P15864 | H12\_MOUSE

[Acetyl]SEAAPAAPAAAPPAEKAPAKK

- ▶ fragmentation table for charge state 2+
- ▶ specType=etd
- ▶ score=47.96
- ▶ F105051.dat
- ▶ query=q9071\_p1
- ▶ precursor=662.693790
- ▶ chargePrecursor=3
- ▶ itol=0.6

| AA    | c              | y              | z+1            | z+2     | z              | AA    |
|-------|----------------|----------------|----------------|---------|----------------|-------|
| S[1]  | 74.042         | <b>993.536</b> | <b>985.527</b> | 0.504   | <b>985.023</b> | S[21] |
| E[2]  | 138.563        | <b>929.015</b> | <b>921.006</b> | 0.504   | <b>920.502</b> | E[20] |
| A[3]  | 174.082        | <b>864.494</b> | <b>856.484</b> | 0.504   | 855.981        | A[19] |
| A[4]  | 209.600        | <b>828.975</b> | <b>820.966</b> | 0.504   | <b>820.462</b> | A[18] |
| P[5]  | 258.127        | 793.457        | 785.447        | 0.504   | 784.943        | P[17] |
| A[6]  | 293.645        | 744.930        | <b>736.921</b> | 0.504   | 736.417        | A[16] |
| A[7]  | 329.164        | 709.412        | <b>701.402</b> | 0.504   | 700.898        | A[15] |
| P[8]  | 377.690        | 673.893        | 665.884        | 0.504   | 665.380        | P[14] |
| A[9]  | 413.209        | 625.367        | 617.357        | 0.504   | 616.854        | A[13] |
| A[10] | 448.727        | 589.848        | 581.839        | 0.504   | 581.335        | A[12] |
| A[11] | 484.246        | 554.330        | 546.320        | 0.504   | 545.816        | A[11] |
| P[12] | 532.772        | 518.811        | 510.802        | 0.504   | 510.298        | P[10] |
| P[13] | 581.299        | 470.285        | 462.275        | 0.504   | 461.771        | P[9]  |
| A[14] | 616.817        | 421.758        | 413.749        | 0.504   | 413.245        | A[8]  |
| E[15] | 681.338        | 386.240        | 378.230        | 0.504   | 377.727        | E[7]  |
| K[16] | 745.386        | 321.718        | 313.709        | 314.213 | 313.205        | K[6]  |
| A[17] | 780.904        | 257.671        | 249.662        | 250.166 | 249.158        | A[5]  |
| P[18] | <b>829.431</b> | 222.152        | 214.143        | 214.647 | 213.639        | P[4]  |
| A[19] | <b>864.949</b> | 173.626        | 165.617        | 166.121 | 165.113        | A[3]  |
| K[20] | <b>928.997</b> | 138.108        | 130.098        | 130.602 | 129.594        | K[2]  |
| K[21] | 993.044        | 74.060         | 66.051         | 66.555  | 65.547         | K[1]  |



# sp | P15864 | H12\_MOUSE

## [Acetyl]SEAAPAAPAAAPPAEKAPAKK

- ▶ fragmentation table for charge state 1+
- ▶ specType=etd
- ▶ score=41.53
- ▶ F105051.dat
- ▶ query=q9072.p1
- ▶ precursor=662.693920
- ▶ chargePrecursor=3
- ▶ itol=0.6

| AA    | c               | y               | z+1             | z+2            | z               | AA    |
|-------|-----------------|-----------------|-----------------|----------------|-----------------|-------|
| S[1]  | 147.076         | 1906.065        | 1070.047        | 0.000          | <b>1969.039</b> | S[2]  |
| E[2]  | 276.119         | <b>1857.023</b> | 1841.004        | 0.000          | 1839.990        | E[20] |
| A[3]  | 347.150         | <b>1727.968</b> | 1717.952        | 0.000          | 1710.954        | A[19] |
| A[4]  | 418.193         | 1656.947        | <b>1640.934</b> | 0.000          | 1639.911        | A[18] |
| P[5]  | 515.246         | 1585.906        | 1570.887        | 0.000          | 1568.880        | P[17] |
| A[6]  | 586.283         | 1488.851        | 1472.835        | 0.000          | 1471.827        | A[16] |
| A[7]  | 657.320         | 1417.810        | 1401.797        | 0.000          | 1400.790        | A[15] |
| P[8]  | 754.373         | 1346.770        | 1330.760        | 0.000          | 1329.751        | P[14] |
| A[9]  | 825.410         | 1249.726        | 1233.708        | 0.000          | 1232.700        | A[13] |
| A[10] | 896.447         | 1178.689        | 1162.670        | 0.000          | 1161.661        | A[12] |
| A[11] | 967.484         | 1107.652        | <b>1091.633</b> | 0.000          | <b>1090.626</b> | A[11] |
| P[12] | 1064.537        | 1036.615        | 1020.596        | 0.000          | 1019.588        | P[10] |
| P[13] | 1161.590        | 939.567         | 923.543         | 0.000          | 922.536         | P[9]  |
| A[14] | 1232.627        | 843.500         | 828.491         | 0.000          | 825.483         | A[8]  |
| E[15] | 1361.670        | 771.472         | 755.454         | 0.000          | 754.446         | E[7]  |
| R[16] | 1489.705        | 642.430         | 626.413         | <b>627.419</b> | 625.401         | R[6]  |
| A[17] | 1550.502        | 514.332         | <b>498.316</b>  | 496.314        | 497.305         | A[5]  |
| P[18] | <b>1657.854</b> | 443.290         | 427.279         | 428.287        | 426.271         | P[4]  |
| A[19] | 1728.892        | 346.245         | 330.226         | 331.234        | 329.216         | A[3]  |
| R[20] | <b>1856.986</b> | 275.208         | 259.189         | <b>260.197</b> | 258.181         | R[2]  |
| K[21] | 1985.081        | 147.113         | 131.094         | 132.102        | 130.086         | K[1]  |

# sp | P15864 | H12\_MOUSE

[Acetyl]SEAAPAAPAAAPPAEKAPAKK

- ▶ fragmentation table for charge state 2+
- ▶ specType=etd
- ▶ score=41.53
- ▶ F105051.dat
- ▶ query=q9072.p1
- ▶ precursor=662.693920
- ▶ chargePrecursor=3
- ▶ itol=0.6

| AA    | c              | y              | z+1            | z+2     | z              | AA    |
|-------|----------------|----------------|----------------|---------|----------------|-------|
| S[1]  | 74.042         | <b>993.536</b> | <b>985.527</b> | 0.504   | <b>985.023</b> | S[21] |
| E[2]  | 138.563        | <b>929.015</b> | <b>921.006</b> | 0.504   | 920.502        | E[20] |
| A[3]  | 174.082        | 964.494        | <b>856.484</b> | 0.504   | <b>855.981</b> | A[19] |
| A[4]  | 209.600        | 928.975        | <b>820.966</b> | 0.504   | <b>820.462</b> | A[18] |
| P[5]  | 258.127        | <b>793.457</b> | 785.447        | 0.504   | 784.943        | P[17] |
| A[6]  | 293.645        | 744.930        | <b>736.921</b> | 0.504   | 736.417        | A[16] |
| A[7]  | 329.164        | 709.412        | <b>701.402</b> | 0.504   | 700.898        | A[15] |
| P[8]  | 377.690        | 673.893        | 665.884        | 0.504   | 665.380        | P[14] |
| A[9]  | 413.209        | 625.367        | 617.357        | 0.504   | 616.854        | A[13] |
| A[10] | 448.727        | 589.848        | 581.839        | 0.504   | 581.335        | A[12] |
| A[11] | 484.246        | 554.330        | 546.320        | 0.504   | 545.816        | A[11] |
| P[12] | 520.772        | 518.811        | 510.802        | 0.504   | 510.298        | P[10] |
| P[13] | 561.290        | 470.285        | 462.275        | 0.504   | 461.771        | P[9]  |
| A[14] | 616.817        | 421.758        | 413.749        | 0.504   | 413.245        | A[8]  |
| E[15] | 681.338        | 386.240        | 378.230        | 0.504   | 377.727        | E[7]  |
| K[16] | 745.386        | 321.718        | 313.709        | 314.213 | 313.205        | K[6]  |
| A[17] | 780.904        | 257.671        | 249.662        | 250.166 | 249.158        | A[5]  |
| P[18] | 829.431        | 222.152        | 214.143        | 214.647 | 213.639        | P[4]  |
| A[19] | 864.949        | 173.626        | 165.617        | 166.121 | 165.113        | A[3]  |
| K[20] | <b>928.997</b> | 138.108        | 130.098        | 130.602 | 129.594        | K[2]  |
| K[21] | 993.044        | 74.060         | 66.051         | 66.555  | 65.547         | K[1]  |



# sp | P15864 | H12\_MOUSE

## [Acetyl]SEAAPAAPAAAPPAEKAPAKK

- ▶ fragmentation table for charge state 1+
- ▶ specType=etd
- ▶ score=68.45
- ▶ F105051.dat
- ▶ query=q9073.p1
- ▶ precursor=662.694530
- ▶ chargePrecursor=3
- ▶ itol=0.6

| AA   | c               | y               | z+1             | z+2            | z               | AA   |
|------|-----------------|-----------------|-----------------|----------------|-----------------|------|
| S 1  | 147.076         | 1906.065        | 1970.047        | 0.000          | <b>1960.030</b> | S 21 |
| E 2  | 276.119         | <b>1857.023</b> | <b>1841.004</b> | 0.000          | 1839.990        | E 20 |
| A 3  | 347.150         | <b>1727.960</b> | <b>1711.962</b> | 0.000          | 1710.954        | A 19 |
| A 4  | 418.193         | 1599.947        | <b>1640.924</b> | 0.000          | 1639.917        | A 18 |
| P 5  | 515.246         | <b>1585.906</b> | 1569.897        | 0.000          | 1568.880        | P 17 |
| A 6  | 586.283         | 1488.851        | 1472.835        | 0.000          | 1471.827        | A 16 |
| A 7  | 657.320         | 1417.816        | <b>1401.797</b> | 0.000          | 1400.790        | A 15 |
| P 8  | 754.373         | 1346.770        | 1330.760        | 0.000          | 1329.753        | P 14 |
| A 9  | 825.410         | 1249.726        | 1233.708        | 0.000          | <b>1232.700</b> | A 13 |
| A 10 | <b>896.447</b>  | 1178.689        | <b>1162.670</b> | 0.000          | 1161.661        | A 12 |
| A 11 | 967.494         | 1107.652        | 1091.633        | 0.000          | 1090.625        | A 11 |
| P 12 | 1064.537        | 1036.615        | 1020.596        | 0.000          | 1019.588        | P 10 |
| P 13 | 1161.590        | 939.567         | 923.543         | 0.000          | 922.536         | P 9  |
| A 14 | <b>1232.627</b> | 843.500         | 828.491         | 0.000          | 827.483         | A 8  |
| E 15 | <b>1361.670</b> | 771.472         | <b>755.454</b>  | 0.000          | 754.446         | E 7  |
| R 16 | <b>1489.765</b> | 642.430         | <b>626.411</b>  | <b>637.419</b> | 625.403         | R 6  |
| A 17 | 1580.802        | 514.332         | <b>498.316</b>  | 496.314        | 497.305         | A 5  |
| P 18 | <b>1657.854</b> | 443.290         | 437.279         | 428.267        | 426.271         | P 4  |
| A 19 | 1728.892        | 346.245         | 330.226         | <b>331.234</b> | 329.216         | A 3  |
| R 20 | <b>1856.986</b> | 275.208         | 259.189         | <b>260.197</b> | 258.181         | R 2  |
| R 21 | 1985.081        | 147.113         | 131.094         | 132.102        | 130.086         | R 1  |

# sp | P15864 | H12\_MOUSE

[Acetyl]SEAAPAAPAAAPPAEKAPAKK

- ▶ fragmentation table for charge state 2+
- ▶ specType=etd
- ▶ score=68.45
- ▶ F105051.dat
- ▶ query=q9073\_p1
- ▶ precursor=662.694530
- ▶ chargePrecursor=3
- ▶ itol=0.6

| AA    | c              | y              | z+1            | z+2     | z              | AA    |
|-------|----------------|----------------|----------------|---------|----------------|-------|
| S[1]  | 74.042         | <b>993.536</b> | <b>985.527</b> | 0.504   | <b>985.023</b> | S[21] |
| E[2]  | 138.563        | <b>929.015</b> | <b>921.006</b> | 0.504   | <b>920.502</b> | E[20] |
| A[3]  | 174.082        | <b>864.494</b> | <b>856.484</b> | 0.504   | 855.981        | A[19] |
| A[4]  | 209.600        | 828.975        | <b>820.966</b> | 0.504   | 820.462        | A[18] |
| P[5]  | 258.127        | <b>793.457</b> | 785.447        | 0.504   | 784.943        | P[17] |
| A[6]  | 293.645        | 744.930        | <b>736.921</b> | 0.504   | <b>736.417</b> | A[16] |
| A[7]  | 329.164        | 709.412        | <b>701.402</b> | 0.504   | 700.898        | A[15] |
| P[8]  | 377.690        | 673.893        | 665.884        | 0.504   | 665.380        | P[14] |
| A[9]  | 413.209        | 625.367        | 617.357        | 0.504   | 616.854        | A[13] |
| A[10] | 448.727        | 589.848        | 581.839        | 0.504   | 581.335        | A[12] |
| A[11] | 484.246        | 554.330        | 546.320        | 0.504   | 545.816        | A[11] |
| P[12] | 520.764        | 518.811        | 510.802        | 0.504   | 510.298        | P[10] |
| P[13] | 556.283        | 479.285        | 462.275        | 0.504   | 461.771        | P[9]  |
| A[14] | 616.817        | 421.758        | 413.749        | 0.504   | 413.245        | A[8]  |
| E[15] | 681.338        | 386.240        | 378.230        | 0.504   | 377.727        | E[7]  |
| K[16] | 745.866        | 321.718        | 313.709        | 314.213 | 313.205        | K[6]  |
| A[17] | 780.904        | 257.671        | 249.662        | 250.166 | 249.158        | A[5]  |
| P[18] | 829.431        | 222.152        | 214.143        | 214.647 | 213.639        | P[4]  |
| A[19] | <b>864.949</b> | 173.626        | 165.617        | 166.121 | 165.113        | A[3]  |
| K[20] | <b>928.997</b> | 138.108        | 130.098        | 130.602 | 129.594        | K[2]  |
| K[21] | <b>993.044</b> | 74.060         | 66.051         | 66.555  | 65.547         | K[1]  |



# sp | P43276 | H15\_MOUSE

[Acetyl]SETAPAETAAPAPVEKSPAK

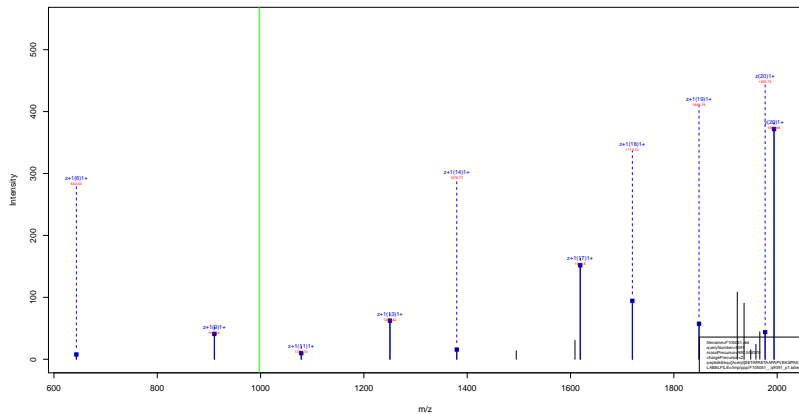

# sp | P43276 | H15\_MOUSE

## [Acetyl]SETAPAETAAPAPVEKSPAK

- ▶ fragmentation table for charge state 1+
- ▶ specType=etd
- ▶ score=52.69
- ▶ F105051.dat
- ▶ query=q9091\_p1
- ▶ precursor=997.508370
- ▶ chargePrecursor=2
- ▶ itol=0.6

| AA    | c        | y               | z+1             | z+2     | z               | AA    |
|-------|----------|-----------------|-----------------|---------|-----------------|-------|
| S[1]  | 147.076  | <b>1994.000</b> | 1977.989        | 0.000   | <b>1976.901</b> | S[20] |
| E[2]  | 276.119  | 1864.965        | <b>1848.946</b> | 0.000   | 1847.939        | E[19] |
| T[3]  | 377.167  | 1735.922        | <b>1719.904</b> | 0.000   | 1718.896        | T[18] |
| A[4]  | 448.204  | 1634.875        | <b>1618.856</b> | 0.000   | 1617.848        | A[17] |
| F[5]  | 545.257  | 1563.838        | 1547.819        | 0.000   | 1546.811        | F[16] |
| A[6]  | 618.294  | 1466.785        | 1450.766        | 0.000   | 1449.758        | A[15] |
| E[7]  | 745.336  | 1395.740        | <b>1379.720</b> | 0.000   | 1378.712        | E[14] |
| T[8]  | 846.384  | 1296.705        | <b>1250.687</b> | 0.000   | 1249.679        | T[13] |
| A[9]  | 917.421  | 1165.658        | 1149.639        | 0.000   | 1148.631        | A[12] |
| A[10] | 988.458  | 1094.620        | <b>1078.602</b> | 0.000   | 1077.594        | A[11] |
| P[11] | 1085.511 | 1023.583        | 1007.565        | 0.000   | 1006.557        | P[10] |
| A[12] | 1156.548 | 926.511         | <b>910.512</b>  | 0.000   | 909.504         | A[9]  |
| P[13] | 1251.601 | 854.491         | 839.473         | 0.000   | 838.465         | P[8]  |
| V[14] | 1352.669 | 758.441         | 752.422         | 0.000   | 741.414         | V[7]  |
| E[15] | 1481.712 | 659.372         | <b>643.354</b>  | 0.000   | 642.346         | E[6]  |
| K[16] | 1609.807 | 530.330         | 514.311         | 515.319 | 513.303         | K[5]  |
| S[17] | 1696.839 | 402.235         | 386.216         | 387.224 | 385.208         | S[4]  |
| P[18] | 1793.892 | 315.203         | 299.184         | 300.192 | 298.176         | P[3]  |
| A[19] | 1864.929 | 218.150         | 202.131         | 203.139 | 201.123         | A[2]  |
| K[20] | 1993.024 | 147.113         | 131.094         | 132.102 | 130.086         | K[1]  |

sp | P43276 | H15\_MOUSE  
[Acetyl]SETAPAETAAPAPVEKSPAK

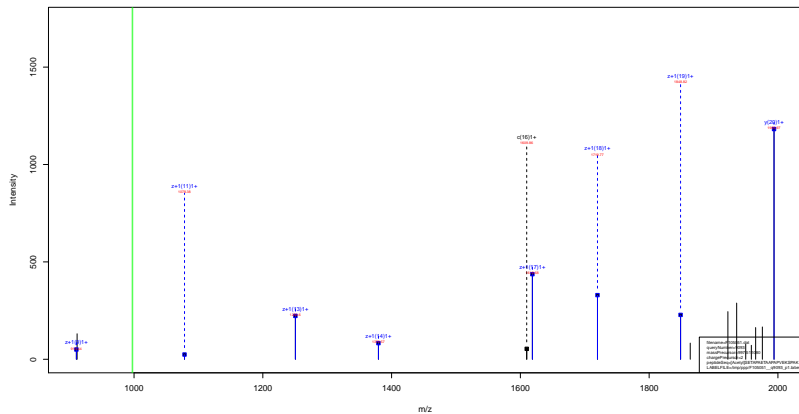

# sp | P43276 | H15\_MOUSE

## [Acetyl]SETAPAETAAPAPVEKSPAK

- ▶ fragmentation table for charge state 1+
- ▶ specType=etd
- ▶ score=48.31
- ▶ F105051.dat
- ▶ query=q9093\_p1
- ▶ precursor=997.511080
- ▶ chargePrecursor=2
- ▶ itol=0.6

| AA |    | c               | y               | z+1             | z+2     | z        | AA    |
|----|----|-----------------|-----------------|-----------------|---------|----------|-------|
| S  | 1  | 147.076         | <b>1994.000</b> | 1977.989        | 0.000   | 1976.981 | S[20] |
| E  | 2  | 276.119         | 1864.965        | <b>1848.946</b> | 0.000   | 1847.939 | E[19] |
| T  | 3  | 377.107         | 1735.922        | <b>1719.904</b> | 0.000   | 1718.896 | T[18] |
| A  | 4  | 448.204         | 1634.875        | <b>1618.856</b> | 0.000   | 1617.848 | A[17] |
| P  | 5  | 545.257         | 1563.830        | 1547.819        | 0.000   | 1546.811 | P[16] |
| A  | 6  | 619.294         | 1468.783        | 1452.766        | 0.000   | 1449.758 | A[15] |
| E  | 7  | 745.336         | 1395.740        | <b>1379.729</b> | 0.000   | 1378.721 | E[14] |
| T  | 8  | 846.384         | 1266.705        | <b>1250.687</b> | 0.000   | 1249.679 | T[13] |
| A  | 9  | 917.421         | 1165.658        | 1149.639        | 0.000   | 1148.631 | A[12] |
| A  | 10 | 988.458         | 1094.620        | <b>1078.602</b> | 0.000   | 1077.594 | A[11] |
| P  | 11 | 1085.511        | 1023.583        | 1007.565        | 0.000   | 1006.557 | P[10] |
| A  | 12 | 1150.548        | 926.531         | <b>910.512</b>  | 0.000   | 909.504  | A[9]  |
| P  | 13 | 1253.603        | 855.493         | 839.476         | 0.000   | 838.467  | P[8]  |
| V  | 14 | 1352.669        | 758.441         | 742.422         | 0.000   | 741.414  | V[7]  |
| E  | 15 | 1481.712        | 659.372         | 643.354         | 0.000   | 642.346  | E[6]  |
| K  | 16 | <b>1609.807</b> | 530.330         | 514.311         | 513.310 | 513.303  | K[5]  |
| S  | 17 | 1696.839        | 402.235         | 386.216         | 387.234 | 385.208  | S[4]  |
| P  | 18 | 1793.892        | 315.203         | 299.184         | 300.192 | 298.176  | P[3]  |
| A  | 19 | 1884.929        | 218.150         | 202.131         | 203.139 | 201.123  | A[2]  |
| K  | 20 | 1993.024        | 147.113         | 131.094         | 132.102 | 130.086  | K[1]  |



# sp | P43274 | H14\_MOUSE

## [Acetyl]SETAPAAPAAPAPAEKTPVKK

- ▶ fragmentation table for charge state 1+
- ▶ specType=etd
- ▶ score=43.61
- ▶ F105051.dat
- ▶ query=q9336.p1
- ▶ precursor=692.043480
- ▶ chargePrecursor=3
- ▶ itol=0.6

| AA    | c               | y               | z+1             | z+2            | z               | AA    |
|-------|-----------------|-----------------|-----------------|----------------|-----------------|-------|
| S[1]  | 147.076         | 2074.118        | 2058.009        | 0.000          | 2057.091        | S[21] |
| E[2]  | 276.119         | <b>1945.075</b> | <b>1929.057</b> | 0.000          | 1928.049        | E[20] |
| T[3]  | 377.167         | <b>1816.033</b> | 1800.014        | 0.000          | <b>1799.006</b> | T[19] |
| A[4]  | 448.204         | 1714.983        | 1698.966        | 0.000          | 1697.956        | A[18] |
| P[5]  | 545.257         | 1643.948        | 1627.929        | 0.000          | 1626.921        | P[17] |
| A[6]  | 616.294         | 1548.895        | 1530.876        | 0.000          | 1529.869        | A[16] |
| A[7]  | 687.331         | <b>1475.858</b> | <b>1459.839</b> | 0.000          | 1458.831        | A[15] |
| P[8]  | 784.384         | 1404.821        | 1388.802        | 0.000          | 1387.794        | P[14] |
| A[9]  | <b>855.421</b>  | 1307.768        | 1291.749        | 0.000          | 1290.742        | A[13] |
| A[10] | 858.458         | 1236.711        | <b>1220.712</b> | 0.000          | 1219.705        | A[12] |
| P[11] | 1023.511        | <b>1165.694</b> | 1149.675        | 0.000          | 1148.667        | P[11] |
| A[12] | 1094.548        | 1068.641        | <b>1052.622</b> | 0.000          | 1051.615        | A[10] |
| P[13] | 1191.600        | 997.604         | 981.585         | 0.000          | 980.578         | P[9]  |
| A[14] | 1262.638        | <b>900.551</b>  | 884.531         | 0.000          | 883.523         | A[8]  |
| E[15] | 1397.690        | 829.514         | 813.495         | 0.000          | 812.488         | E[7]  |
| R[16] | <b>1519.775</b> | 760.477         | <b>684.453</b>  | <b>685.461</b> | 683.444         | R[6]  |
| T[17] | 1620.823        | 572.377         | 556.358         | <b>557.366</b> | <b>555.350</b>  | T[5]  |
| P[18] | 1717.876        | 471.320         | 455.310         | 456.318        | 454.302         | P[4]  |
| V[19] | 1816.944        | 374.276         | 358.257         | 359.265        | 357.250         | V[3]  |
| K[20] | <b>1945.039</b> | 275.208         | 259.189         | <b>260.197</b> | 258.181         | K[2]  |
| K[21] | 2073.134        | 147.113         | 131.094         | 132.102        | 130.086         | K[1]  |

# sp | P43274 | H14\_MOUSE

[Acetyl]SETAPAAPAAPAPAEKTPVKK

- ▶ fragmentation table for charge state 2+
- ▶ specType=etd
- ▶ score=43.61
- ▶ F105051.dat
- ▶ query=q9336.p1
- ▶ precursor=692.043480
- ▶ chargePrecursor=3
- ▶ itol=0.6

| AA    | c               | y               | z+1             | z+2   | z               | AA    |
|-------|-----------------|-----------------|-----------------|-------|-----------------|-------|
| S[1]  | 74.042          | <b>1037.563</b> | <b>1029.553</b> | 0.504 | <b>1029.049</b> | S[2]  |
| E[2]  | 138.563         | <b>973.041</b>  | <b>965.032</b>  | 0.504 | 964.529         | E[3]  |
| T[3]  | 189.087         | 908.520         | <b>900.511</b>  | 0.504 | 900.001         | T[4]  |
| A[4]  | 224.008         | 857.999         | <b>849.987</b>  | 0.504 | 849.481         | A[5]  |
| P[5]  | 273.132         | 822.478         | <b>814.468</b>  | 0.504 | <b>813.964</b>  | P[17] |
| A[6]  | 308.650         | 773.951         | <b>765.942</b>  | 0.504 | 765.438         | A[16] |
| A[7]  | 344.169         | 738.433         | <b>730.423</b>  | 0.504 | 729.919         | A[15] |
| P[8]  | 392.695         | 702.914         | 694.905         | 0.504 | 694.401         | P[14] |
| A[9]  | 428.214         | 664.388         | 656.378         | 0.504 | 645.874         | A[13] |
| A[10] | 463.733         | 618.869         | 610.860         | 0.504 | 610.356         | A[12] |
| P[11] | 512.259         | 583.351         | 575.341         | 0.504 | 574.837         | P[11] |
| A[12] | 547.777         | 534.824         | 526.815         | 0.504 | 526.311         | A[10] |
| P[13] | 596.304         | 499.306         | 491.296         | 0.504 | 490.793         | P[9]  |
| A[14] | 631.822         | 459.779         | 442.770         | 0.504 | 442.266         | A[8]  |
| E[15] | 696.344         | 415.261         | 407.251         | 0.504 | 406.747         | E[7]  |
| R[16] | 769.391         | 359.739         | 342.730         | 0.504 | 342.226         | R[6]  |
| T[17] | 810.915         | 286.607         | 278.603         | 0.504 | 278.179         | T[5]  |
| P[18] | 859.441         | 236.100         | 228.109         | 0.504 | 227.655         | P[4]  |
| V[19] | 908.976         | 187.642         | 179.632         | 0.504 | 179.128         | V[3]  |
| K[20] | <b>973.023</b>  | 138.100         | 130.098         | 0.504 | 129.594         | K[2]  |
| K[21] | <b>1037.071</b> | 74.000          | 66.051          | 0.504 | 65.547          | K[1]  |





# sp | P43274 | H14\_MOUSE

[Acetyl]SETAPAAPAAPAPAEKTPVKK

- ▶ fragmentation table for charge state 1+
- ▶ specType=etd
- ▶ score=41.16
- ▶ F105051.dat
- ▶ query=q9338.p1
- ▶ precursor=692.046650
- ▶ chargePrecursor=3
- ▶ itol=0.6

| AA    | c               | y               | z+1             | z+2            | z              | AA    |
|-------|-----------------|-----------------|-----------------|----------------|----------------|-------|
| S[1]  | 147.076         | 2074.118        | 2038.099        | 0.000          | 2057.091       | S[21] |
| E[2]  | 276.119         | <b>1945.075</b> | <b>1929.057</b> | 0.000          | 1928.049       | E[20] |
| T[3]  | 377.167         | <b>1816.833</b> | <b>1808.814</b> | 0.000          | 1799.805       | T[19] |
| A[4]  | 448.204         | 1714.865        | 1698.846        | 0.000          | 1697.955       | A[18] |
| P[5]  | 545.257         | 1643.940        | 1627.929        | 0.000          | 1626.921       | P[17] |
| A[6]  | 616.294         | 1548.895        | 1530.876        | 0.000          | 1529.889       | A[16] |
| A[7]  | 667.331         | <b>1475.858</b> | <b>1459.839</b> | 0.000          | 1458.831       | A[15] |
| P[8]  | 784.384         | 1404.821        | 1388.802        | 0.000          | 1387.794       | P[14] |
| A[9]  | <b>855.421</b>  | 1307.768        | 1291.749        | 0.000          | 1290.742       | A[13] |
| A[10] | 928.458         | 1238.731        | <b>1228.712</b> | 0.000          | 1219.705       | A[12] |
| P[11] | <b>1023.511</b> | 1185.685        | 1140.675        | 0.000          | 1148.667       | P[11] |
| A[12] | 1094.548        | 1068.641        | <b>1052.622</b> | 0.000          | 1051.615       | A[10] |
| P[13] | 1191.600        | 997.604         | 981.585         | 0.000          | 980.578        | P[9]  |
| A[14] | 1262.638        | <b>900.551</b>  | 884.533         | 0.000          | 883.525        | A[8]  |
| E[15] | 1391.680        | 828.514         | <b>813.495</b>  | 0.000          | 812.488        | E[7]  |
| K[16] | 1519.775        | 760.472         | <b>684.453</b>  | <b>685.461</b> | 683.445        | K[6]  |
| T[17] | 1630.823        | 572.377         | <b>556.358</b>  | <b>557.366</b> | <b>555.350</b> | T[5]  |
| P[18] | 1717.876        | 471.329         | 455.310         | 456.318        | 454.302        | P[4]  |
| V[19] | 1816.944        | 374.270         | 358.257         | 359.265        | 357.250        | V[3]  |
| K[20] | <b>1945.039</b> | 275.200         | 259.189         | <b>260.197</b> | 258.181        | K[2]  |
| K[21] | 2073.134        | 147.113         | 131.094         | 132.102        | 130.086        | K[1]  |

# sp | P43274 | H14\_MOUSE

[Acetyl]SETAPAAPAAPAPAEKTPVKK

- ▶ fragmentation table for charge state 2+
- ▶ specType=etd
- ▶ score=41.16
- ▶ F105051.dat
- ▶ query=q9338.p1
- ▶ precursor=692.046650
- ▶ chargePrecursor=3
- ▶ itol=0.6

| AA    | c               | y               | z+1             | z+2   | z               | AA    |
|-------|-----------------|-----------------|-----------------|-------|-----------------|-------|
| S[1]  | 74.042          | <b>1037.563</b> | <b>1029.553</b> | 0.504 | <b>1029.049</b> | S[2]  |
| E[2]  | 138.563         | <b>973.041</b>  | <b>965.032</b>  | 0.504 | 964.529         | E[3]  |
| T[3]  | 189.087         | <b>908.520</b>  | <b>900.511</b>  | 0.504 | 899.001         | T[4]  |
| A[4]  | 224.008         | 857.997         | <b>849.987</b>  | 0.505 | <b>849.483</b>  | A[5]  |
| P[5]  | 273.132         | <b>822.478</b>  | <b>814.468</b>  | 0.504 | <b>813.964</b>  | P[17] |
| A[6]  | 308.650         | 773.951         | 765.942         | 0.504 | 765.438         | A[16] |
| A[7]  | 344.169         | 738.433         | <b>730.423</b>  | 0.504 | 729.919         | A[15] |
| P[8]  | 392.695         | 702.914         | 694.905         | 0.504 | 694.401         | P[14] |
| A[9]  | 428.214         | 664.388         | 656.378         | 0.504 | 645.874         | A[13] |
| A[10] | 463.733         | 628.869         | 620.860         | 0.504 | 620.356         | A[12] |
| P[11] | 512.259         | 583.351         | 575.341         | 0.504 | 574.837         | P[11] |
| A[12] | 547.777         | 534.824         | 526.815         | 0.504 | 526.311         | A[10] |
| P[13] | 596.304         | 499.300         | 491.290         | 0.504 | 490.786         | P[9]  |
| A[14] | 631.822         | 459.779         | 442.770         | 0.504 | 442.266         | A[8]  |
| E[15] | 696.344         | 415.261         | 407.251         | 0.504 | 406.747         | E[7]  |
| R[16] | 769.391         | 359.739         | 342.730         | 0.504 | 342.226         | R[6]  |
| T[17] | 810.915         | 286.607         | 278.603         | 0.504 | 278.179         | T[5]  |
| P[18] | 859.441         | 236.100         | 228.109         | 0.504 | 227.655         | P[4]  |
| V[19] | <b>908.976</b>  | 187.642         | 179.632         | 0.504 | 179.128         | V[3]  |
| K[20] | <b>973.023</b>  | 138.100         | 130.098         | 0.504 | 129.594         | K[2]  |
| K[21] | <b>1037.071</b> | 74.000          | 66.051          | 0.504 | 65.547          | K[1]  |

# sp | P43276 | H15\_MOUSE

[Acetyl]SETAPAETAAPAPVEKSPAKK

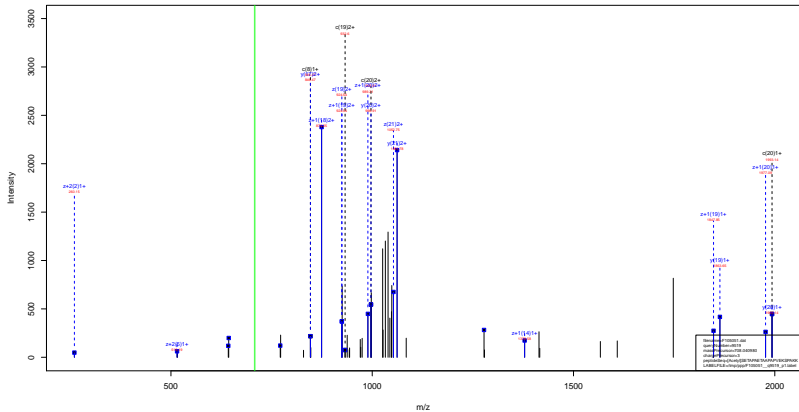

# sp | P43276 | H15\_MOUSE

## [Acetyl]SETAPAETAAPAPVEKSPAKK

- ▶ fragmentation table for charge state 1+
- ▶ specType=etd
- ▶ score=51.37
- ▶ F105051.dat
- ▶ query=q9519\_p1
- ▶ precursor=708.040980
- ▶ chargePrecursor=3
- ▶ itol=0.6

| AA    | c               | y               | z+1             | z+2            | z        | AA    |
|-------|-----------------|-----------------|-----------------|----------------|----------|-------|
| S[1]  | 147.076         | 2122.103        | 2106.094        | 0.000          | 2105.078 | S[21] |
| E[2]  | 276.119         | <b>1993.060</b> | <b>1977.041</b> | 0.000          | 1976.033 | E[20] |
| T[3]  | 377.167         | <b>1864.017</b> | <b>1847.999</b> | 0.000          | 1846.993 | T[19] |
| A[4]  | 448.204         | 1766.999        | 1746.954        | 0.000          | 1745.943 | A[18] |
| P[5]  | 545.257         | 1691.933        | 1675.914        | 0.000          | 1674.908 | P[17] |
| A[6]  | 616.294         | 1594.889        | 1578.861        | 0.000          | 1577.853 | A[16] |
| E[7]  | 745.336         | 1523.843        | 1507.824        | 0.000          | 1506.818 | E[15] |
| T[8]  | <b>846.384</b>  | 1394.800        | <b>1378.781</b> | 0.000          | 1377.774 | T[14] |
| A[9]  | 917.421         | 1295.753        | <b>1277.734</b> | 0.000          | 1276.726 | A[13] |
| A[10] | 988.458         | 1222.713        | 1206.697        | 0.000          | 1205.689 | A[12] |
| P[11] | 1085.511        | 1151.670        | 1135.650        | 0.000          | 1134.652 | P[11] |
| A[12] | 1156.548        | 1054.626        | 1038.607        | 0.000          | 1037.599 | A[10] |
| P[13] | 1251.601        | 983.588         | 967.570         | 0.000          | 966.562  | P[9]  |
| V[14] | 1352.669        | 886.536         | 870.517         | 0.000          | 869.509  | V[8]  |
| E[15] | 1481.712        | 787.467         | <b>771.449</b>  | 0.000          | 770.441  | E[7]  |
| K[16] | 1609.807        | 658.423         | <b>642.406</b>  | <b>643.314</b> | 641.306  | K[6]  |
| S[17] | 1696.839        | 530.330         | 514.311         | <b>515.319</b> | 513.303  | S[5]  |
| P[18] | 1793.892        | 443.290         | 427.279         | 426.267        | 425.271  | P[4]  |
| A[19] | 1864.929        | 348.245         | 332.226         | 331.234        | 329.218  | A[3]  |
| K[20] | <b>1993.024</b> | 275.200         | 259.189         | <b>260.197</b> | 258.181  | K[2]  |
| K[21] | 2121.119        | 147.113         | 131.094         | 132.102        | 130.086  | K[1]  |

# sp | P43276 | H15\_MOUSE

## [Acetyl]SETAPAETAAPAPVEKSPAKK

- ▶ fragmentation table for charge state 2+
- ▶ specType=etd
- ▶ score=51.37
- ▶ F105051.dat
- ▶ query=q9519\_p1
- ▶ precursor=708.040980
- ▶ chargePrecursor=3
- ▶ itol=0.6

| AA | c  | y              | z+1             | z+2            | z       | AA              |   |    |
|----|----|----------------|-----------------|----------------|---------|-----------------|---|----|
| S  | 1  | 74.042         | <b>1061.555</b> | 1053.546       | 0.504   | <b>1053.042</b> | S | 21 |
| E  | 2  | 138.503        | <b>997.034</b>  | <b>989.034</b> | 0.504   | 988.520         | E | 20 |
| T  | 3  | 189.087        | <b>932.512</b>  | <b>924.503</b> | 0.504   | <b>923.999</b>  | T | 19 |
| A  | 4  | 224.606        | 881.989         | <b>873.979</b> | 0.504   | 873.475         | A | 18 |
| P  | 5  | 273.112        | <b>846.470</b>  | 838.461        | 0.504   | 837.957         | P | 17 |
| A  | 6  | 308.650        | 797.944         | 789.934        | 0.504   | 789.430         | A | 16 |
| E  | 7  | 373.172        | 762.425         | 754.416        | 0.504   | 753.912         | E | 15 |
| T  | 8  | 423.696        | 697.904         | 689.894        | 0.504   | 689.390         | T | 14 |
| A  | 9  | 459.214        | 647.380         | 639.371        | 0.504   | 638.867         | A | 13 |
| A  | 10 | 494.733        | 611.961         | 603.952        | 0.504   | 603.448         | A | 12 |
| P  | 11 | 543.259        | 576.441         | 568.431        | 0.504   | 567.927         | P | 11 |
| A  | 12 | 578.778        | 527.810         | 519.801        | 0.504   | 519.301         | A | 10 |
| P  | 13 | 627.304        | 492.289         | 484.280        | 0.504   | 483.785         | P | 9  |
| V  | 14 | 676.838        | 443.771         | 435.762        | 0.504   | 435.258         | V | 8  |
| E  | 15 | 741.360        | 394.237         | 386.228        | 0.504   | 385.724         | E | 7  |
| K  | 16 | 805.407        | 329.716         | 321.707        | 322.211 | 321.203         | K | 6  |
| S  | 17 | 848.923        | 265.660         | 257.650        | 258.163 | 257.155         | S | 5  |
| P  | 18 | 897.449        | 222.157         | 214.147        | 214.661 | 213.653         | P | 4  |
| A  | 19 | <b>932.968</b> | 173.626         | 165.617        | 166.131 | 165.113         | A | 3  |
| K  | 20 | <b>997.015</b> | 138.108         | 130.098        | 130.602 | 129.594         | K | 2  |
| K  | 21 | 1061.063       | 74.060          | 66.051         | 66.555  | 65.547          | K | 1  |

# sp | P43274 | H14\_MOUSE

[Acetyl]ETAPAAPAAPAPAEKTPVKKK

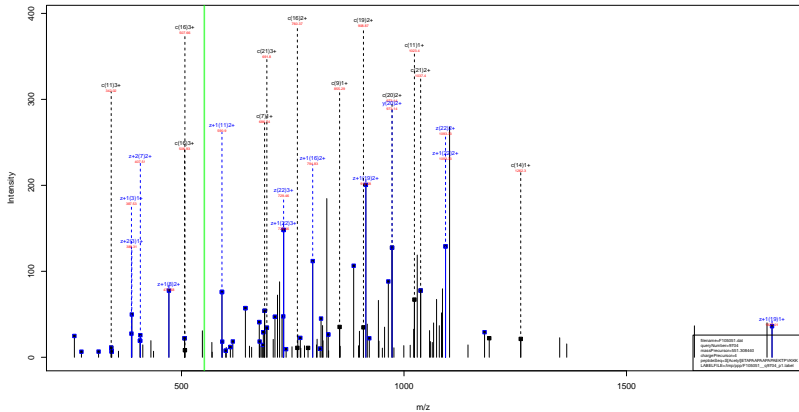

# sp | P43274 | H14\_MOUSE

[Acetyl]ETAPAAPAAPAPAEKTPVKKK

- ▶ fragmentation table for charge state 1+
- ▶ specType=etd
- ▶ score=46.92
- ▶ F105051.dat
- ▶ query=q9704\_p1
- ▶ precursor=551.308440
- ▶ chargePrecursor=4
- ▶ itol=0.6

| AA    | c               | y              | z+1             | z+2            | z              | AA    |
|-------|-----------------|----------------|-----------------|----------------|----------------|-------|
| S[1]  | 147.076         | 2202.211       | 2186.194        | 0.000          | 2185.180       | S[2]  |
| E[2]  | -276.119        | 2073.170       | 2057.152        | 0.000          | 2056.144       | E[2]  |
| T[3]  | 377.167         | 1944.128       | 1928.109        | 0.000          | 1927.101       | T[20] |
| A[4]  | 448.204         | 1843.080       | <b>1827.061</b> | 0.000          | 1826.053       | A[19] |
| P[5]  | 545.257         | 1772.043       | 1756.024        | 0.000          | 1755.016       | P[18] |
| A[6]  | 616.294         | 1674.990       | 1658.971        | 0.000          | 1657.964       | A[17] |
| A[7]  | <b>687.331</b>  | 1603.953       | 1587.934        | 0.000          | 1586.926       | A[10] |
| P[8]  | <b>784.384</b>  | 1532.916       | 1516.897        | 0.000          | 1515.889       | P[15] |
| A[9]  | <b>855.421</b>  | 1461.883       | 1445.864        | 0.000          | 1444.857       | A[14] |
| A[10] | 926.458         | 1394.826       | 1378.807        | 0.000          | 1377.799       | A[13] |
| P[11] | <b>1023.511</b> | 1293.789       | 1277.770        | 0.000          | 1276.762       | P[12] |
| A[12] | 1094.548        | 1195.750       | <b>1180.717</b> | 0.000          | 1179.710       | A[11] |
| P[13] | <b>1191.600</b> | 1125.699       | 1109.680        | 0.000          | 1108.672       | P[10] |
| A[14] | <b>1262.638</b> | 1028.645       | 1012.626        | 0.000          | 1011.623       | A[9]  |
| E[15] | 1394.689        | 957.599        | 941.580         | 0.000          | 940.573        | E[6]  |
| K[16] | 1519.775        | 828.567        | 812.548         | <b>813.556</b> | <b>811.540</b> | K[7]  |
| T[17] | 1620.823        | 700.472        | <b>684.453</b>  | 685.461        | <b>683.445</b> | T[0]  |
| P[18] | 1717.876        | <b>599.424</b> | 583.405         | 584.413        | 582.397        | P[5]  |
| V[19] | 1816.944        | 502.371        | 486.352         | 487.360        | 485.345        | V[4]  |
| K[20] | 1945.039        | 403.303        | <b>387.284</b>  | <b>388.292</b> | 386.276        | K[3]  |
| K[21] | 2073.134        | <b>275.208</b> | <b>259.189</b>  | 260.197        | 258.181        | K[0]  |
| K[22] | 2201.229        | 147.111        | 131.094         | 132.102        | 130.085        | K[1]  |

# sp | P43274 | H14\_MOUSE

[Acetyl]ETAPAAPAAPAPAEKTPVKKK

- ▶ fragmentation table for charge state 2+
- ▶ specType=etd
- ▶ score=46.92
- ▶ F105051.dat
- ▶ query=q9704\_p1
- ▶ precursor=551.308440
- ▶ chargePrecursor=4
- ▶ itol=0.6

| AA |    | c               | y               | z+1             | z+2            | z               | AA    |
|----|----|-----------------|-----------------|-----------------|----------------|-----------------|-------|
| E  | 1  | 74.942          | 1001.717        | <b>1093.601</b> | 0.504          | <b>1093.097</b> | E[2]  |
| E  | 2  | 138.583         | <b>1037.089</b> | 1029.678        | 0.504          | 1028.571        | E[2]  |
| Y  | 3  | 189.087         | <b>972.567</b>  | <b>964.538</b>  | 0.504          | 964.054         | Y[20] |
| A  | 4  | 224.606         | <b>922.044</b>  | <b>914.034</b>  | 0.504          | 913.530         | A[10] |
| F  | 5  | 273.132         | <b>886.525</b>  | 878.516         | 0.504          | 878.017         | F[18] |
| A  | 6  | 308.650         | 837.990         | <b>829.989</b>  | 0.504          | <b>829.485</b>  | A[17] |
| A  | 7  | 364.169         | 782.489         | <b>794.471</b>  | 0.504          | 793.961         | A[10] |
| D  | 8  | 392.696         | <b>766.962</b>  | 758.953         | 0.504          | 758.444         | D[15] |
| A  | 9  | 428.214         | 715.435         | <b>710.426</b>  | 0.504          | <b>709.922</b>  | A[14] |
| A  | 10 | 463.733         | <b>682.917</b>  | <b>674.907</b>  | 0.504          | <b>674.403</b>  | A[13] |
| F  | 11 | 512.259         | 647.390         | 639.389         | 0.504          | 638.885         | F[12] |
| A  | 12 | 547.777         | <b>598.872</b>  | <b>590.862</b>  | 0.504          | <b>590.358</b>  | A[11] |
| F  | 13 | 596.304         | 563.353         | 555.344         | 0.504          | 554.840         | F[10] |
| A  | 14 | 631.822         | 514.827         | <b>506.817</b>  | 0.504          | 506.311         | A[9]  |
| E  | 15 | 686.344         | 479.305         | <b>471.299</b>  | 0.504          | 470.795         | E[8]  |
| R  | 16 | <b>760.391</b>  | 414.787         | <b>406.778</b>  | <b>407.281</b> | <b>406.274</b>  | R[7]  |
| F  | 17 | <b>810.915</b>  | 350.730         | <b>342.730</b>  | <b>343.234</b> | <b>342.226</b>  | F[6]  |
| F  | 18 | 859.441         | 300.210         | 292.205         | 292.710        | 291.703         | F[5]  |
| V  | 19 | <b>908.976</b>  | 251.680         | 243.680         | 244.184        | 243.176         | V[4]  |
| R  | 20 | <b>973.023</b>  | 202.157         | 194.148         | 194.650        | 193.642         | R[3]  |
| R  | 21 | <b>1037.071</b> | 138.100         | 130.098         | 130.602        | 129.594         | R[2]  |
| R  | 22 | 1101.118        | 74.060          | 66.051          | 66.555         | 65.547          | R[1]  |



# sp | P43274 | H14\_MOUSE

[Acetyl]ETAPAAPAAPAPAEKTPVKKK

- ▶ fragmentation table for charge state 3+
- ▶ specType=etd
- ▶ score=46.92
- ▶ F105051.dat
- ▶ query=q9704\_p1
- ▶ precursor=551.308440
- ▶ chargePrecursor=4
- ▶ itol=0.6

| AA    | c              | y              | z+1            | z+2     | z              | AA    |
|-------|----------------|----------------|----------------|---------|----------------|-------|
| S[1]  | 49.697         | <b>734.742</b> | <b>729.403</b> | 0.672   | <b>729.067</b> | S[22] |
| E[2]  | 92.711         | <b>691.728</b> | <b>686.389</b> | 0.672   | 686.053        | E[21] |
| T[3]  | 126.304        | 648.714        | <b>643.375</b> | 0.672   | <b>643.039</b> | T[20] |
| A[4]  | 190.073        | <b>615.032</b> | <b>609.692</b> | 0.672   | <b>609.356</b> | A[19] |
| P[5]  | 182.424        | <b>591.352</b> | 586.013        | 0.672   | 585.677        | P[18] |
| A[6]  | 206.103        | 559.002        | 553.662        | 0.672   | 553.326        | A[17] |
| A[7]  | 229.782        | 526.321        | 520.983        | 0.672   | 520.647        | A[16] |
| P[8]  | 252.133        | 511.641        | 506.304        | 0.672   | 505.968        | P[15] |
| A[9]  | 285.812        | 479.293        | 473.953        | 0.672   | 473.617        | A[14] |
| A[10] | 309.491        | 455.614        | 450.274        | 0.672   | 449.938        | A[13] |
| P[11] | <b>341.842</b> | 431.934        | 426.595        | 0.672   | 426.259        | P[12] |
| A[12] | 365.521        | 399.584        | 394.244        | 0.672   | 393.908        | A[11] |
| P[13] | 397.872        | 375.905        | 370.565        | 0.672   | 370.229        | P[10] |
| A[14] | 421.551        | <b>343.554</b> | 338.214        | 0.672   | 337.878        | A[9]  |
| E[15] | 464.565        | 319.875        | 314.535        | 0.672   | <b>314.199</b> | E[8]  |
| K[16] | <b>507.263</b> | 270.866        | 271.521        | 271.857 | 271.485        | K[7]  |
| T[17] | 560.946        | 234.161        | 228.821        | 229.158 | 228.487        | T[6]  |
| P[18] | 573.297        | 200.475        | 195.140        | 195.476 | 194.804        | P[5]  |
| V[19] | 606.320        | 168.129        | 162.789        | 163.125 | 162.453        | V[4]  |
| K[20] | 649.018        | 135.105        | 129.766        | 130.102 | 129.430        | K[3]  |
| K[21] | <b>691.716</b> | 92.407         | 87.068         | 87.404  | 86.732         | K[2]  |
| K[22] | 734.414        | 49.700         | 44.370         | 44.705  | 44.034         | K[1]  |



# sp | P62806 | H4\_MOUSE

DAVYTEHAKRK Acetyl  
42.01 TVTAM

- ▶ fragmentation table for charge state 1+
- ▶ specType=etd
- ▶ score=54.97
- ▶ F105061.dat
- ▶ query=q1190\_p1
- ▶ precursor=655.338870
- ▶ chargePrecursor=3
- ▶ itol=0.8

| AA    | c               | y               | z+1             | z+2            | z               | AA    |
|-------|-----------------|-----------------|-----------------|----------------|-----------------|-------|
| D[1]  | 133.061         | <b>1961.991</b> | <b>1947.972</b> | 0.000          | 1946.964        | D[7]  |
| A[2]  | 204.098         | 1548.961        | <b>1832.945</b> | 0.000          | 1831.937        | A[16] |
| V[3]  | 303.166         | 1777.927        | 1761.908        | 0.000          | <b>1760.900</b> | V[15] |
| T[4]  | 404.214         | 1678.858        | <b>1662.839</b> | 0.000          | 1661.832        | T[14] |
| Y[5]  | 507.277         | 1577.810        | <b>1561.792</b> | 0.000          | 1560.784        | Y[13] |
| T[6]  | 608.325         | 1414.747        | <b>1398.728</b> | 0.000          | 1397.721        | T[12] |
| E[7]  | <b>797.368</b>  | 1313.699        | 1297.681        | 0.000          | 1296.673        | E[11] |
| H[8]  | 824.229         | 1194.657        | <b>1168.638</b> | 0.000          | 1167.630        | H[10] |
| A[9]  | <b>1005.464</b> | 1047.598        | <b>1031.579</b> | 0.000          | 1030.571        | A[9]  |
| K[10] | <b>1133.559</b> | 978.561         | <b>960.542</b>  | <b>961.550</b> | <b>959.534</b>  | K[8]  |
| R[11] | 1289.600        | 848.460         | <b>832.447</b>  | 831.435        | <b>831.439</b>  | R[7]  |
| R[12] | <b>1459.765</b> | 692.355         | 676.346         | 677.354        | 675.339         | R[6]  |
| T[13] | 1569.813        | 522.250         | 506.240         | 507.248        | 505.233         | T[5]  |
| V[14] | <b>1659.881</b> | 423.212         | 405.193         | 406.201        | 404.185         | V[4]  |
| T[15] | <b>1760.929</b> | 322.143         | 306.124         | 307.132        | 305.117         | T[3]  |
| A[16] | 1831.968        | 221.090         | 205.077         | 206.085        | 204.069         | A[2]  |
| M[17] | 1963.007        | 150.058         | 134.040         | 135.047        | 133.032         | M[1]  |

# sp | P62806 | H4\_MOUSE

DAVYTEHAKRK <sup>Acetyl</sup> 42.01 TVTAM

- ▶ fragmentation table for charge state 2+
- ▶ specType=etd
- ▶ score=54.97
- ▶ F105061.dat
- ▶ query=q1190\_p1
- ▶ precursor=655.338870
- ▶ chargePrecursor=3
- ▶ itol=0.8

| AA    | c              | y              | z+1            | z+2     | z              | AA    |
|-------|----------------|----------------|----------------|---------|----------------|-------|
| D[1]  | 67.034         | <b>982.499</b> | <b>974.490</b> | 0.504   | <b>973.986</b> | D[17] |
| A[2]  | 102.953        | 924.985        | <b>916.976</b> | 0.504   | <b>916.472</b> | A[16] |
| V[3]  | 152.087        | 889.467        | <b>881.458</b> | 0.504   | <b>880.954</b> | V[15] |
| T[4]  | 202.611        | <b>839.933</b> | <b>831.923</b> | 0.504   | <b>831.419</b> | T[14] |
| Y[5]  | 284.142        | <b>789.409</b> | <b>781.399</b> | 0.504   | <b>780.896</b> | Y[13] |
| I[6]  | 334.666        | 707.877        | <b>699.868</b> | 0.504   | 699.364        | I[12] |
| E[7]  | 399.189        | 657.351        | 649.344        | 0.504   | 648.840        | E[11] |
| H[8]  | 467.717        | 602.822        | 584.821        | 0.504   | 584.319        | H[10] |
| A[9]  | 503.235        | 524.303        | 516.293        | 0.504   | 515.789        | A[9]  |
| K[10] | 567.283        | 488.784        | 480.775        | 481.279 | 480.271        | K[8]  |
| R[11] | 645.333        | 424.737        | 416.727        | 417.231 | 416.223        | R[7]  |
| K[12] | <b>730.386</b> | 346.686        | 338.677        | 339.181 | 338.173        | K[6]  |
| T[13] | <b>780.910</b> | 261.637        | 253.624        | 254.128 | 253.120        | T[5]  |
| V[14] | <b>830.444</b> | 211.109        | 203.100        | 203.604 | 202.596        | V[4]  |
| T[15] | <b>880.968</b> | 161.575        | 153.566        | 154.070 | 153.062        | T[3]  |
| A[16] | <b>916.487</b> | 111.051        | 103.042        | 103.546 | 102.538        | A[2]  |
| M[17] | <b>982.007</b> | 75.533         | 67.523         | 68.027  | 67.020         | M[1]  |

# sp | P62806 | H4\_MOUSE

DAVYTEHAK Acetyl RKTVTAM  
42.01

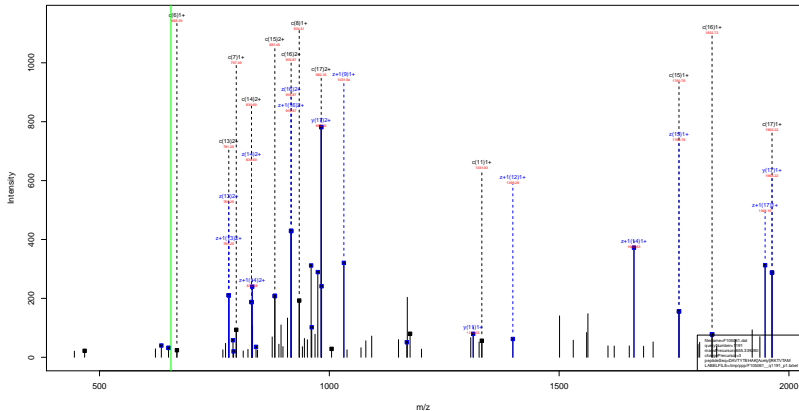

# sp | P62806 | H4\_MOUSE

DAVITYTEHAK <sup>Acetyl</sup> 42.01 RKTVTAM

- ▶ fragmentation table for charge state 1+
- ▶ specType=etd
- ▶ score=36.90
- ▶ F105061.dat
- ▶ query=q1191\_p1
- ▶ precursor=655.339280
- ▶ chargePrecursor=3
- ▶ itol=0.8

| AA    | c               | y               | z+1             | z+2            | z               | AA    |
|-------|-----------------|-----------------|-----------------|----------------|-----------------|-------|
| D[1]  | 133.061         | <b>1963.991</b> | <b>1947.972</b> | 0.000          | 1348.963        | D[7]  |
| A[2]  | 204.098         | 1348.963        | <b>1832.945</b> | 0.000          | <b>1831.937</b> | A[16] |
| V[3]  | 303.166         | 1777.927        | 1761.908        | 0.000          | <b>1760.900</b> | V[15] |
| T[4]  | 404.214         | 1678.859        | <b>1662.839</b> | 0.000          | 1661.832        | T[14] |
| Y[5]  | 507.277         | 1577.810        | 1561.792        | 0.000          | 1560.784        | Y[13] |
| T[6]  | <b>668.325</b>  | 1414.747        | <b>1398.728</b> | 0.000          | 1397.721        | T[12] |
| E[7]  | <b>797.368</b>  | <b>1313.699</b> | 1297.681        | 0.000          | 1296.673        | E[11] |
| H[8]  | <b>934.426</b>  | 1194.667        | <b>1168.638</b> | 0.000          | 1167.630        | H[10] |
| A[9]  | <b>1005.464</b> | 1047.598        | <b>1031.579</b> | 0.000          | 1030.571        | A[9]  |
| K[10] | <b>1175.569</b> | 978.561         | <b>960.542</b>  | <b>961.550</b> | 959.534         | K[8]  |
| R[11] | <b>1331.670</b> | 806.455         | <b>790.437</b>  | <b>791.444</b> | 789.429         | R[7]  |
| K[12] | 1459.765        | <b>650.354</b>  | <b>634.335</b>  | 635.343        | 633.329         | K[6]  |
| T[13] | 1580.813        | 522.250         | 506.240         | 507.248        | 505.233         | T[5]  |
| V[14] | 1659.891        | 423.212         | 405.193         | 406.201        | 404.185         | V[4]  |
| T[15] | <b>1760.929</b> | 322.143         | 306.124         | 307.132        | 305.117         | T[3]  |
| A[16] | <b>1831.966</b> | 221.095         | 205.077         | 206.085        | 204.069         | A[2]  |
| M[17] | <b>1963.007</b> | 150.058         | 134.040         | 135.047        | 133.032         | M[1]  |

# sp | P62806 | H4\_MOUSE

DAVYTEHAK <sup>Acetyl</sup> 42.01 RKTVTAM

- ▶ fragmentation table for charge state 2+
- ▶ specType=etd
- ▶ score=36.90
- ▶ F105061.dat
- ▶ query=q1191\_p1
- ▶ precursor=655.339280
- ▶ chargePrecursor=3
- ▶ itol=0.8

| AA    | c              | y              | z+1            | z+2     | z              | AA    |
|-------|----------------|----------------|----------------|---------|----------------|-------|
| D[1]  | 67.034         | <b>982.499</b> | <b>974.490</b> | 0.504   | 973.985        | D[17] |
| A[2]  | 102.553        | 924.985        | <b>916.976</b> | 0.504   | <b>916.472</b> | A[16] |
| V[3]  | 152.087        | 889.467        | <b>881.458</b> | 0.504   | <b>880.954</b> | V[15] |
| T[4]  | 202.611        | <b>839.933</b> | <b>831.923</b> | 0.504   | <b>831.419</b> | T[14] |
| Y[5]  | 284.142        | 789.409        | <b>781.399</b> | 0.504   | <b>780.896</b> | Y[13] |
| I[6]  | 334.666        | 707.877        | <b>699.868</b> | 0.504   | <b>699.364</b> | I[12] |
| E[7]  | 399.187        | 657.351        | <b>649.344</b> | 0.504   | <b>648.840</b> | E[11] |
| H[8]  | <b>467.717</b> | 602.822        | 584.821        | 0.504   | 584.319        | H[10] |
| A[9]  | 503.235        | 524.303        | 516.293        | 0.504   | 515.789        | A[9]  |
| K[10] | 588.288        | 488.784        | 480.775        | 481.279 | 480.271        | K[8]  |
| R[11] | 666.339        | 403.731        | 395.722        | 396.226 | 395.218        | R[7]  |
| K[12] | 730.386        | 325.681        | 317.671        | 318.175 | 317.167        | K[6]  |
| T[13] | <b>780.910</b> | 261.633        | 253.624        | 254.128 | 253.120        | T[9]  |
| V[14] | <b>830.444</b> | 211.109        | 203.100        | 203.604 | 202.596        | V[4]  |
| T[15] | <b>880.968</b> | 161.575        | 153.566        | 154.070 | 153.062        | T[9]  |
| A[16] | <b>916.487</b> | 111.051        | 103.042        | 103.546 | 102.538        | A[2]  |
| M[17] | <b>982.007</b> | 75.533         | 67.523         | 68.027  | 67.020         | M[1]  |

# sp | P68433 | H31\_MOUSE

DTNLCAIHAK Crotonaldehyde RVTIMPK  
70.04

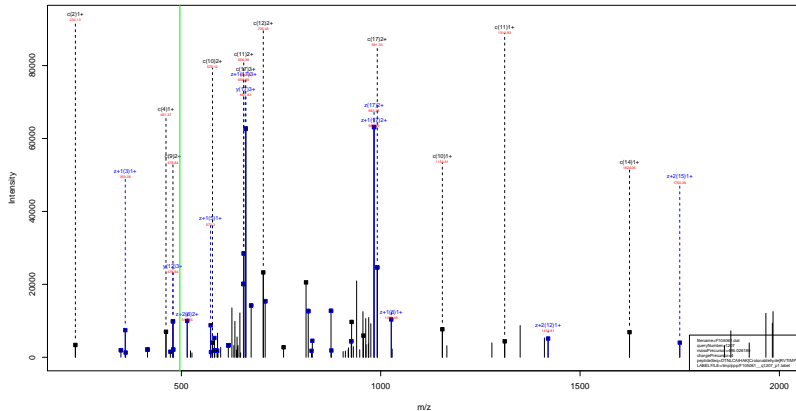



# sp | P68433 | H31\_MOUSE

DTNLCAIHAK Crotonaldehyde  
70.04 RVTIMPK

- ▶ fragmentation table for charge state 1+
- ▶ specType=etd
- ▶ score=53.96
- ▶ F105061.dat
- ▶ query=q1207.p1
- ▶ precursor=496.026180
- ▶ chargePrecursor=4
- ▶ itol=0.8

| AA |    | c               | y              | z+1             | z+2             | z        | AA |
|----|----|-----------------|----------------|-----------------|-----------------|----------|----|
| D  | 1  | 133.951         | 1081.072       | 1965.053        | 0.000           | 1966.046 | D  |
| T  | 2  | <b>234.108</b>  | 1866.945       | 1690.036        | 0.000           | 1849.019 | T  |
| N  | 3  | <b>348.151</b>  | 1764.985       | 1748.979        | <b>1749.987</b> | 1747.971 | N  |
| L  | 4  | <b>461.235</b>  | 1650.955       | 1634.930        | 1635.944        | 1633.928 | L  |
| C  | 5  | 564.245         | 1537.971       | 1521.850        | 1522.860        | 1520.844 | C  |
| A  | 6  | 635.262         | 1434.861       | 1418.843        | <b>1419.850</b> | 1417.835 | A  |
| H  | 7  | 748.268         | 1363.824       | 1347.805        | 1348.813        | 1346.798 | H  |
| W  | 8  | 889.276         | 1250.740       | 1234.721        | 1235.729        | 1233.714 | W  |
| A  | 9  | <b>956.462</b>  | 1113.681       | 1097.663        | 1098.670        | 1096.655 | A  |
| K  | 10 | <b>1154.599</b> | 1042.644       | <b>1026.625</b> | 1027.633        | 1025.618 | K  |
| R  | 11 | <b>1310.700</b> | 844.507        | <b>828.489</b>  | 829.496         | 827.481  | R  |
| V  | 12 | 1409.768        | 688.400        | 672.387         | 673.395         | 671.380  | V  |
| I  | 13 | 1510.816        | <b>589.338</b> | <b>573.319</b>  | <b>574.327</b>  | 572.311  | I  |
| I  | 14 | <b>1623.908</b> | 488.290        | <b>472.271</b>  | 473.279         | 471.264  | I  |
| M  | 15 | 1754.940        | 375.205        | <b>359.187</b>  | <b>360.195</b>  | 358.180  | M  |
| P  | 16 | 1851.993        | 244.166        | 228.149         | 229.155         | 227.139  | P  |
| K  | 17 | 1980.888        | 147.113        | 131.094         | 132.102         | 130.088  | K  |

# sp | P68433 | H31\_MOUSE

DTNLCAIHAK <sup>Crotonaldehyde</sup> 70.04 RVTIMPK

- ▶ fragmentation table for charge state 2+
- ▶ specType=etd
- ▶ score=53.96
- ▶ F105061.dat
- ▶ query=q1207.p1
- ▶ precursor=496.026180
- ▶ chargePrecursor=4
- ▶ itol=0.8

| AA    | c              | y              | z+1            | z+2            | z              | AA    |
|-------|----------------|----------------|----------------|----------------|----------------|-------|
| D[1]  | 67.034         | <b>991.040</b> | <b>981.030</b> | 0.504          | <b>902.526</b> | D[17] |
| Y[2]  | 117.558        | 933.526        | <b>925.517</b> | 0.504          | 925.013        | Y[16] |
| N[3]  | 174.579        | 883.002        | <b>874.993</b> | <b>875.497</b> | 874.489        | N[15] |
| L[4]  | 231.121        | <b>825.981</b> | <b>817.972</b> | <b>818.475</b> | <b>817.468</b> | L[14] |
| C[5]  | 282.626        | 769.439        | 761.430        | 761.933        | 760.936        | C[13] |
| A[6]  | 318.145        | 717.934        | <b>709.925</b> | <b>710.429</b> | <b>709.421</b> | A[12] |
| T[7]  | 374.687        | 662.416        | <b>674.406</b> | <b>674.910</b> | 673.903        | T[11] |
| H[8]  | 431.216        | 628.874        | <b>617.864</b> | <b>618.368</b> | <b>617.360</b> | H[10] |
| A[9]  | <b>478.735</b> | 557.344        | 549.335        | 549.839        | 548.831        | A[9]  |
| K[10] | <b>577.803</b> | 521.826        | 513.816        | <b>514.320</b> | 513.312        | K[8]  |
| R[11] | <b>655.854</b> | 422.757        | <b>414.748</b> | <b>415.252</b> | <b>414.244</b> | R[7]  |
| V[12] | <b>705.388</b> | 344.707        | 336.697        | 337.201        | 336.193        | V[6]  |
| Y[13] | <b>755.912</b> | 295.173        | 287.163        | 287.667        | 286.659        | Y[5]  |
| T[14] | <b>812.454</b> | 244.649        | 236.639        | 237.143        | 236.135        | T[4]  |
| M[15] | 877.974        | 188.107        | 180.097        | 180.601        | 179.593        | M[3]  |
| P[16] | <b>926.500</b> | 122.585        | 114.577        | 115.081        | 114.073        | P[2]  |
| K[17] | <b>990.548</b> | 74.060         | 66.051         | 66.555         | 65.547         | K[1]  |

# sp | P68433 | H31\_MOUSE

DTNLCAIHAK Crotonaldehyde  
70.04 RVTIMPK

- ▶ fragmentation table for charge state 3+
- ▶ specType=etd
- ▶ score=53.96
- ▶ F105061.dat
- ▶ query=q1207.p1
- ▶ precursor=496.026180
- ▶ chargePrecursor=4
- ▶ itol=0.8

| AA    | c              | y              | z+1            | z+2            | z              | AA    |
|-------|----------------|----------------|----------------|----------------|----------------|-------|
| D[1]  | 45.025         | <b>661.029</b> | <b>655.689</b> | 0.672          | <b>655.353</b> | D[17] |
| T[2]  | 78.708         | 622.687        | <b>617.347</b> | 0.672          | <b>617.011</b> | T[16] |
| N[3]  | 116.722        | <b>589.004</b> | <b>583.664</b> | <b>584.000</b> | <b>583.329</b> | N[15] |
| L[4]  | 154.417        | 550.995        | 545.050        | 545.986        | 545.314        | L[14] |
| C[5]  | 188.753        | 513.295        | 507.955        | 508.291        | 507.620        | C[13] |
| A[6]  | 212.432        | <b>478.959</b> | 473.019        | 473.955        | 473.283        | A[12] |
| V[7]  | 250.127        | 456.280        | 449.980        | 450.276        | 449.604        | V[11] |
| H[8]  | 289.813        | 417.585        | 412.245        | 412.581        | 411.909        | H[10] |
| A[9]  | 319.492        | 371.899        | 366.559        | 366.895        | 366.223        | A[9]  |
| K[10] | 385.538        | <b>348.220</b> | 342.880        | 343.216        | 342.544        | K[8]  |
| R[11] | 437.571        | 282.174        | 276.834        | 277.170        | 276.498        | R[7]  |
| V[12] | 470.594        | 230.140        | 224.801        | 225.137        | 224.465        | V[6]  |
| T[13] | 504.277        | 197.117        | 191.778        | 192.114        | 191.442        | T[5]  |
| T[14] | 541.971        | 163.435        | 158.095        | 158.431        | 157.759        | T[4]  |
| M[15] | 585.952        | 125.740        | 120.401        | 120.737        | 120.065        | M[3]  |
| T[16] | <b>618.003</b> | 82.060         | 76.720         | 77.056         | 76.385         | T[2]  |
| K[17] | <b>660.701</b> | 49.705         | 44.370         | 44.705         | 44.034         | K[1]  |



# sp | P68433 | H31\_MOUSE

DTNLCAIHAK Crotonaldehyde  
70.04 RVTIMPK

- ▶ fragmentation table for charge state 1+
- ▶ specType=etd
- ▶ score=32.99
- ▶ F105061.dat
- ▶ query=q1208.p1
- ▶ precursor=661.032820
- ▶ chargePrecursor=3
- ▶ itol=0.8

| AA     | c               | y        | z=1             | z=2             | z              | AA     |
|--------|-----------------|----------|-----------------|-----------------|----------------|--------|
| D [1]  | 133.051         | 1081.072 | <b>1965.053</b> | 0.000           | 1966.046       | D [7]  |
| T [2]  | 234.108         | 1866.045 | 1050.705        | 0.000           | 1849.019       | T [6]  |
| N [3]  | 348.151         | 1764.985 | <b>1748.979</b> | 1749.987        | 1747.971       | N [15] |
| L [4]  | 461.235         | 1650.955 | 1634.930        | <b>1635.944</b> | 1633.928       | L [14] |
| C [5]  | 564.245         | 1537.871 | 1521.850        | 1522.860        | 1520.844       | C [13] |
| A [6]  | 635.282         | 1434.861 | 1418.843        | 1419.850        | 1417.835       | A [12] |
| H [7]  | 748.366         | 1383.824 | 1347.805        | 1348.813        | 1346.798       | H [11] |
| W [8]  | 869.429         | 1250.740 | 1248.723        | 1235.729        | 1233.714       | W [10] |
| A [9]  | <b>956.462</b>  | 1113.681 | 1097.663        | 1098.670        | 1096.655       | A [9]  |
| K [10] | <b>1154.599</b> | 1042.644 | <b>1026.625</b> | 1027.633        | 1025.618       | K [8]  |
| R [11] | <b>1310.700</b> | 844.507  | <b>828.489</b>  | 829.496         | 827.481        | R [7]  |
| V [12] | 1409.759        | 688.400  | <b>672.387</b>  | 673.395         | <b>671.380</b> | V [0]  |
| T [13] | <b>1510.816</b> | 589.338  | <b>573.319</b>  | <b>574.327</b>  | 572.311        | T [9]  |
| I [14] | <b>1623.900</b> | 488.290  | <b>472.271</b>  | 473.279         | 471.264        | I [4]  |
| M [15] | 1754.040        | 375.205  | <b>359.187</b>  | 360.195         | 358.180        | M [3]  |
| P [16] | <b>1851.993</b> | 244.166  | 228.149         | 229.155         | 227.139        | P [2]  |
| K [17] | 1980.888        | 147.113  | 131.094         | 132.102         | 130.088        | K [1]  |

# sp | P68433 | H31\_MOUSE

DTNLCAIHAK <sup>Crotonaldehyde</sup> 70.04 RVTIMPK

- ▶ fragmentation table for charge state 2+
- ▶ specType=etd
- ▶ score=32.99
- ▶ F105061.dat
- ▶ query=q1208.p1
- ▶ precursor=661.032820
- ▶ chargePrecursor=3
- ▶ itol=0.8

| AA    | c              | y              | z+1            | z+2            | z              | AA    |
|-------|----------------|----------------|----------------|----------------|----------------|-------|
| D[1]  | 67.034         | <b>991.040</b> | <b>981.030</b> | 0.504          | <b>982.526</b> | D[17] |
| Y[2]  | 117.558        | 933.526        | <b>925.517</b> | 0.504          | <b>925.013</b> | Y[16] |
| N[3]  | 174.579        | 883.002        | <b>874.993</b> | <b>875.497</b> | 874.489        | N[15] |
| L[4]  | 231.121        | 825.981        | <b>817.972</b> | <b>818.475</b> | 817.468        | L[14] |
| C[5]  | 282.626        | 769.439        | 761.430        | 761.933        | 760.926        | C[13] |
| A[6]  | 318.145        | 717.934        | 709.925        | 710.429        | 709.421        | A[12] |
| V[7]  | 374.687        | 662.415        | 674.405        | <b>674.910</b> | 673.902        | V[11] |
| H[8]  | 443.216        | 628.874        | 617.864        | 618.368        | 617.360        | H[10] |
| A[9]  | 478.735        | 557.344        | 549.335        | 549.839        | 548.831        | A[9]  |
| K[10] | 577.803        | 521.826        | 513.816        | 514.320        | 513.312        | K[8]  |
| R[11] | 655.854        | 422.757        | 414.748        | 415.252        | 414.244        | R[7]  |
| V[12] | <b>705.388</b> | 344.707        | 336.697        | 337.201        | 336.193        | V[6]  |
| T[13] | 755.912        | 295.173        | 287.163        | 287.667        | 286.659        | T[5]  |
| T[14] | 812.454        | 244.649        | 236.639        | 237.143        | 236.135        | T[4]  |
| M[15] | 877.974        | 188.107        | 180.097        | 180.601        | 179.593        | M[3]  |
| Y[16] | <b>925.500</b> | 122.585        | 114.577        | 115.081        | 114.073        | Y[5]  |
| K[17] | 990.548        | 74.060         | 66.051         | 66.555         | 65.547         | K[1]  |

# sp | P62806 | H4\_MOUSE

[Acetyl]SGRGKGGKGLGKGGAKRHRK <sup>Dimethyl</sup>VLRD  
28.03

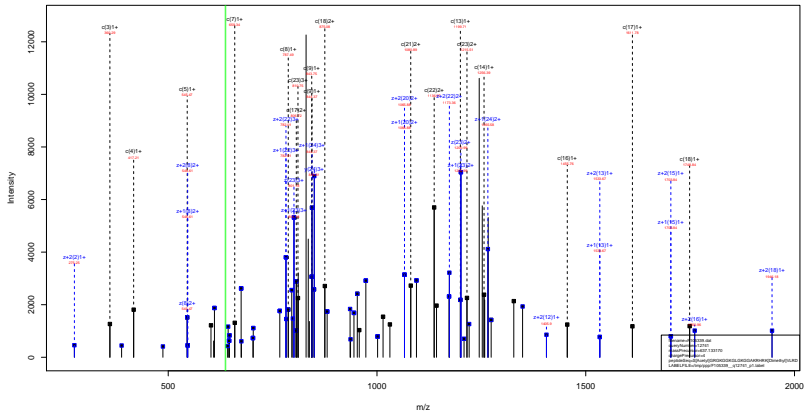

# sp | P62806 | H4\_MOUSE

[Acetyl]SGRGKGGKGLGKGGAKRHRK<sup>Dimethyl</sup>VLRD<sub>28.03</sub>

- ▶ fragmentation table for charge state 1+
- ▶ specType=etd
- ▶ score=140.79
- ▶ F105339.dat
- ▶ query=q12741\_p1
- ▶ precursor=637.133170
- ▶ chargePrecursor=4
- ▶ itol=0.8

| AA | c  | y               | z+1      | z+2             | z               | AA       |       |
|----|----|-----------------|----------|-----------------|-----------------|----------|-------|
| S  | 1  | 147.076         | 2545.502 | 2529.483        | 0.000           | 2528.478 | S[24] |
| G  | 2  | 204.098         | 2416.460 | 2400.441        | 0.000           | 2399.433 | G[23] |
| R  | 3  | <b>368.199</b>  | 2289.438 | 2243.419        | 2244.427        | 2242.412 | R[22] |
| G  | 4  | <b>417.220</b>  | 2203.337 | 2187.318        | 2188.326        | 2186.310 | G[21] |
| K  | 5  | <b>545.315</b>  | 2146.316 | 2130.297        | 2131.305        | 2129.289 | K[20] |
| G  | 6  | <b>602.337</b>  | 2018.221 | 2002.202        | 2003.210        | 2001.194 | G[19] |
| G  | 7  | <b>659.358</b>  | 1961.199 | 1945.180        | <b>1946.188</b> | 1944.173 | G[18] |
| K  | 8  | <b>787.453</b>  | 1904.178 | 1888.159        | 1889.167        | 1887.151 | K[17] |
| G  | 9  | <b>844.475</b>  | 1776.063 | 1760.044        | <b>1761.072</b> | 1759.056 | G[16] |
| L  | 10 | <b>927.559</b>  | 1719.041 | <b>1703.043</b> | <b>1704.050</b> | 1702.035 | L[15] |
| G  | 11 | <b>1014.580</b> | 1662.027 | 1589.958        | 1590.966        | 1588.951 | G[14] |
| K  | 12 | <b>1142.675</b> | 1548.959 | <b>1532.937</b> | <b>1533.945</b> | 1531.929 | K[13] |
| G  | 13 | <b>1199.697</b> | 1420.861 | 1404.842        | <b>1405.850</b> | 1403.834 | G[12] |
| G  | 14 | <b>1256.718</b> | 1363.839 | 1347.821        | <b>1348.828</b> | 1346.813 | G[11] |
| A  | 15 | <b>1327.795</b> | 1306.818 | 1290.799        | 1291.807        | 1289.791 | A[10] |
| R  | 16 | <b>1435.850</b> | 1249.791 | 1219.782        | <b>1220.770</b> | 1218.764 | R[9]  |
| R  | 17 | <b>1611.951</b> | 1107.685 | 1081.667        | 1092.675        | 1090.659 | R[8]  |
| H  | 18 | <b>1749.010</b> | 951.585  | <b>935.566</b>  | <b>936.574</b>  | 934.558  | H[7]  |
| R  | 19 | 1908.111        | 814.526  | <b>798.507</b>  | 799.515         | 797.499  | R[6]  |
| K  | 20 | 2061.238        | 658.425  | <b>642.406</b>  | <b>643.414</b>  | 641.398  | K[5]  |
| V  | 21 | 2180.306        | 502.298  | 486.280         | <b>487.287</b>  | 485.272  | V[4]  |
| L  | 22 | 2273.390        | 403.230  | 387.211         | <b>388.219</b>  | 386.203  | L[3]  |
| R  | 23 | 2429.491        | 280.146  | 274.127         | <b>275.135</b>  | 273.119  | R[2]  |
| D  | 24 | 2544.518        | 134.045  | 118.026         | 119.034         | 117.018  | D[1]  |



# sp | P62806 | H4\_MOUSE

[Acetyl]SGRGKGGKGLGKGGAKRHRK<sup>Dimethyl</sup>VLRD<sub>28.03</sub>

- ▶ fragmentation table for charge state 2+
- ▶ specType=etd
- ▶ score=140.79
- ▶ F105339.dat
- ▶ query=q12741\_p1
- ▶ precursor=637.133170
- ▶ chargePrecursor=4
- ▶ itol=0.8

| AA    | c               | y               | z+1             | z+2             | z               | AA    |
|-------|-----------------|-----------------|-----------------|-----------------|-----------------|-------|
| S[1]  | 74.642          | <b>1273.255</b> | <b>1265.245</b> | 0.504           | 1264.741        | S[24] |
| G[2]  | 102.553         | <b>1208.733</b> | <b>1200.724</b> | 0.504           | <b>1200.220</b> | G[23] |
| K[3]  | 180.603         | 1180.223        | <b>1172.213</b> | <b>1172.717</b> | 1171.700        | R[22] |
| G[4]  | 259.114         | 1102.172        | <b>1094.163</b> | <b>1094.567</b> | 1093.659        | G[21] |
| K[5]  | 273.153         | 1073.661        | <b>1065.652</b> | <b>1066.156</b> | <b>1065.148</b> | K[20] |
| G[6]  | 301.672         | 1009.614        | <b>1001.605</b> | <b>1002.108</b> | <b>1001.101</b> | G[19] |
| G[7]  | 330.183         | 981.103         | <b>973.094</b>  | <b>973.598</b>  | <b>972.590</b>  | G[18] |
| K[8]  | 394.230         | <b>952.592</b>  | <b>944.583</b>  | <b>945.087</b>  | <b>944.079</b>  | K[17] |
| G[9]  | 422.741         | 898.545         | <b>890.536</b>  | <b>891.040</b>  | <b>890.032</b>  | G[16] |
| L[10] | 479.293         | 860.036         | 852.027         | 853.529         | 851.521         | L[15] |
| G[11] | 507.794         | 803.482         | <b>795.483</b>  | <b>795.987</b>  | 794.979         | G[14] |
| K[12] | 571.841         | 774.982         | <b>766.972</b>  | <b>767.476</b>  | <b>766.468</b>  | K[13] |
| G[13] | 600.352         | 710.934         | <b>702.925</b>  | <b>703.429</b>  | <b>702.421</b>  | G[12] |
| G[14] | 638.863         | 682.423         | <b>674.414</b>  | <b>674.918</b>  | <b>673.910</b>  | G[11] |
| A[15] | 684.381         | 653.913         | <b>645.903</b>  | <b>646.407</b>  | <b>645.399</b>  | A[10] |
| R[16] | 739.439         | 618.394         | <b>610.385</b>  | <b>610.889</b>  | 609.881         | R[9]  |
| R[17] | <b>806.479</b>  | 554.347         | <b>546.337</b>  | <b>546.841</b>  | <b>545.833</b>  | R[8]  |
| H[18] | <b>875.009</b>  | 476.290         | 468.289         | 468.791         | 467.783         | H[7]  |
| R[19] | <b>953.059</b>  | 407.767         | 399.757         | 400.261         | 399.253         | R[6]  |
| K[20] | <b>1031.122</b> | 339.716         | 321.707         | 322.211         | 321.203         | K[5]  |
| V[21] | <b>1080.667</b> | 251.663         | 243.653         | 244.157         | 243.149         | V[4]  |
| L[22] | <b>1137.199</b> | 202.119         | 194.109         | 194.613         | 193.605         | L[3]  |
| R[23] | <b>1215.249</b> | 145.577         | 137.567         | 138.071         | 137.063         | R[2]  |
| D[24] | <b>1272.763</b> | 67.526          | 59.517          | 60.021          | 59.013          | D[1]  |

# sp | P62806 | H4\_MOUSE

[Acetyl]SGRGKGGKGLGKGGAKRHRK<sup>Dimethyl</sup>VLRD<sub>28.03</sub>

- ▶ fragmentation table for charge state 3+
- ▶ specType=etd
- ▶ score=140.79
- ▶ F105339.dat
- ▶ query=q12741.p1
- ▶ precursor=637.133170
- ▶ chargePrecursor=4
- ▶ itol=0.8

| AA    | c              | y              | z+1            | z+2            | z              | AA    |
|-------|----------------|----------------|----------------|----------------|----------------|-------|
| S[1]  | 49.697         | <b>849.172</b> | <b>843.833</b> | 0.672          | <b>843.497</b> | S[24] |
| G[2]  | 58.704         | <b>806.158</b> | <b>800.818</b> | 0.672          | <b>800.483</b> | G[23] |
| R[3]  | 150.738        | <b>787.151</b> | <b>781.811</b> | <b>782.147</b> | <b>781.475</b> | R[22] |
| G[4]  | 139.745        | 735.117        | 729.778        | 730.114        | 729.442        | G[21] |
| K[5]  | 182.443        | 716.110        | 710.770        | 711.106        | 710.435        | K[20] |
| G[6]  | 201.450        | 673.412        | 668.072        | 668.408        | 667.736        | G[19] |
| G[7]  | 220.458        | 654.405        | 649.065        | 649.401        | 648.729        | G[18] |
| K[8]  | 263.156        | 635.397        | 630.058        | 630.394        | 629.722        | K[17] |
| G[9]  | 282.163        | 592.699        | 587.359        | 587.695        | 587.024        | G[16] |
| L[10] | 319.858        | 573.692        | 568.352        | 568.688        | 568.016        | L[15] |
| G[11] | 338.865        | 535.997        | 530.658        | 530.994        | 530.322        | G[14] |
| K[12] | 381.563        | 516.990        | 511.651        | 511.986        | 511.315        | K[13] |
| G[13] | 400.570        | 474.292        | 468.952        | 469.288        | 468.616        | G[12] |
| G[14] | 419.578        | 455.285        | 449.945        | 450.281        | 449.609        | G[11] |
| A[15] | 443.257        | 436.277        | 430.938        | 431.274        | 430.602        | A[10] |
| K[16] | 485.955        | 412.598        | 407.259        | 407.595        | 406.923        | K[9]  |
| R[17] | 537.989        | 369.900        | 364.561        | 364.896        | 364.225        | R[8]  |
| H[18] | 583.675        | 317.866        | 312.527        | 312.863        | 312.191        | H[7]  |
| R[19] | 635.709        | 272.180        | 266.841        | 267.176        | 266.505        | R[6]  |
| K[20] | 687.751        | 220.140        | 214.801        | 215.143        | 214.471        | K[5]  |
| V[21] | 720.774        | 168.104        | 162.765        | 163.101        | 162.429        | V[4]  |
| L[22] | 758.468        | 135.082        | 129.742        | 130.078        | 129.406        | L[3]  |
| R[23] | <b>810.502</b> | 97.387         | 92.047         | 92.383         | 91.711         | R[2]  |
| D[24] | <b>848.844</b> | 45.353         | 40.014         | 40.349         | 39.678         | D[1]  |



# sp | Q64525 | H2B2B\_MOUSE

PDKAKSAPAPKK Acetyl 42.01 GSK Acetyl 42.01 KAVT Acetyl 42.01 KVQKKD

- ▶ fragmentation table for charge state 1+
- ▶ specType=etd
- ▶ score=58.26
- ▶ F105339.dat
- ▶ query=q13317.p2
- ▶ precursor=546.915780
- ▶ chargePrecursor=5
- ▶ itol=0.8

| AA |    | c               | y               | z+1             | z+2             | z               | AA    |
|----|----|-----------------|-----------------|-----------------|-----------------|-----------------|-------|
| P  | 1  | 115.087         | 2730.551        | 2714.533        | 0.000           | 2713.525        | P[25] |
| D  | 3  | 230.114         | 3033.498        | 2847.480        | 0.000           | 2818.471        | D[24] |
| F  | 3  | 327.156         | 3518.472        | 2952.453        | 0.000           | 2901.442        | F[23] |
| A  | 4  | <b>398.203</b>  | 2421.416        | 2405.400        | 0.000           | 2404.392        | A[22] |
| K  | 5  | <b>526.298</b>  | 2330.382        | 2334.363        | 2335.371        | 2333.355        | K[21] |
| S  | 6  | <b>613.330</b>  | 2222.287        | 2206.268        | 2207.276        | 2205.260        | S[20] |
| A  | 7  | <b>683.368</b>  | 2135.255        | 2119.236        | 2120.244        | 2118.228        | A[19] |
| F  | 8  | <b>781.420</b>  | 2054.218        | 2048.199        | 2049.207        | 2047.191        | F[18] |
| A  | 9  | 852.453         | 1967.185        | 1951.166        | 1952.174        | 1950.158        | A[17] |
| P  | 10 | <b>949.510</b>  | 1896.128        | 1880.109        | 1881.117        | 1879.101        | P[16] |
| K  | 11 | <b>1077.605</b> | 1799.075        | 1783.056        | 1784.064        | 1782.048        | K[15] |
| K  | 12 | 1247.711        | 1670.980        | 1654.961        | 1655.969        | 1653.953        | K[14] |
| C  | 13 | 1304.732        | 1590.974        | 1484.953        | 1485.964        | 1483.948        | C[13] |
| S  | 14 | 1391.764        | 1443.953        | 1427.934        | 1428.942        | 1426.926        | S[12] |
| K  | 15 | <b>1561.870</b> | 1336.921        | 1340.902        | 1341.910        | 1339.894        | K[11] |
| K  | 16 | 1689.995        | <b>1186.715</b> | <b>1170.697</b> | <b>1171.705</b> | <b>1169.689</b> | K[10] |
| A  | 17 | 1781.002        | <b>1058.620</b> | 1042.602        | <b>1043.610</b> | 1041.594        | A[9]  |
| V  | 18 | 1866.070        | 987.583         | 971.565         | 972.572         | 970.557         | V[8]  |
| T  | 19 | 2003.128        | 898.515         | <b>873.496</b>  | <b>873.504</b>  | 871.488         | T[7]  |
| K  | 20 | 2131.223        | 745.457         | <b>720.438</b>  | <b>720.446</b>  | 718.430         | K[6]  |
| V  | 21 | 2230.292        | 617.382         | <b>601.343</b>  | 602.351         | <b>600.335</b>  | V[5]  |
| Q  | 22 | 2358.350        | 518.293         | 502.275         | <b>503.282</b>  | <b>501.267</b>  | Q[4]  |
| K  | 23 | 2486.445        | 390.235         | <b>374.216</b>  | <b>375.224</b>  | 373.208         | K[3]  |
| K  | 24 | 2614.540        | 282.140         | <b>246.121</b>  | 247.129         | 245.113         | K[2]  |
| D  | 25 | 2726.587        | 134.045         | 118.026         | 119.034         | 117.018         | D[1]  |

# sp | Q64525 | H2B2B\_MOUSE

PDKAKSAPAPKK Acetyl 42.01 GSK Acetyl 42.01 KAVT Acetyl 42.01 KVQKKD

- ▶ fragmentation table for charge state 2+
- ▶ specType=etd
- ▶ score=58.26
- ▶ F105339.dat
- ▶ query=q13317.p2
- ▶ precursor=546.915780
- ▶ chargePrecursor=5
- ▶ itol=0.8

| AA |    | c               | y              | a+1             | a+2             | z               | AA    |
|----|----|-----------------|----------------|-----------------|-----------------|-----------------|-------|
| P  | 1  | 58.647          | 1365.779       | 1357.770        | 0.504           | 1357.266        | P[25] |
| D  | 3  | 115.560         | 1317.253       | 1309.244        | 0.504           | 1308.740        | D[24] |
| P  | 3  | 104.087         | 1259.730       | 1251.730        | 0.504           | 1251.226        | P[23] |
| A  | 4  | 199.605         | 1311.213       | 1203.204        | 0.504           | 1202.700        | A[22] |
| K  | 5  | 263.653         | 1175.694       | 1167.685        | 1168.189        | 1167.181        | K[21] |
| S  | 6  | 307.169         | 1111.647       | <b>1103.638</b> | <b>1104.142</b> | 1103.134        | S[20] |
| A  | 7  | 362.697         | 1058.131       | <b>1050.122</b> | 1050.626        | <b>1059.618</b> | A[19] |
| P  | 8  | 391.214         | 932.612        | <b>924.603</b>  | <b>925.107</b>  | 924.599         | P[18] |
| A  | 9  | 426.732         | 984.086        | <b>976.077</b>  | <b>976.581</b>  | <b>975.573</b>  | A[17] |
| P  | 10 | 475.259         | 948.567        | 940.559         | 941.062         | 940.054         | P[16] |
| K  | 11 | <b>539.306</b>  | 900.041        | <b>892.032</b>  | <b>892.536</b>  | 891.528         | K[15] |
| K  | 12 | <b>624.359</b>  | 835.994        | 827.984         | 828.488         | 827.480         | K[14] |
| Q  | 13 | 672.517         | 750.941        | <b>742.931</b>  | <b>743.435</b>  | <b>742.428</b>  | Q[13] |
| S  | 14 | <b>696.386</b>  | 722.430        | <b>714.421</b>  | <b>714.925</b>  | 713.917         | S[12] |
| K  | 15 | <b>781.438</b>  | <b>678.914</b> | <b>670.905</b>  | <b>671.409</b>  | <b>670.401</b>  | K[11] |
| K  | 16 | <b>845.486</b>  | 593.861        | <b>585.852</b>  | <b>586.356</b>  | <b>585.348</b>  | K[10] |
| A  | 17 | 881.005         | <b>529.814</b> | <b>521.804</b>  | <b>522.308</b>  | 521.301         | A[9]  |
| V  | 18 | <b>930.539</b>  | 494.295        | <b>486.286</b>  | <b>486.790</b>  | 485.782         | V[8]  |
| T  | 19 | <b>1002.866</b> | <b>444.761</b> | <b>436.752</b>  | <b>437.256</b>  | 436.248         | T[7]  |
| K  | 20 | <b>1066.115</b> | 373.529        | 365.520         | 366.024         | 365.017         | K[6]  |
| V  | 21 | <b>1115.650</b> | 309.184        | 301.175         | 301.679         | 300.671         | V[5]  |
| Q  | 22 | <b>1179.679</b> | 259.650        | 251.641         | 252.145         | 251.137         | Q[4]  |
| K  | 23 | <b>1243.726</b> | 195.621        | 187.612         | 188.116         | 187.108         | K[3]  |
| K  | 24 | 1307.774        | 131.574        | 123.564         | 124.068         | 123.060         | K[2]  |
| D  | 25 | 1385.287        | 87.528         | 79.517          | 80.021          | 79.013          | D[1]  |

# sp | Q64525 | H2B2B\_MOUSE

PDKAKSAPAPKK Acetyl 42.01 GSK Acetyl 42.01 KAVT Acetyl 42.01 KVQKKD

- ▶ fragmentation table for charge state 3+
- ▶ specType=etd
- ▶ score=58.26
- ▶ F105339.dat
- ▶ query=q13317.p2
- ▶ precursor=546.915780
- ▶ chargePrecursor=5
- ▶ itol=0.8

| AA    | c              | y              | z+1            | z+2            | z              | AA    |
|-------|----------------|----------------|----------------|----------------|----------------|-------|
| P[1]  | 30.034         | <b>910.855</b> | <b>905.516</b> | 0.672          | 905.180        | P[25] |
| D[2]  | 77.376         | <b>878.504</b> | <b>873.165</b> | 0.672          | <b>872.829</b> | D[24] |
| P[3]  | 109.727        | <b>840.162</b> | 834.822        | 0.672          | 834.487        | P[23] |
| A[4]  | 133.406        | <b>807.811</b> | <b>802.472</b> | 0.672          | <b>802.136</b> | A[22] |
| K[5]  | 176.104        | 784.132        | 778.792        | 779.128        | 778.457        | K[21] |
| S[6]  | 205.115        | 751.438        | <b>736.094</b> | <b>736.430</b> | 735.788        | S[20] |
| A[7]  | 228.794        | 712.823        | 707.483        | 707.819        | 706.748        | A[19] |
| P[8]  | 251.145        | <b>688.744</b> | <b>683.404</b> | <b>683.740</b> | 683.099        | P[18] |
| A[9]  | 294.824        | 656.193        | <b>651.054</b> | <b>651.389</b> | <b>650.718</b> | A[17] |
| P[10] | 317.175        | 632.714        | 627.375        | 627.710        | <b>627.039</b> | P[16] |
| K[11] | <b>359.873</b> | <b>600.363</b> | <b>595.024</b> | <b>595.360</b> | <b>594.688</b> | K[15] |
| K[12] | 418.575        | <b>557.665</b> | 552.325        | 552.661        | 551.989        | K[14] |
| G[13] | 435.582        | <b>500.963</b> | 495.623        | 495.959        | 495.287        | G[13] |
| S[14] | 464.593        | 481.956        | 476.616        | 476.952        | 476.280        | S[12] |
| K[15] | 533.295        | 452.945        | 447.605        | 447.942        | 447.270        | K[11] |
| K[16] | <b>563.993</b> | 396.243        | 390.903        | 391.240        | 390.568        | K[10] |
| A[17] | 587.672        | <b>353.545</b> | 348.205        | 348.541        | 347.869        | A[9]  |
| V[18] | 630.695        | 329.866        | 324.526        | 324.862        | 324.190        | V[8]  |
| T[19] | <b>668.381</b> | 296.843        | 291.503        | 291.840        | 291.168        | T[7]  |
| K[20] | <b>711.079</b> | 249.157        | 243.817        | 244.153        | 243.482        | K[6]  |
| V[21] | <b>744.102</b> | 206.459        | 201.119        | 201.455        | 200.783        | V[5]  |
| Q[22] | <b>786.788</b> | 173.436        | 168.096        | 168.432        | 167.760        | Q[4]  |
| K[23] | <b>829.487</b> | 130.750        | 125.410        | 125.746        | 125.074        | K[3]  |
| K[24] | <b>872.185</b> | 88.051         | 82.712         | 83.048         | 82.376         | K[2]  |
| D[25] | 910.327        | 45.353         | 40.014         | 40.349         | 39.678         | D[1]  |

# sp | Q64525 | H2B2B\_MOUSE

PDKAKSAPAPKK Acetyl 42.01 GSK Acetyl 42.01 KAVT Acetyl 42.01 KVQKKD

- ▶ fragmentation table for charge state 4+
- ▶ specType=etd
- ▶ score=58.26
- ▶ F105339.dat
- ▶ query=q13317.p2
- ▶ precursor=546.915780
- ▶ chargePrecursor=5
- ▶ itol=0.8

| AA |    | c              | y              | z+1            | z+2     | z              | AA   |
|----|----|----------------|----------------|----------------|---------|----------------|------|
| P  | 1  | 29.527         | <b>603.393</b> | <b>679.389</b> | 0.755   | <b>679.137</b> | P 25 |
| D  | 2  | 58.284         | 659.130        | <b>655.125</b> | 0.755   | <b>654.873</b> | D 24 |
| P  | 3  | 82.547         | 630.373        | <b>626.369</b> | 0.755   | <b>626.117</b> | P 23 |
| A  | 4  | 100.305        | 606.110        | <b>602.105</b> | 0.755   | <b>601.854</b> | A 22 |
| K  | 5  | 132.330        | 589.391        | 584.345        | 584.398 | 584.094        | K 21 |
| S  | 6  | 154.088        | <b>556.327</b> | 551.322        | 552.314 | 552.070        | S 20 |
| A  | 7  | 171.547        | 534.550        | 530.504        | 530.816 | 530.312        | A 19 |
| P  | 8  | 196.111        | <b>516.810</b> | 512.805        | 513.057 | 512.553        | P 18 |
| A  | 9  | 213.870        | 492.547        | 488.542        | 488.794 | 488.290        | A 17 |
| P  | 10 | 238.133        | 474.787        | 470.783        | 471.035 | 470.531        | P 16 |
| K  | 11 | 270.157        | 450.524        | 446.520        | 446.771 | 446.268        | K 15 |
| K  | 12 | 312.683        | 418.500        | 414.496        | 414.748 | 414.244        | K 14 |
| G  | 13 | 326.938        | <b>375.974</b> | 371.969        | 372.221 | 371.717        | G 13 |
| S  | 14 | 348.696        | 361.719        | 357.714        | 357.966 | 357.462        | S 12 |
| K  | 15 | 391.223        | 339.961        | 335.956        | 336.208 | 335.704        | K 11 |
| K  | 16 | 423.247        | 297.435        | 293.430        | 293.682 | 293.178        | K 10 |
| A  | 17 | 441.026        | 285.411        | 281.406        | 281.658 | 281.154        | A 9  |
| V  | 18 | 465.773        | 247.651        | 243.647        | 243.899 | 243.395        | V 8  |
| T  | 19 | <b>501.538</b> | 222.884        | 218.880        | 219.131 | 218.628        | T 7  |
| K  | 20 | 533.561        | 187.120        | 183.115        | 183.367 | 182.863        | K 6  |
| V  | 21 | 558.328        | 155.096        | 151.091        | 151.343 | 150.839        | V 5  |
| Q  | 22 | 590.343        | 130.529        | 126.524        | 126.576 | 126.072        | Q 4  |
| K  | 23 | <b>622.367</b> | 98.314         | 94.309         | 94.561  | 94.057         | K 3  |
| K  | 24 | <b>654.391</b> | 66.290         | 62.286         | 62.538  | 62.034         | K 2  |
| D  | 25 | 683.147        | 34.267         | 30.262         | 30.514  | 30.010         | D 1  |

# sp | Q6GSS7 | H2A2A\_MOUSE

LNKLLGK <sup>Dimethyl</sup>VTIAQGGVLPNIQAVLLPKKTESHHKAKGK  
28.03

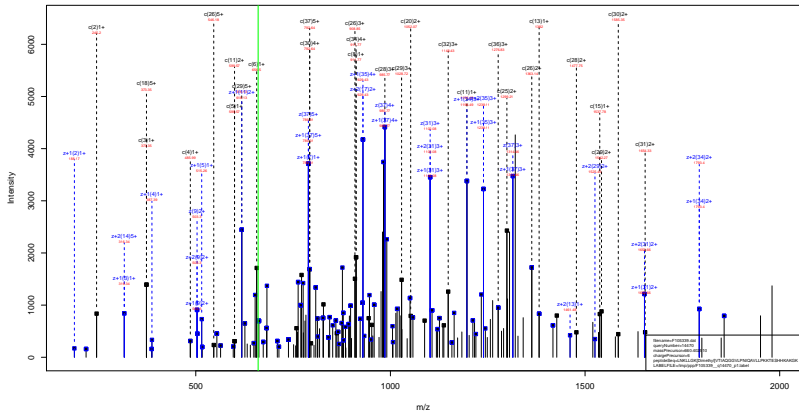



# sp | Q6GSS7 | H2A2A\_MOUSE

LNKLLGK<sup>Dimethyl</sup>VTIAQGGVLPNIQAVLLPKKTESHHKAKGK  
28.03

- ▶ fragmentation table for charge state 1+
- ▶ specType=etd
- ▶ score=58.37
- ▶ F105339.dat
- ▶ query=q14470.p1
- ▶ precursor=660.402510
- ▶ chargePrecursor=6
- ▶ itol=0.8

| AA  |  | c               | y             | a+1            | a+2            | z              | AA   |
|-----|--|-----------------|---------------|----------------|----------------|----------------|------|
| L1  |  | 101118          | 357385        | 3941360        | 0.000          | 3940350        | L137 |
| TW3 |  | <b>245.161</b>  | 3944301       | 3528262        | 3629290        | 3527275        | W30  |
| K3  |  | <b>373.256</b>  | 3730258       | 3714230        | 3715247        | 3713232        | K35  |
| L4  |  | <b>486.340</b>  | 3602163       | 3586144        | 3567152        | 3585137        | L34  |
| L5  |  | <b>599.424</b>  | 3489079       | 3473000        | 3474068        | 3472051        | L33  |
| G6  |  | <b>656.445</b>  | 3375905       | 3359070        | 3360084        | 3358069        | G32  |
| K7  |  | <b>812.572</b>  | 3318074       | 3302955        | 3303963        | 3301947        | K31  |
| Y8  |  | <b>911.640</b>  | 3152959       | 3148920        | 3147936        | 3146951        | Y30  |
| T9  |  | 1012088         | 3063729       | 3047750        | 3048768        | 3046752        | T29  |
| I10 |  | <b>1125.772</b> | 2962731       | 2946713        | 2947720        | 2945705        | I28  |
| A11 |  | <b>1196.809</b> | 2849647       | 2833620        | 2834636        | 2832621        | A27  |
| Q12 |  | 1324867         | 2778010       | 2762010        | 2763009        | 2761004        | Q26  |
| Q13 |  | <b>1381.869</b> | 2650562       | 2634533        | 2635541        | 2633525        | Q25  |
| G14 |  | 1448910         | 2593836       | 2577811        | 2578819        | 2576804        | G24  |
| V15 |  | <b>1537.979</b> | 2536509       | 2520480        | 2521498        | 2519482        | V23  |
| L16 |  | 1651063         | 2437440       | 2421421        | 2422429        | 2420414        | L22  |
| F17 |  | 1748116         | 2324356       | 2308337        | 2309345        | 2307330        | F21  |
| N18 |  | 1862159         | 2227303       | 2211285        | 2212292        | 2210277        | N20  |
| I19 |  | 1875243         | 2113260       | 2097242        | 2098250        | 2096234        | I19  |
| Q20 |  | 2103303         | 2000176       | 1984158        | 1985166        | 1983150        | Q23  |
| A21 |  | 2174338         | 1872118       | 1856099        | <b>1857107</b> | 1855091        | A17  |
| V22 |  | 2273407         | 1801081       | 1785062        | 1786070        | 1784054        | V16  |
| L23 |  | 2388491         | 1702012       | 1685994        | 1687001        | 1684986        | L15  |
| L24 |  | 2499575         | 1588928       | 1572909        | 1573917        | 1571902        | L14  |
| T25 |  | 2608628         | 1475844       | 1459825        | <b>1460833</b> | 1458817        | T13  |
| K26 |  | 2724723         | 1378791       | <b>1362773</b> | <b>1363780</b> | 1361765        | K12  |
| K27 |  | 2852818         | 1250696       | 1234678        | 1235685        | <b>1233670</b> | K11  |
| T28 |  | 2953895         | 1122601       | <b>1106583</b> | <b>1107591</b> | 1105575        | T10  |
| E29 |  | 3082908         | 1021354       | <b>1005335</b> | <b>1006343</b> | 1004327        | E9   |
| S30 |  | 3169940         | <b>892311</b> | <b>876492</b>  | 877500         | <b>875485</b>  | S8   |
| T31 |  | 3308999         | 825979        | <b>789460</b>  | 790468         | 788452         | T7   |
| H32 |  | 3444058         | 668420        | <b>652401</b>  | 653409         | 651394         | H6   |
| K33 |  | 3572153         | 531361        | <b>515343</b>  | <b>516350</b>  | 514335         | K5   |
| A34 |  | 3643190         | 401266        | <b>387240</b>  | 388255         | <b>386240</b>  | A4   |
| K35 |  | 3771285         | 332220        | <b>316211</b>  | 317218         | 315203         | K3   |
| G36 |  | 3828306         | 204134        | <b>188116</b>  | 189123         | 187106         | G2   |
| K37 |  | 3956401         | 147113        | 131094         | 132102         | 130086         | K1   |

# sp | Q6GSS7 | H2A2A\_MOUSE

LNKLLGK<sup>Dimethyl</sup><sub>28.03</sub>VTIAQGGVLPNIQAVLLPKKTESHKAKGK

- ▶ fragmentation table for charge state 2+
- ▶ specType=etd
- ▶ score=58.37
- ▶ F105339.dat
- ▶ query=q14470.p1
- ▶ precursor=660.402510
- ▶ chargePrecursor=6
- ▶ itol=0.8

| AA  | c               | y               | z+1             | z+2             | z               | AA   |
|-----|-----------------|-----------------|-----------------|-----------------|-----------------|------|
| L1  | 66.061          | 1079.190        | 1391.187        | 0.504           | 1070.683        | L137 |
| N2  | 123.064         | 1022.064        | 1014.052        | 1015.140        | 1014.241        | N30  |
| N3  | 187.132         | 1066.616        | <b>1857.623</b> | 1059.237        | <b>1857.119</b> | K101 |
| L4  | 253.674         | 1001.585        | <b>1793.576</b> | <b>1794.080</b> | <b>1793.072</b> | L134 |
| L5  | 300.216         | 1745.043        | 1737.034        | 1737.538        | 1736.530        | L133 |
| G6  | 328.726         | 1638.501        | 1680.492        | 1680.996        | 1679.989        | G32  |
| K7  | 406.789         | 1659.990        | <b>1651.981</b> | <b>1652.485</b> | 1651.477        | K31  |
| V8  | 495.324         | 1384.927        | 1247.913        | 1247.422        | 1247.414        | V30  |
| V9  | 508.848         | 1532.931        | 1524.924        | <b>1524.888</b> | 1523.880        | V129 |
| I10 | <b>563.390</b>  | 1481.869        | 1473.860        | 1474.364        | 1473.356        | I28  |
| A11 | <b>568.908</b>  | 1625.377        | <b>1417.318</b> | <b>1417.822</b> | <b>1416.814</b> | A27  |
| Q12 | <b>662.937</b>  | 1339.809        | <b>1381.799</b> | <b>1382.303</b> | <b>1381.295</b> | Q28  |
| G13 | 691.448         | 1325.779        | 1317.770        | 1318.274        | 1317.266        | G25  |
| G14 | 718.960         | 1297.266        | 1289.259        | 1289.763        | 1288.755        | G24  |
| V15 | <b>769.493</b>  | 1268.758        | 1260.749        | 1261.252        | 1260.245        | V23  |
| L16 | <b>826.035</b>  | <b>1219.224</b> | <b>1211.214</b> | <b>1211.718</b> | 1210.710        | L22  |
| F17 | <b>874.561</b>  | 1162.662        | 1154.672        | 1155.176        | 1154.169        | F21  |
| N18 | 931.583         | 1114.155        | <b>1106.146</b> | <b>1106.650</b> | 1105.642        | N20  |
| T19 | 988.125         | <b>1057.134</b> | 1049.127        | <b>1049.628</b> | 1048.621        | T19  |
| Q20 | <b>1052.154</b> | 1020.592        | 992.582         | 993.086         | 992.079         | Q18  |
| A21 | <b>1087.673</b> | 938.963         | <b>928.553</b>  | <b>929.057</b>  | <b>928.049</b>  | A17  |
| V22 | <b>1137.207</b> | 901.044         | <b>893.035</b>  | 893.539         | <b>892.531</b>  | V16  |
| L23 | 1193.749        | <b>851.510</b>  | <b>843.500</b>  | <b>844.004</b>  | 842.997         | L15  |
| L24 | 1200.291        | 794.062         | 786.055         | 787.462         | 786.454         | L14  |
| F25 | <b>1298.817</b> | <b>738.426</b>  | 730.418         | 730.922         | 729.915         | F13  |
| K26 | <b>1362.865</b> | 689.959         | <b>681.890</b>  | <b>682.394</b>  | <b>681.386</b>  | K12  |
| K27 | <b>1426.912</b> | <b>625.852</b>  | <b>617.842</b>  | <b>618.346</b>  | <b>617.339</b>  | K11  |
| T28 | <b>1477.436</b> | 561.804         | <b>553.795</b>  | <b>554.299</b>  | 553.291         | T10  |
| E29 | <b>1541.958</b> | 511.281         | <b>503.271</b>  | <b>503.775</b>  | <b>502.767</b>  | E10  |
| S30 | <b>1585.474</b> | 448.769         | 438.760         | 439.264         | 438.257         | S28  |
| H31 | <b>1654.003</b> | 403.243         | 395.234         | 395.738         | 394.731         | H27  |
| H32 | 1722.512        | 334.714         | 326.704         | 327.208         | 326.201         | H46  |
| K33 | 1786.580        | 266.184         | 258.175         | 258.679         | 257.671         | K35  |
| A34 | 1822.099        | 202.137         | 194.127         | 194.631         | 193.624         | A4   |
| K35 | 1886.146        | 146.618         | 138.609         | 139.113         | 138.105         | K33  |
| G36 | 1914.657        | 102.571         | 94.561          | 95.065          | 94.057          | G21  |
| K37 | 1978.704        | 74.060          | 66.051          | 66.555          | 65.547          | K11  |

# sp | Q6GSS7 | H2A2A\_MOUSE

LNKLLGK <sup>Dimethyl</sup> <sub>28.03</sub> VTIAQGGVLPNIQAVLLPKKTESHKAKGK

- ▶ fragmentation table for charge state 3+
- ▶ specType=etd
- ▶ score=58.37
- ▶ F105339.dat
- ▶ query=q14470.p1
- ▶ precursor=660.402510
- ▶ chargePrecursor=6
- ▶ itol=0.8

| AA   | c               | y               | z=1             | z=2             | z               | AA   |
|------|-----------------|-----------------|-----------------|-----------------|-----------------|------|
| L1   | 44.377          | 1319.800        | <b>1314.460</b> | 0.672           | <b>1314.124</b> | L137 |
| N12  | 82.392          | 1262.105        | <b>1276.766</b> | <b>1277.102</b> | <b>1276.430</b> | N30  |
| N13  | 128.600         | <b>1244.091</b> | <b>1238.751</b> | <b>1239.087</b> | <b>1238.415</b> | K101 |
| L14  | 162.795         | 1201.931        | <b>1196.053</b> | <b>1196.389</b> | <b>1195.717</b> | L134 |
| L15  | 200.479         | <b>1163.698</b> | <b>1158.358</b> | <b>1158.694</b> | <b>1158.022</b> | L133 |
| G16  | 219.457         | <b>1126.003</b> | <b>1120.664</b> | <b>1121.000</b> |                 | G132 |
| K17  | 271.519         | <b>1106.996</b> | <b>1101.656</b> | <b>1101.992</b> | <b>1101.321</b> | K131 |
| V18  | 304.562         | 1074.959        | <b>1049.614</b> | <b>1049.950</b> | 1049.278        | V130 |
| V19  | 338.214         | 1021.931        | <b>1016.592</b> | <b>1016.928</b> | 1016.256        | V129 |
| I10  | 375.020         | 988.248         | <b>982.909</b>  | 983.245         | <b>982.573</b>  | I28  |
| A111 | 399.600         | <b>950.554</b>  | 945.214         | <b>945.550</b>  | 944.877         | A127 |
| Q12  | 442.294         |                 | 925.875         | <b>921.535</b>  | <b>921.871</b>  | Q128 |
| G113 | 461.301         | <b>884.189</b>  | <b>878.849</b>  | <b>879.185</b>  | <b>878.513</b>  | G125 |
| G14  | 480.308         | <b>865.182</b>  | <b>859.842</b>  | <b>860.178</b>  | <b>859.506</b>  | G124 |
| V115 | 513.311         | 846.174         | <b>840.835</b>  | <b>841.171</b>  | <b>840.499</b>  | V123 |
| L116 | 551.026         | <b>813.152</b>  | <b>807.812</b>  | <b>808.148</b>  | <b>807.476</b>  | L122 |
| F117 | 563.177         | <b>775.457</b>  | <b>770.117</b>  | <b>770.453</b>  | <b>769.781</b>  | F121 |
| M18  | 621.391         | 743.106         | <b>737.766</b>  | <b>738.102</b>  | <b>737.430</b>  | M20  |
| T119 | 659.088         | 705.062         | 699.722         | 700.058         | 699.314         | T119 |
| Q120 | 701.712         | 667.597         | <b>662.057</b>  | <b>662.393</b>  | <b>661.721</b>  | Q118 |
| A121 | 725.451         | 634.711         | 629.371         | 629.707         | 629.035         | A117 |
| V122 | <b>758.474</b>  | 601.012         | <b>595.692</b>  | <b>596.028</b>  | 595.356         | V116 |
| L123 | <b>796.168</b>  | 568.009         | 562.669         | <b>563.005</b>  | 562.333         | L115 |
| L124 | 834.893         | 530.314         | 524.973         | 525.311         | 524.639         | L114 |
| T125 | <b>806.214</b>  | 492.020         | 487.280         | 487.616         | 486.944         | T113 |
| K126 | <b>908.912</b>  | 460.265         | 454.925         | 455.265         | 454.593         | K112 |
| K127 | <b>951.611</b>  | 417.570         | 412.231         | 412.567         | 411.895         | K111 |
| T128 | <b>985.293</b>  | 374.872         | 369.532         | 369.868         | 369.196         | T110 |
| E129 | <b>1028.307</b> | 341.189         | 335.850         | 336.186         | 335.514         | E19  |
| S130 | <b>1057.318</b> | 298.175         | 292.835         | 293.172         | 292.500         | S18  |
| H131 | 1101.024        | 269.185         | 263.825         | 264.161         | 263.489         | H17  |
| H132 | <b>1148.691</b> | 223.478         | <b>218.139</b>  | <b>218.475</b>  | <b>217.803</b>  | H16  |
| K133 | 1191.389        | 177.792         | 172.452         | 172.788         | 172.116         | K15  |
| A134 | 1215.088        | 135.094         | 129.754         | 130.090         | 129.418         | A14  |
| K135 | 1267.609        | 111.415         | 106.075         | 106.411         | 105.739         | K13  |
| G136 | <b>1276.774</b> | 68.716          | 63.377          | 63.713          | 63.041          | G11  |
| K137 | 1319.472        | 49.708          | 44.370          | 44.705          | 44.033          | K11  |

# sp | Q6GSS7 | H2A2A\_MOUSE

LNKLLGK <sup>Dimethyl</sup> <sub>28.03</sub> VTIAQGGVLPNIQAVLLPKKTESHKAKGK

- ▶ fragmentation table for charge state 4+
- ▶ specType=etd
- ▶ score=58.37
- ▶ F105339.dat
- ▶ query=q14470\_p1
- ▶ precursor=660.402510
- ▶ chargePrecursor=6
- ▶ itol=0.8

| AA    | c              | y              | z+1            | z+2            | z              | AA    |
|-------|----------------|----------------|----------------|----------------|----------------|-------|
| L[1]  | 33.535         | <b>990.102</b> | <b>986.097</b> | 0.755          | <b>985.845</b> | L[37] |
| N[2]  | 62.046         | 961.831        | <b>957.826</b> | <b>958.078</b> | <b>957.574</b> | N[36] |
| K[3]  | 84.009         | <b>933.320</b> | <b>929.315</b> | <b>929.567</b> | <b>928.063</b> | K[35] |
| L[4]  | 122.340        | 891.296        | <b>897.292</b> | <b>897.544</b> | <b>897.040</b> | L[34] |
| L[5]  | 150.611        | 873.025        | 869.021        | 869.273        | <b>868.769</b> | L[33] |
| G[6]  | 194.667        | 844.754        | <b>840.750</b> | <b>841.002</b> | <b>840.498</b> | G[32] |
| K[7]  | 203.898        | 830.499        | <b>826.494</b> | <b>826.746</b> | <b>826.242</b> | K[31] |
| V[8]  | 228.665        | 791.467        | 787.463        | 787.715        | 787.211        | V[30] |
| T[9]  | 253.927        | 766.700        | <b>762.696</b> | <b>762.947</b> | <b>762.444</b> | T[29] |
| I[10] | 282.198        | 741.438        | <b>737.434</b> | <b>737.686</b> | 737.182        | I[28] |
| A[11] | 290.958        | <b>713.167</b> | <b>709.163</b> | <b>709.415</b> | <b>708.911</b> | A[27] |
| Q[12] | 341.972        | 698.408        | 694.403        | 694.655        | 694.151        | Q[26] |
| G[13] | 388.226        | 663.393        | 659.389        | 659.641        | 659.137        | G[25] |
| G[14] | 390.483        | <b>649.138</b> | 645.131        | 645.383        | 644.881        | G[24] |
| V[15] | 395.290        | 634.883        | 630.878        | 631.130        | 630.626        | V[23] |
| L[16] | 413.521        | 610.116        | 606.111        | 606.363        | 605.859        | L[22] |
| P[17] | 437.784        | 581.844        | 577.840        | 578.092        | 577.588        | P[21] |
| N[18] | 466.295        | 557.981        | <b>553.577</b> | <b>553.829</b> | 553.325        | N[20] |
| I[19] | 494.566        | 529.071        | 525.066        | 525.318        | 524.814        | I[19] |
| Q[20] | 526.581        | 500.800        | 496.795        | 497.047        | 496.543        | Q[18] |
| A[21] | 544.340        | 468.785        | 464.780        | 465.032        | 464.528        | A[17] |
| V[22] | 569.139        | 433.026        | 429.021        | 429.273        | 428.769        | V[16] |
| L[23] | 597.376        | 428.295        | 424.294        | 424.546        | 424.042        | L[15] |
| L[24] | <b>625.649</b> | 397.988        | 393.981        | 394.233        | 393.731        | L[14] |
| P[25] | <b>649.912</b> | 369.716        | 365.712        | 365.964        | 365.460        | P[13] |
| K[26] | <b>681.936</b> | 345.453        | 341.449        | 341.701        | 341.197        | K[12] |
| K[27] | <b>713.960</b> | 313.430        | 309.425        | 309.677        | 309.173        | K[11] |
| T[28] | 739.222        | 281.406        | 277.401        | 277.653        | 277.149        | T[10] |
| E[29] | <b>771.482</b> | 256.144        | 252.139        | 252.391        | 251.887        | E[9]  |
| S[30] | <b>793.240</b> | 223.883        | 219.879        | 220.131        | 219.627        | S[8]  |
| H[31] | <b>827.505</b> | 202.125        | 198.121        | 198.373        | 197.869        | H[7]  |
| H[32] | <b>861.770</b> | 197.861        | 193.856        | 194.108        | 193.604        | H[6]  |
| K[33] | 893.794        | 173.996        | 170.991        | 171.243        | 170.739        | K[5]  |
| A[34] | <b>911.553</b> | 101.572        | 97.567         | 97.819         | 97.315         | A[4]  |
| K[35] | <b>943.577</b> | 83.813         | 79.808         | 80.060         | 79.556         | K[3]  |
| G[36] | <b>957.832</b> | 51.789         | 47.784         | 48.036         | 47.532         | G[2]  |
| K[37] | 989.856        | 37.534         | 33.529         | 33.781         | 33.277         | K[1]  |

# sp | Q6GSS7 | H2A2A\_MOUSE

LNKLLGK <sup>Dimethyl</sup> <sub>28.03</sub> VTIAQGGVLPNIQAVLLPKKTESHHKAKGK

- ▶ fragmentation table for charge state 5+
- ▶ specType=etd
- ▶ score=58.37
- ▶ F105339.dat
- ▶ query=q14470\_p1
- ▶ precursor=660.402510
- ▶ chargePrecursor=6
- ▶ itol=0.8

| AA    | c              | y              | z+1            | z+2            | z              | AA    |
|-------|----------------|----------------|----------------|----------------|----------------|-------|
| L[1]  | 27.029         | <b>792.283</b> | <b>789.079</b> | 0.806          | <b>788.878</b> | L[37] |
| N[2]  | 49.838         | <b>769.666</b> | 766.462        | 766.664        | 766.261        | N[36] |
| K[3]  | 75.457         | 746.897        | 743.694        | 743.895        | 743.492        | K[35] |
| L[4]  | 88.074         | 721.236        | 718.033        | 718.236        | 717.833        | L[34] |
| L[5]  | 120.691        | 696.522        | 693.319        | 693.519        | 693.116        | L[33] |
| G[6]  | 132.095        | 676.095        | <b>672.801</b> | <b>673.003</b> | <b>672.600</b> | G[32] |
| K[7]  | 163.320        | 664.601        | <b>661.397</b> | <b>661.598</b> | 661.195        | K[31] |
| V[8]  | 183.134        | 633.375        | 630.172        | 630.373        | 629.970        | V[30] |
| T[9]  | 203.343        | 613.562        | 610.359        | 610.559        | 610.156        | T[29] |
| I[10] | 225.960        | 593.352        | 590.149        | 590.350        | 589.947        | I[28] |
| A[11] | 240.168        | 570.735        | 567.532        | 567.733        | 567.330        | A[27] |
| Q[12] | 265.779        | 558.528        | 555.324        | <b>553.526</b> | 553.123        | Q[26] |
| G[13] | 277.184        | 530.916        | 527.712        | 527.914        | 527.511        | G[25] |
| G[14] | 288.588        | 519.512        | <b>516.300</b> | <b>516.510</b> | <b>516.107</b> | G[24] |
| V[15] | 308.402        | 508.108        | 504.904        | 505.106        | <b>504.702</b> | V[23] |
| L[16] | 331.018        | 488.294        | 485.090        | <b>485.292</b> | 484.889        | L[22] |
| P[17] | 350.429        | 465.677        | 462.473        | 462.675        | 462.272        | P[21] |
| N[18] | <b>373.238</b> | 446.266        | 443.063        | 443.264        | 442.861        | N[20] |
| I[19] | 395.854        | 423.458        | 420.254        | 420.456        | 420.053        | I[19] |
| Q[20] | 421.466        | 400.841        | 397.637        | 397.839        | 397.436        | Q[18] |
| A[21] | 435.673        | 378.229        | 375.026        | 375.227        | 374.824        | A[17] |
| V[22] | 455.887        | 363.022        | 359.819        | 360.020        | 359.617        | V[16] |
| L[23] | 478.104        | 341.208        | 338.004        | 338.206        | 337.803        | L[15] |
| L[24] | 500.721        | 318.993        | 315.789        | <b>315.589</b> | 315.186        | L[14] |
| P[25] | 520.131        | 295.975        | 292.771        | 292.972        | 292.569        | P[13] |
| K[26] | <b>545.750</b> | 276.564        | 273.360        | 273.562        | 273.159        | K[12] |
| K[27] | 571.369        | 250.945        | 247.741        | 247.943        | 247.540        | K[11] |
| T[28] | 591.579        | 225.326        | 222.122        | 222.324        | 221.921        | T[10] |
| E[29] | <b>617.387</b> | 205.117        | 201.913        | 202.114        | 201.711        | E[9]  |
| S[30] | 634.794        | 179.308        | 176.104        | 176.306        | 175.903        | S[8]  |
| H[31] | <b>662.206</b> | 161.902        | 158.698        | 158.899        | 158.496        | H[7]  |
| H[32] | 689.617        | 134.490        | 131.286        | 131.488        | 131.085        | H[6]  |
| K[33] | 715.236        | 107.078        | 103.874        | 104.076        | 103.673        | K[5]  |
| A[34] | 729.444        | 81.450         | 78.255         | 78.457         | 78.054         | A[4]  |
| K[35] | 755.063        | 67.252         | 64.048         | 64.249         | 63.846         | K[3]  |
| G[36] | 766.467        | 41.633         | 38.429         | 38.630         | 38.227         | G[2]  |
| K[37] | <b>792.086</b> | 30.228         | 27.025         | 27.226         | 26.823         | K[1]  |

# sp | Q6GSS7 | H2A2A\_MOUSE

LNKLLGK<sup>Dimethyl</sup>VTIAQGGVLPNIQAVLLPKKTESHHKAKGK  
28.03

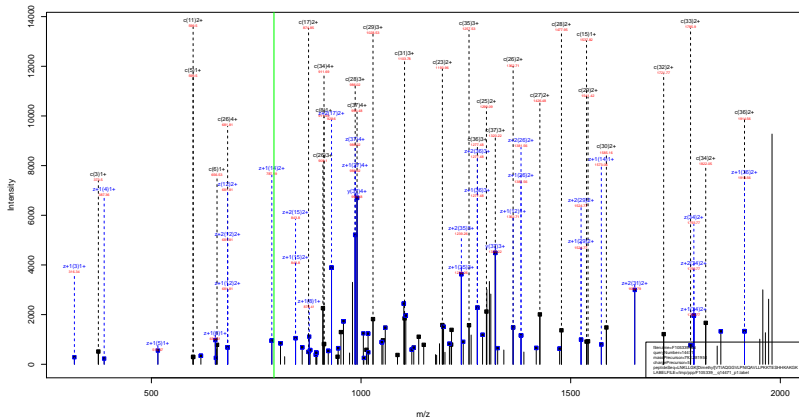

# sp | Q6GSS7 | H2A2A\_MOUSE

LNKLLGK<sup>Dimethyl</sup>VTIAQGGVLPNIQAVLLPKKTESHHKAKGK  
28.03

- ▶ fragmentation table for charge state 1+
- ▶ specType=etd
- ▶ score=96.69
- ▶ F105339.dat
- ▶ query=q14471\_p1
- ▶ precursor=792.281950
- ▶ chargePrecursor=5
- ▶ itol=0.8

| AA   | c               | y              | z+1             | z+2             | z              | AA   |
|------|-----------------|----------------|-----------------|-----------------|----------------|------|
| L1   | 131.118         | 2057.305       | 3041.369        | 0.000           | 2940.391       | L137 |
| N12  | 245.161         | 1844.301       | 3828.282        | 3829.290        | 3827.275       | N130 |
| K13  | <b>373.256</b>  | 3730.258       | 3714.239        | 3715.247        | 3713.231       | K135 |
| L14  | 486.340         | 3002.163       | 3586.144        | 3587.152        | 3585.137       | L134 |
| L15  | <b>599.424</b>  | 3489.079       | 3471.060        | 3474.068        | 3472.053       | L133 |
| G16  | <b>656.445</b>  | 3375.995       | 3359.976        | 3360.984        | 3358.969       | G132 |
| K17  | 817.777         | 3318.974       | 3302.955        | 3303.963        | 3301.947       | K131 |
| V18  | <b>911.640</b>  | 3152.941       | 3146.929        | 3147.936        | 3145.921       | V136 |
| T19  | <b>1012.688</b> | 3003.779       | 3047.760        | 3048.768        | 3046.752       | T129 |
| I10  | <b>1125.772</b> | 2962.731       | 2946.713        | 2947.720        | 2945.705       | I128 |
| A11  | <b>1196.809</b> | 2849.647       | 2833.628        | 2834.636        | 2832.621       | A127 |
| Q12  | 1324.907        | 2778.610       | 2762.591        | 2763.599        | 2761.584       | Q126 |
| G13  | <b>1381.889</b> | 2650.562       | 2634.543        | 2635.541        | 2633.525       | G125 |
| G14  | 1438.939        | 2593.536       | 2577.517        | 2578.519        | 2576.504       | G124 |
| V15  | <b>1537.979</b> | 2536.505       | 2520.486        | 2521.488        | 2519.482       | V123 |
| L16  | 1651.063        | 2437.440       | 2421.421        | 2422.429        | 2420.414       | L122 |
| F17  | 1748.116        | 2324.356       | 2308.337        | 2309.345        | 2307.330       | F121 |
| N18  | 1862.159        | 2227.303       | 2211.285        | 2212.292        | 2210.277       | N120 |
| I19  | 1975.243        | 2133.260       | 2097.242        | 2098.250        | 2096.234       | I119 |
| Q19  | 2103.301        | 2000.176       | 1984.158        | 1985.166        | 1983.150       | Q118 |
| A121 | 2174.338        | 1872.115       | 1856.096        | 1857.107        | 1855.091       | A117 |
| V122 | 2273.407        | 1801.081       | 1785.062        | <b>1786.070</b> | 1784.054       | V116 |
| L123 | 2366.491        | 1702.012       | 1686.004        | 1687.001        | 1684.988       | L115 |
| L124 | 2499.575        | 1588.938       | <b>1572.909</b> | 1573.917        | 1571.902       | L114 |
| F125 | 2596.626        | 1475.844       | 1459.825        | 1460.833        | 1458.818       | F113 |
| L126 | 2724.723        | 1378.791       | <b>1362.773</b> | 1363.780        | 1361.765       | L112 |
| R127 | 2852.818        | 1256.696       | 1234.678        | 1235.685        | 1233.670       | R111 |
| T128 | 2963.965        | 1122.601       | <b>1106.583</b> | 1107.591        | 1105.575       | T110 |
| E129 | 3062.908        | 1021.554       | <b>1005.535</b> | <b>1006.543</b> | 1004.527       | E101 |
| S130 | 3189.940        | <b>892.511</b> | <b>876.492</b>  | 877.500         | <b>875.485</b> | S101 |
| H131 | 3306.999        | 805.479        | 789.460         | 790.468         | 788.453        | H107 |
| T132 | 3444.058        | 698.429        | <b>682.401</b>  | <b>683.409</b>  | 681.394        | T100 |
| K133 | 3572.153        | 531.361        | <b>515.343</b>  | 516.350         | 514.335        | K105 |
| A134 | 3643.190        | 403.266        | <b>387.248</b>  | 388.255         | 386.240        | A104 |
| K135 | 3771.285        | 322.229        | <b>316.211</b>  | 317.218         | 315.203        | K103 |
| G136 | 3828.306        | 204.134        | 188.116         | 189.123         | 187.108        | G102 |
| K137 | 3956.401        | 147.113        | 131.094         | 132.102         | 130.086        | K101 |

# sp | Q6GSS7 | H2A2A\_MOUSE

LNKLLGK <sup>Dimethyl</sup> <sub>28.03</sub> VTIAQGGVLPNIQAVLLPKKTESHKAKGK

- ▶ fragmentation table for charge state 2+
- ▶ specType=etd
- ▶ score=96.69
- ▶ F105339.dat
- ▶ query=q14471.p1
- ▶ precursor=792.281950
- ▶ chargePrecursor=5
- ▶ itol=0.8

| AA   | c               | y               | z+1             | z+2             | z               | AA   |
|------|-----------------|-----------------|-----------------|-----------------|-----------------|------|
| L1   | 66.001          | 1079.190        | 1391.197        | 0.504           | 1970.683        | L137 |
| N1   | 123.004         | 1022.054        | <b>1014.645</b> | <b>1015.149</b> | <b>1914.141</b> | K130 |
| N1   | 107.132         | 1066.616        | <b>1057.623</b> | <b>1058.127</b> | <b>1959.111</b> | K101 |
| L1   | 263.614         | 1001.585        | <b>1793.576</b> | <b>1794.080</b> | <b>1793.072</b> | L134 |
| L1   | 300.216         | 1745.043        | 1737.034        | 1737.538        | 1736.530        | L133 |
| G1   | 328.726         | 1638.501        | 1680.492        | 1680.996        | 1679.989        | G132 |
| K1   | 406.789         | 1659.990        | 1651.981        | <b>1652.485</b> | 1651.477        | K131 |
| V1   | 456.324         | 1384.927        | 1371.913        | 1374.922        | <b>1373.414</b> | V130 |
| V1   | 508.848         | 1532.931        | <b>1524.384</b> | <b>1524.888</b> | 1523.881        | V129 |
| I10  | 563.390         | 1481.869        | <b>1473.860</b> | <b>1474.364</b> | <b>1473.356</b> | I028 |
| A11  | <b>568.908</b>  | 1625.377        | <b>1417.318</b> | <b>1417.822</b> | 1416.814        | A127 |
| Q12  | 602.917         | 1339.809        | <b>1381.799</b> | <b>1382.303</b> | <b>1381.295</b> | Q128 |
| G13  | 601.448         | <b>1325.779</b> | 1317.770        | 1318.274        | 1317.266        | G125 |
| G14  | 718.669         | 1397.596        | <b>1289.259</b> | <b>1289.763</b> | 1288.755        | G124 |
| V15  | 759.493         | 1268.758        | 1250.749        | 1251.252        | 1250.245        | V123 |
| L16  | 838.035         | 1219.224        | <b>1211.214</b> | 1211.718        | <b>1210.710</b> | L122 |
| F17  | <b>874.561</b>  | 1162.662        | 1154.672        | 1155.176        | 1154.169        | F121 |
| N18  | 931.583         | 1114.155        | <b>1106.146</b> | <b>1106.650</b> | 1105.642        | N120 |
| T19  | 908.125         | <b>1057.134</b> | <b>1049.124</b> | <b>1049.628</b> | 1048.621        | T119 |
| Q120 | <b>1052.154</b> | 1020.592        | 992.583         | 993.088         | 992.079         | Q118 |
| A121 | <b>1087.673</b> | 936.963         | 928.953         | <b>929.057</b>  | 928.049         | A117 |
| V122 | <b>1137.207</b> | 901.044         | <b>893.035</b>  | <b>893.539</b>  | <b>892.531</b>  | V116 |
| L123 | <b>1193.749</b> | 851.510         | <b>843.500</b>  | <b>844.004</b>  | 842.997         | L115 |
| L14  | 1092.293        | 794.988         | <b>786.958</b>  | <b>787.462</b>  | <b>786.454</b>  | L114 |
| T125 | <b>1208.817</b> | 738.436         | 720.413         | 720.917         | 719.910         | T113 |
| K126 | <b>1362.865</b> | 889.899         | <b>681.890</b>  | <b>682.394</b>  | <b>681.386</b>  | K112 |
| K127 | <b>1426.912</b> | 625.852         | <b>617.842</b>  | <b>618.346</b>  | <b>617.339</b>  | K111 |
| T128 | <b>1477.436</b> | 561.804         | 553.795         | 554.299         | 553.291         | T110 |
| E10  | <b>1541.958</b> | 511.281         | 503.271         | 503.775         | 502.767         | E10  |
| S10  | <b>1585.474</b> | 448.769         | 438.760         | 439.264         | 438.256         | S10  |
| H11  | 1654.013        | 403.243         | 395.234         | 395.738         | 394.730         | H11  |
| H12  | <b>1722.532</b> | 334.714         | 326.704         | 327.208         | 326.200         | H10  |
| K133 | <b>1786.580</b> | 266.184         | 258.175         | 258.679         | 257.671         | K13  |
| A14  | <b>1822.099</b> | 202.137         | 194.127         | 194.631         | 193.624         | A14  |
| K135 | 1898.149        | 186.610         | 186.609         | 189.113         | 188.105         | K13  |
| G136 | <b>1914.657</b> | 102.571         | 88.051          | 88.065          | 84.951          | G13  |
| K137 | 1978.704        | 74.080          | 68.051          | 68.055          | 65.547          | K11  |



# sp | Q6GSS7 | H2A2A\_MOUSE

LNKLLGK <sup>Dimethyl</sup> <sub>28.03</sub> VTIAQGGVLPNIQAVLLPKKTESHHKAKGK

- ▶ fragmentation table for charge state 3+
- ▶ specType=etd
- ▶ score=96.69
- ▶ F105339.dat
- ▶ query=q14471.p1
- ▶ precursor=792.281504
- ▶ chargePrecursor=5
- ▶ itol=0.8

| AA   | c               | y               | z=1             | z=2             | z               | AA   |
|------|-----------------|-----------------|-----------------|-----------------|-----------------|------|
| L1   | 44.377          | <b>1319.800</b> | 1314.600        | 0.672           | 1314.124        | L137 |
| N1   | 62.392          | 1292.105        | <b>1276.766</b> | <b>1277.102</b> | 1276.430        | N130 |
| N1   | 128.600         | <b>1244.091</b> | <b>1238.751</b> | <b>1239.087</b> | 1238.411        | K125 |
| L1   | 162.795         | 1201.331        | <b>1196.053</b> | <b>1196.389</b> | 1195.717        | L134 |
| L1   | 200.479         | 1161.695        | 1156.358        | 1158.694        | 1158.022        | L133 |
| G1   | 219.657         | <b>1126.003</b> | <b>1120.664</b> | <b>1121.000</b> | <b>1120.328</b> | G132 |
| K1   | 271.519         | <b>1106.996</b> | <b>1101.656</b> | <b>1101.992</b> | <b>1101.321</b> | K131 |
| V1   | 304.362         | 1074.559        | <b>1069.614</b> | <b>1069.950</b> | <b>1069.278</b> | V130 |
| V1   | 338.214         | 1021.931        | <b>1016.592</b> | <b>1016.928</b> | <b>1016.256</b> | V129 |
| I10  | 375.020         | 988.248         | 982.909         | 983.245         | 982.571         | I081 |
| A11  | 399.600         | 950.554         | <b>945.214</b>  | <b>945.550</b>  | <b>944.878</b>  | A127 |
| Q12  | 442.294         | 925.875         | <b>921.535</b>  | <b>921.871</b>  | <b>921.199</b>  | Q128 |
| G13  | 461.301         | 894.189         | <b>878.849</b>  | <b>879.185</b>  | <b>878.513</b>  | G125 |
| G14  | 480.308         | 868.182         | <b>853.842</b>  | <b>854.178</b>  | <b>853.506</b>  | G124 |
| V15  | 513.311         | 840.174         | 840.510         | 841.371         | 840.499         | V123 |
| L16  | 551.026         | 813.152         | <b>807.812</b>  | <b>808.148</b>  | <b>807.476</b>  | L122 |
| F17  | 563.377         | 775.451         | 770.117         | 770.453         | 769.781         | F121 |
| N18  | 621.391         | 743.106         | 737.766         | 738.102         | 737.430         | N120 |
| T19  | 659.088         | 705.062         | 699.732         | 700.388         | 699.411         | T119 |
| Q120 | 701.712         | 667.397         | 662.057         | 662.393         | 661.721         | Q118 |
| A121 | 725.451         | 634.711         | 630.371         | 630.707         | 629.035         | A117 |
| V122 | 758.474         | 601.012         | 595.692         | 596.028         | 595.356         | V116 |
| L123 | 796.118         | 568.009         | 562.669         | 563.005         | 562.333         | L115 |
| L124 | 831.863         | 530.314         | 524.975         | 525.311         | 524.639         | L114 |
| T125 | 868.214         | 492.020         | 487.280         | 487.616         | 486.944         | T113 |
| K126 | <b>908.912</b>  | 460.265         | 454.926         | 455.262         | 454.591         | K112 |
| K127 | <b>951.611</b>  | 417.570         | 412.231         | 412.567         | 411.895         | K111 |
| T128 | <b>985.293</b>  | 374.872         | 369.532         | 369.868         | 369.196         | T110 |
| E129 | <b>1028.307</b> | 341.189         | 335.850         | 336.186         | 335.514         | E109 |
| S130 | <b>1057.318</b> | 298.375         | 292.838         | 293.172         | 292.500         | S108 |
| H131 | <b>1103.004</b> | 269.185         | 263.825         | 264.161         | 263.489         | H107 |
| H132 | <b>1148.691</b> | 223.478         | 218.139         | 218.475         | 217.803         | H106 |
| K133 | 1191.389        | 177.792         | 172.452         | 172.788         | 172.116         | K105 |
| A134 | <b>1215.068</b> | 135.094         | 129.754         | 130.090         | 129.418         | A104 |
| K135 | <b>1257.766</b> | 111.415         | 106.075         | 106.411         | 105.739         | K103 |
| G136 | <b>1276.774</b> | 68.716          | 63.377          | 63.713          | 63.041          | G102 |
| K137 | <b>1319.472</b> | 49.709          | 44.370          | 44.705          | 44.033          | K101 |

# sp | Q6GSS7 | H2A2A\_MOUSE

LNKLLGK <sup>Dimethyl</sup> <sub>28.03</sub> VTIAQGGVLPNIQAVLLPKKTESHKAKGK

- ▶ fragmentation table for charge state 4+
- ▶ specType=etd
- ▶ score=96.69
- ▶ F105339.dat
- ▶ query=q14471.p1
- ▶ precursor=792.281950
- ▶ chargePrecursor=5
- ▶ itol=0.8

| AA    | c              | y              | z+1            | z+2            | z              | AA    |
|-------|----------------|----------------|----------------|----------------|----------------|-------|
| L[1]  | 33.535         | <b>990.102</b> | <b>986.097</b> | 0.755          | <b>985.845</b> | L[37] |
| N[2]  | 62.046         | 961.831        | <b>957.826</b> | <b>958.078</b> | <b>957.574</b> | N[36] |
| K[3]  | 84.089         | 933.320        | <b>929.315</b> | <b>929.567</b> | <b>929.063</b> | K[35] |
| L[4]  | 122.340        | 901.296        | 897.293        | 897.544        | 897.040        | L[34] |
| L[5]  | 150.611        | 873.025        | 869.021        | 869.273        | 868.769        | L[33] |
| G[6]  | 184.667        | 844.754        | 840.750        | 841.002        | 840.498        | G[32] |
| K[7]  | 203.898        | 830.499        | 826.494        | 826.746        | 826.242        | K[31] |
| V[8]  | 228.665        | 791.467        | <b>787.463</b> | <b>787.715</b> | <b>787.211</b> | V[30] |
| T[9]  | 253.927        | 766.700        | 762.696        | 762.947        | 762.444        | T[29] |
| I[10] | 282.198        | 741.438        | 737.434        | 737.686        | 737.182        | I[28] |
| A[11] | 298.958        | 713.167        | 709.163        | 709.415        | 708.911        | A[27] |
| Q[12] | 341.972        | 698.408        | 694.403        | 694.655        | 694.151        | Q[26] |
| G[13] | 388.228        | 683.393        | 679.389        | 679.641        | 679.137        | G[25] |
| G[14] | 390.483        | 649.130        | 645.126        | 645.378        | 644.874        | G[24] |
| V[15] | 395.290        | 634.883        | 630.878        | 631.130        | 630.626        | V[23] |
| L[16] | 413.521        | 610.116        | 606.111        | 606.363        | 605.859        | L[22] |
| P[17] | 437.784        | 581.844        | 577.840        | 578.092        | 577.588        | P[21] |
| N[18] | 466.295        | 557.581        | 553.577        | 553.829        | 553.325        | N[20] |
| I[19] | 494.566        | 529.071        | 525.066        | 525.318        | 524.814        | I[19] |
| Q[20] | 526.581        | 500.800        | 496.795        | 497.047        | 496.543        | Q[18] |
| A[21] | 544.340        | 468.785        | 464.780        | 465.032        | 464.528        | A[17] |
| V[22] | 569.137        | 433.026        | 429.021        | 429.273        | 428.769        | V[16] |
| L[23] | 597.378        | 428.295        | 424.291        | 424.543        | 424.039        | L[15] |
| L[24] | 625.649        | 397.988        | 393.983        | 394.235        | 393.731        | L[14] |
| P[25] | 649.912        | 369.716        | 365.712        | 365.964        | 365.460        | P[13] |
| K[26] | <b>681.936</b> | 345.453        | 341.449        | 341.701        | 341.197        | K[12] |
| K[27] | 713.960        | 313.430        | 309.425        | 309.677        | 309.173        | K[11] |
| T[28] | 739.222        | 281.406        | 277.401        | 277.653        | 277.149        | T[10] |
| E[29] | 771.482        | 256.144        | 252.139        | 252.391        | 251.887        | E[9]  |
| S[30] | 793.240        | 223.883        | 219.879        | 220.131        | 219.627        | S[8]  |
| H[31] | 827.509        | 202.125        | 198.121        | 198.373        | 197.869        | H[7]  |
| H[32] | 851.770        | 167.861        | 163.856        | 164.108        | 163.604        | H[6]  |
| K[33] | <b>893.794</b> | 133.596        | 129.591        | 129.843        | 129.339        | K[5]  |
| A[34] | <b>911.553</b> | 101.572        | 97.567         | 97.819         | 97.315         | A[4]  |
| K[35] | <b>943.577</b> | 83.813         | 79.808         | 80.060         | 79.556         | K[3]  |
| G[36] | <b>957.832</b> | 51.789         | 47.784         | 48.036         | 47.532         | G[2]  |
| K[37] | <b>989.856</b> | 37.534         | 33.529         | 33.781         | 33.277         | K[1]  |

# sp | P62806 | H4\_MOUSE

[Acetyl]SGRGKGGKGLGKGGAKRHRK<sup>Methyl</sup> VLRD  
14.02

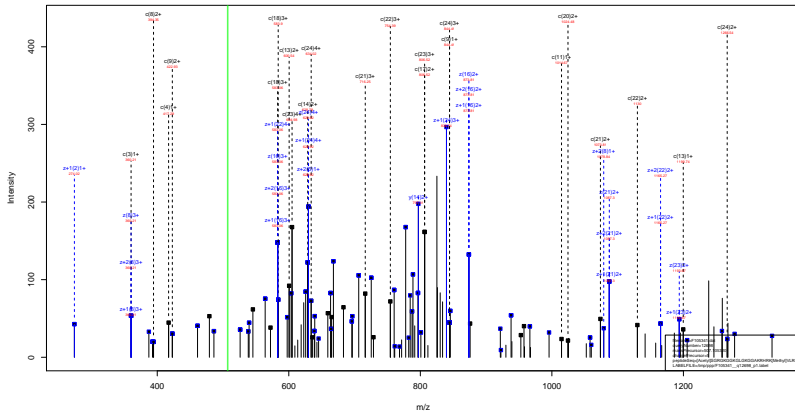

# sp | P62806 | H4\_MOUSE

[Acetyl]SGRGKGGKGLGKGGAKRHRK Methyl VLRD  
14.02

- ▶ fragmentation table for charge state 1+
- ▶ specType=etd
- ▶ score=99.30
- ▶ F105341.dat
- ▶ query=q12698\_p1
- ▶ precursor=507.105320
- ▶ chargePrecursor=5
- ▶ itol=0.8

| AA    | c               | y              | z+1             | z+2             | z        | AA    |
|-------|-----------------|----------------|-----------------|-----------------|----------|-------|
| S[1]  | 347.676         | 2531.487       | 2515.468        | 0.000           | 2514.460 | S[24] |
| G[2]  | 204.008         | 2402.444       | 2386.425        | 0.000           | 2385.417 | G[23] |
| R[3]  | <b>368.199</b>  | 2346.421       | 2329.404        | 2130.412        | 2328.396 | R[22] |
| G[4]  | <b>417.230</b>  | 2189.321       | 2173.303        | 2174.310        | 2172.295 | G[21] |
| K[5]  | <b>545.315</b>  | 2132.300       | 2116.281        | 2117.289        | 2115.273 | K[20] |
| G[6]  | 602.357         | 2084.205       | 1988.186        | 1989.194        | 1987.178 | G[19] |
| G[7]  | <b>659.358</b>  | 1947.184       | 1931.165        | 1932.173        | 1930.157 | G[18] |
| K[8]  | <b>787.453</b>  | 1890.162       | 1874.143        | 1875.151        | 1873.135 | K[17] |
| G[9]  | <b>844.475</b>  | 1782.087       | 1746.068        | 1747.076        | 1745.061 | G[16] |
| L[10] | <b>927.559</b>  | 1705.046       | 1689.027        | 1690.035        | 1688.019 | L[15] |
| G[11] | <b>1014.580</b> | 1591.962       | 1575.943        | 1576.951        | 1574.935 | G[14] |
| K[12] | 1142.675        | 1534.940       | 1518.921        | 1519.929        | 1517.914 | K[13] |
| G[13] | <b>1199.697</b> | 1406.945       | 1390.926        | 1391.934        | 1389.919 | G[12] |
| G[14] | 1256.718        | 1349.824       | 1333.805        | <b>1334.813</b> | 1332.797 | G[11] |
| A[15] | 1327.758        | 1292.802       | 1276.783        | <b>1277.791</b> | 1275.776 | A[10] |
| R[16] | 1455.850        | 1231.765       | <b>1203.746</b> | 1204.754        | 1204.739 | R[9]  |
| R[17] | 1611.951        | 1093.670       | 1077.651        | <b>1078.659</b> | 1076.644 | R[8]  |
| H[18] | 1749.010        | <b>937.569</b> | <b>921.550</b>  | <b>922.558</b>  | 920.542  | H[7]  |
| R[19] | 1905.111        | <b>800.510</b> | <b>784.491</b>  | 785.499         | 783.484  | R[6]  |
| K[20] | 2047.222        | 644.409        | <b>628.390</b>  | <b>629.398</b>  | 627.382  | K[5]  |
| V[21] | 2146.290        | 502.298        | <b>486.280</b>  | 487.287         | 485.272  | V[4]  |
| L[22] | 2259.374        | 403.230        | <b>387.211</b>  | 388.219         | 386.203  | L[3]  |
| R[23] | 2415.476        | 280.146        | <b>274.127</b>  | 275.135         | 273.119  | R[2]  |
| D[24] | 2530.503        | 134.045        | 118.026         | 119.034         | 117.018  | D[1]  |

# sp | P62806 | H4\_MOUSE

[Acetyl]SGRGKGGKGLGKGGAKRHRK<sup>Methyl</sup> VLRD  
14.02

- ▶ fragmentation table for charge state 2+
- ▶ specType=etd
- ▶ score=99.30
- ▶ F105341.dat
- ▶ query=q12698\_p1
- ▶ precursor=507.105320
- ▶ chargePrecursor=5
- ▶ itol=0.8

| AA    | c               | y               | z+1             | z+2             | z               | AA    |
|-------|-----------------|-----------------|-----------------|-----------------|-----------------|-------|
| S[1]  | 74.642          | <b>1266.247</b> | <b>1258.238</b> | 0.504           | 1257.736        | S[24] |
| G[2]  | 102.553         | 1201.726        | <b>1193.716</b> | 0.504           | <b>1193.212</b> | G[23] |
| R[3]  | 180.603         | 1173.215        | <b>1165.206</b> | <b>1165.709</b> | <b>1164.702</b> | R[22] |
| G[4]  | 259.114         | 1095.164        | <b>1087.155</b> | <b>1087.559</b> | <b>1086.551</b> | G[21] |
| K[5]  | 273.153         | 1058.654        | <b>1058.644</b> | <b>1059.148</b> | <b>1058.140</b> | K[20] |
| G[6]  | 303.672         | 1002.606        | 994.597         | <b>995.101</b>  | 994.093         | G[19] |
| G[7]  | 330.183         | 974.095         | <b>966.086</b>  | <b>966.590</b>  | 965.582         | G[18] |
| K[8]  | <b>394.230</b>  | 945.585         | <b>937.575</b>  | <b>938.079</b>  | 937.071         | K[17] |
| G[9]  | <b>422.741</b>  | 881.517         | <b>873.528</b>  | <b>874.032</b>  | <b>873.024</b>  | G[16] |
| L[10] | <b>479.283</b>  | 893.026         | <b>845.017</b>  | <b>845.521</b>  | <b>844.513</b>  | L[15] |
| G[11] | 507.794         | <b>796.484</b>  | <b>788.475</b>  | <b>788.979</b>  | <b>787.971</b>  | G[14] |
| K[12] | <b>571.841</b>  | <b>767.974</b>  | <b>759.964</b>  | <b>760.468</b>  | <b>759.460</b>  | K[13] |
| G[13] | <b>600.352</b>  | 703.026         | <b>695.917</b>  | <b>696.421</b>  | <b>695.413</b>  | G[12] |
| G[14] | <b>628.863</b>  | 675.415         | <b>667.406</b>  | <b>667.910</b>  | 666.902         | G[11] |
| A[15] | <b>664.381</b>  | 648.905         | <b>638.895</b>  | <b>639.399</b>  | <b>638.391</b>  | A[10] |
| R[16] | <b>728.429</b>  | 611.395         | <b>603.377</b>  | <b>603.881</b>  | <b>602.873</b>  | R[9]  |
| R[17] | <b>806.479</b>  | 547.339         | <b>539.329</b>  | <b>539.833</b>  | <b>538.825</b>  | R[8]  |
| H[18] | <b>875.009</b>  | 469.289         | <b>461.279</b>  | <b>461.783</b>  | <b>460.775</b>  | H[7]  |
| R[19] | <b>953.059</b>  | 400.759         | <b>392.749</b>  | <b>393.253</b>  | <b>392.245</b>  | R[6]  |
| K[20] | <b>1024.115</b> | 322.706         | 314.689         | 315.203         | 314.195         | K[5]  |
| V[21] | <b>1073.649</b> | 253.653         | 245.633         | 246.147         | 245.140         | V[4]  |
| L[22] | <b>1130.191</b> | 202.115         | 194.100         | 194.613         | 193.605         | L[3]  |
| R[23] | 1206.241        | 148.577         | 137.567         | 138.071         | 137.063         | R[2]  |
| D[24] | <b>1265.755</b> | 67.526          | 59.517          | 60.021          | 59.013          | D[1]  |

# sp | P62806 | H4\_MOUSE

[Acetyl]SGRGKGGKGLGKGGAKRHRK <sup>Methyl</sup> VLRD  
14.02

- ▶ fragmentation table for charge state 3+
- ▶ specType=etd
- ▶ score=99.30
- ▶ F105341.dat
- ▶ query=q12698.p1
- ▶ precursor=507.105320
- ▶ chargePrecursor=5
- ▶ itol=0.8

| AA    | c              | y              | z+1            | z+2            | z              | AA    |
|-------|----------------|----------------|----------------|----------------|----------------|-------|
| S[1]  | 49.697         | <b>844.500</b> | <b>839.161</b> | 0.672          | 838.825        | S[24] |
| G[2]  | 58.704         | <b>801.486</b> | <b>796.147</b> | 0.672          | <b>795.811</b> | G[23] |
| R[3]  | 120.738        | <b>782.479</b> | <b>777.139</b> | <b>777.475</b> | 776.804        | R[22] |
| G[4]  | 139.745        | 730.445        | <b>725.106</b> | <b>725.442</b> | <b>724.770</b> | G[21] |
| K[5]  | 182.443        | 711.438        | <b>706.099</b> | <b>706.435</b> | <b>705.763</b> | K[20] |
| G[6]  | 201.450        | 668.740        | <b>663.400</b> | <b>663.736</b> | <b>663.064</b> | G[19] |
| G[7]  | 220.458        | 649.733        | 644.393        | <b>644.729</b> | 644.057        | G[18] |
| K[8]  | 263.156        | 630.726        | <b>625.386</b> | <b>625.722</b> | <b>625.050</b> | K[17] |
| G[9]  | 282.163        | 588.021        | <b>582.680</b> | <b>583.024</b> | <b>582.352</b> | G[16] |
| L[10] | 319.958        | 569.020        | <b>563.680</b> | <b>564.016</b> | <b>563.345</b> | L[15] |
| G[11] | 338.965        | 531.325        | <b>525.986</b> | <b>526.322</b> | <b>525.650</b> | G[14] |
| K[12] | 381.563        | 512.318        | 505.979        | 507.315        | 506.643        | K[13] |
| G[13] | 400.570        | 469.620        | 464.280        | 464.616        | 463.944        | G[12] |
| G[14] | 419.578        | 450.613        | 445.273        | 445.609        | 444.937        | G[11] |
| A[15] | 443.257        | 431.606        | 426.266        | 426.602        | 425.930        | A[10] |
| K[16] | <b>485.955</b> | 407.927        | 402.587        | 402.923        | 402.251        | K[9]  |
| R[17] | <b>537.989</b> | 365.226        | <b>359.889</b> | <b>360.225</b> | <b>359.553</b> | R[8]  |
| H[18] | <b>583.675</b> | 313.195        | 307.855        | 308.191        | 307.519        | H[7]  |
| R[19] | <b>633.709</b> | 297.508        | 292.169        | 292.505        | 291.833        | R[6]  |
| K[20] | <b>683.079</b> | 275.475        | 270.135        | 270.471        | 269.799        | K[5]  |
| V[21] | <b>716.102</b> | 168.104        | 162.765        | 163.101        | 162.429        | V[4]  |
| L[22] | <b>753.796</b> | 135.082        | 129.742        | 130.078        | 129.406        | L[3]  |
| R[23] | <b>805.830</b> | 97.387         | 92.047         | 92.383         | 91.711         | R[2]  |
| D[24] | <b>844.172</b> | 45.353         | 40.014         | 40.349         | 39.678         | D[1]  |

# sp | P62806 | H4\_MOUSE

[Acetyl]SGRGKGGKGLGKGGAKRHRK<sup>Methyl</sup>VLRD  
14.02

- ▶ fragmentation table for charge state 4+
- ▶ specType=etd
- ▶ score=99.30
- ▶ F105341.dat
- ▶ query=q12698.p1
- ▶ precursor=507.105320
- ▶ chargePrecursor=5
- ▶ itol=0.8

| AA    | c              | y              | z+1            | z+2            | z              | AA    |
|-------|----------------|----------------|----------------|----------------|----------------|-------|
| S[1]  | 37.525         | <b>633.627</b> | <b>629.622</b> | 0.755          | <b>629.170</b> | S[24] |
| G[2]  | 51.780         | 501.365        | <b>597.362</b> | 0.755          | <b>597.110</b> | G[23] |
| R[3]  | 90.805         | 587.111        | <b>583.106</b> | <b>583.358</b> | <b>582.854</b> | R[22] |
| G[4]  | 105.061        | 548.086        | 544.081        | 544.333        | 543.829        | G[21] |
| K[5]  | 137.084        | 533.830        | 529.826        | 530.078        | 529.574        | K[20] |
| G[6]  | 151.340        | 501.807        | 497.802        | 498.054        | 497.550        | G[19] |
| G[7]  | 165.595        | 487.551        | 483.547        | 483.799        | 483.295        | G[18] |
| K[8]  | 197.619        | 473.296        | 469.291        | 469.543        | 469.039        | K[17] |
| G[9]  | 211.874        | 441.272        | 437.268        | 437.520        | 437.016        | G[16] |
| L[10] | 380.148        | 427.017        | <b>423.012</b> | <b>423.264</b> | <b>422.760</b> | L[15] |
| G[11] | 254.401        | 398.740        | <b>394.741</b> | <b>394.993</b> | <b>394.489</b> | G[14] |
| K[12] | 286.424        | 384.490        | 380.486        | 380.738        | 380.234        | K[13] |
| G[13] | 300.680        | 352.467        | 348.462        | 348.714        | 348.210        | G[12] |
| G[14] | 314.935        | 338.211        | 334.207        | 334.459        | 333.955        | G[11] |
| A[15] | 332.694        | 323.956        | 319.951        | 320.203        | 319.699        | A[10] |
| K[16] | 364.718        | 306.197        | 302.192        | 302.444        | 301.940        | K[9]  |
| R[17] | 403.743        | <b>274.173</b> | 270.168        | 270.420        | 269.916        | R[8]  |
| H[18] | 438.008        | 235.148        | 231.143        | 231.395        | 230.891        | H[7]  |
| R[19] | 477.033        | 200.883        | 196.878        | 197.130        | 196.626        | R[6]  |
| K[20] | 512.561        | 161.858        | 157.853        | 158.105        | 157.601        | K[5]  |
| V[21] | 537.328        | 126.330        | 122.325        | 122.577        | 122.073        | V[4]  |
| L[22] | 565.599        | 101.563        | 97.558         | 97.810         | 97.306         | L[3]  |
| R[23] | <b>604.624</b> | 73.292         | 69.287         | 69.539         | 69.035         | R[2]  |
| D[24] | <b>633.381</b> | 34.267         | 30.262         | 30.514         | 30.010         | D[1]  |





# sp | P62806 | H4\_MOUSE

[Acetyl]SGRGKGGKGLGKGGAKRHRK<sup>Trimethyl</sup>VLRD  
42.05

- ▶ fragmentation table for charge state 1+
- ▶ specType=etd
- ▶ score=124.40
- ▶ F105341.dat
- ▶ query=q12784\_p1
- ▶ precursor=640.636120
- ▶ chargePrecursor=4
- ▶ itol=0.8

| AA    | c               | y        | z+1             | z+2             | z        | AA    |
|-------|-----------------|----------|-----------------|-----------------|----------|-------|
| S[1]  | 147.076         | 2509.518 | 2543.489        | 0.000           | 2542.491 | S[24] |
| G[2]  | 204.098         | 2430.475 | 2414.457        | 0.000           | 2413.449 | G[23] |
| R[3]  | <b>368.199</b>  | 2373.464 | 2367.435        | 2358.443        | 2366.427 | R[22] |
| G[4]  | <b>417.230</b>  | 2217.953 | 2200.334        | 2202.342        | 2200.334 | G[21] |
| K[5]  | <b>545.315</b>  | 2160.331 | 2144.313        | 2145.320        | 2143.305 | K[20] |
| G[6]  | <b>602.337</b>  | 2032.236 | 2016.218        | 2017.225        | 2015.210 | G[19] |
| G[7]  | <b>659.358</b>  | 1975.215 | <b>1959.196</b> | 1960.204        | 1958.188 | G[18] |
| K[8]  | <b>787.453</b>  | 1918.193 | 1902.175        | <b>1903.182</b> | 1901.167 | K[17] |
| G[9]  | <b>844.475</b>  | 1790.098 | <b>1774.080</b> | 1775.087        | 1773.072 | G[16] |
| L[10] | <b>927.559</b>  | 1733.077 | 1717.058        | <b>1718.066</b> | 1716.050 | L[15] |
| G[11] | <b>1014.580</b> | 1619.993 | 1603.974        | <b>1604.982</b> | 1602.966 | G[14] |
| K[12] | <b>1142.675</b> | 1562.971 | 1546.953        | <b>1547.960</b> | 1545.945 | K[13] |
| G[13] | <b>1199.697</b> | 1434.876 | <b>1418.858</b> | <b>1419.866</b> | 1417.850 | G[12] |
| G[14] | 1256.718        | 1377.855 | 1361.836        | <b>1362.844</b> | 1360.828 | G[11] |
| A[15] | <b>1327.795</b> | 1320.833 | 1304.815        | 1305.823        | 1303.807 | A[10] |
| R[16] | <b>1435.850</b> | 1249.796 | 1233.778        | <b>1234.785</b> | 1232.770 | R[9]  |
| R[17] | <b>1611.951</b> | 1121.701 | 1105.683        | <b>1106.691</b> | 1104.675 | R[8]  |
| H[18] | 1749.010        | 995.600  | 949.582         | 950.589         | 948.574  | H[7]  |
| R[19] | 1908.111        | 828.541  | 812.523         | 813.530         | 811.515  | R[6]  |
| K[20] | 2075.253        | 672.440  | <b>656.422</b>  | <b>657.429</b>  | 655.414  | K[5]  |
| V[21] | 2174.322        | 502.298  | 486.280         | 487.287         | 485.272  | V[4]  |
| L[22] | 2287.406        | 403.232  | 387.214         | <b>388.219</b>  | 386.203  | L[3]  |
| R[23] | 2443.507        | 296.146  | 274.127         | <b>275.135</b>  | 273.119  | R[2]  |
| D[24] | 2598.534        | 134.045  | 118.026         | 119.034         | 117.018  | D[1]  |

# sp | P62806 | H4\_MOUSE

[Acetyl]SGRGKGGKGLGKGGAKRHRK<sup>Trimethyl</sup>VLRD  
42.05

- ▶ fragmentation table for charge state 2+
- ▶ specType=etd
- ▶ score=124.40
- ▶ F105341.dat
- ▶ query=q12784\_p1
- ▶ precursor=640.636120
- ▶ chargePrecursor=4
- ▶ itol=0.8

| AA    | c               | y               | z+1             | z+2             | z               | AA    |
|-------|-----------------|-----------------|-----------------|-----------------|-----------------|-------|
| S[1]  | 74.642          | <b>1280.263</b> | <b>1272.253</b> | 0.504           | 1271.749        | S[24] |
| G[2]  | 102.553         | 1215.741        | <b>1207.732</b> | 0.504           | 1207.228        | G[23] |
| R[3]  | 180.603         | 1187.231        | <b>1179.221</b> | <b>1179.725</b> | 1179.711        | R[22] |
| G[4]  | 259.114         | 1159.180        | <b>1101.171</b> | <b>1101.975</b> | <b>1100.567</b> | G[21] |
| K[5]  | 273.151         | 1087.669        | <b>1072.660</b> | <b>1073.164</b> | <b>1072.156</b> | K[20] |
| G[6]  | 301.672         | 1016.622        | <b>1008.612</b> | <b>1009.116</b> | <b>1008.108</b> | G[19] |
| G[7]  | 330.183         | 988.111         | <b>980.102</b>  | <b>980.606</b>  | 979.599         | G[18] |
| K[8]  | 394.230         | 959.600         | <b>951.591</b>  | <b>952.095</b>  | 951.087         | K[17] |
| G[9]  | 422.741         | 895.551         | <b>887.543</b>  | <b>888.047</b>  | <b>887.040</b>  | G[16] |
| L[10] | 479.289         | 867.042         | <b>859.033</b>  | <b>859.537</b>  | <b>858.529</b>  | L[15] |
| G[11] | 507.794         | 810.500         | <b>802.491</b>  | <b>802.995</b>  | <b>801.987</b>  | G[14] |
| K[12] | 571.841         | 781.989         | <b>773.980</b>  | <b>774.484</b>  | 773.476         | K[13] |
| G[13] | 600.352         | 717.942         | <b>709.932</b>  | <b>710.436</b>  | 709.429         | G[12] |
| G[14] | 628.863         | 699.431         | <b>681.422</b>  | <b>681.926</b>  | 680.919         | G[11] |
| A[15] | 684.381         | 669.920         | <b>651.911</b>  | <b>652.415</b>  | <b>652.407</b>  | A[10] |
| R[16] | 739.439         | 625.402         | <b>617.392</b>  | <b>617.896</b>  | 616.889         | R[9]  |
| R[17] | <b>806.479</b>  | 561.354         | <b>553.345</b>  | <b>553.849</b>  | <b>552.841</b>  | R[8]  |
| H[18] | <b>875.009</b>  | 483.304         | 475.294         | 475.798         | 474.791         | H[7]  |
| R[19] | <b>953.059</b>  | 414.774         | 406.765         | 407.269         | 406.261         | R[6]  |
| K[20] | <b>1038.130</b> | 336.724         | 328.714         | 329.218         | 328.211         | K[5]  |
| V[21] | <b>1087.665</b> | 251.653         | 243.643         | 244.147         | 243.140         | V[4]  |
| L[22] | <b>1144.207</b> | 202.119         | 194.109         | 194.613         | 193.606         | L[3]  |
| R[23] | <b>1222.257</b> | 145.577         | 137.567         | 138.071         | 137.063         | R[2]  |
| D[24] | 1279.771        | 67.526          | 59.517          | 60.021          | 59.013          | D[1]  |

# sp | P62806 | H4\_MOUSE

[Acetyl]SGRGKGGKGLGKGGAKRHRK<sup>Trimethyl</sup>VLRD  
42.05

- ▶ fragmentation table for charge state 3+
- ▶ specType=etd
- ▶ score=124.40
- ▶ F105341.dat
- ▶ query=q12784.p1
- ▶ precursor=640.636120
- ▶ chargePrecursor=4
- ▶ itol=0.8

| AA    | c              | y              | z+1            | z+2            | z              | AA    |
|-------|----------------|----------------|----------------|----------------|----------------|-------|
| S[1]  | 49.697         | <b>853.844</b> | <b>848.505</b> | 0.672          | <b>848.169</b> | S[24] |
| G[2]  | 58.704         | 310.830        | <b>905.490</b> | 0.672          | <b>805.154</b> | G[23] |
| R[3]  | 150.738        | 791.821        | <b>786.483</b> | <b>786.819</b> | <b>786.147</b> | R[22] |
| G[4]  | 139.745        | 739.789        | 734.450        | 734.785        | 734.114        | G[21] |
| K[5]  | 182.443        | 720.782        | 715.442        | 715.778        | 715.106        | K[20] |
| G[6]  | 201.450        | 678.084        | 672.744        | 673.080        | 672.408        | G[19] |
| G[7]  | 220.458        | <b>659.076</b> | <b>653.737</b> | 654.073        | <b>653.401</b> | G[18] |
| K[8]  | 263.156        | 640.069        | 634.730        | 635.066        | 634.394        | K[17] |
| G[9]  | 282.163        | 597.371        | 592.031        | 592.367        | 591.695        | G[16] |
| L[10] | 319.858        | 678.364        | 573.024        | 573.360        | 572.688        | L[15] |
| G[11] | 338.865        | 540.660        | 535.320        | 535.656        | 534.984        | G[14] |
| K[12] | 381.563        | 521.662        | 516.322        | 516.658        | 515.986        | K[13] |
| G[13] | 400.570        | 478.964        | 473.624        | 473.960        | 473.288        | G[12] |
| G[14] | 419.578        | 459.957        | 454.617        | 454.953        | 454.281        | G[11] |
| A[15] | 443.257        | 440.949        | 435.610        | 435.946        | 435.274        | A[10] |
| K[16] | 485.955        | <b>417.270</b> | 411.931        | 412.267        | 411.595        | K[9]  |
| R[17] | 537.989        | 374.572        | 369.232        | 369.568        | 368.896        | R[8]  |
| H[18] | 583.675        | 322.538        | 317.199        | 317.535        | 316.863        | H[7]  |
| R[19] | 635.709        | 276.852        | 271.512        | 271.848        | 271.176        | R[6]  |
| K[20] | 692.423        | 224.818        | 219.478        | 219.815        | 219.143        | K[5]  |
| V[21] | 725.445        | 168.104        | 162.764        | 163.101        | 162.429        | V[4]  |
| L[22] | 763.140        | 135.082        | 129.742        | 130.078        | 129.406        | L[3]  |
| R[23] | <b>815.174</b> | 97.387         | 92.047         | 92.383         | 91.711         | R[2]  |
| D[24] | <b>853.516</b> | 45.353         | 40.014         | 40.349         | 39.678         | D[1]  |



# sp | P62806 | H4\_MOUSE

[Acetyl]SGRGKGGKGLGKGGAK<sup>Acetyl</sup> RHRK<sup>Trimethyl</sup> VLRD<sup>42.01</sup> <sup>42.05</sup>

- ▶ fragmentation table for charge state 1+
- ▶ specType=etd
- ▶ score=119.20
- ▶ F105341.dat
- ▶ query=q12975\_p1
- ▶ precursor=651.136820
- ▶ chargePrecursor=4
- ▶ itol=0.8

| AA | c  | y               | z+1             | z+2             | z               | AA             |       |
|----|----|-----------------|-----------------|-----------------|-----------------|----------------|-------|
| S  | 1  | 147.076         | 2601.528        | 2585.510        | 0.000           | 2584.502       | S[24] |
| G  | 2  | 204.098         | 2472.488        | 2456.467        | 0.000           | 2455.459       | G[23] |
| R  | 3  | <b>360.199</b>  | 2415.464        | 2389.446        | 2400.451        | 2398.438       | R[22] |
| G  | 4  | <b>417.220</b>  | 2259.361        | 2243.345        | 2244.352        | 2242.337       | G[21] |
| K  | 5  | <b>545.315</b>  | 2202.342        | 2186.323        | 2187.331        | 2185.315       | K[20] |
| G  | 6  | <b>602.337</b>  | 2074.247        | 2058.228        | 2059.236        | 2057.220       | G[19] |
| G  | 7  | <b>659.358</b>  | 2017.225        | 2001.207        | 2002.214        | 2000.199       | G[18] |
| K  | 8  | <b>787.453</b>  | 1960.204        | 1944.185        | 1945.193        | 1943.177       | K[17] |
| G  | 9  | <b>844.475</b>  | 1832.100        | 1816.080        | <b>1817.098</b> | 1815.082       | G[16] |
| L  | 10 | <b>957.559</b>  | 1775.087        | 1759.069        | 1760.077        | 1758.061       | L[15] |
| Q  | 11 | <b>1014.580</b> | 1662.003        | 1645.985        | <b>1646.993</b> | 1644.977       | Q[14] |
| K  | 12 | <b>1142.675</b> | 1604.982        | 1588.963        | <b>1589.971</b> | 1587.955       | K[13] |
| G  | 13 | <b>1199.697</b> | 1476.887        | <b>1460.868</b> | <b>1461.876</b> | 1459.860       | G[12] |
| G  | 14 | 1256.718        | 1419.866        | 1403.847        | <b>1404.855</b> | 1402.839       | G[11] |
| A  | 15 | 1377.737        | 1362.844        | 1346.825        | 1347.833        | 1345.816       | A[10] |
| R  | 16 | <b>1497.861</b> | 1291.801        | 1275.782        | 1276.790        | 1274.769       | R[9]  |
| R  | 17 | 1653.962        | <b>1121.701</b> | 1105.683        | <b>1106.691</b> | 1104.675       | R[8]  |
| H  | 18 | 1791.021        | 965.600         | 949.582         | <b>950.589</b>  | 948.574        | H[7]  |
| R  | 19 | <b>1947.122</b> | <b>826.541</b>  | 812.523         | <b>813.530</b>  | <b>811.515</b> | R[6]  |
| K  | 20 | 2117.264        | 672.440         | 656.422         | <b>657.429</b>  | 655.414        | K[5]  |
| V  | 21 | 2216.132        | 502.260         | 486.240         | 487.247         | 485.222        | V[4]  |
| L  | 22 | 2329.418        | 463.139         | 447.111         | 448.119         | 446.101        | L[3]  |
| R  | 23 | 2485.517        | 290.146         | 274.127         | <b>275.135</b>  | 273.119        | R[2]  |
| D  | 24 | 2600.544        | 134.045         | 118.026         | 119.034         | 117.018        | D[1]  |

# sp | P62806 | H4\_MOUSE

[Acetyl]SGRGKGGKGLGKGGAK<sup>Acetyl</sup> RHRK<sup>Trimethyl</sup> VLRD<sup>42.01</sup> <sup>42.05</sup>

- ▶ fragmentation table for charge state 2+
- ▶ specType=etd
- ▶ score=119.20
- ▶ F105341.dat
- ▶ query=q12975\_p1
- ▶ precursor=651.136820
- ▶ chargePrecursor=4
- ▶ itol=0.8

| AA    | c               | y               | z+1             | z+2             | z               | AA    |
|-------|-----------------|-----------------|-----------------|-----------------|-----------------|-------|
| S[1]  | 74.042          | <b>1301.268</b> | <b>1293.258</b> | 0.504           | 1299.750        | S[24] |
| G[2]  | 102.553         | 1236.747        | <b>1228.737</b> | 0.504           | <b>1228.233</b> | G[23] |
| R[3]  | 150.603         | <b>1208.236</b> | <b>1200.226</b> | <b>1200.730</b> | <b>1199.723</b> | R[22] |
| G[4]  | 209.114         | 1139.165        | <b>1122.115</b> | <b>1122.680</b> | <b>1121.672</b> | G[21] |
| K[5]  | 273.163         | 1101.675        | <b>1093.665</b> | <b>1094.169</b> | <b>1093.161</b> | K[20] |
| G[6]  | 303.672         | 1037.627        | 1029.618        | <b>1030.122</b> | 1029.114        | G[19] |
| G[7]  | 330.183         | 1009.116        | <b>1001.107</b> | <b>1001.611</b> | 1000.603        | G[18] |
| K[8]  | 394.230         | 950.606         | 942.595         | <b>973.100</b>  | 972.592         | K[17] |
| G[9]  | 422.741         | 916.595         | <b>908.549</b>  | <b>909.053</b>  | <b>908.045</b>  | G[16] |
| L[10] | 479.293         | 858.041         | <b>850.030</b>  | <b>850.542</b>  | <b>849.534</b>  | L[15] |
| G[11] | 507.794         | 831.505         | <b>823.496</b>  | <b>824.000</b>  | 822.992         | G[14] |
| K[12] | 571.841         | 802.995         | <b>794.985</b>  | <b>795.489</b>  | 794.481         | K[13] |
| G[13] | 600.352         | 738.947         | <b>730.938</b>  | <b>731.442</b>  | <b>730.434</b>  | G[12] |
| G[14] | 638.863         | 710.436         | <b>702.427</b>  | <b>702.931</b>  | 701.923         | G[11] |
| A[15] | 684.381         | 681.925         | <b>673.916</b>  | <b>674.420</b>  | <b>673.412</b>  | A[10] |
| R[16] | 749.438         | 646.607         | <b>638.308</b>  | <b>638.802</b>  | <b>637.894</b>  | R[9]  |
| R[17] | <b>827.485</b>  | 561.354         | <b>553.345</b>  | <b>553.849</b>  | <b>552.841</b>  | R[8]  |
| H[18] | <b>896.014</b>  | 483.304         | 475.294         | 475.798         | 474.791         | H[7]  |
| R[19] | <b>974.065</b>  | 414.774         | 406.765         | 407.269         | 406.261         | R[6]  |
| K[20] | <b>1059.136</b> | 336.724         | 328.714         | 329.218         | 328.211         | K[5]  |
| V[21] | <b>1105.670</b> | 252.053         | 243.043         | 244.547         | 243.540         | V[4]  |
| L[22] | <b>1165.212</b> | 202.119         | 194.109         | 194.613         | 193.605         | L[3]  |
| R[23] | <b>1243.262</b> | 145.577         | 137.567         | 138.071         | 137.063         | R[2]  |
| D[24] | 1300.776        | 67.526          | 59.517          | 60.021          | 59.013          | D[1]  |

# sp | P62806 | H4\_MOUSE

[Acetyl]SGRGKGGKGLGKGGAK<sup>Acetyl</sup> RHRK<sup>Trimethyl</sup> VLRLD<sup>42.01</sup> <sup>42.05</sup>

- ▶ fragmentation table for charge state 3+
- ▶ specType=etd
- ▶ score=119.20
- ▶ F105341.dat
- ▶ query=q12975.p1
- ▶ precursor=651.136820
- ▶ chargePrecursor=4
- ▶ itol=0.8

| AA    | c              | y              | z+1            | z+2            | z              | AA    |
|-------|----------------|----------------|----------------|----------------|----------------|-------|
| S[1]  | 49.697         | <b>867.848</b> | <b>862.508</b> | 0.672          | <b>862.172</b> | S[24] |
| G[2]  | 58.704         | 324.933        | <b>819.494</b> | 0.672          | <b>819.158</b> | G[23] |
| R[3]  | 150.738        | <b>805.826</b> | <b>800.487</b> | <b>800.823</b> | <b>800.151</b> | R[22] |
| G[4]  | 139.745        | 753.793        | 748.453        | 748.789        | 748.117        | G[21] |
| K[5]  | 182.443        | 734.785        | 729.446        | 729.782        | 729.110        | K[20] |
| G[6]  | 201.450        | 692.087        | 686.748        | 687.083        | 686.412        | G[19] |
| G[7]  | 220.458        | 673.080        | 667.740        | 668.076        | 667.404        | G[18] |
| K[8]  | 263.156        | 654.073        | 648.733        | 649.069        | 648.397        | K[17] |
| G[9]  | 282.163        | 631.374        | 605.035        | 605.371        | 605.699        | G[16] |
| L[10] | 319.858        | 602.367        | 587.028        | 587.364        | 586.692        | L[15] |
| G[11] | 338.865        | <b>554.673</b> | 549.333        | 549.669        | 548.997        | G[14] |
| K[12] | 381.563        | 535.666        | 530.326        | 530.662        | 529.990        | K[13] |
| G[13] | 400.570        | 492.967        | 487.628        | 487.964        | 487.292        | G[12] |
| G[14] | 419.578        | 473.960        | 468.620        | 468.956        | 468.285        | G[11] |
| A[15] | 443.257        | 454.953        | 449.613        | 449.949        | 449.277        | A[10] |
| K[16] | 469.958        | 431.274        | 425.934        | 426.270        | 425.598        | K[9]  |
| R[17] | 551.992        | 374.572        | 369.232        | 369.568        | 368.896        | R[8]  |
| H[18] | 597.678        | 322.538        | 317.198        | 317.535        | 316.863        | H[7]  |
| R[19] | 649.712        | 276.852        | 271.512        | 271.848        | 271.176        | R[6]  |
| K[20] | 706.426        | 224.818        | 219.478        | 219.815        | 219.143        | K[5]  |
| V[21] | 759.449        | 168.104        | 162.764        | 163.101        | 162.429        | V[4]  |
| L[22] | 777.144        | 135.082        | 129.742        | 130.078        | 129.406        | L[3]  |
| R[23] | <b>829.177</b> | 97.387         | 92.047         | 92.383         | 91.711         | R[2]  |
| D[24] | <b>867.520</b> | 45.353         | 40.014         | 40.349         | 39.678         | D[1]  |





# sp | P62806 | H4\_MOUSE

[Acetyl]SGRGKGGKGLGKGGAK<sup>Acetyl</sup> RHR<sup>Trimethyl</sup> KVLRD<sup>42.01</sup> <sup>42.05</sup>

- ▶ fragmentation table for charge state 1+
- ▶ specType=etd
- ▶ score=111.07
- ▶ F105341.dat
- ▶ query=q12976\_p1
- ▶ precursor=521.111410
- ▶ chargePrecursor=5
- ▶ itol=0.8

| AA | c  | y               | z+1             | z+2            | z               | AA       |       |
|----|----|-----------------|-----------------|----------------|-----------------|----------|-------|
| S  | 1  | 347.676         | 2001.528        | 2585.510       | 0.000           | 2584.502 | S[24] |
| G  | 2  | 204.098         | 3472.480        | 2456.467       | 0.000           | 2455.459 | G[23] |
| R  | 3  | <b>368.199</b>  | 2415.464        | 2399.446       | 2400.453        | 2398.433 | R[22] |
| G  | 4  | <b>417.220</b>  | 2259.363        | 2243.345       | 2244.352        | 2242.331 | G[21] |
| K  | 5  | <b>545.315</b>  | 2202.342        | 2186.323       | 2187.331        | 2185.315 | K[20] |
| G  | 6  | <b>602.337</b>  | 2074.247        | 2058.228       | 2059.236        | 2057.220 | G[19] |
| G  | 7  | <b>659.358</b>  | 2017.225        | 2001.207       | 2002.214        | 2000.199 | G[18] |
| K  | 8  | <b>787.453</b>  | 1960.204        | 1944.185       | 1945.193        | 1943.177 | K[17] |
| G  | 9  | <b>844.475</b>  | 1832.100        | 1816.080       | 1817.088        | 1815.062 | G[16] |
| L  | 10 | <b>927.559</b>  | 1775.087        | 1759.069       | 1760.077        | 1758.061 | L[15] |
| G  | 11 | <b>1014.580</b> | 1662.023        | 1646.005       | 1646.013        | 1644.977 | G[14] |
| K  | 12 | <b>1142.675</b> | 1604.982        | 1588.963       | 1589.971        | 1587.955 | K[13] |
| G  | 13 | 1199.697        | 1476.887        | 1460.868       | <b>1461.876</b> | 1459.860 | G[12] |
| G  | 14 | <b>1256.718</b> | 1419.866        | 1403.847       | <b>1404.855</b> | 1402.839 | G[11] |
| A  | 15 | <b>1327.755</b> | 1362.844        | 1346.825       | <b>1347.833</b> | 1345.818 | A[10] |
| R  | 16 | 1407.883        | 1293.807        | 1277.788       | 1278.796        | 1274.780 | R[9]  |
| R  | 17 | <b>1653.962</b> | <b>1121.701</b> | 1105.683       | 1106.691        | 1104.675 | R[8]  |
| H  | 18 | <b>1791.021</b> | 965.650         | 949.582        | <b>950.589</b>  | 948.574  | H[7]  |
| R  | 19 | 1089.169        | <b>828.541</b>  | <b>812.523</b> | <b>813.530</b>  | 811.515  | R[6]  |
| K  | 20 | 2117.264        | 630.393         | 614.375        | <b>615.382</b>  | 613.367  | K[5]  |
| V  | 21 | 2216.332        | 502.268         | 486.250        | <b>487.267</b>  | 485.272  | V[4]  |
| L  | 22 | 2329.416        | 403.239         | <b>387.211</b> | <b>388.219</b>  | 386.203  | L[3]  |
| R  | 23 | 2485.517        | 290.140         | <b>274.127</b> | -75.135         | 273.112  | R[2]  |
| D  | 24 | 2600.544        | 134.045         | 118.026        | 119.034         | 117.018  | D[1]  |

# sp | P62806 | H4\_MOUSE

[Acetyl]SGRGKGGKGLGKGGAK<sup>Acetyl</sup> RHR<sup>Trimethyl</sup> KVLRD<sup>42.01</sup> <sup>42.05</sup>

- ▶ fragmentation table for charge state 2+
- ▶ specType=etd
- ▶ score=111.07
- ▶ F105341.dat
- ▶ query=q12976\_p1
- ▶ precursor=521.111410
- ▶ chargePrecursor=5
- ▶ itol=0.8

| AA    | c               | y               | z+1             | z+2             | z               | AA    |
|-------|-----------------|-----------------|-----------------|-----------------|-----------------|-------|
| S[1]  | 74.642          | <b>1301.268</b> | <b>1293.258</b> | 0.504           | 1299.756        | S[24] |
| G[2]  | 102.553         | 1236.747        | <b>1228.737</b> | 0.504           | 1228.231        | G[23] |
| K[3]  | 180.603         | 1208.236        | <b>1200.226</b> | <b>1200.730</b> | 1199.221        | K[22] |
| G[4]  | 259.114         | 1130.165        | <b>1122.118</b> | <b>1122.680</b> | <b>1121.872</b> | G[21] |
| K[5]  | 273.151         | 1101.675        | <b>1093.665</b> | <b>1094.169</b> | <b>1093.161</b> | K[20] |
| G[6]  | 303.672         | 1037.627        | <b>1029.618</b> | <b>1030.122</b> | 1029.114        | G[19] |
| G[7]  | 330.183         | 1009.116        | <b>1001.107</b> | <b>1001.611</b> | 1000.603        | G[18] |
| K[8]  | 394.231         | 930.606         | <b>972.596</b>  | <b>973.100</b>  | 972.592         | K[17] |
| G[9]  | 427.741         | 916.566         | <b>908.549</b>  | <b>909.053</b>  | <b>908.045</b>  | G[16] |
| L[10] | <b>479.283</b>  | 868.047         | <b>860.038</b>  | <b>860.542</b>  | 859.536         | L[15] |
| G[11] | 507.794         | 831.505         | <b>823.496</b>  | <b>824.000</b>  | 823.992         | G[14] |
| K[12] | <b>571.841</b>  | 802.995         | <b>794.985</b>  | <b>795.489</b>  | <b>794.481</b>  | K[13] |
| G[13] | <b>600.352</b>  | <b>738.947</b>  | <b>730.938</b>  | <b>731.442</b>  | <b>730.434</b>  | G[12] |
| G[14] | <b>628.863</b>  | 710.436         | <b>702.427</b>  | <b>702.931</b>  | <b>701.923</b>  | G[11] |
| A[15] | <b>664.381</b>  | 681.925         | <b>673.916</b>  | <b>674.420</b>  | <b>673.412</b>  | A[10] |
| K[16] | <b>748.434</b>  | 646.407         | <b>638.398</b>  | <b>638.902</b>  | <b>637.894</b>  | K[9]  |
| R[17] | <b>827.485</b>  | 561.354         | <b>553.345</b>  | <b>553.849</b>  | <b>552.841</b>  | R[8]  |
| H[18] | <b>896.014</b>  | 483.304         | <b>475.294</b>  | <b>475.798</b>  | <b>474.791</b>  | H[7]  |
| R[19] | 995.088         | 414.774         | <b>406.765</b>  | <b>407.269</b>  | <b>406.261</b>  | R[6]  |
| K[20] | <b>1059.136</b> | 315.700         | 307.691         | 308.195         | 307.187         | K[5]  |
| V[21] | <b>1108.670</b> | 251.653         | 243.643         | 244.147         | 243.140         | V[4]  |
| L[22] | <b>1165.212</b> | 202.119         | 194.109         | 194.613         | 193.605         | L[3]  |
| R[23] | <b>1243.262</b> | 145.577         | 137.567         | 138.071         | 137.063         | R[2]  |
| D[24] | 1300.776        | 67.526          | 59.517          | 60.021          | 59.013          | D[1]  |

# sp | P62806 | H4\_MOUSE

[Acetyl]SGRGKGGKGLGKGGAK<sup>Acetyl</sup> RHR<sup>Trimethyl</sup> KVLRD<sup>42.01</sup> <sup>42.05</sup>

- ▶ fragmentation table for charge state 3+
- ▶ specType=etd
- ▶ score=111.07
- ▶ F105341.dat
- ▶ query=q12976.p1
- ▶ precursor=521.111410
- ▶ chargePrecursor=5
- ▶ itol=0.8

| AA    | c              | y              | z+1            | z+2            | z              | AA    |
|-------|----------------|----------------|----------------|----------------|----------------|-------|
| S[1]  | 49.697         | <b>867.848</b> | <b>862.508</b> | 0.672          | <b>862.172</b> | S[24] |
| G[2]  | 58.704         | 324.833        | <b>819.494</b> | 0.672          | 819.158        | G[23] |
| R[3]  | 150.738        | 805.826        | <b>800.487</b> | <b>800.823</b> | 800.151        | R[22] |
| G[4]  | 139.745        | 753.793        | <b>748.453</b> | <b>748.789</b> | <b>748.117</b> | G[21] |
| K[5]  | 182.443        | 734.785        | <b>729.446</b> | <b>729.782</b> | <b>729.110</b> | K[20] |
| G[6]  | 201.450        | 692.087        | <b>686.748</b> | <b>687.083</b> | <b>686.412</b> | G[19] |
| G[7]  | 220.458        | 673.080        | <b>667.740</b> | <b>668.076</b> | <b>667.404</b> | G[18] |
| K[8]  | 263.156        | 654.073        | 646.733        | 646.069        | <b>648.397</b> | K[17] |
| G[9]  | 282.163        | <b>611.374</b> | <b>606.035</b> | <b>606.371</b> | <b>605.999</b> | G[16] |
| L[10] | 319.958        | <b>592.367</b> | <b>587.028</b> | <b>587.364</b> | <b>586.692</b> | L[15] |
| G[11] | 338.965        | <b>554.673</b> | <b>549.333</b> | <b>549.669</b> | <b>548.997</b> | G[14] |
| K[12] | 381.563        | <b>535.666</b> | <b>530.326</b> | <b>530.662</b> | <b>529.990</b> | K[13] |
| G[13] | 400.570        | 492.967        | <b>487.628</b> | <b>487.964</b> | <b>487.292</b> | G[12] |
| G[14] | 419.578        | 473.960        | 468.620        | 468.956        | 468.285        | G[11] |
| A[15] | 443.257        | 454.953        | 449.613        | 449.949        | 449.277        | A[10] |
| K[16] | 469.958        | 431.274        | 425.934        | 426.270        | 425.998        | K[9]  |
| R[17] | <b>551.992</b> | 374.572        | 369.232        | 369.568        | 368.896        | R[8]  |
| H[18] | 597.678        | 322.538        | 317.198        | 317.535        | 316.863        | H[7]  |
| R[19] | 663.278        | 276.852        | 271.512        | 271.848        | 271.176        | R[6]  |
| K[20] | <b>706.426</b> | 210.803        | 205.463        | 205.799        | 205.127        | K[5]  |
| V[21] | <b>739.449</b> | 168.104        | 162.764        | 163.101        | 162.429        | V[4]  |
| L[22] | <b>777.144</b> | 135.082        | 129.742        | 130.078        | 129.406        | L[3]  |
| R[23] | <b>829.177</b> | 97.387         | 92.047         | 92.383         | 91.711         | R[2]  |
| D[24] | <b>867.520</b> | 45.353         | 40.014         | 40.349         | 39.678         | D[1]  |

# sp | P62806 | H4\_MOUSE

[Acetyl]SGRGKGGKGLGKGGAK<sup>Acetyl</sup> RHR<sup>Trimethyl</sup> KVLRD<sup>42.01</sup> <sup>42.05</sup>

- ▶ fragmentation table for charge state 4+
- ▶ specType=etd
- ▶ score=111.07
- ▶ F105341.dat
- ▶ query=q12976.p1
- ▶ precursor=521.111410
- ▶ chargePrecursor=5
- ▶ itol=0.8

| AA    | c              | y              | z+1            | z+2            | z              | AA    |
|-------|----------------|----------------|----------------|----------------|----------------|-------|
| S[1]  | 37.525         | <b>651.130</b> | <b>647.133</b> | 0.755          | 646.881        | S[24] |
| G[2]  | 51.780         | 518.877        | <b>614.872</b> | 0.755          | <b>614.620</b> | G[23] |
| R[3]  | 90.805         | 604.622        | <b>600.617</b> | <b>600.869</b> | <b>600.365</b> | R[22] |
| G[4]  | 105.061        | 565.596        | 561.592        | 561.844        | 561.340        | G[21] |
| K[5]  | 137.084        | <b>551.341</b> | 547.336        | 547.588        | 547.084        | K[20] |
| G[6]  | 151.340        | 519.317        | 515.312        | 515.564        | 515.061        | G[19] |
| G[7]  | 165.595        | 505.062        | 501.057        | 501.309        | 500.805        | G[18] |
| K[8]  | 197.619        | 490.806        | <b>486.802</b> | <b>487.054</b> | 486.550        | K[17] |
| G[9]  | 211.874        | 476.549        | 472.544        | 472.796        | 472.292        | G[16] |
| L[10] | 280.148        | 444.527        | 440.521        | 440.773        | 440.271        | L[15] |
| G[11] | 294.403        | 416.256        | 412.251        | 412.504        | 412.000        | G[14] |
| K[12] | 286.424        | 402.001        | 397.996        | 398.248        | 397.744        | K[13] |
| G[13] | 300.680        | 369.977        | 365.973        | 366.224        | 365.721        | G[12] |
| G[14] | 314.935        | 355.722        | 351.717        | 351.969        | 351.465        | G[11] |
| A[15] | 332.694        | 341.466        | 337.462        | 337.714        | 337.210        | A[10] |
| K[16] | 375.221        | 323.707        | 319.703        | 319.954        | 319.451        | K[9]  |
| R[17] | 414.246        | 301.181        | 297.176        | 297.428        | 296.924        | R[8]  |
| H[18] | 448.511        | 282.156        | 278.151        | 278.403        | 277.899        | H[7]  |
| R[19] | 498.044        | 207.891        | 203.886        | 204.138        | 203.634        | R[6]  |
| K[20] | <b>530.071</b> | 158.354        | 154.349        | 154.601        | 154.097        | K[5]  |
| V[21] | <b>554.839</b> | 126.330        | 122.325        | 122.577        | 122.073        | V[4]  |
| L[22] | 583.110        | 101.563        | 97.558         | 97.810         | 97.306         | L[3]  |
| R[23] | <b>622.135</b> | 73.292         | 69.287         | 69.539         | 69.035         | R[2]  |
| D[24] | <b>650.892</b> | 34.267         | 30.262         | 30.514         | 30.010         | D[1]  |



# sp | P62806 | H4\_MOUSE

[Acetyl]SGRGKGGKGLGK<sup>Acetyl</sup> 42.01 GGAK<sup>Acetyl</sup> 42.01 RHRK<sup>Methyl</sup> 14.02 VLRD

- ▶ fragmentation table for charge state 1+
- ▶ specType=etd
- ▶ score=85.62
- ▶ F105341.dat
- ▶ query=q13037\_p1
- ▶ precursor=654.632540
- ▶ chargePrecursor=4
- ▶ itol=0.8

| AA    | c               | y               | z+1            | z+2             | z        | AA    |
|-------|-----------------|-----------------|----------------|-----------------|----------|-------|
| S[1]  | 147.676         | 2015.508        | 2599.489       | 0.000           | 2598.481 | S[24] |
| G[2]  | 204.008         | 2489.465        | 2470.446       | 0.000           | 2469.439 | G[23] |
| R[3]  | <b>368.199</b>  | 2929.444        | 2413.425       | 2414.433        | 2412.417 | R[22] |
| G[4]  | <b>417.220</b>  | 2773.341        | 2297.334       | 2298.332        | 2296.316 | G[21] |
| K[5]  | <b>545.315</b>  | 2216.321        | 2200.300       | 2201.310        | 2199.295 | K[20] |
| G[6]  | <b>602.337</b>  | 2688.239        | 2072.207       | 2073.215        | 2071.200 | G[19] |
| G[7]  | <b>659.358</b>  | 2031.205        | 2015.189       | 2016.194        | 2014.178 | G[18] |
| K[8]  | <b>787.453</b>  | 1974.183        | 1958.164       | <b>1959.172</b> | 1957.157 | K[17] |
| G[9]  | <b>844.475</b>  | 1846.080        | 1830.069       | <b>1831.077</b> | 1829.062 | G[16] |
| L[10] | <b>927.559</b>  | 1789.967        | 1773.948       | <b>1774.956</b> | 1772.941 | L[15] |
| G[11] | <b>1014.580</b> | 1675.863        | 1659.844       | 1660.872        | 1658.856 | G[14] |
| K[12] | 1184.686        | 1618.961        | 1602.942       | <b>1603.950</b> | 1601.935 | K[13] |
| G[13] | <b>1241.707</b> | 1448.856        | 1432.837       | 1433.845        | 1431.829 | G[12] |
| G[14] | 1298.729        | <b>1391.834</b> | 1375.815       | <b>1376.823</b> | 1374.808 | G[11] |
| A[15] | <b>1369.766</b> | <b>1334.813</b> | 1318.794       | 1319.802        | 1317.786 | A[10] |
| R[16] | 1539.871        | 1293.793        | 1247.787       | 1248.765        | 1246.749 | R[9]  |
| R[17] | 1695.973        | 1093.670        | 1077.651       | 1078.659        | 1076.644 | R[8]  |
| H[18] | <b>1833.031</b> | 937.560         | <b>921.550</b> | 922.558         | 920.542  | H[7]  |
| R[19] | 1989.133        | 900.510         | <b>784.491</b> | <b>785.499</b>  | 783.484  | R[6]  |
| K[20] | 2131.243        | <b>644.409</b>  | 628.390        | <b>629.398</b>  | 627.382  | K[5]  |
| V[21] | 2230.312        | 502.295         | 486.280        | <b>487.287</b>  | 485.272  | V[4]  |
| L[22] | 2343.396        | 403.239         | 387.213        | 388.219         | 386.203  | L[3]  |
| R[23] | 2499.497        | 290.140         | 274.127        | 275.135         | 273.119  | R[2]  |
| D[24] | 2614.524        | 134.045         | 118.026        | 119.034         | 117.018  | D[1]  |

# sp | P62806 | H4\_MOUSE

[Acetyl]SGRGKGGKGLGK<sup>Acetyl</sup><sub>42.01</sub> GGAK<sup>Acetyl</sup><sub>42.01</sub> RHRK<sup>Methyl</sup><sub>14.02</sub> VLRD

- ▶ fragmentation table for charge state 2+
- ▶ specType=etd
- ▶ score=85.62
- ▶ F105341.dat
- ▶ query=q13037\_p1
- ▶ precursor=654.632540
- ▶ chargePrecursor=4
- ▶ itol=0.8

| AA    | c               | y               | z+1             | z+2             | z               | AA    |
|-------|-----------------|-----------------|-----------------|-----------------|-----------------|-------|
| S[1]  | 74.642          | <b>1308.257</b> | 1300.268        | 0.504           | 1299.746        | S[24] |
| G[2]  | 102.553         | 1243.736        | <b>1235.727</b> | 0.504           | 1235.231        | G[23] |
| R[3]  | 180.603         | 1215.225        | <b>1207.216</b> | <b>1207.720</b> | 1206.713        | R[22] |
| G[4]  | 259.114         | 1137.375        | <b>1129.168</b> | <b>1119.669</b> | <b>1128.662</b> | G[21] |
| K[5]  | 273.153         | 1108.664        | 1100.555        | <b>1101.159</b> | 1100.151        | K[20] |
| G[6]  | 301.672         | 1044.617        | <b>1036.607</b> | <b>1037.111</b> | <b>1036.103</b> | G[19] |
| G[7]  | 330.183         | 1016.106        | <b>1008.097</b> | <b>1008.601</b> | 1007.593        | G[18] |
| K[8]  | 394.230         | <b>987.595</b>  | 979.586         | <b>980.090</b>  | 979.082         | K[17] |
| G[9]  | 422.741         | <b>923.548</b>  | <b>915.538</b>  | <b>916.042</b>  | <b>915.034</b>  | G[16] |
| L[10] | 479.293         | 895.031         | <b>887.023</b>  | <b>887.532</b>  | <b>886.524</b>  | L[15] |
| G[11] | 507.794         | 868.495         | <b>830.486</b>  | <b>830.990</b>  | <b>829.982</b>  | G[14] |
| K[12] | 502.847         | <b>809.984</b>  | <b>801.975</b>  | <b>802.479</b>  | <b>801.471</b>  | K[13] |
| G[13] | 621.357         | 724.931         | <b>716.922</b>  | <b>717.426</b>  | 716.418         | G[12] |
| G[14] | 649.868         | <b>696.421</b>  | <b>688.411</b>  | <b>688.915</b>  | 687.907         | G[11] |
| A[15] | 685.389         | <b>657.910</b>  | <b>657.901</b>  | 656.905         | <b>655.397</b>  | A[10] |
| R[16] | 770.439         | 632.393         | 624.382         | 624.886         | 623.878         | R[9]  |
| R[17] | <b>848.490</b>  | 547.339         | 539.329         | <b>539.833</b>  | 538.825         | R[6]  |
| H[18] | <b>917.019</b>  | 469.288         | 461.279         | 461.783         | 460.775         | H[7]  |
| R[19] | <b>995.070</b>  | 400.759         | 392.749         | 393.253         | 392.245         | R[6]  |
| K[20] | <b>1066.125</b> | 322.708         | 314.699         | 315.203         | 314.195         | K[5]  |
| V[21] | <b>1115.659</b> | 254.653         | 246.643         | 247.147         | 246.140         | V[4]  |
| L[22] | <b>1172.201</b> | 202.119         | 194.109         | 194.613         | 193.605         | L[3]  |
| R[23] | <b>1250.252</b> | 145.577         | 137.567         | 138.071         | 137.063         | R[2]  |
| D[24] | <b>1307.765</b> | 67.526          | 59.517          | 60.021          | 59.013          | D[1]  |

# sp | P62806 | H4\_MOUSE

[Acetyl]SGRGKGGKGLGK<sup>Acetyl</sup>42.01 GGAK<sup>Acetyl</sup>42.01 RHRK<sup>Methyl</sup>14.02 VLRD

- ▶ fragmentation table for charge state 3+
- ▶ specType=etd
- ▶ score=85.62
- ▶ F105341.dat
- ▶ query=q13037.p1
- ▶ precursor=654.632540
- ▶ chargePrecursor=4
- ▶ itol=0.8

| AA    | c              | y              | z+1            | z+2            | z              | AA    |
|-------|----------------|----------------|----------------|----------------|----------------|-------|
| S[1]  | 49.697         | <b>872.507</b> | <b>867.168</b> | 0.672          | <b>866.832</b> | S[24] |
| G[2]  | 58.704         | 329.483        | <b>824.154</b> | 0.672          | <b>823.818</b> | G[23] |
| R[3]  | 150.738        | <b>810.486</b> | <b>805.146</b> | <b>805.482</b> | <b>804.811</b> | R[22] |
| G[4]  | 139.745        | 758.452        | 753.113        | 753.449        | 752.777        | G[21] |
| K[5]  | 182.443        | 739.445        | 734.106        | 734.442        | 733.770        | K[20] |
| G[6]  | 201.450        | <b>696.747</b> | 691.407        | 691.743        | 691.071        | G[19] |
| G[7]  | 220.458        | 677.740        | 672.400        | 672.736        | 672.064        | G[18] |
| K[8]  | 263.156        | 658.733        | 653.393        | 653.729        | 653.057        | K[17] |
| G[9]  | 282.163        | 639.726        | 634.386        | 634.722        | 634.050        | G[16] |
| L[10] | 319.858        | 597.027        | 591.687        | 592.023        | 591.351        | L[15] |
| G[11] | 338.865        | 559.132        | 553.791        | 554.129        | 553.457        | G[14] |
| K[12] | 395.567        | <b>540.125</b> | 534.888        | 535.222        | 534.550        | K[13] |
| G[13] | 414.574        | 483.623        | 478.284        | 478.620        | 477.948        | G[12] |
| G[14] | 433.581        | 464.616        | 459.277        | 459.613        | 458.941        | G[11] |
| A[15] | 457.260        | 445.609        | 440.270        | 440.605        | 439.934        | A[10] |
| K[16] | 513.962        | 421.930        | <b>416.590</b> | <b>416.926</b> | 416.255        | K[9]  |
| R[17] | 565.996        | 365.228        | <b>359.889</b> | <b>360.225</b> | <b>359.553</b> | R[8]  |
| H[18] | 611.682        | 313.195        | 307.855        | 308.191        | 307.519        | H[7]  |
| R[19] | 663.716        | 297.508        | 292.169        | 292.505        | 291.833        | R[6]  |
| K[20] | 711.088        | 215.475        | 210.135        | 210.471        | 209.799        | K[5]  |
| V[21] | 764.109        | 168.104        | 162.765        | 163.101        | 162.429        | V[4]  |
| L[22] | 781.803        | 135.082        | 129.742        | 130.078        | 129.406        | L[3]  |
| R[23] | <b>833.837</b> | 97.387         | 92.047         | 92.383         | 91.711         | R[2]  |
| D[24] | <b>872.179</b> | 45.353         | 40.014         | 40.349         | 39.678         | D[1]  |





# sp | Q8CGP0 | H2B3B\_MOUSE

PDPSKSAPAPKK <sup>Trimethyl</sup>42.05 GSKKAVTKAQKKD

- ▶ fragmentation table for charge state 1+
- ▶ specType=etd
- ▶ score=47.90
- ▶ F105341.dat
- ▶ query=q13106\_p1
- ▶ precursor=527.712780
- ▶ chargePrecursor=5
- ▶ itol=0.8

| AA | c       | y               | z+1            | z+2             | z               | AA       |       |
|----|---------|-----------------|----------------|-----------------|-----------------|----------|-------|
| F  | 115.087 | 2034.539        | 2018.511       | 0.000           | 2017.504        | F[25]    |       |
| D  | 230.114 | 2537.477        | 2521.450       | 0.000           | 2520.451        | D[24]    |       |
| P  | 327.166 | 2522.450        | 2406.432       | 0.000           | 2405.424        | P[23]    |       |
| S  | 414.188 | 2325.568        | 2309.539       | 0.000           | 2308.531        | S[22]    |       |
| K  | 542.293 | 2238.566        | 2222.547       | 2223.565        | 2221.539        | K[21]    |       |
| S  | 6       | <b>629.325</b>  | 2110.271       | 2094.252        | 2095.260        | 2093.244 | S[20] |
| A  | 7       | 666.362         | 2023.299       | 2007.220        | 2008.228        | 2006.212 | A[19] |
| P  | 8       | <b>797.415</b>  | 1952.202       | 1936.183        | 1937.191        | 1935.175 | P[18] |
| A  | 9       | <b>868.452</b>  | 1855.148       | 1839.130        | 1840.138        | 1838.122 | A[17] |
| P  | 10      | 905.505         | 1784.112       | 1768.093        | 1769.101        | 1767.085 | P[16] |
| K  | 11      | 1003.600        | 1687.059       | 1671.040        | 1672.048        | 1670.032 | K[15] |
| K  | 12      | 1263.742        | 1558.964       | <b>1542.945</b> | 1543.953        | 1541.937 | K[14] |
| G  | 13      | 1320.763        | 1388.822       | 1372.803        | <b>1373.811</b> | 1371.795 | G[13] |
| S  | 14      | 1407.795        | 1331.801       | 1315.782        | 1316.790        | 1314.774 | S[12] |
| K  | 15      | 1535.890        | 1244.768       | 1228.750        | 1229.758        | 1227.742 | K[11] |
| K  | 16      | <b>1663.985</b> | 1118.674       | <b>1100.655</b> | <b>1101.663</b> | 1099.647 | K[10] |
| A  | 17      | 1735.022        | 988.579        | <b>972.560</b>  | 973.568         | 971.552  | A[9]  |
| V  | 18      | 1834.091        | <b>917.541</b> | 901.523         | 902.531         | 900.515  | V[8]  |
| T  | 19      | 1935.139        | 818.472        | <b>802.454</b>  | <b>803.462</b>  | 801.446  | T[7]  |
| N  | 20      | 2032.234        | <b>717.425</b> | <b>701.407</b>  | 702.414         | 700.399  | N[6]  |
| A  | 21      | 2134.271        | 608.330        | <b>573.312</b>  | 574.320         | 572.304  | A[5]  |
| Q  | 22      | 2262.329        | 518.293        | <b>502.275</b>  | 503.282         | 501.267  | Q[4]  |
| K  | 23      | 2390.434        | 409.235        | <b>374.216</b>  | 375.224         | 373.208  | K[3]  |
| K  | 24      | 2518.519        | 262.140        | <b>246.121</b>  | 247.129         | 245.113  | K[2]  |
| D  | 25      | 2633.546        | 134.045        | 118.028         | 119.034         | 117.018  | D[1]  |

# sp | Q8CGP0 | H2B3B\_MOUSE

PDPSKSAPAPKK <sup>Trimethyl</sup>42.05 GSKKAVTKAQKKD

- ▶ fragmentation table for charge state 2+
- ▶ specType=etd
- ▶ score=47.90
- ▶ F105341.dat
- ▶ query=q13106.p1
- ▶ precursor=527.712780
- ▶ chargePrecursor=5
- ▶ itol=0.8

| AA | c  | y               | z+1             | z+2             | z               | AA              |       |
|----|----|-----------------|-----------------|-----------------|-----------------|-----------------|-------|
| P  | 1  | 58.047          | <b>1317.769</b> | 1309.759        | 0.504           | 1309.255        | P[25] |
| D  | 3  | 115.569         | 1289.242        | <b>1261.233</b> | 0.504           | <b>1260.729</b> | D[24] |
| F  | 3  | 154.092         | 1211.725        | 1203.719        | 0.504           | 1195.219        | F[23] |
| S  | 4  | 207.603         | 1163.202        | 1155.193        | 0.504           | 1154.689        | S[22] |
| K  | 5  | 271.690         | <b>1119.086</b> | 1111.677        | <b>1112.181</b> | 1111.173        | K[21] |
| S  | 6  | 315.166         | <b>1055.639</b> | <b>1047.630</b> | <b>1048.134</b> | 1047.120        | S[20] |
| A  | 7  | 350.895         | 1012.122        | <b>1004.114</b> | <b>1004.617</b> | 1003.610        | A[19] |
| F  | 8  | 399.211         | 978.604         | 969.592         | 969.999         | <b>968.991</b>  | F[18] |
| A  | 9  | 434.730         | 928.075         | <b>920.069</b>  | <b>920.573</b>  | 919.565         | A[17] |
| P  | 10 | 483.256         | 892.559         | 884.550         | 885.054         | 884.040         | P[16] |
| K  | 11 | <b>547.304</b>  | 844.033         | <b>836.024</b>  | <b>836.528</b>  | <b>835.520</b>  | K[15] |
| K  | 12 | 632.375         | 779.889         | <b>771.976</b>  | <b>772.480</b>  | <b>771.472</b>  | K[14] |
| C  | 13 | 692.885         | <b>694.915</b>  | <b>686.905</b>  | <b>687.409</b>  | <b>686.401</b>  | C[13] |
| S  | 14 | 794.403         | 659.824         | 650.815         | <b>658.898</b>  | 657.891         | S[12] |
| K  | 15 | <b>768.449</b>  | 622.888         | <b>614.879</b>  | <b>615.382</b>  | <b>614.375</b>  | K[11] |
| K  | 16 | <b>832.496</b>  | <b>558.840</b>  | <b>550.831</b>  | <b>551.335</b>  | <b>550.327</b>  | K[10] |
| A  | 17 | <b>868.015</b>  | <b>494.793</b>  | <b>486.784</b>  | <b>487.287</b>  | <b>486.280</b>  | A[9]  |
| V  | 18 | <b>917.549</b>  | 459.274         | 451.265         | 451.769         | 450.761         | V[8]  |
| T  | 19 | <b>968.073</b>  | 409.746         | <b>401.731</b>  | <b>402.235</b>  | <b>401.227</b>  | T[7]  |
| K  | 20 | <b>1032.120</b> | 359.215         | 351.207         | 351.711         | 350.703         | K[6]  |
| A  | 21 | <b>1067.639</b> | 295.169         | 287.159         | 287.663         | 286.656         | A[5]  |
| Q  | 22 | <b>1131.668</b> | 259.656         | 251.641         | 252.145         | 251.137         | Q[4]  |
| K  | 23 | 1195.716        | 195.621         | 187.612         | 188.116         | 187.109         | K[3]  |
| K  | 24 | <b>1259.763</b> | 131.574         | 123.568         | 124.069         | 123.060         | K[2]  |
| D  | 25 | <b>1317.277</b> | 67.526          | 59.517          | 60.021          | 59.013          | D[1]  |

# sp | Q8CGP0 | H2B3B\_MOUSE

PDPSKSAPAPKK <sup>Trimethyl</sup> 42.05 GSKKAVTKAQKKD

- ▶ fragmentation table for charge state 3+
- ▶ specType=etd
- ▶ score=47.90
- ▶ F105341.dat
- ▶ query=q13106.p1
- ▶ precursor=527.712780
- ▶ chargePrecursor=5
- ▶ itol=0.8

| AA    | c              | y              | z+1            | z+2            | z              | AA    |
|-------|----------------|----------------|----------------|----------------|----------------|-------|
| P[1]  | 30.034         | <b>878.848</b> | <b>873.509</b> | 0.672          | <b>873.173</b> | P[25] |
| D[2]  | 77.376         | <b>846.497</b> | <b>841.158</b> | 0.672          | <b>840.822</b> | D[24] |
| P[3]  | 109.727        | 808.155        | <b>802.815</b> | 0.672          | <b>802.479</b> | P[23] |
| S[4]  | 138.738        | 775.804        | 770.464        | 0.672          | 770.129        | S[22] |
| K[5]  | 181.436        | <b>746.793</b> | 741.454        | 741.790        | 741.118        | K[21] |
| S[6]  | 210.847        | 704.095        | <b>698.755</b> | <b>699.001</b> | <b>698.420</b> | S[20] |
| A[7]  | 234.126        | 675.084        | <b>669.745</b> | <b>670.001</b> | <b>669.409</b> | A[19] |
| P[8]  | 296.477        | 651.405        | 646.066        | 646.402        | <b>645.730</b> | P[18] |
| A[9]  | 290.156        | <b>619.054</b> | <b>613.715</b> | <b>614.051</b> | <b>613.379</b> | A[17] |
| P[10] | 322.507        | 595.375        | 590.036        | 590.372        | 589.700        | P[16] |
| K[11] | 368.205        | 563.024        | <b>557.685</b> | <b>558.021</b> | <b>557.349</b> | K[15] |
| K[12] | 421.919        | 520.326        | <b>514.987</b> | <b>515.323</b> | <b>514.651</b> | K[14] |
| G[13] | 440.926        | 463.612        | 458.273        | 458.609        | 457.937        | G[13] |
| S[14] | 469.937        | 444.605        | 439.265        | 439.601        | 438.930        | S[12] |
| K[15] | 512.035        | 415.394        | 410.054        | 410.390        | 409.719        | K[11] |
| K[16] | <b>555.333</b> | 372.896        | <b>367.556</b> | <b>367.892</b> | 367.221        | K[10] |
| A[17] | 579.012        | 350.198        | 344.858        | 345.194        | 344.522        | A[9]  |
| V[18] | <b>612.035</b> | 306.519        | 301.179        | 301.515        | 300.843        | V[8]  |
| T[19] | <b>645.718</b> | 273.496        | 268.156        | 268.492        | 267.820        | T[7]  |
| K[20] | <b>688.416</b> | 239.813        | 234.474        | 234.810        | 234.138        | K[6]  |
| A[21] | <b>712.095</b> | 197.115        | 191.775        | 192.111        | 191.439        | A[5]  |
| Q[22] | <b>754.781</b> | 173.436        | 168.096        | 168.432        | 167.760        | Q[4]  |
| K[23] | <b>797.480</b> | 130.750        | 125.410        | 125.746        | 125.074        | K[3]  |
| K[24] | <b>840.178</b> | 88.051         | 82.712         | 83.048         | 82.376         | K[2]  |
| D[25] | <b>878.520</b> | 45.353         | 40.014         | 40.349         | 39.678         | D[1]  |

# sp | Q8CGP0 | H2B3B\_MOUSE

PDPSKSAPAPKK <sup>Trimethyl</sup>42.05 GSKKAVTKAQKKD

- ▶ fragmentation table for charge state 4+
- ▶ specType=etd
- ▶ score=47.90
- ▶ F105341.dat
- ▶ query=q13106.p1
- ▶ precursor=527.712780
- ▶ chargePrecursor=5
- ▶ itol=0.8

| AA |    | c              | y              | z+1            | z+2            | z              | AA    |
|----|----|----------------|----------------|----------------|----------------|----------------|-------|
| P  | 1  | 29.527         | <b>659.388</b> | <b>655.383</b> | 0.755          | <b>655.131</b> | P[25] |
| D  | 2  | 58.284         | <b>635.125</b> | <b>631.120</b> | 0.755          | <b>630.868</b> | D[24] |
| P  | 3  | 82.547         | 606.368        | <b>602.363</b> | 0.755          | <b>602.111</b> | P[23] |
| S  | 4  | 104.305        | 582.105        | 578.100        | 0.755          | 577.848        | S[22] |
| K  | 5  | 136.229        | 560.347        | 556.342        | 556.594        | 556.090        | K[21] |
| S  | 6  | 158.087        | 528.323        | 525.318        | 524.570        | 524.066        | S[20] |
| A  | 7  | 175.946        | 506.565        | <b>502.560</b> | <b>502.812</b> | <b>502.308</b> | A[19] |
| P  | 8  | 200.109        | 488.806        | 484.801        | 485.053        | 484.549        | P[18] |
| A  | 9  | 217.869        | 464.543        | 460.538        | 460.790        | 460.286        | A[17] |
| P  | 10 | 242.132        | 446.783        | 442.779        | 443.031        | 442.527        | P[16] |
| K  | 11 | 274.195        | 422.520        | 418.515        | 418.767        | 418.264        | K[15] |
| K  | 12 | 316.691        | 400.496        | 396.492        | 396.744        | 396.240        | K[14] |
| G  | 13 | 330.946        | 347.951        | 343.956        | 344.208        | 343.704        | G[13] |
| S  | 14 | 352.704        | 333.706        | 329.701        | 329.953        | 329.449        | S[12] |
| K  | 15 | 384.728        | 311.948        | 307.943        | 308.195        | 307.691        | K[11] |
| K  | 16 | 416.752        | 279.924        | 275.919        | 276.171        | 275.667        | K[10] |
| A  | 17 | 434.511        | 247.900        | 243.895        | 244.147        | 243.643        | A[9]  |
| V  | 18 | 459.278        | 230.141        | 226.136        | 226.388        | 225.884        | V[8]  |
| T  | 19 | 484.540        | 205.374        | 201.369        | 201.621        | 201.117        | T[7]  |
| K  | 20 | 516.564        | 180.112        | 176.107        | 176.359        | 175.855        | K[6]  |
| A  | 21 | 534.323        | 148.088        | 144.083        | 144.335        | 143.831        | A[5]  |
| Q  | 22 | 566.338        | 130.329        | 126.324        | 126.576        | 126.072        | Q[4]  |
| K  | 23 | 608.362        | 98.314         | 94.309         | 94.561         | 94.057         | K[3]  |
| K  | 24 | <b>630.385</b> | 66.290         | 62.285         | 62.538         | 62.034         | K[2]  |
| D  | 25 | <b>659.142</b> | 34.267         | 30.263         | 30.514         | 30.010         | D[1]  |



# sp | P62806 | H4\_MOUSE

[Acetyl]SGRGKGGKGLGK <sup>Acetyl</sup><sub>42.01</sub> GGAK <sup>Acetyl</sup><sub>42.01</sub> R <sup>Dimethyl</sup><sub>28.03</sub> HRK <sup>(Methyl)</sup><sub>(14.02)</sub> VLRD

- ▶ fragmentation table for charge state 1+
- ▶ specType=etd
- ▶ score=69.08
- ▶ F105341.dat
- ▶ query=q13133.p1
- ▶ precursor=661.640210
- ▶ chargePrecursor=4
- ▶ itol=0.8

| AA | c  | y               | z+1      | z+2            | z               | AA       |       |
|----|----|-----------------|----------|----------------|-----------------|----------|-------|
| S  | 1  | 147.076         | 2043.539 | 2027.520       | 0.000           | 2026.512 | S[24] |
| G  | 2  | 204.998         | 2514.499 | 2498.478       | 0.000           | 2497.470 | G[23] |
| R  | 3  | <b>360.190</b>  | 2957.475 | 2841.450       | 2842.464        | 2840.448 | R[22] |
| G  | 4  | <b>417.220</b>  | 3301.374 | 3285.352       | 3286.363        | 3284.347 | G[21] |
| K  | 5  | <b>545.315</b>  | 3284.352 | 3228.334       | 3229.341        | 3227.325 | K[20] |
| G  | 6  | <b>602.337</b>  | 2116.257 | 2100.239       | 2101.247        | 2099.231 | G[19] |
| G  | 7  | 609.358         | 2059.238 | 2043.217       | 2044.225        | 2042.209 | G[18] |
| K  | 8  | <b>787.453</b>  | 2002.214 | 1986.190       | 1987.204        | 1985.188 | K[17] |
| G  | 9  | <b>844.475</b>  | 1874.120 | 1858.101       | 1859.109        | 1857.093 | G[16] |
| L  | 10 | <b>937.559</b>  | 1817.095 | 1801.079       | 1802.087        | 1800.071 | L[15] |
| G  | 11 | <b>1014.580</b> | 1704.014 | 1687.997       | 1689.003        | 1686.987 | G[14] |
| K  | 12 | 1184.686        | 1646.993 | 1630.974       | 1631.982        | 1629.966 | K[13] |
| G  | 13 | <b>1241.707</b> | 1476.887 | 1460.868       | <b>1461.876</b> | 1459.860 | G[12] |
| G  | 14 | 1298.729        | 1419.866 | 1403.847       | <b>1404.855</b> | 1402.839 | G[11] |
| A  | 15 | 1389.750        | 1362.844 | 1346.825       | 1347.833        | 1345.819 | A[10] |
| K  | 16 | <b>1539.871</b> | 1291.807 | 1275.788       | 1276.796        | 1274.780 | K[9]  |
| R  | 17 | 1724.924        | 1124.701 | 1108.683       | 1109.691        | 1104.675 | R[8]  |
| H  | 18 | 1561.063        | 937.589  | 921.550        | 922.558         | 920.542  | H[7]  |
| R  | 19 | 2017.184        | 800.510  | 784.491        | 785.499         | 783.484  | R[6]  |
| K  | 20 | 2159.274        | 644.409  | 628.390        | 629.398         | 627.382  | K[5]  |
| V  | 21 | 2258.343        | 502.298  | 486.280        | <b>487.287</b>  | 485.272  | V[4]  |
| L  | 22 | 2371.427        | 403.230  | <b>387.211</b> | <b>388.219</b>  | 386.203  | L[3]  |
| R  | 23 | 2627.526        | 290.146  | 274.127        | <b>275.135</b>  | 273.119  | R[2]  |
| D  | 24 | 2642.555        | 134.045  | 118.020        | 119.034         | 117.015  | D[1]  |

# sp | P62806 | H4\_MOUSE

[Acetyl]SGRGKGGKGLGK <sup>Acetyl</sup><sub>42.01</sub> GGAK <sup>Acetyl</sup><sub>42.01</sub> R <sup>Dimethyl</sup><sub>28.03</sub> HRK <sup>(Methyl)</sup><sub>(14.02)</sub> VLRD

- ▶ fragmentation table for charge state 2+
- ▶ specType=etd
- ▶ score=69.08
- ▶ F105341.dat
- ▶ query=q13133.p1
- ▶ precursor=661.640210
- ▶ chargePrecursor=4
- ▶ itol=0.8

| AA    | c               | y               | z+1             | z+2             | z              | AA    |
|-------|-----------------|-----------------|-----------------|-----------------|----------------|-------|
| S[1]  | 74.042          | <b>1322.273</b> | <b>1314.264</b> | 0.504           | 1313.760       | S[24] |
| G[2]  | 102.553         | 1257.752        | <b>1249.742</b> | 0.504           | 1249.239       | G[23] |
| R[3]  | 180.603         | 1229.241        | <b>1221.232</b> | <b>1221.736</b> | 1220.739       | R[22] |
| G[4]  | 259.114         | 1151.731        | <b>1143.721</b> | <b>1143.685</b> | 1142.677       | G[21] |
| K[5]  | 273.193         | 1122.580        | <b>1114.670</b> | <b>1115.174</b> | 1114.167       | K[20] |
| G[6]  | 301.672         | 1058.632        | 1050.623        | 1051.127        | 1050.119       | G[19] |
| G[7]  | 330.183         | 1030.122        | 1022.112        | 1022.616        | 1021.608       | G[18] |
| K[8]  | 394.230         | 1001.611        | <b>993.602</b>  | <b>994.105</b>  | 993.098        | K[17] |
| G[9]  | 422.741         | 937.563         | <b>929.554</b>  | <b>930.058</b>  | <b>929.050</b> | G[16] |
| L[10] | 439.283         | 909.053         | <b>901.043</b>  | <b>901.547</b>  | <b>900.539</b> | L[15] |
| G[11] | 507.794         | 852.511         | <b>844.501</b>  | 845.005         | <b>843.997</b> | G[14] |
| K[12] | 592.847         | 824.000         | 815.991         | 816.494         | <b>815.487</b> | K[13] |
| G[13] | 621.357         | 738.947         | <b>730.938</b>  | <b>731.442</b>  | <b>730.434</b> | G[12] |
| G[14] | 649.868         | 710.436         | <b>702.427</b>  | <b>702.931</b>  | <b>701.923</b> | G[11] |
| A[15] | 685.367         | <b>681.926</b>  | 673.916         | 674.420         | 673.412        | A[10] |
| R[16] | 770.420         | 646.407         | <b>638.398</b>  | <b>638.902</b>  | <b>637.894</b> | R[9]  |
| R[17] | <b>862.506</b>  | 561.354         | <b>553.345</b>  | <b>553.849</b>  | 552.842        | R[8]  |
| H[18] | 931.035         | 469.288         | 461.279         | 461.783         | 460.775        | H[7]  |
| R[19] | 1009.086        | 400.759         | 392.749         | 393.253         | 392.245        | R[6]  |
| K[20] | <b>1080.141</b> | 322.708         | 314.699         | 315.203         | 314.195        | K[5]  |
| V[21] | <b>1129.675</b> | 251.653         | 243.643         | 244.147         | 243.140        | V[4]  |
| L[22] | <b>1186.217</b> | 202.119         | 194.109         | 194.613         | 193.605        | L[3]  |
| R[23] | <b>1264.268</b> | 145.577         | 137.567         | 138.071         | 137.063        | R[2]  |
| D[24] | <b>1321.781</b> | 67.526          | 59.517          | 60.021          | 59.013         | D[1]  |



# sp | P62806 | H4\_MOUSE

[Acetyl]SGRGKGGKGLGK <sup>Acetyl</sup>42.01 **GGAK** <sup>Acetyl</sup>42.01 <sup>R</sup> <sup>Dimethyl</sup>28.03 **HRK** <sup>(Methyl)</sup>(14.02) **VLRD**

- ▶ fragmentation table for charge state 3+
- ▶ specType=etd
- ▶ score=69.08
- ▶ F105341.dat
- ▶ query=q13133.p1
- ▶ precursor=661.640210
- ▶ chargePrecursor=4
- ▶ itol=0.8

| AA    | c              | y              | z+1            | z+2            | z              | AA    |
|-------|----------------|----------------|----------------|----------------|----------------|-------|
| S[1]  | 49.697         | <b>881.851</b> | <b>876.512</b> | 0.872          | <b>876.176</b> | S[24] |
| G[2]  | 68.704         | 838.831        | <b>833.497</b> | 0.872          | <b>833.161</b> | G[23] |
| R[3]  | 120.738        | 819.830        | <b>814.490</b> | <b>814.826</b> | <b>814.154</b> | R[22] |
| G[4]  | 139.745        | 767.796        | 762.457        | 762.792        | 762.121        | G[21] |
| K[5]  | 182.443        | 748.789        | 743.449        | 743.785        | 743.113        | K[20] |
| G[6]  | 201.450        | 706.091        | <b>700.751</b> | <b>701.087</b> | 700.415        | G[19] |
| G[7]  | 220.458        | 667.083        | <b>681.744</b> | 682.080        | <b>681.408</b> | G[18] |
| K[8]  | 263.156        | <b>668.076</b> | 662.737        | 663.073        | 662.401        | K[17] |
| G[9]  | 282.163        | 625.378        | 620.038        | 620.374        | 619.703        | G[16] |
| L[10] | 319.858        | 606.371        | 601.031        | 601.367        | 600.695        | L[15] |
| G[11] | 338.865        | 568.076        | 563.337        | 563.673        | 563.001        | G[14] |
| K[12] | 395.567        | 549.669        | 544.329        | 544.665        | 543.994        | K[13] |
| G[13] | 414.574        | 492.967        | <b>487.628</b> | <b>487.964</b> | <b>487.292</b> | G[12] |
| G[14] | 433.581        | 473.960        | 468.620        | 468.956        | 468.285        | G[11] |
| A[15] | 497.260        | 454.953        | 449.613        | 449.949        | 449.277        | A[10] |
| K[16] | 513.062        | 431.274        | 425.934        | 426.270        | 425.598        | K[9]  |
| R[17] | 575.339        | 374.572        | 369.232        | 369.568        | 368.896        | R[8]  |
| H[18] | 621.026        | 313.195        | 307.855        | 308.191        | 307.519        | H[7]  |
| R[19] | 673.059        | 267.508        | 262.168        | 262.505        | 261.833        | R[6]  |
| K[20] | 729.430        | 215.475        | 210.135        | 210.471        | 209.799        | K[5]  |
| V[21] | 753.452        | 168.104        | 162.764        | 163.101        | 162.429        | V[4]  |
| L[22] | 791.147        | 135.082        | 129.742        | 130.078        | 129.406        | L[3]  |
| R[23] | 843.181        | 97.387         | 92.047         | 92.383         | 91.711         | R[2]  |
| D[24] | <b>881.523</b> | 45.353         | 40.014         | 40.349         | 39.678         | D[1]  |



# sp | P68433 | H31\_MOUSE

K<sup>Methyl</sup> 14.02 STGGK<sup>Acetyl</sup> 42.01 APR

- ▶ fragmentation table for charge state 1+
- ▶ specType=etd
- ▶ score=53.54
- ▶ F105342.dat
- ▶ query=q1872.p1
- ▶ precursor=479.277410
- ▶ chargePrecursor=2
- ▶ itol=0.8

| AA    | c              | y              | z+1            | z+2            | z              | AA    |
|-------|----------------|----------------|----------------|----------------|----------------|-------|
| R [1] | 160.144        | <b>957.548</b> | <b>941.529</b> | 942.537        | <b>940.521</b> | R [9] |
| S [2] | 247.176        | 815.437        | <b>799.418</b> | <b>800.426</b> | 798.410        | S [8] |
| T [3] | 333.224        | 728.405        | <b>712.386</b> | <b>713.394</b> | 711.379        | T [7] |
| G [4] | 408.248        | <b>627.357</b> | <b>611.339</b> | <b>612.346</b> | 610.331        | G [6] |
| G [5] | 462.267        | <b>570.336</b> | <b>554.317</b> | <b>555.325</b> | 553.309        | G [5] |
| K [6] | 632.373        | 513.314        | <b>497.296</b> | <b>498.303</b> | 496.288        | K [4] |
| A [7] | 703.410        | 343.209        | 327.190        | <b>328.190</b> | 326.182        | A [3] |
| P [8] | <b>800.462</b> | 272.172        | 256.153        | 257.161        | 255.145        | P [2] |
| R [9] | 956.564        | 175.119        | 159.100        | 160.108        | 158.092        | R [1] |



# sp | P68433 | H31\_MOUSE

K<sup>Methyl</sup> 14.02 STGGK<sup>Acetyl</sup> 42.01 APR

- ▶ fragmentation table for charge state 1+
- ▶ specType=etd
- ▶ score=38.66
- ▶ F105342.dat
- ▶ query=q1876\_p1
- ▶ precursor=319.854680
- ▶ chargePrecursor=3
- ▶ itol=0.8

| AA    | c              | y              | z+1            | z+2            | z              | AA    |
|-------|----------------|----------------|----------------|----------------|----------------|-------|
| R [1] | 160.144        | 957.540        | <b>941.529</b> | <b>942.537</b> | 940.521        | K [9] |
| S [2] | <b>247.176</b> | 815.437        | <b>799.418</b> | <b>800.426</b> | 798.410        | S [8] |
| T [3] | <b>348.224</b> | 728.405        | <b>712.386</b> | 713.394        | <b>711.378</b> | T [7] |
| G [4] | <b>405.246</b> | 627.357        | <b>611.339</b> | 612.346        | 610.331        | G [6] |
| W [5] | <b>462.267</b> | 570.330        | <b>554.317</b> | 555.325        | 553.300        | W [5] |
| K [6] | <b>632.373</b> | <b>513.314</b> | <b>497.296</b> | 498.303        | 496.288        | K [4] |
| A [7] | 703.410        | <b>343.209</b> | <b>327.190</b> | 328.198        | 326.182        | A [3] |
| P [8] | <b>800.462</b> | 272.172        | 256.153        | 257.161        | 255.145        | P [2] |
| R [9] | 956.564        | 175.110        | 159.100        | 160.108        | 158.092        | R [1] |

# sp | P68433 | H31\_MOUSE

K<sup>Methyl</sup> 14.02 STGGK<sup>Acetyl</sup> 42.01 APR

- ▶ fragmentation table for charge state 2+
- ▶ specType=etd
- ▶ score=38.66
- ▶ F105342.dat
- ▶ query=q1876\_p1
- ▶ precursor=319.854680
- ▶ chargePrecursor=3
- ▶ itol=0.8

| AA |     | c              | y              | z+1            | z+2            | z              | AA   |
|----|-----|----------------|----------------|----------------|----------------|----------------|------|
| R  | [1] | 80.576         | <b>479.277</b> | <b>471.268</b> | <b>471.772</b> | <b>470.764</b> | R[9] |
| S  | [2] | 124.092        | 408.222        | 400.213        | 400.717        | 399.709        | S[8] |
| T  | [3] | 174.616        | 354.705        | 355.697        | 357.201        | 356.193        | T[7] |
| G  | [4] | 203.128        | 314.182        | 306.173        | 306.677        | 305.669        | G[6] |
| Q  | [5] | 231.637        | 285.672        | 277.662        | 278.166        | 277.158        | Q[5] |
| K  | [6] | 318.690        | 257.151        | 249.151        | 249.655        | 248.648        | K[4] |
| A  | [7] | 352.208        | 172.108        | 164.099        | 164.603        | 163.595        | A[3] |
| P  | [8] | 400.735        | 136.589        | 128.580        | 129.084        | 128.076        | P[2] |
| R  | [9] | <b>478.785</b> | 88.063         | 80.054         | 80.558         | 79.550         | R[1] |

# sp | P68433 | H31\_MOUSE

K Acetyl STGGK Trimethyl APR  
42.01 42.05

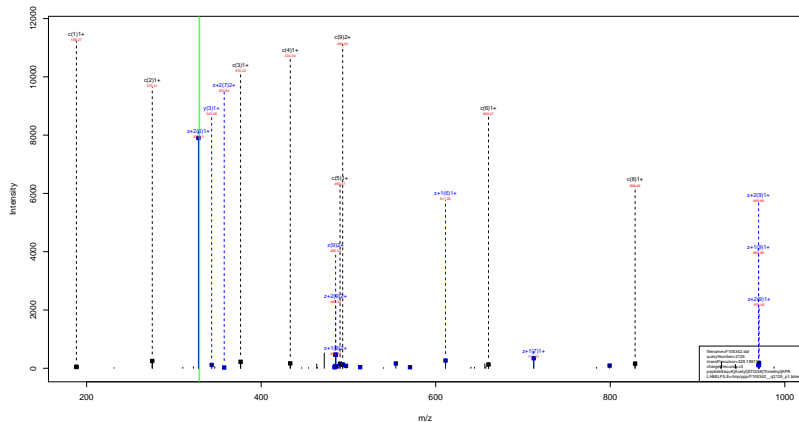

@ProteinP68433\_001  
 queryName=STGGK  
 queryMass=420.1000  
 @FragmentList  
 1:MS1.P68433\_H31\_MOUSE\_01705\_01\_0000

# sp | P68433 | H31\_MOUSE

K<sup>Acetyl</sup> 42.01 STGGK<sup>Trimethyl</sup> 42.05 APR

- ▶ fragmentation table for charge state 1+
- ▶ specType=etd
- ▶ score=50.01
- ▶ F105342.dat
- ▶ query=q2125\_p1
- ▶ precursor=329.198110
- ▶ chargePrecursor=3
- ▶ itol=0.8

| AA | c       | y       | z+1     | z+2     | z       | AA |
|----|---------|---------|---------|---------|---------|----|
| K  | 188.139 | 985.579 | 969.560 | 970.568 | 968.552 | K  |
| S  | 275.171 | 815.473 | 799.455 | 800.462 | 798.447 | S  |
| T  | 376.219 | 728.441 | 712.423 | 713.430 | 711.413 | T  |
| G  | 433.241 | 627.394 | 611.376 | 612.383 | 610.367 | G  |
| G  | 490.262 | 570.372 | 554.353 | 555.361 | 553.346 | G  |
| K  | 660.404 | 513.351 | 497.332 | 498.340 | 496.324 | K  |
| A  | 731.441 | 343.209 | 327.190 | 328.198 | 326.182 | A  |
| P  | 828.494 | 272.172 | 256.153 | 257.161 | 255.145 | P  |
| R  | 984.595 | 175.119 | 159.100 | 160.108 | 158.092 | R  |



# sp | P68433 | H31\_MOUSE

K<sub>42.01</sub> Acetyl STGGK<sub>42.05</sub> Trimethyl APR

- ▶ fragmentation table for charge state 2+
- ▶ specType=etd
- ▶ score=50.01
- ▶ F105342.dat
- ▶ query=q2125\_p1
- ▶ precursor=329.198110
- ▶ chargePrecursor=3
- ▶ itol=0.8

| AA | c | y              | z+1            | z+2            | z              | AA             |   |   |
|----|---|----------------|----------------|----------------|----------------|----------------|---|---|
| R  | 1 | 94.573         | <b>493.293</b> | <b>485.284</b> | <b>485.788</b> | <b>484.780</b> | R | 9 |
| S  | 2 | 133.099        | 408.240        | 400.231        | 400.730        | 399.727        | S | 8 |
| Y  | 3 | <b>188.613</b> | 354.725        | 355.733        | <b>357.219</b> | 356.211        | Y | 7 |
| G  | 4 | 217.124        | 314.200        | 306.191        | 306.690        | 305.682        | G | 6 |
| Q  | 5 | 245.635        | 285.690        | 277.680        | 278.184        | 277.176        | Q | 5 |
| K  | 6 | 330.706        | 257.170        | 249.170        | 249.674        | 248.666        | K | 4 |
| A  | 7 | 366.224        | 172.105        | 164.099        | 164.603        | 163.595        | A | 3 |
| P  | 8 | 414.751        | 136.589        | 128.580        | 129.084        | 128.076        | P | 2 |
| R  | 9 | <b>492.801</b> | 88.063         | 80.054         | 80.558         | 79.550         | R | 1 |

# sp | P10922 | H10\_MOUSE

[Acetyl]TENSTAPAAKPK

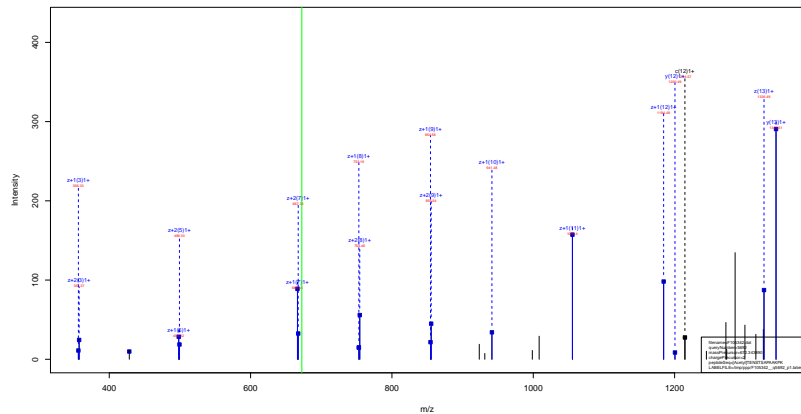

# sp | P10922 | H10\_MOUSE

[Acetyl]TENSTSAPAAKPK

- ▶ fragmentation table for charge state 1+
- ▶ specType=etd
- ▶ score=56.25
- ▶ F105342.dat
- ▶ query=q5692.p1
- ▶ precursor=672.343890
- ▶ chargePrecursor=2
- ▶ itol=0.8

| AA |    | c               | y               | z+1             | z+2            | z               | AA |    |
|----|----|-----------------|-----------------|-----------------|----------------|-----------------|----|----|
| T  | 1  | 181.092         | <b>1343.680</b> | 1327.661        | 0.000          | <b>1326.054</b> | T  | 11 |
| E  | 2  | 290.135         | <b>1200.022</b> | <b>1184.603</b> | 0.000          | 1183.595        | E  | 12 |
| N  | 3  | 404.178         | 1071.579        | <b>1055.561</b> | 1056.568       | 1054.551        | N  | 11 |
| S  | 4  | 491.210         | 957.530         | <b>941.518</b>  | 942.525        | 940.510         | S  | 10 |
| T  | 5  | 592.257         | 810.504         | <b>854.486</b>  | <b>855.493</b> | 853.476         | T  | 9  |
| S  | 6  | 679.289         | 709.457         | <b>711.438</b>  | <b>714.446</b> | <b>752.430</b>  | S  | 8  |
| A  | 7  | 750.326         | 682.425         | <b>660.406</b>  | <b>667.414</b> | 665.397         | A  | 7  |
| P  | 8  | 847.370         | 611.388         | 595.309         | 596.377        | 594.361         | P  | 6  |
| A  | 9  | 918.416         | 514.335         | <b>498.316</b>  | <b>499.324</b> | 497.308         | A  | 5  |
| A  | 10 | 989.451         | 443.290         | 427.279         | <b>428.287</b> | 426.271         | A  | 4  |
| K  | 11 | 1117.548        | 372.261         | <b>356.242</b>  | <b>357.250</b> | 355.234         | K  | 3  |
| P  | 12 | <b>1214.601</b> | 284.165         | 228.147         | 229.155        | 227.139         | P  | 2  |
| K  | 13 | 1342.696        | 147.113         | 131.094         | 132.102        | 130.086         | K  | 1  |

# sp | P10922 | H10\_MOUSE

[Acetyl]TENSTAPAAKPK

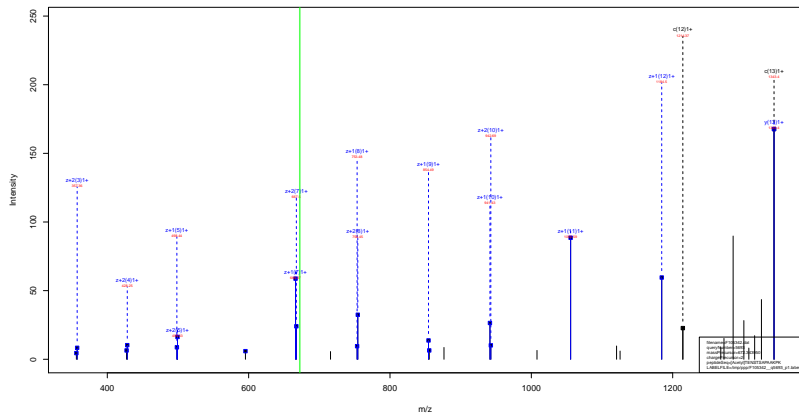

# sp | P10922 | H10\_MOUSE

[Acetyl]TENSTSAPAAKPK

- ▶ fragmentation table for charge state 1+
- ▶ specType=etd
- ▶ score=85.15
- ▶ F105342.dat
- ▶ query=q5693\_p1
- ▶ precursor=672.343950
- ▶ chargePrecursor=2
- ▶ itol=0.8

| AA    | c               | y               | z+1             | z+2            | z        | AA    |
|-------|-----------------|-----------------|-----------------|----------------|----------|-------|
| T[1]  | 161.092         | <b>1343.080</b> | 1527.661        | 0.000          | 1126.054 | T[13] |
| E[2]  | 290.135         | 1200.622        | <b>1184.603</b> | 0.000          | 1183.595 | E[12] |
| N[3]  | 404.178         | 1071.570        | <b>1055.561</b> | 1056.568       | 1054.557 | N[11] |
| S[4]  | 491.210         | 957.530         | <b>941.518</b>  | <b>942.525</b> | 940.510  | S[10] |
| I[5]  | 592.257         | 870.504         | <b>854.486</b>  | <b>855.493</b> | 853.478  | I[9]  |
| S[6]  | 679.289         | 789.457         | <b>753.438</b>  | <b>754.446</b> | 752.430  | S[8]  |
| A[7]  | 750.326         | 682.425         | <b>666.406</b>  | <b>667.414</b> | 665.399  | A[7]  |
| P[8]  | 847.379         | 611.388         | <b>595.369</b>  | 596.377        | 594.361  | P[6]  |
| A[9]  | 918.416         | 514.335         | <b>498.316</b>  | <b>499.324</b> | 497.308  | A[5]  |
| A[10] | 989.453         | 443.290         | <b>427.279</b>  | <b>428.287</b> | 426.271  | A[4]  |
| K[11] | 1117.548        | 372.263         | <b>356.242</b>  | <b>357.250</b> | 355.234  | K[3]  |
| P[12] | <b>1214.601</b> | 244.169         | 228.147         | 229.155        | 227.139  | P[5]  |
| K[13] | <b>1342.696</b> | 147.113         | 131.094         | 132.102        | 130.086  | K[1]  |



# sp | P10922 | H10\_MOUSE

[Acetyl]TENSTSAPAAKPK

- ▶ fragmentation table for charge state 1+
- ▶ specType=etd
- ▶ score=47.04
- ▶ F105342.dat
- ▶ query=q5694.p1
- ▶ precursor=672.344080
- ▶ chargePrecursor=2
- ▶ itol=0.8

| AA |    | c               | y               | z+1             | z+2            | z               | AA |    |
|----|----|-----------------|-----------------|-----------------|----------------|-----------------|----|----|
| T  | 1  | 181.092         | <b>1343.680</b> | 1327.861        | 0.000          | <b>1326.054</b> | T  | 13 |
| E  | 2  | 290.135         | 1200.622        | <b>1184.603</b> | 0.000          | 1183.595        | E  | 12 |
| N  | 3  | 404.178         | <b>1071.579</b> | <b>1055.561</b> | 1056.568       | 1054.551        | N  | 11 |
| S  | 4  | 491.210         | 957.530         | <b>941.518</b>  | 942.525        | 940.510         | S  | 10 |
| T  | 5  | <b>992.257</b>  | 870.504         | <b>854.486</b>  | <b>855.493</b> | 853.476         | T  | 9  |
| S  | 6  | 679.609         | 789.451         | 751.432         | <b>734.446</b> | 752.430         | S  | 8  |
| A  | 7  | 756.526         | 682.425         | <b>666.406</b>  | 667.414        | 665.397         | A  | 7  |
| P  | 8  | 847.379         | 611.388         | 595.369         | 596.377        | 594.361         | P  | 6  |
| A  | 9  | 918.416         | 514.335         | <b>498.316</b>  | <b>499.324</b> | 497.308         | A  | 5  |
| A  | 10 | <b>989.453</b>  | 443.290         | 427.279         | <b>428.287</b> | 426.271         | A  | 4  |
| K  | 11 | 1117.548        | 272.263         | <b>356.242</b>  | <b>357.250</b> | 355.234         | K  | 3  |
| F  | 12 | <b>1214.601</b> | <b>244.166</b>  | 228.147         | 229.155        | 227.139         | F  | 2  |
| K  | 13 | 1342.696        | 147.112         | 131.094         | 132.102        | 130.086         | K  | 1  |





# sp | P10922 | H10\_MOUSE

[Acetyl]TENSTSAPAAKPK

- ▶ fragmentation table for charge state 1+
- ▶ specType=etd
- ▶ score=55.50
- ▶ F105342.dat
- ▶ query=q5696.p1
- ▶ precursor=672.344780
- ▶ chargePrecursor=2
- ▶ itol=0.8

| AA |    | c               | y               | z+1             | z+2            | z               | AA |    |
|----|----|-----------------|-----------------|-----------------|----------------|-----------------|----|----|
| T  | 1  | 181.092         | <b>1343.680</b> | 1327.861        | 0.000          | <b>1326.054</b> | T  | 13 |
| E  | 2  | 290.135         | 1200.622        | <b>1184.603</b> | 0.000          | 1183.595        | E  | 12 |
| N  | 3  | 404.178         | <b>1071.579</b> | <b>1055.561</b> | 1056.568       | 1054.551        | N  | 11 |
| S  | 4  | 491.210         | 957.530         | <b>941.518</b>  | <b>942.525</b> | 940.510         | S  | 10 |
| T  | 5  | 592.257         | 819.504         | <b>854.486</b>  | <b>855.493</b> | 853.478         | T  | 9  |
| S  | 6  | 679.289         | 709.451         | 751.432         | <b>754.448</b> | 752.430         | S  | 8  |
| A  | 7  | 756.326         | 682.425         | <b>666.406</b>  | <b>667.414</b> | 665.397         | A  | 7  |
| P  | 8  | 847.379         | 611.388         | 595.369         | 596.377        | 594.361         | P  | 6  |
| A  | 9  | 918.416         | 514.335         | <b>498.316</b>  | <b>499.324</b> | 497.308         | A  | 5  |
| A  | 10 | 989.451         | 443.290         | <b>427.279</b>  | <b>428.287</b> | 426.271         | A  | 4  |
| K  | 11 | 1117.548        | 372.261         | <b>356.242</b>  | <b>357.250</b> | 355.234         | K  | 3  |
| F  | 12 | <b>1214.601</b> | 284.165         | 228.147         | 229.155        | 227.139         | F  | 2  |
| K  | 13 | 1342.696        | 147.113         | 131.094         | 132.102        | 130.086         | K  | 1  |

# sp | P68433 | H31\_MOUSE

K<sup>Dimethyl</sup> SAPATGGVK<sup>Methyl</sup> KPHR  
28.03 14.02

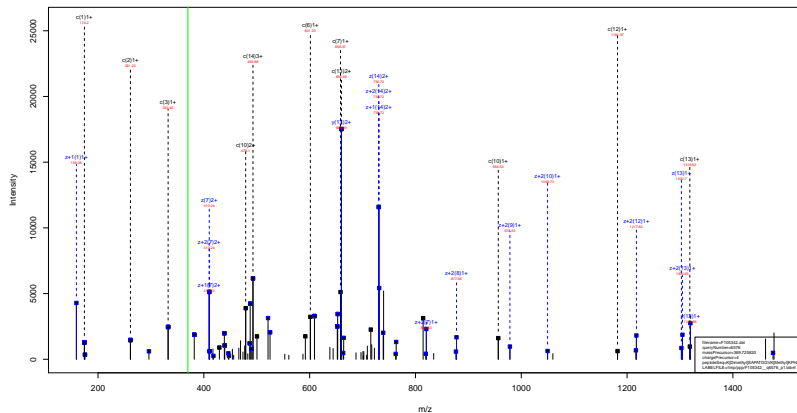

# sp | P68433 | H31\_MOUSE

K<sup>Dimethyl</sup> 28.03 SAPATGGVK<sup>Methyl</sup> 14.02 KPHR

- ▶ fragmentation table for charge state 1+
- ▶ specType=etd
- ▶ score=107.57
- ▶ F105342.dat
- ▶ query=q6576\_p1
- ▶ precursor=369.725820
- ▶ chargePrecursor=4
- ▶ itol=0.8

| AA    | c        | y        | z+1      | z+2      | z        | AA    |
|-------|----------|----------|----------|----------|----------|-------|
| K[1]  | 174.160  | 1475.881 | 1459.890 | 1460.870 | 1458.850 | K[14] |
| S[2]  | 261.192  | 1319.754 | 1303.736 | 1304.743 | 1302.728 | S[13] |
| A[3]  | 332.229  | 1232.722 | 1216.703 | 1217.711 | 1215.696 | A[12] |
| P[4]  | 429.252  | 1161.685 | 1145.667 | 1146.674 | 1144.659 | P[11] |
| A[5]  | 500.319  | 1084.632 | 1068.614 | 1069.621 | 1067.606 | A[10] |
| T[6]  | 601.307  | 993.595  | 977.577  | 978.584  | 976.569  | T[9]  |
| G[7]  | 658.388  | 892.548  | 876.529  | 877.537  | 875.521  | G[8]  |
| G[8]  | 715.410  | 835.526  | 819.507  | 820.515  | 818.500  | G[7]  |
| V[9]  | 814.478  | 778.505  | 762.486  | 763.494  | 761.479  | V[6]  |
| K[10] | 956.589  | 679.435  | 663.417  | 664.425  | 662.410  | K[5]  |
| K[11] | 1094.684 | 537.326  | 521.307  | 522.315  | 520.300  | K[4]  |
| P[12] | 1181.736 | 409.211  | 393.192  | 394.200  | 392.185  | P[3]  |
| H[13] | 1318.795 | 312.179  | 296.159  | 297.167  | 295.151  | H[2]  |
| R[14] | 1474.896 | 175.119  | 159.100  | 160.108  | 158.092  | R[1]  |

# sp | P68433 | H31\_MOUSE

K<sup>Dimethyl</sup> 28.03 SAPATGGVK<sup>Methyl</sup> 14.02 KPHR

- ▶ fragmentation table for charge state 2+
- ▶ specType=etd
- ▶ score=107.57
- ▶ F105342.dat
- ▶ query=q6576\_p1
- ▶ precursor=369.725820
- ▶ chargePrecursor=4
- ▶ itol=0.8

| AA |      | c              | y              | z+1            | z+2            | z              | AA    |
|----|------|----------------|----------------|----------------|----------------|----------------|-------|
| K  | [2]  | 57.584         | <b>738.444</b> | <b>730.435</b> | <b>730.938</b> | <b>729.931</b> | R[14] |
| S  | [2]  | 131.100        | <b>660.381</b> | <b>652.371</b> | <b>652.875</b> | <b>651.867</b> | S[13] |
| A  | [3]  | 156.618        | 616.885        | <b>608.855</b> | <b>609.359</b> | <b>608.351</b> | A[12] |
| P  | [4]  | 215.145        | 581.348        | 573.337        | 573.841        | 572.833        | P[11] |
| A  | [5]  | 250.663        | 532.820        | <b>524.810</b> | <b>525.314</b> | 524.307        | A[10] |
| T  | [6]  | 301.187        | 497.301        | <b>489.292</b> | <b>489.796</b> | 488.788        | T[9]  |
| G  | [7]  | 329.698        | <b>446.777</b> | <b>438.768</b> | <b>439.272</b> | <b>438.264</b> | G[8]  |
| G  | [8]  | 358.208        | <b>418.267</b> | <b>410.257</b> | <b>410.761</b> | <b>409.753</b> | G[7]  |
| V  | [9]  | 407.743        | 389.756        | <b>381.747</b> | <b>382.250</b> | <b>381.243</b> | V[6]  |
| K  | [10] | <b>478.798</b> | 340.222        | <b>332.212</b> | <b>332.716</b> | <b>331.708</b> | K[5]  |
| K  | [11] | 342.945        | 299.166        | <b>281.157</b> | <b>281.661</b> | <b>280.653</b> | K[4]  |
| P  | [12] | <b>591.372</b> | 205.119        | 197.110        | 197.614        | 196.606        | P[3]  |
| H  | [13] | <b>659.901</b> | 156.583        | 148.583        | 149.087        | 148.079        | H[2]  |
| R  | [14] | 737.952        | 88.063         | 80.054         | 80.558         | 79.550         | R[1]  |

# sp | P68433 | H31\_MOUSE

K<sup>Dimethyl</sup> 28.03 SAPATGGVK<sup>Methyl</sup> KPHR 14.02

- ▶ fragmentation table for charge state 3+
- ▶ specType=etd
- ▶ score=107.57
- ▶ F105342.dat
- ▶ query=q6576\_p1
- ▶ precursor=369.725820
- ▶ chargePrecursor=4
- ▶ itol=0.8

| AA    | c              | y              | z+1            | z+2            | z              | AA    |
|-------|----------------|----------------|----------------|----------------|----------------|-------|
| K[2]  | 58.725         | <b>492.632</b> | <b>487.292</b> | <b>481.620</b> | <b>486.956</b> | R[14] |
| S[2]  | 87.736         | 440.590        | 435.257        | 435.568        | 434.914        | S[13] |
| A[3]  | 111.415        | <b>411.579</b> | 405.239        | 402.575        | 405.903        | A[12] |
| P[4]  | 143.766        | 387.900        | <b>382.560</b> | 382.896        | <b>382.224</b> | P[11] |
| A[5]  | 167.445        | 355.549        | 350.209        | 350.545        | 349.873        | A[10] |
| T[6]  | 201.127        | <b>331.870</b> | 326.530        | 326.866        | 326.194        | T[9]  |
| G[7]  | 220.134        | 298.187        | 292.848        | 293.184        | 292.512        | G[8]  |
| G[8]  | 239.141        | 279.180        | 273.841        | 274.177        | 273.505        | G[7]  |
| V[9]  | 272.164        | 260.173        | 254.833        | 255.169        | 254.498        | V[6]  |
| K[10] | 319.534        | 227.150        | 221.811        | 222.147        | 221.475        | K[5]  |
| K[11] | 352.233        | 179.780        | <b>174.440</b> | <b>174.776</b> | <b>174.105</b> | K[4]  |
| P[12] | 394.584        | 137.082        | 131.742        | 132.078        | 131.406        | P[3]  |
| H[13] | <b>440.270</b> | 104.731        | 99.391         | 99.727         | 99.055         | H[2]  |
| R[14] | <b>492.304</b> | 59.045         | 53.705         | 54.041         | 53.369         | R[1]  |



# sp | P84244 | H33\_MOUSE

K<sup>Trimethyl</sup> 42.05 SAPSTGGVK<sup>Dimethyl</sup> 28.03 KPHR

- ▶ fragmentation table for charge state 1+
- ▶ specType=etd
- ▶ score=91.73
- ▶ F105342.dat
- ▶ query=q6857.p1
- ▶ precursor=380.730170
- ▶ chargePrecursor=4
- ▶ itol=0.8

| AA    | c        | y        | z+1      | z+2      | z        | AA    |
|-------|----------|----------|----------|----------|----------|-------|
| R[1]  | 188.176  | 1519.907 | 1509.889 | 1504.896 | 1502.889 | R[14] |
| S[2]  | 275.268  | 1340.705 | 1333.746 | 1334.754 | 1332.739 | S[13] |
| A[3]  | 348.245  | 1200.733 | 1246.718 | 1247.722 | 1245.706 | A[12] |
| P[4]  | 441.298  | 1191.699 | 1179.671 | 1179.689 | 1174.669 | P[11] |
| S[5]  | 530.130  | 1094.643 | 1078.624 | 1079.632 | 1077.616 | S[10] |
| T[6]  | 631.377  | 1007.611 | 991.592  | 992.600  | 990.584  | T[9]  |
| G[7]  | 688.399  | 908.583  | 890.544  | 891.552  | 889.537  | G[8]  |
| G[8]  | 745.420  | 840.542  | 833.523  | 834.531  | 832.515  | G[7]  |
| V[9]  | 844.489  | 732.520  | 718.502  | 717.509  | 715.494  | V[6]  |
| K[10] | 1000.615 | 693.492  | 677.473  | 678.481  | 676.465  | K[5]  |
| K[11] | 1128.710 | 537.326  | 521.307  | 522.315  | 520.299  | K[4]  |
| P[12] | 1225.763 | 409.231  | 383.212  | 394.220  | 392.204  | P[3]  |
| H[13] | 1362.822 | 312.178  | 296.159  | 297.167  | 295.151  | H[2]  |
| R[14] | 1518.923 | 175.119  | 159.100  | 160.108  | 158.092  | R[1]  |

# sp | P84244 | H33\_MOUSE

K<sup>Trimethyl</sup> 42.05 SAPSTGGVK<sup>Dimethyl</sup> 28.03 KPHR

- ▶ fragmentation table for charge state 2+
- ▶ specType=etd
- ▶ score=91.73
- ▶ F105342.dat
- ▶ query=q6857\_p1
- ▶ precursor=380.730170
- ▶ chargePrecursor=4
- ▶ itol=0.8

| AA    | c              | y              | z+1            | z+2            | z              | AA    |
|-------|----------------|----------------|----------------|----------------|----------------|-------|
| K[2]  | 94.592         | 790.497        | <b>752.448</b> | <b>752.952</b> | 751.944        | R[14] |
| S[2]  | 139.108        | 675.389        | <b>667.377</b> | <b>667.881</b> | <b>666.873</b> | S[13] |
| A[3]  | <b>173.626</b> | <b>631.870</b> | <b>623.861</b> | <b>624.365</b> | <b>623.357</b> | A[12] |
| P[4]  | 222.152        | 596.351        | 588.342        | 588.846        | 587.838        | P[11] |
| S[5]  | 285.668        | 547.825        | <b>539.816</b> | <b>540.320</b> | <b>539.312</b> | S[10] |
| T[6]  | 316.192        | 504.309        | <b>496.300</b> | <b>496.804</b> | <b>495.796</b> | T[9]  |
| G[7]  | 344.703        | 453.785        | <b>445.776</b> | <b>446.280</b> | <b>445.272</b> | G[8]  |
| G[8]  | 373.214        | 425.275        | <b>417.265</b> | <b>417.769</b> | <b>416.761</b> | G[7]  |
| V[9]  | 422.748        | <b>396.764</b> | <b>388.754</b> | <b>389.258</b> | <b>388.250</b> | V[6]  |
| K[10] | <b>500.811</b> | <b>347.230</b> | <b>339.220</b> | <b>339.724</b> | <b>338.716</b> | R[5]  |
| K[11] | 594.659        | 299.166        | <b>291.157</b> | <b>291.661</b> | <b>290.653</b> | K[4]  |
| P[12] | <b>613.385</b> | 205.119        | 197.110        | 197.614        | 196.606        | P[3]  |
| H[13] | <b>681.914</b> | 156.583        | 148.583        | 149.087        | 148.079        | H[2]  |
| R[14] | 759.965        | 88.063         | 80.054         | 80.558         | 79.550         | R[1]  |



# sp | P84244 | H33\_MOUSE

K<sup>Trimethyl</sup><sub>42.05</sub> SAPSTGGVK<sup>Dimethyl</sup><sub>28.03</sub> KPHR

- ▶ fragmentation table for charge state 3+
- ▶ specType=etd
- ▶ score=91.73
- ▶ F105342.dat
- ▶ query=q6857.p1
- ▶ precursor=380.730170
- ▶ chargePrecursor=4
- ▶ itol=0.8

| AA    | c              | y              | z+1            | z+2            | z              | AA    |
|-------|----------------|----------------|----------------|----------------|----------------|-------|
| K[2]  | 63.397         | <b>507.307</b> | <b>501.968</b> | <b>502.303</b> | <b>501.632</b> | R[14] |
| S[2]  | 92.407         | 450.593        | <b>445.254</b> | <b>445.509</b> | 444.918        | S[13] |
| A[3]  | 116.086        | 421.582        | 416.243        | 416.579        | 415.907        | A[12] |
| P[4]  | 148.437        | 397.903        | 392.564        | 392.900        | 392.228        | P[11] |
| S[5]  | 177.448        | 365.552        | 360.213        | 360.549        | 359.877        | S[10] |
| T[6]  | 211.131        | 336.542        | 331.202        | 331.538        | 330.866        | T[9]  |
| G[7]  | 230.138        | 302.859        | 297.520        | 297.856        | 297.184        | G[8]  |
| G[8]  | 249.145        | 283.852        | 278.513        | 278.848        | 278.177        | G[7]  |
| V[9]  | 282.168        | 254.845        | 250.505        | 250.841        | 250.169        | V[6]  |
| K[10] | 334.210        | 231.822        | 226.483        | 226.819        | 226.147        | K[5]  |
| K[11] | 376.508        | 179.780        | <b>174.440</b> | <b>174.776</b> | <b>174.105</b> | R[4]  |
| P[12] | 409.259        | 137.082        | 132.742        | 132.078        | 131.405        | P[3]  |
| H[13] | 454.945        | 104.731        | 99.391         | 99.727         | 99.055         | H[2]  |
| R[14] | <b>506.979</b> | 59.045         | 53.705         | 54.041         | 53.369         | R[1]  |



# sp | P43276 | H15\_MOUSE

## [Acetyl]SETAPAETAAPAPVEKSPA

- ▶ fragmentation table for charge state 1+
- ▶ specType=etd
- ▶ score=52.15
- ▶ F105342.dat
- ▶ query=q8973\_p1
- ▶ precursor=997.508370
- ▶ chargePrecursor=2
- ▶ itol=0.8

| AA    | c        | y               | z+1             | z+2     | z               | AA    |
|-------|----------|-----------------|-----------------|---------|-----------------|-------|
| S[1]  | 147.076  | <b>1994.000</b> | 1977.989        | 0.000   | <b>1976.901</b> | S[20] |
| E[2]  | 276.119  | 1864.965        | <b>1848.946</b> | 0.000   | 1847.939        | E[19] |
| T[3]  | 377.167  | 1735.922        | <b>1719.904</b> | 0.000   | 1718.896        | T[18] |
| A[4]  | 448.204  | 1634.875        | <b>1618.856</b> | 0.000   | 1617.848        | A[17] |
| F[5]  | 545.257  | 1563.838        | 1547.819        | 0.000   | 1546.811        | F[16] |
| A[6]  | 618.294  | 1466.785        | 1450.766        | 0.000   | 1449.758        | A[15] |
| E[7]  | 745.136  | 1395.740        | <b>1379.720</b> | 0.000   | 1378.712        | E[14] |
| T[8]  | 846.384  | 1296.705        | <b>1250.687</b> | 0.000   | <b>1249.679</b> | T[13] |
| A[9]  | 917.421  | 1165.658        | 1149.639        | 0.000   | 1148.631        | A[12] |
| A[10] | 989.458  | 1094.620        | <b>1078.602</b> | 0.000   | 1077.594        | A[11] |
| P[11] | 1085.511 | 1023.583        | 1007.565        | 0.000   | 1006.557        | P[10] |
| A[12] | 1156.548 | 926.511         | <b>910.512</b>  | 0.000   | 909.504         | A[9]  |
| P[13] | 1251.601 | 854.491         | 839.473         | 0.000   | 838.465         | P[8]  |
| V[14] | 1352.569 | 758.441         | 752.422         | 0.000   | 741.414         | V[7]  |
| E[15] | 1481.712 | 659.372         | <b>643.354</b>  | 0.000   | 642.346         | E[6]  |
| K[16] | 1609.807 | 530.330         | 514.311         | 515.319 | 513.303         | K[5]  |
| S[17] | 1696.839 | 402.235         | 386.216         | 387.224 | 385.208         | S[4]  |
| P[18] | 1793.892 | 315.203         | 299.184         | 300.192 | 298.176         | P[3]  |
| A[19] | 1864.929 | 218.150         | 202.131         | 203.139 | 201.123         | A[2]  |
| K[20] | 1993.024 | 147.113         | 131.094         | 132.102 | 130.086         | K[1]  |



# sp | P62806 | H4\_MOUSE

SGRGKGGKGLGKGGAK <sup>Acetyl</sup>42.01 RHRK <sup>Dimethyl</sup>28.03 VLRLD

- ▶ fragmentation table for charge state 1+
- ▶ specType=etd
- ▶ score=67.65
- ▶ F105343.dat
- ▶ query=q12738\_p1
- ▶ precursor=637.130450
- ▶ chargePrecursor=4
- ▶ itol=0.8

| AA    | c               | y              | z+1             | z+2             | z               | AA    |
|-------|-----------------|----------------|-----------------|-----------------|-----------------|-------|
| S[1]  | 105.059         | 2545.502       | 2529.463        | 0.000           | 2528.416        | S[24] |
| G[2]  | 162.087         | 2458.470       | 2442.451        | 0.000           | 2441.444        | G[23] |
| R[3]  | <b>318.188</b>  | 2401.449       | 2385.430        | 2386.438        | 2384.422        | R[22] |
| G[4]  | <b>375.210</b>  | 2345.448       | 2229.329        | 2230.337        | 2228.321        | G[21] |
| K[5]  | <b>503.305</b>  | 2188.326       | 2172.307        | 2173.315        | 2171.300        | K[20] |
| G[6]  | <b>560.326</b>  | 2060.231       | 2044.212        | 2045.220        | 2043.205        | G[19] |
| G[7]  | <b>617.348</b>  | 2003.210       | 1987.190        | 1988.199        | 1986.181        | G[18] |
| K[8]  | <b>745.443</b>  | 1946.188       | 1930.170        | 1931.177        | 1929.162        | K[17] |
| G[9]  | 802.464         | 1818.091       | <b>1802.075</b> | <b>1803.082</b> | 1801.067        | G[16] |
| L[10] | 915.588         | 1761.072       | 1745.053        | 1746.061        | 1744.045        | L[15] |
| Q[11] | <b>972.570</b>  | 1647.988       | 1631.969        | <b>1632.977</b> | 1630.961        | Q[14] |
| K[12] | 1100.665        | 1590.966       | 1574.948        | 1575.955        | 1573.940        | K[13] |
| G[13] | <b>1157.686</b> | 1462.871       | 1446.853        | 1447.860        | 1445.845        | G[12] |
| G[14] | <b>1214.708</b> | 1405.850       | 1389.831        | <b>1390.839</b> | 1388.823        | G[11] |
| A[15] | <b>1285.745</b> | 1348.828       | 1332.810        | <b>1333.816</b> | 1331.800        | A[10] |
| R[16] | 1455.950        | 1277.701       | 1261.683        | <b>1262.700</b> | <b>1260.765</b> | R[9]  |
| R[17] | <b>1611.951</b> | 1107.686       | 1091.667        | 1092.675        | 1090.659        | R[8]  |
| H[18] | 1740.010        | 951.585        | <b>935.566</b>  | <b>936.574</b>  | 934.558         | H[7]  |
| R[19] | <b>1905.111</b> | <b>814.526</b> | <b>798.507</b>  | <b>799.515</b>  | 797.499         | R[6]  |
| K[20] | 2061.238        | 658.425        | 642.406         | <b>643.414</b>  | 641.399         | K[5]  |
| V[21] | 2190.306        | <b>502.298</b> | 486.280         | 487.287         | 485.272         | V[4]  |
| L[22] | 2273.369        | 419.326        | 387.311         | <b>388.319</b>  | 386.303         | L[3]  |
| R[23] | 2429.491        | 290.148        | <b>274.127</b>  | 275.135         | 273.119         | R[2]  |
| D[24] | 2544.518        | 134.045        | 118.028         | 119.034         | 117.018         | D[1]  |

# sp | P62806 | H4\_MOUSE

SGRGKGGKGLGKGGAK <sup>Acetyl</sup>42.01 RHRK <sup>Dimethyl</sup>28.03 VLRLD

- ▶ fragmentation table for charge state 2+
- ▶ specType=etd
- ▶ score=67.65
- ▶ F105343.dat
- ▶ query=q12738\_p1
- ▶ precursor=637.130450
- ▶ chargePrecursor=4
- ▶ itol=0.8

| AA    | c               | y               | z+1             | z+2             | z               | AA    |
|-------|-----------------|-----------------|-----------------|-----------------|-----------------|-------|
| S[1]  | 83.037          | 1273.255        | 1266.265        | 0.504           | 1264.741        | S[24] |
| G[2]  | 81.547          | 1229.739        | <b>1221.729</b> | 0.504           | 1221.225        | G[23] |
| K[3]  | 158.558         | 1201.229        | <b>1193.219</b> | <b>1193.723</b> | 1192.715        | K[22] |
| G[4]  | 188.399         | 1123.177        | <b>1115.168</b> | <b>1115.972</b> | 1114.666        | G[21] |
| K[5]  | 252.158         | <b>1094.667</b> | <b>1086.657</b> | <b>1087.161</b> | <b>1086.153</b> | K[20] |
| G[6]  | 280.667         | 1030.619        | <b>1022.610</b> | <b>1023.114</b> | <b>1022.106</b> | G[19] |
| G[7]  | 309.176         | 1002.108        | 994.099         | 994.603         | 993.595         | G[18] |
| K[8]  | 373.225         | 973.598         | 965.588         | <b>966.092</b>  | 965.084         | K[17] |
| G[9]  | 401.736         | <b>909.556</b>  | <b>901.541</b>  | <b>902.045</b>  | <b>901.037</b>  | G[16] |
| L[10] | 430.246         | 881.046         | 873.033         | 873.534         | 872.526         | L[15] |
| G[11] | 458.756         | <b>824.498</b>  | 816.488         | 816.992         | <b>815.984</b>  | G[14] |
| K[12] | 550.836         | <b>795.987</b>  | <b>787.977</b>  | <b>788.481</b>  | <b>787.474</b>  | K[13] |
| G[13] | 579.347         | 731.939         | <b>723.930</b>  | <b>724.434</b>  | <b>723.426</b>  | G[12] |
| G[14] | <b>607.857</b>  | 703.429         | <b>695.419</b>  | <b>695.923</b>  | 694.915         | G[11] |
| A[15] | <b>643.376</b>  | 674.919         | <b>666.908</b>  | <b>667.412</b>  | 666.404         | A[10] |
| R[16] | 736.420         | 639.399         | <b>631.390</b>  | <b>631.894</b>  | <b>630.886</b>  | R[9]  |
| R[17] | <b>806.479</b>  | 554.347         | <b>546.337</b>  | <b>546.841</b>  | 545.833         | R[8]  |
| H[18] | <b>875.009</b>  | 476.296         | 468.287         | 468.791         | 467.783         | H[7]  |
| R[19] | 963.059         | 407.767         | 399.757         | 400.261         | 399.253         | R[6]  |
| K[20] | <b>1031.122</b> | 329.716         | 321.707         | 322.211         | 321.203         | K[5]  |
| V[21] | <b>1080.657</b> | 251.663         | 243.653         | 244.157         | 243.149         | V[4]  |
| L[22] | <b>1137.199</b> | 202.119         | 194.109         | 194.613         | 193.605         | L[3]  |
| R[23] | 1215.249        | 145.577         | 137.567         | 138.071         | 137.063         | R[2]  |
| D[24] | 1272.763        | 67.526          | 59.517          | 60.021          | 59.013          | D[1]  |

# sp | P62806 | H4\_MOUSE

SGRGKGGKGLGKGGAK <sup>Acetyl</sup>42.01 RHRK <sup>Dimethyl</sup>28.03 VLRLD

- ▶ fragmentation table for charge state 3+
- ▶ specType=etd
- ▶ score=67.65
- ▶ F105343.dat
- ▶ query=q12738.p1
- ▶ precursor=637.130450
- ▶ chargePrecursor=4
- ▶ itol=0.8

| AA    | c              | y              | z+1            | z+2            | z              | AA    |
|-------|----------------|----------------|----------------|----------------|----------------|-------|
| S[1]  | 35.693         | <b>849.172</b> | <b>843.833</b> | 0.672          | <b>843.497</b> | S[24] |
| G[2]  | 54.701         | 820.162        | <b>814.822</b> | 0.672          | <b>814.486</b> | G[23] |
| R[3]  | 106.734        | 801.154        | <b>795.815</b> | <b>796.151</b> | <b>795.479</b> | R[22] |
| G[4]  | 125.741        | 749.121        | 743.781        | 744.117        | 743.445        | G[21] |
| K[5]  | 168.440        | 730.114        | <b>724.774</b> | 725.110        | <b>724.438</b> | K[20] |
| G[6]  | 187.447        | 687.415        | 682.076        | 682.412        | 681.740        | G[19] |
| G[7]  | 206.454        | 668.408        | 663.069        | 663.404        | 662.733        | G[18] |
| K[8]  | 249.152        | 649.401        | <b>644.061</b> | 644.397        | <b>643.725</b> | K[17] |
| G[9]  | 268.160        | 606.793        | 601.353        | 601.689        | 601.027        | G[16] |
| L[10] | 305.254        | 587.695        | 582.356        | 582.692        | 582.020        | L[15] |
| G[11] | 324.261        | 550.001        | 544.661        | 544.997        | 544.325        | G[14] |
| K[12] | 367.560        | 530.994        | 525.654        | 525.990        | 525.318        | K[13] |
| G[13] | 386.567        | 488.295        | 482.956        | 483.292        | 482.620        | G[12] |
| G[14] | 405.574        | 469.288        | 463.949        | 464.285        | 463.613        | G[11] |
| A[15] | 429.253        | 450.281        | 444.941        | 445.277        | 444.605        | A[10] |
| K[16] | 485.955        | 426.602        | 421.262        | 421.598        | 420.926        | K[9]  |
| R[17] | 537.989        | 369.900        | 364.561        | 364.896        | 364.225        | R[8]  |
| H[18] | 583.675        | <b>317.866</b> | 312.527        | 312.863        | 312.191        | H[7]  |
| R[19] | 635.709        | 272.180        | 266.841        | 267.176        | 266.505        | R[6]  |
| K[20] | 667.751        | 220.140        | <b>214.807</b> | <b>215.143</b> | <b>214.471</b> | K[5]  |
| V[21] | 720.774        | 168.104        | 162.765        | 163.101        | 162.429        | V[4]  |
| L[22] | <b>758.468</b> | 135.082        | 129.742        | 130.078        | 129.406        | L[3]  |
| R[23] | <b>810.502</b> | 97.387         | 92.047         | 92.383         | 91.711         | R[2]  |
| D[24] | <b>848.844</b> | 45.353         | 40.014         | 40.349         | 39.678         | D[1]  |





# sp | P62806 | H4\_MOUSE

[Acetyl]SGRGKGGKGLGKGGAKRHRK<sup>Dimethyl</sup>VLRD<sub>28.03</sub>

- ▶ fragmentation table for charge state 1+
- ▶ specType=etd
- ▶ score=125.20
- ▶ F105343.dat
- ▶ query=q12739\_p1
- ▶ precursor=637.130570
- ▶ chargePrecursor=4
- ▶ itol=0.8

| AA    | c               | y        | z+1             | z+2             | z        | AA    |
|-------|-----------------|----------|-----------------|-----------------|----------|-------|
| S[1]  | 147.076         | 2545.502 | 2529.483        | 0.000           | 2528.478 | S[24] |
| G[2]  | 204.098         | 2416.460 | 2400.441        | 0.000           | 2399.433 | G[23] |
| R[3]  | <b>350.199</b>  | 2359.438 | 2343.419        | 2344.427        | 2342.412 | R[22] |
| G[4]  | <b>417.230</b>  | 2203.337 | 2187.318        | 2188.326        | 2186.310 | G[21] |
| K[5]  | <b>545.315</b>  | 2146.316 | 2130.297        | 2131.305        | 2129.289 | K[20] |
| G[6]  | <b>602.337</b>  | 2018.221 | 2002.200        | 2003.210        | 2001.194 | G[19] |
| G[7]  | <b>659.358</b>  | 1961.199 | 1945.180        | <b>1946.188</b> | 1944.173 | G[18] |
| K[8]  | <b>787.453</b>  | 1904.178 | <b>1888.159</b> | 1889.167        | 1887.151 | K[17] |
| G[9]  | <b>844.475</b>  | 1776.063 | 1760.064        | 1761.072        | 1759.056 | G[16] |
| L[10] | <b>927.559</b>  | 1719.061 | 1703.063        | 1704.060        | 1702.035 | L[15] |
| G[11] | <b>1014.580</b> | 1605.977 | 1589.958        | 1590.966        | 1588.951 | G[14] |
| K[12] | <b>1142.675</b> | 1548.956 | 1532.937        | 1533.945        | 1531.929 | K[13] |
| G[13] | <b>1199.697</b> | 1420.861 | 1404.840        | <b>1405.850</b> | 1403.834 | G[12] |
| G[14] | <b>1256.718</b> | 1363.839 | <b>1347.821</b> | <b>1348.828</b> | 1346.813 | G[11] |
| A[15] | <b>1327.795</b> | 1306.818 | 1290.799        | 1291.807        | 1289.791 | A[10] |
| R[16] | 1459.850        | 1249.781 | 1233.762        | <b>1230.770</b> | 1231.764 | R[9]  |
| R[17] | 1611.951        | 1107.686 | 1091.667        | 1092.675        | 1090.659 | R[8]  |
| H[18] | <b>1749.010</b> | 951.585  | <b>935.566</b>  | <b>936.574</b>  | 934.558  | H[7]  |
| R[19] | 1908.111        | 814.526  | <b>798.507</b>  | 799.515         | 797.499  | R[6]  |
| K[20] | 2061.238        | 658.425  | 642.406         | <b>643.414</b>  | 641.399  | K[5]  |
| V[21] | 2180.306        | 502.298  | 486.280         | <b>487.287</b>  | 485.272  | V[4]  |
| L[22] | 2273.390        | 403.230  | 387.211         | <b>388.219</b>  | 386.203  | L[3]  |
| R[23] | 2429.491        | 290.146  | 274.127         | <b>275.135</b>  | 273.110  | R[2]  |
| D[24] | 2544.518        | 134.045  | 118.026         | 119.034         | 117.018  | D[1]  |

# sp | P62806 | H4\_MOUSE

[Acetyl]SGRGKGGKGLGKGGAKRHRK<sup>Dimethyl</sup>VLRD<sub>28.03</sub>

- ▶ fragmentation table for charge state 2+
- ▶ specType=etd
- ▶ score=125.20
- ▶ F105343.dat
- ▶ query=q12739\_p1
- ▶ precursor=637.130570
- ▶ chargePrecursor=4
- ▶ itol=0.8

| AA    | c               | y               | z+1             | z+2             | z               | AA    |
|-------|-----------------|-----------------|-----------------|-----------------|-----------------|-------|
| S[1]  | 74.642          | <b>1273.255</b> | <b>1265.245</b> | 0.504           | 1264.741        | S[24] |
| G[2]  | 102.553         | <b>1208.733</b> | <b>1200.724</b> | 0.504           | <b>1200.220</b> | G[23] |
| R[3]  | 180.603         | 1180.222        | <b>1172.213</b> | <b>1172.717</b> | 1171.709        | R[22] |
| G[4]  | 259.114         | 1102.172        | <b>1094.163</b> | <b>1094.667</b> | <b>1093.659</b> | G[21] |
| K[5]  | 273.153         | 1073.661        | <b>1065.652</b> | <b>1066.156</b> | <b>1065.148</b> | K[20] |
| G[6]  | 301.672         | 1009.614        | <b>1001.605</b> | <b>1002.108</b> | 1001.101        | G[19] |
| G[7]  | 330.183         | 981.103         | <b>973.094</b>  | <b>973.598</b>  | <b>972.590</b>  | G[18] |
| K[8]  | 394.230         | <b>952.592</b>  | <b>944.583</b>  | <b>945.087</b>  | <b>944.079</b>  | K[17] |
| G[9]  | 422.741         | 898.545         | <b>890.536</b>  | <b>891.040</b>  | <b>890.032</b>  | G[16] |
| L[10] | 479.293         | 860.036         | 852.027         | 852.529         | 851.521         | L[15] |
| G[11] | 507.794         | 803.492         | <b>795.483</b>  | <b>795.987</b>  | <b>794.979</b>  | G[14] |
| K[12] | 571.841         | 774.982         | <b>766.972</b>  | <b>767.476</b>  | <b>766.468</b>  | K[13] |
| G[13] | 600.352         | 710.934         | <b>702.925</b>  | <b>703.429</b>  | 702.421         | G[12] |
| G[14] | 628.863         | 682.423         | <b>674.414</b>  | <b>674.918</b>  | 673.910         | G[11] |
| A[15] | 694.381         | 653.913         | <b>645.903</b>  | <b>646.407</b>  | <b>645.399</b>  | A[10] |
| R[16] | 728.430         | 618.394         | <b>610.385</b>  | <b>610.889</b>  | <b>609.881</b>  | R[9]  |
| R[17] | <b>806.479</b>  | 554.347         | <b>546.337</b>  | <b>546.841</b>  | <b>545.833</b>  | R[8]  |
| H[18] | <b>875.009</b>  | 476.290         | 468.281         | 468.781         | 467.783         | H[7]  |
| R[19] | <b>953.059</b>  | 407.767         | 399.757         | 400.261         | 399.253         | R[6]  |
| K[20] | <b>1031.122</b> | 329.716         | 321.707         | 322.211         | 321.203         | K[5]  |
| V[21] | <b>1080.667</b> | 251.663         | 243.653         | 244.157         | 243.149         | V[4]  |
| L[22] | <b>1137.199</b> | 202.110         | 194.100         | 194.613         | 193.605         | L[3]  |
| R[23] | <b>1215.249</b> | 145.577         | 137.567         | 138.071         | 137.063         | R[2]  |
| D[24] | <b>1272.763</b> | 67.526          | 59.517          | 60.021          | 59.013          | D[1]  |

# sp | P62806 | H4\_MOUSE

[Acetyl]SGRGKGGKGLGKGGAKRHRK<sup>Dimethyl</sup>VLRD<sub>28.03</sub>

- ▶ fragmentation table for charge state 3+
- ▶ specType=etd
- ▶ score=125.20
- ▶ F105343.dat
- ▶ query=q12739\_p1
- ▶ precursor=637.130570
- ▶ chargePrecursor=4
- ▶ itol=0.8

| AA    | c              | y              | z+1            | z+2            | z              | AA    |
|-------|----------------|----------------|----------------|----------------|----------------|-------|
| S[1]  | 49.697         | <b>849.172</b> | <b>843.833</b> | 0.672          | <b>843.497</b> | S[24] |
| G[2]  | 58.704         | <b>806.158</b> | <b>800.818</b> | 0.672          | <b>800.483</b> | G[23] |
| R[3]  | 150.738        | <b>787.151</b> | <b>781.811</b> | <b>782.147</b> | <b>781.475</b> | R[22] |
| G[4]  | 139.745        | 735.117        | 729.778        | 730.114        | 729.442        | G[21] |
| K[5]  | 182.443        | 716.110        | 710.770        | 711.106        | 710.435        | K[20] |
| G[6]  | 201.450        | 673.412        | 668.072        | 668.408        | 667.736        | G[19] |
| G[7]  | 220.458        | 654.405        | 649.065        | 649.401        | 648.729        | G[18] |
| K[8]  | 263.156        | 635.397        | 630.058        | 630.394        | 629.722        | K[17] |
| G[9]  | 282.163        | 592.699        | 587.359        | 587.695        | 587.024        | G[16] |
| L[10] | 319.658        | 573.692        | 568.352        | 568.688        | 568.016        | L[15] |
| G[11] | 338.665        | 535.997        | 530.658        | 530.994        | 530.322        | G[14] |
| K[12] | 381.563        | 516.990        | 511.651        | 511.986        | 511.315        | K[13] |
| G[13] | 400.570        | 474.292        | 468.952        | 469.288        | 468.616        | G[12] |
| G[14] | 419.578        | 455.285        | 449.945        | 450.281        | 449.609        | G[11] |
| A[15] | 443.257        | 436.277        | 430.938        | 431.274        | 430.602        | A[10] |
| K[16] | 485.955        | 412.598        | 407.259        | 407.595        | 406.923        | K[9]  |
| R[17] | 537.989        | 369.900        | 364.561        | 364.896        | 364.225        | R[8]  |
| H[18] | 583.675        | 317.866        | 312.527        | 312.863        | 312.191        | H[7]  |
| R[19] | 635.709        | 272.180        | 266.841        | 267.176        | 266.505        | R[6]  |
| K[20] | 687.751        | 220.140        | 214.801        | 215.143        | 214.471        | K[5]  |
| V[21] | 720.774        | 168.104        | 162.765        | 163.101        | 162.429        | V[4]  |
| L[22] | 758.468        | 135.082        | 129.742        | 130.078        | 129.406        | L[3]  |
| R[23] | <b>810.502</b> | 97.387         | 92.047         | 92.383         | 91.711         | R[2]  |
| D[24] | <b>848.844</b> | 45.353         | 40.014         | 40.349         | 39.678         | D[1]  |



# sp | P62806 | H4\_MOUSE

[Acetyl]SGRGKGGKGLGKGGAKRHRK<sup>Dimethyl</sup>VLRD<sub>28.03</sub>

- ▶ fragmentation table for charge state 1+
- ▶ specType=etd
- ▶ score=46.10
- ▶ F105343.dat
- ▶ query=q12740\_p1
- ▶ precursor=849.171730
- ▶ chargePrecursor=3
- ▶ itol=0.8

| AA | c  | y               | z+1      | z+2             | z               | AA              |       |
|----|----|-----------------|----------|-----------------|-----------------|-----------------|-------|
| S  | 1  | 147.076         | 2545.502 | 2529.463        | 0.000           | 2526.416        | S[24] |
| G  | 2  | 204.008         | 2416.460 | 2400.441        | 0.000           | 2399.433        | G[23] |
| R  | 3  | <b>360.199</b>  | 2359.438 | 2343.410        | 2344.427        | 2342.412        | R[22] |
| G  | 4  | <b>417.220</b>  | 2303.337 | 2187.318        | 2188.326        | 2186.310        | G[21] |
| K  | 5  | 848.315         | 2144.316 | 2130.297        | 2131.305        | 2129.289        | K[20] |
| G  | 6  | 659.358         | 2018.221 | 2002.202        | 2003.210        | 2001.194        | G[19] |
| G  | 7  | <b>659.358</b>  | 1961.199 | <b>1945.180</b> | 1946.188        | 1944.172        | G[18] |
| K  | 8  | <b>787.453</b>  | 1904.178 | <b>1888.159</b> | 1889.167        | <b>1887.151</b> | K[17] |
| G  | 9  | <b>844.475</b>  | 1776.081 | 1760.064        | 1761.072        | <b>1759.056</b> | G[16] |
| L  | 10 | <b>957.559</b>  | 1719.061 | <b>1703.043</b> | 1704.050        | 1702.035        | L[15] |
| Q  | 11 | <b>1014.580</b> | 1605.977 | 1589.958        | 1590.966        | 1588.951        | Q[14] |
| K  | 12 | 1142.675        | 1548.956 | <b>1532.937</b> | 1533.945        | 1531.929        | K[13] |
| G  | 13 | <b>1199.697</b> | 1420.861 | <b>1404.842</b> | 1405.850        | 1403.834        | G[12] |
| G  | 14 | 1256.718        | 1363.839 | 1347.821        | <b>1348.828</b> | 1346.813        | G[11] |
| A  | 15 | 1327.735        | 1306.818 | 1290.799        | 1291.807        | 1289.791        | A[10] |
| R  | 16 | 1405.802        | 1249.781 | <b>1219.762</b> | <b>1220.770</b> | 1218.755        | R[9]  |
| R  | 17 | 1611.951        | 1107.686 | 1091.667        | 1092.675        | 1090.659        | R[8]  |
| H  | 18 | 1740.010        | 951.585  | 935.566         | <b>936.574</b>  | 934.558         | H[7]  |
| R  | 19 | 1905.111        | 814.526  | 798.507         | <b>799.515</b>  | 797.499         | R[6]  |
| K  | 20 | 2061.238        | 658.425  | 642.406         | 643.414         | 641.399         | K[5]  |
| V  | 21 | 2190.306        | 502.366  | 486.346         | 487.354         | 485.337         | V[4]  |
| L  | 22 | 2273.369        | 403.320  | 387.291         | 388.299         | 386.283         | L[3]  |
| R  | 23 | 2429.491        | 300.146  | 274.127         | 275.135         | 273.119         | R[2]  |
| D  | 24 | 2544.518        | 134.045  | 118.026         | 119.034         | 117.018         | D[1]  |

# sp | P62806 | H4\_MOUSE

[Acetyl]SGRGKGGKGLGKGGAKRHRK <sup>Dimethyl</sup> VLRD  
28.03

- ▶ fragmentation table for charge state 2+
- ▶ specType=etd
- ▶ score=46.10
- ▶ F105343.dat
- ▶ query=q12740\_p1
- ▶ precursor=849.171730
- ▶ chargePrecursor=3
- ▶ itol=0.8

| AA    | c               | y               | z+1             | z+2             | z               | AA    |
|-------|-----------------|-----------------|-----------------|-----------------|-----------------|-------|
| S[1]  | 74.642          | <b>1273.255</b> | <b>1265.245</b> | 0.504           | <b>1264.741</b> | S[24] |
| G[2]  | 102.553         | 1208.733        | <b>1200.724</b> | 0.504           | <b>1200.220</b> | G[23] |
| R[3]  | 180.603         | 1180.223        | <b>1172.213</b> | <b>1172.717</b> | 1171.709        | R[22] |
| G[4]  | 259.114         | 1102.172        | <b>1094.163</b> | <b>1094.667</b> | 1093.659        | G[21] |
| K[5]  | 273.153         | 1073.661        | 1055.652        | 1056.156        | 1055.148        | K[20] |
| G[6]  | 301.672         | 1009.614        | 1001.605        | 1002.109        | 1001.101        | G[19] |
| G[7]  | 330.183         | 981.103         | 973.094         | 973.598         | 972.590         | G[18] |
| K[8]  | 394.210         | 952.592         | 944.583         | 945.087         | 944.079         | K[17] |
| G[9]  | 422.741         | 898.545         | 890.536         | 891.040         | 890.032         | G[16] |
| L[10] | 479.283         | 860.036         | 852.027         | 852.529         | 851.521         | L[15] |
| G[11] | 507.794         | 803.492         | 795.483         | 795.987         | 794.979         | G[14] |
| K[12] | 571.841         | 774.982         | 766.972         | 767.476         | 766.468         | K[13] |
| G[13] | 600.352         | 710.934         | 702.925         | 703.429         | 702.421         | G[12] |
| G[14] | 628.863         | 682.423         | 674.414         | 674.918         | 673.910         | G[11] |
| A[15] | 684.384         | 653.913         | 645.903         | 646.407         | 645.399         | A[10] |
| R[16] | 728.432         | 618.394         | 610.385         | 610.889         | 609.881         | R[9]  |
| R[17] | 806.470         | 554.347         | 546.337         | 546.841         | 545.833         | R[6]  |
| H[18] | 875.009         | 476.290         | 468.280         | 468.784         | 467.776         | H[7]  |
| R[19] | 953.059         | 407.767         | 399.757         | 400.261         | 399.253         | R[6]  |
| K[20] | 1031.122        | 339.716         | 331.707         | 332.211         | 331.203         | K[5]  |
| V[21] | 1080.669        | 251.663         | 243.653         | 244.157         | 243.149         | V[4]  |
| L[22] | <b>1137.199</b> | 202.119         | 194.109         | 194.613         | 193.605         | L[3]  |
| R[23] | 1215.249        | 145.577         | 137.567         | 138.071         | 137.063         | R[2]  |
| D[24] | <b>1272.763</b> | 67.526          | 59.517          | 60.021          | 59.013          | D[1]  |



# sp | P62806 | H4\_MOUSE

[Acetyl]SGRGKGGKGLGKGGAK<sup>Acetyl</sup> RHRK<sup>Dimethyl</sup> VLRD<sup>28.03</sup>

- ▶ fragmentation table for charge state 1+
- ▶ specType=etd
- ▶ score=116.34
- ▶ F105343.dat
- ▶ query=q12882\_p1
- ▶ precursor=647.633020
- ▶ chargePrecursor=4
- ▶ itol=0.8

| AA    | c               | y               | z+1             | z+2             | z        | AA    |
|-------|-----------------|-----------------|-----------------|-----------------|----------|-------|
| S[1]  | 147.076         | 2587.513        | 2571.494        | 0.000           | 2570.486 | S[24] |
| G[2]  | 204.098         | 2458.470        | 2442.451        | 0.000           | 2441.444 | G[23] |
| R[3]  | <b>360.199</b>  | 2401.440        | 2385.430        | 2386.438        | 2384.422 | R[22] |
| G[4]  | <b>417.220</b>  | 2349.340        | 2229.300        | 2230.337        | 2228.321 | G[21] |
| K[5]  | <b>545.315</b>  | 2185.320        | 2172.307        | 2173.315        | 2171.300 | K[20] |
| G[6]  | <b>602.337</b>  | 2060.231        | 2044.212        | 2045.220        | 2043.205 | G[19] |
| G[7]  | <b>659.358</b>  | 2003.210        | 1987.191        | <b>1988.199</b> | 1986.181 | G[18] |
| K[8]  | <b>787.453</b>  | 1946.189        | 1930.170        | 1931.177        | 1929.162 | K[17] |
| G[9]  | <b>844.475</b>  | 1818.083        | <b>1802.075</b> | 1803.082        | 1801.067 | G[16] |
| L[10] | <b>957.559</b>  | 1761.072        | 1745.053        | 1746.061        | 1744.045 | L[15] |
| Q[11] | <b>1014.580</b> | 1647.988        | 1631.969        | 1632.977        | 1630.961 | Q[14] |
| K[12] | <b>1142.675</b> | 1590.966        | 1574.948        | 1575.955        | 1573.940 | K[13] |
| G[13] | <b>1199.697</b> | 1462.871        | 1446.853        | 1447.860        | 1445.845 | G[12] |
| G[14] | <b>1256.718</b> | 1405.850        | 1389.831        | <b>1390.839</b> | 1388.821 | G[11] |
| A[15] | <b>1327.755</b> | 1348.828        | <b>1332.818</b> | <b>1333.818</b> | 1331.802 | A[10] |
| R[16] | <b>1407.861</b> | <b>1277.791</b> | 1261.772        | 1262.780        | 1260.765 | R[9]  |
| R[17] | 1653.962        | 1107.688        | 1091.667        | 1092.675        | 1090.659 | R[8]  |
| H[18] | 1791.021        | 951.585         | <b>935.566</b>  | <b>936.574</b>  | 934.558  | H[7]  |
| R[19] | 1967.122        | <b>814.526</b>  | <b>798.507</b>  | <b>799.515</b>  | 797.499  | R[6]  |
| K[20] | 2103.248        | 658.425         | 642.406         | <b>643.414</b>  | 641.398  | K[5]  |
| V[21] | 2202.217        | 502.300         | 486.280         | 487.287         | 485.272  | V[4]  |
| L[22] | 2313.403        | 463.139         | 447.111         | <b>448.119</b>  | 446.103  | L[3]  |
| R[23] | 2471.502        | 290.146         | 274.127         | 275.135         | 273.119  | R[2]  |
| D[24] | 2586.529        | 134.045         | 118.026         | 119.034         | 117.018  | D[1]  |



# sp | P62806 | H4\_MOUSE

[Acetyl]SGRGKGGKGLGKGGAK<sup>Acetyl</sup> RHRK<sup>Dimethyl</sup> VLRD<sup>28.03</sup>

- ▶ fragmentation table for charge state 2+
- ▶ specType=etd
- ▶ score=116.34
- ▶ F105343.dat
- ▶ query=q12882.p1
- ▶ precursor=647.633020
- ▶ chargePrecursor=4
- ▶ itol=0.8

| AA    | c               | y               | z+1             | z+2             | z               | AA    |
|-------|-----------------|-----------------|-----------------|-----------------|-----------------|-------|
| S[1]  | 74.642          | <b>1294.260</b> | <b>1286.251</b> | 0.504           | 1289.747        | S[24] |
| G[2]  | 102.553         | 1229.739        | <b>1221.729</b> | 0.504           | 1221.225        | G[23] |
| R[3]  | 180.603         | 1201.229        | <b>1193.219</b> | <b>1193.723</b> | 1192.713        | R[22] |
| G[4]  | 259.114         | 1123.177        | <b>1115.168</b> | <b>1115.672</b> | <b>1114.664</b> | G[21] |
| K[5]  | 273.151         | <b>1094.667</b> | <b>1086.657</b> | <b>1087.161</b> | <b>1086.153</b> | K[20] |
| G[6]  | 303.672         | 1030.619        | <b>1022.610</b> | <b>1023.114</b> | <b>1022.106</b> | G[19] |
| G[7]  | 330.183         | 1002.108        | <b>994.099</b>  | <b>994.603</b>  | 993.595         | G[18] |
| K[8]  | 394.230         | <b>973.598</b>  | <b>965.588</b>  | <b>966.092</b>  | <b>965.084</b>  | K[17] |
| G[9]  | 422.741         | 909.550         | <b>901.541</b>  | <b>902.045</b>  | <b>901.037</b>  | G[16] |
| L[10] | 479.293         | 893.040         | 873.033         | 873.534         | 872.526         | L[15] |
| G[11] | 507.794         | <b>824.498</b>  | <b>816.488</b>  | <b>816.992</b>  | <b>815.984</b>  | G[14] |
| K[12] | 571.841         | <b>795.987</b>  | <b>787.977</b>  | <b>788.481</b>  | <b>787.474</b>  | K[13] |
| G[13] | 600.352         | 731.939         | <b>723.930</b>  | <b>724.434</b>  | <b>723.426</b>  | G[12] |
| G[14] | 633.863         | 703.429         | <b>695.419</b>  | <b>695.923</b>  | <b>694.915</b>  | G[11] |
| A[15] | <b>664.381</b>  | 674.919         | <b>666.908</b>  | <b>667.412</b>  | <b>666.405</b>  | A[10] |
| R[16] | <b>749.434</b>  | 639.399         | <b>631.390</b>  | <b>631.894</b>  | 630.886         | R[9]  |
| R[17] | <b>827.485</b>  | 554.347         | <b>546.337</b>  | <b>546.841</b>  | <b>545.833</b>  | R[8]  |
| H[18] | <b>896.014</b>  | 476.290         | 468.287         | 468.791         | 467.783         | H[7]  |
| R[19] | <b>974.065</b>  | 407.767         | 399.757         | 400.261         | 399.253         | R[6]  |
| K[20] | <b>1052.128</b> | 329.716         | 321.707         | 322.211         | 321.203         | K[5]  |
| V[21] | <b>1101.662</b> | 253.693         | 245.683         | 246.187         | 245.180         | V[4]  |
| L[22] | <b>1158.204</b> | 202.139         | 194.130         | 194.633         | 193.625         | L[3]  |
| R[23] | <b>1236.255</b> | 145.577         | 137.567         | 138.071         | 137.063         | R[2]  |
| D[24] | 1293.768        | 67.526          | 59.517          | 60.021          | 59.013          | D[1]  |

# sp | P62806 | H4\_MOUSE

[Acetyl]SGRGKGGKGLGKGGAK<sup>Acetyl</sup>RHRK<sup>Dimethyl</sup>VLRD<sup>28.03</sup>

- ▶ fragmentation table for charge state 3+
- ▶ specType=etd
- ▶ score=116.34
- ▶ F105343.dat
- ▶ query=q12882.p1
- ▶ precursor=647.633020
- ▶ chargePrecursor=4
- ▶ itol=0.8

| AA    | c              | y              | z+1            | z+2            | z              | AA    |
|-------|----------------|----------------|----------------|----------------|----------------|-------|
| S[1]  | 49.697         | <b>863.176</b> | <b>857.836</b> | 0.672          | <b>857.500</b> | S[24] |
| G[2]  | 58.704         | 320.162        | <b>814.822</b> | 0.672          | <b>814.486</b> | G[23] |
| R[3]  | 150.738        | <b>801.154</b> | <b>795.815</b> | <b>796.151</b> | <b>795.479</b> | R[22] |
| G[4]  | 139.745        | <b>749.121</b> | 743.781        | 744.117        | 743.445        | G[21] |
| K[5]  | 182.443        | <b>730.114</b> | <b>724.774</b> | 725.110        | <b>724.438</b> | K[20] |
| G[6]  | 201.450        | 687.415        | 682.076        | 682.412        | 681.740        | G[19] |
| G[7]  | 220.458        | <b>668.408</b> | 663.069        | 663.404        | 662.733        | G[18] |
| K[8]  | 263.156        | 649.401        | <b>644.061</b> | <b>644.397</b> | <b>643.725</b> | K[17] |
| G[9]  | 282.163        | 606.703        | 601.363        | <b>601.699</b> | 601.027        | G[16] |
| L[10] | 319.858        | 587.695        | 582.355        | 582.692        | 582.020        | L[15] |
| G[11] | 338.865        | 550.001        | <b>544.661</b> | <b>544.997</b> | 544.325        | G[14] |
| K[12] | 381.563        | 530.994        | 525.654        | 525.990        | 525.318        | K[13] |
| G[13] | 400.570        | 488.295        | 482.956        | 483.292        | 482.620        | G[12] |
| G[14] | 419.578        | 469.288        | 463.949        | 464.285        | 463.613        | G[11] |
| A[15] | 443.257        | 450.281        | 444.941        | 445.277        | 444.605        | A[10] |
| K[16] | 469.958        | 426.602        | 421.262        | 421.598        | 420.926        | K[9]  |
| R[17] | 551.992        | 369.900        | 364.561        | 364.896        | 364.225        | R[8]  |
| H[18] | 597.678        | 317.866        | 312.527        | 312.863        | 312.191        | H[7]  |
| R[19] | 649.712        | 272.180        | 266.841        | 267.176        | 266.505        | R[6]  |
| K[20] | 701.754        | 220.146        | 214.807        | 215.143        | 214.471        | K[5]  |
| V[21] | 734.777        | 168.104        | 162.765        | 163.101        | 162.429        | V[4]  |
| L[22] | 772.472        | 135.082        | 129.742        | 130.078        | 129.406        | L[3]  |
| R[23] | <b>824.505</b> | 97.387         | 92.047         | 92.383         | 91.711         | R[2]  |
| D[24] | <b>862.848</b> | 45.353         | 40.014         | 40.349         | 39.678         | D[1]  |

# sp | P62806 | H4\_MOUSE

[Acetyl]SGRGKGGKGLGKGGAK <sup>Acetyl</sup>RHRK <sup>Dimethyl</sup>VLRD  
42.01 28.03

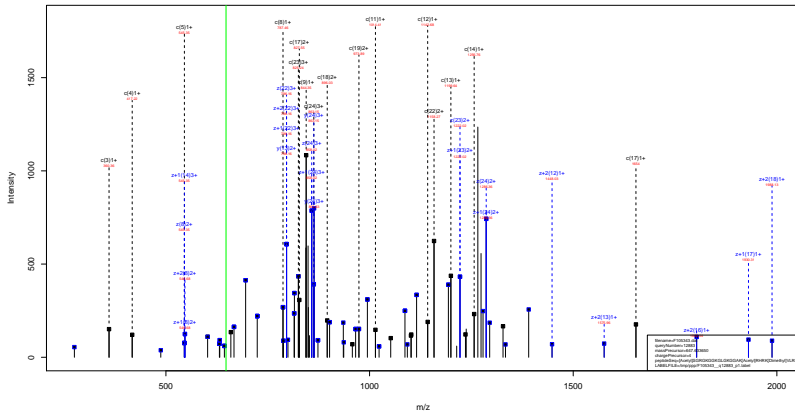

# sp | P62806 | H4\_MOUSE

[Acetyl]SGRGKGGKGLGKGGAK<sup>Acetyl</sup> RHRK<sup>Dimethyl</sup> VLRD<sup>28.03</sup>

- ▶ fragmentation table for charge state 1+
- ▶ specType=etd
- ▶ score=125.07
- ▶ F105343.dat
- ▶ query=q12883\_p1
- ▶ precursor=647.633650
- ▶ chargePrecursor=4
- ▶ itol=0.8

| AA | c  | y               | z+1             | z+2             | z               | AA       |       |
|----|----|-----------------|-----------------|-----------------|-----------------|----------|-------|
| S  | 1  | 147.076         | 2587.513        | 2571.494        | 0.000           | 2570.486 | S[24] |
| G  | 2  | 204.098         | 2458.470        | 2442.451        | 0.000           | 2441.444 | G[23] |
| R  | 3  | <b>360.199</b>  | 2401.440        | 2385.420        | 2388.438        | 2384.422 | R[22] |
| G  | 4  | <b>417.220</b>  | 2349.340        | 2229.309        | 2230.337        | 2228.321 | G[21] |
| K  | 5  | <b>545.315</b>  | 2185.328        | 2172.307        | 2173.315        | 2171.308 | K[20] |
| G  | 6  | <b>602.337</b>  | 2060.231        | 2044.212        | 2045.220        | 2043.205 | G[19] |
| G  | 7  | <b>659.358</b>  | 2003.210        | 1987.191        | <b>1988.199</b> | 1986.181 | G[18] |
| K  | 8  | <b>787.453</b>  | 1946.189        | <b>1930.170</b> | 1931.177        | 1929.162 | K[17] |
| G  | 9  | <b>844.475</b>  | 1818.083        | 1802.075        | <b>1803.082</b> | 1801.067 | G[16] |
| L  | 10 | <b>957.559</b>  | 1761.072        | 1745.063        | 1746.061        | 1744.045 | L[15] |
| Q  | 11 | <b>1014.580</b> | 1647.988        | 1631.980        | 1632.977        | 1630.961 | Q[14] |
| K  | 12 | <b>1142.675</b> | 1590.966        | 1574.948        | <b>1575.955</b> | 1573.940 | K[13] |
| G  | 13 | <b>1199.697</b> | 1462.871        | 1446.853        | <b>1447.860</b> | 1445.845 | G[12] |
| G  | 14 | <b>1256.718</b> | 1405.850        | 1389.831        | <b>1390.839</b> | 1388.821 | G[11] |
| A  | 15 | <b>1327.755</b> | 1249.828        | 1232.808        | <b>1233.818</b> | 1231.802 | A[10] |
| R  | 16 | <b>1407.884</b> | <b>1277.791</b> | 1261.773        | 1262.780        | 1260.765 | R[9]  |
| R  | 17 | <b>1653.962</b> | 1107.688        | 1091.667        | <b>1092.675</b> | 1090.659 | R[8]  |
| H  | 18 | 1791.021        | 951.585         | <b>935.566</b>  | <b>936.574</b>  | 934.558  | H[7]  |
| R  | 19 | 1947.122        | <b>814.526</b>  | 798.507         | <b>799.515</b>  | 797.499  | R[6]  |
| K  | 20 | 2103.248        | 658.425         | 642.406         | <b>643.414</b>  | 641.398  | K[5]  |
| V  | 21 | 2202.217        | 502.368         | 486.349         | <b>487.357</b>  | 485.342  | V[4]  |
| L  | 22 | 2315.403        | 463.239         | 447.211         | 448.219         | 446.201  | L[3]  |
| R  | 23 | 2471.502        | 290.146         | 274.127         | <b>275.135</b>  | 273.119  | R[2]  |
| D  | 24 | 2586.529        | 134.045         | 118.026         | 119.034         | 117.018  | D[1]  |

# sp | P62806 | H4\_MOUSE

[Acetyl]SGRGKGGKGLGKGGAK<sup>Acetyl</sup>42.01 RHRK<sup>Dimethyl</sup>28.03 VLRD

- ▶ fragmentation table for charge state 2+
- ▶ specType=etd
- ▶ score=125.07
- ▶ F105343.dat
- ▶ query=q12883.p1
- ▶ precursor=647.633650
- ▶ chargePrecursor=4
- ▶ itol=0.8

| AA   | c               | y               | z+1             | z+2             | z               | AA   |
|------|-----------------|-----------------|-----------------|-----------------|-----------------|------|
| S 1  | 74.042          | <b>1294.260</b> | <b>1286.251</b> | 0.504           | <b>1285.747</b> | S 24 |
| G 2  | 102.553         | 1229.739        | <b>1221.729</b> | 0.504           | <b>1221.225</b> | G 23 |
| R 3  | 180.603         | 1201.228        | <b>1193.219</b> | <b>1193.723</b> | 1192.715        | R 22 |
| G 4  | 259.114         | 1123.177        | <b>1115.168</b> | <b>1115.672</b> | 1114.666        | G 21 |
| K 5  | 273.153         | 1094.667        | <b>1086.657</b> | <b>1087.161</b> | <b>1086.153</b> | K 20 |
| G 6  | 303.672         | 1030.619        | <b>1022.610</b> | <b>1023.114</b> | 1022.100        | G 19 |
| G 7  | 330.183         | 1002.108        | <b>994.099</b>  | <b>994.603</b>  | 993.590         | G 18 |
| K 8  | 394.230         | <b>973.598</b>  | <b>965.588</b>  | <b>966.092</b>  | <b>965.084</b>  | K 17 |
| G 9  | 422.741         | 909.550         | <b>901.541</b>  | <b>902.045</b>  | 901.031         | G 16 |
| L 10 | 479.293         | 863.040         | <b>873.030</b>  | <b>873.534</b>  | <b>872.526</b>  | L 15 |
| G 11 | 507.794         | <b>824.498</b>  | 815.488         | 816.992         | <b>815.984</b>  | G 14 |
| K 12 | 571.841         | <b>795.987</b>  | <b>787.977</b>  | <b>788.481</b>  | <b>787.474</b>  | K 13 |
| G 13 | 600.352         | 731.939         | <b>723.930</b>  | <b>724.434</b>  | <b>723.426</b>  | G 12 |
| G 14 | 628.863         | 703.429         | <b>695.419</b>  | <b>695.923</b>  | 694.915         | G 11 |
| A 15 | 694.381         | 674.919         | <b>666.908</b>  | <b>667.412</b>  | <b>666.405</b>  | A 10 |
| R 16 | 749.434         | 639.399         | <b>631.390</b>  | <b>631.894</b>  | <b>630.886</b>  | R 9  |
| R 17 | <b>827.485</b>  | 554.347         | <b>546.337</b>  | <b>546.841</b>  | <b>545.833</b>  | R 8  |
| H 18 | <b>896.014</b>  | 476.290         | 468.280         | 468.781         | 467.783         | H 7  |
| R 19 | <b>974.065</b>  | 407.767         | 399.757         | 400.261         | 399.253         | R 6  |
| K 20 | <b>1052.128</b> | 329.716         | 321.707         | 322.211         | 321.203         | K 5  |
| V 21 | <b>1101.662</b> | 251.653         | 243.643         | 244.147         | 243.140         | V 4  |
| L 22 | <b>1158.204</b> | 202.119         | 194.109         | 194.613         | 193.605         | L 3  |
| R 23 | <b>1236.255</b> | 145.577         | 137.567         | 138.071         | 137.063         | R 2  |
| D 24 | 1293.768        | 67.526          | 59.517          | 60.021          | 59.013          | D 1  |

# sp | P62806 | H4\_MOUSE

[Acetyl]SGRGKGGKGLGKGGAK<sup>Acetyl</sup> RHRK<sup>Dimethyl</sup> VLRD<sup>28.03</sup>

- ▶ fragmentation table for charge state 3+
- ▶ specType=etd
- ▶ score=125.07
- ▶ F105343.dat
- ▶ query=q12883.p1
- ▶ precursor=647.633650
- ▶ chargePrecursor=4
- ▶ itol=0.8

| AA    | c              | y              | z+1            | z+2            | z              | AA    |
|-------|----------------|----------------|----------------|----------------|----------------|-------|
| S[1]  | 49.697         | <b>863.176</b> | <b>457.836</b> | 0.672          | <b>857.500</b> | S[24] |
| G[2]  | 58.704         | 320.162        | <b>814.822</b> | 0.672          | <b>814.486</b> | G[23] |
| R[3]  | 150.738        | 801.154        | <b>795.815</b> | <b>796.151</b> | <b>795.479</b> | R[22] |
| G[4]  | 139.745        | 749.121        | 743.781        | 744.117        | 743.445        | G[21] |
| K[5]  | 182.443        | 730.114        | <b>724.774</b> | 725.110        | <b>724.438</b> | K[20] |
| G[6]  | 201.450        | 687.415        | 682.076        | 682.412        | 681.740        | G[19] |
| G[7]  | 220.458        | 668.408        | 663.069        | 663.404        | 662.733        | G[18] |
| K[8]  | 263.156        | 649.401        | <b>644.061</b> | 644.397        | <b>643.725</b> | K[17] |
| G[9]  | 282.163        | 630.393        | 602.363        | <b>601.699</b> | 601.027        | G[16] |
| L[10] | 319.858        | 607.695        | 582.357        | 582.692        | 582.020        | L[15] |
| G[11] | 338.865        | 550.001        | <b>544.661</b> | <b>544.997</b> | 544.325        | G[14] |
| K[12] | 381.563        | 530.994        | 525.654        | 525.990        | 525.318        | K[13] |
| G[13] | 400.570        | 488.295        | 482.956        | 483.292        | 482.620        | G[12] |
| G[14] | 419.578        | 469.288        | 463.949        | 464.285        | 463.613        | G[11] |
| A[15] | 443.257        | 450.281        | 444.941        | 445.277        | 444.605        | A[10] |
| K[16] | 469.958        | 426.602        | 421.262        | 421.598        | 420.926        | K[9]  |
| R[17] | 551.992        | 369.900        | 364.561        | 364.896        | 364.225        | R[8]  |
| H[18] | 597.678        | 317.866        | 312.527        | 312.863        | 312.191        | H[7]  |
| R[19] | 649.712        | 272.180        | 266.841        | 267.176        | 266.505        | R[6]  |
| K[20] | 701.754        | 220.146        | 214.807        | 215.143        | 214.471        | K[5]  |
| V[21] | 734.777        | 168.104        | 162.765        | 163.101        | 162.429        | V[4]  |
| L[22] | 772.472        | 135.082        | 129.742        | 130.078        | 129.406        | L[3]  |
| R[23] | <b>824.505</b> | 97.387         | 92.047         | 92.383         | 91.711         | R[2]  |
| D[24] | <b>862.848</b> | 45.353         | 40.014         | 40.349         | 39.678         | D[1]  |

# sp | P62806 | H4\_MOUSE

[Acetyl]SGRGKGGKGLGKGGAK Acetyl 42.01 RHRK Dimethyl 28.03 VLRD

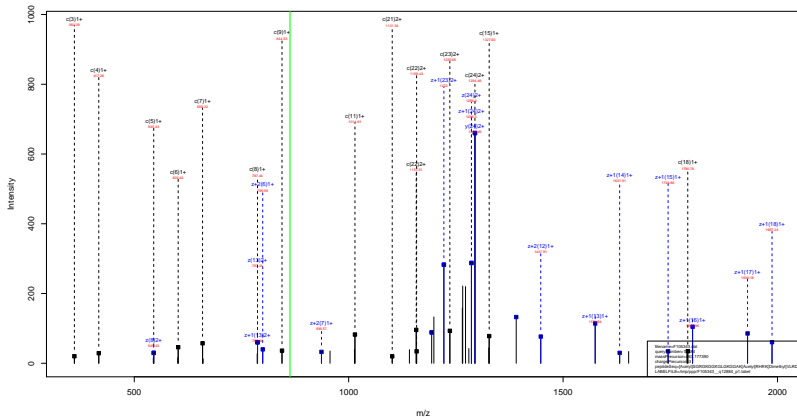

# sp | P62806 | H4\_MOUSE

[Acetyl]SGRGKGGKGLGKGGAK<sup>Acetyl</sup> RHRK<sup>Dimethyl</sup> VLRD<sup>28.03</sup>

- ▶ fragmentation table for charge state 1+
- ▶ specType=etd
- ▶ score=60.24
- ▶ F105343.dat
- ▶ query=q12884\_p1
- ▶ precursor=863.177390
- ▶ chargePrecursor=3
- ▶ itol=0.8

| AA    | c               | y        | z+1             | z+2             | z        | AA    |
|-------|-----------------|----------|-----------------|-----------------|----------|-------|
| S[1]  | 347.676         | 2587.513 | 2571.494        | 0.000           | 2570.486 | S[24] |
| G[2]  | 204.098         | 2458.470 | 2442.451        | 0.000           | 2441.444 | G[23] |
| R[3]  | <b>368.199</b>  | 2401.449 | 2385.430        | 2386.438        | 2384.422 | R[22] |
| G[4]  | <b>417.230</b>  | 2345.348 | 2329.329        | 2330.337        | 2328.321 | G[21] |
| K[5]  | <b>545.315</b>  | 2188.326 | 2172.307        | 2173.315        | 2171.300 | K[20] |
| G[6]  | <b>602.337</b>  | 2060.231 | 2044.210        | 2045.220        | 2043.205 | G[19] |
| G[7]  | <b>659.358</b>  | 2003.210 | <b>1987.191</b> | 1988.199        | 1986.183 | G[18] |
| K[8]  | <b>787.453</b>  | 1946.188 | <b>1930.170</b> | 1931.177        | 1929.162 | K[17] |
| G[9]  | <b>844.475</b>  | 1818.093 | <b>1802.075</b> | 1803.082        | 1801.067 | G[16] |
| L[10] | 937.459         | 1763.072 | <b>1745.053</b> | 1746.061        | 1744.045 | L[15] |
| G[11] | <b>1014.580</b> | 1547.985 | <b>1631.969</b> | 1632.977        | 1630.961 | G[14] |
| K[12] | 1142.675        | 1590.969 | <b>1574.948</b> | 1575.955        | 1573.940 | K[13] |
| G[13] | 1199.697        | 1462.871 | 1446.853        | <b>1447.860</b> | 1445.845 | G[12] |
| G[14] | 1256.718        | 1405.850 | 1389.831        | <b>1390.839</b> | 1388.823 | G[11] |
| A[15] | <b>1327.755</b> | 1348.828 | 1332.810        | 1333.818        | 1331.802 | A[10] |
| R[16] | 1467.883        | 1277.791 | 1261.773        | 1262.780        | 1260.765 | R[9]  |
| R[17] | 1653.962        | 1107.685 | 1091.667        | 1092.675        | 1090.659 | R[8]  |
| H[18] | <b>1791.021</b> | 951.585  | 935.566         | <b>936.574</b>  | 934.558  | H[7]  |
| R[19] | 1947.122        | 814.526  | 798.507         | <b>799.515</b>  | 797.499  | R[6]  |
| K[20] | 2103.248        | 658.425  | 642.406         | 643.414         | 641.398  | K[5]  |
| V[21] | 2202.317        | 502.298  | 486.280         | 487.287         | 485.272  | V[4]  |
| L[22] | 2315.401        | 403.230  | 387.211         | 388.219         | 386.203  | L[3]  |
| R[23] | 2471.502        | 298.146  | 274.127         | 275.135         | 273.119  | R[2]  |
| D[24] | 2586.529        | 134.045  | 118.026         | 119.034         | 117.018  | D[1]  |



# sp | P62806 | H4\_MOUSE

[Acetyl]SGRGKGGKGLGKGGAK<sup>Acetyl</sup>RHRK<sup>Dimethyl</sup>VLRD<sup>28.03</sup>

- ▶ fragmentation table for charge state 2+
- ▶ specType=etd
- ▶ score=60.24
- ▶ F105343.dat
- ▶ query=q12884\_p1
- ▶ precursor=863.177390
- ▶ chargePrecursor=3
- ▶ itol=0.8

| AA    | c               | y               | z+1             | z+2             | z               | AA    |
|-------|-----------------|-----------------|-----------------|-----------------|-----------------|-------|
| S[1]  | 74.042          | <b>1294.260</b> | <b>1286.251</b> | 0.504           | <b>1285.747</b> | S[24] |
| G[2]  | 102.553         | 1229.739        | <b>1221.729</b> | 0.504           | <b>1221.225</b> | G[23] |
| K[3]  | 180.603         | 1201.229        | <b>1193.219</b> | <b>1193.723</b> | 1192.715        | R[22] |
| G[4]  | 259.114         | 1123.177        | 1115.168        | 1115.672        | 1114.664        | G[21] |
| K[5]  | 273.153         | 1094.667        | 1086.657        | 1087.161        | 1086.151        | K[20] |
| G[6]  | 303.672         | 1030.619        | 1022.610        | 1023.114        | 1022.106        | G[19] |
| G[7]  | 330.183         | 1002.108        | 994.099         | 994.603         | 993.595         | G[18] |
| K[8]  | 394.230         | 973.599         | 965.588         | 966.092         | 965.084         | K[17] |
| G[9]  | 422.741         | 959.550         | 961.541         | 962.045         | 961.037         | G[16] |
| L[10] | 479.289         | 893.040         | 873.030         | 873.534         | 872.526         | L[15] |
| G[11] | 507.794         | 824.495         | 816.486         | 816.990         | 815.982         | G[14] |
| K[12] | 571.841         | 795.987         | <b>787.977</b>  | 788.481         | <b>787.474</b>  | K[13] |
| G[13] | 600.352         | 731.939         | 723.930         | 724.434         | 723.426         | G[12] |
| G[14] | 628.863         | 703.429         | 695.419         | 695.923         | 694.915         | G[11] |
| A[15] | 684.381         | 674.919         | 666.908         | 667.412         | 666.404         | A[10] |
| R[16] | 749.438         | 639.390         | 631.380         | 631.884         | 630.876         | R[9]  |
| R[17] | 827.485         | 554.347         | 546.337         | 546.841         | <b>545.833</b>  | R[6]  |
| H[18] | 866.014         | 476.290         | 468.280         | 468.784         | 467.776         | H[7]  |
| R[19] | 974.065         | 407.767         | 399.757         | 400.261         | 399.253         | R[6]  |
| K[20] | 1052.128        | 329.716         | 321.707         | 322.211         | 321.203         | K[5]  |
| V[21] | <b>1101.662</b> | 251.653         | 243.643         | 244.147         | 243.140         | V[4]  |
| L[22] | <b>1158.204</b> | 202.119         | 194.109         | 194.613         | 193.605         | L[3]  |
| R[23] | <b>1236.255</b> | 145.577         | 137.567         | 138.071         | 137.063         | R[2]  |
| D[24] | <b>1293.768</b> | 67.526          | 59.517          | 60.021          | 59.013          | D[1]  |



# sp | P62806 | H4\_MOUSE

[Acetyl]SGRGKGGKGLGKGGAK<sup>Acetyl</sup>RHRK<sup>Dimethyl</sup>VLRD<sup>28.03</sup>

- ▶ fragmentation table for charge state 1+
- ▶ specType=etd
- ▶ score=95.89
- ▶ F105343.dat
- ▶ query=q12885\_p1
- ▶ precursor=518.311020
- ▶ chargePrecursor=5
- ▶ itol=0.8

| AA | c  | y               | z+1             | z+2             | z               | AA              |       |
|----|----|-----------------|-----------------|-----------------|-----------------|-----------------|-------|
| S  | 1  | 147.070         | 2687.513        | 2571.494        | 0.000           | 2570.490        | S[24] |
| G  | 2  | 204.008         | 2438.470        | 2442.451        | 0.000           | 2441.444        | G[23] |
| R  | 3  | <b>360.199</b>  | 2401.440        | 2385.430        | 2386.438        | 2384.422        | R[22] |
| G  | 4  | <b>417.230</b>  | 2048.348        | 2229.329        | 2230.337        | 2229.321        | G[21] |
| K  | 5  | <b>545.315</b>  | 2188.325        | 2172.307        | 2173.315        | 2171.300        | K[20] |
| G  | 6  | <b>602.337</b>  | 2060.211        | 2044.212        | 2045.220        | 2043.205        | G[19] |
| G  | 7  | <b>659.358</b>  | 2003.210        | 1987.191        | 1988.199        | 1986.181        | G[18] |
| K  | 8  | <b>787.453</b>  | 1946.189        | 1930.170        | 1931.177        | 1929.162        | K[17] |
| G  | 9  | <b>844.475</b>  | 1818.093        | 1802.075        | 1803.082        | 1801.066        | G[16] |
| L  | 10 | <b>957.559</b>  | 1763.072        | 1746.053        | 1746.061        | 1744.046        | L[15] |
| G  | 11 | <b>1014.580</b> | 1647.988        | 1631.969        | <b>1632.977</b> | 1630.961        | G[14] |
| K  | 12 | <b>1142.675</b> | 1500.906        | 1574.948        | 1575.955        | 1573.940        | K[13] |
| G  | 13 | <b>1199.697</b> | 1462.871        | <b>1446.853</b> | 1447.860        | 1445.845        | G[12] |
| G  | 14 | <b>1256.718</b> | 1405.850        | <b>1389.831</b> | <b>1390.839</b> | 1388.823        | G[11] |
| A  | 15 | 1320.659        | 1348.829        | 1332.810        | <b>1333.818</b> | 1331.803        | A[10] |
| R  | 16 | 1487.661        | <b>1277.791</b> | 1261.773        | 1262.780        | 1260.765        | R[9]  |
| R  | 17 | <b>1653.902</b> | 1107.688        | <b>1091.667</b> | 1092.675        | <b>1090.659</b> | R[8]  |
| H  | 18 | 1761.001        | <b>951.585</b>  | <b>935.566</b>  | <b>936.574</b>  | <b>934.558</b>  | H[7]  |
| R  | 19 | 1947.122        | <b>814.526</b>  | 798.507         | <b>799.515</b>  | 797.499         | R[6]  |
| K  | 20 | 2103.248        | 638.425         | 642.406         | <b>643.414</b>  | 641.398         | K[5]  |
| V  | 21 | 2202.317        | 502.266         | <b>495.280</b>  | 497.287         | 495.271         | V[4]  |
| L  | 22 | 2315.401        | 403.230         | <b>387.211</b>  | 388.219         | 386.203         | L[3]  |
| R  | 23 | 2471.502        | 290.148         | <b>274.127</b>  | 275.135         | 273.119         | R[2]  |
| D  | 24 | 2588.520        | 134.045         | 118.028         | 119.034         | 117.018         | D[1]  |

# sp | P62806 | H4\_MOUSE

[Acetyl]SGRGKGGKGLGKGGAK<sup>Acetyl</sup> RHRK<sup>Dimethyl</sup> VLRD<sup>28.03</sup>

- ▶ fragmentation table for charge state 2+
- ▶ specType=etd
- ▶ score=95.89
- ▶ F105343.dat
- ▶ query=q12885\_p1
- ▶ precursor=518.311020
- ▶ chargePrecursor=5
- ▶ itol=0.8

| AA    | c               | y               | z+1             | z+2             | z               | AA    |
|-------|-----------------|-----------------|-----------------|-----------------|-----------------|-------|
| S[1]  | 74.042          | <b>1294.260</b> | <b>1286.251</b> | 0.504           | 1289.747        | S[24] |
| G[2]  | 102.553         | 1229.739        | <b>1221.729</b> | 0.504           | <b>1221.225</b> | G[23] |
| R[3]  | 180.603         | <b>1201.228</b> | <b>1193.219</b> | <b>1193.723</b> | <b>1192.715</b> | R[22] |
| G[4]  | 259.114         | <b>1123.177</b> | <b>1115.168</b> | <b>1115.672</b> | <b>1114.664</b> | G[21] |
| K[5]  | 273.153         | 1094.567        | <b>1086.657</b> | <b>1087.161</b> | <b>1086.153</b> | K[20] |
| G[6]  | 303.672         | 1030.619        | 1022.610        | <b>1023.114</b> | 1022.106        | G[19] |
| G[7]  | 330.183         | 1002.108        | <b>994.099</b>  | <b>994.603</b>  | 993.595         | G[18] |
| K[8]  | <b>394.230</b>  | 973.597         | 965.588         | <b>966.092</b>  | 965.084         | K[17] |
| G[9]  | 427.711         | <b>909.550</b>  | <b>901.541</b>  | <b>902.045</b>  | 901.037         | G[16] |
| L[10] | <b>479.293</b>  | <b>881.040</b>  | <b>873.030</b>  | <b>873.534</b>  | <b>872.526</b>  | L[15] |
| G[11] | <b>507.794</b>  | <b>824.498</b>  | <b>816.488</b>  | <b>816.992</b>  | <b>815.984</b>  | G[14] |
| K[12] | <b>571.841</b>  | <b>795.987</b>  | <b>787.977</b>  | <b>788.481</b>  | <b>787.474</b>  | K[13] |
| G[13] | <b>600.352</b>  | 731.939         | <b>723.930</b>  | <b>724.434</b>  | <b>723.426</b>  | G[12] |
| G[14] | <b>628.863</b>  | 703.429         | <b>695.419</b>  | <b>695.923</b>  | 694.915         | G[11] |
| A[15] | <b>664.391</b>  | <b>674.918</b>  | <b>666.908</b>  | <b>667.412</b>  | <b>666.405</b>  | A[10] |
| R[16] | <b>749.434</b>  | <b>639.399</b>  | <b>631.390</b>  | <b>631.894</b>  | 630.886         | R[9]  |
| R[17] | <b>827.485</b>  | <b>554.347</b>  | <b>546.337</b>  | <b>546.841</b>  | <b>545.833</b>  | R[8]  |
| H[18] | <b>896.014</b>  | 476.206         | <b>468.207</b>  | <b>468.791</b>  | <b>467.783</b>  | H[7]  |
| R[19] | 974.085         | 407.767         | <b>399.757</b>  | <b>400.261</b>  | <b>399.253</b>  | R[6]  |
| K[20] | <b>1052.129</b> | 329.716         | 321.707         | 322.211         | 321.203         | K[5]  |
| V[21] | <b>1101.662</b> | 252.693         | 244.683         | 245.187         | 244.180         | V[4]  |
| L[22] | <b>1158.204</b> | 202.135         | 194.126         | 194.631         | 193.623         | L[3]  |
| R[23] | 1236.255        | 145.577         | 137.567         | 138.071         | 137.063         | R[2]  |
| D[24] | 1293.768        | 67.526          | 59.517          | 60.021          | 59.013          | D[1]  |

# sp | P62806 | H4\_MOUSE

[Acetyl]SGRGKGGKGLGKGGAK<sup>Acetyl</sup> RHRK<sup>Dimethyl</sup> VLRD<sup>28.03</sup>

- ▶ fragmentation table for charge state 3+
- ▶ specType=etd
- ▶ score=95.89
- ▶ F105343.dat
- ▶ query=q12885.p1
- ▶ precursor=518.311020
- ▶ chargePrecursor=5
- ▶ itol=0.8

| AA    | c              | y              | z+1            | z+2            | z              | AA    |
|-------|----------------|----------------|----------------|----------------|----------------|-------|
| S[1]  | 49.697         | <b>863.176</b> | <b>857.836</b> | 0.672          | 857.900        | S[24] |
| G[2]  | 58.704         | 320.162        | <b>814.822</b> | 0.672          | <b>814.486</b> | G[23] |
| R[3]  | 150.738        | <b>801.154</b> | <b>795.815</b> | <b>796.151</b> | 795.479        | R[22] |
| G[4]  | 139.745        | <b>749.121</b> | <b>743.781</b> | <b>744.117</b> | <b>743.445</b> | G[21] |
| K[5]  | 182.443        | 730.114        | <b>724.774</b> | <b>725.110</b> | <b>724.438</b> | K[20] |
| G[6]  | 201.450        | <b>687.415</b> | <b>682.076</b> | <b>682.412</b> | <b>681.740</b> | G[19] |
| G[7]  | 220.458        | 668.408        | <b>663.069</b> | <b>663.404</b> | <b>662.733</b> | G[18] |
| K[8]  | 263.156        | <b>649.401</b> | <b>644.061</b> | <b>644.397</b> | <b>643.725</b> | K[17] |
| G[9]  | 282.163        | <b>609.703</b> | <b>601.363</b> | <b>601.699</b> | <b>601.027</b> | G[16] |
| L[10] | 319.958        | <b>587.695</b> | <b>582.356</b> | <b>582.692</b> | <b>582.020</b> | L[15] |
| G[11] | 338.965        | 550.001        | <b>544.661</b> | <b>544.997</b> | <b>544.325</b> | G[14] |
| K[12] | 381.563        | 530.994        | <b>525.654</b> | <b>525.990</b> | <b>525.318</b> | K[13] |
| G[13] | <b>400.570</b> | 488.295        | 482.956        | 483.292        | 482.620        | G[12] |
| G[14] | 419.578        | 469.288        | 463.949        | 464.285        | 463.613        | G[11] |
| A[15] | 443.257        | 450.281        | 444.941        | 445.277        | 444.605        | A[10] |
| K[16] | 499.958        | 426.002        | 421.262        | 421.598        | 420.926        | K[9]  |
| R[17] | 551.992        | 369.900        | 364.561        | 364.896        | 364.225        | R[8]  |
| H[18] | <b>597.678</b> | 317.896        | 312.527        | 312.863        | 312.191        | H[7]  |
| R[19] | <b>649.712</b> | 272.180        | 266.941        | 267.176        | 266.505        | R[6]  |
| K[20] | <b>701.754</b> | 220.140        | 214.807        | 215.143        | 214.471        | K[5]  |
| V[21] | <b>734.777</b> | 168.104        | 162.768        | 163.101        | 162.429        | V[4]  |
| L[22] | <b>772.472</b> | 135.082        | 129.742        | 130.078        | 129.406        | L[3]  |
| R[23] | <b>824.505</b> | 97.387         | 92.047         | 92.383         | 91.711         | R[2]  |
| D[24] | <b>862.848</b> | 45.353         | 40.014         | 40.349         | 39.678         | D[1]  |

# sp | P62806 | H4\_MOUSE

[Acetyl]SGRGKGGKGLGKGGAK<sup>Acetyl</sup> RHRK<sup>Dimethyl</sup> VLRD<sup>28.03</sup>

- ▶ fragmentation table for charge state 4+
- ▶ specType=etd
- ▶ score=95.89
- ▶ F105343.dat
- ▶ query=q12885.p1
- ▶ precursor=518.311020
- ▶ chargePrecursor=5
- ▶ itol=0.8

| AA    | c              | y              | z+1            | z+2            | z              | AA    |
|-------|----------------|----------------|----------------|----------------|----------------|-------|
| S[1]  | 37.525         | <b>647.634</b> | <b>643.629</b> | 0.755          | <b>643.177</b> | S[24] |
| G[2]  | 51.780         | 515.373        | <b>611.368</b> | 0.755          | <b>611.116</b> | G[23] |
| R[3]  | 90.805         | <b>601.118</b> | <b>597.113</b> | <b>597.365</b> | <b>596.061</b> | R[22] |
| G[4]  | 105.061        | 562.092        | <b>558.088</b> | <b>550.340</b> | <b>557.836</b> | G[21] |
| K[5]  | 137.084        | 547.837        | 543.832        | <b>544.084</b> | 543.980        | K[20] |
| G[6]  | 151.340        | 515.813        | 511.809        | 512.061        | 511.557        | G[19] |
| G[7]  | 165.595        | 501.558        | 497.553        | 497.805        | 497.301        | G[18] |
| K[8]  | 197.619        | 487.303        | 483.298        | 483.550        | 483.046        | K[17] |
| G[9]  | 211.874        | 459.279        | 455.274        | 455.526        | 455.022        | G[16] |
| L[10] | 280.148        | 441.023        | 437.019        | 437.271        | 436.767        | L[15] |
| G[11] | 254.403        | 417.752        | 408.748        | 409.000        | 408.496        | G[14] |
| K[12] | 286.424        | 398.497        | <b>394.492</b> | <b>394.744</b> | <b>394.240</b> | K[13] |
| G[13] | 300.680        | 366.473        | 362.469        | 362.721        | 362.217        | G[12] |
| G[14] | 314.935        | 352.218        | 348.213        | 348.465        | 347.961        | G[11] |
| A[15] | 332.694        | 337.963        | 333.958        | 334.210        | 333.706        | A[10] |
| K[16] | 375.221        | 320.203        | 316.199        | 316.451        | 315.947        | K[9]  |
| R[17] | 414.246        | 277.877        | <b>273.672</b> | <b>273.924</b> | <b>273.420</b> | R[8]  |
| H[18] | 448.511        | 238.652        | 234.647        | 234.899        | 234.395        | H[7]  |
| R[19] | 487.536        | 204.387        | 200.382        | 200.634        | 200.130        | R[6]  |
| K[20] | 526.568        | 165.362        | 161.357        | 161.609        | 161.105        | K[5]  |
| V[21] | 551.335        | 126.330        | 122.325        | 122.577        | 122.073        | V[4]  |
| L[22] | 579.606        | 101.563        | 97.558         | 97.810         | 97.306         | L[3]  |
| R[23] | <b>618.631</b> | 73.292         | 69.287         | 69.539         | 69.035         | R[2]  |
| D[24] | <b>647.388</b> | 34.267         | 30.262         | 30.514         | 30.010         | D[1]  |



# sp | P62806 | H4\_MOUSE

[Acetyl]S<sup>Phospho</sup><sub>79.97</sub> GRGKGGKGLGKGGAKRHRK<sup>Dimethyl</sup><sub>28.03</sub> VLRD

- ▶ fragmentation table for charge state 1+
- ▶ specType=etd
- ▶ score=90.65
- ▶ F105343.dat
- ▶ query=q13072.p1
- ▶ precursor=657.122580
- ▶ chargePrecursor=4
- ▶ itol=0.8

| AA    | c               | y        | z+1            | z+2             | z              | AA    |
|-------|-----------------|----------|----------------|-----------------|----------------|-------|
| S[1]  | 227.043         | 2025.469 | 2029.450       | 0.000           | 2039.442       | S[24] |
| G[2]  | 264.054         | 2416.460 | 2420.441       | 0.000           | 2399.433       | G[23] |
| H[3]  | <b>440.105</b>  | 2359.439 | 2343.439       | 2344.437        | 2342.412       | H[22] |
| G[4]  | <b>497.107</b>  | 2203.337 | 2187.338       | 2188.326        | 2186.310       | G[21] |
| K[5]  | 625.082         | 2140.316 | 2130.297       | 2131.305        | 2129.289       | K[20] |
| G[6]  | <b>682.303</b>  | 2018.221 | 2002.202       | 2003.210        | 2001.194       | G[19] |
| G[7]  | 739.325         | 1961.199 | 1945.180       | 1946.188        | 1944.173       | G[18] |
| K[8]  | <b>807.420</b>  | 1904.179 | 1888.159       | 1889.167        | 1887.151       | K[17] |
| G[9]  | 824.441         | 1776.083 | 1760.064       | 1761.072        | 1759.056       | G[16] |
| L[10] | 1037.526        | 1719.061 | 1703.043       | 1704.050        | 1702.035       | L[15] |
| G[11] | <b>1094.547</b> | 1605.977 | 1589.958       | 1590.966        | 1588.951       | G[14] |
| K[12] | 1222.642        | 1548.956 | 1532.937       | <b>1533.945</b> | 1531.929       | K[13] |
| G[13] | 1279.663        | 1420.861 | 1404.842       | 1405.850        | 1403.834       | G[12] |
| G[14] | <b>1336.685</b> | 1363.839 | 1347.821       | <b>1348.828</b> | 1346.813       | G[11] |
| A[15] | 1407.722        | 1306.818 | 1290.799       | <b>1291.807</b> | 1289.791       | A[10] |
| K[16] | 1535.817        | 1249.781 | 1233.762       | <b>1234.770</b> | 1232.754       | K[9]  |
| R[17] | 1691.918        | 1107.686 | 1091.667       | 1092.675        | 1090.659       | R[8]  |
| H[18] | 1828.977        | 991.585  | <b>935.566</b> | <b>936.574</b>  | 934.558        | H[7]  |
| R[19] | 1985.078        | 814.526  | <b>798.507</b> | <b>799.515</b>  | 797.499        | R[6]  |
| K[20] | 2141.204        | 658.425  | <b>642.406</b> | <b>643.414</b>  | <b>641.398</b> | K[5]  |
| V[21] | 2240.272        | 502.298  | 486.280        | 487.287         | 485.272        | V[4]  |
| L[22] | 2363.396        | 401.236  | 385.217        | <b>388.219</b>  | 386.203        | L[3]  |
| D[23] | 2509.488        | 290.140  | <b>274.123</b> | 275.130         | 273.115        | D[2]  |
| D[24] | 2634.485        | 134.045  | 118.026        | 119.034         | 117.018        | D[1]  |



# sp | P62806 | H4\_MOUSE

[Acetyl]S<sup>Phospho</sup><sub>79.97</sub> GRGKGGKGLGKGGAKRHRK<sup>Dimethyl</sup><sub>28.03</sub> VLRD

- ▶ fragmentation table for charge state 2+
- ▶ specType=etd
- ▶ score=90.65
- ▶ F105343.dat
- ▶ query=q13072.p1
- ▶ precursor=657.122580
- ▶ chargePrecursor=4
- ▶ itol=0.8

| AA | c  | y               | z+1             | z+2             | z               | AA              |       |
|----|----|-----------------|-----------------|-----------------|-----------------|-----------------|-------|
| S  | 1  | 144.605         | 1111.238        | <b>1305.229</b> | 0.504           | 1304.726        | S[24] |
| G  | 2  | 142.536         | 1208.733        | <b>1200.724</b> | 0.504           | 1200.220        | G[23] |
| R  | 3  | 230.586         | 1180.223        | <b>1172.213</b> | <b>1172.717</b> | <b>1171.709</b> | R[22] |
| G  | 4  | 249.097         | 1102.172        | <b>1094.163</b> | <b>1094.667</b> | <b>1093.659</b> | G[21] |
| K  | 5  | 313.149         | <b>1073.661</b> | <b>1065.652</b> | <b>1066.156</b> | <b>1065.148</b> | K[20] |
| G  | 6  | 341.655         | 1009.614        | <b>1001.605</b> | <b>1002.108</b> | 1001.101        | G[19] |
| G  | 7  | 370.166         | 981.103         | <b>973.094</b>  | <b>973.598</b>  | <b>972.590</b>  | G[18] |
| K  | 8  | 434.213         | 952.592         | 944.583         | <b>945.087</b>  | 944.070         | K[17] |
| G  | 9  | 462.724         | 888.545         | 880.536         | 881.540         | 880.532         | G[16] |
| L  | 10 | 519.266         | 860.036         | 852.028         | 853.032         | 852.024         | L[15] |
| G  | 11 | 547.777         | 803.482         | <b>795.483</b>  | <b>795.987</b>  | <b>794.979</b>  | G[14] |
| K  | 12 | <b>611.824</b>  | <b>774.982</b>  | <b>766.972</b>  | <b>767.476</b>  | 766.468         | K[13] |
| G  | 13 | 640.335         | 710.934         | <b>702.925</b>  | <b>703.429</b>  | 702.421         | G[12] |
| G  | 14 | 668.846         | <b>682.423</b>  | <b>674.414</b>  | <b>674.918</b>  | <b>673.910</b>  | G[11] |
| A  | 15 | <b>704.364</b>  | 623.913         | <b>615.903</b>  | <b>616.407</b>  | 615.399         | A[10] |
| R  | 16 | 730.412         | <b>618.394</b>  | <b>610.385</b>  | <b>610.889</b>  | 609.881         | R[9]  |
| R  | 17 | <b>846.462</b>  | 554.347         | <b>546.337</b>  | <b>546.841</b>  | 545.833         | R[8]  |
| H  | 18 | <b>914.992</b>  | 476.290         | 468.282         | 469.286         | 467.783         | H[7]  |
| R  | 19 | <b>993.043</b>  | 407.767         | 399.757         | 400.761         | 399.253         | R[6]  |
| K  | 20 | 1071.108        | 339.716         | 331.707         | 332.711         | 331.203         | K[5]  |
| V  | 21 | <b>1120.640</b> | 283.663         | 283.663         | 284.667         | 283.160         | V[4]  |
| L  | 22 | <b>1177.182</b> | 202.110         | 194.100         | 194.613         | 193.605         | L[3]  |
| R  | 23 | <b>1255.232</b> | 145.577         | 137.567         | 138.071         | 137.063         | R[2]  |
| D  | 24 | 1312.746        | 67.526          | 59.517          | 60.021          | 59.013          | D[1]  |

# sp | P62806 | H4\_MOUSE

[Acetyl]S<sup>Phospho</sup><sub>79.97</sub> GRGKGGKGLGKGGAKRHRK<sup>Dimethyl</sup><sub>28.03</sub> VLRR

- ▶ fragmentation table for charge state 3+
- ▶ specType=etd
- ▶ score=90.65
- ▶ F105343.dat
- ▶ query=q13072.p1
- ▶ precursor=657.122580
- ▶ chargePrecursor=4
- ▶ itol=0.8

| AA    | c              | y              | z+1            | z+2            | z              | AA    |
|-------|----------------|----------------|----------------|----------------|----------------|-------|
| S[1]  | 76.352         | <b>875.828</b> | <b>870.488</b> | 0.672          | <b>870.152</b> | S[24] |
| G[2]  | 95.360         | 306.150        | <b>900.818</b> | 0.672          | <b>800.483</b> | G[23] |
| R[3]  | 147.393        | 787.151        | <b>781.811</b> | <b>782.147</b> | 781.475        | R[22] |
| G[4]  | 166.400        | 735.117        | 729.778        | 730.114        | 729.442        | G[21] |
| K[5]  | 209.099        | 716.110        | 710.770        | 711.106        | 710.435        | K[20] |
| G[6]  | 228.106        | 673.412        | 668.072        | 668.408        | 667.736        | G[19] |
| G[7]  | 247.113        | 654.405        | 649.065        | 649.401        | 648.729        | G[18] |
| K[8]  | 289.811        | 635.397        | 630.058        | 630.394        | 629.722        | K[17] |
| G[9]  | 308.819        | 592.699        | 587.360        | 587.696        | 587.024        | G[16] |
| L[10] | 348.313        | 671.692        | 568.352        | 568.688        | 568.016        | L[15] |
| G[11] | 365.520        | 538.997        | 530.658        | 530.994        | 530.322        | G[14] |
| K[12] | 408.219        | 516.990        | 511.651        | 511.986        | 511.315        | K[13] |
| G[13] | 427.226        | 474.292        | 468.952        | 469.288        | 468.616        | G[12] |
| G[14] | 446.233        | 455.285        | 449.945        | 450.281        | 449.609        | G[11] |
| A[15] | 469.912        | 436.277        | 430.938        | 431.274        | 430.602        | A[10] |
| K[16] | 512.610        | 412.598        | 407.259        | 407.595        | 406.923        | K[9]  |
| R[17] | 564.644        | 369.900        | 364.561        | 364.896        | 364.225        | R[8]  |
| H[18] | <b>610.330</b> | 317.866        | 312.527        | 312.863        | 312.191        | H[7]  |
| R[19] | 652.364        | 272.180        | 266.841        | 267.176        | 266.505        | R[6]  |
| K[20] | <b>714.406</b> | 220.140        | 214.807        | 215.143        | 214.471        | K[5]  |
| V[21] | 757.429        | 168.104        | 162.765        | 163.101        | 162.429        | V[4]  |
| L[22] | 785.124        | 135.082        | 129.742        | 130.078        | 129.406        | L[3]  |
| R[23] | <b>837.157</b> | 97.387         | 92.047         | 92.383         | 91.711         | R[2]  |
| D[24] | <b>875.500</b> | 45.353         | 40.014         | 40.349         | 39.678         | D[1]  |



# sp | P62806 | H4\_MOUSE

[Acetyl]SGR<sup>Acetyl</sup>RGK<sup>42.01</sup> GGKGLGKGGAKR<sup>Dimethyl</sup>RH<sup>28.03</sup> K<sup>Acetyl</sup> VLRD<sup>42.01</sup>

- ▶ fragmentation table for charge state 1+
- ▶ specType=etd
- ▶ score=77.38
- ▶ F105343.dat
- ▶ query=q13077\_p1
- ▶ precursor=658.135980
- ▶ chargePrecursor=4
- ▶ itol=0.8

| AA | c  | y               | z+1             | z+2             | z               | AA             |       |
|----|----|-----------------|-----------------|-----------------|-----------------|----------------|-------|
| S  | 1  | 147.076         | 2629.523        | 2613.505        | 0.000           | 2612.497       | S[24] |
| G  | 2  | 204.008         | 2500.481        | 2484.462        | 0.000           | 2483.454       | G[23] |
| R  | 3  | <b>360.199</b>  | 2641.450        | 2427.431        | 2426.448        | 2626.433       | R[22] |
| G  | 4  | <b>417.220</b>  | 2287.568        | 2271.549        | 2272.567        | 2270.551       | G[21] |
| K  | 5  | <b>587.326</b>  | 2230.337        | 2214.318        | 2215.326        | 2213.310       | K[20] |
| G  | 6  | <b>644.347</b>  | 2060.231        | 2044.212        | 2045.220        | 2043.205       | G[19] |
| G  | 7  | <b>701.369</b>  | 2003.210        | 1987.191        | 1988.199        | 1986.181       | G[18] |
| K  | 8  | <b>829.464</b>  | 1946.189        | 1930.170        | 1931.177        | 1929.162       | K[17] |
| G  | 9  | <b>886.485</b>  | 1818.062        | <b>1802.075</b> | 1803.082        | 1801.067       | G[16] |
| L  | 10 | <b>993.569</b>  | 1761.072        | 1745.053        | 1746.061        | 1744.045       | L[15] |
| Q  | 11 | <b>1056.591</b> | 1647.985        | 1631.969        | 1632.977        | 1630.961       | Q[14] |
| K  | 12 | <b>1184.686</b> | 1590.966        | 1574.948        | 1575.955        | 1573.940       | K[13] |
| G  | 13 | <b>1241.707</b> | 1462.871        | 1446.853        | <b>1447.860</b> | 1445.845       | G[12] |
| G  | 14 | <b>1298.729</b> | 1405.850        | 1389.831        | <b>1390.839</b> | 1388.823       | G[11] |
| A  | 15 | 1469.796        | 1348.829        | 1332.810        | 1333.818        | 1331.802       | A[10] |
| R  | 16 | 1469.883        | <b>1277.791</b> | 1261.773        | <b>1262.780</b> | 1260.765       | R[9]  |
| R  | 17 | 1653.962        | 1148.695        | 1132.676        | 1134.685        | 1132.670       | R[8]  |
| H  | 18 | 1791.021        | <b>993.595</b>  | 977.577         | 978.584         | 976.569        | H[7]  |
| R  | 19 | 1975.153        | 856.536         | 840.518         | 841.525         | <b>839.510</b> | R[6]  |
| K  | 20 | 2145.250        | 672.404         | 656.385         | 657.393         | 655.377        | K[5]  |
| V  | 21 | 2244.327        | 502.266         | 486.248         | 487.257         | 485.242        | V[4]  |
| L  | 22 | 2367.413        | 603.139         | 587.121         | <b>588.215</b>  | 586.201        | L[3]  |
| R  | 23 | 2513.512        | 290.146         | 274.127         | <b>275.135</b>  | 273.119        | R[2]  |
| D  | 24 | 2628.539        | 134.045         | 118.026         | 119.034         | 117.018        | D[1]  |

# sp | P62806 | H4\_MOUSE

[Acetyl]SGRGK<sup>Acetyl</sup><sub>42.01</sub> GGKGLGKGGAKRHR<sup>Dimethyl</sup><sub>28.03</sub> K<sup>Acetyl</sup><sub>42.01</sub> VLRD

- ▶ fragmentation table for charge state 2+
- ▶ specType=etd
- ▶ score=77.38
- ▶ F105343.dat
- ▶ query=q13077\_p1
- ▶ precursor=658.135980
- ▶ chargePrecursor=4
- ▶ itol=0.8

| AA    | c               | y               | z+1             | z+2             | z               | AA    |
|-------|-----------------|-----------------|-----------------|-----------------|-----------------|-------|
| S[1]  | 74.642          | <b>1315.265</b> | <b>1307.256</b> | 0.504           | 1308.752        | S[24] |
| G[2]  | 102.553         | 1250.744        | <b>1242.735</b> | 0.504           | <b>1242.231</b> | G[23] |
| R[3]  | 180.603         | 1222.233        | <b>1214.224</b> | <b>1214.728</b> | 1215.720        | R[22] |
| G[4]  | 259.114         | 1144.183        | <b>1138.173</b> | <b>1138.077</b> | <b>1135.669</b> | G[21] |
| K[5]  | 294.157         | 1115.672        | <b>1107.663</b> | <b>1108.167</b> | <b>1107.159</b> | K[20] |
| G[6]  | 322.677         | 1030.619        | <b>1022.610</b> | <b>1023.114</b> | <b>1022.106</b> | G[19] |
| G[7]  | 351.188         | 1002.108        | <b>994.099</b>  | <b>994.603</b>  | <b>993.595</b>  | G[18] |
| K[8]  | 415.230         | 973.599         | <b>965.588</b>  | <b>966.092</b>  | 965.083         | K[17] |
| G[9]  | 443.740         | 950.550         | <b>901.541</b>  | <b>902.045</b>  | <b>901.037</b>  | G[16] |
| L[10] | 509.288         | 893.040         | 871.033         | 873.024         | <b>872.528</b>  | L[15] |
| G[11] | 528.799         | <b>824.498</b>  | <b>816.488</b>  | <b>816.992</b>  | <b>815.984</b>  | G[14] |
| K[12] | 592.847         | 795.987         | <b>787.977</b>  | <b>788.481</b>  | <b>787.474</b>  | K[13] |
| G[13] | 621.357         | 731.939         | <b>723.930</b>  | <b>724.434</b>  | <b>723.426</b>  | G[12] |
| G[14] | 640.868         | 703.429         | <b>695.419</b>  | <b>695.923</b>  | <b>694.915</b>  | G[11] |
| A[15] | 685.389         | <b>674.918</b>  | <b>666.908</b>  | <b>667.412</b>  | <b>666.405</b>  | A[10] |
| R[16] | 749.434         | 639.359         | <b>631.390</b>  | <b>631.894</b>  | 630.885         | R[9]  |
| R[17] | 827.485         | 575.352         | 567.342         | 567.846         | 566.830         | R[8]  |
| H[18] | 896.014         | 497.301         | 489.292         | 489.796         | 488.789         | H[7]  |
| R[19] | 988.080         | 428.772         | 420.762         | 421.266         | 420.250         | R[6]  |
| K[20] | <b>1073.133</b> | 336.706         | 328.695         | 329.200         | 328.192         | K[5]  |
| V[21] | <b>1122.667</b> | 252.653         | 243.643         | 244.147         | 243.140         | V[4]  |
| L[22] | <b>1179.209</b> | 202.119         | 194.109         | 194.613         | 193.605         | L[3]  |
| R[23] | <b>1257.260</b> | 145.577         | 137.567         | 138.071         | 137.063         | R[2]  |
| D[24] | <b>1314.773</b> | 67.526          | 59.517          | 60.021          | 59.013          | D[1]  |

# sp | P62806 | H4\_MOUSE

[Acetyl]SGR<sup>Acetyl</sup>RGK<sup>42.01</sup> GGKGLGKGGAKRHR<sup>Dimethyl</sup> K<sup>28.03</sup> AcetylVLRD<sup>42.01</sup>

- ▶ fragmentation table for charge state 3+
- ▶ specType=etd
- ▶ score=77.38
- ▶ F105343.dat
- ▶ query=q13077\_p1
- ▶ precursor=658.135980
- ▶ chargePrecursor=4
- ▶ itol=0.8

| AA    | c              | y              | z+1            | z+2            | z              | AA    |
|-------|----------------|----------------|----------------|----------------|----------------|-------|
| S[1]  | 49.697         | <b>877.179</b> | <b>871.840</b> | 0.672          | <b>871.504</b> | S[24] |
| G[2]  | 58.704         | 134.105        | <b>826.826</b> | 0.672          | <b>826.490</b> | G[23] |
| R[3]  | 150.738        | 815.158        | <b>809.818</b> | <b>810.154</b> | <b>809.482</b> | R[22] |
| G[4]  | 139.745        | 763.124        | 757.785        | 758.121        | 757.449        | G[21] |
| K[5]  | 196.447        | 744.117        | 738.778        | 739.113        | 738.442        | K[20] |
| G[6]  | 215.454        | 687.415        | 682.076        | 682.412        | 681.740        | G[19] |
| G[7]  | 234.461        | 668.408        | 663.069        | 663.404        | 662.733        | G[18] |
| K[8]  | 277.159        | 649.401        | <b>644.061</b> | <b>644.397</b> | <b>643.725</b> | K[17] |
| G[9]  | 286.167        | 636.793        | 601.363        | 603.699        | 601.047        | G[16] |
| L[10] | 313.881        | <b>587.695</b> | 582.356        | 582.692        | 582.020        | L[15] |
| G[11] | 352.888        | 550.001        | 544.661        | 544.997        | 544.325        | G[14] |
| K[12] | 395.567        | 530.994        | 525.654        | 525.990        | 525.318        | K[13] |
| G[13] | 414.574        | 488.295        | 482.956        | 483.292        | 482.620        | G[12] |
| G[14] | 433.581        | 469.288        | 463.949        | 464.285        | 463.613        | G[11] |
| A[15] | 457.260        | 450.281        | 444.941        | 445.277        | 444.605        | A[10] |
| K[16] | 499.958        | 426.602        | 421.262        | 421.598        | 420.926        | K[9]  |
| R[17] | 551.992        | 383.904        | 378.564        | 378.900        | 378.228        | R[8]  |
| H[18] | 597.678        | 331.870        | 326.530        | 326.866        | 326.194        | H[7]  |
| R[19] | 659.056        | 296.184        | 290.844        | 291.180        | 290.508        | R[6]  |
| K[20] | 715.758        | 224.806        | 219.467        | 219.803        | 219.131        | K[5]  |
| V[21] | 748.781        | 168.104        | 162.765        | 163.101        | 162.429        | V[4]  |
| L[22] | 786.475        | 135.082        | 129.742        | 130.078        | 129.406        | L[3]  |
| R[23] | <b>838.509</b> | 97.387         | 92.047         | 92.383         | 91.711         | R[2]  |
| D[24] | <b>876.851</b> | 45.353         | 40.014         | 40.349         | 39.678         | D[1]  |

# sp | P62806 | H4\_MOUSE

[Acetyl]SGRGKGGKGLGK <sup>Acetyl</sup> 42.01 GGAK <sup>Acetyl</sup> 42.01 RHRK <sup>Dimethyl</sup> 28.03 VLRD

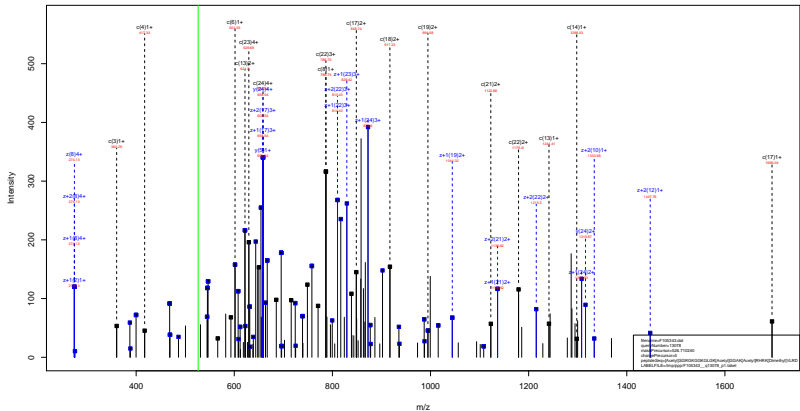

# sp | P62806 | H4\_MOUSE

[Acetyl]SGRGKGGKGLGK<sup>Acetyl</sup><sub>42.01</sub> GGAK<sup>Acetyl</sup><sub>42.01</sub> RHRK<sup>Dimethyl</sup><sub>28.03</sub> VLRD

- ▶ fragmentation table for charge state 1+
- ▶ specType=etd
- ▶ score=71.18
- ▶ F105343.dat
- ▶ query=q13078\_p1
- ▶ precursor=526.710240
- ▶ chargePrecursor=5
- ▶ itol=0.8

| AA | c  | y               | z+1             | z+2            | z               | AA       |       |
|----|----|-----------------|-----------------|----------------|-----------------|----------|-------|
| S  | 1  | 347.676         | 2029.523        | 2613.505       | 0.000           | 2612.497 | S[24] |
| G  | 2  | 204.008         | 2500.481        | 2484.462       | 0.000           | 2483.454 | G[23] |
| R  | 3  | <b>358.199</b>  | 2843.450        | 2827.441       | 2420.448        | 2420.433 | R[22] |
| G  | 4  | <b>417.220</b>  | 2267.386        | 2271.330       | 2272.347        | 2270.333 | G[21] |
| K  | 5  | <b>545.315</b>  | 2230.337        | 2214.318       | 2215.326        | 2213.310 | K[20] |
| G  | 6  | <b>602.337</b>  | 2102.342        | 2086.235       | 2087.231        | 2085.215 | G[19] |
| G  | 7  | 659.358         | 2045.220        | 2026.200       | 2030.209        | 2028.194 | G[18] |
| K  | 8  | <b>787.453</b>  | 1988.199        | 1972.180       | 1973.188        | 1971.172 | K[17] |
| G  | 9  | 844.475         | 1895.104        | 1884.085       | 1845.093        | 1843.077 | G[16] |
| L  | 10 | 897.559         | 1803.062        | 1787.064       | 1788.071        | 1786.055 | L[15] |
| G  | 11 | 1014.580        | 1689.968        | 1673.980       | 1674.987        | 1672.972 | G[14] |
| K  | 12 | 1184.688        | 1632.977        | 1616.958       | 1617.966        | 1615.950 | K[13] |
| G  | 13 | <b>1241.707</b> | 1462.871        | 1446.853       | <b>1447.860</b> | 1445.845 | G[12] |
| G  | 14 | <b>1298.729</b> | 1405.850        | 1389.831       | 1390.839        | 1388.823 | G[11] |
| A  | 15 | 1369.796        | 1348.828        | 1332.810       | <b>1333.818</b> | 1331.802 | A[10] |
| R  | 16 | 1539.871        | 1277.791        | 1261.773       | 1262.780        | 1260.765 | R[9]  |
| R  | 17 | <b>1695.973</b> | <b>1107.686</b> | 1091.667       | 1092.675        | 1090.659 | R[8]  |
| H  | 18 | 1833.031        | 951.585         | <b>935.566</b> | <b>936.574</b>  | 934.558  | H[7]  |
| R  | 19 | 1889.133        | 814.526         | 798.507        | <b>799.515</b>  | 797.499  | R[6]  |
| K  | 20 | 2145.259        | <b>658.425</b>  | 642.406        | <b>643.414</b>  | 641.398  | K[5]  |
| V  | 21 | 2244.327        | 502.298         | <b>486.280</b> | 487.287         | 485.272  | V[4]  |
| L  | 22 | 2357.411        | 403.239         | <b>387.211</b> | <b>388.219</b>  | 386.203  | L[3]  |
| R  | 23 | 2513.512        | 290.140         | <b>274.127</b> | <b>275.135</b>  | 273.119  | R[2]  |
| D  | 24 | 2628.539        | 134.045         | 118.026        | 119.034         | 117.018  | D[1]  |



# sp | P62806 | H4\_MOUSE

[Acetyl]SGRGKGGKGLGK<sup>Acetyl</sup><sub>42.01</sub> GGAK<sup>Acetyl</sup><sub>42.01</sub> RHRK<sup>Dimethyl</sup><sub>28.03</sub> VLRD

- ▶ fragmentation table for charge state 2+
- ▶ specType=etd
- ▶ score=71.18
- ▶ F105343.dat
- ▶ query=q13078\_p1
- ▶ precursor=526.710240
- ▶ chargePrecursor=5
- ▶ itol=0.8

| AA    | c               | y               | z+1             | z+2             | z        | AA    |
|-------|-----------------|-----------------|-----------------|-----------------|----------|-------|
| S[1]  | 74.042          | <b>1315.265</b> | <b>1307.256</b> | 0.504           | 1306.752 | S[24] |
| G[2]  | 102.553         | 1250.744        | 1242.735        | 0.504           | 1242.231 | G[23] |
| R[3]  | 180.603         | 1222.233        | 1214.224        | <b>1214.728</b> | 1213.720 | R[22] |
| G[4]  | 269.114         | 1144.183        | <b>1136.173</b> | <b>1136.677</b> | 1135.669 | G[21] |
| K[5]  | 278.163         | 1115.672        | <b>1107.663</b> | <b>1108.167</b> | 1107.159 | K[20] |
| G[6]  | 361.672         | 1051.625        | <b>1043.615</b> | <b>1044.119</b> | 1043.111 | G[19] |
| G[7]  | 350.183         | 1023.114        | <b>1015.104</b> | <b>1015.608</b> | 1014.600 | G[18] |
| K[8]  | 394.230         | <b>994.603</b>  | <b>986.594</b>  | <b>987.098</b>  | 986.090  | K[17] |
| G[9]  | 422.741         | 928.705         | 922.596         | 921.090         | 922.042  | G[16] |
| L[10] | 479.293         | <b>902.045</b>  | 894.035         | 894.539         | 893.532  | L[15] |
| Q[11] | 507.794         | 845.503         | 837.493         | 837.997         | 836.990  | Q[14] |
| K[12] | <b>592.847</b>  | <b>816.992</b>  | 808.983         | 809.487         | 808.479  | K[13] |
| G[13] | <b>621.357</b>  | 731.939         | <b>723.930</b>  | <b>724.434</b>  | 723.426  | G[12] |
| G[14] | <b>649.868</b>  | 703.429         | <b>695.419</b>  | <b>695.923</b>  | 694.915  | G[11] |
| A[15] | <b>683.387</b>  | 624.919         | <b>616.908</b>  | <b>617.412</b>  | 616.405  | A[10] |
| R[16] | <b>770.439</b>  | <b>639.399</b>  | <b>631.390</b>  | <b>631.894</b>  | 630.886  | R[9]  |
| R[17] | <b>848.490</b>  | 554.347         | <b>546.337</b>  | <b>546.841</b>  | 545.833  | R[8]  |
| R[18] | <b>917.019</b>  | 476.200         | <b>468.287</b>  | <b>468.791</b>  | 467.783  | R[7]  |
| R[19] | <b>995.070</b>  | 407.767         | <b>399.757</b>  | <b>400.261</b>  | 399.253  | R[6]  |
| K[20] | 1073.133        | 329.716         | 321.707         | 322.211         | 321.203  | K[5]  |
| V[21] | <b>1122.667</b> | 251.663         | 243.653         | 244.147         | 243.140  | V[4]  |
| L[22] | <b>1179.709</b> | 202.132         | 194.122         | 194.615         | 193.607  | L[3]  |
| R[23] | 1257.260        | 145.577         | 137.567         | 138.071         | 137.063  | R[2]  |
| D[24] | 1314.773        | 67.526          | 59.517          | 60.021          | 59.013   | D[1]  |

# sp | P62806 | H4\_MOUSE

[Acetyl]SGRGKGGKGLGK <sup>Acetyl</sup><sub>42.01</sub> GGAK <sup>Acetyl</sup><sub>42.01</sub> RHRK <sup>Dimethyl</sup><sub>28.03</sub> VLRD

- ▶ fragmentation table for charge state 3+
- ▶ specType=etd
- ▶ score=71.18
- ▶ F105343.dat
- ▶ query=q13078.p1
- ▶ precursor=526.710240
- ▶ chargePrecursor=5
- ▶ itol=0.8

| AA    | c              | y              | z+1            | z+2            | z              | AA      |       |
|-------|----------------|----------------|----------------|----------------|----------------|---------|-------|
| S[1]  | 49.697         | <b>877.179</b> | <b>871.840</b> |                | 0.672          | 871.904 | S[24] |
| G[2]  | 58.704         | 134.105        | <b>828.826</b> |                | 0.672          | 828.490 | G[23] |
| R[3]  | 120.738        | 815.158        | <b>809.818</b> | <b>810.154</b> | 809.482        | R[22]   |       |
| G[4]  | 139.745        | 763.124        | <b>757.785</b> | <b>750.124</b> | <b>757.449</b> | G[21]   |       |
| K[5]  | 182.443        | 744.117        | <b>738.778</b> | <b>739.113</b> | <b>738.442</b> | K[20]   |       |
| G[6]  | 201.450        | 701.419        | <b>696.079</b> | <b>696.415</b> | <b>695.743</b> | G[19]   |       |
| G[7]  | 220.458        | 682.412        |                | 677.072        | 677.408        | G[18]   |       |
| K[8]  | 263.156        | <b>653.404</b> | <b>658.065</b> | <b>658.401</b> | 657.729        | K[17]   |       |
| G[9]  | 282.163        | 637.095        | 615.367        | 615.703        | 615.031        | G[16]   |       |
| L[10] | 319.858        | <b>601.699</b> | 596.359        | 598.698        | 596.023        | L[15]   |       |
| G[11] | 338.865        | 504.024        | 558.665        | 559.001        | 558.329        | G[14]   |       |
| K[12] | 395.567        | <b>544.997</b> | 539.658        | 539.994        | 539.322        | K[13]   |       |
| G[13] | 414.574        | 488.295        | 482.956        | 483.292        | 482.620        | G[12]   |       |
| G[14] | 433.581        | <b>469.288</b> | 463.949        | 464.285        | 463.613        | G[11]   |       |
| A[15] | 457.260        | 450.281        | 444.941        | 445.277        | 444.605        | A[10]   |       |
| K[16] | 513.962        | 426.602        | 421.262        | 421.598        | 420.926        | K[9]    |       |
| R[17] | <b>565.996</b> | 369.900        | 364.561        | 364.896        | 364.225        | R[8]    |       |
| H[18] | <b>613.682</b> | 317.866        | 312.527        | 312.863        | 312.191        | H[7]    |       |
| R[19] | <b>663.716</b> | 272.180        | 266.841        | 267.176        | 266.505        | R[6]    |       |
| K[20] | <b>715.758</b> | 220.140        | 214.807        | 215.143        | 214.471        | K[5]    |       |
| V[21] | <b>748.781</b> | 168.104        | 162.765        | 163.101        | 162.429        | V[4]    |       |
| L[22] | <b>786.475</b> | 135.082        | 129.742        | 130.078        | 129.406        | L[3]    |       |
| R[23] | <b>838.509</b> | 97.387         | 92.047         | 92.383         | 91.711         | R[2]    |       |
| D[24] | <b>876.851</b> | 45.353         | 40.014         | 40.349         | 39.678         | D[1]    |       |

# sp | P62806 | H4\_MOUSE

[Acetyl]SGRGKGGKGLGK<sup>Acetyl</sup><sub>42.01</sub> GGAK<sup>Acetyl</sup><sub>42.01</sub> RHRK<sup>Dimethyl</sup><sub>28.03</sub> VLRD

- ▶ fragmentation table for charge state 4+
- ▶ specType=etd
- ▶ score=71.18
- ▶ F105343.dat
- ▶ query=q13078.p1
- ▶ precursor=526.710240
- ▶ chargePrecursor=5
- ▶ itol=0.8

| AA    | c              | y              | z+1            | z+2            | z              | AA    |
|-------|----------------|----------------|----------------|----------------|----------------|-------|
| S[1]  | 37.525         | <b>658.136</b> | <b>654.132</b> | 0.755          | <b>653.880</b> | S[24] |
| G[2]  | 51.780         | 525.875        | <b>621.871</b> | 0.755          | <b>621.619</b> | G[23] |
| R[3]  | 90.805         | <b>611.620</b> | <b>607.616</b> | <b>607.868</b> | <b>607.364</b> | R[22] |
| G[4]  | 105.061        | 572.595        | 568.590        | 568.842        | 568.338        | G[21] |
| K[5]  | 137.084        | 558.340        | 554.335        | 554.587        | 554.083        | K[20] |
| G[6]  | 151.340        | 526.316        | 522.311        | 522.563        | 522.059        | G[19] |
| G[7]  | 165.595        | 512.061        | 508.056        | 508.308        | 507.804        | G[18] |
| K[8]  | 197.619        | 497.805        | 493.800        | 494.052        | 493.549        | K[17] |
| G[9]  | 211.874        | 486.781        | 482.777        | 483.029        | 482.525        | G[16] |
| L[10] | 280.148        | 451.526        | 447.521        | 447.773        | 447.269        | L[15] |
| G[11] | 254.401        | 423.255        | 419.250        | 419.502        | 418.998        | G[14] |
| K[12] | 296.627        | 409.000        | 404.995        | 405.247        | 404.743        | K[13] |
| G[13] | 311.182        | 366.473        | 362.469        | 362.721        | 362.217        | G[12] |
| G[14] | 325.438        | 352.218        | 348.213        | 348.465        | 347.961        | G[11] |
| A[15] | 343.197        | 337.963        | 333.958        | 334.210        | 333.706        | A[10] |
| K[16] | 385.723        | 320.203        | 316.199        | 316.451        | 315.947        | K[9]  |
| R[17] | 424.749        | -277.877       | <b>273.672</b> | <b>273.924</b> | <b>273.420</b> | R[8]  |
| H[18] | 459.013        | 238.652        | 234.647        | 234.899        | 234.395        | H[7]  |
| R[19] | 498.039        | 204.397        | 200.392        | 200.644        | 200.140        | R[6]  |
| K[20] | 537.070        | 165.362        | 161.357        | 161.609        | 161.105        | K[5]  |
| V[21] | 561.837        | 126.330        | 122.325        | 122.577        | 122.073        | V[4]  |
| L[22] | 590.108        | 101.563        | 97.558         | 97.810         | 97.306         | L[3]  |
| R[23] | <b>629.134</b> | 73.292         | 69.287         | 69.539         | 69.035         | R[2]  |
| D[24] | <b>657.890</b> | 34.267         | 30.262         | 30.514         | 30.010         | D[1]  |

# sp | P62806 | H4\_MOUSE

[Acetyl]SGRGKGGKGLGK <sup>Acetyl</sup> 42.01 GGAK <sup>Acetyl</sup> 42.01 RHRK <sup>Dimethyl</sup> 28.03 VLRD

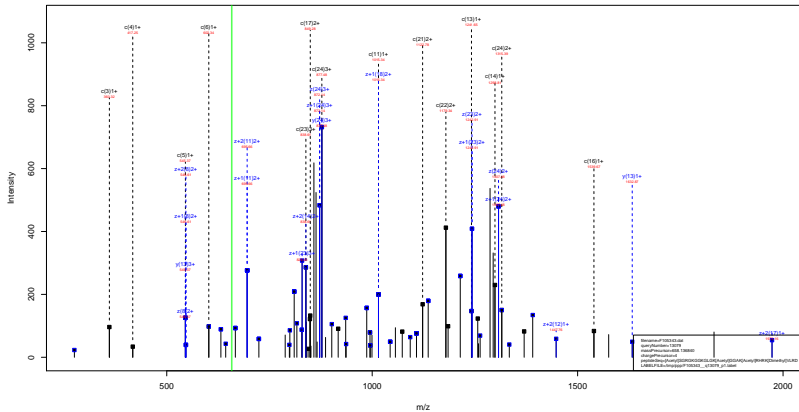

# sp | P62806 | H4\_MOUSE

[Acetyl]SGRGKGGKGLGK<sup>Acetyl</sup><sub>42.01</sub> GGAK<sup>Acetyl</sup><sub>42.01</sub> RHRK<sup>Dimethyl</sup><sub>28.03</sub> VLRD

- ▶ fragmentation table for charge state 1+
- ▶ specType=etd
- ▶ score=99.60
- ▶ F105343.dat
- ▶ query=q13079\_p1
- ▶ precursor=658.136840
- ▶ chargePrecursor=4
- ▶ itol=0.8

| AA    | c               | y               | z+1            | z+2             | z        | AA    |
|-------|-----------------|-----------------|----------------|-----------------|----------|-------|
| S[1]  | 147.676         | 2029.523        | 2613.505       | 0.000           | 2612.497 | S[24] |
| G[2]  | 204.098         | 2500.481        | 2484.462       | 0.000           | 2483.454 | G[23] |
| R[3]  | <b>368.199</b>  | 2843.450        | 2827.441       | 2420.448        | 2420.433 | R[22] |
| G[4]  | <b>417.220</b>  | 2267.386        | 2271.330       | 2272.347        | 2270.333 | G[21] |
| K[5]  | <b>545.315</b>  | 2230.337        | 2214.318       | 2215.326        | 2213.310 | K[20] |
| G[6]  | <b>602.337</b>  | 2102.342        | 2086.235       | 2087.231        | 2085.215 | G[19] |
| G[7]  | 659.358         | 2045.220        | 2026.200       | 2030.209        | 2028.194 | G[18] |
| K[8]  | 787.453         | 1988.199        | 1972.180       | <b>1973.188</b> | 1971.172 | K[17] |
| G[9]  | <b>844.475</b>  | 1866.104        | 1844.085       | 1845.093        | 1843.077 | G[16] |
| L[10] | 973.559         | 1803.062        | 1787.064       | 1788.071        | 1786.056 | L[15] |
| G[11] | <b>1014.580</b> | 1689.958        | 1673.980       | 1674.987        | 1672.972 | G[14] |
| K[12] | <b>1184.686</b> | <b>1632.977</b> | 1616.958       | 1617.966        | 1615.950 | K[13] |
| G[13] | <b>1241.707</b> | 1462.871        | 1446.853       | <b>1447.860</b> | 1445.845 | G[12] |
| G[14] | <b>1298.729</b> | 1405.850        | 1389.831       | <b>1390.839</b> | 1388.823 | G[11] |
| A[15] | <b>1369.766</b> | 1348.828        | 1332.810       | <b>1333.818</b> | 1331.802 | A[10] |
| R[16] | <b>1539.871</b> | 1277.791        | 1261.773       | <b>1262.780</b> | 1260.765 | R[9]  |
| R[17] | 1695.973        | <b>1107.688</b> | 1091.667       | <b>1092.675</b> | 1090.659 | R[8]  |
| H[18] | 1833.031        | 951.585         | <b>935.566</b> | <b>936.574</b>  | 934.558  | H[7]  |
| R[19] | 1989.133        | 814.526         | <b>798.507</b> | <b>799.515</b>  | 797.499  | R[6]  |
| K[20] | 2145.259        | 658.425         | 642.406        | <b>643.414</b>  | 641.398  | K[5]  |
| V[21] | 2244.327        | 502.268         | 486.250        | 487.267         | 485.272  | V[4]  |
| L[22] | 2357.411        | 403.239         | 387.211        | 388.219         | 386.203  | L[3]  |
| R[23] | 2513.512        | 290.140         | 274.127        | <b>275.135</b>  | 273.119  | R[2]  |
| D[24] | 2628.539        | 134.045         | 118.026        | 119.034         | 117.018  | D[1]  |

# sp | P62806 | H4\_MOUSE

[Acetyl]SGRGKGGKGLGK<sup>Acetyl</sup><sub>42.01</sub> GGAK<sup>Acetyl</sup><sub>42.01</sub> RHRK<sup>Dimethyl</sup><sub>28.03</sub> VLRD

- ▶ fragmentation table for charge state 2+
- ▶ specType=etd
- ▶ score=99.60
- ▶ F105343.dat
- ▶ query=q13079\_p1
- ▶ precursor=658.136840
- ▶ chargePrecursor=4
- ▶ itol=0.8

| AA | c  | y               | z+1             | z+2             | z               | AA              |       |
|----|----|-----------------|-----------------|-----------------|-----------------|-----------------|-------|
| S  | 1  | 74.642          | <b>1315.265</b> | <b>1307.256</b> | 0.504           | <b>1306.752</b> | S[24] |
| G  | 2  | 102.553         | 1250.744        | <b>1242.735</b> | 0.504           | <b>1242.231</b> | G[23] |
| R  | 3  | 180.603         | 1222.233        | <b>1214.224</b> | <b>1214.728</b> | <b>1213.720</b> | R[22] |
| G  | 4  | 259.114         | 1144.183        | <b>1136.173</b> | <b>1136.677</b> | <b>1135.669</b> | G[21] |
| K  | 5  | 273.153         | 1115.672        | <b>1107.663</b> | <b>1108.167</b> | <b>1107.159</b> | K[20] |
| G  | 6  | 301.672         | 1051.625        | <b>1043.615</b> | <b>1044.119</b> | <b>1043.111</b> | G[19] |
| G  | 7  | 330.183         | 1023.114        | <b>1015.104</b> | <b>1015.608</b> | <b>1014.601</b> | G[18] |
| K  | 8  | 394.230         | <b>994.603</b>  | <b>986.594</b>  | <b>987.098</b>  | <b>986.090</b>  | K[17] |
| G  | 9  | 422.741         | 938.056         | 922.546         | 923.050         | 922.042         | G[16] |
| L  | 10 | 479.283         | <b>902.045</b>  | 886.035         | 884.539         | 883.532         | L[15] |
| G  | 11 | 507.794         | 845.503         | 837.493         | <b>837.997</b>  | 836.990         | G[14] |
| K  | 12 | 502.847         | <b>816.992</b>  | 808.983         | <b>809.487</b>  | 808.479         | K[13] |
| G  | 13 | 621.357         | 731.939         | <b>723.930</b>  | <b>724.434</b>  | <b>723.426</b>  | G[12] |
| G  | 14 | 649.868         | 703.429         | <b>695.419</b>  | <b>695.923</b>  | <b>694.915</b>  | G[11] |
| A  | 15 | 685.389         | 674.919         | <b>666.908</b>  | <b>667.412</b>  | <b>666.405</b>  | A[10] |
| R  | 16 | 770.439         | 639.399         | <b>631.390</b>  | <b>631.894</b>  | 630.887         | R[9]  |
| R  | 17 | <b>848.490</b>  | 554.347         | <b>546.337</b>  | <b>546.841</b>  | <b>545.833</b>  | R[8]  |
| H  | 18 | <b>917.019</b>  | 476.296         | 468.287         | 468.791         | 467.783         | H[7]  |
| R  | 19 | <b>995.070</b>  | 407.767         | 399.757         | 400.261         | 399.253         | R[6]  |
| K  | 20 | <b>1073.133</b> | 329.716         | 321.707         | 322.211         | 321.203         | K[5]  |
| V  | 21 | <b>1122.667</b> | 251.663         | 243.653         | 244.157         | 243.149         | V[4]  |
| L  | 22 | <b>1179.209</b> | 202.119         | 194.109         | 194.613         | 193.605         | L[3]  |
| R  | 23 | <b>1257.260</b> | 145.577         | 137.567         | 138.071         | 137.063         | R[2]  |
| D  | 24 | <b>1314.773</b> | 67.526          | 59.517          | 60.021          | 59.013          | D[1]  |

# sp | P62806 | H4\_MOUSE

[Acetyl]SGRGKGGKGLGK<sup>Acetyl</sup><sub>42.01</sub> GGAK<sup>Acetyl</sup><sub>42.01</sub> RHRK<sup>Dimethyl</sup><sub>28.03</sub> VLRD

- ▶ fragmentation table for charge state 3+
- ▶ specType=etd
- ▶ score=99.60
- ▶ F105343.dat
- ▶ query=q13079\_p1
- ▶ precursor=658.136840
- ▶ chargePrecursor=4
- ▶ itol=0.8

| AA    | c              | y              | z+1            | z+2            | z              | AA    |
|-------|----------------|----------------|----------------|----------------|----------------|-------|
| S[1]  | 49.697         | <b>877.179</b> | <b>871.840</b> | 0.672          | <b>871.504</b> | S[24] |
| G[2]  | 58.704         | 134.165        | <b>826.826</b> | 0.672          | <b>826.490</b> | G[23] |
| R[3]  | 150.738        | 815.158        | <b>909.818</b> | <b>810.154</b> | <b>809.482</b> | R[22] |
| G[4]  | 139.745        | 763.124        | 757.785        | 758.121        | 757.449        | G[21] |
| K[5]  | 182.443        | 744.117        | 738.778        | 739.113        | 738.442        | K[20] |
| G[6]  | 201.450        | 701.419        | <b>696.079</b> | <b>696.415</b> | <b>695.743</b> | G[19] |
| G[7]  | 220.458        | 682.412        | 677.072        | 677.408        | 676.736        | G[18] |
| K[8]  | 263.156        | 663.404        | 658.063        | 658.401        | 657.729        | K[17] |
| G[9]  | 282.163        | 630.705        | 615.367        | 615.703        | 615.031        | G[16] |
| L[10] | 319.958        | <b>601.699</b> | 596.359        | 596.698        | 596.023        | L[15] |
| G[11] | 338.965        | 504.024        | 558.665        | 559.001        | 558.329        | G[14] |
| K[12] | 395.567        | <b>544.997</b> | 539.658        | 539.994        | 539.322        | K[13] |
| G[13] | 414.574        | 488.295        | 482.956        | 483.292        | 482.620        | G[12] |
| G[14] | 433.581        | 469.288        | 463.949        | 464.285        | 463.613        | G[11] |
| A[15] | 457.260        | 450.281        | 444.941        | 445.277        | 444.605        | A[10] |
| K[16] | 513.962        | 426.602        | 421.262        | 421.598        | 420.926        | K[9]  |
| R[17] | 565.996        | 369.900        | 364.561        | 364.896        | 364.225        | R[8]  |
| H[18] | 611.682        | 317.896        | 312.527        | 312.863        | 312.191        | H[7]  |
| R[19] | 663.716        | 272.180        | 266.841        | 267.176        | 266.505        | R[6]  |
| K[20] | 715.758        | 220.140        | 214.807        | 215.143        | 214.471        | K[5]  |
| V[21] | 748.781        | 168.104        | 162.765        | 163.101        | 162.429        | V[4]  |
| L[22] | 786.475        | 135.082        | 129.742        | 130.078        | 129.406        | L[3]  |
| R[23] | <b>838.509</b> | 97.387         | 92.047         | 92.383         | 91.711         | R[2]  |
| D[24] | <b>876.851</b> | 45.353         | 40.014         | 40.349         | 39.678         | D[1]  |





# sp | Q6ZWY9 | H2B1C\_MOUSE

PEPAKSAPAPKKGSK<sup>Acetyl</sup> KAVTKAQKKD  
42.01

- ▶ fragmentation table for charge state 1+
- ▶ specType=etd
- ▶ score=46.76
- ▶ F105343.dat
- ▶ query=q13099\_p1
- ▶ precursor=658.883000
- ▶ chargePrecursor=4
- ▶ itol=0.8

| AA   | c               | y              | z+1             | z+2            | z        | AA   |
|------|-----------------|----------------|-----------------|----------------|----------|------|
| P 1  | 115.087         | 2632.514       | 2038.496        | 0.000          | 2615.488 | P 25 |
| E 2  | 284.129         | 2535.462       | 2519.443        | 0.000          | 2512.435 | E 24 |
| P 3  | 341.182         | 2406.410       | 2390.400        | 0.000          | 2389.393 | P 23 |
| A 4  | 412.219         | 2309.366       | 2293.348        | 0.000          | 2292.340 | A 22 |
| K 5  | <b>540.314</b>  | 2238.329       | 2222.311        | 2223.318       | 2221.303 | K 21 |
| S 6  | <b>627.346</b>  | 2110.234       | 2094.216        | 2095.223       | 2093.209 | S 20 |
| A 7  | 697.381         | 2022.202       | 2007.184        | 2008.191       | 2006.176 | A 19 |
| P 8  | <b>795.436</b>  | 1952.165       | 1936.146        | 1937.154       | 1935.139 | P 18 |
| A 9  | 866.473         | 1855.112       | <b>1839.094</b> | 1840.101       | 1838.086 | A 17 |
| P 10 | <b>963.526</b>  | 1784.075       | 1768.057        | 1769.064       | 1767.049 | P 16 |
| K 11 | <b>1091.621</b> | 1687.022       | 1671.004        | 1672.012       | 1669.996 | K 15 |
| K 12 | 1219.716        | 1559.928       | 1542.909        | 1543.917       | 1541.901 | K 14 |
| G 13 | 1276.737        | 1430.815       | 1414.814        | 1415.822       | 1413.806 | G 13 |
| S 14 | 1363.769        | 1373.811       | 1357.792        | 1358.800       | 1356.785 | S 12 |
| K 15 | 1533.875        | 1286.779       | 1270.760        | 1271.768       | 1269.752 | K 11 |
| K 16 | 1661.970        | 1119.674       | <b>1100.655</b> | 1101.663       | 1099.647 | K 10 |
| A 17 | 1733.007        | 988.579        | <b>972.560</b>  | 973.568        | 971.552  | A 9  |
| V 18 | 1832.075        | 917.541        | 901.523         | <b>902.531</b> | 900.515  | V 8  |
| T 19 | 1933.123        | <b>818.473</b> | 802.454         | <b>803.462</b> | 801.446  | T 7  |
| K 20 | 2081.218        | 737.425        | <b>701.407</b>  | 702.414        | 700.399  | K 6  |
| A 21 | 2132.255        | 669.332        | <b>573.312</b>  | 574.320        | 572.304  | A 5  |
| Q 22 | 2260.314        | 518.293        | <b>502.275</b>  | <b>503.282</b> | 501.267  | Q 4  |
| K 23 | 2388.409        | 390.235        | <b>374.216</b>  | <b>375.224</b> | 373.208  | K 3  |
| K 24 | 2516.504        | 262.140        | 246.121         | 247.129        | 245.113  | K 2  |
| D 25 | 2631.530        | 134.045        | 118.026         | 119.034        | 117.018  | D 1  |

# sp | Q6ZWY9 | H2B1C\_MOUSE

PEPAKSAPAPKKGSK<sup>Acetyl</sup>42.01 KAVTKAQKKD

- ▶ fragmentation table for charge state 2+
- ▶ specType=etd
- ▶ score=46.76
- ▶ F105343.dat
- ▶ query=q13099\_p1
- ▶ precursor=658.883000
- ▶ chargePrecursor=4
- ▶ itol=0.8

| AA | c  | y               | z+1             | z+2             | z               | AA              |       |
|----|----|-----------------|-----------------|-----------------|-----------------|-----------------|-------|
| F  | 1  | 58.047          | <b>1316.761</b> | <b>1308.752</b> | 0.504           | <b>1308.248</b> | P[25] |
| E  | 3  | 122.508         | 1308.229        | <b>1260.225</b> | 0.504           | <b>1259.721</b> | E[24] |
| F  | 3  | 171.095         | 1303.713        | 1319.708        | 0.504           | <b>1195.209</b> | F[23] |
| A  | 4  | 206.613         | <b>1155.187</b> | <b>1147.177</b> | 0.504           | 1146.674        | A[22] |
| K  | 5  | 270.681         | <b>1119.668</b> | <b>1111.659</b> | <b>1112.163</b> | <b>1111.155</b> | K[21] |
| S  | 6  | 314.177         | 1035.621        | 1047.611        | 1048.115        | 1047.107        | S[20] |
| A  | 7  | 349.695         | <b>1012.105</b> | <b>1004.095</b> | <b>1004.599</b> | <b>1003.591</b> | A[19] |
| F  | 8  | 389.222         | 978.599         | 985.577         | 989.081         | <b>968.673</b>  | F[18] |
| A  | 9  | 433.740         | 928.065         | <b>920.050</b>  | <b>920.554</b>  | 919.543         | A[17] |
| F  | 10 | 482.267         | 892.541         | 894.532         | 885.036         | 884.028         | F[16] |
| K  | 11 | 546.314         | 844.015         | <b>836.006</b>  | <b>836.509</b>  | <b>835.502</b>  | K[15] |
| K  | 12 | 610.362         | 779.987         | <b>771.958</b>  | <b>772.462</b>  | <b>771.454</b>  | K[14] |
| G  | 13 | 638.872         | <b>715.920</b>  | <b>707.911</b>  | <b>708.414</b>  | 707.407         | G[13] |
| S  | 14 | 682.388         | <b>687.409</b>  | 678.400         | 679.904         | 678.895         | S[12] |
| K  | 15 | <b>767.441</b>  | 643.893         | 635.884         | 636.888         | 635.880         | K[11] |
| K  | 16 | <b>831.488</b>  | 638.840         | 630.831         | 631.835         | 630.827         | K[10] |
| A  | 17 | 887.007         | 494.793         | 486.784         | 487.287         | 486.280         | A[9]  |
| V  | 18 | 919.541         | 459.274         | 451.265         | 451.769         | 450.761         | V[8]  |
| T  | 19 | <b>967.065</b>  | 409.746         | 401.733         | 402.235         | 401.227         | T[7]  |
| K  | 20 | <b>1031.113</b> | 359.215         | 351.207         | 351.711         | 350.703         | K[6]  |
| A  | 21 | <b>1066.631</b> | 295.169         | 287.159         | 287.663         | 286.655         | A[5]  |
| Q  | 22 | <b>1130.660</b> | 259.656         | 251.641         | 252.145         | 251.137         | Q[4]  |
| K  | 23 | <b>1194.708</b> | 195.621         | 187.612         | 188.116         | 187.108         | K[3]  |
| K  | 24 | 1238.759        | 131.574         | 123.564         | 124.068         | 123.060         | K[2]  |
| D  | 25 | 1318.289        | 67.526          | 59.517          | 60.021          | 59.013          | D[1]  |

# sp | Q6ZWY9 | H2B1C\_MOUSE

PEPAKSAPAPKKGSK<sup>Acetyl</sup> KAVTKAQKKD  
42.01

- ▶ fragmentation table for charge state 3+
- ▶ specType=etd
- ▶ score=46.76
- ▶ F105343.dat
- ▶ query=q13099\_p1
- ▶ precursor=658.883000
- ▶ chargePrecursor=4
- ▶ itol=0.8

| AA |    | c              | y              | z+1            | z+2     | z              | AA |
|----|----|----------------|----------------|----------------|---------|----------------|----|
| P  | 1  | 39.034         | <b>878.176</b> | <b>872.837</b> | 0.672   | <b>872.501</b> | P  |
| E  | 2  | 82.048         | 845.825        | <b>840.486</b> | 0.672   | <b>840.150</b> | E  |
| P  | 3  | 114.399        | 802.811        | 797.472        | 0.672   | <b>797.136</b> | P  |
| A  | 4  | 138.078        | 770.460        | 765.121        | 0.672   | 764.785        | A  |
| K  | 5  | 180.776        | <b>746.781</b> | 741.442        | 741.778 | 741.106        | K  |
| S  | 6  | 209.737        | 704.063        | 698.743        | 699.079 | 698.407        | S  |
| A  | 7  | 233.406        | 675.072        | 669.733        | 670.069 | 669.397        | A  |
| P  | 8  | 265.817        | 651.393        | 646.054        | 646.390 | 645.718        | P  |
| A  | 9  | 299.496        | 619.042        | 613.703        | 614.039 | 613.367        | A  |
| P  | 10 | 321.847        | 595.363        | 590.024        | 590.360 | 589.688        | P  |
| K  | 11 | 364.545        | 563.012        | 557.673        | 558.009 | 557.337        | K  |
| K  | 12 | 407.243        | 520.314        | 514.974        | 515.310 | 514.639        | K  |
| G  | 13 | 426.251        | 477.616        | 472.276        | 472.612 | 471.940        | G  |
| S  | 14 | 455.261        | 458.609        | 453.269        | 453.605 | 452.933        | S  |
| K  | 15 | 511.963        | 420.598        | 424.258        | 424.594 | 423.922        | K  |
| K  | 16 | 554.051        | 372.896        | 367.556        | 367.892 | 367.221        | K  |
| A  | 17 | 578.140        | 330.190        | 324.850        | 325.184 | 324.522        | A  |
| V  | 18 | 611.363        | 306.519        | 301.179        | 301.515 | 300.843        | V  |
| T  | 19 | 645.046        | 273.496        | 268.156        | 268.492 | 267.820        | T  |
| K  | 20 | 687.744        | 239.813        | 234.474        | 234.810 | 234.138        | K  |
| A  | 21 | 711.423        | 197.115        | 191.775        | 192.111 | 191.439        | A  |
| Q  | 22 | <b>754.109</b> | 173.436        | 168.096        | 168.432 | 167.760        | Q  |
| K  | 23 | <b>796.808</b> | 130.750        | 125.410        | 125.746 | 125.074        | K  |
| K  | 24 | <b>839.506</b> | 88.051         | 82.712         | 83.048  | 82.376         | K  |
| D  | 25 | <b>877.848</b> | 45.353         | 40.014         | 40.349  | 39.678         | D  |

# sp | Q64525 | H2B2B\_MOUSE

PDKASAPAPKKGSKKAVTK <sup>Acetyl</sup> VQKDK  
42.01

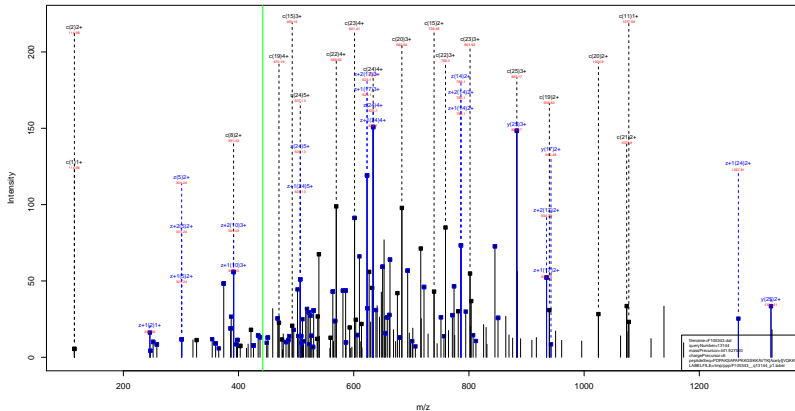

# sp | Q64525 | H2B2B\_MOUSE

PDKASAPAPKKGSKKAVTK<sup>Acetyl</sup> VQKKD  
42.01

- ▶ fragmentation table for charge state 1+
- ▶ specType=etd
- ▶ score=34.09
- ▶ F105343.dat
- ▶ query=q13144.p1
- ▶ precursor=441.927520
- ▶ chargePrecursor=6
- ▶ itol=0.8

| AA   | c               | y              | z+1            | z+2            | z              | AA   |
|------|-----------------|----------------|----------------|----------------|----------------|------|
| P 1  | <b>115.087</b>  | 2646.530       | 2630.511       | 0.000          | 2629.504       | P 25 |
| D 2  | 230.114         | 2549.477       | 2531.459       | 0.000          | 2532.451       | D 24 |
| P 3  | <b>327.166</b>  | 2434.450       | 2418.432       | 0.000          | 2417.424       | P 23 |
| A 4  | <b>398.203</b>  | 2337.399       | 2321.379       | 0.000          | 2320.371       | A 22 |
| K 5  | <b>526.298</b>  | 2250.361       | 2250.342       | 2251.350       | 2249.334       | K 21 |
| S 6  | <b>613.330</b>  | 2138.306       | 2122.287       | 2123.295       | 2121.276       | S 20 |
| A 7  | 624.308         | 2051.234       | 2035.215       | 2036.223       | 2034.205       | A 19 |
| P 8  | <b>781.420</b>  | 1980.190       | 1964.176       | 1965.186       | 1963.170       | P 18 |
| A 9  | 852.457         | 1883.144       | 1867.125       | 1868.133       | 1866.117       | A 17 |
| P 10 | 949.510         | 1812.107       | 1796.088       | 1797.096       | 1795.080       | P 16 |
| K 11 | <b>1077.605</b> | 1715.054       | 1699.035       | 1700.043       | 1698.027       | K 15 |
| K 12 | 1205.700        | 1530.950       | 1570.940       | 1571.948       | 1569.932       | K 14 |
| G 13 | 1262.722        | 1458.864       | 1442.845       | 1443.853       | 1441.837       | G 13 |
| S 14 | 1349.754        | 1401.842       | 1385.824       | 1386.831       | 1384.816       | S 12 |
| K 15 | 1477.849        | 1314.811       | 1298.792       | 1299.799       | 1297.784       | K 11 |
| K 16 | 1605.944        | 1186.715       | 1170.697       | 1171.705       | 1169.689       | K 10 |
| A 17 | 1676.981        | 1058.620       | 1042.602       | 1043.610       | 1041.594       | A 9  |
| V 18 | 1776.049        | 987.583        | 971.565        | 972.572        | 970.557        | V 8  |
| T 19 | 1877.097        | 888.515        | 872.496        | 873.504        | 871.488        | T 7  |
| K 20 | 2047.202        | 787.467        | <b>771.449</b> | 772.456        | <b>770.441</b> | K 6  |
| V 21 | 2146.271        | 617.362        | <b>601.343</b> | 602.351        | 600.335        | V 5  |
| Q 22 | 2274.529        | <b>518.293</b> | <b>502.275</b> | <b>503.282</b> | 501.267        | Q 4  |
| K 23 | 2402.424        | 390.230        | <b>374.216</b> | 375.224        | 373.208        | K 3  |
| K 24 | 2530.510        | 262.140        | <b>246.121</b> | <b>247.129</b> | 245.113        | K 2  |
| D 25 | 2645.546        | 134.045        | 118.026        | 119.034        | 117.019        | D 1  |

# sp | Q64525 | H2B2B\_MOUSE

PDKASAPAPKKGSKKAVTK <sup>Acetyl</sup> 42.01 VQKKD

- ▶ fragmentation table for charge state 2+
- ▶ specType=etd
- ▶ score=34.09
- ▶ F105343.dat
- ▶ query=q13144.p1
- ▶ precursor=441.927520
- ▶ chargePrecursor=6
- ▶ itol=0.8

| AA |    | c               | y               | z+1             | z+2            | z              | AA  |
|----|----|-----------------|-----------------|-----------------|----------------|----------------|-----|
| F  | D  | 58.047          | <b>1323.769</b> | 113.939         | 0.504          | 1315.265       | F25 |
| D  | 2  | <b>115.560</b>  | 1279.247        | <b>1267.233</b> | 0.504          | 1269.729       | D24 |
| P  | 3  | 164.087         | 1217.729        | 1208.719        | 0.504          | 1209.216       | P23 |
| A  | 4  | 199.605         | 1169.202        | 1161.193        | 0.504          | 1160.689       | A22 |
| K  | 5  | 263.693         | 1133.684        | 1125.675        | 1126.178       | 1125.171       | K21 |
| S  | 6  | 307.169         | 1086.166        | 1081.627        | 1082.131       | 1081.129       | S20 |
| A  | 7  | 342.687         | 1026.120        | 1018.111        | 1018.615       | 1017.607       | A19 |
| P  | 8  | <b>391.214</b>  | 990.602         | 982.592         | 983.096        | 982.089        | P18 |
| A  | 9  | 426.732         | <b>942.075</b>  | <b>934.066</b>  | <b>934.570</b> | 933.562        | A17 |
| P  | 10 | <b>475.259</b>  | 908.557         | 898.548         | 899.051        | 898.044        | P16 |
| K  | 11 | <b>539.306</b>  | 858.031         | <b>850.021</b>  | <b>850.525</b> | 849.517        | K15 |
| K  | 12 | <b>603.354</b>  | <b>793.983</b>  | <b>785.974</b>  | <b>786.478</b> | <b>785.470</b> | K14 |
| G  | 13 | <b>631.864</b>  | 729.936         | <b>721.926</b>  | <b>722.430</b> | <b>721.422</b> | G13 |
| S  | 14 | <b>675.380</b>  | <b>701.425</b>  | <b>693.415</b>  | <b>693.919</b> | <b>692.912</b> | S12 |
| K  | 15 | <b>739.428</b>  | <b>657.909</b>  | <b>649.899</b>  | <b>650.403</b> | <b>649.396</b> | K11 |
| K  | 16 | <b>803.475</b>  | 593.861         | <b>585.852</b>  | <b>586.356</b> | <b>585.348</b> | K10 |
| A  | 17 | 838.994         | <b>529.814</b>  | <b>521.804</b>  | <b>522.308</b> | <b>521.301</b> | A9  |
| V  | 18 | 888.528         | 494.292         | <b>486.286</b>  | <b>486.790</b> | <b>485.782</b> | V8  |
| T  | 19 | <b>939.052</b>  | 444.761         | <b>436.752</b>  | <b>437.256</b> | 436.249        | T7  |
| R  | 20 | <b>1024.105</b> | 394.237         | <b>386.228</b>  | <b>386.732</b> | <b>385.724</b> | R6  |
| V  | 21 | <b>1073.639</b> | 350.184         | <b>301.175</b>  | <b>301.679</b> | <b>300.671</b> | V5  |
| Q  | 22 | 1137.688        | 299.659         | <b>251.641</b>  | <b>252.145</b> | <b>251.137</b> | Q4  |
| K  | 23 | 1201.716        | 195.621         | 187.612         | 188.116        | 187.108        | K3  |
| K  | 24 | 1285.763        | 131.574         | 123.564         | 124.068        | 123.060        | K2  |
| D  | 25 | 1323.277        | 67.526          | 59.517          | 60.021         | 59.013         | D1  |

# sp | Q64525 | H2B2B\_MOUSE

PDKASAPAPKKGSKKAVTK <sup>Acetyl</sup> VQKKD  
42.01

- ▶ fragmentation table for charge state 3+
- ▶ specType=etd
- ▶ score=34.09
- ▶ F105343.dat
- ▶ query=q13144.p1
- ▶ precursor=441.927520
- ▶ chargePrecursor=6
- ▶ itol=0.8

| AA    | c              | y              | z+1            | z+2            | z              | AA    |
|-------|----------------|----------------|----------------|----------------|----------------|-------|
| P[1]  | 30.034         | <b>882.848</b> | 877.509        | 0.672          | 877.173        | P[25] |
| D[2]  | 77.376         | <b>850.497</b> | <b>845.158</b> | 0.672          | <b>844.822</b> | D[24] |
| P[3]  | 109.727        | <b>812.155</b> | <b>806.815</b> | 0.672          | 806.479        | P[23] |
| A[4]  | 133.406        | 779.804        | <b>774.464</b> | 0.672          | <b>774.129</b> | A[22] |
| K[5]  | 176.104        | <b>756.125</b> | <b>750.785</b> | <b>751.121</b> | 750.450        | K[21] |
| S[6]  | 205.115        | 713.521        | 708.087        | 708.423        | <b>707.751</b> | S[20] |
| A[7]  | 228.794        | 684.416        | <b>679.076</b> | <b>679.412</b> | <b>678.741</b> | A[19] |
| P[8]  | 261.145        | 660.737        | <b>655.397</b> | <b>655.733</b> | <b>655.061</b> | P[18] |
| A[9]  | 294.824        | 628.088        | <b>623.046</b> | <b>623.382</b> | <b>622.711</b> | A[17] |
| P[10] | 317.175        | 604.707        | 599.367        | 599.703        | 599.032        | P[16] |
| K[11] | <b>359.873</b> | 572.356        | <b>567.017</b> | <b>567.352</b> | <b>566.681</b> | K[15] |
| K[12] | <b>402.572</b> | <b>529.658</b> | <b>524.318</b> | <b>524.654</b> | <b>523.982</b> | K[14] |
| G[13] | <b>421.579</b> | <b>486.959</b> | <b>481.620</b> | <b>481.956</b> | 481.284        | G[13] |
| S[14] | <b>450.589</b> | <b>467.952</b> | 462.613        | 462.949        | 462.277        | S[12] |
| K[15] | <b>493.288</b> | 438.942        | <b>433.602</b> | <b>433.938</b> | <b>433.266</b> | K[11] |
| K[16] | <b>535.986</b> | <b>396.243</b> | <b>390.904</b> | <b>391.240</b> | 390.568        | K[10] |
| A[17] | <b>559.665</b> | <b>353.545</b> | 348.205        | 348.541        | 347.869        | A[9]  |
| V[18] | <b>592.688</b> | 329.866        | 324.526        | 324.862        | 324.190        | V[8]  |
| T[19] | <b>626.370</b> | 296.843        | 291.504        | 291.840        | 291.168        | T[7]  |
| K[20] | <b>683.072</b> | 263.161        | <b>257.821</b> | <b>258.157</b> | <b>257.485</b> | K[6]  |
| V[21] | <b>716.095</b> | 206.459        | 201.119        | 201.455        | 200.783        | V[5]  |
| Q[22] | <b>758.781</b> | 173.436        | 168.096        | 168.432        | 167.760        | Q[4]  |
| K[23] | <b>801.480</b> | 130.750        | 125.410        | 125.746        | 125.074        | K[3]  |
| K[24] | 864.178        | 88.051         | 82.712         | 83.048         | 82.376         | K[2]  |
| D[25] | <b>882.520</b> | 45.353         | 40.014         | 40.349         | 39.678         | D[1]  |

# sp | Q64525 | H2B2B\_MOUSE

PDKASAPAPKKGSKKAVTK <sup>Acetyl</sup> <sub>42.01</sub> VQKKD

- ▶ fragmentation table for charge state 4+
- ▶ specType=etd
- ▶ score=34.09
- ▶ F105343.dat
- ▶ query=q13144.p1
- ▶ precursor=441.927520
- ▶ chargePrecursor=6
- ▶ itol=0.8

| AA |    | c              | y              | z+1            | z+2            | z              | AA   |
|----|----|----------------|----------------|----------------|----------------|----------------|------|
| P  | 1  | 29.527         | <b>662.388</b> | <b>658.383</b> | 0.755          | <b>658.131</b> | P 25 |
| D  | 2  | 58.284         | <b>638.125</b> | <b>634.120</b> | 0.755          | <b>633.868</b> | D 24 |
| P  | 3  | 82.947         | <b>609.368</b> | <b>605.363</b> | 0.755          | <b>605.111</b> | P 23 |
| A  | 4  | 100.306        | 585.105        | <b>581.100</b> | 0.755          | <b>580.848</b> | A 22 |
| K  | 5  | 132.130        | <b>567.346</b> | <b>563.341</b> | <b>563.593</b> | <b>563.089</b> | K 21 |
| S  | 6  | 154.088        | 535.322        | 531.317        | 531.309        | <b>531.065</b> | S 20 |
| A  | 7  | 171.947        | <b>513.564</b> | <b>509.559</b> | <b>509.811</b> | <b>509.307</b> | A 19 |
| P  | 8  | 196.111        | <b>495.805</b> | 491.800        | 492.252        | 491.548        | P 18 |
| A  | 9  | 213.870        | 471.541        | <b>467.537</b> | <b>467.789</b> | 467.285        | A 17 |
| P  | 10 | 238.133        | 453.782        | 449.777        | 450.029        | <b>449.525</b> | P 16 |
| K  | 11 | 270.157        | 429.519        | <b>425.514</b> | <b>425.766</b> | <b>425.262</b> | K 15 |
| K  | 12 | 302.180        | <b>397.495</b> | 393.490        | 393.742        | 393.239        | K 14 |
| G  | 13 | 316.436        | <b>365.471</b> | 361.467        | 361.719        | 361.215        | G 13 |
| S  | 14 | 338.194        | 351.216        | 347.211        | 347.463        | 346.959        | S 12 |
| K  | 15 | 370.218        | 329.458        | 325.453        | 325.705        | 325.201        | K 11 |
| K  | 16 | <b>402.241</b> | 297.434        | 293.430        | 293.682        | 293.178        | K 10 |
| A  | 17 | 420.001        | 285.411        | 281.406        | 281.658        | 281.154        | A 9  |
| V  | 18 | 444.768        | <b>247.651</b> | 243.647        | 243.899        | 243.395        | V 8  |
| T  | 19 | <b>470.030</b> | 222.884        | 218.880        | 219.131        | 218.628        | T 7  |
| K  | 20 | <b>512.556</b> | 197.622        | 193.618        | 193.870        | 193.366        | K 6  |
| V  | 21 | <b>537.323</b> | 155.096        | 151.091        | 151.343        | 150.839        | V 5  |
| Q  | 22 | <b>569.338</b> | 130.329        | 126.324        | 126.576        | 126.072        | Q 4  |
| K  | 23 | <b>601.362</b> | 98.314         | 94.309         | 94.561         | 94.057         | K 3  |
| K  | 24 | <b>633.385</b> | 66.290         | 62.285         | 62.538         | 62.034         | K 2  |
| D  | 25 | <b>662.142</b> | 34.267         | 30.263         | 30.514         | 30.010         | D 1  |



# sp | Q64525 | H2B2B\_MOUSE

PDKASAPAPKKGSKKAVTK <sup>Acetyl</sup> 42.01 VQKKD

- ▶ fragmentation table for charge state 5+
- ▶ specType=etd
- ▶ score=34.09
- ▶ F105343.dat
- ▶ query=q13144.p1
- ▶ precursor=441.927520
- ▶ chargePrecursor=6
- ▶ itol=0.8

| AA    |  | c              | y              | z+1            | z+2            | z              | AA    |
|-------|--|----------------|----------------|----------------|----------------|----------------|-------|
| P[1]  |  | 23.623         | <b>530.112</b> | <b>526.908</b> | 0.806          | <b>526.707</b> | P[25] |
| D[2]  |  | 46.829         | <b>510.701</b> | <b>507.498</b> | 0.806          | <b>507.296</b> | D[24] |
| F[3]  |  | 66.239         | <b>487.696</b> | 484.492        | 0.806          | 484.291        | F[23] |
| A[4]  |  | 80.447         | <b>468.285</b> | 465.082        | 0.806          | 464.880        | A[22] |
| K[5]  |  | 106.065        | 454.078        | <b>450.874</b> | <b>451.076</b> | <b>450.673</b> | K[21] |
| S[6]  |  | 123.872        | 428.859        | <b>425.255</b> | <b>425.457</b> | 425.054        | S[20] |
| A[7]  |  | 157.079        | 411.051        | 407.849        | 408.650        | 407.647        | A[19] |
| F[8]  |  | 157.090        | <b>396.845</b> | 393.641        | 393.843        | 393.440        | F[18] |
| A[9]  |  | 171.297        | 377.485        | <b>374.231</b> | <b>374.432</b> | <b>374.029</b> | A[17] |
| P[10] |  | 190.708        | 363.227        | <b>360.023</b> | <b>360.225</b> | <b>359.822</b> | P[16] |
| K[11] |  | 216.327        | 343.817        | 340.613        | 340.814        | 340.411        | K[15] |
| K[12] |  | 241.946        | 318.198        | 314.994        | 315.195        | 314.792        | K[14] |
| G[13] |  | 253.350        | 292.579        | 289.375        | 289.576        | 289.173        | G[13] |
| S[14] |  | 270.757        | 281.174        | 277.971        | 278.172        | 277.769        | S[12] |
| K[15] |  | 286.376        | 263.768        | 260.564        | 260.766        | 260.363        | K[11] |
| K[16] |  | 311.998        | 238.149        | 234.945        | 235.147        | 234.744        | K[10] |
| A[17] |  | 336.202        | 212.530        | 209.326        | 209.528        | 209.125        | A[9]  |
| V[18] |  | 356.016        | 198.122        | 195.119        | 195.320        | 194.917        | V[8]  |
| T[19] |  | 376.225        | 178.509        | 175.305        | 175.507        | 175.103        | T[7]  |
| K[20] |  | 410.246        | 158.299        | 155.096        | 155.297        | 154.894        | K[6]  |
| V[21] |  | 430.060        | 124.278        | 121.074        | 121.276        | 120.873        | V[5]  |
| Q[22] |  | 455.672        | 104.464        | 101.261        | 101.462        | 101.059        | Q[4]  |
| K[23] |  | 481.291        | 78.853         | 75.649         | 75.851         | 75.447         | K[3]  |
| K[24] |  | <b>506.910</b> | 53.234         | 50.030         | 50.232         | 49.828         | K[2]  |
| D[25] |  | <b>529.915</b> | 27.613         | 24.411         | 24.613         | 24.209         | D[1]  |



# sp | Q64525 | H2B2B\_MOUSE

PDKASAPAPKKGSKKAVTK <sup>Acetyl</sup> 42.01 VQKKD

- ▶ fragmentation table for charge state 1+
- ▶ specType=etd
- ▶ score=58.22
- ▶ F105343.dat
- ▶ query=q13145\_p1
- ▶ precursor=662.388760
- ▶ chargePrecursor=4
- ▶ itol=0.8

| AA | c       | y               | z+1             | z+2             | z              | AA       |    |    |
|----|---------|-----------------|-----------------|-----------------|----------------|----------|----|----|
| F  | 115.087 | 2046.530        | 2630.511        | 0.000           | 2829.504       | F        | 25 |    |
| D  | 230.114 | 2548.477        | 2531.499        | 0.000           | 2532.451       | D        | 24 |    |
| P  | 327.106 | 3434.450        | 2418.432        | 0.000           | 2417.424       | P        | 23 |    |
| A  | 398.203 | 2337.398        | 2321.379        | 0.000           | 2320.371       | A        | 22 |    |
| K  | 5       | <b>526.298</b>  | 2266.361        | 2250.342        | 2251.350       | 2249.334 | K  | 21 |
| S  | 6       | <b>613.330</b>  | 2138.260        | 2122.247        | 2123.255       | 2121.239 | S  | 20 |
| A  | 7       | <b>684.366</b>  | 2051.234        | 2035.215        | 2036.223       | 2034.207 | A  | 19 |
| P  | 8       | <b>781.420</b>  | 1930.190        | 1914.178        | 1915.186       | 1913.170 | P  | 18 |
| A  | 9       | 852.457         | 1883.144        | 1867.125        | 1868.133       | 1866.117 | A  | 17 |
| P  | 10      | <b>949.510</b>  | 1812.107        | 1796.088        | 1797.096       | 1795.080 | P  | 16 |
| K  | 11      | <b>1077.605</b> | 1715.054        | 1699.035        | 1700.043       | 1698.027 | K  | 15 |
| K  | 12      | <b>1205.700</b> | 1530.950        | <b>1570.940</b> | 1571.948       | 1569.932 | K  | 14 |
| G  | 13      | 1262.722        | 1458.864        | 1442.845        | 1443.853       | 1441.837 | G  | 13 |
| S  | 14      | 1319.754        | 1401.842        | 1385.824        | 1386.831       | 1384.815 | S  | 12 |
| K  | 15      | <b>1477.849</b> | <b>1314.810</b> | 1298.792        | 1299.799       | 1297.784 | K  | 11 |
| K  | 16      | 1505.944        | 1188.715        | <b>1170.697</b> | 1171.705       | 1169.689 | K  | 10 |
| A  | 17      | 1676.981        | 1058.620        | <b>1042.602</b> | 1043.610       | 1041.594 | A  | 9  |
| V  | 18      | 1776.049        | <b>987.583</b>  | <b>971.565</b>  | 972.572        | 970.557  | V  | 8  |
| T  | 19      | 1877.097        | 888.515         | 872.496         | 873.504        | 871.488  | T  | 7  |
| R  | 20      | 2047.202        | 787.467         | <b>771.449</b>  | 772.456        | 770.441  | R  | 6  |
| V  | 21      | 2146.271        | 617.362         | <b>601.343</b>  | 602.351        | 600.335  | V  | 5  |
| Q  | 22      | 2274.320        | 518.291         | <b>502.275</b>  | <b>503.282</b> | 501.267  | Q  | 4  |
| K  | 23      | 2402.434        | 390.235         | 374.216         | <b>375.224</b> | 373.208  | K  | 3  |
| K  | 24      | 2530.519        | 262.140         | 246.121         | 247.129        | 245.113  | K  | 2  |
| D  | 25      | 2645.546        | 134.045         | 118.026         | 119.034        | 117.018  | D  | 1  |

# sp | Q64525 | H2B2B\_MOUSE

PDKASAPAPKKGSKKAVTK <sup>Acetyl</sup> 42.01 VQKKD

- ▶ fragmentation table for charge state 2+
- ▶ specType=etd
- ▶ score=58.22
- ▶ F105343.dat
- ▶ query=q13145.p1
- ▶ precursor=662.388760
- ▶ chargePrecursor=4
- ▶ itol=0.8

| AA |    | c               | y               | z+1             | z+2             | z               | AA    |
|----|----|-----------------|-----------------|-----------------|-----------------|-----------------|-------|
| P  | 1  | 58.047          | 1323.799        | <b>1315.799</b> | 0.504           | <b>1315.255</b> | P[25] |
| D  | 3  | 115.569         | <b>1275.242</b> | <b>1267.233</b> | 0.504           | <b>1266.729</b> | D[3]  |
| F  | 3  | 154.097         | <b>1217.725</b> | <b>1209.719</b> | 0.504           | <b>1209.210</b> | F[3]  |
| A  | 4  | 199.605         | 1149.202        | <b>1161.193</b> | 0.504           | <b>1160.689</b> | A[22] |
| K  | 5  | 263.693         | <b>1133.684</b> | 1125.675        | <b>1126.178</b> | 1125.171        | K[21] |
| S  | 6  | 307.109         | 1059.639        | <b>1061.627</b> | <b>1062.131</b> | <b>1061.123</b> | S[20] |
| A  | 7  | 342.607         | 1026.120        | <b>1018.111</b> | <b>1018.615</b> | 1017.607        | A[19] |
| T  | 8  | 393.214         | 999.602         | 992.592         | 993.095         | 992.089         | T[18] |
| A  | 9  | 426.732         | 942.075         | <b>934.066</b>  | <b>934.570</b>  | <b>933.562</b>  | A[17] |
| P  | 10 | 475.259         | 906.557         | 898.548         | 899.051         | 898.044         | P[16] |
| K  | 11 | 539.306         | 858.031         | <b>850.021</b>  | <b>850.525</b>  | <b>849.517</b>  | K[15] |
| K  | 12 | 603.354         | 793.983         | <b>785.974</b>  | <b>786.478</b>  | <b>785.470</b>  | K[14] |
| G  | 13 | 633.864         | <b>729.936</b>  | <b>721.928</b>  | <b>722.430</b>  | <b>721.422</b>  | G[13] |
| S  | 14 | 675.381         | 699.525         | <b>691.515</b>  | <b>691.919</b>  | <b>692.121</b>  | S[12] |
| K  | 15 | <b>739.428</b>  | 657.005         | <b>649.899</b>  | <b>650.403</b>  | <b>649.396</b>  | K[11] |
| K  | 16 | <b>803.475</b>  | 614.861         | 606.852         | 607.356         | 606.349         | K[10] |
| A  | 17 | <b>838.994</b>  | 529.014         | 521.004         | 522.008         | 521.001         | A[9]  |
| V  | 18 | 892.529         | 494.295         | 486.286         | 487.290         | 486.282         | V[8]  |
| T  | 19 | <b>939.052</b>  | 444.761         | 436.752         | 437.756         | 436.749         | T[7]  |
| K  | 20 | <b>1024.105</b> | 394.237         | 386.228         | 387.232         | 386.224         | K[6]  |
| V  | 21 | <b>1073.639</b> | 309.184         | 301.175         | 302.179         | 301.171         | V[5]  |
| Q  | 22 | <b>1137.668</b> | 259.656         | 251.647         | 252.651         | 251.643         | Q[4]  |
| K  | 23 | <b>1201.716</b> | 195.621         | 187.612         | 188.616         | 187.608         | K[3]  |
| K  | 24 | 1285.763        | 131.574         | 123.564         | 124.568         | 123.560         | K[2]  |
| D  | 25 | 1323.277        | 67.526          | 59.517          | 60.521          | 59.513          | D[1]  |

# sp | Q64525 | H2B2B\_MOUSE

PDKASAPAPKKGSKKAVTK <sup>Acetyl</sup> 42.01 VQKKD

- ▶ fragmentation table for charge state 3+
- ▶ specType=etd
- ▶ score=58.22
- ▶ F105343.dat
- ▶ query=q13145.p1
- ▶ precursor=662.388760
- ▶ chargePrecursor=4
- ▶ itol=0.8

| AA |    | c              | y              | z+1            | z+2            | z              | AA    |
|----|----|----------------|----------------|----------------|----------------|----------------|-------|
| P  | 1  | 30.034         | <b>802.848</b> | <b>877.509</b> | 0.672          | <b>877.173</b> | P[25] |
| D  | 2  | 77.376         | <b>850.497</b> | <b>845.158</b> | 0.672          | <b>844.822</b> | D[24] |
| P  | 3  | 109.727        | <b>812.155</b> | 806.815        | 0.672          | 806.479        | P[23] |
| A  | 4  | 133.406        | <b>779.804</b> | <b>774.464</b> | 0.672          | <b>774.129</b> | A[22] |
| K  | 5  | 176.104        | 756.129        | 750.785        | 751.121        | 750.450        | K[21] |
| S  | 6  | 205.115        | <b>713.427</b> | 708.087        | 708.423        | 707.751        | S[20] |
| A  | 7  | 228.794        | <b>684.416</b> | 679.076        | <b>679.412</b> | 678.741        | A[19] |
| P  | 8  | 261.145        | 660.737        | 655.397        | 655.733        | 655.061        | P[18] |
| A  | 9  | 294.824        | 638.068        | 623.646        | 623.982        | 622.711        | A[17] |
| P  | 10 | 317.175        | 604.707        | 599.367        | 599.703        | 599.032        | P[16] |
| K  | 11 | 359.873        | 572.356        | 567.017        | 567.352        | 566.681        | K[15] |
| K  | 12 | 402.572        | 529.658        | 524.318        | 524.654        | 523.982        | K[14] |
| G  | 13 | 421.579        | 486.959        | 481.620        | 481.956        | 481.284        | G[13] |
| S  | 14 | 450.589        | 467.952        | 462.613        | 462.949        | 462.277        | S[12] |
| K  | 15 | 483.288        | 438.942        | 433.602        | 433.938        | 433.266        | K[11] |
| K  | 16 | 535.988        | 396.241        | 390.901        | 391.240        | 390.568        | K[10] |
| A  | 17 | 559.665        | 353.945        | 348.205        | 348.541        | 347.869        | A[9]  |
| V  | 18 | 592.688        | 329.866        | 324.526        | 324.862        | 324.190        | V[8]  |
| T  | 19 | 626.370        | 296.843        | 291.504        | 291.840        | 291.168        | T[7]  |
| K  | 20 | 683.072        | 263.161        | 257.821        | 258.157        | 257.485        | K[6]  |
| V  | 21 | 716.095        | 206.459        | 201.119        | 201.455        | 200.783        | V[5]  |
| Q  | 22 | 758.781        | 173.436        | 168.096        | 168.432        | 167.760        | Q[4]  |
| K  | 23 | 801.480        | 130.750        | 125.410        | 125.746        | 125.074        | K[3]  |
| K  | 24 | <b>844.178</b> | 88.051         | 82.712         | 83.048         | 82.376         | K[2]  |
| D  | 25 | <b>882.520</b> | 45.353         | 40.014         | 40.349         | 39.678         | D[1]  |



# sp | P62806 | H4\_MOUSE

[Acetyl]SGRGK<sup>Acetyl</sup><sub>42.01</sub> GGK<sup>Acetyl</sup><sub>42.01</sub> GLGKGGAKRHR<sup>(Dimethyl)</sup><sub>(28.03)</sub> K<sup>(Acetyl)</sup><sub>(42.01)</sub> VLRD

- ▶ fragmentation table for charge state 1+
- ▶ specType=etd
- ▶ score=85.09
- ▶ F105343.dat
- ▶ query=q13207\_p1
- ▶ precursor=668.639310
- ▶ chargePrecursor=4
- ▶ itol=0.8

| AA |    | c               | y               | z+1      | z+2             | z        | AA    |
|----|----|-----------------|-----------------|----------|-----------------|----------|-------|
| S  | 1  | 147.076         | 2073.534        | 2055.515 | 0.000           | 2054.507 | S[24] |
| G  | 2  | 204.098         | 2542.491        | 2526.473 | 0.000           | 2525.465 | G[23] |
| R  | 3  | <b>360.199</b>  | 2485.470        | 2469.451 | 2470.459        | 2468.443 | R[22] |
| G  | 4  | <b>417.220</b>  | 2329.369        | 2313.350 | 2314.358        | 2312.342 | G[21] |
| K  | 5  | <b>587.326</b>  | 2272.347        | 2256.329 | 2257.336        | 2255.321 | K[20] |
| G  | 6  | <b>644.347</b>  | 2102.242        | 2086.223 | 2087.231        | 2085.215 | G[19] |
| G  | 7  | <b>701.369</b>  | 2045.220        | 2029.202 | 2030.209        | 2028.194 | G[18] |
| K  | 8  | <b>871.474</b>  | 1988.199        | 1972.180 | <b>1973.188</b> | 1971.172 | K[17] |
| G  | 9  | <b>928.496</b>  | 1818.093        | 1802.075 | <b>1803.082</b> | 1801.067 | G[16] |
| L  | 10 | <b>1041.580</b> | 1761.072        | 1745.053 | 1746.061        | 1744.045 | L[15] |
| G  | 11 | <b>1098.601</b> | 1647.956        | 1631.938 | <b>1632.977</b> | 1630.961 | G[14] |
| K  | 12 | <b>1226.696</b> | 1590.935        | 1574.916 | 1575.955        | 1573.940 | K[13] |
| G  | 13 | <b>1283.718</b> | 1462.871        | 1446.853 | <b>1447.860</b> | 1445.845 | G[12] |
| G  | 14 | <b>1340.739</b> | 1405.850        | 1389.831 | <b>1390.839</b> | 1388.823 | G[11] |
| A  | 15 | <b>1411.776</b> | 1348.828        | 1332.810 | <b>1333.818</b> | 1331.802 | A[10] |
| K  | 16 | 1519.871        | <b>1277.791</b> | 1261.773 | <b>1262.780</b> | 1260.765 | K[9]  |
| R  | 17 | 1608.973        | 1149.686        | 1133.678 | 1134.685        | 1132.670 | R[8]  |
| H  | 18 | 1813.031        | 993.595         | 977.577  | 978.584         | 976.569  | H[7]  |
| R  | 19 | 2017.164        | 856.530         | 840.518  | 841.525         | 839.510  | R[6]  |
| K  | 20 | 2187.299        | 672.404         | 656.385  | 657.393         | 655.377  | K[5]  |
| V  | 21 | 2286.338        | 502.290         | 486.280  | 487.287         | 485.272  | V[4]  |
| L  | 22 | 2499.422        | 403.200         | 387.211  | 388.218         | 386.203  | L[3]  |
| D  | 23 | 2658.523        | 290.140         | 274.127  | <b>275.135</b>  | 273.119  | D[2]  |
| D  | 24 | 2870.550        | 134.040         | 118.026  | 119.034         | 117.018  | D[1]  |

# sp | P62806 | H4\_MOUSE

[Acetyl]SGRGK<sup>Acetyl</sup><sub>42.01</sub> GGK<sup>Acetyl</sup><sub>42.01</sub> GLGKGGAKRHR<sup>(Dimethyl)</sup><sub>(28.03)</sub> K<sup>(Acetyl)</sup><sub>(42.01)</sub> VLRD

- ▶ fragmentation table for charge state 2+
- ▶ specType=etd
- ▶ score=85.09
- ▶ F105343.dat
- ▶ query=q13207\_p1
- ▶ precursor=668.639310
- ▶ chargePrecursor=4
- ▶ itol=0.8

| AA    | c               | y               | z+1             | z+2             | z               | AA    |
|-------|-----------------|-----------------|-----------------|-----------------|-----------------|-------|
| S[1]  | 94.692          | <b>1336.271</b> | <b>1328.261</b> | 0.504           | 1327.757        | S[24] |
| G[2]  | 102.553         | <b>1271.749</b> | <b>1263.740</b> | 0.504           | <b>1263.236</b> | G[23] |
| R[3]  | 180.603         | 1243.239        | <b>1235.229</b> | <b>1235.733</b> | 1234.729        | R[22] |
| G[4]  | 209.114         | 1185.188        | <b>1157.179</b> | <b>1157.683</b> | <b>1156.675</b> | G[21] |
| K[5]  | 299.167         | 1136.677        | <b>1136.668</b> | <b>1128.172</b> | <b>1128.164</b> | K[20] |
| G[6]  | 322.677         | 1051.625        | <b>1043.615</b> | <b>1044.119</b> | <b>1043.111</b> | G[19] |
| G[7]  | 351.188         | 1023.114        | <b>1015.104</b> | <b>1015.608</b> | 1014.601        | G[18] |
| K[8]  | 436.241         | 994.603         | <b>986.594</b>  | <b>987.098</b>  | <b>986.090</b>  | K[17] |
| G[9]  | 464.752         | 909.550         | <b>901.541</b>  | <b>902.045</b>  | 901.037         | G[16] |
| L[10] | 501.264         | <b>881.040</b>  | <b>873.030</b>  | 873.534         | <b>872.526</b>  | L[15] |
| G[11] | 540.264         | <b>824.498</b>  | <b>816.488</b>  | <b>816.992</b>  | 815.985         | G[14] |
| K[12] | 613.852         | 795.067         | <b>787.077</b>  | <b>788.481</b>  | 787.474         | K[13] |
| G[13] | 642.363         | 731.939         | <b>723.930</b>  | <b>724.434</b>  | <b>723.426</b>  | G[12] |
| G[14] | 670.873         | 703.429         | <b>695.419</b>  | <b>695.923</b>  | <b>694.915</b>  | G[11] |
| A[15] | 708.262         | 674.918         | <b>666.908</b>  | <b>667.412</b>  | <b>666.405</b>  | A[10] |
| R[16] | 770.439         | 639.399         | <b>631.390</b>  | <b>631.894</b>  | <b>630.886</b>  | R[9]  |
| R[17] | 848.490         | 575.352         | <b>567.342</b>  | <b>567.846</b>  | <b>566.839</b>  | R[8]  |
| H[18] | 917.019         | 497.301         | 489.292         | 489.796         | 488.789         | H[7]  |
| R[19] | 1009.088        | 426.772         | 420.762         | 421.266         | 420.259         | R[6]  |
| K[20] | <b>1094.138</b> | 336.706         | 328.696         | 329.200         | 328.193         | K[5]  |
| V[21] | <b>1143.673</b> | 251.053         | 243.043         | 244.547         | 243.540         | V[4]  |
| L[22] | <b>1206.215</b> | 202.119         | 194.109         | 194.613         | 193.606         | L[3]  |
| R[23] | <b>1278.265</b> | 145.577         | 137.567         | 138.071         | 137.064         | R[2]  |
| D[24] | <b>1335.779</b> | 67.526          | 59.517          | 60.021          | 59.013          | D[1]  |



# sp | P62806 | H4\_MOUSE

[Acetyl]SGRGK<sup>Acetyl</sup><sub>42.01</sub> GGK<sup>Acetyl</sup><sub>42.01</sub> GLGKGGAKRHR<sup>(Dimethyl)</sup><sub>(28.03)</sub> K<sup>(Acetyl)</sup><sub>(42.01)</sub> VLRD

- ▶ fragmentation table for charge state 3+
- ▶ specType=etd
- ▶ score=85.09
- ▶ F105343.dat
- ▶ query=q13207\_p1
- ▶ precursor=668.639310
- ▶ chargePrecursor=4
- ▶ itol=0.8

| AA    | c              | y              | z+1            | z+2            | z              | AA    |
|-------|----------------|----------------|----------------|----------------|----------------|-------|
| S[1]  | 69.697         | <b>891.183</b> | <b>885.843</b> | 0.672          | <b>885.507</b> | S[24] |
| G[2]  | 68.704         | 838.169        | <b>842.829</b> | 0.672          | <b>842.493</b> | G[23] |
| R[3]  | 120.738        | 829.161        | <b>823.822</b> | <b>824.158</b> | <b>823.486</b> | R[22] |
| G[4]  | 139.745        | 777.128        | <b>771.788</b> | <b>772.124</b> | <b>771.452</b> | G[21] |
| K[5]  | 196.447        | 758.121        | 752.781        | 753.117        | 752.445        | K[20] |
| G[6]  | 215.454        | <b>701.419</b> | <b>696.079</b> | <b>696.415</b> | <b>695.743</b> | G[19] |
| G[7]  | 234.461        | 682.412        | 677.072        | 677.408        | 676.736        | G[18] |
| K[8]  | 291.163        | 663.404        | 658.063        | 658.401        | 657.729        | K[17] |
| G[9]  | 310.170        | 606.703        | 601.363        | 601.699        | 601.027        | G[16] |
| L[10] | 347.895        | <b>587.695</b> | 582.355        | 582.692        | 582.020        | L[15] |
| G[11] | 388.972        | 530.001        | 544.661        | 544.997        | 544.325        | G[14] |
| K[12] | 409.570        | 530.994        | 525.654        | 525.990        | 525.318        | K[13] |
| G[13] | 428.577        | 488.295        | 482.956        | 483.292        | 482.620        | G[12] |
| G[14] | 447.585        | 469.288        | 463.949        | 464.285        | 463.613        | G[11] |
| A[15] | 471.264        | 450.281        | 444.941        | 445.277        | 444.605        | A[10] |
| K[16] | 513.962        | 426.602        | 421.262        | 421.598        | 420.926        | K[9]  |
| R[17] | 565.996        | 383.904        | 378.564        | 378.900        | 378.228        | R[8]  |
| H[18] | 611.682        | 331.870        | 326.530        | 326.866        | 326.194        | H[7]  |
| R[19] | 673.059        | 286.184        | 280.844        | 281.180        | 280.508        | R[6]  |
| K[20] | 729.781        | 224.806        | 219.467        | 219.803        | 219.131        | K[5]  |
| V[21] | 752.784        | 168.104        | 162.765        | 163.101        | 162.429        | V[4]  |
| L[22] | 860.479        | 135.082        | 129.742        | 130.078        | 129.406        | L[3]  |
| R[23] | <b>852.513</b> | 97.387         | 92.047         | 92.383         | 91.711         | R[2]  |
| D[24] | <b>890.855</b> | 45.353         | 40.014         | 40.349         | 39.678         | D[1]  |



# sp | Q6ZWY9 | H2B1C\_MOUSE

PEPAKSAPAPKK <sup>Acetyl</sup>42.01 GSK <sup>Acetyl</sup>42.01 KAVTKAQKKD

- ▶ fragmentation table for charge state 1+
- ▶ specType=etd
- ▶ score=65.17
- ▶ F105343.dat
- ▶ query=q13219\_p1
- ▶ precursor=669.386760
- ▶ chargePrecursor=4
- ▶ itol=0.8

| AA  | c               | y               | z+1             | z+2             | z              | AA  |
|-----|-----------------|-----------------|-----------------|-----------------|----------------|-----|
| P1  | 115.087         | 2674.525        | 2688.505        | 0.000           | 2697.486       | P25 |
| E3  | 244.329         | 2377.472        | 2561.454        | 0.000           | 2560.446       | E24 |
| P3  | <b>341.182</b>  | 2448.430        | 2432.411        | 0.000           | 2431.403       | P23 |
| A4  | <b>412.219</b>  | 2351.377        | 2335.358        | 0.000           | 2334.350       | A22 |
| K5  | <b>540.314</b>  | 2280.340        | 2264.321        | 2265.329        | 2263.311       | K21 |
| S6  | <b>627.346</b>  | 2152.345        | 2136.326        | 2137.334        | 2135.318       | S20 |
| A7  | 667.363         | 2085.212        | 2049.194        | 2050.202        | 2048.186       | A19 |
| P8  | <b>795.436</b>  | 1994.198        | 1978.179        | 1979.187        | 1977.171       | P18 |
| A9  | 866.473         | 1897.123        | 1881.104        | <b>1882.112</b> | 1880.096       | A17 |
| P10 | 903.526         | 1826.088        | 1810.069        | 1811.075        | 1809.059       | P16 |
| K11 | <b>1091.621</b> | 1729.033        | 1713.014        | 1714.022        | 1712.006       | K15 |
| K12 | <b>1261.726</b> | 1600.930        | 1584.919        | <b>1585.927</b> | 1583.912       | K14 |
| Q13 | 1338.750        | 1430.833        | <b>1413.814</b> | 1415.822        | 1413.806       | Q12 |
| S14 | 1405.780        | 1373.811        | 1357.793        | 1358.800        | 1356.785       | S12 |
| K15 | <b>1575.885</b> | 1288.778        | 1270.760        | <b>1271.768</b> | 1269.753       | K11 |
| K16 | 1703.980        | <b>1116.674</b> | <b>1100.655</b> | 1101.663        | 1099.647       | K10 |
| A17 | 1775.017        | <b>988.579</b>  | <b>972.560</b>  | <b>973.568</b>  | 971.552        | A9  |
| V18 | 1874.088        | 917.547         | 901.523         | 902.531         | 900.515        | V8  |
| T19 | 1875.133        | <b>818.473</b>  | 802.454         | 803.462         | <b>801.446</b> | T17 |
| K20 | 2103.208        | 747.425         | <b>701.407</b>  | <b>702.414</b>  | 698.399        | K9  |
| A21 | 2174.266        | 589.330         | <b>573.312</b>  | 574.320         | 572.304        | A5  |
| Q22 | 2302.324        | 518.293         | <b>502.275</b>  | 503.282         | 501.267        | Q4  |
| K23 | 2430.419        | 390.235         | 374.216         | 375.224         | 373.208        | K3  |
| K24 | 2558.514        | 262.140         | 246.121         | 247.129         | 245.113        | K2  |
| D25 | 2673.541        | 134.045         | 118.026         | 119.034         | 117.018        | D1  |

# sp | Q6ZWY9 | H2B1C\_MOUSE

PEPAKSAPAPKK <sup>Acetyl</sup>42.01 GSK <sup>Acetyl</sup>42.01 KAVTKAQKKD

- ▶ fragmentation table for charge state 2+
- ▶ specType=etd
- ▶ score=65.17
- ▶ F105343.dat
- ▶ query=q13219\_p1
- ▶ precursor=669.386760
- ▶ chargePrecursor=4
- ▶ itol=0.8

| AA |    | c               | y               | z+1             | z+2             | z               | AA    |
|----|----|-----------------|-----------------|-----------------|-----------------|-----------------|-------|
| P  | 1  | 58.047          | <b>1337.766</b> | <b>1329.757</b> | 0.504           | 1329.251        | P[25] |
| E  | 3  | 127.588         | 1289.240        | <b>1281.230</b> | 0.504           | 1280.726        | E[24] |
| F  | 3  | 171.095         | 1224.715        | <b>1216.709</b> | 0.504           | <b>1216.205</b> | F[23] |
| A  | 4  | 296.613         | 1176.192        | <b>1168.183</b> | 0.504           | <b>1167.679</b> | A[22] |
| K  | 5  | 276.681         | <b>1140.674</b> | <b>1132.664</b> | <b>1133.168</b> | 1132.160        | K[21] |
| S  | 6  | 314.177         | <b>1076.626</b> | <b>1068.617</b> | <b>1069.121</b> | <b>1068.113</b> | S[20] |
| A  | 7  | 349.695         | 1033.110        | <b>1025.101</b> | <b>1025.605</b> | 1024.597        | A[19] |
| F  | 8  | 388.222         | 989.591         | 989.582         | 989.086         | 989.078         | F[18] |
| A  | 9  | 433.740         | 949.065         | 941.056         | <b>941.560</b>  | 940.552         | A[17] |
| P  | 10 | 482.267         | 913.547         | 905.537         | 906.041         | 905.033         | P[16] |
| K  | 11 | <b>546.314</b>  | 865.020         | 857.013         | 857.515         | 856.507         | K[15] |
| K  | 12 | 631.367         | <b>800.973</b>  | <b>792.963</b>  | <b>793.467</b>  | <b>792.459</b>  | K[14] |
| C  | 13 | 659.878         | 743.320         | <b>737.311</b>  | <b>738.314</b>  | <b>737.407</b>  | C[13] |
| S  | 14 | 701.394         | 687.805         | <b>679.400</b>  | <b>679.904</b>  | 678.896         | S[12] |
| K  | 15 | <b>788.446</b>  | 643.891         | <b>635.884</b>  | <b>636.388</b>  | 635.380         | K[11] |
| K  | 16 | 852.494         | 598.840         | 590.831         | 591.335         | 590.327         | K[10] |
| A  | 17 | 888.012         | 494.793         | 486.784         | 487.287         | 486.280         | A[9]  |
| V  | 18 | <b>937.547</b>  | 459.274         | 451.265         | 451.769         | 450.761         | V[8]  |
| T  | 19 | <b>988.070</b>  | 409.746         | 401.737         | 402.239         | 401.232         | T[7]  |
| K  | 20 | <b>1052.118</b> | 359.215         | 351.207         | 351.711         | 350.703         | K[6]  |
| A  | 21 | <b>1087.636</b> | 295.169         | 287.159         | 287.663         | 286.656         | A[5]  |
| Q  | 22 | <b>1151.666</b> | 259.656         | 251.647         | 252.149         | 251.141         | Q[4]  |
| K  | 23 | <b>1215.713</b> | 195.621         | 187.612         | 188.116         | 187.108         | K[3]  |
| K  | 24 | 1279.761        | 131.374         | 123.364         | 124.368         | 123.360         | K[2]  |
| D  | 25 | 1337.274        | 67.526          | 59.517          | 60.021          | 59.013          | D[1]  |

# sp | Q6ZWY9 | H2B1C\_MOUSE

PEPAKSAPAPKK <sup>Acetyl</sup>42.01 GSK <sup>Acetyl</sup>42.01 KAVTKAQKKD

- ▶ fragmentation table for charge state 3+
- ▶ specType=etd
- ▶ score=65.17
- ▶ F105343.dat
- ▶ query=q13219.p1
- ▶ precursor=669.386760
- ▶ chargePrecursor=4
- ▶ itol=0.8

| AA    | c              | y              | z+1            | z+2            | z              | AA    |
|-------|----------------|----------------|----------------|----------------|----------------|-------|
| P[1]  | 38.034         | <b>892.180</b> | <b>886.840</b> | 0.672          | <b>806.504</b> | P[25] |
| E[2]  | 82.048         | <b>859.829</b> | <b>854.489</b> | 0.672          | <b>854.153</b> | E[24] |
| P[3]  | 114.399        | 816.815        | 811.475        | 0.672          | <b>811.139</b> | P[23] |
| A[4]  | 138.078        | 784.464        | 779.124        | 0.672          | 778.788        | A[22] |
| K[5]  | 180.776        | 760.785        | 755.445        | 755.761        | 755.109        | K[21] |
| S[6]  | 209.187        | 718.589        | 712.747        | 713.583        | 712.411        | S[20] |
| A[7]  | 211.468        | 689.076        | 683.736        | 684.072        | 683.400        | A[19] |
| P[8]  | 265.817        | 665.397        | 660.057        | 660.393        | 659.721        | P[18] |
| A[9]  | 289.496        | 633.048        | <b>627.706</b> | <b>628.042</b> | <b>627.370</b> | A[17] |
| P[10] | 321.847        | 609.367        | 604.027        | 604.363        | 603.691        | P[16] |
| K[11] | 364.545        | 577.016        | 571.676        | 572.012        | 571.340        | K[15] |
| K[12] | 421.247        | 534.318        | 528.978        | 529.314        | 528.642        | K[14] |
| G[13] | 440.254        | 477.610        | 472.270        | 472.612        | 471.940        | G[13] |
| S[14] | 469.265        | 458.609        | 453.269        | 453.605        | 452.933        | S[12] |
| K[15] | 525.967        | 420.598        | 424.258        | 424.594        | 423.922        | K[11] |
| K[16] | 588.665        | 372.896        | 367.556        | 367.892        | 367.221        | K[10] |
| A[17] | 592.344        | 330.198        | 324.858        | 325.194        | 324.522        | A[9]  |
| V[18] | 625.367        | 306.519        | 301.179        | 301.515        | 300.843        | V[8]  |
| T[19] | 659.049        | 273.496        | 268.156        | 268.492        | 267.820        | T[7]  |
| K[20] | <b>701.748</b> | 239.813        | 234.474        | 234.810        | 234.138        | K[6]  |
| A[21] | 729.427        | 197.115        | 191.775        | 192.111        | 191.439        | A[5]  |
| Q[22] | 768.113        | 173.436        | 168.096        | 168.432        | 167.760        | Q[4]  |
| K[23] | <b>810.811</b> | 130.750        | 125.410        | 125.746        | 125.074        | K[3]  |
| K[24] | 863.810        | 88.081         | 82.742         | 83.048         | 82.376         | K[2]  |
| D[25] | <b>891.852</b> | 45.353         | 40.014         | 40.349         | 39.678         | D[1]  |

# sp | P62806 | H4\_MOUSE

[Acetyl]SGRGK Acetyl 42.01 GGK Acetyl 42.01 GLGK Acetyl 42.01 GGAK Acetyl 42.01 RHRK Dimethyl 28.03 VLRD

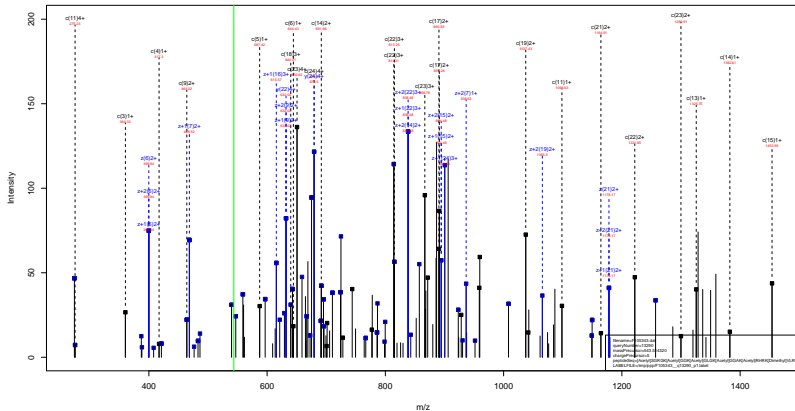

# sp | P62806 | H4\_MOUSE

[Acetyl]SGRGK <sup>Acetyl</sup><sub>42.01</sub> GGK <sup>Acetyl</sup><sub>42.01</sub> GLGK <sup>Acetyl</sup><sub>42.01</sub> GGAK <sup>Acetyl</sup><sub>42.01</sub> RHRK <sup>Dimethyl</sup><sub>28.03</sub> VLRD

- ▶ fragmentation table for charge state 1+
- ▶ specType=etd
- ▶ score=64.15
- ▶ F105343.dat
- ▶ query=q13290.p1
- ▶ precursor=543.514320
- ▶ chargePrecursor=5
- ▶ itol=0.8

| AA | c               | y              | z+1            | z+2            | z        | AA |
|----|-----------------|----------------|----------------|----------------|----------|----|
| S  | 147.076         | 2713.544       | 2697.526       | 0.000          | 2696.518 | S  |
| G  | 234.098         | 2504.362       | 2588.483       | 0.000          | 2587.475 | G  |
| R  | <b>360.199</b>  | 2527.480       | 2511.462       | 2512.470       | 2510.454 | R  |
| G  | <b>417.220</b>  | 2371.379       | 2355.361       | 2356.368       | 2354.353 | G  |
| K  | <b>507.326</b>  | 2314.358       | 2298.339       | 2299.347       | 2297.331 | K  |
| G  | <b>644.347</b>  | 2144.252       | 2128.234       | 2129.241       | 2127.226 | G  |
| G  | <b>701.369</b>  | 2087.231       | 2071.212       | 2072.220       | 2070.204 | G  |
| K  | <b>871.474</b>  | 2030.209       | 2014.191       | 2015.198       | 2013.183 | K  |
| G  | <b>928.496</b>  | 1890.104       | 1884.085       | 1885.093       | 1883.077 | G  |
| L  | <b>1041.500</b> | 1803.082       | 1787.064       | 1788.071       | 1786.056 | L  |
| G  | <b>1098.601</b> | 1688.968       | 1673.950       | 1674.957       | 1672.942 | G  |
| K  | 1268.707        | 1632.977       | 1616.958       | 1617.966       | 1615.950 | K  |
| G  | <b>1325.728</b> | 1462.871       | 1446.853       | 1447.860       | 1445.845 | G  |
| G  | <b>1382.750</b> | 1405.850       | 1389.831       | 1390.839       | 1388.823 | G  |
| A  | <b>1453.787</b> | 1348.828       | 1332.810       | 1333.818       | 1331.802 | A  |
| K  | 1623.893        | 1277.791       | 1261.773       | 1262.780       | 1260.765 | K  |
| R  | 1778.994        | 1199.686       | 1191.667       | 1192.675       | 1190.659 | R  |
| H  | 1917.053        | <b>951.585</b> | 935.566        | <b>936.574</b> | 934.558  | H  |
| R  | 2073.154        | <b>814.526</b> | <b>798.507</b> | <b>799.515</b> | 797.499  | R  |
| K  | 2229.260        | <b>658.425</b> | <b>642.406</b> | <b>643.414</b> | 641.398  | K  |
| V  | 2328.348        | 502.298        | <b>486.280</b> | 487.287        | 485.272  | V  |
| L  | 2441.432        | 403.230        | <b>387.211</b> | <b>388.219</b> | 386.203  | L  |
| R  | 2597.534        | 290.140        | <b>274.127</b> | <b>275.135</b> | 273.119  | R  |
| D  | 2712.560        | 134.045        | 118.026        | 119.034        | 117.018  | D  |

# sp | P62806 | H4\_MOUSE

[Acetyl]SGRGK<sup>Acetyl</sup><sub>42.01</sub> GGK<sup>Acetyl</sup><sub>42.01</sub> GLGK<sup>Acetyl</sup><sub>42.01</sub> GGAK<sup>Acetyl</sup><sub>42.01</sub> RHRK<sup>Dimethyl</sup><sub>28.03</sub> VLRD

- ▶ fragmentation table for charge state 2+
- ▶ specType=etd
- ▶ score=64.15
- ▶ F105343.dat
- ▶ query=q13290\_p1
- ▶ precursor=543.514320
- ▶ chargePrecursor=5
- ▶ itol=0.8

| AA    | c               | y              | z+1             | z+2             | z               | AA    |
|-------|-----------------|----------------|-----------------|-----------------|-----------------|-------|
| S[1]  | 74.042          | 1357.276       | 1349.267        | 0.504           | 1348.763        | S[24] |
| G[2]  | 102.553         | 1292.755       | 1284.745        | 0.504           | 1284.241        | G[23] |
| R[3]  | 180.803         | 1264.244       | <b>1256.234</b> | <b>1256.738</b> | 1255.733        | R[22] |
| G[4]  | 209.314         | 1198.193       | <b>1178.184</b> | <b>1178.688</b> | <b>1177.680</b> | G[21] |
| K[5]  | 294.167         | 1157.683       | <b>1145.673</b> | <b>1150.177</b> | <b>1149.169</b> | K[20] |
| G[6]  | 322.677         | 1072.630       | 1064.620        | <b>1065.124</b> | 1064.117        | G[19] |
| G[7]  | 351.188         | 1044.119       | 1036.110        | 1036.614        | 1035.606        | G[18] |
| K[8]  | 436.241         | 1015.608       | <b>1007.599</b> | <b>1008.103</b> | 1007.097        | K[17] |
| G[9]  | <b>464.752</b>  | <b>930.556</b> | <b>922.546</b>  | <b>923.050</b>  | 922.042         | G[16] |
| L[10] | 511.274         | 932.045        | <b>904.035</b>  | <b>904.539</b>  | 903.532         | L[15] |
| Q[11] | 549.804         | 845.503        | 837.493         | <b>837.997</b>  | 836.990         | Q[14] |
| K[12] | 634.857         | 816.992        | 808.983         | 809.487         | 808.479         | K[13] |
| G[13] | 663.368         | 731.939        | <b>723.930</b>  | <b>724.434</b>  | <b>723.426</b>  | G[12] |
| G[14] | <b>691.879</b>  | 703.429        | <b>695.419</b>  | <b>695.923</b>  | <b>694.915</b>  | G[11] |
| A[15] | <b>727.397</b>  | <b>674.918</b> | <b>666.908</b>  | <b>667.412</b>  | <b>666.405</b>  | A[10] |
| R[16] | 812.390         | <b>639.399</b> | <b>631.390</b>  | <b>631.894</b>  | 630.886         | R[9]  |
| R[17] | <b>890.500</b>  | 554.347        | <b>546.337</b>  | <b>546.841</b>  | 545.833         | R[8]  |
| H[18] | <b>959.030</b>  | <b>476.296</b> | <b>468.287</b>  | <b>468.791</b>  | <b>467.783</b>  | H[7]  |
| R[19] | <b>1037.680</b> | <b>407.767</b> | <b>399.757</b>  | <b>400.261</b>  | <b>399.253</b>  | R[6]  |
| K[20] | 1115.144        | 329.716        | 321.707         | 322.211         | 321.203         | K[5]  |
| V[21] | <b>1184.678</b> | 251.652        | 243.643         | 244.147         | 243.140         | V[4]  |
| L[22] | <b>1251.220</b> | 202.119        | 194.110         | 194.613         | 193.605         | L[3]  |
| R[23] | <b>1299.270</b> | 145.577        | 137.567         | 138.071         | 137.063         | R[2]  |
| D[24] | 1356.784        | 67.526         | 59.517          | 60.021          | 59.013          | D[1]  |



# sp | P62806 | H4\_MOUSE

[Acetyl]SGRGK Acetyl  
42.01 **GGK** Acetyl  
42.01 **GLGK** Acetyl  
42.01 **GGAK** Acetyl  
42.01 **RHRK** Dimethyl  
28.03 **VLRD**

- ▶ fragmentation table for charge state 3+
- ▶ specType=etd
- ▶ score=64.15
- ▶ F105343.dat
- ▶ query=q13290.p1
- ▶ precursor=543.514320
- ▶ chargePrecursor=5
- ▶ itol=0.8

| AA    | c              | y              | z+1            | z+2            | z              | AA    |
|-------|----------------|----------------|----------------|----------------|----------------|-------|
| S[1]  | 49.697         | 305.189        | <b>699.847</b> | 0.672          | 899.511        | S[24] |
| G[2]  | 58.704         | 362.172        | <b>856.833</b> | 0.672          | 856.497        | G[23] |
| R[3]  | 120.738        | <b>843.165</b> | <b>837.825</b> | <b>838.161</b> | 837.489        | R[22] |
| G[4]  | 139.745        | 791.131        | <b>785.792</b> | <b>786.128</b> | <b>785.456</b> | G[21] |
| K[5]  | 196.447        | 772.124        | <b>766.785</b> | <b>767.120</b> | <b>766.449</b> | K[20] |
| G[6]  | 215.454        | 715.422        | <b>710.083</b> | <b>710.419</b> | <b>709.747</b> | G[19] |
| G[7]  | 234.461        | <b>696.415</b> | <b>691.076</b> | <b>691.412</b> | <b>690.740</b> | G[18] |
| K[8]  | 291.163        | 677.408        | <b>672.068</b> | <b>672.404</b> | 671.732        | K[17] |
| G[9]  | 310.170        | <b>620.706</b> | <b>615.367</b> | <b>615.703</b> | <b>615.031</b> | G[16] |
| L[10] | 347.895        | 601.699        | <b>596.359</b> | <b>596.695</b> | <b>596.023</b> | L[15] |
| G[11] | 366.872        | 564.024        | <b>558.665</b> | <b>559.001</b> | <b>558.329</b> | G[14] |
| K[12] | 423.574        | 544.997        | <b>539.658</b> | <b>539.994</b> | <b>539.322</b> | K[13] |
| G[13] | 442.581        | 488.295        | <b>482.956</b> | <b>483.292</b> | <b>482.620</b> | G[12] |
| G[14] | 461.588        | <b>469.288</b> | <b>463.949</b> | <b>464.285</b> | <b>463.613</b> | G[11] |
| A[15] | 485.267        | 450.281        | 444.941        | 445.277        | 444.605        | A[10] |
| K[16] | 541.969        | 426.022        | <b>421.262</b> | <b>421.598</b> | <b>420.926</b> | K[9]  |
| R[17] | 594.003        | 369.900        | 364.561        | 364.896        | 364.225        | R[8]  |
| H[18] | <b>639.669</b> | 317.896        | 312.527        | 312.863        | 312.191        | H[7]  |
| R[19] | <b>691.723</b> | 272.180        | 266.941        | 267.276        | 266.505        | R[6]  |
| K[20] | <b>743.765</b> | 220.140        | 214.807        | 215.143        | 214.471        | K[5]  |
| V[21] | <b>776.788</b> | 168.104        | 162.768        | 163.101        | 162.429        | V[4]  |
| L[22] | <b>814.482</b> | 135.082        | 129.742        | 130.078        | 129.406        | L[3]  |
| R[23] | <b>856.516</b> | 97.387         | 92.047         | 92.383         | 91.711         | R[2]  |
| D[24] | 904.858        | 45.353         | 40.014         | 40.349         | 39.678         | D[1]  |

# sp | P62806 | H4\_MOUSE

[Acetyl]SGRGK<sup>Acetyl  
42.01</sup> GGK<sup>Acetyl  
42.01</sup> GLGK<sup>Acetyl  
42.01</sup> GGAK<sup>Acetyl  
42.01</sup> RHRK<sup>Dimethyl  
28.03</sup> VLRD

- ▶ fragmentation table for charge state 4+
- ▶ specType=etd
- ▶ score=64.15
- ▶ F105343.dat
- ▶ query=q13290.p1
- ▶ precursor=543.514320
- ▶ chargePrecursor=5
- ▶ itol=0.8

| AA    | c              | y              | z+1            | z+2            | z              | AA    |
|-------|----------------|----------------|----------------|----------------|----------------|-------|
| S[1]  | 37.525         | <b>679.142</b> | <b>675.137</b> | 0.755          | <b>674.085</b> | S[24] |
| G[2]  | 51.780         | 546.881        | <b>642.876</b> | 0.755          | <b>642.624</b> | G[23] |
| R[3]  | 90.805         | <b>632.626</b> | <b>628.621</b> | <b>628.873</b> | 628.369        | R[22] |
| G[4]  | 105.061        | 593.600        | 589.596        | 589.848        | 589.344        | G[21] |
| K[5]  | 147.587        | 579.345        | 575.340        | 575.592        | 575.088        | K[20] |
| G[6]  | 161.842        | 536.819        | 532.814        | 533.066        | 532.562        | G[19] |
| G[7]  | 176.098        | 522.563        | 518.558        | 518.810        | 518.307        | G[18] |
| K[8]  | 218.624        | 508.308        | 504.303        | 504.555        | 504.051        | K[17] |
| G[9]  | 232.879        | 495.781        | 491.777        | 492.029        | 491.525        | G[16] |
| L[10] | 251.150        | 451.526        | 447.521        | 447.773        | 447.269        | L[15] |
| G[11] | <b>275.406</b> | 423.255        | 419.250        | 419.502        | 418.998        | G[14] |
| K[12] | 317.932        | 409.000        | 404.995        | 405.247        | 404.743        | K[13] |
| G[13] | 332.188        | 366.473        | 362.469        | 362.721        | 362.217        | G[12] |
| G[14] | 346.443        | 352.218        | 348.213        | 348.465        | 347.961        | G[11] |
| A[15] | 364.202        | 337.963        | 333.958        | 334.210        | 333.706        | A[10] |
| K[16] | 408.729        | 320.203        | 316.199        | 316.451        | 315.947        | K[9]  |
| R[17] | 445.754        | -277.877       | <b>273.672</b> | <b>273.924</b> | <b>273.420</b> | R[8]  |
| H[18] | 480.019        | 238.652        | 234.647        | 234.899        | 234.395        | H[7]  |
| R[19] | 519.044        | 204.397        | 200.392        | 200.644        | 200.140        | R[6]  |
| K[20] | 558.075        | 165.362        | 161.357        | 161.609        | 161.105        | K[5]  |
| V[21] | 582.843        | 126.330        | 122.325        | 122.577        | 122.073        | V[4]  |
| L[22] | 611.114        | 101.563        | 97.558         | 97.810         | 97.306         | L[3]  |
| R[23] | <b>650.139</b> | 73.292         | 69.287         | 69.539         | 69.035         | R[2]  |
| D[24] | <b>678.896</b> | 34.267         | 30.262         | 30.514         | 30.010         | D[1]  |



# sp | P62806 | H4\_MOUSE

[Acetyl]SGRGK<sub>42.01</sub> Acetyl GGK<sub>42.01</sub> Acetyl GLGK<sub>42.01</sub> Acetyl GGAK<sub>42.01</sub> Acetyl RHRK<sub>28.03</sub> Dimethyl VLRD

- ▶ fragmentation table for charge state 1+
- ▶ specType=etd
- ▶ score=94.57
- ▶ F105343.dat
- ▶ query=q13291\_p1
- ▶ precursor=679.141480
- ▶ chargePrecursor=4
- ▶ itol=0.8

| AA | c  | y               | z+1             | z+2             | z               | AA       |       |
|----|----|-----------------|-----------------|-----------------|-----------------|----------|-------|
| S  | 1  | 147.076         | 2713.944        | 2697.536        | 0.000           | 2696.516 | S[24] |
| G  | 2  | 204.098         | 2584.502        | 2568.483        | 0.000           | 2567.473 | G[23] |
| R  | 3  | <b>360.199</b>  | 2527.480        | 2511.462        | 2512.470        | 2510.454 | R[22] |
| G  | 4  | <b>417.220</b>  | 2371.379        | 2355.361        | 2356.369        | 2354.351 | G[21] |
| K  | 5  | <b>587.326</b>  | 2314.358        | 2298.339        | 2299.347        | 2297.331 | K[20] |
| G  | 6  | <b>644.347</b>  | 2144.252        | 2128.234        | 2129.241        | 2127.225 | G[19] |
| G  | 7  | <b>701.369</b>  | 2087.231        | 2071.212        | 2072.220        | 2070.204 | G[18] |
| K  | 8  | <b>871.474</b>  | 2030.209        | 2014.191        | 2015.199        | 2013.183 | K[17] |
| G  | 9  | <b>928.496</b>  | 1860.104        | 1844.085        | <b>1845.093</b> | 1843.077 | G[16] |
| L  | 10 | <b>1041.580</b> | 1803.082        | 1787.064        | 1788.071        | 1786.055 | L[15] |
| Q  | 11 | <b>1098.601</b> | 1689.968        | 1673.950        | <b>1674.967</b> | 1672.952 | Q[14] |
| K  | 12 | <b>1268.707</b> | 1632.947        | 1616.928        | 1617.936        | 1615.920 | K[13] |
| G  | 13 | 1325.728        | 1462.871        | 1446.853        | 1447.860        | 1445.845 | G[12] |
| G  | 14 | <b>1382.750</b> | 1405.850        | <b>1389.831</b> | <b>1390.839</b> | 1388.823 | G[11] |
| A  | 15 | <b>1453.787</b> | <b>1348.828</b> | 1332.810        | 1333.818        | 1331.802 | A[10] |
| R  | 16 | <b>1623.893</b> | 1291.799        | <b>1261.773</b> | <b>1262.780</b> | 1260.765 | R[9]  |
| R  | 17 | <b>1779.994</b> | 1107.688        | 1091.667        | <b>1092.675</b> | 1090.659 | R[8]  |
| H  | 18 | 1817.063        | 951.585         | <b>935.566</b>  | <b>936.574</b>  | 934.558  | H[7]  |
| R  | 19 | 2073.154        | 814.526         | <b>796.507</b>  | <b>799.515</b>  | 797.499  | R[6]  |
| K  | 20 | 2229.280        | 658.425         | 642.406         | <b>643.414</b>  | 641.398  | K[5]  |
| V  | 21 | 2428.348        | 502.366         | 486.346         | 487.354         | 485.327  | V[4]  |
| L  | 22 | 2441.432        | 463.309         | 447.291         | <b>448.299</b>  | 446.283  | L[3]  |
| R  | 23 | 2597.534        | 290.146         | 274.127         | <b>275.135</b>  | 273.119  | R[2]  |
| D  | 24 | 2712.560        | 134.045         | 118.026         | 119.034         | 117.018  | D[1]  |

# sp | P62806 | H4\_MOUSE

[Acetyl]SGRGK<sup>Acetyl</sup><sub>42.01</sub> GGK<sup>Acetyl</sup><sub>42.01</sub> GLGK<sup>Acetyl</sup><sub>42.01</sub> GGAK<sup>Acetyl</sup><sub>42.01</sub> RHRK<sup>Dimethyl</sup><sub>28.03</sub> VLRD

- ▶ fragmentation table for charge state 2+
- ▶ specType=etd
- ▶ score=94.57
- ▶ F105343.dat
- ▶ query=q13291\_p1
- ▶ precursor=679.141480
- ▶ chargePrecursor=4
- ▶ itol=0.8

| AA | c  | y               | z+1             | z+2             | z               | AA              |       |
|----|----|-----------------|-----------------|-----------------|-----------------|-----------------|-------|
| S  | 1  | 74.042          | <b>1357.276</b> | <b>1349.267</b> | 0.504           | 1348.761        | S[24] |
| G  | 2  | 102.553         | 1292.755        | <b>1284.745</b> | 0.504           | <b>1284.241</b> | G[23] |
| R  | 3  | 180.603         | 1264.244        | <b>1256.234</b> | <b>1256.738</b> | <b>1255.731</b> | R[22] |
| G  | 4  | 259.114         | 1198.193        | <b>1178.184</b> | <b>1178.688</b> | 1177.681        | G[21] |
| R  | 5  | 294.157         | 1157.683        | 1149.673        | 1150.177        | 1149.159        | R[20] |
| G  | 6  | 322.677         | 1072.630        | <b>1064.620</b> | <b>1065.124</b> | <b>1064.117</b> | G[19] |
| G  | 7  | 351.188         | 1044.119        | <b>1036.110</b> | <b>1036.614</b> | 1035.606        | G[18] |
| R  | 8  | 436.241         | 1015.608        | <b>1007.599</b> | <b>1008.103</b> | 1007.597        | R[17] |
| G  | 9  | 464.752         | 930.556         | <b>922.546</b>  | <b>923.050</b>  | <b>922.042</b>  | G[16] |
| L  | 10 | 511.294         | 902.045         | 884.035         | 894.539         | 893.532         | L[15] |
| G  | 11 | 549.804         | 845.503         | <b>837.493</b>  | <b>837.997</b>  | 836.990         | G[14] |
| R  | 12 | 634.857         | <b>816.992</b>  | <b>808.983</b>  | <b>809.487</b>  | <b>808.479</b>  | R[13] |
| G  | 13 | 663.368         | 731.939         | <b>723.930</b>  | <b>724.434</b>  | <b>723.426</b>  | G[12] |
| G  | 14 | 691.879         | 703.429         | <b>695.419</b>  | <b>695.923</b>  | 694.915         | G[11] |
| A  | 15 | 720.389         | 674.918         | <b>666.908</b>  | <b>667.412</b>  | <b>666.405</b>  | A[10] |
| R  | 16 | 812.450         | 639.399         | <b>631.390</b>  | <b>631.894</b>  | <b>630.886</b>  | R[9]  |
| R  | 17 | 890.500         | 554.347         | <b>546.337</b>  | <b>546.841</b>  | 545.833         | R[8]  |
| H  | 18 | <b>959.030</b>  | 476.296         | 468.287         | 468.791         | 467.783         | H[7]  |
| R  | 19 | <b>1037.080</b> | 407.747         | 399.737         | 400.241         | 399.233         | R[6]  |
| R  | 20 | 1115.144        | 329.716         | 321.707         | 322.211         | 321.203         | R[5]  |
| V  | 21 | <b>1164.678</b> | 251.693         | 243.683         | 244.187         | 243.180         | V[4]  |
| L  | 22 | <b>1221.220</b> | 202.119         | 194.109         | 194.613         | 193.605         | L[3]  |
| R  | 23 | <b>1299.270</b> | 145.577         | 137.567         | 138.071         | 137.063         | R[2]  |
| D  | 24 | <b>1356.784</b> | 67.526          | 59.517          | 60.021          | 59.013          | D[1]  |

# sp | P62806 | H4\_MOUSE

[Acetyl]SGRGK<sub>42.01</sub> Acetyl GGK<sub>42.01</sub> Acetyl GLGK<sub>42.01</sub> Acetyl GGAK<sub>42.01</sub> Acetyl RHRK<sub>28.03</sub> Dimethyl VLRD

- ▶ fragmentation table for charge state 3+
- ▶ specType=etd
- ▶ score=94.57
- ▶ F105343.dat
- ▶ query=q13291\_p1
- ▶ precursor=679.141480
- ▶ chargePrecursor=4
- ▶ itol=0.8

| AA    | c              | y              | z+1            | z+2            | z              | AA    |
|-------|----------------|----------------|----------------|----------------|----------------|-------|
| S[1]  | 49.697         | <b>905.186</b> | <b>699.847</b> | 0.672          | <b>899.511</b> | S[24] |
| G[2]  | 58.704         | 362.172        | <b>856.833</b> | 0.672          | <b>856.497</b> | G[23] |
| R[3]  | 120.738        | 843.165        | <b>837.825</b> | <b>830.161</b> | <b>837.489</b> | R[22] |
| G[4]  | 139.745        | 791.131        | 785.792        | 786.128        | 785.456        | G[21] |
| K[5]  | 196.447        | 772.124        | 766.785        | 767.120        | 766.449        | K[20] |
| G[6]  | 215.454        | 715.422        | 710.083        | 710.419        | 709.747        | G[19] |
| G[7]  | 234.461        | <b>696.415</b> | 691.076        | 691.412        | 690.740        | G[18] |
| K[8]  | 291.163        | 677.408        | 672.068        | 672.404        | 671.732        | K[17] |
| G[9]  | 310.170        | 620.706        | 615.367        | 615.703        | 615.031        | G[16] |
| L[10] | 317.685        | 601.699        | 596.359        | 596.695        | 596.023        | L[15] |
| G[11] | 356.872        | 554.004        | 558.665        | 559.001        | 558.329        | G[14] |
| K[12] | 423.574        | 544.997        | 539.658        | 539.994        | 539.322        | K[13] |
| G[13] | 442.581        | 488.295        | 482.956        | 483.292        | 482.620        | G[12] |
| G[14] | 461.588        | 469.288        | 463.949        | 464.285        | 463.613        | G[11] |
| A[15] | 485.267        | 450.281        | 444.941        | 445.277        | 444.605        | A[10] |
| K[16] | 541.969        | 426.602        | 421.262        | 421.598        | 420.926        | K[9]  |
| R[17] | 594.003        | 369.900        | 364.561        | 364.896        | 364.225        | R[8]  |
| H[18] | 639.689        | 317.866        | 312.527        | 312.863        | 312.191        | H[7]  |
| R[19] | 691.723        | 272.180        | 266.841        | 267.176        | 266.505        | R[6]  |
| K[20] | 743.765        | 220.146        | 214.807        | 215.143        | 214.471        | K[5]  |
| V[21] | 776.788        | 168.104        | 162.765        | 163.101        | 162.429        | V[4]  |
| L[22] | 814.482        | 135.082        | 129.742        | 130.078        | 129.406        | L[3]  |
| R[23] | <b>866.516</b> | 97.387         | 92.047         | 92.383         | 91.711         | R[2]  |
| D[24] | <b>904.858</b> | 45.353         | 40.014         | 40.349         | 39.678         | D[1]  |



# sp | Q6ZWH9 | H2B1C\_MOUSE

PEPAKSAPAPKKGSK <sup>Acetyl</sup>42.01 K <sup>Acetyl</sup>42.01 AVTK <sup>Acetyl</sup>42.01 AQKKD

- ▶ fragmentation table for charge state 1+
- ▶ specType=etd
- ▶ score=53.93
- ▶ F105343.dat
- ▶ query=q13301\_p1
- ▶ precursor=679.889050
- ▶ chargePrecursor=4
- ▶ itol=0.8

| AA | c       | y               | z+1            | z+2             | z               | AA    |
|----|---------|-----------------|----------------|-----------------|-----------------|-------|
| P  | 115.087 | 2716.539        | 2700.517       | 0.000           | 2699.500        | P[25] |
| E  | 244.159 | 2019.483        | 2003.466       | 0.000           | 2002.450        | E[24] |
| P  | 341.182 | 2090.440        | 2474.432       | 0.000           | 2473.414        | P[23] |
| A  | 412.219 | 2393.387        | 2377.369       | 0.000           | 2376.361        | A[22] |
| K  | 5       | <b>540.314</b>  | 2322.350       | 2306.332        | 2307.339        | K[21] |
| S  | 6       | <b>627.346</b>  | 2104.255       | 2178.237        | 2179.244        | S[20] |
| A  | 7       | <b>696.383</b>  | 2107.222       | 2091.205        | 2092.212        | A[19] |
| P  | 8       | <b>795.436</b>  | 2036.186       | 2020.168        | 2021.176        | P[18] |
| A  | 9       | 866.473         | 1939.133       | <b>1923.115</b> | 1924.123        | A[17] |
| P  | 10      | 963.526         | 1868.096       | 1852.078        | 1853.085        | P[16] |
| K  | 11      | <b>1091.621</b> | 1771.044       | 1755.025        | 1756.033        | K[15] |
| K  | 12      | <b>1219.716</b> | 1642.949       | <b>1626.930</b> | <b>1627.938</b> | K[14] |
| G  | 13      | 1276.737        | 1514.894       | <b>1498.835</b> | 1499.843        | G[13] |
| S  | 14      | 1363.769        | 1457.832       | 1441.813        | 1442.821        | S[12] |
| K  | 15      | <b>1533.875</b> | 1370.800       | 1354.781        | 1355.789        | K[11] |
| K  | 16      | 1701.980        | 1200.695       | <b>1184.676</b> | 1185.684        | K[10] |
| A  | 17      | 1775.017        | 1030.589       | <b>1014.570</b> | 1015.578        | A[9]  |
| V  | 18      | 1874.086        | 950.552        | 943.533         | 944.541         | V[8]  |
| T  | 19      | <b>1975.133</b> | 860.505        | <b>844.465</b>  | 845.473         | T[7]  |
| P  | 20      | 2159.239        | <b>759.436</b> | <b>743.417</b>  | <b>744.425</b>  | P[6]  |
| A  | 21      | 2216.276        | 688.330        | <b>573.312</b>  | <b>574.320</b>  | A[5]  |
| Q  | 22      | 2344.335        | 618.293        | <b>502.275</b>  | 503.283         | Q[4]  |
| K  | 23      | 2472.430        | 560.235        | 374.216         | 375.224         | K[3]  |
| K  | 24      | 2600.525        | 282.140        | 246.121         | 247.129         | K[2]  |
| D  | 25      | 2715.552        | 134.045        | 118.028         | 119.034         | D[1]  |



# sp | Q6ZWY9 | H2B1C\_MOUSE

PEPAKSAPAPKKGSK <sup>Acetyl</sup>42.01 K <sup>Acetyl</sup>42.01 AVTK <sup>Acetyl</sup>42.01 AQKKD

- ▶ fragmentation table for charge state 2+
- ▶ specType=etd
- ▶ score=53.93
- ▶ F105343.dat
- ▶ query=q13301.p1
- ▶ precursor=679.889050
- ▶ chargePrecursor=4
- ▶ itol=0.8

| AA |    | c               | y               | z+1             | z+2             | z               | AA    |
|----|----|-----------------|-----------------|-----------------|-----------------|-----------------|-------|
| P  | 1  | 58.047          | 1336.772        | <b>1350.762</b> | 0.504           | <b>1350.258</b> | P[25] |
| E  | 2  | 127.598         | <b>1310.245</b> | <b>1302.236</b> | 0.504           | <b>1301.732</b> | E[24] |
| F  | 3  | 171.056         | 1345.245        | 1323.744        | 0.504           | <b>1237.210</b> | F[23] |
| A  | 4  | 206.613         | 1197.197        | 1189.188        | 0.504           | 1188.684        | A[22] |
| K  | 5  | 270.661         | 1161.679        | 1153.669        | <b>1154.173</b> | 1153.166        | K[21] |
| S  | 6  | 314.177         | 1097.631        | <b>1089.622</b> | <b>1090.126</b> | 1089.118        | S[20] |
| A  | 7  | 349.695         | 1054.115        | <b>1046.106</b> | <b>1046.610</b> | <b>1045.602</b> | A[19] |
| F  | 8  | 389.222         | <b>1018.597</b> | 1010.587        | 1011.991        | 1010.984        | F[18] |
| A  | 9  | 433.740         | 970.070         | <b>962.061</b>  | <b>962.565</b>  | 961.557         | A[17] |
| P  | 10 | 482.267         | 934.552         | 926.542         | 927.946         | 926.939         | P[16] |
| K  | 11 | 546.314         | 896.025         | <b>878.016</b>  | <b>878.520</b>  | <b>877.512</b>  | K[15] |
| K  | 12 | 610.362         | 821.978         | <b>813.969</b>  | <b>814.473</b>  | <b>813.465</b>  | K[14] |
| C  | 13 | 638.972         | <b>757.930</b>  | <b>749.921</b>  | <b>750.425</b>  | 749.417         | C[13] |
| S  | 14 | 692.388         | <b>729.420</b>  | 721.410         | 721.914         | 720.906         | S[12] |
| K  | 15 | <b>767.441</b>  | 685.904         | 677.894         | 678.898         | 677.890         | K[11] |
| K  | 16 | <b>852.494</b>  | 600.851         | 592.842         | 593.846         | 592.838         | K[10] |
| A  | 17 | 888.012         | 515.798         | 507.789         | 508.793         | 507.785         | A[9]  |
| V  | 18 | 937.655         | 480.268         | 472.259         | 472.774         | 471.766         | V[8]  |
| T  | 19 | <b>988.670</b>  | 438.745         | 429.736         | 429.249         | 428.242         | T[7]  |
| K  | 20 | <b>1073.123</b> | 380.222         | 372.212         | 372.716         | 371.708         | K[6]  |
| A  | 21 | <b>1108.642</b> | 295.169         | 287.159         | 287.663         | 286.656         | A[5]  |
| Q  | 22 | <b>1172.671</b> | 259.656         | 251.646         | 252.149         | 251.141         | Q[4]  |
| K  | 23 | <b>1236.718</b> | 195.621         | 187.612         | 188.116         | 187.108         | K[3]  |
| K  | 24 | <b>1300.766</b> | 131.574         | 123.564         | 124.068         | 123.060         | K[2]  |
| D  | 25 | 1358.279        | 67.526          | 59.517          | 60.021          | 59.013          | D[1]  |

# sp | Q6ZWY9 | H2B1C\_MOUSE

PEPAKSAPAPKKGSK <sup>Acetyl</sup>42.01 K <sup>Acetyl</sup>42.01 AVTK <sup>Acetyl</sup>42.01 AQKKD

- ▶ fragmentation table for charge state 3+
- ▶ specType=etd
- ▶ score=53.93
- ▶ F105343.dat
- ▶ query=q13301.p1
- ▶ precursor=679.889050
- ▶ chargePrecursor=4
- ▶ itol=0.8

| AA    | c              | y              | z+1            | z+2            | z              | AA    |
|-------|----------------|----------------|----------------|----------------|----------------|-------|
| P[1]  | 38.034         | <b>906.183</b> | <b>900.844</b> | 0.672          | <b>900.508</b> | P[25] |
| E[2]  | 82.048         | 873.832        | <b>868.493</b> | 0.672          | <b>868.157</b> | E[24] |
| P[3]  | 114.399        | <b>830.818</b> | 825.479        | 0.672          | 825.143        | P[23] |
| A[4]  | 138.078        | 798.467        | 793.128        | 0.672          | 792.792        | A[22] |
| K[5]  | 180.776        | 774.788        | 769.449        | 769.785        | 769.113        | K[21] |
| S[6]  | 209.187        | 732.090        | 726.752        | 727.098        | 726.418        | S[20] |
| A[7]  | 233.468        | 703.079        | <b>697.740</b> | <b>698.076</b> | <b>697.404</b> | A[19] |
| P[8]  | 265.817        | 679.400        | 674.061        | 674.397        | 673.725        | P[18] |
| A[9]  | 289.496        | 647.048        | 641.710        | 642.046        | 641.374        | A[17] |
| P[10] | 321.847        | 623.370        | 618.031        | 618.367        | 617.695        | P[16] |
| K[11] | 364.545        | 591.019        | 585.680        | 586.016        | 585.344        | K[15] |
| K[12] | 407.243        | 548.321        | 542.981        | 543.317        | 542.646        | K[14] |
| G[13] | 426.251        | 505.623        | 500.283        | 500.619        | 499.947        | G[13] |
| S[14] | 455.261        | 488.616        | 481.278        | 481.612        | 480.940        | S[12] |
| K[15] | 513.963        | 437.065        | 432.726        | 432.061        | 431.329        | K[11] |
| K[16] | 588.068        | 400.363        | 395.023        | 395.359        | 394.628        | K[10] |
| A[17] | 592.344        | 344.201        | 338.862        | 339.198        | 338.526        | A[9]  |
| V[18] | 625.367        | 320.522        | 315.183        | 315.519        | 314.847        | V[8]  |
| T[19] | 659.049        | 287.499        | 282.160        | 282.496        | 281.824        | T[7]  |
| K[20] | 715.751        | 253.817        | 248.477        | 248.813        | 248.141        | K[6]  |
| A[21] | 739.430        | 197.115        | 191.775        | 192.111        | 191.439        | A[5]  |
| Q[22] | 782.116        | 173.436        | 168.096        | 168.432        | 167.760        | Q[4]  |
| K[23] | 834.815        | 130.750        | 125.410        | 125.746        | 125.074        | K[3]  |
| K[24] | <b>867.513</b> | 88.081         | 82.712         | 83.048         | 82.376         | K[2]  |
| D[25] | <b>905.855</b> | 45.353         | 40.014         | 40.349         | 39.678         | D[1]  |



# sp | Q6ZWY9 | H2B1C\_MOUSE

PEPAKSAPAPKK <sup>Acetyl</sup>42.01 GSK <sup>Acetyl</sup>42.01 K <sup>Acetyl</sup>42.01 AVTKAQKKD

- ▶ fragmentation table for charge state 1+
- ▶ specType=etd
- ▶ score=40.49
- ▶ F105343.dat
- ▶ query=q13302.p1
- ▶ precursor=544.112810
- ▶ chargePrecursor=5
- ▶ itol=0.8

| AA | c  | y               | z+1             | z+2             | z               | AA              |       |
|----|----|-----------------|-----------------|-----------------|-----------------|-----------------|-------|
| P  | 1  | 115.087         | 2716.536        | 2700.517        | 0.000           | 2699.500        | P[25] |
| E  | 2  | 234.129         | 2619.483        | 2603.464        | 0.000           | 2602.450        | E[24] |
| F  | 3  | <b>341.182</b>  | 2502.440        | 2474.422        | 0.000           | 2473.411        | F[23] |
| A  | 4  | 412.219         | 2393.387        | 2377.369        | 0.000           | 2376.361        | A[22] |
| K  | 5  | 546.314         | 2322.350        | 2306.332        | 2307.336        | 2305.324        | K[21] |
| S  | 6  | <b>627.346</b>  | 2194.255        | 2178.237        | 2179.244        | 2177.250        | S[20] |
| A  | 7  | <b>696.383</b>  | 2107.223        | 2091.205        | 2092.212        | 2090.197        | A[19] |
| F  | 8  | <b>795.436</b>  | 2036.186        | 2020.168        | 2021.175        | 2019.166        | F[18] |
| A  | 9  | 868.474         | 1939.133        | 1923.115        | 1924.123        | 1922.107        | A[17] |
| P  | 10 | 963.526         | 1868.096        | 1852.078        | 1853.085        | 1851.070        | P[16] |
| K  | 11 | 1091.621        | 1771.044        | 1755.026        | 1756.033        | 1754.017        | K[15] |
| K  | 12 | <b>1261.726</b> | 1642.949        | <b>1626.930</b> | <b>1627.938</b> | 1625.922        | K[14] |
| G  | 13 | 1318.748        | 1572.943        | <b>1456.824</b> | 1457.832        | 1455.811        | G[13] |
| S  | 14 | 1405.780        | 1415.822        | 1399.803        | 1400.811        | 1398.795        | S[12] |
| K  | 15 | 1575.885        | <b>1328.790</b> | 1312.771        | <b>1313.779</b> | 1311.761        | K[11] |
| K  | 16 | 1745.991        | 1158.694        | <b>1142.665</b> | <b>1143.673</b> | <b>1141.658</b> | K[10] |
| A  | 17 | 1817.020        | <b>988.579</b>  | <b>972.560</b>  | <b>973.568</b>  | 971.552         | A[9]  |
| V  | 18 | 1916.096        | 617.541         | <b>901.523</b>  | 607.511         | <b>900.515</b>  | V[8]  |
| T  | 19 | 2017.144        | 618.473         | 605.454         | <b>893.462</b>  | 591.446         | T[7]  |
| K  | 20 | 2145.239        | 717.425         | <b>701.407</b>  | <b>702.414</b>  | <b>700.399</b>  | K[6]  |
| A  | 21 | 2218.276        | 589.330         | <b>573.312</b>  | 574.320         | <b>572.304</b>  | A[5]  |
| Q  | 22 | 2364.435        | 618.293         | <b>502.275</b>  | <b>503.282</b>  | 501.267         | Q[4]  |
| K  | 23 | 2472.430        | 390.235         | <b>374.216</b>  | <b>375.224</b>  | 373.209         | K[3]  |
| K  | 24 | 2666.525        | 262.140         | <b>246.121</b>  | 247.129         | 245.113         | K[2]  |
| D  | 25 | 2735.552        | 134.045         | 118.026         | 119.034         | 117.010         | D[1]  |

# sp | Q6ZWY9 | H2B1C\_MOUSE

PEPAKSAPAPKK <sup>Acetyl</sup><sub>42.01</sub> GSK <sup>Acetyl</sup><sub>42.01</sub> K <sup>Acetyl</sup><sub>42.01</sub> AVTKAQKKD

- ▶ fragmentation table for charge state 2+
- ▶ specType=etd
- ▶ score=40.49
- ▶ F105343.dat
- ▶ query=q13302.p1
- ▶ precursor=544.112810
- ▶ chargePrecursor=5
- ▶ itol=0.8

| AA | c  | y               | z+1             | z+2             | z               | AA              |       |
|----|----|-----------------|-----------------|-----------------|-----------------|-----------------|-------|
| P  | 1  | 58.047          | 1358.771        | <b>1350.762</b> | 0.504           | <b>1350.258</b> | P[25] |
| E  | 2  | 127.588         | 1310.245        | <b>1302.236</b> | 0.504           | 1301.732        | E[24] |
| F  | 3  | 171.095         | 1245.725        | <b>1237.714</b> | 0.504           | <b>1237.210</b> | F[23] |
| A  | 4  | 206.613         | 1197.197        | 1189.188        | 0.504           | 1188.684        | A[22] |
| K  | 5  | 270.601         | <b>1161.679</b> | 1153.669        | 1154.173        | 1153.166        | K[21] |
| S  | 6  | 314.177         | 1097.631        | <b>1089.622</b> | <b>1090.126</b> | 1089.118        | S[20] |
| A  | 7  | 349.695         | <b>1054.115</b> | <b>1046.106</b> | <b>1046.610</b> | 1045.602        | A[19] |
| F  | 8  | 388.223         | <b>1018.597</b> | <b>1010.587</b> | 1011.091        | <b>1010.683</b> | F[18] |
| A  | 9  | 433.740         | 970.070         | <b>962.061</b>  | <b>962.565</b>  | 961.557         | A[17] |
| P  | 10 | 482.267         | 934.552         | 926.542         | 927.046         | 926.039         | P[16] |
| K  | 11 | 546.314         | <b>886.025</b>  | <b>878.016</b>  | <b>878.520</b>  | 877.512         | K[15] |
| K  | 12 | <b>631.367</b>  | 821.978         | <b>813.969</b>  | <b>814.473</b>  | 813.465         | K[14] |
| G  | 13 | <b>659.878</b>  | 786.925         | <b>778.916</b>  | <b>779.420</b>  | <b>778.412</b>  | G[13] |
| S  | 14 | <b>703.394</b>  | <b>708.414</b>  | <b>700.405</b>  | <b>700.909</b>  | <b>699.901</b>  | S[12] |
| K  | 15 | <b>788.446</b>  | 664.898         | <b>656.889</b>  | <b>657.393</b>  | 656.385         | K[11] |
| K  | 16 | <b>873.499</b>  | <b>579.846</b>  | <b>571.836</b>  | <b>572.340</b>  | <b>571.332</b>  | K[10] |
| A  | 17 | 909.018         | 494.793         | 486.784         | <b>487.287</b>  | 486.280         | A[9]  |
| V  | 18 | 958.552         | 459.274         | 451.265         | 451.769         | 450.761         | V[8]  |
| T  | 19 | 1009.076        | 409.746         | 401.737         | 402.241         | 401.232         | T[7]  |
| K  | 20 | <b>1073.123</b> | 359.215         | <b>351.207</b>  | <b>351.711</b>  | <b>350.703</b>  | K[6]  |
| A  | 21 | 1108.642        | 295.169         | 287.159         | 287.663         | 286.656         | A[5]  |
| Q  | 22 | <b>1172.671</b> | 259.656         | 251.646         | 252.149         | 251.141         | Q[4]  |
| K  | 23 | <b>1236.718</b> | 195.621         | 187.612         | 188.116         | 187.108         | K[3]  |
| K  | 24 | 1305.766        | 131.574         | 123.564         | 124.068         | 123.060         | K[2]  |
| D  | 25 | 1358.279        | 67.526          | 59.517          | 60.021          | 59.013          | D[1]  |

# sp | Q6ZWH9 | H2B1C\_MOUSE

PEPAKSAPAPKK <sup>Acetyl</sup>42.01 GSK <sup>Acetyl</sup>42.01 K <sup>Acetyl</sup>42.01 AVTKAQKKD

- ▶ fragmentation table for charge state 3+
- ▶ specType=etd
- ▶ score=40.49
- ▶ F105343.dat
- ▶ query=q13302.p1
- ▶ precursor=544.112810
- ▶ chargePrecursor=5
- ▶ itol=0.8

| AA    | c              | y              | z+1            | z+2            | z              | AA    |
|-------|----------------|----------------|----------------|----------------|----------------|-------|
| P[1]  | 38.034         | <b>906.183</b> | <b>900.844</b> | 0.672          | <b>900.508</b> | P[25] |
| E[2]  | 82.048         | <b>873.832</b> | <b>868.493</b> | 0.672          | <b>868.157</b> | E[24] |
| P[3]  | 114.399        | <b>830.818</b> | <b>825.479</b> | 0.672          | <b>825.143</b> | P[23] |
| A[4]  | 138.078        | 798.467        | <b>793.128</b> | 0.672          | <b>792.792</b> | A[22] |
| K[5]  | 180.776        | <b>774.788</b> | <b>769.449</b> | <b>769.785</b> | <b>769.113</b> | K[21] |
| S[6]  | 209.197        | <b>732.990</b> | 728.792        | 727.098        | 726.218        | S[20] |
| A[7]  | 211.468        | <b>703.079</b> | <b>697.740</b> | <b>698.076</b> | <b>697.404</b> | A[19] |
| P[8]  | 265.817        | 679.430        | 674.081        | 674.397        | 673.725        | P[18] |
| A[9]  | 289.496        | <b>647.049</b> | <b>641.710</b> | <b>642.046</b> | <b>641.374</b> | A[17] |
| P[10] | 321.847        | <b>623.370</b> | 618.031        | 618.367        | 617.695        | P[16] |
| K[11] | 364.545        | <b>591.019</b> | <b>585.680</b> | <b>586.016</b> | <b>585.344</b> | K[15] |
| K[12] | 421.247        | <b>548.321</b> | 542.981        | 543.317        | 542.646        | K[14] |
| G[13] | 440.254        | 491.619        | 486.280        | 486.616        | 485.944        | G[13] |
| S[14] | 469.265        | 472.612        | 467.272        | 467.608        | 466.937        | S[12] |
| K[15] | 525.967        | 441.601        | 438.262        | 438.598        | 437.926        | K[11] |
| K[16] | 527.068        | 398.940        | 393.560        | 393.896        | 393.224        | K[10] |
| A[17] | <b>606.348</b> | 390.198        | 324.858        | 325.194        | 324.522        | A[9]  |
| V[18] | 639.370        | 306.519        | 301.179        | 301.515        | 300.843        | V[8]  |
| T[19] | 673.053        | 273.496        | 268.156        | 268.492        | 267.820        | T[7]  |
| K[20] | <b>715.751</b> | 239.813        | 234.474        | 234.810        | 234.138        | K[6]  |
| A[21] | 739.430        | 197.115        | 191.775        | 192.111        | 191.439        | A[5]  |
| Q[22] | <b>782.116</b> | 173.436        | 168.096        | 168.432        | 167.760        | Q[4]  |
| K[23] | <b>824.815</b> | 130.750        | 125.410        | 125.746        | 125.074        | K[3]  |
| K[24] | <b>867.513</b> | 88.081         | 82.712         | 83.048         | 82.376         | K[2]  |
| D[25] | <b>905.855</b> | 45.353         | 40.014         | 40.349         | 39.678         | D[1]  |

# sp | Q6ZWY9 | H2B1C\_MOUSE

PEPAKSAPAPKK <sup>Acetyl</sup>42.01 GSK <sup>Acetyl</sup>42.01 K <sup>Acetyl</sup>42.01 AVTKAQKKD

- ▶ fragmentation table for charge state 4+
- ▶ specType=etd
- ▶ score=40.49
- ▶ F105343.dat
- ▶ query=q13302.p1
- ▶ precursor=544.112810
- ▶ chargePrecursor=5
- ▶ itol=0.8

| AA    | c              | y              | z+1            | z+2            | z              | AA    |
|-------|----------------|----------------|----------------|----------------|----------------|-------|
| P[1]  | 29.527         | <b>679.889</b> | <b>675.885</b> | 0.755          | <b>675.633</b> | P[25] |
| E[2]  | 61.788         | 695.626        | <b>651.621</b> | 0.755          | <b>651.370</b> | E[24] |
| P[3]  | 86.051         | <b>623.366</b> | 619.361        | 0.755          | 619.109        | P[23] |
| A[4]  | 103.810        | 599.102        | <b>595.098</b> | 0.755          | 594.846        | A[22] |
| K[5]  | 135.834        | 581.343        | 577.338        | 577.590        | 577.086        | K[21] |
| S[6]  | 157.592        | 549.339        | 545.333        | 545.587        | 545.063        | S[20] |
| A[7]  | 175.351        | <b>527.561</b> | 523.557        | 523.809        | 523.306        | A[19] |
| P[8]  | 199.614        | 509.302        | 505.297        | 505.549        | 505.345        | P[18] |
| A[9]  | <b>217.374</b> | 495.539        | 491.534        | 491.786        | 491.282        | A[17] |
| P[10] | 241.637        | 467.780        | 463.775        | 464.027        | 463.523        | P[16] |
| K[11] | 273.661        | 443.516        | 439.512        | 439.764        | 439.260        | K[15] |
| K[12] | 316.197        | 411.493        | 407.488        | 407.740        | 407.236        | K[14] |
| G[13] | 330.442        | <b>368.966</b> | 364.962        | 365.214        | 364.710        | G[13] |
| S[14] | 352.200        | 354.711        | <b>350.706</b> | <b>350.958</b> | <b>350.454</b> | S[12] |
| K[15] | 384.227        | 332.993        | 328.988        | 329.240        | 328.996        | K[11] |
| K[16] | 417.253        | 290.426        | 286.422        | 286.674        | 286.170        | K[10] |
| A[17] | 455.012        | 247.900        | 243.895        | 244.147        | 243.643        | A[9]  |
| V[18] | 479.780        | 230.141        | 226.136        | 226.388        | 225.884        | V[8]  |
| T[19] | 505.041        | 205.374        | 201.369        | 201.621        | 201.117        | T[7]  |
| K[20] | 537.065        | 180.112        | 176.107        | 176.359        | 175.855        | K[6]  |
| A[21] | 554.624        | 148.088        | 144.083        | 144.335        | 143.831        | A[5]  |
| Q[22] | 586.839        | 130.329        | 126.324        | 126.576        | 126.072        | Q[4]  |
| K[23] | 618.863        | 98.314         | 94.309         | 94.561         | 94.057         | K[3]  |
| K[24] | <b>650.887</b> | 66.290         | 62.285         | 62.536         | 62.034         | K[2]  |
| D[25] | <b>679.643</b> | 34.267         | 30.263         | 30.514         | 30.010         | D[1]  |

# sp | Q6GSS7 | H2A2A\_MOUSE

LNKLLGK<sup>Dimethyl</sup>VTIAQGGVLPNIQAVLLPKKTE  
28.03

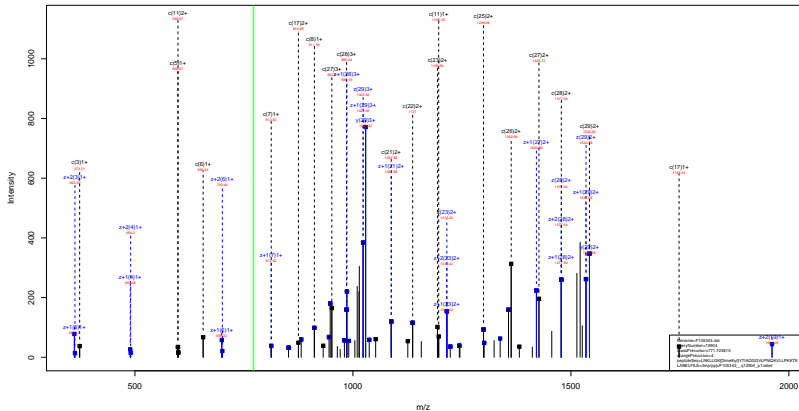



# sp | Q6GSS7 | H2A2A\_MOUSE

LNKLLGK <sup>Dimethyl</sup> <sub>28.03</sub> VTIAQGGVLPNIQAVLLPKKTE

- ▶ fragmentation table for charge state 1+
- ▶ specType=etd
- ▶ score=102.13
- ▶ F105343.dat
- ▶ query=q13904.p1
- ▶ precursor=771.723610
- ▶ chargePrecursor=4
- ▶ itol=0.8

| AA    | c               | y        | z+1             | z+2             | z               | AA    |
|-------|-----------------|----------|-----------------|-----------------|-----------------|-------|
| L[1]  | 131.118         | 3083.802 | 2067.873        | 0.000           | 3056.865        | L[26] |
| N[2]  | 245.161         | 2970.808 | 2954.789        | 2955.797        | 2953.781        | N[28] |
| K[3]  | <b>373.256</b>  | 2856.765 | 3840.740        | 3841.754        | 2839.738        | K[27] |
| L[4]  | 488.340         | 3728.670 | 2712.651        | 2713.659        | 3711.643        | L[26] |
| L[5]  | <b>699.424</b>  | 2615.586 | 2599.567        | 2600.575        | 2598.559        | L[25] |
| G[6]  | <b>658.445</b>  | 2502.502 | 2486.483        | 2487.491        | 2485.473        | G[24] |
| K[7]  | <b>812.572</b>  | 2445.480 | 2429.462        | 2430.469        | 2428.454        | K[23] |
| V[8]  | <b>911.640</b>  | 2389.354 | 2373.335        | 2374.343        | 2372.327        | V[22] |
| T[9]  | 1012.688        | 2190.286 | 2174.267        | 2175.275        | 2173.259        | T[21] |
| I[10] | <b>1125.772</b> | 2089.238 | 2073.219        | 2074.227        | 2072.211        | I[20] |
| A[11] | <b>1196.809</b> | 1976.154 | 1960.135        | <b>1961.143</b> | 1959.127        | A[19] |
| Q[12] | 1214.667        | 1909.111 | 1893.092        | 1894.106        | 1892.090        | Q[18] |
| G[13] | <b>1381.889</b> | 1777.058 | 1761.039        | 1762.047        | 1760.032        | G[17] |
| G[14] | 1438.910        | 1720.937 | 1704.918        | 1705.926        | 1703.910        | G[16] |
| V[15] | 1537.979        | 1603.015 | 1648.997        | 1648.004        | 1645.989        | V[15] |
| L[16] | 1651.063        | 1561.947 | 1547.928        | 1548.936        | 1546.920        | L[14] |
| T[17] | <b>1748.116</b> | 1450.863 | 1434.844        | 1435.852        | 1433.836        | T[13] |
| N[18] | 1862.959        | 1353.810 | <b>1337.791</b> | 1338.799        | 1336.783        | N[12] |
| I[19] | 1975.243        | 1239.767 | <b>1223.748</b> | 1224.756        | <b>1222.741</b> | I[11] |
| Q[20] | 2103.301        | 1126.683 | 1119.664        | 1111.672        | 1109.656        | Q[10] |
| A[21] | 2174.338        | 998.624  | 982.606         | 983.614         | 981.598         | A[9]  |
| V[22] | 2273.407        | 827.587  | <b>911.569</b>  | 912.576         | 910.561         | V[8]  |
| L[23] | 2389.491        | 628.519  | <b>812.500</b>  | 813.508         | 811.492         | L[7]  |
| L[24] | 2499.575        | 715.435  | <b>699.416</b>  | <b>700.424</b>  | 698.408         | L[6]  |
| P[25] | 2596.628        | 602.351  | 586.332         | 587.340         | 585.324         | P[5]  |
| K[26] | 2724.723        | 505.298  | <b>489.279</b>  | <b>490.287</b>  | 488.271         | K[4]  |
| K[27] | 2852.818        | 377.203  | <b>361.184</b>  | <b>362.192</b>  | 360.177         | K[3]  |
| T[28] | 2963.865        | 249.108  | 233.089         | 234.097         | 232.082         | T[2]  |
| E[29] | 3082.908        | 148.050  | 132.042         | 133.050         | 131.034         | E[1]  |

# sp | Q6GSS7 | H2A2A\_MOUSE

LNKLLGK <sup>Dimethyl</sup><sub>28.03</sub> VTIAQGGVLPNIQAVLLPKKTE

- ▶ fragmentation table for charge state 2+
- ▶ specType=etd
- ▶ score=102.13
- ▶ F105343.dat
- ▶ query=q13904\_p1
- ▶ precursor=771.723610
- ▶ chargePrecursor=4
- ▶ itol=0.8

| AA  | c               | y               | z+1             | z+2             | z               | AA   |
|-----|-----------------|-----------------|-----------------|-----------------|-----------------|------|
| L1  | 66.093          | <b>1542.450</b> | <b>1534.440</b> | 9.504           | <b>1533.936</b> | L120 |
| N1  | 123.084         | 1485.905        | <b>1477.898</b> | <b>1478.402</b> | <b>1477.394</b> | N20  |
| K1  | 187.132         | 1428.889        | <b>1420.877</b> | <b>1421.381</b> | <b>1420.373</b> | K27  |
| L1  | 243.674         | 1364.839        | <b>1356.829</b> | <b>1357.333</b> | <b>1356.325</b> | L26  |
| L1  | 300.216         | 1308.297        | <b>1300.287</b> | <b>1300.791</b> | <b>1299.783</b> | L25  |
| G1  | 358.758         | 1251.795        | <b>1243.745</b> | <b>1244.249</b> | <b>1243.241</b> | G24  |
| K1  | 406.789         | <b>1223.244</b> | <b>1215.234</b> | <b>1215.738</b> | <b>1214.731</b> | K23  |
| V1  | 456.324         | 1145.181        | <b>1137.171</b> | <b>1137.675</b> | <b>1136.667</b> | V22  |
| T1  | 506.840         | 1095.646        | <b>1087.637</b> | <b>1088.141</b> | <b>1087.133</b> | T21  |
| T10 | 563.390         | 1045.123        | <b>1037.113</b> | <b>1037.617</b> | 1036.609        | T20  |
| A11 | <b>598.908</b>  | 988.581         | <b>980.571</b>  | <b>981.075</b>  | <b>980.067</b>  | A19  |
| Q12 | 662.937         | 933.060         | <b>925.053</b>  | <b>925.557</b>  | <b>924.549</b>  | Q18  |
| G13 | 691.448         | 889.033         | <b>881.023</b>  | <b>881.527</b>  | 880.519         | G17  |
| G14 | 719.959         | 860.522         | <b>852.513</b>  | <b>853.017</b>  | <b>852.009</b>  | G16  |
| V15 | 769.493         | 832.011         | 824.002         | 824.506         | 823.498         | V15  |
| L16 | 830.035         | 782.477         | 774.468         | 774.972         | 773.964         | L14  |
| T17 | <b>874.561</b>  | 728.935         | 721.928         | 722.432         | 721.424         | T13  |
| N18 | <b>931.583</b>  | 677.400         | 669.390         | 669.893         | 668.885         | N12  |
| I19 | 988.125         | 630.867         | 622.858         | 623.362         | 622.354         | I11  |
| Q20 | <b>1052.154</b> | 583.845         | 575.836         | 576.340         | 575.332         | Q10  |
| A21 | <b>1087.673</b> | 499.816         | 491.807         | 492.310         | 491.303         | A0   |
| V22 | <b>1137.207</b> | 484.297         | 476.288         | 476.792         | 475.784         | V8   |
| L23 | <b>1193.749</b> | 414.763         | 406.754         | 407.258         | 406.250         | L17  |
| L24 | 1250.291        | 358.221         | 350.212         | 350.716         | 349.708         | L16  |
| P25 | <b>1288.817</b> | 301.679         | 293.670         | 294.174         | 293.166         | P5   |
| K26 | <b>1362.865</b> | 253.153         | 245.143         | 245.647         | 244.639         | K4   |
| K27 | <b>1426.912</b> | 189.105         | 181.096         | 181.600         | 180.592         | K3   |
| T28 | <b>1477.436</b> | 125.058         | 117.049         | 117.552         | 116.544         | T2   |
| E29 | <b>1541.958</b> | 74.534          | 66.524          | 67.028          | 66.021          | E1   |

# sp | Q6GSS7 | H2A2A\_MOUSE

LNKLLGK <sup>Dimethyl</sup> <sub>28.03</sub> VTIAQGGVLPNIQAVLLPKKTE

- ▶ fragmentation table for charge state 3+
- ▶ specType=etd
- ▶ score=102.13
- ▶ F105343.dat
- ▶ query=q13904\_p1
- ▶ precursor=771.723610
- ▶ chargePrecursor=4
- ▶ itol=0.8

| AA    | c              | y               | z+1             | z+2            | z       | AA                   |
|-------|----------------|-----------------|-----------------|----------------|---------|----------------------|
| L 1   | 44.377         | <b>1028.635</b> | <b>1023.296</b> |                | 0.672   | <b>1022.960</b> L 29 |
| N 2   | 62.392         | <b>990.941</b>  | <b>985.601</b>  | <b>985.937</b> |         | <b>985.265</b> N 28  |
| K 3   | 125.090        | 952.026         | <b>947.587</b>  | <b>947.923</b> |         | <b>947.251</b> K 27  |
| L 4   | 162.795        | 910.229         | 904.889         | 905.225        | 904.553 | L 26                 |
| L 5   | 200.479        | 872.523         | 867.184         | 867.520        | 866.855 | L 25                 |
| G 6   | 219.487        | 834.839         | 829.499         | 829.835        | 829.169 | G 24                 |
| K 7   | 271.529        | 815.832         | 810.492         | 810.828        | 810.158 | K 23                 |
| V 8   | 304.552        | 783.790         | 778.450         | 778.786        | 778.114 | V 22                 |
| T 9   | 338.234        | 730.767         | 725.427         | 725.763        | 725.091 | T 21                 |
| I 10  | 375.929        | 697.084         | 691.745         | 692.081        | 691.409 | I 20                 |
| A 11  | 399.608        | 659.389         | 654.050         | 654.386        | 653.714 | A 19                 |
| Q 12  | 442.294        | 636.720         | 630.374         | 630.707        | 630.035 | Q 18                 |
| G 13  | 461.301        | 593.024         | 587.685         | 588.021        | 587.349 | G 17                 |
| G 14  | 480.308        | 574.017         | 568.678         | 569.013        | 568.342 | G 16                 |
| V 15  | 513.331        | 555.010         | 549.670         | 550.006        | 549.334 | V 15                 |
| L 16  | 551.026        | 521.987         | 516.648         | 516.984        | 516.312 | L 14                 |
| F 17  | 583.377        | 484.292         | 478.953         | 479.289        | 478.617 | F 13                 |
| Tu 18 | 621.391        | 451.942         | 446.603         | 446.939        | 446.266 | Tu 12                |
| I 19  | 659.088        | 413.927         | 408.588         | 408.924        | 408.252 | I 11                 |
| Q 20  | 701.772        | 376.213         | 370.893         | 371.229        | 370.557 | Q 10                 |
| A 21  | 725.451        | 333.546         | 328.207         | 328.543        | 327.871 | A 9                  |
| V 22  | 758.474        | 309.867         | 304.528         | 304.864        | 304.192 | V 8                  |
| L 23  | 796.168        | 276.844         | 271.505         | 271.841        | 271.169 | L 7                  |
| L 24  | 833.863        | 239.350         | 233.991         | 234.326        | 233.654 | L 6                  |
| P 25  | 866.214        | 201.655         | 196.316         | 196.651        | 195.979 | P 5                  |
| K 26  | 908.912        | 169.104         | 163.765         | 164.101        | 163.429 | K 4                  |
| K 27  | <b>951.611</b> | 126.406         | 121.066         | 121.402        | 120.730 | K 3                  |
| T 28  | <b>985.293</b> | 83.708          | 78.368          | 78.704         | 78.032  | T 2                  |
| E 29  | 1028.307       | 50.025          | 44.685          | 45.021         | 44.349  | E 1                  |



# sp | Q6GSS7 | H2A2A\_MOUSE

LNKLLGK <sup>Dimethyl</sup> <sub>28.03</sub> VTIAQGGVLPNIQAVLLPKKTE

- ▶ fragmentation table for charge state 1+
- ▶ specType=etd
- ▶ score=101.01
- ▶ F105343.dat
- ▶ query=q13905.p1
- ▶ precursor=771.725820
- ▶ chargePrecursor=4
- ▶ itol=0.8

| AA  | c               | y        | z+1             | z+2             | z              | AA  |
|-----|-----------------|----------|-----------------|-----------------|----------------|-----|
| L1  | 131.118         | 3081.892 | 3067.873        | 0.000           | 3066.895       | L29 |
| N2  | 345.161         | 2970.808 | 2954.789        | 2955.797        | 2951.781       | N38 |
| K3  | <b>373.256</b>  | 2856.765 | 2840.746        | 2841.754        | 2839.738       | K27 |
| L4  | 486.340         | 2728.670 | 2712.651        | 2713.659        | 2711.643       | L26 |
| L5  | 607.424         | 2615.585 | 2599.567        | 2600.575        | 2598.560       | L25 |
| Q6  | <b>656.445</b>  | 2502.502 | 2486.483        | 2487.491        | 2485.475       | Q24 |
| K7  | <b>812.572</b>  | 2345.480 | 2429.462        | 2430.469        | 2428.454       | K23 |
| V8  | <b>911.640</b>  | 2288.354 | 2273.335        | 2274.343        | 2272.327       | V22 |
| T9  | 1017.688        | 2190.286 | 2174.267        | 2175.275        | 2173.259       | T21 |
| I10 | <b>1125.772</b> | 2089.238 | 2073.219        | 2074.227        | 2072.211       | I20 |
| A11 | <b>1196.809</b> | 1976.154 | 1960.135        | <b>1961.143</b> | 1959.127       | A19 |
| Q12 | <b>1324.867</b> | 1895.111 | <b>1889.098</b> | 1890.106        | 1888.090       | Q18 |
| G13 | <b>1381.889</b> | 1777.058 | 1761.039        | <b>1762.047</b> | 1760.032       | G17 |
| G14 | 1438.910        | 1720.937 | 1704.918        | 1705.926        | 1703.910       | G16 |
| V15 | 1537.979        | 1663.015 | 1646.997        | 1646.004        | 1645.989       | V15 |
| L16 | 1651.063        | 1563.947 | <b>1547.928</b> | 1548.936        | 1546.920       | L14 |
| P17 | 1748.116        | 1490.893 | 1474.874        | 1475.882        | 1473.866       | P13 |
| T18 | 1852.159        | 1383.810 | <b>1337.791</b> | 1338.799        | 1336.783       | T12 |
| I19 | 1975.243        | 1236.767 | 1223.748        | 1224.756        | 1222.741       | I11 |
| Q20 | 2103.301        | 1126.683 | 1110.664        | 1111.672        | 1109.656       | Q10 |
| A21 | 2174.336        | 996.624  | 980.606         | 981.614         | <b>981.598</b> | A9  |
| V22 | 2273.407        | 927.587  | <b>911.569</b>  | 912.576         | 910.561        | V8  |
| L23 | 2386.491        | 828.519  | <b>812.500</b>  | 813.508         | 811.492        | L7  |
| L24 | 2499.575        | 715.435  | <b>699.415</b>  | <b>700.424</b>  | 698.408        | L6  |
| P25 | 2596.626        | 602.351  | 586.332         | 587.340         | 585.324        | P5  |
| K26 | 2724.723        | 505.298  | <b>489.279</b>  | 490.287         | 488.271        | K4  |
| K27 | 2852.816        | 377.203  | <b>361.184</b>  | 362.192         | 360.177        | K3  |
| T28 | 2951.895        | 249.108  | 233.089         | 234.097         | 232.082        | T2  |
| E29 | 3082.938        | 148.060  | 132.042         | 133.050         | 131.034        | E1  |

# sp | Q6GSS7 | H2A2A\_MOUSE

LNKLLGK <sup>Dimethyl</sup><sub>28.03</sub> VTIAQGGVLPNIQAVLLPKKTE

- ▶ fragmentation table for charge state 2+
- ▶ specType=etd
- ▶ score=101.01
- ▶ F105343.dat
- ▶ query=q13905.p1
- ▶ precursor=771.725820
- ▶ chargePrecursor=4
- ▶ itol=0.8

| AA  | c               | y               | z+1             | z+2             | z               | AA   |
|-----|-----------------|-----------------|-----------------|-----------------|-----------------|------|
| L1  | 66.053          | <b>1542.450</b> | 1524.440        | 8.504           | 1533.930        | L120 |
| N12 | 123.054         | 1485.905        | <b>1477.898</b> | <b>1478.402</b> | <b>1477.394</b> | N020 |
| K13 | 187.132         | 1428.889        | <b>1420.877</b> | <b>1421.381</b> | 1420.373        | K027 |
| L14 | 243.674         | 1364.839        | <b>1356.829</b> | <b>1357.333</b> | <b>1356.325</b> | L126 |
| L15 | 300.216         | 1308.297        | 1300.287        | 1300.791        | <b>1299.783</b> | L125 |
| G16 | 358.759         | 1251.795        | <b>1243.745</b> | <b>1244.249</b> | <b>1243.241</b> | G024 |
| K17 | 406.799         | 1223.244        | <b>1215.234</b> | <b>1215.738</b> | <b>1214.731</b> | K023 |
| V18 | 456.324         | 1145.181        | <b>1137.171</b> | <b>1137.675</b> | <b>1136.667</b> | V022 |
| F19 | 506.840         | 1095.646        | <b>1087.637</b> | <b>1088.141</b> | <b>1087.133</b> | F121 |
| T10 | 563.390         | <b>1045.123</b> | <b>1037.113</b> | <b>1037.617</b> | 1036.609        | T020 |
| A11 | <b>598.908</b>  | 998.581         | <b>990.571</b>  | <b>991.075</b>  | <b>990.067</b>  | A119 |
| Q12 | 662.937         | 953.060         | <b>945.053</b>  | <b>945.557</b>  | 944.549         | Q118 |
| G13 | 691.448         | 899.033         | <b>891.023</b>  | <b>891.527</b>  | <b>890.519</b>  | G117 |
| G14 | 719.959         | 860.522         | <b>852.513</b>  | <b>853.017</b>  | 852.009         | G116 |
| V15 | 769.493         | 832.011         | 824.002         | 824.506         | 823.498         | V115 |
| L16 | 830.035         | 782.477         | <b>774.468</b>  | <b>774.972</b>  | 773.964         | L114 |
| F17 | <b>874.561</b>  | 728.935         | 721.925         | 722.429         | 721.421         | F113 |
| N18 | <b>931.583</b>  | 677.400         | 669.390         | 669.893         | 668.885         | N112 |
| I19 | 988.125         | 630.867         | 622.858         | 623.362         | 622.354         | I111 |
| Q20 | <b>1052.154</b> | 583.845         | 575.836         | 576.340         | 575.332         | Q110 |
| A21 | <b>1087.673</b> | 499.816         | 491.807         | 492.311         | 491.303         | A10  |
| V22 | <b>1137.207</b> | 494.297         | 486.288         | 486.792         | 485.784         | V10  |
| L23 | <b>1193.749</b> | 414.763         | 406.754         | 407.258         | 406.250         | L11  |
| L24 | 1250.291        | 358.221         | 350.212         | 350.716         | 349.708         | L10  |
| P25 | <b>1298.817</b> | 301.679         | 293.670         | 294.174         | 293.166         | P10  |
| K26 | <b>1362.865</b> | 253.153         | 245.143         | 245.647         | 244.639         | K10  |
| K27 | <b>1426.912</b> | 199.105         | 191.096         | 191.600         | 190.592         | K10  |
| T28 | <b>1477.436</b> | 125.058         | 117.049         | 117.552         | 116.544         | T10  |
| E29 | 1541.958        | 74.534          | 66.524          | 67.028          | 66.021          | E10  |

# sp | Q6GSS7 | H2A2A\_MOUSE

LNKLLGK <sup>Dimethyl</sup> <sub>28.03</sub> VTIAQGGVLPNIQAVLLPKKTE

- ▶ fragmentation table for charge state 3+
- ▶ specType=etd
- ▶ score=101.01
- ▶ F105343.dat
- ▶ query=q13905.p1
- ▶ precursor=771.725820
- ▶ chargePrecursor=4
- ▶ itol=0.8

| AA    | c              | y               | z+1             | z+2            | z       | AA                   |
|-------|----------------|-----------------|-----------------|----------------|---------|----------------------|
| L 1   | 44.377         | <b>1028.635</b> | <b>1023.296</b> |                | 0.672   | <b>1022.960</b> L 29 |
| N 2   | 62.392         | 990.941         | <b>985.601</b>  | <b>985.937</b> |         | <b>985.265</b> N 28  |
| K 3   | 125.090        | <b>952.926</b>  | <b>947.587</b>  | <b>947.923</b> |         | <b>947.251</b> K 27  |
| L 4   | 162.795        | 910.229         | 904.889         | 905.225        | 904.553 | L 26                 |
| L 5   | 200.479        | 872.523         | 867.184         | 867.520        | 868.355 | L 25                 |
| G 6   | 219.487        | 834.839         | 829.499         | 829.835        | 829.161 | G 24                 |
| K 7   | 271.529        | 815.832         | 810.492         | 810.828        | 810.158 | K 23                 |
| V 8   | 304.552        | 763.790         | 758.450         | 758.786        | 758.114 | V 22                 |
| T 9   | 336.234        | 730.767         | 725.427         | 725.763        | 725.091 | T 21                 |
| I 10  | 375.929        | 697.084         | 691.745         | 692.081        | 691.409 | I 20                 |
| A 11  | 399.608        | 659.389         | 654.050         | 654.386        | 653.714 | A 19                 |
| Q 12  | 442.294        | 636.720         | 630.374         | 630.707        | 630.035 | Q 18                 |
| G 13  | 461.301        | 593.024         | 587.685         | 588.021        | 587.349 | G 17                 |
| G 14  | 480.308        | 574.017         | 568.678         | 569.013        | 568.342 | G 16                 |
| V 15  | 513.331        | 555.010         | 549.670         | 550.006        | 549.334 | V 15                 |
| L 16  | 551.026        | 521.987         | 516.648         | 516.984        | 516.312 | L 14                 |
| F 17  | 583.377        | 484.292         | 478.953         | 479.289        | 478.617 | F 13                 |
| Tu 18 | 621.391        | 451.942         | 446.603         | 446.939        | 446.266 | Tu 12                |
| I 19  | 659.086        | 413.927         | 408.588         | 408.924        | 408.252 | I 11                 |
| Q 20  | 701.772        | 376.213         | 370.893         | 371.229        | 370.557 | Q 10                 |
| A 21  | 725.451        | 333.546         | 328.207         | 328.543        | 327.871 | A 9                  |
| V 22  | 758.474        | 309.867         | 304.528         | 304.864        | 304.192 | V 8                  |
| L 23  | 796.168        | 276.844         | 271.505         | 271.841        | 271.169 | L 7                  |
| L 24  | 833.863        | 239.350         | 233.991         | 234.326        | 233.654 | L 6                  |
| P 25  | 866.214        | 201.655         | 196.116         | 196.451        | 195.779 | P 5                  |
| K 26  | 908.912        | 169.104         | 163.765         | 164.101        | 163.429 | K 4                  |
| K 27  | <b>951.611</b> | 126.406         | 121.066         | 121.402        | 120.730 | K 3                  |
| T 28  | <b>985.293</b> | 83.708          | 78.368          | 78.704         | 78.032  | T 2                  |
| E 29  | 1028.307       | 50.025          | 44.685          | 45.021         | 44.349  | E 1                  |

# sp | Q6GSS7 | H2A2A\_MOUSE

LNKLLGK <sup>Dimethyl</sup>VTIAQGGVLPNIQAVLLPKKTE  
28.03

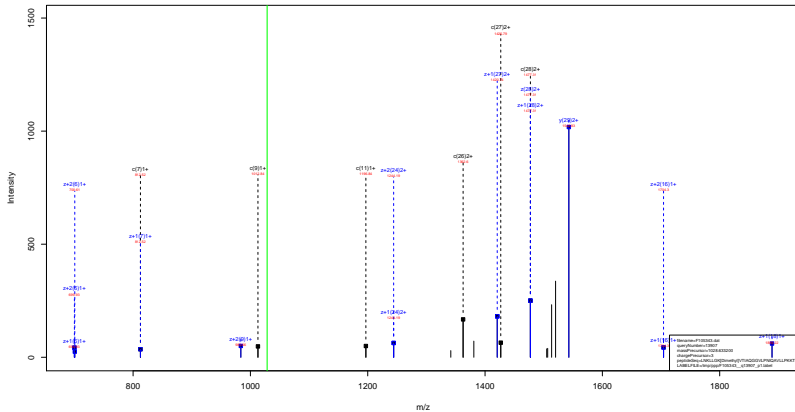



# sp | Q6GSS7 | H2A2A\_MOUSE

LNKLLGK <sup>Dimethyl</sup> <sub>28.03</sub> VTIAQGGVLPNIQAVLLPKKTE

- ▶ fragmentation table for charge state 1+
- ▶ specType=etd
- ▶ score=32.00
- ▶ F105343.dat
- ▶ query=q13907.p1
- ▶ precursor=1028.633200
- ▶ chargePrecursor=3
- ▶ itol=0.8

| AA    | c               | y        | z+1             | z+2             | z        | AA    |
|-------|-----------------|----------|-----------------|-----------------|----------|-------|
| L[1]  | 131.118         | 3081.892 | 3067.873        | 0.000           | 3066.895 | L[29] |
| N[2]  | 345.161         | 2970.808 | 2954.789        | 2955.797        | 2951.781 | N[28] |
| K[3]  | 373.256         | 2856.765 | 2840.746        | 2841.754        | 2839.738 | K[27] |
| L[4]  | 486.340         | 2728.670 | 2712.651        | 2713.659        | 2711.643 | L[26] |
| L[5]  | 599.424         | 2615.585 | 2599.567        | 2600.575        | 2598.560 | L[25] |
| G[6]  | 694.445         | 2502.502 | 2486.483        | 2487.491        | 2485.475 | G[24] |
| K[7]  | <b>812.572</b>  | 2345.480 | 2429.462        | 2430.469        | 2428.454 | K[23] |
| V[8]  | 911.640         | 2288.584 | 2273.535        | 2274.543        | 2272.527 | V[22] |
| T[9]  | <b>1012.688</b> | 2190.586 | 2174.567        | 2175.575        | 2173.559 | T[21] |
| I[10] | 1125.772        | 2089.238 | 2073.219        | 2074.227        | 2072.211 | I[20] |
| A[11] | <b>1196.809</b> | 1976.154 | 1960.135        | 1961.143        | 1959.127 | A[19] |
| Q[12] | 1324.857        | 1905.111 | <b>1889.098</b> | 1890.106        | 1888.090 | Q[18] |
| G[13] | 1381.589        | 1777.055 | 1761.036        | 1762.047        | 1760.032 | G[17] |
| G[14] | 1438.910        | 1720.037 | <b>1704.018</b> | <b>1705.026</b> | 1703.010 | G[16] |
| V[15] | 1537.879        | 1663.015 | 1646.997        | 1648.004        | 1645.989 | V[15] |
| L[16] | 1651.063        | 1563.947 | 1547.928        | 1548.936        | 1546.920 | L[14] |
| P[17] | 1748.116        | 1450.893 | 1434.864        | 1435.872        | 1433.856 | P[13] |
| T[18] | 1852.159        | 1383.810 | 1367.791        | 1368.799        | 1366.783 | T[12] |
| I[19] | 1975.243        | 1239.767 | 1223.748        | 1224.756        | 1222.741 | I[11] |
| Q[20] | 2103.301        | 1126.683 | 1110.664        | 1111.672        | 1109.656 | Q[10] |
| A[21] | 2174.336        | 998.624  | 982.606         | <b>983.614</b>  | 981.598  | A[9]  |
| V[22] | 2273.407        | 927.587  | 911.569         | 912.576         | 910.561  | V[8]  |
| L[23] | 2386.491        | 828.519  | <b>812.500</b>  | 813.508         | 811.492  | L[7]  |
| L[24] | 2499.575        | 715.435  | <b>699.416</b>  | <b>700.424</b>  | 698.408  | L[6]  |
| P[25] | 2596.626        | 602.351  | 586.332         | 587.340         | 585.324  | P[5]  |
| K[26] | 2724.723        | 505.298  | 489.279         | 490.287         | 488.271  | K[4]  |
| K[27] | 2852.816        | 377.203  | 361.184         | 362.192         | 360.177  | K[3]  |
| T[28] | 2951.895        | 249.108  | 233.089         | 234.097         | 232.082  | T[2]  |
| E[29] | 3082.938        | 148.060  | 132.042         | 133.050         | 131.034  | E[1]  |

# sp | Q6GSS7 | H2A2A\_MOUSE

LNKLLGK <sup>Dimethyl</sup> <sub>28.03</sub> VTIAQGGVLPNIQAVLLPKKTE

- ▶ fragmentation table for charge state 2+
- ▶ specType=etd
- ▶ score=32.00
- ▶ F105343.dat
- ▶ query=q13907\_p1
- ▶ precursor=1028.633200
- ▶ chargePrecursor=3
- ▶ itol=0.8

| AA   | c               | y               | z+1             | z+2             | z               | AA   |
|------|-----------------|-----------------|-----------------|-----------------|-----------------|------|
| L1   | 66.053          | <b>1542.450</b> | 1524.440        | 9.504           | 1533.930        | L120 |
| N12  | 123.054         | 1485.905        | <b>1477.898</b> | 1478.402        | <b>1477.394</b> | N120 |
| K13  | 187.132         | 1428.889        | <b>1420.877</b> | <b>1421.381</b> | <b>1420.373</b> | K127 |
| L14  | 243.674         | 1364.839        | 1366.829        | 1357.331        | 1366.325        | L126 |
| L15  | 300.216         | 1308.297        | 1309.287        | 1309.791        | 1299.783        | L125 |
| G16  | 358.759         | 1251.755        | <b>1243.745</b> | <b>1244.249</b> | 1243.243        | G124 |
| K17  | 406.799         | 1223.244        | 1215.234        | 1215.738        | 1214.731        | K123 |
| V18  | 456.324         | 1145.181        | 1137.171        | 1137.675        | 1136.667        | V122 |
| F19  | 506.849         | 1095.646        | 1087.637        | 1088.141        | 1087.133        | F121 |
| T10  | 563.390         | 1045.123        | 1037.113        | 1037.617        | 1036.609        | T20  |
| A111 | 588.909         | 988.581         | 980.571         | 981.075         | 980.067         | A119 |
| Q12  | 602.937         | 953.062         | 945.053         | 945.557         | 944.549         | Q118 |
| G133 | 691.448         | 889.033         | 881.023         | 881.527         | 880.519         | G117 |
| G14  | 719.959         | 860.522         | 852.513         | 853.017         | 852.009         | G116 |
| V15  | 769.493         | 832.011         | 824.002         | 824.506         | 823.498         | V115 |
| L16  | 826.035         | 782.477         | 774.468         | 774.972         | 773.964         | L114 |
| F17  | 874.581         | 728.935         | 721.925         | 722.429         | 721.421         | F113 |
| N118 | 931.583         | 677.400         | 669.390         | 669.893         | 668.885         | N112 |
| I19  | 988.125         | 620.867         | 612.858         | 613.362         | 612.354         | I111 |
| Q120 | 1052.154        | 563.845         | 555.836         | 556.340         | 555.332         | Q110 |
| A121 | 1087.673        | 499.816         | 491.807         | 492.310         | 491.303         | A10  |
| V122 | 1127.207        | 494.297         | 486.288         | 486.792         | 485.784         | V10  |
| L123 | 1193.749        | 414.763         | 406.754         | 407.258         | 406.250         | L11  |
| L124 | 1250.291        | 358.221         | 350.212         | 350.716         | 349.708         | L10  |
| P125 | 1298.817        | 301.679         | 293.670         | 294.174         | 293.166         | P10  |
| K126 | <b>1362.865</b> | 253.153         | 245.143         | 245.647         | 244.639         | K10  |
| K127 | <b>1426.912</b> | 189.105         | 181.096         | 181.600         | 180.592         | K10  |
| T128 | <b>1477.436</b> | 125.058         | 117.048         | 117.552         | 116.544         | T10  |
| E129 | 1541.958        | 74.534          | 66.524          | 67.028          | 66.021          | E10  |



# sp | Q6GSS7 | H2A2A\_MOUSE

ELNKLKLGK<sup>Dimethyl</sup>VTIAQGGVLPNIQAVLLPKKTE  
28.03

- ▶ fragmentation table for charge state 1+
- ▶ specType=etd
- ▶ score=113.38
- ▶ F105343.dat
- ▶ query=q14042.p1
- ▶ precursor=803.986670
- ▶ chargePrecursor=4
- ▶ itol=0.8

| AA | c  | y               | z+1      | z+2             | z               | AA       |   |    |
|----|----|-----------------|----------|-----------------|-----------------|----------|---|----|
| E  | 1  | 147.076         | 3212.934 | 3196.916        | 0.000           | 3195.908 | E | 30 |
| L  | 2  | 260.160         | 3083.892 | 3067.873        | 0.000           | 3066.865 | L | 29 |
| R  | 3  | 374.232         | 2970.868 | 2954.789        | 2855.797        | 2953.781 | R | 28 |
| K  | 4  | <b>502.298</b>  | 2856.765 | 2840.746        | 2841.154        | 2839.735 | K | 27 |
| L  | 5  | 615.382         | 2728.670 | 2712.651        | 2713.659        | 2711.643 | L | 26 |
| L  | 6  | <b>728.466</b>  | 2615.586 | 2599.569        | 2600.575        | 2598.559 | L | 25 |
| G  | 7  | <b>785.488</b>  | 2502.502 | 2486.483        | 2487.491        | 2485.475 | G | 24 |
| K  | 8  | 941.614         | 2445.480 | 2429.462        | 2430.469        | 2428.454 | K | 23 |
| V  | 9  | <b>1048.683</b> | 2388.364 | 2373.335        | 2274.343        | 2272.327 | V | 22 |
| I  | 10 | <b>1141.730</b> | 2190.286 | 2174.267        | 2175.275        | 2173.259 | I | 21 |
| I  | 11 | 1254.814        | 2089.238 | 2073.219        | 2074.227        | 2072.211 | I | 20 |
| A  | 12 | <b>1325.851</b> | 1978.154 | 1960.135        | 1961.143        | 1959.127 | A | 19 |
| Q  | 13 | <b>1453.910</b> | 1905.117 | 1889.098        | <b>1890.106</b> | 1888.090 | Q | 18 |
| G  | 14 | <b>1510.932</b> | 1777.058 | 1761.039        | 1762.047        | 1760.032 | G | 17 |
| G  | 15 | <b>1567.953</b> | 1730.037 | 1704.018        | <b>1705.026</b> | 1703.010 | G | 16 |
| V  | 16 | <b>1607.021</b> | 1683.015 | 1649.997        | 1648.994        | 1646.989 | V | 15 |
| L  | 17 | 1780.105        | 1563.947 | <b>1547.928</b> | 1548.936        | 1546.920 | L | 14 |
| P  | 18 | 1877.158        | 1450.863 | 1434.844        | 1435.852        | 1433.836 | P | 13 |
| N  | 19 | 1991.201        | 1353.810 | <b>1337.791</b> | 1336.799        | 1336.783 | N | 12 |
| I  | 20 | 2104.285        | 1239.767 | 1223.748        | 1224.756        | 1222.741 | I | 11 |
| Q  | 21 | 2232.344        | 1136.682 | 1116.664        | 1111.672        | 1109.656 | Q | 10 |
| A  | 22 | 2303.393        | 998.624  | <b>982.606</b>  | 983.614         | 981.598  | A | 9  |
| V  | 23 | 2402.449        | 927.587  | 911.569         | 912.576         | 910.561  | V | 8  |
| L  | 24 | 2515.533        | 828.519  | <b>812.500</b>  | <b>813.508</b>  | 811.492  | L | 7  |
| L  | 25 | 3028.617        | 715.435  | <b>699.416</b>  | <b>700.424</b>  | 698.408  | L | 6  |
| P  | 26 | 2725.670        | 602.351  | 586.332         | 587.340         | 585.324  | P | 5  |
| K  | 27 | 2853.765        | 505.296  | <b>489.279</b>  | 490.287         | 488.271  | K | 4  |
| R  | 28 | 2883.886        | 377.262  | <b>361.184</b>  | 362.192         | 360.176  | R | 3  |
| T  | 29 | 3082.908        | 249.188  | 233.099         | 234.097         | 232.082  | T | 2  |
| E  | 30 | 3211.950        | 148.060  | 132.042         | 133.050         | 131.034  | E | 1  |

# sp | Q6GSS7 | H2A2A\_MOUSE

ELNKLKLGK<sup>Dimethyl</sup>VTIAQGGVLPNIQAVLLPKKTE  
28.03

- ▶ fragmentation table for charge state 2+
- ▶ specType=etd
- ▶ score=113.38
- ▶ F105343.dat
- ▶ query=q14042.p1
- ▶ precursor=803.986670
- ▶ chargePrecursor=4
- ▶ itol=0.8

| AA   | c               | y               | z+1             | z+2             | z               | AA   |
|------|-----------------|-----------------|-----------------|-----------------|-----------------|------|
| E 1  | 74.042          | <b>1606.971</b> | <b>1598.962</b> | 0.504           | <b>1598.458</b> | E 30 |
| L 2  | 130.504         | <b>1542.450</b> | 1534.440        | 0.504           | 1533.930        | L 26 |
| N 3  | 187.605         | 1485.908        | 1477.898        | 1478.402        | 1477.394        | N 28 |
| K 4  | 251.653         | 1428.889        | <b>1420.877</b> | <b>1421.381</b> | <b>1420.373</b> | K 27 |
| L 5  | 308.195         | 1364.830        | <b>1356.829</b> | <b>1357.333</b> | 1356.323        | L 26 |
| L 6  | 364.737         | 1308.297        | 1300.287        | 1300.791        | 1299.781        | L 28 |
| G 7  | 381.240         | 1251.735        | <b>1243.745</b> | <b>1244.249</b> | <b>1243.241</b> | G 04 |
| K 8  | 471.311         | 1223.244        | <b>1215.234</b> | <b>1215.738</b> | <b>1214.731</b> | K 23 |
| V 9  | 530.845         | 1148.181        | 1147.713        | 1137.679        | 1138.967        | V 22 |
| T 10 | 613.389         | 1095.646        | <b>1087.637</b> | <b>1088.141</b> | <b>1087.133</b> | T 21 |
| I 11 | 627.911         | 1048.123        | <b>1037.113</b> | <b>1037.617</b> | <b>1036.609</b> | I 20 |
| A 12 | 683.429         | 988.581         | <b>980.571</b>  | <b>981.075</b>  | <b>980.067</b>  | A 19 |
| Q 13 | 727.459         | 933.062         | <b>945.053</b>  | <b>945.557</b>  | <b>944.549</b>  | Q 18 |
| G 14 | 755.969         | <b>889.033</b>  | <b>881.023</b>  | <b>881.527</b>  | 880.519         | G 17 |
| G 15 | 794.488         | 886.522         | <b>852.513</b>  | <b>853.017</b>  | 852.009         | G 18 |
| V 16 | <b>834.014</b>  | 832.011         | <b>824.002</b>  | <b>824.506</b>  | <b>823.498</b>  | V 15 |
| L 17 | 890.556         | 782.477         | 774.468         | 774.972         | 773.964         | L 14 |
| F 18 | <b>939.083</b>  | 725.935         | 717.926         | 718.430         | 717.422         | F 13 |
| N 19 | 998.104         | 677.409         | 669.399         | 669.903         | 668.895         | N 12 |
| L 20 | <b>1052.646</b> | 620.387         | 612.378         | 612.882         | 611.874         | L 11 |
| Q 21 | <b>1116.676</b> | 563.848         | 555.838         | 556.342         | 555.334         | Q 19 |
| A 22 | <b>1152.194</b> | 499.810         | 491.801         | 492.305         | 491.297         | A 01 |
| V 23 | <b>1201.728</b> | 464.297         | 456.288         | 456.792         | 455.784         | V 08 |
| L 24 | <b>1258.270</b> | 414.763         | 406.754         | 407.258         | 406.250         | L 17 |
| L 25 | 1314.812        | 358.221         | 350.212         | 350.716         | 349.708         | L 16 |
| T 26 | <b>1363.339</b> | 301.679         | 293.670         | 294.174         | 293.166         | T 15 |
| K 27 | <b>1427.386</b> | 253.153         | 245.143         | 245.647         | 244.639         | K 14 |
| K 28 | <b>1491.434</b> | 189.105         | 181.096         | 181.600         | 180.592         | K 13 |
| T 29 | <b>1541.958</b> | 125.058         | 117.048         | 117.552         | 116.544         | T 12 |
| E 30 | <b>1606.479</b> | 74.534          | 66.524          | 67.028          | 66.021          | E 11 |

# sp | Q6GSS7 | H2A2A\_MOUSE

ELNKLKLGK<sup>Dimethyl</sup><sub>28.03</sub>VTIAQGGVLPNIQAVLLPKKTE

- ▶ fragmentation table for charge state 3+
- ▶ specType=etd
- ▶ score=113.38
- ▶ F105343.dat
- ▶ query=q14042.p1
- ▶ precursor=803.986670
- ▶ chargePrecursor=4
- ▶ itol=0.8

| AA | c  | y               | z+1             | z+2             | z              | AA              |       |
|----|----|-----------------|-----------------|-----------------|----------------|-----------------|-------|
| E  | 1  | 49.697          | <b>1071.050</b> | <b>1066.310</b> | 0.672          | <b>1065.974</b> | E[30] |
| L  | 2  | 87.302          | <b>1028.635</b> | <b>1023.296</b> | 0.672          | <b>1022.960</b> | L[29] |
| K  | 3  | 125.406         | 990.941         | 985.601         | 980.267        | 985.205         | K[28] |
| R  | 4  | 168.104         | 952.926         | <b>947.587</b>  | <b>942.223</b> | 947.291         | R[27] |
| L  | 5  | 205.799         | 910.228         | 904.889         | 905.225        | 904.553         | L[26] |
| L  | 6  | 243.494         | 872.531         | 867.194         | 867.530        | 866.858         | L[25] |
| G  | 7  | 282.501         | <b>834.839</b>  | 829.499         | 829.835        | 829.161         | G[24] |
| K  | 8  | 314.543         | 815.832         | 810.492         | 810.828        | 810.156         | K[23] |
| V  | 9  | 347.566         | 783.790         | 778.450         | 778.786        | 778.114         | V[22] |
| V  | 10 | 381.248         | 750.767         | 745.427         | 745.763        | 745.091         | V[21] |
| I  | 11 | 418.943         | 697.084         | 691.745         | 692.081        | 691.405         | I[20] |
| A  | 12 | 442.622         | 659.389         | 654.050         | 654.386        | 653.714         | A[19] |
| Q  | 13 | 485.308         | 635.711         | 630.371         | 630.707        | 630.035         | Q[18] |
| G  | 14 | 504.315         | 593.024         | 587.685         | 588.021        | 587.349         | G[17] |
| G  | 15 | 523.123         | 574.017         | 568.678         | 569.013        | 568.342         | G[16] |
| V  | 16 | 556.345         | 559.011         | 549.670         | 550.006        | 549.334         | V[15] |
| L  | 17 | 594.040         | 521.987         | 516.648         | 516.984        | 516.312         | L[14] |
| P  | 18 | 626.891         | 484.202         | 478.953         | 479.289        | 478.617         | P[13] |
| N  | 19 | 664.405         | 451.942         | 446.602         | 446.938        | 446.266         | N[12] |
| I  | 20 | 702.100         | 413.927         | 408.588         | 408.924        | 408.252         | I[11] |
| Q  | 21 | 744.786         | 376.213         | 370.893         | 371.229        | 370.557         | Q[10] |
| A  | 22 | 788.465         | 333.546         | 328.207         | 328.543        | 327.871         | A[9]  |
| V  | 23 | 801.488         | 309.967         | 304.528         | 304.864        | 304.192         | V[8]  |
| L  | 24 | 839.183         | 276.844         | 271.505         | 271.841        | 271.169         | L[7]  |
| L  | 25 | 876.877         | 239.150         | 233.810         | 234.146        | 233.474         | L[6]  |
| P  | 26 | 909.238         | 201.455         | 196.116         | 196.451        | 195.780         | P[5]  |
| K  | 27 | 951.827         | 169.104         | 163.765         | 164.101        | 163.429         | K[4]  |
| K  | 28 | <b>994.625</b>  | 129.420         | 124.081         | 124.402        | 123.731         | K[3]  |
| I  | 29 | <b>1028.307</b> | 83.708          | 78.368          | 78.704         | 78.033          | I[2]  |
| E  | 30 | <b>1071.322</b> | 50.025          | 44.685          | 45.021         | 44.349          | E[1]  |



# sp | P43274 | H14\_MOUSE

TAPAAPAAPAPAEKTPVKKKARKAAGGAKRK <sup>Dimethyl</sup> TSGPPVSE <sub>28.03</sub>

- ▶ fragmentation table for charge state 1+
- ▶ specType=etd
- ▶ score=60.97
- ▶ F105343.dat
- ▶ query=q14439.p1
- ▶ precursor=765.039930
- ▶ chargePrecursor=5
- ▶ itol=0.8

| AA  | c               | y               | z+1             | z+2             | z               | AA   |
|-----|-----------------|-----------------|-----------------|-----------------|-----------------|------|
| F1  | 119.082         | 3821.187        | 8656.188        | 0.000           | 3804.181        | T130 |
| A2  | 190.119         | 8720.140        | 5704.121        | 0.000           | 4703.111        | A38  |
| F3  | 287.171         | 3649.102        | 3631.084        | 0.000           | 3632.070        | P137 |
| A4  | 358.208         | 3652.050        | 3636.031        | 0.000           | 3539.021        | A39  |
| A5  | 429.246         | 3681.013        | 3644.984        | 0.000           | 3463.986        | A25  |
| F6  | 526.298         | 3400.075        | 3391.057        | 0.000           | 3392.049        | P34  |
| A7  | 597.335         | 3312.023        | 3296.904        | 0.000           | 3295.896        | A33  |
| A8  | 668.373         | 3241.886        | 3225.867        | 0.000           | 3224.850        | A32  |
| F9  | 765.425         | 3170.848        | 3154.830        | 0.000           | 3153.822        | P131 |
| A10 | 836.462         | 3073.796        | 3071.777        | 0.000           | 3056.769        | A30  |
| F11 | <b>933.515</b>  | 3002.759        | 3085.740        | 0.000           | 3085.732        | P29  |
| A12 | <b>1004.552</b> | 2905.706        | 2899.687        | 0.000           | 2898.679        | A28  |
| E13 | <b>1133.595</b> | 2834.669        | 2818.650        | 0.000           | 2817.642        | E27  |
| K14 | <b>1261.690</b> | 2705.620        | 2699.601        | 2690.615        | 2688.600        | K26  |
| T15 | 1362.738        | 2677.531        | 2661.512        | 2662.520        | 2660.505        | T25  |
| F16 | 1459.790        | 2676.483        | 2660.465        | 2661.473        | 2659.455        | F24  |
| V17 | 1558.859        | 2379.431        | 2381.412        | 2364.420        | 2362.404        | V23  |
| K18 | 1686.954        | 2280.382        | 2264.344        | 2265.351        | 2263.336        | K22  |
| K19 | 1815.049        | 2152.287        | 2136.249        | 2137.256        | 2135.241        | K21  |
| K20 | 1943.144        | 2024.172        | 2008.154        | 2009.161        | 2007.146        | K20  |
| A21 | 2071.233        | 1896.077        | 1880.059        | 1881.066        | 1879.051        | A19  |
| R22 | 2170.282        | 1825.040        | 1809.022        | 1810.029        | 1808.014        | R18  |
| K23 | 2298.377        | 1668.919        | 1652.920        | 1653.928        | 1651.913        | K17  |
| A24 | 2369.414        | 1640.844        | 1624.825        | 1625.833        | 1623.818        | A16  |
| A25 | 2440.451        | 1489.807        | 1453.798        | <b>1454.796</b> | 1452.791        | A15  |
| C26 | 2487.473        | 1398.770        | 1382.751        | 1383.759        | 1381.743        | C14  |
| C27 | 2554.498        | 1241.748        | 1225.729        | 1226.738        | 1224.722        | C13  |
| A28 | 2625.531        | 1284.727        | <b>1268.708</b> | <b>1269.716</b> | 1267.700        | A12  |
| K29 | 2753.626        | 1213.690        | 1197.671        | 1198.679        | 1196.663        | K11  |
| R30 | 2809.727        | <b>1085.595</b> | <b>1069.576</b> | 1070.584        | <b>1068.568</b> | R10  |
| K31 | 3065.853        | 925.494         | <b>913.475</b>  | 914.483         | 912.467         | K9   |
| L32 | 3168.901        | 873.388         | 757.369         | 758.377         | 756.361         | L9   |
| S33 | 3253.913        | 812.350         | 696.301         | 697.309         | 695.293         | S11  |
| G34 | 3310.915        | 585.288         | 589.299         | 570.277         | 568.261         | G6   |
| F35 | 3408.007        | 528.266         | 512.248         | 513.256         | 511.240         | F9   |
| F36 | 3505.060        | 431.214         | 415.195         | 416.203         | 414.187         | F4   |
| V37 | 3604.129        | 334.161         | 318.142         | 319.150         | 317.134         | V3   |
| S38 | 3691.181        | 236.092         | 219.073         | 220.082         | 218.066         | S25  |
| E39 | 3820.203        | 148.060         | 132.042         | 133.050         | 131.034         | E11  |



# sp | P43274 | H14\_MOUSE

TAPAAPAAPAPAEKTPVKKKARKAAGGAKRK <sup>Dimethyl</sup> TSGPPVSE <sub>28.03</sub>

- ▶ fragmentation table for charge state 2+
- ▶ specType=etd
- ▶ score=60.97
- ▶ F105343.dat
- ▶ query=q14439.p1
- ▶ precursor=765.039930
- ▶ chargePrecursor=5
- ▶ itol=0.8

| AA    | c               | y               | z+1             | z+2             | z               | AA    |
|-------|-----------------|-----------------|-----------------|-----------------|-----------------|-------|
| F[1]  | 60.044          | 1911.097        | 1093.088        | 0.504           | 1800.584        | T[30] |
| A[2]  | 65.563          | 1840.573        | <b>1852.564</b> | 0.504           | <b>1852.060</b> | A[38] |
| F[3]  | 144.089         | 1825.055        | 1817.045        | 0.504           | 1816.542        | P[37] |
| A[4]  | 179.208         | 1776.529        | 1768.519        | 0.504           | 1768.015        | A[39] |
| A[5]  | 215.126         | 1741.010        | 1733.001        | 0.504           | 1732.496        | A[25] |
| F[6]  | 263.653         | 1705.491        | 1697.482        | 0.504           | 1696.978        | P[34] |
| A[7]  | 299.171         | 1670.965        | 1662.956        | 0.504           | 1662.452        | A[33] |
| A[8]  | 334.690         | 1621.446        | 1613.437        | 0.504           | 1612.933        | A[32] |
| F[9]  | 383.216         | 1585.929        | 1577.919        | 0.504           | 1577.415        | P[31] |
| A[10] | 418.735         | 1537.403        | <b>1529.392</b> | 0.504           | <b>1528.888</b> | A[30] |
| F[11] | 467.261         | 1501.883        | 1493.874        | 0.504           | 1493.370        | P[29] |
| A[12] | 502.780         | 1453.357        | <b>1445.347</b> | 0.504           | <b>1444.843</b> | A[28] |
| E[13] | 567.301         | 1417.838        | 1409.829        | 0.504           | 1409.325        | E[27] |
| K[14] | 631.349         | 1353.317        | <b>1345.307</b> | <b>1345.811</b> | 1344.803        | K[26] |
| T[15] | 681.872         | 1289.299        | <b>1281.289</b> | <b>1281.794</b> | <b>1280.790</b> | T[25] |
| F[16] | 730.399         | 1230.745        | <b>1230.736</b> | <b>1231.240</b> | <b>1230.232</b> | F[24] |
| V[17] | 779.933         | 1190.218        | 1182.210        | 1182.714        | 1181.706        | V[23] |
| K[18] | <b>843.981</b>  | 1140.695        | <b>1132.675</b> | <b>1133.179</b> | 1132.171        | K[22] |
| K[19] | <b>908.028</b>  | <b>1076.637</b> | <b>1068.628</b> | <b>1069.132</b> | <b>1068.124</b> | K[21] |
| K[20] | 972.075         | 1012.599        | <b>1004.589</b> | <b>1005.084</b> | <b>1004.077</b> | K[20] |
| A[21] | <b>1007.594</b> | <b>948.542</b>  | 940.533         | <b>941.037</b>  | <b>940.029</b>  | A[17] |
| R[22] | <b>1055.645</b> | <b>913.024</b>  | <b>905.014</b>  | <b>905.518</b>  | <b>904.510</b>  | R[18] |
| K[23] | <b>1149.692</b> | 834.973         | <b>826.964</b>  | <b>827.468</b>  | 826.460         | K[17] |
| A[24] | 1185.211        | 770.926         | 762.918         | 763.420         | 762.412         | A[16] |
| A[25] | 1230.729        | 735.407         | 727.397         | 727.902         | 726.894         | A[15] |
| C[26] | <b>1249.240</b> | 699.899         | 691.879         | 692.383         | 691.375         | C[14] |
| C[27] | 1277.813        | 674.379         | 666.360         | 666.864         | 665.856         | C[13] |
| A[28] | <b>1313.269</b> | 642.867         | 634.838         | 635.362         | 634.354         | A[12] |
| K[29] | <b>1377.317</b> | 607.349         | <b>599.339</b>  | <b>599.843</b>  | <b>598.835</b>  | K[11] |
| R[30] | <b>1455.367</b> | 543.301         | 535.292         | 535.796         | 534.788         | R[10] |
| K[31] | 1533.430        | 465.251         | 457.241         | 457.745         | 456.737         | K[9]  |
| T[32] | 1583.959        | 397.201         | 379.178         | 379.682         | 378.674         | T[8]  |
| S[33] | 1627.470        | 198.664         | 328.654         | 329.158         | 328.150         | S[1]  |
| G[34] | 1655.981        | 293.148         | 285.138         | 285.642         | 284.634         | G[6]  |
| F[35] | 1704.507        | 264.637         | 256.627         | 257.131         | 256.124         | F[5]  |
| F[36] | 1753.034        | 216.110         | 208.101         | 208.605         | 207.597         | F[4]  |
| V[37] | 1802.568        | 187.584         | 159.575         | 160.079         | 159.071         | V[3]  |
| S[38] | 1846.088        | 118.050         | 110.041         | 110.544         | 109.535         | S[2]  |
| E[39] | 1910.605        | 74.534          | 66.524          | 67.028          | 66.021          | E[1]  |

# sp | P43274 | H14\_MOUSE

TAPAAPAAPAPAEKTPVKKKARKAAGGAKRK <sup>Dimethyl</sup> TSGPPVSE <sub>28.03</sub>

- ▶ fragmentation table for charge state 3+
- ▶ specType=etd
- ▶ score=60.97
- ▶ F105343.dat
- ▶ query=q14439\_p1
- ▶ precursor=765.039930
- ▶ chargePrecursor=5
- ▶ itol=0.8

| AA | c  | y               | z-1             | z-2             | z              | AA              |   |    |
|----|----|-----------------|-----------------|-----------------|----------------|-----------------|---|----|
| F  | 1  | 40.305          | 1274.401        | <b>1269.061</b> | 0.672          | <b>1268.725</b> | F | 30 |
| A  | 2  | 04.044          | 1240.718        | <b>1235.378</b> | 0.672          | <b>1235.043</b> | A | 38 |
| P  | 3  | 06.395          | 1217.030        | 1211.669        | 0.672          | 1211.363        | P | 37 |
| A  | 4  | 120.074         | 1184.680        | 1179.368        | 0.672          | 1179.011        | A | 26 |
| A  | 5  | 143.753         | 1161.000        | <b>1155.669</b> | 0.672          | <b>1155.334</b> | A | 35 |
| P  | 6  | 176.104         | <b>1137.330</b> | 1131.990        | 0.672          | 1131.054        | P | 34 |
| A  | 7  | 199.793         | 1104.970        | 1099.639        | 0.672          | 1099.304        | A | 33 |
| A  | 8  | 223.462         | 1081.300        | <b>1075.960</b> | 0.672          | 1075.625        | A | 32 |
| P  | 9  | 255.813         | 1057.623        | 1052.241        | 0.672          | 1051.945        | P | 31 |
| A  | 10 | 279.492         | 1025.279        | <b>1019.930</b> | 0.672          | <b>1019.595</b> | A | 30 |
| P  | 11 | 311.843         | 1001.591        | 996.251         | 0.672          | 995.916         | P | 29 |
| A  | 12 | 335.522         | 969.240         | <b>963.901</b>  | 0.672          | <b>963.565</b>  | A | 28 |
| E  | 13 | 378.537         | <b>945.561</b>  | <b>940.221</b>  | 0.672          | <b>939.886</b>  | E | 27 |
| K  | 14 | 421.235         | <b>902.547</b>  | <b>897.207</b>  | <b>897.543</b> | <b>896.871</b>  | K | 26 |
| T  | 15 | 454.017         | 899.840         | <b>854.509</b>  | <b>854.845</b> | <b>854.173</b>  | T | 25 |
| F  | 16 | 487.268         | 826.166         | 821.825         | 821.152        | 820.496         | F | 24 |
| V  | 17 | 520.291         | 793.815         | 788.476         | 788.811        | 788.140         | V | 23 |
| K  | 18 | 562.989         | 760.792         | 755.453         | 755.789        | 755.117         | K | 22 |
| K  | 19 | 605.688         | 718.094         | 712.754         | 713.090        | 712.418         | K | 21 |
| K  | 20 | 648.386         | 675.390         | 670.056         | 670.392        | 669.720         | K | 20 |
| A  | 21 | 692.085         | 632.697         | 627.358         | 627.694        | 627.022         | A | 19 |
| D  | 22 | 724.099         | 609.011         | 603.679         | 604.015        | 603.341         | D | 18 |
| K  | 23 | 766.797         | 555.985         | 551.645         | 551.981        | 551.309         | K | 17 |
| A  | 24 | 790.476         | 514.288         | 508.947         | 509.283        | 508.611         | A | 16 |
| A  | 25 | 814.155         | 490.607         | 485.268         | 485.604        | 484.932         | A | 15 |
| G  | 26 | 833.162         | 466.928         | 461.589         | 461.925        | 461.253         | G | 14 |
| G  | 27 | 852.170         | 447.921         | 442.581         | 442.917        | 442.245         | G | 13 |
| A  | 28 | 875.849         | 429.914         | 423.574         | 423.910        | 423.238         | A | 12 |
| K  | 29 | <b>918.547</b>  | 405.235         | 399.895         | 400.231        | 399.559         | K | 11 |
| R  | 30 | <b>970.581</b>  | 362.537         | 357.197         | 357.533        | 356.861         | R | 10 |
| K  | 31 | 1027.623        | 310.507         | 305.163         | 305.499        | 304.827         | K | 9  |
| T  | 32 | <b>1056.305</b> | 259.461         | 253.121         | 253.457        | 252.785         | T | 8  |
| S  | 33 | <b>1085.316</b> | 224.778         | 218.439         | 218.775        | 218.103         | S | 7  |
| G  | 34 | 1114.219        | 199.767         | 193.428         | 193.764        | 193.092         | G | 6  |
| P  | 35 | 1136.674        | 175.760         | 171.421         | 171.757        | 171.085         | P | 5  |
| P  | 36 | 1169.025        | 144.400         | 139.070         | 139.406        | 138.734         | P | 4  |
| V  | 37 | <b>1202.048</b> | 112.050         | 106.719         | 107.055        | 106.383         | V | 3  |
| S  | 38 | <b>1231.058</b> | 79.030          | 73.696          | 74.032         | 73.360          | S | 2  |
| E  | 39 | 1274.673        | 50.025          | 44.685          | 45.021         | 44.349          | E | 1  |

# sp | P43274 | H14\_MOUSE

TAPAAPAAPAEKTPVKKKARKAAGGAKRK <sup>Dimethyl</sup> TSGPPVSE <sub>28.03</sub>

- ▶ fragmentation table for charge state 4+
- ▶ specType=etd
- ▶ score=60.97
- ▶ F105343.dat
- ▶ query=q14439\_p1
- ▶ precursor=765.039930
- ▶ chargePrecursor=5
- ▶ itol=0.8

| AA    | c              | y              | z+1            | z+2     | z              | AA    |
|-------|----------------|----------------|----------------|---------|----------------|-------|
| T[1]  | 30.526         | <b>956.052</b> | <b>952.048</b> | 0.755   | <b>951.796</b> | T[30] |
| A[2]  | 48.285         | 930.790        | <b>926.786</b> | 0.755   | <b>926.534</b> | A[38] |
| P[3]  | 72.548         | <b>913.031</b> | <b>909.026</b> | 0.755   | <b>908.774</b> | P[37] |
| A[4]  | 90.308         | 888.768        | 884.763        | 0.755   | 884.511        | A[36] |
| A[5]  | 108.087        | 871.009        | 867.004        | 0.755   | 866.752        | A[35] |
| P[6]  | 132.330        | 853.240        | 849.235        | 0.755   | 848.991        | P[34] |
| A[7]  | 150.089        | 828.986        | 824.981        | 0.755   | 824.729        | A[33] |
| A[8]  | 167.849        | 811.227        | 807.222        | 0.755   | 806.970        | A[32] |
| P[9]  | 192.112        | 793.468        | 789.463        | 0.755   | 789.211        | P[31] |
| A[10] | 209.871        | 769.204        | 765.200        | 0.755   | 764.948        | A[30] |
| P[11] | 254.134        | 751.445        | 747.440        | 0.755   | 747.188        | P[29] |
| A[12] | 251.894        | 727.182        | 723.177        | 0.755   | 722.925        | A[28] |
| E[13] | 284.154        | 709.423        | 705.418        | 0.755   | 705.166        | E[27] |
| K[14] | 316.178        | 677.162        | 673.157        | 673.409 | 672.905        | K[26] |
| T[15] | 341.430        | 645.138        | 641.134        | 641.386 | 640.882        | T[25] |
| P[16] | 365.703        | 619.878        | 615.873        | 616.124 | 615.620        | P[24] |
| V[17] | 390.470        | 595.613        | 591.608        | 591.860 | 591.356        | V[23] |
| K[18] | 422.494        | 570.846        | 566.841        | 567.093 | 566.589        | K[22] |
| K[19] | 454.518        | 538.822        | 534.818        | 535.070 | 534.566        | K[21] |
| K[20] | 486.541        | 506.799        | 502.794        | 503.046 | 502.542        | K[20] |
| A[21] | 504.301        | 474.775        | 470.770        | 471.022 | 470.518        | A[19] |
| R[22] | 543.326        | 457.016        | 453.011        | 453.263 | 452.759        | R[18] |
| K[23] | 575.350        | 417.990        | 413.986        | 414.238 | 413.734        | K[17] |
| A[24] | 593.109        | 385.967        | 381.962        | 382.214 | 381.710        | A[16] |
| A[25] | 610.868        | 368.207        | 364.203        | 364.454 | 363.951        | A[15] |
| G[26] | 628.124        | 350.444        | 346.443        | 346.695 | 346.191        | G[14] |
| G[27] | 659.379        | 336.191        | 332.188        | 332.440 | 331.936        | G[13] |
| A[28] | 657.138        | 321.937        | 317.933        | 318.184 | 317.681        | A[12] |
| K[29] | 689.162        | 304.178        | 300.173        | 300.425 | 299.921        | K[11] |
| R[30] | 728.187        | 272.154        | 268.150        | 268.401 | 267.898        | R[10] |
| K[31] | 767.219        | 233.129        | 229.124        | 229.376 | 228.872        | K[9]  |
| T[32] | 792.481        | 194.097        | 190.093        | 190.345 | 189.841        | T[8]  |
| S[33] | 814.239        | 168.835        | 164.831        | 165.083 | 164.579        | S[7]  |
| G[34] | 838.494        | 147.077        | 143.073        | 143.325 | 142.821        | G[6]  |
| F[35] | 852.157        | 132.822        | 128.817        | 129.069 | 128.565        | F[5]  |
| F[36] | <b>873.620</b> | 108.569        | 104.564        | 104.806 | 104.302        | F[4]  |
| V[17] | <b>901.788</b> | 84.296         | 80.291         | 80.543  | 80.039         | V[3]  |
| S[38] | <b>923.546</b> | 59.529         | 55.524         | 55.776  | 55.272         | S[2]  |
| E[39] | <b>955.806</b> | 37.771         | 33.766         | 34.018  | 33.514         | E[1]  |

# sp | P15864 | H12\_MOUSE

[Acetyl]SEAAPAAPAAAPPAEKAPAKKKAAKKPAQVRRKASGPPVSE

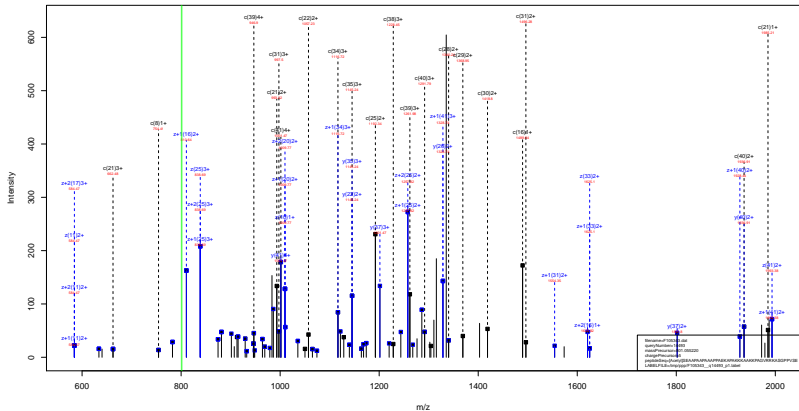

# sp | P15864 | H12\_MOUSE

[Acetyl]SEAAPAAPAAAPPAEKAPAKKKAAKKPAAGVRRKASGPPVSE

- ▶ fragmentation table for charge state 1+
- ▶ specType=etd
- ▶ score=44.72
- ▶ F105343.dat
- ▶ query=q14493.p1
- ▶ precursor=801.055220
- ▶ chargePrecursor=5
- ▶ itol=0.8

| AA  | c               | y               | z+1      | z+2             | z               | AA  |
|-----|-----------------|-----------------|----------|-----------------|-----------------|-----|
| S1  | 147.076         | 4001.243        | 2385.222 | 0.000           | 3054.214        | S41 |
| E2  | 276.119         | 3872.198        | 3856.179 | 0.000           | 3855.172        | E40 |
| A3  | 347.156         | 3743.156        | 4727.137 | 0.000           | 4726.129        | A30 |
| A4  | 418.193         | 3614.118        | 3656.100 | 0.000           | 3655.092        | A38 |
| F5  | 515.246         | 3601.081        | 3585.063 | 0.000           | 3584.055        | F37 |
| A6  | 586.283         | 3504.029        | 3488.010 | 0.000           | 3487.002        | A26 |
| A7  | 657.320         | 3432.992        | 3418.973 | 0.000           | 3415.965        | A35 |
| P8  | <b>754.373</b>  | 3361.954        | 3345.936 | 0.000           | 3344.928        | P34 |
| A9  | 828.410         | 3264.902        | 3248.883 | 0.000           | 3247.875        | A33 |
| A10 | 899.447         | 3193.864        | 3177.846 | 0.000           | 3176.838        | A32 |
| A11 | 970.484         | 3122.827        | 3106.809 | 0.000           | 3105.801        | A31 |
| P12 | <b>1064.537</b> | 3051.790        | 3035.771 | 0.000           | 3034.764        | P20 |
| P13 | 1161.590        | 2954.737        | 2938.719 | 0.000           | 2937.711        | P29 |
| A14 | 1232.627        | 2857.685        | 2841.666 | 0.000           | 2840.658        | A28 |
| E15 | 1361.670        | 2786.648        | 2770.629 | 0.000           | 2769.621        | E27 |
| K16 | <b>1489.765</b> | 2657.602        | 2641.583 | 2642.564        | 2640.578        | K26 |
| A17 | 1560.802        | 2529.510        | 2513.491 | 2514.499        | 2512.483        | A25 |
| P18 | 1657.854        | 2458.473        | 2442.454 | 2443.462        | 2441.446        | P24 |
| A19 | 1728.892        | 2361.425        | 2345.401 | 2346.409        | 2344.394        | A23 |
| K20 | 1856.986        | 2290.383        | 2274.364 | 2275.372        | 2273.356        | K22 |
| K21 | <b>1965.081</b> | 2162.338        | 2146.320 | 2147.377        | 2145.361        | K21 |
| K22 | 2113.176        | 2034.193        | 2018.174 | 2019.182        | 2017.167        | K20 |
| A23 | 2164.214        | 1906.098        | 1890.079 | 1891.087        | 1889.072        | A19 |
| A24 | 2255.251        | 1835.061        | 1819.042 | 1820.050        | 1818.034        | A18 |
| K25 | 2383.346        | 1764.025        | 1748.005 | 1749.013        | 1747.997        | K17 |
| K26 | 2511.441        | 1635.929        | 1619.910 | <b>1620.918</b> | 1618.902        | K16 |
| P27 | 2608.493        | 1507.834        | 1491.815 | 1492.823        | 1490.807        | P15 |
| A28 | 2679.530        | 1410.781        | 1394.762 | 1395.770        | 1393.755        | A14 |
| C29 | 2736.562        | <b>1339.744</b> | 1323.725 | 1324.733        | 1322.717        | C13 |
| V30 | 2835.600        | <b>1288.744</b> | 1269.704 | <b>1267.712</b> | 1265.696        | V12 |
| R31 | 2991.721        | 1183.654        | 1167.635 | <b>1168.643</b> | 1166.628        | R11 |
| R32 | 3147.823        | 1027.553        | 1011.534 | 1012.542        | <b>1010.527</b> | R10 |
| K33 | 3275.918        | 871.452         | 855.433  | 856.441         | 854.425         | K09 |
| A34 | 3346.955        | 743.357         | 727.338  | 728.346         | 726.330         | A08 |
| S35 | 3433.887        | 672.320         | 656.301  | 657.309         | 655.293         | S07 |
| G36 | 3491.008        | 585.280         | 569.260  | 570.277         | 568.261         | G06 |
| P37 | 3568.061        | 528.266         | 512.248  | 513.256         | 511.240         | P05 |
| P38 | 3686.114        | 431.214         | 415.195  | 416.203         | 414.187         | P04 |
| V39 | 3784.182        | 334.161         | 318.142  | 319.150         | 317.134         | V03 |
| S40 | 3871.214        | 235.062         | 219.074  | 220.082         | 218.066         | S02 |
| E41 | 4000.257        | 148.060         | 132.043  | 133.050         | 131.034         | E01 |

# sp | P15864 | H12\_MOUSE

[Acetyl]SEAAPAAPAAAPPAEKAPAKKKAAKKPAGVRRKASGPPVSE

- ▶ fragmentation table for charge state 2+
- ▶ specType=etd
- ▶ score=44.72
- ▶ F105343.dat
- ▶ query=q14493.p1
- ▶ precursor=801.055220
- ▶ chargePrecursor=5
- ▶ itol=0.8

| AA  | c               | y               | z+1             | z+2             | z               | AA    |
|-----|-----------------|-----------------|-----------------|-----------------|-----------------|-------|
| S1  | 74.042          | 2001.124        | <b>1993.115</b> | 0.504           | <b>1992.611</b> | S(41) |
| E2  | 138.503         | <b>1936.603</b> | <b>1928.583</b> | 0.504           | <b>1928.089</b> | E(42) |
| A3  | 174.082         | 1872.001        | 1864.072        | 0.504           | 1863.568        | A(30) |
| A4  | 209.600         | 1836.563        | 1828.553        | 0.504           | 1828.050        | A(38) |
| F5  | 258.127         | <b>1801.044</b> | 1793.035        | 0.504           | 1792.531        | F(37) |
| A16 | 283.888         | 1752.518        | 1744.509        | 0.504           | 1744.005        | A(36) |
| A7  | 329.164         | 1718.990        | 1709.980        | 0.504           | 1709.486        | A(35) |
| F8  | 377.600         | 1681.461        | 1673.451        | 0.504           | 1672.956        | F(34) |
| A9  | 413.209         | 1632.934        | <b>1624.945</b> | 0.504           | <b>1624.441</b> | A(33) |
| A10 | 448.727         | 1597.436        | 1589.426        | 0.504           | 1588.923        | A(32) |
| A11 | 484.246         | 1561.917        | <b>1553.908</b> | 0.504           | 1553.404        | A(31) |
| F12 | 532.972         | 1526.399        | 1518.389        | 0.504           | 1517.885        | F(30) |
| F13 | 581.200         | 1477.872        | 1469.863        | 0.504           | 1469.359        | F(29) |
| A14 | 630.817         | 1429.346        | 1421.337        | 0.504           | 1420.833        | A(28) |
| E15 | 681.336         | 1393.827        | 1385.818        | 0.504           | 1385.314        | E(27) |
| K16 | 745.306         | <b>1329.306</b> | 1321.297        | 1321.801        | 1320.793        | K(28) |
| A17 | 780.824         | 1285.289        | <b>1257.249</b> | <b>1257.753</b> | 1256.745        | A(25) |
| F18 | 829.433         | 1259.746        | 1251.737        | 1252.241        | 1251.227        | F(24) |
| A19 | 884.946         | 1181.214        | <b>1173.204</b> | <b>1173.708</b> | 1172.700        | A(23) |
| K20 | <b>928.997</b>  | <b>1145.695</b> | 1137.686        | 1138.190        | 1137.182        | K(22) |
| K21 | <b>993.044</b>  | 1081.648        | <b>1073.638</b> | <b>1074.142</b> | 1073.134        | K(21) |
| K22 | <b>1057.092</b> | 1017.600        | <b>1009.591</b> | <b>1010.095</b> | <b>1009.087</b> | K(20) |
| A23 | 1092.718        | 953.063         | <b>945.543</b>  | <b>946.047</b>  | 945.039         | A(19) |
| A24 | <b>1128.129</b> | 918.034         | 910.025         | 910.529         | 909.521         | A(18) |
| K25 | <b>1192.176</b> | 882.516         | <b>874.506</b>  | <b>875.010</b>  | <b>874.002</b>  | K(17) |
| K26 | 1256.224        | 818.468         | <b>810.459</b>  | <b>810.963</b>  | <b>809.955</b>  | K(16) |
| F27 | <b>1304.750</b> | <b>754.421</b>  | 746.411         | 746.915         | 745.907         | F(15) |
| A28 | <b>1340.269</b> | 705.894         | 697.885         | 698.389         | 697.381         | A(14) |
| G29 | <b>1368.790</b> | 670.376         | <b>662.366</b>  | <b>662.870</b>  | <b>661.862</b>  | G(13) |
| V30 | <b>1418.314</b> | 641.855         | <b>633.856</b>  | <b>634.359</b>  | <b>633.352</b>  | V(12) |
| R31 | <b>1496.304</b> | 602.331         | <b>584.321</b>  | <b>584.825</b>  | <b>583.817</b>  | R(11) |
| R32 | 1574.415        | 514.280         | 506.271         | 506.775         | 505.767         | R(10) |
| K33 | 1638.462        | 436.230         | 428.220         | 428.724         | 427.716         | K(9)  |
| A34 | 1873.983        | 372.182         | 364.173         | 364.677         | 363.669         | A(8)  |
| S35 | 1717.497        | 336.664         | 328.654         | 329.158         | 328.150         | S(7)  |
| G36 | 1746.008        | 293.148         | 285.138         | 285.642         | 284.634         | G(6)  |
| F37 | 1784.534        | 264.637         | 256.627         | 257.131         | 256.124         | F(5)  |
| F38 | 1843.060        | 216.110         | 208.101         | 208.605         | 207.597         | F(4)  |
| V39 | 1892.595        | 187.584         | 159.575         | 160.079         | 159.071         | V(3)  |
| S40 | <b>1936.111</b> | 118.066         | 110.043         | 110.544         | 109.534         | S(2)  |
| E41 | 2000.832        | 74.534          | 66.524          | 67.028          | 66.021          | E(1)  |

# sp | P15864 | H12\_MOUSE

[Acetyl]SEAAPAAPAAAPPAEKAPAKKKAAKKPAGVRRKASGPPVSE

- ▶ fragmentation table for charge state 3+
- ▶ specType=etd
- ▶ score=44.72
- ▶ F105343.dat
- ▶ query=q14493.p1
- ▶ precursor=801.055220
- ▶ chargePrecursor=5
- ▶ itol=0.8

| AA | c  | y               | z+1             | z+2             | z              | AA              |       |
|----|----|-----------------|-----------------|-----------------|----------------|-----------------|-------|
| S  | 1  | 49.697          | 1334.418        | <b>1329.879</b> | 0.672          | <b>1328.743</b> | S[41] |
| E  | 2  | 92.711          | <b>1291.404</b> | <b>1286.065</b> | 0.672          | <b>1285.729</b> | E[40] |
| A  | 3  | 116.390         | 1248.390        | <b>1243.050</b> | 0.672          | 1242.715        | A[39] |
| A  | 4  | 140.069         | 1204.711        | <b>1219.371</b> | 0.672          | 1219.035        | A[38] |
| P  | 5  | 172.420         | <b>1201.032</b> | <b>1195.992</b> | 0.672          | 1195.365        | P[37] |
| A  | 6  | 199.099         | <b>1168.681</b> | <b>1163.341</b> | 0.672          | 1163.005        | A[36] |
| A  | 7  | 219.778         | <b>1145.002</b> | <b>1139.662</b> | 0.672          | <b>1139.326</b> | A[35] |
| P  | 8  | 252.120         | <b>1121.323</b> | <b>1115.983</b> | 0.672          | 1115.647        | P[34] |
| A  | 9  | 274.808         | 1088.972        | 1083.632        | 0.672          | 1083.297        | A[33] |
| A  | 10 | 299.487         | <b>1065.293</b> | 1059.953        | 0.672          | 1059.617        | A[32] |
| A  | 11 | 323.166         | 1041.814        | <b>1036.274</b> | 0.672          | <b>1035.938</b> | A[31] |
| P  | 12 | 353.177         | 1013.935        | 1012.595        | 0.672          | 1012.259        | P[30] |
| P  | 13 | 387.898         | <b>985.584</b>  | 980.244         | 0.672          | <b>979.908</b>  | P[29] |
| A  | 14 | 411.547         | 953.233         | <b>947.893</b>  | 0.672          | <b>947.558</b>  | A[28] |
| E  | 15 | 454.561         | <b>929.554</b>  | 924.214         | 0.672          | 923.879         | E[27] |
| K  | 16 | 497.260         | 896.540         | <b>881.200</b>  | <b>881.536</b> | <b>880.864</b>  | K[26] |
| A  | 17 | 520.939         | 843.842         | <b>838.502</b>  | <b>838.838</b> | <b>838.166</b>  | A[25] |
| P  | 18 | 553.290         | 820.160         | 814.820         | 814.150        | 813.479         | P[24] |
| A  | 19 | 576.999         | 787.812         | <b>782.472</b>  | <b>782.808</b> | <b>782.136</b>  | A[23] |
| K  | 20 | 619.667         | 764.133         | 758.793         | 759.129        | 758.457         | K[22] |
| K  | 21 | <b>662.365</b>  | 721.434         | 716.095         | 716.431        | 715.759         | K[21] |
| K  | 22 | 705.064         | 678.736         | 673.396         | 673.732        | 673.060         | K[20] |
| A  | 23 | 728.743         | 636.038         | 630.698         | 631.034        | 630.362         | A[19] |
| A  | 24 | 752.422         | 612.359         | 607.019         | 607.355        | 606.683         | A[18] |
| K  | 25 | 795.120         | 588.679         | 583.340         | <b>583.676</b> | 583.004         | K[17] |
| K  | 26 | 837.818         | 545.981         | 540.642         | 540.978        | 540.306         | K[16] |
| P  | 27 | 870.169         | 503.283         | 497.943         | 498.279        | 497.607         | P[15] |
| A  | 28 | 893.848         | 470.932         | 465.592         | 465.928        | 465.256         | A[14] |
| G  | 29 | <b>912.895</b>  | 447.263         | 441.923         | 442.249        | 441.577         | G[13] |
| V  | 30 | <b>945.878</b>  | 429.348         | 423.998         | 423.242        | 422.570         | V[12] |
| R  | 31 | <b>997.912</b>  | 395.223         | 389.883         | 390.219        | 389.547         | R[11] |
| R  | 32 | <b>1049.946</b> | 343.180         | 337.850         | 338.186        | 337.514         | R[10] |
| K  | 33 | 1092.644        | 291.159         | 285.819         | 286.152        | 285.480         | K[9]  |
| A  | 34 | <b>1116.323</b> | 248.457         | 243.118         | 243.454        | 242.782         | A[8]  |
| S  | 35 | <b>1145.334</b> | 224.778         | 219.439         | 219.775        | 219.103         | S[7]  |
| G  | 36 | <b>1164.341</b> | 199.761         | 194.422         | 194.758        | 194.086         | G[6]  |
| P  | 37 | 1198.092        | 175.760         | 171.421         | 171.757        | 171.085         | P[5]  |
| P  | 38 | <b>1229.043</b> | 144.400         | 139.070         | 139.406        | 138.734         | P[4]  |
| V  | 39 | <b>1262.066</b> | 112.050         | 106.719         | 107.055        | 106.383         | V[3]  |
| S  | 40 | <b>1291.076</b> | 79.030          | 73.696          | 74.032         | 73.360          | S[2]  |
| E  | 41 | 1334.090        | 50.025          | 44.685          | 45.021         | 44.349          | E[1]  |

# sp | P15864 | H12\_MOUSE

[Acetyl]SEAAPAAPAAAPPAEKAPAKKKAACKKPAGVRRKASGPPVSE

- ▶ fragmentation table for charge state 4+
- ▶ specType=etd
- ▶ score=44.72
- ▶ F105343.dat
- ▶ query=q14493\_p1
- ▶ precursor=801.055220
- ▶ chargePrecursor=5
- ▶ itol=0.8

| AA | c  | y               | z+1             | z+2            | z     | AA             |       |
|----|----|-----------------|-----------------|----------------|-------|----------------|-------|
| S  | 1  | 37.525          | <b>1001.066</b> | <b>997.061</b> | 0.755 | <b>996.809</b> | S[41] |
| E  | 2  | 89.795          | <b>968.865</b>  | <b>964.860</b> | 0.755 | <b>964.546</b> | E[40] |
| A  | 3  | 87.544          | <b>936.864</b>  | <b>932.540</b> | 0.755 | <b>932.268</b> | A[39] |
| A  | 4  | 105.304         | 918.705         | <b>914.780</b> | 0.755 | <b>914.528</b> | A[38] |
| P  | 5  | 129.567         | <b>901.026</b>  | <b>897.021</b> | 0.755 | <b>896.769</b> | P[37] |
| A  | 6  | 147.326         | 876.703         | 872.758        | 0.755 | 872.506        | A[36] |
| A  | 7  | 165.086         | 859.003         | 854.999        | 0.755 | 854.747        | A[35] |
| P  | 8  | 189.349         | 841.244         | 837.239        | 0.755 | 836.987        | P[34] |
| A  | 9  | 207.108         | 816.981         | 812.976        | 0.755 | 812.724        | A[33] |
| A  | 10 | 224.867         | 799.222         | 795.217        | 0.755 | 794.965        | A[32] |
| A  | 11 | 242.627         | 781.462         | 777.458        | 0.755 | 777.206        | A[31] |
| P  | 12 | 266.890         | 763.703         | 759.698        | 0.755 | 759.446        | P[30] |
| P  | 13 | 291.153         | 739.440         | 735.435        | 0.755 | 735.183        | P[29] |
| A  | 14 | 308.912         | 715.177         | 711.172        | 0.755 | 710.920        | A[28] |
| E  | 15 | 341.173         | 697.417         | 693.413        | 0.755 | 693.161        | E[27] |
| K  | 16 | 373.197         | 668.157         | 664.152        | 0.601 | 660.900        | K[26] |
| A  | 17 | 390.956         | 633.133         | 629.128        | 0.629 | 628.876        | A[25] |
| P  | 18 | 415.219         | 615.374         | 611.369        | 0.611 | 611.117        | P[24] |
| A  | 19 | 432.978         | 591.110         | 587.105        | 0.587 | 586.854        | A[23] |
| K  | 20 | 465.002         | 573.351         | 569.347        | 0.569 | 569.095        | K[22] |
| K  | 21 | 497.026         | 541.327         | 537.323        | 0.537 | 537.071        | K[21] |
| K  | 22 | 529.050         | 509.304         | 505.299        | 0.505 | 505.047        | K[20] |
| A  | 23 | 546.809         | 477.280         | 473.275        | 0.473 | 473.023        | A[19] |
| A  | 24 | 564.568         | 450.521         | 446.516        | 0.446 | 445.264        | A[18] |
| K  | 25 | 596.592         | 442.761         | 437.757        | 0.438 | 437.505        | K[17] |
| K  | 26 | 628.616         | 409.738         | 405.733        | 0.405 | 405.481        | K[16] |
| P  | 27 | 652.879         | 377.714         | 373.709        | 0.373 | 373.457        | P[15] |
| A  | 28 | 670.638         | 353.451         | 349.446        | 0.349 | 349.194        | A[14] |
| G  | 29 | 684.893         | 335.691         | 331.687        | 0.331 | 331.435        | G[13] |
| V  | 30 | 709.661         | 321.436         | 317.431        | 0.317 | 317.179        | V[12] |
| R  | 31 | 748.680         | 296.669         | 292.664        | 0.292 | 292.412        | R[11] |
| R  | 32 | 787.711         | 257.644         | 253.639        | 0.253 | 253.387        | R[10] |
| K  | 33 | 819.735         | 218.618         | 214.614        | 0.214 | 214.362        | K[9]  |
| A  | 34 | 837.694         | 189.595         | 185.590        | 0.185 | 185.338        | A[8]  |
| S  | 35 | 859.252         | 158.835         | 154.831        | 0.154 | 154.579        | S[7]  |
| G  | 36 | 873.507         | 147.077         | 143.073        | 0.143 | 142.821        | G[6]  |
| P  | 37 | 897.771         | 132.822         | 128.817        | 0.129 | 128.565        | P[5]  |
| P  | 38 | 922.034         | 108.559         | 104.554        | 0.104 | 104.302        | P[4]  |
| V  | 39 | <b>946.801</b>  | 84.296          | 80.291         | 0.80  | 80.039         | V[3]  |
| S  | 40 | <b>968.559</b>  | 59.529          | 55.524         | 0.55  | 55.272         | S[2]  |
| E  | 41 | <b>1000.820</b> | 37.771          | 33.766         | 0.34  | 33.514         | E[1]  |



# sp | P15864 | H12\_MOUSE

[Acetyl]SEAAPAAPAAAPPAEKAPAKKKAACKKPAGVRRKASGPPVSE

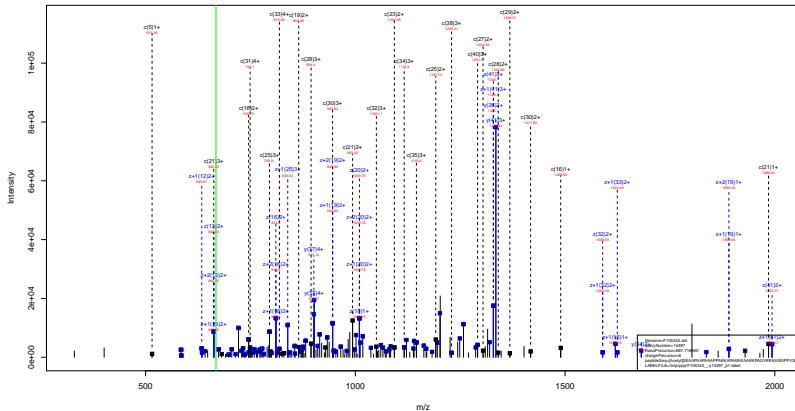

# sp | P15864 | H12\_MOUSE

[Acetyl]SEAAPAAPAAAPPAEKAPAKKKAAKKPAGVRRKASGPPVSE

- ▶ fragmentation table for charge state 1+
- ▶ specType=etd
- ▶ score=40.62
- ▶ F105343.dat
- ▶ query=q14497.p1
- ▶ precursor=667.716900
- ▶ chargePrecursor=6
- ▶ itol=0.8

| AA | c  | y               | z+1             | z+2             | z               | AA              |       |
|----|----|-----------------|-----------------|-----------------|-----------------|-----------------|-------|
| S  | 1  | 147.076         | 4001.241        | 8065.222        | 0.000           | 8984.214        | S[41] |
| E  | 2  | 276.119         | 3072.195        | 6156.179        | 0.000           | 3855.172        | E[42] |
| A  | 3  | 347.156         | 3743.156        | 3727.137        | 0.000           | 3726.120        | A[30] |
| A  | 4  | 418.193         | 4672.118        | 9556.100        | 0.000           | 9555.090        | A[38] |
| P  | 5  | <b>515.246</b>  | 3601.081        | 3585.053        | 0.000           | 3584.055        | P[37] |
| A  | 6  | 565.283         | 3954.129        | 3460.100        | 0.000           | 3467.200        | A[36] |
| A  | 7  | 657.320         | 3432.991        | 3610.973        | 0.000           | 3415.965        | A[35] |
| P  | 8  | <b>754.373</b>  | 3361.054        | 3345.036        | 0.000           | 3344.926        | P[34] |
| A  | 9  | <b>825.410</b>  | 3364.903        | 3246.893        | 0.000           | 3247.875        | A[33] |
| A  | 10 | 896.447         | 3193.864        | 3177.846        | 0.000           | 3176.838        | A[32] |
| A  | 11 | 967.484         | 3122.827        | 3106.809        | 0.000           | 3105.801        | A[31] |
| P  | 12 | 1054.521        | 3051.790        | 3035.771        | 0.000           | 3034.764        | P[30] |
| P  | 13 | 1161.558        | 2954.737        | 2938.718        | 0.000           | 2937.711        | P[29] |
| A  | 14 | 1232.627        | 2857.685        | 2841.666        | 0.000           | 2840.658        | A[28] |
| E  | 15 | 1361.670        | 2786.648        | 2770.629        | 0.000           | 2769.621        | E[27] |
| K  | 16 | <b>1489.765</b> | 2657.605        | 2641.586        | 2642.594        | 2640.578        | K[26] |
| A  | 17 | 1560.802        | 2526.510        | 2513.491        | 2514.499        | 2512.483        | A[25] |
| P  | 18 | 1657.854        | 2458.473        | 2442.454        | 2443.462        | 2441.446        | P[24] |
| A  | 19 | 1728.892        | 2361.426        | 2345.407        | 2346.409        | 2344.394        | A[23] |
| K  | 20 | 1856.886        | 2290.383        | 2274.364        | 2275.372        | 2273.356        | K[22] |
| K  | 21 | <b>1985.081</b> | 2162.289        | 2146.269        | 2147.277        | 2145.261        | K[21] |
| K  | 22 | 2113.176        | 2034.193        | 2018.174        | 2019.182        | 2017.167        | K[20] |
| A  | 23 | 2164.214        | 1958.098        | <b>1890.079</b> | <b>1891.087</b> | 1889.071        | A[19] |
| A  | 24 | 2255.251        | 1875.051        | 1859.032        | 1860.040        | 1858.024        | A[18] |
| K  | 25 | 2383.346        | 1764.024        | 1748.005        | 1749.013        | 1746.997        | K[17] |
| K  | 26 | 2511.441        | 1635.929        | <b>1619.910</b> | 1620.918        | 1618.902        | K[16] |
| P  | 27 | 2608.493        | 1507.834        | 1491.815        | 1492.823        | 1490.807        | P[15] |
| A  | 28 | 2679.530        | 1410.781        | 1394.762        | 1395.770        | 1393.754        | A[14] |
| G  | 29 | 2726.562        | 1339.744        | 1323.725        | 1324.733        | 1322.717        | G[13] |
| V  | 30 | 2835.620        | 1282.723        | 1266.704        | 1267.712        | 1265.696        | V[12] |
| R  | 31 | 2991.721        | <b>1183.654</b> | 1167.635        | <b>1168.643</b> | 1166.628        | R[11] |
| R  | 32 | 3147.823        | 1027.553        | <b>1011.534</b> | 1012.542        | <b>1010.527</b> | R[10] |
| K  | 33 | 3275.916        | 871.452         | <b>855.433</b>  | <b>856.441</b>  | 854.425         | K[9]  |
| A  | 34 | 3368.958        | 743.357         | 727.338         | <b>728.346</b>  | 726.330         | A[8]  |
| S  | 35 | 3433.987        | 672.320         | 656.301         | 657.309         | 655.293         | S[7]  |
| G  | 36 | 3491.008        | <b>585.288</b>  | 569.269         | 570.277         | 568.261         | G[6]  |
| P  | 37 | 3588.061        | 626.266         | 512.248         | 513.256         | 511.240         | P[5]  |
| P  | 38 | 3685.114        | 431.214         | 415.195         | 416.203         | 414.187         | P[4]  |
| V  | 39 | 3784.162        | 334.161         | 318.142         | 319.150         | 317.134         | V[3]  |
| S  | 40 | 3871.214        | 238.092         | 219.073         | 220.081         | 218.065         | S[2]  |
| E  | 41 | 4000.257        | 148.060         | 132.042         | 133.050         | 131.034         | E[1]  |

# sp | P15864 | H12\_MOUSE

[Acetyl]SEAAPAAPAAAPPAEKAPAKKKAAKKPAGVRRKASGPPVSE

- ▶ fragmentation table for charge state 2+
- ▶ specType=etd
- ▶ score=40.62
- ▶ F105343.dat
- ▶ query=q14497.p1
- ▶ precursor=667.716900
- ▶ chargePrecursor=6
- ▶ itol=0.8

| AA | c               | y               | z+1             | z+2             | z               | AA    |
|----|-----------------|-----------------|-----------------|-----------------|-----------------|-------|
| S1 | 74.093          | 2001.124        | <b>1993.115</b> | 0.504           | <b>1992.611</b> | S[41] |
| E1 | 138.503         | 1938.603        | <b>1928.593</b> | 0.504           | 1928.090        | E[42] |
| A1 | 174.082         | 1872.081        | 1864.072        | 0.504           | 1863.566        | A[30] |
| A1 | 209.600         | <b>1836.563</b> | 1828.553        | 0.504           | 1828.050        | A[38] |
| F1 | 258.127         | 1801.044        | 1793.035        | 0.504           | 1792.531        | F[37] |
| A1 | 283.889         | 1752.518        | 1744.509        | 0.504           | 1744.005        | A[36] |
| A1 | 329.164         | 1718.990        | 1708.980        | 0.504           | 1708.480        | A[35] |
| F1 | 377.600         | <b>1681.481</b> | 1673.471        | 0.504           | 1672.966        | F[34] |
| A1 | 413.209         | 1632.954        | <b>1624.945</b> | 0.504           | <b>1624.441</b> | A[33] |
| A1 | 448.727         | 1597.426        | <b>1589.426</b> | 0.504           | <b>1588.923</b> | A[32] |
| A1 | 484.246         | 1561.897        | 1553.888        | 0.504           | 1553.404        | A[31] |
| F1 | 532.972         | 1528.369        | 1520.360        | 0.504           | 1519.858        | F[30] |
| F1 | 581.200         | 1477.872        | 1469.863        | 0.504           | 1469.359        | F[29] |
| A1 | 630.817         | 1429.340        | 1421.330        | 0.504           | 1420.833        | A[28] |
| E1 | <b>681.338</b>  | 1393.827        | 1385.818        | 0.504           | 1385.314        | E[27] |
| K1 | <b>745.386</b>  | <b>1329.306</b> | 1321.297        | 1321.801        | <b>1320.793</b> | K[28] |
| A1 | <b>780.904</b>  | 1298.279        | <b>1257.249</b> | <b>1257.753</b> | 1266.745        | A[25] |
| F1 | <b>829.431</b>  | <b>1229.740</b> | 1221.731        | 1222.235        | 1221.227        | F[24] |
| A1 | <b>864.949</b>  | 1181.214        | 1173.204        | 1173.708        | 1172.700        | A[23] |
| K1 | <b>928.997</b>  | <b>1145.695</b> | 1137.686        | <b>1138.190</b> | 1137.182        | K[22] |
| K1 | <b>993.044</b>  | <b>1081.648</b> | <b>1073.638</b> | <b>1074.142</b> | <b>1073.134</b> | K[21] |
| K1 | 1057.092        | <b>1017.600</b> | <b>1009.591</b> | <b>1010.095</b> | <b>1009.087</b> | K[20] |
| A1 | <b>1092.610</b> | <b>953.553</b>  | <b>943.543</b>  | <b>944.047</b>  | <b>945.039</b>  | A[19] |
| A1 | 1158.159        | 918.024         | <b>910.025</b>  | <b>910.529</b>  | 911.521         | A[18] |
| K1 | <b>1192.176</b> | 882.516         | <b>874.506</b>  | <b>875.010</b>  | <b>874.002</b>  | K[17] |
| K1 | 1256.224        | <b>818.468</b>  | <b>810.459</b>  | <b>810.963</b>  | 809.955         | K[16] |
| F1 | <b>1304.750</b> | <b>754.421</b>  | <b>746.411</b>  | <b>746.915</b>  | <b>745.907</b>  | F[15] |
| A1 | <b>1340.269</b> | <b>705.894</b>  | <b>697.885</b>  | <b>698.389</b>  | <b>697.381</b>  | A[14] |
| G1 | <b>1368.780</b> | 670.376         | <b>662.366</b>  | <b>662.870</b>  | <b>661.862</b>  | G[13] |
| V1 | <b>1418.314</b> | <b>641.865</b>  | <b>633.856</b>  | <b>634.359</b>  | <b>633.352</b>  | V[12] |
| R1 | 1486.904        | 602.331         | <b>584.321</b>  | <b>584.825</b>  | <b>583.817</b>  | R[11] |
| R1 | 1578.415        | 574.280         | 566.271         | 566.775         | 565.767         | R[10] |
| K1 | 1638.462        | 436.230         | 428.220         | 428.724         | 427.716         | K[9]  |
| A1 | 1673.981        | 372.182         | 364.173         | 364.677         | 363.669         | A[8]  |
| S1 | 1717.497        | 308.604         | 300.594         | 301.098         | 300.090         | S[7]  |
| G1 | 1746.008        | 293.148         | 285.138         | 285.642         | 284.634         | G[6]  |
| F1 | 1784.534        | 264.617         | 256.607         | 257.111         | 256.103         | F[5]  |
| F1 | 1843.060        | 216.110         | 208.101         | 208.605         | 207.597         | F[4]  |
| V1 | 1882.595        | 167.584         | 159.575         | 160.079         | 159.071         | V[3]  |
| S1 | 1938.314        | 118.096         | 110.087         | 110.591         | 109.583         | S[2]  |
| E1 | 2000.832        | 74.534          | 66.524          | 67.028          | 66.021          | E[1]  |

# sp | P15864 | H12\_MOUSE

[Acetyl]SEAAPAAPAAAPPAEKAPAKKKAAKKPAGVRRKASGPPVSE

- ▶ fragmentation table for charge state 3+
- ▶ specType=etd
- ▶ score=40.62
- ▶ F105343.dat
- ▶ query=q14497.p1
- ▶ precursor=667.716900
- ▶ chargePrecursor=6
- ▶ itol=0.8

| AA | c  | y               | z+1             | z+2             | z              | AA              |       |
|----|----|-----------------|-----------------|-----------------|----------------|-----------------|-------|
| S  | 1  | 49.697          | <b>1334.418</b> | <b>1329.879</b> | 0.672          | <b>1328.743</b> | S[41] |
| E  | 2  | 92.711          | <b>1291.404</b> | <b>1286.065</b> | 0.672          | 1285.720        | E[40] |
| A  | 3  | 116.390         | <b>1248.390</b> | 1243.050        | 0.672          | 1242.715        | A[39] |
| A  | 4  | 140.069         | 1204.711        | 1200.371        | 0.672          | 1200.035        | A[38] |
| P  | 5  | 172.420         | <b>1261.032</b> | <b>1195.602</b> | 0.672          | <b>1195.355</b> | P[37] |
| A  | 6  | 199.099         | <b>1168.681</b> | <b>1163.341</b> | 0.672          | <b>1163.006</b> | A[36] |
| A  | 7  | 219.778         | <b>1145.002</b> | <b>1139.602</b> | 0.672          | <b>1139.326</b> | A[35] |
| P  | 8  | 252.120         | <b>1121.323</b> | <b>1115.983</b> | 0.672          | <b>1115.647</b> | P[34] |
| A  | 9  | 274.808         | 1088.972        | <b>1083.632</b> | 0.672          | 1083.297        | A[33] |
| A  | 10 | 299.487         | <b>1065.293</b> | <b>1059.953</b> | 0.672          | 1059.617        | A[32] |
| A  | 11 | 323.166         | 1041.814        | <b>1036.274</b> | 0.672          | 1035.938        | A[31] |
| P  | 12 | 353.177         | <b>1017.935</b> | <b>1013.595</b> | 0.672          | <b>1012.259</b> | P[30] |
| P  | 13 | 387.898         | <b>985.584</b>  | <b>980.244</b>  | 0.672          | <b>979.908</b>  | P[29] |
| A  | 14 | 411.547         | <b>953.233</b>  | <b>947.893</b>  | 0.672          | <b>947.558</b>  | A[28] |
| E  | 15 | 454.561         | 929.354         | 924.214         | 0.672          | 923.879         | E[27] |
| K  | 16 | 497.260         | 896.540         | <b>881.200</b>  | <b>881.536</b> | <b>880.864</b>  | K[26] |
| A  | 17 | 520.939         | <b>843.842</b>  | <b>838.502</b>  | <b>838.838</b> | <b>838.166</b>  | A[25] |
| P  | 18 | 553.290         | 820.190         | 814.850         | 813.159        | 811.469         | P[24] |
| A  | 19 | 576.999         | 787.812         | 782.472         | 782.808        | <b>782.136</b>  | A[23] |
| K  | 20 | 619.667         | <b>764.133</b>  | <b>758.793</b>  | <b>759.129</b> | <b>758.457</b>  | K[22] |
| K  | 21 | <b>662.365</b>  | <b>721.434</b>  | 716.095         | 716.431        | 715.759         | K[21] |
| K  | 22 | <b>705.064</b>  | 678.730         | <b>673.396</b>  | <b>673.732</b> | <b>673.060</b>  | K[20] |
| A  | 23 | <b>728.743</b>  | 636.030         | 630.690         | 631.034        | 630.362         | A[19] |
| A  | 24 | <b>752.422</b>  | 612.359         | 607.019         | 607.355        | 606.683         | A[18] |
| K  | 25 | <b>795.120</b>  | 588.679         | 583.340         | <b>583.676</b> | 583.004         | K[17] |
| K  | 26 | 837.818         | 545.981         | 540.642         | 540.978        | 540.306         | K[16] |
| P  | 27 | <b>870.169</b>  | 503.263         | 497.943         | 498.279        | 497.607         | P[15] |
| A  | 28 | <b>893.848</b>  | 470.932         | 465.592         | 465.928        | 465.256         | A[14] |
| G  | 29 | 927.859         | 447.263         | 441.923         | 442.249        | 441.577         | G[13] |
| V  | 30 | <b>945.878</b>  | 420.340         | 423.668         | 423.242        | 422.570         | V[12] |
| R  | 31 | <b>997.912</b>  | 395.223         | 389.883         | 390.219        | 389.547         | R[11] |
| R  | 32 | <b>1049.946</b> | 343.180         | 337.850         | 338.186        | 337.514         | R[10] |
| K  | 33 | <b>1092.644</b> | 291.159         | 285.816         | 286.152        | 285.480         | K[9]  |
| A  | 34 | <b>1116.323</b> | 248.457         | 243.118         | 243.454        | 242.782         | A[8]  |
| S  | 35 | <b>1145.334</b> | 224.778         | 219.439         | 219.775        | 219.103         | S[7]  |
| G  | 36 | 1164.841        | 199.767         | 198.428         | 198.764        | 198.092         | G[6]  |
| P  | 37 | 1198.692        | 175.760         | 171.421         | 171.757        | 171.085         | P[5]  |
| P  | 38 | <b>1229.043</b> | 144.400         | 139.070         | 139.406        | 138.734         | P[4]  |
| V  | 39 | 1262.866        | 112.050         | 106.719         | 107.055        | 106.383         | V[3]  |
| S  | 40 | <b>1291.676</b> | 79.030          | 73.696          | 74.032         | 73.360          | S[2]  |
| E  | 41 | 1334.090        | 50.025          | 44.685          | 45.021         | 44.349          | E[1]  |

# sp | P15864 | H12\_MOUSE

[Acetyl]SEAAPAAPAAAPPAEKAPAKKKAACKKPAGVRRKASGPPVSE

- ▶ fragmentation table for charge state 4+
- ▶ specType=etd
- ▶ score=40.62
- ▶ F105343.dat
- ▶ query=q14497.p1
- ▶ precursor=667.716900
- ▶ chargePrecursor=6
- ▶ itol=0.8

| AA    | c              | y               | z+1            | z+2     | z              | AA    |
|-------|----------------|-----------------|----------------|---------|----------------|-------|
| S[1]  | 37.525         | <b>1001.066</b> | <b>997.061</b> | 0.735   | <b>996.309</b> | S[41] |
| E[2]  | 69.785         | <b>995.407</b>  | <b>964.800</b> | 0.735   | <b>964.548</b> | E[40] |
| A[3]  | 87.544         | 935.544         | <b>932.540</b> | 0.735   | <b>932.288</b> | A[39] |
| A[4]  | 105.304        | 918.788         | <b>914.780</b> | 0.735   | <b>914.528</b> | A[38] |
| P[5]  | 129.567        | <b>901.026</b>  | 897.021        | 0.735   | 896.769        | P[37] |
| A[6]  | 147.326        | 878.763         | <b>872.758</b> | 0.735   | <b>872.506</b> | A[36] |
| A[7]  | 165.086        | 859.003         | <b>854.999</b> | 0.735   | <b>854.747</b> | A[35] |
| P[8]  | 189.549        | <b>841.244</b>  | 837.239        | 0.735   | 836.987        | P[34] |
| A[9]  | 207.308        | 816.983         | <b>812.976</b> | 0.735   | <b>812.724</b> | A[33] |
| A[10] | 224.887        | 799.222         | <b>795.717</b> | 0.735   | <b>794.965</b> | A[32] |
| A[11] | 242.627        | <b>781.462</b>  | <b>777.458</b> | 0.735   | <b>777.206</b> | A[31] |
| P[12] | 266.890        | <b>763.703</b>  | <b>759.698</b> | 0.735   | <b>759.446</b> | P[30] |
| P[13] | 291.153        | 739.440         | <b>735.435</b> | 0.735   | <b>735.183</b> | P[29] |
| A[14] | 308.912        | <b>715.177</b>  | 711.172        | 0.735   | 710.920        | A[28] |
| E[15] | 341.173        | 697.417         | 693.413        | 0.735   | 693.161        | E[27] |
| K[16] | 373.197        | 665.157         | 661.152        | 661.404 | 660.900        | K[26] |
| A[17] | 390.956        | <b>633.133</b>  | 629.128        | 629.380 | 628.876        | A[25] |
| P[18] | 415.219        | 615.373         | 611.369        | 611.621 | 611.117        | P[24] |
| A[19] | 432.978        | 591.113         | 587.108        | 587.358 | 586.854        | A[23] |
| K[20] | 465.002        | 573.351         | 569.347        | 569.598 | 569.095        | K[22] |
| K[21] | 497.026        | 541.237         | 537.232        | 537.479 | 537.071        | K[21] |
| K[22] | 529.050        | 509.304         | 505.299        | 505.551 | 505.047        | K[20] |
| A[23] | 546.809        | 477.280         | 473.275        | 473.527 | 473.023        | A[19] |
| A[24] | 564.568        | 459.521         | 455.516        | 455.768 | 455.264        | A[18] |
| K[25] | 596.592        | 441.761         | 437.757        | 438.009 | 437.505        | K[17] |
| K[26] | 628.616        | 409.738         | 405.733        | 405.985 | 405.481        | K[16] |
| E[27] | 662.879        | 377.714         | 373.709        | 373.961 | 373.457        | E[15] |
| A[28] | 670.538        | 353.451         | 349.446        | 349.698 | 349.194        | A[14] |
| G[29] | 684.893        | 335.691         | 331.687        | 331.939 | 331.435        | G[13] |
| V[30] | 709.661        | 321.436         | 317.431        | 317.683 | 317.179        | V[12] |
| R[31] | <b>748.686</b> | 296.669         | 292.664        | 292.916 | 292.412        | R[11] |
| R[32] | 787.711        | 257.644         | 253.639        | 253.891 | 253.387        | R[10] |
| K[33] | <b>819.735</b> | 218.618         | 214.614        | 214.866 | 214.362        | K[9]  |
| A[34] | 837.494        | 198.595         | 192.590        | 192.842 | 192.338        | A[8]  |
| S[35] | 869.252        | 168.833         | 164.831        | 165.083 | 164.579        | S[7]  |
| G[36] | 873.507        | 147.077         | 143.073        | 143.325 | 142.821        | G[6]  |
| P[37] | 897.771        | 132.822         | 128.817        | 129.069 | 128.565        | P[5]  |
| P[38] | 922.034        | 108.559         | 104.554        | 104.806 | 104.302        | P[4]  |
| V[39] | 946.801        | 84.296          | 80.291         | 80.543  | 80.039         | V[3]  |
| S[40] | 968.559        | 59.529          | 55.524         | 55.776  | 55.272         | S[2]  |
| E[41] | 1000.820       | 37.771          | 33.766         | 34.018  | 33.514         | E[1]  |

# sp | P15864 | H12\_MOUSE

[Acetyl]SEAAPAAPAAAPPAEKAPAKKKAAKKPAGVRRKASGPPVSE

- ▶ fragmentation table for charge state 5+
- ▶ specType=etd
- ▶ score=40.62
- ▶ F105343.dat
- ▶ query=q14497\_p1
- ▶ precursor=667.716900
- ▶ chargePrecursor=6
- ▶ itol=0.8

| AA    | c              | y              | z+1            | z+2     | z              | AA    |
|-------|----------------|----------------|----------------|---------|----------------|-------|
| S[1]  | 30.221         | 301.054        | <b>797.850</b> | 0.806   | <b>797.649</b> | S[41] |
| E[2]  | 56.030         | <b>775.245</b> | <b>772.042</b> | 0.806   | <b>771.840</b> | E[40] |
| A[3]  | 70.237         | <b>749.437</b> | <b>746.233</b> | 0.806   | <b>746.032</b> | A[39] |
| A[4]  | 84.444         | <b>735.230</b> | <b>732.026</b> | 0.806   | <b>731.824</b> | A[38] |
| P[5]  | 103.855        | <b>721.022</b> | 717.818        | 0.806   | 717.617        | P[37] |
| A[6]  | 118.062        | 701.612        | <b>698.408</b> | 0.806   | <b>698.206</b> | A[36] |
| A[7]  | 132.270        | 687.404        | 684.200        | 0.806   | 683.999        | A[35] |
| P[8]  | 151.680        | <b>673.197</b> | 669.993        | 0.806   | 669.791        | P[34] |
| A[9]  | 165.888        | 653.786        | 650.582        | 0.806   | 650.381        | A[33] |
| A[10] | 180.095        | 639.579        | 636.375        | 0.806   | 636.173        | A[32] |
| A[11] | 194.303        | 625.371        | 622.168        | 0.806   | 621.966        | A[31] |
| P[12] | 213.713        | 611.164        | 607.960        | 0.806   | 607.759        | P[30] |
| P[13] | 233.124        | 591.753        | 588.550        | 0.806   | 588.348        | P[29] |
| A[14] | 247.331        | 572.343        | 569.139        | 0.806   | 568.937        | A[28] |
| E[15] | 273.140        | 558.135        | 554.932        | 0.806   | 554.730        | E[27] |
| K[16] | 298.759        | 532.327        | 529.123        | 529.325 | 528.922        | K[26] |
| A[17] | 312.966        | 508.706        | 503.504        | 503.706 | 503.303        | A[25] |
| P[18] | 332.377        | 492.500        | 489.297        | 489.498 | 489.095        | P[24] |
| A[19] | 346.584        | 473.090        | 469.888        | 470.089 | 469.686        | A[23] |
| K[20] | 372.203        | 458.882        | 455.679        | 455.880 | 455.477        | K[22] |
| K[21] | 397.822        | 433.263        | 430.060        | 430.261 | 429.858        | K[21] |
| K[22] | 423.441        | 407.644        | 404.441        | 404.642 | 404.239        | K[20] |
| A[23] | 437.649        | 382.025        | 378.822        | 379.023 | 378.620        | A[19] |
| A[24] | 451.856        | 367.818        | 364.614        | 364.816 | 364.413        | A[18] |
| K[25] | 477.475        | 353.611        | 350.407        | 350.608 | 350.205        | K[17] |
| K[26] | 503.094        | 327.992        | 324.788        | 324.989 | 324.586        | K[16] |
| P[27] | 522.504        | 302.373        | 299.169        | 299.370 | 298.967        | P[15] |
| A[28] | 536.712        | 282.962        | 279.758        | 279.959 | 279.557        | A[14] |
| G[29] | 548.116        | 268.755        | 265.551        | 265.752 | 265.349        | G[13] |
| V[30] | 567.930        | 257.350        | 254.147        | 254.348 | 253.945        | V[12] |
| R[31] | 599.150        | 237.537        | 234.333        | 234.534 | 234.131        | R[11] |
| R[32] | 630.370        | 206.318        | 203.113        | 203.314 | 202.911        | R[10] |
| K[33] | 695.989        | 175.096        | 171.892        | 172.094 | 171.691        | K[9]  |
| A[34] | 670.197        | 149.477        | 146.273        | 146.475 | 146.072        | A[8]  |
| S[35] | 687.603        | 135.270        | 132.066        | 132.268 | 131.864        | S[7]  |
| G[36] | <b>699.007</b> | 117.863        | 114.660        | 114.861 | 114.458        | G[6]  |
| P[37] | 718.418        | 106.459        | 103.255        | 103.457 | 103.054        | P[5]  |
| P[38] | <b>737.829</b> | 87.049         | 83.845         | 84.046  | 83.643         | P[4]  |
| V[39] | 757.643        | 87.638         | 84.434         | 84.636  | 84.233         | V[3]  |
| S[40] | <b>775.049</b> | 47.824         | 44.621         | 44.822  | 44.419         | S[2]  |
| E[41] | <b>800.857</b> | 30.418         | 27.214         | 27.416  | 27.013         | E[1]  |



# sp | P15864 | H12\_MOUSE

[Acetyl]SEAAPAAPAAAPPAEKAPAKKKAACKKPAGVRRKASGPPVSE

- ▶ fragmentation table for charge state 1+
- ▶ specType=etd
- ▶ score=44.71
- ▶ F105343.dat
- ▶ query=q14498.p1
- ▶ precursor=801.059100
- ▶ chargePrecursor=5
- ▶ itol=0.8

| AA | c        | y        | z+1      | z+2      | z        | AA  |
|----|----------|----------|----------|----------|----------|-----|
| S  | 147.076  | 4001.243 | 3025.222 | 0.000    | 3054.214 | S41 |
| E  | 276.119  | 3872.198 | 3856.179 | 0.000    | 3855.172 | E40 |
| A  | 347.156  | 3743.156 | 3727.137 | 0.000    | 3726.129 | A39 |
| A  | 418.193  | 3672.118 | 3656.100 | 0.000    | 3655.092 | A38 |
| F  | 515.246  | 3601.081 | 3585.063 | 0.000    | 3584.055 | F37 |
| A  | 599.283  | 3504.029 | 3488.010 | 0.000    | 3487.002 | A36 |
| A  | 657.320  | 3432.992 | 3416.973 | 0.000    | 3415.965 | A35 |
| P  | 754.373  | 3361.954 | 3345.936 | 0.000    | 3344.928 | P34 |
| A  | 825.410  | 3284.907 | 3268.888 | 0.000    | 3267.879 | A33 |
| A  | 896.447  | 3193.864 | 3177.846 | 0.000    | 3176.838 | A32 |
| A  | 967.484  | 3122.827 | 3106.809 | 0.000    | 3105.801 | A31 |
| P  | 1064.537 | 3051.796 | 3035.771 | 0.000    | 3034.764 | P30 |
| F  | 1161.590 | 2954.737 | 2938.719 | 0.000    | 2937.711 | F29 |
| A  | 1232.627 | 2857.685 | 2841.666 | 0.000    | 2840.658 | A28 |
| E  | 1361.670 | 2786.648 | 2770.629 | 0.000    | 2769.621 | E27 |
| K  | 1489.765 | 2657.605 | 2641.586 | 2642.594 | 2640.578 | K26 |
| A  | 1560.802 | 2526.510 | 2513.491 | 2514.499 | 2512.483 | A25 |
| P  | 1678.854 | 2458.473 | 2442.454 | 2443.462 | 2441.446 | P24 |
| A  | 1728.892 | 2361.420 | 2345.401 | 2346.409 | 2344.394 | A23 |
| K  | 1856.986 | 2290.383 | 2274.364 | 2275.372 | 2273.356 | K22 |
| K  | 1965.031 | 2162.288 | 2146.269 | 2147.277 | 2145.261 | K21 |
| K  | 2113.176 | 2034.193 | 2018.174 | 2019.182 | 2017.167 | K20 |
| A  | 2164.214 | 1906.098 | 1890.079 | 1891.087 | 1889.072 | A19 |
| A  | 2255.251 | 1835.051 | 1819.032 | 1820.039 | 1818.024 | A18 |
| K  | 2361.346 | 1764.005 | 1748.005 | 1749.013 | 1747.997 | K17 |
| K  | 2511.441 | 1635.920 | 1619.910 | 1620.918 | 1618.902 | K16 |
| P  | 2608.493 | 1507.834 | 1491.815 | 1492.823 | 1490.807 | P15 |
| C  | 2679.530 | 1410.781 | 1394.762 | 1395.770 | 1393.755 | A14 |
| C  | 2736.562 | 1339.744 | 1323.725 | 1324.733 | 1322.718 | C13 |
| V  | 2835.600 | 1248.692 | 1266.704 | 1267.712 | 1265.696 | V12 |
| R  | 2991.721 | 1183.654 | 1167.635 | 1168.643 | 1166.628 | R11 |
| R  | 3147.823 | 1027.615 | 1011.534 | 1012.542 | 1010.527 | R10 |
| K  | 3275.918 | 871.452  | 855.431  | 856.441  | 854.425  | K9  |
| A  | 3346.955 | 743.357  | 727.338  | 728.346  | 726.330  | A8  |
| S  | 3433.887 | 792.320  | 658.301  | 659.309  | 655.293  | S7  |
| G  | 3481.008 | 585.288  | 569.269  | 570.277  | 566.261  | G6  |
| P  | 3588.061 | 528.250  | 512.248  | 513.256  | 511.240  | P5  |
| F  | 3685.114 | 431.214  | 415.195  | 416.203  | 414.187  | F4  |
| V  | 3784.182 | 334.161  | 318.142  | 319.150  | 317.134  | V3  |
| S  | 3871.214 | 235.082  | 219.074  | 220.082  | 218.066  | S2  |
| E  | 4005.257 | 148.066  | 132.042  | 133.050  | 131.034  | E1  |



# sp | P15864 | H12\_MOUSE

[Acetyl]SEAAPAAPAAAPPAEKAPAKKKAAKKPAGVRRKASGPPVSE

- ▶ fragmentation table for charge state 2+
- ▶ specType=etd
- ▶ score=44.71
- ▶ F105343.dat
- ▶ query=q14498.p1
- ▶ precursor=801.059100
- ▶ chargePrecursor=5
- ▶ itol=0.8

| AA  | c               | y               | z+1             | z+2             | z               | AA    |
|-----|-----------------|-----------------|-----------------|-----------------|-----------------|-------|
| S1  | 74.042          | 2001.124        | <b>1993.115</b> | 0.504           | 1893.811        | S(41) |
| E2  | 138.503         | <b>1936.603</b> | <b>1928.583</b> | 0.504           | <b>1928.089</b> | E(42) |
| A3  | 174.082         | 1872.001        | 1864.072        | 0.504           | 1863.566        | A(30) |
| A4  | 209.600         | 1836.563        | 1828.553        | 0.504           | 1828.050        | A(38) |
| P5  | 258.127         | 1801.044        | 1793.035        | 0.504           | 1792.531        | P(37) |
| A16 | 283.889         | 1762.518        | 1744.509        | 0.504           | 1744.005        | A(36) |
| A7  | 329.164         | 1718.990        | 1708.990        | 0.504           | 1708.486        | A(35) |
| P8  | 377.600         | 1681.461        | 1673.451        | 0.504           | 1672.956        | P(34) |
| A9  | 413.209         | 1632.964        | 1624.945        | 0.504           | 1624.441        | A(33) |
| A10 | 448.727         | 1597.436        | 1589.420        | 0.504           | 1588.923        | A(32) |
| A11 | 484.246         | 1561.917        | 1553.908        | 0.504           | 1553.404        | A(31) |
| P12 | 532.972         | 1526.399        | 1518.389        | 0.504           | 1517.885        | P(30) |
| P13 | 581.200         | 1487.872        | 1480.863        | 0.504           | 1480.359        | P(29) |
| A14 | 630.817         | 1452.340        | 1421.337        | 0.504           | 1420.833        | A(28) |
| E15 | 681.338         | 1393.827        | 1385.818        | 0.504           | 1385.314        | E(27) |
| K16 | 745.306         | 1329.306        | 1321.297        | 1321.801        | <b>1320.793</b> | K(28) |
| A17 | 780.824         | <b>1298.299</b> | <b>1257.249</b> | <b>1257.753</b> | 1266.745        | A(25) |
| P18 | 829.433         | <b>1229.740</b> | 1221.731        | 1222.235        | 1221.729        | P(24) |
| A19 | 884.946         | 1181.214        | <b>1173.204</b> | <b>1173.708</b> | <b>1172.700</b> | A(23) |
| K20 | <b>928.997</b>  | <b>1145.695</b> | 1137.686        | 1138.190        | 1137.182        | K(22) |
| K21 | <b>993.044</b>  | <b>1081.648</b> | <b>1073.638</b> | <b>1074.142</b> | <b>1073.134</b> | K(21) |
| K22 | <b>1057.092</b> | 1037.600        | <b>1009.591</b> | <b>1010.095</b> | <b>1009.087</b> | K(20) |
| A23 | <b>1092.610</b> | <b>953.553</b>  | <b>945.543</b>  | <b>946.047</b>  | <b>945.039</b>  | A(19) |
| A24 | <b>1128.129</b> | 918.024         | 910.015         | 910.519         | 910.013         | A(18) |
| K25 | <b>1192.176</b> | 882.516         | <b>874.506</b>  | <b>875.010</b>  | <b>874.002</b>  | K(17) |
| K26 | 1256.224        | 818.468         | <b>810.459</b>  | <b>810.963</b>  | <b>809.955</b>  | K(16) |
| P27 | 1304.750        | 754.421         | 746.411         | 746.915         | 745.907         | P(15) |
| A28 | <b>1340.269</b> | 705.894         | <b>697.885</b>  | <b>698.389</b>  | <b>697.381</b>  | A(14) |
| G29 | <b>1368.780</b> | 670.376         | <b>662.366</b>  | <b>662.870</b>  | <b>661.862</b>  | G(13) |
| V30 | <b>1418.314</b> | 641.805         | <b>633.856</b>  | <b>634.359</b>  | <b>633.352</b>  | V(12) |
| R31 | <b>1496.364</b> | 602.331         | <b>584.321</b>  | <b>584.825</b>  | 583.817         | R(11) |
| R32 | <b>1574.415</b> | 514.260         | 506.271         | 506.775         | 505.767         | R(10) |
| K33 | 1638.462        | 436.230         | 428.220         | 428.724         | 427.716         | K(9)  |
| A34 | 1873.983        | 372.182         | 364.173         | 364.677         | 363.669         | A(8)  |
| S35 | 1717.497        | 336.664         | 328.654         | 329.158         | 328.150         | S(7)  |
| G36 | 1746.008        | 293.148         | 285.138         | 285.642         | 284.634         | G(6)  |
| P37 | 1784.534        | 264.617         | 256.627         | 257.131         | 256.124         | P(5)  |
| P38 | 1843.060        | 216.110         | 208.101         | 208.605         | 207.597         | P(4)  |
| V39 | 1882.595        | 187.584         | 159.575         | 160.079         | 159.071         | V(3)  |
| S40 | 1938.311        | 118.066         | 110.043         | 110.544         | 109.535         | S(2)  |
| E41 | 2000.832        | 74.534          | 66.524          | 67.028          | 66.021          | E(1)  |

# sp | P15864 | H12\_MOUSE

[Acetyl]SEAAPAAPAAAPPAEKAPAKKKAAKKPAGVRRKASGPPVSE

- ▶ fragmentation table for charge state 3+
- ▶ specType=etd
- ▶ score=44.71
- ▶ F105343.dat
- ▶ query=q14498.p1
- ▶ precursor=801.059100
- ▶ chargePrecursor=5
- ▶ itol=0.8

| AA   | c               | y               | z+1             | z+2            | z               | AA   |
|------|-----------------|-----------------|-----------------|----------------|-----------------|------|
| S 1  | 49.697          | <b>1334.418</b> | 1329.879        | 0.672          | 1325.743        | S 41 |
| E 2  | 92.711          | <b>1291.404</b> | <b>1286.065</b> | 0.672          | <b>1285.729</b> | E 40 |
| A 3  | 116.390         | 1248.390        | <b>1243.050</b> | 0.672          | 1242.715        | A 39 |
| A 4  | 140.069         | 1224.711        | <b>1219.371</b> | 0.672          | <b>1219.035</b> | A 38 |
| P 5  | 172.420         | <b>1201.032</b> | 1195.892        | 0.672          | 1195.366        | P 37 |
| A 6  | 199.099         | 1159.991        | 1153.361        | 0.672          | 1153.005        | A 36 |
| A 7  | 219.778         | <b>1145.002</b> | <b>1139.662</b> | 0.672          | <b>1139.326</b> | A 35 |
| P 8  | 252.120         | <b>1121.323</b> | <b>1115.983</b> | 0.672          | <b>1115.647</b> | P 34 |
| A 9  | 274.808         | 1089.972        | 1083.632        | 0.672          | 1083.297        | A 33 |
| A 10 | 299.487         | <b>1065.293</b> | 1059.953        | 0.672          | 1059.617        | A 32 |
| A 11 | 323.166         | 1041.614        | 1036.274        | 0.672          | 1035.938        | A 31 |
| P 12 | 353.117         | 1017.935        | 1012.695        | 0.672          | 1012.359        | P 30 |
| P 13 | 387.898         | 985.584         | 980.244         | 0.672          | 979.908         | P 29 |
| A 14 | 411.547         | <b>953.233</b>  | <b>947.893</b>  | 0.672          | <b>947.558</b>  | A 28 |
| E 15 | 454.561         | <b>929.554</b>  | 924.214         | 0.672          | 923.879         | E 27 |
| K 16 | 497.260         | 896.540         | <b>881.200</b>  | <b>881.536</b> | <b>880.864</b>  | K 26 |
| A 17 | 520.939         | <b>843.842</b>  | <b>838.502</b>  | <b>838.838</b> | <b>838.166</b>  | A 25 |
| P 18 | 553.290         | <b>820.162</b>  | 814.821         | 813.159        | 811.497         | P 24 |
| A 19 | 576.999         | 787.812         | <b>782.472</b>  | <b>782.808</b> | <b>782.136</b>  | A 23 |
| K 20 | 619.667         | 764.133         | 758.793         | 759.129        | 758.451         | K 22 |
| K 21 | <b>662.365</b>  | 721.434         | 716.095         | 716.431        | 715.759         | K 21 |
| K 22 | 705.064         | 678.736         | 673.396         | 673.732        | 673.060         | K 20 |
| A 23 | 728.743         | 636.038         | 630.698         | 631.034        | 630.362         | A 19 |
| A 24 | 752.422         | 612.359         | 607.019         | 607.355        | 606.683         | A 18 |
| K 25 | 795.120         | 588.679         | 583.340         | 583.676        | 583.004         | K 17 |
| K 26 | 837.818         | 545.981         | 540.642         | 540.978        | 540.306         | K 16 |
| P 27 | 870.169         | 503.283         | 497.943         | 498.279        | 497.607         | P 15 |
| A 28 | <b>893.848</b>  | 470.932         | 465.592         | 465.928        | 465.256         | A 14 |
| G 29 | <b>912.895</b>  | 447.263         | 441.923         | 442.249        | 441.577         | G 13 |
| V 30 | <b>945.878</b>  | 429.344         | 423.998         | 423.242        | 422.576         | V 12 |
| R 31 | 997.912         | 395.223         | 389.883         | 390.219        | 389.547         | R 11 |
| R 32 | <b>1049.546</b> | 343.180         | 337.850         | 338.186        | 337.514         | R 10 |
| K 33 | <b>1092.644</b> | 291.159         | 285.816         | 286.152        | 285.480         | K 9  |
| A 34 | <b>1116.323</b> | 249.457         | 243.118         | 243.454        | 242.782         | A 8  |
| S 35 | <b>1145.334</b> | 224.778         | 218.439         | 218.775        | 218.103         | S 7  |
| G 36 | 1164.841        | 199.761         | 193.428         | 193.764        | 193.092         | G 6  |
| P 37 | 1198.692        | 175.760         | 171.421         | 171.757        | 171.085         | P 5  |
| P 38 | <b>1229.043</b> | 144.400         | 139.070         | 139.406        | 138.734         | P 4  |
| V 39 | <b>1262.066</b> | 112.050         | 106.719         | 107.055        | 106.383         | V 3  |
| S 40 | <b>1291.076</b> | 79.030          | 73.696          | 74.032         | 73.360          | S 2  |
| E 41 | <b>1334.090</b> | 50.025          | 44.685          | 45.021         | 44.349          | E 1  |

# sp | P15864 | H12\_MOUSE

[Acetyl]SEAAPAAPAAAPPAEKAPAKKKAACKKPAGVRRKASGPPVSE

- ▶ fragmentation table for charge state 4+
- ▶ specType=etd
- ▶ score=44.71
- ▶ F105343.dat
- ▶ query=q14498\_p1
- ▶ precursor=801.059100
- ▶ chargePrecursor=5
- ▶ itol=0.8

| AA | c  | y               | z+1             | z+2            | z     | AA             |       |
|----|----|-----------------|-----------------|----------------|-------|----------------|-------|
| S  | 1  | 37.525          | <b>1001.066</b> | <b>997.061</b> | 0.755 | <b>996.809</b> | S[41] |
| E  | 2  | 89.795          | <b>965.805</b>  |                | 0.755 | 864.549        | E[40] |
| A  | 3  | 87.544          | 936.844         | <b>932.540</b> | 0.755 | <b>932.288</b> | A[39] |
| A  | 4  | 105.304         | 918.705         | 914.780        | 0.755 | 914.528        | A[38] |
| P  | 5  | 129.567         | <b>901.026</b>  | 897.021        | 0.755 | 896.769        | P[37] |
| A  | 6  | 147.326         | 876.703         | 872.758        | 0.755 | 872.506        | A[36] |
| A  | 7  | 165.086         | 859.003         | 854.999        | 0.755 | 854.747        | A[35] |
| P  | 8  | 189.349         | 841.244         | 837.239        | 0.755 | 836.987        | P[34] |
| A  | 9  | 207.108         | 816.981         | 812.976        | 0.755 | 812.724        | A[33] |
| A  | 10 | 224.867         | 799.222         | 795.217        | 0.755 | 794.965        | A[32] |
| A  | 11 | 242.627         | 781.462         | 777.458        | 0.755 | 777.206        | A[31] |
| P  | 12 | 266.890         | 763.703         | 759.698        | 0.755 | 759.446        | P[30] |
| P  | 13 | 291.153         | 739.440         | 735.435        | 0.755 | 735.183        | P[29] |
| A  | 14 | 308.912         | 715.177         | 711.172        | 0.755 | 710.920        | A[28] |
| E  | 15 | 341.173         | 697.417         | 693.413        | 0.755 | 693.161        | E[27] |
| K  | 16 | 373.197         | 665.157         | 661.152        | 0.601 | 660.900        | K[26] |
| A  | 17 | 390.956         | 633.133         | 629.128        | 0.629 | 628.876        | A[25] |
| P  | 18 | 415.219         | 615.374         | 611.369        | 0.113 | 611.117        | P[24] |
| A  | 19 | 432.978         | 591.110         | 587.106        | 0.587 | 586.854        | A[23] |
| K  | 20 | 465.002         | 573.351         | 569.347        | 0.569 | 569.095        | K[22] |
| K  | 21 | 497.026         | 541.327         | 537.323        | 0.537 | 537.071        | K[21] |
| K  | 22 | 529.050         | 509.304         | 505.299        | 0.505 | 505.047        | K[20] |
| A  | 23 | 546.809         | 477.280         | 473.275        | 0.473 | 473.023        | A[19] |
| A  | 24 | 564.568         | 450.521         | 445.516        | 0.445 | 445.264        | A[18] |
| K  | 25 | 596.592         | 445.761         | 437.757        | 0.438 | 438.509        | K[17] |
| K  | 26 | 628.616         | 409.738         | 405.733        | 0.405 | 405.481        | K[16] |
| P  | 27 | 652.879         | 377.714         | 373.709        | 0.373 | 373.457        | P[15] |
| A  | 28 | 670.638         | 353.451         | 349.446        | 0.349 | 349.194        | A[14] |
| G  | 29 | 684.893         | 335.691         | 331.687        | 0.331 | 331.435        | G[13] |
| V  | 30 | 709.661         | 321.436         | 317.431        | 0.317 | 317.179        | V[12] |
| R  | 31 | 748.680         | 296.669         | 292.664        | 0.292 | 292.412        | R[11] |
| R  | 32 | 787.711         | 257.644         | 253.639        | 0.253 | 253.387        | R[10] |
| K  | 33 | <b>819.735</b>  | 218.618         | 214.614        | 0.214 | 214.362        | K[9]  |
| A  | 34 | 837.494         | 189.595         | 185.590        | 0.185 | 185.338        | A[8]  |
| S  | 35 | 859.252         | 158.835         | 154.831        | 0.154 | 154.579        | S[7]  |
| G  | 36 | 873.507         | 147.077         | 143.073        | 0.143 | 142.821        | G[6]  |
| P  | 37 | 897.771         | 132.822         | 128.817        | 0.129 | 128.565        | P[5]  |
| P  | 38 | <b>922.034</b>  | 108.559         | 104.554        | 0.104 | 104.302        | P[4]  |
| V  | 39 | <b>946.801</b>  | 84.296          | 80.291         | 0.080 | 80.039         | V[3]  |
| S  | 40 | <b>968.559</b>  | 59.529          | 55.524         | 0.055 | 55.272         | S[2]  |
| E  | 41 | <b>1000.820</b> | 37.771          | 33.766         | 0.033 | 33.514         | E[1]  |



# sp | P43274 | H14\_MOUSE

[Acetyl]SETAPAAPAAPAPAEKTPVKKKARKAAGGAKRKTSGPPVSE

- ▶ fragmentation table for charge state 1+
- ▶ specType=etd
- ▶ score=48.92
- ▶ F105343.dat
- ▶ query=q14524.p1
- ▶ precursor=811.054270
- ▶ chargePrecursor=5
- ▶ itol=0.8

| AA | c  | y               | z+1             | z+2             | z               | AA              |       |
|----|----|-----------------|-----------------|-----------------|-----------------|-----------------|-------|
| S  | 1  | 147.076         | 4051.241        | 4035.222        | 0.000           | 4034.215        | S(41) |
| E  | 2  | 276.119         | 3022.195        | 3006.180        | 0.000           | 3005.172        | E(42) |
| T  | 3  | 377.187         | 3793.156        | 3777.137        | 0.000           | 3776.120        | T(39) |
| A  | 4  | 448.204         | 3692.108        | 3676.090        | 0.000           | 3675.082        | A(38) |
| P  | 5  | 545.257         | 3021.071        | 3005.052        | 0.000           | 3004.045        | P(37) |
| A  | 6  | 618.204         | 3024.018        | 3008.000        | 0.000           | 3007.992        | A(36) |
| A  | 7  | 687.311         | 3452.981        | 3436.963        | 0.000           | 3435.955        | A(35) |
| P  | 8  | 794.384         | 3181.044        | 3165.025        | 0.000           | 3164.018        | P(34) |
| A  | 9  | 895.421         | 3184.001        | 3168.013        | 0.000           | 3167.885        | A(33) |
| A  | 10 | 926.458         | 3213.854        | 3197.830        | 0.000           | 3196.820        | A(32) |
| P  | 11 | 1023.511        | 3142.817        | 3126.798        | 0.000           | 3125.791        | P(31) |
| A  | 12 | 1094.568        | 3026.784        | 3020.748        | 0.000           | 3019.738        | A(30) |
| P  | 13 | 1191.600        | 3074.727        | 3058.700        | 0.000           | 3057.703        | P(29) |
| A  | 14 | 1262.638        | 2877.674        | 2861.656        | 0.000           | 2860.646        | A(28) |
| E  | 15 | 1361.680        | 2806.637        | 2790.619        | 0.000           | 2789.611        | E(27) |
| K  | 16 | <b>1519.775</b> | 2877.595        | 2861.578        | 2662.584        | 2660.568        | K(26) |
| T  | 17 | 1620.823        | 2549.560        | 2533.483        | 2434.489        | 2432.473        | T(25) |
| P  | 18 | 1717.876        | 2648.625        | 2632.433        | 2433.443        | 2431.426        | P(24) |
| V  | 19 | 1816.944        | 2351.369        | 2335.381        | 2336.388        | 2334.373        | V(23) |
| K  | 20 | 1945.039        | 2352.331        | 2336.312        | 2237.320        | 2235.304        | K(22) |
| K  | 21 | 2073.134        | 2124.236        | 2108.217        | 2109.225        | 2107.209        | K(21) |
| K  | 22 | 2201.229        | 1996.141        | 1980.122        | 1981.130        | 1979.114        | K(20) |
| A  | 23 | 2272.268        | 1868.046        | 1852.027        | 1853.035        | 1851.020        | A(19) |
| R  | 24 | 2426.367        | 1797.020        | 1780.990        | 1781.998        | 1779.982        | R(18) |
| K  | 25 | 2556.462        | 1640.908        | 1624.889        | 1625.897        | 1623.881        | K(17) |
| A  | 26 | 2627.499        | 1512.813        | 1496.794        | <b>1497.802</b> | 1495.788        | A(16) |
| A  | 27 | 2698.536        | <b>1441.776</b> | 1425.757        | 1426.765        | 1424.749        | A(15) |
| G  | 28 | 2765.558        | 1370.789        | 1354.720        | 1355.728        | 1353.712        | G(14) |
| G  | 29 | 2812.579        | 1313.721        | 1297.668        | 1298.676        | 1296.660        | G(13) |
| A  | 30 | 2883.616        | 1256.666        | 1240.617        | 1241.685        | 1239.669        | A(12) |
| K  | 31 | 3011.711        | 1185.659        | 1169.640        | <b>1170.648</b> | <b>1168.632</b> | K(11) |
| R  | 32 | 3187.812        | 1057.564        | <b>1041.545</b> | 1042.553        | 1040.537        | R(10) |
| K  | 33 | 3295.907        | 901.463         | <b>885.444</b>  | 886.452         | 884.436         | K(9)  |
| T  | 34 | 3368.928        | 773.368         | 757.348         | 758.357         | 756.341         | T(8)  |
| S  | 35 | 3483.987        | 672.320         | 656.301         | 657.309         | 655.293         | S(7)  |
| G  | 36 | 3541.009        | <b>585.288</b>  | 569.269         | 570.277         | 568.261         | G(6)  |
| P  | 37 | 3638.061        | 628.266         | 612.248         | 613.256         | 611.240         | P(5)  |
| P  | 38 | 3735.114        | <b>431.214</b>  | 415.195         | 416.203         | 414.187         | P(4)  |
| V  | 39 | 3834.162        | 334.161         | 318.142         | 319.150         | 317.134         | V(3)  |
| S  | 40 | 3931.214        | 238.092         | 219.073         | 220.082         | 218.066         | S(2)  |
| E  | 41 | 4050.257        | 148.060         | 132.042         | 133.050         | 131.034         | E(1)  |

# sp | P43274 | H14\_MOUSE

[Acetyl]SETAPAAPAAPAPAEKTPVKKKARKAAGGAKRKTSGPPVSE

- ▶ fragmentation table for charge state 2+
- ▶ specType=etd
- ▶ score=48.92
- ▶ F105343.dat
- ▶ query=q14524.p1
- ▶ precursor=811.054270
- ▶ chargePrecursor=5
- ▶ itol=0.8

| AA | c  | y               | z+1             | z+2             | z               | AA              |       |
|----|----|-----------------|-----------------|-----------------|-----------------|-----------------|-------|
| S  | 1  | 74.043          | 2026.124        | 2018.135        | 0.504           | 2017.611        | S(41) |
| E  | 2  | 135.553         | <b>1961.603</b> | <b>1953.594</b> | 0.504           | <b>1953.090</b> | E(42) |
| T  | 3  | 189.087         | 1897.082        | 1889.072        | 0.504           | 1888.566        | T(39) |
| A  | 4  | 224.606         | 1846.558        | 1838.548        | 0.504           | 1838.044        | A(38) |
| P  | 5  | 273.132         | <b>1811.039</b> | 1803.030        | 0.504           | 1802.526        | P(37) |
| A  | 6  | 308.880         | 1782.513        | 1774.503        | 0.504           | 1774.000        | A(36) |
| A  | 7  | 344.159         | 1726.994        | 1718.985        | 0.504           | 1718.481        | A(35) |
| P  | 8  | 392.695         | 1691.476        | 1683.466        | 0.504           | 1682.962        | P(34) |
| A  | 9  | 438.214         | 1642.949        | 1634.940        | 0.504           | 1634.436        | A(33) |
| A  | 10 | 463.733         | 1607.431        | 1599.421        | 0.504           | 1598.917        | A(32) |
| P  | 11 | 512.259         | 1571.912        | 1563.903        | 0.504           | 1563.399        | P(31) |
| A  | 12 | 547.777         | 1528.396        | <b>1515.376</b> | 0.504           | <b>1514.873</b> | A(30) |
| P  | 13 | 596.304         | 1487.867        | 1479.858        | 0.504           | 1479.354        | P(29) |
| A  | 14 | 631.822         | 1439.341        | 1431.332        | 0.504           | 1430.828        | A(28) |
| E  | 15 | 666.344         | 1403.822        | 1395.813        | 0.504           | 1395.309        | E(27) |
| K  | 16 | 700.301         | <b>1339.301</b> | 1331.292        | <b>1331.796</b> | 1330.788        | K(26) |
| T  | 17 | 810.815         | 1275.264        | <b>1267.244</b> | <b>1267.748</b> | <b>1266.740</b> | T(25) |
| P  | 18 | 859.443         | 1224.736        | 1216.727        | 1217.231        | 1216.226        | P(24) |
| V  | 19 | <b>908.976</b>  | 1176.203        | <b>1168.194</b> | <b>1168.698</b> | 1167.693        | V(23) |
| K  | 20 | <b>973.023</b>  | 1126.669        | 1118.660        | 1119.164        | 1118.158        | K(22) |
| K  | 21 | <b>1037.071</b> | 1052.622        | <b>1054.612</b> | <b>1055.116</b> | <b>1054.108</b> | K(21) |
| K  | 22 | <b>1101.118</b> | 998.574         | <b>990.565</b>  | <b>991.069</b>  | 990.063         | K(20) |
| A  | 23 | <b>1136.637</b> | 954.527         | 946.517         | 947.021         | 946.015         | A(19) |
| R  | 24 | <b>1214.687</b> | 869.020         | <b>890.999</b>  | <b>891.503</b>  | 890.497         | R(18) |
| K  | 25 | <b>1278.735</b> | 820.958         | 812.948         | 813.452         | 812.444         | K(17) |
| A  | 26 | 1314.253        | 756.910         | <b>748.901</b>  | <b>749.405</b>  | <b>748.397</b>  | A(16) |
| A  | 27 | 1349.772        | 721.362         | 713.352         | 713.856         | 712.850         | A(15) |
| C  | 28 | <b>1378.263</b> | 685.872         | <b>677.864</b>  | <b>678.368</b>  | <b>677.360</b>  | C(14) |
| C  | 29 | <b>1406.793</b> | 657.362         | <b>649.353</b>  | <b>649.857</b>  | <b>648.849</b>  | C(13) |
| A  | 30 | <b>1442.312</b> | 628.852         | 620.842         | 621.346         | 620.339         | A(12) |
| K  | 31 | <b>1506.359</b> | 593.333         | <b>585.324</b>  | <b>585.827</b>  | <b>584.820</b>  | K(11) |
| R  | 32 | <b>1584.410</b> | 529.285         | 521.276         | 521.780         | 520.772         | R(10) |
| K  | 33 | 1648.457        | 451.235         | 443.226         | 443.729         | 442.722         | K(9)  |
| T  | 34 | 1688.984        | 387.187         | 379.178         | 379.682         | 378.675         | T(8)  |
| S  | 35 | 1742.497        | 336.664         | 328.654         | 329.158         | 328.151         | S(7)  |
| G  | 36 | 1771.008        | 293.148         | 285.138         | 285.642         | 284.634         | G(6)  |
| P  | 37 | 1819.534        | 264.637         | 256.627         | 257.131         | 256.124         | P(5)  |
| F  | 38 | 1868.061        | 216.110         | 208.101         | 208.605         | 207.597         | F(4)  |
| V  | 39 | 1917.295        | 167.584         | 159.575         | 160.079         | 159.071         | V(3)  |
| S  | 40 | <b>1961.111</b> | 118.066         | 110.043         | 110.544         | 109.535         | S(2)  |
| E  | 41 | 2025.632        | 74.534          | 66.524          | 67.028          | 66.021          | E(1)  |

# sp | P43274 | H14\_MOUSE

[Acetyl]SETAPAAPAAPAPAEKTPVKKKARKAAGGAKRKTSGPPVSE

- ▶ fragmentation table for charge state 3+
- ▶ specType=etd
- ▶ score=48.92
- ▶ F105343.dat
- ▶ query=q14524\_p1
- ▶ precursor=811.054270
- ▶ chargePrecursor=5
- ▶ itol=0.8

| AA | c  | y               | z+1             | z+2             | z              | AA              |       |
|----|----|-----------------|-----------------|-----------------|----------------|-----------------|-------|
| S  | 1  | 49.697          | 1351.085        | <b>1345.746</b> | 0.672          | <b>1345.410</b> | S[41] |
| E  | 2  | 92.711          | <b>1308.071</b> | <b>1302.731</b> | 0.672          | <b>1302.396</b> | E[40] |
| T  | 3  | 126.394         | 1265.057        | <b>1259.717</b> | 0.672          | <b>1259.381</b> | T[39] |
| A  | 4  | 150.073         | <b>1231.374</b> | <b>1226.035</b> | 0.672          | <b>1225.699</b> | A[38] |
| P  | 5  | 184.424         | <b>1207.695</b> | <b>1202.354</b> | 0.672          | <b>1202.020</b> | P[37] |
| A  | 6  | 208.103         | 1175.344        | <b>1170.005</b> | 0.672          | 1169.669        | A[36] |
| A  | 7  | 229.782         | 1151.065        | <b>1146.326</b> | 0.672          | 1145.990        | A[35] |
| P  | 8  | 262.133         | <b>1127.986</b> | 1122.647        | 0.672          | 1122.311        | P[34] |
| A  | 9  | 285.812         | 1095.835        | <b>1090.296</b> | 0.672          | 1089.960        | A[33] |
| A  | 10 | 309.491         | 1071.950        | 1066.617        | 0.672          | 1066.281        | A[32] |
| P  | 11 | 341.842         | 1048.277        | 1042.938        | 0.672          | 1042.602        | P[31] |
| A  | 12 | 365.521         | 1024.392        | 1019.867        | 0.672          | 1019.251        | A[30] |
| P  | 13 | 397.872         | 992.241         | 986.908         | 0.672          | 986.572         | P[29] |
| A  | 14 | 421.551         | <b>959.896</b>  | <b>954.557</b>  | 0.672          | <b>954.221</b>  | A[28] |
| E  | 15 | 464.565         | 936.217         | <b>930.878</b>  | 0.672          | <b>930.542</b>  | E[27] |
| K  | 16 | 507.263         | 893.201         | <b>887.864</b>  | <b>888.199</b> | <b>887.528</b>  | K[26] |
| T  | 17 | 540.946         | 890.585         | <b>845.165</b>  | <b>845.501</b> | <b>844.829</b>  | T[25] |
| P  | 18 | 574.297         | 835.827         | 831.483         | 831.819        | 831.147         | P[24] |
| V  | 19 | 606.320         | 784.471         | 779.132         | 779.468        | 778.796         | V[23] |
| K  | 20 | <b>649.018</b>  | 751.449         | 746.109         | 746.445        | 745.773         | K[22] |
| K  | 21 | 691.716         | 708.750         | 703.411         | 703.747        | 703.075         | K[21] |
| K  | 22 | 734.414         | 666.052         | 660.712         | 661.048        | 660.376         | K[20] |
| A  | 23 | 758.094         | 623.354         | 618.014         | 618.350        | 617.678         | A[19] |
| R  | 24 | 810.127         | 590.874         | 584.335         | 584.671        | 583.999         | R[18] |
| K  | 25 | 852.826         | 547.641         | 542.301         | 542.637        | 541.965         | K[17] |
| A  | 26 | 876.505         | 504.842         | 499.503         | 499.839        | 499.167         | A[16] |
| A  | 27 | 900.184         | 461.263         | 475.924         | 476.260        | 475.588         | A[15] |
| G  | 28 | <b>919.191</b>  | 457.584         | 452.245         | 452.581        | 451.909         | G[14] |
| G  | 29 | 938.198         | 438.577         | 433.238         | 433.574        | 432.902         | G[13] |
| A  | 30 | 961.877         | 419.570         | 414.231         | 414.566        | 413.894         | A[12] |
| K  | 31 | <b>1004.575</b> | 395.891         | 390.551         | 390.887        | 390.215         | K[11] |
| R  | 32 | <b>1056.609</b> | 353.193         | 347.853         | 348.189        | 347.517         | R[10] |
| K  | 33 | <b>1099.307</b> | 301.159         | 295.819         | 296.155        | 295.483         | K[9]  |
| T  | 34 | <b>1132.990</b> | 258.461         | 253.121         | 253.457        | 252.785         | T[8]  |
| S  | 35 | <b>1162.801</b> | 224.778         | 219.438         | 219.774        | 219.102         | S[7]  |
| G  | 36 | 1183.068        | 199.761         | 194.421         | 194.756        | 194.084         | G[6]  |
| P  | 37 | 1213.359        | 175.760         | 171.421         | 171.757        | 171.085         | P[5]  |
| P  | 38 | 1245.710        | 144.400         | 139.070         | 139.406        | 138.734         | P[4]  |
| V  | 39 | <b>1278.732</b> | 112.050         | 106.710         | 107.045        | 106.373         | V[3]  |
| S  | 40 | <b>1307.743</b> | 79.030          | 73.696          | 74.032         | 73.360          | S[2]  |
| E  | 41 | 1350.757        | 50.025          | 44.685          | 45.021         | 44.349          | E[1]  |

# sp | P43274 | H14\_MOUSE

[Acetyl]SETAPAAPAAPAPAEKTPVKKKARKAAGGAKRKTSGPPVSE

- ▶ fragmentation table for charge state 4+
- ▶ specType=etd
- ▶ score=48.92
- ▶ F105343.dat
- ▶ query=q14524.p1
- ▶ precursor=811.054270
- ▶ chargePrecursor=5
- ▶ itol=0.8

| AA | c  | y               | z+1             | z+2             | z              | AA              |       |
|----|----|-----------------|-----------------|-----------------|----------------|-----------------|-------|
| S  | 1  | 37.525          | <b>1013.566</b> | <b>1009.561</b> | 0.755          | <b>1009.309</b> | S[41] |
| E  | 2  | 69.785          | <b>981.305</b>  | <b>977.300</b>  | 0.755          | <b>977.048</b>  | E[40] |
| T  | 3  | 95.047          | 949.044         | <b>945.040</b>  | 0.755          | <b>944.788</b>  | T[39] |
| A  | 4  | 112.806         | 923.781         | <b>919.776</b>  | 0.755          | <b>919.526</b>  | A[38] |
| P  | 5  | 137.070         | <b>906.023</b>  | 902.019         | 0.755          | 901.761         | P[37] |
| A  | 6  | 154.829         | 881.760         | 877.755         | 0.755          | 877.501         | A[36] |
| A  | 7  | 172.588         | 864.001         | 859.996         | 0.755          | 859.744         | A[35] |
| P  | 8  | 196.851         | 846.241         | 842.237         | 0.755          | 841.985         | P[34] |
| A  | 9  | 214.611         | 821.979         | 817.974         | 0.755          | 817.722         | A[33] |
| A  | 10 | 232.370         | 804.219         | 800.214         | 0.755          | 799.962         | A[32] |
| P  | 11 | 256.633         | 786.460         | 782.455         | 0.755          | 782.203         | P[31] |
| A  | 12 | 274.392         | 769.197         | 765.192         | 0.755          | 764.940         | A[30] |
| P  | 13 | 298.656         | 744.431         | 740.433         | 0.755          | 740.181         | P[29] |
| A  | 14 | 316.415         | 720.174         | 716.169         | 0.755          | 715.917         | A[28] |
| E  | 15 | 348.675         | 702.415         | 698.410         | 0.755          | 698.158         | E[27] |
| K  | 16 | 380.699         | <b>670.154</b>  | 666.149         | 0.666          | 665.898         | K[26] |
| T  | 17 | 405.961         | 638.130         | 634.126         | 0.634          | 633.874         | T[25] |
| P  | 18 | 430.224         | 612.866         | 608.864         | 0.609          | 608.612         | P[24] |
| V  | 19 | 454.991         | 588.005         | 584.001         | <b>584.853</b> | 584.349         | V[23] |
| K  | 20 | 487.015         | 563.838         | 559.834         | 560.085        | 559.589         | K[22] |
| K  | 21 | 519.039         | 531.814         | 527.810         | 528.062        | 527.556         | K[21] |
| K  | 22 | 551.063         | 499.791         | 495.786         | 496.038        | 495.534         | K[20] |
| A  | 23 | 568.822         | 487.767         | 483.762         | 484.014        | 483.510         | A[19] |
| R  | 24 | 607.847         | 450.000         | 446.003         | 446.255        | 445.751         | R[18] |
| K  | 25 | 639.871         | 410.982         | 406.976         | 407.230        | 406.726         | K[17] |
| A  | 26 | 657.630         | 378.959         | 374.954         | 375.206        | 374.702         | A[16] |
| A  | 27 | 675.390         | 361.199         | 357.195         | 357.447        | 356.941         | A[15] |
| G  | 28 | 689.645         | 343.440         | 339.435         | 339.687        | 339.181         | G[14] |
| G  | 29 | 703.900         | 329.185         | 325.180         | 325.432        | 324.926         | G[13] |
| A  | 30 | 721.660         | 314.929         | 310.925         | 311.177        | 310.671         | A[12] |
| K  | 31 | 753.683         | 297.170         | 293.165         | 293.417        | 292.913         | K[11] |
| R  | 32 | 792.709         | 265.146         | 261.142         | 261.394        | 260.890         | R[10] |
| K  | 33 | 824.732         | 226.121         | 222.116         | 222.368        | 221.864         | K[9]  |
| T  | 34 | 849.994         | 194.097         | 190.093         | 190.345        | 189.841         | T[8]  |
| S  | 35 | 877.252         | 166.835         | 164.831         | 165.083        | 164.579         | S[7]  |
| G  | 36 | <b>886.008</b>  | 147.077         | 143.073         | 143.325        | 142.821         | G[6]  |
| P  | 37 | <b>910.271</b>  | 132.822         | 128.817         | 129.069        | 128.565         | P[5]  |
| P  | 38 | 934.534         | 108.550         | 104.554         | 104.806        | 104.302         | P[4]  |
| V  | 39 | <b>959.301</b>  | 84.290          | 80.291          | 80.543         | 80.039          | V[3]  |
| S  | 40 | <b>981.059</b>  | 59.529          | 55.524          | 55.776         | 55.272          | S[2]  |
| E  | 41 | <b>1013.320</b> | 37.772          | 33.766          | 34.018         | 33.514          | E[1]  |



# sp | P43274 | H14\_MOUSE

[Acetyl]SETAPAAPAAPAPAEKTPVKKKARKAAGGAKRKTSGPPVSE

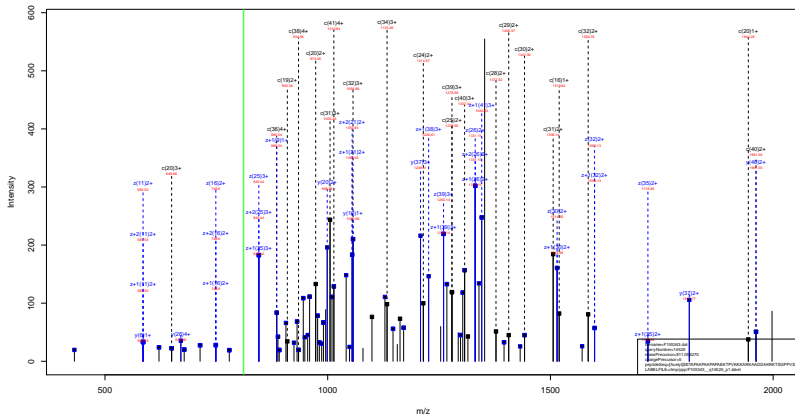

# sp | P43274 | H14\_MOUSE

[Acetyl]SETAPAAPAAPAPAEKTPVKKKARKAAGGAKRKTSGPPVSE

- ▶ fragmentation table for charge state 1+
- ▶ specType=etd
- ▶ score=69.83
- ▶ F105343.dat
- ▶ query=q14525.p1
- ▶ precursor=811.054270
- ▶ chargePrecursor=5
- ▶ itol=0.8

| AA | c  | y               | z+1             | z+2             | z               | AA       |       |
|----|----|-----------------|-----------------|-----------------|-----------------|----------|-------|
| S  | 1  | 147.076         | 4051.243        | 4635.222        | 0.000           | 4034.215 | S[41] |
| E  | 2  | 276.119         | 3922.198        | 9906.180        | 0.000           | 3905.172 | E[40] |
| T  | 3  | 377.167         | 3793.156        | 3777.137        | 0.000           | 3776.129 | T[39] |
| A  | 4  | 448.204         | 3692.108        | 3679.090        | 0.000           | 3675.082 | A[38] |
| F  | 5  | 545.257         | 3621.071        | 3605.052        | 0.000           | 3604.045 | F[37] |
| A  | 6  | 619.294         | 3524.031        | 3508.003        | 0.000           | 3506.999 | A[36] |
| A  | 7  | 667.331         | 3452.982        | 3436.963        | 0.000           | 3435.955 | A[35] |
| P  | 8  | 784.384         | 3381.944        | 3365.925        | 0.000           | 3364.918 | P[34] |
| A  | 9  | 855.421         | 3294.891        | 3268.873        | 0.000           | 3267.865 | A[33] |
| A  | 10 | 926.458         | 3213.854        | 3197.836        | 0.000           | 3196.828 | A[32] |
| F  | 11 | 1023.511        | 3142.817        | 3126.798        | 0.000           | 3125.791 | F[31] |
| A  | 12 | 1094.558        | 3049.764        | 3029.746        | 0.000           | 3028.738 | A[30] |
| F  | 13 | 1191.600        | 2974.727        | 2958.709        | 0.000           | 2957.701 | F[29] |
| A  | 14 | 1262.638        | 2877.674        | 2861.656        | 0.000           | 2860.648 | A[28] |
| E  | 15 | 1361.680        | 2806.637        | 2790.619        | 0.000           | 2789.611 | E[27] |
| K  | 16 | <b>1519.775</b> | 2677.595        | 2661.576        | 2062.584        | 2660.568 | K[26] |
| T  | 17 | 1620.623        | 2549.560        | 2533.541        | 2524.499        | 2522.473 | T[25] |
| P  | 18 | 1717.676        | 2448.452        | 2432.433        | 2423.441        | 2421.425 | P[24] |
| V  | 19 | 1816.944        | 2351.399        | 2335.381        | 2326.388        | 2324.373 | V[23] |
| K  | 20 | <b>1945.039</b> | 2252.331        | 2236.312        | 2227.320        | 2225.304 | K[22] |
| K  | 21 | 2073.134        | 2124.236        | 2108.217        | 2109.225        | 2107.209 | K[21] |
| K  | 22 | 2201.229        | 1996.141        | 1980.122        | 1981.130        | 1979.114 | K[20] |
| A  | 23 | 2272.266        | 1898.045        | 1882.027        | 1883.035        | 1881.020 | A[19] |
| R  | 24 | 2428.367        | 1797.009        | 1780.990        | 1781.998        | 1779.982 | R[18] |
| K  | 25 | 2556.462        | 1640.908        | 1624.889        | 1625.897        | 1623.881 | K[17] |
| A  | 26 | 2627.499        | 1512.813        | 1496.794        | 1497.802        | 1495.786 | A[16] |
| A  | 27 | 2698.536        | <b>1441.776</b> | 1425.757        | 1426.765        | 1424.749 | A[15] |
| G  | 28 | 2755.558        | 1370.739        | 1354.720        | 1355.728        | 1353.712 | G[14] |
| G  | 29 | 2832.579        | 1313.711        | <b>1297.688</b> | <b>1296.706</b> | 1296.691 | G[13] |
| K  | 30 | 2924.616        | 1256.695        | 1240.677        | 1241.685        | 1239.669 | K[12] |
| K  | 31 | 3011.711        | 1185.658        | 1169.640        | <b>1170.648</b> | 1168.632 | K[11] |
| R  | 32 | 3167.812        | <b>1057.564</b> | <b>1041.545</b> | 1042.553        | 1040.537 | R[10] |
| K  | 33 | 3295.907        | 991.462         | <b>885.444</b>  | 886.452         | 884.436  | K[9]  |
| F  | 34 | 3396.955        | 773.368         | 757.349         | 758.357         | 756.341  | F[8]  |
| F  | 35 | 3483.987        | 792.329         | 688.303         | 689.309         | 687.293  | F[7]  |
| G  | 36 | 3541.009        | <b>585.288</b>  | 569.269         | 570.277         | 568.261  | G[6]  |
| P  | 37 | 3638.061        | 528.256         | 512.248         | 513.256         | 511.240  | P[5]  |
| F  | 38 | 3736.114        | <b>431.214</b>  | 415.195         | 416.203         | 414.187  | F[4]  |
| V  | 39 | 3834.182        | 334.161         | 318.142         | 319.150         | 317.134  | V[3]  |
| S  | 40 | 3921.214        | 235.062         | 219.074         | 220.082         | 218.066  | S[2]  |
| E  | 41 | 4050.257        | 148.968         | 132.942         | 133.950         | 131.934  | E[1]  |

# sp | P43274 | H14\_MOUSE

[Acetyl]SETAPAAPAAPAPAEKTPVKKKARKAAGGAKRKTSGPPVSE

- ▶ fragmentation table for charge state 2+
- ▶ specType=etd
- ▶ score=69.83
- ▶ F105343.dat
- ▶ query=q14525.p1
- ▶ precursor=811.054270
- ▶ chargePrecursor=5
- ▶ itol=0.8

| AA | c  | y               | z+1             | z+2             | z               | AA              |       |
|----|----|-----------------|-----------------|-----------------|-----------------|-----------------|-------|
| S  | 1  | 74.043          | 2026.124        | 2018.115        | 0.504           | 2017.61         | S(41) |
| E  | 2  | 138.503         | <b>1961.603</b> | 1951.594        | 0.504           | 1951.050        | E(42) |
| T  | 3  | 189.087         | 1897.082        | 1889.072        | 0.504           | 1888.566        | T(39) |
| A  | 4  | 224.606         | 1846.558        | 1838.548        | 0.504           | 1838.044        | A(38) |
| P  | 5  | 273.132         | <b>1811.039</b> | 1801.030        | 0.504           | 1800.526        | P(37) |
| A  | 6  | 308.890         | 1762.513        | 1754.503        | 0.504           | 1754.200        | A(36) |
| A  | 7  | 344.159         | 1726.994        | <b>1718.985</b> | 0.504           | <b>1718.481</b> | A(35) |
| P  | 8  | 392.695         | 1691.476        | 1683.466        | 0.504           | 1682.962        | P(34) |
| A  | 9  | 438.214         | 1642.949        | 1634.940        | 0.504           | 1634.436        | A(33) |
| A  | 10 | 483.733         | 1607.431        | <b>1599.421</b> | 0.504           | <b>1598.917</b> | A(32) |
| P  | 11 | 512.259         | <b>1571.912</b> | 1563.903        | 0.504           | 1563.399        | P(31) |
| A  | 12 | 549.777         | 1523.396        | <b>1515.376</b> | 0.504           | <b>1514.873</b> | A(30) |
| P  | 13 | 596.304         | 1487.867        | 1479.858        | 0.504           | 1479.354        | P(29) |
| A  | 14 | 631.822         | 1449.341        | <b>1431.332</b> | 0.504           | 1430.828        | A(28) |
| E  | 15 | 666.344         | 1403.822        | <b>1395.813</b> | 0.504           | <b>1395.309</b> | E(27) |
| K  | 16 | 700.301         | <b>1339.301</b> | <b>1331.292</b> | <b>1331.796</b> | <b>1330.788</b> | K(26) |
| T  | 17 | 810.815         | 1275.264        | <b>1267.244</b> | <b>1267.748</b> | 1266.740        | T(25) |
| P  | 18 | 859.443         | 1224.736        | 1216.727        | 1217.234        | 1216.230        | P(24) |
| V  | 19 | <b>908.976</b>  | 1176.203        | 1168.194        | 1168.698        | 1167.690        | V(23) |
| K  | 20 | <b>973.023</b>  | 1126.669        | 1118.660        | 1119.164        | 1118.156        | K(22) |
| K  | 21 | 1037.071        | 1062.622        | <b>1054.612</b> | <b>1055.116</b> | 1054.108        | K(21) |
| K  | 22 | 1101.118        | <b>998.574</b>  | <b>990.565</b>  | <b>991.069</b>  | <b>990.061</b>  | K(20) |
| A  | 23 | 1169.639        | <b>934.527</b>  | 926.517         | 927.024         | 926.016         | A(19) |
| R  | 24 | <b>1214.687</b> | 869.008         | <b>860.999</b>  | <b>861.503</b>  | <b>860.495</b>  | R(18) |
| K  | 25 | <b>1278.735</b> | 820.958         | 812.948         | 813.452         | 812.444         | K(17) |
| A  | 26 | <b>1314.253</b> | 756.910         | <b>748.901</b>  | <b>749.405</b>  | <b>748.397</b>  | A(16) |
| A  | 27 | 1349.772        | 721.362         | <b>713.362</b>  | <b>713.866</b>  | <b>712.878</b>  | A(15) |
| C  | 28 | <b>1378.283</b> | 685.872         | <b>677.864</b>  | <b>678.368</b>  | <b>677.360</b>  | C(14) |
| C  | 29 | <b>1406.793</b> | 657.362         | <b>649.353</b>  | <b>649.857</b>  | 648.849         | C(13) |
| A  | 30 | <b>1442.312</b> | 626.852         | <b>620.842</b>  | <b>621.346</b>  | 620.338         | A(12) |
| K  | 31 | <b>1506.359</b> | 593.333         | <b>585.324</b>  | <b>585.827</b>  | <b>584.820</b>  | K(11) |
| R  | 32 | <b>1584.410</b> | 529.285         | 521.276         | 521.780         | 520.772         | R(10) |
| K  | 33 | 1648.457        | 451.235         | 443.226         | 443.729         | 442.722         | K(9)  |
| T  | 34 | 1688.984        | 389.187         | 379.178         | 379.682         | 378.674         | T(8)  |
| S  | 35 | 1742.497        | 336.664         | 326.654         | 327.158         | 326.150         | S(7)  |
| G  | 36 | 1771.008        | 293.148         | 283.138         | 283.642         | 284.634         | G(6)  |
| P  | 37 | 1819.534        | 264.637         | 256.627         | 257.131         | 256.124         | P(5)  |
| P  | 38 | 1868.061        | 216.110         | 206.101         | 206.605         | 207.597         | P(4)  |
| V  | 39 | 1917.595        | 167.584         | 159.575         | 160.079         | 159.071         | V(3)  |
| S  | 40 | <b>1961.111</b> | 118.066         | 110.043         | 110.544         | 109.535         | S(2)  |
| E  | 41 | 2025.632        | 74.534          | 66.524          | 67.028          | 66.021          | E(1)  |

# sp | P43274 | H14\_MOUSE

[Acetyl]SETAPAAPAAPAPAEKTPVKKKARKAAGGAKRKTSGPPVSE

- ▶ fragmentation table for charge state 3+
- ▶ specType=etd
- ▶ score=69.83
- ▶ F105343.dat
- ▶ query=q14525.p1
- ▶ precursor=811.054270
- ▶ chargePrecursor=5
- ▶ itol=0.8

| AA    | c               | y               | z+1             | z+2            | z               | AA    |
|-------|-----------------|-----------------|-----------------|----------------|-----------------|-------|
| S[1]  | 49.697          | 1351.085        | <b>1345.746</b> | 0.672          | <b>1345.410</b> | S[41] |
| E[2]  | 92.711          | <b>1308.071</b> | <b>1302.731</b> | 0.672          | <b>1302.396</b> | E[40] |
| T[3]  | 126.394         | 1265.057        | <b>1259.717</b> | 0.672          | <b>1259.381</b> | T[39] |
| A[4]  | 150.073         | 1231.374        | <b>1226.035</b> | 0.672          | 1225.699        | A[38] |
| W[5]  | 182.424         | <b>1207.695</b> | <b>1202.359</b> | 0.672          | 1202.023        | W[37] |
| A[6]  | 206.193         | 1175.544        | <b>1170.005</b> | 0.672          | 1169.669        | A[36] |
| A[7]  | 229.782         | 1151.065        | <b>1146.326</b> | 0.672          | <b>1145.990</b> | A[35] |
| P[8]  | 262.133         | <b>1127.986</b> | 1122.647        | 0.672          | 1122.311        | P[34] |
| A[9]  | 285.812         | 1095.835        | 1090.296        | 0.672          | 1089.960        | A[33] |
| A[10] | 309.491         | 1071.950        | 1066.617        | 0.672          | 1066.281        | A[32] |
| P[11] | 341.242         | <b>1048.277</b> | 1042.938        | 0.672          | 1042.602        | P[31] |
| A[12] | 365.921         | 1019.934        | 1019.887        | 0.672          | <b>1010.251</b> | A[29] |
| P[13] | 397.872         | 992.247         | <b>986.508</b>  | 0.672          | <b>986.572</b>  | P[29] |
| A[14] | 421.551         | <b>959.896</b>  | <b>954.557</b>  | 0.672          | 954.221         | A[28] |
| E[15] | 464.565         | 936.217         | <b>930.878</b>  | 0.672          | <b>930.542</b>  | E[27] |
| K[16] | 507.263         | 893.201         | <b>887.864</b>  | <b>888.199</b> | 887.528         | K[26] |
| T[17] | 540.946         | 890.505         | <b>845.165</b>  | <b>845.501</b> | <b>844.829</b>  | T[25] |
| P[18] | 574.297         | 835.829         | 831.483         | 831.819        | 831.141         | P[24] |
| V[19] | 606.320         | 784.471         | <b>779.132</b>  | <b>779.468</b> | <b>778.796</b>  | V[23] |
| K[20] | <b>649.018</b>  | 751.449         | 746.109         | 746.445        | 745.773         | K[22] |
| K[21] | 691.716         | 708.750         | 703.411         | 703.747        | 703.075         | K[21] |
| K[22] | 734.414         | 666.052         | 660.712         | 661.048        | 660.376         | K[20] |
| A[23] | 758.094         | 623.354         | 618.014         | 618.350        | 617.678         | A[19] |
| R[24] | 810.127         | 599.874         | 594.535         | 594.871        | 593.999         | R[18] |
| R[25] | 852.826         | 547.641         | 542.301         | 542.637        | 541.965         | R[17] |
| A[26] | 876.505         | 504.942         | 499.603         | 499.939        | 499.267         | A[16] |
| A[27] | 900.184         | 461.263         | 475.924         | 476.260        | 475.588         | A[15] |
| G[28] | 919.191         | 457.584         | 452.245         | 452.581        | 451.909         | G[14] |
| G[29] | 938.198         | 438.577         | 433.238         | 433.574        | 432.902         | G[13] |
| A[30] | 961.877         | 419.570         | 414.231         | 414.566        | 413.894         | A[12] |
| R[31] | <b>1004.575</b> | 395.891         | 390.551         | 390.887        | 390.215         | R[11] |
| R[32] | <b>1056.609</b> | 353.193         | 347.853         | 348.189        | 347.517         | R[10] |
| K[33] | <b>1099.307</b> | 301.159         | 295.819         | 296.155        | 295.484         | K[9]  |
| T[34] | <b>1132.990</b> | 258.461         | 253.121         | 253.457        | 252.785         | T[8]  |
| S[35] | <b>1162.801</b> | 224.778         | 219.438         | 219.775        | 219.103         | S[7]  |
| G[36] | 1183.068        | 199.761         | 194.421         | 194.756        | 194.084         | G[6]  |
| P[37] | 1213.359        | 175.760         | 171.421         | 171.757        | 171.085         | P[5]  |
| P[38] | 1245.710        | 144.400         | 139.070         | 139.406        | 138.734         | P[4]  |
| V[39] | <b>1278.732</b> | 112.050         | 106.710         | 107.045        | 106.373         | V[3]  |
| S[40] | <b>1307.743</b> | 79.030          | 73.696          | 74.032         | 73.360          | S[2]  |
| E[41] | 1350.757        | 50.025          | 44.685          | 45.021         | 44.349          | E[1]  |

# sp | P43274 | H14\_MOUSE

[Acetyl]SETAPAAPAAPAPAEKTPVKKKARKAAGGAKRKTSGPPVSE

- ▶ fragmentation table for charge state 4+
- ▶ specType=etd
- ▶ score=69.83
- ▶ F105343.dat
- ▶ query=q14525.p1
- ▶ precursor=811.054270
- ▶ chargePrecursor=5
- ▶ itol=0.8

| AA    | c               | y               | z+1             | z+2            | z               | AA    |
|-------|-----------------|-----------------|-----------------|----------------|-----------------|-------|
| S[1]  | 37.525          | <b>1013.566</b> | <b>1009.561</b> | 0.755          | <b>1009.309</b> | S[41] |
| E[2]  | 69.785          | <b>981.305</b>  | <b>977.300</b>  | 0.755          | <b>977.048</b>  | E[40] |
| T[3]  | 95.047          | <b>949.044</b>  | <b>945.040</b>  | 0.755          | <b>944.788</b>  | T[39] |
| A[4]  | 112.806         | <b>923.783</b>  | 919.775         | 0.755          | 919.520         | A[38] |
| P[5]  | 137.070         | <b>906.023</b>  | 902.019         | 0.755          | 901.761         | P[37] |
| A[6]  | 154.829         | 881.766         | 877.755         | 0.755          | 877.501         | A[36] |
| A[7]  | 172.588         | 864.001         | 859.996         | 0.755          | 859.744         | A[35] |
| P[8]  | 196.851         | 846.241         | 842.237         | 0.755          | 841.985         | P[34] |
| A[9]  | 214.611         | 821.979         | 817.974         | 0.755          | 817.722         | A[33] |
| A[10] | 232.370         | 804.210         | 800.214         | 0.755          | 799.962         | A[32] |
| P[11] | 256.633         | 786.460         | 782.455         | 0.755          | 782.203         | P[31] |
| A[12] | 274.392         | 769.191         | 765.193         | 0.755          | 765.946         | A[30] |
| P[13] | 298.656         | 744.431         | 740.433         | 0.755          | 740.181         | P[29] |
| A[14] | 316.415         | 720.174         | 716.169         | 0.755          | 715.917         | A[28] |
| E[15] | 348.675         | 702.415         | 698.410         | 0.755          | 698.158         | E[27] |
| K[16] | 380.699         | <b>670.154</b>  | 666.149         | 0.666          | 665.898         | K[26] |
| T[17] | 405.961         | 658.130         | 654.126         | 0.666          | 653.874         | T[25] |
| P[18] | 439.224         | 642.869         | 638.864         | 0.666          | 638.612         | P[24] |
| V[19] | 454.991         | 588.005         | 594.001         | <b>584.853</b> | 584.349         | V[23] |
| K[20] | 487.015         | 563.838         | 559.834         | 560.085        | 559.580         | K[22] |
| K[21] | 519.039         | 531.814         | 527.810         | 528.062        | 527.558         | K[21] |
| K[22] | 551.063         | 499.791         | 495.786         | 496.038        | 495.534         | K[20] |
| A[23] | 568.822         | 467.767         | 463.762         | 464.014        | 463.510         | A[19] |
| R[24] | 607.847         | 450.000         | 446.003         | 446.255        | 445.751         | R[18] |
| R[25] | 639.871         | 410.982         | 406.976         | 407.230        | 406.726         | R[17] |
| A[26] | 657.630         | 378.959         | 374.954         | 375.206        | 374.702         | A[16] |
| A[27] | 675.390         | 361.199         | 357.195         | 357.447        | 356.941         | A[15] |
| G[28] | 689.645         | 343.440         | 339.435         | 339.687        | 339.181         | G[14] |
| G[29] | 703.900         | 329.185         | 325.180         | 325.432        | 324.926         | G[13] |
| A[30] | 721.660         | 314.929         | 310.925         | 311.177        | 310.671         | A[12] |
| K[31] | 753.683         | 297.170         | 293.165         | 293.417        | 292.913         | K[11] |
| R[32] | 792.709         | 265.146         | 261.142         | 261.394        | 260.890         | R[10] |
| K[33] | 824.732         | 226.121         | 222.116         | 222.368        | 221.864         | K[9]  |
| T[34] | 849.994         | 194.097         | 190.093         | 190.345        | 189.841         | T[8]  |
| S[35] | 877.252         | 166.835         | 164.831         | 165.083        | 164.579         | S[7]  |
| G[36] | <b>886.608</b>  | 147.071         | 143.073         | 143.325        | 142.821         | G[6]  |
| P[37] | 910.271         | 132.822         | 128.817         | 129.069        | 128.565         | P[5]  |
| P[38] | <b>934.534</b>  | 108.550         | 104.554         | 104.806        | 104.302         | P[4]  |
| V[39] | <b>959.301</b>  | 84.290          | 80.291          | 80.543         | 80.039          | V[3]  |
| S[40] | <b>981.659</b>  | 59.520          | 55.524          | 55.776         | 55.272          | S[2]  |
| E[41] | <b>1013.320</b> | 37.771          | 33.766          | 34.018         | 33.514          | E[1]  |



# sp | P43274 | H14\_MOUSE

[Acetyl]SETAPAAPAAPAPAEKTPVKKKARKAAGGAKRKTSGPPVSE

- ▶ fragmentation table for charge state 1+
- ▶ specType=etd
- ▶ score=64.94
- ▶ F105343.dat
- ▶ query=q14526.p1
- ▶ precursor=811.054280
- ▶ chargePrecursor=5
- ▶ itol=0.8

| AA  | c               | y               | z+1             | z+2             | z        | AA  |
|-----|-----------------|-----------------|-----------------|-----------------|----------|-----|
| S1  | 147.076         | 4051.243        | 4635.222        | 0.000           | 4034.215 | S41 |
| E2  | 276.119         | 3922.198        | 9906.180        | 0.000           | 3905.172 | E40 |
| T3  | 377.167         | 3793.156        | 3777.137        | 0.000           | 3776.129 | T30 |
| A4  | 448.204         | 3692.108        | 3679.090        | 0.000           | 3675.082 | A38 |
| F5  | <b>545.257</b>  | 3621.071        | 3605.052        | 0.000           | 3604.045 | F37 |
| A6  | 619.294         | 3524.018        | 3508.000        | 0.000           | 3506.990 | A26 |
| A7  | 687.331         | 3452.982        | 3436.963        | 0.000           | 3435.955 | A35 |
| P8  | 784.384         | 3381.944        | 3365.925        | 0.000           | 3364.918 | P34 |
| A9  | 855.421         | 3294.891        | 3268.873        | 0.000           | 3267.865 | A33 |
| A10 | 926.458         | 3213.854        | 3197.836        | 0.000           | 3196.828 | A32 |
| F11 | 1023.511        | 3142.817        | 3126.798        | 0.000           | 3125.791 | F31 |
| A12 | 1094.548        | 3045.764        | 3029.746        | 0.000           | 3028.738 | A20 |
| F13 | 1191.600        | 2974.727        | 2958.709        | 0.000           | 2957.701 | F29 |
| A14 | 1262.638        | 2877.674        | 2861.656        | 0.000           | 2860.648 | A28 |
| E15 | 1361.680        | 2806.637        | 2790.619        | 0.000           | 2789.611 | E27 |
| K16 | <b>1519.775</b> | 2677.595        | 2661.576        | 2062.584        | 2660.568 | K26 |
| T17 | 1620.623        | 2549.560        | 2533.541        | 2534.489        | 2532.473 | T25 |
| F18 | 1717.676        | 2448.452        | 2432.433        | 2433.441        | 2431.426 | F24 |
| V19 | 1816.944        | 2351.399        | 2335.381        | 2336.388        | 2334.373 | V23 |
| K20 | 1945.039        | 2252.331        | 2236.312        | 2237.320        | 2235.304 | K22 |
| K21 | 2073.134        | 2124.236        | 2108.217        | 2109.225        | 2107.209 | K21 |
| K22 | 2201.229        | 1996.141        | 1980.122        | 1981.130        | 1979.114 | K20 |
| A23 | 2272.266        | 1898.045        | 1882.027        | 1883.035        | 1881.020 | A19 |
| R24 | 2428.367        | 1797.009        | 1780.990        | 1781.998        | 1779.982 | R18 |
| K25 | 2556.462        | 1640.908        | 1624.889        | 1625.897        | 1623.881 | K17 |
| A26 | 2627.499        | 1512.813        | 1496.794        | 1497.802        | 1495.786 | A16 |
| A27 | 2698.536        | <b>1441.776</b> | 1425.757        | 1426.765        | 1424.749 | A15 |
| G28 | 2755.558        | 1370.739        | 1354.720        | 1355.728        | 1353.712 | G14 |
| G29 | 2812.579        | 1303.711        | 1287.692        | 1288.700        | 1286.684 | G13 |
| A30 | 2851.614        | 1256.695        | <b>1240.677</b> | <b>1241.685</b> | 1239.669 | A12 |
| K31 | 3011.711        | 1185.658        | <b>1169.640</b> | 1170.648        | 1168.632 | K11 |
| R32 | 3167.812        | <b>1057.564</b> | <b>1041.545</b> | 1042.553        | 1040.537 | R10 |
| K33 | 3295.907        | 901.462         | <b>885.444</b>  | 886.452         | 884.436  | K9  |
| F34 | 3396.955        | 773.368         | 757.349         | 758.357         | 756.341  | F8  |
| S35 | 3483.987        | 792.329         | 688.303         | <b>657.309</b>  | 655.293  | S31 |
| G36 | 3541.009        | <b>585.288</b>  | 569.269         | 570.277         | 568.261  | G6  |
| F37 | 3638.061        | 528.256         | 512.248         | 513.256         | 511.240  | F6  |
| F38 | 3735.114        | 431.214         | 415.195         | 416.203         | 414.187  | F4  |
| V39 | 3834.182        | 334.161         | 318.142         | 319.150         | 317.134  | V3  |
| S40 | 3923.214        | 235.082         | 219.074         | 220.082         | 218.066  | S3  |
| E41 | 4050.257        | 148.060         | 132.042         | 133.050         | 131.034  | E1  |

# sp | P43274 | H14\_MOUSE

[Acetyl]SETAPAAPAAPAPAEKTPVKKKARKAAGGAKRKTSGPPVSE

- ▶ fragmentation table for charge state 2+
- ▶ specType=etd
- ▶ score=64.94
- ▶ F105343.dat
- ▶ query=q14526.p1
- ▶ precursor=811.054280
- ▶ chargePrecursor=5
- ▶ itol=0.8

| AA | c  | y               | z+1             | z+2             | z               | AA              |       |
|----|----|-----------------|-----------------|-----------------|-----------------|-----------------|-------|
| S  | 1  | 74.043          | 2026.124        | 2018.135        | 0.504           | 2017.611        | S(41) |
| E  | 2  | 135.503         | 1961.003        | <b>1953.594</b> | 0.504           | <b>1953.090</b> | E(42) |
| T  | 3  | 189.087         | 1897.082        | <b>1889.072</b> | 0.504           | <b>1888.568</b> | T(39) |
| A  | 4  | 224.606         | 1846.558        | 1838.549        | 0.504           | 1838.044        | A(38) |
| P  | 5  | 273.132         | 1811.039        | 1803.030        | 0.504           | 1802.526        | P(37) |
| A  | 6  | 308.890         | 1762.513        | <b>1754.503</b> | 0.504           | <b>1754.000</b> | A(36) |
| A  | 7  | 344.159         | 1728.994        | 1721.985        | 0.504           | 1721.481        | A(35) |
| P  | 8  | 392.695         | 1691.476        | 1683.466        | 0.504           | 1682.962        | P(34) |
| A  | 9  | 438.214         | 1642.949        | 1634.940        | 0.504           | 1634.436        | A(33) |
| A  | 10 | 463.733         | 1607.431        | <b>1599.421</b> | 0.504           | <b>1598.917</b> | A(32) |
| P  | 11 | 512.259         | 1571.912        | 1563.903        | 0.504           | 1563.399        | P(31) |
| A  | 12 | 547.977         | 1523.386        | <b>1515.376</b> | 0.504           | <b>1514.872</b> | A(30) |
| P  | 13 | 596.504         | 1487.867        | 1479.858        | 0.504           | 1479.354        | P(29) |
| A  | 14 | 631.822         | 1439.341        | <b>1431.332</b> | 0.504           | <b>1430.828</b> | A(28) |
| E  | 15 | 666.344         | 1403.822        | 1395.813        | 0.504           | 1395.309        | E(27) |
| K  | 16 | 700.301         | <b>1339.301</b> | 1331.292        | <b>1331.796</b> | 1330.788        | K(26) |
| T  | 17 | 810.815         | 1275.264        | <b>1267.244</b> | <b>1267.748</b> | 1266.740        | T(25) |
| P  | 18 | 899.443         | 1204.738        | 1210.730        | 1217.224        | 1216.220        | P(24) |
| V  | 19 | <b>908.976</b>  | 1176.203        | 1168.194        | 1168.698        | 1167.690        | V(23) |
| K  | 20 | <b>973.023</b>  | 1126.669        | 1118.660        | 1119.164        | 1118.156        | K(22) |
| K  | 21 | <b>1037.071</b> | 1062.622        | <b>1054.612</b> | <b>1055.116</b> | 1054.108        | K(21) |
| K  | 22 | 1101.118        | <b>998.574</b>  | <b>990.565</b>  | <b>991.069</b>  | <b>990.061</b>  | K(20) |
| A  | 23 | <b>1136.637</b> | <b>934.527</b>  | 926.518         | 927.021         | 926.013         | A(19) |
| R  | 24 | <b>1214.687</b> | 869.004         | <b>890.999</b>  | <b>891.503</b>  | <b>890.495</b>  | R(18) |
| K  | 25 | <b>1278.735</b> | 820.958         | 812.949         | 813.452         | 812.444         | K(17) |
| A  | 26 | 1314.253        | 756.910         | <b>748.901</b>  | <b>749.405</b>  | <b>748.397</b>  | A(16) |
| A  | 27 | 1349.772        | 721.392         | 713.382         | 713.886         | 712.878         | A(15) |
| C  | 28 | <b>1378.283</b> | 686.874         | 678.864         | 679.368         | 678.360         | C(14) |
| C  | 29 | <b>1406.793</b> | <b>657.362</b>  | <b>649.353</b>  | <b>649.857</b>  | <b>648.849</b>  | C(13) |
| A  | 30 | <b>1442.312</b> | 626.852         | <b>620.842</b>  | 621.346         | <b>620.338</b>  | A(12) |
| K  | 31 | <b>1506.359</b> | 593.333         | <b>585.324</b>  | <b>585.827</b>  | <b>584.820</b>  | K(11) |
| R  | 32 | <b>1584.410</b> | 529.285         | 521.276         | 521.780         | 520.772         | R(10) |
| K  | 33 | <b>1648.457</b> | 451.235         | 443.226         | 443.729         | 442.722         | K(9)  |
| T  | 34 | <b>1698.501</b> | 389.187         | 379.178         | 379.682         | 378.674         | T(8)  |
| S  | 35 | 1762.497        | 336.664         | 328.654         | 329.158         | 328.150         | S(7)  |
| G  | 36 | 1771.008        | 293.148         | 285.138         | 285.642         | 284.634         | G(6)  |
| P  | 37 | 1819.534        | 264.637         | 256.627         | 257.131         | 256.124         | P(5)  |
| P  | 38 | 1868.061        | 216.110         | 208.101         | 208.605         | 207.597         | P(4)  |
| V  | 39 | 1917.595        | 167.584         | 159.575         | 160.079         | 159.071         | V(3)  |
| S  | 40 | 1961.111        | 118.066         | 110.043         | 110.544         | 109.535         | S(2)  |
| E  | 41 | 2005.632        | 74.534          | 66.524          | 67.028          | 66.021          | E(1)  |



# sp | P43274 | H14\_MOUSE

[Acetyl]SETAPAAPAAPAPAEKTPVKKKARKAAGGAKRKTSGPPVSE

- ▶ fragmentation table for charge state 3+
- ▶ specType=etd
- ▶ score=64.94
- ▶ F105343.dat
- ▶ query=q14526.p1
- ▶ precursor=811.054280
- ▶ chargePrecursor=5
- ▶ itol=0.8

| AA | c  | y               | z+1             | z+2             | z              | AA              |       |
|----|----|-----------------|-----------------|-----------------|----------------|-----------------|-------|
| S  | 1  | 49.697          | <b>1351.005</b> | <b>1345.746</b> | 0.672          | <b>1345.410</b> | S[41] |
| E  | 2  | 92.711          | <b>1308.071</b> | <b>1302.731</b> | 0.672          | 1302.398        | E[40] |
| T  | 3  | 126.394         | 1265.057        | <b>1259.717</b> | 0.672          | <b>1259.381</b> | T[39] |
| A  | 4  | 150.073         | 1331.374        | <b>1226.035</b> | 0.672          | 1225.699        | A[38] |
| W  | 5  | 182.424         | <b>1207.695</b> | <b>1202.355</b> | 0.672          | 1202.020        | W[37] |
| A  | 6  | 206.193         | 1375.344        | <b>1170.005</b> | 0.672          | <b>1169.669</b> | A[36] |
| A  | 7  | 229.782         | 1151.065        | <b>1146.376</b> | 0.672          | <b>1145.990</b> | A[35] |
| P  | 8  | 262.133         | <b>1127.986</b> | 1122.647        | 0.672          | 1122.311        | P[34] |
| A  | 9  | 285.812         | 1095.835        | 1090.296        | 0.672          | 1089.960        | A[33] |
| A  | 10 | 309.491         | <b>1071.956</b> | 1066.617        | 0.672          | 1066.281        | A[32] |
| P  | 11 | 341.242         | 1048.277        | 1042.938        | 0.672          | 1042.602        | P[31] |
| A  | 12 | 365.921         | 1015.926        | <b>1010.587</b> | 0.672          | <b>1010.251</b> | A[30] |
| P  | 13 | 397.672         | 992.247         | 986.908         | 0.672          | 986.572         | P[29] |
| A  | 14 | 421.551         | <b>959.896</b>  | <b>954.557</b>  | 0.672          | <b>954.221</b>  | A[28] |
| E  | 15 | 464.565         | 936.217         | <b>930.878</b>  | 0.672          | <b>930.542</b>  | E[27] |
| K  | 16 | 507.263         | 893.201         | <b>887.864</b>  | <b>888.199</b> | <b>887.528</b>  | K[26] |
| T  | 17 | 540.046         | <b>850.505</b>  | <b>845.165</b>  | <b>845.501</b> | <b>844.829</b>  | T[25] |
| P  | 18 | 572.829         | 826.320         | 811.483         | 811.819        | 811.147         | P[24] |
| V  | 19 | 606.320         | 784.471         | 779.132         | 779.468        | 778.796         | V[23] |
| K  | 20 | <b>649.018</b>  | 751.449         | 746.109         | 746.445        | 745.773         | K[22] |
| K  | 21 | 691.716         | 708.750         | 703.411         | 703.747        | 703.075         | K[21] |
| K  | 22 | 734.414         | 666.052         | 660.712         | 661.048        | 660.376         | K[20] |
| A  | 23 | 758.094         | 623.354         | 618.014         | 618.350        | 617.678         | A[19] |
| R  | 24 | 810.127         | 590.876         | 584.336         | 584.671        | 583.999         | R[18] |
| K  | 25 | 852.826         | 547.641         | 542.301         | 542.637        | 541.965         | K[17] |
| A  | 26 | 876.505         | 504.942         | 499.603         | 499.939        | 499.267         | A[16] |
| A  | 27 | 900.184         | 461.263         | 475.924         | 476.260        | 475.588         | A[15] |
| G  | 28 | 919.191         | 457.584         | 452.245         | 452.581        | 451.909         | G[14] |
| G  | 29 | 938.198         | 438.577         | 433.238         | 433.574        | 432.902         | G[13] |
| A  | 30 | 961.877         | 419.570         | 414.231         | 414.566        | 413.894         | A[12] |
| K  | 31 | <b>1004.575</b> | 395.891         | 390.551         | 390.887        | 390.215         | K[11] |
| R  | 32 | <b>1056.609</b> | 353.193         | 347.853         | 348.189        | 347.517         | R[10] |
| K  | 33 | <b>1099.307</b> | 301.159         | 295.819         | 296.155        | 295.483         | K[9]  |
| T  | 34 | <b>1132.990</b> | 258.461         | 253.121         | 253.457        | 252.785         | T[8]  |
| S  | 35 | <b>1162.001</b> | 224.778         | 219.438         | 219.775        | 219.103         | S[7]  |
| G  | 36 | 1183.068        | 199.761         | 194.421         | 194.756        | 194.084         | G[6]  |
| P  | 37 | 1213.359        | 175.760         | 171.421         | 171.757        | 171.085         | P[5]  |
| P  | 38 | <b>1245.710</b> | 144.400         | 139.070         | 139.406        | 138.734         | P[4]  |
| V  | 39 | <b>1278.732</b> | 112.050         | 106.710         | 107.045        | 106.373         | V[3]  |
| S  | 40 | <b>1307.743</b> | 79.030          | 73.696          | 74.032         | 73.360          | S[2]  |
| E  | 41 | 1350.757        | 50.025          | 44.685          | 45.021         | 44.349          | E[1]  |

# sp | P43274 | H14\_MOUSE

[Acetyl]SETAPAAPAAPAPAEKTPVKKKARKAAGGAKRKTSGPPVSE

- ▶ fragmentation table for charge state 4+
- ▶ specType=etd
- ▶ score=64.94
- ▶ F105343.dat
- ▶ query=q14526.p1
- ▶ precursor=811.054280
- ▶ chargePrecursor=5
- ▶ itol=0.8

| AA | c  | y               | z+1             | z+2             | z              | AA              |       |
|----|----|-----------------|-----------------|-----------------|----------------|-----------------|-------|
| S  | 1  | 37.525          | <b>1013.566</b> | <b>1009.561</b> | 0.755          | <b>1009.309</b> | S[41] |
| E  | 2  | 69.785          | <b>981.305</b>  | <b>977.300</b>  | 0.755          | <b>977.048</b>  | E[40] |
| T  | 3  | 95.047          | <b>949.044</b>  | <b>945.040</b>  | 0.755          | <b>944.788</b>  | T[39] |
| A  | 4  | 112.806         | <b>923.781</b>  | <b>919.776</b>  | 0.755          | <b>919.526</b>  | A[38] |
| P  | 5  | 137.070         | <b>906.023</b>  | <b>902.019</b>  | 0.755          | <b>901.761</b>  | P[37] |
| A  | 6  | 154.829         | <b>881.766</b>  | <b>877.755</b>  | 0.755          | <b>877.501</b>  | A[36] |
| A  | 7  | 172.588         | <b>864.001</b>  | <b>859.996</b>  | 0.755          | <b>859.744</b>  | A[35] |
| P  | 8  | 196.851         | <b>846.241</b>  | <b>842.237</b>  | 0.755          | <b>841.985</b>  | P[34] |
| A  | 9  | 214.611         | <b>821.979</b>  | <b>817.974</b>  | 0.755          | <b>817.722</b>  | A[33] |
| A  | 10 | 232.370         | <b>804.210</b>  | <b>800.210</b>  | 0.755          | <b>799.962</b>  | A[32] |
| P  | 11 | 256.833         | <b>786.460</b>  | <b>782.455</b>  | 0.755          | <b>782.203</b>  | P[31] |
| A  | 12 | 274.592         | <b>769.191</b>  | <b>765.192</b>  | 0.755          | <b>765.946</b>  | A[30] |
| P  | 13 | 298.656         | <b>744.431</b>  | <b>740.433</b>  | 0.755          | <b>740.181</b>  | P[29] |
| A  | 14 | 316.415         | <b>720.174</b>  | <b>716.169</b>  | 0.755          | <b>715.917</b>  | A[28] |
| E  | 15 | 348.675         | <b>702.415</b>  | <b>698.410</b>  | 0.755          | <b>698.156</b>  | E[27] |
| K  | 16 | 380.699         | <b>670.154</b>  | <b>666.149</b>  | 0.666          | <b>665.898</b>  | K[26] |
| T  | 17 | 405.961         | <b>638.130</b>  | <b>634.126</b>  | 0.634          | <b>633.874</b>  | T[25] |
| P  | 18 | 439.224         | <b>612.866</b>  | <b>608.864</b>  | 0.608          | <b>608.612</b>  | P[24] |
| V  | 19 | 454.991         | <b>588.005</b>  | <b>584.601</b>  | <b>584.853</b> | <b>584.349</b>  | V[23] |
| K  | 20 | 487.015         | <b>563.838</b>  | <b>559.834</b>  | <b>560.085</b> | <b>559.589</b>  | K[22] |
| K  | 21 | 519.039         | <b>531.814</b>  | <b>527.810</b>  | <b>528.062</b> | <b>527.556</b>  | K[21] |
| K  | 22 | 551.063         | <b>499.791</b>  | <b>495.786</b>  | <b>496.038</b> | <b>495.534</b>  | K[20] |
| A  | 23 | 568.822         | <b>467.767</b>  | <b>463.762</b>  | <b>464.014</b> | <b>463.510</b>  | A[19] |
| R  | 24 | 607.847         | <b>430.000</b>  | <b>426.003</b>  | <b>426.255</b> | <b>425.751</b>  | R[18] |
| K  | 25 | 639.871         | <b>410.982</b>  | <b>406.976</b>  | <b>407.230</b> | <b>406.726</b>  | K[17] |
| A  | 26 | <b>657.630</b>  | <b>378.959</b>  | <b>374.954</b>  | <b>375.206</b> | <b>374.702</b>  | A[16] |
| A  | 27 | <b>675.390</b>  | <b>361.199</b>  | <b>357.195</b>  | <b>357.447</b> | <b>356.941</b>  | A[15] |
| G  | 28 | <b>689.645</b>  | <b>343.440</b>  | <b>339.435</b>  | <b>339.687</b> | <b>339.181</b>  | G[14] |
| G  | 29 | <b>703.900</b>  | <b>329.185</b>  | <b>325.180</b>  | <b>325.432</b> | <b>324.926</b>  | G[13] |
| A  | 30 | <b>721.660</b>  | <b>314.929</b>  | <b>310.925</b>  | <b>311.177</b> | <b>310.671</b>  | A[12] |
| K  | 31 | <b>753.683</b>  | <b>297.170</b>  | <b>293.165</b>  | <b>293.417</b> | <b>292.913</b>  | K[11] |
| R  | 32 | <b>792.709</b>  | <b>265.146</b>  | <b>261.142</b>  | <b>261.394</b> | <b>260.890</b>  | R[10] |
| K  | 33 | <b>824.732</b>  | <b>226.121</b>  | <b>222.116</b>  | <b>222.368</b> | <b>221.864</b>  | K[9]  |
| T  | 34 | <b>849.994</b>  | <b>194.097</b>  | <b>190.093</b>  | <b>190.345</b> | <b>189.841</b>  | T[8]  |
| S  | 35 | <b>877.252</b>  | <b>166.835</b>  | <b>164.831</b>  | <b>165.083</b> | <b>164.579</b>  | S[7]  |
| G  | 36 | <b>896.608</b>  | <b>147.077</b>  | <b>143.073</b>  | <b>143.325</b> | <b>142.821</b>  | G[6]  |
| P  | 37 | <b>910.271</b>  | <b>132.822</b>  | <b>128.817</b>  | <b>129.069</b> | <b>128.565</b>  | P[5]  |
| P  | 38 | <b>934.534</b>  | <b>108.550</b>  | <b>104.554</b>  | <b>104.806</b> | <b>104.302</b>  | P[4]  |
| V  | 39 | <b>959.301</b>  | <b>84.290</b>   | <b>80.291</b>   | <b>80.543</b>  | <b>80.039</b>   | V[3]  |
| S  | 40 | <b>981.059</b>  | <b>59.529</b>   | <b>55.524</b>   | <b>55.776</b>  | <b>55.272</b>   | S[2]  |
| E  | 41 | <b>1013.320</b> | <b>37.771</b>   | <b>33.766</b>   | <b>34.018</b>  | <b>33.514</b>   | E[1]  |

# sp | P43274 | H14\_MOUSE

[Acetyl]SETAPAAPAAPAPAEKTPVKKKARKAAGGAKRKTSGPPVSE

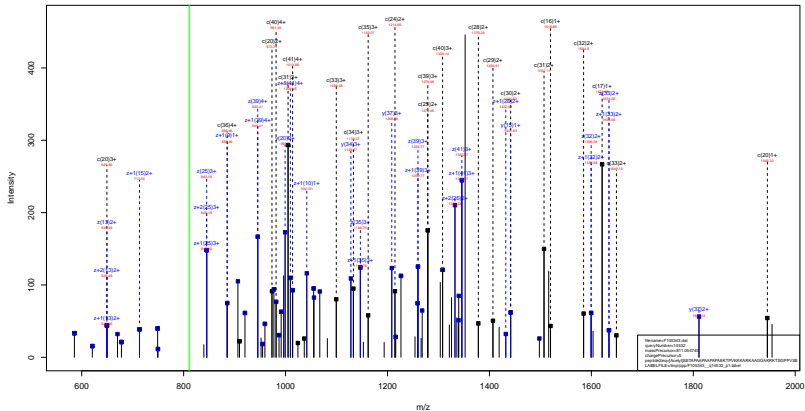

# sp | P43274 | H14\_MOUSE

[Acetyl]SETAPAAPAAPAPAEKTPVKKKARKAAGGAKRKTSGPPVSE

- ▶ fragmentation table for charge state 1+
- ▶ specType=etd
- ▶ score=48.45
- ▶ F105343.dat
- ▶ query=q14532.p1
- ▶ precursor=811.054740
- ▶ chargePrecursor=5
- ▶ itol=0.8

| AA  | c               | y               | z+1             | z+2             | z        | AA  |
|-----|-----------------|-----------------|-----------------|-----------------|----------|-----|
| S1  | 147.076         | 4051.243        | 4635.222        | 0.000           | 4034.215 | S41 |
| E2  | 276.119         | 3922.198        | 9906.180        | 0.000           | 3905.172 | E40 |
| T3  | 377.167         | 3793.156        | 3777.137        | 0.000           | 3776.129 | T30 |
| A4  | 448.204         | 3692.108        | 3679.090        | 0.000           | 3675.082 | A38 |
| F5  | 545.257         | 3621.071        | 3605.052        | 0.000           | 3604.045 | F37 |
| A6  | 619.294         | 3524.018        | 3508.000        | 0.000           | 3506.990 | A26 |
| A7  | 667.331         | 3452.982        | 3436.963        | 0.000           | 3435.955 | A35 |
| P8  | 784.384         | 3381.944        | 3365.925        | 0.000           | 3364.918 | P34 |
| A9  | 855.421         | 3294.891        | 3268.873        | 0.000           | 3267.865 | A33 |
| A10 | 938.458         | 3213.854        | 3197.836        | 0.000           | 3196.828 | A32 |
| F11 | <b>1023.511</b> | 3142.817        | 3126.798        | 0.000           | 3125.791 | F31 |
| A12 | 1094.558        | 3048.764        | 3029.746        | 0.000           | 3028.738 | A20 |
| F13 | 1191.600        | 2974.727        | 2958.709        | 0.000           | 2957.701 | F29 |
| A14 | 1262.638        | 2877.674        | 2861.656        | 0.000           | 2860.648 | A28 |
| E15 | 1361.680        | 2806.637        | 2790.619        | 0.000           | 2789.611 | E27 |
| K16 | <b>1519.775</b> | 2677.595        | 2661.576        | 2062.584        | 2660.568 | K26 |
| T17 | <b>1620.823</b> | 2549.500        | 2533.481        | 2534.469        | 2532.473 | T25 |
| F18 | 1717.549        | 2448.452        | 2432.433        | 2433.441        | 2431.426 | F24 |
| V19 | 1816.544        | 2351.399        | 2335.381        | 2336.388        | 2334.373 | V23 |
| K20 | <b>1945.839</b> | 2252.331        | 2236.312        | 2237.320        | 2235.304 | K22 |
| K21 | 2073.134        | 2124.236        | 2108.217        | 2109.225        | 2107.209 | K21 |
| K22 | 2201.229        | 1996.141        | 1980.122        | 1981.130        | 1979.114 | K20 |
| A23 | 2272.266        | 1898.045        | 1882.027        | 1883.035        | 1881.020 | A19 |
| R24 | 2428.367        | 1797.009        | 1780.990        | 1781.998        | 1779.982 | R18 |
| K25 | 2556.462        | 1640.908        | 1624.889        | 1625.897        | 1623.881 | K17 |
| A26 | 2627.499        | 1512.813        | 1496.794        | <b>1497.802</b> | 1495.786 | A16 |
| A27 | 2698.536        | <b>1441.776</b> | 1425.757        | 1426.765        | 1424.749 | A15 |
| G28 | 2755.558        | 1370.739        | 1354.720        | 1355.728        | 1353.712 | G14 |
| G29 | 2832.579        | 1313.717        | 1297.698        | 1298.706        | 1296.690 | G13 |
| A30 | 2914.618        | 1256.696        | 1240.677        | 1241.685        | 1239.669 | A12 |
| K31 | 3011.711        | 1185.658        | 1169.640        | 1170.648        | 1168.632 | K11 |
| R32 | 3167.812        | 1057.564        | <b>1041.545</b> | 1042.553        | 1040.537 | R10 |
| K33 | 3295.907        | 901.463         | <b>885.444</b>  | 886.452         | 884.436  | K9  |
| F34 | 3396.955        | 773.368         | 757.349         | 758.357         | 756.341  | F8  |
| S35 | 3483.987        | 797.329         | 688.303         | 689.309         | 687.293  | S1  |
| G36 | 3541.009        | <b>585.288</b>  | 569.269         | 570.277         | 568.261  | G0  |
| P37 | 3638.061        | 528.256         | 512.248         | 513.256         | 511.240  | P6  |
| F38 | 3736.114        | 431.214         | 415.195         | 416.203         | 414.187  | F4  |
| V39 | 3834.182        | 334.161         | 318.142         | 319.150         | 317.134  | V3  |
| S40 | 3921.214        | 235.082         | 219.074         | 220.082         | 218.066  | S0  |
| E41 | 4050.257        | 148.986         | 132.942         | 133.950         | 131.934  | E0  |

# sp | P43274 | H14\_MOUSE

[Acetyl]SETAPAAPAAPAPAEKTPVKKKARKAAGGAKRKTSGPPVSE

- ▶ fragmentation table for charge state 2+
- ▶ specType=etd
- ▶ score=48.45
- ▶ F105343.dat
- ▶ query=q14532.p1
- ▶ precursor=811.054740
- ▶ chargePrecursor=5
- ▶ itol=0.8

| AA  | c               | y               | z+1             | z+2             | z               | AA  |
|-----|-----------------|-----------------|-----------------|-----------------|-----------------|-----|
| S1  | 74.043          | 2026.124        | 2018.115        | 0.504           | 2017.61         | S41 |
| E2  | 138.503         | 1961.603        | 1953.594        | 0.504           | 1953.090        | E42 |
| T3  | 189.087         | 1897.082        | 1889.072        | 0.504           | 1888.566        | T30 |
| A4  | 224.606         | 1846.556        | 1838.548        | 0.504           | 1838.044        | A38 |
| P5  | 273.132         | <b>1811.039</b> | 1803.030        | 0.504           | 1802.526        | P37 |
| A16 | 308.880         | 1762.513        | 1754.503        | 0.504           | 1754.000        | A36 |
| A7  | 344.159         | 1728.994        | 1718.985        | 0.504           | 1718.481        | A35 |
| P8  | 392.695         | 1690.476        | 1681.466        | 0.504           | 1682.962        | P34 |
| A9  | 438.214         | 1642.949        | <b>1634.940</b> | 0.504           | <b>1634.436</b> | A33 |
| A10 | 463.733         | 1607.431        | <b>1599.421</b> | 0.504           | <b>1598.917</b> | A32 |
| P11 | 512.259         | 1571.912        | 1563.903        | 0.504           | 1563.399        | P31 |
| A12 | 547.777         | 1528.396        | 1518.386        | 0.504           | 1518.879        | A30 |
| P13 | 596.304         | 1487.867        | 1479.858        | 0.504           | 1479.354        | P29 |
| A14 | 631.822         | 1449.341        | <b>1431.332</b> | 0.504           | 1430.828        | A28 |
| E15 | 666.344         | 1403.822        | 1395.813        | 0.504           | 1395.309        | E27 |
| K16 | 700.301         | <b>1339.301</b> | 1331.292        | <b>1331.796</b> | 1330.788        | K28 |
| T17 | 810.815         | 1275.284        | 1267.274        | <b>1267.748</b> | 1267.244        | T25 |
| P18 | 859.443         | 1224.755        | <b>1216.720</b> | 1217.224        | <b>1216.216</b> | P24 |
| V19 | <b>908.976</b>  | 1176.203        | 1168.194        | 1168.698        | 1167.690        | V23 |
| K20 | <b>973.023</b>  | 1126.669        | 1118.660        | 1119.164        | 1118.156        | K22 |
| K21 | <b>1037.071</b> | 1082.622        | <b>1054.612</b> | <b>1055.116</b> | 1054.108        | K21 |
| K22 | 1101.118        | <b>998.574</b>  | <b>990.565</b>  | <b>991.069</b>  | 990.061         | K26 |
| A23 | 1139.639        | 954.542         | 946.532         | 947.034         | 946.026         | A19 |
| R24 | <b>1214.687</b> | 899.026         | 890.999         | 891.503         | 890.495         | R18 |
| K25 | <b>1278.735</b> | 820.958         | 812.948         | 813.452         | 812.444         | K17 |
| A26 | 1314.253        | 756.910         | <b>748.901</b>  | <b>749.405</b>  | <b>748.397</b>  | A16 |
| A27 | 1349.772        | 721.392         | <b>713.382</b>  | <b>713.886</b>  | <b>712.878</b>  | A15 |
| C28 | <b>1378.263</b> | 685.872         | <b>677.864</b>  | <b>678.368</b>  | <b>677.360</b>  | C14 |
| C29 | <b>1406.793</b> | 657.362         | <b>649.353</b>  | <b>649.857</b>  | <b>648.849</b>  | C13 |
| A30 | <b>1442.312</b> | 626.852         | <b>620.842</b>  | <b>621.346</b>  | <b>620.338</b>  | A12 |
| K31 | <b>1506.359</b> | 593.333         | <b>585.324</b>  | <b>585.827</b>  | 584.820         | K11 |
| R32 | <b>1584.410</b> | 529.285         | 521.276         | 521.780         | 520.772         | R10 |
| K33 | <b>1648.457</b> | 451.235         | 443.226         | 443.729         | 442.722         | K9  |
| T34 | 1685.941        | 387.187         | 379.178         | 379.682         | 378.674         | T7  |
| S35 | 1742.497        | 336.664         | 328.654         | 329.158         | 328.151         | S7  |
| G36 | 1771.008        | 293.148         | 285.138         | 285.642         | 284.634         | G6  |
| P37 | 1819.534        | 264.637         | 256.627         | 257.131         | 256.124         | P5  |
| P38 | 1868.061        | 216.110         | 208.101         | 208.605         | 207.597         | P4  |
| V39 | 1917.595        | 167.584         | 159.575         | 160.079         | 159.071         | V3  |
| S40 | 1961.111        | 118.066         | 110.043         | 110.544         | 109.535         | S2  |
| E41 | 2025.632        | 74.534          | 66.524          | 67.028          | 66.021          | E1  |

# sp | P43274 | H14\_MOUSE

[Acetyl]SETAPAAPAAPAPAEKTPVKKKARKAAGGAKRKTSGPPVSE

- ▶ fragmentation table for charge state 3+
- ▶ specType=etd
- ▶ score=48.45
- ▶ F105343.dat
- ▶ query=q14532.p1
- ▶ precursor=811.054740
- ▶ chargePrecursor=5
- ▶ itol=0.8

| AA | c  | y               | z+1             | z+2             | z              | AA              |       |
|----|----|-----------------|-----------------|-----------------|----------------|-----------------|-------|
| S  | 1  | 49.697          | 1351.085        | <b>1345.746</b> | 0.672          | <b>1345.410</b> | S[41] |
| E  | 2  | 92.711          | <b>1308.071</b> | 1302.731        | 0.672          | 1302.398        | E[40] |
| T  | 3  | 126.394         | 1265.057        | <b>1259.717</b> | 0.672          | <b>1259.381</b> | T[39] |
| A  | 4  | 150.073         | 1231.374        | <b>1226.035</b> | 0.672          | <b>1225.699</b> | A[38] |
| P  | 5  | 182.424         | <b>1207.695</b> | 1202.356        | 0.672          | 1202.020        | P[37] |
| A  | 6  | 206.103         | 1173.544        | 1170.005        | 0.672          | 1169.669        | A[36] |
| A  | 7  | 229.782         | 1151.065        | <b>1146.326</b> | 0.672          | <b>1145.990</b> | A[35] |
| P  | 8  | 262.133         | <b>1127.986</b> | 1122.647        | 0.672          | 1122.311        | P[34] |
| A  | 9  | 285.812         | 1095.835        | 1090.296        | 0.672          | 1089.960        | A[33] |
| A  | 10 | 309.491         | 1071.950        | <b>1066.617</b> | 0.672          | 1066.281        | A[32] |
| P  | 11 | 341.842         | 1048.277        | 1042.738        | 0.672          | 1042.402        | P[31] |
| A  | 12 | 365.521         | 1019.926        | 1010.887        | 0.672          | 1010.251        | A[30] |
| P  | 13 | 397.872         | 992.247         | <b>986.908</b>  | 0.672          | <b>986.572</b>  | P[29] |
| A  | 14 | 421.551         | <b>959.896</b>  | <b>954.557</b>  | 0.672          | <b>954.221</b>  | A[28] |
| E  | 15 | 464.565         | 936.217         | 930.878         | 0.672          | 930.542         | E[27] |
| K  | 16 | 507.263         | 893.203         | 887.864         | 888.199        | 887.528         | K[26] |
| T  | 17 | 540.946         | 890.585         | <b>845.165</b>  | <b>845.501</b> | <b>844.829</b>  | T[25] |
| P  | 18 | 574.297         | 835.827         | 831.483         | 831.819        | 831.147         | P[24] |
| V  | 19 | 606.320         | 784.471         | 779.132         | 779.468        | 778.796         | V[23] |
| K  | 20 | <b>649.018</b>  | 751.449         | 746.109         | 746.445        | 745.773         | K[22] |
| K  | 21 | 691.716         | 708.750         | 703.411         | 703.747        | 703.075         | K[21] |
| K  | 22 | 734.414         | 666.052         | 660.712         | 661.048        | 660.376         | K[20] |
| A  | 23 | 758.094         | 623.354         | 618.014         | 618.350        | 617.678         | A[19] |
| R  | 24 | 810.127         | 599.876         | 594.536         | 594.871        | 593.999         | R[18] |
| R  | 25 | 852.826         | 547.641         | 542.301         | 542.637        | 541.965         | R[17] |
| A  | 26 | 876.505         | 504.842         | 499.503         | 499.939        | 499.267         | A[16] |
| A  | 27 | 900.184         | 461.263         | 475.924         | 476.260        | 475.588         | A[15] |
| G  | 28 | 919.191         | 457.584         | 452.245         | 452.581        | 451.909         | G[14] |
| G  | 29 | 938.198         | 438.577         | 433.238         | 433.574        | 432.902         | G[13] |
| A  | 30 | 961.877         | 419.570         | 414.231         | 414.566        | 413.894         | A[12] |
| K  | 31 | <b>1004.575</b> | 395.891         | 390.551         | 390.887        | 390.215         | K[11] |
| R  | 32 | 1056.609        | 353.193         | 347.853         | 348.189        | 347.517         | R[10] |
| K  | 33 | <b>1099.307</b> | 301.159         | 295.819         | 296.155        | 295.483         | K[9]  |
| T  | 34 | <b>1132.990</b> | 258.461         | 253.121         | 253.457        | 252.785         | T[8]  |
| S  | 35 | <b>1162.001</b> | 224.778         | 219.438         | 219.775        | 219.103         | S[7]  |
| G  | 36 | 1183.008        | 199.761         | 190.428         | 190.764        | 190.092         | G[6]  |
| P  | 37 | 1213.359        | 175.760         | 171.421         | 171.757        | 171.085         | P[5]  |
| P  | 38 | 1245.710        | 144.400         | 139.070         | 139.406        | 138.734         | P[4]  |
| V  | 39 | <b>1278.732</b> | 112.050         | 106.710         | 107.055        | 106.383         | V[3]  |
| S  | 40 | <b>1307.743</b> | 79.030          | 73.696          | 74.032         | 73.360          | S[2]  |
| E  | 41 | 1350.757        | 50.025          | 44.685          | 45.021         | 44.349          | E[1]  |

# sp | P43274 | H14\_MOUSE

[Acetyl]SETAPAAPAAPAPAEKTPVKKKARKAAGGAKRKTSGPPVSE

- ▶ fragmentation table for charge state 4+
- ▶ specType=etd
- ▶ score=48.45
- ▶ F105343.dat
- ▶ query=q14532.p1
- ▶ precursor=811.054740
- ▶ chargePrecursor=5
- ▶ itol=0.8

| AA | c  | y               | z+1             | z+2             | z              | AA              |       |
|----|----|-----------------|-----------------|-----------------|----------------|-----------------|-------|
| S  | 1  | 37.525          | <b>1013.566</b> | <b>1009.561</b> | 0.755          | <b>1009.309</b> | S[41] |
| E  | 2  | 69.785          | <b>981.305</b>  | <b>977.300</b>  | 0.755          | <b>977.048</b>  | E[40] |
| T  | 3  | 95.047          | 949.044         | <b>945.040</b>  | 0.755          | <b>944.788</b>  | T[39] |
| A  | 4  | 112.806         | 923.781         | <b>919.776</b>  | 0.755          | <b>919.526</b>  | A[38] |
| P  | 5  | 137.070         | <b>906.023</b>  | 902.019         | 0.755          | 901.761         | P[37] |
| A  | 6  | 154.829         | 881.766         | 877.755         | 0.755          | 877.501         | A[36] |
| A  | 7  | 172.588         | 864.001         | 859.996         | 0.755          | 859.744         | A[35] |
| P  | 8  | 196.851         | 846.241         | 842.237         | 0.755          | 841.985         | P[34] |
| A  | 9  | 214.611         | 821.979         | 817.974         | 0.755          | 817.722         | A[33] |
| A  | 10 | 232.370         | 804.210         | 800.214         | 0.755          | 799.962         | A[32] |
| P  | 11 | 256.633         | 786.460         | 782.455         | 0.755          | 782.203         | P[31] |
| A  | 12 | 274.392         | 769.197         | 765.192         | 0.755          | 764.940         | A[30] |
| P  | 13 | 298.656         | 744.431         | 740.433         | 0.755          | 740.181         | P[29] |
| A  | 14 | 316.415         | 720.174         | 716.169         | 0.755          | 715.917         | A[28] |
| E  | 15 | 348.675         | 702.415         | 698.410         | 0.755          | 698.158         | E[27] |
| K  | 16 | 380.699         | <b>670.154</b>  | 666.149         | 0.666          | 665.898         | K[26] |
| T  | 17 | 405.961         | 638.130         | 634.126         | 0.634          | 633.874         | T[25] |
| P  | 18 | 430.224         | 612.866         | 608.864         | 0.609          | 608.612         | P[24] |
| V  | 19 | 454.991         | 588.005         | 584.001         | <b>584.853</b> | 584.349         | V[23] |
| K  | 20 | 487.015         | 563.838         | 559.834         | 560.085        | 559.589         | K[22] |
| K  | 21 | 519.039         | 531.814         | 527.810         | 528.062        | 527.556         | K[21] |
| K  | 22 | 551.063         | 499.791         | 495.786         | 496.038        | 495.534         | K[20] |
| A  | 23 | 568.822         | 487.767         | 483.762         | 484.014        | 483.510         | A[19] |
| R  | 24 | 607.847         | 450.000         | 446.003         | 446.255        | 445.751         | R[18] |
| K  | 25 | 639.871         | 410.982         | 406.976         | 407.230        | 406.726         | K[17] |
| A  | 26 | 657.630         | 378.959         | 374.954         | 375.206        | 374.702         | A[16] |
| A  | 27 | 675.390         | 361.199         | 357.195         | 357.447        | 356.941         | A[15] |
| G  | 28 | 689.645         | 343.440         | 339.435         | 339.687        | 339.181         | G[14] |
| G  | 29 | 703.900         | 329.185         | 325.180         | 325.432        | 324.926         | G[13] |
| A  | 30 | 721.660         | 314.929         | 310.925         | 311.177        | 310.671         | A[12] |
| K  | 31 | 753.683         | 297.170         | 293.165         | 293.417        | 292.913         | K[11] |
| R  | 32 | 792.709         | 265.146         | 261.142         | 261.394        | 260.890         | R[10] |
| K  | 33 | 824.732         | 226.121         | 222.116         | 222.368        | 221.864         | K[9]  |
| T  | 34 | 849.994         | 194.097         | 190.093         | 190.345        | 189.841         | T[8]  |
| S  | 35 | 877.252         | 166.835         | 164.831         | 165.083        | 164.579         | S[7]  |
| G  | 36 | <b>886.608</b>  | 147.077         | 143.073         | 143.325        | 142.821         | G[6]  |
| P  | 37 | <b>910.271</b>  | 132.822         | 128.817         | 129.069        | 128.565         | P[5]  |
| P  | 38 | 934.534         | 108.550         | 104.554         | 104.806        | 104.302         | P[4]  |
| V  | 39 | <b>959.301</b>  | 84.290          | 80.291          | 80.543         | 80.039          | V[3]  |
| S  | 40 | <b>981.059</b>  | 59.529          | 55.524          | 55.776         | 55.272          | S[2]  |
| E  | 41 | <b>1013.320</b> | 37.771          | 33.766          | 34.018         | 33.514          | E[1]  |





# sp | P43274 | H14\_MOUSE

[Acetyl]SETAPAAPAAPAPAEKTPVKKKARKAAGGAKRKTSGPPVSE

- ▶ fragmentation table for charge state 1+
- ▶ specType=etd
- ▶ score=54.02
- ▶ F105343.dat
- ▶ query=q14535.p1
- ▶ precursor=811.055430
- ▶ chargePrecursor=5
- ▶ itol=0.8

| AA  | c               | y               | z+1             | z+2             | z        | AA  |
|-----|-----------------|-----------------|-----------------|-----------------|----------|-----|
| S1  | 147.076         | 4051.243        | 4635.222        | 0.000           | 4034.215 | S41 |
| E2  | 276.119         | 3922.198        | 9906.180        | 0.000           | 3905.172 | E40 |
| T3  | 377.167         | 3793.156        | 3777.137        | 0.000           | 3776.129 | T39 |
| A4  | 448.204         | 3692.108        | 3679.090        | 0.000           | 3675.082 | A38 |
| F5  | 545.257         | 3621.071        | 3605.052        | 0.000           | 3604.045 | F37 |
| A6  | 619.294         | 3524.013        | 3508.003        | 0.000           | 3506.990 | A36 |
| A7  | 667.331         | 3452.982        | 3436.963        | 0.000           | 3435.955 | A35 |
| P8  | 784.384         | 3381.944        | 3365.925        | 0.000           | 3364.918 | P34 |
| A9  | 855.421         | 3294.891        | 3268.873        | 0.000           | 3267.865 | A33 |
| A10 | 926.458         | 3213.854        | 3197.836        | 0.000           | 3196.828 | A32 |
| F11 | 1023.511        | 3142.817        | 3126.798        | 0.000           | 3125.791 | F31 |
| A12 | 1094.548        | 3049.764        | 3029.746        | 0.000           | 3028.738 | A30 |
| F13 | 1191.600        | 2974.727        | 2958.709        | 0.000           | 2957.701 | F29 |
| A14 | 1262.638        | 2877.674        | 2861.656        | 0.000           | 2860.648 | A28 |
| E15 | 1361.680        | 2806.637        | 2790.619        | 0.000           | 2789.611 | E27 |
| K16 | <b>1519.775</b> | 2677.595        | 2661.576        | 2062.584        | 2660.568 | K26 |
| T17 | 1620.623        | 2549.560        | 2533.541        | 2534.489        | 2532.473 | T25 |
| F18 | 1717.676        | 2448.452        | 2432.433        | 2433.441        | 2431.426 | F24 |
| V19 | 1816.944        | 2351.399        | 2335.381        | 2336.388        | 2334.373 | V23 |
| K20 | 1945.039        | 2252.331        | 2236.312        | 2237.320        | 2235.304 | K22 |
| K21 | 2073.134        | 2124.236        | 2108.217        | 2109.225        | 2107.209 | K21 |
| K22 | 2201.229        | 1996.141        | 1980.122        | 1981.130        | 1979.114 | K20 |
| A23 | 2272.266        | 1898.045        | 1882.027        | 1883.035        | 1881.020 | A19 |
| R24 | 2428.367        | 1797.009        | 1780.990        | 1781.998        | 1779.982 | R18 |
| K25 | 2556.462        | 1640.908        | 1624.889        | 1625.897        | 1623.881 | K17 |
| A26 | 2627.499        | 1512.813        | 1496.794        | <b>1497.802</b> | 1495.786 | A16 |
| A27 | 2698.536        | <b>1441.776</b> | 1425.757        | 1426.765        | 1424.749 | A15 |
| G28 | 2755.558        | 1310.739        | 1304.720        | 1305.728        | 1303.712 | G14 |
| G29 | 2812.579        | <b>1313.717</b> | 1297.698        | 1298.706        | 1296.690 | G13 |
| A30 | 2883.616        | 1259.656        | <b>1240.677</b> | <b>1241.685</b> | 1239.669 | A12 |
| K31 | 3011.711        | 1185.609        | 1169.590        | <b>1170.648</b> | 1168.632 | K11 |
| R32 | 3167.812        | <b>1057.564</b> | <b>1041.545</b> | <b>1042.553</b> | 1040.537 | R10 |
| K33 | 3295.907        | 901.462         | <b>885.444</b>  | 886.452         | 884.436  | K9  |
| F34 | 3396.955        | 773.368         | 757.349         | 758.357         | 756.341  | F8  |
| S35 | 3483.987        | 792.329         | 688.303         | 689.309         | 687.293  | S1  |
| G36 | 3541.009        | <b>585.288</b>  | 569.269         | 570.277         | 568.261  | G0  |
| P37 | 3638.061        | 528.256         | 512.248         | 513.256         | 511.240  | P6  |
| F38 | 3736.114        | <b>431.214</b>  | 415.195         | 416.203         | 414.187  | F4  |
| V39 | 3834.182        | 334.161         | 318.142         | 319.150         | 317.134  | V3  |
| S40 | 3921.214        | 235.082         | 219.074         | 220.082         | 218.066  | S0  |
| E41 | 4050.257        | 148.986         | 132.962         | 133.969         | 131.950  | E1  |

# sp | P43274 | H14\_MOUSE

[Acetyl]SETAPAAPAAPAPAEKTPVKKKARKAAGGAKRKTS GPVSE

- ▶ fragmentation table for charge state 2+
- ▶ specType=etd
- ▶ score=54.02
- ▶ F105343.dat
- ▶ query=q14535.p1
- ▶ precursor=811.055430
- ▶ chargePrecursor=5
- ▶ itol=0.8

| AA | c  | y               | z+1             | z+2             | z               | AA              |       |
|----|----|-----------------|-----------------|-----------------|-----------------|-----------------|-------|
| S  | 1  | 74.043          | 2026.124        | 2018.115        | 0.504           | 2017.611        | S(41) |
| E  | 2  | 135.503         | <b>1961.603</b> | <b>1953.594</b> | 0.504           | <b>1953.090</b> | E(42) |
| T  | 3  | 189.087         | 1897.082        | 1889.072        | 0.504           | 1888.566        | T(39) |
| A  | 4  | 254.606         | 1846.558        | 1838.548        | 0.504           | 1838.044        | A(38) |
| P  | 5  | 273.132         | 1811.039        | 1803.030        | 0.504           | 1802.526        | P(37) |
| A  | 6  | 308.880         | 1762.513        | 1754.503        | 0.504           | 1754.000        | A(36) |
| A  | 7  | 344.150         | 1726.994        | 1718.985        | 0.504           | 1718.481        | A(35) |
| P  | 8  | 392.695         | 1691.476        | 1683.466        | 0.504           | 1682.962        | P(34) |
| A  | 9  | 438.214         | 1642.949        | 1634.940        | 0.504           | 1634.436        | A(33) |
| A  | 10 | 463.733         | 1607.431        | <b>1599.421</b> | 0.504           | <b>1598.917</b> | A(32) |
| P  | 11 | 512.259         | 1571.912        | 1563.903        | 0.504           | 1563.399        | P(31) |
| A  | 12 | 547.777         | 1523.395        | <b>1515.376</b> | 0.504           | <b>1514.873</b> | A(30) |
| P  | 13 | 596.304         | <b>1487.867</b> | 1479.858        | 0.504           | 1479.354        | P(29) |
| A  | 14 | 631.822         | 1449.341        | <b>1441.332</b> | 0.504           | <b>1440.828</b> | A(28) |
| E  | 15 | 666.344         | 1403.822        | <b>1395.813</b> | 0.504           | 1395.309        | E(27) |
| K  | 16 | 700.301         | <b>1339.301</b> | <b>1331.292</b> | <b>1331.796</b> | 1330.788        | K(26) |
| T  | 17 | 810.815         | 1275.264        | <b>1267.244</b> | <b>1267.748</b> | <b>1266.740</b> | T(25) |
| P  | 18 | 859.441         | 1224.735        | 1216.725        | 1217.224        | 1216.220        | P(24) |
| V  | 19 | <b>908.976</b>  | <b>1176.203</b> | 1168.194        | 1168.698        | 1167.693        | V(23) |
| K  | 20 | <b>973.023</b>  | 1126.669        | 1118.660        | 1119.164        | 1118.156        | K(22) |
| K  | 21 | <b>1037.071</b> | 1076.622        | <b>1054.612</b> | <b>1055.116</b> | <b>1054.108</b> | K(21) |
| K  | 22 | 1101.118        | <b>998.574</b>  | 990.565         | <b>991.069</b>  | 990.061         | K(20) |
| A  | 23 | 1139.639        | <b>934.527</b>  | 926.517         | 927.021         | 926.014         | A(19) |
| R  | 24 | <b>1214.687</b> | 879.026         | 870.999         | 871.503         | 870.495         | R(18) |
| K  | 25 | <b>1278.735</b> | 820.958         | 812.948         | 813.452         | 812.444         | K(17) |
| A  | 26 | <b>1314.253</b> | 756.910         | <b>748.901</b>  | <b>749.405</b>  | <b>748.397</b>  | A(16) |
| A  | 27 | 1349.772        | 721.392         | <b>713.382</b>  | <b>713.886</b>  | <b>712.878</b>  | A(15) |
| C  | 28 | <b>1378.263</b> | 685.872         | <b>677.864</b>  | <b>678.368</b>  | 677.360         | C(14) |
| C  | 29 | <b>1406.793</b> | 657.362         | <b>649.353</b>  | <b>649.857</b>  | <b>648.849</b>  | C(13) |
| A  | 30 | <b>1442.312</b> | 628.852         | <b>620.842</b>  | <b>621.346</b>  | <b>620.338</b>  | A(12) |
| K  | 31 | <b>1506.359</b> | 593.333         | <b>585.324</b>  | <b>585.827</b>  | <b>584.820</b>  | K(11) |
| R  | 32 | <b>1584.410</b> | 529.285         | 521.276         | 521.780         | 520.772         | R(10) |
| K  | 33 | 1648.457        | 451.235         | 443.226         | 443.729         | 442.722         | K(9)  |
| T  | 34 | 1688.984        | 387.187         | 379.178         | 379.682         | 378.674         | T(8)  |
| S  | 35 | 1742.497        | 336.664         | 328.654         | 329.158         | 328.151         | S(7)  |
| G  | 36 | 1771.008        | 293.148         | 285.138         | 285.642         | 284.634         | G(6)  |
| P  | 37 | 1819.534        | 264.637         | 256.627         | 257.131         | 256.124         | P(5)  |
| P  | 38 | 1868.061        | 216.110         | 208.101         | 208.605         | 207.597         | P(4)  |
| V  | 39 | 1917.595        | 167.584         | 159.575         | 160.079         | 159.071         | V(3)  |
| S  | 40 | <b>1961.111</b> | 118.066         | 110.043         | 110.544         | 109.533         | S(2)  |
| E  | 41 | 2025.632        | 74.534          | 66.524          | 67.028          | 66.021          | E(1)  |

# sp | P43274 | H14\_MOUSE

[Acetyl]SETAPAAPAAPAPAEKTPVKKKARKAAGGAKRKTSGPPVSE

- ▶ fragmentation table for charge state 3+
- ▶ specType=etd
- ▶ score=54.02
- ▶ F105343.dat
- ▶ query=q14535.p1
- ▶ precursor=811.055430
- ▶ chargePrecursor=5
- ▶ itol=0.8

| AA | c  | y               | z+1             | z+2             | z              | AA              |       |
|----|----|-----------------|-----------------|-----------------|----------------|-----------------|-------|
| S  | 1  | 49.697          | 1361.085        | <b>1345.746</b> | 0.672          | <b>1345.410</b> | S[41] |
| E  | 2  | 92.711          | <b>1308.071</b> | <b>1302.731</b> | 0.672          | 1302.396        | E[40] |
| T  | 3  | 126.394         | 1265.057        | <b>1259.177</b> | 0.672          | 1259.381        | T[39] |
| A  | 4  | 150.073         | 1231.374        | <b>1226.035</b> | 0.672          | <b>1225.699</b> | A[38] |
| W  | 5  | 184.424         | <b>1207.605</b> | <b>1202.354</b> | 0.672          | <b>1202.020</b> | W[37] |
| A  | 6  | 208.193         | 1175.541        | <b>1170.005</b> | 0.672          | <b>1169.669</b> | A[36] |
| A  | 7  | 229.782         | <b>1151.065</b> | <b>1146.376</b> | 0.672          | <b>1145.990</b> | A[35] |
| P  | 8  | 262.133         | <b>1127.986</b> | 1122.647        | 0.672          | 1122.311        | P[34] |
| A  | 9  | 285.812         | 1095.835        | 1090.296        | 0.672          | 1089.960        | A[33] |
| A  | 10 | 309.491         | 1071.950        | <b>1066.617</b> | 0.672          | <b>1066.281</b> | A[32] |
| P  | 11 | 341.842         | <b>1048.277</b> | <b>1042.938</b> | 0.672          | <b>1042.602</b> | P[31] |
| A  | 12 | 365.521         | 1019.020        | <b>1010.587</b> | 0.672          | <b>1010.251</b> | A[30] |
| P  | 13 | 397.872         | <b>992.247</b>  | 986.908         | 0.672          | 986.572         | P[29] |
| A  | 14 | 421.551         | <b>959.896</b>  | <b>954.557</b>  | 0.672          | <b>954.221</b>  | A[28] |
| E  | 15 | 464.565         | 936.217         | <b>930.878</b>  | 0.672          | 930.542         | E[27] |
| K  | 16 | 507.263         | 893.201         | <b>887.864</b>  | <b>888.199</b> | 887.528         | K[26] |
| T  | 17 | 540.946         | 890.585         | <b>845.165</b>  | <b>845.501</b> | <b>844.829</b>  | T[25] |
| P  | 18 | 574.297         | 835.829         | 831.489         | 831.819        | 831.147         | P[24] |
| V  | 19 | 606.320         | 784.471         | 779.132         | 779.468        | 778.796         | V[23] |
| K  | 20 | <b>649.018</b>  | 751.449         | 746.109         | 746.445        | 745.773         | K[22] |
| K  | 21 | 691.716         | 708.750         | 703.411         | 703.747        | 703.075         | K[21] |
| K  | 22 | 734.414         | 666.052         | 660.712         | 661.048        | 660.376         | K[20] |
| A  | 23 | 758.094         | 623.364         | 618.024         | 618.360        | 617.688         | A[19] |
| R  | 24 | 810.127         | 590.876         | 584.336         | 584.671        | 583.999         | R[18] |
| K  | 25 | 852.826         | 547.641         | 542.301         | 542.637        | 541.965         | K[17] |
| A  | 26 | 876.505         | 504.942         | 499.603         | 499.939        | 499.267         | A[16] |
| A  | 27 | 900.184         | 461.263         | 475.924         | 476.260        | 475.588         | A[15] |
| G  | 28 | <b>919.191</b>  | 457.584         | 452.245         | 452.581        | 451.909         | G[14] |
| G  | 29 | 938.198         | 438.577         | 433.238         | 433.574        | 432.902         | G[13] |
| A  | 30 | 961.877         | 419.570         | 414.231         | 414.566        | <b>413.895</b>  | A[12] |
| K  | 31 | <b>1004.575</b> | 395.891         | 390.551         | 390.887        | 390.215         | K[11] |
| R  | 32 | <b>1056.609</b> | 353.193         | 347.853         | 348.189        | 347.517         | R[10] |
| K  | 33 | <b>1099.307</b> | 301.159         | 295.819         | 296.155        | 295.483         | K[9]  |
| T  | 34 | <b>1132.990</b> | 258.461         | 253.121         | 253.457        | 252.785         | T[8]  |
| S  | 35 | <b>1162.801</b> | 224.778         | 219.438         | 219.775        | 219.103         | S[7]  |
| G  | 36 | 1183.068        | 199.761         | 194.421         | 194.756        | 194.084         | G[6]  |
| P  | 37 | 1213.359        | 175.760         | 171.421         | 171.757        | 171.085         | P[5]  |
| P  | 38 | 1245.710        | 144.400         | 139.070         | 139.406        | 138.734         | P[4]  |
| V  | 39 | <b>1278.732</b> | 112.050         | 106.710         | 107.050        | 106.378         | V[3]  |
| S  | 40 | <b>1307.743</b> | 79.030          | 73.696          | 74.032         | 73.360          | S[2]  |
| E  | 41 | 1350.757        | 50.025          | 44.685          | 45.021         | 44.349          | E[1]  |

# sp | P43274 | H14\_MOUSE

[Acetyl]SETAPAAPAAPAPAEKTPVKKKARKAAGGAKRKTSGPPVSE

- ▶ fragmentation table for charge state 4+
- ▶ specType=etd
- ▶ score=54.02
- ▶ F105343.dat
- ▶ query=q14535.p1
- ▶ precursor=811.055430
- ▶ chargePrecursor=5
- ▶ itol=0.8

| AA    | c               | y               | z+1             | z+2            | z               | AA    |
|-------|-----------------|-----------------|-----------------|----------------|-----------------|-------|
| S[1]  | 37.525          | <b>1013.566</b> | <b>1009.561</b> | 0.755          | <b>1009.309</b> | S[41] |
| E[2]  | 69.785          | <b>981.305</b>  | <b>977.300</b>  | 0.755          | <b>977.048</b>  | E[40] |
| T[3]  | 95.047          | 949.044         | <b>945.040</b>  | 0.755          | 944.789         | T[39] |
| A[4]  | 112.806         | 923.781         | <b>919.776</b>  | 0.755          | <b>919.526</b>  | A[38] |
| P[5]  | 137.070         | <b>906.023</b>  | 902.019         | 0.755          | 901.761         | P[37] |
| A[6]  | 154.829         | 881.760         | 877.755         | 0.755          | 877.501         | A[36] |
| A[7]  | 172.588         | 864.001         | 859.996         | 0.755          | 859.744         | A[35] |
| P[8]  | 196.851         | <b>846.241</b>  | 842.237         | 0.755          | 841.985         | P[34] |
| A[9]  | 214.611         | 821.979         | 817.974         | 0.755          | 817.722         | A[33] |
| A[10] | 232.370         | 804.210         | 800.214         | 0.755          | 799.962         | A[32] |
| P[11] | 256.633         | 786.460         | 782.455         | 0.755          | 782.203         | P[31] |
| A[12] | 274.392         | 769.191         | 765.193         | 0.755          | 765.946         | A[30] |
| P[13] | 298.656         | 744.431         | 740.433         | 0.755          | 740.181         | P[29] |
| A[14] | 316.415         | 720.174         | 716.169         | 0.755          | 715.917         | A[28] |
| E[15] | 348.675         | 702.415         | 698.410         | 0.755          | 698.159         | E[27] |
| K[16] | 380.699         | <b>670.154</b>  | 666.149         | 0.666          | 665.898         | K[26] |
| T[17] | 405.961         | 638.130         | 634.126         | 0.634          | 633.874         | T[25] |
| P[18] | 439.224         | 612.869         | 608.864         | 0.609          | 608.612         | P[24] |
| V[19] | 454.991         | 588.005         | 584.001         | <b>584.853</b> | 584.349         | V[23] |
| K[20] | 487.015         | 563.838         | 559.834         | 560.085        | 559.589         | K[22] |
| K[21] | 519.039         | 531.814         | 527.810         | 528.062        | 527.559         | K[21] |
| K[22] | 551.063         | 499.791         | 495.786         | 496.038        | 495.534         | K[20] |
| A[23] | 568.822         | 467.767         | 463.762         | 464.014        | 463.510         | A[19] |
| R[24] | 607.847         | 450.000         | 446.003         | 446.255        | 445.751         | R[18] |
| R[25] | 639.871         | 410.982         | 406.976         | 407.230        | 406.726         | R[17] |
| A[26] | 657.630         | 378.959         | 374.954         | 375.206        | 374.702         | A[16] |
| A[27] | 675.390         | 361.199         | 357.195         | 357.447        | 356.941         | A[15] |
| G[28] | 689.645         | 343.440         | 339.435         | 339.687        | 339.181         | G[14] |
| G[29] | 703.900         | 329.185         | 325.180         | 325.432        | 324.926         | G[13] |
| A[30] | 721.660         | 314.929         | 310.925         | 311.177        | 310.671         | A[12] |
| K[31] | 753.683         | 297.170         | 293.165         | 293.417        | 292.913         | K[11] |
| R[32] | 792.709         | 265.146         | 261.142         | 261.394        | 260.890         | R[10] |
| K[33] | 824.732         | 226.121         | 222.116         | 222.368        | 221.864         | K[9]  |
| T[34] | 849.994         | 194.097         | 190.093         | 190.345        | 189.841         | T[8]  |
| S[35] | 877.252         | 166.835         | 164.831         | 165.083        | 164.579         | S[7]  |
| G[36] | <b>886.608</b>  | 147.077         | 143.073         | 143.325        | 142.821         | G[6]  |
| P[37] | 910.271         | 132.822         | 128.817         | 129.069        | 128.565         | P[5]  |
| P[38] | <b>934.534</b>  | 108.550         | 104.554         | 104.806        | 104.302         | P[4]  |
| V[39] | <b>959.301</b>  | 84.290          | 80.291          | 80.543         | 80.039          | V[3]  |
| S[40] | <b>981.659</b>  | 59.529          | 55.524          | 55.776         | 55.272          | S[2]  |
| E[41] | <b>1013.320</b> | 37.772          | 33.766          | 34.018         | 33.514          | E[1]  |

sp | P43274 | H14\_MOUSE

[Acetyl]SETAPAAPAAPAPAEKTPVKKKARKAAGGAKRKTSGPPVSE

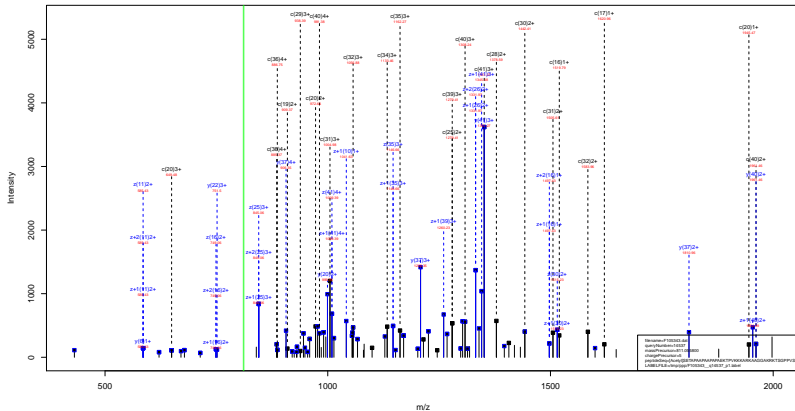

# sp | P43274 | H14\_MOUSE

[Acetyl]SETAPAAPAAPAPAEKTPVKKKARKAAGGAKRKTSGPPVSE

- ▶ fragmentation table for charge state 1+
- ▶ specType=etd
- ▶ score=68.02
- ▶ F105343.dat
- ▶ query=q14537.p1
- ▶ precursor=811.055800
- ▶ chargePrecursor=5
- ▶ itol=0.8

| AA  | c               | y               | z+1             | z+2             | z        | AA  |
|-----|-----------------|-----------------|-----------------|-----------------|----------|-----|
| S1  | 147.076         | 4051.243        | 4635.222        | 0.000           | 4034.215 | S41 |
| E2  | 276.119         | 3922.198        | 9906.180        | 0.000           | 3905.172 | E40 |
| T3  | 377.167         | 3793.156        | 3777.137        | 0.000           | 3776.129 | T30 |
| A4  | 448.204         | 3692.108        | 3679.090        | 0.000           | 3675.082 | A38 |
| F5  | 545.257         | 3621.071        | 3605.052        | 0.000           | 3604.045 | F37 |
| A6  | 619.294         | 3524.031        | 3508.003        | 0.000           | 3506.999 | A36 |
| A7  | 667.331         | 3452.982        | 3436.963        | 0.000           | 3435.955 | A35 |
| P8  | 784.384         | 3381.944        | 3365.925        | 0.000           | 3364.918 | P34 |
| A9  | 855.421         | 3294.891        | 3268.873        | 0.000           | 3267.865 | A33 |
| A10 | 926.458         | 3213.854        | 3197.836        | 0.000           | 3196.828 | A32 |
| F11 | 1023.511        | 3142.817        | 3126.798        | 0.000           | 3125.791 | F31 |
| A12 | 1094.558        | 3049.764        | 3029.746        | 0.000           | 3028.738 | A30 |
| F13 | 1191.600        | 2974.727        | 2958.709        | 0.000           | 2957.701 | F29 |
| A14 | 1262.638        | 2877.674        | 2861.656        | 0.000           | 2860.648 | A28 |
| E15 | 1361.680        | 2806.637        | 2790.619        | 0.000           | 2789.611 | E27 |
| K16 | <b>1519.775</b> | 2677.595        | 2661.576        | 2662.584        | 2660.568 | K26 |
| K17 | <b>1620.823</b> | 2549.500        | 2533.481        | 2534.489        | 2532.473 | K25 |
| T18 | 1717.549        | 2448.452        | 2432.433        | 2433.441        | 2431.425 | T24 |
| V19 | 1816.544        | 2351.399        | 2335.381        | 2336.388        | 2334.373 | V23 |
| K20 | <b>1945.039</b> | 2252.331        | 2236.312        | 2237.320        | 2235.304 | K22 |
| K21 | 2073.134        | 2124.236        | 2108.217        | 2109.225        | 2107.209 | K21 |
| K22 | 2201.229        | 1996.141        | 1980.122        | 1981.130        | 1979.114 | K20 |
| A23 | 2272.266        | 1898.045        | 1882.027        | 1883.035        | 1881.020 | A19 |
| R24 | 2428.367        | 1797.000        | 1780.980        | 1781.988        | 1779.962 | R18 |
| K25 | 2556.462        | 1640.905        | 1624.889        | 1625.897        | 1623.881 | K17 |
| A26 | 2627.499        | 1512.811        | <b>1496.794</b> | <b>1497.802</b> | 1495.786 | A16 |
| A27 | 2698.536        | <b>1441.776</b> | 1425.757        | 1426.765        | 1424.749 | A15 |
| G28 | 2755.558        | 1310.739        | 1304.720        | 1305.728        | 1303.712 | G14 |
| G29 | 2812.579        | <b>1313.717</b> | <b>1297.698</b> | <b>1298.706</b> | 1296.691 | G13 |
| A30 | 2883.616        | 1199.596        | 1193.577        | 1194.585        | 1192.569 | A12 |
| K31 | 3011.711        | 1185.650        | <b>1169.640</b> | <b>1170.648</b> | 1168.632 | K11 |
| R32 | 3167.812        | <b>1057.564</b> | <b>1041.545</b> | 1042.553        | 1040.537 | R10 |
| K33 | 3295.907        | 901.463         | <b>885.444</b>  | <b>886.452</b>  | 884.436  | K9  |
| F34 | 3396.955        | 773.368         | 757.349         | 758.357         | 756.341  | F8  |
| S35 | 3483.987        | 792.329         | 688.303         | 689.309         | 687.293  | S31 |
| G36 | 3541.009        | <b>585.288</b>  | 569.269         | 570.277         | 568.261  | G6  |
| P37 | 3638.061        | 528.256         | 512.248         | 513.256         | 511.240  | P6  |
| F38 | 3736.114        | <b>431.214</b>  | 415.195         | 416.203         | 414.187  | F4  |
| V39 | 3834.182        | 334.161         | 318.142         | 319.150         | 317.134  | V3  |
| S40 | 3921.214        | 235.082         | 219.074         | 220.082         | 218.066  | S3  |
| E41 | 4050.257        | 148.986         | 132.942         | 133.950         | 131.934  | E1  |

# sp | P43274 | H14\_MOUSE

[Acetyl]SETAPAAPAAPAPAEKTPVKKKARKAAGGAKRKTS GPVSE

- ▶ fragmentation table for charge state 2+
- ▶ specType=etd
- ▶ score=68.02
- ▶ F105343.dat
- ▶ query=q14537.p1
- ▶ precursor=811.055800
- ▶ chargePrecursor=5
- ▶ itol=0.8

| AA | c  | y               | z+1             | z+2             | z               | AA              |       |
|----|----|-----------------|-----------------|-----------------|-----------------|-----------------|-------|
| S  | 1  | 74.043          | 2026.124        | 2018.115        | 0.504           | 2017.61         | S(41) |
| E  | 2  | 138.503         | <b>1961.603</b> | <b>1953.594</b> | 0.504           | 1953.050        | E(42) |
| T  | 3  | 189.087         | 1897.082        | 1889.072        | 0.504           | 1888.566        | T(39) |
| A  | 4  | 224.606         | 1846.558        | 1838.548        | 0.504           | 1838.044        | A(38) |
| P  | 5  | 273.132         | <b>1811.039</b> | 1803.030        | 0.504           | 1802.526        | P(37) |
| A  | 6  | 308.880         | 1762.513        | 1754.503        | 0.504           | 1754.000        | A(36) |
| A  | 7  | 344.159         | 1726.994        | 1718.985        | 0.504           | 1718.481        | A(35) |
| P  | 8  | 392.695         | 1691.476        | 1683.466        | 0.504           | 1682.962        | P(34) |
| A  | 9  | 438.214         | 1642.949        | 1634.940        | 0.504           | 1634.436        | A(33) |
| A  | 10 | 463.733         | 1607.431        | <b>1599.421</b> | 0.504           | 1598.917        | A(32) |
| P  | 11 | 512.259         | 1571.912        | 1563.903        | 0.504           | 1563.399        | P(31) |
| A  | 12 | 547.777         | 1532.396        | <b>1515.376</b> | 0.504           | <b>1514.873</b> | A(30) |
| P  | 13 | 596.304         | 1487.867        | 1479.858        | 0.504           | 1479.354        | P(29) |
| A  | 14 | 631.822         | 1449.341        | 1441.332        | 0.504           | 1440.828        | A(28) |
| E  | 15 | 666.344         | 1403.822        | <b>1395.813</b> | 0.504           | 1395.309        | E(27) |
| K  | 16 | 700.301         | <b>1339.301</b> | <b>1331.292</b> | <b>1331.796</b> | 1330.788        | K(26) |
| T  | 17 | 810.815         | 1275.264        | <b>1267.244</b> | <b>1267.748</b> | 1266.740        | T(25) |
| P  | 18 | 859.441         | 1224.736        | 1216.727        | 1217.234        | 1216.230        | P(24) |
| V  | 19 | <b>908.976</b>  | 1176.203        | 1168.194        | 1168.698        | 1167.690        | V(23) |
| K  | 20 | <b>973.023</b>  | 1126.669        | 1118.660        | 1119.164        | 1118.156        | K(22) |
| K  | 21 | 1037.071        | 1082.622        | <b>1054.612</b> | <b>1055.116</b> | <b>1054.108</b> | K(21) |
| K  | 22 | 1101.118        | <b>998.574</b>  | <b>990.565</b>  | <b>991.069</b>  | <b>990.061</b>  | K(20) |
| A  | 23 | 1169.639        | 954.541         | 946.532         | 947.034         | 946.031         | A(19) |
| R  | 24 | <b>1214.687</b> | 909.026         | 901.016         | 901.519         | 900.516         | R(18) |
| K  | 25 | <b>1278.735</b> | 820.958         | 812.948         | 813.452         | 812.444         | K(17) |
| A  | 26 | <b>1314.253</b> | 756.910         | <b>748.901</b>  | <b>749.405</b>  | <b>748.397</b>  | A(16) |
| A  | 27 | 1349.772        | 721.392         | <b>713.382</b>  | <b>713.886</b>  | 712.878         | A(15) |
| C  | 28 | <b>1378.263</b> | 685.872         | <b>677.864</b>  | <b>678.368</b>  | 677.360         | C(14) |
| C  | 29 | <b>1406.793</b> | 657.362         | <b>649.353</b>  | <b>649.857</b>  | <b>648.849</b>  | C(13) |
| A  | 30 | <b>1442.312</b> | 626.852         | <b>620.842</b>  | <b>621.346</b>  | 620.338         | A(12) |
| K  | 31 | <b>1506.359</b> | 593.333         | <b>585.324</b>  | <b>585.827</b>  | <b>584.820</b>  | K(11) |
| R  | 32 | <b>1584.410</b> | 529.285         | 521.276         | 521.780         | 520.772         | R(10) |
| K  | 33 | 1648.457        | 451.235         | 443.226         | 443.729         | 442.722         | K(9)  |
| T  | 34 | 1688.981        | 387.187         | 379.178         | 379.682         | 378.674         | T(8)  |
| S  | 35 | 1742.497        | 336.664         | 328.654         | 329.158         | 328.151         | S(7)  |
| G  | 36 | 1771.008        | 293.148         | 285.138         | 285.642         | 284.634         | G(6)  |
| P  | 37 | 1819.534        | 264.637         | 256.627         | 257.131         | 256.124         | P(5)  |
| P  | 38 | 1868.061        | 216.110         | 208.101         | 208.605         | 207.597         | P(4)  |
| V  | 39 | 1917.295        | 187.584         | 179.575         | 180.079         | 179.071         | V(3)  |
| S  | 40 | <b>1961.111</b> | 118.066         | 110.043         | 110.544         | 109.535         | S(2)  |
| E  | 41 | 2025.632        | 74.534          | 66.524          | 67.028          | 66.021          | E(1)  |

# sp | P43274 | H14\_MOUSE

[Acetyl]SETAPAAPAAPAPAEKTPVKKKARKAAGGAKRKTSGPPVSE

- ▶ fragmentation table for charge state 3+
- ▶ specType=etd
- ▶ score=68.02
- ▶ F105343.dat
- ▶ query=q14537\_p1
- ▶ precursor=811.055800
- ▶ chargePrecursor=5
- ▶ itol=0.8

| AA | c  | y               | z+1             | z+2             | z              | AA              |       |
|----|----|-----------------|-----------------|-----------------|----------------|-----------------|-------|
| S  | 1  | 49.697          | <b>1351.005</b> | <b>1345.746</b> | 0.672          | <b>1345.410</b> | S[41] |
| E  | 2  | 92.711          | <b>1308.071</b> | <b>1302.731</b> | 0.672          | <b>1302.396</b> | E[40] |
| T  | 3  | 126.394         | 1265.057        | <b>1259.717</b> | 0.672          | 1259.381        | T[39] |
| A  | 4  | 150.073         | 1231.374        | <b>1226.035</b> | 0.672          | <b>1225.699</b> | A[38] |
| W  | 5  | 184.424         | <b>1207.695</b> | <b>1202.356</b> | 0.672          | <b>1202.020</b> | W[37] |
| A  | 6  | 208.103         | 1173.541        | <b>1170.005</b> | 0.672          | <b>1169.669</b> | A[36] |
| A  | 7  | 229.782         | <b>1151.065</b> | <b>1146.326</b> | 0.672          | <b>1145.990</b> | A[35] |
| P  | 8  | 262.133         | <b>1127.980</b> | 1122.647        | 0.672          | 1122.311        | P[34] |
| A  | 9  | 285.812         | 1095.835        | 1090.296        | 0.672          | 1089.960        | A[33] |
| A  | 10 | 309.491         | 1071.950        | <b>1066.617</b> | 0.672          | <b>1066.281</b> | A[32] |
| P  | 11 | 341.842         | 1048.277        | 1042.938        | 0.672          | 1042.602        | P[31] |
| A  | 12 | 365.521         | 1024.926        | 1019.587        | 0.672          | 1019.251        | A[30] |
| P  | 13 | 397.872         | 992.247         | 986.908         | 0.672          | 986.572         | P[29] |
| A  | 14 | 421.551         | <b>959.896</b>  | <b>954.557</b>  | 0.672          | <b>954.221</b>  | A[28] |
| E  | 15 | 464.565         | 936.217         | <b>930.878</b>  | 0.672          | <b>930.542</b>  | E[27] |
| K  | 16 | 507.263         | 893.201         | 887.864         | 0.672          | <b>887.528</b>  | K[26] |
| T  | 17 | 540.946         | 890.585         | <b>845.165</b>  | <b>845.501</b> | <b>844.829</b>  | T[25] |
| P  | 18 | 574.297         | 835.829         | 831.483         | 831.819        | 831.147         | P[24] |
| V  | 19 | 606.320         | 784.471         | 779.132         | 779.468        | 778.796         | V[23] |
| K  | 20 | <b>649.018</b>  | <b>751.449</b>  | 746.109         | 746.445        | 745.773         | K[22] |
| K  | 21 | 691.716         | 708.750         | 703.411         | 703.747        | 703.075         | K[21] |
| K  | 22 | 734.414         | 666.052         | 660.712         | 661.048        | 660.376         | K[20] |
| A  | 23 | 758.094         | 623.364         | 618.024         | 618.360        | 617.688         | A[19] |
| R  | 24 | 810.127         | 590.876         | 584.336         | 584.671        | 583.999         | R[18] |
| K  | 25 | 852.826         | 547.641         | 542.301         | 542.637        | 541.965         | K[17] |
| A  | 26 | 876.505         | 504.942         | 499.603         | 499.939        | 499.267         | A[16] |
| A  | 27 | 900.184         | 461.263         | 475.924         | 476.260        | 475.588         | A[15] |
| G  | 28 | 919.191         | 457.584         | 452.245         | 452.581        | 451.909         | G[14] |
| G  | 29 | <b>938.198</b>  | 438.577         | 433.238         | 433.574        | 432.902         | G[13] |
| A  | 30 | 961.877         | 419.370         | 414.031         | 414.366        | 413.694         | A[12] |
| K  | 31 | <b>1004.575</b> | 395.891         | 390.551         | 390.887        | 390.215         | K[11] |
| R  | 32 | <b>1056.609</b> | 353.103         | 347.853         | 348.189        | 347.517         | R[10] |
| K  | 33 | <b>1099.307</b> | 301.159         | 295.819         | 296.155        | 295.483         | K[9]  |
| T  | 34 | <b>1132.990</b> | 258.461         | 253.121         | 253.457        | 252.785         | T[8]  |
| S  | 35 | <b>1162.801</b> | 224.778         | 219.438         | 219.775        | 219.103         | S[7]  |
| G  | 36 | 1183.068        | 199.761         | 194.421         | 194.756        | 194.084         | G[6]  |
| P  | 37 | 1213.359        | 175.760         | 171.421         | 171.757        | 171.085         | P[5]  |
| P  | 38 | <b>1245.710</b> | 144.400         | 139.070         | 139.406        | 138.734         | P[4]  |
| V  | 39 | <b>1278.732</b> | 112.050         | 106.710         | 107.050        | 106.380         | V[3]  |
| S  | 40 | <b>1307.743</b> | 79.030          | 73.696          | 74.032         | 73.360          | S[2]  |
| E  | 41 | <b>1350.757</b> | 50.025          | 44.685          | 45.021         | 44.349          | E[1]  |



# sp | P43274 | H14\_MOUSE

[Acetyl]SETAPAAPAAPAPAEKTPVKKKARKAAGGAKRKTSGPPVSE

- ▶ fragmentation table for charge state 4+
- ▶ specType=etd
- ▶ score=68.02
- ▶ F105343.dat
- ▶ query=q14537.p1
- ▶ precursor=811.055800
- ▶ chargePrecursor=5
- ▶ itol=0.8

| AA | c  | y               | z+1             | z+2             | z              | AA              |       |
|----|----|-----------------|-----------------|-----------------|----------------|-----------------|-------|
| S  | 1  | 37.525          | <b>1013.566</b> | <b>1009.561</b> | 0.755          | <b>1009.309</b> | S[41] |
| E  | 2  | 69.785          | <b>981.305</b>  | <b>977.300</b>  | 0.755          | <b>977.048</b>  | E[40] |
| T  | 3  | 95.047          | <b>949.044</b>  | <b>945.040</b>  | 0.755          | <b>944.788</b>  | T[39] |
| A  | 4  | 112.806         | <b>923.781</b>  | <b>919.776</b>  | 0.755          | <b>919.520</b>  | A[38] |
| P  | 5  | 137.070         | <b>906.023</b>  | 902.019         | 0.755          | 901.767         | P[37] |
| A  | 6  | 154.829         | 881.766         | 877.755         | 0.755          | 877.501         | A[36] |
| A  | 7  | 172.588         | 864.001         | 859.996         | 0.755          | 859.744         | A[35] |
| P  | 8  | 196.851         | 846.241         | 842.237         | 0.755          | 841.985         | P[34] |
| A  | 9  | 214.611         | 821.979         | 817.974         | 0.755          | 817.722         | A[33] |
| A  | 10 | 232.370         | 804.210         | 800.214         | 0.755          | 799.962         | A[32] |
| P  | 11 | 256.633         | 786.460         | 782.455         | 0.755          | 782.203         | P[31] |
| A  | 12 | 274.392         | 769.197         | 765.192         | 0.755          | 765.946         | A[30] |
| P  | 13 | 298.656         | 744.431         | 740.433         | 0.755          | 740.181         | P[29] |
| A  | 14 | 316.415         | 720.174         | 716.169         | 0.755          | 715.917         | A[28] |
| E  | 15 | 348.675         | 702.415         | 698.410         | 0.755          | 698.158         | E[27] |
| K  | 16 | 380.699         | <b>670.154</b>  | 666.149         | 0.666          | 665.898         | K[26] |
| T  | 17 | 405.961         | 658.130         | 654.126         | 0.666          | 653.874         | T[25] |
| P  | 18 | 430.224         | 642.866         | 638.864         | 0.666          | 638.612         | P[24] |
| V  | 19 | 454.991         | 588.005         | 584.001         | <b>584.853</b> | 584.349         | V[23] |
| K  | 20 | 487.015         | 563.838         | 559.834         | 560.085        | 559.589         | K[22] |
| K  | 21 | 519.039         | 531.814         | 527.810         | 528.062        | 527.558         | K[21] |
| K  | 22 | 551.063         | 499.791         | 495.786         | 496.038        | 495.534         | K[20] |
| A  | 23 | 568.822         | 487.767         | 483.762         | 484.014        | 483.510         | A[19] |
| R  | 24 | 607.847         | 450.000         | 446.003         | 446.255        | 445.751         | R[18] |
| K  | 25 | 639.871         | 410.982         | 406.976         | 407.230        | 406.726         | K[17] |
| A  | 26 | 657.630         | 378.959         | 374.954         | 375.206        | 374.702         | A[16] |
| A  | 27 | 675.390         | 361.199         | 357.195         | 357.447        | 356.943         | A[15] |
| G  | 28 | 689.645         | 343.440         | 339.435         | 339.687        | 339.183         | G[14] |
| G  | 29 | 703.900         | 329.185         | 325.180         | 325.432        | 324.928         | G[13] |
| A  | 30 | 721.660         | 314.929         | 310.925         | 311.177        | 310.673         | A[12] |
| K  | 31 | 753.683         | 297.170         | 293.165         | 293.417        | 292.913         | K[11] |
| R  | 32 | 792.709         | 265.146         | 261.142         | 261.394        | 260.890         | R[10] |
| K  | 33 | 824.732         | 226.121         | 222.116         | 222.368        | 221.864         | K[9]  |
| T  | 34 | 849.994         | 194.097         | 190.093         | 190.345        | 189.841         | T[8]  |
| S  | 35 | 877.252         | 166.835         | 164.831         | 165.083        | 164.579         | S[7]  |
| G  | 36 | <b>886.608</b>  | 147.077         | 143.073         | 143.325        | 142.821         | G[6]  |
| P  | 37 | 910.271         | 132.822         | 128.817         | 129.069        | 128.565         | P[5]  |
| P  | 38 | 934.534         | 108.550         | 104.554         | 104.806        | 104.302         | P[4]  |
| V  | 39 | <b>959.301</b>  | 84.290          | 80.291          | 80.543         | 80.039          | V[3]  |
| S  | 40 | <b>981.059</b>  | 59.529          | 55.524          | 55.776         | 55.272          | S[2]  |
| E  | 41 | <b>1013.320</b> | 37.772          | 33.766          | 34.018         | 33.514          | E[1]  |



# sp | P43274 | H14\_MOUSE

[Acetyl]SETAPAAPAAPAPAEKTPVKKKARKAAGGAKRKTSGPPVSE

- ▶ fragmentation table for charge state 1+
- ▶ specType=etd
- ▶ score=44.98
- ▶ F105343.dat
- ▶ query=q14542.p1
- ▶ precursor=811.057910
- ▶ chargePrecursor=5
- ▶ itol=0.8

| AA  | c               | y               | z+1             | z+2             | z               | AA   |
|-----|-----------------|-----------------|-----------------|-----------------|-----------------|------|
| S1  | 147.076         | 4051.241        | 4035.222        | 0.000           | 4034.211        | S41  |
| E2  | 276.119         | 3022.195        | 3006.180        | 0.000           | 3005.172        | E42  |
| F3  | 377.187         | 3793.156        | 3777.137        | 0.000           | 3776.129        | F30  |
| A4  | 448.204         | 3692.108        | 3676.090        | 0.000           | 3675.082        | A38  |
| F5  | 545.257         | 3021.071        | 3005.052        | 0.000           | 3004.045        | F37  |
| A16 | 618.204         | 3024.018        | 3008.000        | 0.000           | 3007.992        | A30  |
| A7  | 687.311         | 3452.981        | 3436.963        | 0.000           | 3435.955        | A155 |
| F8  | 794.384         | 3181.044        | 3165.025        | 0.000           | 3164.019        | F34  |
| A9  | <b>855.421</b>  | 3384.991        | 3368.973        | 0.000           | 3367.965        | A133 |
| A10 | 926.458         | 3213.854        | 3197.836        | 0.000           | 3196.828        | A132 |
| F11 | 1023.511        | 3142.817        | 3126.798        | 0.000           | 3125.791        | F131 |
| A12 | 1094.568        | 3026.784        | 3020.748        | 0.000           | 3019.739        | A130 |
| F13 | 1191.600        | 3074.727        | 3058.709        | 0.000           | 3057.701        | F129 |
| A14 | 1262.638        | 2877.674        | 2861.656        | 0.000           | 2860.648        | A128 |
| E15 | 1361.680        | 2806.637        | 2790.619        | 0.000           | 2789.611        | E127 |
| K16 | <b>1519.775</b> | 2877.595        | 2861.578        | 2667.584        | 2666.588        | K126 |
| T17 | <b>1620.823</b> | 2549.560        | 2533.483        | 2534.489        | 2532.473        | T125 |
| V18 | 1717.878        | 2848.625        | 2832.433        | 2833.443        | 2831.426        | V124 |
| V19 | 1816.944        | 2351.369        | 2335.381        | 2336.388        | 2334.373        | V123 |
| K20 | <b>1945.039</b> | 2352.311        | 2336.312        | 2337.320        | 2335.304        | K122 |
| K21 | 2073.114        | 2124.236        | 2108.217        | 2109.225        | 2107.209        | K121 |
| K22 | 2201.229        | 1996.141        | <b>1980.122</b> | <b>1981.130</b> | 1979.114        | K120 |
| A23 | 2272.268        | 1968.044        | 1952.027        | 1953.035        | <b>1951.020</b> | A119 |
| R24 | 2426.267        | 1797.059        | 1780.990        | 1781.998        |                 | R118 |
| K25 | 2556.482        | 1640.908        | 1624.839        | 1625.897        | 1623.881        | K117 |
| A26 | 2627.499        | 1512.813        | 1496.794        | 1497.821        | 1495.788        | A116 |
| A27 | 2698.536        | <b>1441.776</b> | 1425.757        | 1426.765        | 1424.740        | A115 |
| G28 | 2785.558        | 1370.739        | 1354.720        | 1355.728        |                 | G114 |
| G29 | 2812.579        | 1313.711        | 1297.689        | 1298.708        | <b>1296.691</b> | G113 |
| A30 | 2883.616        | 1256.695        | <b>1240.677</b> | 1241.685        | 1239.669        | A112 |
| K31 | 3011.711        | 1185.659        | <b>1169.640</b> | 1170.648        | <b>1168.632</b> | K111 |
| R32 | 3187.812        | <b>1057.564</b> | <b>1041.545</b> | <b>1042.553</b> | 1040.537        | R110 |
| K33 | 3295.907        | <b>901.463</b>  | <b>885.444</b>  | 886.452         | 884.436         | K109 |
| T34 | 3368.958        | 757.368         | 757.368         | 758.377         | 756.341         | T108 |
| S35 | 3483.987        | 672.320         | 656.301         | 657.309         | 655.293         | S107 |
| G36 | 3541.009        | 585.288         | 589.269         | 570.277         | 568.261         | G106 |
| F37 | 3638.061        | 628.266         | 512.248         | 513.256         | 511.240         | F105 |
| F38 | 3735.114        | <b>431.214</b>  | 415.195         | 416.203         | 414.187         | F104 |
| V39 | 3834.162        | 134.161         | 318.142         | 319.150         | 317.134         | V103 |
| S40 | 3931.214        | 238.092         | 219.073         | 220.082         | 218.066         | S102 |
| E41 | 4050.257        | 148.060         | 132.042         | 133.050         | 131.034         | E101 |

# sp | P43274 | H14\_MOUSE

[Acetyl]SETAPAAPAAPAPAEKTPVKKKARKAAGGAKRKTSGPPVSE

- ▶ fragmentation table for charge state 2+
- ▶ specType=etd
- ▶ score=44.98
- ▶ F105343.dat
- ▶ query=q14542.p1
- ▶ precursor=811.057910
- ▶ chargePrecursor=5
- ▶ itol=0.8

| AA | c  | y               | z+1             | z+2             | z               | AA              |       |
|----|----|-----------------|-----------------|-----------------|-----------------|-----------------|-------|
| S  | 1  | 74.043          | 2026.124        | 2018.115        | 0.504           | 2017.611        | S(41) |
| E  | 2  | 135.553         | <b>1961.603</b> | <b>1953.594</b> | 0.504           | <b>1953.090</b> | E(42) |
| T  | 3  | 189.087         | 1897.082        | 1889.072        | 0.504           | 1888.566        | T(39) |
| A  | 4  | 254.606         | 1846.556        | 1838.546        | 0.504           | 1838.044        | A(38) |
| P  | 5  | 273.132         | <b>1811.039</b> | <b>1803.030</b> | 0.504           | <b>1802.526</b> | P(37) |
| A  | 6  | 308.890         | 1762.513        | 1754.503        | 0.504           | 1754.000        | A(36) |
| A  | 7  | 344.159         | 1726.994        | 1718.985        | 0.504           | 1718.481        | A(35) |
| P  | 8  | 392.695         | 1691.476        | 1683.466        | 0.504           | 1682.962        | P(34) |
| A  | 9  | 438.214         | 1642.949        | 1634.940        | 0.504           | 1634.436        | A(33) |
| A  | 10 | 463.733         | 1607.431        | 1599.421        | 0.504           | 1598.917        | A(32) |
| P  | 11 | 512.259         | 1571.912        | 1563.902        | 0.504           | 1563.399        | P(31) |
| A  | 12 | 547.777         | 1532.396        | <b>1515.376</b> | 0.504           | <b>1514.873</b> | A(30) |
| P  | 13 | 596.304         | 1487.867        | <b>1479.858</b> | 0.504           | 1479.354        | P(29) |
| A  | 14 | 631.822         | 1449.341        | 1441.331        | 0.504           | 1440.828        | A(28) |
| E  | 15 | 666.344         | <b>1403.822</b> | 1395.813        | 0.504           | 1395.309        | E(27) |
| K  | 16 | 700.301         | <b>1339.301</b> | <b>1331.292</b> | <b>1331.796</b> | <b>1330.788</b> | K(26) |
| T  | 17 | 810.815         | 1275.264        | <b>1267.244</b> | 1267.748        | <b>1266.740</b> | T(25) |
| P  | 18 | 859.443         | 1234.739        | <b>1216.720</b> | <b>1217.224</b> | <b>1216.216</b> | P(24) |
| V  | 19 | <b>908.976</b>  | 1176.203        | <b>1168.194</b> | <b>1168.698</b> | 1167.690        | V(23) |
| K  | 20 | <b>973.023</b>  | 1126.669        | 1118.660        | <b>1119.164</b> | 1118.156        | K(22) |
| K  | 21 | <b>1037.071</b> | 1052.623        | <b>1054.612</b> | <b>1055.116</b> | <b>1054.108</b> | K(21) |
| K  | 22 | 1101.118        | <b>998.574</b>  | 990.565         | 991.569         | <b>990.061</b>  | K(20) |
| A  | 23 | <b>1136.637</b> | 934.529         | 926.519         | 927.523         | 926.515         | A(19) |
| R  | 24 | <b>1214.687</b> | 869.050         | <b>890.990</b>  | <b>891.503</b>  | <b>890.495</b>  | R(18) |
| K  | 25 | <b>1278.735</b> | 820.958         | 812.948         | 813.452         | 812.444         | K(17) |
| A  | 26 | <b>1314.253</b> | 756.910         | 748.901         | 749.405         | 748.397         | A(16) |
| A  | 27 | 1349.772        | 721.362         | 713.352         | 713.856         | 712.848         | A(15) |
| C  | 28 | <b>1378.283</b> | 685.873         | 677.863         | 678.867         | 677.860         | C(14) |
| C  | 29 | <b>1408.793</b> | 657.362         | <b>649.353</b>  | <b>649.857</b>  | <b>648.849</b>  | C(13) |
| A  | 30 | <b>1442.312</b> | 626.852         | <b>620.842</b>  | <b>621.346</b>  | 620.338         | A(12) |
| K  | 31 | <b>1506.359</b> | <b>593.333</b>  | 585.324         | 585.827         | 584.820         | K(11) |
| R  | 32 | 1564.410        | 529.285         | 521.276         | 521.780         | 520.772         | R(10) |
| K  | 33 | 1648.457        | 451.235         | 443.226         | 443.729         | 442.722         | K(9)  |
| T  | 34 | 1688.984        | 387.187         | 379.178         | 379.682         | 378.674         | T(8)  |
| S  | 35 | 1742.497        | 336.664         | 328.654         | 329.158         | 328.151         | S(7)  |
| G  | 36 | 1771.008        | 293.148         | 285.138         | 285.642         | 284.634         | G(6)  |
| P  | 37 | 1819.534        | 264.637         | 256.627         | 257.131         | 256.124         | P(5)  |
| P  | 38 | 1868.061        | 216.110         | 208.101         | 208.605         | 207.597         | P(4)  |
| V  | 39 | 1917.595        | 167.584         | 159.575         | 160.079         | 159.071         | V(3)  |
| S  | 40 | <b>1961.111</b> | 118.066         | 110.043         | 110.544         | 109.535         | S(2)  |
| E  | 41 | 2055.632        | 74.534          | 66.524          | 67.028          | 66.021          | E(1)  |

# sp | P43274 | H14\_MOUSE

[Acetyl]SETAPAAPAAPAPAEKTPVKKKARKAAGGAKRKTSGPPVSE

- ▶ fragmentation table for charge state 3+
- ▶ specType=etd
- ▶ score=44.98
- ▶ F105343.dat
- ▶ query=q14542.p1
- ▶ precursor=811.057910
- ▶ chargePrecursor=5
- ▶ itol=0.8

| AA    | c               | y               | z+1             | z+2            | z               | AA    |
|-------|-----------------|-----------------|-----------------|----------------|-----------------|-------|
| S[1]  | 49.697          | <b>1351.085</b> | <b>1345.746</b> | 0.672          | <b>1345.410</b> | S[41] |
| E[2]  | 92.711          | <b>1308.071</b> | <b>1302.731</b> | 0.672          | 1302.396        | E[40] |
| T[3]  | 126.394         | <b>1265.057</b> | 1259.717        | 0.672          | <b>1259.381</b> | T[39] |
| A[4]  | 150.073         | <b>1231.374</b> | <b>1226.035</b> | 0.672          | 1225.699        | A[38] |
| W[5]  | 184.424         | <b>1207.695</b> | <b>1202.356</b> | 0.672          | <b>1202.020</b> | W[37] |
| A[6]  | 206.193         | 1175.344        | 1170.005        | 0.672          | <b>1169.669</b> | A[36] |
| A[7]  | 229.782         | 1151.065        | <b>1146.326</b> | 0.672          | 1145.990        | A[35] |
| P[8]  | 262.133         | <b>1127.986</b> | 1122.647        | 0.672          | 1122.311        | P[34] |
| A[9]  | 285.812         | 1095.635        | 1090.296        | 0.672          | 1089.960        | A[33] |
| A[10] | 309.491         | 1071.950        | 1066.617        | 0.672          | 1066.281        | A[32] |
| P[11] | 341.242         | <b>1048.277</b> | 1042.938        | 0.672          | 1042.602        | P[31] |
| A[12] | 365.921         | 1019.920        | 1010.587        | 0.672          | <b>1010.251</b> | A[30] |
| P[13] | 397.672         | 992.241         | 986.908         | 0.672          | 986.572         | P[29] |
| A[14] | 421.551         | <b>959.896</b>  | <b>954.557</b>  | 0.672          | <b>954.221</b>  | A[28] |
| E[15] | 464.565         | 936.217         | <b>930.878</b>  | 0.672          | <b>930.542</b>  | E[27] |
| K[16] | 507.263         | 893.201         | <b>887.864</b>  | <b>888.199</b> | <b>887.528</b>  | K[26] |
| T[17] | 540.946         | <b>850.505</b>  | <b>845.165</b>  | <b>845.501</b> | <b>844.829</b>  | T[25] |
| P[18] | 574.629         | 826.320         | 811.483         | 811.819        | 811.147         | P[24] |
| V[19] | 608.320         | 784.471         | 779.132         | 779.468        | 778.796         | V[23] |
| K[20] | <b>649.018</b>  | 751.449         | 746.109         | <b>746.445</b> | 745.773         | K[22] |
| K[21] | 691.716         | 708.750         | 703.411         | 703.747        | 703.075         | K[21] |
| K[22] | 734.414         | 666.052         | 660.712         | 661.048        | 660.376         | K[20] |
| A[23] | 758.094         | 623.354         | 618.014         | 618.350        | 617.678         | A[19] |
| R[24] | 810.127         | 590.876         | 584.336         | 584.671        | <b>583.999</b>  | R[18] |
| K[25] | 852.826         | 547.641         | 542.301         | 542.637        | 541.965         | K[17] |
| A[26] | 876.505         | 504.942         | 499.603         | 499.939        | 499.267         | A[16] |
| A[27] | 900.184         | 461.263         | 475.924         | 476.260        | 475.588         | A[15] |
| G[28] | <b>919.191</b>  | 457.584         | 452.245         | 452.581        | 451.909         | G[14] |
| G[29] | 938.198         | 438.577         | 433.238         | 433.574        | 432.902         | G[13] |
| A[30] | 961.877         | 419.570         | 414.231         | 414.566        | 413.894         | A[12] |
| K[31] | <b>1004.575</b> | 395.891         | 390.551         | 390.887        | 390.216         | K[11] |
| R[32] | <b>1056.609</b> | 353.193         | 347.853         | 348.189        | 347.517         | R[10] |
| K[33] | <b>1099.307</b> | 301.159         | 295.819         | 296.155        | 295.484         | K[9]  |
| T[34] | <b>1132.990</b> | 258.461         | 253.121         | 253.457        | 252.785         | T[8]  |
| S[35] | <b>1162.801</b> | 224.778         | 219.438         | 219.775        | 219.103         | S[7]  |
| G[36] | 1183.068        | 199.761         | 190.428         | 190.764        | 190.092         | G[6]  |
| P[37] | 1213.359        | 175.760         | 171.421         | 171.757        | 171.085         | P[5]  |
| P[38] | 1245.710        | 144.400         | 139.070         | 139.406        | 138.734         | P[4]  |
| V[39] | <b>1278.732</b> | 112.050         | 106.710         | 107.055        | 106.383         | V[3]  |
| S[40] | <b>1307.743</b> | 79.030          | 73.696          | 74.032         | 73.360          | S[2]  |
| E[41] | <b>1350.757</b> | 50.025          | 44.685          | 45.021         | 44.349          | E[1]  |

# sp | P43274 | H14\_MOUSE

[Acetyl]SETAPAAPAAPAPAEKTPVKKKARKAAGGAKRKTSGPPVSE

- ▶ fragmentation table for charge state 4+
- ▶ specType=etd
- ▶ score=44.98
- ▶ F105343.dat
- ▶ query=q14542.p1
- ▶ precursor=811.057910
- ▶ chargePrecursor=5
- ▶ itol=0.8

| AA    | c               | y               | z+1             | z+2   | z               | AA    |
|-------|-----------------|-----------------|-----------------|-------|-----------------|-------|
| S[1]  | 37.525          | <b>1013.566</b> | <b>1009.561</b> | 0.755 | <b>1009.309</b> | S[41] |
| E[2]  | 69.785          | <b>981.305</b>  | <b>977.300</b>  | 0.755 | <b>977.048</b>  | E[40] |
| T[3]  | 95.047          | 949.044         | <b>945.040</b>  | 0.755 | <b>944.788</b>  | T[30] |
| A[4]  | 112.808         | 922.783         | <b>919.778</b>  | 0.755 | <b>919.526</b>  | A[38] |
| P[5]  | 139.070         | <b>906.023</b>  | <b>902.019</b>  | 0.755 | <b>901.767</b>  | P[37] |
| A[6]  | 154.829         | 883.765         | 877.755         | 0.755 | 877.503         | A[36] |
| A[7]  | 172.588         | 864.001         | 859.990         | 0.755 | 859.744         | A[35] |
| F[8]  | 196.851         | 846.241         | 842.237         | 0.755 | 841.985         | F[34] |
| A[9]  | 214.611         | 823.978         | 817.974         | 0.755 | 817.722         | A[33] |
| A[10] | 232.370         | 804.219         | 800.214         | 0.755 | 799.962         | A[32] |
| P[11] | 250.133         | 786.460         | 782.455         | 0.755 | 782.203         | P[31] |
| A[12] | 274.392         | 762.197         | 758.192         | 0.755 | 757.940         | A[30] |
| P[13] | 298.656         | 744.437         | 740.433         | 0.755 | 740.181         | P[29] |
| A[14] | 316.415         | 720.174         | 716.169         | 0.755 | 715.917         | A[28] |
| E[15] | 348.675         | 702.415         | 698.410         | 0.755 | 698.158         | E[27] |
| K[16] | 380.699         | 670.154         | 666.149         | 0.665 | 665.898         | K[26] |
| T[17] | 405.961         | 638.130         | 634.126         | 0.634 | 633.874         | T[25] |
| F[18] | 430.224         | 612.866         | 608.864         | 0.609 | 608.612         | F[24] |
| V[19] | 454.991         | 588.605         | 584.601         | 0.584 | 584.349         | V[23] |
| K[20] | 487.015         | 563.839         | 559.834         | 0.560 | 559.582         | K[22] |
| K[21] | 519.039         | 531.814         | 527.810         | 0.528 | 527.558         | K[21] |
| K[22] | 551.063         | 499.791         | 495.786         | 0.496 | 495.534         | K[20] |
| A[23] | 583.822         | 467.767         | 463.762         | 0.464 | 463.510         | A[19] |
| R[24] | 607.847         | 450.008         | 446.003         | 0.446 | 445.751         | R[18] |
| K[25] | 639.871         | 410.982         | 406.978         | 0.407 | 407.725         | K[17] |
| A[26] | 667.630         | 378.959         | 374.954         | 0.375 | 374.702         | A[16] |
| A[27] | 675.390         | 361.199         | 357.195         | 0.357 | 356.943         | A[15] |
| G[28] | 689.645         | 343.440         | 339.435         | 0.339 | 339.183         | G[14] |
| G[29] | 703.900         | 329.185         | 325.180         | 0.325 | 324.928         | G[13] |
| A[30] | 721.880         | 314.929         | 310.925         | 0.311 | 310.673         | A[12] |
| R[31] | 753.083         | 297.170         | 293.165         | 0.293 | 292.913         | R[11] |
| R[32] | 792.709         | 265.140         | 261.142         | 0.261 | 260.890         | R[10] |
| K[33] | 824.752         | 226.121         | 222.116         | 0.222 | 221.864         | K[9]  |
| T[34] | 849.994         | 194.097         | 190.093         | 0.190 | 189.841         | T[8]  |
| S[35] | 871.752         | 168.835         | 164.831         | 0.165 | 0.165           | S[7]  |
| G[36] | <b>886.008</b>  | 147.077         | 143.073         | 0.143 | 142.821         | G[6]  |
| A[37] | 819.071         | 132.821         | 128.817         | 0.129 | 0.129           | A[5]  |
| P[38] | 934.534         | 105.550         | 104.554         | 0.104 | 0.104           | P[4]  |
| V[39] | <b>959.301</b>  | 84.290          | 80.291          | 0.80  | 0.80            | V[3]  |
| S[40] | <b>981.059</b>  | 59.529          | 55.524          | 0.55  | 0.55            | S[2]  |
| E[41] | <b>1013.320</b> | 37.771          | 33.766          | 0.34  | 0.34            | E[1]  |



# sp | P43274 | H14\_MOUSE

[Acetyl]SETAPAAPAAPAPAEKTPVKKKARKAAGGAKRK<sup>Dimethyl</sup> TSGPPVSE<sub>28.03</sub>

- ▶ fragmentation table for charge state 1+
- ▶ specType=etd
- ▶ score=91.90
- ▶ F105343.dat
- ▶ query=q14559\_p1
- ▶ precursor=816.656730
- ▶ chargePrecursor=5
- ▶ itol=0.8

| AA | c  | y               | z+1             | z+2             | z               | AA              |       |
|----|----|-----------------|-----------------|-----------------|-----------------|-----------------|-------|
| S  | 1  | 147.076         | 4078.272        | 4063.254        | 0.000           | 4063.264        | S[41] |
| E  | 2  | 276.119         | 3050.230        | 3034.211        | 0.000           | 3033.203        | E[42] |
| T  | 3  | 377.187         | 3821.187        | 3805.168        | 0.000           | 3804.161        | T[39] |
| A  | 4  | 448.204         | 3720.140        | 3704.121        | 0.000           | 3703.113        | A[38] |
| P  | 5  | 545.257         | 3649.102        | 3633.084        | 0.000           | 3632.076        | P[37] |
| A  | 6  | 618.204         | 3652.065        | 3636.047        | 0.000           | 3635.023        | A[36] |
| A  | 7  | 687.313         | 3483.013        | 3464.994        | 0.000           | 3463.986        | A[35] |
| P  | 8  | 784.384         | 3469.075        | 3391.937        | 0.000           | 3392.940        | P[34] |
| A  | 9  | <b>855.421</b>  | 3312.923        | 3296.904        | 0.000           | 3295.896        | A[33] |
| A  | 10 | <b>926.458</b>  | 3241.866        | 3225.847        | 0.000           | 3224.839        | A[32] |
| P  | 11 | 1023.511        | 3170.848        | 3154.830        | 0.000           | 3153.822        | P[31] |
| A  | 12 | 1094.548        | 3019.795        | 3003.777        | 0.000           | 3002.769        | A[30] |
| P  | 13 | 1191.600        | 3002.750        | 2986.740        | 0.000           | 2985.732        | P[29] |
| A  | 14 | 1262.638        | 2905.700        | 2889.687        | 0.000           | 2888.679        | A[28] |
| E  | 15 | 1361.680        | 2834.669        | 2818.650        | 0.000           | 2817.642        | E[27] |
| K  | 16 | <b>1519.775</b> | 2705.620        | 2689.607        | 2600.615        | 2688.600        | K[26] |
| T  | 17 | 1630.623        | 2577.531        | 2561.512        | 2462.520        | 2560.505        | T[25] |
| P  | 18 | 1717.676        | 2476.483        | 2460.465        | 2401.473        | 2459.457        | P[24] |
| V  | 19 | 1816.644        | 2379.431        | 2363.412        | 2304.420        | 2362.404        | V[23] |
| K  | 20 | 1945.639        | 2300.383        | 2284.364        | 2265.351        | 2263.336        | K[22] |
| K  | 21 | 2073.134        | 2152.267        | 2136.249        | 2137.256        | 2135.241        | K[21] |
| K  | 22 | 2201.229        | 2034.172        | 2008.154        | 2009.161        | 2007.146        | K[20] |
| A  | 23 | 2272.266        | 1909.071        | 1889.059        | 1881.066        | 1879.059        | A[19] |
| R  | 24 | 2426.367        | <b>1825.040</b> | 1809.022        | 1510.029        | 1809.014        | R[18] |
| K  | 25 | 2556.462        | 1668.939        | 1652.920        | 1653.928        | 1651.913        | K[17] |
| A  | 26 | 2637.499        | 1540.844        | 1524.824        | 1525.833        | 1523.818        | A[16] |
| A  | 27 | 2698.536        | 1469.807        | 1453.788        | 1454.796        | 1452.781        | A[15] |
| G  | 28 | 2785.588        | 1398.770        | 1382.753        | 1383.759        | 1381.743        | G[14] |
| G  | 29 | 2812.579        | 1343.746        | 1325.729        | 1326.738        | 1324.722        | G[13] |
| A  | 30 | 2883.616        | 1284.727        | <b>1268.708</b> | <b>1269.716</b> | <b>1267.700</b> | A[12] |
| K  | 31 | 3031.711        | 1213.660        | 1197.641        | 1198.679        | 1196.663        | K[11] |
| R  | 32 | 3187.812        | <b>1085.585</b> | <b>1069.576</b> | 1070.584        | <b>1068.568</b> | R[10] |
| K  | 33 | 3323.939        | 929.494         | <b>913.475</b>  | 914.483         | 912.467         | K[9]  |
| T  | 34 | 3424.988        | 773.365         | 757.347         | 758.357         | 756.341         | T[8]  |
| S  | 35 | 3512.018        | 672.320         | 656.301         | 657.309         | 655.293         | S[7]  |
| G  | 36 | 3569.040        | 585.268         | 569.250         | 570.277         | 568.261         | G[6]  |
| P  | 37 | 3666.093        | 528.206         | 512.188         | 513.196         | 511.180         | P[5]  |
| P  | 38 | 3763.145        | <b>431.214</b>  | 415.195         | 416.203         | 414.187         | P[4]  |
| V  | 39 | 3862.214        | 334.161         | 318.142         | 319.150         | 317.134         | V[3]  |
| S  | 40 | 3969.246        | 238.092         | 219.073         | 220.082         | 218.066         | S[2]  |
| E  | 41 | 4078.288        | 148.060         | 132.042         | 133.050         | 131.034         | E[1]  |



# sp | P43274 | H14\_MOUSE

[Acetyl]SETAPAAPAAPAPAEKTPVKKKARKAAGGAKRK<sup>Dimethyl</sup> TSGPPVSE<sub>28.03</sub>

- ▶ fragmentation table for charge state 2+
- ▶ specType=etd
- ▶ score=91.90
- ▶ F105343.dat
- ▶ query=q14559\_p1
- ▶ precursor=816.656730
- ▶ chargePrecursor=5
- ▶ itol=0.8

| AA | c  | y               | z+1             | z+2             | z               | AA              |       |
|----|----|-----------------|-----------------|-----------------|-----------------|-----------------|-------|
| S  | 1  | 74.042          | 2040.140        | 2032.130        | 0.504           | 2031.627        | S(41) |
| E  | 2  | 135.503         | <b>1975.619</b> | <b>1967.609</b> | 0.504           | <b>1967.105</b> | E(42) |
| T  | 3  | 189.087         | 1911.097        | <b>1903.088</b> | 0.504           | <b>1902.584</b> | T(39) |
| A  | 4  | 224.606         | 1860.573        | 1852.564        | 0.504           | 1852.060        | A(38) |
| P  | 5  | 273.132         | <b>1825.055</b> | 1817.045        | 0.504           | 1816.542        | P(37) |
| A  | 6  | 308.880         | 1776.529        | 1768.520        | 0.504           | 1768.015        | A(36) |
| A  | 7  | 344.159         | 1743.010        | 1735.001        | 0.504           | 1734.497        | A(35) |
| P  | 8  | 392.695         | 1705.461        | 1697.452        | 0.504           | 1696.947        | P(34) |
| A  | 9  | 438.214         | 1656.905        | 1648.896        | 0.504           | 1648.452        | A(33) |
| A  | 10 | 463.733         | 1621.446        | <b>1613.437</b> | 0.504           | <b>1612.933</b> | A(32) |
| P  | 11 | 512.259         | 1585.928        | 1577.919        | 0.504           | 1577.415        | P(31) |
| A  | 12 | 547.977         | 1537.401        | <b>1529.392</b> | 0.504           | 1528.888        | A(30) |
| P  | 13 | 596.504         | 1501.883        | 1493.874        | 0.504           | 1493.370        | P(29) |
| A  | 14 | 631.822         | 1453.357        | 1445.347        | 0.504           | 1444.843        | A(28) |
| E  | 15 | 666.344         | 1417.839        | 1409.829        | 0.504           | 1409.325        | E(27) |
| K  | 16 | 700.301         | 1353.317        | <b>1345.307</b> | <b>1345.811</b> | 1344.803        | K(26) |
| T  | 17 | 810.815         | <b>1289.269</b> | <b>1281.260</b> | <b>1281.764</b> | 1280.756        | T(25) |
| P  | 18 | 859.443         | 1256.745        | 1248.735        | 1249.239        | 1248.232        | P(24) |
| V  | 19 | <b>908.976</b>  | 1190.218        | 1182.210        | 1182.714        | 1181.706        | V(23) |
| K  | 20 | <b>973.023</b>  | 1140.695        | <b>1132.675</b> | <b>1133.179</b> | <b>1132.171</b> | K(22) |
| K  | 21 | 1037.071        | 1076.617        | <b>1068.628</b> | <b>1069.132</b> | 1068.124        | K(21) |
| K  | 22 | 1101.119        | 1012.595        | <b>1004.580</b> | <b>1005.084</b> | 1004.077        | K(20) |
| A  | 23 | <b>1136.637</b> | <b>948.542</b>  | <b>940.533</b>  | <b>941.037</b>  | <b>940.029</b>  | A(19) |
| R  | 24 | 1214.682        | <b>913.024</b>  | 905.014         | 905.518         | 904.510         | R(18) |
| K  | 25 | <b>1278.735</b> | 834.973         | <b>826.964</b>  | <b>827.468</b>  | <b>826.460</b>  | K(17) |
| A  | 26 | 1314.253        | 770.926         | <b>762.916</b>  | <b>763.420</b>  | <b>762.412</b>  | A(16) |
| A  | 27 | <b>1349.772</b> | 735.407         | <b>727.398</b>  | <b>727.902</b>  | 726.894         | A(15) |
| G  | 28 | 1378.220        | 699.889         | 691.879         | 692.383         | 691.375         | G(14) |
| G  | 29 | <b>1408.793</b> | 673.370         | <b>661.360</b>  | <b>661.872</b>  | 660.864         | G(13) |
| A  | 30 | <b>1442.312</b> | 642.867         | <b>634.858</b>  | <b>635.362</b>  | <b>634.354</b>  | A(12) |
| K  | 31 | <b>1506.359</b> | 607.349         | <b>599.339</b>  | <b>599.843</b>  | <b>598.835</b>  | K(11) |
| R  | 32 | 1584.410        | 543.301         | 535.292         | 535.796         | 534.788         | R(10) |
| K  | 33 | 1662.473        | 465.251         | 457.241         | 457.745         | 456.737         | K(9)  |
| T  | 34 | 1712.999        | 387.181         | 379.171         | 379.675         | 378.667         | T(8)  |
| S  | 35 | 1756.513        | 336.664         | 328.654         | 329.158         | 328.150         | S(7)  |
| G  | 36 | 1785.024        | 293.148         | 285.138         | 285.642         | 284.634         | G(6)  |
| P  | 37 | 1833.550        | 264.617         | 256.607         | 257.111         | 256.104         | P(5)  |
| P  | 38 | 1882.076        | 216.110         | 208.101         | 208.605         | 207.597         | P(4)  |
| V  | 39 | 1831.611        | 167.584         | 159.575         | 160.079         | 159.071         | V(3)  |
| S  | 40 | 1975.377        | 118.066         | 110.041         | 110.544         | 109.535         | S(2)  |
| E  | 41 | 2030.848        | 74.534          | 66.524          | 67.028          | 66.021          | E(1)  |

# sp | P43274 | H14\_MOUSE

[Acetyl]SETAPAAPAAPAPAEKTPVKKKARKAAGGAKRK<sup>Dimethyl</sup>TSGPPVSE<sub>28.03</sub>

- ▶ fragmentation table for charge state 3+
- ▶ specType=etd
- ▶ score=91.90
- ▶ F105343.dat
- ▶ query=q14559\_p1
- ▶ precursor=816.656730
- ▶ chargePrecursor=5
- ▶ itol=0.8

| AA | c  | y               | z+1             | z+2             | z              | AA              |       |
|----|----|-----------------|-----------------|-----------------|----------------|-----------------|-------|
| S  | 1  | 49.697          | <b>1360.429</b> | 1355.089        | 0.672          | 1354.751        | S[41] |
| E  | 2  | 92.711          | <b>1317.415</b> | <b>1312.075</b> | 0.672          | <b>1311.739</b> | E[40] |
| T  | 3  | 126.394         | 1274.401        | <b>1269.061</b> | 0.672          | <b>1266.725</b> | T[39] |
| A  | 4  | 150.073         | 1240.710        | <b>1235.378</b> | 0.672          | 1235.043        | A[38] |
| W  | 5  | 184.424         | <b>1217.039</b> | <b>1211.699</b> | 0.672          | <b>1211.363</b> | W[37] |
| A  | 6  | 208.103         | 1194.660        | 1189.320        | 0.672          | 1189.011        | A[36] |
| A  | 7  | 229.782         | <b>1161.009</b> | <b>1155.669</b> | 0.672          | <b>1155.334</b> | A[35] |
| P  | 8  | 262.133         | <b>1137.330</b> | 1131.990        | 0.672          | 1131.654        | P[34] |
| A  | 9  | 285.812         | 1104.970        | <b>1099.639</b> | 0.672          | <b>1099.304</b> | A[33] |
| A  | 10 | 309.491         | 1081.300        | 1075.960        | 0.672          | 1075.625        | A[32] |
| P  | 11 | 341.242         | <b>1057.621</b> | 1052.281        | 0.672          | 1051.945        | P[31] |
| A  | 12 | 365.921         | 1034.770        | <b>1019.930</b> | 0.672          | 1019.595        | A[30] |
| P  | 13 | 397.672         | 1011.501        | 1006.251        | 0.672          | <b>995.916</b>  | P[29] |
| A  | 14 | 421.551         | 989.240         | 983.901         | 0.672          | 983.565         | A[28] |
| E  | 15 | 464.565         | 945.361         | <b>940.221</b>  | 0.672          | <b>939.886</b>  | E[27] |
| K  | 16 | 507.263         | 902.547         | 897.207         | <b>897.543</b> | 896.671         | K[26] |
| T  | 17 | 540.946         | 899.840         | <b>854.509</b>  | <b>854.845</b> | <b>854.173</b>  | T[25] |
| P  | 18 | 574.297         | 826.169         | 820.829         | 821.165        | 820.490         | P[24] |
| V  | 19 | 606.320         | 793.815         | 788.476         | 788.811        | 788.140         | V[23] |
| K  | 20 | 649.018         | 760.792         | 755.453         | 755.789        | 755.111         | K[22] |
| K  | 21 | 691.716         | 718.094         | 712.754         | 713.090        | 712.411         | K[21] |
| K  | 22 | 734.414         | 675.390         | <b>670.056</b>  | <b>670.392</b> | <b>669.720</b>  | K[20] |
| A  | 23 | 758.094         | 632.697         | 627.357         | 627.694        | 627.022         | A[19] |
| R  | 24 | 819.127         | 609.011         | 603.671         | 604.015        | 603.341         | R[18] |
| K  | 25 | 852.826         | 565.985         | 551.645         | 551.981        | 551.309         | K[17] |
| A  | 26 | 876.505         | 514.288         | 508.947         | 509.283        | 508.611         | A[16] |
| A  | 27 | 900.184         | 490.607         | 485.268         | 485.604        | 484.931         | A[15] |
| G  | 28 | 919.191         | 466.928         | 461.589         | 461.925        | 461.251         | G[14] |
| G  | 29 | 938.198         | 447.921         | 442.581         | 442.917        | 442.243         | G[13] |
| A  | 30 | 961.877         | 429.914         | 423.574         | 423.910        | 423.236         | A[12] |
| K  | 31 | <b>1004.575</b> | 405.235         | 399.895         | 400.231        | 399.559         | K[11] |
| R  | 32 | <b>1056.609</b> | 362.537         | 357.197         | 357.533        | 356.861         | R[10] |
| K  | 33 | <b>1108.651</b> | 319.503         | 305.163         | 305.499        | 304.827         | K[9]  |
| T  | 34 | <b>1142.334</b> | 259.461         | 253.121         | 253.457        | 252.785         | T[8]  |
| S  | 35 | 1171.344        | 224.776         | 218.436         | 218.775        | 218.103         | S[7]  |
| G  | 36 | 1199.351        | 199.761         | 193.421         | 193.754        | 193.082         | G[6]  |
| P  | 37 | 1222.702        | 175.760         | 171.421         | 171.757        | 171.085         | P[5]  |
| P  | 38 | 1255.053        | 144.400         | 139.070         | 139.406        | 138.734         | P[4]  |
| V  | 39 | <b>1288.076</b> | 112.050         | 106.710         | 107.055        | 106.383         | V[3]  |
| S  | 40 | <b>1317.087</b> | 79.030          | 73.696          | 74.032         | 73.360          | S[2]  |
| E  | 41 | <b>1360.101</b> | 50.025          | 44.685          | 45.021         | 44.349          | E[1]  |

# sp | P43274 | H14\_MOUSE

[Acetyl]SETAPAAPAAPAPAEKTPVKKKARKAAGGAKRK<sup>Dimethyl</sup> TSGPPVSE  
28.03

- ▶ fragmentation table for charge state 4+
- ▶ specType=etd
- ▶ score=91.90
- ▶ F105343.dat
- ▶ query=q14559\_p1
- ▶ precursor=816.656730
- ▶ chargePrecursor=5
- ▶ itol=0.8

| AA | c  | y               | z+1             | z+2             | z     | AA              |       |
|----|----|-----------------|-----------------|-----------------|-------|-----------------|-------|
| S  | 1  | 37.525          | <b>1020.574</b> | <b>1016.569</b> | 0.755 | <b>1016.317</b> | S[41] |
| E  | 2  | 69.795          | <b>988.313</b>  | <b>984.308</b>  | 0.755 | <b>984.056</b>  | E[40] |
| T  | 3  | 95.047          | 956.052         | <b>952.048</b>  | 0.755 | <b>951.796</b>  | T[39] |
| A  | 4  | 112.508         | 936.793         | <b>926.786</b>  | 0.755 | <b>926.534</b>  | A[38] |
| P  | 5  | 137.070         | <b>913.031</b>  | <b>909.026</b>  | 0.755 | <b>908.774</b>  | P[37] |
| A  | 6  | 154.529         | 885.705         | 884.753         | 0.755 | 884.511         | A[36] |
| A  | 7  | 172.988         | 871.009         | 867.004         | 0.755 | 866.752         | A[35] |
| F  | 8  | 196.851         | 853.249         | 849.245         | 0.755 | 848.991         | F[34] |
| A  | 9  | 214.611         | 828.989         | 824.981         | 0.755 | 824.729         | A[33] |
| A  | 10 | 232.370         | 811.227         | 807.222         | 0.755 | 806.970         | A[32] |
| P  | 11 | 250.133         | 793.468         | 789.463         | 0.755 | 789.211         | P[31] |
| A  | 12 | 274.392         | 769.204         | 765.200         | 0.755 | 764.948         | A[30] |
| P  | 13 | 298.656         | 751.445         | 747.440         | 0.755 | 747.188         | P[29] |
| A  | 14 | 316.415         | <b>727.182</b>  | 723.177         | 0.755 | 722.925         | A[28] |
| E  | 15 | 348.675         | 709.423         | 705.418         | 0.755 | 705.166         | E[27] |
| K  | 16 | 380.699         | 677.162         | 673.157         | 0.755 | 672.905         | K[26] |
| T  | 17 | 405.961         | 645.138         | 641.134         | 0.755 | 640.882         | T[25] |
| P  | 18 | 439.224         | 619.879         | 615.872         | 0.755 | 615.620         | P[24] |
| V  | 19 | 454.991         | 595.611         | 591.606         | 0.755 | 591.354         | V[23] |
| K  | 20 | 487.015         | 570.849         | 566.841         | 0.755 | 566.589         | K[22] |
| K  | 21 | 519.039         | 538.822         | 534.818         | 0.755 | 534.566         | K[21] |
| K  | 22 | 551.063         | 506.799         | 502.794         | 0.755 | 502.542         | K[20] |
| A  | 23 | 588.822         | 474.775         | 470.770         | 0.755 | 470.518         | A[19] |
| R  | 24 | 607.847         | 457.018         | 453.011         | 0.755 | 452.759         | R[18] |
| K  | 25 | 639.571         | 417.990         | 413.986         | 0.755 | 413.734         | K[17] |
| A  | 26 | 657.630         | 385.967         | 381.962         | 0.755 | 381.710         | A[16] |
| A  | 27 | 675.390         | 368.207         | 364.203         | 0.755 | 363.951         | A[15] |
| G  | 28 | 689.645         | 352.448         | 348.443         | 0.755 | 348.191         | G[14] |
| G  | 29 | 703.900         | 336.193         | 332.188         | 0.755 | 331.936         | G[13] |
| A  | 30 | 721.859         | 321.937         | 317.933         | 0.755 | 317.681         | A[12] |
| R  | 31 | 753.083         | 304.176         | 300.173         | 0.755 | 299.921         | R[11] |
| R  | 32 | 792.709         | 272.154         | 268.150         | 0.755 | 267.898         | R[10] |
| K  | 33 | 831.740         | 233.129         | 229.124         | 0.755 | 228.872         | K[9]  |
| T  | 34 | 857.002         | 194.097         | 190.093         | 0.755 | 189.841         | T[8]  |
| S  | 35 | 876.760         | 168.835         | 164.831         | 0.755 | 164.579         | S[7]  |
| G  | 36 | 893.015         | 147.077         | 143.073         | 0.755 | 142.821         | G[6]  |
| P  | 37 | 917.279         | 132.821         | 128.817         | 0.755 | 128.565         | P[5]  |
| P  | 38 | 941.542         | 108.559         | 104.554         | 0.755 | 104.302         | P[4]  |
| V  | 39 | 966.309         | 84.299          | 80.291          | 0.755 | 80.039          | V[3]  |
| S  | 40 | <b>988.067</b>  | 59.529          | 55.524          | 0.755 | 55.272          | S[2]  |
| E  | 41 | <b>1020.328</b> | 37.771          | 33.766          | 0.755 | 33.514          | E[1]  |



# sp | P43277 | H13\_MOUSE

[Acetyl]SETAPAAPAAPAPVEKTPVKKKAKKTGAAAGKRKASGPPVSE

- ▶ fragmentation table for charge state 1+
- ▶ specType=etd
- ▶ score=46.98
- ▶ F105343.dat
- ▶ query=q14584\_p1
- ▶ precursor=687.889370
- ▶ chargePrecursor=6
- ▶ itol=0.8

| AA | c  | y               | z+1             | z+2             | z               | AA       |       |
|----|----|-----------------|-----------------|-----------------|-----------------|----------|-------|
| S  | 1  | 147.076         | 4122.303        | 4106.285        | 0.000           | 4105.277 | E[42] |
| E  | 2  | 276.119         | 3993.261        | 3977.242        | 0.000           | 3976.234 | E[41] |
| L  | 3  | 377.167         | 3684.216        | 3668.199        | 0.000           | 3667.192 | F[40] |
| A  | 4  | 448.204         | 3763.170        | 3747.152        | 0.000           | 3746.144 | A[39] |
| P  | 5  | 545.257         | 3692.133        | 3676.115        | 0.000           | 3675.107 | P[38] |
| A  | 6  | 616.294         | 3595.081        | 3579.062        | 0.000           | 3578.054 | A[37] |
| A  | 7  | 667.331         | 3524.044        | 3508.026        | 0.000           | 3507.017 | A[36] |
| P  | 8  | <b>764.384</b>  | 3453.000        | 3436.980        | 0.000           | 3435.969 | P[35] |
| A  | 9  | <b>855.421</b>  | 3385.954        | 3369.935        | 0.000           | 3368.927 | A[34] |
| A  | 10 | 926.458         | 3284.917        | 3268.898        | 0.000           | 3267.889 | A[33] |
| P  | 11 | <b>1023.511</b> | 3213.879        | 3197.861        | 0.000           | 3196.853 | P[32] |
| A  | 12 | 1094.548        | 3116.827        | 3100.808        | 0.000           | 3099.800 | A[31] |
| P  | 13 | 1161.600        | 3045.790        | 3029.771        | 0.000           | 3028.763 | P[30] |
| V  | 14 | <b>1290.669</b> | 2948.737        | 2932.718        | 0.000           | 2931.710 | V[29] |
| E  | 15 | 1437.711        | 2849.686        | 2833.666        | 0.000           | 2832.642 | E[28] |
| R  | 16 | <b>1547.806</b> | 2720.626        | 2704.607        | 0.000           | 2703.596 | R[27] |
| I  | 17 | 1688.854        | 2592.533        | 2576.512        | 2577.520        | 2575.504 | I[26] |
| P  | 18 | 1745.907        | 2491.483        | 2475.464        | 2476.472        | 2474.457 | P[25] |
| V  | 19 | 1864.975        | 2394.430        | 2378.412        | 2379.419        | 2377.404 | V[24] |
| K  | 20 | 1973.070        | 2295.362        | 2279.343        | 2280.351        | 2278.335 | K[23] |
| K  | 21 | 2101.105        | 2187.287        | 2171.268        | 2182.295        | 2180.246 | K[22] |
| R  | 22 | 2229.209        | 2079.174        | 2063.153        | 2074.161        | 2072.145 | R[21] |
| A  | 23 | 2300.297        | 1971.077        | 1955.058        | 1966.066        | 1964.050 | A[20] |
| R  | 24 | 2438.362        | 1840.040        | 1824.021        | 1825.029        | 1823.013 | R[19] |
| K  | 25 | 2556.407        | 1711.945        | 1695.926        | 1696.934        | 1694.918 | K[18] |
| T  | 26 | 2657.535        | 1583.850        | 1567.831        | 1568.839        | 1566.823 | T[17] |
| G  | 27 | 2714.556        | 1482.802        | 1466.784        | 1467.791        | 1465.775 | G[16] |
| A  | 28 | 2785.593        | 1425.781        | 1409.762        | 1410.770        | 1408.754 | A[15] |
| A  | 29 | 2856.631        | <b>1354.744</b> | 1338.725        | 1339.733        | 1337.717 | A[14] |
| A  | 30 | 2927.668        | <b>1283.707</b> | 1267.688        | 1268.696        | 1266.680 | A[13] |
| G  | 31 | 2984.689        | 1212.670        | <b>1196.651</b> | <b>1197.659</b> | 1195.643 | G[12] |
| K  | 32 | 3112.784        | 1135.640        | 1119.620        | 1140.637        | 1138.621 | K[11] |
| R  | 33 | 3268.885        | <b>1027.553</b> | <b>1011.534</b> | 1012.542        | 1010.527 | R[10] |
| R  | 34 | 3396.982        | 971.522         | <b>855.433</b>  | <b>856.441</b>  | 854.425  | R[9]  |
| A  | 35 | 3468.017        | 743.351         | 727.330         | 728.346         | 726.330  | A[8]  |
| S  | 36 | 3535.049        | 672.320         | 656.301         | 657.309         | 655.293  | S[7]  |
| G  | 37 | 3612.071        | 585.288         | 569.269         | <b>570.277</b>  | 568.261  | G[6]  |
| P  | 38 | 3706.124        | 508.266         | 512.248         | 513.256         | 511.240  | P[5]  |
| P  | 39 | 3888.170        | <b>431.214</b>  | 435.195         | 436.203         | 434.187  | P[4]  |
| V  | 40 | 3905.245        | 336.161         | 338.142         | 339.150         | 337.134  | V[3]  |
| S  | 41 | 3992.277        | 235.092         | 239.074         | 240.082         | 238.066  | S[2]  |
| E  | 42 | 4121.319        | 148.050         | 152.032         | 153.050         | 151.034  | E[1]  |

# sp | P43277 | H13\_MOUSE

[Acetyl]SETAPAAPAAPAPVEKTPVKKKAKKTGAAAGKRKASGPPVSE

- ▶ fragmentation table for charge state 2+
- ▶ specType=etd
- ▶ score=46.98
- ▶ F105343.dat
- ▶ query=q14584\_p1
- ▶ precursor=687.889370
- ▶ chargePrecursor=6
- ▶ itol=0.8

| AA | c  | y               | z+1             | z+2             | z               | AA              |       |
|----|----|-----------------|-----------------|-----------------|-----------------|-----------------|-------|
| S  | 1  | 74.042          | 2061.655        | 2053.646        | 0.504           | 2053.142        | S[42] |
| E  | 2  | 138.563         | 1897.134        | 1889.125        | 0.504           | 1888.621        | E[41] |
| T  | 3  | 189.087         | 1932.613        | 1924.603        | 0.504           | 1924.090        | T[40] |
| A  | 4  | 224.206         | 1828.090        | 1814.080        | 0.504           | 1817.576        | A[39] |
| P  | 5  | 293.135         | <b>1846.570</b> | 1838.561        | 0.504           | 1838.056        | P[38] |
| A  | 6  | 358.650         | 1790.044        | 1790.035        | 0.504           | 1790.531        | A[37] |
| A  | 7  | 344.169         | 1762.525        | 1754.516        | 0.504           | 1754.012        | A[36] |
| F  | 8  | 392.695         | 1727.007        | 1718.997        | 0.504           | 1718.494        | F[35] |
| A  | 9  | 428.214         | 1678.480        | 1670.471        | 0.504           | 1669.967        | A[34] |
| A  | 10 | 463.733         | 1642.962        | 1634.953        | 0.504           | 1634.448        | A[33] |
| P  | 11 | 532.259         | 1607.443        | 1599.434        | 0.504           | 1599.930        | P[32] |
| A  | 12 | 547.777         | 1558.917        | <b>1550.908</b> | 0.504           | 1550.404        | A[31] |
| P  | 13 | 596.304         | 1523.398        | 1515.389        | 0.504           | 1514.885        | P[30] |
| V  | 14 | <b>645.838</b>  | 1474.872        | 1466.863        | 0.504           | 1466.359        | V[29] |
| E  | 15 | <b>710.359</b>  | 1425.358        | 1417.348        | 0.504           | 1416.845        | E[28] |
| R  | 16 | <b>774.407</b>  | 1369.837        | 1361.827        | 1353.818        | 1353.313        | R[27] |
| T  | 17 | 824.911         | 1290.365        | <b>1288.760</b> | <b>1289.264</b> | <b>1288.256</b> | T[26] |
| F  | 18 | 873.457         | 1246.345        | 1238.336        | <b>1238.740</b> | 1237.732        | F[25] |
| V  | 19 | 922.991         | <b>1197.719</b> | 1189.709        | 1190.213        | 1189.206        | V[24] |
| K  | 20 | <b>987.039</b>  | 1148.195        | 1140.185        | 1140.679        | 1139.671        | K[23] |
| R  | 21 | <b>1051.866</b> | <b>1084.137</b> | <b>1076.128</b> | <b>1076.632</b> | 1075.624        | R[22] |
| R  | 22 | <b>1115.134</b> | <b>1020.090</b> | <b>1012.080</b> | 1012.584        | <b>1011.576</b> | R[21] |
| A  | 23 | 1160.652        | <b>956.042</b>  | 948.033         | 948.537         | <b>947.529</b>  | A[20] |
| K  | 24 | <b>1214.700</b> | 920.524         | <b>912.514</b>  | <b>913.018</b>  | <b>912.010</b>  | K[19] |
| K  | 25 | <b>1278.747</b> | <b>856.476</b>  | <b>848.467</b>  | <b>848.971</b>  | <b>847.963</b>  | K[18] |
| T  | 26 | 1329.271        | 792.425         | <b>784.419</b>  | <b>784.923</b>  | <b>783.915</b>  | T[17] |
| C  | 27 | <b>1357.782</b> | 741.905         | <b>731.895</b>  | <b>734.389</b>  | <b>733.382</b>  | C[16] |
| A  | 28 | <b>1391.300</b> | 713.394         | <b>705.385</b>  | <b>705.889</b>  | <b>704.881</b>  | A[15] |
| A  | 29 | <b>1428.819</b> | 677.876         | <b>669.866</b>  | <b>670.370</b>  | <b>669.362</b>  | A[14] |
| A  | 30 | 1464.337        | 642.357         | <b>634.348</b>  | <b>634.852</b>  | <b>633.844</b>  | A[13] |
| G  | 31 | 1492.848        | <b>606.838</b>  | 598.829         | 599.333         | 598.325         | G[12] |
| K  | 32 | <b>1556.896</b> | 678.328         | <b>670.318</b>  | <b>670.822</b>  | <b>669.814</b>  | K[11] |
| R  | 33 | 1624.944        | 614.380         | <b>606.271</b>  | <b>606.775</b>  | <b>605.767</b>  | R[10] |
| K  | 34 | 1698.994        | 436.230         | 428.220         | 428.724         | 427.716         | K[9]  |
| A  | 35 | 1734.512        | 372.182         | 364.173         | 364.677         | 363.669         | A[8]  |
| S  | 36 | 1778.028        | 336.664         | 328.654         | 329.158         | 328.150         | S[7]  |
| C  | 37 | 1806.539        | 291.140         | 283.130         | 283.634         | 282.626         | C[6]  |
| P  | 38 | 1855.065        | 264.617         | 256.607         | 257.111         | 256.103         | P[5]  |
| P  | 39 | 1903.592        | 238.110         | 230.101         | 230.605         | 229.597         | P[4]  |
| V  | 40 | 1953.126        | 167.584         | 159.575         | 160.079         | 159.071         | V[3]  |
| S  | 41 | 1996.642        | 118.050         | 110.041         | 110.544         | 109.537         | S[2]  |
| E  | 42 | 2061.161        | 74.534          | 66.524          | 67.028          | 66.021          | E[1]  |

# sp | P43277 | H13\_MOUSE

[Acetyl]SETAPAAPAAPAPVEKTPVKKKAKKTGAAAGKRKASGPPVSE

- ▶ fragmentation table for charge state 3+
- ▶ specType=etd
- ▶ score=46.98
- ▶ F105343.dat
- ▶ query=q14584\_p1
- ▶ precursor=687.889370
- ▶ chargePrecursor=6
- ▶ itol=0.8

| AA   | c               | y               | z+1             | z+2            | z               | AA   |
|------|-----------------|-----------------|-----------------|----------------|-----------------|------|
| S 1  | 49.697          | 1374.773        | 1369.433        | 0.672          | 1369.097        | E 42 |
| E 2  | 92.711          | <b>1331.758</b> | <b>1326.419</b> | 0.672          | <b>1326.083</b> | E 41 |
| T 3  | 126.394         | <b>1288.744</b> | <b>1283.405</b> | 0.672          | <b>1283.069</b> | F 40 |
| A 4  | 150.073         | 1255.96         | <b>1249.722</b> | 0.672          | <b>1249.386</b> | A 39 |
| P 5  | 182.424         | <b>1231.383</b> | 1226.043        | 0.672          | 1225.707        | P 38 |
| A 6  | 206.103         | 1199.032        | <b>1193.692</b> | 0.672          | <b>1193.356</b> | A 37 |
| A 7  | 229.782         | 1175.361        | <b>1170.013</b> | 0.672          | 1169.677        | A 36 |
| P 8  | 262.133         | <b>1151.674</b> | 1146.334        | 0.672          | 1145.999        | P 35 |
| A 9  | 285.812         | 1119.323        | <b>1113.983</b> | 0.672          | 1113.647        | A 34 |
| A 10 | 309.491         | 1095.644        | <b>1090.304</b> | 0.672          | 1089.969        | A 33 |
| P 11 | <b>341.842</b>  | 1071.965        | 1066.625        | 0.672          | 1066.289        | P 32 |
| A 12 | 365.521         | 1039.614        | <b>1034.274</b> | 0.672          | <b>1033.938</b> | A 31 |
| P 13 | 397.872         | 1015.935        | <b>1010.595</b> | 0.672          | 1010.259        | P 30 |
| V 14 | <b>430.894</b>  | 983.584         | <b>978.244</b>  | 0.672          | <b>977.908</b>  | V 29 |
| E 15 | 473.909         | 959.561         | <b>945.221</b>  | 0.672          | 944.885         | E 28 |
| R 16 | 516.697         | 937.547         | 932.869         | <b>902.543</b> | 901.877         | K 27 |
| T 17 | 550.290         | 884.948         | <b>859.509</b>  | <b>859.845</b> | <b>859.173</b>  | T 26 |
| P 18 | 582.640         | 831.166         | 825.826         | 826.162        | 825.490         | P 25 |
| V 19 | 615.693         | <b>798.815</b>  | 793.475         | 793.811        | 793.139         | V 24 |
| K 20 | 658.362         | <b>765.792</b>  | 760.453         | 760.789        | 760.117         | K 23 |
| K 21 | <b>701.060</b>  | 723.095         | <b>717.754</b>  | <b>718.090</b> | <b>717.418</b>  | K 22 |
| K 22 | 743.758         | <b>680.398</b>  | <b>675.056</b>  | <b>675.392</b> | <b>674.720</b>  | K 21 |
| A 23 | 787.437         | <b>637.697</b>  | 632.358         | 632.694        | 632.022         | A 20 |
| K 24 | <b>810.136</b>  | 614.018         | 608.679         | 609.015        | 608.343         | K 19 |
| K 25 | 852.834         | 571.320         | 565.980         | 566.316        | 565.644         | K 18 |
| T 26 | <b>886.516</b>  | 529.627         | 523.282         | 523.618        | 522.946         | T 17 |
| G 27 | <b>905.524</b>  | 494.930         | 489.590         | 489.925        | 489.263         | G 16 |
| A 28 | 929.203         | 479.937         | 474.592         | 474.928        | 474.256         | A 15 |
| A 29 | 952.882         | 452.263         | 446.913         | 447.249        | 446.577         | A 14 |
| A 30 | <b>976.561</b>  | 428.574         | 423.234         | 423.570        | 422.898         | A 13 |
| G 31 | <b>995.568</b>  | 404.895         | 399.555         | 399.891        | 399.219         | G 12 |
| K 32 | <b>1038.266</b> | 385.888         | 380.548         | 380.884        | 380.212         | K 11 |
| K 33 | <b>1090.300</b> | 342.180         | 337.850         | 338.186        | 337.514         | K 10 |
| R 34 | <b>1112.598</b> | 291.159         | 285.818         | 286.152        | 285.480         | R 9  |
| A 35 | 1156.677        | 248.457         | 243.118         | 243.454        | 242.782         | A 8  |
| S 36 | 1185.688        | 224.778         | 219.439         | 219.775        | 219.103         | S 7  |
| G 37 | 1204.695        | 195.767         | 190.428         | 190.764        | 190.092         | G 6  |
| P 38 | 1237.046        | 176.760         | 171.421         | 171.757        | 171.085         | P 5  |
| P 39 | 1269.297        | 144.409         | 139.070         | 139.406        | 138.734         | P 4  |
| V 40 | 1302.426        | 112.954         | 108.719         | 109.055        | 108.383         | V 3  |
| S 41 | <b>1331.430</b> | 75.032          | 73.696          | 74.032         | 73.360          | S 2  |
| E 42 | 1374.445        | 50.025          | 44.685          | 45.021         | 44.349          | E 1  |

# sp | P43277 | H13\_MOUSE

[Acetyl]SETAPAAPAAPAVEKTPVKKKAKKTGAAAGKRKASGPPVSE

- ▶ fragmentation table for charge state 4+
- ▶ specType=etd
- ▶ score=46.98
- ▶ F105343.dat
- ▶ query=q14584\_p1
- ▶ precursor=687.889370
- ▶ chargePrecursor=6
- ▶ itol=0.8

| AA    | c              | y              | z+1             | z+2            | z               | AA    |
|-------|----------------|----------------|-----------------|----------------|-----------------|-------|
| S[1]  | 87.525         | 1031.231       | <b>1027.327</b> | 0.755          | <b>1027.075</b> | S[2]  |
| T[3]  | 69.785         | <b>999.071</b> | <b>995.066</b>  | 0.755          | <b>994.814</b>  | T[4]  |
| Y[3]  | 95.047         | 966.010        | <b>962.805</b>  | 0.755          | <b>962.553</b>  | Y[4]  |
| A[4]  | 112.806        | 941.548        | <b>937.543</b>  | 0.755          | <b>937.291</b>  | A[3]  |
| F[5]  | 137.070        | <b>923.789</b> | 919.784         | 0.755          | 919.532         | F[8]  |
| A[6]  | 154.820        | 899.526        | <b>895.521</b>  | 0.755          | <b>895.269</b>  | A[37] |
| A[7]  | 172.588        | 881.766        | <b>877.762</b>  | 0.755          | <b>877.510</b>  | A[36] |
| F[8]  | 196.851        | 864.007        | <b>860.002</b>  | 0.755          | <b>859.750</b>  | F[35] |
| A[9]  | 218.611        | 839.744        | 835.739         | 0.755          | 835.487         | A[24] |
| A[10] | 232.370        | <b>821.985</b> | <b>817.980</b>  | 0.755          | <b>817.728</b>  | A[33] |
| P[11] | 256.613        | 804.225        | <b>800.221</b>  | 0.755          | <b>799.969</b>  | P[32] |
| A[12] | 274.302        | <b>779.962</b> | <b>775.957</b>  | 0.755          | <b>775.705</b>  | A[31] |
| P[13] | 298.656        | 762.203        | 758.198         | 0.755          | 757.946         | P[30] |
| V[14] | 323.423        | 737.940        | <b>733.935</b>  | 0.755          | <b>733.683</b>  | V[29] |
| E[15] | 363.663        | 713.173        | <b>709.168</b>  | 0.755          | <b>708.916</b>  | E[28] |
| K[16] | 397.507        | <b>680.912</b> | 676.907         | 0.755          | 676.655         | K[27] |
| T[17] | <b>412.969</b> | 648.888        | <b>644.883</b>  | <b>645.135</b> | <b>644.632</b>  | T[26] |
| P[18] | 437.232        | 623.626        | 619.622         | 0.755          | 619.370         | P[25] |
| V[19] | 461.999        | 599.363        | 595.358         | 0.755          | 595.106         | V[24] |
| K[20] | 494.023        | 574.595        | <b>570.591</b>  | <b>570.843</b> | <b>570.339</b>  | K[23] |
| K[21] | 526.047        | 542.572        | 538.568         | 0.755          | 538.316         | K[22] |
| K[22] | 558.070        | 510.548        | <b>506.544</b>  | <b>506.796</b> | <b>506.292</b>  | K[21] |
| A[23] | 574.831        | 478.525        | 474.520         | 0.755          | 474.268         | A[26] |
| K[24] | 607.854        | 460.765        | 456.761         | 0.755          | 456.509         | K[19] |
| K[25] | 639.877        | 428.742        | 424.737         | 0.755          | 424.485         | K[18] |
| T[26] | 665.139        | 396.718        | 392.713         | 0.755          | 392.461         | T[17] |
| G[27] | 679.395        | 371.456        | 367.451         | 0.755          | 367.199         | G[16] |
| A[28] | 667.154        | 367.201        | 363.196         | 0.755          | 362.944         | A[15] |
| A[29] | 714.913        | 339.441        | 335.437         | 0.755          | 335.185         | A[14] |
| A[30] | 732.672        | 321.682        | 317.677         | 0.755          | 317.425         | A[13] |
| G[31] | 746.928        | 303.923        | 299.918         | 0.755          | 299.666         | G[12] |
| K[32] | <b>778.951</b> | 289.667        | 285.663         | 0.755          | 285.411         | K[11] |
| R[33] | <b>817.977</b> | 257.644        | 253.639         | 0.755          | 253.387         | R[10] |
| K[34] | <b>850.001</b> | 218.618        | 214.614         | 0.755          | 214.362         | K[9]  |
| A[35] | 867.760        | 186.595        | 182.590         | 0.755          | 182.338         | A[8]  |
| S[36] | 899.438        | 168.835        | 164.831         | 0.755          | 164.579         | S[7]  |
| G[37] | <b>903.773</b> | 147.077        | 143.073         | 0.755          | 142.821         | G[6]  |
| F[38] | 928.036        | 132.622        | 128.617         | 0.755          | 128.365         | F[5]  |
| P[39] | 952.300        | 108.559        | 104.554         | 0.755          | 104.302         | P[4]  |
| V[40] | <b>977.067</b> | 84.296         | 80.291          | 0.755          | 80.039          | V[3]  |
| S[41] | <b>998.825</b> | 60.529         | 56.524          | 0.755          | 56.272          | S[2]  |
| E[42] | 1031.065       | 37.771         | 33.766          | 0.755          | 33.514          | E[1]  |



# sp | P43277 | H13\_MOUSE

[Acetyl]SETAPAAPAAPAPVEKTPVKKKAKKTGAAAGKRKASGPPVSE

- ▶ fragmentation table for charge state 5+
- ▶ specType=etd
- ▶ score=46.98
- ▶ F105343.dat
- ▶ query=q14584\_p1
- ▶ precursor=687.889370
- ▶ chargePrecursor=6
- ▶ itol=0.8

| AA    | c              | y              | z+1            | z+2            | z              | AA    |
|-------|----------------|----------------|----------------|----------------|----------------|-------|
| S[1]  | 30.221         | 825.206        | <b>822.063</b> | 0.806          | <b>821.861</b> | S[42] |
| E[2]  | 56.030         | <b>799.458</b> | <b>796.254</b> | 0.806          | <b>796.053</b> | E[41] |
| T[3]  | 76.239         | 773.649        | <b>770.446</b> | 0.806          | <b>770.244</b> | T[40] |
| A[4]  | 90.447         | <b>753.440</b> | 750.236        | 0.806          | 750.035        | A[39] |
| F[5]  | 109.857        | <b>739.232</b> | 736.029        | 0.806          | 735.827        | F[38] |
| A[6]  | 124.068        | 719.822        | 716.618        | 0.806          | 716.417        | A[37] |
| A[7]  | 138.272        | <b>705.615</b> | 702.411        | 0.806          | 702.209        | A[36] |
| P[8]  | 157.683        | 691.407        | 688.203        | 0.806          | 688.002        | P[35] |
| A[9]  | 171.890        | 677.197        | 668.793        | 0.806          | 668.591        | A[34] |
| A[10] | 186.097        | 657.789        | 654.585        | 0.806          | 654.384        | A[33] |
| P[11] | 205.508        | 643.582        | 640.378        | 0.806          | 640.176        | P[32] |
| A[12] | 219.715        | 624.171        | 620.967        | 0.806          | 620.766        | A[31] |
| P[13] | 239.126        | 609.964        | <b>606.760</b> | 0.806          | <b>606.558</b> | P[30] |
| V[14] | 258.940        | 595.753        | 592.549        | 0.806          | 592.348        | V[29] |
| L[15] | 284.748        | <b>570.739</b> | 567.538        | 0.806          | 567.334        | L[28] |
| K[16] | 310.367        | 554.931        | 541.727        | 541.929        | 541.526        | K[27] |
| T[17] | 330.577        | 539.312        | 536.108        | 536.310        | 535.907        | T[26] |
| P[18] | 349.987        | 499.102        | 495.899        | 496.100        | 495.697        | P[25] |
| V[19] | 369.801        | 479.692        | 476.488        | 476.690        | 476.287        | V[24] |
| K[20] | 395.420        | 459.878        | 456.674        | 456.876        | 456.473        | K[23] |
| K[21] | 421.039        | 434.259        | <b>431.055</b> | <b>431.257</b> | <b>430.854</b> | K[22] |
| K[22] | 446.658        | 408.640        | 405.436        | 405.638        | 405.235        | K[21] |
| A[23] | 466.869        | 383.021        | 379.817        | 380.019        | 379.616        | A[20] |
| K[24] | 486.684        | 368.814        | 365.610        | 365.812        | 365.408        | K[19] |
| K[25] | 512.103        | 343.195        | 339.991        | 340.193        | 339.790        | K[18] |
| T[26] | 532.313        | 317.576        | 314.372        | 314.574        | 314.171        | T[17] |
| G[27] | 543.717        | 297.366        | 294.163        | 294.364        | 293.961        | G[16] |
| A[28] | 557.925        | 285.962        | 282.758        | 282.960        | 282.557        | A[15] |
| A[29] | 572.132        | 271.755        | 268.551        | 268.752        | 268.349        | A[14] |
| A[30] | 586.339        | 257.547        | 254.343        | 254.545        | 254.142        | A[13] |
| G[31] | 597.744        | 243.340        | 240.136        | 240.338        | 239.934        | G[12] |
| K[32] | 623.363        | 231.935        | 228.732        | 228.933        | 228.530        | K[11] |
| K[33] | 654.383        | 206.316        | 203.113        | 203.314        | 202.911        | K[10] |
| K[34] | <b>680.202</b> | 175.096        | 171.892        | 172.094        | 171.691        | K[9]  |
| A[35] | 698.409        | 149.477        | 146.273        | 146.475        | 146.072        | A[8]  |
| S[36] | 711.816        | 135.270        | 132.066        | 132.268        | 131.864        | S[7]  |
| G[37] | 723.220        | 117.863        | 114.660        | 114.861        | 114.458        | G[6]  |
| P[38] | 742.631        | 106.459        | 103.255        | 103.457        | 103.054        | P[5]  |
| P[39] | 762.041        | 87.049         | 83.845         | 84.046         | 83.643         | P[4]  |
| V[40] | 781.855        | 67.638         | 64.434         | 64.636         | 64.233         | V[3]  |
| S[41] | <b>799.261</b> | 47.824         | 44.621         | 44.822         | 44.419         | S[2]  |
| E[42] | 825.070        | 30.418         | 27.214         | 27.416         | 27.013         | E[1]  |



# sp | P43277 | H13\_MOUSE

[Acetyl]SETAPAAPAAPAVEKTPVKKKAKKTGAAAGKRKASGPPVSE

- ▶ fragmentation table for charge state 1+
- ▶ specType=etd
- ▶ score=56.10
- ▶ F105343.dat
- ▶ query=q14586.p1
- ▶ precursor=825.266380
- ▶ chargePrecursor=5
- ▶ itol=0.8

| AA | c  | y               | z+1             | z+2             | z               | AA       |       |
|----|----|-----------------|-----------------|-----------------|-----------------|----------|-------|
| S  | 1  | 147.079         | 4122.303        | 4106.285        | 0.000           | 4105.277 | S[42] |
| E  | 2  | 276.119         | 3993.261        | 3977.242        | 0.000           | 3976.234 | E[41] |
| L  | 3  | 377.167         | 3684.215        | 3668.199        | 0.000           | 3647.102 | L[40] |
| A  | 4  | 449.204         | 3763.170        | 3747.152        | 0.000           | 3746.144 | A[39] |
| P  | 5  | 545.257         | 3692.133        | 3676.115        | 0.000           | 3675.107 | P[38] |
| A  | 6  | 616.294         | 3595.081        | 3579.062        | 0.000           | 3578.054 | A[37] |
| A  | 7  | 667.331         | 3524.044        | 3508.026        | 0.000           | 3507.017 | A[36] |
| P  | 8  | 764.384         | 3453.006        | 3436.988        | 0.000           | 3435.980 | P[35] |
| A  | 9  | 855.421         | 3355.954        | 3339.935        | 0.000           | 3338.927 | A[34] |
| A  | 10 | 938.458         | 3284.917        | 3268.898        | 0.000           | 3267.890 | A[33] |
| P  | 11 | <b>1023.511</b> | 3213.879        | 3197.861        | 0.000           | 3196.853 | P[32] |
| A  | 12 | <b>1094.548</b> | 3116.827        | 3100.808        | 0.000           | 3099.800 | A[31] |
| P  | 13 | <b>1191.600</b> | 3045.790        | 3029.771        | 0.000           | 3028.763 | P[30] |
| V  | 14 | 1290.669        | 2948.737        | 2932.718        | 0.000           | 2931.710 | V[29] |
| E  | 15 | 1437.711        | 2949.686        | 2933.668        | 0.000           | 2932.662 | E[28] |
| R  | 16 | <b>1547.806</b> | 2720.626        | 2704.607        | 0.000           | 2703.599 | R[27] |
| L  | 17 | <b>1648.854</b> | 2592.533        | 2576.512        | 2977.520        | 2575.504 | L[26] |
| P  | 18 | <b>1745.907</b> | 2401.483        | 2475.464        | 2476.472        | 2474.457 | P[25] |
| V  | 19 | 1864.975        | 2304.430        | 2378.412        | 2379.419        | 2377.404 | V[24] |
| R  | 20 | 1973.070        | 2295.362        | 2279.343        | 2280.351        | 2278.335 | R[23] |
| R  | 21 | 2101.105        | 2187.287        | 2151.268        | 2152.276        | 2150.260 | R[22] |
| R  | 22 | 2229.200        | 2039.174        | 2003.153        | 2004.161        | 2002.145 | R[21] |
| A  | 23 | 2300.297        | 1911.077        | 1895.058        | 1896.066        | 1894.050 | A[20] |
| R  | 24 | 2438.392        | 1840.040        | 1824.021        | 1825.029        | 1823.013 | R[19] |
| R  | 25 | 2556.497        | 1711.945        | 1695.926        | 1696.934        | 1694.918 | R[18] |
| T  | 26 | 2657.535        | 1583.850        | <b>1567.831</b> | 1568.839        | 1566.823 | T[17] |
| G  | 27 | 2714.550        | 1482.803        | 1466.784        | 1467.791        | 1465.775 | G[16] |
| A  | 28 | 2785.593        | 1425.781        | 1409.762        | 1410.770        | 1408.754 | A[15] |
| A  | 29 | 2856.631        | 1384.744        | 1368.725        | 1369.733        | 1367.717 | A[14] |
| A  | 30 | 2927.668        | <b>1283.707</b> | 1267.688        | <b>1268.696</b> | 1266.680 | A[13] |
| G  | 31 | 2984.689        | 1212.670        | 1196.651        | 1197.659        | 1195.643 | G[12] |
| R  | 32 | 3112.784        | 1135.640        | 1119.620        | <b>1140.637</b> | 1138.621 | R[11] |
| R  | 33 | 3268.885        | <b>1027.553</b> | 1011.534        | <b>1012.542</b> | 1010.527 | R[10] |
| R  | 34 | 3396.980        | 971.492         | 955.473         | 956.481         | 954.465  | R[9]  |
| A  | 35 | 3468.017        | 743.351         | 727.330         | 728.346         | 726.330  | A[8]  |
| S  | 36 | 3535.049        | 672.320         | 656.301         | 657.309         | 655.293  | S[7]  |
| G  | 37 | 3612.071        | 585.288         | 569.269         | <b>570.277</b>  | 568.261  | G[6]  |
| P  | 38 | 3700.124        | 508.266         | 512.248         | 513.256         | 511.240  | P[5]  |
| P  | 39 | 3888.176        | <b>431.214</b>  | 435.195         | 436.203         | 434.187  | P[4]  |
| V  | 40 | 3905.245        | 334.161         | 318.142         | 319.150         | 317.134  | V[3]  |
| S  | 41 | 3992.277        | 235.092         | 219.074         | 220.082         | 218.066  | S[2]  |
| E  | 42 | 4121.319        | 148.050         | 132.032         | 133.040         | 131.024  | E[1]  |

# sp | P43277 | H13\_MOUSE

[Acetyl]SETAPAAPAAPAPVEKTPVKKKAKKTGAAAGKRKASGPPVSE

- ▶ fragmentation table for charge state 2+
- ▶ specType=etd
- ▶ score=56.10
- ▶ F105343.dat
- ▶ query=q14586.p1
- ▶ precursor=825.266380
- ▶ chargePrecursor=5
- ▶ itol=0.8

| AA    | c               | y               | z+1             | z+2             | z               | AA    |
|-------|-----------------|-----------------|-----------------|-----------------|-----------------|-------|
| S[1]  | 74.042          | 2061.655        | 2053.646        | 0.504           | 2053.142        | S[42] |
| E[2]  | 138.563         | 1897.134        | <b>1909.125</b> | 0.504           | <b>1988.621</b> | E[41] |
| T[3]  | 189.087         | 1932.613        | 1924.603        | 0.504           | 1924.090        | T[40] |
| A[4]  | 224.206         | 1828.089        | 1874.080        | 0.504           | 1873.576        | A[39] |
| T[5]  | 293.133         | <b>1846.570</b> | 1838.561        | 0.504           | 1838.056        | T[38] |
| A[6]  | 358.650         | 1790.044        | 1790.035        | 0.504           | 1790.531        | A[37] |
| A[7]  | 344.169         | 1763.525        | 1754.516        | 0.504           | 1754.012        | A[36] |
| F[8]  | 392.695         | 1727.007        | 1718.997        | 0.504           | 1718.494        | F[35] |
| A[9]  | 428.214         | 1678.488        | <b>1670.471</b> | 0.504           | <b>1669.967</b> | A[34] |
| A[10] | 463.733         | 1642.969        | <b>1634.953</b> | 0.504           | <b>1634.449</b> | A[33] |
| P[11] | 532.259         | 1597.443        | 1599.434        | 0.504           | 1599.930        | P[32] |
| A[12] | 547.777         | 1558.917        | 1550.908        | 0.504           | 1550.404        | A[31] |
| F[13] | 596.304         | 1523.398        | 1515.389        | 0.504           | 1514.885        | F[30] |
| V[14] | 645.830         | 1474.872        | 1466.863        | 0.504           | 1466.359        | V[29] |
| E[15] | 710.359         | 1425.358        | <b>1417.328</b> | 0.504           | 1416.825        | E[28] |
| R[16] | 774.887         | 1369.837        | 1361.827        | 139.313         | 1361.324        | R[27] |
| T[17] | 824.911         | 1290.765        | <b>1288.760</b> | <b>1289.264</b> | <b>1288.256</b> | T[26] |
| F[18] | 873.457         | 1246.245        | 1238.236        | 1238.740        | 1237.732        | F[25] |
| V[19] | 922.991         | 1197.719        | 1189.709        | 1190.213        | 1189.206        | V[24] |
| K[20] | <b>987.039</b>  | 1148.195        | <b>1140.175</b> | <b>1140.679</b> | 1139.671        | K[23] |
| K[21] | <b>1057.066</b> | 1089.727        | <b>1078.128</b> | <b>1076.232</b> | <b>1075.524</b> | K[22] |
| K[22] | <b>1115.134</b> | 1020.090        | <b>1012.080</b> | <b>1012.584</b> | <b>1011.576</b> | K[21] |
| A[23] | <b>1150.652</b> | <b>956.042</b>  | 948.033         | 948.537         | 947.529         | A[20] |
| K[24] | 1214.700        | 920.524         | 912.514         | 913.018         | 912.010         | K[19] |
| K[25] | <b>1278.747</b> | 856.476         | 848.467         | 848.971         | 847.963         | K[18] |
| T[26] | 1329.271        | 792.429         | 784.419         | <b>784.923</b>  | 783.915         | T[17] |
| G[27] | 1397.892        | 741.905         | 733.895         | 734.399         | 733.391         | G[16] |
| A[28] | 1393.300        | 713.394         | 705.385         | <b>705.889</b>  | 704.881         | A[15] |
| A[29] | 1438.819        | 677.876         | <b>669.866</b>  | <b>670.370</b>  | <b>669.362</b>  | A[14] |
| A[30] | 1464.337        | 642.357         | <b>634.348</b>  | <b>634.852</b>  | <b>633.844</b>  | A[13] |
| G[31] | <b>1492.848</b> | 606.839         | 598.829         | 599.333         | 598.325         | G[12] |
| K[32] | <b>1556.896</b> | 576.326         | <b>570.318</b>  | <b>570.822</b>  | 569.814         | K[11] |
| R[33] | <b>1634.946</b> | 514.808         | 506.797         | 507.299         | 506.291         | R[10] |
| K[34] | 1698.994        | 436.290         | 428.280         | 428.784         | 427.776         | K[9]  |
| A[35] | 1734.512        | 372.182         | 364.173         | 364.677         | 363.669         | A[8]  |
| S[36] | 1778.028        | 336.664         | 328.654         | 329.158         | 328.150         | S[7]  |
| G[37] | 1806.539        | 291.140         | 283.130         | 283.634         | 282.626         | G[6]  |
| F[38] | 1855.065        | 264.617         | 256.607         | 257.111         | 256.103         | F[5]  |
| F[39] | 1903.592        | 218.110         | 210.101         | 210.605         | 209.597         | F[4]  |
| V[40] | 1953.126        | 167.584         | 159.575         | 160.079         | 159.071         | V[3]  |
| S[41] | <b>1996.642</b> | 118.050         | 110.041         | 110.544         | 109.537         | S[2]  |
| E[42] | 2061.163        | 74.534          | 66.524          | 67.028          | 66.021          | E[1]  |

# sp | P43277 | H13\_MOUSE

[Acetyl]SETAPAAPAAPAVEKTPVKKKAKKTGAAAGKRKASGPPVSE

- ▶ fragmentation table for charge state 3+
- ▶ specType=etd
- ▶ score=56.10
- ▶ F105343.dat
- ▶ query=q14586.p1
- ▶ precursor=825.266380
- ▶ chargePrecursor=5
- ▶ itol=0.8

| AA   | c               | y               | z+1             | z+2            | z               | AA   |
|------|-----------------|-----------------|-----------------|----------------|-----------------|------|
| S 1  | 49.697          | <b>1374.773</b> | <b>1369.433</b> | 0.672          | <b>1369.097</b> | S 42 |
| E 2  | 92.711          | <b>1331.758</b> | <b>1326.419</b> | 0.672          | 1326.083        | E 41 |
| T 3  | 126.394         | <b>1288.744</b> | <b>1283.405</b> | 0.672          | <b>1283.069</b> | T 40 |
| A 4  | 150.078         | 1245.966        | <b>1240.722</b> | 0.672          | <b>1240.386</b> | A 39 |
| P 5  | 182.424         | <b>1231.383</b> | 1226.043        | 0.672          | 1225.707        | P 38 |
| A 6  | 206.103         | 1199.032        | <b>1193.692</b> | 0.672          | <b>1193.356</b> | A 37 |
| A 7  | 229.782         | 1175.353        | 1170.613        | 0.672          | 1169.677        | A 36 |
| P 8  | 262.133         | 1151.674        | 1146.334        | 0.672          | 1145.990        | P 35 |
| A 9  | 285.812         | 1139.323        | 1133.983        | 0.672          | 1133.647        | A 34 |
| A 10 | 309.491         | 1126.944        | 1120.304        | 0.672          | 1120.966        | A 33 |
| P 11 | 341.842         | 1071.905        | 1056.625        | 0.672          | 1056.289        | P 32 |
| A 12 | 395.521         | 1039.614        | 1034.274        | 0.672          | 1033.938        | A 31 |
| P 13 | 397.872         | 1015.935        | 1010.595        | 0.672          | 1010.259        | P 30 |
| V 14 | <b>430.894</b>  | 983.594         | <b>978.244</b>  | 0.672          | <b>977.908</b>  | V 29 |
| E 15 | 473.909         | 950.363         | <b>945.221</b>  | 0.672          | 944.885         | E 28 |
| R 16 | 516.607         | 907.547         | <b>902.207</b>  | <b>902.543</b> | <b>901.871</b>  | R 27 |
| T 17 | 550.290         | 864.948         | <b>859.509</b>  | <b>859.845</b> | <b>859.173</b>  | T 26 |
| P 18 | 582.640         | 831.166         | 825.826         | 826.162        | 825.490         | P 25 |
| V 19 | 615.663         | 798.815         | <b>793.475</b>  | <b>793.811</b> | <b>793.139</b>  | V 24 |
| K 20 | 658.362         | 765.792         | <b>760.453</b>  | <b>760.789</b> | <b>760.117</b>  | K 23 |
| K 21 | 701.060         | 722.094         | 717.754         | 718.090        | 717.418         | K 22 |
| K 22 | 743.758         | 680.396         | 675.956         | 675.302        | 674.726         | K 21 |
| A 23 | 797.437         | 637.907         | 632.358         | 632.694        | 632.022         | A 20 |
| K 24 | 810.136         | 614.018         | 608.679         | 609.015        | 608.343         | K 19 |
| K 25 | 852.834         | <b>571.320</b>  | 565.960         | 566.316        | 565.644         | K 18 |
| T 26 | 895.516         | 529.627         | 523.282         | 523.618        | 522.940         | T 17 |
| G 27 | 905.524         | 494.930         | 489.599         | 489.935        | 489.263         | G 16 |
| A 28 | 929.203         | 475.937         | 470.592         | 470.928        | 470.256         | A 15 |
| A 29 | 952.382         | 452.253         | 446.913         | 447.249        | 446.577         | A 14 |
| A 30 | <b>976.561</b>  | 428.574         | 423.234         | 423.570        | 422.898         | A 13 |
| G 31 | <b>995.568</b>  | 404.895         | 399.555         | 399.891        | 399.219         | G 12 |
| K 32 | <b>1038.266</b> | 385.880         | 380.540         | 380.884        | 380.212         | K 11 |
| R 33 | 1070.950        | 342.180         | 337.850         | 338.186        | 337.514         | R 10 |
| T 34 | <b>1112.998</b> | 291.159         | 285.818         | 286.152        | 285.480         | T 9  |
| A 35 | <b>1156.677</b> | 240.457         | 243.118         | 243.454        | 242.782         | A 8  |
| S 36 | 1185.688        | 224.778         | 219.439         | 219.775        | 219.103         | S 7  |
| G 37 | 1204.695        | 195.767         | 190.428         | 190.764        | 190.092         | G 6  |
| P 38 | 1237.046        | 176.760         | 171.421         | 171.757        | 171.085         | P 5  |
| P 39 | <b>1269.397</b> | 144.409         | 139.070         | 139.406        | 138.734         | P 4  |
| V 40 | <b>1302.420</b> | 112.951         | 108.719         | 107.985        | 106.381         | V 3  |
| S 41 | <b>1331.430</b> | 75.030          | 73.696          | 74.032         | 73.360          | S 2  |
| E 42 | <b>1374.445</b> | 50.025          | 44.685          | 45.021         | 44.340          | E 1  |

# sp | P43277 | H13\_MOUSE

[Acetyl]SETAPAAPAAPAPVEKTPVKKKAKKTGAAAGKRKASGPPVSE

- ▶ fragmentation table for charge state 4+
- ▶ specType=etd
- ▶ score=56.10
- ▶ F105343.dat
- ▶ query=q14586.p1
- ▶ precursor=825.266380
- ▶ chargePrecursor=5
- ▶ itol=0.8

| AA | c  | y               | z+1             | z+2             | z              | AA              |       |
|----|----|-----------------|-----------------|-----------------|----------------|-----------------|-------|
| S  | 1  | 37.525          | <b>1031.331</b> | <b>1027.327</b> | 0.755          | <b>1027.075</b> | S[42] |
| E  | 2  | 60.785          | <b>999.071</b>  | <b>995.066</b>  | 0.755          | <b>994.814</b>  | E[41] |
| T  | 3  | 95.047          | <b>966.810</b>  | <b>962.805</b>  | 0.755          | <b>962.553</b>  | T[40] |
| A  | 4  | 112.808         | 941.543         | 937.538         | 0.755          | 937.291         | A[39] |
| P  | 5  | 137.070         | 925.789         | 919.784         | 0.755          | 919.532         | P[38] |
| A  | 6  | 154.829         | 899.536         | 895.531         | 0.755          | 895.280         | A[37] |
| A  | 7  | 172.588         | 881.766         | 877.762         | 0.755          | 877.510         | A[36] |
| P  | 8  | 196.851         | 864.007         | <b>860.002</b>  | 0.755          | <b>859.750</b>  | P[35] |
| A  | 9  | 214.611         | 839.744         | 835.739         | 0.755          | 835.487         | A[34] |
| A  | 10 | 232.370         | 821.985         | 817.980         | 0.755          | 817.728         | A[33] |
| P  | 11 | 256.633         | 804.225         | 800.221         | 0.755          | 799.969         | P[32] |
| A  | 12 | 274.392         | 779.962         | 775.957         | 0.755          | 775.705         | A[31] |
| P  | 13 | 298.656         | 762.203         | 758.198         | 0.755          | 757.944         | P[30] |
| V  | 14 | 323.423         | 737.940         | 733.935         | 0.755          | 733.683         | V[29] |
| E  | 15 | 355.683         | 713.373         | 709.368         | 0.755          | 709.116         | E[28] |
| R  | 16 | 387.227         | 689.912         | 678.907         | 0.755          | 677.659         | R[27] |
| T  | 17 | 412.989         | 648.388         | 644.383         | 0.755          | 644.132         | T[26] |
| P  | 18 | 437.232         | 623.626         | 619.622         | 0.755          | 619.370         | P[25] |
| V  | 19 | 461.999         | 599.363         | 599.358         | 0.755          | 599.106         | V[24] |
| K  | 20 | 494.023         | 574.590         | <b>570.591</b>  | <b>570.843</b> | <b>570.339</b>  | K[23] |
| K  | 21 | 526.047         | 549.327         | 538.308         | 538.819        | 538.310         | K[22] |
| K  | 22 | 558.070         | 510.548         | 508.544         | 508.798        | 508.292         | K[21] |
| A  | 23 | 575.830         | 475.525         | 474.520         | 474.772        | 474.265         | A[20] |
| K  | 24 | 607.854         | 460.765         | 456.761         | 457.013        | 456.509         | K[19] |
| K  | 25 | 639.877         | 428.742         | 424.737         | 424.989        | 424.485         | K[18] |
| T  | 26 | 665.130         | 396.718         | 392.713         | 392.965        | 392.461         | T[17] |
| G  | 27 | 679.195         | 371.456         | 367.451         | 367.703        | 367.199         | G[16] |
| A  | 28 | 697.154         | 397.201         | 393.196         | 393.448        | 392.944         | A[15] |
| A  | 29 | 714.913         | 339.441         | 335.437         | 335.689        | 335.185         | A[14] |
| A  | 30 | 732.672         | 311.682         | 311.677         | 311.929        | 311.425         | A[13] |
| G  | 31 | 766.626         | 303.923         | 299.918         | 300.170        | 299.666         | G[12] |
| K  | 32 | 778.951         | 289.667         | 285.663         | 285.915        | 285.411         | K[11] |
| R  | 33 | 817.677         | 297.844         | 293.839         | 293.891        | 293.387         | R[10] |
| T  | 34 | 859.201         | 219.913         | 214.914         | 214.896        | 214.362         | T[9]  |
| A  | 35 | <b>867.760</b>  | 186.595         | 182.590         | 182.842        | 182.338         | A[8]  |
| S  | 36 | 889.518         | 169.835         | 164.831         | 165.083        | 164.579         | S[7]  |
| G  | 37 | 903.773         | 147.077         | 143.073         | 143.325        | 142.821         | G[6]  |
| P  | 38 | 928.036         | 132.822         | 128.817         | 129.069        | 128.565         | P[5]  |
| P  | 39 | 952.300         | 108.569         | 104.564         | 104.816        | 104.312         | P[4]  |
| V  | 40 | <b>977.067</b>  | 84.399          | 80.393          | 80.645         | 80.139          | V[3]  |
| S  | 41 | <b>998.825</b>  | 55.524          | 55.524          | 55.776         | 55.272          | S[2]  |
| E  | 42 | <b>1031.085</b> | 37.771          | 33.766          | 34.018         | 33.514          | E[1]  |

# sp | P43277 | H13\_MOUSE

[Acetyl]SETAPAAPAAPAPVEKTPVKKKAKKTGAAAGKRKASGPPVSE

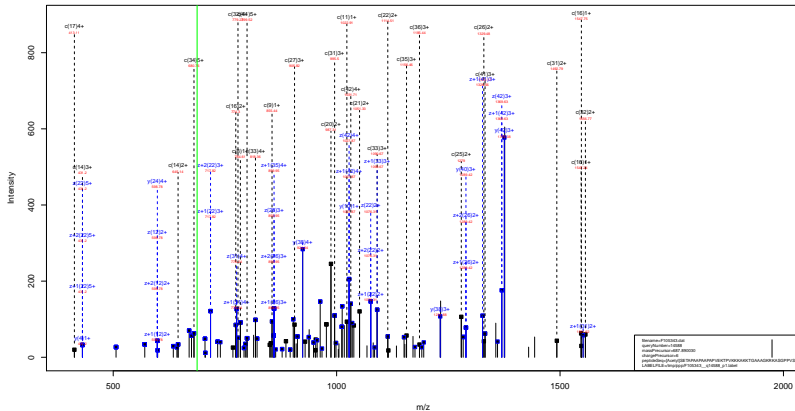

# sp | P43277 | H13\_MOUSE

[Acetyl]SETAPAAPAAPAPVEKTPVKKKAKKTGAAAGKRKASGPPVSE

- ▶ fragmentation table for charge state 1+
- ▶ specType=etd
- ▶ score=39.77
- ▶ F105343.dat
- ▶ query=q14588.p1
- ▶ precursor=687.890030
- ▶ chargePrecursor=6
- ▶ itol=0.8

| AA | c  | y               | z+1             | z+2             | z               | AA              |       |
|----|----|-----------------|-----------------|-----------------|-----------------|-----------------|-------|
| S  | 1  | 147.076         | 4122.803        | 4106.285        | 0.000           | 4105.277        | S[42] |
| E  | 2  | 276.119         | 8993.261        | 9077.242        | 0.000           | 9076.234        | E[41] |
| T  | 3  | 377.167         | 13064.218       | 13048.199       | 0.000           | 13047.191       | T[40] |
| A  | 4  | 448.204         | 17883.170       | 17847.152       | 0.000           | 17846.144       | A[39] |
| F  | 5  | 585.257         | 23992.133       | 23916.115       | 0.000           | 23915.107       | F[38] |
| A  | 6  | 616.294         | 30965.081       | 30791.062       | 0.000           | 30781.054       | A[37] |
| A  | 7  | 687.331         | 38244.044       | 38066.025       | 0.000           | 38057.017       | A[36] |
| P  | 8  | <b>784.384</b>  | 46853.006       | 46366.988       | 0.000           | 4435.980        | P[35] |
| A  | 9  | <b>855.421</b>  | 55955.954       | 5399.935        | 0.000           | 5338.927        | A[34] |
| A  | 10 | 607.368         | 5284.917        | 5268.898        | 0.000           | 5267.890        | A[33] |
| P  | 11 | <b>1023.511</b> | 12113.879       | 1197.861        | 0.000           | 1190.853        | P[32] |
| A  | 12 | 1094.548        | 3116.827        | 3100.808        | 0.000           | 3099.800        | A[31] |
| F  | 13 | 1181.600        | 8045.790        | 8029.771        | 0.000           | 8028.763        | F[30] |
| V  | 14 | 1290.669        | 2948.737        | 2932.718        | 0.000           | 2931.710        | V[29] |
| E  | 15 | 1419.711        | 2849.668        | 2833.650        | 0.000           | 2832.642        | E[28] |
| T  | 16 | <b>1547.806</b> | 2720.606        | 2704.607        | 2109.618        | 2703.599        | T[27] |
| T  | 17 | 1648.854        | 2592.531        | 2576.512        | 2577.520        | 2575.504        | T[26] |
| F  | 18 | 1748.907        | 2461.483        | 2445.484        | 2476.472        | 2474.457        | F[25] |
| V  | 19 | 1844.975        | 2334.430        | 2318.412        | 2379.419        | 2377.406        | V[24] |
| K  | 20 | 1973.070        | 2205.362        | 2179.343        | 2280.351        | 2278.335        | K[23] |
| K  | 21 | 2101.128        | 2107.287        | 2151.288        | 2132.256        | 2130.240        | K[22] |
| K  | 22 | 2229.200        | 2038.172        | 2023.153        | 2024.161        | 2022.145        | K[21] |
| A  | 23 | 2350.297        | 1911.077        | 1895.058        | 1896.066        | 1894.050        | A[20] |
| K  | 24 | 2438.392        | 1840.040        | 1824.021        | 1825.029        | 1823.013        | K[19] |
| K  | 25 | 2556.487        | 1711.945        | 1695.926        | 1696.934        | 1694.918        | K[18] |
| T  | 26 | 2687.535        | 1583.850        | 1567.831        | 1568.839        | 1566.823        | T[17] |
| G  | 27 | 2714.566        | 1492.802        | 1466.783        | 1467.791        | 1465.775        | G[16] |
| A  | 28 | 2785.593        | 1425.781        | 1409.762        | 1410.770        | 1408.754        | A[15] |
| A  | 29 | 2856.611        | 1354.744        | 1338.725        | 1339.733        | 1337.717        | A[14] |
| A  | 30 | 2927.668        | <b>1283.707</b> | 1267.688        | 1268.696        | 1266.680        | A[13] |
| G  | 31 | 2984.689        | 1212.670        | 1196.651        | 1197.659        | <b>1195.643</b> | G[12] |
| K  | 32 | 3112.704        | 1136.649        | 1120.630        | 1121.638        | 1119.622        | K[11] |
| K  | 33 | 3269.695        | <b>1027.553</b> | <b>1011.534</b> | <b>1012.542</b> | 1010.526        | K[10] |
| K  | 34 | 3396.980        | 871.482         | <b>855.433</b>  | 856.441         | 854.425         | K[9]  |
| A  | 35 | 3488.017        | 743.357         | 727.338         | 728.346         | 726.330         | A[8]  |
| S  | 36 | 3535.049        | 672.320         | 656.301         | 657.309         | 655.293         | S[7]  |
| G  | 37 | 3612.071        | 585.288         | 569.269         | <b>570.277</b>  | 568.261         | G[6]  |
| F  | 38 | 3709.124        | 478.246         | 432.248         | 433.256         | 431.240         | F[5]  |
| F  | 39 | 3806.178        | <b>431.214</b>  | 415.195         | 416.203         | 414.187         | F[4]  |
| V  | 40 | 3905.245        | 334.161         | 318.142         | 319.150         | 317.134         | V[3]  |
| S  | 41 | 3992.277        | 235.092         | 219.074         | 220.082         | 218.066         | S[2]  |
| E  | 42 | 4121.319        | 148.060         | 132.042         | 133.050         | 131.034         | E[1]  |



# sp | P43277 | H13\_MOUSE

[Acetyl]SETAPAAPAAPAVEKTPVKKKAKKTGAAAGKRKASGPPVSE

- ▶ fragmentation table for charge state 2+
- ▶ specType=etd
- ▶ score=39.77
- ▶ F105343.dat
- ▶ query=q14588.p1
- ▶ precursor=687.89030
- ▶ chargePrecursor=6
- ▶ itol=0.8

| AA | c  | y               | z+1             | z+2             | z               | AA              |       |
|----|----|-----------------|-----------------|-----------------|-----------------|-----------------|-------|
| S  | 1  | 74.042          | 2061.655        | 2053.646        | 0.504           | 2053.142        | S[42] |
| E  | 2  | 138.563         | 1997.134        | 1989.125        | 0.504           | 1988.621        | E[41] |
| T  | 3  | 189.087         | 1932.613        | 1924.603        | 0.504           | 1924.090        | T[40] |
| A  | 4  | 224.206         | 1868.090        | 1860.080        | 0.504           | 1857.576        | A[39] |
| P  | 5  | 293.135         | 1804.569        | 1806.561        | 0.504           | 1808.056        | P[38] |
| A  | 6  | 358.650         | 1740.044        | 1730.035        | 0.504           | 1739.531        | A[37] |
| A  | 7  | 344.169         | 1762.525        | 1754.516        | 0.504           | 1754.012        | A[36] |
| F  | 8  | 392.695         | 1727.007        | 1718.997        | 0.504           | 1718.494        | F[35] |
| A  | 9  | 428.214         | 1678.480        | 1670.471        | 0.504           | 1669.967        | A[34] |
| A  | 10 | 463.733         | 1624.962        | 1616.953        | 0.504           | 1618.448        | A[33] |
| P  | 11 | 512.259         | 1559.443        | 1559.434        | 0.504           | 1559.930        | P[32] |
| A  | 12 | 547.777         | 1538.017        | <b>1550.980</b> | 0.504           | 1550.404        | A[31] |
| F  | 13 | 596.304         | 1523.398        | 1515.389        | 0.504           | 1514.885        | F[30] |
| V  | 14 | <b>645.838</b>  | 1474.872        | 1466.863        | 0.504           | 1466.359        | V[29] |
| E  | 15 | 710.259         | 1426.358        | 1417.328        | 0.504           | 1416.825        | E[28] |
| R  | 16 | <b>774.407</b>  | <b>1360.817</b> | 1362.807        | 1353.311        | 1352.306        | R[27] |
| T  | 17 | 824.931         | 1296.299        | <b>1288.760</b> | <b>1289.264</b> | 1288.258        | T[26] |
| F  | 18 | 873.457         | 1246.245        | 1238.236        | 1238.740        | 1237.732        | F[25] |
| V  | 19 | 922.991         | 1197.719        | 1189.709        | <b>1190.213</b> | 1189.206        | V[24] |
| K  | 20 | <b>987.039</b>  | 1148.195        | 1140.185        | 1140.679        | 1139.671        | K[23] |
| K  | 21 | <b>1051.066</b> | <b>1084.137</b> | <b>1076.128</b> | <b>1076.632</b> | <b>1075.624</b> | K[22] |
| K  | 22 | <b>1115.134</b> | 1020.080        | <b>1012.080</b> | <b>1012.584</b> | <b>1011.576</b> | K[21] |
| A  | 23 | <b>1150.652</b> | <b>956.042</b>  | <b>948.033</b>  | <b>948.537</b>  | 947.529         | A[20] |
| K  | 24 | 1214.700        | 920.524         | <b>912.514</b>  | <b>913.018</b>  | <b>912.010</b>  | K[19] |
| K  | 25 | <b>1278.747</b> | 856.476         | 848.467         | 848.971         | 847.963         | K[18] |
| T  | 26 | <b>1329.271</b> | <b>792.429</b>  | <b>784.419</b>  | <b>784.923</b>  | <b>783.915</b>  | T[17] |
| Y  | 27 | 1387.783        | 743.905         | <b>731.895</b>  | <b>734.399</b>  | <b>733.392</b>  | Y[16] |
| A  | 28 | 1393.300        | 713.394         | <b>705.385</b>  | <b>705.889</b>  | <b>704.881</b>  | A[15] |
| A  | 29 | 1438.819        | 677.876         | <b>669.866</b>  | <b>670.370</b>  | <b>669.362</b>  | A[14] |
| A  | 30 | 1464.337        | <b>642.357</b>  | <b>634.348</b>  | <b>634.852</b>  | <b>633.844</b>  | A[13] |
| G  | 31 | <b>1492.848</b> | 606.836         | <b>598.829</b>  | <b>599.333</b>  | <b>598.325</b>  | G[12] |
| K  | 32 | <b>1556.896</b> | 576.320         | <b>570.318</b>  | <b>570.822</b>  | <b>569.814</b>  | K[11] |
| R  | 33 | 1634.844        | 514.380         | <b>506.271</b>  | <b>506.775</b>  | <b>505.767</b>  | R[10] |
| K  | 34 | 1698.904        | 436.230         | 428.220         | 428.724         | 427.716         | K[9]  |
| A  | 35 | 1734.512        | 372.182         | 364.173         | 364.677         | 363.669         | A[8]  |
| S  | 36 | 1778.028        | 336.664         | 328.654         | 329.158         | 328.150         | S[7]  |
| G  | 37 | 1806.539        | 291.140         | 283.130         | 283.642         | 284.634         | G[6]  |
| F  | 38 | 1855.065        | 264.617         | 256.607         | 257.111         | 256.103         | F[5]  |
| F  | 39 | 1903.592        | 218.110         | 208.101         | 208.605         | 207.597         | F[4]  |
| V  | 40 | 1953.126        | 167.584         | 159.575         | 160.079         | 159.071         | V[3]  |
| S  | 41 | 1996.642        | 118.050         | 110.041         | 110.544         | 109.537         | S[2]  |
| E  | 42 | 2061.161        | 74.534          | 66.524          | 67.028          | 66.021          | E[1]  |

# sp | P43277 | H13\_MOUSE

[Acetyl]SETAPAAPAAPAPVEKTPVKKKAKKTGAAAGKRKASGPPVSE

- ▶ fragmentation table for charge state 3+
- ▶ specType=etd
- ▶ score=39.77
- ▶ F105343.dat
- ▶ query=q14588.p1
- ▶ precursor=687.890030
- ▶ chargePrecursor=6
- ▶ itol=0.8

| AA   | c               | y               | z+1             | z+2            | z               | AA   |
|------|-----------------|-----------------|-----------------|----------------|-----------------|------|
| S 1  | 49.697          | <b>1374.773</b> | <b>1369.433</b> | 0.672          | <b>1369.097</b> | S 42 |
| E 2  | 92.711          | <b>1331.750</b> | <b>1326.419</b> | 0.672          | <b>1326.083</b> | E 41 |
| T 3  | 126.394         | <b>1288.744</b> | <b>1283.405</b> | 0.672          | <b>1283.069</b> | T 40 |
| A 4  | 150.073         | 1245.766        | 1240.723        | 0.672          | 1240.360        | A 39 |
| F 5  | 182.424         | <b>1231.383</b> | 1228.043        | 0.672          | 1225.707        | F 38 |
| A 6  | 206.103         | 1199.632        | 1193.602        | 0.672          | 1193.356        | A 37 |
| A 7  | 229.782         | <b>1175.353</b> | 1170.613        | 0.672          | 1169.677        | A 36 |
| P 8  | 262.133         | <b>1151.674</b> | 1146.334        | 0.672          | 1145.990        | P 35 |
| A 9  | 285.812         | 1119.322        | <b>1113.983</b> | 0.672          | 1113.643        | A 34 |
| A 10 | 309.491         | 1089.644        | <b>1090.304</b> | 0.672          | <b>1089.968</b> | A 33 |
| P 11 | 341.842         | 1071.965        | 1066.625        | 0.672          | 1066.259        | P 32 |
| A 12 | 365.521         | 1039.614        | <b>1034.274</b> | 0.672          | 1033.938        | A 31 |
| P 13 | 397.872         | 1015.935        | 1010.595        | 0.672          | 1010.259        | P 30 |
| V 14 | <b>430.894</b>  | 983.584         | 978.244         | 0.672          | 977.908         | V 29 |
| E 15 | 473.909         | 950.363         | 945.223         | 0.672          | 944.885         | E 28 |
| R 16 | 516.607         | 907.547         | <b>902.207</b>  | <b>902.543</b> | 901.871         | R 27 |
| T 17 | 550.290         | 864.848         | <b>859.509</b>  | <b>859.845</b> | <b>859.173</b>  | T 26 |
| P 18 | 582.640         | 831.166         | 825.826         | 826.162        | 825.400         | P 25 |
| V 19 | 615.693         | <b>798.815</b>  | <b>793.475</b>  | 793.811        | <b>793.139</b>  | V 24 |
| K 20 | 658.362         | 765.792         | 760.453         | 760.789        | 760.117         | K 23 |
| K 21 | 701.060         | 733.096         | <b>717.754</b>  | <b>718.090</b> | <b>717.418</b>  | K 22 |
| R 22 | 743.758         | <b>680.396</b>  | <b>675.056</b>  | <b>675.392</b> | <b>674.720</b>  | R 21 |
| A 23 | <b>767.437</b>  | 637.897         | 632.558         | 632.894        | 632.122         | A 20 |
| K 24 | 810.136         | 614.018         | 608.679         | 609.015        | 608.343         | K 19 |
| K 25 | <b>852.834</b>  | <b>571.320</b>  | 565.980         | 566.316        | 565.644         | K 18 |
| T 26 | <b>886.516</b>  | 529.627         | 523.282         | 523.618        | 522.946         | T 17 |
| G 27 | <b>905.524</b>  | 494.830         | 489.509         | 489.835        | 489.203         | G 16 |
| A 28 | <b>929.203</b>  | 479.937         | 473.592         | 473.928        | 473.256         | A 15 |
| A 29 | <b>952.882</b>  | 452.253         | 446.913         | 447.249        | 446.577         | A 14 |
| A 30 | <b>976.561</b>  | 428.574         | 423.234         | 423.570        | 422.898         | A 13 |
| G 31 | <b>995.568</b>  | 404.895         | 399.555         | 399.891        | 399.219         | G 12 |
| K 32 | <b>1038.266</b> | 385.888         | 380.548         | 380.884        | 380.212         | K 11 |
| R 33 | <b>1090.300</b> | 342.180         | 337.850         | 338.186        | 337.514         | R 10 |
| R 34 | 1122.949        | 291.159         | 285.818         | 286.152        | 285.480         | R 9  |
| A 35 | <b>1156.677</b> | 245.457         | 243.118         | 243.454        | 242.782         | A 8  |
| S 36 | <b>1185.688</b> | 224.778         | 219.439         | 219.775        | 219.103         | S 7  |
| G 37 | 1204.695        | 195.767         | 190.428         | 190.764        | 190.092         | G 6  |
| P 38 | 1237.046        | 176.760         | 171.421         | 171.757        | 171.085         | P 5  |
| P 39 | 1269.297        | 144.409         | 139.070         | 139.406        | 138.734         | P 4  |
| V 40 | 1302.426        | 112.954         | 108.719         | 109.055        | 108.383         | V 3  |
| S 41 | <b>1331.430</b> | 75.030          | 73.696          | 74.032         | 73.360          | S 2  |
| E 42 | 1374.445        | 50.025          | 44.685          | 45.021         | 44.349          | E 1  |

# sp | P43277 | H13\_MOUSE

[Acetyl]SETAPAAPAAPAPVEKTPVKKKAKKTGAAAGKRKASGPPVSE

- ▶ fragmentation table for charge state 4+
- ▶ specType=etd
- ▶ score=39.77
- ▶ F105343.dat
- ▶ query=q14588.p1
- ▶ precursor=687.890030
- ▶ chargePrecursor=6
- ▶ itol=0.8

| AA | c  | y               | z+1             | z+2             | z              | AA              |       |
|----|----|-----------------|-----------------|-----------------|----------------|-----------------|-------|
| S  | 1  | 37.525          | <b>1031.331</b> | <b>1027.327</b> | 0.755          | <b>1027.075</b> | S[42] |
| E  | 2  | 60.785          | <b>999.071</b>  | <b>995.066</b>  | 0.755          | <b>994.814</b>  | E[41] |
| T  | 3  | 95.047          | <b>966.810</b>  | <b>962.805</b>  | 0.755          | <b>962.553</b>  | T[40] |
| A  | 4  | 112.808         | 941.543         | <b>937.543</b>  | 0.755          | <b>937.291</b>  | A[39] |
| P  | 5  | 137.070         | <b>923.789</b>  | 919.784         | 0.755          | 919.532         | P[38] |
| A  | 6  | 154.829         | 899.526         | <b>895.521</b>  | 0.755          | <b>895.269</b>  | A[37] |
| A  | 7  | 172.588         | 881.766         | <b>877.762</b>  | 0.755          | <b>877.510</b>  | A[36] |
| P  | 8  | 196.851         | <b>864.007</b>  | <b>860.002</b>  | 0.755          | <b>859.750</b>  | P[35] |
| A  | 9  | 214.611         | 839.746         | 835.741         | 0.755          | 835.489         | A[34] |
| A  | 10 | 232.370         | <b>821.985</b>  | <b>817.980</b>  | 0.755          | <b>817.728</b>  | A[33] |
| P  | 11 | 256.633         | 804.225         | <b>800.221</b>  | 0.755          | <b>799.969</b>  | P[32] |
| A  | 12 | 274.392         | <b>779.962</b>  | <b>775.957</b>  | 0.755          | <b>775.705</b>  | A[31] |
| P  | 13 | 298.656         | 762.203         | 758.198         | 0.755          | 757.946         | P[30] |
| V  | 14 | 323.423         | 737.940         | <b>733.935</b>  | 0.755          | <b>733.683</b>  | V[29] |
| E  | 15 | 355.683         | 713.723         | 709.708         | 0.755          | 709.456         | E[28] |
| R  | 16 | 387.937         | <b>690.912</b>  | 678.897         | 0.755          | 678.645         | R[27] |
| T  | 17 | <b>412.969</b>  | 648.958         | <b>644.953</b>  | <b>645.135</b> | <b>644.632</b>  | T[26] |
| P  | 18 | 437.232         | 623.626         | 619.622         | 619.874        | 619.370         | P[25] |
| V  | 19 | 461.999         | <b>599.363</b>  | 595.358         | 595.610        | 595.106         | V[24] |
| K  | 20 | 494.023         | 574.590         | <b>570.591</b>  | <b>570.843</b> | <b>570.339</b>  | K[23] |
| K  | 21 | 526.047         | 549.372         | 538.358         | 538.810        | 538.310         | K[22] |
| K  | 22 | 558.070         | 520.548         | <b>506.544</b>  | <b>506.796</b> | <b>506.292</b>  | K[21] |
| A  | 23 | 575.830         | 475.525         | 474.520         | 474.772        | 474.270         | A[20] |
| K  | 24 | 607.854         | 460.705         | 456.701         | 457.013        | 456.509         | K[19] |
| K  | 25 | 639.877         | 428.742         | 424.737         | 424.989        | 424.485         | K[18] |
| T  | 26 | 665.130         | 396.718         | 392.713         | 392.965        | 392.461         | T[17] |
| G  | 27 | 679.395         | 371.456         | 367.451         | 367.703        | 367.199         | G[16] |
| A  | 28 | 697.154         | 391.201         | 383.196         | 383.448        | 382.944         | A[15] |
| A  | 29 | 714.913         | 339.441         | 335.437         | 335.689        | 335.185         | A[14] |
| A  | 30 | 732.672         | 321.682         | 317.677         | 317.929        | 317.425         | A[13] |
| G  | 31 | 766.626         | 303.923         | 299.918         | 300.170        | 299.666         | G[12] |
| K  | 32 | <b>778.951</b>  | 289.667         | 285.663         | 285.915        | 285.411         | K[11] |
| K  | 33 | <b>817.977</b>  | 297.844         | 293.839         | 293.891        | 293.387         | K[10] |
| T  | 34 | <b>830.601</b>  | 219.911         | 214.914         | 214.898        | 214.361         | T[9]  |
| A  | 35 | 867.760         | 186.595         | 182.590         | 182.842        | 182.338         | A[8]  |
| S  | 36 | 889.518         | 169.835         | 164.831         | 165.083        | 164.579         | S[7]  |
| G  | 37 | 903.773         | 147.077         | 143.073         | 143.325        | 142.821         | G[6]  |
| P  | 38 | 928.036         | 132.822         | 128.817         | 129.069        | 128.565         | P[5]  |
| P  | 39 | <b>952.300</b>  | 108.559         | 104.554         | 104.806        | 104.302         | P[4]  |
| V  | 40 | <b>977.067</b>  | 84.299          | 80.293          | 80.545         | 80.039          | V[3]  |
| S  | 41 | <b>998.825</b>  | 59.529          | 55.524          | 55.776         | 55.272          | S[2]  |
| E  | 42 | <b>1031.085</b> | 37.771          | 33.766          | 34.018         | 33.514          | E[1]  |

# sp | P43277 | H13\_MOUSE

[Acetyl]SETAPAAPAAPAPVEKTPVKKKAKKTGAAAGKRKASGPPVSE

- ▶ fragmentation table for charge state 5+
- ▶ specType=etd
- ▶ score=39.77
- ▶ F105343.dat
- ▶ query=q14588\_p1
- ▶ precursor=687.890030
- ▶ chargePrecursor=6
- ▶ itol=0.8

| AA    | c              | y              | z+1            | z+2            | z              | AA    |
|-------|----------------|----------------|----------------|----------------|----------------|-------|
| S[1]  | 30.221         | 825.206        | <b>822.063</b> | 0.806          | <b>821.861</b> | S[42] |
| E[2]  | 56.030         | <b>799.458</b> | <b>796.254</b> | 0.806          | <b>796.053</b> | E[41] |
| T[3]  | 76.239         | <b>773.649</b> | 770.446        | 0.806          | 770.244        | T[40] |
| A[4]  | 90.447         | 753.440        | 750.236        | 0.806          | 750.035        | A[39] |
| P[5]  | 109.857        | <b>739.232</b> | 736.029        | 0.806          | 735.827        | P[38] |
| A[6]  | 124.066        | 719.022        | 715.818        | 0.806          | 715.617        | A[37] |
| A[7]  | 138.272        | <b>705.815</b> | 702.611        | 0.806          | 702.409        | A[36] |
| P[8]  | 157.683        | 691.407        | 688.203        | 0.806          | 688.002        | P[35] |
| A[9]  | 171.890        | 671.997        | 668.793        | 0.806          | 668.591        | A[34] |
| A[10] | 186.097        | 657.789        | 654.585        | 0.806          | 654.384        | A[33] |
| P[11] | 205.508        | 643.582        | 640.378        | 0.806          | 640.176        | P[32] |
| A[12] | 219.715        | 624.171        | 620.967        | 0.806          | 620.766        | A[31] |
| P[13] | 239.126        | 609.964        | 606.760        | 0.806          | 606.558        | P[30] |
| V[14] | 258.940        | 593.553        | 590.349        | 0.806          | 590.148        | V[29] |
| T[15] | 284.748        | <b>570.739</b> | 567.536        | 0.806          | 567.334        | T[28] |
| K[16] | 310.367        | 554.931        | 551.727        | 541.929        | 541.526        | K[27] |
| T[17] | 330.577        | 539.312        | 536.108        | 536.310        | 535.907        | T[26] |
| P[18] | 349.987        | 499.102        | 495.899        | 496.100        | 495.697        | P[25] |
| V[19] | 369.801        | 479.692        | 476.488        | 476.690        | 476.287        | V[24] |
| K[20] | 395.420        | 459.878        | 456.674        | 456.876        | 456.473        | K[23] |
| K[21] | 421.039        | 434.259        | <b>431.055</b> | <b>431.257</b> | <b>430.854</b> | K[22] |
| K[22] | 446.658        | 408.640        | 405.436        | 405.638        | 405.235        | K[21] |
| A[23] | 460.869        | 383.021        | 379.817        | 380.019        | 379.616        | A[20] |
| K[24] | 486.484        | 368.814        | 365.610        | 365.812        | 365.408        | K[19] |
| K[25] | 512.103        | 343.195        | 339.991        | 340.193        | 339.790        | K[18] |
| T[26] | 532.313        | 317.576        | 314.372        | 314.574        | 314.171        | T[17] |
| G[27] | 543.717        | 297.366        | 294.163        | 294.364        | 293.961        | G[16] |
| A[28] | 557.925        | 285.962        | 282.758        | 282.960        | 282.557        | A[15] |
| A[29] | 572.132        | 271.755        | 268.551        | 268.752        | 268.349        | A[14] |
| A[30] | 586.339        | 257.547        | 254.343        | 254.545        | 254.142        | A[13] |
| G[31] | 597.744        | 243.340        | 240.136        | 240.338        | 239.934        | G[12] |
| K[32] | 623.363        | 231.935        | 228.732        | 228.933        | 228.530        | K[11] |
| K[33] | 654.383        | 206.316        | 203.113        | 203.314        | 202.911        | K[10] |
| K[34] | <b>680.202</b> | 175.096        | 171.892        | 172.094        | 171.691        | K[9]  |
| A[35] | 698.409        | 149.477        | 146.273        | 146.475        | 146.072        | A[8]  |
| S[36] | 711.816        | 135.270        | 132.066        | 132.268        | 131.864        | S[7]  |
| G[37] | 723.220        | 117.863        | 114.660        | 114.861        | 114.458        | G[6]  |
| P[38] | 742.631        | 106.456        | 103.252        | 103.453        | 103.054        | P[5]  |
| P[39] | 762.041        | 87.049         | 83.845         | 84.046         | 83.643         | P[4]  |
| V[40] | 781.855        | 67.638         | 64.434         | 64.636         | 64.233         | V[3]  |
| S[41] | <b>799.261</b> | 47.824         | 44.621         | 44.822         | 44.419         | S[2]  |
| E[42] | 825.070        | 30.418         | 27.214         | 27.416         | 27.013         | E[1]  |



# sp | P43277 | H13\_MOUSE

[Acetyl]SETAPAAPAAPAPVEKTPVKKKAKKTGAAAGKRKASGPPVSE

- ▶ fragmentation table for charge state 1+
- ▶ specType=etd
- ▶ score=77.50
- ▶ F105343.dat
- ▶ query=q14589\_p1
- ▶ precursor=825.266620
- ▶ chargePrecursor=5
- ▶ itol=0.8

| AA | c  | y               | z+1             | z+2             | z               | AA       |       |
|----|----|-----------------|-----------------|-----------------|-----------------|----------|-------|
| S  | 1  | 147.079         | 4122.303        | 4106.285        | 0.000           | 4105.277 | S[42] |
| E  | 2  | 276.119         | 3993.261        | 3977.242        | 0.000           | 3976.234 | E[41] |
| L  | 3  | 377.167         | 3864.218        | 3848.199        | 0.000           | 3847.192 | L[40] |
| A  | 4  | 448.204         | 3735.175        | 3719.155        | 0.000           | 3718.148 | A[39] |
| P  | 5  | 545.257         | 3602.133        | 3586.115        | 0.000           | 3585.107 | P[38] |
| A  | 6  | 616.294         | 3505.081        | 3479.062        | 0.000           | 3478.054 | A[37] |
| A  | 7  | 667.331         | 3524.044        | 3508.026        | 0.000           | 3507.017 | A[36] |
| P  | 8  | <b>784.384</b>  | 3453.000        | 3436.980        | 0.000           | 3435.980 | P[35] |
| A  | 9  | 855.421         | 3355.954        | 3339.935        | 0.000           | 3338.927 | A[34] |
| A  | 10 | 926.458         | 3284.917        | 3268.898        | 0.000           | 3267.890 | A[33] |
| P  | 11 | 1023.511        | 3213.879        | 3197.861        | 0.000           | 3196.853 | P[32] |
| A  | 12 | <b>1094.548</b> | 3116.827        | 3100.808        | 0.000           | 3099.800 | A[31] |
| P  | 13 | 1161.600        | 3045.790        | 3029.771        | 0.000           | 3028.763 | P[30] |
| V  | 14 | 1290.669        | 2948.737        | 2932.718        | 0.000           | 2931.710 | V[29] |
| E  | 15 | 1437.711        | 2949.686        | 2833.650        | 0.000           | 2832.642 | E[28] |
| R  | 16 | <b>1547.806</b> | 2720.626        | 2704.607        | 0.000           | 2703.599 | R[27] |
| L  | 17 | <b>1648.854</b> | 2592.533        | 2576.512        | 2577.520        | 2575.504 | L[26] |
| P  | 18 | 1745.907        | 2491.483        | 2475.464        | 2476.472        | 2474.457 | P[25] |
| V  | 19 | 1864.975        | 2394.430        | 2378.412        | 2379.419        | 2377.404 | V[24] |
| R  | 20 | <b>1973.070</b> | 2295.362        | 2279.343        | 2280.351        | 2278.335 | R[23] |
| R  | 21 | 2101.105        | 2187.287        | 2151.268        | 2152.276        | 2150.260 | R[22] |
| R  | 22 | 2229.209        | 2039.174        | 2003.153        | 2004.161        | 2002.145 | R[21] |
| A  | 23 | 2300.297        | 1911.077        | 1895.058        | 1896.066        | 1894.050 | A[20] |
| R  | 24 | 2438.362        | 1840.040        | 1824.021        | 1825.029        | 1823.013 | R[19] |
| R  | 25 | 2556.407        | 1711.945        | 1695.926        | 1696.934        | 1694.918 | R[18] |
| T  | 26 | 2657.535        | 1583.850        | 1567.831        | 1568.839        | 1566.823 | T[17] |
| G  | 27 | 2714.550        | 1482.802        | <b>1466.784</b> | <b>1467.791</b> | 1465.775 | G[16] |
| A  | 28 | 2785.593        | 1425.783        | 1409.764        | 1410.772        | 1408.748 | A[15] |
| A  | 29 | 2856.631        | <b>1354.744</b> | 1338.725        | 1339.733        | 1337.717 | A[14] |
| A  | 30 | 2927.668        | <b>1283.707</b> | 1267.688        | 1268.696        | 1266.680 | A[13] |
| G  | 31 | 2984.689        | 1212.670        | 1196.651        | 1197.659        | 1195.643 | G[12] |
| R  | 32 | 3112.784        | 1135.640        | 1119.620        | 1120.629        | 1118.613 | R[11] |
| R  | 33 | 3268.805        | <b>1027.553</b> | <b>1011.534</b> | <b>1012.542</b> | 1010.527 | R[10] |
| R  | 34 | 3396.882        | 971.452         | 955.433         | 956.441         | 954.425  | R[9]  |
| A  | 35 | 3468.017        | 743.357         | 727.338         | 728.346         | 726.330  | A[8]  |
| S  | 36 | 3535.049        | 672.320         | <b>656.301</b>  | <b>657.309</b>  | 655.293  | S[7]  |
| G  | 37 | 3612.071        | 585.288         | 569.269         | 570.277         | 568.261  | G[6]  |
| P  | 38 | 3706.124        | 508.260         | 512.248         | 513.256         | 511.240  | P[5]  |
| P  | 39 | 3889.176        | <b>431.214</b>  | 435.195         | 436.203         | 434.187  | P[4]  |
| V  | 40 | 3905.245        | 334.161         | 338.142         | 339.150         | 337.134  | V[3]  |
| S  | 41 | 3992.277        | 235.092         | 239.074         | 240.082         | 238.066  | S[2]  |
| E  | 42 | 4121.319        | 148.050         | 152.032         | 153.040         | 151.024  | E[1]  |

# sp | P43277 | H13\_MOUSE

[Acetyl]SETAPAAPAAPAPVEKTPVKKKAKKTGAAAGKRKASGPPVSE

- ▶ fragmentation table for charge state 2+
- ▶ specType=etd
- ▶ score=77.50
- ▶ F105343.dat
- ▶ query=q14589\_p1
- ▶ precursor=825.266620
- ▶ chargePrecursor=5
- ▶ itol=0.8

| AA    | c               | y               | z+1             | z+2             | z               | AA    |
|-------|-----------------|-----------------|-----------------|-----------------|-----------------|-------|
| S[1]  | 74.042          | 2061.655        | 2053.646        | 0.504           | 2053.142        | S[42] |
| E[2]  | 138.563         | <b>1997.134</b> | <b>1989.125</b> | 0.504           | 1988.621        | E[41] |
| T[3]  | 189.087         | 1932.613        | <b>1924.603</b> | 0.504           | <b>1924.099</b> | T[40] |
| A[4]  | 224.206         | 1882.089        | 1874.080        | 0.504           | 1873.576        | A[39] |
| P[5]  | 293.132         | 1846.570        | 1838.561        | 0.504           | 1838.056        | P[38] |
| A[6]  | 358.650         | 1790.044        | 1782.035        | 0.504           | 1781.531        | A[37] |
| A[7]  | 344.169         | 1763.525        | 1754.516        | 0.504           | 1754.012        | A[36] |
| F[8]  | 392.695         | 1727.007        | 1718.997        | 0.504           | 1718.494        | F[35] |
| A[9]  | 428.214         | 1678.488        | <b>1670.471</b> | 0.504           | 1669.967        | A[34] |
| A[10] | 463.733         | 1629.969        | <b>1621.953</b> | 0.504           | <b>1621.449</b> | A[33] |
| P[11] | 532.259         | <b>1607.443</b> | 1599.434        | 0.504           | 1598.930        | P[32] |
| A[12] | 547.777         | 1558.917        | <b>1550.909</b> | 0.504           | <b>1550.404</b> | A[31] |
| P[13] | 596.304         | 1512.398        | 1511.389        | 0.504           | 1511.885        | P[30] |
| V[14] | 645.830         | 1474.872        | <b>1466.863</b> | 0.504           | <b>1466.359</b> | V[29] |
| E[15] | 710.359         | 1425.338        | <b>1417.328</b> | 0.504           | 1416.825        | E[28] |
| R[16] | 774.887         | 1369.817        | 1368.807        | 1363.311        | 1362.806        | R[27] |
| T[17] | 824.911         | 1290.765        | <b>1288.760</b> | <b>1289.264</b> | 1288.258        | T[26] |
| F[18] | 873.437         | 1246.245        | 1238.236        | 1238.740        | 1237.732        | F[25] |
| V[19] | 922.961         | 1197.719        | <b>1189.709</b> | 1190.213        | <b>1189.206</b> | V[24] |
| K[20] | <b>987.039</b>  | 1148.195        | 1149.195        | 1148.679        | 1139.671        | K[23] |
| K[21] | <b>1057.066</b> | 1098.737        | <b>1078.128</b> | <b>1076.632</b> | <b>1075.624</b> | K[22] |
| R[22] | <b>1115.134</b> | <b>1020.090</b> | <b>1012.080</b> | <b>1012.584</b> | <b>1011.576</b> | R[21] |
| A[23] | <b>1150.652</b> | <b>956.042</b>  | <b>948.033</b>  | <b>948.537</b>  | <b>947.529</b>  | A[20] |
| K[24] | 1214.700        | 920.524         | <b>912.514</b>  | <b>913.018</b>  | <b>912.010</b>  | K[19] |
| K[25] | 1278.747        | 856.476         | 848.467         | 848.971         | 847.963         | K[18] |
| T[26] | 1329.271        | <b>792.429</b>  | <b>784.419</b>  | <b>784.923</b>  | <b>783.915</b>  | T[17] |
| G[27] | 1397.892        | 743.905         | <b>731.895</b>  | <b>734.399</b>  | <b>733.392</b>  | G[16] |
| A[28] | 1393.300        | 713.394         | 705.385         | 705.889         | 704.881         | A[15] |
| A[29] | <b>1428.819</b> | 677.876         | <b>669.866</b>  | <b>670.370</b>  | <b>669.362</b>  | A[14] |
| A[30] | <b>1464.337</b> | 642.357         | <b>634.348</b>  | <b>634.852</b>  | <b>633.844</b>  | A[13] |
| G[31] | <b>1492.848</b> | 606.839         | 598.830         | 599.333         | 598.325         | G[12] |
| K[32] | <b>1556.896</b> | 578.328         | 570.318         | 570.822         | 569.814         | K[11] |
| R[33] | <b>1634.946</b> | 514.380         | 506.371         | 506.875         | 505.867         | R[10] |
| K[34] | <b>1698.994</b> | 436.293         | 428.283         | 428.784         | 427.776         | K[9]  |
| A[35] | 1734.512        | 372.182         | 364.173         | 364.677         | 363.669         | A[8]  |
| S[36] | 1778.028        | 336.664         | 328.654         | 329.158         | 328.150         | S[7]  |
| G[37] | 1806.539        | 291.140         | 283.130         | 283.642         | 284.634         | G[6]  |
| P[38] | 1855.065        | 264.617         | 256.607         | 257.111         | 256.103         | P[5]  |
| F[39] | 1903.592        | 218.110         | 209.101         | 209.605         | 207.597         | F[4]  |
| V[40] | 1953.126        | 167.584         | 159.575         | 160.079         | 159.071         | V[3]  |
| S[41] | <b>1996.642</b> | 118.050         | 110.041         | 110.544         | 109.537         | S[2]  |
| E[42] | 2061.161        | 74.534          | 66.524          | 67.028          | 66.021          | E[1]  |

# sp | P43277 | H13\_MOUSE

[Acetyl]SETAPAAPAAPAPVEKTPVKKKAKKTGAAAGKRKASGPPVSE

- ▶ fragmentation table for charge state 3+
- ▶ specType=etd
- ▶ score=77.50
- ▶ F105343.dat
- ▶ query=q14589\_p1
- ▶ precursor=825.266620
- ▶ chargePrecursor=5
- ▶ itol=0.8

| AA   | c               | y               | z+1             | z+2            | z               | AA   |
|------|-----------------|-----------------|-----------------|----------------|-----------------|------|
| S 1  | 49.697          | <b>1374.773</b> | <b>1369.433</b> | 0.672          | <b>1369.097</b> | S 42 |
| E 2  | 92.711          | <b>1331.758</b> | <b>1326.419</b> | 0.672          | <b>1326.083</b> | E 41 |
| T 3  | 126.394         | <b>1288.744</b> | <b>1283.405</b> | 0.672          | <b>1283.069</b> | T 40 |
| A 4  | 150.073         | <b>1245.730</b> | <b>1240.391</b> | 0.672          | <b>1240.055</b> | A 39 |
| F 5  | 182.424         | <b>1231.383</b> | <b>1226.043</b> | 0.672          | <b>1225.707</b> | F 38 |
| A 6  | 206.103         | 1199.632        | 1193.602        | 0.672          | 1193.356        | A 37 |
| A 7  | 229.782         | <b>1175.353</b> | <b>1170.013</b> | 0.672          | 1169.677        | A 36 |
| P 8  | 262.133         | 1151.674        | 1146.334        | 0.672          | 1145.999        | P 35 |
| A 9  | 285.812         | 1119.323        | <b>1113.983</b> | 0.672          | 1113.643        | A 34 |
| A 10 | 309.491         | 1089.644        | <b>1080.304</b> | 0.672          | <b>1089.968</b> | A 33 |
| P 11 | 341.842         | 1071.965        | <b>1066.625</b> | 0.672          | 1066.289        | P 32 |
| A 12 | 395.521         | 1039.614        | 1034.274        | 0.672          | 1033.938        | A 31 |
| P 13 | 397.872         | 1015.935        | 1010.595        | 0.672          | 1010.259        | P 30 |
| V 14 | <b>430.894</b>  | 983.584         | <b>978.244</b>  | 0.672          | <b>977.908</b>  | V 29 |
| E 15 | 473.909         | 950.563         | <b>945.221</b>  | 0.672          | 944.885         | E 28 |
| R 16 | 516.607         | 907.547         | <b>902.207</b>  | <b>902.543</b> | 901.871         | R 27 |
| T 17 | 550.290         | 864.948         | <b>859.509</b>  | <b>859.845</b> | <b>859.173</b>  | T 26 |
| P 18 | 582.640         | 831.166         | 825.826         | 826.162        | 825.490         | P 25 |
| V 19 | 615.663         | 798.815         | 793.475         | 793.811        | <b>793.139</b>  | V 24 |
| K 20 | 658.362         | 765.792         | 760.453         | 760.789        | 760.117         | K 23 |
| K 21 | 701.060         | 722.994         | 717.254         | 718.090        | 717.418         | K 22 |
| K 22 | 743.758         | 689.399         | 678.956         | 679.302        | 674.739         | K 21 |
| A 23 | 797.437         | 637.697         | 632.358         | 632.694        | 632.022         | A 20 |
| K 24 | 810.136         | 614.018         | 608.679         | 609.015        | 608.343         | K 19 |
| K 25 | 852.834         | 571.320         | 565.980         | 566.316        | 565.644         | K 18 |
| T 26 | 895.516         | 529.622         | 523.282         | 523.618        | 522.946         | T 17 |
| G 27 | 905.524         | 494.830         | 489.509         | 489.835        | 489.203         | G 16 |
| A 28 | 929.203         | 475.922         | 470.582         | 470.928        | 470.256         | A 15 |
| A 29 | 952.382         | 452.253         | 446.913         | 447.249        | 446.577         | A 14 |
| A 30 | 976.561         | 428.574         | 423.234         | 423.570        | 422.898         | A 13 |
| G 31 | 995.556         | 404.895         | 399.555         | 399.891        | 399.219         | G 12 |
| K 32 | <b>1038.266</b> | 385.888         | 380.548         | 380.884        | 380.212         | K 11 |
| R 33 | <b>1090.300</b> | 342.180         | 337.850         | 338.186        | 337.514         | R 10 |
| T 34 | <b>1112.598</b> | 291.159         | 285.818         | 286.152        | 285.480         | T 9  |
| A 35 | <b>1156.677</b> | 245.457         | 243.118         | 243.454        | 242.782         | A 8  |
| S 36 | <b>1185.688</b> | 224.778         | 219.439         | 219.775        | 219.103         | S 7  |
| G 37 | 1204.695        | 195.767         | 190.428         | 190.764        | 190.092         | G 6  |
| P 38 | 1237.046        | 176.760         | 171.421         | 171.757        | 171.085         | P 5  |
| P 39 | 1267.397        | 144.409         | 139.070         | 139.406        | 138.734         | P 4  |
| V 40 | <b>1302.420</b> | 112.951         | 108.719         | 109.055        | 108.383         | V 3  |
| S 41 | <b>1331.430</b> | 75.025          | 73.686          | 74.022         | 73.350          | S 2  |
| E 42 | 1374.445        | 50.025          | 44.685          | 45.021         | 44.349          | E 1  |



# sp | P43277 | H13\_MOUSE

[Acetyl]SETAPAAPAAPAPVEKTPVKKKAKKTGAAAGKRKASGPPVSE

- ▶ fragmentation table for charge state 4+
- ▶ specType=etd
- ▶ score=77.50
- ▶ F105343.dat
- ▶ query=q14589\_p1
- ▶ precursor=825.266620
- ▶ chargePrecursor=5
- ▶ itol=0.8

| AA | c  | y               | a+1             | a+2             | z       | AA              |       |
|----|----|-----------------|-----------------|-----------------|---------|-----------------|-------|
| S  | 1  | 37.525          | <b>1031.331</b> | <b>1027.327</b> | 0.755   | <b>1027.075</b> | S[42] |
| E  | 2  | 69.785          | <b>999.071</b>  | 895.866         | 0.755   | 998.816         | E[41] |
| F  | 3  | 95.047          | 999.911         | <b>962.805</b>  | 0.755   | <b>962.553</b>  | F[40] |
| A  | 4  | 112.506         | 945.540         | <b>937.543</b>  | 0.755   | <b>937.291</b>  | A[39] |
| P  | 5  | 137.070         | <b>923.789</b>  | 919.784         | 0.755   | 919.532         | P[38] |
| A  | 6  | 154.829         | 899.520         | 895.521         | 0.755   | 895.269         | A[37] |
| A  | 7  | 172.588         | 883.760         | 877.762         | 0.755   | 877.510         | A[36] |
| P  | 8  | 190.551         | 864.007         | <b>860.002</b>  | 0.755   | <b>859.750</b>  | P[35] |
| A  | 9  | 214.811         | 839.744         | 835.739         | 0.755   | 835.487         | A[34] |
| A  | 10 | 232.570         | 824.985         | 817.980         | 0.755   | 817.728         | A[33] |
| P  | 11 | 256.633         | 804.225         | 800.221         | 0.755   | 799.969         | P[32] |
| A  | 12 | 274.392         | 779.962         | 775.957         | 0.755   | 775.705         | A[31] |
| P  | 13 | 298.656         | 762.203         | 758.198         | 0.755   | 757.946         | P[30] |
| V  | 14 | 323.423         | 737.940         | <b>733.935</b>  | 0.755   | <b>733.683</b>  | V[29] |
| E  | 15 | 355.683         | 713.173         | 708.168         | 0.755   | 708.916         | E[28] |
| K  | 16 | 387.707         | 689.912         | 676.807         | 677.159 | 676.855         | K[27] |
| T  | 17 | 412.999         | 648.888         | 644.883         | 645.135 | 644.883         | T[26] |
| P  | 18 | 437.232         | 623.620         | 619.622         | 619.874 | 619.370         | P[25] |
| V  | 19 | 461.999         | 599.353         | 595.358         | 595.610 | 595.106         | V[24] |
| K  | 20 | 494.023         | 574.590         | 570.591         | 570.843 | 570.339         | K[23] |
| K  | 21 | 526.047         | 542.372         | 538.568         | 538.819 | 538.316         | K[22] |
| K  | 22 | 558.070         | 510.948         | 508.344         | 508.796 | 508.292         | K[21] |
| A  | 23 | 575.830         | 478.525         | 474.526         | 474.772 | 474.268         | A[20] |
| K  | 24 | 607.854         | 460.705         | 456.701         | 457.013 | 456.509         | K[19] |
| K  | 25 | 639.877         | 428.742         | 424.737         | 424.989 | 424.485         | K[18] |
| T  | 26 | 665.139         | 396.718         | 392.713         | 392.965 | 392.461         | T[17] |
| G  | 27 | 679.395         | 371.456         | 367.451         | 367.703 | 367.199         | G[16] |
| A  | 28 | 697.154         | 367.201         | 353.196         | 353.448 | 352.944         | A[15] |
| A  | 29 | 714.913         | 339.441         | 335.437         | 335.689 | 335.185         | A[14] |
| A  | 30 | 732.672         | 321.682         | 317.677         | 317.929 | 317.425         | A[13] |
| G  | 31 | 746.928         | 303.923         | 299.918         | 300.170 | 299.666         | G[12] |
| K  | 32 | 778.951         | 289.667         | 285.663         | 285.915 | 285.411         | K[11] |
| R  | 33 | 817.977         | 257.644         | 253.639         | 253.891 | 253.387         | R[10] |
| K  | 34 | 850.001         | 218.618         | 214.614         | 214.866 | 214.362         | K[9]  |
| A  | 35 | 867.760         | 189.561         | 185.556         | 185.808 | 185.304         | A[8]  |
| S  | 36 | 889.518         | 168.835         | 164.831         | 165.083 | 164.579         | S[7]  |
| G  | 37 | 903.773         | 147.077         | 143.073         | 143.325 | 142.821         | G[6]  |
| P  | 38 | 928.036         | 132.822         | 128.817         | 129.069 | 128.565         | P[5]  |
| P  | 39 | 952.300         | 108.559         | 104.554         | 104.806 | 104.302         | P[4]  |
| V  | 40 | 977.067         | 84.290          | 80.291          | 80.543  | 80.039          | V[3]  |
| S  | 41 | <b>998.825</b>  | 69.528          | 65.524          | 65.776  | 65.272          | S[2]  |
| E  | 42 | <b>1031.085</b> | 37.771          | 33.766          | 34.018  | 33.514          | E[1]  |

# sp | P43277 | H13\_MOUSE

[Acetyl]SETAPAAPAAPAPVEKTPVKKKAKKTGAAAGKRKASGPPVSE

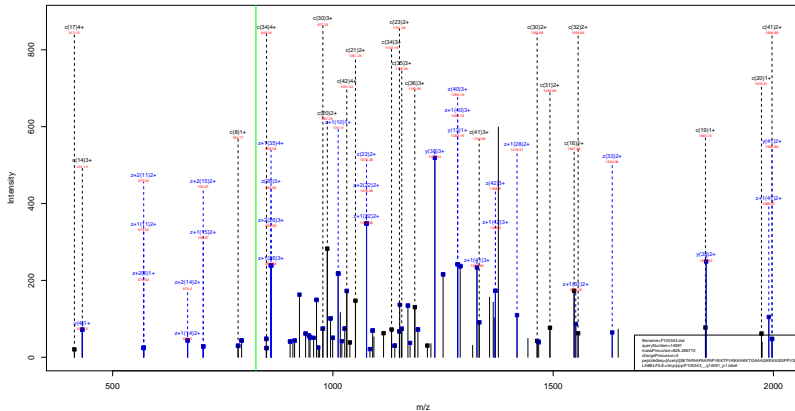

# sp | P43277 | H13\_MOUSE

[Acetyl]SETAPAAPAAPAPVEKTPVKKKAKKTGAAAGKRKASGPPVSE

- ▶ fragmentation table for charge state 1+
- ▶ specType=etd
- ▶ score=59.85
- ▶ F105343.dat
- ▶ query=q14591.p1
- ▶ precursor=825.266710
- ▶ chargePrecursor=5
- ▶ itol=0.8

| AA | c  | y               | z+1             | z+2             | z               | AA       |       |
|----|----|-----------------|-----------------|-----------------|-----------------|----------|-------|
| S  | 1  | 147.079         | 4122.303        | 4106.285        | 0.000           | 4105.277 | S[42] |
| E  | 2  | 276.119         | 3993.261        | 3977.242        | 0.000           | 3976.234 | E[41] |
| L  | 3  | 377.167         | 3684.218        | 3668.199        | 0.000           | 3667.192 | L[40] |
| A  | 4  | 449.204         | 3763.175        | 3747.155        | 0.000           | 3746.148 | A[39] |
| P  | 5  | 545.257         | 3692.133        | 3676.115        | 0.000           | 3675.107 | P[38] |
| A  | 6  | 616.294         | 3595.081        | 3579.062        | 0.000           | 3578.054 | A[37] |
| A  | 7  | 667.331         | 3524.044        | 3508.025        | 0.000           | 3507.017 | A[36] |
| P  | 8  | <b>784.384</b>  | 3453.000        | 3436.980        | 0.000           | 3435.980 | P[35] |
| A  | 9  | 855.421         | 3385.954        | 3369.935        | 0.000           | 3368.927 | A[34] |
| A  | 10 | 926.458         | 3284.917        | 3268.898        | 0.000           | 3267.890 | A[33] |
| P  | 11 | 1023.513        | 3213.879        | 3197.861        | 0.000           | 3196.853 | P[32] |
| A  | 12 | 1094.548        | 3116.827        | 3100.808        | 0.000           | 3099.800 | A[31] |
| P  | 13 | 1161.600        | 3045.790        | 3029.771        | 0.000           | 3028.763 | P[30] |
| V  | 14 | 1290.669        | 2948.737        | 2932.718        | 0.000           | 2931.710 | V[29] |
| E  | 15 | 1437.711        | 2849.686        | 2833.666        | 0.000           | 2832.642 | E[28] |
| R  | 16 | <b>1547.806</b> | 2720.626        | 2704.607        | 0.000           | 2703.599 | R[27] |
| I  | 17 | 1648.854        | 2592.533        | 2576.512        | 2577.520        | 2575.504 | I[26] |
| P  | 18 | 1745.907        | 2491.483        | 2475.464        | 2476.472        | 2474.457 | P[25] |
| V  | 19 | <b>1844.975</b> | 2394.430        | 2378.412        | 2379.419        | 2377.404 | V[24] |
| R  | 20 | <b>1973.070</b> | 2295.362        | 2279.343        | 2280.351        | 2278.335 | R[23] |
| R  | 21 | 2101.105        | 2187.287        | 2171.268        | 2152.250        | 2150.240 | R[22] |
| R  | 22 | 2229.200        | 2099.174        | 2083.153        | 2074.161        | 2072.145 | R[21] |
| A  | 23 | 2300.297        | 1911.077        | 1895.058        | 1896.066        | 1894.050 | A[20] |
| R  | 24 | 2438.392        | 1840.040        | 1824.021        | 1825.029        | 1823.013 | R[19] |
| R  | 25 | 2556.497        | 1711.945        | 1695.926        | 1696.934        | 1694.918 | R[18] |
| T  | 26 | 2657.535        | 1583.850        | 1567.831        | 1568.839        | 1566.823 | T[17] |
| G  | 27 | 2714.550        | 1482.802        | <b>1466.784</b> | <b>1467.791</b> | 1465.775 | G[16] |
| A  | 28 | 2785.593        | 1426.781        | 1410.762        | 1410.770        | 1408.754 | A[15] |
| A  | 29 | 2856.631        | 1384.744        | 1368.725        | 1369.733        | 1367.717 | A[14] |
| A  | 30 | 2927.668        | <b>1283.707</b> | 1267.688        | 1268.696        | 1266.680 | A[13] |
| G  | 31 | 2984.689        | 1212.679        | 1196.661        | 1197.669        | 1195.643 | G[12] |
| R  | 32 | 3112.784        | <b>1155.648</b> | 1139.629        | <b>1140.637</b> | 1138.621 | R[11] |
| R  | 33 | 3268.885        | <b>1027.553</b> | <b>1011.534</b> | <b>1012.542</b> | 1010.527 | R[10] |
| R  | 34 | 3396.980        | 971.526         | 955.507         | 956.514         | 954.498  | R[9]  |
| A  | 35 | 3468.017        | 743.351         | 727.330         | 728.346         | 726.330  | A[8]  |
| S  | 36 | 3535.049        | 672.320         | 656.301         | 657.309         | 655.293  | S[7]  |
| G  | 37 | 3612.071        | 585.288         | 569.269         | <b>570.277</b>  | 568.261  | G[6]  |
| P  | 38 | 3706.124        | 508.260         | 512.248         | 513.256         | 511.240  | P[5]  |
| P  | 39 | 3888.170        | <b>431.214</b>  | 435.195         | 436.203         | 434.187  | P[4]  |
| V  | 40 | 3905.245        | 336.161         | 338.142         | 339.150         | 337.134  | V[3]  |
| S  | 41 | 3992.277        | 235.092         | 239.074         | 240.082         | 238.066  | S[2]  |
| E  | 42 | 4121.319        | 148.050         | 152.032         | 153.050         | 151.034  | E[1]  |

# sp | P43277 | H13\_MOUSE

[Acetyl]SETAPAAPAAPAPVEKTPVKKKAKKTGAAAGKRKASGPPVSE

- ▶ fragmentation table for charge state 2+
- ▶ specType=etd
- ▶ score=59.85
- ▶ F105343.dat
- ▶ query=q14591\_p1
- ▶ precursor=825.266710
- ▶ chargePrecursor=5
- ▶ itol=0.8

| AA    | c               | y               | z+1             | z+2             | z               | AA    |
|-------|-----------------|-----------------|-----------------|-----------------|-----------------|-------|
| S[1]  | 74.042          | 2061.655        | 2053.646        | 0.504           | 2053.142        | S[42] |
| E[2]  | 138.563         | <b>1997.134</b> | <b>1989.125</b> | 0.504           | 1988.621        | E[41] |
| T[3]  | 189.087         | 1932.613        | 1924.603        | 0.504           | 1924.090        | T[40] |
| A[4]  | 224.206         | 1878.080        | 1874.080        | 0.504           | 1873.576        | A[39] |
| P[5]  | 293.135         | <b>1846.570</b> | 1838.561        | 0.504           | 1838.056        | P[38] |
| A[6]  | 358.650         | 1790.044        | 1790.035        | 0.504           | 1789.531        | A[37] |
| A[7]  | 344.169         | 1763.525        | 1754.516        | 0.504           | 1754.012        | A[36] |
| F[8]  | 392.695         | 1727.007        | 1718.997        | 0.504           | 1718.494        | F[35] |
| A[9]  | 428.214         | 1678.480        | 1670.471        | 0.504           | 1669.967        | A[34] |
| A[10] | 463.733         | 1642.962        | 1634.953        | 0.504           | <b>1634.449</b> | A[33] |
| P[11] | 532.259         | 1597.443        | 1599.434        | 0.504           | 1599.929        | P[32] |
| A[12] | 547.777         | 1558.017        | <b>1550.998</b> | 0.504           | 1554.994        | A[31] |
| F[13] | 596.304         | 1523.500        | 1515.490        | 0.504           | 1514.986        | F[30] |
| V[14] | 645.830         | 1474.972        | <b>1466.963</b> | 0.504           | <b>1466.359</b> | V[29] |
| E[15] | 710.359         | 1425.338        | <b>1417.328</b> | 0.504           | 1416.825        | E[28] |
| R[16] | 774.407         | 1369.817        | 1361.807        | 1353.313        | 1352.809        | R[27] |
| T[17] | 824.931         | 1290.765        | <b>1288.760</b> | <b>1289.264</b> | <b>1288.256</b> | T[26] |
| F[18] | 873.457         | 1246.245        | 1238.236        | 1238.740        | 1237.732        | F[25] |
| V[19] | 922.991         | 1197.719        | 1189.709        | 1190.213        | 1189.206        | V[24] |
| K[20] | <b>987.039</b>  | 1148.195        | <b>1140.175</b> | <b>1140.679</b> | <b>1139.671</b> | K[23] |
| K[21] | <b>1051.066</b> | <b>1084.137</b> | <b>1076.128</b> | <b>1076.632</b> | <b>1075.624</b> | K[22] |
| K[22] | <b>1115.134</b> | <b>1020.090</b> | <b>1012.080</b> | <b>1012.584</b> | <b>1011.576</b> | K[21] |
| A[23] | <b>1150.652</b> | <b>956.042</b>  | <b>948.033</b>  | <b>948.537</b>  | <b>947.529</b>  | A[20] |
| K[24] | <b>1214.700</b> | 920.524         | <b>912.514</b>  | <b>913.018</b>  | 912.010         | K[19] |
| K[25] | 1278.747        | 876.476         | <b>848.467</b>  | <b>848.971</b>  | <b>847.963</b>  | K[18] |
| T[26] | 1329.271        | <b>792.429</b>  | <b>784.419</b>  | <b>784.923</b>  | 783.915         | T[17] |
| G[27] | 1397.892        | 743.926         | 733.926         | 734.926         | 733.926         | G[16] |
| A[28] | 1393.300        | 713.394         | <b>705.385</b>  | <b>705.889</b>  | <b>704.881</b>  | A[15] |
| A[29] | 1428.819        | 677.876         | <b>669.866</b>  | <b>670.370</b>  | 669.362         | A[14] |
| A[30] | <b>1464.337</b> | 642.357         | 634.348         | 634.852         | 633.844         | A[13] |
| G[31] | <b>1492.848</b> | 606.839         | 598.829         | 599.333         | 598.325         | G[12] |
| K[32] | <b>1556.896</b> | 570.326         | <b>570.318</b>  | <b>570.822</b>  | <b>569.814</b>  | K[11] |
| R[33] | 1634.944        | 514.360         | 506.351         | 506.855         | 505.847         | R[10] |
| K[34] | 1698.994        | 438.230         | 428.230         | 428.734         | 427.730         | K[9]  |
| A[35] | 1734.512        | 372.182         | 364.173         | 364.677         | 363.669         | A[8]  |
| S[36] | 1778.028        | 338.664         | 328.654         | 329.158         | 328.150         | S[7]  |
| G[37] | 1806.539        | 293.140         | 285.130         | 285.642         | 284.634         | G[6]  |
| F[38] | 1855.065        | 264.617         | 256.607         | 257.111         | 256.103         | F[5]  |
| P[39] | 1903.592        | 218.110         | 208.101         | 208.605         | 207.597         | P[4]  |
| V[40] | 1953.126        | 167.584         | 159.575         | 160.079         | 159.071         | V[3]  |
| S[41] | <b>1996.642</b> | 118.050         | 110.041         | 110.544         | 109.537         | S[2]  |
| E[42] | 2061.163        | 74.534          | 66.524          | 67.028          | 66.021          | E[1]  |

# sp | P43277 | H13\_MOUSE

[Acetyl]SETAPAAPAAPAVEKTPVKKKAKKTGAAAGKRKASGPPVSE

- ▶ fragmentation table for charge state 3+
- ▶ specType=etd
- ▶ score=59.85
- ▶ F105343.dat
- ▶ query=q14591\_p1
- ▶ precursor=825.266710
- ▶ chargePrecursor=5
- ▶ itol=0.8

| AA | c  | y               | z+1             | z+2             | z     | AA              |       |
|----|----|-----------------|-----------------|-----------------|-------|-----------------|-------|
| S  | 1  | 49.697          | 1374.773        | <b>1369.433</b> | 0.672 | <b>1369.097</b> | S[42] |
| E  | 2  | 92.711          | <b>1331.758</b> | <b>1326.419</b> | 0.672 | 1326.083        | E[41] |
| T  | 3  | 126.394         | <b>1288.744</b> | <b>1283.405</b> | 0.672 | <b>1283.065</b> | T[40] |
| A  | 4  | 150.078         | 1255.96         | <b>1249.722</b> | 0.672 | <b>1249.383</b> | A[39] |
| P  | 5  | 182.424         | <b>1231.383</b> | 1228.043        | 0.672 | 1225.707        | P[38] |
| A  | 6  | 206.103         | 1199.032        | <b>1193.692</b> | 0.672 | <b>1193.356</b> | A[37] |
| A  | 7  | 229.782         | <b>1175.353</b> | <b>1170.013</b> | 0.672 | <b>1169.677</b> | A[36] |
| P  | 8  | 262.133         | <b>1151.674</b> | 1146.334        | 0.672 | 1145.990        | P[35] |
| A  | 9  | 285.812         | 1119.323        | 1113.803        | 0.672 | 1113.447        | A[34] |
| A  | 10 | 309.491         | 1089.644        | <b>1090.304</b> | 0.672 | <b>1089.968</b> | A[33] |
| P  | 11 | 341.842         | 1071.965        | 1056.625        | 0.672 | 1056.259        | P[32] |
| A  | 12 | 365.521         | 1039.614        | 1034.274        | 0.672 | 1033.938        | A[31] |
| P  | 13 | 397.872         | 1015.935        | 1010.595        | 0.672 | 1010.259        | P[30] |
| V  | 14 | <b>430.894</b>  | 983.584         | 978.264         | 0.672 | <b>977.908</b>  | V[29] |
| E  | 15 | 473.909         | 959.563         | <b>945.221</b>  | 0.672 | <b>944.885</b>  | E[28] |
| R  | 16 | 516.607         | 937.547         | <b>902.207</b>  | 0.672 | <b>901.871</b>  | R[27] |
| T  | 17 | 550.290         | 884.848         | <b>859.509</b>  | 0.672 | <b>859.173</b>  | T[26] |
| P  | 18 | 582.640         | 831.166         | 825.826         | 0.672 | 825.490         | P[25] |
| V  | 19 | 615.693         | 799.815         | <b>793.475</b>  | 0.672 | <b>793.139</b>  | V[24] |
| K  | 20 | 658.362         | 765.792         | 760.453         | 0.672 | 760.117         | K[23] |
| K  | 21 | 701.090         | 723.094         | 717.754         | 0.672 | 717.418         | K[22] |
| K  | 22 | 743.758         | 689.396         | 678.956         | 0.672 | 678.720         | K[21] |
| A  | 23 | 787.437         | 637.697         | 632.358         | 0.672 | 632.022         | A[20] |
| K  | 24 | 810.136         | 614.018         | 608.679         | 0.672 | 608.343         | K[19] |
| K  | 25 | 852.834         | 571.320         | 565.980         | 0.672 | 565.644         | K[18] |
| T  | 26 | 895.516         | 529.622         | 523.282         | 0.672 | 522.946         | T[17] |
| G  | 27 | 905.524         | 494.930         | 489.590         | 0.672 | 489.254         | G[16] |
| A  | 28 | 929.203         | 475.932         | 470.592         | 0.672 | 470.256         | A[15] |
| A  | 29 | 952.882         | 452.253         | 446.913         | 0.672 | 446.577         | A[14] |
| A  | 30 | <b>976.561</b>  | 428.574         | 423.234         | 0.672 | 422.898         | A[13] |
| G  | 31 | 995.566         | 404.895         | 399.555         | 0.672 | 399.219         | G[12] |
| K  | 32 | <b>1038.266</b> | 385.888         | 380.548         | 0.672 | 380.212         | K[11] |
| K  | 33 | <b>1090.300</b> | 342.180         | 337.850         | 0.672 | 337.514         | K[10] |
| R  | 34 | <b>1132.596</b> | 291.159         | 285.818         | 0.672 | 285.482         | R[9]  |
| A  | 35 | <b>1156.677</b> | 245.457         | 243.118         | 0.672 | 242.782         | A[8]  |
| S  | 36 | <b>1185.688</b> | 224.778         | 219.439         | 0.672 | 219.103         | S[7]  |
| G  | 37 | 1204.695        | 195.767         | 190.428         | 0.672 | 190.092         | G[6]  |
| P  | 38 | 1237.046        | 176.760         | 171.421         | 0.672 | 171.085         | P[5]  |
| P  | 39 | 1269.397        | 144.409         | 139.070         | 0.672 | 138.734         | P[4]  |
| V  | 40 | 1302.426        | 112.954         | 108.119         | 0.672 | 107.685         | V[3]  |
| S  | 41 | <b>1331.430</b> | 75.030          | 73.690          | 0.672 | 73.354          | S[2]  |
| E  | 42 | 1374.445        | 50.025          | 44.685          | 0.672 | 44.349          | E[1]  |

# sp | P43277 | H13\_MOUSE

[Acetyl]SETAPAAPAAPAPVEKTPVKKKAKKTGAAAGKRKASGPPVSE

- ▶ fragmentation table for charge state 4+
- ▶ specType=etd
- ▶ score=59.85
- ▶ F105343.dat
- ▶ query=q14591.p1
- ▶ precursor=825.266710
- ▶ chargePrecursor=5
- ▶ itol=0.8

| AA | c  | y               | z+1             | z+2             | z              | AA              |       |
|----|----|-----------------|-----------------|-----------------|----------------|-----------------|-------|
| S  | 1  | 37.525          | <b>1031.331</b> | <b>1027.327</b> | 0.755          | <b>1027.075</b> | E[42] |
| E  | 2  | 60.785          | <b>999.071</b>  | <b>995.066</b>  | 0.755          | <b>994.814</b>  | E[41] |
| T  | 3  | 95.047          | <b>966.810</b>  | <b>962.805</b>  | 0.755          | <b>962.553</b>  | F[40] |
| A  | 4  | 112.808         | 941.542         | <b>937.543</b>  | 0.755          | <b>937.291</b>  | A[39] |
| P  | 5  | 137.070         | <b>923.789</b>  | 919.794         | 0.755          | 919.532         | P[38] |
| A  | 6  | 154.829         | 899.526         | 895.521         | 0.755          | 895.269         | A[37] |
| A  | 7  | 172.588         | 881.766         | 877.762         | 0.755          | 877.510         | A[36] |
| P  | 8  | 196.851         | 864.007         | <b>860.002</b>  | 0.755          | <b>859.750</b>  | P[35] |
| A  | 9  | 214.611         | 839.744         | 835.739         | 0.755          | 835.487         | A[34] |
| A  | 10 | 232.370         | 821.985         | 817.980         | 0.755          | 817.728         | A[33] |
| P  | 11 | 256.633         | 804.225         | 800.221         | 0.755          | 799.969         | P[32] |
| A  | 12 | 274.392         | 779.962         | 775.957         | 0.755          | 775.705         | A[31] |
| P  | 13 | 298.656         | 762.203         | 758.198         | 0.755          | 757.946         | P[30] |
| V  | 14 | 323.423         | 737.940         | 733.935         | 0.755          | 733.683         | V[29] |
| E  | 15 | 355.683         | 713.373         | 709.368         | 0.755          | 709.116         | E[28] |
| R  | 16 | 387.937         | 689.912         | 685.907         | 0.755          | 685.655         | R[27] |
| T  | 17 | <b>412.969</b>  | 648.388         | 644.383         | 0.755          | 644.132         | T[26] |
| P  | 18 | 437.232         | 623.626         | 619.622         | 0.755          | 619.370         | P[25] |
| V  | 19 | 461.999         | 599.363         | 595.358         | 0.755          | 595.106         | V[24] |
| K  | 20 | 494.023         | 574.596         | <b>570.591</b>  | <b>570.843</b> | <b>570.339</b>  | K[23] |
| K  | 21 | 526.047         | 549.327         | 545.322         | 0.755          | 545.070         | K[22] |
| K  | 22 | 558.070         | 524.560         | 520.555         | 0.755          | 520.303         | K[21] |
| A  | 23 | 575.330         | 475.525         | 471.520         | 0.755          | 471.268         | A[20] |
| K  | 24 | 607.854         | 460.765         | 456.761         | 0.755          | 456.509         | K[19] |
| K  | 25 | 639.877         | 428.742         | 424.737         | 0.755          | 424.485         | K[18] |
| T  | 26 | 665.139         | 396.718         | 392.713         | 0.755          | 392.461         | T[17] |
| G  | 27 | 679.395         | 371.456         | 367.451         | 0.755          | 367.199         | G[16] |
| A  | 28 | 697.154         | 397.201         | 393.196         | 0.755          | 392.944         | A[15] |
| A  | 29 | 714.913         | 339.441         | 335.437         | 0.755          | 335.185         | A[14] |
| A  | 30 | 732.672         | 311.682         | 307.677         | 0.755          | 307.425         | A[13] |
| G  | 31 | 766.626         | 303.923         | 299.918         | 0.755          | 299.666         | G[12] |
| K  | 32 | 778.951         | 289.667         | 285.663         | 0.755          | 285.411         | K[11] |
| K  | 33 | 812.977         | 297.844         | 293.839         | 0.755          | 293.587         | K[10] |
| T  | 34 | <b>850.001</b>  | 219.913         | 214.914         | 0.755          | 214.365         | T[9]  |
| A  | 35 | 867.760         | 186.995         | 182.990         | 0.755          | 182.738         | A[8]  |
| S  | 36 | 889.518         | 169.835         | 164.831         | 0.755          | 164.579         | S[7]  |
| G  | 37 | 903.773         | 147.077         | 143.073         | 0.755          | 142.821         | G[6]  |
| P  | 38 | 928.036         | 132.822         | 128.817         | 0.755          | 128.565         | P[5]  |
| P  | 39 | 952.300         | 108.566         | 104.564         | 0.755          | 104.307         | P[4]  |
| V  | 40 | <b>977.067</b>  | 84.399          | 80.393          | 0.755          | 80.139          | V[3]  |
| S  | 41 | <b>998.825</b>  | 55.524          | 55.524          | 0.755          | 55.272          | S[2]  |
| E  | 42 | <b>1031.085</b> | 37.771          | 37.766          | 0.755          | 37.514          | E[1]  |

sp | P43277 | H13\_MOUSE

[Acetyl]SETAPAAPAAPAPVEKTPVKKKAKKTGAAAGKRKASGPPVSE

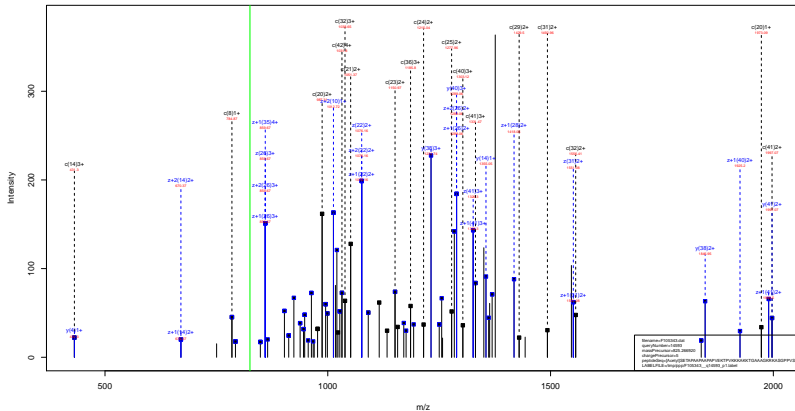

MassBank:SP103201.dat  
Query: [Acetyl]P43277\_1\_0002  
Identified: [Acetyl]P43277\_1\_0002  
Charge: [Acetyl]P43277\_1\_0002  
Protein: [Acetyl]P43277\_1\_0002  
LAMBDA: 214.915 nm, 214.915 nm, 214.915 nm

# sp | P43277 | H13\_MOUSE

[Acetyl]SETAPAAPAAPAVEKTPVKKKAKKTGAAAGKRKASGPPVSE

- ▶ fragmentation table for charge state 1+
- ▶ specType=etd
- ▶ score=54.82
- ▶ F105343.dat
- ▶ query=q14593.p1
- ▶ precursor=825.266920
- ▶ chargePrecursor=5
- ▶ itol=0.8

| AA | c  | y               | z+1             | z+2      | z               | AA       |       |
|----|----|-----------------|-----------------|----------|-----------------|----------|-------|
| S  | 1  | 147.076         | 4122.303        | 4106.295 | 0.000           | 4105.277 | S[42] |
| E  | 2  | 276.119         | 3693.261        | 3677.242 | 0.000           | 3676.234 | E[41] |
| T  | 3  | 377.187         | 3366.213        | 3348.199 | 0.000           | 3347.182 | T[40] |
| A  | 4  | 448.204         | 3163.170        | 3147.152 | 0.000           | 3146.144 | A[39] |
| P  | 5  | 545.297         | 3062.131        | 3076.115 | 0.000           | 3075.107 | P[38] |
| A  | 6  | 616.294         | 3095.081        | 3079.062 | 0.000           | 3078.054 | A[37] |
| A  | 7  | 687.331         | 3524.044        | 3508.025 | 0.000           | 3507.017 | A[36] |
| F  | 8  | <b>784.384</b>  | 3453.000        | 3436.988 | 0.000           | 3435.980 | F[35] |
| A  | 9  | 855.421         | 3393.954        | 3339.935 | 0.000           | 3338.927 | A[34] |
| A  | 10 | 926.458         | 3266.911        | 3266.898 | 0.000           | 3267.896 | A[33] |
| P  | 11 | <b>1023.511</b> | 3213.879        | 3197.861 | 0.000           | 3196.853 | P[32] |
| A  | 12 | 1094.548        | 3116.827        | 3100.808 | 0.000           | 3099.800 | A[31] |
| F  | 13 | 1191.600        | 3045.790        | 3029.771 | 0.000           | 3028.763 | F[30] |
| V  | 14 | 1290.669        | 2948.737        | 2932.718 | 0.000           | 2931.710 | V[29] |
| E  | 15 | 1419.711        | 2849.686        | 2833.665 | 0.000           | 2832.642 | E[28] |
| R  | 16 | 1547.806        | 2720.620        | 2704.607 | 2705.616        | 2703.599 | R[27] |
| T  | 17 | 1648.854        | 2592.531        | 2576.512 | 2577.520        | 2575.504 | T[26] |
| P  | 18 | 1745.907        | 2491.483        | 2475.464 | 2476.472        | 2474.453 | P[25] |
| V  | 19 | 1844.975        | 2394.430        | 2378.412 | 2379.419        | 2377.404 | V[24] |
| K  | 20 | <b>1973.070</b> | 2295.362        | 2279.343 | 2280.351        | 2278.339 | K[23] |
| K  | 21 | 2101.105        | 2187.287        | 2151.248 | 2152.256        | 2150.240 | K[22] |
| K  | 22 | 2229.240        | 2099.172        | 2026.133 | 2024.161        | 2022.145 | K[21] |
| A  | 23 | 2300.297        | 1911.077        | 1895.058 | 1896.066        | 1894.050 | A[20] |
| K  | 24 | 2428.392        | 1840.040        | 1824.021 | 1825.029        | 1823.013 | K[19] |
| K  | 25 | 2506.487        | 1711.945        | 1695.926 | 1696.934        | 1694.919 | K[18] |
| T  | 26 | 2657.535        | 1583.850        | 1567.831 | 1568.839        | 1566.823 | T[17] |
| G  | 27 | 2714.556        | 1482.802        | 1466.784 | 1467.791        | 1465.776 | G[16] |
| A  | 28 | 2785.593        | 1425.761        | 1409.742 | 1410.750        | 1408.734 | A[15] |
| A  | 29 | 2856.631        | <b>1354.744</b> | 1338.725 | 1339.733        | 1337.717 | A[14] |
| A  | 30 | 2927.668        | <b>1283.707</b> | 1267.688 | 1268.696        | 1266.680 | A[13] |
| G  | 31 | 2984.689        | 1212.670        | 1196.651 | 1197.659        | 1195.643 | G[12] |
| K  | 32 | 3112.784        | 1155.648        | 1139.629 | 1140.637        | 1138.621 | K[11] |
| R  | 33 | 3268.685        | <b>1027.553</b> | 1011.534 | <b>1012.542</b> | 1010.527 | R[10] |
| R  | 34 | 3306.660        | 914.482         | 898.463  | 899.471         | 897.455  | R[9]  |
| A  | 35 | 3468.017        | 743.357         | 727.338  | 728.346         | 726.330  | A[8]  |
| S  | 36 | 3555.040        | 672.320         | 656.301  | 657.309         | 655.293  | S[7]  |
| G  | 37 | 3612.071        | 585.288         | 569.269  | 570.277         | 568.261  | G[6]  |
| F  | 38 | 3709.124        | 528.260         | 512.240  | 513.250         | 511.240  | F[5]  |
| F  | 39 | 3806.176        | <b>431.214</b>  | 415.195  | 416.203         | 414.187  | F[4]  |
| V  | 40 | 3905.245        | 336.181         | 320.162  | 321.170         | 319.156  | V[3]  |
| S  | 41 | 3962.277        | 235.092         | 219.074  | 220.082         | 218.066  | S[2]  |
| E  | 42 | 4121.319        | 148.060         | 132.042  | 133.050         | 131.034  | E[1]  |



# sp | P43277 | H13\_MOUSE

[Acetyl]SETAPAAPAAPAPVEKTPVKKKAKKTGAAAGKRKASGPVSE

- ▶ fragmentation table for charge state 2+
- ▶ specType=etd
- ▶ score=54.82
- ▶ F105343.dat
- ▶ query=q14593.p1
- ▶ precursor=825.266920
- ▶ chargePrecursor=5
- ▶ itol=0.8

| AA    | c               | y               | z+1             | z+2             | z               | AA    |
|-------|-----------------|-----------------|-----------------|-----------------|-----------------|-------|
| S[1]  | 74.042          | 2061.655        | 2053.646        | 0.504           | 2053.142        | S[42] |
| E[2]  | 138.563         | <b>1997.134</b> | <b>1989.125</b> | 0.504           | 1988.621        | E[41] |
| T[3]  | 189.087         | 1932.613        | <b>1924.603</b> | 0.504           | 1924.090        | T[40] |
| A[4]  | 224.606         | 1828.089        | 1820.080        | 0.504           | 1817.570        | A[39] |
| F[5]  | 293.135         | <b>1846.576</b> | <b>1838.561</b> | 0.504           | <b>1838.057</b> | F[38] |
| A[6]  | 358.650         | 1790.044        | 1790.035        | 0.504           | 1789.531        | A[37] |
| A[7]  | 344.169         | 1763.525        | 1754.516        | 0.504           | 1754.012        | A[36] |
| F[8]  | 392.695         | 1727.007        | 1718.997        | 0.504           | 1718.494        | F[35] |
| A[9]  | 428.214         | 1678.480        | 1670.471        | 0.504           | 1669.967        | A[34] |
| A[10] | 463.733         | 1642.962        | 1634.953        | 0.504           | 1634.448        | A[33] |
| F[11] | 532.259         | 1607.443        | 1599.434        | 0.504           | 1599.930        | F[32] |
| A[12] | 547.777         | 1558.017        | <b>1550.008</b> | 0.504           | <b>1550.404</b> | A[31] |
| F[13] | 596.304         | 1523.308        | 1515.299        | 0.504           | 1514.795        | F[30] |
| V[14] | 645.830         | 1474.872        | 1466.863        | 0.504           | 1466.359        | V[29] |
| E[15] | 710.359         | 1426.339        | <b>1417.328</b> | 0.504           | 1416.825        | E[28] |
| R[16] | 774.887         | <b>1360.817</b> | 1352.807        | 1353.311        | 1352.300        | R[27] |
| T[17] | 824.911         | 1296.769        | <b>1288.760</b> | <b>1289.264</b> | 1288.256        | T[26] |
| F[18] | 873.437         | 1246.245        | 1238.236        | 1238.740        | 1237.732        | F[25] |
| V[19] | 922.961         | 1197.719        | 1189.709        | 1190.213        | 1189.206        | V[24] |
| K[20] | <b>987.039</b>  | 1148.195        | 1140.185        | 1140.679        | 1139.671        | K[23] |
| R[21] | <b>1051.066</b> | 1098.737        | <b>1078.128</b> | <b>1076.632</b> | <b>1075.624</b> | R[22] |
| K[22] | <b>1115.134</b> | <b>1020.090</b> | <b>1012.080</b> | <b>1012.584</b> | 1011.576        | K[21] |
| A[23] | <b>1150.652</b> | <b>956.042</b>  | <b>948.033</b>  | <b>948.537</b>  | <b>947.529</b>  | A[20] |
| K[24] | <b>1214.700</b> | 920.524         | <b>912.514</b>  | <b>913.018</b>  | <b>912.010</b>  | K[19] |
| K[25] | <b>1278.747</b> | 876.476         | <b>846.467</b>  | <b>848.971</b>  | <b>847.963</b>  | K[18] |
| T[26] | 1329.271        | <b>792.429</b>  | <b>784.419</b>  | <b>784.923</b>  | 783.915         | T[17] |
| G[27] | 1387.802        | 741.905         | 733.895         | 734.399         | 733.390         | G[16] |
| A[28] | 1393.300        | 713.394         | 705.385         | 705.889         | 704.881         | A[15] |
| A[29] | <b>1428.819</b> | 677.876         | <b>669.866</b>  | <b>670.370</b>  | 669.362         | A[14] |
| A[30] | 1464.337        | 642.367         | 634.358         | 634.862         | 633.844         | A[13] |
| G[31] | <b>1492.848</b> | 606.839         | 598.829         | 599.333         | 598.325         | G[12] |
| K[32] | <b>1556.896</b> | 576.328         | 570.318         | 570.822         | 569.814         | K[11] |
| R[33] | 1624.945        | 514.300         | 506.271         | 506.775         | 505.766         | R[10] |
| K[34] | 1698.994        | 436.230         | 428.210         | 428.724         | 427.716         | K[9]  |
| A[35] | 1734.512        | 372.182         | 364.173         | 364.677         | 363.669         | A[8]  |
| S[36] | 1778.028        | 336.664         | 328.654         | 329.158         | 328.150         | S[7]  |
| G[37] | 1806.539        | 291.140         | 285.130         | 285.642         | 284.634         | G[6]  |
| F[38] | 1855.068        | 264.617         | 260.607         | 261.111         | 260.103         | F[5]  |
| F[39] | 1903.592        | 218.110         | 208.101         | 208.605         | 207.597         | F[4]  |
| V[40] | 1953.126        | 167.584         | 159.575         | 160.079         | 159.071         | V[3]  |
| S[41] | <b>1996.642</b> | 118.050         | 110.041         | 110.544         | 109.537         | S[2]  |
| E[42] | 2061.161        | 74.534          | 66.524          | 67.028          | 66.021          | E[1]  |

# sp | P43277 | H13\_MOUSE

[Acetyl]SETAPAAPAAPAVEKTPVKKKAKKTGAAAGKRKASGPVSE

- ▶ fragmentation table for charge state 3+
- ▶ specType=etd
- ▶ score=54.82
- ▶ F105343.dat
- ▶ query=q14593.p1
- ▶ precursor=825.266920
- ▶ chargePrecursor=5
- ▶ itol=0.8

| AA | c  | y               | z+1             | z+2             | z              | AA              |       |
|----|----|-----------------|-----------------|-----------------|----------------|-----------------|-------|
| S  | 1  | 49.697          | 1374.773        | <b>1369.433</b> | 0.672          | <b>1369.097</b> | S[42] |
| E  | 2  | 92.711          | <b>1331.758</b> | <b>1326.419</b> | 0.672          | <b>1326.083</b> | E[41] |
| T  | 3  | 126.394         | <b>1308.745</b> | <b>1283.405</b> | 0.672          | <b>1283.030</b> | T[40] |
| A  | 4  | 150.079         | <b>1255.062</b> | <b>1249.722</b> | 0.672          | <b>1249.386</b> | A[39] |
| P  | 5  | 182.424         | <b>1231.383</b> | 1228.043        | 0.672          | 1225.707        | P[38] |
| A  | 6  | 206.103         | 1199.032        | 1193.602        | 0.672          | <b>1193.356</b> | A[37] |
| A  | 7  | 229.782         | <b>1175.353</b> | <b>1170.013</b> | 0.672          | 1169.677        | A[36] |
| P  | 8  | 262.133         | <b>1151.674</b> | 1146.334        | 0.672          | 1145.990        | P[35] |
| A  | 9  | 285.812         | 1119.323        | 1113.983        | 0.672          | 1113.647        | A[34] |
| A  | 10 | 309.491         | 1089.844        | <b>1090.304</b> | 0.672          | 1089.966        | A[33] |
| P  | 11 | 341.842         | 1071.905        | 1056.625        | 0.672          | 1056.289        | P[32] |
| A  | 12 | 365.521         | 1039.614        | 1034.274        | 0.672          | 1033.938        | A[31] |
| P  | 13 | 397.872         | 1015.935        | 1010.595        | 0.672          | 1010.259        | P[30] |
| V  | 14 | <b>430.894</b>  | 983.584         | 978.244         | 0.672          | 977.908         | V[29] |
| E  | 15 | 473.909         | 959.363         | <b>945.221</b>  | 0.672          | <b>944.885</b>  | E[28] |
| R  | 16 | 516.607         | 937.547         | <b>902.207</b>  | <b>902.543</b> | 901.871         | R[27] |
| T  | 17 | 550.290         | <b>964.848</b>  | <b>859.509</b>  | <b>859.845</b> | <b>859.173</b>  | T[26] |
| P  | 18 | 582.640         | 831.166         | 825.826         | 826.162        | 825.490         | P[25] |
| V  | 19 | 615.663         | 799.815         | <b>793.475</b>  | 793.811        | <b>793.139</b>  | V[24] |
| K  | 20 | 658.362         | 765.792         | 760.453         | 760.789        | 760.117         | K[23] |
| K  | 21 | 701.060         | 723.094         | 717.754         | 718.090        | 717.418         | K[22] |
| K  | 22 | 743.758         | 689.396         | 678.956         | 679.302        | 678.730         | K[21] |
| A  | 23 | 787.437         | 637.697         | 632.358         | 632.694        | 632.022         | A[20] |
| K  | 24 | 810.136         | 614.018         | 608.679         | 609.015        | 608.343         | K[19] |
| K  | 25 | 852.834         | 571.320         | 565.980         | 566.316        | 565.644         | K[18] |
| T  | 26 | 895.516         | 529.622         | 523.282         | 523.618        | 522.946         | T[17] |
| G  | 27 | 905.524         | 494.830         | 489.509         | 489.835        | 489.203         | G[16] |
| A  | 28 | 929.203         | 475.927         | 470.582         | 470.928        | 470.256         | A[15] |
| A  | 29 | 952.882         | 452.253         | 446.913         | 447.249        | 446.577         | A[14] |
| A  | 30 | <b>976.561</b>  | 428.574         | 423.234         | 423.570        | 422.898         | A[13] |
| G  | 31 | <b>995.568</b>  | 404.895         | 399.555         | 399.891        | 399.219         | G[12] |
| K  | 32 | <b>1038.266</b> | 385.888         | 380.548         | 380.884        | 380.212         | K[11] |
| K  | 33 | <b>1090.300</b> | 342.180         | 337.850         | 338.186        | 337.514         | K[10] |
| R  | 34 | <b>1132.596</b> | 291.159         | 285.818         | 286.152        | 285.480         | R[9]  |
| A  | 35 | <b>1156.677</b> | 245.457         | 243.118         | 243.454        | 242.782         | A[8]  |
| S  | 36 | <b>1185.688</b> | 224.778         | 219.439         | 219.775        | 219.103         | S[7]  |
| G  | 37 | 1204.695        | 195.767         | 190.428         | 190.764        | 190.092         | G[6]  |
| P  | 38 | 1237.046        | 176.760         | 171.421         | 171.757        | 171.085         | P[5]  |
| P  | 39 | 1269.397        | 144.409         | 139.070         | 139.406        | 138.734         | P[4]  |
| V  | 40 | <b>1302.420</b> | 112.954         | 108.719         | 109.055        | 108.383         | V[3]  |
| S  | 41 | <b>1331.430</b> | 75.030          | 73.690          | 74.032         | 73.360          | S[2]  |
| E  | 42 | 1374.445        | 50.025          | 44.685          | 45.021         | 44.349          | E[1]  |

# sp | P43277 | H13\_MOUSE

[Acetyl]SETAPAAPAAPAPVEKTPVKKKAKKTGAAAGKRKASGPPVSE

- ▶ fragmentation table for charge state 4+
- ▶ specType=etd
- ▶ score=54.82
- ▶ F105343.dat
- ▶ query=q14593.p1
- ▶ precursor=825.266920
- ▶ chargePrecursor=5
- ▶ itol=0.8

| AA | c  | y               | a+1             | a+2             | z       | AA              |       |
|----|----|-----------------|-----------------|-----------------|---------|-----------------|-------|
| S  | 1  | 37.525          | <b>1031.331</b> | <b>1027.327</b> | 0.755   | <b>1027.075</b> | S[42] |
| E  | 2  | 69.785          | <b>999.071</b>  | <b>995.066</b>  | 0.755   | <b>994.814</b>  | E[41] |
| F  | 3  | 95.047          | <b>966.810</b>  | <b>962.805</b>  | 0.755   | <b>962.553</b>  | F[40] |
| A  | 4  | 112.506         | 945.545         | <b>937.543</b>  | 0.755   | <b>937.291</b>  | A[39] |
| P  | 5  | 137.070         | <b>923.789</b>  | 919.784         | 0.755   | 919.532         | P[38] |
| A  | 6  | 154.829         | 899.520         | 895.521         | 0.755   | 895.269         | A[37] |
| A  | 7  | 172.588         | 883.760         | 877.762         | 0.755   | 877.510         | A[36] |
| P  | 8  | 190.351         | 864.007         | <b>860.002</b>  | 0.755   | <b>859.750</b>  | P[35] |
| A  | 9  | 214.811         | 839.744         | 835.739         | 0.755   | 835.487         | A[34] |
| A  | 10 | 232.570         | 824.989         | 817.980         | 0.755   | 817.728         | A[33] |
| P  | 11 | 256.633         | 804.225         | 800.221         | 0.755   | 799.969         | P[32] |
| A  | 12 | 274.392         | 779.969         | 775.967         | 0.755   | 775.705         | A[31] |
| P  | 13 | 298.656         | 762.203         | 758.198         | 0.755   | 757.946         | P[30] |
| V  | 14 | 323.423         | 737.940         | 733.935         | 0.755   | 733.683         | V[29] |
| E  | 15 | 355.683         | 713.173         | 709.168         | 0.755   | 708.916         | E[28] |
| K  | 16 | 387.707         | 689.917         | 676.807         | 677.159 | 676.951         | K[27] |
| T  | 17 | 412.999         | 648.888         | 644.883         | 645.135 | 644.833         | T[26] |
| P  | 18 | 437.232         | 623.620         | 619.622         | 619.874 | 619.370         | P[25] |
| V  | 19 | 461.999         | 599.363         | 595.358         | 595.610 | 595.106         | V[24] |
| K  | 20 | 494.023         | 574.590         | 570.591         | 570.843 | 570.339         | K[23] |
| K  | 21 | 526.047         | 542.372         | 538.368         | 538.619 | 538.316         | K[22] |
| K  | 22 | 568.070         | 510.949         | 506.944         | 507.196 | 506.292         | K[21] |
| A  | 23 | 575.930         | 478.525         | 474.526         | 474.772 | 474.268         | A[20] |
| K  | 24 | 607.894         | 460.705         | 456.701         | 457.013 | 456.509         | K[19] |
| K  | 25 | 639.877         | 428.742         | 424.737         | 424.989 | 424.485         | K[18] |
| T  | 26 | 665.139         | 396.718         | 392.713         | 392.965 | 392.461         | T[17] |
| G  | 27 | 679.395         | 371.458         | 367.451         | 367.703 | 367.199         | G[16] |
| A  | 28 | 697.154         | 367.201         | 363.196         | 363.448 | 362.944         | A[15] |
| A  | 29 | 714.913         | 339.441         | 335.437         | 335.689 | 335.185         | A[14] |
| A  | 30 | 732.672         | 321.682         | 317.677         | 317.929 | 317.425         | A[13] |
| G  | 31 | 746.928         | 303.923         | 299.918         | 300.170 | 299.666         | G[12] |
| K  | 32 | 778.951         | 289.667         | 285.663         | 285.915 | 285.411         | K[11] |
| R  | 33 | 817.977         | 257.644         | 253.639         | 253.891 | 253.387         | R[10] |
| K  | 34 | 850.001         | 218.618         | 214.614         | 214.866 | 214.362         | K[9]  |
| A  | 35 | 867.760         | 189.561         | 185.556         | 185.808 | 185.304         | A[8]  |
| S  | 36 | 889.518         | 168.835         | 164.831         | 165.083 | 164.579         | S[7]  |
| G  | 37 | 903.773         | 147.077         | 143.073         | 143.325 | 142.821         | G[6]  |
| P  | 38 | 928.036         | 132.822         | 128.817         | 129.069 | 128.565         | P[5]  |
| P  | 39 | 952.300         | 108.559         | 104.554         | 104.806 | 104.302         | P[4]  |
| V  | 40 | <b>977.067</b>  | 84.296          | 80.291          | 80.543  | 80.039          | V[3]  |
| S  | 41 | <b>998.825</b>  | 69.528          | 65.524          | 65.776  | 65.272          | S[2]  |
| E  | 42 | <b>1031.085</b> | 37.771          | 33.766          | 34.018  | 33.514          | E[1]  |

sp | P43277 | H13\_MOUSE

[Acetyl]SETAPAAPAAPAPVEKTPVKKKAKKTGAAAGKRKASGPPVSE

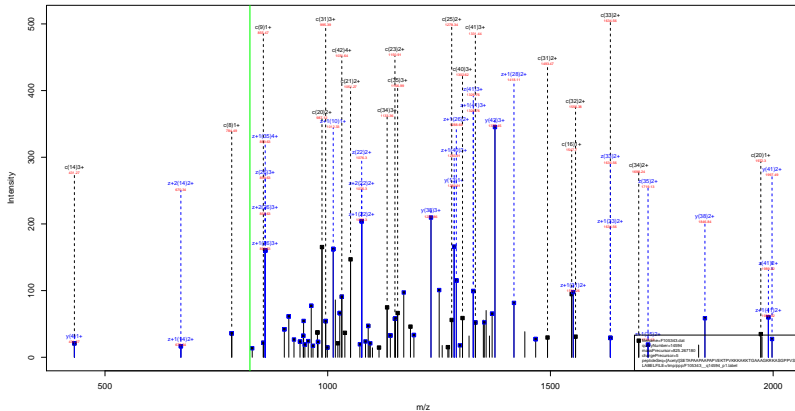

# sp | P43277 | H13\_MOUSE

[Acetyl]SETAPAAPAAPAPVEKTPVKKKAKKTGAAAGKRKASGPPVSE

- ▶ fragmentation table for charge state 1+
- ▶ specType=etd
- ▶ score=53.06
- ▶ F105343.dat
- ▶ query=q14594\_p1
- ▶ precursor=825.267180
- ▶ chargePrecursor=5
- ▶ itol=0.8

| AA | c  | y               | z+1             | z+2             | z               | AA       |       |
|----|----|-----------------|-----------------|-----------------|-----------------|----------|-------|
| S  | 1  | 147.076         | 4122.303        | 4106.285        | 0.000           | 4105.277 | S[42] |
| E  | 2  | 276.119         | 3993.261        | 3977.242        | 0.000           | 3976.234 | E[41] |
| L  | 3  | 377.167         | 3684.218        | 3668.199        | 0.000           | 3667.192 | L[40] |
| A  | 4  | 448.204         | 3763.175        | 3747.155        | 0.000           | 3746.144 | A[39] |
| P  | 5  | 545.257         | 3692.133        | 3676.115        | 0.000           | 3675.107 | P[38] |
| A  | 6  | 616.294         | 3595.081        | 3579.062        | 0.000           | 3578.054 | A[37] |
| A  | 7  | 667.331         | 3524.044        | 3508.025        | 0.000           | 3507.017 | A[36] |
| P  | 8  | <b>764.384</b>  | 3453.000        | 3436.980        | 0.000           | 3435.980 | P[35] |
| A  | 9  | <b>855.421</b>  | 3385.954        | 3369.935        | 0.000           | 3368.927 | A[34] |
| A  | 10 | 926.458         | 3284.917        | 3268.898        | 0.000           | 3267.890 | A[33] |
| P  | 11 | <b>1023.511</b> | 3213.879        | 3197.861        | 0.000           | 3196.853 | P[32] |
| A  | 12 | 1094.548        | 3116.827        | 3100.808        | 0.000           | 3099.800 | A[31] |
| P  | 13 | 1161.600        | 3045.790        | 3029.771        | 0.000           | 3028.763 | P[30] |
| V  | 14 | 1290.669        | 2948.737        | 2932.718        | 0.000           | 2931.710 | V[29] |
| E  | 15 | 1437.711        | 2849.686        | 2833.666        | 0.000           | 2832.642 | E[28] |
| R  | 16 | <b>1547.806</b> | 2720.626        | 2704.607        | 0.000           | 2703.599 | R[27] |
| I  | 17 | 1648.854        | 2592.533        | 2576.512        | 2577.520        | 2575.504 | I[26] |
| P  | 18 | 1745.907        | 2491.483        | 2475.464        | 2476.472        | 2474.457 | P[25] |
| V  | 19 | 1844.975        | 2394.430        | 2378.412        | 2379.419        | 2377.404 | V[24] |
| K  | 20 | <b>1973.070</b> | 2295.367        | 2279.343        | 2280.351        | 2278.335 | K[23] |
| R  | 21 | 2101.105        | 2187.287        | 2171.268        | 2182.295        | 2180.246 | R[22] |
| R  | 22 | 2229.269        | 2099.174        | 2083.153        | 2084.161        | 2082.145 | R[21] |
| A  | 23 | 2300.297        | 1911.077        | 1895.058        | 1896.066        | 1894.050 | A[20] |
| R  | 24 | 2438.362        | 1840.040        | 1824.021        | 1825.029        | 1823.013 | R[19] |
| K  | 25 | 2556.407        | 1711.945        | 1695.926        | 1696.934        | 1694.918 | K[18] |
| T  | 26 | 2657.535        | 1583.850        | 1567.831        | 1568.839        | 1566.823 | T[17] |
| G  | 27 | 2714.556        | 1482.802        | <b>1466.784</b> | 1467.791        | 1465.775 | G[16] |
| A  | 28 | 2785.593        | 1426.781        | 1410.762        | 1411.770        | 1409.754 | A[15] |
| A  | 29 | 2856.631        | 1384.744        | 1368.725        | 1369.733        | 1367.717 | A[14] |
| A  | 30 | 2927.668        | <b>1283.707</b> | 1267.688        | 1268.696        | 1266.680 | A[13] |
| G  | 31 | 2984.689        | 1212.670        | 1196.651        | 1197.659        | 1195.643 | G[12] |
| K  | 32 | 3112.784        | 1150.640        | 1134.620        | <b>1140.637</b> | 1138.621 | K[11] |
| R  | 33 | 3268.805        | <b>1027.553</b> | <b>1011.534</b> | <b>1012.542</b> | 1010.527 | R[10] |
| R  | 34 | 3396.892        | 971.524         | <b>955.433</b>  | 956.441         | 954.425  | R[9]  |
| A  | 35 | 3468.017        | 743.357         | 727.338         | 728.346         | 726.330  | A[8]  |
| S  | 36 | 3535.049        | 672.320         | 656.301         | 657.309         | 655.293  | S[7]  |
| G  | 37 | 3612.071        | 585.288         | 569.269         | 570.277         | 568.261  | G[6]  |
| P  | 38 | 3706.124        | 508.266         | 512.248         | 513.256         | 511.240  | P[5]  |
| P  | 39 | 3808.176        | <b>431.214</b>  | 415.195         | 416.203         | 414.187  | P[4]  |
| V  | 40 | 3905.245        | 334.161         | 318.142         | 319.150         | 317.134  | V[3]  |
| S  | 41 | 3992.277        | 235.092         | 219.074         | 220.082         | 218.066  | S[2]  |
| E  | 42 | 4121.319        | 148.050         | 132.032         | 133.040         | 131.024  | E[1]  |

# sp | P43277 | H13\_MOUSE

[Acetyl]SETAPAAPAAPAPVEKTPVKKKAKKTGAAAGKRKASGPPVSE

- ▶ fragmentation table for charge state 2+
- ▶ specType=etd
- ▶ score=53.06
- ▶ F105343.dat
- ▶ query=q14594\_p1
- ▶ precursor=825.267180
- ▶ chargePrecursor=5
- ▶ itol=0.8

| AA    | c               | y               | z+1             | z+2             | z               | AA    |
|-------|-----------------|-----------------|-----------------|-----------------|-----------------|-------|
| S[1]  | 74.042          | 2061.655        | 2053.646        | 0.504           | 2053.142        | S[42] |
| E[2]  | 138.563         | <b>1997.134</b> | <b>1989.125</b> | 0.504           | <b>1988.621</b> | E[41] |
| T[3]  | 189.087         | 1932.613        | 1924.603        | 0.504           | 1924.090        | T[40] |
| A[4]  | 224.206         | 1926.089        | 1874.080        | 0.504           | 1873.576        | A[39] |
| P[5]  | 293.135         | <b>1846.570</b> | 1838.561        | 0.504           | 1838.056        | P[38] |
| A[6]  | 358.650         | 1790.044        | 1790.035        | 0.504           | 1790.531        | A[37] |
| A[7]  | 344.169         | 1762.525        | 1754.516        | 0.504           | 1754.012        | A[36] |
| F[8]  | 392.695         | 1727.007        | <b>1718.997</b> | 0.504           | <b>1718.494</b> | F[35] |
| A[9]  | 428.214         | 1678.480        | 1670.471        | 0.504           | 1669.967        | A[34] |
| A[10] | 463.733         | 1642.962        | <b>1634.953</b> | 0.504           | <b>1634.449</b> | A[33] |
| P[11] | 532.259         | 1607.443        | 1559.434        | 0.504           | 1558.930        | P[32] |
| A[12] | 547.777         | 1558.017        | <b>1550.908</b> | 0.504           | 1550.404        | A[31] |
| P[13] | 596.304         | 1523.399        | 1515.389        | 0.504           | 1514.885        | P[30] |
| V[14] | 645.830         | 1474.872        | <b>1466.863</b> | 0.504           | <b>1466.359</b> | V[29] |
| E[15] | 710.359         | 1425.356        | <b>1417.328</b> | 0.504           | 1416.825        | E[28] |
| R[16] | 774.887         | 1369.811        | 1362.802        | 1353.311        | <b>1352.303</b> | R[27] |
| T[17] | 824.911         | <b>1296.768</b> | <b>1288.760</b> | <b>1289.264</b> | <b>1288.256</b> | T[26] |
| F[18] | 873.437         | 1246.245        | 1238.236        | 1238.740        | 1237.732        | F[25] |
| V[19] | 922.961         | 1197.719        | 1189.709        | 1190.213        | 1189.206        | V[24] |
| K[20] | <b>987.039</b>  | 1148.195        | <b>1140.175</b> | <b>1140.679</b> | 1139.671        | K[23] |
| R[21] | <b>1051.066</b> | <b>1084.137</b> | <b>1076.128</b> | <b>1076.632</b> | <b>1075.624</b> | R[22] |
| K[22] | <b>1115.134</b> | 1020.080        | <b>1012.080</b> | <b>1012.584</b> | <b>1011.576</b> | K[21] |
| A[23] | <b>1150.652</b> | <b>956.042</b>  | <b>948.033</b>  | <b>948.537</b>  | 947.529         | A[20] |
| K[24] | 1214.700        | 920.524         | <b>912.514</b>  | <b>913.018</b>  | <b>912.010</b>  | K[19] |
| K[25] | <b>1278.747</b> | 856.476         | 848.467         | 848.971         | 847.963         | K[18] |
| T[26] | 1329.271        | 792.429         | <b>784.419</b>  | <b>784.923</b>  | <b>783.915</b>  | T[17] |
| G[27] | 1397.892        | 741.905         | 733.895         | 734.399         | 733.391         | G[16] |
| A[28] | 1393.300        | 713.394         | 705.385         | 705.889         | 704.881         | A[15] |
| A[29] | 1428.819        | 677.876         | <b>669.866</b>  | <b>670.370</b>  | 669.362         | A[14] |
| A[30] | 1464.337        | 642.357         | 634.348         | 634.852         | 633.844         | A[13] |
| G[31] | <b>1492.848</b> | 606.839         | 598.830         | 599.333         | 598.325         | G[12] |
| K[32] | <b>1556.896</b> | 578.328         | 570.318         | 570.822         | 569.814         | K[11] |
| R[33] | <b>1624.946</b> | 514.800         | 506.791         | 507.295         | 506.287         | R[10] |
| R[34] | <b>1698.994</b> | 436.280         | 428.270         | 428.774         | 427.766         | R[9]  |
| A[35] | 1734.512        | 372.182         | 364.173         | 364.677         | 363.669         | A[8]  |
| S[36] | 1778.028        | 336.664         | 328.654         | 329.158         | 328.150         | S[7]  |
| G[37] | 1806.539        | 291.140         | 283.130         | 283.634         | 282.626         | G[6]  |
| F[38] | 1855.065        | 264.617         | 256.607         | 257.111         | 256.103         | F[5]  |
| P[39] | 1903.592        | 218.110         | 210.101         | 210.605         | 209.597         | P[4]  |
| V[40] | 1953.126        | 167.584         | 159.575         | 160.079         | 159.071         | V[3]  |
| S[41] | 1996.642        | 118.050         | 110.041         | 110.544         | 109.537         | S[2]  |
| E[42] | 2061.161        | 74.534          | 66.524          | 67.028          | 66.021          | E[1]  |

# sp | P43277 | H13\_MOUSE

[Acetyl]SETAPAAPAAPAVEKTPVKKKAKKTGAAAGKRKASGPVSE

- ▶ fragmentation table for charge state 3+
- ▶ specType=etd
- ▶ score=53.06
- ▶ F105343.dat
- ▶ query=q14594\_p1
- ▶ precursor=825.267180
- ▶ chargePrecursor=5
- ▶ itol=0.8

| AA   | c               | y               | z+1             | z+2            | z               | AA   |
|------|-----------------|-----------------|-----------------|----------------|-----------------|------|
| S 1  | 49.697          | <b>1374.773</b> | <b>1369.433</b> | 0.672          | <b>1369.097</b> | S 42 |
| E 2  | 92.711          | <b>1331.758</b> | <b>1326.419</b> | 0.672          | <b>1326.083</b> | E 41 |
| T 3  | 126.394         | <b>1288.744</b> | <b>1283.405</b> | 0.672          | 1283.069        | T 40 |
| A 4  | 150.073         | <b>1245.729</b> | <b>1240.390</b> | 0.672          | 1240.389        | A 39 |
| P 5  | 182.424         | <b>1231.383</b> | 1226.043        | 0.672          | 1225.707        | P 38 |
| A 6  | 206.103         | 1199.032        | <b>1193.692</b> | 0.672          | <b>1193.356</b> | A 37 |
| A 7  | 229.782         | 1175.351        | <b>1170.013</b> | 0.672          | 1169.677        | A 36 |
| P 8  | 262.133         | <b>1151.674</b> | 1146.334        | 0.672          | 1145.999        | P 35 |
| A 9  | 285.812         | 1119.273        | 1113.933        | 0.672          | 1113.647        | A 34 |
| A 10 | 309.491         | <b>1095.644</b> | <b>1090.304</b> | 0.672          | 1089.969        | A 33 |
| P 11 | 341.842         | <b>1071.965</b> | 1066.625        | 0.672          | 1066.289        | P 32 |
| A 12 | 365.521         | 1039.614        | 1034.274        | 0.672          | 1033.938        | A 31 |
| P 13 | 397.872         | 1015.935        | 1010.595        | 0.672          | 1010.259        | P 30 |
| V 14 | <b>430.894</b>  | 983.584         | <b>978.244</b>  | 0.672          | <b>977.908</b>  | V 29 |
| E 15 | 473.909         | 959.563         | <b>945.221</b>  | 0.672          | <b>944.885</b>  | E 28 |
| R 16 | 516.607         | 937.547         | <b>902.307</b>  | <b>902.543</b> | <b>901.871</b>  | R 27 |
| T 17 | 550.290         | 884.848         | <b>859.509</b>  | <b>859.845</b> | <b>859.173</b>  | T 26 |
| P 18 | 582.640         | <b>831.166</b>  | 825.826         | 826.162        | 825.490         | P 25 |
| V 19 | 615.663         | 798.815         | 793.475         | 793.811        | 793.139         | V 24 |
| K 20 | 658.362         | 765.792         | 760.453         | 760.789        | 760.117         | K 23 |
| K 21 | 701.060         | 722.094         | 717.754         | 718.090        | 717.418         | K 22 |
| K 22 | 743.758         | 689.399         | 675.059         | 675.392        | 674.720         | K 21 |
| A 23 | 787.437         | 637.697         | 632.358         | 632.694        | 632.022         | A 20 |
| K 24 | 810.136         | 614.018         | 608.679         | 609.015        | 608.343         | K 19 |
| K 25 | 852.834         | 571.320         | 565.980         | 566.316        | 565.644         | K 18 |
| T 26 | 895.516         | 529.622         | 523.282         | 523.618        | 522.946         | T 17 |
| G 27 | 905.524         | 494.830         | 489.509         | 489.835        | 489.203         | G 16 |
| A 28 | 929.203         | 475.927         | 470.582         | 470.928        | 470.256         | A 15 |
| A 29 | 952.882         | 452.253         | 446.913         | 447.249        | 446.577         | A 14 |
| A 30 | <b>976.561</b>  | 428.574         | 423.234         | 423.570        | 422.898         | A 13 |
| G 31 | <b>995.568</b>  | 404.895         | 399.555         | 399.891        | 399.219         | G 12 |
| K 32 | <b>1038.266</b> | 385.888         | 380.548         | 380.884        | 380.212         | K 11 |
| K 33 | <b>1090.300</b> | 342.180         | 337.850         | 338.186        | 337.514         | K 10 |
| R 34 | <b>1112.596</b> | 291.159         | 285.818         | 286.152        | 285.480         | R 9  |
| A 35 | <b>1156.677</b> | 245.457         | 243.118         | 243.454        | 242.782         | A 8  |
| S 36 | <b>1185.688</b> | 224.778         | 219.439         | 219.775        | 219.103         | S 7  |
| G 37 | 1204.695        | 195.767         | 190.428         | 190.764        | 190.092         | G 6  |
| P 38 | 1237.046        | 176.760         | 171.421         | 171.757        | 171.085         | P 5  |
| P 39 | <b>1269.397</b> | 144.409         | 139.070         | 139.406        | 138.734         | P 4  |
| V 40 | <b>1302.420</b> | 112.051         | 106.719         | 107.055        | 106.383         | V 3  |
| S 41 | <b>1331.430</b> | 75.030          | 73.696          | 74.032         | 73.360          | S 2  |
| E 42 | 1374.445        | 50.025          | 44.685          | 45.021         | 44.349          | E 1  |

# sp | P43277 | H13\_MOUSE

[Acetyl]SETAPAAPAAPAPVEKTPVKKKAKKTGAAAGKRKASGPPVSE

- ▶ fragmentation table for charge state 4+
- ▶ specType=etd
- ▶ score=53.06
- ▶ F105343.dat
- ▶ query=q14594\_p1
- ▶ precursor=825.267180
- ▶ chargePrecursor=5
- ▶ itol=0.8

| AA | c  | y               | z+1             | z+2             | z       | AA              |       |
|----|----|-----------------|-----------------|-----------------|---------|-----------------|-------|
| S  | 1  | 37.525          | <b>1031.331</b> | <b>1027.327</b> | 0.755   | <b>1027.075</b> | S[42] |
| E  | 2  | 69.785          | <b>999.071</b>  | <b>995.066</b>  | 0.755   | <b>994.814</b>  | E[41] |
| T  | 3  | 95.047          | <b>950.810</b>  | <b>942.805</b>  | 0.755   | <b>942.553</b>  | T[40] |
| A  | 4  | 112.506         | 943.545         | <b>937.543</b>  | 0.755   | <b>937.291</b>  | A[39] |
| P  | 5  | 137.070         | <b>923.789</b>  | 919.784         | 0.755   | 919.532         | P[38] |
| A  | 6  | 154.829         | 899.520         | 895.521         | 0.755   | 895.269         | A[37] |
| A  | 7  | 172.588         | 883.760         | 877.762         | 0.755   | 877.510         | A[36] |
| P  | 8  | 190.351         | 864.007         | <b>860.002</b>  | 0.755   | <b>859.750</b>  | P[35] |
| A  | 9  | 214.811         | 839.744         | 835.739         | 0.755   | 835.487         | A[34] |
| A  | 10 | 232.570         | 824.989         | 817.980         | 0.755   | 817.728         | A[33] |
| P  | 11 | 256.633         | 804.225         | 800.221         | 0.755   | 799.969         | P[32] |
| A  | 12 | 274.392         | 779.969         | 775.967         | 0.755   | 775.705         | A[31] |
| P  | 13 | 298.656         | 762.203         | 758.198         | 0.755   | 757.946         | P[30] |
| V  | 14 | 323.423         | 737.940         | 733.935         | 0.755   | 733.683         | V[29] |
| E  | 15 | 355.683         | 713.173         | 709.168         | 0.755   | 708.916         | E[28] |
| K  | 16 | 387.707         | 689.913         | 676.807         | 677.159 | 676.953         | K[27] |
| T  | 17 | 412.999         | 648.888         | 644.883         | 645.135 | 644.033         | T[26] |
| P  | 18 | 437.232         | 623.620         | 619.622         | 619.874 | 619.370         | P[25] |
| V  | 19 | 461.999         | 599.353         | 595.358         | 595.610 | 595.106         | V[24] |
| K  | 20 | 494.023         | 574.590         | 570.591         | 570.843 | 570.339         | K[23] |
| K  | 21 | 526.047         | 542.372         | 538.368         | 538.619 | 538.316         | K[22] |
| K  | 22 | 568.070         | 510.949         | 506.944         | 507.196 | 506.292         | K[21] |
| A  | 23 | 575.930         | 478.525         | 474.526         | 474.772 | 474.268         | A[20] |
| K  | 24 | 607.894         | 460.705         | 456.701         | 457.013 | 456.509         | K[19] |
| K  | 25 | 639.877         | 428.742         | 424.737         | 424.989 | 424.485         | K[18] |
| T  | 26 | 665.139         | 396.718         | 392.713         | 392.965 | 392.461         | T[17] |
| G  | 27 | 679.395         | 371.458         | 367.451         | 367.703 | 367.199         | G[16] |
| A  | 28 | 697.154         | 367.201         | 363.196         | 363.448 | 362.944         | A[15] |
| A  | 29 | 714.913         | 339.441         | 335.437         | 335.689 | 335.185         | A[14] |
| A  | 30 | 732.672         | 321.682         | 317.677         | 317.929 | 317.425         | A[13] |
| G  | 31 | 746.928         | 303.923         | 299.918         | 300.170 | 299.666         | G[12] |
| K  | 32 | 778.951         | 289.667         | 285.663         | 285.915 | 285.411         | K[11] |
| R  | 33 | 817.977         | 257.644         | 253.639         | 253.891 | 253.387         | R[10] |
| K  | 34 | 850.001         | 218.618         | 214.614         | 214.866 | 214.362         | K[9]  |
| A  | 35 | 867.760         | 189.561         | 185.556         | 185.808 | 185.304         | A[8]  |
| S  | 36 | 889.518         | 168.835         | 164.831         | 165.083 | 164.579         | S[7]  |
| G  | 37 | 903.773         | 147.077         | 143.073         | 143.325 | 142.821         | G[6]  |
| P  | 38 | 928.036         | 132.822         | 128.817         | 129.069 | 128.565         | P[5]  |
| P  | 39 | 952.300         | 108.559         | 104.554         | 104.806 | 104.302         | P[4]  |
| V  | 40 | <b>977.067</b>  | 84.296          | 80.291          | 80.543  | 80.039          | V[3]  |
| S  | 41 | <b>998.825</b>  | 69.528          | 65.524          | 65.776  | 65.272          | S[2]  |
| E  | 42 | <b>1031.085</b> | 37.771          | 33.766          | 34.018  | 33.514          | E[1]  |





# sp | P43277 | H13\_MOUSE

[Acetyl]SETAPAAPAAPAPVEKTPVKKKAKKTGAAAGKRKASGPPVSE

- ▶ fragmentation table for charge state 1+
- ▶ specType=etd
- ▶ score=47.34
- ▶ F105343.dat
- ▶ query=q14601.p1
- ▶ precursor=825.268710
- ▶ chargePrecursor=5
- ▶ itol=0.8

| AA | c  | y               | z+1             | z+2             | z               | AA       |       |
|----|----|-----------------|-----------------|-----------------|-----------------|----------|-------|
| S  | 1  | 147.079         | 4122.303        | 4106.285        | 0.000           | 4105.277 | S[42] |
| E  | 2  | 276.119         | 3993.261        | 3977.242        | 0.000           | 3976.234 | E[41] |
| L  | 3  | 377.167         | 3684.218        | 3668.199        | 0.000           | 3667.192 | L[40] |
| A  | 4  | 448.204         | 3763.175        | 3747.155        | 0.000           | 3746.144 | A[39] |
| P  | 5  | 545.257         | 3692.133        | 3676.115        | 0.000           | 3675.107 | P[38] |
| A  | 6  | 616.294         | 3595.081        | 3579.062        | 0.000           | 3578.054 | A[37] |
| A  | 7  | 667.331         | 3524.044        | 3508.025        | 0.000           | 3507.017 | A[36] |
| P  | 8  | <b>784.384</b>  | 3453.000        | 3436.980        | 0.000           | 3435.969 | P[35] |
| A  | 9  | 855.421         | 3355.954        | 3339.935        | 0.000           | 3338.927 | A[34] |
| A  | 10 | 926.458         | 3284.917        | 3268.898        | 0.000           | 3267.889 | A[33] |
| P  | 11 | 1023.513        | 3213.879        | 3197.861        | 0.000           | 3196.853 | P[32] |
| A  | 12 | 1094.548        | 3116.827        | 3100.808        | 0.000           | 3099.800 | A[31] |
| P  | 13 | 1161.600        | 3045.790        | 3029.771        | 0.000           | 3028.763 | P[30] |
| V  | 14 | 1290.669        | 2948.737        | 2932.718        | 0.000           | 2931.710 | V[29] |
| E  | 15 | 1437.711        | 2849.686        | 2833.666        | 0.000           | 2832.642 | E[28] |
| R  | 16 | <b>1547.806</b> | 2750.626        | 2734.607        | 0.000           | 2733.596 | R[27] |
| L  | 17 | 1648.854        | 2682.533        | 2676.512        | 0.000           | 2675.504 | L[26] |
| P  | 18 | 1745.907        | 2401.483        | 2475.464        | 2476.472        | 2474.457 | P[25] |
| V  | 19 | 1864.975        | 2304.430        | 2378.412        | 2379.419        | 2377.404 | V[24] |
| R  | 20 | <b>1973.070</b> | 2295.362        | 2279.343        | 2280.351        | 2278.335 | R[23] |
| R  | 21 | 2101.105        | 2187.287        | 2151.268        | 2152.266        | 2150.246 | R[22] |
| R  | 22 | 2229.209        | 2039.174        | 2003.153        | 2004.161        | 2002.141 | R[21] |
| A  | 23 | 2300.297        | 1911.077        | 1895.058        | 1896.066        | 1894.050 | A[20] |
| R  | 24 | 2438.362        | 1840.040        | 1824.021        | 1825.029        | 1823.013 | R[19] |
| R  | 25 | 2556.407        | 1711.945        | 1695.926        | 1696.934        | 1694.918 | R[18] |
| T  | 26 | 2657.535        | 1583.850        | 1567.831        | 1568.839        | 1566.823 | T[17] |
| G  | 27 | 2714.556        | 1482.802        | 1466.784        | <b>1467.791</b> | 1465.770 | G[16] |
| A  | 28 | 2785.593        | 1425.781        | 1409.762        | 1410.770        | 1408.754 | A[15] |
| A  | 29 | 2856.631        | 1384.744        | 1368.725        | 1369.733        | 1367.717 | A[14] |
| A  | 30 | 2927.668        | <b>1283.707</b> | 1267.688        | 1268.696        | 1266.680 | A[13] |
| G  | 31 | 2984.689        | 1212.670        | 1196.651        | 1197.659        | 1195.643 | G[12] |
| R  | 32 | 3112.784        | 1135.649        | 1119.630        | <b>1140.637</b> | 1138.621 | R[11] |
| R  | 33 | 3268.885        | <b>1027.553</b> | <b>1011.534</b> | <b>1012.542</b> | 1010.527 | R[10] |
| R  | 34 | 3396.989        | 974.512         | 958.493         | 959.441         | 957.425  | R[9]  |
| A  | 35 | 3468.017        | 743.351         | 727.330         | 728.346         | 726.330  | A[8]  |
| S  | 36 | 3535.049        | 672.320         | 656.301         | 657.309         | 655.293  | S[7]  |
| G  | 37 | 3612.071        | 585.288         | 569.269         | 570.277         | 568.261  | G[6]  |
| P  | 38 | 3706.124        | 508.266         | 512.248         | 513.256         | 511.240  | P[5]  |
| P  | 39 | 3888.176        | <b>431.214</b>  | 435.195         | 436.203         | 434.187  | P[4]  |
| V  | 40 | 3905.245        | 334.161         | 338.142         | 339.150         | 337.134  | V[3]  |
| S  | 41 | 3992.277        | 235.092         | 239.074         | 240.082         | 238.066  | S[2]  |
| E  | 42 | 4121.319        | 148.050         | 152.032         | 153.050         | 151.034  | E[1]  |

# sp | P43277 | H13\_MOUSE

[Acetyl]SETAPAAPAAPAVEKTPVKKKAKKTGAAAGKRKASGPPVSE

- ▶ fragmentation table for charge state 2+
- ▶ specType=etd
- ▶ score=47.34
- ▶ F105343.dat
- ▶ query=q14601.p1
- ▶ precursor=825.268710
- ▶ chargePrecursor=5
- ▶ itol=0.8

| AA | c  | y               | z+1             | z+2             | z               | AA              |       |
|----|----|-----------------|-----------------|-----------------|-----------------|-----------------|-------|
| S  | 1  | 74.042          | 2061.655        | 2053.646        | 0.504           | 2053.142        | S[42] |
| E  | 2  | 138.563         | 1897.134        | <b>1909.125</b> | 0.504           | 1908.621        | E[41] |
| T  | 3  | 189.087         | 1932.613        | 1924.603        | 0.504           | 1924.090        | T[40] |
| A  | 4  | 224.606         | 1828.090        | 1814.080        | 0.504           | 1817.576        | A[39] |
| P  | 5  | 293.135         | <b>1846.570</b> | 1838.561        | 0.504           | 1838.046        | P[38] |
| A  | 6  | 358.650         | 1790.044        | 1790.035        | 0.504           | 1790.531        | A[37] |
| A  | 7  | 344.169         | 1763.525        | 1754.516        | 0.504           | 1754.012        | A[36] |
| F  | 8  | 392.695         | 1727.007        | 1718.997        | 0.504           | 1718.494        | F[35] |
| A  | 9  | 428.214         | 1678.480        | 1670.471        | 0.504           | 1669.967        | A[34] |
| A  | 10 | 463.733         | 1642.962        | <b>1634.953</b> | 0.504           | <b>1634.449</b> | A[33] |
| P  | 11 | 532.259         | 1607.443        | 1599.434        | 0.504           | 1599.930        | P[32] |
| A  | 12 | 547.777         | 1558.917        | <b>1550.908</b> | 0.504           | <b>1550.404</b> | A[31] |
| P  | 13 | 596.304         | 1523.399        | 1515.389        | 0.504           | 1514.885        | P[30] |
| V  | 14 | 645.830         | 1474.872        | <b>1466.863</b> | 0.504           | 1466.359        | V[29] |
| E  | 15 | 710.359         | 1425.351        | 1417.342        | 0.504           | 1416.838        | E[28] |
| R  | 16 | 774.887         | 1369.831        | 1361.821        | 1353.811        | 1353.307        | R[27] |
| T  | 17 | 824.911         | 1290.765        | <b>1288.760</b> | <b>1289.264</b> | 1288.258        | T[26] |
| F  | 18 | 873.457         | 1246.245        | 1238.236        | 1238.740        | 1237.732        | F[25] |
| V  | 19 | 922.991         | 1197.719        | 1189.709        | 1190.213        | 1189.206        | V[24] |
| K  | 20 | <b>987.039</b>  | 1148.195        | <b>1140.175</b> | <b>1140.679</b> | 1139.671        | K[23] |
| K  | 21 | <b>1051.066</b> | 1098.717        | <b>1076.128</b> | <b>1076.632</b> | <b>1075.624</b> | K[22] |
| K  | 22 | <b>1115.134</b> | <b>1020.090</b> | <b>1012.080</b> | <b>1012.584</b> | <b>1011.576</b> | K[21] |
| A  | 23 | <b>1150.652</b> | <b>956.042</b>  | <b>948.033</b>  | <b>948.537</b>  | 947.529         | A[20] |
| K  | 24 | 1214.700        | 920.524         | <b>912.514</b>  | <b>913.018</b>  | 912.010         | K[19] |
| K  | 25 | 1278.747        | 850.476         | 848.467         | 848.971         | 847.963         | K[18] |
| T  | 26 | 1329.271        | <b>792.429</b>  | <b>784.419</b>  | <b>784.923</b>  | 783.915         | T[17] |
| K  | 27 | 1397.892        | 741.925         | 739.916         | 740.420         | 739.412         | K[16] |
| A  | 28 | 1393.300        | 713.394         | 705.385         | 705.889         | 704.881         | A[15] |
| A  | 29 | 1428.819        | 677.876         | <b>669.866</b>  | <b>670.370</b>  | 669.362         | A[14] |
| A  | 30 | <b>1464.337</b> | 642.357         | 634.348         | 634.852         | 633.844         | A[13] |
| G  | 31 | 1492.848        | 606.839         | 598.830         | 599.333         | 598.325         | G[12] |
| K  | 32 | <b>1556.896</b> | 576.326         | 570.318         | 570.822         | 569.814         | K[11] |
| R  | 33 | <b>1634.946</b> | 514.360         | 509.351         | 509.855         | 508.847         | R[10] |
| K  | 34 | 1698.994        | 436.291         | 428.280         | 428.784         | 427.776         | K[9]  |
| A  | 35 | 1734.512        | 372.182         | 364.173         | 364.677         | 363.669         | A[8]  |
| S  | 36 | 1778.028        | 336.664         | 328.654         | 329.158         | 328.150         | S[7]  |
| G  | 37 | 1806.539        | 291.140         | 285.130         | 285.642         | 284.634         | G[6]  |
| F  | 38 | 1855.065        | 264.617         | 260.607         | 261.111         | 260.103         | F[5]  |
| F  | 39 | 1903.592        | 218.110         | 208.101         | 208.605         | 207.597         | F[4]  |
| V  | 40 | 1953.126        | 167.584         | 159.575         | 160.079         | 159.071         | V[3]  |
| S  | 41 | 1996.642        | 118.050         | 110.041         | 110.544         | 109.537         | S[2]  |
| E  | 42 | 2061.161        | 74.534          | 66.524          | 67.028          | 66.021          | E[1]  |

# sp | P43277 | H13\_MOUSE

[Acetyl]SETAPAAPAAPAPVEKTPVKKKAKKTGAAAGKRKASGPVSE

- ▶ fragmentation table for charge state 3+
- ▶ specType=etd
- ▶ score=47.34
- ▶ F105343.dat
- ▶ query=q14601.p1
- ▶ precursor=825.268710
- ▶ chargePrecursor=5
- ▶ itol=0.8

| AA   | c               | y               | z+1             | z+2            | z               | AA   |
|------|-----------------|-----------------|-----------------|----------------|-----------------|------|
| S 1  | 49.697          | 1374.773        | <b>1369.433</b> | 0.672          | <b>1369.097</b> | S 42 |
| E 2  | 92.711          | <b>1331.758</b> | <b>1326.419</b> | 0.672          | 1326.081        | E 41 |
| T 3  | 126.394         | <b>1288.744</b> | <b>1283.405</b> | 0.672          | 1283.066        | T 40 |
| A 4  | 150.073         | 1255.969        | <b>1249.722</b> | 0.672          | 1249.383        | A 39 |
| P 5  | 182.424         | <b>1231.383</b> | 1226.043        | 0.672          | 1225.707        | P 38 |
| A 6  | 206.103         | 1199.632        | 1193.602        | 0.672          | 1193.356        | A 37 |
| A 7  | 229.782         | 1175.351        | <b>1170.013</b> | 0.672          | <b>1169.677</b> | A 36 |
| P 8  | 262.133         | <b>1151.674</b> | 1146.334        | 0.672          | 1145.999        | P 35 |
| A 9  | 285.812         | 1119.323        | 1113.303        | 0.672          | 1113.047        | A 34 |
| A 10 | 309.491         | 1095.044        | <b>1090.304</b> | 0.672          | <b>1089.968</b> | A 33 |
| P 11 | 341.842         | 1071.065        | 1066.025        | 0.672          | 1065.259        | P 32 |
| A 12 | 395.521         | 1039.614        | 1034.274        | 0.672          | 1033.938        | A 31 |
| P 13 | 397.872         | 1015.935        | 1010.595        | 0.672          | 1010.259        | P 30 |
| V 14 | <b>430.894</b>  | 983.584         | <b>978.244</b>  | 0.672          | <b>977.908</b>  | V 29 |
| E 15 | 473.909         | 959.361         | <b>945.221</b>  | 0.672          | <b>944.885</b>  | E 28 |
| R 16 | 516.697         | 937.541         | 932.201         | 0.672          | 931.877         | R 27 |
| T 17 | 550.290         | <b>914.848</b>  | <b>859.509</b>  | <b>859.845</b> | <b>859.173</b>  | T 26 |
| P 18 | 582.640         | 831.166         | 825.826         | 826.162        | 825.400         | P 25 |
| V 19 | 615.693         | 799.815         | 793.475         | 793.811        | <b>793.139</b>  | V 24 |
| K 20 | 658.362         | 765.792         | 760.451         | 760.789        | 760.117         | K 23 |
| K 21 | 701.090         | 723.094         | 717.754         | 718.090        | 717.418         | K 22 |
| K 22 | 743.758         | 689.399         | 673.959         | 673.302        | 674.739         | K 21 |
| A 23 | 797.437         | 637.987         | 632.358         | 632.694        | 632.022         | A 20 |
| K 24 | 810.136         | 614.018         | 608.679         | 609.015        | 608.343         | K 19 |
| K 25 | 852.834         | 571.320         | 565.980         | 566.316        | 565.644         | K 18 |
| T 26 | 895.516         | 529.627         | 523.282         | 523.618        | 522.946         | T 17 |
| G 27 | 905.524         | 494.930         | 489.599         | 489.935        | 489.263         | G 16 |
| A 28 | 929.203         | 475.937         | 470.592         | 470.928        | 470.256         | A 15 |
| A 29 | 952.882         | 452.253         | 446.913         | 447.249        | 446.577         | A 14 |
| A 30 | <b>976.561</b>  | 428.574         | 423.234         | 423.570        | 422.898         | A 13 |
| G 31 | <b>995.568</b>  | 404.895         | 399.555         | 399.891        | 399.219         | G 12 |
| K 32 | <b>1038.266</b> | 385.888         | 380.548         | 380.884        | 380.212         | K 11 |
| R 33 | <b>1090.300</b> | 342.180         | 337.850         | 338.186        | 337.514         | R 10 |
| R 34 | <b>1112.598</b> | 291.159         | 285.818         | 286.152        | 285.480         | R 9  |
| A 35 | <b>1156.677</b> | 245.457         | 243.118         | 243.454        | 242.782         | A 8  |
| S 36 | <b>1185.688</b> | 224.778         | 219.439         | 219.775        | 219.103         | S 7  |
| G 37 | 1204.695        | 195.767         | 190.428         | 190.764        | 190.092         | G 6  |
| P 38 | 1237.046        | 176.760         | 171.421         | 171.757        | 171.085         | P 5  |
| P 39 | 1269.397        | 144.409         | 139.070         | 139.406        | 138.734         | P 4  |
| V 40 | <b>1302.420</b> | 112.954         | 108.719         | 109.055        | 108.383         | V 3  |
| S 41 | <b>1331.430</b> | 75.030          | 73.696          | 74.032         | 73.360          | S 2  |
| E 42 | 1374.445        | 50.025          | 44.685          | 45.021         | 44.349          | E 1  |

# sp | P43277 | H13\_MOUSE

[Acetyl]SETAPAAPAAPAVEKTPVKKKAKKTGAAAGKRKASGPPVSE

- ▶ fragmentation table for charge state 4+
- ▶ specType=etd
- ▶ score=47.34
- ▶ F105343.dat
- ▶ query=q14601.p1
- ▶ precursor=825.268710
- ▶ chargePrecursor=5
- ▶ itol=0.8

| AA | c  | y               | a+1             | a+2             | z       | AA              |       |
|----|----|-----------------|-----------------|-----------------|---------|-----------------|-------|
| S  | 1  | 37.525          | <b>1031.331</b> | <b>1027.027</b> | 0.755   | <b>1027.075</b> | S[42] |
| E  | 2  | 69.785          | <b>999.071</b>  | <b>995.066</b>  | 0.755   | <b>994.814</b>  | E[41] |
| T  | 3  | 95.047          | <b>999.911</b>  | <b>902.805</b>  | 0.755   | <b>902.553</b>  | T[40] |
| A  | 4  | 112.506         | 945.540         | <b>937.543</b>  | 0.755   | <b>937.291</b>  | A[39] |
| P  | 5  | 137.070         | <b>923.789</b>  | 919.784         | 0.755   | 919.532         | P[38] |
| A  | 6  | 154.820         | 899.520         | 895.521         | 0.755   | 895.269         | A[37] |
| A  | 7  | 172.588         | 883.760         | 877.762         | 0.755   | 877.510         | A[36] |
| P  | 8  | 190.851         | <b>864.007</b>  | <b>860.002</b>  | 0.755   | <b>859.750</b>  | P[35] |
| A  | 9  | 214.811         | 839.744         | 835.739         | 0.755   | 835.487         | A[34] |
| A  | 10 | 232.570         | 824.985         | 817.980         | 0.755   | 817.728         | A[33] |
| P  | 11 | 256.633         | 800.225         | 800.221         | 0.755   | 799.969         | P[32] |
| A  | 12 | 274.392         | 779.969         | 775.967         | 0.755   | 775.705         | A[31] |
| P  | 13 | 298.656         | 762.203         | 758.198         | 0.755   | 757.946         | P[30] |
| V  | 14 | 323.423         | 737.940         | 733.935         | 0.755   | 733.683         | V[29] |
| E  | 15 | 355.683         | 713.173         | 709.168         | 0.755   | 708.916         | E[28] |
| K  | 16 | 387.707         | 689.912         | 676.807         | 677.159 | 676.951         | K[27] |
| T  | 17 | 412.999         | 648.888         | 644.883         | 645.135 | 644.033         | T[26] |
| P  | 18 | 437.232         | 623.620         | 619.622         | 619.874 | 619.370         | P[25] |
| V  | 19 | 461.999         | 599.353         | 595.358         | 595.610 | 595.106         | V[24] |
| K  | 20 | 494.023         | 574.590         | 570.591         | 570.843 | 570.339         | K[23] |
| K  | 21 | 526.047         | 542.372         | 538.568         | 538.819 | 538.316         | K[22] |
| K  | 22 | 558.070         | 510.540         | 506.544         | 506.796 | 506.292         | K[21] |
| A  | 23 | 575.830         | 478.525         | 474.526         | 474.772 | 474.268         | A[20] |
| K  | 24 | 607.894         | 460.705         | 456.701         | 457.013 | 456.509         | K[19] |
| K  | 25 | 639.877         | 428.742         | 424.737         | 424.989 | 424.485         | K[18] |
| T  | 26 | 665.139         | 396.718         | 392.713         | 392.965 | 392.461         | T[17] |
| G  | 27 | 679.395         | 371.458         | 367.451         | 367.703 | 367.199         | G[16] |
| A  | 28 | 697.154         | 367.201         | 353.196         | 353.448 | 352.944         | A[15] |
| A  | 29 | 714.913         | 339.441         | 335.437         | 335.689 | 335.185         | A[14] |
| A  | 30 | 732.672         | 321.682         | 317.677         | 317.929 | 317.425         | A[13] |
| G  | 31 | 746.928         | 303.923         | 299.918         | 300.170 | 299.666         | G[12] |
| K  | 32 | 778.951         | 289.667         | 285.663         | 285.915 | 285.411         | K[11] |
| R  | 33 | 817.977         | 257.644         | 253.639         | 253.891 | 253.387         | R[10] |
| K  | 34 | 850.001         | 218.618         | 214.614         | 214.866 | 214.362         | K[9]  |
| A  | 35 | 867.760         | 189.561         | 185.556         | 185.808 | 185.304         | A[9]  |
| S  | 36 | 889.518         | 168.835         | 164.831         | 165.083 | 164.579         | S[7]  |
| G  | 37 | 903.773         | 147.077         | 143.073         | 143.325 | 142.821         | G[6]  |
| P  | 38 | 928.036         | 132.822         | 128.817         | 129.069 | 128.565         | P[5]  |
| P  | 39 | 952.300         | 108.559         | 104.554         | 104.806 | 104.302         | P[4]  |
| V  | 40 | <b>977.067</b>  | 84.290          | 80.291          | 80.543  | 80.039          | V[3]  |
| S  | 41 | <b>998.825</b>  | 69.528          | 65.524          | 65.776  | 65.272          | S[2]  |
| E  | 42 | <b>1021.085</b> | 37.771          | 33.766          | 34.018  | 33.514          | E[1]  |

# sp | P43277 | H13\_MOUSE

[Acetyl]SETAPAAPAAPAPVEKTPVKKKAKKTGAAAGKRKASGPPVSE

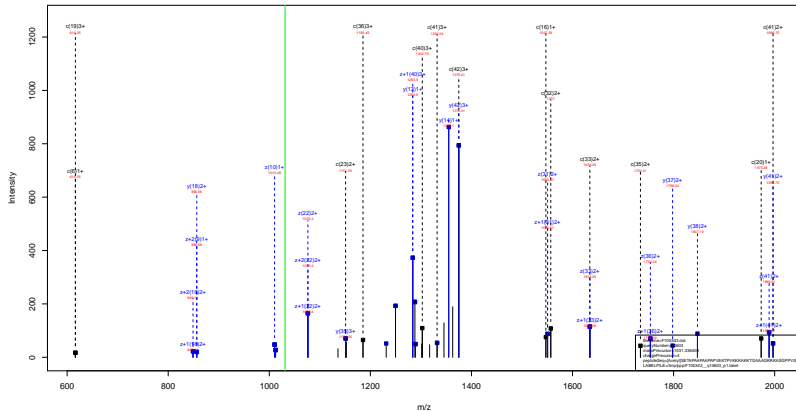

# sp | P43277 | H13\_MOUSE

[Acetyl]SETAPAAPAAPAPVEKTPVKKKAKKTGAAAGKRKASGPPVSE

- ▶ fragmentation table for charge state 1+
- ▶ specType=etd
- ▶ score=50.80
- ▶ F105343.dat
- ▶ query=q14603.p1
- ▶ precursor=1031.336400
- ▶ chargePrecursor=4
- ▶ itol=0.8

| AA | c  | y               | z+1             | z+2      | z               | AA              |       |
|----|----|-----------------|-----------------|----------|-----------------|-----------------|-------|
| S  | 1  | 147.079         | 4122.303        | 4108.265 | 0.000           | 4105.277        | S[42] |
| E  | 2  | 276.119         | 3993.261        | 3977.242 | 0.000           | 3976.234        | E[41] |
| T  | 3  | 377.167         | 3864.218        | 3848.199 | 0.000           | 3847.192        | T[40] |
| A  | 4  | 449.204         | 3763.170        | 3747.151 | 0.000           | 3746.144        | A[39] |
| P  | 5  | 545.257         | 3692.133        | 3676.115 | 0.000           | 3675.107        | P[38] |
| A  | 6  | <b>616.294</b>  | 3595.081        | 3579.062 | 0.000           | 3578.054        | A[37] |
| A  | 7  | 667.331         | 3524.044        | 3508.025 | 0.000           | 3507.017        | A[36] |
| P  | 8  | 764.384         | 3453.000        | 3436.980 | 0.000           | 3435.980        | P[35] |
| A  | 9  | 855.421         | 3385.954        | 3369.935 | 0.000           | 3368.927        | A[34] |
| A  | 10 | 928.458         | 3284.911        | 3268.890 | 0.000           | 3267.884        | A[33] |
| P  | 11 | 1023.511        | 3213.870        | 3197.851 | 0.000           | 3196.853        | P[32] |
| A  | 12 | 1094.548        | 3116.827        | 3100.808 | 0.000           | 3099.800        | A[31] |
| P  | 13 | 1161.600        | 3045.790        | 3029.771 | 0.000           | 3028.763        | P[30] |
| V  | 14 | 1290.669        | 2948.737        | 2932.718 | 0.000           | 2931.710        | V[29] |
| E  | 15 | 1437.711        | 2849.686        | 2833.667 | 0.000           | 2832.662        | E[28] |
| R  | 16 | <b>1547.806</b> | 2720.626        | 2704.607 | 2708.615        | 2703.599        | R[27] |
| T  | 17 | 1688.854        | 2592.533        | 2576.512 | 2577.520        | 2575.504        | T[26] |
| P  | 18 | 1745.907        | 2491.483        | 2475.464 | 2476.472        | 2474.457        | P[25] |
| V  | 19 | 1864.975        | 2394.430        | 2378.412 | 2379.419        | 2377.404        | V[24] |
| R  | 20 | <b>1973.070</b> | 2295.367        | 2279.343 | 2280.351        | 2278.335        | R[23] |
| R  | 21 | 2101.105        | 2187.280        | 2171.248 | 2152.256        | 2150.240        | R[22] |
| R  | 22 | 2229.209        | 2099.174        | 2083.151 | 2074.161        | 2072.145        | R[21] |
| A  | 23 | 2300.297        | 1911.077        | 1895.058 | 1896.066        | 1894.050        | A[20] |
| R  | 24 | 2438.392        | 1840.040        | 1824.021 | 1825.029        | 1823.013        | R[19] |
| R  | 25 | 2556.497        | 1711.945        | 1695.926 | 1696.934        | 1694.918        | R[18] |
| T  | 26 | 2657.535        | 1583.850        | 1567.831 | 1568.839        | 1566.823        | T[17] |
| G  | 27 | 2714.557        | 1482.802        | 1466.780 | 1467.791        | 1465.770        | G[16] |
| A  | 28 | 2758.593        | 1425.781        | 1409.760 | 1410.770        | 1408.754        | A[15] |
| A  | 29 | 2856.631        | <b>1354.744</b> | 1338.725 | 1339.733        | 1337.717        | A[14] |
| A  | 30 | 2927.668        | <b>1283.707</b> | 1267.688 | 1268.696        | 1266.680        | A[13] |
| G  | 31 | 2984.689        | 1212.670        | 1196.651 | 1197.659        | 1195.643        | G[12] |
| R  | 32 | 3112.784        | 1155.640        | 1139.620 | 1140.637        | 1138.621        | R[11] |
| R  | 33 | 3268.885        | 1027.553        | 1011.533 | <b>1012.542</b> | <b>1010.527</b> | R[10] |
| R  | 34 | 3396.989        | 871.452         | 855.431  | <b>856.441</b>  | 854.425         | R[9]  |
| A  | 35 | 3468.017        | 743.351         | 727.330  | 728.346         | 726.330         | A[8]  |
| S  | 36 | 3536.049        | 672.320         | 656.301  | 657.309         | 655.291         | S[7]  |
| G  | 37 | 3612.071        | 585.288         | 569.269  | 570.277         | 568.261         | G[6]  |
| P  | 38 | 3706.124        | 528.266         | 512.248  | 513.256         | 511.240         | P[5]  |
| P  | 39 | 3838.176        | 431.214         | 415.195  | 416.203         | 414.187         | P[4]  |
| V  | 40 | 3905.245        | 334.161         | 318.143  | 319.150         | 317.134         | V[3]  |
| S  | 41 | 3992.277        | 235.092         | 219.074  | 220.082         | 218.066         | S[2]  |
| E  | 42 | 4121.319        | 148.050         | 132.040  | 133.050         | 131.034         | E[1]  |

# sp | P43277 | H13\_MOUSE

[Acetyl]SETAPAAPAAPAPVEKTPVKKKAKKTGAAAGKRKASGPPVSE

- ▶ fragmentation table for charge state 2+
- ▶ specType=etd
- ▶ score=50.80
- ▶ F105343.dat
- ▶ query=q14603.p1
- ▶ precursor=1031.336400
- ▶ chargePrecursor=4
- ▶ itol=0.8

| AA | c  | y               | z+1             | z+2             | z               | AA              |       |
|----|----|-----------------|-----------------|-----------------|-----------------|-----------------|-------|
| S  | 1  | 74.042          | 2061.655        | 2053.646        | 0.504           | 2053.142        | S[42] |
| E  | 2  | 138.563         | <b>1997.134</b> | <b>1989.125</b> | 0.504           | <b>1988.621</b> | E[41] |
| T  | 3  | 189.087         | 1932.613        | 1924.603        | 0.504           | 1924.090        | T[40] |
| A  | 4  | 224.206         | 1928.089        | 1874.080        | 0.504           | 1873.576        | A[39] |
| P  | 5  | 293.133         | <b>1846.576</b> | 1838.567        | 0.504           | 1838.059        | P[38] |
| A  | 6  | 358.650         | <b>1798.044</b> | 1790.035        | 0.504           | 1789.531        | A[37] |
| A  | 7  | 344.169         | 1763.525        | <b>1754.516</b> | 0.504           | <b>1754.012</b> | A[36] |
| F  | 8  | 392.695         | 1727.007        | 1719.997        | 0.504           | 1718.486        | F[35] |
| A  | 9  | 428.214         | 1678.488        | 1670.471        | 0.504           | 1669.967        | A[34] |
| A  | 10 | 463.733         | 1642.969        | <b>1634.953</b> | 0.504           | <b>1634.449</b> | A[33] |
| P  | 11 | 532.259         | 1607.443        | 1599.434        | 0.504           | 1598.929        | P[32] |
| A  | 12 | 547.777         | 1558.917        | <b>1550.908</b> | 0.504           | <b>1550.404</b> | A[31] |
| F  | 13 | 586.304         | 1523.398        | 1515.389        | 0.504           | 1514.885        | F[30] |
| V  | 14 | 645.830         | 1474.872        | 1466.863        | 0.504           | 1466.359        | V[29] |
| E  | 15 | 710.359         | 1425.348        | 1417.338        | 0.504           | 1416.825        | E[28] |
| R  | 16 | 774.887         | 1369.817        | 1361.807        | 1353.797        | 1353.291        | R[27] |
| T  | 17 | 824.911         | 1290.765        | <b>1288.760</b> | <b>1289.264</b> | <b>1288.256</b> | T[26] |
| F  | 18 | 873.457         | 1246.245        | 1238.236        | 1238.740        | 1237.732        | F[25] |
| V  | 19 | 922.991         | 1197.719        | 1189.709        | 1190.213        | 1189.206        | V[24] |
| K  | 20 | 987.030         | 1148.195        | 1140.185        | 1140.679        | 1139.671        | K[23] |
| K  | 21 | 1051.569        | 1098.727        | <b>1076.128</b> | <b>1076.632</b> | <b>1075.624</b> | K[22] |
| K  | 22 | 1115.134        | 1020.090        | <b>1012.080</b> | <b>1012.584</b> | 1011.576        | K[21] |
| A  | 23 | <b>1150.652</b> | 956.042         | 948.033         | 948.537         | 947.529         | A[20] |
| K  | 24 | 1214.700        | 920.524         | 912.514         | 913.018         | 912.010         | K[19] |
| K  | 25 | 1278.747        | <b>856.476</b>  | <b>848.467</b>  | <b>848.971</b>  | 847.963         | K[18] |
| T  | 26 | 1329.271        | 792.429         | 784.419         | 784.923         | 783.915         | T[17] |
| G  | 27 | 1397.802        | 743.905         | 735.895         | 736.399         | 735.391         | G[16] |
| A  | 28 | 1393.300        | 713.394         | 705.385         | 705.889         | 704.881         | A[15] |
| A  | 29 | 1428.819        | 677.876         | 669.866         | 670.370         | 669.362         | A[14] |
| A  | 30 | 1464.337        | 642.357         | 634.348         | 634.852         | 633.844         | A[13] |
| G  | 31 | 1492.848        | 606.839         | 598.829         | 599.333         | 598.325         | G[12] |
| K  | 32 | <b>1556.896</b> | 578.328         | 570.318         | 570.822         | 569.814         | K[11] |
| R  | 33 | <b>1634.946</b> | 514.380         | 506.371         | 506.875         | 505.867         | R[10] |
| K  | 34 | 1698.994        | 436.230         | 428.220         | 428.724         | 427.716         | K[9]  |
| A  | 35 | <b>1734.512</b> | 372.182         | 364.173         | 364.677         | 363.669         | A[8]  |
| S  | 36 | 1778.028        | 336.664         | 328.654         | 329.158         | 328.150         | S[7]  |
| G  | 37 | 1806.539        | 291.140         | 283.130         | 283.634         | 282.626         | G[6]  |
| F  | 38 | 1855.065        | 264.617         | 256.607         | 257.111         | 256.103         | F[5]  |
| F  | 39 | 1903.592        | 238.110         | 230.101         | 230.605         | 229.597         | F[4]  |
| V  | 40 | 1953.126        | 167.584         | 159.575         | 160.079         | 159.071         | V[3]  |
| S  | 41 | <b>1996.642</b> | 118.050         | 110.041         | 110.544         | 109.537         | S[2]  |
| E  | 42 | 2061.163        | 74.534          | 66.524          | 67.028          | 66.021          | E[1]  |



# sp | P43277 | H13\_MOUSE

[Acetyl]SETAPAAPAAPAPVEKTPVKKKAKKTGAAAGKRKASGPPVSE

- ▶ fragmentation table for charge state 3+
- ▶ specType=etd
- ▶ score=50.80
- ▶ F105343.dat
- ▶ query=q14603\_p1
- ▶ precursor=1031.336400
- ▶ chargePrecursor=4
- ▶ itol=0.8

| AA | c  | y               | z+1             | z+2             | z     | AA              |       |
|----|----|-----------------|-----------------|-----------------|-------|-----------------|-------|
| S  | 1  | 49.697          | <b>1374.773</b> | 1300.433        | 0.672 | 1309.097        | S[42] |
| E  | 2  | 62.711          | <b>1331.758</b> | 1250.410        | 0.672 | 1236.083        | E[41] |
| T  | 3  | 139.394         | <b>1238.744</b> | <b>1201.405</b> | 0.672 | 1203.993        | T[40] |
| A  | 4  | 150.073         | 1255.052        | <b>1249.722</b> | 0.672 | <b>1249.386</b> | A[39] |
| P  | 5  | 182.424         | <b>1231.383</b> | 1226.043        | 0.672 | 1225.707        | P[38] |
| A  | 6  | 206.301         | 1199.032        | 1193.692        | 0.672 | 1193.356        | A[37] |
| A  | 7  | 229.782         | 1175.353        | 1170.013        | 0.672 | 1169.677        | A[36] |
| P  | 8  | 262.133         | <b>1151.674</b> | 1146.334        | 0.672 | 1145.990        | P[35] |
| A  | 9  | 285.812         | 1119.453        | 1113.883        | 0.672 | 1113.547        | A[34] |
| A  | 10 | 309.491         | 1095.644        | 1090.304        | 0.672 | 1089.969        | A[33] |
| P  | 11 | 341.842         | 1071.965        | 1066.625        | 0.672 | 1066.280        | P[32] |
| A  | 12 | 365.521         | 1039.614        | 1034.274        | 0.672 | 1033.938        | A[31] |
| P  | 13 | 397.872         | 1015.935        | <b>1010.595</b> | 0.672 | <b>1010.259</b> | P[30] |
| V  | 14 | 430.204         | 983.584         | 978.244         | 0.672 | 977.908         | V[29] |
| E  | 15 | 473.809         | 959.561         | 945.221         | 0.672 | 944.885         | E[28] |
| R  | 16 | 518.607         | 937.547         | 902.207         | 0.672 | 901.871         | R[27] |
| T  | 17 | 550.290         | 884.848         | 850.509         | 0.672 | 850.173         | T[26] |
| P  | 18 | 582.640         | 831.169         | 825.826         | 0.672 | 825.490         | P[25] |
| V  | 19 | <b>615.663</b>  | 798.815         | 793.475         | 0.672 | 793.139         | V[24] |
| K  | 20 | 658.362         | 765.792         | 760.453         | 0.672 | 760.117         | K[23] |
| K  | 21 | 701.060         | 723.094         | 717.754         | 0.672 | 717.418         | K[22] |
| K  | 22 | 743.758         | 680.396         | 675.056         | 0.672 | 674.720         | K[21] |
| A  | 23 | 787.437         | 637.697         | 632.358         | 0.672 | 632.022         | A[20] |
| K  | 24 | 810.136         | 614.018         | 608.679         | 0.672 | 608.343         | K[19] |
| K  | 25 | 852.834         | 571.320         | 565.980         | 0.672 | 565.644         | K[18] |
| T  | 26 | 895.516         | 528.622         | 523.282         | 0.672 | 522.946         | T[17] |
| G  | 27 | 905.524         | 494.930         | 489.590         | 0.672 | 489.254         | G[16] |
| A  | 28 | 929.203         | 475.937         | 470.597         | 0.672 | 470.261         | A[15] |
| A  | 29 | 952.882         | 452.251         | 446.911         | 0.672 | 446.575         | A[14] |
| A  | 30 | 976.561         | 428.574         | 423.234         | 0.672 | 422.898         | A[13] |
| G  | 31 | 995.568         | 404.895         | 399.555         | 0.672 | 399.219         | G[12] |
| K  | 32 | 1018.266        | 385.888         | 380.548         | 0.672 | 380.212         | K[11] |
| R  | 33 | 1090.300        | 343.180         | 337.850         | 0.672 | 337.514         | R[10] |
| K  | 34 | 1132.988        | 291.156         | 285.816         | 0.672 | 285.480         | K[9]  |
| A  | 35 | 1164.077        | 249.457         | 243.118         | 0.672 | 242.782         | A[9]  |
| S  | 36 | <b>1185.688</b> | 224.778         | 219.439         | 0.672 | 219.103         | S[7]  |
| G  | 37 | 1204.695        | 195.767         | 190.428         | 0.672 | 190.092         | G[6]  |
| P  | 38 | 1237.646        | 176.760         | 171.421         | 0.672 | 171.085         | P[5]  |
| P  | 39 | 1269.397        | 144.400         | 139.070         | 0.672 | 138.734         | P[4]  |
| V  | 40 | <b>1302.420</b> | 112.058         | 106.719         | 0.672 | 106.383         | V[3]  |
| S  | 41 | <b>1311.430</b> | 79.038          | 73.698          | 0.672 | 73.362          | S[2]  |
| E  | 42 | <b>1374.445</b> | 50.025          | 44.685          | 0.672 | 44.349          | E[1]  |



# sp | P43274 | H14\_MOUSE

[Acetyl]SET<sup>(Phospho)</sup><sub>(79.97)</sub> APAAPAAPAPAEKTPVKKKARKAAGGAKRKTSGPPVSE

- ▶ fragmentation table for charge state 1+
- ▶ specType=etd
- ▶ score=45.79
- ▶ F105343.dat
- ▶ query=q14613.p1
- ▶ precursor=827.051760
- ▶ chargePrecursor=5
- ▶ itol=0.8

| AA  | c               | y              | z+1             | z+2             | z               | AA  |
|-----|-----------------|----------------|-----------------|-----------------|-----------------|-----|
| S1  | 147.076         | 4131.207       | 4115.180        | 0.000           | 4114.181        | S41 |
| E2  | 276.119         | 4002.165       | 3986.140        | 0.000           | 3985.138        | E46 |
| T3  | 457.133         | 3873.123       | 3857.104        | 0.000           | 3856.098        | T30 |
| A4  | 528.170         | 3692.108       | 3676.090        | 0.000           | 3675.082        | A38 |
| P5  | 625.223         | 3621.071       | 3605.052        | 0.000           | 3604.045        | P37 |
| A6  | 696.260         | 3524.038       | 3508.020        | 0.000           | 3506.992        | A36 |
| A7  | 707.297         | 3452.001       | 3436.983        | 0.000           | 3435.955        | A25 |
| P8  | 864.350         | 3381.944       | 3365.925        | 0.000           | 3364.918        | P34 |
| A9  | 935.387         | 3284.891       | 3268.873        | 0.000           | 3267.865        | A33 |
| A10 | 1006.424        | 3213.854       | 3197.836        | 0.000           | 3196.828        | A32 |
| P11 | 1103.477        | 3142.817       | 3126.798        | 0.000           | 3125.791        | P31 |
| A12 | 1174.514        | 3045.784       | 3029.766        | 0.000           | 3028.758        | A30 |
| P13 | 1271.567        | 2974.747       | 2958.729        | 0.000           | 2957.721        | P29 |
| A14 | 1342.604        | 2877.674       | 2861.656        | 0.000           | 2860.648        | A28 |
| E15 | 1471.646        | 2806.637       | 2790.619        | 0.000           | 2789.611        | E27 |
| K16 | <b>1599.741</b> | 2677.595       | 2661.576        | 2662.584        | 2660.568        | K26 |
| T17 | 1700.789        | 2540.500       | 2523.481        | 2524.489        | 2522.473        | T25 |
| P18 | 1707.826        | 2446.452       | 2430.433        | 2431.441        | 2429.426        | P24 |
| V19 | 1898.910        | 2351.369       | 2335.351        | 2336.358        | 2334.371        | V23 |
| K20 | 2025.005        | 2252.331       | 2236.312        | 2237.320        | 2235.304        | K22 |
| K21 | 2153.100        | 2124.236       | 2108.217        | 2109.225        | 2107.209        | K21 |
| K22 | 2281.195        | 1996.141       | 1980.122        | 1981.130        | 1979.114        | K20 |
| A23 | 2352.232        | 1868.046       | 1852.027        | 1853.035        | 1851.020        | A19 |
| T24 | 2508.313        | 1777.009       | 1760.990        | 1761.998        | 1759.983        | T18 |
| R25 | 2638.428        | 1640.908       | <b>1624.889</b> | 1625.897        | <b>1623.881</b> | R17 |
| A26 | 2707.465        | 1512.813       | 1496.794        | 1497.802        | 1495.786        | A16 |
| A27 | 2778.503        | 1441.776       | 1425.757        | 1426.765        | 1424.749        | A15 |
| G28 | 2835.524        | 1370.739       | 1354.720        | 1355.728        | 1353.712        | G14 |
| G29 | 2892.546        | 1311.717       | 1295.698        | 1296.706        | 1294.690        | G13 |
| A30 | 2953.583        | 1256.696       | 1240.677        | <b>1241.685</b> | 1239.669        | A23 |
| K31 | 3091.678        | 1185.659       | 1169.640        | <b>1170.648</b> | 1168.622        | K11 |
| R32 | 3247.779        | 1057.564       | <b>1041.545</b> | 1042.553        | 1040.537        | R10 |
| K33 | 3375.874        | 901.463        | <b>885.444</b>  | 886.452         | 884.436         | K9  |
| T34 | 3476.921        | 773.368        | 757.349         | <b>758.357</b>  | 756.341         | T8  |
| S35 | 3563.951        | 672.320        | 656.301         | <b>657.309</b>  | 655.293         | S7  |
| G36 | 3620.976        | <b>585.168</b> | 569.269         | 570.277         | 568.261         | G6  |
| P37 | 3748.028        | 528.200        | 512.240         | 513.256         | 511.240         | P5  |
| P38 | 3815.080        | 431.214        | 415.195         | 416.203         | 414.187         | P4  |
| V39 | 3914.149        | 334.061        | 318.142         | 319.150         | 317.134         | V3  |
| S40 | 4001.181        | 235.092        | 219.074         | 220.082         | 218.066         | S2  |
| E41 | 4130.223        | 148.060        | 132.042         | 133.050         | 131.034         | E1  |

# sp | P43274 | H14\_MOUSE

[Acetyl]SET<sup>(Phospho)</sup><sub>(79.97)</sub> APAAPAAPAPAEKTPVKKKARKAAGGAKRKTSGPPVSE

- ▶ fragmentation table for charge state 2+
- ▶ specType=etd
- ▶ score=45.79
- ▶ F105343.dat
- ▶ query=q14613.p1
- ▶ precursor=827.051760
- ▶ chargePrecursor=5
- ▶ itol=0.8

| AA | c  | y               | z+1             | z+2             | z               | AA              |       |
|----|----|-----------------|-----------------|-----------------|-----------------|-----------------|-------|
| S  | 1  | 74.042          | 2058.101        | 2058.088        | 0.504           | 2057.595        | S[41] |
| E  | 2  | 138.593         | 2001.585        | 1993.177        | 0.504           | 1993.671        | E[48] |
| T  | 3  | 229.070         | 1937.065        | 1929.058        | 0.504           | 1928.551        | T[39] |
| A  | 4  | 284.589         | 1848.558        | 1838.548        | 0.504           | 1838.044        | A[38] |
| P  | 5  | 313.115         | 1811.039        | 1801.030        | 0.504           | 1802.526        | P[37] |
| A  | 6  | 348.634         | 1762.513        | 1754.503        | 0.504           | 1754.000        | A[36] |
| A  | 7  | 384.152         | 1726.994        | 1718.983        | 0.504           | 1719.481        | A[35] |
| P  | 8  | 432.679         | 1691.475        | 1683.466        | 0.504           | 1682.962        | P[34] |
| A  | 9  | 468.197         | 1642.949        | 1634.940        | 0.504           | 1634.438        | A[33] |
| A  | 10 | 503.716         | 1607.431        | <b>1599.421</b> | 0.504           | <b>1598.917</b> | A[32] |
| P  | 11 | 552.242         | 1571.912        | 1563.903        | 0.504           | 1563.399        | P[31] |
| A  | 12 | 587.761         | 1523.386        | <b>1515.376</b> | 0.504           | 1514.871        | A[30] |
| F  | 13 | 636.287         | 1487.861        | 1479.853        | 0.504           | 1479.349        | F[29] |
| A  | 14 | 671.806         | 1449.341        | 1441.332        | 0.504           | 1440.828        | A[28] |
| E  | 15 | 736.327         | 1403.822        | 1395.813        | 0.504           | 1395.309        | E[27] |
| K  | 16 | 800.374         | <b>1339.301</b> | 1331.292        | 1331.796        | 1330.788        | K[26] |
| T  | 17 | 850.898         | 1275.254        | 1267.244        | <b>1267.748</b> | 1266.740        | T[25] |
| F  | 18 | 899.426         | 1234.735        | 1226.725        | 1227.229        | 1226.221        | F[24] |
| V  | 19 | 948.959         | <b>1176.203</b> | 1168.194        | 1168.698        | 1167.690        | V[23] |
| K  | 20 | 1013.006        | <b>1120.669</b> | 1118.660        | 1119.164        | 1118.156        | K[22] |
| K  | 21 | <b>1077.054</b> | 1062.622        | <b>1054.612</b> | <b>1055.116</b> | 1054.108        | K[21] |
| K  | 22 | <b>1141.101</b> | <b>998.574</b>  | <b>990.565</b>  | <b>991.069</b>  | <b>990.061</b>  | K[20] |
| A  | 23 | <b>1176.620</b> | 934.527         | 926             | 927.021         | 926.013         | A[19] |
| R  | 24 | 1254.671        | 899.038         | <b>890.999</b>  | <b>891.503</b>  | <b>890.495</b>  | R[18] |
| K  | 25 | <b>1318.718</b> | 820.958         | <b>812.948</b>  | <b>813.452</b>  | 812.444         | K[17] |
| A  | 26 | 1354.236        | 756.910         | <b>748.901</b>  | <b>749.405</b>  | <b>748.397</b>  | A[16] |
| A  | 27 | 1389.755        | 721.392         | <b>713.382</b>  | <b>713.886</b>  | 712.878         | A[15] |
| G  | 28 | <b>1418.266</b> | 685.873         | <b>677.864</b>  | <b>678.368</b>  | <b>677.360</b>  | G[14] |
| G  | 29 | <b>1448.776</b> | <b>657.362</b>  | <b>649.353</b>  | <b>649.857</b>  | 648.849         | G[13] |
| A  | 30 | <b>1482.295</b> | 628.825         | <b>620.842</b>  | <b>621.346</b>  | <b>620.338</b>  | A[12] |
| K  | 31 | <b>1546.342</b> | 593.313         | <b>585.324</b>  | <b>585.827</b>  | <b>584.820</b>  | K[11] |
| R  | 32 | <b>1624.393</b> | 529.805         | 521.278         | 521.780         | 520.772         | R[10] |
| K  | 33 | 1688.440        | 451.235         | 443.230         | 443.729         | 442.722         | K[9]  |
| T  | 34 | 1738.964        | 387.187         | 379.178         | 379.682         | 378.674         | T[8]  |
| S  | 35 | 1782.480        | 198.664         | 190.654         | 191.158         | 190.150         | S[7]  |
| G  | 36 | 1810.991        | 293.140         | 285.138         | 285.642         | 284.634         | G[6]  |
| F  | 37 | 1859.517        | 264.637         | 256.627         | 257.131         | 256.124         | F[5]  |
| F  | 38 | 1908.044        | 216.110         | 208.101         | 208.605         | 207.597         | F[4]  |
| V  | 39 | 1957.576        | 167.584         | 159.575         | 160.079         | 159.071         | V[3]  |
| S  | 40 | 2001.094        | 118.060         | 110.041         | 110.544         | 109.535         | S[2]  |
| E  | 41 | 2055.615        | 74.534          | 66.523          | 67.026          | 66.018          | E[1]  |

# sp | P43274 | H14\_MOUSE

[Acetyl]SET<sup>(Phospho)</sup><sub>(79.97)</sub> APAAPAAPAPAEKTPVKKKARKAAGGAKRKTSGPPVSE

- ▶ fragmentation table for charge state 3+
- ▶ specType=etd
- ▶ score=45.79
- ▶ F105343.dat
- ▶ query=q14613.p1
- ▶ precursor=827.051760
- ▶ chargePrecursor=5
- ▶ itol=0.8

| AA | c  | y               | z+1             | z+2             | z              | AA              |       |
|----|----|-----------------|-----------------|-----------------|----------------|-----------------|-------|
| S  | 1  | 49.697          | 1377.741        | <b>1372.401</b> | 0.672          | 1372.095        | S[41] |
| E  | 2  | 92.711          | <b>1334.726</b> | 1329.397        | 0.672          | 1329.051        | E[40] |
| T  | 3  | 153.049         | 1291.712        | 1286.373        | 0.672          | 1286.037        | T[39] |
| A  | 4  | 176.728         | 1231.374        | <b>1226.035</b> | 0.672          | 1225.699        | A[38] |
| P  | 5  | 209.079         | <b>1207.695</b> | 1202.356        | 0.672          | 1202.020        | P[37] |
| A  | 6  | 232.758         | 1175.343        | 1170.004        | 0.672          | 1169.668        | A[36] |
| A  | 7  | 256.437         | 1151.665        | <b>1146.326</b> | 0.672          | <b>1145.990</b> | A[35] |
| P  | 8  | 268.788         | 1127.986        | 1122.647        | 0.672          | 1122.311        | P[34] |
| A  | 9  | 312.467         | 1095.635        | 1090.296        | 0.672          | 1089.960        | A[33] |
| A  | 10 | 336.146         | 1071.956        | 1066.617        | 0.672          | 1066.281        | A[32] |
| P  | 11 | 368.497         | <b>1048.277</b> | 1042.938        | 0.672          | 1042.602        | P[31] |
| A  | 12 | 392.176         | <b>1015.926</b> | 1010.587        | 0.672          | <b>1010.251</b> | A[30] |
| P  | 13 | 424.527         | 992.247         | 986.908         | 0.672          | 986.572         | P[29] |
| A  | 14 | 448.206         | 969.896         | <b>954.557</b>  | 0.672          | <b>954.221</b>  | A[28] |
| E  | 15 | 491.220         | 936.217         | 930.878         | 0.672          | 930.542         | E[27] |
| K  | 16 | 513.919         | 893.203         | 887.864         | 0.672          | 887.528         | K[26] |
| T  | 17 | 567.601         | 850.505         | <b>845.165</b>  | <b>845.501</b> | 844.829         | T[25] |
| P  | 18 | 599.952         | 818.823         | 813.484         | 0.672          | 813.147         | P[24] |
| V  | 19 | 632.975         | 786.471         | 779.132         | 0.672          | 778.796         | V[23] |
| K  | 20 | 675.673         | 751.449         | <b>746.109</b>  | <b>746.445</b> | <b>745.773</b>  | K[22] |
| K  | 21 | 718.372         | 708.750         | 703.411         | 0.672          | 703.075         | K[21] |
| K  | 22 | 761.070         | 666.052         | 660.712         | 0.672          | 660.376         | K[20] |
| A  | 23 | 784.749         | 623.354         | 618.014         | 0.672          | 617.678         | A[19] |
| R  | 24 | 836.783         | 599.875         | 594.535         | 0.672          | 594.200         | R[18] |
| K  | 25 | 879.481         | 547.641         | 542.301         | 0.672          | 541.965         | K[17] |
| A  | 26 | 903.160         | 504.942         | 499.602         | 0.672          | 499.266         | A[16] |
| A  | 27 | 936.839         | 481.263         | 475.924         | 0.672          | 475.588         | A[15] |
| G  | 28 | <b>945.846</b>  | 457.584         | 452.245         | 0.672          | 451.909         | G[14] |
| G  | 29 | 964.853         | 436.577         | 431.238         | 0.672          | 430.902         | G[13] |
| A  | 30 | 998.532         | 419.570         | 414.231         | 0.672          | 413.895         | A[12] |
| K  | 31 | <b>1031.231</b> | 395.891         | 390.551         | 0.672          | 390.215         | K[11] |
| R  | 32 | <b>1083.264</b> | 353.193         | 347.853         | 0.672          | 347.517         | R[10] |
| K  | 33 | <b>1125.963</b> | 301.150         | 295.810         | 0.672          | 295.474         | K[9]  |
| T  | 34 | <b>1159.645</b> | 259.461         | 253.121         | 0.672          | 252.785         | T[8]  |
| S  | 35 | <b>1188.656</b> | 224.778         | 218.439         | 0.672          | 218.103         | S[7]  |
| G  | 36 | <b>1207.663</b> | 199.767         | 193.427         | 0.672          | 193.091         | G[6]  |
| P  | 37 | 1249.014        | 179.760         | 174.421         | 0.672          | 174.085         | P[5]  |
| P  | 38 | 1272.365        | 144.400         | 139.070         | 0.672          | 138.734         | P[4]  |
| V  | 39 | <b>1305.388</b> | 112.058         | 106.719         | 0.672          | 106.383         | V[3]  |
| S  | 40 | <b>1334.398</b> | 79.030          | 73.690          | 0.672          | 73.354          | S[2]  |
| E  | 41 | 1377.413        | 50.025          | 44.685          | 0.672          | 44.349          | E[1]  |

# sp | P43274 | H14\_MOUSE

[Acetyl]SET<sup>(Phospho)</sup><sub>(79.97)</sub> APAAPAAPAPAEKTPVKKKARKAAGGAKRKTSGPPVSE

- ▶ fragmentation table for charge state 4+
- ▶ specType=etd
- ▶ score=45.79
- ▶ F105343.dat
- ▶ query=q14613\_p1
- ▶ precursor=827.051760
- ▶ chargePrecursor=5
- ▶ itol=0.8

| AA | c  | y               | z+1             | z+2            | z              | AA             |       |
|----|----|-----------------|-----------------|----------------|----------------|----------------|-------|
| S  | 1  | 37.525          | <b>1033.557</b> | 1029.553       | 0.755          | 1029.301       | S[41] |
| E  | 2  | 69.785          | <b>1001.297</b> | 997.292        | 0.755          | 997.040        | E[40] |
| T  | 3  | 115.039         | <b>969.036</b>  | 965.031        | 0.755          | 964.779        | T[39] |
| A  | 4  | 134.798         | 962.783         | <b>919.778</b> | 0.755          | <b>919.526</b> | A[38] |
| P  | 5  | 157.383         | 956.523         | 952.519        | 0.755          | 951.769        | P[37] |
| A  | 6  | 174.820         | 951.760         | 877.755        | 0.755          | 877.503        | A[36] |
| A  | 7  | 192.580         | 954.001         | 859.996        | 0.755          | 859.744        | A[35] |
| P  | 8  | 216.843         | <b>846.241</b>  | 842.237        | 0.755          | 841.985        | P[34] |
| A  | 9  | 234.602         | 821.979         | 817.974        | 0.755          | 817.722        | A[33] |
| A  | 10 | 252.361         | 804.219         | 800.214        | 0.755          | 799.962        | A[32] |
| P  | 11 | 276.625         | 798.460         | 782.455        | 0.755          | 782.203        | P[31] |
| A  | 12 | 294.384         | 792.197         | <b>758.192</b> | 0.755          | <b>757.940</b> | A[30] |
| P  | 13 | 318.647         | 744.437         | 740.433        | 0.755          | 740.181        | P[29] |
| A  | 14 | 336.406         | 726.174         | 726.169        | 0.755          | 715.911        | A[28] |
| E  | 15 | 368.667         | 702.415         | 698.410        | 0.755          | 698.158        | E[27] |
| K  | 16 | 400.691         | 670.154         | 666.149        | 0.606          | 665.896        | K[26] |
| T  | 17 | 425.953         | 638.130         | 634.126        | 0.334          | 633.874        | T[25] |
| P  | 18 | 450.216         | 612.868         | 608.864        | 0.911          | 608.612        | P[24] |
| V  | 19 | 474.383         | 598.605         | 594.601        | <b>584.853</b> | 584.349        | V[23] |
| K  | 20 | 507.007         | 563.838         | 559.834        | 0.808          | 559.582        | K[22] |
| K  | 21 | 539.031         | 531.814         | 527.810        | 0.286          | 527.558        | K[21] |
| K  | 22 | 571.054         | 499.791         | 495.786        | 4.96           | 495.534        | K[20] |
| A  | 23 | 588.814         | 467.767         | 463.762        | 4.04           | 463.510        | A[19] |
| K  | 24 | 627.839         | 450.008         | 446.003        | 4.46           | 445.751        | K[18] |
| K  | 25 | 659.862         | 418.982         | 408.978        | 4.97           | 408.726        | K[17] |
| A  | 26 | <b>677.622</b>  | 378.959         | 374.954        | 3.78           | 374.702        | A[16] |
| A  | 27 | 695.381         | 361.199         | 357.195        | 3.57           | 356.943        | A[15] |
| G  | 28 | 709.636         | 343.440         | 339.435        | 3.39           | 339.183        | G[14] |
| G  | 29 | 723.892         | 329.185         | 325.180        | 3.25           | 324.928        | G[13] |
| A  | 30 | 741.651         | 314.929         | 310.925        | 3.11           | 310.673        | A[12] |
| K  | 31 | 773.675         | 297.170         | 293.165        | 2.93           | 292.913        | K[11] |
| T  | 32 | <b>812.706</b>  | 265.148         | 261.142        | 2.61           | 260.890        | T[10] |
| K  | 33 | 844.224         | 229.121         | 222.116        | 2.22           | 221.868        | K[9]  |
| T  | 34 | 869.986         | 194.097         | 190.093        | 1.90           | 189.841        | T[8]  |
| S  | 35 | <b>891.744</b>  | 168.835         | 164.831        | 1.65           | 164.579        | S[7]  |
| G  | 36 | 905.999         | 147.077         | 143.073        | 1.43           | 142.821        | G[6]  |
| P  | 37 | 930.262         | 132.822         | 128.817        | 1.29           | 128.565        | P[5]  |
| P  | 38 | <b>954.526</b>  | 108.550         | 104.544        | 1.04           | 104.302        | P[4]  |
| V  | 39 | <b>979.233</b>  | 84.298          | 80.293         | 0.80           | 80.043         | V[3]  |
| S  | 40 | <b>1001.051</b> | 59.520          | 55.524         | 0.55           | 55.272         | S[2]  |
| E  | 41 | <b>1033.311</b> | 37.771          | 33.766         | 0.34           | 33.514         | E[1]  |

# sp | P43277 | H13\_MOUSE

S<sup>(Phospho)</sup> (79.97) ETAPAAPAAPAPVEKTPVKKKAKKTGAAAGKRKASGPPVSE

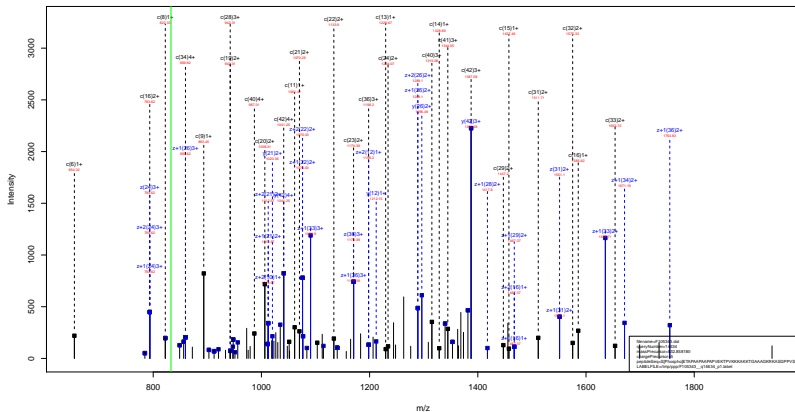

# sp | P43277 | H13\_MOUSE

S<sup>(Phospho)</sup><sub>(79.97)</sub> ETAPAAPAAPAPVEKTPVKKKKAKKTGAAAGKRKASGPPVSE

- ▶ fragmentation table for charge state 1+
- ▶ specType=etd
- ▶ score=64.98
- ▶ F105343.dat
- ▶ query=q14634\_p1
- ▶ precursor=832.858180
- ▶ chargePrecursor=5
- ▶ itol=0.8

| AA | c  | y               | z+1             | z+2             | z               | AA       |       |
|----|----|-----------------|-----------------|-----------------|-----------------|----------|-------|
| S  | 1  | 185.032         | 4160.250        | 4144.240        | 0.000           | 4143.233 | S[42] |
| E  | 2  | 314.075         | 3993.261        | 3977.242        | 0.000           | 3976.234 | E[41] |
| T  | 3  | 415.122         | 3884.218        | 3848.199        | 0.000           | 3847.192 | T[40] |
| A  | 4  | 456.160         | 3783.175        | 3747.152        | 0.000           | 3746.144 | A[39] |
| P  | 5  | 593.212         | 3692.131        | 3656.115        | 0.000           | 3655.109 | P[38] |
| A  | 6  | <b>654.249</b>  | 3595.081        | 3579.062        | 0.000           | 3578.054 | A[37] |
| A  | 7  | 725.287         | 3524.044        | 3508.025        | 0.000           | 3507.017 | A[36] |
| P  | 8  | <b>822.319</b>  | 3453.006        | 3436.988        | 0.000           | 3435.980 | P[35] |
| A  | 9  | <b>893.376</b>  | 3355.954        | 3339.935        | 0.000           | 3338.927 | A[34] |
| A  | 10 | 954.414         | 3284.917        | 3268.898        | 0.000           | 3267.890 | A[33] |
| P  | 11 | <b>1061.466</b> | 3213.879        | 3197.861        | 0.000           | 3196.853 | P[32] |
| A  | 12 | 1152.503        | 3118.827        | 3102.808        | 0.000           | 3101.800 | A[31] |
| P  | 13 | <b>1229.556</b> | 3045.790        | 3029.771        | 0.000           | 3028.763 | P[30] |
| V  | 14 | <b>1328.625</b> | 2948.737        | 2932.718        | 0.000           | 2931.710 | V[29] |
| E  | 15 | <b>1457.667</b> | 2849.668        | 2833.650        | 0.000           | 2832.642 | E[28] |
| K  | 16 | <b>1585.762</b> | 2720.626        | 2704.607        | 2.066           | 2703.599 | K[27] |
| T  | 17 | 1668.819        | 2592.531        | 2576.512        | 2.077           | 2575.504 | T[26] |
| P  | 18 | 1783.863        | 2461.483        | 2445.464        | 2.076           | 2444.457 | P[25] |
| V  | 19 | 1882.911        | 2394.436        | 2378.417        | 2.079           | 2377.409 | V[24] |
| K  | 20 | 2011.026        | 2229.362        | 2213.343        | 2.080           | 2212.335 | K[23] |
| K  | 21 | 2139.121        | 2167.267        | 2151.248        | 2.152           | 2150.240 | K[22] |
| K  | 22 | 2287.216        | 2039.172        | 2023.153        | 3.034           | 2022.145 | K[21] |
| A  | 23 | 2338.253        | 1911.077        | 1895.058        | 1.896           | 1894.050 | A[20] |
| K  | 24 | 2466.348        | 1840.040        | 1824.021        | 1.825           | 1823.013 | K[19] |
| K  | 25 | 2594.443        | 1711.945        | 1695.926        | 1.896           | 1694.918 | K[18] |
| T  | 26 | 2695.491        | 1583.850        | 1567.831        | 1.568           | 1566.823 | T[17] |
| G  | 27 | 2752.512        | 1482.802        | <b>1466.784</b> | <b>1467.791</b> | 1466.776 | G[16] |
| A  | 28 | 2823.549        | 1426.761        | 1410.742        | 1.410           | 1409.734 | A[15] |
| A  | 29 | 2894.586        | 1354.744        | <b>1338.725</b> | <b>1339.733</b> | 1337.717 | A[14] |
| A  | 30 | 2965.623        | 1283.707        | 1267.688        | 1.268           | 1266.680 | A[13] |
| G  | 31 | 3022.645        | <b>1212.670</b> | 1196.651        | <b>1197.659</b> | 1195.644 | G[12] |
| K  | 32 | 3150.740        | 1135.648        | <b>1139.629</b> | <b>1140.637</b> | 1138.621 | K[11] |
| K  | 33 | 3306.841        | 1027.553        | <b>1011.534</b> | <b>1012.542</b> | 1010.527 | K[10] |
| T  | 34 | 3434.936        | 891.456         | 875.437         | <b>856.441</b>  | 854.425  | T[9]  |
| A  | 35 | 3505.973        | 743.357         | 727.338         | 726.340         | 725.332  | A[8]  |
| S  | 36 | 3593.005        | 672.320         | 656.301         | 657.309         | 655.293  | S[7]  |
| G  | 37 | 3656.027        | 585.288         | 569.269         | 570.277         | 568.261  | G[6]  |
| P  | 38 | 3747.079        | 528.250         | 512.248         | 513.256         | 511.240  | P[5]  |
| P  | 39 | 3884.132        | 431.214         | 415.195         | 416.203         | 414.187  | P[4]  |
| V  | 40 | 3943.209        | 334.161         | 318.142         | 319.150         | 317.134  | V[3]  |
| S  | 41 | 4030.233        | 235.082         | 219.074         | 220.082         | 218.066  | S[2]  |
| E  | 42 | 4159.275        | 148.060         | 132.042         | 133.050         | 131.034  | E[1]  |



# sp | P43277 | H13\_MOUSE

S<sup>(Phospho)</sup><sub>(79.97)</sub> ETAPAAPAAPAPVEKTPVKKKKAKKTGAAAGKRKASGPPVSE

- ▶ fragmentation table for charge state 2+
- ▶ specType=etd
- ▶ score=64.98
- ▶ F105343.dat
- ▶ query=q14634\_p1
- ▶ precursor=832.858180
- ▶ chargePrecursor=5
- ▶ itol=0.8

| AA    | c               | y               | z+1             | z+2             | z               | AA    |
|-------|-----------------|-----------------|-----------------|-----------------|-----------------|-------|
| S[1]  | 93.020          | 2080.615        | 2072.634        | 0.504           | 2072.120        | S[42] |
| E[2]  | 157.541         | 1997.134        | 1989.125        | 0.504           | 1988.621        | E[41] |
| T[3]  | 208.005         | 1932.613        | 1924.603        | 0.504           | 1924.090        | T[40] |
| A[4]  | 243.583         | 1882.089        | 1874.080        | 0.504           | 1873.576        | A[39] |
| P[5]  | 282.110         | 1846.570        | 1838.561        | 0.504           | 1838.057        | P[38] |
| A[6]  | 327.658         | 1796.044        | 1788.035        | 0.504           | 1787.531        | A[37] |
| A[7]  | 383.147         | 1762.525        | <b>1754.516</b> | 0.504           | 1754.012        | A[36] |
| F[8]  | 411.673         | 1727.007        | 1719.997        | 0.504           | 1719.494        | F[35] |
| A[9]  | 447.192         | 1678.480        | <b>1670.471</b> | 0.504           | 1669.967        | A[34] |
| A[10] | 482.710         | 1642.962        | <b>1634.953</b> | 0.504           | 1634.449        | A[33] |
| P[11] | 531.289         | 1609.443        | 1599.433        | 0.504           | 1599.930        | P[32] |
| A[12] | 566.755         | 1558.917        | <b>1550.908</b> | 0.504           | <b>1550.404</b> | A[31] |
| P[13] | 615.282         | 1523.399        | 1515.389        | 0.504           | 1515.886        | P[30] |
| V[14] | 664.816         | 1474.872        | <b>1466.863</b> | 0.504           | 1466.359        | V[29] |
| E[15] | 720.337         | 1425.336        | <b>1417.328</b> | 0.504           | 1416.825        | E[28] |
| R[16] | <b>793.385</b>  | 1369.811        | <b>1352.807</b> | <b>1353.311</b> | 1352.301        | R[27] |
| T[17] | 843.909         | <b>1296.769</b> | <b>1288.760</b> | <b>1289.264</b> | 1289.250        | T[26] |
| F[18] | 892.435         | 1246.245        | 1238.236        | 1238.740        | 1237.732        | F[25] |
| V[19] | <b>941.969</b>  | <b>1197.719</b> | 1189.709        | 1190.213        | 1189.206        | V[24] |
| K[20] | <b>1006.017</b> | 1148.195        | <b>1140.175</b> | <b>1140.679</b> | <b>1139.671</b> | K[23] |
| K[21] | <b>1076.064</b> | <b>1084.137</b> | <b>1076.128</b> | <b>1076.632</b> | <b>1075.624</b> | K[22] |
| R[22] | <b>1134.112</b> | 1030.990        | <b>1012.080</b> | <b>1012.584</b> | <b>1011.576</b> | R[21] |
| A[23] | <b>1169.630</b> | <b>956.042</b>  | <b>948.033</b>  | <b>948.537</b>  | <b>947.529</b>  | A[20] |
| R[24] | <b>1233.678</b> | <b>920.524</b>  | <b>912.514</b>  | <b>913.018</b>  | <b>912.010</b>  | R[19] |
| K[25] | 1267.725        | <b>856.476</b>  | <b>848.467</b>  | <b>848.971</b>  | 847.961         | K[18] |
| T[26] | 1348.249        | 792.429         | <b>784.419</b>  | <b>784.923</b>  | <b>783.915</b>  | T[17] |
| G[27] | 1376.780        | 742.905         | 733.895         | 734.399         | 733.392         | G[16] |
| A[28] | 1412.778        | 713.394         | 705.385         | 705.889         | 704.881         | A[15] |
| A[29] | <b>1447.797</b> | 677.876         | 669.866         | 670.370         | 669.362         | A[14] |
| A[30] | 1483.315        | 642.357         | 634.348         | 634.852         | 633.844         | A[13] |
| G[31] | <b>1511.826</b> | 606.838         | 598.829         | 599.333         | 598.325         | G[12] |
| K[32] | <b>1575.874</b> | 578.328         | 570.318         | 570.822         | 569.814         | K[11] |
| R[33] | <b>1653.924</b> | 514.289         | 506.279         | 506.783         | 505.781         | R[10] |
| R[34] | 1747.972        | 436.230         | 428.220         | 428.724         | 427.719         | R[9]  |
| A[35] | 1783.490        | 372.182         | 364.173         | 364.677         | 363.669         | A[8]  |
| S[36] | 1797.006        | 336.664         | 328.654         | 329.158         | 328.150         | S[7]  |
| G[37] | 1825.517        | 293.140         | 285.130         | 285.642         | 284.634         | G[6]  |
| F[38] | 1874.043        | 264.617         | 256.607         | 257.111         | 256.103         | F[5]  |
| F[39] | 1922.570        | 216.110         | 208.101         | 208.605         | 207.597         | F[4]  |
| V[40] | 1972.104        | 167.584         | 159.575         | 160.079         | 159.071         | V[3]  |
| S[41] | 2015.620        | 118.050         | 110.041         | 110.544         | 109.537         | S[2]  |
| E[42] | 2080.141        | 74.534          | 66.524          | 67.028          | 66.021          | E[1]  |

# sp | P43277 | H13\_MOUSE

S<sup>(Phospho)</sup><sub>(79.97)</sub> ETAPAAPAAPAPVEKTPVKKKAKKTGAAAGKRKASGPPVSE

- ▶ fragmentation table for charge state 3+
- ▶ specType=etd
- ▶ score=64.98
- ▶ F105343.dat
- ▶ query=q14634\_p1
- ▶ precursor=832.858180
- ▶ chargePrecursor=5
- ▶ itol=0.8

| AA | c  | y               | z+1             | z+2             | z              | AA              |       |
|----|----|-----------------|-----------------|-----------------|----------------|-----------------|-------|
| S  | 1  | 62.349          | <b>1387.425</b> | <b>1382.085</b> | 0.672          | <b>1381.749</b> | S[42] |
| E  | 2  | 105.303         | 1331.758        | 1328.419        | 0.672          | 1326.083        | E[41] |
| T  | 3  | 139.046         | <b>1288.744</b> | 1283.405        | 0.672          | 1283.069        | T[40] |
| N  | 4  | 183.795         | 1235.963        | 1230.223        | 0.672          | 1230.389        | N[39] |
| P  | 5  | 195.076         | 1231.383        | 1228.043        | 0.672          | 1225.707        | P[38] |
| A  | 6  | 218.755         | 1199.032        | 1193.692        | 0.672          | 1193.356        | A[37] |
| A  | 7  | 242.434         | 1175.353        | <b>1170.013</b> | 0.672          | <b>1169.677</b> | A[36] |
| P  | 8  | 274.785         | 1151.674        | 1146.334        | 0.672          | 1145.998        | P[35] |
| A  | 9  | 298.464         | 1119.323        | <b>1113.983</b> | 0.672          | 1113.647        | A[34] |
| A  | 10 | 322.143         | 1095.644        | <b>1090.304</b> | 0.672          | 1089.968        | A[33] |
| P  | 11 | 354.494         | 1071.965        | 1066.625        | 0.672          | 1066.289        | P[32] |
| A  | 12 | 378.173         | 1049.614        | <b>1034.274</b> | 0.672          | 1033.938        | A[31] |
| P  | 13 | 410.524         | 1015.935        | 1010.595        | 0.672          | 1010.259        | P[30] |
| V  | 14 | 443.546         | 983.584         | 978.244         | 0.672          | 977.908         | V[29] |
| E  | 15 | 485.561         | <b>950.561</b>  | 945.221         | 0.672          | 944.885         | E[28] |
| R  | 16 | 529.259         | 907.543         | <b>902.207</b>  | <b>902.543</b> | 901.871         | R[27] |
| T  | 17 | 582.941         | 864.565         | <b>859.509</b>  | <b>859.845</b> | <b>859.173</b>  | T[26] |
| P  | 18 | 595.292         | 831.166         | 825.826         | 826.162        | 825.496         | P[25] |
| V  | 19 | 638.315         | 798.815         | <b>793.475</b>  | <b>793.811</b> | <b>793.139</b>  | V[24] |
| K  | 20 | 671.014         | 765.792         | 760.453         | 760.789        | 760.117         | K[23] |
| K  | 21 | 713.712         | 723.094         | 717.754         | 718.090        | 717.418         | K[22] |
| K  | 22 | 756.410         | 680.395         | 675.056         | 675.392        | 674.720         | K[21] |
| K  | 23 | 799.108         | 637.697         | 632.358         | 632.694        | 632.022         | K[20] |
| K  | 24 | <b>822.788</b>  | 614.018         | 608.679         | 609.015        | 608.343         | K[19] |
| K  | 25 | 865.486         | 571.320         | 565.980         | 566.316        | 565.644         | K[18] |
| T  | 26 | 899.168         | 528.622         | 523.282         | 523.618        | 522.946         | T[17] |
| G  | 27 | 931.176         | 494.930         | 489.590         | 489.925        | 489.253         | G[16] |
| A  | 28 | <b>941.855</b>  | 475.931         | 470.591         | 470.926        | 470.254         | A[15] |
| A  | 29 | 985.534         | 452.751         | 446.913         | 447.249        | 446.577         | A[14] |
| A  | 30 | 989.213         | 428.574         | 423.234         | 423.570        | 422.898         | A[13] |
| G  | 31 | 1008.230        | 404.895         | 399.555         | 399.891        | 399.219         | G[12] |
| K  | 32 | <b>1050.918</b> | 385.888         | 380.548         | 380.884        | 380.212         | K[11] |
| R  | 33 | <b>1102.952</b> | 343.189         | 337.850         | 338.186        | 337.514         | R[10] |
| K  | 34 | 1145.850        | 291.159         | 285.819         | 286.155        | 285.483         | K[9]  |
| A  | 35 | 1189.329        | 249.457         | 243.118         | 243.454        | 242.782         | A[8]  |
| S  | 36 | <b>1198.340</b> | 224.778         | 219.439         | 219.775        | 219.103         | S[7]  |
| G  | 37 | 1217.347        | 195.767         | 190.428         | 190.764        | 190.092         | G[6]  |
| P  | 38 | 1249.698        | 176.760         | 171.421         | 171.757        | 171.085         | P[5]  |
| P  | 39 | 1282.049        | 144.400         | 139.070         | 139.406        | 138.734         | P[4]  |
| V  | 40 | <b>1315.072</b> | 112.955         | 108.219         | 107.885        | 106.383         | V[3]  |
| S  | 41 | <b>1344.082</b> | 79.939          | 73.698          | 74.034         | 73.362          | S[2]  |
| E  | 42 | <b>1387.097</b> | 50.025          | 44.685          | 45.021         | 44.349          | E[1]  |

# sp | P43277 | H13\_MOUSE

S<sup>(Phospho)</sup><sub>(79.97)</sub> ETAPAAPAAPAPVEKTPVKKKAKKTGAAAGKRKASGPPVSE

- ▶ fragmentation table for charge state 4+
- ▶ specType=etd
- ▶ score=64.98
- ▶ F105343.dat
- ▶ query=q14634\_p1
- ▶ precursor=832.858180
- ▶ chargePrecursor=5
- ▶ itol=0.8

| AA | c  | y               | z+1             | z+2            | z     | AA             |   |    |
|----|----|-----------------|-----------------|----------------|-------|----------------|---|----|
| S  | 1  | 47.014          | <b>1040.820</b> | 1036.816       | 0.795 | 1036.568       | S | 12 |
| E  | 2  | 79.274          | 999.871         | 999.066        | 0.795 | 994.814        | E | 13 |
| T  | 3  | 104.536         | 966.810         | 962.805        | 0.795 | 962.553        | T | 40 |
| A  | 4  | 122.295         | <b>941.548</b>  | 937.543        | 0.795 | 937.291        | A | 39 |
| P  | 5  | 146.559         | 923.789         | 919.784        | 0.795 | 919.532        | P | 38 |
| A  | 6  | 164.318         | 899.526         | 895.521        | 0.795 | 895.269        | A | 37 |
| A  | 7  | 182.077         | 881.766         | 877.762        | 0.795 | 877.510        | A | 36 |
| F  | 8  | 206.340         | 864.007         | <b>860.002</b> | 0.795 | <b>859.750</b> | F | 35 |
| A  | 9  | 224.100         | 839.744         | 835.739        | 0.795 | 835.487        | A | 34 |
| A  | 10 | 241.859         | <b>821.985</b>  | 817.980        | 0.795 | 817.728        | A | 33 |
| P  | 11 | 266.122         | 804.225         | 800.221        | 0.795 | 799.969        | P | 32 |
| A  | 12 | 283.881         | 779.962         | 775.957        | 0.795 | 775.705        | A | 31 |
| F  | 13 | 308.145         | 762.203         | 758.198        | 0.795 | 757.946        | F | 30 |
| V  | 14 | 332.912         | 737.940         | 733.935        | 0.795 | 733.683        | V | 29 |
| E  | 15 | 365.172         | 713.173         | 709.168        | 0.795 | 708.916        | E | 28 |
| K  | 16 | 397.196         | 688.912         | 684.907        | 0.719 | 678.655        | K | 27 |
| T  | 17 | 422.458         | 664.650         | 664.391        | 0.651 | 644.632        | T | 26 |
| F  | 18 | 446.721         | 621.636         | 619.622        | 0.198 | 619.874        | F | 25 |
| V  | 19 | 471.488         | 599.383         | 595.358        | 0.610 | 595.106        | V | 24 |
| K  | 20 | 503.512         | 574.596         | 570.591        | 0.704 | 570.339        | K | 23 |
| K  | 21 | 535.536         | 542.572         | 538.568        | 0.316 | 538.316        | K | 22 |
| K  | 22 | 567.559         | 510.548         | 506.544        | 0.796 | 506.292        | K | 21 |
| A  | 23 | 608.319         | 479.525         | 474.520        | 0.472 | 474.269        | A | 20 |
| K  | 24 | 617.342         | 460.765         | 456.761        | 0.571 | 456.509        | K | 19 |
| K  | 25 | 649.366         | 428.742         | 424.737        | 0.249 | 424.485        | K | 18 |
| T  | 26 | 674.628         | 396.718         | 392.713        | 0.392 | 392.461        | T | 17 |
| G  | 27 | 688.883         | 371.456         | 367.451        | 0.703 | 367.199        | G | 16 |
| A  | 28 | 706.643         | 357.201         | 353.196        | 0.348 | 352.944        | A | 15 |
| A  | 29 | 724.402         | 339.441         | 335.437        | 0.369 | 335.185        | A | 14 |
| A  | 30 | 742.161         | 323.682         | 317.677        | 0.720 | 317.425        | A | 13 |
| G  | 31 | 758.411         | 303.923         | 299.918        | 0.319 | 299.546        | G | 12 |
| K  | 32 | 788.440         | 289.687         | 285.683        | 0.515 | 285.411        | K | 11 |
| R  | 33 | 827.466         | 257.644         | 253.639        | 0.391 | 253.387        | R | 10 |
| K  | 34 | <b>859.489</b>  | 218.618         | 214.614        | 0.866 | 214.362        | K | 9  |
| A  | 35 | 877.249         | 186.595         | 182.590        | 0.642 | 182.338        | A | 8  |
| S  | 36 | 899.007         | 168.835         | 164.831        | 0.683 | 164.579        | S | 7  |
| G  | 37 | <b>913.262</b>  | 147.077         | 143.073        | 0.425 | 142.821        | G | 6  |
| P  | 38 | 937.325         | 132.823         | 128.817        | 0.699 | 128.565        | P | 5  |
| P  | 39 | 961.789         | 108.550         | 104.545        | 0.808 | 104.302        | P | 4  |
| V  | 40 | <b>986.556</b>  | 84.296          | 80.291         | 0.543 | 80.039         | V | 3  |
| S  | 41 | 1008.314        | 59.539          | 55.524         | 0.776 | 55.272         | S | 2  |
| E  | 42 | <b>1040.574</b> | 37.771          | 33.766         | 0.618 | 33.514         | E | 1  |



# sp | P43277 | H13\_MOUSE

SET<sup>Phospho</sup> APAAPAAPVEKTPVKKKAKKTGAAAGKRKASGPPVSE  
79.97

- ▶ fragmentation table for charge state 1+
- ▶ specType=etd
- ▶ score=64.54
- ▶ F105343.dat
- ▶ query=q14635.p1
- ▶ precursor=694.217240
- ▶ chargePrecursor=6
- ▶ itol=0.8

| AA | c  | y               | z+1             | z+2             | z               | AA              |       |
|----|----|-----------------|-----------------|-----------------|-----------------|-----------------|-------|
| S  | 1  | 105.066         | 4140.259        | 4144.240        | 0.000           | 4143.233        | S[42] |
| E  | 2  | 234.108         | 4073.227        | 4057.208        | 0.000           | 4056.201        | E[41] |
| L  | 3  | 415.122         | 3944.185        | 3928.166        | 0.000           | 3927.158        | L[40] |
| A  | 4  | 489.168         | 3783.170        | 3747.152        | 0.000           | 3746.144        | A[39] |
| P  | 5  | 583.212         | 3692.133        | 3676.115        | 0.000           | 3675.107        | P[38] |
| A  | 6  | <b>654.249</b>  | 3595.081        | 3579.062        | 0.000           | 3578.054        | A[37] |
| A  | 7  | 725.297         | 3524.044        | 3508.025        | 0.000           | 3507.017        | A[36] |
| P  | 8  | <b>822.339</b>  | 3453.006        | 3436.988        | 0.000           | 3435.980        | P[35] |
| A  | 9  | <b>893.376</b>  | 3385.954        | 3369.935        | 0.000           | 3368.927        | A[34] |
| A  | 10 | 954.414         | 3284.917        | 3268.898        | 0.000           | 3267.890        | A[33] |
| P  | 11 | <b>1061.466</b> | 3213.879        | 3197.861        | 0.000           | 3196.853        | P[32] |
| A  | 12 | <b>1132.503</b> | 3116.827        | 3100.808        | 0.000           | 3099.800        | A[31] |
| P  | 13 | 1229.556        | 3045.790        | 3029.771        | 0.000           | 3028.763        | P[30] |
| V  | 14 | <b>1328.625</b> | 2948.737        | 2932.718        | 0.000           | 2931.710        | V[29] |
| E  | 15 | 1457.667        | 2849.686        | 2833.666        | 0.000           | 2832.642        | E[28] |
| R  | 16 | 1589.702        | 2729.626        | 2714.607        | 0.000           | 2713.599        | R[27] |
| T  | 17 | 1688.810        | 2592.533        | 2576.512        | 0.000           | 2575.504        | T[26] |
| P  | 18 | 1783.863        | 2491.483        | 2475.464        | 0.000           | 2474.457        | P[25] |
| V  | 19 | 1882.911        | 2394.430        | 2378.412        | 0.000           | 2377.404        | V[24] |
| R  | 20 | 2011.026        | 2295.362        | 2279.343        | 0.000           | 2278.335        | R[23] |
| R  | 21 | 2139.121        | 2187.287        | 2171.268        | 0.000           | 2170.260        | R[22] |
| R  | 22 | 2297.218        | 2039.174        | 2023.153        | 0.000           | 2022.145        | R[21] |
| A  | 23 | 2338.253        | 1911.077        | 1895.058        | 0.000           | 1894.050        | A[20] |
| R  | 24 | 2486.348        | 1840.040        | 1824.021        | 0.000           | 1823.013        | R[19] |
| R  | 25 | 2594.443        | 1711.945        | 1695.926        | 0.000           | 1694.918        | R[18] |
| T  | 26 | 2695.491        | 1583.850        | 1567.831        | 0.000           | 1566.823        | T[17] |
| G  | 27 | 2732.512        | 1482.802        | <b>1466.784</b> | 0.000           | 1465.791        | G[16] |
| A  | 28 | 2823.549        | 1426.781        | 1410.762        | 0.000           | 1410.770        | A[15] |
| A  | 29 | 2994.586        | 1384.744        | 1368.725        | 0.000           | <b>1339.733</b> | A[14] |
| A  | 30 | 2065.623        | 1283.707        | 1267.688        | <b>1268.696</b> | 1266.660        | A[13] |
| G  | 31 | 3072.645        | <b>1212.670</b> | <b>1196.651</b> | <b>1197.659</b> | 1195.643        | G[12] |
| R  | 32 | 3150.740        | 1155.648        | 1139.629        | 1140.637        | 1138.621        | R[11] |
| R  | 33 | 3308.841        | 1027.553        | <b>1011.534</b> | 1012.542        | 1010.527        | R[10] |
| R  | 34 | 3434.936        | <b>871.452</b>  | <b>855.433</b>  | <b>856.441</b>  | 854.425         | R[9]  |
| A  | 35 | 3505.973        | 743.357         | 727.338         | 728.346         | 726.330         | A[8]  |
| S  | 36 | 3591.005        | 672.320         | 656.301         | 657.309         | 655.293         | S[7]  |
| G  | 37 | 3650.027        | 585.288         | 569.269         | <b>570.277</b>  | 568.261         | G[6]  |
| P  | 38 | 3747.079        | 528.266         | 512.248         | 513.256         | 511.240         | P[5]  |
| P  | 39 | 3844.123        | 481.214         | 465.195         | 466.203         | 464.187         | P[4]  |
| V  | 40 | 3943.200        | 334.161         | 318.142         | 319.150         | 317.134         | V[3]  |
| S  | 41 | 4030.233        | 235.092         | 219.074         | 220.082         | 218.066         | S[2]  |
| E  | 42 | 4159.275        | 148.060         | 132.042         | 133.050         | 131.034         | E[1]  |

# sp | P43277 | H13\_MOUSE

SET<sup>Phospho</sup> 79.97 APAAPAAPVEKTPVKKKAKKTGAAAGKRKASGPPVSE

- ▶ fragmentation table for charge state 2+
- ▶ specType=etd
- ▶ score=64.54
- ▶ F105343.dat
- ▶ query=q14635.p1
- ▶ precursor=694.217240
- ▶ chargePrecursor=6
- ▶ itol=0.8

| AA | c  | y               | z+1             | z+2             | z               | AA              |       |
|----|----|-----------------|-----------------|-----------------|-----------------|-----------------|-------|
| S  | 1  | 53.037          | 2080.633        | 2072.626        | 0.504           | 2072.120        | S[42] |
| E  | 2  | 117.550         | 2037.117        | 2029.108        | 0.504           | 2028.604        | E[41] |
| T  | 3  | 208.005         | 1972.596        | 1964.587        | 0.504           | 1964.083        | T[40] |
| A  | 4  | 283.503         | 1892.080        | 1874.080        | 0.504           | 1873.576        | A[39] |
| P  | 5  | 292.110         | 1846.569        | 1838.561        | 0.504           | 1838.056        | P[38] |
| A  | 6  | 327.628         | 1790.044        | 1790.035        | 0.504           | 1789.531        | A[37] |
| A  | 7  | 383.147         | 1762.525        | <b>1754.516</b> | 0.504           | <b>1754.012</b> | A[36] |
| P  | 8  | <b>411.673</b>  | 1727.007        | 1728.997        | 0.504           | 1718.496        | P[35] |
| A  | 9  | <b>447.192</b>  | 1678.480        | <b>1670.471</b> | 0.504           | <b>1669.967</b> | A[34] |
| A  | 10 | 457.710         | 1642.965        | <b>1634.953</b> | 0.504           | <b>1634.449</b> | A[33] |
| P  | 11 | <b>531.237</b>  | 1597.443        | 1599.434        | 0.504           | 1590.933        | P[32] |
| A  | 12 | 566.755         | 1558.017        | <b>1550.908</b> | 0.504           | 1550.404        | A[31] |
| P  | 13 | 615.282         | 1521.308        | 1515.300        | 0.504           | 1514.888        | P[30] |
| V  | 14 | <b>664.816</b>  | 1474.872        | <b>1466.863</b> | 0.504           | <b>1466.359</b> | V[29] |
| E  | 15 | <b>729.337</b>  | 1425.338        | 1417.328        | 0.504           | 1416.825        | E[28] |
| R  | 16 | <b>793.385</b>  | 1369.813        | 1362.807        | <b>1353.311</b> | 1352.808        | R[27] |
| T  | 17 | 851.939         | <b>1296.768</b> | <b>1288.760</b> | <b>1289.264</b> | 1288.256        | T[26] |
| P  | 18 | <b>892.435</b>  | 1246.245        | 1238.236        | 1238.740        | 1237.732        | P[25] |
| V  | 19 | <b>941.969</b>  | <b>1197.719</b> | <b>1189.709</b> | 1190.213        | <b>1189.206</b> | V[24] |
| K  | 20 | 1006.017        | 1148.185        | 1140.175        | 1140.679        | 1139.671        | K[23] |
| K  | 21 | 1070.564        | <b>1084.137</b> | <b>1076.128</b> | <b>1076.632</b> | 1075.624        | K[22] |
| K  | 22 | 1134.112        | <b>1020.090</b> | <b>1012.080</b> | 1012.584        | <b>1011.576</b> | K[21] |
| A  | 23 | 1199.630        | <b>956.042</b>  | <b>948.033</b>  | 948.537         | <b>947.529</b>  | A[20] |
| K  | 24 | 1263.678        | 920.524         | 912.514         | 913.018         | 912.010         | K[19] |
| K  | 25 | <b>1297.725</b> | <b>856.476</b>  | <b>848.467</b>  | <b>848.971</b>  | 847.963         | K[18] |
| T  | 26 | 1368.269        | 792.926         | 784.913         | 784.923         | 783.915         | T[17] |
| G  | 27 | <b>1378.760</b> | <b>741.905</b>  | 733.895         | 734.398         | 733.389         | G[16] |
| A  | 28 | 1442.278        | <b>713.394</b>  | <b>705.385</b>  | <b>705.889</b>  | 704.881         | A[15] |
| A  | 29 | 1447.797        | 677.876         | <b>669.866</b>  | <b>670.370</b>  | 669.362         | A[14] |
| A  | 30 | <b>1483.315</b> | 642.357         | <b>634.348</b>  | <b>634.852</b>  | <b>633.844</b>  | A[13] |
| G  | 31 | 1511.826        | <b>606.838</b>  | <b>598.829</b>  | <b>599.333</b>  | <b>598.325</b>  | G[12] |
| K  | 32 | 1575.874        | 570.320         | <b>570.318</b>  | <b>570.822</b>  | <b>569.814</b>  | K[11] |
| R  | 33 | 1653.624        | 514.380         | 506.371         | 506.874         | 505.866         | R[10] |
| K  | 34 | 1717.972        | 438.230         | 428.220         | 428.724         | 427.716         | K[9]  |
| A  | 35 | 1753.490        | 372.182         | 364.173         | 364.677         | 363.669         | A[8]  |
| S  | 36 | 1797.006        | 338.664         | 328.654         | 329.158         | 328.150         | S[7]  |
| G  | 37 | 1825.517        | 293.140         | 285.130         | 285.642         | 284.634         | G[6]  |
| P  | 38 | 1874.043        | 264.617         | 256.607         | 257.111         | 256.103         | P[5]  |
| P  | 39 | 1922.570        | 218.110         | 208.101         | 208.605         | 207.597         | P[4]  |
| V  | 40 | 1972.104        | 167.584         | 159.575         | 160.079         | 159.071         | V[3]  |
| S  | 41 | 2015.620        | 118.050         | 110.041         | 110.544         | 109.537         | S[2]  |
| E  | 42 | 2080.141        | 74.534          | 66.524          | 67.028          | 66.021          | E[1]  |

# sp | P43277 | H13\_MOUSE

SET<sup>Phospho</sup> APAAPAAPVEKTPVKKKAKKTGAAAGKRKASGPPVSE  
79.97

- ▶ fragmentation table for charge state 3+
- ▶ specType=etd
- ▶ score=64.54
- ▶ F105343.dat
- ▶ query=q14635.p1
- ▶ precursor=694.217240
- ▶ chargePrecursor=6
- ▶ itol=0.8

| AA   | c               | y               | z+1             | z+2            | z               | AA   |
|------|-----------------|-----------------|-----------------|----------------|-----------------|------|
| S 1  | 35.693          | <b>1387.425</b> | 1382.065        | 0.672          | 1381.740        | S 42 |
| E 2  | 78.708          | 1358.414        | <b>1353.074</b> | 0.672          | 1352.739        | E 41 |
| T 3  | 139.046         | 1315.400        | <b>1310.060</b> | 0.672          | <b>1309.724</b> | T 40 |
| A 4  | 182.278         | 1285.961        | 1280.222        | 0.672          | 1279.386        | A 39 |
| P 5  | 195.076         | 1231.383        | 1228.043        | 0.672          | 1225.707        | P 38 |
| A 6  | 218.755         | 1199.032        | 1193.602        | 0.672          | 1193.356        | A 37 |
| A 7  | 262.434         | 1175.351        | <b>1170.013</b> | 0.672          | 1169.677        | A 36 |
| P 8  | 274.785         | 1151.674        | 1146.334        | 0.672          | 1145.999        | P 35 |
| A 9  | 298.464         | 1119.323        | <b>1113.983</b> | 0.672          | <b>1113.647</b> | A 34 |
| A 10 | 322.143         | 1089.644        | <b>1090.304</b> | 0.672          | <b>1089.968</b> | A 33 |
| P 11 | 354.494         | 1071.965        | 1066.625        | 0.672          | 1066.259        | P 32 |
| A 12 | 378.173         | 1039.614        | <b>1034.274</b> | 0.672          | <b>1033.938</b> | A 31 |
| P 13 | 410.524         | 1015.935        | 1010.595        | 0.672          | 1010.259        | P 30 |
| V 14 | 443.546         | 983.584         | 978.244         | 0.672          | 977.908         | V 29 |
| E 15 | 486.501         | <b>950.561</b>  | 945.221         | 0.672          | 944.885         | E 28 |
| R 16 | 509.259         | 907.547         | <b>902.207</b>  | <b>902.543</b> | <b>901.871</b>  | R 27 |
| T 17 | 502.941         | 864.948         | <b>859.509</b>  | <b>859.845</b> | <b>859.173</b>  | T 26 |
| P 18 | 595.292         | 831.166         | 825.826         | 826.162        | 825.490         | P 25 |
| V 19 | 628.315         | <b>798.815</b>  | <b>793.475</b>  | <b>793.811</b> | <b>793.139</b>  | V 24 |
| K 20 | <b>671.014</b>  | <b>765.792</b>  | 760.453         | 760.789        | 760.117         | K 23 |
| K 21 | <b>713.712</b>  | 723.094         | 717.754         | 718.090        | 717.418         | K 22 |
| K 22 | 756.419         | 689.399         | <b>675.056</b>  | <b>675.392</b> | <b>674.720</b>  | K 21 |
| A 23 | <b>780.689</b>  | 637.697         | 632.357         | 632.694        | 632.022         | A 20 |
| K 24 | <b>822.788</b>  | 614.018         | <b>608.679</b>  | <b>609.015</b> | <b>608.343</b>  | K 19 |
| K 25 | 865.486         | 571.320         | 565.980         | 566.316        | 565.644         | K 18 |
| T 26 | 899.188         | 528.622         | 523.282         | 523.618        | 522.946         | T 17 |
| G 27 | 932.176         | 494.930         | 489.590         | 489.925        | 489.253         | G 16 |
| A 28 | <b>941.855</b>  | 475.922         | 470.582         | 470.928        | 470.256         | A 15 |
| A 29 | 985.534         | 452.253         | <b>446.913</b>  | <b>447.249</b> | 446.577         | A 14 |
| A 30 | 989.213         | 428.574         | 423.234         | 423.570        | 422.898         | A 13 |
| G 31 | 1008.220        | 404.895         | 399.555         | 399.891        | 399.219         | G 12 |
| K 32 | <b>1050.918</b> | 385.888         | 380.548         | 380.884        | 380.212         | K 11 |
| K 33 | 1102.652        | 342.180         | 337.850         | 338.186        | 337.514         | K 10 |
| R 34 | 1148.656        | 291.159         | 285.818         | 286.152        | 285.480         | R 9  |
| A 35 | 1169.329        | 245.457         | 243.118         | 243.454        | 242.782         | A 8  |
| S 36 | 1198.340        | 224.778         | 219.439         | 219.775        | 219.103         | S 7  |
| G 37 | 1217.347        | 195.767         | 190.428         | 190.764        | 190.092         | G 6  |
| P 38 | 1249.698        | 176.760         | 171.421         | 171.757        | 171.085         | P 5  |
| P 39 | 1282.049        | 144.409         | 139.070         | 139.406        | 138.734         | P 4  |
| V 40 | 1315.072        | 112.054         | 106.715         | 107.051        | 106.379         | V 3  |
| S 41 | 1344.082        | 79.030          | 73.690          | 74.032         | 73.360          | S 2  |
| E 42 | 1387.097        | 50.025          | 44.685          | 45.021         | 44.349          | E 1  |

# sp | P43277 | H13\_MOUSE

SET<sup>Phospho</sup> 79.97 APAAPAAPAPVEKTPVKKKAKKTGAAAGKRKASGPPVSE

- ▶ fragmentation table for charge state 4+
- ▶ specType=etd
- ▶ score=64.54
- ▶ F105343.dat
- ▶ query=q14635\_p1
- ▶ precursor=694.217240
- ▶ chargePrecursor=6
- ▶ itol=0.8

| AA |    | c               | y               | z+1            | z+2            | z              | AA    |
|----|----|-----------------|-----------------|----------------|----------------|----------------|-------|
| S  | 1  | 27.622          | <b>1040.820</b> | 1036.810       | 0.755          | 1036.504       | S[42] |
| T  | 3  | 59.283          | 1037.967        | 1033.956       | 0.755          | 1034.808       | T[41] |
| T  | 3  | 104.536         | <b>986.802</b>  | 982.797        | 0.755          | 982.545        | T[40] |
| A  | 4  | 122.295         | <b>941.548</b>  | 937.543        | 0.755          | 937.201        | A[39] |
| P  | 5  | 146.559         | 923.789         | 919.784        | 0.755          | 919.532        | P[38] |
| A  | 6  | 164.318         | 899.520         | 895.521        | 0.755          | 895.269        | A[37] |
| A  | 7  | 182.077         | 881.766         | <b>877.762</b> | 0.755          | <b>877.510</b> | A[36] |
| P  | 8  | 206.340         | 864.007         | <b>860.002</b> | 0.755          | <b>859.750</b> | P[35] |
| A  | 9  | 224.100         | 839.742         | 835.739        | 0.755          | 835.487        | A[34] |
| A  | 10 | 241.859         | <b>821.985</b>  | <b>817.980</b> | 0.755          | <b>817.728</b> | A[33] |
| P  | 11 | 266.122         | <b>804.225</b>  | 800.221        | 0.755          | 799.969        | P[32] |
| A  | 12 | 283.881         | <b>779.962</b>  | 775.957        | 0.755          | 775.705        | A[31] |
| P  | 13 | 308.145         | 762.203         | <b>758.198</b> | 0.755          | <b>757.946</b> | P[30] |
| V  | 14 | 332.912         | 737.940         | 733.935        | 0.755          | 733.683        | V[29] |
| E  | 15 | 365.172         | <b>713.173</b>  | 709.168        | 0.755          | 708.916        | E[28] |
| K  | 16 | 397.196         | 688.912         | 678.907        | 0.755          | 678.655        | K[27] |
| T  | 17 | 422.458         | 648.858         | 644.853        | 0.645          | 644.632        | T[26] |
| P  | 18 | <b>446.721</b>  | 623.626         | 619.622        | 0.19           | 619.370        | P[25] |
| V  | 19 | 471.488         | <b>599.363</b>  | 595.358        | 0.595          | 595.106        | V[24] |
| K  | 20 | 503.512         | 574.590         | <b>570.591</b> | <b>570.843</b> | <b>570.339</b> | K[23] |
| K  | 21 | 535.536         | 542.572         | 538.568        | 538.819        | 538.316        | K[22] |
| K  | 22 | 567.559         | 510.548         | 505.544        | 505.796        | 505.292        | K[21] |
| K  | 23 | 599.519         | 478.520         | 474.520        | 474.772        | 474.269        | K[20] |
| K  | 24 | 617.342         | 460.765         | 456.761        | 457.013        | 456.509        | K[19] |
| K  | 25 | 649.366         | 428.742         | 424.737        | 424.989        | 424.485        | K[18] |
| T  | 26 | 674.628         | 396.718         | 392.713        | 392.965        | 392.461        | T[17] |
| G  | 27 | 688.883         | 371.450         | 367.451        | 367.703        | 367.199        | G[16] |
| A  | 28 | 706.643         | 357.261         | 353.196        | 353.448        | 352.944        | A[15] |
| A  | 29 | 724.402         | 339.441         | 335.437        | 335.689        | 335.185        | A[14] |
| A  | 30 | <b>742.161</b>  | 321.682         | 317.677        | 317.929        | 317.425        | A[13] |
| G  | 31 | 756.417         | 303.923         | 299.918        | 300.170        | 299.666        | G[12] |
| K  | 32 | <b>788.440</b>  | 289.667         | 285.663        | 285.915        | 285.411        | K[11] |
| R  | 33 | <b>827.466</b>  | 257.644         | 253.639        | 253.891        | 253.387        | R[10] |
| K  | 34 | <b>859.489</b>  | 218.618         | 214.614        | 214.866        | 214.362        | K[9]  |
| A  | 35 | 877.249         | 186.595         | 182.590        | 182.842        | 182.338        | A[8]  |
| S  | 36 | 899.007         | 168.833         | 164.811        | 165.063        | 164.575        | S[7]  |
| G  | 37 | <b>913.262</b>  | 147.077         | 143.073        | 143.325        | 142.821        | G[6]  |
| P  | 38 | 937.525         | 132.822         | 128.817        | 129.069        | 128.565        | P[5]  |
| P  | 39 | 961.788         | 108.559         | 104.554        | 104.806        | 104.302        | P[4]  |
| V  | 40 | 986.556         | 84.290          | 80.291         | 80.543         | 80.039         | V[3]  |
| S  | 41 | 1008.314        | 59.529          | 55.524         | 55.776         | 55.272         | S[2]  |
| E  | 42 | <b>1040.574</b> | 37.771          | 33.766         | 34.018         | 33.514         | E[1]  |



# sp | P43277 | H13\_MOUSE

SET <sup>Phospho</sup> 79.97 APAAPAAPAPVEKTPVKKKAKKTGAAAGKRKASGPPVSE

- ▶ fragmentation table for charge state 5+
- ▶ specType=etd
- ▶ score=64.54
- ▶ F105343.dat
- ▶ query=q14635\_p1
- ▶ precursor=694.217240
- ▶ chargePrecursor=6
- ▶ itol=0.8

| AA    | c              | y              | z+1            | z+2     | z              | AA    |
|-------|----------------|----------------|----------------|---------|----------------|-------|
| S[1]  | 21.819         | <b>832.858</b> | 829.654        | 0.806   | 829.452        | S[42] |
| E[2]  | 47.628         | 815.451        | 812.247        | 0.806   | 812.046        | E[41] |
| T[3]  | 83.830         | 789.643        | 786.439        | 0.806   | 786.237        | T[40] |
| N[4]  | 98.038         | 753.440        | 750.236        | 0.806   | 750.035        | N[39] |
| P[5]  | 117.448        | 739.232        | <b>736.029</b> | 0.806   | <b>735.827</b> | P[38] |
| A[6]  | 131.656        | 719.822        | 716.618        | 0.806   | 716.417        | A[37] |
| A[7]  | 145.863        | <b>705.615</b> | 702.411        | 0.806   | 702.209        | A[36] |
| P[8]  | 165.274        | 691.407        | 688.203        | 0.806   | 688.002        | P[35] |
| A[9]  | 179.481        | <b>671.997</b> | 668.793        | 0.806   | 668.591        | A[34] |
| A[10] | 193.689        | 657.789        | <b>654.585</b> | 0.806   | <b>654.384</b> | A[33] |
| P[11] | 213.099        | 643.582        | 640.378        | 0.806   | 640.176        | P[32] |
| A[12] | 227.307        | 624.171        | 620.967        | 0.806   | 620.766        | A[31] |
| P[13] | 246.717        | 609.964        | 606.760        | 0.806   | 606.558        | P[30] |
| V[14] | 266.331        | 595.753        | 592.549        | 0.806   | 592.348        | V[29] |
| E[15] | 292.339        | <b>578.739</b> | 567.535        | 0.806   | 567.334        | E[28] |
| K[16] | 317.958        | 564.931        | 561.727        | 541.929 | 541.526        | K[27] |
| T[17] | 338.168        | 549.312        | 546.108        | 546.310 | 545.907        | T[26] |
| P[18] | 357.578        | 499.102        | 495.899        | 496.100 | 495.697        | P[25] |
| V[19] | 377.392        | 479.692        | 476.488        | 476.690 | 476.287        | V[24] |
| K[20] | 403.011        | 459.878        | 456.674        | 456.876 | 456.473        | K[23] |
| K[21] | 428.630        | 434.259        | 431.055        | 431.257 | 430.854        | K[22] |
| K[22] | 454.249        | 408.640        | 405.436        | 405.638 | 405.235        | K[21] |
| A[23] | 468.456        | 383.021        | 379.817        | 380.019 | 379.616        | A[20] |
| K[24] | 494.075        | 368.814        | 365.610        | 365.812 | 365.408        | K[19] |
| K[25] | 519.694        | 343.195        | 339.991        | 340.193 | 339.790        | K[18] |
| T[26] | 539.504        | 317.576        | 314.372        | 314.574 | 314.171        | T[17] |
| G[27] | 551.308        | 297.366        | 294.163        | 294.364 | 293.961        | G[16] |
| A[28] | 565.516        | 285.962        | 282.758        | 282.960 | 282.557        | A[15] |
| A[29] | 579.723        | 271.755        | 268.551        | 268.752 | 268.349        | A[14] |
| A[30] | 593.931        | 257.547        | 254.343        | 254.545 | 254.142        | A[13] |
| G[31] | 605.335        | 243.340        | 240.136        | 240.338 | 239.934        | G[12] |
| K[32] | 630.954        | 231.935        | 228.732        | 228.933 | 228.530        | K[11] |
| R[33] | 662.174        | 206.316        | 203.113        | 203.314 | 202.911        | R[10] |
| K[34] | 687.793        | 175.096        | 171.892        | 172.094 | 171.691        | K[9]  |
| A[35] | 702.000        | 149.477        | 146.273        | 146.475 | 146.072        | A[8]  |
| S[36] | 718.407        | 135.271        | 132.066        | 132.268 | 131.864        | S[7]  |
| G[37] | 730.811        | 117.863        | 114.660        | 114.861 | 114.458        | G[6]  |
| P[38] | 750.222        | 106.459        | 103.255        | 103.457 | 103.054        | P[5]  |
| P[39] | 769.632        | 87.049         | 83.845         | 84.046  | 83.643         | P[4]  |
| V[40] | 789.446        | 67.638         | 64.434         | 64.636  | 64.233         | V[3]  |
| S[41] | <b>806.852</b> | 47.828         | 44.624         | 44.822  | 44.419         | S[2]  |
| E[42] | <b>832.661</b> | 30.418         | 27.214         | 27.416  | 27.013         | E[1]  |



# sp | P43277 | H13\_MOUSE

[Acetyl]SETAPAAPAAPAVEKT<sup>Phospho 79.97</sup>PVKKKAKKTGAAAGKRKASGPPVSE

- ▶ fragmentation table for charge state 1+
- ▶ specType=etd
- ▶ score=67.63
- ▶ F105343.dat
- ▶ query=q14652.p1
- ▶ precursor=841.265760
- ▶ chargePrecursor=5
- ▶ itol=0.8

| AA | c  | y              | z+1             | z+2             | z               | AA       |       |
|----|----|----------------|-----------------|-----------------|-----------------|----------|-------|
| S  | 1  | 147.076        | 4202.270        | 4186.251        | 0.000           | 4185.243 | S[42] |
| E  | 2  | 276.119        | 4073.227        | 4057.208        | 0.000           | 4056.201 | E[41] |
| T  | 3  | 377.187        | 3944.185        | 3928.166        | 0.000           | 3927.159 | T[40] |
| A  | 4  | 445.204        | 3814.137        | 3807.118        | 0.000           | 3805.110 | A[39] |
| P  | 5  | 545.257        | 3772.100        | 3756.081        | 0.000           | 3755.073 | P[38] |
| A  | 6  | 616.294        | 3675.047        | 3659.028        | 0.000           | 3658.020 | A[37] |
| A  | 7  | 687.331        | 3604.010        | 3587.991        | 0.000           | 3586.983 | A[36] |
| P  | 8  | <b>784.384</b> | 3532.973        | 3516.954        | 0.000           | 3515.946 | P[35] |
| A  | 9  | <b>855.421</b> | 3435.920        | 3419.901        | 0.000           | 3418.893 | A[34] |
| A  | 10 | 926.458        | 3364.883        | 3348.864        | 0.000           | 3347.856 | A[33] |
| P  | 11 | 1023.511       | 3293.846        | 3277.827        | 0.000           | 3276.819 | P[32] |
| A  | 12 | 1094.548       | 3196.793        | 3180.774        | 0.000           | 3179.766 | A[31] |
| F  | 13 | 1191.600       | 3125.756        | 3109.737        | 0.000           | 3108.729 | F[30] |
| V  | 14 | 1290.669       | 3028.703        | 3012.684        | 0.000           | 3011.677 | V[29] |
| E  | 15 | 1419.711       | 2929.655        | 2913.636        | 0.000           | 2912.628 | E[28] |
| K  | 16 | 1547.808       | 2830.592        | 2784.573        | 2783.561        | 2783.566 | K[27] |
| T  | 17 | 1728.820       | 2672.497        | 2656.478        | 2657.488        | 2655.471 | T[26] |
| P  | 18 | 1825.873       | 2491.483        | 2475.464        | 2476.472        | 2474.457 | P[25] |
| V  | 19 | 1924.942       | 2394.430        | 2378.412        | 2379.419        | 2377.404 | V[24] |
| K  | 20 | 2053.037       | 2295.362        | 2279.343        | 2280.351        | 2278.339 | K[23] |
| K  | 21 | 2181.132       | 2187.287        | 2151.268        | 2152.276        | 2150.240 | K[22] |
| K  | 22 | 2309.238       | 2079.172        | 2023.153        | 2024.161        | 2022.145 | K[21] |
| A  | 23 | 2350.294       | 1911.077        | 1895.058        | 1896.066        | 1894.050 | A[20] |
| K  | 24 | 2508.339       | 1840.040        | 1824.021        | 1825.029        | 1823.013 | K[19] |
| K  | 25 | 2636.454       | 1711.945        | 1695.926        | <b>1696.934</b> | 1694.919 | K[18] |
| T  | 26 | 2737.501       | 1583.850        | 1567.831        | 1568.839        | 1566.823 | T[17] |
| G  | 27 | 2794.523       | 1482.802        | 1466.784        | 1467.791        | 1465.776 | G[16] |
| A  | 28 | 2865.569       | 1425.781        | 1409.762        | 1410.770        | 1408.754 | A[15] |
| A  | 29 | 3036.597       | 1354.744        | 1338.725        | 1339.733        | 1337.717 | A[14] |
| A  | 30 | 3007.634       | <b>1283.707</b> | 1267.688        | 1268.696        | 1266.680 | A[13] |
| G  | 31 | 3064.655       | <b>1212.670</b> | <b>1196.651</b> | <b>1197.659</b> | 1195.643 | G[12] |
| K  | 32 | 3192.730       | 1155.648        | 1139.629        | <b>1140.637</b> | 1138.621 | K[11] |
| R  | 33 | 3348.852       | <b>1027.553</b> | 1011.534        | <b>1012.542</b> | 1010.527 | R[10] |
| K  | 34 | 3418.897       | 871.525         | <b>855.433</b>  | 856.441         | 854.425  | K[9]  |
| A  | 35 | 3547.984       | 743.357         | 727.338         | 728.346         | 726.330  | A[8]  |
| S  | 36 | 3635.016       | 672.320         | 656.301         | 657.309         | 655.293  | S[7]  |
| G  | 37 | 3692.037       | 585.288         | 569.269         | <b>570.277</b>  | 568.261  | G[6]  |
| F  | 38 | 3789.090       | 528.266         | 512.248         | 513.256         | 511.240  | F[5]  |
| P  | 39 | 3886.143       | <b>431.214</b>  | 415.195         | 416.203         | 414.187  | P[4]  |
| V  | 40 | 3985.211       | 334.161         | 318.142         | 319.150         | 317.134  | V[3]  |
| S  | 41 | 4072.243       | 278.092         | 219.074         | 220.082         | 218.066  | S[2]  |
| E  | 42 | 4251.286       | 148.060         | 132.042         | 133.050         | 131.034  | E[1]  |

# sp | P43277 | H13\_MOUSE

[Acetyl]SETAPAAPAAPAVEKT<sup>Phospho 79.97</sup> PVKKKAKKTGAAAGKRKASGPPVSE

- ▶ fragmentation table for charge state 2+
- ▶ specType=etd
- ▶ score=67.63
- ▶ F105343.dat
- ▶ query=q14652.p1
- ▶ precursor=841.265760
- ▶ chargePrecursor=5
- ▶ itol=0.8

| AA    | c               | y               | z+1             | z+2             | z               | AA    |
|-------|-----------------|-----------------|-----------------|-----------------|-----------------|-------|
| S[1]  | 74.042          | 2101.638        | 2093.629        | 0.504           | 2093.125        | S[42] |
| E[2]  | 138.563         | 2037.117        | 2029.108        | 0.504           | 2028.604        | E[41] |
| T[3]  | 189.087         | 1972.596        | 1964.587        | 0.504           | 1964.083        | T[40] |
| A[4]  | 224.206         | 1908.075        | 1904.063        | 0.504           | 1903.559        | A[39] |
| P[5]  | 293.135         | <b>1886.553</b> | 1894.544        | 0.504           | 1876.040        | P[38] |
| A[6]  | 358.650         | 1838.027        | 1830.018        | 0.504           | 1829.514        | A[37] |
| A[7]  | 344.169         | 1802.509        | 1794.499        | 0.504           | 1793.995        | A[36] |
| F[8]  | 392.695         | 1736.990        | 1738.981        | 0.504           | 1738.477        | F[35] |
| A[9]  | 428.214         | 1718.464        | 1710.454        | 0.504           | 1709.950        | A[34] |
| A[10] | 463.733         | 1652.945        | <b>1674.936</b> | 0.504           | <b>1674.432</b> | A[33] |
| P[11] | 532.259         | 1587.427        | 1639.417        | 0.504           | 1638.913        | P[32] |
| A[12] | 547.777         | 1568.900        | 1560.891        | 0.504           | 1560.387        | A[31] |
| F[13] | 596.304         | 1563.382        | 1555.372        | 0.504           | 1554.868        | F[30] |
| V[14] | 645.830         | 1514.855        | 1506.846        | 0.504           | 1506.342        | V[29] |
| E[15] | 710.359         | 1466.331        | <b>1467.312</b> | 0.504           | 1456.808        | E[28] |
| R[16] | 774.407         | <b>1400.806</b> | 1392.797        | 1393.284        | 1392.280        | R[27] |
| T[17] | <b>864.914</b>  | 1336.279        | <b>1328.743</b> | <b>1329.247</b> | 1325.239        | T[26] |
| F[18] | <b>913.440</b>  | 1246.245        | 1238.236        | 1238.740        | 1237.732        | F[25] |
| V[19] | <b>962.974</b>  | <b>1197.719</b> | 1189.709        | <b>1190.213</b> | 1189.206        | V[24] |
| K[20] | <b>1027.022</b> | 1148.185        | <b>1140.175</b> | <b>1140.679</b> | 1139.671        | K[23] |
| K[21] | <b>1097.069</b> | 1058.127        | <b>1076.128</b> | <b>1076.632</b> | 1075.624        | K[22] |
| R[22] | <b>1155.117</b> | 1020.090        | <b>1012.080</b> | <b>1012.584</b> | 1011.576        | R[21] |
| A[23] | <b>1190.635</b> | <b>956.042</b>  | <b>948.033</b>  | <b>948.537</b>  | <b>947.529</b>  | A[20] |
| K[24] | 1264.683        | 920.524         | 912.514         | <b>913.018</b>  | 912.010         | K[19] |
| K[25] | <b>1318.730</b> | 836.476         | <b>848.467</b>  | <b>848.971</b>  | 847.963         | K[18] |
| T[26] | <b>1369.254</b> | 792.429         | <b>784.419</b>  | <b>784.923</b>  | 783.915         | T[17] |
| Y[27] | 1397.785        | 741.905         | <b>733.895</b>  | <b>734.399</b>  | <b>733.392</b>  | Y[16] |
| A[28] | <b>1433.284</b> | 713.394         | <b>705.385</b>  | <b>705.889</b>  | 704.881         | A[15] |
| A[29] | 1468.802        | 677.876         | <b>669.866</b>  | <b>670.370</b>  | 669.362         | A[14] |
| A[30] | <b>1504.321</b> | 642.357         | <b>634.348</b>  | <b>634.852</b>  | 633.844         | A[13] |
| G[31] | <b>1532.831</b> | 606.839         | 598.829         | 599.333         | 598.325         | G[12] |
| K[32] | <b>1596.879</b> | 678.238         | <b>570.318</b>  | <b>570.822</b>  | <b>569.814</b>  | K[11] |
| R[33] | <b>1674.929</b> | 614.860         | 566.851         | 567.355         | 566.347         | R[10] |
| K[34] | 1738.977        | 436.230         | 428.220         | 428.724         | 427.716         | K[9]  |
| A[35] | 1774.495        | 372.182         | 364.173         | 364.677         | 363.669         | A[8]  |
| S[36] | 1818.011        | 336.664         | 328.654         | 329.158         | 328.150         | S[7]  |
| G[37] | 1846.522        | 291.140         | 283.130         | 283.642         | 284.634         | G[6]  |
| F[38] | 1885.040        | 264.617         | 256.607         | 257.111         | 256.103         | F[5]  |
| F[39] | 1943.575        | 238.110         | 230.101         | 230.605         | 229.597         | F[4]  |
| V[40] | 1993.109        | 167.584         | 159.575         | 160.079         | 159.071         | V[3]  |
| S[41] | 2036.625        | 118.050         | 110.041         | 110.544         | 109.537         | S[2]  |
| E[42] | 2101.146        | 74.534          | 66.524          | 67.028          | 66.021          | E[1]  |

# sp | P43277 | H13\_MOUSE

[Acetyl]SETAPAAPAAPAPVEKT<sup>Phospho 79.97</sup>PVKKKAKKTGAAAGKRKASGPPVSE

- ▶ fragmentation table for charge state 3+
- ▶ specType=etd
- ▶ score=67.63
- ▶ F105343.dat
- ▶ query=q14652.p1
- ▶ precursor=841.265760
- ▶ chargePrecursor=5
- ▶ itol=0.8

| AA | c  | y               | z-1             | z-2             | z              | AA              |       |
|----|----|-----------------|-----------------|-----------------|----------------|-----------------|-------|
| S  | 1  | 49.697          | <b>1401.428</b> | <b>1396.089</b> | 0.672          | <b>1395.753</b> | S[42] |
| E  | 2  | 92.711          | <b>1358.414</b> | 1353.074        | 0.672          | 1352.738        | E[41] |
| T  | 3  | 126.394         | 1315.400        | <b>1310.060</b> | 0.672          | 1309.724        | T[40] |
| A  | 4  | 150.078         | 1281.711        | 1276.378        | 0.672          | 1276.042        | A[39] |
| P  | 5  | 182.424         | <b>1258.038</b> | 1252.699        | 0.672          | 1252.363        | P[38] |
| A  | 6  | 206.103         | 1225.687        | 1220.348        | 0.672          | 1220.012        | A[37] |
| A  | 7  | 229.782         | 1202.000        | <b>1196.669</b> | 0.672          | <b>1196.333</b> | A[36] |
| P  | 8  | 262.133         | 1178.329        | 1172.990        | 0.672          | 1172.654        | P[35] |
| A  | 9  | 285.812         | 1154.970        | <b>1149.639</b> | 0.672          | <b>1149.303</b> | A[34] |
| A  | 10 | 309.491         | <b>1122.299</b> | <b>1116.960</b> | 0.672          | <b>1116.624</b> | A[33] |
| P  | 11 | 341.842         | 1098.620        | 1093.281        | 0.672          | 1092.945        | P[32] |
| A  | 12 | 365.521         | 1066.260        | 1060.920        | 0.672          | 1060.584        | A[31] |
| P  | 13 | 397.872         | 1042.599        | <b>1037.251</b> | 0.672          | <b>1036.915</b> | P[30] |
| V  | 14 | <b>430.894</b>  | 1019.239        | <b>1004.900</b> | 0.672          | <b>1004.564</b> | V[29] |
| E  | 15 | 473.509         | <b>977.216</b>  | <b>971.877</b>  | 0.672          | 971.541         | E[28] |
| R  | 16 | 516.607         | 954.301         | 948.961         | 0.672          | 948.625         | R[27] |
| T  | 17 | 576.945         | 891.504         | <b>886.164</b>  | <b>886.500</b> | <b>885.828</b>  | T[26] |
| P  | 18 | 609.296         | 831.166         | 825.826         | 826.162        | 825.400         | P[25] |
| V  | 19 | 642.319         | 799.815         | <b>793.475</b>  | <b>793.811</b> | 793.139         | V[24] |
| K  | 20 | 685.017         | 765.792         | 760.453         | 760.789        | 760.117         | K[23] |
| K  | 21 | 727.715         | 723.094         | 717.754         | 718.090        | 717.418         | K[22] |
| K  | 22 | 770.414         | 689.399         | 678.956         | 679.302        | 678.739         | K[21] |
| A  | 23 | <b>794.093</b>  | 637.097         | 632.358         | 632.694        | 632.022         | A[20] |
| K  | 24 | 836.791         | 614.018         | 608.679         | 609.015        | 608.343         | K[19] |
| K  | 25 | 879.489         | 571.320         | 565.980         | 566.316        | 565.644         | K[18] |
| T  | 26 | <b>913.172</b>  | 529.627         | 523.282         | 523.618        | 522.946         | T[17] |
| G  | 27 | <b>957.159</b>  | 494.930         | 489.590         | 489.925        | 489.253         | G[16] |
| A  | 28 | <b>955.858</b>  | 475.937         | 470.592         | 470.928        | 470.256         | A[15] |
| A  | 29 | 979.537         | 452.253         | 446.913         | 447.249        | 446.577         | A[14] |
| A  | 30 | 1003.216        | 428.574         | 423.234         | 423.570        | 422.898         | A[13] |
| G  | 31 | 1027.273        | 404.895         | 399.555         | 399.891        | 399.219         | G[12] |
| K  | 32 | <b>1064.922</b> | 385.888         | 380.548         | 380.884        | 380.212         | K[11] |
| K  | 33 | <b>1116.955</b> | 342.180         | 337.850         | 338.186        | 337.514         | K[10] |
| T  | 34 | <b>1159.654</b> | 291.159         | 285.818         | 286.152        | 285.480         | T[9]  |
| A  | 35 | <b>1183.333</b> | 245.457         | 243.118         | 243.454        | 242.782         | A[8]  |
| S  | 36 | <b>1212.343</b> | 224.778         | 219.439         | 219.775        | 219.103         | S[7]  |
| G  | 37 | 1231.351        | 195.767         | 190.428         | 190.764        | 190.092         | G[6]  |
| P  | 38 | 1263.701        | 176.760         | 171.421         | 171.757        | 171.085         | P[5]  |
| P  | 39 | <b>1296.052</b> | 144.409         | 139.070         | 139.406        | 138.734         | P[4]  |
| V  | 40 | <b>1328.075</b> | 112.950         | 108.719         | 109.055        | 108.383         | V[3]  |
| S  | 41 | <b>1358.086</b> | 79.030          | 73.696          | 74.032         | 73.360          | S[2]  |
| E  | 42 | <b>1401.100</b> | 50.025          | 44.685          | 45.021         | 44.349          | E[1]  |

# sp | P43277 | H13\_MOUSE

[Acetyl]SETAPAAPAAPAVEKT<sup>Phospho 79.97</sup> PVKKKAKKTGAAAGKRKASGPPVSE

- ▶ fragmentation table for charge state 4+
- ▶ specType=etd
- ▶ score=67.63
- ▶ F105343.dat
- ▶ query=q14652.p1
- ▶ precursor=841.265760
- ▶ chargePrecursor=5
- ▶ itol=0.8

| AA | c  | y               | z+1             | z+2             | z              | AA              |       |
|----|----|-----------------|-----------------|-----------------|----------------|-----------------|-------|
| S  | 1  | 37.525          | <b>1051.323</b> | <b>1047.318</b> | 0.755          | <b>1047.066</b> | S[42] |
| E  | 2  | 69.785          | <b>1019.062</b> | 1015.058        | 0.755          | 1014.806        | E[41] |
| T  | 3  | 95.047          | <b>986.802</b>  | <b>982.797</b>  | 0.755          | <b>982.545</b>  | T[40] |
| A  | 4  | 112.808         | 941.542         | 937.537         | 0.755          | 937.285         | A[39] |
| P  | 5  | 137.070         | <b>943.780</b>  | 939.776         | 0.755          | 939.524         | P[38] |
| A  | 6  | 154.829         | 919.517         | 915.513         | 0.755          | 915.261         | A[37] |
| A  | 7  | 172.588         | 901.758         | 897.753         | 0.755          | 897.501         | A[36] |
| P  | 8  | 196.851         | 883.999         | 879.994         | 0.755          | 879.742         | P[35] |
| A  | 9  | 214.611         | <b>859.735</b>  | <b>855.731</b>  | 0.755          | <b>855.479</b>  | A[34] |
| A  | 10 | 232.370         | 841.976         | 837.971         | 0.755          | 837.719         | A[33] |
| P  | 11 | 256.633         | 824.217         | 820.212         | 0.755          | 819.960         | P[32] |
| A  | 12 | 274.392         | 799.954         | 795.949         | 0.755          | 795.697         | A[31] |
| P  | 13 | 298.656         | 782.194         | 778.190         | 0.755          | 777.938         | P[30] |
| V  | 14 | 323.423         | 757.931         | 753.927         | 0.755          | 753.675         | V[29] |
| E  | 15 | 355.683         | <b>733.164</b>  | 729.159         | 0.755          | 728.907         | E[28] |
| R  | 16 | 387.937         | 709.901         | 705.896         | 0.755          | 705.644         | R[27] |
| T  | 17 | 412.901         | 685.950         | 681.945         | 0.755          | 681.693         | T[26] |
| P  | 18 | 457.224         | 623.626         | 619.622         | 0.755          | 619.370         | P[25] |
| V  | 19 | 481.991         | 599.367         | 595.362         | 0.755          | 595.110         | V[24] |
| K  | 20 | 514.015         | 574.590         | <b>570.591</b>  | <b>570.843</b> | <b>570.339</b>  | K[23] |
| K  | 21 | 546.038         | 542.572         | 538.568         | 538.819        | 538.316         | K[22] |
| K  | 22 | 578.062         | 510.548         | 506.544         | 506.796        | 506.293         | K[21] |
| A  | 23 | 595.821         | 475.525         | 471.520         | 471.772        | 471.269         | A[20] |
| K  | 24 | 627.845         | 460.765         | 456.761         | 457.013        | 456.509         | K[19] |
| K  | 25 | 659.869         | 428.742         | 424.737         | 424.989        | 424.486         | K[18] |
| T  | 26 | 685.131         | 396.718         | 392.713         | 392.965        | 392.461         | T[17] |
| G  | 27 | 699.396         | 371.456         | 367.451         | 367.703        | 367.199         | G[16] |
| A  | 28 | 717.145         | 397.201         | 393.196         | 393.448        | 392.944         | A[15] |
| A  | 29 | 734.905         | 339.441         | 335.437         | 335.689        | 335.185         | A[14] |
| A  | 30 | 752.664         | 311.682         | 317.677         | 317.929        | 317.425         | A[13] |
| G  | 31 | 766.919         | 303.923         | 299.918         | 300.170        | 299.666         | G[12] |
| K  | 32 | 798.943         | 289.667         | 285.663         | 285.915        | 285.411         | K[11] |
| R  | 33 | 837.668         | 297.644         | 293.639         | 293.891        | 293.387         | R[10] |
| T  | 34 | 869.932         | 219.913         | 214.914         | 214.896        | 214.365         | T[9]  |
| A  | 35 | 887.751         | 186.995         | 182.990         | 182.942        | 182.356         | A[8]  |
| S  | 36 | 909.509         | 168.835         | 164.831         | 165.083        | 164.579         | S[7]  |
| G  | 37 | 923.765         | 147.077         | 143.073         | 143.325        | 142.821         | G[6]  |
| P  | 38 | <b>948.028</b>  | 132.822         | 128.817         | 129.069        | 128.565         | P[5]  |
| P  | 39 | <b>972.291</b>  | 108.559         | 104.554         | 104.806        | 104.302         | P[4]  |
| V  | 40 | <b>997.058</b>  | 84.299          | 80.293          | 80.545         | 80.039          | V[3]  |
| S  | 41 | <b>1018.816</b> | 55.529          | 55.524          | 55.776         | 55.272          | S[2]  |
| E  | 42 | <b>1051.077</b> | 37.771          | 33.766          | 34.018         | 33.514          | E[1]  |

# sp | P43277 | H13\_MOUSE

[Acetyl]SETAPAAPAAPAVEKT <sup>Phospho</sup> PVKKKAKKTGAAAGKRKASGPPVSE <sub>79.97</sub>

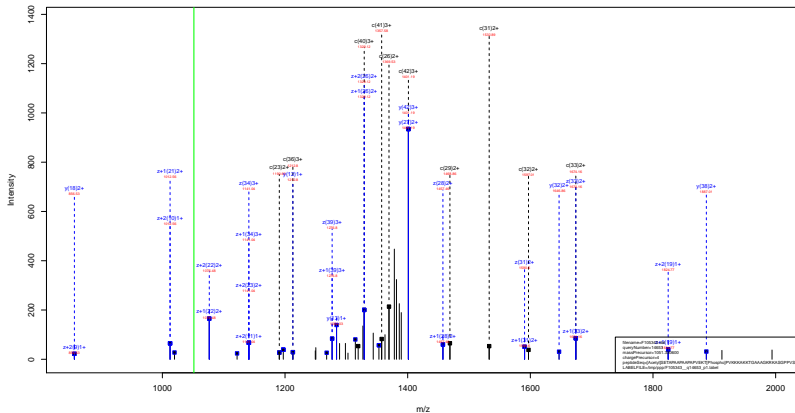

# sp | P43277 | H13\_MOUSE

[Acetyl]SETAPAAPAAPAVEKT<sup>Phospho 79.97</sup>PVKKKAKKTGAAAGKRKASGPPVSE

- ▶ fragmentation table for charge state 1+
- ▶ specType=etd
- ▶ score=39.24
- ▶ F105343.dat
- ▶ query=q14653\_p1
- ▶ precursor=1051.330600
- ▶ chargePrecursor=4
- ▶ itol=0.8

| AA | c  | y        | z+1      | z+2      | z        | AA       |       |
|----|----|----------|----------|----------|----------|----------|-------|
| S  | 1  | 147.076  | 4202.270 | 4186.251 | 0.000    | 4185.243 | S[42] |
| E  | 2  | 276.119  | 4073.227 | 4057.208 | 0.000    | 4056.201 | E[41] |
| T  | 3  | 377.187  | 3944.185 | 3928.166 | 0.000    | 3927.159 | T[40] |
| A  | 4  | 445.204  | 3814.137 | 3807.118 | 0.000    | 3805.110 | A[39] |
| P  | 5  | 545.257  | 3772.100 | 3756.081 | 0.000    | 3755.073 | P[38] |
| A  | 6  | 616.294  | 3675.047 | 3659.028 | 0.000    | 3658.020 | A[37] |
| A  | 7  | 687.331  | 3604.010 | 3587.991 | 0.000    | 3586.983 | A[36] |
| P  | 8  | 784.384  | 3532.973 | 3516.954 | 0.000    | 3515.946 | P[35] |
| A  | 9  | 893.421  | 3435.920 | 3419.901 | 0.000    | 3418.893 | A[34] |
| A  | 10 | 926.458  | 3364.883 | 3348.864 | 0.000    | 3347.856 | A[33] |
| P  | 11 | 1023.511 | 3293.846 | 3277.827 | 0.000    | 3276.819 | P[32] |
| A  | 12 | 1094.548 | 3196.793 | 3180.774 | 0.000    | 3179.766 | A[31] |
| F  | 13 | 1191.600 | 3125.756 | 3109.737 | 0.000    | 3108.729 | F[30] |
| V  | 14 | 1260.669 | 3028.703 | 3012.684 | 0.000    | 3011.677 | V[29] |
| E  | 15 | 1419.711 | 2926.655 | 2910.636 | 0.000    | 2909.628 | E[28] |
| K  | 16 | 1547.808 | 2800.592 | 2784.573 | 0.000    | 2783.565 | K[27] |
| T  | 17 | 1728.820 | 2672.497 | 2656.478 | 0.000    | 2655.471 | T[26] |
| P  | 18 | 1825.873 | 2491.483 | 2475.464 | 0.000    | 2474.457 | P[25] |
| V  | 19 | 1924.942 | 2394.430 | 2378.412 | 0.000    | 2377.404 | V[24] |
| K  | 20 | 2053.037 | 2295.362 | 2279.343 | 0.000    | 2278.335 | K[23] |
| K  | 21 | 2181.132 | 2187.287 | 2171.268 | 0.000    | 2170.260 | K[22] |
| K  | 22 | 2309.228 | 2079.172 | 2063.153 | 0.000    | 2062.145 | K[21] |
| A  | 23 | 2350.294 | 1911.077 | 1895.058 | 0.000    | 1894.050 | A[20] |
| K  | 24 | 2508.339 | 1840.040 | 1824.021 | 1825.029 | 1823.013 | K[19] |
| K  | 25 | 2636.454 | 1711.945 | 1695.926 | 0.000    | 1694.918 | K[18] |
| T  | 26 | 2737.501 | 1583.850 | 1567.831 | 0.000    | 1566.823 | T[17] |
| G  | 27 | 2794.523 | 1482.802 | 1466.784 | 0.000    | 1465.776 | G[16] |
| A  | 28 | 2865.569 | 1428.781 | 1412.762 | 0.000    | 1411.754 | A[15] |
| A  | 29 | 3036.597 | 1354.744 | 1338.725 | 0.000    | 1337.717 | A[14] |
| A  | 30 | 3007.634 | 1283.707 | 1267.688 | 0.000    | 1266.680 | A[13] |
| G  | 31 | 3064.655 | 1212.670 | 1196.651 | 1197.659 | 1195.643 | G[12] |
| K  | 32 | 3192.730 | 1155.648 | 1139.629 | 0.000    | 1138.621 | K[11] |
| R  | 33 | 3348.852 | 1027.553 | 1011.534 | 1012.542 | 1010.527 | R[10] |
| K  | 34 | 3478.947 | 871.452  | 855.433  | 856.441  | 854.425  | K[9]  |
| A  | 35 | 3547.984 | 743.357  | 727.338  | 0.000    | 726.330  | A[9]  |
| S  | 36 | 3635.016 | 672.320  | 656.301  | 0.000    | 655.293  | S[7]  |
| G  | 37 | 3692.037 | 585.288  | 569.269  | 0.000    | 568.261  | G[6]  |
| F  | 38 | 3789.080 | 528.266  | 512.247  | 0.000    | 511.240  | F[5]  |
| P  | 39 | 3886.143 | 431.214  | 415.195  | 0.000    | 414.187  | P[4]  |
| V  | 40 | 3983.211 | 334.161  | 318.142  | 0.000    | 317.134  | V[3]  |
| S  | 41 | 4072.243 | 238.092  | 222.073  | 0.000    | 221.065  | S[2]  |
| E  | 42 | 4251.286 | 148.060  | 132.042  | 0.000    | 131.034  | E[1]  |



# sp | P43277 | H13\_MOUSE

[Acetyl]SETAPAAPAAPAVEKT<sup>Phospho 79.97</sup> PVKKKAKKTGAAAGKRKASGPPVSE

- ▶ fragmentation table for charge state 2+
- ▶ specType=etd
- ▶ score=39.24
- ▶ F105343.dat
- ▶ query=q14653.p1
- ▶ precursor=1051.330600
- ▶ chargePrecursor=4
- ▶ itol=0.8

| AA | c  | y               | z+1             | z+2             | z               | AA              |       |
|----|----|-----------------|-----------------|-----------------|-----------------|-----------------|-------|
| S  | 1  | 74.042          | 2101.638        | 2093.629        | 0.504           | 2093.125        | S[42] |
| E  | 2  | 138.563         | 2037.117        | 2029.108        | 0.504           | 2028.604        | E[41] |
| T  | 3  | 189.087         | 1972.596        | 1964.587        | 0.504           | 1964.083        | T[40] |
| A  | 4  | 224.206         | 1908.075        | 1901.063        | 0.504           | 1901.559        | A[39] |
| T  | 5  | 293.135         | <b>1886.553</b> | 1896.544        | 0.504           | 1876.040        | T[38] |
| A  | 6  | 358.650         | 1830.027        | 1830.018        | 0.504           | 1829.514        | A[37] |
| A  | 7  | 344.169         | 1802.509        | 1794.499        | 0.504           | 1793.995        | A[36] |
| F  | 8  | 392.695         | 1736.990        | 1736.981        | 0.504           | 1736.477        | F[35] |
| A  | 9  | 428.214         | 1718.464        | 1710.454        | 0.504           | 1709.950        | A[34] |
| A  | 10 | 463.733         | 1652.945        | <b>1674.936</b> | 0.504           | <b>1674.432</b> | A[33] |
| P  | 11 | 532.259         | <b>1647.427</b> | 1639.417        | 0.504           | 1638.913        | P[32] |
| A  | 12 | 547.777         | 1598.920        | <b>1590.911</b> | 0.504           | <b>1590.387</b> | A[31] |
| F  | 13 | 596.304         | 1563.362        | 1555.352        | 0.504           | 1554.849        | F[30] |
| V  | 14 | 645.830         | 1514.855        | 1506.846        | 0.504           | 1506.342        | V[29] |
| E  | 15 | 710.359         | 1466.331        | <b>1457.312</b> | 0.504           | <b>1456.808</b> | E[28] |
| R  | 16 | 774.887         | <b>1400.806</b> | 1392.797        | 1393.284        | 1392.780        | R[27] |
| T  | 17 | 854.914         | 1336.752        | <b>1328.743</b> | <b>1329.247</b> | 1325.239        | T[26] |
| F  | 18 | 913.440         | 1246.245        | 1238.236        | 1238.740        | 1237.732        | F[25] |
| V  | 19 | 962.974         | <b>1197.719</b> | 1189.709        | <b>1190.213</b> | 1189.206        | V[24] |
| K  | 20 | 1027.022        | 1148.195        | 1140.175        | <b>1140.679</b> | 1139.671        | K[23] |
| K  | 21 | 1091.559        | 1099.737        | <b>1076.128</b> | <b>1076.632</b> | 1075.625        | K[22] |
| K  | 22 | 1155.117        | <b>1020.090</b> | <b>1012.080</b> | <b>1012.584</b> | 1011.576        | K[21] |
| A  | 23 | <b>1190.615</b> | 956.042         | 948.033         | 948.537         | 947.529         | A[20] |
| K  | 24 | 1254.683        | 920.524         | 912.514         | 913.018         | 912.010         | K[19] |
| K  | 25 | <b>1318.730</b> | <b>856.476</b>  | 848.467         | 848.971         | 847.963         | K[18] |
| T  | 26 | <b>1369.254</b> | 792.429         | 784.419         | 784.923         | 783.915         | T[17] |
| G  | 27 | 1397.805        | 741.905         | 733.895         | 734.399         | 733.391         | G[16] |
| A  | 28 | 1431.284        | 713.394         | 705.385         | 705.889         | 704.881         | A[15] |
| A  | 29 | <b>1468.802</b> | 677.876         | 669.866         | 670.370         | 669.362         | A[14] |
| A  | 30 | 1504.321        | 642.357         | 634.348         | 634.852         | 633.844         | A[13] |
| G  | 31 | <b>1532.831</b> | 606.839         | 598.829         | 599.333         | 598.325         | G[12] |
| K  | 32 | <b>1586.878</b> | 678.328         | 670.318         | 670.822         | 669.814         | K[11] |
| R  | 33 | <b>1674.929</b> | 614.809         | 606.799         | 607.303         | 606.295         | R[10] |
| K  | 34 | 1738.977        | 436.290         | 428.280         | 428.784         | 427.776         | K[9]  |
| A  | 35 | 1774.495        | 372.182         | 364.173         | 364.677         | 363.669         | A[8]  |
| S  | 36 | 1818.011        | 336.664         | 328.654         | 329.158         | 328.150         | S[7]  |
| G  | 37 | 1846.522        | 291.140         | 283.130         | 283.634         | 282.626         | G[6]  |
| F  | 38 | 1895.040        | 264.617         | 256.607         | 257.111         | 256.103         | F[5]  |
| F  | 39 | 1943.575        | 218.110         | 210.101         | 210.605         | 209.597         | F[4]  |
| V  | 40 | 1993.109        | 167.584         | 159.575         | 160.079         | 159.071         | V[3]  |
| S  | 41 | 2036.625        | 118.050         | 110.041         | 110.544         | 109.537         | S[2]  |
| E  | 42 | 2101.146        | 74.534          | 66.524          | 67.028          | 66.021          | E[1]  |

# sp | P43277 | H13\_MOUSE

[Acetyl]SETAPAAPAAPAVEKT<sup>Phospho 79.97</sup>PVKKKAKKTGAAAGKRKASGPPVSE

- ▶ fragmentation table for charge state 3+
- ▶ specType=etd
- ▶ score=39.24
- ▶ F105343.dat
- ▶ query=q14653.p1
- ▶ precursor=1051.330600
- ▶ chargePrecursor=4
- ▶ itol=0.8

| AA | c  | y               | z+1             | z+2             | z     | AA              |       |
|----|----|-----------------|-----------------|-----------------|-------|-----------------|-------|
| S  | 1  | 49.697          | <b>1401.428</b> | 1390.089        | 0.672 | 1395.753        | S[42] |
| E  | 2  | 62.711          | 1398.415        | <b>1353.074</b> | 0.672 | <b>1352.738</b> | E[41] |
| T  | 3  | 139.394         | <b>1315.400</b> | 1304.011        | 0.672 | 1309.295        | T[40] |
| A  | 4  | 150.073         | 1280.717        | <b>1276.378</b> | 0.672 | <b>1276.042</b> | A[39] |
| P  | 5  | 182.424         | 1258.038        | 1252.699        | 0.672 | 1252.363        | P[38] |
| A  | 6  | 206.101         | 1225.687        | 1220.348        | 0.672 | 1220.011        | A[37] |
| A  | 7  | 229.782         | 1202.008        | <b>1196.669</b> | 0.672 | 1196.333        | A[36] |
| P  | 8  | 262.133         | 1178.329        | 1172.990        | 0.672 | 1172.654        | P[35] |
| A  | 9  | 285.812         | 1145.978        | <b>1140.639</b> | 0.672 | <b>1140.303</b> | A[34] |
| A  | 10 | 309.491         | <b>1122.299</b> | 1118.959        | 0.672 | 1118.623        | A[33] |
| P  | 11 | 341.842         | 1098.620        | 1093.281        | 0.672 | 1092.945        | P[32] |
| A  | 12 | 365.521         | 1066.269        | 1060.930        | 0.672 | 1060.594        | A[31] |
| P  | 13 | 397.872         | 1042.590        | 1037.251        | 0.672 | 1036.915        | P[30] |
| V  | 14 | 430.204         | 1010.230        | 1004.900        | 0.672 | 1004.564        | V[29] |
| E  | 15 | 473.509         | 977.210         | 971.871         | 0.672 | 971.534         | E[28] |
| K  | 16 | 516.807         | 944.202         | 938.863         | 0.672 | 938.527         | K[27] |
| I  | 17 | 576.945         | 891.504         | 886.104         | 0.672 | 885.825         | I[26] |
| P  | 18 | 609.296         | 831.100         | 825.826         | 0.672 | 825.490         | P[25] |
| V  | 19 | 642.319         | 798.815         | 793.475         | 0.672 | 793.139         | V[24] |
| K  | 20 | 685.017         | 765.792         | 760.453         | 0.672 | 760.117         | K[23] |
| K  | 21 | 727.715         | 723.094         | 717.754         | 0.672 | 717.418         | K[22] |
| K  | 22 | 770.414         | 689.398         | 684.058         | 0.672 | 683.723         | K[21] |
| A  | 23 | 794.093         | 637.697         | 632.358         | 0.672 | 632.022         | A[20] |
| K  | 24 | 816.791         | 614.018         | 608.679         | 0.672 | 608.343         | K[19] |
| K  | 25 | 879.489         | 571.320         | 565.980         | 0.672 | 565.644         | K[18] |
| T  | 26 | 913.172         | 528.622         | 523.282         | 0.672 | 522.946         | T[17] |
| G  | 27 | 932.179         | 494.930         | 489.590         | 0.672 | 489.254         | G[16] |
| A  | 28 | 953.858         | 475.932         | 470.592         | 0.672 | 470.256         | A[15] |
| A  | 29 | 979.537         | 452.251         | 446.911         | 0.672 | 446.575         | A[14] |
| A  | 30 | 1003.216        | 428.574         | 423.234         | 0.672 | 422.898         | A[13] |
| G  | 31 | 1022.223        | 404.895         | 399.555         | 0.672 | 399.219         | G[12] |
| K  | 32 | 1064.622        | 385.888         | 380.548         | 0.672 | 380.211         | K[11] |
| R  | 33 | 1116.955        | 343.180         | 337.850         | 0.672 | 337.514         | R[10] |
| K  | 34 | 1159.654        | 291.150         | 285.810         | 0.672 | 285.480         | K[9]  |
| A  | 35 | 1193.319        | 249.462         | 244.122         | 0.672 | 243.786         | A[8]  |
| S  | 36 | <b>1212.343</b> | 224.778         | 219.439         | 0.672 | 219.103         | S[7]  |
| G  | 37 | 1231.351        | 195.767         | 190.428         | 0.672 | 190.092         | G[6]  |
| P  | 38 | 1263.701        | 176.760         | 171.421         | 0.672 | 171.085         | P[5]  |
| P  | 39 | 1296.052        | 144.400         | 139.070         | 0.672 | 138.734         | P[4]  |
| V  | 40 | <b>1329.075</b> | 112.058         | 106.719         | 0.672 | 106.383         | V[3]  |
| S  | 41 | <b>1358.086</b> | 79.038          | 73.698          | 0.672 | 73.362          | S[2]  |
| E  | 42 | <b>1401.100</b> | 50.025          | 44.685          | 0.672 | 44.349          | E[1]  |

# sp | Q6ZWY9 | H2B1C\_MOUSE

KAVTK <sup>Acetyl</sup> AQK  
42.01

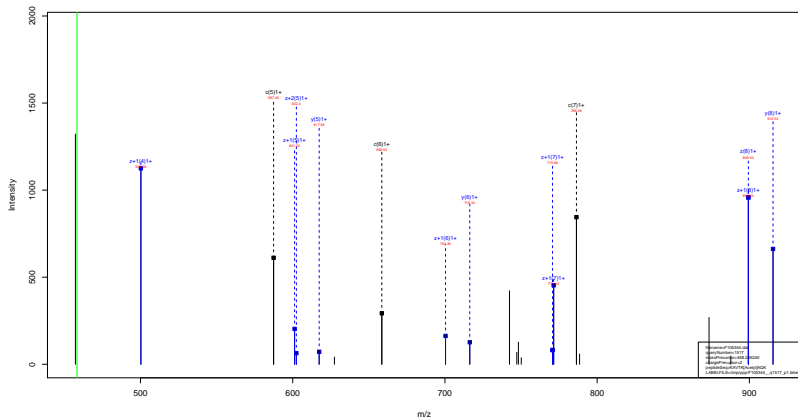

# sp | Q6ZWY9 | H2B1C\_MOUSE

KAVTK<sup>Acetyl</sup> AQK  
42.01

- ▶ fragmentation table for charge state 1+
- ▶ specType=etd
- ▶ score=36.56
- ▶ F105344.dat
- ▶ query=q1517.p1
- ▶ precursor=458.285240
- ▶ chargePrecursor=2
- ▶ itol=0.8

| AA   | c              | y              | z+1            | z+2            | z              | AA   |
|------|----------------|----------------|----------------|----------------|----------------|------|
| K[1] | 146.129        | <b>915.562</b> | <b>899.543</b> | 900.551        | <b>898.536</b> | K[8] |
| A[2] | 217.166        | 787.467        | <b>771.449</b> | 772.456        | <b>770.441</b> | A[7] |
| V[3] | 316.234        | <b>716.430</b> | <b>700.411</b> | 701.419        | 699.404        | V[6] |
| T[4] | 417.262        | <b>617.362</b> | <b>601.343</b> | <b>602.351</b> | 600.335        | T[5] |
| K[5] | <b>587.388</b> | 516.314        | <b>500.295</b> | 501.303        | 499.287        | K[4] |
| A[6] | <b>658.425</b> | 446.208        | 330.190        | 331.198        | 329.182        | A[3] |
| Q[7] | <b>786.483</b> | 278.171        | 269.153        | 260.160        | 258.145        | Q[2] |
| K[8] | 914.578        | 147.113        | 331.094        | 332.102        | 330.086        | K[1] |

# sp | P62806 | H4\_MOUSE

GLGK <sup>Acetyl</sup> GGAK <sup>Acetyl</sup> R  
42.01 42.01

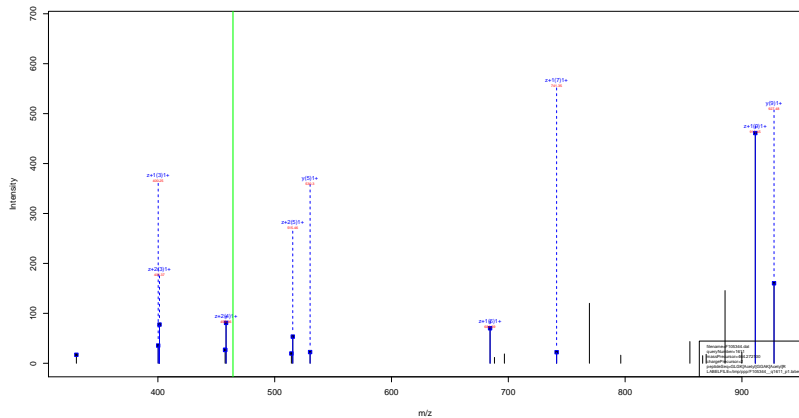

# sp | P62806 | H4\_MOUSE

GLGK<sup>Acetyl</sup><sub>42.01</sub> GGAK<sup>Acetyl</sup><sub>42.01</sub> R

- ▶ fragmentation table for charge state 1+
- ▶ specType=etd
- ▶ score=35.17
- ▶ F105344.dat
- ▶ query=q1611.p1
- ▶ precursor=464.272100
- ▶ chargePrecursor=2
- ▶ itol=0.8

| AA    | c       | y              | z+1            | z+2            | z       | AA    |
|-------|---------|----------------|----------------|----------------|---------|-------|
| G [1] | 75.055  | <b>927.537</b> | <b>911.518</b> | 0.000          | 910.510 | G [9] |
| L [2] | 188.139 | 870.316        | 551.497        | 0.000          | 853.489 | L [8] |
| G [3] | 245.161 | 737.832        | <b>741.413</b> | 0.000          | 740.405 | G [7] |
| K [4] | 415.266 | 700.410        | <b>684.391</b> | 695.399        | 583.384 | K [6] |
| G [5] | 472.288 | <b>530.305</b> | <b>514.286</b> | <b>515.294</b> | 513.278 | G [5] |
| G [6] | 529.309 | 473.283        | <b>457.264</b> | <b>458.272</b> | 456.257 | G [4] |
| A [7] | 600.346 | 416.262        | <b>400.243</b> | <b>401.251</b> | 399.235 | A [3] |
| K [8] | 770.452 | 345.234        | 329.206        | <b>330.214</b> | 328.198 | K [2] |
| R [9] | 936.553 | 175.119        | 159.100        | 160.108        | 158.092 | R [1] |



# sp | P62806 | H4\_MOUSE

GLGK<sub>42.01</sub> Acetyl GGAK<sub>42.01</sub> Acetyl R

- ▶ fragmentation table for charge state 1+
- ▶ specType=etd
- ▶ score=41.37
- ▶ F105344.dat
- ▶ query=q1612.p1
- ▶ precursor=464.272160
- ▶ chargePrecursor=2
- ▶ itol=0.8

| AA   | c              | y              | z+1            | z+2            | z       | AA   |
|------|----------------|----------------|----------------|----------------|---------|------|
| G[1] | 75.055         | <b>927.537</b> | <b>911.518</b> | 0.000          | 910.510 | G[9] |
| L[2] | 188.139        | 870.516        | <b>854.497</b> | 0.000          | 853.489 | L[8] |
| G[3] | 283.164        | 737.432        | <b>741.413</b> | 0.000          | 740.405 | G[7] |
| K[4] | 415.266        | <b>700.410</b> | <b>684.391</b> | 685.399        | 683.384 | K[6] |
| G[5] | 472.288        | 530.305        | <b>514.286</b> | <b>515.294</b> | 513.278 | G[5] |
| G[6] | 529.309        | 473.283        | <b>457.264</b> | <b>458.272</b> | 456.257 | G[4] |
| A[7] | <b>600.346</b> | 416.262        | <b>400.243</b> | <b>401.251</b> | 399.235 | A[3] |
| R[8] | 770.482        | 345.224        | 329.206        | <b>330.214</b> | 328.198 | R[2] |
| R[9] | 926.553        | 175.119        | 159.100        | 160.108        | 158.092 | R[1] |



# sp | P62806 | H4\_MOUSE

GLGK <sup>Acetyl</sup> GGAK <sup>Acetyl</sup> R  
42.01 42.01

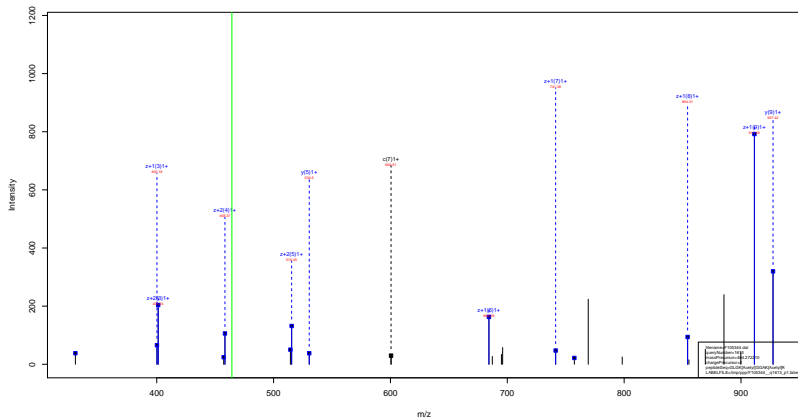

# sp | P62806 | H4\_MOUSE

GLGK<sub>42.01</sub> Acetyl GGAK<sub>42.01</sub> Acetyl R

- ▶ fragmentation table for charge state 1+
- ▶ specType=etd
- ▶ score=43.82
- ▶ F105344.dat
- ▶ query=q1613.p1
- ▶ precursor=464.272210
- ▶ chargePrecursor=2
- ▶ itol=0.8

| AA   | c              | y              | z+1            | z+2            | z       | AA   |
|------|----------------|----------------|----------------|----------------|---------|------|
| G[1] | 75.055         | <b>927.537</b> | <b>911.518</b> | 0.000          | 910.510 | G[9] |
| L[2] | 188.139        | 870.515        | <b>854.497</b> | 0.000          | 853.489 | L[8] |
| G[3] | 283.164        | <b>757.432</b> | <b>741.413</b> | 0.000          | 740.405 | G[7] |
| K[4] | 415.266        | 700.410        | <b>684.391</b> | 685.399        | 683.384 | K[6] |
| G[5] | 472.288        | <b>530.305</b> | <b>514.286</b> | <b>515.294</b> | 513.278 | G[5] |
| L[6] | 529.309        | 473.283        | <b>457.264</b> | <b>458.272</b> | 456.257 | L[4] |
| A[7] | <b>600.346</b> | 416.262        | <b>400.243</b> | <b>401.251</b> | 399.235 | A[3] |
| R[8] | 770.482        | 345.224        | 329.206        | <b>330.214</b> | 328.198 | R[2] |
| R[9] | 926.553        | 175.119        | 159.100        | 160.108        | 158.092 | R[1] |

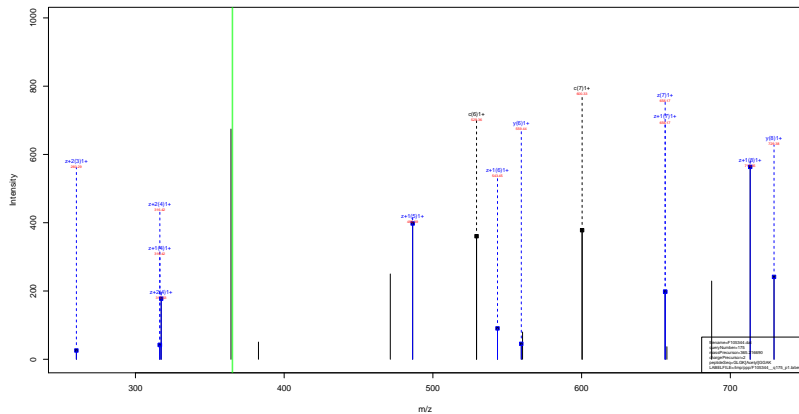

# sp | P62806 | H4\_MOUSE

GLGK<sup>Acetyl</sup>GGAK  
42.01

- ▶ fragmentation table for charge state 1+
- ▶ specType=etd
- ▶ score=33.90
- ▶ F105344.dat
- ▶ query=q175-p1
- ▶ precursor=365.216690
- ▶ chargePrecursor=2
- ▶ itol=0.8

| AA   | c              | y              | z+1            | z+2            | z              | AA   |
|------|----------------|----------------|----------------|----------------|----------------|------|
| G[1] | 75.055         | <b>729.425</b> | <b>713.407</b> | 0.000          | 712.399        | G[8] |
| L[2] | 188.139        | 672.404        | <b>656.385</b> | 0.000          | <b>655.377</b> | L[7] |
| G[3] | 245.161        | <b>559.320</b> | <b>543.301</b> | 0.000          | 542.293        | G[6] |
| K[4] | 415.266        | 502.298        | <b>486.280</b> | 487.287        | 485.272        | K[5] |
| G[5] | 472.288        | 332.193        | <b>316.174</b> | <b>317.182</b> | 315.166        | G[4] |
| G[6] | <b>529.309</b> | -975.171       | 259.153        | <b>260.160</b> | 258.145        | G[3] |
| A[7] | <b>600.346</b> | -218.150       | 202.131        | 203.139        | 201.123        | A[2] |
| R[8] | 728.441        | 147.113        | 131.094        | 132.102        | 130.086        | K[1] |

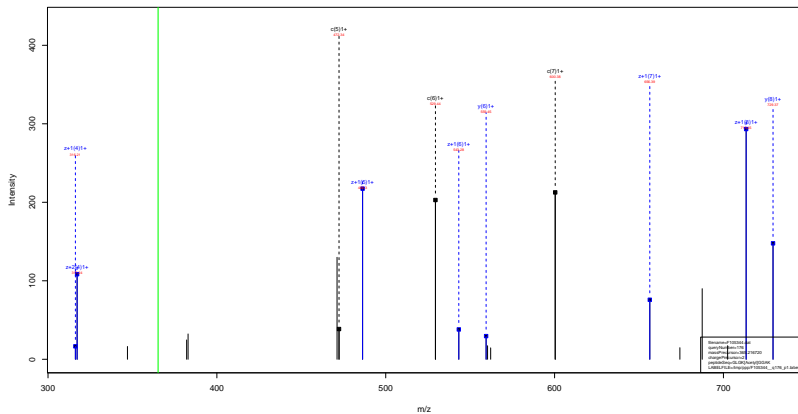

# sp | P62806 | H4\_MOUSE

GLGK<sup>Acetyl</sup>GGAK  
42.01

- ▶ fragmentation table for charge state 1+
- ▶ specType=etd
- ▶ score=35.33
- ▶ F105344.dat
- ▶ query=q176-p1
- ▶ precursor=365.216720
- ▶ chargePrecursor=2
- ▶ itol=0.8

| AA   | c              | y              | z+1            | z+2            | z       | AA   |
|------|----------------|----------------|----------------|----------------|---------|------|
| G[1] | 75.055         | <b>729.425</b> | <b>713.407</b> | 0.000          | 712.399 | G[8] |
| L[2] | 188.139        | 672.404        | <b>656.385</b> | 0.000          | 655.377 | L[7] |
| G[3] | 245.161        | <b>559.320</b> | <b>543.301</b> | 0.000          | 542.293 | G[6] |
| K[4] | 415.266        | 302.298        | <b>486.280</b> | 487.287        | 485.272 | K[5] |
| G[5] | <b>472.288</b> | 332.193        | <b>316.174</b> | <b>317.182</b> | 315.166 | G[4] |
| G[6] | <b>529.309</b> | 275.171        | 259.153        | 260.160        | 258.145 | G[3] |
| A[7] | <b>600.346</b> | 218.150        | 202.131        | 203.139        | 201.123 | A[2] |
| K[8] | 728.441        | 147.113        | 131.094        | 132.102        | 130.086 | K[1] |



# sp | P43277 | H13\_MOUSE

KPAAAAGAK <sup>Acetyl</sup> K  
42.01

- ▶ fragmentation table for charge state 1+
- ▶ specType=etd
- ▶ score=32.24
- ▶ F105344.dat
- ▶ query=q1845\_p1
- ▶ precursor=477.790180
- ▶ chargePrecursor=2
- ▶ itol=0.8

| AA | c              | y              | z+1            | z+2            | z       | AA |
|----|----------------|----------------|----------------|----------------|---------|----|
| K  | 146.129        | <b>954.573</b> | <b>938.554</b> | 939.562        | 937.547 | K  |
| P  | 243.182        | 826.478        | 810.459        | 811.467        | 809.452 | P  |
| A  | 314.219        | 729.425        | <b>713.407</b> | 714.414        | 712.399 | A  |
| A  | 385.256        | <b>658.388</b> | <b>642.370</b> | 643.377        | 641.362 | A  |
| A  | <b>456.293</b> | <b>587.351</b> | <b>571.332</b> | 572.340        | 570.325 | A  |
| A  | <b>527.330</b> | 516.314        | <b>500.295</b> | <b>501.303</b> | 499.287 | A  |
| G  | <b>584.351</b> | 445.277        | 429.258        | 430.266        | 428.250 | G  |
| A  | <b>655.389</b> | 388.255        | 372.237        | 373.245        | 371.229 | A  |
| K  | <b>825.494</b> | 117.213        | 361.200        | 362.207        | 360.192 | K  |
| K  | 953.589        | 147.113        | 131.094        | 132.102        | 130.086 | K  |



# sp | P68433 | H31\_MOUSE

K Dimethyl STGGK Acetyl APR  
28.03 42.01

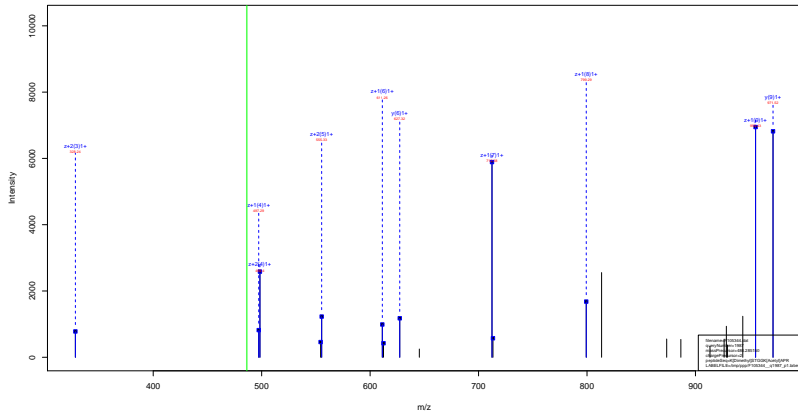

# sp | P68433 | H31\_MOUSE

K<sup>Dimethyl</sup> 28.03 STGGK<sup>Acetyl</sup> 42.01 APR

- ▶ fragmentation table for charge state 1+
- ▶ specType=etd
- ▶ score=34.08
- ▶ F105344.dat
- ▶ query=q1987.p1
- ▶ precursor=486.285150
- ▶ chargePrecursor=2
- ▶ itol=0.8

| AA | c       | y              | z+1            | z+2            | z       | AA |
|----|---------|----------------|----------------|----------------|---------|----|
| K  | 174.160 | <b>971.563</b> | <b>955.545</b> | 956.552        | 954.537 | K  |
| S  | 261.192 | 835.431        | <b>799.413</b> | 800.429        | 798.410 | S  |
| T  | 362.240 | 728.405        | <b>712.386</b> | <b>713.394</b> | 711.370 | T  |
| C  | 419.261 | <b>627.357</b> | <b>611.339</b> | <b>612.346</b> | 610.331 | C  |
| G  | 476.283 | 570.330        | <b>554.317</b> | <b>555.325</b> | 553.309 | G  |
| K  | 646.388 | 513.314        | <b>497.296</b> | <b>498.303</b> | 496.288 | K  |
| A  | 717.425 | 343.209        | 327.190        | <b>328.198</b> | 326.182 | A  |
| P  | 814.478 | 272.172        | 256.153        | 257.161        | 255.145 | P  |
| R  | 970.579 | 175.119        | 159.100        | 160.108        | 158.092 | R  |

# sp | P68433 | H31\_MOUSE

K Dimethyl STGGK Acetyl APR  
28.03 42.01

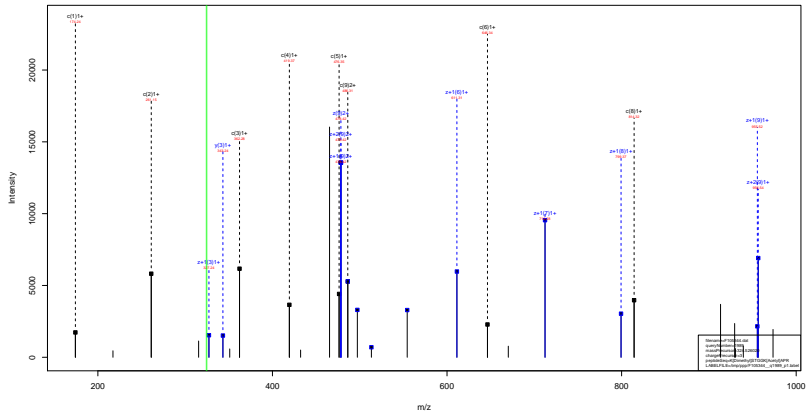

# sp | P68433 | H31\_MOUSE

K<sup>Dimethyl</sup><sub>28.03</sub> STGGK<sup>Acetyl</sup><sub>42.01</sub> APR

- ▶ fragmentation table for charge state 1+
- ▶ specType=etd
- ▶ score=50.71
- ▶ F105344.dat
- ▶ query=q1989\_p1
- ▶ precursor=324.526020
- ▶ chargePrecursor=3
- ▶ itol=0.8

| AA | c       | y       | z+1     | z+2     | z       | AA |
|----|---------|---------|---------|---------|---------|----|
| K  | 174.160 | 971.563 | 955.545 | 956.552 | 954.537 | K  |
| S  | 261.192 | 815.437 | 799.418 | 800.426 | 798.410 | S  |
| T  | 362.240 | 728.405 | 712.386 | 713.394 | 711.378 | T  |
| G  | 419.261 | 627.357 | 611.339 | 612.346 | 610.331 | G  |
| G  | 476.283 | 570.336 | 554.317 | 555.325 | 553.309 | G  |
| K  | 646.388 | 513.314 | 497.296 | 498.303 | 496.288 | K  |
| A  | 717.425 | 343.209 | 327.190 | 328.198 | 326.182 | A  |
| P  | 814.478 | 272.172 | 256.153 | 257.161 | 255.145 | P  |
| R  | 970.579 | 175.119 | 159.100 | 160.108 | 158.092 | R  |

# sp | P68433 | H31\_MOUSE

K<sup>Dimethyl</sup><sub>28.03</sub> STGGK<sup>Acetyl</sup><sub>42.01</sub> APR

- ▶ fragmentation table for charge state 2+
- ▶ specType=etd
- ▶ score=50.71
- ▶ F105344.dat
- ▶ query=q1989\_p1
- ▶ precursor=324.526020
- ▶ chargePrecursor=3
- ▶ itol=0.8

| AA    | c              | y              | z+1            | z+2            | z              | AA    |
|-------|----------------|----------------|----------------|----------------|----------------|-------|
| R [1] | 87.584         | <b>486.285</b> | <b>478.276</b> | <b>478.780</b> | <b>477.172</b> | R [9] |
| S [2] | 131.100        | 408.222        | 400.213        | 400.717        | 399.709        | S [8] |
| T [3] | 183.824        | 354.705        | 355.697        | 357.201        | 356.193        | T [7] |
| G [4] | 210.134        | 314.182        | 306.173        | 306.677        | 305.669        | G [6] |
| Q [5] | 238.645        | 285.672        | 277.662        | 278.166        | 277.158        | Q [5] |
| K [6] | 323.698        | 257.161        | 249.151        | 249.655        | 248.648        | K [4] |
| A [7] | 359.216        | 172.108        | 164.099        | 164.603        | 163.595        | A [3] |
| P [8] | 407.743        | 136.589        | 128.580        | 129.084        | 128.076        | P [2] |
| R [9] | <b>485.793</b> | 88.063         | 80.054         | 80.558         | 79.550         | R [1] |



# sp | P68433 | H31\_MOUSE

K<sup>Acetyl</sup> 42.01 STGGK<sup>Acetyl</sup> 42.01 APR

- ▶ fragmentation table for charge state 1+
- ▶ specType=etd
- ▶ score=33.26
- ▶ F105344.dat
- ▶ query=q2117.p1
- ▶ precursor=493.274470
- ▶ chargePrecursor=2
- ▶ itol=0.8

| AA |   | c              | y              | z+1            | z+2            | z       | AA   |
|----|---|----------------|----------------|----------------|----------------|---------|------|
| K  | 1 | 188.139        | <b>985.543</b> | <b>969.524</b> | 970.532        | 968.516 | K[9] |
| S  | 2 | 275.171        | 815.437        | <b>799.418</b> | 800.426        | 798.410 | S[8] |
| T  | 3 | 318.219        | 728.403        | <b>712.386</b> | <b>713.394</b> | 711.378 | T[7] |
| G  | 4 | 433.241        | <b>627.357</b> | <b>611.339</b> | <b>612.346</b> | 610.331 | G[6] |
| G  | 5 | 490.262        | <b>570.336</b> | 554.317        | <b>555.325</b> | 553.309 | G[5] |
| K  | 6 | 660.368        | 513.314        | <b>497.296</b> | <b>498.303</b> | 496.288 | K[4] |
| A  | 7 | 731.405        | 343.209        | 327.190        | <b>328.198</b> | 326.182 | A[3] |
| P  | 8 | <b>828.457</b> | 272.172        | 256.153        | 257.161        | 255.145 | P[2] |
| R  | 9 | 984.559        | 175.119        | 159.100        | 160.108        | 158.092 | R[1] |





# sp | P68433 | H31\_MOUSE

KS <sup>Phospho</sup>79.97 TGGK <sup>Acetyl</sup>42.01 APR

- ▶ fragmentation table for charge state 1+
- ▶ specType=etd
- ▶ score=32.65
- ▶ F105344.dat
- ▶ query=q2492.p1
- ▶ precursor=512.252120
- ▶ chargePrecursor=2
- ▶ itol=0.8

| AA | c        | y               | z+1             | z+2            | z               | AA  |
|----|----------|-----------------|-----------------|----------------|-----------------|-----|
| K  | 140.129  | <b>1023.498</b> | <b>1007.480</b> | 1008.487       | <b>1006.472</b> | K 0 |
| S  | 313.127  | 895.403         | <b>879.385</b>  | 880.392        | 878.377         | S 8 |
| T  | 414.175  | 728.405         | <b>712.386</b>  | <b>713.394</b> | 711.378         | T 0 |
| G  | 471.188  | 627.397         | <b>611.379</b>  | <b>612.346</b> | 610.331         | G 0 |
| Q  | 528.218  | 570.335         | <b>554.317</b>  | <b>555.325</b> | 553.309         | Q 5 |
| K  | 698.323  | 513.314         | <b>497.296</b>  | <b>498.303</b> | 496.288         | K 6 |
| A  | 769.350  | 343.209         | 327.190         | <b>328.198</b> | 326.182         | A 3 |
| P  | 866.413  | 272.172         | 256.153         | 257.161        | 255.145         | P 2 |
| R  | 1022.514 | 175.119         | 159.100         | 160.108        | 158.092         | R 1 |

# sp | P68433 | H31\_MOUSE

KQLATK<sup>Acetyl</sup>AAR  
42.01

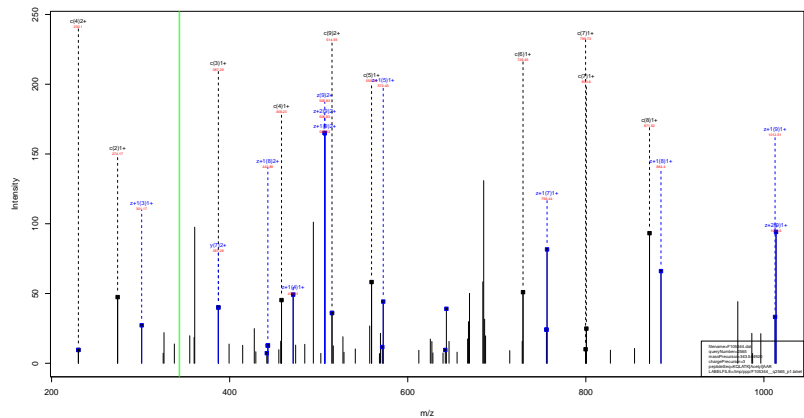

# sp | P68433 | H31\_MOUSE

KQLATK<sup>Acetyl</sup> AAR  
42.01

- ▶ fragmentation table for charge state 1+
- ▶ specType=etd
- ▶ score=42.43
- ▶ F105344.dat
- ▶ query=q2565.p1
- ▶ precursor=343.544920
- ▶ chargePrecursor=3
- ▶ itol=0.8

| AA | c              | y        | z+1             | z+2             | z              | AA   |
|----|----------------|----------|-----------------|-----------------|----------------|------|
| K  | 146.129        | 1028.621 | <b>1012.602</b> | <b>1013.610</b> | 1011.598       | K[9] |
| Q  | <b>274.187</b> | 900.520  | <b>884.567</b>  | 885.515         | 883.503        | Q[8] |
| L  | <b>387.271</b> | 772.468  | <b>756.449</b>  | 757.497         | <b>755.441</b> | L[7] |
| A  | <b>458.308</b> | 659.384  | <b>643.365</b>  | 644.373         | <b>642.357</b> | A[6] |
| T  | <b>559.356</b> | 588.340  | <b>572.328</b>  | 573.335         | <b>571.320</b> | T[5] |
| K  | <b>729.462</b> | 487.299  | <b>471.280</b>  | 472.288         | 470.273        | K[4] |
| A  | <b>800.499</b> | 317.193  | <b>301.174</b>  | 302.182         | 300.167        | A[3] |
| A  | <b>871.536</b> | 246.156  | <b>230.137</b>  | 231.145         | 229.130        | A[2] |
| R  | 1027.637       | 175.119  | 159.100         | 160.108         | 158.092        | R[1] |

# sp | P68433 | H31\_MOUSE

KQLATK<sup>Acetyl</sup>AAR  
42.01

- ▶ fragmentation table for charge state 2+
- ▶ specType=etd
- ▶ score=42.43
- ▶ F105344.dat
- ▶ query=q2565\_p1
- ▶ precursor=343.544920
- ▶ chargePrecursor=3
- ▶ itol=0.8

| AA |     | c              | y              | z+1            | z+2            | z              | AA   |
|----|-----|----------------|----------------|----------------|----------------|----------------|------|
| K  | [1] | 73.568         | <b>514.814</b> | <b>506.805</b> | <b>507.309</b> | <b>506.301</b> | K[9] |
| Q  | [2] | 137.597        | 450.767        | <b>442.757</b> | <b>443.261</b> | <b>442.253</b> | Q[8] |
| L  | [3] | 194.130        | <b>386.737</b> | 376.729        | 379.232        | 378.224        | L[7] |
| A  | [4] | <b>229.658</b> | 130.195        | 322.180        | 322.680        | 321.682        | A[6] |
| T  | [5] | 280.182        | 294.677        | 298.667        | 297.171        | 298.164        | T[5] |
| K  | [6] | 365.235        | 344.153        | 236.144        | 236.640        | 235.640        | K[4] |
| A  | [7] | 400.763        | 199.100        | 351.091        | 351.595        | 350.587        | A[3] |
| A  | [8] | 436.272        | 123.582        | 115.572        | 116.076        | 115.068        | A[2] |
| R  | [9] | <b>514.322</b> | 88.063         | 80.054         | 80.558         | 79.550         | R[1] |

# sp | P68433 | H31\_MOUSE

KQLATK<sup>Acetyl</sup> AAR  
42.01

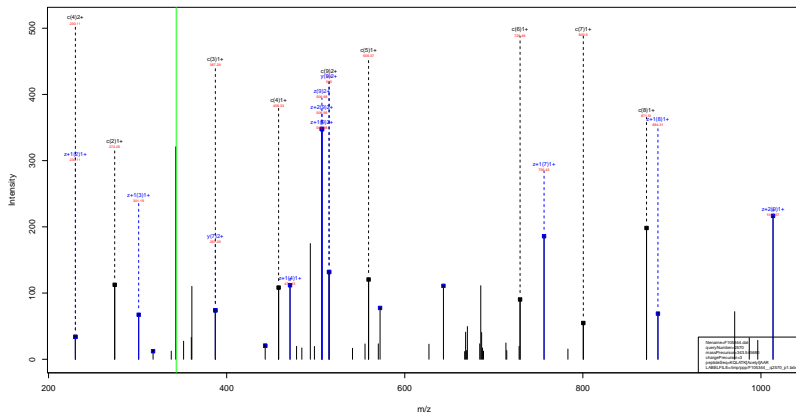

# sp | P68433 | H31\_MOUSE

KQLATK<sup>Acetyl</sup> AAR  
42.01

- ▶ fragmentation table for charge state 1+
- ▶ specType=etd
- ▶ score=44.66
- ▶ F105344.dat
- ▶ query=q2570\_p1
- ▶ precursor=343.545680
- ▶ chargePrecursor=3
- ▶ itol=0.8

| AA    | c              | y              | z+1            | z+2             | z        | AA    |
|-------|----------------|----------------|----------------|-----------------|----------|-------|
| K [1] | 146.129        | 1028.621       | 1012.603       | <b>1013.610</b> | 1011.595 | K [0] |
| Q [2] | <b>274.187</b> | 900.526        | <b>884.507</b> | 885.515         | 883.500  | Q [0] |
| L [3] | <b>387.271</b> | 772.468        | <b>756.449</b> | 757.457         | 755.441  | L [1] |
| A [4] | <b>458.309</b> | 659.384        | <b>643.365</b> | 644.373         | 642.357  | A [0] |
| T [5] | <b>559.356</b> | 588.340        | <b>572.328</b> | 573.335         | 571.320  | T [0] |
| K [6] | <b>729.462</b> | 487.299        | <b>471.280</b> | 472.288         | 470.272  | K [4] |
| A [7] | <b>800.499</b> | <b>317.193</b> | <b>301.174</b> | 302.182         | 300.167  | A [3] |
| A [8] | <b>871.536</b> | 246.156        | <b>230.137</b> | 231.145         | 229.130  | A [2] |
| R [9] | 1027.637       | 175.119        | 159.100        | 160.108         | 158.092  | R [1] |

# sp | P68433 | H31\_MOUSE

KQLATK<sup>Acetyl</sup> AAR  
42.01

- ▶ fragmentation table for charge state 2+
- ▶ specType=etd
- ▶ score=44.66
- ▶ F105344.dat
- ▶ query=q2570\_p1
- ▶ precursor=343.545680
- ▶ chargePrecursor=3
- ▶ itol=0.8

| AA |     | c              | y              | z+1            | z+2            | z              | AA   |
|----|-----|----------------|----------------|----------------|----------------|----------------|------|
| K  | [1] | 73.568         | <b>514.814</b> | <b>506.805</b> | <b>507.309</b> | <b>506.301</b> | K[0] |
| Q  | [2] | 137.597        | 450.767        | <b>442.757</b> | <b>443.261</b> | 442.253        | Q[0] |
| L  | [3] | 194.130        | <b>386.737</b> | 376.729        | 379.232        | 378.224        | L[1] |
| A  | [4] | <b>229.658</b> | 130.195        | 322.180        | 322.680        | 321.662        | A[6] |
| T  | [5] | 280.182        | 294.677        | 288.667        | 287.171        | 286.164        | T[5] |
| K  | [6] | 365.235        | 344.153        | 236.144        | 236.640        | 235.640        | K[4] |
| A  | [7] | 400.763        | 199.100        | 351.091        | 351.595        | 350.587        | A[3] |
| A  | [8] | 436.272        | 123.582        | 115.572        | 116.076        | 115.068        | A[2] |
| R  | [9] | <b>514.322</b> | 88.063         | 80.054         | 80.558         | 79.550         | R[1] |





# sp | P68433 | H31\_MOUSE

K<sup>Dimethyl</sup><sub>28.03</sub> S<sup>Phospho</sup><sub>79.97</sub> TGGK<sup>Acetyl</sup><sub>42.01</sub> APR

- ▶ fragmentation table for charge state 1+
- ▶ specType=etd
- ▶ score=36.48
- ▶ F105344.dat
- ▶ query=q2769.p1
- ▶ precursor=526.268640
- ▶ chargePrecursor=2
- ▶ itol=0.8

| AA |   | c        | y               | z+1             | z+2            | z              | AA   |
|----|---|----------|-----------------|-----------------|----------------|----------------|------|
| K  | 1 | 174.180  | <b>1051.530</b> | <b>1035.511</b> | 1036.519       | 1034.503       | K[0] |
| S  | 2 | 341.158  | 895.403         | <b>879.385</b>  | 880.392        | <b>878.377</b> | S[8] |
| T  | 3 | 442.206  | 738.405         | <b>712.386</b>  | <b>713.394</b> | 711.378        | T[7] |
| G  | 4 | 499.238  | 627.357         | 611.339         | <b>612.346</b> | 610.331        | G[6] |
| G  | 5 | 556.269  | 570.338         | 554.317         | <b>555.325</b> | 553.309        | G[5] |
| K  | 6 | 726.355  | 513.314         | <b>497.296</b>  | <b>498.303</b> | 496.288        | K[4] |
| A  | 7 | 797.392  | 343.200         | 327.190         | <b>328.198</b> | 326.182        | A[3] |
| P  | 8 | 894.444  | 272.172         | 256.153         | 257.161        | 255.145        | P[2] |
| R  | 9 | 1050.546 | 175.119         | 159.100         | 160.108        | 158.092        | R[1] |

# sp | Q6ZWY9 | H2B1C\_MOUSE

K<sub>42.01</sub> Acetyl GSK K<sub>42.01</sub> Acetyl AVTK

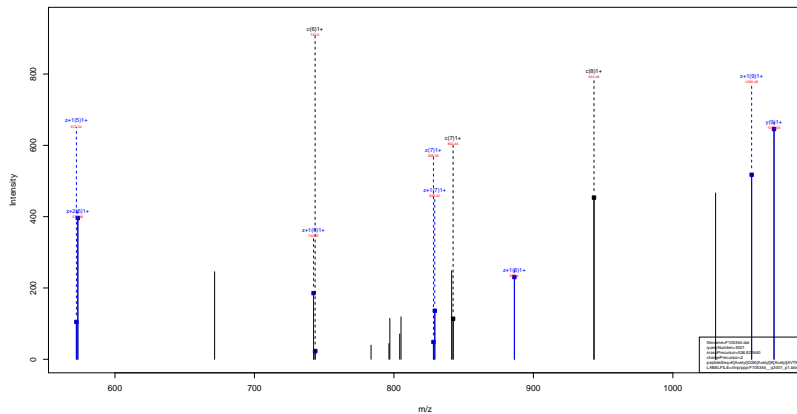

# sp | Q6ZWY9 | H2B1C\_MOUSE

K<sub>42.01</sub> Acetyl GSK<sub>42.01</sub> Acetyl K<sub>42.01</sub> Acetyl AVTK

- ▶ fragmentation table for charge state 1+
- ▶ specType=etd
- ▶ score=34.64
- ▶ F105344.dat
- ▶ query=q3001.p1
- ▶ precursor=536.821640
- ▶ chargePrecursor=2
- ▶ itol=0.8

| AA |   | c              | y               | z+1             | z+2            | z              | AA   |
|----|---|----------------|-----------------|-----------------|----------------|----------------|------|
| K  | 1 | 188.139        | <b>1072.636</b> | <b>1056.617</b> | 1057.629       | 1055.610       | K[0] |
| G  | 2 | 245.161        | 902.531         | <b>886.512</b>  | 887.520        | 885.504        | G[8] |
| S  | 3 | 332.193        | 645.509         | <b>629.490</b>  | 630.499        | <b>628.483</b> | S[7] |
| K  | 4 | 502.288        | 758.477         | <b>742.458</b>  | <b>743.466</b> | 741.451        | K[6] |
| K  | 5 | 672.404        | 588.372         | <b>572.353</b>  | <b>573.361</b> | 571.345        | K[5] |
| A  | 6 | <b>743.441</b> | 418.266         | 402.247         | 403.255        | 401.239        | A[4] |
| V  | 7 | <b>842.509</b> | 347.229         | 331.210         | 332.218        | 330.202        | V[3] |
| T  | 8 | <b>943.557</b> | 248.160         | 232.142         | 233.150        | 231.134        | T[2] |
| K  | 9 | 1071.652       | 147.113         | 131.094         | 132.102        | 130.086        | K[1] |



# sp | P62806 | H4\_MOUSE

GGK<sup>Acetyl</sup><sub>42.01</sub> GLGK<sup>Acetyl</sup><sub>42.01</sub> GGAK<sup>Acetyl</sup><sub>42.01</sub> R

- ▶ fragmentation table for charge state 1+
- ▶ specType=etd
- ▶ score=62.21
- ▶ F105344.dat
- ▶ query=q4370\_p1
- ▶ precursor=606.345940
- ▶ chargePrecursor=2
- ▶ itol=0.8

| AA | c  | y        | z+1             | z+2             | z              | AA       |   |    |
|----|----|----------|-----------------|-----------------|----------------|----------|---|----|
| G  | 1  | 75.055   | <b>1211.685</b> | <b>1195.467</b> | 0.000          | 1194.699 | G | 12 |
| G  | 2  | 132.077  | 1154.969        | <b>1138.645</b> | 0.990          | 1137.657 | G | 11 |
| K  | 3  | 302.182  | 1097.643        | <b>1081.624</b> | 1082.632       | 1080.618 | K | 10 |
| G  | 4  | 350.204  | 927.537         | <b>911.518</b>  | <b>912.526</b> | 910.510  | G | 9  |
| L  | 5  | 472.288  | 870.516         | <b>854.497</b>  | 855.505        | 853.489  | L | 8  |
| G  | 6  | 520.309  | 757.432         | <b>741.413</b>  | <b>742.421</b> | 740.405  | G | 7  |
| K  | 7  | 660.415  | 700.410         | <b>684.391</b>  | <b>685.399</b> | 683.384  | K | 6  |
| G  | 8  | 758.438  | 530.305         | <b>514.286</b>  | <b>515.294</b> | 513.278  | G | 5  |
| G  | 9  | 813.458  | 473.293         | 457.284         | <b>438.272</b> | 456.261  | G | 4  |
| A  | 10 | 884.495  | 416.262         | 400.243         | <b>401.251</b> | 399.235  | A | 3  |
| K  | 11 | 1054.600 | 345.224         | 329.206         | 330.214        | 328.198  | K | 2  |
| R  | 12 | 1210.701 | 175.119         | 159.100         | 160.108        | 158.092  | R | 1  |

# sp | P62806 | H4\_MOUSE

GGK<sup>Acetyl</sup> 42.01 GLGK<sup>Acetyl</sup> 42.01 GGAK<sup>Acetyl</sup> 42.01 R

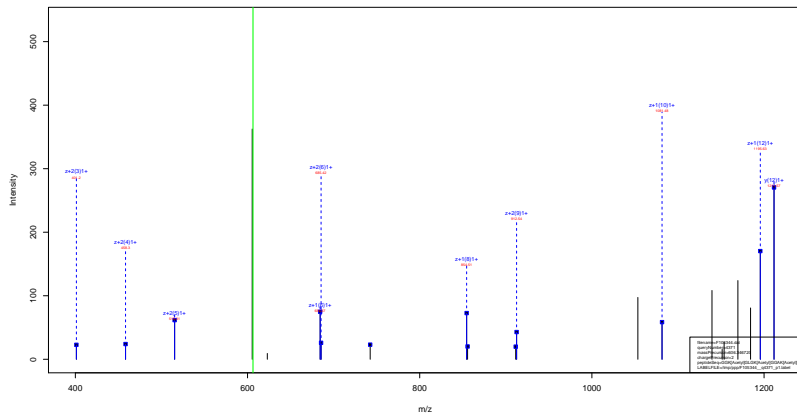

# sp | P62806 | H4\_MOUSE

GGK<sup>Acetyl</sup><sub>42.01</sub> GLGK<sup>Acetyl</sup><sub>42.01</sub> GGAK<sup>Acetyl</sup><sub>42.01</sub> R

- ▶ fragmentation table for charge state 1+
- ▶ specType=etd
- ▶ score=72.47
- ▶ F105344.dat
- ▶ query=q4371.p1
- ▶ precursor=606.346720
- ▶ chargePrecursor=2
- ▶ itol=0.8

| AA | c  | y        | z+1             | z+2             | z              | AA       |   |    |
|----|----|----------|-----------------|-----------------|----------------|----------|---|----|
| G  | 1  | 75.055   | <b>1211.685</b> | <b>1195.667</b> | 0.000          | 1194.699 | G | 12 |
| G  | 2  | 132.077  | 1154.969        | 1138.955        | 0.990          | 1137.957 | G | 11 |
| K  | 3  | 302.182  | 1097.643        | <b>1081.624</b> | 1082.632       | 1080.618 | K | 10 |
| G  | 4  | 350.204  | 927.537         | <b>911.518</b>  | <b>912.526</b> | 910.510  | G | 9  |
| L  | 5  | 472.288  | 870.516         | <b>854.497</b>  | <b>855.505</b> | 853.489  | L | 8  |
| G  | 6  | 520.309  | 757.432         | 741.413         | <b>742.421</b> | 740.405  | G | 7  |
| K  | 7  | 690.415  | 700.410         | <b>684.391</b>  | <b>685.399</b> | 683.384  | K | 6  |
| G  | 8  | 758.438  | 530.305         | 514.286         | <b>515.294</b> | 513.278  | G | 5  |
| G  | 9  | 813.458  | 473.281         | 457.264         | <b>458.272</b> | 456.256  | G | 4  |
| A  | 10 | 884.495  | 416.262         | 400.243         | <b>401.251</b> | 399.235  | A | 3  |
| K  | 11 | 1054.600 | 345.224         | 329.206         | 320.214        | 328.198  | K | 2  |
| R  | 12 | 1210.701 | 175.119         | 159.100         | 160.108        | 158.092  | R | 1  |





# sp | Q3THW5 | H2AV\_MOUSE

AGGK <sup>Acetyl</sup> 42.01 AGK <sup>Acetyl</sup> 42.01 DSGK <sup>Acetyl</sup> 42.01 AK

- ▶ fragmentation table for charge state 1+
- ▶ specType=etd
- ▶ score=52.63
- ▶ F105344.dat
- ▶ query=q5332\_p1
- ▶ precursor=650.847140
- ▶ chargePrecursor=2
- ▶ itol=0.8

| AA   | c               | y               | a+1             | a+2             | a               | AA   |
|------|-----------------|-----------------|-----------------|-----------------|-----------------|------|
| A 1  | 59.071          | <b>1300.686</b> | <b>1294.667</b> | 0.000           | <b>1283.659</b> | A 13 |
| G 2  | 146.092         | 1229.648        | 1213.630        | 0.000           | <b>1212.622</b> | G 12 |
| G 3  | 203.114         | 1172.627        | <b>1156.608</b> | 0.000           | 1155.600        | G 11 |
| R 4  | <b>373.219</b>  | 1115.606        | <b>1099.587</b> | <b>1100.595</b> | 1098.579        | R 10 |
| A 5  | 444.257         | 948.500         | <b>929.481</b>  | <b>930.489</b>  | 928.473         | A 9  |
| G 6  | 501.279         | 874.463         | 858.445         | <b>859.452</b>  | 857.436         | G 8  |
| R 7  | 671.334         | 817.441         | <b>801.423</b>  | <b>802.431</b>  | 800.415         | R 7  |
| D 8  | 786.410         | 647.389         | 631.371         | <b>632.325</b>  | 630.309         | D 6  |
| S 9  | <b>873.442</b>  | <b>532.309</b>  | 516.290         | <b>517.298</b>  | 515.282         | S 5  |
| G 10 | <b>930.464</b>  | 445.277         | 429.258         | 430.266         | 428.250         | G 4  |
| R 11 | <b>1160.569</b> | 388.205         | 372.187         | <b>373.245</b>  | 371.229         | R 3  |
| A 12 | <b>1171.607</b> | 218.150         | 202.131         | 203.139         | 201.123         | A 2  |
| R 13 | <b>1299.702</b> | 147.113         | 131.094         | 132.102         | 130.086         | R 1  |



# sp | P68433 | H31\_MOUSE

EIAQDFK<sup>Dimethyl</sup><sub>28.03</sub> TDLR

- ▶ fragmentation table for charge state 1+
- ▶ specType=etd
- ▶ score=61.39
- ▶ F105344.dat
- ▶ query=q5844.p1
- ▶ precursor=455.243780
- ▶ chargePrecursor=3
- ▶ itol=0.8

| AA     | c               | y              | z+1             | z+2            | z              | AA    |
|--------|-----------------|----------------|-----------------|----------------|----------------|-------|
| E [1]  | 147.076         | 1363.722       | 1347.703        | 0.000          | 1346.695       | E[11] |
| I [2]  | <b>260.160</b>  | 1234.679       | 1238.660        | 0.000          | 1217.652       | I[10] |
| A [3]  | <b>331.198</b>  | 1121.595       | <b>1105.576</b> | 0.000          | 1104.568       | A[9]  |
| Q [4]  | <b>459.256</b>  | 1009.535       | <b>1034.539</b> | 1035.547       | 1033.531       | Q[8]  |
| D [5]  | <b>574.283</b>  | <b>822.499</b> | <b>906.481</b>  | 907.488        | 905.471        | D[7]  |
| F [6]  | <b>721.352</b>  | <b>807.472</b> | <b>791.454</b>  | 792.461        | 790.444        | F[6]  |
| K [7]  | <b>877.478</b>  | <b>660.404</b> | <b>644.385</b>  | <b>645.393</b> | 643.377        | K[5]  |
| T [8]  | <b>978.525</b>  | 504.278        | <b>488.259</b>  | 489.267        | <b>487.251</b> | T[4]  |
| D [9]  | <b>1093.552</b> | 403.230        | <b>387.211</b>  | 388.219        | 386.203        | D[3]  |
| L [10] | <b>1206.636</b> | <b>288.203</b> | <b>272.184</b>  | 273.192        | 271.176        | L[2]  |
| R [11] | 1362.738        | 175.110        | 159.100         | 160.108        | 158.092        | R[1]  |

# sp | P68433 | H31\_MOUSE

EIAQDFK<sup>Dimethyl</sup> TDLR  
28.03

- ▶ fragmentation table for charge state 2+
- ▶ specType=etd
- ▶ score=61.39
- ▶ F105344.dat
- ▶ query=q5844.p1
- ▶ precursor=455.243780
- ▶ chargePrecursor=3
- ▶ itol=0.8

| AA     | c              | y              | z+1            | z+2            | z              | AA    |
|--------|----------------|----------------|----------------|----------------|----------------|-------|
| E [1]  | 74.042         | <b>682.364</b> | <b>674.355</b> | 0.504          | <b>673.851</b> | E[11] |
| T [2]  | 130.584        | 617.843        | <b>609.834</b> | 0.504          | <b>609.330</b> | T[10] |
| A [3]  | 166.102        | 561.301        | <b>553.292</b> | 0.504          | <b>552.788</b> | A[9]  |
| Q [4]  | 239.132        | 325.783        | 317.773        | 313.277        | 317.269        | Q[8]  |
| D [5]  | <b>287.645</b> | 361.753        | <b>453.744</b> | <b>454.248</b> | 453.240        | D[7]  |
| F [6]  | 351.179        | 404.240        | 398.230        | 396.734        | 395.727        | F[6]  |
| K [7]  | 439.243        | <b>330.706</b> | 322.696        | 323.200        | 322.192        | K[5]  |
| T [8]  | 489.766        | 252.642        | 244.633        | 245.137        | 244.129        | T[4]  |
| D [9]  | 547.280        | 202.119        | 194.109        | 194.613        | 193.605        | D[3]  |
| L [10] | 603.822        | 144.605        | 136.595        | 137.100        | 136.092        | L[2]  |
| R [11] | <b>681.872</b> | 88.063         | 80.054         | 80.558         | 79.550         | R[1]  |

# sp | P68433 | H31\_MOUSE

EIAQDFK <sup>Dimethyl</sup> TDLR  
28.03

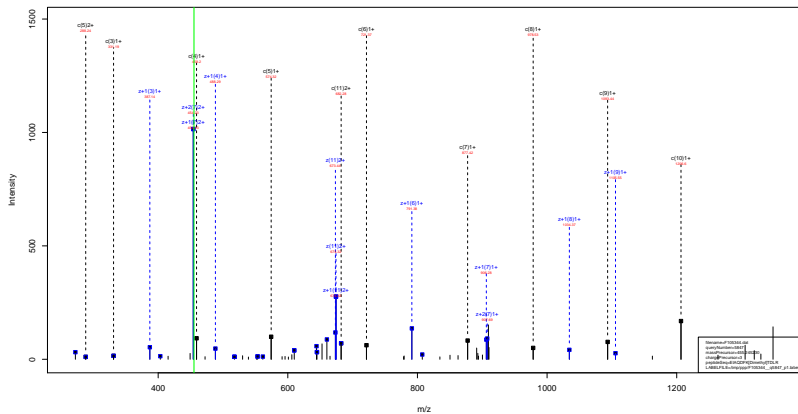

# sp | P68433 | H31\_MOUSE

EIAQDFK<sup>Dimethyl</sup><sub>28.03</sub> TDLR

- ▶ fragmentation table for charge state 1+
- ▶ specType=etd
- ▶ score=49.88
- ▶ F105344.dat
- ▶ query=q5847.p1
- ▶ precursor=455.245230
- ▶ chargePrecursor=3
- ▶ itol=0.8

| AA     | c               | y              | z+1             | z+2            | z        | AA    |
|--------|-----------------|----------------|-----------------|----------------|----------|-------|
| E [1]  | 147.076         | 1363.722       | 1347.703        | 0.000          | 1346.695 | E[11] |
| I [2]  | 260.100         | 1234.679       | 1218.660        | 0.000          | 1217.652 | I[10] |
| A [3]  | <b>331.198</b>  | 1121.595       | <b>1105.576</b> | 0.000          | 1104.568 | A[9]  |
| Q [4]  | <b>453.256</b>  | 1050.598       | <b>1034.539</b> | 1033.547       | 1033.531 | Q[8]  |
| D [5]  | <b>574.283</b>  | 922.499        | <b>906.481</b>  | <b>907.488</b> | 906.471  | D[7]  |
| F [6]  | <b>721.352</b>  | <b>807.472</b> | <b>791.454</b>  | 792.461        | 790.446  | F[6]  |
| K [7]  | <b>877.478</b>  | <b>660.404</b> | <b>644.385</b>  | <b>645.393</b> | 643.377  | K[5]  |
| T [8]  | <b>978.525</b>  | 504.278        | <b>488.259</b>  | 489.267        | 487.251  | T[4]  |
| D [9]  | <b>1093.552</b> | <b>403.230</b> | <b>387.211</b>  | 388.219        | 386.203  | D[3]  |
| L [10] | <b>1206.636</b> | <b>288.203</b> | <b>272.184</b>  | 273.192        | 271.176  | L[2]  |
| R [11] | 1362.738        | 175.110        | 159.100         | 160.108        | 158.092  | R[1]  |

# sp | P68433 | H31\_MOUSE

EIAQDFK<sup>Dimethyl</sup> TDLR  
28.03

- ▶ fragmentation table for charge state 2+
- ▶ specType=etd
- ▶ score=49.88
- ▶ F105344.dat
- ▶ query=q5847.p1
- ▶ precursor=455.245230
- ▶ chargePrecursor=3
- ▶ itol=0.8

| AA     | c              | y              | z+1            | z+2            | z              | AA    |
|--------|----------------|----------------|----------------|----------------|----------------|-------|
| E [1]  | 74.042         | <b>682.364</b> | <b>674.355</b> | 0.504          | <b>673.851</b> | E[11] |
| T [2]  | 130.584        | 617.843        | <b>609.834</b> | 0.504          | <b>609.330</b> | T[10] |
| A [3]  | 166.102        | <b>561.301</b> | <b>553.292</b> | 0.504          | <b>552.788</b> | A[9]  |
| Q [4]  | 239.132        | 825.785        | <b>817.773</b> | <b>818.277</b> | <b>817.269</b> | Q[8]  |
| D [5]  | <b>287.645</b> | 461.753        | <b>453.744</b> | <b>454.248</b> | 453.240        | D[7]  |
| F [6]  | 351.179        | 404.240        | 396.230        | 396.734        | 395.727        | F[6]  |
| K [7]  | 439.243        | <b>330.706</b> | 322.696        | 323.200        | 322.193        | K[5]  |
| T [8]  | 489.766        | 252.642        | 244.633        | 245.137        | 244.129        | T[4]  |
| D [9]  | 547.280        | 202.119        | 194.109        | 194.613        | 193.605        | D[3]  |
| L [10] | 603.822        | 144.605        | 136.595        | 137.100        | 136.092        | L[2]  |
| R [11] | <b>681.872</b> | 88.063         | 80.054         | 80.558         | 79.550         | R[1]  |

# sp | P10922 | H10\_MOUSE

[Acetyl]TENS<sup>Phospho</sup><sub>79.97</sub> TSAPAAKPK

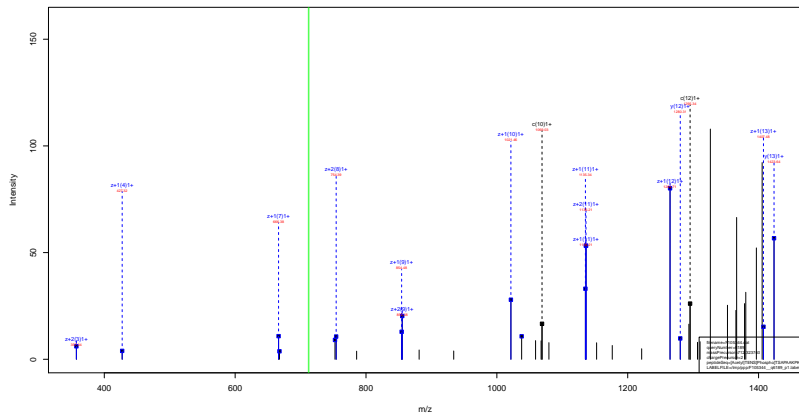



# sp | P10922 | H10\_MOUSE

[Acetyl]TENS<sup>Phospho</sup><sub>79.97</sub> TSAPAAKPK

- ▶ fragmentation table for charge state 1+
- ▶ specType=etd
- ▶ score=41.75
- ▶ F105344.dat
- ▶ query=q6189\_p1
- ▶ precursor=712.323740
- ▶ chargePrecursor=2
- ▶ itol=0.8

| AA |    | c               | y               | z+1             | z+2             | z              | AA    |
|----|----|-----------------|-----------------|-----------------|-----------------|----------------|-------|
| T  | 1  | 181.092         | <b>1423.646</b> | <b>1487.628</b> | 0.000           | 1406.620       | T[13] |
| E  | 2  | 290.135         | <b>1280.588</b> | <b>1264.509</b> | 0.000           | 1263.560       | E[12] |
| N  | 3  | 494.178         | 1151.546        | <b>1135.527</b> | <b>1136.535</b> | 1134.519       | N[11] |
| S  | 4  | 571.176         | <b>1037.503</b> | <b>1021.484</b> | 1022.492        | 1020.470       | S[10] |
| T  | 5  | 872.224         | 810.504         | <b>854.486</b>  | <b>855.493</b>  | 853.476        | T[9]  |
| S  | 6  | 789.258         | 789.451         | 751.420         | <b>754.446</b>  | <b>752.430</b> | S[8]  |
| A  | 7  | 830.293         | 682.425         | <b>666.406</b>  | <b>667.414</b>  | 665.390        | A[7]  |
| P  | 8  | 927.346         | 611.388         | 595.309         | 596.377         | 594.361        | P[6]  |
| A  | 9  | 968.383         | 514.335         | 498.316         | 499.324         | 497.300        | A[5]  |
| A  | 10 | <b>1069.420</b> | 443.290         | <b>427.279</b>  | 428.287         | 426.271        | A[4]  |
| K  | 11 | 1167.519        | 372.281         | 355.262         | <b>357.250</b>  | 355.234        | K[3]  |
| P  | 12 | <b>1294.567</b> | 244.166         | 228.147         | 229.155         | 227.139        | P[2]  |
| K  | 13 | 1422.662        | 147.113         | 131.094         | 132.102         | 130.086        | K[1]  |



# sp | P68433 | H31\_MOUSE

K<sup>Dimethyl</sup><sub>28.03</sub> SAPATGGVK<sup>Dimethyl</sup><sub>28.03</sub> KPHR

- ▶ fragmentation table for charge state 1+
- ▶ specType=etd
- ▶ score=82.31
- ▶ F105344.dat
- ▶ query=q6662.p1
- ▶ precursor=373.229620
- ▶ chargePrecursor=4
- ▶ itol=0.8

| AA    | c               | y        | z+1             | z+2             | z              | AA    |
|-------|-----------------|----------|-----------------|-----------------|----------------|-------|
| R[1]  | <b>174.160</b>  | 1439.935 | 1473.877        | 1474.885        | 1472.870       | R[14] |
| S[2]  | <b>261.192</b>  | 1333.770 | 1317.751        | <b>1318.759</b> | 1316.743       | S[13] |
| A[3]  | 332.279         | 1246.748 | <b>1230.719</b> | <b>1231.727</b> | 1229.711       | A[12] |
| P[4]  | <b>429.282</b>  | 1175.701 | 1159.682        | 1160.690        | 1158.674       | P[11] |
| A[5]  | <b>500.319</b>  | 1078.648 | 1062.629        | <b>1063.637</b> | 1061.621       | A[10] |
| T[6]  | <b>601.367</b>  | 1007.611 | 991.592         | <b>992.600</b>  | 990.584        | T[9]  |
| G[7]  | <b>658.398</b>  | 906.563  | 890.544         | <b>891.552</b>  | 889.537        | G[8]  |
| G[8]  | <b>715.410</b>  | 840.542  | <b>833.523</b>  | <b>834.531</b>  | 832.515        | G[7]  |
| V[9]  | <b>814.478</b>  | 780.520  | <b>775.502</b>  | <b>777.509</b>  | <b>775.498</b> | V[6]  |
| K[10] | <b>970.604</b>  | 693.452  | <b>677.433</b>  | <b>678.441</b>  | <b>676.425</b> | K[9]  |
| K[11] | 1098.699        | 537.326  | <b>521.307</b>  | 522.315         | 520.299        | K[4]  |
| P[12] | 1195.752        | 409.231  | 393.212         | 394.220         | 392.204        | P[3]  |
| H[13] | <b>1332.811</b> | 312.178  | <b>296.159</b>  | 297.167         | 295.151        | H[2]  |
| R[14] | 1488.912        | 175.119  | <b>159.100</b>  | 160.108         | 158.092        | R[1]  |

# sp | P68433 | H31\_MOUSE

K<sup>Dimethyl</sup><sub>28.03</sub> SAPATGGVK<sup>Dimethyl</sup><sub>28.03</sub> KPHR

- ▶ fragmentation table for charge state 2+
- ▶ specType=etd
- ▶ score=82.31
- ▶ F105344.dat
- ▶ query=q6662\_p1
- ▶ precursor=373.229620
- ▶ chargePrecursor=4
- ▶ itol=0.8

| AA |      | c              | y              | z+1            | z+2            | z              | AA    |
|----|------|----------------|----------------|----------------|----------------|----------------|-------|
| K  | [2]  | 57.584         | <b>745.452</b> | <b>737.442</b> | <b>737.940</b> | 738.030        | R[14] |
| S  | [2]  | 131.100        | <b>667.389</b> | <b>659.379</b> | <b>659.803</b> | <b>658.875</b> | S[13] |
| A  | [3]  | 156.618        | 623.873        | <b>615.863</b> | <b>616.367</b> | <b>615.359</b> | A[12] |
| P  | [4]  | 215.145        | 588.354        | 580.345        | 580.840        | 579.841        | P[11] |
| A  | [5]  | 250.663        | 539.828        | <b>531.818</b> | <b>532.322</b> | <b>531.314</b> | A[10] |
| T  | [6]  | 301.187        | 504.309        | 496.300        | <b>496.804</b> | 495.796        | T[9]  |
| G  | [7]  | 329.698        | <b>453.785</b> | <b>445.776</b> | <b>446.280</b> | <b>445.272</b> | G[8]  |
| G  | [8]  | 358.208        | 425.275        | <b>417.265</b> | <b>417.769</b> | <b>416.761</b> | G[7]  |
| V  | [9]  | 407.743        | 396.764        | <b>388.754</b> | <b>389.258</b> | <b>388.250</b> | V[6]  |
| K  | [10] | <b>485.806</b> | 347.230        | <b>339.220</b> | <b>339.724</b> | <b>338.716</b> | R[5]  |
| K  | [11] | 449.654        | 299.166        | <b>261.157</b> | <b>261.661</b> | <b>260.653</b> | K[4]  |
| P  | [12] | <b>598.380</b> | 205.119        | 197.110        | 197.614        | 196.606        | P[3]  |
| H  | [13] | <b>666.909</b> | 156.583        | 148.583        | 149.087        | 148.079        | H[2]  |
| R  | [14] | <b>744.960</b> | 88.063         | 80.054         | 80.558         | 79.550         | R[1]  |

# sp | P68433 | H31\_MOUSE

K<sup>Dimethyl</sup><sub>28.03</sub> SAPATGGVK<sup>Dimethyl</sup><sub>28.03</sub> KPHR

- ▶ fragmentation table for charge state 3+
- ▶ specType=etd
- ▶ score=82.31
- ▶ F105344.dat
- ▶ query=q6662.p1
- ▶ precursor=373.229620
- ▶ chargePrecursor=4
- ▶ itol=0.8

| AA |    | c              | y              | z+1            | z+2            | z              | AA    |
|----|----|----------------|----------------|----------------|----------------|----------------|-------|
| K  | 3  | 58.725         | <b>497.304</b> | <b>491.954</b> | <b>492.300</b> | <b>491.628</b> | R[14] |
| S  | 2  | 87.736         | <b>445.261</b> | 439.927        | 440.256        | 439.566        | S[13] |
| A  | 3  | 111.415        | 416.251        | 410.911        | 411.247        | 410.575        | A[12] |
| P  | 4  | 143.766        | 392.572        | 387.232        | 387.568        | 386.896        | P[11] |
| A  | 5  | 167.445        | 360.221        | 354.881        | 355.217        | 354.545        | A[10] |
| T  | 6  | 201.127        | 336.542        | 331.202        | 331.538        | 330.866        | T[9]  |
| G  | 7  | 220.134        | 302.859        | 297.520        | 297.856        | 297.184        | G[8]  |
| G  | 8  | 239.141        | 283.852        | 278.513        | 278.848        | 278.177        | G[7]  |
| V  | 9  | 272.164        | 264.845        | 259.505        | 259.841        | 259.169        | V[6]  |
| K  | 10 | 324.206        | 231.822        | 226.483        | 226.819        | 226.147        | K[5]  |
| K  | 11 | 358.908        | 179.780        | <b>174.440</b> | <b>174.776</b> | <b>174.105</b> | K[4]  |
| P  | 12 | 399.256        | 137.082        | 131.742        | 132.078        | 131.406        | P[3]  |
| H  | 13 | 444.942        | 104.731        | 99.391         | 99.727         | 99.055         | H[2]  |
| R  | 14 | <b>496.976</b> | 59.045         | 53.705         | 54.041         | 53.369         | R[1]  |



# sp | P68433 | H31\_MOUSE

K<sup>Dimethyl</sup><sub>28.03</sub> SAPATGGVK<sup>Dimethyl</sup><sub>28.03</sub> K<sup>Dimethyl</sup><sub>28.03</sub> P<sup>Dimethyl</sup><sub>28.03</sub>

- ▶ fragmentation table for charge state 1+
- ▶ specType=etd
- ▶ score=41.49
- ▶ F105344.dat
- ▶ query=q6663.p1
- ▶ precursor=373.229970
- ▶ chargePrecursor=4
- ▶ itol=0.8

| AA | c        | y        | z+1      | z+2      | z        | AA    |
|----|----------|----------|----------|----------|----------|-------|
| K  | 174.160  | 1489.896 | 1473.877 | 1474.885 | 1472.870 | K[14] |
| S  | 261.192  | 1333.770 | 1317.751 | 1318.759 | 1316.743 | S[13] |
| A  | 337.239  | 1246.736 | 1230.719 | 1231.727 | 1229.711 | A[12] |
| P  | 429.282  | 1175.701 | 1159.682 | 1160.690 | 1158.674 | P[11] |
| A  | 500.319  | 1078.648 | 1062.629 | 1063.637 | 1061.621 | A[10] |
| T  | 601.367  | 1007.611 | 991.592  | 992.600  | 990.584  | T[9]  |
| G  | 658.388  | 906.563  | 890.544  | 891.552  | 889.537  | G[8]  |
| G  | 715.410  | 849.542  | 833.523  | 834.531  | 832.515  | G[7]  |
| V  | 814.478  | 782.520  | 776.502  | 777.509  | 776.493  | V[6]  |
| K  | 970.604  | 693.483  | 677.463  | 678.471  | 676.455  | K[5]  |
| K  | 1058.699 | 537.326  | 521.307  | 522.315  | 520.299  | K[4]  |
| P  | 1196.752 | 409.231  | 393.212  | 394.220  | 392.204  | P[3]  |
| H  | 1332.811 | 312.178  | 296.159  | 297.167  | 295.151  | H[2]  |
| R  | 1488.912 | 175.119  | 159.100  | 160.108  | 158.092  | R[1]  |

# sp | P68433 | H31\_MOUSE

K<sup>Dimethyl</sup><sub>28.03</sub> SAPATGGVK<sup>Dimethyl</sup><sub>28.03</sub> KPHR

- ▶ fragmentation table for charge state 2+
- ▶ specType=etd
- ▶ score=41.49
- ▶ F105344.dat
- ▶ query=q6663.p1
- ▶ precursor=373.229970
- ▶ chargePrecursor=4
- ▶ itol=0.8

| AA |      | c              | y              | z+1            | z+2            | z              | AA    |
|----|------|----------------|----------------|----------------|----------------|----------------|-------|
| K  | [2]  | 57.584         | <b>745.452</b> | <b>737.442</b> | <b>737.940</b> | <b>736.938</b> | R[14] |
| S  | [2]  | 131.100        | <b>667.389</b> | <b>659.379</b> | <b>659.883</b> | <b>658.875</b> | S[13] |
| A  | [3]  | 156.618        | <b>623.873</b> | <b>615.863</b> | <b>616.367</b> | <b>615.359</b> | A[12] |
| P  | [4]  | 215.145        | 588.354        | 580.345        | 580.849        | 579.841        | P[11] |
| A  | [5]  | 250.663        | 539.828        | <b>531.818</b> | <b>532.322</b> | <b>531.314</b> | A[10] |
| T  | [6]  | 301.187        | 504.309        | 496.300        | <b>496.804</b> | 495.796        | T[9]  |
| G  | [7]  | 329.698        | 453.785        | <b>445.776</b> | <b>446.280</b> | <b>445.272</b> | G[8]  |
| G  | [8]  | 358.208        | 425.275        | <b>417.265</b> | <b>417.769</b> | <b>416.761</b> | G[7]  |
| V  | [9]  | 407.743        | 396.764        | <b>388.754</b> | <b>389.258</b> | <b>388.250</b> | V[6]  |
| K  | [10] | <b>485.806</b> | <b>347.230</b> | <b>339.220</b> | <b>339.724</b> | <b>338.716</b> | R[5]  |
| K  | [11] | <b>549.853</b> | 299.166        | <b>291.157</b> | <b>291.661</b> | <b>290.653</b> | R[4]  |
| P  | [12] | <b>598.380</b> | 205.119        | 197.110        | 197.614        | 196.606        | P[3]  |
| H  | [13] | <b>666.909</b> | 156.583        | 148.583        | 149.087        | 148.079        | H[2]  |
| R  | [14] | <b>744.960</b> | 88.063         | 80.054         | 80.558         | 79.550         | R[1]  |



# sp | P68433 | H31\_MOUSE

K<sup>Dimethyl</sup><sub>28.03</sub> SAPATGGVK<sup>Dimethyl</sup><sub>28.03</sub> KPHR

- ▶ fragmentation table for charge state 3+
- ▶ specType=etd
- ▶ score=41.49
- ▶ F105344.dat
- ▶ query=q6663.p1
- ▶ precursor=373.229970
- ▶ chargePrecursor=4
- ▶ itol=0.8

| AA    | c              | y              | z+1            | z+2            | z              | AA    |
|-------|----------------|----------------|----------------|----------------|----------------|-------|
| K[2]  | 58.725         | <b>497.304</b> | <b>491.964</b> | <b>492.300</b> | <b>491.628</b> | R[14] |
| S[2]  | 87.736         | <b>445.261</b> | 439.927        | 440.256        | 439.569        | S[13] |
| A[3]  | 111.415        | 416.251        | 410.911        | 411.247        | 410.575        | A[12] |
| P[4]  | 143.766        | 392.572        | <b>387.232</b> | <b>387.568</b> | <b>386.896</b> | P[11] |
| A[5]  | 167.445        | 360.221        | <b>354.881</b> | 355.217        | <b>354.545</b> | A[10] |
| T[6]  | 201.127        | 336.542        | 331.202        | 331.538        | 330.866        | T[9]  |
| G[7]  | 220.134        | 302.859        | 297.520        | 297.856        | 297.184        | G[8]  |
| G[8]  | 239.141        | 283.852        | 278.513        | 278.848        | 278.177        | G[7]  |
| V[9]  | 272.164        | 264.845        | 259.505        | 259.841        | 259.169        | V[6]  |
| K[10] | 324.206        | 231.822        | 226.483        | 226.819        | 226.147        | K[5]  |
| K[11] | 356.508        | 179.780        | <b>174.440</b> | <b>174.776</b> | <b>174.105</b> | K[4]  |
| P[12] | <b>399.256</b> | 137.082        | 131.742        | 132.078        | 131.406        | P[3]  |
| H[13] | <b>444.942</b> | 104.731        | 99.391         | 99.727         | 99.055         | H[2]  |
| R[14] | <b>496.976</b> | 59.045         | 53.705         | 54.041         | 53.369         | R[1]  |

# sp | P10922 | H10\_MOUSE

[Acetyl]TENSTSAPAAKPKR

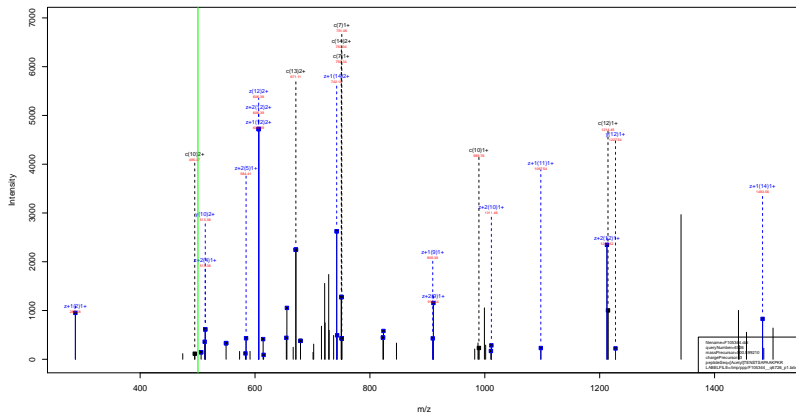

# sp | P10922 | H10\_MOUSE

[Acetyl]TENSTSAPAAKPKR

- ▶ fragmentation table for charge state 1+
- ▶ specType=etd
- ▶ score=61.84
- ▶ F105344.dat
- ▶ query=q6726\_p1
- ▶ precursor=500.599210
- ▶ chargePrecursor=3
- ▶ itol=0.8

| AA    | c               | y               | z+1             | z+2             | z              | AA    |
|-------|-----------------|-----------------|-----------------|-----------------|----------------|-------|
| T[1]  | 181.092         | 1499.783        | <b>1483.763</b> | 0.000           | 1482.755       | T[14] |
| E[2]  | 290.135         | 1356.723        | 1340.704        | 0.000           | 1339.696       | E[13] |
| R[3]  | 404.178         | <b>1227.660</b> | 1211.652        | <b>1212.670</b> | 1210.654       | R[12] |
| S[4]  | 491.219         | 1113.593        | <b>1097.619</b> | 1096.567        | 1096.611       | S[11] |
| T[5]  | 592.257         | 1026.605        | <b>1010.587</b> | <b>1011.595</b> | 1009.579       | T[10] |
| S[6]  | <b>679.289</b>  | 925.558         | <b>909.539</b>  | <b>910.547</b>  | 908.531        | S[9]  |
| A[7]  | <b>750.326</b>  | 838.526         | <b>822.507</b>  | <b>823.515</b>  | 821.499        | A[8]  |
| P[8]  | 847.379         | 767.489         | <b>751.470</b>  | 752.478         | <b>750.462</b> | P[7]  |
| A[9]  | 918.416         | <b>670.436</b>  | <b>654.417</b>  | <b>655.425</b>  | 653.409        | A[6]  |
| A[10] | <b>989.453</b>  | 599.399         | <b>583.380</b>  | <b>584.388</b>  | 582.372        | A[5]  |
| K[11] | 1117.548        | 528.362         | <b>512.343</b>  | <b>513.351</b>  | 511.335        | K[4]  |
| P[12] | <b>1214.601</b> | 400.267         | 384.248         | 385.256         | 383.240        | P[3]  |
| K[13] | 1342.696        | 303.214         | <b>287.195</b>  | 288.203         | 286.187        | K[2]  |
| R[14] | 1488.797        | 175.119         | 159.100         | 160.108         | 158.092        | R[1]  |

# sp | P10922 | H10\_MOUSE

[Acetyl]TENSTSAPAAKPKR

- ▶ fragmentation table for charge state 2+
- ▶ specType=etd
- ▶ score=61.84
- ▶ F105344.dat
- ▶ query=q6726.p1
- ▶ precursor=500.599210
- ▶ chargePrecursor=3
- ▶ itol=0.8

| AA    | c              | y              | z+1            | z+2            | z              | AA    |
|-------|----------------|----------------|----------------|----------------|----------------|-------|
| T[3]  | 81.050         | <b>750.394</b> | <b>742.385</b> | 0.504          | <b>741.081</b> | T[14] |
| E[2]  | 145.571        | <b>678.865</b> | <b>670.856</b> | 0.504          | <b>670.352</b> | E[13] |
| N[3]  | 202.592        | <b>614.344</b> | <b>606.334</b> | <b>606.838</b> | <b>605.831</b> | N[12] |
| S[4]  | 246.108        | 597.325        | <b>549.313</b> | <b>549.817</b> | <b>548.809</b> | S[11] |
| T[5]  | 296.632        | <b>513.806</b> | <b>505.797</b> | <b>506.301</b> | 505.293        | T[10] |
| S[6]  | 340.148        | 463.283        | 455.273        | 455.777        | 454.769        | S[9]  |
| A[7]  | 375.667        | 419.767        | 411.757        | 412.261        | 411.253        | A[8]  |
| P[8]  | 424.193        | 384.248        | 376.239        | 376.743        | 375.735        | P[7]  |
| A[9]  | 459.712        | 335.722        | 327.712        | 328.216        | 327.208        | A[6]  |
| A[10] | <b>495.230</b> | 300.203        | 292.194        | 292.698        | 291.690        | A[5]  |
| K[11] | 339.278        | 254.684        | 250.675        | 251.179        | 250.171        | K[4]  |
| P[12] | 607.804        | 200.637        | 192.628        | 193.132        | 192.124        | P[3]  |
| K[13] | <b>671.852</b> | 152.111        | 144.101        | 144.605        | 143.597        | K[2]  |
| R[14] | <b>749.902</b> | 88.063         | 80.054         | 80.558         | 79.550         | R[1]  |



# sp | P84244 | H33\_MOUSE

K<sup>Dimethyl</sup><sub>28.03</sub> SAPSTGGVK<sup>Dimethyl</sup><sub>28.03</sub> KPHR

- ▶ fragmentation table for charge state 1+
- ▶ specType=etd
- ▶ score=72.23
- ▶ F105344.dat
- ▶ query=q6766\_p1
- ▶ precursor=377.228130
- ▶ chargePrecursor=4
- ▶ itol=0.8

| AA    | c               | y        | z+1             | z+2             | z               | AA    |
|-------|-----------------|----------|-----------------|-----------------|-----------------|-------|
| K[1]  | <b>174.160</b>  | 1505.891 | 1489.872        | <b>1490.880</b> | 1488.865        | R[14] |
| S[2]  | <b>261.192</b>  | 1340.705 | <b>1333.746</b> | 1334.754        | 1332.739        | S[13] |
| A[3]  | 832.229         | 1200.733 | <b>1246.714</b> | <b>1247.722</b> | <b>1245.706</b> | A[12] |
| P[4]  | <b>429.282</b>  | 1191.699 | 1179.687        | 1179.689        | 1174.599        | P[11] |
| S[5]  | <b>516.314</b>  | 1094.643 | 1078.624        | 1079.632        | 1077.616        | S[10] |
| T[6]  | <b>617.362</b>  | 1007.611 | 991.592         | <b>992.600</b>  | 990.584         | T[9]  |
| G[7]  | <b>674.383</b>  | 906.583  | 890.564         | <b>891.552</b>  | 889.537         | G[8]  |
| G[8]  | <b>731.405</b>  | 840.542  | 833.523         | <b>834.531</b>  | 832.515         | G[7]  |
| V[9]  | <b>830.473</b>  | 732.520  | <b>776.502</b>  | <b>777.509</b>  | 775.494         | V[6]  |
| K[10] | <b>986.599</b>  | 693.452  | 677.433         | <b>678.441</b>  | 676.425         | K[5]  |
| K[11] | 1114.694        | 537.330  | <b>521.307</b>  | 522.315         | 520.299         | K[4]  |
| P[12] | 1211.747        | 409.231  | 393.212         | 394.220         | 392.204         | P[3]  |
| H[13] | <b>1348.806</b> | 312.178  | <b>296.159</b>  | 297.167         | 295.151         | H[2]  |
| R[14] | 1504.907        | 175.119  | <b>159.100</b>  | 160.108         | 158.092         | R[1]  |

# sp | P84244 | H33\_MOUSE

K<sup>Dimethyl</sup><sub>28.03</sub> SAPSTGGVK<sup>Dimethyl</sup><sub>28.03</sub> K<sup>PHR</sup>

- ▶ fragmentation table for charge state 2+
- ▶ specType=etd
- ▶ score=72.23
- ▶ F105344.dat
- ▶ query=q6766\_p1
- ▶ precursor=377.228130
- ▶ chargePrecursor=4
- ▶ itol=0.8

| AA    | c              | y              | z+1            | z+2            | z              | AA    |
|-------|----------------|----------------|----------------|----------------|----------------|-------|
| K[2]  | 57.584         | <b>753.449</b> | <b>745.440</b> | <b>743.944</b> | 544.036        | R[14] |
| S[2]  | 131.100        | <b>675.386</b> | <b>667.377</b> | <b>667.801</b> | <b>666.873</b> | S[13] |
| A[3]  | 156.618        | <b>631.870</b> | <b>623.861</b> | <b>624.365</b> | <b>623.357</b> | A[12] |
| P[4]  | 215.145        | 596.351        | 588.342        | 588.846        | 587.838        | P[11] |
| S[5]  | 258.661        | 547.825        | <b>539.816</b> | <b>540.320</b> | <b>539.312</b> | S[10] |
| T[6]  | 309.184        | 504.309        | <b>496.300</b> | <b>496.804</b> | <b>495.796</b> | T[9]  |
| G[7]  | 337.695        | <b>453.785</b> | <b>445.776</b> | <b>446.280</b> | <b>445.272</b> | G[8]  |
| G[8]  | 366.206        | 425.275        | <b>417.265</b> | <b>417.769</b> | <b>416.761</b> | G[7]  |
| V[9]  | 415.740        | <b>396.764</b> | <b>388.754</b> | <b>389.258</b> | <b>388.250</b> | V[6]  |
| K[10] | <b>493.803</b> | 347.230        | <b>339.220</b> | <b>339.724</b> | <b>338.716</b> | R[5]  |
| K[11] | 337.694        | 299.166        | <b>261.157</b> | <b>261.661</b> | <b>260.653</b> | K[4]  |
| P[12] | <b>616.377</b> | 205.119        | 197.110        | 197.614        | 196.606        | P[3]  |
| H[13] | <b>674.907</b> | 156.583        | 148.583        | 149.087        | 148.079        | H[2]  |
| R[14] | <b>752.957</b> | 88.063         | 80.054         | 80.558         | 79.550         | R[1]  |

# sp | P84244 | H33\_MOUSE

K<sup>Dimethyl</sup><sub>28.03</sub> SAPSTGGVK<sup>Dimethyl</sup><sub>28.03</sub> K<sup>PHR</sup>

- ▶ fragmentation table for charge state 3+
- ▶ specType=etd
- ▶ score=72.23
- ▶ F105344.dat
- ▶ query=q6766.p1
- ▶ precursor=377.228130
- ▶ chargePrecursor=4
- ▶ itol=0.8

| AA    | c              | y              | z+1            | z+2            | z              | AA    |
|-------|----------------|----------------|----------------|----------------|----------------|-------|
| K[2]  | 58.725         | <b>502.635</b> | <b>497.296</b> | <b>497.632</b> | <b>496.960</b> | R[14] |
| S[2]  | 87.736         | 450.593        | <b>445.254</b> | <b>445.589</b> | 444.918        | S[13] |
| A[3]  | 111.415        | 421.582        | 416.243        | 416.579        | 415.907        | A[12] |
| P[4]  | 143.766        | 397.903        | 392.564        | 392.900        | 392.228        | P[11] |
| S[5]  | 172.776        | 365.552        | 360.213        | 360.549        | 359.877        | S[10] |
| T[6]  | 206.459        | 336.542        | 331.202        | 331.538        | 330.866        | T[9]  |
| G[7]  | 225.466        | 302.859        | 297.520        | 297.856        | 297.184        | G[8]  |
| G[8]  | 244.473        | 283.852        | 278.513        | 278.848        | 278.177        | G[7]  |
| V[9]  | 277.496        | 264.845        | 259.505        | 259.841        | 259.169        | V[6]  |
| K[10] | 329.530        | 231.822        | 226.483        | 226.819        | 226.147        | K[5]  |
| K[11] | 372.236        | 179.780        | <b>174.440</b> | <b>174.776</b> | <b>174.105</b> | K[4]  |
| P[12] | 404.587        | 137.082        | 131.742        | 132.078        | 131.406        | P[3]  |
| H[13] | 450.273        | 104.731        | 99.391         | 99.727         | 99.055         | H[2]  |
| R[14] | <b>502.307</b> | 59.045         | 53.705         | 54.041         | 53.369         | R[1]  |





# sp | P84244 | H33\_MOUSE

K<sup>Acetyl</sup> 42.01 SAPSTGGVK<sup>Dimethyl</sup> 28.03 KPHR

- ▶ fragmentation table for charge state 1+
- ▶ specType=etd
- ▶ score=58.59
- ▶ F105344.dat
- ▶ query=q6856\_p1
- ▶ precursor=380.722990
- ▶ chargePrecursor=4
- ▶ itol=0.8

| AA |    | c               | y              | z+1             | z+2            | z        | AA    |
|----|----|-----------------|----------------|-----------------|----------------|----------|-------|
| K  | 1  | <b>188.139</b>  | 1519.870       | 1503.852        | 1504.850       | 1502.844 | K[14] |
| S  | 2  | <b>275.171</b>  | 1349.765       | 1333.766        | 1334.754       | 1332.738 | S[13] |
| A  | 3  | 349.936         | 1262.733       | <b>1246.714</b> | 1247.722       | 1245.705 | A[12] |
| P  | 4  | <b>443.261</b>  | 1191.690       | 1175.677        | 1176.685       | 1174.669 | P[11] |
| S  | 5  | <b>530.293</b>  | 1094.643       | 1078.624        | 1079.632       | 1077.616 | S[10] |
| T  | 6  | <b>631.341</b>  | 1007.611       | 991.592         | <b>992.600</b> | 990.584  | T[9]  |
| G  | 7  | <b>668.362</b>  | 926.563        | <b>890.544</b>  | <b>891.552</b> | 889.537  | G[8]  |
| G  | 8  | <b>745.384</b>  | 849.542        | 833.523         | <b>834.531</b> | 832.515  | G[7]  |
| V  | 9  | <b>854.452</b>  | 782.520        | <b>776.502</b>  | <b>777.509</b> | 775.493  | V[6]  |
| K  | 10 | <b>1000.579</b> | 693.485        | 677.463         | <b>678.441</b> | 676.425  | K[5]  |
| K  | 11 | 1128.674        | 597.320        | <b>521.307</b>  | 522.315        | 520.299  | K[4]  |
| P  | 12 | 1225.726        | 499.231        | 393.212         | 394.220        | 392.204  | P[3]  |
| H  | 13 | <b>1362.785</b> | 512.178        | <b>296.159</b>  | 297.167        | 295.151  | H[2]  |
| R  | 14 | 1518.886        | <b>175.119</b> | <b>159.100</b>  | 160.108        | 158.092  | R[1]  |

# sp | P84244 | H33\_MOUSE

K<sup>Acetyl</sup> 42.01 SAPSTGGVK<sup>Dimethyl</sup> 28.03 KPHR

- ▶ fragmentation table for charge state 2+
- ▶ specType=etd
- ▶ score=58.59
- ▶ F105344.dat
- ▶ query=q6856\_p1
- ▶ precursor=380.722990
- ▶ chargePrecursor=4
- ▶ itol=0.8

| AA |      | c              | y              | z+1            | z+2            | z              | AA    |
|----|------|----------------|----------------|----------------|----------------|----------------|-------|
| K  | [2]  | 94.573         | <b>760.439</b> | <b>752.429</b> | <b>752.933</b> | <b>751.926</b> | R[14] |
| S  | [2]  | 138.089        | 875.389        | <b>667.377</b> | <b>667.881</b> | <b>666.873</b> | S[13] |
| A  | [3]  | 173.608        | <b>631.870</b> | <b>623.861</b> | <b>624.365</b> | <b>623.357</b> | A[12] |
| P  | [4]  | 222.134        | <b>596.351</b> | 588.347        | 588.846        | 587.838        | P[11] |
| S  | [5]  | 265.650        | 547.825        | <b>539.816</b> | <b>540.320</b> | <b>539.312</b> | S[10] |
| T  | [6]  | 316.174        | 504.309        | <b>496.300</b> | <b>496.804</b> | <b>495.796</b> | T[9]  |
| G  | [7]  | 344.685        | 453.789        | <b>445.776</b> | <b>446.280</b> | <b>445.272</b> | G[8]  |
| G  | [8]  | 373.196        | 425.279        | <b>417.265</b> | <b>417.769</b> | <b>416.761</b> | G[7]  |
| V  | [9]  | 422.730        | <b>396.764</b> | <b>388.754</b> | <b>389.258</b> | <b>388.250</b> | V[6]  |
| K  | [10] | <b>500.793</b> | 347.230        | <b>339.220</b> | <b>339.724</b> | <b>338.716</b> | K[5]  |
| R  | [11] | 594.840        | 299.166        | 294.157        | 293.661        | 292.653        | R[4]  |
| P  | [12] | <b>613.367</b> | 205.119        | 197.110        | 197.614        | 196.606        | P[3]  |
| H  | [13] | <b>681.896</b> | 156.583        | 148.583        | 149.087        | 148.079        | H[2]  |
| R  | [14] | <b>759.947</b> | 88.063         | 80.054         | 80.558         | 79.550         | R[1]  |

# sp | P84244 | H33\_MOUSE

K<sup>Acetyl</sup> 42.01 SAPSTGGVK<sup>Dimethyl</sup> 28.03 KPHR

- ▶ fragmentation table for charge state 3+
- ▶ specType=etd
- ▶ score=58.59
- ▶ F105344.dat
- ▶ query=q6856.p1
- ▶ precursor=380.722990
- ▶ chargePrecursor=4
- ▶ itol=0.8

| AA |      | c              | y              | z+1            | z+2            | z              | AA    |
|----|------|----------------|----------------|----------------|----------------|----------------|-------|
| K  | [2]  | 63.389         | <b>507.295</b> | <b>501.955</b> | <b>502.291</b> | <b>501.619</b> | R[14] |
| S  | [2]  | 92.395         | 450.593        | <b>445.254</b> | <b>445.589</b> | <b>444.918</b> | S[13] |
| A  | [3]  | 116.074        | 421.582        | 416.243        | <b>416.579</b> | 415.907        | A[12] |
| P  | [4]  | 148.425        | <b>397.903</b> | 392.564        | 392.900        | 392.228        | P[11] |
| S  | [5]  | 177.436        | 365.552        | <b>360.213</b> | <b>360.549</b> | <b>359.877</b> | S[10] |
| T  | [6]  | 211.119        | 336.542        | 331.202        | 331.538        | 330.866        | T[9]  |
| G  | [7]  | 230.126        | 302.859        | 297.520        | 297.856        | 297.184        | G[8]  |
| G  | [8]  | 249.133        | 283.852        | 278.513        | 278.848        | 278.177        | G[7]  |
| V  | [9]  | 282.156        | 264.845        | 259.505        | 259.841        | 259.169        | V[6]  |
| K  | [10] | 324.198        | 231.822        | 226.483        | 226.819        | 226.147        | K[5]  |
| K  | [11] | 376.896        | 179.780        | 174.440        | <b>174.776</b> | 174.105        | K[4]  |
| P  | [12] | 409.247        | 137.082        | 131.742        | 132.078        | 131.406        | P[3]  |
| H  | [13] | 454.933        | 104.731        | 99.391         | 99.727         | 99.055         | H[2]  |
| R  | [14] | <b>506.967</b> | 59.045         | 53.705         | 54.041         | 53.369         | R[1]  |

# sp | P43274 | H14\_MOUSE

[Acetyl]SETAPAAPAAPAEK Dimethyl  
28.03

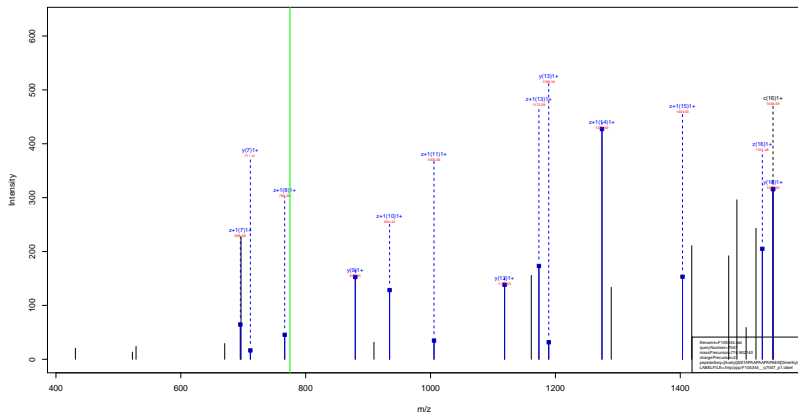

# sp | P43274 | H14\_MOUSE

[Acetyl]SETAPAAPAAPAPAEK <sup>Dimethyl</sup>  
28.03

- ▶ fragmentation table for charge state 1+
- ▶ specType=etd
- ▶ score=45.04
- ▶ F105344.dat
- ▶ query=q7047.p1
- ▶ precursor=774.902140
- ▶ chargePrecursor=2
- ▶ itol=0.8

| AA    | c               | y               | z+1             | z+2     | z               | AA    |
|-------|-----------------|-----------------|-----------------|---------|-----------------|-------|
| S[1]  | 147.076         | <b>1548.790</b> | 1532.772        | 0.000   | <b>1531.764</b> | S[16] |
| E[2]  | 276.119         | 1419.748        | <b>1403.729</b> | 0.000   | 1402.721        | E[15] |
| T[3]  | 377.167         | 1296.705        | <b>1274.687</b> | 0.000   | 1273.679        | T[14] |
| A[4]  | 448.294         | <b>1189.659</b> | <b>1173.639</b> | 0.000   | 1172.631        | A[13] |
| P[5]  | 545.257         | <b>1118.620</b> | 1102.602        | 0.000   | 1101.594        | P[12] |
| A[6]  | 616.294         | 1021.569        | <b>1005.549</b> | 0.000   | 1004.541        | A[11] |
| A[7]  | 687.331         | 950.531         | <b>934.512</b>  | 0.000   | 933.504         | A[10] |
| P[8]  | 784.384         | <b>879.493</b>  | 863.475         | 0.000   | 862.467         | P[9]  |
| A[9]  | 855.421         | 782.441         | <b>766.422</b>  | 0.000   | 765.414         | A[8]  |
| A[10] | 926.458         | <b>711.404</b>  | <b>695.385</b>  | 0.000   | 694.377         | A[7]  |
| P[11] | 1023.511        | 646.397         | 634.368         | 0.000   | 633.360         | P[10] |
| A[12] | 1094.548        | 543.314         | 527.295         | 0.000   | 526.287         | A[6]  |
| P[13] | 1191.600        | 472.277         | 456.258         | 0.000   | 455.250         | P[4]  |
| A[14] | 1262.638        | 375.224         | 359.205         | 0.000   | 358.197         | A[3]  |
| E[15] | 1391.680        | 304.187         | 288.168         | 0.000   | 287.160         | E[2]  |
| R[16] | <b>1547.806</b> | 175.144         | 159.125         | 180.133 | 158.116         | R[1]  |

# sp | P10922 | H10\_MOUSE

[Acetyl]TENS<sup>Phospho</sup><sub>79.97</sub> TSAPAAKPKR

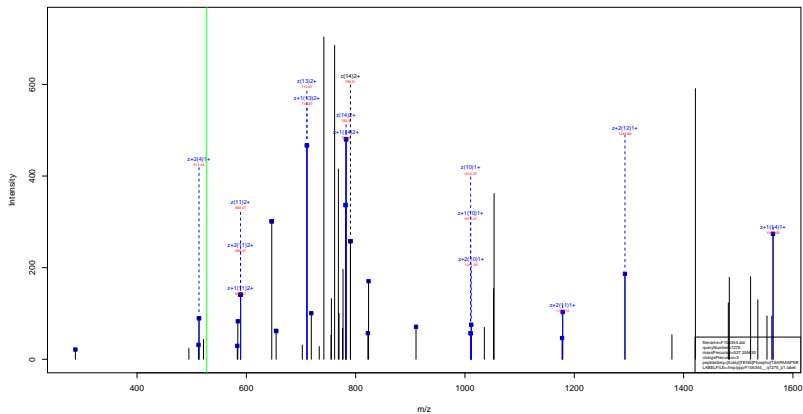

# sp | P10922 | H10\_MOUSE

[Acetyl]TENS<sup>Phospho</sup><sub>79.97</sub> TSAPAAKPKR

- ▶ fragmentation table for charge state 1+
- ▶ specType=etd
- ▶ score=46.96
- ▶ F105344.dat
- ▶ query=q7275\_p1
- ▶ precursor=527.255630
- ▶ chargePrecursor=3
- ▶ itol=0.8

| AA            | c        | y        | z+1             | z+2             | z               | AA             |
|---------------|----------|----------|-----------------|-----------------|-----------------|----------------|
| <b>Y</b> [1]  | 161.062  | 1579.748 | <b>1563.729</b> | 0.000           | 1562.721        | <b>Y</b> [14]  |
| <b>E</b> [2]  | 290.135  | 1436.689 | 1420.671        | 0.000           | 1419.663        | <b>E</b> [13]  |
| <b>TW</b> [3] | 401.178  | 1307.637 | 1291.623        | <b>1282.636</b> | 1280.623        | <b>TW</b> [12] |
| <b>S</b> [4]  | 571.176  | 1191.604 | <b>1177.585</b> | <b>1178.593</b> | 1176.577        | <b>S</b> [11]  |
| <b>Y</b> [5]  | 672.224  | 1058.605 | <b>1010.587</b> | <b>1011.595</b> | <b>1009.579</b> | <b>Y</b> [10]  |
| <b>S</b> [6]  | 759.256  | 925.558  | 909.539         | <b>910.547</b>  | 908.531         | <b>S</b> [9]   |
| <b>A</b> [7]  | 830.293  | 838.526  | <b>822.507</b>  | <b>823.515</b>  | 821.499         | <b>A</b> [8]   |
| <b>P</b> [8]  | 927.346  | 767.489  | 751.470         | 752.478         | 750.462         | <b>P</b> [7]   |
| <b>A</b> [9]  | 998.383  | 676.436  | <b>654.417</b>  | 655.425         | 653.409         | <b>A</b> [6]   |
| <b>A</b> [10] | 1059.430 | 599.399  | <b>583.380</b>  | <b>584.388</b>  | 582.372         | <b>A</b> [5]   |
| <b>K</b> [11] | 1197.515 | 528.362  | <b>512.343</b>  | <b>513.351</b>  | 511.335         | <b>K</b> [4]   |
| <b>P</b> [12] | 1294.567 | 460.267  | 384.248         | 385.256         | 383.240         | <b>P</b> [3]   |
| <b>K</b> [13] | 1422.662 | 301.214  | <b>287.195</b>  | 288.203         | 286.187         | <b>K</b> [2]   |
| <b>R</b> [14] | 1578.764 | 175.119  | 159.100         | 160.108         | 158.092         | <b>R</b> [1]   |



# sp | P10922 | H10\_MOUSE

[Acetyl]TENS<sup>Phospho  
79.97</sup>TSAPAAKPKR

- ▶ fragmentation table for charge state 2+
- ▶ specType=etd
- ▶ score=46.96
- ▶ F105344.dat
- ▶ query=q7275\_p1
- ▶ precursor=527.255630
- ▶ chargePrecursor=3
- ▶ itol=0.8

| AA    | c              | y              | z+1            | z+2            | z              | AA    |
|-------|----------------|----------------|----------------|----------------|----------------|-------|
| T[3]  | 81.050         | <b>790.377</b> | <b>782.368</b> | 0.504          | <b>781.864</b> | T[14] |
| E[2]  | 145.571        | <b>718.848</b> | <b>710.839</b> | 0.504          | <b>710.335</b> | E[13] |
| N[3]  | 202.592        | <b>654.327</b> | <b>646.318</b> | <b>646.822</b> | <b>645.814</b> | N[12] |
| S[4]  | 286.092        | 597.306        | <b>589.296</b> | <b>589.800</b> | <b>588.792</b> | S[11] |
| T[5]  | 336.615        | <b>513.806</b> | 505.797        | 506.301        | 505.293        | T[10] |
| S[6]  | 380.131        | 463.283        | 455.273        | 455.777        | 454.769        | S[9]  |
| A[7]  | 415.650        | 419.767        | 411.757        | 412.261        | 411.253        | A[8]  |
| P[8]  | 464.176        | 384.248        | 376.239        | 376.743        | 375.735        | P[7]  |
| A[9]  | 499.695        | 335.722        | 327.712        | 328.216        | 327.208        | A[6]  |
| A[10] | 535.214        | 300.203        | 292.194        | 292.698        | 291.690        | A[5]  |
| K[11] | 599.291        | 254.684        | 250.675        | 251.179        | 250.171        | K[4]  |
| P[12] | 647.787        | 200.637        | 192.628        | 193.132        | 192.124        | P[3]  |
| K[13] | 711.835        | 152.111        | 144.101        | 144.605        | 143.597        | K[2]  |
| R[14] | <b>789.885</b> | 88.063         | 80.054         | 80.558         | 79.550         | R[1]  |

# sp | P10922 | H10\_MOUSE

[Acetyl]TENS<sup>Phospho</sup><sub>79.97</sub> TSAPAAKPKR

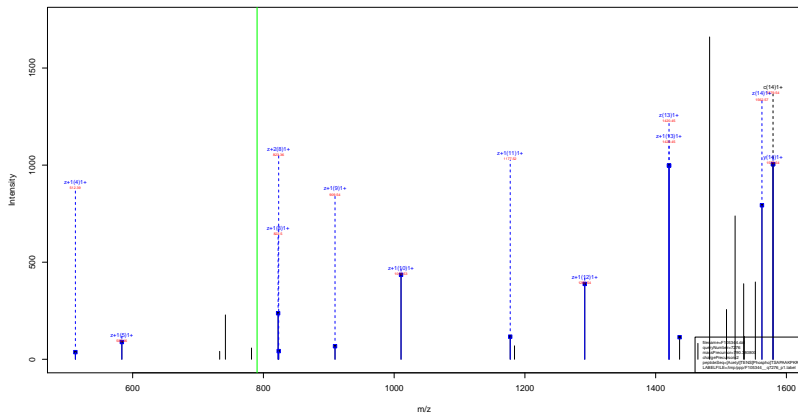

# sp | P10922 | H10\_MOUSE

[Acetyl]TENS<sup>Phospho  
79.97</sup>TSAPAAKPKR

- ▶ fragmentation table for charge state 1+
- ▶ specType=etd
- ▶ score=58.55
- ▶ F105344.dat
- ▶ query=q7276.p1
- ▶ precursor=790.380800
- ▶ chargePrecursor=2
- ▶ itol=0.8

| AA    | c               | y               | z+1             | z+2            | z               | AA    |
|-------|-----------------|-----------------|-----------------|----------------|-----------------|-------|
| T[1]  | 181.092         | <b>1579.748</b> | 1563.729        | 0.000          | <b>1562.721</b> | T[14] |
| E[2]  | 290.135         | <b>1436.689</b> | <b>1420.671</b> | 0.000          | <b>1419.663</b> | E[13] |
| R[3]  | 484.178         | 1387.847        | <b>1291.438</b> | 1392.636       | 1290.629        | R[12] |
| S[4]  | 571.176         | 1193.509        | <b>1177.585</b> | 1178.393       | 1176.577        | S[11] |
| T[5]  | 672.224         | 1028.605        | <b>1010.587</b> | 1011.595       | 1009.579        | T[10] |
| S[6]  | 756.256         | 925.558         | <b>909.539</b>  | 910.947        | 908.531         | S[9]  |
| A[7]  | 838.293         | 838.528         | <b>822.507</b>  | <b>823.515</b> | 821.499         | A[8]  |
| P[8]  | 927.346         | 767.489         | 751.470         | 752.478        | 750.462         | P[7]  |
| A[9]  | 998.383         | 670.438         | 654.417         | 655.425        | 653.409         | A[6]  |
| A[10] | 1069.420        | 599.390         | <b>583.380</b>  | 584.388        | 582.372         | A[5]  |
| K[11] | 1197.515        | 528.362         | <b>512.343</b>  | 513.351        | 511.335         | K[4]  |
| P[12] | 1294.567        | 400.267         | 384.248         | 385.256        | 383.240         | P[3]  |
| K[13] | 1422.662        | 303.214         | 287.195         | 288.203        | 286.187         | K[2]  |
| R[14] | <b>1578.764</b> | 175.119         | 159.100         | 160.108        | 158.092         | R[1]  |

# sp | P84244 | H33\_MOUSE

K Dimethyl 28.03 SAPS Phospho 79.97 TGGVK Dimethyl 28.03 KPHR

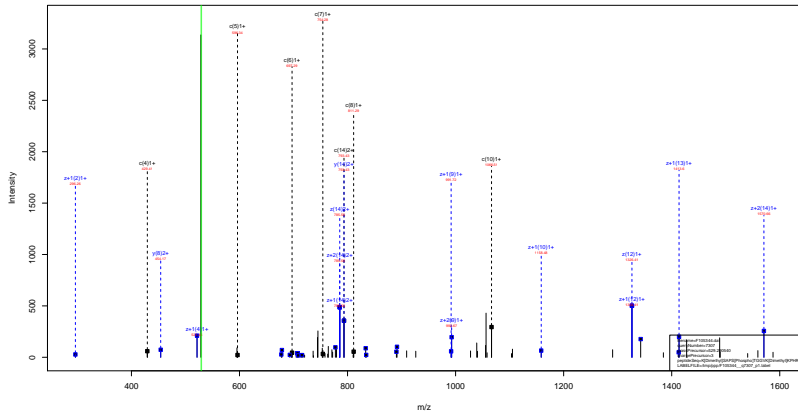

# sp | P84244 | H33\_MOUSE

K<sub>28.03</sub> Dimethyl SAPS Phospho<sub>79.97</sub> TGGVK Dimethyl<sub>28.03</sub> KPHR

- ▶ fragmentation table for charge state 1+
- ▶ specType=etd
- ▶ score=41.34
- ▶ F105344.dat
- ▶ query=q7307\_p1
- ▶ precursor=529.290540
- ▶ chargePrecursor=3
- ▶ itol=0.8

| AA | c               | y               | z+1             | z+2             | z               | AA |
|----|-----------------|-----------------|-----------------|-----------------|-----------------|----|
| K  | 174.100         | 1585.957        | 1560.830        | <b>1570.847</b> | 1566.811        | K  |
| S  | 261.192         | 1429.731        | <b>1413.712</b> | 1414.720        | <b>1412.705</b> | S  |
| A  | 332.229         | <b>1342.699</b> | <b>1326.680</b> | 1327.688        | <b>1325.673</b> | A  |
| P  | <b>429.292</b>  | 1271.662        | 1266.643        | 1266.651        | 1254.633        | P  |
| S  | <b>586.280</b>  | 1174.605        | <b>1158.581</b> | 1159.588        | 1157.581        | S  |
| T  | <b>697.328</b>  | 1007.611        | <b>991.592</b>  | <b>992.600</b>  | 990.588         | T  |
| G  | <b>754.349</b>  | 926.563         | <b>890.544</b>  | <b>891.552</b>  | 889.537         | G  |
| G  | <b>811.371</b>  | 849.542         | <b>833.523</b>  | <b>834.531</b>  | 832.515         | G  |
| V  | 913.433         | 792.526         | 787.502         | <b>777.509</b>  | 775.496         | V  |
| K  | <b>1066.506</b> | <b>693.452</b>  | <b>677.433</b>  | <b>678.441</b>  | 676.425         | K  |
| K  | 1194.661        | 537.326         | <b>521.307</b>  | 522.315         | 520.299         | K  |
| P  | 1261.713        | 409.231         | 393.212         | 394.220         | 392.204         | P  |
| H  | 1428.772        | 312.179         | <b>296.159</b>  | 297.167         | 295.151         | H  |
| R  | 1584.873        | 175.119         | 159.100         | 160.108         | 158.092         | R  |

# sp | P84244 | H33\_MOUSE

K<sub>28.03</sub> Dimethyl SAPS Phospho<sub>79.97</sub> TGGVK Dimethyl<sub>28.03</sub> KPHR

- ▶ fragmentation table for charge state 2+
- ▶ specType=etd
- ▶ score=41.34
- ▶ F105344.dat
- ▶ query=q7307\_p1
- ▶ precursor=529.290540
- ▶ chargePrecursor=3
- ▶ itol=0.8

| AA    | c              | y              | z+1            | z+2            | z              | AA    |
|-------|----------------|----------------|----------------|----------------|----------------|-------|
| K[2]  | 57.584         | <b>791.432</b> | <b>785.423</b> | <b>785.927</b> | <b>784.919</b> | R[14] |
| S[2]  | 131.100        | <b>715.369</b> | <b>707.360</b> | <b>707.864</b> | <b>706.856</b> | S[13] |
| A[3]  | 156.618        | 571.853        | 663.844        | 654.348        | 663.340        | A[12] |
| P[4]  | 215.145        | 636.135        | 628.325        | 628.829        | 627.821        | P[11] |
| S[5]  | 298.644        | 587.808        | 579.799        | 580.303        | 579.295        | S[10] |
| T[6]  | 349.168        | 504.309        | 496.300        | 496.804        | 495.796        | T[9]  |
| G[7]  | 377.678        | <b>453.785</b> | 445.776        | 446.280        | 445.272        | G[8]  |
| G[8]  | 406.189        | 425.275        | 417.265        | 417.769        | 416.761        | G[7]  |
| V[9]  | 455.723        | 396.764        | 388.754        | 389.258        | 388.250        | V[6]  |
| K[10] | 533.786        | 347.230        | 339.220        | 339.724        | 338.716        | K[5]  |
| R[11] | 597.834        | 299.166        | 291.157        | 291.661        | 290.653        | R[4]  |
| P[12] | 646.360        | 205.119        | 197.110        | 197.614        | 196.606        | P[3]  |
| H[13] | <b>714.890</b> | 156.583        | 148.583        | 149.087        | 148.079        | H[2]  |
| R[14] | <b>792.940</b> | 88.063         | 80.054         | 80.558         | 79.550         | R[1]  |



# sp | P84244 | H33\_MOUSE

K<sup>Dimethyl</sup><sub>28.03</sub> SAPS<sup>Phospho</sup><sub>79.97</sub> TGGVK<sup>Dimethyl</sup><sub>28.03</sub> KPHR

- ▶ fragmentation table for charge state 1+
- ▶ specType=etd
- ▶ score=39.68
- ▶ F105344.dat
- ▶ query=q7308\_p1
- ▶ precursor=397.219830
- ▶ chargePrecursor=4
- ▶ itol=0.8

| AA    | c               | y              | z+1            | z+2             | z        | AA    |
|-------|-----------------|----------------|----------------|-----------------|----------|-------|
| K[1]  | 174.100         | 1585.857       | 1569.830       | <b>1570.847</b> | 1568.831 | K[14] |
| S[2]  | <b>261.192</b>  | 1428.731       | 1413.712       | 1414.720        | 1412.705 | S[13] |
| A[3]  | <b>332.229</b>  | 1342.699       | 1328.689       | 1327.688        | 1325.673 | A[12] |
| P[4]  | <b>429.282</b>  | 1271.662       | 1255.641       | 1256.651        | 1254.635 | P[11] |
| S[5]  | <b>596.280</b>  | 1174.609       | 1158.591       | 1159.598        | 1157.583 | S[10] |
| T[6]  | <b>697.328</b>  | 1097.611       | 991.592        | <b>992.600</b>  | 990.584  | T[9]  |
| G[7]  | <b>754.349</b>  | 906.563        | <b>890.544</b> | <b>891.552</b>  | 889.537  | G[8]  |
| G[8]  | <b>811.371</b>  | <b>849.542</b> | 833.523        | <b>834.531</b>  | 832.515  | G[7]  |
| V[9]  | <b>913.438</b>  | 782.526        | 776.502        | <b>777.509</b>  | 775.494  | V[6]  |
| K[10] | <b>1066.568</b> | 693.485        | <b>677.433</b> | <b>678.441</b>  | 676.425  | K[5]  |
| K[11] | 1194.681        | <b>537.326</b> | <b>521.307</b> | 522.315         | 520.299  | K[4]  |
| P[12] | 1291.733        | 409.231        | 393.212        | 394.220         | 392.204  | P[3]  |
| H[13] | <b>1428.772</b> | 312.178        | <b>296.159</b> | 297.167         | 295.151  | H[2]  |
| R[14] | 1584.873        | 175.119        | <b>159.100</b> | 160.108         | 158.092  | R[1]  |



# sp | P84244 | H33\_MOUSE

K<sub>28.03</sub> Dimethyl SAPS<sub>79.97</sub> Phospho TGGVK<sub>28.03</sub> Dimethyl K<sub>28.03</sub> PKHR

- ▶ fragmentation table for charge state 2+
- ▶ specType=etd
- ▶ score=39.68
- ▶ F105344.dat
- ▶ query=q7308\_p1
- ▶ precursor=397.219830
- ▶ chargePrecursor=4
- ▶ itol=0.8

| AA |      | c              | y              | z+1            | z+2            | z              | AA    |
|----|------|----------------|----------------|----------------|----------------|----------------|-------|
| K  | [2]  | 87.584         | <b>791.432</b> | <b>785.423</b> | <b>785.927</b> | 784.919        | K[14] |
| S  | [2]  | 131.100        | <b>715.369</b> | 707.362        | 707.864        | 706.856        | S[13] |
| A  | [3]  | 156.618        | 671.853        | 663.844        | 664.348        | 663.340        | A[12] |
| P  | [4]  | 215.145        | 636.335        | 628.325        | 628.829        | 627.821        | P[11] |
| S  | [5]  | 298.644        | 587.808        | 579.799        | 580.303        | 579.295        | S[10] |
| T  | [6]  | 349.168        | 504.309        | <b>496.300</b> | <b>496.804</b> | 495.796        | T[9]  |
| G  | [7]  | 377.678        | <b>453.785</b> | <b>445.776</b> | <b>446.280</b> | <b>445.272</b> | G[8]  |
| G  | [8]  | 406.189        | <b>425.275</b> | <b>417.265</b> | <b>417.769</b> | <b>416.761</b> | G[7]  |
| V  | [9]  | 455.723        | 396.764        | <b>388.754</b> | <b>389.258</b> | <b>388.250</b> | V[6]  |
| K  | [10] | <b>533.786</b> | <b>347.230</b> | <b>339.220</b> | <b>339.724</b> | <b>338.716</b> | K[5]  |
| K  | [11] | 597.834        | 299.166        | <b>261.157</b> | <b>261.661</b> | <b>260.653</b> | K[4]  |
| P  | [12] | <b>646.360</b> | 205.119        | 197.110        | 197.614        | 196.606        | P[3]  |
| H  | [13] | <b>714.890</b> | 156.583        | 148.583        | 149.087        | 148.079        | H[2]  |
| R  | [14] | <b>792.940</b> | 88.063         | 80.054         | 80.558         | 79.550         | R[1]  |

# sp | P84244 | H33\_MOUSE

K<sup>Dimethyl</sup><sub>28.03</sub> SAPS<sup>Phospho</sup><sub>79.97</sub> TGGVK<sup>Dimethyl</sup><sub>28.03</sub> K<sup>PHR</sup>

- ▶ fragmentation table for charge state 3+
- ▶ specType=etd
- ▶ score=39.68
- ▶ F105344.dat
- ▶ query=q7308\_p1
- ▶ precursor=397.219830
- ▶ chargePrecursor=4
- ▶ itol=0.8

| AA    | c              | y              | z+1            | z+2            | z              | AA    |
|-------|----------------|----------------|----------------|----------------|----------------|-------|
| K[3]  | 58.725         | <b>529.291</b> | <b>523.951</b> | <b>524.207</b> | <b>523.615</b> | R[14] |
| S[2]  | 87.736         | 477.249        | 473.967        | 472.245        | 471.573        | S[13] |
| A[3]  | 111.415        | 448.235        | 442.898        | 443.234        | 442.962        | A[12] |
| P[4]  | 143.766        | <b>424.559</b> | 419.219        | 419.555        | 418.883        | P[11] |
| S[5]  | 199.432        | 392.208        | 388.899        | 387.204        | 386.532        | S[10] |
| T[6]  | 233.114        | 336.542        | 331.202        | 331.538        | 330.866        | T[9]  |
| G[7]  | 252.121        | 302.859        | 297.520        | 297.856        | 297.184        | G[8]  |
| G[8]  | 271.129        | 283.852        | 278.513        | 278.848        | 278.177        | G[7]  |
| V[9]  | 304.151        | 264.845        | 259.505        | 259.841        | 259.169        | V[6]  |
| K[10] | 386.193        | 231.822        | 228.483        | 228.819        | 228.147        | K[5]  |
| K[11] | 398.692        | 179.780        | 174.440        | 174.776        | 174.105        | K[4]  |
| P[12] | 431.243        | 137.082        | 133.742        | 132.078        | 131.406        | P[3]  |
| H[13] | 476.929        | 104.731        | 99.391         | 99.727         | 99.055         | H[2]  |
| R[14] | <b>528.963</b> | 59.045         | 53.705         | 54.041         | 53.369         | R[1]  |

# sp | Q9D2U9 | H2B3A\_MOUSE

PEPSRST Phospho PAK Acetyl K Acetyl GSK  
79.97 42.01 42.01

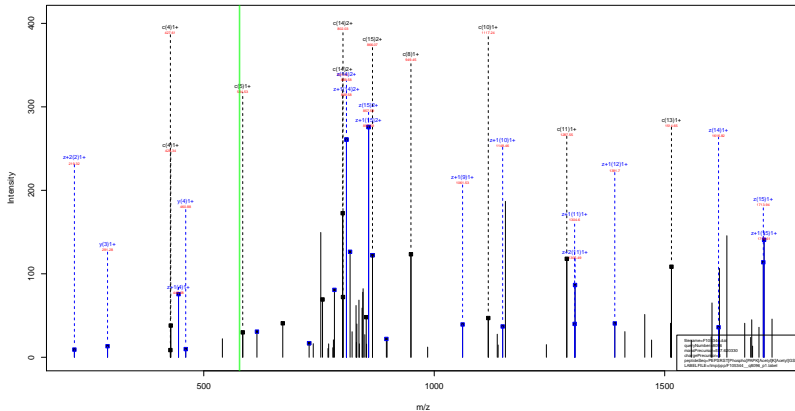

# sp | Q9D2U9 | H2B3A\_MOUSE

PEPSRST <sup>Phospho</sup> PAPK <sup>Acetyl</sup> K <sup>Acetyl</sup> GSK  
 79.97 42.01 42.01

- ▶ fragmentation table for charge state 1+
- ▶ specType=etd
- ▶ score=44.44
- ▶ F105344.dat
- ▶ query=q8096\_p1
- ▶ precursor=577.620330
- ▶ chargePrecursor=3
- ▶ itol=0.8

| AA    | c               | y              | z+1             | z+2             | z               | AA    |
|-------|-----------------|----------------|-----------------|-----------------|-----------------|-------|
| P[1]  | 115.087         | 1730.847       | <b>1714.829</b> | 0.000           | <b>1711.821</b> | P[15] |
| E[2]  | 244.129         | 1633.795       | 1617.770        | 0.000           | <b>1616.768</b> | E[14] |
| P[3]  | 341.182         | 1504.752       | 1488.733        | 0.000           | 1487.725        | P[13] |
| S[4]  | <b>428.214</b>  | 1407.699       | <b>1391.680</b> | 0.000           | 1390.673        | S[12] |
| R[5]  | <b>584.315</b>  | 1320.667       | <b>1304.648</b> | <b>1305.656</b> | 1303.641        | R[11] |
| S[6]  | <b>671.347</b>  | 1104.586       | <b>1148.547</b> | 1140.555        | 1147.530        | S[10] |
| T[7]  | <b>852.361</b>  | 977.534        | <b>1061.515</b> | 1062.523        | 1060.501        | T[9]  |
| P[8]  | <b>949.414</b>  | <b>896.520</b> | 880.505         | 881.509         | 879.403         | P[8]  |
| A[9]  | 1020.451        | 799.467        | <b>783.449</b>  | 784.456         | 782.441         | A[7]  |
| P[10] | <b>1117.504</b> | <b>728.430</b> | 712.411         | 713.419         | 711.404         | P[6]  |
| R[11] | <b>1287.609</b> | 631.377        | <b>615.359</b>  | 616.366         | 614.351         | R[5]  |
| K[12] | 1457.715        | <b>461.272</b> | <b>445.253</b>  | 446.261         | 444.245         | K[4]  |
| G[13] | <b>1514.736</b> | <b>291.166</b> | 275.147         | 276.155         | 274.140         | G[3]  |
| S[14] | 1601.768        | 234.145        | 218.126         | <b>219.134</b>  | 217.118         | S[2]  |
| R[15] | 1729.863        | 147.113        | 131.094         | 132.102         | 130.086         | R[1]  |

# sp | Q9D2U9 | H2B3A\_MOUSE

PEPSRST<sup>Phospho</sup> PAPK<sup>Acetyl</sup> K<sup>Acetyl</sup> GSK  
 79.97 42.01 42.01

- ▶ fragmentation table for charge state 2+
- ▶ specType=etd
- ▶ score=44.44
- ▶ F105344.dat
- ▶ query=q8096\_p1
- ▶ precursor=577.620330
- ▶ chargePrecursor=3
- ▶ itol=0.8

| AA          | c              | y              | z+1            | z+2            | z              | AA           |
|-------------|----------------|----------------|----------------|----------------|----------------|--------------|
| P[1]        | 58.047         | <b>865.927</b> | <b>857.918</b> | 0.504          | <b>857.414</b> | P[15]        |
| E[2]        | 122.568        | <b>817.401</b> | <b>809.392</b> | 0.504          | <b>808.888</b> | E[14]        |
| P[3]        | 171.095        | 752.880        | 744.870        | 0.504          | 744.366        | P[13]        |
| S[4]        | 214.611        | 704.353        | 696.344        | 0.504          | 695.840        | S[12]        |
| R[5]        | 262.661        | 660.837        | 652.828        | 0.504          | 652.324        | R[11]        |
| <b>S[6]</b> | <b>308.177</b> | <b>582.781</b> | <b>574.772</b> | <b>575.263</b> | <b>574.759</b> | <b>S[10]</b> |
| T[7]        | 426.684        | 439.271        | 431.261        | 431.755        | 430.757        | T[9]         |
| P[8]        | 475.211        | 448.754        | 440.744        | 441.238        | 440.250        | P[8]         |
| A[9]        | 510.729        | 400.237        | 392.228        | 392.732        | 391.724        | A[7]         |
| P[10]       | 559.256        | 364.719        | 356.709        | 357.213        | 356.205        | P[6]         |
| K[11]       | 644.308        | 316.192        | 308.183        | 308.687        | 307.679        | K[5]         |
| K[12]       | <b>729.361</b> | 231.140        | 223.130        | 223.634        | 222.626        | K[4]         |
| G[13]       | <b>757.872</b> | 140.087        | 132.077        | 132.581        | 131.574        | G[3]         |
| S[14]       | <b>801.388</b> | 117.576        | 109.567        | 110.071        | 109.063        | S[2]         |
| K[15]       | <b>865.435</b> | 74.060         | 66.051         | 66.555         | 65.547         | K[1]         |



# sp | P68433 | H31\_MOUSE

LVREIAQDFK <sup>Dimethyl</sup>TDLR  
28.03

- ▶ fragmentation table for charge state 1+
- ▶ specType=etd
- ▶ score=58.37
- ▶ F105344.dat
- ▶ query=q8101.p1
- ▶ precursor=577.994750
- ▶ chargePrecursor=3
- ▶ itol=0.8

| AA    | c               | y              | z+1             | z+2             | z               | AA    |
|-------|-----------------|----------------|-----------------|-----------------|-----------------|-------|
| L[1]  | 131.118         | 1731.975       | 1715.950        | 0.000           | 1714.940        | L[14] |
| V[2]  | 230.188         | 1815.901       | 1602.872        | 0.000           | 1601.865        | V[13] |
| R[3]  | <b>388.287</b>  | 1319.823       | 1303.803        | <b>1504.812</b> | <b>1502.795</b> | R[12] |
| E[4]  | <b>515.130</b>  | 1303.722       | <b>1347.703</b> |                 | <b>1346.695</b> | E[11] |
| I[5]  | 628.414         | 1234.679       | <b>1218.660</b> | 1219.668        | 1217.652        | I[10] |
| A[6]  | <b>699.451</b>  | 1121.595       | 1105.576        | 1106.584        | 1104.568        | A[9]  |
| Q[7]  | <b>827.510</b>  | 1050.538       | <b>1034.530</b> | 1035.547        | <b>1033.531</b> | Q[8]  |
| D[8]  | <b>942.537</b>  | <b>922.499</b> | <b>906.481</b>  | 907.488         | 905.473         | D[7]  |
| T[9]  | <b>1083.605</b> | 837.472        | <b>791.454</b>  | 792.461         | 790.446         | T[6]  |
| K[10] | 1245.711        | 650.404        | <b>644.385</b>  | 645.393         | 643.377         | K[5]  |
| V[11] | <b>1346.779</b> | 504.278        | <b>488.259</b>  | 489.267         | 487.251         | V[4]  |
| D[12] | <b>1461.806</b> | 403.230        | 387.211         | 388.219         | <b>386.203</b>  | D[3]  |
| L[13] | <b>1574.890</b> | 388.203        | 272.184         | 273.192         | 271.176         | L[2]  |
| R[14] | 1730.901        | 175.119        | 159.100         | 160.108         | 158.092         | R[1]  |

# sp | P68433 | H31\_MOUSE

LVREIAQDFK <sup>Dimethyl</sup> 28.03 TDLR

- ▶ fragmentation table for charge state 2+
- ▶ specType=etd
- ▶ score=58.37
- ▶ F105344.dat
- ▶ query=q8101.p1
- ▶ precursor=577.994750
- ▶ chargePrecursor=3
- ▶ itol=0.8

| AA    | c              | y              | z+1            | z+2            | z              | AA    |
|-------|----------------|----------------|----------------|----------------|----------------|-------|
| L[1]  | 66.083         | <b>866.491</b> | <b>858.482</b> | 0.504          | <b>857.978</b> | L[14] |
| V[2]  | 115.597        | 809.940        | 801.940        | 0.504          | 801.436        | V[13] |
| R[3]  | 193.647        | 760.415        | <b>752.406</b> | <b>752.910</b> | <b>751.902</b> | R[12] |
| E[4]  | 298.169        | 682.964        | 674.959        | 674.859        | 673.851        | E[11] |
| I[5]  | 314.711        | 617.843        | 609.834        | 610.338        | 609.330        | I[10] |
| A[6]  | 390.220        | 561.301        | 553.292        | 553.796        | 552.788        | A[9]  |
| Q[7]  | 414.259        | 525.783        | 517.773        | 518.277        | 517.269        | Q[8]  |
| D[8]  | 471.772        | 461.753        | 453.744        | 454.248        | 453.240        | D[7]  |
| F[9]  | 545.306        | 404.240        | 396.230        | 396.734        | 395.727        | F[6]  |
| K[10] | 623.309        | 330.705        | 322.696        | 323.200        | 322.192        | K[5]  |
| T[11] | 673.893        | 252.542        | 244.533        | 245.137        | 244.129        | T[4]  |
| D[12] | 731.407        | 202.119        | 194.109        | 194.613        | 193.605        | D[3]  |
| L[13] | 787.940        | 144.605        | 136.596        | 137.100        | 136.092        | L[2]  |
| R[14] | <b>865.999</b> | 88.063         | 80.054         | 80.558         | 79.550         | R[1]  |



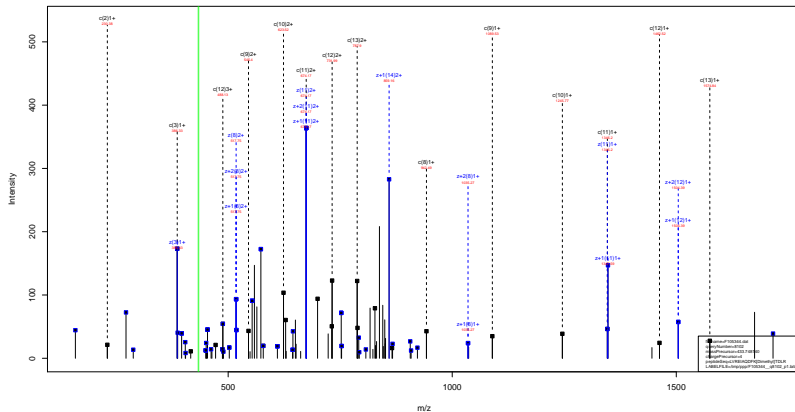

# sp | P68433 | H31\_MOUSE

LVREIAQDFK <sup>Dimethyl</sup> 28.03 TDLR

- ▶ fragmentation table for charge state 1+
- ▶ specType=etd
- ▶ score=81.58
- ▶ F105344.dat
- ▶ query=q8102.p1
- ▶ precursor=433.748140
- ▶ chargePrecursor=4
- ▶ itol=0.8

| AA    | c               | y              | z+1             | z+2             | z               | AA    |
|-------|-----------------|----------------|-----------------|-----------------|-----------------|-------|
| L[1]  | 131.118         | 1731.975       | <b>1715.956</b> | 0.000           | 1714.940        | L[14] |
| V[2]  | <b>230.186</b>  | 1818.891       | 1802.872        | 0.000           | 1801.855        | V[13] |
| R[3]  | <b>380.287</b>  | 1219.652       | <b>1563.804</b> | <b>1564.812</b> | 1562.795        | R[12] |
| E[4]  | 315.330         | 1303.722       | <b>1347.701</b> | 1350.711        | <b>1346.695</b> | E[11] |
| I[5]  | <b>628.414</b>  | 1234.679       | 1218.660        | 1219.668        | 1217.652        | I[10] |
| A[6]  | <b>699.451</b>  | 1121.595       | 1108.576        | 1106.584        | 1104.568        | A[9]  |
| Q[7]  | <b>827.510</b>  | 1050.558       | <b>1034.539</b> | <b>1035.547</b> | 1033.531        | Q[8]  |
| D[8]  | <b>942.537</b>  | <b>922.499</b> | <b>906.481</b>  | <b>907.488</b>  | 905.473         | D[7]  |
| T[9]  | <b>1089.605</b> | <b>807.472</b> | 791.454         | <b>792.461</b>  | 789.445         | T[6]  |
| K[10] | <b>1245.731</b> | 605.404        | <b>644.385</b>  | 645.393         | <b>643.377</b>  | K[5]  |
| Y[11] | <b>1346.779</b> | 504.278        | <b>488.259</b>  | <b>489.267</b>  | <b>487.251</b>  | Y[4]  |
| D[12] | <b>1461.806</b> | 403.230        | <b>387.211</b>  | 388.219         | <b>386.203</b>  | D[3]  |
| L[13] | <b>1574.890</b> | <b>288.203</b> | <b>272.184</b>  | 273.192         | 273.176         | L[2]  |
| R[14] | 1730.901        | 175.119        | <b>159.100</b>  | 160.108         | 158.092         | R[1]  |

# sp | P68433 | H31\_MOUSE

LVREIAQDFK <sup>Dimethyl</sup> 28.03 TDLR

- ▶ fragmentation table for charge state 2+
- ▶ specType=etd
- ▶ score=81.58
- ▶ F105344.dat
- ▶ query=q8102\_p1
- ▶ precursor=433.748140
- ▶ chargePrecursor=4
- ▶ itol=0.8

| AA |      | c              | y              | z+1            | z+2            | z              | AA    |
|----|------|----------------|----------------|----------------|----------------|----------------|-------|
| L  | [1]  | 66.083         | <b>856.491</b> | <b>856.482</b> | 0.504          | 857.978        | L[14] |
| V  | [2]  | 115.597        | 809.549        | 809.540        | 0.504          | 801.436        | V[13] |
| R  | [3]  | 193.647        | 760.435        | <b>752.406</b> | <b>752.910</b> | <b>751.902</b> | R[12] |
| E  | [4]  | 258.169        | 682.964        | <b>674.355</b> | <b>674.859</b> | <b>673.851</b> | E[11] |
| I  | [5]  | 314.711        | 617.843        | <b>609.834</b> | <b>610.338</b> | <b>609.330</b> | I[10] |
| A  | [6]  | 350.229        | 561.301        | <b>553.292</b> | <b>553.796</b> | <b>552.788</b> | A[9]  |
| Q  | [7]  | 414.259        | 525.783        | <b>517.773</b> | <b>518.277</b> | <b>517.269</b> | Q[8]  |
| D  | [8]  | <b>471.772</b> | <b>461.753</b> | <b>453.744</b> | <b>454.248</b> | <b>453.240</b> | D[7]  |
| F  | [9]  | <b>545.306</b> | <b>404.240</b> | <b>396.230</b> | <b>396.734</b> | <b>395.727</b> | F[6]  |
| K  | [10] | <b>623.369</b> | 330.705        | 322.695        | 323.200        | 322.192        | K[5]  |
| T  | [11] | <b>673.893</b> | 252.542        | 244.533        | 245.137        | 244.129        | T[4]  |
| D  | [12] | <b>731.407</b> | 202.119        | 194.109        | 194.613        | 193.605        | D[3]  |
| L  | [13] | <b>787.949</b> | 144.695        | 136.586        | 137.100        | 136.062        | L[2]  |
| R  | [14] | <b>855.999</b> | 88.063         | 80.054         | 80.558         | 79.550         | R[1]  |

# sp | P68433 | H31\_MOUSE

LVREIAQDFK <sup>Dimethyl</sup> 28.03 TDLR

- ▶ fragmentation table for charge state 3+
- ▶ specType=etd
- ▶ score=81.58
- ▶ F105344.dat
- ▶ query=q8102\_p1
- ▶ precursor=433.748140
- ▶ chargePrecursor=4
- ▶ itol=0.8

| AA    | c              | y              | z+1            | z+2            | z              | AA    |
|-------|----------------|----------------|----------------|----------------|----------------|-------|
| L[1]  | 44.377         | <b>577.997</b> | <b>572.657</b> | 0.672          | <b>572.321</b> | L[14] |
| V[2]  | 77.400         | 540.302        | 535.962        | 0.672          | 534.626        | V[13] |
| R[3]  | 129.434        | 507.279        | <b>501.940</b> | <b>502.275</b> | 501.604        | R[12] |
| E[4]  | 172.448        | 495.249        | <b>449.906</b> | <b>450.242</b> | <b>449.570</b> | E[11] |
| I[5]  | 210.143        | 412.231        | 406.892        | 407.228        | 406.556        | I[10] |
| A[6]  | 233.622        | 374.537        | 369.197        | 369.533        | 368.861        | A[9]  |
| Q[7]  | 276.508        | 350.857        | 345.518        | 345.854        | 345.182        | Q[8]  |
| D[8]  | 314.650        | 308.171        | 302.832        | 303.168        | 302.496        | D[7]  |
| F[9]  | 363.673        | 269.829        | 264.489        | 264.825        | 264.153        | F[6]  |
| K[10] | <b>415.915</b> | 220.906        | 215.467        | 215.803        | 215.131        | K[5]  |
| T[11] | <b>449.598</b> | 198.796        | 193.424        | 193.760        | 193.089        | T[4]  |
| D[12] | <b>487.940</b> | 135.082        | 129.742        | 130.078        | 129.406        | D[3]  |
| L[13] | 525.635        | 96.739         | 91.400         | 91.736         | 91.064         | L[2]  |
| R[14] | <b>577.669</b> | 59.045         | 53.705         | 54.041         | 53.369         | R[1]  |

sp | P15864 | H12\_MOUSE

[Acetyl]SEAAPAAPAAAPPAEKAPAK

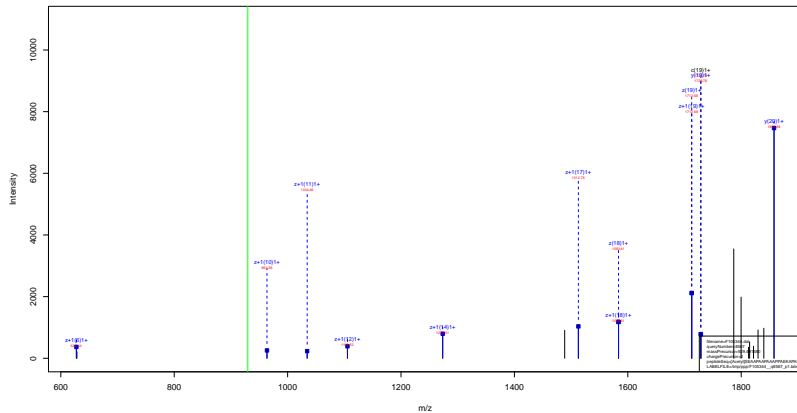

# sp | P15864 | H12\_MOUSE

## [Acetyl]SEAAPAAPAAAPPAEKAPAK

- ▶ fragmentation table for charge state 1+
- ▶ specType=etd
- ▶ score=53.78
- ▶ F105344.dat
- ▶ query=q8567.p1
- ▶ precursor=929.491380
- ▶ chargePrecursor=2
- ▶ itol=0.8

| AA    | c               | y               | z+1             | z+2     | z               | AA    |
|-------|-----------------|-----------------|-----------------|---------|-----------------|-------|
| S[1]  | 147.076         | <b>1057.971</b> | 1041.952        | 0.000   | 1040.940        | S[20] |
| E[2]  | 276.119         | <b>1728.928</b> | <b>1712.909</b> | 0.000   | <b>1711.901</b> | E[18] |
| A[3]  | 347.156         | 1599.885        | <b>1583.867</b> | 0.000   | <b>1582.859</b> | A[18] |
| A[4]  | 418.193         | 1528.840        | <b>1512.829</b> | 0.000   | 1511.822        | A[17] |
| F[5]  | 515.240         | 1457.811        | 1441.792        | 0.000   | 1440.785        | F[16] |
| A[6]  | 588.283         | 1386.795        | 1374.740        | 0.000   | 1373.732        | A[15] |
| A[7]  | 657.320         | 1289.721        | <b>1273.702</b> | 0.000   | 1272.695        | A[14] |
| F[8]  | 754.373         | 1218.684        | 1202.665        | 0.000   | 1201.658        | F[13] |
| A[9]  | 825.410         | 1123.631        | <b>1105.613</b> | 0.000   | 1104.605        | A[12] |
| A[10] | 896.447         | 1050.594        | <b>1034.575</b> | 0.000   | 1033.568        | A[11] |
| A[11] | 967.484         | 979.557         | <b>963.538</b>  | 0.000   | 962.531         | A[10] |
| F[12] | 1004.537        | 908.520         | 892.501         | 0.000   | 891.493         | F[10] |
| F[13] | 1101.590        | 813.467         | 795.449         | 0.000   | 794.441         | F[9]  |
| A[14] | 1232.627        | 714.414         | 698.396         | 0.000   | 697.388         | A[7]  |
| E[15] | 1361.670        | 643.377         | <b>627.359</b>  | 0.000   | 626.351         | E[6]  |
| K[16] | 1469.705        | 514.335         | 498.316         | 499.324 | 497.309         | K[5]  |
| A[17] | 1560.802        | 389.280         | 370.271         | 371.229 | 369.213         | A[4]  |
| F[18] | 1657.854        | 315.203         | 299.184         | 300.192 | 298.176         | F[3]  |
| A[19] | <b>1728.892</b> | 218.150         | 202.131         | 203.139 | 201.123         | A[2]  |
| R[20] | 1826.938        | 147.113         | 131.094         | 132.102 | 130.085         | R[1]  |

# sp | P15864 | H12\_MOUSE

[Acetyl]SEAAPAAPAAAPPAEKAPAKK

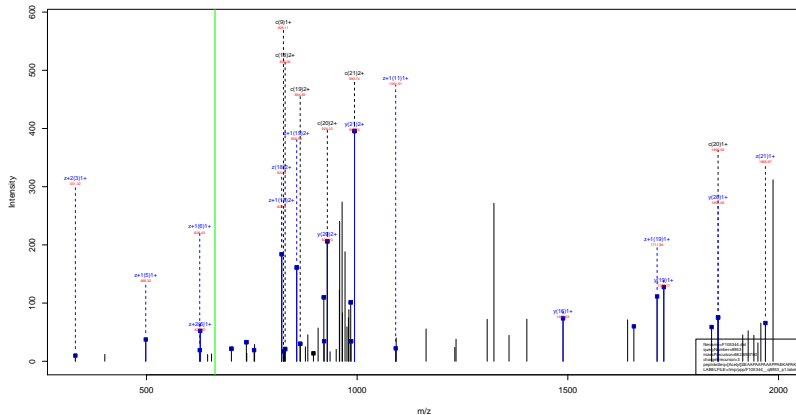

# sp | P15864 | H12\_MOUSE

## [Acetyl]SEAAPAAPAAAPPAEKAPAKK

- ▶ fragmentation table for charge state 1+
- ▶ specType=etd
- ▶ score=47.42
- ▶ F105344.dat
- ▶ query=q8953.p1
- ▶ precursor=662.693790
- ▶ chargePrecursor=3
- ▶ itol=0.8

| AA    | c               | y               | z+1             | z+2            | z               | AA    |
|-------|-----------------|-----------------|-----------------|----------------|-----------------|-------|
| S[1]  | 147.076         | 1906.065        | 1970.047        | 0.000          | <b>1969.039</b> | S[2]  |
| E[2]  | 276.119         | <b>1857.023</b> | <b>1841.004</b> | 0.000          | 1839.990        | E[20] |
| A[3]  | 347.150         | <b>1727.969</b> | <b>1711.962</b> | 0.000          | 1710.954        | A[19] |
| A[4]  | 418.193         | <b>1656.943</b> | 1640.924        | 0.000          | 1639.917        | A[18] |
| P[5]  | 515.246         | 1585.900        | 1569.887        | 0.000          | 1568.880        | P[17] |
| A[6]  | 586.283         | <b>1488.853</b> | 1472.835        | 0.000          | 1471.827        | A[16] |
| A[7]  | 657.320         | 1417.818        | 1401.797        | 0.000          | 1400.790        | A[15] |
| P[8]  | 754.373         | 1346.779        | 1330.760        | 0.000          | 1329.753        | P[14] |
| A[9]  | <b>825.410</b>  | 1249.726        | 1233.708        | 0.000          | 1232.700        | A[13] |
| A[10] | <b>896.447</b>  | 1178.689        | 1162.670        | 0.000          | 1161.662        | A[12] |
| A[11] | 967.494         | 1107.652        | <b>1091.633</b> | 0.000          | 1090.625        | A[11] |
| P[12] | 1064.537        | 1036.615        | 1020.596        | 0.000          | 1019.588        | P[10] |
| P[13] | 1161.590        | 939.567         | 923.543         | 0.000          | 922.536         | P[9]  |
| A[14] | 1232.637        | 843.509         | 828.491         | 0.000          | <b>825.483</b>  | A[8]  |
| E[15] | 1361.670        | 771.472         | <b>755.454</b>  | 0.000          | 754.446         | E[7]  |
| R[16] | 1489.705        | 642.433         | <b>626.411</b>  | <b>637.419</b> | 625.403         | R[6]  |
| A[17] | 1580.802        | 514.332         | <b>498.316</b>  | 496.314        | 497.305         | A[5]  |
| P[18] | 1657.854        | 443.290         | 427.279         | 426.267        | 426.271         | P[4]  |
| A[19] | 1728.892        | 346.245         | 330.226         | <b>331.234</b> | 329.214         | A[3]  |
| R[20] | <b>1856.986</b> | 275.208         | 259.189         | 260.197        | 258.181         | R[2]  |
| K[21] | 1985.081        | 147.113         | 131.094         | 132.102        | 130.086         | K[1]  |



# sp | P15864 | H12\_MOUSE

[Acetyl]SEAAPAAPAAAPPAEKAPAKK

- ▶ fragmentation table for charge state 2+
- ▶ specType=etd
- ▶ score=47.42
- ▶ F105344.dat
- ▶ query=q8953\_p1
- ▶ precursor=662.693790
- ▶ chargePrecursor=3
- ▶ itol=0.8

| AA    | c              | y              | z+1            | z+2     | z              | AA    |
|-------|----------------|----------------|----------------|---------|----------------|-------|
| S[1]  | 74.042         | <b>993.536</b> | <b>985.527</b> | 0.504   | <b>985.023</b> | S[21] |
| E[2]  | 138.563        | <b>929.015</b> | <b>921.006</b> | 0.504   | <b>920.502</b> | E[20] |
| A[3]  | 174.082        | <b>864.494</b> | <b>856.484</b> | 0.504   | <b>855.981</b> | A[19] |
| A[4]  | 209.600        | <b>828.975</b> | <b>820.966</b> | 0.504   | <b>820.462</b> | A[18] |
| P[5]  | 258.127        | 793.457        | 785.447        | 0.504   | 784.943        | P[17] |
| A[6]  | 293.645        | 744.930        | <b>736.921</b> | 0.504   | <b>736.417</b> | A[16] |
| A[7]  | 329.164        | 709.412        | <b>701.402</b> | 0.504   | <b>700.898</b> | A[15] |
| P[8]  | 377.690        | 673.893        | 665.884        | 0.504   | 665.380        | P[14] |
| A[9]  | 413.209        | 625.367        | 617.357        | 0.504   | 616.854        | A[13] |
| A[10] | 448.727        | 589.848        | 581.839        | 0.504   | 581.335        | A[12] |
| A[11] | 484.246        | 554.330        | 546.320        | 0.504   | 545.816        | A[11] |
| P[12] | 532.772        | 518.811        | 510.802        | 0.504   | 510.298        | P[10] |
| P[13] | 581.299        | 470.285        | 462.275        | 0.504   | 461.771        | P[9]  |
| A[14] | 616.817        | 421.758        | 413.749        | 0.504   | 413.245        | A[8]  |
| E[15] | 681.338        | 386.240        | 378.230        | 0.504   | 377.727        | E[7]  |
| K[16] | 745.386        | 321.718        | 313.709        | 314.213 | 313.205        | K[6]  |
| A[17] | 780.904        | 257.671        | 249.662        | 250.166 | 249.158        | A[5]  |
| P[18] | <b>829.431</b> | 222.152        | 214.143        | 214.647 | 213.639        | P[4]  |
| A[19] | <b>864.949</b> | 173.626        | 165.617        | 166.121 | 165.113        | A[3]  |
| K[20] | <b>928.997</b> | 138.108        | 130.098        | 130.602 | 129.594        | K[2]  |
| K[21] | <b>993.044</b> | 74.060         | 66.051         | 66.555  | 65.547         | K[1]  |

# sp | P15864 | H12\_MOUSE

[Acetyl]SEAAPAAPAAAPPAEKAPAKK

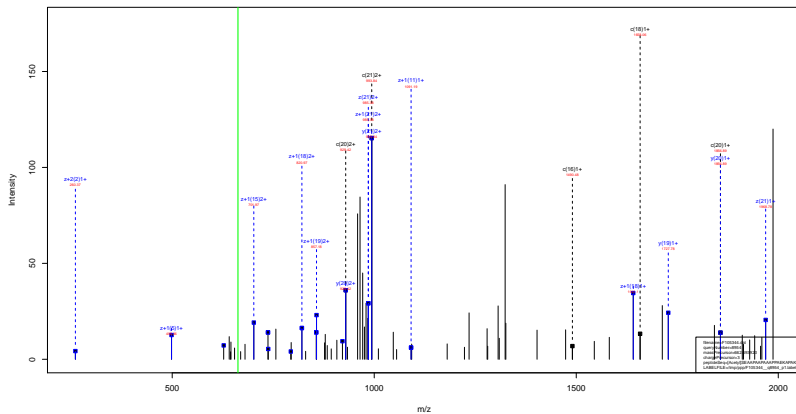

# sp | P15864 | H12\_MOUSE

## [Acetyl]SEAAPAAPAAAPPAEKAPAKK

- ▶ fragmentation table for charge state 1+
- ▶ specType=etd
- ▶ score=42.02
- ▶ F105344.dat
- ▶ query=q8954.p1
- ▶ precursor=662.693920
- ▶ chargePrecursor=3
- ▶ itol=0.8

| AA    | c               | y               | z+1             | z+2            | z               | AA    |
|-------|-----------------|-----------------|-----------------|----------------|-----------------|-------|
| S[1]  | 147.076         | 1906.065        | 1970.047        | 0.000          | <b>1960.039</b> | S[2]  |
| E[2]  | 276.119         | <b>1857.023</b> | 1841.004        | 0.000          | 1839.990        | E[20] |
| A[3]  | 347.150         | <b>1727.960</b> | 1711.907        | 0.000          | 1710.954        | A[19] |
| A[4]  | 418.193         | 1656.947        | <b>1640.834</b> | 0.000          | 1639.911        | A[18] |
| F[5]  | 515.246         | 1585.900        | 1569.857        | 0.000          | 1568.880        | F[17] |
| A[6]  | 586.283         | 1488.853        | 1472.835        | 0.000          | 1471.827        | A[16] |
| A[7]  | 657.320         | 1417.810        | 1401.797        | 0.000          | 1400.790        | A[15] |
| P[8]  | 754.373         | 1346.770        | 1330.700        | 0.000          | 1329.751        | P[14] |
| A[9]  | 825.410         | 1249.726        | 1233.708        | 0.000          | 1232.700        | A[13] |
| A[10] | 896.447         | 1178.689        | 1162.670        | 0.000          | 1161.661        | A[12] |
| A[11] | 967.484         | 1107.652        | <b>1091.633</b> | 0.000          | <b>1090.626</b> | A[11] |
| P[12] | 1064.537        | 1036.615        | 1020.596        | 0.000          | 1019.588        | P[10] |
| P[13] | 1161.590        | 939.567         | 923.543         | 0.000          | 922.536         | P[9]  |
| A[14] | 1232.627        | 843.500         | 828.491         | 0.000          | 828.483         | A[8]  |
| E[15] | 1303.670        | 771.472         | 755.454         | 0.000          | 754.446         | E[7]  |
| T[16] | <b>1489.765</b> | 642.430         | 626.413         | <b>627.419</b> | 625.401         | K[6]  |
| A[17] | 1560.802        | 514.332         | <b>498.316</b>  | 496.314        | 497.305         | A[5]  |
| P[18] | <b>1657.854</b> | 443.290         | 427.279         | 428.287        | 426.271         | P[4]  |
| A[19] | 1728.892        | 346.245         | 330.226         | 331.234        | 329.216         | A[3]  |
| K[20] | <b>1856.986</b> | 275.208         | 259.189         | <b>260.197</b> | 258.181         | K[2]  |
| K[21] | 1985.081        | 147.113         | 131.094         | 132.102        | 130.086         | K[1]  |

# sp | P15864 | H12\_MOUSE

[Acetyl]SEAAPAAPAAAPPAEKAPAKK

- ▶ fragmentation table for charge state 2+
- ▶ specType=etd
- ▶ score=42.02
- ▶ F105344.dat
- ▶ query=q8954\_p1
- ▶ precursor=662.693920
- ▶ chargePrecursor=3
- ▶ itol=0.8

| AA    | c              | y              | z+1            | z+2     | z              | AA    |
|-------|----------------|----------------|----------------|---------|----------------|-------|
| S[1]  | 74.042         | <b>993.536</b> | <b>985.527</b> | 0.504   | <b>985.023</b> | S[21] |
| E[2]  | 138.563        | <b>929.015</b> | <b>921.006</b> | 0.504   | 920.502        | E[20] |
| A[3]  | 174.082        | 964.494        | <b>856.484</b> | 0.504   | <b>855.981</b> | A[19] |
| A[4]  | 209.600        | 928.975        | <b>820.966</b> | 0.504   | <b>820.462</b> | A[18] |
| P[5]  | 258.127        | <b>793.457</b> | 785.447        | 0.504   | 784.943        | P[17] |
| A[6]  | 293.645        | 744.930        | <b>736.921</b> | 0.504   | <b>736.417</b> | A[16] |
| A[7]  | 329.164        | 709.412        | <b>701.402</b> | 0.504   | 700.898        | A[15] |
| P[8]  | 377.690        | 673.893        | 665.884        | 0.504   | 665.380        | P[14] |
| A[9]  | 413.209        | 625.367        | 617.357        | 0.504   | 616.854        | A[13] |
| A[10] | 448.727        | 589.848        | 581.839        | 0.504   | 581.335        | A[12] |
| A[11] | 484.246        | 554.330        | 546.320        | 0.504   | 545.816        | A[11] |
| P[12] | 520.764        | 518.811        | 510.802        | 0.504   | 510.298        | P[10] |
| P[13] | 556.283        | 470.285        | 462.275        | 0.504   | 461.771        | P[9]  |
| A[14] | 616.817        | 421.758        | 413.749        | 0.504   | 413.245        | A[8]  |
| E[15] | 681.338        | 386.240        | 378.230        | 0.504   | 377.727        | E[7]  |
| K[16] | 745.866        | 321.718        | 313.709        | 314.213 | 313.205        | K[6]  |
| A[17] | 780.904        | 257.671        | 249.662        | 250.166 | 249.158        | A[5]  |
| P[18] | 829.431        | 222.152        | 214.143        | 214.647 | 213.639        | P[4]  |
| A[19] | 864.949        | 173.626        | 165.617        | 166.121 | 165.113        | A[3]  |
| K[20] | <b>928.997</b> | 138.108        | 130.098        | 130.602 | 129.594        | K[2]  |
| K[21] | <b>993.044</b> | 74.060         | 66.051         | 66.555  | 65.547         | K[1]  |

# sp | P15864 | H12\_MOUSE

[Acetyl]SEAAPAAPAAAPPAEKAPAKK

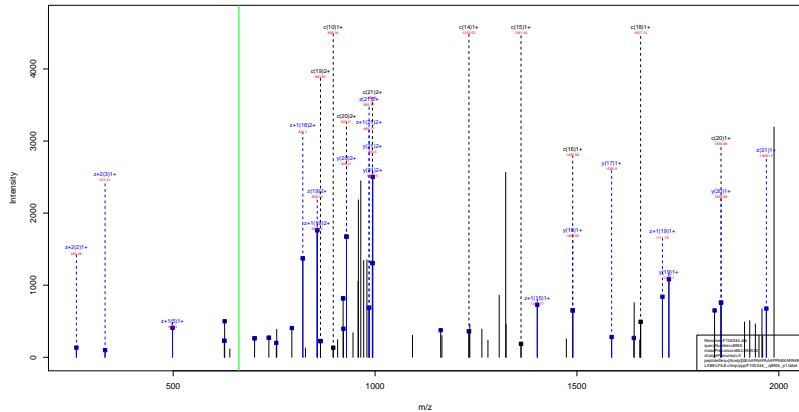

# sp | P15864 | H12\_MOUSE

## [Acetyl]SEAAPAAPAAAPPAEKAPAKK

- ▶ fragmentation table for charge state 1+
- ▶ specType=etd
- ▶ score=67.81
- ▶ F105344.dat
- ▶ query=q8955\_p1
- ▶ precursor=662.694530
- ▶ chargePrecursor=3
- ▶ itol=0.8

| AA    | c               | y               | z+1             | z+2            | z               | AA    |
|-------|-----------------|-----------------|-----------------|----------------|-----------------|-------|
| S[1]  | 147.076         | 1906.065        | 1970.047        | 0.000          | <b>1960.030</b> | S[2]  |
| E[2]  | 276.119         | <b>1857.023</b> | <b>1841.004</b> | 0.000          | 1839.990        | E[20] |
| A[3]  | 347.150         | <b>1727.960</b> | <b>1711.962</b> | 0.000          | 1710.954        | A[19] |
| A[4]  | 418.193         | 1599.947        | <b>1640.924</b> | 0.000          | 1639.917        | A[18] |
| P[5]  | 515.246         | <b>1585.906</b> | 1569.897        | 0.000          | 1568.889        | P[17] |
| A[6]  | 586.283         | <b>1488.853</b> | 1472.835        | 0.000          | 1471.827        | A[16] |
| A[7]  | 657.320         | 1417.816        | <b>1401.797</b> | 0.000          | 1400.790        | A[15] |
| P[8]  | 754.373         | 1346.770        | 1330.760        | 0.000          | 1329.753        | P[14] |
| A[9]  | 825.410         | 1249.726        | 1233.708        | 0.000          | <b>1232.700</b> | A[13] |
| A[10] | <b>896.447</b>  | 1178.689        | <b>1162.670</b> | 0.000          | 1161.662        | A[12] |
| A[11] | 967.494         | 1107.652        | 1091.633        | 0.000          | 1090.625        | A[11] |
| P[12] | 1064.537        | 1036.615        | 1020.596        | 0.000          | 1019.588        | P[10] |
| P[13] | 1161.590        | 939.567         | 923.543         | 0.000          | 922.536         | P[9]  |
| A[14] | <b>1232.627</b> | 843.500         | 828.481         | 0.000          | 827.473         | A[8]  |
| E[15] | <b>1361.670</b> | 771.472         | <b>755.454</b>  | 0.000          | 754.446         | E[7]  |
| R[16] | <b>1489.765</b> | 642.436         | <b>626.411</b>  | <b>637.419</b> | 625.403         | R[6]  |
| A[17] | 1580.802        | 514.332         | <b>498.316</b>  | 496.314        | 497.305         | A[5]  |
| P[18] | <b>1657.854</b> | 443.290         | 427.279         | 426.267        | 426.271         | P[4]  |
| A[19] | 1728.892        | 346.245         | 330.226         | <b>331.234</b> | 329.214         | A[3]  |
| R[20] | <b>1856.986</b> | 275.208         | 259.189         | <b>260.197</b> | 258.181         | R[2]  |
| R[21] | 1985.081        | 147.113         | 131.094         | 132.102        | 130.086         | R[1]  |

# sp | P15864 | H12\_MOUSE

[Acetyl]SEAAPAAPAAAPPAEKAPAKK

- ▶ fragmentation table for charge state 2+
- ▶ specType=etd
- ▶ score=67.81
- ▶ F105344.dat
- ▶ query=q8955\_p1
- ▶ precursor=662.694530
- ▶ chargePrecursor=3
- ▶ itol=0.8

| AA    | c              | y              | z+1            | z+2     | z              | AA    |
|-------|----------------|----------------|----------------|---------|----------------|-------|
| S[1]  | 74.042         | <b>993.536</b> | <b>985.527</b> | 0.504   | <b>985.023</b> | S[21] |
| E[2]  | 138.563        | <b>929.015</b> | <b>921.006</b> | 0.504   | <b>920.502</b> | E[20] |
| A[3]  | 174.082        | <b>864.494</b> | <b>856.484</b> | 0.504   | <b>855.981</b> | A[19] |
| A[4]  | 209.600        | 828.975        | <b>820.966</b> | 0.504   | <b>820.462</b> | A[18] |
| P[5]  | 258.127        | <b>793.457</b> | 785.447        | 0.504   | 784.943        | P[17] |
| A[6]  | 293.645        | 744.930        | <b>736.921</b> | 0.504   | <b>736.417</b> | A[16] |
| A[7]  | 329.164        | 709.412        | <b>701.402</b> | 0.504   | <b>700.898</b> | A[15] |
| P[8]  | 377.690        | 673.893        | 665.884        | 0.504   | 665.380        | P[14] |
| A[9]  | 413.209        | 625.367        | 617.357        | 0.504   | 616.854        | A[13] |
| A[10] | 448.727        | 589.848        | 581.839        | 0.504   | 581.335        | A[12] |
| A[11] | 484.246        | 554.330        | 546.320        | 0.504   | 545.816        | A[11] |
| P[12] | 522.772        | 518.811        | 510.802        | 0.504   | 510.298        | P[10] |
| P[13] | 561.299        | 470.285        | 462.275        | 0.504   | 461.771        | P[9]  |
| A[14] | 616.817        | 421.758        | 413.749        | 0.504   | 413.245        | A[8]  |
| E[15] | 661.338        | 386.240        | 378.230        | 0.504   | 377.727        | E[7]  |
| K[16] | 745.386        | 321.718        | 313.709        | 314.213 | 313.205        | K[6]  |
| A[17] | 780.904        | 257.671        | 249.662        | 250.166 | 249.158        | A[5]  |
| P[18] | 829.431        | 222.152        | 214.143        | 214.647 | 213.639        | P[4]  |
| A[19] | <b>864.949</b> | 173.626        | 165.617        | 166.121 | 165.113        | A[3]  |
| K[20] | <b>928.997</b> | 138.108        | 130.098        | 130.602 | 129.594        | K[2]  |
| K[21] | <b>993.044</b> | 74.060         | 66.051         | 66.555  | 65.547         | K[1]  |

# sp | P43276 | H15\_MOUSE

[Acetyl]SETAPAETAAPAPVEKSPAK

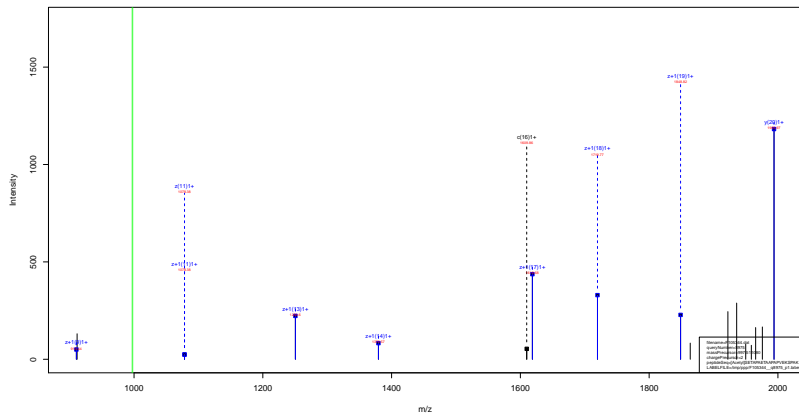



# sp | P43276 | H15\_MOUSE

## [Acetyl]SETAPAETAAPAPVEKSPAK

- ▶ fragmentation table for charge state 1+
- ▶ specType=etd
- ▶ score=47.84
- ▶ F105344.dat
- ▶ query=q8975\_p1
- ▶ precursor=997.511080
- ▶ chargePrecursor=2
- ▶ itol=0.8

| AA    | c               | y               | z+1             | z+2     | z               | AA    |
|-------|-----------------|-----------------|-----------------|---------|-----------------|-------|
| S[1]  | 147.676         | <b>1994.008</b> | 1977.989        | 0.000   | 1976.981        | S[20] |
| E[2]  | 276.119         | 1894.969        | <b>1848.946</b> | 0.000   | 1847.939        | E[18] |
| T[3]  | 377.167         | 1735.922        | <b>1719.904</b> | 0.000   | 1718.896        | T[18] |
| A[4]  | 448.204         | 1634.875        | <b>1618.856</b> | 0.000   | 1617.848        | A[17] |
| P[5]  | 545.257         | 1563.838        | 1547.819        | 0.000   | 1546.811        | P[16] |
| A[6]  | 618.294         | 1466.792        | 1459.766        | 0.000   | 1449.758        | A[15] |
| E[7]  | 745.136         | 1395.747        | <b>1379.729</b> | 0.000   | 1375.721        | E[14] |
| T[8]  | 846.394         | 1266.709        | <b>1250.687</b> | 0.000   | 1249.679        | T[13] |
| A[9]  | 917.421         | 1165.658        | 1149.639        | 0.000   | 1148.631        | A[12] |
| A[10] | 968.458         | 1094.620        | <b>1078.602</b> | 0.000   | <b>1077.594</b> | A[11] |
| P[11] | 1085.511        | 1023.583        | 1007.565        | 0.000   | 1006.557        | P[10] |
| A[12] | 1156.548        | 928.531         | <b>918.512</b>  | 0.000   | 909.504         | A[9]  |
| P[13] | 1253.601        | 859.491         | 852.479         | 0.000   | 838.461         | P[9]  |
| V[14] | 1352.669        | 758.441         | 742.422         | 0.000   | 741.414         | V[7]  |
| E[15] | 1481.712        | 659.372         | 643.354         | 0.000   | 642.346         | E[6]  |
| K[16] | <b>1609.807</b> | 530.330         | 514.311         | 515.319 | 513.303         | K[5]  |
| S[17] | 1696.839        | 402.235         | 386.216         | 387.224 | 385.208         | S[4]  |
| P[18] | 1793.892        | 315.203         | 299.184         | 300.192 | 298.176         | P[3]  |
| A[19] | 1864.929        | 218.159         | 202.131         | 203.139 | 201.123         | A[2]  |
| R[20] | 1993.024        | 147.113         | 131.094         | 132.102 | 130.086         | R[1]  |



# sp | P43274 | H14\_MOUSE

[Acetyl]SETAPAAPAAPAPAEKT<sup>Phospho</sup> PVK  
79.97

- ▶ fragmentation table for charge state 1+
- ▶ specType=etd
- ▶ score=51.23
- ▶ F105344.dat
- ▶ query=q9063\_p1
- ▶ precursor=676.001760
- ▶ chargePrecursor=3
- ▶ itol=0.8

| AA    | c               | y               | z+1             | z+2     | z               | AA    |
|-------|-----------------|-----------------|-----------------|---------|-----------------|-------|
| S[1]  | 147.076         | 2025.987        | 2008.971        | 0.000   | 2008.981        | S[20] |
| E[2]  | 276.119         | 1896.947        | <b>1880.928</b> | 0.000   | 1879.920        | E[18] |
| T[3]  | 377.167         | 1767.904        | <b>1751.885</b> | 0.000   | <b>1750.878</b> | T[18] |
| A[4]  | 448.204         | 1656.850        | <b>1650.838</b> | 0.000   | 1649.830        | A[17] |
| P[5]  | 545.257         | <b>1595.819</b> | 1579.801        | 0.000   | 1578.793        | P[16] |
| A[6]  | 618.294         | 1498.767        | 1482.748        | 0.000   | 1481.740        | A[15] |
| A[7]  | 687.331         | 1427.720        | <b>1411.711</b> | 0.000   | 1410.703        | A[14] |
| P[8]  | 784.384         | 1356.682        | 1340.674        | 0.000   | 1339.666        | P[13] |
| A[9]  | <b>855.421</b>  | <b>1259.640</b> | <b>1243.621</b> | 0.000   | 1242.613        | A[12] |
| A[10] | 926.458         | 1188.602        | <b>1172.584</b> | 0.000   | 1171.576        | A[11] |
| P[11] | 1023.511        | <b>1117.565</b> | 1101.547        | 0.000   | 1100.539        | P[10] |
| A[12] | 1094.548        | 1026.513        | <b>1008.494</b> | 0.000   | 1007.486        | A[9]  |
| P[13] | 1191.600        | 949.471         | <b>931.457</b>  | 0.000   | 930.449         | P[9]  |
| A[14] | <b>1262.638</b> | 852.423         | 836.404         | 0.000   | 835.396         | A[7]  |
| E[15] | 1391.680        | 781.389         | <b>765.367</b>  | 0.000   | 764.359         | E[6]  |
| K[16] | <b>1519.775</b> | 652.343         | 636.324         | 657.312 | 635.316         | K[5]  |
| T[17] | 1700.789        | 524.288         | <b>508.279</b>  | 509.271 | 507.271         | T[4]  |
| P[18] | <b>1797.842</b> | 343.236         | 327.215         | 328.223 | 326.207         | P[3]  |
| V[19] | 1899.910        | 246.181         | 230.162         | 231.170 | 229.155         | V[2]  |
| K[20] | 2025.905        | 147.113         | 131.094         | 132.102 | 130.088         | K[1]  |

# sp | P43274 | H14\_MOUSE

[Acetyl]SETAPAAPAAPAPAEKT<sup>Phospho</sup> PVK  
79.97

- ▶ fragmentation table for charge state 2+
- ▶ specType=etd
- ▶ score=51.23
- ▶ F105344.dat
- ▶ query=q9063\_p1
- ▶ precursor=676.001760
- ▶ chargePrecursor=3
- ▶ itol=0.8

| AA    | c               | y               | z+1             | z+2     | z               | AA    |
|-------|-----------------|-----------------|-----------------|---------|-----------------|-------|
| S[1]  | 74.082          | <b>1013.498</b> | <b>1005.489</b> | 0.504   | <b>1004.985</b> | S[20] |
| E[2]  | 138.563         | <b>948.977</b>  | <b>940.968</b>  | 0.504   | <b>940.464</b>  | E[18] |
| T[3]  | 189.087         | <b>884.456</b>  | <b>876.446</b>  | 0.504   | <b>875.942</b>  | T[18] |
| A[4]  | 224.606         | 833.932         | <b>825.922</b>  | 0.504   | <b>825.419</b>  | A[17] |
| P[5]  | 273.132         | <b>798.413</b>  | 790.404         | 0.504   | 789.900         | P[16] |
| A[6]  | 308.650         | 749.887         | 741.878         | 0.504   | 741.374         | A[15] |
| A[7]  | 344.169         | 714.360         | 706.350         | 0.504   | 705.855         | A[14] |
| P[8]  | 392.695         | 678.850         | <b>670.840</b>  | 0.504   | <b>670.337</b>  | P[13] |
| A[9]  | 428.214         | 633.323         | 625.314         | 0.504   | 624.810         | A[12] |
| A[10] | 463.733         | 594.805         | 586.795         | 0.504   | 586.292         | A[11] |
| P[11] | 512.250         | 559.280         | 551.277         | 0.504   | 550.773         | P[10] |
| A[12] | 547.777         | 518.760         | 510.751         | 0.504   | 510.247         | A[9]  |
| P[13] | 596.304         | 479.241         | 469.232         | 0.504   | 468.728         | P[9]  |
| A[14] | 631.822         | 428.713         | 418.706         | 0.504   | 418.202         | A[7]  |
| E[15] | 696.344         | 391.190         | 381.187         | 0.504   | 380.683         | E[6]  |
| K[16] | 760.391         | 328.675         | 318.666         | 319.170 | 318.162         | K[5]  |
| T[17] | 850.908         | 262.628         | 254.618         | 295.122 | 254.114         | T[4]  |
| P[18] | <b>899.425</b>  | 172.121         | 164.111         | 164.615 | 163.607         | P[3]  |
| V[19] | <b>948.959</b>  | 123.594         | 115.585         | 116.089 | 115.081         | V[2]  |
| K[20] | <b>1013.006</b> | 74.082          | 66.071          | 66.575  | 65.547          | K[1]  |



# sp | P15864 | H12\_MOUSE

[Acetyl]S<sup>Phospho</sup><sub>79.97</sub> EAAPAAPAAAPPAEKAPAKK

- ▶ fragmentation table for charge state 1+
- ▶ specType=etd
- ▶ score=40.24
- ▶ F105344.dat
- ▶ query=q9182.p1
- ▶ precursor=689.351000
- ▶ chargePrecursor=3
- ▶ itol=0.8

| AA    | c               | y        | z+1             | z+2            | z               | AA    |
|-------|-----------------|----------|-----------------|----------------|-----------------|-------|
| S[1]  | 227.043         | 2066.032 | 2050.013        | 0.000          | 2049.005        | S[2]  |
| E[2]  | 356.085         | 1857.023 | 1841.004        | 0.000          | 1839.996        | E[3]  |
| A[3]  | 477.222         | 1722.980 | 1711.962        | 0.000          | 1710.955        | A[10] |
| A[4]  | <b>498.160</b>  | 1656.943 | 1640.924        | 0.000          | 1639.917        | A[18] |
| P[5]  | 595.212         | 1585.906 | 1569.887        | 0.000          | <b>1568.880</b> | P[17] |
| A[6]  | 666.249         | 1488.853 | 1472.835        | 0.000          | 1471.827        | A[16] |
| A[7]  | <b>737.287</b>  | 1417.816 | 1401.797        | 0.000          | 1400.790        | A[15] |
| P[8]  | 834.339         | 1346.779 | 1330.760        | 0.000          | 1329.753        | P[14] |
| A[9]  | 925.476         | 1249.736 | 1233.708        | 0.000          | 1232.700        | A[13] |
| A[10] | <b>976.414</b>  | 1178.699 | 1162.670        | 0.000          | 1161.662        | A[12] |
| A[11] | 1047.451        | 1107.652 | 1091.633        | 0.000          | 1090.625        | A[11] |
| P[12] | 1144.503        | 1036.615 | <b>1020.596</b> | 0.000          | <b>1019.588</b> | P[10] |
| P[13] | 1241.556        | 939.563  | 923.543         | 0.000          | 922.536         | P[9]  |
| A[14] | 1312.593        | 842.509  | 826.491         | 0.000          | 825.483         | A[8]  |
| E[15] | 1441.636        | 771.472  | 755.454         | 0.000          | 754.446         | E[7]  |
| K[16] | 1509.731        | 642.430  | 626.411         | <b>627.419</b> | 625.402         | K[6]  |
| A[17] | 1640.768        | 514.335  | <b>498.316</b>  | <b>499.324</b> | 497.305         | A[5]  |
| P[18] | 1737.821        | 443.298  | 427.279         | 428.287        | 426.271         | P[4]  |
| A[19] | 1808.858        | 346.245  | 330.226         | 331.234        | 329.218         | A[3]  |
| K[20] | <b>1916.953</b> | 275.208  | 259.189         | <b>260.197</b> | 258.181         | K[2]  |
| K[21] | 2085.048        | 147.113  | 131.094         | 132.102        | 130.086         | K[1]  |

# sp | P15864 | H12\_MOUSE

[Acetyl]S<sup>Phospho</sup><sub>79.97</sub> EAAPAAPAAAPPAEKAPAKK

- ▶ fragmentation table for charge state 2+
- ▶ specType=etd
- ▶ score=40.24
- ▶ F105344.dat
- ▶ query=q9182.p1
- ▶ precursor=689.351000
- ▶ chargePrecursor=3
- ▶ itol=0.8

| AA    | c               | y               | z+1             | z+2     | z               | AA    |
|-------|-----------------|-----------------|-----------------|---------|-----------------|-------|
| S[1]  | 114.625         | <b>1033.520</b> | <b>1025.510</b> | 0.504   | <b>1025.006</b> | S[2]  |
| E[2]  | 176.546         | 929.015         | <b>921.006</b>  | 0.504   | <b>920.502</b>  | E[3]  |
| A[3]  | 214.005         | 864.493         | <b>856.484</b>  | 0.504   | 855.979         | A[10] |
| A[4]  | 249.583         | 829.971         | <b>820.966</b>  | 0.505   | <b>820.462</b>  | A[18] |
| P[5]  | 298.110         | <b>793.457</b>  | 785.447         | 0.504   | 784.943         | P[17] |
| A[6]  | 333.628         | 744.939         | <b>736.921</b>  | 0.504   | <b>736.417</b>  | A[16] |
| A[7]  | 369.147         | 709.412         | <b>701.402</b>  | 0.504   | 700.898         | A[15] |
| P[8]  | 417.673         | 673.893         | 665.884         | 0.504   | 665.380         | P[14] |
| A[9]  | 453.192         | 625.367         | 617.357         | 0.504   | 616.854         | A[13] |
| A[10] | 488.710         | 589.840         | 581.830         | 0.504   | 581.326         | A[12] |
| A[11] | 524.229         | 554.313         | 546.303         | 0.504   | 545.800         | A[11] |
| P[12] | 572.795         | 518.811         | 510.802         | 0.504   | 510.298         | P[10] |
| P[13] | 621.282         | 479.285         | 462.275         | 0.504   | 461.771         | P[9]  |
| A[14] | <b>656.800</b>  | 421.758         | 413.749         | 0.504   | 413.245         | A[8]  |
| E[15] | 721.522         | 386.240         | 378.230         | 0.504   | 377.727         | E[7]  |
| K[16] | 783.999         | 324.712         | 313.709         | 3.4.213 | 313.205         | K[6]  |
| A[17] | <b>870.888</b>  | 257.671         | 249.662         | 350.166 | 249.158         | A[5]  |
| P[18] | 869.414         | 222.152         | 214.143         | 214.647 | 213.639         | P[4]  |
| A[19] | 904.933         | 173.629         | 165.617         | 166.121 | 165.113         | A[3]  |
| K[20] | <b>968.980</b>  | 138.100         | 130.090         | 130.602 | 129.594         | K[2]  |
| K[21] | <b>1033.028</b> | 74.000          | 66.051          | 66.555  | 65.547          | K[1]  |





# sp | P43276 | H15\_MOUSE

[Acetyl]SETAPAETAAPAPVEKS<sup>Phospho</sup> PAK<sub>79.97</sub>

- ▶ fragmentation table for charge state 1+
- ▶ specType=etd
- ▶ score=50.59
- ▶ F105344.dat
- ▶ query=q9203.p1
- ▶ precursor=691.996570
- ▶ chargePrecursor=3
- ▶ itol=0.8

| AA    | c               | y               | z+1             | z+2            | z               | AA    |
|-------|-----------------|-----------------|-----------------|----------------|-----------------|-------|
| S[1]  | 147.076         | 2073.974        | 2057.855        | 0.000          | 2055.947        | S[20] |
| E[2]  | 276.119         | 1944.931        | <b>1928.913</b> | 0.000          | 1927.905        | E[19] |
| T[3]  | 377.167         | 1815.889        | <b>1799.870</b> | 0.000          | <b>1798.862</b> | T[18] |
| A[4]  | 463.204         | 1714.843        | <b>1698.822</b> | 0.000          | 1697.815        | A[17] |
| P[5]  | 545.257         | <b>1643.804</b> | 1627.785        | 0.000          | 1626.777        | P[16] |
| A[6]  | 616.294         | 1546.751        | 1530.733        | 0.000          | 1529.725        | A[15] |
| E[7]  | 745.336         | 1475.714        | 1459.695        | 0.000          | 1458.686        | E[14] |
| T[8]  | 846.384         | 1346.672        | 1330.653        | 0.000          | 1329.645        | T[13] |
| A[9]  | <b>917.421</b>  | 1245.624        | <b>1229.605</b> | 0.000          | 1228.597        | A[12] |
| A[10] | <b>988.458</b>  | 1174.587        | <b>1158.568</b> | 0.000          | 1157.560        | A[11] |
| P[11] | <b>1085.511</b> | 1103.550        | 1087.531        | 0.000          | 1086.523        | P[10] |
| A[12] | 1157.540        | 1009.497        | <b>990.478</b>  | 0.000          | <b>989.470</b>  | A[9]  |
| P[13] | 1251.601        | 935.460         | 913.441         | 0.000          | 913.433         | P[8]  |
| V[14] | 1352.669        | 858.407         | <b>822.388</b>  | 0.000          | 821.380         | V[7]  |
| E[15] | 1481.712        | 739.339         | <b>723.320</b>  | 0.000          | 722.312         | E[6]  |
| K[16] | <b>1609.807</b> | 610.290         | 594.277         | <b>595.285</b> | 593.269         | K[5]  |
| S[17] | 1776.805        | 482.201         | <b>466.182</b>  | <b>467.190</b> | 465.174         | S[4]  |
| P[18] | 1873.858        | 315.203         | 299.184         | 300.192        | 298.176         | P[3]  |
| A[19] | 1944.899        | 219.150         | 202.133         | 203.139        | 201.127         | A[2]  |
| K[20] | 2072.990        | 147.113         | 131.094         | 132.102        | 130.086         | K[1]  |

# sp | P43276 | H15\_MOUSE

[Acetyl]SETAPAETAAPAPVEKS <sup>Phospho</sup> PAK  
79.97

- ▶ fragmentation table for charge state 2+
- ▶ specType=etd
- ▶ score=50.59
- ▶ F105344.dat
- ▶ query=q9203.p1
- ▶ precursor=691.996570
- ▶ chargePrecursor=3
- ▶ itol=0.8

| AA    | c               | y               | z+1             | z+2     | z               | AA    |
|-------|-----------------|-----------------|-----------------|---------|-----------------|-------|
| S[1]  | 74.082          | <b>1037.491</b> | <b>1029.481</b> | 0.504   | <b>1028.977</b> | S[20] |
| E[2]  | 138.563         | <b>972.969</b>  | <b>964.960</b>  | 0.504   | <b>964.456</b>  | E[10] |
| T[3]  | 189.087         | <b>908.448</b>  | <b>900.439</b>  | 0.504   | <b>899.935</b>  | T[18] |
| A[4]  | 224.606         | 857.924         | <b>849.915</b>  | 0.504   | <b>849.411</b>  | A[17] |
| P[5]  | 273.132         | <b>822.406</b>  | 814.396         | 0.504   | 813.892         | P[16] |
| A[6]  | 308.650         | 773.879         | 765.870         | 0.504   | 765.366         | A[15] |
| E[7]  | 373.172         | 738.361         | 730.351         | 0.504   | 729.847         | E[14] |
| T[8]  | 423.696         | 673.839         | 665.830         | 0.504   | 665.326         | T[13] |
| A[9]  | 459.214         | 623.316         | 615.306         | 0.504   | 614.802         | A[12] |
| A[10] | 494.733         | 587.797         | 579.788         | 0.504   | 579.284         | A[11] |
| P[11] | 543.259         | 552.278         | 544.269         | 0.504   | 543.765         | P[10] |
| A[12] | 578.778         | 503.752         | 495.743         | 0.504   | 495.239         | A[9]  |
| P[13] | 617.304         | 488.234         | 480.224         | 0.504   | 479.720         | P[9]  |
| V[14] | 676.838         | 418.707         | 411.698         | 0.504   | 411.194         | V[7]  |
| E[15] | 741.360         | 370.173         | 362.164         | 0.504   | 361.660         | E[0]  |
| K[16] | 805.407         | 305.652         | 297.642         | 288.146 | 297.138         | K[5]  |
| S[17] | 888.906         | 241.604         | 233.595         | 234.099 | 233.091         | S[4]  |
| P[18] | 877.433         | 158.105         | 150.096         | 150.600 | 149.592         | P[3]  |
| A[19] | <b>872.951</b>  | 109.579         | 103.569         | 103.073 | 101.065         | A[0]  |
| R[20] | <b>1036.999</b> | 74.082          | 68.071          | 68.575  | 67.547          | R[1]  |

# sp | P43276 | H15\_MOUSE

[Acetyl]SETAPAETAAPAPVEKS <sup>Phospho</sup> PAK  
79.97

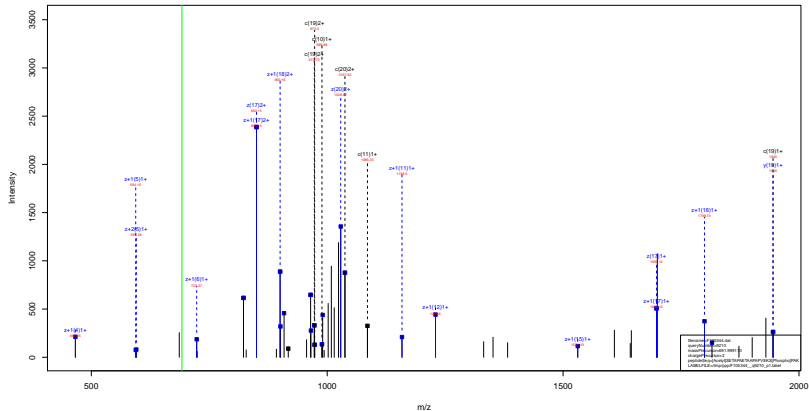

# sp | P43276 | H15\_MOUSE

[Acetyl]SETAPAETAAPAPVEKS<sup>Phospho</sup> PAK<sub>79.97</sub>

- ▶ fragmentation table for charge state 1+
- ▶ specType=etd
- ▶ score=63.44
- ▶ F105344.dat
- ▶ query=q9210.p1
- ▶ precursor=691.999110
- ▶ chargePrecursor=3
- ▶ itol=0.8

| AA    | c               | y               | z+1             | z+2            | z               | AA    |
|-------|-----------------|-----------------|-----------------|----------------|-----------------|-------|
| S[1]  | 147.076         | 2073.974        | 2057.855        | 0.000          | 2055.947        | S[20] |
| E[2]  | 278.119         | <b>1944.931</b> | 1928.813        | 0.000          | 1927.905        | E[19] |
| T[3]  | 377.167         | <b>1815.889</b> | <b>1799.870</b> | 0.000          | 1798.862        | T[18] |
| A[4]  | 463.204         | 1714.941        | <b>1698.822</b> | 0.000          | <b>1697.815</b> | A[17] |
| P[5]  | 545.257         | 1643.804        | 1627.785        | 0.000          | 1626.777        | P[16] |
| A[6]  | 616.294         | 1546.751        | <b>1530.733</b> | 0.000          | 1529.725        | A[15] |
| E[7]  | 745.336         | 1475.714        | 1469.695        | 0.000          | 1468.686        | E[14] |
| T[8]  | 846.384         | 1346.672        | 1330.653        | 0.000          | 1329.645        | T[13] |
| A[9]  | <b>917.421</b>  | 1245.634        | <b>1229.605</b> | 0.000          | 1228.597        | A[12] |
| A[10] | <b>988.458</b>  | 1174.587        | <b>1158.568</b> | 0.000          | 1157.560        | A[11] |
| P[11] | <b>1085.511</b> | 1103.550        | 1087.531        | 0.000          | 1086.523        | P[10] |
| A[12] | 1159.540        | 1009.497        | <b>993.478</b>  | 0.000          | <b>989.470</b>  | A[9]  |
| P[13] | 1251.601        | 935.460         | 919.441         | 0.000          | 918.433         | P[8]  |
| V[14] | 1352.669        | 858.407         | <b>822.388</b>  | 0.000          | 821.380         | V[7]  |
| E[15] | 1481.712        | 739.330         | <b>723.320</b>  | 0.000          | 722.312         | E[6]  |
| K[16] | 1609.807        | 610.290         | <b>594.277</b>  | <b>595.285</b> | 593.269         | K[5]  |
| S[17] | 1776.805        | 482.201         | <b>466.182</b>  | 467.190        | 465.174         | S[4]  |
| P[18] | 1873.858        | 315.203         | 299.184         | 300.192        | 298.176         | P[3]  |
| A[19] | <b>1944.895</b> | 218.150         | 202.131         | 203.139        | 201.123         | A[2]  |
| K[20] | 2072.990        | 147.113         | 131.094         | 132.102        | 130.086         | K[1]  |

# sp | P43276 | H15\_MOUSE

[Acetyl]SETAPAETAAPAPVEKS <sup>Phospho</sup> PAK  
79.97

- ▶ fragmentation table for charge state 2+
- ▶ specType=etd
- ▶ score=63.44
- ▶ F105344.dat
- ▶ query=q9210\_p1
- ▶ precursor=691.999110
- ▶ chargePrecursor=3
- ▶ itol=0.8

| AA    | c               | y               | z+1            | z+2   | z               | AA    |
|-------|-----------------|-----------------|----------------|-------|-----------------|-------|
| S[1]  | 74.042          | <b>1037.491</b> | 1039.401       | 0.504 | <b>1028.977</b> | S[20] |
| E[2]  | 1.80.563        | <b>972.969</b>  | <b>964.960</b> | 0.504 | <b>964.456</b>  | E[19] |
| T[3]  | 189.687         | <b>908.448</b>  | <b>900.439</b> | 0.504 | <b>899.935</b>  | T[18] |
| A[4]  | 224.606         | 857.924         | <b>849.915</b> | 0.504 | <b>849.411</b>  | A[17] |
| F[5]  | 273.132         | <b>822.406</b>  | 814.396        | 0.504 | 813.892         | F[16] |
| A[6]  | 308.650         | 773.873         | 765.870        | 0.504 | 765.366         | A[15] |
| E[7]  | 373.172         | 738.361         | 730.351        | 0.504 | 729.847         | E[14] |
| T[8]  | 423.696         | 673.839         | 665.830        | 0.504 | 665.326         | T[13] |
| A[9]  | 459.214         | 623.316         | 615.306        | 0.504 | 614.802         | A[12] |
| A[10] | 494.733         | 587.797         | 579.788        | 0.504 | 579.284         | A[11] |
| P[11] | 543.259         | 552.278         | 544.269        | 0.504 | 543.765         | P[10] |
| A[12] | 578.778         | 503.752         | 495.743        | 0.504 | 495.239         | A[9]  |
| P[13] | 627.304         | 468.231         | 460.224        | 0.504 | 459.720         | P[8]  |
| V[14] | 676.838         | 419.707         | 411.698        | 0.504 | 411.194         | V[7]  |
| E[15] | 741.360         | 370.173         | 362.164        | 0.504 | 361.660         | E[6]  |
| K[16] | 805.407         | 305.652         | 297.642        | 0.504 | 297.138         | K[5]  |
| S[17] | 888.906         | 241.604         | 233.595        | 0.504 | 233.091         | S[4]  |
| P[18] | 937.433         | 158.103         | 150.096        | 0.504 | 149.592         | P[3]  |
| A[19] | <b>972.951</b>  | 109.573         | 101.569        | 0.504 | 101.065         | A[2]  |
| K[20] | <b>1036.999</b> | 74.600          | 66.591         | 0.504 | 66.087          | K[1]  |

# sp | P43274 | H14\_MOUSE

[Acetyl]SETAPAAPAAPAPAEKTPVKK

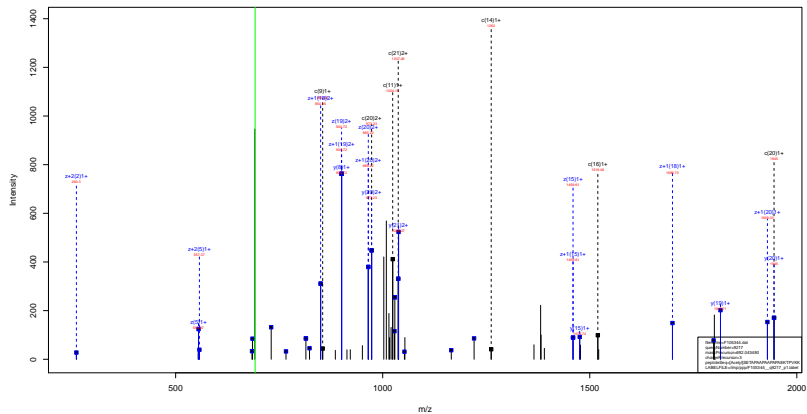

# sp | P43274 | H14\_MOUSE

## [Acetyl]SETAPAAPAAPAPAEKTPVKK

- ▶ fragmentation table for charge state 1+
- ▶ specType=etd
- ▶ score=52.75
- ▶ F105344.dat
- ▶ query=q9217.p1
- ▶ precursor=692.043480
- ▶ chargePrecursor=3
- ▶ itol=0.8

| AA    | c               | y               | z+1             | z+2            | z               | AA    |
|-------|-----------------|-----------------|-----------------|----------------|-----------------|-------|
| S[1]  | 147.076         | 2074.118        | 2058.009        | 0.000          | 2057.091        | S[21] |
| E[2]  | 276.119         | <b>1945.075</b> | <b>1929.057</b> | 0.000          | 1928.049        | E[20] |
| T[3]  | 377.167         | <b>1816.033</b> | <b>1800.014</b> | 0.000          | <b>1799.006</b> | T[19] |
| A[4]  | 448.204         | 1714.983        | <b>1698.966</b> | 0.000          | 1697.956        | A[18] |
| P[5]  | 545.257         | 1643.948        | 1627.929        | 0.000          | 1626.921        | P[17] |
| A[6]  | 616.294         | 1548.895        | 1530.876        | 0.000          | 1529.869        | A[16] |
| A[7]  | 687.331         | <b>1475.858</b> | <b>1459.839</b> | 0.000          | <b>1458.831</b> | A[15] |
| P[8]  | 784.384         | 1404.821        | 1388.802        | 0.000          | 1387.794        | P[14] |
| A[9]  | <b>855.421</b>  | 1307.768        | 1291.749        | 0.000          | 1290.742        | A[13] |
| A[10] | 904.508         | 1236.731        | <b>1220.712</b> | 0.000          | 1219.705        | A[12] |
| P[11] | <b>1023.511</b> | <b>1165.694</b> | 1149.675        | 0.000          | 1148.667        | P[11] |
| A[12] | 1094.548        | 1068.641        | <b>1052.622</b> | 0.000          | 1051.615        | A[10] |
| P[13] | 1191.600        | 997.604         | 981.585         | 0.000          | 980.578         | P[9]  |
| A[14] | <b>1262.638</b> | <b>900.551</b>  | 884.531         | 0.000          | 883.523         | A[8]  |
| E[15] | 1391.680        | 829.514         | 813.495         | 0.000          | 812.488         | E[7]  |
| R[16] | <b>1519.775</b> | 760.477         | <b>684.453</b>  | <b>685.461</b> | 683.444         | R[6]  |
| T[17] | 1620.823        | 672.377         | 596.358         | <b>557.366</b> | <b>555.350</b>  | T[5]  |
| P[18] | 1717.876        | 471.320         | 485.310         | 486.318        | 484.302         | P[4]  |
| V[19] | 1816.944        | 374.276         | 358.267         | 359.265        | 357.250         | V[3]  |
| K[20] | <b>1945.039</b> | 275.208         | 259.189         | <b>260.197</b> | 258.181         | K[2]  |
| K[21] | 2073.134        | 147.113         | 131.094         | 132.102        | 130.086         | K[1]  |

# sp | P43274 | H14\_MOUSE

## [Acetyl]SETAPAAPAAPAPAEKTPVKK

- ▶ fragmentation table for charge state 2+
- ▶ specType=etd
- ▶ score=52.75
- ▶ F105344.dat
- ▶ query=q9217.p1
- ▶ precursor=692.043480
- ▶ chargePrecursor=3
- ▶ itol=0.8

| AA    | c               | y               | z+1             | z+2   | z               | AA    |
|-------|-----------------|-----------------|-----------------|-------|-----------------|-------|
| S[1]  | 74.042          | <b>1037.563</b> | <b>1029.553</b> | 0.504 | <b>1029.049</b> | S[2]  |
| E[2]  | 138.563         | <b>973.041</b>  | <b>965.032</b>  | 0.504 | <b>964.528</b>  | E[3]  |
| T[3]  | 189.087         | 908.520         | <b>900.511</b>  | 0.504 | <b>900.007</b>  | T[4]  |
| A[4]  | 224.008         | 857.999         | <b>849.987</b>  | 0.504 | <b>849.483</b>  | A[5]  |
| P[5]  | 273.132         | <b>822.478</b>  | <b>814.468</b>  | 0.504 | <b>813.964</b>  | P[17] |
| A[6]  | 308.650         | 773.951         | <b>765.942</b>  | 0.504 | 765.438         | A[16] |
| A[7]  | 344.169         | 738.433         | <b>730.423</b>  | 0.504 | 729.919         | A[15] |
| P[8]  | 392.695         | 702.914         | 694.905         | 0.504 | 694.401         | P[14] |
| A[9]  | 428.214         | 664.388         | 656.378         | 0.504 | 645.874         | A[13] |
| A[10] | 463.733         | 618.869         | 610.860         | 0.504 | 610.356         | A[12] |
| P[11] | 512.259         | 583.351         | 575.341         | 0.504 | 574.837         | P[11] |
| A[12] | 547.777         | 534.824         | 526.815         | 0.504 | 526.311         | A[10] |
| P[13] | 596.304         | 499.300         | 491.290         | 0.504 | 490.786         | P[9]  |
| A[14] | 631.822         | 450.770         | 442.770         | 0.504 | 442.266         | A[8]  |
| E[15] | 696.344         | 415.251         | 407.251         | 0.504 | 406.747         | E[7]  |
| R[16] | 768.391         | 350.730         | 342.730         | 0.504 | 342.226         | R[6]  |
| T[17] | 810.915         | 286.602         | 278.603         | 0.504 | 278.170         | T[5]  |
| P[18] | 859.441         | 238.100         | 228.100         | 0.504 | 227.655         | P[4]  |
| V[19] | 908.976         | 187.642         | 179.632         | 0.504 | 179.128         | V[3]  |
| K[20] | <b>973.023</b>  | 138.100         | 130.098         | 0.504 | 129.594         | K[2]  |
| K[21] | <b>1037.071</b> | 74.000          | 66.051          | 0.504 | 65.547          | K[1]  |



# sp | P43274 | H14\_MOUSE

[Acetyl]SETAPAAPAAPAPAEKTPVKK

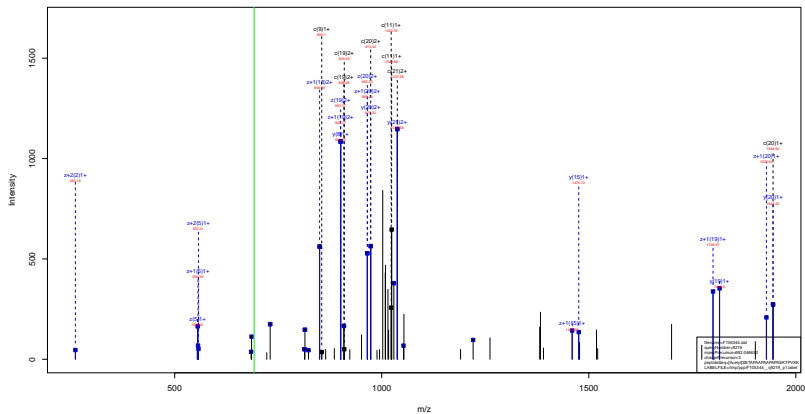

# sp | P43274 | H14\_MOUSE

[Acetyl]SETAPAAPAAPAPAEKTPVKK

- ▶ fragmentation table for charge state 1+
- ▶ specType=etd
- ▶ score=45.97
- ▶ F105344.dat
- ▶ query=q9219.p1
- ▶ precursor=692.046650
- ▶ chargePrecursor=3
- ▶ itol=0.8

| AA    | c               | y               | z+1             | z+2            | z              | AA    |
|-------|-----------------|-----------------|-----------------|----------------|----------------|-------|
| S[1]  | 147.076         | 2074.110        | 2038.099        | 0.000          | 2057.091       | S[21] |
| E[2]  | 276.119         | <b>1945.075</b> | <b>1929.057</b> | 0.000          | 1928.049       | E[20] |
| T[3]  | 377.107         | <b>1816.033</b> | <b>1808.014</b> | 0.000          | 1799.000       | T[19] |
| A[4]  | 448.204         | 1714.965        | 1638.959        | 0.000          | 1697.955       | A[18] |
| P[5]  | 545.257         | 1643.940        | 1627.929        | 0.000          | 1626.921       | P[17] |
| A[6]  | 616.294         | 1548.895        | 1530.876        | 0.000          | 1529.869       | A[16] |
| A[7]  | 667.331         | <b>1475.850</b> | <b>1459.839</b> | 0.000          | 1458.831       | A[15] |
| P[8]  | 784.384         | 1404.821        | 1388.802        | 0.000          | 1387.794       | P[14] |
| A[9]  | <b>855.421</b>  | 1307.760        | 1291.749        | 0.000          | 1290.742       | A[13] |
| A[10] | 928.458         | 1238.731        | <b>1228.712</b> | 0.000          | 1219.705       | A[12] |
| P[11] | <b>1023.511</b> | 1185.680        | 1140.675        | 0.000          | 1148.667       | P[11] |
| A[12] | 1094.548        | 1068.641        | <b>1052.622</b> | 0.000          | 1051.615       | A[10] |
| P[13] | 1191.600        | 997.604         | 981.585         | 0.000          | 980.578        | P[9]  |
| A[14] | 1262.638        | <b>900.551</b>  | 884.533         | 0.000          | 883.529        | A[8]  |
| E[15] | 1391.680        | 828.514         | <b>813.495</b>  | 0.000          | 812.488        | E[7]  |
| K[16] | 1519.775        | 760.472         | <b>684.453</b>  | <b>685.461</b> | 683.445        | K[6]  |
| T[17] | 1630.823        | 572.377         | <b>556.358</b>  | <b>557.366</b> | <b>555.350</b> | T[5]  |
| P[18] | 1717.876        | 471.320         | 455.310         | 456.318        | 454.302        | P[4]  |
| V[19] | 1816.944        | 374.270         | 358.257         | 359.265        | 357.250        | V[3]  |
| K[20] | <b>1945.039</b> | 275.200         | 259.189         | <b>260.197</b> | 258.181        | K[2]  |
| K[21] | 2073.134        | 147.113         | 131.094         | 132.102        | 130.080        | K[1]  |

# sp | P43274 | H14\_MOUSE

## [Acetyl]SETAPAAPAAPAPAEKTPVKK

- ▶ fragmentation table for charge state 2+
- ▶ specType=etd
- ▶ score=45.97
- ▶ F105344.dat
- ▶ query=q9219.p1
- ▶ precursor=692.046650
- ▶ chargePrecursor=3
- ▶ itol=0.8

| AA    | c               | y               | z+1             | z+2   | z               | AA    |
|-------|-----------------|-----------------|-----------------|-------|-----------------|-------|
| S[1]  | 74.042          | <b>1037.563</b> | <b>1029.553</b> | 0.504 | <b>1029.049</b> | S[2]  |
| E[2]  | 138.563         | <b>973.041</b>  | <b>965.032</b>  | 0.504 | <b>964.528</b>  | E[3]  |
| T[3]  | 189.087         | <b>908.520</b>  | <b>900.511</b>  | 0.504 | <b>898.007</b>  | T[4]  |
| A[4]  | 224.008         | 857.999         | <b>849.987</b>  | 0.504 | <b>848.483</b>  | A[5]  |
| P[5]  | 273.132         | <b>822.478</b>  | <b>814.468</b>  | 0.504 | <b>813.964</b>  | P[6]  |
| A[6]  | 308.650         | 773.951         | 765.942         | 0.504 | 765.438         | A[7]  |
| A[7]  | 344.169         | 738.433         | <b>730.423</b>  | 0.504 | <b>729.919</b>  | A[8]  |
| P[8]  | 392.695         | 702.914         | 694.905         | 0.504 | 694.401         | P[9]  |
| A[9]  | 428.214         | 664.388         | 656.378         | 0.504 | 655.874         | A[10] |
| A[10] | 463.733         | 628.869         | 620.860         | 0.504 | 620.356         | A[11] |
| P[11] | 512.259         | 583.351         | 575.341         | 0.504 | 574.837         | P[12] |
| A[12] | 547.777         | 544.824         | 536.815         | 0.504 | 536.311         | A[13] |
| P[13] | 596.304         | 499.300         | 491.290         | 0.504 | 490.786         | P[14] |
| A[14] | 631.822         | 456.779         | 448.770         | 0.504 | 448.266         | A[15] |
| E[15] | 696.344         | 415.261         | 407.251         | 0.504 | 406.747         | E[16] |
| K[16] | 768.391         | 359.739         | 342.730         | 0.504 | 342.226         | K[17] |
| T[17] | 810.915         | 286.602         | 278.603         | 0.504 | 278.179         | T[18] |
| P[18] | 859.441         | 236.100         | 228.100         | 0.504 | 227.655         | P[19] |
| V[19] | <b>908.976</b>  | 187.642         | 179.632         | 0.504 | 179.128         | V[20] |
| K[20] | <b>973.023</b>  | 138.100         | 130.098         | 0.504 | 129.594         | K[21] |
| K[21] | <b>1037.071</b> | 74.000          | 66.051          | 0.504 | 65.547          | K[22] |



# sp | P43276 | H15\_MOUSE

## [Acetyl]SETAPAETAAPAPVEKSPAKK

- ▶ fragmentation table for charge state 1+
- ▶ specType=etd
- ▶ score=54.14
- ▶ F105344.dat
- ▶ query=q9398\_p1
- ▶ precursor=708.040980
- ▶ chargePrecursor=3
- ▶ itol=0.8

| AA    | c               | y               | z+1             | z+2            | z        | AA    |
|-------|-----------------|-----------------|-----------------|----------------|----------|-------|
| S[1]  | 147.076         | 2122.103        | 2106.094        | 0.000          | 2105.078 | S[21] |
| E[2]  | 276.119         | <b>1993.060</b> | <b>1977.041</b> | 0.000          | 1976.033 | E[20] |
| T[3]  | 377.167         | <b>1864.017</b> | <b>1847.999</b> | 0.000          | 1846.993 | T[19] |
| A[4]  | 448.204         | 1766.970        | 1740.954        | 0.000          | 1745.943 | A[18] |
| P[5]  | 545.257         | 1691.933        | 1675.914        | 0.000          | 1674.908 | P[17] |
| A[6]  | 616.294         | 1594.889        | 1578.861        | 0.000          | 1577.853 | A[16] |
| E[7]  | 745.336         | 1523.843        | 1507.824        | 0.000          | 1506.818 | E[15] |
| T[8]  | <b>846.384</b>  | 1394.800        | <b>1378.781</b> | 0.000          | 1377.774 | T[14] |
| A[9]  | 917.421         | 1295.753        | <b>1277.734</b> | 0.000          | 1276.726 | A[13] |
| A[10] | <b>988.458</b>  | 1222.713        | 1206.697        | 0.000          | 1205.689 | A[12] |
| P[11] | 1085.511        | 1151.670        | 1135.650        | 0.000          | 1134.652 | P[11] |
| A[12] | 1156.548        | 1054.626        | <b>1038.607</b> | 0.000          | 1037.599 | A[10] |
| P[13] | 1251.601        | 983.588         | 967.570         | 0.000          | 966.562  | P[9]  |
| V[14] | 1352.669        | 886.536         | 870.517         | 0.000          | 869.509  | V[8]  |
| E[15] | 1481.712        | 787.467         | <b>771.449</b>  | 0.000          | 770.441  | E[7]  |
| K[16] | 1609.807        | 658.423         | <b>642.406</b>  | <b>643.314</b> | 641.398  | K[6]  |
| S[17] | 1696.839        | 530.330         | 514.311         | <b>515.319</b> | 513.303  | S[5]  |
| P[18] | 1793.892        | 443.290         | 427.279         | 426.267        | 426.271  | P[4]  |
| A[19] | 1864.929        | 348.245         | 330.226         | 331.234        | 329.218  | A[3]  |
| K[20] | <b>1993.024</b> | 275.200         | 259.189         | <b>260.197</b> | 258.181  | K[2]  |
| K[21] | 2121.119        | 147.113         | 131.094         | 132.102        | 130.086  | K[1]  |

# sp | P43276 | H15\_MOUSE

## [Acetyl]SETAPAETAAPAPVEKSPAKK

- ▶ fragmentation table for charge state 2+
- ▶ specType=etd
- ▶ score=54.14
- ▶ F105344.dat
- ▶ query=q9398.p1
- ▶ precursor=708.040980
- ▶ chargePrecursor=3
- ▶ itol=0.8

| AA    | c               | y               | z+1             | z+2     | z               | AA    |
|-------|-----------------|-----------------|-----------------|---------|-----------------|-------|
| S[1]  | 74.042          | <b>1061.555</b> | <b>1053.546</b> | 0.504   | <b>1053.042</b> | S[2]  |
| E[2]  | 138.563         | <b>997.034</b>  | <b>989.024</b>  | 0.504   | <b>988.520</b>  | E[3]  |
| T[3]  | 189.087         | <b>932.512</b>  | <b>924.503</b>  | 0.504   | <b>923.999</b>  | T[10] |
| A[4]  | 224.008         | <b>868.990</b>  | <b>871.979</b>  | 0.505   | <b>873.475</b>  | A[18] |
| P[5]  | 273.132         | <b>846.470</b>  | 838.461         | 0.504   | 837.957         | P[17] |
| A[6]  | 308.650         | 797.944         | 789.934         | 0.504   | 789.430         | A[16] |
| E[7]  | 373.172         | 762.425         | 754.416         | 0.504   | 753.912         | E[15] |
| T[8]  | 423.696         | 697.904         | 689.894         | 0.504   | 689.390         | T[14] |
| A[9]  | 459.214         | 647.380         | 639.371         | 0.504   | 638.867         | A[13] |
| A[10] | 494.733         | 613.861         | 603.852         | 0.504   | 603.348         | A[12] |
| P[11] | 543.259         | 576.343         | 568.333         | 0.504   | 567.830         | P[11] |
| A[12] | 578.778         | 527.819         | 519.807         | 0.504   | 519.303         | A[10] |
| P[13] | 627.304         | 492.298         | 484.288         | 0.504   | 483.785         | P[9]  |
| V[14] | 676.838         | 443.771         | 435.762         | 0.504   | 435.258         | V[8]  |
| E[15] | 741.360         | 394.257         | 386.248         | 0.504   | 385.744         | E[7]  |
| R[16] | 805.887         | 329.719         | 321.707         | 0.211   | 321.205         | R[6]  |
| S[17] | 848.923         | 265.660         | 257.650         | 358.163 | 257.155         | S[5]  |
| P[18] | 897.449         | 222.152         | 214.143         | 214.647 | 213.639         | P[4]  |
| A[19] | <b>932.968</b>  | 173.629         | 165.617         | 166.121 | 165.113         | A[3]  |
| K[20] | <b>997.015</b>  | 138.100         | 130.090         | 130.602 | 129.594         | K[2]  |
| K[21] | <b>1061.063</b> | 74.050          | 66.051          | 66.555  | 65.547          | K[1]  |



# sp | P43274 | H14\_MOUSE

[Acetyl]SETAPAAPAAPAPAEKT<sup>Phospho</sup> PVKK<sub>79.97</sub>

- ▶ fragmentation table for charge state 1+
- ▶ specType=etd
- ▶ score=49.17
- ▶ F105344.dat
- ▶ query=q9470.p1
- ▶ precursor=718.700090
- ▶ chargePrecursor=3
- ▶ itol=0.8

| AA    | c               | y               | z+1             | z+2            | z               | AA    |
|-------|-----------------|-----------------|-----------------|----------------|-----------------|-------|
| S[1]  | 147.076         | 2154.084        | 2138.006        | 0.000          | 2137.050        | S[21] |
| E[2]  | 276.119         | 2025.042        | 2009.023        | 0.000          | 2008.019        | E[20] |
| T[3]  | 377.167         | <b>1895.999</b> | 1879.080        | 0.000          | 1878.072        | T[19] |
| A[4]  | 448.204         | 1794.957        | <b>1778.933</b> | 0.000          | 1777.925        | A[18] |
| P[5]  | 545.257         | <b>1723.914</b> | 1707.896        | 0.000          | 1706.888        | P[17] |
| A[6]  | 616.294         | 1626.861        | 1610.843        | 0.000          | 1609.835        | A[16] |
| A[7]  | 687.331         | 1555.824        | <b>1539.806</b> | 0.000          | 1538.799        | A[15] |
| P[8]  | 784.384         | 1484.787        | 1468.769        | 0.000          | 1467.761        | P[14] |
| A[9]  | 855.421         | <b>1387.734</b> | 1371.716        | 0.000          | 1370.708        | A[13] |
| A[10] | 926.458         | 1316.697        | <b>1300.679</b> | 0.000          | 1299.671        | A[12] |
| P[11] | 1023.511        | 1245.650        | 1229.632        | 0.000          | 1228.624        | P[11] |
| A[12] | 1094.548        | 1148.608        | 1132.589        | 0.000          | 1131.581        | A[10] |
| P[13] | 1191.600        | <b>1077.570</b> | 1061.552        | 0.000          | <b>1060.544</b> | P[9]  |
| A[14] | <b>1262.638</b> | 980.518         | 964.499         | 0.000          | 963.491         | A[8]  |
| E[15] | 1391.680        | 909.481         | 893.462         | 0.000          | 892.454         | E[7]  |
| K[16] | 1519.778        | 789.438         | <b>764.419</b>  | <b>765.427</b> | 763.411         | K[6]  |
| T[17] | 1700.789        | 625.342         | <b>630.324</b>  | <b>637.332</b> | 635.316         | T[5]  |
| P[18] | 1797.842        | 471.329         | 485.310         | 486.318        | 484.302         | P[4]  |
| V[19] | 1896.910        | 374.276         | 388.257         | 389.265        | 387.250         | V[3]  |
| K[20] | 2025.005        | 275.208         | 299.189         | <b>260.197</b> | 258.181         | K[2]  |
| K[21] | 2153.100        | 147.112         | 131.094         | 132.102        | 130.086         | K[1]  |



# sp | P43274 | H14\_MOUSE

[Acetyl]SETAPAAPAAPAPAEKT<sup>Phospho</sup> PVKK<sub>79.97</sub>

- ▶ fragmentation table for charge state 2+
- ▶ specType=etd
- ▶ score=49.17
- ▶ F105344.dat
- ▶ query=q9470.p1
- ▶ precursor=718.700090
- ▶ chargePrecursor=3
- ▶ itol=0.8

| AA    | c               | y               | z+1             | z+2   | z               | AA    |
|-------|-----------------|-----------------|-----------------|-------|-----------------|-------|
| S[1]  | 74.042          | <b>1077.546</b> | <b>1069.536</b> | 0.504 | <b>1069.032</b> | S[21] |
| E[2]  | 138.563         | <b>1013.024</b> | <b>1005.015</b> | 0.504 | 1004.511        | E[20] |
| T[3]  | 189.087         | <b>948.503</b>  | <b>940.494</b>  | 0.504 | <b>939.990</b>  | T[19] |
| A[4]  | 224.008         | 897.997         | <b>889.970</b>  | 0.504 | <b>889.466</b>  | A[18] |
| P[5]  | 273.132         | <b>862.461</b>  | <b>854.451</b>  | 0.504 | <b>853.947</b>  | P[17] |
| A[6]  | 308.650         | 813.934         | <b>805.925</b>  | 0.504 | 805.421         | A[16] |
| A[7]  | 344.169         | 778.410         | <b>770.406</b>  | 0.504 | <b>769.903</b>  | A[15] |
| P[8]  | 392.695         | 742.897         | 734.888         | 0.504 | 734.384         | P[14] |
| A[9]  | 428.214         | 694.371         | 686.362         | 0.504 | 685.858         | A[13] |
| A[10] | 463.733         | 658.842         | 650.833         | 0.504 | 650.329         | A[12] |
| P[11] | 512.259         | 623.316         | 615.304         | 0.504 | 614.820         | P[11] |
| A[12] | 547.777         | 574.807         | 566.798         | 0.504 | 566.294         | A[10] |
| P[13] | 596.304         | 539.289         | 531.279         | 0.504 | 530.776         | P[9]  |
| A[14] | 631.822         | 490.762         | 482.753         | 0.504 | 482.249         | A[8]  |
| E[15] | 696.344         | 455.244         | 447.235         | 0.504 | 446.731         | E[7]  |
| K[16] | 768.391         | 390.723         | 382.713         | 0.504 | 382.209         | K[6]  |
| T[17] | 850.898         | 326.672         | 318.666         | 0.504 | 318.162         | T[5]  |
| P[18] | 899.425         | 258.150         | 250.140         | 0.504 | 249.637         | P[4]  |
| V[19] | <b>948.959</b>  | 187.642         | 179.632         | 0.504 | 179.128         | V[3]  |
| K[20] | <b>1013.006</b> | 138.100         | 130.090         | 0.504 | 129.586         | K[2]  |
| K[21] | <b>1077.054</b> | 74.050          | 66.051          | 0.504 | 65.547          | K[1]  |

# sp | P43274 | H14\_MOUSE

[Acetyl]SETAPAAPAAPAEKT<sup>Phospho</sup> PVKK  
79.97

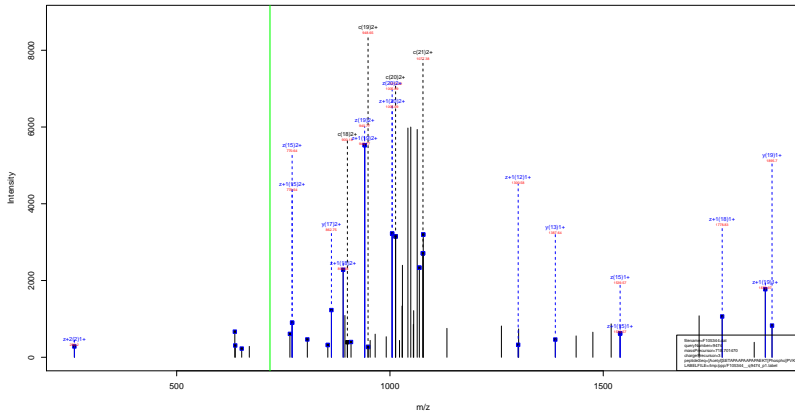

# sp | P43274 | H14\_MOUSE

[Acetyl]SETAPAAPAAPAPAEKT<sup>Phospho</sup>PVKK<sub>79.97</sub>

- ▶ fragmentation table for charge state 1+
- ▶ specType=etd
- ▶ score=53.63
- ▶ F105344.dat
- ▶ query=q9474.p1
- ▶ precursor=718.701470
- ▶ chargePrecursor=3
- ▶ itol=0.8

| AA    | c        | y               | z+1             | z+2            | z               | AA    |
|-------|----------|-----------------|-----------------|----------------|-----------------|-------|
| S[1]  | 147.076  | 2134.084        | 2138.066        | 0.000          | 2137.058        | S[21] |
| E[2]  | 276.119  | 2025.042        | 2029.023        | 0.000          | 2028.015        | E[20] |
| T[3]  | 377.167  | <b>1895.999</b> | <b>1879.980</b> | 0.000          | 1878.972        | T[19] |
| A[4]  | 448.204  | 1794.951        | <b>1778.933</b> | 0.000          | 1777.925        | A[18] |
| P[5]  | 545.257  | 1723.914        | 1707.896        | 0.000          | 1706.888        | P[17] |
| A[6]  | 618.294  | 1626.861        | 1610.843        | 0.000          | 1609.835        | A[16] |
| A[7]  | 667.331  | 1555.824        | <b>1539.806</b> | 0.000          | <b>1538.798</b> | A[15] |
| P[8]  | 784.384  | 1484.787        | 1468.769        | 0.000          | 1467.761        | P[14] |
| A[9]  | 895.421  | <b>1387.734</b> | 1371.716        | 0.000          | 1370.708        | A[13] |
| A[10] | 928.468  | 1316.691        | <b>1300.679</b> | 0.000          | 1299.671        | A[12] |
| P[11] | 1023.511 | 1245.650        | 1229.632        | 0.000          | 1228.624        | P[11] |
| A[12] | 1094.548 | 1148.608        | 1132.589        | 0.000          | 1131.581        | A[10] |
| P[13] | 1191.600 | <b>1077.570</b> | 1061.552        | 0.000          | 1060.544        | P[9]  |
| A[14] | 1262.638 | 980.518         | 964.499         | 0.000          | 963.491         | A[8]  |
| E[15] | 1391.680 | <b>909.481</b>  | 893.462         | 0.000          | 892.454         | E[7]  |
| K[16] | 1519.773 | 787.435         | 781.416         | <b>765.427</b> | 763.411         | K[6]  |
| T[17] | 1705.788 | <b>652.343</b>  | <b>636.324</b>  | <b>637.312</b> | 635.310         | T[5]  |
| P[18] | 1797.842 | 471.329         | 455.310         | 456.318        | 454.302         | P[4]  |
| V[19] | 1896.910 | 374.276         | 358.257         | 359.265        | 357.250         | V[3]  |
| K[20] | 2025.005 | 276.208         | 259.189         | <b>260.197</b> | 258.181         | K[2]  |
| K[21] | 2153.100 | 147.113         | 131.094         | 132.102        | 130.086         | K[1]  |

# sp | P43274 | H14\_MOUSE

[Acetyl]SETAPAAPAAPAPAEKT<sup>Phospho</sup> PVKK<sub>79.97</sub>

- ▶ fragmentation table for charge state 2+
- ▶ specType=etd
- ▶ score=53.63
- ▶ F105344.dat
- ▶ query=q9474.p1
- ▶ precursor=718.701470
- ▶ chargePrecursor=3
- ▶ itol=0.8

| AA | c  | y               | z+1             | z+2             | z     | AA              |   |    |
|----|----|-----------------|-----------------|-----------------|-------|-----------------|---|----|
| S  | 1  | 74.042          | <b>1077.546</b> | <b>1069.536</b> | 0.504 | <b>1069.032</b> | S | 21 |
| E  | 2  | 138.563         | <b>1013.024</b> | <b>1005.015</b> | 0.504 | <b>1004.511</b> | E | 20 |
| T  | 3  | 189.087         | <b>948.503</b>  | <b>940.494</b>  | 0.504 | <b>939.990</b>  | T | 19 |
| A  | 4  | 224.008         | <b>891.997</b>  | <b>889.970</b>  | 0.504 | <b>888.466</b>  | A | 18 |
| P  | 5  | 273.132         | <b>862.461</b>  | <b>854.451</b>  | 0.504 | <b>853.947</b>  | P | 17 |
| A  | 6  | 308.650         | 813.934         | <b>805.925</b>  | 0.504 | 805.421         | A | 16 |
| A  | 7  | 344.169         | 778.410         | <b>770.406</b>  | 0.504 | <b>769.903</b>  | A | 15 |
| P  | 8  | 392.695         | 742.897         | 734.888         | 0.504 | 734.384         | P | 14 |
| A  | 9  | 428.214         | 694.371         | 686.362         | 0.504 | 685.858         | A | 13 |
| A  | 10 | 463.733         | 658.852         | 650.843         | 0.504 | 650.339         | A | 12 |
| P  | 11 | 512.259         | 623.330         | 615.324         | 0.504 | 614.820         | P | 11 |
| A  | 12 | 547.777         | 574.807         | 566.798         | 0.504 | 566.294         | A | 10 |
| P  | 13 | 596.304         | 539.289         | 531.279         | 0.504 | 530.776         | P | 9  |
| A  | 14 | 631.822         | 490.762         | 482.753         | 0.504 | 482.249         | A | 8  |
| E  | 15 | 696.344         | 455.244         | 447.235         | 0.504 | 446.731         | E | 7  |
| K  | 16 | 768.391         | 390.723         | 382.713         | 0.504 | 382.209         | K | 6  |
| T  | 17 | 850.938         | 326.672         | 318.666         | 0.504 | 318.162         | T | 5  |
| P  | 18 | <b>899.425</b>  | 258.160         | 250.150         | 0.504 | 249.646         | P | 4  |
| V  | 19 | <b>948.959</b>  | 187.642         | 179.632         | 0.504 | 179.128         | V | 3  |
| K  | 20 | <b>1013.006</b> | 138.100         | 130.090         | 0.504 | 129.584         | K | 2  |
| K  | 21 | <b>1077.054</b> | 74.000          | 66.001          | 0.504 | 65.497          | K | 1  |

# sp | P43276 | H15\_MOUSE

[Acetyl]SETAPAETAAPAPVEKS <sup>Phospho</sup>PAKK  
79.97

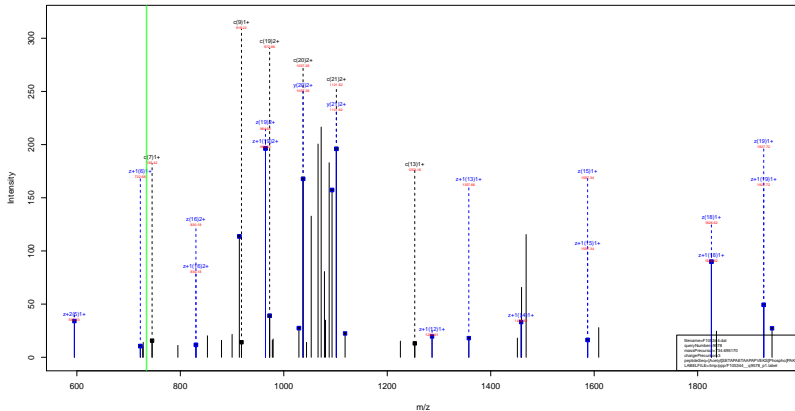

# sp | P43276 | H15\_MOUSE

[Acetyl]SETAPAETAAPAPVEKS<sup>Phospho</sup> PAKK  
79.97

- ▶ fragmentation table for charge state 1+
- ▶ specType=etd
- ▶ score=42.99
- ▶ F105344.dat
- ▶ query=q9578\_p1
- ▶ precursor=734.695170
- ▶ chargePrecursor=3
- ▶ itol=0.8

| AA    | c               | y               | z+1             | z+2            | z               | AA    |
|-------|-----------------|-----------------|-----------------|----------------|-----------------|-------|
| S[1]  | 147.076         | 2202.069        | 2186.050        | 0.000          | 2185.042        | S[21] |
| E[2]  | 276.119         | 2073.020        | 2057.008        | 0.000          | 2056.000        | E[20] |
| T[3]  | 377.167         | <b>1943.984</b> | <b>1927.965</b> | 0.000          | <b>1926.957</b> | T[19] |
| A[4]  | 448.204         | 1842.925        | <b>1826.917</b> | 0.000          | <b>1825.910</b> | A[18] |
| P[5]  | 545.257         | 1771.899        | 1755.890        | 0.000          | 1754.872        | P[17] |
| A[6]  | 616.294         | 1674.848        | 1658.839        | 0.000          | 1657.820        | A[16] |
| E[7]  | <b>745.336</b>  | 1603.809        | <b>1587.790</b> | 0.000          | <b>1586.783</b> | E[15] |
| T[8]  | 846.384         | 1474.767        | <b>1458.748</b> | 0.000          | 1457.740        | T[14] |
| A[9]  | <b>917.421</b>  | 1373.719        | <b>1357.700</b> | 0.000          | 1356.692        | A[13] |
| A[10] | 988.458         | 1302.682        | <b>1286.663</b> | 0.000          | 1285.655        | A[12] |
| P[11] | 1085.511        | 1231.645        | 1215.626        | 0.000          | 1214.618        | P[11] |
| A[12] | 1196.548        | 1134.592        | <b>1118.573</b> | 0.000          | 1117.565        | A[10] |
| P[13] | <b>1253.601</b> | 1063.555        | 1047.536        | 0.000          | 1046.528        | P[9]  |
| V[14] | 1352.669        | 966.502         | 950.483         | 0.000          | 949.475         | V[9]  |
| E[15] | 1481.712        | 897.434         | 881.415         | 0.000          | 880.407         | E[7]  |
| R[16] | 1609.807        | 798.391         | <b>772.372</b>  | <b>773.380</b> | 771.364         | R[6]  |
| S[17] | 1776.905        | 610.296         | 594.277         | <b>595.285</b> | 593.269         | S[5]  |
| P[18] | 1873.858        | 443.208         | 427.219         | 428.287        | 426.271         | P[4]  |
| A[19] | 1944.895        | 346.245         | 330.226         | 331.234        | 329.218         | A[3]  |
| R[20] | 2072.990        | 275.208         | 259.189         | 260.197        | 258.181         | R[2]  |
| K[21] | 2201.085        | 147.112         | 131.094         | 132.102        | 130.086         | K[1]  |

# sp | P43276 | H15\_MOUSE

[Acetyl]SETAPAETAAPAPVEKS <sup>Phospho</sup>79.97 PAKK

- ▶ fragmentation table for charge state 2+
- ▶ specType=etd
- ▶ score=42.99
- ▶ F105344.dat
- ▶ query=q9578\_p1
- ▶ precursor=734.695170
- ▶ chargePrecursor=3
- ▶ itol=0.8

| AA    | c               | y               | z+1             | z+2   | z               | AA    |
|-------|-----------------|-----------------|-----------------|-------|-----------------|-------|
| S[1]  | 74.042          | <b>1101.538</b> | <b>1093.529</b> | 0.504 | <b>1093.025</b> | S[2]  |
| E[2]  | 138.563         | <b>1037.017</b> | <b>1029.007</b> | 0.504 | <b>1028.504</b> | E[3]  |
| T[3]  | 189.087         | <b>972.496</b>  | <b>964.486</b>  | 0.504 | <b>963.983</b>  | T[10] |
| A[4]  | 224.008         | 924.977         | <b>913.962</b>  | 0.505 | <b>913.458</b>  | A[18] |
| P[5]  | 273.132         | 886.453         | 876.444         | 0.504 | 877.040         | P[17] |
| A[6]  | 308.650         | 837.927         | <b>829.917</b>  | 0.504 | <b>829.413</b>  | A[16] |
| E[7]  | 373.172         | 802.400         | 794.399         | 0.504 | 793.895         | E[15] |
| T[8]  | 423.696         | 737.887         | 729.878         | 0.504 | 729.374         | T[14] |
| A[9]  | 459.214         | 687.363         | 679.354         | 0.504 | 678.850         | A[13] |
| A[10] | 494.733         | 637.840         | 643.836         | 0.504 | 643.331         | A[2]  |
| P[11] | 543.259         | 610.320         | 608.317         | 0.504 | 607.813         | P[11] |
| A[12] | 578.778         | 567.800         | 569.790         | 0.504 | 569.286         | A[10] |
| P[13] | 627.304         | 532.281         | 534.272         | 0.504 | 533.768         | P[9]  |
| V[14] | 676.838         | 483.755         | 475.745         | 0.504 | 475.241         | V[8]  |
| E[15] | 741.360         | 434.230         | 436.211         | 0.504 | 435.707         | E[7]  |
| R[16] | 825.807         | 369.699         | 361.690         | 0.504 | 361.186         | R[6]  |
| S[17] | 888.908         | 305.657         | 297.642         | 0.504 | 297.138         | S[5]  |
| P[18] | 937.433         | 222.152         | 214.143         | 0.504 | 213.639         | P[4]  |
| A[19] | <b>972.951</b>  | 173.620         | 165.617         | 0.504 | 165.113         | A[3]  |
| R[20] | <b>1036.999</b> | 138.100         | 130.098         | 0.504 | 129.594         | R[2]  |
| K[21] | <b>1101.046</b> | 74.060          | 66.051          | 0.505 | 65.547          | K[1]  |

# sp | P43274 | H14\_MOUSE

## [Acetyl]SETAPAAPAAPAEKTPVKKK

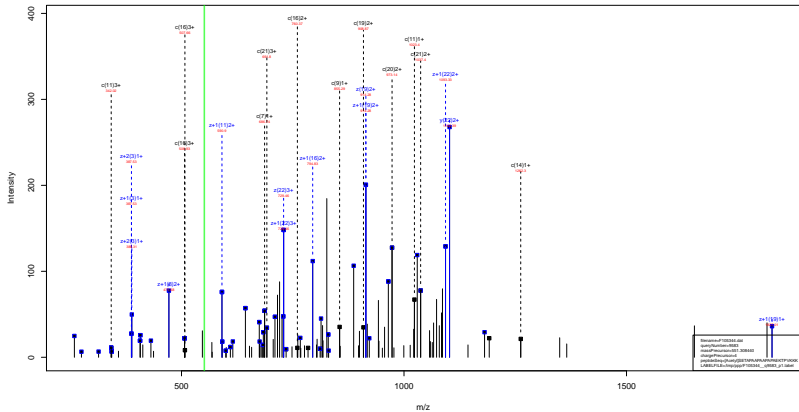



# sp | P43274 | H14\_MOUSE

## [Acetyl]SETAPAAPAAPAPAEKTPVKKK

- ▶ fragmentation table for charge state 1+
- ▶ specType=etd
- ▶ score=54.46
- ▶ F105344.dat
- ▶ query=q9583\_p1
- ▶ precursor=551.308440
- ▶ chargePrecursor=4
- ▶ itol=0.8

| AA    | c               | y              | z+1             | z+2            | z              | AA    |
|-------|-----------------|----------------|-----------------|----------------|----------------|-------|
| S[1]  | 147.076         | 2202.211       | 2186.194        | 0.000          | 2185.180       | S[2]  |
| E[2]  | -276.119        | 2073.170       | 2057.152        | 0.000          | 2056.144       | E[2]  |
| T[3]  | 377.167         | 1944.128       | 1928.109        | 0.000          | 1927.101       | T[20] |
| A[4]  | 448.204         | 1843.080       | <b>1827.061</b> | 0.000          | 1826.053       | A[19] |
| P[5]  | 545.257         | 1772.043       | 1756.024        | 0.000          | 1755.016       | P[18] |
| A[6]  | 616.294         | 1674.990       | 1658.971        | 0.000          | 1657.964       | A[17] |
| A[7]  | <b>687.331</b>  | 1603.953       | 1587.934        | 0.000          | 1586.926       | A[10] |
| P[8]  | <b>784.384</b>  | 1532.916       | 1516.897        | 0.000          | 1515.889       | P[15] |
| A[9]  | <b>855.421</b>  | 1461.883       | 1445.864        | 0.000          | 1444.857       | A[14] |
| A[10] | 926.458         | 1394.826       | 1378.807        | 0.000          | 1377.799       | A[13] |
| P[11] | <b>1023.511</b> | 1293.789       | 1277.770        | 0.000          | 1276.762       | P[12] |
| A[12] | 1094.548        | 1195.736       | <b>1180.717</b> | 0.000          | 1179.710       | A[11] |
| P[13] | <b>1191.600</b> | 1125.699       | 1109.680        | 0.000          | 1108.672       | P[10] |
| A[14] | <b>1262.638</b> | 1028.645       | 1012.626        | 0.000          | 1011.623       | A[9]  |
| E[15] | 1394.689        | 957.599        | 941.580         | 0.000          | 940.573        | E[6]  |
| K[16] | 1519.775        | 828.567        | 812.548         | <b>813.556</b> | <b>811.540</b> | K[7]  |
| T[17] | 1620.823        | 700.472        | <b>684.453</b>  | 685.461        | <b>683.445</b> | T[0]  |
| P[18] | 1717.876        | <b>599.424</b> | 583.405         | 584.413        | 582.397        | P[5]  |
| V[19] | 1816.944        | 502.371        | 486.352         | 487.360        | 485.345        | V[4]  |
| K[20] | 1945.039        | 403.303        | <b>387.284</b>  | <b>388.292</b> | 386.276        | K[3]  |
| K[21] | 2073.134        | <b>275.208</b> | <b>259.189</b>  | 260.197        | 258.181        | K[0]  |
| K[22] | 2201.229        | 147.111        | 131.094         | 132.102        | 130.085        | K[1]  |

# sp | P43274 | H14\_MOUSE

## [Acetyl]SETAPAAPAAPAPAEKTPVKKK

- ▶ fragmentation table for charge state 2+
- ▶ specType=etd
- ▶ score=54.46
- ▶ F105344.dat
- ▶ query=q9583\_p1
- ▶ precursor=551.308440
- ▶ chargePrecursor=4
- ▶ itol=0.8

| AA |    | c               | y               | z+1             | z+2            | z               | AA    |
|----|----|-----------------|-----------------|-----------------|----------------|-----------------|-------|
| E  | 1  | 74.942          | <b>1101.610</b> | <b>1093.601</b> | 0.504          | <b>1093.097</b> | E[2]  |
| E  | 2  | 138.983         | <b>1037.089</b> | <b>1029.079</b> | 0.504          | 1028.577        | E[2]  |
| Y  | 3  | 189.087         | <b>972.567</b>  | <b>964.558</b>  | 0.504          | <b>964.054</b>  | Y[20] |
| A  | 4  | 224.606         | <b>922.044</b>  | <b>914.034</b>  | 0.504          | <b>913.530</b>  | A[10] |
| F  | 5  | 273.132         | <b>886.525</b>  | 878.516         | 0.504          | 878.017         | F[18] |
| A  | 6  | 308.650         | 837.999         | <b>829.989</b>  | 0.504          | <b>829.485</b>  | A[17] |
| A  | 7  | 364.169         | 782.480         | <b>794.471</b>  | 0.504          | 793.967         | A[10] |
| D  | 8  | 392.696         | <b>766.962</b>  | 758.953         | 0.504          | 758.444         | D[15] |
| A  | 9  | 428.214         | 718.435         | <b>710.426</b>  | 0.504          | <b>709.922</b>  | A[14] |
| A  | 10 | 463.733         | <b>682.917</b>  | <b>674.907</b>  | 0.504          | <b>674.403</b>  | A[13] |
| F  | 11 | 512.259         | 647.399         | 639.389         | 0.504          | 638.885         | F[12] |
| A  | 12 | 547.777         | <b>598.872</b>  | <b>590.862</b>  | 0.504          | <b>590.358</b>  | A[11] |
| F  | 13 | 596.304         | 563.353         | 555.344         | 0.504          | 554.840         | F[10] |
| A  | 14 | 631.822         | 514.827         | <b>506.817</b>  | 0.504          | <b>506.313</b>  | A[9]  |
| E  | 15 | 686.344         | 479.305         | <b>471.299</b>  | 0.504          | 470.795         | E[8]  |
| R  | 16 | <b>760.391</b>  | 414.787         | <b>406.778</b>  | <b>407.281</b> | <b>406.274</b>  | R[7]  |
| F  | 17 | <b>810.915</b>  | 359.739         | <b>342.730</b>  | <b>343.234</b> | <b>342.226</b>  | F[6]  |
| P  | 18 | 859.441         | 300.210         | 292.202         | 292.710        | 291.703         | P[5]  |
| V  | 19 | <b>908.976</b>  | 251.680         | 243.680         | 244.184        | 243.176         | V[4]  |
| R  | 20 | <b>973.023</b>  | 202.157         | 194.148         | 194.650        | 193.642         | R[3]  |
| R  | 21 | <b>1037.071</b> | 138.100         | 130.098         | 130.602        | 129.594         | R[2]  |
| R  | 22 | 1101.118        | 74.060          | 66.051          | 66.555         | 65.547          | R[1]  |

# sp | P43274 | H14\_MOUSE

## [Acetyl]SETAPAAPAAPAPAEKTPVKKK

- ▶ fragmentation table for charge state 3+
- ▶ specType=etd
- ▶ score=54.46
- ▶ F105344.dat
- ▶ query=q9583\_p1
- ▶ precursor=551.308440
- ▶ chargePrecursor=4
- ▶ itol=0.8

| AA    | c              | y              | z+1            | z+2     | z              | AA    |
|-------|----------------|----------------|----------------|---------|----------------|-------|
| S[1]  | 49.697         | <b>734.742</b> | <b>729.403</b> | 0.672   | <b>729.067</b> | S[22] |
| E[2]  | 92.711         | <b>691.728</b> | <b>686.389</b> | 0.672   | <b>686.053</b> | E[21] |
| T[3]  | 126.304        | 648.714        | <b>643.375</b> | 0.672   | <b>643.039</b> | T[20] |
| A[4]  | 190.073        | <b>615.032</b> | <b>609.692</b> | 0.672   | <b>609.356</b> | A[19] |
| P[5]  | 182.424        | <b>591.352</b> | 586.013        | 0.672   | 585.677        | P[18] |
| A[6]  | 206.103        | 559.002        | 553.662        | 0.672   | 553.326        | A[17] |
| A[7]  | 229.782        | 526.323        | 520.983        | 0.672   | 520.647        | A[16] |
| P[8]  | 252.133        | 511.841        | <b>506.304</b> | 0.672   | 505.968        | P[15] |
| A[9]  | 285.812        | 479.293        | 473.953        | 0.672   | 473.617        | A[14] |
| A[10] | 309.491        | 455.614        | 450.274        | 0.672   | 449.938        | A[13] |
| P[11] | <b>341.842</b> | <b>431.934</b> | 426.595        | 0.672   | 426.259        | P[12] |
| A[12] | 365.521        | 399.584        | 394.244        | 0.672   | 393.908        | A[11] |
| P[13] | 397.872        | 375.905        | 370.565        | 0.672   | 370.229        | P[10] |
| A[14] | 421.551        | <b>343.554</b> | 338.214        | 0.672   | 337.878        | A[9]  |
| E[15] | 464.565        | 319.875        | 314.535        | 0.672   | <b>314.199</b> | E[8]  |
| K[16] | <b>507.263</b> | 276.866        | 271.526        | 271.857 | 271.489        | K[7]  |
| T[17] | 540.946        | 234.163        | 228.823        | 229.138 | 228.467        | T[6]  |
| P[18] | 573.297        | 200.475        | 195.140        | 195.476 | 194.804        | P[5]  |
| V[19] | 606.320        | 168.129        | 162.789        | 163.125 | 162.453        | V[4]  |
| K[20] | 649.018        | 135.105        | 129.766        | 130.102 | 129.430        | K[3]  |
| K[21] | <b>691.716</b> | 92.407         | 87.068         | 87.404  | 86.732         | K[2]  |
| K[22] | <b>734.414</b> | 49.700         | 44.370         | 44.705  | 44.034         | K[1]  |

# sp | P43274 | H14\_MOUSE

[Acetyl]SETAPAAPAAPAEKT <sup>Phospho</sup> PVKKK  
79.97

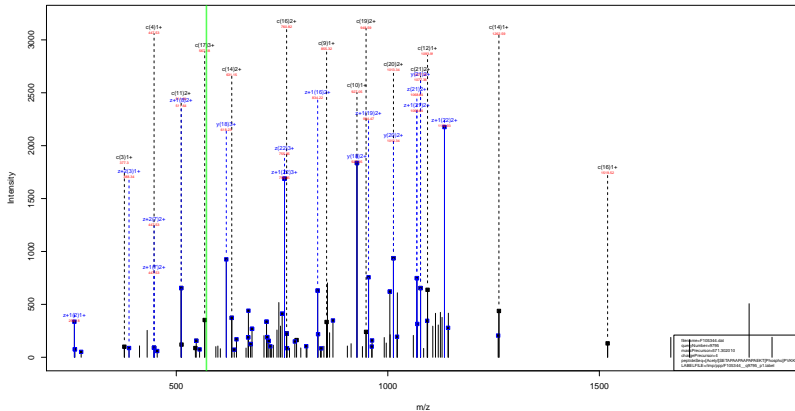

# sp | P43274 | H14\_MOUSE

[Acetyl]SETAPAAPAAPAPAEKT<sup>Phospho</sup>PVKKK  
79.97

- ▶ fragmentation table for charge state 1+
- ▶ specType=etd
- ▶ score=62.39
- ▶ F105344.dat
- ▶ query=q9795\_p1
- ▶ precursor=571.302010
- ▶ chargePrecursor=4
- ▶ itol=0.8

| AA    | c               | y              | z+1             | z+2            | z        | AA    |
|-------|-----------------|----------------|-----------------|----------------|----------|-------|
| S[1]  | 147.076         | 2282.178       | 2286.180        | 0.000          | 2285.181 | S[2]  |
| E[2]  | -276.119        | 2153.137       | 2137.118        | 0.000          | 2136.110 | E[2]  |
| T[3]  | <b>377.167</b>  | 2024.094       | 2008.075        | 0.000          | 2007.067 | T[20] |
| A[4]  | <b>448.204</b>  | 1923.046       | 1907.028        | 0.000          | 1906.020 | A[19] |
| P[5]  | <b>545.257</b>  | 1852.000       | 1835.990        | 0.000          | 1834.983 | P[18] |
| A[6]  | 616.294         | 1754.956       | 1738.938        | 0.000          | 1737.930 | A[17] |
| A[7]  | 697.333         | 1683.910       | 1667.901        | 0.000          | 1666.893 | A[10] |
| P[8]  | <b>784.384</b>  | 1612.862       | 1596.853        | 0.000          | 1595.856 | P[15] |
| A[9]  | <b>855.421</b>  | 1515.829       | 1499.811        | 0.000          | 1498.803 | A[14] |
| A[10] | <b>926.458</b>  | 1444.792       | 1428.774        | 0.000          | 1427.766 | A[13] |
| P[11] | 1023.511        | 1373.755       | 1357.737        | 0.000          | 1356.729 | P[12] |
| A[12] | <b>1094.548</b> | 1276.702       | <b>1260.684</b> | 0.000          | 1259.676 | A[11] |
| P[13] | 1191.600        | 1205.665       | 1189.647        | 0.000          | 1188.639 | P[10] |
| A[14] | <b>1262.638</b> | 1108.613       | <b>1092.594</b> | 0.000          | 1091.586 | A[9]  |
| E[15] | 1361.660        | 1037.575       | <b>1021.557</b> | 0.000          | 1020.549 | E[6]  |
| K[16] | <b>1519.775</b> | 968.533        | 892.514         | 893.522        | 891.505  | K[7]  |
| T[17] | 1700.789        | <b>780.438</b> | 764.419         | 765.427        | 763.411  | T[0]  |
| P[18] | 1797.842        | 599.424        | 583.405         | 584.413        | 582.397  | P[5]  |
| V[19] | 1896.910        | 502.371        | 486.352         | 487.360        | 485.345  | V[4]  |
| K[20] | 2025.005        | 403.303        | 387.284         | <b>388.292</b> | 386.276  | K[3]  |
| K[21] | 2153.180        | <b>275.208</b> | <b>259.189</b>  | <b>260.197</b> | 258.181  | K[0]  |
| K[22] | 2281.395        | 147.111        | 131.094         | 132.102        | 130.085  | K[1]  |

# sp | P43274 | H14\_MOUSE

[Acetyl]SETAPAAPAAPAPAEKT<sup>Phospho</sup>PVKKK  
79.97

- ▶ fragmentation table for charge state 2+
- ▶ specType=etd
- ▶ score=62.39
- ▶ F105344.dat
- ▶ query=q9795\_p1
- ▶ precursor=571.30210
- ▶ chargePrecursor=4
- ▶ itol=0.8

| AA |    | c               | y               | z+1             | z+2            | z               | AA    |
|----|----|-----------------|-----------------|-----------------|----------------|-----------------|-------|
| E  | 1  | 74.942          | <b>1141.593</b> | <b>1133.584</b> | 0.504          | 1133.086        | E[2]  |
| E  | 2  | 138.583         | <b>1077.072</b> | <b>1069.063</b> | 0.504          | <b>1068.559</b> | E[2]  |
| Y  | 3  | 189.087         | <b>1012.551</b> | <b>1004.541</b> | 0.504          | <b>1004.037</b> | Y[20] |
| A  | 4  | 224.606         | <b>962.027</b>  | <b>954.017</b>  | 0.504          | 953.514         | A[10] |
| P  | 5  | 273.132         | <b>926.508</b>  | <b>918.499</b>  | 0.504          | 917.995         | P[18] |
| A  | 6  | 308.650         |                 | <b>869.973</b>  | 0.504          | 869.469         | A[17] |
| A  | 7  | 364.109         | <b>842.463</b>  | <b>834.454</b>  | 0.504          | <b>833.950</b>  | A[10] |
| D  | 8  | 392.695         | <b>806.945</b>  | <b>798.936</b>  | 0.504          | 798.431         | D[15] |
| A  | 9  | 428.214         | 758.418         | <b>750.409</b>  | 0.504          | <b>749.905</b>  | A[14] |
| A  | 10 | 463.733         | <b>722.900</b>  | <b>714.890</b>  | 0.504          | <b>714.387</b>  | A[13] |
| P  | 11 | <b>512.259</b>  | 667.381         | <b>679.372</b>  | 0.504          | <b>678.868</b>  | P[12] |
| A  | 12 | <b>547.777</b>  | 638.855         | <b>630.846</b>  | 0.504          | 630.342         | A[11] |
| P  | 13 | 598.304         | 603.328         | 595.317         | 0.504          | 594.823         | P[10] |
| A  | 14 | <b>631.822</b>  | <b>554.810</b>  | <b>546.801</b>  | 0.504          | 546.297         | A[9]  |
| E  | 15 | 686.344         | 519.291         | <b>511.282</b>  | 0.504          | 510.778         | E[8]  |
| R  | 16 | <b>760.391</b>  | <b>454.770</b>  | <b>446.761</b>  | <b>447.265</b> | 446.257         | R[7]  |
| T  | 17 | 850.898         | 390.723         | 382.713         | 381.217        | 382.200         | T[6]  |
| P  | 18 | 899.425         | 300.210         | 292.200         | 292.710        | 291.701         | P[5]  |
| V  | 19 | <b>948.959</b>  | 251.680         | 243.680         | 244.184        | 243.176         | V[4]  |
| K  | 20 | <b>1013.000</b> | 202.157         | 194.156         | 194.650        | 193.642         | K[3]  |
| R  | 21 | <b>1077.054</b> | 138.100         | 130.098         | 130.602        | 129.594         | R[2]  |
| K  | 22 | 1141.101        | 74.000          | 66.051          | 66.555         | 65.547          | K[1]  |

# sp | P43274 | H14\_MOUSE

[Acetyl]SETAPAAPAAPAPAEKT<sup>Phospho</sup>PVKKK  
79.97

- ▶ fragmentation table for charge state 3+
- ▶ specType=etd
- ▶ score=62.39
- ▶ F105344.dat
- ▶ query=q9795\_p1
- ▶ precursor=571.302010
- ▶ chargePrecursor=4
- ▶ itol=0.8

| AA    | c              | y              | z+1            | z+2     | z              | AA    |
|-------|----------------|----------------|----------------|---------|----------------|-------|
| S[1]  | 49.697         | <b>761.398</b> | <b>756.058</b> | 0.672   | <b>755.722</b> | S[22] |
| E[2]  | 92.711         | <b>718.384</b> | <b>713.044</b> | 0.672   | <b>712.708</b> | E[21] |
| T[3]  | 126.394        | <b>675.370</b> | <b>670.030</b> | 0.672   | <b>669.694</b> | T[20] |
| A[4]  | 190.073        | <b>641.687</b> | <b>636.347</b> | 0.672   | 636.011        | A[19] |
| P[5]  | 182.424        | <b>618.008</b> | 612.668        | 0.672   | 612.332        | P[18] |
| A[6]  | 206.103        | 585.057        | 580.317        | 0.672   | 579.981        | A[17] |
| A[7]  | 229.782        | 561.973        | 556.633        | 0.672   | 556.302        | A[16] |
| P[8]  | 252.133        | 538.290        | 532.950        | 0.672   | 532.623        | P[15] |
| A[9]  | 285.812        | 505.945        | 500.605        | 0.672   | 500.272        | A[14] |
| A[10] | 309.491        | 482.269        | 476.929        | 0.672   | 476.593        | A[13] |
| P[11] | 341.842        | 458.590        | 453.250        | 0.672   | 452.914        | P[12] |
| A[12] | 365.521        | 426.239        | 420.899        | 0.672   | 420.563        | A[11] |
| P[13] | 397.872        | 402.560        | 397.220        | 0.672   | 396.884        | P[10] |
| A[14] | 421.551        | 370.209        | 364.869        | 0.672   | 364.534        | A[9]  |
| E[15] | 464.565        | 346.530        | 341.190        | 0.672   | 340.854        | E[8]  |
| K[16] | 507.260        | 303.316        | 298.176        | 298.512 | 297.840        | K[7]  |
| T[17] | <b>567.601</b> | <b>260.817</b> | 255.478        | 255.814 | 255.142        | T[6]  |
| P[18] | 599.952        | 230.478        | 195.140        | 195.476 | 194.804        | P[5]  |
| V[19] | 632.975        | 188.129        | 162.789        | 163.125 | 162.453        | V[4]  |
| K[20] | <b>675.673</b> | 135.105        | 129.766        | 130.102 | 129.430        | K[3]  |
| K[21] | <b>718.372</b> | 92.407         | 87.068         | 87.404  | 86.732         | K[2]  |
| K[22] | <b>761.070</b> | 49.709         | 44.370         | 44.705  | 44.034         | K[1]  |

# sp | P43276 | H15\_MOUSE

[Acetyl]SETAPAETAAPAPVEKS <sup>Phospho</sup> PAKKK  
79.97

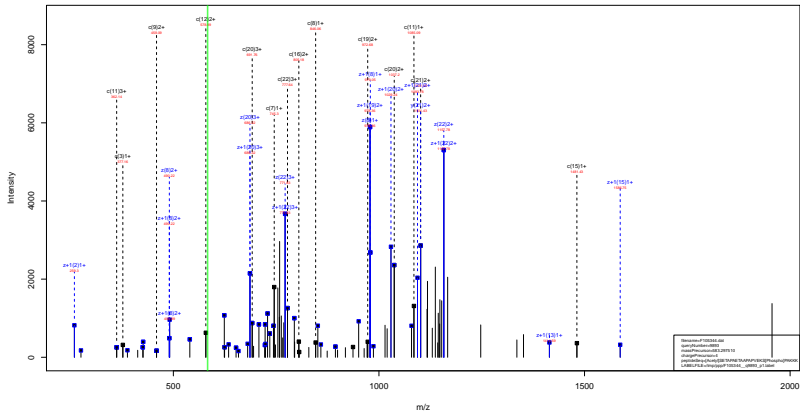



# sp | P43276 | H15\_MOUSE

[Acetyl]SETAPAETAAPAPVEKS <sup>Phospho</sup> PAKKK  
79.97

- ▶ fragmentation table for charge state 1+
- ▶ specType=etd
- ▶ score=69.67
- ▶ F105344.dat
- ▶ query=q9893\_p1
- ▶ precursor=583.297510
- ▶ chargePrecursor=4
- ▶ itol=0.8

| AA    | c               | y              | z+1             | z+2            | z              | AA    |
|-------|-----------------|----------------|-----------------|----------------|----------------|-------|
| S[1]  | 147.076         | 2330.164       | 2314.148        | 0.000          | 2313.137       | S[2]  |
| E[2]  | 276.119         | 2201.123       | 2185.103        | 0.000          | 2184.095       | E[2]  |
| T[3]  | <b>377.107</b>  | 2072.070       | 2056.060        | 0.000          | 2055.052       | T[20] |
| A[4]  | 448.204         | 1971.031       | 1955.012        | 0.000          | 1954.005       | A[19] |
| P[5]  | 545.257         | 1839.994       | 1823.975        | 0.000          | 1822.967       | P[18] |
| A[6]  | 616.294         | 1802.941       | 1786.922        | 0.000          | 1785.915       | A[17] |
| E[7]  | <b>745.336</b>  | 1731.904       | 1715.885        | 0.000          | 1714.878       | E[10] |
| T[8]  | <b>846.384</b>  | 1602.861       | <b>1586.843</b> | 0.000          | 1585.835       | T[15] |
| A[9]  | 917.421         | 1501.814       | 1485.795        | 0.000          | 1484.787       | A[14] |
| A[10] | 988.458         | 1430.777       | <b>1414.758</b> | 0.000          | 1413.750       | A[13] |
| P[11] | <b>1085.511</b> | 1359.740       | 1343.721        | 0.000          | 1342.713       | P[12] |
| A[12] | 1156.548        | 1262.687       | 1246.668        | 0.000          | 1245.660       | A[11] |
| P[13] | 1253.601        | 1191.650       | 1175.631        | 0.000          | 1174.623       | P[10] |
| V[14] | 1352.699        | 1094.597       | <b>1078.578</b> | 0.000          | 1077.570       | V[9]  |
| E[15] | <b>1481.712</b> | 995.529        | <b>979.510</b>  | 0.000          | <b>978.502</b> | E[6]  |
| K[16] | 1609.807        | 896.485        | 880.467         | <b>851.475</b> | 840.459        | K[7]  |
| S[17] | 1776.805        | 738.391        | <b>722.372</b>  | <b>723.380</b> | 721.364        | S[0]  |
| P[18] | 1873.858        | 571.303        | 555.284         | 556.282        | 554.266        | P[5]  |
| A[19] | 1944.895        | 474.340        | <b>458.321</b>  | <b>459.329</b> | 457.313        | A[4]  |
| K[20] | 2072.990        | 403.303        | 387.284         | <b>388.292</b> | 386.276        | K[3]  |
| K[21] | 2201.085        | <b>275.208</b> | <b>259.189</b>  | 260.187        | 258.181        | K[0]  |
| K[22] | 2329.180        | 147.113        | 131.094         | 132.102        | 130.085        | K[1]  |

# sp | P43276 | H15\_MOUSE

[Acetyl]SETAPAETAAPAPVEKS <sup>Phospho</sup> PAKKK  
79.97

- ▶ fragmentation table for charge state 2+
- ▶ specType=etd
- ▶ score=69.67
- ▶ F105344.dat
- ▶ query=q9893\_p1
- ▶ precursor=583.297510
- ▶ chargePrecursor=4
- ▶ itol=0.8

| AA    | c               | y               | z+1             | z+2            | z               | AA    |
|-------|-----------------|-----------------|-----------------|----------------|-----------------|-------|
| S[1]  | 74.942          | 1105.508        | <b>1157.576</b> | 0.504          | <b>1157.072</b> | S[2]  |
| E[2]  | 138.583         | <b>1101.064</b> | <b>1093.055</b> | 0.504          | 1092.551        | E[2]  |
| Y[3]  | 189.087         | <b>1036.543</b> | <b>1028.534</b> | 0.504          | 1028.030        | Y[20] |
| A[4]  | 224.606         | <b>986.019</b>  | <b>978.010</b>  | 0.504          | 977.506         | A[10] |
| P[5]  | 273.132         | <b>950.501</b>  | 942.491         | 0.504          | 941.987         | P[18] |
| A[6]  | 308.650         | 901.974         | <b>893.965</b>  | 0.504          | <b>893.461</b>  | A[17] |
| E[7]  | 323.172         | 866.495         | <b>858.446</b>  | 0.504          | 857.942         | E[16] |
| T[8]  | 413.696         | 801.934         | <b>793.925</b>  | 0.504          | <b>793.421</b>  | T[15] |
| A[9]  | <b>459.214</b>  | 751.411         | <b>743.401</b>  | 0.504          | <b>742.897</b>  | A[14] |
| A[10] | 494.733         | 715.892         | <b>707.883</b>  | 0.504          | <b>707.379</b>  | A[13] |
| P[11] | 543.259         | <b>680.373</b>  | 672.364         | 0.504          | 671.860         | P[12] |
| A[12] | <b>578.778</b>  | 631.847         | <b>623.838</b>  | 0.504          | <b>623.334</b>  | A[11] |
| P[13] | 627.304         | 596.328         | 588.319         | 0.504          | 587.815         | P[10] |
| V[14] | 676.838         | 547.801         | <b>539.793</b>  | 0.504          | <b>539.289</b>  | V[9]  |
| E[15] | 741.360         | 498.280         | <b>490.259</b>  | 0.504          | <b>489.755</b>  | E[8]  |
| R[16] | <b>805.407</b>  | 433.747         | <b>425.737</b>  | <b>426.241</b> | <b>425.233</b>  | R[7]  |
| S[17] | 868.906         | 369.699         | <b>361.690</b>  | <b>362.194</b> | 361.186         | S[6]  |
| P[18] | <b>937.433</b>  | 288.200         | 278.191         | 278.694        | 277.687         | P[5]  |
| A[19] | <b>972.951</b>  | 237.674         | 229.664         | 230.168        | 229.160         | A[4]  |
| R[20] | <b>1038.999</b> | 202.157         | 194.148         | 194.650        | 193.642         | R[3]  |
| R[21] | <b>1101.046</b> | 138.108         | 130.098         | 130.602        | 129.594         | R[2]  |
| R[22] | 1105.094        | 74.060          | 66.051          | 66.555         | 65.547          | R[1]  |

# sp | P43276 | H15\_MOUSE

[Acetyl]SETAPAETAAPAPVEKS <sup>Phospho</sup> PAKKK  
79.97

- ▶ fragmentation table for charge state 3+
- ▶ specType=etd
- ▶ score=69.67
- ▶ F105344.dat
- ▶ query=q9893\_p1
- ▶ precursor=583.297510
- ▶ chargePrecursor=4
- ▶ itol=0.8

| AA    | c              | y              | z+1            | z+2     | z              | AA    |
|-------|----------------|----------------|----------------|---------|----------------|-------|
| S[1]  | 49.697         | <b>777.393</b> | <b>772.053</b> | 0.672   | <b>771.717</b> | S[22] |
| E[2]  | 92.711         | <b>734.379</b> | <b>729.039</b> | 0.672   | <b>728.703</b> | E[21] |
| T[3]  | 126.304        | <b>691.364</b> | <b>686.025</b> | 0.672   | <b>685.689</b> | T[20] |
| A[4]  | 190.073        | <b>657.682</b> | <b>652.342</b> | 0.672   | <b>652.006</b> | A[19] |
| P[5]  | 182.424        | <b>634.003</b> | 628.663        | 0.672   | 628.327        | P[18] |
| A[6]  | 206.103        | 601.652        | 596.312        | 0.672   | 595.976        | A[17] |
| E[7]  | 239.117        | 577.972        | 572.633        | 0.672   | 572.297        | E[16] |
| T[8]  | 262.800        | 554.950        | 549.610        | 0.672   | 549.273        | T[15] |
| A[9]  | 306.479        | 501.275        | 495.937        | 0.672   | 495.601        | A[14] |
| A[10] | 330.158        | 477.597        | 472.258        | 0.672   | 471.922        | A[13] |
| P[11] | <b>362.508</b> | 453.918        | 448.578        | 0.672   | 448.243        | P[12] |
| A[12] | 386.188        | 421.567        | 416.228        | 0.672   | 415.892        | A[11] |
| P[13] | 418.538        | 397.888        | 392.549        | 0.672   | 392.213        | P[10] |
| V[14] | 451.561        | 365.537        | 360.198        | 0.672   | 359.862        | V[9]  |
| E[15] | 494.575        | 332.514        | 327.175        | 0.672   | 326.839        | E[8]  |
| K[16] | 537.274        | 299.500        | 294.161        | 294.497 | 293.825        | K[7]  |
| S[17] | 592.940        | 266.802        | 261.463        | 261.798 | 261.126        | S[6]  |
| P[18] | <b>625.291</b> | 191.130        | 185.790        | 185.132 | 185.460        | P[3]  |
| A[19] | 648.970        | 158.785        | 153.445        | 153.781 | 153.109        | A[4]  |
| K[20] | <b>691.668</b> | 135.105        | 129.766        | 130.102 | 129.430        | K[3]  |
| K[21] | <b>734.367</b> | 92.407         | 87.068         | 87.404  | 86.732         | K[2]  |
| K[22] | <b>777.065</b> | 49.700         | 44.370         | 44.705  | 44.034         | K[1]  |



# sp | P68433 | H31\_MOUSE

EIAQDFK <sup>Methyl</sup> 14.02 TDLR

- ▶ fragmentation table for charge state 1+
- ▶ specType=etd
- ▶ score=36.53
- ▶ F105346.dat
- ▶ query=q5744.p1
- ▶ precursor=450.573370
- ▶ chargePrecursor=3
- ▶ itol=0.8

| AA    | c               | y              | z+1            | z+2      | z        | AA    |
|-------|-----------------|----------------|----------------|----------|----------|-------|
| E[1]  | 147.076         | 1949.706       | 1333.687       | 0.000    | 1332.679 | E[11] |
| I[2]  | 260.160         | 1220.963       | 1204.645       | 0.000    | 1203.637 | I[10] |
| A[3]  | 311.198         | 1107.579       | 1091.561       | 0.000    | 1090.553 | A[9]  |
| Q[4]  | <b>458.256</b>  | 1036.942       | 1020.923       | 1021.531 | 1019.516 | Q[8]  |
| D[5]  | <b>574.283</b>  | 906.484        | <b>892.465</b> | 893.473  | 891.457  | D[7]  |
| F[6]  | <b>721.352</b>  | 793.457        | <b>777.438</b> | 778.446  | 776.430  | F[6]  |
| R[7]  | 863.482         | <b>646.388</b> | <b>630.370</b> | 631.377  | 629.362  | R[5]  |
| T[8]  | <b>964.510</b>  | 504.276        | 488.259        | 489.267  | 487.251  | T[4]  |
| D[9]  | <b>1079.537</b> | 403.230        | <b>387.211</b> | 388.219  | 386.203  | D[3]  |
| L[10] | <b>1192.621</b> | 288.203        | 272.184        | 273.192  | 271.176  | L[2]  |
| R[11] | 1348.722        | 175.119        | 159.100        | 160.108  | 158.092  | R[1]  |

# sp | P68433 | H31\_MOUSE

EIAQDFK <sup>Methyl</sup> 14.02 TDLR

- ▶ fragmentation table for charge state 2+
- ▶ specType=etd
- ▶ score=36.53
- ▶ F105346.dat
- ▶ query=q5744.p1
- ▶ precursor=450.573370
- ▶ chargePrecursor=3
- ▶ itol=0.8

| AA     | c              | y              | z+1            | z+2   | z              | AA     |
|--------|----------------|----------------|----------------|-------|----------------|--------|
| E [1]  | 74.042         | <b>675.357</b> | <b>667.347</b> | 0.504 | <b>666.843</b> | E [11] |
| V [2]  | 130.584        | 610.835        | 602.826        | 0.504 | 602.322        | V [10] |
| A [3]  | 166.102        | 554.293        | 546.284        | 0.504 | 545.780        | A [9]  |
| Q [4]  | 230.132        | 518.775        | 510.765        | 0.504 | 510.261        | Q [8]  |
| D [5]  | 267.645        | 454.745        | 446.736        | 0.504 | 446.232        | D [7]  |
| F [6]  | 351.179        | 397.232        | 389.223        | 0.504 | 388.719        | F [6]  |
| K [7]  | 432.235        | 323.698        | 315.688        | 0.504 | 315.184        | K [5]  |
| Y [8]  | 482.759        | 252.642        | 244.633        | 0.504 | 244.129        | Y [4]  |
| D [9]  | 540.272        | 202.119        | 194.109        | 0.504 | 193.605        | D [3]  |
| L [10] | 596.814        | 144.605        | 136.596        | 0.504 | 136.092        | L [2]  |
| R [11] | <b>674.865</b> | 88.063         | 80.054         | 0.504 | 79.550         | R [1]  |

# sp | P68433 | H31\_MOUSE

EIAQDFKTDLR (Methyl)  
(14.02)

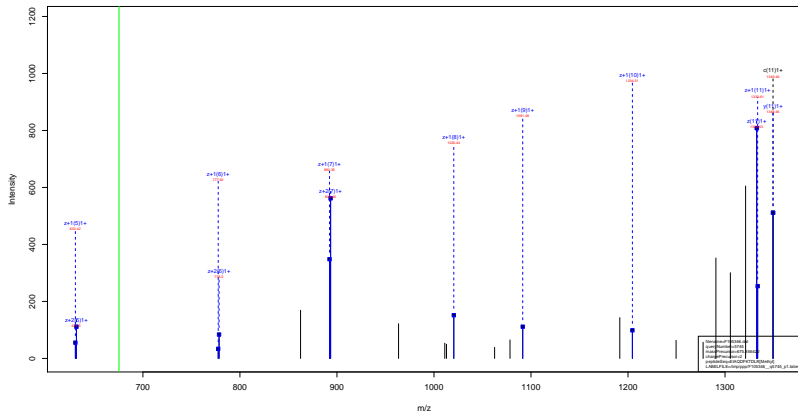

# sp | P68433 | H31\_MOUSE

EIAQDFKTDLR <sup>(Methyl)</sup>  
(14.02)

- ▶ fragmentation table for charge state 1+
- ▶ specType=etd
- ▶ score=37.83
- ▶ F105346.dat
- ▶ query=q5745\_p1
- ▶ precursor=675.356420
- ▶ chargePrecursor=2
- ▶ itol=0.8

| AA    | c               | y               | z+1             | z+2            | z               | AA    |
|-------|-----------------|-----------------|-----------------|----------------|-----------------|-------|
| E[1]  | 147.076         | <b>1349.706</b> | <b>1331.607</b> | 0.000          | <b>1332.679</b> | E[1]  |
| I[2]  | 260.160         | 1220.663        | <b>1204.645</b> | 0.000          | 1203.637        | I[10] |
| A[3]  | 331.198         | 1107.579        | <b>1091.561</b> | 0.000          | 1090.551        | A[9]  |
| Q[4]  | 459.256         | 1036.542        | <b>1020.523</b> | 1071.531       | 1019.510        | Q[8]  |
| D[5]  | 574.283         | 968.495         | <b>952.465</b>  | <b>933.473</b> | 931.451         | D[7]  |
| F[6]  | 721.352         | 793.857         | <b>777.838</b>  | <b>778.446</b> | 776.431         | F[6]  |
| K[7]  | 849.446         | 646.388         | <b>630.370</b>  | <b>631.377</b> | 629.362         | K[5]  |
| T[8]  | 956.494         | 518.203         | 502.375         | 503.282        | 501.267         | T[4]  |
| D[9]  | 1065.521        | 417.246         | 401.227         | 402.236        | 400.210         | D[3]  |
| L[10] | 1178.605        | 302.219         | 286.200         | 287.208        | 285.192         | L[3]  |
| R[11] | <b>1348.722</b> | 189.135         | 173.116         | 174.124        | 172.108         | R[1]  |



# sp | P68433 | H31\_MOUSE

EIAQDFK <sup>Methyl</sup> TDLR  
14.02

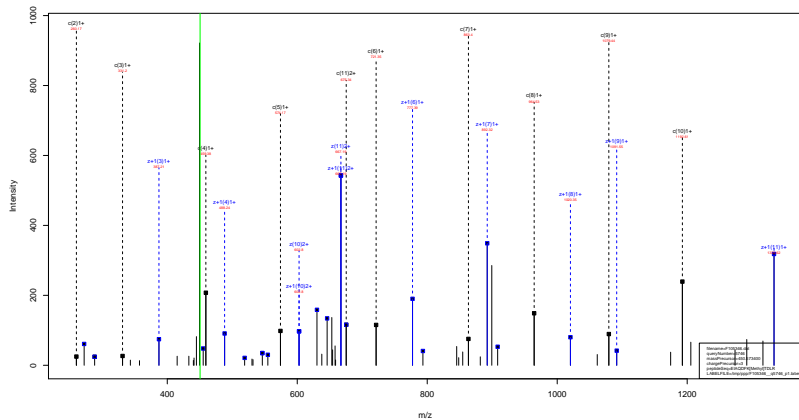

# sp | P68433 | H31\_MOUSE

EIAQDFK<sup>Methyl</sup> TDLR  
14.02

- ▶ fragmentation table for charge state 1+
- ▶ specType=etd
- ▶ score=58.23
- ▶ F105346.dat
- ▶ query=q5746.p1
- ▶ precursor=450.573400
- ▶ chargePrecursor=3
- ▶ itol=0.8

| AA    | c               | y              | z+1             | z+2      | z        | AA    |
|-------|-----------------|----------------|-----------------|----------|----------|-------|
| E[1]  | 147.076         | 1349.706       | <b>1333.607</b> | 0.000    | 1332.679 | E[11] |
| I[2]  | <b>260.160</b>  | 1220.663       | 1209.665        | 0.000    | 1203.637 | I[10] |
| A[3]  | <b>331.198</b>  | 1107.579       | <b>1091.561</b> | 0.000    | 1090.553 | A[9]  |
| Q[4]  | <b>459.256</b>  | 1008.542       | <b>1020.523</b> | 1021.531 | 1019.516 | Q[8]  |
| D[5]  | <b>574.283</b>  | <b>908.484</b> | <b>892.465</b>  | 893.473  | 891.457  | D[7]  |
| F[6]  | <b>721.352</b>  | <b>793.457</b> | <b>777.438</b>  | 778.446  | 776.430  | F[6]  |
| K[7]  | <b>863.462</b>  | <b>646.388</b> | <b>630.370</b>  | 631.377  | 629.362  | K[5]  |
| T[8]  | <b>964.510</b>  | 504.278        | <b>488.259</b>  | 489.267  | 487.251  | T[4]  |
| D[9]  | <b>1079.537</b> | 403.230        | <b>387.211</b>  | 388.219  | 386.203  | D[3]  |
| L[10] | <b>1192.621</b> | <b>288.203</b> | <b>272.184</b>  | 273.192  | 271.176  | L[2]  |
| R[11] | 1348.722        | 175.110        | 159.100         | 160.108  | 158.092  | R[1]  |

# sp | P68433 | H31\_MOUSE

EIAQDFK <sup>Methyl</sup> 14.02 TDLR

- ▶ fragmentation table for charge state 2+
- ▶ specType=etd
- ▶ score=58.23
- ▶ F105346.dat
- ▶ query=q5746\_p1
- ▶ precursor=450.573400
- ▶ chargePrecursor=3
- ▶ itol=0.8

| AA     | c              | y              | z+1            | z+2     | z              | AA     |
|--------|----------------|----------------|----------------|---------|----------------|--------|
| E [1]  | 74.042         | <b>675.357</b> | <b>667.347</b> | 0.504   | <b>666.843</b> | E [11] |
| V [2]  | 130.584        | 610.835        | <b>602.826</b> | 0.504   | <b>602.322</b> | V [10] |
| A [3]  | 166.102        | <b>554.293</b> | <b>546.284</b> | 0.504   | <b>545.780</b> | A [9]  |
| Q [4]  | 239.132        | <b>518.775</b> | 510.765        | 311.269 | 510.261        | Q [8]  |
| D [5]  | <b>287.645</b> | <b>454.745</b> | 446.736        | 447.240 | 446.232        | D [7]  |
| F [6]  | 351.179        | 397.232        | 389.223        | 389.727 | 388.719        | F [6]  |
| K [7]  | 432.235        | 323.698        | 315.688        | 316.192 | 315.184        | K [5]  |
| Y [8]  | 482.759        | 252.642        | 244.633        | 245.137 | 244.129        | Y [4]  |
| D [9]  | 540.272        | 202.119        | 194.109        | 194.613 | 193.605        | D [3]  |
| L [10] | 596.814        | 144.605        | 136.596        | 137.100 | 136.092        | L [2]  |
| R [11] | <b>674.865</b> | 88.063         | 80.054         | 80.558  | 79.550         | R [1]  |



# sp | P68433 | H31\_MOUSE

EIAQDFK<sup>Methyl</sup> TDLR  
14.02

- ▶ fragmentation table for charge state 1+
- ▶ specType=etd
- ▶ score=41.27
- ▶ F105346.dat
- ▶ query=q5748.p1
- ▶ precursor=450.574980
- ▶ chargePrecursor=3
- ▶ itol=0.8

| AA    | c               | y              | z+1             | z+2      | z              | AA    |
|-------|-----------------|----------------|-----------------|----------|----------------|-------|
| E[1]  | 147.076         | 1349.706       | <b>1333.607</b> | 0.000    | 1332.670       | E[11] |
| I[2]  | <b>260.160</b>  | 1220.663       | 1209.665        | 0.000    | 1203.637       | I[10] |
| A[3]  | <b>331.198</b>  | 1107.579       | 1091.561        | 0.000    | 1090.553       | A[9]  |
| Q[4]  | <b>459.256</b>  | 1036.542       | <b>1020.523</b> | 1021.531 | 1019.516       | Q[8]  |
| D[5]  | <b>574.283</b>  | <b>908.484</b> | <b>892.465</b>  | 893.473  | 891.457        | D[7]  |
| F[6]  | <b>721.352</b>  | <b>793.457</b> | <b>777.438</b>  | 778.446  | 776.430        | F[6]  |
| K[7]  | <b>863.462</b>  | <b>646.388</b> | <b>630.370</b>  | 631.377  | 629.362        | K[5]  |
| T[8]  | <b>964.510</b>  | <b>504.278</b> | <b>488.259</b>  | 489.267  | <b>487.251</b> | T[4]  |
| D[9]  | <b>1079.537</b> | 403.230        | <b>387.211</b>  | 388.219  | 386.203        | D[3]  |
| L[10] | <b>1192.621</b> | 288.203        | <b>272.184</b>  | 273.192  | 271.176        | L[2]  |
| R[11] | 1348.722        | 175.110        | 159.100         | 160.108  | 158.092        | R[1]  |

# sp | P68433 | H31\_MOUSE

EIAQDFK <sup>Methyl</sup> 14.02 TDLR

- ▶ fragmentation table for charge state 2+
- ▶ specType=etd
- ▶ score=41.27
- ▶ F105346.dat
- ▶ query=q5748.p1
- ▶ precursor=450.574980
- ▶ chargePrecursor=3
- ▶ itol=0.8

| AA     | c              | y              | z+1            | z+2     | z              | AA    |
|--------|----------------|----------------|----------------|---------|----------------|-------|
| E [1]  | 74.042         | <b>675.357</b> | <b>667.347</b> | 0.504   | <b>666.843</b> | E[11] |
| V [2]  | 130.584        | <b>610.835</b> | <b>602.826</b> | 0.504   | <b>602.322</b> | V[10] |
| A [3]  | 166.102        | 554.293        | <b>546.284</b> | 0.504   | <b>545.780</b> | A[9]  |
| Q [4]  | 230.132        | 518.775        | 510.765        | 511.269 | 510.261        | Q[8]  |
| D [5]  | 267.645        | <b>454.745</b> | 446.736        | 447.240 | 446.232        | D[7]  |
| F [6]  | 351.179        | 397.232        | 389.223        | 389.727 | 388.719        | F[6]  |
| K [7]  | <b>432.235</b> | 323.698        | 315.688        | 316.192 | 315.184        | K[5]  |
| Y [8]  | 482.759        | 252.642        | 244.633        | 245.137 | 244.129        | Y[4]  |
| D [9]  | 540.272        | 202.119        | 194.109        | 194.613 | 193.605        | D[3]  |
| L [10] | 596.814        | 144.605        | 136.596        | 137.100 | 136.092        | L[2]  |
| R [11] | <b>674.865</b> | 88.063         | 80.054         | 80.558  | 79.550         | R[1]  |



# sp | P68433 | H31\_MOUSE

LVREIAQDFK <sup>Methyl</sup> TDLR  
14.02

- ▶ fragmentation table for charge state 1+
- ▶ specType=etd
- ▶ score=75.54
- ▶ F105346.dat
- ▶ query=q8040\_p1
- ▶ precursor=573.323410
- ▶ chargePrecursor=3
- ▶ itol=0.8

| AA    | c               | y               | z+1             | z+2            | z               | AA    |
|-------|-----------------|-----------------|-----------------|----------------|-----------------|-------|
| L[1]  | 131.118         | 1717.960        | <b>1701.941</b> | 0.000          | 1700.933        | L[14] |
| V[2]  | 230.188         | 1604.875        | 1588.857        | 0.000          | 1587.849        | V[13] |
| R[3]  | <b>388.287</b>  | 1329.801        | <b>1489.788</b> | 1460.796       | 1488.781        | R[12] |
| E[4]  | <b>515.130</b>  | <b>1349.706</b> | <b>1333.607</b> | 1334.605       | <b>1332.679</b> | E[11] |
| I[5]  | <b>628.414</b>  | 1220.063        | <b>1204.645</b> | 1205.652       | 1203.637        | I[10] |
| A[6]  | <b>699.451</b>  | 1107.579        | 1091.501        | 1092.568       | 1090.553        | A[9]  |
| Q[7]  | <b>827.510</b>  | 1036.542        | <b>1020.523</b> | 1021.531       | 1019.516        | Q[8]  |
| D[8]  | <b>942.537</b>  | <b>908.484</b>  | <b>892.465</b>  | 893.473        | 891.457         | D[7]  |
| F[9]  | <b>1089.605</b> | 793.451         | <b>777.438</b>  | 778.446        | 776.431         | F[6]  |
| K[10] | <b>1231.716</b> | 640.383         | <b>620.370</b>  | 621.377        | <b>620.362</b>  | K[5]  |
| V[11] | <b>1332.763</b> | 504.278         | <b>488.259</b>  | <b>489.267</b> | 487.251         | V[4]  |
| D[12] | <b>1447.790</b> | 403.230         | <b>387.211</b>  | <b>388.219</b> | <b>386.203</b>  | D[3]  |
| L[13] | <b>1560.874</b> | 288.203         | 272.184         | 273.192        | 271.176         | L[2]  |
| R[14] | 1718.976        | 175.119         | 150.100         | 160.108        | 158.092         | R[1]  |



# sp | P68433 | H31\_MOUSE

LVREIAQDFK <sup>Methyl</sup> 14.02 TDLR

- ▶ fragmentation table for charge state 2+
- ▶ specType=etd
- ▶ score=75.54
- ▶ F105346.dat
- ▶ query=q8040\_p1
- ▶ precursor=573.323410
- ▶ chargePrecursor=3
- ▶ itol=0.8

| AA    | c              | y              | z+1            | z+2            | z              | AA    |
|-------|----------------|----------------|----------------|----------------|----------------|-------|
| L[1]  | 66.083         | <b>859.483</b> | <b>851.474</b> | 0.504          | <b>850.970</b> | L[14] |
| V[2]  | 115.597        | 802.941        | 794.037        | 0.504          | 794.426        | V[13] |
| R[3]  | 193.647        | 753.407        | <b>745.398</b> | <b>745.902</b> | <b>744.894</b> | R[12] |
| E[4]  | 258.169        | 675.357        | 667.347        | 667.851        | 666.843        | E[11] |
| I[5]  | 314.711        | 610.835        | 602.826        | 603.330        | 602.322        | I[10] |
| A[6]  | 350.229        | 564.293        | 546.284        | 546.788        | 545.780        | A[9]  |
| Q[7]  | 414.259        | 518.775        | 510.765        | 511.269        | 510.261        | Q[8]  |
| D[8]  | 471.772        | 454.745        | 446.736        | 447.240        | 446.232        | D[7]  |
| F[9]  | 545.306        | 397.232        | 389.223        | 389.727        | <b>388.719</b> | F[6]  |
| K[10] | 616.362        | 323.698        | 315.688        | 316.192        | 315.184        | K[5]  |
| T[11] | 658.928        | 252.542        | 244.533        | 245.137        | 244.129        | T[4]  |
| D[12] | 724.399        | 202.119        | 194.109        | 194.613        | 193.605        | D[3]  |
| L[13] | 780.941        | 144.605        | 136.596        | 137.100        | 136.092        | L[2]  |
| R[14] | <b>858.991</b> | 88.063         | 80.054         | 80.558         | 79.550         | R[1]  |

# sp | Q3THW5 | H2AV\_MOUSE

SLIKATIAGGGVIPHIHKSLIGKKGQK <sup>Propionyl</sup> TA  
56.03

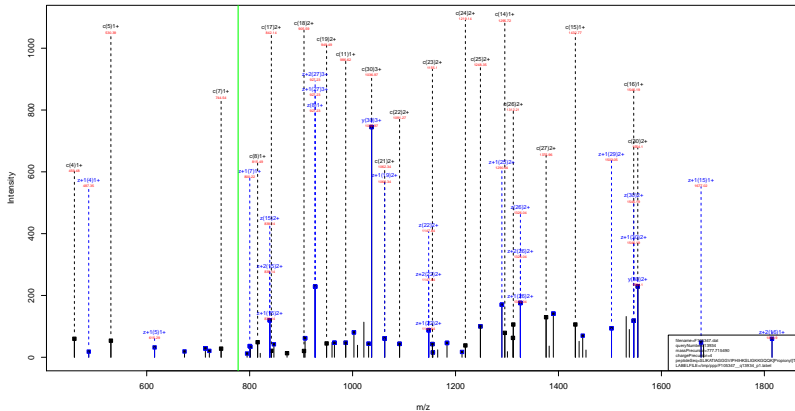

Database: UniProt  
 Query Name: Q3THW5  
 Search Method: FT-MS  
 Charge: 1+  
 Label: SLIKATIAGGGVIPHIHKSLIGKKGQK  
 Label: SLIKATIAGGGVIPHIHKSLIGKKGQK

# sp | Q3THW5 | H2AV\_MOUSE

SLIKATIAGGGVIPHIHKSLIGKKGQK Propionyl TA  
56.03

- ▶ fragmentation table for charge state 1+
- ▶ specType=etd
- ▶ score=99.34
- ▶ F105347.dat
- ▶ query=q13934.p1
- ▶ precursor=777.715490
- ▶ chargePrecursor=4
- ▶ itol=0.8

| AA    | c               | y        | z+1             | z+2             | z              | AA    |
|-------|-----------------|----------|-----------------|-----------------|----------------|-------|
| S[1]  | 105.006         | 3107.842 | 3091.823        | 0.000           | 3090.815       | S[30] |
| L[2]  | 218.150         | 3020.810 | 3004.791        | 0.000           | 3003.783       | L[29] |
| T[3]  | 311.234         | 2907.725 | 2891.707        | 0.000           | 2890.699       | T[28] |
| K[4]  | <b>459.129</b>  | 2794.641 | 2779.623        | 2779.630        | 2777.615       | K[27] |
| A[5]  | <b>530.366</b>  | 2686.546 | 2650.528        | 2651.536        | 2649.520       | A[26] |
| F[6]  | 631.414         | 2595.509 | 2579.491        | 2580.498        | 2578.483       | F[25] |
| I[7]  | <b>744.498</b>  | 2494.462 | 2478.443        | 2479.451        | 2477.435       | I[24] |
| A[8]  | <b>815.535</b>  | 2381.378 | 2365.359        | 2366.367        | 2364.351       | A[23] |
| G[9]  | <b>872.556</b>  | 2210.340 | 2204.322        | 2205.330        | 2203.314       | G[22] |
| Q[10] | 939.516         | 2053.319 | 2037.300        | 2038.308        | 2036.292       | Q[21] |
| G[11] | <b>986.599</b>  | 2106.298 | 2100.279        | 2101.287        | 2100.271       | G[20] |
| V[12] | 1085.668        | 2139.276 | 2123.257        | 2124.265        | 2122.250       | V[19] |
| I[13] | 1108.752        | 2040.208 | 2024.189        | 2025.197        | 2023.181       | I[18] |
| P[14] | <b>1295.805</b> | 1927.134 | 1911.115        | 1912.113        | 1910.107       | P[17] |
| H[15] | <b>1432.863</b> | 1830.071 | 1814.052        | <b>1815.060</b> | 1813.044       | H[16] |
| I[16] | <b>1545.948</b> | 1693.024 | <b>1676.993</b> | 1678.001        | 1676.985       | I[15] |
| H[17] | 1683.006        | 1579.926 | 1563.907        | 1564.917        | 1562.901       | H[14] |
| K[18] | 1811.101        | 1442.869 | 1426.850        | 1427.858        | 1425.843       | K[13] |
| S[19] | 1898.133        | 1314.774 | 1298.755        | 1299.763        | 1297.747       | S[12] |
| L[20] | 2011.217        | 1227.742 | 1211.723        | <b>1212.731</b> | 1210.715       | L[11] |
| I[21] | 2124.302        | 1114.658 | 1098.639        | 1099.647        | 1097.631       | I[10] |
| Q[22] | 2193.223        | 1001.574 | 985.555         | <b>986.563</b>  | 984.547        | Q[9]  |
| K[23] | 2309.418        | 944.552  | 928.534         | 929.541         | <b>927.526</b> | K[8]  |
| K[24] | 2437.513        | 816.457  | <b>800.439</b>  | <b>801.446</b>  | <b>799.431</b> | K[7]  |
| G[25] | 2494.534        | 688.362  | 672.344         | <b>673.352</b>  | 671.336        | G[6]  |
| Q[26] | 2622.593        | 631.341  | <b>615.322</b>  | 616.330         | 614.314        | Q[5]  |
| Q[27] | 2750.652        | 503.282  | <b>487.264</b>  | 488.271         | 486.256        | Q[4]  |
| K[28] | 2834.774        | 376.224  | 360.205         | 360.213         | 358.197        | K[3]  |
| T[29] | 3035.820        | 191.103  | 175.084         | 176.092         | 174.076        | T[2]  |
| A[30] | 3106.858        | 90.055   | 74.036          | 75.044          | 73.028         | A[1]  |

# sp | Q3THW5 | H2AV\_MOUSE

SLIKATIAGGGVIPHIHKSLIGKKGQK Propionyl TA  
56.03

- ▶ fragmentation table for charge state 2+
- ▶ specType=etd
- ▶ score=99.34
- ▶ F105347.dat
- ▶ query=q13934\_p1
- ▶ precursor=777.715490
- ▶ chargePrecursor=4
- ▶ itol=0.8

| AA    | c               | y               | z+1             | z+2             | z               | AA    |
|-------|-----------------|-----------------|-----------------|-----------------|-----------------|-------|
| S[1]  | 53.037          | <b>1554.424</b> | <b>1546.415</b> | 0.504           | <b>1545.911</b> | S[30] |
| L[2]  | 109.579         | 1510.908        | <b>1507.899</b> | 0.504           | <b>1507.395</b> | L[29] |
| I[3]  | 166.121         | 1454.366        | <b>1446.357</b> | 0.504           | 1445.853        | I[28] |
| K[4]  | 222.663         | 1397.824        | <b>1389.815</b> | <b>1380.319</b> | <b>1389.311</b> | K[27] |
| A[5]  | 279.205         | 1343.777        | <b>1335.767</b> | <b>1326.271</b> | <b>1325.264</b> | A[26] |
| T[6]  | 335.747         | 1288.258        | <b>1280.249</b> | <b>1270.753</b> | <b>1289.745</b> | T[25] |
| H[7]  | 392.289         | <b>1247.734</b> | 1236.725        | 1246.226        | 1236.221        | H[24] |
| A[8]  | 448.831         | 1191.192        | <b>1183.183</b> | <b>1183.687</b> | <b>1182.679</b> | A[23] |
| C[9]  | 505.373         | <b>1155.674</b> | <b>1147.665</b> | <b>1148.168</b> | <b>1147.161</b> | C[22] |
| G[10] | 561.915         | 1107.161        | 1118.254        | 1119.859        | 1118.856        | G[21] |
| G[11] | 618.457         | 1058.652        | <b>1050.643</b> | <b>1051.147</b> | 1050.139        | G[20] |
| V[12] | 674.999         | 1010.142        | <b>1002.132</b> | <b>1002.636</b> | <b>1001.628</b> | V[19] |
| I[13] | 731.541         | 962.607         | 1012.599        | 1013.102        | 1012.094        | I[18] |
| F[14] | 788.083         | <b>964.065</b>  | 958.056         | 958.560         | 959.552         | F[17] |
| H[15] | 844.625         | 915.559         | <b>907.530</b>  | <b>908.034</b>  | <b>907.026</b>  | H[16] |
| T[16] | 901.167         | <b>847.010</b>  | <b>839.000</b>  | <b>839.504</b>  | <b>838.496</b>  | T[15] |
| H[17] | <b>842.007</b>  | 790.468         | 782.458         | 782.962         | 781.954         | H[14] |
| K[18] | <b>906.054</b>  | <b>721.938</b>  | <b>713.929</b>  | <b>714.433</b>  | <b>713.425</b>  | K[13] |
| S[19] | <b>949.570</b>  | 657.891         | 649.881         | 650.385         | 649.377         | S[12] |
| L[20] | 1006.112        | 614.375         | 606.365         | 606.869         | 605.861         | L[11] |
| T[21] | <b>1062.654</b> | 557.833         | 549.823         | 550.327         | 549.319         | T[10] |
| G[22] | <b>1091.165</b> | 501.291         | 493.281         | 493.785         | 492.777         | G[9]  |
| K[23] | <b>1155.213</b> | 472.789         | 464.779         | 465.274         | 464.267         | K[8]  |
| K[24] | <b>1219.260</b> | 408.733         | 400.723         | 401.227         | 400.219         | K[7]  |
| G[25] | <b>1247.771</b> | 344.685         | 336.675         | 337.179         | 336.172         | G[6]  |
| C[26] | <b>1311.860</b> | 318.174         | 309.163         | 309.667         | 308.660         | C[5]  |
| Q[27] | <b>1375.829</b> | 252.145         | 244.135         | 244.639         | 243.632         | Q[4]  |
| K[28] | 1487.899        | 188.116         | 180.106         | 180.610         | 179.602         | K[3]  |
| T[29] | 1518.414        | 98.055          | 88.046          | 88.550          | 87.542          | T[2]  |
| A[30] | <b>1553.932</b> | 45.531          | 37.522          | 38.026          | 37.018          | A[1]  |

# sp | Q3THW5 | H2AV\_MOUSE

SLIKATIAGGGVIPHIHKSILIGKKGQK Propionyl TA  
56.03

- ▶ fragmentation table for charge state 3+
- ▶ specType=etd
- ▶ score=99.34
- ▶ F105347.dat
- ▶ query=q13934.p1
- ▶ precursor=777.715490
- ▶ chargePrecursor=4
- ▶ itol=0.8

| AA | c  | y               | z+1             | z+2             | z              | AA              |       |
|----|----|-----------------|-----------------|-----------------|----------------|-----------------|-------|
| S  | 1  | 35.693          | <b>1036.619</b> | <b>1031.279</b> | 0.672          | <b>1030.943</b> | S[30] |
| L  | 2  | 73.388          | 1007.606        | <b>1002.266</b> | 0.672          | <b>1001.933</b> | L[29] |
| L  | 3  | 111.083         | 989.913         | <b>984.574</b>  | 0.672          | <b>984.236</b>  | L[28] |
| K  | 4  | 153.781         | 932.210         | <b>926.879</b>  | <b>921.215</b> | <b>926.543</b>  | K[27] |
| A  | 5  | 177.490         | 889.520         | 884.181         | 884.517        | 883.876         | A[26] |
| T  | 6  | 211.143         | 865.841         | 860.502         | 860.838        | 860.166         | T[25] |
| H  | 7  | 248.837         | 832.159         | 826.819         | 827.155        | 826.483         | H[24] |
| A  | 8  | 272.516         | <b>794.464</b>  | 789.124         | 789.460        | 788.797         | A[23] |
| C  | 9  | 294.524         | 770.785         | 765.445         | 765.781        | 765.108         | C[22] |
| Q  | 10 | 310.311         | 751.799         | 746.438         | 746.774        | 746.109         | Q[21] |
| G  | 11 | 329.538         | 732.771         | 727.431         | 727.767        | 727.095         | G[20] |
| V  | 12 | 362.561         | <b>713.764</b>  | 708.424         | 708.760        | 708.088         | V[19] |
| I  | 13 | 400.255         | 680.741         | 675.401         | 675.737        | 675.065         | I[18] |
| P  | 14 | 432.606         | 643.040         | 637.700         | 638.042        | 637.371         | P[17] |
| H  | 15 | 478.293         | 610.695         | 605.356         | 605.691        | 605.020         | H[16] |
| I  | 16 | 515.987         | 569.909         | 559.669         | 560.005        | 559.333         | I[15] |
| H  | 17 | 561.674         | 527.314         | 521.975         | 522.311        | 521.639         | H[14] |
| K  | 18 | 604.372         | 481.638         | 476.288         | 476.624        | 475.953         | K[13] |
| S  | 19 | 633.393         | 438.930         | 433.590         | 433.926        | 433.254         | S[12] |
| L  | 20 | 671.077         | 409.910         | 404.579         | 404.915        | 404.243         | L[11] |
| L  | 21 | 708.772         | 372.224         | 366.885         | 367.221        | 366.549         | L[10] |
| Q  | 22 | 727.779         | 334.520         | 329.180         | 329.526        | 328.854         | Q[9]  |
| K  | 23 | 770.478         | 315.522         | 310.183         | 310.519        | 309.847         | K[8]  |
| K  | 24 | 813.176         | 272.824         | 267.484         | 267.820        | 267.148         | K[7]  |
| G  | 25 | 832.183         | 230.120         | 224.786         | 225.122        | 224.450         | G[6]  |
| Q  | 26 | 874.889         | 211.110         | 205.779         | 206.115        | 205.443         | Q[5]  |
| Q  | 27 | 917.595         | 168.412         | 163.069         | 163.420        | 162.753         | Q[4]  |
| K  | 28 | 918.259         | 125.746         | 120.403         | 120.742        | 120.071         | K[3]  |
| T  | 29 | 1012.812        | 64.372          | 59.033          | 59.399         | 58.697          | T[2]  |
| A  | 30 | <b>1036.291</b> | 30.690          | 25.350          | 25.688         | 25.014          | A[1]  |



# sp | Q3THW5 | H2AV\_MOUSE

SLIKATIAGGGVIPHIHKSLIGKKGQK Propionyl TA  
56.03

- ▶ fragmentation table for charge state 1+
- ▶ specType=etd
- ▶ score=107.91
- ▶ F105347.dat
- ▶ query=q13935.p1
- ▶ precursor=622.374580
- ▶ chargePrecursor=5
- ▶ itol=0.8

| AA | c  | y               | z+1            | z+2            | z               | AA             |   |    |
|----|----|-----------------|----------------|----------------|-----------------|----------------|---|----|
| S  | 1  | 105.956         | 3107.842       | 3091.823       | 0.000           | 3090.815       | S | 30 |
| L  | 2  | <b>218.150</b>  | 3030.810       | 3004.791       | 0.000           | 3003.783       | L | 29 |
| T  | 3  | <b>331.234</b>  | 2967.725       | 2991.707       | 0.000           | 2990.699       | T | 28 |
| R  | 4  | <b>459.329</b>  | 2794.641       | 2778.623       | 2779.630        | 2777.615       | R | 27 |
| A  | 5  | <b>530.366</b>  | 2666.546       | 2650.528       | 2651.536        | 2649.520       | A | 26 |
| T  | 6  | <b>631.414</b>  | 2505.509       | 2579.491       | 2580.498        | 2578.483       | T | 25 |
| I  | 7  | <b>744.498</b>  | 2494.462       | 2478.443       | 2479.451        | 2477.435       | I | 24 |
| A  | 8  | <b>815.535</b>  | 2381.379       | 2365.359       | 2366.367        | 2364.351       | A | 23 |
| C  | 9  | <b>872.556</b>  | 2310.340       | 2294.322       | 2295.330        | 2293.314       | C | 22 |
| G  | 10 | 939.578         | 2253.319       | 2237.300       | 2238.308        | 2236.292       | G | 21 |
| G  | 11 | <b>986.599</b>  | 2196.298       | 2180.279       | 2181.287        | 2179.271       | G | 20 |
| V  | 12 | <b>1085.668</b> | 2139.276       | 2123.257       | 2124.265        | 2122.250       | V | 19 |
| I  | 13 | 1196.752        | 2040.208       | 2024.189       | 2025.197        | 2023.181       | I | 18 |
| P  | 14 | <b>1295.805</b> | 1927.124       | 1911.105       | 1912.113        | 1910.097       | P | 17 |
| H  | 15 | <b>1432.863</b> | 1830.071       | 1814.052       | 1815.060        | 1813.044       | H | 16 |
| T  | 16 | 1545.948        | 1693.012       | 1678.993       | 1679.001        | 1677.985       | T | 15 |
| H  | 17 | 1683.008        | 1579.928       | 1563.909       | 1564.917        | 1562.901       | H | 14 |
| K  | 18 | 1811.101        | 1442.868       | 1426.850       | 1427.858        | 1425.842       | K | 13 |
| S  | 19 | <b>1898.133</b> | 1314.774       | 1298.755       | 1299.763        | 1297.747       | S | 12 |
| L  | 20 | 2011.217        | 1227.742       | 1211.723       | 1212.731        | 1210.715       | L | 11 |
| I  | 21 | 2124.302        | 1114.650       | 1098.630       | <b>1099.647</b> | 1097.631       | I | 10 |
| G  | 22 | 2181.223        | 1020.574       | <b>985.555</b> | <b>986.563</b>  | 984.547        | G | 9  |
| R  | 23 | 2309.418        | <b>944.552</b> | 928.533        | 929.541         | <b>927.526</b> | R | 8  |
| K  | 24 | 2437.513        | <b>816.457</b> | <b>800.439</b> | 801.446         | 799.431        | K | 7  |
| G  | 25 | 2494.534        | 688.361        | <b>672.344</b> | 673.352         | 671.336        | G | 6  |
| Q  | 26 | 2622.593        | <b>631.341</b> | <b>615.322</b> | 616.330         | 614.314        | Q | 5  |
| Q  | 27 | 2750.652        | 503.262        | <b>487.264</b> | 488.271         | 486.256        | Q | 4  |
| K  | 28 | 2934.773        | 375.224        | <b>359.205</b> | 360.213         | 358.197        | K | 3  |
| T  | 29 | 3035.820        | 191.103        | 175.084        | 176.092         | 174.076        | T | 2  |
| A  | 30 | 3106.858        | 90.055         | 74.036         | 74.044          | 73.028         | A | 1  |

# sp | Q3THW5 | H2AV\_MOUSE

SLIKATIAGGGVIPHIHKSLIGKKKGQK Propionyl TA  
56.03

- ▶ fragmentation table for charge state 2+
- ▶ specType=etd
- ▶ score=107.91
- ▶ F105347.dat
- ▶ query=q13935\_p1
- ▶ precursor=622.374580
- ▶ chargePrecursor=5
- ▶ itol=0.8

| AA    | c               | y               | z+1             | z+2             | z               | AA    |
|-------|-----------------|-----------------|-----------------|-----------------|-----------------|-------|
| S[1]  | 53.037          | <b>1554.424</b> | 1546.415        | 0.504           | 1545.011        | S[30] |
| L[2]  | 109.579         | 1510.908        | <b>1502.899</b> | 0.504           | <b>1502.395</b> | L[29] |
| I[3]  | 166.121         | 1454.366        | <b>1446.357</b> | 0.504           | 1445.053        | I[28] |
| K[4]  | 222.268         | 1397.824        | <b>1389.815</b> | <b>1380.319</b> | <b>1369.311</b> | K[27] |
| A[5]  | 278.407         | 1343.777        | <b>1325.767</b> | <b>1326.271</b> | <b>1325.264</b> | A[26] |
| T[6]  | 334.211         | 1298.258        | <b>1290.249</b> | <b>1290.753</b> | 1288.745        | T[25] |
| I[7]  | 372.753         | <b>1247.734</b> | <b>1239.725</b> | <b>1240.229</b> | 1238.221        | I[24] |
| A[8]  | 408.271         | 1191.192        | <b>1183.183</b> | <b>1183.687</b> | 1182.679        | A[23] |
| C[9]  | 436.762         | <b>1155.674</b> | <b>1147.665</b> | <b>1148.168</b> | 1147.161        | C[22] |
| G[10] | 465.293         | 1127.161        | <b>1119.154</b> | <b>1119.658</b> | <b>1118.650</b> | G[21] |
| G[11] | <b>493.803</b>  | 1098.652        | <b>1090.643</b> | <b>1091.147</b> | 1089.139        | G[20] |
| V[12] | 543.337         | <b>1070.142</b> | <b>1062.132</b> | <b>1062.636</b> | 1061.628        | V[19] |
| I[13] | 599.650         | 1020.607        | <b>1012.598</b> | <b>1013.102</b> | <b>1012.094</b> | I[18] |
| P[14] | 648.406         | 964.055         | 958.056         | 956.560         | 955.552         | P[17] |
| H[15] | <b>718.935</b>  | 925.579         | <b>907.530</b>  | 908.034         | <b>907.026</b>  | H[16] |
| T[16] | <b>773.477</b>  | <b>847.010</b>  | <b>839.000</b>  | <b>839.504</b>  | 838.496         | T[15] |
| H[17] | <b>842.007</b>  | 790.468         | <b>782.458</b>  | <b>782.962</b>  | <b>781.954</b>  | H[14] |
| K[18] | <b>906.054</b>  | 721.938         | <b>713.929</b>  | <b>714.433</b>  | 713.425         | K[13] |
| S[19] | <b>949.570</b>  | <b>657.891</b>  | <b>649.881</b>  | <b>650.385</b>  | <b>649.377</b>  | S[12] |
| L[20] | <b>1006.112</b> | <b>614.375</b>  | <b>606.365</b>  | <b>606.869</b>  | <b>605.861</b>  | L[11] |
| I[21] | <b>1062.654</b> | 557.833         | 549.833         | 550.337         | 549.330         | I[10] |
| G[22] | <b>1091.165</b> | 501.291         | <b>493.281</b>  | <b>493.785</b>  | <b>492.777</b>  | G[9]  |
| K[23] | <b>1155.213</b> | 472.780         | 464.779         | 465.274         | 464.267         | K[8]  |
| K[24] | 1219.260        | 408.732         | 400.733         | 401.227         | 400.219         | K[7]  |
| G[25] | <b>1247.771</b> | 344.685         | 336.675         | 337.179         | 336.172         | G[6]  |
| C[26] | <b>1311.808</b> | 318.174         | 309.165         | 309.669         | 308.661         | C[5]  |
| G[27] | <b>1375.829</b> | 252.145         | 244.135         | 244.639         | 243.631         | G[4]  |
| K[28] | 1487.890        | 188.116         | 180.106         | 180.610         | 179.602         | K[3]  |
| T[29] | 1518.414        | 98.055          | 88.046          | 88.550          | 87.542          | T[2]  |
| A[30] | <b>1553.932</b> | 45.531          | 37.522          | 38.026          | 37.018          | A[1]  |



# sp | Q3THW5 | H2AV\_MOUSE

SLIKATIAGGGVIPHIHKSLIGKKGQK Propionyl TA  
56.03

- ▶ fragmentation table for charge state 3+
- ▶ specType=etd
- ▶ score=107.91
- ▶ F105347.dat
- ▶ query=q13935.p1
- ▶ precursor=622.374580
- ▶ chargePrecursor=5
- ▶ itol=0.8

| AA    | c               | y               | z+1             | z+2            | z               | AA    |
|-------|-----------------|-----------------|-----------------|----------------|-----------------|-------|
| S[1]  | 35.693          | <b>1036.619</b> | <b>1031.279</b> | 0.672          | 1030.943        | S[30] |
| L[2]  | 73.388          | 1007.650        | <b>1002.268</b> | 0.672          | <b>1001.933</b> | L[29] |
| L[3]  | 111.083         | <b>969.913</b>  | <b>964.574</b>  | 0.672          | <b>964.238</b>  | L[28] |
| K[4]  | 183.781         | 939.741         | <b>926.879</b>  | 0.672          | <b>926.543</b>  | K[27] |
| A[5]  | 177.490         | 889.520         | <b>884.181</b>  | <b>884.517</b> | <b>883.845</b>  | A[26] |
| T[6]  | 211.143         | 865.841         | <b>860.502</b>  | <b>860.838</b> | <b>860.166</b>  | T[25] |
| H[7]  | 248.837         | <b>832.150</b>  | <b>826.819</b>  | <b>827.155</b> | <b>826.483</b>  | H[24] |
| A[8]  | 272.516         | 794.454         | <b>789.124</b>  | <b>789.460</b> | 788.799         | A[23] |
| C[9]  | 294.524         | <b>770.785</b>  | <b>765.445</b>  | <b>765.781</b> | <b>765.109</b>  | C[22] |
| Q[10] | 310.911         | <b>751.778</b>  | <b>746.438</b>  | <b>746.774</b> | <b>746.102</b>  | Q[21] |
| G[11] | 329.538         | <b>732.771</b>  | <b>727.431</b>  | <b>727.767</b> | <b>727.095</b>  | G[20] |
| V[12] | 362.561         | <b>713.764</b>  | <b>708.424</b>  | <b>708.760</b> | <b>708.088</b>  | V[19] |
| I[13] | 400.255         | 680.741         | <b>675.401</b>  | <b>675.737</b> | <b>675.065</b>  | I[18] |
| P[14] | 432.606         | <b>643.046</b>  | 637.705         | 638.042        | 637.371         | P[17] |
| H[15] | 478.291         | 610.695         | <b>605.356</b>  | <b>605.691</b> | <b>605.020</b>  | H[16] |
| I[16] | 515.987         | 580.900         | 579.669         | 580.009        | 579.331         | I[15] |
| H[17] | 561.674         | 527.314         | 521.975         | 522.311        | 521.630         | H[14] |
| K[18] | 604.372         | 481.620         | 476.289         | 476.624        | 475.953         | K[13] |
| S[19] | 633.383         | 438.930         | 433.590         | 433.926        | 433.254         | S[12] |
| L[20] | 671.977         | 409.910         | 404.579         | 404.915        | 404.243         | L[11] |
| L[21] | <b>708.772</b>  | 372.224         | 366.885         | 367.221        | 366.549         | L[10] |
| Q[22] | <b>727.779</b>  | 334.520         | 329.189         | 329.526        | 328.854         | Q[9]  |
| K[23] | <b>770.478</b>  | 315.522         | 310.183         | 310.519        | 309.847         | K[8]  |
| K[24] | <b>813.176</b>  | 272.824         | 267.484         | 267.820        | 267.148         | K[7]  |
| G[25] | <b>832.183</b>  | 230.120         | 224.786         | 225.122        | 224.450         | G[6]  |
| Q[26] | <b>874.869</b>  | 211.110         | 205.779         | 206.115        | 205.443         | Q[5]  |
| Q[27] | <b>917.555</b>  | 168.412         | 163.093         | 163.429        | 162.757         | Q[4]  |
| K[28] | 916.259         | 129.746         | 124.407         | 124.742        | 124.071         | K[3]  |
| T[29] | <b>1012.612</b> | 64.372          | 59.033          | 59.369         | 58.697          | T[2]  |
| A[30] | 1036.291        | 30.690          | 25.350          | 25.686         | 25.014          | A[1]  |

# sp | Q3THW5 | H2AV\_MOUSE

SLIKATIAGGGVIPHIHKSLIGKKGQQK Propionyl TA  
56.03

- ▶ fragmentation table for charge state 4+
- ▶ specType=etd
- ▶ score=107.91
- ▶ F105347.dat
- ▶ query=q13935\_p1
- ▶ precursor=622.374580
- ▶ chargePrecursor=5
- ▶ itol=0.8

| AA    | c              | y              | z+1            | z+2            | z              | AA    |
|-------|----------------|----------------|----------------|----------------|----------------|-------|
| S[1]  | 27.022         | <b>777.716</b> | <b>773.711</b> | 0.735          | <b>773.459</b> | S[30] |
| L[2]  | 55.293         | <b>755.958</b> | <b>751.953</b> | 0.735          | <b>751.701</b> | L[29] |
| I[3]  | 83.564         | <b>727.687</b> | 723.682        | 0.735          | 723.430        | I[28] |
| K[4]  | 115.588        | 699.416        | <b>695.411</b> | <b>695.663</b> | <b>695.159</b> | K[27] |
| A[5]  | 133.347        | 667.362        | 663.357        | 663.639        | 663.135        | A[26] |
| T[6]  | 158.609        | <b>649.633</b> | 645.628        | 645.880        | 645.376        | T[25] |
| I[7]  | 186.880        | 624.371        | 620.366        | 620.618        | 620.114        | I[24] |
| A[8]  | 204.639        | 596.100        | 592.095        | 592.347        | 591.843        | A[23] |
| G[9]  | <b>218.895</b> | 578.341        | 574.336        | 574.588        | 574.084        | G[22] |
| G[10] | 233.150        | 564.085        | 560.081        | 560.332        | 559.829        | G[21] |
| G[11] | 247.406        | 549.830        | 545.825        | 546.077        | 545.573        | G[20] |
| V[12] | 272.172        | 535.574        | 531.570        | 531.822        | 531.318        | V[19] |
| I[13] | 300.443        | 510.807        | 506.803        | 507.055        | 506.551        | I[18] |
| F[14] | 324.707        | 482.536        | 478.532        | 478.784        | 478.280        | F[17] |
| H[15] | <b>358.971</b> | 458.273        | 454.268        | 454.520        | 454.017        | H[16] |
| I[16] | 387.242        | 424.008        | 420.004        | 420.256        | 419.752        | I[15] |
| H[17] | 421.507        | 395.731        | 391.723        | 391.985        | 391.481        | H[14] |
| K[18] | 453.311        | 361.473        | 357.468        | 357.720        | 357.216        | K[13] |
| S[19] | 475.289        | 329.449        | 325.444        | 325.696        | 325.192        | S[12] |
| L[20] | 503.560        | 307.691        | 303.686        | 303.938        | 303.434        | L[11] |
| I[21] | 531.831        | 279.420        | 275.415        | 275.667        | 275.163        | I[10] |
| G[22] | 546.086        | 251.149        | 247.144        | 247.396        | 246.892        | G[9]  |
| K[23] | 578.110        | 236.894        | 232.889        | 233.141        | 232.637        | K[8]  |
| K[24] | 610.134        | 204.870        | 200.865        | 201.117        | 200.613        | K[7]  |
| G[25] | 624.389        | 172.846        | 168.841        | 169.093        | 168.589        | G[6]  |
| G[26] | 656.404        | 158.391        | 154.386        | 154.638        | 154.134        | G[5]  |
| Q[27] | 688.418        | 126.376        | 122.371        | 122.623        | 122.119        | Q[4]  |
| K[28] | 734.449        | 94.361         | 90.357         | 90.609         | 90.105         | K[3]  |
| T[29] | <b>750.711</b> | 48.531         | 44.526         | 44.778         | 44.274         | T[2]  |
| A[30] | <b>777.470</b> | 23.269         | 19.265         | 19.516         | 19.013         | A[1]  |



# sp | P43276 | H15\_MOUSE

S<sup>Phospho</sup> 79.97 ET<sup>Phospho</sup> 79.97 APAETAAPAPVEKS<sup>Phospho</sup> PAKKK<sup>79.97</sup>

- ▶ fragmentation table for charge state 1+
- ▶ specType=etd
- ▶ score=32.85
- ▶ F105352.dat
- ▶ query=q10141\_p1
- ▶ precursor=612.776040
- ▶ chargePrecursor=4
- ▶ itol=0.8

| AA | c  | y               | z+1            | z+2             | z              | AA             |       |
|----|----|-----------------|----------------|-----------------|----------------|----------------|-------|
| S  | 1  | 185.032         | 2448.086       | 2442.067        | 0.000          | 2431.050       | S[22] |
| E  | 2  | 314.075         | 2281.082       | 2285.069        | 0.000          | 2264.061       | E[21] |
| T  | 3  | 495.089         | 2152.045       | 2136.026        | 0.000          | 2135.010       | T[20] |
| A  | 4  | 566.126         | 1971.031       | 1955.012        | 0.000          | 1954.005       | A[19] |
| P  | 5  | 663.179         | 1899.964       | 1883.975        | 0.000          | 1882.967       | P[18] |
| A  | 6  | <b>734.216</b>  | 1802.941       | 1786.922        | 0.000          | 1785.915       | A[17] |
| E  | 7  | <b>863.258</b>  | 1731.904       | 1715.885        | 0.000          | 1714.878       | E[16] |
| T  | 8  | <b>964.306</b>  | 1602.861       | <b>1586.843</b> | 0.000          | 1585.835       | T[15] |
| A  | 9  | <b>1035.343</b> | 1501.814       | 1485.795        | 0.000          | 1484.787       | A[14] |
| A  | 10 | 1106.880        | 1430.777       | 1414.758        | 0.000          | 1413.750       | A[13] |
| P  | 11 | 1203.433        | 1359.740       | 1343.721        | 0.000          | 1342.713       | P[12] |
| A  | 12 | 1274.470        | 1262.687       | 1246.668        | 0.000          | 1245.660       | A[11] |
| P  | 13 | 1371.523        | 1191.650       | 1175.631        | 0.000          | 1174.623       | P[10] |
| V  | 14 | <b>1478.591</b> | 1124.597       | 1078.578        | 0.000          | 1077.570       | V[9]  |
| E  | 15 | 1509.634        | <b>995.529</b> | <b>979.510</b>  | 0.000          | 978.502        | E[8]  |
| K  | 16 | <b>1727.729</b> | 896.485        | <b>850.467</b>  | <b>851.475</b> | <b>849.459</b> | K[7]  |
| S  | 17 | 1894.727        | 738.391        | <b>722.372</b>  | <b>723.380</b> | 721.364        | S[0]  |
| P  | 18 | 1991.780        | 571.393        | 555.374         | 556.382        | 554.366        | P[5]  |
| A  | 19 | 2062.817        | 474.340        | <b>458.321</b>  | 459.329        | 457.313        | A[4]  |
| K  | 20 | 2190.912        | 403.303        | <b>387.284</b>  | 388.292        | 386.276        | K[3]  |
| K  | 21 | 2319.007        | <b>275.208</b> | <b>259.189</b>  | 260.197        | 258.181        | K[2]  |
| K  | 22 | 2447.102        | 147.111        | 131.094         | 132.102        | 130.085        | K[1]  |

# sp | P43276 | H15\_MOUSE

S<sup>Phospho</sup> 79.97 ET<sup>Phospho</sup> 79.97 APAETAAPAPVEKS<sup>Phospho</sup> PAKKK<sup>Phospho</sup> 79.97

- ▶ fragmentation table for charge state 2+
- ▶ specType=etd
- ▶ score=32.85
- ▶ F105352.dat
- ▶ query=q10141\_p1
- ▶ precursor=612.776040
- ▶ chargePrecursor=4
- ▶ itol=0.8

| AA    | c               | y              | z+1             | z+2     | z               | AA    |
|-------|-----------------|----------------|-----------------|---------|-----------------|-------|
| S[1]  | 93.020          | 1224.547       | <b>1216.537</b> | 0.504   | <b>1216.033</b> | S[2]  |
| E[2]  | 157.541         | 1141.047       | 1133.038        | 0.504   | 1132.534        | E[2]  |
| T[3]  | 248.048         | 1076.526       | 1068.517        | 0.504   | 1068.013        | T[20] |
| A[4]  | 283.567         | 986.019        | 978.010         | 0.504   | 977.506         | A[19] |
| P[5]  | 332.093         | 920.501        | 942.491         | 0.504   | 941.987         | P[18] |
| A[6]  | 367.612         | 901.974        | 893.965         | 0.504   | 893.461         | A[17] |
| E[7]  | 432.133         | 866.455        | <b>858.446</b>  | 0.504   | 857.942         | E[10] |
| T[8]  | 492.857         | <b>801.934</b> | <b>793.925</b>  | 0.504   | <b>793.421</b>  | T[15] |
| A[9]  | 518.175         | 751.411        | <b>743.401</b>  | 0.504   | <b>742.897</b>  | A[14] |
| A[10] | 553.694         | <b>715.892</b> | <b>707.883</b>  | 0.504   | <b>707.379</b>  | A[13] |
| P[11] | 602.220         | 680.373        | 672.364         | 0.504   | 671.860         | P[12] |
| A[12] | 637.739         | 631.847        | <b>623.838</b>  | 0.504   | <b>623.334</b>  | A[11] |
| P[13] | 686.265         | 596.328        | <b>588.319</b>  | 0.504   | <b>587.815</b>  | P[10] |
| V[14] | <b>735.799</b>  | 547.802        | 539.793         | 0.504   | 539.289         | V[0]  |
| E[15] | <b>800.321</b>  | 498.255        | <b>490.250</b>  | 0.504   | 489.745         | E[9]  |
| K[16] | <b>864.368</b>  | 433.747        | 425.737         | 426.241 | 425.233         | K[7]  |
| S[17] | 947.867         | 369.699        | 361.690         | 362.194 | 361.186         | S[0]  |
| P[18] | <b>996.394</b>  | 286.200        | 278.191         | 279.694 | 277.687         | P[5]  |
| A[19] | <b>1031.912</b> | 237.674        | 229.664         | 230.168 | 229.160         | A[4]  |
| K[20] | <b>1095.960</b> | 202.155        | 194.146         | 194.650 | 193.642         | K[3]  |
| K[21] | <b>1160.007</b> | 138.108        | 130.098         | 130.602 | 129.594         | K[2]  |
| K[22] | 1224.055        | 74.080         | 66.071          | 66.575  | 65.547          | K[1]  |

# sp | P43276 | H15\_MOUSE

S<sup>Phospho</sup> 79.97 ET<sup>Phospho</sup> 79.97 APAETAAPAPVEKS<sup>Phospho</sup> PAKKK<sup>79.97</sup>

- ▶ fragmentation table for charge state 3+
- ▶ specType=etd
- ▶ score=32.85
- ▶ F105352.dat
- ▶ query=q10141.p1
- ▶ precursor=612.776040
- ▶ chargePrecursor=4
- ▶ itol=0.8

| AA    | c              | y              | z+1            | z+2     | z              | AA    |
|-------|----------------|----------------|----------------|---------|----------------|-------|
| S[1]  | 62.949         | <b>816.700</b> | <b>811.361</b> | 0.672   | <b>811.025</b> | S[22] |
| E[2]  | 109.363        | 761.034        | 755.695        | 0.672   | 755.359        | E[21] |
| T[3]  | 165.701        | 718.020        | 712.680        | 0.672   | 712.344        | T[20] |
| A[4]  | 189.380        | 657.862        | 652.522        | 0.672   | 652.006        | A[19] |
| P[5]  | 221.731        | 634.003        | 628.663        | 0.672   | 628.327        | P[18] |
| A[6]  | 245.410        | 601.052        | 596.312        | 0.672   | 595.976        | A[17] |
| E[7]  | 288.424        | 577.973        | 572.633        | 0.672   | 572.297        | E[16] |
| T[8]  | 322.107        | 534.950        | 529.610        | 0.672   | 529.273        | T[15] |
| A[9]  | 345.786        | 501.276        | 495.937        | 0.672   | 495.601        | A[14] |
| A[10] | 369.465        | 477.597        | 472.258        | 0.672   | 471.922        | A[13] |
| P[11] | 401.816        | 453.918        | 448.578        | 0.672   | 448.243        | P[12] |
| A[12] | 425.495        | 421.567        | 416.228        | 0.672   | 415.892        | A[11] |
| P[13] | <b>457.846</b> | 397.888        | 392.549        | 0.672   | 392.213        | P[10] |
| V[14] | <b>490.869</b> | 365.537        | 360.198        | 0.672   | 359.862        | V[9]  |
| E[15] | 533.883        | 332.514        | 327.175        | 0.672   | 326.839        | E[8]  |
| K[16] | 578.561        | 299.500        | 294.161        | 294.497 | 293.825        | K[7]  |
| S[17] | 632.247        | 266.802        | 241.463        | 241.798 | 241.126        | S[6]  |
| P[18] | 664.598        | 191.130        | 185.790        | 185.132 | 185.460        | P[3]  |
| A[19] | 698.277        | 158.785        | 153.445        | 153.781 | 153.109        | A[4]  |
| K[20] | 730.976        | 135.105        | 129.766        | 130.102 | 129.430        | K[3]  |
| K[21] | <b>773.674</b> | 92.407         | 87.068         | 87.404  | 86.732         | K[2]  |
| K[22] | <b>816.372</b> | 49.700         | 44.370         | 44.705  | 44.034         | K[1]  |

# sp | P10922 | H10\_MOUSE

STDHPKYS <sup>Phospho</sup> DMIVAAIQAEKNR  
79.97

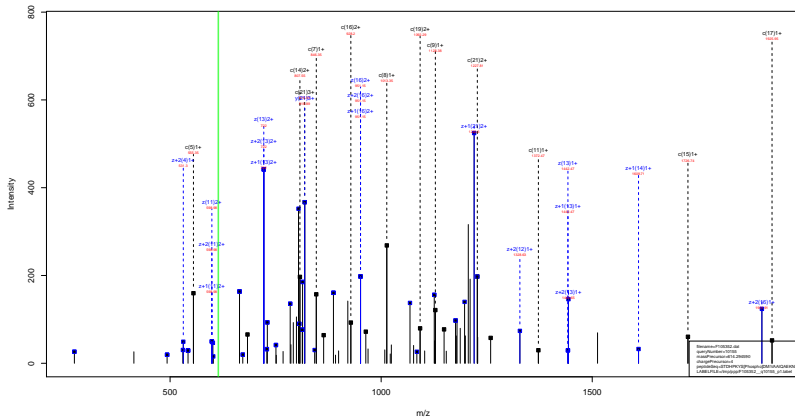

# sp | P10922 | H10\_MOUSE

STDHPKYS <sup>Phospho</sup> 79.97 DMIVAAIQAEKNR

- ▶ fragmentation table for charge state 1+
- ▶ specType=etd
- ▶ score=72.26
- ▶ F105352.dat
- ▶ query=q10155\_p1
- ▶ precursor=614.294590
- ▶ chargePrecursor=4
- ▶ itol=0.8

| AA    | c               | y        | z+1             | z+2             | z               | AA    |
|-------|-----------------|----------|-----------------|-----------------|-----------------|-------|
| S[1]  | 105.066         | 2454.148 | 2438.130        | 0.000           | 2437.122        | S[21] |
| Y[2]  | 206.114         | 2307.116 | 2351.090        | 0.000           | 2350.090        | Y[20] |
| D[3]  | 321.140         | 2386.069 | 2250.050        | 0.000           | 2249.042        | D[19] |
| H[4]  | 438.199         | 2131.042 | 2138.023        | 0.000           | 2134.015        | H[18] |
| F[5]  | <b>555.252</b>  | 2013.083 | 1997.064        | 0.000           | 1995.956        | F[17] |
| K[6]  | <b>663.347</b>  | 1936.930 | 1900.911        | <b>1901.910</b> | 1899.903        | K[16] |
| Y[7]  | <b>846.410</b>  | 1780.835 | 1772.810        | 1773.824        | 1771.808        | Y[15] |
| S[8]  | <b>1013.409</b> | 1625.772 | <b>1609.753</b> | 1610.761        | 1608.749        | S[14] |
| D[9]  | <b>1128.436</b> | 1438.773 | <b>1442.755</b> | <b>1443.762</b> | <b>1441.747</b> | D[13] |
| H[10] | <b>1259.476</b> | 1343.746 | 1327.728        | <b>1328.735</b> | 1326.720        | H[12] |
| I[11] | <b>1372.560</b> | 1232.705 | 1195.657        | <b>1197.695</b> | 1195.678        | I[11] |
| V[12] | 1471.629        | 1099.622 | 1083.603        | <b>1084.611</b> | 1082.595        | V[10] |
| A[13] | 1542.696        | 1000.553 | 984.535         | 985.543         | 983.527         | A[9]  |
| A[14] | 1613.763        | 920.516  | 913.498         | 914.505         | 912.490         | A[8]  |
| T[15] | <b>1726.787</b> | 838.479  | <b>842.460</b>  | 843.468         | 841.451         | T[7]  |
| Q[16] | 1854.849        | 748.395  | <b>725.376</b>  | <b>730.384</b>  | 728.369         | Q[6]  |
| A[17] | <b>1925.883</b> | 617.337  | <b>601.318</b>  | <b>602.326</b>  | 600.310         | A[5]  |
| E[18] | 2054.925        | 546.299  | <b>530.281</b>  | <b>531.289</b>  | 529.273         | E[4]  |
| K[19] | 2183.020        | 417.257  | 401.239         | 402.246         | 400.230         | K[3]  |
| N[20] | 2297.063        | 289.162  | <b>273.143</b>  | 274.151         | 272.135         | N[2]  |
| R[21] | 2453.184        | 178.119  | 159.100         | 160.108         | 158.092         | R[1]  |



# sp | P10922 | H10\_MOUSE

STDHPKYS <sup>Phospho</sup> 79.97 DMIVAAIQAEKNR

- ▶ fragmentation table for charge state 2+
- ▶ specType=etd
- ▶ score=72.26
- ▶ F105352.dat
- ▶ query=q10155\_p1
- ▶ precursor=614.294590
- ▶ chargePrecursor=4
- ▶ itol=0.8

| AA |    | c               | y               | z+1             | z+2            | z               | AA    |
|----|----|-----------------|-----------------|-----------------|----------------|-----------------|-------|
| S  | 1  | 53.037          | <b>1227.578</b> | <b>1219.568</b> | 0.504          | 1219.065        | S(2)  |
| T  | 2  | 103.560         | 1184.962        | <b>1176.052</b> | 0.504          | <b>1175.549</b> | T(2)  |
| D  | 3  | 161.074         | 1133.530        | <b>1125.529</b> | 0.504          | <b>1125.025</b> | D(3)  |
| W  | 4  | 220.603         | 1079.024        | <b>1068.015</b> | 0.504          | 1067.511        | W(4)  |
| P  | 5  | 278.130         | 1027.495        | 999.488         | 0.504          | 998.982         | P(5)  |
| K  | 6  | 342.177         | 958.969         | <b>950.959</b>  | <b>951.463</b> | <b>950.455</b>  | K(6)  |
| Y  | 7  | 423.709         | 894.921         | <b>886.912</b>  | <b>887.416</b> | <b>886.408</b>  | Y(5)  |
| S  | 8  | 507.208         | <b>813.389</b>  | <b>805.380</b>  | <b>805.884</b> | <b>804.876</b>  | S(4)  |
| D  | 9  | 564.722         | <b>729.890</b>  | <b>721.881</b>  | <b>722.385</b> | <b>721.377</b>  | D(3)  |
| T  | 10 | 639.242         | <b>672.377</b>  | <b>664.367</b>  | <b>664.871</b> | <b>663.864</b>  | T(2)  |
| I  | 11 | 688.784         | 600.857         | <b>598.847</b>  | <b>599.351</b> | <b>598.343</b>  | I(1)  |
| V  | 12 | 736.318         | 550.315         | <b>542.305</b>  | <b>542.809</b> | <b>541.801</b>  | V(10) |
| A  | 13 | 771.837         | 500.786         | <b>492.771</b>  | <b>493.275</b> | <b>492.267</b>  | A(0)  |
| A  | 14 | <b>807.355</b>  | 465.262         | 457.252         | 457.756        | 456.749         | A(8)  |
| I  | 15 | <b>863.897</b>  | 420.743         | 421.734         | 422.238        | 421.230         | I(7)  |
| Q  | 16 | <b>927.926</b>  | 373.200         | 365.192         | 365.696        | 364.688         | Q(6)  |
| A  | 17 | <b>963.445</b>  | 309.172         | 301.163         | 301.666        | 300.659         | A(5)  |
| E  | 18 | 1027.966        | <b>273.653</b>  | 265.644         | 266.148        | 265.140         | E(4)  |
| K  | 19 | <b>1092.014</b> | 209.132         | 201.123         | 201.627        | 200.619         | K(3)  |
| N  | 20 | <b>1149.035</b> | 145.085         | 137.075         | 137.579        | 136.571         | N(2)  |
| R  | 21 | <b>1227.086</b> | 88.063          | 80.054          | 80.558         | 79.550          | R(1)  |

# sp | P10922 | H10\_MOUSE

STDHPKYS <sup>Phospho</sup> 79.97 DMIVAAIQAEKNR

- ▶ fragmentation table for charge state 3+
- ▶ specType=etd
- ▶ score=72.26
- ▶ F105352.dat
- ▶ query=q10155\_p1
- ▶ precursor=614.294590
- ▶ chargePrecursor=4
- ▶ itol=0.8

| AA    | c              | y              | z+1            | z+2   | z              | AA    |
|-------|----------------|----------------|----------------|-------|----------------|-------|
| S[1]  | 35.693         | <b>818.721</b> | <b>813.381</b> | 0.672 | <b>813.045</b> | S[21] |
| T[2]  | 69.376         | 769.710        | <b>784.371</b> | 0.672 | <b>784.035</b> | T[20] |
| D[3]  | 107.718        | 756.028        | <b>750.688</b> | 0.672 | <b>750.352</b> | D[19] |
| H[4]  | 153.405        | 717.685        | 712.346        | 0.672 | 712.010        | H[18] |
| P[5]  | 185.756        | <b>671.999</b> | 666.660        | 0.672 | 666.324        | P[17] |
| K[6]  | 228.494        | 639.648        | 634.309        | 0.672 | 633.973        | K[16] |
| Y[7]  | 282.808        | 596.950        | 591.610        | 0.672 | 591.274        | Y[15] |
| S[8]  | 338.474        | <b>542.595</b> | 537.256        | 0.672 | 536.920        | S[14] |
| D[9]  | 376.817        | 486.929        | 481.590        | 0.672 | 481.254        | D[13] |
| M[10] | 430.897        | 448.567        | 443.227        | 0.672 | 442.891        | M[12] |
| I[11] | 458.192        | 404.907        | 399.567        | 0.672 | 399.231        | I[11] |
| V[12] | 491.214        | 367.212        | 361.873        | 0.672 | 361.537        | V[10] |
| A[13] | 514.893        | 334.189        | 328.850        | 0.672 | 328.514        | A[9]  |
| A[14] | 538.572        | 310.510        | 305.171        | 0.672 | 304.835        | A[8]  |
| I[15] | 576.267        | 268.831        | 263.492        | 0.672 | 263.156        | I[7]  |
| Q[16] | 618.953        | 249.131        | 243.792        | 0.672 | 243.456        | Q[6]  |
| A[17] | 642.632        | 206.450        | 201.111        | 0.672 | 200.775        | A[5]  |
| E[18] | 685.647        | 182.771        | 177.432        | 0.672 | 177.096        | E[4]  |
| K[19] | 728.345        | 139.751        | 134.412        | 0.672 | 134.076        | K[3]  |
| N[20] | 766.359        | 97.059         | 91.720         | 0.672 | 91.384         | N[2]  |
| R[21] | <b>818.393</b> | 59.045         | 53.706         | 0.672 | 53.370         | R[1]  |



# sp | P10922 | H10\_MOUSE

KSTDHPKYS <sup>Phospho</sup><sub>79.97</sub> DMIVAAIQAEKNR

- ▶ fragmentation table for charge state 1+
- ▶ specType=etd
- ▶ score=57.03
- ▶ F105352.dat
- ▶ query=q10373\_p1
- ▶ precursor=646.318530
- ▶ chargePrecursor=4
- ▶ itol=0.8

| AA | c               | y               | z=1             | z=2             | z               | AA    |
|----|-----------------|-----------------|-----------------|-----------------|-----------------|-------|
| R  | 146.129         | 2582.243        | 2566.235        | 2567.232        | 2565.217        | R[22] |
| S  | <b>213.164</b>  | 2494.148        | 2438.133        | 2439.137        | 2437.122        | S[21] |
| T  | <b>334.208</b>  | 2367.136        | 2361.088        | 2352.106        | 2360.090        | T[20] |
| D  | <b>449.235</b>  | 2268.065        | 2250.050        | 2251.058        | 2249.043        | D[19] |
| H  | 586.204         | 2151.042        | 2135.023        | 2136.031        | 2134.015        | H[18] |
| F  | <b>683.347</b>  | 2013.983        | 1997.964        | 1998.972        | 1996.956        | F[17] |
| K  | <b>811.442</b>  | 1916.930        | 1900.911        | <b>1901.919</b> | 1899.903        | K[16] |
| Y  | <b>974.505</b>  | 1788.835        | 1772.816        | <b>1773.824</b> | 1771.808        | Y[15] |
| S  | <b>1141.504</b> | 1625.722        | 1609.703        | 1610.701        | 1608.685        | S[14] |
| D  | <b>1256.531</b> | 1458.773        | <b>1442.755</b> | 1443.762        | <b>1441.747</b> | D[13] |
| M  | <b>1387.571</b> | 1343.746        | 1327.728        | 1328.735        | 1326.720        | M[12] |
| I  | 1500.655        | <b>1212.706</b> | 1196.687        | 1197.695        | 1195.679        | I[11] |
| V  | 1599.724        | 1099.542        | 1083.523        | <b>1084.511</b> | 1082.505        | V[10] |
| A  | 1670.761        | 1000.583        | 984.535         | 985.543         | 983.527         | A[9]  |
| A  | 1741.798        | 929.518         | 913.489         | 914.505         | 912.490         | A[8]  |
| I  | <b>1854.682</b> | 858.479         | <b>842.460</b>  | 843.468         | <b>841.453</b>  | I[7]  |
| Q  | 1682.941        | 745.395         | <b>729.376</b>  | <b>730.384</b>  | 728.369         | Q[6]  |
| A  | 2033.076        | 617.337         | <b>601.318</b>  | <b>602.326</b>  | 600.310         | A[5]  |
| E  | 2183.009        | 546.299         | <b>530.281</b>  | <b>531.289</b>  | 529.273         | E[4]  |
| K  | 2311.115        | 417.267         | <b>401.238</b>  | <b>402.246</b>  | 400.230         | K[3]  |
| N  | 2426.158        | 289.162         | <b>273.143</b>  | 274.151         | 272.135         | N[2]  |
| R  | 2581.259        | 175.119         | 159.100         | 160.108         | 158.092         | R[1]  |

# sp | P10922 | H10\_MOUSE

KSTDHPKYS <sup>Phospho</sup><sub>79.97</sub> DMIVAAIQAEKNR

- ▶ fragmentation table for charge state 2+
- ▶ specType=etd
- ▶ score=57.03
- ▶ F105352.dat
- ▶ query=q10373\_p1
- ▶ precursor=646.318530
- ▶ chargePrecursor=4
- ▶ itol=0.8

| AA |    | c               | y               | z=1             | z=2             | z               | AA    |
|----|----|-----------------|-----------------|-----------------|-----------------|-----------------|-------|
| R  | 1  | 73.568          | <b>1291.625</b> | <b>1283.616</b> | <b>1284.120</b> | 1283.112        | R[2]  |
| S  | 2  | 117.084         | 1127.378        | <b>1219.568</b> | 1220.072        | <b>1218.065</b> | S[2]  |
| T  | 3  | 109.608         | <b>1184.062</b> | <b>1176.052</b> | <b>1176.556</b> | <b>1175.549</b> | T[2]  |
| D  | 4  | 225.121         | 1133.558        | <b>1125.529</b> | <b>1126.032</b> | <b>1125.025</b> | D[10] |
| H  | 5  | 293.651         | <b>1076.024</b> | <b>1068.015</b> | <b>1068.519</b> | <b>1067.511</b> | H[18] |
| F  | 6  | 342.177         | <b>1007.495</b> | 999.488         | 999.990         | 998.982         | F[17] |
| K  | 7  | 408.225         | 958.969         | <b>950.959</b>  | <b>951.463</b>  | <b>950.455</b>  | K[16] |
| Y  | 8  | 487.756         | 894.921         | <b>886.912</b>  | <b>887.416</b>  | <b>886.408</b>  | Y[15] |
| S  | 9  | 571.256         | 813.389         | <b>805.380</b>  | <b>805.884</b>  | 804.876         | S[14] |
| D  | 10 | 638.769         | <b>729.890</b>  | <b>721.881</b>  | <b>722.385</b>  | <b>721.377</b>  | D[13] |
| M  | 11 | 694.289         | 672.371         | <b>664.367</b>  | <b>664.871</b>  | <b>663.864</b>  | M[12] |
| I  | 12 | <b>750.831</b>  | 606.852         | 598.847         | 599.351         | 598.343         | I[11] |
| V  | 13 | <b>800.365</b>  | <b>550.315</b>  | 542.307         | 542.809         | 541.801         | V[10] |
| A  | 14 | <b>835.884</b>  | 500.305         | 492.297         | 492.799         | 491.791         | A[9]  |
| A  | 15 | 871.403         | 465.262         | 457.252         | 457.756         | 456.748         | A[8]  |
| I  | 16 | <b>927.945</b>  | 429.743         | 421.734         | 422.238         | 421.230         | I[7]  |
| Q  | 17 | <b>991.974</b>  | 375.201         | 367.192         | 367.696         | 366.688         | Q[6]  |
| A  | 18 | <b>1027.492</b> | 329.172         | 321.163         | 321.666         | 320.658         | A[5]  |
| E  | 19 | <b>1092.014</b> | <b>273.653</b>  | 265.644         | 266.148         | 265.140         | E[4]  |
| K  | 20 | <b>1156.061</b> | 209.132         | 201.123         | 201.627         | 200.619         | K[3]  |
| N  | 21 | 1213.083        | 145.085         | 137.075         | 137.579         | 136.571         | N[2]  |
| R  | 22 | <b>1291.133</b> | 88.063          | 80.054          | 80.558          | 79.550          | R[1]  |

# sp | P10922 | H10\_MOUSE

KSTDHPKYS <sup>Phospho</sup><sub>79.97</sub> DMIVAAIQAEKNR

- ▶ fragmentation table for charge state 3+
- ▶ specType=etd
- ▶ score=57.03
- ▶ F105352.dat
- ▶ query=q10373.p1
- ▶ precursor=646.318530
- ▶ chargePrecursor=4
- ▶ itol=0.8

| AA    | c              | y              | z+1            | z+2            | z              | AA    |
|-------|----------------|----------------|----------------|----------------|----------------|-------|
| K[1]  | 49.381         | <b>861.419</b> | <b>856.080</b> | <b>856.416</b> | <b>855.744</b> | K[22] |
| S[2]  | 78.392         | 818.721        | 813.381        | 813.717        | 813.045        | S[21] |
| T[3]  | 112.074        | 789.710        | 784.371        | 784.707        | 784.035        | T[20] |
| D[4]  | 150.417        | 756.028        | <b>750.688</b> | <b>751.024</b> | <b>750.352</b> | D[19] |
| H[5]  | 196.103        | 717.885        | 712.346        | 712.682        | 712.010        | H[18] |
| K[6]  | 228.454        | 671.999        | 666.660        | 666.995        | 666.324        | K[17] |
| K[7]  | 271.332        | 639.846        | 634.509        | 634.843        | 633.973        | K[16] |
| V[8]  | 325.507        | 598.950        | 593.610        | 593.946        | 593.274        | V[15] |
| S[9]  | 381.173        | 542.985        | 537.256        | 537.592        | 536.920        | S[14] |
| D[10] | 419.515        | 486.929        | 481.590        | 481.926        | 481.254        | D[13] |
| M[11] | 463.195        | <b>448.587</b> | 443.247        | 443.583        | 442.911        | M[12] |
| I[12] | 500.890        | 404.907        | 399.567        | 399.903        | 399.231        | I[11] |
| V[13] | 533.913        | 367.212        | 361.873        | 362.208        | 361.537        | V[10] |
| A[14] | 557.592        | <b>334.189</b> | 328.850        | 329.186        | 328.514        | A[9]  |
| A[15] | 581.271        | 310.510        | 305.171        | 305.507        | 304.835        | A[8]  |
| T[16] | 618.966        | 268.833        | 263.493        | 263.828        | 263.156        | T[7]  |
| Q[17] | 661.657        | 249.137        | 243.797        | 244.133        | 243.461        | Q[6]  |
| A[18] | <b>685.331</b> | 206.450        | 201.111        | 201.447        | 200.775        | A[5]  |
| E[19] | 728.345        | 182.771        | 177.432        | 177.768        | 177.096        | E[4]  |
| K[20] | 771.043        | 139.757        | 134.418        | 134.753        | 134.082        | K[3]  |
| N[21] | <b>809.058</b> | 97.059         | 91.719         | 92.055         | 91.383         | N[2]  |
| R[22] | <b>861.091</b> | 59.045         | 53.705         | 54.041         | 53.369         | R[1]  |



# sp | P70696 | H2B1A\_MOUSE

HAVS <sup>Phospho</sup>EGTK  
79.97

- ▶ fragmentation table for charge state 1+
- ▶ specType=etd
- ▶ score=32.87
- ▶ F105352.dat
- ▶ query=q1427\_p1
- ▶ precursor=454.697400
- ▶ chargePrecursor=2
- ▶ itol=0.8

| AA  | c              | y              | z+1            | z+2     | z       | AA  |
|-----|----------------|----------------|----------------|---------|---------|-----|
| H 1 | 155.093        | <b>908.387</b> | <b>892.369</b> | 0.000   | 891.361 | H 8 |
| A 2 | 226.130        | 771.328        | <b>755.310</b> | 0.000   | 754.302 | A 7 |
| V 3 | 325.198        | 700.291        | <b>684.273</b> | 0.000   | 683.265 | V 6 |
| S 4 | <b>492.197</b> | 601.223        | <b>585.204</b> | 0.000   | 584.196 | S 5 |
| E 5 | 621.239        | 434.225        | <b>418.206</b> | 0.000   | 417.198 | E 4 |
| G 6 | <b>678.261</b> | 305.182        | 289.163        | 0.000   | 288.155 | G 3 |
| T 7 | <b>779.308</b> | 248.160        | 232.142        | 0.000   | 231.134 | T 2 |
| K 8 | 907.403        | 147.113        | 131.094        | 132.102 | 130.086 | K 1 |





# sp | P70696 | H2B1A\_MOUSE

HAVS <sup>Phospho</sup>EGTK  
79.97

- ▶ fragmentation table for charge state 1+
- ▶ specType=etd
- ▶ score=29.02
- ▶ F105352.dat
- ▶ query=q1428\_p1
- ▶ precursor=454.697410
- ▶ chargePrecursor=2
- ▶ itol=0.8

| AA    | c              | y              | z+1            | z+2     | z       | AA    |
|-------|----------------|----------------|----------------|---------|---------|-------|
| H   1 | 155.093        | <b>908.387</b> | <b>892.369</b> | 0.000   | 891.361 | H   8 |
| A   2 | 226.130        | 771.328        | <b>755.310</b> | 0.000   | 754.302 | A   7 |
| V   3 | 325.198        | 700.291        | <b>684.273</b> | 0.000   | 683.265 | V   6 |
| S   4 | <b>492.197</b> | 601.223        | <b>585.204</b> | 0.000   | 584.196 | S   5 |
| E   5 | 621.239        | 434.225        | <b>418.206</b> | 0.000   | 417.198 | E   4 |
| G   6 | <b>678.261</b> | 305.182        | 289.163        | 0.000   | 288.155 | G   3 |
| T   7 | <b>779.308</b> | 248.160        | 232.142        | 0.000   | 231.134 | T   2 |
| K   8 | 907.403        | 147.113        | 131.094        | 132.102 | 130.086 | K   1 |

# sp | P68433 | H31\_MOUSE

ST<sup>(Phospho)</sup> ELLIR  
(79.97)

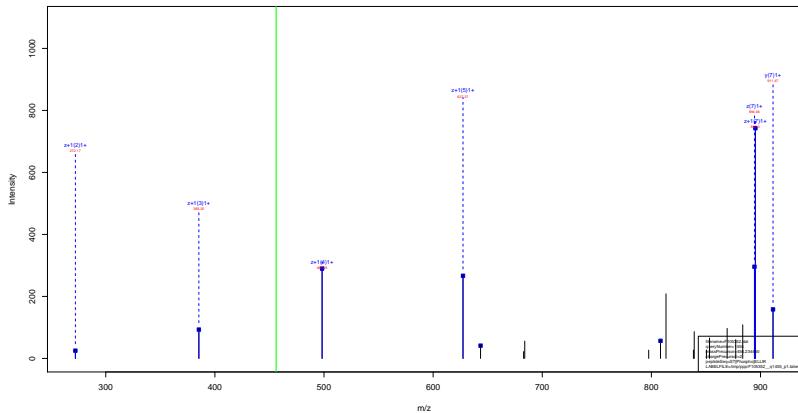

# sp | P68433 | H31\_MOUSE

ST<sup>(Phospho)</sup><sub>(79.97)</sub> ELLIR

- ▶ fragmentation table for charge state 1+
- ▶ specType=etd
- ▶ score=31.06
- ▶ F105352.dat
- ▶ query=q1455\_p1
- ▶ precursor=456.234460
- ▶ chargePrecursor=2
- ▶ itol=0.8

| AA   | c       | y              | z+1            | z+2     | z              | AA   |
|------|---------|----------------|----------------|---------|----------------|------|
| S[1] | 105.066 | <b>911.460</b> | <b>895.441</b> | 0.000   | <b>894.433</b> | S[7] |
| T[2] | 206.080 | 824.428        | <b>808.409</b> | 0.000   | 807.401        | T[6] |
| E[3] | 413.122 | <b>643.414</b> | <b>627.395</b> | 0.000   | 626.387        | E[5] |
| L[4] | 520.207 | 514.371        | <b>498.352</b> | 0.000   | 497.345        | L[4] |
| L[5] | 641.291 | 601.287        | <b>385.268</b> | 0.000   | 384.261        | L[3] |
| I[6] | 754.375 | 388.203        | <b>272.184</b> | 0.000   | 271.176        | I[2] |
| R[7] | 910.476 | 175.119        | 159.100        | 160.108 | 158.092        | R[1] |

# sp | P15864 | H12\_MOUSE

KVAKS<sup>Phospho</sup> PKK  
79.97

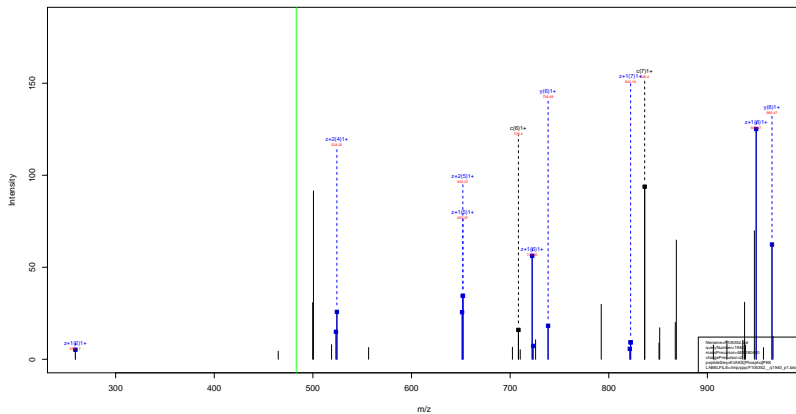

# sp | P15864 | H12\_MOUSE

KVAKS<sup>Phospho</sup> PKK  
79.97

- ▶ fragmentation table for charge state 1+
- ▶ specType=etd
- ▶ score=32.74
- ▶ F105352.dat
- ▶ query=q1940\_p1
- ▶ precursor=483.280490
- ▶ chargePrecursor=2
- ▶ itol=0.8

| AA   | c              | y              | z+1            | z+2            | z       | AA   |
|------|----------------|----------------|----------------|----------------|---------|------|
| R[1] | 146.129        | <b>965.554</b> | <b>949.536</b> | 990.943        | 948.528 | R[8] |
| V[2] | 245.197        | 837.459        | <b>821.441</b> | <b>822.448</b> | 800.433 | V[7] |
| A[3] | 316.234        | <b>738.391</b> | <b>722.372</b> | <b>723.380</b> | 721.364 | A[6] |
| K[4] | 444.329        | 667.354        | <b>651.335</b> | <b>652.343</b> | 650.327 | K[5] |
| S[5] | 611.328        | 639.250        | <b>523.240</b> | <b>524.248</b> | 522.232 | S[4] |
| P[6] | <b>708.380</b> | 372.261        | 356.242        | 357.250        | 355.234 | P[3] |
| K[7] | <b>836.475</b> | 275.208        | <b>259.189</b> | 260.197        | 258.181 | K[2] |
| K[8] | 964.570        | 147.113        | 131.094        | 132.102        | 130.086 | K[1] |

# sp | P15864 | H12\_MOUSE

VAKS Phospho PKKAK  
79.97

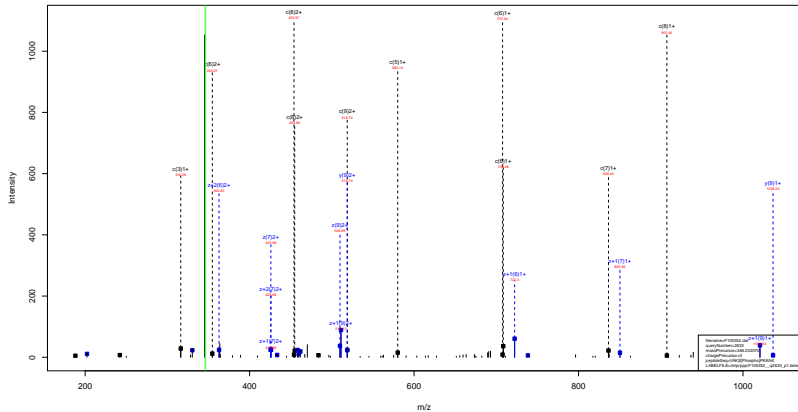

# sp | P15864 | H12\_MOUSE

VAKS <sup>Phospho</sup> PKKAK  
79.97

- ▶ fragmentation table for charge state 1+
- ▶ specType=etd
- ▶ score=24.77
- ▶ F105352.dat
- ▶ query=q2633.p1
- ▶ precursor=346.202070
- ▶ chargePrecursor=3
- ▶ itol=0.8

| AA | c              | y               | z+1             | z+2            | z        | AA |
|----|----------------|-----------------|-----------------|----------------|----------|----|
| V  | 117.102        | <b>1036.591</b> | <b>1020.573</b> | 0.000          | 1019.565 | V  |
| A  | <b>186.139</b> | 937.523         | 921.504         | 0.000          | 920.496  | A  |
| K  | <b>316.234</b> | 896.480         | <b>858.467</b>  | 851.475        | 849.439  | K  |
| S  | <b>483.233</b> | <b>738.391</b>  | <b>722.372</b>  | 723.390        | 721.393  | S  |
| P  | <b>580.285</b> | 671.302         | 595.374         | 596.382        | 554.308  | P  |
| K  | <b>708.380</b> | 474.340         | <b>458.321</b>  | <b>459.329</b> | 457.319  | K  |
| K  | <b>836.475</b> | 346.245         | <b>330.226</b>  | 331.234        | 329.218  | K  |
| A  | <b>907.512</b> | 218.150         | <b>202.131</b>  | 203.139        | 201.123  | A  |
| K  | 1035.607       | 147.113         | 131.094         | 132.102        | 130.088  | K  |



# sp | P15864 | H12\_MOUSE

VAKS <sup>Phospho</sup> PKKAK  
79.97

- ▶ fragmentation table for charge state 2+
- ▶ specType=etd
- ▶ score=24.77
- ▶ F105352.dat
- ▶ query=q2633\_p1
- ▶ precursor=346.202070
- ▶ chargePrecursor=3
- ▶ itol=0.8

| AA   | c              | y              | z+1            | z+2            | z              | AA   |
|------|----------------|----------------|----------------|----------------|----------------|------|
| V[1] | 59.050         | <b>518.799</b> | <b>510.790</b> | 0.504          | <b>510.286</b> | V[9] |
| A[2] | 84.573         | 569.265        | <b>461.256</b> | 0.504          | <b>460.752</b> | A[8] |
| K[3] | 138.621        | <b>433.741</b> | <b>425.737</b> | <b>426.241</b> | <b>425.233</b> | K[1] |
| S[4] | <b>242.120</b> | 369.699        | 361.690        | <b>362.194</b> | 361.186        | S[6] |
| P[5] | 260.546        | 286.200        | 278.191        | 278.694        | 277.687        | P[9] |
| K[6] | <b>354.694</b> | 237.674        | 229.664        | 230.168        | 229.160        | K[4] |
| K[7] | 418.741        | 173.626        | 165.617        | 166.121        | 165.113        | K[3] |
| A[8] | <b>454.260</b> | 109.579        | 101.569        | 102.073        | 101.065        | A[2] |
| K[9] | <b>518.307</b> | 74.060         | 66.051         | 66.555         | 65.547         | K[1] |



# sp | P27661 | H2AX\_MOUSE

KAS<sup>Phospho</sup> QASQEY  
79.97

- ▶ fragmentation table for charge state 1+
- ▶ specType=etd
- ▶ score=31.63
- ▶ F105352.dat
- ▶ query=q3200.p1
- ▶ precursor=546.223980
- ▶ chargePrecursor=2
- ▶ itol=0.8

| AA |   | c              | y               | z+1             | z+2            | z        | AA   |
|----|---|----------------|-----------------|-----------------|----------------|----------|------|
| K  | 1 | 140.129        | <b>1091.440</b> | <b>1075.422</b> | 1076.430       | 1074.414 | K[6] |
| A  | 2 | 217.166        | 963.340         | 947.327         | 948.335        | 946.319  | A[8] |
| S  | 3 | <b>381.164</b> | <b>892.308</b>  | 876.290         | <b>877.298</b> | 875.282  | S[7] |
| Q  | 4 | <b>512.223</b> | 728.310         | 709.291         | 710.299        | 708.283  | Q[6] |
| A  | 5 | <b>583.260</b> | 597.251         | 581.233         | <b>582.241</b> | 580.225  | A[5] |
| S  | 6 | <b>670.292</b> | 528.214         | 510.196         | <b>511.203</b> | 509.188  | S[4] |
| Q  | 7 | <b>798.351</b> | 439.182         | 423.164         | 424.171        | 422.156  | Q[3] |
| E  | 8 | <b>927.393</b> | 311.124         | 295.105         | 296.113        | 294.097  | E[2] |
| Y  | 9 | 1090.456       | 182.081         | 166.062         | 167.070        | 165.053  | Y[1] |

# sp | P43274 | H14\_MOUSE

KAPKS<sup>Phospho</sup> PAKAK  
79.97

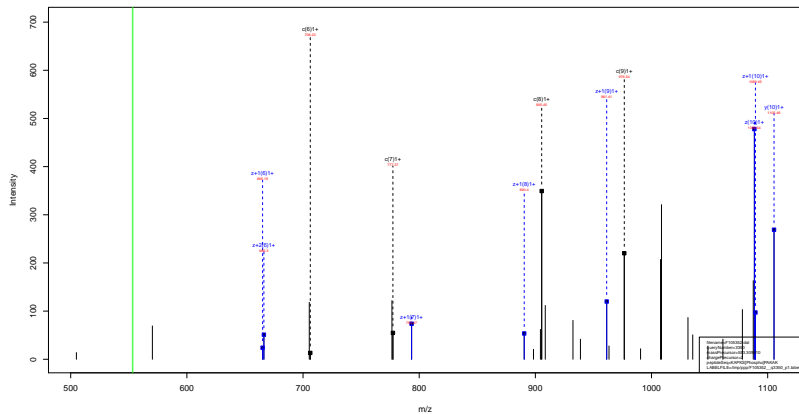

# sp | P43274 | H14\_MOUSE

KAPKS <sup>Phospho</sup> PAKAK  
79.97

- ▶ fragmentation table for charge state 1+
- ▶ specType=etd
- ▶ score=25.58
- ▶ F105352.dat
- ▶ query=q3350\_p1
- ▶ precursor=553.309810
- ▶ chargePrecursor=2
- ▶ itol=0.8

| AA    | c              | p               | s+1             | s+2            | s               | AA    |
|-------|----------------|-----------------|-----------------|----------------|-----------------|-------|
| R 1   | 148.129        | <b>1105.613</b> | <b>1089.594</b> | 1099.602       | <b>1088.595</b> | R[10] |
| A 2   | 217.106        | 377.519         | <b>961.499</b>  | 962.507        | 960.481         | A[9]  |
| P 3   | 314.219        | 906.481         | <b>890.462</b>  | 891.470        | 889.454         | P[8]  |
| K 4   | 442.314        | 809.428         | <b>793.409</b>  | 794.417        | 792.402         | K[7]  |
| S 5   | 609.312        | 691.333         | <b>665.314</b>  | <b>666.322</b> | 664.307         | S[6]  |
| P 6   | <b>706.365</b> | 514.335         | 498.316         | 499.324        | 497.308         | P[5]  |
| A 7   | <b>772.462</b> | 417.262         | 403.263         | 402.271        | 400.255         | A[4]  |
| K 8   | <b>905.497</b> | 348.245         | 339.239         | 331.234        | 329.218         | K[3]  |
| A 9   | <b>976.534</b> | 218.150         | 202.131         | 203.139        | 201.123         | A[2]  |
| R[10] | 1104.629       | 147.113         | 131.094         | 132.102        | 130.088         | R[1]  |

# sp | P43274 | H14\_MOUSE

KAPKS<sup>Phospho</sup> PAKAK  
79.97

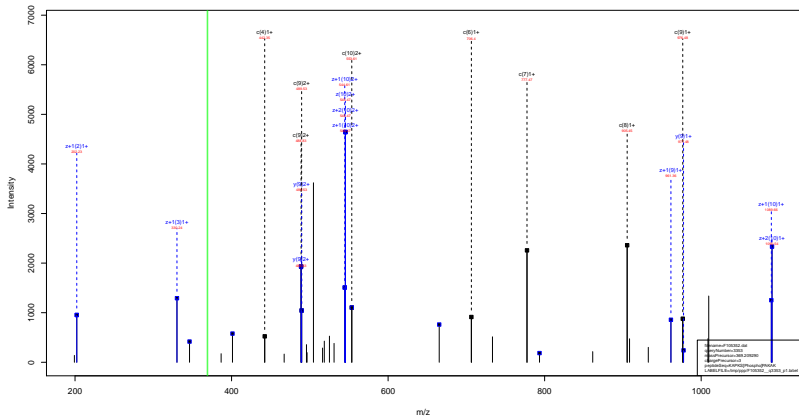

# sp | P43274 | H14\_MOUSE

KAPKS<sup>Phospho</sup> PAKAK  
79.97

- ▶ fragmentation table for charge state 1+
- ▶ specType=etd
- ▶ score=33.58
- ▶ F105352.dat
- ▶ query=q3353\_p1
- ▶ precursor=369.209290
- ▶ chargePrecursor=3
- ▶ itol=0.8

| AA | c              | y              | z+1             | z+2             | z        | AA |
|----|----------------|----------------|-----------------|-----------------|----------|----|
| K  | 148.126        | 1105.613       | <b>1089.594</b> | <b>1090.602</b> | 1088.588 | K  |
| A  | 217.106        | <b>977.518</b> | <b>961.499</b>  | 962.507         | 960.491  | A  |
| P  | 314.219        | 906.481        | 900.462         | 891.470         | 889.454  | P  |
| K  | <b>442.314</b> | 809.428        | <b>793.409</b>  | 794.417         | 792.402  | K  |
| S  | 609.312        | 681.333        | <b>665.314</b>  | 666.322         | 664.307  | S  |
| P  | <b>706.365</b> | 514.335        | 498.318         | 499.324         | 497.309  | P  |
| A  | <b>777.402</b> | 417.289        | <b>401.263</b>  | 402.271         | 400.255  | A  |
| K  | <b>905.497</b> | <b>346.245</b> | <b>330.226</b>  | 331.234         | 329.218  | K  |
| A  | <b>976.534</b> | 218.150        | <b>202.131</b>  | 203.139         | 201.123  | A  |
| K  | 1104.629       | 147.113        | 131.094         | 132.102         | 130.086  | K  |

# sp | P43274 | H14\_MOUSE

KAPKS <sup>Phospho</sup> PAKAK  
79.97

- ▶ fragmentation table for charge state 2+
- ▶ specType=etd
- ▶ score=33.58
- ▶ F105352.dat
- ▶ query=q3353\_p1
- ▶ precursor=369.209290
- ▶ chargePrecursor=3
- ▶ itol=0.8

| AA    | c              | y              | z+1            | z+2            | z              | AA    |
|-------|----------------|----------------|----------------|----------------|----------------|-------|
| R[1]  | 73.568         | <b>553.310</b> | <b>545.301</b> | <b>545.805</b> | <b>544.797</b> | R[10] |
| A[2]  | 109.087        | <b>409.763</b> | 481.253        | 481.757        | 480.749        | A[9]  |
| P[3]  | 157.613        | 453.744        | 445.735        | 446.239        | 445.231        | P[8]  |
| K[4]  | 221.660        | 405.218        | 397.209        | 397.712        | 396.704        | K[7]  |
| S[5]  | 305.160        | 341.170        | 333.161        | 333.665        | 332.657        | S[6]  |
| P[6]  | 353.686        | 257.671        | 249.662        | 250.166        | 249.158        | P[5]  |
| A[7]  | 389.205        | 209.145        | 201.135        | <b>201.639</b> | 200.631        | A[4]  |
| K[8]  | 433.252        | 173.626        | 165.617        | 166.121        | 165.113        | K[3]  |
| A[9]  | <b>488.771</b> | 109.579        | 101.569        | 102.073        | 101.065        | A[2]  |
| R[10] | <b>552.818</b> | 74.060         | 66.051         | 66.555         | 65.547         | R[1]  |





# sp | Q64525 | H2B2B\_MOUSE

PDPAKS<sup>Phospho</sup> APAPK  
79.97

- ▶ fragmentation table for charge state 1+
- ▶ specType=etd
- ▶ score=31.27
- ▶ F105352.dat
- ▶ query=q3878\_p1
- ▶ precursor=579.781410
- ▶ chargePrecursor=2
- ▶ itol=0.8

| AA   | c               | y               | z+1             | z+2            | z               | AA   |
|------|-----------------|-----------------|-----------------|----------------|-----------------|------|
| P 1  | 115.087         | <b>1158.555</b> | <b>1142.537</b> | 0.000          | <b>1141.529</b> | P 11 |
| D 2  | 230.114         | <b>1061.503</b> | <b>1045.484</b> | 0.000          | <b>1044.476</b> | D 10 |
| P 3  | 327.166         | <b>946.476</b>  | 930.457         | 0.000          | 929.449         | P 9  |
| A 4  | 398.203         | 849.422         | <b>833.404</b>  | 0.000          | 832.396         | A 8  |
| K 5  | 509.268         | 778.388         | <b>762.367</b>  | <b>763.375</b> | 761.359         | K 7  |
| S 6  | <b>653.297</b>  | 650.291         | <b>634.272</b>  | <b>635.280</b> | 633.264         | S 6  |
| A 7  | 704.334         | 483.293         | <b>467.274</b>  | <b>468.282</b> | 466.266         | A 5  |
| F 8  | <b>861.387</b>  | 412.250         | 396.237         | 397.245        | 395.229         | F 4  |
| A 9  | 932.424         | 315.203         | 299.184         | 300.192        | 298.176         | A 3  |
| P 10 | <b>1029.476</b> | 244.166         | 228.147         | 229.155        | 227.139         | P 2  |
| R 11 | 1197.511        | 141.110         | 131.094         | 132.102        | 130.086         | R 1  |



# sp | Q9D2U9 | H2B3A\_MOUSE

PEPSRST<sup>Phospho</sup> PAKK  
79.97

- ▶ fragmentation table for charge state 1+
- ▶ specType=etd
- ▶ score=46.91
- ▶ F105352.dat
- ▶ query=q4738\_p1
- ▶ precursor=416.199400
- ▶ chargePrecursor=3
- ▶ itol=0.8

| AA    | c               | y               | z+1             | z+2     | z               | AA    |
|-------|-----------------|-----------------|-----------------|---------|-----------------|-------|
| P[1]  | 115.087         | 2248.583        | <b>1230.564</b> | 0.000   | <b>1229.556</b> | P[11] |
| E[2]  | <b>244.129</b>  | <b>1149.530</b> | <b>1133.511</b> | 0.000   | 1132.503        | E[10] |
| P[3]  | <b>341.182</b>  | 1020.487        | 1004.469        | 0.000   | 1003.461        | P[0]  |
| S[4]  | <b>428.214</b>  | <b>923.435</b>  | 907.418         | 0.000   | 906.408         | S[6]  |
| H[5]  | <b>584.115</b>  | <b>836.483</b>  | <b>820.384</b>  | 821.392 | 819.376         | H[7]  |
| S[6]  | <b>671.347</b>  | <b>680.301</b>  | <b>664.283</b>  | 665.291 | 663.275         | S[0]  |
| T[7]  | 852.301         | <b>593.269</b>  | <b>577.251</b>  | 578.259 | <b>576.243</b>  | T[5]  |
| P[8]  | <b>949.414</b>  | <b>412.255</b>  | 396.237         | 397.245 | 395.229         | P[4]  |
| A[9]  | 1020.451        | <b>315.203</b>  | <b>299.184</b>  | 300.192 | 298.176         | A[3]  |
| P[10] | <b>1117.504</b> | <b>244.166</b>  | 228.147         | 229.155 | 227.139         | P[2]  |
| K[11] | 1248.599        | 147.113         | 131.094         | 132.102 | 130.086         | K[1]  |

# sp | Q9D2U9 | H2B3A\_MOUSE

PEPSRST<sup>Phospho</sup> PAKK  
79.97

- ▶ fragmentation table for charge state 2+
- ▶ specType=etd
- ▶ score=46.91
- ▶ F105352.dat
- ▶ query=q4738\_p1
- ▶ precursor=416.199400
- ▶ chargePrecursor=3
- ▶ itol=0.8

| AA    | c              | y              | z+1            | z+2     | z              | AA    |
|-------|----------------|----------------|----------------|---------|----------------|-------|
| P[1]  | 58.047         | <b>623.795</b> | <b>615.786</b> | 0.504   | <b>615.282</b> | P[11] |
| E[2]  | 122.568        | <b>575.269</b> | <b>567.259</b> | 0.504   | <b>566.755</b> | E[10] |
| P[3]  | 171.099        | <b>510.747</b> | 502.738        | 0.504   | 502.234        | P[9]  |
| S[4]  | 218.611        | 462.221        | 454.212        | 0.504   | 453.708        | S[8]  |
| R[5]  | 262.061        | 418.705        | 410.696        | 411.199 | 410.192        | R[7]  |
| S[6]  | 336.177        | <b>340.654</b> | 332.645        | 333.149 | 332.141        | S[6]  |
| Y[7]  | 426.684        | <b>297.138</b> | 289.129        | 289.633 | 288.625        | Y[5]  |
| P[8]  | 475.211        | 206.631        | 198.622        | 199.126 | 198.118        | P[4]  |
| A[9]  | <b>510.729</b> | 158.105        | 150.096        | 150.600 | 149.592        | A[3]  |
| P[10] | <b>559.256</b> | 122.586        | 114.577        | 115.081 | 114.073        | P[2]  |
| K[11] | <b>623.303</b> | 74.060         | 66.051         | 66.555  | 65.547         | K[1]  |

# sp | Q9D2U9 | H2B3A\_MOUSE

PEPSRST Phospho PAK  
79.97

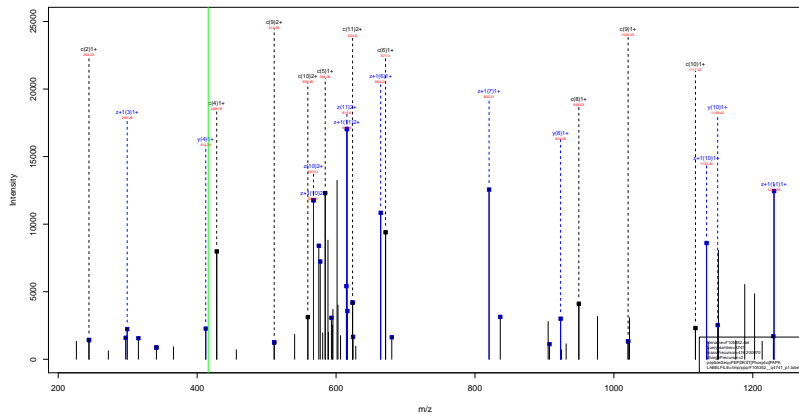

# sp | Q9D2U9 | H2B3A\_MOUSE

PEPSRST<sup>Phospho</sup> PAKK  
79.97

- ▶ fragmentation table for charge state 1+
- ▶ specType=etd
- ▶ score=60.54
- ▶ F105352.dat
- ▶ query=q4741\_p1
- ▶ precursor=416.200070
- ▶ chargePrecursor=3
- ▶ itol=0.8

| AA    | c               | y               | z+1             | z+2     | z               | AA    |
|-------|-----------------|-----------------|-----------------|---------|-----------------|-------|
| P[1]  | 115.087         | 2248.583        | <b>1230.564</b> | 0.000   | <b>1229.556</b> | P[11] |
| E[2]  | <b>244.129</b>  | <b>1149.530</b> | <b>1133.511</b> | 0.000   | 1132.503        | E[10] |
| P[3]  | <b>341.182</b>  | <b>1020.487</b> | 1004.469        | 0.000   | 1003.461        | P[0]  |
| S[4]  | <b>428.214</b>  | <b>923.435</b>  | <b>907.416</b>  | 0.000   | 906.408         | S[6]  |
| H[5]  | <b>584.315</b>  | <b>836.483</b>  | <b>820.304</b>  | 821.392 | 819.376         | H[7]  |
| S[6]  | <b>671.347</b>  | <b>680.301</b>  | <b>664.283</b>  | 665.291 | 663.275         | S[0]  |
| T[7]  | 852.301         | <b>593.269</b>  | <b>577.251</b>  | 578.259 | 576.243         | T[5]  |
| P[8]  | <b>949.414</b>  | <b>412.255</b>  | 396.237         | 397.245 | 395.229         | P[4]  |
| A[9]  | <b>1020.451</b> | <b>315.203</b>  | <b>299.184</b>  | 300.192 | 298.176         | A[3]  |
| P[10] | <b>1117.504</b> | <b>244.166</b>  | 228.147         | 229.155 | 227.139         | P[2]  |
| K[11] | 1245.399        | 147.113         | 131.094         | 132.102 | 130.086         | K[1]  |

# sp | Q9D2U9 | H2B3A\_MOUSE

PEPSRST<sup>Phospho</sup> PAKP  
79.97

- ▶ fragmentation table for charge state 2+
- ▶ specType=etd
- ▶ score=60.54
- ▶ F105352.dat
- ▶ query=q4741\_p1
- ▶ precursor=416.200070
- ▶ chargePrecursor=3
- ▶ itol=0.8

| AA |    | c              | y              | z+1            | z+2     | z              | AA    |
|----|----|----------------|----------------|----------------|---------|----------------|-------|
| P  | 1  | 58.047         | <b>623.795</b> | <b>615.786</b> | 0.504   | <b>615.282</b> | P[11] |
| E  | 2  | 122.568        | <b>575.269</b> | <b>567.259</b> | 0.504   | <b>566.755</b> | E[10] |
| P  | 3  | 171.099        | <b>510.747</b> | 502.738        | 0.504   | 502.234        | P[9]  |
| S  | 4  | 218.611        | 462.221        | 454.212        | 0.504   | 453.708        | S[8]  |
| R  | 5  | 262.661        | 418.705        | 410.696        | 411.199 | 410.192        | R[7]  |
| S  | 6  | 336.177        | <b>340.654</b> | 332.645        | 333.149 | 332.141        | S[6]  |
| Y  | 7  | 426.684        | <b>297.138</b> | 289.129        | 289.633 | 288.625        | Y[5]  |
| P  | 8  | 475.211        | 206.631        | 198.622        | 199.126 | 198.118        | P[4]  |
| A  | 9  | <b>510.729</b> | 158.105        | 150.096        | 150.600 | 149.592        | A[3]  |
| P  | 10 | <b>559.256</b> | 122.586        | 114.577        | 115.081 | 114.073        | P[2]  |
| K  | 11 | <b>623.303</b> | 74.060         | 66.051         | 66.555  | 65.547         | K[1]  |



# sp | P70696 | H2B1A\_MOUSE

QVHPDTGISS Phospho K  
79.97

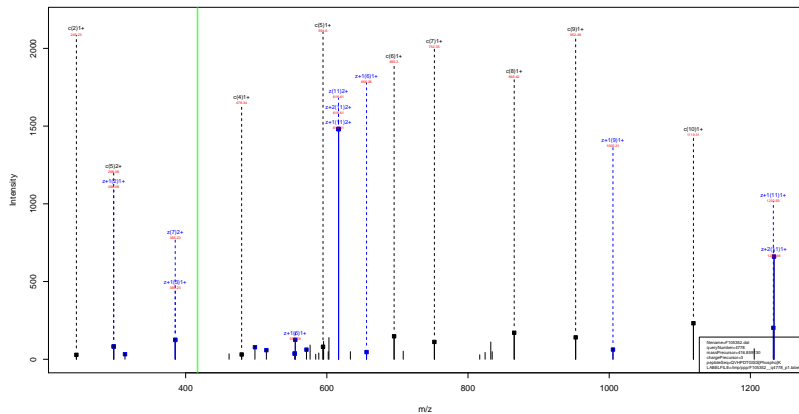

# sp | P70696 | H2B1A\_MOUSE

QVHPDTGISS Phospho K  
79.97

- ▶ fragmentation table for charge state 1+
- ▶ specType=etd
- ▶ score=60.11
- ▶ F105352.dat
- ▶ query=q4778\_p1
- ▶ precursor=416.859130
- ▶ chargePrecursor=3
- ▶ itol=0.8

| AA    | c               | y              | z+1             | z+2             | z              | AA    |
|-------|-----------------|----------------|-----------------|-----------------|----------------|-------|
| Q[1]  | 146.092         | 1348.562       | <b>1232.543</b> | <b>1233.551</b> | 1231.535       | Q[11] |
| V[2]  | <b>245.161</b>  | 1120.503       | 1104.485        | 1105.493        | 1103.477       | V[10] |
| H[3]  | 382.220         | 1021.435       | <b>1005.416</b> | 1006.424        | 1004.408       | H[9]  |
| F[4]  | <b>479.272</b>  | 884.376        | 868.357         | 869.365         | 867.350        | F[8]  |
| D[5]  | <b>594.299</b>  | 787.323        | 771.305         | 772.312         | 770.297        | D[7]  |
| Y[6]  | <b>695.347</b>  | 672.266        | <b>656.278</b>  | 657.285         | 655.270        | Y[6]  |
| G[7]  | <b>752.369</b>  | <b>571.249</b> | <b>555.230</b>  | 556.238         | <b>554.222</b> | G[5]  |
| I[8]  | <b>865.453</b>  | <b>514.227</b> | <b>498.209</b>  | 499.216         | 497.203        | I[4]  |
| S[9]  | <b>952.485</b>  | 401.143        | <b>385.124</b>  | 386.132         | 384.117        | S[3]  |
| S[10] | <b>1119.483</b> | <b>314.111</b> | <b>298.092</b>  | 299.100         | 297.085        | S[2]  |
| K[11] | 1247.578        | 147.113        | 131.094         | 132.102         | 130.088        | K[1]  |

# sp | P70696 | H2B1A\_MOUSE

QVHPDTGISS Phospho K  
79.97

- ▶ fragmentation table for charge state 2+
- ▶ specType=etd
- ▶ score=60.11
- ▶ F105352.dat
- ▶ query=q4778.p1
- ▶ precursor=416.859130
- ▶ chargePrecursor=3
- ▶ itol=0.8

| AA |      | c              | y       | z+1            | z+2            | z              | AA    |
|----|------|----------------|---------|----------------|----------------|----------------|-------|
| Q  | [1]  | 73.550         | 624.785 | <b>616.775</b> | <b>617.279</b> | <b>616.271</b> | Q[11] |
| V  | [2]  | 123.084        | 560.755 | 652.746        | 553.250        | 552.242        | V[10] |
| H  | [3]  | 191.614        | 511.221 | 503.212        | 303.716        | 302.708        | H[9]  |
| T  | [4]  | 339.340        | 432.692 | 434.683        | 435.135        | 434.128        | T[8]  |
| D  | [5]  | <b>297.653</b> | 394.165 | 395.156        | 395.650        | <b>385.652</b> | D[7]  |
| T  | [6]  | 340.177        | 336.652 | 328.642        | 329.146        | 328.139        | T[6]  |
| G  | [7]  | 376.688        | 286.128 | 278.119        | 278.623        | 277.615        | G[5]  |
| I  | [8]  | 433.230        | 257.637 | 249.608        | 250.112        | 249.104        | I[4]  |
| S  | [9]  | 476.746        | 201.075 | 193.066        | 193.570        | 192.562        | S[3]  |
| S  | [10] | 560.245        | 157.559 | 149.550        | 150.054        | 149.046        | S[2]  |
| K  | [11] | 624.293        | 74.060  | 66.051         | 66.555         | 65.547         | K[1]  |



# sp | P62806 | H4\_MOUSE

IS<sup>Phospho</sup>  
79.97 GLIYEETR

- ▶ fragmentation table for charge state 1+
- ▶ specType=etd
- ▶ score=39.28
- ▶ F105352.dat
- ▶ query=q4896\_p1
- ▶ precursor=630.797710
- ▶ chargePrecursor=2
- ▶ itol=0.8

| AA    | c        | y               | z+1             | z+2     | z               | AA    |
|-------|----------|-----------------|-----------------|---------|-----------------|-------|
| I[1]  | 131.118  | <b>1260.587</b> | 1244.588        | 0.000   | <b>1243.561</b> | I[10] |
| S[2]  | 298.116  | 1147.503        | <b>1131.484</b> | 0.000   | 1130.477        | S[9]  |
| G[3]  | 358.118  | <b>980.505</b>  | <b>964.486</b>  | 0.000   | 963.478         | G[8]  |
| L[4]  | 468.222  | 923.483         | <b>907.465</b>  | 0.000   | 906.457         | L[7]  |
| I[5]  | 581.306  | 810.399         | <b>794.380</b>  | 0.000   | 793.373         | I[6]  |
| Y[6]  | 744.389  | <b>697.315</b>  | 681.296         | 0.000   | 680.289         | Y[5]  |
| E[7]  | 873.412  | 594.252         | 578.233         | 0.000   | 577.225         | E[4]  |
| T[8]  | 1002.454 | 499.209         | <b>388.191</b>  | 0.000   | 388.183         | T[3]  |
| V[9]  | 1103.502 | 276.167         | 260.148         | 0.000   | 259.140         | V[2]  |
| R[10] | 1259.603 | 175.119         | 159.100         | 160.108 | 158.092         | R[1]  |



# sp | P68433 | H31\_MOUSE

YQKST<sup>Phospho</sup> ELLIR  
79.97

- ▶ fragmentation table for charge state 1+
- ▶ specType=etd
- ▶ score=44.81
- ▶ F105352.dat
- ▶ query=q5617.p1
- ▶ precursor=444.229960
- ▶ chargePrecursor=3
- ▶ itol=0.8

| AA  | c               | y              | z               | AA              |                 |          |     |
|-----|-----------------|----------------|-----------------|-----------------|-----------------|----------|-----|
| V D | 181.097         | 13.30.877      | 234.895         | 0.000           | <b>1313.050</b> | V10      |     |
| Q 2 | <b>309.156</b>  | 1797.013       | <b>1151.595</b> | <b>1152.602</b> | 1024.544        | 1022.528 | Q10 |
| K 3 | <b>437.251</b>  | 1039.555       | <b>1021.536</b> |                 |                 |          | K8  |
| S 4 | <b>524.283</b>  | 911.460        | <b>895.441</b>  | <b>896.449</b>  | 804.417         | 804.413  | S7  |
| T 5 | <b>705.297</b>  | 824.428        | <b>808.409</b>  |                 | 809.417         | 807.401  | T6  |
| E 6 | <b>834.339</b>  | <b>643.414</b> | <b>627.395</b>  | 628.403         | 626.387         |          | E5  |
| L 7 | <b>947.423</b>  | <b>514.371</b> | <b>498.352</b>  | 499.360         | 497.345         |          | L4  |
| L 8 | <b>1060.507</b> | <b>401.287</b> | <b>385.260</b>  | 386.278         | 384.261         |          | L3  |
| I 9 | <b>1173.592</b> | <b>288.203</b> | <b>272.184</b>  | 273.192         | 271.176         |          | I2  |
| R10 | <b>1329.693</b> | 175.119        | 159.100         | 160.108         | 158.092         |          | R1  |

# sp | P68433 | H31\_MOUSE

YQKST<sup>Phospho</sup> ELLIR  
79.97

- ▶ fragmentation table for charge state 2+
- ▶ specType=etd
- ▶ score=44.81
- ▶ F105352.dat
- ▶ query=q5617.p1
- ▶ precursor=444.229960
- ▶ chargePrecursor=3
- ▶ itol=0.8

| AA    | c              | y              | z+1            | z+2            | z              | AA    |
|-------|----------------|----------------|----------------|----------------|----------------|-------|
| V[1]  | 91.052         | <b>665.842</b> | <b>657.833</b> | 0.504          | <b>657.329</b> | V[10] |
| Q[2]  | 155.082        | 584.310        | <b>576.301</b> | <b>576.805</b> | <b>575.797</b> | Q[9]  |
| R[3]  | 219.129        | 520.281        | 512.272        | 512.776        | 511.768        | R[8]  |
| S[4]  | 262.645        | 456.234        | 448.224        | 448.728        | 447.720        | S[7]  |
| T[5]  | 353.152        | 412.718        | 404.708        | 405.212        | 404.204        | T[6]  |
| E[6]  | 417.673        | 322.211        | 314.201        | 314.705        | 313.697        | E[5]  |
| L[7]  | 474.215        | 257.689        | 249.680        | 250.184        | 249.176        | L[4]  |
| L[8]  | 530.757        | 201.147        | 193.138        | 193.642        | 192.634        | L[3]  |
| L[9]  | 597.299        | 144.505        | 136.500        | 137.104        | 136.092        | L[2]  |
| R[10] | <b>665.350</b> | 88.063         | 80.054         | 80.558         | 79.550         | R[1]  |



# sp | P15864 | H12\_MOUSE

GTGASGS<sup>Phospho</sup>FKLNKK  
79.97

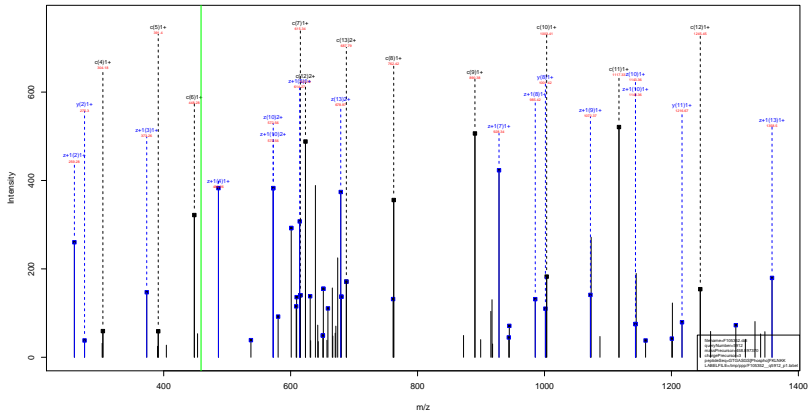

# sp | P15864 | H12\_MOUSE

GTGASGS<sup>Phospho</sup><sub>79.97</sub>FKLNKK

- ▶ fragmentation table for charge state 1+
- ▶ specType=etd
- ▶ score=96.16
- ▶ F105352.dat
- ▶ query=q5912.p1
- ▶ precursor=458.897370
- ▶ chargePrecursor=3
- ▶ itol=0.8

| AA    | c               | y               | z+1             | z+2            | z               | AA    |
|-------|-----------------|-----------------|-----------------|----------------|-----------------|-------|
| G[1]  | 75.055          | 1374.878        | <b>1358.859</b> | 0.000          | 1357.051        | G[13] |
| F[2]  | 176.103         | 1317.056        | <b>1301.638</b> | 0.000          | 1300.630        | F[12] |
| G[3]  | 231.124         | <b>1216.609</b> | <b>1200.590</b> | 0.000          | 1199.582        | G[11] |
| A[4]  | <b>304.162</b>  | <b>1159.587</b> | <b>1143.568</b> | 0.000          | <b>1142.561</b> | A[10] |
| S[5]  | <b>391.194</b>  | 1088.550        | <b>1072.531</b> | 0.000          | 1071.523        | S[9]  |
| G[6]  | <b>448.215</b>  | <b>1001.513</b> | <b>985.499</b>  | 0.000          | 984.491         | G[8]  |
| S[7]  | <b>615.213</b>  | <b>944.490</b>  | <b>928.478</b>  | 0.000          | 927.470         | S[7]  |
| F[8]  | <b>762.282</b>  | 777.498         | <b>761.479</b>  | 0.000          | 760.472         | F[6]  |
| K[9]  | <b>890.377</b>  | <b>630.430</b>  | <b>614.411</b>  | <b>615.419</b> | 613.403         | K[5]  |
| L[10] | <b>1003.461</b> | 602.330         | <b>486.316</b>  | 487.324        | 485.308         | L[4]  |
| N[11] | <b>1117.504</b> | 589.261         | <b>373.232</b>  | 374.240        | 372.228         | N[3]  |
| R[12] | <b>1245.599</b> | <b>275.208</b>  | <b>259.189</b>  | 260.197        | 258.181         | R[2]  |
| R[13] | 1373.694        | 147.113         | 131.094         | 132.102        | 130.088         | R[1]  |

# sp | P15864 | H12\_MOUSE

GTGASGS<sup>Phospho</sup><sub>79.97</sub>FKLNKK

- ▶ fragmentation table for charge state 2+
- ▶ specType=etd
- ▶ score=96.16
- ▶ F105352.dat
- ▶ query=q5912.p1
- ▶ precursor=458.897370
- ▶ chargePrecursor=3
- ▶ itol=0.8

| AA |      | c              | y              | z+1            | z+2     | z              | AA    |
|----|------|----------------|----------------|----------------|---------|----------------|-------|
| G  | [1]  | 38.031         | <b>687.842</b> | <b>679.833</b> | 0.504   | <b>679.329</b> | G[13] |
| T  | [2]  | 88.555         | <b>659.332</b> | <b>651.322</b> | 0.504   | <b>650.818</b> | T[12] |
| G  | [3]  | 117.066        | <b>608.808</b> | <b>600.799</b> | 0.504   | <b>600.295</b> | G[11] |
| A  | [4]  | 152.584        | <b>580.297</b> | <b>572.288</b> | 0.504   | <b>571.784</b> | A[10] |
| S  | [5]  | 198.100        | 544.775        | <b>536.769</b> | 0.504   | 536.265        | S[9]  |
| G  | [6]  | 224.611        | 501.262        | 493.253        | 0.504   | 492.749        | G[8]  |
| S  | [7]  | 308.110        | 472.752        | 464.743        | 0.504   | 464.239        | S[7]  |
| F  | [8]  | 381.645        | 489.253        | 481.243        | 0.504   | 480.739        | F[6]  |
| K  | [9]  | 445.692        | 315.718        | 307.709        | 308.213 | 307.205        | K[5]  |
| L  | [10] | 502.234        | 251.671        | 243.662        | 244.166 | 243.158        | L[4]  |
| N  | [11] | 559.256        | 195.129        | 187.120        | 187.624 | 186.616        | N[3]  |
| K  | [12] | <b>623.303</b> | 138.108        | 130.098        | 130.602 | 129.594        | K[2]  |
| K  | [13] | <b>687.350</b> | 74.060         | 66.051         | 66.555  | 65.547         | K[1]  |



# sp | P15864 | H12\_MOUSE

GTGASGS<sup>Phospho</sup><sub>79.97</sub> FKLNKK

- ▶ fragmentation table for charge state 1+
- ▶ specType=etd
- ▶ score=60.72
- ▶ F105352.dat
- ▶ query=q5913\_p1
- ▶ precursor=687.844330
- ▶ chargePrecursor=2
- ▶ itol=0.8

| AA    | c               | y               | z+1             | z+2            | z               | AA    |
|-------|-----------------|-----------------|-----------------|----------------|-----------------|-------|
| G[1]  | 75.055          | <b>1374.678</b> | <b>1358.859</b> | 0.000          | 1357.051        | G[13] |
| F[2]  | 176.103         | 1317.656        | <b>1301.638</b> | 0.000          | <b>1300.030</b> | F[12] |
| G[3]  | 231.124         | <b>1216.609</b> | <b>1200.590</b> | 0.000          | 1199.582        | G[11] |
| A[4]  | 304.162         | <b>1159.587</b> | <b>1143.568</b> | 0.000          | 1142.561        | A[10] |
| S[5]  | 391.194         | <b>1088.550</b> | <b>1072.531</b> | 0.000          | 1071.523        | S[9]  |
| G[6]  | 489.215         | 1031.511        | <b>985.499</b>  | 0.000          | 984.491         | G[8]  |
| S[7]  | <b>615.213</b>  | 944.455         | <b>928.478</b>  | 0.000          | 927.470         | S[7]  |
| F[8]  | <b>762.282</b>  | 777.498         | <b>761.479</b>  | 0.000          | 760.472         | F[6]  |
| K[9]  | 890.377         | 630.430         | <b>614.411</b>  | <b>615.419</b> | 613.403         | K[5]  |
| L[10] | 1003.461        | 502.339         | 486.316         | 487.324        | 485.308         | L[4]  |
| R[11] | 1117.504        | 389.251         | 373.232         | 374.240        | 372.224         | R[3]  |
| R[12] | <b>1245.599</b> | 275.209         | 259.189         | 260.197        | 258.181         | R[2]  |
| R[13] | 1373.694        | 147.112         | 131.094         | 132.102        | 130.086         | R[1]  |



# sp | P15864 | H12\_MOUSE

KAS<sup>Phospho</sup> GPPVSELITK  
79.97

- ▶ fragmentation table for charge state 1+
- ▶ specType=etd
- ▶ score=34.64
- ▶ F105352.dat
- ▶ query=q6077.p1
- ▶ precursor=469.580660
- ▶ chargePrecursor=3
- ▶ itol=0.8

| AA    | c               | y               | z+1             | z+2            | z               | AA    |
|-------|-----------------|-----------------|-----------------|----------------|-----------------|-------|
| R[1]  | 146.129         | 1406.720        | <b>1390.710</b> | 1301.718       | 389.703         | R[13] |
| A[2]  | 237.166         | 1278.634        | <b>1262.615</b> | 1263.623       | 1261.608        | A[12] |
| S[3]  | <b>384.164</b>  | 1207.907        | <b>1191.578</b> | 1192.586       | <b>1190.570</b> | S[11] |
| G[4]  | 441.186         | <b>1040.599</b> | <b>1024.580</b> | 1025.588       | 1023.572        | G[10] |
| P[5]  | 538.238         | 983.577         | 967.558         | 968.566        | 966.551         | P[9]  |
| F[6]  | 639.291         | 898.524         | 879.506         | 873.514        | 869.498         | F[8]  |
| V[7]  | <b>734.360</b>  | 789.472         | 773.453         | 774.461        | 772.445         | V[7]  |
| S[8]  | <b>821.392</b>  | <b>690.403</b>  | <b>674.385</b>  | <b>675.392</b> | <b>673.377</b>  | S[6]  |
| E[9]  | <b>950.434</b>  | <b>603.371</b>  | <b>587.352</b>  | 588.360        | 586.345         | E[5]  |
| L[10] | <b>1063.518</b> | <b>474.329</b>  | <b>458.310</b>  | 459.318        | 457.302         | L[4]  |
| I[11] | <b>1176.602</b> | 381.245         | <b>345.226</b>  | 346.234        | 344.218         | I[3]  |
| T[12] | <b>1277.650</b> | 248.160         | 232.142         | 233.150        | 231.134         | T[2]  |
| K[13] | 1405.745        | 147.113         | 131.094         | 132.102        | 130.086         | K[1]  |

# sp | P15864 | H12\_MOUSE

KAS<sup>Phospho</sup> 79.97 GPPVSELITK

- ▶ fragmentation table for charge state 2+
- ▶ specType=etd
- ▶ score=34.64
- ▶ F105352.dat
- ▶ query=q6077.p1
- ▶ precursor=469.580660
- ▶ chargePrecursor=3
- ▶ itol=0.8

| AA    | c              | y              | z+1            | z+2            | z              | AA    |
|-------|----------------|----------------|----------------|----------------|----------------|-------|
| K[1]  | 73.508         | <b>703.868</b> | <b>695.859</b> | <b>696.363</b> | <b>695.355</b> | K[13] |
| A[2]  | 109.067        | <b>639.821</b> | 631.811        | 632.315        | <b>631.307</b> | A[12] |
| S[3]  | 192.586        | 604.302        | 596.293        | 596.797        | 595.789        | S[11] |
| G[4]  | 221.097        | 520.803        | 512.794        | 513.298        | 512.290        | G[10] |
| T[5]  | 259.623        | 432.292        | 424.283        | 424.787        | 423.779        | T[9]  |
| P[6]  | 318.148        | 443.766        | 435.756        | 436.260        | 435.253        | P[8]  |
| V[7]  | 357.683        | 395.239        | 387.230        | 387.734        | 386.726        | V[7]  |
| S[8]  | 411.199        | <b>345.705</b> | 337.696        | 338.200        | 337.192        | S[6]  |
| E[9]  | <b>475.721</b> | 302.189        | 294.180        | 294.684        | 293.676        | E[5]  |
| L[10] | 532.263        | 237.668        | 229.659        | 230.162        | 229.155        | L[4]  |
| I[11] | 588.805        | 181.126        | 173.117        | 173.620        | 172.613        | I[3]  |
| T[12] | <b>639.329</b> | 124.584        | 116.575        | 117.078        | 116.071        | T[2]  |
| K[13] | <b>703.376</b> | 74.060         | 66.051         | 66.555         | 65.547         | K[1]  |





# sp | P15864 | H12\_MOUSE

KAS<sup>Phospho</sup> GPPVSELITK  
79.97

- ▶ fragmentation table for charge state 1+
- ▶ specType=etd
- ▶ score=42.48
- ▶ F105352.dat
- ▶ query=q6081\_p1
- ▶ precursor=469.582480
- ▶ chargePrecursor=3
- ▶ itol=0.8

| AA    | c               | y               | z+1             | z+2            | z        | AA    |
|-------|-----------------|-----------------|-----------------|----------------|----------|-------|
| R[1]  | 146.129         | 1466.729        | <b>1390.710</b> | 1391.718       | 1389.703 | R[13] |
| A[2]  | 217.166         | 1278.634        | <b>1262.615</b> | 1263.623       | 1261.608 | A[12] |
| S[3]  | <b>384.164</b>  | 1207.597        | <b>1191.578</b> | 1192.586       | 1190.570 | S[11] |
| G[4]  | 441.186         | <b>1040.599</b> | <b>1024.580</b> | 1025.588       | 1023.572 | G[10] |
| F[5]  | 538.238         | 983.517         | 967.506         | 968.506        | 966.501  | F[9]  |
| P[6]  | 635.291         | 898.524         | 879.506         | 879.514        | 899.498  | P[8]  |
| V[7]  | <b>734.360</b>  | 789.472         | 773.453         | 774.461        | 772.445  | V[7]  |
| S[8]  | <b>821.392</b>  | <b>690.403</b>  | <b>674.385</b>  | <b>675.392</b> | 673.377  | S[6]  |
| E[9]  | <b>950.434</b>  | <b>603.371</b>  | <b>587.352</b>  | 588.360        | 586.345  | E[5]  |
| L[10] | <b>1063.518</b> | <b>474.329</b>  | <b>458.310</b>  | 459.318        | 457.302  | L[4]  |
| I[11] | <b>1176.602</b> | 361.245         | <b>345.226</b>  | 346.234        | 344.218  | I[3]  |
| T[12] | <b>1277.650</b> | <b>248.160</b>  | 232.142         | 233.150        | 231.134  | T[2]  |
| R[13] | 1465.745        | 147.113         | 131.094         | 132.102        | 130.085  | R[1]  |

# sp | P15864 | H12\_MOUSE

KAS<sup>Phospho</sup> GPPVSELITK  
79.97

- ▶ fragmentation table for charge state 2+
- ▶ specType=etd
- ▶ score=42.48
- ▶ F105352.dat
- ▶ query=q6081.p1
- ▶ precursor=469.582480
- ▶ chargePrecursor=3
- ▶ itol=0.8

| AA    | c              | y              | z+1            | z+2            | z              | AA    |
|-------|----------------|----------------|----------------|----------------|----------------|-------|
| K[1]  | 73.508         | <b>703.868</b> | <b>695.859</b> | <b>696.363</b> | <b>695.355</b> | K[13] |
| A[2]  | 109.067        | <b>639.821</b> | <b>631.811</b> | 632.315        | <b>631.307</b> | A[12] |
| S[3]  | 192.586        | 604.302        | 596.293        | 596.797        | 595.789        | S[11] |
| G[4]  | 221.097        | 520.803        | 512.794        | 513.298        | 512.290        | G[10] |
| T[5]  | 259.623        | 432.292        | 424.283        | 424.787        | 423.779        | T[9]  |
| P[6]  | 318.148        | 443.786        | 435.776        | 436.280        | 435.273        | P[8]  |
| V[7]  | 357.683        | 395.279        | 387.270        | 387.774        | 386.726        | V[7]  |
| S[8]  | 411.199        | <b>345.705</b> | 337.696        | 338.200        | 337.192        | S[6]  |
| E[9]  | 475.721        | 302.189        | 294.180        | 294.684        | 293.676        | E[5]  |
| L[10] | 532.263        | 237.668        | 229.659        | 230.162        | 229.155        | L[4]  |
| I[11] | 588.805        | 181.126        | 173.117        | 173.620        | 172.613        | I[3]  |
| T[12] | <b>639.329</b> | 124.584        | 116.575        | 117.078        | 116.071        | T[2]  |
| K[13] | <b>703.376</b> | 74.060         | 66.051         | 66.555         | 65.547         | K[1]  |

# sp | P68433 | H31\_MOUSE

EIAQDFKT <sup>Phospho</sup> DLR  
79.97

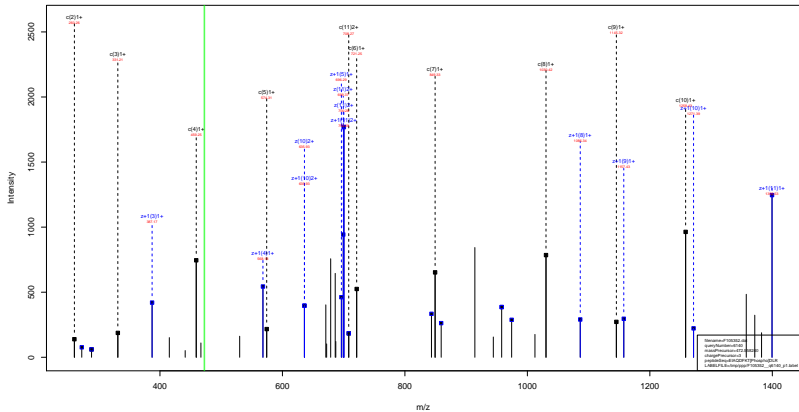

# sp | P68433 | H31\_MOUSE

EIAQDFKT <sup>Phospho</sup> DLR  
79.97

- ▶ fragmentation table for charge state 1+
- ▶ specType=etd
- ▶ score=67.98
- ▶ F105352.dat
- ▶ query=q6140\_p1
- ▶ precursor=472.558240
- ▶ chargePrecursor=3
- ▶ itol=0.8

| AA     | c               | y              | z+1             | z+2      | z              | AA     |
|--------|-----------------|----------------|-----------------|----------|----------------|--------|
| E [1]  | 147.076         | 1415.657       | <b>1399.638</b> | 0.000    | 1398.630       | E [11] |
| I [2]  | <b>260.160</b>  | 1286.014       | <b>1270.595</b> | 0.000    | 1269.587       | I [10] |
| A [3]  | <b>331.198</b>  | 1173.530       | <b>1157.511</b> | 0.000    | 1156.503       | A [9]  |
| Q [4]  | <b>459.256</b>  | 1102.493       | <b>1086.474</b> | 1087.462 | 1085.466       | Q [8]  |
| D [5]  | <b>574.283</b>  | <b>874.434</b> | <b>958.416</b>  | 959.423  | <b>957.408</b> | D [7]  |
| F [6]  | <b>721.352</b>  | <b>859.407</b> | <b>843.389</b>  | 844.390  | 842.381        | F [6]  |
| K [7]  | <b>849.446</b>  | 712.338        | <b>696.320</b>  | 697.328  | 695.312        | K [5]  |
| T [8]  | <b>1030.461</b> | 584.244        | <b>568.225</b>  | 569.233  | 567.217        | T [4]  |
| D [9]  | <b>1145.487</b> | 403.230        | <b>387.211</b>  | 388.219  | 386.203        | D [3]  |
| L [10] | <b>1258.572</b> | <b>288.203</b> | <b>272.184</b>  | 273.192  | 271.176        | L [2]  |
| R [11] | 1414.673        | 175.110        | 159.100         | 160.108  | 158.092        | R [1]  |

# sp | P68433 | H31\_MOUSE

EIAQDFKT <sup>Phospho</sup> DLR  
79.97

- ▶ fragmentation table for charge state 2+
- ▶ specType=etd
- ▶ score=67.98
- ▶ F105352.dat
- ▶ query=q6140\_p1
- ▶ precursor=472.558240
- ▶ chargePrecursor=3
- ▶ itol=0.8

| AA     | c              | y              | z+1            | z+2     | z              | AA     |
|--------|----------------|----------------|----------------|---------|----------------|--------|
| E [1]  | 74.042         | <b>708.332</b> | <b>700.323</b> | 0.504   | <b>699.819</b> | E [11] |
| V [2]  | 130.584        | 643.811        | <b>635.801</b> | 0.504   | <b>635.297</b> | V [10] |
| A [3]  | 166.102        | 587.269        | 579.259        | 0.504   | 578.755        | A [9]  |
| Q [4]  | 239.132        | 351.795        | 343.781        | 348.289 | 343.277        | Q [8]  |
| D [5]  | <b>287.645</b> | 487.721        | 479.711        | 480.215 | 479.208        | D [7]  |
| F [6]  | 351.179        | 430.207        | 422.198        | 422.702 | 421.694        | F [6]  |
| K [7]  | 425.227        | 356.673        | 348.664        | 349.168 | 348.160        | K [5]  |
| Y [8]  | 515.734        | 292.626        | 284.616        | 285.120 | 284.112        | Y [4]  |
| D [9]  | 573.247        | 202.119        | 194.109        | 194.613 | 193.605        | D [3]  |
| L [10] | 629.789        | 144.605        | 136.596        | 137.100 | 136.092        | L [2]  |
| R [11] | <b>707.840</b> | 88.063         | 80.054         | 80.558  | 79.550         | R [1]  |

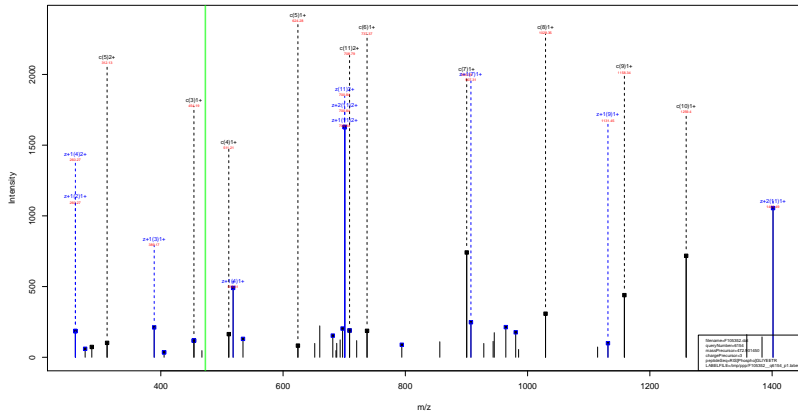

# sp | P62806 | H4\_MOUSE

RIS<sup>Phospho</sup> GLIYEETR  
79.97

- ▶ fragmentation table for charge state 1+
- ▶ specType=etd
- ▶ score=67.09
- ▶ F105352.dat
- ▶ query=q6154.p1
- ▶ precursor=472.901450
- ▶ chargePrecursor=3
- ▶ itol=0.8

| AA   | c               | y              | z+1             | z+2             | z        | AA   |
|------|-----------------|----------------|-----------------|-----------------|----------|------|
| R 1  | 174.135         | 1418.688       | 1400.670        | <b>1401.677</b> | 1399.662 | R 11 |
| I 2  | <b>287.219</b>  | 1200.587       | 1244.569        | 1245.576        | 1243.561 | R 10 |
| S 3  | <b>454.217</b>  | 1147.503       | <b>1131.484</b> | 1132.492        | 1130.477 | S 9  |
| G 4  | <b>511.239</b>  | <b>980.505</b> | <b>964.486</b>  | 965.494         | 963.478  | G 8  |
| L 5  | <b>624.323</b>  | 823.483        | <b>901.465</b>  | 908.472         | 906.457  | L 7  |
| I 6  | <b>737.407</b>  | 810.399        | <b>794.380</b>  | 795.388         | 793.373  | I 6  |
| V 7  | <b>900.470</b>  | <b>697.315</b> | <b>681.296</b>  | 682.304         | 680.289  | V 5  |
| E 8  | <b>1029.513</b> | <b>534.252</b> | <b>518.233</b>  | 519.241         | 517.225  | E 4  |
| E 9  | <b>1158.555</b> | <b>405.209</b> | <b>389.191</b>  | 390.199         | 388.183  | E 3  |
| T 10 | <b>1259.603</b> | <b>276.167</b> | <b>260.148</b>  | 261.156         | 259.140  | T 2  |
| R 11 | 1415.704        | 175.119        | 159.100         | 160.108         | 158.092  | R 1  |



# sp | P62806 | H4\_MOUSE

RIS Phospho  
79.97 GLIYEETR

- ▶ fragmentation table for charge state 2+
- ▶ specType=etd
- ▶ score=67.09
- ▶ F105352.dat
- ▶ query=q6154.p1
- ▶ precursor=472.901450
- ▶ chargePrecursor=3
- ▶ itol=0.8

| AA     | c              | y              | z+1            | z+2            | z              | AA    |
|--------|----------------|----------------|----------------|----------------|----------------|-------|
| R [3]  | 87.571         | <b>708.848</b> | <b>700.838</b> | <b>701.342</b> | <b>700.334</b> | R[11] |
| T [2]  | 144.113        | 630.797        | 622.788        | 623.292        | 622.284        | I[10] |
| S [3]  | 227.612        | 574.255        | 566.246        | 566.750        | 565.742        | S[0]  |
| G [4]  | 258.123        | 690.756        | 682.747        | 683.251        | 682.243        | G[8]  |
| L [5]  | <b>312.665</b> | 682.245        | <b>454.236</b> | <b>454.740</b> | <b>453.732</b> | L[7]  |
| I [6]  | 350.207        | <b>405.703</b> | 357.694        | 358.198        | 357.190        | I[6]  |
| V [7]  | 450.739        | 340.161        | 341.152        | 341.656        | 340.648        | V[5]  |
| E [8]  | 515.260        | 267.630        | <b>259.620</b> | <b>260.124</b> | 259.116        | E[4]  |
| E [9]  | 579.781        | 203.108        | 195.099        | 195.603        | 194.595        | E[3]  |
| T [10] | 630.305        | 138.587        | 130.578        | 131.082        | 130.074        | T[2]  |
| R [11] | <b>708.356</b> | 88.063         | 80.054         | 80.558         | 79.550         | R[1]  |



# sp | P62806 | H4\_MOUSE

RIS<sup>Phospho</sup> GLIYEETR  
79.97

- ▶ fragmentation table for charge state 1+
- ▶ specType=etd
- ▶ score=29.95
- ▶ F105352.dat
- ▶ query=q6155.p1
- ▶ precursor=708.848960
- ▶ chargePrecursor=2
- ▶ itol=0.8

| AA   | c        | y               | z+1             | z+2            | z               | AA   |
|------|----------|-----------------|-----------------|----------------|-----------------|------|
| R 1  | 174.135  | <b>1416.668</b> | <b>1400.670</b> | 1401.677       | <b>1399.662</b> | R 11 |
| I 2  | 287.219  | 1260.587        | 1244.589        | 1245.576       | 1243.561        | I 10 |
| S 3  | 454.217  | 1147.503        | <b>1131.484</b> | 1132.492       | 1130.477        | S 9  |
| G 4  | 511.259  | 980.505         | <b>964.486</b>  | <b>965.494</b> | 963.476         | G 8  |
| L 5  | 628.323  | 873.483         | <b>907.465</b>  | <b>908.472</b> | 906.457         | L 7  |
| I 6  | 737.407  | 810.399         | <b>794.380</b>  | 795.388        | 793.373         | I 6  |
| V 7  | 900.470  | 697.315         | <b>681.296</b>  | 682.304        | 680.289         | V 5  |
| E 8  | 1020.513 | 534.252         | 518.239         | <b>519.241</b> | 517.225         | E 4  |
| E 9  | 1158.535 | 405.200         | 389.191         | <b>390.198</b> | 388.183         | E 3  |
| T 10 | 1259.603 | 276.167         | 260.148         | 261.156        | 259.140         | T 2  |
| R 11 | 1415.704 | 175.119         | 159.100         | 160.108        | 158.092         | R 1  |



# sp | P43274 | H14\_MOUSE

KTS Phospho  
79.97 GPPVSELITK

- ▶ fragmentation table for charge state 1+
- ▶ specType=etd
- ▶ score=63.98
- ▶ F105352.dat
- ▶ query=q6280\_p1
- ▶ precursor=479.585230
- ▶ chargePrecursor=3
- ▶ itol=0.8

| AA    | c               | y               | z+1             | z+2      | z               | AA    |
|-------|-----------------|-----------------|-----------------|----------|-----------------|-------|
| R[1]  | 146.129         | 1436.740        | <b>1420.721</b> | 1421.729 | 1419.713        | R[13] |
| F[2]  | <b>247.176</b>  | 1308.645        | <b>1292.626</b> | 1293.634 | <b>1291.618</b> | F[12] |
| S[3]  | <b>414.175</b>  | 1207.907        | <b>1191.578</b> | 1192.586 | <b>1190.570</b> | S[11] |
| G[4]  | 471.196         | <b>1040.599</b> | <b>1024.580</b> | 1025.588 | <b>1023.572</b> | G[10] |
| P[5]  | 968.249         | 983.577         | 967.558         | 968.566  | 966.551         | P[9]  |
| P[6]  | 699.302         | 898.524         | 879.566         | 873.514  | 869.498         | P[8]  |
| V[7]  | <b>764.370</b>  | <b>789.472</b>  | 773.453         | 774.461  | 772.445         | V[7]  |
| S[8]  | <b>851.402</b>  | <b>690.403</b>  | <b>674.385</b>  | 675.392  | <b>673.377</b>  | S[6]  |
| E[9]  | <b>980.445</b>  | <b>603.371</b>  | <b>587.352</b>  | 588.360  | 586.345         | E[5]  |
| L[10] | <b>1093.529</b> | <b>474.329</b>  | <b>458.310</b>  | 459.318  | 457.302         | L[4]  |
| I[11] | <b>1306.613</b> | 361.245         | <b>345.226</b>  | 346.234  | 344.218         | I[3]  |
| T[12] | <b>1307.661</b> | <b>248.160</b>  | 232.143         | 233.150  | 231.134         | T[2]  |
| R[13] | 1435.756        | 147.113         | 131.094         | 132.102  | 130.086         | R[1]  |

# sp | P43274 | H14\_MOUSE

KTS <sup>Phospho</sup> 79.97 GPPVSELITK

- ▶ fragmentation table for charge state 2+
- ▶ specType=etd
- ▶ score=63.98
- ▶ F105352.dat
- ▶ query=q6280.p1
- ▶ precursor=479.585230
- ▶ chargePrecursor=3
- ▶ itol=0.8

| AA    | c              | y              | z+1            | z+2            | z              | AA    |
|-------|----------------|----------------|----------------|----------------|----------------|-------|
| K[1]  | 73.508         | <b>718.873</b> | <b>710.864</b> | <b>711.368</b> | <b>710.360</b> | K[13] |
| T[2]  | 124.002        | <b>654.826</b> | 646.817        | 647.321        | 646.313        | T[12] |
| S[3]  | 207.591        | 604.302        | 596.293        | 596.797        | 595.789        | S[11] |
| G[4]  | 236.102        | 520.803        | 512.794        | 513.298        | 512.290        | G[10] |
| T[5]  | 264.626        | 492.292        | 484.283        | 484.787        | 483.779        | T[9]  |
| P[6]  | 313.155        | 443.766        | 435.757        | 436.260        | 435.253        | P[8]  |
| V[7]  | 352.689        | 395.239        | 387.230        | 387.734        | 386.726        | V[7]  |
| S[8]  | 426.205        | <b>345.705</b> | 337.696        | 338.200        | 337.192        | S[6]  |
| E[9]  | 490.726        | 302.189        | 294.180        | 294.684        | 293.676        | E[5]  |
| L[10] | 547.268        | 237.668        | 229.659        | 230.162        | 229.155        | L[4]  |
| I[11] | <b>603.810</b> | 181.126        | 173.117        | 173.620        | 172.613        | I[3]  |
| T[12] | <b>654.334</b> | 124.584        | 116.575        | 117.078        | 116.071        | T[2]  |
| K[13] | <b>718.381</b> | 74.060         | 66.051         | 66.555         | 65.547         | K[1]  |



# sp | P70696 | H2B1A\_MOUSE

IAS<sup>Phospho</sup> EASR  
79.97

- ▶ fragmentation table for charge state 1+
- ▶ specType=etd
- ▶ score=28.45
- ▶ F105352.dat
- ▶ query=q652\_p1
- ▶ precursor=407.178950
- ▶ chargePrecursor=2
- ▶ itol=0.8

| AA    | c              | y              | z+1            | z+2            | z              | AA    |
|-------|----------------|----------------|----------------|----------------|----------------|-------|
| T [1] | 131.118        | <b>813.350</b> | <b>797.332</b> | 0.000          | 796.328        | I [7] |
| A [2] | 202.155        | 100.265        | <b>683.247</b> | 0.000          | <b>683.240</b> | A [6] |
| S [3] | 369.153        | <b>629.229</b> | <b>613.210</b> | 0.000          | 612.207        | S [5] |
| E [4] | 498.196        | 462.231        | <b>446.212</b> | 0.000          | 445.208        | E [4] |
| A [5] | 569.233        | 333.188        | <b>317.169</b> | 0.000          | 316.162        | A [3] |
| S [6] | <b>656.265</b> | 282.151        | 246.132        | 0.000          | 245.124        | S [2] |
| R [7] | 812.366        | 175.119        | <b>159.100</b> | <b>160.108</b> | 158.092        | R [1] |



# sp | P70696 | H2B1A\_MOUSE

IAS Phospho EASR  
79.97

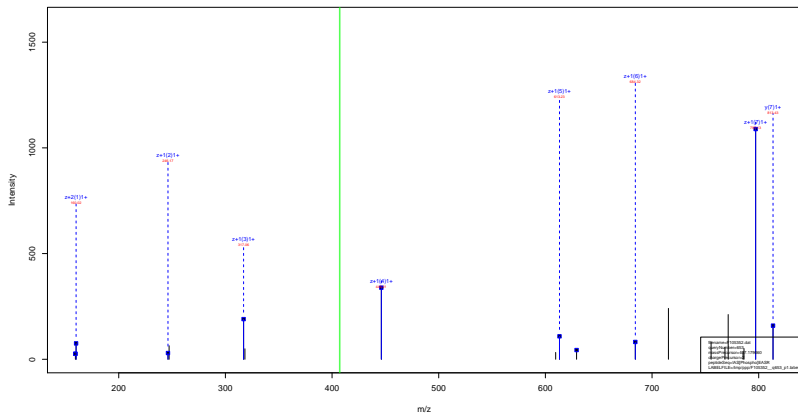

# sp | P70696 | H2B1A\_MOUSE

IAS Phospho EASR  
79.97

- ▶ fragmentation table for charge state 1+
- ▶ specType=etd
- ▶ score=46.65
- ▶ F105352.dat
- ▶ query=q653\_p1
- ▶ precursor=407.179060
- ▶ chargePrecursor=2
- ▶ itol=0.8

| AA   | c       | y              | z+1            | z+2            | z       | AA   |
|------|---------|----------------|----------------|----------------|---------|------|
| A[1] | 131.130 | <b>813.350</b> | <b>797.332</b> | 0.000          | 796.325 | I[7] |
| A[2] | 202.135 | 700.265        | <b>604.247</b> | 0.000          | 603.240 | A[6] |
| S[3] | 369.153 | <b>629.229</b> | <b>613.210</b> | 0.000          | 612.202 | S[5] |
| E[4] | 498.196 | 462.231        | <b>446.212</b> | 0.000          | 445.204 | E[4] |
| A[5] | 569.233 | 333.188        | <b>317.169</b> | 0.000          | 316.162 | A[3] |
| S[6] | 656.265 | 262.151        | <b>246.132</b> | 0.000          | 245.124 | S[2] |
| R[7] | 812.366 | 175.119        | <b>159.100</b> | <b>160.108</b> | 158.092 | R[1] |

# sp | P68433 | H31\_MOUSE

RY<sup>Phospho</sup> 79.97 QKSTELLIR

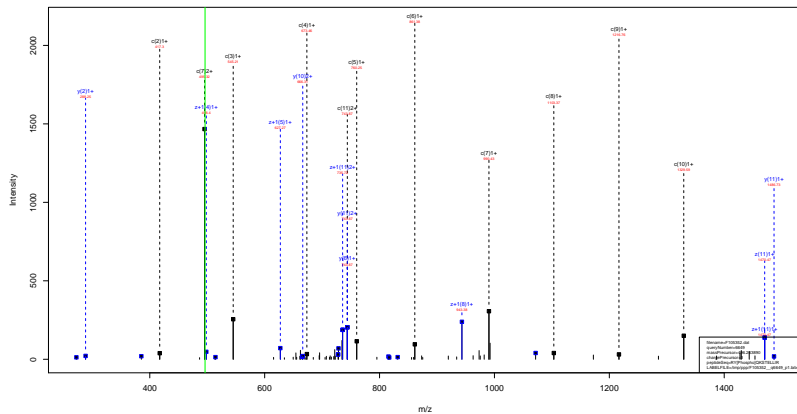

# sp | P68433 | H31\_MOUSE

RY<sup>Phospho</sup>  
79.97 QKSTELLIR

- ▶ fragmentation table for charge state 1+
- ▶ specType=etd
- ▶ score=53.15
- ▶ F105352.dat
- ▶ query=q6649\_p1
- ▶ precursor=496.263890
- ▶ chargePrecursor=3
- ▶ itol=0.8

| AA |    | c               | y               | z+1             | z+2            | z               | AA    |
|----|----|-----------------|-----------------|-----------------|----------------|-----------------|-------|
| R  | 1  | 194.136         | <b>1486.770</b> | <b>1470.759</b> | 1471.767       | <b>1469.751</b> | R[1]  |
| V  | 2  | <b>417.165</b>  | 1330.677        | 1314.650        | 1315.666       | 1313.650        | V[10] |
| Q  | 3  | <b>545.223</b>  | 1087.647        | <b>1071.628</b> | 1072.636       | 1070.620        | Q[9]  |
| K  | 4  | <b>673.318</b>  | 899.585         | <b>943.570</b>  | 944.578        | 942.562         | K[8]  |
| S  | 5  | <b>760.350</b>  | <b>831.493</b>  | <b>815.475</b>  | <b>816.483</b> | 814.467         | S[7]  |
| T  | 6  | <b>861.398</b>  | <b>744.461</b>  | <b>738.443</b>  | 739.451        | <b>727.435</b>  | T[6]  |
| E  | 7  | <b>990.440</b>  | 643.414         | <b>627.395</b>  | 628.403        | 626.387         | E[5]  |
| L  | 8  | <b>1103.525</b> | <b>514.371</b>  | <b>498.352</b>  | 499.360        | 497.345         | L[4]  |
| I  | 9  | <b>1216.609</b> | 401.287         | <b>385.266</b>  | 386.276        | 384.261         | I[3]  |
| I  | 10 | <b>1329.693</b> | <b>288.203</b>  | <b>272.184</b>  | 273.192        | 271.176         | I[2]  |
| R  | 11 | 1485.794        | 175.112         | 159.100         | 160.108        | 158.092         | R[1]  |

# sp | P68433 | H31\_MOUSE

R<sup>Y</sup> Phospho  
79.97 QKSTELLIR

- ▶ fragmentation table for charge state 2+
- ▶ specType=etd
- ▶ score=53.15
- ▶ F105352.dat
- ▶ query=q6649\_p1
- ▶ precursor=496.263890
- ▶ chargePrecursor=3
- ▶ itol=0.8

| AA     | c              | y              | z+1            | z+2            | z              | AA     |
|--------|----------------|----------------|----------------|----------------|----------------|--------|
| R [1]  | 87.571         | <b>743.893</b> | <b>735.883</b> | <b>736.387</b> | <b>735.379</b> | R [1]  |
| Y [2]  | 209.086        | <b>665.842</b> | 657.831        | 658.337        | 657.329        | Y [10] |
| Q [3]  | 273.115        | 544.327        | 536.310        | 536.822        | 535.814        | Q [9]  |
| K [4]  | 337.163        | 430.298        | 422.288        | 422.792        | 421.785        | K [8]  |
| S [5]  | 380.679        | 416.250        | 408.241        | 408.745        | 407.737        | S [7]  |
| T [6]  | 431.203        | 372.734        | 364.726        | 365.229        | 364.221        | T [6]  |
| E [7]  | <b>495.724</b> | 322.211        | 314.201        | 314.705        | 313.697        | E [5]  |
| L [8]  | 552.266        | 257.689        | 249.680        | 250.184        | 249.176        | L [4]  |
| I [9]  | 608.808        | 201.147        | 193.138        | 193.642        | 192.634        | I [3]  |
| I [10] | <b>665.350</b> | 144.605        | 136.596        | 137.100        | 136.092        | I [2]  |
| R [11] | <b>743.401</b> | 88.063         | 80.054         | 80.558         | 79.550         | R [1]  |

# sp | Q9D2U9 | H2B3A\_MOUSE

STITS<sup>Phospho</sup> REVQTAVR  
79.97

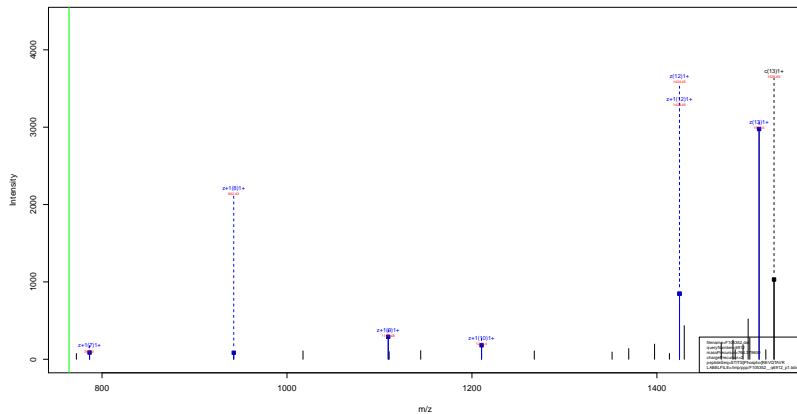

# sp | Q9D2U9 | H2B3A\_MOUSE

STITS<sup>Phospho</sup> REVQTAVR  
79.97

- ▶ fragmentation table for charge state 1+
- ▶ specType=etd
- ▶ score=28.26
- ▶ F105352.dat
- ▶ query=q6912.p1
- ▶ precursor=764.379600
- ▶ chargePrecursor=2
- ▶ itol=0.8

| AA    | c               | y        | z+1             | z+2     | z               | AA    |
|-------|-----------------|----------|-----------------|---------|-----------------|-------|
| S[1]  | 105.060         | 1327.753 | 1511.734        | 0.000   | <b>1510.720</b> | S[13] |
| T[2]  | 306.114         | 1440.721 | <b>1424.702</b> | 0.000   | <b>1423.694</b> | T[12] |
| I[3]  | 319.198         | 1339.673 | 1323.654        | 0.000   | 1322.646        | I[11] |
| T[4]  | 420.245         | 1236.589 | <b>1210.570</b> | 0.000   | 1209.562        | T[10] |
| S[5]  | 567.244         | 1125.541 | <b>1109.522</b> | 0.000   | 1108.515        | S[9]  |
| R[6]  | 743.245         | 958.541  | <b>942.524</b>  | 0.000   | 941.516         | R[8]  |
| E[7]  | 872.287         | 802.442  | <b>786.423</b>  | 787.411 | 785.415         | E[7]  |
| V[8]  | 971.456         | 673.399  | 657.380         | 658.368 | 656.373         | V[6]  |
| Q[9]  | 1099.514        | 574.331  | 558.312         | 559.320 | 557.304         | Q[5]  |
| T[10] | 1200.562        | 448.272  | 430.253         | 431.261 | 429.246         | T[4]  |
| A[11] | 1271.569        | 345.224  | 329.206         | 330.214 | 328.199         | A[3]  |
| V[12] | 1370.595        | 274.187  | 258.169         | 259.176 | 257.161         | V[2]  |
| R[13] | <b>1526.769</b> | 175.133  | 159.100         | 160.108 | 158.092         | R[1]  |





# sp | P10922 | H10\_MOUSE

TENS<sup>Phospho</sup><sub>79.97</sub> TSAPAAKPKR

- ▶ fragmentation table for charge state 1+
- ▶ specType=etd
- ▶ score=28.98
- ▶ F105352.dat
- ▶ query=q6967.p1
- ▶ precursor=513.249590
- ▶ chargePrecursor=3
- ▶ itol=0.8

| AA            | c               | y               | z+1            | z+2             | z        | AA            |
|---------------|-----------------|-----------------|----------------|-----------------|----------|---------------|
| <b>Y</b> [1]  | 119.082         | 1537.737        | 1521.718       | 0.000           | 1520.710 | <b>Y</b> [14] |
| <b>E</b> [2]  | 248.124         | 1436.689        | 1420.671       | 0.000           | 1419.663 | <b>E</b> [13] |
| <b>W</b> [3]  | 382.187         | 1307.647        | 1291.629       | 1392.538        | 1290.520 | <b>W</b> [12] |
| <b>S</b> [4]  | 529.185         | 1193.604        | 1177.585       | <b>1178.593</b> | 1176.577 | <b>S</b> [11] |
| <b>Y</b> [5]  | 630.213         | <b>1026.605</b> | 1010.587       | <b>1011.595</b> | 1009.570 | <b>Y</b> [10] |
| <b>S</b> [6]  | 717.245         | 925.558         | <b>909.539</b> | <b>910.547</b>  | 908.531  | <b>S</b> [9]  |
| <b>A</b> [7]  | 788.292         | 838.520         | <b>822.507</b> | <b>823.515</b>  | 821.499  | <b>A</b> [8]  |
| <b>P</b> [8]  | 885.335         | 767.480         | 751.470        | 752.478         | 750.462  | <b>P</b> [7]  |
| <b>A</b> [9]  | <b>934.372</b>  | 670.438         | <b>654.417</b> | <b>655.425</b>  | 653.409  | <b>A</b> [6]  |
| <b>A</b> [10] | <b>1027.409</b> | 599.397         | <b>583.380</b> | <b>584.388</b>  | 582.372  | <b>A</b> [5]  |
| <b>K</b> [11] | 1184.504        | 528.362         | 512.343        | 513.351         | 511.335  | <b>K</b> [4]  |
| <b>P</b> [12] | 1252.557        | 400.267         | 384.248        | 385.256         | 383.240  | <b>P</b> [3]  |
| <b>K</b> [13] | 1580.652        | 303.214         | <b>287.195</b> | 288.203         | 286.187  | <b>K</b> [2]  |
| <b>R</b> [14] | 1536.753        | 175.119         | 159.100        | 160.108         | 158.092  | <b>R</b> [1]  |

# sp|P10922|H10\_MOUSE

TENS<sup>Phospho</sup><sub>79.97</sub>TSAPAAKPKR

- ▶ fragmentation table for charge state 2+
- ▶ specType=etd
- ▶ score=28.98
- ▶ F105352.dat
- ▶ query=q6967.p1
- ▶ precursor=513.249590
- ▶ chargePrecursor=3
- ▶ itol=0.8

| AA    | c       | y              | z+1            | z+2            | z              | AA    |
|-------|---------|----------------|----------------|----------------|----------------|-------|
| T[1]  | 60.044  | <b>769.372</b> | <b>761.363</b> | 0.504          | <b>760.859</b> | T[14] |
| E[2]  | 124.506 | <b>718.848</b> | <b>710.839</b> | 0.504          | <b>710.335</b> | E[13] |
| N[3]  | 181.537 | <b>654.327</b> | <b>646.318</b> | <b>646.822</b> | 645.814        | N[12] |
| S[4]  | 265.036 | <b>597.306</b> | <b>589.296</b> | <b>589.800</b> | 588.792        | S[11] |
| Y[5]  | 315.610 | 513.806        | 505.797        | 506.301        | 505.293        | Y[10] |
| S[6]  | 359.126 | 463.283        | 455.273        | 455.777        | 454.769        | S[9]  |
| A[7]  | 394.645 | 419.767        | 411.757        | 412.261        | 411.253        | A[8]  |
| P[8]  | 443.171 | 384.248        | 376.239        | 376.743        | 375.735        | P[7]  |
| A[9]  | 478.690 | 335.722        | 327.712        | 328.216        | 327.208        | A[6]  |
| A[10] | 514.208 | 300.203        | 292.194        | 292.698        | 291.690        | A[5]  |
| K[11] | 578.235 | 264.684        | 256.673        | 257.179        | 256.171        | K[4]  |
| P[12] | 626.762 | 200.637        | 192.628        | 193.132        | 192.124        | P[3]  |
| K[13] | 690.830 | 152.111        | 144.101        | 144.605        | 143.597        | K[2]  |
| R[14] | 768.850 | 88.063         | 80.054         | 80.558         | 79.550         | R[1]  |



# sp | P70696 | H2B1A\_MOUSE

STIT<sup>(Phospho)</sup> SREIQTAVR  
(79.97)

- ▶ fragmentation table for charge state 1+
- ▶ specType=etd
- ▶ score=67.04
- ▶ F105352.dat
- ▶ query=q6996\_p1
- ▶ precursor=514.593960
- ▶ chargePrecursor=3
- ▶ itol=0.8

| AA    | c               | y              | z+1             | z+2            | z               | AA    |
|-------|-----------------|----------------|-----------------|----------------|-----------------|-------|
| S[1]  | 105.066         | 1341.765       | <b>1525.750</b> | 0.000          | 1524.742        | S[13] |
| T[2]  | 206.114         | 1494.736       | 1438.718        | 0.000          | 1437.710        | T[12] |
| I[3]  | 319.198         | 1353.689       | 1337.670        | 0.000          | 1336.662        | I[11] |
| T[4]  | 500.212         | 1240.605       | 1224.589        | 0.000          | <b>1223.578</b> | T[10] |
| S[5]  | <b>587.244</b>  | 1059.591       | 1043.572        | 0.000          | 1042.564        | S[9]  |
| R[6]  | <b>743.345</b>  | 872.559        | <b>956.540</b>  | <b>957.548</b> | 955.532         | R[8]  |
| E[7]  | <b>872.387</b>  | <b>816.457</b> | <b>800.439</b>  | 801.444        | 799.431         | E[7]  |
| I[8]  | <b>985.471</b>  | <b>687.415</b> | <b>671.396</b>  | 672.404        | 670.388         | I[6]  |
| Q[9]  | <b>1113.530</b> | <b>574.331</b> | <b>558.312</b>  | 559.320        | 557.304         | Q[5]  |
| T[10] | <b>1214.578</b> | <b>446.272</b> | <b>430.253</b>  | 431.261        | 429.246         | T[4]  |
| A[11] | <b>1285.615</b> | 345.224        | <b>329.206</b>  | 330.214        | 328.198         | A[3]  |
| V[12] | <b>1384.683</b> | <b>274.187</b> | 266.169         | 259.176        | 257.161         | V[2]  |
| R[13] | 1540.784        | 175.119        | 159.100         | 160.108        | 158.092         | R[1]  |

# sp | P70696 | H2B1A\_MOUSE

STIT<sup>(Phospho)</sup> SREIQTAVR  
(79.97)

- ▶ fragmentation table for charge state 2+
- ▶ specType=etd
- ▶ score=67.04
- ▶ F105352.dat
- ▶ query=q6996\_p1
- ▶ precursor=514.593960
- ▶ chargePrecursor=3
- ▶ itol=0.8

| AA    | c              | y              | z+1            | z+2     | z              | AA    |
|-------|----------------|----------------|----------------|---------|----------------|-------|
| S[1]  | 83.037         | <b>771.388</b> | <b>763.378</b> | 0.504   | <b>762.875</b> | S[13] |
| T[2]  | 103.560        | 727.872        | <b>719.862</b> | 0.504   | <b>719.359</b> | T[12] |
| I[3]  | 160.102        | 677.348        | <b>669.339</b> | 0.504   | <b>668.835</b> | I[11] |
| T[4]  | 290.609        | 620.806        | <b>612.797</b> | 0.504   | <b>612.293</b> | T[10] |
| S[5]  | 294.125        | 530.299        | 522.290        | 0.504   | 521.786        | S[9]  |
| R[6]  | 372.176        | 486.783        | 478.774        | 479.277 | 478.270        | R[8]  |
| E[7]  | 436.697        | 408.732        | 400.723        | 401.227 | 400.219        | E[7]  |
| I[8]  | 493.239        | 344.211        | 336.202        | 336.706 | 335.698        | I[6]  |
| Q[9]  | 557.269        | 287.669        | 279.660        | 280.164 | 279.156        | Q[5]  |
| T[10] | 607.792        | 223.640        | 215.630        | 216.134 | 215.126        | T[4]  |
| A[11] | 643.311        | 173.116        | 165.107        | 165.610 | 164.603        | A[3]  |
| V[12] | 692.845        | 137.597        | 129.588        | 130.092 | 129.084        | V[2]  |
| R[13] | <b>770.896</b> | 88.063         | 80.054         | 80.558  | 79.550         | R[1]  |



# sp | P43274 | H14\_MOUSE

SET (Phospho)  
(79.97) APAAPAAPAPVEK

- ▶ fragmentation table for charge state 1+
- ▶ specType=etd
- ▶ score=36.78
- ▶ F105352.dat
- ▶ query=q7112\_p1
- ▶ precursor=520.239840
- ▶ chargePrecursor=3
- ▶ itol=0.8

| AA    | c               | y              | z+1             | z+2     | z               | AA    |
|-------|-----------------|----------------|-----------------|---------|-----------------|-------|
| S[1]  | 105.066         | 1558.715       | <b>1542.696</b> | 0.000   | <b>1541.688</b> | S[16] |
| E[2]  | 234.108         | 1471.683       | 1453.664        | 0.000   | 1454.056        | E[15] |
| T[3]  | 415.122         | 1342.640       | 1326.622        | 0.000   | 1325.614        | T[14] |
| A[4]  | 439.109         | 1181.626       | 1183.608        | 0.000   | 1144.605        | A[13] |
| P[5]  | <b>581.212</b>  | 1090.589       | 1074.570        | 0.000   | 1073.561        | P[12] |
| A[6]  | <b>654.240</b>  | <b>991.536</b> | <b>977.518</b>  | 0.000   | 976.510         | A[11] |
| A[7]  | 725.287         | 922.499        | <b>906.481</b>  | 0.000   | 905.473         | A[10] |
| P[8]  | <b>822.339</b>  | 851.462        | 835.443         | 0.000   | 834.435         | P[9]  |
| A[9]  | <b>893.376</b>  | 754.409        | <b>738.391</b>  | 0.000   | 737.383         | A[8]  |
| A[10] | 964.414         | 683.372        | <b>667.354</b>  | 0.000   | 666.346         | A[7]  |
| P[11] | <b>1051.466</b> | 612.335        | 596.316         | 0.000   | 595.308         | P[10] |
| A[12] | 1132.503        | 515.262        | <b>499.264</b>  | 0.000   | 498.256         | A[5]  |
| P[13] | <b>1229.556</b> | 444.245        | 428.227         | 0.000   | 427.219         | P[4]  |
| A[14] | <b>1309.593</b> | 347.193        | <b>331.174</b>  | 0.000   | 330.166         | A[3]  |
| E[15] | <b>1429.636</b> | 276.155        | 260.137         | 0.000   | 259.129         | E[2]  |
| K[16] | 1557.731        | 147.113        | 131.094         | 132.102 | 130.086         | K[1]  |

# sp | P43274 | H14\_MOUSE

SET <sup>(Phospho)</sup><sub>(79.97)</sub> APAAPAAPAPVEK

- ▶ fragmentation table for charge state 2+
- ▶ specType=etd
- ▶ score=36.78
- ▶ F105352.dat
- ▶ query=q7112\_p1
- ▶ precursor=520.239840
- ▶ chargePrecursor=3
- ▶ itol=0.8

| AA     | c              | y              | z+1            | z+2    | z              | AA     |
|--------|----------------|----------------|----------------|--------|----------------|--------|
| S [1]  | 53.037         | <b>779.861</b> | <b>771.852</b> | 0.504  | <b>771.348</b> | S [16] |
| E [2]  | 117.558        | 730.943        | 720.936        | 0.504  | 727.932        | E [15] |
| T [3]  | 208.065        | 671.824        | 663.814        | 0.504  | 663.310        | T [14] |
| A [4]  | 243.583        | 581.317        | 573.307        | 0.504  | 572.803        | A [13] |
| P [5]  | 292.110        | 545.798        | 537.789        | 0.504  | 537.285        | P [12] |
| A [6]  | 327.628        | 497.272        | 489.262        | 0.504  | 488.759        | A [11] |
| A [7]  | 363.147        | 461.753        | 453.744        | 0.504  | 453.240        | A [10] |
| P [8]  | 411.673        | 426.235        | 418.225        | 0.504  | 417.721        | P [9]  |
| A [9]  | 447.192        | 377.708        | 369.699        | 0.504  | 369.195        | A [8]  |
| A [10] | 482.710        | 342.190        | 334.180        | 0.504  | 333.676        | A [7]  |
| P [11] | 531.237        | 306.671        | 298.662        | 0.504  | 298.158        | P [6]  |
| A [12] | 566.755        | 258.145        | 250.135        | 0.504  | 249.632        | A [5]  |
| P [13] | 613.282        | 222.626        | 214.617        | 0.504  | 214.113        | P [4]  |
| A [14] | <b>650.800</b> | 174.100        | 166.091        | 0.504  | 165.587        | A [3]  |
| E [15] | <b>715.322</b> | 138.581        | 130.572        | 0.504  | 130.068        | E [2]  |
| K [16] | <b>779.369</b> | 74.050         | 66.051         | 66.555 | 65.547         | K [1]  |





# sp | P43274 | H14\_MOUSE

SET <sup>Phospho</sup> APAAPAAPAPAEK  
79.97

- ▶ fragmentation table for charge state 1+
- ▶ specType=etd
- ▶ score=33.25
- ▶ F105352.dat
- ▶ query=q7114\_p1
- ▶ precursor=520.240260
- ▶ chargePrecursor=3
- ▶ itol=0.8

| AA | c               | y        | z+1             | z+2     | z               | AA    |
|----|-----------------|----------|-----------------|---------|-----------------|-------|
| S  | 105.006         | 1558.715 | <b>1542.696</b> | 0.000   | <b>1541.688</b> | S[16] |
| E  | 234.108         | 1471.683 | 1455.664        | 0.000   | 1454.656        | E[15] |
| T  | 415.122         | 1342.640 | 1326.622        | 0.000   | 1325.614        | T[14] |
| A  | 489.160         | 1161.620 | 1145.608        | 0.000   | 1144.600        | A[13] |
| P  | <b>581.212</b>  | 1090.580 | 1074.570        | 0.000   | 1073.563        | P[12] |
| A  | <b>654.240</b>  | 993.536  | <b>977.518</b>  | 0.000   | 976.510         | A[11] |
| A  | 725.287         | 922.490  | <b>906.481</b>  | 0.000   | 905.473         | A[10] |
| P  | <b>822.139</b>  | 851.462  | 835.443         | 0.000   | 834.436         | P[9]  |
| A  | <b>891.176</b>  | 754.400  | <b>738.391</b>  | 0.000   | 737.383         | A[8]  |
| A  | 964.214         | 683.372  | <b>667.354</b>  | 0.000   | 666.346         | A[7]  |
| P  | <b>1061.466</b> | 612.338  | 596.319         | 0.000   | 595.309         | P[6]  |
| A  | 1132.503        | 515.282  | <b>499.264</b>  | 0.000   | 498.256         | A[5]  |
| P  | <b>1229.556</b> | 444.248  | 428.227         | 0.000   | 427.219         | P[4]  |
| A  | <b>1300.593</b> | 347.193  | <b>331.174</b>  | 0.000   | 330.166         | A[3]  |
| E  | 1429.636        | 276.155  | 260.137         | 0.000   | 259.129         | E[2]  |
| K  | 1557.731        | 147.113  | 131.094         | 152.102 | 130.086         | K[1]  |

# sp | P43274 | H14\_MOUSE

SET<sup>Phospho</sup> APAAPAAPAPAEK  
79.97

- ▶ fragmentation table for charge state 2+
- ▶ specType=etd
- ▶ score=33.25
- ▶ F105352.dat
- ▶ query=q7114.p1
- ▶ precursor=520.240260
- ▶ chargePrecursor=3
- ▶ itol=0.8

| AA    | c              | y              | z+1            | z+2   | z              | AA    |
|-------|----------------|----------------|----------------|-------|----------------|-------|
| S[1]  | 53.037         | <b>779.861</b> | <b>771.852</b> | 0.504 | <b>771.348</b> | S[16] |
| E[2]  | 117.558        | 736.345        | 728.336        | 0.504 | 727.832        | E[15] |
| T[3]  | 208.965        | 671.824        | 663.814        | 0.504 | 663.310        | T[14] |
| A[4]  | 243.583        | 581.317        | 573.307        | 0.504 | 572.803        | A[13] |
| P[5]  | 292.110        | 545.798        | 537.789        | 0.504 | 537.285        | P[12] |
| A[6]  | 327.628        | 497.272        | 489.262        | 0.504 | 488.759        | A[11] |
| A[7]  | 353.147        | 461.753        | 453.744        | 0.504 | 453.240        | A[10] |
| P[8]  | 411.673        | 426.235        | 418.225        | 0.504 | 417.721        | P[9]  |
| A[9]  | 447.192        | 377.708        | 369.699        | 0.504 | 369.195        | A[8]  |
| A[10] | 482.710        | 342.190        | 334.180        | 0.504 | 333.676        | A[7]  |
| P[11] | 531.237        | 306.671        | 298.662        | 0.504 | 298.158        | P[6]  |
| A[12] | 566.755        | 258.145        | 250.135        | 0.504 | 249.632        | A[5]  |
| P[13] | 613.282        | 222.626        | 214.617        | 0.504 | 214.113        | P[4]  |
| A[14] | <b>650.800</b> | 174.100        | 166.091        | 0.504 | 165.587        | A[3]  |
| E[15] | <b>715.322</b> | 138.581        | 130.572        | 0.504 | 130.068        | E[2]  |
| K[16] | <b>779.369</b> | 74.050         | 66.051         | 0.504 | 65.547         | K[1]  |



# sp | P43274 | H14\_MOUSE

SET<sup>Phospho</sup> APAAPAAPAPAEK  
79.97

- ▶ fragmentation table for charge state 1+
- ▶ specType=etd
- ▶ score=32.18
- ▶ F105352.dat
- ▶ query=q7115\_p1
- ▶ precursor=520.241440
- ▶ chargePrecursor=3
- ▶ itol=0.8

| AA | c               | y        | z=1             | z=2     | z        | AA    |
|----|-----------------|----------|-----------------|---------|----------|-------|
| S  | 105.060         | 1558.715 | <b>1542.696</b> | 0.000   | 1541.688 | S[16] |
| E  | 234.108         | 1471.683 | 1455.664        | 0.000   | 1454.656 | E[15] |
| T  | 415.122         | 1342.840 | 1326.822        | 0.000   | 1325.814 | T[13] |
| A  | 498.160         | 1161.920 | 1145.908        | 0.000   | 1144.900 | A[15] |
| P  | <b>583.212</b>  | 1090.589 | 1074.570        | 0.000   | 1073.563 | P[12] |
| A  | <b>654.249</b>  | 993.530  | <b>977.518</b>  | 0.000   | 976.510  | A[11] |
| A  | 725.287         | 922.499  | <b>906.481</b>  | 0.000   | 905.473  | A[10] |
| P  | <b>822.139</b>  | 851.462  | 835.443         | 0.000   | 834.436  | P[9]  |
| A  | <b>893.176</b>  | 754.409  | <b>738.391</b>  | 0.000   | 737.383  | A[8]  |
| A  | 964.114         | 683.372  | <b>667.354</b>  | 0.000   | 666.346  | A[7]  |
| P  | <b>1061.466</b> | 612.335  | 596.316         | 0.000   | 595.309  | P[6]  |
| A  | 1132.503        | 515.282  | <b>499.264</b>  | 0.000   | 498.256  | A[5]  |
| P  | <b>1229.556</b> | 444.245  | 428.227         | 0.000   | 427.219  | P[4]  |
| A  | <b>1300.593</b> | 347.193  | <b>331.174</b>  | 0.000   | 330.166  | A[3]  |
| E  | 1429.636        | 276.155  | 260.137         | 0.000   | 259.129  | E[2]  |
| K  | 1567.731        | 147.113  | 131.094         | 132.102 | 130.086  | K[1]  |

# sp | P43274 | H14\_MOUSE

SET<sup>Phospho</sup> APAAPAAPAPAEK  
79.97

- ▶ fragmentation table for charge state 2+
- ▶ specType=etd
- ▶ score=32.18
- ▶ F105352.dat
- ▶ query=q7115\_p1
- ▶ precursor=520.241440
- ▶ chargePrecursor=3
- ▶ itol=0.8

| AA    | c              | y              | z+1            | z+2   | z              | AA    |
|-------|----------------|----------------|----------------|-------|----------------|-------|
| S[1]  | 53.037         | <b>779.861</b> | <b>771.852</b> | 0.504 | <b>771.348</b> | S[16] |
| E[2]  | 117.558        | 736.345        | 728.336        | 0.504 | 727.832        | E[15] |
| T[3]  | 208.965        | 671.824        | 663.814        | 0.504 | 663.310        | T[14] |
| A[4]  | 243.583        | 581.317        | 573.307        | 0.504 | 572.803        | A[13] |
| P[5]  | 292.130        | 545.798        | 537.789        | 0.504 | 537.285        | P[12] |
| A[6]  | 327.628        | 497.272        | 489.262        | 0.504 | 488.759        | A[11] |
| A[7]  | 353.147        | 461.753        | 453.744        | 0.504 | 453.240        | A[10] |
| P[8]  | 411.673        | 426.235        | 418.225        | 0.504 | 417.721        | P[9]  |
| A[9]  | 447.192        | 377.708        | 369.699        | 0.504 | 369.195        | A[8]  |
| A[10] | 482.710        | 342.190        | 334.180        | 0.504 | 333.676        | A[7]  |
| P[11] | 531.237        | 306.671        | 298.662        | 0.504 | 298.158        | P[6]  |
| A[12] | 566.755        | 258.145        | 250.136        | 0.504 | 249.632        | A[5]  |
| P[13] | 613.282        | 222.626        | 214.617        | 0.504 | 214.113        | P[4]  |
| A[14] | <b>650.800</b> | 174.100        | 166.091        | 0.504 | 165.587        | A[3]  |
| E[15] | <b>715.322</b> | 138.581        | 130.572        | 0.504 | 130.068        | E[2]  |
| K[16] | <b>779.369</b> | 74.050         | 66.051         | 0.504 | 65.547         | K[1]  |

# sp | P15864 | H12\_MOUSE

RKAS<sup>Phospho</sup> 79.97 GPPVSELITK

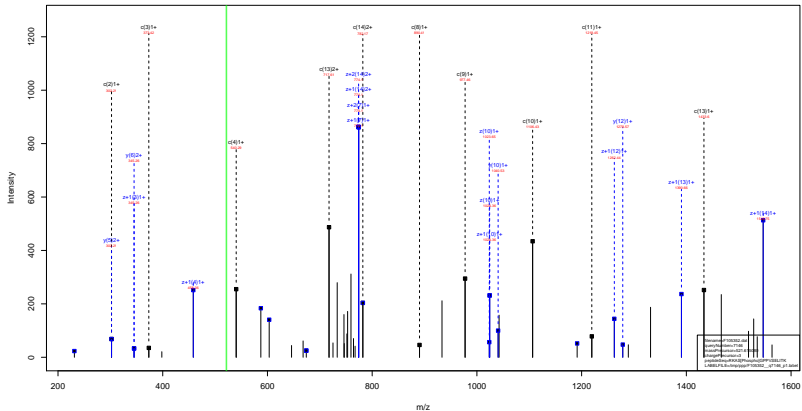

# sp | P15864 | H12\_MOUSE

RKAS<sup>Phospho</sup><sub>79.97</sub> GPPVSELITK

- ▶ fragmentation table for charge state 1+
- ▶ specType=etd
- ▶ score=75.77
- ▶ F105352.dat
- ▶ query=q7146\_p1
- ▶ precursor=521.615080
- ▶ chargePrecursor=3
- ▶ itol=0.8

| AA    | c               | y               | z+1             | z+2            | z               | AA    |
|-------|-----------------|-----------------|-----------------|----------------|-----------------|-------|
| R[1]  | 174.135         | 1562.839        | <b>1546.811</b> | 1567.819       | 1545.804        | R[14] |
| R[2]  | <b>302.230</b>  | 1406.729        | <b>1390.710</b> | 1391.718       | 1389.703        | R[13] |
| A[3]  | <b>373.267</b>  | <b>1278.634</b> | <b>1262.615</b> | 1263.623       | 1261.608        | A[12] |
| S[4]  | <b>540.265</b>  | 1059.599        | <b>1191.578</b> | 1192.586       | 1190.570        | S[11] |
| G[5]  | 597.287         | <b>1040.599</b> | <b>1024.580</b> | 1025.588       | <b>1023.572</b> | G[10] |
| P[6]  | 694.340         | 983.577         | 987.558         | 988.566        | 986.551         | P[9]  |
| P[7]  | 791.392         | 888.524         | 870.509         | 871.514        | 869.498         | P[8]  |
| V[8]  | <b>890.461</b>  | 799.472         | <b>773.453</b>  | <b>774.461</b> | 772.445         | V[7]  |
| S[9]  | <b>977.493</b>  | 699.403         | <b>674.385</b>  | 675.392        | <b>673.377</b>  | S[6]  |
| E[10] | <b>1106.535</b> | <b>603.371</b>  | <b>587.352</b>  | 588.360        | 586.344         | E[5]  |
| L[11] | <b>1219.619</b> | 474.326         | <b>458.310</b>  | 459.318        | 457.302         | L[4]  |
| I[12] | 1332.704        | 361.245         | <b>345.226</b>  | 346.234        | 344.218         | I[3]  |
| T[13] | <b>1433.751</b> | 248.160         | 232.142         | 233.150        | <b>231.134</b>  | T[2]  |
| K[14] | 1561.846        | 147.113         | 131.094         | 132.102        | 130.086         | K[1]  |



# sp | P15864 | H12\_MOUSE

RKAS<sup>Phospho</sup><sub>79.97</sub> GPPVSELITK

- ▶ fragmentation table for charge state 2+
- ▶ specType=etd
- ▶ score=75.77
- ▶ F105352.dat
- ▶ query=q7146\_p1
- ▶ precursor=521.615080
- ▶ chargePrecursor=3
- ▶ itol=0.8

| AA     | c              | y              | z+1            | z+2            | z              | AA    |
|--------|----------------|----------------|----------------|----------------|----------------|-------|
| R [3]  | 87.571         | <b>781.919</b> | <b>773.909</b> | <b>774.413</b> | <b>773.405</b> | R[14] |
| K [2]  | 151.619        | 703.666        | 695.657        | 696.363        | 695.355        | K[13] |
| A [3]  | 187.137        | 639.821        | 631.811        | 632.315        | 631.307        | A[12] |
| S [4]  | 270.636        | 604.302        | 596.293        | 596.797        | 595.789        | S[11] |
| G [5]  | 299.147        | 520.803        | 512.794        | 513.298        | 512.290        | G[10] |
| P [6]  | 347.673        | 492.292        | 484.283        | 484.787        | 483.779        | P[9]  |
| F [7]  | 396.200        | 443.766        | 435.756        | 436.260        | 435.253        | F[8]  |
| V [8]  | 445.734        | 395.239        | 387.230        | 387.734        | 386.726        | V[7]  |
| S [9]  | 489.250        | <b>345.705</b> | 337.696        | 338.200        | 337.192        | S[6]  |
| E [10] | 553.771        | <b>302.189</b> | 294.180        | 294.684        | 293.676        | E[5]  |
| L [11] | 618.313        | 237.666        | 229.657        | 230.162        | 229.156        | L[4]  |
| I [12] | 666.855        | 181.126        | 173.117        | 173.620        | 172.613        | I[3]  |
| T [13] | <b>717.379</b> | 124.584        | 116.575        | 117.078        | 116.071        | T[2]  |
| K [14] | <b>781.427</b> | 74.060         | 66.051         | 66.555         | 65.547         | K[1]  |

# sp | P15864 | H12\_MOUSE

RKAS Phospho 79.97 GPPVSELITK

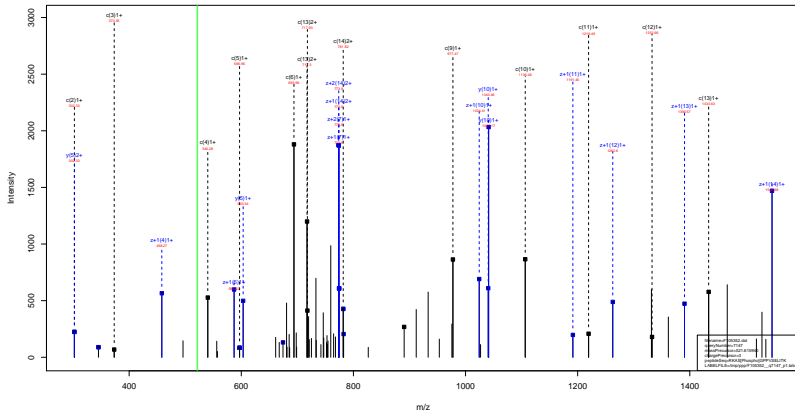

# sp | P15864 | H12\_MOUSE

RKAS<sup>Phospho</sup><sub>79.97</sub> GPPVSELITK

- ▶ fragmentation table for charge state 1+
- ▶ specType=etd
- ▶ score=73.91
- ▶ F105352.dat
- ▶ query=q7147.p1
- ▶ precursor=521.615940
- ▶ chargePrecursor=3
- ▶ itol=0.8

| AA | c               | y               | z+1             | z+2            | z        | AA    |
|----|-----------------|-----------------|-----------------|----------------|----------|-------|
| R  | 174.135         | 1562.830        | <b>1546.811</b> | 1547.810       | 1545.804 | R[14] |
| K  | <b>302.230</b>  | 1408.720        | <b>1390.710</b> | 1391.718       | 1389.703 | K[13] |
| A  | <b>313.287</b>  | 1278.630        | <b>1262.615</b> | 1263.623       | 1261.608 | A[12] |
| S  | <b>540.265</b>  | 1207.597        | <b>1191.578</b> | 1192.586       | 1190.570 | S[11] |
| G  | <b>597.287</b>  | <b>1040.599</b> | <b>1024.580</b> | 1025.588       | 1023.572 | G[10] |
| P  | <b>694.340</b>  | 983.577         | 987.558         | 988.566        | 986.551  | P[9]  |
| F  | 791.392         | 886.524         | 870.506         | 871.514        | 869.498  | F[8]  |
| V  | <b>890.461</b>  | 789.472         | <b>773.453</b>  | <b>774.461</b> | 772.445  | V[7]  |
| S  | <b>977.493</b>  | 699.463         | <b>674.385</b>  | 675.392        | 673.377  | S[6]  |
| E  | <b>1106.535</b> | <b>603.371</b>  | <b>587.352</b>  | 588.360        | 586.345  | E[5]  |
| L  | <b>1219.619</b> | 474.329         | <b>458.310</b>  | 459.318        | 457.302  | L[4]  |
| H  | <b>1332.704</b> | 361.245         | <b>345.226</b>  | 346.234        | 344.218  | H[3]  |
| T  | <b>1433.751</b> | 248.160         | 232.142         | 233.150        | 231.134  | T[2]  |
| K  | 1561.846        | 147.113         | 131.094         | 132.102        | 130.086  | K[1]  |

# sp | P15864 | H12\_MOUSE

RKAS<sup>Phospho</sup><sub>79.97</sub> GPPVSELITK

- ▶ fragmentation table for charge state 2+
- ▶ specType=etd
- ▶ score=73.91
- ▶ F105352.dat
- ▶ query=q7147.p1
- ▶ precursor=521.615940
- ▶ chargePrecursor=3
- ▶ itol=0.8

| AA     | c              | y              | z+1            | z+2            | z              | AA    |
|--------|----------------|----------------|----------------|----------------|----------------|-------|
| R [3]  | 87.571         | <b>781.919</b> | <b>773.909</b> | <b>774.413</b> | <b>773.405</b> | R[14] |
| K [2]  | 151.019        | 703.050        | 695.037        | 696.363        | 695.355        | K[13] |
| A [3]  | 187.137        | 839.821        | 631.811        | 632.315        | 631.307        | A[12] |
| S [4]  | 270.636        | 604.302        | <b>596.293</b> | <b>596.797</b> | 595.789        | S[11] |
| G [5]  | 299.147        | 520.803        | 512.794        | 513.298        | 512.290        | G[10] |
| P [6]  | 347.673        | 492.292        | 484.283        | 484.787        | 483.779        | P[9]  |
| F [7]  | 396.200        | 443.766        | 435.756        | 436.260        | 435.253        | F[8]  |
| V [8]  | 445.734        | 395.239        | 387.230        | 387.734        | 386.726        | V[7]  |
| S [9]  | 489.250        | <b>345.705</b> | 337.696        | 338.200        | 337.192        | S[6]  |
| E [10] | 553.771        | <b>302.189</b> | 294.180        | 294.684        | 293.676        | E[5]  |
| L [11] | 618.313        | 237.666        | 229.659        | 230.162        | 229.156        | L[4]  |
| I [12] | 666.855        | 181.126        | 173.117        | 173.620        | 172.613        | I[3]  |
| T [13] | <b>717.379</b> | 124.584        | 116.575        | 117.078        | 116.071        | T[2]  |
| K [14] | <b>781.427</b> | 74.060         | 66.051         | 66.555         | 65.547         | K[1]  |



# sp | P43277 | H13\_MOUSE

SET <sup>(Phospho)</sup> APAAPAAPAPVEK  
(79.97)

- ▶ fragmentation table for charge state 1+
- ▶ specType=etd
- ▶ score=39.14
- ▶ F105352.dat
- ▶ query=q7316\_p1
- ▶ precursor=529.583410
- ▶ chargePrecursor=3
- ▶ itol=0.8

| AA    | c               | y        | z+1             | z+2     | z               | AA    |
|-------|-----------------|----------|-----------------|---------|-----------------|-------|
| S[1]  | 105.066         | 1586.746 | 1570.727        | 0.000   | <b>1569.720</b> | S[16] |
| E[2]  | 234.108         | 1699.714 | 1483.695        | 0.000   | 1482.088        | E[15] |
| V[3]  | 415.122         | 1370.672 | 1354.653        | 0.000   | 1353.645        | V[14] |
| A[4]  | 439.109         | 1189.695 | 1173.639        | 0.000   | 1172.631        | A[13] |
| P[5]  | <b>581.212</b>  | 1118.620 | 1102.602        | 0.000   | 1101.594        | P[12] |
| A[6]  | <b>654.240</b>  | 1021.565 | <b>1005.549</b> | 0.000   | <b>1004.541</b> | A[11] |
| A[7]  | 725.287         | 950.531  | <b>934.512</b>  | 0.000   | 933.504         | A[10] |
| P[8]  | <b>822.339</b>  | 879.493  | 863.475         | 0.000   | 862.467         | P[9]  |
| A[9]  | <b>893.376</b>  | 782.441  | 766.422         | 0.000   | <b>765.414</b>  | A[8]  |
| A[10] | 964.414         | 711.404  | <b>695.385</b>  | 0.000   | 694.377         | A[7]  |
| P[11] | <b>1061.466</b> | 640.365  | 624.348         | 0.000   | 623.340         | P[10] |
| A[12] | 1132.503        | 543.319  | 527.299         | 0.000   | 526.291         | A[9]  |
| P[13] | <b>1229.556</b> | 472.277  | 456.258         | 0.000   | 455.250         | P[4]  |
| V[14] | <b>1328.625</b> | 375.224  | <b>359.205</b>  | 0.000   | 358.197         | V[3]  |
| E[15] | <b>1457.667</b> | 278.155  | 260.137         | 0.000   | 259.129         | E[2]  |
| K[16] | 1585.762        | 147.113  | 131.094         | 132.102 | 130.086         | K[1]  |

# sp | P43277 | H13\_MOUSE

SET (Phospho)  
(79.97) APAAPAAPAPVEK

- ▶ fragmentation table for charge state 2+
- ▶ specType=etd
- ▶ score=39.14
- ▶ F105352.dat
- ▶ query=q7316\_p1
- ▶ precursor=529.583410
- ▶ chargePrecursor=3
- ▶ itol=0.8

| AA     | c              | y              | z+1            | z+2    | z              | AA     |
|--------|----------------|----------------|----------------|--------|----------------|--------|
| S [1]  | 53.037         | <b>793.877</b> | <b>785.867</b> | 0.504  | <b>785.363</b> | S [8]  |
| E [2]  | 117.558        | 750.361        | 742.351        | 0.504  | 744.347        | E [5]  |
| T [3]  | 208.065        | 685.839        | 677.830        | 0.504  | 677.325        | T [4]  |
| A [4]  | 243.583        | 595.332        | 587.323        | 0.504  | 586.819        | A [13] |
| P [5]  | 292.110        | 559.814        | 551.804        | 0.504  | 551.301        | P [12] |
| A [6]  | 327.628        | 511.287        | 503.278        | 0.504  | 502.774        | A [11] |
| A [7]  | 363.147        | 475.769        | 467.760        | 0.504  | 467.256        | A [10] |
| P [8]  | 411.673        | 440.250        | 432.241        | 0.504  | 431.737        | P [9]  |
| A [9]  | 447.192        | 391.724        | 383.715        | 0.504  | 383.211        | A [8]  |
| A [10] | 482.710        | 356.205        | 348.196        | 0.504  | 347.692        | A [7]  |
| P [11] | 531.237        | 320.687        | 312.678        | 0.504  | 312.174        | P [6]  |
| A [12] | 566.755        | 272.160        | 264.151        | 0.504  | 263.647        | A [5]  |
| P [13] | 613.282        | 236.642        | 228.633        | 0.504  | 228.129        | P [4]  |
| V [14] | <b>664.816</b> | 188.116        | 180.106        | 0.504  | 179.602        | V [3]  |
| E [15] | <b>729.337</b> | 138.589        | 130.572        | 0.504  | 130.068        | E [2]  |
| K [16] | 793.885        | 74.060         | 66.051         | 66.535 | 65.547         | K [1]  |

# sp | P43277 | H13\_MOUSE

SET (Phospho)  
(79.97) APAAPAAPAPVEK

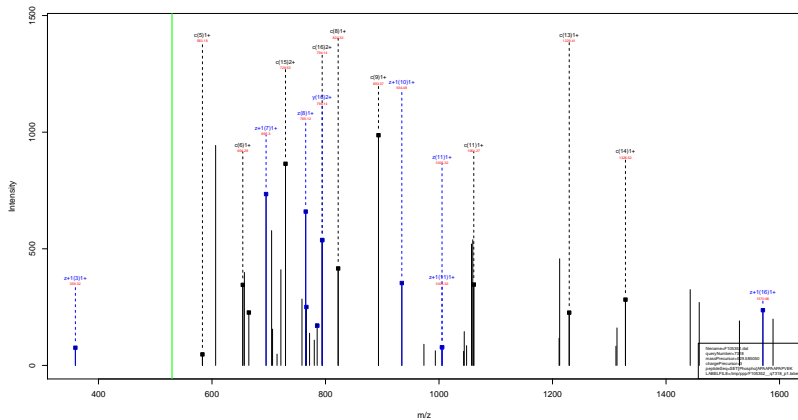



# sp | P43277 | H13\_MOUSE

SET <sup>(Phospho)</sup> APAAPAAPAPVEK  
(79.97)

- ▶ fragmentation table for charge state 1+
- ▶ specType=etd
- ▶ score=29.30
- ▶ F105352.dat
- ▶ query=q7318\_p1
- ▶ precursor=529.585050
- ▶ chargePrecursor=3
- ▶ itol=0.8

| AA    | c               | y        | z+1             | z+2     | z               | AA    |
|-------|-----------------|----------|-----------------|---------|-----------------|-------|
| S[1]  | 105.066         | 1586.748 | <b>1570.727</b> | 0.000   | 1509.720        | S[16] |
| E[2]  | 234.108         | 1699.714 | 1483.695        | 0.000   | 1482.088        | E[15] |
| V[3]  | 415.122         | 1370.672 | 1354.653        | 0.000   | 1353.645        | V[14] |
| A[4]  | 439.109         | 1189.695 | 1173.639        | 0.000   | 1172.631        | A[13] |
| P[5]  | <b>581.212</b>  | 1118.620 | 1102.602        | 0.000   | 1101.594        | P[12] |
| A[6]  | <b>654.249</b>  | 1021.565 | <b>1005.549</b> | 0.000   | <b>1004.541</b> | A[11] |
| A[7]  | 725.287         | 950.531  | <b>934.512</b>  | 0.000   | 933.504         | A[10] |
| P[8]  | <b>822.339</b>  | 879.493  | 863.475         | 0.000   | 862.467         | P[9]  |
| A[9]  | <b>893.376</b>  | 782.441  | <b>766.422</b>  | 0.000   | <b>765.414</b>  | A[8]  |
| A[10] | 964.414         | 711.404  | <b>695.385</b>  | 0.000   | 694.377         | A[7]  |
| P[11] | <b>1061.466</b> | 640.365  | 624.348         | 0.000   | 623.340         | P[10] |
| A[12] | 1132.503        | 543.319  | 527.299         | 0.000   | 526.291         | A[9]  |
| P[13] | <b>1229.556</b> | 472.277  | 456.258         | 0.000   | 455.250         | P[4]  |
| V[14] | <b>1328.625</b> | 375.224  | <b>359.205</b>  | 0.000   | 358.197         | V[3]  |
| E[15] | 1457.667        | 278.155  | 260.137         | 0.000   | 259.129         | E[2]  |
| K[16] | 1585.762        | 147.113  | 131.094         | 132.102 | 130.086         | K[1]  |

# sp | P43277 | H13\_MOUSE

SET (Phospho)  
(79.97) APAAPAAPAPVEK

- ▶ fragmentation table for charge state 2+
- ▶ specType=etd
- ▶ score=29.30
- ▶ F105352.dat
- ▶ query=q7318\_p1
- ▶ precursor=529.585050
- ▶ chargePrecursor=3
- ▶ itol=0.8

| AA    | c              | y              | z+1            | z+2    | z              | AA    |
|-------|----------------|----------------|----------------|--------|----------------|-------|
| S[1]  | 53.037         | <b>793.877</b> | <b>785.867</b> | 0.504  | <b>785.363</b> | S[16] |
| E[2]  | 117.558        | 750.361        | 742.351        | 0.504  | 741.847        | E[15] |
| T[3]  | 208.065        | 685.839        | 677.830        | 0.504  | 677.326        | T[14] |
| A[4]  | 243.583        | 595.332        | 587.323        | 0.504  | 586.819        | A[13] |
| P[5]  | 292.110        | 559.814        | 551.804        | 0.504  | 551.301        | P[12] |
| A[6]  | 327.628        | 511.287        | 503.278        | 0.504  | 502.774        | A[11] |
| A[7]  | 363.147        | 475.769        | 467.760        | 0.504  | 467.256        | A[10] |
| P[8]  | 411.673        | 440.250        | 432.241        | 0.504  | 431.737        | P[9]  |
| A[9]  | 447.192        | 391.724        | 383.715        | 0.504  | 383.211        | A[8]  |
| A[10] | 482.710        | 356.205        | 348.196        | 0.504  | 347.692        | A[7]  |
| P[11] | 531.237        | 320.687        | 312.678        | 0.504  | 312.174        | P[6]  |
| A[12] | 566.755        | 272.160        | 264.151        | 0.504  | 263.647        | A[5]  |
| P[13] | 613.282        | 236.642        | 228.633        | 0.504  | 228.129        | P[4]  |
| V[14] | <b>664.816</b> | 188.116        | 180.106        | 0.504  | 179.602        | V[3]  |
| E[15] | <b>729.337</b> | 138.589        | 130.572        | 0.504  | 130.068        | E[2]  |
| K[16] | <b>793.385</b> | 74.060         | 66.051         | 66.535 | 65.547         | K[1]  |

# sp | Q64475 | H2B1B\_MOUSE

SRKES Phospho YSVYVYK  
79.97

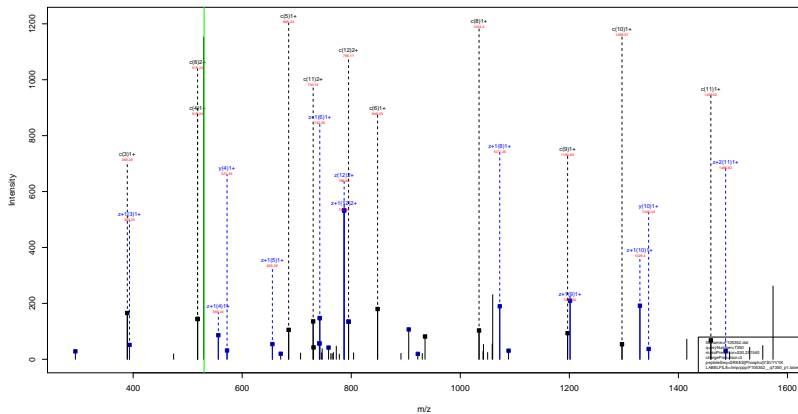

# sp | Q64475 | H2B1B\_MOUSE

SRKES<sup>Phospho</sup> YSVYVYK  
79.97

- ▶ fragmentation table for charge state 1+
- ▶ specType=etd
- ▶ score=59.55
- ▶ F105352.dat
- ▶ query=q7350.p1
- ▶ precursor=530.251540
- ▶ chargePrecursor=3
- ▶ itol=0.8

| AA    | c               | y               | z+1             | z+2             | z              | AA    |
|-------|-----------------|-----------------|-----------------|-----------------|----------------|-------|
| S 1   | 105.066         | 1588.741        | 1572.722        | 0.000           | 1571.714       | S[12] |
| R 2   | 281.107         | 1120.795        | 745.689         | <b>1486.698</b> | 1484.682       | R[11] |
| R 3   | <b>389.262</b>  | <b>1345.608</b> | <b>1329.589</b> | 1328.581        | 1326.565       | R[10] |
| E 4   | <b>518.305</b>  | 1217.513        | <b>1201.494</b> | 1200.502        | 1200.486       | E[9]  |
| S 5   | <b>665.303</b>  | <b>1088.470</b> | <b>1072.451</b> | 1073.459        | 1071.443       | S[8]  |
| Y 6   | <b>848.366</b>  | <b>921.472</b>  | <b>905.453</b>  | 906.461         | 904.445        | Y[7]  |
| S 7   | <b>935.398</b>  | <b>758.408</b>  | <b>742.390</b>  | 743.397         | <b>741.382</b> | S[6]  |
| V 8   | <b>1034.467</b> | <b>671.376</b>  | <b>655.358</b>  | 656.365         | 654.350        | V[5]  |
| V 9   | <b>1197.530</b> | <b>572.308</b>  | <b>556.289</b>  | 557.297         | 555.281        | V[4]  |
| V[10] | <b>1296.598</b> | 469.245         | <b>391.226</b>  | 394.234         | 392.218        | V[3]  |
| V[11] | <b>1459.662</b> | 310.178         | <b>294.157</b>  | 295.165         | 293.150        | V[2]  |
| R[12] | 1587.757        | 147.113         | 131.094         | 132.102         | 130.086        | R[1]  |

# sp | Q64475 | H2B1B\_MOUSE

SRKES<sup>Phospho</sup> YSVYVYK  
79.97

- ▶ fragmentation table for charge state 2+
- ▶ specType=etd
- ▶ score=59.55
- ▶ F105352.dat
- ▶ query=q7350.p1
- ▶ precursor=530.251540
- ▶ chargePrecursor=3
- ▶ itol=0.8

| AA    | c              | y              | z+1            | z+2     | z              | AA    |
|-------|----------------|----------------|----------------|---------|----------------|-------|
| S[1]  | 53.037         | <b>794.874</b> | <b>786.865</b> | 0.504   | <b>786.361</b> | S[12] |
| R[2]  | 131.087        | 751.358        | 743.349        | 743.853 | <b>742.845</b> | R[11] |
| K[3]  | 195.135        | 673.307        | 665.298        | 665.802 | 664.794        | K[10] |
| E[4]  | 259.656        | 609.260        | 601.251        | 601.754 | 600.747        | E[9]  |
| S[5]  | 343.195        | 644.739        | 636.729        | 637.231 | 636.225        | S[8]  |
| Y[6]  | 424.687        | 661.239        | 653.230        | 653.734 | 652.726        | Y[7]  |
| S[7]  | 468.203        | 679.708        | 671.698        | 672.202 | 671.195        | S[6]  |
| V[8]  | <b>517.737</b> | 636.192        | 628.182        | 628.686 | 627.679        | V[9]  |
| V[9]  | 389.259        | 680.658        | 672.648        | 673.152 | 672.144        | V[4]  |
| V[10] | 648.803        | 605.126        | 597.117        | 597.620 | 596.613        | V[3]  |
| V[11] | <b>730.334</b> | 155.592        | 147.582        | 148.086 | 147.078        | V[2]  |
| K[12] | <b>794.382</b> | 74.060         | 66.051         | 66.555  | 65.547         | K[1]  |

# sp | P43274 | H14\_MOUSE

RKT<sup>Phospho</sup>SGPPVSELITK  
79.97

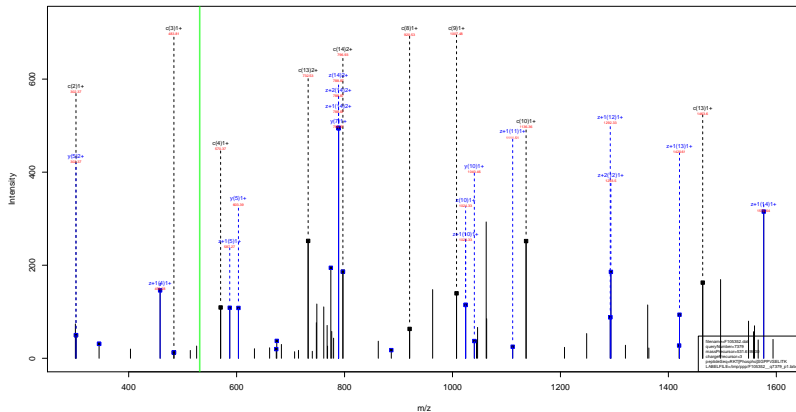

# sp | P43274 | H14\_MOUSE

RKT<sup>Phospho</sup> SGPPVSELITK  
79.97

- ▶ fragmentation table for charge state 1+
- ▶ specType=etd
- ▶ score=45.01
- ▶ F105352.dat
- ▶ query=q7379\_p1
- ▶ precursor=531.618000
- ▶ chargePrecursor=3
- ▶ itol=0.8

| AA |    | c               | y               | z+1             | z+2             | z               | AA    |
|----|----|-----------------|-----------------|-----------------|-----------------|-----------------|-------|
| R  | 1  | 174.135         | 1502.941        | <b>1576.622</b> | 1577.630        | 1575.614        | R[14] |
| K  | 2  | <b>302.230</b>  | 1436.740        | <b>1420.721</b> | 1421.729        | <b>1419.713</b> | K[13] |
| T  | 3  | <b>483.244</b>  | 1338.045        | <b>1293.626</b> | <b>1293.634</b> | <b>1291.618</b> | T[12] |
| S  | 4  | <b>570.276</b>  | 1127.611        | <b>1111.612</b> | 1112.620        | 1110.604        | S[11] |
| G  | 5  | 657.257         | <b>1040.598</b> | <b>1024.580</b> | 1025.588        | <b>1023.572</b> | G[10] |
| F  | 6  | 724.350         | 983.577         | 987.558         | 988.566         | 986.551         | F[9]  |
| P  | 7  | 821.403         | <b>886.524</b>  | 870.500         | 871.514         | 869.486         | P[8]  |
| V  | 8  | <b>920.471</b>  | <b>789.472</b>  | 773.453         | <b>774.461</b>  | 772.445         | V[7]  |
| S  | 9  | <b>1007.503</b> | 680.433         | <b>674.385</b>  | 675.392         | <b>673.377</b>  | S[6]  |
| E  | 10 | <b>1136.546</b> | <b>603.371</b>  | <b>587.352</b>  | 588.360         | 586.344         | E[5]  |
| L  | 11 | 1249.630        | 474.329         | <b>458.310</b>  | 459.318         | 457.302         | L[4]  |
| I  | 12 | 1362.714        | 361.245         | <b>345.226</b>  | 346.234         | 344.218         | I[3]  |
| T  | 13 | <b>1463.762</b> | 248.160         | 232.142         | 233.150         | 231.134         | T[2]  |
| K  | 14 | 1581.857        | 147.113         | 131.094         | 132.102         | 130.086         | K[1]  |

# sp | P43274 | H14\_MOUSE

RKT<sup>Phospho</sup> SGPPVSELITK  
79.97

- ▶ fragmentation table for charge state 2+
- ▶ specType=etd
- ▶ score=45.01
- ▶ F105352.dat
- ▶ query=q7379\_p1
- ▶ precursor=531.618000
- ▶ chargePrecursor=3
- ▶ itol=0.8

| AA     | c              | y              | z+1            | z+2            | z              | AA     |
|--------|----------------|----------------|----------------|----------------|----------------|--------|
| R [3]  | 87.571         | <b>796.924</b> | <b>788.915</b> | <b>789.419</b> | <b>788.411</b> | R [4]  |
| K [2]  | 151.019        | 718.073        | 710.064        | 711.358        | 710.360        | K [3]  |
| Y [3]  | 242.126        | 654.826        | 646.817        | 647.321        | 646.313        | Y [2]  |
| S [4]  | 285.642        | 564.319        | 556.310        | 556.814        | 555.806        | S [11] |
| G [5]  | 314.152        | 520.803        | 512.794        | 513.298        | 512.290        | G [10] |
| P [6]  | 362.679        | 492.292        | <b>484.283</b> | 484.787        | <b>483.779</b> | P [9]  |
| P [7]  | 411.205        | 443.766        | 435.756        | 436.260        | 435.253        | P [8]  |
| V [8]  | 460.739        | 395.239        | 387.230        | 387.734        | 386.726        | V [7]  |
| S [9]  | 504.255        | <b>345.705</b> | 337.696        | 338.200        | 337.192        | S [6]  |
| E [10] | 568.777        | <b>302.189</b> | 294.180        | 294.684        | 293.676        | E [5]  |
| L [11] | 628.319        | 237.666        | 229.657        | 230.162        | 229.156        | L [4]  |
| I [12] | 681.361        | 181.126        | 173.117        | 173.620        | 172.613        | I [3]  |
| T [13] | <b>732.385</b> | 124.584        | 116.575        | 117.078        | 116.071        | T [2]  |
| K [14] | <b>796.432</b> | 74.060         | 66.051         | 66.555         | 65.547         | K [1]  |



# sp | P43274 | H14\_MOUSE

RKT<sup>Phospho</sup>SGPPVSELITK  
79.97

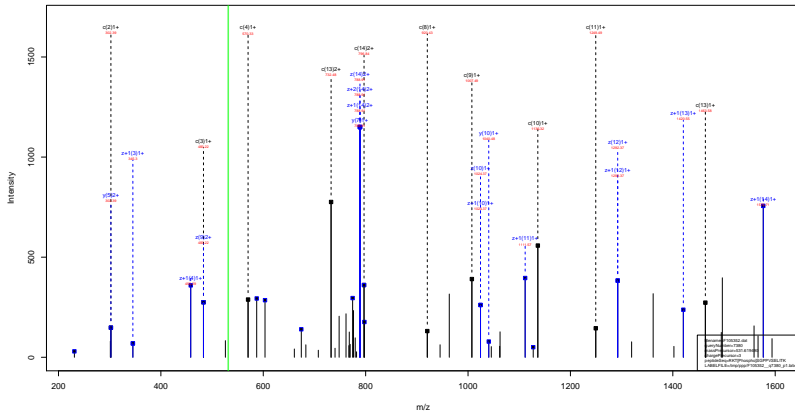

# sp | P43274 | H14\_MOUSE

RKT<sup>Phospho</sup> SGPPVSELITK  
79.97

- ▶ fragmentation table for charge state 1+
- ▶ specType=etd
- ▶ score=61.06
- ▶ F105352.dat
- ▶ query=q7380\_p1
- ▶ precursor=531.619490
- ▶ chargePrecursor=3
- ▶ itol=0.8

| AA     | c               | y               | z+1             | z+2            | z               | AA    |
|--------|-----------------|-----------------|-----------------|----------------|-----------------|-------|
| R [1]  | 174.135         | 1592.841        | <b>1576.822</b> | 1577.830       | 1575.814        | R[14] |
| R [2]  | <b>302.230</b>  | 1436.740        | <b>1420.721</b> | 1421.729       | 1419.713        | R[13] |
| T [3]  | <b>483.244</b>  | 1388.745        | <b>1292.458</b> | 1293.454       | <b>1291.618</b> | T[12] |
| S [4]  | <b>570.276</b>  | <b>1127.631</b> | <b>1111.612</b> | 1112.609       | 1110.599        | S[11] |
| G [5]  | 627.297         | <b>1040.599</b> | <b>1024.580</b> | 1025.588       | <b>1023.572</b> | G[10] |
| F [6]  | 724.350         | 983.577         | 967.558         | 968.566        | 966.551         | F[9]  |
| P [7]  | 821.403         | 888.524         | 870.509         | 871.514        | 869.498         | P[8]  |
| V [8]  | <b>920.471</b>  | <b>789.472</b>  | 773.453         | <b>774.461</b> | 772.445         | V[7]  |
| S [9]  | <b>1007.503</b> | 692.423         | <b>674.385</b>  | 675.392        | 673.377         | S[6]  |
| E [10] | <b>1136.546</b> | <b>603.371</b>  | <b>587.352</b>  | 588.360        | 586.345         | E[5]  |
| L [11] | <b>1249.610</b> | 474.326         | <b>458.310</b>  | 459.318        | 457.302         | L[4]  |
| I [12] | 1362.714        | 361.245         | <b>345.226</b>  | 346.234        | 344.218         | I[3]  |
| T [13] | <b>1463.762</b> | 248.160         | 232.142         | 233.150        | <b>231.134</b>  | T[2]  |
| R [14] | 1591.857        | 147.113         | 131.094         | 132.102        | 130.086         | R[1]  |

# sp | P43274 | H14\_MOUSE

RKT<sup>Phospho</sup> SGPPVSELITK  
79.97

- ▶ fragmentation table for charge state 2+
- ▶ specType=etd
- ▶ score=61.06
- ▶ F105352.dat
- ▶ query=q7380.p1
- ▶ precursor=531.619490
- ▶ chargePrecursor=3
- ▶ itol=0.8

| AA     | c              | y              | z+1            | z+2            | z              | AA     |
|--------|----------------|----------------|----------------|----------------|----------------|--------|
| R [3]  | 87.571         | <b>796.924</b> | <b>788.915</b> | <b>789.419</b> | <b>788.411</b> | R [14] |
| K [2]  | 151.019        | 718.073        | 710.064        | 711.358        | 710.360        | K [13] |
| Y [3]  | 282.126        | 654.826        | 646.817        | 647.321        | 646.313        | Y [12] |
| S [4]  | 285.642        | 564.319        | 556.310        | 556.814        | 555.806        | S [11] |
| G [5]  | 314.152        | 520.803        | 512.794        | 513.298        | 512.290        | G [10] |
| P [6]  | 362.679        | 492.292        | 484.283        | 484.787        | <b>483.779</b> | P [9]  |
| P [7]  | 411.205        | 443.766        | 435.756        | 436.260        | 435.253        | P [8]  |
| V [8]  | 460.739        | 395.239        | 387.230        | 387.734        | 386.726        | V [7]  |
| S [9]  | 504.255        | <b>345.705</b> | 337.696        | 338.200        | 337.192        | S [6]  |
| E [10] | 568.777        | <b>302.189</b> | 294.180        | 294.684        | 293.676        | E [5]  |
| L [11] | 628.319        | 237.668        | 229.659        | 230.162        | 229.156        | L [4]  |
| I [12] | 681.861        | 181.126        | 173.117        | 173.620        | 172.613        | I [3]  |
| T [13] | <b>732.385</b> | 124.584        | 116.575        | 117.078        | 116.071        | T [2]  |
| K [14] | <b>796.432</b> | 74.060         | 66.051         | 66.555         | 65.547         | K [1]  |

# sp | Q8CCK0 | H2AW\_MOUSE

GKSETILS Phospho PPPEKR  
79.97

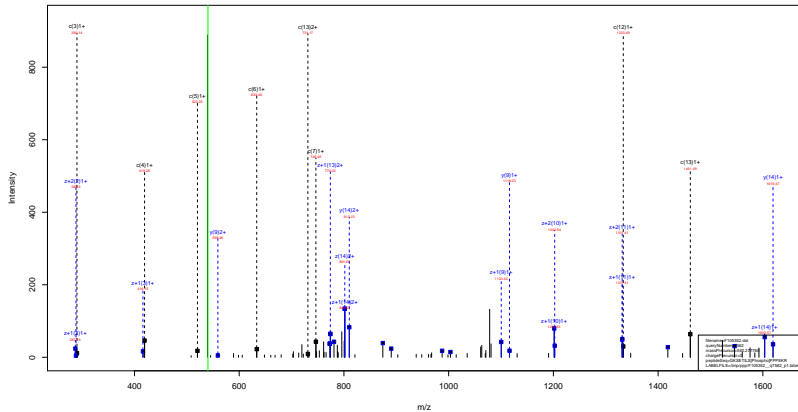

# sp | Q8CCK0 | H2AW\_MOUSE

GKSETILS<sup>Phospho</sup> PPPEKR  
79.97

- ▶ fragmentation table for charge state 1+
- ▶ specType=etd
- ▶ score=44.19
- ▶ F105352.dat
- ▶ query=q7562.p1
- ▶ precursor=540.277760
- ▶ chargePrecursor=3
- ▶ itol=0.8

| AA    | c               | y               | z+1             | z+2             | z        | AA    |
|-------|-----------------|-----------------|-----------------|-----------------|----------|-------|
| G[1]  | 75.055          | <b>1618.820</b> | <b>1602.801</b> | 0.000           | 1601.793 | G[14] |
| R[2]  | 203.150         | 1561.790        | <b>1545.780</b> | 1546.789        | 1544.772 | R[13] |
| S[3]  | <b>290.182</b>  | 1433.764        | 1417.653        | <b>1416.643</b> | 1416.677 | S[12] |
| E[4]  | <b>419.225</b>  | 1340.672        | <b>1330.653</b> | <b>1331.661</b> | 1329.645 | E[11] |
| T[5]  | <b>520.273</b>  | 1237.620        | <b>1201.610</b> | <b>1202.618</b> | 1200.602 | T[10] |
| H[6]  | <b>633.357</b>  | <b>1116.581</b> | <b>1100.563</b> | 1101.570        | 1099.555 | H[9]  |
| L[7]  | <b>746.441</b>  | <b>1003.497</b> | <b>987.478</b>  | 988.485         | 986.471  | L[8]  |
| S[8]  | 913.439         | <b>890.413</b>  | <b>874.394</b>  | 875.402         | 873.387  | S[7]  |
| P[9]  | 1010.402        | 742.413         | 707.397         | 708.404         | 706.388  | P[6]  |
| P[10] | 1107.345        | 626.362         | 630.343         | 611.351         | 600.335  | P[5]  |
| P[11] | 1204.307        | 529.306         | 513.291         | 514.298         | 512.281  | P[4]  |
| E[12] | <b>1333.640</b> | 432.257         | <b>416.238</b>  | 417.246         | 415.230  | E[3]  |
| R[13] | <b>1461.735</b> | 303.214         | <b>287.195</b>  | <b>288.203</b>  | 286.187  | R[2]  |
| R[14] | 1617.836        | 175.110         | 150.100         | 160.108         | 158.092  | R[1]  |

# sp | Q8CCK0 | H2AW\_MOUSE

GKSETILS<sup>Phospho</sup> PPPEKR  
79.97

- ▶ fragmentation table for charge state 2+
- ▶ specType=etd
- ▶ score=44.19
- ▶ F105352.dat
- ▶ query=q7562\_p1
- ▶ precursor=540.277760
- ▶ chargePrecursor=3
- ▶ itol=0.8

| AA    | c              | y              | z+1            | z+2            | z              | AA    |
|-------|----------------|----------------|----------------|----------------|----------------|-------|
| C[3]  | 38.031         | <b>809.914</b> | <b>801.904</b> | 0.504          | <b>801.400</b> | C[14] |
| K[2]  | 102.079        | <b>781.403</b> | <b>773.394</b> | <b>773.897</b> | <b>772.890</b> | K[13] |
| S[3]  | 145.595        | 717.355        | 709.346        | 709.350        | 708.842        | S[12] |
| E[4]  | 210.116        | 673.839        | 665.830        | 666.334        | 665.326        | E[11] |
| T[5]  | 280.640        | 609.318        | 601.309        | 601.813        | 600.805        | T[10] |
| I[6]  | 317.182        | <b>558.794</b> | 550.785        | 551.289        | 550.281        | I[9]  |
| L[7]  | 373.724        | 502.252        | 494.243        | 494.747        | 493.739        | L[8]  |
| S[8]  | 457.223        | 445.710        | 437.701        | 438.205        | 437.197        | S[7]  |
| P[9]  | 505.750        | 362.211        | 354.202        | 354.706        | 353.698        | P[6]  |
| F[10] | 554.276        | 311.685        | 303.675        | 304.179        | 303.171        | F[5]  |
| T[11] | 602.802        | 208.136        | 201.149        | 201.653        | 200.645        | T[4]  |
| E[12] | 667.324        | 216.632        | 208.623        | 209.126        | 208.119        | E[3]  |
| K[13] | <b>731.371</b> | 152.111        | 144.101        | 144.605        | 143.597        | K[2]  |
| R[14] | 809.422        | 88.063         | 80.054         | 80.558         | 79.550         | R[1]  |

# sp | P43274 | H14\_MOUSE

S<sup>Phospho</sup> ET<sup>Phospho</sup> APAAPAAPAPAEK  
79.97 79.97

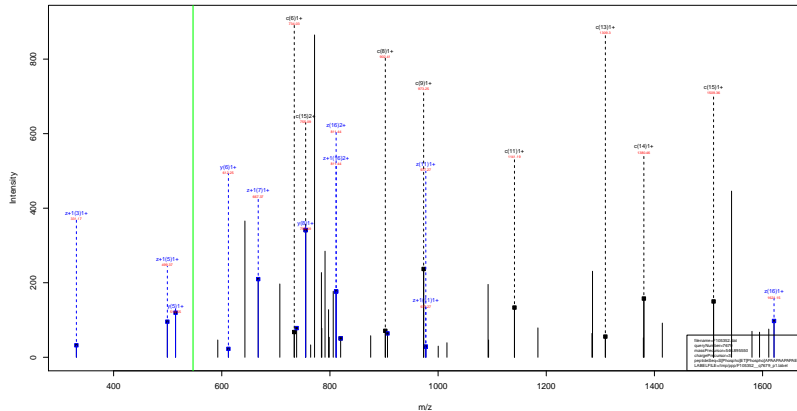

# sp | P43274 | H14\_MOUSE

S<sup>Phospho</sup> 79.97 ET<sup>Phospho</sup> 79.97 APAAPAAPAPAEK

- ▶ fragmentation table for charge state 1+
- ▶ specType=etd
- ▶ score=29.98
- ▶ F105352.dat
- ▶ query=q7679\_p1
- ▶ precursor=546.895550
- ▶ chargePrecursor=3
- ▶ itol=0.8

| AA | c               | y              | z+1            | z+2     | z               | AA    |
|----|-----------------|----------------|----------------|---------|-----------------|-------|
| S  | 185.032         | 1638.681       | 1622.662       | 0.000   | <b>1621.655</b> | S[16] |
| E  | 314.075         | 1471.683       | 1455.664       | 0.000   | 1454.656        | E[15] |
| T  | 495.989         | 1342.840       | 1328.822       | 0.000   | 1325.814        | T[13] |
| A  | 598.126         | 1161.929       | 1145.908       | 0.000   | 1144.900        | A[13] |
| P  | 563.179         | 1090.589       | 1074.570       | 0.000   | 1073.563        | P[12] |
| A  | <b>734.216</b>  | 993.530        | <b>977.518</b> | 0.000   | <b>976.510</b>  | A[11] |
| A  | 805.251         | 922.499        | <b>906.481</b> | 0.000   | 905.473         | A[10] |
| P  | <b>902.306</b>  | 851.462        | 835.443        | 0.000   | 834.436         | P[9]  |
| A  | <b>973.343</b>  | <b>754.409</b> | <b>738.391</b> | 0.000   | 737.383         | A[8]  |
| A  | 1044.389        | 683.372        | <b>667.354</b> | 0.000   | 666.346         | A[7]  |
| P  | <b>1141.433</b> | <b>612.335</b> | 596.316        | 0.000   | 595.309         | P[6]  |
| A  | 1212.470        | <b>515.282</b> | <b>499.264</b> | 0.000   | 498.256         | A[5]  |
| P  | <b>1309.523</b> | 444.245        | 428.227        | 0.000   | 427.219         | P[4]  |
| A  | <b>1380.560</b> | 347.193        | <b>331.174</b> | 0.000   | 330.166         | A[3]  |
| E  | <b>1509.602</b> | 276.155        | 260.137        | 0.000   | 259.129         | E[2]  |
| K  | 1637.697        | 147.113        | 131.094        | 132.102 | 130.086         | K[1]  |



# sp | P43274 | H14\_MOUSE

S<sup>Phospho</sup> 79.97 ET<sup>Phospho</sup> 79.97 APAAPAAPAPAEK

- ▶ fragmentation table for charge state 2+
- ▶ specType=etd
- ▶ score=29.98
- ▶ F105352.dat
- ▶ query=q7679\_p1
- ▶ precursor=546.895550
- ▶ chargePrecursor=3
- ▶ itol=0.8

| AA    | c              | y              | z+1            | z+2   | z              | AA    |
|-------|----------------|----------------|----------------|-------|----------------|-------|
| S[1]  | 93.020         | <b>819.844</b> | <b>811.835</b> | 0.504 | <b>811.331</b> | S[16] |
| E[2]  | 157.541        | 736.345        | 728.336        | 0.504 | 727.832        | E[15] |
| T[3]  | 248.048        | 671.824        | 663.814        | 0.504 | 663.310        | T[14] |
| A[4]  | 283.567        | 581.317        | 573.307        | 0.504 | 572.803        | A[13] |
| P[5]  | 332.093        | 545.798        | 537.789        | 0.504 | 537.285        | P[12] |
| A[6]  | 367.612        | 497.272        | 489.262        | 0.504 | 488.759        | A[11] |
| A[7]  | 403.130        | 461.753        | 453.744        | 0.504 | 453.240        | A[10] |
| P[8]  | 451.656        | 426.235        | 418.225        | 0.504 | 417.721        | P[9]  |
| A[9]  | 487.175        | 377.708        | 369.699        | 0.504 | 369.195        | A[8]  |
| A[10] | 522.694        | 342.190        | 334.180        | 0.504 | 333.676        | A[7]  |
| P[11] | 571.220        | 306.671        | 298.662        | 0.504 | 298.158        | P[6]  |
| A[12] | 666.739        | 258.143        | 250.133        | 0.504 | 249.622        | A[5]  |
| P[13] | 655.266        | 222.626        | 214.617        | 0.504 | 214.113        | P[4]  |
| A[14] | 690.783        | 174.100        | 166.091        | 0.504 | 165.587        | A[3]  |
| E[15] | <b>755.305</b> | 138.581        | 130.572        | 0.504 | 130.068        | E[2]  |
| K[16] | <b>819.352</b> | 74.050         | 66.051         | 0.504 | 65.547         | K[1]  |

# sp | P43276 | H15\_MOUSE

SET (Phospho)  
(79.97) APAETAAPAPVEK

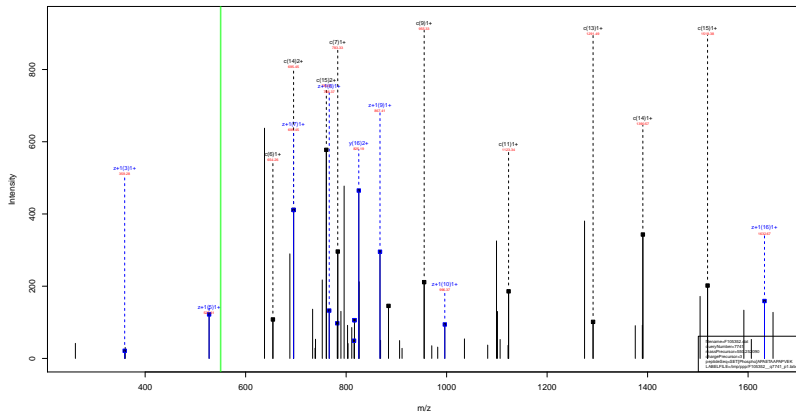

@ProteinSP1703322\_004  
 1. Gene: H15 (Mmus1712)  
 2. Gene: H15 (Mmus1712)  
 3. Gene: H15 (Mmus1712)  
 4. Gene: H15 (Mmus1712)  
 5. Gene: H15 (Mmus1712)  
 6. Gene: H15 (Mmus1712)  
 7. Gene: H15 (Mmus1712)  
 8. Gene: H15 (Mmus1712)  
 9. Gene: H15 (Mmus1712)  
 10. Gene: H15 (Mmus1712)

# sp | P43276 | H15\_MOUSE

SET <sup>(Phospho)</sup> APAETAAPAPVEK  
(79.97)

- ▶ fragmentation table for charge state 1+
- ▶ specType=etd
- ▶ score=40.68
- ▶ F105352.dat
- ▶ query=q7741\_p1
- ▶ precursor=550.252090
- ▶ chargePrecursor=3
- ▶ itol=0.8

| AA    | c               | y              | z+1             | z+2     | z        | AA    |
|-------|-----------------|----------------|-----------------|---------|----------|-------|
| S[1]  | 105.066         | 1648.747       | <b>1632.728</b> | 0.000   | 1631.720 | S[16] |
| E[2]  | 234.108         | 1561.715       | 1545.696        | 0.000   | 1544.688 | E[15] |
| T[3]  | 415.122         | 1432.672       | 1416.653        | 0.000   | 1415.645 | T[14] |
| A[4]  | 696.160         | 1251.858       | 1235.839        | 0.000   | 1234.831 | A[13] |
| P[5]  | 983.212         | 1180.921       | 1164.902        | 0.000   | 1163.894 | P[12] |
| A[6]  | <b>654.249</b>  | 1083.568       | 1067.549        | 0.000   | 1066.542 | A[11] |
| E[7]  | <b>783.292</b>  | 1012.531       | <b>996.512</b>  | 0.000   | 995.504  | E[10] |
| T[8]  | <b>884.340</b>  | 883.488        | <b>867.470</b>  | 0.000   | 866.462  | T[9]  |
| A[9]  | <b>955.377</b>  | <b>782.441</b> | <b>766.422</b>  | 0.000   | 765.414  | A[8]  |
| A[10] | 1026.414        | 711.404        | <b>695.385</b>  | 0.000   | 694.377  | A[7]  |
| P[11] | <b>1123.467</b> | 640.366        | 624.347         | 0.000   | 623.340  | P[6]  |
| A[12] | 1194.504        | 543.319        | <b>527.295</b>  | 0.000   | 526.287  | A[5]  |
| P[13] | <b>1291.557</b> | 472.277        | 456.258         | 0.000   | 455.250  | P[4]  |
| V[14] | <b>1390.625</b> | 375.224        | <b>359.205</b>  | 0.000   | 358.197  | V[3]  |
| E[15] | <b>1519.668</b> | 276.155        | 260.137         | 0.000   | 259.129  | E[2]  |
| K[16] | 1647.763        | 147.113        | 131.094         | 132.102 | 130.086  | K[1]  |

# sp | P43276 | H15\_MOUSE

SET (Phospho)  
(79.97) APAETAAPAPVEK

- ▶ fragmentation table for charge state 2+
- ▶ specType=etd
- ▶ score=40.68
- ▶ F105352.dat
- ▶ query=q7741\_p1
- ▶ precursor=550.252090
- ▶ chargePrecursor=3
- ▶ itol=0.8

| AA     | c              | y              | z+1            | z+2    | z              | AA     |
|--------|----------------|----------------|----------------|--------|----------------|--------|
| S [1]  | 53.037         | <b>824.877</b> | <b>816.868</b> | 0.504  | <b>816.364</b> | S [8]  |
| E [2]  | 117.358        | 781.361        | 773.352        | 0.504  | 772.348        | E [5]  |
| T [3]  | 208.065        | 716.840        | 708.830        | 0.504  | 708.326        | T [4]  |
| A [4]  | 243.583        | 626.333        | 618.323        | 0.504  | 617.319        | A [13] |
| P [5]  | 292.110        | 590.814        | 582.805        | 0.504  | 582.301        | P [12] |
| A [6]  | 327.628        | 542.288        | 534.278        | 0.504  | 533.774        | A [11] |
| E [7]  | 392.150        | 506.769        | 498.760        | 0.504  | 498.256        | E [10] |
| T [8]  | 442.673        | 442.240        | 434.238        | 0.504  | 433.735        | T [9]  |
| A [9]  | 478.192        | 391.724        | 383.715        | 0.504  | 383.211        | A [8]  |
| A [10] | 513.711        | 356.205        | 348.196        | 0.504  | 347.692        | A [7]  |
| P [11] | 562.237        | 320.687        | 312.678        | 0.504  | 312.174        | P [6]  |
| A [12] | 597.756        | 272.160        | 264.151        | 0.504  | 263.647        | A [5]  |
| P [13] | 646.282        | 236.642        | 228.633        | 0.504  | 228.129        | P [4]  |
| V [14] | <b>695.816</b> | 188.116        | 180.106        | 0.504  | 179.602        | V [3]  |
| E [15] | <b>760.337</b> | 138.589        | 130.572        | 0.504  | 130.068        | E [2]  |
| K [16] | 824.385        | 74.060         | 66.051         | 66.535 | 65.547         | K [1]  |



# sp | P43277 | H13\_MOUSE

S<sup>Phospho</sup> 79.97 ET<sup>Phospho</sup> 79.97 APAAPAAPAPVEK

- ▶ fragmentation table for charge state 1+
- ▶ specType=etd
- ▶ score=56.79
- ▶ F105352.dat
- ▶ query=q7814\_p1
- ▶ precursor=556.239380
- ▶ chargePrecursor=3
- ▶ itol=0.8

| AA    | c               | y              | z=1             | z=2     | z        | AA    |
|-------|-----------------|----------------|-----------------|---------|----------|-------|
| S[1]  | 185.032         | 1666.713       | <b>1650.694</b> | 0.000   | 1649.680 | S[16] |
| E[2]  | 314.075         | 1499.714       | 1483.695        | 0.000   | 1482.688 | E[15] |
| T[3]  | 495.089         | 1270.672       | 1254.653        | 0.000   | 1253.645 | T[14] |
| A[4]  | 598.126         | 1189.650       | 1173.639        | 0.000   | 1172.631 | A[13] |
| P[5]  | <b>663.179</b>  | 1118.620       | 1102.602        | 0.000   | 1101.594 | P[12] |
| A[6]  | <b>734.216</b>  | 1021.569       | <b>1005.549</b> | 0.000   | 1004.541 | A[11] |
| A[7]  | <b>805.253</b>  | 950.531        | <b>934.512</b>  | 0.000   | 933.504  | A[10] |
| P[8]  | <b>902.306</b>  | 879.493        | 863.475         | 0.000   | 862.467  | P[9]  |
| A[9]  | <b>973.343</b>  | 782.441        | <b>766.422</b>  | 0.000   | 765.414  | A[8]  |
| A[10] | <b>1044.380</b> | 711.404        | <b>695.385</b>  | 0.000   | 694.377  | A[7]  |
| P[11] | <b>1141.433</b> | <b>640.366</b> | 624.348         | 0.000   | 623.340  | P[10] |
| A[12] | <b>1212.470</b> | 543.314        | <b>527.295</b>  | 0.000   | 526.287  | A[5]  |
| P[13] | <b>1309.523</b> | 472.277        | 456.258         | 0.000   | 455.250  | P[4]  |
| V[14] | 1408.901        | 375.234        | <b>359.205</b>  | 0.000   | 358.197  | V[3]  |
| E[15] | <b>1537.634</b> | 276.155        | 260.137         | 0.000   | 259.129  | E[2]  |
| K[16] | 1665.728        | 147.113        | 131.094         | 132.102 | 130.086  | K[1]  |

# sp | P43277 | H13\_MOUSE

S<sup>Phospho</sup><sub>79.97</sub> ET<sup>Phospho</sup><sub>79.97</sub> APAAPAAPAPVEK

- ▶ fragmentation table for charge state 2+
- ▶ specType=etd
- ▶ score=56.79
- ▶ F105352.dat
- ▶ query=q7814\_p1
- ▶ precursor=556.239380
- ▶ chargePrecursor=3
- ▶ itol=0.8

| AA    | c              | y              | z+1            | z+2   | z              | AA    |
|-------|----------------|----------------|----------------|-------|----------------|-------|
| S[1]  | 93.020         | <b>833.860</b> | <b>825.851</b> | 0.504 | <b>825.347</b> | S[16] |
| E[2]  | 157.541        | 750.351        | 742.351        | 0.504 | 741.347        | E[15] |
| T[3]  | 248.048        | 885.830        | 877.830        | 0.504 | 877.326        | T[14] |
| A[4]  | 283.567        | 995.332        | 987.323        | 0.504 | 986.819        | A[13] |
| P[5]  | 332.093        | 959.814        | 951.804        | 0.504 | 951.301        | P[12] |
| A[6]  | 367.612        | 511.287        | 503.278        | 0.504 | 502.774        | A[11] |
| A[7]  | 403.130        | 475.769        | 467.760        | 0.504 | 467.256        | A[10] |
| P[8]  | 451.656        | 440.250        | 432.241        | 0.504 | 431.737        | P[9]  |
| A[9]  | 487.175        | 391.724        | 383.715        | 0.504 | 383.211        | A[8]  |
| A[10] | 522.694        | 356.205        | 348.196        | 0.504 | 347.692        | A[7]  |
| P[11] | 571.230        | 320.687        | 312.678        | 0.504 | 312.174        | P[6]  |
| A[12] | <b>606.759</b> | 272.160        | 264.151        | 0.504 | 263.647        | A[5]  |
| P[13] | 655.288        | 236.642        | 228.633        | 0.504 | 228.129        | P[4]  |
| V[14] | 704.799        | 188.116        | 180.106        | 0.504 | 179.602        | V[3]  |
| E[15] | <b>769.320</b> | 138.581        | 130.572        | 0.504 | 130.068        | E[2]  |
| K[16] | <b>833.368</b> | 74.050         | 66.051         | 0.504 | 65.547         | K[1]  |

# sp | P43277 | H13\_MOUSE

S<sup>Phospho</sup> ET<sup>Phospho</sup> APAAPAAPAVEK  
79.97 79.97

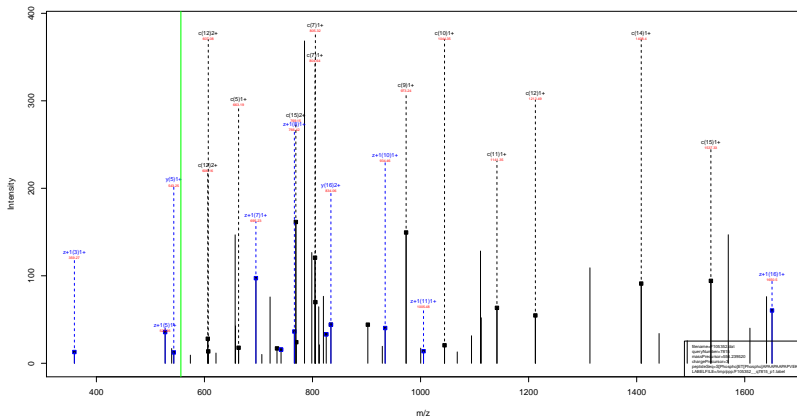



# sp | P43277 | H13\_MOUSE

S<sup>Phospho</sup><sub>79.97</sub> ET<sup>Phospho</sup><sub>79.97</sub> APAAPAAPAPVEK

- ▶ fragmentation table for charge state 1+
- ▶ specType=etd
- ▶ score=54.31
- ▶ F105352.dat
- ▶ query=q7815\_p1
- ▶ precursor=556.239520
- ▶ chargePrecursor=3
- ▶ itol=0.8

| AA    | c               | y              | z=1             | z=2     | z        | AA    |
|-------|-----------------|----------------|-----------------|---------|----------|-------|
| S[1]  | 185.032         | 1666.713       | <b>1650.694</b> | 0.000   | 1649.688 | S[16] |
| E[2]  | 314.075         | 1499.714       | 1483.695        | 0.000   | 1482.688 | E[15] |
| T[3]  | 495.089         | 1270.672       | 1254.653        | 0.000   | 1253.645 | T[14] |
| A[4]  | 598.126         | 1189.628       | 1173.609        | 0.000   | 1172.611 | A[13] |
| P[5]  | <b>663.179</b>  | 1118.620       | 1102.602        | 0.000   | 1101.594 | P[12] |
| A[6]  | <b>734.216</b>  | 1021.568       | <b>1005.549</b> | 0.000   | 1004.541 | A[11] |
| A[7]  | <b>805.253</b>  | 950.531        | <b>934.512</b>  | 0.000   | 933.504  | A[10] |
| P[8]  | <b>902.306</b>  | 879.493        | 863.475         | 0.000   | 862.467  | P[9]  |
| A[9]  | <b>973.343</b>  | 782.441        | <b>766.422</b>  | 0.000   | 765.414  | A[8]  |
| A[10] | <b>1044.380</b> | 711.404        | <b>695.385</b>  | 0.000   | 694.377  | A[7]  |
| P[11] | <b>1141.433</b> | 640.358        | 624.340         | 0.000   | 623.340  | P[6]  |
| A[12] | <b>1212.470</b> | <b>543.314</b> | <b>527.295</b>  | 0.000   | 526.287  | A[5]  |
| P[13] | 1309.521        | 472.277        | 456.258         | 0.000   | 455.250  | P[4]  |
| V[14] | <b>1408.591</b> | 375.234        | <b>359.205</b>  | 0.000   | 358.197  | V[3]  |
| E[15] | <b>1537.634</b> | 278.155        | 260.137         | 0.000   | 259.129  | E[2]  |
| K[16] | 1665.728        | 147.113        | 131.094         | 132.102 | 130.086  | K[1]  |

# sp | P43277 | H13\_MOUSE

S<sup>Phospho</sup><sub>79.97</sub> ET<sup>Phospho</sup><sub>79.97</sub> APAAPAAPAPVEK

- ▶ fragmentation table for charge state 2+
- ▶ specType=etd
- ▶ score=54.31
- ▶ F105352.dat
- ▶ query=q7815\_p1
- ▶ precursor=556.239520
- ▶ chargePrecursor=3
- ▶ itol=0.8

| AA    | c              | y              | z+1            | z+2   | z              | AA    |
|-------|----------------|----------------|----------------|-------|----------------|-------|
| S[1]  | 93.020         | <b>833.860</b> | <b>825.851</b> | 0.504 | <b>825.347</b> | S[16] |
| E[2]  | 157.541        | 750.351        | <b>742.351</b> | 0.504 | <b>741.847</b> | E[15] |
| T[3]  | 248.048        | 885.830        | 877.830        | 0.504 | 877.326        | T[14] |
| A[4]  | 283.567        | 995.332        | 987.323        | 0.504 | 986.819        | A[13] |
| P[5]  | 332.093        | 959.814        | 951.804        | 0.504 | 951.301        | P[12] |
| A[6]  | 367.612        | 511.287        | 503.278        | 0.504 | 502.774        | A[11] |
| A[7]  | 403.130        | 475.769        | 467.760        | 0.504 | 467.256        | A[10] |
| P[8]  | 451.656        | 440.250        | 432.241        | 0.504 | 431.737        | P[9]  |
| A[9]  | 487.175        | 391.724        | 383.715        | 0.504 | 383.211        | A[8]  |
| A[10] | 522.694        | 356.205        | 348.196        | 0.504 | 347.692        | A[7]  |
| P[11] | 571.230        | 320.687        | 312.678        | 0.504 | 312.174        | P[6]  |
| A[12] | <b>606.735</b> | 272.160        | 264.151        | 0.504 | 263.647        | A[5]  |
| P[13] | 655.266        | 236.642        | 228.633        | 0.504 | 228.129        | P[4]  |
| V[14] | 704.799        | 198.116        | 190.106        | 0.504 | 189.602        | V[3]  |
| E[15] | <b>769.320</b> | 138.581        | 130.572        | 0.504 | 130.068        | E[2]  |
| K[16] | <b>833.368</b> | 74.050         | 66.051         | 0.504 | 65.547         | K[1]  |

# sp | P43277 | H13\_MOUSE

S<sup>Phospho</sup> ET<sup>Phospho</sup> APAAPAAPAPVEK  
79.97 79.97

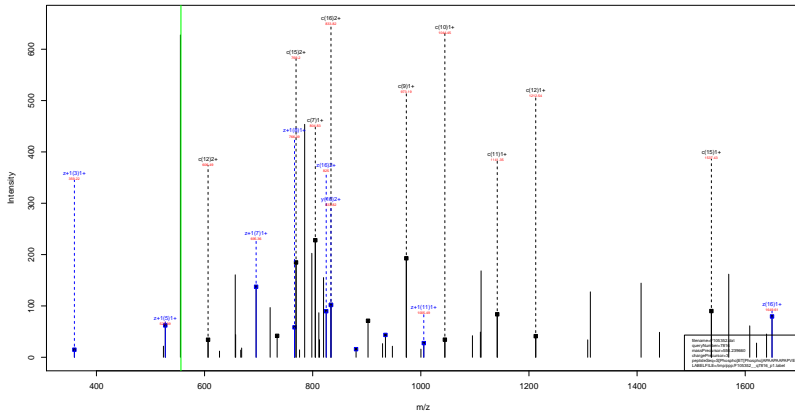

# sp | P43277 | H13\_MOUSE

S<sup>Phospho</sup> 79.97 ET<sup>Phospho</sup> 79.97 APAAPAAPAPVEK

- ▶ fragmentation table for charge state 1+
- ▶ specType=etd
- ▶ score=36.60
- ▶ F105352.dat
- ▶ query=q7816\_p1
- ▶ precursor=556.239660
- ▶ chargePrecursor=3
- ▶ itol=0.8

| AA | c  | y               | z+1            | z+2             | z       | AA              |       |
|----|----|-----------------|----------------|-----------------|---------|-----------------|-------|
| S  | 1  | 185.832         | 1656.713       | 1650.604        | 0.000   | <b>1649.686</b> | S[16] |
| E  | 2  | 314.075         | 1499.714       | 1481.605        | 0.000   | 1482.689        | E[15] |
| T  | 3  | 495.989         | 1370.672       | 1354.653        | 0.000   | 1353.645        | T[14] |
| A  | 4  | 569.126         | 1189.958       | 1173.939        | 0.000   | 1172.931        | A[13] |
| P  | 5  | 663.179         | 1118.620       | 1102.602        | 0.000   | 1101.594        | P[12] |
| A  | 6  | <b>734.216</b>  | 1021.968       | <b>1005.549</b> | 0.000   | 1004.541        | A[11] |
| A  | 7  | <b>805.253</b>  | 950.531        | <b>934.512</b>  | 0.000   | 933.504         | A[10] |
| P  | 8  | <b>902.306</b>  | <b>879.493</b> | 863.475         | 0.000   | 862.467         | P[9]  |
| A  | 9  | <b>973.343</b>  | 782.441        | <b>766.422</b>  | 0.000   | 765.414         | A[8]  |
| A  | 10 | <b>1044.380</b> | 711.406        | <b>695.385</b>  | 0.000   | 694.377         | A[7]  |
| P  | 11 | <b>1141.433</b> | 640.366        | 624.348         | 0.000   | 623.340         | P[6]  |
| A  | 12 | <b>1212.470</b> | 543.316        | <b>527.295</b>  | 0.000   | 526.287         | A[5]  |
| P  | 13 | 1309.523        | 472.277        | 456.258         | 0.000   | 455.250         | P[4]  |
| V  | 14 | 1408.591        | 375.226        | <b>359.205</b>  | 0.000   | 358.197         | V[3]  |
| E  | 15 | <b>1537.634</b> | 276.155        | 260.137         | 0.000   | 259.129         | E[2]  |
| K  | 16 | 1665.728        | 147.113        | 131.094         | 152.102 | 130.086         | K[1]  |

# sp | P43277 | H13\_MOUSE

S<sup>Phospho</sup><sub>79.97</sub> ET<sup>Phospho</sup><sub>79.97</sub> APAAPAAPAPVEK

- ▶ fragmentation table for charge state 2+
- ▶ specType=etd
- ▶ score=36.60
- ▶ F105352.dat
- ▶ query=q7816\_p1
- ▶ precursor=556.239660
- ▶ chargePrecursor=3
- ▶ itol=0.8

| AA    | c              | y              | z+1     | z+2    | z              | AA    |
|-------|----------------|----------------|---------|--------|----------------|-------|
| S[1]  | 93.020         | <b>833.860</b> | 825.851 | 0.504  | <b>825.347</b> | S[16] |
| E[2]  | 157.541        | 750.351        | 742.351 | 0.504  | 741.847        | E[15] |
| T[3]  | 248.048        | 685.839        | 677.830 | 0.504  | 677.325        | T[14] |
| A[4]  | 283.567        | 595.332        | 587.323 | 0.504  | 586.819        | A[13] |
| P[5]  | 332.093        | 559.814        | 551.804 | 0.504  | 551.301        | P[12] |
| A[6]  | 367.612        | 511.287        | 503.278 | 0.504  | 502.774        | A[11] |
| A[7]  | 403.130        | 475.769        | 467.760 | 0.504  | 467.256        | A[10] |
| P[8]  | 451.656        | 440.250        | 432.241 | 0.504  | 431.737        | P[9]  |
| A[9]  | 487.175        | 391.724        | 383.715 | 0.504  | 383.211        | A[8]  |
| A[10] | 522.694        | 356.205        | 348.196 | 0.504  | 347.692        | A[7]  |
| P[11] | 571.220        | 320.687        | 312.678 | 0.504  | 312.174        | P[6]  |
| A[12] | <b>606.739</b> | 272.160        | 264.151 | 0.504  | 263.647        | A[5]  |
| T[13] | 655.265        | 236.642        | 228.633 | 0.504  | 228.129        | T[4]  |
| V[14] | 704.799        | 188.116        | 180.106 | 0.504  | 179.602        | V[3]  |
| E[15] | <b>769.320</b> | 138.581        | 130.572 | 0.504  | 130.068        | E[2]  |
| K[16] | <b>833.368</b> | 74.060         | 66.051  | 66.555 | 65.547         | K[1]  |



# sp | P43276 | H15\_MOUSE

S<sup>Phospho</sup> 79.97 ET<sup>Phospho</sup> 79.97 APAETAAPAPVEK

- ▶ fragmentation table for charge state 1+
- ▶ specType=etd
- ▶ score=33.20
- ▶ F105352.dat
- ▶ query=q8080\_p1
- ▶ precursor=576.905890
- ▶ chargePrecursor=3
- ▶ itol=0.8

| AA | c  | y               | z+1            | z+2             | z       | AA              |       |
|----|----|-----------------|----------------|-----------------|---------|-----------------|-------|
| S  | 1  | 185.832         | 1726.713       | <b>1712.694</b> | 0.000   | <b>1711.686</b> | S[16] |
| E  | 2  | 314.075         | 1561.715       | 1545.696        | 0.000   | 1544.689        | E[15] |
| T  | 3  | 495.989         | 1432.672       | 1416.653        | 0.000   | 1415.645        | T[14] |
| A  | 4  | 569.176         | 1251.958       | 1235.939        | 0.000   | 1234.931        | A[13] |
| P  | 5  | <b>663.179</b>  | 1180.627       | 1164.602        | 0.000   | 1163.594        | P[12] |
| A  | 6  | <b>734.216</b>  | 1083.958       | 1067.949        | 0.000   | 1066.942        | A[11] |
| E  | 7  | <b>863.258</b>  | 1012.531       | <b>996.512</b>  | 0.000   | 995.504         | E[10] |
| T  | 8  | <b>964.306</b>  | 883.488        | 867.470         | 0.000   | <b>866.462</b>  | T[9]  |
| A  | 9  | <b>1035.343</b> | 782.441        | <b>766.422</b>  | 0.000   | 765.414         | A[8]  |
| A  | 10 | <b>1106.380</b> | 711.405        | <b>695.385</b>  | 0.000   | 694.377         | A[7]  |
| P  | 11 | <b>1203.433</b> | <b>640.366</b> | 624.348         | 0.000   | 623.340         | P[6]  |
| A  | 12 | <b>1274.470</b> | 543.318        | <b>527.295</b>  | 0.000   | 526.287         | A[5]  |
| P  | 13 | 1371.523        | 472.277        | 456.258         | 0.000   | 455.250         | P[4]  |
| V  | 14 | <b>1470.591</b> | 375.228        | <b>359.205</b>  | 0.000   | 358.197         | V[3]  |
| E  | 15 | 1599.634        | 276.155        | 260.137         | 0.000   | 259.129         | E[2]  |
| K  | 16 | 1727.729        | 147.113        | 131.094         | 152.102 | 130.086         | K[1]  |

# sp | P43276 | H15\_MOUSE

S<sup>Phospho</sup><sub>79.97</sub> ET<sup>Phospho</sup><sub>79.97</sub> APAETAAPAPVEK

- ▶ fragmentation table for charge state 2+
- ▶ specType=etd
- ▶ score=33.20
- ▶ F105352.dat
- ▶ query=q8080\_p1
- ▶ precursor=576.905890
- ▶ chargePrecursor=3
- ▶ itol=0.8

| AA    | c              | y              | z+1            | z+2   | z              | AA    |
|-------|----------------|----------------|----------------|-------|----------------|-------|
| S[1]  | 93.020         | <b>864.860</b> | <b>856.851</b> | 0.504 | <b>856.347</b> | S[16] |
| E[2]  | 157.541        | 781.351        | 773.352        | 0.504 | 772.845        | E[15] |
| T[3]  | 248.048        | 716.840        | 708.830        | 0.504 | 708.326        | T[14] |
| A[4]  | 283.567        | 628.333        | 618.323        | 0.504 | 617.819        | A[13] |
| P[5]  | 332.093        | 590.814        | 582.805        | 0.504 | 582.301        | P[12] |
| A[6]  | 367.612        | 542.288        | 534.278        | 0.504 | 533.774        | A[11] |
| E[7]  | 432.133        | 506.769        | 496.760        | 0.504 | 496.256        | E[10] |
| T[8]  | 482.657        | 442.240        | 434.238        | 0.504 | 433.735        | T[9]  |
| A[9]  | 518.175        | 393.724        | 383.715        | 0.504 | 383.211        | A[8]  |
| A[10] | 553.694        | 356.205        | 348.196        | 0.504 | 347.692        | A[7]  |
| P[11] | 602.220        | 320.687        | 312.678        | 0.504 | 312.174        | P[6]  |
| A[12] | <b>637.739</b> | 272.160        | 264.151        | 0.504 | 263.647        | A[5]  |
| P[13] | 689.266        | 236.642        | 228.633        | 0.504 | 228.129        | P[4]  |
| V[14] | 735.799        | 188.116        | 180.106        | 0.504 | 179.602        | V[3]  |
| E[15] | <b>800.321</b> | 138.581        | 130.572        | 0.504 | 130.068        | E[2]  |
| K[16] | <b>864.368</b> | 74.050         | 66.051         | 0.504 | 65.547         | K[1]  |





# sp | P43276 | H15\_MOUSE

S<sup>Phospho</sup> 79.97 ET<sup>Phospho</sup> 79.97 APAETAAPAPVEK

- ▶ fragmentation table for charge state 1+
- ▶ specType=etd
- ▶ score=30.94
- ▶ F105352.dat
- ▶ query=q8084\_p1
- ▶ precursor=576.906950
- ▶ chargePrecursor=3
- ▶ itol=0.8

| AA | c               | y              | z=1             | z=2     | z              | AA    |
|----|-----------------|----------------|-----------------|---------|----------------|-------|
| S  | 185.032         | 1728.713       | <b>1712.694</b> | 0.000   | 1711.680       | S[10] |
| E  | 314.075         | 1561.715       | 1545.696        | 0.000   | 1544.688       | E[15] |
| T  | 495.989         | 1432.872       | 1416.853        | 0.000   | 1415.845       | T[3]  |
| A  | 598.126         | 1291.958       | 1275.939        | 0.000   | 1274.931       | A[13] |
| P  | 563.179         | 1180.621       | 1164.602        | 0.000   | 1163.594       | P[12] |
| A  | <b>734.216</b>  | 1083.569       | <b>1067.549</b> | 0.000   | 1066.542       | A[11] |
| E  | 863.258         | 1012.531       | <b>996.512</b>  | 0.000   | <b>995.504</b> | E[10] |
| T  | <b>964.306</b>  | 883.488        | 867.470         | 0.000   | 866.462        | T[9]  |
| A  | <b>1035.343</b> | 782.441        | <b>766.422</b>  | 0.000   | 765.414        | A[8]  |
| A  | <b>1106.380</b> | <b>711.404</b> | <b>695.385</b>  | 0.000   | 694.377        | A[7]  |
| P  | <b>1203.433</b> | <b>640.366</b> | 624.348         | 0.000   | 623.340        | P[6]  |
| A  | <b>1274.470</b> | 543.314        | <b>527.295</b>  | 0.000   | 526.287        | A[5]  |
| P  | 1371.523        | 472.277        | 456.258         | 0.000   | 455.250        | P[4]  |
| V  | <b>1470.591</b> | 375.224        | <b>359.205</b>  | 0.000   | 358.197        | V[3]  |
| E  | <b>1599.634</b> | 276.155        | 260.137         | 0.000   | 259.129        | E[2]  |
| K  | 1727.729        | 147.113        | 131.094         | 132.102 | 130.086        | K[1]  |

# sp | P43276 | H15\_MOUSE

S<sup>Phospho</sup><sub>79.97</sub> ET<sup>Phospho</sup><sub>79.97</sub> APAETAAPAPVEK

- ▶ fragmentation table for charge state 2+
- ▶ specType=etd
- ▶ score=30.94
- ▶ F105352.dat
- ▶ query=q8084\_p1
- ▶ precursor=576.906950
- ▶ chargePrecursor=3
- ▶ itol=0.8

| AA    | c              | y              | z+1            | z+2   | z              | AA    |
|-------|----------------|----------------|----------------|-------|----------------|-------|
| S[1]  | 93.020         | <b>864.860</b> | <b>856.851</b> | 0.504 | <b>856.347</b> | S[16] |
| E[2]  | 157.541        | 781.351        | 773.352        | 0.504 | 772.845        | E[15] |
| T[3]  | 248.048        | 716.840        | 708.830        | 0.504 | 708.326        | T[14] |
| A[4]  | 283.567        | 628.333        | 618.323        | 0.504 | 617.819        | A[13] |
| P[5]  | 332.093        | 590.814        | 582.805        | 0.504 | 582.301        | P[12] |
| A[6]  | 367.612        | 542.288        | 534.278        | 0.504 | 533.774        | A[11] |
| E[7]  | 432.133        | 506.769        | 496.760        | 0.504 | 496.256        | E[10] |
| T[8]  | 482.657        | 442.240        | 434.238        | 0.504 | 433.735        | T[9]  |
| A[9]  | 518.175        | 393.724        | 383.715        | 0.504 | 383.211        | A[8]  |
| A[10] | 553.694        | 356.205        | 348.196        | 0.504 | 347.692        | A[7]  |
| P[11] | 602.220        | 320.687        | 312.678        | 0.504 | 312.174        | P[6]  |
| A[12] | <b>637.739</b> | 272.160        | 264.151        | 0.504 | 263.647        | A[5]  |
| P[13] | 689.266        | 236.642        | 228.633        | 0.504 | 228.129        | P[4]  |
| V[14] | 735.799        | 188.116        | 180.106        | 0.504 | 179.602        | V[3]  |
| E[15] | <b>800.321</b> | 138.581        | 130.572        | 0.504 | 130.068        | E[2]  |
| K[16] | <b>864.368</b> | 74.050         | 66.051         | 0.504 | 65.547         | K[1]  |



# sp | P62806 | H4\_MOUSE

RIS <sup>Phospho</sup> 79.97 GLIYEETRGVLK

- ▶ fragmentation table for charge state 1+
- ▶ specType=etd
- ▶ score=85.52
- ▶ F105352.dat
- ▶ query=q8389\_p1
- ▶ precursor=605.323090
- ▶ chargePrecursor=3
- ▶ itol=0.8

| AA     | c               | y               | z+1             | z+2             | z               | AA    |
|--------|-----------------|-----------------|-----------------|-----------------|-----------------|-------|
| R [3]  | 174.325         | 1613.951        | 1797.858        | <b>1798.546</b> | 1706.931        | R[15] |
| T [2]  | 257.210         | 1657.856        | 1641.837        | 1562.845        | 1640.830        | T[14] |
| S [3]  | <b>454.217</b>  | 1644.772        | <b>1528.753</b> | 1529.761        | 1527.745        | S[13] |
| G [4]  | <b>511.239</b>  | 1677.774        | <b>1361.755</b> | <b>1362.763</b> | <b>1360.747</b> | G[12] |
| L [5]  | 604.323         | 1620.752        | <b>1304.733</b> | <b>1305.741</b> | <b>1303.726</b> | L[11] |
| V [6]  | <b>737.407</b>  | <b>1207.668</b> | 1391.680        | <b>1192.657</b> | 1390.642        | V[10] |
| Y [7]  | 600.470         | 1694.594        | <b>1078.565</b> | 1079.573        | 1077.558        | Y[9]  |
| E [8]  | <b>1029.513</b> | 931.521         | <b>915.502</b>  | <b>916.510</b>  | 914.485         | E[8]  |
| E [9]  | 1158.555        | 802.478         | <b>786.459</b>  | <b>787.467</b>  | 785.452         | E[7]  |
| T [10] | <b>1259.603</b> | 673.436         | <b>657.417</b>  | <b>658.425</b>  | 656.400         | T[6]  |
| R [11] | <b>1415.704</b> | 572.389         | <b>556.369</b>  | <b>557.377</b>  | 555.361         | R[5]  |
| G [12] | <b>1472.726</b> | 418.287         | <b>405.268</b>  | 401.276         | 399.260         | G[4]  |
| V [13] | 1511.754        | 359.265         | <b>343.247</b>  | 344.254         | 342.239         | V[3]  |
| L [14] | <b>1684.878</b> | 260.197         | 244.178         | 245.186         | 243.170         | L[2]  |
| R [15] | 1812.973        | 147.113         | 131.094         | 132.102         | 130.086         | R[1]  |

# sp | P62806 | H4\_MOUSE

RIS <sup>Phospho</sup><sub>79.97</sub> GLIYEETRGVLK

- ▶ fragmentation table for charge state 2+
- ▶ specType=etd
- ▶ score=85.52
- ▶ F105352.dat
- ▶ query=q8389\_p1
- ▶ precursor=605.323090
- ▶ chargePrecursor=3
- ▶ itol=0.8

| AA    | c              | y              | z+1            | z+2            | z              | AA    |
|-------|----------------|----------------|----------------|----------------|----------------|-------|
| R[1]  | 87.571         | <b>907.482</b> | <b>899.473</b> | <b>899.977</b> | <b>898.969</b> | R[15] |
| I[2]  | 144.113        | 829.432        | 821.422        | 821.926        | 820.918        | I[14] |
| S[3]  | 227.612        | 772.890        | 764.880        | 765.384        | 764.376        | S[13] |
| G[4]  | 256.123        | 689.390        | 681.381        | 681.885        | 680.877        | G[12] |
| L[5]  | <b>312.665</b> | 660.880        | 652.870        | 653.374        | 652.366        | L[11] |
| T[6]  | 359.207        | 624.338        | 596.328        | 596.832        | 595.824        | T[10] |
| V[7]  | 450.739        | 547.796        | 539.786        | 540.290        | 539.282        | V[9]  |
| E[8]  | 515.260        | 466.264        | 458.254        | 458.759        | 457.751        | E[8]  |
| E[9]  | 579.781        | 401.743        | 393.733        | 394.237        | 393.229        | E[7]  |
| T[10] | 630.305        | 337.221        | 329.212        | 329.716        | 328.708        | T[6]  |
| R[11] | 708.356        | 286.698        | 278.688        | 279.192        | 278.184        | R[5]  |
| G[12] | <b>736.866</b> | 208.647        | 200.638        | 201.142        | 200.134        | G[4]  |
| V[13] | <b>786.401</b> | 180.136        | 172.127        | 172.631        | 171.623        | V[3]  |
| L[14] | <b>842.943</b> | 130.602        | 122.593        | 123.097        | 122.089        | L[2]  |
| K[15] | <b>906.990</b> | 74.060         | 66.051         | 66.555         | 65.547         | K[1]  |

# sp | P43274 | H14\_MOUSE

S<sup>Phospho</sup> ETAPAAPAAPAPAEEKTPVK  
79.97

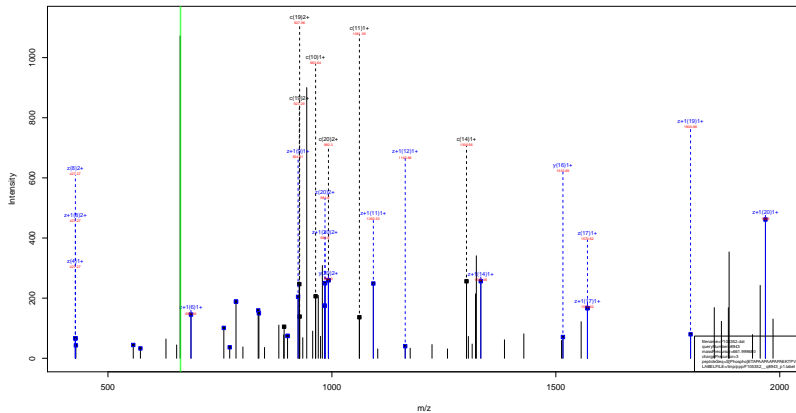

# sp | P43274 | H14\_MOUSE

S<sup>Phospho</sup><sub>79.97</sub> ETAPAAPAAPAPAEKTPVK

- ▶ fragmentation table for charge state 1+
- ▶ specType=etd
- ▶ score=39.06
- ▶ F105352.dat
- ▶ query=q8943\_p1
- ▶ precursor=661.999680
- ▶ chargePrecursor=3
- ▶ itol=0.8

| AA    | c               | y               | z+1             | z+2     | z               | AA    |
|-------|-----------------|-----------------|-----------------|---------|-----------------|-------|
| S[1]  | 185.032         | 1081.977        | <b>1967.960</b> | 0.000   | 1666.950        | S[20] |
| E[2]  | 314.075         | 1010.980        | <b>1800.962</b> | 0.000   | 1799.954        | E[10] |
| T[3]  | 415.122         | 1067.938        | 1671.919        | 0.000   | 1670.911        | T[18] |
| A[4]  | 486.100         | 1580.890        | <b>1570.871</b> | 0.000   | <b>1569.864</b> | A[17] |
| P[5]  | 583.212         | <b>1515.853</b> | 1499.834        | 0.000   | 1498.826        | P[16] |
| A[6]  | 654.249         | 1418.803        | 1402.791        | 0.000   | 1401.774        | A[15] |
| A[7]  | 725.287         | 1347.761        | <b>1331.744</b> | 0.000   | 1330.737        | A[14] |
| P[8]  | 822.339         | 1276.720        | 1260.707        | 0.000   | 1259.699        | P[13] |
| A[9]  | <b>893.376</b>  | 1179.673        | <b>1163.654</b> | 0.000   | 1162.647        | A[12] |
| A[10] | <b>964.414</b>  | 1108.630        | <b>1092.617</b> | 0.000   | 1091.610        | A[11] |
| P[11] | <b>1061.466</b> | 1037.590        | 1021.580        | 0.000   | 1020.572        | P[10] |
| A[12] | 1132.503        | 940.548         | <b>924.527</b>  | 0.000   | 923.520         | A[9]  |
| P[13] | 1203.556        | 869.509         | 853.499         | 0.000   | 852.491         | P[9]  |
| A[14] | <b>1300.593</b> | <b>772.456</b>  | 756.438         | 0.000   | 755.430         | A[7]  |
| E[15] | 1429.636        | 701.419         | <b>685.400</b>  | 0.000   | 684.393         | E[0]  |
| K[16] | 1557.731        | <b>572.377</b>  | <b>556.358</b>  | 957.366 | 555.350         | K[5]  |
| T[17] | 1658.779        | 444.282         | <b>428.263</b>  | 628.271 | <b>427.255</b>  | T[4]  |
| P[18] | 1755.831        | 343.234         | 327.215         | 326.223 | 326.207         | P[3]  |
| V[19] | 1854.889        | 246.181         | 230.162         | 231.170 | 229.155         | V[0]  |
| K[20] | 1962.995        | 147.113         | 131.094         | 132.102 | 130.088         | K[1]  |



# sp | P43274 | H14\_MOUSE

S<sup>Phospho</sup><sub>79.97</sub> ETAPAAPAAPAPAEEKTPVK

- ▶ fragmentation table for charge state 2+
- ▶ specType=etd
- ▶ score=39.06
- ▶ F105352.dat
- ▶ query=q8943\_p1
- ▶ precursor=661.999680
- ▶ chargePrecursor=3
- ▶ itol=0.8

| AA     | c              | y              | z+1            | z+2     | z              | AA    |
|--------|----------------|----------------|----------------|---------|----------------|-------|
| S [1]  | 93.020         | <b>992.493</b> | <b>984.484</b> | 0.504   | <b>983.980</b> | S[20] |
| E [2]  | 157.541        | 908.994        | <b>900.984</b> | 0.504   | <b>900.481</b> | E[19] |
| T [3]  | 208.060        | 844.473        | <b>836.463</b> | 0.504   | <b>835.959</b> | T[18] |
| A [4]  | 243.583        | 793.945        | <b>785.939</b> | 0.504   | <b>785.435</b> | A[17] |
| P [5]  | 292.110        | <b>738.430</b> | 730.421        | 0.504   | 729.917        | P[16] |
| A [6]  | 327.628        | 705.904        | 701.894        | 0.504   | 701.390        | A[15] |
| A [7]  | 363.147        | 674.385        | 666.376        | 0.504   | 665.872        | A[14] |
| P [8]  | 411.673        | 638.867        | 630.857        | 0.504   | 630.353        | P[13] |
| A [9]  | 447.192        | 600.340        | 582.331        | 0.504   | 581.827        | A[12] |
| A [10] | 482.710        | 554.822        | 546.812        | 0.504   | 546.308        | A[11] |
| P [11] | 531.237        | 519.303        | 511.294        | 0.504   | 510.790        | P[10] |
| A [12] | 566.755        | 470.777        | 462.767        | 0.504   | 462.263        | A[9]  |
| P [13] | 615.282        | 435.258        | <b>427.249</b> | 0.504   | <b>426.745</b> | P[9]  |
| A [14] | 650.800        | 386.732        | 378.722        | 0.504   | 378.219        | A[7]  |
| E [15] | 715.322        | 351.211        | 343.204        | 0.504   | 342.700        | E[6]  |
| K [16] | 779.869        | 286.692        | 278.683        | 279.187 | 278.179        | K[5]  |
| T [17] | 829.893        | 222.644        | 214.635        | 215.139 | 214.131        | T[4]  |
| P [18] | 878.419        | 172.121        | 164.111        | 164.615 | 163.607        | P[3]  |
| V [19] | <b>927.953</b> | 123.594        | 115.585        | 116.089 | 115.081        | V[2]  |
| K [20] | <b>992.001</b> | 74.060         | 66.051         | 66.555  | 65.547         | K[1]  |

# sp | P43277 | H13\_MOUSE

SET (Phospho)  
(79.97) APAAPAAPAPVEKTPVK

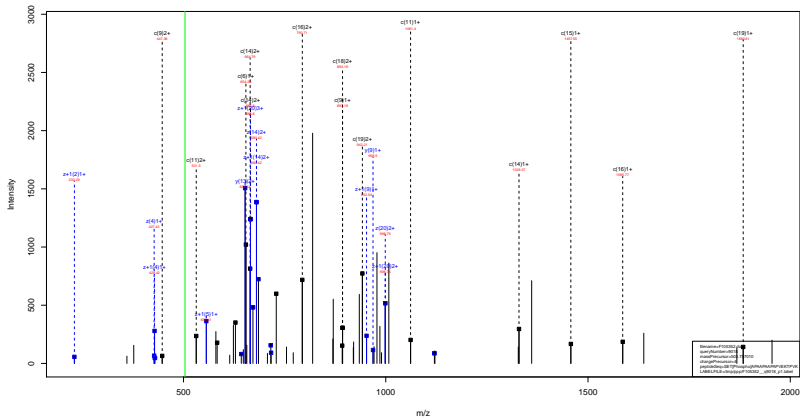

# sp | P43277 | H13\_MOUSE

SET (Phospho)  
(79.97) APAAPAAPAPVEKTPVK

- ▶ fragmentation table for charge state 1+
- ▶ specType=etd
- ▶ score=35.03
- ▶ F105352.dat
- ▶ query=q9018\_p1
- ▶ precursor=503.757010
- ▶ chargePrecursor=4
- ▶ itol=0.8

| AA    | c               | y              | z+1             | z+2            | z               | AA    |
|-------|-----------------|----------------|-----------------|----------------|-----------------|-------|
| S[1]  | 105.006         | 2012.030       | 1995.901        | 0.000          | 1994.983        | S[20] |
| E[2]  | 234.108         | 1924.978       | 1908.959        | 0.000          | 1907.951        | E[19] |
| T[3]  | 415.122         | 1795.935       | 1779.917        | 0.000          | 1778.909        | T[18] |
| A[4]  | 486.100         | 1614.921       | 1596.903        | 0.000          | 1597.895        | A[17] |
| P[5]  | <b>583.212</b>  | 1543.884       | 1527.866        | 0.000          | 1526.858        | P[16] |
| A[6]  | <b>654.249</b>  | 1446.831       | 1430.813        | 0.000          | 1429.805        | A[15] |
| A[7]  | 725.287         | 1375.794       | 1359.776        | 0.000          | 1358.768        | A[14] |
| P[8]  | 822.330         | 1304.757       | 1288.739        | 0.000          | 1287.731        | P[13] |
| A[9]  | <b>893.376</b>  | 1207.705       | 1191.686        | 0.000          | 1190.678        | A[12] |
| A[10] | 964.414         | 1136.667       | <b>1120.649</b> | 0.000          | <b>1119.641</b> | A[11] |
| P[11] | <b>1061.466</b> | 1065.630       | 1049.612        | 0.000          | 1048.604        | P[10] |
| A[12] | 1132.503        | <b>968.578</b> | <b>952.559</b>  | 0.000          | 951.551         | A[9]  |
| P[13] | 1239.556        | 897.540        | 881.522         | 0.000          | 880.514         | P[8]  |
| V[14] | <b>1328.625</b> | 800.488        | 784.469         | 0.000          | 783.461         | V[7]  |
| E[15] | <b>1457.667</b> | 701.419        | <b>685.400</b>  | 0.000          | 684.391         | E[6]  |
| K[16] | <b>1585.762</b> | 672.377        | <b>556.358</b>  | 557.366        | 555.350         | K[5]  |
| T[17] | 1686.810        | 444.282        | <b>428.263</b>  | <b>429.271</b> | <b>427.255</b>  | T[4]  |
| P[18] | 1783.863        | 343.234        | 327.215         | 328.223        | 326.207         | P[3]  |
| V[19] | <b>1882.931</b> | 246.181        | <b>230.162</b>  | 231.170        | 229.155         | V[2]  |
| K[20] | 2011.925        | 147.133        | 131.094         | 132.102        | 130.086         | K[1]  |

# sp | P43277 | H13\_MOUSE

SET (Phospho)  
(79.97) APAAPAAPAPVEKTPVK

- ▶ fragmentation table for charge state 2+
- ▶ specType=etd
- ▶ score=35.03
- ▶ F105352.dat
- ▶ query=q9018\_p1
- ▶ precursor=503.757010
- ▶ chargePrecursor=4
- ▶ itol=0.8

| AA | c  | y              | z+1            | z+2            | z     | AA             |   |
|----|----|----------------|----------------|----------------|-------|----------------|---|
| S  | 1  | 53.037         | 1006.500       | <b>998.499</b> | 0.504 | <b>997.995</b> | S |
| E  | 2  | 117.558        | 962.993        | 954.983        | 0.504 | 954.479        | E |
| T  | 3  | 208.065        | 898.471        | 890.462        | 0.504 | 889.958        | T |
| A  | 4  | 243.583        | 807.964        | 799.955        | 0.504 | 799.451        | A |
| P  | 5  | 292.110        | 772.448        | 764.439        | 0.504 | 763.935        | P |
| A  | 6  | 327.626        | 723.910        | <b>715.910</b> | 0.504 | <b>715.406</b> | A |
| A  | 7  | 363.147        | 688.401        | <b>680.391</b> | 0.504 | <b>679.888</b> | A |
| P  | 8  | 411.673        | <b>652.882</b> | 644.873        | 0.504 | 644.369        | P |
| A  | 9  | <b>447.192</b> | 604.356        | 596.347        | 0.504 | 595.843        | A |
| A  | 10 | 482.710        | 568.837        | 560.828        | 0.504 | 560.324        | A |
| P  | 11 | <b>531.237</b> | 533.319        | 525.309        | 0.504 | 524.805        | P |
| A  | 12 | 566.735        | 484.792        | 476.783        | 0.504 | 476.279        | A |
| P  | 13 | 615.262        | 449.274        | 441.264        | 0.504 | 440.761        | P |
| V  | 14 | <b>664.816</b> | 400.747        | 392.738        | 0.504 | 392.234        | V |
| E  | 15 | <b>729.337</b> | 351.211        | 343.204        | 0.504 | 342.700        | E |
| K  | 16 | <b>793.385</b> | 286.682        | 278.683        | 0.504 | 278.179        | K |
| T  | 17 | 843.909        | 222.644        | 214.635        | 0.504 | 214.131        | T |
| P  | 18 | <b>892.435</b> | 172.121        | 164.111        | 0.504 | 163.607        | P |
| V  | 19 | <b>941.969</b> | 123.594        | 115.585        | 0.504 | 115.081        | V |
| K  | 20 | 1006.017       | 74.060         | 66.051         | 0.504 | 65.547         | K |

# sp | P43277 | H13\_MOUSE

SET (Phospho)  
(79.97) APAAPAAPAPVEKTPVK

- ▶ fragmentation table for charge state 3+
- ▶ specType=etd
- ▶ score=35.03
- ▶ F105352.dat
- ▶ query=q9018\_p1
- ▶ precursor=503.757010
- ▶ chargePrecursor=4
- ▶ itol=0.8

| AA     | c              | y              | z+1            | z+2   | z              | AA     |
|--------|----------------|----------------|----------------|-------|----------------|--------|
| S [1]  | 35.693         | <b>671.342</b> | <b>666.002</b> | 0.672 | <b>665.666</b> | S [20] |
| E [2]  | 78.708         | <b>642.331</b> | 636.991        | 0.672 | 636.655        | E [19] |
| T [3]  | 139.046        | 599.317        | 593.977        | 0.672 | 593.641        | T [18] |
| A [4]  | 162.725        | 538.979        | 533.639        | 0.672 | 533.303        | A [17] |
| P [5]  | 199.076        | 515.300        | 509.960        | 0.672 | 509.624        | P [16] |
| A [6]  | 218.755        | 482.940        | 477.600        | 0.672 | 477.273        | A [15] |
| A [7]  | 242.434        | 450.270        | 445.930        | 0.672 | 445.594        | A [14] |
| P [8]  | 274.785        | 435.591        | 430.251        | 0.672 | <b>429.915</b> | P [13] |
| A [9]  | 298.464        | 403.240        | 397.900        | 0.672 | 397.564        | A [12] |
| A [10] | 322.143        | 379.561        | 374.221        | 0.672 | 373.885        | A [11] |
| P [11] | 354.494        | 355.882        | 350.542        | 0.672 | 350.206        | P [10] |
| A [12] | 378.173        | 323.531        | 318.191        | 0.672 | 317.855        | A [9]  |
| P [13] | 410.524        | 299.852        | 294.512        | 0.672 | 294.176        | P [8]  |
| V [14] | 443.546        | 267.501        | 262.161        | 0.672 | 261.825        | V [7]  |
| L [15] | 488.901        | 234.875        | 229.535        | 0.672 | 229.202        | L [6]  |
| K [16] | 529.259        | 191.464        | 186.124        | 0.672 | 185.788        | K [5]  |
| T [17] | 562.941        | 148.765        | 143.426        | 0.672 | 143.090        | T [4]  |
| P [18] | 595.292        | 115.083        | 109.743        | 0.672 | 109.407        | P [3]  |
| V [19] | <b>628.315</b> | 82.732         | 77.392         | 0.672 | 77.056         | V [2]  |
| K [20] | <b>671.014</b> | 49.709         | 44.370         | 0.672 | 44.034         | K [1]  |

# sp | P43276 | H15\_MOUSE

SETAPAETAAPAPVEKS <sup>Phospho</sup>PAK  
79.97

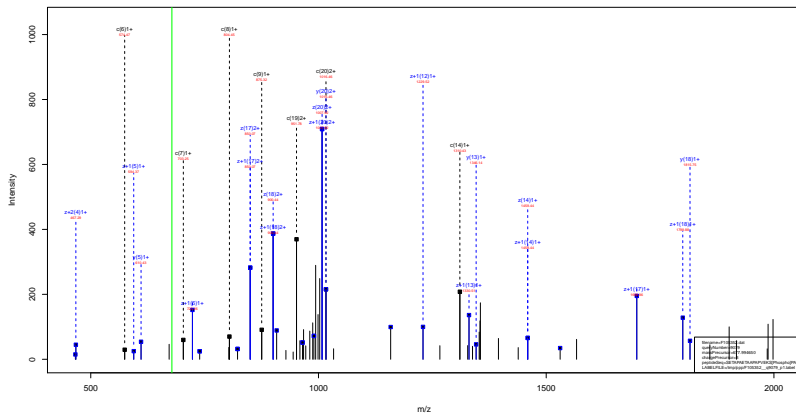

# sp | P43276 | H15\_MOUSE

SETAPAETAAPAPVEKS<sup>Phospho</sup> PAK  
79.97

- ▶ fragmentation table for charge state 1+
- ▶ specType=etd
- ▶ score=69.22
- ▶ F105352.dat
- ▶ query=q9079\_p1
- ▶ precursor=677.994650
- ▶ chargePrecursor=3
- ▶ itol=0.8

| AA    | c               | y               | z+1             | z+2            | z               | AA    |
|-------|-----------------|-----------------|-----------------|----------------|-----------------|-------|
| S[1]  | 105.066         | 2031.982        | 2035.945        | 0.000          | 2014.937        | S[20] |
| E[2]  | 234.108         | 1944.931        | 1928.913        | 0.000          | 1927.905        | E[19] |
| T[3]  | 335.156         | <b>1815.889</b> | <b>1799.870</b> | 0.000          | 1798.862        | T[18] |
| A[4]  | 406.193         | 1714.943        | <b>1698.822</b> | 0.000          | 1697.815        | A[17] |
| P[5]  | 503.246         | 1643.804        | 1627.785        | 0.000          | 1626.777        | P[16] |
| A[6]  | <b>674.283</b>  | 1546.751        | <b>1530.733</b> | 0.000          | 1529.725        | A[15] |
| E[7]  | <b>761.326</b>  | 1475.714        | <b>1459.695</b> | 0.000          | <b>1458.688</b> | E[14] |
| T[8]  | <b>864.373</b>  | <b>1346.672</b> | <b>1330.653</b> | 0.000          | 1329.645        | T[13] |
| A[9]  | <b>875.411</b>  | 1245.624        | <b>1229.605</b> | 0.000          | 1228.597        | A[12] |
| A[10] | 968.448         | 1174.587        | <b>1158.568</b> | 0.000          | 1157.560        | A[11] |
| P[11] | 1043.500        | 1103.550        | 1087.531        | 0.000          | 1086.523        | P[10] |
| A[12] | 1114.537        | 1035.497        | <b>990.478</b>  | 0.000          | <b>989.470</b>  | A[9]  |
| P[13] | 1211.590        | 935.460         | 919.441         | 0.000          | 918.433         | P[8]  |
| V[14] | <b>1310.659</b> | 838.407         | <b>822.388</b>  | 0.000          | 821.380         | V[7]  |
| E[15] | 1439.701        | <b>739.339</b>  | <b>723.320</b>  | 0.000          | 722.312         | E[6]  |
| K[16] | 1567.796        | <b>610.296</b>  | <b>594.277</b>  | 895.205        | 593.269         | K[5]  |
| S[17] | 1734.795        | 482.201         | <b>466.182</b>  | <b>467.190</b> | 465.174         | S[4]  |
| P[18] | 1833.847        | 315.203         | 299.184         | 303.192        | 298.176         | P[3]  |
| A[19] | 1982.884        | 219.150         | 202.133         | 203.139        | 201.127         | A[2]  |
| K[20] | 2030.979        | 147.113         | 131.094         | 132.102        | 130.086         | K[1]  |

# sp | P43276 | H15\_MOUSE

SETAPAETAAPAPVEKS <sup>Phospho</sup> PAK  
79.97

- ▶ fragmentation table for charge state 2+
- ▶ specType=etd
- ▶ score=69.22
- ▶ F105352.dat
- ▶ query=q9079\_p1
- ▶ precursor=677.994650
- ▶ chargePrecursor=3
- ▶ itol=0.8

| AA    | c               | y               | z+1             | z+2     | z               | AA    |
|-------|-----------------|-----------------|-----------------|---------|-----------------|-------|
| S[1]  | 63.037          | <b>1016.485</b> | <b>1008.476</b> | 0.504   | <b>1007.972</b> | S[20] |
| E[2]  | 117.558         | 972.909         | <b>964.960</b>  | 0.504   | <b>964.456</b>  | E[10] |
| T[3]  | 168.082         | <b>908.448</b>  | <b>900.439</b>  | 0.504   | <b>899.935</b>  | T[18] |
| A[4]  | 203.600         | 857.924         | <b>849.915</b>  | 0.504   | <b>849.411</b>  | A[17] |
| P[5]  | 252.127         | <b>822.406</b>  | 814.396         | 0.504   | 813.892         | P[16] |
| A[6]  | 297.845         | 773.879         | 765.870         | 0.504   | 765.366         | A[15] |
| E[7]  | 352.166         | <b>738.361</b>  | 730.351         | 0.504   | 729.847         | E[14] |
| T[8]  | 402.690         | 678.839         | 669.830         | 0.504   | 668.326         | T[13] |
| A[9]  | 438.209         | 623.316         | 615.306         | 0.504   | 614.802         | A[12] |
| A[10] | 473.727         | 587.797         | 579.788         | 0.504   | 579.284         | A[11] |
| P[11] | 522.254         | 552.278         | 544.269         | 0.504   | 543.765         | P[10] |
| A[12] | 557.772         | 507.752         | 499.743         | 0.504   | 499.239         | A[9]  |
| P[13] | 606.299         | 482.234         | 480.224         | 0.504   | 480.720         | P[9]  |
| V[14] | 655.833         | 416.707         | 411.698         | 0.504   | 411.194         | V[7]  |
| E[15] | 720.354         | 370.173         | 362.164         | 0.504   | 361.660         | E[0]  |
| K[16] | 784.802         | 305.652         | 297.642         | 288.146 | 297.138         | K[5]  |
| S[17] | 867.901         | 241.604         | 233.595         | 234.099 | 233.091         | S[4]  |
| P[18] | 816.427         | 158.105         | 150.096         | 150.600 | 149.592         | P[3]  |
| A[19] | <b>951.946</b>  | 109.579         | 103.569         | 103.073 | 101.065         | A[0]  |
| R[20] | <b>1015.993</b> | 79.060          | 66.051          | 66.555  | 65.547          | R[1]  |





# sp | P43274 | H14\_MOUSE

S<sup>Phospho</sup> 79.97 ET<sup>Phospho</sup> 79.97 APAAPAAPAPAEKTPVK

- ▶ fragmentation table for charge state 1+
- ▶ specType=etd
- ▶ score=43.06
- ▶ F105352.dat
- ▶ query=q9172\_p1
- ▶ precursor=516.739940
- ▶ chargePrecursor=4
- ▶ itol=0.8

| AA    | c               | y              | z+1            | z+2            | z              | AA    |
|-------|-----------------|----------------|----------------|----------------|----------------|-------|
| S[1]  | 185.632         | 2063.945       | 2047.926       | 0.000          | 3046.918       | S[20] |
| E[2]  | 314.075         | 1896.947       | 1880.928       | 0.000          | 1879.920       | E[10] |
| T[3]  | 495.080         | 1767.904       | 1751.885       | 0.000          | 1750.878       | T[18] |
| A[4]  | 566.126         | 1586.890       | 1570.871       | 0.000          | 1569.864       | A[17] |
| P[5]  | <b>663.179</b>  | 1315.853       | 1299.834       | 0.000          | 1298.826       | P[10] |
| A[6]  | <b>734.216</b>  | 1018.800       | 1002.781       | 0.000          | 1001.774       | A[15] |
| A[7]  | <b>805.253</b>  | 1347.763       | 1331.744       | 0.000          | 1330.737       | A[14] |
| P[8]  | <b>902.306</b>  | 1276.726       | 1260.707       | 0.000          | 1259.699       | P[13] |
| A[9]  | <b>973.343</b>  | 1179.673       | 1163.654       | 0.000          | 1162.647       | A[12] |
| A[10] | 1044.380        | 1108.636       | 1092.617       | 0.000          | 1091.610       | A[11] |
| P[11] | <b>1141.433</b> | 1037.599       | 1021.580       | 0.000          | 1020.572       | P[16] |
| A[12] | 1212.470        | 1049.546       | <b>924.527</b> | 0.000          | 923.520        | A[9]  |
| P[13] | 1309.523        | <b>869.509</b> | 853.490        | 0.000          | 852.483        | P[8]  |
| A[14] | <b>1380.560</b> | 772.456        | <b>756.438</b> | 0.000          | <b>755.430</b> | A[7]  |
| E[15] | <b>1509.602</b> | <b>701.419</b> | <b>685.400</b> | 0.000          | 684.393        | E[6]  |
| K[16] | <b>1637.697</b> | <b>572.377</b> | <b>556.358</b> | <b>557.366</b> | <b>555.350</b> | K[5]  |
| T[17] | 1738.745        | 444.282        | <b>428.263</b> | <b>429.271</b> | <b>427.255</b> | T[4]  |
| P[18] | 1835.798        | 343.234        | 327.215        | 328.223        | 326.207        | P[3]  |
| V[19] | 1934.866        | 246.181        | <b>230.162</b> | 231.170        | 229.155        | V[2]  |
| K[20] | 2032.961        | 147.113        | 131.094        | 132.102        | 130.086        | K[1]  |

# sp | P43274 | H14\_MOUSE

S<sup>Phospho</sup><sub>79.97</sub> ET<sup>Phospho</sup><sub>79.97</sub> APAAPAAPAPAEKTPVK

- ▶ fragmentation table for charge state 2+
- ▶ specType=etd
- ▶ score=43.06
- ▶ F105352.dat
- ▶ query=q9172\_p1
- ▶ precursor=516.739940
- ▶ chargePrecursor=4
- ▶ itol=0.8

| AA    | c              | y              | z+1             | z+2     | z               | AA    |
|-------|----------------|----------------|-----------------|---------|-----------------|-------|
| S[1]  | 93.620         | 1032.476       | <b>1024.467</b> | 0.504   | <b>1023.963</b> | S[20] |
| E[2]  | 157.541        | 946.977        | 940.968         | 0.504   | 940.464         | E[10] |
| T[3]  | 248.048        | 834.456        | 876.446         | 0.504   | 875.942         | T[18] |
| A[4]  | 283.567        | 793.949        | 785.939         | 0.504   | 785.435         | A[17] |
| P[5]  | 332.093        | 758.430        | 750.421         | 0.504   | 749.917         | P[10] |
| A[6]  | 397.612        | 719.904        | <b>701.894</b>  | 0.504   | <b>701.390</b>  | A[15] |
| A[7]  | 403.130        | <b>674.385</b> | <b>666.376</b>  | 0.504   | <b>665.872</b>  | A[14] |
| P[8]  | 451.656        | 638.867        | 630.857         | 0.504   | 630.353         | P[13] |
| A[9]  | 487.175        | <b>590.340</b> | <b>582.331</b>  | 0.504   | 581.827         | A[12] |
| A[10] | 522.694        | <b>554.822</b> | <b>546.812</b>  | 0.504   | 546.308         | A[11] |
| P[11] | <b>571.220</b> | 519.303        | 511.294         | 0.504   | 510.790         | P[10] |
| A[12] | 606.739        | 470.777        | <b>462.767</b>  | 0.504   | <b>462.263</b>  | A[0]  |
| P[13] | 635.265        | 435.258        | <b>427.249</b>  | 0.504   | <b>426.745</b>  | P[8]  |
| A[14] | 690.783        | 388.732        | 378.722         | 0.504   | 378.218         | A[7]  |
| E[15] | <b>755.305</b> | 351.213        | 343.204         | 0.504   | 342.700         | E[0]  |
| K[16] | <b>819.352</b> | 286.692        | 278.683         | 279.187 | 278.179         | K[9]  |
| T[17] | <b>869.876</b> | 222.644        | 214.635         | 215.139 | 214.131         | T[4]  |
| P[18] | <b>918.402</b> | 172.121        | 164.111         | 164.615 | 163.607         | P[3]  |
| V[19] | <b>967.937</b> | 123.594        | 115.585         | 116.089 | 115.081         | V[2]  |
| K[20] | 1031.984       | 74.060         | 66.051          | 66.555  | 65.547          | K[1]  |

# sp | P43274 | H14\_MOUSE

S<sup>Phospho</sup> 79.97 ET<sup>Phospho</sup> 79.97 APAAPAAPAPAEKTPVK

- ▶ fragmentation table for charge state 3+
- ▶ specType=etd
- ▶ score=43.06
- ▶ F105352.dat
- ▶ query=q9172.p1
- ▶ precursor=516.739940
- ▶ chargePrecursor=4
- ▶ itol=0.8

| AA     | c              | y              | z+1            | z+2     | z              | AA    |
|--------|----------------|----------------|----------------|---------|----------------|-------|
| S [1]  | 62.349         | <b>688.653</b> | <b>681.314</b> | 0.672   | <b>682.978</b> | S[20] |
| E [2]  | 105.363        | 632.987        | 627.648        | 0.672   | 627.312        | E[19] |
| T [3]  | 185.701        | <b>589.973</b> | 384.633        | 0.672   | 384.297        | T[18] |
| A [4]  | 189.380        | 529.635        | 524.295        | 0.672   | 523.959        | A[17] |
| P [5]  | 221.731        | 505.956        | 500.616        | 0.672   | 500.280        | P[16] |
| A [6]  | 245.410        | 473.605        | 468.265        | 0.672   | 467.929        | A[15] |
| A [7]  | 269.089        | 449.926        | 444.586        | 0.672   | 444.250        | A[14] |
| P [8]  | 301.440        | 426.247        | 420.907        | 0.672   | 420.571        | P[13] |
| A [9]  | 325.119        | 393.696        | 388.356        | 0.672   | 388.020        | A[12] |
| A [10] | 348.798        | 370.217        | 364.877        | 0.672   | 364.541        | A[11] |
| P [11] | 381.149        | 346.538        | 341.198        | 0.672   | 340.862        | P[10] |
| A [12] | 404.828        | 314.187        | 308.847        | 0.672   | 308.511        | A[9]  |
| P [13] | 437.179        | 290.508        | 285.168        | 0.672   | 284.832        | P[8]  |
| A [14] | 460.858        | <b>258.157</b> | 252.817        | 0.672   | 252.481        | A[7]  |
| E [15] | 503.972        | 234.471        | 229.131        | 0.672   | 228.795        | E[6]  |
| K [16] | <b>546.571</b> | 191.464        | 186.124        | 186.490 | 185.788        | K[5]  |
| T [17] | 580.253        | 148.765        | 143.426        | 143.762 | 143.090        | T[4]  |
| P [18] | 612.604        | 115.083        | 109.743        | 110.079 | 109.407        | P[3]  |
| V [19] | <b>645.627</b> | 82.732         | 77.392         | 77.728  | 77.056         | V[2]  |
| K [20] | <b>688.325</b> | 49.709         | 44.370         | 44.705  | 44.034         | K[1]  |



# sp | P43274 | H14\_MOUSE

S<sup>Phospho</sup> 79.97 ET<sup>Phospho</sup> 79.97 APAAPAAPAPAEKTPVK

- ▶ fragmentation table for charge state 1+
- ▶ specType=etd
- ▶ score=31.17
- ▶ F105352.dat
- ▶ query=q9174\_p1
- ▶ precursor=688.652760
- ▶ chargePrecursor=3
- ▶ itol=0.8

| AA    | c               | y        | z+1            | z+2            | z               | AA    |
|-------|-----------------|----------|----------------|----------------|-----------------|-------|
| S[1]  | 189.032         | 2063.945 | 2047.926       | 0.000          | 2046.918        | S[20] |
| E[2]  | 314.075         | 1896.947 | 1880.928       | 0.000          | 1879.920        | E[19] |
| T[3]  | 495.089         | 1767.904 | 1751.885       | 0.000          | 1750.878        | T[18] |
| A[4]  | 566.126         | 1588.890 | 1570.871       | 0.000          | 1569.864        | A[17] |
| P[5]  | 863.179         | 1515.853 | 1499.834       | 0.000          | 1498.826        | P[16] |
| A[6]  | <b>734.216</b>  | 1318.806 | 1302.787       | 0.000          | 1301.779        | A[15] |
| A[7]  | <b>805.253</b>  | 1147.763 | 1131.744       | 0.000          | <b>1130.737</b> | A[14] |
| P[8]  | <b>902.306</b>  | 1270.726 | 1250.707       | 0.000          | 1250.699        | P[13] |
| A[9]  | 973.343         | 1179.673 | 1163.654       | 0.000          | 1162.647        | A[12] |
| A[10] | 1044.380        | 1108.636 | 1092.617       | 0.000          | <b>1091.610</b> | A[11] |
| P[11] | <b>1141.433</b> | 1037.599 | 1021.580       | 0.000          | 1020.572        | P[10] |
| A[12] | 1212.670        | 940.546  | 924.527        | 0.000          | <b>923.520</b>  | A[9]  |
| P[13] | <b>1309.523</b> | 869.509  | 853.490        | 0.000          | 852.482         | P[8]  |
| A[14] | <b>1380.560</b> | 772.456  | 756.438        | 0.000          | <b>755.430</b>  | A[7]  |
| E[15] | <b>1509.602</b> | 701.419  | 685.400        | 0.000          | <b>684.393</b>  | E[6]  |
| K[16] | <b>1637.697</b> | 672.377  | <b>556.358</b> | 557.306        | <b>555.350</b>  | K[5]  |
| T[17] | 1738.745        | 444.282  | <b>428.263</b> | <b>429.271</b> | 427.255         | T[4]  |
| P[18] | <b>1835.798</b> | 343.234  | 327.215        | 328.223        | 326.207         | P[3]  |
| V[19] | <b>1934.866</b> | 246.181  | 230.162        | 231.170        | 230.155         | V[2]  |
| K[20] | 2052.953        | 147.113  | 131.094        | 130.102        | 130.086         | K[1]  |

# sp | P43274 | H14\_MOUSE

S<sup>Phospho</sup> 79.97 ET<sup>Phospho</sup> 79.97 APAAPAAPAPAEKTPVK

- ▶ fragmentation table for charge state 2+
- ▶ specType=etd
- ▶ score=31.17
- ▶ F105352.dat
- ▶ query=q9174.p1
- ▶ precursor=688.652760
- ▶ chargePrecursor=3
- ▶ itol=0.8

| AA    | c               | y               | z+1             | z+2     | z               | AA    |
|-------|-----------------|-----------------|-----------------|---------|-----------------|-------|
| S[1]  | 93.020          | <b>1032.476</b> | <b>1024.467</b> | 0.504   | <b>1023.963</b> | S[20] |
| E[2]  | 157.541         | 948.977         | 940.968         | 0.504   | 940.464         | E[10] |
| T[3]  | 248.046         | 884.456         | 876.446         | 0.504   | 875.942         | T[18] |
| A[4]  | 283.567         | 793.940         | 785.939         | 0.504   | 785.435         | A[17] |
| P[5]  | 332.093         | 758.430         | 750.421         | 0.504   | 749.917         | P[16] |
| A[6]  | 397.812         | 709.904         | 701.894         | 0.504   | 701.390         | A[15] |
| A[7]  | 403.130         | 674.385         | 666.376         | 0.504   | 665.872         | A[14] |
| P[8]  | 451.656         | 638.867         | 630.857         | 0.504   | 630.353         | P[13] |
| A[9]  | 487.175         | 590.340         | 582.331         | 0.504   | 581.827         | A[12] |
| A[10] | 522.694         | <b>554.822</b>  | 546.812         | 0.504   | 546.308         | A[11] |
| P[11] | 571.220         | 519.303         | 511.294         | 0.504   | 510.790         | P[10] |
| A[12] | 606.739         | 470.777         | 462.767         | 0.504   | 462.263         | A[9]  |
| P[13] | 655.265         | 430.250         | 422.240         | 0.504   | <b>426.745</b>  | P[9]  |
| A[14] | 690.783         | 386.732         | 378.722         | 0.504   | 378.218         | A[7]  |
| E[15] | <b>755.305</b>  | 351.213         | 343.204         | 0.504   | 342.700         | E[0]  |
| K[16] | 819.352         | 286.692         | 278.683         | 279.187 | 278.179         | K[5]  |
| T[17] | 869.876         | 222.644         | 214.635         | 215.139 | 214.131         | T[4]  |
| P[18] | <b>918.402</b>  | 172.121         | 164.111         | 164.615 | 163.607         | P[3]  |
| V[19] | <b>967.537</b>  | 123.594         | 115.585         | 116.089 | 115.081         | V[0]  |
| K[20] | <b>1031.984</b> | 74.060          | 66.051          | 66.555  | 65.547          | K[1]  |

# sp | P43276 | H15\_MOUSE

SET (Phospho) APAETAAPAPVEKS Phospho PAK  
 (79.97) 79.97

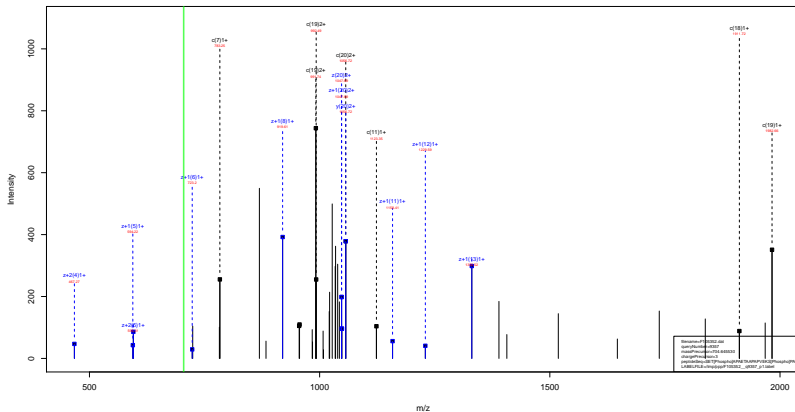



# sp | P43276 | H15\_MOUSE

SET (Phospho) APAETAAPAPVEKS (79.97) Phospho PAK 79.97

- ▶ fragmentation table for charge state 1+
- ▶ specType=etd
- ▶ score=33.95
- ▶ F105352.dat
- ▶ query=q9357\_p1
- ▶ precursor=704.645530
- ▶ chargePrecursor=3
- ▶ itol=0.8

| AA    | c               | y        | z+1             | z+2            | z        | AA    |
|-------|-----------------|----------|-----------------|----------------|----------|-------|
| S[1]  | 105.966         | 2111.910 | 2095.911        | 0.000          | 2094.903 | S[20] |
| E[2]  | 234.108         | 2024.998 | 2008.979        | 0.000          | 2007.971 | E[19] |
| T[3]  | 415.122         | 1895.855 | 1879.836        | 0.000          | 1878.829 | T[18] |
| A[4]  | 498.150         | 1714.941 | 1698.922        | 0.000          | 1697.915 | A[17] |
| P[5]  | 583.212         | 1643.804 | 1627.785        | 0.000          | 1626.777 | P[16] |
| A[6]  | 674.249         | 1546.751 | 1530.733        | 0.000          | 1529.725 | A[15] |
| E[7]  | <b>763.292</b>  | 1475.714 | 1459.696        | 0.000          | 1458.688 | E[14] |
| V[8]  | 854.340         | 1346.672 | <b>1330.653</b> | 0.000          | 1329.645 | V[13] |
| A[9]  | <b>955.377</b>  | 1245.624 | <b>1229.605</b> | 0.000          | 1228.597 | A[12] |
| A[10] | 1006.414        | 1174.587 | <b>1158.568</b> | 0.000          | 1157.560 | A[11] |
| P[11] | <b>1123.467</b> | 1103.550 | 1087.531        | 0.000          | 1086.523 | P[10] |
| A[12] | 1194.504        | 1006.497 | 990.478         | 0.000          | 989.470  | A[9]  |
| T[13] | 1297.557        | 935.460  | <b>919.441</b>  | 0.000          | 918.433  | T[8]  |
| V[14] | 1390.625        | 838.407  | 822.388         | 0.000          | 821.380  | V[7]  |
| E[15] | 1519.688        | 739.359  | <b>723.320</b>  | 0.000          | 722.312  | E[6]  |
| K[16] | 1647.763        | 610.296  | <b>594.277</b>  | <b>595.285</b> | 593.260  | K[5]  |
| S[17] | 1814.791        | 482.201  | 466.182         | <b>467.190</b> | 465.174  | S[4]  |
| P[18] | <b>1911.814</b> | 315.203  | 299.184         | 300.192        | 298.176  | P[3]  |
| A[19] | <b>1982.851</b> | 218.150  | 202.131         | 203.139        | 201.125  | A[2]  |
| K[20] | 2110.946        | 147.113  | 131.094         | 132.102        | 130.086  | K[1]  |

# sp | P43276 | H15\_MOUSE

SET (Phospho) APAETAAPAPVEKS (79.97) Phospho PAK 79.97

- ▶ fragmentation table for charge state 2+
- ▶ specType=etd
- ▶ score=33.95
- ▶ F105352.dat
- ▶ query=q9357\_p1
- ▶ precursor=704.645530
- ▶ chargePrecursor=3
- ▶ itol=0.8

| AA | c  | y               | z+1             | z+2             | z     | AA              |   |
|----|----|-----------------|-----------------|-----------------|-------|-----------------|---|
| S  | 1  | 513.037         | <b>1056.469</b> | <b>1048.459</b> | 0.504 | <b>1047.955</b> | S |
| E  | 2  | 117.558         | 1012.953        | 1004.943        | 0.504 | 1004.439        | E |
| T  | 3  | 208.065         | 948.431         | 940.422         | 0.504 | 939.918         | T |
| A  | 4  | 243.583         | 857.924         | 849.915         | 0.504 | 849.411         | A |
| P  | 5  | 292.110         | 822.400         | 814.396         | 0.504 | 813.892         | P |
| A  | 6  | 327.628         | 773.879         | 765.870         | 0.504 | 765.366         | A |
| E  | 7  | 392.150         | 738.361         | 730.351         | 0.504 | 729.847         | E |
| T  | 8  | 442.673         | 673.830         | 665.820         | 0.504 | 665.316         | T |
| A  | 9  | 478.192         | 623.310         | 615.306         | 0.504 | 614.802         | A |
| A  | 10 | 513.711         | 587.797         | 579.788         | 0.504 | 579.284         | A |
| P  | 11 | 562.237         | 552.278         | 544.269         | 0.504 | 543.765         | P |
| A  | 12 | 597.756         | 503.752         | 495.743         | 0.504 | 495.239         | A |
| P  | 13 | 616.282         | 468.234         | 460.224         | 0.504 | 459.720         | P |
| V  | 14 | 695.516         | 418.707         | 411.698         | 0.504 | 411.194         | V |
| E  | 15 | 760.337         | 370.173         | 362.164         | 0.504 | 361.660         | E |
| K  | 16 | 824.385         | 309.652         | 297.642         | 0.504 | 297.138         | K |
| S  | 17 | 907.894         | 241.604         | 233.595         | 0.504 | 233.091         | S |
| P  | 18 | <b>956.410</b>  | 158.105         | 150.096         | 0.504 | 149.592         | P |
| A  | 19 | <b>991.929</b>  | 106.570         | 101.569         | 0.504 | 101.065         | A |
| K  | 20 | <b>1055.977</b> | 74.000          | 66.951          | 0.504 | 66.447          | K |



# sp | P43276 | H15\_MOUSE

SET (Phospho) APAETAAPAPVEKS (79.97) Phospho PAK 79.97

- ▶ fragmentation table for charge state 1+
- ▶ specType=etd
- ▶ score=34.24
- ▶ F105352.dat
- ▶ query=q9358\_p1
- ▶ precursor=704.646100
- ▶ chargePrecursor=3
- ▶ itol=0.8

| AA    | c               | y        | z+1             | z+2            | z        | AA    |
|-------|-----------------|----------|-----------------|----------------|----------|-------|
| S[1]  | 105.966         | 2111.910 | 2095.911        | 0.000          | 2094.903 | S[20] |
| E[2]  | 234.108         | 2024.998 | 2008.979        | 0.000          | 2007.971 | E[19] |
| T[3]  | 415.122         | 1895.855 | 1879.836        | 0.000          | 1878.829 | T[18] |
| A[4]  | 498.150         | 1714.941 | 1698.922        | 0.000          | 1697.915 | A[17] |
| P[5]  | 583.212         | 1643.804 | 1627.785        | 0.000          | 1626.777 | P[16] |
| A[6]  | 674.249         | 1546.751 | 1530.733        | 0.000          | 1529.725 | A[15] |
| E[7]  | <b>763.292</b>  | 1478.714 | 1459.696        | 0.000          | 1458.689 | E[14] |
| V[8]  | 894.340         | 1348.672 | <b>1330.653</b> | 0.000          | 1329.645 | V[13] |
| A[9]  | <b>955.377</b>  | 1245.624 | <b>1229.605</b> | 0.000          | 1228.597 | A[12] |
| A[10] | 1006.414        | 1174.587 | <b>1158.568</b> | 0.000          | 1157.560 | A[11] |
| P[11] | <b>1123.467</b> | 1103.550 | 1087.531        | 0.000          | 1086.523 | P[10] |
| A[12] | 1194.504        | 1006.497 | 990.478         | 0.000          | 989.470  | A[9]  |
| T[13] | 1297.557        | 938.460  | <b>919.441</b>  | 0.000          | 918.433  | T[8]  |
| V[14] | 1399.625        | 838.407  | 822.388         | 0.000          | 821.380  | V[7]  |
| E[15] | 1519.688        | 739.359  | <b>723.320</b>  | 0.000          | 722.312  | E[6]  |
| K[16] | <b>1647.763</b> | 610.290  | <b>594.277</b>  | <b>595.285</b> | 593.260  | K[5]  |
| S[17] | 1814.781        | 482.201  | <b>466.182</b>  | 467.190        | 465.174  | S[4]  |
| P[18] | 1911.814        | 315.203  | 299.184         | 300.192        | 298.176  | P[3]  |
| A[19] | <b>1982.851</b> | 218.150  | 202.131         | 203.139        | 201.125  | A[2]  |
| K[20] | 2110.946        | 147.113  | 131.094         | 132.102        | 130.088  | K[1]  |

# sp | P43276 | H15\_MOUSE

SET (Phospho) APAETAAPAPVEKS (79.97) Phospho PAK 79.97

- ▶ fragmentation table for charge state 2+
- ▶ specType=etd
- ▶ score=34.24
- ▶ F105352.dat
- ▶ query=q9358\_p1
- ▶ precursor=704.646100
- ▶ chargePrecursor=3
- ▶ itol=0.8

| AA | c  | y               | x+1             | x+2             | z     | AA              |       |
|----|----|-----------------|-----------------|-----------------|-------|-----------------|-------|
| S  | 1  | 513.037         | <b>1056.469</b> | <b>1048.459</b> | 0.504 | <b>1047.955</b> | S[20] |
| E  | 2  | 117.558         | 1012.953        | 1004.943        | 0.504 | 1004.430        | E[19] |
| T  | 3  | 208.065         | 948.431         | 940.422         | 0.504 | 939.918         | T[18] |
| A  | 4  | 243.583         | 857.924         | 849.915         | 0.504 | 849.411         | A[17] |
| P  | 5  | 292.110         | 822.400         | 814.396         | 0.504 | 813.892         | P[16] |
| A  | 6  | 327.628         | 773.879         | 765.870         | 0.504 | 765.366         | A[15] |
| E  | 7  | 392.150         | 738.361         | 730.351         | 0.504 | 729.847         | E[14] |
| T  | 8  | 442.673         | 673.830         | 665.820         | 0.504 | 665.320         | T[13] |
| A  | 9  | 478.192         | 623.310         | 615.306         | 0.504 | 614.800         | A[12] |
| A  | 10 | 513.711         | 587.797         | 579.788         | 0.504 | 579.284         | A[11] |
| P  | 11 | 562.237         | 552.270         | 544.269         | 0.504 | 543.765         | P[10] |
| A  | 12 | 597.756         | 503.752         | 495.743         | 0.504 | 495.239         | A[9]  |
| T  | 13 | 616.282         | 468.239         | 460.234         | 0.504 | 459.730         | T[8]  |
| V  | 14 | 695.516         | 418.727         | 411.698         | 0.504 | 411.194         | V[7]  |
| E  | 15 | 760.337         | 370.173         | 362.164         | 0.504 | 361.660         | E[6]  |
| K  | 16 | 824.385         | 309.652         | 297.642         | 0.504 | 298.146         | K[5]  |
| S  | 17 | 907.894         | 241.604         | 233.595         | 0.504 | 234.099         | S[4]  |
| P  | 18 | <b>956.410</b>  | 158.105         | 150.096         | 0.504 | 149.592         | P[3]  |
| A  | 19 | <b>991.929</b>  | 106.570         | 101.569         | 0.504 | 101.065         | A[2]  |
| K  | 20 | <b>1055.977</b> | 74.060          | 68.051          | 0.504 | 68.541          | K[1]  |

# sp | P43276 | H15\_MOUSE

S<sup>Phospho</sup> ET<sup>Phospho</sup> APAETAAPAPVEKSPAK  
79.97 79.97

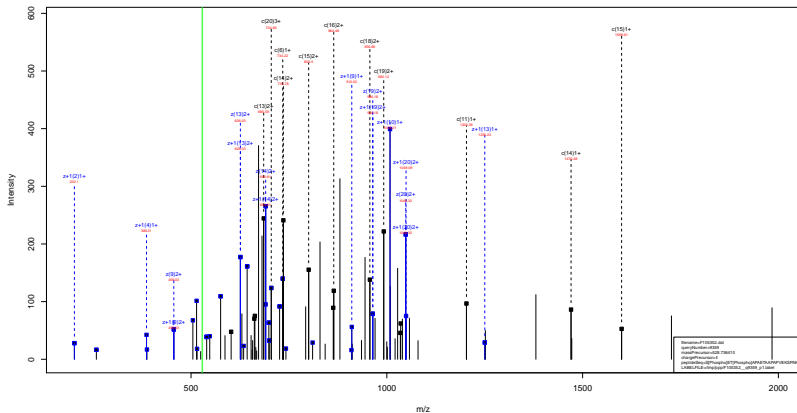

# sp | P43276 | H15\_MOUSE

S<sup>Phospho</sup> 79.97 ET<sup>Phospho</sup> 79.97 APAETAAPAPVEKSPAK

- ▶ fragmentation table for charge state 1+
- ▶ specType=etd
- ▶ score=62.85
- ▶ F105352.dat
- ▶ query=q9359\_p1
- ▶ precursor=528.736410
- ▶ chargePrecursor=4
- ▶ itol=0.8

| AA    | c               | y        | z+1             | z+2            | z               | AA    |
|-------|-----------------|----------|-----------------|----------------|-----------------|-------|
| S[1]  | 185.032         | 2111.030 | 2056.911        | 0.000          | 2094.901        | S[20] |
| E[2]  | 314.075         | 1944.931 | 1928.913        | 0.000          | 1927.905        | E[16] |
| Y[3]  | 495.089         | 1615.889 | 1799.870        | 0.000          | 1798.862        | Y[18] |
| A[4]  | 596.126         | 1634.875 | 1618.856        | 0.000          | 1617.848        | A[17] |
| P[5]  | <b>663.179</b>  | 1583.838 | 1547.819        | 0.000          | 1546.811        | P[16] |
| A[6]  | <b>734.216</b>  | 1466.785 | 1450.766        | 0.000          | 1449.758        | A[15] |
| E[7]  | <b>863.258</b>  | 1395.740 | 1379.720        | 0.000          | 1378.712        | E[14] |
| Y[8]  | <b>964.306</b>  | 1296.705 | <b>1250.687</b> | 0.000          | <b>1249.679</b> | Y[13] |
| A[9]  | <b>1035.343</b> | 1165.658 | 1149.639        | 0.000          | 1148.631        | A[12] |
| A[10] | 1106.380        | 1094.620 | 1078.602        | 0.000          | 1077.594        | A[11] |
| P[11] | <b>1203.433</b> | 1023.583 | <b>1007.565</b> | 0.000          | 1006.557        | P[10] |
| A[12] | 1274.470        | 926.531  | <b>910.512</b>  | 0.000          | <b>909.504</b>  | A[9]  |
| P[13] | 1371.523        | 855.493  | 839.475         | 0.000          | 838.467         | P[9]  |
| V[14] | <b>1470.591</b> | 758.441  | <b>742.422</b>  | 0.000          | 741.414         | V[7]  |
| E[15] | <b>1599.634</b> | 659.372  | <b>643.354</b>  | 0.000          | 642.346         | E[6]  |
| K[16] | 1727.729        | 630.330  | <b>614.311</b>  | <b>615.319</b> | 613.303         | K[5]  |
| S[17] | 1814.761        | 402.235  | <b>386.216</b>  | <b>387.224</b> | 385.208         | S[4]  |
| P[18] | 1911.814        | 215.203  | 200.184         | 200.192        | 298.176         | P[3]  |
| A[19] | 1982.851        | 218.190  | <b>202.131</b>  | 203.139        | 201.123         | A[2]  |
| R[20] | 2110.946        | 147.113  | 131.094         | 132.102        | 130.086         | R[1]  |

# sp | P43276 | H15\_MOUSE

S<sup>Phospho</sup> 79.97 ET<sup>Phospho</sup> 79.97 APAETAAPAPVEKSPAK

- ▶ fragmentation table for charge state 2+
- ▶ specType=etd
- ▶ score=62.85
- ▶ F105352.dat
- ▶ query=q9359\_p1
- ▶ precursor=528.736410
- ▶ chargePrecursor=4
- ▶ itol=0.8

| AA    | c              | y              | z+1             | z+2            | z               | AA    |
|-------|----------------|----------------|-----------------|----------------|-----------------|-------|
| S[1]  | 93.020         | 1066.469       | <b>1048.459</b> | 0.504          | <b>1047.955</b> | S[20] |
| E[2]  | 157.541        | 972.969        | <b>964.960</b>  | 0.504          | <b>964.456</b>  | E[19] |
| T[3]  | 249.048        | 908.448        | 900.430         | 0.504          | 899.935         | T[18] |
| A[4]  | 283.567        | 817.941        | <b>809.932</b>  | 0.504          | 809.429         | A[17] |
| P[5]  | 332.093        | 782.422        | 774.413         | 0.504          | 773.909         | P[16] |
| A[6]  | 387.612        | <b>733.906</b> | <b>725.897</b>  | 0.504          | <b>725.393</b>  | A[15] |
| E[7]  | 432.133        | <b>698.378</b> | <b>690.368</b>  | 0.504          | <b>689.864</b>  | E[14] |
| T[8]  | 482.657        | <b>633.856</b> | <b>625.847</b>  | 0.504          | <b>625.343</b>  | T[13] |
| A[9]  | 518.175        | 583.332        | <b>575.323</b>  | 0.504          | <b>574.819</b>  | A[12] |
| A[10] | 553.694        | <b>547.814</b> | <b>539.804</b>  | 0.504          | <b>539.301</b>  | A[11] |
| P[11] | <b>602.220</b> | 512.295        | <b>504.286</b>  | 0.504          | 503.782         | P[10] |
| A[12] | 637.737        | 463.769        | <b>455.760</b>  | 0.504          | <b>455.256</b>  | A[9]  |
| P[13] | <b>686.265</b> | 429.250        | 420.241         | 0.504          | 419.737         | P[8]  |
| V[14] | <b>735.799</b> | 379.724        | 371.715         | 0.504          | 371.211         | V[7]  |
| E[15] | <b>800.321</b> | 330.190        | 322.180         | 0.504          | 321.676         | E[6]  |
| K[16] | <b>864.368</b> | 285.668        | <b>257.659</b>  | <b>250.163</b> | 257.155         | K[5]  |
| S[17] | 907.884        | <b>201.621</b> | 193.612         | 194.116        | 193.108         | S[4]  |
| P[18] | <b>956.410</b> | 158.105        | 150.096         | 150.600        | 149.592         | P[3]  |
| A[19] | <b>991.929</b> | 109.579        | 101.569         | 102.073        | 101.065         | A[2]  |
| K[20] | 1023.977       | 74.060         | 68.051          | 68.555         | 68.547          | K[1]  |



# sp | P43276 | H15\_MOUSE

S<sup>Phospho</sup> 79.97 ET<sup>Phospho</sup> 79.97 APAETAAPAPVEKSPA

- ▶ fragmentation table for charge state 3+
- ▶ specType=etd
- ▶ score=62.85
- ▶ F105352.dat
- ▶ query=q9359\_p1
- ▶ precursor=528.736410
- ▶ chargePrecursor=4
- ▶ itol=0.8

| AA     | c              | y              | z+1            | z+2   | z              | AA    |
|--------|----------------|----------------|----------------|-------|----------------|-------|
| S [1]  | 62.349         | <b>704.648</b> | <b>699.309</b> | 0.672 | <b>698.973</b> | S[20] |
| E [2]  | 105.363        | 648.982        | <b>643.642</b> | 0.672 | <b>643.306</b> | E[19] |
| T [3]  | 185.701        | 600.966        | 595.702        | 0.672 | 593.292        | T[18] |
| A [4]  | 189.380        | 545.635        | <b>540.290</b> | 0.672 | <b>539.954</b> | A[17] |
| P [5]  | 221.731        | 521.951        | 516.611        | 0.672 | 516.275        | P[16] |
| A [6]  | 245.410        | 489.600        | 484.260        | 0.672 | 483.924        | A[15] |
| E [7]  | 288.424        | 465.921        | 460.581        | 0.672 | 460.245        | E[14] |
| T [8]  | 322.107        | 422.907        | 417.567        | 0.672 | 417.231        | T[13] |
| A [9]  | 345.786        | 389.224        | 383.884        | 0.672 | 383.549        | A[12] |
| A [10] | 369.465        | 365.545        | 360.205        | 0.672 | 359.869        | A[11] |
| P [11] | 401.816        | 341.866        | 336.526        | 0.672 | 336.190        | P[10] |
| A [12] | 425.495        | 309.515        | 304.175        | 0.672 | 303.840        | A[9]  |
| P [13] | 457.846        | 285.836        | 280.496        | 0.672 | 280.160        | P[8]  |
| V [14] | 490.209        | 253.485        | 248.145        | 0.672 | 247.810        | V[7]  |
| E [15] | 533.283        | 220.462        | 215.123        | 0.672 | 214.787        | E[6]  |
| K [16] | 576.581        | 177.448        | 172.109        | 0.672 | 171.773        | K[5]  |
| S [17] | 605.592        | 134.750        | 129.410        | 0.672 | 129.074        | S[4]  |
| P [18] | 637.943        | 105.739        | 100.400        | 0.672 | 100.064        | P[3]  |
| A [19] | <b>661.622</b> | 73.388         | 68.049         | 0.672 | 67.713         | A[2]  |
| K [20] | <b>704.320</b> | 49.709         | 44.370         | 0.672 | 44.034         | K[1]  |

# sp | P43276 | H15\_MOUSE

SET (Phospho) APAETAAPAPVEKS Phospho PAK  
 (79.97) 79.97

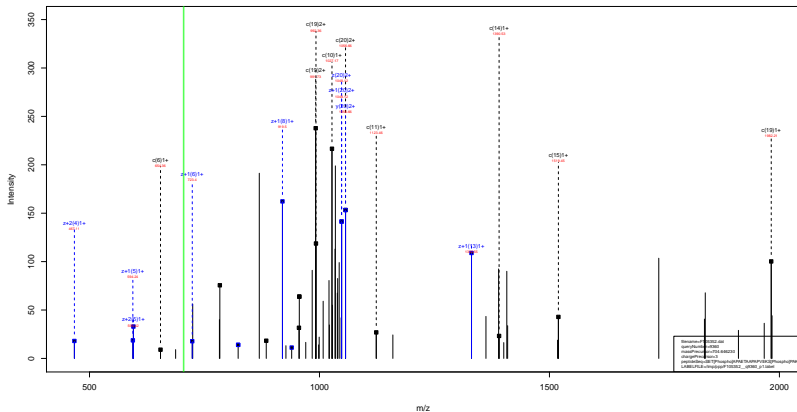

# sp | P43276 | H15\_MOUSE

SET (Phospho) APAETAAPAPVEKS (79.97) Phospho PAK 79.97

- ▶ fragmentation table for charge state 1+
- ▶ specType=etd
- ▶ score=48.48
- ▶ F105352.dat
- ▶ query=q9360\_p1
- ▶ precursor=704.646230
- ▶ chargePrecursor=3
- ▶ itol=0.8

| AA    | c               | y        | z+1             | z+2            | z        | AA    |
|-------|-----------------|----------|-----------------|----------------|----------|-------|
| S[1]  | 105.966         | 2111.910 | 2095.911        | 0.000          | 2094.903 | S[20] |
| E[2]  | 234.108         | 2024.998 | 2008.979        | 0.000          | 2007.971 | E[19] |
| T[3]  | 415.122         | 1895.855 | 1879.836        | 0.000          | 1878.829 | T[18] |
| A[4]  | 498.150         | 1714.841 | 1698.822        | 0.000          | 1697.815 | A[17] |
| P[5]  | 583.212         | 1643.804 | 1627.785        | 0.000          | 1626.777 | P[16] |
| A[6]  | <b>654.249</b>  | 1546.751 | 1530.733        | 0.000          | 1529.725 | A[15] |
| E[7]  | <b>783.292</b>  | 1475.714 | 1459.695        | 0.000          | 1458.688 | E[14] |
| V[8]  | <b>894.340</b>  | 1346.672 | <b>1330.653</b> | 0.000          | 1329.645 | V[13] |
| A[9]  | <b>955.377</b>  | 1245.624 | 1229.605        | 0.000          | 1228.597 | A[12] |
| A[10] | <b>1026.414</b> | 1174.587 | 1158.568        | 0.000          | 1157.560 | A[11] |
| P[11] | <b>1123.467</b> | 1103.550 | 1087.531        | 0.000          | 1086.523 | P[10] |
| A[12] | 1194.504        | 1006.497 | 990.478         | 0.000          | 989.470  | A[9]  |
| T[13] | 1297.557        | 935.460  | <b>919.441</b>  | 0.000          | 918.433  | T[8]  |
| V[14] | <b>1390.625</b> | 838.407  | <b>822.388</b>  | 0.000          | 821.380  | V[7]  |
| E[15] | <b>1519.668</b> | 739.359  | <b>723.320</b>  | 0.000          | 722.312  | E[6]  |
| K[16] | 1647.763        | 610.296  | <b>594.277</b>  | <b>595.285</b> | 593.260  | K[5]  |
| S[17] | 1814.761        | 482.201  | 466.182         | <b>467.190</b> | 465.174  | S[4]  |
| P[18] | 1911.814        | 315.203  | 299.184         | 300.192        | 298.176  | P[3]  |
| A[19] | <b>1982.851</b> | 218.150  | 202.131         | 203.139        | 201.123  | A[2]  |
| K[20] | 2170.946        | 147.113  | 131.094         | 132.102        | 130.086  | K[1]  |

# sp | P43276 | H15\_MOUSE

SET (Phospho) APAETAAPAPVEKS (79.97) Phospho PAK 79.97

- ▶ fragmentation table for charge state 2+
- ▶ specType=etd
- ▶ score=48.48
- ▶ F105352.dat
- ▶ query=q9360\_p1
- ▶ precursor=704.646230
- ▶ chargePrecursor=3
- ▶ itol=0.8

| AA | c  | y               | z+1             | z+2             | z     | AA              |       |
|----|----|-----------------|-----------------|-----------------|-------|-----------------|-------|
| S  | 1  | 513.037         | <b>1056.469</b> | <b>1048.459</b> | 0.504 | <b>1047.955</b> | S[20] |
| E  | 2  | 117.558         | 1012.957        | 1004.943        | 0.504 | 1004.439        | E[19] |
| T  | 3  | 208.065         | 948.431         | 940.422         | 0.504 | <b>939.918</b>  | T[18] |
| A  | 4  | 243.583         | 857.924         | 849.915         | 0.504 | 849.411         | A[17] |
| P  | 5  | 292.110         | <b>822.406</b>  | 814.396         | 0.504 | 813.892         | P[16] |
| A  | 6  | 327.628         | 773.879         | 765.870         | 0.504 | 765.366         | A[15] |
| E  | 7  | 392.150         | 738.361         | 730.351         | 0.504 | 729.847         | E[14] |
| T  | 8  | 442.673         | 673.830         | 665.820         | 0.504 | 665.316         | T[13] |
| A  | 9  | 478.192         | 623.310         | 615.306         | 0.504 | 614.800         | A[12] |
| A  | 10 | 513.711         | 587.797         | 579.788         | 0.504 | 579.284         | A[11] |
| P  | 11 | 562.237         | 552.278         | 544.269         | 0.504 | 543.765         | P[10] |
| A  | 12 | 597.756         | 503.752         | 495.743         | 0.504 | 495.239         | A[9]  |
| T  | 13 | 616.282         | 468.234         | 460.224         | 0.504 | 459.720         | T[8]  |
| V  | 14 | 695.516         | 418.707         | 411.698         | 0.504 | 411.194         | V[7]  |
| E  | 15 | 766.337         | 376.173         | 362.164         | 0.504 | 361.660         | E[6]  |
| K  | 16 | 824.385         | 309.652         | 297.642         | 0.504 | 297.138         | K[5]  |
| S  | 17 | 907.894         | 241.604         | 233.595         | 0.504 | 233.091         | S[4]  |
| P  | 18 | <b>956.410</b>  | 158.105         | 150.096         | 0.504 | 149.592         | P[3]  |
| A  | 19 | <b>991.929</b>  | 106.570         | 101.569         | 0.504 | 101.065         | A[2]  |
| K  | 20 | <b>1055.977</b> | 74.600          | 66.591          | 0.504 | 66.087          | K[1]  |



# sp | P43276 | H15\_MOUSE

SET (Phospho) APAETAAPAPVEKS (79.97) Phospho PAK 79.97

- ▶ fragmentation table for charge state 1+
- ▶ specType=etd
- ▶ score=36.86
- ▶ F105352.dat
- ▶ query=q9363\_p1
- ▶ precursor=704.648200
- ▶ chargePrecursor=3
- ▶ itol=0.8

| AA    | c               | y        | z+1             | z+2            | z        | AA    |
|-------|-----------------|----------|-----------------|----------------|----------|-------|
| S[1]  | 105.966         | 2111.910 | 2095.911        | 0.000          | 2094.903 | S[20] |
| E[2]  | 234.108         | 2024.998 | 2008.979        | 0.000          | 2007.971 | E[19] |
| T[3]  | 415.122         | 1895.855 | 1879.836        | 0.000          | 1878.829 | T[18] |
| A[4]  | 498.150         | 1714.841 | 1698.822        | 0.000          | 1697.815 | A[17] |
| P[5]  | 583.212         | 1643.804 | 1627.785        | 0.000          | 1626.777 | P[16] |
| A[6]  | 674.249         | 1546.751 | 1530.733        | 0.000          | 1529.725 | A[15] |
| E[7]  | <b>763.292</b>  | 1475.714 | 1459.696        | 0.000          | 1458.688 | E[14] |
| V[8]  | 854.340         | 1346.672 | <b>1330.653</b> | 0.000          | 1329.645 | V[13] |
| A[9]  | <b>955.377</b>  | 1245.624 | <b>1229.605</b> | 0.000          | 1228.597 | A[12] |
| A[10] | 1036.414        | 1174.587 | <b>1158.568</b> | 0.000          | 1157.560 | A[11] |
| P[11] | <b>1123.467</b> | 1103.550 | 1087.531        | 0.000          | 1086.523 | P[10] |
| A[12] | 1194.504        | 1036.497 | 990.478         | 0.000          | 989.470  | A[9]  |
| T[13] | 1297.557        | 935.460  | <b>919.441</b>  | 0.000          | 918.433  | T[8]  |
| V[14] | 1390.625        | 838.407  | 802.388         | 0.000          | 801.380  | V[7]  |
| E[15] | 1519.688        | 739.339  | <b>723.320</b>  | 0.000          | 722.312  | E[6]  |
| K[16] | 1647.763        | 610.296  | <b>594.277</b>  | <b>595.285</b> | 593.260  | K[5]  |
| S[17] | 1814.791        | 482.201  | 466.182         | <b>467.190</b> | 465.174  | S[4]  |
| P[18] | <b>1911.814</b> | 315.203  | 299.184         | 300.192        | 298.176  | P[3]  |
| A[19] | <b>1982.851</b> | 218.150  | 202.131         | 203.139        | 201.123  | A[2]  |
| K[20] | 2110.946        | 147.113  | 131.094         | 132.102        | 130.086  | K[1]  |

# sp | P43276 | H15\_MOUSE

SET (Phospho) APAETAAPAPVEKS (79.97) Phospho PAK 79.97

- ▶ fragmentation table for charge state 2+
- ▶ specType=etd
- ▶ score=36.86
- ▶ F105352.dat
- ▶ query=q9363\_p1
- ▶ precursor=704.648200
- ▶ chargePrecursor=3
- ▶ itol=0.8

| AA | c  | y               | z+1             | z+2             | z     | AA              |       |
|----|----|-----------------|-----------------|-----------------|-------|-----------------|-------|
| S  | 1  | 513.037         | <b>1056.469</b> | <b>1048.459</b> | 0.504 | <b>1047.955</b> | S[20] |
| E  | 2  | 117.558         | 1012.953        | 1004.943        | 0.504 | 1004.439        | E[19] |
| T  | 3  | 208.065         | 948.431         | 940.422         | 0.504 | 939.918         | T[18] |
| A  | 4  | 243.583         | 857.924         | 849.915         | 0.504 | 849.411         | A[17] |
| P  | 5  | 292.110         | 822.400         | 814.396         | 0.504 | 813.892         | P[16] |
| A  | 6  | 327.628         | 773.879         | 765.870         | 0.504 | 765.366         | A[15] |
| E  | 7  | 392.150         | 738.361         | 730.351         | 0.504 | 729.847         | E[14] |
| T  | 8  | 442.673         | 673.830         | 665.820         | 0.504 | 665.320         | T[13] |
| A  | 9  | 478.192         | 623.310         | 615.306         | 0.504 | 614.800         | A[12] |
| A  | 10 | 513.711         | 587.797         | 579.788         | 0.504 | 579.284         | A[11] |
| P  | 11 | 562.237         | 552.270         | 544.269         | 0.504 | 543.765         | P[10] |
| A  | 12 | 597.756         | 503.752         | 495.743         | 0.504 | 495.239         | A[9]  |
| T  | 13 | 646.282         | 468.234         | 460.224         | 0.504 | 459.720         | T[8]  |
| V  | 14 | 695.816         | 433.707         | 425.698         | 0.504 | 425.194         | V[7]  |
| E  | 15 | 760.337         | 378.173         | 362.164         | 0.504 | 361.660         | E[6]  |
| K  | 16 | 824.385         | 309.652         | 297.642         | 0.504 | 297.138         | K[5]  |
| S  | 17 | 907.894         | 241.604         | 233.595         | 0.504 | 233.091         | S[4]  |
| P  | 18 | <b>956.410</b>  | 158.105         | 150.096         | 0.504 | 149.592         | P[3]  |
| A  | 19 | <b>961.929</b>  | 106.579         | 101.569         | 0.504 | 101.065         | A[2]  |
| K  | 20 | <b>1055.977</b> | 74.060          | 66.051          | 0.504 | 65.547          | K[1]  |

# sp | P43275 | H11\_MOUSE

S<sup>Phospho</sup> ET<sup>Phospho</sup> APVAQAASTATEK PAAAK  
 79.97 79.97

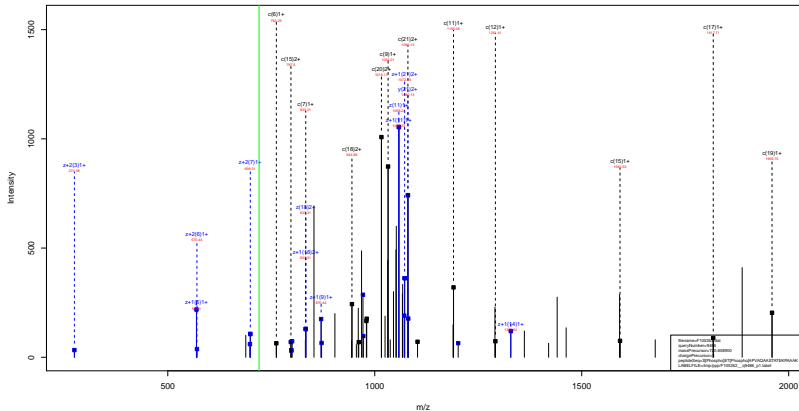



# sp | P43275 | H11\_MOUSE

S<sup>Phospho</sup> 79.97 ET<sup>Phospho</sup> 79.97 APVAQAASTATEKPAAAK

- ▶ fragmentation table for charge state 1+
- ▶ specType=etd
- ▶ score=52.11
- ▶ F105352.dat
- ▶ query=q9486.p1
- ▶ precursor=720.658900
- ▶ chargePrecursor=3
- ▶ itol=0.8

| AA | c  | y               | z+1      | z+2             | z               | AA              |       |
|----|----|-----------------|----------|-----------------|-----------------|-----------------|-------|
| S  | 1  | 188.032         | 2159.962 | 2143.943        | 0.000           | 2142.936        | S[2]  |
| E  | 2  | 314.075         | 1992.954 | 1976.946        | 0.000           | 1975.937        | E[20] |
| T  | 3  | 495.089         | 1863.921 | 1847.902        | 0.000           | 1846.895        | T[19] |
| A  | 4  | 658.126         | 1692.907 | 1666.888        | 0.000           | 1665.881        | A[18] |
| P  | 5  | 863.179         | 1611.870 | 1595.851        | 0.000           | 1594.844        | P[17] |
| V  | 6  | <b>762.247</b>  | 1514.817 | 1498.799        | 0.000           | 1497.791        | V[16] |
| A  | 7  | <b>833.284</b>  | 1415.746 | 1399.730        | 0.000           | 1398.722        | A[15] |
| Q  | 8  | <b>961.343</b>  | 1344.712 | <b>1328.693</b> | 1329.701        | 1327.683        | Q[14] |
| A  | 9  | <b>1032.360</b> | 1216.653 | 1200.634        | <b>1201.642</b> | 1199.627        | A[13] |
| A  | 10 | <b>1103.417</b> | 1149.616 | 1129.597        | 1130.605        | 1128.586        | A[12] |
| S  | 11 | <b>1190.449</b> | 1074.579 | <b>1058.560</b> | 1059.568        | <b>1057.552</b> | S[11] |
| T  | 12 | <b>1291.497</b> | 987.547  | <b>971.528</b>  | <b>972.536</b>  | 970.520         | T[10] |
| A  | 13 | 1362.534        | 896.499  | <b>876.481</b>  | <b>871.488</b>  | 869.477         | A[9]  |
| T  | 14 | 1463.581        | 815.462  | 799.443         | <b>806.451</b>  | <b>798.436</b>  | T[8]  |
| E  | 15 | <b>1592.624</b> | 714.434  | <b>698.396</b>  | <b>699.404</b>  | 697.388         | E[7]  |
| R  | 16 | 1723.671        | 638.373  | <b>649.353</b>  | <b>670.361</b>  | 668.345         | R[6]  |
| P  | 17 | <b>1817.772</b> | 457.277  | 441.258         | 442.266         | 440.250         | P[5]  |
| A  | 18 | 1888.809        | 366.224  | 344.205         | 345.213         | 343.188         | A[4]  |
| A  | 19 | <b>1959.846</b> | 289.187  | 273.168         | <b>274.176</b>  | 272.160         | A[3]  |
| A  | 20 | 2030.883        | 218.150  | 202.131         | 203.139         | 201.123         | A[2]  |
| K  | 21 | 2158.978        | 147.113  | 131.094         | 132.102         | 130.086         | K[1]  |

# sp | P43275 | H11\_MOUSE

S<sup>Phospho</sup> 79.97 ET<sup>Phospho</sup> 79.97 APVAQAASTATEKPAAAK

- ▶ fragmentation table for charge state 2+
- ▶ specType=etd
- ▶ score=52.11
- ▶ F105352.dat
- ▶ query=q9486\_p1
- ▶ precursor=720.658900
- ▶ chargePrecursor=3
- ▶ itol=0.8

| AA    | c               | y               | z+1             | z+2     | z               | AA    |
|-------|-----------------|-----------------|-----------------|---------|-----------------|-------|
| S[1]  | 93.020          | <b>1080.485</b> | <b>1072.475</b> | 0.504   | <b>1071.971</b> | S[2]  |
| E[2]  | 157.541         | 908.988         | 988.976         | 0.504   | 988.472         | E[20] |
| T[3]  | 208.048         | 832.464         | 832.435         | 0.504   | 823.951         | T[19] |
| A[4]  | 293.597         | 843.957         | <b>833.548</b>  | 0.504   | <b>833.444</b>  | A[18] |
| P[5]  | 332.093         | 806.439         | <b>798.429</b>  | 0.504   | <b>797.925</b>  | P[17] |
| V[6]  | 381.627         | 757.912         | 749.903         | 0.504   | 749.399         | V[16] |
| A[7]  | 417.146         | 708.378         | 700.369         | 0.504   | <b>699.865</b>  | A[15] |
| Q[8]  | 481.175         | 672.850         | 664.850         | 665.354 | 664.349         | Q[14] |
| A[9]  | 518.694         | 608.820         | 600.821         | 601.325 | 600.317         | A[13] |
| A[10] | 552.212         | 573.317         | 565.302         | 565.808 | 564.789         | A[12] |
| S[11] | 595.728         | 537.793         | 529.784         | 530.288 | 529.280         | S[11] |
| T[12] | 646.252         | 494.277         | 486.268         | 486.772 | 485.764         | T[10] |
| A[13] | 681.771         | 443.753         | 435.744         | 436.248 | 435.240         | A[9]  |
| T[14] | 732.294         | 408.235         | 400.225         | 400.729 | 399.721         | T[8]  |
| E[15] | <b>796.816</b>  | 357.711         | 349.702         | 350.205 | 349.198         | E[7]  |
| R[16] | 850.883         | 293.199         | 285.189         | 285.694 | 284.678         | R[6]  |
| P[17] | 909.398         | 225.147         | 221.133         | 221.637 | 220.629         | P[5]  |
| A[18] | <b>944.908</b>  | 188.616         | 172.606         | 173.110 | 172.102         | A[4]  |
| A[19] | <b>980.427</b>  | 145.097         | 137.088         | 137.592 | 136.584         | A[3]  |
| A[20] | <b>1015.945</b> | 109.579         | 101.569         | 102.073 | 101.065         | A[2]  |
| K[21] | <b>1079.993</b> | 74.060          | 66.051          | 66.555  | 65.547          | K[1]  |

# sp | P43276 | H15\_MOUSE

SETAPAETAAPAPVEKS<sup>Phospho</sup> PAKK  
79.97

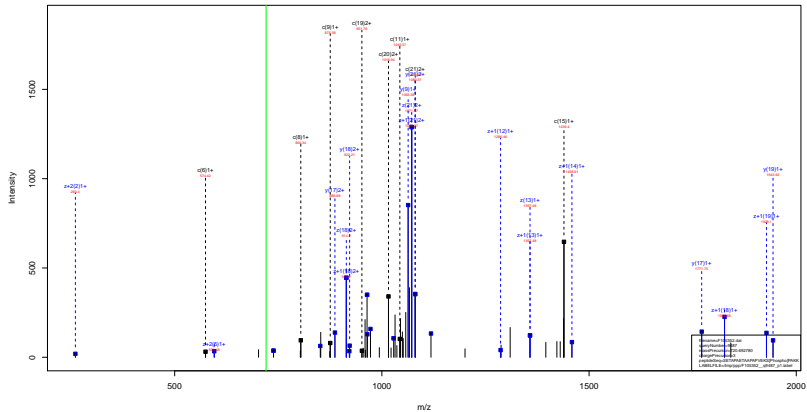

# sp | P43276 | H15\_MOUSE

## SETAPAETAAPAPVEKS <sup>Phospho</sup>79.97 PAKK

- ▶ fragmentation table for charge state 1+
- ▶ specType=etd
- ▶ score=39.21
- ▶ F105352.dat
- ▶ query=q9487.p1
- ▶ precursor=720.692780
- ▶ chargePrecursor=3
- ▶ itol=0.8

| AA    | c               | y               | z+1             | z+2            | z               | AA    |
|-------|-----------------|-----------------|-----------------|----------------|-----------------|-------|
| S[1]  | 105.066         | 2160.050        | 2144.040        | 0.000          | 2143.032        | S[21] |
| E[2]  | 234.108         | 2073.020        | 2057.008        | 0.000          | 2056.000        | E[20] |
| T[3]  | 135.150         | <b>1943.984</b> | <b>1927.965</b> | 0.000          | 1926.957        | T[19] |
| A[4]  | 498.193         | 1842.920        | <b>1826.917</b> | 0.000          | 1825.910        | A[18] |
| F[5]  | 503.246         | <b>1771.899</b> | 1755.880        | 0.000          | 1754.872        | F[17] |
| A[6]  | <b>574.283</b>  | 1674.840        | 1658.820        | 0.000          | 1657.820        | A[16] |
| E[7]  | 703.326         | 1603.809        | 1587.790        | 0.000          | 1586.781        | E[15] |
| T[8]  | <b>804.373</b>  | 1474.767        | <b>1458.748</b> | 0.000          | 1457.740        | T[14] |
| A[9]  | <b>875.411</b>  | 1372.710        | <b>1357.700</b> | 0.000          | <b>1356.692</b> | A[13] |
| A[10] | 949.448         | 1302.660        | <b>1286.663</b> | 0.000          | 1285.655        | A[12] |
| P[11] | <b>1043.500</b> | 1231.645        | 1215.626        | 0.000          | 1214.618        | P[11] |
| A[12] | 1114.537        | 1134.502        | <b>1118.573</b> | 0.000          | 1117.565        | A[10] |
| P[13] | 1211.590        | <b>1063.555</b> | 1047.536        | 0.000          | 1046.528        | P[10] |
| V[14] | 1310.639        | 966.502         | 950.483         | 0.000          | 949.475         | V[9]  |
| E[15] | <b>1439.701</b> | 887.438         | <b>851.415</b>  | 0.000          | 850.407         | E[7]  |
| R[16] | 1567.756        | <b>738.391</b>  | 722.372         | 0.000          | 721.364         | R[6]  |
| S[17] | 1734.795        | 610.290         | 594.277         | <b>595.285</b> | 593.269         | S[5]  |
| P[18] | 1831.847        | 443.208         | 427.279         | <b>428.287</b> | 426.271         | P[4]  |
| A[19] | 1902.884        | 346.245         | 330.226         | 331.234        | 329.211         | A[3]  |
| R[20] | 2030.979        | 275.208         | 259.189         | <b>260.197</b> | 258.181         | R[2]  |
| K[21] | 2159.074        | 147.110         | 131.094         | 132.102        | 130.086         | K[1]  |

# sp | P43276 | H15\_MOUSE

SETAPAETAAPAPVEKS <sup>Phospho</sup>PAKK  
79.97

- ▶ fragmentation table for charge state 2+
- ▶ specType=etd
- ▶ score=39.21
- ▶ F105352.dat
- ▶ query=q9487.p1
- ▶ precursor=720.692780
- ▶ chargePrecursor=3
- ▶ itol=0.8

| AA    | c               | y               | z+1             | z+2   | z               | AA    |
|-------|-----------------|-----------------|-----------------|-------|-----------------|-------|
| S[1]  | 53.037          | <b>1080.533</b> | <b>1072.523</b> | 0.504 | <b>1072.020</b> | S[2]  |
| E[2]  | 117.558         | 1037.017        | <b>1029.007</b> | 0.504 | <b>1028.504</b> | E[3]  |
| T[3]  | 168.082         | <b>972.496</b>  | <b>964.486</b>  | 0.504 | <b>963.983</b>  | T[10] |
| A[4]  | 203.008         | <b>921.972</b>  | <b>911.962</b>  | 0.504 | <b>913.458</b>  | A[18] |
| P[5]  | 252.127         | <b>886.453</b>  | 876.444         | 0.504 | 877.040         | P[17] |
| A[6]  | 297.645         | 837.927         | 829.917         | 0.504 | 829.413         | A[16] |
| E[7]  | 352.166         | 802.408         | 794.399         | 0.504 | 793.895         | E[15] |
| T[8]  | 402.690         | <b>737.887</b>  | 729.878         | 0.504 | 729.374         | T[14] |
| A[9]  | 438.209         | 687.363         | 679.354         | 0.504 | 678.850         | A[13] |
| A[10] | 473.727         | 653.943         | 643.935         | 0.504 | 643.331         | A[12] |
| P[11] | 522.254         | 618.328         | 608.317         | 0.504 | 607.813         | P[11] |
| A[12] | 557.772         | 587.800         | 580.790         | 0.504 | 580.286         | A[10] |
| P[13] | 606.299         | 532.281         | 524.272         | 0.504 | 523.768         | P[9]  |
| V[14] | 655.833         | 483.755         | 475.745         | 0.504 | 475.241         | V[8]  |
| E[15] | 720.354         | 434.220         | 426.211         | 0.504 | 425.707         | E[7]  |
| R[16] | 784.882         | 389.699         | 381.690         | 0.504 | 381.186         | R[6]  |
| S[17] | 867.901         | 355.657         | 347.642         | 0.504 | 347.138         | S[5]  |
| P[18] | 916.427         | 222.152         | 214.143         | 0.504 | 213.639         | P[4]  |
| A[19] | <b>951.946</b>  | 173.629         | 165.617         | 0.504 | 165.113         | A[3]  |
| K[20] | <b>1015.993</b> | 138.108         | 130.098         | 0.504 | 129.594         | K[2]  |
| K[21] | <b>1080.041</b> | 74.060          | 66.051          | 0.504 | 65.547          | K[1]  |



# sp | P43276 | H15\_MOUSE

S<sup>Phospho</sup> 79.97 ET<sup>Phospho</sup> 79.97 APAETAAPAPVEKS<sup>Phospho</sup> PAK<sup>Phospho</sup> 79.97

- ▶ fragmentation table for charge state 1+
- ▶ specType=etd
- ▶ score=37.24
- ▶ F105352.dat
- ▶ query=q9550\_p1
- ▶ precursor=731.303220
- ▶ chargePrecursor=3
- ▶ itol=0.8

| AA    | c               | y        | z+1             | z+2            | z               | AA    |
|-------|-----------------|----------|-----------------|----------------|-----------------|-------|
| S[1]  | 185.032         | 2091.895 | 2175.877        | 0.000          | 2174.870        | S[20] |
| E[2]  | 314.075         | 2024.898 | 2008.879        | 0.000          | 2007.871        | E[10] |
| Y[3]  | 495.089         | 1895.855 | 1879.836        | 0.000          | 1878.829        | Y[18] |
| A[4]  | 566.126         | 1714.841 | 1698.822        | 0.000          | 1697.815        | A[17] |
| P[5]  | 663.179         | 1643.804 | 1627.785        | 0.000          | 1626.777        | P[16] |
| A[6]  | 734.216         | 1346.781 | 1330.753        | 0.000          | 1329.725        | A[15] |
| E[7]  | <b>863.258</b>  | 1175.724 | <b>1159.695</b> | 0.000          | 1158.688        | E[14] |
| Y[8]  | <b>964.306</b>  | 1040.672 | <b>1030.653</b> | 0.000          | 1029.645        | Y[13] |
| A[9]  | <b>1035.343</b> | 1245.624 | 1229.605        | 0.000          | 1228.597        | A[12] |
| A[10] | 1106.380        | 1174.587 | <b>1158.568</b> | 0.000          | 1157.560        | A[11] |
| P[11] | <b>1203.433</b> | 1103.550 | <b>1087.531</b> | 0.000          | <b>1086.523</b> | P[10] |
| A[12] | 1274.470        | 1030.497 | <b>990.478</b>  | 0.000          | 989.470         | A[9]  |
| P[13] | 1371.523        | 935.460  | <b>919.441</b>  | 0.000          | 918.433         | P[9]  |
| V[14] | 1470.591        | 838.407  | 822.388         | 0.000          | 821.380         | V[7]  |
| E[15] | 1569.634        | 739.339  | <b>723.320</b>  | 0.000          | 722.312         | E[6]  |
| K[16] | 1727.729        | 610.296  | 594.277         | 593.265        | 593.260         | K[5]  |
| S[17] | 1894.727        | 482.201  | <b>466.182</b>  | <b>467.190</b> | 465.174         | S[4]  |
| P[18] | 1991.780        | 315.203  | 299.184         | 300.192        | 298.176         | P[3]  |
| A[19] | 2052.817        | 218.150  | 202.131         | 203.139        | 201.123         | A[2]  |
| R[20] | 2190.912        | 147.113  | 131.094         | 132.102        | 130.086         | R[1]  |

# sp | P43276 | H15\_MOUSE

S<sup>Phospho</sup> 79.97 ET<sup>Phospho</sup> 79.97 APAETAAPAPVEKS<sup>Phospho</sup> PAK<sup>Phospho</sup> 79.97

- ▶ fragmentation table for charge state 2+
- ▶ specType=etd
- ▶ score=37.24
- ▶ F105352.dat
- ▶ query=q9550.p1
- ▶ precursor=731.303220
- ▶ chargePrecursor=3
- ▶ itol=0.8

| AA    | c               | y               | z+1             | z+2     | z               | AA    |
|-------|-----------------|-----------------|-----------------|---------|-----------------|-------|
| S[1]  | 93.020          | <b>1096.452</b> | <b>1088.442</b> | 0.504   | <b>1087.930</b> | S[20] |
| E[2]  | 157.541         | 1012.953        | 1004.943        | 0.504   | 1004.430        | E[10] |
| T[3]  | 248.046         | 948.431         | 940.422         | 0.504   | 939.910         | T[18] |
| A[4]  | 283.507         | 857.924         | 849.915         | 0.504   | 849.411         | A[17] |
| P[5]  | 332.093         | 822.400         | 814.396         | 0.504   | 813.892         | P[16] |
| A[6]  | 397.812         | 773.879         | 765.870         | 0.504   | 765.366         | A[15] |
| E[7]  | 432.133         | 738.361         | 730.351         | 0.504   | 729.847         | E[14] |
| T[8]  | 482.697         | 673.839         | 665.830         | 0.504   | 665.326         | T[13] |
| A[9]  | 518.175         | 623.316         | 615.306         | 0.504   | 614.802         | A[12] |
| A[10] | <b>553.694</b>  | 587.797         | 579.788         | 0.504   | 579.284         | A[11] |
| P[11] | 602.220         | 552.278         | 544.269         | 0.504   | 543.765         | P[10] |
| A[12] | 637.739         | 503.752         | 495.743         | 0.504   | 495.239         | A[9]  |
| P[13] | 696.305         | 480.234         | 469.224         | 0.504   | 469.720         | P[8]  |
| V[14] | 735.799         | 410.707         | 411.698         | 0.504   | 411.194         | V[7]  |
| E[15] | 800.321         | 370.173         | 362.164         | 0.504   | 361.660         | E[0]  |
| K[16] | 864.308         | 305.652         | 297.642         | 288.146 | 297.138         | K[5]  |
| S[17] | 947.867         | 241.608         | 233.595         | 234.099 | 233.091         | S[4]  |
| P[18] | <b>996.394</b>  | 158.105         | 150.096         | 150.600 | 149.592         | P[3]  |
| A[19] | <b>1031.512</b> | 109.579         | 103.569         | 103.073 | 101.065         | A[0]  |
| R[20] | <b>1095.960</b> | 74.060          | 68.051          | 68.555  | 65.547          | R[1]  |





# sp | P43274 | H14\_MOUSE

S<sup>Phospho</sup> 79.97 ET<sup>Phospho</sup> 79.97 APAAPAAPAPAEKTPVKK

- ▶ fragmentation table for charge state 1+
- ▶ specType=etd
- ▶ score=43.31
- ▶ F105352.dat
- ▶ query=q9552\_p1
- ▶ precursor=548.763010
- ▶ chargePrecursor=4
- ▶ itol=0.8

| AA    | c               | y               | z+1             | z+2     | z               | AA    |
|-------|-----------------|-----------------|-----------------|---------|-----------------|-------|
| S[1]  | 185.032         | 2192.040        | 2176.021        | 0.000   | 2175.013        | S[21] |
| E[2]  | 31.4.075        | 2025.042        | 2009.023        | 0.000   | 2008.015        | E[20] |
| T[3]  | 495.080         | 1995.990        | 1878.980        | 0.000   | 1878.972        | T[19] |
| A[4]  | 566.126         | 1744.965        | 1698.956        | 0.000   | 1599.956        | A[18] |
| P[5]  | <b>663.179</b>  | 1643.940        | 1627.929        | 0.000   | 1626.921        | P[17] |
| A[6]  | 734.216         | 1548.895        | 1530.876        | 0.000   | 1529.869        | A[16] |
| A[7]  | 805.253         | 1475.850        | <b>1459.839</b> | 0.000   | 1458.831        | A[15] |
| P[8]  | 902.306         | 1404.821        | 1388.802        | 0.000   | 1387.794        | P[14] |
| A[9]  | <b>973.343</b>  | 1307.760        | 1291.749        | 0.000   | 1290.742        | A[13] |
| A[10] | 1044.809        | 1236.731        | 1220.712        | 0.000   | 1219.705        | A[12] |
| P[11] | <b>1141.433</b> | 1185.660        | 1149.675        | 0.000   | 1148.667        | P[11] |
| A[12] | 1212.470        | <b>1068.641</b> | <b>1052.622</b> | 0.000   | <b>1051.615</b> | A[10] |
| P[13] | <b>1309.523</b> | 997.600         | 981.585         | 0.000   | 980.578         | P[9]  |
| A[14] | <b>1380.560</b> | 900.551         | <b>884.533</b>  | 0.000   | 883.525         | A[8]  |
| E[15] | <b>1509.602</b> | 828.514         | <b>813.495</b>  | 0.000   | 812.488         | E[7]  |
| R[16] | 1637.697        | 760.472         | <b>684.453</b>  | 683.461 | 683.443         | R[6]  |
| T[17] | 1738.745        | 572.377         | <b>556.358</b>  | 557.366 | <b>555.350</b>  | T[5]  |
| P[18] | 1835.798        | 471.320         | 455.310         | 456.318 | 454.302         | P[4]  |
| V[19] | <b>1934.866</b> | 374.270         | <b>358.257</b>  | 359.265 | 357.250         | V[3]  |
| K[20] | 2062.901        | 275.200         | <b>259.189</b>  | 260.197 | 258.181         | K[2]  |
| K[21] | 2191.056        | 147.113         | 131.094         | 132.102 | 130.086         | K[1]  |

# sp | P43274 | H14\_MOUSE

S<sup>Phospho</sup> 79.97 ET<sup>Phospho</sup> 79.97 APAAPAAPAPAEKTPVKK

- ▶ fragmentation table for charge state 2+
- ▶ specType=etd
- ▶ score=43.31
- ▶ F105352.dat
- ▶ query=q9552.p1
- ▶ precursor=548.763010
- ▶ chargePrecursor=4
- ▶ itol=0.8

| AA    | c               | y              | z+1             | z+2     | z              | AA    |
|-------|-----------------|----------------|-----------------|---------|----------------|-------|
| S[1]  | 93.020          | 1096.524       | <b>1088.514</b> | 0.504   | 1088.010       | S[21] |
| E[2]  | 157.541         | 1013.024       | 1005.015        | 0.504   | 1004.511       | E[20] |
| T[3]  | 218.048         | 849.501        | 840.004         | 0.504   | 839.599        | T[19] |
| A[4]  | 283.567         | <b>857.996</b> | 849.987         | 0.504   | 849.483        | A[18] |
| P[5]  | 332.093         | <b>822.478</b> | <b>814.468</b>  | 0.504   | <b>813.964</b> | P[17] |
| A[6]  | 367.612         | 773.951        | <b>765.942</b>  | 0.504   | <b>765.438</b> | A[16] |
| A[7]  | 403.130         | 738.433        | 730.423         | 0.504   | 729.919        | A[15] |
| P[8]  | 451.056         | <b>702.914</b> | 694.905         | 0.504   | 694.401        | P[14] |
| A[9]  | 487.175         | 664.395        | <b>646.378</b>  | 0.504   | <b>645.874</b> | A[13] |
| A[10] | 522.894         | <b>618.869</b> | <b>619.360</b>  | 0.504   | 610.359        | A[12] |
| P[11] | 571.220         | 583.351        | 575.343         | 0.504   | 574.837        | P[11] |
| A[12] | 606.739         | 534.824        | <b>526.815</b>  | 0.504   | <b>526.311</b> | A[10] |
| P[13] | <b>655.265</b>  | <b>499.306</b> | 491.296         | 0.504   | 490.792        | P[9]  |
| A[14] | <b>690.783</b>  | 450.779        | <b>442.770</b>  | 0.504   | <b>442.266</b> | A[8]  |
| E[15] | <b>755.305</b>  | <b>415.261</b> | <b>407.251</b>  | 0.504   | <b>406.747</b> | E[7]  |
| K[16] | 819.352         | 350.739        | 342.730         | 343.234 | 342.226        | K[6]  |
| T[17] | <b>869.876</b>  | 280.662        | 278.663         | 279.167 | 278.170        | T[5]  |
| P[18] | 918.802         | 230.160        | 228.159         | 228.663 | 227.655        | P[4]  |
| V[19] | <b>967.937</b>  | 187.642        | 179.632         | 180.136 | 179.128        | V[3]  |
| K[20] | <b>1031.984</b> | 138.108        | 130.098         | 130.602 | 129.594        | K[2]  |
| K[21] | <b>1096.032</b> | 74.060         | 66.051          | 66.555  | 65.547         | K[1]  |

# sp | P43274 | H14\_MOUSE

S<sup>Phospho</sup> 79.97 ET<sup>Phospho</sup> 79.97 APAAPAAPAPAEKTPVKK

- ▶ fragmentation table for charge state 3+
- ▶ specType=etd
- ▶ score=43.31
- ▶ F105352.dat
- ▶ query=q9552\_p1
- ▶ precursor=548.763010
- ▶ chargePrecursor=4
- ▶ itol=0.8

| AA    | c              | y              | z+1            | z+2     | z              | AA    |
|-------|----------------|----------------|----------------|---------|----------------|-------|
| S[1]  | 62.349         | <b>731.352</b> | <b>726.012</b> | 0.672   | <b>725.676</b> | S[21] |
| E[2]  | 105.363        | 575.685        | 670.346        | 0.672   | 670.010        | E[20] |
| Y[3]  | 165.701        | 532.671        | 627.332        | 0.672   | 626.995        | Y[19] |
| A[4]  | 109.580        | 572.333        | 566.994        | 0.672   | 566.658        | A[18] |
| P[5]  | 221.731        | 548.654        | 543.315        | 0.672   | 542.979        | P[17] |
| A[6]  | 245.410        | 516.303        | 510.954        | 0.672   | 510.628        | A[16] |
| A[7]  | 269.089        | 492.624        | 487.285        | 0.672   | 486.949        | A[15] |
| P[8]  | 301.440        | 468.945        | 463.606        | 0.672   | 463.270        | P[14] |
| A[9]  | 325.119        | 436.594        | 431.255        | 0.672   | 430.919        | A[13] |
| A[10] | 348.798        | 412.915        | <b>407.576</b> | 0.672   | <b>407.240</b> | A[12] |
| P[11] | 381.149        | 389.236        | 383.897        | 0.672   | 383.561        | P[11] |
| A[12] | 404.828        | 356.885        | 351.546        | 0.672   | 351.210        | A[10] |
| P[13] | 437.179        | 333.206        | 327.867        | 0.672   | 327.531        | P[9]  |
| A[14] | 460.858        | 300.855        | 295.516        | 0.672   | 295.180        | A[8]  |
| E[15] | 503.872        | 277.176        | 271.837        | 0.672   | 271.501        | E[7]  |
| K[16] | 546.971        | 254.105        | 258.822        | 229.158 | 228.487        | K[6]  |
| T[17] | 580.253        | 191.464        | 186.124        | 186.460 | 185.788        | T[5]  |
| P[18] | 612.604        | 157.781        | 152.442        | 152.778 | 152.105        | P[4]  |
| V[19] | 645.627        | 125.430        | 120.091        | 120.427 | 119.755        | V[3]  |
| K[20] | <b>688.325</b> | 92.407         | 87.068         | 87.404  | 86.732         | K[2]  |
| K[21] | <b>731.024</b> | 49.709         | 44.370         | 44.705  | 44.034         | K[1]  |

# sp | P43274 | H14\_MOUSE

SET<sup>Phospho</sup> 79.97 APAAPAAPAPAEKT<sup>Phospho</sup> PVKK<sup>79.97</sup>

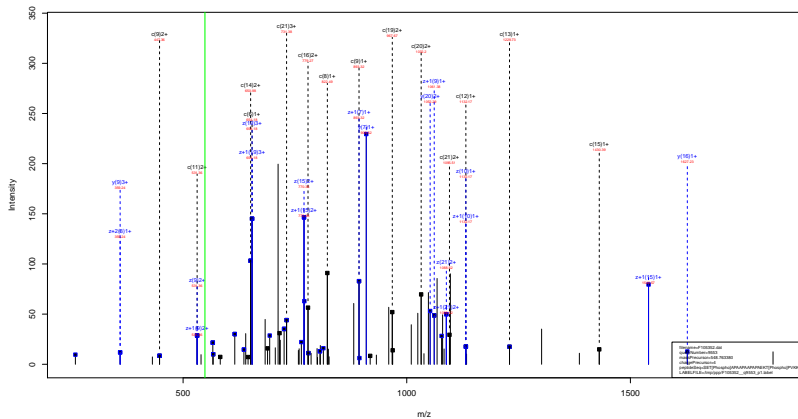

# sp | P43274 | H14\_MOUSE

SET <sup>Phospho</sup> APAAPAAPAPAEKT <sup>Phospho</sup> PVKK <sub>79.97</sub> <sub>79.97</sub>

- ▶ fragmentation table for charge state 1+
- ▶ specType=etd
- ▶ score=68.08
- ▶ F105352.dat
- ▶ query=q9553.p1
- ▶ precursor=548.763380
- ▶ chargePrecursor=4
- ▶ itol=0.8

| AA    | c               | y               | z+1             | z+2            | z               | AA    |
|-------|-----------------|-----------------|-----------------|----------------|-----------------|-------|
| S[1]  | 105.066         | 2192.040        | 2178.021        | 0.000          | 2175.011        | S[21] |
| E[2]  | 234.108         | 2105.000        | 2088.989        | 0.000          | 2087.981        | E[20] |
| T[3]  | 415.122         | 1975.965        | 1959.947        | 0.000          | 1958.939        | T[19] |
| A[4]  | 488.180         | 1798.951        | 1778.933        | 0.000          | 1777.925        | A[18] |
| P[5]  | <b>583.212</b>  | 1723.914        | 1707.896        | 0.000          | 1705.888        | P[17] |
| A[6]  | <b>654.249</b>  | <b>1626.861</b> | 1610.843        | 0.000          | 1609.835        | A[16] |
| A[7]  | <b>725.287</b>  | 1555.824        | <b>1539.806</b> | 0.000          | 1538.798        | A[15] |
| P[8]  | <b>822.339</b>  | 1484.787        | 1468.769        | 0.000          | 1467.761        | P[14] |
| A[9]  | <b>893.376</b>  | 1387.734        | 1371.716        | 0.000          | 1370.708        | A[13] |
| A[10] | 964.414         | 1316.697        | 1300.679        | 0.000          | 1299.671        | A[12] |
| P[11] | <b>1061.466</b> | 1245.650        | <b>1229.642</b> | 0.000          | 1228.634        | P[11] |
| A[12] | <b>1132.503</b> | 1148.608        | <b>1132.589</b> | 0.000          | <b>1131.581</b> | A[10] |
| P[13] | <b>1229.556</b> | <b>1077.570</b> | <b>1061.552</b> | 0.000          | 1060.544        | P[9]  |
| A[14] | 1300.593        | 980.518         | 964.499         | 0.000          | 963.491         | A[8]  |
| E[15] | <b>1429.636</b> | <b>909.481</b>  | <b>893.462</b>  | 0.000          | 892.454         | E[7]  |
| K[16] | 1517.711        | <b>780.438</b>  | <b>764.419</b>  | 385.427        | 763.411         | K[6]  |
| T[17] | 1738.745        | 652.343         | <b>636.324</b>  | 637.312        | <b>635.316</b>  | T[5]  |
| P[18] | 1835.798        | 471.329         | 455.310         | 456.318        | 454.309         | P[4]  |
| V[19] | 1934.866        | 374.276         | 358.257         | <b>359.265</b> | 357.256         | V[3]  |
| K[20] | 2082.961        | 275.208         | <b>259.189</b>  | 260.197        | 258.181         | K[2]  |
| K[21] | 2191.056        | 147.112         | 131.094         | 132.102        | 130.086         | K[1]  |

# sp | P43274 | H14\_MOUSE

SET<sup>Phospho</sup> APAAPAAPAPA EKT<sup>Phospho</sup> PVKK<sup>79.97</sup>

- ▶ fragmentation table for charge state 2+
- ▶ specType=etd
- ▶ score=68.08
- ▶ F105352.dat
- ▶ query=q9553.p1
- ▶ precursor=548.763380
- ▶ chargePrecursor=4
- ▶ itol=0.8

| AA |    | c               | y               | z+1             | z+2   | z               | AA    |
|----|----|-----------------|-----------------|-----------------|-------|-----------------|-------|
| S  | 1  | 53.037          | 1096.524        | <b>1088.514</b> | 0.504 | <b>1088.010</b> | S[2]  |
| E  | 2  | 117.558         | <b>1053.008</b> | 1044.998        | 0.504 | 1044.494        | E[20] |
| T  | 3  | 204.085         | 885.485         | 880.477         | 0.504 | 879.973         | T[19] |
| A  | 4  | 243.583         | 897.979         | 893.970         | 0.504 | 893.466         | A[18] |
| P  | 5  | 292.110         | 862.461         | 854.451         | 0.504 | 853.947         | P[17] |
| A  | 6  | 327.628         | <b>813.934</b>  | <b>805.925</b>  | 0.504 | <b>805.421</b>  | A[16] |
| A  | 7  | 363.147         | 778.410         | <b>770.406</b>  | 0.504 | <b>769.903</b>  | A[15] |
| P  | 8  | 411.673         | 742.897         | 734.888         | 0.504 | 734.384         | P[14] |
| A  | 9  | <b>447.192</b>  | <b>694.371</b>  | 686.362         | 0.504 | 685.858         | A[13] |
| A  | 10 | 602.710         | 598.853         | <b>650.843</b>  | 0.504 | <b>650.339</b>  | A[12] |
| P  | 11 | <b>531.237</b>  | 625.335         | <b>615.324</b>  | 0.504 | <b>614.820</b>  | P[11] |
| A  | 12 | <b>566.755</b>  | 574.807         | <b>566.798</b>  | 0.504 | <b>566.294</b>  | A[10] |
| P  | 13 | <b>615.282</b>  | 539.289         | <b>531.279</b>  | 0.504 | <b>530.776</b>  | P[9]  |
| A  | 14 | <b>650.800</b>  | 490.762         | 482.753         | 0.504 | 482.249         | A[8]  |
| E  | 15 | <b>715.322</b>  | 455.244         | <b>447.235</b>  | 0.504 | <b>446.731</b>  | E[7]  |
| R  | 16 | <b>779.369</b>  | 390.723         | 382.713         | 0.504 | 382.209         | R[6]  |
| T  | 17 | 890.576         | 326.672         | 318.666         | 0.504 | 318.162         | T[5]  |
| P  | 18 | <b>918.402</b>  | 256.160         | 248.150         | 0.504 | 247.655         | P[4]  |
| V  | 19 | <b>967.937</b>  | 187.642         | 179.632         | 0.504 | 179.128         | V[3]  |
| K  | 20 | <b>1031.984</b> | 138.108         | 130.098         | 0.504 | 129.594         | K[2]  |
| K  | 21 | <b>1096.032</b> | 74.050          | 66.051          | 0.504 | 65.547          | K[1]  |

# sp | P43274 | H14\_MOUSE

SET<sup>Phospho</sup> APAAPAAPAPA EKT<sup>Phospho</sup> PVKK<sup>79.97</sup>

- ▶ fragmentation table for charge state 3+
- ▶ specType=etd
- ▶ score=68.08
- ▶ F105352.dat
- ▶ query=q9553\_p1
- ▶ precursor=548.763380
- ▶ chargePrecursor=4
- ▶ itol=0.8

| AA    | c              | y              | z+1            | z+2     | z              | AA    |
|-------|----------------|----------------|----------------|---------|----------------|-------|
| S[1]  | 35.693         | <b>731.352</b> | <b>726.012</b> | 0.672   | <b>725.676</b> | S[21] |
| E[2]  | 78.708         | 702.341        | 697.501        | 0.672   | 696.665        | E[20] |
| Y[3]  | 139.046        | 559.327        | <b>653.987</b> | 0.672   | <b>653.651</b> | Y[19] |
| A[4]  | 162.725        | 598.989        | 593.649        | 0.672   | 593.313        | A[18] |
| P[5]  | 195.076        | 575.310        | 569.970        | 0.672   | 569.634        | P[17] |
| A[6]  | 218.735        | 542.959        | 537.619        | 0.672   | 537.283        | A[16] |
| A[7]  | 242.434        | 519.280        | 513.940        | 0.672   | 513.604        | A[15] |
| P[8]  | 274.785        | 495.601        | 490.261        | 0.672   | 489.925        | P[14] |
| A[9]  | 298.464        | 463.250        | 457.910        | 0.672   | 457.574        | A[13] |
| A[10] | 322.143        | 439.371        | 434.231        | 0.672   | 433.895        | A[12] |
| P[11] | 354.494        | 415.392        | 410.352        | 0.672   | 410.216        | P[11] |
| A[12] | 378.173        | 383.541        | 378.201        | 0.672   | 377.865        | A[10] |
| P[13] | 410.524        | <b>359.862</b> | 354.522        | 0.672   | 354.186        | P[9]  |
| A[14] | 434.203        | 327.511        | 322.171        | 0.672   | 321.835        | A[8]  |
| E[15] | 477.217        | 303.832        | 298.492        | 0.672   | 298.156        | E[7]  |
| K[16] | 519.915        | 280.817        | 275.478        | 295.814 | 295.142        | K[6]  |
| T[17] | 580.253        | 218.119        | 212.780        | 213.116 | 212.444        | T[5]  |
| P[18] | 612.604        | 157.781        | 152.442        | 152.778 | 152.105        | P[4]  |
| V[19] | <b>645.627</b> | 125.430        | 120.091        | 120.427 | 119.755        | V[3]  |
| K[20] | <b>688.325</b> | 36.407         | 37.068         | 37.404  | 36.732         | K[2]  |
| K[21] | <b>731.024</b> | 49.709         | 44.370         | 44.705  | 44.034         | K[1]  |





# sp | P43274 | H14\_MOUSE

S<sup>(Phospho)</sup> ETAPAAPAAPAPAEKT<sup>Phospho</sup> PVKK<sub>79.97</sub>

- ▶ fragmentation table for charge state 1+
- ▶ specType=etd
- ▶ score=41.66
- ▶ F105352.dat
- ▶ query=q9554.p1
- ▶ precursor=548.763500
- ▶ chargePrecursor=4
- ▶ itol=0.8

| AA | c  | y               | z+1             | z+2             | z       | AA              |       |
|----|----|-----------------|-----------------|-----------------|---------|-----------------|-------|
| S  | 1  | 185.032         | 2192.040        | 2176.021        | 0.000   | 2175.011        | S[21] |
| E  | 2  | 314.075         | 2025.042        | 2009.023        | 0.000   | 2008.015        | E[20] |
| T  | 3  | 415.122         | 1895.999        | 1879.980        | 0.000   | 1878.972        | T[19] |
| A  | 4  | 489.169         | 1794.951        | 1778.933        | 0.000   | 1777.925        | A[18] |
| P  | 5  | 583.212         | 1723.914        | 1707.896        | 0.000   | 1706.888        | P[17] |
| A  | 6  | <b>654.249</b>  | 1626.861        | <b>1610.843</b> | 0.000   | 1609.835        | A[16] |
| A  | 7  | <b>725.287</b>  | 1559.824        | 1539.806        | 0.000   | 1538.798        | A[15] |
| P  | 8  | <b>822.339</b>  | 1484.787        | 1468.769        | 0.000   | 1467.761        | P[14] |
| A  | 9  | <b>893.376</b>  | 1387.734        | 1371.716        | 0.000   | <b>1370.708</b> | A[13] |
| A  | 10 | <b>964.414</b>  | 1316.697        | <b>1300.679</b> | 0.000   | 1299.671        | A[12] |
| P  | 11 | <b>1061.466</b> | 1245.660        | 1229.642        | 0.000   | 1228.634        | P[11] |
| A  | 12 | <b>1132.503</b> | 1148.608        | <b>1132.589</b> | 0.000   | 1131.581        | A[10] |
| P  | 13 | 1229.556        | <b>1077.570</b> | <b>1061.552</b> | 0.000   | <b>1060.544</b> | P[9]  |
| A  | 14 | <b>1300.593</b> | 980.510         | <b>964.499</b>  | 0.000   | 963.491         | A[8]  |
| E  | 15 | 1429.636        | <b>909.481</b>  | <b>893.462</b>  | 0.000   | 892.454         | E[7]  |
| R  | 16 | 1557.731        | 780.438         | <b>764.419</b>  | 785.427 | <b>763.411</b>  | R[6]  |
| T  | 17 | 1738.748        | 652.341         | <b>636.324</b>  | 637.312 | 636.305         | T[5]  |
| P  | 18 | 1835.798        | 471.320         | 465.303         | 456.318 | 454.302         | P[4]  |
| V  | 19 | <b>1934.866</b> | 374.270         | 368.257         | 359.265 | 357.250         | V[3]  |
| R  | 20 | 2062.901        | 275.208         | <b>259.189</b>  | 260.197 | 258.181         | R[2]  |
| R  | 21 | 2191.056        | 147.113         | 131.094         | 132.102 | 130.086         | R[1]  |

# sp | P43274 | H14\_MOUSE

S<sup>(Phospho)</sup> (79.97) ETAPAAPAAPAPAEKT<sup>Phospho</sup> PVKK (79.97)

- ▶ fragmentation table for charge state 2+
- ▶ specType=etd
- ▶ score=41.66
- ▶ F105352.dat
- ▶ query=q9554.p1
- ▶ precursor=548.763500
- ▶ chargePrecursor=4
- ▶ itol=0.8

| AA    | c               | y               | z+1             | z+2     | z               | AA    |
|-------|-----------------|-----------------|-----------------|---------|-----------------|-------|
| S[1]  | 93.020          | <b>1096.524</b> | <b>1088.514</b> | 0.504   | <b>1088.010</b> | S[2]  |
| E[2]  | 157.541         | 1013.024        | 1005.015        | 0.504   | 1004.511        | E[20] |
| T[3]  | 208.065         | 948.503         | 940.494         | 0.504   | 939.990         | T[19] |
| A[4]  | 243.583         | 897.979         | 889.970         | 0.504   | 889.466         | A[18] |
| P[5]  | 292.110         | 862.461         | 854.451         | 0.504   | 853.947         | P[17] |
| A[6]  | 327.628         | <b>813.934</b>  | 805.925         | 0.504   | 805.421         | A[16] |
| A[7]  | 363.147         | 778.410         | <b>770.406</b>  | 0.504   | <b>769.903</b>  | A[15] |
| P[8]  | 411.673         | 742.897         | 734.888         | 0.504   | 734.384         | P[14] |
| A[9]  | 447.192         | 694.371         | <b>686.362</b>  | 0.504   | <b>685.859</b>  | A[13] |
| A[10] | 482.710         | 658.852         | <b>650.843</b>  | 0.504   | <b>650.339</b>  | A[12] |
| P[11] | <b>531.237</b>  | 623.334         | <b>615.324</b>  | 0.504   | <b>614.820</b>  | P[11] |
| A[12] | <b>566.755</b>  | 574.807         | <b>566.798</b>  | 0.504   | <b>566.294</b>  | A[10] |
| P[13] | <b>615.282</b>  | 539.289         | <b>531.279</b>  | 0.504   | <b>530.776</b>  | P[9]  |
| A[14] | <b>650.800</b>  | 490.762         | 482.753         | 0.504   | 482.249         | A[8]  |
| E[15] | <b>715.322</b>  | 455.244         | 447.235         | 0.504   | 446.731         | E[7]  |
| K[16] | <b>779.369</b>  | 396.723         | 382.713         | 383.217 | 382.206         | K[6]  |
| T[17] | 869.876         | 329.673         | 318.666         | 319.170 | 318.163         | T[5]  |
| P[18] | 918.402         | 239.150         | 228.159         | 228.663 | 227.655         | P[4]  |
| V[19] | <b>967.937</b>  | 187.642         | 179.632         | 180.136 | 179.128         | V[3]  |
| K[20] | <b>1031.984</b> | 138.108         | 130.098         | 130.602 | 129.594         | K[2]  |
| R[21] | <b>1096.032</b> | 74.000          | 66.051          | 66.555  | 65.547          | R[1]  |

# sp | P43274 | H14\_MOUSE

S<sup>(Phospho)</sup> (79.97) ETAPAAPAAPAPAEKT<sup>Phospho</sup> (79.97) PVKK

- ▶ fragmentation table for charge state 3+
- ▶ specType=etd
- ▶ score=41.66
- ▶ F105352.dat
- ▶ query=q9554\_p1
- ▶ precursor=548.763500
- ▶ chargePrecursor=4
- ▶ itol=0.8

| AA    | c              | y              | z+1            | z+2     | z              | AA    |
|-------|----------------|----------------|----------------|---------|----------------|-------|
| S[1]  | 62.349         | <b>731.352</b> | <b>726.012</b> | 0.672   | <b>725.676</b> | S[21] |
| E[2]  | 105.363        | <b>675.685</b> | 670.306        | 0.672   | 670.010        | E[20] |
| T[3]  | 139.046        | 632.677        | 627.332        | 0.672   | 626.995        | T[19] |
| A[4]  | 162.725        | 598.089        | 593.649        | 0.672   | 593.113        | A[18] |
| P[5]  | 195.076        | 575.310        | 569.970        | 0.672   | 569.634        | P[17] |
| A[6]  | 218.735        | 542.959        | 537.619        | 0.672   | 537.283        | A[16] |
| A[7]  | 242.434        | 519.280        | 513.940        | 0.672   | 513.604        | A[15] |
| P[8]  | 274.785        | 495.601        | 490.261        | 0.672   | 489.925        | P[14] |
| A[9]  | 298.464        | 463.250        | 457.910        | 0.672   | 457.574        | A[13] |
| A[10] | 322.143        | 439.571        | 434.231        | 0.672   | 433.895        | A[12] |
| P[11] | 354.494        | 415.892        | 410.552        | 0.672   | 410.216        | P[11] |
| A[12] | 378.173        | 393.541        | 378.201        | 0.672   | <b>377.865</b> | A[10] |
| P[13] | 410.524        | 359.862        | 354.522        | 0.672   | 354.186        | P[9]  |
| A[14] | 434.203        | 327.511        | 322.171        | 0.672   | 321.835        | A[8]  |
| E[15] | 477.217        | 303.832        | 298.492        | 0.672   | 298.156        | E[7]  |
| K[16] | 519.915        | 260.817        | 255.478        | 255.814 | 255.142        | K[6]  |
| T[17] | 580.293        | 218.119        | 212.780        | 213.116 | 212.444        | T[5]  |
| P[18] | 612.604        | 157.781        | 152.442        | 152.778 | 152.106        | P[4]  |
| V[19] | 645.627        | 125.430        | 120.091        | 120.427 | 119.755        | V[3]  |
| K[20] | 688.325        | 92.407         | 87.068         | 87.404  | 86.732         | K[2]  |
| K[21] | <b>731.624</b> | 49.700         | 44.370         | 44.705  | 44.034         | K[1]  |



# sp | P43274 | H14\_MOUSE

SET <sup>Phospho</sup> APAAPAAPAPAEKT <sup>Phospho</sup> PVKK <sub>79.97</sub> <sub>79.97</sub>

- ▶ fragmentation table for charge state 1+
- ▶ specType=etd
- ▶ score=49.04
- ▶ F105352.dat
- ▶ query=q9555\_p1
- ▶ precursor=548.763940
- ▶ chargePrecursor=4
- ▶ itol=0.8

| AA    | c               | y              | z+1             | z+2     | z               | AA    |
|-------|-----------------|----------------|-----------------|---------|-----------------|-------|
| S[1]  | 105.066         | 2192.040       | 2178.021        | 0.000   | 2175.013        | S[21] |
| E[2]  | 234.108         | 2105.008       | 2088.989        | 0.000   | 2087.981        | E[20] |
| T[3]  | 413.222         | 1975.965       | 1959.947        | 0.000   | 1958.939        | T[19] |
| A[4]  | 486.160         | 1794.951       | 1778.933        | 0.000   | 1777.925        | A[18] |
| P[5]  | <b>583.212</b>  | 1723.914       | 1707.896        | 0.000   | 1706.888        | P[17] |
| A[6]  | <b>654.249</b>  | 1626.861       | 1610.843        | 0.000   | 1609.835        | A[16] |
| A[7]  | <b>725.287</b>  | 1555.824       | <b>1539.806</b> | 0.000   | <b>1538.798</b> | A[15] |
| P[8]  | <b>822.339</b>  | 1484.787       | 1468.769        | 0.000   | 1467.761        | P[14] |
| A[9]  | <b>893.376</b>  | 1387.734       | 1371.716        | 0.000   | 1370.708        | A[13] |
| A[10] | 964.414         | 1316.697       | <b>1300.679</b> | 0.000   | <b>1299.671</b> | A[12] |
| P[11] | <b>1061.466</b> | 1245.660       | 1229.642        | 0.000   | 1228.634        | P[11] |
| A[12] | <b>1132.503</b> | 1148.608       | <b>1132.589</b> | 0.000   | 1131.581        | A[10] |
| P[13] | 1229.556        | 1077.570       | <b>1061.552</b> | 0.000   | 1060.544        | P[9]  |
| A[14] | <b>1300.593</b> | 980.518        | 964.499         | 0.000   | 963.491         | A[8]  |
| E[15] | <b>1429.636</b> | <b>909.481</b> | <b>893.462</b>  | 0.000   | 892.454         | E[7]  |
| K[16] | 1557.731        | <b>780.438</b> | <b>764.419</b>  | 785.427 | 763.411         | K[6]  |
| T[17] | 1738.748        | 652.341        | <b>636.324</b>  | 637.312 | 636.314         | T[5]  |
| P[18] | 1835.798        | 571.325        | 555.307         | 456.318 | 454.302         | P[4]  |
| V[19] | 1934.866        | 374.276        | 358.257         | 359.265 | 357.250         | V[3]  |
| K[20] | 2062.961        | <b>275.208</b> | <b>259.189</b>  | 260.197 | 258.181         | K[2]  |
| K[21] | 2191.056        | 147.113        | 131.094         | 132.102 | 130.086         | K[1]  |

# sp | P43274 | H14\_MOUSE

SET <sup>Phospho</sup> 79.97 APAAPAAPAPAEKT <sup>Phospho</sup> 79.97 PVKK

- ▶ fragmentation table for charge state 2+
- ▶ specType=etd
- ▶ score=49.04
- ▶ F105352.dat
- ▶ query=q9555.p1
- ▶ precursor=548.763940
- ▶ chargePrecursor=4
- ▶ itol=0.8

| AA |    | c               | y               | z+1             | z+2   | z               | AA    |
|----|----|-----------------|-----------------|-----------------|-------|-----------------|-------|
| S  | 1  | 53.037          | <b>1096.524</b> | <b>1088.514</b> | 0.504 | <b>1088.010</b> | S[2]  |
| E  | 2  | 117.558         | <b>1053.008</b> | 1044.998        | 0.504 | 1044.494        | E[20] |
| T  | 3  | 204.005         | 985.485         | 980.477         | 0.504 | 979.973         | T[19] |
| A  | 4  | 243.583         | 897.971         | 893.970         | 0.504 | 889.466         | A[18] |
| P  | 5  | 292.130         | 862.461         | 854.451         | 0.504 | 853.947         | P[17] |
| A  | 6  | 327.628         | <b>813.934</b>  | <b>805.925</b>  | 0.504 | <b>805.421</b>  | A[16] |
| A  | 7  | 363.147         | 778.410         | <b>770.406</b>  | 0.504 | <b>769.903</b>  | A[15] |
| P  | 8  | 411.673         | 742.897         | 734.888         | 0.504 | 734.384         | P[14] |
| A  | 9  | 447.192         | <b>694.371</b>  | <b>686.362</b>  | 0.504 | <b>685.858</b>  | A[13] |
| A  | 10 | 492.710         | 658.857         | <b>650.843</b>  | 0.504 | <b>650.339</b>  | A[12] |
| P  | 11 | <b>531.237</b>  | 623.333         | <b>615.324</b>  | 0.504 | <b>614.820</b>  | P[11] |
| A  | 12 | <b>566.755</b>  | 574.807         | <b>566.798</b>  | 0.504 | <b>566.294</b>  | A[10] |
| P  | 13 | <b>615.282</b>  | 539.289         | <b>531.279</b>  | 0.504 | <b>530.776</b>  | P[9]  |
| A  | 14 | <b>650.800</b>  | 499.762         | 482.753         | 0.504 | 482.249         | A[8]  |
| E  | 15 | <b>715.322</b>  | 455.244         | 447.235         | 0.504 | 446.731         | E[7]  |
| R  | 16 | <b>779.369</b>  | 399.723         | 382.713         | 0.504 | 382.209         | R[6]  |
| T  | 17 | 809.576         | 326.672         | 318.666         | 0.504 | 318.162         | T[5]  |
| P  | 18 | 918.402         | 236.150         | 228.139         | 0.504 | 227.635         | P[4]  |
| V  | 19 | <b>967.937</b>  | 187.642         | 179.632         | 0.504 | 179.128         | V[3]  |
| K  | 20 | <b>1031.984</b> | 138.108         | 130.098         | 0.504 | 129.594         | K[2]  |
| K  | 21 | 1096.032        | 74.050          | 66.051          | 0.504 | 65.547          | K[1]  |

# sp | P43274 | H14\_MOUSE

SET<sup>Phospho</sup> APAAPAAPAPA EKT<sup>Phospho</sup> PVKK<sup>79.97</sup>

- ▶ fragmentation table for charge state 3+
- ▶ specType=etd
- ▶ score=49.04
- ▶ F105352.dat
- ▶ query=q9555\_p1
- ▶ precursor=548.763940
- ▶ chargePrecursor=4
- ▶ itol=0.8

| AA    | c              | y              | z+1            | z+2     | z              | AA    |
|-------|----------------|----------------|----------------|---------|----------------|-------|
| S[1]  | 35.693         | <b>731.352</b> | <b>726.012</b> | 0.672   | <b>725.676</b> | S[21] |
| E[2]  | 78.708         | 702.341        | 697.001        | 0.672   | 696.665        | E[20] |
| Y[3]  | 139.046        | 659.327        | <b>653.987</b> | 0.672   | <b>653.651</b> | Y[19] |
| A[4]  | 162.725        | 598.989        | 593.649        | 0.672   | 593.313        | A[18] |
| P[5]  | 195.076        | 575.310        | 569.970        | 0.672   | 569.634        | P[17] |
| A[6]  | 218.735        | 542.959        | 537.619        | 0.672   | 537.283        | A[16] |
| A[7]  | 242.434        | 519.280        | 513.940        | 0.672   | 513.604        | A[15] |
| P[8]  | <b>274.785</b> | 495.601        | 490.261        | 0.672   | 489.925        | P[14] |
| A[9]  | 298.464        | 463.250        | 457.910        | 0.672   | 457.574        | A[13] |
| A[10] | 322.143        | 439.371        | 434.231        | 0.672   | 433.895        | A[12] |
| P[11] | 354.494        | 415.392        | 410.352        | 0.672   | 410.216        | P[11] |
| A[12] | 378.173        | 383.541        | 378.201        | 0.672   | <b>377.865</b> | A[10] |
| P[13] | 410.524        | <b>359.862</b> | 354.522        | 0.672   | 354.186        | P[9]  |
| A[14] | 434.203        | 327.511        | 322.171        | 0.672   | 321.835        | A[8]  |
| E[15] | 477.217        | 303.832        | 298.492        | 0.672   | 298.156        | E[7]  |
| K[16] | 519.915        | 280.817        | 275.478        | 295.814 | 295.142        | K[6]  |
| T[17] | 580.253        | 218.119        | 212.780        | 213.116 | 212.444        | T[5]  |
| P[18] | 612.604        | 157.781        | 152.442        | 152.778 | 152.105        | P[4]  |
| V[19] | 645.627        | 125.430        | 120.091        | 120.427 | 119.755        | V[3]  |
| K[20] | <b>688.325</b> | 36.407         | 37.068         | 37.404  | 36.732         | K[2]  |
| K[21] | <b>731.024</b> | 49.709         | 44.370         | 44.705  | 44.034         | K[1]  |



# sp | P15864 | H12\_MOUSE

KAS Phospho 79.97 GPPVSELITKAVAASKER

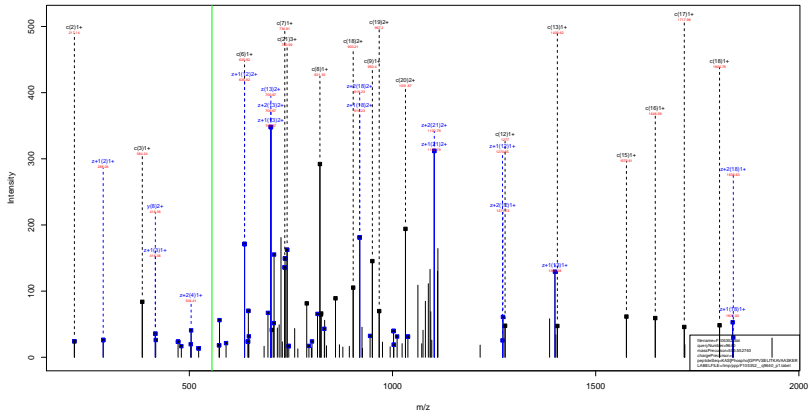

# sp | P15864 | H12\_MOUSE

KAS <sup>Phospho</sup> 79.97 GPPVSELITKAVAASKER

- ▶ fragmentation table for charge state 1+
- ▶ specType=etd
- ▶ score=87.40
- ▶ F105352.dat
- ▶ query=q9640\_p1
- ▶ precursor=555.552740
- ▶ chargePrecursor=4
- ▶ itol=0.8

| AA | c  | y               | z+1            | z+2             | z               | AA             |       |
|----|----|-----------------|----------------|-----------------|-----------------|----------------|-------|
| K  | 1  | 166.129         | 2219.180       | 2201.161        | 2204.169        | 2202.153       | K[21] |
| A  | 2  | <b>217.166</b>  | 2061.085       | 2075.066        | 2076.074        | 2074.058       | A[20] |
| S  | 3  | <b>384.164</b>  | 2030.047       | 2094.032        | 2035.037        | 2043.021       | S[19] |
| G  | 4  | 443.136         | 1853.040       | <b>1837.030</b> | <b>1838.038</b> | 1836.021       | G[18] |
| F  | 5  | 538.238         | 1796.025       | 1780.009        | 1781.017        | 1779.001       | F[17] |
| P  | 6  | <b>635.291</b>  | 1698.075       | 1682.056        | 1683.064        | 1681.048       | P[16] |
| V  | 7  | <b>734.360</b>  | 1601.022       | 1585.003        | 1586.011        | 1584.006       | V[15] |
| S  | 8  | <b>821.392</b>  | 1502.854       | 1486.835        | 1487.843        | 1485.827       | S[14] |
| E  | 9  | <b>950.434</b>  | 1415.622       | <b>1395.603</b> | 1400.611        | 1398.595       | E[13] |
| L  | 10 | 1063.318        | 1308.778       | <b>1270.760</b> | <b>1271.768</b> | 1269.751       | L[12] |
| I  | 11 | 1176.602        | 1173.695       | 1157.676        | 1158.684        | 1156.668       | I[11] |
| T  | 12 | <b>1277.650</b> | 1060.611       | 1044.592        | 1045.600        | 1043.584       | T[10] |
| K  | 13 | <b>1405.745</b> | 959.563        | 943.545         | <b>944.552</b>  | 942.537        | K[9]  |
| A  | 14 | 1476.782        | <b>831.468</b> | <b>815.450</b>  | 816.457         | 814.442        | A[8]  |
| V  | 15 | <b>1575.851</b> | 760.431        | <b>744.412</b>  | <b>745.420</b>  | 743.405        | V[7]  |
| A  | 16 | <b>1648.888</b> | 681.383        | 643.344         | <b>646.352</b>  | <b>644.338</b> | A[6]  |
| A  | 17 | <b>1717.925</b> | <b>590.326</b> | <b>574.307</b>  | 575.315         | <b>573.299</b> | A[5]  |
| S  | 18 | <b>1804.957</b> | 519.289        | <b>503.270</b>  | <b>504.278</b>  | 502.262        | S[4]  |
| K  | 19 | 1983.052        | 432.257        | <b>416.238</b>  | <b>417.246</b>  | 415.230        | K[3]  |
| E  | 20 | 2062.094        | 304.162        | <b>288.143</b>  | 289.151         | 287.135        | E[2]  |
| R  | 21 | 2218.196        | 175.119        | 159.100         | 160.108         | 158.092        | R[1]  |

# sp | P15864 | H12\_MOUSE

KAS <sup>Phospho</sup> 79.97 GPPVSELITKAVAASKER

- ▶ fragmentation table for charge state 2+
- ▶ specType=etd
- ▶ score=87.40
- ▶ F105352.dat
- ▶ query=q9640\_p1
- ▶ precursor=555.552740
- ▶ chargePrecursor=4
- ▶ itol=0.8

| AA    | c               | y               | z+1             | z+2             | z               | AA    |
|-------|-----------------|-----------------|-----------------|-----------------|-----------------|-------|
| K[1]  | 79.568          | 1110.001        | <b>1102.084</b> | <b>1102.588</b> | 1101.580        | R[21] |
| A[2]  | 109.007         | 1046.046        | <b>1038.037</b> | <b>1038.540</b> | <b>1037.533</b> | A[20] |
| S[3]  | 192.596         | <b>1010.527</b> | <b>1002.518</b> | <b>1003.022</b> | <b>1002.014</b> | S[19] |
| G[4]  | 221.097         | 927.048         | <b>918.019</b>  | <b>919.523</b>  | <b>918.515</b>  | G[18] |
| F[5]  | 259.623         | 868.517         | 869.508         | 871.013         | 869.505         | F[17] |
| P[6]  | 318.140         | 849.091         | 841.952         | 842.486         | 841.478         | P[16] |
| V[7]  | 387.683         | <b>801.465</b>  | 793.455         | <b>793.959</b>  | 792.951         | V[15] |
| S[8]  | 411.199         | 751.030         | 743.931         | <b>744.425</b>  | 743.417         | S[14] |
| E[9]  | 475.724         | <b>708.414</b>  | <b>708.405</b>  | <b>708.509</b>  | <b>699.501</b>  | E[13] |
| L[10] | 532.263         | <b>643.893</b>  | <b>635.884</b>  | <b>636.388</b>  | <b>635.380</b>  | L[12] |
| I[11] | 588.805         | 559.321         | 579.542         | 579.046         | 578.538         | I[11] |
| T[12] | 639.329         | 530.809         | <b>522.800</b>  | <b>523.304</b>  | <b>522.296</b>  | T[10] |
| K[13] | <b>703.376</b>  | <b>480.285</b>  | <b>472.276</b>  | <b>472.780</b>  | <b>471.772</b>  | K[9]  |
| A[14] | 738.895         | <b>416.238</b>  | 408.228         | 408.732         | 407.725         | A[8]  |
| V[15] | <b>788.429</b>  | 380.719         | 372.710         | 373.214         | 372.206         | V[7]  |
| A[16] | <b>823.947</b>  | 331.385         | 323.376         | 323.880         | 322.872         | A[6]  |
| A[17] | <b>859.466</b>  | 295.666         | <b>287.657</b>  | <b>288.161</b>  | 287.153         | A[5]  |
| S[18] | <b>902.982</b>  | 260.148         | 252.139         | 252.642         | 251.635         | S[4]  |
| K[19] | <b>967.030</b>  | <b>216.632</b>  | 208.623         | 209.126         | 208.119         | K[3]  |
| E[20] | <b>1031.551</b> | 152.584         | 144.575         | 145.079         | 144.071         | E[2]  |
| R[21] | 1189.001        | 88.063          | 80.054          | 80.558          | 79.550          | R[1]  |

# sp | P15864 | H12\_MOUSE

KAS <sup>Phospho</sup> 79.97 GPPVSELITKAVAASKER

- ▶ fragmentation table for charge state 3+
- ▶ specType=etd
- ▶ score=87.40
- ▶ F105352.dat
- ▶ query=q9640\_p1
- ▶ precursor=555.552740
- ▶ chargePrecursor=4
- ▶ itol=0.8

| AA    | c              | y              | z+1            | z+2            | z              | AA    |
|-------|----------------|----------------|----------------|----------------|----------------|-------|
| K[1]  | 49.381         | <b>740.396</b> | <b>735.058</b> | <b>735.394</b> | <b>734.723</b> | K[21] |
| A[2]  | 73.050         | 657.726        | 652.387        | <b>692.696</b> | 692.024        | A[20] |
| S[3]  | 138.726        | 674.021        | 668.681        | 669.017        | 668.345        | S[19] |
| G[4]  | 147.733        | 618.355        | 613.015        | 613.351        | 612.679        | G[18] |
| P[5]  | 180.084        | 599.347        | 594.008        | 594.344        | 593.672        | P[17] |
| P[6]  | 212.435        | 566.996        | 561.657        | 561.993        | 561.321        | P[16] |
| V[7]  | 245.458        | 534.646        | 529.306        | 529.642        | 528.970        | V[15] |
| S[8]  | 274.469        | 501.623        | 496.283        | 496.619        | 495.947        | S[14] |
| E[9]  | 317.483        | <b>472.612</b> | 467.272        | 467.608        | 466.937        | E[13] |
| L[10] | 353.178        | 429.595        | 424.255        | 424.594        | 423.922        | L[12] |
| I[11] | 392.872        | 391.903        | 386.564        | 386.900        | 386.228        | I[11] |
| I[12] | 426.555        | 354.208        | 348.869        | 349.205        | 348.533        | I[10] |
| K[13] | 469.253        | 320.526        | 315.186        | 315.522        | 314.850        | K[9]  |
| A[14] | 492.932        | 277.828        | 272.488        | 272.824        | 272.152        | A[8]  |
| V[15] | 525.995        | 254.149        | 248.809        | 249.145        | 248.473        | V[7]  |
| A[16] | 549.634        | 221.126        | 215.786        | 216.122        | 215.450        | A[6]  |
| A[17] | <b>573.313</b> | 197.447        | 192.107        | 192.443        | 191.771        | A[5]  |
| S[18] | 602.324        | 173.768        | 168.428        | 168.764        | 168.092        | S[4]  |
| K[19] | <b>645.022</b> | 144.797        | 139.417        | 139.753        | 139.082        | K[3]  |
| L[20] | 698.024        | 102.099        | 96.719         | 97.056         | 96.383         | L[2]  |
| R[21] | <b>740.070</b> | 59.045         | 53.705         | 54.041         | 53.369         | R[1]  |



# sp | P43277 | H13\_MOUSE

S<sup>Phospho</sup> 79.97 ET<sup>Phospho</sup> 79.97 APAAPAAPVEKTPVKK

- ▶ fragmentation table for charge state 1+
- ▶ specType=etd
- ▶ score=29.78
- ▶ F105352.dat
- ▶ query=q9646\_p1
- ▶ precursor=740.694750
- ▶ chargePrecursor=3
- ▶ itol=0.8

| AA    | c               | y               | z+1             | z+2            | z        | AA    |
|-------|-----------------|-----------------|-----------------|----------------|----------|-------|
| S[1]  | 185.032         | 2220.071        | 2204.053        | 0.000          | 2203.045 | S[2]  |
| E[2]  | 314.075         | 2053.073        | 2037.054        | 0.000          | 2036.046 | E[3]  |
| T[3]  | 495.089         | 1924.030        | 1908.012        | 0.000          | 1907.005 | T[4]  |
| A[4]  | 596.126         | 1743.010        | 1726.998        | 0.000          | 1725.990 | A[5]  |
| P[5]  | 663.179         | 1671.979        | 1655.960        | 0.000          | 1654.953 | P[6]  |
| A[6]  | <b>734.216</b>  | 1574.920        | 1558.908        | 0.000          | 1557.900 | A[7]  |
| A[7]  | 805.253         | 1503.889        | <b>1487.871</b> | 0.000          | 1486.863 | A[8]  |
| P[8]  | 902.306         | 1432.852        | 1416.834        | 0.000          | 1415.826 | P[9]  |
| A[9]  | <b>973.343</b>  | 1335.799        | <b>1319.781</b> | 0.000          | 1318.773 | A[10] |
| A[10] | 1044.389        | 1264.762        | <b>1248.744</b> | 0.000          | 1247.736 | A[11] |
| P[11] | <b>1141.433</b> | 1193.725        | 1177.707        | 0.000          | 1176.699 | P[12] |
| A[12] | 1212.470        | <b>1096.672</b> | <b>1080.654</b> | 0.000          | 1079.646 | A[13] |
| P[13] | 1309.523        | 1025.635        | 1009.617        | 0.000          | 1008.609 | P[14] |
| V[14] | 1408.591        | 928.583         | 912.564         | 0.000          | 911.556  | V[15] |
| E[15] | 1537.634        | 828.514         | <b>813.495</b>  | 0.000          | 812.488  | E[16] |
| K[16] | 1665.728        | 709.472         | 694.453         | <b>685.461</b> | 683.443  | K[17] |
| T[17] | 1766.776        | 572.377         | <b>556.358</b>  | <b>557.366</b> | 555.350  | T[18] |
| P[18] | 1863.829        | 471.329         | 455.310         | 456.318        | 454.302  | P[19] |
| V[19] | <b>1962.897</b> | 374.276         | 358.257         | 359.265        | 357.250  | V[20] |
| K[20] | 2090.992        | 273.200         | 259.189         | 260.197        | 258.181  | K[21] |
| K[21] | 2219.087        | 147.113         | 131.094         | 132.102        | 130.086  | K[22] |

# sp | P43277 | H13\_MOUSE

S<sup>Phospho</sup> 79.97 ET<sup>Phospho</sup> 79.97 APAAPAAPAPVEKTPVKK

- ▶ fragmentation table for charge state 2+
- ▶ specType=etd
- ▶ score=29.78
- ▶ F105352.dat
- ▶ query=q9646.p1
- ▶ precursor=740.694750
- ▶ chargePrecursor=3
- ▶ itol=0.8

| AA    | c               | y               | z+1      | z+2     | z               | AA    |
|-------|-----------------|-----------------|----------|---------|-----------------|-------|
| S[1]  | 93.020          | <b>1110.539</b> | 1102.530 | 0.504   | <b>1102.026</b> | S[21] |
| E[2]  | 157.541         | 1027.040        | 1019.031 | 0.504   | 1018.527        | E[20] |
| T[3]  | 248.948         | 962.319         | 954.309  | 0.504   | 954.005         | T[19] |
| A[4]  | 283.507         | 872.017         | 864.002  | 0.504   | 863.490         | A[18] |
| P[5]  | 332.093         | 836.493         | 828.484  | 0.504   | 827.980         | P[17] |
| A[6]  | 367.612         | 787.967         | 779.958  | 0.504   | 779.454         | A[16] |
| A[7]  | 403.130         | 752.449         | 744.439  | 0.504   | 743.935         | A[15] |
| P[8]  | 451.656         | 716.930         | 708.920  | 0.504   | 708.416         | P[14] |
| A[9]  | 487.175         | 686.403         | 680.394  | 0.504   | 680.890         | A[13] |
| A[10] | 522.694         | 632.885         | 624.875  | 0.504   | 624.372         | A[12] |
| P[11] | 571.220         | 597.366         | 589.357  | 0.504   | 588.853         | P[11] |
| A[12] | 606.739         | 548.840         | 540.831  | 0.504   | 540.327         | A[10] |
| P[13] | 655.265         | 513.321         | 505.312  | 0.504   | 504.808         | P[9]  |
| V[14] | 704.799         | 464.795         | 456.786  | 0.504   | 456.282         | V[8]  |
| E[15] | 769.320         | 415.261         | 407.251  | 0.504   | 406.747         | E[7]  |
| K[16] | 833.268         | 360.739         | 342.730  | 343.234 | 342.226         | K[6]  |
| T[17] | <b>881.892</b>  | 286.692         | 278.683  | 279.187 | 278.175         | T[5]  |
| P[18] | <b>932.418</b>  | 236.158         | 228.159  | 228.663 | 227.655         | P[4]  |
| V[19] | <b>981.952</b>  | 187.642         | 179.632  | 180.136 | 179.128         | V[3]  |
| K[20] | <b>1046.000</b> | 138.108         | 130.098  | 130.602 | 129.594         | K[2]  |
| K[21] | <b>1110.047</b> | 74.000          | 66.051   | 66.555  | 65.541          | K[1]  |

# sp | P43276 | H15\_MOUSE

SET (Phospho) APAETAAPAPVEKS Phospho PAKK  
 (79.97) 79.97

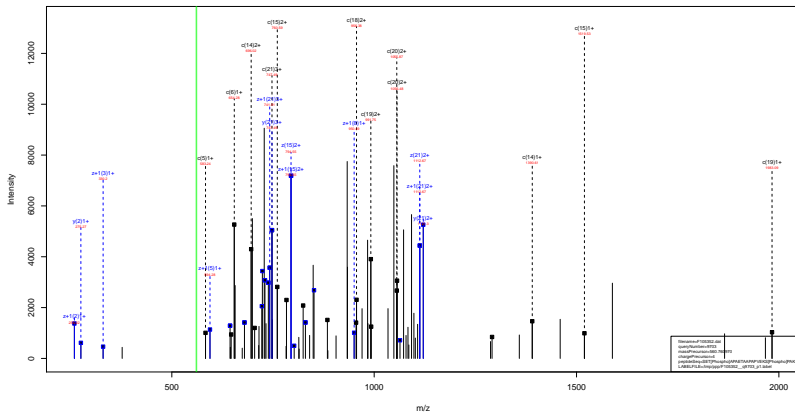

Database: P43276\_H15\_MOUSE  
 Search: Phospho  
 Change: Phospho  
 Label: Phospho  
 Label: Phospho



# sp | P43276 | H15\_MOUSE

SET (Phospho) APAETAAPAPVEKS (79.97) Phospho PAKK 79.97

- ▶ fragmentation table for charge state 1+
- ▶ specType=etd
- ▶ score=50.81
- ▶ F105352.dat
- ▶ query=q9703\_p1
- ▶ precursor=560.760970
- ▶ chargePrecursor=4
- ▶ itol=0.8

| AA | c  | y               | z+1             | z+2            | z              | AA       |   |    |
|----|----|-----------------|-----------------|----------------|----------------|----------|---|----|
| S  | 1  | 105.066         | 2240.025        | 2224.006       | 0.000          | 2222.998 | S | 21 |
| E  | 2  | 234.108         | 2152.993        | 2136.974       | 0.000          | 2135.966 | E | 20 |
| T  | 3  | 415.122         | 2023.950        | 2007.931       | 0.000          | 2006.923 | T | 19 |
| A  | 4  | 499.160         | 1842.938        | 1826.917       | 0.000          | 1825.910 | A | 18 |
| P  | 5  | <b>583.212</b>  | 1771.899        | 1755.880       | 0.000          | 1754.872 | P | 17 |
| A  | 6  | <b>654.249</b>  | 1674.846        | 1658.828       | 0.000          | 1657.820 | A | 16 |
| E  | 7  | <b>783.292</b>  | 1603.809        | 1587.790       | 0.000          | 1586.783 | E | 15 |
| T  | 8  | <b>884.340</b>  | 1474.767        | 1458.748       | 0.000          | 1457.740 | T | 14 |
| A  | 9  | <b>955.377</b>  | 1373.719        | 1357.700       | 0.000          | 1356.692 | A | 13 |
| A  | 10 | 1026.414        | 1302.682        | 1286.663       | 0.000          | 1285.655 | A | 12 |
| P  | 11 | 1123.467        | 1231.645        | 1215.626       | 0.000          | 1214.618 | P | 11 |
| A  | 12 | 1194.504        | 1134.592        | 1118.573       | 0.000          | 1117.565 | A | 10 |
| P  | 13 | <b>1291.557</b> | <b>1063.555</b> | 1047.536       | 0.000          | 1046.528 | P | 9  |
| V  | 14 | <b>1390.625</b> | 966.502         | <b>950.483</b> | 0.000          | 949.475  | V | 8  |
| E  | 15 | <b>1519.668</b> | 867.434         | <b>851.415</b> | 0.000          | 850.407  | E | 7  |
| K  | 16 | 1647.763        | <b>738.391</b>  | <b>722.372</b> | <b>723.380</b> | 721.364  | K | 6  |
| S  | 17 | 1814.781        | 610.288         | <b>594.277</b> | 595.285        | 593.269  | S | 5  |
| P  | 18 | 1911.814        | 443.288         | 427.279        | 428.287        | 426.271  | P | 4  |
| A  | 19 | <b>1982.851</b> | 346.245         | <b>330.226</b> | 331.234        | 329.218  | A | 3  |
| K  | 20 | 2110.946        | <b>275.208</b>  | <b>259.189</b> | 260.197        | 258.181  | K | 2  |
| K  | 21 | 2239.041        | 147.113         | 131.094        | 132.102        | 130.086  | K | 1  |

# sp | P43276 | H15\_MOUSE

SET (Phospho) APAETAAPAPVEKS (79.97) Phospho PAKK 79.97

- ▶ fragmentation table for charge state 2+
- ▶ specType=etd
- ▶ score=50.81
- ▶ F105352.dat
- ▶ query=q9703\_p1
- ▶ precursor=560.760970
- ▶ chargePrecursor=4
- ▶ itol=0.8

| AA |    | c               | y               | z+1             | z+2     | z               | AA    |
|----|----|-----------------|-----------------|-----------------|---------|-----------------|-------|
| S  | 1  | 53.037          | <b>1120.516</b> | <b>1112.507</b> | 0.504   | <b>1112.003</b> | S[2]  |
| E  | 2  | 117.558         | 1077.000        | 1068.991        | 0.504   | 1068.487        | E[20] |
| T  | 3  | 208.065         | 1012.470        | 1004.460        | 0.504   | 1003.955        | T[19] |
| A  | 4  | 243.583         | 922.972         | 913.962         | 0.504   | 913.457         | A[18] |
| P  | 5  | 292.110         | 886.451         | 878.444         | 0.504   | 877.940         | P[17] |
| A  | 6  | 327.628         | 837.927         | <b>829.917</b>  | 0.504   | <b>829.413</b>  | A[16] |
| E  | 7  | 392.150         | <b>802.408</b>  | <b>794.399</b>  | 0.504   | <b>793.895</b>  | E[15] |
| T  | 8  | 442.673         | <b>737.887</b>  | <b>729.878</b>  | 0.504   | <b>729.374</b>  | T[14] |
| A  | 9  | 478.192         | 687.363         | <b>679.354</b>  | 0.504   | <b>678.850</b>  | A[13] |
| A  | 10 | 513.711         | 651.842         | <b>643.835</b>  | 0.504   | <b>643.331</b>  | A[12] |
| P  | 11 | 562.237         | 616.320         | 608.313         | 0.504   | 607.809         | P[11] |
| A  | 12 | 597.756         | 567.800         | 559.790         | 0.504   | 559.286         | A[10] |
| P  | 13 | <b>646.282</b>  | 532.281         | 524.272         | 0.504   | 523.768         | P[9]  |
| V  | 14 | <b>695.816</b>  | 483.755         | 475.745         | 0.504   | 475.241         | V[8]  |
| E  | 15 | <b>760.337</b>  | 434.220         | 426.211         | 0.504   | 425.707         | E[7]  |
| K  | 16 | <b>824.385</b>  | 389.690         | 381.680         | 382.174 | 381.166         | K[6]  |
| S  | 17 | 897.904         | 359.652         | 351.642         | 352.136 | 351.130         | S[5]  |
| P  | 18 | <b>956.410</b>  | 222.152         | 214.143         | 214.637 | 213.630         | P[4]  |
| A  | 19 | <b>991.929</b>  | 173.620         | 165.611         | 166.121 | 165.113         | A[3]  |
| K  | 20 | <b>1055.977</b> | 138.108         | 130.098         | 130.602 | 129.594         | K[2]  |
| R  | 21 | 1120.024        | 74.000          | 66.051          | 66.555  | 65.547          | R[1]  |

# sp | P43276 | H15\_MOUSE

SET (Phospho) APAETAAPAPVEKS (79.97) Phospho PAKK 79.97

- ▶ fragmentation table for charge state 3+
- ▶ specType=etd
- ▶ score=50.81
- ▶ F105352.dat
- ▶ query=q9703\_p1
- ▶ precursor=560.760970
- ▶ chargePrecursor=4
- ▶ itol=0.8

| AA    | c              | y              | z+1            | z+2     | z              | AA    |
|-------|----------------|----------------|----------------|---------|----------------|-------|
| S[1]  | 35.693         | <b>747.346</b> | <b>742.007</b> | 0.672   | <b>741.671</b> | S[21] |
| E[2]  | 78.708         | 718.339        | 712.998        | 0.672   | 712.660        | E[20] |
| T[3]  | 139.046        | 675.322        | 669.982        | 0.672   | 669.645        | T[19] |
| A[4]  | 162.725        | 614.984        | 609.644        | 0.672   | 609.308        | A[18] |
| P[5]  | 195.076        | 591.305        | 585.965        | 0.672   | 585.629        | P[17] |
| A[6]  | 218.735        | 558.954        | 553.614        | 0.672   | 553.278        | A[16] |
| E[7]  | 261.769        | 535.275        | 529.935        | 0.672   | 529.599        | E[15] |
| T[8]  | 295.451        | 492.260        | 486.921        | 0.672   | 486.585        | T[14] |
| A[9]  | 319.130        | 458.578        | 453.238        | 0.672   | 452.902        | A[13] |
| A[10] | 342.810        | 434.899        | 429.559        | 0.672   | 429.223        | A[12] |
| P[11] | 375.160        | 411.220        | 405.880        | 0.672   | 405.544        | P[11] |
| A[12] | 398.839        | 378.869        | 373.529        | 0.672   | 373.193        | A[10] |
| P[13] | 431.190        | 355.190        | 349.850        | 0.672   | 349.514        | P[9]  |
| V[14] | 454.213        | 322.839        | 317.499        | 0.672   | 317.163        | V[8]  |
| E[15] | 507.227        | 289.816        | 284.476        | 0.672   | 284.141        | E[7]  |
| K[16] | 549.926        | 246.802        | 241.462        | 241.798 | 241.126        | K[6]  |
| S[17] | 605.592        | 204.104        | 198.764        | 199.100 | 198.428        | S[5]  |
| P[18] | 637.943        | 148.437        | 143.098        | 143.434 | 142.762        | P[4]  |
| A[19] | 661.622        | 116.086        | 110.747        | 111.083 | 110.411        | A[3]  |
| K[20] | <b>704.320</b> | 92.407         | 87.068         | 87.404  | 86.732         | K[2]  |
| K[21] | <b>747.018</b> | 49.709         | 44.370         | 44.705  | 44.034         | K[1]  |



# sp|P43275|H11\_MOUSE

S<sup>Phospho</sup> 79.97 ET<sup>Phospho</sup> 79.97 APVAQAASTATEKPAAAKK

- ▶ fragmentation table for charge state 1+
- ▶ specType=etd
- ▶ score=76.50
- ▶ F105352.dat
- ▶ query=q9808\_p1
- ▶ precursor=572.768660
- ▶ chargePrecursor=4
- ▶ itol=0.8

| AA    | c               | y               | z+1             | z+2             | z              | AA    |
|-------|-----------------|-----------------|-----------------|-----------------|----------------|-------|
| S[1]  | 185.032         | 2288.057        | 2272.038        | 0.000           | 2271.011       | S[2]  |
| E[2]  | 314.078         | 2121.059        | 2105.040        | 0.000           | 2104.012       | E[3]  |
| T[3]  | 495.089         | 1992.010        | 1975.997        | 0.000           | 1974.969       | T[20] |
| A[4]  | 566.126         | 1811.002        | 1794.983        | 0.000           | 1793.976       | A[10] |
| F[5]  | 663.179         | 1739.965        | 1723.956        | 0.000           | 1722.938       | F[18] |
| V[6]  | 762.247         | 1642.912        | 1626.894        | 0.000           | 1625.880       | V[17] |
| A[7]  | <b>833.264</b>  | 1543.844        | <b>1527.825</b> | 0.000           | 1526.811       | A[16] |
| Q[8]  | <b>901.343</b>  | 1472.807        | <b>1456.788</b> | 1487.796        | 1486.789       | Q[15] |
| A[9]  | <b>1032.380</b> | 1344.748        | 1328.729        | <b>1329.737</b> | 1327.722       | A[14] |
| A[10] | <b>1103.417</b> | 1273.711        | 1257.692        | 1258.700        | 1256.684       | A[13] |
| S[11] | <b>1190.449</b> | 1202.674        | 1186.655        | 1187.663        | 1185.647       | S[12] |
| T[12] | <b>1291.497</b> | <b>1115.642</b> | 1099.623        | <b>1100.631</b> | 1098.615       | T[11] |
| A[13] | <b>1362.534</b> | 1014.596        | <b>998.575</b>  | <b>999.583</b>  | 997.565        | A[10] |
| T[14] | <b>1463.581</b> | 943.557         | 927.538         | 928.546         | <b>926.531</b> | T[9]  |
| E[15] | <b>1592.624</b> | 842.500         | <b>826.491</b>  | 827.499         | 825.483        | E[8]  |
| R[16] | 1720.719        | <b>713.467</b>  | <b>697.448</b>  | <b>698.456</b>  | 696.440        | R[7]  |
| P[17] | <b>1817.772</b> | <b>585.372</b>  | 569.353         | 570.361         | 568.345        | P[6]  |
| A[18] | <b>1888.809</b> | 488.319         | <b>472.300</b>  | 473.308         | 471.293        | A[5]  |
| A[19] | <b>1959.846</b> | 417.282         | <b>401.263</b>  | 402.271         | 400.255        | A[4]  |
| A[20] | 2030.883        | 346.243         | <b>330.226</b>  | 331.234         | 329.218        | A[3]  |
| K[21] | 2188.978        | 275.208         | <b>259.189</b>  | 260.197         | 258.181        | K[2]  |
| K[22] | 2287.073        | 147.113         | 131.094         | 132.102         | 130.088        | K[1]  |

# sp|P43275|H11\_MOUSE

S<sup>Phospho</sup> 79.97 ET<sup>Phospho</sup> 79.97 APVAQAASTATEKPAAAKK

- ▶ fragmentation table for charge state 2+
- ▶ specType=etd
- ▶ score=76.50
- ▶ F105352.dat
- ▶ query=q9808\_p1
- ▶ precursor=572.768660
- ▶ chargePrecursor=4
- ▶ itol=0.8

| AA    | c               | y               | z+1             | z+2            | z               | AA    |
|-------|-----------------|-----------------|-----------------|----------------|-----------------|-------|
| S[1]  | 03.620          | <b>1148.532</b> | <b>1136.523</b> | 0.504          | <b>1136.019</b> | S[2]  |
| E[3]  | 137.941         | <b>1061.033</b> | 1053.024        | 0.504          | 1052.520        | E[2]  |
| V[3]  | 248.048         | 998.512         | 988.502         | 0.504          | 987.998         | V[20] |
| A[4]  | 283.567         | 906.005         | <b>897.995</b>  | 0.504          | 897.491         | A[10] |
| F[5]  | 332.093         | 870.489         | 862.477         | 0.504          | 861.973         | F[18] |
| V[6]  | 381.627         | 821.960         | 813.950         | 0.504          | 813.446         | V[17] |
| A[7]  | 417.146         | 722.426         | 714.416         | 0.504          | <b>703.912</b>  | A[16] |
| Q[8]  | 483.178         | 736.907         | <b>728.898</b>  | <b>729.402</b> | <b>728.394</b>  | Q[15] |
| A[9]  | 516.694         | 672.878         | <b>664.868</b>  | <b>665.372</b> | <b>664.364</b>  | A[14] |
| A[10] | 552.212         | <b>637.350</b>  | <b>629.350</b>  | <b>629.854</b> | <b>628.846</b>  | A[13] |
| S[11] | 599.728         | <b>601.841</b>  | <b>593.831</b>  | <b>594.335</b> | <b>593.327</b>  | S[12] |
| T[12] | <b>646.252</b>  | <b>558.325</b>  | <b>550.315</b>  | <b>550.819</b> | <b>549.811</b>  | T[11] |
| A[13] | <b>681.771</b>  | <b>507.801</b>  | <b>499.791</b>  | <b>500.295</b> | 499.281         | A[10] |
| V[14] | 718.294         | <b>472.282</b>  | <b>464.273</b>  | <b>464.777</b> | <b>463.769</b>  | V[9]  |
| E[15] | <b>796.816</b>  | 421.758         | 413.749         | 414.253        | 413.249         | E[8]  |
| R[16] | 860.983         | 357.237         | 349.228         | 349.732        | 348.724         | R[7]  |
| F[17] | <b>909.390</b>  | 293.190         | 285.180         | 285.684        | 284.676         | F[6]  |
| A[18] | <b>944.908</b>  | 244.663         | 236.654         | 237.158        | 236.150         | A[5]  |
| A[19] | <b>980.427</b>  | 209.145         | 201.135         | 201.639        | 200.631         | A[4]  |
| A[20] | <b>1015.945</b> | 173.629         | 165.617         | 166.121        | 165.113         | A[3]  |
| R[21] | <b>1079.993</b> | 138.108         | 130.098         | 130.602        | 129.594         | R[2]  |
| R[22] | <b>1144.040</b> | 74.580          | 66.051          | 66.555         | 65.541          | R[1]  |

# sp | P43275 | H11\_MOUSE

S<sup>Phospho</sup> 79.97 ET<sup>Phospho</sup> 79.97 APVAQAASTATEKPAAAKK

- ▶ fragmentation table for charge state 3+
- ▶ specType=etd
- ▶ score=76.50
- ▶ F105352.dat
- ▶ query=q9808\_p1
- ▶ precursor=572.768660
- ▶ chargePrecursor=4
- ▶ itol=0.8

| AA    | c              | y              | z+1            | z+2   | z              | AA    |
|-------|----------------|----------------|----------------|-------|----------------|-------|
| S[1]  | 62.949         | <b>763.357</b> | <b>758.018</b> | 0.672 | <b>757.682</b> | S[22] |
| E[2]  | 105.363        | 707.691        | 702.352        | 0.672 | 702.016        | E[21] |
| T[3]  | 165.701        | <b>664.677</b> | 659.337        | 0.672 | 659.001        | T[20] |
| A[4]  | 189.380        | 604.339        | 598.999        | 0.672 | 598.663        | A[19] |
| P[5]  | 221.731        | 580.660        | 575.320        | 0.672 | 574.984        | P[18] |
| V[6]  | 254.754        | <b>548.305</b> | 542.965        | 0.672 | 542.633        | V[17] |
| A[7]  | 278.433        | 515.262        | 509.947        | 0.672 | 509.611        | A[16] |
| Q[8]  | 321.119        | 491.607        | 486.268        | 0.672 | 485.932        | Q[15] |
| A[9]  | 344.798        | 448.921        | 443.581        | 0.672 | 443.245        | A[14] |
| A[10] | 368.477        | 425.242        | 419.902        | 0.672 | 419.566        | A[13] |
| S[11] | 397.488        | <b>401.563</b> | 396.223        | 0.672 | 395.887        | S[12] |
| T[12] | 431.170        | 372.552        | 367.213        | 0.672 | 366.877        | T[11] |
| A[13] | 454.849        | 338.870        | 333.530        | 0.672 | 333.194        | A[10] |
| T[14] | 488.532        | 315.191        | 309.851        | 0.672 | 309.515        | T[9]  |
| E[15] | 531.546        | 281.508        | 276.168        | 0.672 | 275.832        | E[8]  |
| K[16] | 574.245        | 238.494        | 233.154        | 0.672 | 232.818        | K[7]  |
| T[17] | 608.566        | 195.795        | 190.455        | 0.672 | 190.120        | T[6]  |
| A[18] | <b>630.274</b> | 163.445        | 158.105        | 0.672 | 157.769        | A[5]  |
| A[19] | 653.954        | 130.766        | 125.426        | 0.672 | 125.090        | A[4]  |
| A[20] | 677.633        | 116.085        | 110.747        | 0.672 | 110.411        | A[3]  |
| K[21] | <b>720.331</b> | 92.407         | 87.068         | 0.672 | 86.732         | K[2]  |
| K[22] | <b>763.029</b> | 49.700         | 44.370         | 0.672 | 44.034         | K[1]  |

# sp | P43276 | H15\_MOUSE

SETAPAETAAPAPVEKS<sup>Phospho</sup> PAKKK  
79.97

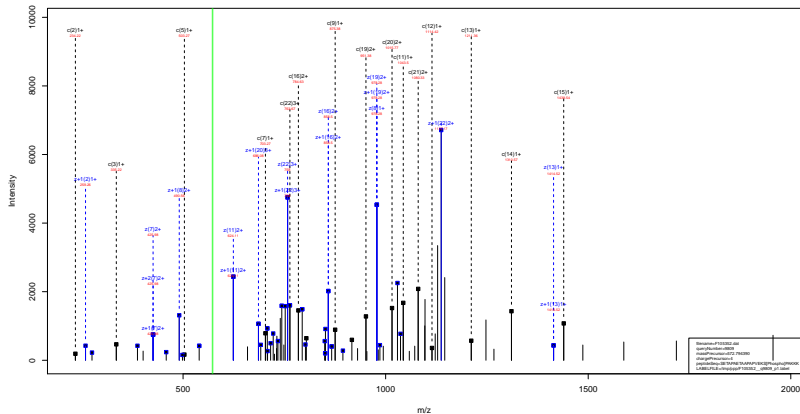



# sp | P43276 | H15\_MOUSE

SETAPAETAAPAPVEKS <sup>Phospho</sup> PAKKK  
79.97

- ▶ fragmentation table for charge state 1+
- ▶ specType=etd
- ▶ score=72.40
- ▶ F105352.dat
- ▶ query=q9809\_p1
- ▶ precursor=572.794390
- ▶ chargePrecursor=4
- ▶ itol=0.8

| AA    | c               | y              | s+1             | s+2            | z               | AA   |
|-------|-----------------|----------------|-----------------|----------------|-----------------|------|
| S   1 | 195.056         | 2288.153       | 2272.135        | 0.000          | 2271.121        | S 22 |
| E   2 | <b>234.108</b>  | 2201.121       | 2185.103        | 0.000          | 2184.095        | E 21 |
| T   3 | <b>335.156</b>  | 2072.079       | 2056.060        | 0.000          | 2055.052        | T 20 |
| A   4 | 406.193         | 1971.031       | 1955.012        | 0.000          | 1954.005        | A 19 |
| F   5 | <b>503.246</b>  | 1899.994       | 1883.975        | 0.000          | 1882.967        | F 18 |
| A   6 | 574.283         | 1802.941       | 1786.922        | 0.000          | 1785.915        | A 17 |
| E   7 | <b>703.326</b>  | 1731.904       | 1715.885        | 0.000          | 1714.878        | E 16 |
| T   8 | <b>804.373</b>  | 1602.861       | 1586.843        | 0.000          | 1585.835        | T 15 |
| A   9 | <b>875.411</b>  | 1501.814       | 1485.795        | 0.000          | 1484.787        | A 14 |
| A 10  | 946.448         | 1430.777       | <b>1414.758</b> | 0.000          | <b>1413.750</b> | A 13 |
| F 11  | <b>1043.500</b> | 1359.740       | 1343.721        | 0.000          | 1342.713        | F 12 |
| A 12  | <b>1114.537</b> | 1262.687       | 1246.668        | 0.000          | 1245.660        | A 11 |
| P 13  | <b>1211.590</b> | 1181.650       | 1175.631        | 0.000          | 1174.623        | P 10 |
| V 14  | <b>1310.659</b> | 1094.597       | 1078.578        | 0.000          | 1077.570        | V 9  |
| E 15  | <b>1439.701</b> | 995.529        | 979.510         | 0.000          | <b>978.502</b>  | E 8  |
| K 16  | 1507.790        | <b>866.486</b> | <b>850.467</b>  | <b>851.475</b> | <b>849.459</b>  | K 7  |
| S 17  | 1734.795        | 736.391        | <b>722.372</b>  | 723.380        | 721.364         | S 6  |
| P 18  | 1831.847        | 671.393        | 655.374         | 656.382        | 654.366         | P 5  |
| A 19  | 1902.884        | 474.340        | <b>458.321</b>  | 459.329        | 457.313         | A 4  |
| K 20  | 2030.939        | 408.292        | <b>387.284</b>  | 388.292        | 386.276         | K 3  |
| K 21  | 2159.074        | <b>275.208</b> | <b>259.189</b>  | 260.197        | 258.181         | K 2  |
| K 22  | 2287.109        | 147.113        | 131.094         | 132.102        | 130.086         | K 1  |

# sp | P43276 | H15\_MOUSE

SETAPAETAAPAPVEKS<sup>Phospho</sup> PAKKK  
79.97

- ▶ fragmentation table for charge state 2+
- ▶ specType=etd
- ▶ score=72.40
- ▶ F105352.dat
- ▶ query=q9809\_p1
- ▶ precursor=572.794390
- ▶ chargePrecursor=4
- ▶ itol=0.8

| AA    | c               | y               | z+1             | z+2            | z              | AA    |
|-------|-----------------|-----------------|-----------------|----------------|----------------|-------|
| S[1]  | 51.037          | 1144.580        | <b>1136.571</b> | 0.504          | 1136.067       | S[2]  |
| E[2]  | 117.558         | 1101.054        | 1092.955        | 0.504          | 1092.551       | E[3]  |
| T[3]  | 168.082         | <b>1036.543</b> | <b>1028.534</b> | 0.504          | 1028.030       | T[20] |
| A[4]  | 203.600         | <b>986.019</b>  | <b>978.010</b>  | 0.504          | <b>977.506</b> | A[10] |
| F[5]  | 252.127         | 950.501         | 942.491         | 0.504          | 941.987        | F[18] |
| A[6]  | 287.645         | 903.978         | <b>893.965</b>  | 0.504          | 893.461        | A[17] |
| E[7]  | 352.166         | <b>866.456</b>  | <b>858.446</b>  | 0.504          | <b>857.942</b> | E[10] |
| T[8]  | 402.690         | <b>801.936</b>  | <b>793.925</b>  | 0.504          | <b>793.421</b> | T[15] |
| A[9]  | 438.209         | <b>751.411</b>  | <b>743.401</b>  | 0.504          | <b>742.897</b> | A[14] |
| A[10] | 473.727         | <b>715.892</b>  | <b>707.883</b>  | 0.504          | <b>707.379</b> | A[13] |
| F[11] | 522.254         | 680.373         | 672.364         | 0.504          | 671.860        | F[12] |
| A[12] | 557.772         | 631.847         | <b>623.838</b>  | 0.504          | <b>623.334</b> | A[11] |
| P[13] | 606.290         | 596.320         | 588.310         | 0.504          | 587.805        | P[10] |
| V[14] | 655.813         | 547.802         | <b>538.793</b>  | 0.504          | <b>539.289</b> | V[0]  |
| E[15] | 720.354         | <b>498.268</b>  | <b>490.259</b>  | 0.504          | 489.755        | E[8]  |
| K[16] | <b>784.402</b>  | 433.747         | <b>425.737</b>  | <b>426.241</b> | <b>425.233</b> | K[7]  |
| S[17] | 867.901         | 369.699         | 361.690         | 362.194        | 361.188        | S[0]  |
| F[18] | <b>916.427</b>  | 286.200         | 278.191         | 278.694        | 277.687        | F[5]  |
| A[19] | <b>951.946</b>  | 237.674         | 229.664         | 230.168        | 229.160        | A[4]  |
| K[20] | <b>1013.993</b> | 202.153         | 194.146         | 194.650        | 193.642        | K[3]  |
| K[21] | <b>1080.041</b> | 130.100         | 130.608         | 130.602        | 129.596        | K[1]  |
| K[22] | 1144.088        | 74.060          | 66.051          | 66.555         | 65.547         | K[1]  |

# sp | P43276 | H15\_MOUSE

SETAPAETAAPAPVEKS<sup>Phospho</sup> PAKKK  
79.97

- ▶ fragmentation table for charge state 3+
- ▶ specType=etd
- ▶ score=72.40
- ▶ F105352.dat
- ▶ query=q9809\_p1
- ▶ precursor=572.794390
- ▶ chargePrecursor=4
- ▶ itol=0.8

| AA    | c              | y              | z+1            | z+2     | z              | AA    |
|-------|----------------|----------------|----------------|---------|----------------|-------|
| S[1]  | 35.693         | <b>763.389</b> | <b>758.050</b> | 0.672   | <b>757.714</b> | S[22] |
| E[2]  | 78.708         | <b>734.379</b> | 729.039        | 0.672   | 728.703        | E[21] |
| T[3]  | 112.300        | <b>691.364</b> | <b>686.025</b> | 0.672   | <b>685.689</b> | T[20] |
| A[4]  | 136.069        | 657.862        | 652.342        | 0.672   | 652.006        | A[19] |
| P[5]  | 168.420        | 634.003        | 628.663        | 0.672   | 628.327        | P[18] |
| A[6]  | 182.099        | 601.652        | 596.312        | 0.672   | 595.976        | A[17] |
| E[7]  | 239.113        | 577.973        | 572.633        | 0.672   | 572.297        | E[16] |
| T[8]  | 268.796        | 534.950        | 529.610        | 0.672   | 529.273        | T[15] |
| A[9]  | 292.475        | 501.276        | 495.937        | 0.672   | 495.601        | A[14] |
| A[10] | 316.154        | 477.597        | 472.258        | 0.672   | 471.922        | A[13] |
| P[11] | 348.505        | 453.918        | 448.578        | 0.672   | 448.243        | P[12] |
| A[12] | 372.184        | 421.567        | 416.228        | 0.672   | 415.892        | A[11] |
| P[13] | 404.535        | 397.888        | 392.549        | 0.672   | 392.213        | P[10] |
| V[14] | 437.558        | 365.537        | 360.198        | 0.672   | 359.862        | V[9]  |
| E[15] | 480.572        | 332.514        | 327.175        | 0.672   | 326.839        | E[8]  |
| K[16] | 523.270        | 299.500        | 294.161        | 294.497 | 293.825        | K[7]  |
| S[17] | 578.936        | 266.802        | 261.463        | 261.798 | 261.126        | S[6]  |
| P[18] | 611.297        | 191.130        | 185.790        | 185.132 | 185.460        | P[3]  |
| A[19] | 634.966        | 158.785        | 153.445        | 153.781 | 153.109        | A[4]  |
| K[20] | 677.665        | 135.105        | 129.766        | 130.102 | 129.430        | K[3]  |
| K[21] | 720.363        | 92.407         | 87.068         | 87.404  | 86.732         | K[2]  |
| K[22] | <b>763.061</b> | 49.700         | 44.370         | 44.705  | 44.034         | K[1]  |



# sp | P43274 | H14\_MOUSE

S<sup>(Phospho)</sup> (79.97) ETAPAAPAAPAPA EKT<sup>Phospho</sup> PVKKK 79.97

- ▶ fragmentation table for charge state 1+
- ▶ specType=etd
- ▶ score=59.40
- ▶ F105352.dat
- ▶ query=q9875\_p1
- ▶ precursor=580.788840
- ▶ chargePrecursor=4
- ▶ itol=0.8

| AA | c               | y              | z+1             | z+2            | z              | AA    |
|----|-----------------|----------------|-----------------|----------------|----------------|-------|
| S  | 185.032         | 2020.175       | 2384.516        | 0.000          | 2003.100       | S[22] |
| E  | 314.075         | 2153.137       | 2137.118        | 0.000          | 2136.110       | E[21] |
| V  | 415.122         | 2024.094       | 2008.075        | 0.000          | 2007.061       | V[20] |
| A  | <b>406.160</b>  | 1923.046       | 1907.028        | 0.000          | 1906.020       | A[19] |
| P  | 583.212         | 1852.009       | 1835.990        | 0.000          | 1834.983       | P[18] |
| A  | <b>654.249</b>  | 1754.956       | 1738.938        | 0.000          | 1737.930       | A[17] |
| A  | <b>725.287</b>  | 1683.919       | 1667.901        | 0.000          | 1666.893       | A[16] |
| T  | <b>822.339</b>  | 1612.882       | 1596.863        | 0.000          | 1595.855       | T[15] |
| A  | <b>893.376</b>  | 1515.825       | 1499.811        | 0.000          | 1498.803       | A[14] |
| A  | 964.414         | 1444.792       | 1428.774        | 0.000          | 1427.766       | A[13] |
| P  | <b>1061.466</b> | 1373.755       | 1357.737        | 0.000          | 1356.729       | P[12] |
| A  | <b>1132.503</b> | 1276.702       | 1260.684        | 0.000          | 1259.676       | A[11] |
| P  | 1229.556        | 1205.665       | 1189.647        | 0.000          | 1188.639       | P[10] |
| A  | <b>1300.593</b> | 1108.613       | <b>1092.594</b> | 0.000          | 1091.586       | A[9]  |
| T  | <b>1439.636</b> | 1037.575       | <b>1021.557</b> | 0.000          | 1020.549       | T[8]  |
| K  | 1553.731        | <b>908.533</b> | <b>892.514</b>  | <b>893.522</b> | 891.505        | K[7]  |
| T  | 1738.745        | 780.438        | 764.419         | <b>765.427</b> | <b>763.411</b> | T[6]  |
| P  | 1835.798        | 599.424        | 583.405         | 584.413        | 582.397        | P[5]  |
| V  | <b>1934.866</b> | 502.371        | <b>486.352</b>  | 487.360        | 485.345        | V[4]  |
| K  | 2062.961        | <b>403.303</b> | <b>387.284</b>  | <b>388.292</b> | 386.276        | K[3]  |
| K  | 2191.056        | 275.206        | <b>259.189</b>  | 260.197        | 258.181        | K[2]  |
| K  | 2319.151        | 147.113        | 131.094         | 132.102        | 130.086        | K[1]  |

# sp | P43274 | H14\_MOUSE

S<sup>(Phospho)</sup> (79.97) ETAPAAPAAPAPAEKT<sup>Phospho</sup> PVKKK 79.97

- ▶ fragmentation table for charge state 2+
- ▶ specType=etd
- ▶ score=59.40
- ▶ F105352.dat
- ▶ query=q9875\_p1
- ▶ precursor=580.788840
- ▶ chargePrecursor=4
- ▶ itol=0.8

| AA    | c               | y              | z+1             | z+2   | z              | AA    |
|-------|-----------------|----------------|-----------------|-------|----------------|-------|
| S[1]  | 93.020          | 1180.971       | <b>1152.562</b> | 0.504 | 1152.056       | S[2]  |
| E[2]  | 157.541         | 1077.072       | 1069.063        | 0.504 | 1068.550       | E[2]  |
| T[3]  | 208.065         | 1012.551       | 1004.541        | 0.504 | 1004.037       | T[20] |
| A[4]  | 243.583         | 962.037        | 954.037         | 0.504 | 953.534        | A[19] |
| F[5]  | 292.110         | 926.508        | <b>918.499</b>  | 0.504 | <b>917.995</b> | F[18] |
| A[6]  | 327.628         | 877.982        | <b>869.973</b>  | 0.504 | 869.469        | A[17] |
| A[7]  | 363.147         | 842.463        | <b>834.454</b>  | 0.504 | <b>833.950</b> | A[16] |
| T[8]  | 411.673         | 806.943        | 798.933         | 0.504 | 798.430        | T[15] |
| A[9]  | 447.192         | <b>750.418</b> | <b>750.409</b>  | 0.504 | <b>749.905</b> | A[14] |
| A[10] | 482.710         | 725.900        | <b>714.890</b>  | 0.504 | <b>714.387</b> | A[13] |
| P[11] | <b>531.237</b>  | 687.381        | 679.372         | 0.504 | 678.868        | P[12] |
| A[12] | 566.755         | 638.855        | <b>630.846</b>  | 0.504 | <b>630.342</b> | A[11] |
| P[13] | <b>615.282</b>  | 603.336        | 595.327         | 0.504 | 594.823        | P[10] |
| A[14] | <b>650.800</b>  | 564.810        | 546.801         | 0.504 | 546.297        | A[9]  |
| T[15] | <b>715.322</b>  | 519.293        | 511.282         | 0.504 | 510.778        | T[8]  |
| K[16] | <b>779.369</b>  | 454.770        | 446.761         | 0.504 | 446.257        | K[17] |
| T[17] | <b>869.876</b>  | 390.723        | 382.713         | 0.504 | 382.209        | T[6]  |
| P[18] | <b>918.402</b>  | 300.210        | 292.206         | 0.504 | 291.702        | P[5]  |
| V[19] | <b>967.937</b>  | 251.689        | 243.680         | 0.504 | 243.176        | V[4]  |
| K[20] | <b>1031.984</b> | 202.155        | 194.146         | 0.504 | 193.642        | K[3]  |
| K[21] | <b>1096.032</b> | 138.108        | 130.098         | 0.504 | 129.594        | K[2]  |
| K[22] | 1160.079        | 74.060         | 66.051          | 0.504 | 65.547         | K[1]  |

# sp | P43274 | H14\_MOUSE

S<sup>(Phospho)</sup> (79.97) ETAPAAPAAPAPAEKT<sup>Phospho</sup> PVKKK 79.97

- ▶ fragmentation table for charge state 3+
- ▶ specType=etd
- ▶ score=59.40
- ▶ F105352.dat
- ▶ query=q9875\_p1
- ▶ precursor=580.788840
- ▶ chargePrecursor=4
- ▶ itol=0.8

| AA    | c              | y              | z+1            | z+2     | z              | AA    |
|-------|----------------|----------------|----------------|---------|----------------|-------|
| S[1]  | 62.949         | <b>774.050</b> | <b>768.710</b> | 0.672   | <b>768.374</b> | S[22] |
| E[2]  | 105.363        | 718.384        | 713.044        | 0.672   | 712.708        | E[21] |
| T[3]  | 139.046        | <b>675.370</b> | 670.030        | 0.672   | 669.694        | T[20] |
| A[4]  | 162.725        | 641.687        | 636.347        | 0.672   | 636.011        | A[19] |
| P[5]  | 195.076        | 618.008        | 612.668        | 0.672   | 612.332        | P[18] |
| A[6]  | 218.755        | 585.657        | 580.317        | 0.672   | 579.981        | A[17] |
| A[7]  | 242.434        | 561.978        | <b>556.638</b> | 0.672   | <b>556.302</b> | A[16] |
| P[8]  | 274.785        | 538.299        | 532.959        | 0.672   | 532.623        | P[15] |
| A[9]  | 298.464        | 505.940        | 500.600        | 0.672   | 500.272        | A[14] |
| A[10] | 322.143        | 482.260        | 476.920        | 0.672   | 476.593        | A[13] |
| P[11] | 354.494        | 458.590        | 453.250        | 0.672   | 452.914        | P[12] |
| A[12] | 378.173        | 426.239        | 420.899        | 0.672   | 420.563        | A[11] |
| P[13] | 410.524        | 402.560        | 397.220        | 0.672   | 396.884        | P[10] |
| A[14] | 434.203        | 370.209        | 364.869        | 0.672   | 364.534        | A[9]  |
| E[15] | 477.217        | 346.530        | 341.190        | 0.672   | 340.854        | E[8]  |
| K[16] | 519.915        | 303.516        | 298.176        | 298.512 | 297.840        | K[7]  |
| T[17] | 580.253        | 260.817        | 255.478        | 255.814 | 255.142        | T[6]  |
| P[18] | 612.604        | 230.475        | 195.140        | 195.476 | 194.804        | P[9]  |
| V[19] | 645.627        | 188.129        | 162.789        | 163.125 | 162.453        | V[4]  |
| K[20] | 698.525        | 135.195        | 129.756        | 130.102 | 129.430        | K[3]  |
| K[21] | <b>731.024</b> | 92.407         | 87.068         | 87.404  | 86.732         | K[2]  |
| K[22] | <b>773.722</b> | 49.709         | 44.370         | 44.705  | 44.034         | K[1]  |

# sp | P43276 | H15\_MOUSE

SET (Phospho) APAETAAPAPVEKS (79.97) Phospho PAKKK (79.97)

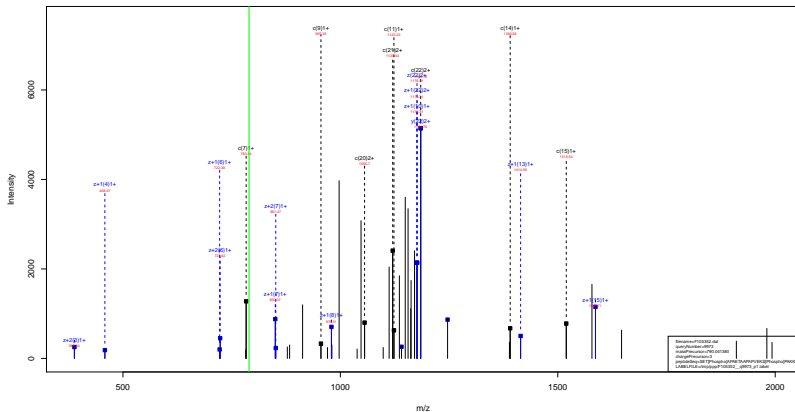



# sp | P43276 | H15\_MOUSE

SET (Phospho) APAETAAPAPVEKS (79.97) Phospho PAKKK (79.97)

- ▶ fragmentation table for charge state 1+
- ▶ specType=etd
- ▶ score=35.86
- ▶ F105352.dat
- ▶ query=q9973\_p1
- ▶ precursor=790.041380
- ▶ chargePrecursor=3
- ▶ itol=0.8

| AA | c   | y               | z+1  | z+2  | z              | AA              |                |                |      |       |       |      |
|----|-----|-----------------|------|------|----------------|-----------------|----------------|----------------|------|-------|-------|------|
| S  | 105 | 668             | 2108 | 170  | 2182           | 101             | S[22]          |                |      |       |       |      |
| E  | 2   | 234             | 108  | 2281 | 889            | 2285            | 669            | 0.000          | 2264 | 061   | E[21] |      |
| Y  | 3   | 415             | 122  | 2152 | 045            | 2136            | 626            | 0.000          | 2135 | 019   | Y[20] |      |
| A  | 4   | 486             | 160  | 1971 | 031            | 1955            | 012            | 0.000          | 1954 | 005   | A[19] |      |
| P  | 5   | 563             | 212  | 1899 | 994            | 1883            | 975            | 0.000          | 1882 | 967   | P[18] |      |
| A  | 6   | 654             | 249  | 1802 | 941            | 1786            | 922            | 0.000          | 1785 | 915   | A[17] |      |
| E  | 7   | <b>783.292</b>  | 1731 | 904  | 1715           | 885             | 0.000          | 1714           | 878  | E[16] |       |      |
| T  | 8   | 874             | 740  | 1262 | 861            | <b>1586.843</b> | 0.000          | 1585           | 835  | T[15] |       |      |
| A  | 9   | <b>955.377</b>  | 1501 | 814  | 1485           | 795             | 0.000          | 1484           | 787  | A[14] |       |      |
| A  | 10  | 1026            | 414  | 1430 | 777            | <b>1414.758</b> | 0.000          | 1413           | 750  | A[13] |       |      |
| P  | 11  | <b>1123.467</b> | 1359 | 740  | 1343           | 721             | 0.000          | 1342           | 713  | P[12] |       |      |
| A  | 12  | 1194            | 504  | 1262 | 687            | <b>1246.668</b> | 0.000          | 1245           | 660  | A[11] |       |      |
| P  | 13  | 1291            | 557  | 1191 | 650            | <b>1175.631</b> | 0.000          | 1174           | 623  | P[10] |       |      |
| V  | 14  | <b>1396.625</b> | 1094 | 597  | 1078           | 578             | 0.000          | 1077           | 570  | V[9]  |       |      |
| E  | 15  | <b>1519.468</b> | 996  | 576  | <b>979.510</b> | 0.000           | 978            | 562            | E[8] |       |       |      |
| K  | 16  | 1657            | 763  | 956  | 485            | <b>850.467</b>  | <b>851.475</b> | 0.000          | 849  | 455   | K[7]  |      |
| S  | 17  | 1814            | 761  | 738  | 391            | <b>722.372</b>  | <b>723.380</b> | 0.000          | 721  | 364   | S[6]  |      |
| P  | 18  | 1911            | 814  | 671  | 393            | 555             | 374            | 556            | 382  | 554   | 368   | P[5] |
| A  | 19  | 1982            | 851  | 674  | 349            | <b>456.321</b>  | 459            | 329            | 457  | 313   | A[4]  |      |
| K  | 20  | 2110            | 946  | 403  | 303            | 387             | 284            | <b>388.292</b> | 386  | 270   | K[3]  |      |
| K  | 21  | 2239            | 941  | 275  | 206            | 259             | 189            | 260            | 197  | 258   | 181   | K[2] |
| K  | 22  | 2367            | 136  | 147  | 113            | 131             | 694            | 132            | 102  | 130   | 688   | K[1] |

# sp | P43276 | H15\_MOUSE

SET (Phospho) APAETAAPAPVEKS (79.97) Phospho PAKKK 79.97

- ▶ fragmentation table for charge state 2+
- ▶ specType=etd
- ▶ score=35.86
- ▶ F105352.dat
- ▶ query=q9973\_p1
- ▶ precursor=790.041380
- ▶ chargePrecursor=3
- ▶ itol=0.8

| AA    | c               | y               | a+1             | a+2     | z               | AA    |
|-------|-----------------|-----------------|-----------------|---------|-----------------|-------|
| S[1]  | 53.037          | <b>1184.563</b> | <b>1176.354</b> | 0.504   | <b>1176.050</b> | S[2]  |
| E[2]  | 117.938         | <b>1141.047</b> | 1137.838        | 0.504   | 1136.534        | E[2]  |
| T[3]  | 208.065         | 1078.528        | 1068.517        | 0.504   | 1068.013        | T[20] |
| A[4]  | 243.583         | 986.019         | 978.010         | 0.504   | 977.506         | A[10] |
| P[5]  | 292.110         | 950.501         | 942.491         | 0.504   | 941.987         | P[18] |
| A[6]  | 327.628         | 901.974         | 893.965         | 0.504   | 893.461         | A[17] |
| E[7]  | 392.150         | 866.456         | 858.446         | 0.504   | 857.942         | E[16] |
| T[8]  | 442.673         | 803.938         | 793.929         | 0.504   | 793.425         | T[15] |
| A[9]  | 478.192         | 753.411         | 743.401         | 0.504   | 742.897         | A[14] |
| A[10] | 513.711         | 715.892         | 707.883         | 0.504   | 707.379         | A[13] |
| P[11] | 562.237         | 680.373         | 672.364         | 0.504   | 671.860         | P[12] |
| A[12] | 597.756         | 631.847         | 623.838         | 0.504   | 623.334         | A[11] |
| P[13] | 646.282         | 596.328         | 588.319         | 0.504   | 587.815         | P[10] |
| V[14] | 695.816         | 547.802         | 539.793         | 0.504   | 539.289         | V[0]  |
| E[15] | 760.337         | 499.283         | 489.274         | 0.504   | 488.770         | E[6]  |
| K[16] | 824.885         | 433.747         | 425.737         | 438.241 | 425.233         | K[7]  |
| S[17] | 907.884         | 369.699         | 361.690         | 362.194 | 361.188         | S[0]  |
| P[18] | 956.410         | 289.200         | 278.191         | 278.694 | 277.687         | P[5]  |
| A[19] | 991.929         | 237.674         | 229.664         | 230.168 | 229.160         | A[0]  |
| K[20] | <b>1055.977</b> | 202.155         | 194.146         | 194.650 | 193.642         | K[3]  |
| K[21] | <b>1138.024</b> | 138.109         | 130.098         | 130.602 | 129.596         | K[2]  |
| K[22] | <b>1184.071</b> | 78.060          | 66.051          | 66.555  | 65.547          | K[0]  |

# sp | P43276 | H15\_MOUSE

SET (Phospho) APAETAAPAPVEKS Phospho PAKKK  
(79.97) 79.97

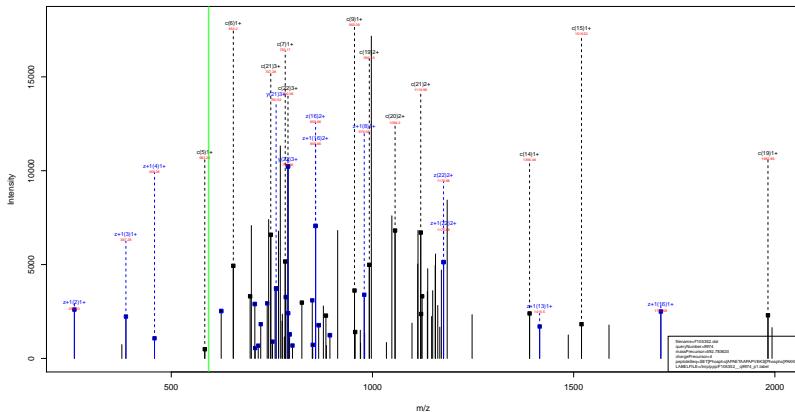

# sp | P43276 | H15\_MOUSE

SET (Phospho) APAETAAPAPVEKS (79.97) Phospho PAKKK 79.97

- ▶ fragmentation table for charge state 1+
- ▶ specType=etd
- ▶ score=44.55
- ▶ F105352.dat
- ▶ query=q9974\_p1
- ▶ precursor=592.783620
- ▶ chargePrecursor=4
- ▶ itol=0.8

| AA | c  | y               | z+1            | z+2             | z              | AA       |       |
|----|----|-----------------|----------------|-----------------|----------------|----------|-------|
| S  | 1  | 305.958         | 2388.170       | 2382.301        | 0.000          | 2351.091 | S[2]  |
| E  | 2  | 234.108         | 2281.089       | 2285.099        | 0.000          | 2264.061 | E[2]  |
| V  | 3  | 415.122         | 2152.045       | 2136.026        | 0.000          | 2135.019 | V[20] |
| A  | 4  | 486.160         | 1971.031       | 1955.012        | 0.000          | 1954.005 | A[19] |
| F  | 5  | <b>583.212</b>  | 1899.994       | 1883.975        | 0.000          | 1882.967 | F[18] |
| A  | 6  | <b>654.249</b>  | 1802.941       | 1786.922        | 0.000          | 1785.915 | A[17] |
| E  | 7  | <b>783.292</b>  | 1731.904       | <b>1715.885</b> | 0.000          | 1714.878 | E[16] |
| T  | 8  | <b>854.340</b>  | 1662.861       | 1659.843        | 0.000          | 1658.835 | T[15] |
| A  | 9  | <b>955.377</b>  | 1501.814       | 1485.795        | 0.000          | 1484.787 | A[14] |
| A  | 10 | 1026.814        | 1430.777       | <b>1414.758</b> | 0.000          | 1413.750 | A[13] |
| P  | 11 | <b>1123.467</b> | 1359.740       | 1343.721        | 0.000          | 1342.713 | P[12] |
| A  | 12 | 1194.504        | 1262.687       | 1246.668        | 0.000          | 1245.660 | A[11] |
| P  | 13 | 1291.557        | 1191.650       | 1175.631        | 0.000          | 1174.623 | P[10] |
| V  | 14 | <b>1396.625</b> | 1094.597       | 1078.578        | 0.000          | 1077.570 | V[9]  |
| E  | 15 | <b>1519.668</b> | 999.529        | <b>979.510</b>  | 0.000          | 978.502  | E[8]  |
| K  | 16 | 1547.763        | <b>864.486</b> | <b>850.467</b>  | <b>851.475</b> | 849.459  | K[7]  |
| S  | 17 | 1814.791        | <b>738.391</b> | <b>722.372</b>  | 723.380        | 721.364  | S[0]  |
| P  | 18 | 1911.814        | 571.393        | 555.374         | 556.382        | 554.366  | P[5]  |
| A  | 19 | <b>1982.851</b> | 474.340        | <b>458.321</b>  | 459.329        | 457.313  | A[4]  |
| K  | 20 | 2110.946        | 403.303        | <b>387.284</b>  | 388.292        | 386.276  | K[3]  |
| K  | 21 | 2239.041        | 275.206        | <b>259.189</b>  | 260.197        | 258.181  | K[2]  |
| K  | 22 | 2367.136        | 147.113        | 131.094         | 132.102        | 130.086  | K[1]  |

# sp | P43276 | H15\_MOUSE

SET (Phospho) APAETAAPAPVEKS (79.97) Phospho PAKKK 79.97

- ▶ fragmentation table for charge state 2+
- ▶ specType=etd
- ▶ score=44.55
- ▶ F105352.dat
- ▶ query=q9974\_p1
- ▶ precursor=592.783620
- ▶ chargePrecursor=4
- ▶ itol=0.8

| AA | c  | y               | z+1             | z+2            | z               | AA             |       |
|----|----|-----------------|-----------------|----------------|-----------------|----------------|-------|
| S  | 1  | 108.563         | <b>1176.534</b> | 0.504          | <b>1176.050</b> | S[2]           |       |
| E  | 2  | 117.558         | 1141.047        | 1113.030       | 0.504           | 1132.534       | E[2]  |
| V  | 3  | 208.005         | 1078.528        | 1058.517       | 0.504           | 1068.013       | V[20] |
| A  | 4  | 243.583         | 986.019         | 978.010        | 0.504           | 977.506        | A[19] |
| P  | 5  | 292.110         | 950.501         | 942.491        | 0.504           | 941.987        | P[18] |
| A  | 6  | 327.628         | 901.974         | <b>893.965</b> | 0.504           | <b>893.461</b> | A[17] |
| E  | 7  | 392.150         | <b>866.456</b>  | <b>858.446</b> | 0.504           | <b>857.942</b> | E[16] |
| T  | 8  | 432.873         | <b>801.934</b>  | <b>793.925</b> | 0.504           | <b>793.421</b> | T[15] |
| A  | 9  | 478.192         | <b>751.411</b>  | 743.401        | 0.504           | 742.897        | A[14] |
| A  | 10 | 513.711         | <b>715.892</b>  | <b>707.883</b> | 0.504           | <b>707.379</b> | A[13] |
| P  | 11 | 562.237         | 680.373         | 672.364        | 0.504           | 671.860        | P[12] |
| A  | 12 | 597.756         | 631.847         | <b>623.838</b> | 0.504           | <b>623.334</b> | A[11] |
| P  | 13 | 646.282         | 596.328         | 588.319        | 0.504           | 587.815        | P[10] |
| V  | 14 | <b>695.816</b>  | 547.802         | 539.793        | 0.504           | 539.289        | V[9]  |
| E  | 15 | <b>748.137</b>  | 498.282         | 490.269        | 0.504           | 489.765        | E[8]  |
| K  | 16 | <b>824.185</b>  | 433.747         | 425.737        | 426.241         | 426.233        | K[7]  |
| S  | 17 | 907.684         | 369.699         | 361.690        | 362.194         | 361.188        | S[6]  |
| P  | 18 | <b>956.410</b>  | 286.200         | 278.191        | 278.694         | 277.687        | P[5]  |
| A  | 19 | <b>991.929</b>  | 237.674         | 229.664        | 230.168         | 229.160        | A[4]  |
| K  | 20 | <b>1055.977</b> | 202.155         | 194.146        | 194.650         | 193.642        | K[3]  |
| K  | 21 | <b>1120.024</b> | 138.108         | 130.098        | 130.602         | 129.594        | K[2]  |
| K  | 22 | 1194.971        | 74.080          | 66.071         | 66.575          | 65.547         | K[1]  |

# sp | P43276 | H15\_MOUSE

SET (Phospho) APAETAAPAPVEKS (79.97) Phospho PAKKK 79.97

- ▶ fragmentation table for charge state 3+
- ▶ specType=etd
- ▶ score=44.55
- ▶ F105352.dat
- ▶ query=q9974.p1
- ▶ precursor=592.783620
- ▶ chargePrecursor=4
- ▶ itol=0.8

| AA    | c              | y              | z+1            | z+2     | z              | AA    |
|-------|----------------|----------------|----------------|---------|----------------|-------|
| S[1]  | 35.693         | <b>790.045</b> | <b>784.705</b> | 0.672   | <b>784.369</b> | S[22] |
| E[2]  | 78.708         | <b>761.034</b> | 755.695        | 0.672   | 755.359        | E[21] |
| Y[3]  | 139.046        | 718.020        | 712.680        | 0.672   | 712.344        | Y[20] |
| A[4]  | 162.725        | 657.662        | 652.342        | 0.672   | 652.006        | A[19] |
| P[5]  | 195.076        | 634.003        | 628.663        | 0.672   | 628.327        | P[18] |
| A[6]  | 218.755        | 601.652        | 596.312        | 0.672   | 595.976        | A[17] |
| E[7]  | 261.769        | 577.973        | 572.633        | 0.672   | 572.297        | E[16] |
| T[8]  | 295.451        | 534.995        | 529.619        | 0.672   | 529.283        | T[15] |
| A[9]  | 319.130        | 501.276        | 495.937        | 0.672   | 495.601        | A[14] |
| A[10] | 342.810        | 477.597        | 472.258        | 0.672   | 471.922        | A[13] |
| P[11] | 375.160        | 453.918        | 448.578        | 0.672   | 448.243        | P[12] |
| A[12] | 398.839        | 421.567        | 416.228        | 0.672   | 415.892        | A[11] |
| P[13] | 431.190        | 397.888        | 392.549        | 0.672   | 392.213        | P[10] |
| V[14] | 464.213        | 365.537        | 360.198        | 0.672   | 359.862        | V[9]  |
| E[15] | 507.227        | 332.514        | 327.175        | 0.672   | 326.839        | E[8]  |
| K[16] | 549.926        | 289.500        | 284.161        | 284.497 | 283.825        | K[7]  |
| S[17] | 605.592        | 246.802        | 241.462        | 241.798 | 241.126        | S[6]  |
| P[18] | 637.943        | 191.135        | 185.796        | 186.132 | 185.460        | P[9]  |
| A[19] | 661.622        | 158.785        | 153.445        | 153.781 | 153.109        | A[4]  |
| K[20] | 704.320        | 135.195        | 129.756        | 130.102 | 129.430        | K[3]  |
| K[21] | <b>747.018</b> | 92.407         | 87.068         | 87.404  | 86.732         | K[2]  |
| K[22] | <b>789.717</b> | 49.709         | 44.370         | 44.705  | 44.034         | K[1]  |



# sp | P68433 | H31\_MOUSE

DT<sup>Phospho</sup> NLCAIHAKRVTIMPK  
79.97

- ▶ fragmentation table for charge state 1+
- ▶ specType=etd
- ▶ score=40.89
- ▶ F112446.dat
- ▶ query=q24887\_p1
- ▶ precursor=664.333630
- ▶ chargePrecursor=3
- ▶ itol=0.5

| AA |    | c               | y               | z+1             | z+2             | z              | AA |
|----|----|-----------------|-----------------|-----------------|-----------------|----------------|----|
| D  | 1  | 133.061         | <b>1990.997</b> | 1074.978        | 0.000           | 1073.970       | D  |
| T  | 2  | 214.076         | 1875.970        | 1889.961        | 0.000           | 1358.941       | T  |
| N  | 3  | 438.118         | 1698.956        | 1878.937        | 1879.945        | 1677.920       | N  |
| L  | 4  | 541.202         | 1580.911        | 1564.894        | 1565.902        | 1563.886       | L  |
| C  | 5  | 644.211         | 1467.820        | 1451.810        | 1452.818        | 1450.800       | C  |
| A  | 6  | 715.240         | 1364.810        | 1348.801        | 1349.809        | 1347.793       | A  |
| I  | 7  | <b>828.332</b>  | 1293.782        | 1277.764        | <b>1278.771</b> | 1276.756       | I  |
| H  | 8  | 909.391         | 1180.690        | <b>1164.680</b> | 1165.687        | 1163.672       | H  |
| A  | 9  | 1038.428        | 1043.630        | 1027.621        | <b>1028.628</b> | 1026.613       | A  |
| K  | 10 | <b>1164.523</b> | 972.600         | <b>956.584</b>  | 957.591         | <b>955.576</b> | K  |
| R  | 11 | <b>1320.624</b> | 844.507         | <b>826.489</b>  | <b>829.496</b>  | 827.481        | R  |
| V  | 12 | <b>1419.693</b> | 688.400         | <b>672.387</b>  | 673.395         | 671.380        | V  |
| T  | 13 | <b>1520.740</b> | 580.330         | <b>573.319</b>  | <b>574.327</b>  | 572.311        | T  |
| I  | 14 | <b>1633.824</b> | 480.260         | <b>473.251</b>  | 473.259         | 471.264        | I  |
| M  | 15 | 1764.895        | <b>375.206</b>  | <b>359.187</b>  | 360.195         | 358.180        | M  |
| P  | 16 | <b>1861.918</b> | 244.160         | 238.147         | 239.155         | 237.139        | P  |
| K  | 17 | 1990.013        | 147.113         | 131.094         | 132.102         | 130.086        | K  |



# sp | P68433 | H31\_MOUSE

DT <sup>Phospho</sup> NLCAIHAKRVTIMPK  
79.97

- ▶ fragmentation table for charge state 2+
- ▶ specType=etd
- ▶ score=40.89
- ▶ F112446.dat
- ▶ query=q24887\_p1
- ▶ precursor=664.333630
- ▶ chargePrecursor=3
- ▶ itol=0.5

| AA    | c              | y              | z+1            | z+2     | z       | AA    |
|-------|----------------|----------------|----------------|---------|---------|-------|
| D[1]  | 67.034         | <b>996.002</b> | <b>987.993</b> | 0.504   | 987.489 | D[17] |
| T[2]  | 157.541        | <b>938.488</b> | <b>930.479</b> | 0.504   | 929.975 | T[16] |
| N[3]  | 214.562        | 847.981        | 839.972        | 840.476 | 839.468 | N[15] |
| L[4]  | 271.105        | 790.950        | 782.951        | 783.455 | 782.447 | L[14] |
| C[5]  | 322.609        | 734.418        | 726.409        | 726.913 | 725.905 | C[13] |
| A[6]  | 358.128        | 682.913        | 674.904        | 675.408 | 674.400 | A[12] |
| T[7]  | 414.670        | 547.395        | 539.385        | 539.889 | 538.882 | T[11] |
| H[8]  | 481.199        | 590.851        | 582.843        | 583.347 | 582.340 | H[10] |
| A[9]  | 518.718        | 522.323        | 514.314        | 514.818 | 513.810 | A[9]  |
| K[10] | 582.765        | 486.805        | 478.795        | 479.299 | 478.292 | K[8]  |
| R[11] | 660.816        | 422.757        | 414.748        | 415.252 | 414.244 | R[7]  |
| V[12] | 710.350        | 344.707        | 336.697        | 337.201 | 336.193 | V[6]  |
| T[13] | 760.874        | 295.173        | 287.163        | 287.667 | 286.659 | T[5]  |
| I[14] | 817.416        | 244.540        | 236.539        | 237.143 | 236.135 | I[4]  |
| M[15] | 882.936        | 188.107        | 180.097        | 180.601 | 179.593 | M[3]  |
| P[16] | <b>931.462</b> | 122.586        | 114.577        | 115.081 | 114.073 | P[2]  |
| K[17] | 995.510        | 74.060         | 66.051         | 66.555  | 65.547  | K[1]  |

# sp | P62806 | H4\_MOUSE

DVVY<sup>Phospho</sup><sub>79.97</sub> ALKRQGR TLYGFGG

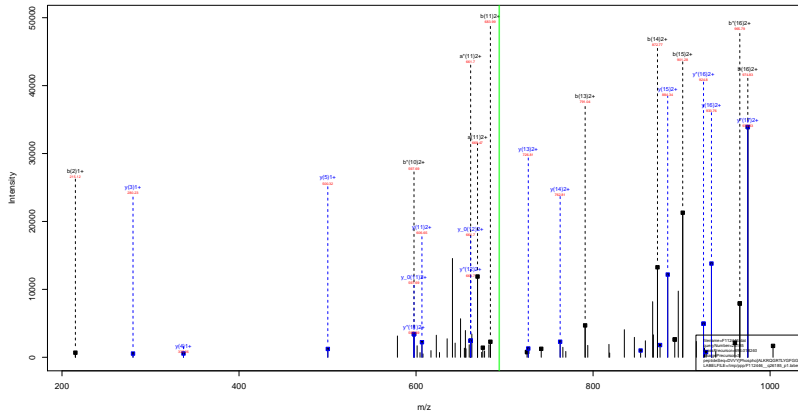

# sp | P62806 | H4\_MOUSE

DVVY<sup>Phospho</sup><sub>79.97</sub> ALKRQGR<sup>TLYGFGG</sup>

- ▶ fragmentation table for charge state 1+
- ▶ specType=cid
- ▶ score=30.88
- ▶ F112446.dat
- ▶ query=q26185\_p1
- ▶ precursor=694.018240
- ▶ chargePrecursor=3
- ▶ itol=0.5

| AA | a  | a'       | a+0   | b        | b'             | b+0      | y        | y'             | y+0            | AA       |         |     |
|----|----|----------|-------|----------|----------------|----------|----------|----------------|----------------|----------|---------|-----|
| D  | 0  | 98.039   | 0.000 | 72.050   | 118.064        | 0.000    | 98.039   | 2060.030       | 2061.014       | 2062.027 | D10     |     |
| V  | 2  | 137.138  | 0.000 | 189.089  | <b>215.183</b> | 0.000    | 137.138  | 1390.011       | 1391.004       | 1391.939 | V17     |     |
| V  | 3  | 259.176  | 0.000 | 289.100  | 244.172        | 0.000    | 259.177  | 1890.000       | 1891.019       | 1891.924 | V16     |     |
| V  | 4  | 329.209  | 0.000 | 321.100  | 320.201        | 0.000    | 329.193  | 1950.974       | 1949.947       | 1948.953 | V15     |     |
| A  | 5  | 460.243  | 0.000 | 382.210  | 428.218        | 0.000    | 436.227  | 1523.844       | 1508.818       | 1505.834 | A14     |     |
| L  | 6  | 513.257  | 0.000 | 495.251  | <b>741.322</b> | 0.000    | 723.211  | 1452.807       | 1435.780       | 1434.796 | L13     |     |
| R  | 7  | 591.282  | 0.000 | 523.241  | 588.243        | 0.000    | 592.289  | 831.468        | 1339.721       | 1332.686 | 830.212 | R12 |
| R  | 8  | 669.223  | 0.000 | 699.212  | 1025.212       | 2008.491 | 1037.237 | 1011.620       | 1194.901       | 1193.917 | R11     |     |
| Q  | 9  | 712.262  | 1.000 | 697.207  | 1107.211       | 1113.217 | 1036.200 | 1000.130       | 1019.509       | 1017.518 | Q10     |     |
| C  | 10 | 1124.200 | 1.000 | 1114.201 | 1212.200       | 1216.214 | 1152.207 | <b>927.468</b> | 811.442        | 1064.458 | C11     |     |
| R  | 11 | 1138.194 | 1.001 | 1130.200 | 1300.200       | 1349.214 | 1346.200 | 811.442        | <b>853.420</b> | 102.438  | R10     |     |
| T  | 12 | 1436.162 | 1.022 | 1423.161 | 1467.167       | 1486.170 | 1448.136 | 714.340        | 0.000          | 866.331  | T11     |     |
| L  | 13 | 1532.136 | 1.015 | 1519.130 | 1538.131       | 1563.134 | 1522.120 | 613.200        | 0.000          | 0.000    | L10     |     |
| V  | 14 | 1713.069 | 1.000 | 1701.060 | 1743.066       | 1778.068 | 1729.060 | <b>500.214</b> | 0.000          | 0.000    | V10     |     |
| G  | 15 | 1772.021 | 1.005 | 1754.020 | 1802.016       | 1783.009 | 1782.016 | <b>337.151</b> | 0.000          | 0.000    | G11     |     |
| F  | 16 | 1816.009 | 1.001 | 1801.010 | 1847.004       | 1831.000 | 1829.011 | <b>280.120</b> | 0.000          | 0.000    | F10     |     |
| C  | 17 | 1817.011 | 1.000 | 1804.000 | 2004.000       | 1887.010 | 1888.000 | 133.001        | 0.000          | 0.000    | C10     |     |
| C  | 18 | 2114.014 | 1.001 | 2002.000 | 2002.001       | 2014.000 | 2014.010 | 70.001         | 0.000          | 0.000    | C11     |     |

# sp | P62806 | H4\_MOUSE

DVVY<sup>Phospho</sup><sub>79.97</sub> ALKRQGRTLYGFGG

- ▶ fragmentation table for charge state 2+
- ▶ specType=cid
- ▶ score=30.88
- ▶ F112446.dat
- ▶ query=q26185\_p1
- ▶ precursor=694.018240
- ▶ chargePrecursor=3
- ▶ itol=0.5

| AA    | a              | a*             | a <sub>0</sub> | b               | b*             | b <sub>0</sub> | y              | y*             | y <sub>0</sub> | AA    |
|-------|----------------|----------------|----------------|-----------------|----------------|----------------|----------------|----------------|----------------|-------|
| D[1]  | 94.929         | 0.504          | 95.433         | 58.924          | 0.504          | 59.428         | 1040.522       | 1041.026       | 1041.530       | D[10] |
| V[2]  | 94.929         | 0.504          | 95.433         | 108.929         | 0.504          | 109.433        | 983.500        | <b>974.496</b> | 974.999        | V[13] |
| V[3]  | 143.502        | 0.504          | 144.006        | 157.503         | 0.504          | 158.007        | <b>833.475</b> | <b>824.961</b> | <b>824.469</b> | V[16] |
| V[4]  | 205.209        | 0.504          | 205.713        | 212.214         | 0.504          | 212.718        | <b>861.961</b> | <b>875.427</b> | 874.926        | V[15] |
| A[5]  | 300.620        | 0.504          | 301.124        | 314.623         | 0.504          | 315.127        | <b>762.426</b> | 763.922        | 764.420        | A[14] |
| L[6]  | 357.587        | 0.504          | 358.091        | 371.589         | 0.504          | 372.093        | <b>725.907</b> | 726.404        | 726.902        | L[8]  |
| R[7]  | 413.213        | 0.504          | 413.717        | 426.215         | 0.504          | 426.719        | 670.900        | <b>661.835</b> | <b>661.360</b> | R[12] |
| R[8]  | 469.255        | 0.504          | 469.759        | 482.257         | 0.504          | 482.761        | <b>606.318</b> | <b>597.804</b> | <b>597.312</b> | R[11] |
| Q[9]  | 525.297        | 0.504          | 525.801        | 538.299         | 0.504          | 538.803        | <b>567.269</b> | 567.766        | 568.264        | Q[10] |
| G[10] | 581.339        | 0.504          | 581.843        | 594.341         | 0.504          | 594.845        | 487.242        | 487.740        | 488.238        | G[11] |
| R[11] | <b>609.856</b> | <b>661.342</b> | 610.360        | <b>643.853</b>  | <b>675.340</b> | 674.846        | 435.224        | 435.722        | 436.220        | R[9]  |
| T[12] | 730.380        | 711.888        | 711.374        | 738.377         | <b>725.864</b> | <b>735.372</b> | 387.676        | 0.504          | 388.171        | T[7]  |
| L[13] | 776.522        | 760.408        | 761.916        | <b>790.919</b>  | 782.406        | 783.914        | 307.153        | 0.504          | 307.648        | L[6]  |
| V[14] | 818.013        | 800.980        | 801.484        | <b>827.451</b>  | 818.937        | 819.441        | 230.631        | 0.504          | 231.126        | V[5]  |
| G[15] | 886.564        | 878.452        | 877.956        | <b>900.961</b>  | <b>892.448</b> | <b>891.956</b> | 150.070        | 0.504          | 150.564        | G[4]  |
| F[16] | <b>960.498</b> | 951.387        | 951.891        | <b>974.496</b>  | <b>965.982</b> | <b>965.490</b> | 140.500        | 0.504          | 140.994        | F[8]  |
| G[17] | 1009.050       | 1000.938       | 1001.442       | <b>1063.906</b> | 1054.393       | 1054.897       | 87.028         | 0.504          | 87.522         | G[2]  |
| G[18] | 1117.200       | 1109.088       | 1109.592       | 1168.201        | 1158.684       | 1159.188       | 78.261         | 0.504          | 78.755         | G[1]  |

# sp | P62806 | H4\_MOUSE

DVVY<sup>Phospho</sup> ALKRQGR TLYGFGG  
79.97

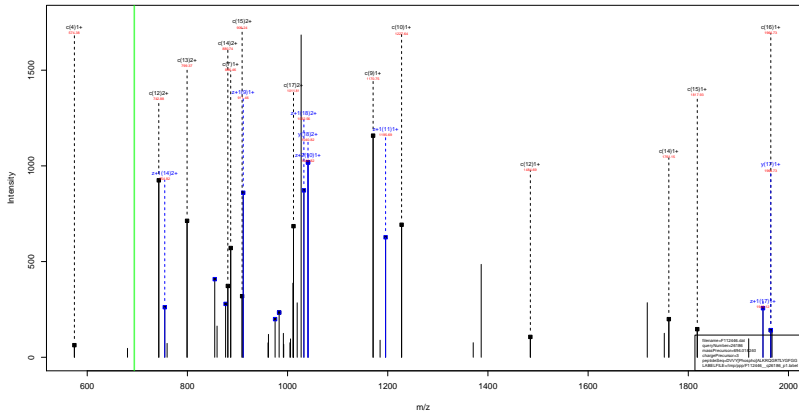

# sp | P62806 | H4\_MOUSE

DVVY<sup>Phospho</sup><sub>79.97</sub> ALKRQGRTLYGFGG

- ▶ fragmentation table for charge state 1+
- ▶ specType=etd
- ▶ score=49.53
- ▶ F112446.dat
- ▶ query=q26186.p1
- ▶ precursor=694.018240
- ▶ chargePrecursor=3
- ▶ itol=0.5

| AA    | c               | y               | z+1             | z+2             | z        | AA    |
|-------|-----------------|-----------------|-----------------|-----------------|----------|-------|
| D[1]  | 113.061         | 2080.938        | 2064.019        | 0.000           | 2061.011 | D[18] |
| V[2]  | 232.129         | <b>1965.011</b> | <b>1948.992</b> | 0.000           | 1947.984 | V[17] |
| V[3]  | 331.198         | 1865.942        | 1849.923        | 0.000           | 1848.916 | V[16] |
| V[4]  | <b>574.227</b>  | 1766.874        | 1750.855        | 0.000           | 1749.847 | V[15] |
| A[5]  | 665.264         | 1523.844        | 1507.825        | 0.000           | 1506.818 | A[14] |
| L[6]  | 798.348         | 1452.909        | 1436.890        | 0.000           | 1435.883 | L[13] |
| K[7]  | <b>886.443</b>  | 1339.723        | 1323.704        | 1324.712        | 1322.696 | K[12] |
| R[8]  | 1042.945        | 1211.628        | <b>1195.609</b> | 1196.617        | 1194.601 | R[11] |
| Q[9]  | <b>1170.603</b> | 1095.529        | 1030.508        | <b>1040.516</b> | 1038.500 | Q[10] |
| G[10] | <b>1227.625</b> | 927.466         | <b>911.450</b>  | 912.457         | 910.442  | G[9]  |
| R[11] | 1323.726        | 870.447         | <b>854.428</b>  | 855.436         | 853.420  | R[8]  |
| T[12] | <b>1484.773</b> | 714.340         | 668.317         | 669.325         | 667.310  | T[7]  |
| L[13] | 1597.857        | 613.268         | 587.279         | 588.287         | 586.271  | L[6]  |
| V[14] | <b>1760.921</b> | 500.214         | 484.195         | 485.203         | 483.187  | V[5]  |
| G[15] | <b>1817.942</b> | 337.151         | 321.132         | 322.140         | 320.124  | G[4]  |
| F[16] | <b>1965.011</b> | 280.129         | 264.110         | 265.118         | 263.103  | F[3]  |
| G[17] | 2022.032        | 133.961         | 117.942         | 118.950         | 116.934  | G[2]  |
| G[18] | 2079.054        | 78.939          | 60.921          | 61.929          | 59.914   | G[1]  |

# sp | P62806 | H4\_MOUSE

DVVY<sup>Phospho</sup><sub>79.97</sub> ALKRQGRTLYGFGG

- ▶ fragmentation table for charge state 2+
- ▶ specType=etd
- ▶ score=49.53
- ▶ F112446.dat
- ▶ query=q26186.p1
- ▶ precursor=694.018240
- ▶ chargePrecursor=3
- ▶ itol=0.5

| AA   | c               | y               | z+1             | z+2     | z        | AA   |
|------|-----------------|-----------------|-----------------|---------|----------|------|
| D 1  | 67.034          | <b>1040.522</b> | <b>1032.513</b> | 0.504   | 1032.009 | D 18 |
| V 2  | 116.568         | <b>983.009</b>  | <b>975.000</b>  | 0.504   | 974.496  | V 17 |
| V 3  | 166.102         | 933.475         | 925.465         | 0.504   | 924.961  | V 16 |
| V 4  | 267.617         | 883.941         | <b>875.931</b>  | 0.504   | 875.427  | V 15 |
| A 5  | 323.136         | 834.407         | <b>754.416</b>  | 0.504   | 753.912  | A 14 |
| L 6  | 379.670         | 728.907         | 718.898         | 0.504   | 718.394  | L 13 |
| R 7  | 443.725         | 670.365         | 662.356         | 662.860 | 661.852  | R 12 |
| R 8  | 521.776         | 608.318         | 598.308         | 598.812 | 597.804  | R 11 |
| Q 9  | 585.805         | 528.267         | 520.258         | 520.762 | 519.754  | Q 10 |
| G 10 | 614.316         | 464.238         | 456.228         | 456.732 | 455.725  | G 9  |
| R 11 | 697.369         | 435.727         | 427.718         | 428.222 | 427.214  | R 8  |
| T 12 | <b>742.890</b>  | 387.670         | 389.667         | 389.171 | 389.161  | T 7  |
| L 13 | <b>799.432</b>  | 307.153         | 299.143         | 299.647 | 298.639  | L 6  |
| V 14 | <b>809.964</b>  | 250.611         | 242.601         | 243.105 | 242.097  | V 5  |
| G 15 | <b>909.475</b>  | 169.079         | 161.070         | 161.574 | 160.566  | G 4  |
| F 16 | <b>983.009</b>  | 140.568         | 132.559         | 133.063 | 132.055  | F 3  |
| G 17 | <b>1011.520</b> | 67.034          | 59.025          | 59.529  | 58.521   | G 2  |
| G 18 | 1040.520        | 38.523          | 30.514          | 31.018  | 30.011   | G 1  |

# sp | Q6ZWY9 | H2B1C\_MOUSE

PEPAKS<sup>Phospho</sup> APAPKKGSKKAVTKAQQK  
79.97

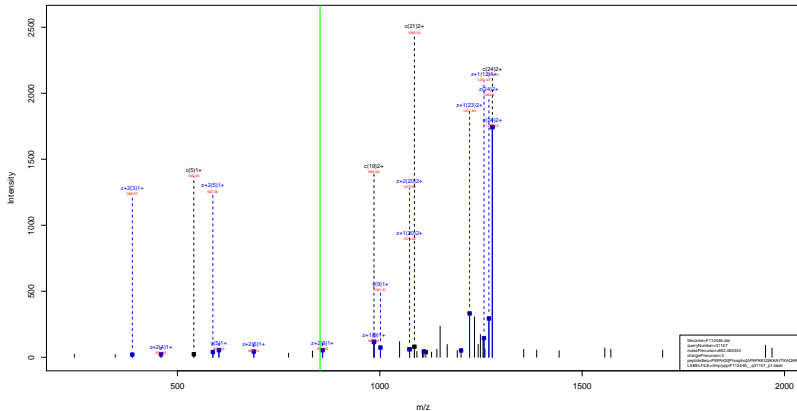



# sp | Q6ZWY9 | H2B1C\_MOUSE

PEPAKS<sup>Phospho</sup> APAPKKGSKKAVTKAQQK  
79.97

- ▶ fragmentation table for charge state 1+
- ▶ specType=etd
- ▶ score=18.70
- ▶ F112446.dat
- ▶ query=q31157.p1
- ▶ precursor=852.483340
- ▶ chargePrecursor=3
- ▶ itol=0.5

| AA | c  | y              | z+1             | z+2             | z              | AA       |       |
|----|----|----------------|-----------------|-----------------|----------------|----------|-------|
| P  | 1  | 115.067        | 2935.443        | 2539.425        | 0.000          | 2539.417 | P[24] |
| E  | 2  | 244.129        | 2438.391        | 2442.372        | 0.000          | 2441.364 | E[23] |
| P  | 3  | 341.182        | 2329.346        | 2333.329        | 0.000          | 2332.321 | P[22] |
| A  | 4  | 432.219        | 2232.295        | 2236.276        | 0.000          | 2235.269 | A[21] |
| K  | 5  | <b>540.314</b> | 2141.258        | 2145.239        | 2146.247       | 2144.232 | K[20] |
| S  | 6  | 707.312        | 2033.163        | 2037.144        | 2038.152       | 2036.137 | S[19] |
| A  | 7  | 776.349        | 1896.105        | 1899.106        | 1851.154       | 1849.139 | A[18] |
| P  | 8  | 875.402        | 1795.129        | 1779.109        | 1780.117       | 1778.101 | P[17] |
| A  | 9  | 946.439        | 1698.075        | 1682.056        | 1683.064       | 1681.049 | A[16] |
| T  | 10 | 1043.462       | 1627.038        | 1611.019        | 1612.027       | 1610.011 | T[15] |
| K  | 11 | 1171.567       | 1529.985        | 1513.966        | 1514.974       | 1512.958 | K[14] |
| K  | 12 | 1290.662       | 1401.890        | 1385.871        | 1386.879       | 1384.863 | K[13] |
| G  | 13 | 1356.704       | 1273.795        | <b>1257.776</b> | 1258.784       | 1256.768 | G[12] |
| S  | 14 | 1443.736       | 1216.774        | <b>1200.755</b> | 1201.763       | 1199.747 | S[11] |
| K  | 15 | 1571.831       | 1129.742        | <b>1113.723</b> | 1114.731       | 1112.715 | K[10] |
| K  | 16 | 1699.925       | <b>1061.647</b> | <b>985.628</b>  | 986.636        | 984.620  | K[9]  |
| A  | 17 | 1770.963       | 873.592         | 857.573         | <b>858.541</b> | 856.525  | A[8]  |
| V  | 18 | 1870.011       | 802.515         | 786.496         | 787.504        | 785.488  | V[7]  |
| T  | 19 | 1971.079       | 703.448         | 687.427         | <b>688.435</b> | 686.420  | T[6]  |
| K  | 20 | 2090.174       | <b>602.398</b>  | 596.380         | <b>587.388</b> | 585.372  | K[5]  |
| A  | 21 | 2170.211       | 474.303         | 458.285         | <b>459.293</b> | 457.277  | A[4]  |
| Q  | 22 | 2298.269       | 403.266         | 387.248         | <b>388.255</b> | 386.240  | Q[3]  |
| K  | 23 | 2429.364       | 278.208         | 259.189         | 259.197        | 256.181  | K[2]  |
| K  | 24 | 2554.459       | 147.113         | 131.094         | 132.102        | 130.086  | K[1]  |

# sp | Q6ZWY9 | H2B1C\_MOUSE

PEPAKS<sup>Phospho</sup> 79.97 APAPKKGSKKAVTKAQQK

- ▶ fragmentation table for charge state 2+
- ▶ specType=etd
- ▶ score=18.70
- ▶ F112446.dat
- ▶ query=q31157.p1
- ▶ precursor=852.483340
- ▶ chargePrecursor=3
- ▶ itol=0.5

| AA | c  | y               | z+1             | z+2             | z               | AA              |       |
|----|----|-----------------|-----------------|-----------------|-----------------|-----------------|-------|
| F  | 1  | 58.047          | <b>1278.225</b> | 1270.218        | 0.504           | <b>1269.712</b> | P[20] |
| E  | 2  | 122.568         | 1220.699        | <b>1221.690</b> | 0.504           | 1221.186        | E[23] |
| F  | 3  | 171.095         | 1165.179        | 1157.168        | 0.504           | 1156.664        | F[22] |
| A  | 4  | 208.611         | 1116.651        | <b>1108.642</b> | 0.504           | 1109.139        | A[21] |
| K  | 5  | 270.661         | 1081.133        | <b>1073.123</b> | <b>1073.627</b> | 1072.610        | K[20] |
| S  | 6  | 354.160         | 1017.085        | 1009.076        | 1009.580        | 1008.574        | S[19] |
| A  | 7  | 389.676         | 933.586         | 925.577         | 926.681         | 925.671         | A[18] |
| P  | 8  | 438.205         | 898.067         | 890.058         | 890.562         | 889.554         | P[17] |
| A  | 9  | 473.721         | 849.541         | 841.532         | 842.036         | 841.026         | A[16] |
| T  | 10 | 522.250         | 814.021         | 806.013         | 806.517         | 805.509         | T[15] |
| K  | 11 | 586.297         | 765.496         | 757.487         | 757.991         | 756.983         | K[14] |
| K  | 12 | 650.345         | 701.449         | 693.439         | 693.943         | 692.935         | K[13] |
| G  | 13 | 678.655         | 637.401         | 629.392         | 629.896         | 628.888         | G[12] |
| S  | 14 | 722.171         | 608.890         | 600.881         | 601.385         | 600.377         | S[11] |
| K  | 15 | 786.409         | 568.374         | 560.365         | 560.869         | 559.861         | K[10] |
| K  | 16 | 850.466         | 501.327         | 493.318         | 493.821         | 492.814         | K[9]  |
| A  | 17 | 885.985         | 437.279         | 429.270         | 429.774         | 428.766         | A[8]  |
| V  | 18 | 935.519         | 401.761         | 393.752         | 394.255         | 393.248         | V[7]  |
| T  | 19 | <b>986.043</b>  | 352.217         | 344.211         | 344.711         | 343.713         | T[6]  |
| K  | 20 | 1020.104        | 301.703         | 293.693         | 294.197         | 293.190         | K[5]  |
| A  | 21 | <b>1085.609</b> | 237.655         | 229.646         | 230.150         | 229.143         | A[4]  |
| Q  | 22 | 1149.638        | 202.137         | 194.127         | 194.631         | 193.624         | Q[3]  |
| K  | 23 | 1213.686        | 138.108         | 130.098         | 130.602         | 129.594         | K[2]  |
| K  | 24 | <b>1277.733</b> | 74.060          | 66.051          | 66.555          | 65.547          | K[1]  |



# sp | P62806 | H4\_MOUSE

DAVYTEHAKRK Acetyl 42.01 TVTAM Oxidation 15.99

- ▶ fragmentation table for charge state 1+
- ▶ specType=cid
- ▶ score=31.12
- ▶ F112447.dat
- ▶ query=q24681\_p1
- ▶ precursor=990.497900
- ▶ chargePrecursor=2
- ▶ itol=0.5

| AA  | a              | y*       | a,y      | b               | b*       | b,y            | v               | y*       | a,y            | AA  |
|-----|----------------|----------|----------|-----------------|----------|----------------|-----------------|----------|----------------|-----|
| T1  | 1361.034       | 0.000    | 0.000    | 1149.034        | 0.000    | 1000.000       | 1000.000        | 1000.000 | 1000.000       | T1  |
| A12 | 1139.018       | 0.000    | 143.000  | 1077.018        | 0.000    | 1000.000       | 1000.000        | 1000.000 | 1000.000       | A12 |
| V13 | 1090.435       | 0.000    | 390.130  | 1008.140        | 0.000    | 1000.100       | 1181.001        | 1178.000 | 1176.001       | V13 |
| T14 | 1069.031       | 0.000    | 385.180  | 1007.180        | 0.000    | 1001.177       | 1089.001        | 1077.000 | 1076.002       | T14 |
| V15 | 1002.000       | 0.000    | 508.000  | 1000.000        | 0.000    | <b>637.240</b> | 1000.000        | 1000.000 | 1000.000       | V15 |
| T16 | 1021.034       | 0.000    | 905.261  | 985.260         | 0.000    | <b>637.280</b> | <b>1430.742</b> | 1413.710 | 1412.731       | T16 |
| E17 | 1000.000       | 0.000    | 130.100  | 869.900         | 0.000    | <b>762.230</b> | 1117.000        | 1117.000 | 1111.000       | E17 |
| R18 | <b>990.495</b> | 0.000    | 81.300   | <b>917.400</b>  | 0.000    | <b>899.280</b> | <b>1260.012</b> | 1180.000 | 1180.000       | R18 |
| A19 | 1000.000       | 0.000    | 990.430  | 990.430         | 0.000    | <b>899.280</b> | <b>1003.593</b> | 1000.000 | 1000.000       | A19 |
| K20 | 1000.000       | 0.000    | 1100.000 | <b>1116.510</b> | 0.000    | 1000.000       | 1000.000        | 1000.000 | 1000.000       | K20 |
| R11 | 1204.030       | 1207.000 | 1200.000 | <b>1277.030</b> | 1200.000 | 1200.000       | <b>964.481</b>  | 967.430  | <b>946.450</b> | R11 |
| R12 | 1214.014       | 1207.010 | 1200.010 | <b>1344.710</b> | 1200.010 | 1200.010       | <b>705.300</b>  | 0.000    | 0.000          | R12 |
| T13 | 1010.000       | 1000.100 | 1000.100 | 1000.100        | 1000.100 | 1000.100       | 1000.100        | 1000.100 | 1000.100       | T13 |
| V14 | 1014.000       | 1007.000 | 1000.000 | <b>1042.050</b> | 1000.000 | 1000.000       | 1000.000        | 1000.000 | 1000.000       | V14 |
| T15 | 1110.000       | 1000.000 | 1000.000 | 1000.000        | 1000.000 | 1000.000       | 1000.000        | 1000.000 | 1000.000       | T15 |
| A16 | 1100.000       | 1000.000 | 1000.000 | 1000.000        | 1000.000 | 1000.000       | 1000.000        | 1000.000 | 1000.000       | A16 |
| M17 | 1010.000       | 1000.000 | 1000.000 | 1000.000        | 1000.000 | 1000.000       | 1000.000        | 1000.000 | 1000.000       | M17 |

# sp | P62806 | H4\_MOUSE

DAVITYTEHAKRK <sup>Acetyl</sup> 42.01 <sup>TVTAM</sup> <sup>Oxidation</sup> 15.99

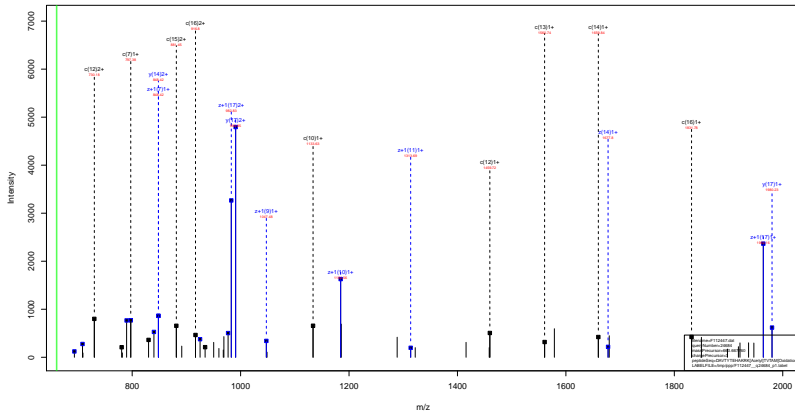

# sp | P62806 | H4\_MOUSE

DAVYTEHAKRK Acetyl 42.01 TVTAM Oxidation 15.99

- ▶ fragmentation table for charge state 1+
- ▶ specType=etd
- ▶ score=64.28
- ▶ F112447.dat
- ▶ query=q24684\_p1
- ▶ precursor=660.667760
- ▶ chargePrecursor=3
- ▶ itol=0.5

| AA | c               | y               | a+1             | a+2            | z               | AA |
|----|-----------------|-----------------|-----------------|----------------|-----------------|----|
| D  | 131.061         | <b>1979.906</b> | <b>1963.967</b> | 0.000          | 1962.959        | D  |
| A  | 204.208         | 1894.929        | 1848.940        | 0.000          | 1847.932        | A  |
| V  | 303.166         | 1793.921        | 1777.903        | 0.000          | 1776.895        | V  |
| T  | 404.214         | 1694.853        | 1678.834        | 0.000          | <b>1677.826</b> | T  |
| Y  | 507.277         | 1593.805        | 1577.787        | 0.000          | 1576.779        | Y  |
| F  | 608.325         | 1430.742        | 1414.723        | 0.000          | 1413.715        | F  |
| E  | <b>797.368</b>  | 1329.694        | <b>1313.676</b> | 0.000          | 1312.668        | E  |
| H  | <b>934.426</b>  | 1200.652        | <b>1184.633</b> | 0.000          | 1183.625        | H  |
| A  | 1025.484        | 1063.593        | <b>1047.574</b> | 0.000          | 1046.566        | A  |
| K  | <b>1133.559</b> | 902.550         | <b>976.537</b>  | 977.545        | 975.520         | K  |
| R  | 1289.600        | 804.461         | <b>848.442</b>  | 860.450        | 847.434         | R  |
| K  | <b>1459.765</b> | <b>708.360</b>  | 692.341         | <b>693.349</b> | 691.331         | K  |
| T  | <b>1566.813</b> | 538.254         | 522.235         | 523.243        | 521.226         | T  |
| V  | <b>1659.881</b> | 437.200         | 421.188         | 422.196        | 420.180         | V  |
| T  | 1760.929        | 338.138         | 322.119         | 323.127        | 321.111         | T  |
| A  | <b>1831.966</b> | 237.090         | 221.072         | 222.079        | 220.064         | A  |
| M  | 1979.001        | 166.053         | 150.035         | 151.042        | 149.027         | M  |

# sp | P62806 | H4\_MOUSE

DAVYTEHAKRK <sup>Acetyl</sup> 42.01 TVTAM <sup>Oxidation</sup> 15.99

- ▶ fragmentation table for charge state 2+
- ▶ specType=etd
- ▶ score=64.28
- ▶ F112447.dat
- ▶ query=q24684\_p1
- ▶ precursor=660.667760
- ▶ chargePrecursor=3
- ▶ itol=0.5

| AA    | c              | y              | z+1            | z+2     | z       | AA    |
|-------|----------------|----------------|----------------|---------|---------|-------|
| D[1]  | 67.034         | <b>990.496</b> | <b>982.487</b> | 0.504   | 981.983 | D[17] |
| A[2]  | 102.553        | 932.983        | <b>924.974</b> | 0.504   | 924.470 | A[16] |
| V[3]  | 152.087        | 897.464        | 889.455        | 0.504   | 888.951 | V[15] |
| T[4]  | 202.611        | <b>847.930</b> | <b>839.921</b> | 0.504   | 839.417 | T[14] |
| Y[5]  | 284.142        | <b>797.406</b> | <b>789.397</b> | 0.504   | 788.893 | Y[13] |
| F[6]  | 334.666        | 715.875        | 707.865        | 0.504   | 707.361 | F[12] |
| E[7]  | 399.187        | 665.351        | 657.341        | 0.504   | 656.838 | E[11] |
| H[8]  | 467.717        | 600.830        | 592.820        | 0.504   | 592.316 | H[10] |
| A[9]  | 503.235        | 532.300        | 524.291        | 0.504   | 523.787 | A[9]  |
| K[10] | 567.283        | 496.782        | 488.772        | 489.276 | 488.268 | K[8]  |
| R[11] | 645.333        | 432.734        | 424.725        | 425.229 | 424.221 | R[7]  |
| K[12] | <b>730.386</b> | 354.683        | 346.674        | 347.178 | 346.170 | K[6]  |
| T[13] | <b>780.910</b> | 269.631        | 261.621        | 262.125 | 261.117 | T[5]  |
| V[14] | <b>830.444</b> | 219.107        | 211.097        | 211.601 | 210.594 | V[4]  |
| T[15] | <b>880.968</b> | 169.573        | 161.563        | 162.067 | 161.059 | T[3]  |
| A[16] | <b>916.487</b> | 119.049        | 111.039        | 111.543 | 110.536 | A[2]  |
| M[17] | 990.004        | 833.330        | 73.521         | 78.025  | 75.017  | M[1]  |

# sp | P62806 | H4\_MOUSE

DAVYTEHAK <sup>Acetyl</sup> 42.01 RKTVTAM <sup>Oxidation</sup> 15.99

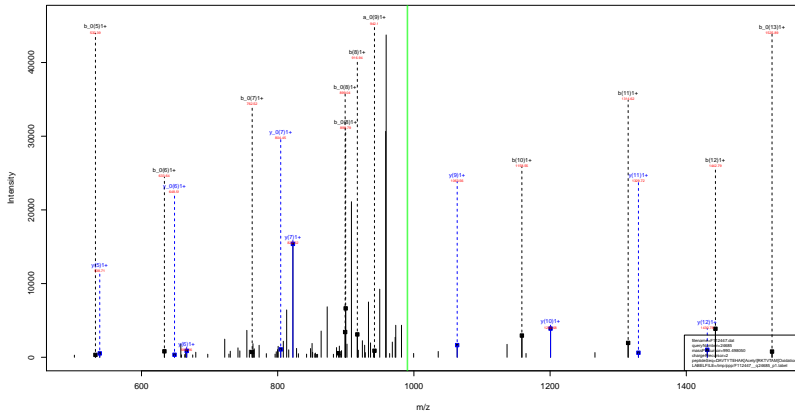



# sp | P62806 | H4\_MOUSE

DAVYTEHAK Acetyl 42.01 RKTVTAM Oxidation 15.99

- ▶ fragmentation table for charge state 1+
- ▶ specType=cid
- ▶ score=45.15
- ▶ F112447.dat
- ▶ query=q24685\_p1
- ▶ precursor=990.498050
- ▶ chargePrecursor=2
- ▶ itol=0.5

| AA  | a        | a*       | a <sub>0</sub> | b        | b*       | b <sub>0</sub> | y        | y*       | y <sub>0</sub> | AA  |
|-----|----------|----------|----------------|----------|----------|----------------|----------|----------|----------------|-----|
| D1  | 80.050   | 0.000    | 70.050         | 116.054  | 0.000    | 106.054        | 1079.028 | 1062.950 | 1081.076       | D17 |
| A2  | 179.078  | 0.000    | 141.099        | 137.071  | 0.000    | 109.061        | 1064.019 | 1047.952 | 1068.064       | A16 |
| V3  | 258.145  | 0.000    | 240.134        | 208.140  | 0.000    | 208.140        | 1193.101 | 1176.895 | 1176.911       | V15 |
| T4  | 338.011  | 0.000    | 341.181        | 387.187  | 0.000    | 307.177        | 1004.053 | 1017.026 | 1016.042       | T14 |
| V5  | 418.056  | 0.000    | 408.049        | 458.041  | 0.000    | 417.041        | 1003.093 | 1003.199 | 1003.706       | V13 |
| T6  | 497.104  | 0.000    | 488.261        | 551.268  | 0.000    | 512.240        | 1033.288 | 1030.742 | 1031.711       | T12 |
| E7  | 576.159  | 0.000    | 578.150        | 651.150  | 0.000    | 602.110        | 1120.494 | 1122.060 | 1111.000       | E11 |
| R8  | 655.212  | 0.000    | 657.200        | 717.200  | 0.000    | 699.160        | 1200.652 | 1198.000 | 1200.000       | R10 |
| A9  | 734.264  | 0.000    | 742.432        | 808.432  | 0.000    | 799.400        | 1063.593 | 1040.500 | 1040.502       | A15 |
| K10 | 813.316  | 1103.101 | 1102.710       | 1158.343 | 1041.614 | 1140.610       | 692.460  | 690.520  | 678.040        | K16 |
| R11 | 892.369  | 1200.652 | 1200.650       | 1214.644 | 1207.617 | 1200.613       | 822.760  | 800.420  | 800.440        | R17 |
| R12 | 971.424  | 1297.711 | 1299.121       | 1342.730 | 1295.712 | 1294.708       | 600.100  | 600.300  | 648.130        | R19 |
| T13 | 1050.476 | 1400.100 | 1401.911       | 1543.700 | 1530.700 | 1525.776       | 538.354  | 0.000    | 520.384        | T18 |
| V14 | 1129.528 | 1507.851 | 1509.849       | 1642.850 | 1625.820 | 1624.844       | 417.200  | 0.000    | 410.100        | V16 |
| T15 | 1208.580 | 1606.891 | 1609.891       | 1743.890 | 1729.870 | 1729.866       | 318.410  | 0.000    | 308.170        | T19 |
| A16 | 1287.632 | 1705.933 | 1708.934       | 1814.940 | 1797.911 | 1796.929       | 217.000  | 0.000    | 0.000          | A18 |
| M17 | 1366.684 | 1804.975 | 1803.980       | 1914.970 | 1894.940 | 1893.954       | 108.000  | 0.000    | 0.000          | M19 |



# sp | P62806 | H4\_MOUSE

DAVYTEHAK <sup>Acetyl</sup> 42.01 RKTVTAM <sup>Oxidation</sup> 15.99

- ▶ fragmentation table for charge state 1+
- ▶ specType=etd
- ▶ score=44.87
- ▶ F112447.dat
- ▶ query=q24686\_p1
- ▶ precursor=990.498050
- ▶ chargePrecursor=2
- ▶ itol=0.5

| AA | c               | y               | a+1             | a+2            | z               | AA |
|----|-----------------|-----------------|-----------------|----------------|-----------------|----|
| D  | 133.061         | <b>1979.806</b> | 1063.967        | 0.000          | <b>1962.959</b> | D  |
| A  | 204.208         | 1894.927        | <b>1848.500</b> | 0.000          | 1847.912        | A  |
| V  | 303.166         | 1793.821        | 1777.863        | 0.000          | 1775.895        | V  |
| T  | 404.214         | 1694.853        | <b>1678.834</b> | 0.000          | 1677.826        | T  |
| Y  | 507.277         | 1593.805        | <b>1577.787</b> | 0.000          | 1576.779        | Y  |
| T  | 608.325         | 1493.742        | 1414.723        | 0.000          | 1413.715        | T  |
| E  | 707.368         | 1329.894        | <b>1313.676</b> | 0.000          | 1312.668        | E  |
| H  | 824.426         | 1200.951        | <b>1184.633</b> | 0.000          | 1183.625        | H  |
| A  | 1005.404        | 1063.573        | <b>1047.574</b> | 0.000          | 1046.566        | A  |
| K  | 1175.569        | 992.550         | 976.537         | <b>977.545</b> | 975.520         | K  |
| R  | 1331.670        | 822.450         | <b>806.431</b>  | <b>807.439</b> | 805.424         | R  |
| K  | 1459.765        | 666.349         | 650.330         | 651.338        | 649.323         | K  |
| T  | 1580.813        | 538.254         | 522.235         | 523.243        | 521.228         | T  |
| V  | 1659.881        | 437.200         | 421.188         | 422.196        | 420.181         | V  |
| T  | <b>1760.929</b> | 338.138         | 322.119         | 323.127        | 321.111         | T  |
| A  | 1831.966        | 237.090         | 221.072         | 222.079        | 220.064         | A  |
| M  | 1979.801        | 166.053         | 150.035         | 151.042        | 149.027         | M  |



# sp | P62806 | H4\_MOUSE

[Acetyl]SGRGKGGKGLGKGGAKRHRK Trimethyl VLR  
42.05

- ▶ fragmentation table for charge state 1+
- ▶ specType=etd
- ▶ score=97.38
- ▶ F112447.dat
- ▶ query=q29996.p1
- ▶ precursor=611.878650
- ▶ chargePrecursor=4
- ▶ itol=0.5

| AA    | c               | y               | z+1             | z+2             | z        | AA    |
|-------|-----------------|-----------------|-----------------|-----------------|----------|-------|
| S[1]  | 147.076         | 2444.491        | 2438.472        | 0.000           | 2427.464 | S[23] |
| G[2]  | 204.098         | 2315.448        | 2299.430        | 0.000           | 2298.422 | G[22] |
| R[3]  | <b>360.199</b>  | 2258.427        | 2242.408        | 2243.416        | 2241.400 | R[21] |
| G[4]  | <b>417.220</b>  | 2102.320        | 2086.302        | 2087.315        | 2085.299 | G[20] |
| K[5]  | <b>545.315</b>  | 2045.304        | 2029.286        | 2030.293        | 2028.276 | K[19] |
| G[6]  | <b>602.337</b>  | 1931.259        | 1931.191        | 1932.198        | 1930.181 | G[18] |
| G[7]  | <b>659.358</b>  | 1880.188        | <b>1844.169</b> | 1845.177        | 1843.161 | G[17] |
| K[8]  | <b>787.453</b>  | 1801.166        | 1787.148        | 1788.156        | 1786.140 | K[16] |
| G[9]  | <b>844.475</b>  | 1675.071        | <b>1659.053</b> | 1660.061        | 1658.045 | G[15] |
| L[10] | <b>957.559</b>  | 1618.050        | 1602.031        | 1603.039        | 1601.023 | L[14] |
| G[11] | <b>1014.580</b> | 1504.965        | 1493.957        | <b>1489.955</b> | 1487.939 | G[13] |
| R[12] | <b>1142.675</b> | 1447.944        | <b>1431.926</b> | 1432.934        | 1430.918 | R[12] |
| G[13] | 1199.697        | 1319.849        | 1303.831        | <b>1304.839</b> | 1302.823 | G[11] |
| G[14] | 1256.718        | 1262.828        | 1246.809        | <b>1247.817</b> | 1245.801 | G[10] |
| A[15] | <b>1327.755</b> | <b>1205.807</b> | 1189.788        | 1190.796        | 1188.780 | A[9]  |
| K[16] | <b>1455.850</b> | 1134.769        | 1118.751        | 1119.759        | 1117.743 | K[8]  |
| R[17] | 1611.851        | 1006.674        | 990.655         | <b>991.664</b>  | 989.648  | R[7]  |
| R[18] | 1769.010        | 890.571         | <b>834.555</b>  | 835.563         | 833.547  | R[6]  |
| R[19] | <b>1905.111</b> | 713.514         | <b>697.496</b>  | <b>698.504</b>  | 696.488  | R[5]  |
| K[20] | 2075.253        | 557.413         | <b>541.395</b>  | <b>542.402</b>  | 540.387  | K[4]  |
| V[21] | 2174.322        | 387.271         | 371.253         | 372.261         | 370.245  | V[3]  |
| L[22] | 2287.406        | 298.203         | 272.184         | 273.192         | 271.176  | L[2]  |
| R[23] | 2443.507        | 175.119         | 159.100         | 160.108         | 158.092  | R[1]  |

# sp | P62806 | H4\_MOUSE

[Acetyl]SGRGKGGKGLGKGGAKRHRK<sup>Trimethyl</sup>VLR  
42.05

- ▶ fragmentation table for charge state 2+
- ▶ specType=etd
- ▶ score=97.38
- ▶ F112447.dat
- ▶ query=q29996\_p1
- ▶ precursor=611.878650
- ▶ chargePrecursor=4
- ▶ itol=0.5

| AA    | c               | y               | z+1             | z+2             | z               | AA    |
|-------|-----------------|-----------------|-----------------|-----------------|-----------------|-------|
| S[1]  | 74.042          | <b>1222.749</b> | 1224.740        | 0.504           | 1214.230        | S[2]  |
| G[2]  | 102.553         | 1150.228        | 1150.218        | 0.504           | 1140.715        | G[2]  |
| R[3]  | 180.603         | 1120.717        | <b>1121.708</b> | <b>1122.212</b> | 1121.204        | R[2]  |
| G[4]  | 209.114         | 1051.667        | 1043.657        | <b>1044.161</b> | 1043.153        | G[20] |
| K[5]  | 273.161         | 1021.156        | <b>1015.146</b> | <b>1015.650</b> | <b>1014.643</b> | K[19] |
| G[6]  | 301.672         | 959.205         | 951.195         | 951.189         | 950.595         | G[18] |
| G[7]  | 330.183         | 930.595         | 922.585         | <b>923.092</b>  | 922.084         | G[17] |
| K[8]  | 394.230         | 902.087         | <b>894.077</b>  | <b>894.581</b>  | 893.574         | K[16] |
| G[9]  | 422.741         | 838.039         | <b>830.030</b>  | <b>830.534</b>  | 829.520         | G[15] |
| L[10] | 479.283         | 809.529         | <b>801.519</b>  | <b>802.023</b>  | 801.010         | L[14] |
| G[11] | 507.794         | 754.967         | <b>744.977</b>  | <b>745.481</b>  | 744.473         | G[13] |
| K[12] | 571.844         | 724.676         | <b>716.466</b>  | <b>716.970</b>  | 715.961         | K[12] |
| G[13] | 600.352         | 660.425         | <b>652.419</b>  | <b>652.923</b>  | 651.915         | G[11] |
| G[14] | 638.863         | 631.918         | <b>623.908</b>  | <b>624.412</b>  | 623.404         | G[10] |
| A[15] | 664.371         | 603.407         | 595.398         | 595.901         | 594.894         | A[9]  |
| K[16] | 728.420         | 567.895         | <b>559.879</b>  | <b>560.383</b>  | 559.375         | K[8]  |
| R[17] | 698.478         | 503.841         | <b>495.832</b>  | <b>496.335</b>  | 495.327         | R[7]  |
| H[18] | <b>875.809</b>  | 425.790         | <b>417.781</b>  | 418.285         | <b>417.277</b>  | H[6]  |
| R[19] | 853.059         | 357.261         | 349.252         | 349.755         | 348.749         | R[5]  |
| K[20] | <b>1038.130</b> | 279.210         | 271.201         | 271.705         | 270.697         | K[4]  |
| V[21] | <b>1087.665</b> | 194.139         | 186.130         | 186.634         | 185.620         | V[9]  |
| L[22] | 1144.207        | 144.605         | 136.595         | 137.100         | 136.092         | L[3]  |
| R[23] | 1222.257        | 98.051          | 89.044          | 89.558          | 79.550          | R[1]  |

# sp | P62806 | H4\_MOUSE

[Acetyl]SGRGKGGKGLGKGGAKRHRK<sup>Trimethyl</sup>VLR<sub>42.05</sub>

- ▶ fragmentation table for charge state 3+
- ▶ specType=etd
- ▶ score=97.38
- ▶ F112447.dat
- ▶ query=q29996.p1
- ▶ precursor=611.878650
- ▶ chargePrecursor=4
- ▶ itol=0.5

| AA    | c       | y              | z+1            | z+2            | z              | AA    |
|-------|---------|----------------|----------------|----------------|----------------|-------|
| S[1]  | 49.697  | <b>815.502</b> | <b>810.162</b> | 0.672          | 809.826        | S[23] |
| G[2]  | 68.704  | 772.488        | <b>767.148</b> | 0.672          | 766.812        | G[22] |
| R[3]  | 120.738 | 753.480        | <b>748.141</b> | <b>743.477</b> | 747.805        | R[21] |
| G[4]  | 139.745 | 701.447        | 696.107        | 695.443        | 695.771        | G[20] |
| K[5]  | 182.443 | 682.440        | 677.100        | 677.436        | 676.764        | K[19] |
| G[6]  | 201.450 | 639.741        | 634.402        | 634.738        | 634.066        | G[18] |
| G[7]  | 220.458 | 620.734        | 615.395        | 615.731        | 615.059        | G[17] |
| K[8]  | 263.156 | 601.727        | 596.387        | 596.723        | 596.051        | K[16] |
| G[9]  | 282.163 | 559.029        | 553.689        | 554.025        | 553.353        | G[15] |
| L[10] | 319.858 | 540.022        | 534.682        | 535.018        | 534.346        | L[14] |
| G[11] | 338.865 | 502.327        | <b>496.987</b> | 497.323        | <b>496.651</b> | G[13] |
| K[12] | 381.563 | 483.320        | 477.980        | 478.316        | 477.644        | K[12] |
| G[13] | 400.570 | 440.621        | 435.282        | 435.618        | 434.946        | G[11] |
| G[14] | 419.578 | 421.614        | 416.275        | 416.611        | 415.939        | G[10] |
| A[15] | 443.257 | 402.607        | 397.267        | 397.603        | 396.932        | A[9]  |
| K[16] | 485.955 | 378.928        | 373.588        | 373.924        | 373.252        | K[8]  |
| R[17] | 537.989 | 336.230        | 330.890        | 331.226        | 330.554        | R[7]  |
| H[18] | 583.675 | 284.196        | 278.856        | 279.192        | 278.520        | H[6]  |
| R[19] | 635.709 | 238.510        | 233.170        | 233.506        | 232.834        | R[5]  |
| K[20] | 692.423 | 186.476        | 181.136        | 181.472        | 180.800        | K[4]  |
| V[21] | 726.445 | 159.762        | 154.422        | 154.758        | 154.086        | V[3]  |
| L[22] | 763.140 | 96.739         | 91.400         | 91.736         | 91.064         | L[2]  |
| R[23] | 815.174 | 59.045         | 53.705         | 54.041         | 53.369         | R[1]  |

# sp | P62806 | H4\_MOUSE

[Acetyl]SGRGKGGKGLGKGGAK <sup>Acetyl</sup>RHRK <sup>Trimethyl</sup>VLR  
42.01 42.05

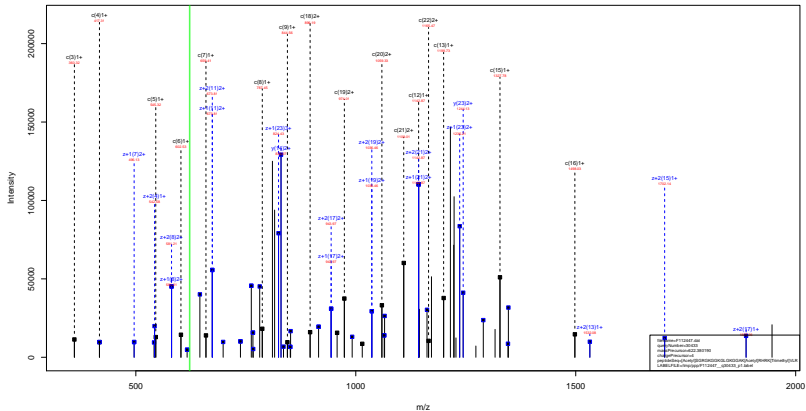



# sp | P62806 | H4\_MOUSE

[Acetyl]SGRGKGGKGLGKGGAK<sup>Acetyl</sup> RHRK<sup>Trimethyl</sup> VLR<sup>42.01</sup> <sup>42.05</sup>

- ▶ fragmentation table for charge state 1+
- ▶ specType=etd
- ▶ score=100.75
- ▶ F112447.dat
- ▶ query=q30433\_p1
- ▶ precursor=622.380190
- ▶ chargePrecursor=4
- ▶ itol=0.5

| AA    | c               | y        | z+1             | z+2             | z        | AA    |
|-------|-----------------|----------|-----------------|-----------------|----------|-------|
| S[1]  | 147.076         | 2486.501 | 2470.485        | 0.000           | 2469.478 | S[23] |
| G[2]  | 304.098         | 2357.459 | 2341.440        | 0.000           | 2340.433 | G[22] |
| R[3]  | <b>360.199</b>  | 2300.437 | 2284.419        | 2285.427        | 2283.411 | R[21] |
| G[4]  | <b>417.220</b>  | 2144.338 | 2128.318        | 2129.325        | 2127.310 | G[20] |
| K[5]  | <b>543.315</b>  | 2007.315 | 2001.298        | 2072.304        | 2070.288 | K[19] |
| G[6]  | <b>602.137</b>  | 1959.220 | 1943.201        | 1944.209        | 1942.191 | G[18] |
| G[7]  | <b>659.358</b>  | 1902.198 | 1886.180        | <b>1887.188</b> | 1885.172 | G[17] |
| K[8]  | <b>787.453</b>  | 1845.177 | 1829.158        | 1830.166        | 1828.150 | K[16] |
| G[9]  | <b>844.475</b>  | 1737.082 | 1701.063        | <b>1702.071</b> | 1700.055 | G[15] |
| L[10] | <b>957.559</b>  | 1660.061 | 1644.042        | 1645.050        | 1643.034 | L[14] |
| G[11] | <b>1014.580</b> | 1546.976 | 1530.958        | <b>1531.966</b> | 1529.950 | G[13] |
| R[12] | <b>1142.675</b> | 1489.955 | 1473.938        | 1474.944        | 1472.928 | R[12] |
| G[13] | <b>1199.697</b> | 1391.860 | <b>1345.841</b> | <b>1346.849</b> | 1344.833 | G[11] |
| G[14] | 1256.718        | 1304.839 | 1288.820        | <b>1289.828</b> | 1287.812 | G[10] |
| A[15] | <b>1327.755</b> | 1247.817 | 1231.798        | 1232.806        | 1230.791 | A[0]  |
| K[16] | <b>1497.861</b> | 1176.780 | 1160.761        | <b>1161.769</b> | 1159.753 | K[8]  |
| R[17] | 1651.962        | 1038.674 | 990.656         | <b>991.664</b>  | 989.648  | R[7]  |
| T[18] | 1793.024        | 896.573  | 834.555         | <b>835.562</b>  | 833.547  | T[6]  |
| R[19] | 1947.122        | 713.514  | 687.496         | <b>688.504</b>  | 686.488  | R[5]  |
| K[20] | 2117.264        | 557.413  | <b>541.395</b>  | <b>542.402</b>  | 540.387  | K[4]  |
| V[21] | 2216.332        | 387.271  | 371.253         | 372.261         | 370.245  | V[3]  |
| L[22] | 2329.416        | 288.203  | 272.184         | 273.192         | 271.176  | L[2]  |
| R[23] | 2485.517        | 175.119  | 159.100         | 160.108         | 158.082  | R[1]  |

# sp | P62806 | H4\_MOUSE

[Acetyl]SGRGKGGKGLGKGGAK<sup>Acetyl</sup> RHRK<sup>Trimethyl</sup> VLR<sup>42.01</sup> <sup>42.05</sup>

- ▶ fragmentation table for charge state 2+
- ▶ specType=etd
- ▶ score=100.75
- ▶ F112447.dat
- ▶ query=q30433\_p1
- ▶ precursor=622.380190
- ▶ chargePrecursor=4
- ▶ itol=0.5

| AA    | c               | y               | z+1             | z+2             | z              | AA    |
|-------|-----------------|-----------------|-----------------|-----------------|----------------|-------|
| S[1]  | 74.062          | <b>1243.754</b> | <b>1235.745</b> | 0.504           | 1235.241       | S[2]  |
| G[2]  | 102.563         | 1179.233        | 1171.224        | 0.504           | 1170.720       | G[2]  |
| R[3]  | 180.603         | 1156.722        | <b>1142.713</b> | <b>1143.217</b> | 1142.209       | R[2]  |
| G[4]  | 209.114         | 1072.672        | <b>1064.662</b> | <b>1065.166</b> | 1064.159       | G[20] |
| K[5]  | 273.161         | 1044.161        | <b>1036.152</b> | <b>1036.656</b> | 1035.648       | K[19] |
| G[6]  | 301.672         | 986.134         | 977.124         | 972.598         | 971.600        | G[18] |
| G[7]  | 330.183         | 951.603         | <b>943.593</b>  | <b>944.097</b>  | 943.090        | G[17] |
| K[8]  | 394.230         | 923.092         | <b>915.083</b>  | <b>915.587</b>  | 914.579        | K[16] |
| G[9]  | 422.741         | 859.045         | <b>851.035</b>  | <b>851.539</b>  | 850.531        | G[15] |
| L[10] | 479.283         | <b>830.534</b>  | 822.525         | 823.029         | 822.021        | L[14] |
| G[11] | 507.794         | 773.992         | <b>765.983</b>  | <b>766.486</b>  | 765.479        | G[13] |
| R[12] | 573.841         | 746.481         | <b>737.472</b>  | <b>737.976</b>  | 736.969        | R[12] |
| G[13] | 600.352         | 681.434         | <b>673.424</b>  | <b>673.928</b>  | 672.920        | G[11] |
| G[14] | 628.863         | 652.923         | 644.914         | <b>645.417</b>  | 644.410        | G[10] |
| A[15] | 664.301         | 624.412         | <b>616.403</b>  | <b>616.907</b>  | 615.899        | A[9]  |
| K[16] | 740.434         | 588.894         | <b>580.884</b>  | <b>581.388</b>  | 580.380        | K[8]  |
| R[17] | 827.486         | 560.843         | <b>493.832</b>  | <b>496.335</b>  | 495.328        | R[7]  |
| R[18] | <b>896.014</b>  | 625.795         | <b>417.781</b>  | 418.285         | <b>417.277</b> | R[6]  |
| R[19] | <b>974.065</b>  | 357.261         | 349.252         | 349.755         | 348.748        | R[5]  |
| K[20] | <b>1059.136</b> | 279.210         | 271.201         | 271.705         | 270.697        | K[4]  |
| V[21] | <b>1108.670</b> | 194.139         | 186.130         | 186.634         | 185.626        | V[3]  |
| L[22] | <b>1165.212</b> | 144.605         | 136.596         | 137.100         | 136.092        | L[2]  |
| R[23] | 1243.202        | 88.063          | 80.054          | 80.558          | 79.550         | R[1]  |

# sp | P62806 | H4\_MOUSE

[Acetyl]SGRGKGGKGLGKGGAK<sup>Acetyl</sup> RHRK<sup>Trimethyl</sup> VLR<sup>42.05</sup>  
42.01

- ▶ fragmentation table for charge state 3+
- ▶ specType=etd
- ▶ score=100.75
- ▶ F112447.dat
- ▶ query=q30433.p1
- ▶ precursor=622.380190
- ▶ chargePrecursor=4
- ▶ itol=0.5

| AA  | c       | y       | z+1            | z+2            | z       | AA  |
|-----|---------|---------|----------------|----------------|---------|-----|
| S1  | 49.697  | 629.505 | <b>824.166</b> | 0.672          | 823.830 | S23 |
| G2  | 68.704  | 786.491 | <b>781.152</b> | 0.572          | 780.816 | G22 |
| R3  | 120.738 | 767.484 | <b>762.144</b> | <b>762.480</b> | 761.808 | R21 |
| G4  | 139.745 | 715.450 | 710.111        | 710.447        | 709.775 | G20 |
| K5  | 182.443 | 696.443 | 691.104        | 691.440        | 690.768 | K19 |
| G6  | 201.450 | 653.745 | 648.405        | 648.741        | 648.069 | G18 |
| G7  | 220.458 | 634.738 | 629.398        | 629.734        | 629.062 | G17 |
| K8  | 263.196 | 615.731 | 610.391        | 610.727        | 610.055 | K16 |
| G9  | 282.163 | 573.032 | 567.693        | 568.029        | 567.357 | G15 |
| L10 | 319.858 | 554.025 | 548.685        | 549.021        | 548.350 | L14 |
| G11 | 338.865 | 516.330 | 510.991        | 511.327        | 510.655 | G13 |
| K12 | 381.563 | 497.323 | 491.984        | 492.320        | 491.648 | K12 |
| G13 | 400.570 | 454.625 | 449.285        | 449.621        | 448.949 | G11 |
| G14 | 419.578 | 435.618 | 430.278        | 430.614        | 429.942 | G10 |
| A15 | 443.297 | 416.611 | 411.271        | 411.607        | 410.935 | A9  |
| K16 | 469.958 | 392.932 | 387.592        | 387.928        | 387.256 | K8  |
| R17 | 551.992 | 336.230 | 330.890        | 331.226        | 330.554 | R7  |
| H18 | 597.878 | 284.196 | 278.856        | 279.192        | 278.520 | H6  |
| R19 | 649.712 | 238.910 | 233.570        | 233.906        | 233.234 | R5  |
| K20 | 706.426 | 186.476 | 181.136        | 181.472        | 180.800 | K4  |
| V21 | 739.449 | 149.762 | 124.422        | 124.758        | 124.086 | V3  |
| L22 | 777.144 | 96.739  | 91.400         | 91.736         | 91.064  | L2  |
| R23 | 829.177 | 49.045  | 53.705         | 54.041         | 53.369  | R1  |



# sp | P62806 | H4\_MOUSE

[Acetyl]SGRGKGGK <sup>Acetyl</sup>42.01 GLGK <sup>Acetyl</sup>42.01 GGAK <sup>Trimethyl</sup>42.05 RHRK <sup>Methyl</sup>14.02 VLR

- ▶ fragmentation table for charge state 1+
- ▶ specType=etd
- ▶ score=59.14
- ▶ F112447.dat
- ▶ query=q31047\_p1
- ▶ precursor=848.176420
- ▶ chargePrecursor=3
- ▶ itol=0.5

| AA    | c               | y        | z+1             | z+2             | z        | AA    |
|-------|-----------------|----------|-----------------|-----------------|----------|-------|
| S[1]  | 147.076         | 2542.528 | 2526.509        | 0.000           | 2525.501 | S[23] |
| G[2]  | 304.068         | 2413.485 | 2397.466        | 0.000           | 2396.458 | G[22] |
| R[3]  | 360.199         | 2356.464 | 2340.445        | 2341.453        | 2339.437 | R[21] |
| G[4]  | 417.220         | 2200.363 | 2184.344        | 2185.352        | 2183.336 | G[20] |
| K[5]  | <b>543.315</b>  | 2143.341 | 2127.322        | 2128.330        | 2126.315 | K[19] |
| G[6]  | <b>602.337</b>  | 2015.240 | 1999.221        | 2000.229        | 1998.223 | G[18] |
| G[7]  | 659.358         | 1958.225 | 1942.206        | 1943.214        | 1941.198 | G[17] |
| K[8]  | <b>829.464</b>  | 1901.203 | 1885.184        | 1886.192        | 1884.177 | K[16] |
| G[9]  | <b>886.485</b>  | 1731.098 | 1715.079        | <b>1716.087</b> | 1714.071 | G[15] |
| L[10] | <b>999.569</b>  | 1674.076 | 1658.057        | <b>1659.065</b> | 1657.050 | L[14] |
| G[11] | 1056.591        | 1560.992 | <b>1545.973</b> | 1545.981        | 1543.966 | G[13] |
| R[12] | 1228.096        | 1303.971 | <b>1487.952</b> | 1488.960        | 1486.944 | R[12] |
| G[13] | <b>1283.718</b> | 1333.955 | <b>1317.946</b> | 1318.954        | 1316.939 | G[11] |
| G[14] | 1340.739        | 1276.944 | 1260.925        | 1261.933        | 1259.917 | G[10] |
| A[15] | 1411.776        | 1219.922 | 1203.903        | <b>1204.911</b> | 1202.896 | A[0]  |
| K[16] | 1581.918        | 1148.785 | 1132.766        | <b>1133.774</b> | 1131.759 | K[6]  |
| R[17] | 1738.019        | 978.643  | 962.624         | <b>963.632</b>  | 961.617  | R[7]  |
| T[18] | 1879.078        | 822.542  | 806.523         | <b>807.531</b>  | 805.516  | T[6]  |
| R[19] | 2031.179        | 685.483  | 669.464         | <b>670.472</b>  | 668.457  | R[5]  |
| K[20] | 2173.290        | 529.382  | 513.363         | <b>514.371</b>  | 512.356  | K[4]  |
| V[21] | 2272.369        | 387.271  | 371.253         | 372.261         | 370.245  | V[3]  |
| L[22] | 2385.443        | 288.203  | 272.184         | 273.192         | 271.176  | L[2]  |
| R[23] | 2541.544        | 175.119  | 159.100         | 160.108         | 158.082  | R[1]  |

# sp | P62806 | H4\_MOUSE

[Acetyl]SGRGKGGK <sup>Acetyl</sup>42.01 GLGK <sup>Acetyl</sup>42.01 GGAK <sup>Trimethyl</sup>42.05 RHRK <sup>Methyl</sup>14.02 VLR

- ▶ fragmentation table for charge state 2+
- ▶ specType=etd
- ▶ score=59.14
- ▶ F112447.dat
- ▶ query=q31047\_p1
- ▶ precursor=848.176420
- ▶ chargePrecursor=3
- ▶ itol=0.5

| AA   | c               | y               | z+1             | z+2             | z               | AA   |
|------|-----------------|-----------------|-----------------|-----------------|-----------------|------|
| S 1  | 74.042          | <b>1271.767</b> | 1261.758        | 0.504           | 1263.254        | S 21 |
| G 2  | 102.553         | 1207.240        | <b>1199.237</b> | 0.504           | 1198.733        | G 22 |
| R 3  | 186.603         | 1178.735        | <b>1170.726</b> | <b>1171.230</b> | 1170.222        | R 21 |
| G 4  | 209.114         | 1130.685        | <b>1092.676</b> | <b>1093.179</b> | 1092.172        | G 20 |
| K 5  | 273.161         | 1072.174        | <b>1064.165</b> | 1064.669        | <b>1063.661</b> | K 19 |
| G 6  | 301.672         | 1008.121        | <b>1000.117</b> | 1000.621        | <b>999.613</b>  | G 18 |
| G 7  | 330.183         | 979.616         | 971.607         | 972.111         | 971.103         | G 17 |
| K 8  | 415.236         | 951.105         | 943.096         | 943.600         | 942.592         | K 16 |
| G 9  | 443.746         | 896.052         | 896.043         | 898.547         | 897.539         | G 15 |
| L 10 | 500.208         | 837.542         | <b>829.532</b>  | <b>830.036</b>  | 829.028         | L 14 |
| G 11 | 528.269         | 781.000         | 772.988         | 773.494         | 772.486         | G 13 |
| K 12 | 613.852         | 752.489         | 744.480         | 744.984         | 743.976         | K 12 |
| G 13 | 642.363         | 697.436         | 699.427         | 699.931         | <b>698.923</b>  | G 11 |
| G 14 | <b>670.873</b>  | 638.925         | 639.916         | 631.420         | 630.412         | G 10 |
| A 15 | 708.392         | 610.415         | <b>602.405</b>  | <b>602.909</b>  | 601.901         | A 9  |
| K 16 | 791.463         | 574.896         | 566.887         | 567.391         | 566.383         | K 8  |
| R 17 | 889.513         | 489.875         | 481.873         | 482.376         | 481.371         | R 7  |
| H 18 | 938.043         | 411.775         | 403.765         | 404.269         | 403.261         | H 6  |
| R 19 | 1018.093        | 343.245         | 335.236         | 335.740         | 334.732         | R 5  |
| K 20 | 1067.149        | 265.195         | 257.185         | 257.689         | 256.681         | K 4  |
| V 21 | <b>1136.683</b> | 194.139         | 186.130         | 186.634         | 185.626         | V 3  |
| L 22 | 1183.225        | 144.605         | 136.595         | 137.100         | 136.092         | L 1  |
| R 23 | <b>1271.275</b> | 98.051          | 89.044          | 89.558          | 79.550          | R 1  |

# sp | P62806 | H4\_MOUSE

[Acetyl]SGR<sup>Acetyl</sup>RGK<sup>42.01</sup> GGK<sup>Acetyl</sup> GLGKGGAK<sup>Trimethyl</sup> RHRK<sup>42.05</sup> Dimethyl<sup>28.03</sup> VLR

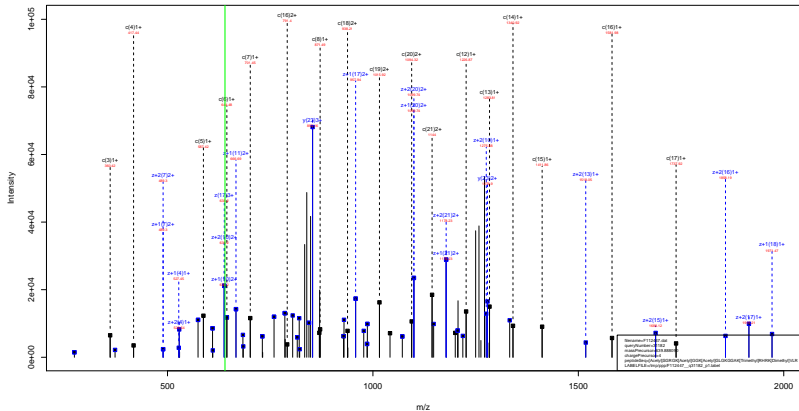

# sp | P62806 | H4\_MOUSE

[Acetyl]SGR**GGK**<sup>Acetyl</sup><sub>42.01</sub> **GGK**<sup>Acetyl</sup><sub>42.01</sub> **GLGKGGAK**<sup>Trimethyl</sup><sub>42.05</sub> **RHRK**<sup>Dimethyl</sup><sub>28.03</sub> **VLR**

- ▶ fragmentation table for charge state 1+
- ▶ specType=etd
- ▶ score=124.62
- ▶ F112447.dat
- ▶ query=q31182.p1
- ▶ precursor=639.888090
- ▶ chargePrecursor=4
- ▶ itol=0.5

| AA    | c               | y        | z+1             | z+2             | z        | AA    |
|-------|-----------------|----------|-----------------|-----------------|----------|-------|
| S[1]  | 147.076         | 256.043  | 2540.535        | 0.000           | 2539.517 | S[23] |
| G[2]  | 304.068         | 2427.501 | 2411.482        | 0.000           | 2410.474 | G[22] |
| R[3]  | <b>360.199</b>  | 2370.479 | 2354.461        | 235.468         | 2353.453 | R[21] |
| G[4]  | <b>417.220</b>  | 2214.378 | 2198.358        | 2199.367        | 2197.352 | G[20] |
| K[5]  | <b>587.326</b>  | 2137.357 | 2141.339        | 2142.346        | 2140.330 | K[19] |
| G[6]  | <b>644.347</b>  | 1987.251 | <b>1971.232</b> | 1972.240        | 1970.225 | G[18] |
| G[7]  | <b>701.369</b>  | 1930.230 | 1914.211        | <b>1915.219</b> | 1913.203 | G[17] |
| K[8]  | <b>871.474</b>  | 1873.208 | 1857.190        | <b>1858.197</b> | 1856.182 | K[16] |
| G[9]  | <b>928.496</b>  | 1703.103 | 1687.085        | <b>1688.092</b> | 1686.076 | G[15] |
| L[10] | <b>1041.580</b> | 1646.081 | 1630.063        | 1631.070        | 1629.055 | L[14] |
| G[11] | 1098.601        | 1532.997 | 1516.978        | <b>1517.986</b> | 1515.971 | G[13] |
| R[12] | <b>1226.696</b> | 1475.976 | 1459.957        | 1460.965        | 1458.949 | R[12] |
| G[13] | <b>1283.718</b> | 1347.881 | 1331.862        | <b>1332.870</b> | 1330.854 | G[11] |
| G[14] | <b>1340.739</b> | 1290.859 | 1274.841        | <b>1275.848</b> | 1273.833 | G[10] |
| A[15] | <b>1411.776</b> | 1233.838 | 1217.819        | <b>1218.827</b> | 1216.811 | A[0]  |
| K[16] | <b>1581.918</b> | 1182.801 | 1166.782        | <b>1167.790</b> | 1165.774 | K[8]  |
| R[17] | <b>1738.019</b> | 992.699  | 976.680         | <b>977.688</b>  | 975.672  | R[7]  |
| T[18] | 1875.978        | 836.598  | <b>820.539</b>  | <b>821.547</b>  | 819.531  | T[6]  |
| R[19] | 2031.179        | 699.499  | <b>683.480</b>  | <b>684.488</b>  | 682.472  | R[5]  |
| K[20] | 2187.306        | 543.398  | <b>527.379</b>  | <b>528.387</b>  | 526.371  | K[4]  |
| V[21] | 2286.374        | 387.271  | 371.253         | <b>372.261</b>  | 370.245  | V[3]  |
| L[22] | 2399.458        | 288.203  | 272.184         | <b>273.192</b>  | 271.176  | L[2]  |
| R[23] | 2555.559        | 178.119  | 159.100         | 160.108         | 158.082  | R[1]  |



# sp | P62806 | H4\_MOUSE

[Acetyl]SGR<sup>Acetyl</sup>RGK<sup>42.01</sup> GGK<sup>Acetyl</sup> GLGKGGAK<sup>42.01</sup> Trimethyl RHRK<sup>42.05</sup> Dimethyl VLR<sup>28.03</sup>

- ▶ fragmentation table for charge state 2+
- ▶ specType=etd
- ▶ score=124.62
- ▶ F112447.dat
- ▶ query=q31182.p1
- ▶ precursor=639.888090
- ▶ chargePrecursor=4
- ▶ itol=0.5

| AA    | c               | y               | z+1             | z+2             | z               | AA    |
|-------|-----------------|-----------------|-----------------|-----------------|-----------------|-------|
| S[1]  | 74.042          | <b>1278.775</b> | 1278.780        | 0.504           | 1278.262        | S[2]  |
| G[2]  | 102.553         | 1214.264        | <b>1206.245</b> | 0.504           | <b>1205.741</b> | G[2]  |
| R[3]  | 180.603         | 1185.743        | <b>1177.734</b> | <b>1178.238</b> | 1177.230        | R[2]  |
| G[4]  | 209.114         | 1107.693        | <b>1099.683</b> | <b>1100.187</b> | 1099.170        | G[20] |
| K[5]  | 268.167         | 1079.182        | <b>1071.173</b> | <b>1071.677</b> | 1070.200        | K[19] |
| G[6]  | 322.677         | 994.129         | <b>986.120</b>  | <b>986.324</b>  | <b>985.816</b>  | G[18] |
| G[7]  | 351.188         | 965.619         | <b>957.609</b>  | <b>958.113</b>  | 957.105         | G[17] |
| K[8]  | 436.241         | 937.108         | 929.099         | <b>929.602</b>  | <b>928.584</b>  | K[16] |
| G[9]  | 464.752         | 852.055         | <b>844.046</b>  | <b>844.550</b>  | 843.542         | G[15] |
| L[10] | 521.294         | 823.544         | <b>815.535</b>  | <b>816.039</b>  | 815.031         | L[14] |
| G[11] | 569.804         | 787.002         | <b>758.993</b>  | <b>759.497</b>  | 758.489         | G[13] |
| K[12] | 613.852         | 738.492         | <b>730.482</b>  | <b>730.986</b>  | 729.978         | K[12] |
| G[13] | 642.363         | 674.444         | <b>666.435</b>  | <b>666.939</b>  | 665.931         | G[11] |
| G[14] | 670.873         | 645.933         | <b>637.924</b>  | <b>638.428</b>  | 637.420         | G[10] |
| A[15] | 708.382         | 617.423         | <b>609.413</b>  | <b>609.917</b>  | 608.909         | A[9]  |
| K[16] | <b>791.463</b>  | 581.904         | <b>573.895</b>  | <b>574.399</b>  | 573.391         | K[8]  |
| R[17] | <b>869.513</b>  | 498.833         | <b>488.824</b>  | <b>489.328</b>  | 488.320         | R[7]  |
| H[18] | <b>938.043</b>  | 418.782         | 410.773         | 411.277         | 410.269         | H[6]  |
| R[19] | <b>1016.093</b> | 350.253         | 342.244         | 342.748         | 341.740         | R[5]  |
| K[20] | <b>1094.157</b> | 272.202         | 264.193         | 264.697         | 263.689         | K[4]  |
| V[21] | <b>1143.691</b> | 194.139         | 186.130         | 186.634         | 185.626         | V[3]  |
| L[22] | <b>1280.233</b> | 144.605         | 136.596         | 137.100         | 136.092         | L[1]  |
| R[23] | 1278.262        | 98.051          | 89.042          | 89.556          | 79.550          | R[1]  |

# sp | P62806 | H4\_MOUSE

[Acetyl]SGRGK<sup>Acetyl  
42.01</sup> GGK<sup>Acetyl  
42.01</sup> GLGKGGAK<sup>Trimethyl  
42.05</sup> RHRK<sup>Dimethyl  
28.03</sup> VLR

- ▶ fragmentation table for charge state 3+
- ▶ specType=etd
- ▶ score=124.62
- ▶ F112447.dat
- ▶ query=q31182\_p1
- ▶ precursor=639.888090
- ▶ chargePrecursor=4
- ▶ itol=0.5

| AA    | c       | y              | z+1            | z+2            | z              | AA    |
|-------|---------|----------------|----------------|----------------|----------------|-------|
| S[1]  | 49.697  | <b>852.853</b> | 847.513        | 0.672          | 847.177        | S[2]  |
| G[2]  | 68.704  | 809.838        | <b>804.499</b> | 0.677          | 804.163        | G[22] |
| R[3]  | 120.738 | 790.831        | <b>785.492</b> | <b>785.828</b> | <b>785.156</b> | R[21] |
| G[4]  | 139.745 | 738.798        | 713.456        | 713.704        | 713.122        | G[20] |
| K[5]  | 196.447 | 719.790        | 714.451        | 714.707        | 714.115        | K[19] |
| G[6]  | 215.454 | 663.089        | 657.749        | 658.085        | 657.413        | G[18] |
| G[7]  | 234.461 | <b>644.081</b> | 638.742        | 639.078        | <b>638.406</b> | G[17] |
| K[8]  | 291.163 | 625.074        | 619.735        | 620.071        | 619.399        | K[16] |
| G[9]  | 310.170 | 568.372        | 563.033        | 563.369        | 562.697        | G[15] |
| L[10] | 347.985 | 549.365        | 544.026        | 544.362        | 543.690        | L[14] |
| G[11] | 366.872 | 511.671        | 506.331        | 506.667        | 505.995        | G[13] |
| K[12] | 409.570 | 492.663        | 487.324        | 487.660        | 486.988        | K[12] |
| G[13] | 428.577 | 449.965        | 444.626        | 444.961        | 444.290        | G[11] |
| G[14] | 447.585 | 430.958        | 425.619        | 425.954        | 425.282        | G[10] |
| A[15] | 471.264 | 411.951        | 406.611        | 406.947        | 406.275        | A[9]  |
| K[16] | 527.978 | 388.272        | 382.932        | 383.268        | 382.596        | K[8]  |
| R[17] | 580.011 | 331.558        | 326.219        | 326.554        | 325.882        | R[7]  |
| H[18] | 625.698 | 279.824        | 274.485        | 274.820        | <b>273.849</b> | H[6]  |
| R[19] | 677.731 | 233.838        | 228.499        | 228.834        | 228.162        | R[5]  |
| K[20] | 729.773 | 181.804        | 176.465        | 176.800        | 176.129        | K[4]  |
| V[21] | 762.796 | 129.762        | 124.422        | 124.758        | 124.086        | V[3]  |
| L[22] | 800.491 | 96.739         | 91.400         | 91.736         | 91.064         | L[2]  |
| R[23] | 852.525 | 59.645         | 53.705         | 54.041         | 53.369         | R[1]  |



# sp | P62806 | H4\_MOUSE

[Acetyl]SGRGK<sup>Trimethyl</sup><sub>42.05</sub> GGGKGLGK<sup>Acetyl</sup><sub>42.01</sub> GGAK<sup>Acetyl</sup><sub>42.01</sub> RHRKVLK<sup>(Dimethyl)</sup><sub>(28.03)</sub>

- ▶ fragmentation table for charge state 1+
- ▶ specType=etd
- ▶ score=52.91
- ▶ F112447.dat
- ▶ query=q31184.p1
- ▶ precursor=852.848510
- ▶ chargePrecursor=3
- ▶ itol=0.5

| AA    | c               | y        | z+1             | z+2             | z        | AA    |
|-------|-----------------|----------|-----------------|-----------------|----------|-------|
| S[1]  | 147.076         | 2556.543 | 2540.525        | 0.000           | 2539.517 | S[23] |
| G[2]  | 204.098         | 2427.501 | 2411.482        | 0.000           | 2410.474 | G[22] |
| R[3]  | 300.199         | 2370.479 | 2354.461        | 2355.468        | 2353.453 | R[21] |
| G[4]  | <b>417.220</b>  | 2214.378 | 2198.359        | 2199.367        | 2197.352 | G[20] |
| K[5]  | <b>587.362</b>  | 2157.357 | 2141.338        | 2142.346        | 2140.330 | K[19] |
| G[6]  | <b>644.384</b>  | 1987.215 | 1971.197        | 1972.204        | 1970.188 | G[18] |
| G[7]  | <b>701.405</b>  | 1930.193 | <b>1914.175</b> | 1915.182        | 1913.167 | G[17] |
| K[8]  | <b>829.500</b>  | 1873.172 | <b>1857.153</b> | 1858.161        | 1856.145 | K[16] |
| G[9]  | <b>886.522</b>  | 1745.077 | <b>1729.058</b> | 1730.066        | 1728.050 | G[15] |
| L[10] | 999.606         | 1688.055 | <b>1672.037</b> | 1673.045        | 1671.029 | L[14] |
| G[11] | 1056.627        | 1574.971 | <b>1558.953</b> | 1559.960        | 1557.945 | G[13] |
| K[12] | 1228.723        | 1517.950 | 1501.931        | <b>1502.939</b> | 1500.923 | K[12] |
| G[13] | <b>1283.754</b> | 1347.844 | <b>1331.826</b> | 1332.833        | 1330.816 | G[11] |
| G[14] | 1340.776        | 1290.823 | 1274.804        | 1275.812        | 1273.796 | G[10] |
| A[15] | 1411.813        | 1233.801 | 1217.783        | 1218.791        | 1216.775 | A[9]  |
| K[16] | 1581.918        | 1182.784 | <b>1146.746</b> | <b>1147.753</b> | 1145.738 | K[8]  |
| R[17] | 1738.019        | 902.659  | 978.640         | <b>977.648</b>  | 975.632  | R[7]  |
| R[18] | 1875.078        | 836.598  | 820.579         | <b>821.547</b>  | 819.531  | R[6]  |
| R[19] | 2013.179        | 699.499  | 683.480         | <b>684.448</b>  | 682.472  | R[5]  |
| K[20] | 2150.274        | 543.398  | 527.379         | <b>528.387</b>  | 525.371  | K[4]  |
| V[21] | 2258.343        | 415.303  | 399.284         | 400.292         | 398.276  | V[3]  |
| L[22] | 2371.427        | 316.234  | 300.215         | 301.223         | 299.209  | L[2]  |
| R[23] | 2555.559        | 203.150  | 187.132         | 188.139         | 186.124  | R[1]  |

# sp | P62806 | H4\_MOUSE

[Acetyl]SGRGK<sup>Trimethyl</sup><sub>42.05</sub> GGGKGLGK<sup>Acetyl</sup><sub>42.01</sub> GGAK<sup>Acetyl</sup><sub>42.01</sub> RHRKVLR<sup>(Dimethyl)</sup><sub>(28.03)</sub>

- ▶ fragmentation table for charge state 2+
- ▶ specType=etd
- ▶ score=52.91
- ▶ F112447.dat
- ▶ query=q31184\_p1
- ▶ precursor=852.848510
- ▶ chargePrecursor=3
- ▶ itol=0.5

| AA | c  | y              | z+1             | z+2             | z               | AA              |      |
|----|----|----------------|-----------------|-----------------|-----------------|-----------------|------|
| S  | 1  | 74.042         | <b>1278.775</b> | <b>1270.766</b> | 0.504           | <b>1270.262</b> | S(2) |
| G  | 2  | 102.553        | 1214.254        | <b>1206.245</b> | 0.504           | 1205.741        | G(2) |
| R  | 3  | 180.603        | 1185.743        | <b>1177.734</b> | <b>1178.238</b> | 1177.230        | R(2) |
| G  | 4  | 200.114        | 1107.693        | <b>1099.683</b> | <b>1100.187</b> | 1099.179        | G(2) |
| K  | 5  | 294.185        | 1079.182        | 1071.173        | 1071.677        | 1070.669        | K(2) |
| G  | 6  | 322.697        | 924.111         | 988.102         | 988.606         | 985.598         | G(2) |
| G  | 7  | 351.206        | 905.602         | 957.591         | 958.095         | 957.087         | G(2) |
| K  | 8  | 415.254        | 937.090         | 929.080         | 929.584         | 928.576         | K(2) |
| G  | 9  | 443.765        | 873.042         | 885.031         | 885.537         | 884.529         | G(2) |
| L  | 10 | 500.307        | 844.531         | 836.522         | 837.026         | 836.018         | L(2) |
| G  | 11 | <b>528.817</b> | 787.989         | 779.980         | 780.484         | 779.476         | G(2) |
| K  | 12 | 613.810        | 759.479         | 751.469         | 751.973         | 750.965         | K(2) |
| G  | 13 | 642.321        | 674.429         | 666.420         | 666.924         | 665.917         | G(2) |
| G  | 14 | 670.891        | 645.915         | 637.906         | 638.410         | 637.402         | G(2) |
| A  | 15 | 706.410        | 617.404         | 609.395         | 609.899         | 608.891         | A(2) |
| R  | 16 | 791.463        | 591.888         | 573.879         | 574.383         | 573.373         | R(2) |
| R  | 17 | 869.513        | 496.833         | 488.824         | 489.328         | 488.320         | R(2) |
| T  | 18 | 938.043        | 418.782         | 410.773         | 411.277         | 410.269         | T(2) |
| R  | 19 | 1016.093       | 350.253         | 342.244         | 342.748         | 341.740         | R(2) |
| K  | 20 | 1080.141       | 272.202         | 264.193         | 264.697         | 263.689         | K(2) |
| V  | 21 | 1129.675       | 208.155         | 200.146         | 200.650         | 199.642         | V(2) |
| L  | 22 | 1186.217       | 158.621         | 150.611         | 151.115         | 150.108         | L(2) |
| R  | 23 | 1278.263       | 102.079         | 94.069          | 94.573          | 93.565          | R(2) |

# sp | P70696 | H2B1A\_MOUSE

GTK <sup>Acetyl</sup> AVTKYTSSK  
42.01

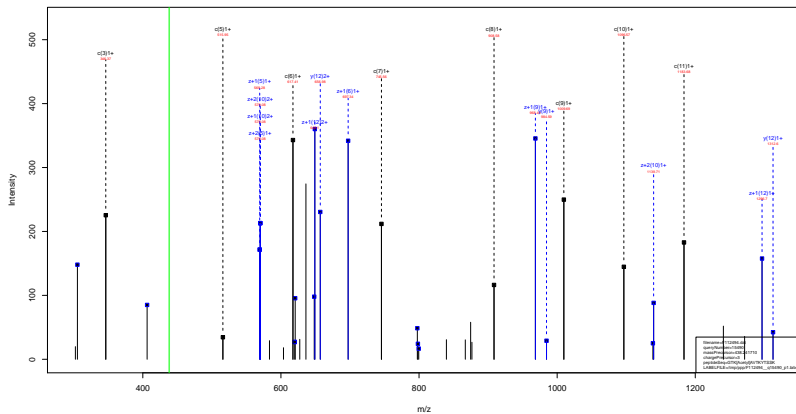

# sp | P70696 | H2B1A\_MOUSE

GTK <sup>Acetyl</sup> 42.01 AVTKYTSSK

- ▶ fragmentation table for charge state 1+
- ▶ specType=etd
- ▶ score=65.14
- ▶ F112494.dat
- ▶ query=q15490\_p1
- ▶ precursor=438.241710
- ▶ chargePrecursor=3
- ▶ itol=0.5

| AA     | c               | y               | z+1             | z+2             | z              | AA     |
|--------|-----------------|-----------------|-----------------|-----------------|----------------|--------|
| G [1]  | 75.055          | <b>1312.711</b> | <b>1296.692</b> | 0.000           | 1295.684       | G [12] |
| T [2]  | 118.103         | 1295.683        | 1279.677        | 0.000           | 1278.663       | T [11] |
| K [3]  | <b>346.208</b>  | 1154.642        | <b>1138.623</b> | <b>1139.631</b> | 1137.615       | K [10] |
| A [4]  | 417.248         | <b>984.536</b>  | <b>968.517</b>  | 966.525         | 967.509        | A [9]  |
| V [5]  | <b>516.314</b>  | 913.499         | 897.480         | 898.488         | 896.472        | V [8]  |
| T [6]  | <b>617.362</b>  | 814.431         | <b>798.412</b>  | <b>799.420</b>  | <b>797.404</b> | T [7]  |
| K [7]  | <b>745.457</b>  | 713.383         | <b>697.364</b>  | 698.372         | 696.356        | K [6]  |
| V [8]  | <b>908.520</b>  | 589.308         | <b>569.289</b>  | <b>570.297</b>  | 568.281        | V [5]  |
| T [9]  | <b>1009.568</b> | 422.225         | <b>406.206</b>  | 407.214         | 405.199        | T [4]  |
| S [10] | <b>1096.600</b> | 321.177         | <b>305.158</b>  | 306.166         | 304.150        | S [3]  |
| S [11] | <b>1183.632</b> | 234.145         | 218.126         | 219.134         | 217.118        | S [2]  |
| R [12] | 1311.727        | 147.113         | 131.094         | 132.102         | 130.086        | R [1]  |

# sp | P70696 | H2B1A\_MOUSE

GTK <sup>Acetyl</sup> 42.01 AVTKYTSSK

- ▶ fragmentation table for charge state 2+
- ▶ specType=etd
- ▶ score=65.14
- ▶ F112494.dat
- ▶ query=q15490\_p1
- ▶ precursor=438.241710
- ▶ chargePrecursor=3
- ▶ itol=0.5

| AA    | c       | y              | z+1            | z+2            | z              | AA    |
|-------|---------|----------------|----------------|----------------|----------------|-------|
| G[1]  | 88.0311 | <b>656.859</b> | <b>648.850</b> | 0.504          | <b>648.346</b> | G[12] |
| T[2]  | 88.555  | 628.348        | <b>620.339</b> | 0.504          | <b>619.835</b> | T[11] |
| K[3]  | 173.608 | 577.824        | <b>569.815</b> | <b>570.319</b> | <b>569.311</b> | K[10] |
| A[4]  | 209.126 | 492.722        | 484.762        | 485.266        | 484.258        | A[9]  |
| V[5]  | 256.661 | 457.263        | 449.244        | 449.740        | 448.740        | V[8]  |
| T[6]  | 309.184 | 407.719        | 399.710        | 400.213        | 399.206        | T[7]  |
| K[7]  | 373.232 | 357.195        | 349.186        | 349.690        | 348.682        | K[6]  |
| V[8]  | 454.764 | 293.148        | 285.138        | 285.642        | 284.634        | V[5]  |
| T[9]  | 505.287 | 231.636        | 203.607        | 204.110        | 203.103        | T[4]  |
| S[10] | 548.803 | 161.092        | 153.083        | 153.587        | 152.579        | S[3]  |
| S[11] | 592.320 | 117.576        | 109.567        | 110.071        | 109.063        | S[2]  |
| K[12] | 656.367 | 74.060         | 66.051         | 66.555         | 65.547         | K[1]  |



# sp | P70696 | H2B1A\_MOUSE

GTKAVTK <sup>Acetyl</sup>YTSSK  
42.01

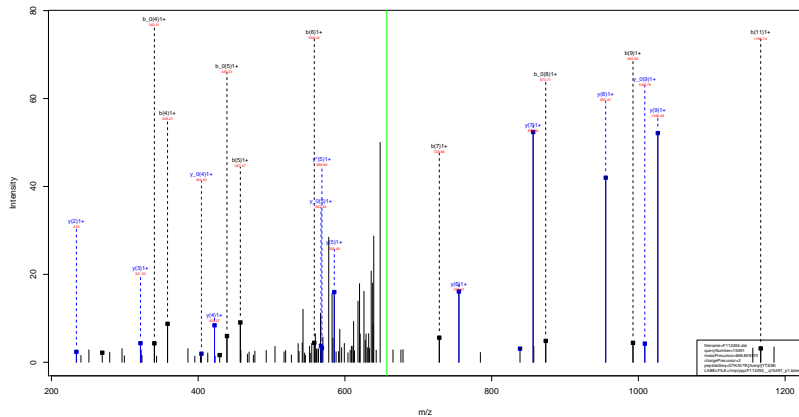

# sp | P70696 | H2B1A\_MOUSE

GTKAVTK <sup>Acetyl</sup> YTSSK  
42.01

- ▶ fragmentation table for charge state 1+
- ▶ specType=cid
- ▶ score=51.98
- ▶ F112494.dat
- ▶ query=q15491\_p1
- ▶ precursor=656.859370
- ▶ chargePrecursor=2
- ▶ itol=0.5

| AA  | a              | a'       | a+b      | b               | b'       | b+a            | c               | c'             | c+b             | AA  |
|-----|----------------|----------|----------|-----------------|----------|----------------|-----------------|----------------|-----------------|-----|
| Q1  | 331.092        | 0.000    | 331.092  | 331.092         | 0.000    | 0.000          | 1132.712        | 0.000          | 1463.804        | Q12 |
| T1  | 331.092        | 0.000    | 331.092  | 331.092         | 0.000    | 0.000          | 1463.804        | 0.000          | 1463.804        | T11 |
| K2  | 359.176        | 262.150  | 244.168  | 277.372         | 279.145  | <b>260.161</b> | 175.848         | 1137.615       | 1136.931        | K10 |
| A1  | 339.014        | 313.839  | 329.089  | <b>358.208</b>  | 359.379  | <b>240.189</b> | <b>1028.541</b> | 1009.709       | <b>1008.536</b> | A10 |
| V1  | <b>429.282</b> | 432.255  | 441.371  | <b>457.277</b>  | 446.250  | <b>439.206</b> | <b>955.509</b>  | 938.483        | 937.669         | V10 |
| T1  | 339.014        | 331.092  | 332.739  | <b>358.325</b>  | 351.209  | 360.134        | <b>856.441</b>  | 839.415        | <b>838.431</b>  | T12 |
| K1  | 339.014        | 363.493  | 362.742  | <b>728.439</b>  | 331.424  | 331.424        | 725.379         | 707.962        | 717.283         | K10 |
| V1  | 361.699        | 369.472  | 369.492  | 369.492         | 374.917  | <b>873.481</b> | <b>585.239</b>  | <b>568.261</b> | <b>567.277</b>  | V10 |
| T1  | 361.699        | 367.519  | 368.139  | <b>902.541</b>  | 375.313  | 374.917        | <b>422.235</b>  | 405.109        | <b>404.214</b>  | T10 |
| S10 | 393.179        | 393.652  | 393.658  | 397.973         | 392.547  | 393.653        | <b>321.377</b>  | 304.150        | 303.166         | S10 |
| S11 | 1178.603       | 1178.589 | 1178.600 | <b>1166.605</b> | 1166.599 | 1166.599       | <b>234.140</b>  | 217.119        | 216.106         | S10 |
| R12 | 1366.100       | 1366.039 | 1348.949 | 1349.104        | 1377.014 | 1376.959       | 437.119         | 130.080        | 0.000           | R10 |

# sp | P70696 | H2B1A\_MOUSE

GTKAVTK <sup>Acetyl</sup> YTSSK  
42.01

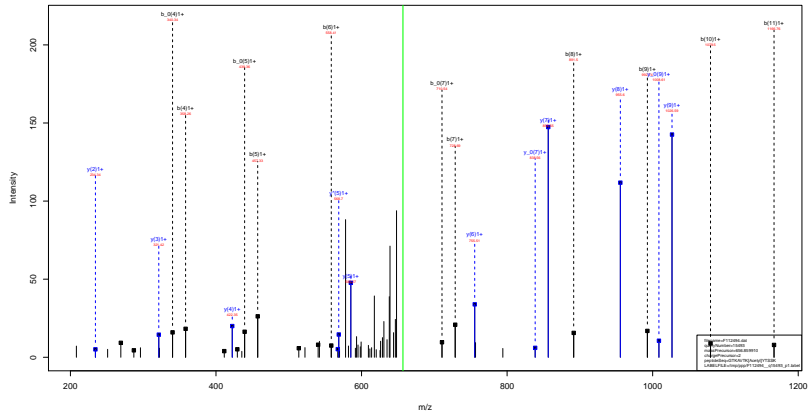

# sp | P70696 | H2B1A\_MOUSE

GTKAVTK<sup>Acetyl</sup>YTSSK  
42.01

- ▶ fragmentation table for charge state 1+
- ▶ specType=cid
- ▶ score=72.22
- ▶ F112494.dat
- ▶ query=q15493\_p1
- ▶ precursor=656.859910
- ▶ chargePrecursor=2
- ▶ itol=0.5

| AA  | a              | a'             | a+b            | b               | b'       | b+a            | x               | x'      | x+b      | AA  |
|-----|----------------|----------------|----------------|-----------------|----------|----------------|-----------------|---------|----------|-----|
| Q1  | 331.092        | 0.000          | 331.092        | 363.000         | 0.000    | 694.092        | 1132.712        | 0.000   | 1496.804 | Q12 |
| T1  | 331.092        | 0.000          | 331.092        | 363.000         | 0.000    | 694.092        | 1255.892        | 0.000   | 1619.984 | T13 |
| K2  | 359.176        | 262.150        | 621.326        | <b>287.171</b>  | 370.145  | <b>389.181</b> | 1124.847        | 1.137   | 1514.031 | K10 |
| A1  | 359.176        | 313.130        | 672.306        | <b>358.208</b>  | 381.130  | <b>340.189</b> | <b>1028.547</b> | 0.000   | 1369.737 | A16 |
| V1  | <b>429.282</b> | 432.250        | <b>411.291</b> | <b>457.277</b>  | 440.250  | <b>439.286</b> | <b>856.569</b>  | 0.000   | 1315.835 | V18 |
| I1  | 439.370        | <b>513.303</b> | 513.370        | <b>558.325</b>  | 541.303  | <b>540.334</b> | <b>856.441</b>  | 0.000   | 1397.782 | I17 |
| K7  | 459.452        | 563.400        | 563.452        | <b>728.439</b>  | 711.400  | <b>730.420</b> | <b>755.393</b>  | 0.000   | 1486.813 | K8  |
| V10 | 461.460        | 565.412        | 565.460        | <b>691.403</b>  | 674.412  | <b>673.421</b> | <b>825.280</b>  | 0.000   | 1498.702 | V15 |
| V11 | 461.460        | 567.424        | 567.460        | <b>692.541</b>  | 675.424  | <b>674.431</b> | <b>827.235</b>  | 0.000   | 1498.714 | V14 |
| S10 | 503.536        | 3034.052       | 2933.589       | <b>3079.573</b> | 3062.547 | 3063.083       | <b>321.377</b>  | 304.150 | 3033.149 | S15 |
| S11 | 519.600        | 1120.569       | 1120.569       | <b>1166.565</b> | 1149.600 | 1149.600       | <b>234.140</b>  | 232.130 | 1126.739 | S16 |
| R12 | 1356.100       | 1356.100       | 1348.945       | 1324.122        | 1337.824 | 1336.959       | 437.110         | 1.300   | 0.000    | R13 |



# sp | P70696 | H2B1A\_MOUSE

LAK<sup>Acetyl</sup> 42.01 HAVSE

- ▶ fragmentation table for charge state 1+
- ▶ specType=cid
- ▶ score=27.85
- ▶ F112494.dat
- ▶ query=q2726\_p1
- ▶ precursor=448.745250
- ▶ chargePrecursor=2
- ▶ itol=0.5

| AA | a              | a*      | a,Δ     | b              | b*      | b,Δ            | y              | y*      | y,Δ            | AA  |
|----|----------------|---------|---------|----------------|---------|----------------|----------------|---------|----------------|-----|
| L1 | 86.298         | 0.000   | 0.000   | 114.793        | 0.000   | 0.000          | 688.483        | 0.000   | 0.000          | L10 |
| A1 | 157.134        | 0.000   | 0.000   | <b>185.128</b> | 0.000   | 0.000          | 793.400        | 0.000   | 0.000          | A17 |
| K1 | 327.230        | 100.213 | 0.000   | <b>355.234</b> | 108.207 | 0.000          | <b>712.362</b> | 695.338 | 0.000          | K16 |
| H1 | 404.298        | 447.271 | 0.000   | <b>492.293</b> | 475.264 | 0.000          | <b>542.257</b> | 0.000   | 0.000          | H15 |
| A1 | 535.232        | 318.209 | 0.000   | <b>563.300</b> | 346.203 | 0.000          | 455.100        | 0.000   | 0.000          | A14 |
| V1 | <b>624.404</b> | 617.377 | 0.000   | <b>662.398</b> | 645.372 | 0.000          | <b>334.181</b> | 0.000   | 0.000          | V13 |
| S1 | 721.436        | 704.409 | 701.425 | <b>749.430</b> | 732.404 | <b>731.420</b> | <b>235.092</b> | 0.000   | <b>217.082</b> | S12 |
| E1 | 850.478        | 833.450 | 834.466 | 878.473        | 861.446 | 860.462        | <b>148.060</b> | 0.000   | 130.050        | E11 |

# sp | P70696 | H2B1A\_MOUSE

LAK<sup>Acetyl</sup> HAVSE  
42.01

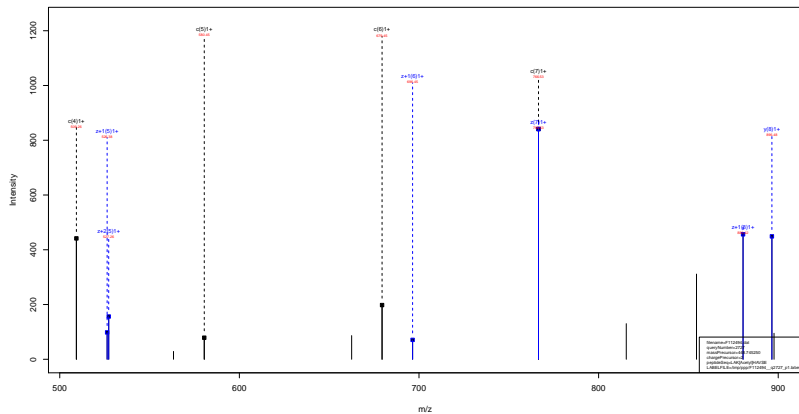

# sp | P70696 | H2B1A\_MOUSE

LAK<sup>Acetyl</sup> 42.01 HAVSE

- ▶ fragmentation table for charge state 1+
- ▶ specType=etd
- ▶ score=34.41
- ▶ F112494.dat
- ▶ query=q2727.p1
- ▶ precursor=448.745250
- ▶ chargePrecursor=2
- ▶ itol=0.5

| AA |   | c              | y              | z+1            | z+2            | z              | AA |
|----|---|----------------|----------------|----------------|----------------|----------------|----|
| L  | 1 | 131.118        | <b>896.484</b> | <b>880.465</b> | 0.000          | 879.457        | L  |
| A  | 2 | 202.155        | 783.400        | 767.381        | 0.000          | <b>766.373</b> | A  |
| R  | 3 | 372.261        | 712.362        | <b>696.344</b> | 697.352        | 699.336        | R  |
| H  | 4 | <b>509.319</b> | 542.257        | <b>526.238</b> | <b>527.246</b> | 525.230        | H  |
| A  | 5 | <b>580.357</b> | 405.198        | 389.179        | 390.187        | 388.171        | A  |
| V  | 6 | <b>679.425</b> | 334.161        | 318.142        | 319.150        | 317.134        | V  |
| S  | 7 | <b>766.457</b> | 235.092        | 219.074        | 220.082        | 218.066        | S  |
| E  | 8 | 899.500        | 148.060        | 132.042        | 133.050        | 131.034        | E  |



# sp | Q64475 | H2B1B\_MOUSE

TGISSK Acetyl 42.01 AMGIM Oxidation 15.99 NSFVND

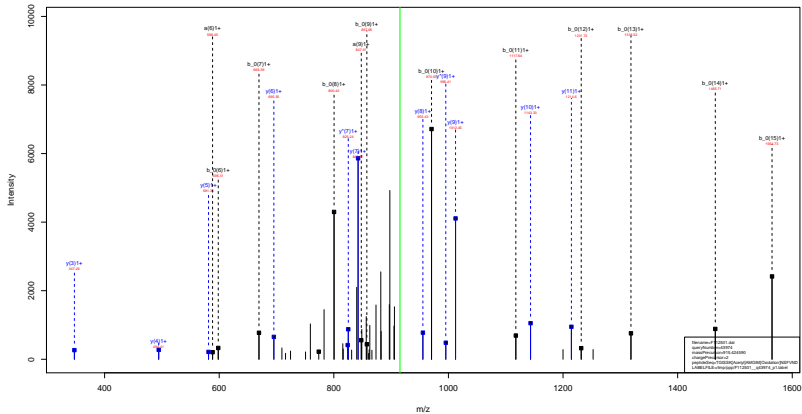

# sp | Q64475 | H2B1B\_MOUSE

TGISSK <sup>Acetyl</sup> 42.01 AMGIM <sup>Oxidation</sup> 15.99 NSFVND

- ▶ fragmentation table for charge state 1+
- ▶ specType=cid
- ▶ score=43.81
- ▶ F112501.dat
- ▶ query=q43974.p1
- ▶ precursor=915.424590
- ▶ chargePrecursor=2
- ▶ itol=0.5

| AA  | a              | a*             | a $\Delta$ | b       | b*       | b $\Delta$ | y               | y*              | y $\Delta$     | AA  |
|-----|----------------|----------------|------------|---------|----------|------------|-----------------|-----------------|----------------|-----|
| T1  | 74.060         | 0.000          | 74.060     | 141.090 | 0.000    | 141.090    | 162.050         | 162.050         | 162.050        | T11 |
| G2  | 134.100        | 0.000          | 134.100    | 159.010 | 0.000    | 159.010    | 170.790         | 170.790         | 170.790        | G26 |
| I3  | 204.160        | 0.000          | 204.160    | 177.180 | 0.000    | 177.180    | 181.770         | 181.770         | 181.770        | I15 |
| S4  | 251.190        | 0.000          | 251.190    | 199.190 | 0.000    | 199.190    | 180.680         | 180.680         | 180.680        | S14 |
| S5  | 414.200        | 0.000          | 414.200    | 246.200 | 0.000    | 246.200    | 187.690         | 187.690         | 187.690        | S13 |
| R6  | <b>538.135</b> | 0.000          | 538.135    | 265.130 | 0.000    | 265.130    | <b>538.130</b>  | 136.620         | 136.620        | R12 |
| A7  | 702.212        | 0.000          | 702.212    | 307.200 | 0.000    | 307.200    | <b>667.257</b>  | <b>1214.518</b> | 1137.600       | A11 |
| T8  | 789.010        | <b>773.385</b> | 15.625     | 318.000 | 0.000    | 318.000    | <b>805.707</b>  | <b>1145.481</b> | 1129.670       | T10 |
| G9  | <b>847.434</b> | 0.000          | 847.434    | 319.420 | 0.000    | 319.420    | <b>857.419</b>  | <b>1012.440</b> | <b>995.414</b> | G16 |
| I10 | 950.010        | 0.000          | 950.010    | 360.010 | 0.000    | 360.010    | <b>970.503</b>  | <b>955.419</b>  | 938.700        | I10 |
| M11 | 1037.050       | 1009.520       | 27.530     | 313.540 | 1118.520 | 1118.520   | <b>1117.538</b> | <b>842.335</b>  | <b>825.308</b> | M17 |
| N12 | 1214.700       | 429.710        | 784.990    | 339.000 | 1312.700 | 1312.700   | <b>1213.581</b> | <b>995.209</b>  | 995.209        | N10 |
| S13 | 1308.650       | 1281.40        | 27.250     | 338.620 | 1318.270 | 1318.270   | <b>1318.413</b> | <b>981.297</b>  | 984.210        | S15 |
| F14 | 1435.007       | 1438.800       | -3.793     | 340.000 | 1405.000 | 1405.000   | <b>1445.681</b> | <b>894.225</b>  | 877.100        | F14 |
| L15 | 1554.700       | 1537.000       | 17.700     | 350.000 | 1504.700 | 1504.700   | <b>1554.700</b> | <b>947.126</b>  | 954.100        | L15 |
| N16 | 1698.000       | 1681.100       | 16.900     | 360.000 | 1628.000 | 1628.000   | 1698.000        | 1011.000        | 1011.000       | N16 |
| D17 | 1773.000       | 1768.000       | 5.000      | 371.000 | 1704.000 | 1704.000   | 1773.000        | 1041.000        | 1041.000       | D17 |



# sp | Q64475 | H2B1B\_MOUSE

TGISSK Acetyl 42.01 AM Oxidation 15.99 GIM Oxidation 15.99 NSFVND

- ▶ fragmentation table for charge state 1+
- ▶ specType=cid
- ▶ score=31.83
- ▶ F112501.dat
- ▶ query=q44334.p1
- ▶ precursor=923.420980
- ▶ chargePrecursor=2
- ▶ itol=0.5

| AA  | a       | a*    | a,p     | b       | b*    | b,p     | y        | y*       | y,p      | AA  |
|-----|---------|-------|---------|---------|-------|---------|----------|----------|----------|-----|
| T11 | 74.080  | 0.000 | 95.940  | 100.030 | 0.000 | 10.044  | 1045.830 | 1020.800 | 1037.830 | T11 |
| G12 | 133.080 | 0.000 | 133.070 | 139.070 | 0.000 | 141.060 | 1144.780 | 1127.780 | 1136.770 | G12 |
| K13 | 144.080 | 0.000 | 144.070 | 150.070 | 0.000 | 150.150 | 1187.780 | 1170.780 | 1180.770 | K13 |
| S14 | 151.080 | 0.000 | 151.080 | 158.080 | 0.000 | 161.180 | 1174.880 | 1157.880 | 1168.870 | S14 |
| R15 | 158.080 | 0.000 | 160.070 | 168.070 | 0.000 | 170.160 | 1169.880 | 1152.880 | 1163.860 | R15 |
| R16 | 168.080 | 0.000 | 170.070 | 178.070 | 0.000 | 180.150 | 1164.880 | 1147.880 | 1158.860 | R16 |
| A17 | 180.070 | 0.000 | 181.070 | 188.070 | 0.000 | 190.140 | 1159.880 | 1142.880 | 1153.860 | A17 |
| M18 | 189.070 | 0.000 | 190.070 | 197.070 | 0.000 | 200.130 | 1154.880 | 1135.880 | 1148.850 | M18 |
| G19 | 193.070 | 0.000 | 194.070 | 201.070 | 0.000 | 210.120 | 1149.880 | 1128.880 | 1143.840 | G19 |
| K20 | 197.070 | 0.000 | 198.070 | 205.070 | 0.000 | 220.110 | 1144.880 | 1121.880 | 1138.830 | K20 |
| M21 | 203.060 | 0.000 | 204.060 | 211.060 | 0.000 | 230.100 | 1139.880 | 1114.880 | 1133.820 | M21 |
| N22 | 207.060 | 0.000 | 208.060 | 215.060 | 0.000 | 240.090 | 1134.880 | 1107.880 | 1128.810 | N22 |
| S23 | 214.050 | 0.000 | 215.050 | 221.050 | 0.000 | 250.080 | 1129.880 | 1099.880 | 1123.800 | S23 |
| T24 | 217.050 | 0.000 | 218.050 | 225.050 | 0.000 | 260.070 | 1124.880 | 1092.880 | 1118.790 | T24 |
| V25 | 226.040 | 0.000 | 227.040 | 233.040 | 0.000 | 270.060 | 1119.880 | 1084.880 | 1113.780 | V25 |
| N26 | 230.040 | 0.000 | 231.040 | 237.040 | 0.000 | 280.050 | 1114.880 | 1077.880 | 1108.770 | N26 |
| D27 | 239.030 | 0.000 | 240.030 | 245.030 | 0.000 | 290.040 | 1109.880 | 1069.880 | 1103.760 | D27 |

# sp | P62806 | H4\_MOUSE

[Acetyl]SGRGKGGKGLGKGGAKRHRK Trimethyl VLRD  
42.05

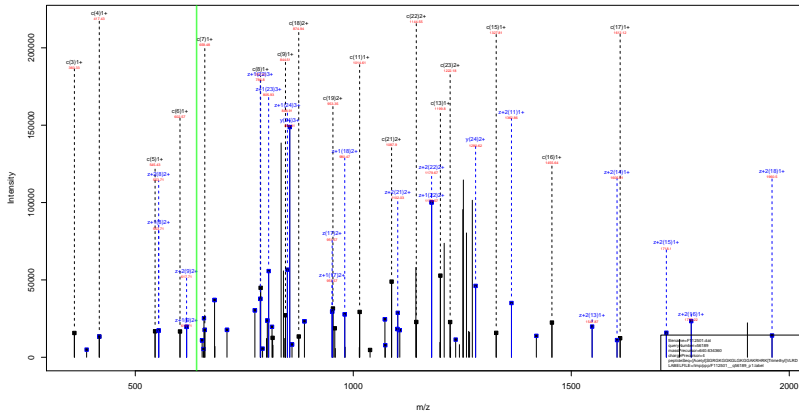

# sp | P62806 | H4\_MOUSE

[Acetyl]SGRGKGGKGLGKGGAKRHRK<sup>Trimethyl</sup>VLRD  
42.05

- ▶ fragmentation table for charge state 1+
- ▶ specType=etd
- ▶ score=101.23
- ▶ F112501.dat
- ▶ query=q56189.p1
- ▶ precursor=640.634360
- ▶ chargePrecursor=4
- ▶ itol=0.5

| AA    | c               | y        | z+1            | z+2             | z        | AA    |
|-------|-----------------|----------|----------------|-----------------|----------|-------|
| S[1]  | 167.076         | 2559.518 | 2543.490       | 0.000           | 2542.491 | S[24] |
| G[2]  | 224.598         | 2430.475 | 2414.457       | 0.000           | 2413.449 | G[23] |
| H[3]  | <b>360.199</b>  | 2373.454 | 2357.438       | 2356.443        | 2356.427 | H[22] |
| G[4]  | <b>417.220</b>  | 2217.353 | 2201.334       | 2202.342        | 2200.326 | G[21] |
| K[5]  | <b>545.315</b>  | 2160.331 | 2144.311       | 2145.320        | 2143.305 | K[20] |
| G[6]  | <b>602.337</b>  | 2032.238 | 2016.218       | 2017.225        | 2015.210 | G[19] |
| G[7]  | <b>659.358</b>  | 1975.215 | 1959.190       | <b>1960.204</b> | 1958.189 | G[18] |
| K[8]  | <b>787.453</b>  | 1918.193 | 1902.173       | 1903.182        | 1901.167 | K[17] |
| G[9]  | <b>844.475</b>  | 1790.098 | 1774.080       | <b>1775.087</b> | 1773.072 | G[16] |
| L[10] | <b>957.559</b>  | 1733.077 | 1717.059       | <b>1718.066</b> | 1716.056 | L[15] |
| G[11] | <b>1014.580</b> | 1619.993 | 1603.974       | <b>1604.982</b> | 1602.968 | G[14] |
| K[12] | 1142.075        | 1562.971 | 1546.953       | <b>1547.960</b> | 1545.945 | K[13] |
| G[13] | <b>1199.697</b> | 1434.878 | 1418.859       | <b>1419.866</b> | 1417.850 | G[12] |
| G[14] | 1256.718        | 1377.855 | 1361.830       | <b>1362.844</b> | 1360.828 | G[11] |
| A[15] | <b>1327.755</b> | 1320.833 | 1304.813       | 1305.823        | 1303.807 | A[10] |
| K[16] | <b>1435.850</b> | 1249.795 | 1233.773       | <b>1234.785</b> | 1232.770 | K[9]  |
| R[17] | <b>1611.951</b> | 1121.701 | 1105.683       | <b>1106.691</b> | 1104.675 | R[8]  |
| H[18] | 1748.010        | 995.600  | 949.582        | 950.589         | 948.574  | H[7]  |
| R[19] | 1905.111        | 828.541  | 812.523        | <b>813.530</b>  | 811.515  | R[6]  |
| K[20] | 2075.253        | 672.440  | <b>656.422</b> | <b>657.429</b>  | 655.414  | K[5]  |
| V[21] | 2174.322        | 502.298  | 486.280        | 487.287         | 485.272  | V[4]  |
| L[22] | 2287.406        | 401.236  | 387.211        | <b>388.219</b>  | 386.203  | L[3]  |
| D[23] | 2443.507        | 290.140  | 274.121        | 275.129         | 273.113  | D[2]  |
| D[24] | 2558.534        | 134.045  | 118.026        | 119.034         | 117.018  | D[1]  |

# sp | P62806 | H4\_MOUSE

[Acetyl]SGRGKGGKGLGKGGAKRHRK<sup>Trimethyl</sup>VLRD  
42.05

- ▶ fragmentation table for charge state 2+
- ▶ specType=etd
- ▶ score=101.23
- ▶ F112501.dat
- ▶ query=q56189\_p1
- ▶ precursor=640.634360
- ▶ chargePrecursor=4
- ▶ itol=0.5

| AA    | c               | y               | z+1             | z+2             | z               | AA    |
|-------|-----------------|-----------------|-----------------|-----------------|-----------------|-------|
| S[1]  | 74.642          | <b>1280.263</b> | 1272.263        | 0.504           | 1271.740        | S[24] |
| G[2]  | 102.553         | 1215.741        | 1207.732        | 0.504           | 1207.228        | G[23] |
| R[3]  | 180.603         | 1187.231        | <b>1179.221</b> | <b>1179.725</b> | 1178.717        | R[22] |
| G[4]  | 259.114         | 1109.189        | <b>1101.171</b> | <b>1101.675</b> | 1100.666        | G[21] |
| K[5]  | 273.151         | 1080.699        | <b>1072.690</b> | <b>1073.194</b> | <b>1072.156</b> | K[20] |
| G[6]  | 301.672         | 1016.622        | 1008.612        | 1009.116        | 1008.109        | G[19] |
| G[7]  | 330.183         | 988.111         | <b>980.102</b>  | <b>980.606</b>  | 979.599         | G[18] |
| K[8]  | 394.230         | 959.600         | <b>951.591</b>  | 952.095         | <b>951.087</b>  | K[17] |
| G[9]  | 422.741         | 895.551         | <b>887.543</b>  | <b>888.047</b>  | 887.040         | G[16] |
| L[10] | 479.283         | 867.042         | <b>859.033</b>  | <b>859.537</b>  | 858.530         | L[15] |
| G[11] | 507.794         | 810.500         | <b>802.491</b>  | <b>802.995</b>  | 801.987         | G[14] |
| K[12] | 571.841         | 781.989         | <b>773.980</b>  | <b>774.484</b>  | 773.476         | K[13] |
| G[13] | 600.352         | 717.943         | <b>709.932</b>  | <b>710.436</b>  | 709.429         | G[12] |
| G[14] | 628.863         | 699.431         | <b>681.422</b>  | <b>681.926</b>  | 680.919         | G[11] |
| A[15] | 684.381         | 660.920         | <b>652.911</b>  | <b>653.415</b>  | 652.408         | A[10] |
| R[16] | 728.439         | 625.402         | <b>617.392</b>  | <b>617.896</b>  | 616.889         | R[9]  |
| R[17] | 896.479         | 561.354         | <b>553.345</b>  | <b>553.849</b>  | 552.841         | R[8]  |
| H[18] | <b>875.009</b>  | 483.304         | 475.294         | 475.798         | 474.791         | H[7]  |
| R[19] | <b>953.059</b>  | 414.774         | 406.765         | 407.269         | 406.261         | R[6]  |
| K[20] | <b>1038.130</b> | 336.724         | 328.714         | 329.218         | 328.211         | K[5]  |
| V[21] | <b>1087.665</b> | 251.693         | 243.683         | 244.187         | 243.180         | V[4]  |
| L[22] | <b>1144.207</b> | 202.119         | 194.109         | 194.613         | 193.606         | L[3]  |
| R[23] | <b>1222.257</b> | 145.577         | 137.567         | 138.071         | 137.064         | R[2]  |
| D[24] | 1279.771        | 67.526          | 59.517          | 60.021          | 59.013          | D[1]  |

# sp | P62806 | H4\_MOUSE

[Acetyl]SGRGKGGKGLGKGGAKRHRK<sup>Trimethyl</sup>VLRD  
42.05

- ▶ fragmentation table for charge state 3+
- ▶ specType=etd
- ▶ score=101.23
- ▶ F112501.dat
- ▶ query=q56189\_p1
- ▶ precursor=640.634360
- ▶ chargePrecursor=4
- ▶ itol=0.5

| AA    | c              | y              | z+1            | z+2            | z              | AA    |
|-------|----------------|----------------|----------------|----------------|----------------|-------|
| S[1]  | 49.697         | <b>853.844</b> | <b>848.505</b> | 0.672          | 848.199        | S[24] |
| G[2]  | 58.704         | 810.830        | <b>805.490</b> | 0.672          | 805.154        | G[23] |
| R[3]  | 150.738        | <b>791.823</b> | <b>786.483</b> | <b>786.819</b> | 786.147        | R[22] |
| G[4]  | 139.745        | 739.789        | 734.450        | 734.785        | 734.114        | G[21] |
| K[5]  | 182.443        | 720.782        | 715.442        | 715.778        | 715.106        | K[20] |
| G[6]  | 201.450        | 678.084        | 672.744        | 673.080        | 672.408        | G[19] |
| G[7]  | 220.458        | <b>659.076</b> | <b>653.737</b> | 654.073        | <b>653.401</b> | G[18] |
| K[8]  | 263.156        | 640.069        | 634.730        | 635.066        | 634.394        | K[17] |
| G[9]  | 282.163        | 597.371        | 592.031        | 592.367        | 591.695        | G[16] |
| L[10] | 319.858        | 578.364        | 573.024        | 573.360        | 572.688        | L[15] |
| G[11] | 338.865        | 540.666        | 535.326        | 535.662        | 534.994        | G[14] |
| K[12] | 381.563        | 521.662        | 516.322        | 516.658        | 515.986        | K[13] |
| G[13] | 400.570        | 478.964        | 473.624        | 473.960        | 473.288        | G[12] |
| G[14] | 419.578        | 459.957        | 454.617        | 454.953        | 454.281        | G[11] |
| A[15] | 443.257        | 440.949        | 435.610        | 435.946        | 435.274        | A[10] |
| K[16] | 485.955        | <b>417.270</b> | 411.931        | 412.267        | 411.595        | K[9]  |
| R[17] | 537.989        | 374.572        | 369.232        | 369.568        | 368.896        | R[8]  |
| H[18] | 583.675        | 322.538        | 317.199        | 317.535        | 316.863        | H[7]  |
| R[19] | 635.709        | 276.852        | 271.512        | 271.848        | 271.176        | R[6]  |
| K[20] | 692.423        | 224.818        | 219.478        | 219.815        | 219.143        | K[5]  |
| V[21] | 725.445        | 168.104        | 162.764        | 163.101        | 162.429        | V[4]  |
| L[22] | 763.140        | 135.082        | 129.742        | 130.078        | 129.406        | L[3]  |
| R[23] | <b>815.174</b> | 97.387         | 92.047         | 92.383         | 91.711         | R[2]  |
| D[24] | 853.516        | 45.353         | 40.014         | 40.349         | 39.678         | D[1]  |



# sp | P62806 | H4\_MOUSE

[Acetyl]SGRGKGGKGLGKGGAKRHRK Trimethyl VLRD  
42.05

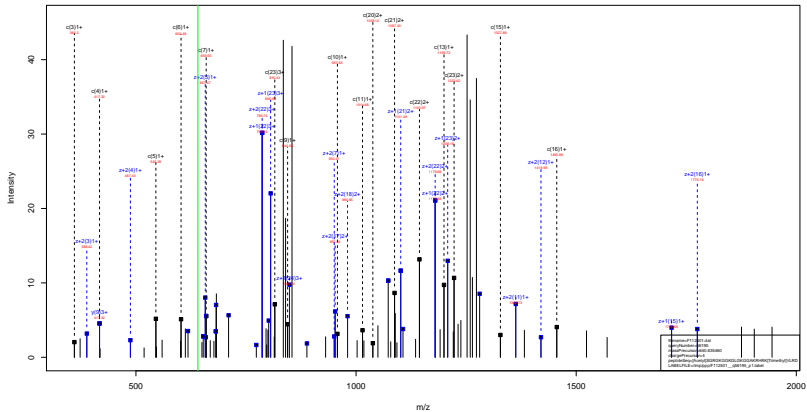

# sp | P62806 | H4\_MOUSE

[Acetyl]SGRGKGGKGLGKGGAKRHRK<sup>Trimethyl</sup>VLRD  
42.05

- ▶ fragmentation table for charge state 1+
- ▶ specType=etd
- ▶ score=58.90
- ▶ F112501.dat
- ▶ query=q56195\_p1
- ▶ precursor=640.635460
- ▶ chargePrecursor=4
- ▶ itol=0.5

| AA    | c               | y        | z+1             | z+2             | z        | AA    |
|-------|-----------------|----------|-----------------|-----------------|----------|-------|
| S[1]  | 147.076         | 2509.518 | 2541.409        | 0.000           | 2542.491 | S[24] |
| G[2]  | 204.098         | 2430.475 | 2414.457        | 0.000           | 2413.449 | G[23] |
| R[3]  | <b>368.199</b>  | 2373.454 | 2367.435        | 2358.443        | 2366.427 | R[22] |
| G[4]  | <b>417.230</b>  | 2217.953 | 2201.334        | 2202.342        | 2200.326 | G[21] |
| K[5]  | <b>545.315</b>  | 2160.331 | 2144.313        | 2145.320        | 2143.305 | K[20] |
| G[6]  | <b>602.337</b>  | 2032.236 | 2016.218        | 2017.225        | 2015.210 | G[19] |
| G[7]  | <b>659.358</b>  | 1975.215 | 1959.196        | 1960.204        | 1958.189 | G[18] |
| K[8]  | 787.453         | 1918.193 | 1902.175        | 1903.182        | 1901.167 | K[17] |
| G[9]  | <b>844.475</b>  | 1790.098 | 1774.080        | 1775.087        | 1773.072 | G[16] |
| L[10] | <b>927.559</b>  | 1733.077 | <b>1717.058</b> | 1718.066        | 1716.050 | L[15] |
| G[11] | <b>1014.580</b> | 1619.993 | 1603.974        | 1604.982        | 1602.966 | G[14] |
| K[12] | 1142.675        | 1562.971 | 1546.953        | 1547.960        | 1545.945 | K[13] |
| G[13] | <b>1199.697</b> | 1434.876 | 1418.858        | <b>1419.866</b> | 1417.850 | G[12] |
| G[14] | 1256.718        | 1377.855 | 1361.836        | <b>1362.844</b> | 1360.828 | G[11] |
| A[15] | <b>1327.795</b> | 1320.833 | 1304.815        | 1305.823        | 1303.807 | A[10] |
| R[16] | <b>1435.850</b> | 1249.796 | 1233.778        | 1234.785        | 1232.770 | R[9]  |
| R[17] | 1611.951        | 1121.701 | 1105.683        | <b>1106.691</b> | 1104.675 | R[8]  |
| H[18] | 1749.010        | 995.600  | 949.582         | <b>950.589</b>  | 948.574  | H[7]  |
| R[19] | 1908.111        | 828.541  | 812.523         | 813.530         | 811.515  | R[6]  |
| K[20] | 2075.253        | 672.440  | 656.422         | <b>657.429</b>  | 655.414  | K[5]  |
| V[21] | 2174.322        | 502.298  | 486.280         | <b>487.287</b>  | 485.272  | V[4]  |
| L[22] | 2287.406        | 403.232  | 387.213         | <b>388.219</b>  | 386.203  | L[3]  |
| R[23] | 2443.507        | 298.146  | 274.127         | 275.135         | 273.119  | R[2]  |
| D[24] | 2598.534        | 134.045  | 118.026         | 119.034         | 117.018  | D[1]  |

# sp | P62806 | H4\_MOUSE

[Acetyl]SGRGKGGKGLGKGGAKRHRK<sup>Trimethyl</sup>VLRD  
42.05

- ▶ fragmentation table for charge state 2+
- ▶ specType=etd
- ▶ score=58.90
- ▶ F112501.dat
- ▶ query=q56195\_p1
- ▶ precursor=640.635460
- ▶ chargePrecursor=4
- ▶ itol=0.5

| AA    | c               | y               | z+1             | z+2             | z              | AA    |
|-------|-----------------|-----------------|-----------------|-----------------|----------------|-------|
| S[1]  | 74.042          | <b>1280.263</b> | 1272.259        | 0.504           | 1271.449       | S[24] |
| G[2]  | 102.553         | 1215.741        | <b>1207.732</b> | 0.504           | 1207.228       | G[23] |
| R[3]  | 180.603         | 1187.213        | <b>1179.221</b> | <b>1179.725</b> | 1178.717       | R[22] |
| G[4]  | 269.114         | 1109.185        | <b>1101.171</b> | <b>1101.975</b> | 1100.667       | G[21] |
| K[5]  | 273.161         | 1080.060        | <b>1072.660</b> | <b>1073.164</b> | 1072.156       | K[20] |
| G[6]  | 351.672         | 1016.622        | 1008.612        | 1009.116        | 1008.108       | G[19] |
| G[7]  | 330.193         | 988.111         | 980.100         | <b>980.606</b>  | 979.599        | G[18] |
| K[8]  | 394.230         | 959.600         | 951.591         | <b>952.095</b>  | 951.087        | K[17] |
| G[9]  | 422.741         | 895.513         | 887.503         | <b>888.047</b>  | 887.040        | G[16] |
| L[10] | 479.283         | 867.042         | 859.033         | 859.537         | 858.529        | L[15] |
| G[11] | 507.794         | 810.500         | 802.491         | 802.995         | <b>801.987</b> | G[14] |
| K[12] | 571.841         | 781.989         | 773.980         | 774.484         | <b>773.476</b> | K[13] |
| G[13] | 600.352         | 717.942         | 709.932         | <b>710.436</b>  | 709.429        | G[12] |
| G[14] | 628.863         | 689.431         | <b>681.422</b>  | <b>681.926</b>  | 680.918        | G[11] |
| A[15] | 664.381         | 660.920         | <b>652.911</b>  | <b>653.415</b>  | <b>652.407</b> | A[10] |
| R[16] | 708.409         | 626.400         | 618.390         | <b>617.896</b>  | 616.889        | R[9]  |
| R[17] | 806.479         | 561.354         | 553.345         | 553.849         | 552.841        | R[8]  |
| H[18] | 875.009         | 483.304         | 475.294         | 475.798         | 474.791        | H[7]  |
| R[19] | 963.059         | 414.774         | 406.765         | 407.269         | 406.261        | R[6]  |
| K[20] | <b>1038.130</b> | 336.724         | 328.714         | 329.218         | 328.211        | K[5]  |
| V[21] | <b>1087.665</b> | 251.663         | 243.653         | 244.147         | 243.140        | V[4]  |
| L[22] | <b>1144.707</b> | 202.119         | 194.109         | 194.613         | 193.606        | L[3]  |
| R[23] | <b>1222.257</b> | 145.577         | 137.567         | 138.071         | 137.065        | R[2]  |
| D[24] | 1279.771        | 67.526          | 59.517          | 60.021          | 59.013         | D[1]  |

# sp | P62806 | H4\_MOUSE

[Acetyl]SGRGKGGKGLGKGGAKRHRK<sup>Trimethyl</sup>VLRD<sub>42.05</sub>

- ▶ fragmentation table for charge state 3+
- ▶ specType=etd
- ▶ score=58.90
- ▶ F112501.dat
- ▶ query=q56195.p1
- ▶ precursor=640.635460
- ▶ chargePrecursor=4
- ▶ itol=0.5

| AA    | c              | y              | z+1            | z+2            | z       | AA    |
|-------|----------------|----------------|----------------|----------------|---------|-------|
| S[1]  | 49.697         | 853.844        | <b>845.505</b> | 0.672          | 648.169 | S[24] |
| G[2]  | 68.704         | 810.830        | <b>805.490</b> | 0.672          | 805.154 | G[23] |
| R[3]  | 120.738        | 791.823        | <b>786.483</b> | <b>786.819</b> | 786.147 | R[22] |
| G[4]  | 139.745        | 739.789        | 734.450        | 734.785        | 734.114 | G[21] |
| K[5]  | 182.443        | 720.782        | 715.442        | 715.778        | 715.106 | K[20] |
| G[6]  | 201.450        | 678.084        | 672.744        | 673.080        | 672.408 | G[19] |
| G[7]  | 220.458        | <b>659.076</b> | 653.737        | 654.073        | 653.401 | G[18] |
| K[8]  | 263.156        | 640.069        | 634.730        | 635.066        | 634.394 | K[17] |
| G[9]  | 282.163        | 597.371        | 592.031        | 592.367        | 591.695 | G[16] |
| L[10] | 319.258        | 578.364        | 573.024        | 573.360        | 572.688 | L[15] |
| G[11] | 338.265        | 540.660        | 535.320        | 535.656        | 534.984 | G[14] |
| K[12] | 381.563        | 521.662        | 516.322        | 516.658        | 515.986 | K[13] |
| G[13] | 400.570        | 478.964        | 473.624        | 473.960        | 473.288 | G[12] |
| G[14] | 419.578        | 459.957        | 454.617        | 454.953        | 454.281 | G[11] |
| A[15] | 443.257        | 440.949        | 435.610        | 435.946        | 435.274 | A[10] |
| K[16] | 485.955        | <b>417.270</b> | 411.931        | 412.267        | 411.595 | K[9]  |
| R[17] | 537.989        | 374.572        | 369.232        | 369.568        | 368.896 | R[8]  |
| H[18] | 583.675        | 322.530        | 317.199        | 317.535        | 316.863 | H[7]  |
| R[19] | 635.709        | 276.892        | 271.552        | 271.888        | 271.216 | R[6]  |
| K[20] | 692.423        | 234.813        | 219.479        | 219.815        | 219.143 | K[5]  |
| V[21] | 725.445        | 188.194        | 182.795        | 183.101        | 182.429 | V[4]  |
| L[22] | 763.140        | 135.082        | 129.742        | 130.078        | 129.406 | L[3]  |
| R[23] | <b>815.174</b> | 97.387         | 92.047         | 92.383         | 91.711  | R[2]  |
| D[24] | 853.516        | 45.353         | 40.014         | 40.349         | 39.678  | D[1]  |



# sp | P62806 | H4\_MOUSE

[Acetyl]SGRGKGGKGLGKGGAKRHRK<sup>Trimethyl</sup>VLRD  
42.05

- ▶ fragmentation table for charge state 1+
- ▶ specType=etd
- ▶ score=113.04
- ▶ F112501.dat
- ▶ query=q56200.p1
- ▶ precursor=640.637440
- ▶ chargePrecursor=4
- ▶ itol=0.5

| AA    | c               | y        | z+1            | z+2             | z        | AA    |
|-------|-----------------|----------|----------------|-----------------|----------|-------|
| S[1]  | 167.076         | 2559.518 | 2543.490       | 0.000           | 2542.491 | S[24] |
| G[2]  | 224.598         | 2430.475 | 2414.457       | 0.000           | 2413.449 | G[23] |
| H[3]  | <b>360.199</b>  | 2373.454 | 2357.438       | 2356.443        | 2356.427 | H[22] |
| G[4]  | <b>417.220</b>  | 2217.353 | 2201.334       | 2202.342        | 2200.325 | G[21] |
| K[5]  | <b>545.115</b>  | 2160.311 | 2144.311       | 2145.320        | 2143.305 | K[20] |
| G[6]  | <b>602.137</b>  | 2032.238 | 2016.218       | 2017.225        | 2015.210 | G[19] |
| G[7]  | <b>659.158</b>  | 1975.215 | 1959.190       | <b>1960.204</b> | 1958.189 | G[18] |
| K[8]  | <b>707.453</b>  | 1918.193 | 1902.173       | 1903.182        | 1901.167 | K[17] |
| G[9]  | <b>844.475</b>  | 1790.096 | 1774.080       | <b>1775.087</b> | 1773.072 | G[16] |
| L[10] | <b>957.559</b>  | 1733.071 | 1717.059       | <b>1718.066</b> | 1716.056 | L[15] |
| G[11] | <b>1014.580</b> | 1619.993 | 1603.974       | <b>1604.982</b> | 1602.968 | G[14] |
| K[12] | 1142.075        | 1562.971 | 1546.953       | <b>1547.960</b> | 1545.945 | K[13] |
| G[13] | <b>1199.697</b> | 1434.878 | 1418.859       | <b>1419.866</b> | 1417.850 | G[12] |
| G[14] | 1256.718        | 1377.855 | 1361.830       | <b>1362.844</b> | 1360.828 | G[11] |
| A[15] | <b>1327.755</b> | 1320.833 | 1304.813       | <b>1305.823</b> | 1303.807 | A[10] |
| K[16] | <b>1435.850</b> | 1249.795 | 1233.773       | <b>1234.785</b> | 1232.770 | K[9]  |
| R[17] | <b>1611.951</b> | 1121.701 | 1105.683       | <b>1106.691</b> | 1104.675 | R[8]  |
| H[18] | 1740.010        | 995.600  | 949.582        | 950.589         | 948.574  | H[7]  |
| R[19] | 1905.111        | 828.541  | <b>812.523</b> | <b>813.530</b>  | 811.515  | R[6]  |
| K[20] | 2075.253        | 672.440  | <b>656.422</b> | <b>657.429</b>  | 655.414  | K[5]  |
| V[21] | 2174.322        | 502.298  | 486.280        | 487.287         | 485.272  | V[4]  |
| L[22] | 2287.406        | 401.216  | 387.211        | <b>388.219</b>  | 386.203  | L[3]  |
| D[23] | 2433.507        | 290.140  | 274.127        | <b>275.135</b>  | 273.119  | D[2]  |
| D[24] | 2558.534        | 134.045  | 118.026        | 119.034         | 117.018  | D[1]  |

# sp | P62806 | H4\_MOUSE

[Acetyl]SGRGKGGKGLGKGGAKRHRK<sup>Trimethyl</sup>VLRD  
42.05

- ▶ fragmentation table for charge state 2+
- ▶ specType=etd
- ▶ score=113.04
- ▶ F112501.dat
- ▶ query=q56200\_p1
- ▶ precursor=640.637440
- ▶ chargePrecursor=4
- ▶ itol=0.5

| AA |    | c               | y               | x+1             | x+2             | z        | AA    |
|----|----|-----------------|-----------------|-----------------|-----------------|----------|-------|
| S  | 1  | 74.042          | <b>1280.263</b> | <b>1272.253</b> | 0.504           | 1271.449 | S[24] |
| G  | 2  | 102.553         | 1215.741        | <b>1207.732</b> | 0.504           | 1207.228 | G[23] |
| R  | 3  | 180.603         | 1187.212        | <b>1179.221</b> | <b>1179.725</b> | 1178.717 | R[22] |
| G  | 4  | 269.114         | 1109.180        | 1101.773        | <b>1101.875</b> | 1100.667 | G[21] |
| K  | 5  | 273.161         | 1080.060        | <b>1072.660</b> | <b>1073.164</b> | 1072.158 | K[20] |
| G  | 6  | 301.672         | 1016.622        | 1008.612        | <b>1009.116</b> | 1008.108 | G[19] |
| G  | 7  | 330.183         | 968.111         | <b>960.102</b>  | <b>960.606</b>  | 979.599  | G[18] |
| K  | 8  | 394.230         | 959.600         | <b>951.591</b>  | <b>952.095</b>  | 951.087  | K[17] |
| G  | 9  | 422.741         | 895.513         | <b>887.543</b>  | <b>888.047</b>  | 887.040  | G[16] |
| L  | 10 | 479.293         | 867.042         | 859.034         | 859.537         | 868.529  | L[15] |
| G  | 11 | 507.794         | <b>810.500</b>  | <b>802.491</b>  | <b>802.995</b>  | 801.987  | G[14] |
| K  | 12 | 571.841         | 781.989         | <b>773.980</b>  | <b>774.484</b>  | 773.476  | K[13] |
| G  | 13 | 600.352         | 717.942         | <b>709.932</b>  | <b>710.436</b>  | 709.429  | G[12] |
| G  | 14 | 628.863         | 689.431         | <b>681.422</b>  | <b>681.926</b>  | 680.918  | G[11] |
| A  | 15 | 664.361         | 660.920         | 652.911         | <b>653.415</b>  | 652.407  | A[10] |
| R  | 16 | 708.409         | 626.409         | <b>617.392</b>  | <b>617.896</b>  | 616.889  | R[9]  |
| R  | 17 | 806.479         | 561.354         | <b>553.345</b>  | <b>553.849</b>  | 552.841  | R[8]  |
| H  | 18 | <b>875.009</b>  | 483.304         | 475.294         | 475.798         | 474.791  | H[7]  |
| R  | 19 | 953.059         | 414.774         | 406.765         | 407.269         | 406.261  | R[6]  |
| K  | 20 | 1038.130        | 336.724         | 328.714         | 329.218         | 328.211  | K[5]  |
| V  | 21 | <b>1087.665</b> | 251.663         | 243.653         | 244.147         | 243.140  | V[4]  |
| L  | 22 | <b>1144.202</b> | 202.119         | 194.109         | 194.613         | 193.606  | L[3]  |
| R  | 23 | <b>1222.257</b> | 145.577         | 137.567         | 138.071         | 137.063  | R[2]  |
| D  | 24 | 1279.771        | 67.526          | 59.517          | 60.021          | 59.013   | D[1]  |

# sp | P62806 | H4\_MOUSE

[Acetyl]SGRGKGGKGLGKGGAKRHRK<sup>Trimethyl</sup>VLRD  
42.05

- ▶ fragmentation table for charge state 3+
- ▶ specType=etd
- ▶ score=113.04
- ▶ F112501.dat
- ▶ query=q56200.p1
- ▶ precursor=640.637440
- ▶ chargePrecursor=4
- ▶ itol=0.5

| AA    | c              | y              | z+1            | z+2            | z              | AA    |
|-------|----------------|----------------|----------------|----------------|----------------|-------|
| S[1]  | 49.697         | <b>853.844</b> | <b>848.505</b> | 0.672          | <b>848.169</b> | S[24] |
| G[2]  | 58.704         | 810.830        | <b>805.490</b> | 0.672          | 805.154        | G[23] |
| R[3]  | 120.738        | 791.823        | 786.483        | <b>786.819</b> | 786.147        | R[22] |
| G[4]  | 139.745        | 739.789        | 734.450        | 734.785        | 734.114        | G[21] |
| K[5]  | 182.443        | 720.782        | 715.442        | 715.778        | 715.106        | K[20] |
| G[6]  | 201.450        | 678.084        | 672.744        | 673.080        | 672.408        | G[19] |
| G[7]  | 220.458        | 659.076        | <b>653.737</b> | 654.073        | <b>653.401</b> | G[18] |
| K[8]  | 263.156        | 640.069        | 634.730        | 635.066        | 634.394        | K[17] |
| G[9]  | 282.163        | 597.371        | 592.031        | 592.367        | 591.695        | G[16] |
| L[10] | 319.858        | 578.364        | 573.024        | 573.360        | 572.688        | L[15] |
| G[11] | 338.865        | 540.666        | 535.326        | 535.662        | 534.994        | G[14] |
| K[12] | 381.563        | 521.662        | 516.322        | 516.658        | 515.986        | K[13] |
| G[13] | 400.570        | 478.964        | 473.624        | 473.960        | 473.288        | G[12] |
| G[14] | 419.578        | 459.957        | 454.617        | 454.953        | 454.281        | G[11] |
| A[15] | 443.257        | 440.949        | 435.610        | 435.946        | 435.274        | A[10] |
| K[16] | 485.955        | <b>417.270</b> | 411.931        | 412.267        | 411.595        | K[9]  |
| R[17] | 537.989        | 374.572        | 369.232        | 369.568        | 368.896        | R[8]  |
| H[18] | 583.675        | 322.538        | 317.199        | 317.535        | 316.863        | H[7]  |
| R[19] | 635.709        | 276.852        | 271.512        | 271.848        | 271.176        | R[6]  |
| K[20] | 692.423        | 224.818        | 219.478        | 219.815        | 219.143        | K[5]  |
| V[21] | 725.445        | 168.104        | 162.764        | 163.101        | 162.429        | V[4]  |
| L[22] | 763.140        | 135.082        | 129.742        | 130.078        | 129.406        | L[3]  |
| R[23] | <b>815.174</b> | 97.387         | 92.047         | 92.383         | 91.711         | R[2]  |
| D[24] | 853.516        | 45.353         | 40.014         | 40.349         | 39.678         | D[1]  |



# sp | P62806 | H4\_MOUSE

[Acetyl]SGR<sup>Methyl</sup> 14.02 GKGKGLGKGGAKRHRK<sup>Trimethyl</sup> VLRD 42.05

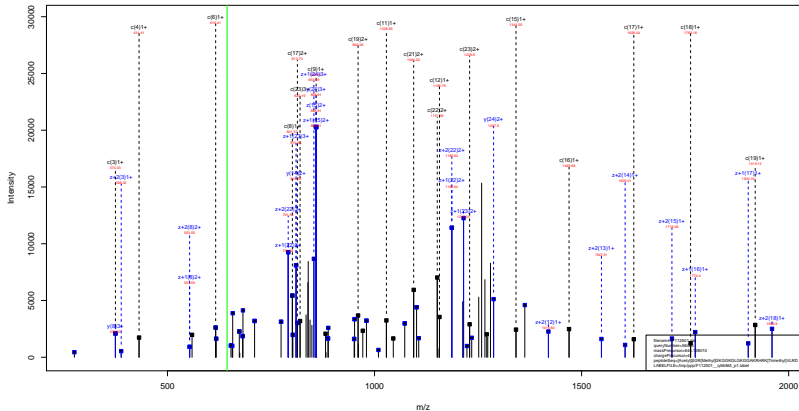

# sp | P62806 | H4\_MOUSE

[Acetyl]SGR<sup>Methyl</sup><sub>14.02</sub> GKGGKGLGKGGAKRHRK<sup>Trimethyl</sup><sub>42.05</sub> VLRD

- ▶ fragmentation table for charge state 1+
- ▶ specType=etd
- ▶ score=134.85
- ▶ F112501.dat
- ▶ query=q56465\_p1
- ▶ precursor=644.138010
- ▶ chargePrecursor=4
- ▶ itol=0.5

| AA | c  | y               | z+1      | z+2             | z               | AA       |       |
|----|----|-----------------|----------|-----------------|-----------------|----------|-------|
| S  | 1  | 147.076         | 2573.534 | 2557.515        | 0.000           | 2556.507 | S[24] |
| G  | 2  | 204.098         | 2444.491 | 2428.472        | 0.000           | 2427.464 | G[23] |
| R  | 3  | <b>374.215</b>  | 2387.469 | 2371.451        | 2472.499        | 2370.443 | R[22] |
| G  | 4  | <b>431.236</b>  | 2317.953 | 2299.334        | 2292.342        | 2290.326 | G[21] |
| K  | 5  | <b>559.331</b>  | 2160.331 | 2144.313        | 2145.320        | 2143.305 | K[20] |
| G  | 6  | <b>616.353</b>  | 2032.236 | 2016.218        | 2017.225        | 2015.210 | G[19] |
| G  | 7  | <b>673.374</b>  | 1975.215 | 1959.196        | <b>1960.204</b> | 1958.189 | G[18] |
| K  | 8  | <b>801.469</b>  | 1918.193 | <b>1902.175</b> | 1903.182        | 1901.167 | K[17] |
| G  | 9  | <b>858.490</b>  | 1790.096 | <b>1774.080</b> | 1775.087        | 1773.072 | G[16] |
| L  | 10 | <b>971.574</b>  | 1733.071 | 1717.053        | <b>1718.066</b> | 1716.050 | L[15] |
| G  | 11 | <b>1028.596</b> | 1619.993 | 1603.974        | <b>1604.982</b> | 1602.966 | G[14] |
| K  | 12 | <b>1156.691</b> | 1562.971 | 1546.953        | <b>1547.960</b> | 1545.945 | K[13] |
| G  | 13 | 1213.712        | 1434.876 | 1418.858        | <b>1419.866</b> | 1417.850 | G[12] |
| G  | 14 | <b>1270.734</b> | 1377.855 | 1361.836        | <b>1362.844</b> | 1360.828 | G[11] |
| A  | 15 | <b>1341.771</b> | 1320.833 | 1304.815        | 1305.823        | 1303.807 | A[10] |
| R  | 16 | <b>1409.866</b> | 1249.796 | 1233.778        | <b>1234.785</b> | 1232.770 | R[9]  |
| R  | 17 | <b>1625.967</b> | 1121.701 | 1105.683        | <b>1106.691</b> | 1104.675 | R[8]  |
| H  | 18 | <b>1763.026</b> | 995.600  | 989.582         | <b>990.589</b>  | 988.574  | H[7]  |
| R  | 19 | <b>1919.127</b> | 826.541  | 810.523         | <b>813.530</b>  | 811.515  | R[6]  |
| K  | 20 | 2089.269        | 672.440  | <b>656.422</b>  | <b>657.429</b>  | 655.414  | K[5]  |
| V  | 21 | 2188.337        | 502.298  | 486.280         | <b>487.287</b>  | 485.272  | V[4]  |
| L  | 22 | 2391.421        | 403.230  | 387.211         | <b>388.219</b>  | 386.203  | L[3]  |
| R  | 23 | 2457.523        | 298.146  | 274.127         | <b>275.135</b>  | 273.119  | R[2]  |
| D  | 24 | 2572.550        | 134.045  | 118.026         | 119.034         | 117.018  | D[1]  |

# sp | P62806 | H4\_MOUSE

[Acetyl]SGR<sup>Methyl</sup><sub>14.02</sub> GKGGKGLGKGGAKRHRK<sup>Trimethyl</sup><sub>42.05</sub> VLRD

- ▶ fragmentation table for charge state 2+
- ▶ specType=etd
- ▶ score=134.85
- ▶ F112501.dat
- ▶ query=q56465\_p1
- ▶ precursor=644.138010
- ▶ chargePrecursor=4
- ▶ itol=0.5

| AA    | c               | y               | z+1             | z+2             | z              | AA    |
|-------|-----------------|-----------------|-----------------|-----------------|----------------|-------|
| S[1]  | 74.042          | <b>1287.270</b> | 1279.261        | 0.504           | 1278.757       | S[24] |
| G[2]  | 102.553         | <b>1222.749</b> | <b>1214.740</b> | 0.504           | 1214.236       | G[23] |
| R[3]  | 187.811         | 1194.238        | <b>1186.229</b> | <b>1186.733</b> | 1185.725       | R[22] |
| G[4]  | 218.322         | 1109.188        | <b>1101.171</b> | <b>1101.675</b> | 1100.667       | G[21] |
| K[5]  | 280.189         | 1080.060        | <b>1072.660</b> | <b>1073.164</b> | 1072.156       | K[20] |
| G[6]  | 308.680         | 1016.622        | 1008.612        | <b>1009.116</b> | 1008.108       | G[19] |
| G[7]  | 337.191         | 988.111         | <b>980.102</b>  | <b>980.606</b>  | 979.598        | G[18] |
| K[8]  | 401.238         | 959.600         | <b>951.591</b>  | <b>952.095</b>  | <b>951.087</b> | K[17] |
| G[9]  | 429.749         | 895.553         | <b>887.543</b>  | <b>888.047</b>  | 887.040        | G[16] |
| L[10] | 489.293         | 867.042         | <b>859.033</b>  | 859.537         | <b>858.529</b> | L[15] |
| G[11] | 514.802         | <b>810.500</b>  | <b>802.491</b>  | <b>802.995</b>  | <b>801.987</b> | G[14] |
| K[12] | 578.949         | 781.989         | <b>773.980</b>  | <b>774.484</b>  | 773.476        | K[13] |
| G[13] | 607.360         | 717.942         | <b>709.932</b>  | <b>710.436</b>  | 709.429        | G[12] |
| G[14] | 635.871         | 689.431         | <b>681.422</b>  | <b>681.926</b>  | 680.918        | G[11] |
| A[15] | 667.389         | 660.920         | 652.911         | <b>653.415</b>  | 652.407        | A[10] |
| R[16] | 735.437         | 629.409         | <b>617.392</b>  | <b>617.896</b>  | <b>616.889</b> | R[9]  |
| R[17] | <b>813.487</b>  | 561.354         | <b>553.345</b>  | <b>553.849</b>  | 552.841        | R[8]  |
| H[18] | <b>882.017</b>  | 483.304         | 475.294         | 475.798         | 474.791        | H[7]  |
| R[19] | <b>960.067</b>  | 414.774         | 406.765         | 407.269         | 406.261        | R[6]  |
| K[20] | <b>1045.138</b> | 336.724         | 328.714         | 329.218         | 328.211        | K[5]  |
| V[21] | <b>1094.672</b> | 251.663         | 243.653         | 244.147         | 243.140        | V[4]  |
| L[22] | <b>1151.214</b> | 202.132         | 194.123         | 194.617         | 193.610        | L[3]  |
| R[23] | <b>1229.265</b> | 145.577         | 137.567         | 138.071         | 137.063        | R[2]  |
| D[24] | 1286.778        | 67.526          | 59.517          | 60.021          | 59.013         | D[1]  |

# sp | P62806 | H4\_MOUSE

[Acetyl]SGR<sup>Methyl</sup><sub>14.02</sub> GKGKGLGKGGAKRHRK<sup>Trimethyl</sup><sub>42.05</sub> VLRD

- ▶ fragmentation table for charge state 3+
- ▶ specType=etd
- ▶ score=134.85
- ▶ F112501.dat
- ▶ query=q56465.p1
- ▶ precursor=644.138010
- ▶ chargePrecursor=4
- ▶ itol=0.5

| AA    | c              | y              | z+1            | z+2            | z              | AA    |
|-------|----------------|----------------|----------------|----------------|----------------|-------|
| S[1]  | 49.697         | <b>858.516</b> | <b>853.176</b> | 0.672          | 852.841        | S[24] |
| G[2]  | 58.704         | 815.902        | <b>810.162</b> | 0.672          | 809.826        | G[23] |
| R[3]  | 125.410        | 796.495        | <b>791.155</b> | <b>791.491</b> | 790.819        | R[22] |
| G[4]  | 144.417        | 739.789        | 734.450        | 734.785        | 734.114        | G[21] |
| K[5]  | 187.115        | 720.782        | 715.442        | 715.778        | 715.106        | K[20] |
| G[6]  | 206.122        | 678.084        | 672.744        | <b>673.080</b> | 672.408        | G[19] |
| G[7]  | 225.130        | 659.076        | <b>653.737</b> | 654.073        | <b>653.401</b> | G[18] |
| K[8]  | 267.828        | 640.069        | 634.730        | 635.066        | 634.394        | K[17] |
| G[9]  | 286.835        | 597.371        | 592.031        | 592.367        | 591.699        | G[16] |
| L[10] | 324.930        | 578.364        | 573.024        | 573.360        | 572.688        | L[15] |
| G[11] | 343.937        | 540.666        | 535.326        | 535.666        | 534.994        | G[14] |
| K[12] | 386.235        | 521.662        | 516.322        | 516.658        | 515.986        | K[13] |
| G[13] | 405.242        | 478.964        | 473.624        | 473.960        | 473.288        | G[12] |
| G[14] | 424.249        | 459.957        | 454.617        | 454.953        | 454.281        | G[11] |
| A[15] | 447.929        | 440.949        | 435.610        | 435.946        | 435.274        | A[10] |
| K[16] | 490.627        | 417.270        | 411.931        | 412.267        | 411.595        | K[9]  |
| R[17] | 542.661        | <b>374.572</b> | 369.232        | 369.568        | 368.896        | R[8]  |
| H[18] | 588.347        | 322.538        | 317.199        | 317.535        | 316.863        | H[7]  |
| R[19] | 640.381        | 276.852        | 271.512        | 271.848        | 271.176        | R[6]  |
| K[20] | 697.095        | 224.818        | 219.478        | 219.815        | 219.143        | K[5]  |
| V[21] | 730.117        | 168.104        | 162.764        | 163.101        | 162.429        | V[4]  |
| L[22] | 767.812        | 135.082        | 129.742        | 130.078        | 129.406        | L[3]  |
| R[23] | <b>819.846</b> | 97.387         | 92.047         | 92.383         | 91.711         | R[2]  |
| D[24] | 858.188        | 45.353         | 40.014         | 40.349         | 39.678         | D[1]  |



# sp | P62806 | H4\_MOUSE

SGR<sup>Trimethyl</sup><sub>42.05</sub> GKGGKGLGKGGAK<sup>Trimethyl</sup><sub>42.05</sub> RHRK<sup>Methyl</sup><sub>14.02</sub> VLRD

- ▶ fragmentation table for charge state 1+
- ▶ specType=etd
- ▶ score=93.59
- ▶ F112501.dat
- ▶ query=q56468\_p1
- ▶ precursor=515.517010
- ▶ chargePrecursor=5
- ▶ itol=0.5

| AA    | c               | y              | z+1             | z+2             | z              | AA    |
|-------|-----------------|----------------|-----------------|-----------------|----------------|-------|
| S[1]  | 105.006         | 2573.570       | 2557.551        | 0.000           | 2556.543       | S[24] |
| G[2]  | 162.087         | 2486.538       | 2470.519        | 0.000           | 2469.511       | G[23] |
| R[3]  | <b>360.235</b>  | 2420.516       | 2413.488        | 2414.506        | 2412.460       | R[22] |
| G[4]  | <b>417.257</b>  | 2213.568       | 2218.390        | 2219.357        | 2214.341       | G[21] |
| K[5]  | <b>545.352</b>  | 2174.347       | 2158.338        | 2150.336        | 2157.320       | K[20] |
| G[6]  | <b>602.373</b>  | 2046.252       | 2030.235        | 2031.241        | 2029.225       | G[19] |
| G[7]  | <b>659.395</b>  | 1989.230       | 1973.215        | 1974.220        | 1972.204       | G[18] |
| K[8]  | <b>787.490</b>  | 1932.209       | 1916.190        | 1917.198        | 1915.182       | K[17] |
| G[9]  | <b>844.511</b>  | 1894.114       | 1788.085        | <b>1789.103</b> | 1787.087       | G[16] |
| L[10] | <b>927.595</b>  | 1747.093       | 1733.074        | <b>1732.082</b> | 1730.066       | L[15] |
| G[11] | <b>1014.617</b> | 1634.026       | 1617.990        | 1618.998        | 1616.982       | G[14] |
| K[12] | <b>1142.712</b> | 1576.987       | 1560.968        | <b>1561.976</b> | 1559.960       | K[13] |
| G[13] | <b>1199.733</b> | 1448.902       | 1432.873        | <b>1433.881</b> | 1431.866       | G[12] |
| G[14] | 1256.755        | 1391.871       | <b>1375.852</b> | 1376.860        | 1374.844       | G[11] |
| A[15] | <b>1327.792</b> | 1334.849       | 1318.830        | <b>1319.838</b> | 1317.823       | A[10] |
| R[16] | <b>1459.834</b> | 1283.812       | 1247.793        | <b>1248.801</b> | 1246.785       | R[9]  |
| R[17] | <b>1654.035</b> | 1093.670       | 1077.651        | 1078.659        | 1076.644       | R[8]  |
| H[18] | 1791.094        | 937.569        | 921.550         | <b>922.558</b>  | <b>920.542</b> | H[7]  |
| R[19] | 1947.195        | <b>800.510</b> | <b>784.491</b>  | <b>785.499</b>  | 783.484        | R[6]  |
| K[20] | 2089.305        | <b>644.409</b> | <b>628.390</b>  | <b>629.398</b>  | 627.382        | K[5]  |
| V[21] | 2188.374        | 502.298        | <b>486.280</b>  | 487.287         | 485.272        | V[4]  |
| L[22] | 2397.456        | 403.230        | <b>387.211</b>  | 388.219         | 386.203        | L[3]  |
| R[23] | 2457.559        | 290.146        | <b>274.127</b>  | 275.135         | 273.119        | R[2]  |
| D[24] | 2572.588        | 134.045        | 118.026         | 119.034         | 117.018        | D[1]  |

# sp | P62806 | H4\_MOUSE

SGR<sup>Trimethyl</sup><sub>42.05</sub> GKGGKGLGKGGAK<sup>Trimethyl</sup><sub>42.05</sub> RHRK<sup>Methyl</sup><sub>14.02</sub> VLRD

- ▶ fragmentation table for charge state 2+
- ▶ specType=etd
- ▶ score=93.59
- ▶ F112501.dat
- ▶ query=q56468.p1
- ▶ precursor=515.517010
- ▶ chargePrecursor=5
- ▶ itol=0.5

| AA    | c               | y               | z+1             | z+2             | z               | AA    |
|-------|-----------------|-----------------|-----------------|-----------------|-----------------|-------|
| S[1]  | 81.017          | 1087.209        | 1270.299        | 0.504           | 1278.776        | S[24] |
| G[2]  | 81.547          | 1243.773        | 1235.763        | 0.504           | 1235.250        | G[23] |
| K[3]  | 180.621         | <b>1215.262</b> | <b>1207.252</b> | <b>1207.756</b> | 1206.740        | K[22] |
| G[4]  | 289.182         | 1116.166        | 1108.156        | <b>1108.662</b> | 1107.652        | G[21] |
| K[5]  | 273.180         | 1087.877        | <b>1079.668</b> | <b>1088.172</b> | 1079.154        | K[20] |
| G[6]  | 301.690         | 1023.630        | 1015.620        | 1016.124        | <b>1015.116</b> | G[19] |
| G[7]  | 330.201         | 995.119         | 987.110         | <b>987.613</b>  | 986.600         | G[18] |
| K[8]  | <b>394.248</b>  | 956.608         | <b>958.599</b>  | <b>959.103</b>  | <b>958.095</b>  | K[17] |
| G[9]  | <b>422.759</b>  | 928.081         | <b>894.551</b>  | <b>895.055</b>  | 894.047         | G[16] |
| L[10] | <b>479.301</b>  | <b>874.050</b>  | 866.041         | <b>866.544</b>  | 865.531         | L[15] |
| G[11] | <b>507.812</b>  | <b>817.508</b>  | <b>809.499</b>  | <b>810.002</b>  | 808.995         | G[14] |
| K[12] | <b>571.859</b>  | 788.997         | <b>780.988</b>  | <b>781.492</b>  | <b>780.484</b>  | K[13] |
| G[13] | <b>600.370</b>  | 724.950         | <b>716.940</b>  | <b>717.444</b>  | 716.430         | G[12] |
| G[14] | <b>628.861</b>  | 696.439         | <b>688.430</b>  | <b>688.933</b>  | <b>687.926</b>  | G[11] |
| A[15] | <b>664.399</b>  | <b>667.928</b>  | <b>659.919</b>  | <b>660.423</b>  | <b>659.415</b>  | A[10] |
| R[16] | <b>748.470</b>  | 632.410         | <b>624.400</b>  | <b>624.904</b>  | 623.895         | R[9]  |
| R[17] | <b>827.521</b>  | 547.399         | <b>539.329</b>  | <b>539.833</b>  | 538.825         | R[6]  |
| H[18] | <b>896.050</b>  | 469.288         | <b>461.279</b>  | <b>461.783</b>  | 460.775         | H[7]  |
| R[19] | <b>974.101</b>  | 400.759         | <b>392.749</b>  | <b>393.253</b>  | 392.245         | R[6]  |
| K[20] | <b>1045.156</b> | 322.708         | 314.689         | 315.203         | 314.195         | K[5]  |
| V[21] | <b>1094.691</b> | 293.683         | 285.663         | 286.177         | 285.169         | V[4]  |
| L[22] | <b>1151.233</b> | 202.119         | 194.100         | 194.613         | 193.605         | L[3]  |
| R[23] | <b>1229.283</b> | 145.577         | 137.567         | 138.071         | 137.063         | R[2]  |
| D[24] | 1286.797        | 67.526          | 59.517          | 60.021          | 59.013          | D[1]  |

# sp | P62806 | H4\_MOUSE

SGR<sup>Trimethyl</sup><sub>42.05</sub> GKGGKGLGKGGAK<sup>Trimethyl</sup><sub>42.05</sub> RHRK<sup>Methyl</sup><sub>14.02</sub> VL RD

- ▶ fragmentation table for charge state 3+
- ▶ specType=etd
- ▶ score=93.59
- ▶ F112501.dat
- ▶ query=q56468.p1
- ▶ precursor=515.517010
- ▶ chargePrecursor=5
- ▶ itol=0.5

| AA    | c              | y              | z+1            | z+2            | z     | AA             |       |
|-------|----------------|----------------|----------------|----------------|-------|----------------|-------|
| S[1]  | 35.693         | <b>858.528</b> | <b>853.189</b> |                | 0.672 | 852.853        | S[24] |
| G[2]  | 54.701         | 829.517        | 824.178        |                | 0.672 | 823.842        | G[23] |
| R[3]  | 120.750        | <b>810.510</b> | <b>805.171</b> | <b>805.507</b> |       | <b>804.835</b> | R[22] |
| G[4]  | 139.757        | 744.461        | 739.121        | <b>739.457</b> |       | 738.785        | G[21] |
| K[5]  | 182.455        | 725.454        | <b>720.114</b> | <b>720.450</b> |       | 719.778        | K[20] |
| G[6]  | 201.463        | 682.755        | <b>677.416</b> | <b>677.752</b> |       | <b>677.080</b> | G[19] |
| G[7]  | 220.470        | 663.749        | 658.409        | 658.745        |       | 658.073        | G[18] |
| K[8]  | 253.168        | <b>644.741</b> | <b>639.402</b> | <b>639.738</b> |       | 639.066        | K[17] |
| G[9]  | 282.175        | <b>602.843</b> | <b>596.703</b> | <b>597.039</b> |       | <b>596.367</b> | G[16] |
| L[10] | 319.670        | 544.196        | <b>577.696</b> | <b>578.032</b> |       | 577.360        | L[15] |
| G[11] | 338.677        | <b>545.341</b> | <b>540.001</b> | <b>540.337</b> |       | <b>539.666</b> | G[14] |
| K[12] | 381.575        | 526.334        | <b>520.994</b> | <b>521.330</b> |       | 520.658        | K[13] |
| G[13] | 400.583        | 483.630        | 478.290        | 478.632        |       | 477.960        | G[12] |
| G[14] | 419.590        | 464.628        | 459.289        | 459.625        |       | 458.953        | G[11] |
| A[15] | 443.269        | 445.621        | 440.282        | 440.618        |       | 439.946        | A[10] |
| K[16] | 469.983        | 421.942        | 416.603        | <b>416.939</b> |       | 416.267        | K[9]  |
| R[17] | 552.016        | 365.226        | <b>359.889</b> | <b>360.225</b> |       | 359.553        | R[8]  |
| H[18] | <b>597.703</b> | 313.195        | 307.855        | 308.191        |       | 307.519        | H[7]  |
| R[19] | <b>649.736</b> | 297.508        | 292.169        | 292.505        |       | 291.833        | R[6]  |
| K[20] | <b>697.107</b> | 215.475        | 210.137        | 210.471        |       | 209.799        | K[5]  |
| V[21] | <b>730.129</b> | 168.104        | 162.765        | 163.101        |       | 162.429        | V[4]  |
| L[22] | <b>767.824</b> | 135.082        | 129.742        | 130.078        |       | 129.406        | L[3]  |
| R[23] | <b>819.858</b> | 97.387         | 92.047         | 92.383         |       | 91.711         | R[2]  |
| D[24] | <b>858.200</b> | 45.353         | 40.014         | 40.349         |       | 39.678         | D[1]  |



# sp | P62806 | H4\_MOUSE

SGR<sup>Trimethyl</sup> 42.05 GKGGKGLGKGGAK<sup>Trimethyl</sup> 42.05 RHRK<sup>Methyl</sup> 14.02 VLRLD

- ▶ fragmentation table for charge state 4+
- ▶ specType=etd
- ▶ score=93.59
- ▶ F112501.dat
- ▶ query=q56468.p1
- ▶ precursor=515.517010
- ▶ chargePrecursor=5
- ▶ itol=0.5

| AA    | c              | y              | z+1            | z+2            | z              | AA    |
|-------|----------------|----------------|----------------|----------------|----------------|-------|
| S[1]  | 27.022         | <b>644.140</b> | <b>640.143</b> | 0.755          | <b>639.091</b> | S[24] |
| G[2]  | 41.277         | 527.390        | 618.385        | 0.755          | 618.133        | G[23] |
| R[3]  | 90.814         | <b>608.135</b> | 604.130        | <b>604.382</b> | 603.878        | R[22] |
| G[4]  | 105.070        | 558.598        | 554.593        | 554.845        | 554.341        | G[21] |
| K[5]  | 137.093        | 544.342        | <b>540.337</b> | <b>540.589</b> | <b>540.086</b> | K[20] |
| G[6]  | 151.349        | 512.318        | <b>508.314</b> | <b>508.566</b> | <b>508.062</b> | G[19] |
| G[7]  | 165.604        | 498.063        | 494.058        | 494.310        | 493.806        | G[18] |
| K[8]  | 197.628        | 483.808        | <b>479.803</b> | 480.055        | <b>479.551</b> | K[17] |
| G[9]  | 211.883        | 451.784        | 447.779        | 448.031        | 447.527        | G[16] |
| L[10] | 280.154        | 437.529        | 433.524        | 433.776        | 433.272        | L[15] |
| G[11] | 254.410        | 409.250        | 405.251        | 405.505        | 405.001        | G[14] |
| K[12] | 286.433        | 395.002        | 390.998        | 391.249        | 390.746        | K[13] |
| G[13] | 300.689        | 362.978        | 358.974        | 359.226        | 358.722        | G[12] |
| G[14] | 314.944        | 348.723        | 344.718        | 344.970        | 344.466        | G[11] |
| A[15] | 332.703        | 334.468        | 330.463        | 330.715        | 330.211        | A[10] |
| K[16] | 375.239        | 316.708        | 312.704        | 312.956        | 312.452        | K[9]  |
| R[17] | 414.264        | <b>274.173</b> | 270.168        | 270.420        | 269.916        | R[8]  |
| H[18] | 448.529        | 235.146        | 231.143        | 231.395        | 230.891        | H[7]  |
| R[19] | 487.554        | 200.883        | 196.878        | 197.130        | 196.626        | R[6]  |
| K[20] | 523.082        | 161.858        | 157.853        | 158.105        | 157.601        | K[5]  |
| V[21] | 547.849        | 126.330        | 122.325        | 122.577        | 122.073        | V[4]  |
| L[22] | 576.120        | 101.563        | 97.558         | 97.810         | 97.306         | L[3]  |
| R[23] | <b>615.145</b> | 73.292         | 69.287         | 69.539         | 69.035         | R[2]  |
| D[24] | 643.902        | 34.267         | 30.262         | 30.514         | 30.010         | D[1]  |



# sp | P62806 | H4\_MOUSE

SGR<sup>Trimethyl</sup><sub>42.05</sub> GKGGKGLGKGGAK<sup>Trimethyl</sup><sub>42.05</sub> RHRK<sup>Dimethyl</sup><sub>28.03</sub> VLRLD

- ▶ fragmentation table for charge state 1+
- ▶ specType=etd
- ▶ score=118.78
- ▶ F112501.dat
- ▶ query=q56694\_p1
- ▶ precursor=647.648350
- ▶ chargePrecursor=4
- ▶ itol=0.5

| AA    | c               | y               | z+1             | z+2             | z        | AA    |
|-------|-----------------|-----------------|-----------------|-----------------|----------|-------|
| S[1]  | 105.066         | 2587.588        | 2571.569        | 0.000           | 2570.559 | S[24] |
| G[2]  | 162.087         | 2500.554        | 2484.535        | 0.000           | 2483.527 | G[23] |
| R[3]  | <b>360.235</b>  | 2641.532        | 2627.513        | 2428.521        | 2626.506 | R[22] |
| G[4]  | <b>417.257</b>  | 2245.584        | 2229.565        | 2228.573        | 2228.561 | G[21] |
| K[5]  | <b>945.352</b>  | 2185.362        | 2172.344        | 2173.352        | 2171.336 | K[20] |
| G[6]  | <b>602.373</b>  | 2060.268        | 2044.249        | 2045.257        | 2043.241 | G[19] |
| G[7]  | <b>659.395</b>  | 2001.246        | 1987.227        | <b>1988.235</b> | 1986.220 | G[18] |
| K[8]  | <b>787.490</b>  | 1946.225        | 1930.205        | 1931.214        | 1929.199 | K[17] |
| G[9]  | <b>844.511</b>  | 1818.130        | 1802.111        | <b>1803.119</b> | 1801.103 | G[16] |
| L[10] | <b>957.595</b>  | 1761.109        | 1745.089        | 1746.097        | 1744.082 | L[15] |
| G[11] | <b>1014.617</b> | 1648.024        | 1632.005        | 1633.013        | 1630.998 | G[14] |
| K[12] | <b>1142.712</b> | 1591.003        | 1574.984        | 1575.992        | 1573.976 | K[13] |
| G[13] | <b>1199.733</b> | 1462.908        | 1446.889        | <b>1447.897</b> | 1445.881 | G[12] |
| G[14] | <b>1256.755</b> | 1405.886        | <b>1389.868</b> | <b>1390.875</b> | 1388.860 | G[11] |
| A[15] | <b>1327.792</b> | 1348.865        | 1332.846        | <b>1333.854</b> | 1331.838 | A[10] |
| R[16] | <b>1409.814</b> | <b>1277.828</b> | 1261.809        | 1262.817        | 1260.801 | R[9]  |
| R[17] | <b>1654.835</b> | 1107.688        | 1091.667        | <b>1092.675</b> | 1090.659 | R[8]  |
| H[18] | 1791.094        | 951.585         | <b>935.566</b>  | <b>936.574</b>  | 934.558  | H[7]  |
| R[19] | 1967.195        | 814.526         | 798.507         | <b>799.515</b>  | 797.499  | R[6]  |
| K[20] | 2103.321        | 658.425         | 642.405         | 643.414         | 641.398  | K[5]  |
| V[21] | 2202.289        | 502.366         | 486.346         | 487.354         | 485.338  | V[4]  |
| L[22] | 2313.473        | 363.239         | 347.211         | <b>348.219</b>  | 346.203  | L[3]  |
| R[23] | 2471.575        | 200.146         | 274.127         | <b>275.135</b>  | 273.119  | R[2]  |
| D[24] | 2586.602        | 134.045         | 138.026         | 139.034         | 137.018  | D[1]  |

# sp | P62806 | H4\_MOUSE

SGR<sup>Trimethyl</sup><sub>42.05</sub> GKGGKGLGKGGAK<sup>Trimethyl</sup><sub>42.05</sub> RHRK<sup>Dimethyl</sup><sub>28.03</sub> VLRLD

- ▶ fragmentation table for charge state 2+
- ▶ specType=etd
- ▶ score=118.78
- ▶ F112501.dat
- ▶ query=q56694\_p1
- ▶ precursor=647.648350
- ▶ chargePrecursor=4
- ▶ itol=0.5

| AA |    | c               | y               | z+1             | z+2             | z               | AA    |
|----|----|-----------------|-----------------|-----------------|-----------------|-----------------|-------|
| S  | 1  | 61.017          | <b>1294.296</b> | <b>1286.287</b> | 0.504           | 1289.781        | S[24] |
| G  | 2  | 61.547          | 1250.780        | 1242.771        | 0.504           | 1242.267        | G[23] |
| R  | 3  | 180.621         | <b>1222.270</b> | <b>1214.260</b> | 1914.704        | <b>1213.756</b> | R[22] |
| G  | 4  | 339.132         | 1123.199        | <b>1115.186</b> | <b>1115.990</b> | 1114.685        | G[21] |
| K  | 5  | 273.180         | 1094.685        | 1086.676        | <b>1087.179</b> | 1085.174        | K[20] |
| G  | 6  | 301.690         | 1030.637        | 1022.628        | 1023.132        | 1022.124        | G[19] |
| G  | 7  | 330.201         | 1002.127        | <b>994.117</b>  | <b>994.621</b>  | 993.613         | G[18] |
| K  | 8  | 394.240         | <b>973.616</b>  | <b>965.607</b>  | <b>966.111</b>  | 965.101         | K[17] |
| G  | 9  | 422.759         | 939.568         | <b>901.559</b>  | <b>902.063</b>  | 901.055         | G[16] |
| L  | 10 | 479.303         | 893.059         | 873.546         | 873.553         | 872.544         | L[15] |
| G  | 11 | 507.812         | <b>824.516</b>  | 816.506         | <b>817.010</b>  | 816.002         | G[14] |
| K  | 12 | 571.859         | <b>796.005</b>  | <b>787.996</b>  | <b>788.500</b>  | <b>787.492</b>  | K[13] |
| G  | 13 | 600.370         | 731.958         | <b>723.948</b>  | <b>724.452</b>  | 723.444         | G[12] |
| G  | 14 | 628.881         | 703.447         | <b>695.437</b>  | <b>695.941</b>  | 694.933         | G[11] |
| A  | 15 | 684.399         | 674.939         | <b>665.927</b>  | <b>667.431</b>  | 666.423         | A[10] |
| R  | 16 | 749.410         | 639.417         | <b>631.408</b>  | <b>631.912</b>  | 630.904         | R[9]  |
| R  | 17 | <b>827.521</b>  | 554.347         | <b>546.337</b>  | <b>546.841</b>  | <b>545.833</b>  | R[8]  |
| H  | 18 | <b>896.050</b>  | 476.296         | 468.287         | 468.791         | 467.783         | H[7]  |
| R  | 19 | <b>974.101</b>  | 407.767         | 399.757         | 400.261         | 399.253         | R[6]  |
| K  | 20 | 1052.164        | 329.746         | 321.737         | 322.241         | 321.233         | K[5]  |
| V  | 21 | <b>1101.698</b> | 251.693         | 243.683         | 244.187         | 243.180         | V[4]  |
| L  | 22 | <b>1158.240</b> | 202.119         | 194.109         | 194.613         | 193.605         | L[3]  |
| R  | 23 | <b>1236.291</b> | 145.577         | 137.567         | 138.071         | 137.063         | R[2]  |
| D  | 24 | 1293.804        | 67.526          | 59.517          | 60.021          | 59.013          | D[1]  |

# sp | P62806 | H4\_MOUSE

SGR<sup>Trimethyl</sup><sub>42.05</sub> GKGGKGLGKGGAK<sup>Trimethyl</sup><sub>42.05</sub> RHRK<sup>Dimethyl</sup><sub>28.03</sub> VL RD

- ▶ fragmentation table for charge state 3+
- ▶ specType=etd
- ▶ score=118.78
- ▶ F112501.dat
- ▶ query=q56694.p1
- ▶ precursor=647.648350
- ▶ chargePrecursor=4
- ▶ itol=0.5

| AA    | c              | y              | z+1            | z+2            | z              | AA    |
|-------|----------------|----------------|----------------|----------------|----------------|-------|
| S[1]  | 35.693         | <b>863.200</b> | <b>857.860</b> | 0.672          | 857.826        | S[24] |
| G[2]  | 54.701         | 334.189        | 828.850        | 0.672          | 828.814        | G[23] |
| R[3]  | 120.750        | <b>815.182</b> | 809.843        | 810.179        | 809.507        | R[22] |
| G[4]  | 139.757        | 749.133        | 743.793        | 744.129        | 743.457        | G[21] |
| K[5]  | 182.455        | 730.126        | 724.789        | 725.122        | <b>724.450</b> | K[20] |
| G[6]  | 201.463        | 687.427        | 682.089        | 682.424        | 681.752        | G[19] |
| G[7]  | 220.470        | 668.420        | 663.081        | 663.417        | 662.745        | G[18] |
| K[8]  | 263.168        | 649.413        | 644.073        | 644.409        | 643.738        | K[17] |
| G[9]  | 282.175        | 606.715        | 601.375        | 601.711        | 601.039        | G[16] |
| L[10] | 319.970        | 587.708        | 582.368        | 582.704        | 582.032        | L[15] |
| G[11] | 338.977        | 550.013        | 544.673        | <b>545.009</b> | 544.337        | G[14] |
| K[12] | 381.575        | 531.006        | 525.666        | 526.002        | 525.330        | K[13] |
| G[13] | 400.583        | 488.307        | 482.969        | 483.304        | 482.632        | G[12] |
| G[14] | 419.590        | 469.300        | 463.961        | 464.297        | 463.625        | G[11] |
| A[15] | 443.269        | 450.293        | 444.954        | 445.289        | 444.618        | A[10] |
| K[16] | 469.983        | 426.014        | 421.275        | 421.610        | 420.939        | K[9]  |
| R[17] | 552.016        | 369.900        | 364.561        | 364.896        | 364.225        | R[8]  |
| H[18] | 597.703        | 317.896        | 312.527        | 312.863        | 312.191        | H[7]  |
| R[19] | 649.736        | 272.180        | 266.941        | 267.176        | 266.505        | R[6]  |
| K[20] | 701.779        | 220.146        | 214.807        | 215.143        | 214.471        | K[5]  |
| V[21] | 734.801        | 168.104        | 162.765        | 163.101        | 162.429        | V[4]  |
| L[22] | 772.496        | 135.082        | 129.742        | 130.078        | 129.406        | L[3]  |
| R[23] | <b>824.530</b> | 97.387         | 92.047         | 92.383         | 91.711         | R[2]  |
| D[24] | <b>862.872</b> | 45.353         | 40.014         | 40.349         | 39.678         | D[1]  |



# sp | P62806 | H4\_MOUSE

SGR<sup>Trimethyl</sup><sub>42.05</sub> GKGGKGLGKGGAKR<sup>(Trimethyl)</sup><sub>(42.05)</sub> HRK<sup>(Dimethyl)</sup><sub>(28.03)</sub> VLRD

- ▶ fragmentation table for charge state 1+
- ▶ specType=etd
- ▶ score=46.10
- ▶ F112501.dat
- ▶ query=q56696\_p1
- ▶ precursor=863.196670
- ▶ chargePrecursor=3
- ▶ itol=0.5

| AA |    | c               | y               | z+1             | z+2            | z        | AA    |
|----|----|-----------------|-----------------|-----------------|----------------|----------|-------|
| S  | 1  | 105.066         | 2587.586        | 2571.507        | 0.000          | 2570.559 | S[24] |
| G  | 2  | 102.007         | 2500.554        | 2484.535        | 0.000          | 2483.527 | G[23] |
| R  | 3  | 360.238         | 2443.532        | 2427.513        | 2420.521       | 2436.506 | R[22] |
| G  | 4  | <b>417.257</b>  | 2245.384        | 2229.365        | 2230.373       | 2238.351 | G[21] |
| K  | 5  | <b>545.352</b>  | 2188.363        | 2172.344        | 2173.352       | 2171.336 | K[20] |
| G  | 6  | <b>602.373</b>  | 2090.268        | 2084.249        | 2045.257       | 2043.241 | G[19] |
| G  | 7  | <b>659.395</b>  | 2003.246        | <b>1987.227</b> | 1988.235       | 1986.220 | G[18] |
| K  | 8  | <b>787.490</b>  | 1946.225        | <b>1930.206</b> | 1931.214       | 1929.198 | K[17] |
| G  | 9  | <b>844.511</b>  | 1818.130        | <b>1802.111</b> | 1803.119       | 1801.103 | G[16] |
| L  | 10 | 877.376         | 1761.108        | <b>1745.089</b> | 1746.097       | 1744.082 | L[15] |
| G  | 11 | <b>1014.617</b> | 1648.024        | <b>1632.005</b> | 1633.013       | 1630.996 | G[14] |
| R  | 12 | 1142.712        | 1591.003        | <b>1574.984</b> | 1575.992       | 1573.976 | R[13] |
| G  | 13 | 1199.733        | 1462.908        | <b>1446.889</b> | 1447.897       | 1445.881 | G[12] |
| G  | 14 | 1256.755        | 1405.886        | <b>1389.868</b> | 1390.875       | 1388.860 | G[11] |
| A  | 15 | 1327.792        | 1349.865        | 1332.846        | 1333.854       | 1331.838 | A[10] |
| R  | 16 | 1405.887        | <b>1277.828</b> | 1281.809        | 1282.817       | 1280.801 | R[9]  |
| R  | 17 | 1634.038        | 1149.733        | 1133.714        | 1134.722       | 1132.706 | R[8]  |
| H  | 18 | 1791.094        | 951.585         | 935.566         | 936.574        | 934.558  | H[7]  |
| R  | 19 | 1947.195        | 814.520         | 798.507         | <b>799.515</b> | 797.499  | R[6]  |
| R  | 20 | 2103.221        | 658.425         | 642.406         | 643.414        | 641.398  | R[5]  |
| V  | 21 | 2202.389        | 502.290         | 486.280         | 487.287        | 485.272  | V[4]  |
| L  | 22 | 2335.473        | 403.200         | 387.211         | 388.219        | 386.203  | L[3]  |
| D  | 23 | 2471.578        | 290.140         | 274.127         | 275.136        | 273.119  | D[2]  |
| D  | 24 | 2586.602        | 134.040         | 118.026         | 119.034        | 117.018  | D[1]  |

# sp | P62806 | H4\_MOUSE

SGR<sup>Trimethyl</sup><sub>42.05</sub> GKGGKGLGKGGAKR<sup>(Trimethyl)</sup><sub>(42.05)</sub> HRK<sup>(Dimethyl)</sup><sub>(28.03)</sub> VLRD

- ▶ fragmentation table for charge state 2+
- ▶ specType=etd
- ▶ score=46.10
- ▶ F112501.dat
- ▶ query=q56696.p1
- ▶ precursor=863.196670
- ▶ chargePrecursor=3
- ▶ itol=0.5

| AA    | c               | y               | z+1             | z+2             | z               | AA    |
|-------|-----------------|-----------------|-----------------|-----------------|-----------------|-------|
| S[1]  | 53.037          | <b>1294.296</b> | <b>1286.287</b> | 0.504           | <b>1285.783</b> | S[24] |
| G[2]  | 81.547          | 1250.780        | 1242.771        | 0.504           | 1242.267        | G[23] |
| R[3]  | 180.621         | <b>1222.270</b> | 1214.260        | 1214.764        | 1213.750        | R[22] |
| G[4]  | 209.132         | 1121.196        | 1115.185        | <b>1115.690</b> | 1114.682        | G[21] |
| K[5]  | 273.180         | 1094.685        | 1086.675        | 1087.179        | 1086.171        | K[20] |
| G[6]  | 301.690         | 1030.637        | 1022.628        | 1023.132        | 1022.124        | G[19] |
| G[7]  | 330.201         | 1002.127        | 994.117         | 994.621         | 993.613         | G[18] |
| K[8]  | 394.248         | 973.616         | 965.607         | 966.111         | 965.103         | K[17] |
| G[9]  | 422.759         | 909.568         | 901.559         | 902.063         | 901.055         | G[16] |
| L[10] | 499.304         | 881.058         | 873.048         | 873.552         | 872.544         | L[15] |
| G[11] | 507.812         | 824.510         | 816.500         | 817.004         | 816.000         | G[14] |
| K[12] | 571.859         | 796.005         | <b>787.996</b>  | 788.500         | <b>787.492</b>  | K[13] |
| G[13] | 600.370         | 731.958         | 723.948         | 724.452         | 723.444         | G[12] |
| G[14] | 628.881         | 703.447         | 695.437         | 695.941         | 694.933         | G[11] |
| A[15] | 664.399         | 674.936         | 666.927         | 667.431         | 666.423         | A[10] |
| R[16] | 728.447         | 639.417         | 631.408         | 631.912         | 630.904         | R[9]  |
| R[17] | 827.521         | 575.370         | 567.361         | 567.865         | 566.857         | R[8]  |
| H[18] | 896.050         | 476.290         | 468.282         | 468.791         | 467.783         | H[7]  |
| R[19] | 974.101         | 407.767         | 399.757         | 400.261         | 399.253         | R[6]  |
| K[20] | 1052.164        | 329.716         | 321.707         | 322.211         | 321.203         | K[5]  |
| V[21] | 1101.998        | 251.053         | 243.043         | 244.547         | 243.540         | V[4]  |
| L[22] | <b>1158.240</b> | 202.110         | 194.100         | 194.613         | 193.605         | L[3]  |
| R[23] | <b>1236.291</b> | 145.577         | 137.567         | 138.071         | 137.063         | R[2]  |
| D[24] | 1263.804        | 87.526          | 79.517          | 80.021          | 79.013          | D[1]  |





# sp | P62806 | H4\_MOUSE

[Acetyl]SGRGKGGKGLGKGGAK<sup>Acetyl</sup> RHRK<sup>Trimethyl</sup> VLRD<sup>42.01</sup> <sup>42.05</sup>

- ▶ fragmentation table for charge state 1+
- ▶ specType=etd
- ▶ score=110.86
- ▶ F112501.dat
- ▶ query=q56902.p1
- ▶ precursor=651.137580
- ▶ chargePrecursor=4
- ▶ itol=0.5

| AA | c  | y               | z+1      | z+2             | z               | AA              |       |
|----|----|-----------------|----------|-----------------|-----------------|-----------------|-------|
| S  | 1  | 147.076         | 2601.528 | 2585.510        | 0.000           | 2584.502        | S(24) |
| G  | 2  | 204.008         | 2472.488 | 2456.467        | 0.000           | 2455.450        | G(23) |
| R  | 3  | <b>360.199</b>  | 2415.464 | 2399.440        | 2400.451        | 2398.430        | R(22) |
| G  | 4  | <b>417.220</b>  | 2359.368 | 2343.345        | 2344.352        | 2343.331        | G(21) |
| K  | 5  | <b>545.315</b>  | 2202.342 | 2186.321        | 2187.331        | 2185.315        | K(20) |
| G  | 6  | <b>602.337</b>  | 2074.247 | 2058.228        | 2059.236        | 2057.220        | G(19) |
| G  | 7  | <b>659.358</b>  | 2017.225 | 2001.207        | 2002.214        | 2000.199        | G(18) |
| K  | 8  | <b>787.453</b>  | 1960.204 | 1944.185        | 1945.193        | 1943.177        | K(17) |
| G  | 9  | <b>844.475</b>  | 1832.109 | 1816.090        | <b>1817.098</b> | 1815.082        | G(16) |
| L  | 10 | <b>957.559</b>  | 1775.087 | 1759.069        | <b>1760.077</b> | 1758.061        | L(15) |
| G  | 11 | <b>1014.580</b> | 1602.003 | 1545.985        | <b>1646.993</b> | 1644.977        | G(14) |
| K  | 12 | <b>1142.675</b> | 1604.982 | <b>1588.963</b> | 1589.971        | 1587.955        | K(13) |
| G  | 13 | <b>1199.697</b> | 1476.887 | <b>1460.868</b> | 1461.876        | 1459.860        | G(12) |
| G  | 14 | <b>1256.718</b> | 1419.866 | 1403.847        | <b>1404.855</b> | <b>1402.839</b> | G(11) |
| A  | 15 | <b>1327.755</b> | 1302.044 | 1246.025        | 1247.033        | 1245.018        | A(10) |
| R  | 16 | <b>1407.861</b> | 1291.809 | 1235.790        | 1236.798        | 1234.783        | R(9)  |
| R  | 17 | <b>1653.962</b> | 1121.701 | 1105.683        | 1106.691        | 1104.675        | R(8)  |
| H  | 18 | <b>1791.021</b> | 965.600  | <b>949.582</b>  | <b>950.589</b>  | 948.574         | H(7)  |
| R  | 19 | 1967.122        | 828.541  | 812.523         | <b>813.530</b>  | 811.515         | R(6)  |
| K  | 20 | 2117.264        | 672.440  | <b>656.422</b>  | <b>657.429</b>  | 655.414         | K(5)  |
| V  | 21 | 2216.132        | 602.298  | 486.280         | 487.287         | 485.272         | V(4)  |
| L  | 22 | 2329.418        | 493.230  | 387.211         | 388.219         | 386.203         | L(3)  |
| R  | 23 | 2485.517        | 390.148  | 274.127         | <b>275.135</b>  | 273.119         | R(2)  |
| D  | 24 | 2690.544        | 134.045  | 118.028         | 119.034         | 117.018         | D(1)  |

# sp | P62806 | H4\_MOUSE

[Acetyl]SGRGKGGKGLGKGGAK<sup>Acetyl</sup> RHRK<sup>Trimethyl</sup> VLRD<sup>42.01 42.05</sup>

- ▶ fragmentation table for charge state 2+
- ▶ specType=etd
- ▶ score=110.86
- ▶ F112501.dat
- ▶ query=q56902.p1
- ▶ precursor=651.137580
- ▶ chargePrecursor=4
- ▶ itol=0.5

| AA    | c               | y               | z+1             | z+2             | z               | AA    |
|-------|-----------------|-----------------|-----------------|-----------------|-----------------|-------|
| S[1]  | 74.642          | <b>1301.268</b> | <b>1291.258</b> | 0.504           | 1290.750        | S[24] |
| G[2]  | 102.553         | <b>1236.747</b> | <b>1228.737</b> | 0.504           | 1228.231        | G[23] |
| R[3]  | 180.603         | 1208.238        | <b>1200.226</b> | 1200.730        | <b>1199.723</b> | R[22] |
| G[4]  | 259.114         | 1130.165        | <b>1122.116</b> | <b>1122.600</b> | 1121.677        | G[21] |
| K[5]  | 273.153         | 1101.675        | <b>1093.665</b> | <b>1094.169</b> | 1093.161        | K[20] |
| G[6]  | 301.672         | 1037.627        | 1029.618        | 1030.122        | 1029.114        | G[19] |
| G[7]  | 330.183         | 1009.116        | <b>1001.107</b> | <b>1001.611</b> | 1000.603        | G[18] |
| K[8]  | 394.230         | 930.600         | <b>922.596</b>  | <b>923.100</b>  | 922.092         | K[17] |
| G[9]  | 422.741         | 918.556         | <b>908.549</b>  | <b>909.053</b>  | 908.045         | G[16] |
| L[10] | 479.293         | 858.041         | <b>850.033</b>  | <b>850.542</b>  | 849.536         | L[15] |
| G[11] | 507.794         | 831.505         | <b>823.496</b>  | <b>824.000</b>  | 823.002         | G[14] |
| K[12] | 571.841         | 802.995         | <b>794.985</b>  | <b>795.489</b>  | 794.481         | K[13] |
| G[13] | 600.352         | 738.947         | <b>730.938</b>  | <b>731.442</b>  | 730.436         | G[12] |
| G[14] | 628.863         | 710.436         | <b>702.427</b>  | <b>702.931</b>  | 701.923         | G[11] |
| A[15] | 684.381         | 681.926         | 673.917         | <b>674.420</b>  | 673.412         | A[10] |
| R[16] | 749.438         | 646.407         | 638.398         | <b>638.902</b>  | 637.894         | R[9]  |
| R[17] | <b>827.485</b>  | 561.354         | <b>553.345</b>  | <b>553.849</b>  | 552.841         | R[8]  |
| H[18] | <b>896.014</b>  | 483.304         | 475.294         | 475.798         | 474.791         | H[7]  |
| R[19] | <b>974.065</b>  | 414.774         | 406.765         | 407.269         | 406.261         | R[6]  |
| K[20] | <b>1059.136</b> | 336.724         | 328.714         | 329.218         | 328.211         | K[5]  |
| V[21] | <b>1108.670</b> | 252.053         | 243.043         | 244.547         | 243.540         | V[4]  |
| L[22] | <b>1165.212</b> | 202.119         | 194.109         | 194.613         | 193.605         | L[3]  |
| R[23] | 1243.262        | 145.577         | 137.567         | 138.071         | 137.063         | R[2]  |
| D[24] | 1300.776        | 67.526          | 59.517          | 60.021          | 59.013          | D[1]  |

# sp | P62806 | H4\_MOUSE

[Acetyl]SGRGKGGKGLGKGGAK<sup>Acetyl</sup>42.01 RHRK<sup>Trimethyl</sup>42.05 VLRD

- ▶ fragmentation table for charge state 3+
- ▶ specType=etd
- ▶ score=110.86
- ▶ F112501.dat
- ▶ query=q56902.p1
- ▶ precursor=651.137580
- ▶ chargePrecursor=4
- ▶ itol=0.5

| AA    | c              | y              | z+1            | z+2            | z       | AA    |
|-------|----------------|----------------|----------------|----------------|---------|-------|
| S[1]  | 49.597         | <b>867.848</b> | <b>862.508</b> | 0.572          | 862.172 | S[24] |
| G[2]  | 58.704         | <b>824.833</b> | <b>819.494</b> | 0.572          | 819.158 | G[23] |
| R[3]  | 120.738        | <b>805.826</b> | <b>800.487</b> | <b>800.823</b> | 800.151 | R[22] |
| G[4]  | 139.745        | 753.793        | 748.453        | 748.789        | 748.117 | G[21] |
| K[5]  | 182.443        | 734.785        | 729.446        | 729.782        | 729.110 | K[20] |
| G[6]  | 201.450        | 692.087        | 686.748        | 687.083        | 686.412 | G[19] |
| G[7]  | 220.458        | 673.080        | 667.740        | 668.076        | 667.404 | G[18] |
| K[8]  | 263.156        | 654.073        | 648.733        | 649.069        | 648.397 | K[17] |
| G[9]  | 282.163        | 631.374        | 626.035        | 626.371        | 625.699 | G[16] |
| L[10] | 319.258        | 592.367        | 587.029        | 587.364        | 586.692 | L[15] |
| G[11] | 338.265        | 554.671        | 549.333        | 549.669        | 548.997 | G[14] |
| K[12] | 381.563        | 535.666        | 530.326        | 530.662        | 529.990 | K[13] |
| G[13] | 400.570        | 492.967        | 487.628        | 487.964        | 487.292 | G[12] |
| G[14] | 419.578        | 473.960        | 468.620        | 468.956        | 468.285 | G[11] |
| A[15] | 443.257        | 454.953        | 449.613        | 449.949        | 449.277 | A[10] |
| K[16] | 499.958        | 431.274        | 425.934        | 426.270        | 425.598 | K[9]  |
| R[17] | 551.992        | 374.572        | 369.232        | 369.568        | 368.896 | R[8]  |
| H[18] | 597.678        | 322.530        | 317.190        | 317.525        | 316.853 | H[7]  |
| R[19] | 649.712        | 276.852        | 271.512        | 271.848        | 271.176 | R[6]  |
| K[20] | 706.426        | 224.813        | 219.473        | 219.809        | 219.137 | K[5]  |
| V[21] | 759.449        | 168.194        | 162.854        | 163.190        | 162.518 | V[4]  |
| L[22] | 777.144        | 136.082        | 129.742        | 130.078        | 129.406 | L[3]  |
| R[23] | <b>829.177</b> | 97.387         | 92.047         | 92.383         | 91.711  | R[2]  |
| D[24] | 867.520        | 45.353         | 40.014         | 40.349         | 39.678  | D[1]  |

# sp | P62806 | H4\_MOUSE

[Acetyl]SGRGKGGKGLGKGGAK <sup>Acetyl</sup>42.01 RHRK <sup>Trimethyl</sup>42.05 VLRD

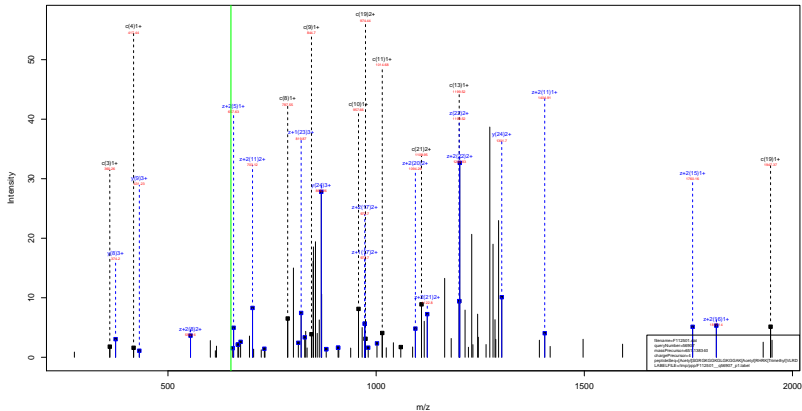

# sp | P62806 | H4\_MOUSE

[Acetyl]SGRGKGGKGLGKGGAK<sup>Acetyl</sup> RHRK<sup>Trimethyl</sup> VLRLD<sup>42.01 42.05</sup>

- ▶ fragmentation table for charge state 1+
- ▶ specType=etd
- ▶ score=47.68
- ▶ F112501.dat
- ▶ query=q56907.p1
- ▶ precursor=651.138340
- ▶ chargePrecursor=4
- ▶ itol=0.5

| AA | c  | y               | z+1            | z+2      | z               | AA             |   |    |
|----|----|-----------------|----------------|----------|-----------------|----------------|---|----|
| S  | 1  | 147.076         | 2001.528       | 2585.510 | 0.000           | 2584.502       | S | 24 |
| G  | 2  | 224.598         | 2472.486       | 2456.467 | 0.000           | 2455.459       | G | 23 |
| T  | 3  | <b>306.199</b>  | 2415.464       | 2399.448 | 2600.433        | 2398.430       | T | 22 |
| G  | 4  | <b>417.220</b>  | 2259.363       | 2243.345 | 2244.332        | 2242.337       | G | 21 |
| K  | 5  | 548.315         | 2202.342       | 2186.323 | 2187.331        | 2185.315       | K | 20 |
| G  | 6  | 602.337         | 2074.247       | 2058.228 | 2059.236        | 2057.220       | G | 19 |
| G  | 7  | 659.358         | 2017.225       | 2001.207 | 2002.214        | 2000.199       | G | 18 |
| K  | 8  | <b>787.453</b>  | 1960.204       | 1944.185 | 1945.193        | 1943.177       | K | 17 |
| G  | 9  | <b>844.475</b>  | 1832.106       | 1816.090 | <b>1817.098</b> | 1815.082       | G | 16 |
| L  | 10 | <b>957.559</b>  | 1778.087       | 1759.069 | <b>1760.077</b> | 1758.061       | L | 15 |
| G  | 11 | <b>1014.580</b> | 1662.003       | 1645.985 | 1646.993        | 1644.977       | G | 14 |
| K  | 12 | 1142.675        | 1604.982       | 1588.963 | 1589.971        | 1587.955       | K | 13 |
| G  | 13 | <b>1199.697</b> | 1476.887       | 1460.868 | 1461.876        | 1459.860       | G | 12 |
| G  | 14 | 1256.718        | 1419.866       | 1403.847 | <b>1404.855</b> | 1402.839       | G | 11 |
| A  | 15 | 1327.735        | 1362.844       | 1346.825 | 1347.833        | 1345.818       | A | 10 |
| K  | 16 | 1407.851        | 1291.807       | 1275.788 | 1276.796        | 1274.780       | K | 9  |
| R  | 17 | 1653.982        | 1123.701       | 1105.683 | 1106.691        | 1104.675       | R | 8  |
| H  | 18 | 1791.021        | 995.600        | 949.582  | 950.589         | 948.574        | H | 7  |
| R  | 19 | <b>1947.122</b> | <b>828.541</b> | 812.523  | <b>813.530</b>  | 811.515        | R | 6  |
| K  | 20 | 2117.264        | 672.440        | 656.422  | <b>657.429</b>  | <b>655.414</b> | K | 5  |
| V  | 21 | 2216.332        | 602.298        | 486.280  | 487.287         | 485.272        | V | 4  |
| L  | 22 | 2320.416        | 461.236        | 387.211  | 388.219         | 386.203        | L | 3  |
| D  | 23 | 2489.517        | 290.140        | 274.121  | 275.128         | 273.113        | D | 2  |
| D  | 24 | 2600.544        | 134.045        | 118.026  | 119.034         | 117.018        | D | 1  |

# sp | P62806 | H4\_MOUSE

[Acetyl]SGRGKGGKGLGKGGAK<sup>Acetyl</sup> RHRK<sup>Trimethyl</sup> VLRLD<sup>42.01</sup> <sup>42.05</sup>

- ▶ fragmentation table for charge state 2+
- ▶ specType=etd
- ▶ score=47.68
- ▶ F112501.dat
- ▶ query=q56907\_p1
- ▶ precursor=651.138340
- ▶ chargePrecursor=4
- ▶ itol=0.5

| AA    | c               | y               | z+1            | z+2             | z               | AA    |
|-------|-----------------|-----------------|----------------|-----------------|-----------------|-------|
| S[1]  | 74.042          | <b>1301.268</b> | 1293.259       | 0.504           | 1292.755        | S[24] |
| G[2]  | 102.553         | 1236.747        | 1228.737       | 0.504           | 1228.233        | G[23] |
| R[3]  | 180.603         | 1208.236        | 1200.226       | <b>1200.730</b> | <b>1199.723</b> | R[22] |
| G[4]  | 269.114         | 1139.185        | 1122.175       | <b>1122.680</b> | 1121.677        | G[21] |
| K[5]  | 273.161         | 1101.675        | 1093.665       | <b>1094.169</b> | 1093.165        | K[20] |
| G[6]  | 351.672         | 1037.627        | 1029.618       | 1030.122        | 1029.114        | G[19] |
| G[7]  | 330.183         | 1009.116        | 1001.107       | <b>1001.611</b> | 1000.603        | G[18] |
| K[8]  | 394.230         | <b>980.606</b>  | <b>972.596</b> | <b>973.100</b>  | 972.092         | K[17] |
| G[9]  | 422.741         | 916.556         | <b>908.549</b> | <b>909.053</b>  | 908.045         | G[16] |
| L[10] | 479.203         | 888.047         | <b>880.038</b> | <b>880.542</b>  | 879.536         | L[15] |
| G[11] | 507.794         | 831.505         | 823.495        | 824.000         | 823.992         | G[14] |
| K[12] | 571.841         | 802.995         | 794.985        | 795.489         | 794.481         | K[13] |
| G[13] | 600.352         | 738.947         | 730.938        | <b>731.442</b>  | 730.434         | G[12] |
| G[14] | 628.863         | 710.436         | 702.427        | <b>702.931</b>  | 701.923         | G[11] |
| A[15] | 664.381         | 681.926         | 673.916        | <b>674.420</b>  | 673.412         | A[10] |
| R[16] | 708.234         | 546.409         | 538.399        | 539.904         | 538.896         | R[9]  |
| R[17] | 827.488         | 561.354         | 553.345        | <b>553.849</b>  | 552.841         | R[8]  |
| H[18] | 896.014         | 483.304         | 475.294        | 475.798         | 474.791         | H[7]  |
| R[19] | <b>974.065</b>  | 414.774         | 406.765        | 407.269         | 406.261         | R[6]  |
| K[20] | <b>1058.136</b> | 336.724         | 328.714        | 329.218         | 328.211         | K[5]  |
| V[21] | <b>1108.670</b> | 251.663         | 243.653        | 244.157         | 243.150         | V[4]  |
| L[22] | 1105.212        | 202.119         | 194.109        | 194.613         | 193.605         | L[3]  |
| R[23] | 1243.262        | 145.577         | 137.567        | 138.071         | 137.063         | R[2]  |
| D[24] | 1300.776        | 67.526          | 59.517         | 60.021          | 59.013          | D[1]  |

# sp | P62806 | H4\_MOUSE

[Acetyl]SGRGKGGKGLGKGGAK<sup>Acetyl</sup> RHRK<sup>Trimethyl</sup> VLRD<sup>42.01</sup> <sup>42.05</sup>

- ▶ fragmentation table for charge state 3+
- ▶ specType=etd
- ▶ score=47.68
- ▶ F112501.dat
- ▶ query=q56907.p1
- ▶ precursor=651.138340
- ▶ chargePrecursor=4
- ▶ itol=0.5

| AA    | c       | y              | z+1            | z+2            | z       | AA    |
|-------|---------|----------------|----------------|----------------|---------|-------|
| S[1]  | 49.697  | <b>867.848</b> | 867.508        | 0.672          | 862.172 | S[24] |
| G[2]  | 68.704  | 824.833        | <b>819.494</b> | 0.672          | 819.158 | G[23] |
| R[3]  | 120.738 | 805.826        | 800.487        | 800.823        | 800.151 | R[22] |
| G[4]  | 139.745 | 753.793        | 748.453        | 748.789        | 748.117 | G[21] |
| K[5]  | 182.443 | 734.785        | 729.445        | 729.782        | 729.110 | K[20] |
| G[6]  | 201.450 | 692.087        | 686.748        | 687.083        | 686.412 | G[19] |
| G[7]  | 220.458 | 673.080        | <b>667.740</b> | <b>668.076</b> | 667.404 | G[18] |
| K[8]  | 263.156 | 654.073        | 648.733        | 649.069        | 648.397 | K[17] |
| G[9]  | 282.163 | 611.374        | 606.035        | 606.371        | 605.699 | G[16] |
| L[10] | 319.858 | 592.367        | 587.028        | 587.364        | 586.692 | L[15] |
| G[11] | 338.865 | 554.673        | 549.333        | 549.669        | 548.997 | G[14] |
| K[12] | 381.563 | 535.666        | 530.326        | 530.662        | 529.990 | K[13] |
| G[13] | 400.570 | 492.967        | 487.628        | 487.964        | 487.292 | G[12] |
| G[14] | 419.578 | 473.960        | 468.620        | 468.956        | 468.285 | G[11] |
| A[15] | 443.257 | 454.953        | 449.613        | 449.949        | 449.277 | A[10] |
| K[16] | 469.958 | <b>431.274</b> | 425.934        | 426.270        | 425.598 | K[9]  |
| R[17] | 551.962 | <b>374.572</b> | 369.232        | 369.568        | 368.896 | R[8]  |
| H[18] | 597.678 | 322.538        | 317.199        | 317.535        | 316.863 | H[7]  |
| R[19] | 649.712 | 276.852        | 271.512        | 271.848        | 271.176 | R[6]  |
| K[20] | 708.426 | 224.818        | 219.479        | 219.815        | 219.143 | K[5]  |
| V[21] | 739.849 | 198.104        | 192.765        | 193.101        | 192.429 | V[4]  |
| L[22] | 777.144 | 135.082        | 129.742        | 130.078        | 129.406 | L[3]  |
| R[23] | 829.177 | 97.887         | 92.047         | 92.383         | 91.711  | R[2]  |
| D[24] | 867.520 | 45.353         | 40.014         | 40.349         | 39.678  | D[1]  |





# sp | P62806 | H4\_MOUSE

SGR <sup>Trimethyl</sup> 42.05 GKGGKGLGKGGAK <sup>Trimethyl</sup> 42.05 RHR <sup>Dimethyl</sup> 28.03 K <sup>Methyl</sup> 14.02 VLRLD

- ▶ fragmentation table for charge state 1+
- ▶ specType=etd
- ▶ score=70.95
- ▶ F112501.dat
- ▶ query=q56912.p1
- ▶ precursor=521.123430
- ▶ chargePrecursor=5
- ▶ itol=0.5

| AA   | c               | y        | z+1             | z+2             | z        | AA   |
|------|-----------------|----------|-----------------|-----------------|----------|------|
| S 1  | 105.096         | 2601.601 | 2585.582        | 0.000           | 2584.573 | S 24 |
| G 2  | 162.087         | 2514.569 | 2498.550        | 0.000           | 2497.543 | G 23 |
| R 3  | <b>368.236</b>  | 2487.540 | 2441.529        | 2442.537        | 2440.521 | R 22 |
| G 4  | <b>417.257</b>  | 2259.600 | 2243.381        | 2244.389        | 2242.373 | G 21 |
| K 5  | <b>545.352</b>  | 2202.378 | 2186.359        | 2187.367        | 2185.352 | K 20 |
| G 6  | <b>602.373</b>  | 2074.283 | 2058.264        | 2059.272        | 2057.257 | G 19 |
| G 7  | <b>659.395</b>  | 2017.262 | 2001.243        | 2002.251        | 2000.235 | G 18 |
| K 8  | <b>787.490</b>  | 1960.240 | 1944.222        | 1945.229        | 1943.214 | K 17 |
| G 9  | <b>844.511</b>  | 1832.145 | 1816.127        | 1817.134        | 1815.119 | G 16 |
| L 10 | <b>927.590</b>  | 1775.124 | 1759.105        | 1760.113        | 1758.099 | L 15 |
| G 11 | <b>1014.617</b> | 1662.040 | 1646.021        | <b>1647.029</b> | 1645.013 | G 14 |
| K 12 | <b>1142.712</b> | 1605.019 | 1589.000        | 1590.007        | 1587.992 | K 13 |
| G 13 | 1199.733        | 1476.923 | 1460.905        | <b>1461.912</b> | 1459.897 | G 12 |
| G 14 | <b>1256.755</b> | 1419.902 | <b>1403.883</b> | 1404.891        | 1402.875 | G 11 |
| A 15 | <b>1327.792</b> | 1362.880 | 1346.862        | <b>1347.870</b> | 1345.854 | A 10 |
| R 16 | <b>1407.834</b> | 1291.843 | 1275.825        | 1276.832        | 1274.817 | R 9  |
| R 17 | <b>1654.035</b> | 1121.791 | 1105.883        | 1106.891        | 1104.875 | R 8  |
| H 18 | 1791.094        | 965.600  | <b>949.582</b>  | <b>950.589</b>  | 948.574  | H 7  |
| R 19 | 1975.226        | 828.541  | 812.523         | <b>813.530</b>  | 811.515  | R 6  |
| K 20 | 2117.337        | 644.409  | 628.390         | <b>629.398</b>  | 627.382  | K 5  |
| V 21 | 2216.405        | 502.298  | 486.280         | <b>487.287</b>  | 485.272  | V 4  |
| L 22 | 2329.489        | 403.230  | <b>387.211</b>  | <b>388.219</b>  | 386.203  | L 3  |
| R 23 | 2485.580        | 280.146  | <b>274.127</b>  | -75.135         | 273.110  | R 2  |
| D 24 | 2660.617        | 134.045  | 118.026         | 119.034         | 117.018  | D 1  |

# sp | P62806 | H4\_MOUSE

SGR <sup>Trimethyl</sup> 42.05 GKGGKGLGKGGAK <sup>Trimethyl</sup> 42.05 RHR <sup>Dimethyl</sup> 28.03 K <sup>Methyl</sup> 14.02 VLRLD

- ▶ fragmentation table for charge state 2+
- ▶ specType=etd
- ▶ score=70.95
- ▶ F112501.dat
- ▶ query=q56912.p1
- ▶ precursor=521.123430
- ▶ chargePrecursor=5
- ▶ itol=0.5

| AA    | c               | y               | z+1             | z+2             | z               | AA    |
|-------|-----------------|-----------------|-----------------|-----------------|-----------------|-------|
| S[1]  | 83.017          | 1101.304        | 1293.295        | 0.504           | 1200.791        | S[24] |
| G[2]  | 81.547          | 1257.788        | 1240.779        | 0.504           | 1240.275        | G[23] |
| K[3]  | 130.621         | <b>1229.277</b> | 1291.268        | 1251.772        | 1220.764        | K[22] |
| G[4]  | 209.132         | 1130.203        | <b>1122.194</b> | <b>1122.698</b> | 1131.699        | G[21] |
| K[5]  | 273.130         | 1101.693        | <b>1093.683</b> | 1094.187        | <b>1093.179</b> | K[20] |
| G[6]  | 301.690         | 1037.645        | <b>1029.636</b> | <b>1030.140</b> | 1029.132        | G[19] |
| G[7]  | 330.201         | 1009.135        | 1001.125        | <b>1001.629</b> | 1000.621        | G[18] |
| K[8]  | 394.248         | 980.624         | 972.614         | <b>973.118</b>  | 972.111         | K[17] |
| G[9]  | 422.759         | 916.576         | <b>908.567</b>  | <b>909.071</b>  | 908.063         | G[16] |
| L[10] | <b>479.301</b>  | 868.066         | 860.056         | <b>860.560</b>  | 879.552         | L[15] |
| G[11] | <b>507.812</b>  | 831.524         | 823.514         | <b>824.018</b>  | 823.010         | G[14] |
| K[12] | <b>571.859</b>  | 803.013         | <b>795.003</b>  | <b>795.507</b>  | 794.500         | K[13] |
| G[13] | <b>600.370</b>  | 738.965         | <b>730.956</b>  | <b>731.460</b>  | <b>730.452</b>  | G[12] |
| G[14] | 638.861         | 710.455         | <b>702.445</b>  | <b>702.949</b>  | 701.941         | G[11] |
| A[15] | <b>684.399</b>  | 681.944         | <b>673.934</b>  | <b>674.438</b>  | 673.431         | A[10] |
| R[16] | 740.410         | 646.425         | <b>638.416</b>  | <b>638.920</b>  | 637.912         | R[9]  |
| R[17] | <b>827.521</b>  | 561.954         | <b>553.945</b>  | <b>553.949</b>  | 552.941         | R[8]  |
| H[18] | <b>896.050</b>  | 483.904         | <b>475.294</b>  | <b>475.798</b>  | 474.791         | H[7]  |
| R[19] | 988.117         | 414.774         | <b>406.765</b>  | <b>407.269</b>  | 406.261         | R[6]  |
| K[20] | 1059.177        | 322.706         | 314.699         | 315.203         | 314.195         | K[5]  |
| V[21] | <b>1108.706</b> | 254.653         | 246.643         | 247.147         | 246.140         | V[4]  |
| L[22] | <b>1165.248</b> | 202.119         | 194.109         | 194.613         | 193.605         | L[3]  |
| R[23] | 1243.299        | 145.577         | 137.567         | 138.071         | 137.063         | R[2]  |
| D[24] | 1300.812        | 67.526          | 59.517          | 60.021          | 59.013          | D[1]  |

# sp | P62806 | H4\_MOUSE

SGR<sup>Trimethyl</sup><sub>42.05</sub> GKGGKGLGKGGAK<sup>Trimethyl</sup><sub>42.05</sub> RHR<sup>Dimethyl</sup><sub>28.03</sub> K<sup>Methyl</sup><sub>14.02</sub> VLRD

- ▶ fragmentation table for charge state 3+
- ▶ specType=etd
- ▶ score=70.95
- ▶ F112501.dat
- ▶ query=q56912.p1
- ▶ precursor=521.123430
- ▶ chargePrecursor=5
- ▶ itol=0.5

| AA    | c              | y              | z+1            | z+2            | z              | AA    |
|-------|----------------|----------------|----------------|----------------|----------------|-------|
| S[1]  | 35.693         | 367.872        | <b>662.532</b> | 0.672          | 362.196        | S[24] |
| G[2]  | 54.701         | 338.861        | 333.527        | 0.672          | 333.186        | G[23] |
| R[3]  | 130.750        | <b>819.854</b> | <b>814.515</b> | <b>814.850</b> | <b>814.179</b> | R[22] |
| G[4]  | 139.757        | 753.805        | <b>748.465</b> | <b>748.801</b> | 748.129        | G[21] |
| K[5]  | 182.455        | 734.798        | 729.458        | <b>729.794</b> | 729.122        | K[20] |
| G[6]  | 201.463        | 692.099        | <b>686.760</b> | <b>687.096</b> | 686.424        | G[19] |
| G[7]  | 220.470        | 673.092        | <b>667.753</b> | <b>668.088</b> | 667.417        | G[18] |
| K[8]  | 253.168        | 654.085        | 648.743        | 649.081        | 648.409        | K[17] |
| G[9]  | 282.175        | <b>611.387</b> | <b>606.047</b> | <b>606.383</b> | 605.711        | G[16] |
| L[10] | 319.870        | <b>592.379</b> | 587.040        | <b>587.376</b> | 586.704        | L[15] |
| G[11] | 338.877        | 554.035        | 549.345        | <b>549.681</b> | 549.009        | G[14] |
| K[12] | 381.575        | <b>535.678</b> | <b>530.338</b> | <b>530.674</b> | 530.002        | K[13] |
| G[13] | 400.583        | 492.979        | 487.640        | 487.976        | 487.304        | G[12] |
| G[14] | 419.590        | 473.972        | 468.633        | 468.969        | 468.297        | G[11] |
| A[15] | 443.269        | 454.965        | 449.625        | 449.961        | 449.289        | A[10] |
| K[16] | 499.983        | 431.286        | 425.946        | 426.282        | 425.610        | K[9]  |
| R[17] | 552.016        | 374.572        | 369.232        | 369.568        | 368.896        | R[8]  |
| H[18] | 567.703        | 322.538        | 317.199        | 317.535        | 316.863        | H[7]  |
| R[19] | <b>659.080</b> | 276.852        | 271.513        | 271.848        | 271.176        | R[6]  |
| K[20] | 706.450        | 215.475        | 210.135        | 210.471        | 209.799        | K[5]  |
| V[21] | <b>739.473</b> | 168.104        | 162.765        | 163.101        | 162.429        | V[4]  |
| L[22] | <b>777.168</b> | 135.082        | 129.742        | 130.078        | 129.406        | L[3]  |
| R[23] | <b>829.202</b> | 97.387         | 92.047         | 92.383         | 91.711         | R[2]  |
| D[24] | 867.544        | 45.353         | 40.014         | 40.349         | 39.678         | D[1]  |

# sp | P62806 | H4\_MOUSE

SGR <sup>Trimethyl</sup> 42.05 GKGGKGLGKGGAK <sup>Trimethyl</sup> 42.05 RHR <sup>Dimethyl</sup> 28.03 K <sup>Methyl</sup> 14.02 VLRD

- ▶ fragmentation table for charge state 4+
- ▶ specType=etd
- ▶ score=70.95
- ▶ F112501.dat
- ▶ query=q56912.p1
- ▶ precursor=521.123430
- ▶ chargePrecursor=5
- ▶ itol=0.5

| AA    | c              | y              | z+1     | z+2            | z       | AA    |
|-------|----------------|----------------|---------|----------------|---------|-------|
| S[1]  | 27.022         | 651.156        | 647.151 | 0.755          | 646.899 | S[24] |
| G[2]  | 41.277         | <b>629.398</b> | 625.393 | 0.755          | 625.141 | G[23] |
| R[3]  | 90.814         | <b>615.142</b> | 611.138 | <b>611.390</b> | 610.886 | R[22] |
| G[4]  | 105.070        | 565.605        | 561.601 | 561.853        | 561.349 | G[21] |
| K[5]  | 137.093        | 551.350        | 547.345 | 547.597        | 547.093 | K[20] |
| G[6]  | 151.349        | 519.326        | 515.322 | 515.574        | 515.070 | G[19] |
| G[7]  | 165.604        | 505.071        | 501.066 | 501.318        | 500.814 | G[18] |
| K[8]  | 197.626        | 490.816        | 486.811 | 487.063        | 486.559 | K[17] |
| G[9]  | 211.883        | 458.792        | 454.787 | 455.039        | 454.535 | G[16] |
| L[10] | 280.154        | 444.536        | 440.532 | 440.784        | 440.280 | L[15] |
| G[11] | 254.410        | 416.265        | 412.261 | 412.513        | 412.009 | G[14] |
| K[12] | 286.433        | 402.010        | 398.005 | 398.257        | 397.753 | K[13] |
| G[13] | 300.689        | 369.986        | 365.982 | 366.234        | 365.730 | G[12] |
| G[14] | 314.944        | 355.731        | 351.726 | 351.978        | 351.474 | G[11] |
| A[15] | 352.703        | 341.476        | 337.471 | 337.723        | 337.219 | A[10] |
| K[16] | 375.239        | 323.716        | 319.712 | 319.964        | 319.460 | K[9]  |
| R[17] | 414.264        | 281.181        | 277.176 | 277.428        | 276.924 | R[8]  |
| H[18] | 448.529        | 242.156        | 238.151 | 238.403        | 237.899 | H[7]  |
| R[19] | 494.562        | 207.891        | 203.886 | 204.138        | 203.634 | R[6]  |
| K[20] | <b>530.090</b> | 181.858        | 177.853 | 178.105        | 177.601 | K[5]  |
| V[21] | 554.852        | 126.330        | 122.325 | 122.577        | 122.073 | V[4]  |
| L[22] | 583.126        | 101.561        | 97.556  | 97.810         | 97.306  | L[3]  |
| R[23] | 622.153        | 73.292         | 69.287  | 69.539         | 69.035  | R[2]  |
| D[24] | 650.910        | 34.267         | 30.262  | 30.514         | 30.010  | D[1]  |

# sp | P62806 | H4\_MOUSE

SGR<sup>Trimethyl</sup> 42.05 GKGGKLGKGGAK<sup>Trimethyl</sup> 42.05 RHRK<sup>Trimethyl</sup> 42.05 VLRL

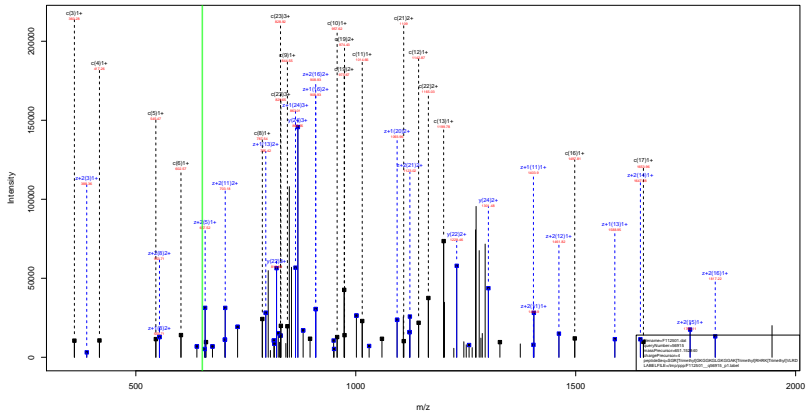

# sp | P62806 | H4\_MOUSE

SGR<sup>Trimethyl</sup><sub>42.05</sub> GKGGKGLGKGGAK<sup>Trimethyl</sup><sub>42.05</sub> RHRK<sup>Trimethyl</sup><sub>42.05</sub> VLRD

- ▶ fragmentation table for charge state 1+
- ▶ specType=etd
- ▶ score=90.14
- ▶ F112501.dat
- ▶ query=q56915\_p1
- ▶ precursor=651.152840
- ▶ chargePrecursor=4
- ▶ itol=0.5

| AA | c               | y              | z+1             | z+2             | z        | AA    |
|----|-----------------|----------------|-----------------|-----------------|----------|-------|
| S  | 105.096         | 2601.601       | 2585.582        | 0.000           | 2584.573 | S[24] |
| G  | 162.087         | 2514.569       | 2498.550        | 0.000           | 2497.543 | G[23] |
| R  | <b>368.236</b>  | 2487.548       | 2443.529        | 2442.537        | 2440.521 | R[22] |
| G  | <b>417.757</b>  | 2359.600       | 2243.381        | 2244.369        | 2242.373 | G[21] |
| K  | <b>545.352</b>  | 2202.378       | 2186.359        | 2187.367        | 2185.352 | K[20] |
| G  | <b>602.373</b>  | 2074.283       | 2058.264        | 2059.272        | 2057.257 | G[19] |
| G  | <b>659.395</b>  | 2017.262       | 2001.243        | 2002.251        | 2000.235 | G[18] |
| K  | <b>787.490</b>  | 1960.240       | 1944.222        | 1945.229        | 1943.214 | K[17] |
| G  | <b>844.511</b>  | 1832.145       | 1816.127        | <b>1817.134</b> | 1815.119 | G[16] |
| L  | <b>927.590</b>  | 1775.124       | 1759.105        | <b>1760.113</b> | 1758.099 | L[15] |
| G  | <b>1014.617</b> | 1662.040       | 1646.021        | <b>1647.029</b> | 1645.013 | G[14] |
| K  | <b>1142.712</b> | 1605.019       | <b>1589.000</b> | 1590.007        | 1587.992 | K[13] |
| G  | <b>1199.733</b> | 1476.923       | 1460.905        | <b>1461.912</b> | 1459.897 | G[12] |
| G  | 1256.755        | 1419.902       | <b>1403.883</b> | <b>1404.891</b> | 1402.875 | G[11] |
| A  | <b>1327.792</b> | 1362.880       | 1346.862        | 1347.870        | 1345.854 | A[10] |
| R  | <b>1407.834</b> | 1291.843       | 1275.825        | 1276.832        | 1274.817 | R[9]  |
| R  | <b>1654.035</b> | 1121.791       | 1105.883        | 1106.891        | 1104.875 | R[8]  |
| H  | 1791.094        | 965.600        | <b>949.582</b>  | <b>950.589</b>  | 948.574  | H[7]  |
| R  | 1947.195        | <b>828.541</b> | 812.533         | <b>813.530</b>  | 811.515  | R[6]  |
| K  | 2117.337        | 672.440        | <b>656.422</b>  | <b>657.429</b>  | 655.414  | K[5]  |
| V  | 2216.405        | 502.298        | 486.280         | 487.287         | 485.272  | V[4]  |
| L  | 2329.489        | 403.230        | 387.211         | <b>388.219</b>  | 386.203  | L[3]  |
| R  | 2485.588        | 298.146        | 274.127         | -75.135         | 273.110  | R[2]  |
| D  | 2660.617        | 134.045        | 118.026         | 119.034         | 117.018  | D[1]  |

# sp | P62806 | H4\_MOUSE

SGR<sup>Trimethyl</sup><sub>42.05</sub> GKGGKGLGKGGAK<sup>Trimethyl</sup><sub>42.05</sub> RHRK<sup>Trimethyl</sup><sub>42.05</sub> VLRD

- ▶ fragmentation table for charge state 2+
- ▶ specType=etd
- ▶ score=90.14
- ▶ F112501.dat
- ▶ query=q56915.p1
- ▶ precursor=651.152840
- ▶ chargePrecursor=4
- ▶ itol=0.5

| AA    | c               | y               | z+1             | z+2             | z        | AA    |
|-------|-----------------|-----------------|-----------------|-----------------|----------|-------|
| S[1]  | 53.037          | <b>1301.304</b> | 1293.205        | 0.504           | 1292.701 | S[24] |
| G[2]  | 81.547          | <b>1257.788</b> | 1249.770        | 0.504           | 1249.270 | G[23] |
| R[3]  | 180.621         | <b>1229.277</b> | 1221.768        | 1.011772        | 1220.764 | R[22] |
| G[4]  | 289.132         | 1139.201        | <b>1122.104</b> | <b>1122.698</b> | 1121.699 | G[21] |
| K[5]  | 273.180         | 1101.092        | <b>1093.683</b> | <b>1094.187</b> | 1093.179 | K[20] |
| G[6]  | 301.690         | 1037.645        | 1029.636        | <b>1030.140</b> | 1029.132 | G[19] |
| G[7]  | 330.201         | 1009.135        | <b>1001.125</b> | <b>1001.629</b> | 1000.621 | G[18] |
| K[8]  | 394.248         | 980.624         | 972.614         | 973.118         | 972.111  | K[17] |
| G[9]  | 422.759         | 916.576         | <b>908.567</b>  | <b>909.071</b>  | 908.063  | G[16] |
| L[10] | 479.201         | 888.066         | <b>880.056</b>  | <b>880.560</b>  | 879.552  | L[15] |
| G[11] | 507.812         | 831.528         | <b>823.514</b>  | <b>824.018</b>  | 823.010  | G[14] |
| K[12] | 571.859         | 803.013         | <b>795.003</b>  | <b>795.507</b>  | 794.500  | K[13] |
| G[13] | 600.370         | 738.965         | <b>730.956</b>  | <b>731.460</b>  | 730.452  | G[12] |
| G[14] | 628.881         | 710.455         | <b>702.445</b>  | <b>702.949</b>  | 701.941  | G[11] |
| A[15] | 664.399         | 681.944         | <b>673.934</b>  | <b>674.438</b>  | 673.431  | A[10] |
| R[16] | 708.910         | 646.826         | <b>638.816</b>  | <b>639.320</b>  | 637.912  | R[9]  |
| R[17] | 827.521         | 561.354         | <b>553.345</b>  | <b>553.849</b>  | 552.841  | R[8]  |
| H[18] | <b>896.050</b>  | 483.304         | 475.294         | 475.798         | 474.791  | H[7]  |
| R[19] | <b>974.101</b>  | 414.774         | 406.765         | 407.269         | 406.261  | R[6]  |
| K[20] | <b>1059.172</b> | 336.724         | 328.714         | 329.218         | 328.211  | K[5]  |
| V[21] | <b>1108.706</b> | 251.663         | 243.653         | 244.147         | 243.140  | V[4]  |
| L[22] | <b>1165.248</b> | 202.119         | 194.109         | 194.613         | 193.605  | L[3]  |
| R[23] | 1243.299        | 145.577         | 137.567         | 138.071         | 137.063  | R[2]  |
| D[24] | 1300.812        | 67.526          | 59.517          | 60.021          | 59.013   | D[1]  |



# sp | P62806 | H4\_MOUSE

SGR<sup>Trimethyl</sup><sub>42.05</sub> GKGGKGLGKGGAK<sup>Trimethyl</sup><sub>42.05</sub> RHRK<sup>Trimethyl</sup><sub>42.05</sub> VLRD

- ▶ fragmentation table for charge state 3+
- ▶ specType=etd
- ▶ score=90.14
- ▶ F112501.dat
- ▶ query=q56915.p1
- ▶ precursor=651.152840
- ▶ chargePrecursor=4
- ▶ itol=0.5

| AA    | c              | y              | z+1            | z+2            | z              | AA      |       |
|-------|----------------|----------------|----------------|----------------|----------------|---------|-------|
| S[1]  | 35.693         | <b>867.872</b> | <b>862.532</b> |                | 0.672          | 862.196 | S[24] |
| G[2]  | 54.701         | 338.861        | 333.521        |                | 0.672          | 333.186 | G[23] |
| R[3]  | 130.750        | <b>819.854</b> | <b>814.515</b> | <b>814.850</b> | <b>814.179</b> |         | R[22] |
| G[4]  | 139.757        | 753.805        | 748.465        | 748.801        | 748.129        |         | G[21] |
| K[5]  | 182.455        | 734.736        | 729.458        | 729.794        | 729.122        |         | K[20] |
| G[6]  | 201.463        | 692.099        | 686.760        | 687.096        | 686.424        |         | G[19] |
| G[7]  | 220.470        | 673.092        | 667.753        | 668.088        | 667.417        |         | G[18] |
| K[8]  | 263.168        | 654.085        | 648.743        | 649.081        | 648.409        |         | K[17] |
| G[9]  | 282.175        | 631.387        | 626.047        | 626.383        | 625.711        |         | G[16] |
| L[10] | 319.676        | 602.379        | 597.040        | 597.376        | 596.704        |         | L[15] |
| G[11] | 338.877        | 554.685        | 549.345        | 549.681        | 549.009        |         | G[14] |
| K[12] | 381.575        | 535.678        | 530.338        | 530.674        | 530.002        |         | K[13] |
| G[13] | 400.583        | 492.979        | 487.640        | 487.976        | 487.304        |         | G[12] |
| G[14] | 419.590        | 473.972        | 468.633        | 468.969        | 468.297        |         | G[11] |
| A[15] | 443.269        | 454.965        | 449.625        | 449.961        | 449.289        |         | A[10] |
| K[16] | 469.983        | 431.286        | 425.946        | 426.282        | 425.610        |         | K[9]  |
| R[17] | 552.016        | 374.572        | 369.232        | 369.568        | 368.896        |         | R[8]  |
| H[18] | 597.703        | 322.538        | 317.199        | 317.535        | 316.863        |         | H[7]  |
| R[19] | 669.736        | 276.852        | 271.512        | 271.848        | 271.176        |         | R[6]  |
| K[20] | 706.450        | 224.818        | 219.478        | 219.815        | 219.143        |         | K[5]  |
| V[21] | 739.473        | 168.104        | 162.765        | 163.101        | 162.429        |         | V[4]  |
| L[22] | 777.168        | 135.082        | 129.742        | 130.078        | 129.406        |         | L[3]  |
| R[23] | <b>829.202</b> | 97.387         | 92.047         | 92.383         | 91.711         |         | R[2]  |
| D[24] | 867.544        | 45.353         | 40.014         | 40.349         | 39.678         |         | D[1]  |



# sp | P62806 | H4\_MOUSE

[Acetyl]SGR<sup>Methyl</sup><sub>14.02</sub> GKGKGLGKGGAK<sup>Acetyl</sup><sub>42.01</sub> RHRK<sup>Trimethyl</sup><sub>42.05</sub> VLRD

- ▶ fragmentation table for charge state 1+
- ▶ specType=etd
- ▶ score=118.87
- ▶ F112501.dat
- ▶ query=q57128\_p1
- ▶ precursor=654.642890
- ▶ chargePrecursor=4
- ▶ itol=0.5

| AA | c               | y               | z+1             | z+2             | z        | AA    |
|----|-----------------|-----------------|-----------------|-----------------|----------|-------|
| S  | 147.076         | 2015.544        | 2599.525        | 0.000           | 2599.519 | S[24] |
| G  | 204.098         | 2486.501        | 2470.483        | 0.000           | 2469.473 | G[23] |
| R  | <b>374.215</b>  | 2629.480        | 2413.461        | 2414.469        | 2412.453 | R[22] |
| G  | <b>431.236</b>  | 2959.361        | 2243.345        | 2344.352        | 2242.337 | G[21] |
| K  | <b>559.331</b>  | 2202.342        | 2198.323        | 2187.331        | 2185.315 | K[20] |
| G  | <b>616.353</b>  | 2074.347        | 2058.328        | 2059.336        | 2057.320 | G[19] |
| G  | <b>673.374</b>  | 2017.325        | 2001.307        | 2002.314        | 2000.199 | G[18] |
| K  | <b>801.469</b>  | 1960.204        | 1944.185        | 1945.193        | 1943.177 | K[17] |
| G  | <b>858.490</b>  | 1832.106        | 1816.087        | <b>1817.098</b> | 1815.082 | G[16] |
| L  | <b>911.514</b>  | 1775.087        | <b>1759.069</b> | 1760.077        | 1758.061 | L[15] |
| Q  | <b>1028.596</b> | 1662.003        | 1645.985        | <b>1646.993</b> | 1644.977 | Q[14] |
| K  | <b>1156.691</b> | 1604.982        | <b>1588.963</b> | 1589.971        | 1587.955 | K[13] |
| G  | <b>1213.712</b> | 1476.887        | 1460.869        | <b>1461.876</b> | 1459.860 | G[12] |
| G  | 1270.734        | 1419.866        | 1403.847        | <b>1404.855</b> | 1402.839 | G[11] |
| A  | <b>1341.771</b> | 1362.845        | 1346.825        | 1347.833        | 1345.818 | A[10] |
| R  | <b>1511.876</b> | <b>1291.807</b> | 1275.788        | 1276.795        | 1274.780 | R[9]  |
| R  | <b>1667.978</b> | 1121.701        | 1105.683        | <b>1106.691</b> | 1104.675 | R[8]  |
| H  | 1805.037        | 965.600         | 949.582         | <b>950.589</b>  | 948.574  | H[7]  |
| R  | <b>1961.138</b> | <b>828.541</b>  | 812.523         | <b>813.530</b>  | 811.515  | R[6]  |
| K  | 2131.280        | 672.440         | 656.422         | <b>657.429</b>  | 655.414  | K[5]  |
| V  | 2230.348        | 502.300         | 486.280         | 487.287         | 485.272  | V[4]  |
| L  | 2414.432        | 463.130         | 447.111         | 448.119         | 446.103  | L[3]  |
| R  | 2499.533        | 290.148         | 274.127         | 275.135         | 273.119  | R[2]  |
| D  | 2614.560        | 134.045         | 118.026         | 119.034         | 117.018  | D[1]  |

# sp | P62806 | H4\_MOUSE

[Acetyl]SGR<sup>Methyl</sup><sub>14.02</sub> GKGGKGLGKGGAK<sup>Acetyl</sup><sub>42.01</sub> RHRK<sup>Trimethyl</sup><sub>42.05</sub> VLRLD

- ▶ fragmentation table for charge state 2+
- ▶ specType=etd
- ▶ score=118.87
- ▶ F112501.dat
- ▶ query=q57128.p1
- ▶ precursor=654.642890
- ▶ chargePrecursor=4
- ▶ itol=0.5

| AA    | c               | y               | z+1             | z+2             | z               | AA    |
|-------|-----------------|-----------------|-----------------|-----------------|-----------------|-------|
| S[1]  | 74.042          | <b>1308.276</b> | <b>1300.266</b> | 0.504           | 1299.760        | S[24] |
| G[2]  | 102.553         | 1243.754        | <b>1235.745</b> | 0.504           | 1235.241        | G[23] |
| R[3]  | 187.611         | 1215.244        | 1207.236        | <b>1207.738</b> | 1206.730        | R[22] |
| G[4]  | 238.122         | 1130.105        | <b>1122.116</b> | <b>1122.680</b> | 1121.672        | G[21] |
| K[5]  | 280.109         | 1101.675        | <b>1093.665</b> | <b>1094.169</b> | 1093.161        | K[20] |
| G[6]  | 308.680         | 1037.627        | <b>1029.618</b> | <b>1030.122</b> | <b>1029.114</b> | G[10] |
| G[7]  | 357.191         | 1009.116        | <b>1001.107</b> | <b>1001.611</b> | 1000.603        | G[18] |
| K[8]  | 401.210         | <b>980.606</b>  | <b>972.596</b>  | <b>973.100</b>  | <b>972.092</b>  | K[17] |
| G[9]  | 429.749         | 916.505         | <b>908.549</b>  | <b>909.053</b>  | <b>908.045</b>  | G[16] |
| L[10] | 489.273         | 898.041         | <b>890.038</b>  | <b>890.542</b>  | 879.536         | L[15] |
| G[11] | 514.802         | 831.505         | 823.498         | 824.000         | 822.992         | G[14] |
| K[12] | 578.849         | 802.995         | <b>794.985</b>  | <b>795.489</b>  | 794.481         | K[13] |
| G[13] | 607.390         | 738.947         | <b>730.938</b>  | <b>731.442</b>  | 730.436         | G[12] |
| G[14] | 635.971         | 710.430         | <b>702.427</b>  | <b>702.931</b>  | 701.923         | G[11] |
| A[15] | 691.389         | 681.926         | <b>673.916</b>  | <b>674.420</b>  | <b>673.412</b>  | A[10] |
| R[16] | 736.442         | 646.407         | <b>638.398</b>  | <b>638.902</b>  | 637.894         | R[9]  |
| R[17] | <b>834.492</b>  | 561.354         | <b>553.345</b>  | <b>553.849</b>  | 552.841         | R[6]  |
| H[18] | <b>903.022</b>  | 483.304         | 475.294         | 475.798         | 474.791         | H[7]  |
| R[19] | <b>981.072</b>  | 414.774         | 406.765         | 407.269         | 406.261         | R[6]  |
| K[20] | <b>1066.143</b> | 336.724         | 328.714         | 329.218         | 328.211         | K[5]  |
| V[21] | <b>1115.678</b> | 252.053         | 243.043         | 244.547         | 243.540         | V[4]  |
| L[22] | <b>1172.220</b> | 202.110         | 194.100         | 194.613         | 193.605         | L[3]  |
| R[23] | <b>1250.270</b> | 145.577         | 137.567         | 138.071         | 137.063         | R[2]  |
| D[24] | 1307.704        | 67.526          | 59.517          | 60.021          | 59.013          | D[1]  |

# sp | P62806 | H4\_MOUSE

[Acetyl]SGR<sup>Methyl</sup><sub>14.02</sub> GKGGKGLGKGGAK<sup>Acetyl</sup><sub>42.01</sub> RHRK<sup>Trimethyl</sup><sub>42.05</sub> VLRLD

- ▶ fragmentation table for charge state 3+
- ▶ specType=etd
- ▶ score=118.87
- ▶ F112501.dat
- ▶ query=q57128.p1
- ▶ precursor=654.642890
- ▶ chargePrecursor=4
- ▶ itol=0.5

| AA    | c              | y              | z+1            | z+2            | z       | AA    |
|-------|----------------|----------------|----------------|----------------|---------|-------|
| S[1]  | 49.597         | <b>872.520</b> | <b>867.180</b> | 0.572          | 866.844 | S[24] |
| G[2]  | 58.704         | 829.902        | <b>824.166</b> | 0.572          | 823.830 | G[23] |
| R[3]  | 125.410        | 810.498        | <b>805.159</b> | <b>805.495</b> | 804.823 | R[22] |
| G[4]  | 144.417        | 753.793        | 748.453        | 748.789        | 748.117 | G[21] |
| K[5]  | 187.115        | 734.785        | 729.446        | 729.782        | 729.110 | K[20] |
| G[6]  | 206.122        | 692.087        | 686.748        | 687.083        | 686.412 | G[19] |
| G[7]  | 225.130        | <b>673.080</b> | 667.740        | 668.076        | 667.404 | G[18] |
| K[8]  | 267.828        | 654.073        | 648.733        | 649.069        | 648.397 | K[17] |
| G[9]  | 286.835        | 611.374        | 606.035        | 606.371        | 605.699 | G[16] |
| L[10] | 324.330        | 592.367        | 587.028        | 587.364        | 586.692 | L[15] |
| G[11] | 343.537        | 554.671        | 549.333        | 549.669        | 548.997 | G[14] |
| K[12] | 386.235        | 535.666        | 530.326        | 530.662        | 529.990 | K[13] |
| G[13] | 405.242        | 492.967        | 487.628        | 487.964        | 487.292 | G[12] |
| G[14] | 424.249        | 473.960        | 468.620        | 468.956        | 468.285 | G[11] |
| A[15] | 447.929        | 454.953        | 449.613        | 449.949        | 449.277 | A[10] |
| K[16] | 504.630        | <b>431.274</b> | 425.934        | 426.270        | 425.598 | K[9]  |
| R[17] | 556.664        | <b>374.572</b> | 369.232        | 369.568        | 368.896 | R[8]  |
| H[18] | 602.350        | 322.536        | 317.196        | 317.535        | 316.863 | H[7]  |
| R[19] | 654.384        | 276.852        | 271.512        | 271.848        | 271.176 | R[6]  |
| K[20] | 711.098        | 224.813        | 219.473        | 219.815        | 219.143 | K[5]  |
| V[21] | 744.121        | 188.194        | 182.795        | 183.101        | 182.429 | V[4]  |
| L[22] | 781.816        | 136.082        | 129.742        | 130.078        | 129.406 | L[3]  |
| R[23] | <b>833.849</b> | 97.387         | 92.047         | 92.383         | 91.711  | R[2]  |
| D[24] | 872.182        | 45.353         | 40.014         | 40.349         | 39.678  | D[1]  |

# sp | P62806 | H4\_MOUSE

[Acetyl]SGR<sup>Methyl</sup> 14.02 GKGKGLGKGGAK<sup>Trimethyl</sup> 42.05 RHRK<sup>Trimethyl</sup> 42.05 VLRD

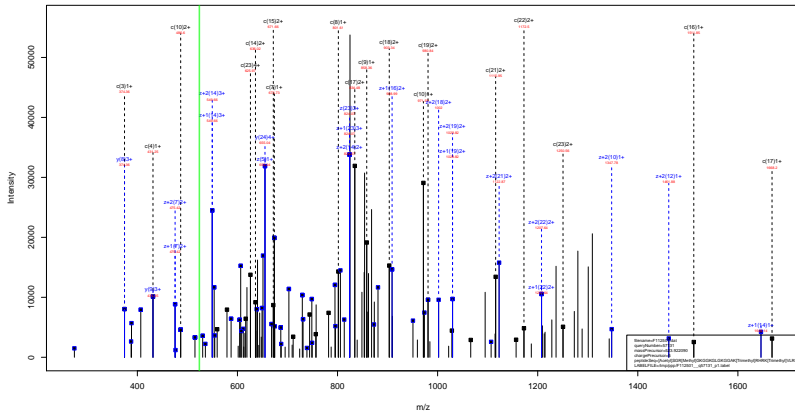

# sp | P62806 | H4\_MOUSE

[Acetyl]SGR<sup>Methyl</sup><sub>14.02</sub> GKGKGLGKGGAK<sup>Trimethyl</sup><sub>42.05</sub> RHRK<sup>Trimethyl</sup><sub>42.05</sub> VLRLD

- ▶ fragmentation table for charge state 1+
- ▶ specType=etd
- ▶ score=90.12
- ▶ F112501.dat
- ▶ query=q57131\_p1
- ▶ precursor=523.922090
- ▶ chargePrecursor=5
- ▶ itol=0.5

| AA | c  | y               | z+1      | z+2             | z               | AA             |       |
|----|----|-----------------|----------|-----------------|-----------------|----------------|-------|
| S  | 1  | 147.076         | 2615.580 | 2599.562        | 0.000           | 2598.554       | S[24] |
| G  | 2  | 204.098         | 2486.538 | 2470.519        | 0.000           | 2469.511       | G[23] |
| R  | 3  | <b>374.215</b>  | 2420.516 | 2413.488        | 2414.506        | 2412.480       | R[22] |
| G  | 4  | <b>431.236</b>  | 2259.400 | 2243.381        | 2244.399        | 2242.373       | G[21] |
| K  | 5  | <b>559.331</b>  | 2202.378 | 2186.359        | 2187.367        | 2185.352       | K[20] |
| G  | 6  | <b>616.353</b>  | 2074.263 | 2058.244        | 2059.272        | 2057.257       | G[19] |
| G  | 7  | <b>673.374</b>  | 2017.262 | 2001.243        | 2002.261        | 2000.235       | G[18] |
| K  | 8  | <b>801.469</b>  | 1960.240 | 1944.222        | 1945.229        | 1943.214       | K[17] |
| G  | 9  | <b>858.490</b>  | 1832.145 | 1816.127        | 1817.134        | 1815.119       | G[16] |
| L  | 10 | <b>971.574</b>  | 1775.124 | 1759.105        | 1760.113        | 1758.099       | L[15] |
| G  | 11 | <b>1028.596</b> | 1562.040 | <b>1646.021</b> | 1547.029        | 1645.013       | G[14] |
| K  | 12 | <b>1156.691</b> | 1605.018 | 1589.000        | 1590.007        | 1587.992       | K[13] |
| G  | 13 | 1213.712        | 1476.923 | 1460.905        | <b>1461.912</b> | 1459.897       | G[12] |
| G  | 14 | 1270.734        | 1419.902 | 1403.883        | 1404.891        | 1402.875       | G[11] |
| A  | 15 | 1341.771        | 1362.880 | 1346.862        | <b>1347.870</b> | 1345.854       | A[10] |
| R  | 16 | <b>1511.913</b> | 1291.843 | 1275.825        | 1276.832        | 1274.817       | R[9]  |
| R  | 17 | <b>1668.014</b> | 1121.791 | 1105.783        | <b>1106.691</b> | 1104.675       | R[8]  |
| H  | 18 | 1505.073        | 965.600  | 949.582         | <b>950.589</b>  | 948.574        | H[7]  |
| R  | 19 | 1961.174        | 826.541  | 810.523         | <b>813.530</b>  | 811.515        | R[6]  |
| K  | 20 | 2131.316        | 672.440  | 656.422         | 657.429         | <b>655.414</b> | K[5]  |
| V  | 21 | 2230.384        | 502.298  | <b>486.280</b>  | 487.287         | 485.272        | V[4]  |
| L  | 22 | 2513.466        | 403.232  | <b>367.211</b>  | <b>368.219</b>  | 366.203        | L[3]  |
| R  | 23 | 2499.570        | 280.146  | <b>274.127</b>  | 275.135         | 273.119        | R[2]  |
| D  | 24 | 2614.596        | 134.045  | 118.026         | 119.034         | 117.018        | D[1]  |

# sp | P62806 | H4\_MOUSE

[Acetyl]SGR<sup>Methyl</sup><sub>14.02</sub> GKGGKGLGKGGAK<sup>Trimethyl</sup><sub>42.05</sub> RHRK<sup>Trimethyl</sup><sub>42.05</sub> VLRLD

- ▶ fragmentation table for charge state 2+
- ▶ specType=etd
- ▶ score=90.12
- ▶ F112501.dat
- ▶ query=q57131\_p1
- ▶ precursor=523.922090
- ▶ chargePrecursor=5
- ▶ itol=0.5

| AA | c  | y               | z+1            | z+2             | z               | AA             |       |
|----|----|-----------------|----------------|-----------------|-----------------|----------------|-------|
| S  | 1  | 74.642          | 1308.294       | 1306.285        | 0.904           | 1299.781       | S[24] |
| G  | 2  | 102.553         | 1243.773       | 1238.763        | 0.904           | 1235.259       | G[23] |
| R  | 3  | 187.611         | 1215.262       | <b>1207.252</b> | <b>1207.756</b> | 1206.749       | R[22] |
| G  | 4  | 216.122         | 1130.203       | 1122.193        | <b>1122.698</b> | 1121.690       | G[21] |
| K  | 5  | 280.109         | 1101.693       | 1093.683        | 1094.187        | 1093.179       | K[20] |
| G  | 6  | 308.680         | 1037.645       | <b>1029.636</b> | <b>1030.140</b> | 1029.132       | G[19] |
| G  | 7  | 337.191         | 1009.135       | 1001.125        | <b>1001.629</b> | 1000.621       | G[18] |
| K  | 8  | 401.238         | <b>980.624</b> | 972.614         | <b>973.118</b>  | 972.111        | K[17] |
| G  | 9  | 429.749         | 918.576        | <b>908.567</b>  | <b>909.071</b>  | 908.063        | G[16] |
| L  | 10 | <b>486.291</b>  | 888.066        | 880.056         | <b>880.560</b>  | 879.552        | L[15] |
| G  | 11 | <b>514.802</b>  | 831.524        | 823.514         | <b>824.018</b>  | 823.010        | G[14] |
| K  | 12 | <b>578.849</b>  | 803.013        | <b>795.003</b>  | <b>795.507</b>  | <b>794.500</b> | K[13] |
| G  | 13 | <b>607.360</b>  | <b>738.965</b> | <b>730.956</b>  | <b>731.460</b>  | 730.452        | G[12] |
| G  | 14 | <b>635.871</b>  | 710.455        | <b>702.445</b>  | <b>702.949</b>  | 701.941        | G[11] |
| A  | 15 | <b>671.389</b>  | 681.944        | <b>673.934</b>  | <b>674.438</b>  | <b>673.431</b> | A[10] |
| R  | 16 | <b>738.460</b>  | 646.432        | <b>638.416</b>  | <b>638.920</b>  | 637.912        | R[9]  |
| R  | 17 | <b>834.511</b>  | 561.354        | <b>553.345</b>  | <b>553.849</b>  | 552.841        | R[8]  |
| H  | 18 | <b>903.040</b>  | 483.304        | <b>475.294</b>  | <b>475.798</b>  | 474.791        | H[7]  |
| R  | 19 | <b>981.091</b>  | 414.774        | <b>406.765</b>  | <b>407.269</b>  | 406.261        | R[6]  |
| K  | 20 | <b>1066.162</b> | 336.724        | 328.714         | 329.218         | 328.211        | K[5]  |
| V  | 21 | <b>1115.696</b> | 251.653        | 243.643         | 244.147         | 243.140        | V[4]  |
| L  | 22 | <b>1172.230</b> | 202.119        | 194.109         | 194.613         | 193.605        | L[3]  |
| R  | 23 | <b>1250.288</b> | 145.577        | 137.567         | 138.071         | 137.063        | R[2]  |
| D  | 24 | 1307.802        | 67.528         | 59.517          | 60.021          | 59.013         | D[1]  |



# sp | P62806 | H4\_MOUSE

[Acetyl]SGR<sup>Methyl</sup><sub>14.02</sub> GKGGKGLGKGGAK<sup>Trimethyl</sup><sub>42.05</sub> RHRK<sup>Trimethyl</sup><sub>42.05</sub> VLRLD

- ▶ fragmentation table for charge state 3+
- ▶ specType=etd
- ▶ score=90.12
- ▶ F112501.dat
- ▶ query=q57131\_p1
- ▶ precursor=523.922090
- ▶ chargePrecursor=5
- ▶ itol=0.5

| AA    | c              | y              | z+1            | z+2            | z              | AA    |
|-------|----------------|----------------|----------------|----------------|----------------|-------|
| S[1]  | 49.697         | <b>872.532</b> | 867.192        | 0.672          | 866.896        | S[24] |
| G[2]  | 58.704         | 829.517        | <b>824.178</b> | 0.672          | <b>823.842</b> | G[23] |
| R[3]  | 125.410        | 810.510        | 805.171        | <b>805.507</b> | 804.835        | R[22] |
| G[4]  | 144.417        | 753.805        | <b>748.465</b> | <b>748.801</b> | 748.129        | G[21] |
| K[5]  | 187.115        | 734.798        | <b>729.458</b> | <b>729.794</b> | <b>729.122</b> | K[20] |
| G[6]  | 206.122        | 692.099        | <b>686.760</b> | <b>687.096</b> | <b>686.424</b> | G[19] |
| G[7]  | 225.130        | 673.092        | <b>667.753</b> | <b>668.088</b> | 667.417        | G[18] |
| K[8]  | 267.828        | 654.085        | <b>648.745</b> | <b>649.081</b> | 648.409        | K[17] |
| C[9]  | 289.835        | <b>611.387</b> | <b>606.047</b> | <b>606.383</b> | 605.711        | C[16] |
| L[10] | 324.530        | 592.379        | <b>587.040</b> | <b>587.376</b> | 586.704        | L[15] |
| G[11] | 343.537        | <b>554.685</b> | <b>549.345</b> | <b>549.681</b> | 549.009        | G[14] |
| K[12] | 386.235        | <b>535.678</b> | <b>530.338</b> | <b>530.674</b> | 530.002        | K[13] |
| G[13] | 405.242        | 492.979        | 487.640        | 487.976        | 487.304        | G[12] |
| G[14] | 424.249        | 473.972        | 468.633        | 468.969        | 468.297        | G[11] |
| A[15] | 447.929        | 454.965        | 449.625        | 449.961        | 449.289        | A[10] |
| K[16] | 504.642        | <b>431.286</b> | 425.946        | 426.282        | 425.610        | K[9]  |
| R[17] | 556.676        | <b>374.572</b> | 369.232        | 369.568        | 368.896        | R[8]  |
| H[18] | 602.362        | 322.538        | 317.199        | 317.535        | 316.863        | H[7]  |
| R[19] | 654.396        | 276.852        | 271.512        | 271.848        | 271.176        | R[6]  |
| K[20] | <b>711.110</b> | 224.818        | 219.478        | 219.815        | 219.143        | K[5]  |
| V[21] | <b>744.133</b> | 168.104        | 162.765        | 163.101        | 162.429        | V[4]  |
| L[22] | <b>781.828</b> | 135.082        | 129.742        | 130.078        | 129.406        | L[3]  |
| R[23] | 833.861        | 97.387         | 92.047         | 92.383         | 91.711         | R[2]  |
| D[24] | 872.204        | 45.353         | 40.014         | 40.349         | 39.678         | D[1]  |

# sp | P62806 | H4\_MOUSE

[Acetyl]SGR<sup>Methyl</sup><sub>14.02</sub> GKGGKGLGKGGAK<sup>Trimethyl</sup><sub>42.05</sub> RHRK<sup>Trimethyl</sup><sub>42.05</sub> VLRD

- ▶ fragmentation table for charge state 4+
- ▶ specType=etd
- ▶ score=90.12
- ▶ F112501.dat
- ▶ query=q57131\_p1
- ▶ precursor=523.922090
- ▶ chargePrecursor=5
- ▶ itol=0.5

| AA    | c              | y              | z+1            | z+2            | z              | AA      |       |
|-------|----------------|----------------|----------------|----------------|----------------|---------|-------|
| S[1]  | 37.525         | <b>654.651</b> | <b>650.646</b> |                | 0.755          | 650.394 | S[24] |
| G[2]  | 51.780         | 527.390        | 618.385        |                | 0.755          | 618.133 | G[23] |
| R[3]  | 94.309         | <b>608.135</b> | <b>604.130</b> | <b>604.382</b> | <b>603.878</b> |         | R[22] |
| G[4]  | 108.564        | 565.605        | 561.601        | 561.853        | 561.349        |         | G[21] |
| K[5]  | 140.588        | 551.350        | 547.345        | 547.597        | 547.093        |         | K[20] |
| G[6]  | 154.844        | 519.326        | <b>515.322</b> | <b>515.574</b> | <b>515.070</b> |         | G[19] |
| G[7]  | 169.099        | 505.071        | 501.066        | 501.318        | 500.814        |         | G[18] |
| K[8]  | 201.123        | 490.816        | <b>486.811</b> | <b>487.063</b> | <b>486.559</b> |         | K[17] |
| G[9]  | 215.378        | 458.792        | 454.787        | 455.039        | 454.535        |         | G[16] |
| L[10] | 253.049        | 444.536        | 440.532        | 440.784        | 440.280        |         | L[15] |
| G[11] | 257.904        | 416.265        | 412.261        | 412.513        | 412.009        |         | G[14] |
| K[12] | 289.928        | 402.010        | 398.005        | 398.257        | 397.753        |         | K[13] |
| G[13] | 304.184        | 369.986        | 365.982        | 366.234        | 365.730        |         | G[12] |
| G[14] | 318.439        | 355.731        | 351.726        | 351.978        | 351.474        |         | G[11] |
| A[15] | 336.198        | 341.476        | 337.471        | 337.723        | 337.219        |         | A[10] |
| K[16] | 378.734        | 323.216        | 319.212        | 319.464        | 319.460        |         | K[9]  |
| R[17] | 417.759        | 381.181        | 377.176        | 377.428        | 376.924        |         | R[8]  |
| H[18] | 452.024        | 242.156        | 238.151        | 238.403        | 237.899        |         | H[7]  |
| R[19] | 491.049        | 207.891        | 203.886        | 204.138        | 203.634        |         | R[6]  |
| K[20] | 533.584        | 168.866        | 164.861        | 165.113        | 164.609        |         | K[5]  |
| V[21] | 558.352        | 126.330        | 122.325        | 122.577        | 122.073        |         | V[4]  |
| L[22] | 586.623        | 101.563        | 97.558         | 97.810         | 97.306         |         | L[3]  |
| R[23] | <b>625.648</b> | 73.292         | 69.287         | 69.539         | 69.035         |         | R[2]  |
| D[24] | 654.405        | 34.267         | 30.262         | 30.514         | 30.010         |         | D[1]  |



# sp | Q64525 | H2B2B\_MOUSE

PDKASAPAPKKGSKK<sup>Acetyl</sup> AVTK<sup>Acetyl</sup> VQKKDGKKRKRSRKE  
42.01 42.01

- ▶ fragmentation table for charge state 1+
- ▶ specType=etd
- ▶ score=54.92
- ▶ F112501.dat
- ▶ query=q68741.p1
- ▶ precursor=789.269990
- ▶ chargePrecursor=5
- ▶ itol=0.5

| AA   | c               | y              | z+1             | z+2             | z        | AA   |
|------|-----------------|----------------|-----------------|-----------------|----------|------|
| P 1  | 115.087         | 3942.525       | 3626.301        | 0.000           | 3625.291 | P 35 |
| D 2  | 230.114         | 3845.267       | 3829.248        | 0.000           | 3828.241 | D 34 |
| P 3  | 327.106         | 3730.240       | 3714.222        | 0.000           | 3713.214 | P 33 |
| A 4  | 398.203         | 3633.187       | 3617.169        | 0.000           | 3616.161 | A 32 |
| R 5  | <b>526.298</b>  | 3562.150       | 3546.132        | 3847.139        | 3545.124 | R 31 |
| S 6  | 617.338         | 3534.055       | 3418.037        | 3819.045        | 3417.029 | S 30 |
| A 7  | 684.368         | 3347.023       | 3331.005        | 3332.012        | 3329.997 | A 29 |
| P 8  | <b>781.420</b>  | 3275.986       | 3259.968        | 3260.975        | 3258.960 | P 28 |
| A 9  | 852.457         | 3178.933       | 3162.915        | 3163.923        | 3161.907 | A 27 |
| P 10 | 949.510         | 3107.896       | 3091.878        | 3092.885        | 3090.871 | P 26 |
| R 11 | <b>1077.605</b> | 3030.844       | 2994.825        | 2995.833        | 2993.817 | R 25 |
| K 12 | 1205.709        | 2982.740       | 2966.720        | 2967.728        | 2965.711 | K 24 |
| G 13 | 1262.722        | 2794.684       | 2738.635        | 2739.643        | 2737.627 | G 23 |
| S 14 | 1349.754        | 2697.632       | 2681.614        | 2682.621        | 2680.605 | S 22 |
| K 15 | 1477.849        | 2610.600       | 2594.581        | 2595.589        | 2593.574 | K 21 |
| K 16 | 1547.954        | 2482.505       | 2466.487        | 2467.494        | 2465.479 | K 20 |
| A 17 | 1718.991        | 2312.400       | 2296.381        | 2297.389        | 2295.373 | A 19 |
| V 18 | 1818.068        | 2241.363       | 2225.344        | 2226.352        | 2224.336 | V 18 |
| T 19 | 1919.107        | 2142.294       | 2126.275        | 2127.283        | 2125.266 | T 17 |
| K 20 | 2089.213        | 2041.246       | 2025.228        | 2026.236        | 2024.220 | K 16 |
| V 21 | 2188.281        | 1871.141       | 1855.122        | 1856.130        | 1854.114 | V 15 |
| Q 22 | 2316.340        | 1772.073       | <b>1756.054</b> | 1757.062        | 1755.046 | Q 14 |
| K 23 | 2444.435        | 1644.014       | 1627.995        | 1628.003        | 1626.987 | K 13 |
| R 24 | 2572.530        | 1515.919       | 1499.900        | <b>1500.908</b> | 1498.892 | R 12 |
| D 25 | 2687.557        | 1387.824       | 1371.805        | <b>1372.813</b> | 1370.798 | D 11 |
| G 26 | 2744.578        | 1272.797       | 1256.778        | <b>1257.786</b> | 1255.771 | G 10 |
| K 27 | 2872.673        | 1175.716       | 1160.697        | <b>1200.765</b> | 1168.649 | K 9  |
| K 28 | 3000.768        | 1087.681       | 1071.662        | 1072.670        | 1070.654 | K 8  |
| R 29 | 3156.869        | <b>959.586</b> | 943.567         | 944.575         | 942.559  | R 7  |
| R 30 | 3284.954        | 833.495        | 787.468         | 788.474         | 786.458  | R 6  |
| R 31 | 3441.065        | 675.390        | 659.371         | <b>660.379</b>  | 658.363  | R 5  |
| S 32 | 3528.097        | 519.289        | 503.270         | <b>504.278</b>  | 502.262  | S 4  |
| R 33 | 3684.198        | 432.257        | 416.238         | <b>417.246</b>  | 415.230  | R 3  |
| K 34 | 3812.293        | 276.155        | 260.137         | 261.144         | 259.129  | K 2  |
| E 35 | 3941.336        | 148.060        | 132.042         | 133.050         | 131.034  | E 1  |

# sp | Q64525 | H2B2B\_MOUSE

PDKASAPAPKKGSKK<sup>Acetyl</sup> AVTK<sup>Acetyl</sup> VQKKDGKKRKRSRKE<sup>42.01</sup>

- ▶ fragmentation table for charge state 2+
- ▶ specType=etd
- ▶ score=54.92
- ▶ F112501.dat
- ▶ query=q68741.p1
- ▶ precursor=789.269990
- ▶ chargePrecursor=5
- ▶ itol=0.5

| AA  | c               | y               | z+1             | z+2             | z               | AA  |
|-----|-----------------|-----------------|-----------------|-----------------|-----------------|-----|
| P1  | 58.047          | 1071.654        | 1063.654        | 0.504           | 1063.150        | P10 |
| D1  | 115.500         | 1023.137        | <b>1915.128</b> | 0.504           | 1014.624        | D34 |
| F1  | 164.087         | 1065.624        | 1057.614        | 0.504           | 1057.110        | F33 |
| A1  | 199.605         | 1017.091        | 1009.088        | 0.504           | 1008.584        | A32 |
| K1  | 263.651         | 1781.579        | 1773.566        | 1774.073        | 1773.060        | K31 |
| S1  | 307.169         | 1747.533        | 1739.522        | <b>1710.026</b> | 1709.010        | S30 |
| A17 | 352.692         | 1074.015        | 1066.008        | 1058.010        | 1059.505        | A29 |
| F1  | 391.214         | 1038.497        | 1030.487        | 1020.991        | 1020.981        | F28 |
| A1  | 436.732         | 1589.070        | <b>1581.961</b> | 1582.465        | <b>1581.457</b> | A27 |
| P10 | 475.250         | 1254.452        | 1246.442        | 1246.946        | 1245.930        | P26 |
| K11 | 539.306         | 1505.025        | 1497.015        | 1489.020        | 1489.412        | K25 |
| K12 | 603.354         | 1444.876        | 1433.989        | <b>1434.373</b> | 1433.366        | K24 |
| G13 | 631.804         | <b>1377.830</b> | 1369.821        | 1370.325        | 1369.317        | G23 |
| S14 | 675.380         | <b>1349.320</b> | 1341.310        | 1341.814        | 1340.808        | S22 |
| K15 | 739.426         | 1305.904        | 1297.894        | 1298.398        | 1297.390        | K21 |
| K16 | <b>824.481</b>  | 1241.756        | 1233.747        | 1234.251        | 1233.243        | K20 |
| A17 | 859.999         | <b>1156.763</b> | 1148.753        | <b>1149.198</b> | 1148.190        | A19 |
| V18 | 909.533         | 1124.325        | 1115.316        | 1115.819        | 1112.822        | V18 |
| T19 | <b>960.957</b>  | 1071.051        | <b>1063.641</b> | 1064.145        | <b>1063.137</b> | T17 |
| K20 | 1045.110        | <b>1021.127</b> | <b>1013.118</b> | <b>1013.621</b> | 1012.614        | K16 |
| V21 | <b>1094.644</b> | 936.074         | 928.065         | <b>928.569</b>  | 927.561         | V15 |
| Q22 | <b>1158.674</b> | 886.540         | <b>878.531</b>  | <b>879.034</b>  | 878.027         | Q14 |
| R23 | <b>1222.721</b> | 822.513         | <b>814.501</b>  | <b>815.005</b>  | 813.997         | R13 |
| K24 | <b>1286.768</b> | 758.483         | <b>750.454</b>  | <b>750.958</b>  | 749.950         | K12 |
| D25 | <b>1344.282</b> | 694.418         | <b>686.406</b>  | 686.910         | <b>685.902</b>  | D11 |
| G26 | <b>1372.793</b> | 636.902         | <b>628.893</b>  | <b>629.397</b>  | 628.389         | G10 |
| K27 | 1436.840        | 608.391         | 600.382         | 600.886         | 599.878         | K9  |
| K28 | <b>1500.888</b> | 544.344         | 536.335         | 536.839         | 535.831         | K8  |
| R29 | 1578.918        | 480.296         | 472.287         | 472.791         | 471.783         | R7  |
| K30 | <b>1642.986</b> | 402.246         | 394.237         | 394.740         | 393.733         | K6  |
| R31 | <b>1721.036</b> | 338.198         | 330.189         | 330.693         | 329.685         | R5  |
| S32 | <b>1764.552</b> | 260.148         | 252.139         | 252.642         | 251.635         | S4  |
| R33 | 1842.603        | 216.632         | 208.623         | 209.126         | 208.119         | R3  |
| T34 | <b>1906.650</b> | 138.581         | 130.572         | 131.076         | 130.068         | T2  |
| E35 | 1971.172        | 74.534          | 66.524          | 67.028          | 66.021          | E1  |

# sp | Q64525 | H2B2B\_MOUSE

PDKASAPAPKKGSKK<sup>Acetyl</sup>AVTK<sup>Acetyl</sup>VQKKDGKKRKRSRKE  
42.01 42.01

- ▶ fragmentation table for charge state 3+
- ▶ specType=etd
- ▶ score=54.92
- ▶ F112501.dat
- ▶ query=q68741.p1
- ▶ precursor=789.269990
- ▶ chargePrecursor=5
- ▶ itol=0.5

| AA     | c               | y               | z+1             | z+2             | z               | AA   |
|--------|-----------------|-----------------|-----------------|-----------------|-----------------|------|
| F   1  | 39.034          | 1314.778        | <b>1309.439</b> | 0.672           | <b>1309.163</b> | P 28 |
| D   2  | 77.376          | 1282.427        | <b>1277.088</b> | 0.672           | 1276.752        | D 34 |
| F   3  | 109.727         | <b>1244.085</b> | 1238.745        | 0.672           | 1238.409        | F 33 |
| A   4  | 134.406         | 1211.734        | 1206.394        | 0.672           | 1206.058        | A 32 |
| K   5  | 176.104         | 1188.055        | <b>1182.715</b> | <b>1183.051</b> | <b>1182.379</b> | K 31 |
| S   6  | 205.215         | 1149.357        | <b>1145.017</b> | <b>1140.353</b> | <b>1139.681</b> | S 30 |
| A   7  | 229.796         | 1116.346        | 1111.999        | 1111.744        | 1110.959        | A 29 |
| F   8  | 261.145         | 1092.667        | 1087.377        | 1087.663        | 1086.901        | F 28 |
| A   9  | 284.634         | 1060.316        | 1054.976        | 1055.312        | 1054.640        | A 27 |
| F   10 | 317.175         | 1036.637        | 1031.297        | 1031.633        | 1030.961        | F 26 |
| K   11 | 359.873         | 1004.286        | <b>998.946</b>  | <b>999.262</b>  | 998.611         | K 25 |
| K   12 | 402.572         | 983.568         | 978.249         | 978.564         | 977.911         | K 24 |
| G   13 | 421.579         | 918.889         | 913.530         | 913.886         | 913.214         | G 23 |
| S   14 | 450.589         | 899.882         | 894.543         | 894.879         | 894.207         | S 22 |
| K   15 | 491.288         | 870.872         | 865.532         | 865.868         | 865.190         | K 21 |
| K   16 | 549.990         | 828.173         | 822.834         | 823.170         | 822.468         | K 20 |
| A   17 | 573.669         | 774.471         | 769.132         | 769.468         | 768.799         | A 19 |
| V   18 | 608.694         | 747.792         | 742.453         | 742.789         | 742.117         | V 18 |
| T   19 | 640.374         | 714.770         | 709.430         | 709.766         | 709.094         | T 17 |
| K   20 | 697.076         | 681.087         | 675.747         | 676.083         | 675.411         | K 16 |
| V   21 | 720.099         | 624.385         | 619.046         | 619.382         | 618.710         | V 15 |
| Q   22 | 772.785         | 591.362         | 586.023         | 586.359         | 585.687         | Q 14 |
| K   23 | 815.483         | 548.676         | 543.337         | 543.672         | 543.001         | K 13 |
| K   24 | 858.181         | 505.975         | 500.636         | 500.974         | 500.302         | K 12 |
| D   25 | 896.524         | 463.280         | 457.940         | 458.276         | 457.604         | D 11 |
| G   26 | 915.531         | 424.937         | 419.598         | 419.934         | 419.262         | G 10 |
| K   27 | <b>958.229</b>  | 405.930         | 400.590         | 400.926         | 400.255         | K 9  |
| K   28 | 1007.927        | 363.232         | 357.892         | 358.228         | 357.556         | K 8  |
| R   29 | <b>1052.961</b> | 320.533         | 315.194         | 315.530         | 314.858         | R 7  |
| K   30 | <b>1095.660</b> | 288.500         | 283.160         | 283.496         | 282.824         | K 6  |
| R   31 | 1147.693        | 225.801         | 220.462         | 220.798         | 220.126         | R 5  |
| S   32 | 1176.704        | 173.768         | 168.428         | 168.764         | 168.092         | S 4  |
| R   33 | <b>1226.738</b> | 144.757         | 139.417         | 139.753         | 139.082         | R 3  |
| N   34 | <b>1271.436</b> | 92.721          | 87.381          | 87.720          | 87.048          | N 2  |
| E   35 | 1314.450        | 50.025          | 44.685          | 45.021          | 44.349          | E 1  |

# sp | Q64525 | H2B2B\_MOUSE

PDKASAPAPKKGSKK <sup>Acetyl</sup>42.01 AVTK <sup>Acetyl</sup>42.01 VQKKDGKKRKRSRKE

- ▶ fragmentation table for charge state 4+
- ▶ specType=etd
- ▶ score=54.92
- ▶ F112501.dat
- ▶ query=q68741.p1
- ▶ precursor=789.269990
- ▶ chargePrecursor=5
- ▶ itol=0.5

| AA    | c              | y              | z+1            | z+2            | z              | AA    |
|-------|----------------|----------------|----------------|----------------|----------------|-------|
| P[1]  | 29.527         | <b>986.335</b> | <b>982.331</b> | 0.755          | <b>982.079</b> | P[15] |
| D[2]  | 58.284         | 952.072        | 958.068        | 0.755          | 957.810        | D[34] |
| P[3]  | 82.547         | 933.316        | 929.311        | 0.755          | <b>929.059</b> | P[13] |
| A[4]  | 100.306        | 909.052        | 905.048        | 0.755          | 904.796        | A[32] |
| K[5]  | 132.430        | 891.293        | 887.288        | 887.540        | 887.036        | K[31] |
| S[6]  | 154.088        | 859.269        | 855.265        | 855.517        | 855.013        | S[30] |
| A[7]  | 171.847        | 837.511        | 833.507        | <b>833.759</b> | 833.255        | A[29] |
| P[8]  | 196.111        | 819.752        | 815.747        | 815.999        | 815.495        | P[28] |
| A[9]  | 213.870        | 795.489        | 791.484        | 791.736        | 791.232        | A[27] |
| P[10] | 238.133        | 777.730        | 773.725        | 773.977        | 773.473        | P[26] |
| K[11] | 270.157        | 753.466        | 749.462        | 749.714        | 749.210        | K[25] |
| K[12] | 302.180        | 721.443        | 717.438        | 717.690        | 717.186        | K[24] |
| G[13] | 316.436        | 689.419        | 685.414        | 685.666        | 685.162        | G[23] |
| S[14] | 338.194        | 675.164        | 671.159        | 671.411        | 670.907        | S[22] |
| K[15] | 370.218        | 653.406        | 649.401        | 649.653        | 649.149        | K[21] |
| K[16] | 412.744        | 621.382        | 617.377        | 617.629        | 617.125        | K[20] |
| A[17] | 430.503        | 578.855        | 574.851        | 575.103        | 574.599        | A[19] |
| V[18] | 455.270        | 561.096        | 557.091        | 557.343        | 556.839        | V[18] |
| T[19] | 480.532        | 536.329        | 532.324        | 532.576        | 532.072        | T[17] |
| K[20] | 523.059        | 511.067        | 507.062        | 507.314        | 506.810        | K[16] |
| V[21] | 547.826        | 468.541        | 464.536        | 464.788        | 464.284        | V[15] |
| Q[22] | 579.840        | 443.774        | 439.769        | 440.021        | 439.517        | Q[14] |
| K[23] | 611.864        | 411.759        | 407.754        | 408.006        | 407.502        | K[13] |
| K[24] | 643.888        | 379.735        | 375.731        | 375.982        | 375.479        | K[12] |
| D[25] | 672.645        | 347.711        | 343.707        | 343.959        | 343.455        | D[11] |
| G[26] | 688.900        | 318.955        | 314.950        | 315.202        | 314.698        | G[10] |
| K[27] | 718.924        | 304.699        | 300.695        | 300.947        | 300.443        | K[9]  |
| K[28] | <b>750.947</b> | 272.676        | 268.671        | 268.923        | 268.419        | K[8]  |
| K[29] | 789.973        | 240.652        | 236.647        | 236.899        | 236.395        | K[7]  |
| K[30] | 821.996        | 201.627        | 197.622        | 197.874        | 197.370        | K[6]  |
| R[31] | 851.022        | 169.603        | 165.598        | 165.850        | 165.346        | R[5]  |
| S[32] | 882.780        | 130.578        | 126.573        | 126.825        | 126.321        | S[4]  |
| R[33] | 921.805        | 108.620        | 104.615        | 104.867        | 104.363        | R[3]  |
| K[34] | <b>953.829</b> | 69.794         | 65.790         | 66.042         | 65.538         | K[2]  |
| E[35] | 986.089        | 37.771         | 33.766         | 34.018         | 33.514         | E[1]  |





# sp | P68433 | H31\_MOUSE

IAQDFK<sup>Methyl</sup> TD  
14.02

- ▶ fragmentation table for charge state 1+
- ▶ specType=cid
- ▶ score=55.12
- ▶ F112501.dat
- ▶ query=q8868\_p1
- ▶ precursor=476.241540
- ▶ chargePrecursor=2
- ▶ itol=0.5

| AA  | a              | a*      | a:Δ     | b              | b*             | b:Δ            | y              | y*             | y:Δ            | AA  |
|-----|----------------|---------|---------|----------------|----------------|----------------|----------------|----------------|----------------|-----|
| T 1 | 46.998         | 0.000   | 0.000   | 114.098        | 0.000          | 0.000          | 901.414        | 109.404        | 114.098        | T 1 |
| A 2 | <b>157.134</b> | 0.000   | 0.000   | <b>185.128</b> | 0.000          | 0.000          | <b>838.354</b> | 821.354        | 820.354        | A 2 |
| Q 3 | 286.192        | 286.186 | 0.000   | <b>313.187</b> | 296.160        | 0.000          | <b>767.357</b> | <b>750.330</b> | <b>749.346</b> | Q 3 |
| G 4 | 400.219        | 393.193 | 362.209 | <b>478.214</b> | 411.187        | <b>410.203</b> | <b>636.298</b> | <b>622.272</b> | 621.288        | G 4 |
| F 5 | 547.287        | 540.261 | 549.277 | <b>575.282</b> | <b>558.256</b> | 567.272        | <b>524.271</b> | 507.245        | <b>506.261</b> | F 5 |
| R 6 | 689.366        | 672.372 | 671.366 | <b>717.393</b> | 700.369        | 699.362        | <b>377.263</b> | 360.177        | 359.193        | R 6 |
| T 7 | 790.446        | 775.419 | 772.435 | <b>818.441</b> | 801.414        | 800.430        | <b>235.092</b> | 0.000          | 237.082        | T 7 |
| G 8 | 905.473        | 888.449 | 887.462 | 933.468        | 916.441        | 915.457        | 134.040        | 0.000          | 136.034        | G 8 |

# sp | P68433 | H31\_MOUSE

IAQDFK Methyl TD  
14.02

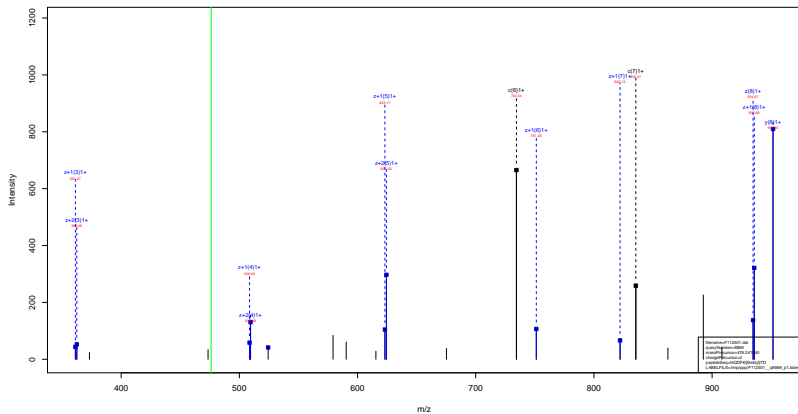

# sp | P68433 | H31\_MOUSE

IAQDFK<sup>Methyl</sup>TD  
14.02

- ▶ fragmentation table for charge state 1+
- ▶ specType=etd
- ▶ score=49.12
- ▶ F112501.dat
- ▶ query=q8869.p1
- ▶ precursor=476.241540
- ▶ chargePrecursor=2
- ▶ itol=0.5

| AA  | c              | y              | z+1            | z+2            | z              | AA  |
|-----|----------------|----------------|----------------|----------------|----------------|-----|
| I 1 | 131.118        | <b>951.478</b> | <b>935.459</b> | 0.000          | <b>934.452</b> | I 8 |
| A 2 | 202.155        | 838.394        | <b>822.375</b> | 0.000          | 821.368        | A 7 |
| Q 3 | 330.214        | 767.357        | <b>751.338</b> | 762.346        | 750.330        | Q 6 |
| D 4 | 445.241        | 639.298        | <b>623.280</b> | <b>624.288</b> | 622.272        | D 5 |
| F 5 | 592.309        | <b>524.271</b> | <b>508.253</b> | <b>509.261</b> | 507.245        | F 4 |
| R 6 | <b>734.420</b> | 377.203        | <b>361.184</b> | <b>362.192</b> | 360.177        | R 3 |
| T 7 | <b>835.467</b> | 235.092        | 219.074        | 220.082        | 218.066        | T 2 |
| D 8 | 950.494        | 134.045        | 118.026        | 119.034        | 117.018        | D 1 |

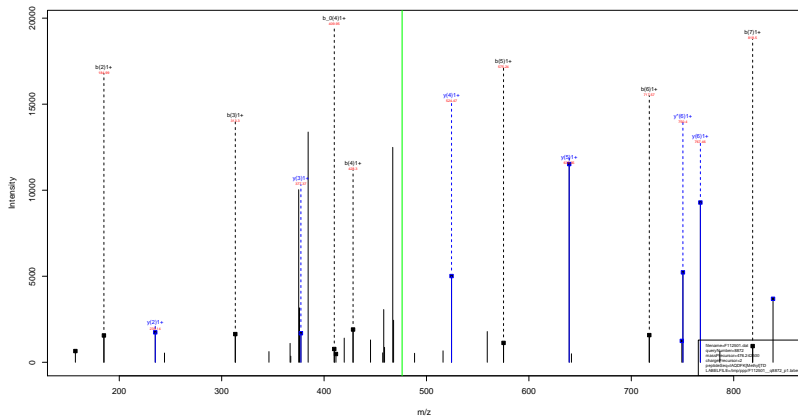

# sp | P68433 | H31\_MOUSE

IAQDFK<sup>Methyl</sup> TD  
14.02

- ▶ fragmentation table for charge state 1+
- ▶ specType=cid
- ▶ score=53.26
- ▶ F112501.dat
- ▶ query=q8872\_p1
- ▶ precursor=476.242500
- ▶ chargePrecursor=2
- ▶ itol=0.5

| AA         | a              | a*      | a:Δ     | b              | b*             | b:Δ            | y              | y*             | y:Δ            | AA         |
|------------|----------------|---------|---------|----------------|----------------|----------------|----------------|----------------|----------------|------------|
| <b>T</b> 1 | 46.998         | 0.000   | 0.000   | 114.099        | 0.000          | 0.000          | 901.419        | 109.456        | 113.989        | <b>T</b> 1 |
| <b>A</b> 2 | <b>157.134</b> | 0.000   | 0.000   | <b>185.128</b> | 0.000          | 0.000          | <b>838.354</b> | 821.392        | 820.384        | <b>A</b> 2 |
| <b>Q</b> 3 | 286.192        | 286.189 | 0.000   | <b>313.187</b> | 296.169        | 0.000          | <b>767.357</b> | <b>750.330</b> | <b>749.346</b> | <b>Q</b> 3 |
| <b>G</b> 4 | 400.219        | 393.193 | 362.209 | <b>428.214</b> | <b>411.187</b> | <b>410.203</b> | <b>636.298</b> | 622.272        | 621.288        | <b>G</b> 4 |
| <b>F</b> 5 | 547.287        | 540.261 | 529.277 | <b>575.282</b> | 558.256        | 557.272        | <b>524.271</b> | 507.245        | 506.261        | <b>F</b> 5 |
| <b>H</b> 6 | 659.356        | 652.332 | 641.368 | <b>717.393</b> | 700.369        | 699.382        | <b>377.263</b> | 360.237        | 359.253        | <b>H</b> 6 |
| <b>I</b> 7 | 790.446        | 775.419 | 772.435 | <b>818.441</b> | 801.414        | 800.430        | <b>235.092</b> | 0.000          | 237.082        | <b>I</b> 7 |
| <b>G</b> 8 | 905.473        | 890.449 | 887.462 | 933.468        | 916.441        | 915.457        | 134.040        | 0.000          | 136.034        | <b>G</b> 8 |

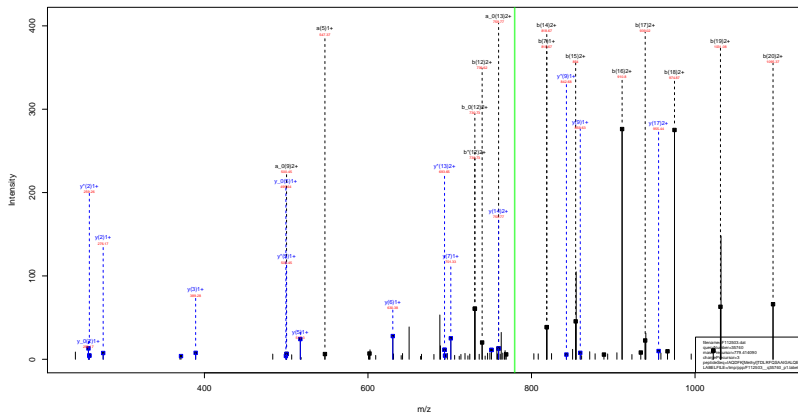

# sp | P84244 | H33\_MOUSE

IAQDFK <sup>Methyl</sup> 14.02 TDLRFQSA AIGALQE

- ▶ fragmentation table for charge state 1+
- ▶ specType=cid
- ▶ score=47.83
- ▶ F112503.dat
- ▶ query=q35740\_p1
- ▶ precursor=779.414090
- ▶ chargePrecursor=3
- ▶ itol=0.5

| AA | a              | a'             | a,b      | b              | b'       | b,b'     | r              | r'             | r,b            | AA          |
|----|----------------|----------------|----------|----------------|----------|----------|----------------|----------------|----------------|-------------|
| I  | 98.698         | 0.000          | 0.000    | 114.091        | 0.000    | 0.000    | 2356.225       | 2310.088       | 2318.214       | I <b>21</b> |
| A  | 137.134        | 0.000          | 0.000    | 105.129        | 0.000    | 0.000    | 2221.140       | 2256.114       | 2205.130       | A <b>20</b> |
| Q  | 139.072        | 282.985        | 0.000    | 113.181        | 289.166  | 0.000    | 2191.101       | 2176.077       | 2154.043       | Q <b>19</b> |
| D  | 160.219        | 363.193        | 382.209  | 142.214        | 311.197  | 410.203  | 2024.052       | 2007.018       | 2006.034       | D <b>18</b> |
| F  | <b>547.267</b> | 629.261        | 629.277  | 379.263        | 626.256  | 627.272  | 1669.010       | 1661.993       | 1661.007       | F <b>17</b> |
| K  | 680.268        | 672.272        | 671.267  | 371.267        | 670.266  | 669.262  | 1761.945       | 1744.923       | 1743.939       | K <b>16</b> |
| V  | 700.446        | 674.419        | 722.432  | <b>618.441</b> | 661.414  | 660.438  | 1618.939       | 1600.912       | 1601.928       | V <b>15</b> |
| D  | 160.219        | <b>638.416</b> | 687.402  | <b>633.468</b> | 616.441  | 615.437  | 1518.792       | 1501.765       | 1500.781       | D <b>14</b> |
| L  | 101.829        | 101.829        | 101.840  | 104.822        | 102.822  | 102.824  | 1461.761       | 1466.739       | 1466.754       | L <b>13</b> |
| R  | 117.438        | 117.441        | 118.441  | 120.433        | 118.436  | 118.442  | 1291.662       | 1272.644       | 1272.659       | R <b>12</b> |
| F  | 1321.728       | 1304.700       | 1303.710 | 1248.721       | 1332.699 | 1331.711 | 1134.979       | 1117.950       | 1116.968       | F <b>11</b> |
| Q  | 1640.782       | 1442.760       | 1431.774 | 1477.769       | 1460.751 | 1459.769 | 687.511        | 687.504        | 686.500        | Q <b>10</b> |
| S  | 1638.617       | 1618.769       | 1612.882 | 1564.812       | 1547.785 | 1546.801 | <b>839.452</b> | <b>842.425</b> | 841.441        | S <b>9</b>  |
| A  | 1007.254       | 1000.252       | 1000.261 | 1000.264       | 1018.252 | 1017.258 | 771.250        | 766.250        | 764.249        | A <b>8</b>  |
| A  | 1016.291       | 1061.285       | 1060.282 | 1028.285       | 1060.292 | 1060.279 | <b>701.383</b> | 684.369        | 683.372        | A <b>7</b>  |
| I  | 1791.978       | 1774.969       | 1771.963 | 1819.970       | 1802.944 | 1801.950 | <b>630.346</b> | <b>633.319</b> | 632.330        | I <b>6</b>  |
| C  | 1648.907       | 1611.919       | 1611.960 | 1579.916       | 1609.904 | 1608.910 | <b>517.262</b> | <b>508.235</b> | <b>499.251</b> | C <b>5</b>  |
| A  | 1000.244       | 1001.237       | 1002.221 | 1048.229       | 1031.232 | 1030.218 | 461.242        | 461.242        | 460.240        | A <b>4</b>  |
| L  | 1001.116       | 1001.101       | 1001.111 | 1004.100       | 1001.111 | 1004.100 | <b>389.203</b> | 374.177        | 371.183        | L <b>3</b>  |
| Q  | 1011.170       | 1044.159       | 1043.150 | 1038.171       | 1072.145 | 1071.151 | <b>276.119</b> | <b>259.092</b> | <b>258.108</b> | Q <b>2</b>  |
| E  | 2000.219       | 2001.200       | 2000.200 | 2010.214       | 2001.187 | 2000.200 | 148.190        | 0.000          | 148.190        | E <b>1</b>  |

# sp | P84244 | H33\_MOUSE

IAQDFK <sup>Methyl</sup> 14.02 TDLRFQSAAILGALQE

- ▶ fragmentation table for charge state 2+
- ▶ specType=cid
- ▶ score=47.83
- ▶ F112503.dat
- ▶ query=q35740\_p1
- ▶ precursor=779.414090
- ▶ chargePrecursor=3
- ▶ itol=0.5

| AA    | a              | a'    | a-D            | b               | b'              | b-D             | y              | y'             | y-D            | AA             |      |
|-------|----------------|-------|----------------|-----------------|-----------------|-----------------|----------------|----------------|----------------|----------------|------|
| R1    | 451502         | 0.504 | 0.504          | 57340           | 0.504           | 0.504           | 1168810        | 1169121        | 1169121        | R21            |      |
| A1-2  | 791010         | 0.504 | 0.504          | 81569           | 0.504           | 0.504           | 11471074       | 11491501       | 11491501       | A205           |      |
| Q1-3  | 1431141        | 1.008 | 0.504          | 1491091         | 1.008           | 0.504           | 10176765       | 10181041       | 10181041       | Q104           |      |
| D1-4  | 2001111        | 1.512 | 1.008          | 1451111         | 1.512           | 1.008           | 89171202       | 8918101        | 8918101        | D110           |      |
| F1-5  | 3741141        | 2.016 | 1.512          | 3881141         | 2.016           | 1.512           | 4791140        | <b>955.013</b> | 955.013        | F111           |      |
| K1-6  | 5451131        | 2.520 | 2.016          | 3911101         | 2.520           | 2.016           | 3501195        | 351141         | 352195         | K116           |      |
| T1-7  | 6911111        | 3.024 | 2.520          | 691111          | 3.024           | 2.520           | 4021111        | 4031111        | 4031111        | T115           |      |
| D1-8  | 8011101        | 3.528 | 3.024          | 801111          | 3.528           | 3.024           | 4361111        | <b>750.859</b> | <b>751.386</b> | <b>750.894</b> | D114 |
| L1-9  | 1001101        | 4.032 | 3.528          | 1001111         | 4.032           | 3.528           | 1141111        | <b>693.872</b> | <b>693.380</b> | L113           |      |
| M1-10 | 1101111        | 4.536 | 4.032          | <b>1061111</b>  | 4.536           | 4.032           | 1141111        | 1141111        | 1141111        | M112           |      |
| R1-11 | 1201111        | 5.040 | 4.536          | <b>661.830</b>  | 5.040           | 4.536           | 1021111        | 1021111        | 1021111        | R111           |      |
| P1-12 | 1301111        | 5.544 | 5.040          | 1301111         | 5.544           | 5.040           | 1021111        | 1021111        | 1021111        | P111           |      |
| Q1-13 | 1401111        | 6.048 | 5.544          | <b>739.344</b>  | <b>730.880</b>  | <b>730.386</b>  | 1021111        | 1021111        | 1021111        | Q110           |      |
| S1-14 | <b>168.912</b> | 6.552 | <b>759.907</b> | 759.907         | 759.907         | 759.907         | 1021111        | 1021111        | 1021111        | S110           |      |
| A1-14 | 168.912        | 6.552 | 759.907        | <b>818.428</b>  | 818.428         | 818.428         | 1021111        | 1021111        | 1021111        | A110           |      |
| A1-15 | 330.824        | 6.552 | 818.428        | <b>851.947</b>  | 851.947         | 851.947         | 1021111        | 1021111        | 1021111        | A110           |      |
| I1-16 | 330.824        | 6.552 | 818.428        | <b>910.469</b>  | 910.469         | 910.469         | 1021111        | 1021111        | 1021111        | I110           |      |
| C1-17 | 330.824        | 6.552 | 818.428        | <b>938.989</b>  | 938.989         | 938.989         | <b>230.134</b> | 230.134        | 230.134        | C110           |      |
| L1-18 | 330.824        | 6.552 | 818.428        | <b>974.518</b>  | <b>966.005</b>  | <b>966.513</b>  | 230.134        | 230.134        | 230.134        | L110           |      |
| L1-19 | 1011101        | 1.008 | 1.008          | <b>1031.060</b> | <b>1022.547</b> | <b>1022.055</b> | 1021111        | 1021111        | 1021111        | L110           |      |
| Q1-20 | 1011101        | 1.008 | 1.008          | <b>1095.089</b> | 1095.089        | 1095.089        | 1021111        | 1021111        | 1021111        | Q110           |      |
| R1-21 | 1149111        | 1.512 | 1.512          | 1149111         | 1149111         | 1149111         | 1149111        | 1149111        | 1149111        | R110           |      |





# sp | P84244 | H33\_MOUSE

IAQDFK <sup>Methyl</sup> 14.02 TDLRFQSA AIGALQE

- ▶ fragmentation table for charge state 1+
- ▶ specType=cid
- ▶ score=41.21
- ▶ F112503.dat
- ▶ query=q35743.p1
- ▶ precursor=779.414150
- ▶ chargePrecursor=3
- ▶ itol=0.5

| AA | a       | a*      | a,b     | b              | b*      | b,b     | r              | r*       | r,b      | AA          |
|----|---------|---------|---------|----------------|---------|---------|----------------|----------|----------|-------------|
| I  | 98.698  | 0.000   | 0.000   | 114.091        | 0.000   | 0.000   | 2356.225       | 2316.088 | 2316.214 | I <b>21</b> |
| A  | 137.134 | 0.000   | 0.000   | 105.129        | 0.000   | 0.000   | 2221.140       | 2206.114 | 2206.130 | A <b>20</b> |
| Q  | 159.012 | 282.985 | 0.000   | 113.181        | 286.166 | 0.000   | 2351.101       | 2336.077 | 2336.093 | Q <b>19</b> |
| D  | 160.219 | 303.193 | 382.239 | 126.214        | 311.197 | 410.263 | 2624.076       | 2607.051 | 2606.034 | D <b>18</b> |
| F  | 167.207 | 320.201 | 420.277 | 137.263        | 326.256 | 427.272 | 3069.031       | 3051.001 | 3051.017 | F <b>17</b> |
| K  | 168.208 | 322.212 | 421.283 | 137.273        | 327.266 | 428.273 | 3161.045       | 3144.021 | 3144.037 | K <b>16</b> |
| V  | 170.046 | 324.213 | 422.283 | <b>813.468</b> | 328.264 | 429.274 | 3019.030       | 3002.011 | 3002.028 | V <b>15</b> |
| D  | 165.473 | 308.446 | 387.452 | 126.441        | 315.437 | 415.432 | 2518.751       | 2501.765 | 2501.781 | D <b>14</b> |
| L  | 161.827 | 301.520 | 380.540 | 124.524        | 312.521 | 412.521 | 2421.761       | 2404.789 | 2404.794 | L <b>13</b> |
| R  | 117.438 | 117.431 | 118.491 | 120.521        | 118.526 | 119.472 | 1281.000       | 1272.004 | 1272.010 | R <b>12</b> |
| F  | 131.728 | 134.700 | 133.710 | 134.721        | 133.709 | 133.711 | 1334.979       | 1317.962 | 1316.968 | F <b>11</b> |
| Q  | 164.782 | 162.731 | 163.774 | 167.769        | 166.751 | 165.769 | 167.511        | 167.494  | 166.920  | Q <b>10</b> |
| S  | 153.617 | 152.709 | 153.800 | 156.812        | 154.783 | 154.801 | 160.402        | 162.425  | 161.441  | S <b>9</b>  |
| A  | 107.254 | 106.272 | 105.343 | 107.364        | 105.322 | 104.322 | 101.426        | 102.429  | 101.406  | A <b>8</b>  |
| A  | 116.891 | 116.105 | 115.281 | 117.308        | 115.293 | 116.375 | <b>701.383</b> | 684.368  | 685.372  | A <b>7</b>  |
| D  | 171.978 | 177.408 | 171.861 | 173.979        | 172.944 | 181.980 | <b>630.346</b> | 613.319  | 612.319  | D <b>6</b>  |
| C  | 168.907 | 163.103 | 163.860 | 167.916        | 165.854 | 165.861 | <b>517.262</b> | 501.239  | 499.241  | C <b>5</b>  |
| A  | 100.034 | 100.031 | 100.021 | 104.029        | 103.102 | 103.018 | 463.262        | 445.254  | 444.258  | A <b>4</b>  |
| L  | 103.110 | 103.101 | 103.111 | 104.111        | 104.100 | 104.111 | <b>389.203</b> | 372.177  | 371.183  | L <b>3</b>  |
| Q  | 101.170 | 101.159 | 101.150 | 101.171        | 101.145 | 101.151 | <b>276.119</b> | 269.092  | 258.108  | Q <b>2</b>  |
| E  | 200.219 | 200.200 | 200.201 | 201.214        | 201.187 | 200.201 | 148.990        | 0.000    | 148.990  | E <b>1</b>  |

# sp | P84244 | H33\_MOUSE

IAQDFK <sup>Methyl</sup> 14.02 TDLRFQSA AIGALQE

- ▶ fragmentation table for charge state 2+
- ▶ specType=cid
- ▶ score=41.21
- ▶ F112503.dat
- ▶ query=q35743.p1
- ▶ precursor=779.414150
- ▶ chargePrecursor=3
- ▶ itol=0.5

| AA    | a        | a'       | a <sub>0</sub> | b        | b'       | b <sub>0</sub> | y        | y'       | y <sub>0</sub> | AA    |
|-------|----------|----------|----------------|----------|----------|----------------|----------|----------|----------------|-------|
| I(3)  | 43.602   | 0.500    | 0.500          | 37.941   | 0.504    | 0.500          | 1180.830 | 1180.330 | 1180.831       | I(2)  |
| A(2)  | 78.070   | 0.504    | 0.500          | 33.082   | 0.504    | 0.504          | 1112.034 | 1110.530 | 1110.030       | A(20) |
| G(3)  | 143.100  | 1.514    | 0.504          | 137.087  | 1.481    | 0.504          | 1038.181 | 1038.182 | 1038.182       | G(16) |
| D(4)  | 200.513  | 193.330  | 191.600        | 214.461  | 209.097  | 205.600        | 1010.520 | 1004.915 | 1003.512       | D(10) |
| F(5)  | 274.147  | 265.834  | 265.147        | 288.141  | 279.632  | 279.140        | 995.031  | 948.496  | 946.007        | F(17) |
| K(6)  | 345.201  | 339.069  | 336.197        | 359.200  | 350.687  | 350.195        | 881.431  | 872.869  | 872.471        | K(16) |
| L(7)  | 399.777  | 397.213  | 396.721        | 408.724  | 401.211  | 400.710        | 810.421  | 806.910  | 806.418        | L(15) |
| E(8)  | 451.240  | 444.727  | 444.235        | 467.211  | 460.724  | 459.232        | 750.890  | 715.340  | 703.894        | E(14) |
| L(9)  | 502.782  | 491.269  | 490.777        | 511.268  | 511.778  | 511.276        | 707.386  | 692.874  | 691.380        | L(13) |
| M(10) | 557.813  | 579.311  | 578.811        | 601.830  | 598.317  | 597.825        | 640.791  | 617.240  | 608.788        | M(12) |
| P(11) | 594.304  | 652.324  | 652.324        | 597.304  | 668.831  | 664.304        | 597.311  | 559.260  | 558.760        | P(11) |
| Q(12) | 671.396  | 690.887  | 690.391        | 739.394  | 730.880  | 730.388        | 490.290  | 493.740  | 493.234        | Q(10) |
| S(13) | 698.012  | 740.399  | 740.399        | 698.012  | 774.396  | 773.894        | 430.230  | 442.710  | 442.214        | S(9)  |
| A(14) | 804.918  | 810.819  | 810.819        | 814.426  | 808.825  | 808.825        | 360.749  | 319.260  | 319.760        | A(8)  |
| A(15) | 830.949  | 831.430  | 830.941        | 851.947  | 845.431  | 844.941        | 351.180  | 347.682  | 347.190        | A(7)  |
| I(16) | 888.461  | 887.938  | 887.450        | 910.469  | 901.975  | 901.483        | 311.630  | 307.181  | 306.711        | I(6)  |
| G(17) | 978.600  | 978.469  | 978.399        | 938.509  | 931.466  | 929.948        | 298.134  | 296.621  | 296.130        | G(5)  |
| A(18) | 990.521  | 992.083  | 991.513        | 974.518  | 974.005  | 969.513        | 230.824  | 222.110  | 221.618        | A(4)  |
| L(19) | 1017.681 | 1008.549 | 1008.011       | 1031.610 | 1022.547 | 1022.020       | 196.180  | 188.760  | 188.130        | L(3)  |
| Q(20) | 1081.692 | 1072.219 | 1071.682       | 1095.669 | 1086.516 | 1086.004       | 130.363  | 130.890  | 129.530        | Q(2)  |
| E(21) | 1148.513 | 1117.000 | 1116.600       | 1149.511 | 1151.000 | 1150.600       | 74.901   | 0.760    | 0.510          | E(1)  |



# sp | P68433 | H31\_MOUSE

IAQDFKTDLR <sup>Methyl</sup> 14.02 FQSSAVM <sup>Oxidation</sup> 15.99 ALQE

- ▶ fragmentation table for charge state 1+
- ▶ specType=cid
- ▶ score=49.40
- ▶ F112503.dat
- ▶ query=q36463\_p1
- ▶ precursor=810.078180
- ▶ chargePrecursor=3
- ▶ itol=0.5

| AA | a              | a*       | aΔ             | b              | b*       | bΔ        | y              | y*             | yΔ             | AA |
|----|----------------|----------|----------------|----------------|----------|-----------|----------------|----------------|----------------|----|
| I  | 36.000         | 0.000    | 0.000          | 114.000        | 0.000    | 0.000     | 2424.210       | 2411.100       | 2411.100       | I  |
| A  | 137.134        | 0.000    | 0.000          | 149.77         | 0.000    | 0.000     | 2111.131       | 2108.100       | 2107.113       | A  |
| G  | 159.150        | 189.310  | 1.000          | <b>313.187</b> | 208.100  | 0.000     | 2294.100       | 2272.010       | 2270.000       | G  |
| D  | 140.219        | 33.510   | 382.200        | 629.219        | 141.100  | 410.200   | 2118.010       | 2099.010       | 2098.027       | D  |
| F  | 147.207        | 130.201  | 539.219        | <b>575.282</b> | 1038.210 | 101.219   | 2001.010       | 1983.004       | 1983.000       | F  |
| K  | <b>675.382</b> | 808.206  | <b>657.372</b> | 705.372        | 1038.210 | 101.219   | 1818.044       | 1809.010       | 1805.012       | K  |
| L  | 176.170        | 700.408  | 704.412        | 1008.420       | 1197.100 | 108.412   | 1720.040       | 1709.010       | 1707.010       | L  |
| D  | 181.407        | 37.4.411 | <b>871.446</b> | 918.412        | 1001.425 | 101.411   | 1824.000       | 1807.773       | 1808.788       | D  |
| I  | 104.101        | 107.110  | 108.110        | 1012.100       | 1012.100 | 101.4.100 | 1528.770       | 1492.740       | 1491.762       | I  |
| R  | 1174.008       | 1177.011 | 1180.000       | 1222.010       | 1180.000 | 1184.011  | 1398.000       | 1379.000       | 1378.010       | R  |
| P  | 1121.720       | 1124.700 | 1125.710       | 1149.720       | 1132.000 | 1131.711  | 1326.572       | 1308.540       | 1308.562       | P  |
| Q  | 1449.700       | 1452.700 | 1451.700       | 1477.700       | 1460.700 | 1462.700  | 1070.500       | 1062.470       | 1061.490       | Q  |
| S  | 1138.017       | 1139.700 | 1142.000       | 1164.012       | 1147.100 | 1148.011  | <b>951.445</b> | <b>935.410</b> | 934.410        | S  |
| S  | 1013.100       | 1016.010 | 1019.010       | 1015.044       | 1016.011 | 1013.100  | 864.411        | <b>841.387</b> | 840.400        | S  |
| A  | 1094.000       | 1077.000 | 1076.000       | 1123.000       | 1105.004 | 1104.000  | 777.000        | 765.000        | 760.011        | A  |
| V  | 1173.004       | 1176.000 | 1173.004       | 1182.000       | 1184.000 | 1181.000  | <b>706.344</b> | <b>689.317</b> | 688.311        | V  |
| T  | 1149.000       | 1152.011 | 1151.000       | 1168.000       | 1171.000 | 1169.011  | <b>687.278</b> | 599.240        | 599.000        | T  |
| A  | 2012.107       | 1998.000 | 1994.000       | 2040.000       | 2022.000 | 2022.011  | 460.210        | 449.214        | 444.210        | A  |
| L  | 1201.111       | 1198.000 | 1197.100       | 1215.100       | 1216.000 | 1215.111  | <b>389.203</b> | 374.110        | 371.100        | L  |
| Q  | 2253.110       | 2236.110 | 2235.100       | 2260.100       | 2264.110 | 2263.114  | <b>276.110</b> | <b>259.092</b> | <b>258.100</b> | Q  |
| E  | 1102.112       | 1105.100 | 1104.100       | 1124.100       | 1125.100 | 1124.112  | 148.100        | 146.100        | 145.100        | E  |

# sp | P68433 | H31\_MOUSE

IAQDFKTDLR <sup>Methyl</sup>14.02 FQSSAVM <sup>Oxidation</sup>15.99 ALQE

- ▶ fragmentation table for charge state 2+
- ▶ specType=cid
- ▶ score=49.40
- ▶ F112503.dat
- ▶ query=q36463\_p1
- ▶ precursor=810.078180
- ▶ chargePrecursor=3
- ▶ itol=0.5

| AA    | a        | a'    | a <sub>0</sub> | b       | b'    | b <sub>0</sub> | y        | y'       | y <sub>0</sub> | AA    |
|-------|----------|-------|----------------|---------|-------|----------------|----------|----------|----------------|-------|
| I(3)  | 41.952   | 0.504 | 0.504          | 57.940  | 0.504 | 0.504          | 1174.612 | 1326.068 | 1326.068       | I(2)  |
| A(2)  | 78.070   | 0.504 | 0.504          | 93.060  | 0.504 | 0.504          | 1158.030 | 1149.537 | 1149.537       | A(25) |
| Q(3)  | 1143.100 | 1.504 | 0.504          | 131.090 | 1.504 | 0.504          | 1177.792 | 1114.030 | 1113.544       | Q(19) |
| D(4)  | 1508.513 | 1.504 | 1.504          | 214.611 | 1.504 | 1.504          | 1059.551 | 1059.055 | 1049.571       | D(16) |
| F(5)  | 174.547  | 2.004 | 0.504          | 168.141 | 2.004 | 0.504          | 1191.440 | 1081.039 | 1064.034       | F(17) |
| K(6)  | 1138.095 | 1.504 | 1.504          | 382.192 | 1.504 | 1.504          | 943.137  | 927.431  | 918.962        | K(16) |
| T(7)  | 488.119  | 2.004 | 1.504          | 462.719 | 2.004 | 1.504          | 1013.113 | 1013.617 | 1004.124       | T(15) |
| D(8)  | 1646.131 | 1.504 | 1.504          | 457.231 | 1.504 | 1.504          | 1011.234 | 1011.738 | 1002.245       | D(14) |
| L(9)  | 1022.774 | 1.504 | 1.504          | 483.762 | 1.504 | 1.504          | 1017.266 | 1017.770 | 1008.281       | L(13) |
| M(10) | 1037.819 | 1.504 | 1.504          | 510.293 | 1.504 | 1.504          | 1012.279 | 1012.783 | 1003.298       | M(12) |
| F(11) | 1054.367 | 1.504 | 1.504          | 536.824 | 1.504 | 1.504          | 1013.310 | 1013.814 | 1004.329       | F(11) |
| Q(12) | 725.394  | 1.504 | 1.504          | 563.355 | 1.504 | 1.504          | 1014.341 | 1014.845 | 1005.359       | Q(10) |
| S(13) | 1080.912 | 1.504 | 1.504          | 589.886 | 1.504 | 1.504          | 1015.372 | 1015.876 | 1006.391       | S(9)  |
| S(14) | 1114.458 | 1.504 | 1.504          | 616.417 | 1.504 | 1.504          | 1016.403 | 1016.907 | 1007.421       | S(8)  |
| A(15) | 847.947  | 1.504 | 1.504          | 642.948 | 1.504 | 1.504          | 1017.434 | 1017.938 | 1008.451       | A(7)  |
| V(16) | 1097.481 | 1.504 | 1.504          | 669.479 | 1.504 | 1.504          | 1018.465 | 1018.969 | 1009.481       | V(6)  |
| T(17) | 1139.019 | 1.504 | 1.504          | 696.010 | 1.504 | 1.504          | 1019.496 | 1019.999 | 1010.511       | T(5)  |
| A(18) | 1108.517 | 1.504 | 1.504          | 722.541 | 1.504 | 1.504          | 1020.527 | 1021.031 | 1011.541       | A(4)  |
| L(19) | 1083.059 | 1.504 | 1.504          | 749.072 | 1.504 | 1.504          | 1021.558 | 1022.062 | 1012.571       | L(3)  |
| Q(20) | 1127.600 | 1.504 | 1.504          | 775.603 | 1.504 | 1.504          | 1022.589 | 1023.093 | 1013.601       | Q(2)  |
| D(21) | 1116.103 | 1.504 | 1.504          | 802.134 | 1.504 | 1.504          | 1023.620 | 1024.124 | 1014.631       | D(1)  |

# sp | P62806 | H4\_MOUSE

[Acetyl]SGRGKGGKGLGKGGAKRHRK Trimethyl VLRD  
42.05

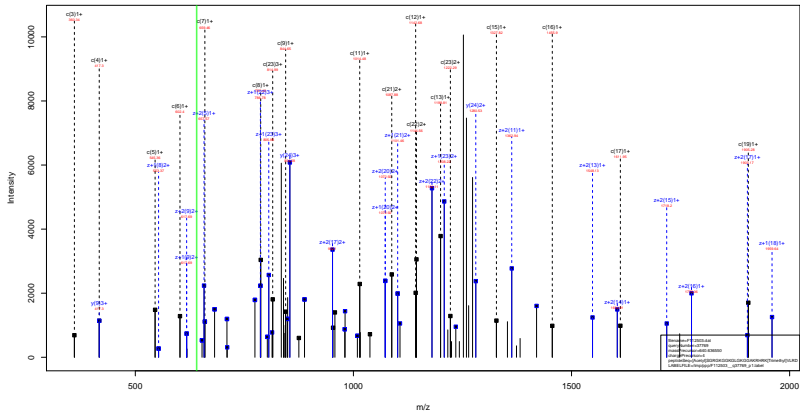

# sp | P62806 | H4\_MOUSE

[Acetyl]SGRGKGGKGLGKGGAKRHRK<sup>Trimethyl</sup>VLRD  
42.05

- ▶ fragmentation table for charge state 1+
- ▶ specType=etd
- ▶ score=107.32
- ▶ F112503.dat
- ▶ query=q37769\_p1
- ▶ precursor=640.636550
- ▶ chargePrecursor=4
- ▶ itol=0.5

| AA | c  | y               | z+1      | z+2             | z               | AA       |       |
|----|----|-----------------|----------|-----------------|-----------------|----------|-------|
| S  | 1  | 147.676         | 2509.518 | 2543.489        | 0.000           | 2542.491 | S[24] |
| G  | 2  | 204.098         | 2430.475 | 2414.457        | 0.000           | 2413.449 | G[23] |
| R  | 3  | <b>368.199</b>  | 2373.464 | 2367.435        | 2358.443        | 2366.427 | R[22] |
| G  | 4  | <b>417.230</b>  | 2217.953 | 2200.334        | 2202.342        | 2200.328 | G[21] |
| K  | 5  | <b>545.315</b>  | 2160.331 | 2144.313        | 2145.320        | 2143.305 | K[20] |
| G  | 6  | <b>602.337</b>  | 2032.236 | 2016.218        | 2017.225        | 2015.210 | G[19] |
| G  | 7  | <b>659.358</b>  | 1975.215 | <b>1959.196</b> | 1960.204        | 1958.188 | G[18] |
| K  | 8  | <b>787.453</b>  | 1918.193 | 1902.175        | <b>1903.182</b> | 1901.167 | K[17] |
| G  | 9  | <b>844.475</b>  | 1790.098 | 1774.080        | <b>1775.087</b> | 1773.072 | G[16] |
| L  | 10 | <b>927.559</b>  | 1733.077 | 1717.058        | <b>1718.066</b> | 1716.050 | L[15] |
| G  | 11 | <b>1014.580</b> | 1619.993 | 1603.974        | <b>1604.982</b> | 1602.966 | G[14] |
| K  | 12 | <b>1142.675</b> | 1562.971 | 1546.953        | <b>1547.960</b> | 1545.945 | K[13] |
| G  | 13 | <b>1199.697</b> | 1434.876 | 1418.858        | <b>1419.866</b> | 1417.850 | G[12] |
| G  | 14 | 1256.718        | 1377.855 | 1361.836        | <b>1362.844</b> | 1360.828 | G[11] |
| A  | 15 | <b>1327.795</b> | 1320.833 | 1304.815        | 1305.823        | 1303.807 | A[10] |
| R  | 16 | <b>1455.850</b> | 1249.796 | 1233.778        | <b>1234.785</b> | 1232.770 | R[9]  |
| R  | 17 | <b>1611.951</b> | 1121.701 | 1105.683        | <b>1106.691</b> | 1104.675 | R[8]  |
| H  | 18 | 1749.010        | 995.600  | 949.582         | 950.589         | 948.574  | H[7]  |
| R  | 19 | <b>1905.111</b> | 838.541  | 812.523         | <b>813.530</b>  | 811.515  | R[6]  |
| K  | 20 | 2075.253        | 672.440  | 656.422         | <b>657.429</b>  | 655.414  | K[5]  |
| V  | 21 | 2174.322        | 502.298  | 486.280         | 487.287         | 485.272  | V[4]  |
| L  | 22 | 2287.406        | 403.232  | 387.214         | 388.219         | 386.203  | L[3]  |
| R  | 23 | 2443.507        | 286.146  | 274.127         | 275.135         | 273.119  | R[2]  |
| D  | 24 | 2598.534        | 134.045  | 118.026         | 119.034         | 117.018  | D[1]  |



# sp | P62806 | H4\_MOUSE

[Acetyl]SGRGKGGKGLGKGGAKRHRK<sup>Trimethyl</sup>VLRD  
42.05

- ▶ fragmentation table for charge state 2+
- ▶ specType=etd
- ▶ score=107.32
- ▶ F112503.dat
- ▶ query=q37769\_p1
- ▶ precursor=640.636550
- ▶ chargePrecursor=4
- ▶ itol=0.5

| AA |    | c               | y               | z+1             | z+2             | z        | AA    |
|----|----|-----------------|-----------------|-----------------|-----------------|----------|-------|
| S  | 1  | 74.042          | <b>1280.263</b> | 1272.259        | 0.904           | 1271.449 | S(24) |
| G  | 2  | 102.553         | 1215.741        | <b>1207.732</b> | 0.904           | 1207.228 | G(23) |
| R  | 3  | 180.603         | 1187.213        | 1179.257        | <b>1179.725</b> | 1178.717 | R(22) |
| G  | 4  | 269.114         | 1109.185        | <b>1101.171</b> | <b>1101.975</b> | 1100.667 | G(21) |
| K  | 5  | 273.161         | 1080.060        | <b>1072.660</b> | <b>1073.164</b> | 1072.158 | K(20) |
| G  | 6  | 351.672         | 1016.623        | <b>1008.612</b> | <b>1009.116</b> | 1008.108 | G(19) |
| G  | 7  | 330.193         | 988.111         | <b>980.102</b>  | <b>980.606</b>  | 979.599  | G(18) |
| K  | 8  | 394.230         | 959.600         | 951.591         | <b>952.095</b>  | 951.087  | K(17) |
| G  | 9  | 422.741         | 895.513         | <b>887.543</b>  | <b>888.047</b>  | 887.040  | G(16) |
| L  | 10 | 479.283         | 867.042         | 859.033         | 859.537         | 858.529  | L(15) |
| G  | 11 | 507.794         | 818.500         | <b>802.491</b>  | <b>802.995</b>  | 801.987  | G(14) |
| K  | 12 | 571.841         | 781.989         | <b>773.980</b>  | <b>774.484</b>  | 773.476  | K(13) |
| G  | 13 | 600.352         | 717.942         | <b>709.932</b>  | <b>710.436</b>  | 709.429  | G(12) |
| G  | 14 | 628.863         | 689.431         | <b>681.422</b>  | <b>681.926</b>  | 680.918  | G(11) |
| A  | 15 | 664.381         | 660.920         | <b>652.911</b>  | <b>653.415</b>  | 652.407  | A(10) |
| R  | 16 | 708.409         | 629.408         | <b>612.392</b>  | <b>612.896</b>  | 611.889  | R(9)  |
| R  | 17 | 806.479         | 561.354         | <b>553.345</b>  | <b>553.849</b>  | 552.841  | R(8)  |
| H  | 18 | <b>875.009</b>  | 483.304         | 475.294         | 475.798         | 474.791  | H(7)  |
| R  | 19 | <b>953.059</b>  | 414.774         | 406.765         | 407.269         | 406.261  | R(6)  |
| K  | 20 | <b>1038.130</b> | 336.724         | 328.714         | 329.218         | 328.211  | K(5)  |
| V  | 21 | <b>1087.065</b> | 251.663         | 243.653         | 244.147         | 243.140  | V(4)  |
| L  | 22 | <b>1144.202</b> | 202.119         | 194.109         | 194.613         | 193.605  | L(3)  |
| R  | 23 | <b>1222.257</b> | 145.577         | 137.567         | 138.071         | 137.063  | R(2)  |
| D  | 24 | 1279.771        | 67.526          | 59.517          | 60.021          | 59.013   | D(1)  |

# sp | P62806 | H4\_MOUSE

[Acetyl]SGRGKGGKGLGKGGAKRHRK<sup>Trimethyl</sup>VLRD  
42.05

- ▶ fragmentation table for charge state 3+
- ▶ specType=etd
- ▶ score=107.32
- ▶ F112503.dat
- ▶ query=q37769\_p1
- ▶ precursor=640.636550
- ▶ chargePrecursor=4
- ▶ itol=0.5

| AA    | c              | y              | z+1            | z+2            | z              | AA    |
|-------|----------------|----------------|----------------|----------------|----------------|-------|
| S[1]  | 49.697         | <b>853.844</b> | <b>648.505</b> | 0.672          | <b>848.169</b> | S[24] |
| G[2]  | 58.704         | 810.830        | <b>805.490</b> | 0.672          | 805.154        | G[23] |
| R[3]  | 120.738        | 791.821        | <b>786.483</b> | <b>786.819</b> | 786.147        | R[22] |
| G[4]  | 139.745        | 739.789        | 734.450        | 734.785        | 734.114        | G[21] |
| K[5]  | 182.443        | 720.782        | 715.442        | 715.778        | 715.106        | K[20] |
| G[6]  | 201.450        | 678.084        | 672.744        | 673.080        | 672.408        | G[19] |
| G[7]  | 220.458        | <b>659.076</b> | 653.737        | 654.073        | <b>653.401</b> | G[18] |
| K[8]  | 263.156        | 640.069        | 634.730        | 635.066        | 634.394        | K[17] |
| G[9]  | 282.163        | 597.371        | 592.031        | 592.367        | 591.695        | G[16] |
| L[10] | 319.858        | 678.364        | 573.024        | 573.360        | 572.688        | L[15] |
| G[11] | 338.865        | 540.660        | 535.320        | 535.656        | 534.984        | G[14] |
| K[12] | 381.563        | 521.662        | 516.322        | 516.658        | 515.986        | K[13] |
| G[13] | 400.570        | 478.964        | 473.624        | 473.960        | 473.288        | G[12] |
| G[14] | 419.578        | 459.957        | 454.617        | 454.953        | 454.281        | G[11] |
| A[15] | 443.257        | 440.949        | 435.610        | 435.946        | 435.274        | A[10] |
| K[16] | 485.955        | <b>417.270</b> | 411.931        | 412.267        | 411.595        | K[9]  |
| R[17] | 537.989        | 374.572        | 369.232        | 369.568        | 368.896        | R[8]  |
| H[18] | 583.675        | 322.538        | 317.199        | 317.535        | 316.863        | H[7]  |
| R[19] | 635.709        | 276.852        | 271.512        | 271.848        | 271.176        | R[6]  |
| K[20] | 692.423        | 224.818        | 219.478        | 219.815        | 219.143        | K[5]  |
| V[21] | 725.445        | 168.104        | 162.764        | 163.101        | 162.429        | V[4]  |
| L[22] | 763.140        | 135.082        | 129.742        | 130.078        | 129.406        | L[3]  |
| R[23] | <b>815.174</b> | 97.387         | 92.047         | 92.383         | 91.711         | R[2]  |
| D[24] | 853.516        | 45.353         | 40.014         | 40.349         | 39.678         | D[1]  |



# sp | P62806 | H4\_MOUSE

[Acetyl]SGRGKGGKGLGKGGAKRHRK<sup>Trimethyl</sup>VLRD  
42.05

- ▶ fragmentation table for charge state 1+
- ▶ specType=etd
- ▶ score=92.75
- ▶ F112503.dat
- ▶ query=q37770\_p1
- ▶ precursor=640.636920
- ▶ chargePrecursor=4
- ▶ itol=0.5

| AA    | c               | y        | z+1             | z+2             | z        | AA    |
|-------|-----------------|----------|-----------------|-----------------|----------|-------|
| S[1]  | 147.076         | 2509.518 | 2541.489        | 0.000           | 2542.491 | S[24] |
| G[2]  | 204.098         | 2430.475 | 2414.457        | 0.000           | 2413.449 | G[23] |
| R[3]  | <b>368.199</b>  | 2373.464 | 2367.435        | 2358.443        | 2366.427 | R[22] |
| G[4]  | <b>417.230</b>  | 2217.953 | 2200.334        | 2202.342        | 2200.328 | G[21] |
| K[5]  | <b>545.315</b>  | 2160.331 | 2144.313        | 2145.320        | 2143.305 | K[20] |
| G[6]  | <b>602.337</b>  | 2032.236 | 2016.218        | 2017.225        | 2015.210 | G[19] |
| G[7]  | <b>659.358</b>  | 1975.215 | 1959.196        | <b>1960.204</b> | 1958.188 | G[18] |
| K[8]  | <b>787.453</b>  | 1918.193 | 1902.175        | 1903.182        | 1901.167 | K[17] |
| G[9]  | <b>844.475</b>  | 1790.096 | 1774.080        | 1775.087        | 1773.072 | G[16] |
| L[10] | <b>927.559</b>  | 1733.077 | 1717.060        | <b>1718.066</b> | 1716.050 | L[15] |
| G[11] | <b>1014.580</b> | 1619.993 | 1603.974        | <b>1604.982</b> | 1602.966 | G[14] |
| K[12] | 1142.675        | 1562.971 | 1546.953        | <b>1547.960</b> | 1545.945 | K[13] |
| G[13] | <b>1199.697</b> | 1434.876 | 1418.858        | <b>1419.866</b> | 1417.850 | G[12] |
| G[14] | 1256.718        | 1377.855 | 1361.836        | <b>1362.844</b> | 1360.828 | G[11] |
| A[15] | <b>1327.795</b> | 1320.833 | 1304.815        | 1305.823        | 1303.807 | A[10] |
| R[16] | <b>1435.930</b> | 1249.796 | 1233.778        | <b>1234.785</b> | 1232.770 | R[9]  |
| R[17] | 1631.951        | 1121.701 | <b>1105.683</b> | 1106.691        | 1104.675 | R[8]  |
| H[18] | 1749.010        | 995.600  | 989.582         | 990.589         | 988.574  | H[7]  |
| R[19] | 1908.111        | 828.541  | 812.523         | <b>813.530</b>  | 811.515  | R[6]  |
| R[20] | 2075.253        | 672.440  | 656.422         | <b>657.429</b>  | 655.414  | R[5]  |
| V[21] | 2174.322        | 502.298  | 486.280         | 487.287         | 485.272  | V[4]  |
| L[22] | 2287.406        | 403.232  | 387.213         | <b>388.219</b>  | 386.203  | L[3]  |
| R[23] | 2443.507        | 298.146  | 274.127         | <b>275.135</b>  | 273.119  | R[2]  |
| D[24] | 2598.534        | 134.045  | 118.026         | 119.034         | 117.018  | D[1]  |

# sp | P62806 | H4\_MOUSE

[Acetyl]SGRGKGGKGLGKGGAKRHRK<sup>Trimethyl</sup>VLRD  
42.05

- ▶ fragmentation table for charge state 2+
- ▶ specType=etd
- ▶ score=92.75
- ▶ F112503.dat
- ▶ query=q37770\_p1
- ▶ precursor=640.636920
- ▶ chargePrecursor=4
- ▶ itol=0.5

| AA    | c               | y               | z+1             | z+2             | z              | AA    |
|-------|-----------------|-----------------|-----------------|-----------------|----------------|-------|
| S[1]  | 74.042          | <b>1280.263</b> | 1272.259        | 0.504           | 1271.449       | S[24] |
| G[2]  | 102.553         | 1215.741        | 1207.732        | 0.504           | 1207.238       | G[23] |
| R[3]  | 180.603         | 1187.215        | 1179.222        | <b>1179.725</b> | 1178.717       | R[22] |
| G[4]  | 269.114         | 1109.185        | <b>1101.171</b> | <b>1101.975</b> | 1100.667       | G[21] |
| K[5]  | 273.161         | 1080.060        | <b>1072.660</b> | <b>1073.164</b> | 1072.156       | K[20] |
| G[6]  | 351.672         | 1016.622        | 1008.612        | 1000.116        | 1008.108       | G[19] |
| G[7]  | 330.193         | 988.111         | <b>980.102</b>  | <b>980.606</b>  | 979.599        | G[18] |
| K[8]  | 394.230         | 959.600         | <b>951.591</b>  | <b>952.095</b>  | 951.087        | K[17] |
| G[9]  | 422.741         | 895.513         | <b>887.543</b>  | <b>888.047</b>  | 887.040        | G[16] |
| L[10] | 479.293         | 867.042         | 859.033         | 859.537         | 858.529        | L[15] |
| G[11] | 507.794         | 818.500         | <b>802.491</b>  | <b>802.995</b>  | 801.987        | G[14] |
| K[12] | 571.841         | 781.980         | <b>773.980</b>  | <b>774.484</b>  | 773.476        | K[13] |
| G[13] | 600.352         | 717.942         | <b>709.932</b>  | <b>710.436</b>  | 709.429        | G[12] |
| G[14] | 628.863         | 689.431         | <b>681.422</b>  | <b>681.926</b>  | 680.918        | G[11] |
| A[15] | 664.381         | 660.920         | <b>652.911</b>  | 653.415         | <b>652.407</b> | A[10] |
| R[16] | 708.208         | 629.400         | <b>617.392</b>  | <b>617.896</b>  | <b>616.889</b> | R[9]  |
| R[17] | <b>806.479</b>  | 561.354         | <b>553.345</b>  | <b>553.849</b>  | 552.841        | R[8]  |
| H[18] | <b>875.009</b>  | 483.304         | 475.294         | 475.798         | 474.791        | H[7]  |
| R[19] | <b>953.059</b>  | 414.774         | 406.765         | 407.269         | 406.261        | R[6]  |
| K[20] | <b>1038.130</b> | 336.724         | 328.714         | 329.218         | 328.211        | K[5]  |
| V[21] | <b>1087.865</b> | 251.663         | 243.653         | 244.147         | 243.140        | V[4]  |
| L[22] | <b>1144.207</b> | 202.119         | 194.109         | 194.613         | 193.605        | L[3]  |
| R[23] | 1222.257        | 145.577         | 137.567         | 138.071         | 137.063        | R[2]  |
| D[24] | 1279.771        | 67.526          | 59.517          | 60.021          | 59.013         | D[1]  |

# sp | P62806 | H4\_MOUSE

[Acetyl]SGRGKGGKGLGKGGAKRHRK<sup>Trimethyl</sup>VLRD  
42.05

- ▶ fragmentation table for charge state 3+
- ▶ specType=etd
- ▶ score=92.75
- ▶ F112503.dat
- ▶ query=q37770.p1
- ▶ precursor=640.636920
- ▶ chargePrecursor=4
- ▶ itol=0.5

| AA    | c              | y              | z+1            | z+2            | z              | AA    |
|-------|----------------|----------------|----------------|----------------|----------------|-------|
| S[1]  | 49.697         | <b>853.844</b> | <b>848.505</b> | 0.672          | <b>848.169</b> | S[24] |
| G[2]  | 58.704         | 810.830        | 805.490        | 0.672          | 805.154        | G[23] |
| R[3]  | 120.738        | 791.823        | <b>786.483</b> | <b>786.819</b> | 786.147        | R[22] |
| G[4]  | 139.745        | 739.789        | 734.450        | 734.785        | 734.114        | G[21] |
| K[5]  | 182.443        | 720.782        | 715.442        | 715.778        | 715.106        | K[20] |
| G[6]  | 201.450        | 678.084        | 672.744        | 673.080        | 672.408        | G[19] |
| G[7]  | 220.458        | <b>659.076</b> | 653.737        | 654.073        | 653.401        | G[18] |
| K[8]  | 263.156        | 640.069        | 634.730        | 635.066        | 634.394        | K[17] |
| G[9]  | 282.163        | 597.371        | 592.031        | 592.367        | 591.695        | G[16] |
| L[10] | 319.858        | 678.364        | 573.024        | 573.360        | 572.688        | L[15] |
| G[11] | 338.865        | 540.660        | 535.320        | 535.656        | 534.984        | G[14] |
| K[12] | 381.563        | 521.662        | 516.322        | 516.658        | 515.986        | K[13] |
| G[13] | 400.570        | 478.964        | 473.624        | 473.960        | 473.288        | G[12] |
| G[14] | 419.578        | 459.957        | 454.617        | 454.953        | 454.281        | G[11] |
| A[15] | 443.257        | 440.949        | 435.610        | 435.946        | 435.274        | A[10] |
| K[16] | 485.955        | <b>417.270</b> | 411.931        | 412.267        | 411.595        | K[9]  |
| R[17] | 537.989        | 374.572        | 369.232        | 369.568        | 368.896        | R[8]  |
| H[18] | 583.675        | 322.538        | 317.199        | 317.535        | 316.863        | H[7]  |
| R[19] | 635.709        | 276.852        | 271.512        | 271.848        | 271.176        | R[6]  |
| K[20] | 692.423        | 224.818        | 219.478        | 219.815        | 219.143        | K[5]  |
| V[21] | 725.445        | 168.104        | 162.764        | 163.101        | 162.429        | V[4]  |
| L[22] | 763.140        | 135.082        | 129.742        | 130.078        | 129.406        | L[3]  |
| R[23] | <b>815.174</b> | 97.387         | 92.047         | 92.383         | 91.711         | R[2]  |
| D[24] | 853.516        | 45.353         | 40.014         | 40.349         | 39.678         | D[1]  |

# sp | P62806 | H4\_MOUSE

[Acetyl]SGRGKGGKGLGKGGAKRHRK Trimethyl VLRD  
42.05

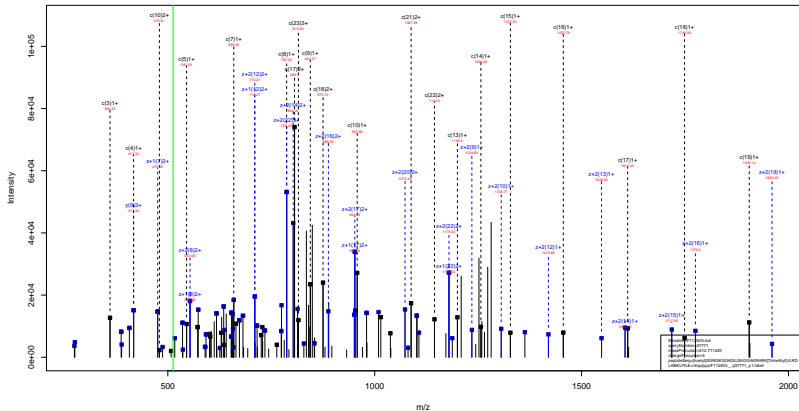

# sp | P62806 | H4\_MOUSE

[Acetyl]SGRGKGGKGLGKGGAKRHRK<sup>Trimethyl</sup>VLRD  
42.05

- ▶ fragmentation table for charge state 1+
- ▶ specType=etd
- ▶ score=122.03
- ▶ F112503.dat
- ▶ query=q37771.p1
- ▶ precursor=512.711420
- ▶ chargePrecursor=5
- ▶ itol=0.5

| AA    | c               | y              | z+1            | z+2             | z        | AA    |
|-------|-----------------|----------------|----------------|-----------------|----------|-------|
| S[1]  | 167.076         | 2559.518       | 2543.490       | 0.000           | 2542.491 | S[24] |
| G[2]  | 224.598         | 2430.475       | 2414.457       | 0.000           | 2413.449 | G[23] |
| H[3]  | <b>360.199</b>  | 2373.454       | 2357.438       | 2355.443        | 2356.427 | H[22] |
| G[4]  | <b>417.220</b>  | 2217.353       | 2201.334       | 2202.342        | 2200.325 | G[21] |
| K[5]  | <b>545.115</b>  | 2160.311       | 2144.311       | 2145.320        | 2143.305 | K[20] |
| G[6]  | <b>602.337</b>  | 2032.238       | 2016.218       | 2017.225        | 2015.210 | G[19] |
| G[7]  | <b>659.358</b>  | 1975.215       | 1959.190       | <b>1960.204</b> | 1958.188 | G[18] |
| K[8]  | <b>787.453</b>  | 1918.193       | 1902.173       | 1903.182        | 1901.167 | K[17] |
| G[9]  | <b>844.475</b>  | 1790.098       | 1774.080       | <b>1775.087</b> | 1773.072 | G[16] |
| L[10] | <b>957.559</b>  | 1733.071       | 1717.059       | <b>1718.066</b> | 1716.056 | L[15] |
| G[11] | <b>1014.580</b> | 1619.993       | 1603.974       | <b>1604.982</b> | 1602.968 | G[14] |
| K[12] | 1142.075        | 1562.971       | 1546.953       | <b>1547.960</b> | 1545.945 | K[13] |
| G[13] | <b>1199.697</b> | 1434.878       | 1418.859       | <b>1419.866</b> | 1417.850 | G[12] |
| G[14] | <b>1256.718</b> | 1327.855       | 1311.830       | <b>1362.844</b> | 1360.828 | G[11] |
| A[15] | <b>1327.735</b> | 1220.833       | 1204.813       | <b>1305.823</b> | 1303.807 | A[10] |
| K[16] | <b>1435.850</b> | 1249.795       | 1233.773       | <b>1234.785</b> | 1232.770 | K[9]  |
| R[17] | <b>1611.951</b> | 1121.701       | 1105.683       | <b>1106.691</b> | 1104.675 | R[8]  |
| H[18] | <b>1749.010</b> | 995.605        | 949.582        | <b>950.589</b>  | 948.574  | H[7]  |
| R[19] | <b>1905.111</b> | <b>828.541</b> | 812.523        | <b>813.530</b>  | 811.515  | R[6]  |
| K[20] | 2075.253        | 672.440        | <b>656.422</b> | <b>657.429</b>  | 655.414  | K[5]  |
| V[21] | 2174.322        | 602.298        | 486.280        | <b>487.287</b>  | 485.272  | V[4]  |
| L[22] | 2287.406        | 461.216        | <b>387.211</b> | <b>388.219</b>  | 386.203  | L[3]  |
| D[23] | 2443.587        | 390.140        | <b>274.127</b> | <b>275.135</b>  | 273.119  | D[2]  |
| D[24] | 2558.534        | 134.045        | 118.026        | 119.034         | 117.018  | D[1]  |



# sp | P62806 | H4\_MOUSE

[Acetyl]SGRGKGGKGLGKGGAKRHRK<sup>Trimethyl</sup>VLRD  
42.05

- ▶ fragmentation table for charge state 2+
- ▶ specType=etd
- ▶ score=122.03
- ▶ F112503.dat
- ▶ query=q37771\_p1
- ▶ precursor=512.711420
- ▶ chargePrecursor=5
- ▶ itol=0.5

| AA    | c               | y               | z+1             | z+2             | z              | AA    |
|-------|-----------------|-----------------|-----------------|-----------------|----------------|-------|
| S[1]  | 74.042          | 1280.263        | 1272.259        | 0.504           | 1271.449       | S[24] |
| G[2]  | 102.553         | 1215.741        | 1207.732        | 0.504           | 1207.228       | G[23] |
| R[3]  | 180.603         | <b>1187.231</b> | <b>1179.221</b> | <b>1179.725</b> | 1178.717       | R[22] |
| G[4]  | 269.114         | 1179.185        | <b>1161.171</b> | <b>1161.675</b> | 1160.666       | G[21] |
| K[5]  | 273.161         | <b>1080.649</b> | 1072.640        | <b>1073.144</b> | 1072.136       | K[20] |
| G[6]  | 351.672         | 1016.622        | 1008.612        | <b>1009.116</b> | 1008.108       | G[19] |
| G[7]  | 330.163         | 968.111         | <b>960.102</b>  | <b>960.606</b>  | 959.596        | G[18] |
| K[8]  | 394.230         | 959.600         | <b>951.591</b>  | <b>952.095</b>  | <b>951.087</b> | K[17] |
| G[9]  | 427.741         | 895.513         | 887.503         | <b>888.047</b>  | 887.040        | G[16] |
| L[10] | <b>479.283</b>  | 861.942         | 853.933         | 855.931         | 854.923        | L[15] |
| G[11] | <b>507.794</b>  | 818.500         | 810.491         | <b>810.995</b>  | 809.987        | G[14] |
| K[12] | <b>571.841</b>  | 781.989         | <b>773.980</b>  | <b>774.484</b>  | 773.476        | K[13] |
| G[13] | <b>600.352</b>  | 717.942         | <b>709.932</b>  | <b>710.436</b>  | 709.429        | G[12] |
| G[14] | <b>628.863</b>  | 689.431         | <b>681.422</b>  | <b>681.926</b>  | 680.918        | G[11] |
| A[15] | <b>664.381</b>  | 669.920         | <b>653.911</b>  | <b>653.415</b>  | 652.407        | A[10] |
| R[16] | <b>728.429</b>  | <b>625.402</b>  | <b>617.392</b>  | <b>617.896</b>  | 616.889        | R[9]  |
| R[17] | <b>806.479</b>  | 561.354         | <b>553.345</b>  | <b>553.849</b>  | 552.841        | R[8]  |
| H[18] | <b>875.009</b>  | 483.304         | <b>475.294</b>  | <b>475.798</b>  | 474.791        | H[7]  |
| R[19] | <b>953.059</b>  | 414.774         | <b>406.765</b>  | <b>407.269</b>  | 406.261        | R[6]  |
| K[20] | <b>1038.130</b> | 336.724         | 328.714         | 329.218         | 328.211        | K[5]  |
| V[21] | <b>1087.665</b> | 251.663         | 243.653         | 244.147         | 243.140        | V[4]  |
| L[22] | <b>1144.207</b> | 202.110         | 194.100         | 194.613         | 193.605        | L[3]  |
| R[23] | 1222.257        | 145.577         | 137.567         | 138.071         | 137.063        | R[2]  |
| D[24] | 1279.771        | 67.526          | 59.517          | 60.021          | 59.013         | D[1]  |

# sp | P62806 | H4\_MOUSE

[Acetyl]SGRGKGGKGLGKGGAKRHRK<sup>Trimethyl</sup>VLRD  
42.05

- ▶ fragmentation table for charge state 3+
- ▶ specType=etd
- ▶ score=122.03
- ▶ F112503.dat
- ▶ query=q37771.p1
- ▶ precursor=512.711420
- ▶ chargePrecursor=5
- ▶ itol=0.5

| AA    | c              | y              | z+1            | z+2            | z              | AA    |
|-------|----------------|----------------|----------------|----------------|----------------|-------|
| S[1]  | 49.697         | <b>853.844</b> | 848.505        | 0.672          | 848.169        | S[24] |
| G[2]  | 58.704         | 810.830        | 805.490        | 0.672          | 805.154        | G[23] |
| R[3]  | 120.738        | 791.823        | 786.483        | <b>786.819</b> | 786.147        | R[22] |
| G[4]  | 139.745        | 739.789        | <b>734.450</b> | <b>734.785</b> | 734.114        | G[21] |
| K[5]  | 182.443        | 720.782        | <b>715.442</b> | <b>715.778</b> | 715.106        | K[20] |
| G[6]  | 201.450        | 678.084        | <b>672.744</b> | <b>673.080</b> | 672.408        | G[19] |
| G[7]  | 220.458        | <b>659.076</b> | <b>653.737</b> | <b>654.073</b> | <b>653.401</b> | G[18] |
| K[8]  | 263.156        | 640.069        | <b>634.730</b> | <b>635.066</b> | 634.394        | K[17] |
| G[9]  | 282.163        | 597.371        | <b>592.031</b> | <b>592.367</b> | 591.695        | G[16] |
| L[10] | 319.858        | 578.364        | <b>573.024</b> | <b>573.360</b> | 572.688        | L[15] |
| G[11] | 338.865        | 540.669        | <b>535.330</b> | <b>535.666</b> | 534.994        | G[14] |
| K[12] | 381.563        | 521.662        | 516.322        | <b>516.658</b> | 515.986        | K[13] |
| G[13] | 400.570        | 478.964        | 473.624        | 473.960        | 473.288        | G[12] |
| G[14] | 419.578        | 459.957        | 454.617        | 454.953        | 454.281        | G[11] |
| A[15] | 443.257        | 440.949        | 435.610        | 435.946        | 435.274        | A[10] |
| K[16] | 485.955        | <b>417.270</b> | 411.931        | 412.267        | 411.595        | K[9]  |
| R[17] | 537.989        | 374.572        | 369.232        | 369.568        | 368.896        | R[8]  |
| H[18] | 583.675        | 322.538        | 317.199        | 317.535        | 316.863        | H[7]  |
| R[19] | <b>635.709</b> | 276.852        | 271.512        | 271.848        | 271.176        | R[6]  |
| K[20] | 662.423        | 224.818        | 219.479        | 219.815        | 219.143        | K[5]  |
| V[21] | <b>725.445</b> | 168.104        | 162.765        | 163.101        | 162.429        | V[4]  |
| L[22] | <b>763.140</b> | 135.082        | 129.742        | 130.078        | 129.406        | L[3]  |
| R[23] | <b>815.174</b> | 97.387         | 92.047         | 92.383         | 91.711         | R[2]  |
| D[24] | <b>853.516</b> | 45.353         | 40.014         | 40.349         | 39.678         | D[1]  |

# sp | P62806 | H4\_MOUSE

[Acetyl]SGRGKGGKGLGKGGAKRHRK<sup>Trimethyl</sup>VLRD<sub>42.05</sub>

- ▶ fragmentation table for charge state 4+
- ▶ specType=etd
- ▶ score=122.03
- ▶ F112503.dat
- ▶ query=q37771.p1
- ▶ precursor=512.711420
- ▶ chargePrecursor=5
- ▶ itol=0.5

| AA    | c              | y       | z+1            | z+2            | z              | AA    |
|-------|----------------|---------|----------------|----------------|----------------|-------|
| S[1]  | 37.525         | 640.635 | <b>636.630</b> | 0.755          | 636.378        | S[24] |
| G[2]  | 51.780         | 608.374 | 604.370        | 0.755          | 604.118        | G[23] |
| R[3]  | 90.805         | 594.119 | <b>590.114</b> | <b>590.366</b> | <b>589.862</b> | R[22] |
| G[4]  | 105.061        | 555.094 | 551.089        | 551.341        | 550.837        | G[21] |
| K[5]  | 137.084        | 540.838 | 536.834        | 537.086        | <b>536.582</b> | K[20] |
| G[6]  | 151.340        | 508.815 | 504.810        | 505.062        | 504.558        | G[19] |
| G[7]  | 165.595        | 494.559 | 490.554        | 490.806        | 490.303        | G[18] |
| K[8]  | 197.619        | 480.304 | 476.299        | 476.551        | <b>476.047</b> | K[17] |
| G[9]  | 211.874        | 448.280 | 444.275        | 445.527        | 444.523        | G[16] |
| L[10] | 240.145        | 434.025 | 430.020        | 430.272        | 429.768        | L[15] |
| G[11] | 254.401        | 405.754 | 401.749        | 402.001        | 401.497        | G[14] |
| K[12] | 286.424        | 391.498 | <b>387.494</b> | 387.746        | <b>387.242</b> | K[13] |
| G[13] | 300.680        | 359.475 | 355.470        | 355.722        | 355.218        | G[12] |
| G[14] | 314.935        | 345.219 | 341.215        | 341.466        | 340.963        | G[11] |
| A[15] | 332.694        | 330.964 | 326.959        | 327.211        | 326.707        | A[10] |
| K[16] | 364.718        | 313.205 | 309.200        | 309.452        | 308.948        | K[9]  |
| R[17] | 403.743        | 281.181 | 277.176        | 277.428        | 276.924        | R[8]  |
| H[18] | 438.008        | 242.156 | 238.151        | 238.403        | 237.899        | H[7]  |
| R[19] | 477.033        | 207.891 | 203.886        | 204.138        | 203.634        | R[6]  |
| K[20] | 519.569        | 158.866 | 154.861        | 155.113        | 154.609        | K[5]  |
| V[21] | 544.136        | 126.130 | 122.125        | 122.377        | 122.073        | V[4]  |
| L[22] | <b>572.607</b> | 101.563 | 97.558         | 97.810         | 97.306         | L[3]  |
| R[23] | 611.632        | 73.292  | 69.287         | 69.539         | 69.035         | R[2]  |
| D[24] | 640.389        | 34.267  | 30.262         | 30.514         | 30.010         | D[1]  |



# sp | P62806 | H4\_MOUSE

[Acetyl]SGR<sup>Methyl</sup><sub>14.02</sub> GKGGKGLGKGGAKRHRK<sup>Trimethyl</sup><sub>42.05</sub> VLRD

- ▶ fragmentation table for charge state 1+
- ▶ specType=etd
- ▶ score=113.75
- ▶ F112503.dat
- ▶ query=q37937\_p1
- ▶ precursor=644.140540
- ▶ chargePrecursor=4
- ▶ itol=0.5

| AA    | c               | y        | z+1             | z+2             | z        | AA    |
|-------|-----------------|----------|-----------------|-----------------|----------|-------|
| S[1]  | 147.076         | 2573.534 | 2557.515        | 0.000           | 2556.507 | S[24] |
| G[2]  | 204.098         | 2444.491 | 2428.472        | 0.000           | 2427.464 | G[23] |
| R[3]  | <b>374.215</b>  | 2387.469 | 2371.451        | 2372.459        | 2370.443 | R[22] |
| G[4]  | <b>431.236</b>  | 2317.953 | 2299.334        | 2292.342        | 2290.326 | G[21] |
| K[5]  | <b>559.331</b>  | 2160.331 | 2144.313        | 2145.320        | 2143.305 | K[20] |
| G[6]  | <b>616.353</b>  | 2032.236 | 2016.218        | 2017.225        | 2015.210 | G[19] |
| G[7]  | <b>673.374</b>  | 1975.215 | 1959.196        | <b>1960.204</b> | 1958.189 | G[18] |
| K[8]  | <b>801.469</b>  | 1918.193 | <b>1902.175</b> | 1903.182        | 1901.167 | K[17] |
| G[9]  | <b>858.490</b>  | 1790.098 | 1774.080        | <b>1775.087</b> | 1773.072 | G[16] |
| L[10] | <b>971.574</b>  | 1733.077 | 1717.058        | <b>1718.066</b> | 1716.050 | L[15] |
| G[11] | <b>1028.596</b> | 1619.993 | 1603.974        | <b>1604.982</b> | 1602.966 | G[14] |
| K[12] | <b>1156.691</b> | 1562.971 | 1546.953        | <b>1547.960</b> | 1545.945 | K[13] |
| G[13] | 1213.712        | 1434.876 | 1418.858        | <b>1419.866</b> | 1417.850 | G[12] |
| G[14] | <b>1270.734</b> | 1377.855 | 1361.836        | <b>1362.844</b> | 1360.828 | G[11] |
| A[15] | <b>1341.771</b> | 1320.833 | 1304.815        | 1305.823        | 1303.807 | A[10] |
| R[16] | 1409.886        | 1249.796 | 1233.778        | <b>1234.785</b> | 1232.770 | R[9]  |
| R[17] | 1625.967        | 1121.701 | 1105.683        | <b>1106.691</b> | 1104.675 | R[8]  |
| H[18] | <b>1763.026</b> | 995.600  | 989.582         | <b>990.589</b>  | 988.574  | H[7]  |
| R[19] | <b>1919.127</b> | 826.541  | 810.523         | <b>813.530</b>  | 811.515  | R[6]  |
| K[20] | 2089.269        | 672.440  | <b>656.422</b>  | <b>657.429</b>  | 655.414  | K[5]  |
| V[21] | 2188.437        | 502.298  | 486.280         | <b>487.287</b>  | 485.272  | V[4]  |
| L[22] | 2301.421        | 403.230  | 387.211         | <b>388.219</b>  | 386.203  | L[3]  |
| R[23] | 2457.523        | 290.146  | 274.127         | -75.135         | 273.110  | R[2]  |
| D[24] | 2572.550        | 134.045  | 118.026         | 119.034         | 117.018  | D[1]  |

# sp | P62806 | H4\_MOUSE

[Acetyl]SGR<sup>Methyl</sup><sub>14.02</sub> GKGGKGLGKGGAKRHRK<sup>Trimethyl</sup><sub>42.05</sub> VLRD

- ▶ fragmentation table for charge state 2+
- ▶ specType=etd
- ▶ score=113.75
- ▶ F112503.dat
- ▶ query=q37937\_p1
- ▶ precursor=644.140540
- ▶ chargePrecursor=4
- ▶ itol=0.5

| AA    | c               | y               | z+1             | z+2             | z              | AA    |
|-------|-----------------|-----------------|-----------------|-----------------|----------------|-------|
| S[1]  | 74.042          | <b>1287.270</b> | <b>1279.261</b> | 0.504           | 1278.757       | S[24] |
| G[2]  | 102.553         | <b>1222.749</b> | <b>1214.740</b> | 0.504           | 1214.236       | G[23] |
| R[3]  | 187.811         | <b>1194.238</b> | <b>1186.229</b> | <b>1186.733</b> | 1185.725       | R[22] |
| G[4]  | 218.322         | 1109.180        | <b>1101.171</b> | <b>1101.875</b> | 1100.667       | G[21] |
| K[5]  | 280.169         | 1080.060        | <b>1072.660</b> | <b>1073.164</b> | 1072.156       | K[20] |
| G[6]  | 308.680         | 1016.622        | 1008.612        | 1000.116        | 1008.108       | G[19] |
| G[7]  | 337.191         | 968.111         | 960.100         | <b>960.606</b>  | 979.596        | G[18] |
| K[8]  | 401.216         | <b>959.600</b>  | <b>951.591</b>  | <b>952.095</b>  | <b>951.087</b> | K[17] |
| G[9]  | 429.740         | 895.512         | <b>887.543</b>  | <b>888.047</b>  | 887.040        | G[16] |
| L[10] | 489.291         | 867.042         | <b>859.033</b>  | 859.537         | <b>858.529</b> | L[15] |
| G[11] | 514.802         | <b>810.500</b>  | <b>802.491</b>  | <b>802.995</b>  | <b>801.987</b> | G[14] |
| K[12] | 578.949         | 781.989         | <b>773.980</b>  | <b>774.484</b>  | 773.476        | K[13] |
| G[13] | 607.360         | 717.942         | <b>709.932</b>  | <b>710.436</b>  | 709.429        | G[12] |
| G[14] | 635.871         | 689.431         | <b>681.422</b>  | <b>681.926</b>  | 680.918        | G[11] |
| A[15] | 677.389         | 660.920         | 652.911         | 653.415         | 652.407        | A[10] |
| R[16] | 735.437         | 629.409         | <b>617.392</b>  | <b>617.896</b>  | <b>616.889</b> | R[9]  |
| R[17] | <b>813.487</b>  | 561.354         | <b>553.345</b>  | <b>553.849</b>  | 552.841        | R[8]  |
| R[18] | <b>882.017</b>  | 483.304         | 475.294         | 475.798         | 474.791        | R[7]  |
| R[19] | <b>960.067</b>  | 414.774         | 406.765         | 407.269         | 406.261        | R[6]  |
| K[20] | <b>1045.138</b> | 336.724         | 328.714         | 329.218         | 328.211        | K[5]  |
| V[21] | <b>1094.672</b> | 251.662         | 243.653         | 244.147         | 243.140        | V[4]  |
| L[22] | <b>1151.214</b> | 202.112         | 194.103         | 194.613         | 193.605        | L[3]  |
| R[23] | <b>1229.265</b> | 145.577         | 137.567         | 138.071         | 137.063        | R[2]  |
| D[24] | 1286.778        | 67.526          | 59.517          | 60.021          | 59.013         | D[1]  |

# sp | P62806 | H4\_MOUSE

[Acetyl]SGR<sup>Methyl</sup><sub>14.02</sub> GKGKGLGKGGAKRHRK<sup>Trimethyl</sup><sub>42.05</sub> VLRD

- ▶ fragmentation table for charge state 3+
- ▶ specType=etd
- ▶ score=113.75
- ▶ F112503.dat
- ▶ query=q37937.p1
- ▶ precursor=644.140540
- ▶ chargePrecursor=4
- ▶ itol=0.5

| AA    | c              | y              | z+1            | z+2            | z       | AA    |
|-------|----------------|----------------|----------------|----------------|---------|-------|
| S[1]  | 49.597         | <b>858.516</b> | <b>853.176</b> | 0.572          | 852.841 | S[24] |
| G[2]  | 58.704         | 815.502        | <b>810.162</b> | 0.572          | 809.826 | G[23] |
| R[3]  | 125.410        | 796.495        | <b>791.155</b> | <b>791.491</b> | 790.819 | R[22] |
| G[4]  | 144.417        | 739.789        | 734.450        | 734.785        | 734.114 | G[21] |
| K[5]  | 187.115        | 720.782        | 715.442        | 715.778        | 715.106 | K[20] |
| G[6]  | 206.122        | 678.084        | 672.744        | <b>673.080</b> | 672.408 | G[19] |
| G[7]  | 225.130        | 659.076        | 653.737        | 654.073        | 653.401 | G[18] |
| K[8]  | 267.828        | 640.069        | 634.730        | 635.066        | 634.394 | K[17] |
| G[9]  | 286.835        | 597.371        | 592.031        | 592.367        | 591.695 | G[16] |
| L[10] | 324.330        | 578.364        | 573.024        | 573.360        | 572.688 | L[15] |
| G[11] | 343.537        | 540.660        | 535.320        | 535.656        | 534.984 | G[14] |
| K[12] | 386.235        | 521.652        | 516.312        | 516.648        | 515.986 | K[13] |
| G[13] | 405.242        | 478.954        | 473.614        | 473.950        | 473.288 | G[12] |
| G[14] | 424.249        | 459.957        | 454.617        | 454.953        | 454.281 | G[11] |
| A[15] | 447.929        | 440.949        | 435.610        | 435.946        | 435.274 | A[10] |
| K[16] | 490.627        | 417.270        | 411.931        | 412.267        | 411.595 | K[9]  |
| R[17] | 542.661        | <b>374.572</b> | 369.232        | 369.568        | 368.896 | R[8]  |
| H[18] | 588.347        | 322.536        | 317.196        | 317.535        | 316.863 | H[7]  |
| R[19] | 640.381        | 276.892        | 271.552        | 271.888        | 271.216 | R[6]  |
| K[20] | 697.095        | 234.813        | 229.473        | 229.815        | 229.143 | K[5]  |
| V[21] | 730.117        | 188.194        | 182.854        | 183.191        | 182.529 | V[4]  |
| L[22] | 767.812        | 135.082        | 129.742        | 130.078        | 129.406 | L[3]  |
| R[23] | <b>819.846</b> | 97.387         | 92.047         | 92.383         | 91.711  | R[2]  |
| D[24] | 858.188        | 45.353         | 40.014         | 40.349         | 39.678  | D[1]  |

# sp | P27661 | H2AX\_MOUSE

SGR<sup>Trimethyl</sup><sub>42.05</sub> GKTGKARAKAKSRSSRAGLQFPVGRVHLLRKGHYAE

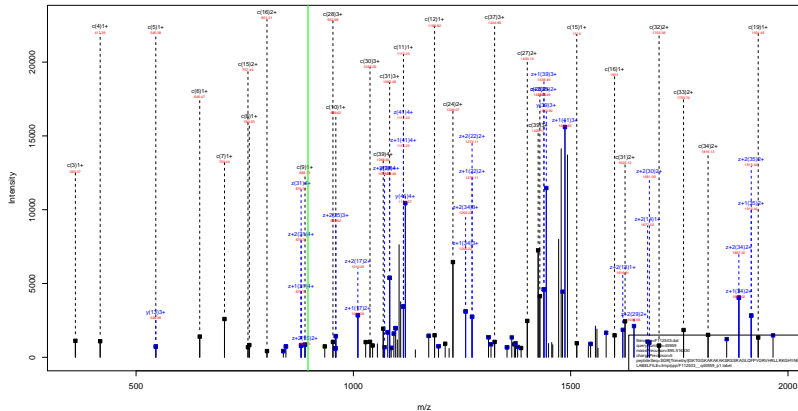



# sp | P27661 | H2AX\_MOUSE

SGR<sup>Trimethyl</sup><sub>42.05</sub> GKTGGKARAKAKSRSSRAGLQFPVGRVHLLRKGHYAE

- ▶ fragmentation table for charge state 1+
- ▶ specType=etd
- ▶ score=72.85
- ▶ F112503.dat
- ▶ query=q45959\_p1
- ▶ precursor=895.516330
- ▶ chargePrecursor=5
- ▶ itol=0.5

| AA   | c               | y               | z+1            | z+2             | z        | AA   |
|------|-----------------|-----------------|----------------|-----------------|----------|------|
| S 1  | 105.066         | 5473.552        | 4487.535       | 0.000           | 4486.925 | S 41 |
| G 2  | 162.087         | 4388.519        | 4370.501       | 0.000           | 4369.403 | G 40 |
| R 3  | <b>360.235</b>  | 4329.496        | 4311.479       | 4314.487        | 4312.471 | R 39 |
| G 4  | <b>417.257</b>  | 4131.350        | 4115.331       | 4116.339        | 4114.323 | G 38 |
| K 5  | <b>545.352</b>  | 4074.326        | 4058.310       | 4059.318        | 4057.302 | K 37 |
| T 6  | <b>646.399</b>  | 3946.234        | 3930.215       | 3931.223        | 3929.207 | T 36 |
| G 7  | <b>703.421</b>  | 3845.186        | 3829.167       | 3830.175        | 3828.159 | G 35 |
| G 8  | <b>760.442</b>  | 3788.164        | 3772.146       | 3773.153        | 3771.138 | G 34 |
| K 9  | <b>868.537</b>  | 3731.143        | 3715.124       | 3716.132        | 3714.116 | K 33 |
| A 10 | <b>959.574</b>  | 3663.048        | 3647.029       | 3648.037        | 3646.021 | A 32 |
| R 11 | <b>1115.676</b> | 3532.011        | 3515.992       | 3517.000        | 3514.984 | R 31 |
| A 12 | <b>1186.713</b> | 3375.910        | 3359.891       | 3360.899        | 3358.883 | A 30 |
| K 13 | 1314.588        | 3304.873        | 3288.854       | 3289.862        | 3287.846 | K 29 |
| A 14 | <b>1385.845</b> | 3176.778        | 3160.759       | 3161.767        | 3159.751 | A 28 |
| K 15 | <b>1513.940</b> | 3105.741        | 3089.722       | 3090.730        | 3088.714 | K 27 |
| S 16 | <b>1600.972</b> | 2977.640        | 2961.621       | 2962.629        | 2960.613 | S 26 |
| R 17 | 1757.673        | 2895.614        | 2879.595       | 2879.603        | 2877.587 | R 25 |
| S 18 | 1814.305        | 2734.513        | 2718.494       | 2719.502        | 2717.486 | S 24 |
| S 19 | <b>1931.137</b> | 2647.486        | 2631.467       | 2632.475        | 2630.459 | S 23 |
| R 20 | 2087.238        | 2560.448        | 2544.430       | 2545.437        | 2543.421 | R 22 |
| A 21 | 2158.475        | 2404.347        | 2388.329       | 2389.336        | 2387.321 | A 21 |
| G 22 | 2215.297        | 2333.310        | 2317.291       | 2318.299        | 2316.284 | G 20 |
| L 23 | 2328.381        | 2278.289        | 2262.270       | 2263.278        | 2261.262 | L 19 |
| G 24 | 2458.439        | 2183.250        | 2167.231       | 2168.239        | 2166.223 | G 18 |
| F 25 | 2603.508        | 2035.148        | 2019.129       | 2020.135        | 2018.120 | F 17 |
| P 26 | 2700.550        | 1888.078        | 1872.059       | 1873.067        | 1871.051 | P 16 |
| V 27 | 2799.629        | 1791.025        | 1775.006       | 1776.014        | 1774.998 | V 15 |
| G 28 | 2896.650        | 1691.950        | 1675.938       | <b>1676.945</b> | 1674.930 | G 14 |
| R 29 | 3012.751        | 1614.935        | 1618.916       | <b>1619.924</b> | 1617.908 | R 13 |
| V 30 | 3111.820        | 1478.834        | 1462.815       | 1463.823        | 1461.807 | V 12 |
| H 31 | 3248.879        | 1379.765        | 1363.747       | <b>1364.755</b> | 1362.739 | H 11 |
| R 32 | 3404.980        | 1242.707        | 1226.688       | 1227.695        | 1225.680 | R 10 |
| L 33 | 3518.064        | <b>1086.605</b> | 1070.587       | <b>1071.595</b> | 1069.579 | L 9  |
| L 34 | 3611.148        | 973.521         | 957.503        | <b>958.510</b>  | 956.495  | L 8  |
| R 35 | 3787.249        | 860.437         | <b>844.419</b> | 845.426         | 843.411  | R 7  |
| K 36 | 3815.344        | 764.358         | 748.337        | 749.345         | 747.329  | K 6  |
| G 37 | 3972.366        | 576.241         | 560.223        | 561.230         | 559.215  | G 5  |
| H 38 | 4109.424        | 519.220         | 503.201        | 504.209         | 502.193  | H 4  |
| V 39 | 4272.488        | 382.161         | 366.142        | 367.150         | 365.134  | V 3  |
| A 40 | 4343.525        | 219.080         | 203.079        | 204.087         | 202.071  | A 2  |
| E 41 | 4472.567        | 148.060         | 132.042        | 133.050         | 131.034  | E 1  |

# sp | P27661 | H2AX\_MOUSE

SGR<sup>Trimethyl</sup><sub>42.05</sub> GKTGGKARAKAKSRSSRAGLQFPVGRVHLLRKGHYAE

- ▶ fragmentation table for charge state 2+
- ▶ specType=etd
- ▶ score=72.85
- ▶ F112503.dat
- ▶ query=q45959\_p1
- ▶ precursor=895.516330
- ▶ chargePrecursor=5
- ▶ itol=0.5

| AA   | c               | y        | z+1             | z+2             | z        | AA   |
|------|-----------------|----------|-----------------|-----------------|----------|------|
| S 1  | 53.037          | 2237.279 | 2229.270        | 0.504           | 2228.766 | S 41 |
| G 2  | 81.547          | 2193.763 | 2185.754        | 0.504           | 2185.250 | G 40 |
| R 3  | 189.621         | 2105.253 | 2157.243        | 2157.747        | 2156.739 | R 39 |
| G 4  | 209.132         | 2066.179 | 2058.169        | 2058.673        | 2057.665 | G 38 |
| K 5  | 273.180         | 2037.568 | 2029.559        | 2030.162        | 2029.155 | K 37 |
| T 6  | 323.703         | 1973.620 | <b>1965.611</b> | 1966.115        | 1965.107 | T 36 |
| G 7  | 352.214         | 1923.097 | <b>1915.087</b> | <b>1915.591</b> | 1914.583 | G 35 |
| G 8  | 380.725         | 1894.580 | <b>1886.576</b> | <b>1887.080</b> | 1886.073 | G 34 |
| K 9  | 444.772         | 1806.075 | 1858.065        | <b>1858.570</b> | 1857.562 | K 33 |
| A 10 | 480.291         | 1802.028 | 1794.018        | 1794.522        | 1793.514 | A 32 |
| R 11 | 558.341         | 1756.509 | 1758.503        | 1759.006        | 1757.998 | R 31 |
| A 12 | 593.809         | 1688.459 | 1680.449        | <b>1680.953</b> | 1679.945 | A 30 |
| K 13 | 657.907         | 1652.940 | 1644.931        | <b>1645.435</b> | 1644.427 | K 29 |
| A 14 | 693.426         | 1588.892 | 1580.883        | <b>1581.387</b> | 1580.379 | A 28 |
| K 15 | <b>757.474</b>  | 1593.374 | <b>1545.365</b> | <b>1545.868</b> | 1544.861 | K 27 |
| S 16 | <b>800.990</b>  | 1489.126 | <b>1481.317</b> | 1481.821        | 1480.813 | S 26 |
| R 17 | 879.040         | 1448.910 | 1437.893        | <b>1438.395</b> | 1437.387 | R 25 |
| S 18 | 922.556         | 1387.780 | 1389.783        | 1389.284        | 1389.243 | S 24 |
| S 19 | 966.072         | 1324.244 | <b>1316.234</b> | <b>1316.738</b> | 1315.731 | S 23 |
| R 20 | <b>1044.123</b> | 1280.728 | <b>1272.718</b> | <b>1273.222</b> | 1272.215 | R 22 |
| A 21 | 1079.641        | 1202.677 | 1194.668        | 1195.172        | 1194.164 | A 21 |
| G 22 | 1108.152        | 1167.159 | 1159.149        | 1159.653        | 1158.645 | G 20 |
| L 23 | 1164.694        | 1138.048 | 1130.039        | 1131.143        | 1130.135 | L 19 |
| G 24 | <b>1228.723</b> | 1082.106 | 1074.097        | 1074.601        | 1073.593 | G 18 |
| F 25 | 1352.257        | 1018.977 | <b>1010.967</b> | <b>1010.571</b> | 1009.563 | F 17 |
| F 26 | 1350.784        | 944.542  | 936.533         | 937.037         | 936.029  | F 16 |
| V 27 | <b>1400.318</b> | 896.016  | 888.007         | <b>888.511</b>  | 887.503  | V 15 |
| G 28 | <b>1428.829</b> | 946.482  | <b>838.473</b>  | <b>838.976</b>  | 837.969  | G 14 |
| R 29 | 1506.879        | 817.971  | 809.962         | 810.466         | 809.458  | R 13 |
| V 30 | 1554.414        | 739.301  | 731.291         | 731.795         | 731.401  | V 12 |
| H 31 | <b>1624.943</b> | 690.385  | 682.377         | 682.881         | 681.873  | H 11 |
| R 32 | <b>1702.994</b> | 621.857  | 613.848         | 614.351         | 613.344  | R 10 |
| L 33 | <b>1759.536</b> | 543.806  | 535.797         | 536.301         | 535.293  | L 9  |
| L 34 | <b>1816.978</b> | 487.264  | 479.255         | 479.759         | 478.751  | L 8  |
| R 35 | 1894.128        | 430.722  | 422.713         | 423.217         | 422.209  | R 7  |
| K 36 | 1958.176        | 352.972  | 344.963         | 345.466         | 344.458  | K 6  |
| G 37 | 1986.688        | 288.624  | 280.615         | 281.119         | 280.111  | G 5  |
| H 38 | 2055.216        | 260.114  | 252.104         | 252.608         | 251.600  | H 4  |
| Y 39 | 2136.746        | 181.584  | 183.575         | 184.079         | 183.071  | Y 3  |
| A 40 | 2172.206        | 110.062  | 102.043         | 102.547         | 101.539  | A 2  |
| E 41 | 2216.787        | 74.534   | 66.524          | 67.028          | 66.021   | E 1  |

# sp | P27661 | H2AX\_MOUSE

SGR<sup>Trimethyl</sup><sub>42.05</sub> GKTGGKARAKAKSRSSRAGLQFPVGRVHLLRKGHYAE

- ▶ fragmentation table for charge state 3+
- ▶ specType=etd
- ▶ score=72.85
- ▶ F112503.dat
- ▶ query=q45959\_p1
- ▶ precursor=895.516330
- ▶ chargePrecursor=5
- ▶ itol=0.5

| AA | c  | y               | #s=1            | #s=2            | z               | AA              |       |
|----|----|-----------------|-----------------|-----------------|-----------------|-----------------|-------|
| S  | 1  | 35.693          | 1491.833        | <b>1486.516</b> | 0.872           | 1488.181        | S[1]  |
| G  | 2  | 54.703          | 1462.845        | 1457.505        | 0.672           | 1457.160        | G[2]  |
| R  | 3  | 130.750         | <b>1443.838</b> | <b>1438.490</b> | <b>1438.834</b> | <b>1438.162</b> | R[3]  |
| G  | 4  | 139.757         | <b>1377.788</b> | 1372.440        | <b>1372.785</b> | 1372.111        | G[4]  |
| K  | 5  | 182.455         | 1358.781        | <b>1353.441</b> | <b>1353.777</b> | <b>1353.105</b> | K[5]  |
| T  | 6  | 218.138         | 1338.083        | <b>1310.743</b> | <b>1311.079</b> | 1310.401        | T[6]  |
| G  | 7  | 235.145         | 1302.450        | 1297.081        | 1297.397        | 1296.723        | G[7]  |
| G  | 8  | 254.152         | 1283.931        | <b>1258.053</b> | <b>1258.389</b> | 1257.717        | G[8]  |
| K  | 9  | 296.651         | 1244.388        | 1239.046        | 1239.382        | 1238.710        | K[9]  |
| A  | 10 | 320.530         | 1201.688        | <b>1196.348</b> | 1196.684        | <b>1196.012</b> | A[10] |
| R  | 11 | 372.563         | 1178.008        | 1172.660        | <b>1173.005</b> | 1172.331        | R[11] |
| A  | 12 | 386.242         | 1138.379        | 1133.031        | 1133.367        | 1132.693        | A[12] |
| K  | 13 | 438.941         | 1102.296        | <b>1096.956</b> | <b>1097.292</b> | 1096.618        | K[13] |
| A  | 14 | 482.620         | 1059.597        | 1054.250        | 1054.584        | 1053.910        | A[14] |
| K  | 15 | 505.318         | 1035.918        | 1030.570        | 1030.915        | 1030.241        | K[15] |
| S  | 16 | 534.320         | 993.220         | 987.880         | 988.216         | 987.543         | S[16] |
| R  | 17 | 586.362         | 984.200         | <b>958.870</b>  | <b>959.206</b>  | <b>958.534</b>  | R[17] |
| S  | 18 | 615.374         | 932.176         | 926.837         | 927.172         | 926.500         | S[18] |
| S  | 19 | 644.384         | 883.165         | 877.825         | 878.161         | 877.489         | S[19] |
| R  | 20 | 696.418         | 854.154         | 848.815         | 849.151         | 848.479         | R[20] |
| A  | 21 | 728.097         | 802.121         | 796.781         | 797.117         | 796.445         | A[21] |
| G  | 22 | 759.104         | 778.442         | 773.102         | 773.438         | 772.766         | G[22] |
| L  | 23 | 776.208         | 759.434         | 754.093         | 754.431         | 753.759         | L[23] |
| G  | 24 | 818.465         | 721.740         | 716.400         | 716.736         | 716.064         | G[24] |
| F  | 25 | 868.507         | 674.054         | 673.714         | 674.050         | 673.378         | F[25] |
| F  | 26 | 900.958         | 630.031         | 624.691         | 625.027         | 624.355         | F[26] |
| V  | 27 | <b>933.881</b>  | 597.680         | 592.340         | 592.676         | 592.004         | V[27] |
| G  | 28 | <b>952.868</b>  | 558.051         | 552.711         | 553.047         | 552.375         | G[28] |
| K  | 29 | 1004.920        | <b>545.650</b>  | 540.310         | 540.646         | 539.974         | K[29] |
| V  | 30 | <b>1037.945</b> | 491.610         | 486.270         | 486.613         | 485.941         | V[30] |
| H  | 31 | <b>1083.631</b> | 460.593         | 455.254         | 455.590         | 454.918         | H[31] |
| R  | 32 | 1135.665        | 414.907         | 409.567         | 409.903         | 409.231         | R[32] |
| L  | 33 | <b>1173.360</b> | 362.873         | 357.534         | 357.870         | 357.198         | L[33] |
| L  | 34 | <b>1211.054</b> | 326.176         | 320.837         | 321.173         | 320.501         | L[34] |
| R  | 35 | 1253.268        | 287.484         | 282.144         | 282.480         | 281.808         | R[35] |
| K  | 36 | 1305.786        | 235.460         | 230.121         | 230.447         | 229.775         | K[36] |
| G  | 37 | <b>1324.793</b> | 192.752         | 187.413         | 187.748         | 187.076         | G[37] |
| H  | 38 | <b>1370.480</b> | 173.745         | 168.405         | 168.741         | 168.069         | H[38] |
| V  | 39 | <b>1424.834</b> | 128.098         | 122.759         | 123.095         | 122.423         | V[39] |
| A  | 40 | 1448.813        | 83.304          | 77.964          | 78.300          | 77.628          | A[40] |
| E  | 41 | 1491.527        | 50.025          | 44.686          | 45.021          | 44.349          | E[41] |

# sp | P27661 | H2AX\_MOUSE

SGR<sup>Trimethyl</sup><sub>42.05</sub> GKTGGKARAKAKSRSSRAGLQFPVGRVHLLLRKGHYAE

- ▶ fragmentation table for charge state 4+
- ▶ specType=etd
- ▶ score=72.85
- ▶ F112503.dat
- ▶ query=q45959\_p1
- ▶ precursor=895.516330
- ▶ chargePrecursor=5
- ▶ itol=0.5

| AA   | c               | y               | #s1             | #s2             | #s3             | AA   |
|------|-----------------|-----------------|-----------------|-----------------|-----------------|------|
| S 1  | 217.022         | <b>1119.143</b> | <b>1115.139</b> | 0.765           | <b>1114.887</b> | S 41 |
| G 2  | 41.277          | <b>1097.385</b> | <b>1093.381</b> | 0.765           | <b>1093.129</b> | G 40 |
| R 3  | 90.814          | <b>1083.130</b> | <b>1079.125</b> | <b>1079.377</b> | <b>1078.873</b> | R 39 |
| G 4  | 108.070         | 1033.593        | 1029.589        | 1029.840        | 1029.130        | G 38 |
| K 5  | 137.093         | 1019.138        | 1015.133        | 1015.385        | 1015.081        | K 37 |
| T 6  | 162.255         | 987.314         | 983.309         | 983.561         | 983.061         | T 36 |
| G 7  | 178.811         | 952.052         | 948.047         | <b>958.299</b>  | 957.795         | G 35 |
| G 8  | 190.856         | 947.797         | 943.792         | 944.044         | 943.540         | G 34 |
| K 9  | 222.890         | 933.541         | 929.537         | 929.788         | 929.285         | K 33 |
| A 10 | 240.649         | 901.511         | 897.513         | 897.765         | 897.261         | A 32 |
| R 11 | 279.674         | 833.735         | <b>879.753</b>  | <b>880.005</b>  | <b>879.502</b>  | R 31 |
| A 12 | 297.438         | 803.728         | 803.728         | 803.980         | 803.477         | A 30 |
| K 13 | 329.457         | 826.974         | 823.969         | 823.221         | 823.717         | K 29 |
| A 14 | 347.217         | 794.950         | 790.945         | 791.197         | 790.693         | A 28 |
| K 15 | 379.240         | 777.191         | 773.186         | 773.438         | 772.934         | K 27 |
| S 16 | 405.998         | 745.167         | 741.162         | 741.414         | 740.910         | S 26 |
| R 17 | 440.024         | 723.409         | 719.404         | 719.656         | 719.152         | R 25 |
| S 18 | 483.792         | 694.384         | 690.379         | 690.631         | 690.127         | S 24 |
| S 19 | 483.540         | 662.626         | 658.621         | 658.873         | 658.369         | S 23 |
| R 20 | 522.595         | 640.868         | 636.863         | 637.115         | 636.611         | R 22 |
| A 21 | 540.324         | 601.842         | 597.837         | 598.090         | 597.586         | A 21 |
| G 22 | 554.580         | 584.083         | 580.078         | 580.330         | 579.826         | G 20 |
| L 23 | 582.813         | 669.826         | 665.821         | 666.073         | 665.571         | L 19 |
| Q 24 | 614.895         | 541.557         | 537.552         | 537.804         | 537.301         | Q 18 |
| F 25 | 651.832         | 500.542         | 506.537         | 505.789         | 505.285         | F 17 |
| F 26 | 678.896         | 472.775         | 468.770         | 469.022         | 468.518         | F 16 |
| V 27 | 700.663         | 448.512         | 444.507         | 444.759         | 444.255         | V 15 |
| G 28 | 724.018         | 422.745         | 418.740         | 419.992         | 419.488         | G 14 |
| R 29 | 753.943         | 409.809         | 405.804         | 405.739         | 405.231         | R 13 |
| V 30 | 778.710         | 370.464         | 366.459         | 366.711         | 366.207         | V 12 |
| H 31 | 812.975         | 345.697         | 341.692         | 341.944         | 341.440         | H 11 |
| R 32 | 852.000         | 311.432         | 307.427         | 307.679         | 307.175         | R 10 |
| L 33 | 880.271         | 272.407         | 268.402         | 268.654         | 268.150         | L 9  |
| L 34 | 895.542         | 244.178         | 240.173         | 240.425         | 239.921         | L 8  |
| R 35 | 947.508         | 215.885         | 211.880         | 212.132         | 211.628         | R 7  |
| K 36 | 979.591         | 176.840         | 172.835         | 173.087         | 172.583         | K 6  |
| G 37 | 993.847         | 144.816         | 140.811         | 141.063         | 140.559         | G 5  |
| H 38 | <b>1028.112</b> | 130.560         | 126.556         | 126.808         | 126.304         | H 4  |
| V 39 | <b>1068.837</b> | 96.296          | 92.291          | 92.543          | 92.039          | V 3  |
| A 40 | <b>1086.637</b> | 58.130          | 53.925          | 54.177          | 53.673          | A 2  |
| E 41 | 1118.897        | 37.771          | 33.766          | 34.018          | 33.514          | E 1  |

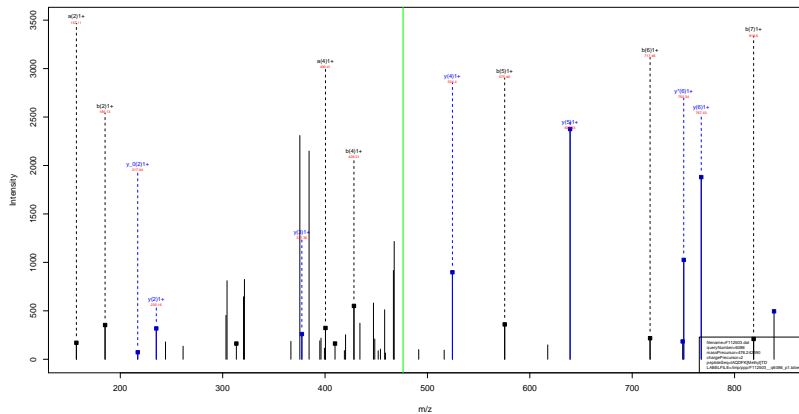

# sp | P68433 | H31\_MOUSE

IAQDFK<sup>Methyl</sup> TD  
14.02

- ▶ fragmentation table for charge state 1+
- ▶ specType=cid
- ▶ score=46.65
- ▶ F112503.dat
- ▶ query=q6086\_p1
- ▶ precursor=476.242390
- ▶ chargePrecursor=2
- ▶ itol=0.5

| AA  | a              | a*      | a $\beta$ | b              | b*      | b $\beta$      | $\gamma$       | $\gamma^*$     | $\gamma\beta$  | AA  |
|-----|----------------|---------|-----------|----------------|---------|----------------|----------------|----------------|----------------|-----|
| T 1 | 86.998         | 0.000   | 0.000     | 114.191        | 0.000   | 0.000          | 961.419        | 919.464        | 223.988        | T 1 |
| A 2 | <b>157.134</b> | 0.000   | 0.000     | <b>185.128</b> | 0.000   | 0.000          | <b>838.384</b> | 821.388        | 652.584        | A 2 |
| Q 3 | 286.192        | 286.186 | 0.000     | <b>313.187</b> | 286.180 | 0.000          | <b>767.357</b> | <b>750.330</b> | <b>749.346</b> | Q 3 |
| G 4 | <b>400.219</b> | 383.193 | 382.209   | <b>426.214</b> | 411.187 | <b>410.203</b> | <b>639.298</b> | 622.272        | 621.288        | G 4 |
| F 5 | 547.287        | 530.261 | 529.277   | <b>575.282</b> | 558.256 | 557.272        | <b>524.271</b> | 507.245        | 506.261        | F 5 |
| R 6 | 689.356        | 672.332 | 671.348   | <b>717.363</b> | 700.366 | 699.382        | <b>377.303</b> | 360.377        | 359.393        | R 6 |
| T 7 | 790.446        | 773.419 | 772.435   | <b>818.441</b> | 801.414 | 800.430        | <b>235.092</b> | 0.000          | <b>217.082</b> | T 7 |
| G 8 | 925.473        | 908.448 | 907.464   | 933.468        | 916.441 | 915.457        | 138.040        | 0.000          | 116.034        | G 8 |

# sp | P84244 | H33\_MOUSE

IAQDFK <sup>Methyl</sup> TDLRFQSAAILGALQE  
14.02

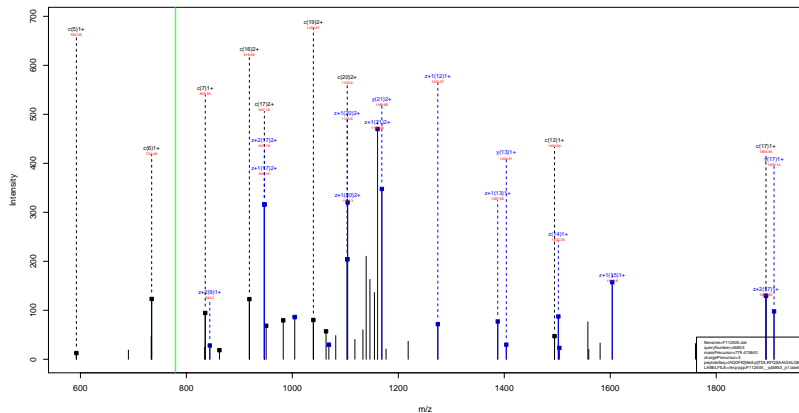

# sp | P84244 | H33\_MOUSE

IAQDFK <sup>Methyl</sup> 14.02 TDLRFQSAAGALQE

- ▶ fragmentation table for charge state 1+
- ▶ specType=etd
- ▶ score=51.35
- ▶ F112505.dat
- ▶ query=q45853.p1
- ▶ precursor=779.413840
- ▶ chargePrecursor=3
- ▶ itol=0.5

| AA    | c               | y               | z+1             | z+2             | z               | AA   |
|-------|-----------------|-----------------|-----------------|-----------------|-----------------|------|
| I   1 | 151.118         | 2336.224        | 2356.206        | 0.000           | 2316.188        | Q 1  |
| A   2 | 262.155         | 2223.140        | 2307.122        | 0.000           | 2206.114        | A 20 |
| Q   3 | 330.214         | 2152.103        | 2136.085        | 2137.062        | 2135.077        | Q 19 |
| D   4 | 485.241         | 2124.045        | 2088.028        | 2019.024        | 2007.011        | Q 18 |
| F   5 | <b>592.309</b>  | <b>1909.018</b> | 1882.999        | <b>1894.007</b> | 1891.991        | F 17 |
| K   6 | <b>734.420</b>  | 1761.948        | 1745.931        | 1746.938        | 1744.921        | K 16 |
| T   7 | <b>835.407</b>  | 1616.836        | <b>1601.820</b> | 1604.828        | 1602.811        | T 15 |
| D   8 | <b>950.494</b>  | 1518.791        | 1502.772        | <b>1503.780</b> | <b>1501.765</b> | D 14 |
| L   9 | <b>1063.578</b> | <b>1403.764</b> | <b>1387.745</b> | 1388.751        | 1386.735        | L 13 |
| R 10  | 1218.679        | 1296.695        | <b>1274.661</b> | 1275.669        | 1273.654        | R 12 |
| F 11  | 1366.748        | 1194.579        | 1178.560        | 1119.568        | 1117.552        | F 11 |
| Q 12  | <b>1494.806</b> | 987.511         | 971.492         | 972.500         | 970.484         | Q 10 |
| S 13  | 1561.838        | 859.452         | 843.433         | <b>844.441</b>  | 842.425         | S 9  |
| A 14  | 1652.875        | 722.420         | 706.401         | 707.409         | 705.393         | A 8  |
| A 15  | 1723.913        | 701.361         | 685.342         | 686.352         | 684.336         | A 7  |
| L 16  | 1838.952        | 630.346         | 614.327         | 615.335         | 613.319         | L 6  |
| G 17  | <b>1894.018</b> | 517.262         | 501.243         | 502.251         | 500.235         | G 5  |
| A 18  | 1985.055        | 460.240         | 444.221         | 445.229         | 443.214         | A 4  |
| L 19  | 2076.119        | 389.203         | 373.184         | 374.192         | 372.177         | L 3  |
| Q 20  | 2206.198        | 276.119         | 260.100         | 261.108         | 259.092         | Q 2  |
| E 21  | 2335.240        | 148.060         | 132.042         | 133.050         | 131.034         | E 1  |



# sp | P84244 | H33\_MOUSE

IAQDFK <sup>Methyl</sup> 14.02 TDLRFQSA AIGALQE

- ▶ fragmentation table for charge state 2+
- ▶ specType=etd
- ▶ score=51.35
- ▶ F112505.dat
- ▶ query=q45853.p1
- ▶ precursor=779.413840
- ▶ chargePrecursor=3
- ▶ itol=0.5

| AA     | c               | y               | z+1             | z+2             | z               | AA    |
|--------|-----------------|-----------------|-----------------|-----------------|-----------------|-------|
| I [1]  | 66.093          | <b>1168.616</b> | <b>1166.607</b> | 0.504           | 1169.103        | [21]  |
| A [2]  | 101.561         | 1112.074        | <b>1104.064</b> | 0.504           | <b>1103.561</b> | A[20] |
| Q [3]  | 165.610         | 1076.555        | <b>1066.546</b> | <b>1069.050</b> | 1069.042        | Q[19] |
| D [4]  | 223.224         | 1032.526        | <b>1004.517</b> | <b>1005.021</b> | 1004.011        | D[18] |
| F [5]  | 296.658         | 955.013         | <b>947.003</b>  | <b>947.507</b>  | 950.497         | F[17] |
| K [6]  | 367.713         | 881.478         | 871.469         | 873.973         | 872.965         | K[16] |
| T [7]  | 418.237         | 810.423         | 802.414         | 802.918         | 801.910         | T[15] |
| D [8]  | 475.751         | 759.899         | 751.890         | 752.394         | 751.386         | D[14] |
| L [9]  | 532.293         | 702.366         | 694.376         | 694.880         | 693.872         | L[13] |
| R [10] | 610.343         | 646.844         | 637.833         | 638.338         | 637.330         | R[12] |
| F [11] | 663.578         | 597.793         | 559.784         | 560.288         | 559.280         | F[11] |
| Q [12] | 747.907         | 494.259         | 486.250         | 486.753         | 485.745         | Q[10] |
| S [13] | 791.423         | 430.230         | 422.220         | 422.724         | 421.716         | S[9]  |
| A [14] | 826.941         | 396.714         | 378.704         | 379.208         | 378.200         | A[8]  |
| A [15] | <b>802.460</b>  | 351.195         | 343.188         | 343.690         | 342.682         | A[7]  |
| I [16] | <b>819.002</b>  | 315.676         | 307.667         | 308.171         | 307.163         | I[6]  |
| G [17] | <b>947.513</b>  | 259.134         | 251.125         | 251.629         | 250.621         | G[5]  |
| A [18] | <b>983.031</b>  | 230.624         | 222.614         | 223.118         | 222.110         | A[4]  |
| L [19] | <b>1039.573</b> | 195.105         | 187.096         | 187.600         | 186.592         | L[3]  |
| Q [20] | <b>1163.603</b> | 138.563         | 130.554         | 131.058         | 130.050         | Q[2]  |
| E [21] | 1188.124        | 74.534          | 66.524          | 67.028          | 66.021          | E[1]  |



# sp | P84244 | H33\_MOUSE

IAQDFK <sup>Methyl</sup> 14.02 TDLRFQSA AIGALQE

- ▶ fragmentation table for charge state 1+
- ▶ specType=cid
- ▶ score=53.62
- ▶ F112505.dat
- ▶ query=q45854.p1
- ▶ precursor=779.413840
- ▶ chargePrecursor=3
- ▶ itol=0.5

| AA | a       | a'      | a,b     | b              | b'      | b,b'    | y              | y'             | y,b            | AA          |
|----|---------|---------|---------|----------------|---------|---------|----------------|----------------|----------------|-------------|
| I  | 98.698  | 0.000   | 0.000   | 114.091        | 0.000   | 0.000   | 2356.225       | 2316.088       | 2316.214       | I <b>21</b> |
| A  | 137.134 | 0.000   | 0.000   | 105.129        | 0.000   | 0.000   | 2221.140       | 2206.114       | 2206.130       | A <b>20</b> |
| Q  | 139.012 | 282.985 | 0.000   | 113.181        | 289.166 | 0.000   | 2351.101       | 2336.074       | 2336.090       | Q <b>19</b> |
| D  | 160.219 | 363.193 | 382.239 | 145.214        | 341.197 | 410.263 | 2624.055       | 2607.018       | 2606.034       | D <b>18</b> |
| F  | 147.207 | 520.201 | 520.277 | 149.202        | 526.256 | 527.272 | 3469.011       | 3461.993       | 3461.007       | F <b>17</b> |
| K  | 168.038 | 572.272 | 631.303 | 171.267        | 600.266 | 609.262 | 3761.945       | 3744.923       | 3743.939       | K <b>16</b> |
| V  | 100.446 | 174.413 | 172.431 | <b>813.463</b> | 161.414 | 160.438 | 1618.938       | 1600.912       | 1601.928       | V <b>15</b> |
| D  | 165.473 | 358.436 | 357.452 | <b>816.441</b> | 315.441 | 315.457 | 3518.751       | 3501.703       | 3500.701       | D <b>14</b> |
| L  | 101.829 | 181.529 | 180.546 | 186.524        | 182.522 | 182.524 | 1461.761       | 1460.739       | 1460.754       | L <b>13</b> |
| R  | 117.438 | 117.461 | 118.461 | 120.453        | 118.468 | 119.462 | 1281.961       | 1272.894       | 1272.898       | R <b>12</b> |
| P  | 121.728 | 124.700 | 123.710 | 124.721        | 123.699 | 123.711 | 1134.979       | 1117.960       | 1116.968       | P <b>11</b> |
| G  | 144.030 | 142.029 | 143.174 | 147.169        | 146.191 | 145.169 | 887.511        | 879.504        | 880.500        | G <b>10</b> |
| S  | 153.617 | 152.639 | 151.650 | 154.612        | 153.610 | 154.601 | <b>859.452</b> | 842.425        | 841.441        | S <b>9</b>  |
| A  | 167.054 | 166.072 | 165.081 | 167.064        | 166.072 | 167.058 | 771.920        | 755.901        | 754.898        | A <b>8</b>  |
| A  | 167.051 | 166.105 | 165.051 | 167.058        | 166.059 | 166.075 | <b>701.383</b> | 684.368        | 683.372        | A <b>7</b>  |
| I  | 171.978 | 171.439 | 171.460 | 171.970        | 170.944 | 170.959 | <b>630.346</b> | 613.319        | 612.319        | I <b>6</b>  |
| C  | 168.007 | 161.010 | 161.000 | 167.000        | 166.004 | 166.000 | <b>517.262</b> | 501.239        | 499.241        | C <b>5</b>  |
| A  | 150.034 | 150.030 | 150.021 | 149.029        | 149.032 | 150.030 | 463.262        | 445.254        | 444.258        | A <b>4</b>  |
| L  | 101.110 | 101.010 | 101.011 | 101.111        | 101.000 | 101.101 | <b>389.203</b> | <b>372.177</b> | 371.191        | L <b>3</b>  |
| Q  | 101.170 | 101.150 | 101.150 | 101.171        | 101.145 | 101.161 | <b>276.119</b> | <b>259.092</b> | <b>258.108</b> | Q <b>2</b>  |
| E  | 200.219 | 200.199 | 200.200 | 200.214        | 200.187 | 200.200 | 148.990        | 0.000          | 148.990        | E <b>1</b>  |

# sp | P84244 | H33\_MOUSE

IAQDFK <sup>Methyl</sup> 14.02 TDLRFQSAAILGALQE

- ▶ fragmentation table for charge state 2+
- ▶ specType=cid
- ▶ score=53.62
- ▶ F112505.dat
- ▶ query=q45854.p1
- ▶ precursor=779.413840
- ▶ chargePrecursor=3
- ▶ itol=0.5

| AA | x  | x'   | x <sub>0</sub> | b       | b'      | b <sub>0</sub> | y        | y'       | y <sub>0</sub> | AA |
|----|----|------|----------------|---------|---------|----------------|----------|----------|----------------|----|
| H  | 41 | 502  | 0.509          | 0.504   | 0.504   | 0.504          | 1160.010 | 1160.010 | 1160.010       | H  |
| A  | 7  | 1670 | 0.509          | 0.504   | 0.504   | 0.504          | 1112.204 | 1110.593 | 1101.009       | A  |
| Q  | 1  | 143  | 100            | 10.004  | 10.004  | 10.004         | 1015.500 | 1000.004 | 1004.004       | Q  |
| D  | 4  | 200  | 102            | 10.004  | 10.004  | 10.004         | 1015.500 | 1000.010 | 1002.010       | D  |
| F  | 5  | 174  | 147            | 146.638 | 146.638 | 146.638        | 1015.500 | 1000.010 | 1000.010       | F  |
| K  | 6  | 145  | 101            | 100.000 | 100.000 | 100.000        | 1015.500 | 1000.010 | 1000.010       | K  |
| T  | 7  | 185  | 177            | 187.213 | 186.124 | 186.124        | 1015.500 | 1000.010 | 1000.010       | T  |
| D  | 8  | 151  | 100            | 100.000 | 100.000 | 100.000        | 1015.500 | 1000.010 | 1000.010       | D  |
| L  | 9  | 190  | 182            | 181.200 | 180.774 | 180.774        | 1015.500 | 1000.010 | 1000.010       | L  |
| M  | 10 | 187  | 173            | 178.113 | 176.021 | 176.021        | 1015.500 | 1000.010 | 1000.010       | M  |
| P  | 11 | 194  | 184            | 182.004 | 180.364 | 180.364        | 1015.500 | 1000.010 | 1000.010       | P  |
| Q  | 12 | 725  | 306            | 308.000 | 306.304 | 306.304        | 1015.500 | 1000.010 | 1000.010       | Q  |
| S  | 13 | 190  | 182            | 180.000 | 178.901 | 178.901        | 1015.500 | 1000.010 | 1000.010       | S  |
| A  | 14 | 194  | 178            | 179.811 | 178.424 | 178.424        | 1015.500 | 1000.010 | 1000.010       | A  |
| A  | 15 | 130  | 100            | 100.000 | 100.000 | 100.000        | 1015.500 | 1000.010 | 1000.010       | A  |
| I  | 16 | 195  | 191            | 187.010 | 187.000 | 187.000        | 1015.500 | 1000.010 | 1000.010       | I  |
| G  | 17 | 175  | 160            | 161.000 | 159.999 | 159.999        | 1015.500 | 1000.010 | 1000.010       | G  |
| A  | 18 | 180  | 174            | 173.000 | 171.518 | 171.518        | 1015.500 | 1000.010 | 1000.010       | A  |
| L  | 19 | 177  | 163            | 163.000 | 161.000 | 161.000        | 1015.500 | 1000.010 | 1000.010       | L  |
| Q  | 20 | 184  | 174            | 173.217 | 171.200 | 171.200        | 1015.500 | 1000.010 | 1000.010       | Q  |
| E  | 21 | 114  | 101            | 113.000 | 113.000 | 113.000        | 1015.500 | 1000.010 | 1000.010       | E  |

# sp | P84244 | H33\_MOUSE

IAQDFK <sup>Methyl</sup> TDLRFQSAAGALQE  
14.02

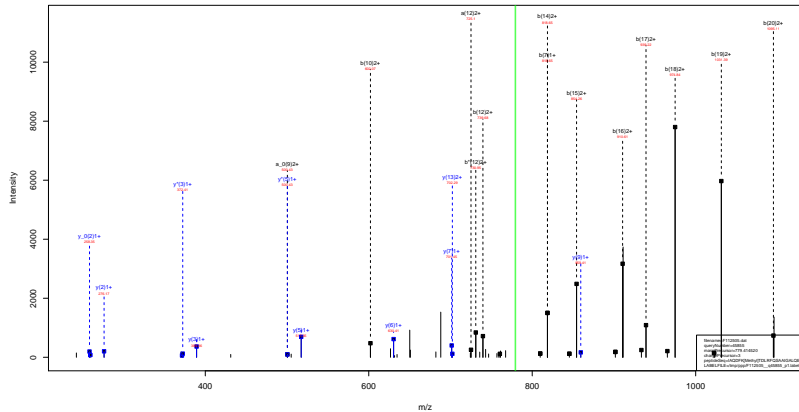

# sp | P84244 | H33\_MOUSE

IAQDFK <sup>Methyl</sup> 14.02 TDLRFQSA AIGALQE

- ▶ fragmentation table for charge state 1+
- ▶ specType=cid
- ▶ score=48.98
- ▶ F112505.dat
- ▶ query=q45855\_p1
- ▶ precursor=779.414520
- ▶ chargePrecursor=3
- ▶ itol=0.5

| AA | a       | a*      | a,b     | b              | b*      | b,b     | r              | r*             | r,b            | AA          |
|----|---------|---------|---------|----------------|---------|---------|----------------|----------------|----------------|-------------|
| I  | 98.698  | 0.000   | 0.000   | 114.091        | 0.000   | 0.000   | 2356.225       | 2319.088       | 2318.214       | I <b>21</b> |
| A  | 137.134 | 0.000   | 0.000   | 105.129        | 0.000   | 0.000   | 2221.140       | 2206.114       | 2205.130       | A <b>20</b> |
| Q  | 159.012 | 282.985 | 0.000   | 113.181        | 289.166 | 0.000   | 2191.101       | 2176.075       | 2175.091       | Q <b>19</b> |
| D  | 160.219 | 303.193 | 382.209 | 120.214        | 311.197 | 410.203 | 2024.052       | 2009.026       | 2008.044       | D <b>18</b> |
| F  | 147.207 | 520.201 | 520.217 | 129.217        | 529.204 | 527.212 | 1669.011       | 1664.993       | 1664.007       | F <b>17</b> |
| K  | 168.098 | 572.212 | 431.203 | 171.207        | 570.204 | 669.202 | 1761.945       | 1744.923       | 1743.939       | K <b>16</b> |
| V  | 100.446 | 174.413 | 172.410 | <b>818.441</b> | 181.414 | 180.416 | 1618.928       | 1603.912       | 1602.928       | V <b>15</b> |
| D  | 165.473 | 358.456 | 357.452 | <b>818.448</b> | 361.441 | 315.437 | 1518.751       | 1503.735       | 1502.751       | D <b>14</b> |
| L  | 101.829 | 181.829 | 180.840 | 104.824        | 182.822 | 182.824 | 1461.704       | 1456.700       | 1455.714       | L <b>13</b> |
| R  | 117.458 | 117.451 | 116.461 | 120.453        | 118.456 | 119.462 | 1281.662       | 1272.664       | 1271.678       | R <b>12</b> |
| F  | 133.728 | 134.730 | 133.710 | 134.721        | 133.699 | 133.711 | 1134.979       | 1117.963       | 1116.968       | F <b>11</b> |
| Q  | 144.782 | 142.781 | 143.774 | 147.769        | 146.781 | 145.769 | 887.511        | 879.504        | 878.500        | Q <b>10</b> |
| S  | 120.817 | 121.809 | 120.800 | 124.812        | 123.810 | 124.801 | <b>859.452</b> | 842.425        | 841.441        | S <b>9</b>  |
| A  | 107.254 | 106.252 | 105.243 | 109.246        | 108.242 | 107.240 | 771.928        | 755.901        | 754.898        | A <b>8</b>  |
| A  | 116.891 | 116.105 | 115.092 | 117.095        | 116.093 | 116.095 | <b>701.383</b> | 684.368        | 683.372        | A <b>7</b>  |
| D  | 171.978 | 171.408 | 171.160 | 171.970        | 171.944 | 181.980 | <b>638.346</b> | 623.319        | 612.310        | D <b>6</b>  |
| C  | 148.907 | 143.100 | 143.060 | 147.916        | 147.864 | 152.910 | <b>517.262</b> | <b>508.215</b> | 499.211        | C <b>5</b>  |
| A  | 100.034 | 100.030 | 100.021 | 104.025        | 104.022 | 103.018 | 463.242        | 443.214        | 442.230        | A <b>4</b>  |
| L  | 103.110 | 103.101 | 103.111 | 104.111        | 104.100 | 104.111 | <b>389.203</b> | <b>372.177</b> | <b>371.193</b> | L <b>3</b>  |
| Q  | 101.170 | 104.159 | 104.150 | 108.174        | 107.145 | 107.143 | <b>276.119</b> | <b>259.092</b> | <b>258.108</b> | Q <b>2</b>  |
| E  | 100.219 | 100.210 | 100.201 | 101.214        | 101.187 | 100.201 | 148.980        | 0.000          | 138.959        | E <b>1</b>  |

# sp | P84244 | H33\_MOUSE

IAQDFK <sup>Methyl</sup> 14.02 TDLRFQSA AIGALQE

- ▶ fragmentation table for charge state 2+
- ▶ specType=cid
- ▶ score=48.98
- ▶ F112505.dat
- ▶ query=q45855\_p1
- ▶ precursor=779.414520
- ▶ chargePrecursor=3
- ▶ itol=0.5

| AA  | a        | a'    | a-D   | b       | b'    | b-D   | y        | y'       | y-D      | AA  |
|-----|----------|-------|-------|---------|-------|-------|----------|----------|----------|-----|
| R1  | 451502   | 0.504 | 0.504 | 57.940  | 0.504 | 0.504 | 1168.610 | 1169.521 | 1169.611 | R21 |
| A1  | 791010   | 0.504 | 0.504 | 83.069  | 0.504 | 0.504 | 1117.014 | 1118.501 | 1119.009 | A20 |
| Q1  | 1431131  | 1.008 | 0.504 | 140.581 | 1.008 | 0.504 | 1019.505 | 1020.014 | 1020.501 | Q10 |
| D1  | 2001111  | 1.008 | 1.008 | 144.511 | 1.008 | 1.008 | 819.150  | 820.011  | 820.511  | D10 |
| F1  | 3741147  | 1.008 | 1.008 | 144.511 | 1.008 | 1.008 | 819.150  | 820.011  | 820.511  | F11 |
| K1  | 3951131  | 1.008 | 1.008 | 144.511 | 1.008 | 1.008 | 819.150  | 820.011  | 820.511  | K10 |
| T1  | 3951131  | 1.008 | 1.008 | 144.511 | 1.008 | 1.008 | 819.150  | 820.011  | 820.511  | T10 |
| E1  | 4011130  | 1.008 | 1.008 | 144.511 | 1.008 | 1.008 | 819.150  | 820.011  | 820.511  | E10 |
| L1  | 4011130  | 1.008 | 1.008 | 144.511 | 1.008 | 1.008 | 819.150  | 820.011  | 820.511  | L10 |
| M1  | 4011130  | 1.008 | 1.008 | 144.511 | 1.008 | 1.008 | 819.150  | 820.011  | 820.511  | M10 |
| N1  | 4011130  | 1.008 | 1.008 | 144.511 | 1.008 | 1.008 | 819.150  | 820.011  | 820.511  | N10 |
| P1  | 4011130  | 1.008 | 1.008 | 144.511 | 1.008 | 1.008 | 819.150  | 820.011  | 820.511  | P10 |
| Q1  | 4011130  | 1.008 | 1.008 | 144.511 | 1.008 | 1.008 | 819.150  | 820.011  | 820.511  | Q10 |
| S1  | 4011130  | 1.008 | 1.008 | 144.511 | 1.008 | 1.008 | 819.150  | 820.011  | 820.511  | S10 |
| V1  | 4011130  | 1.008 | 1.008 | 144.511 | 1.008 | 1.008 | 819.150  | 820.011  | 820.511  | V10 |
| A11 | 4301140  | 1.008 | 1.008 | 144.511 | 1.008 | 1.008 | 819.150  | 820.011  | 820.511  | A10 |
| A12 | 4301140  | 1.008 | 1.008 | 144.511 | 1.008 | 1.008 | 819.150  | 820.011  | 820.511  | A10 |
| I13 | 4301140  | 1.008 | 1.008 | 144.511 | 1.008 | 1.008 | 819.150  | 820.011  | 820.511  | I10 |
| C11 | 4301140  | 1.008 | 1.008 | 144.511 | 1.008 | 1.008 | 819.150  | 820.011  | 820.511  | C10 |
| A14 | 4301140  | 1.008 | 1.008 | 144.511 | 1.008 | 1.008 | 819.150  | 820.011  | 820.511  | A10 |
| L15 | 4301140  | 1.008 | 1.008 | 144.511 | 1.008 | 1.008 | 819.150  | 820.011  | 820.511  | L10 |
| G11 | 4301140  | 1.008 | 1.008 | 144.511 | 1.008 | 1.008 | 819.150  | 820.011  | 820.511  | G10 |
| L16 | 4301140  | 1.008 | 1.008 | 144.511 | 1.008 | 1.008 | 819.150  | 820.011  | 820.511  | L10 |
| Q17 | 4301140  | 1.008 | 1.008 | 144.511 | 1.008 | 1.008 | 819.150  | 820.011  | 820.511  | Q10 |
| D18 | 4301140  | 1.008 | 1.008 | 144.511 | 1.008 | 1.008 | 819.150  | 820.011  | 820.511  | D10 |
| E19 | 4301140  | 1.008 | 1.008 | 144.511 | 1.008 | 1.008 | 819.150  | 820.011  | 820.511  | E10 |
| K21 | 11491111 | 1.008 | 1.008 | 144.511 | 1.008 | 1.008 | 819.150  | 820.011  | 820.511  | K10 |

# sp | P84244 | H33\_MOUSE

IAQDFK <sup>Methyl</sup> TDLRFQSA AIGALQE  
14.02

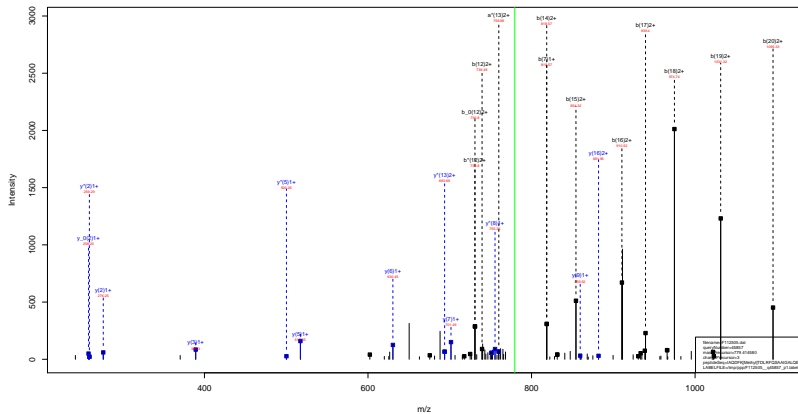



# sp | P84244 | H33\_MOUSE

IAQDFK <sup>Methyl</sup> 14.02 TDLRFQSA AIGALQE

- ▶ fragmentation table for charge state 1+
- ▶ specType=cid
- ▶ score=49.86
- ▶ F112505.dat
- ▶ query=q45857\_p1
- ▶ precursor=779.414580
- ▶ chargePrecursor=3
- ▶ itol=0.5

| AA | a       | a'      | a,b     | b              | b'      | b,b'    | r              | r'             | r,b            | AA   |
|----|---------|---------|---------|----------------|---------|---------|----------------|----------------|----------------|------|
| I  | 98.698  | 0.000   | 0.000   | 114.001        | 0.000   | 0.000   | 2356.225       | 2310.088       | 2310.088       | I(b) |
| A  | 137.134 | 0.000   | 0.000   | 105.120        | 0.000   | 0.000   | 2221.140       | 2206.114       | 2206.114       | A(b) |
| Q  | 139.012 | 282.985 | 0.000   | 113.181        | 289.166 | 0.000   | 2191.101       | 2176.075       | 2176.075       | Q(b) |
| D  | 160.219 | 303.193 | 382.200 | 142.214        | 311.197 | 410.203 | 2024.050       | 2007.018       | 2006.034       | D(b) |
| F  | 167.207 | 320.201 | 420.217 | 149.202        | 326.206 | 457.212 | 1989.010       | 1969.993       | 1969.007       | F(b) |
| K  | 168.098 | 322.212 | 421.202 | <b>717.393</b> | 320.206 | 359.202 | 1761.940       | 1744.923       | 1743.939       | K(b) |
| V  | 170.046 | 323.213 | 422.213 | <b>818.411</b> | 321.214 | 360.208 | 1619.890       | 1600.812       | 1600.828       | V(b) |
| D  | 165.473 | 328.446 | 387.452 | <b>813.468</b> | 316.441 | 315.437 | 1518.751       | 1501.705       | 1500.701       | D(b) |
| L  | 181.829 | 381.520 | 381.540 | 194.822        | 382.522 | 382.524 | 1461.704       | 1456.700       | 1456.704       | L(b) |
| N  | 117.438 | 317.461 | 318.461 | 120.439        | 318.462 | 319.462 | 1290.960       | 1272.894       | 1272.899       | N(b) |
| P  | 132.178 | 334.700 | 333.710 | 134.179        | 332.699 | 333.711 | 1134.979       | 1117.902       | 1116.908       | P(b) |
| G  | 144.070 | 142.070 | 143.171 | 147.070        | 146.071 | 145.070 | 887.511        | 886.504        | 886.500        | G(b) |
| S  | 152.817 | 152.816 | 153.816 | 154.817        | 154.816 | 154.816 | <b>859.452</b> | 842.425        | 841.441        | S(b) |
| A  | 167.054 | 166.054 | 166.054 | 167.054        | 167.054 | 167.054 | <b>755.393</b> | 754.406        | 754.406        | A(b) |
| A  | 167.054 | 166.105 | 166.105 | 167.054        | 166.105 | 166.105 | <b>701.383</b> | 684.356        | 683.372        | A(b) |
| I  | 171.978 | 171.978 | 171.978 | 171.978        | 171.978 | 171.978 | <b>630.346</b> | 613.319        | 612.335        | I(b) |
| C  | 168.007 | 167.007 | 167.007 | 168.007        | 167.007 | 167.007 | <b>517.262</b> | <b>500.235</b> | 489.251        | C(b) |
| A  | 160.034 | 160.034 | 160.034 | 160.034        | 160.034 | 160.034 | 463.243        | 444.230        | 444.230        | A(b) |
| L  | 163.110 | 163.110 | 163.110 | 163.111        | 163.110 | 163.110 | <b>389.203</b> | 374.171        | 371.191        | L(b) |
| Q  | 161.170 | 161.170 | 161.170 | 161.171        | 161.170 | 161.170 | <b>276.119</b> | <b>259.092</b> | <b>258.108</b> | Q(b) |
| E  | 200.219 | 200.219 | 200.219 | 200.219        | 200.219 | 200.219 | 148.990        | 0.000          | 148.990        | E(b) |

# sp | P84244 | H33\_MOUSE

IAQDFK <sup>Methyl</sup> 14.02 TDLRFQSA AIGALQE

- ▶ fragmentation table for charge state 2+
- ▶ specType=cid
- ▶ score=49.86
- ▶ F112505.dat
- ▶ query=q45857\_p1
- ▶ precursor=779.414580
- ▶ chargePrecursor=3
- ▶ itol=0.5

| AA | a             | a'            | a-D           | b              | b'             | b-D            | y             | y'            | y-D           | AA  |
|----|---------------|---------------|---------------|----------------|----------------|----------------|---------------|---------------|---------------|-----|
| R1 | 491592        | 0.504         | 0.504         | 57949          | 0.504          | 0.504          | 1168810       | 1169123       | 1169181       | R21 |
| A1 | 791070        | 0.504         | 0.504         | 81569          | 0.504          | 0.504          | 11471074      | 11491591      | 1149189       | A20 |
| Q1 | 1431131       | 1431300       | 0.504         | 1431300        | 1431300        | 1431300        | 11678700      | 11681074      | 11681300      | Q19 |
| L1 | 2001111       | 2001200       | 1431300       | 1431111        | 2001200        | 2001200        | 10191200      | 1019181       | 1019111       | L18 |
| F1 | 374144        | 3851334       | 385141        | 388141         | 379131         | 379140         | 981181        | 98141         | 98100         | F17 |
| K1 | 345121        | 338180        | 338189        | 3391200        | 339187         | 339195         | <b>881478</b> | 872185        | 872471        | K16 |
| T1 | 389147        | 389191        | 389191        | 389191         | 389191         | 389191         | 1019111       | 1019111       | 1019111       | T15 |
| D1 | 351120        | 444122        | 444125        | 467121         | 468124         | 438121         | <b>750189</b> | <b>751138</b> | <b>750184</b> | D14 |
| L1 | 3391182       | 331120        | 332177        | 315120         | 314174         | 314180         | <b>68172</b>  | <b>681172</b> | <b>681180</b> | L13 |
| M1 | 387111        | 378111        | 378111        | <b>461120</b>  | 388111         | 388111         | 871181        | 871181        | 871181        | M12 |
| P1 | 351121        | 352124        | 352125        | <b>375134</b>  | 369131         | 369139         | 357179        | 359120        | 359120        | P11 |
| Q1 | <b>725136</b> | 730188        | 730191        | <b>739134</b>  | <b>730180</b>  | <b>730188</b>  | 681120        | 681110        | 681120        | Q10 |
| S1 | 100111        | <b>760139</b> | <b>759167</b> | 761111         | 774136         | 773164         | 438120        | 431111        | 431124        | S10 |
| A1 | 309111        | 309111        | 309111        | <b>818128</b>  | 309111         | 309111         | 309111        | 309111        | 309111        | A10 |
| A1 | 339189        | <b>831126</b> | <b>830144</b> | <b>851147</b>  | 865111         | 844181         | 381181        | 381181        | 381181        | A10 |
| I1 | 339189        | 337111        | 337111        | 337111         | <b>910189</b>  | 901170         | 901181        | 918111        | 907181        | I10 |
| G1 | 179189        | 179189        | 179189        | <b>938199</b>  | <b>930146</b>  | 930189         | <b>239114</b> | 239181        | 239181        | G10 |
| A1 | 369121        | 362120        | 365111        | <b>974111</b>  | <b>966105</b>  | <b>965111</b>  | 239124        | 232111        | 231181        | A10 |
| L1 | 1111201       | 1108130       | 1108120       | <b>103100</b>  | <b>1022147</b> | <b>1022105</b> | 181181        | 180120        | 180110        | L10 |
| Q1 | 181111        | 181111        | 181111        | <b>1095189</b> | 1088110        | 1088110        | 119111        | 119181        | 119181        | Q10 |
| R1 | 1149111       | 1137120       | 1139185       | 1139111        | 1131187        | 1132189        | 74134         | 0.504         | 65120         | R10 |



# sp | P62806 | H4\_MOUSE

[Acetyl]SGRGKGGKGLGKGGAKRHRKVL R Trimethyl D  
42.05

- ▶ fragmentation table for charge state 1+
- ▶ specType=etd
- ▶ score=59.17
- ▶ F112505.dat
- ▶ query=q47767.p1
- ▶ precursor=366.506610
- ▶ chargePrecursor=7
- ▶ itol=0.5

| AA |    | c               | y        | z+1            | z+2            | z        | AA    |
|----|----|-----------------|----------|----------------|----------------|----------|-------|
| S  | 1  | 147.070         | 2559.518 | 2543.499       | 0.000          | 2542.491 | S[24] |
| G  | 2  | <b>204.096</b>  | 2430.473 | 2414.457       | 0.000          | 2413.449 | G[23] |
| R  | 3  | <b>360.190</b>  | 2373.454 | 2357.435       | 2356.443       | 2356.421 | R[22] |
| G  | 4  | <b>417.220</b>  | 2217.353 | 2201.334       | 2202.342       | 2200.320 | G[21] |
| K  | 5  | <b>545.315</b>  | 2160.331 | 2144.313       | 2145.320       | 2143.305 | K[20] |
| G  | 6  | <b>602.337</b>  | 2032.230 | 2016.218       | 2017.225       | 2015.210 | G[19] |
| G  | 7  | <b>659.358</b>  | 1975.215 | 1959.196       | 1960.204       | 1958.188 | G[18] |
| K  | 8  | <b>787.453</b>  | 1918.193 | 1902.175       | 1903.182       | 1901.167 | K[17] |
| G  | 9  | <b>844.475</b>  | 1790.080 | 1774.060       | 1775.067       | 1773.072 | G[16] |
| L  | 10 | <b>957.559</b>  | 1733.977 | 1717.958       | 1718.966       | 1716.950 | L[15] |
| G  | 11 | <b>1014.580</b> | 1619.963 | 1603.974       | 1604.982       | 1602.965 | G[14] |
| K  | 12 | 1142.075        | 1562.971 | 1546.953       | 1547.960       | 1545.945 | K[13] |
| G  | 13 | 1199.697        | 1434.876 | 1418.858       | 1419.866       | 1417.850 | G[12] |
| G  | 14 | <b>1256.718</b> | 1377.855 | 1361.836       | 1362.844       | 1360.828 | G[11] |
| A  | 15 | 1327.795        | 1320.833 | 1304.815       | 1305.823       | 1303.807 | A[10] |
| K  | 16 | 1455.850        | 1249.790 | 1233.778       | 1234.785       | 1232.770 | K[9]  |
| R  | 17 | 1613.894        | 1129.701 | 1105.683       | 1106.691       | 1104.675 | R[8]  |
| H  | 18 | 1749.030        | 995.620  | 949.582        | <b>950.589</b> | 948.574  | H[7]  |
| R  | 19 | 1905.111        | 828.541  | 812.523        | <b>813.530</b> | 811.515  | R[6]  |
| K  | 20 | 2033.206        | 672.440  | <b>656.422</b> | 657.429        | 655.414  | K[5]  |
| V  | 21 | 2132.275        | 544.345  | 528.327        | <b>529.334</b> | 527.319  | V[4]  |
| L  | 22 | 2245.359        | 445.277  | 429.258        | <b>430.266</b> | 428.250  | L[3]  |
| K  | 23 | 2443.507        | 332.193  | 316.174        | 317.182        | 315.166  | K[2]  |
| D  | 24 | 2558.534        | 134.045  | 118.026        | 119.034        | 117.018  | D[1]  |

# sp | P62806 | H4\_MOUSE

[Acetyl]SGRGKGGKGLGKGGAKRHRKVL R Trimethyl D  
42.05

- ▶ fragmentation table for charge state 2+
- ▶ specType=etd
- ▶ score=59.17
- ▶ F112505.dat
- ▶ query=q47767.p1
- ▶ precursor=366.506610
- ▶ chargePrecursor=7
- ▶ itol=0.5

| AA    | c               | y              | z+1            | z+2             | z              | AA    |
|-------|-----------------|----------------|----------------|-----------------|----------------|-------|
| S[1]  | 74.942          | 1280.263       | 1272.253       | 0.504           | 1271.749       | S[24] |
| G[2]  | 102.553         | 1215.741       | 1207.732       | 0.504           | 1207.228       | G[23] |
| H[3]  | 130.603         | 1149.213       | 1139.223       | 1179.725        | 1178.711       | H[22] |
| G[4]  | 209.114         | 1059.180       | 1051.171       | <b>1101.675</b> | 1100.667       | G[21] |
| K[5]  | <b>273.161</b>  | 1080.669       | 1072.660       | 1073.664        | 1072.158       | K[20] |
| G[6]  | <b>301.672</b>  | 1016.623       | 1008.612       | 1009.116        | 1008.108       | G[19] |
| G[7]  | <b>330.183</b>  | 958.111        | 950.102        | <b>980.606</b>  | 979.598        | G[18] |
| K[8]  | <b>394.230</b>  | 959.600        | 951.591        | 952.095         | 951.087        | K[17] |
| G[9]  | <b>422.741</b>  | 895.553        | 887.543        | 888.047         | 887.040        | G[16] |
| L[10] | <b>479.283</b>  | 897.043        | 889.033        | <b>859.537</b>  | 858.529        | L[15] |
| G[11] | 507.794         | <b>810.500</b> | <b>802.491</b> | <b>802.995</b>  | 801.987        | G[14] |
| K[12] | <b>571.841</b>  | <b>781.989</b> | 773.980        | <b>774.484</b>  | <b>773.476</b> | K[13] |
| G[13] | <b>600.352</b>  | 717.942        | <b>709.932</b> | <b>710.436</b>  | 709.429        | G[12] |
| G[14] | <b>628.863</b>  | 689.431        | <b>681.422</b> | <b>681.926</b>  | <b>680.918</b> | G[11] |
| A[15] | <b>664.381</b>  | 660.920        | <b>652.911</b> | <b>653.415</b>  | 652.407        | A[10] |
| K[16] | <b>728.429</b>  | <b>625.462</b> | 617.452        | <b>617.956</b>  | 616.948        | K[9]  |
| R[17] | <b>806.479</b>  | 563.394        | 553.385        | 553.889         | 552.881        | R[8]  |
| H[18] | <b>875.009</b>  | <b>483.104</b> | <b>475.294</b> | <b>475.798</b>  | <b>474.791</b> | H[7]  |
| R[19] | <b>953.059</b>  | 414.774        | <b>406.765</b> | <b>407.269</b>  | 406.261        | R[6]  |
| K[20] | 1017.107        | 336.724        | <b>328.714</b> | <b>329.218</b>  | 328.211        | K[5]  |
| V[21] | <b>1066.641</b> | 272.679        | 264.667        | 265.171         | 264.163        | V[4]  |
| L[22] | 1123.183        | 223.142        | 215.133        | 215.637         | 214.629        | L[3]  |
| H[23] | 1222.287        | 166.800        | <b>158.591</b> | 159.095         | <b>154.087</b> | H[2]  |
| D[24] | 1279.771        | 67.526         | 59.517         | 60.021          | 59.013         | D[1]  |

# sp | P62806 | H4\_MOUSE

[Acetyl]SGRGKGGKGLGKGGAKRHRKVL R Trimethyl D  
42.05

- ▶ fragmentation table for charge state 3+
- ▶ specType=etd
- ▶ score=59.17
- ▶ F112505.dat
- ▶ query=q47767.p1
- ▶ precursor=366.506610
- ▶ chargePrecursor=7
- ▶ itol=0.5

| AA    | c              | y              | z+1            | z+2            | z              | AA    |
|-------|----------------|----------------|----------------|----------------|----------------|-------|
| S[1]  | 49.697         | 853.844        | 848.905        | 0.672          | 848.199        | S[24] |
| G[2]  | 58.704         | <b>810.830</b> | <b>805.490</b> | 0.672          | 805.154        | G[23] |
| R[3]  | 120.738        | 791.821        | 786.481        | <b>786.819</b> | 786.147        | R[22] |
| G[4]  | 139.745        | <b>739.789</b> | 734.450        | <b>734.785</b> | 734.114        | G[21] |
| K[5]  | 182.443        | <b>720.782</b> | <b>715.442</b> | <b>715.778</b> | 715.106        | K[20] |
| G[6]  | 201.450        | 678.084        | 672.744        | <b>673.080</b> | 672.408        | G[19] |
| G[7]  | 220.458        | <b>659.076</b> | <b>653.737</b> | 654.073        | <b>653.401</b> | G[18] |
| K[8]  | 263.156        | 640.069        | <b>634.730</b> | <b>635.066</b> | 634.394        | K[17] |
| G[9]  | <b>282.163</b> | <b>597.371</b> | 592.031        | <b>592.367</b> | 591.695        | G[16] |
| L[10] | <b>319.858</b> | <b>578.364</b> | <b>573.024</b> | <b>573.360</b> | 572.688        | L[15] |
| G[11] | <b>338.865</b> | <b>540.669</b> | <b>535.330</b> | <b>535.666</b> | <b>534.994</b> | G[14] |
| K[12] | <b>381.563</b> | <b>521.662</b> | <b>516.322</b> | <b>516.658</b> | <b>515.986</b> | K[13] |
| G[13] | <b>400.570</b> | <b>478.964</b> | <b>473.624</b> | <b>473.960</b> | <b>473.288</b> | G[12] |
| G[14] | <b>419.578</b> | 459.957        | <b>454.617</b> | <b>454.953</b> | <b>454.281</b> | G[11] |
| A[15] | 443.257        | 440.949        | <b>435.610</b> | <b>435.946</b> | <b>435.274</b> | A[10] |
| K[16] | <b>485.955</b> | <b>417.270</b> | <b>411.931</b> | <b>412.267</b> | 411.595        | K[9]  |
| R[17] | 537.989        | 374.572        | 369.232        | 369.568        | 368.896        | R[8]  |
| H[18] | 853.675        | 822.538        | 317.190        | 317.525        | 316.853        | H[7]  |
| R[19] | <b>635.709</b> | 276.852        | 271.512        | 271.848        | 271.176        | R[6]  |
| K[20] | 678.407        | 224.818        | 219.478        | 219.815        | 219.143        | K[5]  |
| V[21] | 711.430        | 182.120        | 176.780        | 177.116        | 176.444        | V[4]  |
| L[22] | <b>749.124</b> | 149.097        | 143.758        | 144.094        | 143.422        | L[3]  |
| R[23] | <b>815.174</b> | 111.402        | 106.063        | 106.399        | 105.727        | R[2]  |
| D[24] | 853.516        | 45.353         | 40.014         | 40.349         | 39.678         | D[1]  |

# sp | P62806 | H4\_MOUSE

[Acetyl]SGRGKGGKGLGKGGAKRHRKVL R Trimethyl D  
42.05

- ▶ fragmentation table for charge state 4+
- ▶ specType=etd
- ▶ score=59.17
- ▶ F112505.dat
- ▶ query=q47767.p1
- ▶ precursor=366.506610
- ▶ chargePrecursor=7
- ▶ itol=0.5

| AA    | c              | y              | z+1            | z+2            | z              | AA    |
|-------|----------------|----------------|----------------|----------------|----------------|-------|
| S[1]  | 37.525         | 840.635        | <b>636.630</b> | 0.755          | <b>636.378</b> | S[24] |
| G[2]  | 51.780         | <b>608.374</b> | <b>604.370</b> | 0.755          | 604.118        | G[23] |
| R[3]  | 90.805         | 594.119        | 590.114        | <b>590.366</b> | 589.862        | R[22] |
| G[4]  | 105.061        | <b>555.094</b> | 551.089        | 551.341        | 550.837        | G[21] |
| K[5]  | 137.084        | <b>540.838</b> | 536.834        | <b>537.086</b> | 536.582        | K[20] |
| G[6]  | 151.340        | 508.815        | 504.810        | 505.062        | 504.558        | G[19] |
| G[7]  | 165.595        | 494.559        | 490.554        | 490.806        | <b>490.303</b> | G[18] |
| K[8]  | 197.619        | 480.304        | <b>476.299</b> | <b>476.551</b> | <b>476.047</b> | K[17] |
| G[9]  | 211.874        | 476.299        | <b>444.275</b> | <b>444.527</b> | <b>444.023</b> | G[16] |
| L[10] | 380.148        | <b>434.025</b> | <b>430.020</b> | <b>430.272</b> | <b>429.768</b> | L[15] |
| G[11] | 354.403        | 429.754        | 425.749        | 426.001        | 425.497        | G[14] |
| K[12] | 286.424        | 391.498        | <b>387.494</b> | 387.746        | <b>387.242</b> | K[13] |
| G[13] | <b>300.680</b> | 359.475        | 355.470        | 355.722        | 355.218        | G[12] |
| G[14] | 314.935        | 345.219        | 341.215        | 341.466        | 340.963        | G[11] |
| A[15] | 332.694        | <b>330.964</b> | 326.959        | 327.211        | 326.707        | A[10] |
| K[16] | 364.718        | 313.205        | 309.200        | 309.452        | 308.948        | K[9]  |
| R[17] | <b>403.743</b> | 281.181        | 277.176        | 277.428        | 276.924        | R[8]  |
| H[18] | <b>438.008</b> | 242.156        | 238.151        | 238.403        | 237.899        | H[7]  |
| R[19] | <b>477.033</b> | 207.891        | <b>203.886</b> | <b>204.138</b> | 203.634        | R[6]  |
| K[20] | 369.057        | 198.866        | 194.861        | 195.113        | 194.609        | K[5]  |
| V[21] | 533.824        | 136.842        | 132.837        | 133.089        | 132.585        | V[4]  |
| L[22] | 562.095        | 112.075        | 108.070        | 108.322        | 107.818        | L[3]  |
| R[23] | <b>611.632</b> | 83.804         | 79.799         | 80.051         | 79.547         | R[2]  |
| D[24] | 640.389        | 34.267         | 30.262         | 30.514         | 30.010         | D[1]  |

# sp | P62806 | H4\_MOUSE

[Acetyl]SGRGKGGKGLGKGGAKRHRKVL R Trimethyl D  
42.05

- ▶ fragmentation table for charge state 5+
- ▶ specType=etd
- ▶ score=59.17
- ▶ F112505.dat
- ▶ query=q47767.p1
- ▶ precursor=366.506610
- ▶ chargePrecursor=7
- ▶ itol=0.5

| AA    | c              | y              | z+1            | z+2            | z              | AA    |
|-------|----------------|----------------|----------------|----------------|----------------|-------|
| S[1]  | 80.221         | 512.709        | <b>509.506</b> | 0.806          | 509.804        | S[24] |
| G[2]  | 41.625         | <b>486.901</b> | <b>483.697</b> | 0.806          | <b>483.496</b> | G[23] |
| R[3]  | 72.846         | <b>475.497</b> | 472.293        | 472.494        | 472.091        | R[22] |
| G[4]  | 84.250         | <b>444.276</b> | 441.073        | 441.274        | 440.871        | G[21] |
| K[5]  | 109.869        | 432.872        | 429.668        | <b>429.870</b> | 429.467        | K[20] |
| G[6]  | 121.273        | <b>407.253</b> | <b>404.049</b> | <b>404.251</b> | <b>403.848</b> | G[19] |
| G[7]  | 132.677        | 395.849        | 392.645        | 392.847        | 392.443        | G[18] |
| K[8]  | <b>158.296</b> | 384.444        | <b>381.241</b> | <b>381.442</b> | <b>381.039</b> | K[17] |
| G[9]  | 169.701        | 373.039        | 369.835        | 369.835        | 369.432        | G[16] |
| L[10] | 182.118        | 347.821        | <b>344.217</b> | 344.819        | <b>344.016</b> | L[15] |
| G[11] | <b>203.722</b> | 324.804        | 321.601        | 321.802        | 321.399        | G[14] |
| K[12] | 229.341        | 313.400        | 310.196        | 310.398        | 309.995        | K[13] |
| G[13] | 240.745        | 287.781        | 284.577        | 284.779        | 284.376        | G[12] |
| G[14] | 252.149        | 276.377        | <b>273.173</b> | <b>273.375</b> | <b>272.972</b> | G[11] |
| A[15] | 266.357        | 264.973        | 261.769        | 261.970        | 261.567        | A[10] |
| K[16] | 281.976        | 250.765        | 247.561        | 247.763        | 247.360        | K[9]  |
| R[17] | 323.196        | 225.146        | 221.942        | 222.144        | 221.741        | R[8]  |
| H[18] | 360.608        | 193.926        | 190.722        | 190.924        | 190.521        | H[7]  |
| R[19] | <b>381.828</b> | 166.514        | 163.310        | 163.512        | 163.109        | R[6]  |
| K[20] | <b>407.447</b> | 135.294        | 132.090        | 132.292        | 131.889        | K[5]  |
| V[21] | <b>427.261</b> | 109.675        | 106.471        | 106.673        | 106.270        | V[4]  |
| L[22] | <b>449.878</b> | 89.861         | 86.657         | 86.859         | 86.456         | L[3]  |
| R[23] | <b>489.507</b> | 67.244         | 64.041         | 64.242         | 63.839         | R[2]  |
| D[24] | 512.513        | 27.615         | 24.411         | 24.613         | 24.209         | D[1]  |



# sp | P62806 | H4\_MOUSE

[Acetyl]SGRGKGGKGLGKGGAKRHRKVL R Trimethyl D  
42.05

- ▶ fragmentation table for charge state 6+
- ▶ specType=etd
- ▶ score=59.17
- ▶ F112505.dat
- ▶ query=q47767.p1
- ▶ precursor=366.506610
- ▶ chargePrecursor=7
- ▶ itol=0.5

| AA    | c              | y              | z+1            | z+2            | z              | AA    |
|-------|----------------|----------------|----------------|----------------|----------------|-------|
| S[1]  | 25.352         | <b>427.426</b> | <b>424.756</b> | 0.839          | <b>424.588</b> | S[24] |
| G[2]  | 34.856         | 405.919        | 403.240        | 0.839          | 403.081        | G[23] |
| R[3]  | 60.873         | 396.415        | 393.745        | <b>393.913</b> | 393.577        | R[22] |
| G[4]  | 70.376         | <b>370.398</b> | 367.728        | 367.896        | 367.560        | G[21] |
| K[5]  | 91.725         | 360.895        | 358.225        | 358.393        | 358.057        | K[20] |
| G[6]  | 101.229        | <b>339.545</b> | 336.875        | 337.044        | 336.708        | G[19] |
| G[7]  | 110.732        | <b>330.042</b> | 327.372        | 327.540        | 327.204        | G[18] |
| K[8]  | 132.082        | 320.538        | 317.868        | 318.036        | 317.701        | K[17] |
| G[9]  | 143.585        | 299.189        | 296.519        | 296.687        | 296.351        | G[16] |
| L[10] | 150.433        | 299.686        | 287.016        | 287.184        | 286.848        | L[15] |
| G[11] | 169.936        | 270.838        | 268.168        | 268.336        | 268.000        | G[14] |
| K[12] | 191.285        | 261.335        | 258.665        | 258.833        | 258.497        | K[13] |
| G[13] | 200.789        | 239.985        | 237.315        | 237.484        | 237.148        | G[12] |
| G[14] | 210.292        | 230.482        | 227.812        | 227.980        | 227.644        | G[11] |
| A[15] | 222.132        | 220.978        | 218.308        | 218.476        | 218.141        | A[10] |
| K[16] | 243.481        | 209.139        | 206.469        | 206.637        | 206.301        | K[9]  |
| R[17] | 269.498        | 187.790        | 185.120        | 185.288        | 184.952        | R[8]  |
| H[18] | 292.341        | 161.773        | 159.103        | 159.271        | 158.935        | H[7]  |
| R[19] | 318.358        | 138.930        | 136.260        | 136.428        | 136.092        | R[6]  |
| K[20] | 339.707        | 112.913        | 110.243        | 110.411        | 110.075        | K[5]  |
| V[21] | 356.219        | 91.564         | 88.894         | 89.062         | 88.726         | V[4]  |
| L[22] | 375.066        | 75.052         | 72.382         | 72.550         | 72.214         | L[3]  |
| R[23] | 408.091        | 56.205         | 53.535         | 53.703         | 53.367         | R[2]  |
| D[24] | <b>427.262</b> | 23.180         | 20.510         | 20.678         | 20.342         | D[1]  |

# sp | P62806 | H4\_MOUSE

[Acetyl]SGRGKGGKGLGKGGAKRHRK Trimethyl VLRD  
42.05

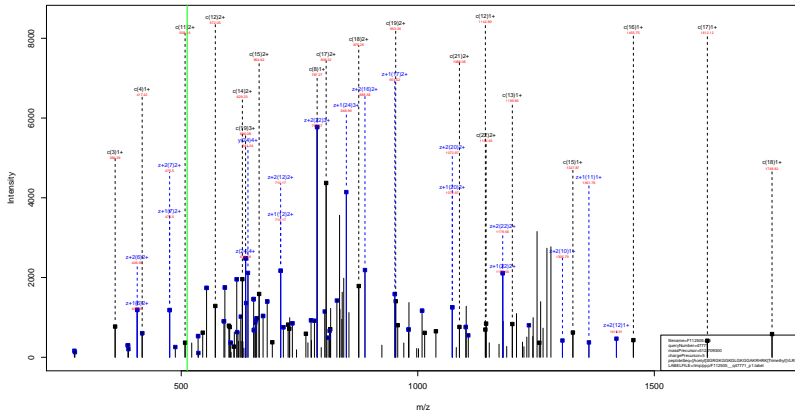

# sp | P62806 | H4\_MOUSE

[Acetyl]SGRGKGGKGLGKGGAKRHRK<sup>Trimethyl</sup>VLRD  
42.05

- ▶ fragmentation table for charge state 1+
- ▶ specType=etd
- ▶ score=98.76
- ▶ F112505.dat
- ▶ query=q47771\_p1
- ▶ precursor=512.709300
- ▶ chargePrecursor=5
- ▶ itol=0.5

| AA | c  | y               | z+1            | z+2             | z               | AA       |       |
|----|----|-----------------|----------------|-----------------|-----------------|----------|-------|
| S  | 1  | 147.076         | 2509.518       | 2541.489        | 0.000           | 2542.491 | S[24] |
| G  | 2  | 204.098         | 2430.475       | 2414.457        | 0.000           | 2413.449 | G[23] |
| R  | 3  | <b>368.199</b>  | 2373.464       | 2367.435        | 2358.443        | 2366.427 | R[22] |
| G  | 4  | <b>417.230</b>  | 2217.953       | 2201.334        | 2202.342        | 2200.328 | G[21] |
| K  | 5  | <b>545.315</b>  | 2160.331       | 2144.313        | 2145.320        | 2143.305 | K[20] |
| G  | 6  | <b>602.337</b>  | 2032.236       | 2016.218        | 2017.225        | 2015.210 | G[19] |
| G  | 7  | <b>659.358</b>  | 1975.215       | 1959.196        | 1960.204        | 1958.188 | G[18] |
| K  | 8  | <b>787.453</b>  | 1918.193       | 1902.175        | 1903.182        | 1901.167 | K[17] |
| G  | 9  | <b>814.875</b>  | 1790.098       | 1774.080        | 1775.087        | 1773.072 | G[16] |
| L  | 10 | <b>957.559</b>  | 1733.077       | 1717.058        | 1718.066        | 1716.050 | L[15] |
| G  | 11 | <b>1014.580</b> | 1619.993       | 1603.974        | 1604.982        | 1602.966 | G[14] |
| K  | 12 | <b>1142.675</b> | 1562.971       | 1546.953        | 1547.960        | 1545.945 | K[13] |
| G  | 13 | <b>1199.697</b> | 1434.876       | 1418.858        | <b>1419.866</b> | 1417.850 | G[12] |
| G  | 14 | <b>1256.718</b> | 1377.855       | <b>1361.836</b> | 1362.844        | 1360.828 | G[11] |
| A  | 15 | <b>1327.795</b> | 1320.833       | 1304.815        | <b>1305.823</b> | 1303.807 | A[10] |
| R  | 16 | <b>1435.850</b> | 1249.796       | 1233.778        | <b>1234.785</b> | 1232.770 | R[9]  |
| R  | 17 | <b>1611.951</b> | 1121.701       | 1105.683        | <b>1106.691</b> | 1104.675 | R[8]  |
| H  | 18 | <b>1749.010</b> | 985.600        | 949.582         | 950.589         | 948.574  | H[7]  |
| R  | 19 | 1908.111        | <b>828.541</b> | 812.523         | <b>813.530</b>  | 811.515  | R[6]  |
| K  | 20 | 2075.253        | 672.440        | <b>656.422</b>  | <b>657.429</b>  | 655.414  | K[5]  |
| V  | 21 | 2174.322        | 502.298        | 486.280         | <b>487.287</b>  | 485.272  | V[4]  |
| L  | 22 | 2287.406        | 403.232        | <b>387.211</b>  | <b>388.219</b>  | 386.203  | L[3]  |
| R  | 23 | 2443.507        | 290.146        | <b>274.127</b>  | <b>275.135</b>  | 273.119  | R[2]  |
| D  | 24 | 2538.534        | 134.045        | 118.026         | 119.034         | 117.018  | D[1]  |

# sp | P62806 | H4\_MOUSE

[Acetyl]SGRGKGGKGLGKGGAKRHRK<sup>Trimethyl</sup>VLRD  
42.05

- ▶ fragmentation table for charge state 2+
- ▶ specType=etd
- ▶ score=98.76
- ▶ F112505.dat
- ▶ query=q47771\_p1
- ▶ precursor=512.709300
- ▶ chargePrecursor=5
- ▶ itol=0.5

| AA    | c               | y              | z+1             | z+2             | z              | AA    |
|-------|-----------------|----------------|-----------------|-----------------|----------------|-------|
| S[1]  | 74.642          | 1280.263       | 1272.253        | 0.504           | 1271.749       | S[24] |
| G[2]  | 102.553         | 1215.741       | 1207.732        | 0.504           | 1207.236       | G[23] |
| R[3]  | 180.603         | 1187.231       | <b>1179.221</b> | <b>1179.725</b> | 1178.717       | R[22] |
| G[4]  | 209.114         | 1109.180       | <b>1101.171</b> | <b>1101.675</b> | 1100.569       | G[21] |
| K[5]  | 273.161         | 1080.669       | <b>1072.660</b> | <b>1073.164</b> | 1072.158       | K[20] |
| G[6]  | 301.672         | 1018.622       | <b>1008.612</b> | <b>1009.116</b> | 1008.108       | G[19] |
| G[7]  | 330.183         | 988.111        | <b>980.102</b>  | <b>980.606</b>  | 979.598        | G[18] |
| K[8]  | 394.230         | 959.600        | <b>951.591</b>  | 952.095         | <b>951.087</b> | K[17] |
| G[9]  | 422.741         | 898.553        | 887.543         | <b>888.047</b>  | 887.040        | G[16] |
| L[10] | 479.293         | 867.042        | 859.033         | 859.537         | 858.529        | L[15] |
| G[11] | <b>507.794</b>  | <b>810.500</b> | 802.491         | <b>802.995</b>  | 801.987        | G[14] |
| K[12] | <b>571.841</b>  | <b>781.989</b> | <b>773.980</b>  | <b>774.484</b>  | 773.476        | K[13] |
| G[13] | <b>600.352</b>  | 717.042        | <b>709.932</b>  | <b>710.436</b>  | 709.429        | G[12] |
| G[14] | <b>628.863</b>  | 689.431        | <b>681.422</b>  | <b>681.926</b>  | 680.918        | G[11] |
| A[15] | <b>664.381</b>  | 660.920        | <b>652.911</b>  | <b>653.415</b>  | 652.407        | A[10] |
| R[16] | <b>728.429</b>  | <b>625.402</b> | <b>617.392</b>  | <b>617.896</b>  | <b>616.889</b> | R[9]  |
| R[17] | <b>806.479</b>  | 501.354        | <b>553.345</b>  | <b>553.849</b>  | 552.841        | R[8]  |
| H[18] | <b>875.009</b>  | 481.304        | <b>475.294</b>  | <b>475.798</b>  | 474.791        | H[7]  |
| R[19] | <b>953.059</b>  | 414.774        | <b>406.765</b>  | <b>407.269</b>  | 406.261        | R[6]  |
| K[20] | <b>1038.130</b> | 336.724        | 328.714         | 329.218         | 328.211        | K[5]  |
| V[21] | <b>1087.665</b> | 251.653        | 243.643         | 244.147         | 243.140        | V[4]  |
| L[22] | <b>1144.207</b> | 202.119        | 194.109         | 194.613         | 193.605        | L[3]  |
| R[23] | 1222.257        | 148.577        | 137.567         | 138.071         | 137.063        | R[2]  |
| D[24] | 1279.771        | 67.528         | 59.517          | 60.021          | 59.013         | D[1]  |

# sp | P62806 | H4\_MOUSE

[Acetyl]SGRGKGGKGLGKGGAKRHRK<sup>Trimethyl</sup>VLRD  
42.05

- ▶ fragmentation table for charge state 3+
- ▶ specType=etd
- ▶ score=98.76
- ▶ F112505.dat
- ▶ query=q47771.p1
- ▶ precursor=512.709300
- ▶ chargePrecursor=5
- ▶ itol=0.5

| AA    | c              | y              | z+1            | z+2            | z              | AA    |
|-------|----------------|----------------|----------------|----------------|----------------|-------|
| S[1]  | 49.697         | 853.844        | <b>848.505</b> | 0.672          | 848.109        | S[24] |
| G[2]  | 58.704         | <b>810.830</b> | 805.420        | 0.672          | 805.154        | G[23] |
| R[3]  | 120.738        | 791.823        | 786.483        | <b>786.819</b> | 786.147        | R[22] |
| G[4]  | 139.745        | 739.789        | <b>734.450</b> | <b>734.785</b> | 734.114        | G[21] |
| K[5]  | 182.443        | 720.782        | <b>715.442</b> | <b>715.778</b> | 715.106        | K[20] |
| G[6]  | 201.450        | 678.084        | <b>672.744</b> | <b>673.080</b> | 672.408        | G[19] |
| G[7]  | 220.458        | <b>659.076</b> | <b>653.737</b> | <b>654.073</b> | <b>653.401</b> | G[18] |
| K[8]  | 263.156        | 640.069        | 634.730        | 635.066        | 634.394        | K[17] |
| G[9]  | 282.163        | 597.371        | <b>592.031</b> | <b>592.367</b> | 591.699        | G[16] |
| L[10] | 319.858        | 678.364        | 673.024        | 673.360        | 672.688        | L[15] |
| G[11] | 338.865        | 540.669        | <b>535.330</b> | <b>535.666</b> | 534.994        | G[14] |
| K[12] | 381.563        | 521.662        | 516.322        | 516.658        | 515.986        | K[13] |
| G[13] | 400.570        | 478.964        | 473.624        | 473.960        | 473.288        | G[12] |
| G[14] | 419.578        | 459.957        | 454.617        | 454.953        | 454.281        | G[11] |
| A[15] | 443.257        | 440.949        | 435.610        | 435.946        | 435.274        | A[10] |
| K[16] | 485.955        | <b>417.270</b> | 411.931        | 412.267        | 411.595        | K[9]  |
| R[17] | 537.989        | 374.572        | 369.232        | 369.568        | 368.896        | R[8]  |
| H[18] | 593.976        | 322.538        | 317.199        | 317.535        | 316.863        | H[7]  |
| R[19] | <b>635.709</b> | 276.852        | 271.512        | 271.848        | 271.176        | R[6]  |
| K[20] | <b>692.423</b> | 224.818        | 219.478        | 219.815        | 219.143        | K[5]  |
| V[21] | <b>725.445</b> | 168.104        | 162.765        | 163.101        | 162.429        | V[4]  |
| L[22] | <b>763.140</b> | 135.082        | 129.742        | 130.078        | 129.406        | L[3]  |
| R[23] | <b>815.174</b> | 97.387         | 92.047         | 92.383         | 91.711         | R[2]  |
| D[24] | 853.516        | 45.353         | 40.014         | 40.349         | 39.678         | D[1]  |

# sp | P62806 | H4\_MOUSE

[Acetyl]SGRGKGGKGLGKGGAKRHRK<sup>Trimethyl</sup>VLRD  
42.05

- ▶ fragmentation table for charge state 4+
- ▶ specType=etd
- ▶ score=98.76
- ▶ F112505.dat
- ▶ query=q47771\_p1
- ▶ precursor=512.709300
- ▶ chargePrecursor=5
- ▶ itol=0.5

| AA    | c              | y              | z+1            | z+2            | z              | AA    |
|-------|----------------|----------------|----------------|----------------|----------------|-------|
| S[1]  | 37.525         | <b>640.635</b> | <b>636.630</b> | 0.755          | <b>636.178</b> | S[24] |
| G[2]  | 51.780         | 508.174        | <b>604.370</b> | 0.755          | <b>604.118</b> | G[23] |
| R[3]  | 90.805         | 594.119        | <b>590.114</b> | <b>590.366</b> | <b>589.862</b> | R[22] |
| G[4]  | 105.061        | 555.094        | 551.089        | 551.341        | 550.837        | G[21] |
| K[5]  | 137.084        | 540.838        | 536.834        | 537.086        | <b>536.582</b> | K[20] |
| G[6]  | 151.340        | 508.815        | 504.810        | 505.062        | 504.558        | G[19] |
| G[7]  | 165.595        | 494.559        | 490.554        | 490.806        | 490.303        | G[18] |
| K[8]  | 197.619        | 480.304        | 476.299        | 476.551        | 476.047        | K[17] |
| G[9]  | 211.874        | 448.280        | 445.275        | 445.527        | 444.023        | G[16] |
| L[10] | 280.148        | 434.025        | 430.020        | 430.272        | 429.768        | L[15] |
| G[11] | 254.401        | 405.754        | 401.749        | 402.001        | 401.497        | G[14] |
| K[12] | 286.424        | 391.498        | <b>387.494</b> | <b>387.746</b> | <b>387.242</b> | K[13] |
| G[13] | 300.680        | 359.475        | 355.470        | 355.722        | 355.218        | G[12] |
| G[14] | 314.935        | 345.219        | 341.215        | 341.466        | 340.963        | G[11] |
| A[15] | 332.694        | 330.964        | 326.959        | 327.211        | 326.707        | A[10] |
| K[16] | 364.718        | 313.205        | 309.200        | 309.452        | 308.948        | K[9]  |
| R[17] | 403.743        | 281.181        | 277.176        | 277.428        | 276.924        | R[8]  |
| H[18] | 438.008        | 242.156        | 238.151        | 238.403        | 237.899        | H[7]  |
| R[19] | 477.033        | 207.891        | 203.886        | 204.138        | 203.634        | R[6]  |
| K[20] | 519.569        | 168.866        | 164.861        | 165.113        | 164.609        | K[5]  |
| V[21] | 544.336        | 126.330        | 122.325        | 122.577        | 122.073        | V[4]  |
| L[22] | 572.607        | 101.563        | 97.558         | 97.810         | 97.306         | L[3]  |
| R[23] | <b>611.632</b> | 73.292         | 69.287         | 69.539         | 69.035         | R[2]  |
| D[24] | 640.389        | 34.267         | 30.262         | 30.514         | 30.010         | D[1]  |

# sp | P62806 | H4\_MOUSE

[Acetyl]SGRGKGGKGLGKGGAK Acetyl 42.01 RHRK Trimethyl 42.05 VLRD

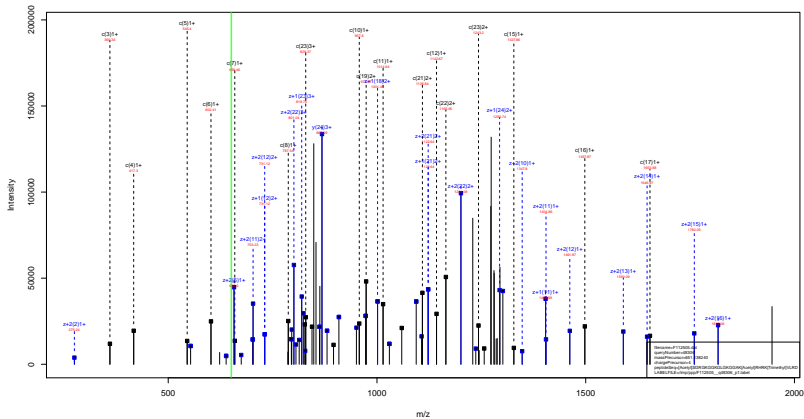

# sp | P62806 | H4\_MOUSE

[Acetyl]SGRGKGGKGLGKGGAK<sup>Acetyl</sup> RHRK<sup>Trimethyl</sup> VLRD<sup>42.01</sup> <sup>42.05</sup>

- ▶ fragmentation table for charge state 1+
- ▶ specType=etd
- ▶ score=110.80
- ▶ F112505.dat
- ▶ query=q48306\_p1
- ▶ precursor=651.138240
- ▶ chargePrecursor=4
- ▶ itol=0.5

| AA    | c               | y              | z+1             | z+2             | z        | AA    |
|-------|-----------------|----------------|-----------------|-----------------|----------|-------|
| S[1]  | 147.076         | 2601.528       | 2585.510        | 0.000           | 2584.502 | S[24] |
| G[2]  | 204.098         | 2472.488       | 2456.467        | 0.000           | 2455.450 | G[23] |
| R[3]  | <b>350.190</b>  | 2415.464       | 2399.445        | 2400.453        | 2398.430 | R[22] |
| G[4]  | <b>417.230</b>  | 2269.363       | 2243.345        | 2244.352        | 2242.337 | G[21] |
| K[5]  | <b>545.315</b>  | 2202.342       | 2186.323        | 2187.331        | 2185.315 | K[20] |
| G[6]  | <b>602.337</b>  | 2074.247       | 2058.228        | 2059.236        | 2057.220 | G[19] |
| G[7]  | <b>659.358</b>  | 2017.225       | 2001.207        | 2002.214        | 2000.199 | G[18] |
| K[8]  | <b>787.453</b>  | 1960.204       | 1944.185        | 1945.193        | 1943.177 | K[17] |
| G[9]  | <b>844.475</b>  | 1832.109       | 1816.080        | <b>1817.098</b> | 1815.082 | G[16] |
| L[10] | <b>927.559</b>  | 1775.087       | 1759.068        | <b>1760.077</b> | 1758.061 | L[15] |
| G[11] | <b>1014.580</b> | 1682.003       | 1665.985        | <b>1646.993</b> | 1644.977 | G[14] |
| K[12] | <b>1142.675</b> | 1604.982       | 1588.963        | <b>1589.971</b> | 1587.955 | K[13] |
| G[13] | 1199.697        | 1476.887       | 1460.868        | <b>1461.876</b> | 1459.860 | G[12] |
| G[14] | <b>1256.718</b> | 1419.866       | <b>1403.847</b> | <b>1404.855</b> | 1402.839 | G[11] |
| A[15] | <b>1327.756</b> | 1362.844       | 1346.825        | <b>1347.833</b> | 1345.818 | A[10] |
| R[16] | <b>1409.881</b> | 1291.807       | 1275.788        | 1276.796        | 1274.780 | R[9]  |
| R[17] | <b>1653.962</b> | 1121.701       | 1105.683        | <b>1106.691</b> | 1104.675 | R[8]  |
| H[18] | 1791.021        | 965.600        | 949.582         | <b>950.589</b>  | 948.574  | H[7]  |
| R[19] | 1947.122        | <b>828.541</b> | 812.523         | <b>813.530</b>  | 811.515  | R[6]  |
| K[20] | 2117.264        | 672.440        | 656.422         | <b>657.429</b>  | 655.414  | K[5]  |
| V[21] | 2216.332        | 502.298        | 486.280         | 487.287         | 485.272  | V[4]  |
| L[22] | 2329.416        | 403.230        | 387.211         | 388.219         | 386.203  | L[3]  |
| R[23] | 2485.517        | 298.146        | 274.127         | <b>275.135</b>  | 273.110  | R[2]  |
| D[24] | 2600.544        | 134.045        | 118.026         | 119.034         | 117.018  | D[1]  |



# sp | P62806 | H4\_MOUSE

[Acetyl]SGRGKGGKGLGKGGAK<sup>Acetyl</sup> RHRK<sup>Trimethyl</sup> VLRLD<sup>42.01</sup> <sup>42.05</sup>

- ▶ fragmentation table for charge state 2+
- ▶ specType=etd
- ▶ score=110.80
- ▶ F112505.dat
- ▶ query=q48306\_p1
- ▶ precursor=651.138240
- ▶ chargePrecursor=4
- ▶ itol=0.5

| AA |    | c               | y               | z+1             | z+2             | z              | AA    |
|----|----|-----------------|-----------------|-----------------|-----------------|----------------|-------|
| S  | 1  | 74.642          | <b>1301.268</b> | <b>1293.258</b> | 0.504           | 1292.752       | S[24] |
| G  | 2  | 102.553         | <b>1236.747</b> | 1228.737        | 0.504           | 1228.231       | G[23] |
| R  | 3  | 180.603         | 1208.236        | 1203.225        | <b>1200.730</b> | 1199.723       | R[22] |
| G  | 4  | 269.114         | 1139.185        | <b>1122.176</b> | <b>1122.680</b> | 1121.677       | G[21] |
| K  | 5  | 273.161         | 1101.675        | <b>1093.665</b> | <b>1094.169</b> | 1093.163       | K[20] |
| G  | 6  | 351.672         | 1037.627        | <b>1029.618</b> | <b>1030.122</b> | 1029.114       | G[19] |
| G  | 7  | 330.183         | 1009.116        | <b>1001.107</b> | <b>1001.611</b> | 1000.603       | G[18] |
| K  | 8  | 394.230         | 980.606         | <b>972.596</b>  | <b>973.100</b>  | 972.092        | K[17] |
| G  | 9  | 422.741         | 916.556         | <b>908.549</b>  | <b>909.053</b>  | 908.045        | G[16] |
| L  | 10 | 479.293         | 888.047         | <b>880.038</b>  | <b>880.542</b>  | 879.535        | L[15] |
| G  | 11 | 507.794         | 831.505         | <b>823.496</b>  | <b>824.000</b>  | 823.992        | G[14] |
| K  | 12 | 571.841         | 802.995         | <b>794.985</b>  | <b>795.489</b>  | <b>794.481</b> | K[13] |
| G  | 13 | 600.352         | 738.947         | <b>730.938</b>  | <b>731.442</b>  | 730.434        | G[12] |
| G  | 14 | 628.863         | 710.436         | <b>702.427</b>  | <b>702.931</b>  | <b>701.923</b> | G[11] |
| A  | 15 | 664.361         | 681.926         | 672.917         | <b>674.420</b>  | 673.412        | A[10] |
| R  | 16 | 709.438         | 646.409         | <b>638.398</b>  | <b>638.902</b>  | 638.895        | R[9]  |
| R  | 17 | <b>827.485</b>  | 561.354         | <b>553.345</b>  | <b>553.849</b>  | 552.841        | R[8]  |
| H  | 18 | <b>896.014</b>  | 483.304         | 475.294         | 475.798         | 474.791        | H[7]  |
| R  | 19 | <b>974.065</b>  | 414.774         | 406.765         | 407.269         | 406.261        | R[6]  |
| K  | 20 | <b>1058.136</b> | 336.724         | 328.714         | 329.218         | 328.211        | K[5]  |
| V  | 21 | <b>1108.870</b> | 251.663         | 243.653         | 244.157         | 243.150        | V[4]  |
| L  | 22 | <b>1165.212</b> | 202.119         | 194.109         | 194.613         | 193.605        | L[3]  |
| R  | 23 | <b>1243.262</b> | 145.577         | 137.567         | 138.071         | 137.063        | R[2]  |
| D  | 24 | 1300.776        | 67.526          | 59.517          | 60.021          | 59.013         | D[1]  |

# sp | P62806 | H4\_MOUSE

[Acetyl]SGRGKGGKGLGKGGAK<sup>Acetyl</sup> RHRK<sup>Trimethyl</sup> VLRLD<sup>42.01</sup> <sup>42.05</sup>

- ▶ fragmentation table for charge state 3+
- ▶ specType=etd
- ▶ score=110.80
- ▶ F112505.dat
- ▶ query=q48306.p1
- ▶ precursor=651.138240
- ▶ chargePrecursor=4
- ▶ itol=0.5

| AA    | c              | y              | z+1            | z+2            | z              | AA    |
|-------|----------------|----------------|----------------|----------------|----------------|-------|
| S[1]  | 49.697         | <b>867.848</b> | <b>862.508</b> | 0.672          | <b>862.172</b> | S[24] |
| G[2]  | 58.704         | 824.833        | <b>819.494</b> | 0.672          | 819.158        | G[23] |
| R[3]  | 150.738        | <b>805.826</b> | 800.487        | <b>800.823</b> | 800.151        | R[22] |
| G[4]  | 139.745        | 753.793        | 748.453        | 748.789        | 748.117        | G[21] |
| K[5]  | 182.443        | 734.785        | 729.446        | 729.782        | 729.110        | K[20] |
| G[6]  | 201.450        | 692.087        | 686.748        | 687.083        | 686.412        | G[19] |
| G[7]  | 220.458        | 673.080        | 667.740        | 668.076        | 667.404        | G[18] |
| K[8]  | 263.156        | 654.073        | 648.733        | 649.069        | 648.397        | K[17] |
| G[9]  | 282.163        | 633.374        | 628.035        | 628.371        | 627.699        | G[16] |
| L[10] | 319.858        | 602.367        | 597.028        | 597.364        | 596.692        | L[15] |
| G[11] | 338.865        | 554.673        | 549.333        | 549.669        | 548.997        | G[14] |
| K[12] | 381.563        | 535.666        | 530.326        | 530.662        | 529.990        | K[13] |
| G[13] | 400.570        | 492.967        | 487.628        | 487.964        | 487.292        | G[12] |
| G[14] | 419.578        | 473.960        | 468.620        | 468.956        | 468.285        | G[11] |
| A[15] | 443.257        | 454.953        | 449.613        | 449.949        | 449.277        | A[10] |
| K[16] | 469.958        | 431.274        | 425.934        | 426.270        | 425.598        | K[9]  |
| R[17] | 551.992        | 374.572        | 369.232        | 369.568        | 368.896        | R[8]  |
| H[18] | 597.678        | 322.538        | 317.198        | 317.535        | 316.863        | H[7]  |
| R[19] | 649.712        | 276.852        | 271.512        | 271.848        | 271.176        | R[6]  |
| K[20] | 706.426        | 224.818        | 219.478        | 219.815        | 219.143        | K[5]  |
| V[21] | 739.449        | 168.104        | 162.764        | 163.101        | 162.429        | V[4]  |
| L[22] | 777.144        | 135.082        | 129.742        | 130.078        | 129.406        | L[3]  |
| R[23] | <b>829.177</b> | 97.387         | 92.047         | 92.383         | 91.711         | R[2]  |
| D[24] | 867.550        | 45.353         | 40.014         | 40.349         | 39.678         | D[1]  |

# sp | P62806 | H4\_MOUSE

SGR<sup>Trimethyl</sup><sub>42.05</sub> GKGGKGLGK<sup>Acetyl</sup><sub>42.01</sub> GGAK<sup>Acetyl</sup><sub>42.01</sub> RHRK<sup>Acetyl</sup><sub>42.01</sub> VL<sup>Acetyl</sup>LRD

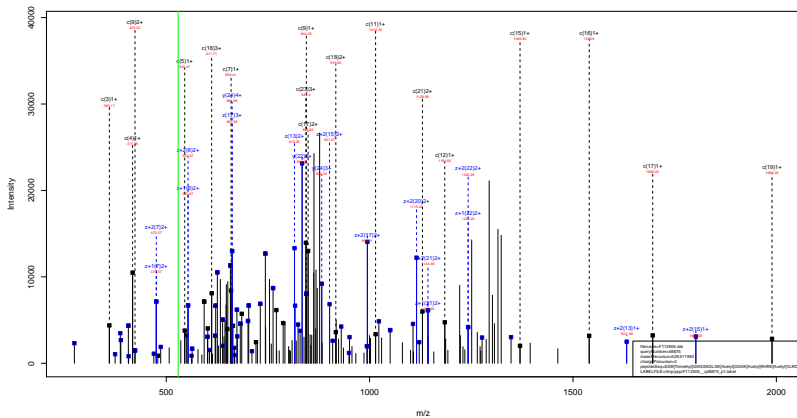

# sp | P62806 | H4\_MOUSE

SGR<sup>Trimethyl</sup><sub>42.05</sub> GKGGKGLGK<sup>Acetyl</sup><sub>42.01</sub> GGAK<sup>Acetyl</sup><sub>42.01</sub> RHRK<sup>Acetyl</sup><sub>42.01</sub> VLRLD

- ▶ fragmentation table for charge state 1+
- ▶ specType=etd
- ▶ score=59.46
- ▶ F112505.dat
- ▶ query=q48875\_p1
- ▶ precursor=529.511950
- ▶ chargePrecursor=5
- ▶ itol=0.5

| AA | c  | y               | z+1             | z+2            | z               | AA       |       |
|----|----|-----------------|-----------------|----------------|-----------------|----------|-------|
| S  | 1  | 105.006         | 2043.530        | 2027.520       | 0.000           | 2026.512 | S[24] |
| G  | 2  | 162.087         | 2556.507        | 2540.488       | 0.000           | 2539.480 | G[23] |
| R  | 3  | <b>360.235</b>  | 2490.480        | 2483.460       | 2484.475        | 2482.450 | R[22] |
| G  | 4  | <b>417.257</b>  | 2303.337        | 2288.330       | 2298.327        | 2284.311 | G[21] |
| K  | 5  | <b>545.352</b>  | 2244.310        | 2228.297       | 2220.305        | 2227.289 | K[20] |
| G  | 6  | <b>602.373</b>  | 2118.221        | 2100.200       | 2101.210        | 2099.194 | G[19] |
| G  | 7  | <b>659.395</b>  | 2059.200        | 2043.181       | 2044.189        | 2042.173 | G[18] |
| K  | 8  | <b>787.490</b>  | 2002.170        | 1986.150       | 1987.167        | 1985.152 | K[17] |
| G  | 9  | <b>844.511</b>  | 1874.063        | 1858.064       | 1859.072        | 1857.061 | G[16] |
| L  | 10 | 937.509         | 1817.062        | 1801.043       | <b>1802.051</b> | 1800.035 | L[15] |
| G  | 11 | <b>1014.617</b> | 1793.978        | 1687.950       | 1688.967        | 1686.951 | G[14] |
| K  | 12 | <b>1184.722</b> | 1646.950        | 1630.937       | <b>1631.945</b> | 1629.930 | K[13] |
| G  | 13 | 1241.744        | 1476.851        | 1460.830       | 1461.840        | 1459.824 | G[12] |
| G  | 14 | 1298.765        | 1419.820        | 1403.810       | 1404.818        | 1402.803 | G[11] |
| A  | 15 | <b>1369.802</b> | 1362.800        | 1346.789       | <b>1347.797</b> | 1345.781 | A[10] |
| R  | 16 | <b>1539.908</b> | 1290.771        | 1275.762       | <b>1276.760</b> | 1274.744 | R[9]  |
| R  | 17 | <b>1696.009</b> | <b>1121.665</b> | 1105.646       | <b>1106.654</b> | 1104.638 | R[8]  |
| H  | 18 | 1833.088        | 968.564         | <b>949.545</b> | <b>950.553</b>  | 948.537  | H[7]  |
| R  | 19 | <b>1989.169</b> | 828.505         | 812.488        | 813.494         | 811.478  | R[6]  |
| K  | 20 | 2159.274        | 672.404         | 656.385        | <b>657.393</b>  | 655.377  | K[5]  |
| V  | 21 | 2258.343        | 502.290         | <b>486.280</b> | 487.287         | 485.272  | V[4]  |
| L  | 22 | 2371.427        | 403.230         | <b>387.211</b> | <b>388.219</b>  | 386.203  | L[3]  |
| R  | 23 | 2527.528        | 290.140         | <b>274.127</b> | 275.135         | 273.119  | R[2]  |
| D  | 24 | 2642.595        | 134.045         | 118.020        | 119.034         | 117.018  | D[1]  |

# sp | P62806 | H4\_MOUSE

SGR<sup>Trimethyl</sup><sub>42.05</sub> GKGGKGLGK<sup>Acetyl</sup><sub>42.01</sub> GGAK<sup>Acetyl</sup><sub>42.01</sub> RHRK<sup>Acetyl</sup><sub>42.01</sub> VLRD

- ▶ fragmentation table for charge state 2+
- ▶ specType=etd
- ▶ score=59.46
- ▶ F112505.dat
- ▶ query=q48875\_p1
- ▶ precursor=529.511950
- ▶ chargePrecursor=5
- ▶ itol=0.5

| AA |    | c               | y              | z+1             | z+2             | z               | AA    |
|----|----|-----------------|----------------|-----------------|-----------------|-----------------|-------|
| S  | 1  | 53.037          | 1322.273       | 1314.264        | 0.504           | 1313.760        | S[24] |
| G  | 2  | 81.547          | 1278.757       | 1270.748        | 0.504           | 1270.244        | G[23] |
| R  | 3  | 180.821         | 1250.240       | <b>1242.237</b> | <b>1242.741</b> | 1241.733        | R[22] |
| G  | 4  | 309.332         | 1151.172       | <b>1143.163</b> | <b>1143.667</b> | 1142.659        | G[21] |
| K  | 5  | 273.180         | 1122.662       | 1114.653        | <b>1115.156</b> | 1114.148        | K[20] |
| G  | 6  | 301.690         | 1058.614       | <b>1050.605</b> | 1051.109        | <b>1050.101</b> | G[19] |
| G  | 7  | 330.201         | 1030.103       | 1022.094        | <b>1022.598</b> | 1021.590        | G[18] |
| K  | 8  | 394.248         | 1001.593       | <b>993.583</b>  | <b>994.087</b>  | <b>993.079</b>  | K[17] |
| G  | 9  | <b>422.750</b>  | 937.245        | 929.236         | <b>930.040</b>  | 929.032         | G[16] |
| L  | 10 | <b>479.301</b>  | <b>909.034</b> | 901.025         | <b>901.529</b>  | 900.521         | L[15] |
| Q  | 11 | 507.812         | 852.062        | <b>844.053</b>  | 844.557         | <b>843.979</b>  | Q[14] |
| K  | 12 | <b>592.865</b>  | <b>823.982</b> | 815.972         | <b>816.476</b>  | <b>815.468</b>  | K[13] |
| G  | 13 | <b>621.375</b>  | 738.029        | <b>730.920</b>  | <b>731.423</b>  | 730.415         | G[12] |
| G  | 14 | <b>649.886</b>  | <b>710.418</b> | <b>702.409</b>  | <b>702.913</b>  | 701.905         | G[11] |
| A  | 15 | <b>685.405</b>  | <b>681.507</b> | <b>673.498</b>  | <b>674.002</b>  | <b>673.394</b>  | A[10] |
| R  | 16 | <b>770.458</b>  | 606.059        | <b>638.380</b>  | <b>638.883</b>  | 637.875         | R[9]  |
| R  | 17 | <b>848.508</b>  | 561.136        | <b>553.327</b>  | <b>553.831</b>  | 552.823         | R[8]  |
| H  | 18 | <b>917.038</b>  | 483.288        | <b>475.276</b>  | <b>475.780</b>  | 474.772         | H[7]  |
| R  | 19 | 995.088         | 414.756        | <b>406.747</b>  | <b>407.251</b>  | 406.243         | R[6]  |
| K  | 20 | 1080.141        | 336.706        | 328.696         | 329.200         | 328.192         | K[5]  |
| V  | 21 | <b>1129.675</b> | 251.652        | 243.643         | 244.147         | 243.140         | V[4]  |
| L  | 22 | 1409.917        | 202.119        | 194.110         | 194.613         | 193.605         | L[3]  |
| R  | 23 | 1594.268        | 145.577        | 137.567         | 138.071         | 137.063         | R[2]  |
| D  | 24 | 1321.781        | 67.526         | 59.517          | 60.021          | 59.013          | D[1]  |

# sp | P62806 | H4\_MOUSE

SGR<sup>Trimethyl</sup><sub>42.05</sub> GKGGKGLGK<sup>Acetyl</sup><sub>42.01</sub> GGAK<sup>Acetyl</sup><sub>42.01</sub> RHRK<sup>Acetyl</sup><sub>42.01</sub> VLRD

- ▶ fragmentation table for charge state 3+
- ▶ specType=etd
- ▶ score=59.46
- ▶ F112505.dat
- ▶ query=q48875.p1
- ▶ precursor=529.511950
- ▶ chargePrecursor=5
- ▶ itol=0.5

| AA    | c              | y              | z+1            | z+2            | z              | AA    |
|-------|----------------|----------------|----------------|----------------|----------------|-------|
| S[1]  | 35.693         | <b>881.851</b> | 876.517        | 0.672          | 876.176        | S[24] |
| G[2]  | 54.701         | 852.841        | 847.501        | 0.672          | 847.165        | G[23] |
| R[3]  | 120.750        | <b>833.833</b> | 828.494        | <b>820.830</b> | 828.158        | R[22] |
| G[4]  | 139.757        | 767.784        | <b>762.444</b> | <b>762.780</b> | 762.108        | G[21] |
| K[5]  | 182.455        | 748.777        | <b>743.437</b> | <b>743.773</b> | 743.101        | K[20] |
| G[6]  | 201.463        | 706.079        | <b>700.739</b> | <b>701.075</b> | 700.403        | G[19] |
| G[7]  | 220.470        | 687.071        | <b>681.732</b> | <b>682.068</b> | 681.396        | G[18] |
| K[8]  | 253.168        | <b>668.064</b> | 662.725        | 653.061        | <b>662.389</b> | K[17] |
| G[9]  | 282.175        | <b>625.366</b> | <b>620.026</b> | <b>620.362</b> | 619.690        | G[16] |
| L[10] | 319.870        | <b>606.359</b> | <b>601.019</b> | <b>601.355</b> | 600.683        | L[15] |
| G[11] | 338.877        | 508.654        | <b>563.324</b> | <b>563.660</b> | 562.989        | G[14] |
| K[12] | 395.579        | <b>549.657</b> | 544.317        | 544.653        | 543.981        | K[13] |
| G[13] | 414.586        | 492.955        | 487.615        | 487.951        | 487.280        | G[12] |
| G[14] | 433.593        | 473.948        | 468.608        | 468.944        | 468.272        | G[11] |
| A[15] | 457.272        | 454.941        | 449.601        | 449.937        | 449.265        | A[10] |
| K[16] | 513.974        | 431.262        | 425.922        | 426.258        | 425.586        | K[9]  |
| R[17] | 568.688        | <b>374.560</b> | 369.220        | 369.556        | 368.884        | R[8]  |
| H[18] | <b>611.694</b> | 322.526        | 317.187        | 317.523        | 316.851        | H[7]  |
| R[19] | <b>663.728</b> | 276.840        | 271.500        | 271.836        | 271.164        | R[6]  |
| K[20] | <b>720.430</b> | 224.806        | 219.467        | 219.803        | 219.131        | K[5]  |
| V[21] | 753.452        | 168.104        | 162.765        | 163.101        | 162.429        | V[4]  |
| L[22] | 791.147        | 135.082        | 129.742        | 130.078        | 129.406        | L[3]  |
| R[23] | <b>843.181</b> | 97.387         | 92.047         | 92.383         | 91.711         | R[2]  |
| D[24] | 881.523        | 45.353         | 40.014         | 40.349         | 39.678         | D[1]  |

# sp | P62806 | H4\_MOUSE

SGR<sup>Trimethyl</sup><sub>42.05</sub> GKGGKGLGK<sup>Acetyl</sup><sub>42.01</sub> GGAK<sup>Acetyl</sup><sub>42.01</sub> RHRK<sup>Acetyl</sup><sub>42.01</sub> VLRLD

- ▶ fragmentation table for charge state 4+
- ▶ specType=etd
- ▶ score=59.46
- ▶ F112505.dat
- ▶ query=q48875.p1
- ▶ precursor=529.511950
- ▶ chargePrecursor=5
- ▶ itol=0.5

| AA    | c              | y              | z+1            | z+2            | z              | AA    |
|-------|----------------|----------------|----------------|----------------|----------------|-------|
| S[1]  | 27.022         | <b>661.640</b> | <b>657.636</b> | 0.755          | <b>657.384</b> | S[24] |
| G[2]  | 41.277         | <b>639.882</b> | 635.878        | 0.755          | 635.626        | G[23] |
| R[3]  | 90.814         | <b>625.627</b> | <b>621.622</b> | <b>621.874</b> | <b>621.370</b> | R[22] |
| G[4]  | 105.070        | 576.090        | 572.085        | 572.337        | 571.833        | G[21] |
| K[5]  | 137.093        | <b>561.834</b> | 557.830        | 558.082        | 557.578        | K[20] |
| G[6]  | 151.349        | 529.811        | 525.806        | 526.058        | 525.554        | G[19] |
| G[7]  | 165.604        | 515.555        | 511.551        | 511.803        | 511.299        | G[18] |
| K[8]  | 197.628        | 501.300        | 497.295        | 497.547        | 497.043        | K[17] |
| G[9]  | 211.883        | <b>469.276</b> | 465.272        | 465.524        | 465.020        | G[16] |
| L[10] | 280.154        | 435.021        | 431.016        | 431.268        | 430.764        | L[15] |
| G[11] | 254.410        | 426.750        | <b>422.745</b> | <b>422.997</b> | 422.493        | G[14] |
| K[12] | 296.936        | 412.494        | 408.489        | 408.742        | 408.238        | K[13] |
| G[13] | 311.191        | 369.968        | 365.963        | 366.215        | 365.711        | G[12] |
| G[14] | 325.447        | 355.713        | 351.708        | 351.960        | 351.456        | G[11] |
| A[15] | 343.206        | 341.457        | 337.453        | 337.705        | 337.201        | A[10] |
| K[16] | 385.732        | 323.698        | 319.693        | 319.945        | 319.441        | K[9]  |
| R[17] | 424.758        | 381.172        | 277.167        | 277.419        | 276.915        | R[8]  |
| H[18] | 459.022        | 242.146        | 238.142        | 238.394        | 237.890        | H[7]  |
| R[19] | 488.048        | 207.882        | 203.877        | 204.129        | 203.625        | R[6]  |
| K[20] | 560.574        | 168.856        | 164.852        | 165.104        | 164.600        | K[5]  |
| V[21] | 565.341        | 126.330        | 122.325        | 122.577        | 122.073        | V[4]  |
| L[22] | <b>593.612</b> | 101.563        | 97.558         | 97.810         | 97.306         | L[3]  |
| R[23] | 632.637        | 73.292         | 69.287         | 69.539         | 69.035         | R[2]  |
| D[24] | 661.394        | 34.267         | 30.262         | 30.514         | 30.010         | D[1]  |





# sp | P68433 | H31\_MOUSE

IAQDFK<sup>Methyl</sup>TD  
14.02

- ▶ fragmentation table for charge state 1+
- ▶ specType=etd
- ▶ score=42.36
- ▶ F112505.dat
- ▶ query=q7487.p1
- ▶ precursor=476.242630
- ▶ chargePrecursor=2
- ▶ itol=0.5

| AA  | c              | y              | z+1            | z+2            | z       | AA  |
|-----|----------------|----------------|----------------|----------------|---------|-----|
| I 1 | 131.118        | <b>951.478</b> | <b>935.459</b> | 0.000          | 934.452 | I 8 |
| A 2 | 202.155        | 838.394        | <b>822.375</b> | 0.000          | 821.368 | A 7 |
| Q 3 | 330.214        | 767.357        | <b>751.338</b> | 752.346        | 750.330 | Q 6 |
| D 4 | 445.241        | 639.298        | <b>623.280</b> | <b>624.288</b> | 622.272 | D 5 |
| F 5 | 592.309        | 524.271        | <b>508.253</b> | <b>509.261</b> | 507.245 | F 4 |
| K 6 | <b>734.420</b> | 377.203        | 361.184        | <b>362.192</b> | 360.177 | K 3 |
| T 7 | <b>835.467</b> | 235.092        | 219.074        | 220.082        | 218.066 | T 2 |
| D 8 | 950.494        | 134.045        | 118.026        | 119.034        | 117.018 | D 1 |

# sp | P68433 | H31\_MOUSE

IAQDFK Methyl TD  
14.02

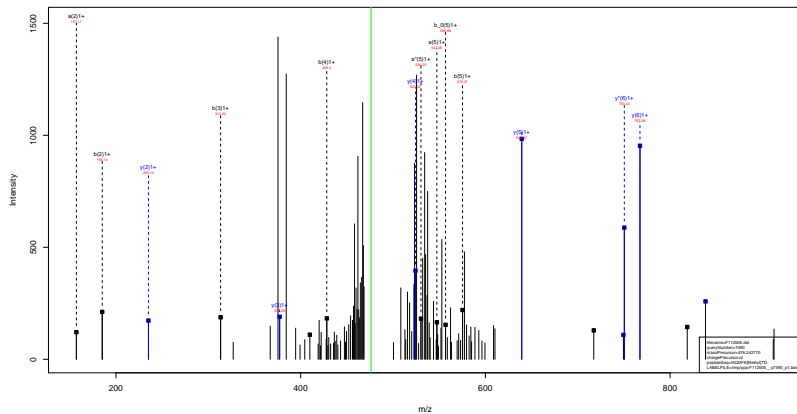

# sp | P68433 | H31\_MOUSE

IAQDFK<sup>Methyl</sup> TD  
14.02

- ▶ fragmentation table for charge state 1+
- ▶ specType=cid
- ▶ score=37.14
- ▶ F112505.dat
- ▶ query=q7490\_p1
- ▶ precursor=476.242710
- ▶ chargePrecursor=2
- ▶ itol=0.5

| AA  | a              | a*             | a:d     | b              | b*      | b:d            | y              | y*             | y:d            | AA  |
|-----|----------------|----------------|---------|----------------|---------|----------------|----------------|----------------|----------------|-----|
| T 1 | 46.098         | 0.000          | 0.000   | 114.093        | 0.000   | 0.000          | 901.416        | 109.406        | 113.989        | T 1 |
| A 2 | <b>157.134</b> | 0.000          | 0.000   | <b>185.128</b> | 0.000   | 0.000          | <b>838.354</b> | 821.366        | 830.384        | A 2 |
| Q 3 | 285.192        | 288.186        | 0.000   | <b>313.187</b> | 296.169 | 0.000          | <b>767.357</b> | <b>750.330</b> | <b>749.346</b> | Q 3 |
| G 4 | 400.219        | 393.193        | 387.200 | <b>428.214</b> | 411.187 | <b>410.203</b> | <b>630.298</b> | 622.272        | 621.288        | G 4 |
| F 5 | <b>547.287</b> | <b>536.261</b> | 529.277 | <b>575.282</b> | 558.256 | <b>557.272</b> | <b>524.271</b> | 507.245        | 508.261        | F 5 |
| R 6 | 639.289        | 632.273        | 621.260 | <b>717.293</b> | 700.269 | 689.262        | <b>377.283</b> | 360.277        | 359.283        | R 6 |
| T 7 | 790.446        | 773.419        | 772.435 | <b>818.441</b> | 801.414 | 800.430        | <b>235.092</b> | 0.000          | 237.082        | T 7 |
| G 8 | 905.473        | 888.446        | 887.462 | 933.468        | 916.441 | 915.457        | 134.040        | 0.000          | 136.034        | G 8 |

# sp | P68433 | H31\_MOUSE

IAQDFK Methyl TD  
14.02

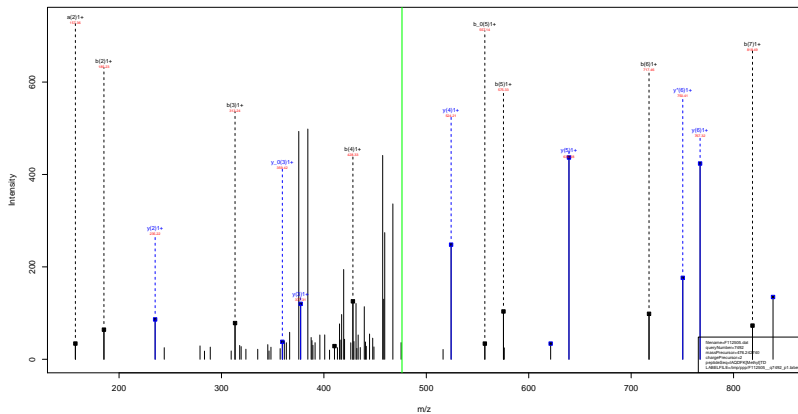

# sp | P68433 | H31\_MOUSE

IAQDFK<sup>Methyl</sup> TD  
14.02

- ▶ fragmentation table for charge state 1+
- ▶ specType=cid
- ▶ score=48.23
- ▶ F112505.dat
- ▶ query=q7492\_p1
- ▶ precursor=476.242740
- ▶ chargePrecursor=2
- ▶ itol=0.5

| AA         | a              | a <sup>*</sup> | a,β     | b              | b <sup>*</sup> | b,β   | γ              | γ <sup>*</sup> | γ,β     | AA         |
|------------|----------------|----------------|---------|----------------|----------------|-------|----------------|----------------|---------|------------|
| <b>T</b> 1 | 88.098         | 0.000          | 0.000   | 114.191        | 0.000          | 0.000 | 95.419         | 0.000          | 0.000   | <b>T</b> 1 |
| <b>A</b> 2 | <b>157.134</b> | 0.000          | 0.000   | <b>185.128</b> | 0.000          | 0.000 | <b>838.304</b> | 0.000          | 0.000   | <b>A</b> 2 |
| <b>Q</b> 3 | 285.192        | 286.186        | 0.000   | <b>313.187</b> | 286.186        | 0.000 | <b>767.357</b> | <b>750.330</b> | 0.000   | <b>Q</b> 3 |
| <b>D</b> 4 | 400.219        | 393.193        | 392.209 | <b>428.214</b> | 411.197        | 0.000 | <b>410.203</b> | <b>639.298</b> | 622.272 | <b>D</b> 4 |
| <b>F</b> 5 | 547.287        | 540.261        | 529.271 | <b>575.282</b> | 558.256        | 0.000 | <b>357.272</b> | <b>524.271</b> | 507.245 | <b>F</b> 5 |
| <b>R</b> 6 | 689.356        | 672.372        | 673.368 | <b>717.363</b> | 700.366        | 0.000 | 660.382        | <b>377.203</b> | 360.177 | <b>R</b> 6 |
| <b>I</b> 7 | 790.446        | 773.419        | 772.435 | <b>818.441</b> | 801.414        | 0.000 | 800.430        | <b>235.092</b> | 0.000   | <b>I</b> 7 |
| <b>G</b> 8 | 905.473        | 888.446        | 887.462 | 913.468        | 916.441        | 0.000 | 915.457        | 138.040        | 0.000   | <b>G</b> 8 |

# sp | P68433 | H31\_MOUSE

IAQDFK Methyl TD  
14.02

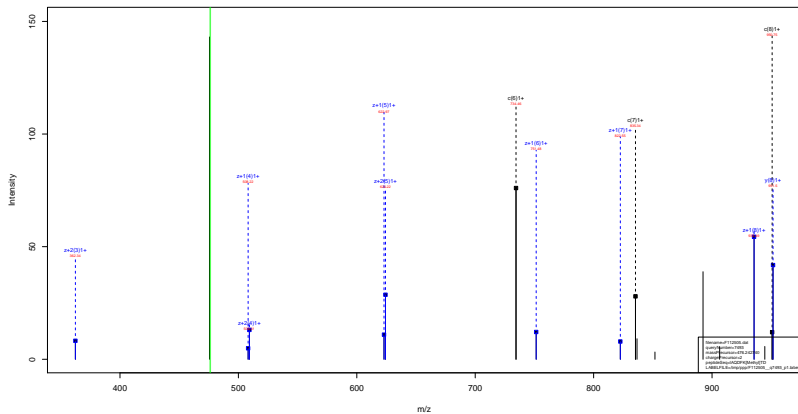

# sp | P68433 | H31\_MOUSE

IAQDFK<sup>Methyl</sup>TD  
14.02

- ▶ fragmentation table for charge state 1+
- ▶ specType=etd
- ▶ score=32.09
- ▶ F112505.dat
- ▶ query=q7493\_p1
- ▶ precursor=476.242740
- ▶ chargePrecursor=2
- ▶ itol=0.5

| AA  | c              | y              | z+1            | z+2            | z       | AA  |
|-----|----------------|----------------|----------------|----------------|---------|-----|
| I 1 | 131.118        | <b>951.478</b> | <b>935.459</b> | 0.000          | 934.452 | I 8 |
| A 2 | 202.155        | 838.394        | <b>822.375</b> | 0.000          | 821.368 | A 7 |
| Q 3 | 330.214        | 767.357        | <b>751.338</b> | 752.346        | 750.330 | Q 6 |
| D 4 | 445.241        | 639.298        | <b>623.280</b> | <b>624.288</b> | 622.272 | D 5 |
| F 5 | 592.309        | 524.271        | <b>508.253</b> | <b>509.261</b> | 507.245 | F 4 |
| K 6 | <b>734.420</b> | 377.203        | 361.184        | <b>362.192</b> | 360.177 | K 3 |
| T 7 | <b>835.467</b> | 235.092        | 219.074        | 220.082        | 218.066 | T 2 |
| D 8 | <b>950.494</b> | 134.045        | 118.026        | 119.034        | 117.018 | D 1 |

# sp | P68433 | H31\_MOUSE

VREIAQDFK <sup>Methyl</sup>TDL  
14.02

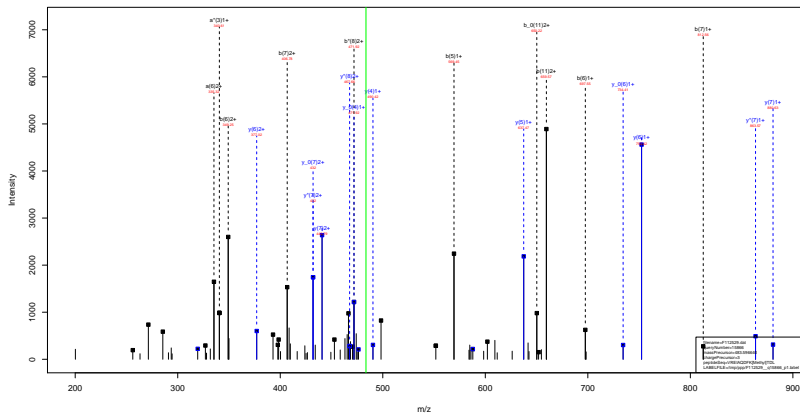



# sp | P68433 | H31\_MOUSE

VREIAQDFK <sup>Methyl</sup> 14.02 TDL

- ▶ fragmentation table for charge state 1+
- ▶ specType=cid
- ▶ score=39.91
- ▶ F112529.dat
- ▶ query=q15866\_p1
- ▶ precursor=483.596640
- ▶ chargePrecursor=3
- ▶ itol=0.5

| AA | a              | a*             | aΔ       | b              | b*       | bΔ             | r              | r*             | rΔ             | AA       |       |
|----|----------------|----------------|----------|----------------|----------|----------------|----------------|----------------|----------------|----------|-------|
| V  | 72.081         | 0.000          | 0.000    | 108.016        | 0.000    | 0.000          | 1448.172       | 1443.198       | 24.974         | V(L)2    |       |
| R  | 238.487        | 251.105        | 0.000    | <b>256.177</b> | 239.130  | 0.000          | 1349.700       | 1332.678       | 17.022         | R(L)1    |       |
| E  | 187.274        | <b>346.198</b> | 158.924  | 150.214        | 210      | 58.786         | 107.208        | 1103.603       | 1178.372       | 1175.904 | E(L)1 |
| T  | <b>478.369</b> | <b>453.252</b> | -25.117  | <b>406.303</b> | 488.277  | 81.974         | 609.203        | 1098.908       | 1044.538       | 54.370   | T(L)1 |
| A  | 241.246        | 208.239        | -32.997  | <b>568.341</b> | 252.314  | <b>551.330</b> | 951.478        | 954.482        | 1031.668       | 1031.668 | A(L)1 |
| Q  | 388.614        | <b>652.378</b> | 263.764  | <b>697.359</b> | 388.273  | 0.000          | <b>880.441</b> | <b>863.415</b> | 16.996         | Q(L)1    |       |
| D  | 184.431        | 187.462        | 3.031    | <b>812.426</b> | 195.668  | 11.237         | <b>782.362</b> | 738.268        | <b>734.212</b> | 4.048    | D(L)1 |
| F  | 474.208        | 614.473        | 140.265  | 408.492        | 492.408  | 83.916         | <b>637.356</b> | 609.323        | 28.033         | F(L)1    |       |
| R  | 107.632        | 1086.184       | 1078.552 | 1101.605       | 1084.978 | 16.627         | <b>490.287</b> | 473.261        | <b>472.277</b> | 1.014    | R(L)1 |
| I  | 1174.658       | 1157.631       | -17.027  | 1158.647       | 1202.653 | 43.996         | 1184.612       | 148.177        | 0.000          | I(L)1    |       |
| D  | 1099.608       | 1072.668       | -26.940  | 1071.661       | 1111.668 | 40.007         | 1099.608       | 261.729        | 0.000          | D(L)1    |       |
| L  | 1402.198       | 1386.192       | -16.006  | 1404.192       | 1436.194 | 31.992         | 1412.191       | 132.102        | 0.000          | L(L)1    |       |

# sp | P68433 | H31\_MOUSE

VREIAQDFK <sup>Methyl</sup> TDL  
14.02

- ▶ fragmentation table for charge state 2+
- ▶ specType=cid
- ▶ score=39.91
- ▶ F112529.dat
- ▶ query=q15866\_p1
- ▶ precursor=483.596640
- ▶ chargePrecursor=3
- ▶ itol=0.5

| AA    | a              | a*             | a,0     | b              | b*             | b,0            | y              | y*             | y,0            | AA    |
|-------|----------------|----------------|---------|----------------|----------------|----------------|----------------|----------------|----------------|-------|
| V[1]  | 36.544         | 0.504          | 0.504   | 50.541         | 0.504          | 0.504          | 724.891        | 718.378        | 715.886        | V[12] |
| R[2]  | 114.595        | 109.091        | 0.509   | 128.592        | 123.079        | 0.504          | 676.397        | 668.843        | 666.351        | R[11] |
| E[3]  | 179.116        | 170.603        | 170.111 | 191.113        | 184.600        | 184.108        | 587.395        | 588.791        | <b>588.301</b> | E[10] |
| T[4]  | 238.638        | 229.125        | 228.631 | 249.635        | 243.122        | 242.630        | 512.393        | 528.211        | 525.719        | T[9]  |
| A[5]  | <b>271.176</b> | 262.663        | 262.171 | <b>285.174</b> | 278.661        | 278.169        | <b>476.243</b> | <b>467.729</b> | <b>467.237</b> | A[8]  |
| Q[6]  | <b>315.206</b> | <b>326.692</b> | 326.200 | <b>349.203</b> | <b>340.690</b> | <b>340.198</b> | <b>440.724</b> | <b>432.211</b> | <b>431.719</b> | Q[7]  |
| D[7]  | <b>392.710</b> | 384.197        | 383.714 | <b>406.717</b> | <b>398.203</b> | <b>397.711</b> | <b>376.695</b> | 368.182        | 367.690        | D[6]  |
| F[8]  | <b>466.253</b> | 457.740        | 457.258 | 480.251        | <b>471.738</b> | 471.245        | <b>315.181</b> | 310.668        | 310.176        | F[5]  |
| K[9]  | 537.809        | 528.295        | 528.803 | <b>551.306</b> | 542.793        | 542.301        | 245.647        | 237.134        | 236.642        | K[4]  |
| I[10] | <b>587.833</b> | 579.319        | 578.827 | <b>601.830</b> | 593.317        | 592.825        | 178.599        | 0.504          | 185.091        | I[3]  |
| G[11] | 645.146        | 636.633        | 636.141 | <b>659.144</b> | 650.631        | <b>650.138</b> | 124.000        | 0.504          | 115.000        | G[2]  |
| L[12] | 701.668        | 693.155        | 692.663 | 714.666        | 706.152        | 705.660        | 68.500         | 0.504          | 0.504          | L[1]  |

# sp | P68433 | H31\_MOUSE

VREIAQDFK <sup>Methyl</sup> TDL  
14.02

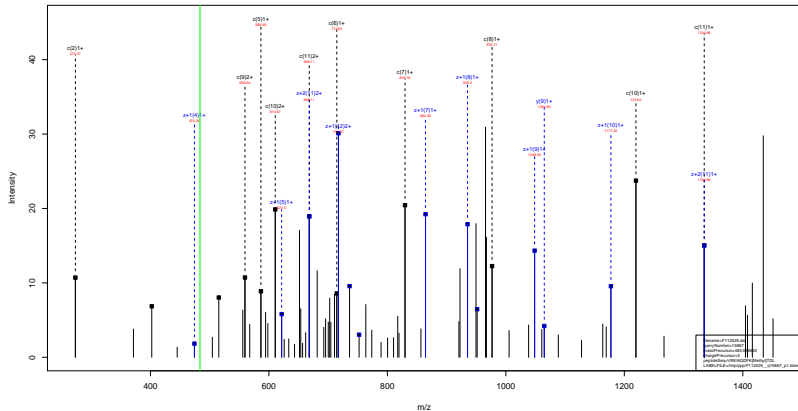

# sp | P68433 | H31\_MOUSE

VREIAQDFK <sup>Methyl</sup> TDL  
14.02

- ▶ fragmentation table for charge state 1+
- ▶ specType=etd
- ▶ score=46.67
- ▶ F112529.dat
- ▶ query=q15867\_p1
- ▶ precursor=483.596640
- ▶ chargePrecursor=3
- ▶ itol=0.5

| AA     | c               | y               | z+1             | z+2             | z        | AA     |
|--------|-----------------|-----------------|-----------------|-----------------|----------|--------|
| V [1]  | 117.102         | 1448.774        | 1432.756        | 0.000           | 1431.748 | V [12] |
| R [2]  | <b>273.203</b>  | 1349.705        | 1333.687        | <b>1334.695</b> | 1332.679 | R [11] |
| E [3]  | <b>402.246</b>  | 1191.655        | <b>1177.586</b> | 1176.594        | 1175.597 | E [10] |
| I [4]  | <b>515.130</b>  | <b>1064.562</b> | <b>1048.544</b> | 1049.551        | 1047.530 | I [9]  |
| A [5]  | <b>586.367</b>  | <b>951.478</b>  | <b>935.459</b>  | 936.467         | 934.452  | A [8]  |
| Q [6]  | <b>714.426</b>  | 889.441         | <b>864.422</b>  | 865.430         | 863.415  | Q [7]  |
| D [7]  | <b>829.453</b>  | <b>752.382</b>  | <b>736.364</b>  | 737.372         | 735.356  | D [6]  |
| T [8]  | <b>978.521</b>  | 677.366         | <b>621.337</b>  | 622.345         | 620.329  | T [5]  |
| K [9]  | 1118.632        | 600.287         | <b>474.208</b>  | 475.220         | 473.261  | K [4]  |
| V [10] | <b>1219.679</b> | 448.177         | 352.158         | 353.166         | 351.150  | V [13] |
| D [11] | <b>1334.706</b> | 247.120         | 231.110         | 232.118         | 230.102  | D [9]  |
| L [12] | 1447.790        | 132.102         | 116.083         | 117.091         | 115.075  | L [0]  |

# sp | P68433 | H31\_MOUSE

VREIAQDFK <sup>Methyl</sup> TDL  
14.02

- ▶ fragmentation table for charge state 2+
- ▶ specType=etd
- ▶ score=46.67
- ▶ F112529.dat
- ▶ query=q15867\_p1
- ▶ precursor=483.596640
- ▶ chargePrecursor=3
- ▶ itol=0.5

| AA    | c              | y       | z+1            | z+2            | z       | AA    |
|-------|----------------|---------|----------------|----------------|---------|-------|
| V[1]  | 59.095         | 724.891 | <b>716.881</b> | 0.504          | 716.376 | V[12] |
| R[2]  | 137.105        | 675.357 | 667.347        | <b>667.851</b> | 666.843 | R[11] |
| E[3]  | 201.627        | 597.306 | 589.297        | 589.801        | 588.793 | E[10] |
| I[4]  | 258.169        | 532.785 | 524.775        | 525.279        | 524.271 | I[9]  |
| A[5]  | 293.687        | 476.243 | 468.233        | 468.737        | 467.729 | A[8]  |
| Q[6]  | 357.716        | 440.724 | 432.715        | 433.219        | 432.211 | Q[7]  |
| D[7]  | 415.230        | 376.695 | 368.686        | 369.189        | 368.182 | D[6]  |
| F[8]  | 488.764        | 319.181 | 311.172        | 311.676        | 310.668 | F[5]  |
| K[9]  | <b>559.819</b> | 245.647 | 237.638        | 238.142        | 237.134 | K[4]  |
| *[10] | <b>610.343</b> | 174.592 | 166.583        | 167.086        | 166.079 | *[3]  |
| D[11] | <b>667.857</b> | 124.026 | 116.020        | 116.563        | 115.555 | D[2]  |
| L[12] | 724.309        | 66.555  | 58.545         | 59.049         | 58.041  | L[1]  |

sp | P62806 | H4\_MOUSE

[Acetyl]SGRGKGGKGL

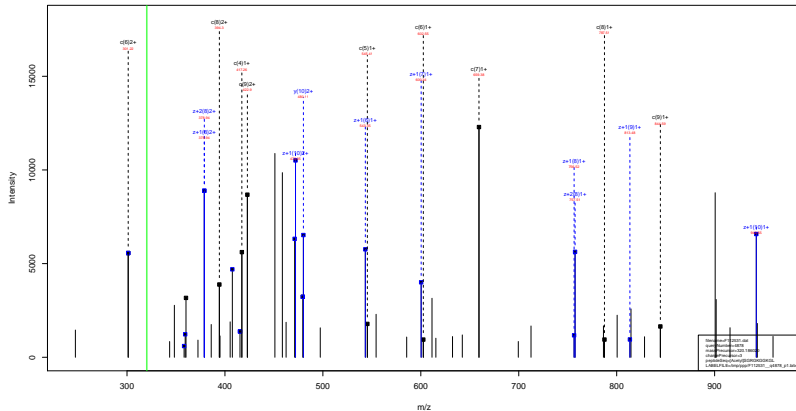

# sp | P62806 | H4\_MOUSE

[Acetyl]SGRGKGGKGL

- ▶ fragmentation table for charge state 1+
- ▶ specType=etd
- ▶ score=44.20
- ▶ F112531.dat
- ▶ query=q4878\_p1
- ▶ precursor=320.186020
- ▶ chargePrecursor=3
- ▶ itol=0.5

| AA    | c       | y       | z+1     | z+2     | z       | AA    |
|-------|---------|---------|---------|---------|---------|-------|
| S[1]  | 147.076 | 958.943 | 942.524 | 0.000   | 941.516 | S[10] |
| G[2]  | 204.098 | 829.500 | 813.482 | 0.000   | 812.474 | G[9]  |
| R[3]  | 360.199 | 772.479 | 756.460 | 757.468 | 755.452 | R[8]  |
| G[4]  | 417.220 | 616.378 | 600.359 | 601.367 | 599.351 | G[7]  |
| K[5]  | 545.315 | 359.356 | 543.337 | 544.345 | 542.330 | K[6]  |
| G[6]  | 602.337 | 431.263 | 415.243 | 416.250 | 414.235 | G[5]  |
| G[7]  | 659.358 | 374.240 | 358.221 | 359.229 | 357.213 | G[4]  |
| K[8]  | 787.453 | 317.218 | 301.200 | 302.207 | 300.192 | K[3]  |
| G[9]  | 844.475 | 189.123 | 173.105 | 174.112 | 172.097 | G[2]  |
| L[10] | 957.559 | 132.102 | 116.083 | 117.091 | 115.075 | L[1]  |

# sp | P62806 | H4\_MOUSE

[Acetyl]SGRGKGGKGL

- ▶ fragmentation table for charge state 2+
- ▶ specType=etd
- ▶ score=44.20
- ▶ F112531.dat
- ▶ query=q4878\_p1
- ▶ precursor=320.186020
- ▶ chargePrecursor=3
- ▶ itol=0.5

| AA    | c              | y              | z+1            | z+2            | z              | AA    |
|-------|----------------|----------------|----------------|----------------|----------------|-------|
| S[1]  | 74.042         | <b>479.775</b> | <b>471.766</b> | 0.504          | <b>471.262</b> | S[10] |
| G[2]  | 102.553        | <b>415.254</b> | <b>407.244</b> | 0.504          | 406.740        | G[9]  |
| R[3]  | 180.603        | 386.743        | <b>378.734</b> | <b>379.238</b> | 378.230        | R[8]  |
| Q[4]  | 209.114        | 308.692        | 300.683        | <b>301.187</b> | 300.179        | Q[7]  |
| K[5]  | 273.161        | 280.182        | 272.172        | 272.676        | 271.668        | K[6]  |
| G[6]  | <b>301.672</b> | 216.134        | 208.125        | 208.629        | 207.621        | G[5]  |
| G[7]  | 330.183        | 187.624        | 179.614        | 180.118        | 179.110        | G[4]  |
| K[8]  | <b>394.230</b> | 139.114        | 131.103        | 131.607        | 130.600        | K[3]  |
| G[9]  | <b>422.741</b> | 95.065         | 87.056         | 87.560         | 86.552         | G[2]  |
| L[10] | <b>479.283</b> | 56.555         | 58.545         | 59.049         | 58.041         | L[1]  |



# sp | P62806 | H4\_MOUSE

DVVY<sup>Phospho</sup><sub>79.97</sub> ALKRQGR<sup>TLYG</sup>FGG

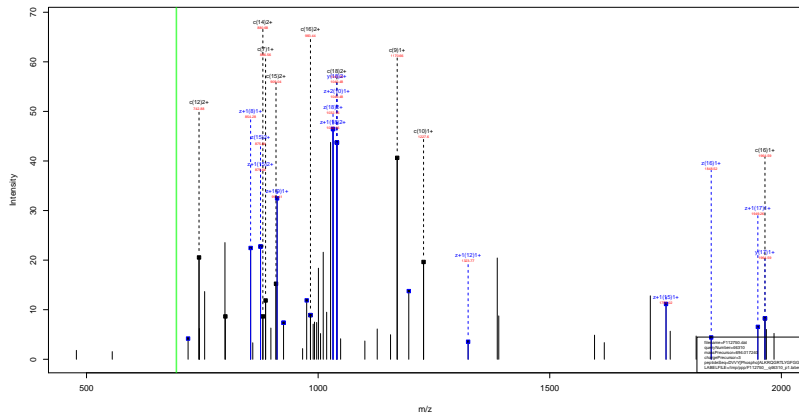

# sp | P62806 | H4\_MOUSE

DVVY<sup>Phospho</sup><sub>79.97</sub> ALKRQGRTLYGFGG

- ▶ fragmentation table for charge state 1+
- ▶ specType=etd
- ▶ score=33.48
- ▶ F112750.dat
- ▶ query=q46310\_p1
- ▶ precursor=694.017240
- ▶ chargePrecursor=3
- ▶ itol=0.5

| AA    | c               | y               | z+1             | z+2             | z               | AA    |
|-------|-----------------|-----------------|-----------------|-----------------|-----------------|-------|
| D[1]  | 133.061         | 2080.938        | 2054.030        | 0.000           | 2063.011        | D[10] |
| V[2]  | 232.129         | <b>1965.011</b> | <b>1948.992</b> | 0.000           | 1947.984        | V[17] |
| V[3]  | 331.198         | 1865.942        | 1840.923        | 0.000           | <b>1848.916</b> | V[16] |
| Y[4]  | 574.227         | 1766.874        | <b>1750.855</b> | 0.000           | 1749.847        | Y[15] |
| A[5]  | 685.264         | 1523.844        | 1507.825        | 0.000           | 1505.810        | A[14] |
| L[6]  | 798.308         | 1452.807        | 1436.789        | 0.000           | 1435.780        | L[13] |
| R[7]  | <b>886.443</b>  | 1330.723        | <b>1323.704</b> | 1324.712        | 1322.696        | R[12] |
| R[8]  | 1042.545        | 1211.628        | <b>1195.609</b> | 1196.617        | 1194.601        | R[11] |
| Q[9]  | <b>1170.603</b> | 1095.527        | 1090.509        | <b>1040.516</b> | 1038.500        | Q[10] |
| G[10] | <b>1227.625</b> | 927.468         | <b>911.450</b>  | 912.457         | 910.442         | G[0]  |
| R[11] | 1363.728        | 870.447         | <b>854.428</b>  | 855.436         | 853.420         | R[6]  |
| T[12] | 1484.773        | 714.340         | 698.327         | 699.335         | 697.319         | T[7]  |
| L[13] | 1597.857        | 613.298         | 597.279         | 598.287         | 596.271         | L[0]  |
| Y[14] | 1780.921        | 500.214         | 484.195         | 485.203         | 483.187         | Y[5]  |
| G[15] | 1817.982        | 337.151         | 321.132         | 322.140         | 320.124         | G[4]  |
| F[16] | <b>1965.011</b> | 280.129         | 264.110         | 265.118         | 263.103         | F[3]  |
| G[17] | 2021.037        | 133.061         | 117.042         | 118.050         | 116.034         | G[2]  |
| G[18] | 2079.054        | 76.036          | 60.021          | 61.028          | 59.013          | G[1]  |

# sp | P62806 | H4\_MOUSE

DVVY<sup>Phospho</sup><sub>79.97</sub> ALKRQGRTLYGFGG

- ▶ fragmentation table for charge state 2+
- ▶ specType=etd
- ▶ score=33.48
- ▶ F112750.dat
- ▶ query=q46310.p1
- ▶ precursor=694.017240
- ▶ chargePrecursor=3
- ▶ itol=0.5

| AA              | c               | y               | z+1             | z+2     | z               | AA              |
|-----------------|-----------------|-----------------|-----------------|---------|-----------------|-----------------|
| D <sup>1</sup>  | 67.034          | <b>1040.522</b> | <b>1032.513</b> | 0.504   | <b>1032.009</b> | D <sup>10</sup> |
| V <sup>2</sup>  | 116.566         | <b>983.009</b>  | <b>975.000</b>  | 0.504   | 974.496         | V <sup>17</sup> |
| V <sup>3</sup>  | 166.102         | 933.475         | <b>925.465</b>  | 0.504   | <b>924.961</b>  | V <sup>16</sup> |
| Y <sup>4</sup>  | 267.617         | 883.941         | <b>875.931</b>  | 0.504   | <b>875.427</b>  | Y <sup>15</sup> |
| A <sup>5</sup>  | 313.136         | 762.428         | 754.419         | 0.504   | 753.912         | A <sup>14</sup> |
| L <sup>6</sup>  | 379.672         | 725.907         | <b>718.898</b>  | 0.504   | 718.394         | L <sup>13</sup> |
| R <sup>7</sup>  | 443.725         | 676.395         | 662.396         | 662.890 | 661.882         | R <sup>12</sup> |
| R <sup>8</sup>  | 521.776         | 606.318         | 596.308         | 596.812 | 597.804         | R <sup>11</sup> |
| Q <sup>9</sup>  | 565.805         | 528.267         | 520.258         | 520.762 | 519.754         | Q <sup>10</sup> |
| G <sup>10</sup> | 614.316         | 464.238         | 456.228         | 456.732 | 455.725         | G <sup>9</sup>  |
| R <sup>11</sup> | 667.366         | 435.227         | 427.218         | 428.222 | 427.214         | R <sup>8</sup>  |
| L <sup>12</sup> | <b>742.890</b>  | 357.670         | 349.667         | 350.171 | 349.163         | L <sup>7</sup>  |
| L <sup>13</sup> | <b>799.432</b>  | 307.153         | 299.143         | 299.647 | 298.639         | L <sup>6</sup>  |
| V <sup>14</sup> | <b>880.964</b>  | 250.611         | 242.601         | 243.105 | 242.097         | V <sup>5</sup>  |
| G <sup>15</sup> | <b>909.475</b>  | 169.070         | 161.070         | 161.574 | 160.566         | G <sup>4</sup>  |
| F <sup>16</sup> | <b>983.009</b>  | 140.568         | 132.559         | 133.063 | 132.059         | F <sup>3</sup>  |
| G <sup>17</sup> | 1011.520        | 67.034          | 59.025          | 59.529  | 58.521          | G <sup>2</sup>  |
| G <sup>18</sup> | <b>1040.030</b> | 38.523          | 30.514          | 31.018  | 30.013          | G <sup>1</sup>  |

# sp | P68433 | H31\_MOUSE

PKDIQLARRIRGER<sup>Methyl</sup> A  
14.02

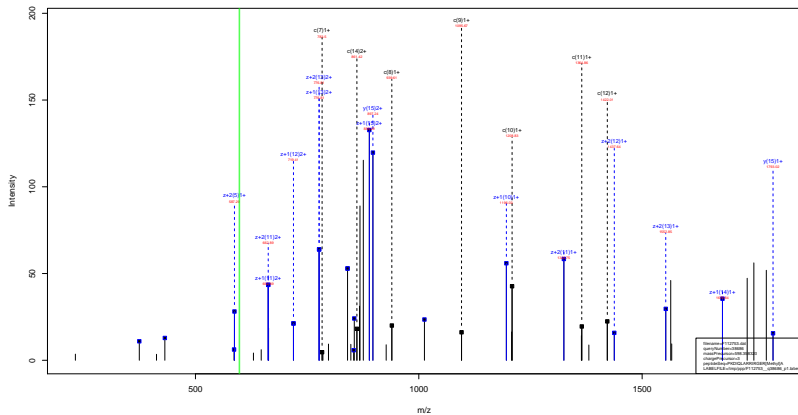

# sp | P68433 | H31\_MOUSE

PKDIQLARRIRGER <sup>Methyl</sup> A  
14.02

- ▶ fragmentation table for charge state 1+
- ▶ specType=etd
- ▶ score=52.22
- ▶ F112753.dat
- ▶ query=q38686.p1
- ▶ precursor=598.358320
- ▶ chargePrecursor=3
- ▶ itol=0.5

| AA    | c               | y               | z+1             | z+2             | z              | AA    |
|-------|-----------------|-----------------|-----------------|-----------------|----------------|-------|
| P[1]  | 115.087         | <b>1781.862</b> | 1777.651        | 0.000           | 1776.511       | P[15] |
| K[2]  | 243.182         | 1696.050        | <b>1679.990</b> | 1680.998        | 1675.982       | K[14] |
| D[3]  | 358.208         | 1567.914        | 1551.895        | <b>1552.903</b> | 1550.987       | D[13] |
| I[4]  | 471.293         | 1452.887        | 1436.868        | <b>1437.876</b> | 1435.960       | I[12] |
| Q[5]  | 599.351         | 1339.803        | 1323.784        | <b>1324.792</b> | 1322.776       | Q[11] |
| L[6]  | 727.436         | 1221.744        | <b>1195.726</b> | 1196.733        | 1194.718       | L[10] |
| A[7]  | <b>783.472</b>  | 1098.660        | 1082.642        | 1083.649        | 1081.634       | A[9]  |
| R[8]  | <b>939.573</b>  | 1027.623        | 1011.604        | <b>1012.612</b> | 1010.597       | R[8]  |
| R[9]  | <b>1095.675</b> | 871.522         | <b>855.503</b>  | 856.511         | <b>854.496</b> | R[7]  |
| I[10] | <b>1268.759</b> | 715.421         | 699.402         | 700.410         | 698.394        | I[6]  |
| R[11] | <b>1364.860</b> | 602.317         | <b>586.318</b>  | <b>587.326</b>  | 585.310        | R[5]  |
| G[12] | <b>1421.881</b> | 446.216         | 430.217         | <b>431.225</b>  | 429.209        | G[4]  |
| E[13] | 1550.924        | 389.214         | 373.216         | <b>374.203</b>  | 372.188        | E[3]  |
| R[14] | 1721.041        | 280.172         | 264.153         | 265.161         | 263.145        | R[2]  |
| A[15] | 1782.078        | 90.085          | 74.036          | 75.044          | 73.028         | A[1]  |

# sp | P68433 | H31\_MOUSE

PKDIQLARRIRGER<sup>Methyl</sup> A  
14.02

- ▶ fragmentation table for charge state 2+
- ▶ specType=etd
- ▶ score=52.22
- ▶ F112753.dat
- ▶ query=q38686.p1
- ▶ precursor=598.358320
- ▶ chargePrecursor=3
- ▶ itol=0.5

| AA    | c              | y              | z+1            | z+2            | z              | AA    |
|-------|----------------|----------------|----------------|----------------|----------------|-------|
| P[1]  | 58.047         | <b>897.034</b> | <b>809.025</b> | 0.504          | 888.521        | P[15] |
| K[2]  | 122.094        | 848.508        | <b>840.499</b> | 841.003        | <b>839.995</b> | K[14] |
| D[3]  | 179.608        | 784.461        | <b>776.451</b> | <b>776.955</b> | 775.947        | D[13] |
| T[4]  | 236.150        | 726.947        | <b>718.938</b> | <b>719.442</b> | 718.434        | T[12] |
| Q[5]  | 300.179        | 670.405        | <b>662.396</b> | <b>662.900</b> | 661.892        | Q[11] |
| L[6]  | 358.221        | 606.376        | <b>598.369</b> | <b>598.873</b> | 597.865        | L[10] |
| A[7]  | 392.240        | 549.834        | 541.824        | 542.328        | 541.321        | A[9]  |
| R[8]  | 470.290        | 514.315        | 506.306        | 506.810        | 505.802        | R[8]  |
| R[9]  | 548.341        | 436.265        | 428.255        | 428.759        | 427.751        | R[7]  |
| I[10] | 604.883        | 358.214        | 350.205        | 350.709        | 349.701        | I[6]  |
| R[11] | 682.933        | 301.672        | 293.663        | 294.167        | 293.159        | R[5]  |
| G[12] | 711.444        | 223.622        | 215.612        | 216.116        | 215.108        | G[4]  |
| E[13] | 775.966        | 195.111        | 187.101        | 187.605        | 186.598        | E[3]  |
| R[14] | <b>861.024</b> | 130.589        | 122.580        | 123.084        | 122.076        | R[2]  |
| A[15] | 896.542        | 45.531         | 37.522         | 38.026         | 37.018         | A[1]  |



# sp | P68433 | H31\_MOUSE

PKDIQLARRIRGER<sup>Methyl</sup> A  
14.02

- ▶ fragmentation table for charge state 1+
- ▶ specType=etd
- ▶ score=51.94
- ▶ F112753.dat
- ▶ query=q38687\_p1
- ▶ precursor=449.020840
- ▶ chargePrecursor=4
- ▶ itol=0.5

| AA   | c               | y        | z+1             | z+2             | z              | AA   |
|------|-----------------|----------|-----------------|-----------------|----------------|------|
| R 3  | 115.087         | 1703.062 | 1777.043        | 0.000           | 1776.035       | R 15 |
| K 2  | <b>243.182</b>  | 1596.055 | <b>1679.990</b> | 1588.998        | 1678.982       | K 14 |
| D 3  | <b>358.208</b>  | 1567.014 | 1551.895        | 1552.903        | 1550.887       | D 13 |
| I 4  | <b>471.293</b>  | 1452.887 | 1436.869        | 1437.876        | 1435.860       | I 12 |
| Q 5  | <b>599.351</b>  | 1339.803 | 1323.794        | <b>1324.792</b> | 1322.776       | Q 11 |
| L 6  | <b>712.435</b>  | 1231.744 | 1195.725        | <b>1196.733</b> | 1194.718       | L 10 |
| A 7  | <b>783.472</b>  | 1098.660 | 1082.642        | <b>1083.649</b> | 1081.634       | A 9  |
| R 8  | <b>939.573</b>  | 1027.623 | 1011.604        | <b>1012.612</b> | 1010.597       | R 8  |
| R 9  | <b>1095.675</b> | 871.522  | 855.503         | <b>856.511</b>  | 854.496        | R 7  |
| I 10 | <b>1208.759</b> | 715.421  | <b>699.402</b>  | 700.410         | <b>698.394</b> | I 6  |
| R 11 | 1304.860        | 602.337  | <b>586.318</b>  | 587.326         | 585.310        | R 5  |
| G 12 | <b>1421.801</b> | 446.236  | <b>430.217</b>  | 431.225         | 429.209        | G 4  |
| E 13 | 1559.924        | 309.214  | <b>373.196</b>  | 374.203         | 372.185        | E 3  |
| R 14 | 1721.041        | 200.192  | 304.153         | 245.161         | <b>243.145</b> | R 2  |
| A 15 | 1792.078        | 90.055   | 74.036          | 75.044          | 73.028         | A 1  |



# sp | P68433 | H31\_MOUSE

PKDIQLARRIRGER<sup>Methyl</sup> A  
14.02

- ▶ fragmentation table for charge state 2+
- ▶ specType=etd
- ▶ score=51.94
- ▶ F112753.dat
- ▶ query=q38687\_p1
- ▶ precursor=449.020840
- ▶ chargePrecursor=4
- ▶ itol=0.5

| AA    | c              | y              | z+1            | z+2            | z              | AA    |
|-------|----------------|----------------|----------------|----------------|----------------|-------|
| P[1]  | 58.047         | <b>897.034</b> | <b>889.025</b> | 0.504          | 888.521        | P[15] |
| K[2]  | 122.094        | 848.508        | <b>840.499</b> | <b>841.003</b> | 839.995        | K[14] |
| D[3]  | 179.608        | 784.461        | <b>776.451</b> | <b>776.955</b> | <b>775.947</b> | D[13] |
| T[4]  | 236.150        | 720.947        | <b>718.938</b> | <b>719.442</b> | 718.434        | T[12] |
| Q[5]  | 303.179        | 670.405        | <b>662.396</b> | <b>662.900</b> | 661.892        | Q[11] |
| L[6]  | 359.721        | 606.376        | <b>598.368</b> | <b>598.870</b> | 597.863        | L[10] |
| A[7]  | 392.240        | 549.834        | <b>541.824</b> | <b>542.328</b> | 541.321        | A[9]  |
| R[8]  | 470.290        | 514.315        | <b>506.306</b> | <b>506.810</b> | 505.802        | R[8]  |
| R[9]  | <b>548.341</b> | 436.265        | <b>428.255</b> | <b>428.759</b> | 427.751        | R[7]  |
| I[10] | <b>604.883</b> | <b>358.214</b> | 350.205        | 350.709        | 349.701        | I[6]  |
| R[11] | <b>682.933</b> | 301.672        | 293.663        | 294.167        | 293.159        | R[5]  |
| G[12] | <b>711.444</b> | 223.622        | 215.612        | 216.116        | 215.108        | G[4]  |
| E[13] | <b>775.966</b> | 195.111        | 187.101        | 187.605        | 186.598        | E[3]  |
| R[14] | <b>861.024</b> | 130.589        | 122.580        | 123.084        | 122.076        | R[2]  |
| A[15] | 898.542        | 45.531         | 37.522         | 38.026         | 37.018         | A[1]  |

# sp | P68433 | H31\_MOUSE

PKDIQLARRIRGER <sup>Methyl</sup> A  
14.02

- ▶ fragmentation table for charge state 3+
- ▶ specType=etd
- ▶ score=51.94
- ▶ F112753.dat
- ▶ query=q38687\_p1
- ▶ precursor=449.020840
- ▶ chargePrecursor=4
- ▶ itol=0.5

| AA    | c              | y              | z+1            | z+2            | z       | AA    |
|-------|----------------|----------------|----------------|----------------|---------|-------|
| P[1]  | 30.034         | <b>598.359</b> | <b>593.019</b> | 0.672          | 592.683 | P[15] |
| K[2]  | 81.732         | 596.008        | <b>560.668</b> | <b>561.064</b> | 560.332 | R[14] |
| D[3]  | 120.074        | 523.309        | 517.970        | 518.306        | 517.634 | D[13] |
| T[4]  | 157.769        | 484.967        | 479.628        | 479.964        | 479.292 | I[12] |
| Q[5]  | 200.455        | 447.272        | 441.933        | 442.269        | 441.597 | Q[11] |
| L[6]  | 238.150        | 404.586        | 399.247        | 399.583        | 398.911 | L[10] |
| A[7]  | 281.829        | 366.892        | 361.553        | 361.888        | 361.216 | A[9]  |
| R[8]  | 313.563        | 343.213        | 337.873        | 338.209        | 337.537 | R[8]  |
| R[9]  | 365.896        | 291.179        | 285.839        | 286.175        | 285.503 | R[7]  |
| I[10] | 403.591        | 239.145        | 233.806        | 234.142        | 233.470 | I[6]  |
| R[11] | 455.625        | 201.450        | 196.111        | 196.447        | 195.775 | R[5]  |
| G[12] | 474.632        | 149.617        | 144.077        | 144.413        | 143.741 | G[4]  |
| E[13] | 517.646        | 130.410        | 125.070        | 125.406        | 124.734 | E[3]  |
| R[14] | <b>574.352</b> | 87.395         | 82.056         | 82.392         | 81.720  | R[2]  |
| A[15] | 998.031        | 30.690         | 25.350         | 25.686         | 25.014  | A[1]  |

tr | Q8CGP4 | Q8CGP4\_MOUSE

DNKKTRIT Acetyl PRHLQLAIRN  
42.01

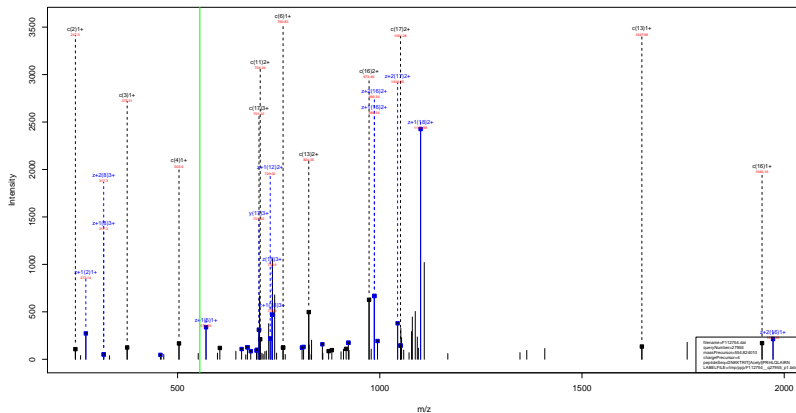

## tr | Q8CGP4 | Q8CGP4\_MOUSE

DNKKTRIT<sup>Acetyl</sup>PRHLQLAIRN  
42.01

- ▶ fragmentation table for charge state 1+
- ▶ specType=etd
- ▶ score=35.00
- ▶ F112754.dat
- ▶ query=q27955.p1
- ▶ precursor=554.824010
- ▶ chargePrecursor=4
- ▶ itol=0.5

| AA    | c               | y        | z+1            | z+2             | z        | AA    |
|-------|-----------------|----------|----------------|-----------------|----------|-------|
| D[1]  | 133.061         | 2216.273 | 2200.255       | 0.000           | 2109.247 | D[18] |
| N[2]  | <b>247.104</b>  | 2101.247 | 2085.229       | 2069.216        | 2084.220 | N[17] |
| K[3]  | <b>375.199</b>  | 1987.204 | 1971.185       | <b>1972.193</b> | 1970.177 | K[16] |
| K[4]  | <b>503.294</b>  | 1859.109 | 1843.090       | 1844.098        | 1842.082 | K[15] |
| T[5]  | <b>604.341</b>  | 1731.014 | 1714.995       | 1716.003        | 1713.987 | T[14] |
| R[6]  | <b>760.442</b>  | 1620.960 | 1611.947       | 1614.955        | 1612.939 | R[13] |
| I[7]  | <b>873.526</b>  | 1473.805 | 1457.846       | 1458.854        | 1456.838 | I[12] |
| T[8]  | 1016.585        | 1360.781 | 1344.762       | 1345.770        | 1343.754 | T[11] |
| F[9]  | 1113.637        | 1217.723 | 1201.704       | 1202.712        | 1200.696 | F[10] |
| R[10] | 1269.739        | 1120.670 | 1104.651       | 1105.659        | 1103.643 | R[9]  |
| H[11] | 1406.798        | 984.560  | 948.539        | 949.558         | 947.542  | H[8]  |
| L[12] | 1519.882        | 829.510  | <b>811.491</b> | 812.499         | 810.483  | L[7]  |
| Q[13] | <b>1647.940</b> | 714.420  | 698.407        | 699.415         | 697.399  | Q[6]  |
| L[14] | 1761.024        | 588.367  | <b>570.348</b> | 571.356         | 569.341  | L[5]  |
| A[15] | 1832.061        | 473.283  | <b>457.264</b> | 458.272         | 456.257  | A[4]  |
| I[16] | <b>1945.145</b> | 402.240  | 386.227        | 387.235         | 385.219  | I[3]  |
| R[17] | 2101.247        | 289.162  | <b>273.143</b> | 274.151         | 272.135  | R[2]  |
| N[18] | 2215.289        | 133.061  | 117.043        | 118.050         | 116.034  | N[1]  |

# tr | Q8CGP4 | Q8CGP4\_MOUSE

DNKKTRIT<sup>Acetyl</sup>PRHLQLAIRN  
42.01

- ▶ fragmentation table for charge state 2+
- ▶ specType=etd
- ▶ score=35.00
- ▶ F112754.dat
- ▶ query=q27955.p1
- ▶ precursor=554.824010
- ▶ chargePrecursor=4
- ▶ itol=0.5

| AA    | c               | y               | z+1             | z+2             | z              | AA    |
|-------|-----------------|-----------------|-----------------|-----------------|----------------|-------|
| D[1]  | 67.034          | 1108.940        | <b>1100.631</b> | 0.604           | 1100.127       | D[18] |
| N[2]  | 124.055         | <b>1051.127</b> | 1043.118        | <b>1043.021</b> | 1042.614       | N[17] |
| K[3]  | 188.103         | <b>994.105</b>  | <b>986.096</b>  | <b>986.000</b>  | 985.592        | K[16] |
| K[4]  | 252.150         | 930.050         | <b>922.049</b>  | <b>922.552</b>  | 921.545        | K[15] |
| T[5]  | 302.674         | 866.010         | <b>858.001</b>  | 856.995         | 857.497        | T[14] |
| R[6]  | 360.725         | 812.467         | <b>807.477</b>  | <b>807.981</b>  | 806.974        | R[13] |
| H[7]  | 417.267         | 757.430         | <b>729.427</b>  | 729.931         | <b>728.923</b> | H[12] |
| T[8]  | 508.790         | <b>680.894</b>  | <b>672.885</b>  | 673.389         | <b>672.381</b> | T[11] |
| P[9]  | 557.322         | 609.355         | 601.350         | 601.854         | 600.852        | P[10] |
| R[10] | 635.773         | 560.830         | 552.820         | 553.323         | 552.325        | R[9]  |
| H[11] | <b>703.502</b>  | 482.788         | 474.779         | 475.283         | 474.275        | H[8]  |
| L[12] | <b>760.444</b>  | 414.250         | 406.240         | 406.753         | 405.745        | L[7]  |
| Q[13] | <b>824.474</b>  | 357.718         | 349.707         | 350.211         | 349.203        | Q[6]  |
| L[14] | <b>881.016</b>  | 293.687         | 285.678         | 286.182         | 285.174        | L[5]  |
| A[15] | <b>916.534</b>  | 217.145         | 209.136         | 209.640         | 208.632        | A[4]  |
| H[16] | <b>973.076</b>  | 201.627         | 193.617         | 194.121         | 193.113        | H[3]  |
| R[17] | <b>1051.127</b> | 149.085         | 137.075         | 137.579         | 136.571        | R[2]  |
| N[18] | 1108.148        | 67.034          | 59.025          | 59.529          | 58.521         | N[1]  |

## tr | Q8CGP4 | Q8CGP4\_MOUSE

DNKKTRIT<sup>Acetyl</sup>PRHLQLAIRN  
42.01

- ▶ fragmentation table for charge state 3+
- ▶ specType=etd
- ▶ score=35.00
- ▶ F112754.dat
- ▶ query=q27955.p1
- ▶ precursor=554.824010
- ▶ chargePrecursor=4
- ▶ itol=0.5

| AA    | c              | y              | z+1            | z+2            | z              | AA    |
|-------|----------------|----------------|----------------|----------------|----------------|-------|
| D[1]  | 45.025         | 739.429        | <b>734.090</b> | 0.672          | <b>733.754</b> | D[18] |
| N[2]  | 83.039         | <b>701.087</b> | 695.747        | <b>696.083</b> | <b>695.412</b> | N[17] |
| K[3]  | 123.736        | 663.073        | 657.733        | <b>658.069</b> | 657.397        | K[16] |
| K[4]  | 168.436        | 620.374        | 615.035        | 613.374        | 614.699        | K[15] |
| T[5]  | 202.119        | 577.676        | 572.336        | 572.672        | 572.001        | T[14] |
| R[6]  | 254.152        | 543.994        | 538.654        | 538.990        | 538.318        | R[13] |
| I[7]  | 291.847        | 491.960        | 486.620        | 486.956        | 486.284        | I[12] |
| T[8]  | 339.533        | 454.265        | 448.926        | 449.261        | 448.590        | T[11] |
| P[9]  | 371.884        | 406.579        | 401.239        | 401.575        | 400.904        | P[10] |
| R[10] | 423.918        | 374.228        | <b>368.889</b> | 369.224        | 368.553        | R[9]  |
| H[11] | 469.604        | 322.194        | <b>316.855</b> | <b>317.191</b> | 316.519        | H[8]  |
| L[12] | 507.299        | 276.508        | 271.169        | 271.504        | 270.833        | L[7]  |
| Q[13] | 549.983        | 238.813        | 233.474        | 233.810        | 233.136        | Q[6]  |
| L[14] | 587.680        | 196.127        | 190.788        | 191.124        | 190.452        | L[5]  |
| A[15] | 611.369        | 158.433        | 153.093        | 153.429        | 152.757        | A[4]  |
| I[16] | 649.053        | 134.753        | 129.414        | 129.750        | 129.078        | I[3]  |
| R[17] | <b>701.087</b> | 97.059         | 91.719         | 92.055         | 91.383         | R[2]  |
| N[18] | 739.101        | 45.025         | 39.686         | 40.021         | 39.350         | N[1]  |



tr | Q8CGP4 | Q8CGP4\_MOUSE

DNKKTRIT<sup>Acetyl</sup>PRHLQLAIRN  
42.01

- ▶ fragmentation table for charge state 1+
- ▶ specType=etd
- ▶ score=33.58
- ▶ F112754.dat
- ▶ query=q27956.p1
- ▶ precursor=554.824760
- ▶ chargePrecursor=4
- ▶ itol=0.5

| AA    | c               | y               | z+1             | z+2             | z        | AA    |
|-------|-----------------|-----------------|-----------------|-----------------|----------|-------|
| D[1]  | 111.061         | 2216.271        | 2250.255        | 0.000           | 2199.247 | D[18] |
| N[2]  | <b>247.104</b>  | 2101.247        | 2085.230        | 2088.236        | 2084.230 | N[17] |
| K[3]  | <b>375.199</b>  | 1987.204        | 1971.185        | 1972.193        | 1970.177 | K[16] |
| K[4]  | <b>503.294</b>  | <b>1859.109</b> | <b>1843.090</b> | 1844.098        | 1842.082 | K[15] |
| T[5]  | <b>604.341</b>  | 1731.014        | <b>1714.995</b> | 1716.003        | 1713.987 | T[14] |
| R[6]  | 700.454         | 1620.956        | 1613.947        | 1614.955        | 1612.939 | R[13] |
| I[7]  | <b>873.526</b>  | 1471.865        | 1457.846        | 1458.854        | 1456.838 | I[12] |
| T[8]  | 1016.985        | 1360.781        | 1344.762        | <b>1345.770</b> | 1343.754 | T[11] |
| P[9]  | 1113.637        | 1217.723        | 1201.704        | 1202.712        | 1200.696 | P[10] |
| R[10] | 1269.739        | 1120.610        | 1104.601        | 1105.609        | 1103.643 | R[9]  |
| H[11] | 1408.796        | 964.569         | 948.550         | 949.558         | 947.542  | H[8]  |
| L[12] | 1519.882        | 827.510         | <b>811.491</b>  | 812.499         | 810.483  | L[7]  |
| Q[13] | <b>1647.940</b> | 714.426         | <b>698.407</b>  | 699.415         | 697.399  | Q[6]  |
| L[14] | 1761.024        | 598.367         | <b>570.348</b>  | 571.356         | 569.341  | L[5]  |
| A[15] | 1832.061        | 473.283         | <b>457.264</b>  | 458.272         | 456.257  | A[4]  |
| I[16] | <b>1945.145</b> | 402.246         | <b>386.227</b>  | 387.235         | 385.219  | I[3]  |
| R[17] | 2101.247        | 289.182         | <b>273.143</b>  | 274.151         | 272.135  | R[2]  |
| N[18] | 2215.289        | 133.060         | 137.042         | 138.050         | 136.034  | N[1]  |



tr | Q8CGP4 | Q8CGP4\_MOUSE

DNKKTRIT<sup>Acetyl</sup>PRHLQLAIRN  
42.01

- ▶ fragmentation table for charge state 2+
- ▶ specType=etd
- ▶ score=33.58
- ▶ F112754.dat
- ▶ query=q27956.p1
- ▶ precursor=554.824760
- ▶ chargePrecursor=4
- ▶ itol=0.5

| AA    | c               | y               | z+1            | z+2             | z              | AA    |
|-------|-----------------|-----------------|----------------|-----------------|----------------|-------|
| D[1]  | 67.034          | <b>1108.640</b> | 1100.831       | 0.504           | 1100.129       | D[18] |
| N[2]  | 124.055         | <b>1051.127</b> | 1043.118       | <b>1043.621</b> | 1042.614       | N[17] |
| K[3]  | 188.103         | 994.105         | <b>986.096</b> | <b>986.600</b>  | 985.592        | K[16] |
| K[4]  | 252.150         | 930.058         | <b>922.049</b> | <b>922.552</b>  | 921.545        | K[15] |
| T[5]  | 302.674         | 869.010         | <b>855.003</b> | 854.005         | <b>857.497</b> | T[14] |
| R[6]  | 369.725         | <b>815.487</b>  | <b>807.477</b> | <b>807.981</b>  | 806.973        | R[13] |
| I[7]  | 437.267         | 737.430         | 729.427        | 729.931         | 728.923        | I[12] |
| T[8]  | 508.796         | 680.894         | <b>672.885</b> | 673.389         | <b>672.381</b> | T[11] |
| F[9]  | 557.322         | 609.365         | 601.356        | 601.859         | 600.852        | F[10] |
| R[10] | 635.373         | 560.830         | 552.820        | 553.323         | 552.325        | R[9]  |
| H[11] | 703.660         | 482.768         | 474.759        | 475.262         | 474.275        | H[8]  |
| L[12] | 769.444         | 414.250         | 406.240        | 406.743         | 405.745        | L[7]  |
| Q[13] | <b>824.474</b>  | 357.710         | 349.707        | 350.211         | 349.203        | Q[6]  |
| L[14] | <b>881.016</b>  | 293.687         | 285.678        | 286.182         | 285.174        | L[5]  |
| A[15] | 916.534         | 237.145         | 229.136        | 229.640         | 228.632        | A[4]  |
| I[16] | <b>973.076</b>  | 201.627         | 193.617        | 194.121         | 193.113        | I[3]  |
| R[17] | <b>1051.127</b> | 145.085         | 137.075        | 137.579         | 136.571        | R[2]  |
| N[18] | 1108.148        | 67.034          | 59.023         | 59.529          | 58.521         | N[1]  |

## tr | Q8CGP4 | Q8CGP4\_MOUSE

DNKKTRIT<sup>Acetyl</sup>PRHLQLAIRN  
42.01

- ▶ fragmentation table for charge state 3+
- ▶ specType=etd
- ▶ score=33.58
- ▶ F112754.dat
- ▶ query=q27956.p1
- ▶ precursor=554.824760
- ▶ chargePrecursor=4
- ▶ itol=0.5

| AA |    | c              | y              | z+1            | z+2            | z              | AA              |
|----|----|----------------|----------------|----------------|----------------|----------------|-----------------|
| D  | 1  | 45.025         | <b>739.429</b> | <b>734.090</b> | 0.672          | <b>733.754</b> | D <sup>18</sup> |
| N  | 2  | 83.039         | <b>701.007</b> | <b>695.747</b> | <b>695.083</b> | 695.412        | N <sup>17</sup> |
| K  | 3  | 123.936        | 613.373        | 557.723        | 653.959        | 637.397        | K <sup>16</sup> |
| K  | 4  | 168.436        | <b>620.374</b> | 615.035        | 615.371        | 614.699        | K <sup>15</sup> |
| T  | 5  | 202.119        | 577.676        | 572.336        | 572.672        | 572.001        | T <sup>14</sup> |
| R  | 6  | 254.152        | 543.994        | 538.654        | 538.990        | 538.318        | R <sup>13</sup> |
| I  | 7  | 291.847        | 491.960        | 486.620        | 486.956        | 486.284        | I <sup>12</sup> |
| T  | 8  | 339.533        | 454.265        | 448.925        | 449.261        | 448.590        | T <sup>11</sup> |
| P  | 9  | 371.884        | 406.579        | 401.239        | 401.575        | 400.904        | P <sup>10</sup> |
| R  | 10 | 423.918        | 374.228        | 368.889        | 369.224        | 368.553        | R <sup>9</sup>  |
| H  | 11 | 469.604        | 322.194        | 316.853        | 317.191        | 316.519        | H <sup>8</sup>  |
| L  | 12 | 507.299        | 276.508        | 271.169        | 271.504        | 270.833        | L <sup>7</sup>  |
| Q  | 13 | 549.983        | 238.813        | 233.474        | 233.810        | 233.136        | Q <sup>6</sup>  |
| L  | 14 | 587.680        | 196.127        | 190.788        | 191.124        | 190.452        | L <sup>5</sup>  |
| A  | 15 | 611.369        | 158.433        | 153.093        | 153.429        | 152.757        | A <sup>4</sup>  |
| I  | 16 | 649.053        | 134.753        | 129.414        | 129.750        | 129.078        | I <sup>3</sup>  |
| R  | 17 | <b>701.007</b> | 97.059         | 91.719         | 92.055         | 91.383         | R <sup>2</sup>  |
| N  | 18 | <b>739.101</b> | 45.025         | 39.685         | 40.021         | 39.350         | N <sup>1</sup>  |

# sp | P62806 | H4\_MOUSE

[Acetyl]SGRGKGGKGLGKGGAKRHRK Methyl VLR  
14.02

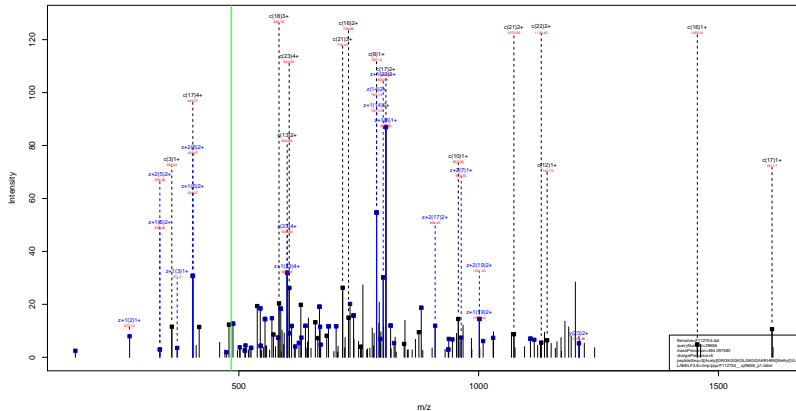

# sp | P62806 | H4\_MOUSE

[Acetyl]SGRGKGGKGLGKGGAKRHRK <sup>Methyl</sup> VLR  
14.02

- ▶ fragmentation table for charge state 1+
- ▶ specType=etd
- ▶ score=55.07
- ▶ F112754.dat
- ▶ query=q29656.p1
- ▶ precursor=484.097580
- ▶ chargePrecursor=5
- ▶ itol=0.5

| AA    | c               | y        | z+1            | z+2            | z              | AA    |
|-------|-----------------|----------|----------------|----------------|----------------|-------|
| S[1]  | 147.076         | 2416.460 | 2400.441       | 0.000          | 2309.433       | S[23] |
| G[2]  | 204.098         | 2287.417 | 2271.398       | 0.000          | 2270.390       | G[22] |
| R[3]  | <b>360.199</b>  | 2230.390 | 2214.377       | 2215.385       | 2213.369       | R[21] |
| G[4]  | <b>417.220</b>  | 2074.204 | 2058.276       | 2059.284       | 2057.268       | G[20] |
| K[5]  | <b>545.315</b>  | 2017.273 | 2001.254       | 2002.262       | 2000.246       | K[19] |
| G[6]  | <b>552.339</b>  | 1889.176 | 1873.150       | 1874.157       | 1872.151       | G[18] |
| G[7]  | <b>659.358</b>  | 1832.157 | 1816.138       | 1817.146       | 1815.130       | G[17] |
| K[8]  | <b>787.453</b>  | 1775.135 | 1759.116       | 1760.124       | 1758.109       | K[16] |
| G[9]  | <b>844.475</b>  | 1647.040 | 1631.021       | 1632.029       | 1630.014       | G[15] |
| L[10] | <b>957.559</b>  | 1590.019 | 1574.000       | 1575.008       | 1572.992       | L[14] |
| G[11] | 1014.580        | 1476.935 | 1460.916       | 1461.924       | 1459.908       | G[13] |
| K[12] | <b>1142.675</b> | 1419.913 | 1403.894       | 1404.902       | 1402.887       | K[12] |
| G[13] | 1159.697        | 1361.814 | 1345.799       | 1346.807       | 1344.792       | G[11] |
| G[14] | 1256.718        | 1294.797 | 1278.778       | 1279.786       | 1277.770       | G[10] |
| A[15] | 1327.755        | 1177.775 | 1161.757       | 1162.764       | 1160.749       | A[9]  |
| K[16] | <b>1455.850</b> | 1106.738 | 1090.719       | 1091.727       | 1089.712       | K[8]  |
| R[17] | <b>1611.951</b> | 978.643  | 962.624        | <b>963.632</b> | 961.617        | R[7]  |
| H[18] | 1749.010        | 822.542  | <b>806.523</b> | 807.531        | 806.515        | H[6]  |
| R[19] | 1826.114        | 685.483  | <b>669.464</b> | <b>670.472</b> | <b>668.457</b> | R[5]  |
| K[20] | 2047.222        | 529.382  | <b>513.363</b> | 514.371        | <b>512.355</b> | K[4]  |
| V[21] | 2146.290        | 387.271  | <b>371.253</b> | 372.261        | 370.245        | V[3]  |
| L[22] | 2259.374        | 288.203  | <b>272.184</b> | 273.192        | 271.176        | L[2]  |
| R[23] | 2415.476        | 175.119  | <b>159.100</b> | 160.108        | 158.092        | R[1]  |

# sp | P62806 | H4\_MOUSE

S<sup>Acetyl</sup> GRGKGGKGLGKGGAKRHRK<sup>Methyl</sup> VLR  
42.01 14.02

- ▶ fragmentation table for charge state 2+
- ▶ specType=etd
- ▶ score=55.07
- ▶ F112754.dat
- ▶ query=q29656\_p1
- ▶ precursor=484.097580
- ▶ chargePrecursor=5
- ▶ itol=0.5

| AA    | c               | y               | z+1             | z+2             | z              | AA    |
|-------|-----------------|-----------------|-----------------|-----------------|----------------|-------|
| S[1]  | 74.042          | <b>1208.733</b> | 1200.726        | 0.504           | 1200.220       | S[23] |
| G[2]  | 102.553         | 1144.212        | 1136.203        | 0.504           | 1135.699       | G[22] |
| R[3]  | 180.603         | <b>1115.701</b> | <b>1107.692</b> | <b>1108.196</b> | 1107.188       | R[21] |
| G[4]  | 209.114         | 1037.657        | 1029.647        | <b>1030.145</b> | 1029.137       | G[20] |
| K[5]  | 273.161         | <b>1009.140</b> | <b>1001.131</b> | <b>1001.635</b> | 1000.627       | K[19] |
| G[6]  | 301.672         | <b>945.093</b>  | <b>937.083</b>  | <b>937.587</b>  | <b>936.579</b> | G[18] |
| G[7]  | 330.183         | 916.582         | 908.573         | <b>909.076</b>  | 908.069        | G[17] |
| K[8]  | 394.230         | 888.071         | <b>880.062</b>  | <b>880.566</b>  | 879.558        | K[16] |
| G[9]  | 422.741         | <b>824.024</b>  | <b>816.014</b>  | <b>816.518</b>  | 815.510        | G[15] |
| L[10] | <b>479.283</b>  | <b>795.513</b>  | <b>787.504</b>  | 788.008         | <b>787.000</b> | L[14] |
| G[11] | 507.704         | <b>738.971</b>  | 730.962         | <b>731.465</b>  | 730.458        | G[13] |
| R[12] | <b>571.841</b>  | 710.460         | <b>702.451</b>  | <b>702.955</b>  | 701.947        | R[12] |
| G[13] | <b>600.352</b>  | 648.413         | <b>638.403</b>  | <b>638.907</b>  | 637.899        | G[11] |
| G[14] | <b>628.863</b>  | <b>617.902</b>  | <b>609.893</b>  | <b>610.397</b>  | 609.389        | G[10] |
| A[15] | <b>664.381</b>  | 589.391         | <b>581.382</b>  | <b>581.886</b>  | 580.878        | A[9]  |
| R[16] | <b>728.429</b>  | 551.873         | <b>543.863</b>  | 544.367         | <b>545.359</b> | R[8]  |
| R[17] | <b>808.479</b>  | 489.826         | 481.817         | 482.320         | 481.312        | R[7]  |
| R[18] | <b>875.009</b>  | 413.778         | <b>403.765</b>  | <b>404.269</b>  | 403.261        | R[6]  |
| R[19] | 953.059         | 343.248         | <b>335.236</b>  | <b>335.740</b>  | 334.732        | R[5]  |
| K[20] | 1024.115        | 265.195         | 257.185         | 257.689         | 256.681        | K[4]  |
| V[21] | <b>1073.649</b> | 194.139         | 186.130         | 186.634         | 185.626        | V[3]  |
| L[22] | <b>1130.191</b> | 144.605         | 136.596         | 137.100         | 136.092        | L[2]  |
| R[23] | 1208.241        | 88.063          | 80.054          | 80.558          | 79.550         | R[1]  |

# sp | P62806 | H4\_MOUSE

S<sup>Acetyl</sup> 42.01 GRGKGGKGLGKGGAKRHRK<sup>Methyl</sup> VLR 14.02

- ▶ fragmentation table for charge state 3+
- ▶ specType=etd
- ▶ score=55.07
- ▶ F112754.dat
- ▶ query=q29656.p1
- ▶ precursor=484.097580
- ▶ chargePrecursor=5
- ▶ itol=0.5

| AA    | c              | y              | z+1            | z+2            | z              | AA    |
|-------|----------------|----------------|----------------|----------------|----------------|-------|
| S[1]  | 49.697         | 806.158        | <b>800.818</b> | 0.672          | <b>800.483</b> | S[23] |
| G[2]  | 68.704         | 763.144        | 757.854        | 0.672          | 757.468        | G[22] |
| R[3]  | 120.738        | 744.131        | <b>738.797</b> | <b>739.133</b> | 738.801        | R[21] |
| G[4]  | 139.745        | 692.103        | <b>686.763</b> | <b>687.099</b> | <b>686.427</b> | G[20] |
| K[5]  | 182.443        | 573.096        | <b>667.756</b> | <b>668.092</b> | 667.433        | K[19] |
| G[6]  | 201.450        | <b>630.398</b> | <b>625.058</b> | <b>625.394</b> | 624.722        | G[18] |
| G[7]  | 220.458        | 611.390        | <b>606.051</b> | 606.387        | <b>605.715</b> | G[17] |
| K[8]  | 263.156        | 592.383        | <b>587.044</b> | <b>587.380</b> | 586.708        | K[16] |
| G[9]  | 282.163        | 549.685        | <b>544.345</b> | <b>544.681</b> | 544.009        | G[15] |
| L[10] | 319.658        | 530.678        | <b>525.338</b> | <b>525.674</b> | 525.002        | L[14] |
| G[11] | 338.665        | 492.983        | <b>487.643</b> | <b>487.979</b> | <b>487.308</b> | G[13] |
| K[12] | 381.163        | <b>473.976</b> | 468.630        | 468.972        | 468.300        | K[12] |
| G[13] | 400.170        | 431.278        | 425.938        | 426.274        | 425.602        | G[11] |
| G[14] | 419.178        | 412.270        | 405.931        | 407.267        | 406.595        | G[10] |
| A[15] | 443.257        | 393.263        | 387.924        | 388.260        | 387.588        | A[9]  |
| K[16] | 485.955        | 369.584        | 364.245        | 364.581        | 363.909        | K[8]  |
| R[17] | <b>537.989</b> | 326.886        | 321.546        | 321.882        | 321.210        | R[7]  |
| H[18] | <b>583.675</b> | 274.852        | 269.513        | 269.849        | 269.177        | H[6]  |
| R[19] | 635.709        | 229.166        | 223.826        | 224.162        | 223.490        | R[5]  |
| K[20] | <b>683.079</b> | 177.132        | 171.793        | 172.129        | 171.457        | K[4]  |
| V[21] | <b>716.102</b> | 129.762        | 124.422        | 124.758        | 124.086        | V[9]  |
| L[22] | <b>753.796</b> | 86.739         | 81.400         | 81.736         | 81.064         | L[2]  |
| R[23] | 803.333        | 39.045         | 33.705         | 34.041         | 33.369         | R[1]  |

# sp | P62806 | H4\_MOUSE

S<sup>Acetyl</sup> 42.01 GRGKGGKGLGKGGAKRHRK<sup>Methyl</sup> VLR 14.02

- ▶ fragmentation table for charge state 4+
- ▶ specType=etd
- ▶ score=55.07
- ▶ F112754.dat
- ▶ query=q29656.p1
- ▶ precursor=484.097580
- ▶ chargePrecursor=5
- ▶ itol=0.5

| AA |      | c              | y              | z+1            | z+2            | z              | AA    |
|----|------|----------------|----------------|----------------|----------------|----------------|-------|
| S  | [1]  | 37.525         | <b>604.870</b> | <b>600.866</b> | 0.755          | <b>600.614</b> | S[23] |
| G  | [2]  | 51.780         | 572.610        | <b>568.605</b> | 0.755          | 568.353        | G[22] |
| R  | [3]  | 60.805         | 558.394        | <b>554.350</b> | <b>554.602</b> | <b>554.098</b> | R[21] |
| G  | [4]  | 105.061        | 319.329        | 313.324        | 313.576        | 313.072        | G[20] |
| K  | [5]  | 137.084        | 505.074        | 501.069        | <b>501.321</b> | 500.817        | K[19] |
| G  | [6]  | 151.340        | 473.050        | 469.045        | 469.297        | 468.793        | G[18] |
| G  | [7]  | 165.595        | 458.795        | 454.790        | 455.042        | 454.538        | G[17] |
| K  | [8]  | 197.619        | 444.539        | 440.534        | 440.787        | 440.283        | K[16] |
| G  | [9]  | 211.874        | 412.515        | 408.511        | 408.763        | 408.259        | G[15] |
| L  | [10] | 240.145        | 398.260        | 394.255        | 394.507        | 394.003        | L[14] |
| G  | [11] | 254.401        | 369.989        | 365.984        | 366.236        | 365.732        | G[13] |
| K  | [12] | 286.424        | 355.734        | 351.729        | 351.981        | 351.477        | K[12] |
| G  | [13] | 300.680        | 323.710        | 319.705        | 319.957        | 319.453        | G[11] |
| G  | [14] | 314.935        | 309.455        | 305.450        | 305.702        | 305.198        | G[10] |
| A  | [15] | 332.694        | 295.199        | 291.194        | 291.447        | 290.943        | A[9]  |
| K  | [16] | 364.718        | 277.440        | 273.435        | 273.687        | 273.183        | K[8]  |
| R  | [17] | <b>403.743</b> | 245.416        | 241.412        | 241.664        | 241.160        | R[7]  |
| H  | [18] | 438.008        | 206.931        | 202.926        | 202.638        | 202.134        | H[6]  |
| R  | [19] | 477.033        | 172.126        | 168.122        | 168.374        | 167.870        | R[5]  |
| K  | [20] | <b>512.561</b> | 133.101        | 129.096        | 129.348        | 128.844        | K[4]  |
| V  | [21] | 537.328        | 97.573         | 93.569         | 93.821         | 93.317         | V[9]  |
| L  | [22] | 553.399        | 72.306         | 68.302         | 68.554         | 68.050         | L[8]  |
| R  | [23] | <b>604.624</b> | 44.535         | 40.531         | 40.782         | 40.279         | R[1]  |

# sp | P62806 | H4\_MOUSE

[Acetyl]SGRGKGGKGLGKGGAKRHRKVL R Methyl 14.02

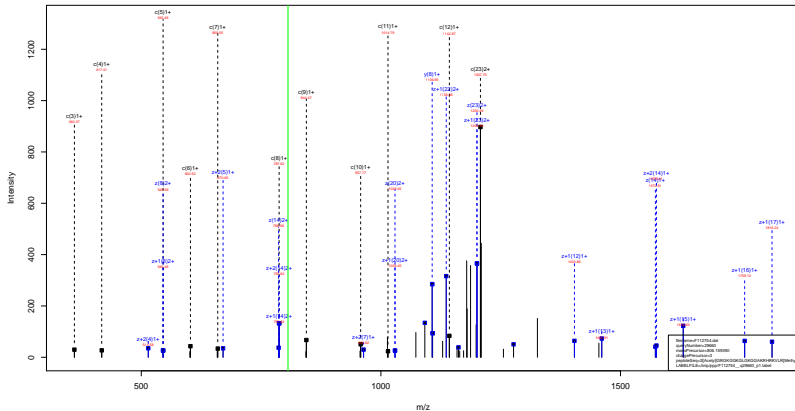



# sp | P62806 | H4\_MOUSE

[Acetyl]SGRGKGGKGLGKGGAKRHRKVL R Methyl  
14.02

- ▶ fragmentation table for charge state 1+
- ▶ specType=etd
- ▶ score=60.84
- ▶ F112754.dat
- ▶ query=q29660\_p1
- ▶ precursor=806.159390
- ▶ chargePrecursor=3
- ▶ itol=0.5

| AA | c       | y               | z+1             | z+2             | z               | AA              |      |
|----|---------|-----------------|-----------------|-----------------|-----------------|-----------------|------|
| S  | 147.076 | 2416.460        | 2420.441        | 0.000           | 2399.431        | S(2)            |      |
| G  | 2       | 294.098         | 2287.417        | 2271.398        | 0.000           | 2270.890        | G(2) |
| R  | 3       | <b>360.199</b>  | 2230.396        | 2214.377        | 2215.385        | 2213.369        | R(2) |
| G  | 4       | <b>417.220</b>  | 2074.294        | 2058.276        | 2059.284        | 2057.268        | G(2) |
| K  | 5       | <b>545.315</b>  | 2017.273        | 2001.254        | 2002.262        | 2000.246        | K(1) |
| G  | 6       | <b>602.337</b>  | 1859.170        | 1843.150        | 1844.159        | 1842.143        | G(1) |
| G  | 7       | <b>659.358</b>  | 1802.157        | <b>1816.138</b> | 1817.146        | 1815.130        | G(1) |
| K  | 8       | <b>787.453</b>  | 1745.135        | <b>1759.116</b> | 1760.124        | 1758.108        | K(1) |
| G  | 9       | <b>844.475</b>  | 1687.040        | <b>1631.021</b> | 1632.029        | 1630.014        | G(1) |
| L  | 10      | <b>957.559</b>  | 1590.019        | 1574.000        | <b>1575.008</b> | <b>1572.992</b> | L(1) |
| G  | 11      | <b>1014.580</b> | 1478.935        | <b>1468.916</b> | 1469.924        | 1469.908        | G(1) |
| K  | 12      | <b>1142.675</b> | 1419.913        | <b>1403.894</b> | 1404.902        | 1402.886        | K(1) |
| G  | 13      | 1199.697        | 1291.818        | 1275.799        | <b>1276.807</b> | 1274.792        | G(1) |
| G  | 14      | 1296.718        | 1234.797        | 1218.778        | 1219.786        | 1217.770        | G(1) |
| A  | 15      | 1327.735        | 1177.775        | <b>1161.757</b> | 1162.764        | 1160.749        | A(1) |
| K  | 16      | 1455.850        | <b>1106.738</b> | 1090.719        | <b>1091.727</b> | 1089.712        | K(1) |
| R  | 17      | 1611.964        | 978.645         | 962.626         | <b>963.632</b>  | 961.616         | R(1) |
| H  | 18      | 1740.010        | 822.542         | 806.523         | 807.531         | 805.515         | H(1) |
| R  | 19      | 1905.111        | 685.483         | 669.464         | <b>670.472</b>  | 668.457         | R(1) |
| K  | 20      | 2053.206        | 529.382         | 513.363         | <b>514.371</b>  | 512.355         | K(1) |
| V  | 21      | 2132.275        | 401.287         | 385.268         | 386.276         | 384.261         | V(1) |
| L  | 22      | 2285.269        | 302.210         | 286.200         | 287.208         | 285.192         | L(1) |
| R  | 23      | 2445.476        | 189.139         | 173.119         | 174.124         | 172.109         | R(1) |

# sp | P62806 | H4\_MOUSE

[Acetyl]SGRGKGGKGLGKGGAKRHRKVL R Methyl  
14.02

- ▶ fragmentation table for charge state 2+
- ▶ specType=etd
- ▶ score=60.84
- ▶ F112754.dat
- ▶ query=q29660\_p1
- ▶ precursor=806.159390
- ▶ chargePrecursor=3
- ▶ itol=0.5

| AA    | c               | y        | z+1             | z+2             | z               | AA    |
|-------|-----------------|----------|-----------------|-----------------|-----------------|-------|
| S[1]  | 74.042          | 1208.733 | <b>1208.724</b> | 0.504           | <b>1200.220</b> | S[23] |
| G[2]  | 102.553         | 1144.232 | <b>1136.203</b> | 0.504           | 1135.699        | G[22] |
| R[3]  | 180.603         | 1115.701 | <b>1107.692</b> | <b>1108.196</b> | <b>1107.188</b> | R[21] |
| G[4]  | 209.114         | 1037.051 | <b>1029.642</b> | 1030.145        | <b>1029.138</b> | G[20] |
| K[5]  | 273.161         | 1009.140 | 1001.131        | 1001.635        | 1000.627        | K[19] |
| G[6]  | 301.672         | 945.993  | 937.983         | 937.587         | 936.571         | G[18] |
| G[7]  | 330.183         | 916.582  | 908.571         | 909.076         | 908.060         | G[17] |
| K[8]  | 394.230         | 888.071  | 880.060         | 880.566         | 879.550         | K[16] |
| G[9]  | 422.741         | 824.024  | 816.014         | 816.518         | 815.510         | G[15] |
| L[10] | 479.283         | 795.513  | <b>787.504</b>  | <b>788.008</b>  | <b>787.000</b>  | L[14] |
| G[11] | 507.794         | 736.971  | 730.962         | 731.465         | 730.458         | G[13] |
| R[12] | 571.841         | 710.460  | 702.451         | 702.955         | 701.947         | R[12] |
| G[13] | 600.352         | 646.913  | 638.903         | 639.407         | 637.899         | G[11] |
| G[14] | 628.863         | 617.902  | 609.893         | 610.397         | 609.389         | G[10] |
| A[15] | 664.301         | 509.391  | 501.382         | 501.886         | 500.878         | A[9]  |
| K[16] | 728.420         | 553.873  | <b>545.863</b>  | 546.367         | <b>545.359</b>  | K[8]  |
| R[17] | 806.479         | 499.826  | 491.816         | 492.320         | 491.312         | R[7]  |
| R[18] | 875.009         | 411.775  | 403.765         | 404.269         | 403.261         | R[6]  |
| R[19] | 953.059         | 343.245  | 335.235         | 335.740         | 334.732         | R[5]  |
| K[20] | 1017.107        | 265.195  | 257.185         | 257.689         | 256.681         | K[4]  |
| V[21] | 1096.641        | 201.147  | 193.137         | 193.642         | 192.634         | V[3]  |
| L[22] | 1173.183        | 151.613  | 143.604         | 144.108         | 143.100         | L[2]  |
| R[23] | <b>1208.241</b> | 95.071   | 87.062          | 87.565          | 86.558          | R[1]  |

# sp | P62806 | H4\_MOUSE

[Acetyl]SGRGKGGKGLGKGGAKRHRK Methyl VLR  
14.02

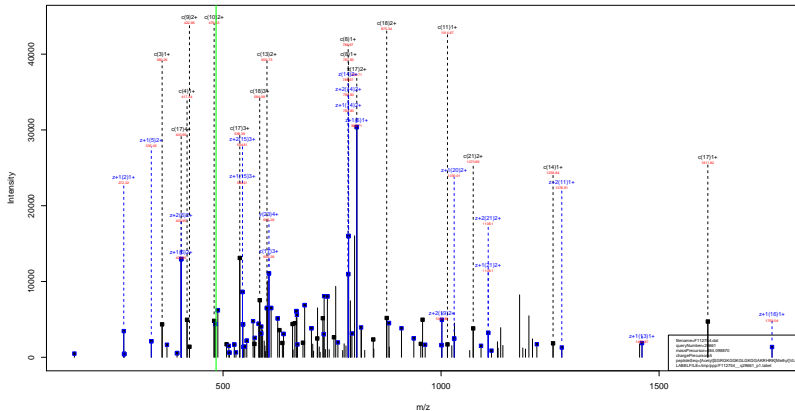

# sp | P62806 | H4\_MOUSE

[Acetyl]SGRGKGGKGLGKGGAKRHRK Methyl VLR  
14.02

- ▶ fragmentation table for charge state 1+
- ▶ specType=etd
- ▶ score=95.37
- ▶ F112754.dat
- ▶ query=q29661\_p1
- ▶ precursor=484.098870
- ▶ chargePrecursor=5
- ▶ itol=0.5

| AA    | c               | y              | z+1             | z+2             | z              | AA    |
|-------|-----------------|----------------|-----------------|-----------------|----------------|-------|
| S[1]  | 147.076         | 2416.465       | 2430.441        | 0.000           | 2389.431       | S[23] |
| G[2]  | 304.068         | 2287.417       | 2271.398        | 0.000           | 2270.300       | G[22] |
| R[3]  | <b>360.199</b>  | 2230.396       | 2214.377        | 2215.385        | 2213.369       | R[21] |
| G[4]  | <b>417.220</b>  | 2074.294       | 2058.276        | 2059.284        | 2057.269       | G[20] |
| K[5]  | <b>545.315</b>  | 2017.272       | 2001.254        | 2002.262        | 2000.246       | K[19] |
| G[6]  | 603.297         | 1889.176       | 1873.159        | 1874.167        | 1872.151       | G[18] |
| G[7]  | <b>659.358</b>  | 1832.157       | 1816.138        | 1817.146        | 1815.130       | G[17] |
| K[8]  | <b>787.453</b>  | 1775.135       | <b>1759.116</b> | 1760.124        | 1758.108       | K[16] |
| G[9]  | <b>844.475</b>  | 1647.040       | 1631.021        | 1632.029        | 1630.014       | G[15] |
| L[10] | <b>957.559</b>  | 1590.019       | 1574.000        | 1575.008        | 1572.992       | L[14] |
| G[11] | <b>1014.580</b> | 1476.915       | <b>1460.916</b> | 1461.924        | 1459.908       | G[13] |
| R[12] | 1142.475        | 1419.913       | 1403.904        | 1404.902        | 1402.887       | R[12] |
| G[13] | 1199.597        | 1291.815       | 1275.799        | <b>1276.807</b> | 1274.792       | G[11] |
| G[14] | <b>1256.718</b> | 1234.797       | 1218.778        | <b>1219.786</b> | 1217.770       | G[10] |
| A[15] | 1327.795        | 1177.775       | 1161.757        | 1162.764        | 1160.749       | A[0]  |
| K[16] | 1435.850        | 1106.738       | 1090.719        | <b>1091.727</b> | 1089.712       | K[9]  |
| R[17] | <b>1611.951</b> | 978.643        | 962.624         | <b>963.632</b>  | 961.617        | R[7]  |
| T[18] | 1749.910        | 922.542        | <b>906.523</b>  | 907.531         | 905.516        | T[6]  |
| R[19] | 1905.111        | 895.483        | <b>880.464</b>  | <b>870.472</b>  | <b>868.457</b> | R[5]  |
| K[20] | 2047.222        | <b>529.382</b> | <b>513.363</b>  | <b>514.371</b>  | 512.355        | K[4]  |
| V[21] | 2146.290        | 387.271        | <b>371.253</b>  | 372.261         | 370.245        | V[3]  |
| L[22] | 2259.374        | 288.203        | <b>272.184</b>  | <b>273.192</b>  | 271.176        | L[2]  |
| R[23] | 2415.476        | 175.119        | <b>159.100</b>  | 160.108         | 158.092        | R[1]  |

# sp | P62806 | H4\_MOUSE

[Acetyl]SGRGKGGKGLGKGGAKRHRK Methyl VLR  
14.02

- ▶ fragmentation table for charge state 2+
- ▶ specType=etd
- ▶ score=95.37
- ▶ F112754.dat
- ▶ query=q29661\_p1
- ▶ precursor=484.098870
- ▶ chargePrecursor=5
- ▶ itol=0.5

| AA   | c               | y               | z+1             | z+2             | z               | AA   |
|------|-----------------|-----------------|-----------------|-----------------|-----------------|------|
| S 1  | 74.042          | 1208.753        | 1200.736        | 0.504           | 1200.220        | S 21 |
| G 2  | 102.553         | 1144.212        | 1136.203        | 0.504           | 1135.690        | G 20 |
| R 3  | 180.603         | <b>1115.701</b> | <b>1107.692</b> | <b>1108.196</b> | 1107.188        | R 21 |
| G 4  | 209.114         | 1037.651        | <b>1029.642</b> | <b>1030.145</b> | 1029.138        | G 20 |
| K 5  | <b>273.161</b>  | 1059.140        | <b>1001.131</b> | <b>1001.635</b> | <b>1000.627</b> | K 19 |
| G 6  | 301.672         | 926.093         | <b>937.083</b>  | <b>937.587</b>  | 936.579         | G 18 |
| G 7  | 330.183         | 918.582         | 908.573         | <b>909.076</b>  | 908.068         | G 17 |
| K 8  | <b>394.230</b>  | 888.071         | <b>880.062</b>  | <b>880.566</b>  | 879.558         | K 18 |
| G 9  | <b>422.741</b>  | 874.024         | 866.014         | <b>816.518</b>  | 815.510         | G 15 |
| L 10 | <b>479.283</b>  | <b>795.513</b>  | <b>787.504</b>  | <b>788.008</b>  | <b>787.000</b>  | L 14 |
| G 11 | <b>507.794</b>  | <b>738.971</b>  | <b>730.962</b>  | <b>731.465</b>  | 730.458         | G 13 |
| K 12 | <b>571.841</b>  | 719.966         | <b>702.451</b>  | <b>702.955</b>  | 701.947         | K 12 |
| G 13 | <b>600.352</b>  | 646.413         | <b>638.403</b>  | <b>638.907</b>  | 637.899         | G 11 |
| G 14 | <b>628.863</b>  | 617.903         | <b>609.893</b>  | <b>610.397</b>  | 609.389         | G 10 |
| A 15 | <b>664.381</b>  | 589.391         | <b>581.382</b>  | <b>581.886</b>  | 580.878         | A 9  |
| K 16 | <b>728.429</b>  | 553.872         | <b>545.863</b>  | <b>546.367</b>  | <b>545.359</b>  | K 8  |
| R 17 | <b>808.479</b>  | 489.825         | <b>481.816</b>  | <b>482.320</b>  | 481.312         | R 7  |
| H 18 | <b>875.009</b>  | 411.725         | <b>403.705</b>  | <b>404.209</b>  | 403.201         | H 6  |
| R 19 | <b>953.059</b>  | 343.245         | <b>335.236</b>  | <b>335.740</b>  | 334.732         | R 5  |
| K 20 | 1024.115        | 265.195         | 257.185         | 257.689         | 256.681         | K 4  |
| V 21 | <b>1073.649</b> | 194.139         | 186.130         | 186.634         | 185.626         | V 9  |
| L 22 | 1130.191        | 144.065         | 136.055         | 137.060         | 136.052         | L 3  |
| R 23 | 1208.241        | 88.061          | 80.054          | 80.558          | 79.550          | R 1  |

# sp | P62806 | H4\_MOUSE

[Acetyl]SGRGKGGKGLGKGGAKRHRK Methyl VLR  
14.02

- ▶ fragmentation table for charge state 3+
- ▶ specType=etd
- ▶ score=95.37
- ▶ F112754.dat
- ▶ query=q29661\_p1
- ▶ precursor=484.098870
- ▶ chargePrecursor=5
- ▶ itol=0.5

| AA    | c              | y              | z+1            | z+2            | z              | AA    |
|-------|----------------|----------------|----------------|----------------|----------------|-------|
| S[1]  | 49.697         | 806.158        | 800.818        | 0.672          | 800.483        | S[23] |
| G[2]  | 68.704         | <b>763.144</b> | 757.804        | 0.672          | 757.468        | G[22] |
| R[3]  | 120.738        | 744.137        | 738.797        | <b>739.133</b> | 738.461        | R[21] |
| G[4]  | 139.743        | 692.103        | <b>686.763</b> | <b>687.099</b> | 686.427        | G[20] |
| K[5]  | 182.443        | 573.096        | <b>667.756</b> | <b>668.092</b> | 667.420        | K[19] |
| G[6]  | 201.450        | 630.398        | <b>625.058</b> | <b>625.394</b> | 624.722        | G[18] |
| G[7]  | 220.458        | 611.390        | 606.051        | 606.387        | <b>605.715</b> | G[17] |
| K[8]  | 263.156        | 592.383        | <b>587.044</b> | <b>587.380</b> | <b>586.708</b> | K[16] |
| G[9]  | 282.163        | <b>549.685</b> | <b>544.345</b> | <b>544.681</b> | 544.009        | G[15] |
| L[10] | 319.658        | 530.678        | <b>525.338</b> | <b>525.674</b> | 525.002        | L[14] |
| G[11] | 338.665        | 492.983        | <b>487.643</b> | <b>487.979</b> | 487.308        | G[13] |
| K[12] | 381.363        | 473.976        | 468.636        | 468.972        | 468.300        | K[12] |
| G[13] | 400.370        | 431.278        | 425.938        | 426.274        | 425.602        | G[11] |
| G[14] | 419.378        | 412.270        | 406.931        | 407.267        | 406.595        | G[10] |
| A[15] | 443.257        | 393.263        | 387.924        | 388.260        | 387.588        | A[9]  |
| K[16] | 485.955        | 369.584        | 364.245        | 364.581        | 363.909        | K[8]  |
| R[17] | <b>537.989</b> | 326.886        | 321.546        | 321.882        | 321.210        | R[7]  |
| H[18] | <b>583.675</b> | 274.852        | 269.513        | 269.849        | 269.177        | H[6]  |
| R[19] | <b>635.709</b> | 229.166        | 223.826        | 224.162        | 223.490        | R[5]  |
| K[20] | <b>683.079</b> | 177.132        | 171.793        | 172.129        | 171.457        | K[4]  |
| V[21] | <b>716.102</b> | 129.762        | 124.422        | 124.758        | 124.086        | V[9]  |
| L[22] | <b>753.796</b> | 86.739         | 81.400         | 81.736         | 81.064         | L[2]  |
| R[23] | 863.333        | 39.043         | 33.703         | 34.041         | 33.369         | R[1]  |

# sp | P62806 | H4\_MOUSE

[Acetyl]SGRGKGGKGLGKGGAKRHRK Methyl VLR  
14.02

- ▶ fragmentation table for charge state 4+
- ▶ specType=etd
- ▶ score=95.37
- ▶ F112754.dat
- ▶ query=q29661\_p1
- ▶ precursor=484.098870
- ▶ chargePrecursor=5
- ▶ itol=0.5

| AA |      | c              | y              | z+1            | z+2            | z     | AA                   |
|----|------|----------------|----------------|----------------|----------------|-------|----------------------|
| S  | [1]  | 37.525         | <b>604.870</b> | <b>600.866</b> |                | 0.755 | <b>600.614</b> S[2]  |
| G  | [2]  | 51.780         | <b>572.610</b> | <b>568.605</b> |                | 0.755 | 568.353 G[2]         |
| R  | [3]  | 60.805         | 558.394        | <b>554.350</b> | <b>554.602</b> |       | <b>554.098</b> R[2]  |
| G  | [4]  | 105.061        | 319.329        | 313.324        | 313.576        |       | <b>515.072</b> G[20] |
| K  | [5]  | 137.084        | 505.074        | 501.069        | 501.321        |       | 500.017 K[19]        |
| G  | [6]  | 151.340        | 473.050        | 469.045        | 469.297        |       | 468.793 G[18]        |
| G  | [7]  | 165.595        | 458.795        | 454.790        | 455.042        |       | 454.538 G[17]        |
| K  | [8]  | 197.619        | 444.539        | 440.534        | 440.787        |       | 440.283 K[16]        |
| G  | [9]  | 211.874        | 412.515        | 408.511        | 408.763        |       | 408.259 G[15]        |
| L  | [10] | 240.145        | 398.260        | <b>394.255</b> | <b>394.507</b> |       | 394.003 L[14]        |
| G  | [11] | 254.401        | 369.989        | 365.984        | 366.236        |       | 365.732 G[13]        |
| K  | [12] | 286.424        | 355.734        | 351.729        | 351.981        |       | 351.477 K[12]        |
| G  | [13] | 300.680        | 323.710        | 319.705        | 319.957        |       | 319.453 G[11]        |
| G  | [14] | 314.935        | 309.455        | 305.450        | 305.702        |       | 305.198 G[10]        |
| A  | [15] | 332.694        | 295.199        | 291.194        | 291.447        |       | 290.943 A[9]         |
| R  | [16] | 364.718        | 277.440        | <b>273.435</b> | 273.687        |       | <b>273.183</b> R[8]  |
| R  | [17] | <b>403.743</b> | 245.416        | 241.412        | 241.664        |       | 241.160 R[7]         |
| H  | [18] | 438.008        | 206.931        | 202.926        | 202.638        |       | 202.134 H[6]         |
| R  | [19] | 477.033        | 172.126        | 168.122        | 168.374        |       | 167.870 R[5]         |
| K  | [20] | 512.561        | 133.101        | 129.096        | 129.348        |       | 128.844 K[4]         |
| V  | [21] | 537.328        | 97.573         | 93.569         | 93.821         |       | 93.317 V[9]          |
| L  | [22] | 563.599        | 72.306         | 68.302         | 68.554         |       | 68.050 L[2]          |
| R  | [23] | 604.624        | 44.535         | 40.531         | 40.782         |       | 40.279 R[1]          |





# sp | P62806 | H4\_MOUSE

[Acetyl]SGRGKGGKGLGKGGAKRHR <sup>Methyl</sup> K <sup>Methyl</sup> VLR  
 14.02 14.02

- ▶ fragmentation table for charge state 1+
- ▶ specType=etd
- ▶ score=33.67
- ▶ F112754.dat
- ▶ query=q29801\_p1
- ▶ precursor=405.918130
- ▶ chargePrecursor=6
- ▶ itol=0.5

| AA    | c               | y        | z+1            | z+2             | z              | AA    |
|-------|-----------------|----------|----------------|-----------------|----------------|-------|
| S[1]  | 147.076         | 2430.475 | 2414.457       | 0.000           | 2413.440       | S[2]  |
| G[2]  | <b>204.098</b>  | 2301.433 | 2285.414       | 0.000           | 2284.406       | G[2]  |
| R[3]  | <b>360.199</b>  | 2244.411 | 2228.392       | 2229.400        | 2227.385       | R[2]  |
| G[4]  | <b>417.220</b>  | 2088.310 | 2072.291       | 2073.299        | 2071.284       | G[2]  |
| K[5]  | <b>545.315</b>  | 2031.289 | 2015.270       | 2016.278        | 2014.262       | K[10] |
| G[6]  | 602.337         | 1903.194 | 1887.175       | 1888.183        | 1886.167       | G[18] |
| G[7]  | <b>659.358</b>  | 1846.172 | 1830.153       | 1831.161        | 1829.146       | G[17] |
| K[8]  | 787.453         | 1789.151 | 1773.132       | 1774.140        | 1772.124       | K[10] |
| G[9]  | 844.475         | 1661.056 | 1645.037       | 1646.045        | 1644.029       | G[13] |
| L[10] | 957.559         | 1604.034 | 1588.016       | 1589.023        | 1587.008       | L[14] |
| G[11] | 1014.580        | 1490.950 | 1474.932       | 1475.939        | 1473.924       | G[13] |
| R[12] | 1142.676        | 1433.929 | 1417.910       | 1418.918        | 1416.902       | R[12] |
| G[13] | <b>1199.697</b> | 1305.834 | 1289.815       | 1290.823        | 1288.807       | G[11] |
| G[14] | 1256.718        | 1248.812 | 1232.794       | <b>1233.801</b> | 1231.786       | G[10] |
| A[15] | 1327.735        | 1191.791 | 1175.772       | 1176.780        | 1174.764       | A[0]  |
| K[16] | 1455.830        | 1120.754 | 1104.735       | 1105.743        | 1103.727       | K[8]  |
| R[17] | 1611.951        | 992.659  | 976.640        | 977.648         | 975.632        | R[7]  |
| H[18] | 1740.030        | 836.555  | 820.536        | 821.544         | 819.528        | H[0]  |
| R[19] | 1819.127        | 699.499  | <b>683.480</b> | 684.488         | <b>682.472</b> | R[5]  |
| K[20] | 2061.236        | 529.382  | 513.363        | 514.371         | 512.355        | K[4]  |
| V[21] | 2160.306        | 387.271  | <b>371.253</b> | 372.261         | 370.245        | V[3]  |
| L[22] | 2273.390        | 288.203  | 272.184        | 273.192         | 271.176        | L[2]  |
| R[23] | 2429.491        | 175.119  | 159.100        | 160.108         | 158.092        | R[1]  |

# sp | P62806 | H4\_MOUSE

[Acetyl]SGRGKGGKGLGKGGAKRHR <sup>Methyl</sup>14.02 K <sup>Methyl</sup>14.02 VLR

- ▶ fragmentation table for charge state 2+
- ▶ specType=etd
- ▶ score=33.67
- ▶ F112754.dat
- ▶ query=q29801\_p1
- ▶ precursor=405.918130
- ▶ chargePrecursor=6
- ▶ itol=0.5

| AA    | c              | y              | z+1             | z+2             | z              | AA    |
|-------|----------------|----------------|-----------------|-----------------|----------------|-------|
| S[1]  | 74.042         | 1215.741       | 1207.732        | 0.904           | 1207.228       | S[23] |
| G[2]  | 102.553        | 1151.220       | <b>1143.211</b> | 0.904           | 1142.707       | G[22] |
| R[3]  | 180.603        | 1122.709       | 1114.700        | 1115.204        | 1114.190       | R[21] |
| G[4]  | 209.114        | 1044.659       | <b>1036.649</b> | <b>1037.153</b> | 1036.145       | G[20] |
| K[5]  | 273.161        | 1016.148       | 1008.139        | 1009.643        | 1007.935       | K[19] |
| G[6]  | 301.673        | 923.190        | 944.001         | 944.595         | 943.587        | G[18] |
| G[7]  | 330.183        | 923.990        | 915.580         | 916.084         | 915.078        | G[17] |
| K[8]  | <b>394.230</b> | 895.079        | 887.070         | <b>887.574</b>  | 886.566        | K[16] |
| G[9]  | <b>422.741</b> | 831.632        | 823.622         | <b>823.526</b>  | 822.518        | G[15] |
| L[10] | <b>479.283</b> | 802.521        | 794.511         | <b>795.015</b>  | 794.008        | L[14] |
| G[11] | <b>507.794</b> | 745.070        | 737.060         | <b>738.473</b>  | 737.465        | G[13] |
| R[12] | <b>571.841</b> | 117.468        | 709.459         | <b>709.363</b>  | 708.355        | R[12] |
| G[13] | <b>600.352</b> | 653.421        | <b>645.411</b>  | <b>645.915</b>  | <b>644.907</b> | G[11] |
| G[14] | <b>628.863</b> | <b>624.910</b> | <b>616.900</b>  | <b>617.404</b>  | <b>616.397</b> | G[10] |
| A[15] | 664.381        | <b>596.399</b> | <b>588.390</b>  | 588.894         | <b>587.886</b> | A[9]  |
| K[16] | 728.429        | 560.881        | <b>552.871</b>  | <b>553.375</b>  | 552.367        | K[8]  |
| R[17] | <b>806.479</b> | 496.833        | 488.824         | 489.328         | 488.320        | R[7]  |
| H[18] | 875.029        | 418.782        | 410.773         | <b>411.277</b>  | 410.269        | H[6]  |
| R[19] | 960.067        | 350.253        | 342.244         | 342.748         | 341.740        | R[5]  |
| K[20] | 1031.122       | 265.195        | <b>257.185</b>  | <b>257.689</b>  | 256.681        | K[4]  |
| V[21] | 1080.657       | 194.139        | 186.130         | 186.634         | 185.626        | V[3]  |
| L[22] | 1137.199       | 144.605        | 136.596         | 137.100         | 136.092        | L[2]  |
| R[23] | 1215.249       | 88.063         | 80.054          | 80.558          | 79.550         | R[1]  |

# sp | P62806 | H4\_MOUSE

[Acetyl]SGRGKGGKGLGKGGAKRHR <sup>Methyl</sup>K <sup>Methyl</sup>VLR  
14.02 14.02

- ▶ fragmentation table for charge state 3+
- ▶ specType=etd
- ▶ score=33.67
- ▶ F112754.dat
- ▶ query=q29801\_p1
- ▶ precursor=405.918130
- ▶ chargePrecursor=6
- ▶ itol=0.5

| AA |      | c              | y              | z+1            | z+2            | z              | AA    |
|----|------|----------------|----------------|----------------|----------------|----------------|-------|
| S  | [1]  | 49.697         | 810.830        | 805.490        | 0.672          | 805.154        | S[23] |
| G  | [2]  | 68.704         | 767.816        | 762.476        | 0.672          | 762.140        | G[22] |
| R  | [3]  | 120.738        | 748.909        | 743.469        | <b>743.805</b> | 743.133        | R[21] |
| G  | [4]  | 139.743        | 696.775        | 693.435        | <b>691.771</b> | 691.099        | G[20] |
| K  | [5]  | 182.443        | 677.768        | <b>672.428</b> | <b>672.764</b> | 672.092        | K[19] |
| G  | [6]  | 201.450        | 635.069        | <b>629.730</b> | <b>630.066</b> | 629.394        | G[18] |
| G  | [7]  | 220.458        | 616.062        | 610.723        | 611.059        | 610.387        | G[17] |
| K  | [8]  | 263.156        | <b>597.055</b> | 591.716        | 592.051        | 591.380        | K[16] |
| G  | [9]  | 282.163        | 554.357        | <b>549.017</b> | <b>549.353</b> | 548.681        | G[15] |
| L  | [10] | 319.658        | <b>535.350</b> | <b>530.010</b> | <b>530.346</b> | <b>529.674</b> | L[14] |
| G  | [11] | 338.665        | 497.655        | <b>492.315</b> | <b>492.651</b> | <b>491.979</b> | G[13] |
| K  | [12] | 381.563        | 478.648        | <b>473.308</b> | <b>473.644</b> | <b>472.972</b> | K[12] |
| G  | [13] | <b>400.570</b> | 435.949        | <b>430.610</b> | <b>430.946</b> | <b>430.274</b> | G[11] |
| G  | [14] | <b>419.578</b> | <b>416.942</b> | <b>411.603</b> | 411.939        | <b>411.267</b> | G[10] |
| A  | [15] | <b>443.257</b> | 397.935        | 392.596        | 392.932        | 392.260        | A[9]  |
| K  | [16] | 485.955        | 374.256        | 368.917        | 369.252        | 368.581        | K[8]  |
| R  | [17] | <b>537.989</b> | 351.558        | 326.218        | 326.554        | 325.882        | R[7]  |
| H  | [18] | 583.675        | 279.524        | 274.185        | 274.520        | 273.849        | H[6]  |
| R  | [19] | 640.381        | 233.838        | 228.498        | 228.834        | 228.162        | R[5]  |
| K  | [20] | 687.751        | 177.132        | 171.793        | 172.129        | 171.457        | K[4]  |
| V  | [21] | 720.774        | 129.762        | 124.422        | 124.758        | 124.086        | V[3]  |
| L  | [22] | <b>758.468</b> | 96.739         | 91.400         | 91.736         | 91.064         | L[2]  |
| R  | [23] | 810.502        | 59.043         | 53.703         | 54.041         | 53.369         | R[1]  |

# sp | P62806 | H4\_MOUSE

[Acetyl]SGRGKGGKGLGKGGAKRHR <sup>Methyl</sup>K <sup>Methyl</sup>VLR  
14.02 14.02

- ▶ fragmentation table for charge state 4+
- ▶ specType=etd
- ▶ score=33.67
- ▶ F112754.dat
- ▶ query=q29801\_p1
- ▶ precursor=405.918130
- ▶ chargePrecursor=6
- ▶ itol=0.5

| AA |      | c              | y              | z+1            | z+2            | z              | AA    |
|----|------|----------------|----------------|----------------|----------------|----------------|-------|
| S  | [1]  | 37.525         | 608.374        | 604.370        | 0.755          | 604.118        | S[23] |
| G  | [2]  | 51.780         | 576.114        | <b>572.109</b> | 0.755          | <b>571.857</b> | G[22] |
| R  | [3]  | 60.805         | 561.898        | <b>557.854</b> | <b>558.106</b> | 557.602        | R[21] |
| G  | [4]  | 105.061        | 522.843        | 518.827        | 313.050        | 318.576        | G[20] |
| K  | [5]  | 137.084        | 508.578        | 504.573        | 504.825        | 504.321        | K[19] |
| G  | [6]  | 151.340        | <b>476.554</b> | 472.549        | 472.801        | 472.297        | G[18] |
| G  | [7]  | 165.595        | 462.299        | <b>458.294</b> | <b>458.546</b> | <b>458.042</b> | G[17] |
| K  | [8]  | 197.619        | 448.043        | 444.038        | 444.290        | 443.787        | K[16] |
| G  | [9]  | 211.874        | 416.019        | 412.015        | 412.267        | <b>411.763</b> | G[15] |
| L  | [10] | 240.145        | <b>401.764</b> | 397.759        | 398.011        | 397.507        | L[14] |
| G  | [11] | 254.401        | 373.493        | 369.488        | 369.740        | 369.236        | G[13] |
| K  | [12] | 286.424        | 359.238        | 355.233        | 355.485        | 354.981        | K[12] |
| G  | [13] | 303.680        | 327.214        | 323.209        | 323.461        | 322.957        | G[11] |
| G  | [14] | 314.935        | 312.950        | 308.954        | 309.206        | 308.702        | G[10] |
| A  | [15] | 332.694        | 298.703        | 294.699        | 294.950        | 294.447        | A[9]  |
| K  | [16] | 364.718        | 280.944        | 276.939        | 277.191        | 276.687        | K[8]  |
| R  | [17] | 403.743        | 248.920        | 244.915        | 245.167        | 244.664        | R[7]  |
| H  | [18] | <b>438.008</b> | 209.895        | 205.890        | 206.142        | 205.638        | H[6]  |
| R  | [19] | 480.537        | 175.630        | 171.625        | 171.877        | 171.374        | R[5]  |
| K  | [20] | <b>516.065</b> | 133.101        | 129.096        | 129.348        | 128.844        | K[4]  |
| V  | [21] | 540.832        | 97.573         | 93.569         | 93.821         | 93.317         | V[3]  |
| L  | [22] | 569.103        | 72.306         | 68.302         | 68.553         | 68.050         | L[2]  |
| R  | [23] | 608.128        | 44.535         | 40.531         | 40.782         | 40.279         | R[1]  |

# sp | P62806 | H4\_MOUSE

[Acetyl]SGRGKGGKGLGKGGAKRHR <sup>Methyl</sup>K <sup>Methyl</sup>VLR  
 14.02 14.02

- ▶ fragmentation table for charge state 5+
- ▶ specType=etd
- ▶ score=33.67
- ▶ F112754.dat
- ▶ query=q29801\_p1
- ▶ precursor=405.918130
- ▶ chargePrecursor=6
- ▶ itol=0.5

| AA    | c              | y              | z+1            | z+2     | z              | AA    |
|-------|----------------|----------------|----------------|---------|----------------|-------|
| S[1]  | 30.221         | <b>486.901</b> | <b>483.697</b> | 0.806   | <b>483.496</b> | S[23] |
| G[2]  | 41.625         | 461.092        | <b>457.889</b> | 0.806   | 457.687        | G[22] |
| R[3]  | 72.846         | 449.085        | 446.484        | 446.686 | 446.283        | R[21] |
| G[4]  | 84.250         | 418.486        | 415.284        | 415.486 | 415.083        | G[20] |
| K[5]  | 109.869        | 407.084        | 403.880        | 404.081 | 403.678        | K[19] |
| G[6]  | 121.273        | 381.445        | 378.241        | 378.442 | 378.039        | G[18] |
| G[7]  | 132.677        | 370.040        | 366.837        | 367.038 | 366.635        | G[17] |
| K[8]  | 158.296        | 358.636        | 355.432        | 355.634 | 355.231        | K[16] |
| G[9]  | 169.701        | 333.017        | 329.813        | 330.015 | 329.612        | G[15] |
| L[10] | 192.318        | 321.613        | 318.409        | 318.611 | 318.207        | L[14] |
| G[11] | <b>203.722</b> | 298.996        | 295.792        | 295.994 | 295.591        | G[13] |
| K[12] | 229.341        | 287.592        | 284.388        | 284.589 | 284.186        | K[12] |
| G[13] | 240.745        | 261.973        | 258.769        | 258.970 | 258.567        | G[11] |
| G[14] | 252.149        | 250.568        | 247.365        | 247.566 | 247.163        | G[10] |
| A[15] | 266.357        | 239.164        | 235.960        | 236.162 | 235.759        | A[9]  |
| K[16] | 291.976        | 224.957        | 221.753        | 221.954 | 221.551        | K[8]  |
| R[17] | 323.196        | 199.338        | 196.134        | 196.335 | 195.932        | R[7]  |
| H[18] | 350.608        | 168.117        | 164.914        | 165.115 | 164.712        | H[6]  |
| R[19] | 384.631        | 140.706        | 137.502        | 137.703 | 137.300        | R[5]  |
| K[20] | 413.053        | 106.682        | 103.478        | 103.680 | 103.277        | K[4]  |
| V[21] | <b>432.867</b> | 78.260         | 75.056         | 75.258  | 74.855         | V[3]  |
| L[22] | 455.484        | 58.446         | 55.243         | 55.444  | 55.041         | L[2]  |
| R[23] | <b>486.704</b> | 35.830         | 32.626         | 32.827  | 32.424         | R[1]  |



# sp | P62806 | H4\_MOUSE

[Acetyl]SGR<sup>Methyl</sup><sub>14.02</sub> GKGGKGLGKGGAKRHRK<sup>Dimethyl</sup><sub>28.03</sub> VLR

- ▶ fragmentation table for charge state 1+
- ▶ specType=etd
- ▶ score=72.48
- ▶ F112754.dat
- ▶ query=q29994\_p1
- ▶ precursor=815.502410
- ▶ chargePrecursor=3
- ▶ itol=0.5

| AA    | c               | y        | z+1             | z+2             | z        | AA    |
|-------|-----------------|----------|-----------------|-----------------|----------|-------|
| S[1]  | 147.076         | 2444.491 | 2426.472        | 0.000           | 2427.464 | S[23] |
| G[2]  | 304.068         | 2315.448 | 2299.430        | 0.000           | 2298.422 | G[22] |
| R[3]  | <b>374.215</b>  | 2258.427 | 2242.408        | 2243.416        | 2241.400 | R[21] |
| G[4]  | <b>431.236</b>  | 2088.310 | 2072.291        | 2073.299        | 2071.284 | G[20] |
| K[5]  | <b>559.331</b>  | 2031.289 | 2015.270        | 2016.278        | 2014.263 | K[19] |
| G[6]  | <b>616.353</b>  | 1903.194 | <b>1887.175</b> | 1888.183        | 1886.167 | G[18] |
| G[7]  | <b>673.374</b>  | 1846.172 | <b>1830.153</b> | 1831.161        | 1829.146 | G[17] |
| K[8]  | <b>801.469</b>  | 1789.151 | <b>1773.132</b> | 1774.140        | 1772.124 | K[16] |
| G[9]  | <b>858.490</b>  | 1661.056 | <b>1645.037</b> | 1646.045        | 1644.029 | G[15] |
| L[10] | <b>971.574</b>  | 1604.034 | 1588.015        | <b>1589.023</b> | 1587.008 | L[14] |
| G[11] | 1028.596        | 1490.950 | <b>1474.932</b> | 1475.939        | 1473.924 | G[13] |
| R[12] | 1156.691        | 1433.929 | <b>1417.910</b> | 1418.918        | 1416.902 | R[12] |
| G[13] | <b>1213.712</b> | 1305.834 | <b>1289.815</b> | <b>1290.823</b> | 1288.807 | G[11] |
| G[14] | 1270.734        | 1248.812 | 1232.794        | <b>1233.801</b> | 1231.786 | G[10] |
| A[15] | 1341.771        | 1191.791 | <b>1175.772</b> | 1176.780        | 1174.764 | A[0]  |
| K[16] | 1409.806        | 1120.754 | <b>1104.735</b> | <b>1105.743</b> | 1103.727 | K[6]  |
| R[17] | 1625.967        | 992.699  | 976.680         | <b>977.688</b>  | 976.672  | R[7]  |
| T[18] | 1763.026        | 836.596  | 820.578         | <b>821.587</b>  | 819.571  | T[6]  |
| R[19] | 1919.127        | 699.499  | 683.480         | <b>684.488</b>  | 682.472  | R[5]  |
| K[20] | 2075.263        | 543.398  | 527.379         | <b>528.387</b>  | 526.371  | K[4]  |
| V[21] | 2174.322        | 387.271  | 371.253         | 372.261         | 370.245  | V[3]  |
| L[22] | 2287.406        | 288.203  | 272.184         | 273.192         | 271.176  | L[2]  |
| R[23] | 2443.507        | 178.119  | 159.100         | 160.108         | 158.092  | R[1]  |

# sp | P62806 | H4\_MOUSE

[Acetyl]SGR<sup>Methyl</sup><sub>14.02</sub> GKGGKGLGKGGAKRHRK<sup>Dimethyl</sup><sub>28.03</sub> VLR

- ▶ fragmentation table for charge state 2+
- ▶ specType=etd
- ▶ score=72.48
- ▶ F112754.dat
- ▶ query=q29994\_p1
- ▶ precursor=815.502410
- ▶ chargePrecursor=3
- ▶ itol=0.5

| AA | c  | y               | z+1             | z+2             | z               | AA              |      |
|----|----|-----------------|-----------------|-----------------|-----------------|-----------------|------|
| S  | 1  | 74.042          | <b>1222.749</b> | <b>1214.740</b> | 0.504           | <b>1214.236</b> | S(2) |
| G  | 2  | 102.553         | 1158.228        | <b>1150.218</b> | 0.504           | 1149.715        | G(2) |
| R  | 3  | 187.611         | 1120.717        | <b>1121.708</b> | <b>1122.212</b> | 1121.204        | R(2) |
| G  | 4  | 218.122         | 1044.659        | 1036.649        | 1037.153        | 1036.143        | G(2) |
| K  | 5  | 280.169         | 1016.148        | 1008.139        | 1008.643        | 1007.635        | K(1) |
| G  | 6  | 388.680         | 892.200         | 948.001         | 944.505         | 943.589         | G(1) |
| G  | 7  | 337.191         | 923.590         | 915.580         | 916.084         | 915.075         | G(1) |
| K  | 8  | 401.238         | 895.079         | 887.070         | 887.574         | 886.566         | K(1) |
| G  | 9  | 429.749         | 831.053         | 823.022         | 823.526         | 822.518         | G(1) |
| L  | 10 | 486.291         | 802.521         | 794.511         | 795.015         | 794.008         | L(1) |
| G  | 11 | 514.802         | 748.079         | 737.069         | 738.573         | 737.465         | G(1) |
| K  | 12 | 578.599         | 717.485         | 709.459         | 709.963         | 708.955         | K(1) |
| G  | 13 | 607.360         | 651.421         | 645.411         | 645.915         | 644.907         | G(1) |
| G  | 14 | 635.871         | 624.910         | <b>616.900</b>  | 617.404         | <b>616.397</b>  | G(1) |
| A  | 15 | 671.389         | 596.399         | 588.390         | 588.894         | 587.886         | A(0) |
| K  | 16 | 735.437         | 560.881         | 552.871         | 553.375         | 552.367         | K(0) |
| R  | 17 | 813.487         | 498.833         | 488.823         | 489.328         | 488.321         | R(0) |
| H  | 18 | 882.017         | 418.782         | 410.773         | 411.277         | 410.269         | H(0) |
| R  | 19 | 980.067         | 350.253         | 342.244         | 342.748         | 341.740         | R(0) |
| K  | 20 | 1038.130        | 272.202         | 264.193         | 264.697         | 263.689         | K(0) |
| V  | 21 | <b>1087.665</b> | 194.139         | 186.130         | 186.634         | 185.626         | V(0) |
| L  | 22 | <b>1144.207</b> | 144.605         | 136.595         | 137.100         | 136.092         | L(0) |
| R  | 23 | 1223.257        | 98.051          | 89.044          | 89.558          | 79.550          | R(1) |



# sp | P62806 | H4\_MOUSE

[Acetyl]SGRGKGGKGLGKGGAKRHRK Methyl VLR Dimethyl  
14.02 28.03

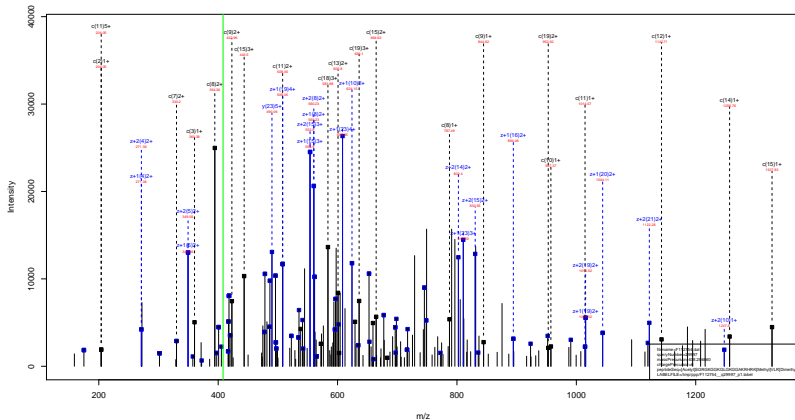

# sp | P62806 | H4\_MOUSE

[Acetyl]SGRGKGGKGLGKGGAKRHRK <sup>Methyl</sup>VLR <sup>Dimethyl</sup>28.03  
14.02

- ▶ fragmentation table for charge state 1+
- ▶ specType=etd
- ▶ score=98.36
- ▶ F112754.dat
- ▶ query=q29997\_p1
- ▶ precursor=408.256660
- ▶ chargePrecursor=6
- ▶ itol=0.5

| AA    | c               | y        | z+1            | z+2             | z              | AA    |
|-------|-----------------|----------|----------------|-----------------|----------------|-------|
| S[1]  | 147.076         | 2444.491 | 2438.472       | 0.000           | 2427.464       | S[23] |
| G[2]  | <b>204.098</b>  | 2315.448 | 2299.430       | 0.000           | 2298.422       | G[22] |
| R[3]  | <b>360.199</b>  | 2258.427 | 2242.408       | 2243.416        | 2241.400       | R[21] |
| G[4]  | <b>417.220</b>  | 2102.326 | 2086.307       | 2087.315        | 2085.299       | G[20] |
| K[5]  | 547.319         | 2046.304 | 2029.286       | 2030.293        | 2028.276       | K[19] |
| G[6]  | <b>602.337</b>  | 1917.209 | 1901.191       | 1902.198        | 1900.183       | G[18] |
| G[7]  | <b>659.358</b>  | 1860.188 | 1844.169       | 1845.177        | 1843.161       | G[17] |
| K[8]  | <b>787.453</b>  | 1803.168 | 1787.149       | 1788.156        | 1786.140       | K[16] |
| G[9]  | <b>844.475</b>  | 1675.071 | 1659.053       | 1660.061        | 1658.045       | G[15] |
| L[10] | <b>957.559</b>  | 1618.050 | 1602.031       | 1603.039        | 1601.023       | L[14] |
| G[11] | <b>1014.580</b> | 1504.966 | 1488.947       | 1489.955        | 1487.939       | G[13] |
| R[12] | <b>1142.675</b> | 1447.844 | 1431.826       | 1432.834        | 1430.818       | R[12] |
| G[13] | 1199.697        | 1319.840 | 1303.831       | 1304.839        | 1302.823       | G[11] |
| G[14] | <b>1256.718</b> | 1262.828 | 1246.809       | <b>1247.817</b> | 1245.801       | G[10] |
| A[15] | <b>1327.755</b> | 1205.807 | 1189.788       | 1190.796        | 1188.780       | A[9]  |
| K[16] | 1455.830        | 1134.769 | 1118.751       | <b>1119.759</b> | 1117.743       | K[8]  |
| R[17] | 1611.951        | 1006.674 | <b>990.656</b> | 991.664         | 989.648        | R[7]  |
| R[18] | 1740.030        | 890.573  | 881.565        | <b>835.562</b>  | 833.547        | R[6]  |
| R[19] | 1809.111        | 713.514  | <b>697.496</b> | <b>698.504</b>  | <b>696.488</b> | R[5]  |
| K[20] | 2047.222        | 557.413  | <b>541.395</b> | <b>542.402</b>  | 540.387        | K[4]  |
| V[21] | 2146.290        | 415.303  | 399.284        | <b>400.292</b>  | 398.276        | V[3]  |
| L[22] | 2259.374        | 316.234  | 300.216        | <b>301.223</b>  | 299.208        | L[2]  |
| R[23] | 2443.507        | 203.150  | 187.132        | 188.139         | 186.124        | R[1]  |

# sp | P62806 | H4\_MOUSE

[Acetyl]SGRGKGGKGLGKGGAKRHRK <sup>Methyl</sup> VLR <sup>Dimethyl</sup> 14.02 28.03

- ▶ fragmentation table for charge state 2+
- ▶ specType=etd
- ▶ score=98.36
- ▶ F112754.dat
- ▶ query=q29997\_p1
- ▶ precursor=408.256660
- ▶ chargePrecursor=6
- ▶ itol=0.5

| AA    | c              | y              | z+1             | z+2             | z               | AA    |
|-------|----------------|----------------|-----------------|-----------------|-----------------|-------|
| S[1]  | 74.042         | 1222.740       | 1214.740        | 0.504           | 1214.236        | S[23] |
| G[2]  | 102.553        | 1158.228       | 1150.210        | 0.504           | 1149.715        | G[22] |
| R[3]  | 180.603        | 1129.717       | 1121.700        | <b>1122.212</b> | 1121.204        | R[21] |
| G[4]  | 259.114        | 1051.667       | <b>1043.657</b> | <b>1044.161</b> | 1043.153        | G[20] |
| K[5]  | 273.183        | 1023.156       | <b>1015.146</b> | <b>1015.650</b> | <b>1014.643</b> | K[19] |
| G[6]  | <b>301.672</b> | 959.108        | 951.099         | <b>951.603</b>  | 950.595         | G[18] |
| G[7]  | <b>330.183</b> | 930.598        | 922.589         | <b>923.092</b>  | 922.084         | G[17] |
| K[8]  | <b>394.230</b> | 902.087        | <b>894.077</b>  | <b>894.581</b>  | 893.574         | K[16] |
| G[9]  | <b>422.741</b> | 858.639        | 850.630         | <b>850.534</b>  | 849.526         | G[15] |
| L[10] | 479.263        | 809.529        | 801.510         | <b>802.023</b>  | 801.015         | L[14] |
| G[11] | <b>507.794</b> | 752.087        | <b>744.977</b>  | <b>745.481</b>  | 744.473         | G[13] |
| R[12] | <b>571.841</b> | 704.476        | <b>716.466</b>  | <b>716.970</b>  | <b>715.963</b>  | R[12] |
| G[13] | <b>600.352</b> | <b>660.428</b> | <b>652.419</b>  | <b>652.923</b>  | 651.915         | G[11] |
| G[14] | <b>628.863</b> | 631.918        | <b>623.908</b>  | <b>624.412</b>  | 623.404         | G[10] |
| A[15] | <b>664.381</b> | 603.407        | <b>595.398</b>  | <b>595.901</b>  | 594.894         | A[0]  |
| K[16] | 728.420        | 567.888        | <b>559.879</b>  | <b>560.383</b>  | 559.375         | K[8]  |
| R[17] | 806.470        | 503.641        | <b>495.832</b>  | <b>496.335</b>  | 495.328         | R[7]  |
| T[18] | 878.009        | 429.790        | <b>417.781</b>  | <b>418.285</b>  | <b>417.277</b>  | T[6]  |
| R[19] | <b>953.059</b> | <b>357.261</b> | <b>349.252</b>  | <b>349.755</b>  | 348.748         | R[5]  |
| K[20] | 1024.115       | 279.210        | <b>271.201</b>  | <b>271.705</b>  | 270.697         | K[4]  |
| V[21] | 1073.649       | 208.155        | 200.146         | 200.650         | 199.642         | V[3]  |
| L[22] | 1130.191       | 158.621        | 150.611         | 151.115         | 150.108         | L[2]  |
| R[23] | 1222.257       | 102.079        | 94.069          | 94.573          | 93.565          | R[1]  |

# sp | P62806 | H4\_MOUSE

[Acetyl]SGRGKGGKGLGKGGAKRHRK <sup>Methyl</sup>VLR <sup>Dimethyl</sup>28.03  
14.02

- ▶ fragmentation table for charge state 3+
- ▶ specType=etd
- ▶ score=98.36
- ▶ F112754.dat
- ▶ query=q29997\_p1
- ▶ precursor=408.256660
- ▶ chargePrecursor=6
- ▶ itol=0.5

| AA    | c              | y              | z+1            | z+2            | z              | AA    |
|-------|----------------|----------------|----------------|----------------|----------------|-------|
| S[1]  | 49.697         | 815.502        | <b>810.162</b> | 0.672          | 809.826        | S[23] |
| G[2]  | 68.704         | <b>772.488</b> | 767.148        | 0.672          | 766.812        | G[22] |
| R[3]  | 120.738        | 751.488        | <b>748.141</b> | <b>748.477</b> | 747.805        | R[21] |
| G[4]  | 139.743        | 701.441        | <b>696.107</b> | <b>696.443</b> | 696.771        | G[20] |
| K[5]  | 182.443        | 682.440        | <b>677.100</b> | <b>674.316</b> | 676.764        | K[19] |
| G[6]  | 201.450        | 639.741        | <b>634.402</b> | <b>634.738</b> | 634.066        | G[18] |
| G[7]  | 220.458        | 620.734        | 615.399        | 615.731        | 615.059        | G[17] |
| K[8]  | 263.156        | <b>601.727</b> | <b>596.387</b> | <b>596.723</b> | <b>596.051</b> | K[16] |
| G[9]  | 282.163        | 559.029        | <b>553.689</b> | <b>554.025</b> | 553.353        | G[15] |
| L[10] | 319.858        | 540.022        | <b>534.682</b> | <b>535.018</b> | <b>534.346</b> | L[14] |
| G[11] | 338.865        | 502.327        | <b>496.987</b> | <b>497.323</b> | <b>496.651</b> | G[13] |
| K[12] | 381.563        | 483.320        | <b>477.980</b> | <b>478.316</b> | <b>477.644</b> | K[12] |
| G[13] | <b>400.570</b> | 440.821        | 435.282        | 435.618        | 434.940        | G[11] |
| G[14] | <b>419.578</b> | 421.614        | <b>416.275</b> | <b>416.611</b> | 415.939        | G[10] |
| A[15] | <b>441.257</b> | 402.607        | <b>397.267</b> | <b>397.603</b> | 396.932        | A[9]  |
| K[16] | <b>485.955</b> | 378.928        | 373.588        | 373.924        | 373.252        | K[8]  |
| R[17] | <b>537.989</b> | 336.230        | 330.890        | 331.226        | <b>330.554</b> | R[7]  |
| H[18] | <b>583.675</b> | 284.196        | 278.856        | 279.192        | 278.520        | H[6]  |
| R[19] | <b>635.709</b> | 238.510        | 233.170        | 233.506        | 232.834        | R[5]  |
| K[20] | <b>683.079</b> | 186.476        | 181.136        | 181.472        | 180.800        | K[4]  |
| V[21] | <b>716.102</b> | 139.106        | 133.766        | 134.102        | 133.430        | V[9]  |
| L[22] | 753.796        | 106.063        | 100.723        | 101.059        | 100.387        | L[8]  |
| R[23] | 815.174        | 88.388         | 83.048         | 83.385         | 82.713         | R[1]  |

# sp | P62806 | H4\_MOUSE

[Acetyl]SGRGKGGKGLGKGGAKRHRK <sup>Methyl</sup> VLR <sup>Dimethyl</sup> 14.02 28.03

- ▶ fragmentation table for charge state 4+
- ▶ specType=etd
- ▶ score=98.36
- ▶ F112754.dat
- ▶ query=q29997.p1
- ▶ precursor=408.256660
- ▶ chargePrecursor=6
- ▶ itol=0.5

| AA    | c              | y              | z+1            | z+2            | z              | AA    |
|-------|----------------|----------------|----------------|----------------|----------------|-------|
| S[1]  | 37.525         | 611.878        | <b>607.874</b> | 0.755          | 607.622        | S[2]  |
| G[2]  | 51.780         | 579.618        | 575.613        | 0.755          | 575.361        | G[22] |
| R[3]  | 60.805         | <b>565.362</b> | <b>561.357</b> | <b>561.609</b> | <b>561.106</b> | R[21] |
| G[4]  | 105.091        | 526.337        | <b>522.332</b> | <b>522.584</b> | 522.380        | G[20] |
| K[5]  | 137.084        | 512.082        | <b>508.077</b> | <b>508.329</b> | <b>507.825</b> | K[19] |
| G[6]  | 151.340        | 480.058        | 476.053        | 476.305        | 475.801        | G[18] |
| G[7]  | 165.595        | 465.802        | 461.798        | 462.050        | 461.546        | G[17] |
| K[8]  | 197.619        | 451.547        | 447.542        | 447.794        | 447.290        | K[16] |
| G[9]  | 211.874        | <b>419.523</b> | 415.519        | 415.771        | 415.267        | G[15] |
| L[10] | 240.145        | <b>405.268</b> | 401.263        | 401.515        | <b>401.011</b> | L[14] |
| G[11] | 254.401        | 376.997        | 372.992        | 373.244        | <b>372.740</b> | G[13] |
| K[12] | 286.424        | 362.742        | 358.737        | 358.989        | 358.485        | K[12] |
| G[13] | 300.680        | 330.718        | 326.713        | 326.965        | 326.461        | G[11] |
| G[14] | 314.935        | 316.462        | 312.458        | 312.710        | 312.206        | G[10] |
| A[15] | 332.694        | 302.207        | 298.202        | 298.454        | 297.950        | A[9]  |
| K[16] | 364.718        | 284.448        | 280.443        | 280.695        | 280.191        | K[8]  |
| R[17] | 403.743        | 252.424        | 248.419        | 248.671        | 248.167        | R[7]  |
| H[18] | 438.008        | 213.399        | 209.394        | 209.646        | 209.142        | H[6]  |
| R[19] | <b>477.033</b> | 179.134        | <b>175.129</b> | <b>175.381</b> | <b>174.877</b> | R[5]  |
| K[20] | 512.561        | 140.109        | 136.104        | 136.356        | 135.852        | K[4]  |
| V[21] | 537.528        | 104.581        | 100.576        | 100.828        | 100.325        | V[9]  |
| L[22] | <b>565.599</b> | 79.814         | 75.809         | 76.061         | 75.557         | L[2]  |
| R[23] | 611.632        | 51.543         | 47.538         | 47.790         | 47.286         | R[1]  |

# sp | P62806 | H4\_MOUSE

[Acetyl]SGRGKGGKGLGKGGAKRHRK <sup>Methyl</sup>VLR <sup>Dimethyl</sup>14.02 28.03

- ▶ fragmentation table for charge state 5+
- ▶ specType=etd
- ▶ score=98.36
- ▶ F112754.dat
- ▶ query=q29997.p1
- ▶ precursor=408.256660
- ▶ chargePrecursor=6
- ▶ itol=0.5

| AA    | c              | y              | z+1            | z+2            | z              | AA    |
|-------|----------------|----------------|----------------|----------------|----------------|-------|
| S[1]  | 30.221         | <b>409.704</b> | <b>406.500</b> |                | <b>406.299</b> | S[2]  |
| G[2]  | 41.625         | 463.895        | 460.692        | 0.806          | 460.490        | G[22] |
| R[3]  | 72.846         | 432.491        | 443.287        | 449.889        | 449.289        | R[21] |
| G[4]  | 84.250         | 421.271        | <b>418.067</b> | <b>418.269</b> | <b>417.866</b> | G[20] |
| K[5]  | 109.869        | 409.867        | 405.663        | 405.554        | 405.461        | K[19] |
| G[6]  | 121.273        | 394.248        | 381.044        | 381.246        | 380.842        | G[18] |
| G[7]  | 132.677        | 372.843        | 369.640        | 369.541        | 369.438        | G[17] |
| K[8]  | 158.296        | 361.439        | 358.235        | 358.437        | 358.034        | K[16] |
| G[9]  | 169.701        | 339.620        | 332.616        | 332.818        | 332.415        | G[15] |
| L[10] | 192.318        | 324.616        | 321.212        | 321.414        | 321.011        | L[14] |
| G[11] | <b>203.722</b> | <b>301.799</b> | 298.595        | 298.797        | 298.394        | G[13] |
| K[12] | 229.341        | 290.395        | 287.191        | 287.393        | 286.989        | K[12] |
| G[13] | 249.748        | 284.776        | 281.572        | 281.774        | 281.370        | G[11] |
| G[14] | 252.149        | 253.371        | 250.168        | 250.369        | 249.966        | G[10] |
| A[15] | 256.357        | 241.967        | 238.763        | 238.965        | 238.562        | A[9]  |
| K[16] | 291.976        | 227.760        | 224.556        | 224.758        | 224.354        | K[8]  |
| R[17] | 323.196        | 202.141        | 198.937        | 199.139        | 198.735        | R[7]  |
| H[18] | 350.608        | 170.920        | 167.717        | 167.918        | 167.515        | H[6]  |
| R[19] | 381.828        | 143.509        | 140.305        | 140.507        | 140.103        | R[5]  |
| K[20] | 410.250        | 112.288        | 109.083        | 109.286        | 108.883        | K[4]  |
| V[21] | 430.064        | 83.866         | 80.663         | 80.864         | 80.461         | V[9]  |
| L[22] | 432.881        | 64.053         | 60.849         | 61.051         | 60.647         | L[8]  |
| K[23] | 489.507        | 41.430         | 38.227         | 38.434         | 38.031         | K[1]  |



# sp | P62806 | H4\_MOUSE

[Acetyl]SGRGKGGKGLGKGGAK<sup>Acetyl</sup> RHRK<sup>Methyl</sup> VLR<sup>14.02</sup>  
42.01 14.02

- ▶ fragmentation table for charge state 1+
- ▶ specType=etd
- ▶ score=72.85
- ▶ F112754.dat
- ▶ query=q30119\_p1
- ▶ precursor=492.500570
- ▶ chargePrecursor=5
- ▶ itol=0.5

| AA    | c               | y              | z+1             | z+2             | z        | AA    |
|-------|-----------------|----------------|-----------------|-----------------|----------|-------|
| S[1]  | 147.076         | 2456.470       | 2442.451        | 0.000           | 2441.444 | S[23] |
| G[2]  | 304.068         | 2329.428       | 2313.409        | 0.000           | 2312.401 | G[22] |
| R[3]  | <b>360.199</b>  | 2272.406       | 2256.387        | 2257.395        | 2255.389 | R[21] |
| G[4]  | <b>417.220</b>  | 2116.305       | 2100.286        | 2101.294        | 2099.279 | G[20] |
| K[5]  | <b>543.315</b>  | 2059.284       | 2043.265        | 2044.273        | 2042.257 | K[19] |
| G[6]  | <b>602.137</b>  | 1931.189       | 1915.170        | 1916.178        | 1914.162 | G[18] |
| G[7]  | <b>659.358</b>  | 1874.167       | 1858.148        | 1859.156        | 1857.141 | G[17] |
| K[8]  | <b>787.453</b>  | 1817.146       | 1801.127        | 1802.135        | 1800.119 | K[16] |
| G[9]  | <b>844.475</b>  | 1689.051       | 1673.032        | 1674.040        | 1672.024 | G[15] |
| L[10] | <b>957.559</b>  | 1632.029       | 1616.011        | 1617.018        | 1615.003 | L[14] |
| G[11] | <b>1014.580</b> | 1518.945       | 1502.926        | 1503.934        | 1501.919 | G[13] |
| R[12] | <b>1142.675</b> | 1461.924       | 1445.905        | 1446.913        | 1444.897 | R[12] |
| G[13] | 1199.697        | 1333.829       | 1317.810        | 1318.818        | 1316.802 | G[11] |
| G[14] | 1256.718        | 1276.807       | 1260.789        | <b>1261.796</b> | 1259.781 | G[10] |
| A[15] | <b>1327.755</b> | 1219.786       | 1203.767        | <b>1204.775</b> | 1202.759 | A[0]  |
| K[16] | 1497.801        | 1148.749       | <b>1132.730</b> | 1133.738        | 1131.722 | K[8]  |
| R[17] | <b>1653.962</b> | 978.643        | 962.624         | <b>963.632</b>  | 961.617  | R[7]  |
| T[18] | 1793.924        | 922.545        | <b>906.523</b>  | 907.531         | 905.516  | T[6]  |
| R[19] | 1947.122        | <b>685.483</b> | <b>669.464</b>  | <b>670.472</b>  | 668.457  | R[5]  |
| K[20] | 2089.231        | 529.382        | <b>513.363</b>  | <b>514.371</b>  | 512.355  | K[4]  |
| V[21] | 2188.301        | 387.271        | <b>371.253</b>  | 372.261         | 370.245  | V[3]  |
| L[22] | 2301.395        | 288.203        | <b>272.184</b>  | 273.192         | 271.176  | L[2]  |
| R[23] | 2457.488        | 178.119        | <b>159.100</b>  | 160.108         | 158.092  | R[1]  |



# sp | P62806 | H4\_MOUSE

[Acetyl]SGRGKGGKGLGKGGAK<sup>Acetyl</sup> RHRK<sup>Methyl</sup> VLR<sup>14.02</sup>

- ▶ fragmentation table for charge state 2+
- ▶ specType=etd
- ▶ score=72.85
- ▶ F112754.dat
- ▶ query=q30119\_p1
- ▶ precursor=492.500570
- ▶ chargePrecursor=5
- ▶ itol=0.5

| AA    | c               | y              | z+1             | z+2             | z              | AA    |
|-------|-----------------|----------------|-----------------|-----------------|----------------|-------|
| S[1]  | 74.642          | 1229.739       | 1221.739        | 0.904           | 1221.225       | S[23] |
| G[2]  | 102.553         | 1165.217       | 1157.208        | 0.904           | 1156.704       | G[22] |
| R[3]  | 189.603         | 1136.707       | <b>1128.697</b> | <b>1129.201</b> | 1128.193       | R[21] |
| G[4]  | 269.114         | 1058.656       | <b>1050.647</b> | <b>1051.151</b> | 1050.143       | G[20] |
| K[5]  | 273.181         | 1030.145       | <b>1022.136</b> | <b>1022.640</b> | 1021.632       | K[19] |
| G[6]  | 301.672         | 966.096        | <b>958.089</b>  | <b>958.593</b>  | <b>957.585</b> | G[18] |
| G[7]  | 330.183         | 937.587        | <b>929.578</b>  | <b>930.082</b>  | 929.074        | G[17] |
| K[8]  | 394.230         | 909.076        | 901.067         | <b>901.571</b>  | 900.563        | K[16] |
| G[9]  | 422.741         | <b>845.029</b> | 837.020         | <b>837.524</b>  | 836.511        | G[15] |
| L[10] | <b>479.283</b>  | 816.518        | <b>808.509</b>  | <b>809.013</b>  | 808.009        | L[14] |
| G[11] | <b>507.794</b>  | 750.016        | 742.007         | <b>752.471</b>  | 751.463        | G[13] |
| R[12] | <b>571.841</b>  | 731.465        | <b>723.456</b>  | <b>723.960</b>  | 722.952        | R[12] |
| G[13] | <b>600.352</b>  | 597.415        | <b>589.409</b>  | <b>589.913</b>  | 588.905        | G[11] |
| G[14] | <b>628.863</b>  | <b>638.907</b> | <b>630.898</b>  | <b>631.402</b>  | 630.394        | G[10] |
| A[15] | <b>664.381</b>  | 610.397        | <b>602.387</b>  | <b>602.891</b>  | <b>601.883</b> | A[0]  |
| K[16] | 749.434         | 574.878        | <b>566.869</b>  | <b>567.373</b>  | 566.369        | K[9]  |
| R[17] | <b>827.485</b>  | 489.825        | <b>481.816</b>  | <b>482.320</b>  | 481.312        | R[7]  |
| T[18] | <b>898.014</b>  | 413.775        | <b>403.765</b>  | <b>404.269</b>  | 403.261        | T[6]  |
| R[19] | <b>974.065</b>  | 343.245        | <b>335.236</b>  | <b>335.740</b>  | 334.732        | R[5]  |
| K[20] | 1045.120        | 295.195        | 287.185         | 287.689         | 286.681        | K[4]  |
| V[21] | <b>1094.654</b> | 194.139        | 186.130         | 186.634         | 185.626        | V[3]  |
| L[22] | 1151.196        | 144.605        | 136.595         | 137.100         | 136.092        | L[2]  |
| R[23] | 1229.247        | 88.063         | 80.054          | 80.558          | 79.550         | R[1]  |

# sp | P62806 | H4\_MOUSE

[Acetyl]SGRGKGGKGLGKGGAK<sup>Acetyl</sup> RHRK<sup>Methyl</sup> VLR<sub>42.01 14.02</sub>

- ▶ fragmentation table for charge state 3+
- ▶ specType=etd
- ▶ score=72.85
- ▶ F112754.dat
- ▶ query=q30119\_p1
- ▶ precursor=492.500570
- ▶ chargePrecursor=5
- ▶ itol=0.5

| AA |      | c              | y              | z+1            | z+2            | z              | AA    |
|----|------|----------------|----------------|----------------|----------------|----------------|-------|
| S  | [1]  | 49.697         | <b>820.162</b> | 814.822        | 0.672          | 814.486        | S[23] |
| G  | [2]  | 68.704         | 777.147        | 773.808        | 0.672          | 771.472        | G[22] |
| R  | [3]  | 120.738        | 758.140        | <b>752.801</b> | <b>753.137</b> | <b>752.465</b> | R[21] |
| G  | [4]  | 139.743        | 706.107        | <b>706.767</b> | <b>701.103</b> | 700.431        | G[20] |
| K  | [5]  | 182.443        | 687.099        | <b>681.760</b> | <b>682.096</b> | 681.424        | K[19] |
| G  | [6]  | 201.450        | 644.401        | <b>639.061</b> | <b>639.397</b> | <b>638.726</b> | G[18] |
| G  | [7]  | 220.458        | 625.394        | <b>620.054</b> | <b>620.390</b> | 619.718        | G[17] |
| K  | [8]  | 263.156        | 606.387        | <b>601.047</b> | <b>601.383</b> | <b>600.711</b> | K[16] |
| G  | [9]  | 282.163        | 563.688        | <b>558.349</b> | <b>558.685</b> | 558.013        | G[15] |
| L  | [10] | 319.658        | <b>544.681</b> | <b>539.342</b> | <b>539.678</b> | 539.006        | L[14] |
| G  | [11] | 338.665        | 506.987        | <b>501.647</b> | <b>501.983</b> | 501.311        | G[13] |
| K  | [12] | 381.363        | 487.979        | 482.640        | 482.976        | <b>482.304</b> | K[12] |
| G  | [13] | 400.370        | 448.281        | 439.942        | 440.277        | 439.609        | G[11] |
| G  | [14] | 419.378        | 426.274        | 420.934        | 421.270        | 420.598        | G[10] |
| A  | [15] | 443.257        | 407.267        | 401.927        | 402.263        | 401.591        | A[9]  |
| K  | [16] | 499.958        | 383.588        | 378.249        | 378.584        | 377.912        | K[8]  |
| R  | [17] | <b>551.992</b> | 326.886        | 321.546        | 321.882        | 321.210        | R[7]  |
| H  | [18] | <b>597.678</b> | 274.852        | 269.513        | 269.849        | 269.177        | H[6]  |
| R  | [19] | <b>649.712</b> | 229.166        | 223.826        | 224.162        | 223.490        | R[5]  |
| K  | [20] | <b>697.082</b> | 177.132        | 171.793        | 172.129        | 171.457        | K[4]  |
| V  | [21] | <b>730.105</b> | 129.762        | 124.422        | 124.758        | 124.086        | V[3]  |
| L  | [22] | 767.800        | 96.739         | 91.400         | 91.736         | 91.064         | L[2]  |
| R  | [23] | 819.834        | 59.043         | 53.703         | 54.041         | 53.369         | R[1]  |

# sp | P62806 | H4\_MOUSE

[Acetyl]SGRGKGGKGLGKGGAK<sup>Acetyl</sup>RHRK<sup>Methyl</sup>VLR<sub>42.01 14.02</sub>

- ▶ fragmentation table for charge state 4+
- ▶ specType=etd
- ▶ score=72.85
- ▶ F112754.dat
- ▶ query=q30119\_p1
- ▶ precursor=492.500570
- ▶ chargePrecursor=5
- ▶ itol=0.5

| AA    | c       | y       | z+1            | z+2            | z              | AA    |
|-------|---------|---------|----------------|----------------|----------------|-------|
| S[1]  | 37.525  | 615.373 | <b>611.368</b> | 0.755          | 611.116        | S[2]  |
| G[2]  | 51.760  | 583.112 | <b>579.108</b> | 0.733          | 578.856        | G[2]  |
| R[3]  | 60.809  | 598.897 | <b>564.852</b> | <b>565.104</b> | 564.600        | R[2]  |
| G[4]  | 105.061 | 529.832 | 525.827        | 526.079        | 525.576        | G[20] |
| K[5]  | 137.084 | 515.576 | 511.572        | 511.824        | 511.320        | K[19] |
| G[6]  | 151.340 | 483.593 | <b>479.548</b> | <b>479.800</b> | <b>479.296</b> | G[18] |
| G[7]  | 165.595 | 469.297 | 465.293        | 465.545        | 465.041        | G[17] |
| K[8]  | 197.619 | 456.042 | 451.037        | 451.289        | 450.785        | K[16] |
| G[9]  | 211.874 | 423.018 | 419.013        | 419.265        | 418.761        | G[15] |
| L[10] | 240.145 | 408.763 | <b>404.758</b> | <b>405.010</b> | <b>404.506</b> | L[14] |
| G[11] | 254.401 | 380.492 | 376.487        | 376.739        | 376.235        | G[13] |
| K[12] | 286.424 | 366.236 | 362.232        | 362.484        | 361.980        | K[12] |
| G[13] | 300.680 | 334.213 | 330.208        | 330.460        | 329.956        | G[11] |
| G[14] | 318.938 | 319.997 | 315.993        | 316.245        | 315.701        | G[10] |
| A[15] | 332.694 | 305.702 | 301.697        | 301.949        | 301.445        | A[9]  |
| K[16] | 378.221 | 287.943 | 283.938        | 284.190        | 283.686        | K[8]  |
| R[17] | 414.246 | 245.416 | 241.412        | 241.664        | 241.160        | R[7]  |
| H[18] | 448.511 | 206.391 | 202.386        | 202.638        | 202.134        | H[6]  |
| R[19] | 487.536 | 172.126 | 168.122        | 168.374        | 167.870        | R[5]  |
| K[20] | 523.064 | 133.101 | 129.096        | 129.348        | 128.844        | K[4]  |
| V[21] | 547.811 | 97.573  | 93.569         | 93.821         | 93.317         | V[3]  |
| L[22] | 576.102 | 72.806  | 68.802         | 69.053         | 68.550         | L[2]  |
| R[23] | 615.127 | 44.535  | 40.531         | 40.782         | 40.279         | R[1]  |



# sp | P62806 | H4\_MOUSE

[Acetyl]SGRGKGGKGLGKGGAK<sup>Acetyl</sup> RHR<sup>(Dimethyl)</sup> K<sup>(Methyl)</sup> VLR<sup>(28.03)</sup> K<sup>(14.02)</sup>

- ▶ fragmentation table for charge state 1+
- ▶ specType=etd
- ▶ score=96.05
- ▶ F112754.dat
- ▶ query=q30435.p1
- ▶ precursor=622.381060
- ▶ chargePrecursor=4
- ▶ itol=0.5

| AA    | c               | y        | z+1      | z+2             | z        | AA    |
|-------|-----------------|----------|----------|-----------------|----------|-------|
| S[1]  | 147.076         | 2486.501 | 2479.453 | 0.000           | 2469.475 | S[23] |
| G[2]  | 304.098         | 2357.459 | 2341.440 | 0.000           | 2340.433 | G[22] |
| R[3]  | <b>360.199</b>  | 2300.437 | 2284.419 | 2265.427        | 2261.411 | R[21] |
| G[4]  | <b>417.220</b>  | 2144.339 | 2128.318 | 2129.325        | 2127.310 | G[20] |
| K[5]  | <b>545.315</b>  | 2087.315 | 2071.290 | 2072.304        | 2070.288 | K[19] |
| G[6]  | <b>602.337</b>  | 1959.220 | 1943.201 | 1944.209        | 1942.193 | G[18] |
| G[7]  | <b>659.358</b>  | 1902.190 | 1886.150 | <b>1887.188</b> | 1885.172 | G[17] |
| K[8]  | <b>787.453</b>  | 1845.177 | 1829.158 | 1830.166        | 1828.150 | K[16] |
| G[9]  | <b>844.475</b>  | 1717.082 | 1701.063 | <b>1702.071</b> | 1700.055 | G[15] |
| L[10] | <b>957.559</b>  | 1660.061 | 1644.042 | 1645.050        | 1643.034 | L[14] |
| G[11] | 1014.580        | 1546.979 | 1530.958 | 1531.966        | 1529.950 | G[13] |
| K[12] | <b>1142.675</b> | 1490.955 | 1474.928 | 1474.944        | 1472.928 | K[12] |
| G[13] | <b>1199.697</b> | 1361.860 | 1345.841 | <b>1346.849</b> | 1344.833 | G[11] |
| G[14] | <b>1256.718</b> | 1304.839 | 1288.820 | <b>1289.828</b> | 1287.812 | G[10] |
| A[15] | <b>1327.755</b> | 1247.817 | 1231.798 | 1232.806        | 1230.791 | A[9]  |
| K[16] | <b>1487.861</b> | 1176.780 | 1160.761 | <b>1161.769</b> | 1159.753 | K[8]  |
| R[17] | <b>1653.962</b> | 1026.674 | 990.656  | <b>991.664</b>  | 989.648  | R[7]  |
| H[18] | 1791.621        | 890.573  | 834.555  | <b>835.562</b>  | 833.547  | H[6]  |
| R[19] | 1878.333        | 713.514  | 667.498  | 668.504         | 666.488  | R[5]  |
| K[20] | 2117.204        | 628.382  | 582.363  | 514.371         | 512.355  | K[4]  |
| V[21] | 2216.032        | 487.271  | 371.253  | <b>372.261</b>  | 370.245  | V[3]  |
| L[22] | 2320.416        | 288.203  | 272.184  | 273.192         | 271.176  | L[2]  |
| R[23] | 2485.517        | 175.119  | 159.100  | 160.108         | 158.092  | R[1]  |

# sp | P62806 | H4\_MOUSE

[Acetyl]SGRGKGGKGLGKGGAK<sup>Acetyl</sup> RHR<sup>(Dimethyl)</sup> K<sup>(Methyl)</sup> VLR<sup>(14.02)</sup>  
 42.01 (28.03)

- ▶ fragmentation table for charge state 2+
- ▶ specType=etd
- ▶ score=96.05
- ▶ F112754.dat
- ▶ query=q30435\_p1
- ▶ precursor=622.381060
- ▶ chargePrecursor=4
- ▶ itol=0.5

| AA     | c               | y               | z+1             | z+2             | z               | AA    |
|--------|-----------------|-----------------|-----------------|-----------------|-----------------|-------|
| S [1]  | 74.002          | <b>1243.754</b> | <b>1235.745</b> | 0.504           | 235.241         | S[2]  |
| G [2]  | 102.553         | 1179.233        | <b>1171.224</b> | 0.504           | 170.720         | G[2]  |
| R [3]  | 180.603         | <b>1150.722</b> | <b>1142.713</b> | <b>1143.217</b> | 1142.200        | R[2]  |
| G [4]  | 209.114         | 1072.072        | <b>1064.662</b> | <b>1065.166</b> | <b>1064.159</b> | G[20] |
| K [5]  | 273.161         | 1044.161        | <b>1036.152</b> | <b>1036.656</b> | 1035.648        | K[19] |
| G [6]  | 361.672         | 980.144         | 972.136         | 972.640         | 971.630         | G[18] |
| G [7]  | 330.183         | 953.663         | <b>943.593</b>  | <b>944.097</b>  | 943.590         | G[17] |
| K [8]  | 394.210         | <b>923.092</b>  | 915.083         | <b>915.587</b>  | 914.579         | K[16] |
| G [9]  | 432.741         | 859.045         | <b>851.035</b>  | <b>851.539</b>  | 850.531         | G[15] |
| L [10] | 479.263         | 830.534         | 822.525         | 823.029         | 822.021         | L[14] |
| G [11] | 507.704         | 773.092         | <b>765.083</b>  | <b>766.586</b>  | 765.470         | G[13] |
| T [12] | 391.834         | 746.321         | <b>737.472</b>  | <b>737.976</b>  | 736.969         | T[12] |
| G [13] | 600.352         | 681.434         | <b>673.424</b>  | <b>673.928</b>  | 672.920         | G[11] |
| G [14] | 658.883         | 652.923         | <b>644.914</b>  | <b>645.417</b>  | <b>644.410</b>  | G[10] |
| A [15] | 664.301         | 624.412         | <b>616.403</b>  | <b>616.907</b>  | 615.899         | A[9]  |
| K [16] | 749.434         | 588.894         | <b>580.884</b>  | <b>581.388</b>  | 580.380         | K[8]  |
| R [17] | 827.605         | 503.841         | <b>495.832</b>  | <b>496.335</b>  | 495.328         | R[7]  |
| T [18] | <b>894.014</b>  | 428.790         | <b>417.781</b>  | 418.285         | <b>417.277</b>  | T[6]  |
| R [19] | 988.080         | 357.261         | 349.252         | 349.755         | 348.748         | R[5]  |
| K [20] | <b>1059.136</b> | 265.195         | 257.185         | 257.689         | 256.681         | K[4]  |
| V [21] | <b>1108.679</b> | 194.139         | 186.130         | 186.634         | 185.626         | V[3]  |
| L [22] | <b>1165.212</b> | 144.605         | 136.596         | 137.100         | 136.092         | L[1]  |
| R [23] | 1243.262        | 88.063          | 80.054          | 80.558          | 79.550          | R[1]  |

# sp | P62806 | H4\_MOUSE

[Acetyl]SGRGKGGKGLGKGGAK<sup>Acetyl</sup> RHR<sup>(Dimethyl)</sup> K<sup>(Methyl)</sup> VLR<sup>(14.02)</sup>  
 42.01 (28.03)

- ▶ fragmentation table for charge state 3+
- ▶ specType=etd
- ▶ score=96.05
- ▶ F112754.dat
- ▶ query=q30435.p1
- ▶ precursor=622.381060
- ▶ chargePrecursor=4
- ▶ itol=0.5

| AA    | c              | y              | z+1            | z+2            | z       | AA    |
|-------|----------------|----------------|----------------|----------------|---------|-------|
| S[1]  | 49.697         | <b>829.505</b> | <b>824.166</b> | 0.672          | 823.830 | S[23] |
| G[2]  | 68.704         | 786.491        | 781.152        | 0.672          | 780.816 | G[22] |
| R[3]  | 120.738        | 787.484        | <b>762.144</b> | <b>762.480</b> | 761.808 | R[21] |
| G[4]  | 139.245        | 715.493        | 710.111        | 710.447        | 709.775 | G[20] |
| K[5]  | 152.443        | 696.441        | 691.104        | 691.440        | 690.768 | K[19] |
| G[6]  | 201.450        | 635.743        | 648.405        | 648.741        | 648.069 | G[18] |
| G[7]  | 220.458        | 634.738        | 629.398        | 629.734        | 629.062 | G[17] |
| R[8]  | 263.156        | 615.731        | 610.391        | 610.727        | 610.055 | R[16] |
| G[9]  | 282.163        | 573.032        | 567.693        | 568.029        | 567.357 | G[15] |
| L[10] | 319.858        | 554.025        | 548.685        | 549.021        | 548.350 | L[14] |
| G[11] | 338.865        | 516.330        | 510.991        | 511.327        | 510.655 | G[13] |
| R[12] | 381.563        | 497.323        | 491.984        | 492.320        | 491.648 | R[12] |
| G[13] | 400.570        | 454.625        | 449.285        | 449.621        | 448.949 | G[11] |
| G[14] | 419.578        | 435.618        | 430.278        | 430.614        | 429.942 | G[10] |
| A[15] | 443.297        | 416.611        | 411.271        | 411.607        | 410.935 | A[9]  |
| R[16] | 496.958        | 392.932        | 387.592        | 387.928        | 387.256 | R[8]  |
| R[17] | 551.992        | 336.230        | 330.890        | 331.226        | 330.554 | R[7]  |
| H[18] | 597.678        | 284.196        | 278.856        | 279.192        | 278.520 | H[6]  |
| R[19] | <b>659.056</b> | 238.510        | 233.170        | 233.506        | 232.834 | R[5]  |
| K[20] | 706.426        | 177.132        | 171.793        | 172.129        | 171.457 | K[4]  |
| V[21] | 739.449        | 129.762        | 124.422        | 124.758        | 124.086 | V[3]  |
| L[22] | 777.144        | 96.739         | 91.400         | 91.736         | 91.064  | L[2]  |
| R[23] | 829.177        | 59.045         | 53.705         | 54.041         | 53.369  | R[1]  |





# sp | P62806 | H4\_MOUSE

[Acetyl]SGRGKGGKGLGKGGAK<sup>Acetyl</sup> RHRK<sup>(Dimethyl)</sup> VLR<sup>(Methyl)</sup>  
 42.01 (28.03) (14.02)

- ▶ fragmentation table for charge state 1+
- ▶ specType=etd
- ▶ score=32.15
- ▶ F112754.dat
- ▶ query=q30437.p1
- ▶ precursor=829.506080
- ▶ chargePrecursor=3
- ▶ itol=0.5

| AA    | c               | y        | z+1             | z+2             | z        | AA    |
|-------|-----------------|----------|-----------------|-----------------|----------|-------|
| S[1]  | 147.076         | 2386.501 | 2478.483        | 0.000           | 2465.475 | S[23] |
| G[2]  | 204.098         | 2357.459 | 2341.440        | 0.000           | 2340.432 | G[22] |
| R[3]  | 300.199         | 2300.437 | 2394.419        | 2395.427        | 2383.411 | R[21] |
| G[4]  | 417.230         | 2144.336 | 2128.318        | 2129.325        | 2127.310 | G[20] |
| K[5]  | 545.315         | 2087.315 | 2071.296        | 2072.304        | 2070.288 | K[19] |
| G[6]  | 602.337         | 1959.220 | 1943.201        | 1944.209        | 1942.193 | G[18] |
| G[7]  | 659.358         | 1902.198 | 1886.180        | 1887.188        | 1885.172 | G[17] |
| K[8]  | <b>787.453</b>  | 1845.177 | 1829.158        | 1830.166        | 1828.150 | K[16] |
| G[9]  | 844.475         | 1717.082 | 1701.063        | 1702.071        | 1700.055 | G[15] |
| L[10] | <b>957.559</b>  | 1660.061 | 1644.042        | 1645.050        | 1643.034 | L[14] |
| G[11] | 1014.588        | 1546.976 | <b>1530.958</b> | 1531.966        | 1529.950 | G[13] |
| K[12] | <b>1142.675</b> | 1489.955 | 1473.937        | 1474.944        | 1472.928 | K[12] |
| G[13] | 1199.697        | 1381.860 | <b>1345.841</b> | 1346.849        | 1344.833 | G[11] |
| G[14] | 1256.718        | 1304.839 | 1288.820        | <b>1289.828</b> | 1287.812 | G[10] |
| A[15] | 1327.755        | 1247.817 | 1231.798        | 1232.806        | 1230.791 | A[10] |
| K[16] | 1407.801        | 1176.780 | 1160.761        | <b>1161.769</b> | 1159.753 | K[8]  |
| R[17] | 1553.962        | 1006.674 | 990.656         | <b>991.664</b>  | 989.648  | R[7]  |
| R[18] | 1791.021        | 850.572  | 834.553         | <b>835.562</b>  | 833.547  | R[6]  |
| R[19] | 1847.122        | 713.514  | 697.495         | <b>698.504</b>  | 696.488  | R[5]  |
| K[20] | 2103.248        | 557.413  | 541.395         | <b>542.402</b>  | 540.387  | K[4]  |
| V[21] | 2202.317        | 401.287  | 385.268         | 386.276         | 384.261  | V[3]  |
| L[22] | 2315.401        | 302.219  | 286.200         | 287.208         | 285.192  | L[2]  |
| R[23] | 2485.517        | 189.135  | 173.116         | 174.124         | 172.108  | R[1]  |

# sp | P62806 | H4\_MOUSE

[Acetyl]SGRGKGGKGLGKGGAK<sup>Acetyl</sup> RHRK<sup>(Dimethyl)</sup> VLR<sup>(Methyl)</sup>  
 42.01 (28.03) (14.02)

- ▶ fragmentation table for charge state 2+
- ▶ specType=etd
- ▶ score=32.15
- ▶ F112754.dat
- ▶ query=q30437\_p1
- ▶ precursor=829.506080
- ▶ chargePrecursor=3
- ▶ itol=0.5

| AA | c  | y        | a+1             | a+2             | z               | AA              |      |
|----|----|----------|-----------------|-----------------|-----------------|-----------------|------|
| S  | 1  | 74.082   | <b>1243.754</b> | <b>1235.745</b> | 0.504           | <b>1235.241</b> | S(2) |
| G  | 2  | 102.553  | 1179.233        | 1171.224        | 0.504           | 1170.720        | G(2) |
| R  | 3  | 180.600  | 1150.722        | <b>1142.713</b> | 1143.217        | <b>1142.209</b> | R(2) |
| G  | 4  | 209.114  | 1072.672        | <b>1064.662</b> | <b>1065.166</b> | 1064.150        | G(2) |
| K  | 5  | 273.161  | 1044.161        | 1036.152        | <b>1036.656</b> | 1035.648        | K(2) |
| G  | 6  | 301.672  | 980.114         | 972.104         | 972.608         | 971.600         | G(2) |
| G  | 7  | 330.183  | 951.603         | 943.593         | 944.097         | 943.090         | G(2) |
| K  | 8  | 394.230  | 923.092         | 915.081         | 915.585         | 914.579         | K(2) |
| G  | 9  | 422.741  | 859.045         | 851.035         | 851.539         | 850.531         | G(2) |
| L  | 10 | 479.293  | 830.534         | 822.525         | 823.028         | 822.021         | L(2) |
| G  | 11 | 507.794  | 773.992         | 765.981         | 766.486         | 765.479         | G(2) |
| K  | 12 | 571.841  | 746.481         | 738.471         | 737.976         | 736.969         | K(2) |
| G  | 13 | 600.352  | 681.434         | 673.424         | 673.928         | 672.920         | G(2) |
| G  | 14 | 628.863  | 652.923         | 644.914         | 645.417         | 644.410         | G(2) |
| A  | 15 | 664.381  | 624.412         | 616.401         | 616.907         | 615.899         | A(2) |
| R  | 16 | 749.434  | 598.894         | 590.884         | 591.388         | 590.380         | R(2) |
| R  | 17 | 827.485  | 561.841         | 495.832         | 496.335         | 495.328         | R(2) |
| H  | 18 | 886.034  | 426.790         | 417.781         | 418.285         | 417.277         | H(2) |
| R  | 19 | 974.085  | 357.261         | 349.252         | 349.755         | 348.748         | R(2) |
| K  | 20 | 1052.138 | 279.210         | 271.201         | 271.705         | 270.697         | K(2) |
| V  | 21 | 1101.689 | 201.147         | 193.138         | 193.642         | 192.634         | V(2) |
| L  | 22 | 1158.204 | 151.613         | 143.604         | 144.108         | 143.100         | L(2) |
| R  | 23 | 1243.262 | 95.071          | 87.062          | 87.565          | 86.558          | R(2) |



# sp | Q6ZWY9 | H2B1C\_MOUSE

PEPAKSAPAPKK Acetyl 42.01 GS Acetyl 42.01 KKAVT Acetyl 42.01 KAQKK

- ▶ fragmentation table for charge state 1+
- ▶ specType=etd
- ▶ score=52.51
- ▶ F112754.dat
- ▶ query=q31533.p1
- ▶ precursor=651.132060
- ▶ chargePrecursor=4
- ▶ itol=0.5

| AA | c  | y               | z+1             | z+2             | z               | AA       |       |
|----|----|-----------------|-----------------|-----------------|-----------------|----------|-------|
| P  | 1  | 115.087         | 2601.509        | 2585.490        | 0.000           | 2584.463 | P[24] |
| E  | 2  | 244.129         | 2504.456        | 2488.437        | 0.000           | 2487.429 | E[23] |
| P  | 3  | 341.162         | 2375.413        | 2359.395        | 0.000           | 2358.387 | P[22] |
| A  | 4  | 412.219         | 2278.361        | 2262.342        | 0.000           | 2261.334 | A[21] |
| R  | 5  | <b>540.314</b>  | 2207.323        | 2191.305        | 2302.313        | 2190.297 | R[20] |
| S  | 6  | <b>627.346</b>  | 2079.238        | 2063.219        | 2064.218        | 2062.202 | S[19] |
| A  | 7  | 698.383         | 1992.196        | <b>1976.178</b> | 1977.186        | 1975.170 | A[18] |
| P  | 8  | <b>795.436</b>  | 1921.159        | 1905.141        | 1905.140        | 1904.133 | P[17] |
| A  | 9  | 829.473         | 1824.107        | 1808.088        | <b>1809.096</b> | 1807.080 | A[16] |
| P  | 10 | <b>963.526</b>  | 1763.069        | 1747.051        | 1748.059        | 1746.044 | P[15] |
| R  | 11 | <b>1091.621</b> | 1656.017        | 1639.998        | 1641.006        | 1638.990 | R[14] |
| K  | 12 | <b>1261.726</b> | 1527.922        | 1511.903        | 1512.911        | 1510.895 | K[13] |
| G  | 13 | <b>1318.748</b> | 1357.818        | <b>1341.797</b> | 1342.805        | 1340.790 | G[12] |
| S  | 14 | 1447.790        | 1300.795        | 1284.776        | <b>1285.784</b> | 1283.768 | S[11] |
| R  | 15 | <b>1575.885</b> | 1171.753        | 1155.734        | 1156.741        | 1154.726 | R[10] |
| K  | 16 | 1703.930        | <b>1043.657</b> | <b>1027.638</b> | 1028.646        | 1026.631 | K[9]  |
| A  | 17 | 1775.017        | 915.562         | <b>899.543</b>  | 900.551         | 898.536  | A[8]  |
| V  | 18 | 1874.088        | <b>844.525</b>  | 828.506         | 829.514         | 827.499  | V[7]  |
| T  | 19 | 2017.144        | 745.457         | <b>729.438</b>  | 730.446         | 728.430  | T[6]  |
| R  | 20 | 2145.239        | 602.388         | <b>586.369</b>  | 587.388         | 585.372  | R[5]  |
| A  | 21 | 2216.276        | 474.303         | <b>458.285</b>  | 459.293         | 457.277  | A[4]  |
| Q  | 22 | 2344.335        | 403.296         | <b>387.248</b>  | 388.255         | 386.240  | Q[3]  |
| K  | 23 | 2472.430        | 275.208         | <b>259.189</b>  | 260.197         | 258.181  | K[2]  |
| K  | 24 | 2600.525        | 147.113         | 131.094         | 132.102         | 130.086  | K[1]  |

# sp | Q6ZWH9 | H2B1C\_MOUSE

PEPAKSAPAPKK Acetyl 42.01 GS Acetyl 42.01 KKAIVT Acetyl 42.01 KAQQK

- ▶ fragmentation table for charge state 2+
- ▶ specType=etd
- ▶ score=52.51
- ▶ F112754.dat
- ▶ query=q31533.p1
- ▶ precursor=651.132060
- ▶ chargePrecursor=4
- ▶ itol=0.5

| AA   | c               | y               | z+1             | z+2             | z               | AA   |
|------|-----------------|-----------------|-----------------|-----------------|-----------------|------|
| F 1  | 58.047          | <b>1301.258</b> | <b>1291.249</b> | 0.504           | <b>1292.745</b> | P 20 |
| E 2  | 122.568         | 1252.732        | <b>1244.722</b> | 0.504           | 1244.218        | E 23 |
| F 3  | 171.095         | 1188.210        | 1180.201        | 0.504           | 1179.697        | F 22 |
| A 4  | 258.611         | 1139.684        | 1131.675        | 0.504           | 1131.171        | A 21 |
| R 5  | 270.693         | <b>1104.165</b> | 1096.156        | <b>1096.660</b> | 1095.652        | R 24 |
| S 6  | 314.177         | 1040.118        | <b>1032.109</b> | <b>1032.612</b> | 1031.605        | S 19 |
| A 7  | 349.695         | 996.602         | <b>988.592</b>  | 989.696         | <b>988.089</b>  | A 18 |
| F 8  | 398.222         | 951.083         | 953.074         | 953.578         | 952.570         | F 17 |
| A 9  | 433.740         | 912.567         | <b>904.548</b>  | <b>905.051</b>  | 904.044         | A 16 |
| T 10 | 482.287         | 877.036         | 869.027         | 869.533         | <b>868.525</b>  | T 15 |
| R 11 | 546.314         | 828.512         | 820.503         | 821.007         | <b>819.999</b>  | R 14 |
| K 12 | 631.367         | 764.464         | <b>756.455</b>  | <b>756.959</b>  | 755.951         | K 13 |
| G 13 | 659.678         | 679.412         | <b>671.402</b>  | <b>671.906</b>  | 670.898         | G 12 |
| S 14 | 728.699         | 650.901         | <b>642.892</b>  | <b>643.396</b>  | 642.388         | S 11 |
| R 15 | <b>788.446</b>  | <b>596.380</b>  | 592.371         | 592.874         | 591.866         | R 10 |
| K 16 | 852.494         | 522.332         | 514.323         | 514.827         | 513.819         | K 9  |
| A 17 | 888.012         | <b>458.285</b>  | 450.276         | 450.779         | 449.771         | A 8  |
| V 18 | <b>937.547</b>  | 422.766         | 414.757         | 415.261         | 414.253         | V 7  |
| T 19 | <b>1009.076</b> | 373.232         | 365.223         | 365.727         | 364.719         | T 6  |
| K 20 | <b>1073.123</b> | 301.703         | 293.693         | 294.197         | 293.189         | K 5  |
| A 21 | <b>1108.642</b> | 237.655         | 229.646         | 230.150         | 229.142         | A 4  |
| Q 22 | <b>1172.671</b> | 202.137         | 194.127         | 194.631         | 193.623         | Q 3  |
| K 23 | <b>1236.718</b> | 138.108         | 130.098         | 130.602         | 129.594         | K 2  |
| K 24 | 1300.756        | 74.060          | 66.051          | 66.555          | 65.547          | K 1  |

# sp | Q6ZWH9 | H2B1C\_MOUSE

PEPAKSAPAPKK Acetyl 42.01 GS Acetyl 42.01 KKAVT Acetyl 42.01 KAQQK

- ▶ fragmentation table for charge state 3+
- ▶ specType=etd
- ▶ score=52.51
- ▶ F112754.dat
- ▶ query=q31533.p1
- ▶ precursor=651.132060
- ▶ chargePrecursor=4
- ▶ itol=0.5

| AA    | c              | y       | z+1            | z+2     | z              | AA    |
|-------|----------------|---------|----------------|---------|----------------|-------|
| P[1]  | 39.034         | 567.841 | <b>862.501</b> | 0.672   | <b>862.166</b> | P[24] |
| E[2]  | 62.048         | 835.490 | <b>830.151</b> | 0.672   | 829.815        | E[23] |
| P[3]  | 114.999        | 792.476 | 787.136        | 0.672   | 786.800        | P[22] |
| A[4]  | 138.078        | 760.125 | 754.785        | 0.672   | 754.450        | A[21] |
| K[5]  | 180.776        | 736.446 | 731.106        | 731.442 | 730.770        | K[20] |
| S[6]  | 209.787        | 693.748 | 688.408        | 688.744 | 688.072        | S[19] |
| A[7]  | 233.466        | 664.737 | 659.397        | 659.733 | 659.061        | A[18] |
| F[8]  | 265.817        | 641.058 | 635.718        | 636.054 | 635.382        | F[17] |
| A[9]  | 289.896        | 608.791 | 603.451        | 603.787 | 603.122        | A[16] |
| P[10] | 321.847        | 585.028 | 579.688        | 580.024 | 579.352        | P[15] |
| K[11] | 364.545        | 552.677 | 547.337        | 547.673 | 547.002        | K[14] |
| K[12] | 421.247        | 509.979 | 504.639        | 504.975 | 504.303        | K[13] |
| G[13] | 440.284        | 453.277 | 447.937        | 448.273 | 447.601        | G[12] |
| S[14] | 483.268        | 434.270 | 428.930        | 429.266 | 428.594        | S[11] |
| K[15] | 525.967        | 391.256 | 385.916        | 386.252 | 385.580        | K[10] |
| K[16] | 568.665        | 348.557 | 343.218        | 343.554 | 342.882        | K[9]  |
| A[17] | 592.344        | 305.859 | 300.519        | 300.855 | 300.183        | A[8]  |
| V[18] | 625.367        | 282.180 | 276.840        | 277.176 | 276.504        | V[7]  |
| T[19] | 673.053        | 249.157 | 243.817        | 244.153 | 243.482        | T[6]  |
| K[20] | 715.751        | 201.471 | 196.131        | 196.467 | 195.795        | K[5]  |
| A[21] | 739.430        | 158.773 | 153.433        | 153.769 | 153.097        | A[4]  |
| Q[22] | 782.116        | 115.994 | 110.654        | 110.990 | 110.318        | Q[3]  |
| K[23] | <b>824.815</b> | 92.407  | 87.068         | 87.404  | 86.732         | K[2]  |
| K[24] | 867.513        | 49.709  | 44.370         | 44.705  | 44.034         | K[1]  |

# sp | Q6ZWY9 | H2B1C\_MOUSE

PEPAKSAPAPKK Acetyl GSK Acetyl KAVT Acetyl KAQKK  
42.01 42.01 42.01

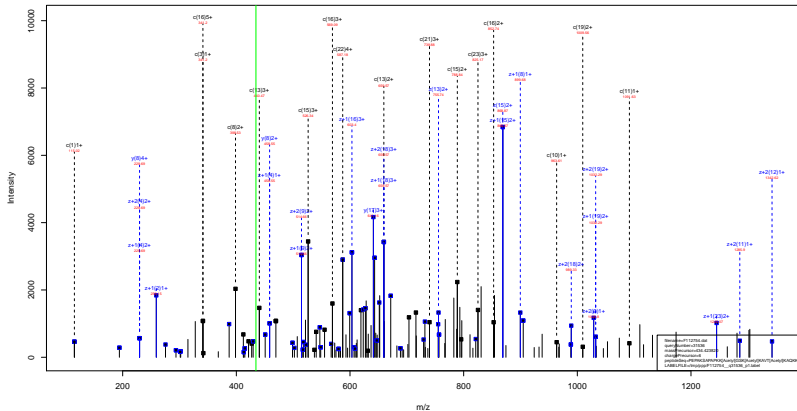

# sp | Q6ZWY9 | H2B1C\_MOUSE

PEPAKSAPAPKK <sup>Acetyl</sup>42.01 GSK <sup>Acetyl</sup>42.01 KAVT <sup>Acetyl</sup>42.01 KAQQK

- ▶ fragmentation table for charge state 1+
- ▶ specType=etd
- ▶ score=73.39
- ▶ F112754.dat
- ▶ query=q31536.p1
- ▶ precursor=434.423820
- ▶ chargePrecursor=6
- ▶ itol=0.5

| AA    | c               | y              | z+1            | z+2             | z        | AA    |
|-------|-----------------|----------------|----------------|-----------------|----------|-------|
| P[1]  | <b>115.087</b>  | 2001.509       | 2585.490       | 0.000           | 2584.462 | P[24] |
| E[2]  | 244.129         | 2504.456       | 2488.437       | 0.000           | 2487.429 | E[23] |
| P[3]  | <b>341.182</b>  | 2278.413       | 2359.399       | 0.000           | 2358.367 | P[22] |
| A[4]  | <b>412.219</b>  | 2278.363       | 2262.342       | 0.000           | 2261.334 | A[21] |
| K[5]  | <b>540.314</b>  | 2207.325       | 2191.305       | 2102.313        | 2100.291 | K[20] |
| S[6]  | <b>627.346</b>  | 2079.228       | 2063.210       | 2064.218        | 2062.202 | S[19] |
| A[7]  | 698.383         | 1992.156       | 1976.170       | 1977.186        | 1975.170 | A[18] |
| P[8]  | <b>795.436</b>  | 1921.159       | 1905.141       | 1906.148        | 1904.133 | P[17] |
| A[9]  | 869.473         | 1834.107       | 1808.080       | 1809.096        | 1807.080 | A[16] |
| P[10] | <b>953.526</b>  | 1753.069       | 1737.051       | 1738.059        | 1736.041 | P[15] |
| K[11] | <b>1091.621</b> | 1656.017       | 1639.998       | 1641.006        | 1638.990 | K[14] |
| K[12] | 1261.726        | 1527.922       | 1511.903       | 1512.911        | 1510.895 | K[13] |
| G[13] | 1316.748        | 1357.816       | 1341.797       | <b>1342.805</b> | 1340.790 | G[12] |
| S[14] | 1405.780        | 1300.795       | 1284.776       | <b>1285.784</b> | 1283.768 | S[11] |
| K[15] | 1575.885        | 1212.763       | 1197.744       | 1198.752        | 1196.736 | K[10] |
| K[16] | 1763.880        | 1043.657       | 1027.638       | <b>1028.646</b> | 1026.631 | K[9]  |
| A[17] | 1775.017        | 915.582        | <b>895.543</b> | 890.551         | 898.536  | A[6]  |
| V[18] | 1874.086        | 844.525        | 828.506        | 829.514         | 827.499  | V[7]  |
| T[19] | 2017.144        | 745.457        | <b>729.438</b> | 730.446         | 728.430  | T[0]  |
| K[20] | 2145.239        | 602.398        | 586.380        | <b>587.388</b>  | 585.372  | K[5]  |
| A[21] | 2216.276        | 474.303        | <b>458.285</b> | 459.293         | 457.277  | A[4]  |
| Q[22] | 2344.335        | 308.205        | <b>307.246</b> | 308.255         | 306.240  | Q[3]  |
| K[23] | 2472.430        | <b>275.208</b> | <b>259.189</b> | 260.197         | 258.181  | K[2]  |
| K[24] | 2600.525        | 147.113        | 131.094        | 132.102         | 130.088  | K[1]  |



# sp | Q6ZWY9 | H2B1C\_MOUSE

PEPAKSAPAPKK <sup>Acetyl</sup>42.01 GSK <sup>Acetyl</sup>42.01 KAVT <sup>Acetyl</sup>42.01 KAQKK

- ▶ fragmentation table for charge state 2+
- ▶ specType=etd
- ▶ score=73.39
- ▶ F112754.dat
- ▶ query=q31536\_p1
- ▶ precursor=434.423820
- ▶ chargePrecursor=6
- ▶ itol=0.5

| AA  | c               | y              | z+1             | z+2             | z              | AA  |
|-----|-----------------|----------------|-----------------|-----------------|----------------|-----|
| P1  | 58.047          | 1301.258       | 1293.249        | 0.504           | 1292.745       | P24 |
| E2  | 122.568         | 1252.732       | <b>1244.722</b> | 0.504           | 1244.218       | E23 |
| P3  | 171.095         | 1188.210       | 1180.201        | 0.504           | 1179.697       | P22 |
| A4  | 208.013         | 1139.684       | 1131.675        | 0.504           | 1131.171       | A21 |
| K5  | 270.661         | 1104.165       | 1096.156        | 1096.660        | 1095.652       | K20 |
| S6  | 314.177         | 1040.118       | <b>1032.109</b> | <b>1032.612</b> | 1031.605       | S19 |
| A7  | 349.695         | 996.602        | <b>988.592</b>  | <b>989.096</b>  | 988.089        | A18 |
| P8  | <b>398.222</b>  | 961.083        | 953.074         | 953.578         | 952.570        | P17 |
| A9  | 431.740         | 912.597        | <b>904.548</b>  | <b>905.051</b>  | 904.044        | A16 |
| P10 | 482.287         | 877.036        | <b>869.029</b>  | 869.533         | <b>868.525</b> | P15 |
| K11 | 546.314         | 828.512        | 820.503         | <b>821.007</b>  | 819.999        | K14 |
| K12 | <b>631.367</b>  | 784.464        | <b>756.455</b>  | <b>756.959</b>  | <b>755.951</b> | K13 |
| G13 | <b>659.878</b>  | 679.412        | <b>671.402</b>  | <b>671.906</b>  | 670.898        | G12 |
| S14 | <b>703.394</b>  | 650.901        | <b>642.892</b>  | <b>643.395</b>  | 642.388        | S11 |
| K15 | <b>788.446</b>  | <b>607.385</b> | <b>599.376</b>  | <b>599.880</b>  | 598.872        | K10 |
| K16 | <b>832.494</b>  | <b>522.332</b> | <b>514.323</b>  | <b>514.827</b>  | 513.819        | K9  |
| A17 | 888.012         | <b>458.285</b> | <b>450.275</b>  | <b>450.779</b>  | 449.771        | A8  |
| V18 | 937.547         | 422.766        | <b>414.757</b>  | <b>415.261</b>  | 414.253        | V7  |
| T19 | <b>1009.076</b> | 373.232        | 365.223         | 365.727         | 364.719        | T6  |
| K20 | 1073.123        | <b>301.703</b> | <b>293.693</b>  | <b>294.197</b>  | 293.190        | K5  |
| A21 | 1108.642        | 237.655        | <b>229.646</b>  | <b>230.150</b>  | 229.142        | A4  |
| Q22 | 1172.874        | 202.137        | <b>194.127</b>  | <b>194.631</b>  | 193.624        | Q3  |
| K23 | 1236.718        | 138.108        | 130.098         | 130.602         | 129.594        | K2  |
| K24 | 1300.766        | 74.060         | 66.051          | 66.555          | 65.547         | K1  |

# sp | Q6ZWH9 | H2B1C\_MOUSE

PEPAKSAPAPKK <sup>Acetyl</sup><sub>42.01</sub> GSK <sup>Acetyl</sup><sub>42.01</sub> KAVT <sup>Acetyl</sup><sub>42.01</sub> KAQKK

- ▶ fragmentation table for charge state 3+
- ▶ specType=etd
- ▶ score=73.39
- ▶ F112754.dat
- ▶ query=q31536.p1
- ▶ precursor=434.423820
- ▶ chargePrecursor=6
- ▶ itol=0.5

| AA    | c              | y              | z+1            | z+2            | z              | AA    |
|-------|----------------|----------------|----------------|----------------|----------------|-------|
| P[1]  | 39.034         | 867.841        | 862.501        | 0.672          | 862.166        | P[24] |
| E[2]  | 82.048         | 135.490        | 830.151        | 0.672          | 829.815        | E[23] |
| P[3]  | 114.399        | 792.476        | 787.136        | 0.672          | 786.800        | P[22] |
| A[4]  | 138.078        | 760.125        | <b>754.785</b> | 0.672          | 754.450        | A[21] |
| K[5]  | 180.776        | 736.446        | 733.106        | <b>731.442</b> | 730.770        | K[20] |
| S[6]  | 209.767        | 693.748        | <b>688.408</b> | <b>688.744</b> | 688.072        | S[19] |
| A[7]  | 233.466        | 664.737        | <b>659.397</b> | <b>659.733</b> | 659.061        | A[18] |
| F[8]  | 265.817        | <b>641.058</b> | 635.718        | 636.054        | 635.389        | F[17] |
| A[9]  | 289.896        | <b>608.707</b> | <b>603.367</b> | <b>603.703</b> | <b>603.035</b> | A[16] |
| P[10] | 321.947        | 605.026        | <b>579.608</b> | <b>580.024</b> | <b>579.352</b> | P[15] |
| K[11] | 364.545        | 552.677        | <b>547.337</b> | 547.673        | <b>547.002</b> | K[14] |
| K[12] | <b>421.247</b> | 509.979        | 504.639        | 504.975        | 504.303        | K[13] |
| G[13] | <b>440.254</b> | 453.277        | 447.937        | 448.273        | 447.601        | G[12] |
| S[14] | <b>469.265</b> | 434.270        | 428.930        | <b>429.266</b> | 428.594        | S[11] |
| K[15] | <b>525.967</b> | 405.259        | 399.920        | 400.255        | 399.584        | K[10] |
| K[16] | <b>568.665</b> | 348.557        | 343.218        | 343.554        | 342.882        | K[9]  |
| A[17] | 592.544        | 305.856        | 300.519        | <b>300.855</b> | 300.183        | A[8]  |
| V[18] | 625.367        | 282.180        | 276.840        | 277.176        | 276.504        | V[7]  |
| T[19] | 673.053        | 249.157        | 243.817        | 244.153        | 243.482        | T[6]  |
| K[20] | <b>715.751</b> | 201.471        | 196.131        | 196.467        | 195.795        | K[5]  |
| A[21] | <b>739.430</b> | 158.773        | 153.433        | 153.769        | 153.097        | A[4]  |
| Q[22] | 782.116        | 135.094        | 129.754        | 130.090        | 129.418        | Q[3]  |
| K[23] | <b>824.815</b> | 92.407         | 87.068         | 87.404         | 86.732         | K[2]  |
| K[24] | 867.513        | 49.709         | 44.370         | 44.705         | 44.034         | K[1]  |

# sp | Q6ZWY9 | H2B1C\_MOUSE

PEPAKSAPAPKK <sup>Acetyl</sup>42.01 GSK <sup>Acetyl</sup>42.01 KAVT <sup>Acetyl</sup>42.01 KAQKK

- ▶ fragmentation table for charge state 4+
- ▶ specType=etd
- ▶ score=73.39
- ▶ F112754.dat
- ▶ query=q31536.p1
- ▶ precursor=434.423820
- ▶ chargePrecursor=6
- ▶ itol=0.5

| AA    | c              | y              | z+1            | z+2            | z              | AA    |
|-------|----------------|----------------|----------------|----------------|----------------|-------|
| P[1]  | 39.527         | <b>651.133</b> | <b>647.128</b> | 0.755          | <b>646.876</b> | P[24] |
| E[2]  | 61.788         | <b>626.805</b> | <b>622.865</b> | 0.755          | 622.613        | E[23] |
| P[3]  | 96.051         | 594.605        | 590.604        | 0.755          | 590.352        | P[22] |
| A[4]  | 103.810        | 570.346        | <b>566.341</b> | 0.755          | 566.089        | A[21] |
| K[5]  | 135.834        | 552.586        | <b>548.582</b> | <b>548.834</b> | <b>548.330</b> | K[20] |
| S[6]  | 157.592        | 520.563        | <b>516.558</b> | <b>516.810</b> | 516.306        | S[19] |
| A[7]  | 175.351        | <b>498.805</b> | 494.800        | 495.052        | 494.548        | A[18] |
| F[8]  | 199.614        | 481.045        | 477.041        | 477.293        | 476.789        | F[17] |
| A[9]  | 217.374        | 456.782        | 452.777        | 453.029        | 452.525        | A[16] |
| P[10] | 241.637        | 439.023        | 435.021        | 435.270        | 434.766        | P[15] |
| K[11] | 273.661        | <b>414.760</b> | 410.755        | 411.007        | 410.503        | K[14] |
| K[12] | 316.187        | 382.730        | 378.731        | 378.983        | 378.479        | K[13] |
| G[13] | 330.442        | 340.210        | 336.205        | 336.457        | 335.953        | G[12] |
| S[14] | 352.200        | 325.954        | 321.949        | 322.201        | 321.697        | S[11] |
| K[15] | 394.727        | 304.196        | 300.191        | 300.443        | 299.939        | K[10] |
| K[16] | <b>426.751</b> | 261.670        | 257.665        | 257.917        | 257.413        | K[9]  |
| A[17] | 444.510        | <b>229.546</b> | 225.541        | 225.893        | 225.389        | A[8]  |
| V[18] | <b>469.277</b> | 211.887        | 207.882        | 208.134        | 207.630        | V[7]  |
| T[19] | 495.041        | 187.120        | 183.113        | 183.367        | 182.863        | T[6]  |
| K[20] | <b>537.065</b> | 151.355        | 147.350        | 147.602        | 147.098        | K[5]  |
| A[21] | <b>554.824</b> | 119.331        | <b>115.327</b> | 115.579        | <b>115.075</b> | A[4]  |
| Q[22] | <b>586.839</b> | 101.572        | 97.567         | 97.819         | 97.315         | Q[3]  |
| K[23] | <b>618.863</b> | 69.557         | 65.553         | 65.805         | 65.301         | K[2]  |
| K[24] | 650.887        | 37.534         | 33.529         | 33.781         | 33.277         | K[1]  |

# sp | Q6ZWY9 | H2B1C\_MOUSE

PEPAKSAPAPKK <sup>Acetyl</sup>42.01 GSK <sup>Acetyl</sup>42.01 KAVT <sup>Acetyl</sup>42.01 KAQKK

- ▶ fragmentation table for charge state 5+
- ▶ specType=etd
- ▶ score=73.39
- ▶ F112754.dat
- ▶ query=q31536.p1
- ▶ precursor=434.423820
- ▶ chargePrecursor=6
- ▶ itol=0.5

| AA    | c              | y              | z+1            | z+2     | z              | AA    |
|-------|----------------|----------------|----------------|---------|----------------|-------|
| P[1]  | 23.923         | 921.108        | <b>517.904</b> | 0.806   | <b>517.702</b> | P[24] |
| E[2]  | 49.632         | <b>501.697</b> | <b>498.493</b> | 0.806   | 498.292        | E[23] |
| P[3]  | 69.042         | 475.888        | 472.685        | 0.806   | 472.483        | P[22] |
| A[4]  | 83.250         | 456.478        | 453.274        | 0.806   | 453.073        | A[21] |
| K[5]  | 108.869        | 442.271        | 439.067        | 439.268 | 438.865        | K[20] |
| S[6]  | 126.275        | 416.052        | <b>413.448</b> | 413.649 | <b>413.246</b> | S[19] |
| A[7]  | 140.482        | 399.245        | 396.041        | 396.243 | 395.840        | A[18] |
| P[8]  | 159.893        | 385.038        | 381.834        | 382.036 | 381.632        | P[17] |
| A[9]  | 174.100        | 368.827        | 365.623        | 365.825 | 365.222        | A[16] |
| P[10] | 193.311        | 351.425        | 348.219        | 348.418 | 348.014        | P[15] |
| K[11] | 219.130        | 332.050        | 328.805        | 329.007 | 328.604        | K[14] |
| K[12] | 253.151        | 306.390        | 303.196        | 303.388 | 302.985        | K[13] |
| G[13] | 284.555        | 272.369        | 269.165        | 269.367 | 268.964        | G[12] |
| S[14] | 281.962        | 260.965        | 257.761        | 257.963 | 257.559        | S[11] |
| K[15] | 315.983        | 243.558        | 240.355        | 240.556 | 240.153        | K[10] |
| K[16] | <b>341.602</b> | 209.537        | 206.334        | 206.535 | 206.132        | K[9]  |
| A[17] | 395.809        | 183.918        | 180.715        | 180.916 | 180.513        | A[8]  |
| V[18] | 375.623        | 169.711        | 166.507        | 166.709 | 166.306        | V[7]  |
| T[19] | 404.235        | 149.897        | 146.693        | 146.895 | 146.492        | T[6]  |
| K[20] | <b>429.854</b> | 121.286        | 118.082        | 118.283 | 117.880        | K[5]  |
| A[21] | 444.051        | 95.667         | 92.463         | 92.664  | 92.261         | A[4]  |
| Q[22] | <b>469.673</b> | 81.459         | 78.255         | 78.457  | 78.054         | Q[3]  |
| K[23] | 495.292        | 55.847         | 52.644         | 52.845  | 52.442         | K[2]  |
| K[24] | 520.911        | 30.228         | 27.025         | 27.226  | 26.823         | K[1]  |



# sp | P62806 | H4\_MOUSE

[Acetyl]SGR<sup>Methyl</sup><sub>14.02</sub> GK<sup>Acetyl</sup><sub>42.01</sub> GGK<sup>Acetyl</sup><sub>42.01</sub> GLGK<sup>Acetyl</sup><sub>42.01</sub> GGAK<sup>Acetyl</sup><sub>42.01</sub> RHRK<sup>(Dimethyl)</sup><sub>(28.03)</sub> VLR

- ▶ fragmentation table for charge state 1+
- ▶ specType=etd
- ▶ score=49.98
- ▶ F112754.dat
- ▶ query=q31623.p1
- ▶ precursor=653.889510
- ▶ chargePrecursor=4
- ▶ itol=0.5

| AA    | c               | y        | z+1            | z+2             | z        | AA    |
|-------|-----------------|----------|----------------|-----------------|----------|-------|
| S[1]  | 147.076         | 2612.533 | 2596.514       | 0.000           | 2595.507 | S[23] |
| G[2]  | 304.098         | 2481.491 | 2467.472       | 0.000           | 2466.464 | G[22] |
| R[3]  | <b>374.215</b>  | 2626.469 | 2410.450       | 2411.458        | 2609.443 | R[21] |
| G[4]  | <b>431.236</b>  | 2256.352 | 2240.334       | 2241.341        | 2239.326 | G[20] |
| K[5]  | <b>601.342</b>  | 2199.331 | 2183.312       | 2184.320        | 2182.304 | K[19] |
| G[6]  | <b>658.363</b>  | 2029.225 | 2013.207       | 2014.214        | 2012.199 | G[18] |
| G[7]  | <b>715.385</b>  | 1972.204 | 1956.185       | 1957.193        | 1955.177 | G[17] |
| K[8]  | <b>885.490</b>  | 1915.182 | 1899.164       | 1900.172        | 1898.156 | K[16] |
| G[9]  | 942.512         | 1745.077 | 1729.058       | <b>1730.066</b> | 1728.050 | G[15] |
| L[10] | 1055.596        | 1688.055 | 1672.037       | <b>1673.045</b> | 1671.029 | L[14] |
| G[11] | <b>1112.617</b> | 1574.971 | 1558.953       | 1559.960        | 1557.945 | G[13] |
| K[12] | 1222.723        | 1517.950 | 1501.931       | 1502.939        | 1500.923 | K[12] |
| G[13] | 1339.744        | 1347.844 | 1331.826       | <b>1332.833</b> | 1330.818 | G[11] |
| G[14] | <b>1396.766</b> | 1290.823 | 1274.804       | 1275.812        | 1273.796 | G[10] |
| A[15] | 1467.803        | 1233.801 | 1217.783       | <b>1218.791</b> | 1216.775 | A[9]  |
| K[16] | 1637.808        | 1162.764 | 1146.746       | <b>1147.753</b> | 1145.738 | K[8]  |
| R[17] | 1794.059        | 992.659  | 976.640        | 977.648         | 975.632  | R[7]  |
| H[18] | <b>1931.068</b> | 836.558  | <b>820.539</b> | 821.547         | 819.531  | H[6]  |
| R[19] | 2087.189        | 699.499  | 683.480        | <b>684.488</b>  | 682.472  | R[5]  |
| K[20] | 2243.290        | 543.399  | 527.379        | 528.387         | 526.371  | K[4]  |
| V[21] | 2342.994        | 387.271  | 371.253        | 372.261         | 370.245  | V[3]  |
| L[22] | 2455.448        | 288.203  | 272.184        | 273.192         | 271.176  | L[2]  |
| R[23] | 2611.549        | 175.119  | 159.100        | 160.108         | 158.092  | R[1]  |

# sp | P62806 | H4\_MOUSE

[Acetyl]SGR <sup>Methyl</sup> 14.02 GK <sup>Acetyl</sup> 42.01 GGK <sup>Acetyl</sup> 42.01 GLGK <sup>Acetyl</sup> 42.01 GGAK <sup>Acetyl</sup> 42.01 RHRK <sup>(Dimethyl)</sup> 28.03 VLR

- ▶ fragmentation table for charge state 2+
- ▶ specType=etd
- ▶ score=49.98
- ▶ F112754.dat
- ▶ query=q31623\_p1
- ▶ precursor=653.889510
- ▶ chargePrecursor=4
- ▶ itol=0.5

| AA | c  | y               | z+1             | z+2             | z               | AA       |      |
|----|----|-----------------|-----------------|-----------------|-----------------|----------|------|
| S  | 1  | 74.042          | <b>1306.770</b> | <b>1298.761</b> | 0.504           | 1298.257 | S(2) |
| G  | 2  | 102.553         | 1242.240        | 1234.240        | 0.504           | 1233.736 | G(2) |
| R  | 3  | 187.611         | 1213.738        | 1206.739        | <b>1206.233</b> | 1205.225 | R(2) |
| G  | 4  | 216.122         | 1128.686        | 1120.670        | <b>1121.174</b> | 1120.167 | G(2) |
| K  | 5  | 301.174         | 1100.169        | 1092.160        | <b>1092.664</b> | 1091.656 | K(2) |
| G  | 6  | 339.685         | 1015.117        | 1007.107        | 1007.611        | 1006.603 | G(2) |
| G  | 7  | 358.196         | 986.606         | <b>978.596</b>  | <b>979.100</b>  | 978.092  | G(2) |
| K  | 8  | 443.249         | <b>950.095</b>  | <b>950.095</b>  | <b>950.589</b>  | 949.582  | K(2) |
| G  | 9  | 471.759         | 873.042         | 865.033         | 865.537         | 864.529  | G(2) |
| L  | 10 | 528.301         | 844.531         | 836.522         | 837.026         | 836.018  | L(2) |
| G  | 11 | 556.812         | 787.069         | 779.060         | <b>780.484</b>  | 779.476  | G(2) |
| K  | 12 | 641.866         | 759.476         | 751.469         | <b>751.973</b>  | 750.965  | K(2) |
| G  | 13 | 670.376         | 674.426         | 666.416         | <b>666.920</b>  | 665.913  | G(2) |
| G  | 14 | 698.886         | <b>645.915</b>  | 637.906         | <b>638.410</b>  | 637.402  | G(2) |
| A  | 15 | 734.405         | 617.404         | <b>609.395</b>  | <b>609.899</b>  | 608.891  | A(2) |
| R  | 16 | 819.458         | 581.898         | 573.876         | <b>574.380</b>  | 573.373  | R(2) |
| R  | 17 | <b>897.508</b>  | 496.833         | 488.824         | 489.328         | 488.320  | R(2) |
| T  | 18 | 956.936         | 418.782         | 410.773         | 411.277         | 410.269  | T(2) |
| R  | 19 | 1044.088        | 350.253         | 342.244         | 342.748         | 341.740  | R(2) |
| K  | 20 | 1122.151        | 272.202         | 264.193         | 264.697         | 263.689  | K(2) |
| V  | 21 | <b>1171.686</b> | 194.139         | 186.130         | 186.634         | 185.626  | V(2) |
| L  | 22 | 1228.228        | 144.609         | 136.596         | 137.100         | 136.092  | L(2) |
| R  | 23 | 1306.278        | 88.083          | 80.054          | 80.558          | 79.550   | R(2) |

# sp | P62806 | H4\_MOUSE

[Acetyl]SGR <sup>Methyl</sup> 14.02 GK <sup>Acetyl</sup> 42.01 GGK <sup>Acetyl</sup> 42.01 GLGK <sup>Acetyl</sup> 42.01 GGAK <sup>Acetyl</sup> 42.01 RHRK (Dimethyl) VLR (28.03)

- ▶ fragmentation table for charge state 3+
- ▶ specType=etd
- ▶ score=49.98
- ▶ F112754.dat
- ▶ query=q31623.p1
- ▶ precursor=653.889510
- ▶ chargePrecursor=4
- ▶ itol=0.5

| AA   | c              | y              | z+1            | z+2            | z              | AA   |
|------|----------------|----------------|----------------|----------------|----------------|------|
| S 1  | 49.697         | <b>871.516</b> | 866.176        | 0.672          | 865.840        | S 23 |
| G 2  | 68.704         | 828.502        | <b>823.162</b> | 0.672          | <b>822.826</b> | G 22 |
| R 3  | 125.410        | 809.495        | 804.155        | <b>804.491</b> | 803.819        | R 21 |
| G 4  | 144.817        | 792.789        | 747.449        | 747.789        | 747.113        | G 20 |
| K 5  | 201.119        | 733.782        | 728.442        | 728.778        | 728.106        | K 19 |
| G 6  | 220.126        | 677.080        | 671.740        | 672.076        | 671.404        | G 18 |
| G 7  | 239.133        | <b>658.073</b> | 652.733        | 653.069        | 652.397        | G 17 |
| K 8  | 295.835        | <b>639.066</b> | 633.726        | 634.062        | 633.390        | K 16 |
| G 9  | 314.842        | 582.364        | 577.024        | 577.360        | 576.688        | G 15 |
| L 10 | 352.537        | 563.357        | 558.017        | 558.353        | 557.681        | L 14 |
| G 11 | 371.544        | 525.662        | 520.322        | 520.658        | 519.986        | G 13 |
| K 12 | 428.246        | 506.655        | 501.315        | 501.651        | 500.979        | K 12 |
| G 13 | 447.253        | 449.953        | 444.613        | 444.949        | 444.277        | G 11 |
| G 14 | 499.260        | 430.946        | 425.606        | 425.942        | 425.270        | G 10 |
| A 15 | <b>489.939</b> | 411.939        | 406.599        | 406.935        | 406.263        | A 9  |
| K 16 | 546.641        | 388.260        | 382.920        | 383.256        | 382.584        | K 8  |
| R 17 | 598.675        | 331.558        | 326.218        | 326.554        | 325.882        | R 7  |
| H 18 | 644.361        | 279.524        | 274.184        | 274.520        | 273.849        | H 6  |
| R 19 | 696.395        | 233.838        | 228.498        | 228.834        | 228.162        | R 5  |
| K 20 | 748.437        | 181.804        | 176.464        | 176.800        | 176.129        | K 4  |
| V 21 | <b>781.460</b> | 129.762        | 124.422        | 124.758        | 124.086        | V 3  |
| L 22 | 819.154        | 98.739         | 91.400         | 91.736         | 91.064         | L 2  |
| R 23 | 871.188        | 39.045         | 31.705         | 34.041         | 33.369         | R 1  |





# sp | Q6ZWY9 | H2B1C\_MOUSE

PEPAKS <sup>Acetyl</sup> 42.01 APAPKK <sup>Acetyl</sup> 42.01 GSK <sup>Acetyl</sup> 42.01 K <sup>Acetyl</sup> 42.01 AVTK <sup>Acetyl</sup> 42.01 AQKK

- ▶ fragmentation table for charge state 1+
- ▶ specType=etd
- ▶ score=59.47
- ▶ F112754.dat
- ▶ query=q32169\_p1
- ▶ precursor=672.138750
- ▶ chargePrecursor=4
- ▶ itol=0.5

| AA  | c               | y              | z+1             | z+2             | z        | AA  |
|-----|-----------------|----------------|-----------------|-----------------|----------|-----|
| P1  | 115.007         | 2605.530       | 2660.511        | 0.000           | 2668.503 | P24 |
| E2  | 244.129         | 2588.477       | 2572.458        | 0.000           | 2571.450 | E23 |
| P3  | 341.182         | 2450.434       | 2443.415        | 0.000           | 2442.406 | P22 |
| A4  | 412.219         | 2302.392       | 2346.383        | 0.000           | 2345.355 | A21 |
| K5  | <b>540.314</b>  | 2291.345       | 2275.326        | 2276.334        | 2274.318 | K20 |
| S6  | 669.357         | 2163.250       | 2147.231        | 2148.239        | 2146.223 | S19 |
| A7  | 740.394         | 2034.207       | 2016.188        | 2019.196        | 2017.180 | A18 |
| P8  | <b>837.446</b>  | 1963.170       | 1947.151        | 1948.159        | 1946.143 | P17 |
| A9  | 859.484         | 1898.117       | <b>1850.098</b> | 1851.106        | 1849.091 | A16 |
| P10 | <b>1005.536</b> | 1795.080       | 1779.061        | 1780.069        | 1778.053 | P15 |
| K11 | <b>1133.631</b> | 1698.027       | <b>1682.009</b> | 1683.016        | 1681.001 | K14 |
| K12 | <b>1303.737</b> | 1569.932       | 1553.914        | <b>1554.921</b> | 1552.906 | K13 |
| G13 | 1360.758        | 1399.827       | 1383.808        | 1384.816        | 1382.800 | G12 |
| S14 | 1447.790        | 1342.805       | <b>1326.787</b> | 1327.794        | 1325.779 | S11 |
| K15 | <b>1617.896</b> | 1258.772       | <b>1229.755</b> | <b>1240.762</b> | 1238.747 | K10 |
| K16 | 1738.913        | 1205.648       | <b>1169.649</b> | <b>1170.657</b> | 1168.641 | K9  |
| A17 | 1859.039        | 915.562        | 890.543         | 900.551         | 895.536  | A8  |
| V18 | 1958.107        | <b>844.525</b> | 828.506         | 829.514         | 827.499  | V7  |
| T19 | 2059.155        | 745.457        | <b>729.438</b>  | 730.446         | 728.430  | T6  |
| K20 | 2229.260        | 644.409        | <b>628.390</b>  | 629.398         | 627.382  | K5  |
| A21 | 2300.297        | 474.303        | <b>455.285</b>  | 456.293         | 454.277  | A4  |
| Q22 | 2428.356        | 403.296        | <b>387.248</b>  | 388.256         | 386.240  | Q3  |
| K23 | 2556.451        | 275.208        | <b>259.189</b>  | 260.197         | 258.181  | K2  |
| K24 | 2684.546        | 147.113        | 131.004         | 132.102         | 130.986  | K1  |

# sp | Q6ZWY9 | H2B1C\_MOUSE

PEPAKS Acetyl 42.01 APAPKK Acetyl 42.01 GSK Acetyl 42.01 K Acetyl 42.01 AVTK Acetyl 42.01 AQKK

- ▶ fragmentation table for charge state 2+
- ▶ specType=etd
- ▶ score=59.47
- ▶ F112754.dat
- ▶ query=q32169\_p1
- ▶ precursor=672.138750
- ▶ chargePrecursor=4
- ▶ itol=0.5

| AA   | c               | y               | z+1             | z+2             | z              | AA   |
|------|-----------------|-----------------|-----------------|-----------------|----------------|------|
| P 1  | 58.047          | <b>1343.269</b> | <b>1335.259</b> | 0.504           | 1334.755       | P 24 |
| E 2  | 122.568         | <b>1294.742</b> | <b>1286.733</b> | 0.504           | 1286.229       | E 23 |
| P 3  | 171.095         | 1230.221        | 1222.211        | 0.504           | 1221.706       | P 22 |
| A 4  | 206.613         | 1181.694        | 1173.685        | 0.504           | 1173.181       | A 21 |
| K 5  | 270.561         | 1146.176        | 1138.167        | <b>1138.670</b> | 1137.662       | K 20 |
| S 6  | 335.182         | 1082.128        | <b>1074.119</b> | <b>1074.623</b> | 1073.615       | S 19 |
| A 7  | 370.701         | 1017.607        | <b>1009.598</b> | <b>1010.102</b> | 1009.094       | A 18 |
| P 8  | 419.227         | 982.089         | 974.079         | 974.583         | 973.575        | P 17 |
| A 9  | 454.745         | 933.562         | <b>925.553</b>  | 926.057         | <b>925.049</b> | A 16 |
| T 10 | 503.272         | 898.044         | 890.034         | 890.538         | 889.530        | T 15 |
| K 11 | 507.319         | 849.517         | <b>841.508</b>  | <b>842.012</b>  | 841.004        | K 14 |
| K 12 | 652.372         | 785.470         | <b>777.460</b>  | <b>777.964</b>  | 776.956        | K 13 |
| G 13 | 680.883         | 700.417         | 692.408         | <b>692.912</b>  | 691.904        | G 12 |
| S 14 | 724.399         | 673.000         | <b>663.897</b>  | <b>664.401</b>  | 663.393        | S 11 |
| K 15 | <b>809.452</b>  | <b>628.300</b>  | <b>620.301</b>  | <b>620.885</b>  | 619.877        | K 10 |
| K 16 | 804.904         | 543.337         | 535.338         | 535.839         | 534.840        | K 9  |
| A 17 | 930.023         | <b>458.285</b>  | 450.275         | 450.779         | 449.771        | A 8  |
| V 18 | <b>979.557</b>  | 422.768         | 414.757         | 415.261         | 414.253        | V 7  |
| T 19 | <b>1030.081</b> | 373.232         | 365.223         | 365.727         | 364.719        | T 6  |
| K 20 | <b>1115.134</b> | 322.708         | 314.699         | 315.203         | 314.195        | K 5  |
| A 21 | 1157.652        | 297.655         | 289.646         | 290.150         | 289.142        | A 4  |
| Q 22 | <b>1214.682</b> | 202.137         | 194.127         | 194.631         | 193.623        | Q 3  |
| K 23 | <b>1278.729</b> | 138.108         | 130.098         | 130.602         | 129.594        | K 2  |
| K 24 | 1342.777        | 74.060          | 66.051          | 66.555          | 65.547         | K 1  |

# sp | Q6ZWY9 | H2B1C\_MOUSE

PEPAKS Acetyl 42.01 APAPKK Acetyl 42.01 GSK Acetyl 42.01 K Acetyl 42.01 AVTK Acetyl 42.01 AQKK

- ▶ fragmentation table for charge state 3+
- ▶ specType=etd
- ▶ score=59.47
- ▶ F112754.dat
- ▶ query=q32169\_p1
- ▶ precursor=672.138750
- ▶ chargePrecursor=4
- ▶ itol=0.5

| AA    | c              | y       | z+1     | z+2     | z       | AA    |
|-------|----------------|---------|---------|---------|---------|-------|
| P[1]  | 39.034         | 895.848 | 890.509 | 0.672   | 890.173 | P[24] |
| E[2]  | 82.048         | 863.497 | 858.158 | 0.672   | 857.822 | E[23] |
| P[3]  | 114.999        | 820.483 | 815.143 | 0.672   | 814.807 | P[22] |
| A[4]  | 138.078        | 788.132 | 782.792 | 0.672   | 782.457 | A[21] |
| K[5]  | 180.776        | 764.453 | 759.113 | 759.449 | 758.778 | K[20] |
| S[6]  | 223.790        | 721.755 | 716.415 | 716.751 | 716.079 | S[19] |
| A[7]  | 247.469        | 678.741 | 673.401 | 673.737 | 673.065 | A[18] |
| P[8]  | 279.820        | 655.061 | 649.722 | 650.058 | 649.386 | P[17] |
| A[9]  | 303.999        | 622.711 | 617.371 | 617.707 | 617.035 | A[16] |
| P[10] | 338.890        | 599.032 | 593.692 | 594.028 | 593.356 | P[15] |
| K[11] | 378.549        | 566.681 | 561.341 | 561.677 | 561.005 | K[14] |
| K[12] | 435.250        | 523.982 | 518.643 | 518.979 | 518.307 | K[13] |
| G[13] | 454.258        | 467.280 | 461.941 | 462.277 | 461.605 | G[12] |
| S[14] | 483.268        | 448.273 | 442.934 | 443.270 | 442.598 | S[11] |
| K[15] | <b>539.970</b> | 419.263 | 413.923 | 414.259 | 413.587 | K[10] |
| K[16] | 596.672        | 382.561 | 377.221 | 377.557 | 376.885 | K[9]  |
| A[17] | <b>620.351</b> | 305.859 | 300.519 | 300.855 | 300.183 | A[8]  |
| V[18] | 653.374        | 282.180 | 276.840 | 277.176 | 276.504 | V[7]  |
| T[19] | 687.056        | 249.157 | 243.817 | 244.153 | 243.482 | T[6]  |
| K[20] | 743.758        | 215.475 | 210.135 | 210.471 | 209.799 | K[5]  |
| A[21] | 767.437        | 158.773 | 153.433 | 153.769 | 153.097 | A[4]  |
| Q[22] | <b>810.123</b> | 135.094 | 129.754 | 130.090 | 129.418 | Q[3]  |
| K[23] | <b>852.822</b> | 92.407  | 87.068  | 87.404  | 86.732  | K[2]  |
| K[24] | 895.520        | 49.709  | 44.370  | 44.705  | 44.034  | K[1]  |

# sp | P62806 | H4\_MOUSE

[Acetyl]SGR<sup>Dimethyl</sup><sub>28.03</sub> GKGGKGLGKGGAKRHRK<sup>Dimethyl</sup><sub>28.03</sub> VLR<sup>Methyl</sup><sub>14.02</sub> D

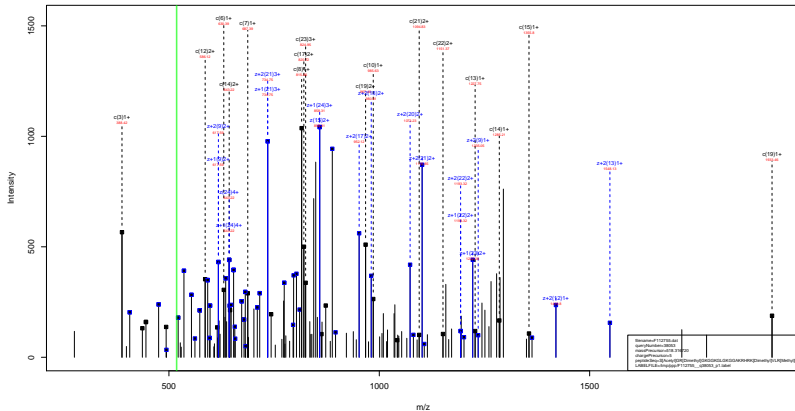

# sp | P62806 | H4\_MOUSE

[Acetyl]SGR<sup>Dimethyl</sup><sub>28.03</sub> GKGKGLGKGGAKRHRK<sup>Dimethyl</sup><sub>28.03</sub> VLR<sup>Methyl</sup><sub>14.02</sub> D

- ▶ fragmentation table for charge state 1+
- ▶ specType=etd
- ▶ score=98.62
- ▶ F112755.dat
- ▶ query=q38053.p1
- ▶ precursor=518.316720
- ▶ chargePrecursor=5
- ▶ itol=0.5

| AA |    | c               | y              | z+1            | z+2             | z        | AA    |
|----|----|-----------------|----------------|----------------|-----------------|----------|-------|
| S  | 1  | 147.076         | 2587.549       | 2571.530       | 0.000           | 2570.523 | S[24] |
| Q  | 2  | 204.098         | 2438.507       | 2442.488       | 0.000           | 2441.480 | Q[23] |
| T  | 3  | <b>308.230</b>  | 2302.485       | 2308.468       | 2309.474        | 2304.459 | T[22] |
| G  | 4  | <b>445.252</b>  | 2217.353       | 2201.134       | 2202.342        | 2200.325 | G[21] |
| K  | 5  | <b>573.147</b>  | 2160.311       | 2144.311       | 2145.120        | 2143.305 | K[20] |
| G  | 6  | <b>630.368</b>  | 2032.238       | 2016.218       | 2017.225        | 2015.210 | G[19] |
| G  | 7  | <b>687.390</b>  | 1975.215       | 1959.190       | 1960.204        | 1958.189 | G[18] |
| K  | 8  | <b>815.485</b>  | 1918.193       | 1902.173       | 1903.182        | 1901.167 | K[17] |
| G  | 9  | <b>872.506</b>  | 1790.098       | 1774.080       | 1775.087        | 1773.072 | G[16] |
| L  | 10 | <b>935.590</b>  | 1733.071       | 1717.059       | 1718.066        | 1716.056 | L[15] |
| G  | 11 | <b>1042.612</b> | 1619.993       | 1603.974       | 1604.982        | 1602.968 | G[14] |
| K  | 12 | 1170.707        | 1562.971       | 1546.953       | <b>1547.960</b> | 1545.945 | K[13] |
| G  | 13 | <b>1227.728</b> | 1434.878       | 1418.859       | <b>1419.866</b> | 1417.850 | G[12] |
| G  | 14 | <b>1284.749</b> | 1377.855       | 1361.830       | <b>1362.844</b> | 1360.828 | G[11] |
| A  | 15 | <b>1355.787</b> | 1320.833       | 1304.813       | 1305.823        | 1303.807 | A[10] |
| K  | 16 | 1483.882        | 1249.795       | 1233.773       | <b>1234.785</b> | 1232.770 | K[9]  |
| R  | 17 | 1639.983        | 1171.701       | 1155.683       | <b>1156.691</b> | 1154.675 | R[8]  |
| H  | 18 | 1777.042        | 995.008        | 949.582        | 950.589         | 948.574  | H[7]  |
| R  | 19 | <b>1933.143</b> | 828.541        | 812.523        | 813.530         | 811.515  | R[6]  |
| K  | 20 | 2069.209        | <b>672.440</b> | <b>656.422</b> | <b>657.429</b>  | 655.414  | K[5]  |
| V  | 21 | 2188.337        | 516.314        | 500.295        | 501.303         | 499.287  | V[4]  |
| L  | 22 | 2301.421        | 417.246        | 401.227        | 402.235         | 400.219  | L[3]  |
| I  | 23 | 2473.538        | 304.162        | 288.143        | 289.151         | 287.135  | I[2]  |
| D  | 24 | 2586.565        | 134.045        | 118.026        | 119.034         | 117.018  | D[1]  |

# sp | P62806 | H4\_MOUSE

[Acetyl]SGR<sup>Dimethyl</sup><sub>28.03</sub> GKGKGLGKGGAKRHRK<sup>Dimethyl</sup><sub>28.03</sub> VLR<sup>Methyl</sup><sub>14.02</sub> D

- ▶ fragmentation table for charge state 2+
- ▶ specType=etd
- ▶ score=98.62
- ▶ F112755.dat
- ▶ query=q38053.p1
- ▶ precursor=518.316720
- ▶ chargePrecursor=5
- ▶ itol=0.5

| AA    | c               | y               | z+1             | z+2             | z              | AA    |
|-------|-----------------|-----------------|-----------------|-----------------|----------------|-------|
| S[1]  | 74.042          | 1294.219        | 1296.269        | 0.504           | 1295.765       | S[24] |
| G[2]  | 102.553         | 1220.757        | <b>1221.748</b> | 0.504           | 1221.244       | G[23] |
| R[3]  | 194.619         | <b>1201.246</b> | <b>1193.237</b> | <b>1193.741</b> | 1192.733       | R[22] |
| G[4]  | 223.330         | 1179.193        | 1181.177        | <b>1101.875</b> | 1100.667       | G[21] |
| K[5]  | 287.177         | <b>1080.669</b> | 1072.680        | <b>1073.164</b> | 1072.156       | K[20] |
| G[6]  | 315.688         | 1016.622        | 1008.612        | 1000.116        | 1008.108       | G[19] |
| G[7]  | 344.196         | 968.111         | 960.100         | <b>980.606</b>  | 979.596        | G[18] |
| K[8]  | 408.246         | 959.600         | 951.591         | <b>952.095</b>  | 951.087        | K[17] |
| G[9]  | <b>436.757</b>  | <b>895.553</b>  | 887.543         | <b>888.047</b>  | 887.040        | G[16] |
| L[10] | <b>493.299</b>  | 887.042         | 879.033         | 879.537         | <b>858.529</b> | L[15] |
| G[11] | <b>521.809</b>  | <b>810.500</b>  | 802.491         | <b>802.995</b>  | 801.987        | G[14] |
| K[12] | <b>585.857</b>  | 781.989         | <b>773.980</b>  | <b>774.484</b>  | 773.476        | K[13] |
| G[13] | <b>614.368</b>  | 717.942         | <b>709.932</b>  | <b>710.436</b>  | 709.429        | G[12] |
| G[14] | <b>642.878</b>  | 689.431         | <b>681.422</b>  | <b>681.926</b>  | 680.918        | G[11] |
| A[15] | <b>678.397</b>  | 660.920         | 652.911         | <b>653.415</b>  | 652.407        | A[10] |
| R[16] | <b>742.444</b>  | 565.902         | <b>617.392</b>  | <b>617.896</b>  | 616.889        | R[9]  |
| R[17] | <b>820.495</b>  | <b>561.354</b>  | <b>553.345</b>  | <b>553.849</b>  | 552.841        | R[8]  |
| H[18] | 880.024         | 483.304         | <b>475.294</b>  | <b>475.798</b>  | 474.791        | H[7]  |
| R[19] | <b>967.075</b>  | 414.774         | <b>406.765</b>  | <b>407.269</b>  | 406.261        | R[6]  |
| K[20] | 1045.138        | 336.724         | 328.714         | 320.218         | 328.211        | K[5]  |
| V[21] | <b>1094.672</b> | 250.663         | 242.653         | 251.155         | 250.147        | V[4]  |
| L[22] | <b>1151.214</b> | 269.128         | 261.117         | 261.621         | 260.613        | L[3]  |
| R[23] | 1238.273        | 152.584         | 144.575         | 145.079         | 144.071        | R[2]  |
| D[24] | 1293.786        | 67.526          | 59.517          | 60.021          | 59.013         | D[1]  |

# sp | P62806 | H4\_MOUSE

[Acetyl]SGR<sup>Dimethyl</sup><sub>28.03</sub> GKGGKGLGKGGAKRHRK<sup>Dimethyl</sup><sub>28.03</sub> VLR<sup>Methyl</sup><sub>14.02</sub> D

- ▶ fragmentation table for charge state 3+
- ▶ specType=etd
- ▶ score=98.62
- ▶ F112755.dat
- ▶ query=q38053.p1
- ▶ precursor=518.316720
- ▶ chargePrecursor=5
- ▶ itol=0.5

| AA    | c              | y              | z+1            | z+2            | z              | AA    |
|-------|----------------|----------------|----------------|----------------|----------------|-------|
| S[1]  | 49.697         | 883.188        | <b>857.848</b> | 0.672          | 857.512        | S[24] |
| G[2]  | 58.704         | 820.174        | 814.834        | 0.672          | 814.498        | G[23] |
| R[3]  | 130.082        | 801.167        | 795.827        | <b>796.163</b> | <b>795.491</b> | R[22] |
| G[4]  | 149.089        | 739.789        | <b>734.450</b> | <b>734.785</b> | 734.114        | G[21] |
| K[5]  | 191.787        | 720.782        | <b>715.442</b> | <b>715.778</b> | 715.106        | K[20] |
| G[6]  | 210.794        | <b>678.084</b> | <b>672.744</b> | <b>673.080</b> | 672.408        | G[19] |
| G[7]  | 229.801        | 659.076        | <b>653.737</b> | <b>654.073</b> | <b>653.401</b> | G[18] |
| K[8]  | 272.500        | 640.069        | <b>634.730</b> | <b>635.066</b> | 634.394        | K[17] |
| G[9]  | 291.507        | <b>597.371</b> | <b>592.031</b> | <b>592.367</b> | <b>591.695</b> | G[16] |
| L[10] | 329.202        | 578.364        | <b>573.024</b> | <b>573.360</b> | 572.688        | L[15] |
| G[11] | 348.209        | 540.669        | <b>535.330</b> | <b>535.666</b> | 534.994        | G[14] |
| K[12] | 390.907        | <b>521.662</b> | 516.322        | 516.658        | 515.986        | K[13] |
| G[13] | 409.914        | 478.964        | 473.624        | 473.960        | 473.288        | G[12] |
| G[14] | 428.921        | 459.957        | 454.617        | 454.953        | 454.281        | G[11] |
| A[15] | 452.600        | 440.949        | 435.610        | 435.946        | 435.274        | A[10] |
| K[16] | 495.299        | 417.270        | 411.931        | 412.267        | 411.595        | K[9]  |
| R[17] | 547.132        | 374.572        | 369.232        | 369.568        | 368.896        | R[8]  |
| H[18] | 593.019        | 322.538        | 317.199        | 317.535        | 316.863        | H[7]  |
| R[19] | <b>645.052</b> | 276.852        | 271.512        | 271.848        | 271.176        | R[6]  |
| K[20] | 697.059        | 224.818        | 219.478        | 219.815        | 219.143        | K[5]  |
| V[21] | 730.117        | 172.776        | 167.437        | 167.773        | 167.101        | V[4]  |
| L[22] | 767.812        | 130.753        | 134.414        | 134.750        | 134.078        | L[3]  |
| R[23] | <b>824.518</b> | 102.059        | 96.719         | 97.055         | 96.383         | R[2]  |
| D[24] | <b>862.860</b> | 45.353         | 40.014         | 40.349         | 39.678         | D[1]  |



# sp | P62806 | H4\_MOUSE

[Acetyl]SGR<sup>Dimethyl</sup><sub>28.03</sub> GKGGKGLGKGGAKRHRK<sup>Dimethyl</sup><sub>28.03</sub> VLR<sup>Methyl</sup><sub>14.02</sub> D

- ▶ fragmentation table for charge state 4+
- ▶ specType=etd
- ▶ score=98.62
- ▶ F112755.dat
- ▶ query=q38053.p1
- ▶ precursor=518.316720
- ▶ chargePrecursor=5
- ▶ itol=0.5

| AA    | c              | y              | z+1            | z+2            | z              | AA    |
|-------|----------------|----------------|----------------|----------------|----------------|-------|
| S[1]  | 37.525         | <b>647.643</b> | <b>643.638</b> | 0.755          | <b>643.186</b> | S[24] |
| G[2]  | 51.780         | 615.382        | 611.377        | 0.755          | 611.125        | G[23] |
| R[3]  | 97.813         | 601.127        | <b>597.122</b> | <b>597.374</b> | <b>596.870</b> | R[22] |
| G[4]  | 112.068        | 555.094        | 551.089        | 551.341        | 550.837        | G[21] |
| K[5]  | 144.092        | 540.838        | 536.834        | 537.086        | 536.582        | K[20] |
| G[6]  | 158.348        | 508.615        | 504.610        | 505.062        | 504.558        | G[19] |
| G[7]  | 172.603        | <b>494.559</b> | 490.554        | 490.806        | 490.303        | G[18] |
| K[8]  | 204.627        | 480.304        | 476.299        | 476.551        | 476.047        | K[17] |
| G[9]  | 218.882        | 448.280        | 445.275        | 445.527        | 444.923        | G[16] |
| L[10] | 287.153        | 434.025        | 430.020        | 430.272        | 429.768        | L[15] |
| G[11] | 351.408        | 405.754        | 401.749        | 402.001        | 401.497        | G[14] |
| K[12] | 293.432        | 391.498        | 387.494        | 387.746        | 387.242        | K[13] |
| G[13] | 307.687        | 359.475        | 355.470        | 355.722        | 355.218        | G[12] |
| G[14] | 321.943        | 345.219        | 341.215        | 341.466        | 340.963        | G[11] |
| A[15] | 339.702        | 330.964        | 326.959        | 327.211        | 326.707        | A[10] |
| K[16] | 371.726        | 313.205        | 309.200        | 309.452        | 308.948        | K[9]  |
| R[17] | 410.751        | 281.181        | 277.176        | 277.428        | 276.924        | R[8]  |
| H[18] | <b>445.016</b> | 262.156        | 258.151        | 258.403        | 257.899        | H[7]  |
| R[19] | 484.041        | 207.891        | 203.886        | 204.138        | 203.634        | R[6]  |
| K[20] | 523.073        | 158.866        | 154.861        | 155.113        | 154.609        | K[5]  |
| V[21] | 547.840        | 129.834        | 125.829        | 126.081        | 125.577        | V[4]  |
| L[22] | 576.111        | 105.067        | 101.062        | 101.314        | 100.810        | L[3]  |
| R[23] | 618.640        | 76.796         | 72.791         | 73.043         | 72.539         | R[2]  |
| D[24] | 647.397        | 34.267         | 30.262         | 30.514         | 30.010         | D[1]  |

# sp | Q6ZWY9 | H2B1C\_MOUSE

PEPAKSAPAPKK Acetyl GSKKAVTKAQKKD  
42.01

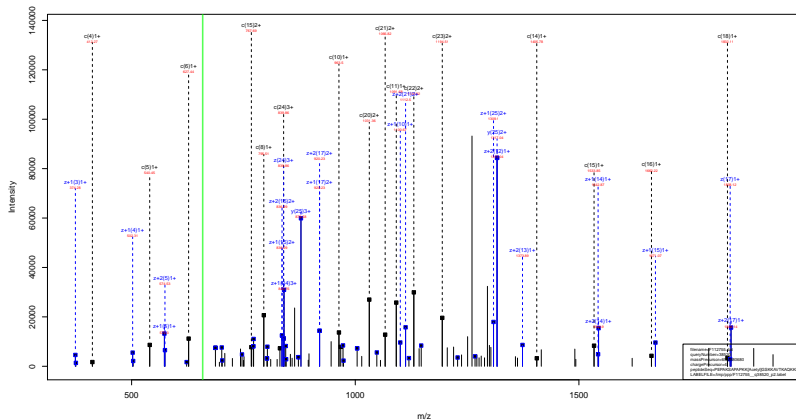

# sp | Q6ZWY9 | H2B1C\_MOUSE

PEPAKSAPAPKK <sup>Acetyl</sup><sub>42.01</sub> GSKKAVTKAQKKD

- ▶ fragmentation table for charge state 1+
- ▶ specType=etd
- ▶ score=66.88
- ▶ F112755.dat
- ▶ query=q38520\_p2
- ▶ precursor=658.880680
- ▶ chargePrecursor=4
- ▶ itol=0.5

| AA | c  | y               | a+1      | a+2             | z               | AA              |       |
|----|----|-----------------|----------|-----------------|-----------------|-----------------|-------|
| P  | 1  | 115.087         | 2832.514 | 2816.490        | 0.000           | 2815.466        | P[25] |
| E  | 2  | 244.229         | 2335.468 | 2319.443        | 0.000           | 2318.420        | E[24] |
| P  | 3  | 341.182         | 2406.419 | 2390.400        | 0.000           | 2389.381        | P[23] |
| A  | 4  | <b>412.219</b>  | 2309.366 | 2293.348        | 0.000           | 2292.340        | A[22] |
| K  | 5  | <b>540.314</b>  | 2238.329 | 2222.311        | 2221.318        | 2221.301        | K[21] |
| S  | 6  | <b>627.346</b>  | 2110.234 | 2094.216        | 2093.213        | 2093.208        | S[20] |
| A  | 7  | 697.363         | 2023.202 | 2007.184        | 2006.191        | 2006.176        | A[19] |
| P  | 8  | <b>795.436</b>  | 1962.166 | 1946.148        | 1945.154        | 1945.139        | P[18] |
| A  | 9  | 866.473         | 1855.112 | 1839.094        | <b>1840.101</b> | <b>1838.086</b> | A[17] |
| P  | 10 | <b>963.526</b>  | 1784.075 | 1768.057        | 1769.064        | 1767.049        | P[16] |
| K  | 11 | <b>1091.621</b> | 1687.022 | <b>1671.004</b> | 1672.012        | 1669.996        | K[15] |
| K  | 12 | 1261.726        | 1558.928 | <b>1542.909</b> | <b>1543.917</b> | 1541.901        | K[14] |
| Q  | 13 | 1318.749        | 1386.822 | 1372.803        | <b>1373.811</b> | 1371.795        | Q[13] |
| S  | 14 | <b>1405.780</b> | 1331.801 | 1315.782        | <b>1316.790</b> | 1314.774        | S[12] |
| K  | 15 | <b>1533.875</b> | 1244.768 | <b>1228.750</b> | 1229.758        | 1227.742        | K[11] |
| K  | 16 | <b>1661.970</b> | 1116.674 | <b>1100.655</b> | 1101.663        | 1099.647        | K[10] |
| A  | 17 | 1733.007        | 988.579  | <b>972.560</b>  | <b>973.568</b>  | 971.552         | A[9]  |
| V  | 18 | <b>1832.075</b> | 917.541  | 901.523         | 902.531         | 900.515         | V[8]  |
| T  | 19 | 1833.123        | 816.472  | <b>802.454</b>  | <b>803.462</b>  | 801.446         | T[7]  |
| K  | 20 | 2001.218        | 717.425  | <b>701.407</b>  | <b>702.414</b>  | 700.399         | K[6]  |
| A  | 21 | 2132.255        | 589.330  | <b>573.312</b>  | <b>574.320</b>  | 572.304         | A[5]  |
| Q  | 22 | 2280.314        | 518.293  | <b>502.275</b>  | <b>503.282</b>  | 501.267         | Q[4]  |
| K  | 23 | 2388.409        | 409.235  | <b>374.216</b>  | <b>375.224</b>  | 373.209         | K[3]  |
| K  | 24 | 2516.504        | 362.140  | 246.121         | 247.129         | 245.113         | K[2]  |
| D  | 25 | 2831.530        | 134.045  | 118.026         | 119.034         | 117.018         | D[1]  |

# sp | Q6ZWY9 | H2B1C\_MOUSE

PEPAKSAPAPKK <sup>Acetyl</sup><sub>42.01</sub> GSKKAVTKAQKKD

- ▶ fragmentation table for charge state 2+
- ▶ specType=etd
- ▶ score=66.88
- ▶ F112755.dat
- ▶ query=q38520\_p2
- ▶ precursor=658.880680
- ▶ chargePrecursor=4
- ▶ itol=0.5

| AA    | c               | y               | z+1             | z+2             | z        | AA    |
|-------|-----------------|-----------------|-----------------|-----------------|----------|-------|
| P[1]  | 58.047          | <b>1316.761</b> | <b>1308.752</b> | 0.504           | 1308.246 | P[25] |
| E[3]  | 132.588         | <b>1366.234</b> | 1290.225        | 0.504           | 1290.721 | E[24] |
| P[3]  | 171.095         | 1333.713        | 1195.704        | 0.504           | 1195.200 | P[23] |
| A[4]  | 206.613         | 1155.187        | <b>1147.177</b> | 0.504           | 1146.674 | A[22] |
| K[5]  | 270.661         | <b>1119.668</b> | 1111.659        | <b>1112.163</b> | 1111.155 | K[21] |
| S[6]  | 314.177         | 1055.621        | 1047.611        | <b>1048.115</b> | 1047.107 | S[20] |
| A[7]  | 349.695         | 1012.105        | <b>1004.095</b> | <b>1004.599</b> | 1003.591 | A[19] |
| F[8]  | 389.222         | 976.589         | 968.579         | 969.083         | 968.074  | F[18] |
| A[9]  | 433.740         | 928.062         | <b>920.050</b>  | <b>920.554</b>  | 919.547  | A[17] |
| P[10] | 482.267         | 892.541         | 884.532         | 885.036         | 884.028  | P[16] |
| K[11] | 526.114         | <b>844.015</b>  | <b>836.006</b>  | <b>836.509</b>  | 835.500  | K[15] |
| K[12] | 631.367         | 779.967         | <b>771.958</b>  | <b>772.462</b>  | 771.454  | K[14] |
| Q[13] | 659.376         | 804.913         | <b>806.905</b>  | <b>807.409</b>  | 806.401  | Q[13] |
| S[14] | 703.104         | 666.404         | 658.395         | 658.899         | 657.891  | S[12] |
| K[15] | <b>767.441</b>  | <b>622.888</b>  | 614.879         | 615.382         | 614.375  | K[11] |
| K[16] | <b>831.488</b>  | 558.840         | 550.831         | 551.335         | 550.327  | K[10] |
| A[17] | 897.007         | 694.797         | 686.788         | 687.292         | 686.284  | A[9]  |
| V[18] | 917.541         | 459.274         | 451.265         | 451.769         | 450.761  | V[9]  |
| T[19] | <b>967.065</b>  | 409.740         | 401.731         | 402.235         | 401.227  | T[17] |
| K[20] | <b>1031.113</b> | 359.210         | 351.201         | 351.711         | 350.703  | K[6]  |
| A[21] | <b>1066.631</b> | 295.160         | 287.150         | 287.661         | 286.656  | A[5]  |
| Q[22] | <b>1130.660</b> | 259.650         | 251.641         | 252.145         | 251.137  | Q[4]  |
| K[23] | <b>1194.708</b> | 195.621         | 187.612         | 188.116         | 187.108  | K[3]  |
| K[24] | 1258.755        | 131.574         | 123.564         | 124.068         | 123.060  | K[2]  |
| E[25] | 1316.289        | 87.528          | 89.517          | 90.021          | 89.013   | E[1]  |

# sp | Q6ZWY9 | H2B1C\_MOUSE

PEPAKSAPAPKK <sup>Acetyl</sup><sub>42.01</sub> GSKKAVTKAQKKD

- ▶ fragmentation table for charge state 3+
- ▶ specType=etd
- ▶ score=66.88
- ▶ F112755.dat
- ▶ query=q38520.p2
- ▶ precursor=658.880680
- ▶ chargePrecursor=4
- ▶ itol=0.5

| AA    | c              | y              | z+1            | z+2     | z              | AA    |
|-------|----------------|----------------|----------------|---------|----------------|-------|
| P[5]  | 39.034         | <b>878.176</b> | <b>872.837</b> | 0.672   | <b>872.501</b> | P[25] |
| E[2]  | 82.048         | <b>845.825</b> | <b>840.486</b> | 0.672   | <b>840.150</b> | E[24] |
| P[3]  | 114.399        | <b>802.811</b> | 797.472        | 0.672   | 797.135        | P[23] |
| A[4]  | 138.078        | 770.460        | 765.121        | 0.672   | 764.785        | A[22] |
| K[5]  | 180.776        | <b>746.781</b> | 741.442        | 741.778 | 741.156        | K[21] |
| S[6]  | 209.737        | 704.583        | 699.743        | 699.079 | 698.407        | S[20] |
| A[7]  | 233.466        | 675.072        | 669.733        | 670.069 | 669.397        | A[19] |
| P[8]  | 265.817        | 651.393        | 646.054        | 646.390 | 645.718        | P[18] |
| A[9]  | 289.496        | 619.042        | 613.703        | 614.039 | 613.367        | A[17] |
| P[10] | 321.847        | 595.363        | 590.024        | 590.360 | 589.688        | P[16] |
| K[11] | 364.545        | 563.012        | 557.673        | 558.009 | 557.337        | K[15] |
| K[12] | 421.247        | 520.314        | 514.974        | 515.310 | 514.639        | K[14] |
| G[13] | 440.254        | 493.612        | 488.273        | 488.609 | 487.937        | G[13] |
| S[14] | 469.265        | 444.605        | 439.265        | 439.601 | 438.930        | S[12] |
| K[15] | 511.963        | 415.594        | 410.255        | 410.591 | 409.919        | K[11] |
| K[16] | 554.051        | 372.896        | 367.556        | 367.892 | 367.221        | K[10] |
| A[17] | 578.140        | 330.196        | 324.856        | 325.194 | 324.522        | A[9]  |
| V[18] | 611.363        | 306.519        | 301.179        | 301.515 | 300.843        | V[8]  |
| T[19] | 645.046        | 273.496        | 268.156        | 268.492 | 267.820        | T[7]  |
| K[20] | <b>687.744</b> | 239.813        | 234.474        | 234.810 | 234.138        | K[6]  |
| A[21] | 711.423        | 197.113        | 191.773        | 192.111 | 191.439        | A[5]  |
| Q[22] | 754.109        | 173.436        | 168.096        | 168.432 | 167.760        | Q[4]  |
| K[23] | 796.808        | 130.750        | 125.410        | 125.746 | 125.074        | K[3]  |
| K[24] | <b>839.506</b> | 88.051         | 82.712         | 83.048  | 82.376         | K[2]  |
| D[25] | 877.848        | 45.353         | 40.014         | 40.349  | 39.678         | D[1]  |



# sp | Q6GSS7 | H2A2A\_MOUSE

LNK<sup>Acetyl</sup><sub>42.01</sub> LLGK<sup>Methyl</sup><sub>14.02</sub> VTIAQGGVLPNIQAVLLPKKTE

- ▶ fragmentation table for charge state 1+
- ▶ specType=etd
- ▶ score=51.31
- ▶ F112755.dat
- ▶ query=q41779\_p1
- ▶ precursor=778.725030
- ▶ chargePrecursor=4
- ▶ itol=0.5

| AA    | c               | y        | z+1             | z+2             | z        | AA    |
|-------|-----------------|----------|-----------------|-----------------|----------|-------|
| L 1   | 131.118         | 3111.887 | 3095.888        | 0.000           | 3094.889 | L 29  |
| N 2   | 345.161         | 2998.803 | 2982.794        | 2963.793        | 2961.778 | N 28  |
| K 3   | 415.206         | 2884.760 | 2866.741        | 2859.749        | 2867.733 | K 27  |
| L 4   | 528.350         | 2714.654 | 2698.636        | 2699.643        | 2697.629 | L 26  |
| L 5   | 641.434         | 2601.570 | 2585.551        | 2586.559        | 2584.544 | L 25  |
| Q 6   | 698.458         | 2488.486 | 2472.467        | 2473.475        | 2471.460 | Q 24  |
| K 7   | 840.597         | 2331.465 | 2315.446        | 2316.454        | 2314.438 | K 23  |
| V 8   | <b>939.635</b>  | 2289.354 | 2273.335        | 2274.343        | 2272.327 | V 22  |
| T 9   | 1040.683        | 2190.288 | 2174.269        | 2175.275        | 2173.259 | T 21  |
| I 10  | <b>1153.767</b> | 2089.238 | 2073.219        | 2074.227        | 2072.211 | I 20  |
| A 11  | <b>1224.804</b> | 1978.154 | 1962.135        | 1963.143        | 1961.127 | A 19  |
| Q 12  | <b>1352.862</b> | 1895.111 | <b>1889.094</b> | 1890.106        | 1888.090 | Q 18  |
| G 13  | 1408.904        | 1777.058 | 1761.039        | 1762.047        | 1760.032 | G 17  |
| G 14  | 1466.905        | 1720.937 | 1704.918        | 1705.926        | 1703.910 | G 16  |
| V 15  | <b>1565.974</b> | 1663.015 | 1646.997        | 1646.004        | 1645.989 | V 15  |
| L 16  | 1679.058        | 1563.947 | <b>1547.928</b> | 1548.936        | 1546.920 | L 14  |
| F 17  | 1778.111        | 1450.893 | 1434.864        | 1435.872        | 1433.856 | F 13  |
| TW 18 | 1899.133        | 1383.810 | 1367.791        | 1368.799        | 1366.783 | TW 12 |
| I 19  | 2003.238        | 1239.767 | 1223.748        | <b>1224.756</b> | 1222.741 | I 11  |
| Q 20  | 2131.296        | 1126.683 | 1110.664        | <b>1111.672</b> | 1109.656 | Q 10  |
| A 21  | 2202.331        | 998.624  | 982.606         | <b>983.614</b>  | 981.598  | A 9   |
| V 22  | 2301.402        | 927.587  | <b>911.569</b>  | 912.576         | 910.561  | V 8   |
| L 23  | 2414.486        | 828.519  | <b>812.500</b>  | 813.508         | 811.492  | L 7   |
| L 24  | 2527.570        | 715.435  | <b>699.415</b>  | <b>700.424</b>  | 698.408  | L 6   |
| P 25  | 2624.623        | 602.351  | 586.332         | 587.340         | 585.324  | P 5   |
| K 26  | 2752.718        | 505.298  | <b>489.279</b>  | 490.287         | 488.271  | K 4   |
| K 27  | 3880.812        | 377.203  | <b>361.184</b>  | 362.192         | 360.177  | K 3   |
| T 28  | 2981.850        | 249.138  | 233.089         | 234.097         | 232.082  | T 2   |
| E 29  | 3110.903        | 148.060  | 132.042         | 133.050         | 131.034  | E 1   |

# sp | Q6GSS7 | H2A2A\_MOUSE

LNK<sup>Acetyl</sup><sub>42.01</sub> LLGK<sup>Methyl</sup><sub>14.02</sub> VTIAQGGVLPNIQAVLLPKKTE

- ▶ fragmentation table for charge state 2+
- ▶ specType=etd
- ▶ score=51.31
- ▶ F112755.dat
- ▶ query=q41779\_p1
- ▶ precursor=778.725030
- ▶ chargePrecursor=4
- ▶ itol=0.5

| AA |    | c               | y               | z+1             | z+2             | z               | AA   |
|----|----|-----------------|-----------------|-----------------|-----------------|-----------------|------|
| L  | 1  | 66.053          | <b>1556.447</b> | <b>1548.438</b> | 8.504           | <b>1547.934</b> | L126 |
| N  | 2  | 123.054         | 1699.905        | <b>1491.896</b> | <b>1492.400</b> | <b>1491.392</b> | N020 |
| K  | 3  | 208.137         | 1442.884        | 1434.874        | 1435.378        | 1434.370        | K027 |
| L  | 4  | 294.679         | 1337.811        | 1349.823        | 1350.326        | 1346.317        | L126 |
| L  | 5  | 321.221         | 1300.269        | 1293.279        | 1293.783        | 1292.775        | L125 |
| G  | 6  | 389.752         | <b>1244.747</b> | 1236.737        | 1237.241        | 1235.233        | G04  |
| K  | 7  | 420.787         | 1216.230        | <b>1208.227</b> | 1208.731        | <b>1207.723</b> | K023 |
| V  | 8  | 470.321         | 1145.181        | 1137.171        | 1137.675        | 1136.667        | V022 |
| T  | 9  | 520.845         | 1095.646        | <b>1087.637</b> | <b>1088.141</b> | 1087.133        | T021 |
| T  | 10 | 577.387         | 1045.123        | 1037.113        | 1037.617        | 1036.609        | T020 |
| A  | 11 | 622.866         | 1008.583        | <b>998.571</b>  | <b>998.075</b>  | 998.067         | A019 |
| Q  | 12 | 678.939         | <b>953.062</b>  | <b>945.053</b>  | <b>945.557</b>  | 944.549         | Q018 |
| G  | 13 | 705.446         | <b>899.033</b>  | <b>891.023</b>  | <b>891.527</b>  | 890.519         | G017 |
| G  | 14 | 733.956         | 860.522         | 852.513         | <b>853.017</b>  | 852.009         | G016 |
| V  | 15 | <b>783.491</b>  | 832.011         | 824.002         | <b>824.506</b>  | 823.498         | V015 |
| L  | 16 | 840.033         | 782.477         | 774.468         | 774.972         | 773.964         | L114 |
| T  | 17 | <b>888.559</b>  | 728.935         | 721.926         | 722.430         | 721.422         | T013 |
| N  | 18 | <b>945.580</b>  | 677.400         | 669.390         | 669.893         | 668.885         | N012 |
| I  | 19 | <b>1002.122</b> | 620.867         | 612.858         | 612.862         | 611.874         | I011 |
| Q  | 20 | 1066.152        | 563.845         | 555.836         | 556.340         | 555.332         | Q010 |
| A  | 21 | <b>1101.670</b> | 499.816         | 491.807         | 492.310         | 491.303         | A010 |
| V  | 22 | <b>1151.204</b> | 484.297         | 476.288         | 476.792         | 475.784         | V009 |
| L  | 23 | <b>1207.747</b> | 414.763         | 406.754         | 407.258         | 406.250         | L111 |
| L  | 24 | 1264.289        | 358.221         | 350.212         | 350.716         | 349.708         | L104 |
| P  | 25 | <b>1312.815</b> | 301.679         | 293.670         | 294.174         | 293.166         | P009 |
| K  | 26 | <b>1376.862</b> | 253.153         | 245.143         | 245.647         | 244.639         | K04  |
| K  | 27 | <b>1440.910</b> | 189.105         | 181.096         | 181.600         | 180.592         | K03  |
| T  | 28 | 1481.434        | 125.058         | 117.048         | 117.552         | 116.544         | T02  |
| E  | 29 | 1555.955        | 74.534          | 66.524          | 67.028          | 66.021          | E01  |



# sp | Q6GSS7 | H2A2A\_MOUSE

LNK<sup>Acetyl</sup>42.01 LLGK<sup>Methyl</sup>14.02 VTIAQGGVLPNIQAVLLPKKTE

- ▶ fragmentation table for charge state 3+
- ▶ specType=etd
- ▶ score=51.31
- ▶ F112755.dat
- ▶ query=q41779\_p1
- ▶ precursor=778.725030
- ▶ chargePrecursor=4
- ▶ itol=0.5

| AA  | c              | y               | z+1             | z+2            | z              | AA  |
|-----|----------------|-----------------|-----------------|----------------|----------------|-----|
| L1  | 44.377         | 1037.967        | <b>1032.628</b> | 0.672          | 1032.292       | L29 |
| N2  | 62.302         | <b>1000.272</b> | <b>994.933</b>  | <b>995.269</b> | <b>994.597</b> | N28 |
| K3  | 139.094        | 962.258         | 956.919         | 957.254        | 956.583        | K27 |
| L4  | 176.768        | 905.556         | 900.217         | 900.553        | 899.881        | L26 |
| L5  | 214.483        | 867.862         | 862.523         | 862.858        | 862.182        | L25 |
| Q6  | 233.490        | 830.167         | <b>824.827</b>  | 825.163        | <b>824.491</b> | Q24 |
| K7  | 280.860        | 811.160         | 805.820         | 806.156        | 805.484        | K23 |
| V8  | 313.883        | 763.790         | 758.450         | 758.786        | 758.114        | V22 |
| T9  | 347.566        | 730.767         | 725.427         | 725.763        | 725.091        | T21 |
| I10 | 385.260        | 697.084         | 691.745         | 692.081        | 691.409        | I20 |
| A11 | 468.039        | 659.389         | 654.050         | 654.386        | 653.714        | A19 |
| Q12 | 493.606        | 626.710         | 621.371         | 621.707        | 621.035        | Q18 |
| Q13 | 470.633        | 593.024         | 587.685         | 588.021        | 587.349        | Q17 |
| Q14 | <b>489.640</b> | 574.017         | 568.678         | 569.013        | 568.342        | Q16 |
| V15 | 522.603        | 555.010         | 549.670         | 550.006        | 549.334        | V15 |
| L16 | 560.357        | 521.987         | 516.648         | 516.984        | 516.312        | L14 |
| P17 | 562.708        | 484.292         | 478.953         | 479.289        | 478.617        | P13 |
| N18 | 630.723        | 451.942         | 446.602         | 446.938        | 446.266        | N12 |
| I19 | 668.417        | 413.927         | 408.588         | 408.924        | 408.252        | I11 |
| Q20 | 711.104        | 376.233         | 370.893         | 371.229        | 370.557        | Q10 |
| A21 | 734.783        | 333.546         | 328.207         | 328.543        | 327.871        | A9  |
| V22 | 767.805        | 309.867         | 304.528         | 304.864        | 304.192        | V8  |
| L23 | 805.500        | 276.844         | 271.505         | 271.841        | 271.169        | L7  |
| L24 | 843.195        | 239.150         | 233.810         | 234.146        | 233.474        | L6  |
| T25 | 875.949        | 201.455         | 196.116         | 196.453        | 195.781        | T5  |
| K26 | 918.244        | 169.100         | 163.760         | 164.101        | 163.429        | K4  |
| K27 | <b>960.942</b> | 136.406         | 131.066         | 131.402        | 130.730        | K3  |
| T28 | <b>994.625</b> | 83.708          | 78.368          | 78.704         | 78.032         | T2  |
| E29 | 1037.639       | 50.025          | 44.685          | 45.021         | 44.349         | E1  |

# sp | Q6GSS7 | H2A2A\_MOUSE

ELNK <sup>Methyl</sup> 14.02 LLGK <sup>Methyl</sup> 14.02 VTIAQGGVLPNIQAVLLPKKTE

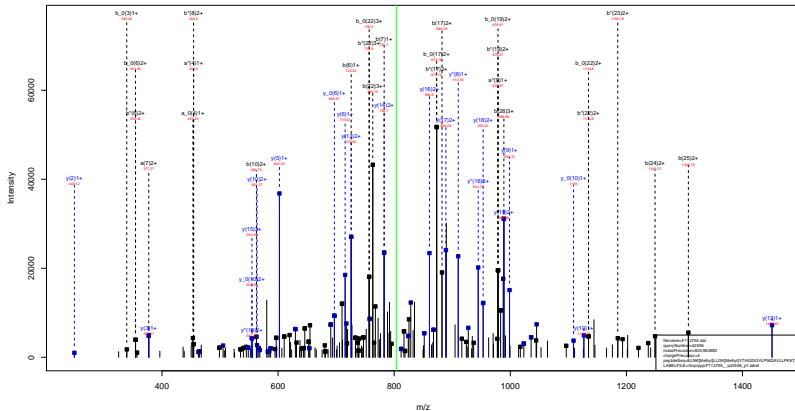

# sp | Q6GSS7 | H2A2A\_MOUSE

ELNK <sup>Methyl</sup> 14.02 LLGK <sup>Methyl</sup> 14.02 VTIAQGGVLPNIQAVLLPKKTE

- ▶ fragmentation table for charge state 1+
- ▶ specType=cid
- ▶ score=50.82
- ▶ F112755.dat
- ▶ query=q42556.p1
- ▶ precursor=803.984880
- ▶ chargePrecursor=4
- ▶ itol=0.5

| AA  | a               | a <sup>+</sup> | a,Δ            | b               | b <sup>+</sup>  | b,Δ            | y               | y <sup>+</sup> | y,Δ             | AA       |     |
|-----|-----------------|----------------|----------------|-----------------|-----------------|----------------|-----------------|----------------|-----------------|----------|-----|
| L1  | 3000000         | 0              | 0              | 0               | 0               | 0              | 0               | 0              | 0               | L130     |     |
| L2  | 215130          | 0              | 0              | 0               | 0               | 0              | 0               | 0              | 0               | L129     |     |
| N3  | 37810           | 0              | 0              | 0               | 0               | 0              | 0               | 0              | 0               | N28      |     |
| N4  | 171000          | <b>454,268</b> | <b>453,283</b> | <b>499,287</b>  | 482,284         | 482,284        | 0               | 0              | 0               | N27      |     |
| L5  | <b>594,377</b>  | <b>551,353</b> | <b>550,366</b> | 432,357         | 505,365         | <b>594,381</b> | 274,354         | 297,325        | 288,644         | L26      |     |
| L6  | <b>697,461</b>  | <b>680,434</b> | 678,433        | <b>725,456</b>  | 708,439         | 707,439        | 361,433         | 374,444        | 361,503         | L25      |     |
| N7  | 724302          | <b>737,458</b> | 736,474        | <b>762,477</b>  | <b>765,451</b>  | 764,451        | 284,450         | 297,460        | 297,500         | N24      |     |
| N8  | 706700          | 819,493        | 818,506        | <b>824,508</b>  | 807,503         | 806,503        | 305,502         | 303,501        | 294,500         | N23      |     |
| V9  | 805001          | <b>978,635</b> | <b>977,651</b> | <b>1023,656</b> | 1006,639        | 1005,639       | 348,634         | 372,631        | 371,541         | V22      |     |
| T10 | <b>1096,709</b> | 1079,682       | 1078,688       | <b>1124,708</b> | <b>1120,677</b> | 1120,673       | 318,673         | 314,283        | 2174,299        | 2172,275 | T21 |
| L11 | 1200000         | 1300,700       | 1299,702       | <b>1337,708</b> | <b>1320,701</b> | 1320,697       | 328,702         | 329,219        | 2172,271        | 2172,272 | L20 |
| A12 | 1300000         | 1301,800       | 1292,810       | 1300,800        | 1300,800        | 1300,800       | 1970,814        | 1870,154       | 1893,127        | 1898,141 | A19 |
| Q13 | 1400000         | 1301,800       | 1300,810       | 1430,804        | 1419,807        | 1418,813       | 1865,817        | 1888,800       | 1887,128        | Q18      |     |
| Q14 | 1500000         | 1302,800       | 1294,808       | 1439,809        | 1428,812        | 1427,818       | 1777,823        | 1829,806       | 1828,820        | Q17      |     |
| Q15 | 1522000         | 1305,808       | 1298,822       | 1450,809        | 1433,800        | 1434,810       | 1740,821        | 1761,810       | 1762,508        | Q16      |     |
| V16 | 1622000         | 1304,800       | 1292,808       | 1459,808        | 1432,808        | 1431,808       | 1611,808        | 1661,811       | 1645,808        | V15      |     |
| L17 | 1722000         | 1311,800       | 1297,810       | 1471,810        | 1456,804        | 1455,810       | 1501,804        | 1549,810       | 1549,810        | L14      |     |
| F18 | 1822137         | 1315,130       | 1284,125       | 1480,123        | 1463,108        | 1464,123       | <b>1450,803</b> | 1443,826       | 2437,827        | F13      |     |
| N19 | 1948100         | 1309,100       | 1298,108       | 1474,113        | 1457,148        | 1456,148       | 1333,829        | 1339,783       | 1335,789        | N12      |     |
| N20 | 2000000         | 1302,800       | 1294,808       | 1479,809        | 1461,804        | 1462,809       | 1232,810        | 1222,791       | 1221,807        | N11      |     |
| Q21 | 2107700         | 1310,200       | 1299,212       | 1475,811        | 1458,201        | 1459,207       | <b>1126,803</b> | 1109,800       | <b>1108,872</b> | Q19      |     |
| A22 | 2200000         | 1311,800       | 1296,804       | 1468,804        | 1450,802        | 1451,802       | 1008,802        | 981,808        | 981,514         | A18      |     |
| V23 | 2317428         | 1290,800       | 1286,412       | 1438,412        | 1430,396        | 1431,412       | <b>927,587</b>  | <b>910,581</b> | 908,577         | V18      |     |
| L24 | 2411113         | 1291,400       | 1282,704       | 1428,704        | 1421,400        | 1422,400       | <b>826,519</b>  | <b>811,492</b> | 808,708         | L17      |     |
| L25 | 2511304         | 1290,100       | 1285,304       | 1411,301        | 1404,304        | 1403,304       | <b>715,435</b>  | 707,424        | 707,424         | L16      |     |
| P26 | 2603049         | 1281,600       | 1282,630       | 1378,644        | 1361,617        | 1362,633       | <b>602,351</b>  | 585,324        | <b>584,340</b>  | P15      |     |
| K27 | 2700000         | 1280,000       | 1280,000       | 1368,000        | 1353,000        | 1353,000       | <b>505,308</b>  | 488,319        | 487,300         | K14      |     |
| R28 | 2800000         | 1281,812       | 1281,828       | 1354,834        | 1347,807        | 1346,813       | <b>377,203</b>  | 365,174        | 362,181         | R13      |     |
| T29 | 2917000         | 1281,800       | 1278,778       | 1355,811        | 1346,800        | 1347,800       | <b>249,108</b>  | 235,000        | 235,000         | T12      |     |
| E30 | 3000000         | 1280,000       | 1280,000       | 1344,824        | 1337,800        | 1337,800       | 148,800         | 0,000          | 130,000         | E11      |     |

# sp | Q6GSS7 | H2A2A\_MOUSE

ELNK<sup>Methyl</sup><sub>14.02</sub> LLGK<sup>Methyl</sup><sub>14.02</sub> VTIAQGGVLPNIQAVLLPKKTE

- ▶ fragmentation table for charge state 2+
- ▶ specType=cid
- ▶ score=50.82
- ▶ F112755.dat
- ▶ query=q42556.p1
- ▶ precursor=803.984880
- ▶ chargePrecursor=4
- ▶ itol=0.5

| AA   | i | a       | a'      | a <sub>0</sub> | b       | b'      | b <sub>0</sub> | y       | y'      | y <sub>0</sub> | AA   |
|------|---|---------|---------|----------------|---------|---------|----------------|---------|---------|----------------|------|
| L1   | 1 | 106193  | 1       | 106193         | 44      | 106193  | 1              | 106193  | 106193  | 106193         | L120 |
| L2   | 1 | 106193  | 1       | 106193         | 106193  | 1       | 106193         | 106193  | 106193  | 106193         | L120 |
| N3   | 1 | 106193  | 106193  | 106193         | 1       | 106193  | 1              | 106193  | 106193  | 106193         | N120 |
| L4   | 1 | 106193  | 106193  | 106193         | 106193  | 1       | 106193         | 106193  | 106193  | 106193         | L120 |
| L5   | 1 | 106193  | 106193  | 106193         | 106193  | 106193  | 1              | 106193  | 106193  | 106193         | L120 |
| L6   | 1 | 106193  | 106193  | 106193         | 106193  | 106193  | 106193         | 1       | 106193  | 106193         | L120 |
| L7   | 1 | 106193  | 106193  | 106193         | 106193  | 106193  | 106193         | 106193  | 1       | 106193         | L120 |
| N8   | 1 | 106193  | 106193  | 106193         | 106193  | 106193  | 106193         | 106193  | 106193  | 106193         | N120 |
| V9   | 1 | 106193  | 106193  | 106193         | 106193  | 106193  | 106193         | 106193  | 106193  | 106193         | V120 |
| T101 | 1 | 548856  | 548345  | 539853         | 562836  | 554343  | 551352         | 1087133 | 1087133 | 1088046        | T121 |
| L11  | 1 | 548856  | 539857  | 536355         | 618338  | 618384  | 618382         | 1045123 | 1045123 | 1046036        | L121 |
| A121 | 1 | 648919  | 631431  | 631913         | 654916  | 646403  | 645911         | 988581  | 988581  | 989591         | A119 |
| Q13  | 1 | 688437  | 685433  | 685843         | 718945  | 718432  | 706940         | 951082  | 944549  | 944357         | Q118 |
| Q14  | 1 | 715468  | 698368  | 698883         | 747456  | 738943  | 738451         | 889331  | 889331  | 889841         | Q117 |
| Q15  | 1 | 761359  | 751452  | 762364         | 776385  | 767454  | 766385         | 868522  | 862369  | 861517         | Q116 |
| V16  | 1 | 811504  | 801599  | 802498         | 825501  | 816988  | 816496         | 881211  | 874466  | 873588         | V115 |
| L17  | 1 | 868048  | 868362  | 868676         | 882643  | 873530  | 873038         | 782417  | 773564  | 773472         | L114 |
| F118 | 1 | 916372  | 908359  | 907587         | 936368  | 927356  | 926368         | 725935  | 717422  | 716530         | F113 |
| N119 | 1 | 971301  | 968388  | 964388         | 987591  | 978078  | 978586         | 677469  | 668889  | 668411         | N112 |
| N120 | 1 | 988748  | 988262  | 988176         | 1044133 | 1035620 | 1035128        | 628767  | 613276  | 612386         | N111 |
| Q121 | 1 | 1016708 | 1016624 | 1016540        | 1141381 | 1134676 | 1134184        | 489316  | 481301  | 480811         | Q110 |
| A22  | 1 | 1108281 | 1108197 | 1108113        | 1191215 | 1184702 | 1184210        | 464287  | 458784  | 458282         | A18  |
| V23  | 1 | 1179238 | 1179154 | 1179070        | 1248317 | 1241712 | 1241220        | 416719  | 408266  | 407774         | V18  |
| L24  | 1 | 1202308 | 1202224 | 1202140        | 1268399 | 1261794 | 1261302        | 348738  | 340285  | 339793         | L18  |
| P25  | 1 | 1340330 | 1339246 | 1338162        | 1394815 | 1388210 | 1387718        | 301874  | 293321  | 292829         | P18  |
| R26  | 1 | 1404916 | 1403832 | 1402748        | 1468899 | 1462294 | 1461802        | 248893  | 240340  | 239848         | R18  |
| R27  | 1 | 1458513 | 1458429 | 1458345        | 1524942 | 1518337 | 1517845        | 189155  | 180602  | 180110         | R13  |
| L28  | 1 | 1512417 | 1512333 | 1512249        | 1578446 | 1571841 | 1571349        | 148488  | 140035  | 139543         | L12  |
| L29  | 1 | 1613488 | 1613404 | 1613320        | 1679487 | 1672882 | 1672390        | 74314   | 70361   | 70310          | L11  |

# sp | Q6GSS7 | H2A2A\_MOUSE

ELNK<sup>Methyl</sup> 14.02 LLGK<sup>Methyl</sup> 14.02 VTIAQGGVLPNIQAVLLPKKTE

- ▶ fragmentation table for charge state 3+
- ▶ specType=cid
- ▶ score=50.82
- ▶ F112755.dat
- ▶ query=q42556.p1
- ▶ precursor=803.984880
- ▶ chargePrecursor=4
- ▶ itol=0.5

| AA | a              | a'             | a <sub>0</sub> | b              | b'             | b <sub>0</sub> | r              | r'              | r <sub>0</sub> | AA  |
|----|----------------|----------------|----------------|----------------|----------------|----------------|----------------|-----------------|----------------|-----|
| E1 | 34.600         | 0.677          | 28.920         | 44.001         | 0.672          | 38.310         | 1071.650       | 1100.974        | 1205.046       | E10 |
| L1 | 72.380         | 0.677          | 66.381         | 81.716         | 0.672          | 76.119         | 1620.613       | <b>1022.960</b> | 1102.512       | L20 |
| K  | 112.599        | 104.721        | 104.395        | 119.730        | 114.055        | 113.727        | 960.343        | 680.200         | 104.637        | K20 |
| R  | 137.800        | 120.584        | 109.700        | 160.010        | 131.426        | 131.000        | <b>952.926</b> | 640.250         | 104.637        | R20 |
| L  | 136.404        | 109.700        | 109.400        | 104.790        | 100.120        | 100.700        | 900.500        | 600.000         | 100.551        | L20 |
| L  | 113.133        | 107.400        | 107.133        | 102.660        | 98.013         | 100.407        | <b>867.862</b> | 600.100         | 101.070        | L20 |
| G  | 102.500        | 100.000        | 100.000        | 100.000        | 100.000        | 100.000        | 800.100        | 600.000         | 100.000        | G20 |
| R  | 100.500        | 100.500        | 100.500        | 100.500        | 100.500        | 100.500        | 800.500        | 600.500         | 100.500        | R20 |
| V  | 112.600        | 106.600        | 106.500        | 104.800        | 100.410        | 100.000        | 780.700        | <b>758.114</b>  | <b>757.786</b> | V20 |
| T  | 100.241        | 100.500        | 100.210        | 100.510        | 100.000        | 100.000        | 800.000        | 720.000         | 100.000        | T20 |
| I  | 100.000        | 100.000        | 100.000        | 100.000        | 100.000        | 100.000        | <b>800.000</b> | 600.000         | <b>600.000</b> | I20 |
| A  | 107.610        | 101.000        | 101.000        | 101.000        | 101.000        | 101.000        | 800.000        | <b>653.714</b>  | <b>653.386</b> | A10 |
| Q  | 110.300        | <b>664.626</b> | <b>664.700</b> | 110.000        | 110.000        | 110.000        | 800.000        | <b>630.010</b>  | <b>629.707</b> | Q10 |
| G  | 100.000        | 100.000        | 100.000        | <b>100.000</b> | <b>100.000</b> | <b>100.000</b> | 800.000        | 600.000         | <b>600.000</b> | G10 |
| Q  | 100.000        | 100.000        | 100.000        | 100.000        | 100.000        | 100.000        | 800.000        | <b>587.340</b>  | <b>587.021</b> | Q10 |
| V  | 111.000        | <b>535.663</b> | <b>535.310</b> | 110.000        | <b>544.904</b> | 100.000        | <b>555.010</b> | 500.100         | <b>549.006</b> | V10 |
| L  | 109.010        | 100.000        | 100.000        | 100.000        | <b>100.000</b> | <b>100.000</b> | 800.000        | 600.000         | 100.000        | L10 |
| P  | 111.000        | 100.000        | 100.000        | 100.000        | 100.000        | 100.000        | 800.000        | 600.000         | 100.000        | P10 |
| N  | 100.000        | <b>643.723</b> | <b>643.395</b> | 100.000        | <b>653.054</b> | <b>652.726</b> | 400.000        | 400.000         | 441.000        | N10 |
| D  | 100.000        | <b>681.417</b> | <b>681.089</b> | 100.000        | <b>690.740</b> | <b>690.421</b> | 410.000        | 400.000         | 400.000        | D10 |
| Q  | 110.000        | 100.000        | 100.000        | <b>110.000</b> | <b>110.000</b> | <b>110.000</b> | 800.000        | 600.000         | 100.000        | Q10 |
| A  | 100.000        | 100.000        | 100.000        | <b>100.000</b> | <b>100.000</b> | <b>100.000</b> | 800.000        | 600.000         | 100.000        | A10 |
| V  | 110.000        | 100.000        | 100.000        | <b>110.000</b> | <b>110.000</b> | <b>110.000</b> | 800.000        | 600.000         | 100.000        | V10 |
| L  | <b>824.175</b> | <b>810.500</b> | <b>818.172</b> | 820.000        | 820.000        | 820.000        | 200.000        | 200.000         | 200.000        | L10 |
| L  | 100.000        | 100.000        | 100.000        | 100.000        | 100.000        | 100.000        | 800.000        | 600.000         | 100.000        | L10 |
| P  | 100.000        | 100.000        | 100.000        | 100.000        | 100.000        | 100.000        | 800.000        | 600.000         | 100.000        | P10 |
| K  | <b>816.919</b> | 800.000        | 800.000        | <b>800.000</b> | <b>800.000</b> | <b>800.000</b> | 100.000        | 100.000         | 100.000        | K10 |
| R  | 100.000        | 100.000        | 100.000        | <b>100.000</b> | <b>100.000</b> | <b>100.000</b> | 800.000        | 600.000         | 100.000        | R10 |
| T  | 100.000        | 100.000        | 100.000        | <b>100.000</b> | <b>100.000</b> | <b>100.000</b> | 800.000        | 600.000         | 100.000        | T10 |
| E  | 100.000        | 100.000        | 100.000        | 100.000        | 100.000        | 100.000        | 800.000        | 600.000         | 100.000        | E10 |

# sp | P22752 | H2A1\_MOUSE

SHHKAKGK Acetyl  
42.01

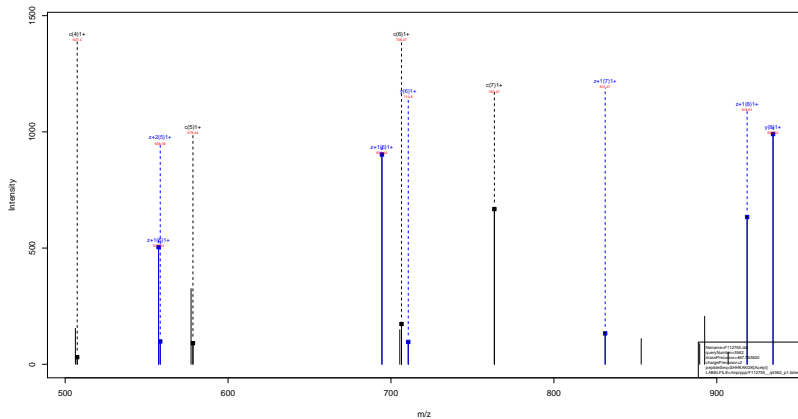

# sp | P22752 | H2A1\_MOUSE

SHHKAKGK<sup>Acetyl</sup>  
42.01

- ▶ fragmentation table for charge state 1+
- ▶ specType=etd
- ▶ score=30.71
- ▶ F112755.dat
- ▶ query=q5562.p1
- ▶ precursor=467.763820
- ▶ chargePrecursor=2
- ▶ itol=0.5

| AA   | c              | y              | z+1            | z+2            | z       | AA   |
|------|----------------|----------------|----------------|----------------|---------|------|
| S[1] | 108.066        | <b>934.522</b> | <b>918.503</b> | 0.000          | 917.495 | S[8] |
| H[2] | 242.125        | 847.490        | <b>831.471</b> | 0.000          | 830.463 | H[7] |
| H[3] | 379.184        | <b>710.431</b> | <b>694.412</b> | 0.000          | 693.404 | H[6] |
| K[4] | <b>507.279</b> | 673.372        | <b>557.353</b> | <b>558.361</b> | 556.345 | K[5] |
| A[5] | <b>578.316</b> | 445.277        | 429.258        | 430.266        | 428.250 | A[4] |
| K[6] | <b>706.411</b> | 374.240        | 358.221        | 359.229        | 357.213 | K[3] |
| G[7] | <b>763.432</b> | 246.145        | 230.126        | 231.134        | 229.118 | G[2] |
| K[8] | 933.538        | 189.123        | 173.105        | 174.112        | 172.097 | K[1] |





# sp | P22752 | H2A1\_MOUSE

SHHKAKGK<sup>Acetyl</sup>  
42.01

- ▶ fragmentation table for charge state 1+
- ▶ specType=etd
- ▶ score=38.19
- ▶ F112755.dat
- ▶ query=q5563.p1
- ▶ precursor=467.764230
- ▶ chargePrecursor=2
- ▶ itol=0.5

| AA   | c              | y              | z+1            | z+2            | z       | AA   |
|------|----------------|----------------|----------------|----------------|---------|------|
| S[1] | 105.066        | <b>934.522</b> | <b>916.503</b> | 0.000          | 917.495 | S[8] |
| H[2] | 242.125        | 847.490        | <b>831.471</b> | 0.000          | 830.463 | H[7] |
| H[3] | 379.184        | <b>710.431</b> | <b>694.412</b> | 0.000          | 693.404 | H[6] |
| K[4] | 507.279        | 573.372        | <b>557.353</b> | <b>558.361</b> | 556.345 | K[5] |
| A[5] | <b>578.316</b> | 445.277        | 429.258        | <b>430.266</b> | 428.250 | A[4] |
| K[6] | <b>706.411</b> | 374.240        | 358.221        | <b>359.229</b> | 357.213 | K[3] |
| G[7] | <b>763.432</b> | 246.145        | 230.126        | 231.134        | 229.118 | G[2] |
| K[8] | 933.538        | 189.123        | 173.105        | 174.112        | 172.097 | K[1] |



# sp | P22752 | H2A1\_MOUSE

SHHKAKGK<sup>Acetyl</sup>  
42.01

- ▶ fragmentation table for charge state 1+
- ▶ specType=etd
- ▶ score=33.41
- ▶ F112755.dat
- ▶ query=q5564.p1
- ▶ precursor=467.764340
- ▶ chargePrecursor=2
- ▶ itol=0.5

| AA   | c              | y              | z+1            | z+2            | z       | AA   |
|------|----------------|----------------|----------------|----------------|---------|------|
| S[1] | 105.066        | <b>934.522</b> | <b>916.503</b> | 0.000          | 917.495 | S[8] |
| H[2] | 242.125        | 847.490        | <b>831.471</b> | 0.000          | 830.463 | H[7] |
| H[3] | 379.184        | <b>710.431</b> | <b>694.412</b> | 0.000          | 693.404 | H[6] |
| K[4] | <b>507.279</b> | 573.372        | <b>557.353</b> | <b>558.361</b> | 556.345 | K[5] |
| A[5] | <b>578.316</b> | 445.277        | 429.258        | 430.266        | 428.250 | A[4] |
| K[6] | <b>706.411</b> | 374.240        | 358.221        | 359.229        | 357.213 | K[3] |
| G[7] | <b>763.432</b> | 246.145        | 230.126        | 231.134        | 229.118 | G[2] |
| K[8] | 933.538        | 189.123        | 173.105        | 174.112        | 172.097 | K[1] |

# sp | P22752 | H2A1\_MOUSE

SHHKAKGK <sup>Acetyl</sup>  
42.01

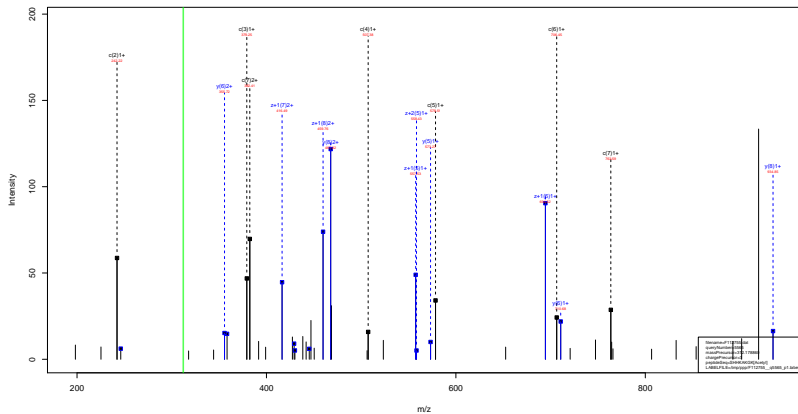

# sp | P22752 | H2A1\_MOUSE

SHHKAKGK<sup>Acetyl</sup>  
42.01

- ▶ fragmentation table for charge state 1+
- ▶ specType=etd
- ▶ score=33.29
- ▶ F112755.dat
- ▶ query=q5565.p1
- ▶ precursor=312.178860
- ▶ chargePrecursor=3
- ▶ itol=0.5

| AA   | c              | y              | z+1            | z+2            | z       | AA   |
|------|----------------|----------------|----------------|----------------|---------|------|
| S[1] | 109.066        | <b>934.522</b> | 918.503        | 0.000          | 917.495 | S[8] |
| H[2] | <b>242.125</b> | 847.490        | 831.471        | 0.000          | 830.463 | H[7] |
| H[3] | <b>379.184</b> | <b>710.431</b> | <b>694.412</b> | 0.000          | 693.404 | H[6] |
| K[4] | <b>507.279</b> | <b>573.372</b> | <b>557.353</b> | <b>558.361</b> | 556.345 | K[5] |
| A[5] | <b>578.316</b> | <b>445.277</b> | <b>429.258</b> | <b>430.266</b> | 428.250 | A[4] |
| K[6] | <b>706.411</b> | 374.240        | <b>358.221</b> | 359.229        | 357.213 | K[3] |
| G[7] | <b>763.432</b> | <b>246.145</b> | 230.126        | 231.134        | 229.118 | G[2] |
| K[8] | 933.538        | 189.123        | 173.105        | 174.112        | 172.097 | K[1] |

# sp | P22752 | H2A1\_MOUSE

SHHKAKGK <sup>Acetyl</sup>  
42.01

- ▶ fragmentation table for charge state 2+
- ▶ specType=etd
- ▶ score=33.29
- ▶ F112755.dat
- ▶ query=q5565\_p1
- ▶ precursor=312.178860
- ▶ chargePrecursor=3
- ▶ itol=0.5

| AA   | c              | y              | z+1            | z+2     | z       | AA   |
|------|----------------|----------------|----------------|---------|---------|------|
| S[1] | 53.037         | <b>467.765</b> | <b>459.755</b> | 0.504   | 459.251 | S[8] |
| H[2] | 121.566        | 424.248        | <b>416.239</b> | 0.504   | 415.735 | H[7] |
| H[3] | 190.095        | <b>355.719</b> | 347.710        | 0.504   | 347.206 | H[6] |
| K[4] | 254.143        | 287.190        | 279.180        | 279.684 | 278.676 | K[5] |
| A[5] | 289.662        | 223.142        | 215.133        | 215.637 | 214.629 | A[4] |
| K[6] | 353.709        | 187.624        | 179.614        | 180.118 | 179.110 | K[3] |
| G[7] | <b>382.220</b> | 123.576        | 115.567        | 116.071 | 115.063 | G[2] |
| K[8] | 467.272        | 95.063         | 87.056         | 87.560  | 86.552  | K[1] |

# sp | P22752 | H2A1\_MOUSE

SHHKAK Acetyl GK  
42.01

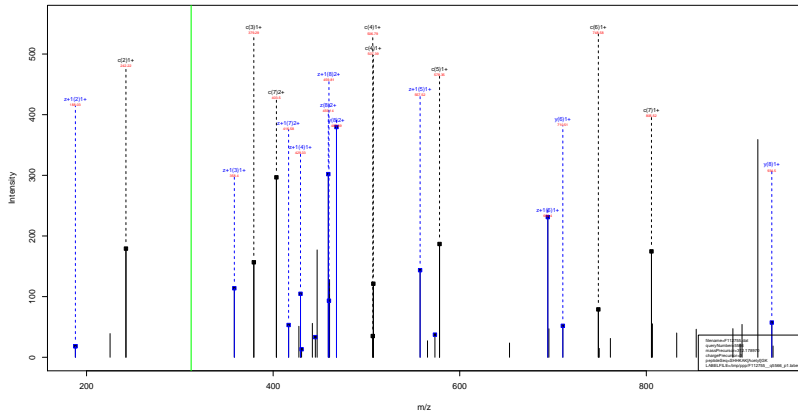

# sp | P22752 | H2A1\_MOUSE

SHHKAK<sup>Acetyl</sup> GK  
42.01

- ▶ fragmentation table for charge state 1+
- ▶ specType=etd
- ▶ score=42.59
- ▶ F112755.dat
- ▶ query=q5566.p1
- ▶ precursor=312.178970
- ▶ chargePrecursor=3
- ▶ itol=0.5

| AA   | c              | y              | z+1            | z+2            | z       | AA   |
|------|----------------|----------------|----------------|----------------|---------|------|
| S[1] | 109.066        | <b>934.522</b> | 918.503        | 0.000          | 917.495 | S[8] |
| H[2] | <b>242.125</b> | 847.490        | 831.471        | 0.000          | 830.463 | H[7] |
| H[3] | <b>379.184</b> | <b>710.431</b> | <b>694.412</b> | 0.000          | 693.404 | H[6] |
| K[4] | <b>507.279</b> | <b>573.372</b> | <b>557.353</b> | 558.361        | 556.345 | K[5] |
| A[5] | <b>578.316</b> | <b>445.277</b> | <b>429.258</b> | <b>430.266</b> | 428.250 | A[4] |
| K[6] | <b>748.421</b> | 374.240        | <b>358.221</b> | 359.229        | 357.213 | K[3] |
| G[7] | <b>805.443</b> | 204.134        | <b>188.116</b> | 189.123        | 187.108 | G[2] |
| K[8] | 933.538        | 147.113        | 131.094        | 132.102        | 130.086 | K[1] |



# sp | P22752 | H2A1\_MOUSE

SHHKAK<sup>Acetyl</sup> GK  
42.01

- ▶ fragmentation table for charge state 2+
- ▶ specType=etd
- ▶ score=42.59
- ▶ F112755.dat
- ▶ query=q5566.p1
- ▶ precursor=312.178970
- ▶ chargePrecursor=3
- ▶ itol=0.5

| AA   | c              | y              | z+1            | z+2     | z              | AA   |
|------|----------------|----------------|----------------|---------|----------------|------|
| S[1] | 53.037         | <b>467.765</b> | <b>459.755</b> | 0.504   | <b>459.251</b> | S[8] |
| H[2] | 121.566        | 424.248        | <b>416.239</b> | 0.504   | 415.735        | H[7] |
| H[3] | 190.095        | 355.719        | 347.710        | 0.504   | 347.206        | H[6] |
| K[4] | 254.143        | 287.190        | 279.180        | 279.684 | 278.676        | K[5] |
| A[5] | 289.662        | 223.142        | 215.133        | 215.637 | 214.629        | A[4] |
| K[6] | 374.714        | <b>187.624</b> | 179.614        | 190.118 | 179.110        | K[3] |
| G[7] | <b>403.225</b> | 102.571        | 94.561         | 95.065  | 94.057         | G[2] |
| K[8] | 467.272        | 74.060         | 66.051         | 66.555  | 65.547         | K[1] |



# sp | P15864 | H12\_MOUSE

LITKAVAASK <sup>Methyl</sup> E  
14.02

- ▶ fragmentation table for charge state 1+
- ▶ specType=etd
- ▶ score=55.83
- ▶ F112758.dat
- ▶ query=q18812.p1
- ▶ precursor=382.235220
- ▶ chargePrecursor=3
- ▶ itol=0.5

| AA   | c              | y               | z+1            | z+2     | z        | AA   |
|------|----------------|-----------------|----------------|---------|----------|------|
| L 3  | 131.118        | <b>1144.694</b> | 1128.675       | 0.000   | 1127.067 | L 11 |
| T 2  | <b>244.202</b> | 1031.610        | 1015.501       | 0.000   | 1014.583 | T 10 |
| T 3  | <b>345.250</b> | 918.525         | <b>902.507</b> | 0.000   | 901.490  | T 9  |
| K 4  | <b>473.345</b> | 817.433         | <b>801.459</b> | 802.467 | 800.451  | K 8  |
| A 5  | <b>544.392</b> | <b>699.383</b>  | <b>673.364</b> | 674.372 | 672.366  | A 7  |
| V 6  | <b>643.450</b> | 618.340         | <b>602.327</b> | 603.335 | 601.319  | V 6  |
| A 7  | <b>714.487</b> | <b>519.277</b>  | <b>503.259</b> | 504.266 | 502.251  | A 5  |
| A 8  | <b>785.524</b> | 448.240         | <b>432.221</b> | 433.229 | 431.214  | A 4  |
| S 9  | <b>872.556</b> | 377.203         | <b>361.184</b> | 362.192 | 360.177  | S 3  |
| R 10 | 1014.667       | 290.171         | <b>274.152</b> | 275.160 | 273.144  | R 2  |
| E 11 | 1143.710       | 148.060         | 132.042        | 133.050 | 131.034  | E 1  |

# sp | P15864 | H12\_MOUSE

LITKAVAASK <sup>Methyl</sup>E  
14.02

- ▶ fragmentation table for charge state 2+
- ▶ specType=etd
- ▶ score=55.83
- ▶ F112758.dat
- ▶ query=q18812\_p1
- ▶ precursor=382.235220
- ▶ chargePrecursor=3
- ▶ itol=0.5

| AA     | c       | y              | z+1            | z+2     | z              | AA     |
|--------|---------|----------------|----------------|---------|----------------|--------|
| L [1]  | 66.063  | <b>572.850</b> | <b>564.841</b> | 0.504   | <b>564.337</b> | L [11] |
| T [2]  | 122.605 | 516.308        | <b>508.299</b> | 0.504   | 507.795        | T [10] |
| T [3]  | 173.128 | 459.766        | 451.757        | 0.504   | 451.253        | T [9]  |
| K [4]  | 237.116 | 409.243        | 401.233        | 401.737 | 400.729        | K [8]  |
| A [5]  | 272.694 | <b>345.195</b> | 337.186        | 337.690 | 336.682        | A [7]  |
| V [6]  | 322.229 | 309.676        | 301.667        | 302.171 | 301.163        | V [6]  |
| A [7]  | 357.747 | 260.142        | 252.133        | 252.637 | 251.629        | A [5]  |
| A [8]  | 393.266 | 224.624        | 216.614        | 217.118 | 216.110        | A [4]  |
| S [9]  | 436.782 | 189.105        | 181.096        | 181.600 | 180.592        | S [3]  |
| K [10] | 507.837 | 145.589        | 137.580        | 138.084 | 137.076        | K [2]  |
| E [11] | 572.358 | 74.534         | 66.524         | 67.028  | 66.021         | E [1]  |

# sp | Q64475 | H2B1B\_MOUSE

GKKRKRSRK <sup>Methyl</sup>E  
14.02

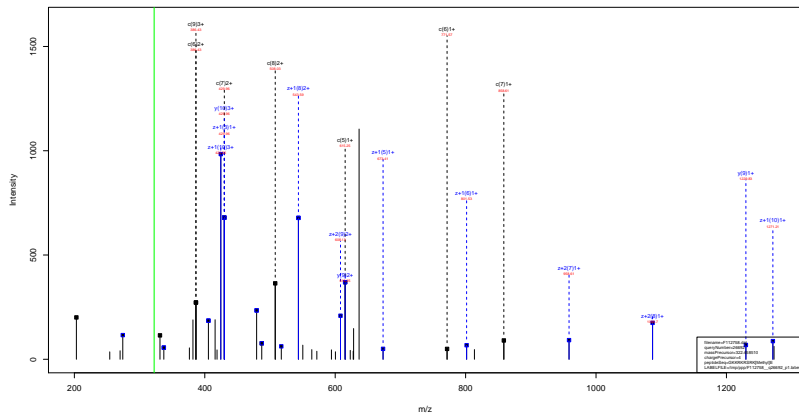

# sp | Q64475 | H2B1B\_MOUSE

GKKRKRSRK <sup>Methyl</sup> E  
14.02

- ▶ fragmentation table for charge state 1+
- ▶ specType=etd
- ▶ score=34.11
- ▶ F112758.dat
- ▶ query=q26692\_p1
- ▶ precursor=322.458510
- ▶ chargePrecursor=4
- ▶ itol=0.5

| AA    | c              | y               | z+1             | z+2             | z        | AA    |
|-------|----------------|-----------------|-----------------|-----------------|----------|-------|
| C[1]  | 75.035         | 1286.813        | <b>1270.794</b> | 0.000           | 1269.788 | C[10] |
| K[2]  | <b>201.150</b> | <b>1229.791</b> | 1213.773        | 1214.780        | 1212.765 | K[9]  |
| K[3]  | <b>331.245</b> | 1101.660        | 1085.618        | <b>1086.685</b> | 1084.670 | K[8]  |
| R[4]  | <b>487.346</b> | 973.601         | 957.583         | <b>958.590</b>  | 956.575  | R[7]  |
| K[5]  | <b>615.441</b> | 817.500         | <b>801.462</b>  | 802.489         | 800.474  | K[6]  |
| R[6]  | <b>771.542</b> | 689.405         | <b>673.387</b>  | 674.394         | 672.379  | R[5]  |
| S[7]  | <b>858.574</b> | 553.304         | <b>517.285</b>  | 518.292         | 516.276  | S[4]  |
| R[8]  | 1014.673       | 448.272         | <b>430.253</b>  | 431.261         | 429.246  | R[3]  |
| K[9]  | 1158.788       | 390.171         | <b>274.152</b>  | 275.160         | 273.144  | K[2]  |
| E[10] | 1285.829       | 148.060         | 132.042         | 133.050         | 131.034  | E[1]  |

# sp | Q64475 | H2B1B\_MOUSE

GKKRKRSRK <sup>Methyl</sup> E  
14.02

- ▶ fragmentation table for charge state 2+
- ▶ specType=etd
- ▶ score=34.11
- ▶ F112758.dat
- ▶ query=q26692.p1
- ▶ precursor=322.458510
- ▶ chargePrecursor=4
- ▶ itol=0.5

| AA    | c              | y              | z+1            | z+2            | z              | AA    |
|-------|----------------|----------------|----------------|----------------|----------------|-------|
| G[1]  | 58.031         | 643.910        | 635.901        | 0.504          | 635.397        | G[10] |
| K[2]  | 102.079        | <b>615.399</b> | 607.390        | <b>607.894</b> | 606.885        | K[9]  |
| K[3]  | 166.126        | 551.352        | <b>543.342</b> | <b>543.846</b> | 542.839        | K[8]  |
| R[4]  | 244.177        | <b>487.304</b> | <b>479.295</b> | <b>479.799</b> | 478.791        | R[7]  |
| K[5]  | 308.224        | 409.254        | 401.244        | 401.748        | 400.740        | K[6]  |
| R[6]  | <b>386.275</b> | 345.206        | <b>337.197</b> | 337.701        | <b>336.693</b> | R[5]  |
| S[7]  | <b>429.791</b> | 267.156        | 259.146        | 259.650        | 258.642        | S[4]  |
| R[8]  | <b>507.841</b> | 223.040        | 215.030        | 215.534        | 215.126        | R[3]  |
| K[9]  | 918.897        | 148.599        | 139.589        | 138.684        | 137.676        | K[2]  |
| E[10] | 643.418        | 74.534         | 66.524         | 67.028         | 66.021         | E[1]  |

# sp | Q64475 | H2B1B\_MOUSE

GKKRKRSRK <sup>Methyl</sup> E  
14.02

- ▶ fragmentation table for charge state 3+
- ▶ specType=etd
- ▶ score=34.11
- ▶ F112758.dat
- ▶ query=q26692.p1
- ▶ precursor=322.458510
- ▶ chargePrecursor=4
- ▶ itol=0.5

| AA |      | c              | y              | z+1            | z+2            | z       | AA    |
|----|------|----------------|----------------|----------------|----------------|---------|-------|
| G  | [1]  | 25.690         | <b>429.609</b> | <b>424.270</b> | 0.672          | 423.934 | G[10] |
| K  | [2]  | 68.388         | 410.602        | <b>405.262</b> | <b>405.598</b> | 404.926 | K[9]  |
| K  | [3]  | 111.087        | 367.904        | 362.564        | 362.900        | 362.228 | K[8]  |
| R  | [4]  | 163.120        | 325.205        | 319.866        | 320.202        | 319.530 | R[7]  |
| K  | [5]  | 205.819        | 273.172        | 267.832        | 268.168        | 267.496 | K[6]  |
| R  | [6]  | 257.852        | 230.473        | 225.134        | 225.470        | 224.798 | R[5]  |
| S  | [7]  | 286.863        | 178.440        | 173.100        | 173.436        | 172.764 | S[4]  |
| R  | [8]  | 338.897        | 149.426        | 144.089        | 144.425        | 143.753 | R[3]  |
| K  | [9]  | <b>388.267</b> | 97.395         | 92.055         | 92.392         | 91.720  | K[2]  |
| E  | [10] | 429.201        | 50.025         | 44.685         | 45.021         | 44.349  | E[1]  |





# sp | Q64475 | H2B1B\_MOUSE

GKKRKRSRK <sup>Methyl</sup> E  
14.02

- ▶ fragmentation table for charge state 1+
- ▶ specType=etd
- ▶ score=41.81
- ▶ F112758.dat
- ▶ query=q26694.p1
- ▶ precursor=429.608950
- ▶ chargePrecursor=3
- ▶ itol=0.5

| AA | c               | y               | z+1             | z+2             | z              | AA    |
|----|-----------------|-----------------|-----------------|-----------------|----------------|-------|
| C  | 75.925          | 1298.211        | 1273.794        | 1309            | 1299.786       | C[10] |
| R  | 203.150         | <b>1229.791</b> | 1213.771        | <b>1214.780</b> | 1212.765       | R[9]  |
| K  | <b>331.245</b>  | 1101.699        | <b>1085.678</b> | <b>1086.685</b> | 1084.670       | K[8]  |
| R  | <b>487.346</b>  | 973.601         | <b>957.583</b>  | 958.590         | 956.575        | R[7]  |
| K  | <b>615.441</b>  | 817.500         | <b>801.482</b>  | 802.489         | <b>800.474</b> | K[6]  |
| R  | <b>771.542</b>  | 689.405         | <b>673.387</b>  | 674.394         | 672.379        | R[5]  |
| S  | <b>858.574</b>  | 533.305         | <b>517.285</b>  | <b>518.293</b>  | 518.278        | S[4]  |
| R  | <b>1014.676</b> | 446.277         | 430.253         | 431.261         | <b>429.240</b> | R[3]  |
| K  | 1156.788        | 290.171         | 274.152         | 275.160         | 273.144        | K[2]  |
| E  | 1285.829        | 148.050         | 132.042         | 133.050         | 131.034        | E[1]  |

# sp | Q64475 | H2B1B\_MOUSE

GKKRKRSRK <sup>Methyl</sup> E  
14.02

- ▶ fragmentation table for charge state 2+
- ▶ specType=etd
- ▶ score=41.81
- ▶ F112758.dat
- ▶ query=q26694.p1
- ▶ precursor=429.608950
- ▶ chargePrecursor=3
- ▶ itol=0.5

| AA    | c              | y              | z+1            | z+2            | z       | AA    |
|-------|----------------|----------------|----------------|----------------|---------|-------|
| G[1]  | 38.031         | <b>643.910</b> | <b>635.901</b> | 0.504          | 635.397 | G[10] |
| K[2]  | 102.079        | <b>615.399</b> | <b>607.390</b> | <b>607.894</b> | 606.886 | K[9]  |
| K[3]  | 166.126        | <b>551.352</b> | <b>543.342</b> | <b>543.846</b> | 542.839 | K[8]  |
| R[4]  | 244.177        | <b>487.304</b> | 479.295        | 479.799        | 478.791 | R[7]  |
| K[5]  | 308.224        | 409.254        | 401.244        | 401.748        | 400.740 | K[6]  |
| R[6]  | 386.275        | 345.206        | 337.197        | 337.701        | 336.693 | R[5]  |
| S[7]  | 429.791        | -267.156       | 259.146        | 259.650        | 258.642 | S[4]  |
| R[8]  | <b>507.841</b> | 223.640        | 215.630        | 216.134        | 215.126 | R[3]  |
| K[9]  | 918.897        | 145.595        | 137.585        | 138.084        | 137.076 | K[2]  |
| E[10] | 643.418        | 74.534         | 66.524         | 67.028         | 66.021  | E[1]  |

# sp | Q8CGP5 | H2A1F\_MOUSE

LAGNAAR<sup>Methyl</sup>D  
14.02

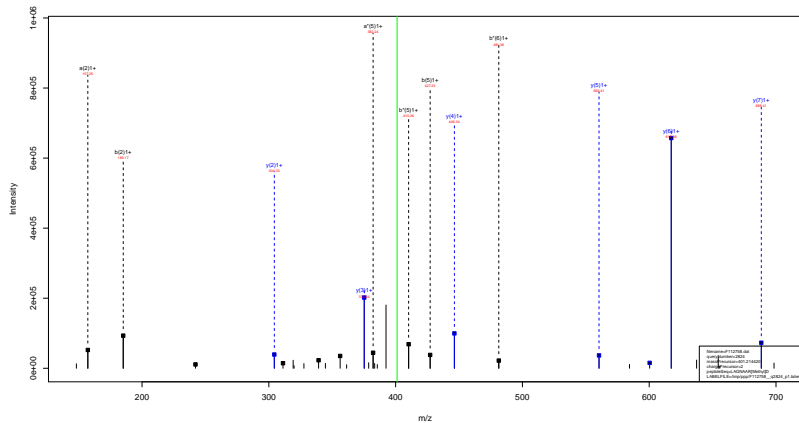

# sp | Q8CGP5 | H2A1F\_MOUSE

LAGNAAR<sup>Methyl D</sup>  
14.02

- ▶ fragmentation table for charge state 1+
- ▶ specType=cid
- ▶ score=47.08
- ▶ F112758.dat
- ▶ query=q2824\_p1
- ▶ precursor=401.214420
- ▶ chargePrecursor=2
- ▶ itol=0.5

| AA | a              | a*             | a $\beta$ | b              | b*             | b $\beta$ | y              | y*             | y $\beta$ | AA  |
|----|----------------|----------------|-----------|----------------|----------------|-----------|----------------|----------------|-----------|-----|
| L1 | 86.998         | 0.000          | 0.000     | 114.073        | 0.000          | 0.000     | 401.214        | 168.199        | 163.341   | L10 |
| A1 | <b>157.134</b> | 0.000          | 0.000     | <b>185.128</b> | 0.000          | 0.000     | <b>608.337</b> | 671.311        | 670.327   | A17 |
| G1 | 214.155        | 0.000          | 0.000     | <b>242.150</b> | 0.000          | 0.000     | <b>617.300</b> | <b>600.274</b> | 589.260   | G69 |
| N1 | 228.189        | <b>311.171</b> | 0.000     | <b>356.193</b> | <b>239.166</b> | 0.000     | <b>560.279</b> | 543.252        | 542.269   | N15 |
| A1 | 289.235        | <b>382.208</b> | 0.000     | <b>437.230</b> | <b>410.203</b> | 0.000     | <b>446.236</b> | 430.210        | 430.235   | A14 |
| A1 | 419.272        | 613.248        | 0.000     | 498.267        | <b>481.241</b> | 0.000     | <b>375.199</b> | 369.173        | 357.186   | A13 |
| R1 | 640.389        | 823.362        | 0.000     | 668.384        | 651.357        | 0.000     | <b>304.182</b> | 287.155        | 286.151   | R12 |
| G1 | 735.416        | 738.389        | 737.405   | 703.411        | 706.384        | 705.400   | 134.069        | 0.000          | 116.034   | G11 |

# sp | Q8CGP5 | H2A1F\_MOUSE

LAGNAAR Methyl D  
14.02

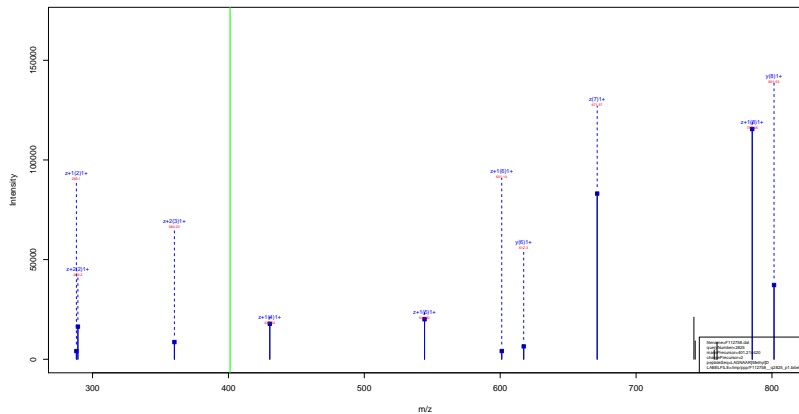

- ▶ fragmentation table for charge state 1+
- ▶ specType=etd
- ▶ score=28.37
- ▶ F112758.dat
- ▶ query=q2825\_p1
- ▶ precursor=401.214420
- ▶ chargePrecursor=2
- ▶ itol=0.5

| AA   | c       | y              | z+1            | z+2            | z              | AA   |
|------|---------|----------------|----------------|----------------|----------------|------|
| L[1] | 131.118 | <b>801.421</b> | <b>785.403</b> | 0.000          | 784.395        | L[8] |
| A[2] | 202.155 | 688.337        | 672.319        | 0.000          | <b>671.311</b> | A[7] |
| G[3] | 259.176 | <b>617.300</b> | <b>601.281</b> | 0.000          | 600.274        | G[6] |
| N[4] | 371.219 | 560.279        | <b>544.260</b> | 545.268        | 543.252        | N[5] |
| A[5] | 444.257 | 446.235        | <b>430.217</b> | 431.225        | 429.209        | A[4] |
| A[6] | 515.294 | 375.199        | 359.180        | <b>360.188</b> | 358.172        | A[3] |
| R[7] | 685.410 | 304.162        | <b>288.143</b> | <b>289.151</b> | 287.135        | R[2] |
| D[8] | 800.437 | 134.045        | 118.026        | 119.034        | 117.018        | D[1] |

# sp | Q8CGP1 | H2B1K\_MOUSE

GTKAVTKYT Acetyl S (Acetyl) AK  
42.01 (42.01)

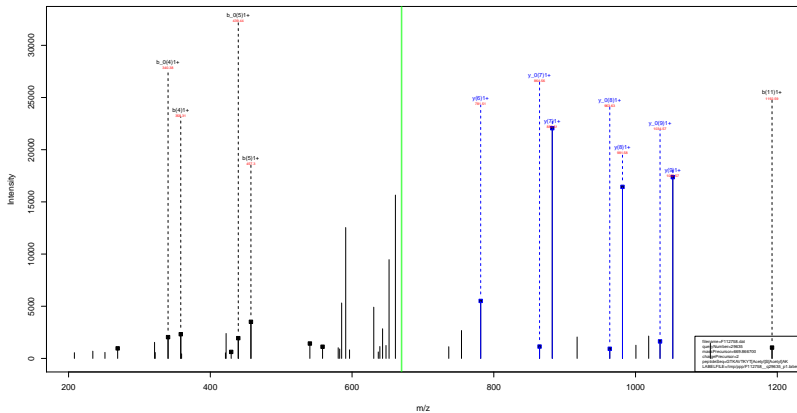



# sp | Q8CGP1 | H2B1K\_MOUSE

GTKAVTKYT Acetyl S (Acetyl) AK  
42.01 (42.01)

- ▶ fragmentation table for charge state 1+
- ▶ specType=cid
- ▶ score=35.12
- ▶ F112758.dat
- ▶ query=q29635\_p1
- ▶ precursor=669.866700
- ▶ chargePrecursor=2
- ▶ itol=0.5

| AA  | a              | a*       | a,b      | b               | b*       | b,b            | y               | y*       | y,b             | AA  |
|-----|----------------|----------|----------|-----------------|----------|----------------|-----------------|----------|-----------------|-----|
| G 1 | 303.079        | 3.030    | 313.089  | 36.309          | 0.309    | 0.309          | 1158.721        | 1151.788 | 1028.709        | G12 |
| T 2 | 131.060        | 0.060    | 113.091  | 189.090         | 0.060    | 0.060          | 1181.710        | 1284.078 | 1263.094        | T11 |
| K 3 | 258.110        | 262.110  | 244.109  | 289.110         | 293.110  | <b>269.101</b> | 1189.050        | 1153.011 | 1102.049        | K10 |
| R 4 | 109.014        | 111.014  | 112.014  | <b>158.208</b>  | 161.014  | <b>160.108</b> | <b>1027.580</b> | 1079.589 | <b>1034.552</b> | R16 |
| V 5 | <b>429.282</b> | 433.283  | 415.281  | <b>457.277</b>  | 459.282  | <b>439.268</b> | <b>1081.525</b> | 1094.499 | <b>1043.515</b> | V18 |
| I 6 | 339.030        | 343.031  | 314.018  | <b>358.325</b>  | 341.028  | <b>340.318</b> | <b>1027.437</b> | 1059.410 | <b>104.446</b>  | I17 |
| K 7 | 358.425        | 361.700  | 340.414  | 388.420         | 389.393  | 382.403        | <b>781.409</b>  | 784.382  | 783.386         | K19 |
| V 8 | 221.400        | 224.401  | 225.417  | 246.401         | 252.406  | 231.417        | 1043.312        | 1036.288 | 1026.304        | V19 |
| I 9 | 304.598        | 307.510  | 348.510  | 360.541         | 378.510  | 374.511        | 1001.251        | 1073.224 | 1112.240        | I14 |
| S10 | 1193.589       | 1078.582 | 1078.578 | 1092.584        | 1104.587 | 1101.571       | 147.101         | 130.100  | 130.102         | S13 |
| R11 | 1184.628       | 1187.599 | 1184.613 | <b>1182.621</b> | 1178.624 | 1178.601       | 118.101         | 109.101  | 109.101         | R15 |
| R12 | 1394.711       | 1275.694 | 1274.710 | 1335.708        | 1303.699 | 1302.705       | 147.111         | 130.088  | 0.000           | R14 |



# sp | P62806 | H4\_MOUSE

[Acetyl]SGRGKGGKGLGKGGAKRHRK<sup>Methyl</sup> VLRD  
14.02

- ▶ fragmentation table for charge state 1+
- ▶ specType=etd
- ▶ score=116.98
- ▶ F112758.dat
- ▶ query=q55689.p1
- ▶ precursor=633.626600
- ▶ chargePrecursor=4
- ▶ itol=0.5

| AA    | c               | y              | z+1            | z+2             | z        | AA    |
|-------|-----------------|----------------|----------------|-----------------|----------|-------|
| S[1]  | 167.076         | 2531.487       | 2515.468       | 0.000           | 2514.460 | S[24] |
| G[2]  | 254.598         | 2402.444       | 2386.425       | 0.000           | 2385.417 | G[23] |
| T[3]  | <b>306.199</b>  | 2348.423       | 2332.404       | 2330.412        | 2328.396 | T[22] |
| G[4]  | <b>417.220</b>  | 2189.321       | 2174.303       | 2174.310        | 2172.295 | G[21] |
| K[5]  | <b>545.115</b>  | 2132.300       | 2116.281       | 2117.289        | 2115.273 | K[20] |
| G[6]  | <b>602.137</b>  | 2004.205       | 1988.186       | <b>1989.194</b> | 1987.178 | G[19] |
| G[7]  | <b>659.158</b>  | 1947.184       | 1931.165       | <b>1932.173</b> | 1930.157 | G[18] |
| K[8]  | <b>787.453</b>  | 1890.162       | 1874.143       | 1875.151        | 1873.135 | K[17] |
| G[9]  | <b>844.475</b>  | 1782.067       | 1766.048       | <b>1767.056</b> | 1765.041 | G[16] |
| L[10] | <b>957.559</b>  | 1725.046       | 1699.027       | <b>1699.035</b> | 1698.019 | L[15] |
| G[11] | <b>1014.580</b> | 1591.962       | 1575.943       | <b>1576.951</b> | 1574.935 | G[14] |
| K[12] | <b>1142.675</b> | 1534.940       | 1518.921       | <b>1519.929</b> | 1517.914 | K[13] |
| G[13] | <b>1199.697</b> | 1406.845       | 1390.826       | <b>1391.834</b> | 1389.819 | G[12] |
| G[14] | 1256.718        | 1349.824       | 1333.805       | <b>1334.813</b> | 1332.797 | G[11] |
| A[15] | <b>1327.735</b> | 1292.802       | 1276.783       | 1277.791        | 1275.776 | A[10] |
| K[16] | <b>1435.850</b> | 1224.705       | 1208.686       | 1209.694        | 1204.678 | K[9]  |
| R[17] | 1511.951        | 1093.630       | 1077.611       | <b>1078.659</b> | 1076.644 | R[8]  |
| H[18] | <b>1749.010</b> | <b>937.569</b> | <b>921.550</b> | <b>922.558</b>  | 920.542  | H[7]  |
| R[19] | 1905.111        | 800.510        | <b>784.491</b> | 785.499         | 783.484  | R[6]  |
| K[20] | 2047.222        | 644.400        | 628.390        | <b>629.398</b>  | 627.382  | K[5]  |
| V[21] | 2146.290        | 502.298        | 486.280        | <b>487.287</b>  | 485.272  | V[4]  |
| L[22] | 2269.374        | 403.216        | 387.211        | <b>388.219</b>  | 386.203  | L[3]  |
| D[23] | 2419.476        | 290.140        | 274.127        | <b>275.135</b>  | 273.119  | D[2]  |
| D[24] | 2530.503        | 134.045        | 118.026        | 119.034         | 117.018  | D[1]  |

# sp | P62806 | H4\_MOUSE

[Acetyl]SGRGKGGKGLGKGGAKRHRK<sup>Methyl</sup> VLRD  
14.02

- ▶ fragmentation table for charge state 2+
- ▶ specType=etd
- ▶ score=116.98
- ▶ F112758.dat
- ▶ query=q55689\_p1
- ▶ precursor=633.626600
- ▶ chargePrecursor=4
- ▶ itol=0.5

| AA | c  | y               | z+1             | z+2             | z               | AA              |       |
|----|----|-----------------|-----------------|-----------------|-----------------|-----------------|-------|
| S  | 1  | 74.042          | 1206.247        | <b>1258.238</b> | 0.504           | 1257.736        | S[24] |
| G  | 2  | 102.553         | 1201.726        | <b>1193.716</b> | 0.504           | 1193.212        | G[23] |
| R  | 3  | 180.603         | 1173.215        | <b>1165.206</b> | <b>1165.709</b> | 1164.703        | R[22] |
| G  | 4  | 259.114         | 1098.164        | <b>1087.155</b> | 1087.659        | <b>1086.651</b> | G[21] |
| K  | 5  | 273.163         | <b>1066.654</b> | <b>1055.644</b> | <b>1059.148</b> | 1055.141        | K[20] |
| G  | 6  | 303.672         | 1002.606        | <b>994.597</b>  | 995.101         | <b>994.093</b>  | G[19] |
| G  | 7  | 330.183         | 974.095         | <b>966.086</b>  | <b>966.590</b>  | 965.582         | G[18] |
| K  | 8  | 394.230         | 945.585         | <b>937.575</b>  | <b>938.079</b>  | 937.071         | K[17] |
| G  | 9  | 422.741         | 881.537         | <b>873.528</b>  | <b>874.032</b>  | 873.024         | G[16] |
| L  | 10 | 479.289         | 853.026         | <b>843.017</b>  | <b>845.521</b>  | <b>844.513</b>  | L[15] |
| G  | 11 | 507.794         | <b>796.484</b>  | 788.475         | 788.979         | 787.971         | G[14] |
| K  | 12 | 571.841         | 767.974         | <b>759.964</b>  | <b>760.468</b>  | 759.460         | K[13] |
| G  | 13 | 600.352         | 703.926         | <b>695.917</b>  | <b>696.421</b>  | 695.413         | G[12] |
| G  | 14 | 628.863         | 675.415         | <b>667.406</b>  | <b>667.910</b>  | 666.902         | G[11] |
| A  | 15 | 694.361         | 646.905         | <b>638.895</b>  | <b>639.399</b>  | 638.391         | A[10] |
| R  | 16 | <b>728.429</b>  | 611.396         | 603.377         | <b>603.881</b>  | <b>602.873</b>  | R[9]  |
| R  | 17 | <b>806.479</b>  | 547.339         | <b>539.329</b>  | <b>539.833</b>  | 538.825         | R[8]  |
| H  | 18 | <b>875.009</b>  | 469.288         | 461.270         | 461.783         | 460.775         | H[7]  |
| R  | 19 | <b>953.059</b>  | 400.759         | 392.740         | 393.253         | 392.245         | R[6]  |
| K  | 20 | 1024.117        | 322.706         | 314.689         | 315.203         | 314.195         | K[5]  |
| V  | 21 | <b>1073.649</b> | 254.653         | 246.633         | 247.147         | 246.140         | V[4]  |
| L  | 22 | <b>1130.191</b> | 202.119         | 194.100         | 194.613         | 193.605         | L[3]  |
| R  | 23 | <b>1208.241</b> | 145.577         | 137.557         | 138.071         | 137.063         | R[2]  |
| D  | 24 | 1266.755        | 67.526          | 59.517          | 60.021          | 59.013          | D[1]  |

# sp | P62806 | H4\_MOUSE

[Acetyl]SGRGKGGKGLGKGGAKRHRK<sup>Methyl</sup> VLRD  
14.02

- ▶ fragmentation table for charge state 3+
- ▶ specType=etd
- ▶ score=116.98
- ▶ F112758.dat
- ▶ query=q55689.p1
- ▶ precursor=633.626600
- ▶ chargePrecursor=4
- ▶ itol=0.5

| AA    | c              | y              | z+1            | z+2            | z       | AA    |
|-------|----------------|----------------|----------------|----------------|---------|-------|
| S[1]  | 49.697         | <b>844.500</b> | 839.101        | 0.672          | 838.826 | S[24] |
| G[2]  | 68.704         | <b>801.486</b> | <b>796.147</b> | 0.672          | 795.811 | G[23] |
| R[3]  | 120.738        | 782.479        | <b>777.139</b> | <b>777.475</b> | 776.804 | R[22] |
| G[4]  | 139.745        | 730.445        | 725.106        | 725.442        | 724.770 | G[21] |
| K[5]  | 182.443        | 711.438        | 706.099        | 706.435        | 705.763 | K[20] |
| G[6]  | 201.450        | 668.740        | 661.400        | 663.736        | 663.064 | G[19] |
| G[7]  | 220.458        | 649.733        | 644.393        | 644.729        | 644.057 | G[18] |
| K[8]  | 263.156        | 630.726        | 625.386        | 625.722        | 625.050 | K[17] |
| G[9]  | 282.163        | 608.027        | 602.687        | 603.024        | 602.352 | G[16] |
| L[10] | 319.258        | 569.020        | 563.680        | 564.016        | 563.345 | L[15] |
| G[11] | 338.265        | 531.325        | 525.986        | 526.322        | 525.650 | G[14] |
| K[12] | 381.563        | 512.318        | 506.979        | 507.315        | 506.643 | K[13] |
| G[13] | 400.570        | 469.620        | 464.280        | 464.616        | 463.944 | G[12] |
| G[14] | 419.578        | 450.613        | 445.273        | 445.609        | 444.937 | G[11] |
| A[15] | 443.297        | 431.606        | 426.266        | 426.602        | 425.930 | A[10] |
| K[16] | 485.955        | 407.927        | 402.587        | 402.923        | 402.251 | K[9]  |
| R[17] | 537.989        | 365.228        | 359.889        | <b>360.225</b> | 359.553 | R[8]  |
| H[18] | 583.675        | 313.195        | 307.855        | 308.191        | 307.519 | H[7]  |
| R[19] | 635.709        | 267.508        | 262.169        | 262.505        | 261.833 | R[6]  |
| K[20] | 683.079        | 215.475        | 210.135        | 210.471        | 209.799 | K[5]  |
| V[21] | 716.102        | 188.194        | 182.795        | 183.101        | 182.429 | V[4]  |
| L[22] | 753.796        | 135.082        | 129.742        | 130.078        | 129.406 | L[3]  |
| R[23] | <b>805.830</b> | 97.387         | 92.047         | 92.383         | 91.711  | R[2]  |
| D[24] | <b>844.172</b> | 45.353         | 40.014         | 40.349         | 39.678  | D[1]  |

# sp | P62806 | H4\_MOUSE

[Acetyl]SGRGKGGKGLGKGGAKRHRK Methyl VLRLD  
14.02

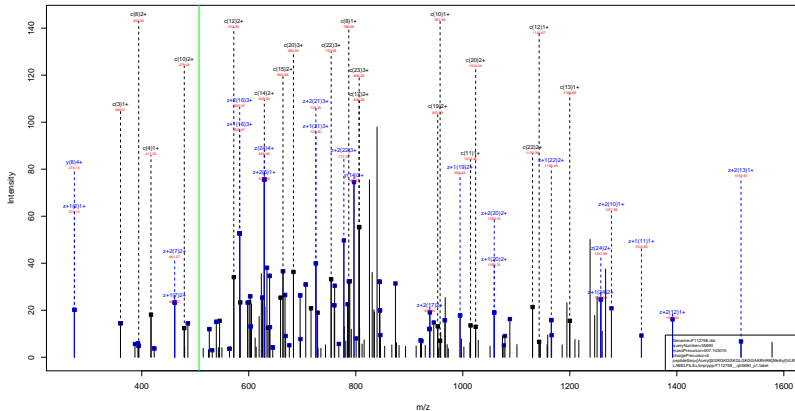

# sp | P62806 | H4\_MOUSE

[Acetyl]SGRGKGGKGLGKGGAKRHRK <sup>Methyl</sup> VLRD  
14.02

- ▶ fragmentation table for charge state 1+
- ▶ specType=etd
- ▶ score=104.86
- ▶ F112758.dat
- ▶ query=q55690\_p1
- ▶ precursor=507.103010
- ▶ chargePrecursor=5
- ▶ itol=0.5

| AA | c  | y               | z+1            | z+2             | z               | AA              |       |
|----|----|-----------------|----------------|-----------------|-----------------|-----------------|-------|
| S  | 1  | 147.076         | 2531.487       | 2515.469        | 0.000           | 2514.469        | S[24] |
| G  | 2  | 204.098         | 2402.444       | 2386.425        | 0.000           | 2385.417        | G[23] |
| R  | 3  | <b>360.199</b>  | 2345.423       | 2329.404        | 2330.412        | 2328.396        | R[22] |
| G  | 4  | <b>417.220</b>  | 2189.321       | 2173.303        | 2174.310        | 2172.295        | G[21] |
| K  | 5  | <b>545.115</b>  | 2132.300       | 2116.281        | 2117.289        | 2115.273        | K[20] |
| G  | 6  | <b>602.337</b>  | 2004.205       | 1988.186        | 1989.194        | 1987.178        | G[19] |
| G  | 7  | <b>659.358</b>  | 1947.184       | 1931.165        | 1932.173        | 1930.157        | G[18] |
| K  | 8  | <b>787.453</b>  | 1890.162       | 1874.143        | 1875.151        | 1873.135        | K[17] |
| G  | 9  | <b>844.475</b>  | 1752.067       | 1746.048        | 1747.056        | 1745.041        | G[16] |
| L  | 10 | <b>927.559</b>  | 1705.046       | 1689.027        | 1690.035        | 1688.019        | L[15] |
| G  | 11 | <b>1014.580</b> | 1591.962       | 1575.943        | 1576.951        | 1574.935        | G[14] |
| K  | 12 | <b>1142.675</b> | 1534.940       | 1518.921        | <b>1519.929</b> | 1517.914        | K[13] |
| G  | 13 | <b>1199.697</b> | 1406.845       | 1390.826        | <b>1391.834</b> | 1389.819        | G[12] |
| G  | 14 | 1256.718        | 1349.824       | <b>1333.805</b> | 1334.813        | 1332.797        | G[11] |
| A  | 15 | 1327.735        | 1292.802       | 1276.783        | <b>1277.791</b> | 1275.776        | A[10] |
| R  | 16 | 1405.829        | 1221.765       | 1205.746        | 1206.754        | 1204.739        | R[9]  |
| R  | 17 | 1611.951        | 1093.670       | 1077.651        | <b>1078.659</b> | <b>1076.644</b> | R[8]  |
| H  | 18 | 1740.010        | <b>937.569</b> | <b>921.550</b>  | <b>922.558</b>  | 920.542         | H[7]  |
| R  | 19 | 1905.111        | <b>800.510</b> | <b>784.491</b>  | 785.499         | 783.484         | R[6]  |
| K  | 20 | 2047.222        | <b>644.409</b> | 628.390         | <b>629.398</b>  | 627.382         | K[5]  |
| V  | 21 | 2146.290        | 502.290        | <b>486.280</b>  | 487.287         | 485.272         | V[4]  |
| L  | 22 | 2299.374        | 403.170        | <b>387.211</b>  | 388.219         | 386.203         | L[3]  |
| R  | 23 | 2415.476        | 290.140        | <b>274.127</b>  | 275.135         | 273.119         | R[2]  |
| D  | 24 | 2530.503        | 134.045        | 118.026         | 119.034         | 117.018         | D[1]  |

# sp | P62806 | H4\_MOUSE

[Acetyl]SGRGKGGKGLGKGGAKRHRK<sup>Methyl</sup> VLRD  
14.02

- ▶ fragmentation table for charge state 2+
- ▶ specType=etd
- ▶ score=104.86
- ▶ F112758.dat
- ▶ query=q55690\_p1
- ▶ precursor=507.103010
- ▶ chargePrecursor=5
- ▶ itol=0.5

| AA    | c               | y              | z+1             | z+2             | z               | AA    |
|-------|-----------------|----------------|-----------------|-----------------|-----------------|-------|
| S[1]  | 74.042          | 1256.247       | <b>1258.238</b> | 8.504           | <b>1257.734</b> | S[24] |
| G[2]  | 102.553         | 1201.726       | 1193.730        | 8.504           | 1193.212        | G[23] |
| R[3]  | 180.603         | 1173.215       | <b>1165.206</b> | <b>1165.709</b> | 1164.702        | R[22] |
| G[4]  | 269.114         | 1095.164       | 1087.157        | <b>1087.659</b> | 1086.651        | G[21] |
| K[5]  | 273.161         | 1058.694       | <b>1058.644</b> | <b>1059.148</b> | 1055.140        | K[20] |
| G[6]  | 301.672         | 1002.606       | <b>994.597</b>  | <b>995.101</b>  | 994.093         | G[19] |
| G[7]  | 330.183         | 974.095        | <b>966.086</b>  | <b>966.590</b>  | 965.582         | G[18] |
| K[8]  | <b>394.230</b>  | <b>945.585</b> | <b>937.575</b>  | <b>938.079</b>  | 937.071         | K[17] |
| G[9]  | 427.741         | 891.537        | 883.530         | <b>874.832</b>  | 873.026         | G[16] |
| L[10] | <b>479.283</b>  | 853.026        | <b>845.017</b>  | <b>845.521</b>  | <b>844.513</b>  | L[15] |
| G[11] | 507.794         | <b>796.484</b> | <b>788.475</b>  | <b>788.979</b>  | 787.971         | G[14] |
| K[12] | <b>571.841</b>  | <b>767.974</b> | <b>759.964</b>  | <b>760.468</b>  | <b>759.460</b>  | K[13] |
| G[13] | <b>600.352</b>  | 703.926        | <b>695.917</b>  | <b>696.421</b>  | 695.413         | G[12] |
| G[14] | <b>628.863</b>  | <b>675.415</b> | <b>667.406</b>  | <b>667.910</b>  | 666.902         | G[11] |
| A[15] | <b>664.381</b>  | 646.905        | <b>638.895</b>  | <b>639.399</b>  | 638.391         | A[10] |
| R[16] | <b>728.429</b>  | 611.366        | <b>603.377</b>  | <b>603.881</b>  | <b>602.873</b>  | R[9]  |
| R[17] | <b>806.479</b>  | 547.139        | <b>539.329</b>  | <b>539.833</b>  | 538.825         | R[8]  |
| H[18] | 875.009         | 469.288        | <b>461.279</b>  | <b>461.783</b>  | 460.775         | H[7]  |
| R[19] | <b>953.059</b>  | 400.759        | <b>392.749</b>  | <b>393.253</b>  | 392.245         | R[6]  |
| K[20] | <b>1024.115</b> | 322.708        | 314.690         | 315.203         | 314.195         | K[5]  |
| V[21] | 1077.669        | 251.692        | 243.643         | 244.147         | 243.140         | V[4]  |
| L[22] | <b>1130.191</b> | 202.119        | 194.100         | 194.613         | 193.605         | L[3]  |
| R[23] | 1208.241        | 145.577        | 137.567         | 138.071         | 137.063         | R[2]  |
| D[24] | 1265.755        | 67.526         | 59.517          | 60.021          | 59.013          | D[1]  |



# sp | P62806 | H4\_MOUSE

[Acetyl]SGRGKGGKGLGKGGAKRHRK<sup>Methyl</sup> VLRD  
14.02

- ▶ fragmentation table for charge state 3+
- ▶ specType=etd
- ▶ score=104.86
- ▶ F112758.dat
- ▶ query=q55690.p1
- ▶ precursor=507.103010
- ▶ chargePrecursor=5
- ▶ itol=0.5

| AA    | c              | y              | z+1            | z+2            | z       | AA    |
|-------|----------------|----------------|----------------|----------------|---------|-------|
| S[1]  | 49.697         | <b>844.500</b> | 839.101        | 0.672          | 838.826 | S[24] |
| G[2]  | 68.704         | 801.488        | 796.147        | 0.672          | 795.811 | G[23] |
| R[3]  | 120.738        | 782.479        | 777.139        | <b>777.475</b> | 776.804 | R[22] |
| G[4]  | 139.745        | 730.445        | <b>725.106</b> | <b>725.442</b> | 724.770 | G[21] |
| K[5]  | 182.443        | 711.438        | <b>706.099</b> | <b>706.435</b> | 705.763 | K[20] |
| G[6]  | 201.450        | <b>668.740</b> | 661.400        | <b>663.736</b> | 661.064 | G[19] |
| G[7]  | 220.458        | 649.733        | <b>644.393</b> | <b>644.729</b> | 644.057 | G[18] |
| K[8]  | 263.156        | 630.726        | <b>625.386</b> | <b>625.722</b> | 625.050 | K[17] |
| C[9]  | 282.163        | 608.027        | <b>582.688</b> | <b>583.024</b> | 582.352 | C[16] |
| L[10] | 319.258        | 589.020        | <b>561.680</b> | <b>564.016</b> | 561.348 | L[15] |
| G[11] | 338.265        | <b>531.325</b> | <b>525.986</b> | <b>526.322</b> | 525.650 | G[14] |
| K[12] | 381.563        | 512.318        | 505.979        | 507.315        | 506.643 | K[13] |
| G[13] | 400.570        | 499.620        | 494.280        | 494.616        | 493.944 | G[12] |
| G[14] | 419.578        | 450.613        | 445.273        | 445.609        | 444.937 | G[11] |
| A[15] | 443.257        | 431.606        | 426.266        | 426.602        | 425.930 | A[10] |
| K[16] | <b>485.955</b> | 407.927        | 402.587        | 402.923        | 402.251 | K[9]  |
| R[17] | 537.989        | 365.228        | <b>359.889</b> | <b>360.225</b> | 359.553 | R[8]  |
| H[18] | <b>583.675</b> | 313.195        | 307.855        | 308.191        | 307.519 | H[7]  |
| R[19] | <b>635.709</b> | 267.508        | 262.169        | 262.505        | 261.833 | R[6]  |
| K[20] | <b>683.079</b> | 215.475        | 210.135        | 210.471        | 209.799 | K[5]  |
| V[21] | <b>716.102</b> | 168.194        | 162.795        | 163.101        | 162.429 | V[4]  |
| L[22] | <b>753.796</b> | 135.082        | 129.742        | 130.078        | 129.406 | L[3]  |
| R[23] | <b>805.830</b> | 97.387         | 92.047         | 92.383         | 91.711  | R[2]  |
| D[24] | <b>844.172</b> | 45.353         | 40.014         | 40.349         | 39.678  | D[1]  |

# sp | P62806 | H4\_MOUSE

[Acetyl]SGRGKGGKGLGKGGAKRHRK<sup>Methyl</sup> VLRD  
14.02

- ▶ fragmentation table for charge state 4+
- ▶ specType=etd
- ▶ score=104.86
- ▶ F112758.dat
- ▶ query=q55690.p1
- ▶ precursor=507.103010
- ▶ chargePrecursor=5
- ▶ itol=0.5

| AA    | c       | y              | z+1            | z+2            | z              | AA    |
|-------|---------|----------------|----------------|----------------|----------------|-------|
| S[1]  | 37.525  | <b>633.627</b> | 629.627        | 0.755          | <b>629.370</b> | S[24] |
| G[2]  | 51.780  | 601.965        | <b>597.362</b> | 0.755          | 597.110        | G[23] |
| R[3]  | 90.805  | 587.111        | <b>583.106</b> | <b>583.358</b> | <b>582.854</b> | R[22] |
| G[4]  | 105.061 | 548.086        | 544.081        | 544.333        | 543.829        | G[21] |
| K[5]  | 137.084 | 533.830        | 529.826        | 530.078        | 529.574        | K[20] |
| G[6]  | 151.340 | 501.807        | 497.802        | 498.054        | 497.550        | G[19] |
| G[7]  | 165.595 | 487.551        | 483.547        | 483.799        | 483.295        | G[18] |
| K[8]  | 197.619 | 473.296        | 469.291        | 469.543        | 469.039        | K[17] |
| G[9]  | 211.874 | 461.272        | 457.268        | 457.520        | 457.016        | G[16] |
| L[10] | 240.145 | 427.017        | <b>423.012</b> | <b>423.264</b> | 422.760        | L[15] |
| G[11] | 254.401 | 398.745        | <b>394.741</b> | 394.993        | <b>394.489</b> | G[14] |
| K[12] | 286.424 | 384.490        | 380.486        | 380.738        | 380.234        | K[13] |
| G[13] | 300.680 | 352.467        | 348.462        | 348.714        | 348.210        | G[12] |
| G[14] | 314.935 | 338.211        | 334.207        | 334.459        | 333.955        | G[11] |
| A[15] | 332.694 | 323.956        | 319.951        | 320.203        | 319.699        | A[10] |
| K[16] | 364.718 | 306.197        | 302.192        | 302.444        | 301.940        | K[9]  |
| R[17] | 403.743 | <b>274.173</b> | 270.168        | 270.420        | 269.916        | R[8]  |
| H[18] | 438.008 | 235.148        | 231.143        | 231.395        | 230.891        | H[7]  |
| R[19] | 477.033 | 200.883        | 196.878        | 197.130        | 196.626        | R[6]  |
| K[20] | 512.561 | 163.858        | 159.853        | 160.105        | 159.601        | K[5]  |
| V[21] | 537.328 | 138.530        | 132.525        | 132.577        | 132.073        | V[4]  |
| L[22] | 565.599 | 101.563        | 97.558         | 97.810         | 97.306         | L[3]  |
| R[23] | 604.624 | 73.292         | 69.287         | 69.539         | 69.035         | R[2]  |
| D[24] | 633.381 | 34.267         | 30.262         | 30.514         | 30.010         | D[1]  |

# sp | P62806 | H4\_MOUSE

[Acetyl]SGRGKGGKGLGKGGAKRHRK (Methyl) VLRD  
(14.02)

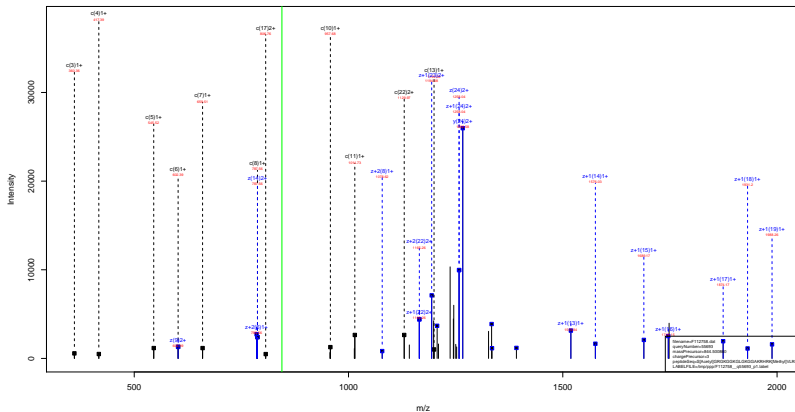

# sp | P62806 | H4\_MOUSE

[Acetyl]SGRGKGGKGLGKGGAKRHRK<sup>(Methyl)</sup>VLRD  
(14.02)

- ▶ fragmentation table for charge state 1+
- ▶ specType=etd
- ▶ score=61.58
- ▶ F112758.dat
- ▶ query=q55693\_p1
- ▶ precursor=844.500860
- ▶ chargePrecursor=3
- ▶ itol=0.5

| AA |    | c               | y        | z+1             | z+2             | z        | AA    |
|----|----|-----------------|----------|-----------------|-----------------|----------|-------|
| S  | 1  | 147.076         | 2531.487 | 2515.488        | 0.000           | 2514.460 | S[24] |
| G  | 2  | 204.098         | 2402.444 | 2386.425        | 0.000           | 2385.417 | G[23] |
| R  | 3  | <b>360.199</b>  | 2348.423 | 2329.404        | 2330.412        | 2328.396 | R[22] |
| G  | 4  | <b>417.220</b>  | 2389.321 | 2378.303        | 2374.310        | 2372.295 | G[21] |
| K  | 5  | <b>545.315</b>  | 2152.930 | 2138.261        | 2117.280        | 2115.273 | K[20] |
| G  | 6  | <b>602.337</b>  | 2004.205 | <b>1980.180</b> | 1980.194        | 1987.178 | G[19] |
| G  | 7  | <b>659.358</b>  | 1947.184 | <b>1931.165</b> | 1932.173        | 1930.157 | G[18] |
| K  | 8  | <b>787.453</b>  | 1890.162 | <b>1874.143</b> | 1875.151        | 1873.135 | K[17] |
| G  | 9  | 844.475         | 1762.067 | <b>1746.048</b> | 1747.056        | 1745.041 | G[16] |
| L  | 10 | <b>937.550</b>  | 1705.046 | <b>1689.027</b> | 1690.035        | 1688.019 | L[15] |
| G  | 11 | <b>1014.580</b> | 1591.962 | <b>1575.943</b> | 1576.951        | 1574.935 | G[14] |
| R  | 12 | 1142.675        | 1534.940 | <b>1518.921</b> | 1519.929        | 1517.914 | R[13] |
| G  | 13 | <b>1199.697</b> | 1406.845 | 1390.826        | <b>1391.834</b> | 1389.819 | G[12] |
| G  | 14 | 1256.718        | 1349.824 | <b>1333.805</b> | <b>1334.813</b> | 1332.797 | G[11] |
| A  | 15 | 1327.755        | 1292.802 | 1276.783        | 1277.791        | 1275.776 | A[10] |
| R  | 16 | 1405.850        | 1221.780 | 1200.760        | <b>1206.754</b> | 1204.739 | R[9]  |
| R  | 17 | 1611.951        | 1093.676 | 1077.651        | <b>1078.659</b> | 1076.644 | R[8]  |
| H  | 18 | 1749.010        | 937.569  | 921.539         | 922.558         | 920.542  | H[7]  |
| R  | 19 | 1905.111        | 800.510  | 784.481         | <b>785.499</b>  | 783.484  | R[6]  |
| R  | 20 | 2047.222        | 644.409  | 628.380         | 629.398         | 627.382  | R[5]  |
| V  | 21 | 2146.290        | 502.298  | 486.269         | 487.287         | 485.272  | V[4]  |
| L  | 22 | 2259.374        | 403.230  | 387.211         | 388.219         | 386.203  | L[3]  |
| D  | 23 | 2415.476        | 260.146  | 254.127         | 278.136         | 273.119  | D[2]  |
| D  | 24 | 2530.503        | 134.045  | 118.026         | 119.034         | 117.018  | D[1]  |

# sp | P62806 | H4\_MOUSE

[Acetyl]SGRGKGGKGLGKGGAKRHRK (Methyl) VLRD  
(14.02)

- ▶ fragmentation table for charge state 2+
- ▶ specType=etd
- ▶ score=61.58
- ▶ F112758.dat
- ▶ query=q55693.p1
- ▶ precursor=844.500860
- ▶ chargePrecursor=3
- ▶ itol=0.5

| AA    | c               | y               | z+1             | z+2             | z               | AA    |
|-------|-----------------|-----------------|-----------------|-----------------|-----------------|-------|
| S[1]  | 74.092          | <b>1266.247</b> | <b>1256.238</b> | 0.504           | <b>1257.734</b> | S[24] |
| G[2]  | 102.553         | 1201.726        | <b>1193.716</b> | 0.504           | 1193.212        | G[23] |
| R[3]  | 180.603         | 1173.215        | <b>1165.206</b> | <b>1165.709</b> | 1164.702        | R[22] |
| G[4]  | 209.114         | 1095.164        | 1087.155        | 1087.659        | 1086.651        | G[21] |
| K[5]  | 273.163         | 1056.654        | 1056.644        | 1059.148        | 1059.141        | K[20] |
| G[6]  | 301.672         | 1002.605        | 994.597         | 995.101         | 994.593         | G[19] |
| G[7]  | 330.183         | 974.095         | 966.086         | 966.590         | 965.582         | G[18] |
| K[8]  | 394.230         | 945.585         | 937.575         | 938.079         | 937.071         | K[17] |
| G[9]  | 422.741         | 881.537         | 873.528         | 874.032         | 873.024         | G[16] |
| L[10] | 479.283         | 853.026         | 845.017         | 845.521         | 844.513         | L[15] |
| G[11] | 507.794         | 796.484         | 788.475         | 788.979         | <b>787.971</b>  | G[14] |
| K[12] | 571.841         | 767.974         | 759.964         | 760.468         | 759.460         | K[13] |
| G[13] | 600.352         | 703.926         | 695.917         | 696.421         | 695.413         | G[12] |
| G[14] | 628.863         | 675.415         | 667.405         | 667.910         | 666.902         | G[11] |
| A[15] | 664.361         | 646.905         | 638.895         | 639.399         | 638.391         | A[10] |
| R[16] | 728.429         | 613.396         | 603.377         | 603.881         | <b>602.873</b>  | R[9]  |
| R[17] | <b>806.479</b>  | 547.335         | 539.326         | 539.833         | 538.825         | R[6]  |
| H[18] | 875.009         | 469.288         | 461.279         | 461.783         | 460.775         | H[7]  |
| R[19] | 953.059         | 400.759         | 392.749         | 393.253         | 392.245         | R[6]  |
| K[20] | 1026.115        | 322.708         | 314.699         | 315.203         | 314.195         | K[5]  |
| V[21] | 1073.669        | 251.163         | 243.153         | 244.147         | 243.140         | V[4]  |
| L[22] | <b>1136.191</b> | 202.119         | 194.109         | 194.613         | 193.605         | L[1]  |
| R[23] | 1208.241        | 145.577         | 137.567         | 138.071         | 137.063         | R[2]  |
| D[24] | 1266.755        | 87.526          | 59.537          | 60.021          | 59.013          | D[1]  |



# sp | P62806 | H4\_MOUSE

[Acetyl]SGRGKGGKGLGKGGAKRHRK Methyl VLRD  
14.02

- ▶ fragmentation table for charge state 1+
- ▶ specType=etd
- ▶ score=92.42
- ▶ F112758.dat
- ▶ query=q55695\_p1
- ▶ precursor=507.103490
- ▶ chargePrecursor=5
- ▶ itol=0.5

| AA    | c               | y              | z+1             | z+2             | z        | AA    |
|-------|-----------------|----------------|-----------------|-----------------|----------|-------|
| S[1]  | 347.676         | 2531.487       | 2515.468        | 0.000           | 2514.460 | S[24] |
| G[2]  | 204.008         | 2402.444       | 2386.425        | 0.000           | 2385.417 | G[23] |
| R[3]  | <b>368.199</b>  | 2346.421       | 2329.404        | 2130.412        | 2328.396 | R[22] |
| G[4]  | <b>417.230</b>  | 2189.321       | 2173.303        | 2174.310        | 2172.295 | G[21] |
| K[5]  | <b>545.315</b>  | 2132.300       | 2116.281        | 2117.289        | 2115.273 | K[20] |
| G[6]  | <b>602.337</b>  | 2084.205       | 2068.186        | 2069.194        | 2067.178 | G[19] |
| G[7]  | <b>659.358</b>  | 1947.184       | 1931.165        | 1932.173        | 1930.157 | G[18] |
| K[8]  | <b>787.453</b>  | 1890.162       | 1874.143        | 1875.151        | 1873.135 | K[17] |
| G[9]  | <b>844.475</b>  | 1782.067       | 1766.048        | 1747.056        | 1745.041 | G[16] |
| L[10] | <b>957.559</b>  | 1705.046       | 1689.027        | 1690.035        | 1688.019 | L[15] |
| G[11] | <b>1014.580</b> | 1591.962       | 1575.943        | 1576.951        | 1574.935 | G[14] |
| K[12] | <b>1142.675</b> | 1534.940       | 1518.921        | 1519.929        | 1517.914 | K[13] |
| G[13] | <b>1199.697</b> | 1406.945       | 1390.926        | 1391.934        | 1389.919 | G[12] |
| G[14] | <b>1256.718</b> | 1349.824       | 1333.805        | <b>1334.813</b> | 1332.797 | G[11] |
| A[15] | <b>1327.795</b> | 1292.802       | <b>1276.783</b> | 1277.791        | 1275.776 | A[10] |
| R[16] | 1459.850        | 1221.765       | 1205.746        | <b>1206.754</b> | 1204.739 | R[9]  |
| R[17] | 1611.951        | 1093.670       | 1077.651        | 1078.659        | 1076.644 | R[8]  |
| H[18] | 1749.010        | 937.569        | <b>921.550</b>  | <b>922.558</b>  | 920.543  | H[7]  |
| R[19] | 1905.111        | <b>800.510</b> | <b>784.491</b>  | 785.499         | 783.484  | R[6]  |
| K[20] | 2047.222        | <b>644.409</b> | 628.390         | <b>629.398</b>  | 627.382  | K[5]  |
| V[21] | 2146.290        | 502.298        | <b>486.280</b>  | <b>487.287</b>  | 485.272  | V[4]  |
| L[22] | 2259.374        | 403.230        | <b>387.211</b>  | 388.219         | 386.203  | L[3]  |
| R[23] | 2415.476        | 280.146        | <b>274.127</b>  | 275.135         | 273.119  | R[2]  |
| D[24] | 2530.503        | 134.045        | 118.026         | 119.034         | 117.018  | D[1]  |

# sp | P62806 | H4\_MOUSE

[Acetyl]SGRGKGGKGLGKGGAKRHRK<sup>Methyl</sup> VLRD  
14.02

- ▶ fragmentation table for charge state 2+
- ▶ specType=etd
- ▶ score=92.42
- ▶ F112758.dat
- ▶ query=q55695\_p1
- ▶ precursor=507.103490
- ▶ chargePrecursor=5
- ▶ itol=0.5

| AA    | c               | y               | z+1             | z+2             | z              | AA    |
|-------|-----------------|-----------------|-----------------|-----------------|----------------|-------|
| S[1]  | 74.042          | 1206.347        | 1258.238        | 0.504           | 1257.734       | S[24] |
| G[2]  | 102.553         | 1201.729        | <b>1193.716</b> | 0.504           | 1193.212       | G[23] |
| R[3]  | 180.603         | <b>1173.215</b> | <b>1165.206</b> | <b>1165.709</b> | 1164.702       | R[22] |
| G[4]  | 269.114         | 1079.194        | 1087.155        | <b>1087.659</b> | 1089.651       | G[21] |
| K[5]  | 273.161         | 1066.054        | 1058.044        | <b>1059.148</b> | 1055.140       | K[20] |
| G[6]  | 301.672         | 1002.608        | <b>954.597</b>  | <b>995.101</b>  | 994.093        | G[19] |
| G[7]  | 330.183         | 974.095         | <b>966.086</b>  | <b>966.590</b>  | <b>965.582</b> | G[18] |
| K[8]  | 394.230         | 945.587         | 937.575         | <b>938.079</b>  | 937.071        | K[17] |
| G[9]  | <b>422.741</b>  | <b>881.537</b>  | 873.529         | <b>874.032</b>  | 873.024        | G[16] |
| L[10] | <b>479.283</b>  | <b>853.028</b>  | <b>845.017</b>  | 846.511         | <b>844.513</b> | L[15] |
| G[11] | 507.794         | <b>796.484</b>  | <b>788.475</b>  | <b>788.979</b>  | <b>787.971</b> | G[14] |
| K[12] | <b>571.841</b>  | 767.974         | <b>759.964</b>  | <b>760.468</b>  | 759.460        | K[13] |
| G[13] | <b>600.352</b>  | 703.928         | <b>695.917</b>  | <b>696.421</b>  | <b>695.413</b> | G[12] |
| G[14] | <b>628.863</b>  | 675.415         | <b>667.406</b>  | <b>667.910</b>  | 666.902        | G[11] |
| A[15] | <b>664.381</b>  | 649.905         | <b>638.895</b>  | <b>639.399</b>  | 638.391        | A[16] |
| R[16] | <b>728.429</b>  | <b>611.380</b>  | <b>603.377</b>  | <b>603.881</b>  | <b>602.873</b> | R[19] |
| R[17] | <b>806.479</b>  | 547.359         | <b>539.329</b>  | <b>539.833</b>  | 538.825        | R[18] |
| H[18] | <b>875.009</b>  | 469.288         | <b>461.279</b>  | <b>461.783</b>  | 460.775        | H[17] |
| R[19] | <b>953.059</b>  | 400.759         | <b>392.749</b>  | <b>393.253</b>  | 392.245        | R[16] |
| K[20] | <b>1024.115</b> | 322.700         | 314.699         | 315.203         | 314.195        | K[15] |
| V[21] | 1077.669        | 251.663         | 243.643         | 244.147         | 243.140        | V[14] |
| L[22] | <b>1130.191</b> | 202.132         | 194.108         | 194.613         | 193.605        | L[13] |
| R[23] | 1208.241        | 148.577         | 137.567         | 138.071         | 137.063        | R[12] |
| D[24] | 1265.755        | 67.526          | 59.517          | 60.021          | 59.013         | D[1]  |



# sp | P62806 | H4\_MOUSE

[Acetyl]SGRGKGGKGLGKGGAKRHRK<sup>Methyl</sup> VLRD  
14.02

- ▶ fragmentation table for charge state 3+
- ▶ specType=etd
- ▶ score=92.42
- ▶ F112758.dat
- ▶ query=q55695.p1
- ▶ precursor=507.103490
- ▶ chargePrecursor=5
- ▶ itol=0.5

| AA    | c              | y              | z+1            | z+2            | z              | AA    |
|-------|----------------|----------------|----------------|----------------|----------------|-------|
| S[1]  | 49.697         | <b>844.500</b> | 839.161        | 0.672          | 838.825        | S[24] |
| G[2]  | 58.704         | 801.485        | 796.147        | 0.672          | 795.811        | G[23] |
| R[3]  | 150.738        | 782.479        | 777.139        | <b>777.475</b> | 776.804        | R[22] |
| G[4]  | 139.745        | 730.445        | 725.106        | <b>725.442</b> | 724.770        | G[21] |
| K[5]  | 182.443        | 711.438        | <b>706.099</b> | <b>706.435</b> | 705.763        | K[20] |
| G[6]  | 201.450        | 668.740        | <b>663.400</b> | <b>663.736</b> | <b>663.064</b> | G[19] |
| G[7]  | 220.458        | <b>649.733</b> | <b>644.393</b> | <b>644.729</b> | 644.057        | G[18] |
| K[8]  | 263.156        | 630.726        | <b>625.386</b> | <b>625.722</b> | 625.050        | K[17] |
| G[9]  | 282.163        | 588.021        | <b>582.681</b> | <b>583.017</b> | 582.345        | G[16] |
| L[10] | 319.958        | 569.020        | <b>563.680</b> | <b>564.016</b> | <b>563.345</b> | L[15] |
| G[11] | 338.965        | 531.325        | <b>525.986</b> | <b>526.322</b> | <b>525.650</b> | G[14] |
| K[12] | 381.563        | 512.318        | 506.979        | 507.315        | 506.643        | K[13] |
| G[13] | 400.570        | 469.620        | 464.280        | 464.616        | 463.944        | G[12] |
| G[14] | 419.578        | 450.613        | 445.273        | 445.609        | 444.937        | G[11] |
| A[15] | 443.257        | 431.606        | 426.266        | 426.602        | 425.930        | A[10] |
| K[16] | <b>485.955</b> | 407.927        | 402.587        | 402.923        | 402.251        | K[9]  |
| R[17] | <b>537.989</b> | 365.226        | <b>359.889</b> | <b>360.225</b> | 359.553        | R[8]  |
| H[18] | <b>583.675</b> | 313.195        | 307.855        | 308.191        | 307.519        | H[7]  |
| R[19] | 635.709        | 297.508        | 292.169        | 292.505        | 291.833        | R[6]  |
| K[20] | 663.079        | 275.475        | 270.135        | 270.471        | 269.799        | K[5]  |
| V[21] | 716.102        | 168.104        | 162.765        | 163.101        | 162.429        | V[4]  |
| L[22] | <b>753.796</b> | 135.082        | 129.742        | 130.078        | 129.406        | L[3]  |
| R[23] | 805.830        | 97.387         | 92.047         | 92.383         | 91.711         | R[2]  |
| D[24] | 844.172        | 45.353         | 40.014         | 40.349         | 39.678         | D[1]  |

# sp | P62806 | H4\_MOUSE

[Acetyl]SGRGKGGKGLGKGGAKRHRK<sup>Methyl</sup> VLRD  
14.02

- ▶ fragmentation table for charge state 4+
- ▶ specType=etd
- ▶ score=92.42
- ▶ F112758.dat
- ▶ query=q55695.p1
- ▶ precursor=507.103490
- ▶ chargePrecursor=5
- ▶ itol=0.5

| AA    | c              | y              | z+1            | z+2            | z              | AA    |
|-------|----------------|----------------|----------------|----------------|----------------|-------|
| S[1]  | 37.525         | <b>633.627</b> | 629.627        | 0.755          | <b>629.170</b> | S[24] |
| G[2]  | 51.780         | 501.365        | 507.362        | 0.755          | 507.110        | G[23] |
| R[3]  | 90.805         | 507.111        | <b>583.106</b> | <b>583.350</b> | <b>582.854</b> | R[22] |
| G[4]  | 105.061        | 548.086        | 544.081        | 544.333        | 543.829        | G[21] |
| K[5]  | 137.084        | 533.830        | 529.826        | 530.078        | 529.574        | K[20] |
| G[6]  | 151.340        | 501.807        | 497.802        | 498.054        | 497.550        | G[19] |
| G[7]  | 165.595        | <b>487.551</b> | 483.547        | 483.799        | 483.295        | G[18] |
| K[8]  | 197.619        | 473.296        | 469.291        | 469.543        | 469.039        | K[17] |
| G[9]  | 211.874        | 441.272        | 437.268        | 437.520        | 437.016        | G[16] |
| L[10] | 380.148        | 427.017        | <b>423.012</b> | <b>423.264</b> | <b>422.760</b> | L[15] |
| G[11] | 254.401        | 398.740        | 394.741        | 394.993        | 394.489        | G[14] |
| K[12] | 286.424        | 384.490        | 380.488        | 380.738        | 380.234        | K[13] |
| G[13] | 300.680        | 352.467        | 348.462        | 348.714        | 348.210        | G[12] |
| G[14] | 314.935        | 338.211        | 334.207        | 334.459        | 333.955        | G[11] |
| A[15] | 332.694        | 323.956        | 319.951        | 320.203        | 319.699        | A[10] |
| K[16] | 364.718        | 306.197        | 302.192        | 302.444        | 301.940        | K[9]  |
| R[17] | 403.743        | <b>274.173</b> | 270.168        | 270.420        | 269.916        | R[8]  |
| H[18] | 438.008        | 235.148        | 231.143        | 231.395        | 230.891        | H[7]  |
| R[19] | 477.033        | 200.883        | 196.878        | 197.130        | 196.626        | R[6]  |
| K[20] | 512.561        | 161.858        | 157.853        | 158.105        | 157.601        | K[5]  |
| V[21] | 537.328        | 126.330        | 122.325        | 122.577        | 122.073        | V[4]  |
| L[22] | 565.599        | 101.563        | 97.558         | 97.810         | 97.306         | L[3]  |
| R[23] | <b>604.624</b> | 73.292         | 69.287         | 69.539         | 69.035         | R[2]  |
| D[24] | <b>633.381</b> | 34.267         | 30.262         | 30.514         | 30.010         | D[1]  |

sp | P62806 | H4\_MOUSE

[Acetyl]SGRGKGGKGLGKGGAKRHRK (Methyl) VLRD  
(14.02)

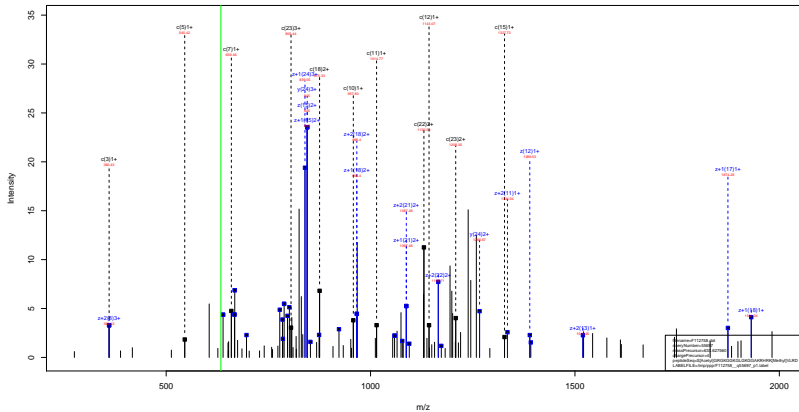

# sp | P62806 | H4\_MOUSE

[Acetyl]SGRGKGGKGLGKGGAKRHRK<sup>(Methyl)</sup>VLRD  
(14.02)

- ▶ fragmentation table for charge state 1+
- ▶ specType=etd
- ▶ score=42.10
- ▶ F112758.dat
- ▶ query=q55697.p1
- ▶ precursor=633.627560
- ▶ chargePrecursor=4
- ▶ itol=0.5

| AA    | c               | y        | z+1             | z+2             | z               | AA    |
|-------|-----------------|----------|-----------------|-----------------|-----------------|-------|
| S[1]  | 147.076         | 2531.487 | 2515.469        | 0.000           | 2514.460        | S[24] |
| G[2]  | 204.008         | 2402.444 | 2386.425        | 0.000           | 2385.417        | G[23] |
| R[3]  | <b>360.199</b>  | 2345.423 | 2329.404        | 2130.412        | 2328.396        | R[22] |
| G[4]  | 417.220         | 2189.321 | 2173.303        | 2174.310        | 2172.295        | G[21] |
| K[5]  | <b>545.315</b>  | 2132.300 | 2116.281        | 2117.289        | 2115.271        | K[20] |
| G[6]  | 602.337         | 2004.265 | 1988.246        | 1989.104        | 1987.178        | G[19] |
| G[7]  | <b>609.358</b>  | 1947.184 | <b>1931.165</b> | 1932.173        | 1930.157        | G[18] |
| K[8]  | 727.453         | 1890.162 | <b>1874.143</b> | 1875.151        | 1873.135        | K[17] |
| G[9]  | 844.475         | 1762.067 | 1746.048        | 1747.056        | 1745.041        | G[16] |
| L[10] | <b>937.559</b>  | 1705.046 | 1689.027        | 1690.035        | 1688.019        | L[15] |
| G[11] | <b>1014.580</b> | 1591.962 | 1575.943        | 1576.951        | 1574.935        | G[14] |
| K[12] | <b>1142.675</b> | 1534.940 | 1518.921        | <b>1519.929</b> | 1517.914        | K[13] |
| G[13] | 1199.697        | 1406.845 | 1390.826        | <b>1391.834</b> | <b>1389.819</b> | G[12] |
| G[14] | 1256.718        | 1349.824 | 1333.805        | <b>1334.813</b> | 1332.797        | G[11] |
| A[15] | <b>1327.755</b> | 1292.802 | 1276.783        | 1277.791        | 1275.776        | A[10] |
| R[16] | 1403.850        | 1221.769 | 1205.750        | 1206.758        | 1204.743        | R[9]  |
| R[17] | 1611.951        | 1093.670 | <b>1077.651</b> | 1078.659        | 1076.644        | R[8]  |
| H[18] | 1749.010        | 937.569  | 921.550         | <b>922.558</b>  | 920.542         | H[7]  |
| R[19] | 1905.111        | 800.510  | <b>784.491</b>  | <b>785.499</b>  | 783.484         | R[0]  |
| K[20] | 2047.222        | 644.409  | 628.390         | 629.398         | 627.382         | K[5]  |
| V[21] | 2146.290        | 502.298  | 486.280         | 487.287         | 485.272         | V[4]  |
| L[22] | 2289.374        | 403.230  | 387.211         | 388.219         | 386.203         | L[3]  |
| R[23] | 2415.476        | 300.140  | 274.121         | 275.129         | 273.113         | R[2]  |
| D[24] | 2530.503        | 134.045  | 118.026         | 119.034         | 117.018         | D[1]  |

# sp | P62806 | H4\_MOUSE

[Acetyl]SGRGKGGKGLGKGGAKRHRK<sup>(Methyl)</sup> VLRD  
(14.02)

- ▶ fragmentation table for charge state 2+
- ▶ specType=etd
- ▶ score=42.10
- ▶ F112758.dat
- ▶ query=q55697.p1
- ▶ precursor=633.627560
- ▶ chargePrecursor=4
- ▶ itol=0.5

| AA    | c               | y               | z+1             | z+2             | z              | AA    |
|-------|-----------------|-----------------|-----------------|-----------------|----------------|-------|
| S[1]  | 74.042          | <b>1266.247</b> | 1258.238        | 0.504           | 1257.734       | S[24] |
| G[2]  | 102.553         | 1201.728        | 1193.716        | 0.504           | 1193.212       | G[23] |
| R[3]  | 180.603         | <b>1173.215</b> | 1165.206        | <b>1165.709</b> | 1164.702       | R[22] |
| G[4]  | 208.114         | <b>1095.164</b> | <b>1087.155</b> | <b>1087.659</b> | 1086.651       | G[21] |
| K[5]  | 274.164         | 1056.594        | <b>1054.644</b> | <b>1059.148</b> | 1058.140       | K[20] |
| G[6]  | 301.672         | 1002.066        | 994.597         | 995.101         | 994.093        | G[19] |
| G[7]  | 330.183         | 974.095         | <b>966.086</b>  | <b>966.590</b>  | 965.582        | G[18] |
| K[8]  | 394.230         | 945.585         | 937.575         | 938.079         | 937.071        | K[17] |
| G[9]  | 422.741         | 881.117         | 873.109         | <b>874.032</b>  | 873.024        | G[16] |
| L[10] | 479.203         | <b>853.026</b>  | <b>845.017</b>  | 845.521         | <b>844.513</b> | L[15] |
| G[11] | 507.794         | <b>796.484</b>  | <b>788.475</b>  | <b>788.979</b>  | 787.971        | G[14] |
| K[12] | 571.844         | 767.974         | 759.964         | 760.468         | 759.460        | K[13] |
| G[13] | 600.352         | 703.920         | 695.911         | <b>696.421</b>  | 695.413        | G[12] |
| G[14] | 628.863         | 675.413         | <b>667.406</b>  | <b>667.910</b>  | <b>666.902</b> | G[11] |
| A[15] | 664.361         | 646.905         | <b>638.895</b>  | <b>639.399</b>  | 638.391        | A[10] |
| R[16] | 728.429         | 613.386         | 605.377         | 605.881         | 604.873        | R[9]  |
| R[17] | 806.479         | 547.330         | 539.320         | 539.823         | 538.820        | R[8]  |
| H[18] | <b>875.009</b>  | 489.288         | 481.279         | 481.783         | 480.775        | H[7]  |
| R[19] | 953.059         | 400.759         | 392.749         | 393.253         | 392.245        | R[0]  |
| K[20] | 1024.115        | 322.708         | 314.699         | 315.203         | 314.195        | K[5]  |
| V[21] | 1073.649        | 251.653         | 243.643         | 244.147         | 243.140        | V[4]  |
| L[22] | <b>1130.191</b> | 202.119         | 194.109         | 194.613         | 193.605        | L[3]  |
| R[23] | <b>1208.241</b> | 145.577         | 137.567         | 138.071         | 137.063        | R[2]  |
| D[24] | 1265.755        | 67.526          | 59.517          | 60.021          | 59.013         | D[1]  |

# sp | P62806 | H4\_MOUSE

[Acetyl]SGRGKGGKGLGKGGAKRHRK<sup>(Methyl)</sup>VLRD  
(14.02)

- ▶ fragmentation table for charge state 3+
- ▶ specType=etd
- ▶ score=42.10
- ▶ F112758.dat
- ▶ query=q55697.p1
- ▶ precursor=633.627560
- ▶ chargePrecursor=4
- ▶ itol=0.5

| AA    | c              | y              | z+1            | z+2            | z       | AA    |
|-------|----------------|----------------|----------------|----------------|---------|-------|
| S[1]  | 49.697         | <b>844.500</b> | <b>839.161</b> | 0.672          | 838.825 | S[24] |
| G[2]  | 68.704         | <b>801.486</b> | 796.147        | 0.572          | 795.811 | G[23] |
| R[3]  | 120.738        | 782.479        | 777.139        | <b>777.475</b> | 776.804 | R[22] |
| G[4]  | 139.745        | 730.445        | 725.106        | 725.442        | 724.770 | G[21] |
| K[5]  | 182.443        | 711.438        | 706.099        | 706.435        | 705.763 | K[20] |
| G[6]  | 201.450        | 668.740        | 663.400        | 663.736        | 663.064 | G[19] |
| G[7]  | 220.458        | 649.733        | 644.393        | 644.729        | 644.057 | G[18] |
| K[8]  | 263.156        | 630.726        | 625.386        | 625.722        | 625.050 | K[17] |
| G[9]  | 282.163        | 588.027        | 582.688        | 583.024        | 582.352 | G[16] |
| L[10] | 319.858        | 569.020        | 563.680        | 564.016        | 563.345 | L[15] |
| G[11] | 338.865        | 531.325        | 525.985        | 526.322        | 525.650 | G[14] |
| K[12] | 381.563        | 512.318        | 506.979        | 507.315        | 506.643 | K[13] |
| G[13] | 400.570        | 469.620        | 464.280        | 464.616        | 463.944 | G[12] |
| G[14] | 419.578        | 450.613        | 445.273        | 445.609        | 444.937 | G[11] |
| A[15] | 443.257        | 431.606        | 426.266        | 426.602        | 425.930 | A[10] |
| K[16] | 468.955        | 402.927        | 402.587        | 402.923        | 402.251 | K[9]  |
| R[17] | 537.989        | 385.228        | 389.889        | <b>360.225</b> | 359.553 | R[8]  |
| H[18] | 583.675        | 313.195        | 307.855        | 308.191        | 307.519 | H[7]  |
| R[19] | 635.769        | 267.508        | 262.168        | 262.505        | 261.833 | R[6]  |
| K[20] | 683.079        | 235.475        | 230.135        | 230.471        | 229.799 | K[5]  |
| V[21] | 718.102        | 188.104        | 182.764        | 183.101        | 182.429 | V[4]  |
| L[22] | 753.196        | 135.082        | 129.742        | 130.078        | 129.406 | L[3]  |
| R[23] | <b>805.830</b> | 97.387         | 92.047         | 92.383         | 91.711  | R[2]  |
| D[24] | 844.172        | 45.353         | 40.014         | 40.349         | 39.678  | D[1]  |



# sp | P62806 | H4\_MOUSE

[Acetyl]SGRGKGGKGLGKGGAKRHR (Methyl)  
(14.02) KVLRD

- ▶ fragmentation table for charge state 1+
- ▶ specType=etd
- ▶ score=92.14
- ▶ F112758.dat
- ▶ query=q55700.p1
- ▶ precursor=507.104110
- ▶ chargePrecursor=5
- ▶ itol=0.5

| AA    | c               | y              | z+1             | z+2             | z        | AA    |
|-------|-----------------|----------------|-----------------|-----------------|----------|-------|
| S[1]  | 147.076         | 2531.487       | 2515.468        | 0.000           | 2514.460 | S[24] |
| G[2]  | 204.098         | 2402.444       | 2386.425        | 0.000           | 2385.417 | G[23] |
| R[3]  | <b>368.199</b>  | 2348.423       | 2329.404        | 2330.412        | 2328.396 | R[22] |
| G[4]  | <b>417.220</b>  | 2189.321       | 2178.303        | 2174.310        | 2172.295 | G[21] |
| K[5]  | <b>545.315</b>  | 2132.830       | 2116.281        | 2117.289        | 2115.273 | K[20] |
| G[6]  | 602.337         | 2004.205       | 1988.186        | 1989.194        | 1987.178 | G[19] |
| G[7]  | <b>659.358</b>  | 1947.184       | 1931.165        | 1932.173        | 1930.157 | G[18] |
| K[8]  | <b>787.453</b>  | 1890.162       | 1874.143        | 1875.151        | 1873.135 | K[17] |
| G[9]  | <b>844.475</b>  | 1762.067       | 1746.048        | <b>1747.056</b> | 1745.041 | G[16] |
| L[10] | <b>937.559</b>  | 1705.046       | 1689.027        | 1690.035        | 1688.019 | L[15] |
| G[11] | <b>1014.580</b> | 1581.962       | 1575.943        | 1576.951        | 1574.935 | G[14] |
| K[12] | <b>1142.675</b> | 1534.940       | <b>1518.921</b> | 1519.929        | 1517.914 | K[13] |
| G[13] | 1199.697        | 1406.845       | 1390.826        | <b>1391.834</b> | 1389.819 | G[12] |
| G[14] | 1256.718        | 1349.824       | <b>1333.805</b> | 1334.813        | 1332.797 | G[11] |
| A[15] | <b>1327.755</b> | 1292.802       | 1276.783        | <b>1277.791</b> | 1275.776 | A[10] |
| R[16] | <b>1435.850</b> | 1221.765       | 1205.746        | 1206.754        | 1204.739 | R[9]  |
| R[17] | 1631.953        | 1093.620       | 1077.601        | <b>1078.609</b> | 1076.594 | R[8]  |
| H[18] | 1749.010        | <b>937.569</b> | <b>921.550</b>  | <b>922.558</b>  | 920.542  | H[7]  |
| R[19] | 1919.127        | <b>800.510</b> | <b>784.491</b>  | 785.499         | 783.484  | R[6]  |
| K[20] | 2047.222        | <b>630.393</b> | 634.375         | 635.382         | 633.367  | K[5]  |
| V[21] | 2146.290        | 502.298        | <b>486.280</b>  | 487.287         | 485.272  | V[4]  |
| L[22] | 2259.374        | 403.230        | <b>387.211</b>  | 388.219         | 386.203  | L[3]  |
| D[23] | 2415.476        | 280.146        | <b>274.127</b>  | 275.135         | 273.119  | D[2]  |
| D[24] | 2530.503        | 134.045        | 138.026         | 139.034         | 137.018  | D[1]  |



# sp | P62806 | H4\_MOUSE

[Acetyl]SGRGKGGKGLGKGGAKRHR (Methyl)  
(14.02) KVLRD

- ▶ fragmentation table for charge state 2+
- ▶ specType=etd
- ▶ score=92.14
- ▶ F112758.dat
- ▶ query=q55700.p1
- ▶ precursor=507.104110
- ▶ chargePrecursor=5
- ▶ itol=0.5

| AA   | c               | y              | z+1             | z+2             | z              | AA   |
|------|-----------------|----------------|-----------------|-----------------|----------------|------|
| S 1  | 74.042          | 1266.247       | 1258.238        | 0.504           | 1257.734       | S 24 |
| G 2  | 102.553         | 1201.726       | 1193.716        | 0.504           | 1193.212       | G 23 |
| R 3  | 180.603         | 1173.215       | <b>1165.206</b> | <b>1165.709</b> | 1164.702       | R 22 |
| G 4  | 269.114         | 1095.194       | 1087.183        | <b>1087.559</b> | 1086.551       | G 21 |
| K 5  | 273.163         | 1066.654       | 1058.644        | <b>1058.148</b> | 1058.140       | K 20 |
| G 6  | 301.672         | 1002.608       | 994.597         | <b>995.101</b>  | 994.093        | G 19 |
| G 7  | 330.183         | 974.095        | 966.086         | <b>966.590</b>  | 965.582        | G 18 |
| K 8  | <b>394.230</b>  | 945.585        | <b>937.575</b>  | <b>938.079</b>  | 937.071        | K 17 |
| G 9  | <b>422.741</b>  | 888.537        | <b>873.528</b>  | <b>874.032</b>  | 873.024        | G 16 |
| L 10 | <b>479.283</b>  | <b>853.026</b> | <b>845.017</b>  | <b>845.521</b>  | <b>844.513</b> | L 15 |
| G 11 | 507.794         | <b>796.484</b> | 788.475         | <b>788.979</b>  | <b>787.971</b> | G 14 |
| R 12 | <b>571.841</b>  | <b>767.974</b> | <b>759.964</b>  | <b>760.468</b>  | 759.460        | R 13 |
| G 13 | <b>600.352</b>  | 703.926        | <b>695.917</b>  | <b>696.421</b>  | 695.413        | G 12 |
| G 14 | <b>628.863</b>  | <b>675.415</b> | <b>667.406</b>  | <b>667.910</b>  | 666.902        | G 11 |
| A 15 | <b>664.381</b>  | 646.905        | <b>638.895</b>  | <b>639.399</b>  | 638.391        | A 10 |
| R 16 | <b>728.429</b>  | 611.366        | <b>603.377</b>  | <b>603.881</b>  | 602.873        | R 9  |
| R 17 | <b>806.479</b>  | 547.539        | <b>539.329</b>  | <b>539.833</b>  | 538.825        | R 8  |
| H 18 | <b>875.009</b>  | 509.288        | <b>461.279</b>  | <b>461.783</b>  | 460.775        | H 7  |
| R 19 | 960.067         | 400.759        | <b>392.749</b>  | <b>393.253</b>  | 392.245        | R 6  |
| R 20 | <b>1024.115</b> | 315.700        | 307.691         | 308.195         | 307.187        | R 5  |
| V 21 | 1073.649        | 251.653        | 243.643         | 244.147         | 243.140        | V 4  |
| L 22 | <b>1138.191</b> | 202.119        | 194.109         | 194.613         | 193.605        | L 3  |
| D 23 | 1288.441        | 148.571        | 137.562         | 138.066         | 137.058        | D 2  |
| D 24 | 1265.755        | 87.525         | 59.517          | 60.021          | 59.013         | D 1  |

# sp | P62806 | H4\_MOUSE

[Acetyl]SGRGKGGKGLGKGGAKRHR (Methyl) KVLRD  
(14.02)

- ▶ fragmentation table for charge state 3+
- ▶ specType=etd
- ▶ score=92.14
- ▶ F112758.dat
- ▶ query=q55700.p1
- ▶ precursor=507.104110
- ▶ chargePrecursor=5
- ▶ itol=0.5

| AA    | c              | y              | z+1            | z+2            | z              | AA    |
|-------|----------------|----------------|----------------|----------------|----------------|-------|
| S[1]  | 49.697         | <b>844.500</b> | 839.161        | 0.672          | 838.526        | S[24] |
| G[2]  | 68.704         | 801.486        | 796.147        | 0.672          | 795.511        | G[23] |
| R[3]  | 120.738        | 782.479        | 777.139        | <b>777.475</b> | 776.804        | R[22] |
| G[4]  | 139.745        | 730.445        | <b>725.106</b> | <b>725.442</b> | 724.770        | G[21] |
| K[5]  | 182.443        | 711.438        | <b>706.099</b> | <b>706.435</b> | 705.763        | K[20] |
| G[6]  | 201.450        | 668.740        | <b>663.400</b> | <b>663.736</b> | <b>663.064</b> | G[19] |
| G[7]  | 220.458        | 649.733        | <b>644.393</b> | <b>644.729</b> | 644.057        | G[18] |
| K[8]  | 263.156        | 630.726        | 625.386        | <b>625.722</b> | 625.050        | K[17] |
| G[9]  | 282.163        | <b>588.027</b> | <b>582.688</b> | <b>583.024</b> | 582.352        | G[16] |
| L[10] | 319.858        | 569.020        | <b>563.580</b> | <b>564.016</b> | 563.345        | L[15] |
| G[11] | 338.865        | 531.325        | <b>525.986</b> | <b>526.322</b> | 525.650        | G[14] |
| K[12] | 381.563        | 512.318        | 506.973        | 507.315        | 506.643        | K[13] |
| G[13] | 400.570        | 499.620        | 494.280        | 494.616        | 493.944        | G[12] |
| G[14] | 419.578        | 480.613        | 445.273        | 445.609        | 444.937        | G[11] |
| A[15] | 443.297        | 431.606        | 426.266        | 426.602        | 425.930        | A[10] |
| K[16] | <b>485.955</b> | 407.927        | 402.587        | 402.923        | 402.251        | K[9]  |
| R[17] | <b>537.989</b> | 395.228        | <b>359.889</b> | <b>360.225</b> | 359.553        | R[8]  |
| H[18] | <b>583.675</b> | 313.195        | 307.853        | 308.191        | 307.519        | H[7]  |
| R[19] | 667.391        | 287.508        | 282.168        | 282.505        | 281.833        | R[6]  |
| K[20] | <b>683.079</b> | 210.803        | 205.463        | 205.799        | 205.127        | K[5]  |
| V[21] | 718.102        | 188.104        | 182.764        | 183.101        | 182.429        | V[4]  |
| L[22] | <b>753.796</b> | 135.082        | 129.742        | 130.078        | 129.406        | L[3]  |
| R[23] | 805.830        | 97.387         | 92.047         | 92.383         | 91.711         | R[2]  |
| D[24] | <b>844.172</b> | 45.353         | 40.014         | 40.349         | 39.678         | D[1]  |

# sp | P62806 | H4\_MOUSE

[Acetyl]SGRGKGGKGLGKGGAKRHR (Methyl)  
(14.02) KVLRD

- ▶ fragmentation table for charge state 4+
- ▶ specType=etd
- ▶ score=92.14
- ▶ F112758.dat
- ▶ query=q55700.p1
- ▶ precursor=507.104110
- ▶ chargePrecursor=5
- ▶ itol=0.5

| AA    | c              | y              | z+1            | z+2            | z              | AA    |
|-------|----------------|----------------|----------------|----------------|----------------|-------|
| S[1]  | 37.525         | 633.027        | <b>629.622</b> | 0.755          | <b>629.370</b> | S[24] |
| G[2]  | 51.780         | 601.366        | 599.267        | 0.755          | 597.110        | G[23] |
| R[3]  | 90.305         | 587.111        | <b>583.106</b> | <b>583.358</b> | <b>582.854</b> | R[22] |
| G[4]  | 105.061        | 548.086        | 544.081        | 544.333        | 543.829        | G[21] |
| K[5]  | 137.084        | 533.830        | 529.826        | 530.078        | 529.574        | K[20] |
| G[6]  | 151.340        | 501.807        | 497.802        | 498.054        | 497.550        | G[19] |
| G[7]  | 165.595        | 467.551        | 463.547        | 463.799        | 463.295        | G[18] |
| K[8]  | 197.619        | 473.296        | 469.291        | 469.543        | 469.039        | K[17] |
| G[9]  | 211.874        | 441.272        | 437.268        | 437.520        | 437.016        | G[16] |
| L[10] | 240.140        | 427.017        | <b>423.012</b> | <b>423.264</b> | <b>422.760</b> | L[15] |
| G[11] | 254.401        | 398.746        | <b>394.741</b> | <b>394.993</b> | <b>394.489</b> | G[14] |
| K[12] | 286.424        | 384.490        | 380.486        | 380.738        | 380.234        | K[13] |
| G[13] | 300.680        | 352.467        | 348.462        | 348.714        | 348.210        | G[12] |
| G[14] | 314.935        | 338.211        | 334.207        | 334.459        | 333.955        | G[11] |
| A[15] | 332.694        | 423.956        | 319.951        | 320.203        | 319.699        | A[10] |
| K[16] | 364.718        | 306.197        | 302.192        | 302.444        | 301.940        | K[9]  |
| R[17] | 403.743        | <b>274.173</b> | 270.168        | 270.420        | 269.916        | R[8]  |
| H[18] | 438.008        | 235.148        | 231.143        | 231.395        | 230.891        | H[7]  |
| R[19] | 480.537        | 200.883        | 196.878        | 197.130        | 196.626        | R[6]  |
| K[20] | 512.561        | 138.354        | 134.349        | 134.601        | 134.097        | K[5]  |
| V[21] | 537.328        | 126.130        | 122.125        | 122.377        | 122.073        | V[4]  |
| L[22] | 565.599        | 101.563        | 97.558         | 97.810         | 97.306         | L[3]  |
| R[23] | <b>604.624</b> | 73.292         | 69.287         | 69.539         | 69.035         | R[2]  |
| D[24] | 633.381        | 34.267         | 30.262         | 30.514         | 30.010         | D[1]  |

sp | P62806 | H4\_MOUSE

[Acetyl]SGRGKGGKGLGKGGAKRHRK Methyl VLRD  
14.02

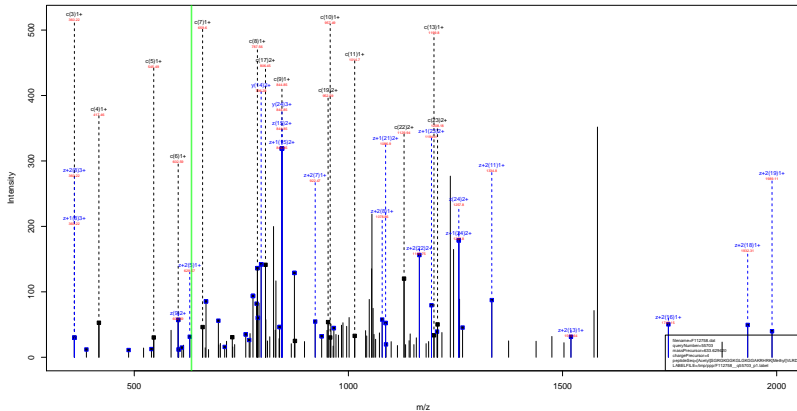

# sp | P62806 | H4\_MOUSE

[Acetyl]SGRGKGGKGLGKGGAKRHRK<sup>Methyl</sup> VLRD  
14.02

- ▶ fragmentation table for charge state 1+
- ▶ specType=etd
- ▶ score=58.80
- ▶ F112758.dat
- ▶ query=q55703.p1
- ▶ precursor=633.629420
- ▶ chargePrecursor=4
- ▶ itol=0.5

| AA    | c               | y              | z+1      | z+2             | z        | AA    |
|-------|-----------------|----------------|----------|-----------------|----------|-------|
| S[1]  | 167.076         | 2531.487       | 2515.468 | 0.000           | 2514.460 | S[24] |
| G[2]  | 224.598         | 2402.444       | 2386.425 | 0.000           | 2385.417 | G[23] |
| T[3]  | <b>306.199</b>  | 2348.423       | 2332.404 | 2330.412        | 2328.396 | T[22] |
| G[4]  | <b>417.220</b>  | 2189.321       | 2174.303 | 2174.310        | 2172.295 | G[21] |
| K[5]  | <b>545.115</b>  | 2132.300       | 2116.281 | 2117.289        | 2115.273 | K[20] |
| G[6]  | <b>602.337</b>  | 2004.205       | 1988.186 | <b>1989.194</b> | 1987.178 | G[19] |
| G[7]  | <b>659.358</b>  | 1947.184       | 1931.165 | <b>1932.173</b> | 1930.157 | G[18] |
| K[8]  | <b>787.453</b>  | 1890.162       | 1874.143 | 1875.151        | 1873.135 | K[17] |
| G[9]  | <b>844.475</b>  | 1782.067       | 1746.048 | <b>1747.056</b> | 1745.041 | G[16] |
| L[10] | <b>957.559</b>  | 1725.046       | 1689.027 | 1693.035        | 1688.013 | L[15] |
| G[11] | <b>1014.580</b> | 1591.962       | 1575.943 | 1576.951        | 1574.935 | G[14] |
| K[12] | 1142.075        | 1534.940       | 1518.921 | <b>1519.929</b> | 1517.914 | K[13] |
| G[13] | <b>1199.697</b> | 1406.845       | 1390.826 | 1391.834        | 1389.819 | G[12] |
| G[14] | 1256.718        | 1349.824       | 1333.805 | <b>1334.813</b> | 1332.797 | G[11] |
| A[15] | 1327.735        | 1292.802       | 1276.783 | 1277.791        | 1275.776 | A[10] |
| K[16] | 1405.850        | 1224.705       | 1205.748 | <b>1206.754</b> | 1204.739 | K[9]  |
| R[17] | 1611.951        | 1093.630       | 1077.651 | <b>1078.659</b> | 1076.644 | R[8]  |
| H[18] | 1748.010        | <b>937.568</b> | 921.550  | <b>922.558</b>  | 920.542  | H[7]  |
| R[19] | 1905.111        | 800.510        | 784.491  | <b>785.499</b>  | 783.484  | R[6]  |
| K[20] | 2047.222        | 644.409        | 628.390  | <b>629.398</b>  | 627.382  | K[5]  |
| V[21] | 2146.290        | 502.298        | 486.280  | <b>487.287</b>  | 485.272  | V[4]  |
| L[22] | 2289.374        | 403.216        | 387.211  | <b>388.219</b>  | 386.203  | L[3]  |
| L[23] | 2419.476        | 290.140        | 274.127  | 275.135         | 273.119  | L[2]  |
| D[24] | 2530.503        | 134.045        | 118.026  | 119.034         | 117.018  | D[1]  |

# sp | P62806 | H4\_MOUSE

[Acetyl]SGRGKGGKGLGKGGAKRHRK<sup>Methyl</sup> VLRD  
14.02

- ▶ fragmentation table for charge state 2+
- ▶ specType=etd
- ▶ score=58.80
- ▶ F112758.dat
- ▶ query=q55703.p1
- ▶ precursor=633.629420
- ▶ chargePrecursor=4
- ▶ itol=0.5

| AA   | c               | y               | z+1             | z+2             | z               | AA   |
|------|-----------------|-----------------|-----------------|-----------------|-----------------|------|
| S 1  | 74.042          | <b>1266.247</b> | <b>1258.238</b> | 0.504           | <b>1257.734</b> | S 24 |
| G 2  | 102.553         | 1201.726        | <b>1193.716</b> | 0.504           | 1193.212        | G 23 |
| R 3  | 180.603         | 1173.215        | 1165.206        | <b>1165.709</b> | 1164.702        | R 22 |
| G 4  | 259.114         | 1095.164        | <b>1087.155</b> | <b>1087.559</b> | <b>1086.551</b> | G 21 |
| K 5  | 273.153         | 1058.654        | 1058.654        | 1059.148        | 1055.141        | K 20 |
| G 6  | 303.672         | 1002.606        | 994.597         | 995.101         | 994.093         | G 19 |
| G 7  | 330.183         | 974.095         | <b>966.086</b>  | 966.590         | <b>965.582</b>  | G 18 |
| K 8  | 394.230         | 945.585         | <b>937.575</b>  | 938.079         | 937.071         | K 17 |
| G 9  | 422.741         | 881.537         | <b>873.528</b>  | <b>874.032</b>  | 873.025         | G 16 |
| L 10 | 479.283         | 853.026         | <b>845.017</b>  | 845.521         | <b>844.513</b>  | L 15 |
| G 11 | 507.794         | <b>796.484</b>  | <b>788.475</b>  | <b>788.979</b>  | <b>787.971</b>  | G 14 |
| K 12 | 571.841         | <b>767.974</b>  | <b>759.964</b>  | <b>760.468</b>  | 759.460         | K 13 |
| G 13 | 600.352         | 703.926         | 695.917         | <b>696.421</b>  | 695.413         | G 12 |
| G 14 | 628.863         | 675.415         | <b>667.406</b>  | <b>667.910</b>  | 666.902         | G 11 |
| A 15 | 694.384         | 646.905         | 638.895         | 639.399         | 638.391         | A 10 |
| R 16 | <b>728.429</b>  | <b>611.386</b>  | <b>603.377</b>  | <b>603.881</b>  | <b>602.873</b>  | R 9  |
| R 17 | <b>806.479</b>  | 547.339         | 539.329         | <b>539.833</b>  | 538.825         | R 8  |
| H 18 | <b>875.009</b>  | 469.288         | 461.279         | 461.783         | 460.775         | H 7  |
| R 19 | <b>953.059</b>  | 400.759         | 392.749         | 393.253         | 392.245         | R 6  |
| K 20 | 1028.115        | 322.708         | 314.699         | 315.203         | 314.195         | K 5  |
| V 21 | 1073.669        | 253.653         | 245.643         | 246.147         | 245.140         | V 4  |
| L 22 | <b>1130.191</b> | 202.110         | 194.100         | 194.613         | 193.605         | L 3  |
| R 23 | <b>1208.241</b> | 145.577         | 137.567         | 138.071         | 137.063         | R 2  |
| D 24 | 1265.755        | 67.526          | 59.517          | 60.021          | 59.013          | D 1  |

# sp | P62806 | H4\_MOUSE

[Acetyl]SGRGKGGKGLGKGGAKRHRK <sup>Methyl</sup> VLRD  
14.02

- ▶ fragmentation table for charge state 3+
- ▶ specType=etd
- ▶ score=58.80
- ▶ F112758.dat
- ▶ query=q55703.p1
- ▶ precursor=633.629420
- ▶ chargePrecursor=4
- ▶ itol=0.5

| AA    | c       | y              | z+1            | z+2            | z              | AA    |
|-------|---------|----------------|----------------|----------------|----------------|-------|
| S[1]  | 49.697  | <b>844.500</b> | <b>839.161</b> | 0.672          | <b>838.825</b> | S[24] |
| G[2]  | 68.704  | 801.486        | <b>796.147</b> | 0.672          | <b>795.811</b> | G[23] |
| R[3]  | 120.738 | 782.479        | <b>777.139</b> | <b>777.475</b> | <b>776.804</b> | R[22] |
| G[4]  | 139.745 | 730.445        | 725.106        | 725.442        | 724.770        | G[21] |
| K[5]  | 182.443 | <b>711.438</b> | 706.099        | 706.435        | 705.763        | K[20] |
| G[6]  | 201.450 | 668.740        | 663.400        | 663.736        | 663.064        | G[19] |
| G[7]  | 220.458 | 649.733        | 644.393        | 644.729        | 644.057        | G[18] |
| K[8]  | 263.156 | 630.726        | 625.386        | 625.722        | 625.050        | K[17] |
| G[9]  | 282.163 | 588.027        | 582.688        | 583.024        | 582.352        | G[16] |
| L[10] | 319.858 | 569.020        | 563.680        | 564.016        | 563.345        | L[15] |
| G[11] | 338.865 | 531.525        | 525.986        | 526.322        | 525.650        | G[14] |
| K[12] | 381.563 | 512.518        | 506.979        | 507.315        | 506.643        | K[13] |
| G[13] | 400.570 | 469.620        | 464.280        | 464.616        | 463.944        | G[12] |
| G[14] | 419.578 | 450.613        | 445.273        | 445.609        | 444.937        | G[11] |
| A[15] | 443.257 | 431.606        | 426.266        | 426.602        | 425.930        | A[10] |
| K[16] | 485.955 | 407.927        | 402.587        | 402.923        | 402.251        | K[9]  |
| R[17] | 537.989 | 395.238        | <b>359.889</b> | <b>360.225</b> | 359.553        | R[8]  |
| H[18] | 583.675 | 313.195        | 307.855        | 308.191        | 307.519        | H[7]  |
| R[19] | 635.709 | 287.508        | 282.168        | 282.505        | 281.833        | R[6]  |
| K[20] | 683.079 | 215.875        | 210.535        | 210.871        | 209.999        | K[5]  |
| V[21] | 716.102 | 188.104        | 182.764        | 183.101        | 182.429        | V[4]  |
| L[22] | 753.796 | 135.982        | 129.742        | 130.078        | 129.406        | L[3]  |
| R[23] | 805.830 | 97.387         | 92.047         | 92.383         | 91.711         | R[2]  |
| D[24] | 844.172 | 45.353         | 40.014         | 40.349         | 39.678         | D[1]  |

# sp | P62806 | H4\_MOUSE

[Acetyl]SGRGKGGKGLGKGGAKRHR <sup>Dimethyl</sup> K <sup>Methyl</sup> VLRD  
 28.03 14.02

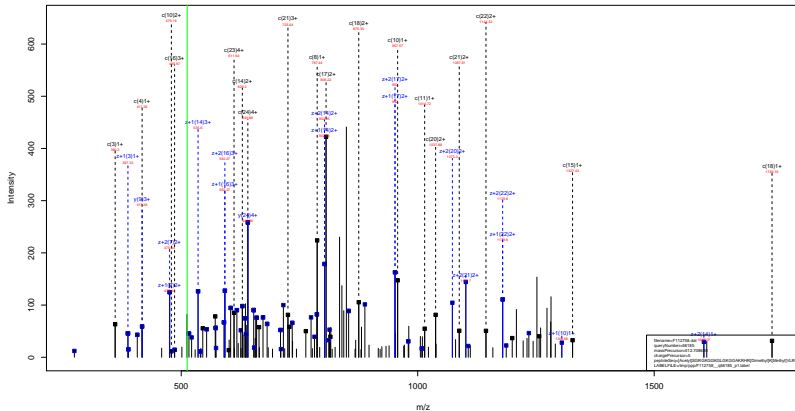



# sp | P62806 | H4\_MOUSE

[Acetyl]SGRGKGGKGLGKGGAKRHR <sup>Dimethyl</sup>K <sup>Methyl</sup>VLRD  
28.03 14.02

- ▶ fragmentation table for charge state 1+
- ▶ specType=etd
- ▶ score=73.95
- ▶ F112758.dat
- ▶ query=q56185\_p1
- ▶ precursor=512.708620
- ▶ chargePrecursor=5
- ▶ itol=0.5

| AA | c  | y               | z+1      | z+2             | z               | AA             |       |
|----|----|-----------------|----------|-----------------|-----------------|----------------|-------|
| S  | 1  | 147.076         | 2509.518 | 2541.499        | 0.000           | 2542.491       | S[24] |
| G  | 2  | 204.098         | 2430.475 | 2414.457        | 0.000           | 2413.449       | G[23] |
| R  | 3  | <b>368.199</b>  | 2373.454 | 2367.435        | 2358.443        | 2366.427       | R[22] |
| G  | 4  | <b>417.230</b>  | 2217.953 | 2201.934        | 2202.942        | 2200.926       | G[21] |
| K  | 5  | <b>545.315</b>  | 2160.931 | 2144.913        | 2145.920        | 2143.905       | K[20] |
| G  | 6  | 602.357         | 2032.930 | 2016.918        | 2017.925        | 2015.910       | G[19] |
| G  | 7  | <b>659.358</b>  | 1975.915 | 1959.899        | 1960.904        | 1958.889       | G[18] |
| K  | 8  | <b>787.453</b>  | 1918.893 | 1902.875        | 1903.882        | 1901.867       | K[17] |
| G  | 9  | 814.975         | 1790.896 | 1774.880        | 1775.887        | 1773.872       | G[16] |
| L  | 10 | <b>957.559</b>  | 1733.877 | 1717.860        | 1718.866        | 1716.850       | L[15] |
| G  | 11 | <b>1014.580</b> | 1619.953 | 1603.974        | <b>1604.982</b> | 1602.966       | G[14] |
| K  | 12 | 1142.675        | 1562.971 | 1546.953        | 1547.960        | 1545.945       | K[13] |
| G  | 13 | <b>1199.697</b> | 1434.976 | 1418.958        | 1419.966        | 1417.950       | G[12] |
| G  | 14 | <b>1256.718</b> | 1377.955 | 1361.938        | 1362.944        | 1360.928       | G[11] |
| A  | 15 | <b>1327.795</b> | 1320.933 | <b>1304.915</b> | 1305.923        | 1303.907       | A[10] |
| R  | 16 | 1459.850        | 1249.996 | 1233.978        | <b>1234.985</b> | 1232.970       | R[9]  |
| R  | 17 | 1611.951        | 1121.991 | 1105.983        | <b>1106.991</b> | 1104.975       | R[8]  |
| H  | 18 | <b>1749.010</b> | 995.000  | 989.582         | 990.589         | 988.574        | H[7]  |
| R  | 19 | 1933.143        | 826.941  | 812.533         | <b>813.530</b>  | <b>811.515</b> | R[6]  |
| K  | 20 | 2075.253        | 644.409  | 628.993         | <b>629.998</b>  | 627.982        | K[5]  |
| V  | 21 | 2174.322        | 502.298  | <b>486.280</b>  | 487.287         | 485.272        | V[4]  |
| L  | 22 | 2287.406        | 403.232  | <b>387.211</b>  | <b>388.219</b>  | 386.203        | L[3]  |
| R  | 23 | 2443.507        | 280.146  | <b>274.127</b>  | -75.135         | 273.119        | R[2]  |
| D  | 24 | 2558.534        | 134.045  | 118.020         | 119.034         | 117.018        | D[1]  |

# sp | P62806 | H4\_MOUSE

[Acetyl]SGRGKGGKGLGKGGAKRHR <sup>Dimethyl</sup>K <sup>Methyl</sup>VLRD  
28.03 14.02

- ▶ fragmentation table for charge state 2+
- ▶ specType=etd
- ▶ score=73.95
- ▶ F112758.dat
- ▶ query=q56185.p1
- ▶ precursor=512.708620
- ▶ chargePrecursor=5
- ▶ itol=0.5

| AA    | c               | y               | z+1             | z+2             | z              | AA    |
|-------|-----------------|-----------------|-----------------|-----------------|----------------|-------|
| S[1]  | 74.042          | 1280.263        | 1272.253        | 0.504           | 1271.749       | S[24] |
| G[2]  | 102.553         | 1215.741        | 1207.732        | 0.504           | 1207.228       | G[23] |
| R[3]  | 180.603         | <b>1187.231</b> | <b>1179.221</b> | <b>1179.725</b> | 1178.717       | R[22] |
| G[4]  | 269.114         | 1109.181        | 1101.173        | <b>1101.675</b> | 1100.667       | G[21] |
| K[5]  | 273.161         | 1080.060        | 1072.050        | <b>1073.164</b> | 1072.156       | K[20] |
| G[6]  | 351.672         | 1016.625        | <b>1008.612</b> | <b>1009.116</b> | 1008.108       | G[19] |
| G[7]  | 330.193         | 988.111         | <b>980.102</b>  | 980.606         | <b>979.598</b> | G[18] |
| K[8]  | 394.230         | 959.600         | <b>951.591</b>  | <b>952.095</b>  | 951.087        | K[17] |
| G[9]  | 427.741         | 895.513         | 887.503         | <b>888.047</b>  | 887.040        | G[16] |
| L[10] | <b>479.283</b>  | 867.042         | 859.033         | 859.537         | 858.529        | L[15] |
| G[11] | 507.794         | 810.500         | <b>802.491</b>  | <b>802.995</b>  | 801.987        | G[14] |
| K[12] | <b>571.841</b>  | <b>781.989</b>  | 773.980         | <b>774.484</b>  | 773.476        | K[13] |
| G[13] | <b>600.352</b>  | 717.042         | <b>709.032</b>  | <b>710.436</b>  | <b>709.429</b> | G[12] |
| G[14] | <b>628.863</b>  | 689.431         | <b>681.422</b>  | <b>681.926</b>  | 680.918        | G[11] |
| A[15] | <b>664.381</b>  | 669.920         | <b>652.911</b>  | <b>653.415</b>  | 652.407        | A[10] |
| R[16] | <b>728.429</b>  | <b>625.402</b>  | <b>617.392</b>  | <b>617.896</b>  | 616.889        | R[9]  |
| R[17] | <b>866.479</b>  | 561.354         | <b>553.345</b>  | <b>553.849</b>  | 552.841        | R[8]  |
| R[18] | <b>875.009</b>  | 483.304         | <b>475.294</b>  | <b>475.798</b>  | 474.791        | R[7]  |
| R[19] | 967.075         | 414.774         | <b>406.765</b>  | <b>407.269</b>  | 406.261        | R[6]  |
| K[20] | <b>1038.130</b> | 322.700         | 314.690         | 315.203         | 314.195        | K[5]  |
| V[21] | <b>1087.865</b> | 251.653         | 243.643         | 244.147         | 243.140        | V[4]  |
| L[22] | <b>1144.207</b> | 202.119         | 194.109         | 194.613         | 193.606        | L[3]  |
| R[23] | 1222.257        | 145.577         | 137.567         | 138.071         | 137.063        | R[2]  |
| D[24] | 1276.771        | 67.526          | 59.517          | 60.021          | 59.013         | D[1]  |

# sp | P62806 | H4\_MOUSE

[Acetyl]SGRGKGGKGLGKGGAKRHR <sup>Dimethyl</sup> K <sup>Methyl</sup> VLRD  
28.03 14.02

- ▶ fragmentation table for charge state 3+
- ▶ specType=etd
- ▶ score=73.95
- ▶ F112758.dat
- ▶ query=q56185.p1
- ▶ precursor=512.708620
- ▶ chargePrecursor=5
- ▶ itol=0.5

| AA    | c              | y              | z+1            | z+2            | z              | AA    |
|-------|----------------|----------------|----------------|----------------|----------------|-------|
| S[1]  | 49.697         | <b>853.844</b> | 848.505        | 0.672          | 848.169        | S[24] |
| G[2]  | 58.704         | 810.830        | 805.490        | 0.672          | 805.154        | G[23] |
| R[3]  | 120.738        | 791.821        | <b>786.483</b> | <b>786.819</b> | 786.147        | R[22] |
| G[4]  | 139.745        | 739.789        | <b>734.450</b> | <b>734.785</b> | 734.114        | G[21] |
| K[5]  | 182.443        | 720.782        | 715.442        | <b>715.778</b> | 715.106        | K[20] |
| G[6]  | 201.450        | 678.084        | <b>672.744</b> | <b>673.080</b> | 672.408        | G[19] |
| G[7]  | 220.458        | <b>659.076</b> | <b>653.737</b> | <b>654.073</b> | <b>653.401</b> | G[18] |
| K[8]  | 263.156        | 640.069        | <b>634.730</b> | <b>635.066</b> | 634.394        | K[17] |
| G[9]  | 282.163        | 599.371        | <b>592.031</b> | <b>592.367</b> | 591.695        | G[16] |
| L[10] | 319.958        | 578.364        | <b>573.024</b> | <b>573.360</b> | <b>572.688</b> | L[15] |
| G[11] | 338.965        | <b>540.669</b> | <b>535.330</b> | <b>535.666</b> | 534.994        | G[14] |
| K[12] | 381.563        | <b>521.662</b> | <b>516.322</b> | <b>516.658</b> | <b>515.986</b> | K[13] |
| G[13] | 400.570        | <b>478.964</b> | 473.624        | 473.960        | 473.288        | G[12] |
| G[14] | 419.578        | 459.957        | 454.617        | 454.953        | 454.281        | G[11] |
| A[15] | 443.257        | 440.949        | 435.610        | 435.946        | 435.274        | A[10] |
| K[16] | <b>485.955</b> | <b>417.270</b> | 411.931        | 412.267        | 411.595        | K[9]  |
| R[17] | 537.989        | 374.572        | 369.232        | 369.568        | 368.896        | R[8]  |
| H[18] | 583.675        | 322.538        | 317.199        | 317.535        | 316.863        | H[7]  |
| R[19] | 643.052        | 276.852        | 271.512        | 271.848        | 271.176        | R[6]  |
| K[20] | 692.423        | 215.475        | 210.135        | 210.471        | 209.799        | K[5]  |
| V[21] | <b>725.445</b> | 168.104        | 162.765        | 163.101        | 162.429        | V[4]  |
| L[22] | <b>763.140</b> | 135.082        | 129.742        | 130.078        | 129.406        | L[3]  |
| R[23] | <b>815.174</b> | 97.387         | 92.047         | 92.383         | 91.711         | R[2]  |
| D[24] | <b>853.516</b> | 45.353         | 40.014         | 40.349         | 39.678         | D[1]  |

# sp | P62806 | H4\_MOUSE

[Acetyl]SGRGKGGKGLGKGGAKRHR <sup>Dimethyl</sup> K <sup>Methyl</sup> VLRD  
28.03 14.02

- ▶ fragmentation table for charge state 4+
- ▶ specType=etd
- ▶ score=73.95
- ▶ F112758.dat
- ▶ query=q56185.p1
- ▶ precursor=512.708620
- ▶ chargePrecursor=5
- ▶ itol=0.5

| AA    | c              | y              | z+1            | z+2            | z              | AA    |
|-------|----------------|----------------|----------------|----------------|----------------|-------|
| S[1]  | 37.525         | <b>640.635</b> | <b>636.630</b> | 0.755          | <b>636.378</b> | S[24] |
| G[2]  | 51.780         | 508.374        | <b>604.370</b> | 0.755          | <b>604.118</b> | G[23] |
| R[3]  | 90.805         | 594.119        | <b>590.114</b> | <b>590.366</b> | <b>589.862</b> | R[22] |
| G[4]  | 105.061        | 555.094        | 551.089        | 551.341        | 550.837        | G[21] |
| K[5]  | 137.084        | <b>540.838</b> | 536.834        | 537.086        | 536.582        | K[20] |
| G[6]  | 151.340        | 508.815        | 504.810        | 505.062        | 504.558        | G[19] |
| G[7]  | 165.595        | 494.559        | 490.554        | 490.806        | 490.303        | G[18] |
| K[8]  | 197.619        | 480.304        | 476.299        | 476.551        | 476.047        | K[17] |
| G[9]  | 211.874        | 448.280        | 445.275        | 445.527        | 444.023        | G[16] |
| L[10] | 280.148        | 434.025        | 430.020        | 430.272        | 429.768        | L[15] |
| G[11] | 254.403        | 405.754        | 401.749        | 402.001        | 401.497        | G[14] |
| K[12] | 286.424        | 391.498        | <b>387.494</b> | <b>387.746</b> | <b>387.242</b> | K[13] |
| G[13] | 300.680        | 359.475        | 355.470        | 355.722        | 355.218        | G[12] |
| G[14] | 314.935        | 345.219        | 341.215        | 341.466        | 340.963        | G[11] |
| A[15] | 332.694        | 330.964        | 326.959        | 327.211        | 326.707        | A[10] |
| K[16] | 364.718        | 313.205        | 309.200        | 309.452        | 308.948        | K[9]  |
| R[17] | 403.743        | 281.181        | 277.176        | 277.428        | 276.924        | R[8]  |
| H[18] | 438.008        | 242.156        | 238.151        | 238.403        | 237.899        | H[7]  |
| R[19] | 484.041        | 207.891        | 203.886        | 204.138        | 203.634        | R[6]  |
| K[20] | 519.569        | 161.858        | 157.853        | 158.105        | 157.601        | K[5]  |
| V[21] | 544.336        | 126.330        | 122.325        | 122.577        | 122.073        | V[4]  |
| L[22] | <b>572.607</b> | 101.563        | 97.558         | 97.810         | 97.306         | L[3]  |
| R[23] | <b>611.632</b> | 73.292         | 69.287         | 69.539         | 69.035         | R[2]  |
| D[24] | <b>640.389</b> | 34.267         | 30.262         | 30.514         | 30.010         | D[1]  |



# sp | P62806 | H4\_MOUSE

[Acetyl]SGR<sup>Methyl</sup><sub>14.02</sub> GKGKGLGKGGAKRHRK<sup>Dimethyl</sup><sub>28.03</sub> VLRD

- ▶ fragmentation table for charge state 1+
- ▶ specType=etd
- ▶ score=94.29
- ▶ F112758.dat
- ▶ query=q56186.p1
- ▶ precursor=512.708690
- ▶ chargePrecursor=5
- ▶ itol=0.5

| AA |    | c               | y        | z+1            | z+2             | z        | AA    |
|----|----|-----------------|----------|----------------|-----------------|----------|-------|
| S  | 1  | 147.076         | 2559.518 | 2543.490       | 0.000           | 2542.491 | S[24] |
| G  | 2  | 204.598         | 2430.475 | 2414.457       | 0.000           | 2413.449 | G[23] |
| H  | 3  | <b>374.215</b>  | 2379.454 | 2357.438       | 2354.443        | 2356.427 | H[22] |
| G  | 4  | <b>431.236</b>  | 2203.537 | 2187.518       | 2188.526        | 2186.510 | G[21] |
| K  | 5  | <b>559.331</b>  | 2146.516 | 2130.500       | 2131.505        | 2129.288 | K[20] |
| G  | 6  | <b>616.353</b>  | 2018.221 | 2002.202       | 2003.210        | 2001.194 | G[19] |
| G  | 7  | <b>673.374</b>  | 1961.199 | 1945.180       | 1946.188        | 1944.173 | G[18] |
| K  | 8  | <b>801.469</b>  | 1904.179 | 1888.159       | 1889.167        | 1887.151 | K[17] |
| G  | 9  | <b>858.490</b>  | 1776.083 | 1760.064       | <b>1761.072</b> | 1759.056 | G[16] |
| L  | 10 | <b>915.514</b>  | 1719.061 | 1703.043       | 1704.050        | 1702.035 | L[15] |
| G  | 11 | <b>1028.596</b> | 1665.977 | 1589.958       | <b>1590.966</b> | 1588.951 | G[14] |
| K  | 12 | <b>1156.691</b> | 1548.956 | 1532.937       | <b>1533.945</b> | 1531.929 | K[13] |
| G  | 13 | <b>1213.712</b> | 1420.961 | 1404.942       | <b>1405.950</b> | 1403.934 | G[12] |
| G  | 14 | <b>1270.734</b> | 1363.939 | 1347.921       | <b>1348.928</b> | 1346.913 | G[11] |
| A  | 15 | <b>1341.771</b> | 1306.918 | 1290.900       | <b>1291.907</b> | 1289.891 | A[10] |
| K  | 16 | 1469.866        | 1250.897 | 1234.878       | <b>1235.886</b> | 1233.870 | K[9]  |
| R  | 17 | 1625.957        | 1197.886 | 1181.867       | 1182.875        | 1180.859 | R[8]  |
| H  | 18 | 1763.026        | 1051.985 | <b>935.566</b> | <b>936.574</b>  | 934.558  | H[7]  |
| R  | 19 | 1919.127        | 814.526  | 798.507        | 799.515         | 797.499  | R[6]  |
| K  | 20 | 2075.253        | 658.425  | 642.406        | 643.414         | 641.398  | K[5]  |
| V  | 21 | 2174.322        | 502.298  | <b>486.280</b> | 487.287         | 485.272  | V[4]  |
| L  | 22 | 2287.406        | 403.236  | <b>387.211</b> | 388.219         | 386.203  | L[3]  |
| L  | 23 | 2453.587        | 290.140  | <b>274.127</b> | 275.135         | 273.119  | L[2]  |
| D  | 24 | 2558.534        | 134.045  | 118.026        | 119.034         | 117.018  | D[1]  |

# sp | P62806 | H4\_MOUSE

[Acetyl]SGR<sup>Methyl</sup><sub>14.02</sub> GKGGKGLGKGGAKRHRK<sup>Dimethyl</sup><sub>28.03</sub> VLRD

- ▶ fragmentation table for charge state 2+
- ▶ specType=etd
- ▶ score=94.29
- ▶ F112758.dat
- ▶ query=q56186.p1
- ▶ precursor=512.708690
- ▶ chargePrecursor=5
- ▶ itol=0.5

| AA   | c               | y              | z+1             | z+2             | z              | AA   |
|------|-----------------|----------------|-----------------|-----------------|----------------|------|
| S 1  | 74.642          | 1200.263       | 1272.253        | 0.504           | 1271.749       | S 24 |
| G 2  | 102.553         | 1215.741       | 1207.732        | 0.504           | 1207.239       | G 23 |
| R 3  | 187.611         | 1180.231       | <b>1179.221</b> | <b>1179.725</b> | 1178.717       | R 22 |
| G 4  | 216.722         | 1102.172       | 1099.163        | <b>1094.667</b> | 1093.659       | G 21 |
| K 5  | 280.109         | 1073.661       | <b>1065.652</b> | <b>1066.156</b> | 1065.148       | K 20 |
| G 6  | 308.680         | 1008.614       | <b>1001.605</b> | <b>1002.108</b> | 1001.101       | G 19 |
| G 7  | 337.191         | 981.103        | <b>973.094</b>  | <b>973.598</b>  | <b>972.590</b> | G 18 |
| K 8  | <b>401.218</b>  | 952.592        | <b>944.583</b>  | <b>945.087</b>  | 944.079        | K 17 |
| G 9  | <b>429.749</b>  | <b>888.545</b> | <b>880.536</b>  | <b>881.040</b>  | 880.032        | G 16 |
| L 10 | <b>458.291</b>  | <b>860.934</b> | 857.925         | 853.920         | 851.921        | L 15 |
| G 11 | <b>514.802</b>  | 803.482        | <b>795.483</b>  | <b>795.987</b>  | 794.979        | G 14 |
| K 12 | <b>578.849</b>  | 774.982        | <b>766.972</b>  | <b>767.476</b>  | 766.468        | K 13 |
| G 13 | <b>607.360</b>  | <b>710.934</b> | <b>702.925</b>  | <b>703.429</b>  | 702.421        | G 12 |
| G 14 | <b>635.871</b>  | 682.423        | <b>674.414</b>  | <b>674.918</b>  | <b>673.910</b> | G 11 |
| A 15 | <b>671.389</b>  | 653.912        | <b>645.903</b>  | <b>646.407</b>  | 645.399        | A 10 |
| R 16 | <b>735.437</b>  | 618.394        | <b>610.385</b>  | <b>610.889</b>  | 609.881        | R 9  |
| R 17 | <b>813.487</b>  | 554.347        | <b>546.337</b>  | <b>546.841</b>  | <b>545.833</b> | R 8  |
| H 18 | <b>882.017</b>  | 476.290        | 468.289         | <b>468.791</b>  | 467.783        | H 7  |
| R 19 | <b>960.067</b>  | 407.707        | <b>399.757</b>  | 400.261         | <b>399.253</b> | R 6  |
| K 20 | <b>1038.130</b> | 329.716        | 321.707         | 322.211         | 321.203        | K 5  |
| V 21 | <b>1087.665</b> | 251.653        | 243.643         | 244.147         | 243.140        | V 4  |
| L 22 | <b>1144.207</b> | 202.119        | 194.109         | 194.613         | 193.605        | L 3  |
| R 23 | 1222.257        | 148.577        | 137.567         | 138.071         | 137.063        | R 2  |
| D 24 | 1279.771        | 67.528         | 59.517          | 60.021          | 59.013         | D 1  |

# sp | P62806 | H4\_MOUSE

[Acetyl]SGR<sup>Methyl</sup><sub>14.02</sub> GKGGKGLGKGGAKRHRK<sup>Dimethyl</sup><sub>28.03</sub> VLRD

- ▶ fragmentation table for charge state 3+
- ▶ specType=etd
- ▶ score=94.29
- ▶ F112758.dat
- ▶ query=q56186.p1
- ▶ precursor=512.708690
- ▶ chargePrecursor=5
- ▶ itol=0.5

| AA    | c              | y              | z+1            | z+2            | z              | AA    |
|-------|----------------|----------------|----------------|----------------|----------------|-------|
| S[1]  | 49.697         | <b>853.844</b> | 848.507        | 0.672          | 848.199        | S[24] |
| G[2]  | 58.704         | 810.830        | 805.490        | 0.672          | 805.154        | G[23] |
| R[3]  | 125.410        | 791.823        | 786.483        | <b>786.819</b> | 786.147        | R[22] |
| G[4]  | 144.417        | <b>735.117</b> | <b>729.778</b> | <b>730.114</b> | 729.442        | G[21] |
| K[5]  | 187.115        | 716.110        | <b>710.770</b> | <b>711.106</b> | <b>710.435</b> | K[20] |
| G[6]  | 206.122        | <b>673.412</b> | <b>668.072</b> | <b>668.408</b> | 667.736        | G[19] |
| G[7]  | 225.130        | 654.405        | <b>649.065</b> | <b>649.401</b> | 648.729        | G[18] |
| K[8]  | 267.828        | 635.397        | <b>630.058</b> | <b>630.394</b> | 629.722        | K[17] |
| G[9]  | 286.835        | <b>592.699</b> | 587.359        | <b>587.695</b> | 587.024        | G[16] |
| L[10] | 324.930        | 573.692        | 568.352        | 568.688        | 568.016        | L[15] |
| G[11] | 343.937        | 558.997        | <b>530.658</b> | <b>530.994</b> | 530.322        | G[14] |
| K[12] | 386.235        | 516.990        | 511.651        | 511.986        | 511.315        | K[13] |
| G[13] | 405.242        | 474.292        | <b>468.952</b> | <b>469.288</b> | <b>468.616</b> | G[12] |
| G[14] | 424.249        | 455.285        | 449.945        | 450.281        | 449.609        | G[11] |
| A[15] | 447.959        | 436.277        | <b>430.938</b> | <b>431.274</b> | 430.602        | A[10] |
| K[16] | 490.627        | 412.598        | 407.259        | 407.595        | 406.923        | K[9]  |
| R[17] | <b>542.661</b> | 369.900        | 364.561        | 364.896        | 364.225        | R[8]  |
| H[18] | <b>588.347</b> | 317.866        | 312.527        | 312.863        | 312.191        | H[7]  |
| R[19] | 630.331        | 272.180        | 266.841        | 267.176        | 266.505        | R[6]  |
| K[20] | <b>692.423</b> | 220.140        | 214.807        | 215.143        | 214.471        | K[5]  |
| V[21] | <b>725.445</b> | 168.104        | 162.765        | 163.101        | 162.429        | V[4]  |
| L[22] | <b>763.140</b> | 135.082        | 129.742        | 130.078        | 129.406        | L[3]  |
| R[23] | <b>815.174</b> | 97.387         | 92.047         | 92.383         | 91.711         | R[2]  |
| D[24] | <b>853.516</b> | 45.353         | 40.014         | 40.349         | 39.678         | D[1]  |



# sp | P62806 | H4\_MOUSE

[Acetyl]SGR<sup>Methyl</sup><sub>14.02</sub> GKGGKGLGKGGAKRHRK<sup>Dimethyl</sup><sub>28.03</sub> VLRD

- ▶ fragmentation table for charge state 4+
- ▶ specType=etd
- ▶ score=94.29
- ▶ F112758.dat
- ▶ query=q56186.p1
- ▶ precursor=512.708690
- ▶ chargePrecursor=5
- ▶ itol=0.5

| AA    | c              | y              | z+1            | z+2            | z              | AA    |
|-------|----------------|----------------|----------------|----------------|----------------|-------|
| S[1]  | 37.525         | <b>640.635</b> | <b>636.630</b> | 0.755          | <b>636.378</b> | S[24] |
| G[2]  | 51.780         | 508.374        | <b>604.370</b> | 0.755          | 604.118        | G[23] |
| R[3]  | 94.309         | 594.119        | 590.114        | <b>590.366</b> | 589.862        | R[22] |
| G[4]  | 108.564        | 551.590        | 547.585        | 547.837        | <b>547.333</b> | G[21] |
| K[5]  | 140.588        | 537.334        | 533.330        | 533.582        | 533.078        | K[20] |
| G[6]  | 154.844        | 505.311        | 501.306        | 501.558        | 501.054        | G[19] |
| G[7]  | 169.099        | 491.055        | 487.051        | 487.303        | <b>486.799</b> | G[18] |
| K[8]  | 201.123        | 476.800        | 472.795        | 473.047        | 472.543        | K[17] |
| G[9]  | 215.378        | 454.776        | 449.771        | 449.923        | 449.520        | G[16] |
| L[10] | 283.049        | <b>430.521</b> | 426.516        | 426.768        | 426.264        | L[15] |
| G[11] | 257.904        | 402.250        | 398.245        | 398.497        | 397.993        | G[14] |
| K[12] | 289.928        | 387.994        | 383.989        | 384.242        | 383.738        | K[13] |
| G[13] | 304.184        | 355.971        | 351.966        | 352.218        | 351.714        | G[12] |
| G[14] | 318.439        | 341.715        | 337.711        | 337.963        | 337.459        | G[11] |
| A[15] | 336.198        | 327.460        | 323.455        | 323.707        | 323.203        | A[10] |
| K[16] | 368.222        | 309.701        | 305.696        | 305.948        | 305.444        | K[9]  |
| R[17] | 407.247        | 277.677        | 273.672        | <b>273.924</b> | 273.420        | R[8]  |
| H[18] | 441.512        | 238.652        | 234.647        | 234.899        | 234.395        | H[7]  |
| R[19] | 480.537        | 204.397        | 200.392        | 200.644        | 200.140        | R[6]  |
| K[20] | 519.569        | 165.362        | 161.357        | 161.609        | 161.105        | K[5]  |
| V[21] | 544.336        | 126.330        | 122.325        | 122.577        | 122.073        | V[4]  |
| L[22] | 572.607        | 101.563        | 97.558         | 97.810         | 97.306         | L[3]  |
| R[23] | <b>611.632</b> | 73.292         | 69.287         | 69.539         | 69.035         | R[2]  |
| D[24] | 640.389        | 34.267         | 30.262         | 30.514         | 30.010         | D[1]  |



# sp | P62806 | H4\_MOUSE

[Acetyl]SGRGKGGKGLGKGGAKRHRK (Dimethyl)<sub>(28.03)</sub> VLR (Methyl)<sub>(14.02)</sub> D

- ▶ fragmentation table for charge state 1+
- ▶ specType=etd
- ▶ score=65.89
- ▶ F112758.dat
- ▶ query=q56193\_p1
- ▶ precursor=853.844030
- ▶ chargePrecursor=3
- ▶ itol=0.5

| AA    | c               | y        | z+1             | z+2             | z        | AA    |
|-------|-----------------|----------|-----------------|-----------------|----------|-------|
| S[1]  | 147.076         | 2559.518 | 2543.499        | 0.000           | 2542.491 | S[24] |
| G[2]  | 204.098         | 2430.475 | 2414.457        | 0.000           | 2413.449 | G[23] |
| R[3]  | 380.199         | 2373.454 | 2357.435        | 2358.443        | 2356.427 | R[22] |
| G[4]  | 417.220         | 2217.383 | 2201.364        | 2202.342        | 2200.326 | G[21] |
| K[5]  | <b>545.315</b>  | 2160.331 | 2144.313        | 2145.320        | 2143.305 | K[20] |
| G[6]  | <b>602.337</b>  | 2032.298 | 2016.279        | 2017.295        | 2015.270 | G[19] |
| G[7]  | <b>659.358</b>  | 1975.215 | <b>1959.196</b> | 1960.204        | 1958.188 | G[18] |
| K[8]  | <b>787.453</b>  | 1918.193 | <b>1902.175</b> | 1903.182        | 1901.167 | K[17] |
| G[9]  | <b>844.475</b>  | 1790.098 | <b>1774.080</b> | 1775.087        | 1773.072 | G[16] |
| L[10] | <b>937.559</b>  | 1733.077 | <b>1717.058</b> | 1718.066        | 1716.050 | L[15] |
| G[11] | <b>1014.580</b> | 1619.993 | <b>1603.974</b> | 1604.982        | 1602.966 | G[14] |
| R[12] | 1142.675        | 1562.971 | <b>1546.953</b> | 1547.960        | 1545.945 | R[13] |
| G[13] | 1199.697        | 1434.876 | <b>1418.858</b> | 1419.866        | 1417.850 | G[12] |
| G[14] | 1256.718        | 1377.855 | <b>1361.836</b> | <b>1362.844</b> | 1360.829 | G[11] |
| A[15] | 1327.755        | 1320.833 | 1304.815        | 1305.823        | 1303.807 | A[10] |
| R[16] | 1405.850        | 1249.799 | 1233.778        | 1234.785        | 1232.770 | R[9]  |
| R[17] | 1611.951        | 1171.701 | 1155.683        | <b>1106.691</b> | 1104.675 | R[8]  |
| H[18] | <b>1749.010</b> | 995.600  | 949.582         | 950.589         | 948.574  | H[7]  |
| R[19] | 1906.111        | 828.541  | 812.523         | <b>813.530</b>  | 811.515  | R[6]  |
| R[20] | 2061.238        | 672.440  | 656.422         | <b>657.429</b>  | 655.414  | R[5]  |
| V[21] | 2180.306        | 516.314  | 500.295         | 501.303         | 499.287  | V[4]  |
| L[22] | 2273.390        | 417.246  | 401.227         | 402.235         | 400.219  | L[3]  |
| D[23] | 2443.507        | 304.162  | 288.143         | 289.151         | 287.135  | D[2]  |
| D[24] | 2558.534        | 194.045  | 178.026         | 179.034         | 177.018  | D[1]  |

# sp | P62806 | H4\_MOUSE

[Acetyl]SGRGKGGKGLGKGGAKRHRK <sup>(Dimethyl)</sup><sub>(28.03)</sub> VLR <sup>(Methyl)</sup><sub>(14.02)</sub> D

- ▶ fragmentation table for charge state 2+
- ▶ specType=etd
- ▶ score=65.89
- ▶ F112758.dat
- ▶ query=q56193\_p1
- ▶ precursor=853.844030
- ▶ chargePrecursor=3
- ▶ itol=0.5

| AA    | c        | y               | z+1             | z+2             | z        | AA    |
|-------|----------|-----------------|-----------------|-----------------|----------|-------|
| S[1]  | 74.042   | <b>1280.263</b> | <b>1272.253</b> | 0.504           | 1271.749 | S[2]  |
| G[2]  | 102.553  | 1215.741        | <b>1207.732</b> | 0.504           | 1207.228 | G[23] |
| R[3]  | 180.053  | 1187.231        | <b>1179.221</b> | <b>1179.725</b> | 1178.717 | R[22] |
| G[4]  | 209.114  | 1159.380        | <b>1101.171</b> | <b>1101.675</b> | 1100.667 | G[21] |
| K[5]  | 271.161  | 1080.669        | 1072.660        | 1073.164        | 1072.156 | K[20] |
| G[6]  | 301.672  | 1016.622        | 1008.612        | 1009.116        | 1008.108 | G[19] |
| G[7]  | 330.183  | 988.111         | 980.102         | 980.606         | 979.598  | G[18] |
| K[8]  | 394.230  | 959.600         | 951.591         | 952.095         | 951.087  | K[17] |
| G[9]  | 422.741  | 895.553         | 887.543         | 888.047         | 887.040  | G[16] |
| L[10] | 439.283  | 887.042         | 889.033         | 890.537         | 889.529  | L[15] |
| G[11] | 507.794  | 816.500         | 807.491         | 807.995         | 807.987  | G[14] |
| R[12] | 571.841  | 781.989         | 773.980         | 774.484         | 773.476  | R[13] |
| G[13] | 600.352  | 717.943         | 709.932         | 710.436         | 709.429  | G[12] |
| G[14] | 628.863  | 689.431         | 681.422         | 681.926         | 680.918  | G[11] |
| A[15] | 664.381  | 660.920         | 652.911         | 653.415         | 652.407  | A[10] |
| R[16] | 728.439  | 625.402         | 617.392         | 617.896         | 616.889  | R[9]  |
| R[17] | 806.478  | 563.354         | 553.345         | 553.849         | 552.841  | R[8]  |
| H[18] | 875.009  | 483.304         | 475.294         | 475.798         | 474.791  | H[7]  |
| R[19] | 953.059  | 414.774         | 406.765         | 407.269         | 406.261  | R[6]  |
| R[20] | 1031.125 | 336.724         | 328.714         | 329.218         | 328.211  | R[5]  |
| V[21] | 1080.657 | 258.661         | 250.651         | 251.155         | 250.147  | V[4]  |
| L[22] | 1137.199 | 209.136         | 201.127         | 201.631         | 200.623  | L[3]  |
| D[23] | 1222.297 | 132.584         | 144.573         | 145.078         | 144.071  | D[2]  |
| D[24] | 1279.771 | 87.525          | 59.517          | 60.021          | 59.013   | D[1]  |

# sp | P62806 | H4\_MOUSE

[Acetyl]SGRGKGGKGLGKGGAK Acetyl RHRK (Methyl) VLRD  
42.01 (14.02)

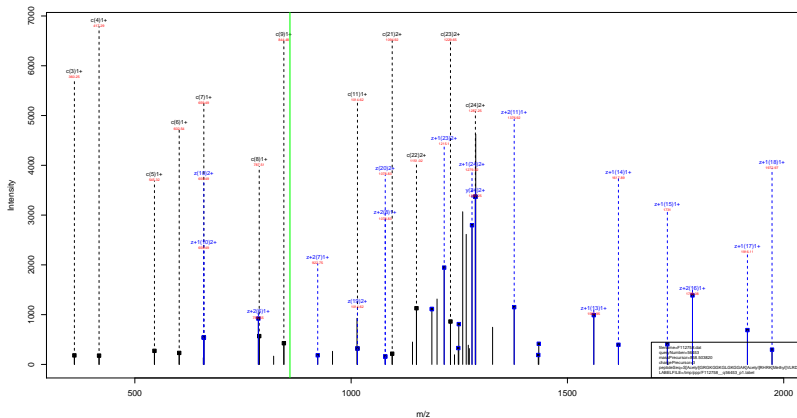

# sp | P62806 | H4\_MOUSE

[Acetyl]SGRGKGGKGLGKGGAK<sup>Acetyl</sup> RHRK<sup>(Methyl)</sup> VLRD<sup>(14.02)</sup>

- ▶ fragmentation table for charge state 1+
- ▶ specType=etd
- ▶ score=64.60
- ▶ F112758.dat
- ▶ query=q56453\_p1
- ▶ precursor=858.503820
- ▶ chargePrecursor=3
- ▶ itol=0.5

| AA |    | c               | y        | z+1             | z+2             | z        | AA    |
|----|----|-----------------|----------|-----------------|-----------------|----------|-------|
| S  | 1  | 147.076         | 2573.497 | 2557.478        | 0.000           | 2556.471 | S[24] |
| G  | 2  | 204.098         | 2444.455 | 2428.436        | 0.000           | 2427.429 | G[23] |
| R  | 3  | <b>360.199</b>  | 2307.413 | 2291.414        | 2272.422        | 2310.407 | R[22] |
| G  | 4  | <b>417.220</b>  | 2213.312 | 2213.313        | 2216.321        | 2214.305 | G[21] |
| K  | 5  | <b>545.315</b>  | 2174.310 | 2158.292        | 2159.300        | 2157.284 | K[20] |
| G  | 6  | <b>602.337</b>  | 2046.216 | 2030.197        | 2031.205        | 2029.189 | G[19] |
| G  | 7  | <b>659.358</b>  | 1989.194 | <b>1973.175</b> | 1974.183        | 1972.168 | G[18] |
| K  | 8  | <b>787.453</b>  | 1932.173 | <b>1916.154</b> | 1917.162        | 1915.146 | K[17] |
| G  | 9  | <b>844.475</b>  | 1804.078 | 1788.059        | <b>1789.067</b> | 1787.051 | G[16] |
| L  | 10 | 897.556         | 1747.056 | <b>1731.037</b> | 1732.045        | 1730.030 | L[15] |
| G  | 11 | <b>1014.580</b> | 1633.972 | <b>1617.953</b> | 1618.961        | 1616.946 | G[14] |
| K  | 12 | 1142.675        | 1576.951 | <b>1560.932</b> | 1561.940        | 1559.924 | K[13] |
| G  | 13 | 1199.697        | 1448.856 | <b>1432.837</b> | <b>1433.845</b> | 1431.829 | G[12] |
| G  | 14 | 1256.718        | 1391.834 | 1375.815        | <b>1376.823</b> | 1374.808 | G[11] |
| A  | 15 | 1327.755        | 1334.813 | 1318.794        | 1319.802        | 1317.786 | A[10] |
| R  | 16 | 1407.801        | 1283.791 | <b>1247.757</b> | <b>1248.765</b> | 1246.749 | R[9]  |
| R  | 17 | 1653.962        | 1203.670 | 1187.651        | <b>1076.659</b> | 1076.644 | R[8]  |
| H  | 18 | 1791.021        | 937.569  | 921.550         | <b>922.558</b>  | 920.542  | H[7]  |
| R  | 19 | 1947.122        | 900.510  | 784.491         | <b>785.499</b>  | 783.484  | R[6]  |
| K  | 20 | 2089.233        | 644.409  | 628.390         | 629.398         | 627.382  | K[5]  |
| V  | 21 | 2188.301        | 502.298  | 486.280         | 487.287         | 485.272  | V[4]  |
| L  | 22 | 2401.386        | 403.230  | 387.211         | 388.219         | 386.203  | L[3]  |
| D  | 23 | 2674.486        | 300.140  | 274.121         | 275.128         | 273.112  | D[2]  |
| D  | 24 | 2572.513        | 194.045  | 178.026         | 179.034         | 177.018  | D[1]  |

# sp | P62806 | H4\_MOUSE

[Acetyl]SGRGKGGKGLGKGGAK<sup>Acetyl</sup> RHRK<sup>(Methyl)</sup> VLRD<sup>(14.02)</sup>

- ▶ fragmentation table for charge state 2+
- ▶ specType=etd
- ▶ score=64.60
- ▶ F112758.dat
- ▶ query=q56453.p1
- ▶ precursor=858.503820
- ▶ chargePrecursor=3
- ▶ itol=0.5

| AA    | c               | y               | z+1             | z+2             | z               | AA    |
|-------|-----------------|-----------------|-----------------|-----------------|-----------------|-------|
| S[1]  | 74.092          | <b>1287.252</b> | <b>1279.243</b> | 0.504           | 1278.739        | S[24] |
| G[2]  | 102.553         | 1222.731        | <b>1214.722</b> | 0.504           | 1214.218        | G[23] |
| R[3]  | 180.603         | 1194.220        | <b>1186.211</b> | <b>1186.715</b> | 1185.707        | R[22] |
| G[4]  | 269.114         | 1118.170        | 1108.160        | 1108.664        | 1107.656        | G[21] |
| R[5]  | 373.163         | 1037.659        | 1029.649        | 1030.153        | <b>1079.146</b> | R[20] |
| G[6]  | 501.672         | 1023.611        | 1015.600        | 1016.106        | <b>1015.098</b> | G[19] |
| G[7]  | 330.183         | 995.101         | 987.091         | 987.595         | 988.587         | G[18] |
| K[8]  | 394.230         | 956.590         | 956.581         | 959.084         | 958.077         | K[17] |
| G[9]  | 422.741         | 902.542         | 894.533         | 895.037         | 894.029         | G[16] |
| L[10] | 479.289         | 874.132         | 866.122         | 866.626         | 865.618         | L[15] |
| G[11] | 507.794         | 817.490         | 809.480         | 809.984         | 808.976         | G[14] |
| K[12] | 571.841         | 789.079         | 789.070         | 781.474         | 780.466         | K[13] |
| G[13] | 600.352         | 724.911         | 716.902         | 717.406         | 716.418         | G[12] |
| G[14] | 628.863         | 696.421         | 688.411         | 688.915         | 687.907         | G[11] |
| A[15] | 664.361         | 667.910         | <b>659.901</b>  | 660.405         | <b>659.397</b>  | A[10] |
| R[16] | 749.434         | 632.391         | 624.382         | 624.886         | 623.878         | R[9]  |
| R[17] | 827.485         | 547.339         | 539.329         | 539.833         | 538.825         | R[6]  |
| H[18] | 896.014         | 469.288         | 461.279         | 461.783         | 460.775         | H[7]  |
| R[19] | 974.065         | 400.759         | 392.749         | 393.253         | 392.245         | R[6]  |
| K[20] | 1046.120        | 322.708         | 314.699         | 315.203         | 314.195         | K[5]  |
| V[21] | <b>1094.654</b> | 251.053         | 243.043         | 244.547         | 243.540         | V[4]  |
| L[22] | <b>1151.196</b> | 202.119         | 194.109         | 194.613         | 193.605         | L[1]  |
| R[23] | <b>1229.247</b> | 145.577         | 137.567         | 138.071         | 137.063         | R[2]  |
| D[24] | <b>1286.760</b> | 67.526          | 59.517          | 60.021          | 59.013          | D[1]  |

# sp | P62806 | H4\_MOUSE

[Acetyl]SGRGKGGKGLGKGGAK Acetyl 42.01 RHRK Methyl 14.02 VLRD

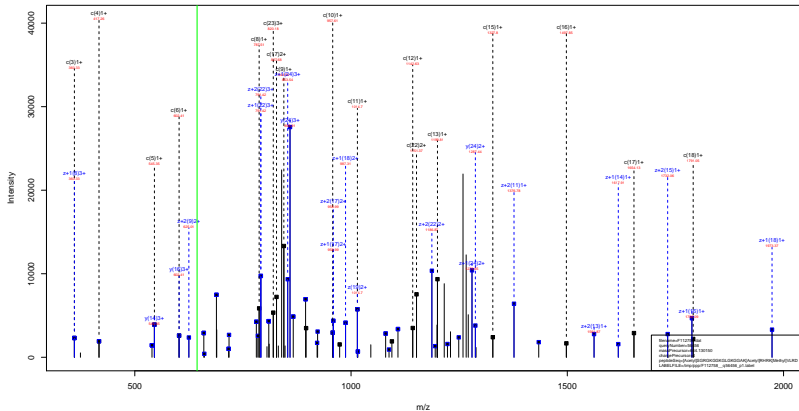



# sp | P62806 | H4\_MOUSE

[Acetyl]SGRGKGGKGLGKGGAK<sup>Acetyl</sup> RHRK<sup>Methyl</sup> VLRD<sup>14.02</sup>

- ▶ fragmentation table for charge state 1+
- ▶ specType=etd
- ▶ score=135.55
- ▶ F112758.dat
- ▶ query=q56456\_p1
- ▶ precursor=644.130150
- ▶ chargePrecursor=4
- ▶ itol=0.5

| AA | c  | y               | z+1      | z+2             | z               | AA       |       |
|----|----|-----------------|----------|-----------------|-----------------|----------|-------|
| S  | 1  | 147.676         | 2573.497 | 2557.478        | 0.000           | 2556.471 | S[24] |
| G  | 2  | 204.098         | 2444.455 | 2428.436        | 0.000           | 2427.429 | G[23] |
| R  | 3  | <b>350.199</b>  | 2387.433 | 2371.414        | 2372.432        | 2310.407 | R[22] |
| G  | 4  | <b>417.230</b>  | 2213.332 | 2215.313        | 2216.321        | 2214.309 | G[21] |
| K  | 5  | <b>545.315</b>  | 2174.310 | 2158.292        | 2159.300        | 2157.284 | K[20] |
| G  | 6  | <b>602.337</b>  | 2046.216 | 2030.197        | 2031.205        | 2029.189 | G[19] |
| G  | 7  | <b>659.358</b>  | 1989.194 | <b>1973.175</b> | 1974.183        | 1972.168 | G[18] |
| K  | 8  | <b>787.453</b>  | 1932.173 | 1916.154        | 1917.162        | 1915.146 | K[17] |
| G  | 9  | <b>844.475</b>  | 1894.078 | <b>1788.059</b> | 1789.067        | 1787.051 | G[16] |
| L  | 10 | <b>927.559</b>  | 1747.056 | 1731.037        | <b>1732.045</b> | 1730.030 | L[15] |
| G  | 11 | <b>1014.580</b> | 1633.972 | <b>1617.953</b> | 1618.961        | 1616.946 | G[14] |
| K  | 12 | <b>1142.675</b> | 1576.951 | 1560.932        | <b>1561.940</b> | 1559.924 | K[13] |
| G  | 13 | <b>1199.697</b> | 1448.856 | 1432.837        | <b>1433.845</b> | 1431.829 | G[12] |
| G  | 14 | 1256.718        | 1391.834 | 1375.815        | <b>1376.823</b> | 1374.808 | G[11] |
| A  | 15 | <b>1327.756</b> | 1334.812 | 1318.794        | 1319.802        | 1317.786 | A[10] |
| R  | 16 | <b>1497.861</b> | 1283.776 | 1247.757        | <b>1248.765</b> | 1246.749 | R[9]  |
| R  | 17 | <b>1653.962</b> | 1093.670 | 1077.651        | 1078.659        | 1076.644 | R[8]  |
| H  | 18 | <b>1791.021</b> | 937.569  | <b>921.550</b>  | <b>922.558</b>  | 920.542  | H[7]  |
| R  | 19 | 1947.122        | 800.510  | <b>784.491</b>  | 785.499         | 783.484  | R[6]  |
| K  | 20 | 2089.233        | 644.409  | 628.390         | 629.398         | 627.382  | K[5]  |
| V  | 21 | 2188.301        | 502.298  | 486.280         | 487.287         | 485.272  | V[4]  |
| L  | 22 | 2301.388        | 403.230  | 387.211         | 388.219         | 386.203  | L[3]  |
| R  | 23 | 2437.488        | 290.146  | 274.127         | 275.135         | 273.119  | R[2]  |
| D  | 24 | 2572.513        | 134.045  | 118.026         | 119.034         | 117.018  | D[1]  |

# sp | P62806 | H4\_MOUSE

[Acetyl]SGRGKGGKGLGKGGAK<sup>Acetyl</sup>RHRK<sup>Methyl</sup>VLRD<sup>14.02</sup>  
42.01 14.02

- ▶ fragmentation table for charge state 2+
- ▶ specType=etd
- ▶ score=135.55
- ▶ F112758.dat
- ▶ query=q56456.p1
- ▶ precursor=644.130150
- ▶ chargePrecursor=4
- ▶ itol=0.5

| AA    | c               | y               | z+1             | z+2             | z               | AA    |
|-------|-----------------|-----------------|-----------------|-----------------|-----------------|-------|
| S[1]  | 74.642          | <b>1287.252</b> | <b>1279.243</b> | 0.504           | 1278.739        | S[24] |
| G[2]  | 102.553         | <b>1222.731</b> | 1214.722        | 0.504           | 1214.218        | G[23] |
| R[3]  | 180.603         | <b>1194.220</b> | 1186.211        | <b>1186.715</b> | 1185.707        | R[22] |
| G[4]  | 259.114         | 1129.710        | <b>1108.160</b> | <b>1108.654</b> | 1107.650        | G[21] |
| K[5]  | 273.153         | <b>1087.659</b> | <b>1079.650</b> | <b>1080.153</b> | 1079.149        | K[20] |
| G[6]  | 301.672         | 1023.611        | <b>1015.602</b> | <b>1016.106</b> | <b>1015.098</b> | G[19] |
| G[7]  | 330.183         | 995.101         | <b>987.091</b>  | <b>987.595</b>  | 986.587         | G[18] |
| K[8]  | 394.230         | 956.590         | <b>958.581</b>  | <b>959.084</b>  | <b>958.077</b>  | K[17] |
| G[9]  | 422.741         | 902.542         | <b>894.533</b>  | <b>895.037</b>  | 894.030         | G[16] |
| L[10] | 479.293         | 874.032         | <b>866.022</b>  | <b>866.526</b>  | 865.521         | L[15] |
| G[11] | 507.794         | 817.490         | <b>809.480</b>  | <b>809.984</b>  | 808.979         | G[14] |
| K[12] | 571.841         | 788.979         | <b>780.970</b>  | <b>781.474</b>  | 780.466         | K[13] |
| G[13] | 600.352         | 724.931         | <b>716.922</b>  | <b>717.426</b>  | 716.418         | G[12] |
| G[14] | 628.863         | 696.421         | <b>688.411</b>  | <b>688.915</b>  | 687.907         | G[11] |
| A[15] | 684.381         | 667.910         | <b>659.901</b>  | <b>660.405</b>  | <b>659.397</b>  | A[10] |
| R[16] | 749.438         | 632.391         | 624.382         | <b>624.886</b>  | 623.878         | R[9]  |
| R[17] | <b>827.485</b>  | 547.339         | <b>539.329</b>  | <b>539.833</b>  | 538.825         | R[8]  |
| H[18] | <b>896.014</b>  | 469.289         | 461.279         | 461.783         | 460.775         | H[7]  |
| R[19] | <b>974.065</b>  | 400.759         | 392.749         | 393.253         | 392.245         | R[6]  |
| K[20] | 1042.129        | 322.708         | 314.699         | 315.203         | 314.195         | K[5]  |
| V[21] | <b>1094.654</b> | 254.653         | 246.643         | 247.147         | 246.140         | V[4]  |
| L[22] | <b>1151.196</b> | 202.139         | 194.130         | 194.633         | 193.625         | L[3]  |
| R[23] | 1226.247        | 145.577         | 137.567         | 138.071         | 137.063         | R[2]  |
| D[24] | 1286.700        | 67.526          | 59.517          | 60.021          | 59.013          | D[1]  |

# sp | P62806 | H4\_MOUSE

[Acetyl]SGRGKGGKGLGKGGAK<sup>Acetyl</sup> RHRK<sup>Methyl</sup> VLRD<sup>14.02</sup>  
42.01 14.02

- ▶ fragmentation table for charge state 3+
- ▶ specType=etd
- ▶ score=135.55
- ▶ F112758.dat
- ▶ query=q56456.p1
- ▶ precursor=644.130150
- ▶ chargePrecursor=4
- ▶ itol=0.5

| AA    | c              | y              | z+1            | z+2            | z              | AA    |
|-------|----------------|----------------|----------------|----------------|----------------|-------|
| S[1]  | 49.697         | <b>858.504</b> | <b>853.164</b> | 0.672          | 852.838        | S[24] |
| G[2]  | 58.704         | 815.490        | <b>810.150</b> | 0.672          | <b>809.814</b> | G[23] |
| R[3]  | 150.738        | 796.481        | <b>791.143</b> | <b>791.479</b> | 790.807        | R[22] |
| G[4]  | 139.745        | 784.449        | 739.109        | 739.445        | 738.773        | G[21] |
| K[5]  | 182.443        | 725.442        | 720.102        | 720.438        | 719.766        | K[20] |
| G[6]  | 201.450        | 682.743        | 677.404        | 677.740        | 677.068        | G[19] |
| G[7]  | 220.458        | 663.736        | 658.397        | 658.733        | 658.061        | G[18] |
| K[8]  | 263.156        | 644.729        | 639.389        | 639.725        | 639.054        | K[17] |
| G[9]  | 282.163        | <b>602.031</b> | 596.691        | 597.027        | 596.355        | G[16] |
| L[10] | 319.958        | 584.024        | 577.684        | 578.020        | 577.348        | L[15] |
| G[11] | 338.965        | <b>545.329</b> | <b>539.989</b> | 540.325        | <b>539.653</b> | G[14] |
| K[12] | 381.563        | 526.322        | 520.982        | 521.318        | 520.646        | K[13] |
| G[13] | 400.570        | 483.623        | 478.284        | 478.620        | 477.948        | G[12] |
| G[14] | 419.578        | 464.616        | 459.277        | 459.613        | 458.941        | G[11] |
| A[15] | 443.257        | 445.609        | 440.270        | 440.605        | 439.934        | A[10] |
| K[16] | 469.958        | 421.930        | 416.590        | <b>416.926</b> | 416.255        | K[9]  |
| R[17] | 551.992        | 365.226        | <b>359.889</b> | <b>360.225</b> | 359.553        | R[8]  |
| H[18] | 597.678        | 313.195        | 307.855        | 308.191        | 307.519        | H[7]  |
| R[19] | 649.712        | 297.508        | 262.169        | 262.505        | 261.833        | R[6]  |
| K[20] | 697.082        | 215.475        | 210.137        | 210.471        | 209.799        | K[5]  |
| V[21] | 730.105        | 168.104        | 162.765        | 163.101        | 162.429        | V[4]  |
| L[22] | 767.800        | 135.082        | 129.742        | 130.078        | 129.406        | L[3]  |
| R[23] | <b>819.834</b> | 97.387         | 92.047         | 92.383         | 91.711         | R[2]  |
| D[24] | 858.176        | 45.353         | 40.014         | 40.349         | 39.678         | D[1]  |

# sp | P62806 | H4\_MOUSE

[Acetyl]SGRGKGGKGLGKGGAK <sup>Acetyl</sup>42.01 RHR <sup>Methyl</sup>14.02 KVLRD

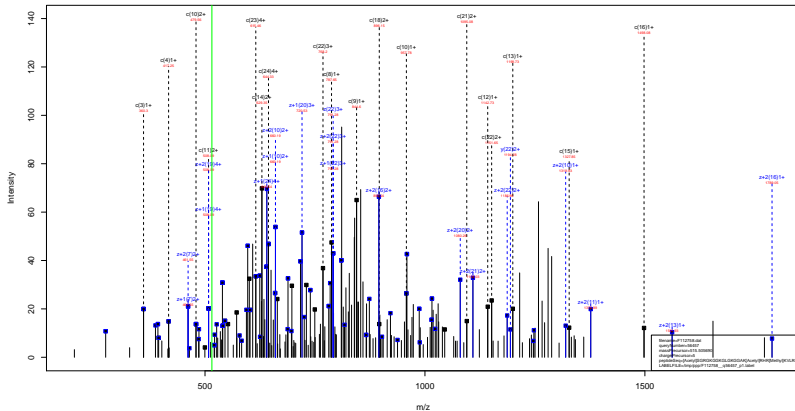

# sp | P62806 | H4\_MOUSE

[Acetyl]SGRGKGGKGLGKGGAK<sup>Acetyl</sup> RHR<sup>Methyl</sup> KVLRD<sup>14.02</sup>  
42.01 14.02

- ▶ fragmentation table for charge state 1+
- ▶ specType=etd
- ▶ score=76.02
- ▶ F112758.dat
- ▶ query=q56457\_p1
- ▶ precursor=515.505690
- ▶ chargePrecursor=5
- ▶ itol=0.5

| AA    | c               | y              | z+1             | z+2             | z               | AA    |
|-------|-----------------|----------------|-----------------|-----------------|-----------------|-------|
| S[1]  | 147.076         | 257.3497       | 257.478         | 0.000           | 256.471         | S[24] |
| G[2]  | 204.008         | 2444.455       | 2428.430        | 0.000           | 2427.428        | G[23] |
| R[3]  | <b>360.199</b>  | 2387.433       | 2371.411        | 2472.422        | 2370.407        | R[22] |
| G[4]  | <b>417.220</b>  | 2331.328       | 2315.313        | 2218.221        | 2214.205        | G[21] |
| K[5]  | <b>545.315</b>  | 2174.310       | 2158.290        | 2159.300        | 2157.284        | K[20] |
| G[6]  | <b>602.337</b>  | 2046.216       | 2030.197        | 2031.205        | 2029.189        | G[19] |
| G[7]  | <b>659.358</b>  | 1989.104       | 1973.175        | 1974.183        | 1972.166        | G[18] |
| K[8]  | <b>787.453</b>  | 1932.173       | 1916.154        | 1917.162        | 1915.146        | K[17] |
| G[9]  | <b>844.475</b>  | 1804.078       | 1788.050        | <b>1789.067</b> | 1787.051        | G[16] |
| L[10] | <b>927.559</b>  | 1747.056       | 1731.037        | 1732.045        | 1730.028        | L[15] |
| Q[11] | 1014.580        | 1633.972       | 1617.953        | 1618.961        | 1616.944        | Q[14] |
| K[12] | <b>1142.675</b> | 1576.951       | 1560.932        | <b>1561.940</b> | 1559.924        | K[13] |
| G[13] | <b>1199.697</b> | 1448.856       | 1432.837        | 1433.845        | 1431.829        | G[12] |
| G[14] | 1256.718        | 1391.834       | 1375.810        | <b>1376.823</b> | 1374.800        | G[11] |
| A[15] | <b>1327.755</b> | 1334.813       | 1318.789        | <b>1319.802</b> | 1317.785        | A[10] |
| R[16] | <b>1407.861</b> | 1293.798       | <b>1247.757</b> | 1248.765        | <b>1246.749</b> | R[9]  |
| R[17] | 1653.962        | 1093.670       | 1077.651        | 1078.659        | 1076.644        | R[8]  |
| H[18] | 1791.021        | <b>937.569</b> | <b>921.550</b>  | 922.558         | 920.542         | H[7]  |
| R[19] | 1961.128        | 800.510        | <b>784.491</b>  | 785.499         | 783.484         | R[6]  |
| K[20] | 2089.233        | 630.393        | 614.375         | <b>615.382</b>  | 613.367         | K[5]  |
| V[21] | 2188.301        | 602.298        | <b>486.280</b>  | 487.287         | <b>485.272</b>  | V[4]  |
| L[22] | 2301.388        | 493.170        | <b>387.211</b>  | 388.219         | 386.204         | L[3]  |
| R[23] | 2457.486        | 390.148        | <b>274.127</b>  | 275.135         | 273.119         | R[2]  |
| D[24] | 2572.513        | 134.045        | 118.028         | 119.034         | 117.018         | D[1]  |

# sp | P62806 | H4\_MOUSE

[Acetyl]SGRGKGGKGLGKGGAK<sup>Acetyl</sup> RHR<sup>Methyl</sup> KVLRD<sup>14.02</sup>  
42.01 14.02

- ▶ fragmentation table for charge state 2+
- ▶ specType=etd
- ▶ score=76.02
- ▶ F112758.dat
- ▶ query=q56457\_p1
- ▶ precursor=515.505690
- ▶ chargePrecursor=5
- ▶ itol=0.5

| AA    | c               | y               | z+1             | z+2             | z               | AA    |
|-------|-----------------|-----------------|-----------------|-----------------|-----------------|-------|
| S[1]  | 74.642          | 1087.252        | 1270.243        | 0.504           | 1278.739        | S[24] |
| G[2]  | 102.553         | 8222.731        | 1214.722        | 0.504           | 1214.218        | G[23] |
| R[3]  | 180.603         | <b>1194.220</b> | 1186.211        | <b>1186.715</b> | 1185.707        | R[22] |
| G[4]  | 339.114         | 1158.170        | 1108.160        | <b>1108.664</b> | 1107.656        | G[21] |
| K[5]  | 274.163         | 1087.655        | 1079.650        | <b>1080.153</b> | 1079.148        | K[20] |
| G[6]  | 301.672         | <b>1023.611</b> | <b>1015.602</b> | <b>1016.106</b> | <b>1015.098</b> | G[19] |
| G[7]  | 330.183         | 895.101         | <b>987.091</b>  | <b>987.595</b>  | <b>986.587</b>  | G[18] |
| K[8]  | <b>394.230</b>  | 956.590         | <b>958.581</b>  | <b>959.084</b>  | <b>958.077</b>  | K[17] |
| G[9]  | 627.711         | <b>892.542</b>  | <b>894.533</b>  | <b>895.037</b>  | <b>894.030</b>  | G[16] |
| L[10] | <b>479.283</b>  | <b>874.032</b>  | <b>866.022</b>  | <b>866.526</b>  | <b>865.521</b>  | L[15] |
| G[11] | <b>507.794</b>  | <b>817.490</b>  | <b>809.480</b>  | <b>809.984</b>  | <b>808.979</b>  | G[14] |
| K[12] | <b>571.841</b>  | 788.979         | <b>780.970</b>  | <b>781.474</b>  | 780.466         | K[13] |
| G[13] | <b>600.352</b>  | 724.931         | <b>716.922</b>  | <b>717.426</b>  | 716.418         | G[12] |
| G[14] | <b>628.863</b>  | <b>696.421</b>  | <b>688.411</b>  | <b>688.915</b>  | <b>687.907</b>  | G[11] |
| A[15] | <b>604.381</b>  | 687.910         | <b>655.901</b>  | <b>668.905</b>  | <b>659.397</b>  | A[10] |
| R[16] | <b>749.434</b>  | 632.391         | <b>624.382</b>  | <b>624.886</b>  | 623.877         | R[9]  |
| R[17] | 827.485         | 547.339         | <b>539.329</b>  | <b>539.833</b>  | 538.825         | R[6]  |
| H[18] | <b>896.014</b>  | 469.288         | <b>461.279</b>  | <b>461.783</b>  | 460.775         | H[7]  |
| R[19] | 981.072         | 400.759         | <b>392.749</b>  | <b>393.253</b>  | 392.245         | R[6]  |
| K[20] | <b>1045.120</b> | 315.700         | 307.691         | 308.195         | 307.187         | K[5]  |
| V[21] | <b>1094.654</b> | 252.653         | 244.643         | 244.147         | 243.140         | V[4]  |
| L[22] | <b>1151.196</b> | 202.119         | 194.109         | 194.613         | 193.605         | L[3]  |
| R[23] | 1226.247        | 148.577         | 137.567         | 138.071         | 137.063         | R[2]  |
| D[24] | 1286.700        | 67.526          | 59.517          | 60.021          | 59.013          | D[1]  |

# sp | P62806 | H4\_MOUSE

[Acetyl]SGRGKGGKGLGKGGAK<sup>Acetyl</sup> RHR<sup>Methyl</sup> KVLRD<sup>14.02</sup>  
42.01 14.02

- ▶ fragmentation table for charge state 3+
- ▶ specType=etd
- ▶ score=76.02
- ▶ F112758.dat
- ▶ query=q56457.p1
- ▶ precursor=515.505690
- ▶ chargePrecursor=5
- ▶ itol=0.5

| AA    | c              | y              | z+1            | z+2            | z              | AA    |
|-------|----------------|----------------|----------------|----------------|----------------|-------|
| S[1]  | 49.697         | 858.504        | 853.164        | 0.672          | 852.828        | S[24] |
| G[2]  | 58.704         | 915.490        | <b>810.150</b> | 0.672          | <b>809.814</b> | G[23] |
| R[3]  | 120.738        | 796.483        | <b>791.143</b> | <b>791.479</b> | <b>790.807</b> | R[22] |
| G[4]  | 139.745        | 784.449        | <b>739.109</b> | <b>739.445</b> | 738.773        | G[21] |
| K[5]  | 182.443        | <b>725.442</b> | <b>720.102</b> | <b>720.438</b> | 719.766        | K[20] |
| G[6]  | 201.450        | 682.743        | 677.404        | 677.740        | 677.068        | G[19] |
| G[7]  | 220.458        | 663.736        | 658.397        | 658.733        | 658.061        | G[18] |
| K[8]  | 253.156        | <b>644.729</b> | <b>639.389</b> | <b>639.725</b> | 639.054        | K[17] |
| G[9]  | 282.183        | <b>602.031</b> | <b>596.691</b> | <b>597.027</b> | 596.355        | G[16] |
| L[10] | 319.958        | <b>583.024</b> | <b>577.687</b> | <b>578.020</b> | 577.348        | L[15] |
| G[11] | 338.965        | <b>545.329</b> | <b>539.989</b> | <b>540.325</b> | <b>539.653</b> | G[14] |
| K[12] | 381.563        | <b>526.322</b> | <b>520.982</b> | <b>521.318</b> | <b>520.646</b> | K[13] |
| G[13] | 400.570        | 483.623        | 478.284        | 478.620        | 477.948        | G[12] |
| G[14] | 419.578        | <b>464.616</b> | 459.277        | 459.613        | 458.941        | G[11] |
| A[15] | 443.257        | 445.609        | 440.270        | 440.605        | 439.934        | A[10] |
| K[16] | <b>499.958</b> | 421.930        | 416.590        | <b>416.926</b> | 416.255        | K[9]  |
| R[17] | <b>551.992</b> | 365.226        | <b>359.889</b> | <b>360.225</b> | 359.553        | R[8]  |
| H[18] | 597.678        | 313.195        | 307.855        | 308.191        | 307.519        | H[7]  |
| R[19] | 634.384        | 297.508        | 292.169        | 292.505        | 291.833        | R[6]  |
| K[20] | <b>697.082</b> | 210.803        | 205.464        | 205.799        | 205.127        | K[5]  |
| V[21] | <b>730.105</b> | 168.104        | 162.765        | 163.101        | 162.429        | V[4]  |
| L[22] | <b>767.800</b> | 135.082        | 129.742        | 130.078        | 129.406        | L[3]  |
| R[23] | 819.834        | 97.387         | 92.047         | 92.383         | 91.711         | R[2]  |
| D[24] | 858.176        | 45.353         | 40.014         | 40.349         | 39.678         | D[1]  |

# sp | P62806 | H4\_MOUSE

[Acetyl]SGRGKGGKGLGKGGAK<sup>Acetyl</sup> RHR<sup>Methyl</sup> KVLRD<sup>14.02</sup>  
42.01 14.02

- ▶ fragmentation table for charge state 4+
- ▶ specType=etd
- ▶ score=76.02
- ▶ F112758.dat
- ▶ query=q56457.p1
- ▶ precursor=515.505690
- ▶ chargePrecursor=5
- ▶ itol=0.5

| AA    | c              | y              | z+1            | z+2            | z              | AA    |
|-------|----------------|----------------|----------------|----------------|----------------|-------|
| S[1]  | 37.525         | <b>644.130</b> | <b>640.125</b> | 0.755          | <b>639.073</b> | S[24] |
| G[2]  | 51.780         | 511.850        | 607.854        | 0.755          | 607.612        | G[23] |
| R[3]  | 90.805         | 597.614        | 593.609        | <b>593.861</b> | 593.352        | R[22] |
| G[4]  | 105.061        | 558.588        | 554.584        | 554.836        | 554.332        | G[21] |
| K[5]  | 137.084        | 544.333        | <b>540.328</b> | <b>540.580</b> | <b>540.076</b> | K[20] |
| G[6]  | 151.340        | 512.309        | <b>508.305</b> | <b>508.557</b> | <b>508.053</b> | G[19] |
| G[7]  | 165.595        | 498.054        | 494.049        | 494.301        | 493.797        | G[18] |
| K[8]  | 197.619        | 483.799        | <b>479.794</b> | <b>480.046</b> | <b>479.542</b> | K[17] |
| G[9]  | 211.874        | 451.775        | 447.770        | 448.022        | 447.518        | G[16] |
| L[10] | 280.148        | 437.520        | 433.515        | 433.767        | 433.263        | L[15] |
| G[11] | 254.403        | 409.245        | 405.244        | 405.496        | 404.992        | G[14] |
| K[12] | 286.424        | <b>394.993</b> | 390.988        | 391.240        | 390.736        | K[13] |
| G[13] | 300.680        | 362.969        | 358.965        | 359.217        | 358.713        | G[12] |
| G[14] | 314.935        | 348.714        | 344.709        | 344.961        | 344.457        | G[11] |
| A[15] | 332.694        | 334.459        | 330.454        | 330.706        | 330.202        | A[10] |
| K[16] | 375.221        | 316.699        | 312.695        | 312.947        | 312.443        | K[9]  |
| R[17] | 414.246        | <b>274.173</b> | 270.168        | 270.420        | 269.916        | R[8]  |
| H[18] | 448.511        | 235.148        | 231.143        | 231.395        | 230.891        | H[7]  |
| R[19] | 491.040        | 200.883        | 196.878        | 197.130        | 196.626        | R[6]  |
| K[20] | 523.054        | 158.354        | 154.349        | 154.601        | 154.097        | K[5]  |
| V[21] | 547.831        | 126.330        | 122.325        | 122.577        | 122.073        | V[4]  |
| L[22] | 576.102        | 101.563        | 97.558         | 97.810         | 97.306         | L[3]  |
| R[23] | <b>615.127</b> | 73.292         | 69.287         | 69.539         | 69.035         | R[2]  |
| D[24] | <b>643.884</b> | 34.267         | 30.262         | 30.514         | 30.010         | D[1]  |





# sp | P62806 | H4\_MOUSE

SGR <sup>Methyl</sup> 14.02 GKGGK <sup>Acetyl</sup> 42.01 GLGKGGAKRHR <sup>Methyl</sup> 14.02 KVLK <sup>Dimethyl</sup> 28.03 D

- ▶ fragmentation table for charge state 1+
- ▶ specType=etd
- ▶ score=38.22
- ▶ F112758.dat
- ▶ query=q56466\_p1
- ▶ precursor=515.512830
- ▶ chargePrecursor=5
- ▶ itol=0.5

| AA    | c               | y               | z+1             | z+2             | z        | AA    |
|-------|-----------------|-----------------|-----------------|-----------------|----------|-------|
| S[1]  | 105.066         | 2573.534        | 2557.515        | 0.000           | 2556.507 | S[24] |
| G[2]  | 102.087         | 2486.501        | 2470.483        | 0.000           | 2469.475 | G[23] |
| R[3]  | 102.204         | 2629.480        | 2613.461        | 2614.469        | 2612.453 | R[22] |
| G[4]  | 899.228         | 2259.361        | 2243.345        | 2244.352        | 2242.337 | G[21] |
| K[5]  | 517.321         | 2202.342        | 2186.323        | 2187.331        | 2185.315 | K[20] |
| G[6]  | 574.342         | 2074.347        | 2058.328        | 2059.336        | 2057.320 | G[19] |
| G[7]  | 631.363         | 2017.325        | 2001.307        | 2002.314        | 2000.300 | G[18] |
| K[8]  | <b>801.469</b>  | 1960.304        | 1944.285        | 1945.293        | 1943.277 | K[17] |
| G[9]  | <b>858.490</b>  | 1790.289        | 1774.280        | 1775.287        | 1773.272 | G[16] |
| L[10] | <b>913.514</b>  | <b>1733.077</b> | 1717.058        | 1718.066        | 1716.050 | L[15] |
| Q[11] | <b>1028.596</b> | 1619.993        | <b>1601.974</b> | 1604.982        | 1602.966 | Q[14] |
| K[12] | 1156.691        | 1562.971        | 1546.953        | 1547.960        | 1545.945 | K[13] |
| G[13] | 1213.712        | 1434.878        | 1418.859        | 1419.866        | 1417.850 | G[12] |
| G[14] | 1270.734        | <b>1377.855</b> | 1361.836        | <b>1362.844</b> | 1360.828 | G[11] |
| A[15] | <b>1341.771</b> | 1240.813        | 1224.795        | <b>1305.823</b> | 1203.806 | A[10] |
| R[16] | 1469.868        | 1202.795        | 1223.776        | <b>1234.785</b> | 1232.770 | R[9]  |
| R[17] | 1625.967        | <b>1121.701</b> | <b>1105.683</b> | 1106.691        | 1104.675 | R[8]  |
| H[18] | <b>1763.026</b> | 965.600         | <b>949.582</b>  | 950.589         | 948.574  | H[7]  |
| R[19] | 1933.143        | 828.541         | 812.523         | <b>813.530</b>  | 811.515  | R[6]  |
| K[20] | 2061.238        | 658.425         | 642.406         | <b>643.414</b>  | 641.399  | K[5]  |
| V[21] | 2160.306        | 439.340         | 514.311         | 515.319         | 513.303  | V[4]  |
| L[22] | 2273.399        | <b>431.261</b>  | 415.243         | <b>416.250</b>  | 414.235  | L[3]  |
| R[23] | 2467.523        | 318.177         | 302.158         | 303.166         | 301.151  | R[2]  |
| D[24] | 2572.550        | 134.045         | 138.026         | 139.034         | 137.018  | D[1]  |

# sp | P62806 | H4\_MOUSE

SGR <sup>Methyl</sup> 14.02 GKGGK <sup>Acetyl</sup> 42.01 GLGKGGAKRHR <sup>Methyl</sup> 14.02 KVLRL <sup>Dimethyl</sup> 28.03 D

- ▶ fragmentation table for charge state 2+
- ▶ specType=etd
- ▶ score=38.22
- ▶ F112758.dat
- ▶ query=q56466.p1
- ▶ precursor=515.512830
- ▶ chargePrecursor=5
- ▶ itol=0.5

| AA    | c              | y               | z+1             | z+2             | z               | AA    |
|-------|----------------|-----------------|-----------------|-----------------|-----------------|-------|
| S[1]  | 53.037         | 1297.230        | 1279.263        | 0.504           | 1278.757        | S[24] |
| G[2]  | 81.547         | 1243.754        | 1235.745        | 0.504           | 1235.241        | G[23] |
| R[3]  | 166.656        | 1215.244        | 1207.238        | <b>1207.738</b> | 1206.730        | R[22] |
| G[4]  | 195.119        | <b>1130.185</b> | <b>1122.176</b> | 1122.689        | <b>1121.672</b> | G[21] |
| K[5]  | 259.194        | 1051.675        | <b>1093.665</b> | 1094.169        | <b>1093.161</b> | K[20] |
| G[6]  | <b>287.675</b> | 1037.627        | <b>1029.618</b> | <b>1030.122</b> | 1029.114        | G[19] |
| G[7]  | 316.185        | <b>1009.116</b> | 1001.107        | 1001.611        | 1000.603        | G[18] |
| K[8]  | 401.238        | <b>980.606</b>  | <b>972.596</b>  | <b>973.100</b>  | <b>972.092</b>  | K[17] |
| G[9]  | 429.742        | 895.551         | <b>887.543</b>  | 888.047         | <b>887.040</b>  | G[16] |
| L[10] | <b>485.291</b> | 887.042         | <b>859.033</b>  | <b>859.537</b>  | <b>858.529</b>  | L[15] |
| G[11] | 514.804        | <b>810.500</b>  | 802.491         | <b>802.995</b>  | <b>801.987</b>  | G[14] |
| K[12] | <b>578.849</b> | 781.989         | 773.980         | 774.484         | 773.476         | K[13] |
| G[13] | 607.360        | 717.042         | <b>709.932</b>  | <b>710.436</b>  | 709.429         | G[12] |
| G[14] | <b>635.871</b> | <b>689.431</b>  | <b>681.422</b>  | <b>681.926</b>  | 680.918         | G[11] |
| A[15] | <b>671.389</b> | 680.920         | <b>652.911</b>  | 653.415         | <b>652.407</b>  | A[10] |
| R[16] | <b>715.437</b> | 682.402         | <b>617.392</b>  | <b>617.896</b>  | <b>616.889</b>  | R[9]  |
| R[17] | <b>813.487</b> | 561.354         | <b>553.345</b>  | <b>553.849</b>  | 552.841         | R[8]  |
| H[18] | <b>882.017</b> | 483.304         | <b>475.294</b>  | <b>475.798</b>  | 474.791         | H[7]  |
| R[19] | 967.015        | 414.774         | <b>406.765</b>  | <b>407.269</b>  | 406.261         | R[6]  |
| K[20] | 1031.122       | 329.716         | 321.707         | 322.211         | 321.203         | K[5]  |
| V[21] | 1080.667       | 285.660         | 287.650         | 288.153         | 287.145         | V[4]  |
| L[22] | 1137.199       | 218.134         | 209.125         | 209.629         | 208.621         | L[3]  |
| R[23] | 1259.285       | <b>159.592</b>  | 151.583         | 152.087         | 151.079         | R[2]  |
| D[24] | 1286.778       | 67.526          | 59.517          | 60.021          | 59.013          | D[1]  |

# sp | P62806 | H4\_MOUSE

SGR <sup>Methyl</sup> 14.02 GKGGK <sup>Acetyl</sup> 42.01 GLGKGGAKRHR <sup>Methyl</sup> 14.02 KVLK <sup>Dimethyl</sup> 28.03 D

- ▶ fragmentation table for charge state 3+
- ▶ specType=etd
- ▶ score=38.22
- ▶ F112758.dat
- ▶ query=q56466.p1
- ▶ precursor=515.512830
- ▶ chargePrecursor=5
- ▶ itol=0.5

| AA    | c              | y              | z+1            | z+2            | z              | AA    |
|-------|----------------|----------------|----------------|----------------|----------------|-------|
| S[1]  | 35.693         | <b>858.516</b> | 853.170        | 0.672          | 852.841        | S[24] |
| G[2]  | 54.701         | 829.505        | 824.166        | 0.672          | 823.830        | G[23] |
| R[3]  | 111.406        | <b>810.498</b> | 805.159        | 805.495        | 804.823        | R[22] |
| G[4]  | 130.413        | 753.793        | <b>748.453</b> | <b>748.789</b> | <b>748.117</b> | G[21] |
| K[5]  | 173.112        | <b>734.785</b> | 729.446        | 729.446        | 729.110        | K[20] |
| G[6]  | 192.119        | 692.087        | 686.748        | 687.083        | 686.412        | G[19] |
| G[7]  | 211.126        | <b>673.080</b> | 667.740        | <b>668.076</b> | 667.404        | G[18] |
| K[8]  | 267.828        | 654.073        | 648.733        | 649.069        | 648.397        | K[17] |
| G[9]  | <b>286.835</b> | <b>597.371</b> | 592.031        | 592.367        | 591.691        | G[16] |
| L[10] | 324.930        | 578.364        | 573.024        | <b>573.360</b> | <b>572.688</b> | L[15] |
| G[11] | 363.537        | 540.660        | <b>535.330</b> | <b>535.666</b> | 534.994        | G[14] |
| K[12] | 386.235        | <b>521.662</b> | 516.322        | 516.658        | 515.986        | K[13] |
| G[13] | 405.242        | 478.964        | 473.624        | 473.960        | 473.288        | G[12] |
| G[14] | 424.249        | 459.957        | 454.617        | 454.953        | 454.281        | G[11] |
| A[15] | 447.959        | 440.949        | 435.610        | 435.946        | 435.274        | A[10] |
| K[16] | 490.627        | 417.270        | 411.931        | 412.267        | 411.595        | K[9]  |
| R[17] | <b>542.661</b> | <b>374.572</b> | 369.232        | 369.568        | 368.896        | R[8]  |
| H[18] | <b>568.347</b> | 322.538        | 317.199        | 317.535        | 316.863        | H[7]  |
| R[19] | <b>645.052</b> | 276.852        | 271.512        | 271.848        | 271.176        | R[6]  |
| K[20] | 667.751        | 220.146        | 214.807        | 215.143        | 214.471        | K[5]  |
| V[21] | 720.774        | 177.448        | 172.109        | 172.444        | 171.773        | V[4]  |
| L[22] | 758.468        | 144.425        | 139.086        | 139.422        | 138.750        | L[3]  |
| R[23] | 819.846        | 106.731        | 101.391        | 101.727        | 101.055        | R[2]  |
| D[24] | <b>858.188</b> | 45.353         | 40.014         | 40.349         | 39.678         | D[1]  |

# sp | P62806 | H4\_MOUSE

SGR <sup>Methyl</sup> 14.02 GKGGK <sup>Acetyl</sup> 42.01 GLGKGGAKRHR <sup>Methyl</sup> 14.02 KVLK <sup>Dimethyl</sup> 28.03 D

- ▶ fragmentation table for charge state 4+
- ▶ specType=etd
- ▶ score=38.22
- ▶ F112758.dat
- ▶ query=q56466.p1
- ▶ precursor=515.512830
- ▶ chargePrecursor=5
- ▶ itol=0.5

| AA    | c              | y              | z+1            | z+2            | z              | AA    |
|-------|----------------|----------------|----------------|----------------|----------------|-------|
| S[1]  | 27.022         | <b>644.139</b> | <b>640.134</b> | 0.755          | <b>639.882</b> | S[24] |
| G[2]  | 41.277         | 527.381        | <b>618.376</b> | 0.755          | <b>618.124</b> | G[23] |
| R[3]  | 83.806         | <b>608.125</b> | <b>604.121</b> | <b>604.373</b> | <b>603.869</b> | R[22] |
| G[4]  | 98.062         | 565.596        | 561.592        | 561.844        | 561.340        | G[21] |
| K[5]  | 130.086        | 551.341        | 547.336        | 547.588        | 547.084        | K[20] |
| G[6]  | 144.341        | 519.317        | 515.312        | 515.564        | 515.061        | G[19] |
| G[7]  | 158.596        | 505.062        | 501.057        | 501.309        | 500.805        | G[18] |
| K[8]  | 201.123        | 490.806        | <b>486.802</b> | 487.054        | <b>486.550</b> | K[17] |
| G[9]  | 215.378        | 476.550        | 472.545        | 472.797        | 472.293        | G[16] |
| L[10] | 283.049        | 434.025        | 430.020        | 430.272        | 429.768        | L[15] |
| G[11] | 257.904        | 405.754        | 401.749        | 402.001        | 401.497        | G[14] |
| K[12] | 289.928        | 391.498        | <b>387.494</b> | <b>387.746</b> | <b>387.242</b> | K[13] |
| G[13] | 304.184        | 359.475        | 355.470        | 355.722        | 355.218        | G[12] |
| G[14] | 318.439        | 345.219        | 341.215        | 341.466        | 340.963        | G[11] |
| A[15] | 336.198        | 330.964        | 326.959        | 327.211        | 326.707        | A[10] |
| K[16] | 368.222        | 313.205        | 309.200        | 309.452        | 308.948        | K[9]  |
| R[17] | <b>407.247</b> | -81.181        | 277.178        | 277.428        | -76.924        | R[8]  |
| H[18] | 441.512        | 242.156        | 238.151        | 238.403        | 237.899        | H[7]  |
| R[19] | 484.041        | 207.891        | 203.886        | 204.138        | 203.634        | R[6]  |
| K[20] | 516.065        | 195.362        | 191.357        | 191.609        | 191.105        | K[5]  |
| V[21] | 540.832        | 133.338        | 129.333        | 129.585        | 129.081        | V[4]  |
| L[22] | 569.103        | 108.571        | 104.566        | 104.818        | 104.314        | L[3]  |
| R[23] | 615.136        | 80.300         | 76.295         | 76.547         | 76.043         | R[2]  |
| D[24] | <b>643.893</b> | 34.267         | 30.262         | 30.514         | 30.010         | D[1]  |



# sp | P62806 | H4\_MOUSE

[Acetyl]SGRGKGGKGLGKGGAK<sup>Acetyl</sup><sub>42.01</sub> RHRK<sup>(Methyl)</sup><sub>(14.02)</sub> VLR<sup>Dimethyl</sup><sub>28.03</sub> D

- ▶ fragmentation table for charge state 1+
- ▶ specType=etd
- ▶ score=75.20
- ▶ F112758.dat
- ▶ query=q56896.p1
- ▶ precursor=521.111010
- ▶ chargePrecursor=5
- ▶ itol=0.5

| AA | c  | y               | z+1            | z+2            | z               | AA       |       |
|----|----|-----------------|----------------|----------------|-----------------|----------|-------|
| S  | 1  | 147.076         | 2601.528       | 2385.510       | 0.000           | 2584.502 | S[24] |
| G  | 2  | 204.998         | 2472.489       | 2456.467       | 0.000           | 2455.459 | G[23] |
| R  | 3  | <b>360.199</b>  | 2415.464       | 2399.440       | 2400.453        | 2398.438 | R[22] |
| G  | 4  | <b>417.220</b>  | 2259.363       | 2241.346       | 2244.352        | 2242.337 | G[21] |
| K  | 5  | <b>545.315</b>  | 2202.342       | 2185.323       | 2187.331        | 2185.315 | K[20] |
| G  | 6  | <b>602.337</b>  | 2074.247       | 2058.228       | 2059.236        | 2057.220 | G[19] |
| G  | 7  | <b>659.358</b>  | 2017.225       | 2001.207       | 2002.214        | 2000.199 | G[18] |
| K  | 8  | <b>787.453</b>  | 1960.204       | 1944.185       | 1945.193        | 1943.177 | K[17] |
| G  | 9  | <b>844.475</b>  | 1832.109       | 1816.090       | 1817.098        | 1815.082 | G[16] |
| L  | 10 | <b>937.559</b>  | 1775.087       | 1759.069       | 1760.077        | 1758.061 | L[15] |
| G  | 11 | <b>1014.580</b> | 1662.093       | 1645.965       | <b>1646.993</b> | 1644.977 | G[14] |
| K  | 12 | <b>1142.675</b> | 1604.082       | 1588.963       | 1589.971        | 1587.955 | K[13] |
| G  | 13 | 1199.697        | 1476.887       | 1460.868       | 1461.876        | 1459.860 | G[12] |
| G  | 14 | <b>1256.718</b> | 1419.866       | 1403.847       | <b>1404.855</b> | 1402.839 | G[11] |
| A  | 15 | <b>1327.755</b> | 1362.844       | 1346.825       | <b>1347.833</b> | 1345.819 | A[10] |
| K  | 16 | 1497.861        | 1291.807       | 1275.788       | 1276.796        | 1274.780 | K[9]  |
| R  | 17 | 1653.862        | 1124.701       | 1108.683       | <b>1109.691</b> | 1104.675 | R[8]  |
| H  | 18 | 1791.021        | 985.600        | 949.582        | <b>950.589</b>  | 948.574  | H[7]  |
| R  | 19 | <b>1947.122</b> | <b>828.541</b> | 812.523        | <b>813.530</b>  | 811.515  | R[6]  |
| K  | 20 | 2089.233        | 672.440        | <b>656.422</b> | <b>657.429</b>  | 655.414  | K[5]  |
| V  | 21 | 2188.301        | 530.330        | 514.311        | 515.319         | 513.303  | V[4]  |
| L  | 22 | 2301.385        | 431.263        | 415.243        | 416.250         | 414.235  | L[3]  |
| R  | 23 | 2486.537        | 338.177        | 302.158        | 303.166         | 301.151  | R[2]  |
| D  | 24 | 2600.544        | 194.045        | 118.020        | 119.034         | 117.015  | D[1]  |

# sp | P62806 | H4\_MOUSE

[Acetyl]SGRGKGGKGLGKGGAK<sup>Acetyl</sup> RHRK<sup>(Methyl)</sup> VLR<sup>Dimethyl</sup> D  
 42.01 (14.02) 28.03

- ▶ fragmentation table for charge state 2+
- ▶ specType=etd
- ▶ score=75.20
- ▶ F112758.dat
- ▶ query=q56896.p1
- ▶ precursor=521.111010
- ▶ chargePrecursor=5
- ▶ itol=0.5

| AA |    | c               | y        | z+1             | z+2             | z              | AA    |
|----|----|-----------------|----------|-----------------|-----------------|----------------|-------|
| S  | 1  | 74.042          | 1301.268 | 1293.258        | 0.304           | 1292.755       | S[24] |
| G  | 2  | 102.553         | 1236.747 | 1228.737        | 0.304           | 1228.233       | G[23] |
| R  | 3  | 180.601         | 1208.236 | 1200.226        | <b>1200.730</b> | 1199.723       | R[22] |
| G  | 4  | 259.114         | 1130.389 | <b>1122.176</b> | <b>1122.680</b> | 1121.672       | G[21] |
| K  | 5  | 273.161         | 1101.675 | 1093.665        | <b>1094.169</b> | 1093.161       | K[20] |
| G  | 6  | 301.672         | 1037.027 | <b>1029.618</b> | <b>1030.122</b> | 1029.114       | G[19] |
| G  | 7  | 330.183         | 1008.116 | 1001.107        | <b>1001.611</b> | 1000.603       | G[18] |
| K  | 8  | 394.230         | 980.006  | 972.595         | <b>973.100</b>  | 972.092        | K[17] |
| G  | 9  | 422.741         | 916.558  | 908.548         | <b>909.053</b>  | 908.045        | G[16] |
| L  | 10 | 479.203         | 888.047  | 880.037         | <b>880.542</b>  | 879.535        | L[15] |
| G  | 11 | <b>507.794</b>  | 831.505  | 823.495         | 824.000         | 823.992        | G[14] |
| R  | 12 | <b>571.841</b>  | 802.095  | <b>794.985</b>  | <b>795.489</b>  | 794.481        | R[13] |
| G  | 13 | 600.352         | 738.047  | <b>730.938</b>  | 731.443         | <b>730.434</b> | G[12] |
| G  | 14 | <b>628.863</b>  | 710.436  | <b>702.427</b>  | <b>702.931</b>  | 701.923        | G[11] |
| A  | 15 | <b>664.381</b>  | 681.926  | <b>673.916</b>  | <b>674.420</b>  | 673.412        | A[10] |
| R  | 16 | <b>749.434</b>  | 646.407  | <b>638.398</b>  | <b>638.902</b>  | 637.895        | R[9]  |
| R  | 17 | <b>827.485</b>  | 593.354  | <b>585.345</b>  | <b>585.849</b>  | 584.841        | R[8]  |
| H  | 18 | <b>896.014</b>  | 483.304  | <b>475.294</b>  | <b>475.798</b>  | 474.791        | H[7]  |
| R  | 19 | <b>974.065</b>  | 414.774  | <b>406.765</b>  | <b>407.269</b>  | 406.261        | R[6]  |
| R  | 20 | 1045.120        | 336.724  | 328.714         | 329.218         | 328.211        | R[5]  |
| V  | 21 | <b>1094.654</b> | 265.668  | 257.658         | 258.163         | 257.155        | V[4]  |
| L  | 22 | 1151.196        | 216.134  | 208.125         | 208.629         | 207.621        | L[3]  |
| D  | 23 | 1243.262        | 159.592  | 151.583         | 152.087         | 151.079        | D[2]  |
| D  | 24 | 1300.776        | 87.525   | 89.517          | 90.021          | 89.013         | D[1]  |



# sp | P62806 | H4\_MOUSE

[Acetyl]SGRGKGGKGLGKGGAK<sup>Acetyl</sup> RHRK<sup>(Methyl)</sup> VLR<sup>Dimethyl</sup> D  
 42.01 (14.02) 28.03

- ▶ fragmentation table for charge state 3+
- ▶ specType=etd
- ▶ score=75.20
- ▶ F112758.dat
- ▶ query=q56896.p1
- ▶ precursor=521.111010
- ▶ chargePrecursor=5
- ▶ itol=0.5

| AA    | c              | y              | z+1     | z+2            | z       | AA    |
|-------|----------------|----------------|---------|----------------|---------|-------|
| S[1]  | 49.697         | 867.848        | 862.908 | 0.672          | 862.172 | S[24] |
| G[2]  | 68.704         | <b>824.833</b> | 819.494 | 0.672          | 819.156 | G[23] |
| R[3]  | 120.738        | 805.826        | 800.487 | 800.823        | 800.151 | R[22] |
| G[4]  | 139.745        | 753.793        | 748.453 | <b>748.789</b> | 748.117 | G[21] |
| K[5]  | 182.443        | 734.785        | 729.446 | <b>729.782</b> | 729.110 | K[20] |
| G[6]  | 201.450        | 692.087        | 686.748 | <b>687.083</b> | 686.412 | G[19] |
| G[7]  | 220.458        | 673.080        | 667.740 | <b>668.076</b> | 667.404 | G[18] |
| K[8]  | 263.156        | 654.073        | 648.733 | <b>649.069</b> | 648.397 | K[17] |
| G[9]  | 282.163        | <b>611.374</b> | 606.035 | 606.371        | 605.699 | G[16] |
| L[10] | 319.858        | 592.367        | 587.028 | <b>587.364</b> | 586.692 | L[15] |
| G[11] | 338.866        | 554.871        | 549.533 | <b>549.869</b> | 549.197 | G[14] |
| K[12] | 381.563        | 535.866        | 530.526 | <b>530.862</b> | 529.990 | K[13] |
| G[13] | 400.570        | 492.967        | 487.628 | 487.964        | 487.292 | G[12] |
| G[14] | 419.578        | 473.960        | 468.620 | 468.956        | 468.285 | G[11] |
| A[15] | 443.257        | 454.953        | 449.613 | 449.949        | 449.277 | A[10] |
| K[16] | 499.958        | 431.274        | 425.934 | 426.270        | 425.598 | K[9]  |
| R[17] | 551.992        | 374.572        | 369.232 | 369.568        | 368.896 | R[8]  |
| H[18] | 597.676        | 322.538        | 317.199 | 317.535        | 316.863 | H[7]  |
| R[19] | <b>649.712</b> | 276.852        | 271.512 | 271.848        | 271.176 | R[6]  |
| K[20] | 697.062        | 234.818        | 219.479 | 219.815        | 219.143 | K[5]  |
| V[21] | <b>730.105</b> | 177.448        | 172.109 | 172.444        | 171.773 | V[4]  |
| L[22] | 767.597        | 144.425        | 139.086 | 139.422        | 138.750 | L[1]  |
| R[23] | <b>829.177</b> | 108.731        | 103.391 | 103.727        | 103.055 | R[2]  |
| D[24] | 867.520        | 45.353         | 40.014  | 40.349         | 39.678  | D[1]  |

# sp | P62806 | H4\_MOUSE

[Acetyl]SGRGKGGKGLGKGGAK<sup>Acetyl</sup> RHRK<sup>(Methyl)</sup> VLR<sup>Dimethyl</sup> D  
 42.01 (14.02) 28.03

- ▶ fragmentation table for charge state 4+
- ▶ specType=etd
- ▶ score=75.20
- ▶ F112758.dat
- ▶ query=q56896.p1
- ▶ precursor=521.111010
- ▶ chargePrecursor=5
- ▶ itol=0.5

| AA    | c       | y       | z+1            | z+2            | z              | AA    |
|-------|---------|---------|----------------|----------------|----------------|-------|
| S[1]  | 37.525  | 651.138 | 547.133        | 0.755          | 646.981        | S[24] |
| G[2]  | 51.780  | 618.877 | 514.872        | 0.755          | 614.620        | G[23] |
| R[3]  | 90.805  | 694.622 | <b>600.617</b> | <b>600.869</b> | 600.965        | R[22] |
| G[4]  | 105.061 | 565.596 | 561.592        | 561.844        | 561.340        | G[21] |
| K[5]  | 137.084 | 351.341 | 547.336        | 547.588        | <b>547.084</b> | K[20] |
| G[6]  | 151.340 | 819.317 | 515.312        | 515.564        | 515.061        | G[19] |
| G[7]  | 165.595 | 505.062 | 501.057        | 501.309        | 500.805        | G[18] |
| K[8]  | 197.619 | 490.806 | 486.802        | 487.054        | 486.550        | K[17] |
| G[9]  | 211.874 | 458.783 | 454.778        | 455.030        | 454.526        | G[16] |
| L[10] | 240.145 | 444.527 | 440.523        | 440.775        | 440.271        | L[15] |
| G[11] | 254.403 | 418.256 | 412.252        | 412.504        | 412.000        | G[14] |
| K[12] | 266.424 | 402.001 | 397.996        | 398.248        | 397.744        | K[13] |
| G[13] | 300.680 | 359.977 | 355.973        | 356.224        | 355.721        | G[12] |
| G[14] | 314.935 | 355.722 | 351.717        | 351.969        | 351.465        | G[11] |
| A[15] | 332.694 | 341.466 | 337.462        | 337.714        | 337.210        | A[10] |
| K[16] | 375.221 | 323.707 | 319.703        | 319.954        | 319.451        | K[9]  |
| R[17] | 414.246 | 281.181 | 277.176        | 277.428        | 276.924        | R[8]  |
| H[18] | 448.511 | 242.156 | 238.151        | 238.403        | 237.899        | H[7]  |
| R[19] | 487.535 | 207.891 | 203.886        | 204.138        | 203.634        | R[6]  |
| K[20] | 523.064 | 168.866 | 164.861        | 165.113        | 164.609        | K[5]  |
| V[21] | 547.831 | 133.338 | 129.333        | 129.585        | 129.081        | V[4]  |
| L[22] | 576.102 | 108.571 | 104.566        | 104.818        | 104.314        | L[3]  |
| R[23] | 622.135 | 80.300  | 76.295         | 76.547         | 76.043         | R[2]  |
| D[24] | 650.802 | 34.267  | 30.262         | 30.514         | 30.010         | D[1]  |



# sp | P62806 | H4\_MOUSE

[Acetyl]SGRGKGGKGLGKGGAK<sup>Acetyl</sup> RHRK<sup>(Dimethyl)</sup> VLR<sup>(Methyl)</sup> D<sup>(28.03)</sup> <sup>(14.02)</sup>

- ▶ fragmentation table for charge state 1+
- ▶ specType=etd
- ▶ score=56.78
- ▶ F112758.dat
- ▶ query=q56908\_p1
- ▶ precursor=867.849110
- ▶ chargePrecursor=3
- ▶ itol=0.5

| AA |    | c               | y        | z+1             | z+2             | z        | AA    |
|----|----|-----------------|----------|-----------------|-----------------|----------|-------|
| S  | 1  | 147.076         | 2001.528 | 2585.510        | 0.000           | 2584.502 | S[24] |
| G  | 2  | 204.098         | 2472.488 | 2456.467        | 0.000           | 2455.459 | G[23] |
| R  | 3  | 380.199         | 3415.464 | 2399.446        | 2400.453        | 2398.438 | R[22] |
| G  | 4  | 417.220         | 2259.363 | 2243.385        | 2244.362        | 2242.337 | G[21] |
| K  | 5  | <b>545.315</b>  | 2202.342 | 2186.323        | 2187.331        | 2185.315 | K[20] |
| G  | 6  | <b>602.337</b>  | 2074.247 | 2058.228        | 2059.236        | 2057.220 | G[19] |
| G  | 7  | <b>659.358</b>  | 2017.225 | 2001.207        | 2002.214        | 2000.199 | G[18] |
| K  | 8  | <b>787.453</b>  | 1960.204 | <b>1944.185</b> | 1945.193        | 1943.177 | K[17] |
| G  | 9  | <b>844.475</b>  | 1832.109 | <b>1816.090</b> | 1817.098        | 1815.082 | G[16] |
| L  | 10 | <b>937.559</b>  | 1775.087 | <b>1759.069</b> | 1760.077        | 1758.061 | L[15] |
| G  | 11 | <b>1014.580</b> | 1682.003 | <b>1645.985</b> | 1646.993        | 1644.977 | G[14] |
| K  | 12 | 1142.675        | 1604.082 | 1588.063        | <b>1589.971</b> | 1587.955 | K[13] |
| G  | 13 | <b>1199.697</b> | 1476.887 | <b>1460.868</b> | 1461.876        | 1459.860 | G[12] |
| G  | 14 | 1256.718        | 1419.866 | <b>1403.847</b> | <b>1404.855</b> | 1402.839 | G[11] |
| A  | 15 | 1327.755        | 1362.844 | 1346.825        | 1347.833        | 1345.818 | A[10] |
| R  | 16 | 1407.803        | 1291.807 | 1275.788        | 1276.796        | 1274.780 | R[9]  |
| R  | 17 | 1653.982        | 1123.701 | <b>1105.683</b> | <b>1106.691</b> | 1104.675 | R[8]  |
| H  | 18 | 1791.021        | 965.600  | 949.582         | <b>950.589</b>  | 948.574  | H[7]  |
| R  | 19 | 1947.122        | 828.541  | 812.523         | <b>813.530</b>  | 811.515  | R[6]  |
| R  | 20 | 2103.248        | 672.440  | 656.422         | <b>657.429</b>  | 655.414  | R[5]  |
| V  | 21 | 2202.317        | 516.314  | 500.295         | 501.303         | 499.287  | V[4]  |
| L  | 22 | 2435.401        | 417.246  | 401.227         | 402.235         | 400.219  | L[3]  |
| D  | 23 | 2489.517        | 304.162  | 288.143         | 289.151         | 287.135  | D[2]  |
| D  | 24 | 2600.544        | 194.045  | 178.026         | 179.034         | 177.018  | D[1]  |

# sp | P62806 | H4\_MOUSE

[Acetyl]SGRGKGGKGLGKGGAK<sup>Acetyl</sup> RHRK<sup>(Dimethyl)</sup> VLR<sup>(Methyl)</sup> D<sup>42.01 (28.03) (14.02)</sup>

- ▶ fragmentation table for charge state 2+
- ▶ specType=etd
- ▶ score=56.78
- ▶ F112758.dat
- ▶ query=q56908.p1
- ▶ precursor=867.849110
- ▶ chargePrecursor=3
- ▶ itol=0.5

| AA    | c               | y        | z+1             | z+2             | z               | AA    |
|-------|-----------------|----------|-----------------|-----------------|-----------------|-------|
| S[1]  | 74.042          | 1301.268 | <b>1293.258</b> | 0.504           | <b>1292.755</b> | S[24] |
| G[2]  | 102.553         | 1236.747 | <b>1228.737</b> | 0.504           | 1228.233        | G[23] |
| R[3]  | 180.603         | 1208.236 | <b>1200.226</b> | 1200.730        | <b>1199.723</b> | R[22] |
| G[4]  | 208.114         | 1130.185 | <b>1122.176</b> | <b>1122.680</b> | 1121.672        | G[21] |
| K[5]  | 273.193         | 1101.675 | <b>1093.665</b> | <b>1094.169</b> | 1093.161        | K[20] |
| G[6]  | 301.672         | 1037.627 | 1029.618        | 1030.122        | 1029.114        | G[19] |
| G[7]  | 330.183         | 1009.116 | 1001.107        | 1001.611        | 1000.603        | G[18] |
| K[8]  | 394.230         | 980.606  | 972.596         | 973.100         | 972.092         | K[17] |
| G[9]  | 422.741         | 916.558  | 908.549         | 909.053         | 908.045         | G[16] |
| L[10] | 479.203         | 838.047  | 830.038         | 830.542         | 829.534         | L[15] |
| G[11] | 507.794         | 811.505  | 803.496         | 804.000         | 802.992         | G[14] |
| K[12] | 571.841         | 802.995  | 794.985         | 795.489         | 794.481         | K[13] |
| G[13] | 600.352         | 738.947  | 730.938         | 731.442         | 730.434         | G[12] |
| G[14] | 628.863         | 710.436  | 702.427         | 702.931         | 701.923         | G[11] |
| A[15] | 664.361         | 681.926  | 673.916         | 674.420         | 673.412         | A[10] |
| R[16] | 769.434         | 646.407  | 638.398         | 638.902         | 637.894         | R[9]  |
| R[17] | 827.468         | 551.384  | 553.385         | 553.889         | 552.881         | R[6]  |
| H[18] | 896.014         | 483.304  | 475.294         | 475.798         | 474.791         | H[7]  |
| R[19] | 974.065         | 414.774  | 406.765         | 407.269         | 406.261         | R[0]  |
| K[20] | 1052.128        | 336.724  | 328.714         | 329.218         | 328.211         | K[5]  |
| V[21] | 1101.662        | 258.661  | 250.651         | 251.155         | 250.147         | V[4]  |
| L[22] | 1188.204        | 209.126  | 201.117         | 201.621         | 200.613         | L[1]  |
| R[23] | <b>1243.262</b> | 152.584  | 144.575         | 145.079         | 144.071         | R[2]  |
| D[24] | 1300.776        | 67.526   | 59.517          | 60.021          | 59.013          | D[1]  |



# sp | P62806 | H4\_MOUSE

[Acetyl]SGR<sup>Methyl</sup><sub>14.02</sub> GKGGKGLGKGGAK<sup>(Dimethyl)</sup><sub>(28.03)</sub> R<sup>(Methyl)</sup><sub>(14.02)</sub> HRK<sup>(Dimethyl)</sup><sub>(28.03)</sub> VLRD

- ▶ fragmentation table for charge state 1+
- ▶ specType=etd
- ▶ score=52.68
- ▶ F112758.dat
- ▶ query=q56910.p1
- ▶ precursor=867.862400
- ▶ chargePrecursor=3
- ▶ itol=0.5

| AA |    | c               | y        | z+1             | z+2             | z        | AA    |
|----|----|-----------------|----------|-----------------|-----------------|----------|-------|
| S  | 1  | 147.076         | 2001.505 | 2585.546        | 0.000           | 2584.538 | S[24] |
| G  | 2  | 204.098         | 2472.522 | 2456.503        | 0.000           | 2455.496 | G[23] |
| R  | 3  | <b>374.215</b>  | 2415.501 | 2399.482        | 2400.490        | 2398.474 | R[22] |
| G  | 4  | <b>431.236</b>  | 2345.504 | 2229.383        | 2230.373        | 2228.361 | G[21] |
| K  | 5  | <b>559.331</b>  | 2188.365 | 2173.344        | 2173.352        | 2171.336 | K[20] |
| G  | 6  | <b>616.353</b>  | 2090.268 | 2044.249        | 2045.257        | 2043.241 | G[19] |
| G  | 7  | <b>673.374</b>  | 2003.246 | <b>1987.227</b> | 1988.235        | 1986.220 | G[18] |
| K  | 8  | <b>801.469</b>  | 1946.225 | <b>1930.206</b> | 1931.214        | 1929.198 | K[17] |
| G  | 9  | <b>858.490</b>  | 1818.130 | 1802.111        | <b>1803.119</b> | 1801.103 | G[16] |
| L  | 10 | 873.374         | 1781.108 | <b>1745.089</b> | 1746.097        | 1744.082 | L[15] |
| G  | 11 | <b>1028.596</b> | 1648.024 | 1632.005        | 1633.013        | 1630.996 | G[14] |
| K  | 12 | 1156.491        | 1591.003 | 1574.984        | <b>1575.992</b> | 1573.976 | K[13] |
| G  | 13 | 1213.712        | 1462.908 | 1446.889        | <b>1447.897</b> | 1445.881 | G[12] |
| G  | 14 | 1270.734        | 1405.889 | <b>1389.868</b> | <b>1390.875</b> | 1388.860 | G[11] |
| A  | 15 | 1341.771        | 1348.805 | 1332.846        | 1333.854        | 1331.839 | A[10] |
| R  | 16 | 1407.807        | 1277.828 | <b>1261.809</b> | <b>1262.817</b> | 1260.801 | R[9]  |
| R  | 17 | 1668.014        | 1121.701 | 1105.663        | 1106.661        | 1104.675 | R[8]  |
| H  | 18 | 1805.073        | 951.585  | 935.508         | 936.574         | 934.558  | H[7]  |
| R  | 19 | 1961.174        | 814.526  | 798.507         | <b>799.515</b>  | 797.499  | R[6]  |
| R  | 20 | 2117.300        | 658.425  | 642.405         | 643.414         | 641.399  | R[5]  |
| V  | 21 | 2216.369        | 502.298  | 486.280         | 487.287         | 485.272  | V[4]  |
| L  | 22 | 2429.451        | 403.230  | 387.211         | 388.219         | 386.203  | L[3]  |
| D  | 23 | 2469.454        | 260.146  | 254.127         | 278.136         | 273.119  | D[2]  |
| D  | 24 | 2600.581        | 134.045  | 118.026         | 119.034         | 117.018  | D[1]  |

# sp | P62806 | H4\_MOUSE

[Acetyl]SGR<sup>Methyl</sup><sub>14.02</sub> GKGGKGLGKGGAK<sup>(Dimethyl)</sup><sub>(28.03)</sub> R<sup>(Methyl)</sup><sub>(14.02)</sub> HRK<sup>(Dimethyl)</sup><sub>(28.03)</sub> VLRD

- ▶ fragmentation table for charge state 2+
- ▶ specType=etd
- ▶ score=52.68
- ▶ F112758.dat
- ▶ query=q56910.p1
- ▶ precursor=867.862400
- ▶ chargePrecursor=3
- ▶ itol=0.5

| AA    | c               | y               | z+1             | z+2             | z               | AA    |
|-------|-----------------|-----------------|-----------------|-----------------|-----------------|-------|
| S[1]  | 74.092          | <b>1301.286</b> | <b>1293.277</b> | 0.504           | <b>1292.773</b> | S[24] |
| G[2]  | 102.553         | 1236.765        | <b>1228.755</b> | 0.504           | <b>1228.251</b> | G[23] |
| R[3]  | 187.611         | 1208.254        | <b>1200.245</b> | <b>1200.749</b> | 1199.741        | R[22] |
| G[4]  | 236.122         | 1123.196        | 1115.185        | 1115.690        | 1114.682        | G[21] |
| K[5]  | 280.169         | 1094.685        | 1086.673        | 1087.179        | 1086.171        | K[20] |
| G[6]  | 338.680         | 1030.637        | 1022.626        | 1023.132        | 1022.124        | G[19] |
| G[7]  | 337.191         | 1002.127        | 994.117         | 994.621         | 993.613         | G[18] |
| K[8]  | 401.238         | 973.616         | 965.607         | 966.111         | 965.101         | K[17] |
| G[9]  | 420.749         | 909.588         | 901.559         | 902.063         | 901.055         | G[16] |
| L[10] | 489.291         | 881.058         | 873.048         | 873.552         | 872.544         | L[15] |
| G[11] | 514.802         | 824.510         | 816.500         | 817.010         | 816.002         | G[14] |
| K[12] | 578.848         | 796.025         | 787.996         | 788.500         | 787.492         | K[13] |
| G[13] | 607.360         | 731.958         | 723.948         | 724.452         | 723.444         | G[12] |
| G[14] | 635.871         | 703.447         | 695.437         | 695.941         | 694.933         | G[11] |
| A[15] | 671.389         | 674.936         | 666.927         | 667.431         | 666.423         | A[10] |
| R[16] | 749.432         | 639.417         | 631.408         | 631.912         | 630.904         | R[9]  |
| R[17] | 834.511         | 581.354         | 553.345         | 553.849         | 552.841         | R[6]  |
| H[18] | 903.040         | 476.296         | 468.287         | 468.791         | 467.783         | H[7]  |
| R[19] | 961.091         | 407.767         | 399.757         | 400.261         | 399.253         | R[6]  |
| K[20] | 1059.154        | 329.716         | 321.707         | 322.211         | 321.203         | K[5]  |
| V[21] | <b>1108.688</b> | 251.053         | 243.043         | 244.547         | 243.540         | V[4]  |
| L[22] | <b>1165.730</b> | 202.119         | 194.109         | 194.613         | 193.605         | L[1]  |
| R[23] | <b>1243.281</b> | 145.577         | 137.567         | 138.071         | 137.063         | R[2]  |
| D[24] | 1380.794        | 87.526          | 59.517          | 60.021          | 59.013          | D[1]  |





# sp | P62806 | H4\_MOUSE

S Acetyl 42.01 GRGKGGKGLGK Acetyl 42.01 GGAK Acetyl 42.01 RHRK (Methyl) 14.02 VLRD

- ▶ fragmentation table for charge state 1+
- ▶ specType=etd
- ▶ score=70.50
- ▶ F112758.dat
- ▶ query=q57122\_p1
- ▶ precursor=872.510110
- ▶ chargePrecursor=3
- ▶ itol=0.5

| AA | c  | y               | z+1      | z+2             | z               | AA       |       |
|----|----|-----------------|----------|-----------------|-----------------|----------|-------|
| S  | 1  | 147.076         | 2815.508 | 2599.489        | 0.000           | 2598.481 | G[24] |
| G  | 2  | 204.098         | 2406.465 | 2470.446        | 0.000           | 2469.439 | G[23] |
| R  | 3  | 380.199         | 3420.444 | 2413.425        | 2414.433        | 2412.417 | R[22] |
| G  | 4  | <b>417.220</b>  | 2273.343 | 2297.324        | 2236.302        | 2256.310 | G[21] |
| K  | 5  | <b>545.315</b>  | 2216.321 | 2200.302        | 2201.310        | 2199.295 | K[20] |
| G  | 6  | <b>602.337</b>  | 2088.228 | 2072.207        | 2073.215        | 2071.200 | G[19] |
| G  | 7  | <b>659.358</b>  | 2031.205 | 2015.186        | 2016.194        | 2014.178 | G[18] |
| K  | 8  | <b>787.453</b>  | 1974.183 | <b>1958.164</b> | 1959.172        | 1957.157 | K[17] |
| G  | 9  | <b>844.475</b>  | 1846.088 | 1830.069        | <b>1831.077</b> | 1829.062 | G[16] |
| L  | 10 | 897.556         | 1789.067 | <b>1773.048</b> | 1774.056        | 1772.040 | L[15] |
| G  | 11 | <b>1014.580</b> | 1675.963 | 1659.944        | 1660.952        | 1658.936 | G[14] |
| K  | 12 | <b>1184.686</b> | 1618.961 | <b>1602.942</b> | 1603.950        | 1601.935 | K[13] |
| G  | 13 | <b>1241.707</b> | 1448.856 | 1432.837        | 1433.845        | 1431.829 | G[12] |
| G  | 14 | 1298.729        | 1391.834 | 1375.815        | <b>1376.823</b> | 1374.808 | G[11] |
| A  | 15 | 1369.766        | 1334.813 | 1318.794        | 1319.802        | 1317.786 | A[10] |
| K  | 16 | 1539.872        | 1283.791 | <b>1247.757</b> | 1248.765        | 1246.749 | K[9]  |
| R  | 17 | 1608.973        | 1203.670 | 1077.653        | <b>1078.659</b> | 1076.644 | R[8]  |
| H  | 18 | <b>1833.031</b> | 937.569  | 621.530         | 622.538         | 620.542  | H[7]  |
| R  | 19 | 1989.153        | 900.510  | <b>784.491</b>  | <b>785.499</b>  | 783.484  | R[6]  |
| K  | 20 | 2131.243        | 644.409  | 628.390         | 629.398         | 627.382  | K[5]  |
| V  | 21 | 2230.312        | 502.298  | 486.280         | 487.287         | 485.272  | V[4]  |
| L  | 22 | 2443.396        | 403.230  | 387.213         | 388.219         | 386.203  | L[3]  |
| D  | 23 | 2699.487        | 306.146  | 294.127         | 278.136         | 273.119  | D[2]  |
| D  | 24 | 2814.524        | 134.045  | 118.026         | 119.034         | 117.018  | D[1]  |

# sp | P62806 | H4\_MOUSE

S<sup>Acetyl</sup><sub>42.01</sub> GRGKGGKGLGK<sup>Acetyl</sup><sub>42.01</sub> GGAK<sup>Acetyl</sup><sub>42.01</sub> RHRK<sup>(Methyl)</sup><sub>(14.02)</sub> VLRD

- ▶ fragmentation table for charge state 2+
- ▶ specType=etd
- ▶ score=70.50
- ▶ F112758.dat
- ▶ query=q57122.p1
- ▶ precursor=872.510110
- ▶ chargePrecursor=3
- ▶ itol=0.5

| AA    | c               | y               | z+1             | z+2             | z               | AA    |
|-------|-----------------|-----------------|-----------------|-----------------|-----------------|-------|
| S[1]  | 74.092          | <b>1308.257</b> | <b>1300.248</b> | 0.504           | <b>1299.744</b> | S[24] |
| G[2]  | 102.553         | 1243.736        | <b>1235.727</b> | 0.504           | 1235.223        | G[23] |
| R[3]  | 180.603         | 1215.225        | <b>1207.216</b> | <b>1207.720</b> | <b>1206.712</b> | R[22] |
| G[4]  | 209.114         | 1137.175        | 1129.165        | 1129.669        | 1128.662        | G[21] |
| R[5]  | 273.163         | 1108.664        | 1100.655        | 1101.159        | 1099.151        | R[20] |
| G[6]  | 301.672         | 1044.617        | 1036.607        | 1037.111        | 1035.103        | G[19] |
| G[7]  | 330.183         | 1016.106        | 1008.097        | 1008.601        | 1007.593        | G[18] |
| K[8]  | 394.230         | 987.595         | 979.586         | 980.090         | 979.082         | K[17] |
| G[9]  | 422.741         | 923.548         | 915.538         | 916.042         | 915.034         | G[16] |
| L[10] | 479.289         | 894.037         | 887.028         | 887.532         | 886.524         | L[15] |
| G[11] | 507.794         | 838.490         | 830.480         | 830.984         | 829.976         | G[14] |
| K[12] | 592.847         | 809.984         | 801.975         | 802.479         | 801.471         | K[13] |
| G[13] | 621.357         | 724.931         | 716.922         | 717.426         | 716.418         | G[12] |
| G[14] | 649.868         | 696.421         | 688.411         | 688.915         | 687.907         | G[11] |
| A[15] | 685.367         | 667.910         | <b>659.901</b>  | 660.405         | <b>659.397</b>  | A[10] |
| R[16] | 770.419         | 632.391         | 624.382         | 624.886         | 623.878         | R[9]  |
| R[17] | 848.490         | 547.339         | 539.329         | 539.833         | 538.825         | R[6]  |
| H[18] | 917.019         | 469.288         | 461.279         | 461.783         | 460.775         | H[7]  |
| R[19] | 995.070         | 400.759         | 392.749         | 393.253         | 392.245         | R[6]  |
| K[20] | 1096.125        | 322.708         | 314.699         | 315.203         | 314.195         | K[5]  |
| V[21] | <b>1115.659</b> | 251.653         | 243.643         | 244.147         | 243.140         | V[4]  |
| L[22] | <b>1172.501</b> | 202.110         | 194.100         | 194.613         | 193.605         | L[3]  |
| R[23] | <b>1250.252</b> | 145.577         | 137.567         | 138.071         | 137.063         | R[2]  |
| D[24] | 1387.705        | 87.526          | 79.517          | 80.021          | 79.013          | D[1]  |



# sp | P62806 | H4\_MOUSE

[Acetyl]SGRGKGGKGLGK <sup>Acetyl</sup>42.01 **GGAK** <sup>Acetyl</sup>42.01 **RHRK** <sup>Methyl</sup>14.02 **VLR** <sup>Dimethyl</sup>28.03 **D**

- ▶ fragmentation table for charge state 1+
- ▶ specType=etd
- ▶ score=60.84
- ▶ F112758.dat
- ▶ query=q57612.p1
- ▶ precursor=881.853410
- ▶ chargePrecursor=3
- ▶ itol=0.5

| AA | c  | y               | z+1      | z+2             | z               | AA              |       |
|----|----|-----------------|----------|-----------------|-----------------|-----------------|-------|
| S  | 1  | 147.076         | 2643.539 | 2627.520        | 0.000           | 2626.512        | S[24] |
| G  | 2  | 204.098         | 2514.496 | 2498.478        | 0.000           | 2497.470        | G[23] |
| R  | 3  | 360.199         | 2457.475 | 2441.456        | 2442.464        | 2440.448        | R[22] |
| G  | 4  | 417.220         | 2301.474 | 2285.455        | 2286.463        | 2284.447        | G[21] |
| K  | 5  | <b>945.315</b>  | 2244.352 | 2228.334        | 2229.341        | 2227.325        | K[20] |
| G  | 6  | <b>602.337</b>  | 2118.257 | 2102.239        | 2101.247        | 2099.231        | G[19] |
| G  | 7  | <b>659.358</b>  | 2059.236 | 2043.217        | 2044.225        | 2042.209        | G[18] |
| K  | 8  | <b>787.453</b>  | 2002.214 | 1986.195        | <b>1987.204</b> | <b>1985.188</b> | K[17] |
| G  | 9  | <b>844.475</b>  | 1874.120 | <b>1858.101</b> | 1859.109        | 1857.093        | G[16] |
| L  | 10 | <b>927.559</b>  | 1817.098 | <b>1801.079</b> | 1802.087        | 1800.071        | L[15] |
| G  | 11 | <b>1014.580</b> | 1760.014 | 1857.995        | 1858.003        | 1856.987        | G[14] |
| K  | 12 | <b>1184.686</b> | 1846.993 | 1830.974        | <b>1831.982</b> | 1829.966        | K[13] |
| G  | 13 | 1241.707        | 1476.887 | 1460.869        | <b>1461.876</b> | 1459.860        | G[12] |
| G  | 14 | 1298.729        | 1419.866 | 1403.847        | <b>1404.855</b> | 1402.839        | G[11] |
| A  | 15 | 1359.796        | 1362.844 | 1346.825        | 1347.833        | 1345.816        | A[10] |
| R  | 16 | 1378.814        | 1291.809 | 1275.790        | <b>1276.796</b> | 1274.780        | R[9]  |
| R  | 17 | 1695.873        | 1121.701 | <b>1105.683</b> | 1106.691        | 1104.675        | R[8]  |
| H  | 18 | 1833.031        | 965.600  | 949.582         | 950.589         | 948.574         | H[7]  |
| R  | 19 | 1969.133        | 828.541  | 812.523         | <b>813.530</b>  | 811.515         | R[6]  |
| K  | 20 | 2131.243        | 672.440  | 656.422         | <b>657.429</b>  | 655.414         | K[5]  |
| V  | 21 | 2230.312        | 530.380  | 514.361         | 515.369         | 513.353         | V[4]  |
| L  | 22 | 2463.368        | 433.261  | 417.243         | 418.250         | 416.235         | L[3]  |
| R  | 23 | 2527.528        | 318.177  | 302.158         | 303.166         | 301.151         | R[2]  |
| D  | 24 | 2642.585        | 134.045  | 118.026         | 119.034         | 117.018         | D[1]  |

# sp | P62806 | H4\_MOUSE

[Acetyl]SGRGKGGKGLGK<sup>Acetyl</sup><sub>42.01</sub> GGAK<sup>Acetyl</sup><sub>42.01</sub> RHRK<sup>Methyl</sup><sub>14.02</sub> VLR<sup>Dimethyl</sup><sub>28.03</sub> D

- ▶ fragmentation table for charge state 2+
- ▶ specType=etd
- ▶ score=60.84
- ▶ F112758.dat
- ▶ query=q57612.p1
- ▶ precursor=881.853410
- ▶ chargePrecursor=3
- ▶ itol=0.5

| AA    | c               | y               | z+1             | z+2             | z               | AA    |
|-------|-----------------|-----------------|-----------------|-----------------|-----------------|-------|
| S[1]  | 74.612          | <b>1322.273</b> | <b>1314.264</b> | 0.504           | <b>1313.760</b> | S[24] |
| G[2]  | 102.553         | 1257.752        | <b>1249.742</b> | 0.504           | <b>1249.239</b> | G[23] |
| R[3]  | 180.603         | 1230.241        | <b>1221.232</b> | <b>1221.736</b> | 1220.726        | R[22] |
| G[4]  | 259.114         | 1151.191        | <b>1143.181</b> | <b>1143.685</b> | 1142.677        | G[21] |
| K[5]  | 273.153         | 1122.680        | 1114.670        | <b>1115.174</b> | 1114.167        | K[20] |
| G[6]  | 301.672         | 1058.632        | 1050.623        | 1051.127        | 1050.119        | G[19] |
| G[7]  | 330.183         | 1030.122        | 1022.112        | 1022.616        | 1021.608        | G[18] |
| K[8]  | 394.230         | 1001.611        | 993.602         | 994.105         | 993.097         | K[17] |
| G[9]  | 422.741         | 937.563         | 929.554         | 930.058         | 929.050         | G[16] |
| L[10] | 479.283         | 909.053         | 901.043         | 901.547         | 900.539         | L[15] |
| G[11] | 507.794         | 852.511         | <b>844.501</b>  | <b>845.005</b>  | 843.997         | G[14] |
| K[12] | 502.847         | 824.000         | 815.991         | 816.494         | 815.487         | K[13] |
| G[13] | 621.357         | 738.947         | 730.938         | 731.442         | 730.434         | G[12] |
| G[14] | 649.868         | 710.436         | 702.427         | 702.931         | 701.923         | G[11] |
| A[15] | 685.389         | 681.926         | 673.917         | 674.420         | 673.412         | A[10] |
| R[16] | 770.439         | 646.407         | 638.398         | 638.902         | 637.894         | R[9]  |
| R[17] | 848.490         | 561.354         | 553.345         | 553.849         | 552.841         | R[6]  |
| H[18] | 917.019         | 483.304         | 475.294         | 475.798         | 474.791         | H[7]  |
| R[19] | 995.070         | 414.774         | 406.765         | 407.269         | 406.261         | R[6]  |
| K[20] | 1059.125        | 336.724         | 328.714         | 329.218         | 328.211         | K[5]  |
| V[21] | <b>1115.659</b> | 258.668         | 250.659         | 251.163         | 250.155         | V[4]  |
| L[22] | 1172.201        | 216.134         | 208.125         | 208.629         | 207.621         | L[3]  |
| R[23] | <b>1264.268</b> | 159.592         | 151.583         | 152.087         | 151.079         | R[2]  |
| D[24] | <b>1321.781</b> | 67.526          | 59.517          | 60.021          | 59.013          | D[1]  |

# sp | P43274 | H14\_MOUSE

KTPVKKKARK <sup>Methyl</sup> AAGAKRKTSGPPVSE  
14.02

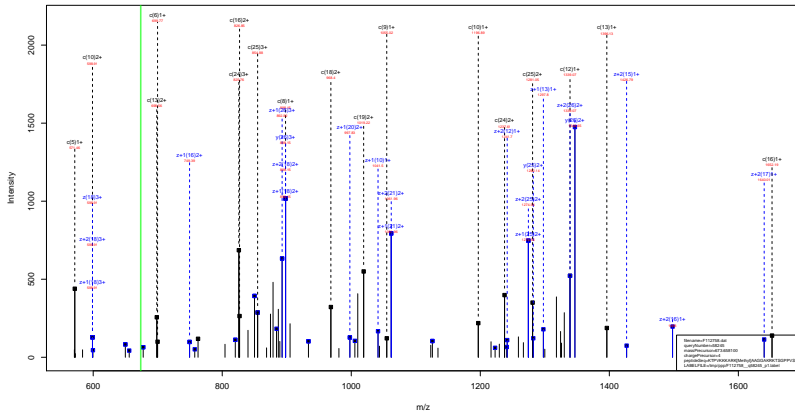

# sp | P43274 | H14\_MOUSE

KTPVKKKARK <sup>Methyl</sup> AAGGAKRKTSGPPVSE  
14.02

- ▶ fragmentation table for charge state 1+
- ▶ specType=etd
- ▶ score=58.08
- ▶ F112758.dat
- ▶ query=q58245.p1
- ▶ precursor=673.658100
- ▶ chargePrecursor=4
- ▶ itol=0.5

| AA | c  | y               | z+1      | z+2             | z               | AA             |       |
|----|----|-----------------|----------|-----------------|-----------------|----------------|-------|
| R  | 1  | 146.129         | 2091.610 | 2676.592        | 2676.600        | 2674.584       | K[20] |
| T  | 2  | 247.176         | 2563.515 | 2547.497        | 2548.505        | 2546.489       | T[25] |
| P  | 3  | 344.229         | 2462.668 | 2446.449        | 2447.457        | 2445.441       | P[24] |
| V  | 4  | 441.288         | 2365.415 | 2349.395        | 2350.404        | 2348.389       | V[23] |
| K  | 5  | <b>571.393</b>  | 2266.347 | 2250.328        | 2251.336        | 2249.320       | K[22] |
| K  | 6  | <b>699.488</b>  | 2156.262 | 2142.243        | 2143.251        | 2141.235       | K[21] |
| K  | 7  | 827.583         | 2030.157 | 1994.138        | 1995.146        | 1993.130       | K[20] |
| A  | 8  | <b>898.620</b>  | 1882.062 | 1866.043        | 1867.051        | 1865.035       | A[19] |
| R  | 9  | <b>1054.721</b> | 1811.025 | 1795.006        | 1796.014        | 1793.998       | R[18] |
| K  | 10 | <b>1196.831</b> | 1654.923 | 1638.905        | <b>1639.913</b> | 1637.897       | K[17] |
| A  | 11 | 1267.868        | 1512.812 | 1496.794        | <b>1497.802</b> | 1495.786       | A[16] |
| A  | 12 | <b>1338.906</b> | 1444.776 | 1428.757        | <b>1429.765</b> | 1428.749       | A[15] |
| G  | 13 | <b>1395.927</b> | 1370.739 | 1354.720        | 1355.728        | 1353.712       | G[14] |
| G  | 14 | 1452.949        | 1313.717 | <b>1297.698</b> | 1298.706        | 1296.691       | G[13] |
| A  | 15 | 1521.886        | 1256.699 | <b>1240.677</b> | <b>1241.685</b> | 1239.669       | A[12] |
| K  | 16 | <b>1652.081</b> | 1185.659 | 1169.640        | 1170.648        | 1168.632       | K[11] |
| K  | 17 | 1808.182        | 1057.564 | <b>1041.545</b> | 1042.553        | 1040.537       | K[10] |
| R  | 18 | 1936.277        | 901.463  | 885.444         | 886.452         | <b>884.436</b> | R[9]  |
| T  | 19 | 2037.324        | 773.385  | <b>757.349</b>  | 758.357         | 756.341        | T[8]  |
| S  | 20 | 2124.356        | 672.320  | <b>656.301</b>  | 657.309         | 655.293        | S[7]  |
| G  | 21 | 2181.378        | 585.288  | 569.269         | 570.277         | 568.261        | G[6]  |
| P  | 22 | 2278.431        | 528.266  | 512.248         | 513.256         | 511.240        | P[5]  |
| P  | 23 | 2375.483        | 431.214  | 415.195         | 416.203         | 414.187        | P[4]  |
| V  | 24 | 2474.532        | 334.161  | 318.142         | 319.150         | 317.134        | V[3]  |
| S  | 25 | 2561.584        | 235.092  | 219.074         | 220.082         | 218.066        | S[2]  |
| E  | 26 | 2660.626        | 148.060  | 132.042         | 133.050         | 131.034        | E[1]  |



# sp | P43274 | H14\_MOUSE

KTPVKKKARK <sup>Methyl</sup> AAGGAKRKTSGPPVSE  
14.02

- ▶ fragmentation table for charge state 2+
- ▶ specType=etd
- ▶ score=58.08
- ▶ F112758.dat
- ▶ query=q58245.p1
- ▶ precursor=673.658100
- ▶ chargePrecursor=4
- ▶ itol=0.5

| AA   | c               | y               | z+1             | z+2             | z               | AA   |
|------|-----------------|-----------------|-----------------|-----------------|-----------------|------|
| R 1  | 73.568          | <b>1346.309</b> | 1158.390        | <b>1338.803</b> | 1337.796        | R 26 |
| T 2  | 154.002         | <b>1282.261</b> | <b>1274.252</b> | <b>1274.156</b> | 1273.740        | T 25 |
| F 3  | 172.618         | 1231.738        | 1223.728        | 1224.232        | <b>1223.224</b> | F 24 |
| V 4  | 222.152         | 1183.211        | 1175.202        | 1175.706        | 1174.696        | V 23 |
| K 5  | 286.200         | 1133.677        | <b>1125.668</b> | <b>1126.171</b> | 1125.164        | K 22 |
| K 6  | 350.237         | 1088.820        | <b>1061.820</b> | <b>1062.124</b> | 1061.115        | K 21 |
| K 7  | 414.295         | <b>1005.582</b> | <b>997.573</b>  | <b>998.077</b>  | 997.069         | K 20 |
| A 8  | 449.813         | 941.534         | <b>933.525</b>  | <b>934.029</b>  | 933.021         | A 10 |
| R 9  | 527.864         | 906.016         | <b>898.007</b>  | <b>898.510</b>  | 897.503         | R 18 |
| K 10 | <b>598.919</b>  | 827.965         | <b>819.956</b>  | <b>820.460</b>  | 819.452         | K 17 |
| A 11 | 634.436         | 756.910         | <b>748.901</b>  | <b>748.405</b>  | 748.399         | A 16 |
| A 12 | 669.856         | 723.362         | 715.353         | 715.856         | 715.850         | A 15 |
| G 13 | <b>698.467</b>  | 685.873         | <b>677.864</b>  | 678.368         | <b>677.360</b>  | G 14 |
| G 14 | 736.978         | 657.363         | <b>649.353</b>  | <b>649.857</b>  | 648.849         | G 13 |
| A 15 | <b>762.496</b>  | 628.852         | 620.842         | 621.346         | 620.338         | A 12 |
| K 16 | <b>826.544</b>  | 593.333         | 585.324         | 585.827         | 584.820         | K 11 |
| R 17 | 873.574         | 529.285         | 521.276         | 521.780         | 520.772         | R 10 |
| K 18 | <b>968.642</b>  | 453.235         | 443.226         | 443.729         | 442.722         | K 9  |
| T 19 | <b>1019.166</b> | 387.187         | 379.178         | 379.682         | 378.674         | T 8  |
| S 20 | 1062.682        | 336.664         | 328.654         | 329.158         | 328.150         | S 7  |
| G 21 | 1091.193        | 293.149         | 285.138         | 285.642         | 284.634         | G 6  |
| F 22 | 1139.719        | 264.637         | 256.627         | 257.131         | 256.124         | F 5  |
| F 23 | 1189.248        | 216.110         | 208.101         | 208.605         | 207.597         | F 4  |
| V 24 | <b>1237.780</b> | 167.584         | 159.575         | 160.079         | 159.071         | V 3  |
| S 25 | <b>1281.296</b> | 118.050         | 110.041         | 110.544         | 109.537         | S 2  |
| E 26 | 1345.817        | 74.534          | 66.524          | 67.028          | 66.021          | E 1  |

# sp | P43274 | H14\_MOUSE

KTPVKKKARK <sup>Methyl</sup> AAGGAKRKTSGPPVSE  
14.02

- ▶ fragmentation table for charge state 3+
- ▶ specType=etd
- ▶ score=58.08
- ▶ F112758.dat
- ▶ query=q58245.p1
- ▶ precursor=673.658100
- ▶ chargePrecursor=4
- ▶ itol=0.5

| AA | c  | y              | z+1            | z+2            | z              | AA             |   |    |
|----|----|----------------|----------------|----------------|----------------|----------------|---|----|
| R  | 1  | 49.381         | <b>897.875</b> | <b>892.535</b> | <b>892.871</b> | 892.199        | R | 26 |
| F  | 2  | 83.064         | <b>855.177</b> | <b>849.837</b> | <b>850.173</b> | 849.501        | F | 25 |
| F  | 3  | 113.815        | 821.498        | 816.153        | 816.890        | 815.819        | F | 24 |
| V  | 4  | 148.437        | 789.143        | 783.804        | 784.140        | 783.468        | V | 23 |
| K  | 5  | 191.136        | 756.120        | 750.781        | 751.117        | 750.445        | K | 22 |
| K  | 6  | 233.834        | 713.422        | 708.082        | 708.418        | 707.747        | K | 21 |
| K  | 7  | 276.532        | 670.724        | 665.384        | 665.720        | 665.048        | K | 20 |
| A  | 8  | 300.211        | 628.025        | 622.685        | 623.022        | 622.350        | A | 19 |
| R  | 9  | 352.245        | 604.346        | <b>599.007</b> | <b>599.343</b> | <b>598.671</b> | R | 18 |
| K  | 10 | 399.615        | 552.313        | 546.973        | 547.309        | 546.637        | K | 17 |
| A  | 11 | 423.294        | 504.942        | 499.603        | 499.939        | 499.267        | A | 16 |
| A  | 12 | 448.973        | 481.263        | 475.923        | 476.260        | 475.588        | A | 15 |
| G  | 13 | 465.591        | 437.564        | 432.245        | 432.581        | 431.909        | G | 14 |
| G  | 14 | 484.988        | 438.577        | 433.238        | 433.574        | 432.902        | G | 13 |
| A  | 15 | 508.667        | 419.570        | 414.231        | 414.566        | 413.895        | A | 12 |
| K  | 16 | 551.365        | 395.891        | 390.551        | 390.887        | 390.216        | K | 11 |
| R  | 17 | 603.399        | 353.193        | 347.853        | 348.189        | 347.517        | R | 10 |
| K  | 18 | 646.097        | 301.159        | 295.819        | 296.155        | 295.484        | K | 9  |
| T  | 19 | 679.780        | 258.461        | 253.121        | 253.457        | 252.785        | T | 8  |
| S  | 20 | 708.790        | 224.778        | 219.438        | 219.775        | 219.103        | S | 7  |
| G  | 21 | 727.797        | 195.767        | 190.428        | 190.764        | 190.092        | G | 6  |
| P  | 22 | 769.148        | 176.760        | 171.421        | 171.757        | 171.085        | P | 5  |
| P  | 23 | 792.499        | 184.405        | 179.070        | 179.406        | 178.734        | P | 4  |
| V  | 24 | <b>825.522</b> | 112.058        | 106.719        | 107.055        | 106.383        | V | 3  |
| S  | 25 | <b>854.533</b> | 79.836         | 74.496         | 74.832         | 74.160         | S | 2  |
| E  | 26 | 897.547        | 50.025         | 44.685         | 45.021         | 44.349         | E | 1  |



# sp | Q64475 | H2B1B\_MOUSE

PEPSKSAPAPK <sup>Dimethyl</sup> 28.03 KGSKKAISK <sup>Methyl</sup> 14.02 AQKKDGKKRKRSRKE

- ▶ fragmentation table for charge state 1+
- ▶ specType=etd
- ▶ score=53.33
- ▶ F112758.dat
- ▶ query=q68561.p1
- ▶ precursor=558.337890
- ▶ chargePrecursor=7
- ▶ itol=0.5

| AA   | c               | y               | z+1             | z+2             | z              | AA   |
|------|-----------------|-----------------|-----------------|-----------------|----------------|------|
| P 1  | 115.087         | 3002.325        | 3856.306        | 0.000           | 3855.286       | P 35 |
| E 2  | 244.129         | 3805.272        | 3789.254        | 0.000           | 3788.246       | E 34 |
| P 3  | 341.182         | 3676.238        | 3660.211        | 0.000           | 3659.203       | P 33 |
| S 4  | 428.214         | 3579.177        | 3563.158        | 0.000           | 3562.150       | S 32 |
| K 5  | 559.309         | 3492.145        | 3476.126        | 3477.134        | 3475.116       | K 31 |
| S 6  | <b>643.341</b>  | 3384.095        | 3368.071        | 3349.039        | 3347.023       | S 30 |
| A 7  | 714.378         | 3277.018        | 3260.999        | 3262.007        | 3259.991       | A 29 |
| P 8  | 811.431         | 3205.981        | 3189.962        | 3190.970        | 3188.954       | P 28 |
| A 9  | 882.468         | 3108.929        | 3092.909        | 3093.917        | 3091.901       | A 27 |
| P 10 | <b>979.521</b>  | 3037.891        | 3021.872        | 3022.880        | 3020.864       | P 26 |
| K 11 | 1135.847        | 2946.836        | 2924.819        | 2925.827        | 2923.812       | K 25 |
| K 12 | <b>1263.742</b> | 2784.712        | 2768.693        | 2769.701        | 2767.686       | K 24 |
| G 13 | 1320.763        | 2695.617        | 2640.598        | 2641.606        | 2639.590       | G 23 |
| S 14 | 1407.795        | 2599.595        | 2583.577        | 2584.585        | 2582.569       | S 22 |
| K 15 | 1534.890        | 2512.565        | 2466.545        | 2467.553        | 2465.537       | K 21 |
| K 16 | 1663.985        | 2384.468        | 2368.450        | 2369.458        | 2367.442       | K 20 |
| A 17 | 1735.022        | 2299.373        | 2240.354        | 2241.363        | 2239.347       | A 19 |
| I 18 | 1848.107        | 2185.338        | 2169.318        | 2170.326        | 2168.311       | I 18 |
| S 19 | 1935.139        | 2072.252        | 2056.234        | 2057.241        | 2055.226       | S 17 |
| K 20 | 2077.249        | 1985.220        | 1969.202        | 1970.209        | 1968.194       | K 16 |
| A 21 | 2149.286        | 1843.110        | 1827.091        | 1828.099        | 1826.083       | A 15 |
| Q 22 | 2276.345        | 1772.073        | 1756.054        | 1757.062        | 1755.046       | Q 14 |
| K 23 | 2404.440        | 1644.014        | 1627.995        | 1628.003        | 1626.987       | K 13 |
| R 24 | 2532.535        | 1515.915        | 1499.893        | 1500.900        | 1498.884       | R 12 |
| D 25 | 2647.562        | 1387.824        | 1371.805        | <b>1372.813</b> | 1370.798       | D 11 |
| G 26 | 2704.583        | 1272.797        | 1256.778        | <b>1257.786</b> | 1255.771       | G 10 |
| K 27 | 2812.678        | <b>1215.776</b> | <b>1199.757</b> | 1200.765        | 1198.749       | K 9  |
| K 28 | 2960.773        | 1087.681        | 1071.663        | 1072.670        | 1070.654       | K 8  |
| R 29 | 3118.874        | 959.588         | <b>943.567</b>  | <b>944.575</b>  | 942.559        | R 7  |
| K 30 | 3244.969        | 833.485         | <b>787.466</b>  | 788.474         | <b>786.458</b> | K 6  |
| R 31 | 3401.070        | <b>675.390</b>  | 659.371         | <b>660.379</b>  | <b>658.363</b> | R 5  |
| S 32 | 3488.102        | 519.289         | <b>503.270</b>  | 504.278         | <b>502.262</b> | S 4  |
| R 33 | 3644.203        | 432.257         | <b>416.238</b>  | <b>417.246</b>  | 415.230        | R 3  |
| K 34 | 3772.298        | 276.155         | <b>260.137</b>  | <b>261.144</b>  | <b>259.129</b> | K 2  |
| E 35 | 3901.341        | 148.060         | 132.042         | 133.050         | 131.034        | E 1  |

# sp | Q64475 | H2B1B\_MOUSE

PEPSKSAPAPK <sup>Dimethyl</sup> 28.03 KGSKKAISK <sup>Methyl</sup> 14.02 AQKKDGKKRKRSRKE

- ▶ fragmentation table for charge state 2+
- ▶ specType=etd
- ▶ score=53.33
- ▶ F112758.dat
- ▶ query=q68561\_p1
- ▶ precursor=558.337890
- ▶ chargePrecursor=7
- ▶ itol=0.5

| AA | c  | y               | #+1             | #+2             | z               | AA              |       |
|----|----|-----------------|-----------------|-----------------|-----------------|-----------------|-------|
| F  | 1  | 58.047          | <b>1951.666</b> | 1943.657        | 0.504           | 1943.151        | F(28) |
| E  | 2  | 122.508         | 1203.140        | <b>1895.130</b> | 0.504           | <b>1894.626</b> | E(34) |
| F  | 3  | 171.095         | 1838.618        | 1830.609        | 0.504           | 1830.105        | F(33) |
| S  | 4  | 234.611         | 1790.062        | 1782.053        | 0.504           | 1781.570        | S(32) |
| K  | 5  | 278.658         | 1746.576        | 1738.567        | 1739.071        | 1739.063        | K(31) |
| S  | 6  | 322.174         | 1692.529        | 1684.520        | 1675.503        | 1674.011        | S(30) |
| A  | 7  | 357.693         | 1639.013        | <b>1631.003</b> | 1631.507        | <b>1630.499</b> | A(29) |
| F  | 8  | 408.219         | 1603.494        | 1595.485        | 1595.989        | 1594.981        | F(28) |
| A  | 9  | 441.738         | 1554.968        | 1546.958        | 1547.462        | 1546.454        | A(27) |
| F  | 10 | 490.264         | 1519.449        | 1511.440        | 1511.944        | 1510.936        | F(26) |
| K  | 11 | <b>568.327</b>  | 1470.923        | 1462.913        | 1463.417        | 1462.409        | K(25) |
| K  | 12 | 612.978         | 1392.866        | 1384.857        | 1385.361        | 1384.354        | K(24) |
| G  | 13 | 660.505         | 1328.812        | 1320.803        | 1321.307        | 1320.299        | G(23) |
| S  | 14 | <b>704.401</b>  | <b>1300.301</b> | <b>1292.292</b> | 1292.796        | <b>1291.788</b> | S(22) |
| K  | 15 | <b>768.449</b>  | 1256.785        | <b>1248.776</b> | <b>1249.280</b> | 1248.272        | K(21) |
| K  | 16 | 832.496         | 1192.738        | <b>1184.729</b> | 1185.232        | <b>1184.225</b> | K(20) |
| A  | 17 | 888.014         | 1128.689        | <b>1120.681</b> | 1121.185        | <b>1120.177</b> | A(19) |
| T  | 18 | <b>924.557</b>  | <b>1093.172</b> | 1093.676        | 1094.180        | 1093.672        | T(18) |
| S  | 19 | 968.073         | <b>1036.630</b> | <b>1028.620</b> | 1029.124        | <b>1028.117</b> | S(17) |
| K  | 20 | <b>1039.128</b> | <b>993.114</b>  | 993.618         | 994.122         | 994.601         | K(16) |
| A  | 21 | 1074.647        | 922.058         | 924.049         | <b>914.553</b>  | 913.545         | A(15) |
| Q  | 22 | 1138.676        | <b>886.540</b>  | <b>878.531</b>  | <b>879.034</b>  | 878.027         | Q(14) |
| K  | 23 | <b>1202.724</b> | <b>822.511</b>  | 814.503         | <b>815.005</b>  | 813.997         | K(13) |
| K  | 24 | <b>1266.771</b> | <b>758.463</b>  | <b>750.454</b>  | <b>750.958</b>  | 749.950         | K(12) |
| D  | 25 | 1334.285        | <b>694.416</b>  | <b>686.406</b>  | <b>686.910</b>  | <b>685.902</b>  | D(11) |
| G  | 26 | 1392.795        | <b>636.902</b>  | <b>628.893</b>  | <b>629.397</b>  | <b>628.389</b>  | G(10) |
| K  | 27 | 1418.843        | <b>608.391</b>  | <b>600.382</b>  | <b>600.886</b>  | <b>599.878</b>  | K(9)  |
| K  | 28 | <b>1480.890</b> | <b>544.344</b>  | <b>536.335</b>  | <b>536.839</b>  | 535.831         | K(8)  |
| R  | 29 | 1558.641        | 480.296         | <b>472.287</b>  | <b>472.791</b>  | <b>471.783</b>  | R(7)  |
| K  | 30 | 1622.688        | 402.246         | <b>394.237</b>  | <b>394.740</b>  | 393.733         | K(6)  |
| R  | 31 | 1701.639        | 338.198         | <b>330.189</b>  | <b>330.693</b>  | 329.685         | R(5)  |
| S  | 32 | 1744.535        | <b>260.149</b>  | 252.139         | 252.642         | 251.635         | S(4)  |
| R  | 33 | 1822.695        | 216.632         | 208.623         | 209.126         | 208.119         | R(3)  |
| T  | 34 | <b>1886.663</b> | 138.561         | 130.552         | 131.056         | 130.048         | T(2)  |
| E  | 35 | 1951.174        | 74.534          | 66.524          | 67.028          | 66.021          | E(1)  |

# sp | Q64475 | H2B1B\_MOUSE

PEPSKSAPAPK <sup>Dimethyl</sup> 28.03 KGSKKAISK <sup>Methyl</sup> 14.02 AQKKDGKKRKRSRKE

- ▶ fragmentation table for charge state 3+
- ▶ specType=etd
- ▶ score=53.33
- ▶ F112758.dat
- ▶ query=q68561.p1
- ▶ precursor=558.337890
- ▶ chargePrecursor=7
- ▶ itol=0.5

| AA   | c               | y               | z+1             | z+2            | z               | AA   |
|------|-----------------|-----------------|-----------------|----------------|-----------------|------|
| P 1  | 30.034          | 1301.447        | 1296.107        | 0.672          | 1295.771        | P 35 |
| E 2  | 62.048          | 1269.096        | <b>1261.756</b> | 0.672          | <b>1263.420</b> | E 34 |
| F 3  | 114.399         | <b>1226.081</b> | 1220.742        | 0.672          | 1220.406        | F 33 |
| S 4  | 143.410         | 1193.730        | 1188.391        | 0.672          | 1188.055        | S 32 |
| K 5  | 186.108         | 1164.720        | 1159.260        | 1159.716       | 1159.044        | K 31 |
| S 6  | 235.119         | 1122.021        | 1118.662        | 1117.018       | 1116.346        | S 30 |
| A 7  | 238.798         | <b>1091.011</b> | 1087.671        | 1088.007       | 1087.335        | A 29 |
| P 8  | 271.148         | 1069.332        | 1063.992        | 1064.328       | 1063.656        | P 28 |
| A 9  | 294.628         | <b>1036.981</b> | 1031.641        | 1031.977       | 1031.305        | A 27 |
| P 10 | 327.178         | 1013.302        | 1007.962        | 1008.298       | 1007.626        | P 26 |
| K 11 | 379.221         | 989.251         | 975.811         | 975.947        | 975.275         | K 25 |
| K 12 | 411.919         | <b>928.909</b>  | <b>923.569</b>  | <b>923.905</b> | 923.231         | K 24 |
| G 13 | 440.926         | <b>886.210</b>  | 880.871         | 881.207        | 880.535         | G 23 |
| S 14 | 469.937         | 867.201         | 861.864         | <b>862.200</b> | 861.528         | S 22 |
| K 15 | 512.635         | <b>838.193</b>  | <b>832.853</b>  | <b>833.189</b> | 832.517         | K 21 |
| K 16 | 555.313         | <b>795.494</b>  | 790.155         | <b>790.491</b> | 789.819         | K 20 |
| A 17 | 579.012         | <b>752.796</b>  | 747.456         | 747.792        | 747.120         | A 19 |
| I 18 | 618.707         | 729.111         | <b>723.777</b>  | <b>724.113</b> | 723.441         | I 18 |
| S 19 | 645.718         | 691.422         | <b>686.083</b>  | <b>686.419</b> | 685.747         | S 17 |
| K 20 | <b>693.088</b>  | <b>662.412</b>  | <b>657.072</b>  | <b>657.408</b> | <b>656.736</b>  | K 16 |
| A 21 | <b>716.767</b>  | <b>615.041</b>  | <b>609.702</b>  | <b>610.038</b> | 609.366         | A 15 |
| Q 22 | 759.453         | <b>591.362</b>  | <b>586.023</b>  | <b>586.359</b> | <b>585.687</b>  | Q 14 |
| K 23 | <b>802.154</b>  | 546.016         | 540.676         | 541.012        | 540.340         | K 13 |
| K 24 | <b>844.850</b>  | 529.972         | 520.638         | 520.974        | 520.302         | K 12 |
| D 25 | <b>883.192</b>  | 481.260         | <b>457.940</b>  | <b>458.276</b> | <b>457.604</b>  | D 11 |
| G 26 | <b>902.199</b>  | 424.937         | 419.598         | 419.934        | 419.262         | G 10 |
| K 27 | <b>944.898</b>  | 405.930         | <b>400.590</b>  | <b>400.926</b> | 400.255         | K 9  |
| K 28 | <b>987.596</b>  | 383.212         | 357.850         | 358.218        | 357.556         | K 8  |
| T 29 | <b>1039.630</b> | 320.521         | 315.184         | 315.520        | 314.858         | T 7  |
| K 30 | <b>1082.328</b> | 268.590         | 263.193         | 263.496        | 262.824         | K 6  |
| R 31 | 1134.362        | 225.801         | 220.462         | 220.798        | 220.126         | R 5  |
| S 32 | <b>1163.372</b> | 173.768         | 168.428         | 168.764        | 168.092         | S 4  |
| R 33 | 1215.406        | 144.757         | 139.417         | 139.753        | 139.082         | R 3  |
| K 34 | <b>1258.104</b> | 92.723          | 87.384          | 87.720         | 87.048          | K 2  |
| E 35 | 1301.119        | 50.029          | 44.685          | 45.021         | 44.349          | E 1  |

# sp | Q64475 | H2B1B\_MOUSE

PEPSKSAPAPK <sup>Dimethyl</sup> 28.03 KGSKKAISK <sup>Methyl</sup> 14.02 AQKKDGKKRKRSRKE

- ▶ fragmentation table for charge state 4+
- ▶ specType=etd
- ▶ score=53.33
- ▶ F112758.dat
- ▶ query=q68561.p1
- ▶ precursor=558.337890
- ▶ chargePrecursor=7
- ▶ itol=0.5

| AA    | c              | y              | z+1            | z+2            | z              | AA    |
|-------|----------------|----------------|----------------|----------------|----------------|-------|
| P[3]  | 29.527         | <b>976.137</b> | <b>972.332</b> | 0.735          | <b>972.080</b> | P[15] |
| E[2]  | 61.788         | <b>952.074</b> | <b>948.069</b> | 0.735          | <b>947.817</b> | E[34] |
| P[3]  | 96.051         | <b>919.813</b> | 915.808        | 0.735          | 915.556        | P[13] |
| S[4]  | 107.809        | 995.550        | 991.545        | 0.735          | 991.293        | S[32] |
| K[5]  | 136.833        | 873.792        | 869.787        | 870.039        | 869.535        | K[31] |
| S[6]  | 161.591        | 941.768        | 937.763        | <b>938.015</b> | 937.511        | S[30] |
| A[7]  | 179.350        | 820.010        | 816.005        | 816.257        | 815.753        | A[29] |
| P[8]  | 203.613        | <b>802.251</b> | 798.246        | 798.498        | <b>797.994</b> | P[28] |
| A[9]  | 221.372        | <b>777.907</b> | 773.902        | 774.235        | 773.731        | A[27] |
| P[10] | 243.836        | 760.228        | 756.223        | 756.475        | 756.072        | P[26] |
| K[11] | 284.097        | 735.965        | <b>731.960</b> | 732.212        | <b>731.708</b> | K[25] |
| K[12] | 316.691        | <b>696.933</b> | <b>692.929</b> | <b>693.181</b> | <b>692.677</b> | K[24] |
| G[13] | 330.946        | 664.910        | 660.905        | 661.157        | <b>660.653</b> | G[23] |
| S[14] | 352.704        | 650.654        | 646.650        | 646.902        | 646.398        | S[22] |
| K[15] | 384.728        | <b>628.896</b> | 624.892        | 625.144        | <b>624.640</b> | K[21] |
| K[16] | <b>416.752</b> | 596.873        | <b>592.868</b> | <b>593.120</b> | <b>592.616</b> | K[20] |
| A[17] | 434.511        | 564.849        | <b>560.844</b> | <b>561.096</b> | <b>560.592</b> | A[19] |
| I[18] | 462.782        | <b>547.090</b> | 543.085        | 543.337        | 542.833        | I[18] |
| S[19] | 484.540        | 518.819        | 514.814        | 515.066        | 514.562        | S[17] |
| K[20] | 520.068        | 497.081        | 493.076        | 493.328        | 492.824        | K[16] |
| A[21] | 537.827        | 461.533        | <b>457.528</b> | <b>457.780</b> | <b>457.276</b> | A[15] |
| Q[22] | 569.842        | 443.774        | 439.769        | 440.021        | 439.517        | Q[14] |
| K[23] | <b>601.865</b> | 411.759        | 407.754        | 408.006        | 407.502        | K[13] |
| K[24] | <b>633.889</b> | 379.735        | 375.731        | 375.982        | 375.479        | K[12] |
| D[25] | <b>662.646</b> | 347.711        | 343.707        | 343.959        | 343.455        | D[11] |
| G[26] | <b>676.901</b> | 318.955        | 314.950        | 315.202        | 314.698        | G[10] |
| K[27] | 708.925        | 304.699        | 300.695        | 300.947        | 300.443        | K[9]  |
| K[28] | <b>740.549</b> | 272.676        | 268.671        | 268.923        | 268.419        | K[8]  |
| K[29] | 779.974        | 240.582        | 236.577        | 236.829        | 236.325        | K[7]  |
| K[30] | 811.998        | 201.627        | 197.622        | 197.874        | 197.370        | K[6]  |
| R[31] | <b>851.023</b> | 169.603        | 165.598        | 165.850        | 165.346        | R[5]  |
| S[32] | <b>872.781</b> | 130.578        | 126.573        | 126.825        | 126.321        | S[4]  |
| R[33] | <b>911.806</b> | 108.620        | 104.615        | 104.867        | 104.363        | R[3]  |
| K[34] | 943.830        | 69.794         | 65.790         | 66.042         | 65.538         | K[2]  |
| E[35] | 976.091        | 37.771         | 33.766         | 34.018         | 33.514         | E[1]  |

# sp | Q64475 | H2B1B\_MOUSE

PEPSKSAPAPK <sup>Dimethyl</sup>28.03 KGSKKAISK <sup>Methyl</sup>14.02 AQKKDGKKRKRSRKE

- ▶ fragmentation table for charge state 5+
- ▶ specType=etd
- ▶ score=53.33
- ▶ F112758.dat
- ▶ query=q68561.p1
- ▶ precursor=558.337890
- ▶ chargePrecursor=7
- ▶ itol=0.5

| AA    | c              | y              | z+1            | z+2            | z              | AA    |
|-------|----------------|----------------|----------------|----------------|----------------|-------|
| P[1]  | 23.823         | <b>781.271</b> | <b>778.067</b> | 0.806          | <b>777.866</b> | P[15] |
| L[2]  | 49.032         | <b>761.860</b> | <b>758.657</b> | 0.806          | <b>758.455</b> | L[34] |
| P[3]  | 69.042         | 138.052        | 732.848        | 0.806          | 732.646        | P[13] |
| S[4]  | 90.449         | <b>716.641</b> | <b>713.437</b> | 0.806          | <b>713.236</b> | S[32] |
| K[5]  | 112.068        | 699.235        | 696.031        | 696.233        | 695.829        | K[31] |
| S[6]  | 129.474        | 673.616        | <b>670.412</b> | <b>670.614</b> | <b>670.210</b> | S[30] |
| A[7]  | 143.681        | 656.209        | <b>653.006</b> | <b>653.207</b> | <b>652.804</b> | A[29] |
| P[8]  | 163.092        | 642.002        | <b>638.798</b> | <b>639.000</b> | <b>638.597</b> | P[28] |
| A[9]  | 177.299        | 622.591        | <b>619.388</b> | <b>619.589</b> | <b>619.186</b> | A[27] |
| F[10] | 186.710        | <b>608.384</b> | 605.180        | 605.382        | 604.979        | F[26] |
| K[11] | 227.938        | 588.974        | <b>585.770</b> | <b>585.971</b> | <b>585.568</b> | K[25] |
| K[12] | 253.554        | <b>557.748</b> | <b>554.544</b> | <b>554.746</b> | <b>554.343</b> | K[24] |
| G[13] | 264.959        | 532.159        | <b>528.926</b> | <b>529.127</b> | <b>528.724</b> | G[23] |
| S[14] | 282.365        | 520.725        | 517.521        | 517.723        | 517.320        | S[22] |
| K[15] | 307.984        | <b>503.319</b> | 500.115        | 500.316        | 499.913        | K[21] |
| K[16] | 333.603        | 477.700        | 474.496        | 474.697        | 474.294        | K[20] |
| A[17] | 347.810        | 452.081        | 448.877        | 449.078        | 448.675        | A[19] |
| I[18] | 370.427        | 437.873        | 434.669        | 434.871        | 434.468        | I[18] |
| S[19] | 397.834        | 413.256        | 410.053        | 410.254        | 410.051        | S[17] |
| K[20] | <b>416.256</b> | 397.836        | <b>394.646</b> | <b>394.848</b> | <b>394.445</b> | K[16] |
| A[21] | 430.463        | 369.438        | 366.234        | 366.435        | 366.032        | A[15] |
| Q[22] | 456.076        | 355.220        | 352.017        | 352.218        | 351.815        | Q[14] |
| K[23] | 481.694        | 329.609        | 326.405        | 326.606        | 326.203        | K[13] |
| K[24] | 507.313        | 303.990        | 300.786        | 300.987        | 300.584        | K[12] |
| D[25] | 530.318        | 278.371        | 275.167        | 275.368        | 274.965        | D[11] |
| G[26] | 541.722        | 255.365        | 252.161        | 252.363        | 251.960        | G[10] |
| K[27] | 567.341        | 243.961        | 240.757        | 240.959        | 240.556        | K[9]  |
| K[28] | <b>592.560</b> | <b>218.342</b> | 215.138        | 215.340        | 214.937        | K[8]  |
| K[29] | <b>624.181</b> | 192.723        | 189.519        | 189.721        | 189.318        | K[7]  |
| K[30] | <b>649.800</b> | 161.503        | 158.299        | 158.501        | 158.097        | K[6]  |
| R[31] | <b>681.020</b> | 135.884        | 132.680        | 132.882        | 132.479        | R[5]  |
| S[32] | <b>698.426</b> | 104.664        | 101.460        | 101.661        | 101.258        | S[4]  |
| R[33] | 726.647        | 87.257         | 84.053         | 84.255         | 83.852         | R[3]  |
| K[34] | <b>755.266</b> | 56.037         | 52.833         | 53.035         | 52.632         | K[2]  |
| E[35] | <b>781.074</b> | 30.418         | 27.214         | 27.416         | 27.013         | E[1]  |



# sp | Q64475 | H2B1B\_MOUSE

PEPSKSAPAPK <sup>Dimethyl</sup> 28.03 KGSKKAISK <sup>Methyl</sup> 14.02 AQKKDGKKRKRSRKE

- ▶ fragmentation table for charge state 6+
- ▶ specType=etd
- ▶ score=53.33
- ▶ F112758.dat
- ▶ query=q68561.p1
- ▶ precursor=558.337890
- ▶ chargePrecursor=7
- ▶ itol=0.5

| AA | c  | y              | z+1            | z+2            | z              | AA             |   |    |
|----|----|----------------|----------------|----------------|----------------|----------------|---|----|
| P  | 1  | 20.020         | <b>651.227</b> | 545.557        | 0.839          | 548.389        | P | 13 |
| E  | 2  | 41.528         | 635.051        | 632.382        | 0.839          | 632.214        | E | 34 |
| P  | 3  | 57.703         | 613.544        | 610.875        | 0.839          | 610.707        | P | 13 |
| S  | 4  | 72.208         | 597.369        | 594.699        | 0.839          | 594.531        | S | 32 |
| K  | 5  | 93.558         | <b>582.864</b> | 580.194        | 580.362        | 580.026        | K | 31 |
| S  | 6  | 108.063        | <b>561.514</b> | 558.845        | 559.013        | 558.677        | S | 30 |
| A  | 7  | 119.902        | <b>547.009</b> | <b>544.339</b> | <b>544.507</b> | <b>544.171</b> | A | 29 |
| P  | 8  | 136.078        | 535.170        | 532.500        | 532.668        | 532.332        | P | 28 |
| A  | 9  | 147.917        | 518.994        | 516.324        | 516.492        | 516.156        | A | 27 |
| P  | 10 | 164.093        | 507.155        | 505.485        | 505.653        | 505.317        | P | 28 |
| K  | 11 | 190.114        | 490.979        | 489.309        | 489.477        | 489.141        | K | 25 |
| K  | 12 | 211.463        | 464.958        | 462.288        | 462.456        | 462.120        | K | 24 |
| G  | 13 | 220.967        | 443.609        | 440.939        | 441.107        | 440.771        | G | 23 |
| S  | 14 | 235.472        | 434.105        | 431.436        | 431.603        | 431.268        | S | 22 |
| K  | 15 | 256.821        | 416.600        | 416.930        | <b>417.098</b> | <b>416.762</b> | K | 21 |
| K  | 16 | 278.170        | 398.251        | 395.581        | 395.749        | 395.413        | K | 20 |
| A  | 17 | 290.010        | 376.902        | 374.232        | 374.400        | 374.064        | A | 19 |
| I  | 18 | 308.857        | 365.062        | 362.392        | 362.560        | 362.224        | I | 18 |
| S  | 19 | 323.362        | 346.215        | 343.545        | 343.713        | 343.377        | S | 17 |
| K  | 20 | 347.048        | 331.709        | 329.040        | 329.208        | 328.872        | K | 16 |
| A  | 21 | 358.397        | 308.024        | 305.355        | 305.523        | 305.187        | A | 15 |
| Q  | 22 | 380.230        | 296.185        | 293.515        | 293.683        | 293.347        | Q | 14 |
| K  | 23 | 401.579        | 274.842        | 272.172        | 272.340        | 272.004        | K | 13 |
| K  | 24 | 422.929        | 253.493        | 250.823        | 250.991        | 250.655        | K | 12 |
| D  | 25 | 442.100        | 232.143        | 229.474        | 229.642        | 229.306        | D | 11 |
| G  | 26 | 451.603        | 212.972        | 210.302        | 210.470        | 210.134        | G | 10 |
| K  | 27 | <b>472.952</b> | 203.469        | 200.799        | 200.967        | 200.631        | K | 9  |
| K  | 28 | 484.302        | 182.120        | 179.450        | 179.618        | 179.282        | K | 9  |
| K  | 29 | 529.218        | 160.770        | 158.101        | 158.269        | 157.933        | K | 7  |
| K  | 30 | 541.668        | 134.753        | 132.084        | 132.252        | 131.916        | K | 6  |
| R  | 31 | 567.684        | 113.404        | 110.735        | 110.903        | 110.567        | R | 5  |
| S  | 32 | 582.190        | 87.387         | 84.718         | 84.886         | 84.550         | S | 4  |
| R  | 33 | 608.207        | 72.882         | 70.212         | 70.380         | 70.044         | R | 3  |
| K  | 34 | <b>629.556</b> | 46.865         | 44.196         | 44.363         | 44.028         | K | 2  |
| E  | 35 | <b>651.063</b> | 25.516         | 22.846         | 23.014         | 22.679         | E | 1  |

# sp | Q64525 | H2B2B\_MOUSE

PDKASAPAPKK (Acetyl) GS (Acetyl) KKAVT Acetyl KVQKKDGKKRKRSRKE  
 (42.01) (42.01) 42.01

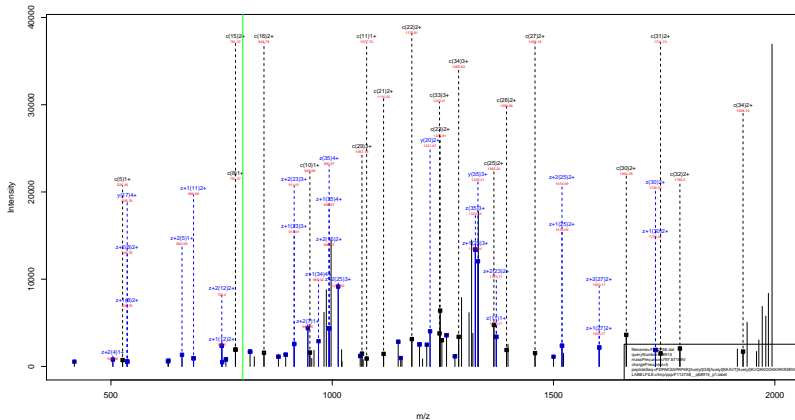

# sp | Q64525 | H2B2B\_MOUSE

PDKASAPAPKK (Acetyl) (42.01) GS (Acetyl) (42.01) KKAVT (Acetyl) (42.01) KVQKKDGKKRKRSRKE

- ▶ fragmentation table for charge state 1+
- ▶ specType=etd
- ▶ score=59.14
- ▶ F112758.dat
- ▶ query=q68915.p1
- ▶ precursor=797.671090
- ▶ chargePrecursor=5
- ▶ itol=0.5

| AA   | c               | y        | #s1             | #s2             | z               | AA   |
|------|-----------------|----------|-----------------|-----------------|-----------------|------|
| P 1  | 115.087         | 3054.331 | 3056.117        | 0.000           | 3057.301        | P 58 |
| Q 2  | 230.114         | 3887.278 | 3871.250        | 0.000           | 3870.251        | Q 34 |
| P 3  | 327.166         | 3772.251 | 3756.232        | 0.000           | 3755.234        | P 33 |
| A 4  | 398.203         | 3675.108 | 3659.170        | 0.000           | 3658.171        | A 32 |
| K 5  | <b>526.298</b>  | 3604.161 | 3588.142        | 3589.150        | 3587.134        | K 31 |
| S 6  | 613.130         | 3476.060 | 3460.040        | 3461.055        | 3459.030        | S 30 |
| A 7  | 694.308         | 3399.034 | 3373.015        | 3374.023        | 3372.000        | A 29 |
| P 8  | <b>781.420</b>  | 3317.997 | 3301.978        | 3302.986        | 3300.970        | P 28 |
| A 9  | 852.457         | 3220.944 | 3204.925        | 3205.933        | 3203.918        | A 27 |
| P 10 | <b>949.510</b>  | 3149.007 | 3133.889        | 3134.896        | 3132.880        | P 26 |
| K 11 | <b>1077.605</b> | 3052.854 | 3036.835        | 3037.843        | 3035.826        | K 25 |
| K 12 | <b>1247.711</b> | 2924.799 | 2908.740        | 2909.748        | 2907.731        | K 24 |
| Q 13 | 1304.132        | 2794.654 | 2778.635        | 2779.643        | 2777.627        | Q 23 |
| S 14 | 1433.775        | 2697.632 | 2681.614        | 2682.621        | 2680.606        | S 22 |
| K 15 | 1561.870        | 2568.500 | 2552.571        | 2553.579        | 2551.563        | K 21 |
| K 16 | 1689.965        | 2440.405 | 2424.476        | 2425.484        | 2423.468        | K 20 |
| A 17 | 1761.002        | 2312.400 | 2296.381        | 2297.389        | 2295.373        | A 19 |
| V 18 | 1889.076        | 2241.363 | 2225.344        | 2226.352        | 2224.336        | V 18 |
| V 19 | 2003.128        | 2142.294 | 2126.275        | 2127.283        | 2125.267        | V 17 |
| K 20 | 2111.223        | 1999.230 | 1983.211        | 1984.225        | 1982.209        | K 16 |
| V 21 | 2230.292        | 1871.141 | 1855.122        | 1856.130        | 1854.114        | V 15 |
| Q 22 | 2358.350        | 1772.073 | 1756.054        | 1757.062        | 1755.046        | Q 14 |
| K 23 | 2486.445        | 1644.014 | 1627.995        | 1629.003        | 1626.987        | K 13 |
| P 24 | 2614.540        | 1515.919 | <b>1499.900</b> | 1500.908        | 1498.892        | P 12 |
| Q 25 | 2729.567        | 1387.824 | 1371.805        | 1372.813        | <b>1370.798</b> | Q 11 |
| G 26 | 2786.589        | 1272.797 | 1256.778        | <b>1257.786</b> | 1255.771        | G 10 |
| K 27 | 2914.684        | 1215.776 | 1199.757        | 1200.765        | 1198.749        | K 9  |
| K 28 | 3042.779        | 1087.681 | 1071.662        | 1072.670        | 1070.654        | K 8  |
| K 29 | 3168.860        | 959.586  | 943.567         | <b>944.575</b>  | 942.559         | K 7  |
| R 30 | 3298.978        | 831.488  | 787.466         | 788.474         | 786.458         | R 6  |
| R 31 | 3483.076        | 675.390  | 659.371         | <b>660.379</b>  | 658.363         | R 5  |
| S 32 | 3570.108        | 519.289  | 503.270         | <b>504.278</b>  | 502.262         | S 4  |
| R 33 | 3726.209        | 432.257  | 416.238         | <b>417.246</b>  | 415.230         | R 3  |
| K 34 | 3854.304        | 276.155  | 260.137         | 261.144         | 259.129         | K 2  |
| E 35 | 3983.346        | 148.060  | 132.042         | 133.050         | 131.034         | E 1  |

# sp | Q64525 | H2B2B\_MOUSE

PDKAKSAPAPKK (Acetyl) (42.01) GS (Acetyl) (42.01) KKAVT (Acetyl) (42.01) KVQKKDGGKRRKRSRKE

- ▶ fragmentation table for charge state 2+
- ▶ specType=etd
- ▶ score=59.14
- ▶ F112758.dat
- ▶ query=q68915.p1
- ▶ precursor=797.671090
- ▶ chargePrecursor=5
- ▶ itol=0.5

| AA  | c               | y               | a+1             | a+2             | z               | AA   |
|-----|-----------------|-----------------|-----------------|-----------------|-----------------|------|
| P1  | 58.047          | 1092.666        | 1084.663        | 0.504           | 1084.150        | P155 |
| D1  | 115.506         | 1344.143        | 1339.133        | 0.504           | 1335.620        | S124 |
| F1  | 164.027         | 1886.628        | 1878.620        | 0.504           | 1878.110        | P133 |
| A1  | 199.605         | 1838.103        | 1830.093        | 0.504           | 1829.580        | A132 |
| K1  | 263.653         | 1802.584        | 1794.575        | 1795.079        | 1794.071        | K131 |
| S1  | 307.169         | 1738.517        | <b>1730.527</b> | 1731.031        | <b>1730.023</b> | S130 |
| A17 | 382.687         | 1699.024        | 1691.013        | 1687.515        | 1688.509        | A129 |
| F1  | 391.214         | 1659.502        | 1651.493        | 1651.997        | 1650.989        | F128 |
| A1  | 436.732         | 1610.976        | <b>1602.966</b> | <b>1603.470</b> | 1602.462        | A127 |
| P10 | 475.250         | 1575.451        | 1567.448        | 1567.952        | 1566.944        | P126 |
| K11 | 539.306         | 1526.931        | <b>1518.921</b> | <b>1519.425</b> | 1518.417        | K125 |
| K12 | 624.259         | 1469.883        | 1464.874        | 1465.378        | 1464.370        | K124 |
| G13 | 652.870         | 1377.830        | 1369.821        | <b>1370.325</b> | 1369.317        | G123 |
| S14 | 717.391         | 1349.320        | 1341.310        | 1341.814        | 1340.806        | S122 |
| K15 | <b>761.438</b>  | 1284.798        | <b>1276.789</b> | <b>1277.293</b> | 1276.285        | K121 |
| K16 | <b>845.486</b>  | <b>1220.751</b> | 1212.742        | <b>1213.246</b> | 1212.238        | K120 |
| A17 | 881.005         | 1156.703        | <b>1148.694</b> | <b>1149.198</b> | 1148.190        | A119 |
| V18 | 895.539         | 1121.195        | 1113.187        | 1113.679        | 1112.671        | V118 |
| T19 | 1002.068        | 1071.651        | <b>1063.641</b> | 1064.145        | <b>1063.137</b> | T117 |
| K20 | 1066.115        | 1000.122        | 992.112         | <b>992.616</b>  | 991.608         | K116 |
| V21 | <b>1115.650</b> | 936.074         | 928.065         | 928.569         | 927.561         | V115 |
| Q22 | <b>1179.679</b> | 896.540         | <b>878.531</b>  | 879.034         | <b>878.027</b>  | Q114 |
| K23 | <b>1243.726</b> | 822.511         | <b>814.501</b>  | 815.005         | <b>813.997</b>  | K113 |
| K24 | 1307.874        | 758.463         | <b>750.454</b>  | <b>750.958</b>  | 749.950         | K112 |
| D25 | <b>1365.287</b> | 694.416         | <b>686.406</b>  | <b>686.910</b>  | 685.902         | D111 |
| G26 | <b>1393.798</b> | 636.902         | <b>628.893</b>  | <b>629.397</b>  | 628.389         | G110 |
| K27 | <b>1457.845</b> | 608.391         | 600.382         | 600.886         | 599.878         | K109 |
| K28 | 1521.893        | 544.344         | <b>536.335</b>  | <b>536.839</b>  | 535.831         | K108 |
| R29 | 1589.844        | 489.296         | 481.287         | 481.791         | 479.783         | R107 |
| K30 | <b>1663.991</b> | 402.245         | 394.237         | 394.740         | 393.732         | K106 |
| R31 | <b>1742.042</b> | 338.198         | 330.189         | 330.693         | 329.685         | R105 |
| S32 | <b>1785.558</b> | 260.148         | 252.139         | 252.642         | 251.634         | S104 |
| R33 | 1863.608        | 216.632         | 208.623         | 209.126         | 208.119         | R103 |
| K34 | <b>1927.656</b> | 148.581         | 140.572         | 141.076         | 139.068         | K102 |
| E35 | 1992.117        | 74.534          | 66.525          | 67.028          | 66.021          | E101 |

# sp | Q64525 | H2B2B\_MOUSE

PDKAKSAPAPKK (Acetyl) (42.01) GS (Acetyl) (42.01) KKAVT (Acetyl) (42.01) KVQKKDGKKRKRSRKE

- ▶ fragmentation table for charge state 3+
- ▶ specType=etd
- ▶ score=59.14
- ▶ F112758.dat
- ▶ query=q68915.p1
- ▶ precursor=797.671090
- ▶ chargePrecursor=5
- ▶ itol=0.5

| AA   | c               | y               | a+1             | a+2             | z               | AA   |
|------|-----------------|-----------------|-----------------|-----------------|-----------------|------|
| P1   | 38.034          | <b>1328.782</b> | <b>1323.442</b> | 0.072           | <b>1323.106</b> | P15  |
| D1   | 77.376          | 1269.441        | 1261.061        | 0.072           | 1266.755        | S124 |
| F1   | 109.727         | <b>1258.088</b> | 1252.749        | 0.072           | 1252.413        | P133 |
| A4   | 133.406         | 1225.738        | 1220.398        | 0.072           | 1220.062        | A132 |
| K1   | 178.104         | 1202.058        | <b>1196.719</b> | <b>1197.055</b> | 1196.383        | K131 |
| S1   | 205.115         | 1159.360        | 1154.021        | <b>1154.357</b> | 1153.885        | S130 |
| A17  | 228.904         | 1130.349        | 1125.010        | 1125.346        | 1124.874        | A129 |
| F1   | 251.145         | 1108.670        | 1103.331        | 1103.667        | 1103.002        | P128 |
| A1   | 284.824         | 1074.320        | 1068.980        | 1069.316        | 1068.644        | A127 |
| F10  | 317.175         | 1050.640        | 1045.301        | 1045.637        | 1044.965        | P126 |
| K11  | 359.873         | 1018.290        | 1012.950        | <b>1013.286</b> | 1012.614        | K125 |
| K12  | 418.575         | 975.591         | 970.252         | 970.588         | 969.916         | K124 |
| G13  | 435.502         | 918.889         | <b>913.550</b>  | <b>913.886</b>  | 913.214         | G123 |
| S14  | 478.596         | 899.882         | <b>894.543</b>  | <b>894.879</b>  | 894.207         | S122 |
| K15  | 521.295         | 856.868         | 851.528         | 851.864         | 851.193         | K121 |
| K16  | 583.993         | <b>814.170</b>  | 808.830         | 809.166         | 808.494         | K120 |
| A17  | 587.672         | 771.471         | 766.132         | 766.468         | 765.796         | A119 |
| V18  | 630.665         | 747.792         | 742.453         | 742.789         | 742.117         | V118 |
| T19  | 688.581         | 714.770         | 709.430         | 709.766         | 709.094         | T117 |
| K10  | 711.079         | 667.083         | 661.744         | 662.080         | 661.408         | K116 |
| V21  | 744.102         | 624.385         | 619.046         | 619.382         | 618.710         | V115 |
| Q22  | 786.718         | 591.382         | 586.043         | 586.379         | 585.687         | Q114 |
| K13  | 828.487         | 548.076         | 542.737         | 543.073         | 542.401         | K113 |
| K14  | 872.135         | 505.975         | 500.636         | 500.974         | 500.302         | K112 |
| D25  | 910.527         | 463.280         | 457.940         | 458.276         | 457.604         | D111 |
| G10  | 926.534         | 424.937         | 419.598         | 419.934         | 419.262         | G110 |
| K27  | 972.233         | 405.930         | 400.590         | 400.926         | 400.253         | K109 |
| K18  | 1014.931        | 363.232         | 357.892         | 358.228         | 357.556         | K108 |
| R29  | <b>1026.565</b> | 328.533         | 323.194         | 323.530         | 322.857         | R107 |
| K10  | 1100.653        | 288.500         | 283.160         | 283.496         | 282.823         | K106 |
| R31  | 1181.697        | 225.801         | 220.462         | 220.798         | 220.126         | R105 |
| S12  | 1186.707        | 173.768         | 168.428         | 168.764         | 168.092         | S104 |
| R33  | <b>1242.741</b> | 144.757         | 139.417         | 139.753         | 139.082         | R103 |
| K134 | <b>1285.439</b> | 82.723          | 87.384          | 87.720          | 87.048          | K102 |
| E15  | 1328.454        | 50.025          | 44.685          | 45.021          | 44.350          | E101 |

# sp | Q64525 | H2B2B\_MOUSE

PDKAKSAPAPKK (Acetyl) (42.01) GS (Acetyl) (42.01) KKAFT (Acetyl) (42.01) KVQKKDGKKRKRSRKE

- ▶ fragmentation table for charge state 4+
- ▶ specType=etd
- ▶ score=59.14
- ▶ F112758.dat
- ▶ query=q68915.p1
- ▶ precursor=797.671090
- ▶ chargePrecursor=5
- ▶ itol=0.5

| AA    | c       | y              | z+1            | z+2     | z              | AA    |
|-------|---------|----------------|----------------|---------|----------------|-------|
| P[1]  | 29.537  | 996.836        | <b>992.833</b> | 0.755   | <b>992.581</b> | P[35] |
| D[2]  | 58.284  | 972.575        | <b>968.570</b> | 0.755   | 968.316        | D[34] |
| P[3]  | 82.547  | 943.818        | 939.813        | 0.755   | 939.562        | P[33] |
| A[4]  | 100.306 | 919.555        | 915.550        | 0.755   | 915.298        | A[32] |
| K[5]  | 132.330 | 901.796        | 897.791        | 898.043 | 897.539        | K[31] |
| S[6]  | 154.088 | 899.772        | 895.767        | 896.019 | 895.515        | S[30] |
| A[7]  | 171.847 | 848.014        | 844.009        | 844.261 | 843.757        | A[29] |
| P[8]  | 196.111 | 830.255        | 826.250        | 826.502 | 825.998        | P[28] |
| A[9]  | 213.870 | 805.991        | 801.987        | 802.239 | 801.735        | A[27] |
| P[10] | 238.133 | 788.232        | 784.228        | 784.479 | 783.976        | P[26] |
| K[11] | 210.157 | 683.969        | <b>759.964</b> | 760.216 | <b>759.712</b> | K[25] |
| K[12] | 312.683 | 731.945        | 727.941        | 728.193 | 727.689        | K[24] |
| G[13] | 326.938 | 689.413        | 685.414        | 685.666 | 685.162        | G[23] |
| S[14] | 359.199 | 675.164        | 671.159        | 671.411 | 670.907        | S[22] |
| K[15] | 391.223 | 642.903        | 638.898        | 639.150 | 638.646        | K[21] |
| K[16] | 423.247 | 610.879        | 606.874        | 607.126 | 606.622        | K[20] |
| A[17] | 441.006 | 578.855        | 574.851        | 575.103 | 574.599        | A[19] |
| V[18] | 465.773 | 561.096        | 557.091        | 557.343 | 556.839        | V[18] |
| T[19] | 501.538 | <b>536.329</b> | 532.324        | 532.576 | 532.072        | T[17] |
| K[20] | 533.561 | 500.564        | 496.560        | 496.812 | 496.308        | K[16] |
| V[21] | 558.328 | 468.341        | 464.336        | 464.588 | 464.084        | V[15] |
| G[22] | 590.343 | 433.774        | 429.769        | 430.021 | 429.517        | G[14] |
| K[23] | 622.367 | 411.759        | 407.754        | 408.006 | 407.502        | K[13] |
| K[24] | 654.391 | 379.735        | 375.731        | 375.982 | 375.479        | K[12] |
| D[25] | 683.147 | 347.711        | 343.707        | 343.959 | 343.455        | D[11] |
| G[26] | 697.403 | 318.955        | 314.950        | 315.202 | 314.698        | G[10] |
| K[27] | 729.426 | 304.699        | 300.695        | 300.947 | 300.443        | K[9]  |
| K[28] | 761.450 | 272.676        | 268.671        | 268.923 | 268.419        | K[8]  |
| R[29] | 800.475 | 240.652        | 236.647        | 236.899 | 236.395        | R[7]  |
| K[30] | 832.499 | 201.627        | 197.622        | 197.874 | 197.370        | K[6]  |
| R[31] | 871.524 | 169.603        | 165.598        | 165.850 | 165.346        | R[5]  |
| S[32] | 893.262 | 130.578        | 126.573        | 126.825 | 126.321        | S[4]  |
| R[33] | 932.288 | 108.550        | 104.545        | 104.797 | 104.293        | R[3]  |
| K[34] | 964.311 | 69.594         | 65.589         | 65.842  | 65.338         | K[2]  |
| E[35] | 996.592 | 37.771         | 33.766         | 34.018  | 33.514         | E[1]  |

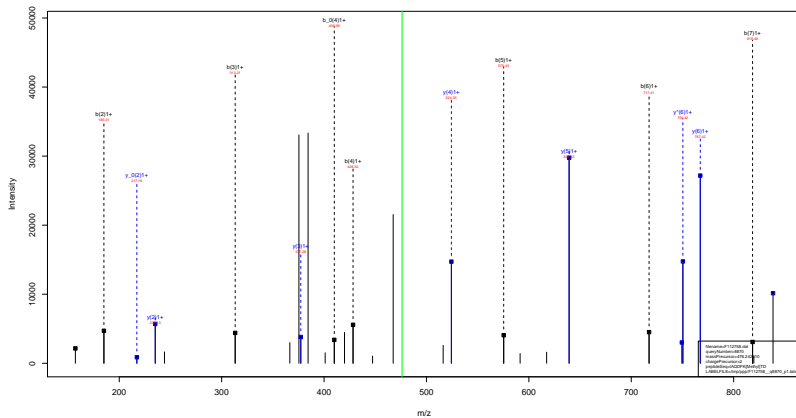

# sp | P68433 | H31\_MOUSE

IAQDFK<sup>Methyl</sup> TD  
14.02

- ▶ fragmentation table for charge state 1+
- ▶ specType=cid
- ▶ score=57.54
- ▶ F112758.dat
- ▶ query=q8870\_p1
- ▶ precursor=476.242010
- ▶ chargePrecursor=2
- ▶ itol=0.5

| AA  | a              | a*      | a,β     | b              | b*      | b,β     | γ              | γ*             | γ,β            | AA  |
|-----|----------------|---------|---------|----------------|---------|---------|----------------|----------------|----------------|-----|
| T 1 | 86.096         | 0.000   | 0.000   | 114.191        | 0.000   | 0.000   | 361.416        | 319.464        | 623.880        | T 1 |
| A 2 | <b>157.134</b> | 0.000   | 0.000   | <b>185.126</b> | 0.000   | 0.000   | <b>838.304</b> | 821.368        | 1620.584       | A 2 |
| Q 3 | 286.192        | 286.186 | 0.000   | <b>313.187</b> | 296.180 | 0.000   | <b>767.357</b> | <b>750.330</b> | <b>749.346</b> | Q 3 |
| D 4 | 400.219        | 383.193 | 382.209 | <b>426.214</b> | 411.197 | 0.000   | <b>410.203</b> | <b>639.296</b> | 622.272        | D 4 |
| F 5 | 547.287        | 530.261 | 529.277 | <b>575.282</b> | 558.256 | 557.272 | <b>524.271</b> | 507.245        | 506.261        | F 5 |
| R 6 | 689.356        | 672.332 | 671.348 | <b>717.363</b> | 700.366 | 699.332 | <b>377.303</b> | 360.177        | 359.193        | R 6 |
| T 7 | 790.446        | 773.419 | 772.435 | <b>818.441</b> | 801.414 | 800.430 | <b>235.092</b> | 0.000          | <b>217.082</b> | T 7 |
| G 8 | 905.473        | 888.448 | 887.464 | 913.468        | 916.441 | 915.457 | 138.040        | 0.000          | 116.034        | G 8 |



# sp | Q8CGP1 | H2B1K\_MOUSE

GTKAVTKYT Acetyl S (Acetyl)  
42.01 (42.01) AK

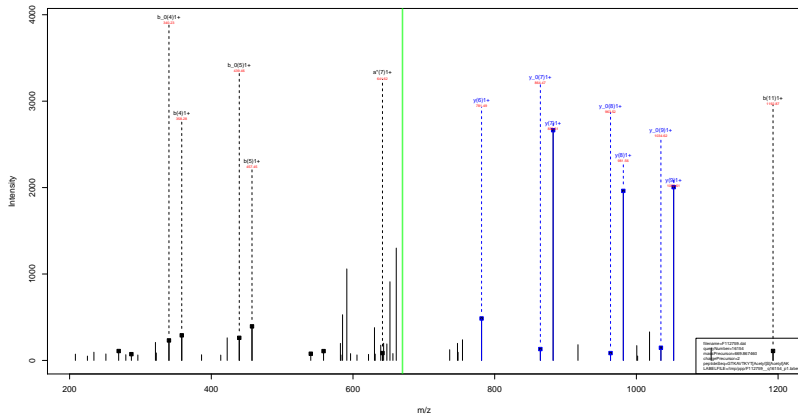

# sp | Q8CGP1 | H2B1K\_MOUSE

GTKAVTKYT Acetyl S (Acetyl) AK  
42.01 (42.01)

- ▶ fragmentation table for charge state 1+
- ▶ specType=cid
- ▶ score=34.92
- ▶ F112759.dat
- ▶ query=q16154\_p1
- ▶ precursor=669.867460
- ▶ chargePrecursor=2
- ▶ itol=0.5

| AA  | a        | a*             | a,b      | b               | b*       | b,b            | y              | y*      | y,b            | AA  |
|-----|----------|----------------|----------|-----------------|----------|----------------|----------------|---------|----------------|-----|
| G 1 | 103.074  | 0.000          | 113.074  | 50.000          | 0.000    | 0.000          | 110.074        | 113.074 | 103.074        | G10 |
| T 2 | 131.080  | 0.000          | 141.080  | 100.000         | 0.000    | 0.000          | 128.080        | 131.080 | 131.080        | T11 |
| K 3 | 204.110  | 262.130        | 244.100  | <b>287.171</b>  | 270.145  | <b>269.161</b> | 180.090        | 113.010 | 110.040        | K10 |
| R 4 | 330.114  | 311.131        | 312.200  | <b>358.200</b>  | 341.145  | <b>340.180</b> | <b>100.240</b> | 310.090 | <b>103.252</b> | R10 |
| V 5 | 429.202  | 433.233        | 415.211  | <b>457.277</b>  | 450.230  | <b>430.200</b> | <b>081.225</b> | 404.090 | <b>083.215</b> | V10 |
| I 6 | 530.230  | 513.203        | 514.210  | <b>538.325</b>  | 541.200  | <b>540.314</b> | <b>082.437</b> | 469.090 | <b>084.446</b> | I10 |
| K 7 | 658.425  | <b>641.390</b> | 640.414  | 680.420         | 669.393  | 680.403        | <b>781.400</b> | 764.382 | 763.380        | K10 |
| V 8 | 811.400  | 814.400        | 809.411  | 840.403         | 832.400  | 831.411        | 669.310        | 636.280 | 626.304        | V10 |
| I 9 | 904.500  | 897.431        | 840.510  | 900.541         | 878.511  | 874.531        | 490.241        | 473.224 | 472.240        | I10 |
| S10 | 1093.580 | 1078.521       | 1078.570 | 1090.584        | 1104.557 | 1103.571       | 347.101        | 330.100 | 320.102        | S10 |
| R11 | 1184.620 | 1187.590       | 1184.611 | <b>1192.621</b> | 1176.594 | 1174.611       | 210.110        | 200.121 | 0.000          | R10 |
| R12 | 1304.711 | 1275.634       | 1274.710 | 1330.700        | 1303.660 | 1302.700       | 147.111        | 130.080 | 0.000          | R10 |



# sp | Q6ZWY9 | H2B1C\_MOUSE

PEPAKSAPAPKK Acetyl 42.01 GS Acetyl 42.01 KKAVT Acetyl 42.01 KAQQKD

- ▶ fragmentation table for charge state 1+
- ▶ specType=etd
- ▶ score=59.57
- ▶ F112759.dat
- ▶ query=q28914.p1
- ▶ precursor=544.112880
- ▶ chargePrecursor=5
- ▶ itol=0.5

| AA | c               | y        | z+1             | z+2             | z              | AA    |
|----|-----------------|----------|-----------------|-----------------|----------------|-------|
| P  | 115.087         | 2716.539 | 2700.517        | 0.000           | 2699.500       | P[25] |
| E  | 244.159         | 2619.483 | 2603.464        | 0.000           | 2602.450       | E[24] |
| P  | <b>341.182</b>  | 2690.440 | 2474.432        | 0.000           | 2473.414       | P[23] |
| A  | <b>412.219</b>  | 2393.387 | 2377.369        | 0.000           | 2376.361       | A[22] |
| K  | <b>540.314</b>  | 2322.350 | 2306.332        | 2307.339        | 2305.324       | K[21] |
| S  | <b>627.346</b>  | 2194.257 | 2178.237        | 2179.244        | 2177.229       | S[20] |
| A  | <b>698.283</b>  | 2107.223 | 2091.205        | 2092.212        | 2090.197       | A[19] |
| P  | <b>795.430</b>  | 2036.186 | 2020.168        | 2021.176        | 2019.161       | P[18] |
| A  | 866.473         | 1930.133 | 1923.115        | 1924.123        | 1922.107       | A[17] |
| P  | <b>963.526</b>  | 1868.096 | 1852.078        | 1853.085        | 1851.070       | P[16] |
| K  | <b>1091.621</b> | 1771.044 | 1755.025        | 1756.033        | 1754.017       | K[15] |
| K  | <b>1261.726</b> | 1642.949 | <b>1626.930</b> | 1627.938        | 1625.922       | K[14] |
| G  | 1318.748        | 1472.843 | 1456.824        | <b>1457.832</b> | 1455.817       | G[13] |
| S  | 1467.790        | 1315.822 | 1309.803        | 1310.811        | 1309.795       | S[12] |
| K  | <b>1575.885</b> | 1288.779 | 1270.760        | 1271.768        | 1269.753       | K[11] |
| K  | <b>1703.980</b> | 1158.684 | 1142.665        | <b>1143.673</b> | 1141.658       | K[10] |
| A  | 1775.017        | 1030.589 | <b>1014.570</b> | 1015.578        | 1013.563       | A[9]  |
| V  | 1874.086        | 950.552  | 943.533         | 944.541         | 942.525        | V[8]  |
| T  | 2017.144        | 860.484  | 844.465         | 845.472         | 843.457        | T[7]  |
| R  | 2156.239        | 773.425  | 767.407         | 768.414         | <b>760.399</b> | R[6]  |
| A  | 2216.276        | 689.330  | <b>573.312</b>  | <b>574.320</b>  | <b>572.304</b> | A[5]  |
| Q  | 2244.335        | 618.293  | <b>502.275</b>  | 503.282         | 501.267        | Q[4]  |
| K  | 2472.430        | 600.235  | <b>374.216</b>  | <b>375.224</b>  | 373.208        | K[3]  |
| K  | 2600.525        | 262.140  | <b>246.121</b>  | 247.129         | 245.113        | K[2]  |
| D  | 2715.552        | 134.045  | 118.028         | 119.034         | 117.018        | D[1]  |

# sp | Q6ZWY9 | H2B1C\_MOUSE

PEPAKSAPAPKK <sup>Acetyl</sup>42.01 GS <sup>Acetyl</sup>42.01 KKA<sup>Acetyl</sup>42.01 VTKA<sup>Acetyl</sup>42.01 QKQKKD

- ▶ fragmentation table for charge state 2+
- ▶ specType=etd
- ▶ score=59.57
- ▶ F112759.dat
- ▶ query=q28914.p1
- ▶ precursor=544.112880
- ▶ chargePrecursor=5
- ▶ itol=0.5

| AA   | c               | y              | z+1             | z+2             | z               | AA   |
|------|-----------------|----------------|-----------------|-----------------|-----------------|------|
| P 1  | 58.647          | 1358.771       | 1350.762        | 0.504           | 1350.256        | P 25 |
| E 2  | 122.586         | 1310.245       | 1302.236        | 0.504           | 1301.730        | E 24 |
| P 3  | 171.095         | 1245.724       | <b>1237.714</b> | 0.504           | <b>1237.210</b> | P 23 |
| A 4  | 206.613         | 1197.197       | <b>1189.188</b> | 0.504           | 1188.684        | A 22 |
| K 5  | 270.661         | 1101.679       | 1153.669        | <b>1154.173</b> | 1153.166        | K 21 |
| S 6  | 314.177         | 1007.631       | <b>1089.622</b> | <b>1090.126</b> | 1089.118        | S 20 |
| A 7  | 349.695         | 1054.135       | 1046.100        | <b>1046.610</b> | 1045.602        | A 19 |
| F 8  | 389.222         | 1018.567       | 1010.557        | 1011.071        | 1010.062        | F 18 |
| A 9  | 433.740         | 970.070        | 962.051         | <b>962.565</b>  | 961.552         | A 17 |
| P 10 | 482.267         | 934.552        | 926.542         | 927.046         | 926.039         | P 16 |
| K 11 | <b>546.314</b>  | 886.025        | <b>878.016</b>  | <b>878.520</b>  | 877.512         | K 15 |
| K 12 | <b>631.367</b>  | 821.978        | <b>813.969</b>  | <b>814.473</b>  | 813.465         | K 14 |
| Q 13 | <b>659.876</b>  | 736.925        | <b>728.916</b>  | <b>729.420</b>  | 728.412         | Q 13 |
| S 14 | <b>724.399</b>  | 708.414        | <b>700.405</b>  | <b>700.909</b>  | 699.901         | S 12 |
| K 15 | <b>788.446</b>  | 643.893        | 635.884         | 636.388         | 635.380         | K 11 |
| K 16 | <b>852.494</b>  | <b>579.846</b> | <b>571.836</b>  | <b>572.340</b>  | 571.332         | K 10 |
| A 17 | 888.012         | <b>515.798</b> | <b>507.789</b>  | <b>508.293</b>  | 507.285         | A 9  |
| V 18 | <b>937.547</b>  | 480.280        | 472.270         | 472.774         | 471.766         | V 9  |
| T 19 | <b>1009.076</b> | 430.740        | <b>422.730</b>  | <b>423.240</b>  | 422.232         | T 7  |
| K 20 | 1074.619        | 359.216        | 351.207         | 351.711         | 350.703         | K 6  |
| A 21 | <b>1108.642</b> | 295.169        | 287.159         | 287.663         | 286.656         | A 5  |
| Q 22 | <b>1172.671</b> | 269.650        | 251.641         | 252.145         | 251.137         | Q 4  |
| K 23 | 1236.718        | 195.621        | 187.612         | 188.116         | 187.108         | K 3  |
| K 24 | 1300.766        | 131.574        | 123.564         | 124.068         | 123.060         | K 2  |
| D 25 | 1358.279        | 87.528         | 89.537          | 89.021          | 89.013          | D 1  |

# sp | Q6ZWH9 | H2B1C\_MOUSE

PEPAKSAPAPKK Acetyl 42.01 GS Acetyl 42.01 KKAVT Acetyl 42.01 KAQQKD

- ▶ fragmentation table for charge state 3+
- ▶ specType=etd
- ▶ score=59.57
- ▶ F112759.dat
- ▶ query=q28914.p1
- ▶ precursor=544.112880
- ▶ chargePrecursor=5
- ▶ itol=0.5

| AA    | c              | y              | z+1            | z+2            | z              | AA    |
|-------|----------------|----------------|----------------|----------------|----------------|-------|
| P[1]  | 38.034         | <b>906.183</b> | <b>900.844</b> | 0.672          | <b>900.508</b> | P[25] |
| E[2]  | 82.048         | <b>873.832</b> | <b>868.493</b> | 0.672          | <b>868.157</b> | E[24] |
| P[3]  | 114.399        | 830.818        | <b>825.479</b> | 0.672          | <b>825.143</b> | P[23] |
| A[4]  | 138.078        | 798.467        | <b>793.128</b> | 0.672          | 792.792        | A[22] |
| K[5]  | 180.776        | <b>774.788</b> | 769.449        | 769.785        | 769.113        | K[21] |
| S[6]  | 209.187        | 732.095        | 726.752        | 727.096        | 726.418        | S[20] |
| A[7]  | 233.468        | 703.079        | 697.740        | <b>698.076</b> | 697.404        | A[19] |
| P[8]  | 265.817        | 679.480        | <b>674.061</b> | 674.397        | <b>673.725</b> | P[18] |
| A[9]  | 289.496        | 647.049        | <b>641.710</b> | <b>642.046</b> | 641.374        | A[17] |
| P[10] | 321.847        | <b>623.370</b> | 618.031        | 618.367        | 617.695        | P[16] |
| K[11] | 364.545        | 591.019        | <b>585.680</b> | <b>586.016</b> | <b>585.344</b> | K[15] |
| K[12] | 421.247        | 548.321        | 542.981        | 543.317        | 542.646        | K[14] |
| G[13] | 440.254        | 491.619        | 486.280        | <b>486.616</b> | 485.944        | G[13] |
| S[14] | 483.268        | 472.612        | 467.272        | 467.608        | 466.937        | S[12] |
| K[15] | 525.987        | 429.598        | 424.258        | 424.594        | 423.922        | K[11] |
| K[16] | 588.695        | 386.940        | 381.560        | 381.896        | 381.224        | K[10] |
| A[17] | 592.344        | 344.203        | 338.862        | 339.198        | 338.526        | A[9]  |
| V[18] | 625.367        | 320.522        | 315.181        | 315.519        | 314.847        | V[8]  |
| T[19] | 673.053        | 287.499        | 282.160        | 282.496        | 281.824        | T[7]  |
| K[20] | <b>715.751</b> | 239.813        | 234.474        | 234.810        | 234.138        | K[6]  |
| A[21] | <b>739.430</b> | 197.115        | 191.775        | 192.111        | 191.439        | A[5]  |
| Q[22] | <b>782.116</b> | 173.436        | 168.096        | 168.432        | 167.760        | Q[4]  |
| K[23] | <b>824.815</b> | 130.750        | 125.410        | 125.746        | 125.074        | K[3]  |
| K[24] | 867.513        | 88.061         | 82.722         | 83.048         | 82.376         | K[2]  |
| D[25] | 905.255        | 45.353         | 40.014         | 40.349         | 39.678         | D[1]  |

# sp | Q6ZWY9 | H2B1C\_MOUSE

PEPAKSAPAPKK Acetyl 42.01 GS Acetyl 42.01 KKAVT Acetyl 42.01 KAQQKD

- ▶ fragmentation table for charge state 4+
- ▶ specType=etd
- ▶ score=59.57
- ▶ F112759.dat
- ▶ query=q28914.p1
- ▶ precursor=544.112880
- ▶ chargePrecursor=5
- ▶ itol=0.5

| AA  | c       | y              | z+1            | z+2     | z              | AA  |
|-----|---------|----------------|----------------|---------|----------------|-----|
| P1  | 29.527  | <b>679.889</b> | 675.885        | 0.755   | 675.633        | P25 |
| E2  | 61.788  | <b>655.626</b> | <b>651.621</b> | 0.755   | <b>651.370</b> | E24 |
| P3  | 86.051  | <b>623.366</b> | 619.361        | 0.755   | 619.109        | P23 |
| A4  | 103.810 | 599.102        | 595.098        | 0.755   | 594.846        | A22 |
| K5  | 135.834 | 581.343        | 577.338        | 577.590 | 577.086        | K21 |
| S6  | 187.892 | 549.319        | 545.315        | 545.567 | 545.063        | S20 |
| A7  | 175.351 | 527.561        | 523.557        | 523.809 | 523.305        | A19 |
| P8  | 199.614 | 509.802        | 505.797        | 506.049 | 505.545        | P18 |
| A9  | 217.374 | 485.539        | 481.534        | 481.786 | 481.282        | A17 |
| P10 | 241.637 | 467.780        | 463.775        | 464.027 | 463.523        | P16 |
| K11 | 273.661 | 443.516        | 439.512        | 439.764 | 439.260        | K15 |
| K12 | 316.187 | 411.493        | 407.488        | 407.740 | 407.236        | K14 |
| G13 | 330.442 | 368.966        | 364.962        | 365.214 | 364.710        | G13 |
| S14 | 362.703 | 354.711        | 350.706        | 350.958 | 350.454        | S12 |
| R15 | 394.727 | 322.450        | 318.446        | 318.697 | 318.194        | K11 |
| K16 | 426.751 | 290.426        | 286.422        | 286.674 | 286.170        | K10 |
| A17 | 448.510 | 258.403        | 254.398        | 254.650 | 254.146        | A9  |
| V18 | 469.277 | 240.643        | 236.639        | 236.891 | 236.387        | V8  |
| T19 | 505.041 | 215.875        | 211.872        | 212.124 | 211.620        | T17 |
| K20 | 537.065 | 180.112        | 176.107        | 176.359 | 175.855        | K6  |
| A21 | 554.824 | 148.088        | 144.083        | 144.335 | 143.831        | A5  |
| Q22 | 586.839 | 130.529        | 126.524        | 126.576 | 126.072        | Q4  |
| K23 | 618.863 | 98.314         | 94.309         | 94.561  | 94.057         | K3  |
| K24 | 650.887 | 66.290         | 62.285         | 62.538  | 62.034         | K2  |
| D25 | 679.643 | 34.267         | 30.262         | 30.514  | 30.010         | D1  |





# sp | P62806 | H4\_MOUSE

[Acetyl]SGRGKGGKGLGKGGAKRHRK <sup>Methyl</sup> VLRD  
14.02

- ▶ fragmentation table for charge state 1+
- ▶ specType=etd
- ▶ score=50.51
- ▶ F112760.dat
- ▶ query=q47457\_p1
- ▶ precursor=507.101790
- ▶ chargePrecursor=5
- ▶ itol=0.5

| AA    | c               | y        | z+1             | z+2             | z              | AA    |
|-------|-----------------|----------|-----------------|-----------------|----------------|-------|
| S[1]  | 347.676         | 2531.487 | 2515.468        | 0.000           | 2514.460       | S[24] |
| G[2]  | 204.098         | 2402.444 | 2386.425        | 0.000           | 2385.417       | G[23] |
| R[3]  | <b>368.199</b>  | 2346.421 | 2329.404        | 2130.412        | 2328.396       | R[22] |
| G[4]  | <b>417.230</b>  | 2389.321 | 2373.303        | 2174.310        | 2372.295       | G[21] |
| K[5]  | <b>545.315</b>  | 2132.300 | 2116.281        | 2117.289        | 2115.273       | K[20] |
| G[6]  | <b>602.337</b>  | 2084.205 | 1988.186        | 1989.194        | 1987.178       | G[19] |
| G[7]  | <b>659.358</b>  | 1947.184 | 1931.165        | <b>1932.173</b> | 1930.157       | G[18] |
| K[8]  | 787.453         | 1890.162 | 1874.143        | <b>1875.151</b> | 1873.135       | K[17] |
| G[9]  | 814.475         | 1782.087 | 1766.068        | 1747.056        | 1745.041       | G[16] |
| L[10] | <b>957.559</b>  | 1705.046 | 1689.027        | 1690.035        | 1688.019       | L[15] |
| G[11] | <b>1014.580</b> | 1591.962 | <b>1575.943</b> | 1576.951        | 1574.935       | G[14] |
| K[12] | 1142.675        | 1534.940 | <b>1518.921</b> | 1519.929        | 1517.914       | K[13] |
| G[13] | 1199.697        | 1406.945 | 1390.926        | <b>1391.934</b> | 1389.919       | G[12] |
| G[14] | 1256.718        | 1349.824 | <b>1333.805</b> | 1334.813        | 1332.797       | G[11] |
| A[15] | 1329.798        | 1292.802 | 1276.783        | <b>1277.791</b> | 1275.776       | A[10] |
| R[16] | <b>1435.850</b> | 1221.765 | 1205.746        | 1206.754        | 1204.739       | R[9]  |
| R[17] | 1611.951        | 1093.670 | 1077.651        | 1078.659        | 1076.644       | R[8]  |
| H[18] | 1749.010        | 937.569  | 921.550         | 922.558         | 920.543        | H[7]  |
| R[19] | 1905.111        | 800.510  | <b>784.491</b>  | 785.499         | <b>783.484</b> | R[6]  |
| K[20] | 2047.222        | 644.409  | 628.390         | <b>629.398</b>  | 627.382        | K[5]  |
| V[21] | 2146.290        | 502.298  | <b>486.280</b>  | 487.287         | 485.272        | V[4]  |
| L[22] | 2259.374        | 403.230  | <b>387.211</b>  | 388.219         | 386.203        | L[3]  |
| R[23] | 2415.476        | 280.146  | <b>274.127</b>  | 275.135         | 273.119        | R[2]  |
| D[24] | 2530.503        | 134.045  | 118.026         | 119.034         | 117.018        | D[1]  |

# sp | P62806 | H4\_MOUSE

[Acetyl]SGRGKGGKGLGKGGAKRHRK<sup>Methyl</sup>VLRD  
14.02

- ▶ fragmentation table for charge state 2+
- ▶ specType=etd
- ▶ score=50.51
- ▶ F112760.dat
- ▶ query=q47457\_p1
- ▶ precursor=507.101790
- ▶ chargePrecursor=5
- ▶ itol=0.5

| AA    | c               | y              | z+1             | z+2             | z               | AA    |
|-------|-----------------|----------------|-----------------|-----------------|-----------------|-------|
| S[1]  | 74.042          | 1256.247       | 1256.239        | 0.504           | 1257.734        | S[24] |
| G[2]  | 102.553         | 1201.726       | 1193.738        | 0.504           | 1193.212        | G[23] |
| R[3]  | 180.603         | 1173.215       | <b>1165.206</b> | 1165.709        | <b>1164.702</b> | R[22] |
| G[4]  | 209.114         | 1095.164       | 1097.155        | 1097.659        | 1099.051        | G[21] |
| K[5]  | 273.163         | 1058.694       | 1058.644        | <b>1059.148</b> | 1055.140        | K[20] |
| G[6]  | 301.672         | 1002.606       | <b>994.597</b>  | <b>995.101</b>  | 994.093         | G[19] |
| G[7]  | 330.183         | 974.695        | <b>966.086</b>  | <b>966.590</b>  | 965.582         | G[18] |
| K[8]  | 394.230         | 945.985        | 937.575         | 938.079         | 937.071         | K[17] |
| G[9]  | <b>422.741</b>  | <b>881.537</b> | 873.528         | <b>874.032</b>  | 873.024         | G[16] |
| L[10] | <b>479.283</b>  | 853.996        | <b>845.017</b>  | 845.521         | 844.513         | L[15] |
| G[11] | 507.794         | <b>796.484</b> | <b>788.475</b>  | <b>788.979</b>  | 787.971         | G[14] |
| K[12] | <b>571.841</b>  | 767.974        | <b>759.964</b>  | <b>760.468</b>  | <b>759.460</b>  | K[13] |
| G[13] | <b>600.352</b>  | <b>703.926</b> | <b>695.917</b>  | <b>696.421</b>  | 695.413         | G[12] |
| G[14] | <b>628.863</b>  | <b>675.415</b> | <b>667.406</b>  | <b>667.910</b>  | 666.902         | G[11] |
| A[15] | <b>664.381</b>  | 646.905        | <b>638.895</b>  | <b>639.399</b>  | 638.391         | A[10] |
| R[16] | <b>728.429</b>  | <b>611.386</b> | <b>603.377</b>  | <b>603.881</b>  | <b>602.873</b>  | R[9]  |
| R[17] | <b>806.479</b>  | 547.139        | <b>539.329</b>  | <b>539.833</b>  | 538.825         | R[8]  |
| H[18] | 875.009         | 469.288        | <b>461.279</b>  | <b>461.783</b>  | 460.775         | H[7]  |
| R[19] | 953.059         | <b>400.759</b> | <b>392.749</b>  | 393.253         | <b>392.245</b>  | R[6]  |
| K[20] | 1034.115        | 322.708        | 314.699         | 315.203         | 314.195         | K[5]  |
| V[21] | <b>1073.649</b> | 251.692        | 243.683         | 244.187         | 243.180         | V[4]  |
| L[22] | <b>1110.191</b> | 202.119        | 194.109         | 194.613         | 193.605         | L[3]  |
| R[23] | 1208.241        | 145.577        | 137.567         | 138.071         | 137.063         | R[2]  |
| D[24] | 1265.755        | 67.526         | 59.517          | 60.021          | 59.013          | D[1]  |

# sp | P62806 | H4\_MOUSE

[Acetyl]SGRGKGGKGLGKGGAKRHRK <sup>Methyl</sup> VLRD  
14.02

- ▶ fragmentation table for charge state 3+
- ▶ specType=etd
- ▶ score=50.51
- ▶ F112760.dat
- ▶ query=q47457.p1
- ▶ precursor=507.101790
- ▶ chargePrecursor=5
- ▶ itol=0.5

| AA    | c              | y              | z+1            | z+2            | z              | AA    |
|-------|----------------|----------------|----------------|----------------|----------------|-------|
| S[1]  | 49.697         | 844.500        | <b>839.161</b> | 0.672          | <b>838.825</b> | S[24] |
| G[2]  | 58.704         | 301.485        | <b>796.147</b> | 0.672          | <b>795.811</b> | G[23] |
| R[3]  | 120.738        | 782.476        | <b>777.139</b> | <b>777.475</b> | 776.804        | R[22] |
| G[4]  | 139.745        | <b>730.445</b> | <b>725.106</b> | <b>725.442</b> | <b>724.770</b> | G[21] |
| K[5]  | 182.443        | 711.438        | <b>706.099</b> | <b>706.435</b> | 705.763        | K[20] |
| G[6]  | 201.450        | 668.740        | <b>663.400</b> | <b>663.736</b> | 663.064        | G[19] |
| G[7]  | 220.458        | 649.733        | 644.393        | 644.729        | 644.057        | G[18] |
| K[8]  | 263.156        | <b>630.726</b> | <b>625.386</b> | <b>625.722</b> | 625.050        | K[17] |
| G[9]  | 282.163        | 598.027        | <b>582.688</b> | <b>583.024</b> | 582.352        | G[16] |
| L[10] | 319.858        | 569.020        | 563.680        | 564.016        | 563.346        | L[15] |
| G[11] | 338.865        | 531.325        | <b>525.986</b> | <b>526.322</b> | <b>525.650</b> | G[14] |
| K[12] | 381.563        | <b>512.318</b> | 505.979        | 507.315        | 506.643        | K[13] |
| G[13] | <b>400.570</b> | 469.620        | 464.280        | 464.616        | 463.944        | G[12] |
| G[14] | 419.578        | 450.613        | 445.273        | 445.609        | 444.937        | G[11] |
| A[15] | 443.257        | 431.606        | 426.266        | 426.602        | 425.930        | A[10] |
| K[16] | <b>485.955</b> | 407.927        | 402.587        | 402.923        | 402.251        | K[9]  |
| R[17] | 537.989        | 365.226        | <b>359.889</b> | <b>360.225</b> | 359.553        | R[8]  |
| H[18] | 583.675        | 313.195        | 307.855        | 308.191        | 307.519        | H[7]  |
| R[19] | 639.709        | 297.508        | 292.168        | 292.504        | 291.833        | R[6]  |
| K[20] | <b>683.079</b> | 275.475        | 270.135        | 270.471        | 269.799        | K[5]  |
| V[21] | <b>716.102</b> | 168.104        | 162.764        | 163.101        | 162.429        | V[4]  |
| L[22] | <b>753.796</b> | 135.082        | 129.742        | 130.078        | 129.406        | L[3]  |
| R[23] | 805.830        | 97.387         | 92.047         | 92.383         | 91.711         | R[2]  |
| D[24] | 844.172        | 45.353         | 40.014         | 40.349         | 39.678         | D[1]  |

# sp | P62806 | H4\_MOUSE

[Acetyl]SGRGKGGKGLGKGGAKRHRK<sup>Methyl</sup> VLRD  
14.02

- ▶ fragmentation table for charge state 4+
- ▶ specType=etd
- ▶ score=50.51
- ▶ F112760.dat
- ▶ query=q47457.p1
- ▶ precursor=507.101790
- ▶ chargePrecursor=5
- ▶ itol=0.5

| AA    | c              | y              | z+1            | z+2            | z              | AA    |
|-------|----------------|----------------|----------------|----------------|----------------|-------|
| S[1]  | 37.525         | <b>633.627</b> | <b>629.622</b> | 0.755          | <b>629.170</b> | S[24] |
| G[2]  | 51.780         | 501.365        | 507.352        | 0.755          | 507.110        | G[23] |
| R[3]  | 90.805         | 507.111        | <b>583.106</b> | <b>583.358</b> | <b>582.854</b> | R[22] |
| G[4]  | 105.061        | 548.086        | 544.081        | 544.333        | 543.829        | G[21] |
| K[5]  | 137.084        | 533.830        | 529.826        | 530.078        | 529.574        | K[20] |
| G[6]  | 151.340        | <b>501.807</b> | 497.802        | 498.054        | 497.550        | G[19] |
| G[7]  | 165.595        | 487.551        | 483.547        | 483.799        | 483.295        | G[18] |
| K[8]  | 197.619        | 473.296        | 469.291        | 469.543        | 469.039        | K[17] |
| G[9]  | 211.874        | 461.272        | 457.268        | 457.520        | 457.016        | G[16] |
| L[10] | 380.148        | 427.017        | <b>423.012</b> | <b>423.264</b> | <b>422.760</b> | L[15] |
| G[11] | 254.403        | 398.740        | 394.741        | 394.993        | 394.489        | G[14] |
| K[12] | 286.424        | 384.490        | 380.488        | 380.738        | 380.234        | K[13] |
| G[13] | 300.680        | 352.467        | 348.462        | 348.714        | 348.210        | G[12] |
| G[14] | 314.935        | 338.211        | 334.207        | 334.459        | 333.955        | G[11] |
| A[15] | 332.694        | 323.956        | 319.951        | 320.203        | 319.699        | A[10] |
| K[16] | 364.718        | 306.197        | 302.192        | 302.444        | 301.940        | K[9]  |
| R[17] | 403.743        | <b>274.173</b> | 270.168        | 270.420        | 269.916        | R[8]  |
| H[18] | 488.008        | 235.148        | 231.143        | 231.395        | 230.891        | H[7]  |
| R[19] | 477.033        | 220.883        | 196.873        | 197.130        | 196.626        | R[6]  |
| K[20] | <b>512.561</b> | 161.858        | 157.853        | 158.105        | 157.601        | K[5]  |
| V[21] | 537.328        | 126.330        | 122.325        | 122.577        | 122.073        | V[4]  |
| L[22] | <b>565.599</b> | 101.563        | 97.558         | 97.810         | 97.306         | L[3]  |
| R[23] | <b>604.624</b> | 73.292         | 69.287         | 69.539         | 69.035         | R[2]  |
| D[24] | 653.381        | 34.267         | 30.262         | 30.514         | 30.010         | D[1]  |

# sp | P62806 | H4\_MOUSE

[Acetyl]SGRGKGGKGLGKGGAKRHRK Methyl VLRD  
14.02

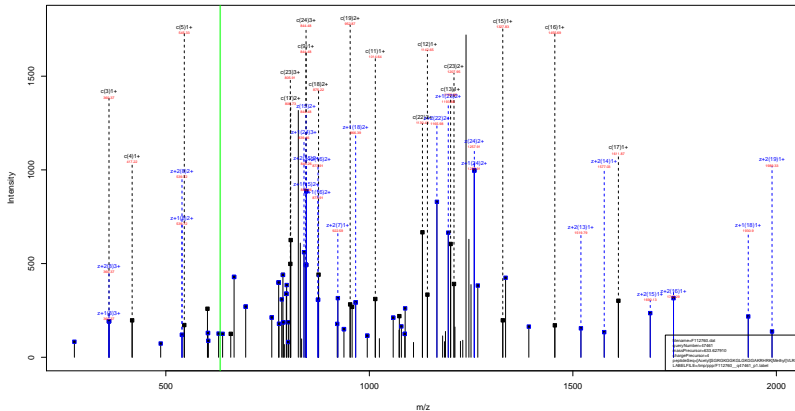

# sp | P62806 | H4\_MOUSE

[Acetyl]SGRGKGGKGLGKGGAKRHRK <sup>Methyl</sup> VLRD  
14.02

- ▶ fragmentation table for charge state 1+
- ▶ specType=etd
- ▶ score=118.82
- ▶ F112760.dat
- ▶ query=q47461\_p1
- ▶ precursor=633.627910
- ▶ chargePrecursor=4
- ▶ itol=0.5

| AA    | c               | y              | z+1             | z+2             | z        | AA    |
|-------|-----------------|----------------|-----------------|-----------------|----------|-------|
| S[1]  | 347.676         | 2531.487       | 2515.468        | 0.000           | 2514.460 | S[24] |
| G[2]  | 204.008         | 2402.444       | 2386.425        | 0.000           | 2385.417 | G[23] |
| R[3]  | <b>368.199</b>  | 2346.421       | 2329.404        | 2130.412        | 2328.396 | R[22] |
| G[4]  | <b>417.230</b>  | 2189.321       | 2173.303        | 2174.310        | 2172.295 | G[21] |
| K[5]  | <b>545.315</b>  | 2132.300       | 2116.281        | 2117.289        | 2115.273 | K[20] |
| G[6]  | <b>602.337</b>  | 2084.205       | 2068.186        | <b>1989.194</b> | 1987.178 | G[19] |
| G[7]  | <b>659.358</b>  | 1947.184       | <b>1931.165</b> | 1932.173        | 1930.157 | G[18] |
| K[8]  | <b>787.453</b>  | 1890.162       | 1874.143        | 1875.151        | 1873.135 | K[17] |
| G[9]  | <b>844.475</b>  | 1782.087       | 1766.068        | <b>1747.856</b> | 1745.841 | G[16] |
| L[10] | <b>937.559</b>  | 1705.046       | 1689.027        | <b>1690.035</b> | 1688.019 | L[15] |
| G[11] | <b>1014.580</b> | 1591.962       | 1575.943        | <b>1576.951</b> | 1574.935 | G[14] |
| K[12] | <b>1142.675</b> | 1534.940       | 1518.921        | <b>1519.929</b> | 1517.914 | K[13] |
| G[13] | <b>1199.697</b> | 1406.945       | 1390.926        | <b>1391.834</b> | 1389.819 | G[12] |
| G[14] | 1256.718        | 1349.824       | 1333.805        | <b>1334.813</b> | 1332.797 | G[11] |
| A[15] | <b>1327.795</b> | 1292.802       | 1276.783        | 1277.791        | 1275.776 | A[10] |
| R[16] | <b>1435.850</b> | 1221.765       | 1205.746        | 1206.754        | 1204.739 | R[9]  |
| R[17] | <b>1611.951</b> | 1093.670       | 1077.651        | <b>1078.659</b> | 1076.644 | R[8]  |
| H[18] | 1749.030        | <b>937.569</b> | <b>921.550</b>  | <b>922.558</b>  | 920.542  | H[7]  |
| R[19] | 1905.111        | <b>800.510</b> | <b>784.491</b>  | 785.499         | 783.484  | R[6]  |
| K[20] | 2047.222        | 644.409        | 628.390         | <b>629.398</b>  | 627.382  | K[5]  |
| V[21] | 2146.290        | 502.298        | 486.280         | <b>487.287</b>  | 485.272  | V[4]  |
| L[22] | 2259.374        | 403.230        | 387.211         | 388.219         | 386.203  | L[3]  |
| R[23] | 2415.476        | 290.146        | 274.127         | <b>275.135</b>  | 273.119  | R[2]  |
| D[24] | 2530.503        | 134.045        | 118.026         | 119.034         | 117.018  | D[1]  |

# sp | P62806 | H4\_MOUSE

[Acetyl]SGRGKGGKGLGKGGAKRHRK<sup>Methyl</sup> VLRD  
14.02

- ▶ fragmentation table for charge state 2+
- ▶ specType=etd
- ▶ score=118.82
- ▶ F112760.dat
- ▶ query=q47461\_p1
- ▶ precursor=633.627910
- ▶ chargePrecursor=4
- ▶ itol=0.5

| AA   | c               | y               | z+1             | z+2             | z               | AA   |
|------|-----------------|-----------------|-----------------|-----------------|-----------------|------|
| S 1  | 74.042          | <b>1266.247</b> | <b>1258.238</b> | 0.504           | <b>1257.734</b> | S 24 |
| G 2  | 102.551         | 1201.726        | <b>1193.716</b> | 0.504           | 1193.212        | G 23 |
| R 3  | 180.603         | 1173.215        | 1165.206        | <b>1165.709</b> | 1164.703        | R 22 |
| G 4  | 259.114         | 1095.164        | <b>1087.155</b> | <b>1087.559</b> | <b>1086.551</b> | G 21 |
| K 5  | 273.151         | 1056.654        | <b>1055.644</b> | 1059.148        | <b>1058.140</b> | K 20 |
| G 6  | 301.672         | 1002.606        | <b>994.597</b>  | <b>995.101</b>  | 994.093         | G 19 |
| G 7  | 330.183         | 974.095         | <b>966.086</b>  | <b>966.590</b>  | 965.582         | G 18 |
| K 8  | 394.230         | 945.585         | <b>937.575</b>  | 938.079         | 937.071         | K 17 |
| G 9  | 422.741         | 881.517         | <b>873.528</b>  | <b>874.032</b>  | 873.024         | G 16 |
| L 10 | 479.283         | 853.026         | <b>845.017</b>  | <b>845.521</b>  | <b>844.513</b>  | L 15 |
| G 11 | 507.794         | <b>796.484</b>  | <b>788.475</b>  | <b>788.979</b>  | <b>787.971</b>  | G 14 |
| K 12 | 571.841         | 767.974         | <b>759.964</b>  | <b>760.468</b>  | 759.460         | K 13 |
| G 13 | 600.352         | 703.926         | <b>695.917</b>  | <b>696.421</b>  | 695.413         | G 12 |
| G 14 | 628.863         | 675.415         | <b>667.406</b>  | <b>667.910</b>  | 666.902         | G 11 |
| A 15 | 664.381         | 646.905         | 638.895         | <b>639.399</b>  | 638.391         | A 10 |
| R 16 | 729.439         | 611.386         | <b>603.377</b>  | <b>603.881</b>  | 602.873         | R 9  |
| R 17 | <b>806.479</b>  | 547.339         | <b>539.329</b>  | <b>539.833</b>  | 538.825         | R 8  |
| H 18 | <b>875.009</b>  | 469.288         | 461.279         | 461.783         | 460.775         | H 7  |
| R 19 | <b>953.059</b>  | 400.759         | 392.749         | 393.253         | 392.245         | R 6  |
| K 20 | 1024.117        | 322.706         | 314.696         | 315.200         | 314.192         | K 5  |
| V 21 | <b>1073.649</b> | 254.653         | 246.643         | 247.147         | 246.140         | V 4  |
| L 22 | <b>1130.191</b> | 202.119         | 194.109         | 194.613         | 193.605         | L 3  |
| R 23 | <b>1208.241</b> | 145.577         | 137.567         | 138.071         | 137.063         | R 2  |
| D 24 | 1265.755        | 67.526          | 59.517          | 60.021          | 59.013          | D 1  |

# sp | P62806 | H4\_MOUSE

[Acetyl]SGRGKGGKGLGKGGAKRHRK <sup>Methyl</sup> VLRD  
14.02

- ▶ fragmentation table for charge state 3+
- ▶ specType=etd
- ▶ score=118.82
- ▶ F112760.dat
- ▶ query=q47461\_p1
- ▶ precursor=633.627910
- ▶ chargePrecursor=4
- ▶ itol=0.5

| AA    | c              | y              | z+1            | z+2            | z              | AA    |
|-------|----------------|----------------|----------------|----------------|----------------|-------|
| S[1]  | 49.697         | <b>844.500</b> | <b>839.161</b> | 0.672          | 838.825        | S[24] |
| G[2]  | 58.704         | <b>801.486</b> | <b>796.147</b> | 0.672          | <b>795.811</b> | G[23] |
| R[3]  | 150.738        | 782.476        | <b>777.139</b> | <b>777.475</b> | <b>776.804</b> | R[22] |
| G[4]  | 139.745        | 730.445        | 725.106        | 725.442        | 724.770        | G[21] |
| K[5]  | 182.443        | 711.438        | 706.099        | 706.435        | 705.763        | K[20] |
| G[6]  | 201.450        | 668.740        | 663.400        | 663.736        | 663.064        | G[19] |
| G[7]  | 220.458        | 649.733        | 644.393        | 644.729        | 644.057        | G[18] |
| K[8]  | 263.156        | 630.726        | 625.386        | 625.722        | 625.050        | K[17] |
| G[9]  | 282.163        | 588.021        | 582.681        | 583.024        | 582.352        | G[16] |
| L[10] | 319.858        | 569.020        | 563.680        | 564.016        | 563.345        | L[15] |
| G[11] | 338.865        | 531.325        | 525.985        | 526.322        | 525.650        | G[14] |
| K[12] | 381.563        | 512.318        | 506.979        | 507.315        | 506.643        | K[13] |
| G[13] | 400.570        | 469.620        | 464.280        | 464.616        | 463.944        | G[12] |
| G[14] | 419.578        | 450.613        | 445.273        | 445.609        | 444.937        | G[11] |
| A[15] | 443.257        | 431.606        | 426.266        | 426.602        | 425.930        | A[10] |
| K[16] | 485.955        | 407.927        | 402.587        | 402.923        | 402.251        | K[9]  |
| R[17] | 537.989        | 365.226        | <b>359.889</b> | <b>360.225</b> | 359.553        | R[8]  |
| H[18] | 583.675        | 313.195        | 307.855        | 308.191        | 307.519        | H[7]  |
| R[19] | 635.709        | 297.508        | 292.169        | 292.505        | 291.833        | R[6]  |
| K[20] | 663.079        | 215.475        | 210.135        | 210.471        | 209.799        | K[5]  |
| V[21] | 716.102        | 168.104        | 162.765        | 163.101        | 162.429        | V[4]  |
| L[22] | 753.796        | 135.082        | 129.742        | 130.078        | 129.406        | L[3]  |
| R[23] | <b>805.830</b> | 97.387         | 92.047         | 92.383         | 91.711         | R[2]  |
| D[24] | <b>844.172</b> | 45.353         | 40.014         | 40.349         | 39.678         | D[1]  |



sp | P62806 | H4\_MOUSE

[Acetyl]SGRGKGGKGLGKGGAKRHRK (Methyl) VLRD  
(14.02)

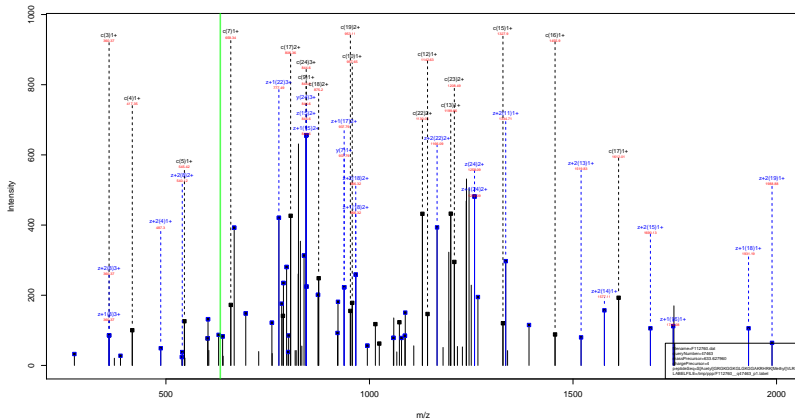

# sp | P62806 | H4\_MOUSE

[Acetyl]SGRGKGGKGLGKGGAKRHRK<sup>(Methyl)</sup>VLRD  
(14.02)

- ▶ fragmentation table for charge state 1+
- ▶ specType=etd
- ▶ score=101.41
- ▶ F112760.dat
- ▶ query=q47463\_p1
- ▶ precursor=633.627960
- ▶ chargePrecursor=4
- ▶ itol=0.5

| AA |    | c               | y              | z+1             | z+2             | z        | AA    |
|----|----|-----------------|----------------|-----------------|-----------------|----------|-------|
| S  | 1  | 147.076         | 2531.487       | 2515.468        | 0.000           | 2514.460 | S(24) |
| G  | 2  | 204.098         | 2402.444       | 2386.425        | 0.000           | 2385.417 | G(23) |
| R  | 3  | <b>360.199</b>  | 2348.423       | 2329.404        | 2330.412        | 2328.396 | R(22) |
| G  | 4  | <b>417.220</b>  | 2189.321       | 2173.303        | 2174.310        | 2172.295 | G(21) |
| K  | 5  | <b>545.315</b>  | 2132.300       | 2116.281        | 2117.289        | 2115.273 | K(20) |
| G  | 6  | <b>602.337</b>  | 2004.205       | 1988.186        | <b>1989.194</b> | 1987.178 | G(19) |
| G  | 7  | <b>659.358</b>  | 1947.184       | <b>1931.165</b> | 1932.173        | 1930.157 | G(18) |
| K  | 8  | <b>787.453</b>  | 1890.162       | 1874.143        | 1875.151        | 1873.135 | K(17) |
| G  | 9  | <b>844.475</b>  | 1762.067       | <b>1746.048</b> | 1747.056        | 1745.041 | G(16) |
| L  | 10 | <b>937.559</b>  | 1705.046       | 1689.027        | <b>1690.035</b> | 1688.019 | L(15) |
| G  | 11 | <b>1014.580</b> | 1591.962       | 1575.943        | <b>1576.951</b> | 1574.935 | G(14) |
| K  | 12 | <b>1142.675</b> | 1534.940       | 1518.921        | <b>1519.929</b> | 1517.914 | K(13) |
| G  | 13 | <b>1199.697</b> | 1406.845       | 1390.826        | <b>1391.834</b> | 1389.819 | G(12) |
| G  | 14 | 1256.718        | 1349.824       | 1331.805        | <b>1334.813</b> | 1332.797 | G(11) |
| A  | 15 | <b>1327.755</b> | 1292.802       | 1276.783        | 1277.791        | 1275.776 | A(10) |
| R  | 16 | <b>1435.850</b> | 1231.780       | 1205.760        | 1206.768        | 1204.753 | R(9)  |
| R  | 17 | <b>1811.951</b> | 1093.674       | 1077.653        | <b>1078.659</b> | 1076.644 | R(8)  |
| H  | 18 | 1749.010        | <b>937.569</b> | <b>921.550</b>  | <b>922.558</b>  | 920.542  | H(7)  |
| R  | 19 | 1005.111        | <b>800.510</b> | <b>784.491</b>  | 785.499         | 783.484  | R(6)  |
| K  | 20 | 2047.222        | 644.409        | 628.390         | <b>629.398</b>  | 627.382  | K(5)  |
| V  | 21 | 2146.290        | 502.298        | 486.280         | <b>487.287</b>  | 485.272  | V(4)  |
| L  | 22 | 2259.374        | 403.230        | 387.211         | <b>388.219</b>  | 386.203  | L(3)  |
| D  | 23 | 2415.476        | 260.146        | 244.127         | <b>275.135</b>  | 273.119  | D(2)  |
| D  | 24 | 2530.503        | 134.045        | 118.026         | 119.034         | 117.018  | D(1)  |

# sp | P62806 | H4\_MOUSE

[Acetyl]SGRGKGGKGLGKGGAKRHRK<sup>(Methyl)</sup> VLRD  
(14.02)

- ▶ fragmentation table for charge state 2+
- ▶ specType=etd
- ▶ score=101.41
- ▶ F112760.dat
- ▶ query=q47463.p1
- ▶ precursor=633.627960
- ▶ chargePrecursor=4
- ▶ itol=0.5

| AA   | c               | y               | z+1             | z+2             | z               | AA   |
|------|-----------------|-----------------|-----------------|-----------------|-----------------|------|
| S 1  | 74.092          | <b>1266.247</b> | <b>1256.238</b> | 0.504           | <b>1257.734</b> | S 24 |
| G 2  | 102.553         | 1201.726        | 1193.716        | 0.504           | 1193.212        | G 23 |
| R 3  | 180.603         | 1173.215        | 1165.206        | <b>1165.709</b> | 1164.702        | R 22 |
| G 4  | 209.114         | 1095.164        | <b>1087.155</b> | <b>1087.659</b> | <b>1086.651</b> | G 21 |
| K 5  | 273.163         | 1066.654        | <b>1058.644</b> | <b>1059.148</b> | 1059.144        | K 20 |
| G 6  | 301.672         | 1002.605        | <b>994.597</b>  | <b>995.101</b>  | 994.595         | G 19 |
| G 7  | 330.183         | 974.095         | <b>966.086</b>  | <b>966.590</b>  | 965.582         | G 18 |
| K 8  | 394.230         | 945.585         | <b>937.575</b>  | <b>938.079</b>  | 937.071         | K 17 |
| G 9  | 422.741         | 881.537         | <b>873.528</b>  | <b>874.032</b>  | 873.024         | G 16 |
| L 10 | 499.283         | 853.028         | <b>845.017</b>  | <b>845.521</b>  | <b>844.513</b>  | L 15 |
| G 11 | 507.794         | <b>796.484</b>  | <b>788.475</b>  | <b>788.979</b>  | 787.971         | G 14 |
| K 12 | 571.841         | 767.074         | <b>759.964</b>  | <b>760.468</b>  | 759.460         | K 13 |
| G 13 | 600.352         | 703.026         | <b>695.917</b>  | <b>696.421</b>  | 695.413         | G 12 |
| G 14 | 628.863         | 675.415         | <b>667.406</b>  | <b>667.910</b>  | 666.902         | G 11 |
| A 15 | 664.361         | 646.905         | <b>638.895</b>  | <b>639.399</b>  | 638.391         | A 10 |
| R 16 | 728.426         | 613.396         | <b>603.377</b>  | <b>603.881</b>  | <b>602.873</b>  | R 9  |
| R 17 | <b>806.479</b>  | 547.335         | <b>539.329</b>  | <b>539.833</b>  | 538.825         | R 8  |
| H 18 | <b>875.009</b>  | 469.288         | 461.279         | 461.783         | 460.775         | H 7  |
| R 19 | <b>953.059</b>  | 400.759         | 392.749         | 393.253         | 392.245         | R 6  |
| K 20 | <b>1024.115</b> | 322.708         | 314.699         | 315.203         | 314.195         | K 5  |
| V 21 | <b>1073.669</b> | 254.053         | 246.043         | 246.547         | 245.540         | V 4  |
| L 22 | <b>1130.191</b> | 202.119         | 194.109         | 194.613         | 193.605         | L 3  |
| R 23 | <b>1208.241</b> | 145.577         | 137.567         | 138.071         | 137.063         | R 2  |
| D 24 | 1266.755        | 87.526          | 59.537          | 60.021          | 59.013          | D 1  |

# sp | P62806 | H4\_MOUSE

[Acetyl]SGRGKGGKGLGKGGAKRHRK<sup>(Methyl)</sup> VLRD  
(14.02)

- ▶ fragmentation table for charge state 3+
- ▶ specType=etd
- ▶ score=101.41
- ▶ F112760.dat
- ▶ query=q47463.p1
- ▶ precursor=633.627960
- ▶ chargePrecursor=4
- ▶ itol=0.5

| AA    | c              | y              | z+1            | z+2            | z              | AA    |
|-------|----------------|----------------|----------------|----------------|----------------|-------|
| S[1]  | 49.697         | <b>844.500</b> | <b>839.161</b> | 0.672          | <b>838.825</b> | S[24] |
| G[2]  | 68.704         | <b>801.486</b> | <b>796.147</b> | 0.672          | 776.811        | G[23] |
| R[3]  | 120.738        | 782.479        | <b>777.139</b> | <b>777.475</b> | 776.804        | R[22] |
| G[4]  | 139.745        | 730.445        | 725.106        | 725.442        | 724.770        | G[21] |
| K[5]  | 182.443        | 711.438        | 706.099        | 706.435        | 705.763        | K[20] |
| G[6]  | 201.450        | 668.740        | 663.400        | 663.736        | 663.064        | G[19] |
| G[7]  | 220.458        | 649.733        | 644.393        | 644.729        | 644.057        | G[18] |
| K[8]  | 263.156        | 630.726        | 625.386        | 625.722        | 625.050        | K[17] |
| G[9]  | 282.163        | 588.027        | 582.688        | 583.024        | 582.352        | G[16] |
| L[10] | 319.858        | 569.020        | 563.680        | 564.016        | 563.345        | L[15] |
| G[11] | 338.865        | 531.325        | 525.985        | 526.322        | 525.650        | G[14] |
| K[12] | 381.563        | 512.318        | 506.979        | 507.315        | 506.643        | K[13] |
| G[13] | 400.570        | 499.620        | 494.280        | 494.616        | 493.944        | G[12] |
| G[14] | 419.578        | 450.613        | 445.273        | 445.609        | 444.937        | G[11] |
| A[15] | 443.297        | 431.606        | 426.266        | 426.602        | 425.930        | A[10] |
| K[16] | 485.955        | 407.927        | 402.587        | 402.923        | 402.251        | K[9]  |
| R[17] | 537.989        | 365.228        | <b>359.889</b> | <b>360.225</b> | 359.553        | R[8]  |
| H[18] | 583.675        | 313.195        | 307.855        | 308.191        | 307.519        | H[7]  |
| R[19] | 635.709        | 267.508        | 262.168        | 262.505        | 261.833        | R[6]  |
| K[20] | 683.079        | 215.475        | 210.135        | 210.471        | 209.799        | K[5]  |
| V[21] | 716.102        | 168.104        | 162.764        | 163.101        | 162.429        | V[4]  |
| L[22] | 753.796        | 135.082        | 129.742        | 130.078        | 129.406        | L[3]  |
| R[23] | 805.830        | 97.387         | 92.047         | 92.383         | 91.711         | R[2]  |
| D[24] | <b>844.172</b> | 45.353         | 40.014         | 40.349         | 39.678         | D[1]  |

# sp | P62806 | H4\_MOUSE

[Acetyl]SGRGKGGKGLGKGGAKRHR Methy K Dimethyl VLRD  
14.02 28.03

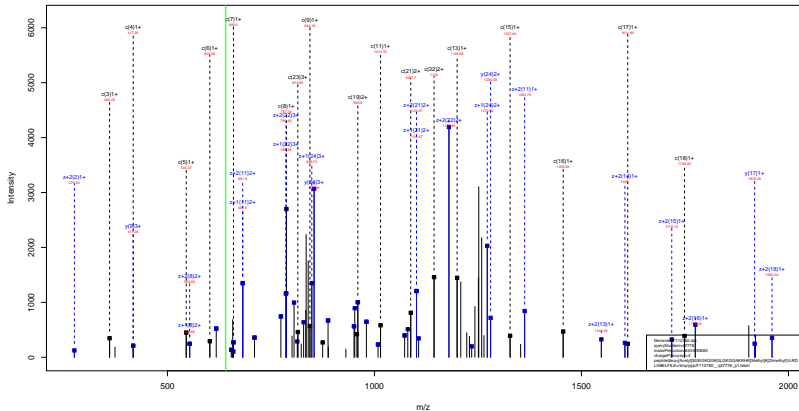

# sp | P62806 | H4\_MOUSE

[Acetyl]SGRGKGGKGLGKGGAKRHR <sup>Methyl</sup>K <sup>Dimethyl</sup>VLRD  
14.02 28.03

- ▶ fragmentation table for charge state 1+
- ▶ specType=etd
- ▶ score=95.00
- ▶ F112760.dat
- ▶ query=q47776\_p1
- ▶ precursor=640.635660
- ▶ chargePrecursor=4
- ▶ itol=0.5

| AA | c  | y               | z+1             | z+2      | z               | AA       |       |
|----|----|-----------------|-----------------|----------|-----------------|----------|-------|
| S  | 1  | 147.676         | 2556.518        | 2541.489 | 0.000           | 2542.491 | S[24] |
| G  | 2  | 204.088         | 2430.475        | 2414.457 | 0.000           | 2413.449 | G[23] |
| R  | 3  | <b>368.199</b>  | 2371.464        | 2357.435 | 2358.443        | 2366.427 | R[22] |
| G  | 4  | <b>417.230</b>  | 2217.351        | 2200.334 | 2202.342        | 2206.328 | G[21] |
| K  | 5  | <b>545.315</b>  | 2160.331        | 2144.313 | 2145.320        | 2143.305 | K[20] |
| G  | 6  | <b>602.337</b>  | 2032.239        | 2016.218 | 2017.225        | 2015.210 | G[19] |
| G  | 7  | <b>659.358</b>  | 1975.215        | 1959.196 | <b>1960.204</b> | 1958.188 | G[18] |
| K  | 8  | <b>787.453</b>  | <b>1918.193</b> | 1902.175 | 1903.182        | 1901.167 | K[17] |
| G  | 9  | <b>844.475</b>  | 1795.098        | 1774.080 | <b>1775.087</b> | 1773.072 | G[16] |
| L  | 10 | <b>957.559</b>  | 1733.977        | 1717.958 | <b>1718.966</b> | 1716.950 | L[15] |
| G  | 11 | <b>1014.580</b> | 1619.963        | 1603.974 | <b>1604.982</b> | 1602.966 | G[14] |
| K  | 12 | 1142.675        | 1562.971        | 1546.953 | <b>1547.960</b> | 1545.945 | K[13] |
| G  | 13 | <b>1199.697</b> | 1434.876        | 1418.858 | 1419.866        | 1417.850 | G[12] |
| G  | 14 | 1256.718        | 1377.855        | 1361.836 | <b>1362.844</b> | 1360.828 | G[11] |
| A  | 15 | <b>1327.795</b> | 1326.833        | 1304.815 | 1305.823        | 1303.807 | A[10] |
| R  | 16 | <b>1455.850</b> | 1249.789        | 1233.778 | <b>1234.785</b> | 1232.770 | R[9]  |
| R  | 17 | <b>1611.951</b> | 1127.761        | 1105.683 | <b>1106.691</b> | 1104.675 | R[8]  |
| H  | 18 | <b>1749.010</b> | 995.600         | 949.582  | <b>950.589</b>  | 948.574  | H[7]  |
| R  | 19 | 1919.127        | <b>828.541</b>  | 812.533  | <b>813.530</b>  | 811.515  | R[6]  |
| K  | 20 | 2075.253        | <b>658.425</b>  | 642.408  | 643.414         | 641.399  | K[5]  |
| V  | 21 | 2174.322        | 502.298         | 486.280  | 487.287         | 485.272  | V[4]  |
| L  | 22 | 2287.406        | 403.239         | 387.211  | 388.219         | 386.203  | L[3]  |
| R  | 23 | 2443.507        | 290.140         | 274.127  | <b>275.135</b>  | 273.119  | R[2]  |
| D  | 24 | 2598.534        | 134.045         | 118.026  | 119.034         | 117.018  | D[1]  |

# sp | P62806 | H4\_MOUSE

[Acetyl]SGRGKGGKGLGKGGAKRHR <sup>Methyl</sup> K <sup>Dimethyl</sup> VLRD  
 14.02 28.03

- ▶ fragmentation table for charge state 2+
- ▶ specType=etd
- ▶ score=95.00
- ▶ F112760.dat
- ▶ query=q47776\_p1
- ▶ precursor=640.635660
- ▶ chargePrecursor=4
- ▶ itol=0.5

| AA    | c               | y               | z+1             | z+2             | z              | AA    |
|-------|-----------------|-----------------|-----------------|-----------------|----------------|-------|
| S[1]  | 74.642          | <b>1280.263</b> | <b>1272.253</b> | 0.504           | 1271.449       | S[24] |
| G[2]  | 102.553         | 1215.741        | 1207.732        | 0.504           | 1207.238       | G[23] |
| R[3]  | 180.603         | 1187.233        | 1179.222        | <b>1179.725</b> | 1178.717       | R[22] |
| G[4]  | 269.114         | 1159.185        | <b>1161.171</b> | <b>1161.675</b> | 1160.666       | G[21] |
| K[5]  | 273.161         | <b>1080.669</b> | <b>1072.660</b> | <b>1073.164</b> | 1072.156       | K[20] |
| G[6]  | 351.672         | 1016.625        | <b>1058.612</b> | <b>1059.116</b> | 1058.108       | G[19] |
| G[7]  | 330.193         | 988.111         | <b>980.102</b>  | <b>980.606</b>  | 979.599        | G[18] |
| K[8]  | 394.230         | <b>959.600</b>  | 951.591         | <b>952.095</b>  | <b>951.087</b> | K[17] |
| G[9]  | 422.741         | 895.515         | <b>887.543</b>  | <b>888.047</b>  | 887.040        | G[16] |
| L[10] | 479.283         | 867.042         | 859.033         | 859.537         | 858.529        | L[15] |
| G[11] | 507.794         | 818.500         | 802.491         | 802.995         | 801.987        | G[14] |
| K[12] | 571.841         | 781.989         | <b>773.980</b>  | <b>774.484</b>  | 773.476        | K[13] |
| G[13] | 600.352         | 717.942         | <b>709.932</b>  | <b>710.436</b>  | 709.429        | G[12] |
| G[14] | 628.863         | 689.431         | <b>681.422</b>  | <b>681.926</b>  | 680.918        | G[11] |
| A[15] | 664.381         | 660.920         | 652.911         | 653.415         | 652.407        | A[10] |
| R[16] | 708.409         | 629.402         | <b>617.392</b>  | <b>617.896</b>  | 616.889        | R[9]  |
| R[17] | 806.479         | 561.354         | <b>553.345</b>  | <b>553.849</b>  | 552.841        | R[8]  |
| H[18] | <b>875.009</b>  | 483.304         | 475.294         | 475.798         | 474.791        | H[7]  |
| R[19] | <b>960.067</b>  | 414.774         | 406.765         | 407.269         | 406.261        | R[6]  |
| K[20] | 1038.130        | 329.716         | 321.707         | 322.211         | 321.203        | K[5]  |
| V[21] | <b>1087.665</b> | 251.663         | 243.653         | 244.147         | 243.140        | V[4]  |
| L[22] | <b>1144.207</b> | 202.132         | 194.123         | 194.617         | 193.609        | L[3]  |
| R[23] | 1222.257        | 145.577         | 137.567         | 138.071         | 137.063        | R[2]  |
| D[24] | 1279.771        | 67.526          | 59.517          | 60.021          | 59.013         | D[1]  |

# sp | P62806 | H4\_MOUSE

[Acetyl]SGRGKGGKGLGKGGAKRHR <sup>Methyl</sup>K <sup>Dimethyl</sup>VLRD  
14.02 28.03

- ▶ fragmentation table for charge state 3+
- ▶ specType=etd
- ▶ score=95.00
- ▶ F112760.dat
- ▶ query=q47776.p1
- ▶ precursor=640.635660
- ▶ chargePrecursor=4
- ▶ itol=0.5

| AA    | c              | y              | z+1            | z+2            | z              | AA    |
|-------|----------------|----------------|----------------|----------------|----------------|-------|
| S[1]  | 49.697         | <b>853.844</b> | <b>648.505</b> | 0.672          | 848.199        | S[24] |
| G[2]  | 58.704         | 810.830        | <b>805.490</b> | 0.672          | 805.154        | G[23] |
| R[3]  | 150.738        | 791.823        | <b>786.483</b> | <b>786.819</b> | <b>786.147</b> | R[22] |
| G[4]  | 139.745        | 739.789        | 734.450        | 734.785        | 734.114        | G[21] |
| K[5]  | 182.443        | 720.782        | 715.442        | 715.778        | 715.106        | K[20] |
| G[6]  | 201.450        | 678.084        | 672.744        | 673.080        | 672.408        | G[19] |
| G[7]  | 220.458        | <b>659.076</b> | <b>653.737</b> | <b>654.073</b> | 653.401        | G[18] |
| K[8]  | 263.156        | 640.069        | 634.730        | 635.066        | 634.394        | K[17] |
| G[9]  | 282.163        | 597.371        | 592.031        | 592.367        | 591.695        | G[16] |
| L[10] | 319.858        | 678.364        | 573.024        | 573.360        | 572.688        | L[15] |
| G[11] | 338.865        | 540.660        | 535.320        | 535.656        | 534.984        | G[14] |
| K[12] | 381.563        | 521.662        | 516.322        | 516.658        | 515.986        | K[13] |
| G[13] | 400.570        | 478.964        | 473.624        | 473.960        | 473.288        | G[12] |
| G[14] | 419.578        | 459.957        | 454.617        | 454.953        | 454.281        | G[11] |
| A[15] | 443.257        | 440.949        | 435.610        | 435.946        | 435.274        | A[10] |
| K[16] | 485.955        | <b>417.270</b> | 411.931        | 412.267        | 411.595        | K[9]  |
| R[17] | 537.989        | 374.572        | 369.232        | 369.568        | 368.896        | R[8]  |
| H[18] | 583.675        | 322.538        | 317.199        | 317.535        | 316.863        | H[7]  |
| R[19] | 640.381        | 276.852        | 271.512        | 271.848        | 271.176        | R[6]  |
| K[20] | 692.423        | 220.146        | 214.807        | 215.143        | 214.471        | K[5]  |
| V[21] | 725.445        | 168.104        | 162.765        | 163.101        | 162.429        | V[4]  |
| L[22] | 763.140        | 135.082        | 129.742        | 130.078        | 129.406        | L[3]  |
| R[23] | <b>815.174</b> | 97.387         | 92.047         | 92.383         | 91.711         | R[2]  |
| D[24] | 853.516        | 45.353         | 40.014         | 40.349         | 39.678         | D[1]  |



# sp | P62806 | H4\_MOUSE

[Acetyl]SGRGKGGKGLGKGGAKRHR <sup>Dimethyl</sup> K <sup>Methyl</sup> VLRD  
 28.03 14.02

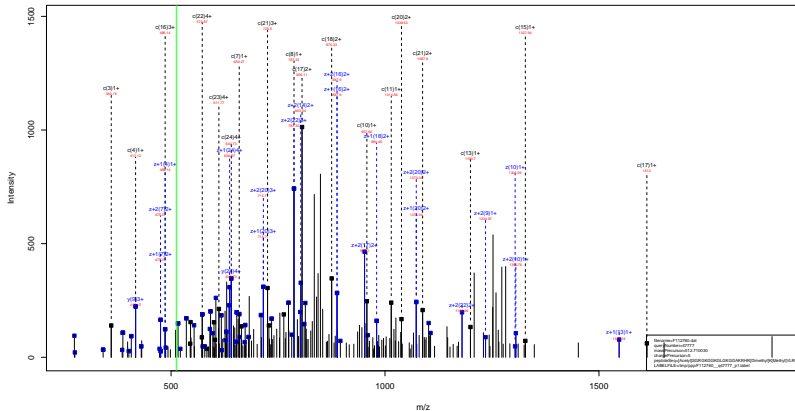

# sp | P62806 | H4\_MOUSE

[Acetyl]SGRGKGGKGLGKGGAKRHR <sup>Dimethyl</sup> K <sup>Methyl</sup> VLRD  
28.03 14.02

- ▶ fragmentation table for charge state 1+
- ▶ specType=etd
- ▶ score=53.33
- ▶ F112760.dat
- ▶ query=q47777\_p1
- ▶ precursor=512.710030
- ▶ chargePrecursor=5
- ▶ itol=0.5

| AA    | c               | y        | z+1             | z+2             | z               | AA    |
|-------|-----------------|----------|-----------------|-----------------|-----------------|-------|
| S[1]  | 147.076         | 259.518  | 254.469         | 0.000           | 254.469         | S[24] |
| G[2]  | 204.008         | 2430.475 | 2414.457        | 0.000           | 2413.449        | G[23] |
| R[3]  | <b>360.199</b>  | 237.1454 | 2357.435        | 2358.441        | 2356.427        | R[22] |
| G[4]  | <b>417.220</b>  | 2317.383 | 2291.359        | 2292.342        | 2290.326        | G[21] |
| K[5]  | <b>545.315</b>  | 2160.331 | 2144.313        | 2145.320        | 2143.305        | K[20] |
| G[6]  | <b>602.337</b>  | 2032.236 | 2016.218        | 2017.225        | 2015.210        | G[19] |
| G[7]  | <b>659.358</b>  | 1975.215 | 1959.190        | 1960.204        | 1958.188        | G[18] |
| K[8]  | <b>787.453</b>  | 1918.193 | 1902.175        | 1903.182        | 1901.167        | K[17] |
| G[9]  | 844.475         | 1790.098 | 1774.080        | 1775.087        | 1773.072        | G[16] |
| L[10] | <b>957.559</b>  | 1733.077 | 1717.059        | 1718.066        | 1716.050        | L[15] |
| Q[11] | <b>1014.580</b> | 1619.993 | 1603.974        | 1604.982        | 1602.965        | Q[14] |
| K[12] | 1142.675        | 1562.971 | <b>1546.953</b> | 1547.960        | 1545.945        | K[13] |
| L[13] | <b>1199.697</b> | 1434.876 | 1418.859        | 1419.866        | 1417.850        | L[12] |
| G[14] | 1256.718        | 1377.855 | 1361.838        | 1362.844        | 1360.828        | G[11] |
| A[15] | <b>1327.755</b> | 1320.833 | 1304.815        | <b>1305.823</b> | <b>1303.807</b> | A[10] |
| R[16] | 1405.850        | 1249.766 | 1233.749        | <b>1234.765</b> | 1232.749        | R[9]  |
| R[17] | <b>1611.951</b> | 1121.701 | 1105.683        | <b>1106.691</b> | 1104.675        | R[8]  |
| H[18] | 1740.010        | 965.600  | 949.582         | 950.589         | 948.574         | H[7]  |
| R[19] | 1931.143        | 828.541  | 812.523         | <b>813.530</b>  | <b>811.515</b>  | R[6]  |
| K[20] | 2075.253        | 644.400  | 628.380         | <b>629.398</b>  | <b>627.382</b>  | K[5]  |
| V[21] | 2174.220        | 502.298  | <b>486.280</b>  | <b>487.287</b>  | 485.272         | V[4]  |
| L[22] | 2297.408        | 403.230  | <b>387.211</b>  | 388.219         | <b>386.203</b>  | L[3]  |
| R[23] | 2443.507        | 290.148  | <b>274.127</b>  | <b>275.135</b>  | 273.119         | R[2]  |
| D[24] | 2558.534        | 134.045  | 118.028         | 119.034         | 117.018         | D[1]  |

# sp | P62806 | H4\_MOUSE

[Acetyl]SGRGKGGKGLGKGGAKRHR <sup>Dimethyl</sup> K <sup>Methyl</sup> VLRD  
28.03 14.02

- ▶ fragmentation table for charge state 2+
- ▶ specType=etd
- ▶ score=53.33
- ▶ F112760.dat
- ▶ query=q47777\_p1
- ▶ precursor=512.710030
- ▶ chargePrecursor=5
- ▶ itol=0.5

| AA | c  | y               | z+1            | z+2             | z               | AA             |       |
|----|----|-----------------|----------------|-----------------|-----------------|----------------|-------|
| S  | 1  | 74.042          | 1200.263       | 1272.253        | 0.904           | 1271.749       | S[24] |
| G  | 2  | 102.553         | 1215.741       | 1207.732        | 0.904           | 1207.230       | G[23] |
| R  | 3  | 180.603         | 1187.231       | 1179.221        | <b>1179.725</b> | 1178.717       | R[22] |
| G  | 4  | 259.114         | 1109.180       | 1101.171        | <b>1101.675</b> | 1100.569       | G[21] |
| K  | 5  | 273.101         | 1080.669       | <b>1072.660</b> | <b>1073.164</b> | 1072.158       | K[20] |
| G  | 6  | 301.672         | 1018.622       | 1008.612        | 1009.116        | 1008.108       | G[19] |
| G  | 7  | 330.183         | 998.111        | <b>980.102</b>  | <b>980.606</b>  | 979.599        | G[18] |
| K  | 8  | 394.230         | <b>959.600</b> | 951.591         | <b>952.095</b>  | 951.087        | K[17] |
| G  | 9  | 422.741         | <b>895.553</b> | <b>887.543</b>  | <b>888.047</b>  | 887.040        | G[16] |
| L  | 10 | 479.283         | 857.042        | 850.033         | 850.537         | 849.529        | L[15] |
| G  | 11 | 507.794         | 810.500        | 802.491         | <b>802.995</b>  | <b>801.987</b> | G[14] |
| K  | 12 | <b>571.841</b>  | <b>781.989</b> | <b>773.980</b>  | <b>774.484</b>  | 773.476        | K[13] |
| G  | 13 | <b>600.352</b>  | 717.942        | <b>709.932</b>  | <b>710.436</b>  | 709.429        | G[12] |
| G  | 14 | <b>628.863</b>  | 689.431        | <b>681.422</b>  | 681.926         | <b>680.918</b> | G[11] |
| A  | 15 | <b>664.381</b>  | <b>660.920</b> | <b>652.911</b>  | <b>653.415</b>  | <b>652.407</b> | A[10] |
| R  | 16 | <b>728.429</b>  | 629.402        | <b>617.392</b>  | <b>617.896</b>  | 616.889        | R[9]  |
| R  | 17 | <b>806.479</b>  | 561.354        | 553.345         | <b>553.849</b>  | 552.841        | R[8]  |
| H  | 18 | <b>875.009</b>  | 483.304        | <b>475.294</b>  | <b>475.798</b>  | 474.791        | H[7]  |
| R  | 19 | 967.075         | 414.774        | <b>406.765</b>  | <b>407.269</b>  | 406.261        | R[6]  |
| K  | 20 | <b>1038.130</b> | 322.708        | 314.699         | 315.203         | 314.195        | K[5]  |
| V  | 21 | <b>1087.665</b> | 251.653        | 243.643         | 244.147         | 243.140        | V[4]  |
| L  | 22 | 1144.207        | 202.119        | 194.109         | 194.613         | 193.605        | L[3]  |
| R  | 23 | 1222.257        | 148.577        | 137.567         | 138.071         | 137.063        | R[2]  |
| D  | 24 | 1279.771        | 67.528         | 59.517          | 60.021          | 59.013         | D[1]  |

# sp | P62806 | H4\_MOUSE

[Acetyl]SGRGKGGKGLGKGGAKRHR <sup>Dimethyl</sup> K <sup>Methyl</sup> VLRD  
28.03 14.02

- ▶ fragmentation table for charge state 3+
- ▶ specType=etd
- ▶ score=53.33
- ▶ F112760.dat
- ▶ query=q47777.p1
- ▶ precursor=512.710030
- ▶ chargePrecursor=5
- ▶ itol=0.5

| AA    | c              | y              | z+1            | z+2            | z              | AA    |
|-------|----------------|----------------|----------------|----------------|----------------|-------|
| S[1]  | 49.697         | 853.844        | 848.507        | 0.672          | 848.169        | S[24] |
| G[2]  | 58.704         | <b>810.830</b> | 805.490        | 0.672          | 805.154        | G[23] |
| R[3]  | 120.738        | 791.823        | 786.483        | <b>786.819</b> | 786.147        | R[22] |
| G[4]  | 139.745        | 739.789        | <b>734.450</b> | <b>734.785</b> | 734.114        | G[21] |
| K[5]  | 182.443        | 720.782        | <b>715.442</b> | <b>715.778</b> | 715.106        | K[20] |
| G[6]  | 201.450        | 678.084        | <b>672.744</b> | <b>673.080</b> | <b>672.408</b> | G[19] |
| G[7]  | 220.458        | <b>659.076</b> | <b>653.737</b> | 654.073        | <b>653.401</b> | G[18] |
| K[8]  | 263.156        | 640.069        | 634.730        | <b>635.066</b> | 634.394        | K[17] |
| G[9]  | 282.163        | <b>597.371</b> | <b>592.031</b> | <b>592.367</b> | 591.699        | G[16] |
| L[10] | 319.858        | <b>578.364</b> | <b>573.024</b> | <b>573.360</b> | <b>572.688</b> | L[15] |
| G[11] | 338.865        | 540.050        | <b>535.330</b> | <b>535.666</b> | 534.994        | G[14] |
| K[12] | 381.563        | <b>521.662</b> | <b>516.322</b> | <b>516.658</b> | <b>515.986</b> | K[13] |
| G[13] | 400.570        | 478.964        | 473.624        | 473.960        | <b>473.288</b> | G[12] |
| G[14] | 419.578        | 459.957        | 454.617        | 454.953        | 454.281        | G[11] |
| A[15] | 443.257        | 440.949        | 435.610        | 435.946        | 435.274        | A[10] |
| K[16] | <b>485.955</b> | <b>417.270</b> | 411.931        | 412.267        | 411.595        | K[9]  |
| R[17] | 537.669        | 374.572        | 369.232        | 369.568        | 368.896        | R[8]  |
| H[18] | <b>583.675</b> | 322.538        | 317.199        | 317.535        | 316.863        | H[7]  |
| R[19] | 645.052        | 278.852        | 273.512        | 273.848        | 273.176        | R[6]  |
| K[20] | 692.423        | 235.475        | 230.135        | 230.471        | 229.799        | K[5]  |
| V[21] | <b>725.445</b> | 188.104        | 182.765        | 183.101        | 182.429        | V[4]  |
| L[22] | <b>763.140</b> | 135.082        | 129.742        | 130.078        | 129.406        | L[3]  |
| R[23] | 815.174        | 97.387         | 92.047         | 92.383         | 91.711         | R[2]  |
| D[24] | 863.516        | 45.353         | 40.014         | 40.349         | 39.678         | D[1]  |

# sp | P62806 | H4\_MOUSE

[Acetyl]SGRGKGGKGLGKGGAKRHR <sup>Dimethyl</sup> K <sup>Methyl</sup> VLRD  
28.03 14.02

- ▶ fragmentation table for charge state 4+
- ▶ specType=etd
- ▶ score=53.33
- ▶ F112760.dat
- ▶ query=q47777.p1
- ▶ precursor=512.710030
- ▶ chargePrecursor=5
- ▶ itol=0.5

| AA    | c              | y              | z+1            | z+2            | z              | AA                   |
|-------|----------------|----------------|----------------|----------------|----------------|----------------------|
| S[1]  | 37.525         | <b>640.635</b> | <b>636.630</b> |                | 0.755          | <b>636.378</b> S[24] |
| G[2]  | 51.780         | 508.374        | <b>604.370</b> |                | 0.755          | 604.118 G[23]        |
| R[3]  | 90.805         | 594.119        | 590.114        | <b>590.366</b> | 589.862        | R[22]                |
| G[4]  | 105.061        | 555.094        | 551.089        | 551.341        | 550.837        | G[21]                |
| K[5]  | 137.084        | 540.838        | 536.834        | 537.086        | 536.582        | K[20]                |
| G[6]  | 151.340        | 508.815        | 504.810        | 505.062        | 504.558        | G[19]                |
| G[7]  | 165.595        | 494.559        | 490.554        | 490.806        | 490.303        | G[18]                |
| K[8]  | 197.619        | 480.304        | <b>476.299</b> | 476.551        | <b>476.047</b> | K[17]                |
| G[9]  | 211.874        | 446.280        | 442.275        | 442.527        | 442.023        | G[16]                |
| L[10] | 380.148        | 434.025        | <b>430.020</b> | <b>430.272</b> | 429.768        | L[15]                |
| G[11] | 354.403        | 405.754        | <b>401.749</b> | 402.001        | <b>401.497</b> | G[14]                |
| K[12] | 286.424        | 391.498        | <b>387.494</b> | <b>387.746</b> | <b>387.242</b> | K[13]                |
| G[13] | 300.680        | 359.475        | 355.470        | 355.722        | 355.218        | G[12]                |
| G[14] | 314.935        | 345.219        | <b>341.215</b> | <b>341.466</b> | <b>340.963</b> | G[11]                |
| A[15] | 332.694        | 330.964        | 326.959        | 327.211        | 326.707        | A[10]                |
| K[16] | 364.718        | 313.205        | 309.200        | 309.452        | 308.948        | K[9]                 |
| R[17] | 403.743        | 281.181        | 277.176        | 277.428        | 276.924        | R[8]                 |
| H[18] | 438.008        | 242.156        | 238.151        | 238.403        | 237.899        | H[7]                 |
| R[19] | 484.041        | 207.891        | 203.886        | 204.138        | 203.634        | R[6]                 |
| K[20] | 519.569        | 161.858        | 157.853        | 158.105        | 157.601        | K[5]                 |
| V[21] | <b>544.336</b> | 126.330        | 122.325        | 122.577        | 122.073        | V[4]                 |
| L[22] | <b>572.607</b> | 101.563        | 97.558         | 97.810         | 97.306         | L[3]                 |
| R[23] | <b>611.632</b> | 73.292         | 69.287         | 69.539         | 69.035         | R[2]                 |
| D[24] | <b>640.389</b> | 34.267         | 30.262         | 30.514         | 30.010         | D[1]                 |

# sp | P62806 | H4\_MOUSE

[Acetyl]SGRGKGGKGLGKGGAKRHR (Dimethyl) K (Methyl) VLRD  
 (28.03) (14.02)

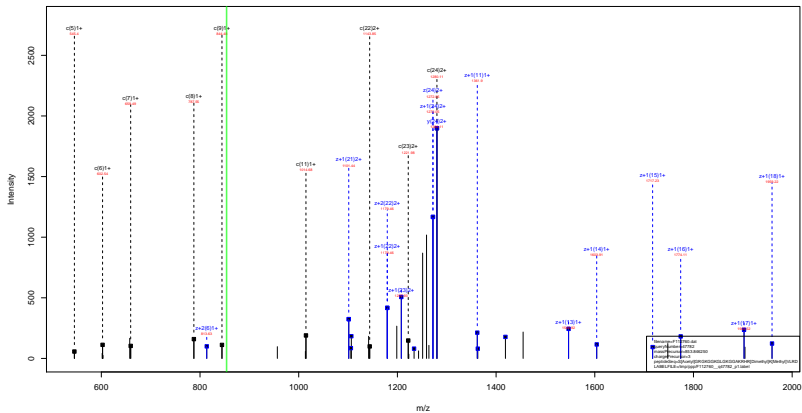

# sp | P62806 | H4\_MOUSE

[Acetyl]SGRGKGGKGLGKGGAKRHR (Dimethyl) K (Methyl) VLRD  
(28.03) (14.02)

- ▶ fragmentation table for charge state 1+
- ▶ specType=etd
- ▶ score=59.26
- ▶ F112760.dat
- ▶ query=q47782\_p1
- ▶ precursor=853.846250
- ▶ chargePrecursor=3
- ▶ itol=0.5

| AA |    | c               | y        | z+1             | z+2             | z        | AA    |
|----|----|-----------------|----------|-----------------|-----------------|----------|-------|
| S  | 1  | 147.076         | 2559.518 | 2543.499        | 0.000           | 2542.491 | S[24] |
| G  | 2  | 204.098         | 2430.475 | 2414.457        | 0.000           | 2413.449 | G[23] |
| R  | 3  | 380.199         | 2373.454 | 2357.435        | 2358.443        | 2356.427 | R[22] |
| G  | 4  | 417.220         | 2217.953 | 2201.934        | 2202.942        | 2200.926 | G[21] |
| K  | 5  | <b>545.315</b>  | 2160.931 | 2144.913        | 2145.920        | 2143.905 | K[20] |
| G  | 6  | <b>602.337</b>  | 2032.298 | 2016.279        | 2017.285        | 2015.270 | G[19] |
| G  | 7  | <b>659.358</b>  | 1975.215 | <b>1959.196</b> | 1960.204        | 1958.188 | G[18] |
| K  | 8  | <b>787.453</b>  | 1918.193 | <b>1902.175</b> | 1903.182        | 1901.167 | K[17] |
| G  | 9  | <b>844.475</b>  | 1790.598 | <b>1774.580</b> | 1775.587        | 1773.572 | G[16] |
| L  | 10 | 897.596         | 1733.077 | <b>1717.058</b> | 1718.066        | 1716.050 | L[15] |
| G  | 11 | <b>1014.580</b> | 1619.953 | <b>1603.934</b> | 1604.942        | 1602.926 | G[14] |
| R  | 12 | 1142.675        | 1562.971 | <b>1546.953</b> | 1547.960        | 1545.945 | R[13] |
| G  | 13 | 1199.697        | 1434.876 | <b>1418.858</b> | 1419.866        | 1417.850 | G[12] |
| G  | 14 | 1256.718        | 1377.895 | <b>1361.836</b> | <b>1362.844</b> | 1360.828 | G[11] |
| A  | 15 | 1327.755        | 1320.833 | 1304.815        | 1305.823        | 1303.807 | A[10] |
| R  | 16 | 1405.850        | 1249.799 | <b>1233.778</b> | 1234.785        | 1232.770 | R[9]  |
| R  | 17 | 1611.951        | 1179.701 | <b>1105.663</b> | <b>1106.691</b> | 1104.675 | R[8]  |
| H  | 18 | 1749.010        | 995.605  | 949.587         | 950.589         | 948.574  | H[7]  |
| R  | 19 | 1933.143        | 828.541  | 812.523         | <b>813.530</b>  | 811.515  | R[6]  |
| R  | 20 | 2075.253        | 644.409  | 628.390         | 629.388         | 627.383  | R[5]  |
| V  | 21 | 2174.322        | 502.298  | 486.280         | 487.287         | 485.272  | V[4]  |
| L  | 22 | 2287.406        | 403.230  | 387.213         | 388.219         | 386.203  | L[3]  |
| D  | 23 | 2443.507        | 268.146  | 252.127         | 253.136         | 251.119  | D[2]  |
| D  | 24 | 2558.534        | 134.045  | 118.026         | 119.034         | 117.018  | D[1]  |

# sp | P62806 | H4\_MOUSE

[Acetyl]SGRGKGGKGLGKGGAKRHR (Dimethyl) K (Methyl) VLRD  
(28.03) (14.02)

- ▶ fragmentation table for charge state 2+
- ▶ specType=etd
- ▶ score=59.26
- ▶ F112760.dat
- ▶ query=q47782\_p1
- ▶ precursor=853.846250
- ▶ chargePrecursor=3
- ▶ itol=0.5

| AA    | c               | y               | z+1             | z+2             | z               | AA    |
|-------|-----------------|-----------------|-----------------|-----------------|-----------------|-------|
| S[1]  | 74.092          | <b>1280.263</b> | <b>1272.253</b> | 0.504           | <b>1271.749</b> | S[24] |
| G[2]  | 102.553         | 1215.741        | <b>1207.732</b> | 0.504           | 1207.228        | G[23] |
| R[3]  | 180.603         | 1187.231        | <b>1179.221</b> | <b>1179.725</b> | 1179.717        | R[22] |
| G[4]  | 209.114         | 1109.180        | <b>1101.171</b> | <b>1101.675</b> | 1100.667        | G[21] |
| R[5]  | 273.183         | 1080.669        | 1072.660        | 1073.164        | 1072.156        | R[20] |
| G[6]  | 301.672         | 1016.625        | 1008.612        | 1009.116        | 1008.108        | G[19] |
| G[7]  | 330.183         | 988.111         | 980.102         | 980.606         | 979.598         | G[18] |
| K[8]  | 394.230         | 959.600         | 951.591         | 952.095         | 951.087         | K[17] |
| G[9]  | 422.741         | 895.553         | 887.543         | 888.047         | 887.040         | G[16] |
| L[10] | 479.283         | 867.042         | 859.033         | 859.537         | 858.529         | L[15] |
| G[11] | 507.794         | 810.500         | 802.491         | 802.995         | 801.987         | G[14] |
| K[12] | 571.841         | 781.989         | 773.980         | 774.484         | 773.476         | K[13] |
| G[13] | 600.352         | 717.942         | 709.932         | 710.436         | 709.429         | G[12] |
| G[14] | 628.863         | 689.431         | 681.422         | 681.926         | 680.918         | G[11] |
| A[15] | 664.361         | 660.920         | 652.911         | 653.415         | 652.407         | A[10] |
| R[16] | 728.429         | 628.402         | 619.392         | 619.896         | 618.888         | R[9]  |
| R[17] | 806.479         | 561.354         | 553.345         | 553.849         | 552.841         | R[6]  |
| H[18] | 875.009         | 483.304         | 475.294         | 475.798         | 474.791         | H[7]  |
| R[19] | 967.075         | 414.774         | 406.765         | 407.269         | 406.261         | R[6]  |
| K[20] | 1038.130        | 322.708         | 314.699         | 315.203         | 314.195         | K[5]  |
| V[21] | 1097.668        | 254.653         | 246.643         | 247.147         | 246.140         | V[4]  |
| L[22] | <b>1144.207</b> | 202.110         | 194.100         | 194.613         | 193.605         | L[3]  |
| R[23] | <b>1222.257</b> | 145.577         | 137.567         | 138.071         | 137.063         | R[2]  |
| D[24] | <b>1279.771</b> | 87.526          | 79.517          | 80.021          | 79.013          | D[1]  |



# sp | P62806 | H4\_MOUSE

[Acetyl]SGRGKGGKGLGKGGAK <sup>Acetyl</sup>RHRK <sup>Methyl</sup>VLRD  
42.01 14.02

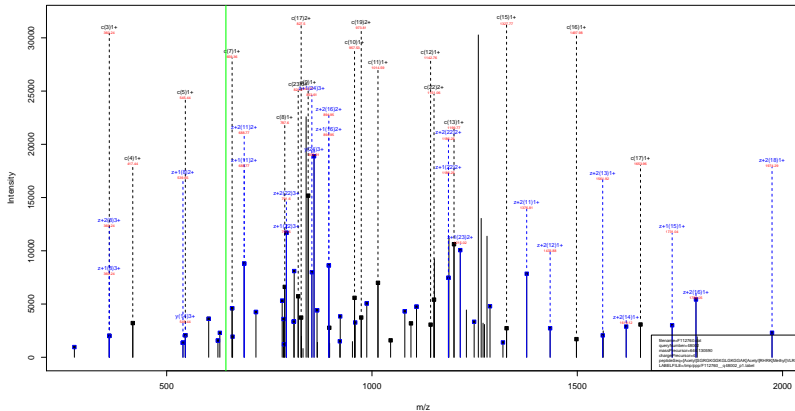

# sp | P62806 | H4\_MOUSE

[Acetyl]SGRGKGGKGLGKGGAK<sup>Acetyl</sup> RHRK<sup>Methyl</sup> VLRD<sup>14.02</sup>

- ▶ fragmentation table for charge state 1+
- ▶ specType=etd
- ▶ score=106.18
- ▶ F112760.dat
- ▶ query=q48002\_p1
- ▶ precursor=644.130590
- ▶ chargePrecursor=4
- ▶ itol=0.5

| AA | c  | y               | z+1      | z+2             | z               | AA       |       |
|----|----|-----------------|----------|-----------------|-----------------|----------|-------|
| S  | 1  | 147.676         | 2573.497 | 2557.478        | 0.000           | 2556.471 | S[24] |
| G  | 2  | 204.008         | 2444.455 | 2428.438        | 0.000           | 2427.420 | G[23] |
| R  | 3  | <b>350.199</b>  | 2387.433 | 2371.414        | 2372.432        | 2310.403 | R[22] |
| G  | 4  | <b>417.230</b>  | 2213.332 | 2215.313        | 2216.331        | 2214.309 | G[21] |
| K  | 5  | <b>545.315</b>  | 2174.310 | 2158.292        | 2159.300        | 2157.284 | K[20] |
| G  | 6  | <b>602.337</b>  | 2046.216 | 2030.197        | 2031.205        | 2029.189 | G[19] |
| G  | 7  | <b>659.358</b>  | 1909.194 | 1973.175        | <b>1974.183</b> | 1972.168 | G[18] |
| K  | 8  | <b>787.453</b>  | 1932.173 | 1916.154        | 1917.162        | 1915.146 | K[17] |
| G  | 9  | <b>844.475</b>  | 1804.078 | 1788.059        | <b>1789.067</b> | 1787.051 | G[16] |
| L  | 10 | <b>927.559</b>  | 1747.056 | <b>1731.037</b> | 1732.045        | 1730.030 | L[15] |
| G  | 11 | <b>1014.580</b> | 1633.972 | 1617.953        | <b>1618.961</b> | 1616.946 | G[14] |
| K  | 12 | <b>1142.675</b> | 1576.951 | 1560.932        | <b>1561.940</b> | 1559.924 | K[13] |
| G  | 13 | <b>1199.697</b> | 1448.856 | 1432.837        | <b>1433.845</b> | 1431.829 | G[12] |
| G  | 14 | 1256.718        | 1391.834 | 1375.815        | <b>1376.823</b> | 1374.808 | G[11] |
| A  | 15 | <b>1327.756</b> | 1334.812 | <b>1318.794</b> | 1319.802        | 1317.786 | A[10] |
| R  | 16 | <b>1407.801</b> | 1283.790 | 1247.771        | <b>1248.765</b> | 1246.749 | R[9]  |
| R  | 17 | <b>1653.962</b> | 1093.670 | 1077.651        | 1078.659        | 1076.644 | R[8]  |
| H  | 18 | 1791.021        | 937.569  | <b>921.550</b>  | <b>922.558</b>  | 920.542  | H[7]  |
| R  | 19 | 1947.122        | 800.510  | <b>784.491</b>  | <b>785.499</b>  | 783.484  | R[6]  |
| K  | 20 | 2089.233        | 644.409  | 628.390         | <b>629.398</b>  | 627.382  | K[5]  |
| V  | 21 | 2188.301        | 502.298  | 486.280         | 487.287         | 485.272  | V[4]  |
| L  | 22 | 2301.388        | 403.230  | 387.211         | 388.219         | 386.203  | L[3]  |
| R  | 23 | 2437.488        | 290.140  | 274.127         | <b>275.135</b>  | 273.119  | R[2]  |
| D  | 24 | 2572.513        | 134.045  | 118.026         | 119.034         | 117.018  | D[1]  |

# sp | P62806 | H4\_MOUSE

[Acetyl]SGRGKGGKGLGKGGAK<sup>Acetyl</sup> RHRK<sup>Methyl</sup> VLRD<sup>14.02</sup>  
42.01 14.02

- ▶ fragmentation table for charge state 2+
- ▶ specType=etd
- ▶ score=106.18
- ▶ F112760.dat
- ▶ query=q48002\_p1
- ▶ precursor=644.130590
- ▶ chargePrecursor=4
- ▶ itol=0.5

| AA    | c               | y               | z+1             | z+2             | z              | AA    |
|-------|-----------------|-----------------|-----------------|-----------------|----------------|-------|
| S[1]  | 74.042          | <b>1287.252</b> | 1279.243        | 0.504           | 1278.739       | S[24] |
| G[2]  | 102.553         | 1222.731        | <b>1214.722</b> | 0.504           | 1214.218       | G[23] |
| R[3]  | 180.603         | 1194.220        | <b>1186.211</b> | <b>1186.715</b> | 1185.707       | R[22] |
| G[4]  | 269.114         | 1116.170        | <b>1108.160</b> | <b>1108.664</b> | 1107.656       | G[21] |
| K[5]  | 273.161         | 1087.659        | <b>1079.650</b> | <b>1080.153</b> | 1079.146       | K[20] |
| G[6]  | 351.672         | 1023.611        | 1015.602        | 1016.106        | 1015.098       | G[19] |
| G[7]  | 330.193         | 995.101         | <b>987.091</b>  | <b>987.595</b>  | 986.587        | G[18] |
| K[8]  | 394.230         | 966.590         | 958.581         | <b>959.084</b>  | 958.077        | K[17] |
| G[9]  | 422.741         | 902.542         | <b>894.533</b>  | <b>895.037</b>  | 894.029        | G[16] |
| L[10] | 479.293         | 874.032         | <b>866.022</b>  | <b>866.526</b>  | 865.518        | L[15] |
| Q[11] | 507.794         | 817.490         | <b>809.480</b>  | <b>809.984</b>  | 808.976        | Q[14] |
| K[12] | 571.841         | 788.979         | <b>780.970</b>  | <b>781.474</b>  | 780.466        | K[13] |
| G[13] | 600.352         | 724.931         | <b>716.922</b>  | <b>717.426</b>  | 716.418        | G[12] |
| G[14] | 628.863         | 696.421         | <b>688.411</b>  | <b>688.915</b>  | 687.907        | G[11] |
| A[15] | 664.361         | 667.910         | 659.901         | <b>660.405</b>  | <b>659.397</b> | A[10] |
| R[16] | 788.434         | 638.391         | <b>624.382</b>  | <b>624.886</b>  | 623.878        | R[9]  |
| R[17] | <b>827.485</b>  | 547.339         | <b>539.329</b>  | <b>539.833</b>  | 538.825        | R[8]  |
| H[18] | <b>896.014</b>  | 469.288         | 461.279         | 461.783         | 460.775        | H[7]  |
| R[19] | <b>974.065</b>  | 400.750         | 392.740         | 393.243         | 392.245        | R[6]  |
| K[20] | <b>1045.120</b> | 322.700         | 314.690         | 315.203         | 314.195        | K[5]  |
| V[21] | <b>1094.654</b> | 251.663         | 243.653         | 244.167         | 243.160        | V[4]  |
| L[22] | <b>1151.196</b> | 180.119         | 184.109         | 184.613         | 183.605        | L[3]  |
| R[23] | 1229.247        | 145.577         | 137.567         | 138.071         | 137.063        | R[2]  |
| D[24] | 1386.760        | 67.526          | 59.517          | 60.021          | 59.013         | D[1]  |

# sp | P62806 | H4\_MOUSE

[Acetyl]SGRGKGGKGLGKGGAK<sup>Acetyl</sup> RHRK<sup>Methyl</sup> VLRD<sup>14.02</sup>  
42.01 14.02

- ▶ fragmentation table for charge state 3+
- ▶ specType=etd
- ▶ score=106.18
- ▶ F112760.dat
- ▶ query=q48002.p1
- ▶ precursor=644.130590
- ▶ chargePrecursor=4
- ▶ itol=0.5

| AA    | c              | y              | z+1            | z+2            | z              | AA    |
|-------|----------------|----------------|----------------|----------------|----------------|-------|
| S[1]  | 49.697         | <b>858.504</b> | <b>853.164</b> | 0.672          | 852.838        | S[24] |
| G[2]  | 58.704         | 815.490        | <b>810.150</b> | 0.672          | <b>809.814</b> | G[23] |
| R[3]  | 150.738        | 796.481        | <b>791.143</b> | <b>791.479</b> | 790.807        | R[22] |
| G[4]  | 139.745        | 784.449        | 739.109        | 739.445        | 738.773        | G[21] |
| K[5]  | 182.443        | 725.442        | 720.102        | 720.438        | 719.766        | K[20] |
| G[6]  | 201.450        | 682.743        | 677.404        | 677.740        | 677.068        | G[19] |
| G[7]  | 220.458        | 663.736        | 658.397        | 658.733        | 658.061        | G[18] |
| K[8]  | 263.156        | 644.729        | 639.389        | 639.725        | 639.054        | K[17] |
| G[9]  | 282.163        | <b>602.031</b> | 596.691        | 597.027        | 596.355        | G[16] |
| L[10] | 319.958        | 584.024        | 577.684        | 578.020        | 577.348        | L[15] |
| G[11] | 338.965        | <b>545.329</b> | <b>539.989</b> | 540.325        | <b>539.653</b> | G[14] |
| K[12] | 381.563        | 526.322        | 520.982        | 521.318        | 520.646        | K[13] |
| G[13] | 400.570        | 483.623        | 478.284        | 478.620        | 477.948        | G[12] |
| G[14] | 419.578        | 464.616        | 459.277        | 459.613        | 458.941        | G[11] |
| A[15] | 443.257        | 445.609        | 440.270        | 440.605        | 439.934        | A[10] |
| K[16] | 499.958        | 421.930        | 416.590        | 416.926        | 416.255        | K[9]  |
| R[17] | 551.992        | 365.226        | <b>359.889</b> | <b>360.225</b> | 359.553        | R[8]  |
| H[18] | 597.678        | 313.195        | 307.855        | 308.191        | 307.519        | H[7]  |
| R[19] | 649.712        | 297.508        | 262.169        | 262.505        | 261.833        | R[6]  |
| K[20] | 697.082        | 215.475        | 210.137        | 210.471        | 209.799        | K[5]  |
| V[21] | 730.105        | 168.104        | 162.765        | 163.101        | 162.429        | V[4]  |
| L[22] | 767.800        | 135.082        | 129.742        | 130.078        | 129.406        | L[3]  |
| R[23] | <b>819.834</b> | 97.387         | 92.047         | 92.383         | 91.711         | R[2]  |
| D[24] | 858.176        | 45.353         | 40.014         | 40.349         | 39.678         | D[1]  |



# sp | P62806 | H4\_MOUSE

[Acetyl]SGR<sup>Methyl</sup><sub>14.02</sub> GKGGKGLGKGGAK<sup>Acetyl</sup><sub>42.01</sub> RHR<sup>Dimethyl</sup><sub>28.03</sub> KVLRD

- ▶ fragmentation table for charge state 1+
- ▶ specType=etd
- ▶ score=73.23
- ▶ F112760.dat
- ▶ query=q48304\_p1
- ▶ precursor=867.847920
- ▶ chargePrecursor=3
- ▶ itol=0.5

| AA    | c               | y        | z+1             | z+2             | z               | AA    |
|-------|-----------------|----------|-----------------|-----------------|-----------------|-------|
| S[1]  | 147.076         | 2601.528 | 2585.510        | 0.000           | 2584.502        | S[24] |
| G[2]  | 204.098         | 2472.488 | 2456.467        | 0.000           | 2455.459        | G[23] |
| R[3]  | <b>374.215</b>  | 2415.484 | 2399.440        | 2400.451        | 2398.430        | R[22] |
| G[4]  | <b>431.236</b>  | 2345.348 | 2229.320        | 2230.337        | 2228.321        | G[21] |
| K[5]  | <b>559.131</b>  | 2188.320 | 2172.301        | 2173.315        | 2171.300        | K[20] |
| G[6]  | <b>616.353</b>  | 2060.231 | 2044.212        | 2045.220        | 2043.205        | G[19] |
| G[7]  | <b>673.374</b>  | 2003.210 | 1987.190        | 1988.199        | <b>1986.183</b> | G[18] |
| K[8]  | <b>801.469</b>  | 1946.188 | <b>1930.170</b> | 1931.177        | 1929.162        | K[17] |
| G[9]  | <b>858.490</b>  | 1818.091 | <b>1802.075</b> | 1803.082        | 1801.067        | G[16] |
| L[10] | 913.474         | 1791.072 | <b>1745.053</b> | 1746.061        | 1744.045        | L[15] |
| Q[11] | <b>1028.596</b> | 1647.988 | 1631.969        | 1632.977        | 1630.961        | Q[14] |
| K[12] | <b>1156.691</b> | 1590.966 | 1574.948        | <b>1575.955</b> | 1573.940        | K[13] |
| G[13] | 1213.712        | 1462.871 | 1446.853        | <b>1447.860</b> | 1445.845        | G[12] |
| G[14] | 1270.734        | 1405.850 | <b>1389.831</b> | 1390.839        | 1388.823        | G[11] |
| A[15] | 1341.771        | 1348.828 | 1332.810        | 1333.818        | 1331.802        | A[10] |
| R[16] | 1311.806        | 1277.914 | 1261.894        | <b>1262.780</b> | 1260.765        | R[9]  |
| R[17] | 1667.878        | 1107.886 | 1091.867        | <b>1092.675</b> | 1090.659        | R[8]  |
| H[18] | <b>1805.037</b> | 951.985  | 935.966         | <b>936.574</b>  | 934.558         | H[7]  |
| R[19] | 1969.109        | 814.826  | 798.807         | <b>799.515</b>  | 797.499         | R[6]  |
| K[20] | 2117.264        | 630.393  | 614.373         | <b>615.382</b>  | 613.367         | K[5]  |
| V[21] | 2216.132        | 602.298  | 486.280         | 487.287         | 485.272         | V[4]  |
| L[22] | 2329.418        | 493.230  | 387.211         | 388.219         | 386.203         | L[3]  |
| R[23] | 2485.517        | 390.148  | 274.127         | 275.135         | 273.119         | R[2]  |
| D[24] | 2690.544        | 134.045  | 118.028         | 119.034         | 117.018         | D[1]  |

# sp | P62806 | H4\_MOUSE

[Acetyl]SGR<sup>Methyl</sup><sub>14.02</sub> GKGGKGLGKGGAK<sup>Acetyl</sup><sub>42.01</sub> RHR<sup>Dimethyl</sup><sub>28.03</sub> KVLRD

- ▶ fragmentation table for charge state 2+
- ▶ specType=etd
- ▶ score=73.23
- ▶ F112760.dat
- ▶ query=q48304.p1
- ▶ precursor=867.847920
- ▶ chargePrecursor=3
- ▶ itol=0.5

| AA | c  | y               | z+1             | z+2             | z               | AA              |       |
|----|----|-----------------|-----------------|-----------------|-----------------|-----------------|-------|
| S  | 1  | 74.042          | <b>1301.268</b> | <b>1291.258</b> | 0.504           | <b>1292.755</b> | S[24] |
| G  | 2  | 102.553         | 1236.747        | <b>1228.737</b> | 0.504           | 1228.231        | G[23] |
| R  | 3  | 187.611         | 1208.236        | <b>1200.226</b> | <b>1200.730</b> | 1199.721        | R[22] |
| G  | 4  | 238.322         | 1123.177        | 1115.168        | 1115.672        | 1114.666        | G[21] |
| K  | 5  | 290.159         | 1094.567        | 1086.557        | 1087.061        | 1086.151        | K[20] |
| G  | 6  | 308.680         | 1030.619        | 1022.610        | 1023.114        | 1022.106        | G[19] |
| G  | 7  | 337.191         | 1002.108        | 994.099         | 994.603         | 993.595         | G[18] |
| K  | 8  | 401.218         | 973.590         | 965.588         | 966.092         | 965.084         | K[17] |
| G  | 9  | 429.749         | 950.550         | 941.541         | 942.045         | 941.037         | G[16] |
| L  | 10 | 489.293         | 893.040         | 873.030         | 873.534         | 872.526         | L[15] |
| G  | 11 | 514.802         | <b>824.498</b>  | 816.488         | 816.992         | 815.984         | G[14] |
| K  | 12 | 578.849         | 795.987         | 787.977         | 788.481         | 787.474         | K[13] |
| G  | 13 | 607.360         | 731.939         | 723.930         | 724.434         | 723.426         | G[12] |
| G  | 14 | 635.871         | 703.429         | 695.419         | 695.923         | 694.915         | G[11] |
| A  | 15 | 671.389         | 674.918         | 665.908         | 667.412         | 666.404         | A[10] |
| R  | 16 | 736.442         | 639.390         | 631.380         | 631.884         | 630.876         | R[9]  |
| R  | 17 | 834.492         | 554.347         | 546.337         | 546.841         | 545.833         | R[8]  |
| H  | 18 | 963.022         | 476.290         | 468.280         | 468.784         | 467.776         | H[7]  |
| R  | 19 | 995.088         | 407.767         | 399.757         | 400.261         | 399.253         | R[6]  |
| K  | 20 | 1059.136        | 315.700         | 307.691         | 308.195         | 307.187         | K[5]  |
| V  | 21 | 1128.670        | 251.653         | 243.643         | 244.147         | 243.140         | V[4]  |
| L  | 22 | <b>1165.212</b> | 202.119         | 194.109         | 194.613         | 193.605         | L[3]  |
| R  | 23 | <b>1243.262</b> | 145.577         | 137.567         | 138.071         | 137.063         | R[2]  |
| D  | 24 | <b>1300.776</b> | 87.526          | 89.517          | 90.021          | 89.013          | D[1]  |





# sp | P62806 | H4\_MOUSE

[Acetyl]SGRGKGGKGLGK<sup>Acetyl</sup> 42.01 GGAK<sup>Acetyl</sup> 42.01 RHRK<sup>Methyl</sup> 14.02 VLRLD

- ▶ fragmentation table for charge state 1+
- ▶ specType=etd
- ▶ score=86.33
- ▶ F112760.dat
- ▶ query=q48414\_p1
- ▶ precursor=654.632530
- ▶ chargePrecursor=4
- ▶ itol=0.5

| AA | c  | y               | z+1            | z+2             | z               | AA       |       |
|----|----|-----------------|----------------|-----------------|-----------------|----------|-------|
| S  | 1  | 147.676         | 2615.508       | 2599.489        | 0.000           | 2598.481 | S[24] |
| G  | 2  | 204.008         | 2486.465       | 2470.446        | 0.000           | 2469.439 | G[23] |
| R  | 3  | <b>368.199</b>  | 2420.944       | 2413.425        | 2414.433        | 2412.417 | R[22] |
| G  | 4  | <b>417.230</b>  | 2373.943       | 2297.334        | 2298.332        | 2296.316 | G[21] |
| K  | 5  | <b>545.315</b>  | 2216.321       | 2200.302        | 2201.310        | 2199.295 | K[20] |
| G  | 6  | <b>602.337</b>  | 2088.226       | 2072.207        | 2073.215        | 2071.200 | G[19] |
| G  | 7  | <b>659.358</b>  | 2031.205       | 2015.186        | 2016.194        | 2014.178 | G[18] |
| K  | 8  | <b>787.453</b>  | 1974.183       | 1958.164        | <b>1959.172</b> | 1957.157 | K[17] |
| G  | 9  | 814.875         | 1846.088       | <b>1838.069</b> | 1831.077        | 1829.062 | G[16] |
| L  | 10 | <b>957.559</b>  | 1789.067       | <b>1773.048</b> | 1774.056        | 1772.040 | L[15] |
| K  | 11 | <b>1014.580</b> | 1675.963       | 1659.944        | <b>1660.972</b> | 1658.956 | K[14] |
| K  | 12 | <b>1184.686</b> | 1618.961       | 1602.942        | <b>1603.950</b> | 1601.935 | K[13] |
| G  | 13 | <b>1241.707</b> | 1446.956       | 1432.937        | <b>1433.945</b> | 1431.929 | G[12] |
| G  | 14 | 1298.729        | 1391.934       | 1375.915        | <b>1376.923</b> | 1374.908 | G[11] |
| A  | 15 | 1369.766        | 1334.912       | 1318.894        | 1319.902        | 1317.886 | A[10] |
| R  | 16 | 1539.871        | 1283.896       | 1247.877        | <b>1248.765</b> | 1246.749 | R[9]  |
| R  | 17 | <b>1695.973</b> | 1093.870       | 1077.851        | <b>1078.659</b> | 1076.644 | R[8]  |
| H  | 18 | 1833.031        | <b>937.569</b> | <b>921.550</b>  | <b>922.558</b>  | 920.542  | H[7]  |
| R  | 19 | 1989.133        | 900.510        | <b>784.491</b>  | <b>785.499</b>  | 783.484  | R[6]  |
| K  | 20 | 2131.243        | 644.409        | <b>628.390</b>  | <b>629.398</b>  | 627.382  | K[5]  |
| V  | 21 | 2230.312        | 502.298        | 486.280         | 487.287         | 485.272  | V[4]  |
| L  | 22 | 2343.396        | 403.230        | 387.211         | <b>388.219</b>  | 386.203  | L[3]  |
| R  | 23 | 2499.497        | 290.146        | 274.127         | -75.135         | 273.110  | R[2]  |
| D  | 24 | 2614.524        | 134.045        | 118.026         | 119.034         | 117.018  | D[1]  |

# sp | P62806 | H4\_MOUSE

[Acetyl]SGRGKGGKGLGK<sup>Acetyl</sup> 42.01 **GGAK**<sup>Acetyl</sup> 42.01 **RHRK**<sup>Methyl</sup> 14.02 **VLRD**

- ▶ fragmentation table for charge state 2+
- ▶ specType=etd
- ▶ score=86.33
- ▶ F112760.dat
- ▶ query=q48414.p1
- ▶ precursor=654.632530
- ▶ chargePrecursor=4
- ▶ itol=0.5

| AA    | c               | y               | z+1             | z+2             | z               | AA    |
|-------|-----------------|-----------------|-----------------|-----------------|-----------------|-------|
| S[1]  | 74.642          | <b>1308.257</b> | 1300.268        | 0.504           | 1299.746        | S[24] |
| G[2]  | 102.553         | <b>1243.736</b> | 1235.727        | 0.504           | 1235.231        | G[23] |
| R[3]  | 180.603         | 1215.225        | 1207.216        | <b>1207.720</b> | 1206.712        | R[22] |
| G[4]  | 259.114         | 1137.375        | <b>1129.166</b> | <b>1119.669</b> | 1119.666        | G[21] |
| K[5]  | 273.153         | 1108.664        | 1100.655        | <b>1101.159</b> | 1100.151        | K[20] |
| G[6]  | 303.672         | 1044.617        | <b>1036.607</b> | 1037.111        | <b>1036.103</b> | G[19] |
| G[7]  | 330.163         | 1016.106        | <b>1008.097</b> | <b>1008.601</b> | <b>1007.593</b> | G[18] |
| K[8]  | 394.210         | 987.595         | 979.586         | <b>980.090</b>  | 979.082         | K[17] |
| G[9]  | 422.741         | 929.545         | <b>915.538</b>  | <b>916.042</b>  | 915.034         | G[16] |
| L[10] | 479.263         | <b>895.037</b>  | <b>887.028</b>  | <b>887.532</b>  | 886.524         | L[15] |
| G[11] | 507.794         | 836.465         | 830.456         | 830.960         | <b>829.962</b>  | G[14] |
| K[12] | 502.847         | 809.984         | <b>801.975</b>  | <b>802.479</b>  | 801.471         | K[13] |
| G[13] | 621.357         | 724.931         | <b>716.922</b>  | <b>717.426</b>  | 716.418         | G[12] |
| G[14] | 649.868         | <b>696.421</b>  | <b>688.411</b>  | <b>688.915</b>  | 687.907         | G[11] |
| A[15] | 685.389         | 659.910         | <b>657.901</b>  | <b>660.905</b>  | <b>659.397</b>  | A[10] |
| R[16] | 770.439         | 632.991         | 624.982         | <b>624.886</b>  | 623.878         | R[9]  |
| R[17] | <b>848.490</b>  | 547.339         | 539.330         | 539.833         | 538.825         | R[6]  |
| H[18] | <b>917.019</b>  | 469.288         | 461.279         | 461.783         | 460.775         | H[7]  |
| R[19] | <b>995.070</b>  | 400.759         | 392.750         | 393.253         | 392.245         | R[6]  |
| K[20] | 1069.125        | 322.708         | 314.699         | 315.203         | 314.195         | K[5]  |
| V[21] | <b>1115.659</b> | 253.653         | 245.643         | 246.147         | 245.140         | V[4]  |
| L[22] | <b>1172.201</b> | 202.119         | 194.109         | 194.613         | 193.605         | L[3]  |
| R[23] | 1250.252        | 145.577         | 137.567         | 138.071         | 137.063         | R[2]  |
| D[24] | 1307.705        | 67.526          | 59.517          | 60.021          | 59.013          | D[1]  |

# sp | P62806 | H4\_MOUSE

[Acetyl]SGRGKGGKGLGK<sup>Acetyl</sup>42.01 GGAK<sup>Acetyl</sup>42.01 RHRK<sup>Methyl</sup>14.02 VLRD

- ▶ fragmentation table for charge state 3+
- ▶ specType=etd
- ▶ score=86.33
- ▶ F112760.dat
- ▶ query=q48414.p1
- ▶ precursor=654.632530
- ▶ chargePrecursor=4
- ▶ itol=0.5

| AA    | c              | y              | z+1            | z+2            | z              | AA    |
|-------|----------------|----------------|----------------|----------------|----------------|-------|
| S[1]  | 49.697         | <b>872.507</b> | <b>867.168</b> | 0.672          | <b>866.832</b> | S[24] |
| G[2]  | 58.704         | <b>829.493</b> | <b>824.154</b> | 0.672          | 823.818        | G[23] |
| R[3]  | 120.738        | 810.480        | <b>805.146</b> | <b>805.482</b> | 804.811        | R[22] |
| G[4]  | 139.745        | 758.452        | 753.113        | 753.449        | 752.777        | G[21] |
| K[5]  | 182.443        | 739.445        | 734.106        | 734.442        | 733.770        | K[20] |
| G[6]  | 201.450        | 696.747        | 691.407        | 691.743        | 691.071        | G[19] |
| G[7]  | 220.458        | 677.740        | 672.400        | 672.736        | 672.064        | G[18] |
| K[8]  | 263.156        | 658.733        | 653.393        | 653.729        | 653.057        | K[17] |
| G[9]  | 282.163        | 639.726        | 634.386        | 634.721        | 634.050        | G[16] |
| L[10] | 319.858        | 597.027        | 591.687        | 592.023        | 591.351        | L[15] |
| G[11] | 338.865        | 559.132        | 553.791        | 554.129        | 553.457        | G[14] |
| K[12] | 395.567        | 540.125        | 534.785        | 535.122        | 534.450        | K[13] |
| G[13] | 414.574        | 483.623        | 478.284        | 478.620        | 477.948        | G[12] |
| G[14] | 433.581        | 464.616        | 459.277        | 459.613        | 458.941        | G[11] |
| A[15] | 457.260        | 445.609        | 440.270        | 440.605        | 439.934        | A[10] |
| K[16] | 513.962        | 421.930        | 416.590        | <b>416.926</b> | 416.255        | K[9]  |
| R[17] | 565.996        | 365.220        | <b>359.889</b> | <b>360.225</b> | 359.553        | R[8]  |
| H[18] | 611.682        | 313.195        | 307.855        | 308.191        | 307.519        | H[7]  |
| R[19] | 663.716        | 297.508        | 292.169        | 292.505        | 291.833        | R[6]  |
| K[20] | 711.088        | 215.475        | 210.135        | 210.471        | 209.799        | K[5]  |
| V[21] | 764.109        | 168.104        | 162.765        | 163.101        | 162.429        | V[4]  |
| L[22] | 781.803        | 135.082        | 129.742        | 130.078        | 129.406        | L[3]  |
| R[23] | <b>833.837</b> | 97.387         | 92.047         | 92.383         | 91.711         | R[2]  |
| D[24] | 872.179        | 45.353         | 40.014         | 40.349         | 39.678         | D[1]  |

# sp | P62806 | H4\_MOUSE

[Acetyl]S<sub>42.01</sub> GRGKGGKGLGKGGAK Acetyl<sub>42.01</sub> RHRK Dimethyl<sub>28.03</sub> VLRD

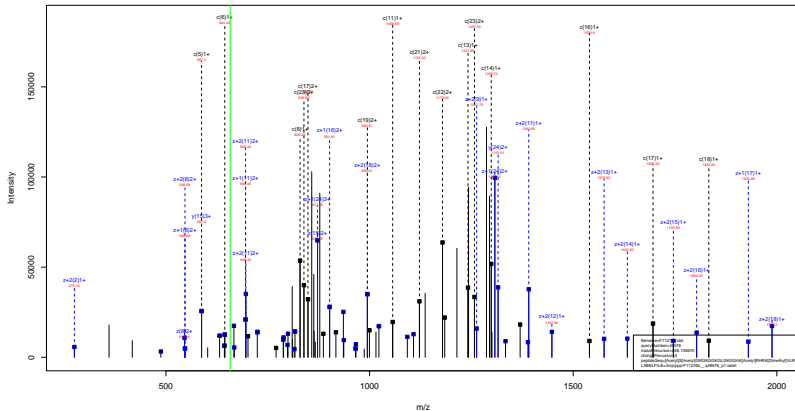

# sp | P62806 | H4\_MOUSE

[Acetyl]S<sub>42.01</sub> GRGKGGKGLGKGGAK Acetyl<sub>42.01</sub> RHRK Dimethyl<sub>28.03</sub> VLRD

- ▶ fragmentation table for charge state 1+
- ▶ specType=etd
- ▶ score=104.34
- ▶ F112760.dat
- ▶ query=q48576\_p1
- ▶ precursor=658.135670
- ▶ chargePrecursor=4
- ▶ itol=0.5

| AA | c  | y               | z+1             | z+2             | z               | AA              |       |
|----|----|-----------------|-----------------|-----------------|-----------------|-----------------|-------|
| S  | 1  | 189.067         | 2029.923        | 2013.505        | 0.000           | 2012.497        | S[24] |
| G  | 2  | 246.108         | 2438.470        | 2442.451        | 0.000           | 2441.444        | G[23] |
| R  | 3  | 402.210         | 2401.449        | 2385.430        | 2386.438        | 2384.422        | R[22] |
| G  | 4  | 459.251         | 2048.349        | 2229.329        | 2230.337        | 2229.321        | G[21] |
| K  | 5  | <b>587.326</b>  | 2188.325        | 2172.307        | 2173.315        | 2171.300        | K[20] |
| G  | 6  | <b>644.347</b>  | 2060.211        | 2044.212        | 2045.220        | 2043.205        | G[19] |
| G  | 7  | <b>701.369</b>  | 2003.210        | 1987.191        | <b>1988.199</b> | 1986.181        | G[18] |
| K  | 8  | <b>829.464</b>  | 1946.189        | <b>1930.170</b> | 1931.177        | 1929.162        | K[17] |
| G  | 9  | <b>886.485</b>  | 1818.093        | 1802.075        | <b>1803.082</b> | 1801.066        | G[16] |
| L  | 10 | <b>955.569</b>  | 1763.072        | 1746.953        | <b>1748.061</b> | 1744.940        | L[15] |
| G  | 11 | <b>1056.591</b> | 1647.988        | 1631.969        | <b>1632.977</b> | 1630.961        | G[14] |
| K  | 12 | <b>1184.686</b> | 1590.966        | 1574.948        | <b>1575.955</b> | 1573.940        | K[13] |
| G  | 13 | <b>1241.707</b> | 1462.871        | 1446.853        | <b>1447.860</b> | 1445.845        | G[12] |
| G  | 14 | <b>1298.729</b> | 1405.850        | 1389.831        | <b>1390.839</b> | <b>1388.823</b> | G[11] |
| A  | 15 | <b>1367.766</b> | 1348.829        | 1332.810        | <b>1333.818</b> | 1331.800        | A[10] |
| R  | 16 | <b>1539.871</b> | 1277.791        | 1261.773        | <b>1262.780</b> | 1260.765        | R[9]  |
| R  | 17 | <b>1695.973</b> | <b>1107.686</b> | 1091.667        | <b>1092.675</b> | 1090.659        | R[8]  |
| H  | 18 | <b>1833.031</b> | 951.585         | <b>935.566</b>  | <b>936.574</b>  | 934.558         | H[7]  |
| R  | 19 | 1989.131        | <b>814.526</b>  | <b>798.507</b>  | <b>799.515</b>  | 797.499         | R[6]  |
| K  | 20 | 2145.259        | 658.425         | 642.406         | <b>643.414</b>  | 641.398         | K[5]  |
| V  | 21 | 2244.327        | 592.299         | 486.280         | <b>487.287</b>  | 485.271         | V[4]  |
| L  | 22 | 2357.411        | 463.230         | 387.211         | 488.219         | 386.203         | L[3]  |
| R  | 23 | 2513.512        | 290.146         | 274.127         | <b>275.135</b>  | 273.119         | R[2]  |
| D  | 24 | 2628.519        | 134.045         | 118.026         | 119.034         | 117.018         | D[1]  |

# sp | P62806 | H4\_MOUSE

[Acetyl]S<sub>42.01</sub> GRGKGGKGLGKGGAK Acetyl<sub>42.01</sub> RHRK Dimethyl<sub>28.03</sub> VLRD

- ▶ fragmentation table for charge state 2+
- ▶ specType=etd
- ▶ score=104.34
- ▶ F112760.dat
- ▶ query=q48576\_p1
- ▶ precursor=658.135670
- ▶ chargePrecursor=4
- ▶ itol=0.5

| AA | c  | y               | z+1             | z+2             | z               | AA             |       |
|----|----|-----------------|-----------------|-----------------|-----------------|----------------|-------|
| S  | 1  | 95.047          | <b>1315.265</b> | <b>1307.256</b> | 0.504           | 1306.752       | S[24] |
| G  | 2  | 123.558         | 1229.739        | 1221.729        | 0.504           | 1221.225       | G[23] |
| R  | 3  | 201.808         | 1201.226        | 1193.219        | 1.003.723       | 1192.715       | R[22] |
| G  | 4  | 230.319         | 1223.177        | 1115.368        | 1.115.672       | 1114.666       | G[21] |
| K  | 5  | 294.167         | 1094.067        | 1086.057        | 1.087.161       | 1085.153       | K[20] |
| G  | 6  | 352.877         | 1030.619        | <b>1022.610</b> | <b>1023.114</b> | 1022.106       | G[19] |
| G  | 7  | 351.188         | 1002.108        | 994.099         | <b>994.603</b>  | 993.599        | G[18] |
| K  | 8  | 415.236         | 873.599         | <b>965.588</b>  | <b>966.092</b>  | 965.084        | K[17] |
| G  | 9  | 443.746         | 909.550         | <b>901.541</b>  | <b>902.045</b>  | 901.037        | G[16] |
| L  | 10 | 509.288         | 881.040         | 873.033         | 873.534         | <b>872.526</b> | L[15] |
| G  | 11 | 528.799         | 824.498         | <b>816.488</b>  | <b>816.992</b>  | 815.984        | G[14] |
| K  | 12 | 592.947         | 795.987         | <b>787.977</b>  | <b>788.481</b>  | 787.474        | K[13] |
| G  | 13 | 621.357         | 731.939         | <b>723.930</b>  | <b>724.434</b>  | 723.426        | G[12] |
| G  | 14 | 649.868         | 703.429         | <b>695.419</b>  | <b>695.923</b>  | 694.915        | G[11] |
| A  | 15 | 687.367         | 674.918         | <b>666.908</b>  | <b>667.412</b>  | 666.404        | A[10] |
| R  | 16 | <b>770.439</b>  | 639.399         | <b>631.390</b>  | <b>631.894</b>  | 630.886        | R[9]  |
| R  | 17 | <b>848.490</b>  | 554.341         | <b>546.337</b>  | <b>546.841</b>  | <b>545.833</b> | R[8]  |
| H  | 18 | <b>917.019</b>  | 476.206         | 468.207         | 468.701         | 467.783        | H[7]  |
| R  | 19 | <b>995.070</b>  | 407.767         | 399.757         | 400.261         | 399.253        | R[6]  |
| K  | 20 | 1073.133        | 329.716         | 321.707         | 322.211         | 321.203        | K[5]  |
| V  | 21 | <b>1122.867</b> | 251.663         | 243.653         | 244.147         | 243.140        | V[4]  |
| L  | 22 | <b>1178.799</b> | 202.119         | 194.108         | 194.613         | 193.605        | L[3]  |
| R  | 23 | <b>1257.260</b> | 145.577         | 137.567         | 138.071         | 137.063        | R[2]  |
| D  | 24 | 1314.773        | 67.526          | 59.517          | 60.021          | 59.013         | D[1]  |

# sp | P62806 | H4\_MOUSE

[Acetyl]S<sub>42.01</sub> GRGKGGKGLGKGGAK<sub>42.01</sub> RHRK<sub>28.03</sub> [Dimethyl]VLRD

- ▶ fragmentation table for charge state 3+
- ▶ specType=etd
- ▶ score=104.34
- ▶ F112760.dat
- ▶ query=q48576.p1
- ▶ precursor=658.135670
- ▶ chargePrecursor=4
- ▶ itol=0.5

| AA    | c              | y              | z+1            | z+2            | z              | AA    |
|-------|----------------|----------------|----------------|----------------|----------------|-------|
| S[1]  | 63.701         | 877.179        | <b>871.840</b> | 0.672          | 871.904        | S[24] |
| G[2]  | 92.708         | 920.162        | <b>814.822</b> | 0.672          | 814.486        | G[23] |
| R[3]  | 134.741        | 801.154        | 795.815        | 796.151        | 795.479        | R[22] |
| G[4]  | 153.749        | 749.121        | 743.781        | 744.117        | 743.445        | G[21] |
| K[5]  | 196.447        | 730.114        | <b>724.774</b> | 725.110        | <b>724.438</b> | K[20] |
| G[6]  | 215.454        | 687.415        | 682.076        | 682.412        | 681.740        | G[19] |
| G[7]  | 234.461        | 668.408        | 663.069        | 663.404        | 662.733        | G[18] |
| K[8]  | 277.159        | 649.401        | <b>644.061</b> | <b>644.397</b> | <b>643.725</b> | K[17] |
| G[9]  | 296.167        | 630.793        | 602.363        | 603.699        | 601.047        | G[16] |
| L[10] | 313.681        | <b>587.695</b> | 582.356        | 582.692        | 582.020        | L[15] |
| G[11] | 352.868        | 530.001        | 544.661        | 544.997        | 544.325        | G[14] |
| K[12] | 395.567        | 530.994        | 525.654        | 525.990        | 525.318        | K[13] |
| G[13] | 414.574        | 488.295        | 482.956        | 483.292        | 482.620        | G[12] |
| G[14] | 433.581        | 469.288        | 463.949        | 464.285        | 463.613        | G[11] |
| A[15] | 457.260        | 450.281        | 444.941        | 445.277        | 444.605        | A[10] |
| K[16] | 513.962        | 426.602        | 421.262        | 421.598        | 420.926        | K[9]  |
| R[17] | 565.996        | 369.900        | 364.561        | 364.896        | 364.225        | R[8]  |
| H[18] | 611.682        | 317.896        | 312.527        | 312.863        | 312.191        | H[7]  |
| R[19] | 663.716        | 272.180        | 266.941        | 267.176        | 266.505        | R[6]  |
| K[20] | 715.758        | 220.140        | 214.807        | 215.143        | 214.471        | K[5]  |
| V[21] | 748.781        | 168.104        | 162.765        | 163.101        | 162.429        | V[4]  |
| L[22] | 786.475        | 135.082        | 129.742        | 130.078        | 129.406        | L[3]  |
| R[23] | <b>838.509</b> | 97.387         | 92.047         | 92.383         | 91.711         | R[2]  |
| D[24] | 876.851        | 45.353         | 40.014         | 40.349         | 39.678         | D[1]  |





# sp | P62806 | H4\_MOUSE

[Acetyl]SGRGKGGK <sup>Acetyl</sup><sub>42.01</sub> GLGK <sup>Acetyl</sup><sub>42.01</sub> GGAK <sup>Acetyl</sup><sub>42.01</sub> RHRK <sup>Methyl</sup><sub>14.02</sub> VLRD

- ▶ fragmentation table for charge state 1+
- ▶ specType=etd
- ▶ score=113.39
- ▶ F112760.dat
- ▶ query=q48966.p1
- ▶ precursor=532.310040
- ▶ chargePrecursor=5
- ▶ itol=0.5

| AA    | c               | y        | z+1            | z+2             | z        | AA    |
|-------|-----------------|----------|----------------|-----------------|----------|-------|
| S[1]  | 147.076         | 2057.518 | 2041.500       | 0.000           | 2040.492 | S[24] |
| G[2]  | 224.298         | 2528.476 | 2512.457       | 0.000           | 2511.449 | G[23] |
| T[3]  | <b>300.199</b>  | 2972.454 | 2956.435       | 2056.443        | 2054.425 | T[22] |
| G[4]  | <b>417.220</b>  | 2315.353 | 2299.334       | 2300.342        | 2298.327 | G[21] |
| K[5]  | <b>545.115</b>  | 2258.332 | 2242.313       | 2243.321        | 2241.305 | K[20] |
| G[6]  | <b>602.337</b>  | 2130.237 | 2114.218       | 2115.226        | 2113.210 | G[19] |
| G[7]  | <b>659.358</b>  | 2073.215 | 2057.196       | 2058.204        | 2056.189 | G[18] |
| K[8]  | <b>829.464</b>  | 2016.194 | 2000.175       | 2001.183        | 1999.167 | K[17] |
| G[9]  | <b>886.485</b>  | 1946.088 | 1930.069       | 1931.077        | 1929.062 | G[16] |
| L[10] | <b>959.549</b>  | 1789.067 | 1773.048       | 1774.056        | 1772.041 | L[15] |
| G[11] | <b>1056.591</b> | 1675.983 | 1659.964       | <b>1660.972</b> | 1658.956 | G[14] |
| K[12] | 1226.696        | 1618.961 | 1602.942       | <b>1603.950</b> | 1601.935 | K[13] |
| G[13] | <b>1283.718</b> | 1448.856 | 1432.837       | <b>1433.845</b> | 1431.829 | G[12] |
| G[14] | <b>1340.739</b> | 1391.834 | 1375.816       | <b>1376.823</b> | 1374.808 | G[11] |
| A[15] | <b>1411.776</b> | 1334.813 | 1318.794       | 1319.802        | 1317.786 | A[10] |
| K[16] | 1501.862        | 1283.776 | 1267.757       | <b>1268.765</b> | 1266.749 | K[9]  |
| R[17] | 1737.983        | 1093.670 | 1077.651       | <b>1078.659</b> | 1076.644 | R[8]  |
| H[18] | 1875.042        | 937.565  | <b>921.550</b> | 922.558         | 920.542  | H[7]  |
| R[19] | 2031.143        | 800.510  | <b>784.491</b> | <b>785.499</b>  | 783.484  | R[6]  |
| K[20] | 2173.254        | 644.405  | <b>628.390</b> | <b>629.398</b>  | 627.382  | K[5]  |
| V[21] | 2272.322        | 502.298  | <b>486.280</b> | 487.287         | 485.272  | V[4]  |
| L[22] | 2385.406        | 403.236  | <b>387.211</b> | <b>388.219</b>  | 386.203  | L[3]  |
| D[23] | 2541.507        | 290.140  | <b>274.127</b> | 275.135         | 273.119  | D[2]  |
| D[24] | 2656.534        | 134.045  | 118.026        | 119.034         | 117.018  | D[1]  |

# sp | P62806 | H4\_MOUSE

[Acetyl]SGRGKGGK <sup>Acetyl</sup><sub>42.01</sub> GLGK <sup>Acetyl</sup><sub>42.01</sub> GGAK <sup>Acetyl</sup><sub>42.01</sub> RHRK <sup>Methyl</sup><sub>14.02</sub> VLRD

- ▶ fragmentation table for charge state 2+
- ▶ specType=etd
- ▶ score=113.39
- ▶ F112760.dat
- ▶ query=q48966\_p1
- ▶ precursor=532.310040
- ▶ chargePrecursor=5
- ▶ itol=0.5

| AA    | c               | y               | z+1             | z+2             | z               | AA    |
|-------|-----------------|-----------------|-----------------|-----------------|-----------------|-------|
| S[1]  | 74.642          | 1129.263        | 1121.263        | 0.504           | 1120.740        | S[24] |
| G[2]  | 102.553         | 1264.741        | 1256.732        | 0.504           | 1256.228        | G[23] |
| R[3]  | 180.603         | 1236.231        | 1228.231        | <b>1228.725</b> | 1227.717        | R[22] |
| G[4]  | 209.114         | 1158.189        | <b>1158.171</b> | <b>1158.975</b> | 1149.666        | G[21] |
| K[5]  | 273.163         | 1129.669        | <b>1121.660</b> | <b>1122.164</b> | 1121.155        | K[20] |
| G[6]  | 301.672         | 1065.622        | <b>1057.613</b> | <b>1058.117</b> | <b>1057.109</b> | G[19] |
| G[7]  | 330.183         | <b>1037.111</b> | <b>1029.102</b> | <b>1029.606</b> | 1028.599        | G[18] |
| K[8]  | 415.236         | 1038.601        | <b>1000.591</b> | <b>1001.095</b> | <b>1000.087</b> | K[17] |
| G[9]  | <b>443.746</b>  | 921.548         | <b>915.538</b>  | <b>916.042</b>  | 915.034         | G[16] |
| L[10] | <b>509.288</b>  | 899.037         | <b>887.029</b>  | 887.533         | <b>886.524</b>  | L[15] |
| G[11] | <b>528.799</b>  | <b>838.495</b>  | <b>830.486</b>  | <b>830.990</b>  | 829.982         | G[14] |
| K[12] | <b>613.852</b>  | <b>809.984</b>  | <b>801.975</b>  | <b>802.479</b>  | <b>801.471</b>  | K[13] |
| G[13] | <b>642.363</b>  | 724.931         | <b>716.922</b>  | <b>717.426</b>  | 716.418         | G[12] |
| G[14] | <b>670.873</b>  | 696.421         | <b>688.411</b>  | <b>688.915</b>  | 687.907         | G[11] |
| A[15] | <b>708.382</b>  | 689.910         | <b>655.901</b>  | <b>660.405</b>  | <b>659.397</b>  | A[10] |
| R[16] | <b>791.445</b>  | 632.391         | <b>624.382</b>  | <b>624.886</b>  | 623.877         | R[9]  |
| R[17] | 869.495         | 547.339         | <b>539.329</b>  | <b>539.833</b>  | 538.825         | R[8]  |
| H[18] | <b>938.025</b>  | 469.288         | <b>461.279</b>  | 461.783         | <b>460.775</b>  | H[7]  |
| R[19] | <b>1016.075</b> | 400.759         | <b>392.749</b>  | 393.253         | <b>392.245</b>  | R[6]  |
| K[20] | <b>1087.130</b> | 322.708         | 314.699         | 315.203         | 314.195         | K[5]  |
| V[21] | <b>1138.665</b> | 253.653         | 245.643         | 246.147         | 245.140         | V[4]  |
| L[22] | <b>1193.207</b> | 202.119         | 194.109         | 194.613         | 193.605         | L[3]  |
| R[23] | <b>1271.257</b> | 145.577         | 137.567         | 138.071         | 137.063         | R[2]  |
| D[24] | 1328.771        | 67.526          | 59.517          | 60.021          | 59.013          | D[1]  |

# sp | P62806 | H4\_MOUSE

[Acetyl]SGRGKGGK <sup>Acetyl</sup><sub>42.01</sub> GLGK <sup>Acetyl</sup><sub>42.01</sub> GGAK <sup>Acetyl</sup><sub>42.01</sub> RHRK <sup>Methyl</sup><sub>14.02</sub> VLRLD

- ▶ fragmentation table for charge state 3+
- ▶ specType=etd
- ▶ score=113.39
- ▶ F112760.dat
- ▶ query=q48966.p1
- ▶ precursor=532.310040
- ▶ chargePrecursor=5
- ▶ itol=0.5

| AA    | c              | y              | z+1            | z+2            | z              | AA    |
|-------|----------------|----------------|----------------|----------------|----------------|-------|
| S[1]  | 49.697         | <b>886.511</b> | 881.171        | 0.672          | 880.835        | S[24] |
| G[2]  | 58.704         | 843.497        | 838.157        | 0.672          | 837.821        | G[23] |
| R[3]  | 120.738        | 824.460        | 819.150        | <b>819.486</b> | 818.814        | R[22] |
| G[4]  | 139.745        | 772.456        | <b>767.116</b> | <b>767.452</b> | 766.780        | G[21] |
| K[5]  | 182.443        | 793.449        | <b>748.109</b> | <b>748.445</b> | 747.773        | K[20] |
| G[6]  | 201.450        | 710.750        | <b>705.411</b> | <b>705.747</b> | <b>705.075</b> | G[19] |
| G[7]  | 220.458        | 691.743        | 686.404        | 686.740        | 686.068        | G[18] |
| K[8]  | 277.159        | <b>672.736</b> | 667.397        | 667.732        | 667.061        | K[17] |
| G[9]  | 296.167        | <b>616.034</b> | <b>616.695</b> | <b>611.031</b> | 610.399        | G[16] |
| L[10] | 313.681        | 597.027        | <b>591.668</b> | <b>592.023</b> | 591.362        | L[15] |
| G[11] | 352.868        | 559.132        | <b>553.993</b> | <b>554.329</b> | 553.657        | G[14] |
| K[12] | 409.570        | 540.325        | 534.988        | <b>535.322</b> | 534.650        | K[13] |
| G[13] | 428.577        | 483.623        | 478.284        | 478.620        | 477.948        | G[12] |
| G[14] | 447.585        | 464.616        | 459.277        | 459.613        | 458.941        | G[11] |
| A[15] | 471.264        | 445.609        | 440.270        | 440.605        | 439.934        | A[10] |
| K[16] | 527.966        | 421.930        | 416.590        | <b>416.926</b> | 416.255        | K[9]  |
| R[17] | <b>579.999</b> | 365.226        | <b>359.869</b> | <b>360.225</b> | 359.553        | R[8]  |
| H[18] | <b>625.686</b> | 313.195        | 307.855        | 308.191        | 307.519        | H[7]  |
| R[19] | 677.719        | 297.508        | 292.169        | 292.505        | 291.833        | R[6]  |
| K[20] | <b>725.089</b> | 215.475        | 210.135        | 210.471        | 209.799        | K[5]  |
| V[21] | <b>758.112</b> | 168.104        | 162.765        | 163.101        | 162.429        | V[4]  |
| L[22] | <b>795.807</b> | 135.082        | 129.742        | 130.078        | 129.406        | L[3]  |
| R[23] | 847.841        | 97.387         | 92.047         | 92.383         | 91.711         | R[2]  |
| D[24] | 886.183        | 45.353         | 40.014         | 40.349         | 39.678         | D[1]  |

# sp | P62806 | H4\_MOUSE

[Acetyl]SGRGKGGK <sup>Acetyl</sup><sub>42.01</sub> GLGK <sup>Acetyl</sup><sub>42.01</sub> GGAK <sup>Acetyl</sup><sub>42.01</sub> RHRK <sup>Methyl</sup><sub>14.02</sub> VLRL

- ▶ fragmentation table for charge state 4+
- ▶ specType=etd
- ▶ score=113.39
- ▶ F112760.dat
- ▶ query=q48966.p1
- ▶ precursor=532.310040
- ▶ chargePrecursor=5
- ▶ itol=0.5

| AA    | c              | y              | z+1            | z+2            | z              | AA    |
|-------|----------------|----------------|----------------|----------------|----------------|-------|
| S[1]  | 37.525         | <b>665.135</b> | 663.130        | 0.755          | 660.878        | S[24] |
| G[2]  | 51.780         | 532.874        | <b>626.870</b> | 0.755          | <b>626.618</b> | G[23] |
| R[3]  | 90.805         | 618.619        | <b>614.614</b> | <b>614.866</b> | <b>614.362</b> | R[22] |
| G[4]  | 105.061        | 579.594        | 575.589        | 575.841        | 575.337        | G[21] |
| K[5]  | 137.084        | 565.338        | 561.334        | 561.586        | 561.082        | K[20] |
| G[6]  | 151.340        | 533.315        | <b>529.310</b> | <b>529.562</b> | <b>529.058</b> | G[19] |
| G[7]  | 165.595        | 519.059        | 515.055        | 515.307        | 514.803        | G[18] |
| K[8]  | 208.121        | 504.804        | <b>500.799</b> | 501.051        | <b>500.547</b> | K[17] |
| G[9]  | 222.377        | 492.278        | 488.273        | 488.525        | 488.021        | G[16] |
| L[10] | 250.048        | 448.022        | <b>444.017</b> | <b>444.269</b> | <b>443.766</b> | L[15] |
| G[11] | 264.303        | 419.751        | 415.746        | 415.998        | 415.494        | G[14] |
| K[12] | 307.430        | 405.496        | 401.491        | 401.743        | 401.239        | K[13] |
| G[13] | 321.685        | 362.969        | 358.965        | 359.217        | 358.713        | G[12] |
| G[14] | 335.940        | 348.714        | 344.709        | 344.961        | 344.457        | G[11] |
| A[15] | 353.700        | 334.459        | 330.454        | 330.706        | 330.202        | A[10] |
| K[16] | 396.226        | 316.699        | 312.695        | 312.947        | 312.443        | K[9]  |
| R[17] | 435.251        | <b>274.173</b> | 270.168        | 270.420        | 269.916        | R[8]  |
| H[18] | 469.516        | 235.148        | 231.143        | 231.395        | 230.891        | H[7]  |
| R[19] | 503.541        | 200.883        | 196.878        | 197.130        | 196.626        | R[6]  |
| K[20] | 544.069        | 161.858        | 157.853        | 158.105        | 157.601        | K[5]  |
| V[21] | 568.836        | 126.330        | 122.325        | 122.577        | 122.073        | V[4]  |
| L[22] | 597.107        | 101.563        | 97.558         | 97.810         | 97.306         | L[3]  |
| R[23] | <b>636.132</b> | 73.292         | 69.287         | 69.539         | 69.035         | R[2]  |
| D[24] | 664.889        | 34.267         | 30.262         | 30.514         | 30.010         | D[1]  |



# sp | P62806 | H4\_MOUSE

[Acetyl]SGRGK<sup>Acetyl</sup><sub>42.01</sub> GGK<sup>Acetyl</sup><sub>42.01</sub> GLGK<sup>Acetyl</sup><sub>42.01</sub> GGAK<sup>Acetyl</sup><sub>42.01</sub> RHRK<sup>Methyl</sup><sub>14.02</sub> VLRLD

- ▶ fragmentation table for charge state 1+
- ▶ specType=etd
- ▶ score=86.58
- ▶ F112760.dat
- ▶ query=q49257\_p1
- ▶ precursor=675.638920
- ▶ chargePrecursor=4
- ▶ itol=0.5

| AA    | c               | y              | z+1             | z+2             | z        | AA    |
|-------|-----------------|----------------|-----------------|-----------------|----------|-------|
| S[1]  | 147.076         | 2699.529       | 2683.510        | 0.000           | 2682.502 | S[24] |
| G[2]  | 204.098         | 2570.488       | 2554.468        | 0.000           | 2553.460 | G[23] |
| R[3]  | <b>358.199</b>  | 2513.465       | 2497.445        | 2498.454        | 2496.438 | R[22] |
| G[4]  | <b>417.220</b>  | 2357.904       | 2341.883        | 2342.953        | 2340.337 | G[21] |
| K[5]  | <b>587.326</b>  | 2300.342       | 2284.333        | 2285.331        | 2283.318 | K[20] |
| G[6]  | <b>644.347</b>  | 2130.237       | 2114.218        | 2115.226        | 2113.210 | G[19] |
| G[7]  | <b>701.369</b>  | 2073.215       | 2057.196        | 2058.204        | 2056.189 | G[18] |
| K[8]  | <b>871.474</b>  | 2016.194       | 2000.175        | 2001.183        | 1999.167 | K[17] |
| G[9]  | <b>928.496</b>  | 1848.088       | <b>1830.069</b> | 1831.077        | 1829.062 | G[16] |
| L[10] | <b>1041.580</b> | 1789.067       | 1773.048        | <b>1774.056</b> | 1772.040 | L[15] |
| G[11] | <b>1098.601</b> | 1675.983       | <b>1659.964</b> | 1660.972        | 1658.956 | G[14] |
| K[12] | <b>1268.707</b> | 1618.961       | 1602.942        | <b>1603.950</b> | 1601.935 | K[13] |
| G[13] | <b>1325.728</b> | 1448.956       | <b>1432.937</b> | 1433.945        | 1431.929 | G[12] |
| G[14] | 1382.750        | 1391.834       | 1375.815        | <b>1376.823</b> | 1374.808 | G[11] |
| A[15] | <b>1453.787</b> | 1334.812       | 1318.794        | 1319.802        | 1317.786 | A[10] |
| R[16] | 1603.893        | 1283.796       | 1267.777        | <b>1268.765</b> | 1266.749 | R[9]  |
| R[17] | <b>1779.994</b> | 1093.670       | 1077.651        | <b>1078.659</b> | 1076.644 | R[8]  |
| H[18] | 1917.053        | 937.569        | <b>921.550</b>  | <b>922.558</b>  | 920.542  | H[7]  |
| R[19] | 2073.194        | 800.510        | <b>784.491</b>  | <b>785.499</b>  | 783.484  | R[6]  |
| K[20] | 2215.264        | <b>644.409</b> | 628.390         | <b>629.398</b>  | 627.382  | K[5]  |
| V[21] | 2314.333        | 502.298        | 486.280         | <b>487.287</b>  | 485.272  | V[4]  |
| L[22] | 2427.817        | 403.230        | 387.211         | <b>388.219</b>  | 386.203  | L[3]  |
| R[23] | 2583.518        | 298.146        | 274.127         | <b>275.135</b>  | 273.119  | R[2]  |
| D[24] | 2698.545        | 134.045        | 118.026         | 119.034         | 117.018  | D[1]  |

# sp | P62806 | H4\_MOUSE

[Acetyl]SGRGK<sub>42.01</sub><sup>Acetyl</sup> GGK<sub>42.01</sub><sup>Acetyl</sup> GLGK<sub>42.01</sub><sup>Acetyl</sup> GGAK<sub>42.01</sub><sup>Acetyl</sup> RHRK<sub>14.02</sub><sup>Methyl</sup> VLRLD

- ▶ fragmentation table for charge state 2+
- ▶ specType=etd
- ▶ score=86.58
- ▶ F112760.dat
- ▶ query=q49257\_p1
- ▶ precursor=675.638920
- ▶ chargePrecursor=4
- ▶ itol=0.5

| AA    | c               | y              | z+1             | z+2             | z               | AA    |
|-------|-----------------|----------------|-----------------|-----------------|-----------------|-------|
| S[1]  | 74.042          | 1350.268       | 1342.259        | 0.504           | 1341.755        | S[24] |
| G[2]  | 102.553         | 1285.747       | 1277.737        | 0.504           | 1277.233        | G[23] |
| R[3]  | 180.603         | 1257.236       | <b>1249.227</b> | 1249.731        | <b>1248.723</b> | R[22] |
| G[4]  | 209.114         | 1179.885       | <b>1171.176</b> | <b>1171.680</b> | 1170.677        | G[21] |
| K[5]  | 294.167         | 1150.675       | 1142.665        | <b>1143.169</b> | 1142.161        | K[20] |
| G[6]  | 322.677         | 1065.623       | 1057.613        | 1058.117        | <b>1057.109</b> | G[19] |
| G[7]  | 351.188         | 1037.111       | <b>1029.102</b> | <b>1029.606</b> | 1028.598        | G[18] |
| K[8]  | 435.241         | 1008.601       | <b>1000.591</b> | <b>1001.095</b> | 1000.087        | K[17] |
| G[9]  | 464.752         | 923.549        | <b>915.538</b>  | <b>916.042</b>  | 915.034         | G[16] |
| L[10] | 511.294         | <b>895.037</b> | <b>887.028</b>  | 887.532         | <b>886.524</b>  | L[15] |
| Q[11] | 549.804         | 838.065        | <b>830.486</b>  | <b>830.990</b>  | 829.982         | Q[14] |
| K[12] | 634.857         | 809.984        | <b>801.975</b>  | <b>802.479</b>  | 801.471         | K[13] |
| G[13] | 663.368         | 724.931        | <b>716.922</b>  | <b>717.426</b>  | 716.418         | G[12] |
| G[14] | 691.879         | 696.421        | <b>688.411</b>  | <b>688.915</b>  | 687.907         | G[11] |
| A[15] | 727.391         | 667.910        | 659.901         | 660.405         | 659.397         | A[10] |
| R[16] | 812.450         | 632.901        | 624.887         | <b>624.886</b>  | 623.879         | R[9]  |
| R[17] | <b>890.500</b>  | 547.139        | 539.129         | <b>539.833</b>  | 538.825         | R[8]  |
| H[18] | <b>959.030</b>  | 469.288        | 461.279         | 461.783         | 460.775         | H[7]  |
| R[19] | 1037.680        | 400.759        | 392.749         | 393.253         | 392.245         | R[6]  |
| K[20] | <b>1108.136</b> | 322.708        | 314.699         | 315.203         | 314.195         | K[5]  |
| V[21] | <b>1157.670</b> | 251.693        | 243.683         | 244.187         | 243.180         | V[4]  |
| L[22] | <b>1214.212</b> | 202.119        | 194.109         | 194.613         | 193.605         | L[3]  |
| R[23] | <b>1292.263</b> | 145.577        | 137.567         | 138.071         | 137.063         | R[2]  |
| D[24] | 1349.776        | 67.526         | 59.517          | 60.021          | 59.013          | D[1]  |

# sp | P62806 | H4\_MOUSE

[Acetyl]SGRAcetyl  
42.01GGKAcetyl  
42.01GLGKAcetyl  
42.01GGAKAcetyl  
42.01RHRKMethyl  
14.02VLRD

- ▶ fragmentation table for charge state 3+
- ▶ specType=etd
- ▶ score=86.58
- ▶ F112760.dat
- ▶ query=q49257.p1
- ▶ precursor=675.638920
- ▶ chargePrecursor=4
- ▶ itol=0.5

| AA    | c              | y              | z+1            | z+2            | z       | AA    |
|-------|----------------|----------------|----------------|----------------|---------|-------|
| S[1]  | 49.597         | <b>900.514</b> | <b>895.175</b> | 0.572          | 594.839 | S[24] |
| G[2]  | 58.704         | 857.502        | 852.151        | 0.572          | 851.825 | G[23] |
| R[3]  | 120.738        | 838.493        | <b>833.154</b> | <b>833.489</b> | 832.818 | R[22] |
| G[4]  | 139.745        | 786.459        | 781.120        | 781.456        | 780.784 | G[21] |
| K[5]  | 196.447        | 767.452        | 762.113        | 762.449        | 761.777 | K[20] |
| G[6]  | 215.454        | 710.750        | 705.411        | 705.747        | 705.075 | G[19] |
| G[7]  | 234.461        | 691.743        | 686.404        | 686.740        | 686.068 | G[18] |
| K[8]  | 291.163        | 672.736        | 667.397        | 667.732        | 667.061 | K[17] |
| G[9]  | 310.170        | 616.034        | 610.695        | 611.031        | 610.359 | G[16] |
| L[10] | 347.895        | 597.027        | 591.688        | 592.023        | 591.352 | L[15] |
| G[11] | 366.872        | 559.332        | 553.993        | 554.329        | 553.657 | G[14] |
| K[12] | 423.574        | <b>540.325</b> | 534.986        | 535.322        | 534.650 | K[13] |
| G[13] | 442.581        | 483.623        | 478.284        | 478.620        | 477.948 | G[12] |
| G[14] | 461.588        | 464.616        | 459.277        | 459.613        | 458.941 | G[11] |
| A[15] | 485.267        | 445.609        | 440.270        | 440.605        | 439.934 | A[10] |
| K[16] | 541.969        | 421.930        | 416.590        | <b>416.926</b> | 416.255 | K[9]  |
| R[17] | 594.003        | 365.228        | <b>359.889</b> | <b>360.225</b> | 359.553 | R[8]  |
| H[18] | 639.689        | 313.195        | 307.855        | 308.191        | 307.519 | H[7]  |
| R[19] | 691.723        | 267.508        | 262.169        | 262.505        | 261.833 | R[6]  |
| K[20] | 739.093        | 215.475        | 210.135        | 210.471        | 209.799 | K[5]  |
| V[21] | 772.116        | 168.194        | 162.855        | 163.191        | 162.519 | V[4]  |
| L[22] | 820.810        | 135.082        | 129.742        | 130.078        | 129.406 | L[3]  |
| R[23] | <b>861.844</b> | 97.387         | 92.047         | 92.383         | 91.711  | R[2]  |
| D[24] | 900.186        | 45.353         | 40.014         | 40.349         | 39.678  | D[1]  |



# sp | P22752 | H2A1\_MOUSE

SHHKAKGK Acetyl  
42.01

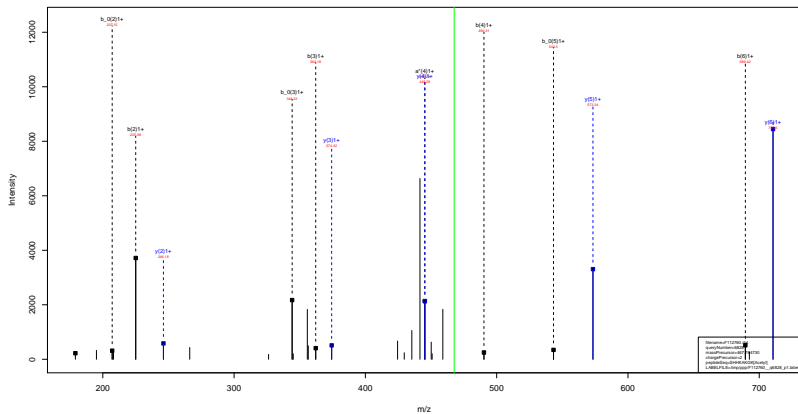

# sp | P22752 | H2A1\_MOUSE

SHHKAKGK<sup>Acetyl</sup>  
42.01

- ▶ fragmentation table for charge state 1+
- ▶ specType=cid
- ▶ score=39.68
- ▶ F112760.dat
- ▶ query=q6828.p1
- ▶ precursor=467.764730
- ▶ chargePrecursor=2
- ▶ itol=0.5

| AA  | a       | a*             | a,b            | b              | b*      | b,b            | y              | y*      | y,b     | AA  |
|-----|---------|----------------|----------------|----------------|---------|----------------|----------------|---------|---------|-----|
| S 1 | 101.044 | 0.000          | 42.131         | 66.133         | 0.000   | 61.226         | 334.522        | 311.493 | 348.511 | S 8 |
| H 2 | 107.103 | 0.000          | <b>179.063</b> | <b>225.068</b> | 0.000   | <b>207.068</b> | 347.490        | 330.451 | 0.000   | H 7 |
| H 3 | 134.162 | 0.000          | 116.151        | <b>362.157</b> | 0.000   | <b>344.147</b> | <b>710.431</b> | 693.404 | 0.000   | H 6 |
| K 4 | 402.257 | <b>445.231</b> | 444.250        | <b>490.252</b> | 473.226 | 472.242        | <b>573.372</b> | 556.345 | 0.000   | K 5 |
| A 5 | 331.244 | 316.258        | 315.261        | 365.267        | 344.261 | <b>343.270</b> | <b>445.277</b> | 428.250 | 0.000   | A 4 |
| T 6 | 663.309 | 644.311        | 643.313        | <b>649.384</b> | 672.366 | 671.374        | <b>374.240</b> | 357.213 | 0.000   | T 3 |
| G 7 | 718.411 | 701.404        | 700.400        | 746.405        | 729.379 | 728.395        | <b>246.145</b> | 229.118 | 0.000   | G 2 |
| K 8 | 488.516 | 471.469        | 470.509        | 518.511        | 499.485 | 498.501        | 189.123        | 172.099 | 0.000   | K 1 |

# sp | P22752 | H2A1\_MOUSE

SHHKAKGK Acetyl  
42.01

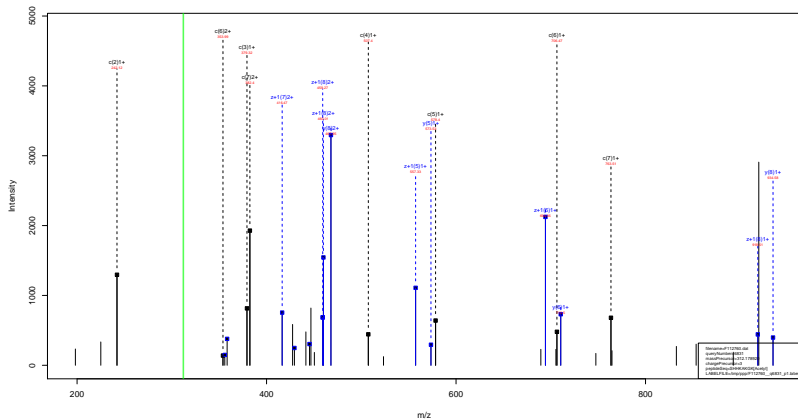

# sp | P22752 | H2A1\_MOUSE

SHHKAKGK<sup>Acetyl</sup>  
42.01

- ▶ fragmentation table for charge state 1+
- ▶ specType=etd
- ▶ score=41.21
- ▶ F112760.dat
- ▶ query=q6831\_p1
- ▶ precursor=312.178920
- ▶ chargePrecursor=3
- ▶ itol=0.5

| AA   | c              | y              | z+1            | z+2     | z       | AA   |
|------|----------------|----------------|----------------|---------|---------|------|
| S[1] | 105.066        | <b>934.522</b> | <b>916.503</b> | 0.000   | 917.495 | S[8] |
| H[2] | <b>242.125</b> | 847.490        | 831.471        | 0.000   | 830.463 | H[7] |
| H[3] | <b>379.184</b> | <b>710.431</b> | <b>694.412</b> | 0.000   | 693.404 | H[6] |
| K[4] | <b>507.279</b> | <b>573.372</b> | <b>557.353</b> | 558.361 | 556.345 | K[5] |
| A[5] | <b>578.316</b> | <b>445.277</b> | <b>429.258</b> | 430.266 | 428.250 | A[4] |
| K[6] | <b>706.411</b> | 374.340        | <b>358.221</b> | 359.229 | 357.213 | K[3] |
| G[7] | <b>763.432</b> | 246.143        | 230.126        | 231.134 | 229.118 | G[2] |
| K[8] | 933.538        | 189.123        | 173.105        | 174.112 | 172.097 | K[1] |

# sp | P22752 | H2A1\_MOUSE

SHHKAKGK<sup>Acetyl</sup>  
42.01

- ▶ fragmentation table for charge state 2+
- ▶ specType=etd
- ▶ score=41.21
- ▶ F112760.dat
- ▶ query=q6831\_p1
- ▶ precursor=312.178920
- ▶ chargePrecursor=3
- ▶ itol=0.5

| AA   | c              | y              | z+1            | z+2     | z              | AA   |
|------|----------------|----------------|----------------|---------|----------------|------|
| S[1] | 93.037         | <b>467.765</b> | <b>459.755</b> | 0.504   | <b>459.251</b> | S[8] |
| H[2] | 121.566        | 424.248        | <b>416.239</b> | 0.504   | 415.735        | H[7] |
| H[3] | 190.095        | <b>355.719</b> | 347.710        | 0.504   | 347.206        | H[6] |
| K[4] | 254.143        | 287.190        | 279.180        | 279.684 | 278.676        | K[5] |
| A[5] | 289.662        | 223.142        | 215.133        | 215.637 | 214.629        | A[4] |
| K[6] | <b>353.709</b> | 187.624        | 179.614        | 180.118 | 179.110        | K[3] |
| G[7] | <b>382.220</b> | 123.576        | 115.567        | 116.071 | 115.063        | G[2] |
| K[8] | 467.272        | 95.065         | 87.056         | 87.560  | 86.552         | K[1] |

# sp | P22752 | H2A1\_MOUSE

SHHKAK Acetyl GK  
42.01

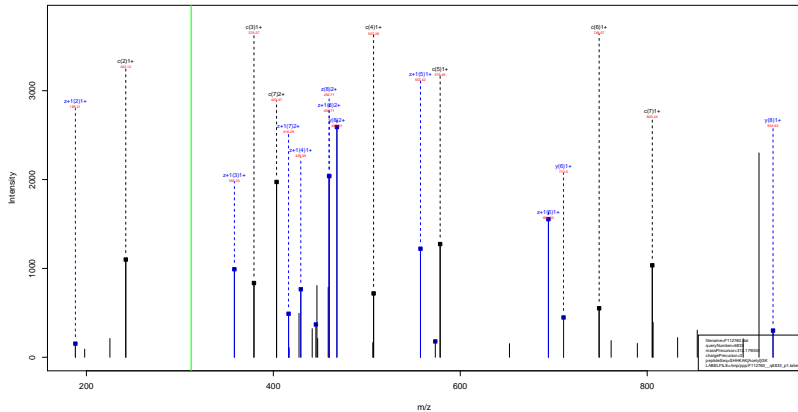

# sp | P22752 | H2A1\_MOUSE

SHHKAK<sup>Acetyl</sup> GK  
42.01

- ▶ fragmentation table for charge state 1+
- ▶ specType=etd
- ▶ score=40.10
- ▶ F112760.dat
- ▶ query=q6833.p1
- ▶ precursor=312.179000
- ▶ chargePrecursor=3
- ▶ itol=0.5

| AA   | c              | y              | z+1            | z+2     | z       | AA   |
|------|----------------|----------------|----------------|---------|---------|------|
| S[1] | 105.066        | <b>934.522</b> | 918.503        | 0.000   | 917.495 | S[8] |
| H[2] | <b>242.125</b> | 847.490        | 831.471        | 0.000   | 830.463 | H[7] |
| H[3] | <b>379.184</b> | <b>710.431</b> | <b>694.412</b> | 0.000   | 693.404 | H[6] |
| K[4] | <b>507.279</b> | <b>573.372</b> | <b>557.353</b> | 558.361 | 556.345 | K[5] |
| A[5] | <b>578.316</b> | <b>445.277</b> | <b>429.258</b> | 430.266 | 428.250 | A[4] |
| K[6] | <b>748.421</b> | 374.240        | <b>358.221</b> | 359.229 | 357.213 | K[3] |
| G[7] | <b>805.443</b> | 204.134        | <b>188.116</b> | 189.123 | 187.108 | G[2] |
| K[8] | 933.538        | 147.113        | 131.094        | 132.102 | 130.086 | K[1] |

# sp | P22752 | H2A1\_MOUSE

SHHKAK<sup>Acetyl</sup> GK  
42.01

- ▶ fragmentation table for charge state 2+
- ▶ specType=etd
- ▶ score=40.10
- ▶ F112760.dat
- ▶ query=q6833.p1
- ▶ precursor=312.179000
- ▶ chargePrecursor=3
- ▶ itol=0.5

| AA   | c              | y              | z+1            | z+2     | z              | AA   |
|------|----------------|----------------|----------------|---------|----------------|------|
| S[1] | 93.037         | <b>467.765</b> | <b>459.755</b> | 0.504   | <b>459.251</b> | S[8] |
| H[2] | 121.566        | 424.248        | <b>416.239</b> | 0.504   | 415.735        | H[7] |
| H[3] | 190.095        | 355.719        | 347.710        | 0.504   | 347.206        | H[6] |
| K[4] | 254.143        | 287.190        | 279.180        | 279.684 | 278.676        | K[5] |
| A[5] | 289.662        | 223.142        | 215.133        | 215.637 | 214.629        | A[4] |
| K[6] | 374.714        | 187.624        | 179.614        | 190.118 | 179.110        | K[3] |
| G[7] | <b>403.225</b> | 102.571        | 94.561         | 95.065  | 94.057         | G[2] |
| K[8] | 467.272        | 74.060         | 66.051         | 66.555  | 65.547         | K[1] |



# sp | P22752 | H2A1\_MOUSE

SHHKAKGK Acetyl  
42.01

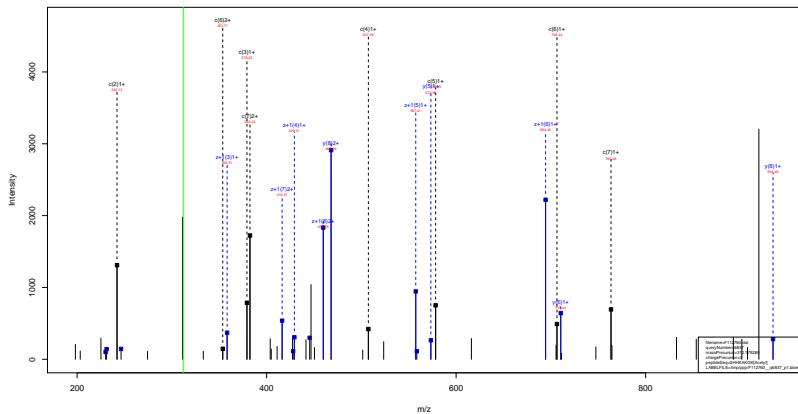

# sp | P22752 | H2A1\_MOUSE

SHHKAKGK<sup>Acetyl</sup>  
42.01

- ▶ fragmentation table for charge state 1+
- ▶ specType=etd
- ▶ score=36.09
- ▶ F112760.dat
- ▶ query=q6837.p1
- ▶ precursor=312.179280
- ▶ chargePrecursor=3
- ▶ itol=0.5

| AA   | c              | y              | z+1            | z+2            | z              | AA   |
|------|----------------|----------------|----------------|----------------|----------------|------|
| S[1] | 105.066        | <b>934.522</b> | 918.503        | 0.000          | 917.400        | S[8] |
| H[2] | <b>242.125</b> | 847.490        | 831.471        | 0.000          | 830.463        | H[7] |
| H[3] | <b>379.184</b> | <b>710.431</b> | <b>694.412</b> | 0.000          | 693.404        | H[6] |
| K[4] | <b>507.279</b> | <b>573.372</b> | <b>557.353</b> | <b>558.361</b> | 556.345        | K[5] |
| A[5] | <b>578.316</b> | <b>445.277</b> | <b>429.258</b> | 430.266        | <b>428.250</b> | A[4] |
| R[6] | <b>706.411</b> | 374.240        | <b>358.221</b> | 359.229        | 357.213        | R[3] |
| G[7] | <b>763.432</b> | <b>246.145</b> | <b>230.126</b> | <b>231.134</b> | 229.118        | G[2] |
| R[8] | 933.538        | 189.123        | 173.105        | 174.112        | 172.097        | R[1] |

# sp | P22752 | H2A1\_MOUSE

SHHKAKGK<sup>Acetyl</sup>  
42.01

- ▶ fragmentation table for charge state 2+
- ▶ specType=etd
- ▶ score=36.09
- ▶ F112760.dat
- ▶ query=q6837\_p1
- ▶ precursor=312.179280
- ▶ chargePrecursor=3
- ▶ itol=0.5

| AA   | c              | y              | z+1            | z+2     | z       | AA   |
|------|----------------|----------------|----------------|---------|---------|------|
| S[1] | 53.037         | <b>467.765</b> | <b>459.755</b> | 0.504   | 459.251 | S[8] |
| H[2] | 121.566        | 424.248        | <b>416.239</b> | 0.504   | 415.735 | H[7] |
| H[3] | 190.095        | 355.719        | 347.710        | 0.504   | 347.206 | H[6] |
| K[4] | 254.143        | 287.190        | 279.180        | 279.684 | 278.676 | K[5] |
| A[5] | 289.662        | 223.142        | 215.133        | 215.637 | 214.629 | A[4] |
| K[6] | <b>353.709</b> | 187.624        | 179.614        | 180.118 | 179.110 | K[3] |
| G[7] | <b>382.220</b> | 123.576        | 115.567        | 116.071 | 115.063 | G[2] |
| K[8] | 467.272        | 95.063         | 87.056         | 87.560  | 86.552  | K[1] |



# sp | Q8CGP7 | H2A1K\_MOUSE

THHKAK<sup>Acetyl</sup> GK  
42.01

- ▶ fragmentation table for charge state 1+
- ▶ specType=etd
- ▶ score=39.16
- ▶ F112760.dat
- ▶ query=q7417.p1
- ▶ precursor=316.850430
- ▶ chargePrecursor=3
- ▶ itol=0.5

| AA   | c              | y              | z+1            | z+2            | z              | AA   |
|------|----------------|----------------|----------------|----------------|----------------|------|
| T[1] | 159.082        | <b>948.537</b> | 932.519        | 0.000          | 931.511        | T[8] |
| H[2] | <b>256.140</b> | 847.490        | 831.471        | 0.000          | 830.463        | H[7] |
| H[3] | <b>393.199</b> | <b>710.431</b> | <b>694.412</b> | 0.000          | 693.404        | H[6] |
| K[4] | <b>521.294</b> | <b>573.372</b> | <b>557.353</b> | <b>558.361</b> | 556.345        | K[5] |
| A[5] | <b>592.331</b> | 445.277        | <b>429.258</b> | 430.266        | <b>428.250</b> | A[4] |
| R[6] | <b>762.437</b> | 374.240        | <b>358.221</b> | 359.229        | 357.213        | R[3] |
| G[7] | <b>819.458</b> | 204.134        | <b>188.116</b> | 189.123        | 187.108        | G[2] |
| R[8] | 947.553        | 147.113        | 131.094        | 132.102        | 130.086        | R[1] |

# sp | Q8CGP7 | H2A1K\_MOUSE

THHKAK<sup>Acetyl</sup> GK  
42.01

- ▶ fragmentation table for charge state 2+
- ▶ specType=etd
- ▶ score=39.16
- ▶ F112760.dat
- ▶ query=q7417.p1
- ▶ precursor=316.850430
- ▶ chargePrecursor=3
- ▶ itol=0.5

| AA    | c              | y              | z+1            | z+2     | z              | AA    |
|-------|----------------|----------------|----------------|---------|----------------|-------|
| T   1 | 60.044         | <b>474.772</b> | <b>466.763</b> | 0.504   | <b>466.259</b> | T   8 |
| H   2 | 128.574        | 424.248        | <b>416.239</b> | 0.504   | 415.735        | H   7 |
| H   3 | 197.103        | 355.719        | 347.710        | 0.504   | 347.206        | H   6 |
| K   4 | 261.151        | 287.190        | 279.180        | 279.684 | 278.676        | K   5 |
| A   5 | 298.669        | 223.142        | 215.133        | 215.637 | 214.629        | A   4 |
| K   6 | 381.722        | <b>187.624</b> | 179.614        | 190.118 | 179.110        | K   3 |
| G   7 | <b>410.233</b> | 102.571        | 94.561         | 95.065  | 94.057         | G   2 |
| K   8 | 474.280        | 74.060         | 66.051         | 66.555  | 65.547         | K   1 |

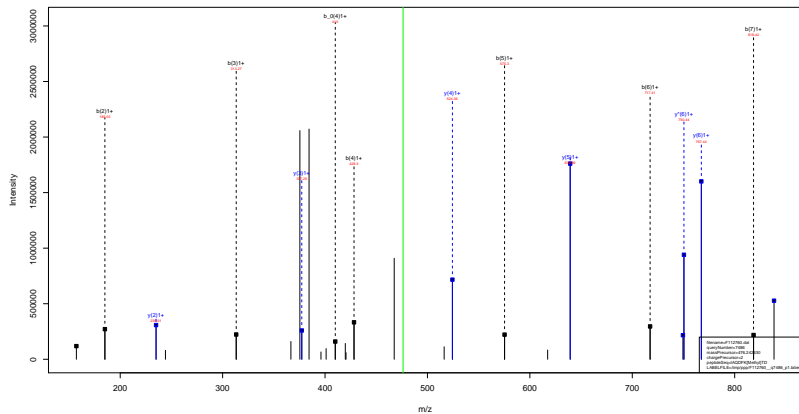

# sp | P68433 | H31\_MOUSE

IAQDFK<sup>Methyl</sup> TD  
14.02

- ▶ fragmentation table for charge state 1+
- ▶ specType=cid
- ▶ score=60.13
- ▶ F112760.dat
- ▶ query=q7486\_p1
- ▶ precursor=476.242630
- ▶ chargePrecursor=2
- ▶ itol=0.5

| AA  | a              | a*      | a <sub>0</sub> | b              | b*      | b <sub>0</sub> | γ              | γ*             | γ <sub>0</sub> | AA  |
|-----|----------------|---------|----------------|----------------|---------|----------------|----------------|----------------|----------------|-----|
| T 1 | 88.098         | 0.000   | 0.000          | 114.191        | 0.000   | 0.000          | 0.000          | 0.000          | 0.000          | T 1 |
| A 2 | <b>157.134</b> | 0.000   | 0.000          | <b>185.128</b> | 0.000   | 0.000          | <b>0.000</b>   | <b>0.000</b>   | <b>0.000</b>   | A 2 |
| Q 3 | 285.192        | 286.186 | 0.000          | <b>313.187</b> | 286.186 | 0.000          | <b>767.357</b> | <b>750.330</b> | <b>749.346</b> | Q 3 |
| D 4 | 400.219        | 393.193 | 392.209        | <b>426.214</b> | 411.197 | 0.000          | <b>410.203</b> | <b>639.298</b> | 622.272        | D 4 |
| F 5 | 547.287        | 540.261 | 529.271        | <b>575.282</b> | 558.256 | 557.272        | <b>524.271</b> | 507.245        | 506.261        | F 5 |
| R 6 | 689.356        | 672.372 | 671.368        | <b>717.363</b> | 700.366 | 699.352        | <b>377.303</b> | 360.177        | 359.183        | R 6 |
| T 7 | 790.446        | 773.419 | 772.435        | <b>818.441</b> | 801.414 | 800.430        | <b>235.092</b> | 0.000          | 217.082        | T 7 |
| G 8 | 905.473        | 888.446 | 887.462        | <b>913.468</b> | 916.441 | 915.457        | 138.040        | 0.000          | 116.034        | G 8 |





# sp | P68433 | H31\_MOUSE

IAQDFK<sup>Methyl</sup> TD  
14.02

- ▶ fragmentation table for charge state 1+
- ▶ specType=cid
- ▶ score=35.51
- ▶ F112760.dat
- ▶ query=q7488\_p1
- ▶ precursor=476.242700
- ▶ chargePrecursor=2
- ▶ itol=0.5

| AA  | a              | a*      | a,d     | b              | b*             | b,d            | y              | y*             | y,d            | AA  |
|-----|----------------|---------|---------|----------------|----------------|----------------|----------------|----------------|----------------|-----|
| T 1 | 46.098         | 0.000   | 0.000   | 114.098        | 0.000          | 0.000          | 901.416        | 109.404        | 114.098        | T 1 |
| A 2 | <b>157.134</b> | 0.000   | 0.000   | <b>185.128</b> | 0.000          | 0.000          | <b>838.384</b> | 821.384        | 820.384        | A 2 |
| Q 3 | 286.192        | 286.186 | 0.000   | <b>313.187</b> | 296.160        | 0.000          | <b>767.357</b> | <b>750.330</b> | <b>749.346</b> | Q 3 |
| G 4 | 400.219        | 393.193 | 362.209 | <b>428.214</b> | <b>411.187</b> | <b>410.203</b> | <b>636.298</b> | 622.272        | 621.288        | G 4 |
| F 5 | 547.287        | 540.261 | 529.277 | <b>575.282</b> | 558.256        | 557.272        | <b>524.271</b> | 507.245        | 496.257        | F 5 |
| R 6 | 689.356        | 672.332 | 671.366 | <b>717.363</b> | 700.369        | 699.382        | <b>377.263</b> | 360.177        | <b>359.193</b> | R 6 |
| T 7 | 790.446        | 775.419 | 772.435 | <b>818.441</b> | 801.414        | 800.430        | <b>235.092</b> | 0.000          | <b>217.082</b> | T 7 |
| G 8 | 905.473        | 888.449 | 887.462 | 933.468        | 916.441        | 915.457        | 134.040        | 0.000          | 116.034        | G 8 |

# sp | P62806 | H4\_MOUSE

[Acetyl]SGRGKGGKGLGKGGAKRHR Dimethyl K Methyl VL  
28.03 14.02

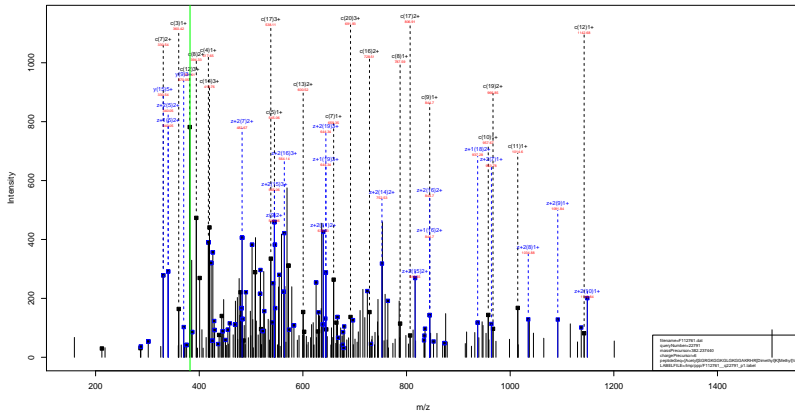

# sp | P62806 | H4\_MOUSE

[Acetyl]SGRGKGGKGLGKGGAKRHR <sup>Dimethyl</sup>K <sup>Methyl</sup>VL  
28.03 14.02

- ▶ fragmentation table for charge state 1+
- ▶ specType=etd
- ▶ score=38.40
- ▶ F112761.dat
- ▶ query=q22791\_p1
- ▶ precursor=382.237440
- ▶ chargePrecursor=6
- ▶ itol=0.5

| AA    | c               | y        | z+1            | z+2             | z              | AA    |
|-------|-----------------|----------|----------------|-----------------|----------------|-------|
| S[1]  | 147.076         | 2288.390 | 2272.171       | 0.000           | 2271.361       | S[2]  |
| G[2]  | 204.098         | 2159.347 | 2143.328       | 0.000           | 2142.321       | G[2]  |
| R[3]  | <b>360.199</b>  | 2102.326 | 2086.307       | 2087.315        | 2085.299       | R[20] |
| G[4]  | <b>417.220</b>  | 1946.225 | 1930.206       | 1931.214        | 1929.198       | G[19] |
| K[5]  | <b>545.315</b>  | 1839.203 | 1873.184       | 1874.192        | 1872.177       | K[18] |
| G[6]  | <b>602.337</b>  | 1761.108 | 1745.089       | 1746.097        | 1744.082       | G[17] |
| G[7]  | <b>659.358</b>  | 1704.087 | 1688.068       | 1689.076        | 1687.060       | G[16] |
| K[8]  | <b>787.453</b>  | 1647.065 | 1631.047       | 1632.054        | 1630.039       | K[15] |
| G[9]  | <b>844.475</b>  | 1518.970 | 1502.952       | 1503.959        | 1501.944       | G[14] |
| L[10] | <b>957.559</b>  | 1461.949 | 1445.930       | 1446.938        | 1444.923       | L[13] |
| G[11] | <b>1014.580</b> | 1348.865 | 1332.846       | 1333.854        | 1331.838       | G[12] |
| K[12] | <b>1142.675</b> | 1291.843 | 1275.825       | 1276.832        | 1274.817       | K[11] |
| G[13] | 1199.697        | 1163.748 | 1147.730       | <b>1148.737</b> | 1146.722       | G[10] |
| G[14] | 1256.718        | 1106.727 | 1090.708       | <b>1091.716</b> | 1089.701       | G[9]  |
| A[15] | 1327.755        | 1049.705 | 1033.687       | <b>1034.695</b> | 1032.679       | A[8]  |
| K[16] | 1455.830        | 979.668  | 963.650        | <b>963.657</b>  | 961.642        | K[7]  |
| R[17] | 1611.951        | 850.573  | <b>834.555</b> | <b>835.562</b>  | <b>833.547</b> | R[6]  |
| H[18] | 1749.010        | 694.472  | <b>678.454</b> | <b>679.461</b>  | <b>677.446</b> | H[5]  |
| R[19] | 1933.143        | 557.413  | <b>541.395</b> | <b>542.402</b>  | 540.387        | R[4]  |
| K[20] | 2075.253        | 373.281  | 387.262        | 388.270         | 386.254        | K[3]  |
| V[21] | 2174.322        | 238.170  | 239.159        | 238.159         | 234.144        | V[2]  |
| L[22] | 2287.406        | 132.102  | 138.081        | 137.091         | 135.075        | L[1]  |

# sp | P62806 | H4\_MOUSE

[Acetyl]SGRGKGGKGLGKGGAKRHR Dimethyl K Methyl VL  
28.03 14.02

- ▶ fragmentation table for charge state 2+
- ▶ specType=etd
- ▶ score=38.40
- ▶ F112761.dat
- ▶ query=q22791\_p1
- ▶ precursor=382.237440
- ▶ chargePrecursor=6
- ▶ itol=0.5

| AA    | c              | y              | z+1             | z+2            | z              | AA    |
|-------|----------------|----------------|-----------------|----------------|----------------|-------|
| S[1]  | 74.042         | 1144.099       | <b>1136.689</b> | 0.504          | 1136.185       | S[2]  |
| G[2]  | 102.553        | 1080.177       | 1072.188        | 0.504          | 1071.664       | G[3]  |
| R[3]  | 180.603        | 1051.667       | 1043.657        | 1044.161       | 1043.153       | R[20] |
| G[4]  | 209.114        | 973.616        | 965.607         | 966.111        | 965.103        | G[19] |
| K[5]  | 273.201        | 945.105        | <b>937.096</b>  | <b>937.600</b> | 936.592        | K[18] |
| G[6]  | <b>301.672</b> | 881.058        | <b>873.048</b>  | <b>873.552</b> | 872.544        | G[17] |
| G[7]  | <b>330.183</b> | <b>852.547</b> | <b>844.538</b>  | <b>845.042</b> | 844.034        | G[16] |
| K[8]  | <b>364.230</b> | 824.036        | 816.027         | <b>816.531</b> | 815.523        | K[15] |
| G[9]  | <b>422.741</b> | 759.989        | 751.979         | <b>752.483</b> | 751.476        | G[14] |
| L[10] | <b>479.283</b> | <b>731.478</b> | 723.469         | <b>723.973</b> | 722.965        | L[13] |
| G[11] | <b>507.794</b> | 674.936        | <b>666.927</b>  | <b>667.431</b> | <b>666.423</b> | G[12] |
| K[12] | <b>571.841</b> | 646.425        | <b>638.416</b>  | <b>638.920</b> | <b>637.912</b> | K[11] |
| G[13] | <b>600.352</b> | <b>582.378</b> | 574.368         | 574.872        | 573.865        | G[10] |
| G[14] | <b>628.863</b> | <b>553.867</b> | <b>545.858</b>  | <b>546.362</b> | <b>545.354</b> | G[9]  |
| A[15] | <b>664.381</b> | <b>525.356</b> | <b>517.347</b>  | <b>517.851</b> | 516.843        | A[8]  |
| K[16] | <b>728.429</b> | <b>489.838</b> | <b>481.828</b>  | <b>482.332</b> | 481.325        | K[7]  |
| R[17] | <b>806.479</b> | <b>425.790</b> | <b>417.781</b>  | 418.285        | <b>417.277</b> | R[6]  |
| H[18] | 875.009        | 347.740        | <b>339.730</b>  | <b>340.234</b> | 339.226        | H[5]  |
| R[19] | <b>967.075</b> | 279.210        | 271.201         | 271.705        | 270.697        | R[4]  |
| K[20] | 1038.130       | 187.144        | 179.135         | 179.639        | 178.631        | K[3]  |
| V[21] | 1087.669       | 116.689        | 108.079         | 108.583        | 107.576        | V[2]  |
| L[22] | 1144.207       | 66.355         | 58.345          | 58.849         | 58.341         | L[1]  |

# sp | P62806 | H4\_MOUSE

[Acetyl]SGRGKGGKGLGKGGAKRHR <sup>Dimethyl</sup>K <sup>Methyl</sup>VL  
28.03 14.02

- ▶ fragmentation table for charge state 3+
- ▶ specType=etd
- ▶ score=38.40
- ▶ F112761.dat
- ▶ query=q22791\_p1
- ▶ precursor=382.237440
- ▶ chargePrecursor=6
- ▶ itol=0.5

| AA   | c              | y              | z+1            | z+2            | z              | AA   |
|------|----------------|----------------|----------------|----------------|----------------|------|
| S 1  | 49.697         | <b>763.468</b> | 758.129        | 0.672          | 757.793        | S 22 |
| G 2  | 68.704         | 720.454        | 715.114        | 0.672          | 714.778        | G 21 |
| R 3  | 120.738        | 701.447        | <b>696.107</b> | <b>696.443</b> | 695.771        | R 20 |
| G 4  | 139.745        | 649.413        | <b>644.073</b> | <b>644.409</b> | <b>643.738</b> | G 19 |
| K 5  | 182.443        | <b>630.406</b> | <b>625.066</b> | <b>625.402</b> | 624.730        | K 18 |
| G 6  | 201.450        | 587.708        | <b>582.368</b> | <b>582.704</b> | 582.032        | G 17 |
| G 7  | 239.456        | 598.700        | <b>583.361</b> | <b>583.697</b> | <b>583.025</b> | G 16 |
| K 8  | 253.156        | 549.693        | 544.354        | <b>544.690</b> | 544.018        | K 15 |
| G 9  | 282.163        | 506.995        | <b>501.655</b> | <b>501.991</b> | 501.319        | G 14 |
| L 10 | 319.858        | 497.988        | <b>482.648</b> | <b>482.984</b> | <b>482.312</b> | L 13 |
| G 11 | 338.865        | <b>450.293</b> | <b>444.954</b> | <b>445.289</b> | 444.618        | G 12 |
| K 12 | <b>381.563</b> | 431.286        | <b>425.946</b> | <b>426.282</b> | <b>425.610</b> | K 11 |
| G 13 | <b>400.570</b> | 388.589        | 383.249        | 383.584        | 382.912        | G 10 |
| G 14 | <b>419.578</b> | <b>369.580</b> | 364.241        | 364.577        | 363.905        | G 9  |
| A 15 | <b>443.257</b> | 350.573        | 345.234        | 345.570        | 344.898        | A 8  |
| K 16 | <b>485.955</b> | 326.994        | 321.655        | 321.991        | 321.319        | K 7  |
| R 17 | <b>537.989</b> | 294.196        | 278.857        | 279.192        | 278.520        | R 6  |
| H 18 | 553.675        | 232.162        | 226.823        | 227.159        | 226.487        | H 5  |
| R 19 | <b>645.052</b> | 186.476        | 181.136        | 181.472        | 180.800        | R 4  |
| K 20 | <b>692.423</b> | 125.098        | 119.759        | 120.095        | 119.423        | K 3  |
| V 21 | 725.445        | 77.728         | 72.389         | 72.725         | 72.053         | V 2  |
| L 22 | 763.140        | 44.705         | 39.366         | 39.702         | 39.030         | L 1  |

# sp | P62806 | H4\_MOUSE

[Acetyl]SGRGKGGKGLGKGGAKRHR <sup>Dimethyl</sup>K <sup>Methyl</sup>VL  
28.03 14.02

- ▶ fragmentation table for charge state 4+
- ▶ specType=etd
- ▶ score=38.40
- ▶ F112761.dat
- ▶ query=q22791\_p1
- ▶ precursor=382.237440
- ▶ chargePrecursor=6
- ▶ itol=0.5

| AA   | c              | y              | z+1            | z+2            | z              | AA   |
|------|----------------|----------------|----------------|----------------|----------------|------|
| S 1  | 37.525         | <b>572.053</b> | 568.849        | 0.755          | 568.996        | S 22 |
| G 2  | 51.780         | 540.592        | 536.588        | 0.755          | 536.336        | G 21 |
| R 3  | 90.605         | 526.337        | <b>522.332</b> | <b>522.584</b> | 522.080        | R 20 |
| G 4  | 105.061        | 487.312        | <b>483.307</b> | <b>481.559</b> | <b>483.055</b> | G 19 |
| K 5  | 137.084        | 473.056        | <b>469.052</b> | <b>469.304</b> | <b>468.800</b> | K 18 |
| G 6  | 151.340        | 441.033        | 437.028        | 437.280        | <b>436.776</b> | G 17 |
| G 7  | 185.595        | 426.777        | <b>422.772</b> | <b>423.024</b> | <b>422.521</b> | G 16 |
| K 8  | 197.619        | 412.522        | 408.517        | 408.769        | 408.265        | K 15 |
| G 9  | <b>211.874</b> | 380.498        | 376.493        | 376.745        | 376.241        | G 14 |
| L 10 | 240.145        | 366.243        | 362.238        | 362.490        | 361.986        | L 13 |
| G 11 | 254.401        | 337.072        | 333.067        | 334.219        | 333.715        | G 12 |
| K 12 | <b>286.424</b> | 323.716        | 319.712        | 319.964        | 319.460        | K 11 |
| G 13 | 300.680        | 291.693        | <b>287.688</b> | 287.940        | <b>287.436</b> | G 10 |
| G 14 | 314.935        | 277.437        | 273.433        | 273.684        | 273.181        | G 9  |
| A 15 | 332.694        | 263.182        | 259.177        | 259.429        | 258.925        | A 8  |
| K 16 | 358.716        | 249.927        | 245.923        | 246.075        | 245.569        | K 7  |
| R 17 | 401.743        | 213.399        | 209.394        | 209.646        | 209.142        | R 6  |
| H 18 | <b>438.008</b> | 174.374        | 170.369        | 170.621        | 170.117        | H 5  |
| R 19 | 484.041        | 140.109        | 136.104        | 136.356        | 135.852        | R 4  |
| K 20 | <b>519.569</b> | 94.076         | 90.071         | 90.323         | 89.819         | K 3  |
| V 21 | 544.336        | 88.548         | 84.543         | 84.795         | 84.291         | V 2  |
| L 22 | <b>572.607</b> | 33.781         | 29.776         | 30.028         | 29.524         | L 1  |

# sp | P62806 | H4\_MOUSE

[Acetyl]SGRGKGGKGLGKGGAKRHR <sup>Dimethyl</sup> K <sup>Methyl</sup> VL  
28.03 14.02

- ▶ fragmentation table for charge state 5+
- ▶ specType=etd
- ▶ score=38.40
- ▶ F112761.dat
- ▶ query=q22791\_p1
- ▶ precursor=382.237440
- ▶ chargePrecursor=6
- ▶ itol=0.5

| AA    | c       | y              | z+1            | z+2            | z              | AA    |
|-------|---------|----------------|----------------|----------------|----------------|-------|
| S[1]  | 30.221  | <b>458.484</b> | <b>455.280</b> | 0.806          | <b>455.078</b> | S[22] |
| G[2]  | 41.625  | 432.675        | <b>429.472</b> | 0.806          | <b>429.270</b> | G[23] |
| R[3]  | 72.846  | 421.271        | <b>418.067</b> | 418.269        | <b>417.866</b> | R[20] |
| G[4]  | 84.290  | 390.051        | <b>386.847</b> | 387.049        | <b>386.645</b> | G[19] |
| K[5]  | 109.869 | 378.646        | <b>375.443</b> | <b>375.644</b> | <b>375.241</b> | K[18] |
| G[6]  | 121.273 | 353.027        | 349.824        | 350.025        | 349.622        | G[17] |
| G[7]  | 132.677 | 341.623        | 338.419        | 338.621        | 338.218        | G[16] |
| K[8]  | 158.298 | <b>330.219</b> | 327.011        | 327.213        | 326.814        | K[15] |
| G[9]  | 169.701 | 304.603        | <b>301.396</b> | <b>301.598</b> | <b>301.195</b> | G[14] |
| L[10] | 192.318 | 293.196        | 289.992        | 290.193        | 289.990        | L[13] |
| G[11] | 203.722 | 270.579        | 267.375        | 267.577        | 267.173        | G[12] |
| K[12] | 229.341 | 259.174        | 255.971        | 256.172        | 255.769        | K[11] |
| G[13] | 240.745 | 233.555        | 230.352        | 230.553        | 230.150        | G[10] |
| G[14] | 252.149 | 222.151        | 218.947        | 219.149        | 218.746        | G[9]  |
| A[15] | 266.357 | 210.747        | 207.543        | 207.745        | 207.342        | A[8]  |
| K[16] | 291.976 | 196.539        | 193.336        | 193.537        | 193.134        | K[7]  |
| R[17] | 323.196 | 170.920        | 167.717        | 167.918        | 167.515        | R[6]  |
| H[18] | 350.608 | 139.703        | 136.497        | 136.698        | 136.295        | H[5]  |
| R[19] | 387.434 | 112.288        | 109.085        | 109.286        | 108.883        | R[4]  |
| K[20] | 415.856 | 75.462         | 72.258         | 72.460         | 72.057         | K[3]  |
| V[21] | 435.670 | 47.040         | 43.836         | 44.038         | 43.635         | V[2]  |
| L[22] | 458.287 | 27.226         | 24.022         | 24.224         | 23.821         | L[1]  |





# sp | Q8CGP1 | H2B1K\_MOUSE

GTKAVTK<sup>Acetyl</sup>YTSAK  
42.01

- ▶ fragmentation table for charge state 1+
- ▶ specType=etd
- ▶ score=58.09
- ▶ F113277.dat
- ▶ query=q14907\_p1
- ▶ precursor=432.910320
- ▶ chargePrecursor=3
- ▶ itol=0.5

| AA     | c               | y               | z+1             | z+2             | z        | AA     |
|--------|-----------------|-----------------|-----------------|-----------------|----------|--------|
| G [1]  | 75.055          | <b>1296.716</b> | 1280.697        | 0.000           | 1279.689 | G [12] |
| T [2]  | 178.103         | 1230.695        | 1223.678        | 0.000           | 1222.660 | T [11] |
| K [3]  | <b>304.198</b>  | 1138.641        | <b>1122.628</b> | <b>1123.636</b> | 1121.620 | K [10] |
| A [4]  | 378.235         | 1010.552        | <b>994.533</b>  | 995.541         | 991.525  | A [9]  |
| V [5]  | <b>474.303</b>  | 939.515         | <b>923.496</b>  | 924.504         | 922.488  | V [8]  |
| Y [6]  | <b>575.351</b>  | 840.446         | <b>824.427</b>  | 825.435         | 823.420  | Y [7]  |
| K [7]  | <b>745.457</b>  | 739.388         | <b>723.380</b>  | 724.388         | 722.372  | K [6]  |
| V [8]  | <b>908.520</b>  | <b>569.293</b>  | <b>553.274</b>  | 554.282         | 552.266  | V [5]  |
| Y [9]  | <b>1009.568</b> | 469.239         | <b>390.211</b>  | 391.219         | 389.203  | Y [4]  |
| S [10] | <b>1096.600</b> | <b>305.182</b>  | <b>289.163</b>  | 290.171         | 288.155  | S [3]  |
| A [11] | <b>1167.637</b> | 218.150         | 202.131         | 203.139         | 201.123  | A [2]  |
| R [12] | 1295.732        | 147.113         | 131.094         | 132.102         | 130.086  | R [1]  |

# sp | Q8CGP1 | H2B1K\_MOUSE

GTKAVTK<sup>Acetyl</sup>Y TSAK  
42.01

- ▶ fragmentation table for charge state 2+
- ▶ specType=etd
- ▶ score=58.09
- ▶ F113277.dat
- ▶ query=q14907\_p1
- ▶ precursor=432.910320
- ▶ chargePrecursor=3
- ▶ itol=0.5

| AA    | c              | y              | z+1            | z+2     | z              | AA    |
|-------|----------------|----------------|----------------|---------|----------------|-------|
| G[1]  | 86.031         | <b>648.862</b> | <b>640.852</b> | 0.504   | <b>640.348</b> | G[12] |
| T[2]  | 88.555         | <b>620.351</b> | <b>612.341</b> | 0.504   | 611.838        | T[11] |
| K[3]  | 152.603        | <b>569.827</b> | <b>561.818</b> | 562.322 | <b>561.314</b> | K[10] |
| A[4]  | 188.121        | 505.779        | 497.770        | 498.274 | 497.266        | A[9]  |
| V[5]  | 237.695        | 470.261        | 462.250        | 462.755 | 461.748        | V[8]  |
| T[6]  | 288.179        | 420.727        | 412.717        | 413.221 | 412.213        | T[7]  |
| K[7]  | 373.232        | 370.203        | 362.194        | 362.697 | 361.690        | K[6]  |
| V[8]  | 454.764        | 385.150        | 277.141        | 277.645 | 276.637        | V[5]  |
| T[9]  | 305.287        | 301.618        | 305.609        | 306.113 | 305.105        | T[4]  |
| S[10] | 648.803        | 153.995        | 145.085        | 145.589 | 144.581        | S[3]  |
| A[11] | 584.322        | 109.570        | 101.560        | 102.073 | 101.065        | A[2]  |
| R[12] | <b>648.370</b> | 74.060         | 66.051         | 66.555  | 65.547         | R[1]  |

# sp | P70696 | H2B1A\_MOUSE

GTKAVTK <sup>Acetyl</sup> YTSSK  
42.01

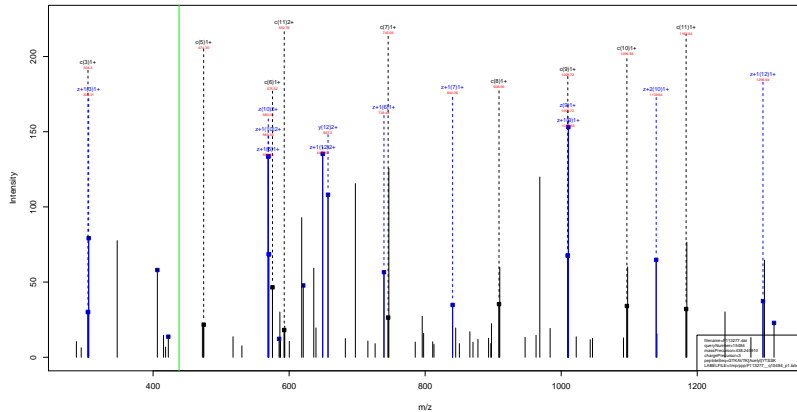

# sp | P70696 | H2B1A\_MOUSE

GTKAVTK<sup>Acetyl</sup>YTSSK  
42.01

- ▶ fragmentation table for charge state 1+
- ▶ specType=etd
- ▶ score=35.42
- ▶ F113277.dat
- ▶ query=q15484\_p1
- ▶ precursor=438.240910
- ▶ chargePrecursor=3
- ▶ itol=0.5

| AA    | c               | y               | z+1             | z+2             | z               | AA    |
|-------|-----------------|-----------------|-----------------|-----------------|-----------------|-------|
| G[1]  | 75.055          | <b>1312.711</b> | <b>1296.692</b> | 0.000           | 1295.681        | G[12] |
| T[2]  | 119.183         | 1255.889        | 1239.671        | 0.000           | 1238.663        | T[11] |
| R[3]  | <b>304.198</b>  | 1154.642        | 1138.623        | <b>1119.631</b> | 1117.615        | R[10] |
| A[4]  | 375.235         | 1026.547        | <b>1010.528</b> | 1011.536        | <b>1009.520</b> | A[9]  |
| V[5]  | <b>474.303</b>  | 935.509         | 939.491         | 940.499         | 938.483         | V[8]  |
| T[6]  | <b>575.351</b>  | 856.441         | <b>840.422</b>  | 841.430         | 839.415         | T[7]  |
| K[7]  | <b>745.457</b>  | 755.392         | <b>739.375</b>  | 740.382         | 738.367         | K[6]  |
| V[8]  | <b>908.520</b>  | <b>585.288</b>  | <b>569.269</b>  | <b>570.277</b>  | 569.261         | V[5]  |
| T[9]  | <b>1009.508</b> | <b>422.225</b>  | <b>406.206</b>  | 407.214         | 405.198         | T[4]  |
| S[10] | <b>1096.600</b> | 321.177         | <b>305.158</b>  | 306.166         | <b>304.150</b>  | S[3]  |
| S[11] | <b>1183.632</b> | 234.145         | 218.126         | 219.134         | 217.116         | S[2]  |
| R[12] | 1311.727        | 147.113         | 131.094         | 132.102         | 130.086         | R[1]  |

# sp | P70696 | H2B1A\_MOUSE

GTKAVTK <sup>Acetyl</sup>YTSSK  
42.01

- ▶ fragmentation table for charge state 2+
- ▶ specType=etd
- ▶ score=35.42
- ▶ F113277.dat
- ▶ query=q15484\_p1
- ▶ precursor=438.240910
- ▶ chargePrecursor=3
- ▶ itol=0.5

| AA     | c              | y              | z+1            | z+2            | z              | AA    |
|--------|----------------|----------------|----------------|----------------|----------------|-------|
| C [1]  | 38.031         | <b>656.859</b> | <b>648.850</b> | 0.504          | 648.346        | C[12] |
| T [2]  | 58.555         | 628.345        | <b>620.339</b> | 0.504          | 619.835        | T[11] |
| K [3]  | 152.603        | 577.824        | <b>569.815</b> | <b>570.319</b> | <b>569.311</b> | K[10] |
| A [4]  | 188.121        | 513.777        | 505.768        | 506.271        | 505.264        | A[9]  |
| V [5]  | 237.695        | 478.258        | 470.249        | 470.753        | 469.745        | V[8]  |
| T [6]  | 288.179        | 428.724        | 420.715        | 421.219        | 420.211        | T[7]  |
| K [7]  | 373.232        | 378.200        | 370.191        | 370.695        | 369.687        | K[6]  |
| V [8]  | 454.764        | 293.148        | 285.138        | 285.642        | 284.634        | V[5]  |
| T [9]  | 505.297        | 211.616        | 203.607        | 204.110        | 203.103        | T[4]  |
| S [10] | 549.803        | 181.062        | 173.053        | 173.557        | 172.550        | S[3]  |
| S [11] | <b>592.320</b> | 117.576        | 109.567        | 110.071        | 109.063        | S[2]  |
| K [12] | 656.367        | 74.060         | 66.051         | 66.555         | 65.547         | K[1]  |

# sp | P70696 | H2B1A\_MOUSE

GTKAVTK <sup>Acetyl</sup> YTSSK  
42.01

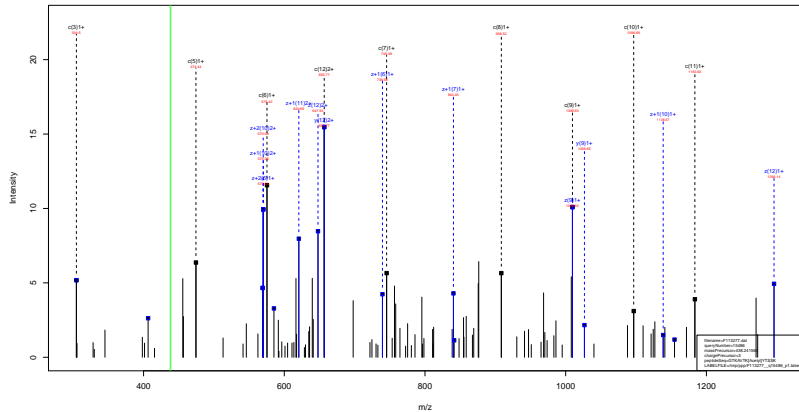

# sp | P70696 | H2B1A\_MOUSE

GTKAVTK<sup>Acetyl</sup>YTSSK  
42.01

- ▶ fragmentation table for charge state 1+
- ▶ specType=etd
- ▶ score=55.68
- ▶ F113277.dat
- ▶ query=q15486.p1
- ▶ precursor=438.241560
- ▶ chargePrecursor=3
- ▶ itol=0.5

| AA     | c               | y               | z+1             | z+2            | z               | AA     |
|--------|-----------------|-----------------|-----------------|----------------|-----------------|--------|
| G [1]  | 75.055          | 1312.711        | 1296.692        | 0.000          | <b>1295.684</b> | G [12] |
| T [2]  | 119.103         | 1175.692        | 1159.674        | 0.000          | 1158.663        | T [11] |
| K [3]  | <b>304.198</b>  | <b>1154.642</b> | <b>1138.623</b> | 1139.611       | 1137.613        | K [10] |
| A [4]  | 378.235         | <b>1026.547</b> | 1010.528        | 1011.536       | <b>1009.520</b> | A [9]  |
| V [5]  | <b>474.303</b>  | 955.509         | 939.491         | 940.499        | 938.483         | V [8]  |
| T [6]  | <b>575.351</b>  | 856.441         | <b>840.422</b>  | <b>841.430</b> | 839.415         | T [7]  |
| K [7]  | <b>745.457</b>  | 755.393         | <b>739.375</b>  | 740.382        | 738.367         | K [6]  |
| V [8]  | <b>908.520</b>  | <b>585.268</b>  | <b>569.259</b>  | <b>570.277</b> | 568.261         | V [5]  |
| T [9]  | <b>1009.568</b> | 422.225         | <b>406.206</b>  | 407.214        | 405.199         | T [4]  |
| S [10] | <b>1096.600</b> | 321.177         | 305.158         | 306.166        | <b>304.150</b>  | S [3]  |
| S [11] | <b>1183.632</b> | 234.145         | 218.126         | 219.134        | 217.118         | S [2]  |
| R [12] | 1311.727        | 147.113         | 131.094         | 132.102        | 130.086         | R [1]  |



# sp | P70696 | H2B1A\_MOUSE

GTKAVTK <sup>Acetyl</sup> YTSSK  
42.01

- ▶ fragmentation table for charge state 2+
- ▶ specType=etd
- ▶ score=55.68
- ▶ F113277.dat
- ▶ query=q15486.p1
- ▶ precursor=438.241560
- ▶ chargePrecursor=3
- ▶ itol=0.5

| AA     | c              | y              | z+1            | z+2            | z              | AA     |
|--------|----------------|----------------|----------------|----------------|----------------|--------|
| G [1]  | 38.031         | <b>656.859</b> | 648.859        | 0.504          | <b>648.346</b> | G [2]  |
| T [2]  | 58.555         | 628.345        | <b>620.339</b> | 0.504          | 619.835        | T [1]  |
| K [3]  | 152.603        | 577.824        | <b>569.815</b> | <b>570.319</b> | <b>569.311</b> | K [10] |
| A [4]  | 188.121        | 513.777        | 505.768        | 506.271        | 505.264        | A [9]  |
| V [5]  | 237.695        | 478.258        | 470.249        | 470.753        | 469.745        | V [8]  |
| T [6]  | 288.179        | 428.724        | 420.715        | 421.219        | 420.211        | T [7]  |
| K [7]  | 373.232        | 378.200        | 370.191        | 370.695        | 369.687        | K [6]  |
| V [8]  | 454.764        | 293.148        | 285.138        | 285.642        | 284.634        | V [5]  |
| T [9]  | 505.287        | 211.616        | 203.607        | 204.110        | 203.103        | T [4]  |
| S [10] | 548.803        | 181.962        | 173.953        | 174.457        | 173.450        | S [3]  |
| S [11] | 592.320        | 117.576        | 109.567        | 110.071        | 109.063        | S [2]  |
| K [12] | <b>656.367</b> | 74.060         | 66.051         | 66.555         | 65.547         | K [1]  |

# sp | Q6GSS7 | H2A2A\_MOUSE

LNKLLGK<sup>Dimethyl</sup>VTIAQGGVLPNIQAVLLPKKTE  
28.03

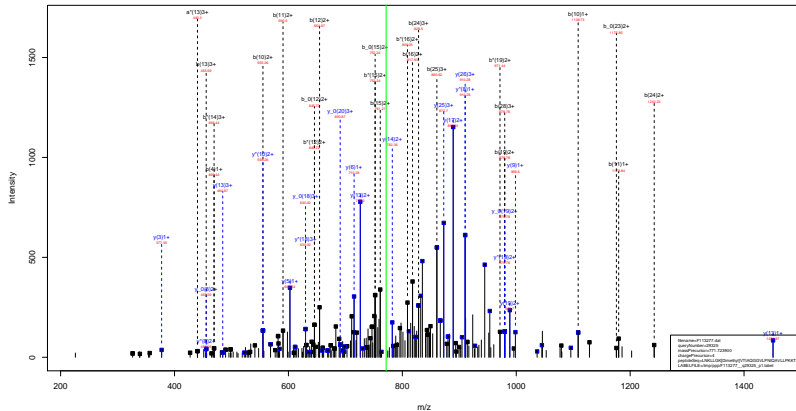

# sp | Q6GSS7 | H2A2A\_MOUSE

LNKLLGK <sup>Dimethyl</sup>VTIAQGGVLPNIQAVLLPKKTE  
28.03

- ▶ fragmentation table for charge state 1+
- ▶ specType=cid
- ▶ score=78.80
- ▶ F113277.dat
- ▶ query=q29325\_p1
- ▶ precursor=771.723900
- ▶ chargePrecursor=4
- ▶ itol=0.5

| AA  | a              | a'             | a <sub>0</sub> | b               | b'             | b <sub>0</sub> | y        | y'              | y <sub>0</sub>  | AA             |     |
|-----|----------------|----------------|----------------|-----------------|----------------|----------------|----------|-----------------|-----------------|----------------|-----|
| L1  | 380.080        | 0.000          | 0.000          | 114.080         | 0.000          | 0.000          | 368.000  | 0.000           | 0.000           | L20            |     |
| R1  | 397.100        | 183.111        | 0.000          | 214.000         | 0.000          | 0.000          | 183.111  | 0.000           | 0.000           | R20            |     |
| R2  | 338.254        | 331.200        | 0.000          | <b>356.229</b>  | <b>338.203</b> | 0.000          | 388.765  | 2639.738        | 2638.784        | R22            |     |
| L4  | 341.133        | 454.200        | 0.000          | <b>468.313</b>  | <b>452.287</b> | 0.000          | 2726.870 | 2711.043        | 2710.039        | L26            |     |
| L5  | 334.410        | 331.200        | 0.000          | <b>352.307</b>  | 338.211        | 0.000          | 3435.500 | 3438.300        | 3439.700        | L28            |     |
| Q1  | <b>811.424</b> | 384.310        | 0.000          | <b>630.419</b>  | 320.300        | 0.000          | 2422.520 | 2488.475        | 2484.461        | Q24            |     |
| R7  | 337.070        | <b>750.524</b> | 0.000          | <b>795.345</b>  | 0.000          | 0.000          | 3445.481 | 2428.454        | 2427.410        | R23            |     |
| V1  | <b>866.619</b> | <b>849.592</b> | 0.000          | <b>894.613</b>  | <b>877.587</b> | 0.000          | 2280.280 | 2272.251        | 2271.248        | V22            |     |
| L9  | 367.058        | 360.040        | 0.000          | <b>385.061</b>  | 378.035        | 0.000          | 377.055  | 2130.250        | 2129.210        | L22            |     |
| I10 | 388.308        | 381.290        | 1384.740       | <b>1108.745</b> | 381.210        | 1388.110       | 3888.210 | 2074.211        | 2073.207        | I20            |     |
| A11 | 1151.100       | 1134.082       | 1133.777       | <b>1178.782</b> | 1162.766       | 1162.772       | 1836.154 | 1999.127        | 1998.143        | A16            |     |
| Q12 | 1179.486       | 1170.470       | 1169.454       | 1164.474        | 1167.458       | 1167.464       | 1920.411 | 1988.060        | 1987.046        | Q18            |     |
| Q13 | 1139.360       | 1130.344       | 1129.328       | 1124.344        | 1127.328       | 1127.334       | 1777.265 | 1760.022        | 1759.048        | Q17            |     |
| Q14 | 1193.080       | 1184.064       | 1183.048       | 1178.064        | 1181.048       | 1181.054       | 1823.011 | 1703.010        | 1702.026        | Q16            |     |
| V15 | 1483.077       | 1474.061       | 1474.045       | 1469.061        | 1472.045       | 1472.051       | 1881.040 | 1848.089        | 1847.095        | V19            |     |
| L16 | 1306.041       | 1297.025       | 1296.009       | 1291.025        | 1294.009       | 1294.015       | 1616.020 | 1583.044        | 1582.050        | L14            |     |
| P17 | 1013.024       | 1004.008       | 1003.992       | 998.008         | 1001.992       | 1001.998       | 1143.010 | <b>1450.863</b> | 1433.818        | 1432.824       | P13 |
| R18 | 1017.137       | 1008.121       | 1008.105       | 1003.121        | 1006.105       | 1006.111       | 1267.124 | 1263.814        | 1262.790        | R12            |     |
| I19 | 1170.412       | 1161.396       | 1161.380       | 1156.396        | 1159.380       | 1159.386       | 1329.390 | 1322.343        | 1321.327        | I11            |     |
| Q20 | 1058.280       | 1049.264       | 1049.248       | 1044.264        | 1047.248       | 1047.254       | 1128.264 | 1109.265        | <b>1108.672</b> | Q10            |     |
| A21 | 1139.117       | 1130.101       | 1129.085       | 1124.101        | 1127.085       | 1127.091       | 1310.104 | <b>998.624</b>  | 985.269         | 984.244        | A10 |
| V22 | 1228.300       | 1219.284       | 1219.268       | 1214.284        | 1217.268       | 1217.274       | 1228.310 | <b>921.581</b>  | <b>910.561</b>  | 909.536        | V10 |
| L23 | 1041.260       | 1032.244       | 1032.228       | 1027.244        | 1030.228       | 1030.234       | 1081.244 | <b>828.519</b>  | <b>811.492</b>  | 810.468        | L17 |
| L24 | 1054.300       | 1045.284       | 1045.268       | 1040.284        | 1043.268       | 1043.274       | 1084.284 | <b>715.435</b>  | <b>698.408</b>  | <b>697.426</b> | L10 |
| P25 | 1013.310       | 1004.294       | 1004.278       | 999.294         | 1002.278       | 1002.284       | 1053.294 | <b>682.351</b>  | 668.291         | 667.297        | P11 |
| R26 | 1016.111       | 1007.095       | 1007.079       | 1002.095        | 1005.079       | 1005.085       | 1056.095 | 1053.095        | 1052.091        | R10            |     |
| R27 | 1017.100       | 1008.084       | 1008.068       | 1003.084        | 1006.068       | 1006.074       | 1057.084 | <b>377.303</b>  | 363.177         | 362.183        | R15 |
| K28 | 1017.080       | 1008.064       | 1008.048       | 1003.064        | 1006.048       | 1006.054       | 1058.064 | 1055.064        | 1054.060        | K10            |     |
| L29 | 1017.080       | 1008.064       | 1008.048       | 1003.064        | 1006.048       | 1006.054       | 1058.064 | 1055.064        | 1054.060        | L11            |     |

# sp | Q6GSS7 | H2A2A\_MOUSE

LNKLLGK <sup>Dimethyl</sup> <sub>28.03</sub> VTIAQGGVLPNIQAVLLPKKTE

- ▶ fragmentation table for charge state 2+
- ▶ specType=cid
- ▶ score=78.80
- ▶ F113277.dat
- ▶ query=q29325\_p1
- ▶ precursor=771.723900
- ▶ chargePrecursor=4
- ▶ itol=0.5

| AA  | a               | a*              | a,Δ             | b               | b*              | b,Δ             | y               | y*              | y,Δ             | AA       |     |
|-----|-----------------|-----------------|-----------------|-----------------|-----------------|-----------------|-----------------|-----------------|-----------------|----------|-----|
| L1  | 43              | 352             | 0.504           | 0.504           | 57.949          | 0.504           | 0.504           | 1542.430        | 1531.930        | 1531.944 | L29 |
| R1  | 100             | 353             | 0.504           | 0.504           | 124.874         | 0.504           | 0.504           | 1449.309        | 1447.309        | 1447.302 | R20 |
| R1  | 104             | 352             | 1.000           | 0.504           | 122.618         | 1.000           | 0.504           | 1433.050        | 1420.371        | 1410.081 | K27 |
| L1  | 121             | 353             | 212.850         | 0.504           | 235.100         | 226.847         | 0.504           | 1384.833        | 1350.320        | 1350.833 | L26 |
| L1  | 127             | 353             | 289.330         | 0.504           | 301.100         | 300.303         | 0.504           | 1309.330        | 1299.780        | 1299.780 | L25 |
| G1  | 156             | 353             | 289.330         | 0.504           | 302.253         | 311.700         | 0.504           | 1351.935        | 1343.241        | 1342.740 | G26 |
| R1  | 164             | 353             | 336.100         | 0.504           | 369.276         | 389.703         | 0.504           | 1243.242        | 1218.730        | 1218.730 | R23 |
| V1  | 171             | 353             | 426.300         | 0.504           | 447.100         | 470.247         | 0.504           | 1143.041        | 1134.801        | 1134.801 | V26 |
| L1  | <b>484.317</b>  | <b>476.823</b>  | <b>629.331</b>  | <b>498.134</b>  | <b>489.821</b>  | <b>480.320</b>  | <b>1095.446</b> | <b>1087.233</b> | <b>1088.041</b> | L21      |     |
| I10 | <b>548.879</b>  | <b>532.366</b>  | <b>511.874</b>  | <b>554.876</b>  | <b>546.369</b>  | <b>540.871</b>  | <b>1045.123</b> | <b>1036.609</b> | <b>1036.117</b> | I21      |     |
| A11 | <b>576.397</b>  | <b>567.884</b>  | <b>551.382</b>  | <b>590.395</b>  | <b>581.882</b>  | <b>581.380</b>  | <b>988.581</b>  | <b>988.087</b>  | <b>979.575</b>  | A16      |     |
| G12 | <b>648.427</b>  | <b>631.913</b>  | <b>631.421</b>  | <b>654.424</b>  | <b>645.911</b>  | <b>645.419</b>  | <b>951.062</b>  | <b>944.549</b>  | <b>944.055</b>  | G10      |     |
| G13 | <b>668.937</b>  | <b>660.424</b>  | <b>650.932</b>  | <b>682.935</b>  | <b>674.422</b>  | <b>673.930</b>  | <b>889.633</b>  | <b>880.519</b>  | <b>880.027</b>  | G17      |     |
| G14 | <b>697.448</b>  | <b>688.935</b>  | <b>688.443</b>  | <b>711.446</b>  | <b>702.932</b>  | <b>702.440</b>  | <b>860.522</b>  | <b>852.009</b>  | <b>851.517</b>  | G16      |     |
| V13 | <b>746.983</b>  | <b>738.469</b>  | <b>737.977</b>  | <b>760.990</b>  | <b>752.467</b>  | <b>751.974</b>  | <b>832.011</b>  | <b>823.498</b>  | <b>823.006</b>  | V15      |     |
| L10 | <b>855.583</b>  | <b>846.069</b>  | <b>845.577</b>  | <b>871.592</b>  | <b>863.079</b>  | <b>862.587</b>  | <b>782.477</b>  | <b>773.964</b>  | <b>773.472</b>  | L14      |     |
| P12 | <b>874.308</b>  | <b>843.537</b>  | <b>843.045</b>  | <b>888.048</b>  | <b>879.535</b>  | <b>879.043</b>  | <b>725.935</b>  | <b>717.422</b>  | <b>716.930</b>  | P13      |     |
| T14 | <b>888.814</b>  | <b>887.301</b>  | <b>900.807</b>  | <b>919.812</b>  | <b>911.008</b>  | <b>910.516</b>  | <b>674.084</b>  | <b>673.592</b>  | <b>668.403</b>  | T12      |     |
| I16 | <b>908.814</b>  | <b>897.301</b>  | <b>900.807</b>  | <b>919.812</b>  | <b>911.008</b>  | <b>910.516</b>  | <b>630.537</b>  | <b>631.874</b>  | <b>631.382</b>  | I11      |     |
| G20 | <b>929.814</b>  | <b>902.138</b>  | <b>920.820</b>  | <b>943.841</b>  | <b>935.139</b>  | <b>934.647</b>  | <b>583.846</b>  | <b>555.122</b>  | <b>554.840</b>  | G19      |     |
| A21 | <b>959.814</b>  | <b>958.844</b>  | <b>958.351</b>  | <b>1019.160</b> | <b>1010.646</b> | <b>1010.154</b> | <b>489.810</b>  | <b>489.318</b>  | <b>489.318</b>  | A18      |     |
| V22 | <b>1114.308</b> | <b>1110.813</b> | <b>1120.944</b> | <b>1132.864</b> | <b>1124.351</b> | <b>1123.859</b> | <b>454.247</b>  | <b>455.784</b>  | <b>455.292</b>  | V18      |     |
| L23 | <b>1112.288</b> | <b>1100.720</b> | <b>1100.228</b> | <b>1181.728</b> | <b>1176.720</b> | <b>1176.230</b> | <b>414.700</b>  | <b>408.720</b>  | <b>408.720</b>  | L17      |     |
| L24 | <b>1227.730</b> | <b>1218.200</b> | <b>1218.770</b> | <b>1241.778</b> | <b>1233.205</b> | <b>1232.771</b> | <b>358.221</b>  | <b>349.700</b>  | <b>349.210</b>  | L20      |     |
| R25 | <b>1276.340</b> | <b>1270.810</b> | <b>1280.941</b> | <b>1294.944</b> | <b>1286.340</b> | <b>1285.848</b> | <b>301.619</b>  | <b>293.100</b>  | <b>292.610</b>  | R19      |     |
| R26 | <b>1340.854</b> | <b>1331.841</b> | <b>1331.349</b> | <b>1384.352</b> | <b>1374.838</b> | <b>1374.346</b> | <b>253.133</b>  | <b>244.610</b>  | <b>244.120</b>  | R10      |     |
| K27 | <b>1354.368</b> | <b>1349.838</b> | <b>1359.366</b> | <b>1418.389</b> | <b>1408.880</b> | <b>1408.388</b> | <b>188.301</b>  | <b>180.500</b>  | <b>180.100</b>  | K15      |     |
| L28 | <b>1374.348</b> | <b>1369.818</b> | <b>1379.346</b> | <b>1438.349</b> | <b>1428.840</b> | <b>1428.348</b> | <b>148.819</b>  | <b>140.300</b>  | <b>139.810</b>  | L22      |     |
| E29 | <b>1518.441</b> | <b>1510.934</b> | <b>1510.442</b> | <b>1533.444</b> | <b>1524.931</b> | <b>1524.439</b> | <b>74.534</b>   | <b>0.500</b>    | <b>0.500</b>    | E11      |     |

# sp | Q6GSS7 | H2A2A\_MOUSE

LNKLLGK <sup>Dimethyl</sup>VTIAQGGVLPNIQAVLLPKKTE  
28.03

- ▶ fragmentation table for charge state 3+
- ▶ specType=cid
- ▶ score=78.80
- ▶ F113277.dat
- ▶ query=q29325.p1
- ▶ precursor=771.723900
- ▶ chargePrecursor=4
- ▶ itol=0.5

| AA  | a              | a*             | a,b            | b              | b*             | b,b            | r              | r*             | r,b            | AA  |
|-----|----------------|----------------|----------------|----------------|----------------|----------------|----------------|----------------|----------------|-----|
| L1  | 28.719         | 0.072          | 0.072          | 38.102         | 0.072          | 0.072          | 1033.033       | 1032.999       | 1032.812       | L26 |
| N2  | 67.385         | 61.730         | 0.672          | 76.715         | 71.041         | 0.672          | 960.941        | 965.265        | 964.937        | N26 |
| K3  | 110.681        | 104.407        | 0.672          | 119.413        | 113.739        | 0.672          | 992.020        | 947.251        | 946.921        | K27 |
| L4  | 147.778        | 142.125        | 0.672          | 157.109        | 151.434        | 0.672          | <b>910.228</b> | <b>904.553</b> | <b>904.226</b> | L26 |
| L5  | 185.874        | 179.397        | 0.672          | 194.884        | 189.210        | 0.672          | <b>872.533</b> | <b>866.858</b> | <b>866.530</b> | L26 |
| G6  | 264.478        | 258.004        | 0.672          | 273.811        | 268.136        | 0.672          | <b>834.839</b> | <b>829.163</b> | <b>828.835</b> | G24 |
| K7  | 298.522        | 292.048        | 0.672          | 307.851        | 302.176        | 0.672          | 813.831        | 810.156        | 809.826        | K25 |
| V8  | 328.544        | 322.069        | 0.672          | 338.078        | 332.403        | 0.672          | <b>761.760</b> | 758.114        | 757.788        | V22 |
| Y9  | 323.227        | 317.553        | 0.672          | 332.595        | <b>326.883</b> | <b>326.555</b> | <b>730.767</b> | 725.091        | 724.763        | Y21 |
| I10 | 360.622        | 354.288        | 0.672          | 370.251        | 364.576        | 0.672          | <b>697.064</b> | 691.409        | <b>691.081</b> | I20 |
| A11 | 394.601        | 378.625        | 0.672          | 394.912        | 389.237        | 0.672          | <b>658.389</b> | 652.714        | <b>652.386</b> | A19 |
| Q12 | <b>427.287</b> | 421.613        | 0.672          | 436.913        | 431.238        | 0.672          | <b>635.710</b> | <b>630.035</b> | <b>629.707</b> | Q10 |
| G13 | 446.204        | <b>440.618</b> | <b>440.290</b> | <b>455.626</b> | 449.950        | 449.950        | 614.114        | 608.439        | 608.112        | G17 |
| G14 | <b>465.301</b> | 459.626        | 459.291        | 474.637        | <b>468.957</b> | 468.957        | 600.628        | 594.953        | <b>598.342</b> | G16 |
| V15 | <b>498.224</b> | 492.549        | 492.214        | 507.658        | 501.983        | 501.983        | <b>535.019</b> | 529.344        | 529.018        | V19 |
| L16 | 536.619        | 530.383        | <b>530.015</b> | 545.395        | 539.079        | 539.347        | <b>521.987</b> | 516.312        | 515.984        | L14 |
| P17 | <b>568.370</b> | 562.694        | 562.360        | 577.703        | 572.028        | 571.699        | <b>484.292</b> | 478.617        | 478.290        | P13 |
| N18 | 606.284        | 600.708        | 600.382        | 615.718        | <b>610.048</b> | <b>609.712</b> | 461.942        | 446.266        | 445.938        | N15 |
| T19 | <b>644.079</b> | 638.403        | 638.078        | 653.410        | <b>647.735</b> | 647.407        | 443.900        | 428.224        | 427.896        | T17 |
| Q20 | 686.705        | <b>681.089</b> | <b>680.751</b> | <b>696.090</b> | <b>690.421</b> | 690.093        | 376.251        | 370.575        | 370.249        | Q10 |
| A21 | 726.644        | 720.968        | 720.642        | <b>736.001</b> | <b>730.325</b> | 730.000        | 331.540        | 325.864        | 325.538        | A19 |
| V22 | <b>742.467</b> | <b>737.781</b> | <b>737.403</b> | <b>748.778</b> | <b>743.102</b> | <b>742.725</b> | 309.897        | 304.221        | 303.895        | V19 |
| L23 | 781.161        | 775.485        | 775.159        | <b>790.493</b> | 784.817        | <b>784.489</b> | 276.944        | 271.268        | 270.941        | L17 |
| L24 | 818.856        | 813.180        | 812.854        | <b>828.188</b> | 822.512        | 822.184        | 239.100        | 233.424        | 233.098        | L16 |
| P25 | 851.037        | <b>845.531</b> | <b>845.203</b> | <b>860.539</b> | 854.863        | 854.535        | 201.403        | 195.726        | 195.402        | P15 |
| K26 | <b>893.365</b> | 887.689        | 887.363        | 902.698        | 897.022        | 896.694        | 169.194        | 163.518        | 163.191        | K14 |
| K27 | 930.654        | 924.978        | 924.652        | 945.983        | 940.307        | 939.979        | 126.426        | 120.750        | 120.423        | K15 |
| T28 | 1011.280       | 1005.604       | 1005.278       | <b>995.618</b> | 989.942        | 989.614        | 81.718         | 76.042         | 75.714         | T12 |
| E29 | 1033.158       | 1027.482       | 1027.156       | 1042.632       | 1036.956       | 1036.628       | 30.020         | 0.672          | 44.021         | E10 |



# sp | Q6GSS7 | H2A2A\_MOUSE

LNKLLGK <sup>Dimethyl</sup> <sub>28.03</sub> VTIAQGGVLPNIQAVLLPKKTE

- ▶ fragmentation table for charge state 1+
- ▶ specType=etd
- ▶ score=67.51
- ▶ F113277.dat
- ▶ query=q29326.p1
- ▶ precursor=771.723900
- ▶ chargePrecursor=4
- ▶ itol=0.5

| AA    | c               | y               | z+1             | z+2            | z        | AA    |
|-------|-----------------|-----------------|-----------------|----------------|----------|-------|
| L 1   | 131.118         | 3081.892        | 3067.873        | 0.000          | 3066.895 | L 29  |
| N 2   | 345.161         | 2970.808        | 2954.789        | 2955.797       | 2951.781 | N 28  |
| K 3   | <b>373.256</b>  | 2956.795        | 2940.746        | 2941.754       | 2939.739 | K 27  |
| L 4   | 486.340         | 2728.670        | 2712.651        | 2713.659       | 2711.643 | L 26  |
| L 5   | <b>599.424</b>  | 2615.586        | 2609.567        | 2600.575       | 2598.560 | L 25  |
| Q 6   | <b>656.445</b>  | 2502.500        | 2495.483        | 2497.491       | 2495.475 | Q 24  |
| K 7   | <b>812.572</b>  | 2445.480        | 2429.462        | 2430.469       | 2428.454 | K 23  |
| V 8   | <b>911.640</b>  | 2389.354        | 2373.335        | 2374.343       | 2372.327 | V 22  |
| T 9   | <b>1012.688</b> | 2196.286        | 2174.267        | 2175.275       | 2173.259 | T 21  |
| I 10  | <b>1125.772</b> | 2089.238        | 2073.219        | 2074.227       | 2072.211 | I 20  |
| A 11  | <b>1196.809</b> | 1978.159        | <b>1960.135</b> | 1961.143       | 1959.127 | A 19  |
| Q 12  | <b>1324.857</b> | <b>1905.117</b> | <b>1889.098</b> | 1890.106       | 1888.090 | Q 18  |
| G 13  | <b>1381.889</b> | 1777.058        | 1761.039        | 1762.047       | 1760.032 | G 17  |
| G 14  | <b>1438.910</b> | 1720.937        | 1704.918        | 1705.926       | 1703.910 | G 16  |
| V 15  | 1537.879        | 1663.015        | <b>1646.997</b> | 1646.004       | 1645.989 | V 15  |
| L 16  | 1651.063        | 1561.947        | <b>1547.928</b> | 1548.936       | 1546.920 | L 14  |
| P 17  | 1748.116        | 1456.863        | 1439.844        | 1439.852       | 1431.836 | P 13  |
| Tu 18 | 1852.159        | 1351.810        | <b>1337.791</b> | 1338.799       | 1336.783 | Tu 12 |
| I 19  | 1975.243        | 1239.767        | 1223.748        | 1224.756       | 1222.741 | I 11  |
| Q 20  | 2103.301        | 1126.683        | 1110.664        | 1111.672       | 1109.656 | Q 10  |
| A 21  | 2174.338        | 998.624         | 982.606         | 981.614        | 981.598  | A 9   |
| V 22  | 2273.407        | 927.587         | <b>911.569</b>  | 912.576        | 910.561  | V 8   |
| L 23  | 2386.491        | 828.519         | <b>812.500</b>  | 813.508        | 811.492  | L 7   |
| L 24  | 2499.575        | 715.438         | <b>699.416</b>  | <b>700.424</b> | 698.408  | L 6   |
| P 25  | 2596.626        | 602.351         | 586.332         | 587.340        | 585.324  | P 5   |
| K 26  | 2724.723        | 505.298         | <b>489.279</b>  | <b>490.287</b> | 488.271  | K 4   |
| K 27  | 2852.816        | 377.203         | <b>361.184</b>  | 362.192        | 360.177  | K 3   |
| T 28  | 2951.895        | 249.108         | 233.089         | 234.097        | 232.082  | T 2   |
| E 29  | 3082.938        | 148.060         | 132.042         | 133.050        | 131.034  | E 1   |

# sp | Q6GSS7 | H2A2A\_MOUSE

LNKLLGK <sup>Dimethyl</sup><sub>28.03</sub> VTIAQGGVLPNIQAVLLPKKTE

- ▶ fragmentation table for charge state 2+
- ▶ specType=etd
- ▶ score=67.51
- ▶ F113277.dat
- ▶ query=q29326.p1
- ▶ precursor=771.723900
- ▶ chargePrecursor=4
- ▶ itol=0.5

| AA    | c               | y              | z+1             | z+2             | z               | AA    |
|-------|-----------------|----------------|-----------------|-----------------|-----------------|-------|
| L[1]  | 66.063          | 1542.450       | 1538.440        | 0.504           | 1533.930        | L[26] |
| N[2]  | 123.084         | 1485.908       | 1477.890        | 1478.402        | <b>1477.394</b> | N[28] |
| K[3]  | 187.132         | 1436.886       | <b>1426.877</b> | 1421.361        | 1420.373        | K[27] |
| L[4]  | 243.674         | 1384.839       | <b>1356.829</b> | <b>1357.333</b> | 1356.325        | L[26] |
| L[5]  | 300.216         | 1338.297       | 1329.289        | 1320.791        | <b>1299.783</b> | L[25] |
| G[6]  | 358.726         | 1291.758       | <b>1263.745</b> | <b>1264.249</b> | 1263.241        | G[24] |
| K[7]  | 406.789         | 1223.244       | <b>1213.234</b> | <b>1214.249</b> | 1214.733        | K[23] |
| V[8]  | 456.324         | 1145.181       | <b>1137.171</b> | 1137.875        | <b>1136.667</b> | V[22] |
| T[9]  | 506.846         | 1095.646       | <b>1087.637</b> | <b>1088.141</b> | 1087.133        | T[21] |
| I[10] | 563.390         | 1045.123       | <b>1037.113</b> | <b>1037.617</b> | 1036.609        | I[20] |
| A[11] | 608.608         | 998.581        | <b>990.571</b>  | 981.675         | <b>980.067</b>  | A[19] |
| Q[12] | 662.937         | 953.062        | <b>945.053</b>  | 945.557         | <b>944.549</b>  | Q[18] |
| G[13] | 691.448         | 899.033        | 881.023         | <b>881.527</b>  | 880.519         | G[17] |
| G[14] | <b>719.959</b>  | <b>860.522</b> | <b>852.513</b>  | <b>853.017</b>  | 852.000         | G[16] |
| V[15] | 769.493         | 832.011        | <b>824.002</b>  | <b>824.506</b>  | 823.490         | V[15] |
| L[16] | 828.035         | 782.477        | 774.468         | 774.972         | 773.964         | L[14] |
| F[17] | <b>874.561</b>  | 725.935        | 717.926         | 718.430         | 717.422         | F[13] |
| N[18] | 913.583         | 677.409        | 669.399         | 669.903         | 668.895         | N[12] |
| I[19] | 988.125         | 626.387        | 612.378         | 612.882         | 611.874         | I[11] |
| Q[20] | <b>1052.154</b> | 563.845        | 555.836         | 556.340         | 555.332         | Q[10] |
| A[21] | <b>1087.673</b> | 499.616        | 491.607         | 492.110         | 491.303         | A[9]  |
| V[22] | <b>1137.207</b> | 464.297        | 456.288         | 456.792         | 455.784         | V[8]  |
| L[23] | <b>1193.749</b> | 414.763        | 406.754         | 407.258         | 406.250         | L[17] |
| L[24] | 1260.293        | 358.221        | 350.211         | 350.715         | 349.707         | L[6]  |
| P[25] | 1298.817        | 301.679        | 293.670         | 294.174         | 293.166         | P[5]  |
| K[26] | 1362.805        | 253.153        | 245.143         | 245.647         | 244.639         | K[4]  |
| K[27] | <b>1426.912</b> | 189.105        | 181.096         | 181.600         | 180.592         | K[3]  |
| T[28] | <b>1477.436</b> | 125.058        | 117.048         | 117.552         | 116.544         | T[2]  |
| E[29] | 1541.059        | 74.534         | 66.524          | 67.028          | 66.021          | E[1]  |



# sp | Q6GSS7 | H2A2A\_MOUSE

LNKLLGK <sup>Dimethyl</sup> <sub>28.03</sub> VTIAQGGVLPNIQAVLLPKKTE

- ▶ fragmentation table for charge state 3+
- ▶ specType=etd
- ▶ score=67.51
- ▶ F113277.dat
- ▶ query=q29326.p1
- ▶ precursor=771.723900
- ▶ chargePrecursor=4
- ▶ itol=0.5

| AA  | c              | y               | z+1            | z+2            | z              | AA  |
|-----|----------------|-----------------|----------------|----------------|----------------|-----|
| L1  | 44.377         | <b>1028.635</b> | 1023.206       | 0.672          | 1022.960       | L29 |
| N2  | 82.392         | <b>990.941</b>  | <b>985.601</b> | <b>985.937</b> | <b>985.265</b> | N28 |
| K3  | 125.090        | 952.926         | <b>947.587</b> | <b>947.923</b> | 947.251        | K27 |
| L4  | 162.756        | 930.228         | 908.809        | 908.225        | 904.953        | L26 |
| L5  | 200.479        | 872.531         | 867.194        | 867.530        | 866.856        | L25 |
| G6  | 219.487        | 834.830         | 829.499        | 829.835        | 829.163        | G24 |
| K7  | 271.529        | 815.832         | 810.492        | 810.828        | 810.156        | K23 |
| V8  | 304.652        | 763.790         | 758.450        | 758.786        | 758.114        | V22 |
| T9  | 338.234        | 730.767         | 725.427        | 725.763        | 725.091        | T21 |
| I10 | 375.929        | 697.084         | 691.745        | 692.081        | 691.409        | I20 |
| A11 | 399.608        | 699.389         | 654.050        | 654.386        | 653.714        | A19 |
| Q12 | 442.294        | 639.710         | 630.371        | 630.707        | 630.035        | Q18 |
| G13 | 461.301        | 593.024         | 587.685        | 588.021        | 587.349        | G17 |
| G14 | 480.308        | 574.017         | 568.678        | 569.013        | 568.342        | G16 |
| V15 | 513.331        | 555.010         | 549.670        | 550.006        | 549.334        | V15 |
| L16 | 551.026        | 521.987         | 516.648        | 516.984        | 516.312        | L14 |
| P17 | 583.377        | 484.292         | 478.953        | 479.289        | 478.617        | P13 |
| N18 | 621.391        | 451.942         | 446.602        | 446.938        | 446.266        | N12 |
| I19 | 659.088        | 413.927         | 408.588        | 408.924        | 408.252        | I11 |
| Q20 | 701.772        | 376.231         | 370.893        | 371.229        | 370.557        | Q10 |
| A21 | 725.451        | 333.546         | 328.207        | 328.543        | 327.871        | A9  |
| V22 | 758.474        | 309.807         | 304.468        | 304.804        | 304.132        | V8  |
| L23 | 796.168        | 276.844         | 271.505        | 271.841        | 271.169        | L7  |
| L24 | 833.861        | 239.150         | 233.810        | 234.146        | 233.474        | L6  |
| P25 | 866.214        | 201.455         | 196.116        | 196.451        | 195.780        | P5  |
| K26 | 928.912        | 169.154         | 163.815        | 164.151        | 163.479        | K4  |
| K27 | <b>951.611</b> | 126.400         | 121.060        | 121.402        | 120.730        | K3  |
| T28 | <b>985.293</b> | 83.708          | 78.368         | 78.704         | 78.032         | T2  |
| E29 | 1028.397       | 50.025          | 44.685         | 45.021         | 44.349         | E1  |

# sp | P70696 | H2B1A\_MOUSE

GTKAVTKYTSK <sup>Acetyl</sup>  
42.01

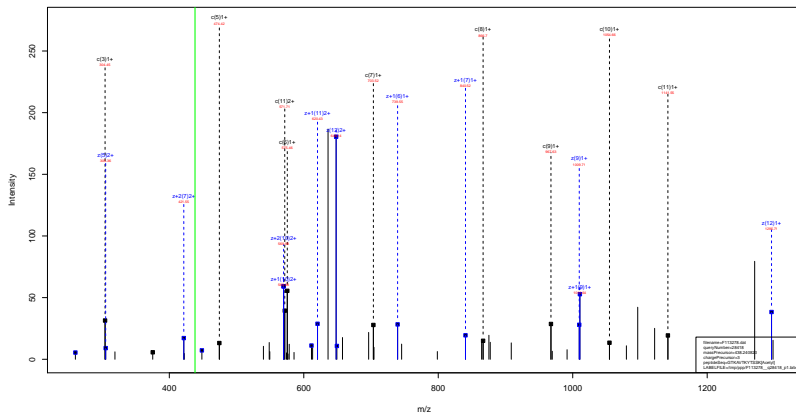

# sp | P70696 | H2B1A\_MOUSE

GTKAVTKYTSK <sup>Acetyl</sup>  
42.01

- ▶ fragmentation table for charge state 1+
- ▶ specType=etd
- ▶ score=52.39
- ▶ F113278.dat
- ▶ query=q28418\_p1
- ▶ precursor=438.240820
- ▶ chargePrecursor=3
- ▶ itol=0.5

| AA    | c               | y        | z+1             | z+2      | z               | AA    |
|-------|-----------------|----------|-----------------|----------|-----------------|-------|
| G 1   | 75.955          | 1312.711 | 1296.692        | 0.000    | <b>1295.684</b> | G[12] |
| T 2   | 179.333         | 1255.589 | 1239.671        | 0.000    | 1238.563        | T[11] |
| K 3   | <b>304.198</b>  | 1154.642 | 1138.623        | 1139.611 | 1137.615        | K[10] |
| A 4   | <b>375.235</b>  | 1026.547 | <b>1010.528</b> | 1011.536 | <b>1009.520</b> | A[0]  |
| V 5   | <b>474.303</b>  | 955.509  | 939.491         | 940.499  | 938.483         | V[0]  |
| T 6   | <b>575.351</b>  | 826.441  | <b>840.422</b>  | 841.430  | 839.415         | T[7]  |
| K 7   | <b>703.446</b>  | 755.393  | <b>739.375</b>  | 740.382  | 738.367         | K[6]  |
| V 8   | <b>868.509</b>  | 627.298  | <b>611.280</b>  | 612.288  | 610.272         | V[5]  |
| T 9   | <b>967.557</b>  | 494.335  | <b>443.215</b>  | 449.224  | 447.209         | T[4]  |
| S[10] | <b>1054.589</b> | 363.187  | 347.169         | 348.177  | 346.161         | S[3]  |
| S[11] | <b>1141.621</b> | 278.155  | <b>260.137</b>  | 261.144  | 259.129         | S[2]  |
| K[12] | 1311.227        | 189.123  | 173.105         | 174.112  | 172.097         | K[1]  |

# sp | P70696 | H2B1A\_MOUSE

GTKAVTKYTSK <sup>Acetyl</sup>  
42.01

- ▶ fragmentation table for charge state 2+
- ▶ specType=etd
- ▶ score=52.39
- ▶ F113278.dat
- ▶ query=q28418\_p1
- ▶ precursor=438.240820
- ▶ chargePrecursor=3
- ▶ itol=0.5

| AA    | c              | y       | z+1            | z+2            | z              | AA    |
|-------|----------------|---------|----------------|----------------|----------------|-------|
| G[1]  | 88.031         | 656.859 | <b>648.850</b> | 0.504          | <b>648.346</b> | G[12] |
| T[2]  | 88.555         | 628.348 | <b>620.339</b> | 0.504          | 619.835        | T[11] |
| K[3]  | 152.603        | 577.824 | <b>569.815</b> | <b>570.319</b> | 569.311        | K[10] |
| A[4]  | 188.121        | 513.777 | 505.768        | 506.271        | 505.264        | A[9]  |
| V[5]  | 237.655        | 478.258 | 470.249        | 470.753        | 469.745        | V[8]  |
| T[6]  | 288.179        | 428.724 | 420.715        | <b>421.219</b> | 420.211        | T[7]  |
| K[7]  | 352.227        | 378.200 | 370.191        | 370.695        | 369.687        | K[6]  |
| V[8]  | 433.758        | 314.153 | 306.143        | 306.647        | <b>305.640</b> | V[5]  |
| T[9]  | 484.282        | 232.621 | 224.612        | 225.116        | 224.108        | T[4]  |
| S[10] | 527.296        | 182.097 | 174.088        | 174.592        | 173.584        | S[3]  |
| S[11] | <b>571.314</b> | 138.581 | 130.572        | 131.076        | 130.068        | S[2]  |
| K[12] | 658.367        | 95.065  | 87.056         | 87.560         | 86.552         | K[1]  |



# sp | P70696 | H2B1A\_MOUSE

GTKAVTK<sup>Acetyl</sup>YTSSK  
42.01

- ▶ fragmentation table for charge state 1+
- ▶ specType=etd
- ▶ score=57.93
- ▶ F113278.dat
- ▶ query=q28420\_p1
- ▶ precursor=438.241200
- ▶ chargePrecursor=3
- ▶ itol=0.5

| AA | c  | y               | z+1            | z+2             | z              | AA              |       |
|----|----|-----------------|----------------|-----------------|----------------|-----------------|-------|
| G  | 1  | 75.955          | 1312.711       | <b>1296.692</b> | 0.000          | 1295.684        | G[12] |
| T  | 2  | 179.330         | 1235.589       | 1239.931        | 0.000          | 1238.923        | T[11] |
| K  | 3  | <b>304.198</b>  | 1154.642       | <b>1138.623</b> | 1139.611       | 1137.615        | K[10] |
| A  | 4  | 375.235         | 1026.947       | <b>1010.528</b> | 1011.536       | <b>1009.520</b> | A[9]  |
| V  | 5  | <b>474.303</b>  | 955.509        | 939.491         | 940.499        | 938.483         | V[8]  |
| T  | 6  | <b>575.351</b>  | <b>856.441</b> | <b>840.422</b>  | 841.430        | 839.415         | T[7]  |
| K  | 7  | <b>745.457</b>  | 755.393        | <b>739.375</b>  | 740.382        | 739.367         | K[6]  |
| V  | 8  | <b>908.520</b>  | <b>585.288</b> | <b>569.269</b>  | <b>570.277</b> | <b>568.261</b>  | V[5]  |
| T  | 9  | <b>1009.568</b> | <b>422.225</b> | <b>406.206</b>  | 407.214        | <b>405.198</b>  | T[4]  |
| S  | 10 | <b>1096.600</b> | 321.177        | <b>305.158</b>  | 306.166        | <b>304.150</b>  | S[3]  |
| S  | 11 | <b>1183.632</b> | 234.145        | 218.126         | 219.134        | 217.118         | S[2]  |
| K  | 12 | 1311.227        | 147.113        | 131.084         | 132.102        | 130.086         | K[1]  |

# sp | P70696 | H2B1A\_MOUSE

GTKAVTK<sup>Acetyl</sup>YTSSK  
42.01

- ▶ fragmentation table for charge state 2+
- ▶ specType=etd
- ▶ score=57.93
- ▶ F113278.dat
- ▶ query=q28420\_p1
- ▶ precursor=438.241200
- ▶ chargePrecursor=3
- ▶ itol=0.5

| AA    | c       | y              | z+1            | z+2            | z              | AA    |
|-------|---------|----------------|----------------|----------------|----------------|-------|
| G[1]  | 88.031  | <b>656.859</b> | <b>648.850</b> | 0.504          | <b>648.346</b> | G[12] |
| T[2]  | 88.555  | 628.348        | <b>620.339</b> | 0.504          | 619.835        | T[11] |
| K[3]  | 152.603 | 577.824        | <b>569.815</b> | <b>570.319</b> | <b>569.311</b> | K[10] |
| A[4]  | 188.121 | 513.777        | 505.768        | 506.271        | 505.264        | A[9]  |
| V[5]  | 237.055 | 478.258        | 470.249        | 470.753        | 469.745        | V[8]  |
| T[6]  | 286.179 | 428.724        | 420.715        | 421.219        | 420.211        | T[7]  |
| K[7]  | 373.232 | 378.200        | 370.191        | 370.695        | 369.687        | K[6]  |
| V[8]  | 454.764 | 293.148        | 285.138        | 285.642        | 284.634        | V[5]  |
| T[9]  | 505.287 | 211.616        | 203.607        | 204.110        | 203.103        | T[4]  |
| S[10] | 548.803 | 161.092        | 153.083        | 153.587        | 152.579        | S[3]  |
| S[11] | 592.320 | 117.576        | 109.567        | 110.071        | 109.063        | S[2]  |
| K[12] | 656.367 | 74.060         | 66.051         | 66.555         | 65.547         | K[1]  |

# sp | P70696 | H2B1A\_MOUSE

GTKAVTK <sup>Acetyl</sup> YTSSK  
42.01

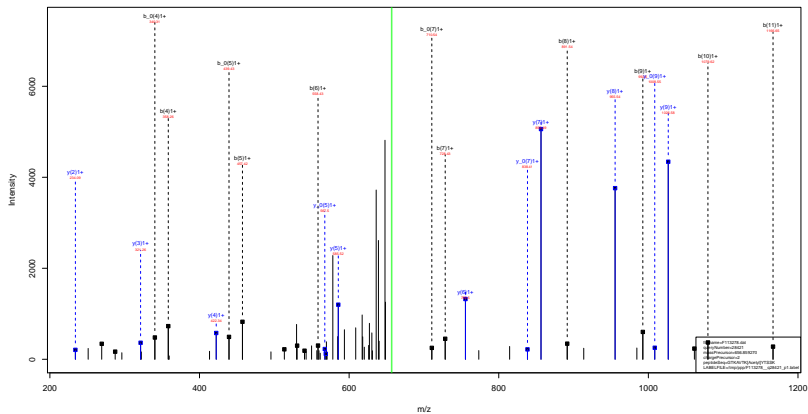



# sp | P70696 | H2B1A\_MOUSE

GTKAVTK <sup>Acetyl</sup> YTSSK  
42.01

- ▶ fragmentation table for charge state 1+
- ▶ specType=cid
- ▶ score=62.84
- ▶ F113278.dat
- ▶ query=q28421\_p1
- ▶ precursor=656.859270
- ▶ chargePrecursor=2
- ▶ itol=0.5

| AA  | a              | a'             | a''      | b               | b'       | b''             | y               | y'       | y''             | AA  |
|-----|----------------|----------------|----------|-----------------|----------|-----------------|-----------------|----------|-----------------|-----|
| G1  | 302.070        | 42.000         | 0.000    | 76.020          | 0.000    | 0.000           | 1132.771        | 1120.664 | 1224.720        | G12 |
| T1  | 132.100        | 0.000          | 13.971   | 100.000         | 0.000    | 141.000         | 1230.663        | 1237.636 | 1111            | T11 |
| K3  | 350.170        | 262.150        | 241.160  | <b>207.171</b>  | 270.150  | <b>260.161</b>  | 1154.642        | 1157.615 | 1130.610        | K10 |
| A4  | 130.114        | 301.100        | 320.100  | <b>330.100</b>  | 340.100  | <b>340.100</b>  | <b>1026.547</b> | 1029.520 | <b>1008.536</b> | A10 |
| V5  | 420.100        | 432.100        | 411.101  | <b>457.107</b>  | 440.100  | <b>430.106</b>  | <b>655.509</b>  | 658.483  | 637.480         | V10 |
| I6  | <b>510.510</b> | <b>511.001</b> | 512.110  | <b>558.325</b>  | 561.100  | <b>540.314</b>  | <b>856.441</b>  | 859.415  | <b>838.431</b>  | I12 |
| K7  | 330.430        | 300.400        | 302.420  | <b>326.430</b>  | 324.400  | <b>310.420</b>  | <b>750.393</b>  | 753.367  | <b>731.381</b>  | K10 |
| V9  | 351.400        | 350.410        | 352.400  | <b>391.401</b>  | 394.400  | <b>379.401</b>  | <b>555.288</b>  | 558.262  | <b>547.277</b>  | V10 |
| T9  | 364.340        | 347.330        | 348.330  | <b>392.341</b>  | 395.330  | <b>374.331</b>  | <b>422.225</b>  | 425.199  | <b>404.214</b>  | T14 |
| S10 | 3251.710       | 3124.100       | 3133.100 | <b>3079.373</b> | 3202.114 | <b>3081.363</b> | <b>321.177</b>  | 304.150  | 303.140         | S11 |
| S11 | 1170.400       | 1170.300       | 1170.300 | <b>1166.365</b> | 1166.300 | 1166.300        | <b>234.140</b>  | 231.110  | 228.110         | S11 |
| K12 | 1266.100       | 1240.670       | 1240.660 | 1254.660        | 1277.014 | 1270.660        | 147.110         | 130.660  | 0.000           | K10 |

# sp | P70696 | H2B1A\_MOUSE

GTKAVTK <sup>Acetyl</sup> YTSSK  
42.01

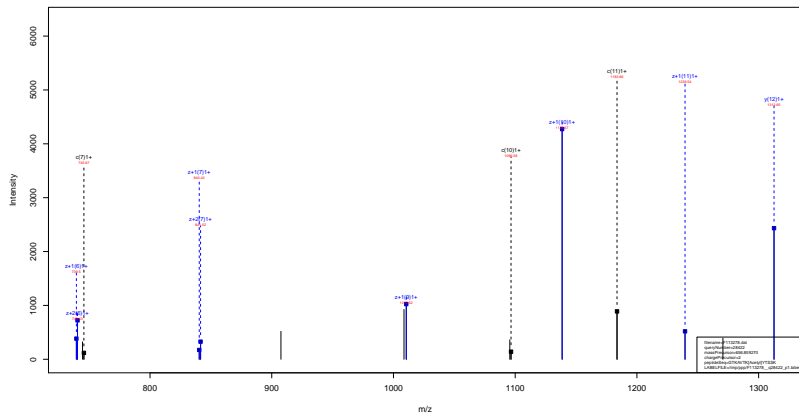

# sp | P70696 | H2B1A\_MOUSE

GTKAVTK <sup>Acetyl</sup> YTSSK  
42.01

- ▶ fragmentation table for charge state 1+
- ▶ specType=etd
- ▶ score=41.60
- ▶ F113278.dat
- ▶ query=q28422.p1
- ▶ precursor=656.859270
- ▶ chargePrecursor=2
- ▶ itol=0.5

| AA | c  | y               | z+1             | z+2             | z              | AA       |   |    |
|----|----|-----------------|-----------------|-----------------|----------------|----------|---|----|
| G  | 1  | 75.955          | <b>1312.711</b> | 1596.692        | 0.000          | 1295.684 | G | 12 |
| T  | 2  | 119.303         | 1259.689        | <b>1239.671</b> | 0.000          | 1239.663 | T | 11 |
| K  | 3  | 304.198         | 1154.642        | <b>1138.623</b> | 1139.631       | 1137.615 | K | 10 |
| A  | 4  | 375.235         | 1026.547        | <b>1010.528</b> | 1011.536       | 1009.520 | A | 9  |
| V  | 5  | 474.303         | 955.509         | 939.491         | 940.499        | 938.483  | V | 8  |
| T  | 6  | 575.351         | 856.441         | <b>840.422</b>  | <b>841.430</b> | 839.415  | T | 7  |
| K  | 7  | <b>745.457</b>  | 755.393         | <b>739.375</b>  | <b>740.382</b> | 738.367  | K | 6  |
| V  | 8  | 868.520         | 585.260         | 569.269         | 570.277        | 568.261  | V | 5  |
| T  | 9  | 1009.668        | 422.229         | 405.209         | 407.214        | 405.199  | T | 4  |
| S  | 10 | <b>1096.600</b> | 321.177         | 305.158         | 306.166        | 304.150  | S | 3  |
| S  | 11 | <b>1183.632</b> | 234.145         | 218.126         | 219.134        | 217.118  | S | 2  |
| K  | 12 | 1311.727        | 147.113         | 131.094         | 132.102        | 130.086  | K | 1  |

# sp | P70696 | H2B1A\_MOUSE

GTKAVTKYTSK <sup>Acetyl</sup>  
42.01

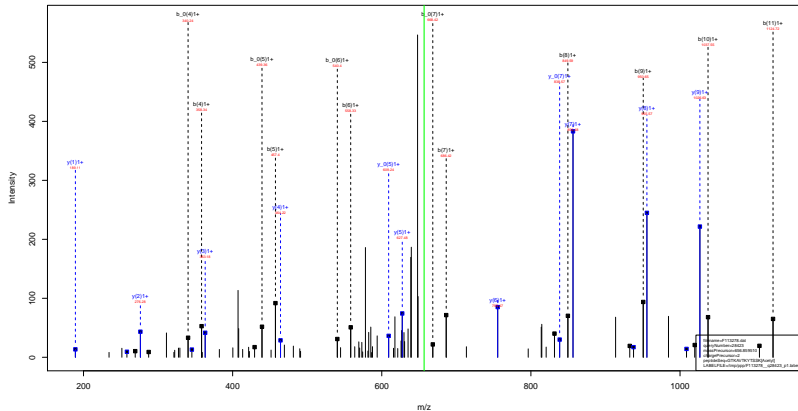

# sp | P70696 | H2B1A\_MOUSE

GTKAVTKYTSSK<sup>Acetyl</sup>  
42.01

- ▶ fragmentation table for charge state 1+
- ▶ specType=cid
- ▶ score=69.75
- ▶ F113278.dat
- ▶ query=q28423\_p1
- ▶ precursor=656.859510
- ▶ chargePrecursor=2
- ▶ itol=0.5

| AA   | a        | b        | a*       | a+b      | b        | b*       | b+a      | y        | y*       | y+a      | AA  |
|------|----------|----------|----------|----------|----------|----------|----------|----------|----------|----------|-----|
| G1   | 182.078  | 112.091  | 0.000    | 294.169  | 0.000    | 0.000    | 1132.771 | 1120.684 | 2254.729 | 661.2    | G12 |
| T12  | 132.092  | 0.000    | 132.091  | 182.088  | 0.000    | 0.000    | 141.000  | 1250.683 | 1327.636 | 1111     | K10 |
| K13  | 282.110  | 282.110  | 282.108  | 287.174  | 270.110  | 280.181  | 1134.642 | 1137.611 | 1130.610 | 1130.610 | K10 |
| A14  | 132.091  | 182.101  | 182.099  | 256.208  | 182.101  | 240.133  | 1026.547 | 1029.509 | 1102.536 | 1102.536 | A10 |
| V15  | 428.282  | 432.252  | 441.291  | 457.277  | 440.252  | 430.286  | 855.509  | 938.483  | 937.490  | V10      | V10 |
| T16  | 132.092  | 132.091  | 132.091  | 256.325  | 141.200  | 140.134  | 856.441  | 1094.410 | 1038.431 | 1038.431 | T12 |
| K17  | 182.422  | 182.422  | 182.421  | 186.428  | 182.422  | 182.422  | 627.298  | 750.292  | 750.292  | 609.288  | K10 |
| V18  | 132.408  | 182.401  | 182.401  | 294.477  | 132.408  | 132.417  | 627.298  | 1012.277 | 1012.277 | 1012.277 | V10 |
| T19  | 432.538  | 468.538  | 468.535  | 490.531  | 461.539  | 432.520  | 464.235  | 441.208  | 448.221  | 448.221  | T14 |
| S100 | 1029.516 | 102.541  | 991.557  | 1037.563 | 1020.528 | 1010.552 | 361.187  | 348.181  | 348.177  | 348.177  | S11 |
| S11  | 1029.603 | 1029.603 | 1029.598 | 1124.565 | 1120.568 | 1120.568 | 1120.568 | 216.120  | 206.120  | 206.120  | S11 |
| K12  | 1366.100 | 1348.630 | 1348.626 | 1354.108 | 1327.614 | 1320.620 | 180.123  | 172.067  | 160.000  | 160.000  | K10 |

# sp | P70696 | H2B1A\_MOUSE

GTKAVTK <sup>Acetyl</sup>YTSSK  
42.01

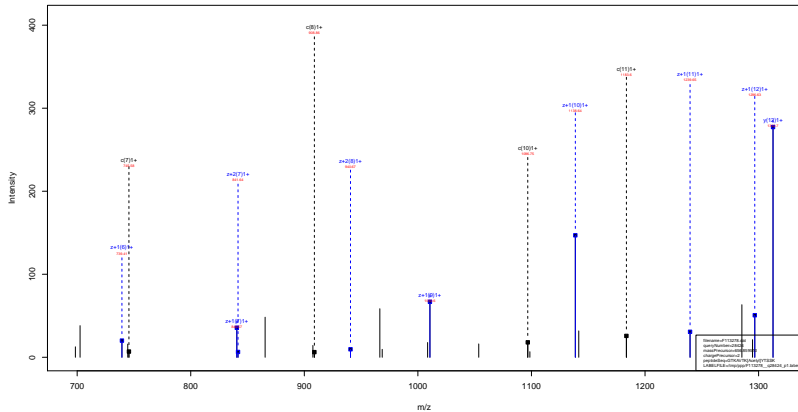

# sp | P70696 | H2B1A\_MOUSE

GTKAVTK <sup>Acetyl</sup>YTSSK  
42.01

- ▶ fragmentation table for charge state 1+
- ▶ specType=etd
- ▶ score=35.93
- ▶ F113278.dat
- ▶ query=q28424.p1
- ▶ precursor=656.859510
- ▶ chargePrecursor=2
- ▶ itol=0.5

| AA | c  | y               | z+1             | z+2             | z              | AA       |   |    |
|----|----|-----------------|-----------------|-----------------|----------------|----------|---|----|
| G  | 1  | 75.955          | <b>1312.711</b> | <b>1296.692</b> | 0.000          | 1295.684 | G | 12 |
| T  | 2  | 119.303         | 1295.684        | <b>1239.571</b> | 0.000          | 1238.563 | T | 11 |
| K  | 3  | 304.198         | 1154.642        | <b>1138.623</b> | 1139.631       | 1137.615 | K | 10 |
| A  | 4  | 375.235         | 1026.547        | <b>1010.528</b> | 1011.536       | 1009.520 | A | 9  |
| V  | 5  | 474.303         | 955.509         | 939.491         | <b>940.499</b> | 938.483  | V | 8  |
| T  | 6  | 575.351         | 856.441         | <b>840.422</b>  | <b>841.430</b> | 839.415  | T | 7  |
| K  | 7  | <b>745.457</b>  | 755.393         | <b>739.375</b>  | 740.382        | 738.367  | K | 6  |
| V  | 8  | <b>908.520</b>  | 585.260         | 569.269         | 570.277        | 568.261  | V | 5  |
| T  | 9  | 1005.548        | 422.220         | 405.208         | 407.214        | 405.198  | T | 4  |
| S  | 10 | <b>1096.600</b> | 321.177         | 305.158         | 306.166        | 304.150  | S | 3  |
| S  | 11 | <b>1183.632</b> | 234.145         | 218.126         | 219.134        | 217.118  | S | 2  |
| K  | 12 | 1311.227        | 147.113         | 131.094         | 132.102        | 130.086  | K | 1  |

# sp | P70696 | H2B1A\_MOUSE

GTKAVTKYTSSK <sup>Acetyl</sup>  
42.01

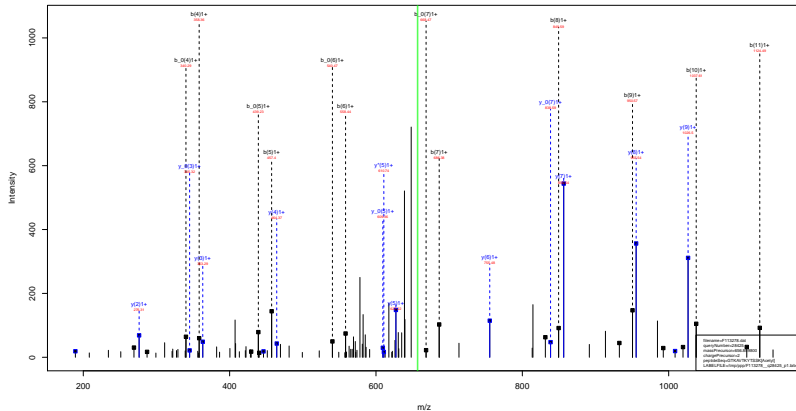



# sp | P70696 | H2B1A\_MOUSE

GTKAVTKYTSSK<sup>Acetyl</sup>  
42.01

- ▶ fragmentation table for charge state 1+
- ▶ specType=cid
- ▶ score=65.34
- ▶ F113278.dat
- ▶ query=q28425\_p1
- ▶ precursor=656.859800
- ▶ chargePrecursor=2
- ▶ itol=0.5

| AA  | a              | b              | a*       | b*              | b              | b*              | b               | a*             | b*              | AA  |
|-----|----------------|----------------|----------|-----------------|----------------|-----------------|-----------------|----------------|-----------------|-----|
| G1  | 182.020        | 112.000        | 0.000    | 182.020         | 0.000          | 0.000           | 112.000         | 1120.884       | 1224.728        | G12 |
| T1  | 132.050        | 0.000          | 132.051  | 182.088         | 0.000          | 141.000         | 1230.880        | 1238.983       | 1237.836        | T11 |
| K3  | 358.170        | 282.150        | 241.188  | <b>287.174</b>  | 270.135        | <b>289.181</b>  | 1154.824        | 1157.813       | 1139.810        | K10 |
| A4  | 132.044        | 311.920        | 320.200  | <b>320.208</b>  | 311.910        | <b>340.193</b>  | <b>1026.547</b> | 1029.500       | <b>1016.536</b> | A10 |
| V5  | <b>429.282</b> | 432.250        | 411.211  | <b>457.277</b>  | <b>448.250</b> | <b>439.246</b>  | <b>855.509</b>  | 938.483        | 937.988         | V10 |
| T6  | 330.320        | 131.920        | 112.110  | <b>326.325</b>  | 141.200        | <b>540.314</b>  | <b>856.641</b>  | 1104.110       | <b>838.431</b>  | T12 |
| K7  | 358.420        | 341.200        | 242.414  | <b>346.428</b>  | 339.400        | <b>404.489</b>  | <b>756.393</b>  | 747.260        | 747.261         | K18 |
| V9  | 412.400        | 656.400        | 625.477  | <b>649.463</b>  | 632.460        | <b>821.472</b>  | <b>627.290</b>  | <b>618.272</b> | <b>609.268</b>  | V15 |
| T9  | 412.438        | 606.438        | 604.520  | <b>650.531</b>  | 611.509        | <b>812.520</b>  | <b>464.235</b>  | 447.200        | <b>446.225</b>  | T14 |
| S10 | 3209.108       | <b>992.541</b> | 991.557  | <b>1037.563</b> | 1020.528       | <b>1010.552</b> | <b>361.187</b>  | 348.161        | <b>345.177</b>  | S11 |
| S11 | 1206.600       | 1206.600       | 1170.586 | <b>1124.565</b> | 1120.568       | <b>1126.584</b> | <b>276.120</b>  | 266.120        | 266.124         | S12 |
| K12 | 1246.100       | 1246.870       | 1248.665 | 1254.658        | 1277.614       | 1270.600        | <b>189.123</b>  | 172.067        | 0.000           | K13 |

# sp | P70696 | H2B1A\_MOUSE

GTKAVTKYTSK <sup>Acetyl</sup>  
42.01

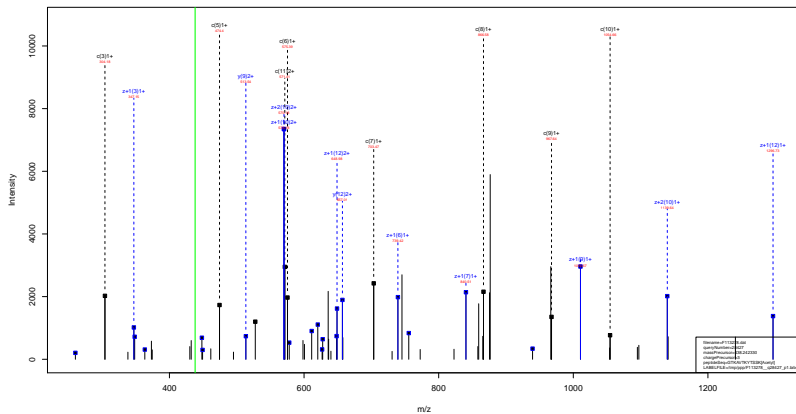

# sp | P70696 | H2B1A\_MOUSE

GTKAVTKYTSK <sup>Acetyl</sup>  
42.01

- ▶ fragmentation table for charge state 1+
- ▶ specType=etd
- ▶ score=37.63
- ▶ F113278.dat
- ▶ query=q28427\_p1
- ▶ precursor=438.242330
- ▶ chargePrecursor=3
- ▶ itol=0.5

| AA     | c               | y              | z+1             | z+2             | z        | AA     |
|--------|-----------------|----------------|-----------------|-----------------|----------|--------|
| G [1]  | 75.955          | 1312.711       | <b>1296.692</b> | 0.000           | 1295.684 | G [12] |
| T [2]  | 179.301         | 1235.589       | 1239.631        | 0.000           | 1238.563 | T [11] |
| K [3]  | <b>304.198</b>  | 1154.642       | 1158.620        | <b>1139.631</b> | 1137.615 | K [10] |
| A [4]  | 375.235         | 1026.547       | <b>1010.528</b> | 1011.536        | 1009.520 | A [9]  |
| V [5]  | <b>474.303</b>  | 955.509        | <b>939.491</b>  | 940.499         | 938.483  | V [8]  |
| T [6]  | <b>575.351</b>  | 856.441        | <b>840.422</b>  | 841.430         | 839.415  | T [7]  |
| K [7]  | <b>703.446</b>  | <b>755.393</b> | <b>739.375</b>  | 740.382         | 738.367  | K [6]  |
| V [8]  | <b>868.509</b>  | <b>627.298</b> | <b>611.280</b>  | 612.288         | 610.272  | V [5]  |
| T [9]  | <b>957.557</b>  | 444.235        | <b>443.216</b>  | <b>449.224</b>  | 447.209  | T [4]  |
| S [10] | <b>1054.589</b> | <b>363.187</b> | <b>347.169</b>  | <b>348.177</b>  | 346.161  | S [3]  |
| S [11] | 1141.621        | 278.155        | <b>260.137</b>  | 261.144         | 259.129  | S [2]  |
| K [12] | 1311.727        | 189.123        | 173.105         | 174.112         | 172.097  | K [1]  |

# sp | P70696 | H2B1A\_MOUSE

GTKAVTKYTSSK <sup>Acetyl</sup>  
42.01

- ▶ fragmentation table for charge state 2+
- ▶ specType=etd
- ▶ score=37.63
- ▶ F113278.dat
- ▶ query=q28427\_p1
- ▶ precursor=438.242330
- ▶ chargePrecursor=3
- ▶ itol=0.5

| AA     | c              | y              | z+1            | z+2            | z              | AA     |
|--------|----------------|----------------|----------------|----------------|----------------|--------|
| G [1]  | 38.031         | <b>656.859</b> | <b>648.850</b> | 0.504          | <b>648.346</b> | G [2]  |
| T [2]  | 58.555         | 628.345        | <b>620.339</b> | 0.504          | 619.835        | T [1]  |
| K [3]  | 152.603        | <b>577.824</b> | <b>569.815</b> | <b>570.319</b> | 569.311        | K [10] |
| A [4]  | 188.121        | <b>513.777</b> | 505.769        | 506.271        | 505.264        | A [9]  |
| V [5]  | 237.695        | 478.258        | 470.249        | 470.753        | 469.745        | V [8]  |
| T [6]  | 288.179        | 428.724        | 420.715        | 421.219        | 420.211        | T [7]  |
| K [7]  | 352.227        | 378.200        | 370.191        | 370.695        | 369.687        | K [6]  |
| V [8]  | 433.758        | 314.153        | 306.143        | 306.647        | 305.640        | V [5]  |
| T [9]  | 494.292        | 232.621        | 224.612        | 225.116        | 224.108        | T [4]  |
| S [10] | <b>527.798</b> | 182.091        | 174.082        | 174.582        | 173.584        | S [3]  |
| S [11] | <b>571.314</b> | 138.581        | 130.572        | 131.076        | 130.068        | S [2]  |
| K [12] | 658.367        | 95.065         | 87.056         | 87.560         | 86.552         | K [1]  |

# sp | P70696 | H2B1A\_MOUSE

GTKAVTKYTSSK <sup>Acetyl</sup>  
42.01

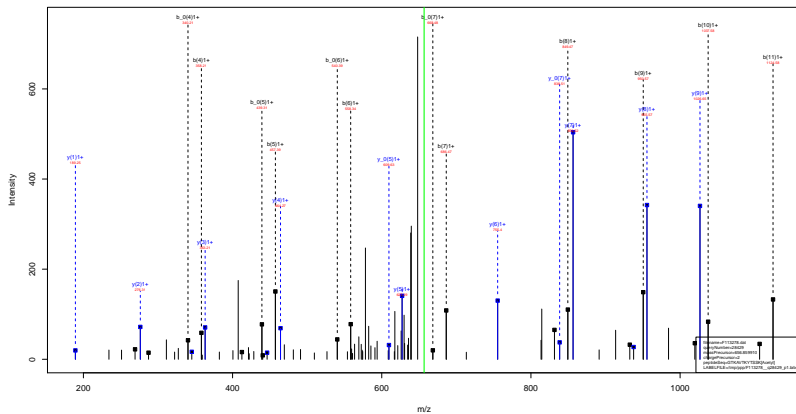

# sp | P70696 | H2B1A\_MOUSE

GTKAVTKYTSK <sup>Acetyl</sup>  
42.01

- ▶ fragmentation table for charge state 1+
- ▶ specType=cid
- ▶ score=71.50
- ▶ F113278.dat
- ▶ query=q28429\_p1
- ▶ precursor=656.859910
- ▶ chargePrecursor=2
- ▶ itol=0.5

| AA  | a       | a'             | a+b      | b               | b'             | b+b'            | x               | y'       | y              | AA  |
|-----|---------|----------------|----------|-----------------|----------------|-----------------|-----------------|----------|----------------|-----|
| Q1  | 131.082 | 0.000          | 131.082  | 36.526          | 0.000          | 131.082         | 131.777         | 132.500  | 234.102        | Q12 |
| T1  | 131.082 | 0.000          | 131.082  | 139.006         | 0.000          | 131.082         | 139.639         | 139.639  | 237.618        | T13 |
| K2  | 159.176 | 262.150        | 244.188  | <b>287.171</b>  | 370.145        | <b>266.161</b>  | 119.632         | 117.610  | 11.36.011      | K10 |
| A1  | 170.214 | 311.810        | 319.089  | <b>356.308</b>  | 384.319        | <b>340.336</b>  | <b>1026.547</b> | 1009.520 | 1009.520       | A16 |
| V1  | 176.100 | <b>412.355</b> | 411.371  | <b>457.277</b>  | <b>446.250</b> | <b>439.206</b>  | <b>955.539</b>  | 938.483  | <b>937.490</b> | V18 |
| T1  | 176.100 | 133.100        | 312.100  | <b>358.325</b>  | 361.000        | <b>340.314</b>  | <b>856.441</b>  | 130.411  | <b>836.431</b> | T17 |
| K7  | 189.452 | 181.100        | 340.444  | <b>406.429</b>  | 389.471        | <b>405.469</b>  | <b>725.392</b>  | 140.380  | 141.002        | K16 |
| V1  | 191.400 | 309.450        | 302.471  | <b>349.483</b>  | 352.250        | <b>331.472</b>  | <b>627.200</b>  | 612.227  | <b>609.288</b> | V15 |
| T1  | 192.138 | 405.500        | 404.521  | <b>450.531</b>  | 451.000        | <b>432.520</b>  | <b>464.235</b>  | 447.210  | <b>446.225</b> | T14 |
| S10 | 199.109 | 382.541        | 380.557  | <b>423.563</b>  | 420.536        | <b>409.252</b>  | <b>363.187</b>  | 346.162  | <b>345.177</b> | S15 |
| S11 | 199.443 | 1078.911       | 1079.566 | <b>1124.905</b> | 1107.944       | <b>1106.364</b> | <b>276.135</b>  | 269.120  | 268.106        | S18 |
| R12 | 199.100 | 1340.839       | 1340.949 | 1324.924        | 1317.814       | 1314.900        | <b>189.123</b>  | 172.000  | 0.000          | R13 |



# sp | P70696 | H2B1A\_MOUSE

GTKAVTKYTSSK <sup>Acetyl</sup>  
42.01

- ▶ fragmentation table for charge state 1+
- ▶ specType=etd
- ▶ score=42.87
- ▶ F113278.dat
- ▶ query=q28430\_p1
- ▶ precursor=656.859910
- ▶ chargePrecursor=2
- ▶ itol=0.5

| AA    | c               | y               | z+1             | z+2             | z               | AA    |
|-------|-----------------|-----------------|-----------------|-----------------|-----------------|-------|
| G[1]  | 75.055          | <b>1312.711</b> | <b>1296.692</b> | 0.000           | 1295.684        | G[12] |
| T[2]  | 176.103         | 1275.089        | <b>1239.671</b> | 0.000           | 1238.663        | T[11] |
| R[3]  | 384.108         | <b>1154.642</b> | <b>1138.623</b> | 1130.611        | 1131.603        | R[10] |
| A[4]  | 375.235         | 1026.547        | <b>1010.528</b> | <b>1011.536</b> | <b>1009.520</b> | A[9]  |
| V[5]  | 474.303         | 935.509         | 939.491         | <b>940.499</b>  | 938.483         | V[8]  |
| T[6]  | 575.351         | 856.441         | <b>840.422</b>  | <b>841.430</b>  | 839.415         | T[7]  |
| K[7]  | <b>703.446</b>  | 755.393         | <b>739.375</b>  | <b>740.382</b>  | 738.367         | K[6]  |
| V[8]  | <b>868.509</b>  | 827.268         | 811.250         | 812.258         | 810.271         | V[5]  |
| T[9]  | <b>967.557</b>  | 864.235         | 848.218         | 849.224         | 847.250         | T[4]  |
| S[10] | <b>1054.589</b> | 863.187         | 847.169         | 848.177         | 846.161         | S[3]  |
| S[11] | <b>1141.621</b> | 276.155         | 260.137         | 261.144         | 259.129         | S[2]  |
| R[12] | 1311.727        | 189.123         | 173.105         | 174.112         | 172.097         | R[1]  |



## sp | P70696 | H2B1A\_MOUSE

GTKAVTKYTSK<sup>Acetyl</sup>  
42.01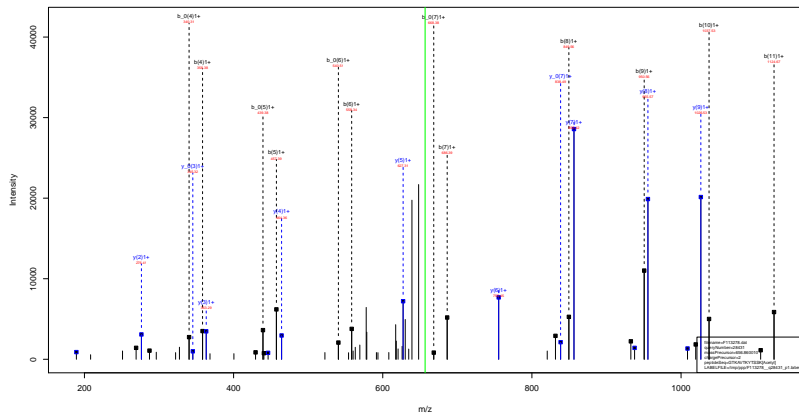

# sp | P70696 | H2B1A\_MOUSE

GTKAVTKYTSK <sup>Acetyl</sup>  
42.01

- ▶ fragmentation table for charge state 1+
- ▶ specType=cid
- ▶ score=87.60
- ▶ F113278.dat
- ▶ query=q28431.p1
- ▶ precursor=656.860010
- ▶ chargePrecursor=2
- ▶ itol=0.5

| AA  | a              | b        | a*       | a+b             | b              | b*              | b+a            | v        | v*              | v+a             | AA  |
|-----|----------------|----------|----------|-----------------|----------------|-----------------|----------------|----------|-----------------|-----------------|-----|
| G1  | 182.078        | 112.092  | 0.000    | 294.170         | 182.078        | 0.000           | 0.000          | 1112.711 | 1120.884        | 2234.595        | G12 |
| T1  | 131.052        | 0.000    | 113.091  | 182.098         | 0.000          | 141.000         | 1250.850       | 1250.850 | 1381.902        | 1381.902        | T11 |
| K1  | 159.110        | 241.151  | 241.158  | <b>287.174</b>  | 270.110        | <b>289.181</b>  | 1154.842       | 1154.842 | 1154.842        | 1154.842        | K10 |
| A1  | 110.014        | 101.101  | 101.101  | <b>156.108</b>  | 101.101        | <b>201.103</b>  | 1026.547       | 1026.547 | 1026.547        | 1026.547        | A10 |
| V1  | <b>478.282</b> | 432.252  | 411.291  | <b>457.277</b>  | <b>448.250</b> | <b>439.246</b>  | <b>855.509</b> | 938.483  | <b>937.490</b>  | 937.490         | V10 |
| I1  | 135.101        | 131.101  | 112.119  | <b>158.125</b>  | 141.101        | <b>149.114</b>  | <b>856.441</b> | 1104.119 | <b>1104.119</b> | <b>1104.119</b> | I12 |
| K1  | 159.412        | 141.101  | 142.114  | <b>186.128</b>  | 159.412        | <b>185.489</b>  | <b>756.393</b> | 1104.119 | 1104.119        | 1104.119        | K10 |
| V1  | 112.408        | 104.401  | 102.417  | <b>149.463</b>  | 112.408        | <b>151.472</b>  | <b>627.298</b> | 1011.272 | 1011.272        | 1011.272        | V10 |
| T1  | 112.108        | 106.101  | 104.111  | <b>150.131</b>  | 111.109        | <b>112.120</b>  | <b>464.235</b> | 441.209  | <b>446.225</b>  | 446.225         | T14 |
| S10 | 1009.108       | 102.141  | 991.157  | <b>1037.163</b> | 1020.110       | <b>1010.152</b> | <b>161.187</b> | 148.181  | <b>145.177</b>  | 145.177         | S11 |
| S11 | 1006.603       | 101.101  | 101.101  | <b>1124.165</b> | 1120.606       | <b>1126.164</b> | <b>216.191</b> | 206.176  | 206.176         | 206.176         | S11 |
| K12 | 1366.110       | 1348.610 | 1348.605 | 1354.108        | 1377.614       | 1376.601        | <b>189.123</b> | 172.067  | 0.000           | 0.000           | K10 |

# sp | P70696 | H2B1A\_MOUSE

GTKAVTKYTSK <sup>Acetyl</sup>  
42.01

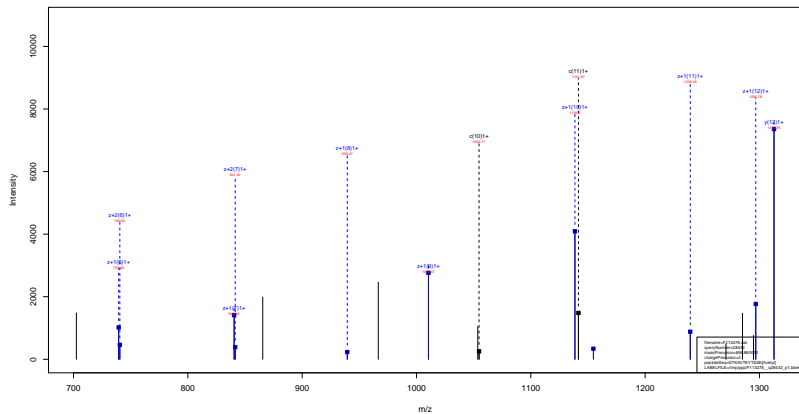

# sp | P70696 | H2B1A\_MOUSE

GTKAVTKYTSSK <sup>Acetyl</sup>  
42.01

- ▶ fragmentation table for charge state 1+
- ▶ specType=etd
- ▶ score=41.90
- ▶ F113278.dat
- ▶ query=q28432\_p1
- ▶ precursor=656.860010
- ▶ chargePrecursor=2
- ▶ itol=0.5

| AA     | c               | y               | z+1             | z+2            | z        | AA     |
|--------|-----------------|-----------------|-----------------|----------------|----------|--------|
| G [1]  | 75.955          | <b>1312.711</b> | <b>1296.692</b> | 0.000          | 1295.684 | G [12] |
| T [2]  | 119.303         | 1255.069        | <b>1239.571</b> | 0.000          | 1238.563 | T [11] |
| K [3]  | 304.198         | <b>1154.642</b> | <b>1138.623</b> | 1139.631       | 1137.615 | K [10] |
| A [4]  | 375.235         | 1026.547        | <b>1010.528</b> | 1011.536       | 1009.520 | A [9]  |
| V [5]  | 474.303         | 955.509         | <b>939.491</b>  | 940.499        | 938.483  | V [8]  |
| T [6]  | 575.351         | 856.441         | <b>840.422</b>  | <b>841.430</b> | 839.415  | T [7]  |
| K [7]  | 703.446         | 755.393         | <b>739.375</b>  | <b>740.382</b> | 738.367  | K [6]  |
| V [8]  | 896.599         | 627.260         | 611.250         | 612.266        | 610.272  | V [5]  |
| T [9]  | 997.657         | 484.239         | 468.216         | 469.224        | 467.209  | T [4]  |
| S [10] | <b>1054.589</b> | 363.187         | 347.169         | 348.177        | 346.161  | S [3]  |
| S [11] | <b>1141.621</b> | 276.155         | 260.137         | 261.144        | 259.129  | S [2]  |
| K [12] | 1311.227        | 189.123         | 173.105         | 174.112        | 172.097  | K [1]  |

# sp | Q8R1M2 | H2AJ\_MOUSE

SQKVKSK Acetyl  
42.01

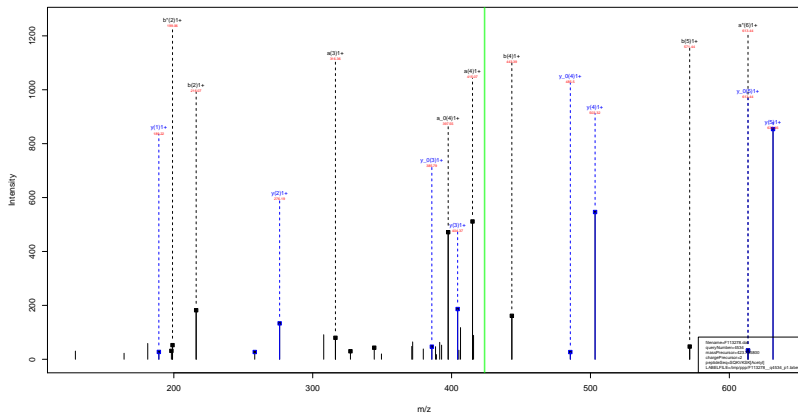

# sp | Q8R1M2 | H2AJ\_MOUSE

SQKVKSK <sup>Acetyl</sup>  
42.01

- ▶ fragmentation table for charge state 1+
- ▶ specType=cid
- ▶ score=45.62
- ▶ F113278.dat
- ▶ query=q4534.p1
- ▶ precursor=423.755800
- ▶ chargePrecursor=2
- ▶ itol=0.5

| AA   | a              | a*             | a $\beta$      | b              | b*             | b $\beta$      | y              | y*      | y $\beta$      | AA   |
|------|----------------|----------------|----------------|----------------|----------------|----------------|----------------|---------|----------------|------|
| S(1) | 60.044         | 0.000          | 40.034         | 68.030         | 0.000          | 70.000         | 686.004        | 829.476 | 828.494        | S(2) |
| Q(2) | 108.103        | 171.075        | 170.082        | <b>216.060</b> | <b>199.071</b> | <b>198.067</b> | 708.472        | 742.440 | 741.460        | Q(3) |
| R(3) | <b>316.160</b> | 609.161        | 608.167        | <b>344.163</b> | <b>327.166</b> | 326.162        | <b>631.414</b> | 614.389 | <b>613.403</b> | R(4) |
| V(4) | <b>415.266</b> | 595.260        | <b>397.256</b> | <b>443.261</b> | 425.255        | 425.251        | <b>593.319</b> | 485.274 | <b>485.308</b> | V(5) |
| K(5) | 943.961        | 606.959        | 626.951        | <b>571.356</b> | 654.350        | 653.346        | <b>404.250</b> | 387.234 | <b>386.240</b> | K(6) |
| S(6) | 0.00.003       | <b>613.367</b> | 612.363        | 650.358        | 641.362        | 640.358        | <b>276.155</b> | 250.120 | <b>258.145</b> | S(7) |
| R(7) | 650.409        | 683.412        | 682.408        | 828.400        | 811.403        | 810.403        | <b>189.123</b> | 212.089 | 0.000          | R(8) |



# sp | P62806 | H4\_MOUSE

SGRGKGGKGLGKGGAKRHRK<sup>Dimethyl</sup>VLRD  
28.03

- ▶ fragmentation table for charge state 1+
- ▶ specType=etd
- ▶ score=110.03
- ▶ F113278.dat
- ▶ query=q55452\_p1
- ▶ precursor=626.628420
- ▶ chargePrecursor=4
- ▶ itol=0.5

| AA | c  | y               | z+1      | z+2             | z               | AA       |       |
|----|----|-----------------|----------|-----------------|-----------------|----------|-------|
| S  | 1  | 105.056         | 2503.492 | 2487.473        | 0.000           | 2486.465 | S[24] |
| G  | 2  | 162.087         | 2416.460 | 2400.441        | 0.000           | 2399.433 | G[23] |
| R  | 3  | <b>318.188</b>  | 2359.438 | 2343.419        | 2344.427        | 2342.412 | R[22] |
| G  | 4  | <b>375.210</b>  | 2303.337 | 2187.318        | 2198.326        | 2189.319 | G[21] |
| K  | 5  | <b>503.305</b>  | 2146.316 | 2130.297        | 2131.305        | 2129.289 | K[20] |
| G  | 6  | <b>560.326</b>  | 2018.221 | 2002.200        | 2003.210        | 2001.194 | G[19] |
| G  | 7  | <b>617.348</b>  | 1961.199 | <b>1945.180</b> | 1946.188        | 1944.173 | G[18] |
| K  | 8  | <b>745.443</b>  | 1904.178 | 1888.159        | <b>1889.167</b> | 1887.151 | K[17] |
| G  | 9  | <b>802.464</b>  | 1776.063 | 1760.064        | <b>1761.072</b> | 1759.056 | G[16] |
| L  | 10 | <b>915.548</b>  | 1719.061 | 1703.063        | 1704.069        | 1702.035 | L[15] |
| G  | 11 | <b>972.570</b>  | 1605.977 | 1589.958        | <b>1590.966</b> | 1588.951 | G[14] |
| K  | 12 | <b>1100.665</b> | 1548.956 | 1532.937        | <b>1533.945</b> | 1531.929 | K[13] |
| G  | 13 | <b>1157.686</b> | 1430.861 | 1404.840        | <b>1405.850</b> | 1403.834 | G[12] |
| G  | 14 | <b>1214.708</b> | 1363.839 | 1347.821        | <b>1348.828</b> | 1346.813 | G[11] |
| A  | 15 | <b>1285.745</b> | 1306.818 | 1290.799        | 1291.807        | 1289.791 | A[10] |
| R  | 16 | <b>1413.840</b> | 1238.781 | 1219.782        | 1220.790        | 1218.764 | R[9]  |
| R  | 17 | <b>1569.941</b> | 1107.686 | 1091.667        | <b>1092.675</b> | 1090.659 | R[8]  |
| H  | 18 | <b>1707.000</b> | 951.585  | <b>935.566</b>  | <b>936.574</b>  | 934.558  | H[7]  |
| R  | 19 | 1863.101        | 814.526  | 798.507         | <b>799.515</b>  | 797.499  | R[6]  |
| K  | 20 | 2019.227        | 658.425  | <b>642.406</b>  | <b>643.414</b>  | 641.398  | K[5]  |
| V  | 21 | 2118.296        | 502.298  | 486.280         | <b>487.287</b>  | 485.272  | V[4]  |
| L  | 22 | 2213.380        | 403.230  | 387.211         | <b>388.219</b>  | 386.203  | L[3]  |
| R  | 23 | 2387.481        | 298.146  | 274.127         | 275.135         | 273.119  | R[2]  |
| D  | 24 | 2502.508        | 134.045  | 118.026         | 119.034         | 117.018  | D[1]  |



# sp | P62806 | H4\_MOUSE

SGRGKGGKGLGKGGAKRHRK<sup>Dimethyl</sup> VLRD  
28.03

- ▶ fragmentation table for charge state 2+
- ▶ specType=etd
- ▶ score=110.03
- ▶ F113278.dat
- ▶ query=q55452.p1
- ▶ precursor=626.628420
- ▶ chargePrecursor=4
- ▶ itol=0.5

| AA |    | c               | y               | z+1             | z+2             | z              | AA    |
|----|----|-----------------|-----------------|-----------------|-----------------|----------------|-------|
| S  | 1  | 53.037          | <b>1252.249</b> | 1244.260        | 0.504           | 1243.756       | S(24) |
| G  | 2  | 81.547          | 1208.733        | 1200.726        | 0.504           | 1200.220       | G(23) |
| R  | 3  | 159.598         | 1180.222        | <b>1172.213</b> | <b>1172.717</b> | 1171.709       | R(22) |
| G  | 4  | 189.309         | 1102.172        | <b>1094.163</b> | <b>1094.667</b> | 1093.659       | G(21) |
| K  | 5  | 252.159         | <b>1073.661</b> | <b>1065.652</b> | <b>1066.156</b> | 1065.148       | K(20) |
| G  | 6  | 280.667         | <b>1009.614</b> | 1001.605        | 1002.108        | 1001.101       | G(19) |
| G  | 7  | 309.176         | 961.101         | <b>973.094</b>  | <b>973.598</b>  | <b>972.590</b> | G(18) |
| K  | 8  | 373.225         | 952.592         | <b>944.583</b>  | <b>945.087</b>  | 944.079        | K(17) |
| G  | 9  | 401.736         | 898.545         | <b>889.536</b>  | <b>891.040</b>  | 890.032        | G(16) |
| L  | 10 | 459.278         | 890.036         | <b>852.025</b>  | <b>852.529</b>  | 851.521        | L(15) |
| G  | 11 | 488.789         | 803.492         | 795.483         | <b>795.987</b>  | 794.979        | G(14) |
| K  | 12 | 550.836         | 774.982         | <b>766.972</b>  | <b>767.476</b>  | 766.468        | K(13) |
| G  | 13 | 579.347         | 710.934         | <b>702.925</b>  | <b>703.429</b>  | 702.421        | G(12) |
| G  | 14 | 607.857         | 682.423         | <b>674.414</b>  | <b>674.918</b>  | 673.910        | G(11) |
| A  | 15 | <b>643.376</b>  | 653.913         | 645.904         | <b>646.407</b>  | 645.399        | A(10) |
| R  | 16 | 707.413         | 618.399         | <b>610.389</b>  | <b>610.893</b>  | 609.885        | R(9)  |
| R  | 17 | <b>785.474</b>  | 554.341         | <b>546.337</b>  | <b>546.841</b>  | 545.833        | R(8)  |
| H  | 18 | <b>854.004</b>  | 476.290         | 468.287         | 468.791         | 467.783        | H(7)  |
| R  | 19 | <b>932.054</b>  | 407.767         | 399.757         | 400.261         | 399.253        | R(6)  |
| K  | 20 | <b>1010.117</b> | 329.716         | 321.707         | 322.211         | 321.203        | K(5)  |
| V  | 21 | <b>1059.651</b> | 251.663         | 243.653         | 244.157         | 243.149        | V(4)  |
| L  | 22 | <b>1116.193</b> | 202.119         | 194.109         | 194.613         | 193.605        | L(3)  |
| R  | 23 | <b>1194.244</b> | 145.577         | 137.567         | 138.071         | 137.063        | R(2)  |
| D  | 24 | <b>1251.757</b> | 67.526          | 59.517          | 60.021          | 59.013         | D(1)  |

# sp | P62806 | H4\_MOUSE

SGRGKGGKGLGKGGAKRHRK<sup>Dimethyl</sup>VLRD<sub>28.03</sub>

- ▶ fragmentation table for charge state 3+
- ▶ specType=etd
- ▶ score=110.03
- ▶ F113278.dat
- ▶ query=q55452.p1
- ▶ precursor=626.628420
- ▶ chargePrecursor=4
- ▶ itol=0.5

| AA    | c              | y              | z+1            | z+2            | z              | AA    |
|-------|----------------|----------------|----------------|----------------|----------------|-------|
| S[1]  | 35.693         | <b>835.169</b> | <b>629.829</b> | 0.672          | 829.893        | S[24] |
| G[2]  | 54.701         | 806.150        | <b>800.818</b> | 0.672          | <b>800.463</b> | G[23] |
| R[3]  | 106.734        | 787.151        | <b>781.811</b> | <b>782.147</b> | <b>781.475</b> | R[22] |
| G[4]  | 125.741        | 735.117        | 729.778        | 730.114        | 729.442        | G[21] |
| K[5]  | 168.440        | 716.110        | 710.770        | 711.106        | 710.435        | K[20] |
| G[6]  | 187.447        | 673.412        | 668.072        | 668.408        | 667.736        | G[19] |
| G[7]  | 206.454        | 654.405        | 649.065        | 649.401        | 648.729        | G[18] |
| K[8]  | 249.152        | 635.397        | 630.058        | 630.394        | 629.722        | K[17] |
| C[9]  | 288.100        | 592.699        | 587.360        | 587.696        | 587.024        | C[16] |
| L[10] | 335.954        | 573.692        | 568.352        | 568.688        | 568.016        | L[15] |
| G[11] | 324.861        | 535.997        | 530.658        | 530.994        | 530.322        | G[14] |
| K[12] | 387.560        | 516.990        | 511.651        | 511.986        | 511.315        | K[13] |
| G[13] | 386.567        | 474.292        | 468.952        | 469.288        | 468.616        | G[12] |
| G[14] | 405.574        | 455.285        | 449.945        | 450.281        | 449.609        | G[11] |
| A[15] | 429.253        | 436.277        | 430.938        | 431.274        | 430.602        | A[10] |
| K[16] | 471.951        | 412.598        | 407.259        | 407.595        | 406.923        | K[9]  |
| R[17] | 523.985        | 369.900        | 364.561        | 364.896        | 364.225        | R[8]  |
| H[18] | 569.671        | <b>317.866</b> | 312.527        | 312.863        | 312.191        | H[7]  |
| R[19] | 621.705        | 272.180        | 266.841        | 267.176        | 266.505        | R[6]  |
| K[20] | 673.747        | 220.140        | 214.801        | 215.143        | 214.471        | K[5]  |
| V[21] | 706.770        | 168.104        | 162.765        | 163.101        | 162.429        | V[4]  |
| L[22] | <b>744.465</b> | 135.082        | 129.742        | 130.078        | 129.406        | L[3]  |
| R[23] | <b>796.498</b> | 97.387         | 92.047         | 92.383         | 91.711         | R[2]  |
| D[24] | 854.841        | 45.353         | 40.014         | 40.349         | 39.678         | D[1]  |



# sp | P62806 | H4\_MOUSE

[Acetyl]SGRGKGGKGLGKGGAKRHRK<sup>Dimethyl</sup>VLRD<sub>28.03</sub>

- ▶ fragmentation table for charge state 1+
- ▶ specType=etd
- ▶ score=96.58
- ▶ F113278.dat
- ▶ query=q55939\_p1
- ▶ precursor=509.905810
- ▶ chargePrecursor=5
- ▶ itol=0.5

| AA | c  | y               | z+1      | z+2             | z               | AA       |       |
|----|----|-----------------|----------|-----------------|-----------------|----------|-------|
| S  | 1  | 147.076         | 2545.502 | 2529.483        | 0.000           | 2528.478 | S[24] |
| G  | 2  | 204.098         | 2416.460 | 2400.441        | 0.000           | 2399.433 | G[23] |
| R  | 3  | <b>368.199</b>  | 2289.438 | 2243.419        | 2244.427        | 2242.412 | R[22] |
| G  | 4  | <b>417.220</b>  | 2203.337 | 2187.318        | 2188.326        | 2186.310 | G[21] |
| K  | 5  | <b>545.315</b>  | 2146.316 | 2130.297        | 2131.305        | 2129.289 | K[20] |
| G  | 6  | 602.337         | 2018.221 | 2002.202        | 2003.210        | 2001.194 | G[19] |
| G  | 7  | <b>659.358</b>  | 1961.199 | 1945.180        | 1946.188        | 1944.173 | G[18] |
| K  | 8  | <b>787.453</b>  | 1904.178 | 1888.159        | <b>1889.167</b> | 1887.151 | K[17] |
| G  | 9  | <b>844.475</b>  | 1776.083 | 1760.064        | 1761.072        | 1759.056 | G[16] |
| L  | 10 | <b>927.559</b>  | 1719.061 | 1703.043        | <b>1704.050</b> | 1702.035 | L[15] |
| G  | 11 | <b>1014.580</b> | 1662.077 | 1589.958        | 1590.966        | 1588.951 | G[14] |
| K  | 12 | <b>1142.675</b> | 1548.999 | 1532.937        | <b>1533.945</b> | 1531.929 | K[13] |
| G  | 13 | <b>1199.697</b> | 1420.961 | 1404.942        | 1405.950        | 1403.934 | G[12] |
| G  | 14 | <b>1256.718</b> | 1363.839 | 1347.821        | 1348.828        | 1346.813 | G[11] |
| A  | 15 | 1327.755        | 1306.818 | <b>1290.799</b> | <b>1291.807</b> | 1289.791 | A[10] |
| R  | 16 | 1459.850        | 1238.781 | 1223.763        | 1223.770        | 1221.754 | R[9]  |
| R  | 17 | 1611.951        | 1107.686 | 1091.667        | 1092.675        | 1090.659 | R[8]  |
| H  | 18 | <b>1749.010</b> | 951.585  | <b>935.566</b>  | <b>936.574</b>  | 934.558  | H[7]  |
| R  | 19 | 1908.111        | 814.526  | 798.507         | 799.515         | 797.499  | R[6]  |
| K  | 20 | 2061.238        | 658.425  | <b>642.406</b>  | 643.414         | 641.398  | K[5]  |
| V  | 21 | 2180.306        | 502.298  | <b>486.288</b>  | <b>487.287</b>  | 485.272  | V[4]  |
| L  | 22 | 2273.390        | 403.230  | <b>387.211</b>  | 388.219         | 386.203  | L[3]  |
| R  | 23 | 2429.491        | 298.146  | <b>274.127</b>  | 275.135         | 273.119  | R[2]  |
| D  | 24 | 2544.518        | 134.045  | 118.026         | 119.034         | 117.018  | D[1]  |

# sp | P62806 | H4\_MOUSE

[Acetyl]SGRGKGGKGLGKGGAKRHRK<sup>Dimethyl</sup>VLRD<sub>28.03</sub>

- ▶ fragmentation table for charge state 2+
- ▶ specType=etd
- ▶ score=96.58
- ▶ F113278.dat
- ▶ query=q55939\_p1
- ▶ precursor=509.905810
- ▶ chargePrecursor=5
- ▶ itol=0.5

| AA    | c               | y               | z+1             | z+2             | z               | AA    |
|-------|-----------------|-----------------|-----------------|-----------------|-----------------|-------|
| S[1]  | 74.042          | <b>1273.255</b> | 1266.265        | 0.504           | 1264.741        | S[24] |
| G[2]  | 102.553         | 1208.733        | 1200.724        | 0.504           | 1200.220        | G[23] |
| R[3]  | 180.603         | 1180.223        | <b>1172.213</b> | 1172.717        | <b>1171.709</b> | R[22] |
| G[4]  | 259.114         | 1102.172        | 1094.163        | <b>1094.667</b> | 1093.659        | G[21] |
| K[5]  | 273.163         | 1073.661        | 1065.650        | <b>1066.156</b> | 1065.148        | K[20] |
| G[6]  | 301.672         | 1009.614        | <b>1001.605</b> | <b>1002.108</b> | 1001.101        | G[19] |
| G[7]  | 330.183         | <b>981.103</b>  | <b>973.094</b>  | <b>973.598</b>  | 972.590         | G[18] |
| K[8]  | 394.230         | 952.592         | 944.583         | <b>945.087</b>  | 944.070         | K[17] |
| G[9]  | <b>422.741</b>  | 898.545         | <b>880.536</b>  | <b>881.040</b>  | 880.032         | G[16] |
| L[10] | <b>479.293</b>  | <b>860.034</b>  | 852.025         | 853.529         | 853.521         | L[15] |
| G[11] | <b>507.794</b>  | 803.482         | 795.483         | <b>795.987</b>  | 794.979         | G[14] |
| K[12] | <b>571.841</b>  | <b>774.982</b>  | <b>766.972</b>  | <b>767.476</b>  | 766.468         | K[13] |
| G[13] | <b>600.352</b>  | <b>710.934</b>  | <b>702.925</b>  | <b>703.429</b>  | 702.421         | G[12] |
| G[14] | <b>628.863</b>  | 652.423         | <b>674.414</b>  | <b>674.918</b>  | 673.910         | G[11] |
| A[15] | <b>664.381</b>  | 653.913         | <b>645.903</b>  | <b>646.407</b>  | <b>645.399</b>  | A[10] |
| R[16] | 720.432         | 618.394         | <b>610.385</b>  | <b>610.889</b>  | 609.881         | R[9]  |
| R[17] | <b>806.479</b>  | 554.347         | <b>546.337</b>  | <b>546.841</b>  | <b>545.833</b>  | R[8]  |
| H[18] | <b>875.009</b>  | 476.290         | <b>468.287</b>  | <b>468.791</b>  | 467.783         | H[7]  |
| R[19] | <b>953.059</b>  | 407.767         | <b>399.757</b>  | <b>400.261</b>  | 399.253         | R[6]  |
| K[20] | <b>1031.122</b> | 329.716         | 321.707         | 322.211         | 321.203         | K[5]  |
| V[21] | 1080.667        | 252.693         | 244.683         | 244.187         | 243.180         | V[4]  |
| L[22] | <b>1137.199</b> | 202.139         | 194.129         | 194.633         | 193.625         | L[3]  |
| R[23] | 1215.249        | 145.577         | 137.567         | 138.071         | 137.063         | R[2]  |
| D[24] | 1272.703        | 67.526          | 59.517          | 60.021          | 59.013          | D[1]  |

# sp | P62806 | H4\_MOUSE

[Acetyl]SGRGKGGKGLGKGGAKRHRK<sup>Dimethyl</sup>VLRD<sub>28.03</sub>

- ▶ fragmentation table for charge state 3+
- ▶ specType=etd
- ▶ score=96.58
- ▶ F113278.dat
- ▶ query=q55939.p1
- ▶ precursor=509.905810
- ▶ chargePrecursor=5
- ▶ itol=0.5

| AA    | c              | y              | z+1            | z+2            | z              | AA    |
|-------|----------------|----------------|----------------|----------------|----------------|-------|
| S[1]  | 49.697         | <b>849.172</b> | 843.833        | 0.672          | 843.897        | S[24] |
| G[2]  | 56.704         | 806.158        | 800.810        | 0.672          | 800.483        | G[23] |
| R[3]  | 150.738        | <b>787.151</b> | <b>781.811</b> | <b>782.147</b> | 781.475        | R[22] |
| G[4]  | 139.745        | 735.117        | <b>729.778</b> | <b>730.114</b> | 729.442        | G[21] |
| K[5]  | 182.443        | 716.110        | <b>710.770</b> | <b>711.106</b> | 710.435        | K[20] |
| G[6]  | 201.450        | 673.412        | <b>668.072</b> | <b>668.408</b> | 667.736        | G[19] |
| G[7]  | 220.458        | <b>654.405</b> | <b>649.065</b> | <b>649.401</b> | 648.729        | G[18] |
| K[8]  | 263.156        | 635.397        | 630.058        | 630.394        | 629.722        | K[17] |
| G[9]  | 282.163        | <b>592.699</b> | <b>587.360</b> | <b>587.695</b> | <b>587.024</b> | G[16] |
| L[10] | 319.858        | 673.692        | <b>568.352</b> | <b>568.688</b> | <b>568.016</b> | L[15] |
| G[11] | 338.865        | 535.997        | 530.658        | 530.994        | 530.322        | G[14] |
| K[12] | 381.563        | 516.990        | 511.651        | 511.986        | 511.315        | K[13] |
| G[13] | <b>400.570</b> | 474.292        | <b>468.952</b> | 469.288        | <b>468.616</b> | G[12] |
| G[14] | 419.578        | 455.285        | 449.945        | 450.281        | 449.609        | G[11] |
| A[15] | 443.257        | 436.277        | 430.938        | 431.274        | 430.602        | A[10] |
| K[16] | <b>485.955</b> | 412.598        | 407.259        | 407.595        | 406.923        | K[9]  |
| R[17] | <b>537.989</b> | 369.900        | 364.561        | 364.896        | 364.225        | R[8]  |
| H[18] | 583.675        | 317.866        | 312.527        | 312.863        | 312.191        | H[7]  |
| R[19] | 635.709        | 272.180        | 266.841        | 267.176        | 266.505        | R[6]  |
| K[20] | <b>687.751</b> | 220.140        | 214.801        | 215.143        | 214.471        | K[5]  |
| V[21] | <b>720.774</b> | 168.104        | 162.765        | 163.101        | 162.429        | V[4]  |
| L[22] | <b>758.468</b> | 135.082        | 129.742        | 130.078        | 129.406        | L[3]  |
| R[23] | <b>810.502</b> | 97.387         | 92.047         | 92.383         | 91.711         | R[2]  |
| D[24] | <b>848.844</b> | 45.353         | 40.014         | 40.349         | 39.678         | D[1]  |

# sp | P62806 | H4\_MOUSE

[Acetyl]SGRGKGGKGLGKGGAKRHRK<sup>Dimethyl</sup>VLRD<sub>28.03</sub>

- ▶ fragmentation table for charge state 4+
- ▶ specType=etd
- ▶ score=96.58
- ▶ F113278.dat
- ▶ query=q55939\_p1
- ▶ precursor=509.905810
- ▶ chargePrecursor=5
- ▶ itol=0.5

| AA    | c       | y              | z+1            | z+2            | z              | AA    |
|-------|---------|----------------|----------------|----------------|----------------|-------|
| S[1]  | 37.525  | <b>637.131</b> | <b>633.126</b> | 0.755          | 632.974        | S[24] |
| G[2]  | 51.780  | 604.970        | <b>600.856</b> | 0.755          | <b>600.614</b> | G[23] |
| R[3]  | 90.805  | 590.615        | <b>586.610</b> | <b>586.862</b> | <b>586.358</b> | R[22] |
| G[4]  | 105.061 | 551.590        | 547.585        | 547.837        | 547.333        | G[21] |
| K[5]  | 137.084 | <b>537.334</b> | 533.330        | 533.582        | 533.078        | K[20] |
| G[6]  | 151.340 | 505.311        | 501.306        | 501.558        | 501.054        | G[19] |
| G[7]  | 165.595 | 491.055        | <b>487.051</b> | <b>487.303</b> | <b>486.799</b> | G[18] |
| K[8]  | 197.619 | 476.800        | 472.795        | 473.047        | 472.543        | K[17] |
| G[9]  | 211.874 | 464.776        | 460.772        | 461.023        | 460.520        | G[16] |
| L[10] | 240.145 | 430.521        | 426.516        | 426.768        | 426.264        | L[15] |
| G[11] | 254.401 | 402.250        | 398.245        | 398.497        | 397.993        | G[14] |
| K[12] | 286.424 | 387.994        | 383.989        | 384.242        | 383.738        | K[13] |
| G[13] | 300.680 | 355.971        | 351.966        | 352.218        | 351.714        | G[12] |
| G[14] | 314.935 | 341.715        | 337.711        | 337.963        | 337.459        | G[11] |
| A[15] | 332.694 | 327.460        | 323.455        | 323.707        | 323.203        | A[10] |
| K[16] | 354.718 | 309.701        | 305.696        | 305.948        | 305.444        | K[9]  |
| R[17] | 403.743 | <b>277.677</b> | 273.672        | <b>273.924</b> | 273.420        | R[8]  |
| H[18] | 438.008 | 238.652        | 234.647        | 234.899        | 234.395        | H[7]  |
| R[19] | 477.033 | 204.387        | 200.382        | 200.634        | 200.130        | R[6]  |
| K[20] | 516.065 | 169.362        | 165.357        | 165.609        | 165.105        | K[5]  |
| V[21] | 540.832 | 136.130        | 132.125        | 132.377        | 132.073        | V[4]  |
| L[22] | 569.103 | 101.563        | 97.558         | 97.810         | 97.306         | L[3]  |
| R[23] | 608.128 | 73.292         | 69.287         | 69.539         | 69.035         | R[2]  |
| D[24] | 636.885 | 34.267         | 30.262         | 30.514         | 30.010         | D[1]  |

# sp | P62806 | H4\_MOUSE

[Acetyl]SGRGKGGKGLGKGGAKRHR (Dimethyl) KVLRD  
(28.03)

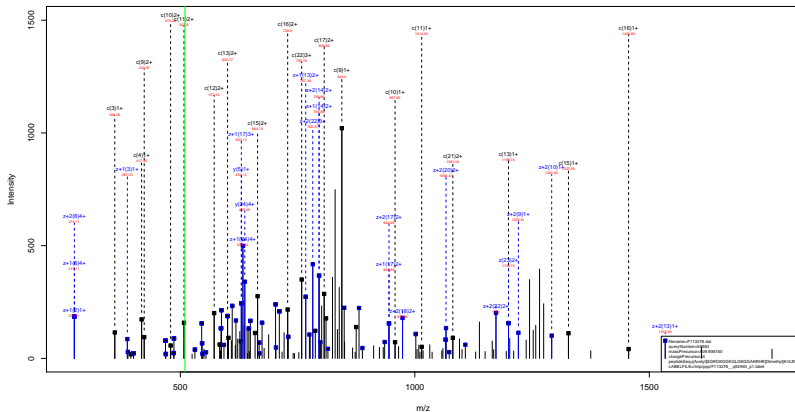



# sp | P62806 | H4\_MOUSE

[Acetyl]SGRGKGGKGLGKGGAKRHR (Dimethyl)  
(28.03) KVLRD

- ▶ fragmentation table for charge state 1+
- ▶ specType=etd
- ▶ score=78.41
- ▶ F113278.dat
- ▶ query=q55940.p1
- ▶ precursor=509.906150
- ▶ chargePrecursor=5
- ▶ itol=0.5

| AA |    | c               | y               | z+1            | z+2             | z              | AA    |
|----|----|-----------------|-----------------|----------------|-----------------|----------------|-------|
| S  | 1  | 147.076         | 2545.502        | 2529.483       | 0.000           | 2528.478       | S[24] |
| G  | 2  | 204.098         | 3416.460        | 2400.441       | 0.000           | 2399.433       | G[23] |
| R  | 3  | <b>360.199</b>  | 2359.438        | 2343.419       | 2344.427        | 2342.412       | R[22] |
| G  | 4  | <b>417.220</b>  | 2203.337        | 2187.318       | 2188.326        | 2186.310       | G[21] |
| K  | 5  | <b>545.315</b>  | 2146.310        | 2130.297       | 2131.305        | 2129.289       | K[20] |
| G  | 6  | <b>602.337</b>  | 2018.221        | 2002.202       | 2003.210        | 2001.194       | G[19] |
| G  | 7  | <b>659.358</b>  | 1961.199        | 1945.180       | 1946.188        | 1944.173       | G[18] |
| K  | 8  | <b>787.453</b>  | 1904.178        | 1888.159       | 1889.167        | 1887.151       | K[17] |
| G  | 9  | <b>844.475</b>  | 1776.083        | 1760.064       | 1761.072        | 1759.056       | G[16] |
| L  | 10 | <b>953.559</b>  | 1719.061        | 1703.043       | 1704.050        | 1702.035       | L[15] |
| G  | 11 | <b>1014.580</b> | 1655.977        | 1589.958       | 1590.966        | 1588.951       | G[14] |
| K  | 12 | 1142.675        | 1548.950        | 1532.937       | <b>1533.945</b> | 1531.929       | K[13] |
| G  | 13 | <b>1199.697</b> | 1420.861        | 1404.842       | 1405.850        | 1403.834       | G[12] |
| G  | 14 | 1256.718        | 1363.839        | 1347.821       | 1348.828        | 1346.813       | G[11] |
| A  | 15 | <b>1327.755</b> | 1308.818        | 1290.799       | <b>1291.807</b> | 1289.791       | A[10] |
| R  | 16 | <b>1435.850</b> | 1235.781        | 1219.762       | <b>1220.770</b> | 1218.755       | R[9]  |
| R  | 17 | 1631.953        | <b>1107.680</b> | 1091.661       | 1092.670        | 1090.655       | R[8]  |
| H  | 18 | 1749.010        | 951.585         | <b>935.566</b> | 936.574         | 934.558        | H[7]  |
| R  | 19 | 1933.143        | <b>814.526</b>  | <b>798.507</b> | 799.515         | 797.499        | R[6]  |
| K  | 20 | 2061.238        | <b>630.393</b>  | 614.375        | 615.382         | 613.367        | K[5]  |
| V  | 21 | 2180.306        | 502.290         | <b>486.280</b> | 487.287         | <b>485.272</b> | V[4]  |
| L  | 22 | 2473.390        | 403.280         | <b>387.211</b> | <b>388.219</b>  | 386.203        | L[3]  |
| D  | 23 | 2629.481        | 290.146         | <b>274.127</b> | 275.136         | 273.119        | D[2]  |
| D  | 24 | 2544.518        | 134.040         | 118.026        | 119.034         | 117.018        | D[1]  |

# sp | P62806 | H4\_MOUSE

[Acetyl]SGRGKGGKGLGKGGAKRHR (Dimethyl)  
(28.03) KVLRD

- ▶ fragmentation table for charge state 2+
- ▶ specType=etd
- ▶ score=78.41
- ▶ F113278.dat
- ▶ query=q55940.p1
- ▶ precursor=509.906150
- ▶ chargePrecursor=5
- ▶ itol=0.5

| AA    | c               | y               | z+1             | z+2             | z               | AA    |
|-------|-----------------|-----------------|-----------------|-----------------|-----------------|-------|
| S[1]  | 74.042          | 1273.255        | 1265.245        | 0.504           | 1264.741        | S[24] |
| G[2]  | 102.553         | 1208.733        | 1200.724        | 0.504           | <b>1200.220</b> | G[23] |
| R[3]  | 180.603         | 1180.223        | 1172.213        | <b>1172.717</b> | 1171.700        | R[22] |
| G[4]  | 209.114         | 1102.172        | 1094.162        | 1004.507        | 1093.000        | G[21] |
| K[5]  | 273.483         | <b>1073.661</b> | <b>1065.652</b> | <b>1066.156</b> | <b>1065.149</b> | K[20] |
| G[6]  | 301.672         | 1008.614        | <b>1001.605</b> | <b>1002.108</b> | 1001.100        | G[19] |
| G[7]  | 330.183         | 981.103         | 973.094         | <b>973.598</b>  | 972.590         | G[18] |
| K[8]  | <b>394.230</b>  | 952.592         | <b>944.583</b>  | <b>945.087</b>  | 944.070         | K[17] |
| G[9]  | <b>422.741</b>  | <b>888.545</b>  | 880.536         | <b>881.040</b>  | 880.032         | G[16] |
| L[10] | <b>479.283</b>  | 860.134         | 852.125         | 853.797         | 853.321         | L[15] |
| G[11] | <b>507.794</b>  | 831.492         | <b>795.483</b>  | <b>795.987</b>  | 794.970         | G[14] |
| K[12] | <b>571.841</b>  | <b>774.982</b>  | <b>766.972</b>  | <b>767.476</b>  | 766.468         | K[13] |
| G[13] | <b>600.352</b>  | <b>710.934</b>  | <b>702.925</b>  | <b>703.429</b>  | 702.421         | G[12] |
| G[14] | <b>628.863</b>  | 682.423         | <b>674.414</b>  | 674.918         | <b>673.910</b>  | G[11] |
| A[15] | <b>664.381</b>  | 653.912         | <b>645.903</b>  | <b>646.407</b>  | 645.390         | A[10] |
| T[16] | <b>728.429</b>  | <b>618.394</b>  | <b>610.385</b>  | <b>610.889</b>  | 609.881         | T[9]  |
| R[17] | <b>806.479</b>  | <b>554.347</b>  | <b>546.337</b>  | <b>546.841</b>  | <b>545.833</b>  | R[8]  |
| H[18] | <b>875.009</b>  | 476.296         | <b>468.287</b>  | <b>468.791</b>  | 467.783         | H[7]  |
| R[19] | 967.075         | 407.767         | <b>399.757</b>  | <b>400.261</b>  | 399.253         | R[6]  |
| K[20] | 1031.122        | 315.700         | 307.691         | 308.195         | 307.187         | K[5]  |
| V[21] | <b>1080.657</b> | 251.953         | 243.943         | 244.447         | 243.440         | V[4]  |
| L[22] | 1137.156        | 202.119         | 194.109         | 194.613         | 193.605         | L[3]  |
| R[23] | 1215.249        | 145.977         | 137.967         | 138.471         | 137.463         | R[2]  |
| D[24] | 1272.763        | 87.526          | 59.537          | 60.021          | 59.013          | D[1]  |

# sp | P62806 | H4\_MOUSE

[Acetyl]SGRGKGGKGLGKGGAKRHR (Dimethyl)  
(28.03) KVLRD

- ▶ fragmentation table for charge state 3+
- ▶ specType=etd
- ▶ score=78.41
- ▶ F113278.dat
- ▶ query=q55940.p1
- ▶ precursor=509.906150
- ▶ chargePrecursor=5
- ▶ itol=0.5

| AA    | c              | y              | z+1            | z+2            | z              | AA    |
|-------|----------------|----------------|----------------|----------------|----------------|-------|
| S[1]  | 49.697         | <b>849.172</b> | 843.833        | 0.672          | 843.497        | S[24] |
| G[2]  | 68.704         | 836.196        | 830.811        | 0.672          | 830.483        | G[23] |
| R[3]  | 120.738        | 787.151        | 781.811        | <b>782.147</b> | 781.475        | R[22] |
| G[4]  | 139.745        | 735.117        | <b>725.778</b> | <b>730.114</b> | 729.442        | G[21] |
| K[5]  | 182.443        | 716.110        | <b>710.770</b> | <b>711.106</b> | 710.435        | K[20] |
| G[6]  | 201.450        | 673.412        | <b>668.072</b> | <b>668.408</b> | <b>667.736</b> | G[19] |
| G[7]  | 220.458        | 654.405        | <b>649.065</b> | <b>649.401</b> | 648.729        | G[18] |
| K[8]  | 263.156        | 635.397        | <b>630.058</b> | <b>630.394</b> | <b>629.722</b> | K[17] |
| G[9]  | 282.163        | <b>592.699</b> | <b>587.360</b> | <b>587.695</b> | <b>587.024</b> | G[16] |
| L[10] | 319.858        | 571.692        | 566.352        | 565.688        | 568.016        | L[15] |
| G[11] | 338.865        | 535.991        | <b>530.658</b> | <b>530.994</b> | 530.322        | G[14] |
| K[12] | 381.563        | 516.990        | 511.651        | 511.986        | 511.315        | K[13] |
| G[13] | <b>400.570</b> | 474.292        | <b>468.952</b> | <b>469.288</b> | <b>468.616</b> | G[12] |
| G[14] | 419.578        | 455.285        | 449.945        | 450.281        | 449.609        | G[11] |
| A[15] | 443.297        | 436.277        | 430.938        | 431.274        | 430.602        | A[10] |
| K[16] | <b>485.955</b> | 412.588        | 407.250        | 407.585        | 406.923        | K[9]  |
| R[17] | 537.989        | 369.900        | 364.561        | 364.896        | 364.225        | R[8]  |
| H[18] | <b>583.675</b> | 317.866        | 312.527        | 312.863        | 312.191        | H[7]  |
| R[19] | 645.052        | 272.180        | 266.841        | 267.176        | 266.505        | R[6]  |
| K[20] | 687.751        | 210.883        | 205.463        | 205.799        | 205.127        | K[5]  |
| V[21] | 720.774        | 188.104        | 182.705        | 183.101        | 182.429        | V[4]  |
| L[22] | <b>758.468</b> | 135.082        | 129.742        | 130.078        | 129.406        | L[3]  |
| R[23] | <b>810.502</b> | 97.387         | 92.047         | 92.383         | 91.711         | R[2]  |
| D[24] | 848.844        | 45.353         | 40.014         | 40.340         | 39.678         | D[1]  |

# sp | P62806 | H4\_MOUSE

[Acetyl]SGRGKGGKGLGKGGAKRHR<sup>(Dimethyl)</sup> KVLRD  
(28.03)

- ▶ fragmentation table for charge state 4+
- ▶ specType=etd
- ▶ score=78.41
- ▶ F113278.dat
- ▶ query=q55940.p1
- ▶ precursor=509.906150
- ▶ chargePrecursor=5
- ▶ itol=0.5

| AA    | c       | y              | z+1            | z+2            | z              | AA    |
|-------|---------|----------------|----------------|----------------|----------------|-------|
| S[1]  | 37.525  | <b>637.131</b> | <b>633.126</b> | 0.755          | 632.074        | S[24] |
| G[2]  | 51.790  | 604.070        | <b>600.066</b> | 0.755          | <b>600.614</b> | G[23] |
| R[3]  | 90.805  | 590.615        | <b>586.610</b> | <b>586.862</b> | <b>586.358</b> | R[22] |
| G[4]  | 105.061 | 551.590        | <b>547.585</b> | <b>547.837</b> | <b>547.333</b> | G[21] |
| K[5]  | 137.084 | 537.334        | 533.330        | 533.582        | 533.078        | K[20] |
| G[6]  | 151.340 | 505.311        | 501.306        | 501.558        | 501.054        | G[19] |
| G[7]  | 165.595 | 491.055        | 487.051        | 487.303        | <b>486.799</b> | G[18] |
| K[8]  | 197.619 | 476.900        | 472.795        | 473.047        | 472.543        | K[17] |
| G[9]  | 211.874 | 444.776        | 440.771        | 441.023        | 440.520        | G[16] |
| L[10] | 240.145 | 430.521        | 426.516        | 426.768        | 426.264        | L[15] |
| G[11] | 254.403 | 402.260        | 398.245        | 398.497        | 397.993        | G[14] |
| K[12] | 266.424 | <b>387.594</b> | 383.590        | 384.242        | 383.738        | K[13] |
| G[13] | 300.680 | 355.971        | 351.966        | 352.218        | 351.714        | G[12] |
| G[14] | 314.935 | 341.715        | 337.711        | 337.963        | 337.459        | G[11] |
| A[15] | 332.694 | 327.460        | 323.455        | 323.707        | 323.203        | A[10] |
| K[16] | 364.718 | 309.701        | 305.696        | 305.948        | 305.444        | K[9]  |
| R[17] | 403.743 | <b>277.677</b> | <b>273.672</b> | <b>273.924</b> | 273.420        | R[8]  |
| H[18] | 438.008 | 238.652        | 234.647        | 234.899        | 234.395        | H[7]  |
| R[19] | 484.041 | 204.387        | 200.382        | 200.634        | 200.130        | R[6]  |
| K[20] | 516.065 | 158.284        | 154.340        | 154.601        | 154.097        | K[5]  |
| V[21] | 540.832 | 136.330        | 132.325        | 132.577        | 132.073        | V[4]  |
| L[22] | 569.103 | 101.563        | 97.558         | 97.810         | 97.306         | L[3]  |
| R[23] | 608.128 | 73.292         | 69.287         | 69.539         | 69.035         | R[2]  |
| D[24] | 636.885 | 34.267         | 30.262         | 30.514         | 30.010         | D[1]  |



# sp | P62806 | H4\_MOUSE

[Acetyl]SGRGKGGKGLGKGGAKRHRK <sup>Dimethyl</sup> VLRD  
28.03

- ▶ fragmentation table for charge state 1+
- ▶ specType=etd
- ▶ score=128.05
- ▶ F113278.dat
- ▶ query=q55943.p1
- ▶ precursor=637.131170
- ▶ chargePrecursor=4
- ▶ itol=0.5

| AA    | c               | y        | z+1            | z+2             | z        | AA    |
|-------|-----------------|----------|----------------|-----------------|----------|-------|
| S[1]  | 147.076         | 2945.502 | 2529.483       | 0.000           | 2529.478 | S[24] |
| G[2]  | 224.298         | 2416.460 | 2403.441       | 0.000           | 2399.433 | G[23] |
| H[3]  | <b>366.199</b>  | 2359.438 | 2343.419       | 2344.437        | 2342.412 | H[22] |
| G[4]  | <b>417.220</b>  | 2203.337 | 2187.318       | 2188.326        | 2186.310 | G[21] |
| K[5]  | <b>545.115</b>  | 2148.318 | 2130.297       | 2131.305        | 2129.288 | K[20] |
| G[6]  | <b>602.337</b>  | 2018.221 | 2002.202       | 2003.210        | 2001.194 | G[19] |
| G[7]  | <b>659.358</b>  | 1961.199 | 1945.180       | 1946.188        | 1944.173 | G[18] |
| K[8]  | <b>787.453</b>  | 1904.179 | 1888.159       | 1889.167        | 1887.151 | K[17] |
| G[9]  | <b>844.475</b>  | 1776.083 | 1760.064       | <b>1761.072</b> | 1759.056 | G[16] |
| L[10] | <b>957.559</b>  | 1719.061 | 1703.043       | 1704.050        | 1702.035 | L[15] |
| G[11] | <b>1014.580</b> | 1665.977 | 1589.958       | <b>1590.966</b> | 1588.951 | G[14] |
| K[12] | <b>1142.675</b> | 1548.958 | 1532.937       | <b>1533.945</b> | 1531.929 | K[13] |
| G[13] | 1199.697        | 1420.861 | 1404.842       | <b>1405.850</b> | 1403.834 | G[12] |
| G[14] | <b>1256.718</b> | 1363.839 | 1347.821       | <b>1348.828</b> | 1346.813 | G[11] |
| A[15] | 1327.755        | 1306.818 | 1290.799       | <b>1291.807</b> | 1289.791 | A[10] |
| K[16] | <b>1455.850</b> | 1238.781 | 1219.762       | <b>1220.770</b> | 1218.754 | K[9]  |
| R[17] | <b>1611.951</b> | 1107.686 | 1091.667       | 1092.675        | 1090.659 | R[8]  |
| H[18] | <b>1749.010</b> | 991.585  | <b>935.566</b> | <b>936.574</b>  | 934.558  | H[7]  |
| R[19] | <b>1905.111</b> | 814.526  | <b>798.507</b> | 799.515         | 797.499  | R[6]  |
| K[20] | 2061.238        | 658.425  | <b>642.406</b> | <b>643.414</b>  | 641.398  | K[5]  |
| V[21] | 2190.306        | 502.298  | 486.280        | 487.287         | 485.272  | V[4]  |
| L[22] | 2273.390        | 403.236  | 387.211        | <b>388.219</b>  | 386.203  | L[3]  |
| D[23] | 2429.481        | 290.140  | 274.121        | <b>275.125</b>  | 273.111  | D[2]  |
| D[24] | 2544.518        | 134.045  | 118.026        | 119.034         | 117.018  | D[1]  |

# sp | P62806 | H4\_MOUSE

[Acetyl]SGRGKGGKGLGKGGAKRHRK<sup>Dimethyl</sup>VLRD<sub>28.03</sub>

- ▶ fragmentation table for charge state 2+
- ▶ specType=etd
- ▶ score=128.05
- ▶ F113278.dat
- ▶ query=q55943.p1
- ▶ precursor=637.131170
- ▶ chargePrecursor=4
- ▶ itol=0.5

| AA    | c               | y               | z+1             | z+2             | z              | AA    |
|-------|-----------------|-----------------|-----------------|-----------------|----------------|-------|
| S[1]  | 74.042          | <b>1273.255</b> | 1295.265        | 0.504           | 1264.741       | S[24] |
| G[2]  | 102.553         | 1238.733        | <b>1200.724</b> | 0.504           | 1200.220       | G[23] |
| R[3]  | 180.603         | 1180.223        | 1172.233        | <b>1172.717</b> | 1171.700       | R[22] |
| G[4]  | 269.114         | 1102.172        | <b>1094.163</b> | <b>1094.667</b> | 1093.650       | G[21] |
| K[5]  | 273.161         | 1073.063        | <b>1065.052</b> | <b>1066.156</b> | 1065.143       | K[20] |
| G[6]  | 351.672         | 1009.614        | <b>1001.605</b> | <b>1002.108</b> | 1001.101       | G[19] |
| G[7]  | 330.193         | 981.103         | <b>973.094</b>  | <b>973.598</b>  | 972.590        | G[18] |
| K[8]  | 394.230         | 952.592         | <b>944.583</b>  | <b>945.087</b>  | 944.079        | K[17] |
| G[9]  | 422.741         | 888.545         | <b>880.536</b>  | <b>881.040</b>  | 880.032        | G[16] |
| L[10] | 479.293         | 860.036         | 852.025         | 852.529         | 851.521        | L[15] |
| G[11] | 507.794         | 803.492         | <b>795.483</b>  | <b>795.987</b>  | 794.979        | G[14] |
| K[12] | 571.841         | 774.982         | <b>766.972</b>  | <b>767.476</b>  | 766.468        | K[13] |
| G[13] | 600.352         | 710.934         | <b>702.925</b>  | <b>703.429</b>  | 702.421        | G[12] |
| G[14] | 628.863         | 682.423         | <b>674.414</b>  | <b>674.918</b>  | 673.910        | G[11] |
| A[15] | 667.361         | 653.913         | <b>645.903</b>  | <b>646.407</b>  | <b>645.399</b> | A[10] |
| R[16] | <b>728.429</b>  | 618.369         | <b>610.360</b>  | <b>610.864</b>  | 609.856        | R[9]  |
| R[17] | <b>806.479</b>  | 554.341         | <b>546.337</b>  | <b>546.841</b>  | <b>545.833</b> | R[8]  |
| H[18] | <b>875.009</b>  | 476.200         | 468.197         | 468.701         | 467.783        | H[7]  |
| R[19] | <b>953.059</b>  | 407.767         | 399.757         | 400.261         | 399.253        | R[6]  |
| K[20] | <b>1031.122</b> | 329.716         | 321.707         | 322.211         | 321.203        | K[5]  |
| V[21] | <b>1080.657</b> | 251.663         | 243.653         | 244.147         | 243.140        | V[4]  |
| L[22] | <b>1137.199</b> | 202.119         | 194.108         | 194.613         | 193.605        | L[3]  |
| R[23] | <b>1215.248</b> | 145.577         | 137.567         | 138.071         | 137.063        | R[2]  |
| D[24] | 1272.763        | 67.526          | 59.517          | 60.021          | 59.013         | D[1]  |

# sp | P62806 | H4\_MOUSE

[Acetyl]SGRGKGGKGLGKGGAKRHRK<sup>Dimethyl</sup>VLRD<sub>28.03</sub>

- ▶ fragmentation table for charge state 3+
- ▶ specType=etd
- ▶ score=128.05
- ▶ F113278.dat
- ▶ query=q55943.p1
- ▶ precursor=637.131170
- ▶ chargePrecursor=4
- ▶ itol=0.5

| AA    | c              | y              | z+1            | z+2            | z              | AA    |
|-------|----------------|----------------|----------------|----------------|----------------|-------|
| S[1]  | 49.697         | <b>849.172</b> | <b>843.833</b> | 0.672          | <b>843.497</b> | S[24] |
| G[2]  | 58.704         | 806.150        | <b>800.818</b> | 0.672          | 800.483        | G[23] |
| R[3]  | 150.738        | <b>787.151</b> | <b>781.811</b> | <b>782.147</b> | 781.475        | R[22] |
| G[4]  | 139.745        | 735.117        | 729.778        | 730.114        | 729.442        | G[21] |
| K[5]  | 182.443        | 716.110        | 710.770        | 711.106        | 710.435        | K[20] |
| G[6]  | 201.450        | 673.412        | 668.072        | 668.408        | 667.736        | G[19] |
| G[7]  | 220.458        | 654.405        | 649.065        | 649.401        | 648.729        | G[18] |
| K[8]  | 263.156        | 635.397        | 630.058        | 630.394        | 629.722        | K[17] |
| G[9]  | 282.163        | 592.699        | 587.360        | 587.696        | 587.024        | G[16] |
| L[10] | 319.658        | 573.692        | 568.352        | 568.688        | 568.016        | L[15] |
| G[11] | 338.665        | 535.997        | 530.658        | 530.994        | 530.322        | G[14] |
| K[12] | 381.563        | 516.990        | 511.651        | 511.986        | 511.315        | K[13] |
| G[13] | 400.570        | 474.292        | 468.952        | 469.288        | 468.616        | G[12] |
| G[14] | 419.578        | 455.285        | 449.945        | 450.281        | 449.609        | G[11] |
| A[15] | 443.257        | 436.277        | 430.938        | 431.274        | 430.602        | A[10] |
| K[16] | 485.955        | 412.598        | 407.259        | 407.595        | 406.923        | K[9]  |
| R[17] | 537.989        | 369.900        | 364.561        | 364.896        | 364.225        | R[8]  |
| H[18] | 583.675        | 317.866        | 312.527        | 312.863        | 312.191        | H[7]  |
| R[19] | 635.709        | 272.180        | 266.841        | 267.176        | 266.505        | R[6]  |
| K[20] | 687.751        | 220.140        | 214.801        | 215.143        | 214.471        | K[5]  |
| V[21] | 720.774        | 168.104        | 162.765        | 163.101        | 162.429        | V[4]  |
| L[22] | 758.468        | 135.082        | 129.742        | 130.078        | 129.406        | L[3]  |
| R[23] | <b>810.502</b> | 97.387         | 92.047         | 92.383         | 91.711         | R[2]  |
| D[24] | 848.844        | 45.353         | 40.014         | 40.349         | 39.678         | D[1]  |



# sp | P62806 | H4\_MOUSE

[Acetyl]SGRGKGGKGLGKGGAKRHRK <sup>Dimethyl</sup>VLRD  
28.03

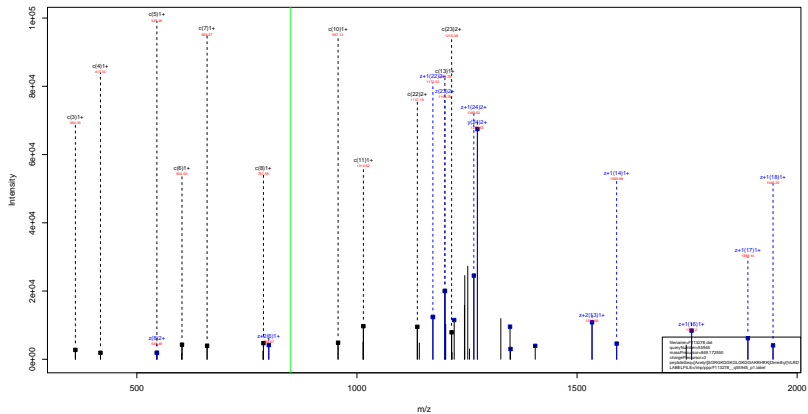

# sp | P62806 | H4\_MOUSE

[Acetyl]SGRGKGGKGLGKGGAKRHRK<sup>Dimethyl</sup>VLRD<sub>28.03</sub>

- ▶ fragmentation table for charge state 1+
- ▶ specType=etd
- ▶ score=57.32
- ▶ F113278.dat
- ▶ query=q55945.p1
- ▶ precursor=849.172550
- ▶ chargePrecursor=3
- ▶ itol=0.5

| AA | c  | y               | z+1      | z+2             | z               | AA       |       |
|----|----|-----------------|----------|-----------------|-----------------|----------|-------|
| S  | 1  | 347.676         | 2545.502 | 2529.463        | 0.000           | 2528.478 | S[24] |
| G  | 2  | 204.098         | 2416.460 | 2400.441        | 0.000           | 2399.433 | G[23] |
| R  | 3  | <b>368.199</b>  | 2389.438 | 2343.419        | 2344.427        | 2342.412 | R[22] |
| G  | 4  | <b>417.220</b>  | 2303.337 | 2187.318        | 2188.326        | 2186.310 | G[21] |
| K  | 5  | <b>545.315</b>  | 2146.316 | 2130.297        | 2131.305        | 2129.289 | K[20] |
| G  | 6  | <b>602.337</b>  | 2018.221 | 2002.200        | 2003.210        | 2001.194 | G[19] |
| G  | 7  | <b>659.358</b>  | 1961.199 | <b>1945.180</b> | 1946.188        | 1944.173 | G[18] |
| K  | 8  | <b>787.453</b>  | 1904.178 | <b>1888.159</b> | 1889.167        | 1887.151 | K[17] |
| G  | 9  | <b>844.475</b>  | 1776.083 | <b>1760.064</b> | 1761.072        | 1759.056 | G[16] |
| L  | 10 | <b>957.559</b>  | 1719.061 | 1703.043        | 1704.050        | 1702.035 | L[15] |
| G  | 11 | <b>1014.580</b> | 1605.977 | <b>1589.958</b> | 1590.966        | 1588.951 | G[14] |
| K  | 12 | 1142.675        | 1548.956 | 1532.937        | <b>1533.945</b> | 1531.929 | K[13] |
| G  | 13 | <b>1199.697</b> | 1420.861 | <b>1404.842</b> | 1405.850        | 1403.834 | G[12] |
| G  | 14 | 1256.718        | 1363.839 | <b>1347.821</b> | <b>1348.828</b> | 1346.813 | G[11] |
| A  | 15 | 1327.755        | 1306.818 | 1290.799        | 1291.807        | 1289.791 | A[10] |
| R  | 16 | 1459.850        | 1235.781 | 1219.762        | <b>1220.770</b> | 1218.754 | R[9]  |
| R  | 17 | 1611.951        | 1107.685 | 1091.667        | 1092.675        | 1090.659 | R[8]  |
| H  | 18 | 1749.010        | 951.585  | 935.566         | 936.574         | 934.558  | H[7]  |
| R  | 19 | 1905.111        | 814.526  | 798.507         | <b>799.515</b>  | 797.499  | R[6]  |
| K  | 20 | 2061.238        | 658.425  | 642.406         | 643.414         | 641.398  | K[5]  |
| V  | 21 | 2180.306        | 502.298  | 486.280         | 487.287         | 485.272  | V[4]  |
| L  | 22 | 2273.390        | 403.230  | 387.211         | 388.219         | 386.203  | L[3]  |
| R  | 23 | 2429.491        | 280.146  | 274.127         | 275.135         | 273.119  | R[2]  |
| D  | 24 | 2544.518        | 134.045  | 118.026         | 119.034         | 117.018  | D[1]  |

# sp | P62806 | H4\_MOUSE

[Acetyl]SGRGKGGKGLGKGGAKRHRK <sup>Dimethyl</sup> VLRD  
28.03

- ▶ fragmentation table for charge state 2+
- ▶ specType=etd
- ▶ score=57.32
- ▶ F113278.dat
- ▶ query=q55945.p1
- ▶ precursor=849.172550
- ▶ chargePrecursor=3
- ▶ itol=0.5

| AA    | c               | y               | z+1             | z+2             | z               | AA    |
|-------|-----------------|-----------------|-----------------|-----------------|-----------------|-------|
| S[1]  | 74.042          | <b>1273.255</b> | <b>1265.245</b> | 0.504           | 1264.741        | S[24] |
| G[2]  | 102.553         | 1208.733        | 1200.724        | 0.504           | <b>1200.220</b> | G[23] |
| R[3]  | 180.603         | 1180.223        | <b>1172.213</b> | <b>1172.717</b> | 1171.709        | R[22] |
| G[4]  | 259.114         | 1102.172        | 1094.163        | 1094.667        | 1093.659        | G[21] |
| K[5]  | 273.153         | 1073.661        | 1065.652        | 1066.156        | 1065.148        | K[20] |
| G[6]  | 301.672         | 1009.614        | 1001.605        | 1002.109        | 1001.101        | G[19] |
| G[7]  | 330.183         | 981.103         | 973.094         | 973.598         | 972.590         | G[18] |
| K[8]  | 394.210         | 952.592         | 944.583         | 945.087         | 944.079         | K[17] |
| G[9]  | 422.741         | 888.545         | 880.536         | 881.040         | 880.032         | G[16] |
| L[10] | 479.263         | 860.036         | 852.027         | 852.529         | 851.521         | L[15] |
| G[11] | 507.794         | 803.492         | 795.483         | 795.987         | 794.979         | G[14] |
| K[12] | 571.841         | 774.982         | 766.972         | 767.476         | 766.468         | K[13] |
| G[13] | 600.352         | 710.934         | 702.925         | 703.429         | 702.421         | G[12] |
| G[14] | 628.863         | 682.423         | 674.414         | 674.918         | 673.910         | G[11] |
| A[15] | 684.384         | 653.913         | 645.903         | 646.407         | 645.399         | A[10] |
| R[16] | 728.432         | 618.394         | 610.385         | 610.889         | 609.881         | R[9]  |
| R[17] | 806.470         | 554.347         | 546.337         | 546.841         | <b>545.833</b>  | R[6]  |
| H[18] | 878.009         | 476.290         | 468.280         | 468.784         | 467.776         | H[7]  |
| R[19] | 953.059         | 407.767         | 399.757         | 400.261         | 399.253         | R[6]  |
| K[20] | 1031.122        | 329.716         | 321.707         | 322.211         | 321.203         | K[5]  |
| V[21] | 1080.669        | 251.663         | 243.653         | 244.157         | 243.149         | V[4]  |
| L[22] | <b>1137.199</b> | 202.119         | 194.109         | 194.613         | 193.605         | L[3]  |
| R[23] | <b>1215.249</b> | 145.577         | 137.567         | 138.071         | 137.063         | R[2]  |
| D[24] | 1272.703        | 67.526          | 59.517          | 60.021          | 59.013          | D[1]  |

sp | P62806 | H4\_MOUSE

[Acetyl]SGRGKGGKGLGKGGAKRHRK<sup>Dimethyl</sup>VLRD  
28.03

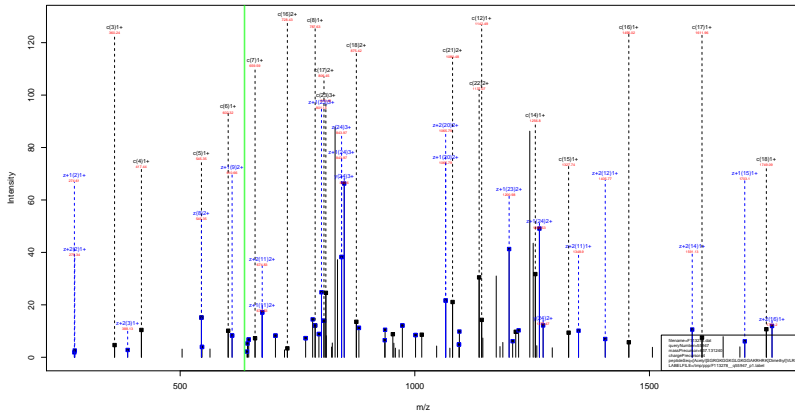

# sp | P62806 | H4\_MOUSE

[Acetyl]SGRGKGGKGLGKGGAKRHRK<sup>Dimethyl</sup>VLRD  
28.03

- ▶ fragmentation table for charge state 1+
- ▶ specType=etd
- ▶ score=90.20
- ▶ F113278.dat
- ▶ query=q55947.p1
- ▶ precursor=637.131240
- ▶ chargePrecursor=4
- ▶ itol=0.5

| AA    | c               | y        | z+1             | z+2             | z        | AA    |
|-------|-----------------|----------|-----------------|-----------------|----------|-------|
| S[1]  | 147.076         | 2545.502 | 2520.483        | 0.000           | 2528.478 | S[24] |
| G[2]  | 204.098         | 2416.460 | 2400.441        | 0.000           | 2399.433 | G[23] |
| R[3]  | <b>350.199</b>  | 2350.438 | 2343.419        | 2344.427        | 2342.412 | R[22] |
| G[4]  | <b>417.220</b>  | 2203.337 | 2187.318        | 2188.326        | 2186.310 | G[21] |
| K[5]  | <b>545.315</b>  | 2146.316 | 2130.297        | 2131.305        | 2129.289 | K[20] |
| G[6]  | <b>602.337</b>  | 2018.221 | 2002.200        | 2003.210        | 2001.194 | G[19] |
| G[7]  | <b>659.358</b>  | 1961.199 | 1945.180        | 1946.188        | 1944.173 | G[18] |
| K[8]  | <b>787.453</b>  | 1904.178 | 1888.159        | 1889.167        | 1887.151 | K[17] |
| G[9]  | 844.475         | 1776.063 | 1760.044        | <b>1761.052</b> | 1759.036 | G[16] |
| L[10] | 897.506         | 1719.041 | <b>1703.043</b> | 1704.050        | 1702.035 | L[15] |
| G[11] | <b>1014.580</b> | 1605.977 | 1589.958        | <b>1590.966</b> | 1588.951 | G[14] |
| K[12] | <b>1142.675</b> | 1548.956 | 1532.937        | 1533.945        | 1531.929 | K[13] |
| G[13] | 1199.697        | 1430.901 | 1404.840        | <b>1405.850</b> | 1403.834 | G[12] |
| G[14] | <b>1256.718</b> | 1363.839 | 1347.821        | <b>1348.828</b> | 1346.813 | G[11] |
| A[15] | <b>1327.795</b> | 1306.818 | 1290.799        | 1291.807        | 1289.791 | A[10] |
| R[16] | <b>1455.950</b> | 1239.781 | 1219.762        | <b>1220.770</b> | 1218.754 | R[9]  |
| R[17] | <b>1611.951</b> | 1107.685 | 1091.667        | 1092.675        | 1090.659 | R[8]  |
| H[18] | <b>1749.010</b> | 951.585  | <b>935.566</b>  | <b>936.574</b>  | 934.558  | H[7]  |
| R[19] | 1905.111        | 814.526  | 798.507         | 799.515         | 797.499  | R[6]  |
| K[20] | 2061.238        | 658.425  | <b>642.406</b>  | <b>643.414</b>  | 641.398  | K[5]  |
| V[21] | 2180.306        | 502.290  | 486.280         | 487.287         | 485.272  | V[4]  |
| L[22] | 2273.390        | 403.230  | 387.213         | <b>388.219</b>  | 386.203  | L[3]  |
| R[23] | 2420.491        | 290.140  | <b>274.127</b>  | <b>275.135</b>  | 273.119  | R[2]  |
| D[24] | 2544.518        | 134.045  | 118.026         | 119.034         | 117.018  | D[1]  |

# sp | P62806 | H4\_MOUSE

[Acetyl]SGRGKGGKGLGKGGAKRHRK<sup>Dimethyl</sup>VLRD  
28.03

- ▶ fragmentation table for charge state 2+
- ▶ specType=etd
- ▶ score=90.20
- ▶ F113278.dat
- ▶ query=q55947.p1
- ▶ precursor=637.131240
- ▶ chargePrecursor=4
- ▶ itol=0.5

| AA    | c               | y               | z+1             | z+2             | z               | AA    |
|-------|-----------------|-----------------|-----------------|-----------------|-----------------|-------|
| S[1]  | 74.642          | <b>1273.255</b> | <b>1265.245</b> | 0.504           | 1264.741        | S[24] |
| G[2]  | 102.553         | <b>1208.733</b> | <b>1200.724</b> | 0.504           | 1200.220        | G[23] |
| R[3]  | 180.603         | 1180.223        | 1172.213        | 1172.717        | 1171.709        | R[22] |
| G[4]  | 259.114         | 1102.172        | <b>1094.163</b> | <b>1094.667</b> | <b>1093.659</b> | G[21] |
| K[5]  | 273.163         | 1073.661        | <b>1065.652</b> | <b>1066.156</b> | 1065.148        | K[20] |
| G[6]  | 301.672         | 1009.614        | <b>1001.605</b> | 1002.109        | <b>1001.101</b> | G[19] |
| G[7]  | 330.183         | 981.103         | <b>973.094</b>  | <b>973.598</b>  | 972.590         | G[18] |
| K[8]  | 394.230         | 952.592         | 944.583         | 945.087         | 944.079         | K[17] |
| G[9]  | 422.741         | 898.545         | <b>890.536</b>  | <b>891.040</b>  | 890.032         | G[16] |
| L[10] | 479.293         | 860.036         | 852.027         | 852.530         | 851.521         | L[15] |
| G[11] | 507.794         | 803.492         | <b>795.483</b>  | <b>795.987</b>  | 794.979         | G[14] |
| K[12] | 571.841         | 774.982         | <b>766.972</b>  | <b>767.476</b>  | 766.468         | K[13] |
| G[13] | 600.352         | 710.934         | <b>702.925</b>  | <b>703.429</b>  | 702.421         | G[12] |
| G[14] | 638.863         | 682.423         | <b>674.414</b>  | <b>674.918</b>  | 673.910         | G[11] |
| A[15] | 694.381         | 653.913         | <b>645.903</b>  | <b>646.407</b>  | 645.399         | A[10] |
| R[16] | <b>728.429</b>  | 618.394         | <b>610.385</b>  | <b>610.889</b>  | 609.881         | R[9]  |
| R[17] | <b>806.479</b>  | 554.347         | <b>546.337</b>  | <b>546.841</b>  | <b>545.833</b>  | R[8]  |
| H[18] | <b>875.009</b>  | 476.290         | 468.281         | 468.784         | 467.776         | H[7]  |
| R[19] | <b>953.059</b>  | 407.767         | 399.757         | 400.261         | 399.253         | R[6]  |
| K[20] | 1011.127        | 339.716         | 331.707         | 332.211         | 331.203         | K[5]  |
| V[21] | <b>1080.657</b> | 293.693         | 285.683         | 286.187         | 285.180         | V[4]  |
| L[22] | <b>1137.199</b> | 202.139         | 194.130         | 194.633         | 193.625         | L[3]  |
| R[23] | <b>1215.249</b> | 145.577         | 137.567         | 138.071         | 137.063         | R[2]  |
| D[24] | 1272.703        | 67.526          | 59.517          | 60.021          | 59.013          | D[1]  |

# sp | P62806 | H4\_MOUSE

[Acetyl]SGRGKGGKGLGKGGAKRHRK<sup>Dimethyl</sup>VLRD<sub>28.03</sub>

- ▶ fragmentation table for charge state 3+
- ▶ specType=etd
- ▶ score=90.20
- ▶ F113278.dat
- ▶ query=q55947.p1
- ▶ precursor=637.131240
- ▶ chargePrecursor=4
- ▶ itol=0.5

| AA    | c              | y              | z+1            | z+2            | z              | AA    |
|-------|----------------|----------------|----------------|----------------|----------------|-------|
| S[1]  | 49.697         | <b>849.172</b> | <b>843.833</b> | 0.672          | <b>843.497</b> | S[24] |
| G[2]  | 58.704         | <b>806.158</b> | <b>800.818</b> | 0.672          | 800.483        | G[23] |
| R[3]  | 150.738        | <b>787.151</b> | 781.811        | <b>782.147</b> | 781.475        | R[22] |
| G[4]  | 139.745        | 735.117        | 729.778        | 730.114        | 729.442        | G[21] |
| K[5]  | 182.443        | 716.110        | 710.770        | 711.106        | 710.435        | K[20] |
| G[6]  | 201.450        | 673.412        | 668.072        | 668.408        | 667.736        | G[19] |
| G[7]  | 220.458        | 654.405        | 649.065        | 649.401        | 648.729        | G[18] |
| K[8]  | 263.156        | 635.397        | 630.058        | 630.394        | 629.722        | K[17] |
| G[9]  | 282.163        | 592.699        | 587.359        | 587.695        | 587.024        | G[16] |
| L[10] | 319.658        | 573.692        | 568.352        | 568.688        | 568.016        | L[15] |
| G[11] | 338.665        | 535.997        | 530.658        | 530.994        | 530.322        | G[14] |
| K[12] | 381.563        | 516.990        | 511.651        | 511.986        | 511.315        | K[13] |
| G[13] | 400.570        | 474.292        | 468.952        | 469.288        | 468.616        | G[12] |
| G[14] | 419.578        | 455.285        | 449.945        | 450.281        | 449.609        | G[11] |
| A[15] | 443.257        | 436.277        | 430.938        | 431.274        | 430.602        | A[10] |
| K[16] | 485.955        | 412.598        | 407.259        | 407.595        | 406.923        | K[9]  |
| R[17] | 537.989        | 369.900        | 364.561        | 364.896        | 364.225        | R[8]  |
| H[18] | 583.675        | 317.866        | 312.527        | 312.863        | 312.191        | H[7]  |
| R[19] | 635.709        | 272.180        | 266.841        | 267.176        | 266.505        | R[6]  |
| K[20] | 687.751        | 220.140        | 214.801        | 215.143        | 214.471        | K[5]  |
| V[21] | 720.774        | 168.104        | 162.765        | 163.101        | 162.429        | V[4]  |
| L[22] | 758.468        | 135.082        | 129.742        | 130.078        | 129.406        | L[3]  |
| R[23] | <b>810.502</b> | 97.387         | 92.047         | 92.383         | 91.711         | R[2]  |
| D[24] | 848.844        | 45.353         | 40.014         | 40.349         | 39.678         | D[1]  |

# sp | P62806 | H4\_MOUSE

[Acetyl]SGRGKGGKGLGKGGAKRHRK <sup>Dimethyl</sup> VLRD  
28.03

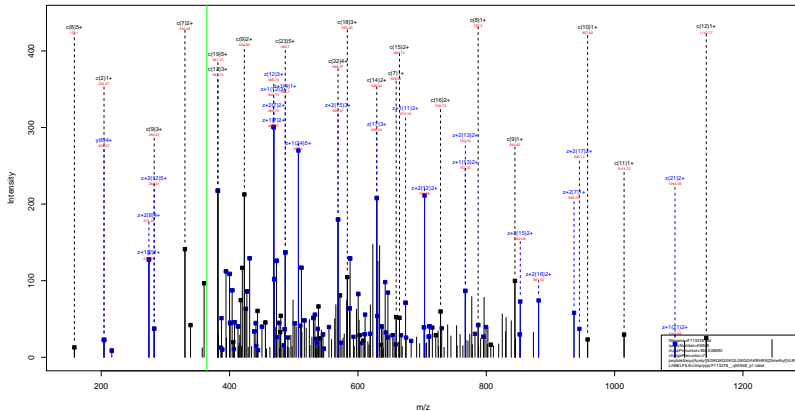



# sp | P62806 | H4\_MOUSE

[Acetyl]SGRGKGGKGLGKGGAKRHRK <sup>Dimethyl</sup> VLRD  
28.03

- ▶ fragmentation table for charge state 1+
- ▶ specType=etd
- ▶ score=40.01
- ▶ F113278.dat
- ▶ query=q55948.p1
- ▶ precursor=364.506690
- ▶ chargePrecursor=7
- ▶ itol=0.5

| AA |    | c               | y              | z+1            | z+2            | z              | AA    |
|----|----|-----------------|----------------|----------------|----------------|----------------|-------|
| S  | 1  | 147.070         | 2545.502       | 2529.483       | 0.000          | 2528.470       | S[24] |
| G  | 2  | <b>204.096</b>  | 2518.460       | 2499.441       | 0.000          | 2499.433       | G[23] |
| R  | 3  | <b>360.199</b>  | 2399.439       | 2383.419       | 2364.527       | 2362.412       | R[22] |
| G  | 4  | <b>417.220</b>  | 2203.337       | 2187.318       | 2188.326       | 2186.310       | G[21] |
| K  | 5  | <b>545.315</b>  | 2148.310       | 2130.297       | 2131.305       | 2129.289       | K[20] |
| G  | 6  | <b>602.337</b>  | 2018.221       | 2002.202       | 2003.210       | 2001.194       | G[19] |
| G  | 7  | <b>659.358</b>  | 1961.199       | 1945.180       | 1946.188       | 1944.173       | G[18] |
| K  | 8  | <b>787.453</b>  | 1904.178       | 1888.159       | 1889.167       | 1887.151       | K[17] |
| G  | 9  | <b>844.475</b>  | 1776.083       | 1760.064       | 1761.072       | 1759.056       | G[16] |
| L  | 10 | <b>957.559</b>  | 1719.961       | 1703.943       | 1704.950       | 1702.935       | L[15] |
| G  | 11 | <b>1014.580</b> | 1605.977       | 1589.958       | 1590.966       | 1588.951       | G[14] |
| K  | 12 | <b>1142.675</b> | 1548.950       | 1532.937       | 1533.945       | 1531.929       | K[13] |
| G  | 13 | 1199.697        | 1420.861       | 1404.842       | 1405.850       | 1403.834       | G[12] |
| G  | 14 | 1256.718        | 1363.839       | 1347.821       | 1348.828       | 1346.813       | G[11] |
| A  | 15 | 1327.795        | 1306.818       | 1290.799       | 1291.807       | 1289.791       | A[10] |
| K  | 16 | 1485.850        | 1235.781       | 1219.762       | 1220.770       | 1218.754       | K[9]  |
| R  | 17 | 1611.894        | 1197.686       | 1181.667       | 1182.675       | 1180.659       | R[8]  |
| H  | 18 | 1749.010        | 951.582        | 935.566        | <b>936.574</b> | 934.558        | H[7]  |
| R  | 19 | 1905.111        | 814.520        | 798.507        | <b>799.515</b> | 797.499        | R[6]  |
| K  | 20 | 2061.238        | <b>658.425</b> | <b>642.406</b> | <b>643.414</b> | 641.398        | K[5]  |
| V  | 21 | 2100.306        | 502.290        | <b>486.280</b> | 487.287        | 485.272        | V[4]  |
| L  | 22 | 2273.390        | 403.230        | <b>387.211</b> | <b>388.219</b> | <b>386.203</b> | L[3]  |
| R  | 23 | 2429.491        | 290.140        | <b>274.127</b> | 275.135        | 273.119        | R[2]  |
| D  | 24 | 2544.518        | 134.045        | 118.026        | 119.034        | 117.018        | D[1]  |

# sp | P62806 | H4\_MOUSE

[Acetyl]SGRGKGGKGLGKGGAKRHRK<sup>Dimethyl</sup>VLRD<sub>28.03</sub>

- ▶ fragmentation table for charge state 2+
- ▶ specType=etd
- ▶ score=40.01
- ▶ F113278.dat
- ▶ query=q55948.p1
- ▶ precursor=364.506690
- ▶ chargePrecursor=7
- ▶ itol=0.5

| AA | c  | y              | z+1            | z+2             | z              | AA              |       |
|----|----|----------------|----------------|-----------------|----------------|-----------------|-------|
| S  | 1  | 74.042         | 1273.255       | 1205.245        | 0.504          | 1264.741        | S[24] |
| G  | 2  | 102.553        | 1208.733       | 1200.724        | 0.504          | 1200.220        | G[23] |
| H  | 3  | 180.663        | 1130.223       | 1172.213        | 1172.717       | 1173.709        | H[22] |
| G  | 4  | 209.114        | 1102.172       | <b>1094.163</b> | 1094.667       | <b>1093.659</b> | G[21] |
| K  | 5  | 273.161        | 1073.661       | 1065.652        | 1066.156       | 1065.148        | K[20] |
| G  | 6  | 301.672        | 1009.614       | 1001.605        | 1002.108       | 1001.101        | G[19] |
| G  | 7  | <b>330.183</b> | 961.103        | 973.094         | 973.598        | 972.590         | G[18] |
| K  | 8  | <b>394.230</b> | 952.592        | 944.583         | <b>945.087</b> | 944.079         | K[17] |
| G  | 9  | <b>422.741</b> | 898.545        | 890.536         | <b>891.040</b> | 890.032         | G[16] |
| L  | 10 | <b>479.283</b> | 860.034        | <b>852.025</b>  | <b>852.529</b> | 851.521         | L[15] |
| G  | 11 | 507.704        | 803.492        | <b>795.483</b>  | <b>795.987</b> | 794.979         | G[14] |
| K  | 12 | <b>571.841</b> | 774.982        | <b>766.972</b>  | <b>767.476</b> | 766.468         | K[13] |
| G  | 13 | <b>600.352</b> | <b>710.934</b> | <b>702.925</b>  | <b>703.429</b> | <b>702.421</b>  | G[12] |
| G  | 14 | <b>628.863</b> | <b>682.423</b> | <b>674.414</b>  | <b>674.918</b> | <b>673.910</b>  | G[11] |
| A  | 15 | <b>664.391</b> | <b>653.913</b> | <b>645.903</b>  | <b>646.407</b> | <b>645.399</b>  | A[10] |
| K  | 16 | <b>723.429</b> | <b>618.394</b> | <b>610.385</b>  | <b>610.889</b> | <b>609.881</b>  | K[9]  |
| R  | 17 | <b>806.479</b> | <b>554.347</b> | <b>546.337</b>  | <b>546.841</b> | <b>545.833</b>  | R[8]  |
| H  | 18 | 875.009        | 476.296        | <b>468.287</b>  | <b>468.791</b> | 467.783         | H[7]  |
| R  | 19 | 953.059        | <b>407.767</b> | <b>399.757</b>  | <b>400.261</b> | 399.253         | R[6]  |
| K  | 20 | 1031.122       | 329.716        | 321.707         | 322.211        | 321.203         | K[5]  |
| V  | 21 | 1080.657       | 251.653        | 243.643         | 244.147        | 243.140         | V[4]  |
| L  | 22 | 1127.199       | 202.139        | 194.130         | 194.633        | 193.625         | L[3]  |
| I  | 23 | 1213.249       | 153.577        | 137.567         | 138.071        | 137.063         | I[2]  |
| D  | 24 | 1272.763       | 67.526         | 59.517          | 60.021         | 59.013          | D[1]  |

# sp | P62806 | H4\_MOUSE

[Acetyl]SGRGKGGKGLGKGGAKRHRK<sup>Dimethyl</sup>VLRD<sub>28.03</sub>

- ▶ fragmentation table for charge state 3+
- ▶ specType=etd
- ▶ score=40.01
- ▶ F113278.dat
- ▶ query=q55948.p1
- ▶ precursor=364.506690
- ▶ chargePrecursor=7
- ▶ itol=0.5

| AA    | c              | y              | z+1            | z+2            | z              | AA    |
|-------|----------------|----------------|----------------|----------------|----------------|-------|
| S[1]  | 49.697         | 849.172        | 843.833        | 0.672          | 843.497        | S[24] |
| G[2]  | 56.704         | 806.158        | 800.819        | 0.672          | 800.483        | G[23] |
| R[3]  | 150.738        | <b>787.151</b> | 781.811        | <b>782.147</b> | 781.475        | R[22] |
| G[4]  | 139.745        | 735.117        | 729.778        | <b>730.114</b> | 729.442        | G[21] |
| K[5]  | 182.443        | <b>716.110</b> | <b>710.770</b> | <b>711.106</b> | <b>710.435</b> | K[20] |
| G[6]  | 201.450        | 673.412        | 668.072        | 668.408        | <b>667.736</b> | G[19] |
| G[7]  | 220.458        | <b>654.405</b> | 649.065        | 649.401        | 648.729        | G[18] |
| K[8]  | 263.156        | 635.397        | <b>630.058</b> | <b>630.394</b> | <b>629.722</b> | K[17] |
| C[9]  | <b>282.163</b> | <b>592.699</b> | <b>587.360</b> | <b>587.695</b> | <b>587.024</b> | C[16] |
| L[10] | 319.208        | <b>573.692</b> | 568.352        | <b>568.688</b> | 568.016        | L[15] |
| G[11] | <b>338.865</b> | <b>535.997</b> | <b>530.658</b> | <b>530.994</b> | <b>530.322</b> | G[14] |
| K[12] | <b>381.563</b> | <b>516.990</b> | <b>511.651</b> | <b>511.986</b> | 511.315        | K[13] |
| G[13] | <b>400.570</b> | <b>474.292</b> | <b>468.952</b> | <b>469.288</b> | <b>468.616</b> | G[12] |
| G[14] | <b>419.578</b> | 455.285        | <b>449.945</b> | <b>450.281</b> | 449.609        | G[11] |
| A[15] | <b>443.257</b> | 436.277        | <b>430.938</b> | <b>431.274</b> | 430.602        | A[10] |
| K[16] | <b>485.955</b> | <b>412.598</b> | <b>407.259</b> | <b>407.595</b> | <b>406.923</b> | K[9]  |
| R[17] | <b>537.989</b> | 369.900        | 364.561        | 364.896        | 364.225        | R[8]  |
| H[18] | <b>583.675</b> | 317.866        | 312.527        | 312.863        | 312.191        | H[7]  |
| R[19] | <b>635.709</b> | 272.180        | 266.841        | 267.176        | 266.505        | R[6]  |
| K[20] | 667.751        | 220.140        | 214.807        | 215.143        | 214.471        | K[5]  |
| V[21] | <b>720.774</b> | 168.104        | 162.765        | 163.101        | 162.429        | V[4]  |
| L[22] | 758.468        | 135.082        | 129.742        | 130.078        | 129.406        | L[3]  |
| R[23] | 810.502        | 97.387         | 92.047         | 92.383         | 91.711         | R[2]  |
| D[24] | 848.844        | 45.353         | 40.014         | 40.349         | 39.678         | D[1]  |

# sp | P62806 | H4\_MOUSE

[Acetyl]SGRGKGGKGLGKGGAKRHRK <sup>Dimethyl</sup>VLRD  
28.03

- ▶ fragmentation table for charge state 4+
- ▶ specType=etd
- ▶ score=40.01
- ▶ F113278.dat
- ▶ query=q55948.p1
- ▶ precursor=364.506690
- ▶ chargePrecursor=7
- ▶ itol=0.5

| AA    | c              | y              | z+1            | z+2            | z              | AA    |
|-------|----------------|----------------|----------------|----------------|----------------|-------|
| S[1]  | 57.525         | <b>637.131</b> | 633.120        | 0.755          | 632.874        | S[24] |
| G[2]  | 51.780         | <b>604.870</b> | 600.859        | 0.755          | <b>600.614</b> | G[23] |
| R[3]  | 90.805         | 590.615        | <b>586.610</b> | <b>586.862</b> | 586.353        | R[22] |
| G[4]  | 105.061        | 551.590        | 547.585        | 547.837        | 547.333        | G[21] |
| K[5]  | 137.084        | <b>537.334</b> | <b>533.330</b> | <b>533.582</b> | <b>533.078</b> | K[20] |
| G[6]  | 151.340        | 505.311        | <b>501.306</b> | <b>501.558</b> | 501.054        | G[19] |
| G[7]  | 165.595        | <b>491.055</b> | <b>487.051</b> | 487.303        | <b>486.799</b> | G[18] |
| K[8]  | 197.619        | <b>476.800</b> | <b>472.795</b> | <b>473.047</b> | 472.543        | K[17] |
| G[9]  | 213.874        | <b>444.776</b> | <b>440.771</b> | <b>441.023</b> | <b>440.520</b> | G[16] |
| L[10] | 280.148        | 430.521        | <b>426.516</b> | <b>426.768</b> | 426.264        | L[15] |
| G[11] | 254.403        | 407.265        | 398.247        | 398.499        | 397.993        | G[14] |
| K[12] | 286.424        | <b>387.994</b> | 383.990        | 384.242        | 383.738        | K[13] |
| G[13] | 300.680        | 355.971        | 351.966        | 352.218        | 351.714        | G[12] |
| G[14] | 314.935        | 341.715        | 337.711        | 337.963        | 337.459        | G[11] |
| A[15] | 332.694        | 327.460        | 323.455        | 323.707        | 323.203        | A[10] |
| K[16] | 364.718        | 309.701        | 305.696        | 305.948        | 305.444        | K[9]  |
| R[17] | <b>403.743</b> | 277.877        | 273.872        | <b>273.924</b> | 273.420        | R[8]  |
| H[18] | <b>438.008</b> | 238.652        | 234.647        | 234.899        | 234.395        | H[7]  |
| R[19] | <b>477.033</b> | <b>204.367</b> | 200.362        | 200.614        | 200.110        | R[6]  |
| K[20] | <b>516.065</b> | 165.362        | 161.357        | 161.609        | 161.105        | K[5]  |
| V[21] | <b>540.832</b> | 126.330        | 122.325        | 122.577        | 122.073        | V[4]  |
| L[22] | <b>569.103</b> | 101.563        | 97.558         | 97.810         | 97.306         | L[3]  |
| R[23] | <b>608.128</b> | 73.292         | 69.287         | 69.539         | 69.035         | R[2]  |
| D[24] | <b>636.885</b> | 34.267         | 30.262         | 30.514         | 30.010         | D[1]  |

# sp | P62806 | H4\_MOUSE

[Acetyl]SGRGKGGKGLGKGGAKRHRK<sup>Dimethyl</sup>VLRD<sub>28.03</sub>

- ▶ fragmentation table for charge state 5+
- ▶ specType=etd
- ▶ score=40.01
- ▶ F113278.dat
- ▶ query=q55948.p1
- ▶ precursor=364.506690
- ▶ chargePrecursor=7
- ▶ itol=0.5

| AA    | c              | y              | z+1            | z+2            | z              | AA    |
|-------|----------------|----------------|----------------|----------------|----------------|-------|
| S[1]  | 30.221         | <b>509.906</b> | <b>506.703</b> | 0.806          | 506.901        | S[24] |
| G[2]  | 41.625         | <b>484.098</b> | 480.894        | 0.806          | 480.892        | G[23] |
| R[3]  | 72.846         | <b>472.693</b> | <b>469.490</b> | <b>469.691</b> | <b>469.288</b> | R[22] |
| G[4]  | 84.250         | <b>441.473</b> | <b>438.269</b> | <b>438.471</b> | <b>438.068</b> | G[21] |
| K[5]  | 109.869        | 430.069        | <b>426.865</b> | <b>427.067</b> | <b>426.664</b> | K[20] |
| G[6]  | 121.273        | <b>404.450</b> | <b>401.246</b> | 401.448        | <b>401.045</b> | G[19] |
| G[7]  | 132.677        | 393.046        | 389.842        | 390.043        | 389.040        | G[18] |
| K[8]  | <b>158.296</b> | <b>381.641</b> | 378.438        | 378.639        | 378.236        | K[17] |
| G[9]  | 169.104        | 366.522        | 362.819        | 363.020        | 362.617        | G[16] |
| L[10] | 192.318        | 344.618        | 341.414        | 341.616        | 341.213        | L[15] |
| G[11] | 203.722        | 322.001        | 318.798        | 318.999        | 318.596        | G[14] |
| K[12] | 229.341        | 310.597        | 307.393        | 307.595        | 307.192        | K[13] |
| G[13] | 240.745        | 284.978        | 281.774        | <b>281.976</b> | 281.573        | G[12] |
| G[14] | 252.149        | 273.574        | 270.370        | 270.572        | 270.168        | G[11] |
| A[15] | 266.357        | 262.169        | 258.966        | 259.167        | 258.764        | A[10] |
| K[16] | 291.976        | 247.962        | 244.758        | 244.960        | 244.557        | K[9]  |
| R[17] | 323.196        | 222.343        | 219.139        | 219.341        | 218.938        | R[8]  |
| H[18] | 350.608        | 191.123        | 187.919        | 188.121        | 187.717        | H[7]  |
| R[19] | <b>381.828</b> | 163.711        | 160.507        | 160.709        | 160.306        | R[6]  |
| K[20] | <b>413.053</b> | 132.491        | 129.287        | 129.489        | 129.085        | K[5]  |
| V[21] | 432.867        | 101.265        | 98.062         | 98.263         | 97.860         | V[4]  |
| L[22] | <b>455.484</b> | 81.452         | 78.248         | 78.450         | 78.047         | L[3]  |
| R[23] | <b>486.704</b> | 58.835         | 55.631         | 55.833         | 55.430         | R[2]  |
| D[24] | 509.769        | 27.615         | 24.411         | 24.613         | 24.209         | D[1]  |

# sp | P62806 | H4\_MOUSE

[Acetyl]SGRGKGGKGLGKGGAKRHRK<sup>Dimethyl</sup>VLRD<sub>28.03</sub>

- ▶ fragmentation table for charge state 6+
- ▶ specType=etd
- ▶ score=40.01
- ▶ F113278.dat
- ▶ query=q55948.p1
- ▶ precursor=364.506690
- ▶ chargePrecursor=7
- ▶ itol=0.5

| AA    | c              | y              | z+1            | z+2            | z              | AA    |
|-------|----------------|----------------|----------------|----------------|----------------|-------|
| S[1]  | 25.352         | <b>425.090</b> | 422.420        | 0.839          | 422.262        | S[24] |
| G[2]  | 34.856         | <b>403.583</b> | <b>400.913</b> | 0.839          | <b>400.745</b> | G[23] |
| R[3]  | 60.873         | <b>394.079</b> | 391.409        | 391.577        | 391.241        | R[22] |
| G[4]  | 70.376         | 368.062        | 365.392        | 365.560        | 365.224        | G[21] |
| K[5]  | 91.725         | 358.559        | 355.889        | 356.057        | 355.721        | K[20] |
| G[6]  | 101.229        | 337.210        | 334.540        | 334.708        | 334.372        | G[19] |
| G[7]  | 110.732        | 327.706        | 325.036        | 325.204        | 324.868        | G[18] |
| K[8]  | 132.062        | 318.202        | 315.532        | 315.701        | 315.365        | K[17] |
| G[9]  | 143.589        | 296.852        | 294.182        | 294.351        | 294.015        | G[16] |
| L[10] | 150.433        | 297.350        | 294.680        | 294.848        | 294.512        | L[15] |
| G[11] | 169.936        | 268.502        | 265.832        | 266.000        | 265.665        | G[14] |
| K[12] | 191.285        | 258.999        | 256.329        | 256.497        | 256.161        | K[13] |
| G[13] | 200.789        | 237.650        | 234.980        | 235.148        | 234.812        | G[12] |
| G[14] | 210.292        | 228.146        | 225.476        | 225.644        | 225.308        | G[11] |
| A[15] | 222.132        | 218.642        | <b>215.973</b> | <b>216.141</b> | 215.805        | A[10] |
| K[16] | 243.481        | 206.803        | <b>204.133</b> | <b>204.301</b> | <b>203.965</b> | K[9]  |
| R[17] | 269.498        | 185.454        | 182.784        | 182.952        | 182.616        | R[8]  |
| H[18] | 292.341        | 159.437        | 156.767        | 156.935        | 156.599        | H[7]  |
| R[19] | 318.358        | 136.594        | 133.924        | 134.092        | 133.756        | R[6]  |
| K[20] | 344.379        | 110.577        | 107.907        | 108.075        | 107.739        | K[5]  |
| V[21] | 360.890        | 84.556         | 81.886         | 82.054         | 81.718         | V[4]  |
| L[22] | 379.738        | 68.044         | 65.374         | 65.543         | 65.207         | L[3]  |
| R[23] | <b>405.755</b> | 49.197         | 46.527         | 46.695         | 46.359         | R[2]  |
| D[24] | <b>424.926</b> | 23.180         | 20.510         | 20.678         | 20.342         | D[1]  |

# sp | P62806 | H4\_MOUSE

[Acetyl]SGRGKGGKGLGKGGAKRHRK <sup>Dimethyl</sup>VLRD  
28.03

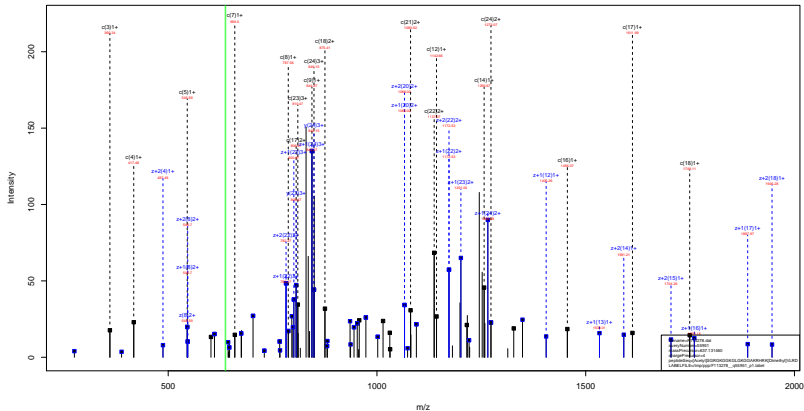

# sp | P62806 | H4\_MOUSE

[Acetyl]SGRGKGGKGLGKGGAKRHRK<sup>Dimethyl</sup>VLRD<sub>28.03</sub>

- ▶ fragmentation table for charge state 1+
- ▶ specType=etd
- ▶ score=116.51
- ▶ F113278.dat
- ▶ query=q55951\_p1
- ▶ precursor=637.131460
- ▶ chargePrecursor=4
- ▶ itol=0.5

| AA | c  | y               | z+1      | z+2             | z               | AA       |       |
|----|----|-----------------|----------|-----------------|-----------------|----------|-------|
| S  | 1  | 347.676         | 2545.502 | 2529.483        | 0.000           | 2528.478 | S[24] |
| G  | 2  | 204.908         | 2416.460 | 2400.441        | 0.000           | 2399.433 | G[23] |
| R  | 3  | <b>358.199</b>  | 2389.438 | 2343.419        | 2344.427        | 2342.412 | R[22] |
| G  | 4  | <b>417.220</b>  | 2303.337 | 2187.318        | 2198.326        | 2189.319 | G[21] |
| K  | 5  | <b>545.315</b>  | 2146.316 | 2130.297        | 2131.305        | 2129.289 | K[20] |
| G  | 6  | <b>602.337</b>  | 2018.221 | 2002.200        | 2003.210        | 2001.194 | G[19] |
| G  | 7  | <b>659.358</b>  | 1991.199 | 1945.180        | <b>1946.188</b> | 1944.173 | G[18] |
| K  | 8  | <b>787.453</b>  | 1904.178 | <b>1888.159</b> | 1889.167        | 1887.151 | K[17] |
| G  | 9  | <b>844.475</b>  | 1776.063 | <b>1768.064</b> |                 | 1767.056 | G[16] |
| L  | 10 | <b>927.559</b>  | 1719.961 | 1703.943        | <b>1704.950</b> | 1702.935 | L[15] |
| G  | 11 | <b>1014.580</b> | 1605.977 | 1589.958        | <b>1590.966</b> | 1588.951 | G[14] |
| K  | 12 | <b>1142.675</b> | 1548.956 | <b>1532.937</b> | 1533.945        | 1531.929 | K[13] |
| G  | 13 | 1109.697        | 1420.961 | <b>1404.842</b> | 1405.850        | 1403.834 | G[12] |
| G  | 14 | <b>1256.718</b> | 1363.839 | 1347.821        | <b>1348.828</b> | 1346.813 | G[11] |
| A  | 15 | <b>1327.795</b> | 1306.818 | 1290.799        | 1291.807        | 1289.791 | A[10] |
| R  | 16 | <b>1455.850</b> | 1238.781 | 1219.763        | <b>1220.770</b> | 1218.754 | R[9]  |
| R  | 17 | <b>1611.951</b> | 1107.686 | 1091.667        | 1092.675        | 1090.659 | R[8]  |
| H  | 18 | <b>1749.010</b> | 951.585  | <b>935.566</b>  | <b>936.574</b>  | 934.558  | H[7]  |
| R  | 19 | 1095.111        | 814.526  | <b>798.507</b>  | 799.515         | 797.499  | R[6]  |
| K  | 20 | 2061.238        | 658.425  | 642.406         | <b>643.414</b>  | 641.398  | K[5]  |
| V  | 21 | 2180.306        | 502.298  | 486.280         | <b>487.287</b>  | 485.272  | V[4]  |
| L  | 22 | 2273.390        | 403.230  | 387.211         | <b>388.219</b>  | 386.203  | L[3]  |
| R  | 23 | 2429.491        | 298.146  | 274.127         | <b>275.135</b>  | 273.119  | R[2]  |
| D  | 24 | 2544.518        | 134.045  | 118.026         | 119.034         | 117.018  | D[1]  |



# sp | P62806 | H4\_MOUSE

[Acetyl]SGRGKGGKGLGKGGAKRHRK<sup>Dimethyl</sup>VLRD<sub>28.03</sub>

- ▶ fragmentation table for charge state 2+
- ▶ specType=etd
- ▶ score=116.51
- ▶ F113278.dat
- ▶ query=q55951\_p1
- ▶ precursor=637.131460
- ▶ chargePrecursor=4
- ▶ itol=0.5

| AA    | c               | y               | z+1             | z+2             | z              | AA    |
|-------|-----------------|-----------------|-----------------|-----------------|----------------|-------|
| S[1]  | 74.042          | <b>1273.255</b> | <b>1265.245</b> | 0.504           | 1264.741       | S[24] |
| G[2]  | 102.553         | 1238.733        | <b>1200.724</b> | 0.504           | 1200.220       | G[23] |
| R[3]  | 180.603         | 1180.223        | <b>1172.213</b> | <b>1172.717</b> | 1171.709       | R[22] |
| G[4]  | 269.114         | 1122.712        | <b>1094.163</b> | <b>1094.667</b> | 1093.659       | G[21] |
| K[5]  | 273.161         | <b>1073.661</b> | <b>1065.652</b> | <b>1066.156</b> | 1065.148       | K[20] |
| G[6]  | 351.672         | 1009.614        | <b>1001.605</b> | <b>1002.108</b> | 1001.101       | G[19] |
| G[7]  | 330.163         | 961.103         | <b>973.094</b>  | <b>973.598</b>  | 972.590        | G[18] |
| K[8]  | 394.230         | <b>952.592</b>  | <b>944.583</b>  | <b>945.087</b>  | 944.079        | K[17] |
| G[9]  | 422.741         | 888.545         | <b>880.536</b>  | <b>881.040</b>  | <b>880.032</b> | G[16] |
| L[10] | 479.293         | 860.036         | 823.625         | 852.529         | 851.521        | L[15] |
| G[11] | 507.794         | 803.492         | 795.483         | <b>795.987</b>  | 794.979        | G[14] |
| K[12] | 571.841         | 774.982         | <b>766.972</b>  | <b>767.476</b>  | 766.468        | K[13] |
| G[13] | 600.352         | 710.934         | <b>702.925</b>  | <b>703.429</b>  | 702.421        | G[12] |
| G[14] | 628.863         | 682.423         | <b>674.414</b>  | <b>674.918</b>  | 673.910        | G[11] |
| A[15] | 664.363         | 653.913         | <b>645.903</b>  | <b>646.407</b>  | 645.399        | A[10] |
| R[16] | 728.252         | 618.399         | <b>610.385</b>  | <b>610.889</b>  | 609.881        | R[9]  |
| R[17] | <b>806.479</b>  | 554.341         | <b>546.337</b>  | <b>546.841</b>  | <b>545.833</b> | R[8]  |
| R[18] | <b>875.009</b>  | 476.200         | 468.197         | 468.701         | 467.783        | R[7]  |
| R[19] | <b>953.059</b>  | 407.767         | 399.757         | 400.261         | 399.253        | R[6]  |
| K[20] | <b>1031.122</b> | 329.716         | 321.707         | 322.211         | 321.203        | K[5]  |
| V[21] | <b>1080.657</b> | 251.663         | 243.653         | 244.147         | 243.140        | V[4]  |
| L[22] | <b>1137.199</b> | 202.132         | 194.123         | 194.617         | 193.609        | L[3]  |
| R[23] | <b>1215.248</b> | 145.577         | 137.567         | 138.071         | 137.063        | R[2]  |
| D[24] | <b>1272.763</b> | 67.526          | 59.517          | 60.021          | 59.013         | D[1]  |

# sp | P62806 | H4\_MOUSE

[Acetyl]SGRGKGGKGLGKGGAKRHRK<sup>Dimethyl</sup>VLRD<sub>28.03</sub>

- ▶ fragmentation table for charge state 3+
- ▶ specType=etd
- ▶ score=116.51
- ▶ F113278.dat
- ▶ query=q55951.p1
- ▶ precursor=637.131460
- ▶ chargePrecursor=4
- ▶ itol=0.5

| AA    | c              | y              | z+1            | z+2            | z              | AA    |
|-------|----------------|----------------|----------------|----------------|----------------|-------|
| S[1]  | 49.697         | <b>849.172</b> | <b>843.833</b> | 0.672          | 843.897        | S[24] |
| G[2]  | 58.704         | <b>806.158</b> | <b>800.818</b> | 0.672          | <b>800.483</b> | G[23] |
| R[3]  | 150.738        | <b>787.151</b> | <b>781.811</b> | <b>782.147</b> | 781.475        | R[22] |
| G[4]  | 139.745        | 735.117        | <b>729.778</b> | <b>730.114</b> | 729.442        | G[21] |
| K[5]  | 182.443        | 716.110        | 710.770        | 711.106        | 710.435        | K[20] |
| G[6]  | 201.450        | 673.412        | 668.072        | 668.408        | 667.736        | G[19] |
| G[7]  | 220.458        | 654.405        | 649.065        | 649.401        | 648.729        | G[18] |
| K[8]  | 263.156        | 635.397        | 630.058        | 630.394        | 629.722        | K[17] |
| G[9]  | 282.163        | 592.699        | 587.360        | 587.696        | 587.024        | G[16] |
| L[10] | 319.658        | 573.692        | 568.352        | 568.688        | 568.016        | L[15] |
| G[11] | 338.665        | 535.997        | 530.658        | 530.994        | 530.322        | G[14] |
| K[12] | 381.563        | 516.990        | 511.651        | 511.986        | 511.315        | K[13] |
| G[13] | 400.570        | 474.292        | 468.952        | 469.288        | 468.616        | G[12] |
| G[14] | 419.578        | 455.285        | 449.945        | 450.281        | 449.609        | G[11] |
| A[15] | 443.257        | 436.277        | 430.938        | 431.274        | 430.602        | A[10] |
| K[16] | 485.955        | 412.598        | 407.259        | 407.595        | 406.923        | K[9]  |
| R[17] | 537.989        | 369.900        | 364.561        | 364.896        | 364.225        | R[8]  |
| H[18] | 583.675        | 317.866        | 312.527        | 312.863        | 312.191        | H[7]  |
| R[19] | 635.709        | 272.180        | 266.841        | 267.176        | 266.505        | R[6]  |
| K[20] | 687.751        | 220.146        | 214.807        | 215.143        | 214.471        | K[5]  |
| V[21] | 720.774        | 168.104        | 162.765        | 163.101        | 162.429        | V[4]  |
| L[22] | 758.468        | 135.082        | 129.742        | 130.078        | 129.406        | L[3]  |
| R[23] | <b>810.502</b> | 97.387         | 92.047         | 92.383         | 91.711         | R[2]  |
| D[24] | <b>848.844</b> | 45.353         | 40.014         | 40.349         | 39.678         | D[1]  |

sp | P62806 | H4\_MOUSE

[Acetyl]SGRGKGGKGLGKGGAKRHRK Dimethyl VLRD  
28.03

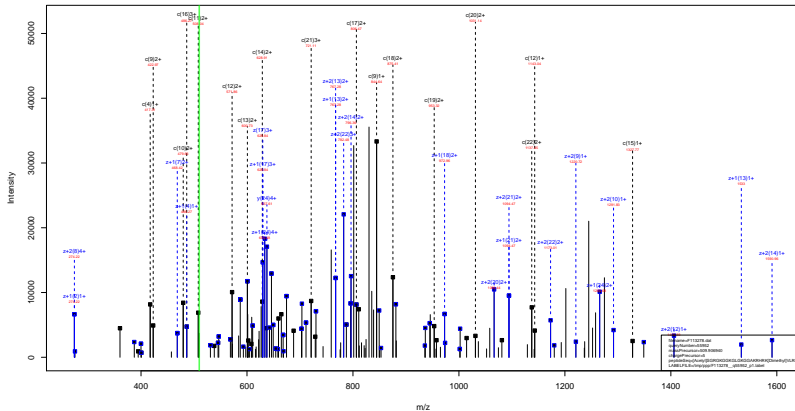

# sp | P62806 | H4\_MOUSE

[Acetyl]SGRGKGGKGLGKGGAKRHRK<sup>Dimethyl</sup>VLRD<sub>28.03</sub>

- ▶ fragmentation table for charge state 1+
- ▶ specType=etd
- ▶ score=98.84
- ▶ F113278.dat
- ▶ query=q55952.p1
- ▶ precursor=509.906940
- ▶ chargePrecursor=5
- ▶ itol=0.5

| AA | c  | y               | z+1            | z+2             | z               | AA       |       |
|----|----|-----------------|----------------|-----------------|-----------------|----------|-------|
| S  | 1  | 347.676         | 2545.502       | 2529.483        | 0.000           | 2528.478 | S[24] |
| G  | 2  | 204.098         | 2416.460       | 2400.441        | 0.000           | 2399.433 | G[23] |
| R  | 3  | <b>368.199</b>  | 2389.438       | 2343.419        | 2344.427        | 2342.412 | R[22] |
| G  | 4  | <b>417.220</b>  | 2303.337       | 2187.318        | 2188.326        | 2186.310 | G[21] |
| K  | 5  | <b>545.315</b>  | 2146.316       | 2130.297        | 2131.305        | 2129.289 | K[20] |
| G  | 6  | <b>602.337</b>  | 2018.221       | 2002.200        | 2003.210        | 2001.194 | G[19] |
| G  | 7  | <b>659.358</b>  | 1991.199       | 1945.180        | 1946.188        | 1944.173 | G[18] |
| K  | 8  | <b>787.453</b>  | 1904.178       | 1888.159        | 1889.167        | 1887.151 | K[17] |
| G  | 9  | <b>844.475</b>  | 1776.063       | 1760.064        | 1761.072        | 1759.056 | G[16] |
| L  | 10 | <b>927.559</b>  | 1719.061       | 1703.063        | 1704.060        | 1702.035 | L[15] |
| G  | 11 | <b>1014.580</b> | 1605.977       | 1589.958        | <b>1590.966</b> | 1588.951 | G[14] |
| K  | 12 | <b>1142.675</b> | 1548.959       | <b>1532.937</b> | 1533.945        | 1531.929 | K[13] |
| G  | 13 | 1199.697        | 1420.901       | 1404.840        | <b>1405.850</b> | 1403.834 | G[12] |
| G  | 14 | 1256.718        | 1363.839       | 1347.821        | <b>1348.828</b> | 1346.813 | G[11] |
| A  | 15 | <b>1327.755</b> | 1306.818       | 1290.759        | <b>1291.807</b> | 1289.791 | A[10] |
| R  | 16 | 1489.850        | 1238.781       | 1219.782        | <b>1220.770</b> | 1218.764 | R[9]  |
| R  | 17 | 1611.951        | 1107.686       | 1091.667        | 1092.675        | 1090.659 | R[8]  |
| H  | 18 | 1749.010        | 951.585        | <b>935.566</b>  | <b>936.574</b>  | 934.558  | H[7]  |
| R  | 19 | 1905.111        | 814.526        | 798.507         | 799.515         | 797.499  | R[6]  |
| K  | 20 | 2061.238        | <b>658.425</b> | <b>642.406</b>  | 643.414         | 641.398  | K[5]  |
| V  | 21 | 2180.306        | 502.298        | <b>486.288</b>  | 487.297         | 485.272  | V[4]  |
| L  | 22 | 2273.390        | 403.230        | <b>387.211</b>  | 388.219         | 386.203  | L[3]  |
| R  | 23 | 2429.491        | 280.146        | <b>274.127</b>  | <b>275.135</b>  | 273.119  | R[2]  |
| D  | 24 | 2544.518        | 134.045        | 118.026         | 119.034         | 117.018  | D[1]  |

# sp | P62806 | H4\_MOUSE

[Acetyl]SGRGKGGKGLGKGGAKRHRK <sup>Dimethyl</sup> VLRD  
28.03

- ▶ fragmentation table for charge state 2+
- ▶ specType=etd
- ▶ score=98.84
- ▶ F113278.dat
- ▶ query=q55952.p1
- ▶ precursor=509.906940
- ▶ chargePrecursor=5
- ▶ itol=0.5

| AA    | c               | y               | z+1             | z+2             | z              | AA    |
|-------|-----------------|-----------------|-----------------|-----------------|----------------|-------|
| S[1]  | 74.042          | 1273.255        | <b>1265.245</b> | 0.504           | 1264.741       | S[24] |
| G[2]  | 102.553         | 1238.731        | 1200.724        | 0.504           | 1200.220       | G[23] |
| R[3]  | 180.603         | <b>1180.223</b> | 1172.213        | <b>1172.717</b> | 1171.700       | R[22] |
| G[4]  | 269.114         | 1100.172        | <b>1094.183</b> | <b>1094.667</b> | 1093.650       | G[21] |
| K[5]  | 273.161         | 1073.062        | 1025.052        | <b>1066.156</b> | 1065.143       | K[20] |
| G[6]  | 351.672         | 1009.614        | <b>1001.605</b> | <b>1002.108</b> | 1001.101       | G[19] |
| G[7]  | 330.183         | 981.103         | <b>973.094</b>  | <b>973.598</b>  | <b>972.590</b> | G[18] |
| K[8]  | <b>394.230</b>  | 952.592         | <b>944.583</b>  | <b>945.087</b>  | 944.079        | K[17] |
| G[9]  | <b>422.741</b>  | 888.545         | <b>880.536</b>  | <b>881.040</b>  | 880.032        | G[16] |
| L[10] | <b>479.283</b>  | 860.036         | 807.025         | <b>852.529</b>  | 851.521        | L[15] |
| G[11] | <b>507.794</b>  | 803.492         | <b>795.483</b>  | <b>795.987</b>  | 794.979        | G[14] |
| K[12] | <b>571.841</b>  | 774.982         | <b>766.972</b>  | <b>767.476</b>  | 766.468        | K[13] |
| G[13] | <b>600.352</b>  | <b>710.934</b>  | <b>702.925</b>  | <b>703.429</b>  | <b>702.421</b> | G[12] |
| G[14] | <b>628.863</b>  | 682.423         | <b>674.414</b>  | <b>674.918</b>  | 673.910        | G[11] |
| A[15] | <b>664.381</b>  | <b>653.913</b>  | <b>645.903</b>  | <b>646.407</b>  | 645.399        | A[10] |
| R[16] | <b>728.429</b>  | 628.399         | <b>610.385</b>  | <b>610.889</b>  | 609.881        | R[9]  |
| R[17] | <b>806.479</b>  | 554.341         | <b>546.337</b>  | <b>546.841</b>  | <b>545.833</b> | R[8]  |
| R[18] | <b>875.009</b>  | 476.208         | <b>468.207</b>  | <b>468.791</b>  | 467.783        | R[7]  |
| R[19] | <b>953.059</b>  | 407.767         | <b>399.757</b>  | <b>400.261</b>  | 399.253        | R[6]  |
| K[20] | <b>1031.122</b> | 329.716         | 321.707         | 322.211         | 321.203        | K[5]  |
| V[21] | <b>1080.657</b> | 251.663         | 243.653         | 244.147         | 243.140        | V[4]  |
| L[22] | <b>1137.199</b> | 202.112         | 194.103         | 194.613         | 193.605        | L[3]  |
| R[23] | 1215.240        | 145.577         | 137.567         | 138.071         | 137.063        | R[2]  |
| D[24] | 1272.763        | 67.526          | 59.517          | 60.021          | 59.013         | D[1]  |

# sp | P62806 | H4\_MOUSE

[Acetyl]SGRGKGGKGLGKGGAKRHRK<sup>Dimethyl</sup>VLRD<sub>28.03</sub>

- ▶ fragmentation table for charge state 3+
- ▶ specType=etd
- ▶ score=98.84
- ▶ F113278.dat
- ▶ query=q55952.p1
- ▶ precursor=509.906940
- ▶ chargePrecursor=5
- ▶ itol=0.5

| AA    | c              | y              | z+1            | z+2            | z              | AA    |
|-------|----------------|----------------|----------------|----------------|----------------|-------|
| S[1]  | 49.697         | <b>849.172</b> | 843.833        | 0.672          | 843.497        | S[24] |
| G[2]  | 58.704         | <b>806.158</b> | 800.820        | 0.672          | 800.483        | G[23] |
| R[3]  | 150.738        | <b>787.151</b> | 781.811        | <b>782.147</b> | 781.475        | R[22] |
| G[4]  | 139.745        | 735.117        | <b>729.778</b> | <b>730.114</b> | 729.442        | G[21] |
| K[5]  | 182.443        | 716.110        | 710.770        | <b>711.106</b> | 710.435        | K[20] |
| G[6]  | 201.450        | 673.412        | <b>668.072</b> | <b>668.408</b> | <b>667.736</b> | G[19] |
| G[7]  | 220.458        | <b>654.405</b> | <b>649.065</b> | <b>649.401</b> | 648.729        | G[18] |
| K[8]  | 263.156        | 635.397        | <b>630.058</b> | 630.394        | <b>629.722</b> | K[17] |
| G[9]  | 282.163        | <b>592.699</b> | <b>587.360</b> | <b>587.695</b> | <b>587.024</b> | G[16] |
| L[10] | 319.858        | 573.692        | <b>568.352</b> | <b>568.688</b> | 568.016        | L[15] |
| G[11] | 338.865        | 535.997        | <b>530.658</b> | <b>530.994</b> | 530.322        | G[14] |
| K[12] | 381.563        | 516.990        | 511.651        | 511.988        | 511.315        | K[13] |
| G[13] | <b>400.570</b> | 474.292        | 468.952        | 469.288        | <b>468.616</b> | G[12] |
| G[14] | 419.578        | 455.285        | 449.945        | 450.281        | 449.609        | G[11] |
| A[15] | 443.257        | 436.277        | 430.938        | 431.274        | 430.602        | A[10] |
| K[16] | <b>485.955</b> | 412.598        | 407.259        | 407.595        | 406.923        | K[9]  |
| R[17] | <b>537.989</b> | 369.900        | 364.561        | 364.896        | 364.225        | R[8]  |
| H[18] | 583.675        | 317.866        | 312.527        | 312.863        | 312.191        | H[7]  |
| R[19] | <b>635.709</b> | 272.180        | 266.841        | 267.176        | 266.505        | R[6]  |
| K[20] | <b>687.751</b> | 220.140        | 214.807        | 215.143        | 214.471        | K[5]  |
| V[21] | <b>720.774</b> | 168.104        | 162.765        | 163.101        | 162.429        | V[4]  |
| L[22] | 758.468        | 135.082        | 129.742        | 130.078        | 129.406        | L[3]  |
| R[23] | <b>810.502</b> | 97.387         | 92.047         | 92.383         | 91.711         | R[2]  |
| D[24] | 848.844        | 45.353         | 40.014         | 40.349         | 39.678         | D[1]  |

# sp | P62806 | H4\_MOUSE

[Acetyl]SGRGKGGKGLGKGGAKRHRK<sup>Dimethyl</sup>VLRD<sub>28.03</sub>

- ▶ fragmentation table for charge state 4+
- ▶ specType=etd
- ▶ score=98.84
- ▶ F113278.dat
- ▶ query=q55952.p1
- ▶ precursor=509.906940
- ▶ chargePrecursor=5
- ▶ itol=0.5

| AA    | c              | y              | z+1            | z+2            | z              | AA    |
|-------|----------------|----------------|----------------|----------------|----------------|-------|
| S[1]  | 37.525         | <b>637.131</b> | <b>633.126</b> | 0.755          | 632.874        | S[24] |
| G[2]  | 51.780         | <b>604.870</b> | <b>600.866</b> | 0.755          | <b>600.614</b> | G[23] |
| R[3]  | 90.805         | 590.615        | 586.610        | <b>586.862</b> | 586.358        | R[22] |
| G[4]  | 105.061        | 551.590        | 547.585        | 547.837        | 547.333        | G[21] |
| K[5]  | 137.084        | 537.334        | 533.330        | 533.582        | 533.078        | K[20] |
| G[6]  | 151.340        | 505.311        | 501.306        | 501.558        | 501.054        | G[19] |
| G[7]  | 165.595        | 491.055        | 487.051        | 487.303        | 486.799        | G[18] |
| K[8]  | 197.619        | 476.800        | 472.795        | 473.047        | 472.543        | K[17] |
| G[9]  | 211.874        | 444.776        | 440.771        | 441.023        | 440.520        | G[16] |
| L[10] | 280.148        | 430.521        | 426.516        | 426.768        | 426.264        | L[15] |
| G[11] | 254.401        | 402.250        | 398.245        | 398.497        | 397.993        | G[14] |
| K[12] | 286.424        | 387.994        | 383.989        | 384.242        | 383.738        | K[13] |
| G[13] | 300.680        | 355.971        | 351.966        | 352.218        | 351.714        | G[12] |
| G[14] | 314.935        | 341.715        | 337.711        | 337.963        | 337.459        | G[11] |
| A[15] | 332.694        | 327.460        | 323.455        | 323.707        | 323.203        | A[10] |
| K[16] | 364.718        | 309.701        | 305.696        | 305.948        | 305.444        | K[9]  |
| R[17] | 403.743        | 277.677        | 273.672        | <b>273.924</b> | 273.420        | R[8]  |
| H[18] | 438.008        | 238.652        | 234.647        | 234.899        | 234.395        | H[7]  |
| R[19] | 477.033        | 204.397        | 200.392        | 200.644        | 200.140        | R[6]  |
| K[20] | 516.058        | 165.362        | 161.357        | 161.609        | 161.105        | K[5]  |
| V[21] | 540.832        | 126.330        | 122.325        | 122.577        | 122.073        | V[4]  |
| L[22] | <b>569.103</b> | 101.563        | 97.558         | 97.810         | 97.306         | L[3]  |
| R[23] | <b>608.128</b> | 73.292         | 69.287         | 69.539         | 69.035         | R[2]  |
| D[24] | 636.885        | 34.267         | 30.262         | 30.514         | 30.010         | D[1]  |





# sp | P62806 | H4\_MOUSE

[Acetyl]SGRGKGGKGLGKGGAKRHRK<sup>Dimethyl</sup>VLRD<sub>28.03</sub>

- ▶ fragmentation table for charge state 1+
- ▶ specType=etd
- ▶ score=126.63
- ▶ F113278.dat
- ▶ query=q55955\_p1
- ▶ precursor=637.134240
- ▶ chargePrecursor=4
- ▶ itol=0.5

| AA    | c               | y        | z+1             | z+2             | z        | AA    |
|-------|-----------------|----------|-----------------|-----------------|----------|-------|
| S[1]  | 147.076         | 2545.502 | 2520.463        | 0.000           | 2528.478 | S[24] |
| G[2]  | 204.008         | 2416.460 | 2400.441        | 0.000           | 2399.433 | G[23] |
| R[3]  | <b>350.199</b>  | 2350.438 | 2343.419        | 2344.427        | 2342.412 | R[22] |
| G[4]  | <b>417.220</b>  | 2203.337 | 2187.318        | 2188.326        | 2186.310 | G[21] |
| K[5]  | <b>545.315</b>  | 2146.316 | 2130.297        | 2131.305        | 2129.289 | K[20] |
| G[6]  | <b>602.337</b>  | 2018.221 | 2002.200        | 2003.210        | 2001.194 | G[19] |
| G[7]  | <b>659.358</b>  | 1961.199 | 1945.180        | <b>1946.188</b> | 1944.173 | G[18] |
| K[8]  | <b>787.453</b>  | 1904.178 | 1888.159        | <b>1889.167</b> | 1887.151 | K[17] |
| G[9]  | <b>844.475</b>  | 1776.063 | 1760.064        | <b>1761.072</b> | 1759.056 | G[16] |
| L[10] | <b>927.559</b>  | 1719.061 | 1703.063        | <b>1704.050</b> | 1702.035 | L[15] |
| G[11] | <b>1014.580</b> | 1605.977 | 1589.958        | <b>1590.966</b> | 1588.951 | G[14] |
| K[12] | <b>1142.675</b> | 1548.956 | 1532.937        | 1533.945        | 1531.929 | K[13] |
| G[13] | 1199.697        | 1420.901 | 1404.842        | <b>1405.850</b> | 1403.834 | G[12] |
| G[14] | <b>1256.718</b> | 1363.839 | 1347.821        | <b>1348.828</b> | 1346.813 | G[11] |
| A[15] | <b>1327.795</b> | 1306.818 | 1290.769        | 1291.807        | 1289.791 | A[10] |
| R[16] | <b>1435.850</b> | 1238.781 | <b>1219.762</b> | 1220.770        | 1218.754 | R[9]  |
| R[17] | <b>1611.951</b> | 1107.686 | 1091.667        | 1092.675        | 1090.659 | R[8]  |
| H[18] | <b>1749.010</b> | 951.585  | <b>935.566</b>  | <b>936.574</b>  | 934.558  | H[7]  |
| R[19] | 1908.111        | 814.526  | 798.507         | 799.515         | 797.499  | R[6]  |
| K[20] | 2061.238        | 658.425  | 642.406         | <b>643.414</b>  | 641.398  | K[5]  |
| V[21] | 2180.306        | 502.290  | 486.280         | <b>487.287</b>  | 485.272  | V[4]  |
| L[22] | 2273.390        | 403.230  | 387.211         | <b>388.219</b>  | 386.203  | L[3]  |
| R[23] | 2429.491        | 290.140  | 274.127         | -75.135         | 273.110  | R[2]  |
| D[24] | 2544.518        | 134.045  | 118.026         | 119.034         | 117.018  | D[1]  |

# sp | P62806 | H4\_MOUSE

[Acetyl]SGRGKGGKGLGKGGAKRHRK<sup>Dimethyl</sup>VLRD<sub>28.03</sub>

- ▶ fragmentation table for charge state 2+
- ▶ specType=etd
- ▶ score=126.63
- ▶ F113278.dat
- ▶ query=q55955\_p1
- ▶ precursor=637.134240
- ▶ chargePrecursor=4
- ▶ itol=0.5

| AA    | c               | y               | z+1             | z+2             | z               | AA    |
|-------|-----------------|-----------------|-----------------|-----------------|-----------------|-------|
| S[1]  | 74.042          | 1273.255        | <b>1265.245</b> | 0.504           | 1264.741        | S[24] |
| G[2]  | 102.553         | 1238.733        | <b>1200.724</b> | 0.504           | 1200.220        | G[23] |
| R[3]  | 180.603         | 1180.223        | 1172.713        | <b>1172.717</b> | 1171.709        | R[22] |
| G[4]  | 259.114         | 1102.152        | <b>1094.163</b> | <b>1094.667</b> | <b>1093.659</b> | G[21] |
| K[5]  | 273.103         | <b>1073.661</b> | <b>1065.652</b> | <b>1066.156</b> | 1065.148        | K[20] |
| G[6]  | 301.672         | 1009.614        | 1001.605        | <b>1002.108</b> | 1001.101        | G[19] |
| G[7]  | 330.183         | 981.103         | <b>973.094</b>  | <b>973.598</b>  | <b>972.590</b>  | G[18] |
| K[8]  | 394.230         | <b>952.592</b>  | <b>944.583</b>  | <b>945.087</b>  | 944.070         | K[17] |
| G[9]  | 422.741         | 898.545         | <b>890.536</b>  | <b>891.040</b>  | 890.032         | G[16] |
| L[10] | 479.283         | 860.036         | 852.027         | 853.029         | 851.521         | L[15] |
| G[11] | 507.794         | 803.492         | <b>795.483</b>  | <b>795.987</b>  | 794.979         | G[14] |
| K[12] | 571.841         | 774.982         | <b>766.972</b>  | <b>767.476</b>  | 766.468         | K[13] |
| G[13] | 600.352         | 710.934         | <b>702.925</b>  | <b>703.429</b>  | 702.421         | G[12] |
| G[14] | 628.863         | 682.423         | <b>674.414</b>  | <b>674.918</b>  | 673.910         | G[11] |
| A[15] | 694.381         | 653.913         | <b>645.903</b>  | <b>646.407</b>  | 645.399         | A[10] |
| R[16] | 728.430         | 618.394         | <b>610.385</b>  | <b>610.889</b>  | 609.881         | R[9]  |
| R[17] | <b>806.479</b>  | 554.347         | <b>546.337</b>  | <b>546.841</b>  | <b>545.833</b>  | R[8]  |
| H[18] | <b>875.009</b>  | 476.290         | 468.281         | 469.281         | 467.783         | H[7]  |
| R[19] | <b>953.059</b>  | 407.767         | 399.757         | 400.761         | 399.263         | R[6]  |
| K[20] | <b>1031.122</b> | 329.716         | 321.707         | 322.711         | 321.203         | K[5]  |
| V[21] | <b>1080.667</b> | 251.663         | 243.653         | 244.657         | 243.149         | V[4]  |
| L[22] | <b>1137.199</b> | 202.119         | 194.109         | 194.613         | 193.605         | L[3]  |
| R[23] | <b>1215.249</b> | 145.577         | 137.567         | 138.071         | 137.063         | R[2]  |
| D[24] | 1272.703        | 67.526          | 59.517          | 60.021          | 59.013          | D[1]  |

# sp | P62806 | H4\_MOUSE

[Acetyl]SGRGKGGKGLGKGGAKRHRK<sup>Dimethyl</sup>VLRD<sub>28.03</sub>

- ▶ fragmentation table for charge state 3+
- ▶ specType=etd
- ▶ score=126.63
- ▶ F113278.dat
- ▶ query=q55955.p1
- ▶ precursor=637.134240
- ▶ chargePrecursor=4
- ▶ itol=0.5

| AA    | c              | y              | z+1            | z+2            | z       | AA    |
|-------|----------------|----------------|----------------|----------------|---------|-------|
| S[1]  | 49.597         | 849.172        | 843.833        | 0.572          | 843.497 | S[24] |
| G[2]  | 58.704         | <b>806.158</b> | <b>800.818</b> | 0.572          | 800.483 | G[23] |
| R[3]  | 120.738        | <b>787.151</b> | <b>781.811</b> | <b>782.147</b> | 781.475 | R[22] |
| G[4]  | 139.745        | 735.117        | 729.778        | 730.114        | 729.442 | G[21] |
| K[5]  | 182.443        | 716.110        | 710.770        | 711.106        | 710.435 | K[20] |
| G[6]  | 201.450        | 673.412        | 668.072        | 668.408        | 667.736 | G[19] |
| G[7]  | 220.458        | 654.405        | 649.065        | 649.401        | 648.729 | G[18] |
| K[8]  | 263.156        | 635.397        | 630.058        | 630.394        | 629.722 | K[17] |
| G[9]  | 282.163        | 592.899        | 587.559        | 587.896        | 587.224 | G[16] |
| L[10] | 319.258        | 573.892        | 568.552        | 568.888        | 568.216 | L[15] |
| G[11] | 338.265        | 535.997        | 530.658        | 530.994        | 530.322 | G[14] |
| K[12] | 381.563        | 516.990        | 511.651        | 511.986        | 511.315 | K[13] |
| G[13] | 400.570        | 474.292        | 468.952        | 469.288        | 468.616 | G[12] |
| G[14] | 419.578        | 455.285        | 449.945        | 450.281        | 449.609 | G[11] |
| A[15] | 443.297        | 436.277        | 430.938        | 431.274        | 430.602 | A[10] |
| K[16] | 485.955        | 412.598        | 407.259        | 407.595        | 406.923 | K[9]  |
| R[17] | 537.989        | 369.900        | 364.561        | 364.896        | 364.225 | R[8]  |
| H[18] | 583.675        | 317.866        | 312.527        | 312.863        | 312.191 | H[7]  |
| R[19] | 635.709        | 272.180        | 266.841        | 267.176        | 266.505 | R[6]  |
| K[20] | 687.751        | 220.140        | 214.801        | 215.143        | 214.471 | K[5]  |
| V[21] | 720.774        | 188.104        | 182.765        | 183.101        | 182.429 | V[4]  |
| L[22] | 758.468        | 135.082        | 129.742        | 130.078        | 129.406 | L[3]  |
| R[23] | <b>810.502</b> | 97.387         | 92.047         | 92.383         | 91.711  | R[2]  |
| D[24] | 848.844        | 45.353         | 40.014         | 40.349         | 39.678  | D[1]  |

# sp | P62806 | H4\_MOUSE

[Acetyl]SGRGKGGKGLGKGGAK Acetyl 42.01 RHRK Dimethyl 28.03 VLRD

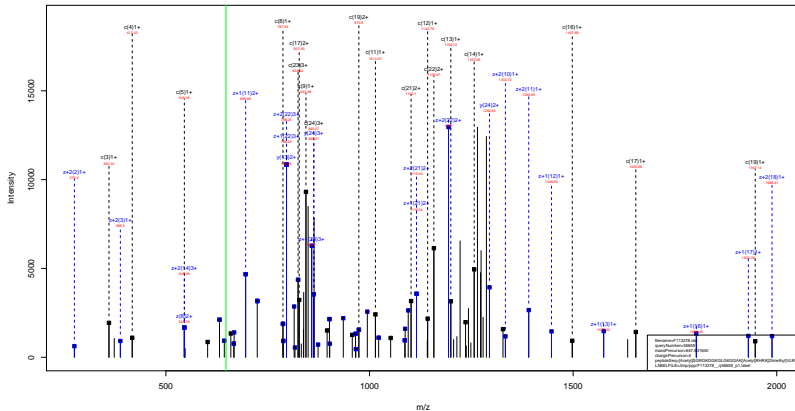

# sp | P62806 | H4\_MOUSE

[Acetyl]SGRGKGGKGLGKGGAK<sup>Acetyl</sup> RHRK<sup>Dimethyl</sup> VLRD<sup>28.03</sup>  
42.01

- ▶ fragmentation table for charge state 1+
- ▶ specType=etd
- ▶ score=123.04
- ▶ F113278.dat
- ▶ query=q56659\_p1
- ▶ precursor=647.631640
- ▶ chargePrecursor=4
- ▶ itol=0.5

| AA    | c               | y        | z+1             | z+2             | z        | AA    |
|-------|-----------------|----------|-----------------|-----------------|----------|-------|
| S[1]  | 147.676         | 2587.513 | 2571.494        | 0.000           | 2570.486 | S[24] |
| G[2]  | 204.098         | 2458.470 | 2442.451        | 0.000           | 2441.444 | G[23] |
| R[3]  | <b>358.199</b>  | 2420.449 | 2385.430        | 2386.438        | 2384.422 | R[22] |
| G[4]  | <b>417.230</b>  | 2345.348 | 2229.329        | 2230.337        | 2228.321 | G[21] |
| K[5]  | <b>545.315</b>  | 2188.326 | 2172.307        | 2173.315        | 2171.300 | K[20] |
| G[6]  | <b>602.337</b>  | 2060.231 | 2044.210        | 2045.220        | 2043.205 | G[19] |
| G[7]  | <b>659.358</b>  | 2003.210 | 1987.191        | <b>1988.199</b> | 1986.183 | G[18] |
| K[8]  | <b>787.453</b>  | 1946.189 | <b>1930.170</b> | 1931.177        | 1929.162 | K[17] |
| G[9]  | <b>844.475</b>  | 1818.093 | <b>1802.075</b> | 1803.082        | 1801.067 | G[16] |
| L[10] | <b>957.559</b>  | 1763.072 | 1746.053        | 1748.061        | 1744.045 | L[15] |
| G[11] | <b>1014.580</b> | 1647.985 | 1631.966        | 1632.977        | 1630.961 | G[14] |
| K[12] | <b>1142.675</b> | 1590.966 | <b>1574.948</b> | 1575.955        | 1573.940 | K[13] |
| G[13] | <b>1199.697</b> | 1462.871 | <b>1446.853</b> | 1447.860        | 1445.845 | G[12] |
| G[14] | <b>1256.718</b> | 1405.850 | 1389.831        | <b>1390.839</b> | 1388.823 | G[11] |
| A[15] | <b>1327.756</b> | 1348.828 | 1332.810        | <b>1333.818</b> | 1331.802 | A[10] |
| R[16] | <b>1407.881</b> | 1277.791 | 1261.773        | 1262.780        | 1260.765 | R[9]  |
| R[17] | <b>1653.962</b> | 1107.685 | 1091.667        | 1092.675        | 1090.659 | R[8]  |
| H[18] | 1791.021        | 951.585  | <b>935.566</b>  | 936.574         | 934.558  | H[7]  |
| R[19] | <b>1947.122</b> | 814.526  | 798.507         | 799.515         | 797.499  | R[6]  |
| K[20] | 2103.248        | 658.425  | 642.406         | <b>643.414</b>  | 641.398  | K[5]  |
| V[21] | 2202.317        | 502.298  | 486.280         | 487.287         | 485.272  | V[4]  |
| L[22] | 2315.401        | 403.230  | 387.211         | <b>388.219</b>  | 386.203  | L[3]  |
| R[23] | 2471.502        | 298.146  | 274.127         | <b>275.135</b>  | 273.119  | R[2]  |
| D[24] | 2586.529        | 134.045  | 118.026         | 119.034         | 117.018  | D[1]  |

# sp | P62806 | H4\_MOUSE

[Acetyl]SGRGKGGKGLGKGGAK<sup>Acetyl</sup>RHRK<sup>Dimethyl</sup>VLRD<sup>28.03</sup>

- ▶ fragmentation table for charge state 2+
- ▶ specType=etd
- ▶ score=123.04
- ▶ F113278.dat
- ▶ query=q56659\_p1
- ▶ precursor=647.631640
- ▶ chargePrecursor=4
- ▶ itol=0.5

| AA | c  | y               | z+1             | z+2             | z               | AA              |       |
|----|----|-----------------|-----------------|-----------------|-----------------|-----------------|-------|
| S  | 1  | 74.042          | <b>1294.260</b> | 1286.261        | 0.504           | 1289.747        | S[24] |
| G  | 2  | 102.553         | 1229.739        | 1221.729        | 0.504           | 1221.225        | G[23] |
| R  | 3  | 180.603         | 1201.229        | 1193.219        | <b>1193.723</b> | 1192.715        | R[22] |
| G  | 4  | 259.114         | 1123.177        | <b>1115.168</b> | <b>1115.972</b> | 1114.666        | G[21] |
| K  | 5  | 273.151         | <b>1094.667</b> | <b>1086.657</b> | <b>1087.161</b> | 1086.151        | K[20] |
| G  | 6  | 303.672         | 1030.619        | <b>1022.610</b> | 1023.114        | <b>1022.106</b> | G[19] |
| G  | 7  | 330.183         | 1002.108        | 994.099         | <b>994.603</b>  | 993.595         | G[18] |
| K  | 8  | 394.230         | <b>973.598</b>  | <b>965.588</b>  | <b>966.092</b>  | 965.084         | K[17] |
| G  | 9  | 422.741         | 909.550         | <b>901.541</b>  | <b>902.045</b>  | 901.037         | G[16] |
| L  | 10 | 479.293         | 869.040         | 861.030         | <b>873.534</b>  | 872.526         | L[15] |
| G  | 11 | 507.794         | <b>824.498</b>  | 816.488         | <b>816.992</b>  | 815.984         | G[14] |
| K  | 12 | 571.841         | <b>795.987</b>  | <b>787.977</b>  | <b>788.481</b>  | <b>787.474</b>  | K[13] |
| G  | 13 | 600.352         | 731.939         | <b>723.930</b>  | <b>724.434</b>  | 723.426         | G[12] |
| G  | 14 | 628.863         | 703.429         | <b>695.419</b>  | <b>695.923</b>  | 694.915         | G[11] |
| A  | 15 | 694.381         | 674.919         | <b>666.908</b>  | <b>667.412</b>  | <b>666.405</b>  | A[10] |
| R  | 16 | 749.434         | 639.399         | <b>631.390</b>  | <b>631.894</b>  | 630.886         | R[9]  |
| R  | 17 | <b>827.485</b>  | 554.347         | 546.337         | 546.841         | <b>545.833</b>  | R[8]  |
| H  | 18 | <b>896.014</b>  | 476.290         | 468.280         | 468.784         | 467.776         | H[7]  |
| R  | 19 | <b>974.065</b>  | 407.767         | 399.757         | 400.261         | 399.253         | R[6]  |
| K  | 20 | <b>1052.128</b> | 329.716         | 321.707         | 322.211         | 321.203         | K[5]  |
| V  | 21 | <b>1101.662</b> | 251.663         | 243.653         | 244.157         | 243.149         | V[4]  |
| L  | 22 | <b>1158.204</b> | 202.119         | 194.109         | 194.613         | 193.605         | L[3]  |
| R  | 23 | <b>1236.255</b> | 145.577         | 137.567         | 138.071         | 137.063         | R[2]  |
| D  | 24 | 1293.768        | 67.526          | 59.517          | 60.021          | 59.013          | D[1]  |

# sp | P62806 | H4\_MOUSE

[Acetyl]SGRGKGGKGLGKGGAK<sup>Acetyl</sup><sub>42.01</sub> RHRK<sup>Dimethyl</sup><sub>28.03</sub> VLRD

- ▶ fragmentation table for charge state 3+
- ▶ specType=etd
- ▶ score=123.04
- ▶ F113278.dat
- ▶ query=q56659.p1
- ▶ precursor=647.631640
- ▶ chargePrecursor=4
- ▶ itol=0.5

| AA    | c              | y              | z+1            | z+2            | z     | AA             |       |
|-------|----------------|----------------|----------------|----------------|-------|----------------|-------|
| S[1]  | 49.697         | <b>863.176</b> | <b>857.836</b> |                | 0.672 | 857.900        | S[24] |
| G[2]  | 58.704         | 320.162        | <b>814.822</b> |                | 0.672 | 814.486        | G[23] |
| R[3]  | 120.738        | 801.154        | <b>795.815</b> | <b>796.151</b> |       | 795.479        | R[22] |
| G[4]  | 139.745        | 749.121        | 743.781        | 744.117        |       | 743.445        | G[21] |
| K[5]  | 182.443        | 730.114        | <b>724.774</b> | 725.110        |       | <b>724.438</b> | K[20] |
| G[6]  | 201.450        | 687.415        | 682.076        | 682.412        |       | 681.740        | G[19] |
| G[7]  | 220.458        | 668.408        | 663.069        | 663.404        |       | 662.733        | G[18] |
| K[8]  | 263.156        | 649.401        | 644.061        | 644.397        |       | <b>643.725</b> | K[17] |
| G[9]  | 282.163        | 606.703        | 601.363        | 601.699        |       | 601.027        | G[16] |
| L[10] | 319.858        | 587.695        | 582.355        | 582.691        |       | 582.020        | L[15] |
| G[11] | 338.865        | 550.001        | 544.661        | <b>544.997</b> |       | 544.325        | G[14] |
| K[12] | 381.563        | 530.994        | 525.654        | 525.990        |       | 525.318        | K[13] |
| G[13] | 400.570        | 488.295        | 482.956        | 483.292        |       | 482.620        | G[12] |
| G[14] | 419.578        | 469.288        | 463.949        | 464.285        |       | 463.613        | G[11] |
| A[15] | 443.257        | 450.281        | 444.941        | 445.277        |       | 444.605        | A[10] |
| K[16] | 469.958        | 426.602        | 421.262        | 421.598        |       | 420.926        | K[9]  |
| R[17] | 551.992        | 369.900        | 364.561        | 364.896        |       | 364.225        | R[8]  |
| H[18] | 597.678        | 317.866        | 312.527        | 312.863        |       | 312.191        | H[7]  |
| R[19] | 649.712        | 272.180        | 266.841        | 267.176        |       | 266.505        | R[6]  |
| K[20] | 701.754        | 220.146        | 214.807        | 215.143        |       | 214.471        | K[5]  |
| V[21] | 734.777        | 168.104        | 162.765        | 163.101        |       | 162.429        | V[4]  |
| L[22] | 772.472        | 135.082        | 129.742        | 130.078        |       | 129.406        | L[3]  |
| R[23] | <b>824.505</b> | 97.387         | 92.047         | 92.383         |       | 91.711         | R[2]  |
| D[24] | <b>862.848</b> | 45.353         | 40.014         | 40.349         |       | 39.678         | D[1]  |

# sp | P62806 | H4\_MOUSE

[Acetyl]SGRGKGGKGLGKGGAK Acetyl 42.01 RHRK Dimethyl 28.03 VLRD

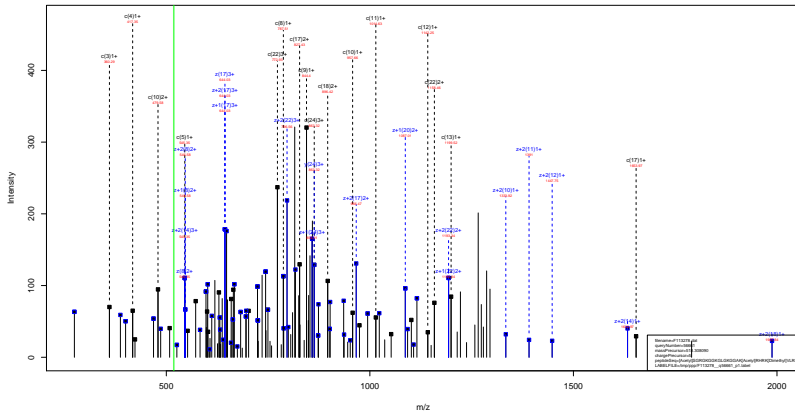

Downloaded from Proteomics.com  
 Copyright © 2010 Proteomics.com  
 All rights reserved.  
 www.proteomics.com



# sp | P62806 | H4\_MOUSE

[Acetyl]SGRGKGGKGLGKGGAK<sup>Acetyl</sup>42.01 RHRK<sup>Dimethyl</sup>28.03 VLRD

- ▶ fragmentation table for charge state 1+
- ▶ specType=etd
- ▶ score=100.26
- ▶ F113278.dat
- ▶ query=q56661\_p1
- ▶ precursor=518.308090
- ▶ chargePrecursor=5
- ▶ itol=0.5

| AA | c  | y               | z+1             | z+2            | z               | AA       |       |
|----|----|-----------------|-----------------|----------------|-----------------|----------|-------|
| S  | 1  | 347.676         | 2587.513        | 2571.494       | 0.000           | 2570.486 | S[24] |
| G  | 2  | 204.008         | 2458.470        | 2442.451       | 0.000           | 2441.444 | G[23] |
| R  | 3  | <b>368.199</b>  | 2401.440        | 2385.430       | 2386.438        | 2384.422 | R[22] |
| G  | 4  | <b>417.230</b>  | 2245.346        | 2229.336       | 2230.337        | 2228.321 | G[21] |
| K  | 5  | <b>545.315</b>  | 2188.326        | 2172.307       | 2173.315        | 2171.300 | K[20] |
| G  | 6  | <b>602.337</b>  | 2080.231        | 2044.210       | 2045.220        | 2043.205 | G[19] |
| G  | 7  | <b>659.358</b>  | 2003.210        | 1987.191       | <b>1988.199</b> | 1986.183 | G[18] |
| K  | 8  | <b>787.453</b>  | 1946.180        | 1930.170       | 1931.177        | 1929.162 | K[17] |
| G  | 9  | <b>844.475</b>  | 1818.093        | 1802.075       | 1803.082        | 1801.067 | G[16] |
| L  | 10 | <b>927.559</b>  | 1763.072        | 1746.053       | 1746.061        | 1744.045 | L[15] |
| G  | 11 | <b>1014.580</b> | 1647.958        | 1631.900       | <b>1632.977</b> | 1630.961 | G[14] |
| K  | 12 | <b>1142.675</b> | 1590.950        | 1574.940       | 1575.955        | 1573.940 | K[13] |
| G  | 13 | <b>1199.697</b> | 1462.871        | 1446.853       | <b>1447.860</b> | 1445.845 | G[12] |
| G  | 14 | 1256.718        | 1405.850        | 1389.831       | <b>1390.839</b> | 1388.823 | G[11] |
| A  | 15 | 1327.795        | 1348.828        | 1332.810       | <b>1333.818</b> | 1331.802 | A[10] |
| R  | 16 | 1409.881        | 1277.791        | 1261.773       | 1262.780        | 1260.765 | R[9]  |
| R  | 17 | <b>1653.962</b> | <b>1107.688</b> | 1091.667       | <b>1092.675</b> | 1090.659 | R[8]  |
| H  | 18 | 1791.021        | <b>951.585</b>  | <b>935.566</b> | <b>936.574</b>  | 934.558  | H[7]  |
| R  | 19 | 1947.122        | 914.526         | 798.507        | <b>799.515</b>  | 797.499  | R[6]  |
| K  | 20 | 2103.248        | <b>658.425</b>  | 642.406        | 643.414         | 641.399  | K[5]  |
| V  | 21 | 2202.317        | 502.398         | <b>486.380</b> | 487.387         | 485.272  | V[4]  |
| L  | 22 | 2319.401        | 403.239         | <b>387.211</b> | 388.219         | 386.203  | L[3]  |
| R  | 23 | 2471.502        | 290.140         | <b>274.127</b> | 275.135         | 273.119  | R[2]  |
| D  | 24 | 2586.520        | 134.045         | 118.026        | 119.034         | 117.018  | D[1]  |

# sp | P62806 | H4\_MOUSE

[Acetyl]SGRGKGGKGLGKGGAK<sup>Acetyl</sup>42.01 RHRK<sup>Dimethyl</sup>28.03 VLRD

- ▶ fragmentation table for charge state 2+
- ▶ specType=etd
- ▶ score=100.26
- ▶ F113278.dat
- ▶ query=q56661\_p1
- ▶ precursor=518.308090
- ▶ chargePrecursor=5
- ▶ itol=0.5

| AA | c  | y               | z+1            | z+2             | z               | AA             |       |
|----|----|-----------------|----------------|-----------------|-----------------|----------------|-------|
| S  | 1  | 74.642          | 1204.260       | 1286.251        | 0.504           | 1285.747       | S[24] |
| G  | 2  | 102.553         | 1220.739       | 1221.729        | 0.904           | 1221.225       | G[23] |
| R  | 3  | 180.603         | 1280.238       | <b>1193.219</b> | <b>1193.723</b> | 1242.715       | R[22] |
| G  | 4  | 209.114         | 1323.177       | <b>1115.168</b> | <b>1115.672</b> | 1314.566       | G[21] |
| K  | 5  | 273.161         | 1094.667       | <b>1086.657</b> | <b>1087.161</b> | 1086.153       | K[20] |
| G  | 6  | 301.672         | 1030.619       | 1022.810        | <b>1023.114</b> | 1022.108       | G[19] |
| G  | 7  | 330.183         | 1002.108       | <b>994.099</b>  | <b>994.603</b>  | 993.595        | G[18] |
| K  | 8  | 394.230         | 973.598        | 965.588         | <b>966.092</b>  | 965.084        | K[17] |
| G  | 9  | <b>423.741</b>  | 908.550        | <b>901.541</b>  | <b>902.045</b>  | 901.041        | G[16] |
| L  | 10 | <b>479.283</b>  | 883.040        | <b>873.030</b>  | <b>873.534</b>  | <b>872.526</b> | L[15] |
| G  | 11 | <b>507.794</b>  | 824.495        | 816.485         | <b>816.992</b>  | 815.982        | G[14] |
| K  | 12 | <b>571.841</b>  | 795.987        | <b>787.977</b>  | <b>788.481</b>  | <b>787.474</b> | K[13] |
| G  | 13 | <b>600.352</b>  | 731.939        | <b>723.930</b>  | <b>724.434</b>  | 723.426        | G[12] |
| G  | 14 | <b>628.863</b>  | 703.429        | <b>695.419</b>  | <b>695.923</b>  | 694.915        | G[11] |
| A  | 15 | <b>664.381</b>  | <b>674.918</b> | <b>666.908</b>  | <b>667.412</b>  | 666.405        | A[10] |
| R  | 16 | <b>749.434</b>  | <b>639.399</b> | <b>631.390</b>  | <b>631.894</b>  | 630.886        | R[9]  |
| R  | 17 | <b>827.485</b>  | 554.387        | <b>546.337</b>  | <b>546.841</b>  | <b>545.833</b> | R[8]  |
| H  | 18 | <b>896.014</b>  | 476.290        | <b>468.287</b>  | <b>468.791</b>  | 467.783        | H[7]  |
| R  | 19 | <b>974.065</b>  | 407.707        | <b>399.757</b>  | <b>400.261</b>  | 399.253        | R[6]  |
| K  | 20 | <b>1052.128</b> | 329.716        | 321.707         | 322.211         | 321.203        | K[5]  |
| V  | 21 | <b>1101.662</b> | 251.653        | 243.643         | 244.147         | 243.140        | V[4]  |
| L  | 22 | <b>1158.204</b> | 202.119        | 194.109         | 194.613         | 193.605        | L[3]  |
| R  | 23 | 1236.255        | 145.577        | 137.567         | 138.071         | 137.063        | R[2]  |
| D  | 24 | 1293.768        | 67.526         | 59.517          | 60.021          | 59.013         | D[1]  |

# sp | P62806 | H4\_MOUSE

[Acetyl]SGRGKGGKGLGKGGAK<sup>Acetyl</sup> RHRK<sup>Dimethyl</sup> VLRD<sup>28.03</sup>

- ▶ fragmentation table for charge state 3+
- ▶ specType=etd
- ▶ score=100.26
- ▶ F113278.dat
- ▶ query=q56661.p1
- ▶ precursor=518.308090
- ▶ chargePrecursor=5
- ▶ itol=0.5

| AA    | c              | y              | z+1            | z+2            | z              | AA    |
|-------|----------------|----------------|----------------|----------------|----------------|-------|
| S[1]  | 49.697         | <b>863.176</b> | <b>857.836</b> | 0.672          | 857.900        | S[24] |
| G[2]  | 58.704         | 320.162        | 814.827        | 0.672          | 814.486        | G[23] |
| R[3]  | 150.738        | 801.154        | 795.815        | <b>796.151</b> | 795.479        | R[22] |
| G[4]  | 130.745        | <b>749.121</b> | <b>743.781</b> | <b>744.117</b> | <b>743.445</b> | G[21] |
| K[5]  | 182.443        | 730.114        | <b>724.774</b> | <b>725.110</b> | <b>724.438</b> | K[20] |
| G[6]  | 201.450        | 687.415        | <b>682.076</b> | <b>682.412</b> | 681.740        | G[19] |
| G[7]  | 220.458        | 668.408        | <b>663.069</b> | <b>663.404</b> | 662.733        | G[18] |
| K[8]  | 263.156        | 649.401        | <b>644.061</b> | <b>644.397</b> | <b>643.725</b> | K[17] |
| G[9]  | 282.163        | <b>606.703</b> | <b>601.363</b> | <b>601.699</b> | 601.027        | G[16] |
| L[10] | 319.858        | 887.695        | 882.355        | <b>882.692</b> | 882.020        | L[15] |
| G[11] | 338.865        | 150.001        | 544.661        | <b>544.997</b> | 544.325        | G[14] |
| K[12] | 381.563        | 530.994        | <b>525.654</b> | <b>525.990</b> | 525.318        | K[13] |
| G[13] | 400.570        | 488.295        | 482.956        | 483.292        | 482.620        | G[12] |
| G[14] | 419.578        | 469.288        | 463.949        | 464.285        | 463.613        | G[11] |
| A[15] | 443.257        | 450.281        | 444.941        | 445.277        | 444.605        | A[10] |
| K[16] | 469.958        | 426.602        | 421.262        | 421.598        | 420.926        | K[9]  |
| R[17] | <b>551.992</b> | 369.900        | 364.561        | 364.896        | 364.225        | R[8]  |
| H[18] | <b>597.678</b> | 317.866        | 312.527        | 312.863        | 312.191        | H[7]  |
| R[19] | 659.712        | 272.180        | 266.841        | 267.176        | 266.505        | R[6]  |
| K[20] | <b>701.754</b> | 220.140        | 214.807        | 215.143        | 214.471        | K[5]  |
| V[21] | 734.777        | 168.104        | 162.765        | 163.101        | 162.429        | V[4]  |
| L[22] | <b>772.472</b> | 135.082        | 129.742        | 130.078        | 129.406        | L[3]  |
| R[23] | 824.505        | 97.387         | 92.047         | 92.383         | 91.711         | R[2]  |
| D[24] | <b>862.848</b> | 45.353         | 40.014         | 40.349         | 39.678         | D[1]  |

# sp | P62806 | H4\_MOUSE

[Acetyl]SGRGKGGKGLGKGGAK<sup>Acetyl</sup> RHRK<sup>Dimethyl</sup> VLRD<sup>28.03</sup>

- ▶ fragmentation table for charge state 4+
- ▶ specType=etd
- ▶ score=100.26
- ▶ F113278.dat
- ▶ query=q56661.p1
- ▶ precursor=518.308090
- ▶ chargePrecursor=5
- ▶ itol=0.5

| AA    | c       | y              | z+1            | z+2            | z       | AA    |
|-------|---------|----------------|----------------|----------------|---------|-------|
| S[1]  | 37.525  | <b>647.634</b> | <b>643.629</b> | 0.795          | 643.377 | S[24] |
| G[2]  | 51.780  | 615.373        | <b>611.368</b> | 0.795          | 611.116 | G[23] |
| R[3]  | 90.895  | 601.118        | <b>597.113</b> | <b>597.365</b> | 596.861 | R[22] |
| G[4]  | 105.061 | 562.092        | 558.088        | 558.340        | 557.836 | G[21] |
| K[5]  | 137.084 | 547.837        | 543.832        | 544.084        | 543.580 | K[20] |
| G[6]  | 151.340 | 515.813        | 511.809        | 512.061        | 511.557 | G[19] |
| G[7]  | 165.595 | 501.558        | 497.553        | 497.805        | 497.301 | G[18] |
| K[8]  | 197.619 | 487.303        | 483.298        | 483.550        | 483.046 | K[17] |
| G[9]  | 213.874 | 459.279        | 455.274        | 455.526        | 455.022 | G[16] |
| L[10] | 230.148 | 441.023        | 437.019        | 437.271        | 436.767 | L[15] |
| G[11] | 254.401 | 412.752        | 408.748        | 409.000        | 408.496 | G[14] |
| K[12] | 286.424 | 398.497        | 394.492        | 394.744        | 394.240 | K[13] |
| G[13] | 300.680 | 366.473        | 362.469        | 362.721        | 362.217 | G[12] |
| G[14] | 314.935 | 352.218        | 348.213        | 348.465        | 347.961 | G[11] |
| A[15] | 332.694 | 337.963        | 333.958        | 334.210        | 333.706 | A[10] |
| K[16] | 375.221 | 320.203        | 316.199        | 316.451        | 315.947 | K[9]  |
| R[17] | 414.246 | 277.677        | 273.672        | <b>273.924</b> | 273.420 | R[8]  |
| H[18] | 448.511 | 238.652        | 234.647        | 234.899        | 234.395 | H[7]  |
| R[19] | 487.536 | 204.387        | 200.382        | 200.634        | 200.130 | R[6]  |
| K[20] | 526.568 | 169.362        | 165.357        | 165.609        | 165.105 | K[5]  |
| V[21] | 551.335 | 126.130        | 122.125        | 122.377        | 121.873 | V[4]  |
| L[22] | 579.606 | 101.563        | 97.558         | 97.810         | 97.306  | L[3]  |
| R[23] | 618.631 | 73.292         | 69.287         | 69.539         | 69.035  | R[2]  |
| D[24] | 647.388 | 34.267         | 30.262         | 30.514         | 30.010  | D[1]  |

# sp | P62806 | H4\_MOUSE

[Acetyl]SGRGKGGK <sup>Acetyl</sup> 42.01 GLGKGGAKRHRK <sup>Dimethyl</sup> 28.03 VLRD

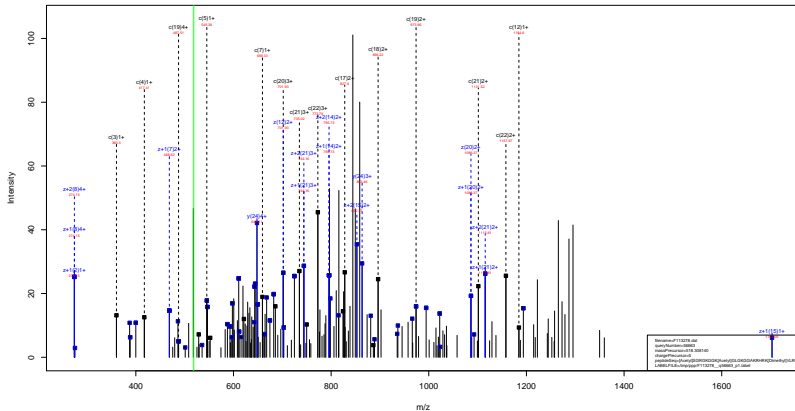

# sp | P62806 | H4\_MOUSE

[Acetyl]SGRGKGGK<sup>Acetyl</sup><sub>42.01</sub> GLGKGGAKRHRK<sup>Dimethyl</sup><sub>28.03</sub> VLRD

- ▶ fragmentation table for charge state 1+
- ▶ specType=etd
- ▶ score=62.42
- ▶ F113278.dat
- ▶ query=q56663.p1
- ▶ precursor=518.308140
- ▶ chargePrecursor=5
- ▶ itol=0.5

| AA | c  | y               | z+1      | z+2             | z               | AA       |       |
|----|----|-----------------|----------|-----------------|-----------------|----------|-------|
| S  | 1  | 347.676         | 2587.513 | 2571.494        | 0.000           | 2570.486 | S[24] |
| G  | 2  | 204.098         | 2458.470 | 2442.451        | 0.000           | 2441.444 | G[23] |
| R  | 3  | <b>368.199</b>  | 2401.449 | 2385.430        | 2386.438        | 2384.422 | R[22] |
| G  | 4  | <b>417.230</b>  | 2345.348 | 2229.329        | 2230.337        | 2228.321 | G[21] |
| K  | 5  | <b>545.315</b>  | 2188.326 | 2172.307        | 2173.315        | 2171.300 | K[20] |
| G  | 6  | 602.357         | 2060.211 | 2044.210        | 2045.220        | 2043.205 | G[19] |
| G  | 7  | <b>659.358</b>  | 2003.210 | 1987.191        | 1988.199        | 1986.183 | G[18] |
| K  | 8  | 829.464         | 1946.189 | 1930.170        | 1931.177        | 1929.162 | K[17] |
| G  | 9  | <b>886.485</b>  | 1778.081 | 1762.084        | 1761.072        | 1759.056 | G[16] |
| L  | 10 | 909.559         | 1719.061 | <b>1703.043</b> | 1704.050        | 1702.035 | L[15] |
| G  | 11 | 1056.591        | 1605.977 | 1589.958        | 1590.966        | 1588.951 | G[14] |
| K  | 12 | <b>1184.686</b> | 1548.956 | 1532.937        | 1533.945        | 1531.929 | K[13] |
| G  | 13 | 1241.707        | 1420.901 | 1404.840        | 1405.850        | 1403.834 | G[12] |
| G  | 14 | 1298.729        | 1363.839 | 1347.821        | 1348.828        | 1346.813 | G[11] |
| A  | 15 | 1369.766        | 1306.818 | 1290.759        | 1291.807        | 1289.791 | A[10] |
| R  | 16 | 1497.881        | 1238.781 | 1219.782        | 1220.780        | 1218.764 | R[9]  |
| R  | 17 | 1653.962        | 1107.686 | 1091.667        | <b>1092.675</b> | 1090.659 | R[8]  |
| H  | 18 | 1791.021        | 951.585  | <b>935.566</b>  | <b>936.574</b>  | 934.558  | H[7]  |
| R  | 19 | 1947.122        | 814.526  | <b>798.507</b>  | 799.515         | 797.499  | R[6]  |
| K  | 20 | 2103.248        | 658.425  | <b>642.406</b>  | <b>643.414</b>  | 641.398  | K[5]  |
| V  | 21 | 2202.317        | 502.298  | <b>486.288</b>  | <b>487.287</b>  | 485.272  | V[4]  |
| L  | 22 | 2315.401        | 403.230  | <b>387.211</b>  | <b>388.219</b>  | 386.203  | L[3]  |
| R  | 23 | 2471.502        | 286.146  | <b>274.127</b>  | <b>275.135</b>  | 273.119  | R[2]  |
| D  | 24 | 2586.529        | 134.045  | 118.026         | 119.034         | 117.018  | D[1]  |

# sp | P62806 | H4\_MOUSE

[Acetyl]SGRGKGGK <sup>Acetyl</sup><sub>42.01</sub> GLGKGGAKRHRK <sup>Dimethyl</sup><sub>28.03</sub> VLRD

- ▶ fragmentation table for charge state 2+
- ▶ specType=etd
- ▶ score=62.42
- ▶ F113278.dat
- ▶ query=q56663.p1
- ▶ precursor=518.308140
- ▶ chargePrecursor=5
- ▶ itol=0.5

| AA    | c               | y              | z+1             | z+2             | z               | AA    |
|-------|-----------------|----------------|-----------------|-----------------|-----------------|-------|
| S[1]  | 74.042          | 1294.200       | 1288.251        | 0.504           | 1289.747        | S[24] |
| G[2]  | 102.551         | 1229.739       | 1221.729        | 0.504           | 1221.225        | G[23] |
| R[3]  | 180.601         | 1201.238       | <b>1193.219</b> | <b>1193.723</b> | 1192.715        | R[22] |
| G[4]  | 269.114         | 1173.177       | <b>1115.168</b> | <b>1115.672</b> | 1114.664        | G[21] |
| K[5]  | 273.161         | 1094.667       | <b>1086.657</b> | 1087.161        | <b>1086.153</b> | K[20] |
| G[6]  | 351.672         | 1030.619       | <b>1022.610</b> | <b>1023.114</b> | <b>1022.106</b> | G[19] |
| G[7]  | 330.193         | 1002.108       | <b>994.099</b>  | <b>994.603</b>  | 993.595         | G[18] |
| K[8]  | 415.236         | <b>973.598</b> | 965.588         | <b>966.092</b>  | 965.084         | K[17] |
| G[9]  | 443.746         | <b>888.545</b> | 880.535         | <b>881.040</b>  | 880.032         | G[16] |
| L[10] | 609.288         | 859.034        | 851.024         | <b>852.529</b>  | 851.521         | L[15] |
| G[11] | <b>528.799</b>  | 803.002        | <b>795.483</b>  | <b>795.987</b>  | 794.979         | G[14] |
| K[12] | <b>592.847</b>  | 774.982        | 766.972         | 767.476         | 766.468         | K[13] |
| G[13] | <b>621.357</b>  | 710.934        | <b>702.925</b>  | <b>703.429</b>  | <b>702.421</b>  | G[12] |
| G[14] | <b>649.868</b>  | <b>682.423</b> | <b>674.414</b>  | <b>674.918</b>  | 673.910         | G[11] |
| A[15] | <b>683.387</b>  | 653.912        | 645.902         | 646.407         | 645.399         | A[10] |
| R[16] | <b>749.434</b>  | 618.904        | <b>610.385</b>  | <b>610.889</b>  | 609.881         | R[9]  |
| R[17] | <b>827.485</b>  | 554.147        | <b>546.337</b>  | <b>546.841</b>  | <b>545.833</b>  | R[8]  |
| H[18] | <b>896.014</b>  | 476.206        | <b>468.287</b>  | <b>468.791</b>  | 467.783         | H[7]  |
| R[19] | <b>974.065</b>  | 407.767        | <b>399.757</b>  | <b>400.261</b>  | 399.253         | R[6]  |
| K[20] | 1052.128        | 329.716        | 321.707         | 322.211         | 321.203         | K[5]  |
| V[21] | <b>1101.662</b> | 251.692        | 243.683         | 244.187         | 243.180         | V[4]  |
| L[22] | <b>1158.204</b> | 202.119        | 194.109         | 194.613         | 193.605         | L[3]  |
| R[23] | 1238.255        | 145.577        | 137.567         | 138.071         | 137.063         | R[2]  |
| D[24] | 1293.768        | 67.526         | 59.517          | 60.021          | 59.013          | D[1]  |

# sp | P62806 | H4\_MOUSE

[Acetyl]SGRGKGGK<sup>Acetyl</sup><sub>42.01</sub> GLGKGGAKRHRK<sup>Dimethyl</sup><sub>28.03</sub> VLRD

- ▶ fragmentation table for charge state 3+
- ▶ specType=etd
- ▶ score=62.42
- ▶ F113278.dat
- ▶ query=q56663.p1
- ▶ precursor=518.308140
- ▶ chargePrecursor=5
- ▶ itol=0.5

| AA    | c              | y              | z+1            | z+2            | z              | AA    |
|-------|----------------|----------------|----------------|----------------|----------------|-------|
| S[1]  | 49.697         | <b>863.176</b> | 857.830        | 0.672          | 857.500        | S[24] |
| G[2]  | 58.704         | 320.162        | <b>814.822</b> | 0.672          | 814.486        | G[23] |
| R[3]  | 120.738        | 801.154        | <b>795.815</b> | <b>796.151</b> | <b>795.479</b> | R[22] |
| G[4]  | 139.745        | 749.121        | <b>743.781</b> | <b>744.117</b> | 743.445        | G[21] |
| K[5]  | 182.443        | 730.114        | <b>724.774</b> | <b>725.110</b> | <b>724.438</b> | K[20] |
| G[6]  | 201.450        | 687.415        | <b>682.076</b> | <b>682.412</b> | 681.740        | G[19] |
| G[7]  | 220.458        | <b>668.408</b> | <b>663.069</b> | <b>663.404</b> | <b>662.733</b> | G[18] |
| K[8]  | 277.159        | <b>649.401</b> | <b>644.061</b> | <b>644.397</b> | <b>643.725</b> | K[17] |
| G[9]  | 286.167        | <b>592.699</b> | <b>587.360</b> | <b>587.695</b> | 587.024        | G[16] |
| L[10] | 333.881        | 574.992        | 568.327        | 568.668        | 568.016        | L[15] |
| G[11] | 352.888        | <b>535.997</b> | 530.658        | 530.994        | 530.322        | G[14] |
| K[12] | 395.567        | 516.990        | 511.651        | 511.988        | 511.315        | K[13] |
| G[13] | 414.574        | 474.292        | <b>468.952</b> | 469.288        | <b>468.616</b> | G[12] |
| G[14] | 433.581        | 455.285        | 449.945        | 450.281        | 449.609        | G[11] |
| A[15] | 457.260        | 436.277        | 430.938        | 431.274        | 430.602        | A[10] |
| K[16] | 499.958        | 412.598        | 407.259        | 407.595        | 406.923        | K[9]  |
| R[17] | <b>551.992</b> | 369.900        | 364.561        | 364.896        | 364.225        | R[8]  |
| H[18] | <b>597.678</b> | 317.866        | 312.527        | 312.863        | 312.191        | H[7]  |
| R[19] | <b>649.712</b> | 272.180        | 266.841        | 267.176        | 266.505        | R[6]  |
| K[20] | <b>701.754</b> | 220.140        | 214.807        | 215.143        | 214.471        | K[5]  |
| V[21] | <b>734.777</b> | 168.104        | 162.765        | 163.101        | 162.429        | V[4]  |
| L[22] | <b>772.472</b> | 135.082        | 129.742        | 130.078        | 129.406        | L[3]  |
| R[23] | <b>824.505</b> | 97.387         | 92.047         | 92.383         | 91.711         | R[2]  |
| D[24] | 862.848        | 45.353         | 40.014         | 40.349         | 39.678         | D[1]  |



# sp | P62806 | H4\_MOUSE

[Acetyl]SGRGKGGK <sup>Acetyl</sup><sub>42.01</sub> GLGKGGAKRHRK <sup>Dimethyl</sup><sub>28.03</sub> VLRD

- ▶ fragmentation table for charge state 4+
- ▶ specType=etd
- ▶ score=62.42
- ▶ F113278.dat
- ▶ query=q56663.p1
- ▶ precursor=518.308140
- ▶ chargePrecursor=5
- ▶ itol=0.5

| AA    | c              | y              | z+1            | z+2            | z              | AA    |
|-------|----------------|----------------|----------------|----------------|----------------|-------|
| S[1]  | 37.525         | <b>647.634</b> | <b>643.629</b> | 0.755          | <b>643.177</b> | S[24] |
| G[2]  | 51.780         | <b>615.373</b> | <b>611.368</b> | 0.755          | <b>611.116</b> | G[23] |
| R[3]  | 90.805         | 601.118        | 597.113        | <b>597.365</b> | <b>596.061</b> | R[22] |
| G[4]  | 105.061        | 562.092        | 558.088        | 558.340        | 557.836        | G[21] |
| K[5]  | 137.084        | 547.837        | 543.832        | 544.084        | 543.980        | K[20] |
| G[6]  | 151.340        | 515.813        | 511.809        | 512.061        | 511.557        | G[19] |
| G[7]  | 165.595        | <b>501.558</b> | 497.553        | 497.805        | 497.301        | G[18] |
| K[8]  | 208.121        | <b>487.303</b> | 483.298        | 483.550        | 483.046        | K[17] |
| G[9]  | 222.377        | 444.776        | 440.771        | 441.023        | 440.520        | G[16] |
| L[10] | 250.048        | 430.521        | 426.516        | 426.768        | 426.264        | L[15] |
| G[11] | 264.303        | 407.265        | 398.243        | 398.497        | 397.993        | G[14] |
| K[12] | 296.027        | <b>387.994</b> | 383.990        | 384.242        | 383.738        | K[13] |
| G[13] | 311.182        | 355.971        | 351.966        | 352.218        | 351.714        | G[12] |
| G[14] | 325.438        | 341.715        | 337.711        | 337.963        | 337.459        | G[11] |
| A[15] | 343.197        | 327.460        | 323.455        | 323.707        | 323.203        | A[10] |
| K[16] | 375.221        | 309.701        | 305.696        | 305.948        | 305.444        | K[9]  |
| R[17] | 414.246        | 277.877        | <b>273.672</b> | <b>273.924</b> | 273.420        | R[8]  |
| H[18] | 448.511        | 238.652        | 234.647        | 234.899        | 234.395        | H[7]  |
| R[19] | <b>487.536</b> | 204.397        | 200.392        | 200.644        | 200.140        | R[6]  |
| K[20] | 525.569        | 165.362        | 161.357        | 161.609        | 161.105        | K[5]  |
| V[21] | 551.335        | 126.330        | 122.325        | 122.577        | 122.073        | V[4]  |
| L[22] | 579.606        | 101.563        | 97.558         | 97.810         | 97.306         | L[3]  |
| R[23] | 618.631        | 73.292         | 69.287         | 69.539         | 69.035         | R[2]  |
| D[24] | 647.388        | 34.267         | 30.262         | 30.514         | 30.010         | D[1]  |

# sp | P62806 | H4\_MOUSE

[Acetyl]SGRGKGGKGLGKGGAK <sup>Acetyl</sup>42.01 RHRK <sup>Dimethyl</sup>28.03 VLRD

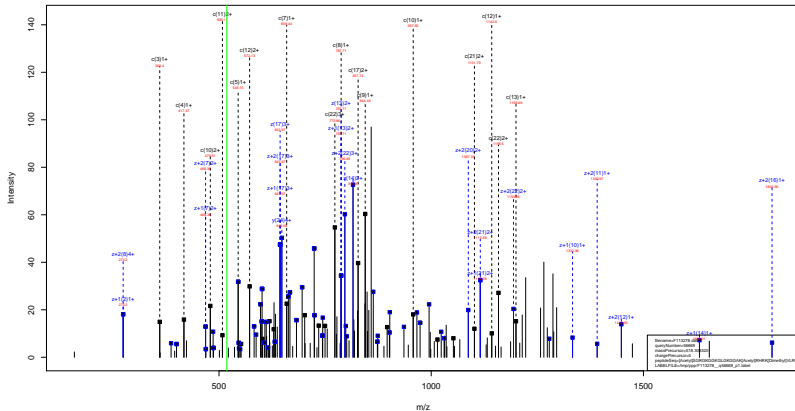

# sp | P62806 | H4\_MOUSE

[Acetyl]SGRGKGGKGLGKGGAK<sup>Acetyl</sup> RHRK<sup>Dimethyl</sup> VLRD<sup>28.03</sup>

- ▶ fragmentation table for charge state 1+
- ▶ specType=etd
- ▶ score=87.76
- ▶ F113278.dat
- ▶ query=q56669\_p1
- ▶ precursor=518.308320
- ▶ chargePrecursor=5
- ▶ itol=0.5

| AA | c  | y               | z+1             | z+2             | z               | AA       |       |
|----|----|-----------------|-----------------|-----------------|-----------------|----------|-------|
| S  | 1  | 147.076         | 2587.513        | 2571.494        | 0.000           | 2570.486 | S[24] |
| G  | 2  | 204.098         | 2458.470        | 2442.451        | 0.000           | 2441.444 | G[23] |
| R  | 3  | <b>360.199</b>  | 2401.440        | 2385.430        | 2388.438        | 2384.422 | R[22] |
| G  | 4  | <b>417.220</b>  | 2349.340        | 2229.330        | 2230.337        | 2228.321 | G[21] |
| K  | 5  | <b>545.315</b>  | 2185.320        | 2172.307        | 2173.315        | 2171.300 | K[20] |
| G  | 6  | <b>602.337</b>  | 2060.231        | 2044.212        | 2045.220        | 2043.205 | G[19] |
| G  | 7  | <b>659.358</b>  | 2003.210        | 1987.191        | 1988.199        | 1986.181 | G[18] |
| K  | 8  | <b>787.453</b>  | 1946.189        | 1930.170        | 1931.177        | 1929.162 | K[17] |
| G  | 9  | <b>844.475</b>  | 1818.063        | 1802.075        | <b>1803.082</b> | 1801.067 | G[16] |
| L  | 10 | <b>927.559</b>  | 1761.072        | 1745.053        | 1746.061        | 1744.045 | L[15] |
| Q  | 11 | <b>1014.580</b> | 1647.985        | <b>1631.909</b> | 1632.917        | 1630.901 | Q[14] |
| K  | 12 | <b>1142.675</b> | 1590.966        | 1574.948        | 1575.955        | 1573.940 | K[13] |
| G  | 13 | <b>1199.697</b> | 1462.871        | 1446.853        | <b>1447.860</b> | 1445.845 | G[12] |
| G  | 14 | 1256.718        | 1405.850        | 1389.831        | <b>1390.839</b> | 1388.821 | G[11] |
| A  | 15 | 1327.735        | 1348.825        | <b>1332.818</b> | 1333.818        | 1331.802 | A[10] |
| R  | 16 | 1407.851        | <b>1277.791</b> | 1261.773        | 1262.780        | 1260.765 | R[9]  |
| R  | 17 | 1653.962        | 1107.688        | 1091.667        | 1092.675        | 1090.659 | R[8]  |
| H  | 18 | 1791.021        | 951.585         | <b>935.566</b>  | 936.574         | 934.558  | H[7]  |
| R  | 19 | 1967.122        | 814.526         | <b>798.507</b>  | 799.515         | 797.499  | R[6]  |
| K  | 20 | 2103.248        | 658.425         | 642.406         | 643.414         | 641.398  | K[5]  |
| V  | 21 | 2202.217        | 502.360         | <b>485.380</b>  | <b>487.287</b>  | 485.272  | V[4]  |
| L  | 22 | 2313.403        | 463.130         | <b>387.211</b>  | 388.219         | 386.203  | L[3]  |
| R  | 23 | 2471.502        | 290.146         | <b>274.127</b>  | 275.135         | 273.119  | R[2]  |
| D  | 24 | 2586.529        | 134.045         | 138.026         | 139.034         | 137.018  | D[1]  |

# sp | P62806 | H4\_MOUSE

[Acetyl]SGRGKGGKGLGKGGAK<sup>Acetyl</sup> RHRK<sup>Dimethyl</sup> VLRD<sup>28.03</sup>

- ▶ fragmentation table for charge state 2+
- ▶ specType=etd
- ▶ score=87.76
- ▶ F113278.dat
- ▶ query=q56669\_p1
- ▶ precursor=518.308320
- ▶ chargePrecursor=5
- ▶ itol=0.5

| AA    | c               | y               | z+1             | z+2             | z              | AA    |
|-------|-----------------|-----------------|-----------------|-----------------|----------------|-------|
| S[1]  | 74.042          | 1294.260        | 1286.251        | 0.504           | 1285.747       | S[24] |
| G[2]  | 102.553         | 1229.730        | 1221.720        | 0.504           | 1221.225       | G[23] |
| R[3]  | 180.603         | 1201.226        | 1193.219        | <b>1193.723</b> | 1192.715       | R[22] |
| G[4]  | 269.114         | 1123.177        | <b>1115.168</b> | <b>1115.672</b> | 1114.666       | G[21] |
| K[5]  | 273.161         | 1094.067        | 1086.057        | <b>1087.161</b> | 1086.153       | K[20] |
| G[6]  | 301.672         | <b>1030.619</b> | 1022.610        | <b>1023.114</b> | 1022.106       | G[19] |
| G[7]  | 330.183         | 1002.108        | 994.099         | <b>994.603</b>  | 993.595        | G[18] |
| K[8]  | 394.230         | <b>973.598</b>  | 965.588         | <b>966.092</b>  | 965.084        | K[17] |
| G[9]  | 427.741         | 909.550         | <b>901.541</b>  | <b>902.045</b>  | <b>901.037</b> | G[16] |
| L[10] | <b>479.283</b>  | 881.040         | <b>873.030</b>  | <b>873.534</b>  | 872.526        | L[15] |
| G[11] | <b>507.794</b>  | 824.498         | 816.488         | 816.992         | <b>815.984</b> | G[14] |
| K[12] | <b>571.841</b>  | 795.987         | <b>787.977</b>  | 788.481         | <b>787.474</b> | K[13] |
| G[13] | <b>600.352</b>  | 731.939         | <b>723.930</b>  | <b>724.434</b>  | 723.426        | G[12] |
| G[14] | <b>628.863</b>  | 703.429         | <b>695.419</b>  | <b>695.923</b>  | 694.915        | G[11] |
| A[15] | 664.361         | 674.918         | <b>666.908</b>  | <b>667.412</b>  | 666.404        | A[10] |
| R[16] | <b>749.434</b>  | 636.369         | <b>631.360</b>  | <b>631.864</b>  | 630.856        | R[9]  |
| R[17] | <b>827.485</b>  | 554.347         | <b>546.337</b>  | <b>546.841</b>  | 545.833        | R[8]  |
| H[18] | <b>896.014</b>  | 476.208         | <b>468.207</b>  | <b>468.791</b>  | 467.783        | H[7]  |
| R[19] | <b>974.065</b>  | 407.767         | <b>399.757</b>  | <b>400.261</b>  | 399.253        | R[6]  |
| K[20] | <b>1052.128</b> | 329.716         | 321.707         | 322.211         | 321.203        | K[5]  |
| V[21] | <b>1101.662</b> | 251.663         | 243.653         | 244.147         | 243.140        | V[4]  |
| L[22] | <b>1158.204</b> | 202.119         | 194.108         | 194.613         | 193.605        | L[3]  |
| R[23] | 1236.255        | 145.577         | 137.567         | 138.071         | 137.063        | R[2]  |
| D[24] | 1293.768        | 67.526          | 59.517          | 60.021          | 59.013         | D[1]  |

# sp | P62806 | H4\_MOUSE

[Acetyl]SGRGKGGKGLGKGGAK<sup>Acetyl</sup> RHRK<sup>Dimethyl</sup> VLRD<sup>28.03</sup>

- ▶ fragmentation table for charge state 3+
- ▶ specType=etd
- ▶ score=87.76
- ▶ F113278.dat
- ▶ query=q56669.p1
- ▶ precursor=518.308320
- ▶ chargePrecursor=5
- ▶ itol=0.5

| AA    | c              | y              | z+1            | z+2            | z              | AA    |
|-------|----------------|----------------|----------------|----------------|----------------|-------|
| S[1]  | 49.697         | <b>863.176</b> | 857.830        | 0.672          | 857.500        | S[24] |
| G[2]  | 58.704         | 820.162        | 814.822        | 0.672          | 814.486        | G[23] |
| R[3]  | 150.738        | <b>801.154</b> | 795.815        | <b>796.151</b> | 795.479        | R[22] |
| G[4]  | 139.745        | 749.121        | <b>743.781</b> | <b>744.117</b> | <b>743.445</b> | G[21] |
| K[5]  | 182.443        | 730.114        | <b>724.774</b> | <b>725.110</b> | <b>724.438</b> | K[20] |
| G[6]  | 201.450        | 687.415        | <b>682.076</b> | <b>682.412</b> | 681.740        | G[19] |
| G[7]  | 220.458        | 668.408        | <b>663.069</b> | <b>663.404</b> | 662.733        | G[18] |
| K[8]  | 263.156        | 649.401        | <b>644.061</b> | <b>644.397</b> | <b>643.725</b> | K[17] |
| G[9]  | 282.163        | <b>606.703</b> | <b>601.363</b> | <b>601.699</b> | <b>601.027</b> | G[16] |
| L[10] | 319.958        | <b>587.695</b> | <b>582.356</b> | <b>582.692</b> | 582.020        | L[15] |
| G[11] | 338.965        | <b>550.001</b> | <b>544.661</b> | <b>544.997</b> | 544.325        | G[14] |
| K[12] | 381.563        | 530.994        | 525.654        | 525.990        | 525.318        | K[13] |
| G[13] | 400.570        | 488.295        | 482.956        | 483.292        | 482.620        | G[12] |
| G[14] | 419.578        | <b>469.288</b> | 463.949        | 464.285        | 463.613        | G[11] |
| A[15] | 443.257        | 450.281        | 444.941        | 445.277        | 444.605        | A[10] |
| K[16] | 469.958        | 426.602        | 421.262        | 421.598        | 420.926        | K[9]  |
| R[17] | <b>551.992</b> | 369.900        | 364.561        | 364.896        | 364.225        | R[8]  |
| H[18] | <b>597.678</b> | 317.866        | 312.527        | 312.863        | 312.191        | H[7]  |
| R[19] | 659.712        | 272.180        | 266.841        | 267.176        | 266.505        | R[6]  |
| K[20] | <b>701.754</b> | 220.140        | 214.801        | 215.143        | 214.471        | K[5]  |
| V[21] | <b>734.777</b> | 168.104        | 162.765        | 163.101        | 162.429        | V[4]  |
| L[22] | <b>772.472</b> | 135.082        | 129.742        | 130.078        | 129.406        | L[3]  |
| R[23] | 824.505        | 97.387         | 92.047         | 92.383         | 91.711         | R[2]  |
| D[24] | 862.848        | 45.353         | 40.014         | 40.349         | 39.678         | D[1]  |

# sp | P62806 | H4\_MOUSE

[Acetyl]SGRGKGGKGLGKGGAK<sup>Acetyl</sup>RHRK<sup>Dimethyl</sup>VLRD<sup>28.03</sup>

- ▶ fragmentation table for charge state 4+
- ▶ specType=etd
- ▶ score=87.76
- ▶ F113278.dat
- ▶ query=q56669.p1
- ▶ precursor=518.308320
- ▶ chargePrecursor=5
- ▶ itol=0.5

| AA    | c              | y              | z+1            | z+2            | z              | AA    |
|-------|----------------|----------------|----------------|----------------|----------------|-------|
| S[1]  | 37.525         | <b>647.634</b> | <b>643.629</b> | 0.755          | 643.377        | S[24] |
| G[2]  | 51.780         | <b>615.373</b> | <b>611.368</b> | 0.755          | <b>611.116</b> | G[23] |
| R[3]  | 90.805         | <b>601.118</b> | 597.113        | <b>597.365</b> | 596.861        | R[22] |
| G[4]  | 105.061        | 562.092        | 558.088        | 558.340        | 557.836        | G[21] |
| K[5]  | 137.084        | 547.837        | 543.832        | 544.084        | 543.580        | K[20] |
| G[6]  | 151.340        | 515.813        | 511.809        | 512.061        | 511.557        | G[19] |
| G[7]  | 165.595        | 501.558        | 497.553        | 497.805        | 497.301        | G[18] |
| K[8]  | 197.619        | <b>487.303</b> | 483.298        | 483.550        | 483.046        | K[17] |
| G[9]  | 211.874        | 459.279        | 455.274        | 455.526        | 455.022        | G[16] |
| L[10] | 280.148        | 441.023        | 437.019        | 437.271        | 436.767        | L[15] |
| G[11] | 254.403        | 417.752        | 408.748        | 409.000        | 408.496        | G[14] |
| K[12] | 286.424        | 398.497        | 394.492        | 394.744        | 394.240        | K[13] |
| G[13] | 300.680        | 366.473        | 362.469        | 362.721        | 362.217        | G[12] |
| G[14] | 314.935        | 352.218        | 348.213        | 348.465        | 347.961        | G[11] |
| A[15] | 332.694        | 337.963        | 333.958        | 334.210        | 333.706        | A[10] |
| K[16] | 375.221        | 320.203        | 316.199        | 316.451        | 315.947        | K[9]  |
| R[17] | 414.246        | 277.877        | 273.872        | <b>273.924</b> | 273.420        | R[8]  |
| H[18] | 448.511        | 238.652        | 234.647        | 234.899        | 234.395        | H[7]  |
| R[19] | <b>487.536</b> | 204.397        | 200.392        | 200.644        | 200.140        | R[6]  |
| K[20] | 525.568        | 165.362        | 161.357        | 161.609        | 161.105        | K[5]  |
| V[21] | 551.335        | 126.330        | 122.325        | 122.577        | 122.073        | V[4]  |
| L[22] | 579.606        | 101.563        | 97.558         | 97.810         | 97.306         | L[3]  |
| R[23] | <b>618.631</b> | 73.292         | 69.287         | 69.539         | 69.035         | R[2]  |
| D[24] | 647.388        | 34.267         | 30.262         | 30.514         | 30.010         | D[1]  |



# sp | P62806 | H4\_MOUSE

[Acetyl]SGRGKGGKGLGKGGAK<sup>Acetyl</sup> RHRK<sup>Dimethyl</sup> VLRD<sup>28.03</sup>

- ▶ fragmentation table for charge state 1+
- ▶ specType=etd
- ▶ score=71.33
- ▶ F113278.dat
- ▶ query=q56671\_p1
- ▶ precursor=647.633880
- ▶ chargePrecursor=4
- ▶ itol=0.5

| AA | c  | y               | z+1      | z+2             | z               | AA       |       |
|----|----|-----------------|----------|-----------------|-----------------|----------|-------|
| S  | 1  | 347.676         | 2587.513 | 2571.494        | 0.000           | 2570.486 | S[24] |
| G  | 2  | 204.098         | 2458.470 | 2442.451        | 0.000           | 2441.444 | G[23] |
| R  | 3  | <b>358.1190</b> | 2420.440 | 2385.430        | 2386.438        | 2384.422 | R[22] |
| G  | 4  | <b>417.220</b>  | 2345.340 | 2229.330        | 2230.337        | 2228.321 | G[21] |
| K  | 5  | 545.315         | 2188.326 | 2172.307        | 2173.315        | 2171.300 | K[20] |
| G  | 6  | <b>602.337</b>  | 2060.231 | 2044.210        | 2045.220        | 2043.205 | G[19] |
| G  | 7  | <b>659.358</b>  | 2003.210 | <b>1987.191</b> | 1988.199        | 1986.183 | G[18] |
| K  | 8  | 787.453         | 1946.188 | <b>1930.170</b> | 1931.177        | 1929.162 | K[17] |
| G  | 9  | <b>844.475</b>  | 1818.093 | 1802.075        | 1803.082        | 1801.067 | G[16] |
| L  | 10 | 973.559         | 1763.072 | 1746.053        | 1746.061        | 1744.045 | L[15] |
| G  | 11 | <b>1014.580</b> | 1647.985 | 1631.966        | 1632.977        | 1630.961 | G[14] |
| K  | 12 | <b>1142.675</b> | 1590.966 | 1574.948        | 1575.955        | 1573.940 | K[13] |
| G  | 13 | <b>1199.697</b> | 1462.871 | 1446.853        | 1447.860        | 1445.845 | G[12] |
| G  | 14 | <b>1256.718</b> | 1405.850 | 1389.831        | <b>1390.839</b> | 1388.823 | G[11] |
| A  | 15 | 1327.735        | 1348.828 | 1332.810        | 1333.818        | 1331.802 | A[10] |
| R  | 16 | 1497.881        | 1277.791 | 1261.773        | 1262.780        | 1260.765 | R[9]  |
| R  | 17 | <b>1653.962</b> | 1107.685 | 1091.667        | 1092.675        | 1090.659 | R[8]  |
| H  | 18 | <b>1791.021</b> | 951.585  | 935.566         | <b>936.574</b>  | 934.558  | H[7]  |
| R  | 19 | 1947.122        | 814.526  | <b>798.507</b>  | 799.515         | 797.499  | R[6]  |
| K  | 20 | 2103.248        | 658.425  | 642.406         | <b>643.414</b>  | 641.398  | K[5]  |
| V  | 21 | 2202.317        | 502.298  | 486.280         | 487.287         | 485.272  | V[4]  |
| L  | 22 | 2315.401        | 403.230  | 387.211         | 388.219         | 386.203  | L[3]  |
| R  | 23 | 2471.502        | 298.146  | 274.127         | 275.135         | 273.119  | R[2]  |
| D  | 24 | 2586.529        | 134.045  | 118.026         | 119.034         | 117.018  | D[1]  |



# sp | P62806 | H4\_MOUSE

[Acetyl]SGRGKGGKGLGKGGAK<sup>Acetyl</sup> RHRK<sup>Dimethyl</sup> VLRD<sup>28.03</sup>

- ▶ fragmentation table for charge state 2+
- ▶ specType=etd
- ▶ score=71.33
- ▶ F113278.dat
- ▶ query=q56671.p1
- ▶ precursor=647.633880
- ▶ chargePrecursor=4
- ▶ itol=0.5

| AA | c  | y               | z+1             | z+2             | z               | AA              |       |
|----|----|-----------------|-----------------|-----------------|-----------------|-----------------|-------|
| S  | 1  | 74.042          | <b>1294.260</b> | <b>1286.251</b> | 0.504           | <b>1285.747</b> | S[24] |
| G  | 2  | 102.553         | 1229.739        | 1221.729        | 0.504           | 1221.225        | G[23] |
| R  | 3  | 180.603         | <b>1261.228</b> | 1191.719        | <b>1193.723</b> | 1192.715        | R[22] |
| G  | 4  | 259.114         | 1123.777        | <b>1115.108</b> | <b>1115.072</b> | 1114.666        | G[21] |
| K  | 5  | 273.153         | 1094.667        | <b>1085.657</b> | <b>1087.161</b> | 1086.151        | K[20] |
| G  | 6  | 303.672         | <b>1030.619</b> | 1022.610        | 1023.114        | 1022.106        | G[19] |
| G  | 7  | 330.183         | 1002.108        | <b>994.099</b>  | <b>994.603</b>  | 993.595         | G[18] |
| K  | 8  | 394.230         | 973.599         | 965.588         | 966.092         | 965.084         | K[17] |
| G  | 9  | 422.741         | 959.560         | 961.541         | <b>962.045</b>  | 961.037         | G[16] |
| L  | 10 | 479.293         | 893.040         | 873.030         | <b>873.534</b>  | 872.526         | L[15] |
| G  | 11 | 507.794         | 824.468         | 816.458         | 816.962         | 815.954         | G[14] |
| K  | 12 | 571.841         | <b>795.987</b>  | <b>787.977</b>  | <b>788.481</b>  | 787.474         | K[13] |
| G  | 13 | 600.352         | 731.939         | 723.930         | <b>724.434</b>  | 723.426         | G[12] |
| G  | 14 | 628.863         | 703.429         | <b>695.419</b>  | <b>695.923</b>  | 694.915         | G[11] |
| A  | 15 | 684.381         | 674.919         | 666.908         | 667.412         | <b>666.405</b>  | A[10] |
| R  | 16 | 749.438         | 639.399         | 631.390         | <b>631.894</b>  | 630.886         | R[9]  |
| R  | 17 | 827.485         | 554.347         | 546.337         | 546.841         | 545.833         | R[8]  |
| H  | 18 | 866.014         | 476.296         | 468.287         | 468.791         | 467.783         | H[7]  |
| R  | 19 | 974.065         | 407.767         | 399.757         | 400.261         | 399.253         | R[6]  |
| K  | 20 | <b>1052.128</b> | 329.716         | 321.707         | 322.211         | 321.203         | K[5]  |
| V  | 21 | <b>1101.662</b> | 251.663         | 243.653         | 244.157         | 243.149         | V[4]  |
| L  | 22 | <b>1158.204</b> | 202.119         | 194.109         | 194.613         | 193.605         | L[3]  |
| R  | 23 | <b>1236.255</b> | 145.577         | 137.567         | 138.071         | 137.063         | R[2]  |
| D  | 24 | 1293.768        | 67.526          | 59.517          | 60.021          | 59.013          | D[1]  |

# sp | P62806 | H4\_MOUSE

[Acetyl]SGRGKGGKGLGKGGAK<sup>Acetyl</sup> RHRK<sup>Dimethyl</sup> VLRD<sup>28.03</sup>

- ▶ fragmentation table for charge state 3+
- ▶ specType=etd
- ▶ score=71.33
- ▶ F113278.dat
- ▶ query=q56671\_p1
- ▶ precursor=647.633880
- ▶ chargePrecursor=4
- ▶ itol=0.5

| AA    | c       | y              | z+1            | z+2            | z              | AA    |
|-------|---------|----------------|----------------|----------------|----------------|-------|
| S[1]  | 49.697  | <b>863.176</b> | 857.836        | 0.672          | 857.503        | S[24] |
| G[2]  | 68.704  | 820.162        | <b>814.822</b> | 0.672          | 814.486        | G[23] |
| R[3]  | 120.738 | <b>801.154</b> | <b>795.815</b> | <b>796.151</b> | <b>795.479</b> | R[22] |
| G[4]  | 139.745 | 749.121        | 743.781        | 744.117        | 743.445        | G[21] |
| K[5]  | 182.443 | 730.114        | <b>724.774</b> | <b>725.110</b> | <b>724.438</b> | K[20] |
| G[6]  | 201.450 | 687.415        | 682.076        | 682.412        | 681.740        | G[19] |
| G[7]  | 220.458 | <b>668.408</b> | 663.069        | 663.404        | 662.733        | G[18] |
| K[8]  | 263.156 | 649.401        | <b>644.061</b> | 644.397        | <b>643.725</b> | K[17] |
| C[9]  | 282.163 | 606.793        | 601.353        | 601.689        | 601.027        | C[16] |
| L[10] | 319.838 | 587.696        | 582.356        | 582.692        | 582.020        | L[15] |
| G[11] | 338.865 | 550.001        | 544.661        | 544.997        | 544.325        | G[14] |
| K[12] | 381.563 | 530.994        | 525.654        | 525.990        | 525.318        | K[13] |
| G[13] | 400.570 | 488.295        | 482.956        | 483.292        | 482.620        | G[12] |
| G[14] | 419.578 | 469.288        | 463.949        | 464.285        | 463.613        | G[11] |
| A[15] | 443.257 | 450.281        | 444.941        | 445.277        | 444.605        | A[10] |
| K[16] | 499.958 | 426.602        | 421.262        | 421.598        | 420.926        | K[9]  |
| R[17] | 551.992 | 399.900        | 394.561        | 394.896        | 394.225        | R[8]  |
| H[18] | 597.678 | 317.866        | 312.527        | 312.863        | 312.191        | H[7]  |
| R[19] | 649.712 | 272.180        | 266.841        | 267.176        | 266.505        | R[6]  |
| K[20] | 701.754 | 223.346        | 218.007        | 218.343        | 217.671        | K[5]  |
| V[21] | 734.777 | 198.104        | 192.765        | 193.101        | 192.429        | V[4]  |
| L[22] | 772.472 | 135.982        | 129.742        | 130.078        | 129.406        | L[3]  |
| R[23] | 824.505 | 97.387         | 92.047         | 92.383         | 91.711         | R[2]  |
| D[24] | 862.848 | 45.353         | 40.014         | 40.349         | 39.678         | D[1]  |

# sp | P62806 | H4\_MOUSE

[Acetyl]SGRGKGGKGLGKGGAK Acetyl 42.01 RHRK Dimethyl 28.03 VLRD

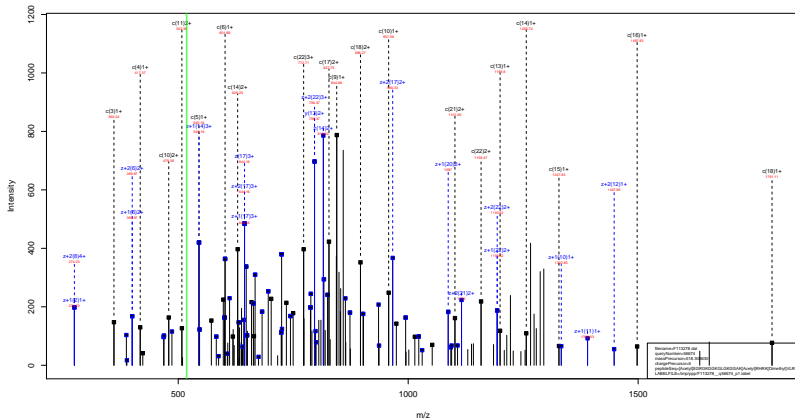

# sp | P62806 | H4\_MOUSE

[Acetyl]SGRGKGGKGLGKGGAK<sup>Acetyl</sup> RHRK<sup>Dimethyl</sup> VLRD<sup>28.03</sup>

- ▶ fragmentation table for charge state 1+
- ▶ specType=etd
- ▶ score=99.04
- ▶ F113278.dat
- ▶ query=q56674\_p1
- ▶ precursor=518.308630
- ▶ chargePrecursor=5
- ▶ itol=0.5

| AA | c  | y               | z+1             | z+2             | z               | AA       |       |
|----|----|-----------------|-----------------|-----------------|-----------------|----------|-------|
| S  | 1  | 147.076         | 2587.513        | 2571.494        | 0.000           | 2570.486 | S[24] |
| G  | 2  | 204.098         | 2458.470        | 2442.451        | 0.000           | 2441.444 | G[23] |
| R  | 3  | <b>360.199</b>  | 2401.440        | 2385.420        | 2386.438        | 2384.422 | R[22] |
| G  | 4  | <b>417.220</b>  | 2349.340        | 2229.320        | 2230.337        | 2228.321 | G[21] |
| K  | 5  | <b>545.315</b>  | 2185.320        | 2172.307        | 2273.315        | 2171.300 | K[20] |
| G  | 6  | <b>602.337</b>  | 2060.231        | 2044.212        | 2045.220        | 2043.205 | G[19] |
| G  | 7  | <b>659.358</b>  | 2003.210        | 1987.191        | 1988.199        | 1986.181 | G[18] |
| K  | 8  | <b>787.453</b>  | 1946.189        | 1930.170        | 1931.177        | 1929.162 | K[17] |
| G  | 9  | <b>844.475</b>  | 1818.083        | 1802.075        | 1803.082        | 1801.067 | G[16] |
| L  | 10 | <b>957.559</b>  | 1761.072        | 1745.063        | 1746.061        | 1744.045 | L[15] |
| Q  | 11 | <b>1014.580</b> | 1647.988        | 1631.969        | 1632.977        | 1630.961 | Q[14] |
| K  | 12 | 1142.675        | 1590.966        | 1574.948        | 1575.955        | 1573.940 | K[13] |
| G  | 13 | <b>1199.697</b> | 1462.871        | 1446.853        | <b>1447.860</b> | 1445.845 | G[12] |
| G  | 14 | <b>1256.718</b> | 1405.850        | <b>1389.831</b> | 1390.839        | 1388.823 | G[11] |
| A  | 15 | <b>1327.755</b> | 1348.828        | <b>1332.818</b> | 1333.826        | 1331.810 | A[10] |
| R  | 16 | <b>1407.861</b> | 1277.793        | 1261.775        | 1262.782        | 1260.765 | R[9]  |
| R  | 17 | 1653.962        | <b>1107.686</b> | 1091.667        | <b>1092.675</b> | 1090.659 | R[8]  |
| H  | 18 | <b>1791.021</b> | 951.585         | <b>935.566</b>  | <b>936.574</b>  | 934.558  | H[7]  |
| R  | 19 | 1967.122        | 814.526         | <b>796.507</b>  | <b>799.515</b>  | 797.499  | R[6]  |
| K  | 20 | 2103.248        | 658.425         | <b>642.406</b>  | 643.414         | 641.398  | K[5]  |
| V  | 21 | 2202.217        | 502.366         | <b>486.348</b>  | 487.357         | 485.342  | V[4]  |
| L  | 22 | 2313.403        | 463.199         | <b>387.211</b>  | <b>388.219</b>  | 386.203  | L[3]  |
| R  | 23 | 2471.502        | 290.146         | <b>274.127</b>  | 275.135         | 273.119  | R[2]  |
| D  | 24 | 2586.529        | 134.045         | 138.026         | 139.034         | 137.018  | D[1]  |

# sp | P62806 | H4\_MOUSE

[Acetyl]SGRGKGGKGLGKGGAK<sup>Acetyl</sup> RHRK<sup>Dimethyl</sup> VLRD<sup>28.03</sup>

- ▶ fragmentation table for charge state 2+
- ▶ specType=etd
- ▶ score=99.04
- ▶ F113278.dat
- ▶ query=q56674\_p1
- ▶ precursor=518.308630
- ▶ chargePrecursor=5
- ▶ itol=0.5

| AA    | c               | y               | z+1             | z+2             | z              | AA    |
|-------|-----------------|-----------------|-----------------|-----------------|----------------|-------|
| S[1]  | 74.042          | 1294.260        | 1236.251        | 0.504           | 1285.747       | S[24] |
| G[2]  | 102.553         | 1229.739        | 1231.729        | 0.504           | 1221.229       | G[23] |
| R[3]  | 180.603         | 1201.228        | <b>1193.219</b> | <b>1193.723</b> | 1192.715       | R[22] |
| G[4]  | 269.114         | 1123.177        | 1113.168        | <b>1115.672</b> | 1114.664       | G[21] |
| K[5]  | 273.161         | <b>1094.667</b> | <b>1086.657</b> | <b>1087.161</b> | 1086.153       | K[20] |
| G[6]  | 301.672         | <b>1030.619</b> | <b>1022.610</b> | <b>1023.114</b> | 1022.106       | G[19] |
| G[7]  | 330.183         | 1002.108        | <b>994.099</b>  | <b>994.603</b>  | 993.595        | G[18] |
| K[8]  | 394.230         | 973.599         | 965.588         | <b>966.092</b>  | 965.084        | K[17] |
| G[9]  | <b>422.741</b>  | 909.550         | <b>901.541</b>  | <b>902.045</b>  | 901.037        | G[16] |
| L[10] | <b>479.283</b>  | 861.040         | <b>873.030</b>  | <b>873.534</b>  | 872.526        | L[15] |
| G[11] | <b>507.794</b>  | <b>824.498</b>  | <b>816.488</b>  | <b>816.992</b>  | <b>815.984</b> | G[14] |
| K[12] | <b>571.841</b>  | <b>795.987</b>  | <b>787.977</b>  | <b>788.481</b>  | <b>787.474</b> | K[13] |
| G[13] | <b>600.352</b>  | 731.939         | <b>723.930</b>  | <b>724.434</b>  | 723.426        | G[12] |
| G[14] | <b>628.863</b>  | 703.429         | <b>695.419</b>  | <b>695.923</b>  | 694.915        | G[11] |
| A[15] | <b>664.381</b>  | <b>674.918</b>  | <b>666.908</b>  | <b>667.412</b>  | 666.404        | A[10] |
| R[16] | <b>749.434</b>  | <b>639.399</b>  | <b>631.390</b>  | <b>631.894</b>  | 630.886        | R[9]  |
| R[17] | <b>827.485</b>  | 554.347         | <b>546.337</b>  | <b>546.841</b>  | 545.833        | R[8]  |
| H[18] | <b>896.014</b>  | 476.200         | <b>468.287</b>  | <b>468.791</b>  | 467.783        | H[7]  |
| R[19] | <b>974.065</b>  | 407.767         | <b>399.757</b>  | <b>400.261</b>  | 399.253        | R[6]  |
| K[20] | <b>1052.128</b> | 329.716         | 321.707         | 322.211         | 321.203        | K[5]  |
| V[21] | <b>1101.662</b> | 251.663         | 243.653         | 244.147         | 243.140        | V[4]  |
| L[22] | <b>1158.204</b> | 202.119         | 194.108         | 194.613         | 193.605        | L[3]  |
| R[23] | 1236.255        | 145.577         | 137.567         | 138.071         | 137.063        | R[2]  |
| D[24] | 1293.768        | 67.526          | 59.517          | 60.021          | 59.013         | D[1]  |

# sp | P62806 | H4\_MOUSE

[Acetyl]SGRGKGGKGLGKGGAK<sup>Acetyl</sup>42.01 RHRK<sup>Dimethyl</sup>28.03 VLRD

- ▶ fragmentation table for charge state 3+
- ▶ specType=etd
- ▶ score=99.04
- ▶ F113278.dat
- ▶ query=q56674.p1
- ▶ precursor=518.308630
- ▶ chargePrecursor=5
- ▶ itol=0.5

| AA    | c              | y              | z+1            | z+2            | z              | AA    |
|-------|----------------|----------------|----------------|----------------|----------------|-------|
| S[1]  | 49.697         | <b>863.176</b> | 857.830        | 0.672          | 857.500        | S[24] |
| G[2]  | 58.704         | 320.162        | 814.822        | 0.672          | 814.486        | G[23] |
| R[3]  | 150.738        | 801.154        | 795.815        | <b>796.151</b> | 795.479        | R[22] |
| G[4]  | 139.745        | 749.121        | <b>743.781</b> | <b>744.117</b> | 743.445        | G[21] |
| K[5]  | 182.443        | 730.114        | <b>724.774</b> | <b>725.110</b> | <b>724.438</b> | K[20] |
| G[6]  | 201.450        | 687.415        | <b>682.076</b> | <b>682.412</b> | 681.740        | G[19] |
| G[7]  | 220.458        | 668.408        | <b>663.069</b> | <b>663.404</b> | 662.733        | G[18] |
| K[8]  | 263.156        | <b>649.401</b> | <b>644.061</b> | <b>644.397</b> | <b>643.725</b> | K[17] |
| G[9]  | 282.163        | <b>606.703</b> | <b>601.363</b> | <b>601.699</b> | <b>601.027</b> | G[16] |
| L[10] | 319.858        | <b>587.695</b> | <b>582.356</b> | <b>582.692</b> | 582.020        | L[15] |
| G[11] | 338.865        | 550.051        | <b>544.661</b> | <b>544.997</b> | 544.325        | G[14] |
| K[12] | 381.563        | 530.994        | 525.654        | 525.990        | 525.318        | K[13] |
| G[13] | 400.570        | 488.295        | 482.956        | 483.292        | 482.620        | G[12] |
| G[14] | 419.578        | <b>469.288</b> | 463.949        | 464.285        | 463.613        | G[11] |
| A[15] | 443.257        | 450.281        | 444.941        | 445.277        | 444.605        | A[10] |
| K[16] | 499.958        | 426.602        | 421.262        | 421.598        | 420.926        | K[9]  |
| R[17] | 551.692        | 369.900        | 364.561        | 364.896        | 364.225        | R[8]  |
| H[18] | <b>597.678</b> | 317.866        | 312.527        | 312.863        | 312.191        | H[7]  |
| R[19] | <b>649.712</b> | 272.180        | 266.841        | 267.176        | 266.505        | R[6]  |
| K[20] | <b>701.754</b> | 220.140        | 214.807        | 215.143        | 214.471        | K[5]  |
| V[21] | <b>734.777</b> | 168.104        | 162.765        | 163.101        | 162.429        | V[4]  |
| L[22] | <b>772.472</b> | 135.082        | 129.742        | 130.078        | 129.406        | L[3]  |
| R[23] | <b>824.505</b> | 97.387         | 92.047         | 92.383         | 91.711         | R[2]  |
| D[24] | 862.848        | 45.353         | 40.014         | 40.349         | 39.678         | D[1]  |

# sp | P62806 | H4\_MOUSE

[Acetyl]SGRGKGGKGLGKGGAK<sup>Acetyl</sup> RHRK<sup>Dimethyl</sup> VLRD<sup>28.03</sup>

- ▶ fragmentation table for charge state 4+
- ▶ specType=etd
- ▶ score=99.04
- ▶ F113278.dat
- ▶ query=q56674.p1
- ▶ precursor=518.308630
- ▶ chargePrecursor=5
- ▶ itol=0.5

| AA    | c              | y              | z+1            | z+2            | z       | AA    |
|-------|----------------|----------------|----------------|----------------|---------|-------|
| S[1]  | 37.525         | <b>647.634</b> | 643.620        | 0.758          | 643.377 | S[24] |
| G[2]  | 51.780         | 615.373        | <b>611.368</b> | 0.795          | 611.116 | G[23] |
| R[3]  | 90.805         | <b>601.118</b> | 597.113        | 597.365        | 596.861 | R[22] |
| G[4]  | 105.061        | 562.092        | 558.088        | 558.340        | 557.836 | G[21] |
| K[5]  | 137.084        | 547.837        | 543.832        | 544.084        | 543.580 | K[20] |
| G[6]  | 151.340        | 515.813        | 511.809        | 512.061        | 511.557 | G[19] |
| G[7]  | 165.595        | 501.558        | 497.553        | 497.805        | 497.301 | G[18] |
| K[8]  | 197.619        | 487.303        | 483.298        | 483.550        | 483.046 | K[17] |
| G[9]  | 211.874        | 458.279        | 454.274        | 454.526        | 454.022 | G[16] |
| L[10] | 240.145        | 441.021        | 437.019        | 437.271        | 436.767 | L[15] |
| G[11] | 254.401        | 412.752        | 408.748        | 409.000        | 408.496 | G[14] |
| K[12] | 286.424        | 398.497        | 394.492        | 394.744        | 394.240 | K[13] |
| G[13] | 300.680        | 386.473        | 382.469        | 382.721        | 382.217 | G[12] |
| G[14] | 314.935        | 352.218        | 348.213        | 348.465        | 347.961 | G[11] |
| A[15] | 332.694        | 337.963        | 333.958        | 334.210        | 333.706 | A[10] |
| K[16] | 375.221        | 320.203        | 316.199        | 316.451        | 315.947 | K[9]  |
| R[17] | 414.246        | 277.671        | 273.672        | <b>273.924</b> | 273.420 | R[8]  |
| H[18] | 448.511        | 238.652        | 234.647        | 234.899        | 234.395 | H[7]  |
| R[19] | 487.536        | 204.387        | 200.382        | 200.634        | 200.130 | R[6]  |
| K[20] | 528.568        | 168.362        | 164.357        | 164.609        | 164.105 | K[5]  |
| V[21] | 551.135        | 126.330        | 122.325        | 122.577        | 122.073 | V[4]  |
| L[22] | 579.606        | 101.563        | 97.558         | 97.810         | 97.306  | L[3]  |
| R[23] | <b>618.631</b> | 73.292         | 69.287         | 69.539         | 69.035  | R[2]  |
| D[24] | <b>647.388</b> | 34.267         | 30.262         | 30.514         | 30.010  | D[1]  |

# sp | P62806 | H4\_MOUSE

[Acetyl]SGRGKGGKGLGKGGAK Acetyl RHRK Dimethyl VLRD  
42.01 28.03

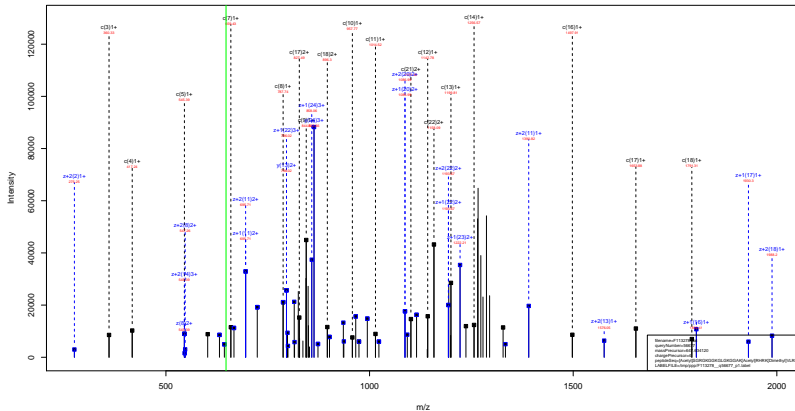



# sp | P62806 | H4\_MOUSE

[Acetyl]SGRGKGGKGLGKGGAK<sup>Acetyl</sup> RHRK<sup>Dimethyl</sup> VLRD<sup>28.03</sup>  
42.01

- ▶ fragmentation table for charge state 1+
- ▶ specType=etd
- ▶ score=131.24
- ▶ F113278.dat
- ▶ query=q56677\_p1
- ▶ precursor=647.634120
- ▶ chargePrecursor=4
- ▶ itol=0.5

| AA    | c               | y        | z+1             | z+2             | z        | AA    |
|-------|-----------------|----------|-----------------|-----------------|----------|-------|
| S[1]  | 147.076         | 2507.513 | 2571.494        | 0.000           | 2570.486 | S[24] |
| G[2]  | 204.098         | 2458.470 | 2442.451        | 0.000           | 2441.444 | G[23] |
| R[3]  | <b>350.190</b>  | 2401.440 | 2385.430        | 2386.438        | 2384.422 | R[22] |
| G[4]  | <b>417.230</b>  | 2345.340 | 2229.320        | 2230.337        | 2228.321 | G[21] |
| K[5]  | <b>545.315</b>  | 2188.326 | 2172.307        | 2173.315        | 2171.300 | K[20] |
| G[6]  | <b>602.337</b>  | 2060.231 | 2044.210        | 2045.220        | 2043.205 | G[19] |
| G[7]  | <b>659.358</b>  | 2003.210 | 1987.191        | <b>1988.199</b> | 1986.183 | G[18] |
| K[8]  | <b>787.453</b>  | 1946.188 | <b>1930.170</b> | 1931.177        | 1929.162 | K[17] |
| G[9]  | <b>844.475</b>  | 1818.093 | <b>1802.075</b> | 1803.082        | 1801.067 | G[16] |
| L[10] | <b>937.559</b>  | 1763.072 | 1746.053        | 1746.061        | 1744.045 | L[15] |
| G[11] | <b>1014.580</b> | 1647.985 | 1631.960        | 1632.977        | 1630.961 | G[14] |
| K[12] | <b>1142.675</b> | 1590.960 | 1574.940        | <b>1575.955</b> | 1573.940 | K[13] |
| G[13] | <b>1199.697</b> | 1462.871 | 1446.853        | 1447.860        | 1445.845 | G[12] |
| G[14] | <b>1256.718</b> | 1405.850 | 1389.831        | <b>1390.839</b> | 1388.823 | G[11] |
| A[15] | <b>1327.755</b> | 1348.828 | 1332.810        | <b>1333.818</b> | 1331.802 | A[10] |
| R[16] | <b>1407.881</b> | 1277.791 | 1261.773        | 1262.780        | 1260.765 | R[9]  |
| R[17] | <b>1653.962</b> | 1107.680 | 1091.667        | <b>1092.675</b> | 1090.659 | R[8]  |
| H[18] | <b>1791.021</b> | 951.585  | <b>935.566</b>  | <b>936.574</b>  | 934.558  | H[7]  |
| R[19] | 1947.122        | 814.526  | <b>798.507</b>  | <b>799.515</b>  | 797.499  | R[6]  |
| K[20] | 2103.248        | 658.425  | 642.405         | <b>643.414</b>  | 641.398  | K[5]  |
| V[21] | 2202.317        | 502.290  | 486.280         | 487.287         | 485.272  | V[4]  |
| L[22] | 2315.401        | 403.230  | 387.211         | 388.219         | 386.203  | L[3]  |
| R[23] | 2471.502        | 290.140  | 274.127         | <b>275.135</b>  | 273.119  | R[2]  |
| D[24] | 2586.520        | 134.045  | 118.026         | 119.034         | 117.018  | D[1]  |

# sp | P62806 | H4\_MOUSE

[Acetyl]SGRGKGGKGLGKGGAK<sup>Acetyl</sup> RHRK<sup>Dimethyl</sup> VLRD<sup>28.03</sup>

- ▶ fragmentation table for charge state 2+
- ▶ specType=etd
- ▶ score=131.24
- ▶ F113278.dat
- ▶ query=q56677\_p1
- ▶ precursor=647.634120
- ▶ chargePrecursor=4
- ▶ itol=0.5

| AA | c  | y               | z+1            | z+2             | z               | AA             |       |
|----|----|-----------------|----------------|-----------------|-----------------|----------------|-------|
| S  | 1  | 74.642          | 1204.260       | 1286.251        | 0.904           | 1285.747       | S[24] |
| G  | 2  | 102.563         | 1220.739       | <b>1221.729</b> | 0.904           | 1221.225       | G[23] |
| R  | 3  | 180.603         | 1280.238       | <b>1193.219</b> | <b>1193.723</b> | 1192.715       | R[22] |
| G  | 4  | 209.114         | 1323.177       | <b>1115.168</b> | <b>1115.672</b> | 1114.664       | G[21] |
| K  | 5  | 273.161         | 1094.667       | <b>1086.657</b> | <b>1087.161</b> | 1086.153       | K[20] |
| G  | 6  | 301.672         | 1030.619       | <b>1022.610</b> | <b>1023.114</b> | 1022.106       | G[19] |
| G  | 7  | 330.183         | 1002.108       | <b>994.099</b>  | <b>994.603</b>  | 993.595        | G[18] |
| K  | 8  | 394.230         | <b>973.598</b> | <b>965.588</b>  | <b>966.092</b>  | 965.084        | K[17] |
| G  | 9  | 422.741         | 908.550        | <b>901.541</b>  | <b>902.045</b>  | 901.037        | G[16] |
| L  | 10 | 479.283         | 883.040        | <b>873.030</b>  | <b>873.534</b>  | 872.526        | L[15] |
| G  | 11 | 507.794         | 824.495        | 818.488         | 816.992         | <b>815.984</b> | G[14] |
| K  | 12 | 571.841         | <b>795.987</b> | <b>787.977</b>  | 788.481         | <b>787.474</b> | K[13] |
| G  | 13 | 600.352         | 731.939        | <b>723.930</b>  | <b>724.434</b>  | 723.426        | G[12] |
| G  | 14 | 628.863         | 703.429        | <b>695.419</b>  | <b>695.923</b>  | 694.915        | G[11] |
| A  | 15 | 664.381         | 674.918        | <b>666.908</b>  | <b>667.412</b>  | 666.405        | A[10] |
| R  | 16 | 739.434         | 639.399        | <b>631.390</b>  | <b>631.894</b>  | 630.886        | R[9]  |
| R  | 17 | <b>827.485</b>  | 554.347        | <b>546.337</b>  | <b>546.841</b>  | <b>545.833</b> | R[8]  |
| H  | 18 | <b>896.014</b>  | 476.290        | 468.287         | 468.791         | 467.783        | H[7]  |
| R  | 19 | <b>974.065</b>  | 407.767        | 399.757         | 400.261         | 399.253        | R[6]  |
| K  | 20 | 1052.128        | 329.716        | 321.707         | 322.211         | 321.203        | K[5]  |
| V  | 21 | <b>1101.662</b> | 251.653        | 243.643         | 244.147         | 243.140        | V[4]  |
| L  | 22 | <b>1158.204</b> | 202.119        | 194.109         | 194.613         | 193.605        | L[3]  |
| R  | 23 | <b>1236.255</b> | 145.577        | 137.567         | 138.071         | 137.063        | R[2]  |
| D  | 24 | 1293.768        | 67.526         | 59.517          | 60.021          | 59.013         | D[1]  |

# sp | P62806 | H4\_MOUSE

[Acetyl]SGRGKGGKGLGKGGAK<sup>Acetyl</sup> RHRK<sup>Dimethyl</sup> VLRD<sup>28.03</sup>

- ▶ fragmentation table for charge state 3+
- ▶ specType=etd
- ▶ score=131.24
- ▶ F113278.dat
- ▶ query=q56677.p1
- ▶ precursor=647.634120
- ▶ chargePrecursor=4
- ▶ itol=0.5

| AA    | c       | y              | z+1            | z+2            | z              | AA    |
|-------|---------|----------------|----------------|----------------|----------------|-------|
| S[1]  | 49.697  | <b>863.176</b> | <b>857.836</b> | 0.672          | 857.503        | S[24] |
| G[2]  | 68.704  | 820.162        | <b>814.822</b> | 0.672          | 814.486        | G[23] |
| R[3]  | 120.738 | 801.154        | <b>795.815</b> | <b>796.151</b> | 795.479        | R[22] |
| G[4]  | 139.745 | 749.121        | 743.781        | 744.117        | 743.445        | G[21] |
| K[5]  | 182.443 | 730.114        | <b>724.774</b> | 725.110        | <b>724.438</b> | K[20] |
| G[6]  | 201.450 | 687.415        | 682.076        | 682.412        | 681.740        | G[19] |
| G[7]  | 220.458 | 668.408        | 663.069        | 663.404        | 662.733        | G[18] |
| K[8]  | 263.156 | 649.401        | 644.061        | 644.397        | <b>643.725</b> | K[17] |
| C[9]  | 282.163 | 606.793        | 601.353        | 601.689        | 601.027        | C[16] |
| L[10] | 319.858 | 587.696        | 582.356        | 582.692        | 582.020        | L[15] |
| G[11] | 338.865 | 550.001        | 544.661        | <b>544.997</b> | 544.329        | G[14] |
| K[12] | 381.563 | 530.994        | 525.654        | 525.990        | 525.318        | K[13] |
| G[13] | 400.570 | 488.295        | 482.956        | 483.292        | 482.620        | G[12] |
| G[14] | 419.578 | 469.288        | 463.949        | 464.285        | 463.613        | G[11] |
| A[15] | 443.257 | 450.281        | 444.941        | 445.277        | 444.605        | A[10] |
| K[16] | 499.958 | 426.602        | 421.262        | 421.598        | 420.926        | K[9]  |
| R[17] | 551.992 | 399.900        | 394.561        | 394.896        | 394.225        | R[8]  |
| H[18] | 597.678 | 317.866        | 312.527        | 312.863        | 312.191        | H[7]  |
| R[19] | 649.712 | 272.180        | 266.841        | 267.176        | 266.505        | R[6]  |
| K[20] | 701.754 | 220.346        | 214.907        | 215.243        | 214.571        | K[5]  |
| V[21] | 734.777 | 198.104        | 192.765        | 193.101        | 192.429        | V[4]  |
| L[22] | 772.472 | 135.982        | 129.742        | 130.078        | 129.406        | L[3]  |
| R[23] | 824.505 | 97.387         | 92.047         | 92.383         | 91.711         | R[2]  |
| D[24] | 862.848 | 45.353         | 40.014         | 40.349         | 39.678         | D[1]  |

# sp | P62806 | H4\_MOUSE

[Acetyl]SGRGKGGKGLGKGGAK Acetyl 42.01 RHRK Dimethyl 28.03 VLRD

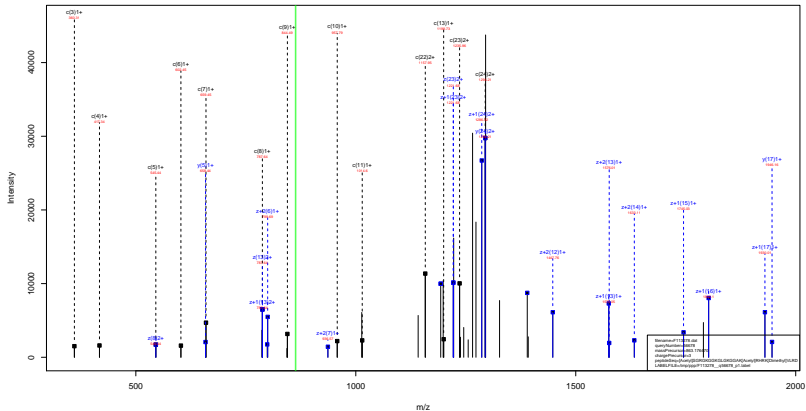

# sp | P62806 | H4\_MOUSE

[Acetyl]SGRGKGGKGLGKGGAK<sup>Acetyl</sup> RHRK<sup>Dimethyl</sup> VLRD<sup>28.03</sup>

- ▶ fragmentation table for charge state 1+
- ▶ specType=etd
- ▶ score=58.26
- ▶ F113278.dat
- ▶ query=q56678\_p1
- ▶ precursor=863.176470
- ▶ chargePrecursor=3
- ▶ itol=0.5

| AA | c  | y               | z+1             | z+2             | z               | AA       |       |
|----|----|-----------------|-----------------|-----------------|-----------------|----------|-------|
| S  | 1  | 147.076         | 2587.513        | 2571.494        | 0.000           | 2570.486 | S[24] |
| G  | 2  | 204.098         | 2458.470        | 2442.451        | 0.000           | 2441.444 | G[23] |
| R  | 3  | <b>360.199</b>  | 2401.440        | 2385.430        | 2388.438        | 2384.422 | R[22] |
| G  | 4  | <b>417.220</b>  | 2349.340        | 2229.330        | 2230.337        | 2228.321 | G[21] |
| K  | 5  | <b>945.315</b>  | 2185.320        | 2172.307        | 2173.315        | 2171.300 | K[20] |
| G  | 6  | <b>602.337</b>  | 2060.231        | 2044.212        | 2045.220        | 2043.205 | G[19] |
| G  | 7  | <b>659.358</b>  | 2003.210        | 1987.191        | 1988.199        | 1986.181 | G[18] |
| K  | 8  | <b>787.453</b>  | <b>1946.188</b> | <b>1930.170</b> | 1931.177        | 1929.162 | K[17] |
| G  | 9  | <b>844.475</b>  | 1818.083        | <b>1802.075</b> | 1803.082        | 1801.067 | G[16] |
| L  | 10 | <b>957.559</b>  | 1761.072        | <b>1745.063</b> | 1746.061        | 1744.045 | L[15] |
| G  | 11 | <b>1014.580</b> | 1647.988        | 1631.969        | <b>1632.977</b> | 1630.961 | G[14] |
| K  | 12 | 1142.675        | 1590.966        | <b>1574.948</b> | <b>1575.955</b> | 1573.940 | K[13] |
| G  | 13 | <b>1199.697</b> | 1462.871        | 1446.853        | <b>1447.860</b> | 1445.845 | G[12] |
| G  | 14 | 1256.718        | 1405.850        | <b>1389.831</b> | 1390.839        | 1388.823 | G[11] |
| A  | 15 | 1327.735        | 1348.826        | 1332.810        | 1333.818        | 1331.802 | A[10] |
| R  | 16 | 1407.881        | 1297.793        | 1281.774        | 1282.782        | 1280.765 | R[9]  |
| R  | 17 | 1653.962        | 1107.688        | 1091.667        | 1092.675        | 1090.659 | R[8]  |
| H  | 18 | 1791.021        | 951.585         | 935.566         | <b>936.574</b>  | 934.558  | H[7]  |
| R  | 19 | 1967.122        | 814.526         | <b>798.507</b>  | <b>799.515</b>  | 797.499  | R[6]  |
| K  | 20 | 2103.248        | <b>658.425</b>  | 642.406         | 643.414         | 641.398  | K[5]  |
| V  | 21 | 2202.217        | 502.360         | 486.280         | 487.287         | 485.272  | V[4]  |
| L  | 22 | 2313.403        | 463.239         | 447.211         | 448.219         | 446.203  | L[3]  |
| R  | 23 | 2471.502        | 290.146         | 274.127         | 275.135         | 273.119  | R[2]  |
| D  | 24 | 2586.529        | 134.045         | 118.026         | 119.034         | 117.018  | D[1]  |

# sp | P62806 | H4\_MOUSE

[Acetyl]SGRGKGGKGLGKGGAK<sup>Acetyl</sup> RHRK<sup>Dimethyl</sup> VLRD<sup>28.03</sup>

- ▶ fragmentation table for charge state 2+
- ▶ specType=etd
- ▶ score=58.26
- ▶ F113278.dat
- ▶ query=q56678.p1
- ▶ precursor=863.176470
- ▶ chargePrecursor=3
- ▶ itol=0.5

| AA    | c               | y               | z+1             | z+2      | z               | AA    |
|-------|-----------------|-----------------|-----------------|----------|-----------------|-------|
| S[1]  | 74.042          | <b>1294.260</b> | <b>1286.251</b> | 0.504    | 1285.747        | S[24] |
| G[2]  | 102.553         | 1229.739        | <b>1221.729</b> | 0.504    | <b>1221.225</b> | G[23] |
| R[3]  | 180.603         | 1201.226        | <b>1193.219</b> | 1193.723 | <b>1192.715</b> | R[22] |
| G[4]  | 269.114         | 1123.177        | 1115.169        | 1115.672 | 1114.664        | G[21] |
| K[5]  | 273.161         | 1094.067        | 1086.057        | 1087.161 | 1085.153        | K[20] |
| G[6]  | 301.672         | 1030.619        | 1022.610        | 1023.114 | 1022.106        | G[19] |
| G[7]  | 330.183         | 1002.108        | 994.099         | 994.603  | 993.595         | G[18] |
| K[8]  | 394.230         | 973.599         | 965.589         | 966.092  | 965.084         | K[17] |
| G[9]  | 422.741         | 909.550         | 901.541         | 902.045  | 901.037         | G[16] |
| L[10] | 479.293         | 881.040         | 873.030         | 873.534  | 872.526         | L[15] |
| G[11] | 507.794         | 824.498         | 816.488         | 816.992  | 815.984         | G[14] |
| K[12] | 571.841         | 795.987         | <b>787.977</b>  | 788.481  | <b>787.474</b>  | K[13] |
| G[13] | 600.352         | 731.939         | 723.930         | 724.434  | 723.426         | G[12] |
| G[14] | 628.863         | 703.429         | 695.419         | 695.923  | 694.915         | G[11] |
| A[15] | 664.361         | 674.918         | 666.908         | 667.412  | 666.404         | A[10] |
| R[16] | 708.434         | 639.399         | 631.390         | 631.894  | 630.886         | R[9]  |
| R[17] | 827.485         | 554.341         | 546.331         | 546.841  | <b>545.833</b>  | R[8]  |
| H[18] | 896.014         | 476.200         | 468.191         | 468.701  | 467.783         | H[7]  |
| R[19] | 974.065         | 407.767         | 399.757         | 400.261  | 399.253         | R[6]  |
| K[20] | 1052.126        | 329.716         | 321.707         | 322.211  | 321.203         | K[5]  |
| V[21] | 1107.660        | 251.663         | 243.653         | 244.147  | 243.140         | V[4]  |
| L[22] | <b>1158.204</b> | 392.119         | 384.109         | 384.613  | 383.605         | L[3]  |
| R[23] | <b>1236.255</b> | 145.577         | 137.567         | 138.071  | 137.063         | R[2]  |
| D[24] | <b>1293.768</b> | 67.526          | 59.517          | 60.021   | 59.013          | D[1]  |



# sp | P62806 | H4\_MOUSE

[Acetyl]SGRGKGGKGLGKGGAK<sup>Acetyl</sup> RHRK<sup>Dimethyl</sup> VLRD<sup>28.03</sup>

- ▶ fragmentation table for charge state 1+
- ▶ specType=etd
- ▶ score=92.74
- ▶ F113278.dat
- ▶ query=q56683.p1
- ▶ precursor=647.634350
- ▶ chargePrecursor=4
- ▶ itol=0.5

| AA | c  | y               | z+1      | z+2            | z               | AA              |       |
|----|----|-----------------|----------|----------------|-----------------|-----------------|-------|
| S  | 1  | 147.076         | 2507.513 | 2571.496       | 0.000           | 2570.486        | S[24] |
| G  | 2  | 204.098         | 2458.470 | 2442.451       | 0.000           | 2441.444        | G[23] |
| R  | 3  | <b>350.199</b>  | 2420.449 | 2385.430       | 2385.430        | 2384.422        | R[22] |
| G  | 4  | <b>417.230</b>  | 2345.340 | 2229.320       | 2230.337        | 2228.321        | G[21] |
| K  | 5  | <b>545.315</b>  | 2188.326 | 2172.307       | 2173.315        | 2171.300        | K[20] |
| G  | 6  | <b>602.337</b>  | 2060.231 | 2044.212       | 2045.220        | 2043.205        | G[19] |
| G  | 7  | <b>659.358</b>  | 2003.210 | 1987.191       | 1988.199        | <b>1986.183</b> | G[18] |
| K  | 8  | <b>787.453</b>  | 1946.189 | 1930.170       | 1931.177        | 1929.162        | K[17] |
| G  | 9  | <b>844.475</b>  | 1818.093 | 1802.075       | 1803.082        | 1801.067        | G[16] |
| L  | 10 | <b>927.559</b>  | 1783.072 | 1745.053       | 1746.061        | 1744.045        | L[15] |
| G  | 11 | <b>1014.580</b> | 1547.985 | 1531.969       | <b>1632.977</b> | 1530.961        | G[14] |
| K  | 12 | <b>1142.675</b> | 1590.969 | 1574.949       | 1575.955        | 1573.940        | K[13] |
| G  | 13 | <b>1199.697</b> | 1462.871 | 1446.853       | <b>1447.860</b> | 1445.845        | G[12] |
| G  | 14 | <b>1256.718</b> | 1405.850 | 1389.831       | <b>1390.839</b> | 1388.823        | G[11] |
| A  | 15 | <b>1327.755</b> | 1348.828 | 1332.810       | <b>1333.818</b> | 1331.802        | A[10] |
| R  | 16 | <b>1407.883</b> | 1277.791 | 1261.773       | 1262.780        | 1260.765        | R[9]  |
| R  | 17 | <b>1653.962</b> | 1107.685 | 1091.667       | <b>1092.675</b> | 1090.659        | R[8]  |
| H  | 18 | <b>1791.021</b> | 951.585  | 935.566        | <b>936.574</b>  | 934.558         | H[7]  |
| R  | 19 | 1947.122        | 814.526  | <b>798.507</b> | <b>799.515</b>  | 797.499         | R[6]  |
| K  | 20 | 2103.248        | 658.425  | 642.406        | <b>643.414</b>  | 641.398         | K[5]  |
| V  | 21 | 2202.317        | 502.298  | 486.280        | <b>487.287</b>  | 485.272         | V[4]  |
| L  | 22 | 2315.401        | 403.230  | 387.211        | 388.219         | 386.203         | L[3]  |
| R  | 23 | 2471.502        | 290.146  | 274.127        | <b>275.135</b>  | 273.119         | R[2]  |
| D  | 24 | 2586.529        | 134.045  | 118.026        | 119.034         | 117.018         | D[1]  |



# sp | P62806 | H4\_MOUSE

[Acetyl]SGRGKGGKGLGKGGAK<sup>Acetyl</sup> RHRK<sup>Dimethyl</sup> VLRD<sup>28.03</sup>

- ▶ fragmentation table for charge state 2+
- ▶ specType=etd
- ▶ score=92.74
- ▶ F113278.dat
- ▶ query=q56683.p1
- ▶ precursor=647.634350
- ▶ chargePrecursor=4
- ▶ itol=0.5

| AA    | c               | y               | z+1             | z+2             | z               | AA    |
|-------|-----------------|-----------------|-----------------|-----------------|-----------------|-------|
| S[1]  | 74.042          | <b>1294.260</b> | 1286.261        | 0.504           | 1289.747        | S[24] |
| G[2]  | 102.553         | 1229.739        | 1221.729        | 0.504           | 1221.225        | G[23] |
| K[3]  | 180.603         | 1304.229        | 1301.729        | <b>1193.723</b> | 1302.710        | K[22] |
| G[4]  | 259.114         | <b>1123.177</b> | <b>1115.168</b> | 1119.707        | <b>1114.564</b> | G[21] |
| K[5]  | 273.153         | 1094.567        | <b>1086.657</b> | <b>1087.161</b> | 1085.151        | K[20] |
| G[6]  | 303.672         | 1030.619        | 1022.610        | 1023.114        | 1022.100        | G[19] |
| G[7]  | 330.183         | 1002.108        | <b>994.099</b>  | 994.603         | <b>993.595</b>  | G[18] |
| K[8]  | 394.230         | <b>973.598</b>  | <b>965.588</b>  | 965.092         | <b>965.084</b>  | K[17] |
| G[9]  | 422.741         | 909.550         | <b>901.541</b>  | <b>902.045</b>  | 901.031         | G[16] |
| L[10] | 479.293         | 893.040         | 891.039         | 893.034         | 892.526         | L[15] |
| G[11] | 507.794         | <b>824.498</b>  | <b>816.488</b>  | <b>816.992</b>  | <b>815.984</b>  | G[14] |
| K[12] | 571.841         | <b>795.987</b>  | <b>787.977</b>  | <b>788.481</b>  | <b>787.474</b>  | K[13] |
| G[13] | 600.352         | 731.939         | <b>723.930</b>  | <b>724.434</b>  | 723.420         | G[12] |
| G[14] | 628.863         | 703.429         | <b>695.419</b>  | <b>695.923</b>  | 694.915         | G[11] |
| A[15] | 664.381         | 674.919         | <b>666.908</b>  | <b>667.412</b>  | 666.405         | A[10] |
| R[16] | 749.434         | 639.399         | <b>631.390</b>  | <b>631.894</b>  | 630.880         | R[9]  |
| R[17] | <b>827.485</b>  | 554.347         | 546.337         | <b>546.841</b>  | <b>545.833</b>  | R[8]  |
| H[18] | <b>896.014</b>  | 476.290         | 468.280         | 468.781         | 467.783         | H[7]  |
| R[19] | 974.065         | 407.767         | 399.757         | 400.261         | 399.253         | R[6]  |
| K[20] | <b>1052.128</b> | 329.716         | 321.707         | 322.211         | 321.203         | K[5]  |
| V[21] | <b>1101.662</b> | 253.693         | 245.683         | 246.187         | 245.180         | V[4]  |
| L[22] | <b>1158.204</b> | 202.139         | 194.129         | 194.633         | 193.625         | L[3]  |
| R[23] | 1236.255        | 145.577         | 137.567         | 138.071         | 137.063         | R[2]  |
| D[24] | 1293.708        | 67.526          | 59.517          | 60.021          | 59.013          | D[1]  |

# sp | P62806 | H4\_MOUSE

[Acetyl]SGRGKGGKGLGKGGAK<sup>Acetyl</sup> RHRK<sup>Dimethyl</sup> VLRD<sup>28.03</sup>

- ▶ fragmentation table for charge state 3+
- ▶ specType=etd
- ▶ score=92.74
- ▶ F113278.dat
- ▶ query=q56683.p1
- ▶ precursor=647.634350
- ▶ chargePrecursor=4
- ▶ itol=0.5

| AA    | c              | y              | z+1            | z+2            | z              | AA    |
|-------|----------------|----------------|----------------|----------------|----------------|-------|
| S[1]  | 49.697         | <b>863.176</b> | <b>857.836</b> | 0.672          | 857.500        | S[24] |
| G[2]  | 58.704         | 320.162        | 314.822        | 0.672          | 314.486        | G[23] |
| R[3]  | 120.738        | 801.154        | <b>795.815</b> | <b>796.151</b> | 795.479        | R[22] |
| G[4]  | 139.745        | 749.121        | 743.781        | 744.117        | 743.445        | G[21] |
| K[5]  | 182.443        | 730.114        | <b>724.774</b> | <b>725.110</b> | <b>724.438</b> | K[20] |
| G[6]  | 201.450        | 687.415        | 682.076        | 682.412        | 681.740        | G[19] |
| G[7]  | 220.458        | 668.408        | 663.069        | 663.404        | 662.733        | G[18] |
| K[8]  | 263.156        | 649.401        | <b>644.061</b> | 644.397        | <b>643.725</b> | K[17] |
| G[9]  | 282.163        | 606.793        | 601.353        | 601.689        | 601.027        | G[16] |
| L[10] | 319.858        | 587.695        | 582.356        | 582.692        | 582.020        | L[15] |
| G[11] | 338.865        | 550.001        | 544.661        | <b>544.997</b> | 544.325        | G[14] |
| K[12] | 381.563        | 530.994        | 525.654        | 525.990        | 525.318        | K[13] |
| G[13] | 400.570        | 488.295        | 482.956        | 483.292        | 482.620        | G[12] |
| G[14] | 419.578        | 469.288        | 463.949        | 464.285        | 463.613        | G[11] |
| A[15] | 443.257        | 450.281        | 444.941        | 445.277        | 444.605        | A[10] |
| K[16] | 499.958        | 426.602        | 421.262        | 421.598        | 420.926        | K[9]  |
| R[17] | 551.992        | 369.900        | 364.561        | 364.896        | 364.225        | R[8]  |
| H[18] | 597.678        | 317.866        | 312.527        | 312.863        | 312.191        | H[7]  |
| R[19] | 649.712        | 272.180        | 266.841        | 267.176        | 266.505        | R[6]  |
| K[20] | 701.754        | 220.146        | 214.807        | 215.143        | 214.471        | K[5]  |
| V[21] | 734.777        | 168.104        | 162.765        | 163.101        | 162.429        | V[4]  |
| L[22] | 772.472        | 135.082        | 129.742        | 130.078        | 129.406        | L[3]  |
| R[23] | <b>824.505</b> | 97.387         | 92.047         | 92.383         | 91.711         | R[2]  |
| D[24] | 862.848        | 45.353         | 40.014         | 40.349         | 39.678         | D[1]  |

# sp | P62806 | H4\_MOUSE

[Acetyl]SGRGKGGKGLGKGGAK Acetyl 42.01 RHRK Dimethyl 28.03 VLRD

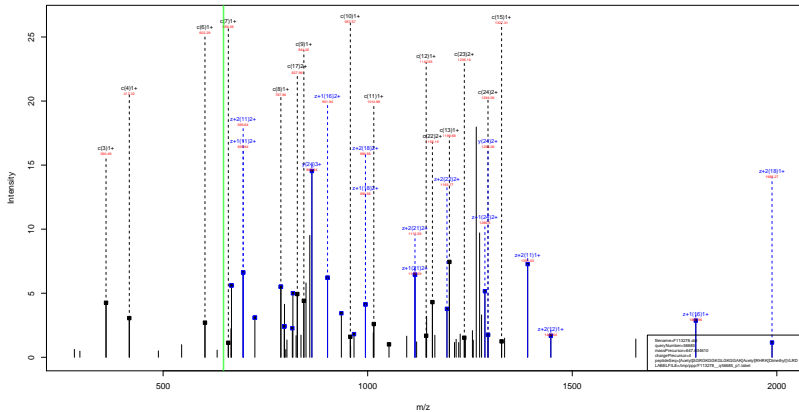

# sp | P62806 | H4\_MOUSE

[Acetyl]SGRGKGGKGLGKGGAK<sup>Acetyl</sup> RHRK<sup>Dimethyl</sup> VLRD<sup>28.03</sup>

- ▶ fragmentation table for charge state 1+
- ▶ specType=etd
- ▶ score=66.48
- ▶ F113278.dat
- ▶ query=q56685\_p1
- ▶ precursor=647.634610
- ▶ chargePrecursor=4
- ▶ itol=0.5

| AA | c  | y               | z+1      | z+2             | z               | AA       |       |
|----|----|-----------------|----------|-----------------|-----------------|----------|-------|
| S  | 1  | 347.676         | 2587.513 | 2571.494        | 0.000           | 2570.486 | S[24] |
| G  | 2  | 204.008         | 2458.470 | 2442.451        | 0.000           | 2441.444 | G[23] |
| R  | 3  | <b>360.199</b>  | 2620.440 | 2385.430        | 2386.438        | 2384.422 | R[22] |
| G  | 4  | <b>417.220</b>  | 2345.340 | 2229.320        | 2230.327        | 2228.321 | G[21] |
| K  | 5  | 545.315         | 2188.326 | 2172.307        | 2173.315        | 2171.300 | K[20] |
| G  | 6  | <b>602.337</b>  | 2060.231 | 2044.210        | 2045.220        | 2043.205 | G[19] |
| G  | 7  | <b>659.358</b>  | 2003.210 | 1987.191        | <b>1988.199</b> | 1986.183 | G[18] |
| K  | 8  | <b>787.453</b>  | 1946.189 | 1930.170        | 1931.177        | 1929.162 | K[17] |
| G  | 9  | <b>844.475</b>  | 1818.093 | <b>1802.075</b> | 1803.082        | 1801.067 | G[16] |
| L  | 10 | <b>957.559</b>  | 1763.072 | 1745.053        | 1746.061        | 1744.045 | L[15] |
| G  | 11 | <b>1014.580</b> | 1647.985 | 1631.966        | 1632.977        | 1630.961 | G[14] |
| K  | 12 | <b>1142.675</b> | 1590.966 | 1574.948        | 1575.955        | 1573.940 | K[13] |
| G  | 13 | <b>1199.697</b> | 1462.871 | 1446.853        | <b>1447.860</b> | 1445.845 | G[12] |
| G  | 14 | 1256.718        | 1405.850 | 1389.831        | <b>1390.839</b> | 1388.823 | G[11] |
| A  | 15 | <b>1327.795</b> | 1348.828 | 1332.810        | 1333.818        | 1331.802 | A[10] |
| R  | 16 | 1487.883        | 1277.791 | 1261.773        | 1262.780        | 1260.765 | R[9]  |
| R  | 17 | 1653.962        | 1107.680 | 1091.661        | 1092.675        | 1090.650 | R[8]  |
| H  | 18 | 1791.021        | 951.585  | <b>935.566</b>  | 936.574         | 934.558  | H[7]  |
| R  | 19 | 1947.122        | 814.526  | 798.507         | 799.515         | 797.499  | R[6]  |
| K  | 20 | 2103.248        | 658.425  | 642.406         | 643.414         | 641.398  | K[5]  |
| V  | 21 | 2202.317        | 502.298  | 486.280         | 487.287         | 485.272  | V[4]  |
| L  | 22 | 2315.401        | 403.230  | 387.211         | 388.219         | 386.203  | L[3]  |
| R  | 23 | 2471.502        | 290.140  | 274.122         | 275.135         | 273.119  | R[2]  |
| D  | 24 | 2586.520        | 134.045  | 118.026         | 119.034         | 117.018  | D[1]  |

# sp | P62806 | H4\_MOUSE

[Acetyl]SGRGKGGKGLGKGGAK<sup>Acetyl</sup> RHRK<sup>Dimethyl</sup> VLRD<sup>28.03</sup>

- ▶ fragmentation table for charge state 2+
- ▶ specType=etd
- ▶ score=66.48
- ▶ F113278.dat
- ▶ query=q56685\_p1
- ▶ precursor=647.634610
- ▶ chargePrecursor=4
- ▶ itol=0.5

| AA    | c               | y               | z+1             | z+2             | z              | AA    |
|-------|-----------------|-----------------|-----------------|-----------------|----------------|-------|
| S[1]  | 74.042          | <b>1294.260</b> | <b>1286.251</b> | 0.504           | 1285.747       | S[24] |
| G[2]  | 102.553         | 1229.730        | 1221.720        | 0.504           | 1221.225       | G[23] |
| R[3]  | 180.603         | 1201.226        | 1193.219        | <b>1193.723</b> | 1192.715       | R[22] |
| G[4]  | 269.114         | 1123.177        | <b>1115.168</b> | <b>1115.672</b> | 1114.664       | G[21] |
| K[5]  | 273.161         | 1094.067        | 1086.057        | 1085.161        | 1085.153       | K[20] |
| G[6]  | 301.672         | 1030.619        | 1022.610        | 1023.114        | 1022.106       | G[19] |
| G[7]  | 330.183         | 1002.108        | <b>994.099</b>  | <b>994.603</b>  | 993.595        | G[18] |
| K[8]  | 394.230         | 973.590         | 965.580         | <b>966.092</b>  | 965.084        | K[17] |
| G[9]  | 422.741         | 909.550         | <b>901.541</b>  | <b>902.045</b>  | 901.037        | G[16] |
| L[10] | 479.293         | 881.040         | 873.030         | 873.534         | 872.526        | L[15] |
| G[11] | 507.794         | 824.498         | 816.488         | <b>816.992</b>  | <b>815.984</b> | G[14] |
| K[12] | 571.841         | <b>795.987</b>  | <b>787.977</b>  | 788.481         | <b>787.474</b> | K[13] |
| G[13] | 600.352         | 731.939         | <b>723.930</b>  | <b>724.434</b>  | 723.426        | G[12] |
| G[14] | 628.863         | 703.429         | <b>695.419</b>  | <b>695.923</b>  | 694.915        | G[11] |
| A[15] | 664.361         | 674.918         | <b>666.908</b>  | <b>667.412</b>  | 666.404        | A[10] |
| R[16] | 788.438         | 639.399         | 631.389         | 631.894         | 630.886        | R[9]  |
| R[17] | <b>827.485</b>  | 554.347         | 546.337         | 546.841         | 545.833        | R[8]  |
| H[18] | 896.014         | 476.200         | 468.190         | 468.701         | 467.783        | H[7]  |
| R[19] | 974.005         | 407.767         | 399.757         | 400.261         | 399.253        | R[6]  |
| K[20] | <b>1052.128</b> | 329.716         | 321.707         | 322.211         | 321.203        | K[5]  |
| V[21] | 1107.860        | 251.663         | 243.653         | 244.147         | 243.140        | V[4]  |
| L[22] | <b>1158.204</b> | 202.119         | 194.109         | 194.613         | 193.605        | L[3]  |
| R[23] | <b>1236.255</b> | 145.577         | 137.567         | 138.071         | 137.063        | R[2]  |
| D[24] | <b>1293.768</b> | 67.526          | 59.517          | 60.021          | 59.013         | D[1]  |

# sp | P62806 | H4\_MOUSE

[Acetyl]SGRGKGGKGLGKGGAK<sup>Acetyl</sup> RHRK<sup>Dimethyl</sup> VLRD<sup>28.03</sup>

- ▶ fragmentation table for charge state 3+
- ▶ specType=etd
- ▶ score=66.48
- ▶ F113278.dat
- ▶ query=q56685.p1
- ▶ precursor=647.634610
- ▶ chargePrecursor=4
- ▶ itol=0.5

| AA    | c       | y              | z+1            | z+2            | z              | AA    |
|-------|---------|----------------|----------------|----------------|----------------|-------|
| S[1]  | 49.697  | <b>863.176</b> | 857.836        | 0.672          | 857.503        | S[24] |
| G[2]  | 68.704  | 820.822        | 814.822        | 0.672          | 814.486        | G[23] |
| R[3]  | 120.738 | 801.154        | <b>795.815</b> | <b>796.151</b> | <b>795.479</b> | R[22] |
| G[4]  | 139.745 | 749.121        | 743.781        | 744.117        | 743.445        | G[21] |
| K[5]  | 182.443 | 730.114        | 724.774        | 725.110        | <b>724.438</b> | K[20] |
| G[6]  | 201.450 | 687.415        | 682.076        | 682.412        | 681.740        | G[19] |
| G[7]  | 220.458 | 668.408        | 663.069        | 663.404        | 662.733        | G[18] |
| K[8]  | 263.156 | 649.401        | 644.061        | 644.397        | 643.725        | K[17] |
| C[9]  | 282.163 | 606.793        | 601.353        | 601.689        | 601.027        | C[16] |
| L[10] | 319.838 | 587.896        | 582.356        | 582.692        | 582.020        | L[15] |
| G[11] | 338.865 | 550.001        | 544.661        | 544.997        | 544.325        | G[14] |
| K[12] | 381.563 | 530.994        | 525.054        | 525.990        | 525.318        | K[13] |
| G[13] | 400.570 | 488.295        | 482.956        | 483.292        | 482.620        | G[12] |
| G[14] | 419.578 | 469.288        | 463.949        | 464.285        | 463.613        | G[11] |
| A[15] | 443.257 | 450.281        | 444.941        | 445.277        | 444.605        | A[10] |
| K[16] | 499.958 | 426.602        | 421.262        | 421.598        | 420.926        | K[9]  |
| R[17] | 551.992 | 399.900        | 394.561        | 394.896        | 394.225        | R[8]  |
| H[18] | 597.678 | 317.866        | 312.527        | 312.863        | 312.191        | H[7]  |
| R[19] | 649.712 | 272.180        | 266.841        | 267.176        | 266.505        | R[6]  |
| K[20] | 701.754 | 223.346        | 214.807        | 215.143        | 214.471        | K[5]  |
| V[21] | 734.777 | 198.104        | 182.765        | 183.101        | 182.429        | V[4]  |
| L[22] | 772.472 | 135.982        | 129.742        | 130.078        | 129.406        | L[3]  |
| R[23] | 824.505 | 97.387         | 92.047         | 92.383         | 91.711         | R[2]  |
| D[24] | 862.848 | 45.353         | 40.014         | 40.349         | 39.678         | D[1]  |

# sp | P62806 | H4\_MOUSE

[Acetyl]SGRGK Acetyl 42.01 **GGK** Acetyl 42.01 **GLGK** Acetyl 42.01 **GGAK** Acetyl 42.01 **RHRK** Dimethyl 28.03 **VLRD**

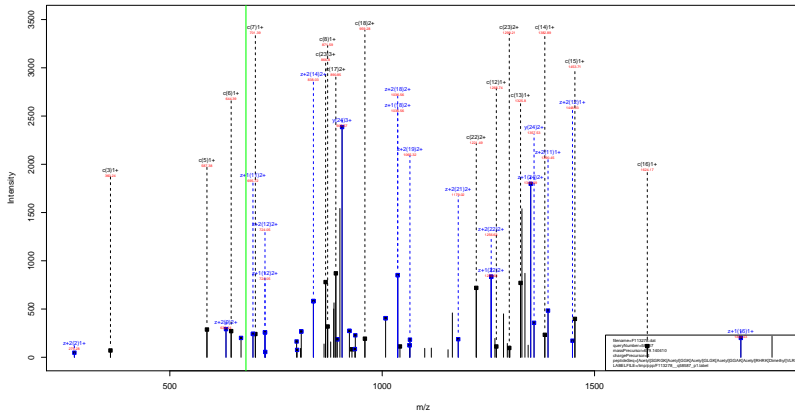

# sp | P62806 | H4\_MOUSE

[Acetyl]SGRGK<sub>42.01</sub> Acetyl GGK<sub>42.01</sub> Acetyl GLGK<sub>42.01</sub> Acetyl GGAK<sub>42.01</sub> Acetyl RHRK<sub>28.03</sub> Dimethyl VLRD

- ▶ fragmentation table for charge state 1+
- ▶ specType=etd
- ▶ score=89.17
- ▶ F113278.dat
- ▶ query=q58587\_p1
- ▶ precursor=679.140410
- ▶ chargePrecursor=4
- ▶ itol=0.5

| AA | c  | y               | z+1      | z+2             | z               | AA       |       |
|----|----|-----------------|----------|-----------------|-----------------|----------|-------|
| S  | 1  | 147.076         | 273.544  | 2697.526        | 0.000           | 2696.518 | S[24] |
| G  | 2  | 204.098         | 2584.502 | 2568.483        | 0.000           | 2567.475 | G[23] |
| R  | 3  | <b>360.199</b>  | 2527.480 | 2511.463        | 2512.470        | 2510.454 | R[22] |
| G  | 4  | 417.225         | 2371.379 | 2356.361        | 2356.368        | 2354.353 | G[21] |
| K  | 5  | <b>587.326</b>  | 2314.358 | 2298.339        | 2299.347        | 2297.331 | K[20] |
| G  | 6  | <b>644.347</b>  | 2144.252 | 2128.234        | 2129.241        | 2127.226 | G[19] |
| G  | 7  | <b>701.369</b>  | 2087.231 | 2071.215        | 2072.220        | 2070.204 | G[18] |
| K  | 8  | <b>871.474</b>  | 2030.209 | 2014.191        | 2015.198        | 2013.183 | K[17] |
| G  | 9  | <b>928.496</b>  | 1880.104 | <b>1844.085</b> | 1845.093        | 1843.077 | G[16] |
| L  | 10 | <b>1041.580</b> | 1803.062 | 1787.044        | 1788.051        | 1786.036 | L[15] |
| G  | 11 | 1088.601        | 1588.998 | 1673.980        | 1674.987        | 1672.972 | G[14] |
| K  | 12 | <b>1268.707</b> | 1632.977 | 1616.958        | 1617.966        | 1615.950 | K[13] |
| G  | 13 | <b>1325.728</b> | 1462.871 | 1446.853        | <b>1447.860</b> | 1445.845 | G[12] |
| G  | 14 | <b>1382.750</b> | 1405.850 | 1389.831        | <b>1390.839</b> | 1388.823 | G[11] |
| A  | 15 | <b>1453.787</b> | 1348.828 | 1332.810        | 1333.818        | 1331.802 | A[10] |
| R  | 16 | <b>1623.893</b> | 1277.791 | 1261.773        | 1262.780        | 1260.765 | R[9]  |
| R  | 17 | 1779.994        | 1107.685 | 1091.667        | 1092.675        | 1090.659 | R[8]  |
| H  | 18 | 1917.053        | 951.585  | <b>935.566</b>  | <b>936.574</b>  | 934.558  | H[7]  |
| R  | 19 | 2073.154        | 814.526  | <b>798.507</b>  | <b>799.515</b>  | 797.499  | R[6]  |
| K  | 20 | 2229.280        | 658.425  | 642.406         | 643.414         | 641.398  | K[5]  |
| V  | 21 | 2326.348        | 502.290  | 486.280         | 487.287         | 485.272  | V[4]  |
| L  | 22 | 2441.432        | 403.230  | 387.211         | 388.219         | 386.203  | L[3]  |
| R  | 23 | 2587.534        | 280.140  | 274.127         | <b>275.135</b>  | 273.119  | R[2]  |
| D  | 24 | 2712.590        | 134.045  | 118.026         | 119.034         | 117.018  | D[1]  |



# sp | P62806 | H4\_MOUSE

[Acetyl]SGRGK<sup>Acetyl</sup><sub>42.01</sub> GGK<sup>Acetyl</sup><sub>42.01</sub> GLGK<sup>Acetyl</sup><sub>42.01</sub> GGAK<sup>Acetyl</sup><sub>42.01</sub> RHRK<sup>Dimethyl</sup><sub>28.03</sub> VLRD

- ▶ fragmentation table for charge state 2+
- ▶ specType=etd
- ▶ score=89.17
- ▶ F113278.dat
- ▶ query=q58587.p1
- ▶ precursor=679.140410
- ▶ chargePrecursor=4
- ▶ itol=0.5

| AA   | c               | y               | z+1             | z+2             | z               | AA   |
|------|-----------------|-----------------|-----------------|-----------------|-----------------|------|
| S 1  | 74.042          | <b>1357.276</b> | <b>1349.267</b> | 0.504           | 1349.761        | S 24 |
| G 2  | 102.553         | 1292.755        | 1284.745        | 0.504           | 1284.241        | G 23 |
| R 3  | 180.603         | 1264.244        | <b>1256.234</b> | <b>1256.738</b> | 1255.731        | R 22 |
| G 4  | 259.114         | 1198.193        | 1172.183        | <b>1178.688</b> | 1177.681        | G 21 |
| K 5  | 294.157         | 1157.683        | 1149.673        | 1150.177        | 1149.150        | K 20 |
| G 6  | 322.677         | 1072.630        | <b>1064.620</b> | <b>1065.124</b> | <b>1064.117</b> | G 19 |
| G 7  | 351.188         | 1044.119        | <b>1036.110</b> | <b>1036.614</b> | 1035.606        | G 18 |
| K 8  | 436.241         | 1015.608        | <b>1007.599</b> | <b>1008.103</b> | 1007.095        | K 17 |
| G 9  | 464.752         | 930.556         | <b>922.546</b>  | <b>923.050</b>  | 922.042         | G 16 |
| L 10 | 511.294         | 902.045         | <b>894.035</b>  | <b>894.539</b>  | 893.532         | L 15 |
| G 11 | 540.804         | 845.503         | 837.493         | <b>837.997</b>  | 836.990         | G 14 |
| K 12 | 634.857         | 816.992         | <b>808.983</b>  | <b>809.487</b>  | 808.479         | K 13 |
| G 13 | 663.368         | 731.939         | <b>723.930</b>  | <b>724.434</b>  | 723.426         | G 12 |
| G 14 | 691.879         | 703.429         | <b>695.419</b>  | <b>695.923</b>  | 694.915         | G 11 |
| A 15 | 720.389         | 674.918         | 666.908         | <b>667.412</b>  | 666.404         | A 10 |
| R 16 | 812.450         | 639.399         | 631.389         | <b>631.894</b>  | 630.886         | R 9  |
| R 17 | <b>890.500</b>  | 554.347         | 546.337         | 546.841         | 545.833         | R 8  |
| H 18 | <b>959.030</b>  | 476.290         | 468.280         | 468.784         | 467.776         | H 7  |
| R 19 | 1037.080        | 407.767         | 399.757         | 400.261         | 399.253         | R 6  |
| K 20 | 1125.144        | 329.716         | 321.707         | 322.211         | 321.203         | K 5  |
| V 21 | 1164.676        | 251.653         | 243.643         | 244.147         | 243.140         | V 4  |
| L 22 | <b>1221.220</b> | 202.119         | 194.109         | 194.613         | 193.605         | L 3  |
| R 23 | <b>1299.270</b> | 145.577         | 137.567         | 138.071         | 137.063         | R 2  |
| D 24 | 1356.704        | 67.526          | 59.517          | 60.021          | 59.013          | D 1  |

# sp | P62806 | H4\_MOUSE

[Acetyl]SGRGK Acetyl  
42.01 **GGK** Acetyl  
42.01 **GLGK** Acetyl  
42.01 **GGAK** Acetyl  
42.01 **RHRK** Dimethyl  
28.03 **VLRD**

- ▶ fragmentation table for charge state 3+
- ▶ specType=etd
- ▶ score=89.17
- ▶ F113278.dat
- ▶ query=q58587.p1
- ▶ precursor=679.140410
- ▶ chargePrecursor=4
- ▶ itol=0.5

| AA    | c              | y              | z+1            | z+2            | z       | AA    |
|-------|----------------|----------------|----------------|----------------|---------|-------|
| S[1]  | 49.597         | <b>905.186</b> | 899.847        | 0.572          | 599.511 | S[24] |
| G[2]  | 58.704         | 852.172        | 856.833        | 0.572          | 856.497 | G[23] |
| R[3]  | 120.738        | 943.165        | <b>837.825</b> | <b>838.161</b> | 837.489 | R[22] |
| G[4]  | 139.745        | 791.131        | 785.792        | 786.128        | 785.456 | G[21] |
| K[5]  | 196.447        | 772.124        | 766.785        | 767.120        | 766.449 | K[20] |
| G[6]  | 215.454        | 715.422        | 710.083        | 710.419        | 709.747 | G[19] |
| G[7]  | 234.461        | 696.415        | 691.075        | 691.412        | 690.740 | G[18] |
| K[8]  | 291.163        | 677.408        | 672.068        | 672.404        | 671.732 | K[17] |
| G[9]  | 310.170        | 658.705        | 653.365        | 653.701        | 653.031 | G[16] |
| L[10] | 347.895        | 601.699        | 596.359        | 596.695        | 596.023 | L[15] |
| G[11] | 366.572        | 564.054        | 558.695        | 559.031        | 558.359 | G[14] |
| K[12] | 423.574        | 544.997        | 539.658        | 539.994        | 539.322 | K[13] |
| G[13] | 442.581        | 488.295        | 482.956        | 483.292        | 482.620 | G[12] |
| G[14] | 461.588        | 469.288        | 463.949        | 464.285        | 463.613 | G[11] |
| A[15] | 485.267        | 450.281        | 444.941        | 445.277        | 444.605 | A[10] |
| K[16] | 541.969        | 426.602        | 421.262        | 421.598        | 420.926 | K[9]  |
| R[17] | 594.003        | 369.900        | 364.561        | 364.896        | 364.225 | R[8]  |
| H[18] | 639.689        | 317.866        | 312.527        | 312.863        | 312.191 | H[7]  |
| R[19] | 691.723        | 272.180        | 266.841        | 267.176        | 266.505 | R[6]  |
| K[20] | 743.765        | 220.140        | 214.801        | 215.143        | 214.471 | K[5]  |
| V[21] | 776.788        | 168.154        | 162.795        | 163.101        | 162.429 | V[4]  |
| L[22] | 814.482        | 135.082        | 129.742        | 130.078        | 129.406 | L[3]  |
| R[23] | <b>866.516</b> | 97.387         | 92.047         | 92.383         | 91.711  | R[2]  |
| D[24] | 904.858        | 45.353         | 40.014         | 40.349         | 39.678  | D[1]  |

# sp | P62806 | H4\_MOUSE

[Acetyl]SGRGK Acetyl 42.01 GGK Acetyl 42.01 GLGK Acetyl 42.01 GGAK Acetyl 42.01 RHRK Dimethyl 28.03 VLRD

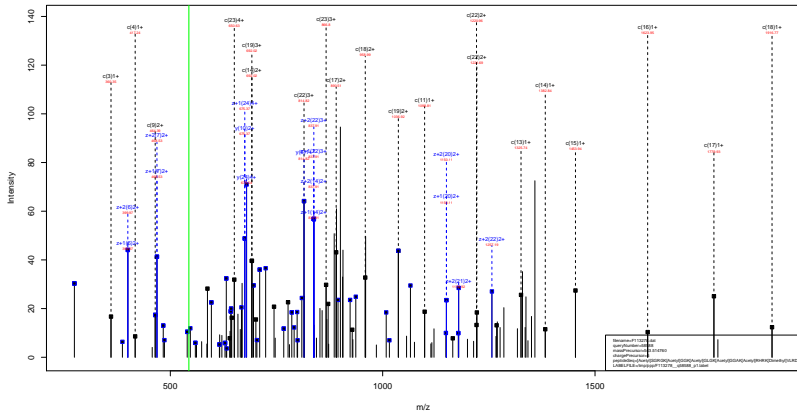

# sp | P62806 | H4\_MOUSE

[Acetyl]SGRGK<sup>Acetyl</sup><sub>42.01</sub> GGK<sup>Acetyl</sup><sub>42.01</sub> GLGK<sup>Acetyl</sup><sub>42.01</sub> GGAK<sup>Acetyl</sup><sub>42.01</sub> RHRK<sup>Dimethyl</sup><sub>28.03</sub> VLRD

- ▶ fragmentation table for charge state 1+
- ▶ specType=etd
- ▶ score=95.52
- ▶ F113278.dat
- ▶ query=q58588.p1
- ▶ precursor=543.514760
- ▶ chargePrecursor=5
- ▶ itol=0.5

| AA | c  | y               | z+1            | z+2            | z              | AA       |   |    |
|----|----|-----------------|----------------|----------------|----------------|----------|---|----|
| S  | 11 | 147.076         | 2713.544       | 2697.526       | 0.000          | 2696.518 | S | 24 |
| G  | 2  | 234.998         | 2504.362       | 2598.483       | 0.000          | 2597.475 | G | 23 |
| R  | 3  | <b>360.199</b>  | 2527.480       | 2511.462       | 2512.470       | 2510.454 | R | 22 |
| G  | 4  | <b>417.220</b>  | 2371.379       | 2355.361       | 2356.368       | 2354.353 | G | 21 |
| K  | 5  | <b>507.326</b>  | 2314.358       | 2298.339       | 2299.347       | 2297.331 | K | 20 |
| G  | 6  | <b>644.347</b>  | 2144.252       | 2128.234       | 2129.241       | 2127.226 | G | 19 |
| G  | 7  | <b>701.369</b>  | 2087.231       | 2071.212       | 2072.220       | 2070.204 | G | 18 |
| K  | 8  | <b>871.474</b>  | 2030.209       | 2014.191       | 2015.198       | 2013.183 | K | 17 |
| G  | 9  | <b>928.496</b>  | 1890.104       | 1884.085       | 1885.093       | 1883.077 | G | 16 |
| L  | 10 | 1041.390        | 1803.981       | 1787.964       | 1788.971       | 1786.956 | L | 15 |
| G  | 11 | <b>1098.601</b> | 1689.958       | 1673.940       | 1674.947       | 1672.932 | G | 14 |
| K  | 12 | <b>1268.707</b> | 1632.937       | 1616.918       | 1617.926       | 1615.910 | K | 13 |
| G  | 13 | <b>1325.728</b> | 1462.871       | 1446.853       | 1447.860       | 1445.845 | G | 12 |
| G  | 14 | <b>1382.750</b> | 1405.850       | 1389.831       | 1390.839       | 1388.823 | G | 11 |
| A  | 15 | <b>1453.787</b> | 1348.828       | 1332.810       | 1333.818       | 1331.802 | A | 10 |
| K  | 16 | <b>1623.893</b> | 1277.791       | 1261.773       | 1262.780       | 1260.765 | K | 9  |
| R  | 17 | <b>1719.994</b> | 1159.686       | 1091.667       | 1092.675       | 1090.659 | R | 8  |
| H  | 18 | <b>1917.053</b> | 951.582        | 935.566        | <b>936.574</b> | 934.558  | H | 7  |
| R  | 19 | 2073.154        | <b>814.526</b> | <b>798.507</b> | <b>799.515</b> | 797.499  | R | 6  |
| K  | 20 | 2229.280        | 658.425        | <b>642.406</b> | <b>643.414</b> | 641.398  | K | 5  |
| V  | 21 | 2328.348        | 502.298        | <b>486.280</b> | 487.287        | 485.272  | V | 4  |
| L  | 22 | 2441.432        | 403.230        | <b>387.211</b> | 388.219        | 386.203  | L | 3  |
| K  | 23 | 2597.534        | 290.140        | <b>274.127</b> | 275.135        | 273.119  | K | 2  |
| D  | 24 | 2712.560        | 134.045        | 118.028        | 119.034        | 117.018  | D | 1  |

# sp | P62806 | H4\_MOUSE

[Acetyl]SGRGK<sub>42.01</sub> Acetyl GGK<sub>42.01</sub> Acetyl GLGK<sub>42.01</sub> Acetyl GGAK<sub>42.01</sub> Acetyl RHRK<sub>28.03</sub> Dimethyl VLRD

- ▶ fragmentation table for charge state 2+
- ▶ specType=etd
- ▶ score=95.52
- ▶ F113278.dat
- ▶ query=q58588.p1
- ▶ precursor=543.514760
- ▶ chargePrecursor=5
- ▶ itol=0.5

| AA    | c               | y               | z+1             | z+2             | z               | AA    |
|-------|-----------------|-----------------|-----------------|-----------------|-----------------|-------|
| S[1]  | 74.042          | 1157.276        | 1340.267        | 0.504           | 1348.761        | S[24] |
| G[2]  | 102.553         | 1292.755        | 1284.745        | 0.504           | 1284.241        | G[23] |
| K[3]  | 180.603         | 1264.244        | 1256.234        | <b>1256.738</b> | 1255.731        | K[22] |
| G[4]  | 259.114         | 1156.193        | <b>1178.184</b> | <b>1178.688</b> | <b>1177.689</b> | G[21] |
| K[5]  | 294.157         | 1157.683        | <b>1148.673</b> | <b>1158.177</b> | <b>1149.169</b> | K[20] |
| G[6]  | 322.677         | 1072.630        | 1064.620        | <b>1065.124</b> | 1064.117        | G[19] |
| G[7]  | 351.188         | 1044.119        | 1036.110        | <b>1036.614</b> | 1035.606        | G[18] |
| K[8]  | 436.241         | <b>1015.608</b> | 1007.599        | <b>1008.103</b> | 1007.599        | K[17] |
| G[9]  | <b>464.752</b>  | 930.595         | 922.585         | <b>923.090</b>  | 922.584         | G[16] |
| L[10] | 511.254         | 902.045         | 894.035         | <b>894.539</b>  | 893.532         | L[15] |
| G[11] | 540.804         | 845.503         | <b>837.493</b>  | <b>837.997</b>  | 836.990         | G[14] |
| K[12] | 634.857         | 816.992         | 808.983         | <b>809.487</b>  | 808.479         | K[13] |
| G[13] | 663.368         | 731.939         | 723.930         | <b>724.434</b>  | 723.426         | G[12] |
| G[14] | <b>691.879</b>  | <b>703.429</b>  | <b>695.419</b>  | <b>695.923</b>  | 694.915         | G[11] |
| A[15] | 721.387         | <b>674.918</b>  | 666.909         | <b>667.412</b>  | 666.405         | A[10] |
| R[16] | 812.450         | 636.399         | <b>631.390</b>  | <b>631.894</b>  | 630.886         | R[9]  |
| R[17] | <b>890.500</b>  | 554.347         | 546.337         | <b>546.841</b>  | 545.831         | R[8]  |
| H[18] | <b>959.030</b>  | 476.290         | <b>468.287</b>  | <b>468.791</b>  | 467.783         | H[7]  |
| R[19] | <b>1037.080</b> | 407.767         | <b>399.757</b>  | <b>400.261</b>  | 399.253         | R[6]  |
| K[20] | 1112.144        | 329.716         | 321.707         | 322.211         | 321.203         | K[5]  |
| V[21] | <b>1164.678</b> | 251.653         | 243.643         | 244.147         | 243.140         | V[4]  |
| L[22] | <b>1221.220</b> | 202.119         | 194.109         | 194.613         | 193.605         | L[3]  |
| R[23] | 1290.270        | 145.577         | 137.567         | 138.071         | 137.063         | R[2]  |
| D[24] | 1356.704        | 67.526          | 59.517          | 60.021          | 59.013          | D[1]  |

# sp | P62806 | H4\_MOUSE

[Acetyl]SGRGK Acetyl  
42.01 **GGK** Acetyl  
42.01 **GLGK** Acetyl  
42.01 **GGAK** Acetyl  
42.01 **RHRK** Dimethyl  
28.03 **VLRD**

- ▶ fragmentation table for charge state 3+
- ▶ specType=etd
- ▶ score=95.52
- ▶ F113278.dat
- ▶ query=q58588.p1
- ▶ precursor=543.514760
- ▶ chargePrecursor=5
- ▶ itol=0.5

| AA    | c              | y              | z+1            | z+2            | z              | AA    |
|-------|----------------|----------------|----------------|----------------|----------------|-------|
| S[1]  | 49.697         | 305.189        | 899.847        | 0.672          | 899.511        | S[24] |
| G[2]  | 58.704         | 362.172        | 856.831        | 0.672          | 856.497        | G[23] |
| R[3]  | 120.738        | 841.165        | <b>837.825</b> | <b>830.161</b> | <b>837.489</b> | R[22] |
| G[4]  | 139.745        | <b>791.131</b> | <b>785.792</b> | <b>786.128</b> | 785.456        | G[21] |
| K[5]  | 196.447        | 772.124        | <b>766.785</b> | <b>767.120</b> | 766.449        | K[20] |
| G[6]  | 215.454        | 715.422        | <b>710.083</b> | <b>710.419</b> | 709.747        | G[19] |
| G[7]  | 234.461        | 696.415        | 691.076        | 691.412        | 690.740        | G[18] |
| K[8]  | 291.163        | 677.408        | 672.058        | 672.394        | 671.732        | K[17] |
| G[9]  | 310.170        | 620.705        | <b>615.367</b> | <b>615.703</b> | 615.031        | G[16] |
| L[10] | 347.885        | 601.699        | <b>596.359</b> | <b>596.695</b> | 596.023        | L[15] |
| G[11] | 366.872        | 564.004        | <b>558.665</b> | <b>559.001</b> | 558.329        | G[14] |
| K[12] | 423.574        | 544.997        | <b>539.658</b> | <b>539.994</b> | <b>539.322</b> | K[13] |
| G[13] | 442.581        | 488.295        | <b>482.956</b> | <b>483.292</b> | 482.620        | G[12] |
| G[14] | 461.588        | 469.288        | <b>463.949</b> | <b>464.285</b> | 463.613        | G[11] |
| A[15] | 485.267        | 450.281        | 444.941        | 445.277        | 444.605        | A[10] |
| K[16] | 541.969        | 426.602        | 421.262        | 421.598        | 420.926        | K[9]  |
| R[17] | 594.003        | 369.900        | 364.561        | 364.896        | 364.225        | R[8]  |
| H[18] | <b>639.669</b> | 317.866        | 312.527        | 312.863        | 312.191        | H[7]  |
| R[19] | <b>691.723</b> | 272.180        | 266.841        | 267.176        | 266.505        | R[6]  |
| K[20] | <b>743.765</b> | 220.140        | 214.807        | 215.143        | 214.471        | K[5]  |
| V[21] | <b>776.788</b> | 168.104        | 162.765        | 163.101        | 162.429        | V[4]  |
| L[22] | <b>814.482</b> | 135.082        | 129.742        | 130.078        | 129.406        | L[3]  |
| R[23] | <b>866.516</b> | 97.387         | 92.047         | 92.383         | 91.711         | R[2]  |
| D[24] | 964.858        | 45.353         | 40.014         | 40.349         | 39.678         | D[1]  |

# sp | P62806 | H4\_MOUSE

[Acetyl]SGRGK<sup>Acetyl</sup><sub>42.01</sub> GGK<sup>Acetyl</sup><sub>42.01</sub> GLGK<sup>Acetyl</sup><sub>42.01</sub> GGAK<sup>Acetyl</sup><sub>42.01</sub> RHRK<sup>Dimethyl</sup><sub>28.03</sub> VLRD

- ▶ fragmentation table for charge state 4+
- ▶ specType=etd
- ▶ score=95.52
- ▶ F113278.dat
- ▶ query=q58588.p1
- ▶ precursor=543.514760
- ▶ chargePrecursor=5
- ▶ itol=0.5

| AA    | c              | y              | z+1            | z+2            | z              | AA    |
|-------|----------------|----------------|----------------|----------------|----------------|-------|
| S[1]  | 37.525         | <b>679.142</b> | <b>675.137</b> | 0.755          | <b>674.085</b> | S[24] |
| G[2]  | 51.780         | 546.081        | <b>642.876</b> | 0.755          | <b>642.624</b> | G[23] |
| R[3]  | 90.005         | <b>632.626</b> | <b>628.621</b> | <b>628.873</b> | <b>628.369</b> | R[22] |
| G[4]  | 105.061        | 593.600        | 589.596        | 589.848        | 589.344        | G[21] |
| K[5]  | 147.507        | 579.345        | 575.340        | 575.592        | 575.088        | K[20] |
| G[6]  | 161.842        | 536.819        | 532.814        | 533.066        | 532.562        | G[19] |
| G[7]  | 176.098        | 522.563        | 518.558        | 518.810        | 518.307        | G[18] |
| K[8]  | 218.624        | 508.308        | 504.303        | 504.555        | 504.051        | K[17] |
| G[9]  | 232.879        | 495.781        | 491.777        | 492.029        | 491.525        | G[16] |
| L[10] | 261.150        | 451.526        | 447.521        | 447.773        | 447.269        | L[15] |
| G[11] | 275.406        | 423.255        | 419.250        | 419.502        | 418.998        | G[14] |
| K[12] | 317.932        | 409.000        | 404.995        | 405.247        | 404.743        | K[13] |
| G[13] | 332.188        | 366.473        | 362.469        | 362.721        | 362.217        | G[12] |
| G[14] | 346.443        | 352.218        | 348.213        | 348.465        | 347.961        | G[11] |
| A[15] | 364.202        | 337.963        | 333.958        | 334.210        | 333.706        | A[10] |
| K[16] | 408.729        | 320.203        | 316.199        | 316.451        | 315.947        | K[9]  |
| R[17] | 445.754        | 277.877        | <b>273.672</b> | <b>273.924</b> | 273.420        | R[8]  |
| H[18] | 480.019        | 238.652        | 234.647        | 234.899        | 234.395        | H[7]  |
| R[19] | 519.044        | 204.397        | 200.392        | 200.644        | 200.140        | R[6]  |
| K[20] | 558.075        | 165.362        | 161.357        | 161.609        | 161.105        | K[5]  |
| V[21] | 582.843        | 126.330        | 122.325        | 122.577        | 122.073        | V[4]  |
| L[22] | 611.114        | 101.563        | 97.558         | 97.810         | 97.306         | L[3]  |
| R[23] | <b>650.139</b> | 73.292         | 69.287         | 69.539         | 69.035         | R[2]  |
| D[24] | 678.896        | 34.267         | 30.262         | 30.514         | 30.010         | D[1]  |





# sp | P62806 | H4\_MOUSE

[Acetyl]SGR**GK**<sup>Acetyl</sup><sub>42.01</sub> **G**G**K**<sup>Acetyl</sup><sub>42.01</sub> **G**L**G****K**<sup>Acetyl</sup><sub>42.01</sub> **G**G**A****K**<sup>Acetyl</sup><sub>42.01</sub> **R**H**R****K**<sup>Dimethyl</sup><sub>28.03</sub> **V**L**R****D**

- ▶ fragmentation table for charge state 1+
- ▶ specType=etd
- ▶ score=81.46
- ▶ F113278.dat
- ▶ query=q58591\_p1
- ▶ precursor=679.142130
- ▶ chargePrecursor=4
- ▶ itol=0.5

| AA | c  | y               | z+1      | z+2             | z               | AA       |       |
|----|----|-----------------|----------|-----------------|-----------------|----------|-------|
| S  | 1  | 147.076         | 273.544  | 2697.526        | 0.000           | 2696.518 | S[24] |
| G  | 2  | 204.098         | 2584.502 | 2568.483        | 0.000           | 2567.475 | G[23] |
| R  | 3  | <b>360.199</b>  | 2527.480 | 2511.463        | 2512.470        | 2510.454 | R[22] |
| G  | 4  | 417.225         | 2371.379 | 2356.361        | 2356.368        | 2354.353 | G[21] |
| K  | 5  | <b>587.326</b>  | 2314.358 | 2298.339        | 2299.347        | 2297.331 | K[20] |
| G  | 6  | <b>644.347</b>  | 2144.252 | 2128.234        | 2129.241        | 2127.226 | G[19] |
| G  | 7  | <b>701.369</b>  | 2087.231 | 2071.213        | 2072.220        | 2070.204 | G[18] |
| K  | 8  | <b>871.474</b>  | 2030.209 | 2014.191        | 2015.198        | 2013.183 | K[17] |
| G  | 9  | <b>928.496</b>  | 1880.104 | 1864.085        | <b>1845.093</b> | 1843.077 | G[16] |
| L  | 10 | <b>1041.580</b> | 1803.062 | 1787.044        | 1788.071        | 1786.056 | L[15] |
| G  | 11 | <b>1098.601</b> | 1588.995 | 1673.980        | 1674.987        | 1672.972 | G[14] |
| K  | 12 | <b>1268.707</b> | 1632.977 | <b>1616.958</b> | 1617.966        | 1615.950 | K[13] |
| G  | 13 | <b>1325.728</b> | 1462.871 | 1446.853        | 1447.860        | 1445.845 | G[12] |
| G  | 14 | <b>1382.750</b> | 1405.850 | 1389.831        | <b>1390.839</b> | 1388.823 | G[11] |
| A  | 15 | <b>1453.787</b> | 1348.828 | 1332.810        | 1333.818        | 1331.802 | A[10] |
| R  | 16 | 1623.893        | 1277.791 | 1261.773        | <b>1262.780</b> | 1260.765 | R[9]  |
| R  | 17 | 1779.994        | 1107.685 | 1091.667        | <b>1092.675</b> | 1090.659 | R[8]  |
| H  | 18 | <b>1917.053</b> | 951.585  | <b>935.566</b>  | <b>936.574</b>  | 934.558  | H[7]  |
| R  | 19 | 2073.194        | 814.526  | <b>798.507</b>  | <b>799.515</b>  | 797.499  | R[6]  |
| K  | 20 | 2229.280        | 658.425  | 642.406         | 643.414         | 641.398  | K[5]  |
| V  | 21 | 2326.348        | 502.290  | 486.280         | <b>487.287</b>  | 485.272  | V[4]  |
| L  | 22 | 2441.432        | 403.230  | 387.211         | 388.219         | 386.203  | L[3]  |
| R  | 23 | 2587.534        | 280.140  | 274.127         | <b>275.135</b>  | 273.119  | R[2]  |
| D  | 24 | 2712.560        | 134.045  | 118.026         | 119.034         | 117.018  | D[1]  |

# sp | P62806 | H4\_MOUSE

[Acetyl]SGRGK<sup>Acetyl</sup><sub>42.01</sub> GGK<sup>Acetyl</sup><sub>42.01</sub> GLGK<sup>Acetyl</sup><sub>42.01</sub> GGAK<sup>Acetyl</sup><sub>42.01</sub> RHRK<sup>Dimethyl</sup><sub>28.03</sub> VLRD

- ▶ fragmentation table for charge state 2+
- ▶ specType=etd
- ▶ score=81.46
- ▶ F113278.dat
- ▶ query=q58591\_p1
- ▶ precursor=679.142130
- ▶ chargePrecursor=4
- ▶ itol=0.5

| AA | c  | y               | z+1            | z+2             | z               | AA       |       |
|----|----|-----------------|----------------|-----------------|-----------------|----------|-------|
| S  | 1  | 74.042          | 1357.276       | 1340.267        | 0.504           | 1348.763 | S[24] |
| G  | 2  | 102.553         | 1292.755       | 1284.745        | 0.904           | 1284.241 | G[23] |
| R  | 3  | 180.603         | 1284.244       | 1295.234        | <b>1256.738</b> | 1295.711 | R[22] |
| G  | 4  | 209.114         | 1336.193       | 1179.184        | <b>1178.668</b> | 1177.668 | G[21] |
| K  | 5  | 204.167         | 1157.683       | 1149.673        | <b>1150.177</b> | 1149.169 | K[20] |
| G  | 6  | 322.677         | 1072.630       | <b>1064.620</b> | <b>1065.124</b> | 1064.117 | G[19] |
| G  | 7  | 351.188         | 1044.119       | <b>1036.110</b> | <b>1036.614</b> | 1035.606 | G[18] |
| K  | 8  | 436.241         | 1015.608       | <b>1007.599</b> | <b>1008.103</b> | 1007.095 | K[17] |
| G  | 9  | 464.752         | 930.596        | 922.586         | <b>923.090</b>  | 922.082  | G[16] |
| L  | 10 | 501.284         | 902.045        | 894.035         | 914.529         | 893.521  | L[15] |
| G  | 11 | 549.804         | 845.503        | 837.493         | <b>837.997</b>  | 836.990  | G[14] |
| K  | 12 | 634.857         | 816.992        | 808.983         | 809.487         | 808.479  | K[13] |
| G  | 13 | 663.366         | <b>731.939</b> | 723.930         | <b>724.434</b>  | 723.426  | G[12] |
| G  | 14 | 691.879         | 703.429        | 695.419         | <b>695.923</b>  | 694.915  | G[11] |
| A  | 15 | 727.397         | 674.918        | 666.908         | <b>667.412</b>  | 666.405  | A[10] |
| R  | 16 | 812.450         | 639.399        | <b>631.390</b>  | <b>631.894</b>  | 630.886  | R[9]  |
| R  | 17 | 890.500         | 554.347        | 546.337         | 546.841         | 545.833  | R[8]  |
| H  | 18 | <b>959.030</b>  | 476.290        | 468.280         | 468.791         | 467.783  | H[7]  |
| R  | 19 | 1037.080        | 407.767        | 399.757         | 400.261         | 399.253  | R[6]  |
| K  | 20 | <b>1115.144</b> | 329.716        | 321.707         | 322.211         | 321.203  | K[5]  |
| V  | 21 | <b>1164.678</b> | 251.653        | 243.643         | 244.147         | 243.140  | V[4]  |
| L  | 22 | <b>1221.220</b> | 202.119        | 194.109         | 194.613         | 193.605  | L[3]  |
| R  | 23 | <b>1299.270</b> | 145.577        | 137.567         | 138.072         | 137.063  | R[2]  |
| D  | 24 | 1356.784        | 67.526         | 59.517          | 60.021          | 59.013   | D[1]  |

# sp | P62806 | H4\_MOUSE

[Acetyl]SGRGK Acetyl  
42.01 **GGK** Acetyl  
42.01 **GLGK** Acetyl  
42.01 **GGAK** Acetyl  
42.01 **RHRK** Dimethyl  
28.03 **VLRD**

- ▶ fragmentation table for charge state 3+
- ▶ specType=etd
- ▶ score=81.46
- ▶ F113278.dat
- ▶ query=q58591\_p1
- ▶ precursor=679.142130
- ▶ chargePrecursor=4
- ▶ itol=0.5

| AA    | c              | y              | z+1            | z+2            | z       | AA    |
|-------|----------------|----------------|----------------|----------------|---------|-------|
| S[1]  | 49.597         | <b>905.186</b> | <b>899.847</b> | 0.572          | 599.511 | S[24] |
| G[2]  | 58.704         | 852.172        | <b>856.833</b> | 0.572          | 856.497 | G[23] |
| R[3]  | 120.738        | 943.165        | <b>837.825</b> | <b>838.161</b> | 837.489 | R[22] |
| G[4]  | 139.745        | 791.131        | 785.792        | 786.128        | 785.456 | G[21] |
| K[5]  | 196.447        | 772.124        | 766.785        | 767.120        | 766.449 | K[20] |
| G[6]  | 215.454        | 715.422        | <b>710.083</b> | <b>710.419</b> | 709.747 | G[19] |
| G[7]  | 234.461        | <b>696.415</b> | 691.075        | 691.412        | 690.740 | G[18] |
| K[8]  | 291.163        | 677.408        | 672.068        | 672.404        | 671.732 | K[17] |
| G[9]  | 310.170        | 650.705        | 645.365        | 645.701        | 645.031 | G[16] |
| L[10] | 347.895        | 601.699        | 596.359        | 596.695        | 596.023 | L[15] |
| G[11] | 366.572        | 564.054        | 558.695        | 559.031        | 558.359 | G[14] |
| K[12] | 423.574        | 544.997        | 539.658        | 539.994        | 539.322 | K[13] |
| G[13] | 442.581        | 488.295        | 482.956        | 483.292        | 482.620 | G[12] |
| G[14] | 461.588        | 469.288        | 463.949        | 464.285        | 463.613 | G[11] |
| A[15] | 485.267        | 450.281        | 444.941        | 445.277        | 444.605 | A[10] |
| K[16] | 541.969        | 426.602        | 421.262        | 421.598        | 420.926 | K[9]  |
| R[17] | 594.003        | 369.900        | 364.561        | 364.896        | 364.225 | R[8]  |
| H[18] | 639.689        | 317.866        | 312.527        | 312.863        | 312.191 | H[7]  |
| R[19] | 691.723        | 272.180        | 266.841        | 267.176        | 266.505 | R[6]  |
| K[20] | 743.765        | 220.140        | 214.801        | 215.143        | 214.471 | K[5]  |
| V[21] | 776.788        | 168.104        | 162.765        | 163.101        | 162.429 | V[4]  |
| L[22] | 814.482        | 135.082        | 129.742        | 130.078        | 129.406 | L[3]  |
| R[23] | <b>866.516</b> | 97.387         | 92.047         | 92.383         | 91.711  | R[2]  |
| D[24] | 904.858        | 45.353         | 40.014         | 40.349         | 39.678  | D[1]  |



# sp | Q6ZWY9 | H2B1C\_MOUSE

PEPAKSAPAPKKGSK <sup>Acetyl</sup>42.01 K <sup>Acetyl</sup>42.01 AVTK <sup>Acetyl</sup>42.01 AQKKD

- ▶ fragmentation table for charge state 1+
- ▶ specType=etd
- ▶ score=41.82
- ▶ F113278.dat
- ▶ query=q58616.p1
- ▶ precursor=679.889710
- ▶ chargePrecursor=4
- ▶ itol=0.5

| AA | c  | y               | z+1             | z+2             | z               | AA       |       |
|----|----|-----------------|-----------------|-----------------|-----------------|----------|-------|
| P  | 1  | 115.087         | 2716.536        | 2700.517        | 0.000           | 2099.509 | P[25] |
| E  | 2  | 244.229         | 2019.483        | 2053.464        | 0.000           | 2052.456 | E[24] |
| P  | 3  | 341.182         | 2490.440        | 2474.422        | 0.000           | 2473.414 | P[23] |
| A  | 4  | 412.219         | 2393.387        | 2377.369        | 0.000           | 2376.361 | A[22] |
| K  | 5  | <b>540.314</b>  | 2322.350        | 2306.332        | 2307.339        | 2305.324 | K[21] |
| S  | 6  | <b>627.346</b>  | 2184.255        | 2178.237        | 2179.244        | 2177.229 | S[20] |
| A  | 7  | 698.383         | 2107.223        | 2091.205        | 2092.212        | 2090.197 | A[19] |
| P  | 8  | <b>795.436</b>  | 2036.186        | 2020.168        | 2021.175        | 2019.160 | P[18] |
| A  | 9  | 866.473         | 1939.133        | 1923.115        | <b>1924.123</b> | 1922.107 | A[17] |
| P  | 10 | <b>963.526</b>  | 1868.098        | 1852.079        | 1853.085        | 1851.070 | P[16] |
| K  | 11 | <b>1091.621</b> | 1771.044        | 1755.025        | 1756.033        | 1754.017 | K[15] |
| K  | 12 | 1210.716        | 1642.949        | 1626.930        | <b>1627.938</b> | 1625.922 | K[14] |
| Q  | 13 | 1220.739        | 1514.854        | 1498.835        | 1499.843        | 1497.827 | Q[13] |
| S  | 14 | 1363.769        | <b>1457.832</b> | 1441.813        | 1442.821        | 1440.805 | S[12] |
| K  | 15 | <b>1533.875</b> | 1370.800        | 1354.781        | 1355.789        | 1353.774 | K[11] |
| K  | 16 | <b>1703.980</b> | 1200.695        | <b>1184.676</b> | 1185.684        | 1183.668 | K[10] |
| A  | 17 | 1775.017        | 1030.589        | 1014.570        | <b>1015.578</b> | 1013.563 | A[9]  |
| V  | 18 | 1874.088        | 959.527         | 943.508         | 944.516         | 942.501  | V[8]  |
| T  | 19 | 1875.133        | 860.464         | <b>844.465</b>  | 845.473         | 843.457  | T[7]  |
| K  | 20 | 2435.239        | 759.435         | <b>743.417</b>  | 744.425         | 742.409  | K[6]  |
| A  | 21 | 2216.276        | 589.350         | <b>573.312</b>  | <b>574.320</b>  | 572.304  | A[5]  |
| Q  | 22 | 2344.335        | 518.293         | <b>502.275</b>  | 503.282         | 501.267  | Q[4]  |
| K  | 23 | 2472.430        | 390.235         | 374.216         | <b>375.224</b>  | 373.209  | K[3]  |
| K  | 24 | 2600.525        | 262.140         | 246.121         | 247.129         | 245.113  | K[2]  |
| D  | 25 | 2735.552        | 134.045         | 118.026         | 119.034         | 117.018  | D[1]  |

# sp | Q6ZWY9 | H2B1C\_MOUSE

PEPAKSAPAPKKGSK <sup>Acetyl</sup><sub>42.01</sub> K <sup>Acetyl</sup><sub>42.01</sub> AVTK <sup>Acetyl</sup><sub>42.01</sub> AQKKD

- ▶ fragmentation table for charge state 2+
- ▶ specType=etd
- ▶ score=41.82
- ▶ F113278.dat
- ▶ query=q58616.p1
- ▶ precursor=679.889710
- ▶ chargePrecursor=4
- ▶ itol=0.5

| AA   | c               | y               | z+1             | z+2             | z               | AA   |
|------|-----------------|-----------------|-----------------|-----------------|-----------------|------|
| F 1  | 58.047          | 1358.771        | <b>1350.762</b> | 0.504           | 1350.253        | P 25 |
| E 3  | 127.588         | 1310.245        | <b>1302.236</b> | 0.504           | <b>1301.732</b> | C 4  |
| F 3  | 171.095         | 1245.725        | 1221.744        | 0.504           | 1221.231        | P 25 |
| A 4  | 256.613         | 1197.197        | 1189.188        | 0.504           | 1188.684        | A 22 |
| K 5  | 270.601         | <b>1161.679</b> | 1153.669        | <b>1154.173</b> | 1153.166        | K 21 |
| S 6  | 314.177         | 1097.631        | <b>1089.622</b> | <b>1090.126</b> | 1089.118        | S 20 |
| A 7  | 349.695         | 1054.115        | <b>1046.106</b> | <b>1046.610</b> | 1045.602        | A 19 |
| F 8  | 388.222         | 1018.597        | 1010.587        | 1011.091        | 1010.083        | F 18 |
| A 9  | 433.740         | 970.070         | 962.061         | <b>962.565</b>  | 961.557         | A 17 |
| F 10 | 482.287         | 934.552         | 926.542         | 927.046         | 926.039         | F 16 |
| K 11 | 546.314         | 886.025         | <b>878.016</b>  | <b>878.520</b>  | 877.512         | K 15 |
| K 12 | 610.362         | 821.979         | <b>813.969</b>  | <b>814.473</b>  | 813.465         | K 14 |
| C 13 | 638.872         | 757.935         | 749.921         | 750.425         | 749.417         | C 13 |
| S 14 | 682.388         | <b>729.420</b>  | 721.410         | 721.914         | 720.906         | S 12 |
| K 15 | <b>767.441</b>  | 685.904         | 677.894         | 678.398         | 677.390         | K 11 |
| K 16 | <b>852.494</b>  | 600.851         | 592.842         | 593.346         | 592.338         | K 10 |
| A 17 | 888.012         | 515.798         | 507.789         | 508.293         | 507.285         | A 9  |
| V 18 | <b>937.547</b>  | 480.380         | 472.370         | 472.874         | 471.866         | V 8  |
| T 19 | <b>968.670</b>  | 438.745         | 429.736         | 429.240         | 428.232         | T 7  |
| K 20 | <b>1073.123</b> | 380.222         | 372.212         | 372.716         | 371.708         | K 6  |
| A 21 | <b>1108.642</b> | 295.169         | 287.159         | 287.663         | 286.656         | A 5  |
| Q 22 | <b>1172.671</b> | 259.656         | 251.641         | 252.145         | 251.137         | Q 4  |
| K 23 | <b>1236.718</b> | 195.621         | 187.612         | 188.116         | 187.108         | K 3  |
| K 24 | 1380.766        | 131.974         | 123.964         | 124.468         | 123.460         | K 2  |
| D 25 | 1358.270        | 67.526          | 59.517          | 60.021          | 59.013          | D 1  |

# sp | Q6ZWH9 | H2B1C\_MOUSE

PEPAKSAPAPKKGSK <sup>Acetyl</sup><sub>42.01</sub> K <sup>Acetyl</sup><sub>42.01</sub> AVTK <sup>Acetyl</sup><sub>42.01</sub> AQKKD

- ▶ fragmentation table for charge state 3+
- ▶ specType=etd
- ▶ score=41.82
- ▶ F113278.dat
- ▶ query=q58616.p1
- ▶ precursor=679.889710
- ▶ chargePrecursor=4
- ▶ itol=0.5

| AA  | c              | y       | z+1            | z+2     | z              | AA  |
|-----|----------------|---------|----------------|---------|----------------|-----|
| P1  | 39.034         | 906.183 | <b>900.844</b> | 0.672   | <b>900.508</b> | P25 |
| E2  | 82.048         | 873.832 | <b>868.493</b> | 0.672   | <b>868.157</b> | E24 |
| P3  | 114.399        | 830.818 | 825.479        | 0.672   | 825.143        | P23 |
| A4  | 138.078        | 798.467 | <b>793.128</b> | 0.672   | 792.792        | A22 |
| K5  | 180.776        | 774.788 | 769.449        | 769.785 | 769.113        | K21 |
| S6  | 209.787        | 732.990 | 725.750        | 727.088 | 726.414        | S20 |
| A7  | 233.466        | 703.076 | 697.740        | 698.076 | 697.404        | A19 |
| P8  | 265.817        | 679.400 | 674.061        | 674.397 | 673.725        | P18 |
| A9  | 289.496        | 647.049 | 641.710        | 642.046 | 641.374        | A17 |
| P10 | 321.847        | 623.370 | 618.031        | 618.367 | 617.695        | P16 |
| K11 | 364.545        | 591.019 | 585.680        | 586.016 | 585.344        | K15 |
| K12 | 407.243        | 548.321 | 542.981        | 543.317 | 542.646        | K14 |
| G13 | 426.251        | 505.623 | 500.283        | 500.619 | 499.947        | G13 |
| S14 | 455.261        | 486.616 | 481.276        | 481.612 | 480.940        | S12 |
| R15 | 511.963        | 457.605 | 452.265        | 452.601 | 451.929        | K11 |
| K16 | 568.665        | 400.903 | 395.563        | 395.899 | 395.228        | K10 |
| A17 | 592.344        | 344.201 | 338.862        | 339.198 | 338.526        | A9  |
| V18 | 625.367        | 320.522 | 315.183        | 315.519 | 314.847        | V8  |
| T19 | 689.049        | 287.499 | 282.159        | 282.496 | 281.824        | T17 |
| K20 | 715.751        | 253.817 | 248.477        | 248.813 | 248.141        | K6  |
| A21 | 739.430        | 197.115 | 191.775        | 192.111 | 191.439        | A5  |
| Q22 | 782.116        | 173.436 | 168.096        | 168.432 | 167.760        | Q4  |
| K23 | 824.815        | 130.750 | 125.410        | 125.746 | 125.074        | K3  |
| K24 | <b>867.513</b> | 88.051  | 82.712         | 83.048  | 82.376         | K2  |
| D25 | 905.855        | 45.353  | 40.014         | 40.349  | 39.678         | D1  |

# sp | Q6ZWY9 | H2B1C\_MOUSE

PEPAKSAPAPKKGSK <sup>Acetyl</sup>K <sub>42.01</sub> AVTK <sup>Acetyl</sup>K <sub>42.01</sub> AQKKD <sup>Acetyl</sup>K <sub>42.01</sub>

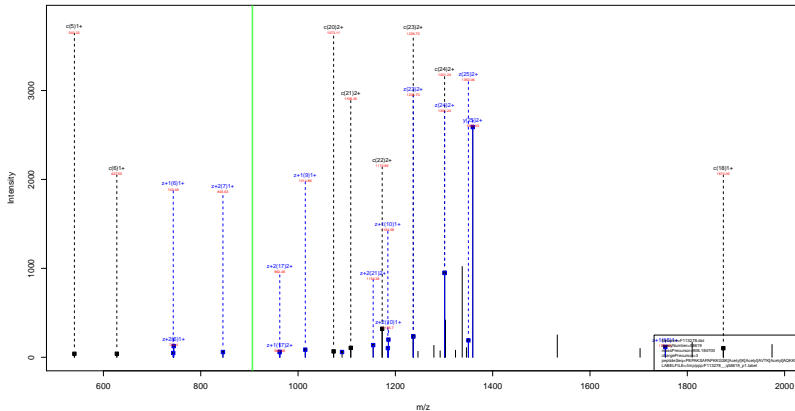



# sp | Q6ZWH9 | H2B1C\_MOUSE

PEPAKSAPAPKKGSK <sup>Acetyl</sup>42.01 K <sup>Acetyl</sup>42.01 AVTK <sup>Acetyl</sup>42.01 AQKKD

- ▶ fragmentation table for charge state 1+
- ▶ specType=etd
- ▶ score=36.60
- ▶ F113278.dat
- ▶ query=q58619\_p1
- ▶ precursor=906.184700
- ▶ chargePrecursor=3
- ▶ itol=0.5

| AA  | c               | y        | z+1             | z+2             | z        | AA  |
|-----|-----------------|----------|-----------------|-----------------|----------|-----|
| P1  | 115.087         | 2716.539 | 2700.517        | 0.000           | 2699.505 | P25 |
| E2  | 244.129         | 2019.483 | 2003.464        | 0.000           | 2002.450 | E24 |
| P13 | 341.182         | 2090.440 | 2474.432        | 0.000           | 2473.414 | P23 |
| A4  | 412.219         | 2393.387 | 2377.369        | 0.000           | 2376.361 | A22 |
| K5  | <b>540.314</b>  | 2322.350 | 2306.332        | 2307.339        | 2305.324 | K21 |
| S6  | <b>627.346</b>  | 2104.255 | 2178.237        | 2179.244        | 2177.229 | S20 |
| A7  | 698.283         | 2107.222 | 2091.205        | 2092.212        | 2090.191 | A19 |
| P8  | 795.438         | 2036.186 | 2020.168        | 2021.176        | 2019.161 | P18 |
| A9  | 866.473         | 1930.133 | 1923.115        | 1924.123        | 1922.107 | A17 |
| P10 | 963.526         | 1868.096 | 1852.078        | 1853.085        | 1851.070 | P16 |
| K11 | 1001.621        | 1771.044 | <b>1755.025</b> | 1756.033        | 1754.017 | K15 |
| K12 | 1219.716        | 1642.949 | 1626.930        | 1627.938        | 1625.922 | K14 |
| G13 | 1276.737        | 1514.894 | 1498.875        | 1499.883        | 1497.867 | G13 |
| S14 | 1363.769        | 1457.832 | 1441.813        | 1442.821        | 1440.805 | S12 |
| K15 | 1533.875        | 1370.800 | 1354.781        | 1355.789        | 1353.774 | K11 |
| K16 | 1701.980        | 1200.695 | <b>1184.676</b> | <b>1185.684</b> | 1183.668 | K10 |
| A17 | 1775.017        | 1030.589 | <b>1014.570</b> | 1015.578        | 1013.563 | A0  |
| V18 | <b>1874.086</b> | 950.552  | 943.533         | 944.541         | 942.525  | V8  |
| T10 | 1075.133        | 860.484  | 844.465         | <b>845.473</b>  | 843.457  | T10 |
| R20 | 2149.239        | 759.436  | <b>743.417</b>  | <b>744.425</b>  | 742.409  | R6  |
| A21 | 2216.276        | 589.330  | 573.312         | 574.320         | 572.304  | A5  |
| Q22 | 2344.335        | 518.293  | 502.275         | 503.282         | 501.267  | Q4  |
| K23 | 2472.430        | 390.235  | 374.216         | 375.224         | 373.208  | K3  |
| K24 | 2600.525        | 262.140  | 246.121         | 247.129         | 245.113  | K2  |
| D25 | 2715.552        | 134.045  | 118.028         | 119.034         | 117.018  | D1  |

# sp | Q6ZWY9 | H2B1C\_MOUSE

PEPAKSAPAPKKGSK <sup>Acetyl</sup>42.01 K <sup>Acetyl</sup>42.01 AVTK <sup>Acetyl</sup>42.01 AQKKD

- ▶ fragmentation table for charge state 2+
- ▶ specType=etd
- ▶ score=36.60
- ▶ F113278.dat
- ▶ query=q58619.p1
- ▶ precursor=906.184700
- ▶ chargePrecursor=3
- ▶ itol=0.5

| AA   | c               | y               | z+1            | z+2             | z               | AA   |
|------|-----------------|-----------------|----------------|-----------------|-----------------|------|
| P 1  | 58.047          | <b>1358.771</b> | 1350.762       | 0.504           | <b>1350.295</b> | P 25 |
| E 2  | 132.588         | 1310.245        | 1302.236       | 0.504           | <b>1301.712</b> | E 24 |
| P 3  | 171.095         | 1245.728        | 1237.714       | 0.504           | <b>1237.210</b> | P 23 |
| A 4  | 206.613         | 1197.197        | 1189.188       | 0.504           | 1188.684        | A 22 |
| K 5  | 270.661         | 1161.679        | 1153.669       | <b>1154.173</b> | 1153.166        | K 21 |
| S 6  | 314.177         | 1097.631        | 1089.622       | <b>1090.126</b> | 1089.118        | S 20 |
| A 7  | 349.695         | 1054.115        | 1046.106       | 1046.610        | 1045.602        | A 19 |
| P 8  | 389.222         | 1018.597        | 1010.587       | 1011.091        | 1010.082        | P 18 |
| A 9  | 433.740         | 970.070         | <b>962.061</b> | <b>962.565</b>  | 961.552         | A 17 |
| P 10 | 482.267         | 934.552         | 926.542        | 927.046         | 926.039         | P 16 |
| K 11 | 546.314         | 886.025         | 878.016        | 878.520         | 877.512         | K 15 |
| K 12 | 610.362         | 821.070         | 813.060        | 814.473         | 813.465         | K 14 |
| Q 13 | 638.372         | 797.930         | 789.921        | 790.425         | 789.417         | Q 13 |
| S 14 | 682.388         | 729.420         | 721.410        | 721.914         | 720.906         | S 12 |
| K 15 | 707.441         | 685.904         | 677.894        | 678.398         | 677.390         | K 11 |
| K 16 | 852.494         | 600.851         | 592.842        | 593.346         | 592.338         | K 10 |
| A 17 | 888.012         | 515.799         | 507.789        | 508.293         | 507.285         | A 9  |
| V 18 | 937.547         | 480.280         | 472.270        | 472.774         | 471.766         | V 8  |
| T 19 | 981.076         | 430.745         | 422.736        | 423.240         | 422.232         | T 7  |
| K 20 | <b>1073.123</b> | 380.222         | 372.211        | 372.716         | 371.708         | K 6  |
| A 21 | <b>1108.642</b> | 295.160         | 287.150        | 287.663         | 286.656         | A 5  |
| Q 22 | <b>1172.671</b> | 259.650         | 251.641        | 252.145         | 251.137         | Q 4  |
| K 23 | <b>1236.718</b> | 195.621         | 187.612        | 188.116         | 187.108         | K 3  |
| K 24 | <b>1300.766</b> | 131.574         | 123.564        | 124.068         | 123.060         | K 2  |
| D 25 | 1358.279        | 67.528          | 59.519         | 60.021          | 59.013          | D 1  |



# sp | Q64525 | H2B2B\_MOUSE

PDKASAPAPKKGSK <sup>Acetyl</sup>42.01 K <sup>Acetyl</sup>42.01 AVTK <sup>Acetyl</sup>42.01 VQKKD

- ▶ fragmentation table for charge state 1+
- ▶ specType=etd
- ▶ score=42.04
- ▶ F113278.dat
- ▶ query=q58846.p1
- ▶ precursor=683.394690
- ▶ chargePrecursor=4
- ▶ itol=0.5

| AA | c  | y               | z+1             | z+2             | z               | AA       |       |
|----|----|-----------------|-----------------|-----------------|-----------------|----------|-------|
| P  | 1  | 115.087         | 27.90.551       | 2724.533        | 0.000           | 2713.525 | P[25] |
| D  | 3  | 230.114         | 2833.498        | 2617.480        | 0.000           | 2610.472 | D[24] |
| P  | 3  | 327.168         | 2519.472        | 2502.453        | 0.000           | 2501.445 | P[23] |
| A  | 4  | 398.203         | 2421.410        | 2405.400        | 0.000           | 2404.392 | A[22] |
| K  | 5  | <b>526.298</b>  | 2350.382        | 2334.363        | 2335.371        | 2333.355 | K[21] |
| S  | 6  | <b>613.330</b>  | 2222.397        | 2206.268        | 2207.276        | 2205.360 | S[20] |
| A  | 7  | 684.368         | 21.85.295       | 2119.236        | 2120.244        | 2118.228 | A[19] |
| P  | 8  | <b>781.420</b>  | 2084.218        | 2068.189        | 2049.201        | 2047.191 | P[18] |
| A  | 9  | 852.457         | 1987.162        | 1951.148        | <b>1952.154</b> | 1950.138 | A[17] |
| P  | 10 | <b>949.510</b>  | 1896.128        | 1880.109        | 1881.117        | 1879.101 | P[16] |
| K  | 11 | <b>1077.605</b> | 1799.070        | 1783.056        | 1784.064        | 1782.048 | K[15] |
| K  | 12 | 1205.700        | 1670.980        | 1654.961        | <b>1655.969</b> | 1653.953 | K[14] |
| Q  | 13 | 1282.722        | 1542.895        | 1526.866        | 1527.874        | 1525.858 | Q[13] |
| S  | 14 | 1369.754        | <b>1485.804</b> | 1469.845        | 1470.853        | 1468.837 | S[12] |
| K  | 15 | <b>1519.859</b> | 1368.831        | 1352.813        | 1383.821        | 1381.805 | K[11] |
| K  | 16 | 1689.965        | 1228.728        | <b>1212.707</b> | <b>1213.715</b> | 1211.699 | K[10] |
| A  | 17 | 1781.002        | 1058.620        | 1042.602        | <b>1043.610</b> | 1041.594 | A[9]  |
| V  | 18 | 1860.070        | 987.583         | 971.565         | 972.572         | 970.557  | V[8]  |
| T  | 19 | <b>1981.118</b> | 888.515         | <b>872.496</b>  | <b>873.504</b>  | 871.488  | T[7]  |
| K  | 20 | 2111.233        | 787.461         | <b>771.449</b>  | <b>772.456</b>  | 770.441  | K[6]  |
| V  | 21 | 2230.292        | 617.362         | <b>601.343</b>  | <b>602.351</b>  | 600.335  | V[5]  |
| Q  | 22 | 2388.360        | 518.291         | <b>502.275</b>  | 503.282         | 501.267  | Q[4]  |
| K  | 23 | 2489.445        | 390.235         | 374.216         | 375.224         | 373.208  | K[3]  |
| K  | 24 | 2614.540        | 302.140         | 286.121         | 287.129         | 285.113  | K[2]  |
| D  | 25 | 2729.587        | 134.045         | 118.026         | 119.034         | 117.018  | D[1]  |

# sp | Q64525 | H2B2B\_MOUSE

PDKAKSAPAPKKGSK <sup>Acetyl</sup>42.01 K <sup>Acetyl</sup>42.01 AVTK <sup>Acetyl</sup>42.01 VQKKD

- ▶ fragmentation table for charge state 2+
- ▶ specType=etd
- ▶ score=42.04
- ▶ F113278.dat
- ▶ query=q58846.p1
- ▶ precursor=683.394690
- ▶ chargePrecursor=4
- ▶ itol=0.5

| AA | c  | y               | a+1            | a+2             | z               | AA              |       |
|----|----|-----------------|----------------|-----------------|-----------------|-----------------|-------|
| P  | 1  | 58.647          | 1365.779       | <b>1397.770</b> | 0.504           | 1397.266        | P[25] |
| D  | 3  | 115.560         | 1317.253       | <b>1309.244</b> | 0.504           | 1308.740        | D[24] |
| P  | 3  | 104.087         | 1259.730       | 1251.730        | 0.504           | 1251.226        | P[23] |
| A  | 4  | 199.605         | 1311.213       | <b>1203.204</b> | 0.504           | 1202.700        | A[22] |
| K  | 5  | 263.653         | 1175.694       | 1167.695        | <b>1168.189</b> | 1167.181        | K[21] |
| S  | 6  | 307.169         | 1111.647       | 1103.638        | <b>1104.142</b> | 1103.134        | S[20] |
| A  | 7  | 362.697         | 1058.131       | <b>1060.122</b> | <b>1060.626</b> | 1059.618        | A[19] |
| P  | 8  | 391.214         | 932.612        | <b>1024.603</b> | <b>1025.107</b> | <b>1024.099</b> | P[18] |
| A  | 9  | 426.732         | 984.086        | <b>976.077</b>  | <b>976.581</b>  | 975.572         | A[17] |
| P  | 10 | 475.259         | 948.567        | 940.559         | 941.062         | 940.054         | P[16] |
| K  | 11 | 539.306         | 900.041        | <b>892.032</b>  | <b>892.536</b>  | 891.528         | K[15] |
| K  | 12 | 603.354         | 835.994        | <b>827.984</b>  | <b>828.488</b>  | 827.480         | K[14] |
| Q  | 13 | 637.404         | 771.995        | <b>763.937</b>  | <b>764.441</b>  | 763.433         | Q[13] |
| S  | 14 | 675.390         | <b>743.435</b> | 735.426         | 735.930         | 734.922         | S[12] |
| K  | 15 | <b>760.433</b>  | 699.919        | 691.910         | 692.414         | 691.406         | K[11] |
| K  | 16 | 845.486         | 614.867        | 606.857         | 607.361         | 606.353         | K[10] |
| A  | 17 | 881.005         | 529.814        | 521.804         | 522.308         | 521.301         | A[9]  |
| V  | 18 | <b>930.539</b>  | 464.295        | 456.286         | 456.790         | 455.782         | V[8]  |
| T  | 19 | <b>981.063</b>  | 414.761        | 406.752         | 407.256         | 406.248         | T[7]  |
| K  | 20 | 1069.115        | 394.237        | 386.229         | 386.732         | 385.725         | K[6]  |
| V  | 21 | <b>1115.650</b> | 309.184        | 301.175         | 301.679         | 300.671         | V[5]  |
| Q  | 22 | <b>1179.679</b> | 259.650        | 251.641         | 252.145         | 251.137         | Q[4]  |
| K  | 23 | <b>1243.726</b> | 195.621        | 187.612         | 188.116         | 187.108         | K[3]  |
| K  | 24 | 1307.774        | 131.574        | 123.564         | 124.068         | 123.060         | K[2]  |
| D  | 25 | 1385.287        | 87.526         | 79.517          | 80.021          | 79.013          | D[1]  |

# sp | Q64525 | H2B2B\_MOUSE

PDKAKSAPAPKKGSK <sup>Acetyl</sup>42.01 K <sup>Acetyl</sup>42.01 AVTK <sup>Acetyl</sup>42.01 VQKKD

- ▶ fragmentation table for charge state 3+
- ▶ specType=etd
- ▶ score=42.04
- ▶ F113278.dat
- ▶ query=q58846.p1
- ▶ precursor=683.394690
- ▶ chargePrecursor=4
- ▶ itol=0.5

| AA  | c       | y              | z+1            | z+2     | z              | AA  |
|-----|---------|----------------|----------------|---------|----------------|-----|
| P1  | 39.034  | <b>910.855</b> | 905.510        | 0.672   | 905.180        | P25 |
| D2  | 77.376  | 878.504        | <b>873.165</b> | 0.672   | <b>872.829</b> | D24 |
| P3  | 109.727 | 840.162        | 834.822        | 0.672   | 834.487        | P23 |
| A4  | 133.406 | 807.811        | <b>802.472</b> | 0.672   | <b>802.136</b> | A22 |
| K5  | 178.104 | 784.132        | 778.792        | 779.128 | 778.457        | K21 |
| S6  | 305.113 | 741.434        | 735.094        | 735.430 | 735.758        | S20 |
| A7  | 228.794 | 712.423        | 707.063        | 707.419 | 706.748        | A19 |
| P8  | 261.145 | 688.744        | 683.404        | 683.740 | 683.069        | P18 |
| A9  | 284.824 | 656.393        | 651.054        | 651.389 | 650.718        | A17 |
| P10 | 317.175 | 632.714        | 627.375        | 627.710 | 627.039        | P16 |
| K11 | 359.873 | 600.363        | 595.024        | 595.360 | 594.688        | K15 |
| K12 | 402.572 | 557.665        | 552.325        | 552.661 | 551.989        | K14 |
| G13 | 421.579 | 514.967        | 509.627        | 509.963 | 509.291        | G13 |
| S14 | 450.589 | 495.959        | 490.620        | 490.956 | 490.284        | S12 |
| K15 | 507.291 | 466.949        | 461.609        | 461.945 | 461.273        | K11 |
| K16 | 563.993 | 410.247        | 404.907        | 405.243 | 404.571        | K10 |
| A17 | 587.672 | 353.545        | 348.205        | 348.541 | 347.869        | A9  |
| V18 | 620.695 | 329.896        | 324.556        | 324.892 | 324.190        | V8  |
| T19 | 654.377 | 298.843        | 293.504        | 293.840 | 293.168        | T17 |
| K20 | 711.079 | 263.161        | 257.821        | 258.157 | 257.485        | K6  |
| V21 | 744.102 | 206.459        | 201.119        | 201.455 | 200.783        | V5  |
| Q22 | 786.788 | 173.436        | 168.096        | 168.432 | 167.760        | Q4  |
| K23 | 829.487 | 130.750        | 125.410        | 125.746 | 125.074        | K3  |
| K24 | 872.185 | 88.051         | 82.712         | 83.048  | 82.376         | K2  |
| D25 | 910.527 | 45.353         | 40.014         | 40.349  | 39.678         | D1  |

# sp | Q64475 | H2B1B\_MOUSE

PEPSKSAPAPKK Acetyl GSK Acetyl K Acetyl AISKAQKKD  
 42.01 42.01 42.01

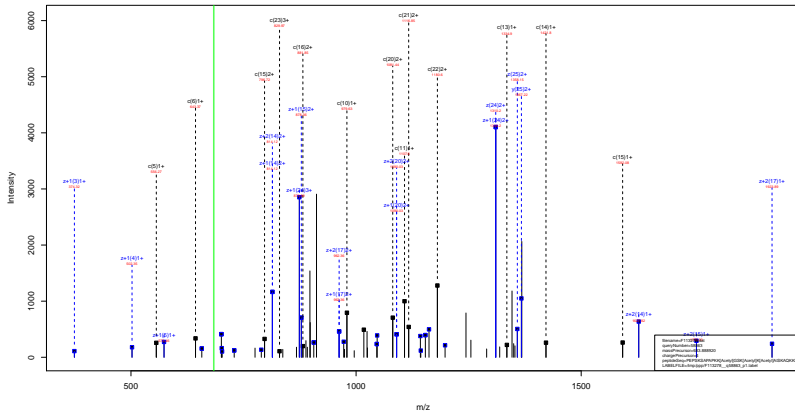

# sp | Q64475 | H2B1B\_MOUSE

PEPSKSAPAPKK Acetyl 42.01 GSK Acetyl 42.01 K Acetyl 42.01 AISKAQKKD

- ▶ fragmentation table for charge state 1+
- ▶ specType=etd
- ▶ score=69.43
- ▶ F113278.dat
- ▶ query=q58863.p1
- ▶ precursor=683.888920
- ▶ chargePrecursor=4
- ▶ itol=0.5

| AA | c       | y               | z+1      | z+2             | z               | AA             |       |
|----|---------|-----------------|----------|-----------------|-----------------|----------------|-------|
| P  | 115.987 | 2732.531        | 2716.512 | 0.000           | 2715.504        | P[25]          |       |
| E  | 244.129 | 2935.476        | 2919.459 | 0.000           | 2918.451        | E[24]          |       |
| P  | 341.182 | 2506.435        | 2490.418 | 0.000           | 2489.409        | P[23]          |       |
| S  | 4       | 438.214         | 2409.382 | 2393.364        | 0.000           | 2392.356       | S[22] |
| K  | 5       | <b>556.309</b>  | 2322.350 | 2306.332        | 2307.339        | 2305.324       | K[21] |
| S  | 6       | <b>643.341</b>  | 2104.255 | 2178.237        | 2179.244        | 2177.229       | S[20] |
| A  | 7       | 714.278         | 2107.222 | 2091.205        | 2092.212        | 2090.191       | A[19] |
| P  | 8       | 811.431         | 2036.186 | 2020.168        | 2021.176        | 2019.161       | P[18] |
| A  | 9       | 862.468         | 1930.133 | 1923.115        | <b>1924.123</b> | 1922.107       | A[17] |
| P  | 10      | <b>979.521</b>  | 1868.096 | 1852.078        | 1853.085        | 1851.070       | P[16] |
| K  | 11      | <b>1107.616</b> | 1771.044 | 1755.025        | <b>1756.033</b> | 1754.017       | K[15] |
| K  | 12      | 1277.721        | 1642.949 | 1626.930        | <b>1627.938</b> | 1625.922       | K[14] |
| G  | 13      | <b>1334.743</b> | 1472.843 | 1456.824        | 1457.832        | 1455.817       | G[13] |
| S  | 14      | <b>1421.775</b> | 1315.822 | 1309.803        | 1309.811        | 1308.795       | S[12] |
| K  | 15      | <b>1591.880</b> | 1328.790 | 1312.771        | 1313.779        | 1311.763       | K[11] |
| K  | 16      | 1761.988        | 1158.684 | <b>1142.665</b> | <b>1143.673</b> | 1141.658       | K[10] |
| A  | 17      | 1833.023        | 988.579  | <b>972.560</b>  | 973.568         | 971.552        | A[0]  |
| T  | 18      | 1946.107        | 917.541  | 901.523         | 902.531         | 900.515        | T[8]  |
| S  | 19      | 2033.139        | 804.497  | 788.479         | <b>789.446</b>  | 787.431        | S[7]  |
| K  | 20      | 2109.234        | 717.425  | <b>701.407</b>  | <b>702.414</b>  | <b>700.399</b> | K[6]  |
| A  | 21      | 2232.271        | 589.330  | <b>573.312</b>  | 574.320         | 572.304        | A[5]  |
| Q  | 22      | 2360.330        | 518.293  | <b>502.275</b>  | 503.282         | 501.267        | Q[4]  |
| K  | 23      | 2488.425        | 400.235  | <b>374.216</b>  | 375.224         | 373.208        | K[3]  |
| K  | 24      | 2616.520        | 282.140  | 246.121         | 247.129         | 245.113        | K[2]  |
| D  | 25      | 2731.546        | 134.045  | 118.028         | 119.034         | 117.018        | D[1]  |



# sp | Q64475 | H2B1B\_MOUSE

PEPSKSAPAPKK Acetyl GSK Acetyl K Acetyl AISKAQKKD  
42.01 42.01 42.01

- ▶ fragmentation table for charge state 2+
- ▶ specType=etd
- ▶ score=69.43
- ▶ F113278.dat
- ▶ query=q58863.p1
- ▶ precursor=683.888920
- ▶ chargePrecursor=4
- ▶ itol=0.5

| AA |    | c               | y               | z+1             | z+2             | z               | AA    |
|----|----|-----------------|-----------------|-----------------|-----------------|-----------------|-------|
| P  | 1  | 58.047          | <b>1366.769</b> | 1358.760        | 0.504           | <b>1358.256</b> | P[25] |
| E  | 2  | 122.588         | 1348.243        | <b>1310.233</b> | 0.504           | <b>1309.720</b> | E[24] |
| F  | 3  | 171.096         | 1283.721        | 1245.713        | 0.504           | 1245.200        | F[23] |
| S  | 4  | 214.611         | 1205.195        | <b>1197.185</b> | 0.504           | 1196.662        | S[22] |
| K  | 5  | 278.658         | <b>1161.679</b> | <b>1153.669</b> | <b>1154.173</b> | 1153.166        | K[21] |
| S  | 6  | 322.174         | 1097.631        | <b>1089.622</b> | <b>1090.126</b> | 1089.118        | S[20] |
| A  | 7  | 357.693         | 1034.115        | <b>1046.106</b> | <b>1046.610</b> | <b>1045.602</b> | A[19] |
| F  | 8  | 406.219         | 1018.597        | 1010.587        | 1011.991        | 1010.985        | F[18] |
| A  | 9  | 441.738         | 970.070         | <b>962.061</b>  | <b>962.565</b>  | 961.557         | A[17] |
| P  | 10 | 480.264         | 934.552         | 926.542         | 927.946         | 926.939         | P[16] |
| K  | 11 | 554.311         | 886.025         | <b>878.016</b>  | <b>878.520</b>  | 877.512         | K[15] |
| K  | 12 | 639.364         | 821.979         | <b>813.969</b>  | <b>814.473</b>  | 813.465         | K[14] |
| C  | 13 | 687.975         | 786.925         | <b>728.916</b>  | <b>729.420</b>  | 728.412         | C[13] |
| S  | 14 | 711.394         | 708.814         | <b>700.805</b>  | <b>700.909</b>  | 699.901         | S[12] |
| K  | 15 | <b>796.444</b>  | 664.898         | <b>656.889</b>  | <b>657.393</b>  | 656.385         | K[11] |
| K  | 16 | <b>881.497</b>  | 678.846         | 671.836         | 672.840         | 671.832         | K[10] |
| A  | 17 | 917.015         | 694.793         | 686.784         | 687.287         | 686.280         | A[9]  |
| I  | 18 | 977.527         | 659.274         | 651.265         | 651.769         | 650.761         | I[8]  |
| S  | 19 | <b>1017.673</b> | 602.735         | 594.723         | 595.227         | 594.219         | S[7]  |
| K  | 20 | <b>1081.121</b> | 559.215         | 551.207         | 551.711         | 550.703         | K[6]  |
| A  | 21 | <b>1116.639</b> | 595.169         | 587.159         | 587.663         | 586.656         | A[5]  |
| Q  | 22 | <b>1180.668</b> | 559.656         | 551.641         | 552.145         | 551.137         | Q[4]  |
| K  | 23 | 1244.716        | 195.621         | 187.612         | 188.116         | 187.108         | K[3]  |
| K  | 24 | 1308.763        | 131.574         | 123.564         | 124.068         | 123.060         | K[2]  |
| D  | 25 | 1366.277        | 67.526          | 59.517          | 60.021          | 59.013          | D[1]  |

# sp | Q64475 | H2B1B\_MOUSE

PEPSKSAPAPKK <sup>Acetyl</sup>42.01 GSK <sup>Acetyl</sup>42.01 K <sup>Acetyl</sup>42.01 AISKAKKKD

- ▶ fragmentation table for charge state 3+
- ▶ specType=etd
- ▶ score=69.43
- ▶ F113278.dat
- ▶ query=q58863.p1
- ▶ precursor=683.888920
- ▶ chargePrecursor=4
- ▶ itol=0.5

| AA  | c              | y       | z+1            | z+2     | z              | AA  |
|-----|----------------|---------|----------------|---------|----------------|-----|
| P1  | 39.034         | 911.515 | <b>906.175</b> | 0.672   | <b>906.840</b> | P25 |
| E2  | 82.048         | 879.164 | <b>873.825</b> | 0.672   | 873.489        | E24 |
| P3  | 114.399        | 836.150 | 830.810        | 0.672   | 830.474        | P23 |
| S4  | 143.410        | 803.799 | 798.459        | 0.672   | 798.123        | S22 |
| K5  | 186.108        | 774.788 | 769.448        | 769.785 | 769.113        | K21 |
| S6  | 215.119        | 732.590 | 725.750        | 727.088 | 726.414        | S20 |
| A7  | 238.798        | 703.075 | 697.740        | 698.076 | 697.404        | A19 |
| P8  | 271.148        | 679.400 | 674.061        | 674.397 | 673.725        | P18 |
| A9  | 294.828        | 647.049 | 641.710        | 642.046 | 641.374        | A17 |
| P10 | 327.178        | 623.370 | 618.031        | 618.367 | 617.695        | P16 |
| K11 | 369.877        | 591.019 | 585.680        | 586.016 | 585.344        | K15 |
| K12 | 406.579        | 548.321 | 542.981        | 543.317 | 542.646        | K14 |
| G13 | 445.586        | 491.619 | 486.280        | 486.616 | 485.944        | G13 |
| S14 | 474.596        | 472.612 | 467.272        | 467.608 | 466.937        | S12 |
| R15 | 511.298        | 443.601 | 438.262        | 438.598 | 437.926        | K11 |
| K16 | 588.000        | 386.900 | 381.560        | 381.896 | 381.224        | K10 |
| A17 | 611.879        | 330.186 | 324.838        | 325.184 | 324.522        | A9  |
| I18 | 649.174        | 305.519 | 301.179        | 301.515 | 300.843        | I8  |
| S19 | 678.385        | 268.824 | 263.484        | 263.820 | 263.148        | S7  |
| K20 | 721.083        | 239.813 | 234.474        | 234.810 | 234.138        | K6  |
| A21 | 744.762        | 197.115 | 191.775        | 192.111 | 191.439        | A5  |
| Q22 | 787.448        | 173.436 | 168.096        | 168.432 | 167.760        | Q4  |
| K23 | <b>830.146</b> | 130.750 | 125.410        | 125.746 | 125.074        | K3  |
| K24 | 872.845        | 88.051  | 82.712         | 83.048  | 82.376         | K2  |
| D25 | 911.187        | 45.353  | 40.014         | 40.349  | 39.678         | D1  |

# sp | Q64525 | H2B2B\_MOUSE

PDKASAPAPKK Acetyl GSK Acetyl K Acetyl AVTK Acetyl VQKKD  
42.01 42.01 42.01 42.01

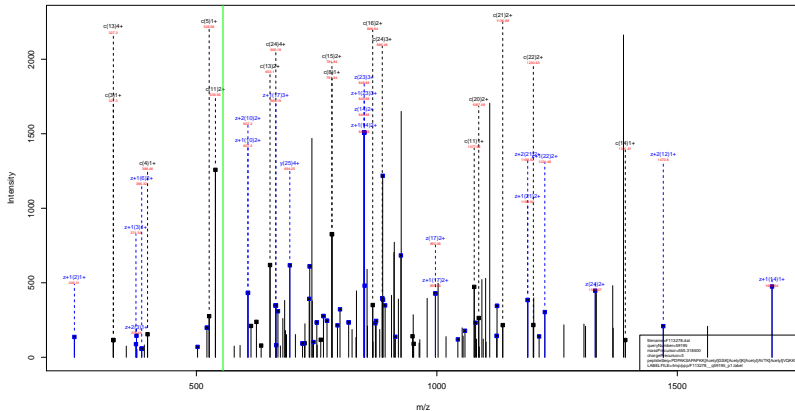

# sp | Q64525 | H2B2B\_MOUSE

PDKAKSAPAPKK Acetyl 42.01 GSK Acetyl 42.01 K Acetyl 42.01 AVTK Acetyl 42.01 VQKKD

- ▶ fragmentation table for charge state 1+
- ▶ specType=etd
- ▶ score=40.48
- ▶ F113278.dat
- ▶ query=q59195.p1
- ▶ precursor=555.318400
- ▶ chargePrecursor=5
- ▶ itol=0.5

| AA  | c               | y               | z+1             | z+2             | z        | AA   |
|-----|-----------------|-----------------|-----------------|-----------------|----------|------|
| P1  | 115.087         | 2772.562        | 2756.543        | 0.000           | 2755.535 | P125 |
| D3  | 239.114         | 2875.509        | 2859.490        | 0.000           | 2858.482 | D24  |
| P3  | <b>327.166</b>  | 2560.482        | 2544.463        | 0.000           | 2543.456 | P123 |
| A4  | <b>398.203</b>  | 2461.429        | 2445.411        | 0.000           | 2444.403 | A122 |
| K5  | <b>526.298</b>  | 2392.392        | 2376.373        | 2377.381        | 2375.366 | K121 |
| S6  | <b>613.330</b>  | 2264.297        | 2248.279        | 2249.286        | 2247.271 | S20  |
| A7  | 864.268         | 2177.265        | 2161.247        | 2162.254        | 2160.239 | A119 |
| P8  | <b>781.420</b>  | 2108.229        | 2092.210        | 2093.217        | 2091.202 | P118 |
| A9  | 852.497         | 2009.173        | 1993.157        | 1994.164        | 1992.149 | A117 |
| P10 | <b>949.510</b>  | 1938.138        | 1922.120        | 1923.127        | 1921.112 | P116 |
| K11 | <b>1077.605</b> | 1841.085        | 1825.067        | 1826.075        | 1824.059 | K115 |
| K12 | 1247.711        | 1712.991        | <b>1696.972</b> | 1697.980        | 1695.964 | K114 |
| Q13 | 1304.732        | 1542.893        | 1526.875        | 1527.883        | 1525.867 | Q113 |
| S14 | <b>1391.764</b> | 1485.864        | 1469.846        | <b>1470.853</b> | 1468.837 | S112 |
| K15 | 1561.876        | 1398.831        | 1382.813        | 1383.821        | 1381.805 | K111 |
| K16 | 1731.975        | 1228.728        | <b>1212.707</b> | 1213.715        | 1211.699 | K110 |
| A17 | 1803.012        | <b>1058.620</b> | 1042.602        | <b>1043.610</b> | 1041.594 | A10  |
| V18 | 1902.081        | 987.583         | 971.565         | 972.572         | 970.557  | V8   |
| T19 | 2003.126        | <b>888.515</b>  | <b>872.496</b>  | <b>873.504</b>  | 871.488  | T17  |
| K20 | 2173.234        | 787.469         | <b>771.449</b>  | 772.456         | 770.441  | K16  |
| V21 | 2272.302        | 617.362         | 601.343         | 602.351         | 600.335  | V15  |
| Q22 | 2400.361        | 518.293         | <b>502.275</b>  | 503.282         | 501.267  | Q4   |
| K23 | 2528.456        | 390.235         | <b>374.216</b>  | <b>375.224</b>  | 373.208  | K3   |
| K24 | 2656.551        | 302.140         | <b>246.121</b>  | 247.129         | 245.113  | K2   |
| D25 | 2771.578        | 134.045         | 118.026         | 119.034         | 117.018  | D1   |

# sp | Q64525 | H2B2B\_MOUSE

PDKAKSAPAPKK Acetyl 42.01 GSK Acetyl 42.01 K Acetyl 42.01 AVTK Acetyl 42.01 VQKKD

- ▶ fragmentation table for charge state 2+
- ▶ specType=etd
- ▶ score=40.48
- ▶ F113278.dat
- ▶ query=q59195.p1
- ▶ precursor=555.318400
- ▶ chargePrecursor=5
- ▶ itol=0.5

| AA |    | c               | y              | a+1             | a+2             | z               | AA    |
|----|----|-----------------|----------------|-----------------|-----------------|-----------------|-------|
| P  | 1  | 58.047          | 1386.785       | 1378.775        | 0.504           | 1378.271        | P[25] |
| D  | 3  | 115.560         | 1338.258       | 1330.249        | 0.504           | <b>1329.745</b> | D[24] |
| P  | 3  | 104.087         | 1280.745       | 1272.735        | 0.504           | 1272.231        | P[23] |
| A  | 4  | 199.605         | 1232.218       | <b>1224.209</b> | 0.504           | 1223.705        | A[22] |
| K  | 5  | 263.653         | 1196.700       | <b>1188.690</b> | <b>1189.194</b> | 1188.189        | K[21] |
| S  | 6  | 307.169         | 1132.652       | <b>1124.643</b> | <b>1125.147</b> | <b>1124.139</b> | S[20] |
| A  | 7  | 362.697         | 1099.136       | 1091.127        | 1091.631        | <b>1080.623</b> | A[19] |
| P  | 8  | 393.214         | 1053.618       | 1045.609        | 1046.112        | 1045.104        | P[18] |
| A  | 9  | 426.732         | 1005.091       | <b>997.082</b>  | 997.586         | <b>996.578</b>  | A[17] |
| P  | 10 | 475.259         | 969.573        | 961.563         | 962.067         | 961.059         | P[16] |
| K  | 11 | <b>539.306</b>  | 921.046        | 913.037         | <b>913.541</b>  | 912.533         | K[15] |
| K  | 12 | <b>624.359</b>  | 855.999        | <b>848.990</b>  | <b>849.493</b>  | <b>848.486</b>  | K[14] |
| G  | 13 | <b>652.870</b>  | <b>771.346</b> | <b>763.337</b>  | <b>764.341</b>  | 763.333         | G[13] |
| S  | 14 | 698.389         | <b>743.435</b> | <b>735.426</b>  | <b>735.930</b>  | <b>734.922</b>  | S[12] |
| K  | 15 | <b>781.438</b>  | 699.919        | 691.910         | 692.414         | 691.406         | K[11] |
| K  | 16 | <b>866.491</b>  | 614.867        | <b>606.857</b>  | <b>607.361</b>  | 606.353         | K[10] |
| A  | 17 | 902.010         | 529.814        | <b>521.804</b>  | <b>522.308</b>  | 521.301         | A[9]  |
| V  | 18 | <b>951.544</b>  | 484.295        | 486.288         | 486.790         | 485.782         | V[8]  |
| T  | 19 | 1002.088        | 444.761        | 436.752         | 437.256         | 436.248         | T[7]  |
| K  | 20 | <b>1087.121</b> | 394.227        | <b>386.220</b>  | <b>386.732</b>  | 385.725         | K[6]  |
| V  | 21 | <b>1136.655</b> | 309.184        | 301.175         | 301.679         | 300.671         | V[5]  |
| Q  | 22 | <b>1200.684</b> | 259.650        | 251.641         | 252.145         | 251.137         | Q[4]  |
| K  | 23 | 1264.732        | 195.621        | 187.612         | 188.116         | 187.108         | K[3]  |
| K  | 24 | 1328.779        | 131.574        | 123.564         | 124.068         | 123.060         | K[2]  |
| D  | 25 | 1388.293        | 87.528         | 79.519          | 80.021          | 79.013          | D[1]  |

# sp | Q64525 | H2B2B\_MOUSE

PDKAKSAPAPKK Acetyl 42.01 GSK Acetyl 42.01 K Acetyl 42.01 AVTK Acetyl 42.01 VQKKD

- ▶ fragmentation table for charge state 3+
- ▶ specType=etd
- ▶ score=40.48
- ▶ F113278.dat
- ▶ query=q59195.p1
- ▶ precursor=555.318400
- ▶ chargePrecursor=5
- ▶ itol=0.5

| AA    | c              | y              | z+1            | z+2            | z              | AA    |
|-------|----------------|----------------|----------------|----------------|----------------|-------|
| P[1]  | 30.034         | <b>924.850</b> | 919.519        | 0.672          | 019.183        | P[25] |
| D[2]  | 77.376         | <b>892.508</b> | <b>887.168</b> | 0.672          | <b>886.832</b> | D[24] |
| F[3]  | 109.727        | 854.166        | <b>848.826</b> | 0.672          | <b>848.490</b> | F[23] |
| A[4]  | 133.406        | 821.815        | <b>816.475</b> | 0.672          | <b>816.139</b> | A[22] |
| K[5]  | 176.104        | <b>798.136</b> | 792.796        | <b>793.132</b> | 792.400        | K[21] |
| S[6]  | 205.115        | 756.437        | <b>750.098</b> | <b>750.434</b> | 749.762        | S[20] |
| A[7]  | 228.794        | 726.421        | <b>721.087</b> | 721.423        | <b>720.751</b> | A[19] |
| F[8]  | 261.145        | 702.745        | 697.405        | 697.744        | 697.072        | F[18] |
| A[9]  | 294.824        | 670.397        | <b>665.057</b> | <b>665.393</b> | <b>664.721</b> | A[17] |
| P[10] | 317.175        | 646.718        | 641.378        | 641.714        | 641.042        | P[16] |
| K[11] | 359.873        | 614.367        | 609.027        | 609.363        | 608.691        | K[15] |
| K[12] | 418.575        | 571.668        | 566.329        | 566.665        | 565.993        | K[14] |
| G[13] | 435.582        | 514.967        | 509.627        | 509.963        | 509.291        | G[13] |
| S[14] | 464.593        | 495.959        | 490.620        | 490.956        | 490.284        | S[12] |
| K[15] | 523.295        | 456.049        | 451.009        | 451.345        | 451.273        | K[11] |
| K[16] | 577.997        | 410.247        | 404.907        | 405.243        | 404.571        | K[10] |
| A[17] | 601.676        | 353.545        | 348.205        | 348.541        | 347.869        | A[9]  |
| V[18] | <b>634.698</b> | 329.866        | 324.526        | 324.862        | 324.190        | V[8]  |
| T[19] | 668.381        | 296.843        | 291.504        | 291.840        | 291.168        | T[7]  |
| K[20] | <b>725.083</b> | 263.161        | 257.821        | 258.157        | 257.485        | K[6]  |
| V[21] | <b>758.106</b> | 206.459        | 201.119        | 201.455        | 200.783        | V[5]  |
| Q[22] | 800.792        | 173.436        | 168.096        | 168.432        | 167.760        | Q[4]  |
| K[23] | 843.490        | 130.750        | 125.410        | 125.746        | 125.074        | K[3]  |
| K[24] | <b>886.188</b> | 88.051         | 82.712         | 83.048         | 82.376         | K[2]  |
| D[25] | 924.311        | 48.353         | 40.014         | 40.349         | 39.678         | D[1]  |

# sp | Q64525 | H2B2B\_MOUSE

PDKAKSAPAPKK <sup>Acetyl</sup>42.01 GSK <sup>Acetyl</sup>42.01 K <sup>Acetyl</sup>42.01 AVTK <sup>Acetyl</sup>42.01 VQKKD

- ▶ fragmentation table for charge state 4+
- ▶ specType=etd
- ▶ score=40.48
- ▶ F113278.dat
- ▶ query=q59195.p1
- ▶ precursor=555.318400
- ▶ chargePrecursor=5
- ▶ itol=0.5

| AA |    | c              | y              | z+1            | z+2     | z              | AA |
|----|----|----------------|----------------|----------------|---------|----------------|----|
| P  | 1  | 29.527         | <b>693.096</b> | 689.891        | 0.755   | 689.639        | P  |
| D  | 2  | 58.284         | <b>669.633</b> | <b>665.628</b> | 0.755   | <b>665.376</b> | D  |
| P  | 3  | 82.547         | 640.876        | 636.871        | 0.755   | 636.619        | P  |
| A  | 4  | 100.306        | 616.613        | 612.608        | 0.755   | 612.356        | A  |
| K  | 5  | 132.330        | 598.854        | 594.849        | 595.101 | 594.597        | K  |
| S  | 6  | 154.088        | 566.835        | 562.235        | 563.077 | 562.373        | S  |
| A  | 7  | 171.847        | 545.072        | 541.057        | 541.319 | 540.515        | A  |
| P  | 8  | 196.111        | 527.312        | 523.308        | 523.560 | 523.056        | P  |
| A  | 9  | 213.870        | 503.049        | 499.045        | 499.297 | 498.793        | A  |
| P  | 10 | 238.133        | 485.290        | 481.285        | 481.537 | 481.033        | P  |
| K  | 11 | 270.157        | 461.027        | 457.022        | 457.274 | 456.770        | K  |
| K  | 12 | 312.683        | 429.003        | 424.998        | 425.250 | 424.746        | K  |
| G  | 13 | <b>326.938</b> | <b>386.477</b> | 382.472        | 382.724 | 382.220        | G  |
| S  | 14 | 348.696        | 372.221        | 368.217        | 368.469 | 367.965        | S  |
| K  | 15 | 391.223        | 350.463        | 346.459        | 346.711 | 346.207        | K  |
| K  | 16 | 433.749        | 307.937        | 303.932        | 304.184 | 303.680        | K  |
| A  | 17 | 451.509        | 285.411        | 281.406        | 281.658 | 281.154        | A  |
| V  | 18 | 476.276        | 247.651        | 243.647        | 243.899 | 243.395        | V  |
| T  | 19 | 501.538        | 222.884        | 218.880        | 219.131 | 218.628        | T  |
| K  | 20 | 544.064        | 197.622        | 193.618        | 193.870 | 193.366        | K  |
| V  | 21 | 568.831        | 155.096        | 151.091        | 151.343 | 150.839        | V  |
| Q  | 22 | 600.846        | 130.329        | 126.324        | 126.576 | 126.072        | Q  |
| K  | 23 | 632.869        | 98.314         | 94.309         | 94.561  | 94.057         | K  |
| K  | 24 | <b>664.893</b> | 66.290         | 62.286         | 62.538  | 62.034         | K  |
| D  | 25 | 693.650        | 34.267         | 30.262         | 30.514  | 30.010         | D  |





# sp | Q64525 | H2B2B\_MOUSE

PDKAKSAPAPKK Acetyl 42.01 GSK Acetyl 42.01 K Acetyl 42.01 AVTK Acetyl 42.01 VQKKD

- ▶ fragmentation table for charge state 1+
- ▶ specType=etd
- ▶ score=74.93
- ▶ F113278.dat
- ▶ query=q59197\_p1
- ▶ precursor=693.896730
- ▶ chargePrecursor=4
- ▶ itol=0.5

| AA | c  | y               | a+1      | a+2             | z               | AA              |      |
|----|----|-----------------|----------|-----------------|-----------------|-----------------|------|
| P  | 1  | 115.087         | 2772.962 | 2796.543        | 0.000           | 2795.535        | P 25 |
| D  | 3  | 230.114         | 2675.509 | 2659.490        | 0.000           | 2658.482        | D 24 |
| P  | 3  | 327.168         | 2560.482 | 2544.463        | 0.000           | 2543.456        | P 23 |
| A  | 4  | 398.203         | 2463.429 | 2447.411        | 0.000           | 2446.403        | A 22 |
| K  | 5  | <b>526.298</b>  | 2392.392 | 2376.373        | 2377.361        | 2375.356        | K 21 |
| S  | 6  | 613.330         | 2284.297 | 2268.279        | 2269.266        | 2247.271        | S 20 |
| A  | 7  | 684.368         | 2177.265 | 2161.247        | 2162.234        | 2160.230        | A 19 |
| P  | 8  | <b>781.420</b>  | 2108.228 | 2092.209        | 2093.217        | 2091.202        | P 18 |
| A  | 9  | 852.457         | 2009.175 | 1993.157        | <b>1994.164</b> | 1992.149        | A 17 |
| P  | 10 | <b>949.510</b>  | 1938.138 | 1922.120        | 1923.127        | 1921.112        | P 16 |
| K  | 11 | <b>1077.605</b> | 1841.085 | <b>1825.067</b> | 1826.075        | 1824.059        | K 15 |
| K  | 12 | 1247.711        | 1712.991 | 1696.972        | <b>1697.980</b> | 1695.964        | K 14 |
| Q  | 13 | <b>1304.732</b> | 1642.954 | 1626.936        | 1627.944        | 1625.928        | Q 13 |
| S  | 14 | 1381.164        | 1495.864 | 1489.845        | <b>1470.853</b> | 1468.837        | S 12 |
| K  | 15 | <b>1561.870</b> | 1398.831 | 1382.813        | 1383.821        | 1381.805        | K 11 |
| K  | 16 | 1731.975        | 1228.726 | <b>1212.707</b> | 1213.715        | 1211.699        | K 10 |
| A  | 17 | 1803.012        | 1098.620 | 1042.602        | 1043.610        | <b>1041.594</b> | A 9  |
| V  | 18 | 1902.081        | 987.583  | 971.565         | 972.572         | 970.557         | V 8  |
| T  | 19 | 2003.126        | 898.535  | <b>872.496</b>  | <b>873.504</b>  | 871.488         | T 7  |
| K  | 20 | 2173.234        | 787.467  | <b>771.449</b>  | 772.456         | 770.441         | K 6  |
| V  | 21 | 2272.302        | 617.362  | <b>601.343</b>  | 602.351         | 600.335         | V 5  |
| Q  | 22 | 2400.361        | 518.293  | <b>502.275</b>  | 503.282         | 501.267         | Q 4  |
| K  | 23 | 2528.456        | 409.235  | <b>374.216</b>  | 375.224         | 373.209         | K 3  |
| K  | 24 | 2656.551        | 262.140  | 246.121         | 247.129         | 245.113         | K 2  |
| D  | 25 | 2771.578        | 134.045  | 118.026         | 119.034         | 117.018         | D 1  |

# sp | Q64525 | H2B2B\_MOUSE

PDKAKSAPAPKK <sup>Acetyl</sup>42.01 GSK <sup>Acetyl</sup>42.01 K <sup>Acetyl</sup>42.01 AVTK <sup>Acetyl</sup>42.01 VQKKD

- ▶ fragmentation table for charge state 2+
- ▶ specType=etd
- ▶ score=74.93
- ▶ F113278.dat
- ▶ query=q59197.p1
- ▶ precursor=693.896730
- ▶ chargePrecursor=4
- ▶ itol=0.5

| AA |    | c               | y               | z+1             | z+2             | z               | AA    |
|----|----|-----------------|-----------------|-----------------|-----------------|-----------------|-------|
| P  | 1  | 58.047          | <b>1386.785</b> | <b>1378.775</b> | 0.504           | <b>1378.271</b> | P[25] |
| D  | 2  | 115.569         | 1132.252        | <b>1330.249</b> | 0.504           | 1329.745        | D[24] |
| F  | 3  | 154.057         | <b>1280.745</b> | 1272.735        | 0.504           | 1272.231        | F[23] |
| A  | 4  | 199.605         | 1232.218        | <b>1224.209</b> | 0.504           | 1223.705        | A[22] |
| K  | 5  | 253.653         | 1196.700        | <b>1188.690</b> | <b>1189.194</b> | 1188.186        | K[21] |
| S  | 6  | 307.109         | 1132.652        | <b>1124.643</b> | 1125.147        | <b>1124.139</b> | S[20] |
| A  | 7  | 342.657         | 1089.136        | <b>1081.127</b> | 1081.631        | <b>1080.623</b> | A[19] |
| F  | 8  | 393.214         | 1053.618        | 1045.609        | 1046.113        | 1045.104        | F[18] |
| A  | 9  | 426.732         | 1035.091        | <b>997.082</b>  | <b>997.586</b>  | 995.578         | A[17] |
| P  | 10 | 475.259         | 969.573         | 961.563         | 962.067         | 961.059         | P[16] |
| K  | 11 | 539.306         | 921.046         | <b>913.037</b>  | <b>913.541</b>  | 912.533         | K[15] |
| K  | 12 | 624.359         | 856.999         | <b>848.990</b>  | <b>849.493</b>  | 848.486         | K[14] |
| C  | 13 | 652.870         | <b>771.946</b>  | 763.937         | 764.441         | 763.433         | C[13] |
| S  | 14 | 695.356         | 743.430         | <b>735.426</b>  | <b>735.930</b>  | 734.922         | S[12] |
| K  | 15 | <b>781.438</b>  | 699.915         | 691.910         | 692.414         | 691.406         | K[11] |
| K  | 16 | <b>866.491</b>  | 614.867         | 606.857         | 607.361         | 606.353         | K[10] |
| A  | 17 | <b>902.010</b>  | 529.814         | 521.804         | 522.308         | 521.301         | A[9]  |
| V  | 18 | 951.544         | 494.295         | 486.285         | 486.790         | 485.782         | V[8]  |
| T  | 19 | <b>1002.068</b> | 444.761         | 436.752         | 437.256         | 436.249         | T[7]  |
| K  | 20 | 1057.171        | 394.237         | 386.228         | 386.732         | 385.724         | K[6]  |
| V  | 21 | <b>1136.655</b> | 309.184         | 301.175         | 301.679         | 300.671         | V[5]  |
| Q  | 22 | <b>1200.684</b> | 259.656         | 251.645         | 252.149         | 251.141         | Q[4]  |
| K  | 23 | <b>1264.732</b> | 195.621         | 187.612         | 188.116         | 187.108         | K[3]  |
| K  | 24 | 1328.779        | 131.574         | 123.564         | 124.068         | 123.060         | K[2]  |
| D  | 25 | 1388.293        | 67.526          | 59.517          | 60.021          | 59.013          | D[1]  |

# sp | Q64525 | H2B2B\_MOUSE

PDKAKSAPAPKK Acetyl 42.01 GSK Acetyl 42.01 K Acetyl 42.01 AVTK Acetyl 42.01 VQKKD

- ▶ fragmentation table for charge state 3+
- ▶ specType=etd
- ▶ score=74.93
- ▶ F113278.dat
- ▶ query=q59197\_p1
- ▶ precursor=693.896730
- ▶ chargePrecursor=4
- ▶ itol=0.5

| AA  | c              | y              | z+1            | z+2     | z       | AA  |
|-----|----------------|----------------|----------------|---------|---------|-----|
| P1  | 39.034         | <b>924.859</b> | 919.519        | 0.672   | 919.183 | P25 |
| D2  | 77.376         | 892.508        | <b>887.168</b> | 0.672   | 886.832 | D24 |
| P3  | 109.727        | 854.166        | <b>848.826</b> | 0.672   | 848.490 | P23 |
| A4  | 133.406        | 821.815        | 816.475        | 0.672   | 816.139 | A22 |
| K5  | 176.104        | 798.130        | 792.796        | 793.132 | 792.850 | K21 |
| S6  | 209.116        | 756.437        | 750.098        | 750.434 | 749.782 | S20 |
| A7  | 228.794        | 726.427        | 721.087        | 721.423 | 720.751 | A19 |
| P8  | 261.145        | 702.748        | 697.408        | 697.744 | 697.072 | P18 |
| A9  | 284.824        | 670.397        | 665.057        | 665.393 | 664.721 | A17 |
| P10 | 317.175        | 646.718        | 641.378        | 641.714 | 641.042 | P16 |
| K11 | 359.873        | 614.367        | 609.027        | 609.363 | 608.691 | K15 |
| K12 | 416.575        | 571.068        | 566.329        | 566.665 | 565.993 | K14 |
| G13 | 435.582        | 514.967        | 509.627        | 509.963 | 509.291 | G13 |
| S14 | 464.593        | 495.950        | 490.620        | 490.956 | 490.284 | S12 |
| K15 | 521.295        | 466.949        | 461.609        | 461.945 | 461.273 | K11 |
| K16 | 577.997        | 410.247        | 404.907        | 405.243 | 404.571 | K10 |
| A17 | <b>601.676</b> | 353.541        | 348.205        | 348.541 | 347.869 | A9  |
| V18 | 634.038        | 329.896        | 324.526        | 324.862 | 324.190 | V8  |
| T19 | 668.381        | 296.841        | 291.504        | 291.840 | 291.168 | T17 |
| K20 | 725.083        | 263.161        | 257.821        | 258.157 | 257.485 | K6  |
| V21 | 758.106        | 206.459        | 201.119        | 201.455 | 200.783 | V5  |
| Q22 | 800.792        | 173.436        | 168.096        | 168.432 | 167.760 | Q4  |
| K23 | 843.490        | 130.750        | 125.410        | 125.746 | 125.074 | K3  |
| K24 | 886.188        | 88.051         | 82.712         | 83.048  | 82.376  | K2  |
| D25 | 924.531        | 45.353         | 40.014         | 40.349  | 39.678  | D1  |



# sp | Q64525 | H2B2B\_MOUSE

PDKAKSAPAPKK Acetyl/42.01 GSK Acetyl/42.01 K Acetyl/42.01 AVTK Acetyl/42.01 VQKKD

- ▶ fragmentation table for charge state 1+
- ▶ specType=etd
- ▶ score=52.99
- ▶ F113278.dat
- ▶ query=q59199\_p1
- ▶ precursor=693.897030
- ▶ chargePrecursor=4
- ▶ itol=0.5

| AA | c  | y               | a+1      | a+2             | z               | AA              |       |
|----|----|-----------------|----------|-----------------|-----------------|-----------------|-------|
| P  | 1  | 115.087         | 2772.962 | 2795.543        | 0.000           | 2795.535        | P[25] |
| D  | 3  | 230.114         | 2075.509 | 2059.490        | 0.000           | 2058.482        | D[24] |
| P  | 3  | 327.168         | 2560.482 | 2544.463        | 0.000           | 2543.456        | P[23] |
| A  | 4  | 398.203         | 2463.429 | 2447.411        | 0.000           | 2446.403        | A[22] |
| K  | 5  | <b>526.298</b>  | 2392.392 | 2376.373        | 2377.361        | 2375.350        | K[21] |
| S  | 6  | <b>613.330</b>  | 2264.297 | 2248.279        | 2249.266        | 2247.271        | S[20] |
| A  | 7  | 684.268         | 2177.265 | 2161.247        | 2162.254        | 2160.230        | A[19] |
| P  | 8  | <b>781.420</b>  | 2108.228 | 2092.209        | 2093.217        | 2091.202        | P[18] |
| A  | 9  | 852.457         | 2029.175 | 1993.157        | <b>1994.164</b> | 1992.149        | A[17] |
| P  | 10 | <b>949.510</b>  | 1938.138 | 1922.120        | 1923.127        | 1921.112        | P[16] |
| K  | 11 | <b>1077.605</b> | 1841.085 | 1825.067        | <b>1826.075</b> | 1824.050        | K[15] |
| K  | 12 | <b>1247.711</b> | 1712.991 | 1696.972        | <b>1697.980</b> | 1695.954        | K[14] |
| Q  | 13 | 1304.732        | 1542.885 | 1526.866        | 1527.874        | 1525.850        | Q[13] |
| S  | 14 | 1701.764        | 1495.864 | 1469.845        | 1470.853        | 1468.831        | S[12] |
| K  | 15 | <b>1561.870</b> | 1398.831 | 1382.813        | 1383.821        | 1381.805        | K[11] |
| K  | 16 | 1731.975        | 1228.726 | <b>1212.707</b> | 1213.715        | 1211.699        | K[10] |
| A  | 17 | 1803.012        | 1098.620 | 1042.602        | 1043.610        | <b>1041.594</b> | A[9]  |
| V  | 18 | 1902.081        | 987.585  | 971.566         | 972.572         | 970.557         | V[8]  |
| T  | 19 | 2003.126        | 898.535  | <b>872.496</b>  | 873.504         | 871.486         | T[7]  |
| K  | 20 | 2173.234        | 787.467  | <b>771.449</b>  | <b>772.456</b>  | 770.441         | K[6]  |
| V  | 21 | 2272.302        | 617.362  | 601.343         | 602.351         | 600.335         | V[5]  |
| Q  | 22 | 2490.361        | 518.293  | <b>502.275</b>  | 503.282         | 501.267         | Q[4]  |
| K  | 23 | 2528.456        | 490.235  | <b>374.216</b>  | 375.224         | 373.209         | K[3]  |
| K  | 24 | 2656.551        | 362.140  | 246.121         | 247.129         | 245.113         | K[2]  |
| D  | 25 | 2771.578        | 134.045  | 118.026         | 119.034         | 117.018         | D[1]  |

# sp | Q64525 | H2B2B\_MOUSE

PDKAKSAPAPKK Acetyl 42.01 GSK Acetyl 42.01 K Acetyl 42.01 AVTK Acetyl 42.01 VQKKD

- ▶ fragmentation table for charge state 2+
- ▶ specType=etd
- ▶ score=52.99
- ▶ F113278.dat
- ▶ query=q59199.p1
- ▶ precursor=693.897030
- ▶ chargePrecursor=4
- ▶ itol=0.5

| AA | c  | y               | z+1             | z+2             | z               | AA              |       |
|----|----|-----------------|-----------------|-----------------|-----------------|-----------------|-------|
| P  | 1  | 58.047          | <b>1386.785</b> | <b>1378.775</b> | 0.504           | <b>1378.271</b> | P[25] |
| D  | 2  | 115.569         | <b>1336.259</b> | <b>1330.249</b> | 0.504           | 1329.745        | D[20] |
| F  | 3  | 174.092         | <b>1280.745</b> | 1272.735        | 0.504           | 1272.231        | F[23] |
| A  | 4  | 199.605         | 1232.218        | <b>1224.209</b> | 0.504           | 1223.705        | A[22] |
| K  | 5  | 263.653         | 1186.700        | 1188.690        | <b>1189.194</b> | 1188.186        | K[21] |
| S  | 6  | 307.169         | 1132.652        | 1124.643        | <b>1125.147</b> | 1124.139        | S[20] |
| A  | 7  | 342.667         | 1089.136        | <b>1081.127</b> | <b>1081.631</b> | 1080.623        | A[19] |
| T  | 8  | 393.214         | 1053.618        | 1045.609        | 1046.112        | 1045.104        | T[18] |
| A  | 9  | 426.732         | 1005.091        | <b>997.082</b>  | 997.586         | <b>996.578</b>  | A[17] |
| P  | 10 | 475.259         | 969.573         | 961.563         | 962.067         | 961.059         | P[16] |
| K  | 11 | 539.306         | 921.046         | <b>913.037</b>  | <b>913.541</b>  | 912.533         | K[15] |
| K  | 12 | 624.359         | 856.009         | <b>848.990</b>  | <b>849.493</b>  | 848.486         | K[14] |
| C  | 13 | 652.970         | <b>771.946</b>  | 763.937         | <b>764.441</b>  | 763.433         | C[13] |
| S  | 14 | 695.366         | <b>743.435</b>  | 735.426         | <b>735.930</b>  | 734.922         | S[12] |
| K  | 15 | <b>781.438</b>  | 699.918         | 691.910         | 692.414         | 691.406         | K[11] |
| K  | 16 | <b>866.491</b>  | 614.867         | 606.857         | 607.361         | 606.353         | K[10] |
| A  | 17 | <b>902.010</b>  | 529.814         | 521.804         | 522.308         | 521.301         | A[9]  |
| V  | 18 | 951.244         | 494.295         | 486.286         | 486.790         | 485.782         | V[8]  |
| T  | 19 | <b>1002.668</b> | 444.761         | 436.752         | 437.256         | 436.248         | T[7]  |
| K  | 20 | <b>1087.121</b> | 394.237         | 386.228         | 386.732         | 385.724         | K[6]  |
| V  | 21 | 1136.655        | 309.184         | 301.175         | 301.679         | 300.671         | V[5]  |
| Q  | 22 | <b>1200.684</b> | 259.656         | 251.646         | 252.149         | 251.141         | Q[4]  |
| K  | 23 | <b>1264.732</b> | 195.621         | 187.612         | 188.116         | 187.108         | K[3]  |
| K  | 24 | 1328.779        | 131.574         | 123.564         | 124.068         | 123.060         | K[2]  |
| D  | 25 | 1388.293        | 67.526          | 59.517          | 60.021          | 59.013          | D[1]  |

# sp | Q64525 | H2B2B\_MOUSE

PDKAKSAPAPKK <sup>Acetyl</sup>42.01 GSK <sup>Acetyl</sup>42.01 K <sup>Acetyl</sup>42.01 AVTK <sup>Acetyl</sup>42.01 VQKKD

- ▶ fragmentation table for charge state 3+
- ▶ specType=etd
- ▶ score=52.99
- ▶ F113278.dat
- ▶ query=q59199\_p1
- ▶ precursor=693.897030
- ▶ chargePrecursor=4
- ▶ itol=0.5

| AA    | c       | y              | z+1            | z+2     | z       | AA    |
|-------|---------|----------------|----------------|---------|---------|-------|
| P[1]  | 39.034  | <b>924.859</b> | 919.519        | 0.672   | 919.183 | P[25] |
| D[2]  | 77.376  | 892.508        | <b>887.168</b> | 0.672   | 886.832 | D[24] |
| P[3]  | 109.727 | <b>854.166</b> | 848.826        | 0.672   | 848.490 | P[23] |
| A[4]  | 133.466 | 821.815        | 816.475        | 0.672   | 816.139 | A[22] |
| K[5]  | 178.304 | 798.139        | 792.798        | 793.132 | 792.860 | K[21] |
| S[6]  | 205.115 | 755.437        | 750.098        | 750.434 | 749.762 | S[20] |
| A[7]  | 228.794 | 726.427        | 721.087        | 721.423 | 720.751 | A[19] |
| P[8]  | 261.145 | 702.745        | 697.406        | 697.744 | 697.072 | P[18] |
| A[9]  | 284.824 | 670.397        | 665.057        | 665.393 | 664.721 | A[17] |
| P[10] | 317.175 | 646.718        | 641.378        | 641.714 | 641.042 | P[16] |
| K[11] | 359.873 | 614.367        | 609.027        | 609.363 | 608.691 | K[15] |
| K[12] | 416.575 | 571.668        | 566.329        | 566.665 | 565.993 | K[14] |
| G[13] | 435.582 | 514.967        | 509.627        | 509.963 | 509.291 | G[13] |
| S[14] | 464.593 | 495.959        | 490.620        | 490.956 | 490.284 | S[12] |
| K[15] | 521.295 | 466.949        | 461.609        | 461.945 | 461.273 | K[11] |
| K[16] | 577.997 | 410.247        | 404.907        | 405.243 | 404.571 | K[10] |
| A[17] | 661.676 | 353.545        | 348.205        | 348.541 | 347.869 | A[9]  |
| V[18] | 634.696 | 329.865        | 324.525        | 324.862 | 324.190 | V[8]  |
| T[19] | 668.301 | 296.841        | 291.504        | 291.840 | 291.168 | T[7]  |
| K[20] | 725.083 | 263.161        | 257.821        | 258.157 | 257.485 | K[6]  |
| V[21] | 758.106 | 206.459        | 201.119        | 201.455 | 200.783 | V[5]  |
| Q[22] | 800.792 | 173.438        | 168.098        | 168.432 | 167.760 | Q[4]  |
| K[23] | 843.490 | 130.750        | 125.410        | 125.746 | 125.074 | K[3]  |
| K[24] | 886.188 | 88.051         | 82.712         | 83.048  | 82.376  | K[2]  |
| D[25] | 924.531 | 45.353         | 40.014         | 40.349  | 39.678  | D[1]  |

# sp | Q64475 | H2B1B\_MOUSE

PEPSKSAPAPKK Acetyl GSK Acetyl K Acetyl AISK Acetyl AQKKD  
42.01 42.01 42.01 42.01

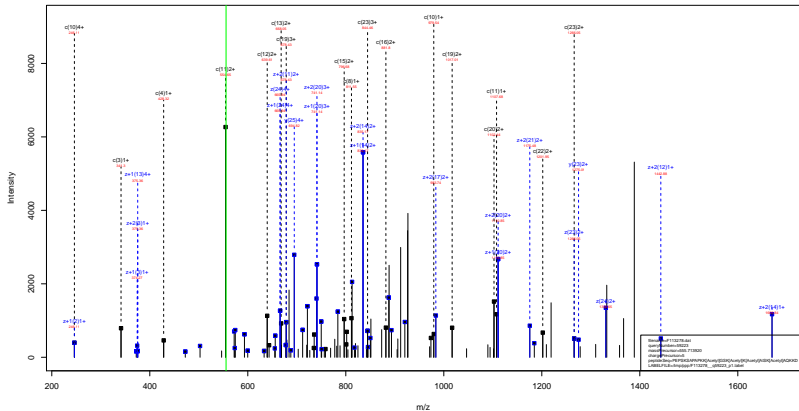



# sp | Q64475 | H2B1B\_MOUSE

PEPSKSAPAPKK Acetyl 42.01 GSK Acetyl 42.01 K Acetyl 42.01 AISK Acetyl 42.01 AQKKD

- ▶ fragmentation table for charge state 1+
- ▶ specType=etd
- ▶ score=53.44
- ▶ F113278.dat
- ▶ query=q59223.p1
- ▶ precursor=555.713920
- ▶ chargePrecursor=5
- ▶ itol=0.5

| AA  | c               | y        | z+1             | z+2             | z              | AA  |
|-----|-----------------|----------|-----------------|-----------------|----------------|-----|
| P1  | 115.087         | 2774.541 | 2758.552        | 0.000           | 2757.515       | P25 |
| E2  | 244.159         | 2577.488 | 2561.470        | 0.000           | 2560.462       | E24 |
| P3  | <b>341.182</b>  | 2548.446 | 2532.437        | 0.000           | 2531.419       | P23 |
| S4  | <b>428.214</b>  | 2451.393 | 2435.374        | 0.000           | 2434.366       | S22 |
| K5  | 556.309         | 2304.361 | 2346.342        | 2349.350        | 2347.334       | K21 |
| S6  | <b>643.341</b>  | 2236.266 | 2220.247        | 2221.255        | 2219.239       | S20 |
| A7  | 714.378         | 2149.234 | 2133.215        | 2134.223        | 2132.207       | A19 |
| P8  | <b>811.431</b>  | 2078.191 | 2062.173        | 2063.186        | 2061.179       | P18 |
| A9  | 882.468         | 1981.144 | 1965.125        | 1966.133        | 1964.118       | A17 |
| P10 | <b>979.521</b>  | 1910.107 | 1894.088        | 1895.096        | 1893.080       | P16 |
| K11 | <b>1107.616</b> | 1813.054 | 1797.035        | 1798.043        | 1796.028       | K15 |
| K12 | 1277.721        | 1684.959 | 1668.940        | <b>1669.948</b> | 1667.933       | K14 |
| G13 | 1334.743        | 1514.854 | 1498.835        | 1499.843        | 1497.827       | G13 |
| S14 | 1423.778        | 1357.832 | 1441.813        | <b>1442.821</b> | 1440.805       | S12 |
| K15 | 1591.880        | 1370.800 | 1354.781        | 1355.789        | 1353.774       | K11 |
| K16 | 1761.988        | 1200.695 | <b>1184.676</b> | 1185.684        | 1183.668       | K10 |
| A17 | 1833.023        | 1030.589 | 1014.570        | 1015.578        | 1013.563       | A0  |
| I18 | 1946.107        | 950.552  | 943.533         | 944.541         | 942.525        | I18 |
| S19 | 2033.139        | 846.468  | 830.449         | 831.457         | 829.441        | S19 |
| K20 | 2203.244        | 759.436  | 743.417         | 744.425         | 742.409        | K0  |
| A21 | 2274.282        | 589.330  | <b>573.312</b>  | <b>574.320</b>  | <b>572.304</b> | A5  |
| Q22 | 2402.340        | 518.293  | <b>502.275</b>  | 503.282         | 501.267        | Q4  |
| K23 | 2530.435        | 390.235  | <b>374.216</b>  | <b>375.224</b>  | 373.208        | K3  |
| K24 | 2698.530        | 282.140  | <b>246.121</b>  | 247.129         | 245.113        | K2  |
| D25 | 2773.557        | 134.045  | 118.028         | 119.034         | 117.018        | D1  |

# sp | Q64475 | H2B1B\_MOUSE

PEPSKSAPAPKK Acetyl 42.01 GSK Acetyl 42.01 K Acetyl 42.01 AISK Acetyl 42.01 AQKKD

- ▶ fragmentation table for charge state 2+
- ▶ specType=etd
- ▶ score=53.44
- ▶ F113278.dat
- ▶ query=q59223.p1
- ▶ precursor=555.713920
- ▶ chargePrecursor=5
- ▶ itol=0.5

| AA |    | c               | y               | z+1             | z+2             | z               | AA    |
|----|----|-----------------|-----------------|-----------------|-----------------|-----------------|-------|
| P  | 1  | 58.047          | 1387.774        | 1379.765        | 0.504           | 1379.261        | P[25] |
| E  | 2  | 127.588         | 1139.245        | 1131.238        | 0.504           | <b>1130.735</b> | E[24] |
| F  | 3  | 171.095         | <b>1274.726</b> | 1266.717        | 0.504           | <b>1266.213</b> | F[23] |
| S  | 4  | 214.611         | 1226.200        | 1218.191        | 0.504           | 1217.681        | S[22] |
| K  | 5  | 278.658         | 1182.684        | 1174.675        | <b>1175.179</b> | 1174.171        | K[21] |
| S  | 6  | 322.174         | 1118.637        | <b>1110.627</b> | <b>1111.131</b> | 1110.123        | S[20] |
| A  | 7  | 357.693         | 1075.121        | 1067.113        | 1067.615        | 1066.607        | A[19] |
| T  | 8  | 406.219         | 1039.602        | 1031.593        | 1032.097        | 1031.089        | T[18] |
| A  | 9  | 441.738         | 991.075         | 983.066         | <b>983.570</b>  | 982.562         | A[17] |
| P  | 10 | 490.264         | 955.557         | 947.548         | 948.052         | 947.044         | P[16] |
| K  | 11 | <b>554.311</b>  | 907.031         | 899.021         | 899.525         | 898.517         | K[15] |
| K  | 12 | <b>639.364</b>  | 842.983         | <b>834.974</b>  | <b>835.478</b>  | 834.470         | K[14] |
| C  | 13 | <b>667.875</b>  | 797.935         | <b>749.921</b>  | <b>750.425</b>  | <b>749.417</b>  | C[13] |
| S  | 14 | 711.394         | 749.420         | <b>721.410</b>  | <b>721.914</b>  | 720.905         | S[12] |
| K  | 15 | <b>796.444</b>  | 685.004         | <b>677.894</b>  | <b>678.398</b>  | <b>677.390</b>  | K[11] |
| K  | 16 | <b>881.497</b>  | 600.851         | <b>592.842</b>  | <b>593.346</b>  | 592.338         | K[10] |
| A  | 17 | 917.015         | 515.798         | 507.789         | 508.293         | 507.285         | A[9]  |
| I  | 18 | <b>973.557</b>  | 480.289         | <b>472.270</b>  | <b>472.774</b>  | 471.766         | I[8]  |
| S  | 19 | <b>1017.673</b> | 423.738         | 415.729         | 416.233         | 415.225         | S[7]  |
| R  | 20 | <b>1102.126</b> | 380.222         | <b>372.212</b>  | <b>372.716</b>  | 371.708         | R[6]  |
| A  | 21 | 1137.644        | 295.169         | 287.159         | 287.663         | 286.656         | A[5]  |
| Q  | 22 | <b>1201.674</b> | 259.656         | 251.641         | 252.145         | 251.137         | Q[4]  |
| K  | 23 | <b>1265.721</b> | 195.621         | 187.612         | 188.116         | 187.108         | K[3]  |
| K  | 24 | 1129.769        | 131.974         | 123.964         | 124.468         | 123.460         | K[2]  |
| D  | 25 | 1387.282        | 67.526          | 59.517          | 60.021          | 59.013          | D[1]  |

# sp | Q64475 | H2B1B\_MOUSE

PEPSKSAPAPKK Acetyl 42.01 GSK Acetyl 42.01 K Acetyl 42.01 AISK Acetyl 42.01 AQKKD

- ▶ fragmentation table for charge state 3+
- ▶ specType=etd
- ▶ score=53.44
- ▶ F113278.dat
- ▶ query=q59223.p1
- ▶ precursor=555.713920
- ▶ chargePrecursor=5
- ▶ itol=0.5

| AA    | c              | y              | z+1            | z+2            | z              | AA    |
|-------|----------------|----------------|----------------|----------------|----------------|-------|
| P[1]  | 38.034         | 925.519        | <b>920.179</b> | 0.672          | 919.843        | P[25] |
| E[2]  | 82.048         | <b>893.168</b> | <b>887.828</b> | 0.672          | <b>887.492</b> | E[24] |
| P[3]  | 114.399        | <b>850.153</b> | <b>844.814</b> | 0.672          | <b>844.478</b> | P[23] |
| S[4]  | 143.410        | <b>817.803</b> | <b>812.463</b> | 0.672          | 812.127        | S[22] |
| K[5]  | 186.108        | 788.792        | <b>783.452</b> | <b>783.768</b> | 783.116        | K[21] |
| S[6]  | 213.119        | 746.094        | <b>740.754</b> | <b>741.090</b> | <b>740.418</b> | S[20] |
| A[7]  | 238.798        | 717.083        | <b>711.743</b> | <b>712.079</b> | 711.407        | A[19] |
| P[8]  | 271.148        | 693.458        | <b>688.064</b> | 688.400        | <b>687.728</b> | P[18] |
| A[9]  | 294.828        | 661.051        | <b>655.713</b> | <b>656.049</b> | <b>655.377</b> | A[17] |
| P[10] | 327.178        | 637.374        | 632.034        | 632.370        | 631.698        | P[16] |
| K[11] | 369.877        | 605.023        | <b>599.683</b> | <b>600.019</b> | 599.347        | K[15] |
| K[12] | 426.579        | 562.325        | 556.985        | 557.321        | 556.649        | K[14] |
| G[13] | 445.586        | 505.623        | 500.283        | 500.619        | 499.947        | G[13] |
| S[14] | 474.596        | 488.616        | 481.276        | 481.612        | 480.940        | S[12] |
| K[15] | 531.298        | 457.605        | 452.265        | 452.601        | 451.929        | K[11] |
| K[16] | 588.002        | 400.901        | 395.561        | 395.899        | 395.226        | K[10] |
| A[17] | 611.679        | 344.201        | 338.862        | 339.198        | 338.526        | A[9]  |
| I[18] | 649.374        | 320.522        | 315.183        | 315.519        | 314.847        | I[8]  |
| S[19] | <b>678.385</b> | 282.828        | 277.488        | 277.824        | 277.152        | S[7]  |
| K[20] | <b>735.086</b> | 253.817        | 248.477        | 248.813        | 248.141        | K[6]  |
| A[21] | <b>758.765</b> | 197.115        | 191.775        | 192.111        | 191.439        | A[5]  |
| Q[22] | <b>801.452</b> | 173.436        | 168.096        | 168.432        | 167.760        | Q[4]  |
| K[23] | <b>844.150</b> | 130.750        | 125.410        | 125.746        | 125.074        | K[3]  |
| K[24] | 886.848        | 88.061         | 82.722         | 83.048         | 82.376         | K[2]  |
| D[25] | 925.191        | 45.353         | 40.014         | 40.349         | 39.678         | D[1]  |

# sp | Q64475 | H2B1B\_MOUSE

PEPSKSAPAPKK <sup>Acetyl</sup>42.01 GSK <sup>Acetyl</sup>42.01 K <sup>Acetyl</sup>42.01 AISK <sup>Acetyl</sup>42.01 AQKKD

- ▶ fragmentation table for charge state 4+
- ▶ specType=etd
- ▶ score=53.44
- ▶ F113278.dat
- ▶ query=q59223.p1
- ▶ precursor=555.713920
- ▶ chargePrecursor=5
- ▶ itol=0.5

| AA    | c              | y              | z+1            | z+2            | z              | AA    |
|-------|----------------|----------------|----------------|----------------|----------------|-------|
| P[1]  | 29.527         | <b>694.391</b> | 690.389        | 0.755          | 690.134        | P[25] |
| E[2]  | 61.788         | 0.70.128       | <b>666.123</b> | 0.755          | <b>665.871</b> | E[24] |
| P[3]  | 86.051         | 637.867        | 633.862        | 0.755          | <b>633.610</b> | P[23] |
| S[4]  | 107.809        | 613.604        | 609.599        | 0.755          | 609.347        | S[22] |
| K[5]  | 139.833        | 591.846        | 587.841        | 588.093        | 587.589        | K[21] |
| S[6]  | 183.391        | 539.822        | 535.817        | 535.069        | 535.369        | S[20] |
| A[7]  | 179.250        | 538.064        | 534.059        | 534.311        | 533.507        | A[19] |
| P[8]  | 203.613        | 520.805        | 516.800        | 516.552        | 516.048        | P[18] |
| A[9]  | 221.372        | 496.041        | 492.037        | 492.289        | 491.785        | A[17] |
| P[10] | <b>245.636</b> | 478.282        | 474.278        | 474.529        | 474.026        | P[16] |
| K[11] | 277.659        | 454.019        | 450.014        | 450.266        | 449.762        | K[15] |
| K[12] | 320.186        | 421.995        | 417.991        | 418.243        | 417.739        | K[14] |
| G[13] | 334.441        | 379.469        | <b>375.464</b> | <b>375.716</b> | <b>375.212</b> | G[13] |
| S[14] | 356.199        | 365.214        | 361.209        | 361.461        | 360.957        | S[12] |
| K[15] | 388.726        | 343.456        | 339.451        | 339.703        | 339.199        | K[11] |
| K[16] | 441.252        | 300.929        | 296.924        | 297.176        | 296.672        | K[10] |
| A[17] | 459.011        | 258.403        | 254.398        | 254.650        | 254.146        | A[9]  |
| I[18] | 487.282        | 240.643        | 236.639        | 236.891        | 236.387        | I[8]  |
| S[19] | 509.040        | 212.372        | 208.368        | 208.620        | 208.116        | S[7]  |
| K[20] | 551.567        | 190.614        | 186.610        | 186.862        | 186.358        | K[6]  |
| A[21] | 569.326        | 148.088        | 144.083        | 144.335        | 143.831        | A[5]  |
| Q[22] | 601.341        | 130.329        | 126.324        | 126.576        | 126.072        | Q[4]  |
| K[23] | <b>633.364</b> | 98.314         | 94.309         | 94.561         | 94.057         | K[3]  |
| K[24] | 665.388        | 66.290         | 62.285         | 62.538         | 62.034         | K[2]  |
| D[25] | 694.145        | 34.261         | 30.253         | 30.514         | 30.010         | D[1]  |



# sp | Q64475 | H2B1B\_MOUSE

PEPSKSAPAPKK Acetyl 42.01 GSK Acetyl 42.01 K Acetyl 42.01 AISK Acetyl 42.01 AQKKD

- ▶ fragmentation table for charge state 1+
- ▶ specType=etd
- ▶ score=64.77
- ▶ F113278.dat
- ▶ query=q59227.p1
- ▶ precursor=694.390750
- ▶ chargePrecursor=4
- ▶ itol=0.5

| AA  | c               | y               | z+1             | z+2             | z        | AA  |
|-----|-----------------|-----------------|-----------------|-----------------|----------|-----|
| P1  | 115.007         | 2774.541        | 2758.522        | 0.000           | 2757.515 | P25 |
| E2  | 244.229         | 2077.488        | 2061.470        | 0.000           | 2060.462 | E24 |
| P3  | 341.182         | 2545.445        | 2529.427        | 0.000           | 2528.419 | P23 |
| S4  | 428.214         | 2451.393        | 2435.374        | 0.000           | 2434.366 | S22 |
| K5  | <b>556.309</b>  | 2364.361        | 2348.342        | 2349.350        | 2347.334 | K21 |
| S6  | <b>643.341</b>  | 2236.350        | 2220.347        | 2221.255        | 2219.250 | S20 |
| A7  | 714.378         | 2149.234        | 2133.215        | 2134.223        | 2132.207 | A19 |
| P8  | <b>811.431</b>  | 2078.191        | 2062.176        | 2063.186        | 2061.170 | P18 |
| A9  | 882.468         | 1981.144        | 1965.125        | 1966.133        | 1964.118 | A17 |
| P10 | <b>979.521</b>  | 1910.107        | 1894.088        | 1895.096        | 1893.080 | P16 |
| K11 | <b>1107.616</b> | 1813.054        | <b>1797.035</b> | 1798.043        | 1796.028 | K15 |
| K12 | 1277.721        | 1684.959        | 1668.940        | <b>1669.948</b> | 1667.933 | K14 |
| Q13 | 1387.743        | 1514.854        | 1498.835        | 1499.843        | 1497.827 | Q13 |
| S14 | <b>1421.775</b> | 1457.812        | 1441.813        | 1442.821        | 1440.805 | S12 |
| K15 | 1591.888        | <b>1370.800</b> | 1354.781        | <b>1355.789</b> | 1353.774 | K11 |
| K16 | 1761.986        | 1200.695        | <b>1184.676</b> | <b>1185.684</b> | 1183.668 | K10 |
| A17 | 1833.023        | 1030.589        | 1014.570        | 1015.578        | 1013.563 | A9  |
| T18 | 1946.107        | 959.527         | 943.513         | 944.541         | 942.525  | T8  |
| S19 | 2033.139        | 846.465         | 830.449         | 831.457         | 829.441  | S19 |
| K20 | 2203.244        | 759.439         | <b>743.417</b>  | 744.425         | 742.409  | K9  |
| A21 | 2274.282        | 689.330         | <b>573.312</b>  | 574.320         | 572.304  | A5  |
| Q22 | 2402.340        | 618.293         | <b>502.275</b>  | 503.282         | 501.267  | Q4  |
| K23 | 2530.435        | 550.235         | <b>374.216</b>  | 375.224         | 373.208  | K3  |
| K24 | 2658.530        | 482.140         | 246.121         | 247.129         | 245.113  | K2  |
| D25 | 2773.557        | 134.045         | 118.026         | 119.034         | 117.018  | D1  |

# sp | Q64475 | H2B1B\_MOUSE

PEPSKSAPAPKK Acetyl 42.01 GSK Acetyl 42.01 K Acetyl 42.01 AISK Acetyl 42.01 AQKKD

- ▶ fragmentation table for charge state 2+
- ▶ specType=etd
- ▶ score=64.77
- ▶ F113278.dat
- ▶ query=q59227.p1
- ▶ precursor=694.390750
- ▶ chargePrecursor=4
- ▶ itol=0.5

| AA |    | c               | y               | z+1             | z+2             | z               | AA    |
|----|----|-----------------|-----------------|-----------------|-----------------|-----------------|-------|
| P  | 1  | 58.047          | 1387.774        | <b>1379.765</b> | 0.504           | <b>1379.261</b> | P[25] |
| E  | 3  | 122.588         | 1339.245        | <b>1331.238</b> | 0.504           | <b>1330.735</b> | E[24] |
| F  | 3  | 171.095         | 1274.725        | 1265.717        | 0.504           | 1255.213        | F[23] |
| S  | 4  | 214.611         | 1226.205        | 1218.191        | 0.504           | 1217.687        | S[22] |
| K  | 5  | 278.658         | <b>1182.684</b> | <b>1174.675</b> | <b>1175.179</b> | 1174.171        | K[21] |
| S  | 6  | 322.174         | 1118.637        | <b>1110.627</b> | 1111.131        | 1110.123        | S[20] |
| A  | 7  | 357.693         | 1075.121        | <b>1067.111</b> | <b>1067.615</b> | 1066.607        | A[19] |
| T  | 8  | 406.219         | 1039.602        | 1031.593        | 1032.097        | 1031.089        | T[18] |
| A  | 9  | 441.738         | 991.075         | <b>983.066</b>  | <b>983.570</b>  | 982.562         | A[17] |
| P  | 10 | 480.264         | 935.557         | 947.548         | 948.052         | 947.044         | P[16] |
| K  | 11 | 554.311         | <b>907.031</b>  | <b>899.021</b>  | <b>899.525</b>  | 898.517         | K[15] |
| K  | 12 | 639.364         | 842.983         | <b>834.974</b>  | <b>835.478</b>  | <b>834.470</b>  | K[14] |
| C  | 13 | 687.875         | 757.935         | 749.927         | 750.431         | 749.423         | C[13] |
| S  | 14 | 711.394         | 729.420         | 721.410         | <b>721.914</b>  | 720.906         | S[12] |
| K  | 15 | <b>796.444</b>  | 685.904         | <b>677.894</b>  | 678.398         | <b>677.390</b>  | K[11] |
| K  | 16 | <b>881.497</b>  | 600.851         | 592.842         | 593.346         | 592.338         | K[10] |
| A  | 17 | 917.015         | 515.798         | 507.789         | 508.293         | 507.285         | A[9]  |
| I  | 18 | <b>973.557</b>  | 480.280         | 472.270         | 472.774         | 471.766         | I[8]  |
| S  | 19 | <b>1017.673</b> | 423.738         | 415.728         | 416.232         | 415.224         | S[7]  |
| K  | 20 | <b>1102.126</b> | 380.222         | 372.212         | 372.716         | 371.708         | K[6]  |
| A  | 21 | <b>1137.644</b> | 295.169         | 287.159         | 287.663         | 286.655         | A[5]  |
| Q  | 22 | <b>1201.674</b> | 259.656         | 251.646         | 252.149         | 251.141         | Q[4]  |
| K  | 23 | <b>1265.721</b> | 195.621         | 187.612         | 188.116         | 187.108         | K[3]  |
| K  | 24 | 1329.769        | 131.574         | 123.564         | 124.068         | 123.060         | K[2]  |
| D  | 25 | 1387.282        | 67.526          | 59.517          | 60.021          | 59.013          | D[1]  |

# sp | Q64475 | H2B1B\_MOUSE

PEPSKSAPAPKK <sup>Acetyl</sup>42.01 GSK <sup>Acetyl</sup>42.01 K <sup>Acetyl</sup>42.01 AISK <sup>Acetyl</sup>42.01 AQKKD

- ▶ fragmentation table for charge state 3+
- ▶ specType=etd
- ▶ score=64.77
- ▶ F113278.dat
- ▶ query=q59227\_p1
- ▶ precursor=694.390750
- ▶ chargePrecursor=4
- ▶ itol=0.5

| AA    | c              | y              | z+1            | z+2            | z              | AA    |
|-------|----------------|----------------|----------------|----------------|----------------|-------|
| P[1]  | 38.034         | <b>925.519</b> | <b>920.179</b> | 0.672          | <b>919.043</b> | P[25] |
| E[2]  | 82.046         | 891.168        | 887.820        | 0.672          | 887.492        | E[24] |
| P[3]  | 114.399        | 850.153        | 844.814        | 0.672          | 844.478        | P[23] |
| S[4]  | 143.410        | 817.803        | <b>812.463</b> | 0.672          | 812.127        | S[22] |
| K[5]  | 186.108        | 788.792        | 783.452        | 783.788        | 783.116        | K[21] |
| S[6]  | 213.119        | 746.094        | 740.752        | 741.090        | 740.418        | S[20] |
| A[7]  | 238.798        | 717.083        | <b>711.743</b> | <b>712.079</b> | 711.407        | A[19] |
| P[8]  | 271.148        | 693.458        | 688.094        | 688.400        | 687.728        | P[18] |
| A[9]  | 294.826        | 661.053        | 655.713        | 656.048        | 655.377        | A[17] |
| P[10] | 327.178        | 637.374        | 632.034        | 632.370        | 631.698        | P[16] |
| K[11] | 369.877        | 605.023        | 599.683        | 600.019        | 599.347        | K[15] |
| K[12] | 426.579        | 562.325        | 556.985        | 557.321        | <b>556.649</b> | K[14] |
| G[13] | 445.586        | 505.623        | 500.283        | 500.619        | 499.947        | G[13] |
| S[14] | 474.596        | 488.616        | 481.276        | 481.612        | 480.940        | S[12] |
| K[15] | 531.298        | 457.065        | 452.265        | 452.261        | 451.929        | K[11] |
| K[16] | 588.050        | 430.901        | 395.561        | 393.899        | 396.228        | K[10] |
| A[17] | 611.679        | 144.201        | 338.862        | 339.198        | 338.526        | A[9]  |
| I[18] | 649.374        | 320.522        | 315.183        | 315.519        | 314.847        | I[8]  |
| S[19] | 678.385        | 282.826        | 277.486        | 277.824        | 277.152        | S[7]  |
| K[20] | 735.086        | 253.817        | 248.477        | 248.813        | 248.141        | K[6]  |
| A[21] | 758.765        | 197.115        | 191.775        | 192.111        | 191.439        | A[5]  |
| Q[22] | 801.452        | 173.436        | 168.096        | 168.432        | 167.760        | Q[4]  |
| K[23] | 844.150        | 130.750        | 125.410        | 125.746        | 125.074        | K[3]  |
| K[24] | 886.848        | 88.061         | 82.721         | 83.048         | 82.376         | K[2]  |
| D[25] | <b>925.191</b> | 45.353         | 40.013         | 40.349         | 39.678         | D[1]  |





# sp | Q6ZWY9 | H2B1C\_MOUSE

PEPAKSAPAPKK Acetyl 42.01 GSK Acetyl 42.01 K Acetyl 42.01 AVTK Acetyl 42.01 AQK Acetyl 42.01 KD

- ▶ fragmentation table for charge state 1+
- ▶ specType=cid
- ▶ score=56.56
- ▶ F113278.dat
- ▶ query=q59459\_p1
- ▶ precursor=934.192020
- ▶ chargePrecursor=3
- ▶ itol=0.5

| AA  | a        | a*       | aΔ       | b        | b*       | bΔ      | y        | y*        | yΔ        | AA  |
|-----|----------|----------|----------|----------|----------|---------|----------|-----------|-----------|-----|
| P1  | 70.085   | 0.000    | 0.000    | 98.085   | 0.000    | 0.000   | 280.550  | 2.783.530 | 27.02.548 | P29 |
| T2  | 118.070  | 0.000    | 0.000    | 227.070  | 0.000    | 0.000   | 270.520  | 2088.477  | 2088.489  | L14 |
| P3  | 196.100  | 0.000    | 278.150  | 324.150  | 0.000    | 306.150 | 2574.480 | 2507.450  | 2538.461  | P23 |
| A4  | 387.610  | 0.000    | 188.170  | 389.170  | 0.000    | 377.170 | 2477.489 | 2488.500  | 2459.509  | A22 |
| K5  | 489.610  | 183.200  | 417.200  | 528.200  | 183.200  | 345.000 | 2485.570 | 2388.540  | 2388.561  | K21 |
| S6  | 592.610  | 375.200  | 468.210  | 633.210  | 375.200  | 258.010 | 2779.571 | 2783.250  | 2782.560  | S20 |
| A7  | 611.602  | 636.100  | 616.101  | 681.101  | 636.100  | 45.001  | 3181.584 | 3174.210  | 3174.210  | A10 |
| P8  | 730.614  | 163.300  | 732.450  | 823.450  | 163.300  | 260.150 | 3120.580 | 3103.180  | 3103.181  | P16 |
| A9  | 811.610  | 684.400  | 684.400  | 811.610  | 684.400  | 0.000   | 3281.570 | 3008.150  | 3008.144  | A17 |
| P10 | 910.504  | 381.470  | 905.454  | 942.448  | 381.470  | 260.978 | 3352.110 | 3370.000  | 3374.107  | P10 |
| K11 | 1048.580 | 383.570  | 1102.580 | 1074.584 | 383.580  | 268.004 | 3481.580 | 3481.570  | 3481.570  | K15 |
| K12 | 1108.580 | 1188.580 | 1188.580 | 1244.580 | 1188.580 | 56.000  | 3478.580 | 3478.580  | 3478.580  | K14 |
| Q13 | 1213.720 | 1258.720 | 1258.720 | 1244.708 | 1258.720 | 2.000   | 3558.710 | 3558.804  | 3558.804  | Q13 |
| S14 | 1300.610 | 1383.700 | 1383.700 | 1383.700 | 1383.700 | 0.000   | 3601.600 | 3601.600  | 3601.600  | S12 |
| K15 | 1380.604 | 1383.800 | 1383.800 | 1383.800 | 1383.800 | 0.000   | 3541.604 | 3541.604  | 3541.604  | K11 |
| K16 | 1708.580 | 1821.600 | 1821.600 | 1743.604 | 1821.600 | 88.000  | 3711.600 | 3711.600  | 3711.600  | K16 |
| A17 | 1742.580 | 1784.600 | 1783.600 | 1800.600 | 1783.600 | 17.000  | 3781.600 | 3781.600  | 3781.600  | A16 |
| V18 | 1871.570 | 1884.600 | 1883.500 | 1888.500 | 1883.500 | 55.000  | 3881.580 | 3881.580  | 3881.580  | V18 |
| T19 | 1912.570 | 1928.600 | 1928.600 | 1928.600 | 1928.600 | 0.000   | 3901.570 | 3901.580  | 3901.580  | T19 |
| K20 | 2142.580 | 2145.200 | 2145.200 | 2145.200 | 2145.200 | 0.000   | 3932.210 | 3932.210  | 3932.210  | K20 |
| A21 | 2171.580 | 2188.200 | 2188.200 | 2188.200 | 2188.200 | 0.000   | 3928.210 | 3928.210  | 3928.210  | A21 |
| Q22 | 2241.614 | 2445.200 | 2445.200 | 2445.200 | 2445.200 | 0.000   | 4001.614 | 4001.614  | 4001.614  | Q22 |
| K23 | 2311.610 | 2484.400 | 2484.400 | 2484.400 | 2484.400 | 0.000   | 4011.610 | 4011.610  | 4011.610  | K23 |
| K24 | 2632.614 | 2887.400 | 2887.400 | 2887.400 | 2887.400 | 0.000   | 4048.610 | 4048.610  | 4048.610  | K24 |
| L25 | 2794.501 | 2987.600 | 2988.540 | 2988.540 | 2987.600 | 2.000   | 4104.500 | 4104.500  | 4104.500  | L25 |

# sp | Q6ZWH9 | H2B1C\_MOUSE

PEPAKSAPAPKK Acetyl 42.01 GSK Acetyl 42.01 K Acetyl 42.01 AVTK Acetyl 42.01 AQK Acetyl 42.01 KD

- ▶ fragmentation table for charge state 2+
- ▶ specType=cid
- ▶ score=56.56
- ▶ F113278.dat
- ▶ query=q59459\_p1
- ▶ precursor=934.192020
- ▶ chargePrecursor=3
- ▶ itol=0.5

| AA  | a              | a'             | a+2            | b               | b'              | b+2             | y               | y'              | y+2             | AA      |      |
|-----|----------------|----------------|----------------|-----------------|-----------------|-----------------|-----------------|-----------------|-----------------|---------|------|
| P1  | 38.838         | 0.504          | 0.504          | 46.934          | 0.504           | 0.504           | 1440.199        | 1399.289        | 1391.777        | P129    |      |
| E2  | 109.107        | 0.504          | 0.504          | 114.055         | 0.504           | 105.993         | 1331.275        | 1245.761        | 1243.250        | E34     |      |
| P3  | 198.704        | 0.504          | 138.709        | 139.709         | 0.504           | 133.479         | <b>1287.734</b> | <b>1270.221</b> | <b>1278.729</b> | P123    |      |
| A4  | 184.193        | 0.504          | 178.987        | 186.493         | 0.504           | 189.699         | 1278.253        | 1233.055        | 1230.545        | A122    |      |
| K5  | 348.155        | 238.837        | 239.145        | 282.147         | 263.818         | 26.142          | <b>1201.689</b> | 1199.178        | 1194.684        | K121    |      |
| S6  | 481.055        | 269.939        | 269.851        | 306.813         | <b>297.138</b>  | 269.889         | <b>1138.942</b> | <b>1131.128</b> | 1131.839        | S204    |      |
| A7  | 337.164        | 152.671        | 158.178        | 141.162         | 141.162         | 152.177         | <b>1098.126</b> | 1097.611        | 1099.121        | A109    |      |
| P8  | 439.169        | 387.191        | 388.708        | 388.708         | 381.195         | 381.701         | <b>1066.607</b> | 1066.092        | 1061.602        | P118    |      |
| A9  | <b>411.325</b> | 402.712        | 402.724        | 425.227         | 418.714         | 418.227         | 1000.000        | <b>1003.588</b> | 1003.093        | A117    |      |
| P10 | 439.169        | 481.243        | 480.793        | 471.753         | 465.240         | <b>464.748</b>  | <b>976.562</b>  | 969.045         | 967.567         | P116    |      |
| K11 | <b>523.803</b> | 153.260        | 154.768        | 159.267         | 159.267         | 159.267         | 929.499         | 929.929         | 919.511         | K115    |      |
| K12 | 609.881        | 601.341        | 599.881        | 512.814         | 514.319         | <b>613.848</b>  | <b>861.589</b>  | 860.079         | 859.589         | K114    |      |
| G13 | 317.163        | 528.856        | 528.362        | 351.354         | 342.811         | 342.811         | 823.919         | 779.423         | 768.919         | G123    |      |
| S14 | 681.081        | 617.119        | 617.618        | 604.603         | 606.107         | 605.612         | 780.439         | 748.911         | 741.431         | S121    |      |
| K15 | 108.108        | 197.426        | 198.934        | 177.411         | 178.919         | <b>771.426</b>  | <b>749.928</b>  | <b>706.909</b>  | 698.408         | 697.904 | K111 |
| P16 | 610.918        | 605.411        | <b>641.983</b> | <b>664.995</b>  | 661.489         | 661.489         | 661.489         | 613.943         | 613.943         | P114    |      |
| A17 | 688.169        | <b>877.994</b> | 877.992        | <b>906.504</b>  | 901.999         | 901.999         | 536.891         | 536.291         | 537.788         | A108    |      |
| V18 | 639.054        | 627.526        | 627.526        | <b>650.039</b>  | 641.525         | 641.525         | 541.193         | 482.772         | 482.280         | V18     |      |
| T19 | 688.169        | 616.026        | <b>877.560</b> | <b>1008.042</b> | 1003.046        | 1003.046        | 651.674         | 651.713         | 643.233         | T117    |      |
| K20 | 1071.618       | 1063.100       | 1063.617       | <b>1085.615</b> | <b>1077.102</b> | <b>1076.610</b> | 493.227         | 389.714         | 389.222         | K10     |      |
| A21 | 1107.136       | 1098.620       | 1098.131       | <b>1121.134</b> | 1112.620        | 1112.131        | 316.174         | 307.661         | 307.169         | A10     |      |
| G22 | 1114.165       | 1105.649       | 1105.160       | <b>1185.183</b> | <b>1176.668</b> | <b>1176.184</b> | 300.669         | 292.144         | 291.656         | G10     |      |
| K23 | 109.149        | 1147.170       | 1147.171       | <b>1276.216</b> | 1271.701        | 1271.701        | 216.430         | 208.111         | 207.621         | K11     |      |
| K24 | 130.209        | 1111.791       | 1111.791       | 1134.281        | 1135.790        | 1135.280        | 131.571         | 123.060         | 122.568         | K11     |      |
| G25 | 1177.171       | 1168.654       | 1168.174       | 1189.177        | 1189.211        | 1189.211        | 87.820          | 8.864           | 88.820          | G10     |      |



# sp | Q9D2U9 | H2B3A\_MOUSE

PEPSRSTPAPKK <sup>Acetyl</sup>42.01 GSK <sup>Acetyl</sup>42.01 K <sup>Acetyl</sup>42.01 AITKAQKKD

- ▶ fragmentation table for charge state 1+
- ▶ specType=etd
- ▶ score=64.17
- ▶ F113278.dat
- ▶ query=q59496.p1
- ▶ precursor=701.895750
- ▶ chargePrecursor=4
- ▶ itol=0.5

| AA |    | c               | y        | z+1             | z+2             | z               | AA  |
|----|----|-----------------|----------|-----------------|-----------------|-----------------|-----|
| P  | 1  | 115.087         | 2604.963 | 2788.544        | 0.000           | 2787.536        | P25 |
| E  | 2  | 244.229         | 2707.510 | 3691.481        | 0.000           | 3690.481        | E24 |
| P  | 3  | 341.182         | 2578.468 | 2502.440        | 0.000           | 2501.441        | P23 |
| S  | 4  | 428.214         | 2481.415 | 2465.398        | 0.000           | 2464.389        | S22 |
| R  | 5  | <b>584.315</b>  | 2394.363 | 2378.304        | 2379.372        | 2377.356        | R21 |
| S  | 6  | <b>671.347</b>  | 2238.282 | 2222.263        | 2223.271        | 2221.255        | S20 |
| T  | 7  | 772.305         | 2151.250 | 2135.211        | 2136.239        | 2134.223        | T19 |
| F  | 8  | <b>869.448</b>  | 2060.202 | 2034.183        | 2035.191        | 2033.174        | F18 |
| A  | 9  | 960.485         | 1953.149 | 1937.130        | 1938.138        | 1936.123        | A17 |
| P  | 10 | <b>1037.537</b> | 1882.112 | 1866.093        | 1867.101        | 1865.085        | P16 |
| K  | 11 | <b>1165.632</b> | 1795.059 | <b>1769.041</b> | 1770.048        | 1768.031        | K15 |
| K  | 12 | 1335.738        | 1656.964 | 1640.940        | <b>1641.953</b> | 1639.930        | K14 |
| Q  | 13 | 1392.759        | 1506.899 | 1470.880        | <b>1471.846</b> | 1469.825        | Q13 |
| S  | 14 | <b>1479.791</b> | 1429.837 | 1413.819        | 1414.826        | 1412.811        | S12 |
| K  | 15 | 1549.897        | 1342.805 | 1326.787        | <b>1327.794</b> | <b>1325.779</b> | K11 |
| K  | 16 | <b>1820.002</b> | 1172.700 | <b>1156.681</b> | <b>1157.689</b> | 1155.673        | K10 |
| A  | 17 | 1891.040        | 1002.594 | <b>986.575</b>  | <b>987.583</b>  | 985.568         | A9  |
| T  | 18 | 2004.124        | 931.557  | 915.538         | <b>916.546</b>  | 914.531         | T8  |
| T  | 19 | 2105.171        | 818.473  | 802.454         | <b>803.462</b>  | 801.446         | T7  |
| K  | 20 | 2213.268        | 717.425  | 701.407         | 702.414         | 700.399         | K6  |
| A  | 21 | 2304.303        | 589.130  | <b>573.112</b>  | 574.120         | 572.304         | A5  |
| Q  | 22 | 2432.362        | 518.203  | <b>502.275</b>  | 503.282         | 501.267         | Q4  |
| K  | 23 | 2560.457        | 400.235  | <b>374.216</b>  | 375.224         | 373.209         | K3  |
| K  | 24 | 2688.552        | 362.140  | 246.121         | 247.129         | 245.113         | K2  |
| E  | 25 | 2893.579        | 134.045  | 118.028         | 119.034         | 117.018         | E1  |

# sp | Q9D2U9 | H2B3A\_MOUSE

PEPSRSTPAPKK <sup>Acetyl</sup>42.01 GSK <sup>Acetyl</sup>42.01 K <sup>Acetyl</sup>42.01 AITKAQKKD

- ▶ fragmentation table for charge state 2+
- ▶ specType=etd
- ▶ score=64.17
- ▶ F113278.dat
- ▶ query=q59496.p1
- ▶ precursor=701.895750
- ▶ chargePrecursor=4
- ▶ itol=0.5

| AA |    | c               | y              | z+1             | z+2             | z               | AA    |
|----|----|-----------------|----------------|-----------------|-----------------|-----------------|-------|
| P  | 1  | 58.647          | 1402.785       | <b>1394.776</b> | 0.504           | 1398.272        | P[25] |
| E  | 2  | 122.588         | 1354.259       | <b>1340.249</b> | 0.504           | <b>1345.745</b> | E[24] |
| P  | 3  | 171.095         | 1289.737       | 1281.725        | 0.504           | <b>1281.224</b> | P[23] |
| S  | 4  | 214.611         | 1241.211       | <b>1233.202</b> | 0.504           | 1232.698        | S[22] |
| R  | 5  | 262.661         | 1197.695       | 1189.680        | <b>1190.190</b> | 1189.182        | R[21] |
| S  | 6  | 336.177         | 1119.644       | <b>1111.635</b> | <b>1112.139</b> | 1111.131        | S[20] |
| T  | 7  | 386.201         | 1076.128       | <b>1068.119</b> | <b>1068.623</b> | <b>1067.615</b> | T[19] |
| F  | 8  | 435.227         | 1028.605       | 1021.589        | 1019.969        | 1019.460        | F[18] |
| A  | 9  | 470.748         | 977.078        | <b>969.069</b>  | <b>969.573</b>  | 968.565         | A[17] |
| P  | 10 | 519.272         | 941.560        | 933.550         | 934.054         | 933.048         | P[16] |
| K  | 11 | 561.320         | 893.033        | <b>885.024</b>  | <b>885.528</b>  | 884.520         | K[15] |
| K  | 12 | 608.373         | <b>828.986</b> | <b>820.976</b>  | <b>821.480</b>  | 820.473         | K[14] |
| Q  | 13 | 667.893         | 743.933        | 735.924         | 736.428         | 735.420         | Q[13] |
| S  | 14 | <b>740.399</b>  | 715.622        | 707.613         | 707.917         | 706.909         | S[12] |
| K  | 15 | <b>825.452</b>  | <b>671.906</b> | <b>663.897</b>  | <b>664.401</b>  | 663.393         | K[11] |
| K  | 16 | <b>910.505</b>  | 586.854        | 578.844         | 579.348         | 578.340         | K[10] |
| A  | 17 | 966.023         | 501.801        | 493.791         | 494.295         | 493.287         | A[9]  |
| T  | 18 | 1027.565        | 466.282        | 458.273         | 458.777         | 457.769         | T[8]  |
| T  | 19 | <b>1053.069</b> | 408.746        | 401.731         | 402.235         | 401.227         | T[7]  |
| K  | 20 | <b>1117.137</b> | 359.218        | 351.207         | 351.711         | 350.703         | K[6]  |
| A  | 21 | <b>1152.655</b> | 295.169        | 287.159         | 287.663         | 286.656         | A[5]  |
| Q  | 22 | <b>1216.685</b> | 269.650        | 251.641         | 252.145         | 251.137         | Q[4]  |
| K  | 23 | <b>1280.732</b> | 195.621        | 187.612         | 188.116         | 187.108         | K[3]  |
| K  | 24 | 1344.780        | 131.574        | 123.564         | 124.068         | 123.060         | K[2]  |
| D  | 25 | 1402.293        | 87.528         | 89.531          | 89.021          | 89.013          | D[1]  |

# sp | Q9D2U9 | H2B3A\_MOUSE

PEPSRSTPAPKK Acetyl 42.01 GSK Acetyl 42.01 K Acetyl 42.01 AITKAQKKD

- ▶ fragmentation table for charge state 3+
- ▶ specType=etd
- ▶ score=64.17
- ▶ F113278.dat
- ▶ query=q59496.p1
- ▶ precursor=701.895750
- ▶ chargePrecursor=4
- ▶ itol=0.5

| AA  | c              | y       | z+1            | z+2     | z              | AA  |
|-----|----------------|---------|----------------|---------|----------------|-----|
| P1  | 39.034         | 935.526 | <b>930.186</b> | 0.672   | 929.850        | P25 |
| E2  | 82.048         | 903.175 | <b>897.835</b> | 0.672   | 897.499        | E24 |
| P3  | 114.399        | 960.161 | 854.821        | 0.672   | <b>854.485</b> | P23 |
| S4  | 143.410        | 827.810 | 822.470        | 0.672   | 822.134        | S22 |
| R5  | 195.443        | 798.799 | 793.460        | 703.785 | 703.124        | R21 |
| S6  | 234.484        | 748.785 | 743.429        | 743.782 | <b>741.090</b> | S20 |
| T7  | 258.136        | 717.755 | 712.415        | 712.751 | 712.079        | T19 |
| P8  | 290.487        | 684.072 | 678.733        | 679.069 | 678.397        | P18 |
| A9  | 314.166        | 651.721 | 646.382        | 646.718 | 646.046        | A17 |
| P10 | 346.517        | 628.042 | 622.703        | 623.039 | 622.367        | P16 |
| K11 | 389.216        | 595.691 | 590.352        | 590.688 | 590.016        | K15 |
| K12 | 445.917        | 552.993 | 547.653        | 547.989 | 547.317        | K14 |
| G13 | 464.925        | 496.291 | 490.952        | 491.287 | 490.616        | G13 |
| S14 | 493.935        | 477.284 | 471.944        | 472.280 | 471.608        | S12 |
| R15 | 550.637        | 448.273 | 442.934        | 443.270 | 442.598        | K11 |
| K16 | 607.339        | 391.571 | 386.232        | 386.568 | 385.896        | K10 |
| A17 | 631.018        | 334.870 | 329.530        | 329.866 | 329.194        | A9  |
| I18 | 668.713        | 311.191 | 305.851        | 306.187 | 305.515        | I8  |
| T19 | 702.395        | 273.496 | 268.156        | 268.492 | 267.820        | T11 |
| K20 | 745.094        | 239.813 | 234.474        | 234.810 | 234.138        | K6  |
| A21 | 768.773        | 197.115 | 191.775        | 192.111 | 191.439        | A5  |
| Q22 | 811.459        | 173.436 | 168.096        | 168.432 | 167.760        | Q4  |
| K23 | <b>854.157</b> | 130.750 | 125.410        | 125.746 | 125.074        | K3  |
| K24 | 896.855        | 88.051  | 82.712         | 83.048  | 82.376         | K2  |
| D25 | 935.198        | 45.353  | 40.014         | 40.349  | 39.678         | D1  |

# sp | Q64525 | H2B2B\_MOUSE

[Acetyl]PDKSAPAPKK Acetyl 42.01 GSK Acetyl 42.01 K Acetyl 42.01 AVTK Acetyl 42.01 VQKKD

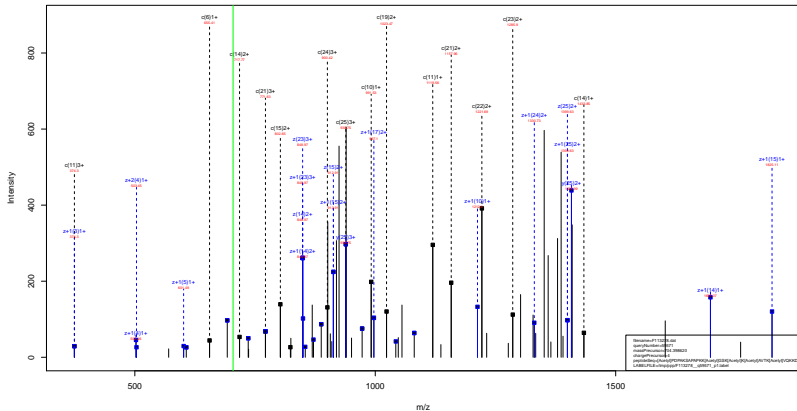



# sp | Q64525 | H2B2B\_MOUSE

[Acetyl]PDKAKSAPAPKK Acetyl 42.01 GSK Acetyl 42.01 K Acetyl 42.01 AVTK Acetyl 42.01 VQKKD

- ▶ fragmentation table for charge state 1+
- ▶ specType=etd
- ▶ score=44.11
- ▶ F113278.dat
- ▶ query=q59571.p1
- ▶ precursor=704.398620
- ▶ chargePrecursor=4
- ▶ itol=0.5

| AA | c  | y               | z+1      | z+2             | z              | AA             |       |
|----|----|-----------------|----------|-----------------|----------------|----------------|-------|
| P  | 1  | 157.097         | 2814.572 | 2798.554        | 0.000          | 2797.546       | P[25] |
| D  | 2  | 272.124         | 2075.509 | 2059.490        | 0.000          | 2058.482       | D[24] |
| P  | 3  | 369.177         | 2560.462 | 2544.463        | 0.000          | 2543.456       | P[23] |
| A  | 4  | 440.214         | 2463.429 | 2447.411        | 0.000          | 2446.403       | A[22] |
| K  | 5  | 508.209         | 2392.392 | 2376.373        | 2377.381       | 2375.366       | K[21] |
| S  | 6  | <b>655.241</b>  | 2264.297 | 2248.279        | 2249.280       | 2247.271       | S[20] |
| A  | 7  | 729.278         | 2177.265 | 2161.247        | 2162.254       | 2160.236       | A[19] |
| P  | 8  | <b>823.431</b>  | 2106.228 | 2090.209        | 2091.217       | 2089.202       | P[18] |
| A  | 9  | 894.468         | 2029.175 | 1993.157        | 1994.164       | 1992.149       | A[17] |
| P  | 10 | <b>991.521</b>  | 1938.138 | 1922.120        | 1923.127       | 1921.112       | P[16] |
| K  | 11 | <b>1119.616</b> | 1841.085 | <b>1825.067</b> | 1826.075       | 1824.059       | K[15] |
| K  | 12 | 1289.721        | 1712.993 | <b>1696.972</b> | 1697.980       | 1695.964       | K[14] |
| G  | 13 | 1360.743        | 1542.885 | 1526.866        | 1527.874       | 1525.858       | G[13] |
| S  | 14 | <b>1433.775</b> | 1485.864 | 1469.845        | 1470.853       | 1468.837       | S[12] |
| K  | 15 | 1503.880        | 1398.831 | 1382.813        | 1383.821       | 1381.805       | K[11] |
| K  | 16 | 1773.986        | 1228.726 | <b>1212.707</b> | 1213.715       | 1211.699       | K[10] |
| A  | 17 | 1845.023        | 1058.620 | <b>1042.602</b> | 1043.610       | 1041.594       | A[9]  |
| V  | 18 | 1944.091        | 987.583  | 971.565         | <b>972.572</b> | 970.557        | V[8]  |
| T  | 19 | 2045.139        | 888.515  | 872.496         | 873.504        | <b>871.488</b> | T[7]  |
| K  | 20 | 2215.244        | 787.407  | <b>771.449</b>  | 772.456        | 770.441        | K[6]  |
| V  | 21 | 2314.313        | 617.362  | <b>601.343</b>  | 602.351        | 600.335        | V[5]  |
| Q  | 22 | 2442.371        | 518.293  | <b>502.275</b>  | <b>503.282</b> | 501.267        | Q[4]  |
| K  | 23 | 2570.466        | 390.235  | <b>374.216</b>  | 375.224        | 373.208        | K[3]  |
| K  | 24 | 2698.561        | 262.140  | 246.121         | 247.129        | 245.113        | K[2]  |
| D  | 25 | 2813.588        | 134.045  | 118.026         | 119.034        | 117.018        | D[1]  |

# sp | Q64525 | H2B2B\_MOUSE

[Acetyl]PDKAKSAPAPKK<sup>Acetyl</sup><sub>42.01</sub> GSK<sup>Acetyl</sup><sub>42.01</sub> K<sup>Acetyl</sup><sub>42.01</sub> AVTK<sup>Acetyl</sup><sub>42.01</sub> VQKKD

- ▶ fragmentation table for charge state 2+
- ▶ specType=etd
- ▶ score=44.11
- ▶ F113278.dat
- ▶ query=q59571.p1
- ▶ precursor=704.398620
- ▶ chargePrecursor=4
- ▶ itol=0.5

| AA |    | c               | y               | x+1             | x+2            | z               | AA    |
|----|----|-----------------|-----------------|-----------------|----------------|-----------------|-------|
| P  | 1  | 79.652          | <b>1407.790</b> | <b>1399.780</b> | 0.504          | <b>1399.277</b> | P[25] |
| D  | 3  | 136.566         | 1338.295        | <b>1330.249</b> | 0.504          | 1329.743        | D[24] |
| P  | 3  | 185.092         | 1280.745        | 1272.735        | 0.504          | 1272.231        | P[23] |
| A  | 4  | 220.611         | 1232.218        | 1224.209        | 0.504          | 1223.705        | A[22] |
| K  | 5  | 264.658         | 1196.707        | 1188.699        | 1189.194       | 1188.189        | K[21] |
| S  | 6  | 328.174         | 1132.652        | 1124.643        | 1125.147       | 1124.139        | S[20] |
| A  | 7  | 363.693         | 1089.136        | <b>1081.127</b> | 1081.631       | <b>1080.623</b> | A[19] |
| P  | 8  | 412.219         | 1053.618        | 1045.609        | 1046.113       | 1045.104        | P[18] |
| A  | 9  | 447.738         | 1005.092        | <b>997.082</b>  | <b>997.586</b> | 996.578         | A[17] |
| P  | 10 | 496.264         | 969.573         | 961.563         | 962.067        | 961.059         | P[16] |
| K  | 11 | 560.311         | 921.046         | <b>913.037</b>  | 913.541        | <b>912.533</b>  | K[15] |
| K  | 12 | 645.364         | 856.097         | <b>848.990</b>  | <b>849.493</b> | <b>848.486</b>  | K[14] |
| G  | 13 | 673.375         | <b>771.306</b>  | 763.297         | 763.801        | 762.793         | G[13] |
| S  | 14 | <b>717.391</b>  | 743.439         | <b>735.426</b>  | <b>735.930</b> | 734.922         | S[12] |
| K  | 15 | <b>802.444</b>  | 699.910         | <b>691.910</b>  | <b>692.414</b> | 691.406         | K[11] |
| K  | 16 | <b>887.497</b>  | 614.867         | <b>606.857</b>  | <b>607.361</b> | 606.353         | K[10] |
| A  | 17 | 923.015         | 529.814         | 521.804         | 522.308        | 521.301         | A[9]  |
| V  | 18 | <b>972.549</b>  | 494.295         | 486.285         | 486.790        | 485.782         | V[8]  |
| T  | 19 | <b>1023.073</b> | 444.761         | 436.752         | 437.256        | 436.248         | T[7]  |
| K  | 20 | 1108.598        | 394.237         | 386.228         | 386.732        | 385.725         | K[6]  |
| V  | 21 | <b>1157.660</b> | 309.184         | 301.175         | 301.679        | 300.671         | V[5]  |
| Q  | 22 | <b>1221.689</b> | 259.650         | 251.641         | 252.145        | 251.137         | Q[4]  |
| K  | 23 | <b>1285.737</b> | 195.621         | 187.612         | 188.116        | 187.109         | K[3]  |
| K  | 24 | 1349.784        | 131.574         | 123.565         | 124.069        | 123.060         | K[2]  |
| D  | 25 | 1407.298        | 67.528          | 59.517          | 60.021         | 59.013          | D[1]  |

# sp | Q64525 | H2B2B\_MOUSE

[Acetyl]PDKSAKAPAPKK<sup>Acetyl</sup><sub>42.01</sub> GSK<sup>Acetyl</sup><sub>42.01</sub> K<sup>Acetyl</sup><sub>42.01</sub> AVTK<sup>Acetyl</sup><sub>42.01</sub> VQKKD

- ▶ fragmentation table for charge state 3+
- ▶ specType=etd
- ▶ score=44.11
- ▶ F113278.dat
- ▶ query=q59571.p1
- ▶ precursor=704.398620
- ▶ chargePrecursor=4
- ▶ itol=0.5

| AA    | c              | y              | z+1            | z+2     | z              | AA    |
|-------|----------------|----------------|----------------|---------|----------------|-------|
| P[1]  | 53.037         | <b>938.062</b> | 933.523        | 0.672   | 933.187        | P[25] |
| D[2]  | 91.380         | 892.508        | <b>887.168</b> | 0.672   | 886.832        | D[24] |
| P[3]  | 123.730        | <b>854.166</b> | <b>848.826</b> | 0.672   | <b>848.490</b> | P[23] |
| A[4]  | 147.410        | 821.815        | 816.475        | 0.672   | 816.139        | A[22] |
| K[5]  | 190.108        | 798.136        | 792.796        | 793.132 | 792.460        | K[21] |
| S[6]  | 219.119        | 755.437        | 750.098        | 750.434 | 749.762        | S[20] |
| A[7]  | 242.798        | 726.427        | 721.087        | 721.423 | 720.751        | A[19] |
| P[8]  | 275.148        | 702.748        | 697.408        | 697.744 | 697.072        | P[18] |
| A[9]  | 298.828        | 670.397        | 665.057        | 665.393 | 664.721        | A[17] |
| P[10] | 331.178        | 646.718        | 641.378        | 641.714 | 641.042        | P[16] |
| K[11] | <b>373.877</b> | 614.367        | 609.027        | 609.363 | 608.691        | K[15] |
| K[12] | 430.579        | 571.668        | 566.328        | 566.665 | 565.993        | K[14] |
| G[13] | 449.586        | 514.967        | 509.627        | 509.963 | 509.291        | G[13] |
| S[14] | 478.596        | 495.959        | 490.620        | 490.956 | 490.284        | S[12] |
| K[15] | 535.298        | 466.949        | 461.609        | 461.945 | 461.273        | K[11] |
| K[16] | 592.000        | 410.247        | 404.907        | 405.243 | 404.571        | K[10] |
| A[17] | 615.679        | 351.545        | 346.205        | 346.541 | 345.869        | A[9]  |
| V[18] | 648.702        | 329.866        | 324.526        | 324.862 | 324.190        | V[8]  |
| T[19] | 682.985        | 296.843        | 291.504        | 291.840 | 291.168        | T[7]  |
| K[20] | 739.086        | 263.161        | 257.821        | 258.157 | 257.485        | K[6]  |
| V[21] | <b>772.109</b> | 206.459        | 201.119        | 201.455 | 200.783        | V[5]  |
| Q[22] | 814.795        | 173.436        | 168.096        | 168.432 | 167.760        | Q[4]  |
| K[23] | 857.494        | 130.750        | 125.410        | 125.746 | 125.074        | K[3]  |
| K[24] | <b>900.192</b> | 88.051         | 82.712         | 83.048  | 82.376         | K[2]  |
| D[25] | <b>938.534</b> | 45.353         | 40.014         | 40.349  | 39.678         | D[1]  |



# sp | Q9D2U9 | H2B3A\_MOUSE

PEPSRSTPAPKK <sup>Acetyl</sup>42.01 GSK <sup>Acetyl</sup>42.01 K <sup>Acetyl</sup>42.01 AITK <sup>Acetyl</sup>42.01 AQQKD

- ▶ fragmentation table for charge state 1+
- ▶ specType=etd
- ▶ score=69.04
- ▶ F113278.dat
- ▶ query=q59873.p1
- ▶ precursor=570.120090
- ▶ chargePrecursor=5
- ▶ itol=0.5

| AA  | c               | y              | z+1             | z+2             | z               | AA  |
|-----|-----------------|----------------|-----------------|-----------------|-----------------|-----|
| P1  | 115.067         | 2646.572       | 2830.555        | 0.000           | 2829.547        | P25 |
| E2  | 244.229         | 2749.324       | 2733.362        | 0.000           | 2732.496        | E24 |
| P3  | 341.182         | 2620.476       | 2604.459        | 0.000           | 2603.452        | P23 |
| S4  | <b>428.214</b>  | 2621.425       | 2607.407        | 0.000           | 2606.399        | S22 |
| R5  | <b>504.315</b>  | 2436.393       | 2420.375        | 2421.392        | 2419.367        | R21 |
| S6  | <b>671.347</b>  | 2280.292       | 2264.273        | 2265.281        | 2263.266        | S20 |
| T7  | 772.395         | 2193.280       | 2177.261        | 2178.249        | 2176.234        | T19 |
| P8  | 869.448         | 2092.212       | 2076.194        | 2077.202        | 2075.186        | P18 |
| A9  | 960.485         | 1995.160       | 1979.141        | <b>1980.149</b> | 1978.133        | A17 |
| P10 | <b>1037.537</b> | 1924.123       | 1908.104        | 1909.112        | 1907.096        | P16 |
| K11 | <b>1165.632</b> | 1827.070       | 1811.051        | 1812.059        | 1810.043        | K15 |
| K12 | 1335.736        | 1698.975       | <b>1682.956</b> | 1683.964        | 1681.948        | K14 |
| Q13 | 1392.199        | 1520.869       | 1512.881        | <b>1513.856</b> | 1511.841        | Q12 |
| S14 | 1479.193        | 1471.846       | <b>1455.829</b> | 1456.837        | 1454.821        | S12 |
| K15 | 1649.897        | 1384.819       | 1368.797        | 1369.805        | <b>1367.789</b> | K11 |
| K16 | 1820.002        | 1214.710       | 1198.692        | <b>1199.699</b> | 1197.684        | K10 |
| A17 | 1891.040        | 1044.605       | <b>1028.586</b> | 1029.594        | 1027.578        | A9  |
| T18 | 2004.124        | 973.568        | 957.549         | 958.557         | 956.541         | T8  |
| T19 | 2105.171        | 809.465        | 844.462         | 845.473         | 843.457         | T7  |
| K20 | 2275.277        | <b>759.436</b> | <b>743.417</b>  | <b>744.425</b>  | 742.409         | K9  |
| A21 | 2346.314        | 589.130        | <b>573.312</b>  | <b>574.320</b>  | 572.304         | A5  |
| Q22 | 2474.373        | 518.203        | <b>502.275</b>  | 503.282         | 501.267         | Q4  |
| K23 | 2602.468        | 400.235        | <b>374.216</b>  | <b>375.224</b>  | 373.208         | K3  |
| K24 | 2730.562        | 362.140        | <b>246.121</b>  | 247.129         | 245.113         | K2  |
| E25 | 2845.589        | 134.045        | 118.028         | 119.034         | 117.018         | E1  |

# sp | Q9D2U9 | H2B3A\_MOUSE

PEPSRSTPAPKK <sup>Acetyl</sup>42.01 GSK <sup>Acetyl</sup>42.01 K <sup>Acetyl</sup>42.01 AITK <sup>Acetyl</sup>42.01 AQKKD

- ▶ fragmentation table for charge state 2+
- ▶ specType=etd
- ▶ score=69.04
- ▶ F113278.dat
- ▶ query=q59873.p1
- ▶ precursor=570.120090
- ▶ chargePrecursor=5
- ▶ itol=0.5

| AA |    | c               | y               | z+1             | z+2             | z               | AA    |
|----|----|-----------------|-----------------|-----------------|-----------------|-----------------|-------|
| P  | 1  | 58.047          | 1423.790        | <b>1415.781</b> | 0.504           | 1415.277        | P[25] |
| E  | 2  | 122.588         | 1379.264        | 1367.263        | 0.504           | 1369.751        | E[24] |
| F  | 3  | 171.096         | 1310.743        | 1303.733        | 0.504           | <b>1302.229</b> | F[23] |
| S  | 4  | 214.611         | 1262.218        | 1254.207        | 0.504           | 1253.703        | S[22] |
| R  | 5  | 262.681         | 1218.700        | 1210.681        | <b>1211.195</b> | 1210.187        | R[21] |
| S  | 6  | 336.177         | <b>1140.650</b> | 1132.640        | <b>1133.144</b> | 1132.130        | S[20] |
| T  | 7  | 389.704         | 1097.134        | 1089.124        | <b>1089.628</b> | 1088.620        | T[19] |
| F  | 8  | <b>435.227</b>  | 1046.610        | 1038.601        | 1039.104        | 1038.097        | F[18] |
| A  | 9  | 470.748         | 998.083         | <b>990.074</b>  | <b>990.578</b>  | 989.570         | A[17] |
| P  | 10 | <b>519.272</b>  | 962.565         | 954.556         | 955.059         | 954.052         | P[16] |
| K  | 11 | <b>563.320</b>  | 914.039         | <b>906.029</b>  | <b>906.533</b>  | 905.525         | K[15] |
| K  | 12 | <b>668.373</b>  | 849.991         | <b>841.982</b>  | <b>842.486</b>  | 841.478         | K[14] |
| C  | 13 | 697.913         | 784.935         | <b>776.929</b>  | <b>777.433</b>  | 776.425         | C[13] |
| S  | 14 | <b>740.399</b>  | <b>736.428</b>  | <b>728.418</b>  | <b>728.922</b>  | 727.914         | S[12] |
| K  | 15 | <b>825.452</b>  | <b>692.912</b>  | <b>684.902</b>  | <b>685.406</b>  | <b>684.398</b>  | K[11] |
| K  | 16 | <b>910.505</b>  | <b>607.859</b>  | <b>599.849</b>  | <b>600.353</b>  | 599.346         | K[10] |
| A  | 17 | 946.021         | 522.806         | <b>514.797</b>  | <b>515.301</b>  | 514.293         | A[9]  |
| I  | 18 | <b>1002.565</b> | 487.287         | 479.278         | 479.782         | 478.774         | I[8]  |
| T  | 19 | <b>1053.689</b> | 438.745         | <b>422.736</b>  | <b>423.240</b>  | 422.232         | T[7]  |
| K  | 20 | 1138.142        | 380.222         | <b>372.212</b>  | <b>372.716</b>  | 371.708         | K[6]  |
| A  | 21 | <b>1173.661</b> | 295.169         | 287.159         | 287.663         | 286.656         | A[5]  |
| Q  | 22 | 1237.690        | 239.656         | 231.641         | 232.145         | 231.137         | Q[4]  |
| K  | 23 | <b>1301.737</b> | 195.621         | 187.612         | 188.116         | 187.108         | K[3]  |
| K  | 24 | 1385.785        | 131.374         | 123.364         | 124.868         | 123.860         | K[2]  |
| D  | 25 | 1423.236        | 67.526          | 59.517          | 60.021          | 59.013          | D[1]  |

# sp | Q9D2U9 | H2B3A\_MOUSE

PEPSRSTPAPKK Acetyl 42.01 GSK Acetyl 42.01 K Acetyl 42.01 AITK Acetyl 42.01 AQKKD

- ▶ fragmentation table for charge state 3+
- ▶ specType=etd
- ▶ score=69.04
- ▶ F113278.dat
- ▶ query=q59873.p1
- ▶ precursor=570.120090
- ▶ chargePrecursor=5
- ▶ itol=0.5

| AA    | c              | y              | z+1            | z+2            | z              | AA    |
|-------|----------------|----------------|----------------|----------------|----------------|-------|
| P[1]  | 38.034         | 949.529        | 944.199        | 0.672          | 943.854        | P[25] |
| E[2]  | 82.048         | <b>917.178</b> | <b>911.839</b> | 0.672          | <b>911.503</b> | E[24] |
| P[3]  | 114.399        | 874.164        | <b>868.825</b> | 0.672          | <b>868.489</b> | P[23] |
| S[4]  | 143.410        | <b>841.813</b> | 839.474        | 0.672          | 836.138        | S[22] |
| K[5]  | 195.443        | 812.903        | <b>807.463</b> | <b>807.799</b> | 807.127        | K[21] |
| S[6]  | 224.454        | <b>760.769</b> | <b>755.429</b> | <b>755.765</b> | <b>755.093</b> | S[20] |
| T[7]  | 258.136        | 731.759        | <b>726.419</b> | <b>726.755</b> | 726.083        | T[19] |
| P[8]  | 290.487        | 698.075        | <b>692.736</b> | <b>693.072</b> | 692.403        | P[18] |
| A[9]  | 314.166        | 665.725        | 660.385        | 660.721        | 660.049        | A[17] |
| P[10] | 346.517        | 642.048        | 636.708        | 637.042        | 636.370        | P[16] |
| K[11] | 389.216        | 609.695        | 604.355        | 604.691        | 604.019        | K[15] |
| K[12] | 445.917        | 566.996        | 561.657        | 561.993        | 561.321        | K[14] |
| G[13] | 464.925        | 510.295        | 504.955        | 505.291        | 504.619        | G[13] |
| S[14] | 493.935        | 491.287        | 485.948        | 486.284        | 485.612        | S[12] |
| K[15] | 550.937        | 462.277        | 456.937        | 457.273        | 456.601        | K[11] |
| K[16] | <b>607.339</b> | 408.375        | 403.035        | 403.371        | 399.999        | K[10] |
| A[17] | <b>631.018</b> | 348.873        | 343.533        | 343.869        | 343.198        | A[9]  |
| I[18] | <b>668.713</b> | 325.194        | 319.854        | 320.190        | 319.519        | I[8]  |
| T[19] | <b>702.395</b> | 287.499        | 282.160        | 282.496        | 281.824        | T[7]  |
| K[20] | 759.097        | 253.817        | 248.477        | 248.813        | 248.141        | K[6]  |
| A[21] | <b>782.776</b> | 197.115        | 191.775        | 192.111        | 191.439        | A[5]  |
| Q[22] | <b>825.462</b> | 173.436        | 168.096        | 168.432        | 167.760        | Q[4]  |
| K[23] | <b>868.161</b> | 130.750        | 125.410        | 125.746        | 125.074        | K[3]  |
| K[24] | <b>910.859</b> | 88.051         | 82.712         | 83.048         | 82.376         | K[2]  |
| D[25] | 949.201        | 45.353         | 40.014         | 40.349         | 39.678         | D[1]  |

# sp | Q9D2U9 | H2B3A\_MOUSE

PEPSRSTPAPKK Acetyl 42.01 GSK Acetyl 42.01 K Acetyl 42.01 AITK Acetyl 42.01 AQKKD

- ▶ fragmentation table for charge state 4+
- ▶ specType=etd
- ▶ score=69.04
- ▶ F113278.dat
- ▶ query=q59873.p1
- ▶ precursor=570.120090
- ▶ chargePrecursor=5
- ▶ itol=0.5

| AA    | c              | y              | z+1            | z+2            | z              | AA    |
|-------|----------------|----------------|----------------|----------------|----------------|-------|
| P[1]  | 29.527         | <b>712.399</b> | <b>708.394</b> | 0.755          | <b>708.142</b> | P[25] |
| E[2]  | 61.798         | <b>608.136</b> | <b>604.131</b> | 0.755          | <b>603.879</b> | E[24] |
| P[3]  | 86.051         | 655.875        | 651.870        | 0.755          | 651.618        | P[23] |
| S[4]  | 107.809        | <b>631.612</b> | 627.607        | 0.755          | 627.355        | S[22] |
| K[5]  | 146.834        | 659.854        | 655.849        | 606.101        | 605.597        | K[21] |
| S[6]  | 188.392        | 670.329        | 566.323        | 567.076        | 566.372        | S[20] |
| T[7]  | 193.054        | 548.070        | 543.060        | 545.318        | 544.814        | T[19] |
| P[8]  | 218.117        | 523.859        | <b>519.804</b> | <b>520.056</b> | <b>519.552</b> | P[18] |
| A[9]  | 235.877        | 499.545        | 495.541        | 495.793        | 495.289        | A[17] |
| P[10] | 260.140        | 481.786        | 477.781        | 478.033        | 477.529        | P[16] |
| K[11] | 292.164        | 457.523        | 453.518        | 453.770        | 453.266        | K[15] |
| K[12] | 334.690        | 425.499        | 421.494        | 421.746        | 421.243        | K[14] |
| G[13] | 348.945        | 382.973        | 378.968        | 379.220        | 378.716        | G[13] |
| S[14] | 370.703        | 368.717        | 364.713        | 364.965        | 364.461        | S[12] |
| K[15] | 413.230        | 346.955        | 342.950        | 343.202        | 342.703        | K[11] |
| K[16] | 455.756        | 304.431        | 300.426        | 300.680        | 300.176        | K[10] |
| A[17] | 473.515        | 261.907        | 257.902        | 258.154        | 257.650        | A[9]  |
| I[18] | <b>501.786</b> | 244.147        | 240.143        | 240.395        | 239.891        | I[8]  |
| T[19] | 527.048        | 215.876        | 211.872        | 212.124        | 211.620        | T[7]  |
| K[20] | 569.575        | 190.614        | 186.610        | 186.862        | 186.358        | K[6]  |
| A[21] | 587.334        | 148.088        | 144.083        | 144.335        | 143.831        | A[5]  |
| Q[22] | 619.349        | 130.329        | 126.324        | 126.576        | 126.072        | Q[4]  |
| K[23] | 651.372        | 98.314         | 94.309         | 94.561         | 94.057         | K[3]  |
| K[24] | 683.396        | 66.290         | 62.285         | 62.538         | 62.034         | K[2]  |
| D[25] | 712.153        | 34.267         | 30.263         | 30.514         | 30.010         | D[1]  |





# sp | Q9D2U9 | H2B3A\_MOUSE

PEPSRSTPAPKK <sup>Acetyl</sup>42.01 GSK <sup>Acetyl</sup>42.01 K <sup>Acetyl</sup>42.01 AITK <sup>Acetyl</sup>42.01 AQQKD

- ▶ fragmentation table for charge state 1+
- ▶ specType=etd
- ▶ score=61.78
- ▶ F113278.dat
- ▶ query=q59875.p1
- ▶ precursor=712.398650
- ▶ chargePrecursor=4
- ▶ itol=0.5

| AA |    | c               | y        | z+1             | z+2             | z               | AA    |
|----|----|-----------------|----------|-----------------|-----------------|-----------------|-------|
| P  | 1  | 115.067         | 2646.573 | 2830.555        | 0.000           | 2829.547        | P[25] |
| E  | 2  | 244.229         | 2749.324 | 2733.362        | 0.000           | 2732.496        | E[24] |
| P  | 3  | 341.182         | 2620.476 | 2604.459        | 0.000           | 2603.452        | P[23] |
| S  | 4  | <b>428.214</b>  | 2621.425 | 2607.407        | 0.000           | 2606.399        | S[22] |
| R  | 5  | <b>504.315</b>  | 2436.393 | 2420.375        | 2421.382        | 2419.367        | R[21] |
| S  | 6  | <b>671.347</b>  | 2380.292 | 2364.273        | 2265.281        | 2263.266        | S[20] |
| T  | 7  | 717.305         | 2193.280 | 2177.241        | 2178.249        | 2176.234        | T[19] |
| F  | 8  | <b>809.448</b>  | 2092.212 | 2076.194        | 2077.202        | 2075.186        | F[18] |
| A  | 9  | 960.485         | 1995.160 | 1979.141        | 1980.149        | 1978.133        | A[17] |
| P  | 10 | <b>1037.537</b> | 1924.123 | 1908.104        | 1909.112        | 1907.096        | P[16] |
| K  | 11 | <b>1165.632</b> | 1827.070 | 1811.051        | <b>1812.059</b> | <b>1810.043</b> | K[15] |
| K  | 12 | <b>1335.738</b> | 1698.975 | 1682.956        | <b>1683.964</b> | 1681.948        | K[14] |
| Q  | 13 | 1392.799        | 1529.869 | 1512.850        | 1513.858        | 1511.843        | Q[13] |
| S  | 14 | 1478.793        | 1471.846 | 1455.829        | 1456.837        | 1454.821        | S[12] |
| K  | 15 | <b>1649.897</b> | 1384.819 | 1368.797        | 1369.805        | <b>1367.789</b> | K[11] |
| K  | 16 | 1820.002        | 1214.710 | <b>1198.692</b> | 1199.699        | 1197.684        | K[10] |
| A  | 17 | 1891.040        | 1044.605 | 1028.589        | <b>1029.594</b> | 1027.578        | A[9]  |
| T  | 18 | 2004.124        | 973.568  | 957.549         | 958.557         | 956.541         | T[8]  |
| T  | 19 | 2105.171        | 806.464  | 844.443         | <b>845.473</b>  | 843.457         | T[7]  |
| K  | 20 | 2215.217        | 739.430  | <b>743.417</b>  | 744.425         | 742.409         | K[6]  |
| A  | 21 | 2346.314        | 589.330  | <b>573.312</b>  | <b>574.320</b>  | 572.304         | A[5]  |
| Q  | 22 | 2474.373        | 518.293  | <b>502.275</b>  | 503.282         | 501.267         | Q[4]  |
| K  | 23 | 2602.468        | 400.235  | <b>374.216</b>  | 375.224         | 373.209         | K[3]  |
| K  | 24 | 2730.562        | 362.140  | 246.121         | 247.129         | 245.113         | K[2]  |
| E  | 25 | 2845.589        | 134.045  | 118.028         | 119.034         | 117.018         | E[1]  |

# sp | Q9D2U9 | H2B3A\_MOUSE

PEPSRSTPAPKK <sup>Acetyl</sup>42.01 GSK <sup>Acetyl</sup>42.01 K <sup>Acetyl</sup>42.01 AITK <sup>Acetyl</sup>42.01 AQKKD

- ▶ fragmentation table for charge state 2+
- ▶ specType=etd
- ▶ score=61.78
- ▶ F113278.dat
- ▶ query=q59875.p1
- ▶ precursor=712.398650
- ▶ chargePrecursor=4
- ▶ itol=0.5

| AA |    | c               | y               | z+1             | z+2             | z               | AA    |
|----|----|-----------------|-----------------|-----------------|-----------------|-----------------|-------|
| P  | 1  | 58.047          | <b>1423.790</b> | 1415.781        | 0.504           | 1415.277        | P[25] |
| E  | 2  | 122.588         | 1217.295        | <b>1367.255</b> | 0.504           | 1366.751        | E[24] |
| F  | 3  | 171.095         | 1310.743        | 1302.733        | 0.504           | <b>1302.229</b> | F[23] |
| S  | 4  | 214.611         | 1262.218        | <b>1254.207</b> | 0.504           | 1253.703        | S[22] |
| R  | 5  | 262.681         | 1218.700        | <b>1210.691</b> | <b>1211.195</b> | 1210.187        | R[21] |
| S  | 6  | 336.177         | 1140.650        | <b>1132.640</b> | 1133.144        | <b>1132.136</b> | S[20] |
| T  | 7  | 366.704         | 1097.134        | 1089.124        | 1089.628        | <b>1088.620</b> | T[19] |
| F  | 8  | 435.227         | 1046.610        | 1038.603        | 1039.104        | 1038.597        | F[18] |
| A  | 9  | 470.748         | 998.083         | <b>990.074</b>  | <b>990.578</b>  | 989.571         | A[17] |
| P  | 10 | 519.272         | 962.565         | 954.556         | 955.059         | 954.052         | P[16] |
| K  | 11 | 561.320         | 914.039         | <b>906.029</b>  | <b>906.533</b>  | 905.525         | K[15] |
| K  | 12 | 668.373         | 849.991         | <b>841.982</b>  | <b>842.486</b>  | 841.479         | K[14] |
| C  | 13 | 698.903         | 804.938         | 797.927         | 797.433         | 796.425         | C[13] |
| S  | 14 | <b>740.399</b>  | 736.425         | <b>728.418</b>  | <b>728.922</b>  | 727.914         | S[12] |
| K  | 15 | <b>825.452</b>  | 692.012         | 684.902         | 685.406         | 684.398         | K[11] |
| K  | 16 | 910.505         | 607.859         | 599.848         | 600.351         | 599.344         | K[10] |
| A  | 17 | 946.021         | 522.806         | 514.797         | 515.301         | 514.293         | A[9]  |
| I  | 18 | <b>1002.565</b> | 487.287         | 479.278         | 479.782         | 478.774         | I[8]  |
| T  | 19 | <b>1053.069</b> | 438.745         | 429.736         | 429.240         | 428.232         | T[7]  |
| K  | 20 | <b>1138.142</b> | 380.222         | 372.212         | 372.716         | 371.708         | K[6]  |
| A  | 21 | <b>1173.601</b> | 295.169         | 287.159         | 287.663         | 286.656         | A[5]  |
| Q  | 22 | <b>1237.690</b> | 259.656         | 251.641         | 252.145         | 251.137         | Q[4]  |
| K  | 23 | <b>1301.737</b> | 195.621         | 187.612         | 188.116         | 187.108         | K[3]  |
| K  | 24 | 1385.789        | 131.574         | 123.564         | 124.068         | 123.060         | K[2]  |
| D  | 25 | 1423.236        | 67.526          | 59.517          | 60.021          | 59.013          | D[1]  |

# sp | Q9D2U9 | H2B3A\_MOUSE

PEPSRSTPAPKK Acetyl 42.01 GSK Acetyl 42.01 K Acetyl 42.01 AITK Acetyl 42.01 AQQKD

- ▶ fragmentation table for charge state 3+
- ▶ specType=etd
- ▶ score=61.78
- ▶ F113278.dat
- ▶ query=q59875.p1
- ▶ precursor=712.398650
- ▶ chargePrecursor=4
- ▶ itol=0.5

| AA    | c              | y              | z+1            | z+2     | z              | AA    |
|-------|----------------|----------------|----------------|---------|----------------|-------|
| P[5]  | 39.034         | <b>949.529</b> | <b>944.190</b> | 0.672   | <b>943.854</b> | P[25] |
| E[2]  | 82.048         | 917.178        | <b>911.839</b> | 0.672   | <b>911.503</b> | E[24] |
| P[3]  | 114.399        | 874.164        | 868.825        | 0.672   | 868.489        | P[23] |
| S[4]  | 143.410        | <b>841.813</b> | 836.474        | 0.672   | 836.138        | S[22] |
| K[5]  | 185.483        | 812.803        | 807.463        | 807.799 | 807.127        | K[21] |
| S[6]  | 224.454        | 780.769        | 775.429        | 775.765 | 775.093        | S[20] |
| T[7]  | 258.136        | 731.758        | 726.419        | 726.755 | 726.083        | T[19] |
| P[8]  | 290.487        | 698.078        | 692.738        | 693.072 | 692.403        | P[18] |
| A[9]  | 314.166        | 665.725        | 660.385        | 660.721 | 660.049        | A[17] |
| P[10] | 346.517        | 642.046        | 636.706        | 637.042 | 636.370        | P[16] |
| K[11] | 389.216        | 609.695        | 604.355        | 604.691 | 604.019        | K[15] |
| K[12] | 445.917        | 566.996        | 561.657        | 561.993 | 561.321        | K[14] |
| G[13] | 464.925        | 510.295        | 504.955        | 505.291 | 504.619        | G[13] |
| S[14] | 493.935        | 491.287        | 485.948        | 486.284 | 485.612        | S[12] |
| K[15] | 550.637        | 462.277        | 456.937        | 457.273 | 456.601        | K[11] |
| K[16] | 607.339        | 425.375        | 420.035        | 420.371 | 419.699        | K[10] |
| A[17] | 631.018        | 348.873        | 343.534        | 343.869 | 343.198        | A[9]  |
| T[18] | 658.713        | 325.194        | 319.855        | 320.190 | 319.519        | T[9]  |
| T[19] | 702.395        | 287.499        | 282.159        | 282.496 | 281.824        | T[7]  |
| K[20] | 759.097        | 253.817        | 248.477        | 248.813 | 248.141        | K[6]  |
| A[21] | 782.776        | 197.115        | 191.775        | 192.111 | 191.439        | A[5]  |
| Q[22] | <b>825.462</b> | 173.438        | 168.098        | 168.432 | 167.760        | Q[4]  |
| K[23] | 868.161        | 130.750        | 125.410        | 125.746 | 125.074        | K[3]  |
| K[24] | <b>910.859</b> | 88.051         | 82.712         | 83.048  | 82.376         | K[2]  |
| D[25] | 949.201        | 45.353         | 40.014         | 40.349  | 39.678         | D[1]  |

# sp | P70696 | H2B1A\_MOUSE

LAK<sup>Acetyl</sup> HAVSE  
42.01

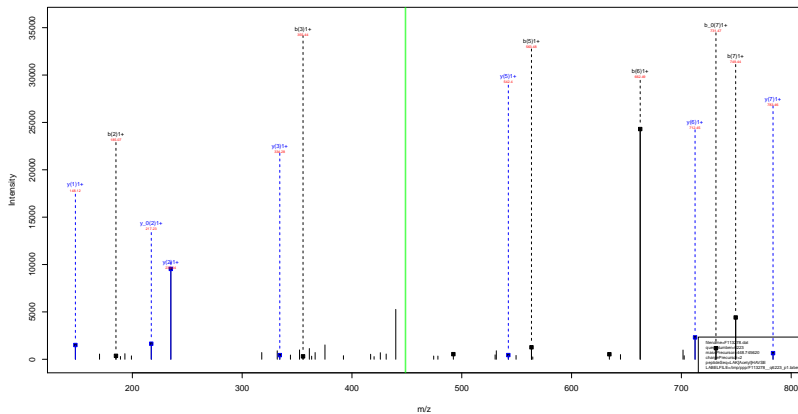

# sp | P70696 | H2B1A\_MOUSE

LAK<sup>Acetyl</sup> 42.01 HAVSE

- ▶ fragmentation table for charge state 1+
- ▶ specType=cid
- ▶ score=41.34
- ▶ F113278.dat
- ▶ query=q6223.p1
- ▶ precursor=448.745620
- ▶ chargePrecursor=2
- ▶ itol=0.5

| AA | a              | a*      | a,β     | b              | b*      | b,β            | y              | y*    | y,β            | AA |
|----|----------------|---------|---------|----------------|---------|----------------|----------------|-------|----------------|----|
| L1 | 86.298         | 0.000   | 0.000   | 114.293        | 0.000   | 0.000          | 488.483        | 0.000 | 0.000          | L1 |
| A1 | 157.134        | 0.000   | 0.000   | <b>185.128</b> | 0.000   | 0.000          | <b>783.400</b> | 0.000 | 0.000          | A1 |
| R1 | 327.230        | 100.213 | 0.000   | <b>355.234</b> | 108.207 | 0.000          | <b>712.302</b> | 0.000 | 0.000          | R1 |
| H1 | 404.298        | 447.271 | 0.000   | <b>492.293</b> | 475.264 | 0.000          | <b>542.257</b> | 0.000 | 0.000          | H1 |
| A1 | 535.232        | 518.209 | 0.000   | <b>563.300</b> | 546.203 | 0.000          | 495.200        | 0.000 | 0.000          | A1 |
| V1 | <b>624.404</b> | 617.377 | 0.000   | <b>662.390</b> | 645.373 | 0.000          | <b>334.181</b> | 0.000 | 0.000          | V1 |
| S1 | 721.430        | 704.409 | 701.425 | <b>749.430</b> | 732.404 | <b>731.420</b> | <b>235.092</b> | 0.000 | <b>217.082</b> | S1 |
| E1 | 850.478        | 833.459 | 834.466 | 878.473        | 861.446 | 860.459        | <b>148.060</b> | 0.000 | 130.050        | E1 |



# sp | P70696 | H2B1A\_MOUSE

LAK<sup>Acetyl</sup> 42.01 HAVSE

- ▶ fragmentation table for charge state 1+
- ▶ specType=etd
- ▶ score=30.87
- ▶ F113278.dat
- ▶ query=q6224.p1
- ▶ precursor=448.745620
- ▶ chargePrecursor=2
- ▶ itol=0.5

| AA |   | c              | y              | z+1            | z+2            | z              | AA |
|----|---|----------------|----------------|----------------|----------------|----------------|----|
| L  | 1 | 131.118        | <b>896.484</b> | <b>880.465</b> | 0.000          | 879.457        | L  |
| A  | 2 | 202.155        | 783.400        | <b>767.381</b> | 0.000          | <b>766.373</b> | A  |
| R  | 3 | 372.261        | 712.362        | <b>696.344</b> | 697.352        | 699.336        | R  |
| H  | 4 | <b>509.319</b> | 542.257        | <b>526.238</b> | <b>527.246</b> | 525.230        | H  |
| A  | 5 | <b>580.357</b> | 405.198        | 389.179        | 390.187        | 388.171        | A  |
| V  | 6 | <b>679.425</b> | 334.161        | 318.142        | 319.150        | 317.134        | V  |
| S  | 7 | <b>766.457</b> | 235.092        | 219.074        | 220.082        | 218.066        | S  |
| E  | 8 | 899.500        | 148.060        | 132.042        | 133.050        | 131.034        | E  |



# sp | Q6GSS7 | H2A2A\_MOUSE

LNKLLGK <sup>Dimethyl</sup>VTIAQGGVLPNIQAVLLPKKTE  
28.03

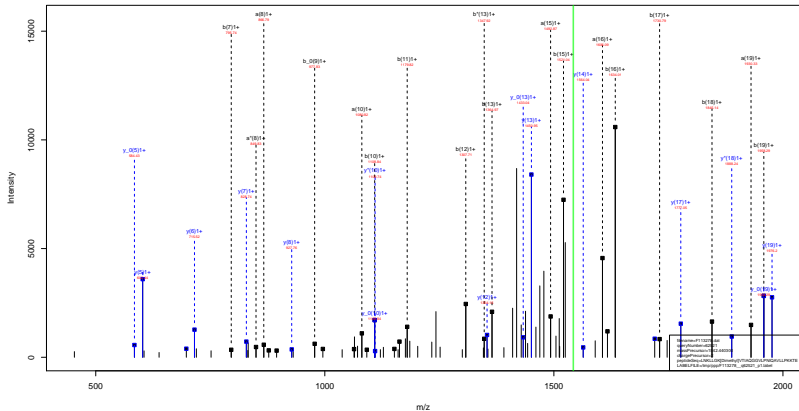

# sp | Q6GSS7 | H2A2A\_MOUSE

LNKLLGK <sup>Dimethyl</sup> <sub>28.03</sub> VTIAQGGVLPNIQAVLLPKKTE

- ▶ fragmentation table for charge state 1+
- ▶ specType=cid
- ▶ score=76.19
- ▶ F113278.dat
- ▶ query=q62521\_p1
- ▶ precursor=1542.440300
- ▶ chargePrecursor=2
- ▶ itol=0.5

| AA  | a   | a*  | a,0 | b   | b*   | b,0 | r | y*  | y,0 | AA   |
|-----|-----|-----|-----|-----|------|-----|---|-----|-----|------|
| L1  | 26  | 202 | 0   | 0   | 0    | 0   | 0 | 0   | 0   | L129 |
| N1  | 27  | 211 | 0   | 0   | 0    | 0   | 0 | 0   | 0   | N130 |
| K1  | 28  | 224 | 111 | 202 | 355  | 225 | 0 | 202 | 202 | K129 |
| L4  | 44  | 116 | 424 | 202 | 466  | 119 | 0 | 271 | 441 | L128 |
| L5  | 45  | 124 | 537 | 202 | 582  | 287 | 0 | 283 | 538 | L129 |
| G5  | 51  | 192 | 606 | 202 | 658  | 319 | 0 | 352 | 607 | G54  |
| K1  | 77  | 352 | 102 | 538 | 785  | 345 | 0 | 345 | 484 | K123 |
| V1  | 87  | 406 | 119 | 607 | 894  | 413 | 0 | 413 | 574 | V122 |
| L1  | 97  | 458 | 174 | 686 | 955  | 461 | 0 | 461 | 620 | L121 |
| I10 | 108 | 510 | 232 | 768 | 1108 | 519 | 0 | 519 | 678 | I120 |
| A11 | 115 | 527 | 254 | 814 | 1177 | 572 | 0 | 572 | 731 | A119 |
| G12 | 117 | 536 | 262 | 823 | 1187 | 581 | 0 | 581 | 740 | G120 |
| G13 | 118 | 545 | 270 | 832 | 1196 | 590 | 0 | 590 | 749 | G121 |
| G14 | 119 | 554 | 279 | 841 | 1205 | 599 | 0 | 599 | 758 | G122 |
| V15 | 142 | 657 | 378 | 943 | 1320 | 692 | 0 | 692 | 861 | V120 |
| L16 | 150 | 684 | 399 | 971 | 1358 | 720 | 0 | 720 | 889 | L124 |
| P17 | 151 | 694 | 408 | 980 | 1367 | 729 | 0 | 729 | 898 | P115 |
| N18 | 151 | 694 | 408 | 980 | 1367 | 729 | 0 | 729 | 898 | N120 |
| I19 | 153 | 702 | 416 | 989 | 1376 | 738 | 0 | 738 | 907 | I121 |
| G20 | 153 | 702 | 416 | 989 | 1376 | 738 | 0 | 738 | 907 | G119 |
| A21 | 153 | 702 | 416 | 989 | 1376 | 738 | 0 | 738 | 907 | A118 |
| V22 | 153 | 702 | 416 | 989 | 1376 | 738 | 0 | 738 | 907 | V118 |
| L23 | 153 | 702 | 416 | 989 | 1376 | 738 | 0 | 738 | 907 | L117 |
| F24 | 153 | 702 | 416 | 989 | 1376 | 738 | 0 | 738 | 907 | F118 |
| K25 | 153 | 702 | 416 | 989 | 1376 | 738 | 0 | 738 | 907 | K116 |
| K26 | 153 | 702 | 416 | 989 | 1376 | 738 | 0 | 738 | 907 | K14  |
| K27 | 153 | 702 | 416 | 989 | 1376 | 738 | 0 | 738 | 907 | K13  |
| L28 | 153 | 702 | 416 | 989 | 1376 | 738 | 0 | 738 | 907 | L12  |
| E29 | 153 | 702 | 416 | 989 | 1376 | 738 | 0 | 738 | 907 | E11  |

# sp | Q6GSS7 | H2A2A\_MOUSE

LNKLLGK<sup>Dimethyl</sup>VTIAQGGVLPNIQAVLLPKKTE  
28.03

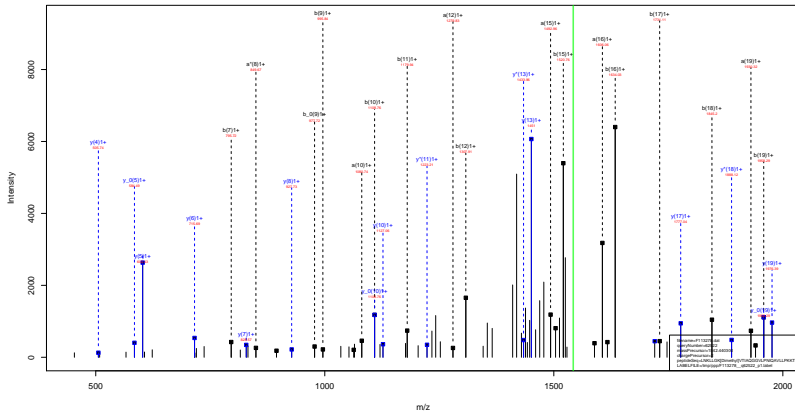

# sp | Q6GSS7 | H2A2A\_MOUSE

LNKLLGK <sup>Dimethyl</sup> <sub>28.03</sub> VTIAQGGVLPNIQAVLLPKKTE

- ▶ fragmentation table for charge state 1+
- ▶ specType=cid
- ▶ score=98.03
- ▶ F113278.dat
- ▶ query=q62522\_p1
- ▶ precursor=1542.440300
- ▶ chargePrecursor=2
- ▶ itol=0.5

| AA   | a    | a'  | a-D      | b        | b'       | b-D      | y        | y'       | y-D      | AA   |
|------|------|-----|----------|----------|----------|----------|----------|----------|----------|------|
| L1   | 36   | 600 | 0.000    | 0.000    | 114.000  | 0.000    | 0.000    | 360.000  | 0.000    | L129 |
| N1   | 200  | 174 | 163.113  | 0.000    | 240.134  | 211.000  | 0.000    | 287.000  | 240.134  | N221 |
| K1   | 708  | 174 | 511.262  | 0.000    | 355.214  | 326.000  | 0.000    | 355.214  | 317.141  | K221 |
| L4   | 441  | 418 | 424.202  | 0.000    | 469.113  | 442.000  | 0.000    | 2720.000 | 2711.041 | L128 |
| L13  | 204  | 407 | 337.200  | 0.000    | 382.200  | 353.000  | 0.000    | 382.200  | 343.000  | L124 |
| G1   | 311  | 424 | 314.307  | 0.000    | 329.412  | 324.300  | 0.000    | 2202.000 | 2193.471 | G124 |
| K1   | 707  | 600 | 600.000  | 0.000    | 705.540  | 728.510  | 0.000    | 2441.400 | 2432.454 | K122 |
| V1   | 688  | 614 | 640.592  | 0.000    | 694.613  | 677.500  | 0.000    | 2409.000 | 2402.100 | V122 |
| T1   | 397  | 600 | 492.600  | 0.000    | 525.601  | 518.600  | 0.000    | 2102.000 | 2111.200 | T122 |
| G13  | 1088 | 750 | 1081.144 | 1062.740 | 1108.740 | 1091.710 | 1050.100 | 3000.200 | 3009.210 | G120 |
| A11  | 1117 | 777 | 1114.701 | 1112.777 | 1179.770 | 1162.700 | 1101.710 | 1976.154 | 1958.141 | A119 |
| G12  | 1278 | 646 | 1262.610 | 1261.610 | 1301.641 | 1291.610 | 1101.111 | 1801.000 | 1800.000 | G119 |
| G15  | 1310 | 600 | 1310.000 | 1310.000 | 1375.000 | 1365.000 | 1100.000 | 1777.000 | 1776.000 | G117 |
| G14  | 1310 | 600 | 1310.000 | 1310.000 | 1375.000 | 1365.000 | 1101.010 | 1791.010 | 1790.010 | G116 |
| V15  | 1482 | 557 | 1476.010 | 1476.010 | 1528.952 | 1501.926 | 1301.940 | 1601.910 | 1600.910 | V115 |
| L16  | 1508 | 541 | 1500.015 | 1498.015 | 1634.036 | 1617.010 | 1410.000 | 1540.000 | 1540.000 | L114 |
| P17  | 1511 | 524 | 1505.000 | 1503.000 | 1710.000 | 1714.001 | 1711.010 | 1430.001 | 1431.010 | P113 |
| N18  | 1611 | 418 | 1600.011 | 1598.011 | 1845.132 | 1838.100 | 1601.010 | 1300.000 | 1300.000 | N112 |
| G19  | 1938 | 272 | 1931.100 | 1929.211 | 1958.210 | 1941.100 | 1900.200 | 1222.741 | 1221.701 | G111 |
| Q120 | 2058 | 281 | 2044.201 | 2042.201 | 2090.271 | 2082.240 | 2068.200 | 1126.681 | 1120.672 | Q110 |
| A111 | 2090 | 317 | 2076.010 | 2074.100 | 2119.101 | 2109.100 | 2090.100 | 800.000  | 800.000  | A110 |
| V122 | 2091 | 400 | 2011.000 | 2011.000 | 2170.000 | 2151.000 | 2010.000 | 627.500  | 627.500  | V110 |
| L123 | 2041 | 403 | 2034.401 | 2033.400 | 2090.404 | 2072.410 | 2051.400 | 628.510  | 611.490  | L117 |
| L124 | 2042 | 413 | 2030.010 | 2029.010 | 2080.000 | 2062.000 | 2042.010 | 715.400  | 698.400  | L116 |
| P121 | 2011 | 400 | 2011.000 | 2010.000 | 2061.000 | 2051.000 | 2001.000 | 602.501  | 584.500  | P110 |
| K126 | 2074 | 311 | 2062.010 | 2061.000 | 2107.000 | 2089.010 | 2080.000 | 505.200  | 488.200  | K114 |
| K127 | 2074 | 311 | 2062.010 | 2061.000 | 2107.000 | 2089.010 | 2080.000 | 505.200  | 488.200  | K113 |
| L128 | 2038 | 404 | 2031.401 | 2030.400 | 2078.410 | 2059.410 | 2010.000 | 401.000  | 391.000  | L112 |
| L129 | 2037 | 400 | 2030.000 | 2029.000 | 2069.000 | 2049.000 | 2010.000 | 300.000  | 290.000  | L111 |

# sp | Q6GSS7 | H2A2A\_MOUSE

LNKLLGK<sup>Dimethyl</sup>VTIAQGGVLPNIQAVLLPKKTE  
28.03

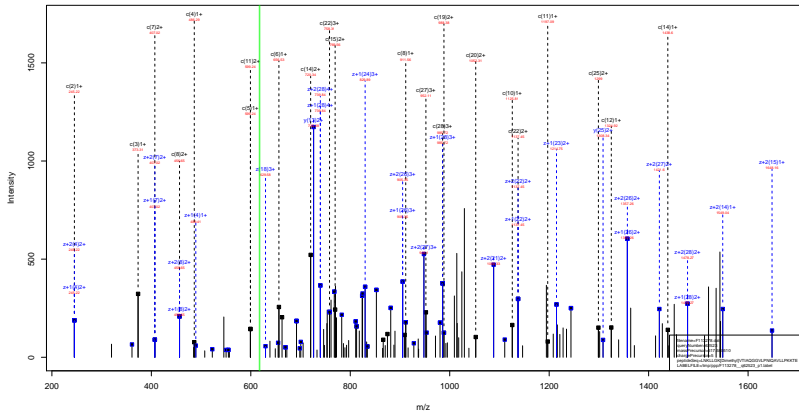

# sp | Q6GSS7 | H2A2A\_MOUSE

LNKLLGK <sup>Dimethyl</sup> <sub>28.03</sub> VTIAQGGVLPNIQAVLLPKKTE

- ▶ fragmentation table for charge state 1+
- ▶ specType=etd
- ▶ score=58.51
- ▶ F113278.dat
- ▶ query=q62523.p1
- ▶ precursor=617.580510
- ▶ chargePrecursor=5
- ▶ itol=0.5

| AA  | c               | y              | z+1             | z+2             | z              | AA   |
|-----|-----------------|----------------|-----------------|-----------------|----------------|------|
| L1  | 131.118         | 3083.892       | 3067.873        | 0.000           | 3066.895       | L129 |
| N2  | <b>245.161</b>  | 2970.838       | 2954.789        | 2955.797        | 2953.781       | N28  |
| K3  | <b>373.256</b>  | 2856.765       | 2840.746        | 2841.754        | 2839.738       | K27  |
| L4  | <b>486.340</b>  | 2728.670       | 2712.651        | 2713.659        | 2711.643       | L26  |
| L5  | <b>599.424</b>  | 2615.585       | 2599.567        | 2600.575        | 2598.560       | L25  |
| G6  | <b>656.445</b>  | 2502.502       | 2486.483        | 2487.491        | 2485.475       | G24  |
| K7  | <b>812.572</b>  | 2345.480       | 2429.462        | 2430.469        | 2428.454       | K23  |
| V8  | <b>911.640</b>  | 2288.354       | 2273.335        | 2274.343        | 2272.327       | V22  |
| T9  | 1017.688        | 2190.286       | 2174.267        | 2175.275        | 2173.259       | T21  |
| I10 | <b>1125.772</b> | 2089.238       | 2073.219        | 2074.227        | 2072.211       | I20  |
| A11 | <b>1196.809</b> | 1976.154       | 1960.135        | 1961.143        | 1959.127       | A19  |
| Q12 | <b>1324.867</b> | 1895.111       | 1889.093        | 1890.106        | 1888.090       | Q18  |
| G13 | 1381.889        | 1777.058       | 1761.039        | 1762.047        | 1760.032       | G17  |
| G14 | <b>1438.910</b> | 1720.937       | 1704.918        | 1705.926        | 1703.910       | G16  |
| V15 | 1537.879        | 1663.015       | 1646.997        | <b>1648.004</b> | 1645.989       | V15  |
| L16 | 1651.063        | 1563.947       | 1547.928        | <b>1548.936</b> | 1546.920       | L14  |
| F17 | 1748.116        | 1450.893       | 1434.864        | 1435.872        | 1433.856       | F13  |
| T18 | 1852.159        | 1383.810       | 1367.791        | 1368.799        | 1366.783       | T12  |
| I19 | 1975.243        | 1236.767       | 1223.748        | 1224.756        | 1222.741       | I11  |
| Q20 | 2103.301        | 1126.683       | <b>1110.664</b> | 1111.672        | 1109.656       | Q10  |
| A21 | 2174.336        | 998.624        | 982.606         | 983.614         | 981.598        | A9   |
| V22 | 2273.407        | <b>927.587</b> | <b>911.569</b>  | 912.576         | 910.561        | V8   |
| L23 | 2386.491        | 828.519        | <b>812.500</b>  | 813.508         | 811.492        | L7   |
| L24 | 2499.575        | 715.456        | 699.433         | <b>700.424</b>  | <b>696.408</b> | L6   |
| P25 | 2596.626        | 602.351        | 586.332         | 587.340         | 585.324        | P5   |
| K26 | 2724.723        | 505.298        | <b>489.279</b>  | 490.287         | 488.271        | K4   |
| K27 | 2852.816        | 377.203        | <b>361.184</b>  | 362.192         | 360.177        | K3   |
| T28 | 2953.895        | 249.138        | 233.089         | 234.097         | 232.082        | T2   |
| E29 | 3082.938        | 148.060        | 132.042         | 133.050         | 131.034        | E1   |

# sp | Q6GSS7 | H2A2A\_MOUSE

LNKLLGK <sup>Dimethyl</sup><sub>28.03</sub> VTIAQGGVLPNIQAVLLPKKTE

- ▶ fragmentation table for charge state 2+
- ▶ specType=etd
- ▶ score=58.51
- ▶ F113278.dat
- ▶ query=q62523.p1
- ▶ precursor=617.580510
- ▶ chargePrecursor=5
- ▶ itol=0.5

| AA  | c               | y               | z+1             | z+2             | z               | AA   |
|-----|-----------------|-----------------|-----------------|-----------------|-----------------|------|
| L1  | 66.053          | 1542.850        | 1534.440        | 9.504           | 1533.930        | L126 |
| N1  | 123.054         | 1485.905        | <b>1477.898</b> | <b>1478.402</b> | 1477.304        | N20  |
| K1  | 157.132         | 1428.886        | 1420.877        | <b>1421.381</b> | 1420.373        | K27  |
| L14 | 243.674         | 1364.839        | <b>1356.829</b> | <b>1357.333</b> | 1356.325        | L26  |
| L15 | 300.216         | <b>1308.297</b> | 1300.287        | 1299.791        | 1299.783        | L25  |
| G16 | 328.228         | 1251.795        | <b>1243.745</b> | <b>1244.249</b> | 1243.241        | G24  |
| K17 | <b>406.789</b>  | 1223.244        | <b>1215.234</b> | 1215.738        | <b>1214.731</b> | K23  |
| V18 | <b>456.324</b>  | 1145.181        | <b>1137.171</b> | <b>1137.675</b> | 1136.667        | V22  |
| T19 | 506.640         | 1095.646        | 1087.637        | <b>1088.141</b> | 1087.133        | T21  |
| T10 | 563.390         | 1045.123        | 1037.113        | 1037.617        | 1036.609        | T20  |
| A11 | <b>598.908</b>  | <b>980.581</b>  | <b>980.571</b>  | 981.075         | <b>980.067</b>  | A19  |
| G12 | <b>602.817</b>  | <b>953.062</b>  | 953.563         | 954.067         | 954.569         | G18  |
| G13 | <b>691.448</b>  | 899.033         | <b>881.023</b>  | <b>881.527</b>  | 880.519         | G17  |
| G14 | <b>719.959</b>  | 860.522         | <b>852.513</b>  | <b>853.017</b>  | 852.009         | G16  |
| V15 | <b>769.493</b>  | 832.011         | <b>824.002</b>  | <b>824.506</b>  | <b>823.498</b>  | V15  |
| L16 | 826.935         | <b>782.477</b>  | 774.468         | 774.972         | 773.964         | L14  |
| T17 | <b>874.561</b>  | <b>725.335</b>  | 717.325         | 717.829         | 717.325         | T13  |
| N18 | 911.553         | 677.820         | <b>669.399</b>  | <b>669.903</b>  | 668.895         | N12  |
| I19 | <b>988.125</b>  | 620.307         | 612.297         | 612.802         | 611.874         | I11  |
| Q20 | <b>1052.154</b> | 563.845         | 555.836         | 556.340         | <b>555.332</b>  | Q10  |
| A21 | 1087.673        | 499.816         | 491.807         | 492.310         | 491.303         | A10  |
| V22 | <b>1137.207</b> | 484.297         | <b>456.288</b>  | <b>456.792</b>  | 455.784         | V16  |
| L23 | 1163.159        | 414.763         | <b>406.754</b>  | <b>407.258</b>  | 406.250         | L17  |
| L24 | 1256.291        | 358.221         | 350.213         | 350.716         | 349.708         | L16  |
| P25 | <b>1298.817</b> | 301.679         | 293.670         | 294.174         | 293.166         | P15  |
| K26 | 1382.895        | 253.153         | <b>245.143</b>  | <b>245.647</b>  | 244.639         | K14  |
| K27 | 1426.912        | 189.105         | 181.096         | 181.600         | 180.592         | K13  |
| T28 | 1477.436        | 125.058         | 117.049         | 117.552         | 116.544         | T12  |
| E29 | 1541.958        | 74.534          | 66.524          | 67.028          | 66.021          | E11  |

# sp | Q6GSS7 | H2A2A\_MOUSE

LNKLLGK <sup>Dimethyl</sup> <sub>28.03</sub> VTIAQGGVLPNIQAVLLPKKTE

- ▶ fragmentation table for charge state 3+
- ▶ specType=etd
- ▶ score=58.51
- ▶ F113278.dat
- ▶ query=q62523.p1
- ▶ precursor=617.580510
- ▶ chargePrecursor=5
- ▶ itol=0.5

| AA |    | c              | y              | z+1            | z+2            | z              | AA  |
|----|----|----------------|----------------|----------------|----------------|----------------|-----|
| L  | 1  | 44.377         | 1028.035       | 1021.295       | 0.672          | 1022.960       | L29 |
| N  | 2  | 82.302         | 990.941        | <b>985.601</b> | <b>985.937</b> | <b>985.265</b> | N28 |
| K  | 3  | 125.090        | 952.905        | 947.567        | <b>947.923</b> | 947.251        | K27 |
| L  | 4  | 183.785        | 910.225        | <b>904.889</b> | <b>905.225</b> | 904.553        | L26 |
| L  | 5  | 230.479        | 872.531        | 867.194        | 867.530        | 866.858        | L25 |
| G  | 6  | 219.487        | <b>834.839</b> | <b>829.499</b> | <b>829.835</b> | 829.163        | G24 |
| K  | 7  | 271.529        | 815.832        | <b>810.492</b> | <b>810.828</b> | 810.156        | K23 |
| V  | 8  | 304.552        | 763.790        | <b>758.450</b> | <b>758.786</b> | <b>758.114</b> | V22 |
| Y  | 9  | 338.234        | 730.767        | 725.427        | 725.763        | 725.091        | Y21 |
| V  | 10 | 375.929        | 697.084        | <b>691.745</b> | <b>692.081</b> | <b>691.409</b> | V20 |
| A  | 11 | 369.608        | 659.305        | 654.050        | 654.386        | 653.718        | A19 |
| Q  | 12 | 442.294        | 636.710        | 630.371        | 630.707        | <b>630.035</b> | Q18 |
| G  | 13 | 461.301        | 593.024        | 587.685        | 588.021        | 587.349        | G17 |
| G  | 14 | 480.308        | 574.017        | 568.678        | 569.013        | 568.343        | G16 |
| V  | 15 | 513.331        | <b>555.010</b> | 549.670        | <b>550.006</b> | 549.334        | V15 |
| L  | 16 | 551.026        | 521.987        | 516.648        | 516.984        | 516.312        | L14 |
| P  | 17 | 583.377        | 484.202        | 478.953        | 479.289        | 478.617        | P13 |
| N  | 18 | 621.391        | 451.942        | 446.602        | 446.938        | 446.266        | N12 |
| T  | 19 | 659.086        | 413.927        | 408.588        | 408.924        | 408.252        | T11 |
| Q  | 20 | 701.772        | 376.231        | 370.893        | 371.229        | 370.557        | Q10 |
| A  | 21 | 725.451        | 333.545        | 328.207        | 328.543        | 327.871        | A9  |
| V  | 22 | <b>758.474</b> | 309.867        | 304.528        | 304.864        | 304.192        | V8  |
| L  | 23 | 796.168        | 276.844        | 271.505        | 271.841        | 271.169        | L7  |
| L  | 24 | <b>833.863</b> | 239.150        | 233.810        | 234.146        | 233.474        | L6  |
| P  | 25 | <b>866.214</b> | 201.455        | 196.116        | 196.451        | 195.780        | P5  |
| K  | 26 | <b>908.912</b> | 169.104        | 163.765        | 164.101        | 163.429        | K4  |
| K  | 27 | <b>951.611</b> | 126.805        | 121.466        | 121.802        | 121.130        | K3  |
| L  | 28 | <b>985.293</b> | 83.709         | 78.369         | 78.704         | 78.032         | L2  |
| E  | 29 | 1028.307       | 50.025         | 44.685         | 45.021         | 44.349         | E1  |



# sp | Q6GSS7 | H2A2A\_MOUSE

LNKLLGK <sup>Dimethyl</sup><sub>28.03</sub> VTIAQGGVLPNIQAVLLPKKTE

- ▶ fragmentation table for charge state 4+
- ▶ specType=etd
- ▶ score=58.51
- ▶ F113278.dat
- ▶ query=q62523.p1
- ▶ precursor=617.580510
- ▶ chargePrecursor=5
- ▶ itol=0.5

| AA    | c       | y              | z+1            | z+2            | z              | AA    |
|-------|---------|----------------|----------------|----------------|----------------|-------|
| L[3]  | 33.535  | 771.748        | <b>767.724</b> | 0.765          | <b>767.472</b> | L[29] |
| W[2]  | 62.046  | 783.457        | <b>739.453</b> | <b>739.705</b> | 739.201        | K[29] |
| K[3]  | 94.069  | 714.947        | 710.947        | 711.104        | 710.690        | K[27] |
| L[4]  | 122.340 | 682.923        | 678.918        | 679.170        | 678.666        | L[26] |
| L[5]  | 150.611 | <b>654.652</b> | 650.647        | 650.899        | 650.395        | L[25] |
| G[6]  | 164.867 | 626.381        | 622.376        | 622.628        | 622.124        | G[24] |
| K[7]  | 203.898 | 612.126        | 608.121        | 608.373        | 607.869        | K[23] |
| V[8]  | 228.665 | 573.094        | 569.089        | 569.341        | 568.837        | V[22] |
| T[9]  | 253.927 | 548.327        | 544.322        | 544.574        | 544.070        | T[21] |
| T[10] | 282.158 | <b>523.065</b> | 519.060        | 519.312        | 518.808        | L[20] |
| A[11] | 299.958 | 494.794        | 490.789        | 491.041        | 490.537        | A[19] |
| Q[12] | 331.972 | 477.036        | 473.030        | 473.282        | 472.778        | Q[18] |
| G[13] | 346.228 | 445.020        | 441.015        | 441.267        | 440.763        | G[17] |
| G[14] | 360.483 | 430.765        | 426.760        | 427.012        | 426.508        | G[16] |
| V[15] | 385.250 | 416.509        | 412.505        | 412.757        | 412.253        | V[15] |
| L[16] | 413.521 | 391.742        | 387.737        | 387.989        | 387.486        | L[14] |
| P[17] | 437.784 | 363.471        | 359.466        | 359.718        | 359.215        | P[13] |
| N[18] | 466.295 | 339.208        | 335.203        | 335.455        | 334.951        | N[12] |
| T[19] | 494.566 | 310.697        | 306.693        | 306.945        | 306.441        | T[11] |
| Q[20] | 526.581 | 282.426        | 278.422        | 278.673        | 278.170        | Q[10] |
| A[21] | 544.340 | 250.412        | 246.407        | 246.659        | 246.155        | A[9]  |
| V[22] | 569.137 | 232.652        | 228.648        | 228.900        | 228.396        | V[8]  |
| L[23] | 597.378 | 207.885        | 203.881        | 204.132        | 203.629        | L[7]  |
| L[24] | 625.649 | 179.614        | 175.609        | 175.861        | 175.358        | L[6]  |
| P[25] | 649.912 | 151.343        | 147.338        | 147.590        | 147.087        | P[5]  |
| K[26] | 681.936 | 127.080        | 123.075        | 123.327        | 122.823        | K[4]  |
| K[27] | 713.960 | 95.056         | 91.052         | 91.304         | 90.800         | K[3]  |
| T[28] | 739.222 | 63.032         | 59.028         | 59.280         | 58.776         | T[2]  |
| E[29] | 771.482 | 37.771         | 33.766         | 34.018         | 33.514         | E[1]  |



# sp | Q6GSS7 | H2A2A\_MOUSE

LNKLLGK <sup>Dimethyl</sup> <sub>28.03</sub> VTIAQGGVLPNIQAVLLPKKTE

- ▶ fragmentation table for charge state 1+
- ▶ specType=cid
- ▶ score=34.20
- ▶ F113278.dat
- ▶ query=q62524.p1
- ▶ precursor=617.580510
- ▶ chargePrecursor=5
- ▶ itol=0.5

| AA   | a        | a*       | a,b      | b              | b*             | b,b      | r        | r*       | r,b      | AA   |
|------|----------|----------|----------|----------------|----------------|----------|----------|----------|----------|------|
| L11  | 88.008   | 0.000    | 0.000    | 114.091        | 0.000          | 0.000    | 1063.893 | 1069.893 | 1063.893 | L12G |
| K12  | 2003.199 | 103.113  | 0.000    | 228.134        | 201.108        | 0.000    | 2070.803 | 2065.781 | 2062.797 | K12G |
| K13  | 626.234  | 61.120   | 0.000    | 366.229        | 330.203        | 0.000    | 2486.166 | 2489.738 | 2436.754 | K12T |
| L14  | 641.318  | 624.202  | 0.000    | <b>468.313</b> | <b>452.287</b> | 0.000    | 2122.610 | 2111.643 | 2110.668 | L12G |
| L15  | 254.402  | 217.478  | 0.000    | 266.394        | 246.374        | 0.000    | 2615.260 | 2598.263 | 2599.278 | L12G |
| Q16  | 81.1424  | 584.397  | 0.000    | 608.416        | 622.392        | 0.000    | 2002.300 | 2048.475 | 2044.461 | Q124 |
| K17  | 187.550  | 200.524  | 0.000    | 395.545        | 378.519        | 0.000    | 2443.480 | 2420.454 | 2427.470 | K122 |
| V18  | 616.618  | 609.592  | 0.000    | 664.613        | 657.587        | 0.000    | 2289.761 | 2272.737 | 2271.763 | V122 |
| V19  | 167.608  | 160.582  | 649.655  | 965.661        | 978.635        | 977.611  | 2190.205 | 2115.205 | 2115.205 | V121 |
| L120 | 1080.970 | 1063.124 | 1062.146 | 1108.749       | 1091.719       | 1090.719 | 2089.238 | 2072.211 | 2071.227 | L120 |
| A111 | 1151.087 | 1134.061 | 1133.777 | 1174.362       | 1162.790       | 1161.772 | 1406.154 | 1404.127 | 1404.143 | A119 |
| Q112 | 1219.696 | 1202.670 | 1202.821 | 1230.484       | 1226.014       | 1225.020 | 1920.111 | 1898.096 | 1898.108 | Q110 |
| Q113 | 1008.867 | 1013.884 | 1014.801 | 1044.962       | 1047.434       | 1046.959 | 1777.026 | 1769.013 | 1769.024 | Q117 |
| G14  | 1383.889 | 1376.862 | 1376.871 | 1421.884       | 1404.857       | 1403.873 | 1721.037 | 1703.010 | 1702.026 | G116 |
| V115 | 1402.877 | 1419.851 | 1418.866 | 1520.921       | 1503.894       | 1502.909 | 1681.011 | 1643.986 | 1642.999 | V115 |
| L116 | 1306.041 | 1309.015 | 1308.031 | 1354.035       | 1351.010       | 1350.026 | 1563.947 | 1549.920 | 1548.936 | L114 |
| P117 | 1703.094 | 1698.068 | 1698.084 | 1711.089       | 1714.063       | 1713.079 | 1440.963 | 1413.938 | 1412.952 | P113 |
| M18  | 1817.437 | 1805.111 | 1799.127 | 1845.132       | 1828.105       | 1827.121 | 1383.810 | 1338.783 | 1335.799 | M112 |
| T19  | 1009.071 | 1013.045 | 1013.251 | 1039.255       | 1041.186       | 1040.266 | 1329.780 | 1322.744 | 1321.759 | T111 |
| Q120 | 2056.500 | 2041.263 | 2040.278 | 2099.272       | 2084.244       | 2083.264 | 1126.400 | 1109.365 | 1108.377 | Q110 |
| A121 | 1170.517 | 1172.509 | 1171.300 | 1215.512       | 1210.302       | 1209.318 | 1681.624 | 1671.589 | 1661.614 | A111 |
| V122 | 2268.668 | 2241.369 | 2231.876 | 2259.368       | 2236.254       | 2235.270 | 1607.989 | 1601.361 | 1600.377 | V111 |
| L123 | 2241.499 | 2224.483 | 2223.470 | 2269.464       | 2252.438       | 2251.424 | 1628.513 | 1611.492 | 1610.508 | L117 |
| L124 | 2434.651 | 2417.327 | 2416.343 | 2462.348       | 2445.322       | 2444.338 | 1715.430 | 1698.403 | 1697.424 | L116 |
| P125 | 2051.606 | 2034.580 | 2033.595 | 2079.601       | 2062.575       | 2061.591 | 1682.351 | 1665.324 | 1664.340 | P115 |
| L126 | 2076.702 | 2059.676 | 2058.691 | 2104.696       | 2087.670       | 2086.686 | 1608.465 | 1591.438 | 1590.453 | L114 |
| K127 | 1907.196 | 1890.170 | 1889.185 | 1935.173       | 1918.164       | 1917.180 | 1617.389 | 1601.177 | 1600.193 | K115 |
| L128 | 1808.874 | 1801.857 | 1800.851 | 1836.839       | 1819.812       | 1818.828 | 1498.108 | 1481.100 | 1480.116 | L112 |
| L129 | 1017.608 | 1021.602 | 1019.879 | 1059.881       | 1048.054       | 1047.071 | 1448.090 | 1430.100 | 1430.102 | L111 |

# sp | Q6GSS7 | H2A2A\_MOUSE

LNKLLGK <sup>Dimethyl</sup> <sub>28.03</sub> VTIAQGGVLPNIQAVLLPKKTE

- ▶ fragmentation table for charge state 2+
- ▶ specType=cid
- ▶ score=34.20
- ▶ F113278.dat
- ▶ query=q62524.p1
- ▶ precursor=617.580510
- ▶ chargePrecursor=5
- ▶ itol=0.5

| AA  | a              | a*       | a,b            | b              | b*             | b,b            | r              | r*             | r,b            | AA  |
|-----|----------------|----------|----------------|----------------|----------------|----------------|----------------|----------------|----------------|-----|
| L1  | 43.552         | 0.561    | 501            | 31.549         | 0.504          | 0.501          | 1561.201       | 3333.139       | 3333.144       | L26 |
| R1  | 100.573        | 92.180   | 0.504          | 114.571        | 106.197        | 0.504          | 1485.931       | 2477.904       | 2476.902       | N26 |
| K1  | 184.621        | 156.438  | 0.504          | 178.618        | 170.495        | 0.504          | 1428.886       | 2420.371       | 2419.381       | K27 |
| L4  | 251.583        | 214.658  | 0.504          | 235.160        | 226.647        | 0.504          | 1384.833       | 2366.321       | 2365.331       | L26 |
| L5  | 277.678        | 236.101  | 0.504          | 251.162        | 242.188        | 0.504          | 1336.201       | 2299.183       | 2298.201       | L26 |
| G6  | 306.418        | 267.102  | 0.504          | 300.213        | 291.108        | 0.504          | 1291.701       | 2243.341       | 2242.348       | G24 |
| K7  | 384.719        | 316.105  | 0.504          | 380.212        | 380.763        | 0.504          | 1223.241       | 2124.731       | 2124.739       | K25 |
| V8  | 431.113        | 425.363  | 0.504          | 441.611        | 439.267        | 0.504          | 1181.181       | 2136.661       | 2136.676       | V22 |
| Y9  | <b>484.337</b> | 475.523  | <b>475.331</b> | <b>498.334</b> | 489.921        | 489.329        | 1059.645       | 1987.133       | 1988.041       | I21 |
| I10 | 540.878        | 532.309  | 531.874        | <b>554.876</b> | 546.381        | <b>545.871</b> | 1045.111       | 2038.609       | 2038.111       | I20 |
| A11 | <b>576.397</b> | 567.854  | 567.382        | <b>590.395</b> | 581.681        | 581.177        | 988.561        | 1961.661       | 1961.676       | A19 |
| Q12 | 586.227        | 571.113  | 570.642        | <b>554.424</b> | 545.911        | <b>545.419</b> | 953.101        | 1884.561       | 1884.576       | Q10 |
| G13 | 608.617        | 593.504  | 593.032        | <b>622.935</b> | 614.422        | 613.919        | <b>889.631</b> | 1805.511       | 1805.527       | G17 |
| G14 | 607.448        | 588.935  | 588.441        | <b>711.446</b> | <b>702.932</b> | <b>702.440</b> | 851.701        | 1852.039       | 1851.517       | G16 |
| V15 | 746.832        | 738.349  | 737.877        | <b>760.360</b> | <b>752.487</b> | <b>751.974</b> | <b>831.811</b> | 1827.489       | 1827.506       | V19 |
| L16 | 803.524        | 795.111  | 794.513        | <b>817.522</b> | <b>809.069</b> | 808.517        | <b>781.477</b> | 1773.964       | 1773.472       | L14 |
| P17 | 852.651        | 843.137  | 843.046        | 866.644        | 857.632        | 857.041        | <b>725.915</b> | <b>717.422</b> | <b>716.930</b> | P13 |
| N18 | 909.672        | 895.559  | 895.087        | 924.670        | 914.558        | 914.054        | 617.462        | 1668.995       | 1668.491       | N15 |
| T19 | 968.814        | 954.491  | 954.000        | 979.812        | 971.596        | 971.000        | 568.301        | 1613.874       | 1613.383       | T17 |
| Q20 | 1029.944       | 1017.131 | 1016.659       | 1043.941       | 1035.128       | 1034.609       | 593.951        | <b>555.332</b> | <b>554.840</b> | Q10 |
| A21 | 1082.162       | 1065.689 | 1065.157       | 1099.160       | 1091.946       | 1091.324       | 488.811        | 1461.111       | 1461.111       | A19 |
| V22 | 1114.696       | 1105.113 | 1104.661       | 1124.694       | 1116.169       | 1115.668       | 489.201        | <b>455.784</b> | 455.782        | V19 |
| L23 | 1171.238       | 1159.225 | 1159.231       | 1185.226       | 1176.222       | 1176.230       | 414.701        | 1025.252       | 1025.758       | L17 |
| L24 | 1227.480       | 1218.281 | 1218.776       | 1243.778       | 1233.385       | 1233.774       | 358.221        | 948.708        | 948.216        | L16 |
| P25 | 1276.507       | 1267.703 | 1267.301       | 1290.304       | 1281.791       | 1281.259       | 381.670        | 293.168        | 292.674        | P15 |
| K26 | 1340.204       | 1331.841 | 1331.369       | 1354.362       | 1345.614       | 1345.518       | 283.911        | 244.939        | 244.144        | K14 |
| K27 | 1404.402       | 1395.588 | 1395.396       | 1418.399       | 1409.886       | 1409.394       | 189.112        | 189.561        | 189.100        | K15 |
| L28 | 1464.926       | 1449.412 | 1449.160       | 1488.921       | 1480.418       | 1480.912       | 126.661        | 0.504          | 116.162        | L12 |
| E29 | 1519.447       | 1511.934 | 1511.440       | 1533.444       | 1524.931       | 1524.432       | 74.531         | 0.504          | 65.529         | E10 |

# sp | Q6GSS7 | H2A2A\_MOUSE

LNKLLGK<sup>Dimethyl</sup>VTIAQGGVLPNIQAVLLPKKTE  
28.03

- ▶ fragmentation table for charge state 3+
- ▶ specType=cid
- ▶ score=34.20
- ▶ F113278.dat
- ▶ query=q62524.p1
- ▶ precursor=617.580510
- ▶ chargePrecursor=5
- ▶ itol=0.5

| AA  | a              | a*       | a,b   | b              | b*             | b,b            | r              | r*             | r,b            | AA  |
|-----|----------------|----------|-------|----------------|----------------|----------------|----------------|----------------|----------------|-----|
| L11 | 28.718         | 0.872    | 0.872 | 38.102         | 0.872          | 0.872          | 1033.031       | 1032.999       | 1032.812       | L28 |
| K12 | 67.585         | 61.730   | 0.872 | 78.715         | 71.941         | 0.872          | 960.941        | 965.265        | 964.921        | K26 |
| K13 | 110.681        | 104.407  | 0.872 | 116.413        | 113.739        | 0.872          | 952.520        | 947.251        | 946.921        | K27 |
| L14 | 147.778        | 142.125  | 0.872 | 157.109        | 151.434        | 0.872          | 910.228        | 904.503        | 904.225        | L28 |
| L15 | 188.874        | 179.197  | 0.872 | 194.884        | 188.128        | 0.872          | 815.511        | 806.952        | 806.735        | L29 |
| Q16 | 204.478        | 198.004  | 0.872 | 213.811        | 208.136        | 0.872          | 824.839        | 820.183        | 820.031        | Q24 |
| K17 | 258.522        | 250.908  | 0.872 | 265.853        | 260.178        | 0.872          | 811.832        | 810.159        | 809.820        | K22 |
| V18 | 289.048        | 281.869  | 0.872 | 298.878        | 293.301        | 0.872          | 781.729        | 788.114        | 787.789        | V22 |
| V19 | 323.227        | 317.551  | 0.872 | 331.221        | 323.595        | 0.872          | 526.505        | 530.767        | 529.091        | V21 |
| L20 | 360.822        | 355.288  | 0.872 | 370.251        | 364.876        | 0.872          | 494.200        | 497.084        | 491.409        | L25 |
| A11 | 384.601        | 378.625  | 0.872 | 397.919        | 390.257        | 0.872          | 459.350        | <b>453.714</b> | <b>453.386</b> | A19 |
| Q13 | 427.208        | 421.411  | 0.872 | <b>436.818</b> | 430.084        | 0.872          | 430.815        | 430.711        | <b>430.025</b> | Q10 |
| G15 | 446.204        | 440.611  | 0.872 | <b>455.626</b> | 448.968        | 0.872          | 449.929        | <b>451.024</b> | 447.021        | G17 |
| G14 | 489.008        | 483.628  | 0.872 | <b>474.833</b> | <b>468.957</b> | <b>468.829</b> | 374.101        | 389.382        | 388.114        | G16 |
| V15 | <b>478.124</b> | 469.949  | 0.872 | <b>507.856</b> | <b>501.300</b> | <b>501.852</b> | <b>528.010</b> | 549.154        | 548.069        | V19 |
| L10 | <b>538.019</b> | 532.383  | 0.872 | <b>545.350</b> | <b>539.875</b> | <b>539.347</b> | <b>521.087</b> | 535.312        | 535.084        | L14 |
| P17 | 566.870        | 561.494  | 0.872 | 567.701        | 572.026        | 0.872          | 484.292        | <b>478.617</b> | 476.289        | P13 |
| N18 | 608.084        | 603.208  | 0.872 | 613.119        | 610.046        | 0.872          | 451.942        | 446.268        | 445.036        | N12 |
| T19 | 644.878        | 638.401  | 0.872 | <b>653.418</b> | 648.748        | 0.872          | 441.800        | 440.292        | 439.804        | T11 |
| Q20 | 686.705        | 681.189  | 0.872 | <b>696.096</b> | 690.421        | 0.872          | 376.251        | 375.501        | 375.228        | Q10 |
| A21 | 728.709        | 724.709  | 0.872 | 734.440        | 728.112        | 0.872          | 331.540        | 327.871        | 327.942        | A19 |
| V22 | <b>712.867</b> | 707.147  | 0.872 | <b>732.798</b> | 724.123        | 0.872          | 389.889        | 384.182        | 383.854        | V19 |
| L21 | 751.151        | 745.488  | 0.872 | 759.997        | 754.817        | 0.872          | 364.489        | 378.944        | 377.185        | L20 |
| L24 | 818.856        | 813.189  | 0.872 | 826.188        | 822.812        | 0.872          | 298.150        | 293.474        | 293.146        | L16 |
| P25 | 851.207        | 845.511  | 0.872 | 860.539        | 854.863        | 0.872          | 281.455        | 280.789        | 280.452        | P15 |
| K26 | 893.806        | 888.161  | 0.872 | 903.251        | 898.874        | 0.872          | 269.213        | 268.184        | 267.829        | K14 |
| K27 | 936.054        | 930.508  | 0.872 | 945.951        | 940.280        | 0.872          | 126.426        | 125.735        | 125.602        | K15 |
| L28 | 970.288        | 964.611  | 0.872 | 979.811        | 973.942        | 0.872          | 81.718         | 81.872         | 81.784         | L12 |
| L29 | 1013.558       | 1007.822 | 0.872 | 1022.832       | 1016.958       | 0.872          | 301.023        | 0.872          | 44.102         | L10 |

# sp | Q6GSS7 | H2A2A\_MOUSE

LNKLLGK<sup>Dimethyl</sup>VTIAQGGVLPNIQAVLLPKKTE<sup>28.03</sup>

- ▶ fragmentation table for charge state 4+
- ▶ specType=cid
- ▶ score=34.20
- ▶ F113278.dat
- ▶ query=q62524.p1
- ▶ precursor=617.580510
- ▶ chargePrecursor=5
- ▶ itol=0.5

| AA  | a              | a*             | a,0            | b              | b*      | b,0     | y              | y*             | y,0            | AA  |
|-----|----------------|----------------|----------------|----------------|---------|---------|----------------|----------------|----------------|-----|
| L1  | 32.280         | 0.755          | 0.755          | 28.210         | 0.755   | 0.755   | 774.720        | 767.472        | 767.226        | L10 |
| N2  | 30.790         | 0.534          | 0.755          | 57.705         | 3.532   | 0.755   | <b>743.457</b> | 739.201        | 738.955        | N10 |
| K3  | 62.014         | 175.557        | 0.755          | 89.813         | 85.556  | 0.755   | 714.967        | 710.990        | 710.444        | K10 |
| L4  | 111.009        | 339.808        | 0.755          | 133.594        | 113.827 | 0.755   | <b>642.923</b> | 639.666        | 639.200        | L10 |
| L5  | 136.356        | 435.099        | 0.755          | 148.355        | 142.060 | 0.755   | <b>654.652</b> | <b>650.395</b> | <b>650.148</b> | L10 |
| G6  | 133.611        | 349.320        | 0.755          | 160.810        | 136.354 | 0.755   | 626.381        | 622.124        | 621.878        | G10 |
| K7  | 132.648        | 338.309        | 0.755          | 139.842        | 135.385 | 0.755   | 612.126        | <b>607.869</b> | <b>607.623</b> | K10 |
| V8  | 217.410        | 613.253        | 0.755          | 224.400        | 220.152 | 0.755   | 573.066        | 568.597        | 568.351        | V10 |
| T9  | 242.872        | 638.415        | 238.189        | 249.671        | 245.414 | 245.188 | 548.527        | 544.010        | 543.524        | T10 |
| L10 | 270.843        | 699.689        | 260.440        | 277.942        | 273.685 | 273.459 | 523.069        | 518.809        | 518.324        | L10 |
| A11 | 288.702        | 684.446        | 284.202        | 295.701        | 291.444 | 291.188 | 484.784        | 480.517        | 480.251        | A10 |
| G12 | 306.714        | 638.460        | 318.213        | 327.718        | 323.460 | 323.213 | 477.628        | 473.186        | 472.532        | G10 |
| G13 | 334.872        | 530.716        | 330.470        | 341.971        | 337.714 | 337.468 | 445.021        | 440.761        | 440.517        | G10 |
| G14 | 398.228        | 384.971        | 394.720        | 398.228        | 394.970 | 394.720 | 430.760        | 426.508        | 426.262        | G10 |
| V15 | 423.095        | 309.730        | 360.482        | 360.984        | 336.737 | 335.481 | 416.509        | 412.253        | 411.807        | V10 |
| L16 | 462.266        | 398.030        | 397.781        | 409.265        | 406.008 | 405.752 | 393.742        | 389.486        | 389.239        | L10 |
| P17 | 426.520        | 422.272        | 422.020        | 433.520        | 429.271 | 429.020 | 363.471        | 359.215        | 358.969        | P10 |
| N18 | 493.040        | 619.213        | 607.530        | 462.539        | 467.782 | 467.530 | 339.200        | 334.951        | 334.705        | N10 |
| L19 | 493.214        | <b>479.054</b> | <b>478.808</b> | 493.214        | 488.053 | 487.807 | 316.887        | 312.641        | 312.395        | L10 |
| G20 | 535.325        | 613.000        | 612.903        | <b>522.324</b> | 518.067 | 517.971 | 282.420        | 278.170        | 277.924        | G10 |
| A21 | 631.088        | 303.909        | 626.588        | <b>540.083</b> | 535.827 | 535.571 | 268.411        | 264.155        | 263.909        | A10 |
| V22 | 637.852        | 553.509        | 551.590        | <b>564.851</b> | 560.594 | 560.338 | 232.852        | 228.596        | 228.350        | V10 |
| L23 | 596.124        | 613.269        | 607.820        | <b>593.122</b> | 588.865 | 588.610 | 207.485        | 203.249        | 203.003        | L10 |
| L24 | 614.368        | 613.137        | 609.951        | 622.367        | 617.130 | 616.943 | 178.614        | 174.368        | 174.122        | L10 |
| P25 | 638.857        | 634.400        | 634.154        | 645.856        | 641.599 | 641.353 | 151.341        | 147.087        | 146.841        | P10 |
| K26 | 670.981        | 606.426        | 606.130        | 677.979        | 673.423 | 673.127 | 127.080        | 122.823        | 122.577        | K10 |
| K27 | <b>702.764</b> | 609.478        | 609.230        | 708.120        | 703.444 | 703.188 | 88.840         | 84.584         | 84.338         | K10 |
| L28 | 612.110        | 612.110        | 612.110        | 623.465        | 619.465 | 619.465 | 78.530         | 78.530         | 78.530         | L10 |
| E29 | 780.227        | 655.910        | 785.724        | 767.226        | 762.969 | 762.723 | 37.771         | 0.755          | 33.260         | E10 |



# sp | Q6GSS7 | H2A2A\_MOUSE

LNKLLGK <sup>Dimethyl</sup> <sub>28.03</sub> VTIAQGGVLPNIQAVLLPKKTE

- ▶ fragmentation table for charge state 1+
- ▶ specType=etd
- ▶ score=76.90
- ▶ F113278.dat
- ▶ query=q62525.p1
- ▶ precursor=617.580570
- ▶ chargePrecursor=5
- ▶ itol=0.5

| AA    | c               | y               | z+1             | z+2             | z              | AA    |
|-------|-----------------|-----------------|-----------------|-----------------|----------------|-------|
| L[1]  | 131.118         | 3083.892        | 3067.873        | 0.000           | 3066.865       | L[26] |
| N[2]  | <b>245.161</b>  | 2970.808        | 2954.789        | 2938.769        | 2953.781       | N[28] |
| K[3]  | <b>373.256</b>  | 2856.765        | 2840.746        | 2841.754        | 2839.738       | K[27] |
| L[4]  | 488.340         | 2728.670        | 2712.651        | 2713.659        | 2711.643       | L[26] |
| L[5]  | <b>699.424</b>  | 2615.586        | 2599.567        | 2600.575        | 2598.559       | L[25] |
| G[6]  | <b>658.445</b>  | 2502.500        | 2486.483        | 2487.491        | 2485.475       | G[24] |
| K[7]  | <b>812.572</b>  | 2445.460        | 2429.442        | 2430.449        | 2428.454       | K[23] |
| V[8]  | <b>911.640</b>  | 2289.354        | 2273.335        | 2274.343        | 2272.327       | V[22] |
| T[9]  | 1012.688        | 2190.288        | 2174.267        | 2175.275        | 2173.259       | T[21] |
| I[10] | <b>1125.772</b> | 2089.230        | 2073.210        | 2074.227        | 2072.211       | I[20] |
| A[11] | <b>1196.809</b> | 1976.154        | 1960.135        | 1961.143        | 1959.127       | A[19] |
| Q[12] | <b>1324.867</b> | 1905.111        | 1889.098        | 1890.106        | 1888.090       | Q[18] |
| G[13] | <b>1381.889</b> | 1777.058        | 1761.039        | <b>1762.047</b> | 1760.032       | G[17] |
| G[14] | 1438.910        | 1720.037        | 1704.018        | <b>1705.026</b> | 1703.010       | G[16] |
| V[15] | 1537.979        | 1663.015        | 1646.997        | <b>1648.004</b> | 1646.989       | V[15] |
| L[16] | 1651.063        | 1583.947        | 1547.928        | <b>1548.936</b> | 1546.920       | L[14] |
| F[17] | 1768.116        | <b>1450.863</b> | 1434.844        | 1435.852        | 1433.836       | F[13] |
| N[18] | 1862.159        | 1393.819        | 1377.791        | 1378.799        | 1376.783       | N[12] |
| I[19] | 1975.243        | 1239.761        | <b>1223.748</b> | 1224.756        | 1222.741       | I[11] |
| Q[20] | 2103.301        | 1126.683        | 1110.664        | 1111.672        | 1109.656       | Q[10] |
| A[21] | 2174.338        | 998.624         | 982.606         | 983.614         | 981.598        | A[9]  |
| V[22] | 2273.407        | 927.587         | <b>911.569</b>  | <b>912.576</b>  | 910.561        | V[8]  |
| L[23] | 2389.491        | 808.513         | <b>813.500</b>  | 811.508         | <b>811.492</b> | L[7]  |
| L[24] | 2499.575        | 715.435         | <b>699.416</b>  | <b>700.424</b>  | 698.408        | L[6]  |
| P[25] | 2596.628        | 602.351         | 586.332         | 587.340         | 585.324        | P[5]  |
| K[26] | 2724.723        | 505.268         | <b>489.279</b>  | 490.287         | 488.271        | K[4]  |
| K[27] | 2852.818        | 377.203         | <b>361.184</b>  | 362.192         | 360.177        | K[3]  |
| T[28] | 2953.865        | 249.108         | 233.089         | 234.097         | 232.082        | T[2]  |
| E[29] | 3082.908        | 148.060         | 132.042         | 133.050         | 131.034        | E[1]  |



# sp | Q6GSS7 | H2A2A\_MOUSE

LNKLLGK <sup>Dimethyl</sup><sub>28.03</sub> VTIAQGGVLPNIQAVLLPKKTE

- ▶ fragmentation table for charge state 2+
- ▶ specType=etd
- ▶ score=76.90
- ▶ F113278.dat
- ▶ query=q62525.p1
- ▶ precursor=617.580570
- ▶ chargePrecursor=5
- ▶ itol=0.5

| AA  | c               | y               | z+1             | z+2             | z               | AA   |
|-----|-----------------|-----------------|-----------------|-----------------|-----------------|------|
| L1  | 66.093          | <b>1542.450</b> | 1534.440        | 9.504           | 1533.930        | L120 |
| N12 | 123.034         | 1485.905        | <b>1477.898</b> | <b>1478.402</b> | 1477.304        | N020 |
| K13 | 157.132         | 1428.805        | 1420.877        | 1421.381        | 1420.373        | K027 |
| L14 | 243.674         | 1364.839        | <b>1356.829</b> | <b>1357.333</b> | 1356.325        | L126 |
| L15 | 300.216         | 1308.297        | 1300.257        | 1300.791        | <b>1299.783</b> | L125 |
| Q16 | 328.290         | 1251.795        | 1243.743        | <b>1244.249</b> | 1243.241        | Q024 |
| K17 | 406.730         | <b>1223.244</b> | 1215.234        | <b>1215.738</b> | 1214.731        | K023 |
| V18 | <b>456.324</b>  | 1145.181        | <b>1137.171</b> | <b>1137.675</b> | 1136.667        | V022 |
| T19 | <b>506.848</b>  | 1095.646        | 1087.637        | <b>1088.141</b> | 1087.133        | T121 |
| T10 | 563.390         | 1045.123        | 1037.113        | <b>1037.617</b> | 1036.609        | T020 |
| A11 | <b>568.909</b>  | <b>988.581</b>  | <b>980.571</b>  | 981.075         | <b>980.067</b>  | A119 |
| Q12 | <b>662.937</b>  | 938.066         | 930.053         | 930.557         | 929.549         | Q118 |
| G13 | <b>691.448</b>  | 889.033         | <b>881.023</b>  | <b>881.527</b>  | 880.519         | G117 |
| G14 | <b>719.959</b>  | 860.522         | <b>852.513</b>  | <b>853.017</b>  | 852.009         | G116 |
| V15 | <b>769.493</b>  | 832.011         | <b>824.002</b>  | <b>824.506</b>  | 823.498         | V115 |
| L16 | 820.935         | <b>782.477</b>  | <b>774.468</b>  | <b>774.972</b>  | 773.964         | L114 |
| T17 | <b>874.561</b>  | <b>725.935</b>  | 717.925         | 718.429         | 717.421         | T113 |
| N18 | <b>931.583</b>  | 677.422         | <b>669.399</b>  | <b>669.903</b>  | 668.895         | N012 |
| I19 | 988.125         | 630.907         | <b>612.378</b>  | <b>612.882</b>  | 611.874         | I111 |
| Q20 | 1052.154        | <b>563.845</b>  | <b>555.836</b>  | <b>556.340</b>  | 555.332         | Q110 |
| A21 | 1087.673        | 499.816         | <b>491.807</b>  | <b>492.310</b>  | <b>491.303</b>  | A10  |
| V22 | <b>1137.207</b> | 484.297         | <b>456.288</b>  | <b>456.792</b>  | 455.784         | V10  |
| L23 | <b>1193.749</b> | 414.763         | 406.753         | 407.257         | 406.250         | L11  |
| L24 | 1250.291        | 358.221         | 350.213         | 350.716         | 349.708         | L10  |
| P25 | 1298.817        | 301.679         | 293.670         | 294.174         | 293.166         | P10  |
| K26 | 1362.895        | 253.153         | <b>245.143</b>  | <b>245.647</b>  | 244.639         | K14  |
| K27 | 1426.912        | 199.105         | 181.096         | 181.600         | 180.592         | K13  |
| T28 | 1477.436        | 125.058         | 117.048         | 117.552         | 116.544         | T12  |
| E29 | 1541.958        | 74.534          | 66.524          | 67.028          | 66.021          | E11  |

# sp | Q6GSS7 | H2A2A\_MOUSE

LNKLLGK <sup>Dimethyl</sup><sub>28.03</sub> VTIAQGGVLPNIQAVLLPKKTE

- ▶ fragmentation table for charge state 3+
- ▶ specType=etd
- ▶ score=76.90
- ▶ F113278.dat
- ▶ query=q62525.p1
- ▶ precursor=617.580570
- ▶ chargePrecursor=5
- ▶ itol=0.5

| AA  | c              | y              | z+1            | z+2            | z              | AA  |
|-----|----------------|----------------|----------------|----------------|----------------|-----|
| L1  | 44.377         | 1028.035       | 1021.295       | 0.672          | 1022.960       | L29 |
| N2  | 82.302         | 990.941        | 985.601        | <b>985.937</b> | 985.265        | N28 |
| K3  | 125.090        | 952.025        | 947.587        | 947.923        | 947.251        | K27 |
| L4  | 183.385        | <b>910.228</b> | <b>904.889</b> | <b>905.225</b> | 904.553        | L26 |
| L5  | 230.479        | 872.533        | <b>867.194</b> | <b>867.530</b> | 866.858        | L25 |
| G6  | 219.487        | 834.838        | 829.499        | <b>829.835</b> | 829.163        | G24 |
| K7  | 271.529        | 815.832        | <b>810.492</b> | <b>810.828</b> | <b>810.156</b> | K23 |
| V8  | 304.552        | 763.790        | <b>758.450</b> | <b>758.786</b> | 758.114        | V22 |
| Y9  | 338.234        | 730.767        | 725.427        | <b>725.763</b> | 725.091        | Y21 |
| V10 | 375.929        | 697.084        | <b>691.745</b> | <b>692.081</b> | 691.409        | V20 |
| A11 | 399.608        | 659.389        | 654.050        | <b>654.386</b> | 653.714        | A19 |
| Q12 | 442.294        | 636.710        | 630.371        | 630.707        | 630.035        | Q18 |
| G13 | 461.301        | 593.024        | 587.685        | 588.021        | 587.349        | G17 |
| G14 | 480.308        | 574.017        | 568.678        | 569.013        | 568.343        | G16 |
| V15 | 513.331        | 555.010        | 549.670        | 550.006        | 549.334        | V15 |
| L16 | 551.026        | 521.987        | 516.648        | 516.984        | 516.312        | L14 |
| P17 | 583.377        | 484.202        | 478.953        | 479.289        | 478.617        | P13 |
| N18 | 621.391        | 451.942        | 446.602        | 446.938        | 446.266        | N12 |
| T19 | 659.086        | 413.927        | 408.588        | 408.924        | 408.252        | T11 |
| Q20 | 701.772        | 376.231        | 370.893        | 371.229        | 370.557        | Q10 |
| A21 | 725.451        | 333.546        | 328.207        | 328.543        | 327.871        | A9  |
| V22 | <b>758.474</b> | 309.867        | 304.528        | 304.864        | 304.192        | V8  |
| L23 | <b>796.168</b> | 276.844        | 271.505        | 271.841        | 271.169        | L7  |
| L24 | 833.893        | 239.150        | 233.810        | 234.146        | 233.474        | L6  |
| P25 | 866.214        | 201.455        | 196.116        | 196.451        | 195.780        | P5  |
| K26 | 908.912        | 169.104        | 163.765        | 164.101        | 163.429        | K4  |
| K27 | 951.611        | 126.808        | 121.469        | 121.805        | 121.133        | K3  |
| L28 | 985.293        | 83.709         | 78.369         | 78.704         | 78.032         | L2  |
| E29 | 1028.307       | 50.025         | 44.685         | 45.021         | 44.349         | E1  |

# sp | Q6GSS7 | H2A2A\_MOUSE

LNKLLGK <sup>Dimethyl</sup><sub>28.03</sub> VTIAQGGVLPNIQAVLLPKKTE

- ▶ fragmentation table for charge state 4+
- ▶ specType=etd
- ▶ score=76.90
- ▶ F113278.dat
- ▶ query=q62525\_p1
- ▶ precursor=617.580570
- ▶ chargePrecursor=5
- ▶ itol=0.5

| AA    | c       | y              | z+1            | z+2            | z       | AA    |
|-------|---------|----------------|----------------|----------------|---------|-------|
| L[1]  | 33.535  | 771.726        | 767.725        | 0.755          | 767.472 | L[29] |
| N[2]  | 62.046  | 743.457        | <b>739.453</b> | <b>739.705</b> | 739.201 | N[20] |
| K[3]  | 94.069  | <b>714.947</b> | 710.942        | 711.194        | 710.690 | K[27] |
| L[4]  | 122.340 | 682.923        | 678.918        | 679.170        | 678.666 | L[28] |
| L[5]  | 150.611 | <b>654.652</b> | 650.647        | 650.899        | 650.395 | L[25] |
| G[6]  | 164.867 | 626.381        | 622.376        | 622.628        | 622.124 | G[24] |
| K[7]  | 203.898 | 612.126        | 608.121        | 608.373        | 607.869 | K[23] |
| V[8]  | 228.665 | 573.094        | 569.089        | 569.341        | 568.837 | V[22] |
| T[9]  | 253.927 | 548.327        | 544.322        | 544.574        | 544.070 | T[21] |
| T[10] | 282.158 | 523.065        | 519.060        | 519.312        | 518.808 | T[20] |
| A[11] | 299.958 | 494.794        | 490.789        | 491.041        | 490.537 | A[19] |
| Q[12] | 331.972 | 477.035        | 473.030        | 473.282        | 472.778 | Q[18] |
| G[13] | 346.228 | 445.020        | 441.015        | 441.267        | 440.763 | G[17] |
| G[14] | 360.483 | 430.765        | 426.760        | 427.012        | 426.508 | G[16] |
| V[15] | 385.250 | 416.509        | 412.504        | 412.757        | 412.253 | V[15] |
| L[16] | 413.521 | 391.742        | 387.737        | 387.989        | 387.486 | L[14] |
| P[17] | 437.794 | 363.471        | 359.466        | 359.718        | 359.215 | P[13] |
| N[18] | 466.205 | 339.208        | 335.203        | 335.455        | 334.951 | N[12] |
| T[19] | 494.566 | 310.697        | 306.693        | 306.945        | 306.441 | T[11] |
| Q[20] | 526.581 | 282.426        | 278.422        | 278.673        | 278.170 | Q[10] |
| A[21] | 544.340 | 250.412        | 246.407        | 246.659        | 246.155 | A[9]  |
| V[22] | 569.107 | 232.652        | 228.648        | 228.900        | 228.396 | V[8]  |
| L[23] | 597.378 | 207.885        | 203.881        | 204.132        | 203.629 | L[7]  |
| L[24] | 625.649 | 179.614        | 175.610        | 175.861        | 175.358 | L[6]  |
| P[25] | 649.912 | 151.343        | 147.338        | 147.590        | 147.087 | P[5]  |
| K[26] | 681.936 | 127.080        | 123.075        | 123.327        | 122.823 | K[4]  |
| K[27] | 713.960 | 95.056         | 91.052         | 91.304         | 90.800  | K[3]  |
| T[28] | 739.222 | 63.032         | 59.028         | 59.280         | 58.776  | T[2]  |
| E[29] | 771.482 | 37.771         | 33.766         | 34.018         | 33.514  | E[1]  |

# sp | Q6GSS7 | H2A2A\_MOUSE

LNKLLGK <sup>Dimethyl</sup>VTIAQGGVLPNIQAVLLPKKTE  
28.03

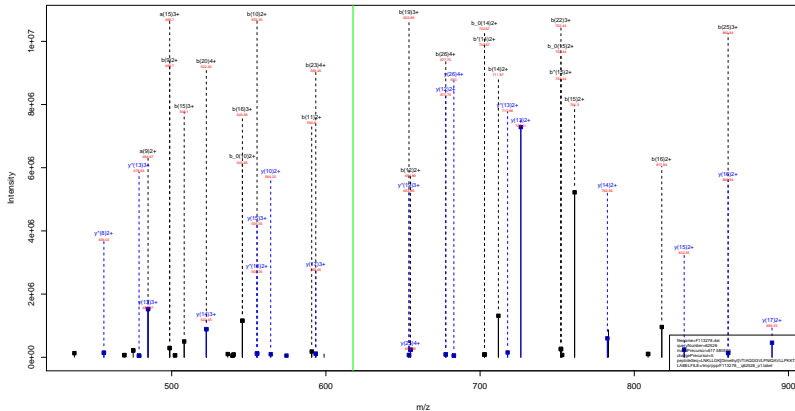

# sp | Q6GSS7 | H2A2A\_MOUSE

LNKLLGK <sup>Dimethyl</sup>VTIAQGGVLPNIQAVLLPKKTE  
28.03

- ▶ fragmentation table for charge state 1+
- ▶ specType=cid
- ▶ score=48.20
- ▶ F113278.dat
- ▶ query=q62526.p1
- ▶ precursor=617.580570
- ▶ chargePrecursor=5
- ▶ itol=0.5

| AA  | a        | a*       | a,b      | b              | b*       | b,b      | r        | r*       | r,b      | AA       |      |
|-----|----------|----------|----------|----------------|----------|----------|----------|----------|----------|----------|------|
| L1  | 88.008   | 0.000    | 1.000    | 114.091        | 0.000    | 0.000    | 1063.890 | 1069.890 | 1063.890 | L208     |      |
| K12 | 2003.199 | 1033.113 | 0.000    | 2205.134       | 201.108  | 0.000    | 2070.800 | 2065.782 | 2062.767 | K206     |      |
| K13 | 626.034  | 611.209  | 0.000    | 366.273        | 330.203  | 0.000    | 2466.160 | 2459.738 | 2436.754 | K127     |      |
| L14 | 641.318  | 624.202  | 0.000    | <b>468.313</b> | 452.287  | 0.000    | 2126.810 | 2111.643 | 2110.608 | L206     |      |
| L15 | 254.802  | 237.476  | 0.000    | 266.394        | 246.374  | 0.000    | 2615.260 | 2599.269 | 2599.273 | L205     |      |
| Q16 | 81.1424  | 784.397  | 0.000    | 808.419        | 822.362  | 0.000    | 2002.300 | 2048.475 | 2044.461 | Q124     |      |
| K17 | 187.550  | 180.524  | 0.000    | 395.545        | 378.519  | 0.000    | 2443.480 | 2426.454 | 2427.470 | K125     |      |
| V18 | 106.819  | 809.362  | 0.000    | 804.813        | 817.267  | 0.000    | 2289.760 | 2272.237 | 2271.243 | V122     |      |
| V19 | 167.608  | 160.600  | 0.000    | 965.065        | 965.065  | 0.000    | 377.651  | 2190.200 | 2115.250 | 2112.275 | V121 |
| L20 | 1080.970 | 1063.124 | 1062.140 | 1108.749       | 1091.719 | 1090.710 | 2089.230 | 2072.211 | 2071.227 | L203     |      |
| A11 | 1151.087 | 1134.163 | 1133.717 | 1174.362       | 1162.790 | 1161.712 | 1406.124 | 1404.127 | 1404.143 | A109     |      |
| Q12 | 1019.696 | 1002.619 | 1001.820 | 1100.484       | 1090.814 | 1089.820 | 1920.111 | 1899.096 | 1898.776 | Q110     |      |
| Q13 | 1008.867 | 1013.864 | 1014.870 | 1064.963       | 1047.434 | 1046.959 | 1777.020 | 1769.013 | 1768.954 | Q117     |      |
| G14 | 1383.889 | 1376.882 | 1376.870 | 1421.884       | 1404.867 | 1403.873 | 1721.037 | 1703.010 | 1702.032 | G116     |      |
| V15 | 1402.877 | 1407.874 | 1408.866 | 1520.820       | 1503.803 | 1502.849 | 1681.010 | 1643.989 | 1642.990 | V119     |      |
| L16 | 1306.041 | 1309.033 | 1308.031 | 1354.035       | 1337.018 | 1336.026 | 1563.947 | 1546.920 | 1545.936 | L114     |      |
| P17 | 1003.694 | 1008.688 | 1005.684 | 1111.689       | 1114.681 | 1113.679 | 1440.663 | 1413.638 | 1412.652 | P113     |      |
| M18 | 1017.437 | 1005.113 | 1000.127 | 1045.132       | 1028.105 | 1027.123 | 1383.810 | 1338.763 | 1335.799 | M115     |      |
| T19 | 1009.074 | 1013.065 | 1012.051 | 1069.058       | 1044.186 | 1043.266 | 1329.760 | 1222.744 | 1221.751 | T111     |      |
| Q20 | 2056.500 | 2041.263 | 2040.250 | 2099.272       | 2084.244 | 2083.264 | 2126.460 | 2109.950 | 2108.977 | Q100     |      |
| A21 | 1170.517 | 1172.509 | 1171.500 | 1215.512       | 1210.500 | 1209.501 | 1681.624 | 1617.589 | 1616.614 | A101     |      |
| V22 | 2268.668 | 2241.369 | 2231.870 | 2256.368       | 2236.354 | 2235.341 | 1671.689 | 1617.563 | 1616.677 | V101     |      |
| L23 | 2241.499 | 2224.483 | 2223.470 | 2269.484       | 2252.438 | 2251.424 | 1628.510 | 1611.460 | 1610.508 | L107     |      |
| L24 | 2434.633 | 2417.527 | 2416.545 | 2462.548       | 2445.522 | 2444.535 | 1715.430 | 1608.408 | 1607.424 | L105     |      |
| P25 | 2051.606 | 2034.500 | 2033.500 | 2079.601       | 2062.575 | 2061.561 | 1682.351 | 1605.324 | 1604.340 | P103     |      |
| K26 | 2076.702 | 2061.512 | 2060.500 | 2110.606       | 2093.610 | 2092.600 | 1608.465 | 1488.275 | 1487.287 | K104     |      |
| K27 | 1967.196 | 1950.710 | 1949.700 | 1995.703       | 1978.194 | 1977.189 | 1617.160 | 1517.200 | 1516.173 | K103     |      |
| L28 | 1608.874 | 1601.817 | 1600.851 | 1650.839       | 1633.812 | 1632.826 | 1491.100 | 1400.100 | 1401.100 | L102     |      |
| L29 | 1617.668 | 1610.600 | 1609.610 | 1660.601       | 1643.624 | 1642.617 | 1448.000 | 1400.000 | 1401.000 | L101     |      |

# sp | Q6GSS7 | H2A2A\_MOUSE

LNKLLGK <sup>Dimethyl</sup> 28.03 VTIAQGGVLPNIQAVLLPKKTE

- ▶ fragmentation table for charge state 2+
- ▶ specType=cid
- ▶ score=48.20
- ▶ F113278.dat
- ▶ query=q62526.p1
- ▶ precursor=617.580570
- ▶ chargePrecursor=5
- ▶ itol=0.5

| AA  | a              | a*             | a,b            | b              | b*             | b,b            | r               | r*              | r,b             | AA   |
|-----|----------------|----------------|----------------|----------------|----------------|----------------|-----------------|-----------------|-----------------|------|
| L1  | 43.552         | 0.564          | 501            | 31.549         | 0.504          | 0.504          | 1261.201        | 3333.139        | 3333.144        | L206 |
| R1  | 100.573        | 92.180         | 0.504          | 114.571        | 106.197        | 0.504          | 1485.901        | 1477.904        | 1476.902        | R206 |
| K1  | 184.621        | 156.439        | 0.504          | 178.618        | 170.495        | 0.504          | 1428.886        | 1420.371        | 1419.081        | K127 |
| L4  | 251.583        | 214.658        | 0.504          | 235.160        | 226.647        | 0.504          | 1384.833        | 1376.321        | 1375.131        | L206 |
| L5  | 277.678        | 238.101        | 0.504          | 257.162        | 248.188        | 0.504          | 1336.201        | 1327.183        | 1326.281        | L206 |
| G6  | 308.418        | 267.102        | 0.504          | 289.213        | 281.108        | 0.504          | 1291.701        | 1282.381        | 1281.748        | G24  |
| K7  | 384.719        | 316.105        | 0.504          | 366.212        | 358.163        | 0.504          | 1223.241        | 1214.731        | 1214.739        | K125 |
| V8  | 433.119        | 405.303        | 0.504          | 411.611        | 403.267        | 0.504          | 1181.181        | 1172.661        | 1172.176        | V222 |
| Y9  | <b>484.337</b> | <b>473.523</b> | <b>475.331</b> | <b>498.334</b> | <b>489.921</b> | <b>489.520</b> | <b>1059.645</b> | <b>1047.133</b> | <b>1046.941</b> | Y221 |
| I10 | 540.878        | 512.309        | 531.871        | <b>554.876</b> | 546.361        | <b>545.871</b> | 1045.121        | 1036.609        | 1036.117        | I201 |
| A11 | 616.587        | 587.854        | 587.382        | <b>590.395</b> | 581.682        | 581.390        | 980.161         | 980.161         | 979.275         | A119 |
| Q12 | 660.277        | 611.113        | 611.621        | <b>654.424</b> | 645.911        | 645.419        | 951.901         | 951.901         | 950.984         | Q110 |
| G13 | 698.577        | 660.404        | 660.912        | <b>687.935</b> | 679.422        | 678.930        | <b>889.031</b>  | 889.513         | 889.027         | G117 |
| G14 | 697.448        | 668.935        | 669.441        | <b>711.446</b> | <b>702.932</b> | <b>702.440</b> | <b>860.522</b>  | 861.009         | 861.517         | G116 |
| V15 | 746.833        | 708.469        | 708.977        | <b>768.380</b> | <b>752.467</b> | <b>751.974</b> | <b>822.011</b>  | 822.498         | 822.986         | V119 |
| L16 | 803.524        | 765.111        | 764.513        | <b>817.522</b> | <b>809.009</b> | <b>808.517</b> | <b>773.471</b>  | 773.471         | 773.472         | L124 |
| P17 | 852.651        | 814.117        | 814.648        | 866.048        | 857.635        | 857.643        | <b>725.935</b>  | <b>717.422</b>  | 716.930         | P113 |
| N18 | 909.672        | 865.559        | 866.087        | 924.070        | 914.958        | 914.954        | <b>677.469</b>  | 668.995         | 668.403         | N112 |
| T19 | 968.814        | 921.401        | 921.930        | 978.812        | 969.398        | 969.398        | 611.014         | 611.014         | 611.014         | T111 |
| Q20 | 1009.644       | 1017.130       | 1017.659       | 1043.641       | 1035.128       | 1034.639       | <b>563.845</b>  | <b>555.332</b>  | 554.840         | Q110 |
| A21 | 1062.182       | 1065.669       | 1066.157       | 1091.180       | 1082.668       | 1082.154       | 481.811         | 481.811         | 481.811         | A111 |
| V22 | 1114.696       | 1118.181       | 1118.669       | 1142.694       | 1134.180       | 1133.668       | 489.249         | <b>455.784</b>  | 455.292         | V111 |
| L23 | 1171.238       | 1174.723       | 1175.211       | 1195.235       | 1186.722       | 1186.210       | 414.751         | 405.252         | 405.758         | L117 |
| L24 | 1227.480       | 1231.467       | 1231.975       | 1244.478       | 1235.965       | 1235.473       | 368.221         | 348.708         | 349.216         | L16  |
| P25 | 1276.507       | 1287.753       | 1287.301       | 1299.304       | 1291.191       | 1291.259       | 381.670         | 263.168         | 262.674         | P115 |
| K26 | 1340.204       | 1331.941       | 1331.969       | 1354.205       | 1346.018       | 1345.946       | 263.161         | 244.839         | 244.144         | K14  |
| R27 | 1404.402       | 1395.588       | 1395.360       | 1416.399       | 1408.086       | 1408.304       | 189.110         | 189.561         | 189.100         | R115 |
| L28 | 1464.926       | 1446.412       | 1446.560       | 1468.921       | 1460.812       | 1460.812       | 126.016         | 0.504           | 116.162         | L12  |
| E29 | 1519.447       | 1511.934       | 1511.440       | 1533.444       | 1524.931       | 1524.439       | 74.531          | 0.504           | 65.529          | E11  |

# sp | Q6GSS7 | H2A2A\_MOUSE

LNKLLGK<sup>Dimethyl</sup>VTIAQGGVLPNIQAVLLPKKTE  
28.03

- ▶ fragmentation table for charge state 3+
- ▶ specType=cid
- ▶ score=48.20
- ▶ F113278.dat
- ▶ query=q62526.p1
- ▶ precursor=617.580570
- ▶ chargePrecursor=5
- ▶ itol=0.5

| AA  | a        | a*       | a,b   | b        | b*       | b,b   | r     | r*    | r,b   | AA  |
|-----|----------|----------|-------|----------|----------|-------|-------|-------|-------|-----|
| L1  | 28.718   | 0.072    | 0.072 | 38.102   | 0.072    | 0.072 | 0.031 | 0.022 | 0.022 | L28 |
| K1  | 67.585   | 61.700   | 0.072 | 76.715   | 71.041   | 0.072 | 0.001 | 0.005 | 0.004 | K26 |
| K1  | 110.681  | 104.407  | 0.072 | 119.413  | 113.739  | 0.072 | 0.002 | 0.001 | 0.001 | K27 |
| L4  | 147.778  | 142.125  | 0.072 | 157.109  | 151.434  | 0.072 | 0.010 | 0.004 | 0.004 | L26 |
| L5  | 188.874  | 179.197  | 0.072 | 194.804  | 189.128  | 0.072 | 0.015 | 0.004 | 0.004 | L25 |
| G6  | 204.478  | 198.104  | 0.072 | 213.611  | 208.136  | 0.072 | 0.004 | 0.001 | 0.001 | G24 |
| K7  | 256.522  | 250.008  | 0.072 | 265.853  | 260.178  | 0.072 | 0.013 | 0.010 | 0.010 | K22 |
| V6  | 268.044  | 261.869  | 0.072 | 278.878  | 273.303  | 0.072 | 0.013 | 0.014 | 0.014 | V22 |
| V9  | 323.227  | 317.551  | 0.072 | 333.505  | 328.083  | 0.072 | 0.006 | 0.001 | 0.001 | V21 |
| I20 | 380.822  | 375.289  | 0.072 | 391.251  | 384.876  | 0.072 | 0.004 | 0.001 | 0.001 | I20 |
| A11 | 384.601  | 378.625  | 0.072 | 393.913  | 388.257  | 0.072 | 0.006 | 0.001 | 0.001 | A19 |
| Q13 | 427.208  | 421.611  | 0.072 | 436.818  | 430.984  | 0.072 | 0.010 | 0.001 | 0.001 | Q10 |
| G13 | 446.204  | 440.611  | 0.072 | 455.626  | 449.900  | 0.072 | 0.010 | 0.001 | 0.001 | G17 |
| G14 | 460.208  | 454.625  | 0.072 | 474.633  | 468.957  | 0.072 | 0.010 | 0.001 | 0.001 | G16 |
| V15 | 498.214  | 492.600  | 0.072 | 507.850  | 501.882  | 0.072 | 0.010 | 0.001 | 0.001 | V19 |
| L16 | 536.019  | 530.383  | 0.072 | 545.350  | 539.675  | 0.072 | 0.010 | 0.001 | 0.001 | L14 |
| P17 | 566.870  | 561.094  | 0.072 | 577.701  | 572.026  | 0.072 | 0.010 | 0.001 | 0.001 | P13 |
| N18 | 606.184  | 600.708  | 0.072 | 613.719  | 607.940  | 0.072 | 0.010 | 0.001 | 0.001 | N12 |
| T19 | 644.878  | 638.463  | 0.072 | 653.418  | 647.718  | 0.072 | 0.010 | 0.001 | 0.001 | T11 |
| Q20 | 686.705  | 681.189  | 0.072 | 695.490  | 689.421  | 0.072 | 0.010 | 0.001 | 0.001 | Q10 |
| A21 | 712.848  | 707.100  | 0.072 | 724.440  | 718.300  | 0.072 | 0.010 | 0.001 | 0.001 | A19 |
| V22 | 742.807  | 737.480  | 0.072 | 752.700  | 747.124  | 0.072 | 0.010 | 0.001 | 0.001 | V19 |
| L23 | 781.161  | 775.480  | 0.072 | 790.961  | 784.817  | 0.072 | 0.010 | 0.001 | 0.001 | L17 |
| L24 | 818.856  | 813.189  | 0.072 | 829.189  | 822.812  | 0.072 | 0.010 | 0.001 | 0.001 | L16 |
| P25 | 851.207  | 845.511  | 0.072 | 860.539  | 854.863  | 0.072 | 0.010 | 0.001 | 0.001 | P15 |
| K26 | 893.806  | 888.161  | 0.072 | 905.490  | 899.814  | 0.072 | 0.010 | 0.001 | 0.001 | K14 |
| K27 | 936.054  | 930.500  | 0.072 | 945.915  | 940.260  | 0.072 | 0.010 | 0.001 | 0.001 | K13 |
| L28 | 979.280  | 974.611  | 0.072 | 989.813  | 984.164  | 0.072 | 0.010 | 0.001 | 0.001 | L12 |
| E29 | 1013.550 | 1007.822 | 0.072 | 1027.832 | 1022.056 | 0.072 | 0.010 | 0.001 | 0.001 | E10 |

# sp | Q6GSS7 | H2A2A\_MOUSE

LNKLLGK <sup>Dimethyl</sup> <sub>28.03</sub> VTIAQGGVLPNIQAVLLPKKTE

- ▶ fragmentation table for charge state 4+
- ▶ specType=cid
- ▶ score=48.20
- ▶ F113278.dat
- ▶ query=q62526.p1
- ▶ precursor=617.580570
- ▶ chargePrecursor=5
- ▶ itol=0.5

| AA  | a              | a*             | a.0            | b              | b*      | b.0   | y              | y*      | y.0     | AA  |
|-----|----------------|----------------|----------------|----------------|---------|-------|----------------|---------|---------|-----|
| L1  | 22.200         | 0.755          | 0.755          | 40.230         | 0.755   | 0.755 | 771.720        | 767.472 | 767.250 | L20 |
| N2  | 50.790         | 46.534         | 0.755          | 57.790         | 55.532  | 0.755 | 743.457        | 739.201 | 738.975 | N28 |
| K3  | 28.844         | 78.551         | 0.755          | 89.813         | 88.505  | 0.755 | 712.057        | 710.000 | 710.414 | K27 |
| L4  | 111.085        | 109.038        | 0.755          | 118.080        | 115.827 | 0.755 | <b>682.923</b> | 678.956 | 679.430 | L26 |
| L5  | 118.356        | 116.999        | 0.755          | 146.356        | 142.098 | 0.755 | <b>654.652</b> | 650.995 | 650.148 | L25 |
| G6  | 153.611        | 149.355        | 0.755          | 160.610        | 156.354 | 0.755 | 658.391        | 652.124 | 651.978 | G24 |
| T7  | 162.843        | 158.586        | 0.755          | 189.842        | 185.585 | 0.755 | 612.120        | 607.864 | 607.423 | T23 |
| V8  | 217.410        | 213.153        | 0.755          | 226.409        | 222.152 | 0.755 | 573.069        | 568.812 | 568.506 | V22 |
| T9  | 224.672        | 220.415        | 0.755          | 249.671        | 245.414 | 0.755 | 548.158        | 544.070 | 543.824 | T21 |
| D10 | 270.943        | 266.686        | 0.755          | 277.942        | 273.685 | 0.755 | 523.165        | 518.808 | 518.502 | D20 |
| A11 | 286.702        | 282.445        | 0.755          | 295.701        | 291.444 | 0.755 | 484.758        | 480.501 | 480.255 | A19 |
| Q12 | 326.431        | 318.896        | 0.755          | 337.430        | 329.895 | 0.755 | 477.035        | 472.778 | 472.532 | Q18 |
| G13 | 334.922        | 330.716        | 0.755          | 341.911        | 337.714 | 0.755 | 445.020        | 440.763 | 440.517 | G17 |
| G14 | 349.239        | 344.971        | 0.755          | 356.230        | 351.970 | 0.755 | 431.724        | 426.508 | 426.262 | G16 |
| V15 | 373.995        | 369.738        | 0.755          | 380.994        | 376.737 | 0.755 | 415.500        | 411.253 | 411.007 | V15 |
| L16 | 402.266        | 398.009        | 0.755          | 409.265        | 405.008 | 0.755 | 393.747        | 389.490 | 389.244 | L14 |
| P17 | 426.520        | 422.272        | 0.755          | 433.520        | 429.271 | 0.755 | 393.411        | 389.215 | 388.968 | P13 |
| N18 | 435.040        | 430.783        | 0.755          | 462.039        | 457.782 | 0.755 | 339.208        | 334.951 | 334.705 | N12 |
| D19 | 448.111        | <b>470.054</b> | <b>470.808</b> | 451.110        | 446.053 | 0.755 | 310.667        | 306.444 | 306.195 | D11 |
| Q20 | 458.308        | 453.809        | 0.755          | <b>522.324</b> | 518.869 | 0.755 | 319.411        | 315.444 | 315.197 | Q15 |
| A21 | 55.83085       | 508.028        | 508.582        | <b>540.083</b> | 535.827 | 0.755 | 290.413        | 286.155 | 286.009 | A16 |
| V22 | 657.852        | 653.305        | 0.755          | 664.851        | 660.304 | 0.755 | 232.057        | 227.800 | 227.554 | V16 |
| L23 | 658.123        | 653.566        | 0.755          | <b>593.122</b> | 588.565 | 0.755 | 207.885        | 203.627 | 203.383 | L17 |
| L24 | 664.384        | 659.827        | 0.755          | 671.383        | 666.826 | 0.755 | 178.619        | 174.361 | 174.117 | L18 |
| L25 | 668.957        | 664.400        | 0.755          | 675.956        | 671.399 | 0.755 | 151.343        | 147.085 | 146.841 | P19 |
| K26 | 670.681        | 666.424        | 0.755          | <b>677.679</b> | 673.421 | 0.755 | 127.000        | 122.823 | 122.577 | K18 |
| K27 | <b>702.704</b> | 698.446        | 0.755          | 709.703        | 705.444 | 0.755 | 85.056         | 80.800  | 80.554  | K16 |
| L28 | 722.876        | 718.618        | 0.755          | 734.875        | 730.617 | 0.755 | 78.788         | 74.531  | 74.285  | L19 |
| E29 | 760.597        | 755.970        | 0.755          | 767.220        | 762.960 | 0.755 | 72.771         | 68.515  | 68.268  | E11 |





# sp | Q6GSS7 | H2A2A\_MOUSE

LNKLLGK <sup>Dimethyl</sup>VTIAQGGVLPNIQAVLLPKKTE  
28.03

- ▶ fragmentation table for charge state 1+
- ▶ specType=cid
- ▶ score=88.10
- ▶ F113278.dat
- ▶ query=q62527\_p1
- ▶ precursor=1028.629500
- ▶ chargePrecursor=3
- ▶ itol=0.5

| AA   | a              | a*              | a,Δ      | b               | b*              | b,Δ             | r               | y*              | y,Δ             | AA       |      |
|------|----------------|-----------------|----------|-----------------|-----------------|-----------------|-----------------|-----------------|-----------------|----------|------|
| L13  | 881.000        | 0.000           | 88.000   | 114.000         | 0.000           | 0.000           | 2081.000        | 0.000           | 0.000           | L129     |      |
| N12  | 881.111        | 1.111           | 7.000    | 108.750         | 111.750         | 0.000           | 2079.889        | 2811.750        | 2822.750        | N104     |      |
| K13  | 530.250        | 351.250         | 0.000    | 500.250         | 350.000         | 0.000           | 2076.100        | 2078.250        | 2088.750        | K129     |      |
| L14  | 641.101        | 424.202         | 0.000    | 469.212         | 462.201         | 0.000           | 2120.471        | 2113.041        | 2118.000        | L128     |      |
| L15  | 654.452        | 581.303         | 0.000    | 562.309         | 560.111         | 0.000           | 2073.500        | 2068.500        | 2069.511        | L120     |      |
| G16  | 611.414        | 356.207         | 0.000    | 530.419         | 362.202         | 0.000           | 2050.000        | 2049.414        | 2049.414        | G104     |      |
| K17  | 307.619        | 193.134         | 0.000    | 795.545         | 178.133         | 0.000           | 3440.460        | 2420.904        | 2427.410        | K123     |      |
| V18  | <b>866.619</b> | <b>640.592</b>  | 0.000    | <b>694.633</b>  | 677.587         | 0.000           | 2260.304        | 2272.592        | 2271.541        | V122     |      |
| T19  | 807.619        | 601.642         | 949.000  | <b>755.663</b>  | 678.616         | 0.000           | 307.000         | 412.200         | 412.200         | T121     |      |
| E10  | 1000.110       | <b>1063.724</b> | 1064.740 | <b>1108.745</b> | 1061.719        | <b>1060.735</b> | 2088.200        | 3074.311        | 3071.767        | E100     |      |
| A11  | 1151.250       | 1124.750        | 2133.777 | <b>1170.782</b> | 1162.750        | 1161.772        | 1890.154        | 1890.129        | 1890.143        | A109     |      |
| G12  | 1170.400       | 1021.400        | 128.400  | <b>1207.841</b> | 1200.416        | 1200.400        | 1920.111        | 1890.000        | 1890.000        | G103     |      |
| G13  | 1336.100       | 1310.604        | 1110.000 | <b>1364.862</b> | 1347.836        | 1346.830        | <b>1777.050</b> | 1760.000        | 1760.048        | G127     |      |
| G14  | 1359.000       | 1340.000        | 1349.000 | <b>1421.004</b> | 1404.000        | 1403.001        | 1740.000        | 1740.000        | 1740.000        | G126     |      |
| V15  | 1400.000       | 1424.910        | 1447.840 | <b>1570.852</b> | 1561.840        | 1560.842        | 1860.000        | 1840.000        | 1840.000        | V100     |      |
| L106 | 2000.100       | 1700.100        | 1549.000 | <b>1834.036</b> | <b>1817.010</b> | 1816.000        | <b>1463.047</b> | 1440.000        | 1440.040        | L104     |      |
| P117 | 1933.500       | 1860.000        | 1888.000 | 1888.000        | 1711.000        | 1714.000        | 1711.000        | <b>1450.863</b> | <b>1433.836</b> | 1432.862 | P115 |
| N108 | 1810.000       | 1680.000        | 1690.000 | 1690.000        | 1690.000        | 1690.000        | <b>1305.810</b> | 1330.000        | 1330.000        | N102     |      |
| E109 | 1500.200       | 1463.211        | 1442.211 | 1466.210        | 1441.200        | 1440.200        | 1440.200        | 1422.741        | <b>1221.797</b> | E111     |      |
| G120 | 1000.000       | 2041.200        | 2040.000 | 2000.210        | 2000.200        | 2000.200        | 2000.200        | 1109.000        | <b>1108.672</b> | G118     |      |
| A121 | 1000.000       | 2000.200        | 1919.200 | 1919.200        | 1919.200        | 1919.200        | <b>1000.000</b> | 1000.000        | 1000.000        | A119     |      |
| V122 | 2226.300       | 2221.310        | 2220.310 | 2250.300        | 2236.314        | 2236.310        | <b>827.587</b>  | 810.501         | 800.577         | V118     |      |
| L123 | 1011.400       | 1021.400        | 1020.400 | 1000.404        | 1012.410        | 1011.400        | <b>820.510</b>  | 810.400         | 810.400         | L117     |      |
| L124 | 1024.410       | 1017.410        | 1020.410 | 1000.408        | 1012.414        | 1011.410        | <b>711.430</b>  | 690.400         | <b>687.424</b>  | L116     |      |
| P126 | 2001.000       | 1544.500        | 1553.500 | 1550.000        | 1550.510        | 1550.510        | <b>602.351</b>  | 580.200         | <b>584.500</b>  | P120     |      |
| K129 | 1011.000       | 1002.000        | 1001.000 | 1001.000        | 1001.000        | 1001.000        | <b>500.790</b>  | 490.271         | 487.267         | K114     |      |
| K127 | 1007.200       | 1000.210        | 1000.000 | 1000.701        | 1000.610        | 1001.110        | <b>377.203</b>  | 360.171         | 357.163         | K113     |      |
| L128 | 1000.000       | 1000.000        | 1000.000 | 1000.000        | 1000.000        | 1000.000        | 1000.000        | 1000.000        | 1000.000        | L119     |      |
| E120 | 1007.000       | 1000.000        | 1000.000 | 1000.000        | 1000.000        | 1000.000        | 1000.000        | 1000.000        | 1000.000        | E111     |      |

# sp | Q6GSS7 | H2A2A\_MOUSE

LNKLLGK <sup>Dimethyl</sup> 28.03 VTIAQGGVLPNIQAVLLPKKTE

- ▶ fragmentation table for charge state 2+
- ▶ specType=cid
- ▶ score=88.10
- ▶ F113278.dat
- ▶ query=q62527\_p1
- ▶ precursor=1028.629500
- ▶ chargePrecursor=3
- ▶ itol=0.5

| AA  | a               | a <sup>b</sup>  | a,β   | b               | b <sup>a</sup>  | b,β             | y               | y <sup>a</sup> | a,β            | AA  |
|-----|-----------------|-----------------|-------|-----------------|-----------------|-----------------|-----------------|----------------|----------------|-----|
| L1  | 43.592          | 0.500           | 0.500 | 37.540          | 0.504           | 0.504           | 1042.490        | 1531.830       | 1533.444       | L29 |
| K1  | 100.074         | 0.500           | 0.500 | 144.574         | 0.500           | 0.504           | 4039.300        | 1477.200       | 1478.000       | K30 |
| K1  | 184.924         | 0.500           | 0.504 | 178.016         | 0.500           | 0.504           | 1438.000        | 1430.372       | 1431.000       | K22 |
| L14 | 241.188         | 0.500           | 0.500 | 236.100         | 2.000           | 0.504           | <b>1304.210</b> | 1300.300       | 1300.810       | L26 |
| L15 | 227.000         | 0.500           | 0.504 | 240.100         | 2.000           | 0.504           | <b>1308.240</b> | 1298.700       | 1299.210       | L25 |
| G1  | 300.210         | 0.500           | 0.504 | 370.210         | 0.500           | 0.500           | <b>1251.755</b> | 1243.241       | 1243.749       | G24 |
| K1  | 384.270         | 0.500           | 0.500 | <b>368.276</b>  | 0.500           | 0.504           | 1071.004        | 1016.174       | 1016.678       | K23 |
| V1  | 433.013         | 0.500           | 0.504 | 447.010         | 0.500           | 0.504           | 1145.101        | 1130.460       | 1130.970       | V22 |
| L18 | 460.710         | 0.500           | 0.504 | 460.710         | 0.500           | 0.504           | 800.700         | 800.700        | 800.700        | L21 |
| L10 | 540.870         | 0.500           | 0.500 | 534.870         | 0.500           | 0.504           | 645.071         | 645.071        | 645.071        | L24 |
| A11 | 576.507         | 0.500           | 0.500 | 580.500         | 0.500           | 0.500           | <b>808.581</b>  | <b>800.047</b> | <b>809.575</b> | A16 |
| G13 | 586.877         | 0.500           | 0.504 | <b>654.425</b>  | <b>645.911</b>  | 0.500           | 0.500           | <b>851.082</b> | <b>844.101</b> | G18 |
| G13 | 668.877         | <b>668.424</b>  | 0.500 | <b>682.935</b>  | <b>674.422</b>  | <b>673.930</b>  | <b>809.035</b>  | 0.500          | 0.500          | G17 |
| G14 | <b>697.448</b>  | 0.500           | 0.500 | 692.441         | <b>711.446</b>  | <b>702.932</b>  | <b>702.440</b>  | <b>805.522</b> | <b>852.000</b> | G16 |
| V15 | <b>746.302</b>  | <b>738.460</b>  | 0.500 | <b>760.300</b>  | <b>752.407</b>  | <b>751.374</b>  | 0.500           | 0.500          | 0.500          | V10 |
| L16 | 795.911         | 0.500           | 0.500 | <b>817.522</b>  | <b>809.009</b>  | <b>808.517</b>  | <b>782.477</b>  | 0.500          | 0.500          | L14 |
| L17 | <b>852.051</b>  | 0.500           | 0.500 | 843.000         | <b>823.073</b>  | <b>814.558</b>  | <b>807.043</b>  | <b>775.935</b> | <b>717.422</b> | L13 |
| L18 | <b>899.072</b>  | 0.500           | 0.500 | 890.000         | <b>923.070</b>  | <b>914.556</b>  | <b>914.064</b>  | 0.500          | 0.500          | L12 |
| L16 | 900.514         | 0.500           | 0.500 | 890.000         | <b>908.612</b>  | 0.500           | 0.500           | 0.500          | <b>611.874</b> | L11 |
| G20 | 944             | 0.500           | 0.500 | 930.000         | 0.500           | 0.500           | 101.000         | 101.000        | 101.000        | G19 |
| K21 | <b>1065.162</b> | 0.500           | 0.500 | <b>1070.160</b> | <b>1070.160</b> | <b>1070.160</b> | 0.500           | 0.500          | 0.500          | K6  |
| V22 | <b>1114.696</b> | <b>1108.183</b> | 0.500 | <b>1120.694</b> | <b>1120.180</b> | <b>1119.688</b> | 0.500           | 0.500          | <b>455.784</b> | V8  |
| L23 | <b>1171.238</b> | <b>1162.229</b> | 0.500 | <b>1185.236</b> | <b>1176.222</b> | <b>1176.230</b> | 0.500           | 0.500          | 0.500          | L17 |
| L14 | 1227.000        | <b>1218.267</b> | 0.500 | <b>1241.770</b> | <b>1232.760</b> | <b>1232.773</b> | 0.500           | 0.500          | 0.500          | L10 |
| P26 | 1276.300        | 0.500           | 0.500 | 1266.300        | 0.500           | 0.500           | 126.000         | 126.000        | 126.000        | P25 |
| K26 | 1461.074        | 0.500           | 0.500 | 1456.074        | 0.500           | 0.500           | 151.000         | 151.000        | 151.000        | K14 |
| K27 | 1504.402        | 0.500           | 0.500 | <b>1418.399</b> | 0.500           | 0.500           | 139.100         | 139.100        | 139.100        | K13 |
| L26 | 1504.700        | 0.500           | 0.500 | <b>1424.692</b> | 0.500           | 0.500           | 139.000         | 139.000        | 139.000        | L15 |
| E20 | 1510.447        | 0.500           | 0.500 | 1510.447        | 0.500           | 0.500           | 0.500           | 0.500          | 0.500          | E11 |



# sp | Q6GSS7 | H2A2A\_MOUSE

LNKLLGK <sup>Dimethyl</sup> <sub>28.03</sub> VTIAQGGVLPNIQAVLLPKKTE

- ▶ fragmentation table for charge state 1+
- ▶ specType=etd
- ▶ score=37.56
- ▶ F113278.dat
- ▶ query=q62528.p1
- ▶ precursor=1028.629500
- ▶ chargePrecursor=3
- ▶ itol=0.5

| AA    | c               | y        | z+1             | z+2            | z        | AA    |
|-------|-----------------|----------|-----------------|----------------|----------|-------|
| L 1   | 131.118         | 2083.892 | 3067.873        | 0.000          | 3066.865 | L 29  |
| N 2   | 245.161         | 2970.808 | 2954.769        | 2955.797       | 2953.781 | N 28  |
| K 3   | 373.256         | 2856.765 | 2840.746        | 2841.754       | 2839.738 | K 27  |
| L 4   | 486.340         | 2738.670 | 2722.651        | 2713.659       | 2711.643 | L 26  |
| L 5   | 599.424         | 2615.586 | 2599.567        | 2600.575       | 2598.559 | L 25  |
| G 6   | <b>656.445</b>  | 2502.502 | 2486.483        | 2487.491       | 2485.475 | G 24  |
| K 7   | <b>812.572</b>  | 2445.468 | 2429.452        | 2430.469       | 2428.454 | K 23  |
| V 8   | 911.640         | 2329.354 | 2273.335        | 2274.343       | 2272.327 | V 22  |
| T 9   | <b>1012.688</b> | 2190.288 | 2174.267        | 2175.275       | 2173.259 | T 21  |
| I 10  | 1125.772        | 2089.230 | 2073.219        | 2074.227       | 2072.211 | I 20  |
| A 11  | <b>1196.809</b> | 1976.154 | <b>1960.135</b> | 1961.143       | 1959.127 | A 19  |
| Q 12  | 1324.887        | 1925.111 | <b>1889.098</b> | 1890.106       | 1888.090 | Q 18  |
| G 13  | 1381.889        | 1777.058 | 1761.039        | 1762.047       | 1760.032 | G 17  |
| G 14  | 1438.910        | 1720.037 | 1704.018        | 1705.026       | 1703.010 | G 16  |
| V 15  | 1537.979        | 1663.015 | 1646.997        | 1648.004       | 1646.989 | V 15  |
| L 16  | 1651.063        | 1563.947 | 1547.928        | 1548.936       | 1546.920 | L 14  |
| P 17  | 1748.116        | 1450.863 | 1434.844        | 1435.852       | 1433.836 | P 13  |
| TW 18 | 1862.159        | 1353.810 | 1337.792        | 1338.799       | 1336.783 | TW 12 |
| I 19  | 1975.243        | 1239.767 | 1223.748        | 1224.756       | 1222.741 | I 11  |
| Q 20  | 2103.301        | 1120.683 | 1110.664        | 1111.672       | 1109.656 | Q 10  |
| A 21  | 2174.338        | 998.624  | <b>982.606</b>  | <b>983.614</b> | 981.598  | A 9   |
| V 22  | 2273.407        | 827.587  | 811.569         | 812.576        | 810.561  | V 8   |
| L 23  | 2386.491        | 628.519  | <b>812.500</b>  | 813.508        | 811.492  | L 7   |
| L 24  | 2489.576        | 435.435  | <b>699.416</b>  | <b>700.424</b> | 698.408  | L 6   |
| L 25  | 2598.638        | 602.351  | 603.352         | 607.340        | 605.324  | L 5   |
| K 26  | 2724.723        | 505.298  | 499.279         | 499.287        | 488.273  | K 4   |
| K 27  | 2852.818        | 377.203  | 361.184         | 362.192        | 360.177  | K 3   |
| T 28  | 2953.865        | 249.108  | 233.089         | 234.097        | 232.082  | T 2   |
| E 29  | 3082.958        | 148.060  | 132.042         | 133.050        | 131.034  | E 1   |

# sp | Q6GSS7 | H2A2A\_MOUSE

LNKLLGK <sup>Dimethyl</sup> <sub>28.03</sub> VTIAQGGVLPNIQAVLLPKKTE

- ▶ fragmentation table for charge state 2+
- ▶ specType=etd
- ▶ score=37.56
- ▶ F113278.dat
- ▶ query=q62528.p1
- ▶ precursor=1028.629500
- ▶ chargePrecursor=3
- ▶ itol=0.5

| AA  | c               | y               | z+1             | z+2             | z               | AA   |
|-----|-----------------|-----------------|-----------------|-----------------|-----------------|------|
| L1  | 66.053          | <b>1542.450</b> | <b>1534.440</b> | 9.504           | 1533.930        | L120 |
| N12 | 123.054         | 1485.905        | <b>1477.898</b> | 1478.402        | <b>1477.394</b> | N120 |
| K13 | 187.132         | 1428.889        | <b>1420.877</b> | <b>1421.381</b> | 1420.373        | K127 |
| L14 | 243.674         | 1364.839        | <b>1356.829</b> | 1357.333        | <b>1356.325</b> | L126 |
| L15 | 300.216         | 1308.297        | 1300.287        | 1300.791        | 1299.783        | L125 |
| G16 | 356.759         | 1251.755        | 1243.745        | 1244.249        | 1243.241        | G124 |
| K17 | 406.799         | 1223.244        | 1215.234        | 1215.738        | 1214.731        | K123 |
| V18 | 456.324         | 1145.181        | 1137.171        | 1137.675        | 1136.667        | V122 |
| F19 | 506.849         | 1095.646        | 1087.637        | 1088.141        | 1087.133        | F121 |
| T10 | 563.390         | 1045.123        | 1037.113        | 1037.617        | 1036.609        | T20  |
| A11 | 608.608         | 988.581         | 980.571         | 981.075         | 980.067         | A119 |
| G12 | 662.937         | 933.065         | 925.055         | 925.559         | 924.551         | G118 |
| G13 | 691.448         | 889.033         | 881.023         | 881.527         | 880.519         | G117 |
| G14 | 719.959         | 860.522         | 852.513         | 853.017         | 852.009         | G116 |
| V15 | 769.493         | 832.011         | 824.002         | 824.506         | 823.498         | V115 |
| L16 | 826.035         | 782.477         | 774.468         | 774.972         | 773.964         | L114 |
| F17 | 874.581         | 728.935         | 720.925         | 721.429         | 720.421         | F113 |
| N18 | 931.583         | 677.405         | 669.395         | 669.901         | 668.893         | N112 |
| I19 | 988.125         | 620.867         | 612.857         | 613.361         | 612.353         | I111 |
| Q10 | 1052.154        | 563.845         | 555.836         | 556.340         | 555.332         | Q110 |
| A11 | 1087.673        | 499.816         | 491.807         | 492.311         | 491.303         | A10  |
| V12 | 1137.207        | 484.297         | 476.288         | 476.792         | 475.784         | V10  |
| L13 | 1193.749        | 414.763         | 406.754         | 407.258         | 406.250         | L11  |
| L14 | 1250.291        | 358.221         | 350.212         | 350.716         | 349.708         | L10  |
| P15 | 1298.817        | 301.679         | 293.670         | 294.174         | 293.166         | P10  |
| K16 | <b>1362.865</b> | 253.153         | 245.143         | 245.647         | 244.639         | K14  |
| K17 | <b>1426.912</b> | 189.105         | 181.096         | 181.600         | 180.592         | K13  |
| T18 | <b>1477.436</b> | 125.058         | 117.048         | 117.552         | 116.544         | T12  |
| E19 | 1541.958        | 74.534          | 66.524          | 67.028          | 66.021          | E11  |

# sp | Q6GSS7 | H2A2A\_MOUSE

LNKLLGK <sup>Dimethyl</sup>VTIAQGGVLPNIQAVLLPKKTE  
28.03

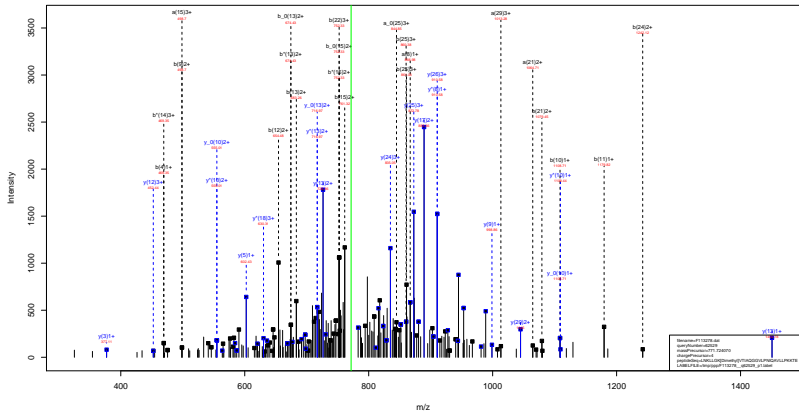

# sp | Q6GSS7 | H2A2A\_MOUSE

LNKLLGK <sup>Dimethyl</sup>VTIAQGGVLPNIQAVLLPKKTE  
28.03

- ▶ fragmentation table for charge state 1+
- ▶ specType=cid
- ▶ score=39.66
- ▶ F113278.dat
- ▶ query=q62529\_p1
- ▶ precursor=771.724070
- ▶ chargePrecursor=4
- ▶ itol=0.5

| AA   | a               | a <sup>+</sup> | a-2      | b               | b <sup>+</sup> | b-2      | y               | y <sup>+</sup>  | y-2             | AA   |
|------|-----------------|----------------|----------|-----------------|----------------|----------|-----------------|-----------------|-----------------|------|
| L1   | 88.098          | 0.000          | 0.000    | 114.091         | 0.000          | 0.000    | 1081.292        | 1094.889        | 1095.881        | L129 |
| K1   | 100.160         | 101.161        | 0.000    | 108.134         | 111.135        | 0.000    | 1019.026        | 1025.181        | 1029.767        | K130 |
| R1   | 108.234         | 111.235        | 0.000    | 109.249         | 119.250        | 0.000    | 1088.761        | 1091.738        | 1098.794        | K127 |
| L14  | 141.118         | 142.119        | 0.000    | <b>469.313</b>  | <b>452.287</b> | 0.000    | 1728.071        | 1711.043        | 1728.019        | L126 |
| L15  | 154.042         | 157.043        | 0.000    | <b>582.397</b>  | <b>565.371</b> | 0.000    | 1811.088        | 1798.109        | 1819.119        | L125 |
| G16  | 181.424         | 184.425        | 0.000    | 182.413         | 192.414        | 0.000    | 1752.523        | 1749.475        | 1744.461        | G124 |
| K17  | 187.070         | <b>750.524</b> | 0.000    | 179.543         | 177.519        | 0.000    | 1448.488        | 1423.454        | 1427.470        | K123 |
| V18  | <b>566.819</b>  | <b>848.592</b> | 0.000    | 189.813         | <b>177.587</b> | 0.000    | 2088.186        | 2072.201        | 2074.543        | V122 |
| L19  | <b>567.806</b>  | 568.807        | 880.836  | 195.811         | 192.810        | 917.821  | 2130.251        | 2117.251        | 2124.215        | L121 |
| L10  | <b>1088.750</b> | 1081.751       | 1082.749 | <b>1108.745</b> | 1081.719       | 1086.718 | 1088.718        | 1087.211        | 1077.217        | L120 |
| A11  | 1151.737        | 1154.738       | 1152.777 | <b>1178.782</b> | 1162.756       | 1161.752 | 1410.154        | 1404.127        | 1408.141        | A116 |
| G12  | 1214.694        | 1217.695       | 1216.694 | 1219.744        | 1200.718       | 1208.692 | 1480.111        | 1483.066        | 1487.108        | G118 |
| G13  | 1336.667        | 1339.668       | 1338.667 | 1344.662        | 1347.656       | 1346.652 | 1777.048        | 1769.033        | 1769.048        | G117 |
| G14  | 1381.689        | 1376.682       | 1379.676 | 1421.684        | 1404.657       | 1403.653 | 1720.037        | 1703.010        | 1702.026        | G116 |
| V15  | 1460.669        | 1456.662       | 1454.644 | 1458.659        | 1451.653       | 1450.649 | 1608.038        | 1544.968        | 1543.959        | V115 |
| L16  | 1506.041        | 1509.042       | 1508.041 | 1514.036        | 1517.030       | 1516.026 | 1503.041        | 1548.936        | 1545.938        | L114 |
| L17  | 1703.004        | 1706.005       | 1705.004 | 1711.000        | 1714.000       | 1713.000 | <b>1450.863</b> | 1431.826        | 1432.812        | L113 |
| N18  | 1811.110        | 1810.111       | 1788.211 | 1849.110        | 1838.111       | 1827.111 | 1881.111        | 1838.111        | 1839.111        | N112 |
| L106 | 1830.223        | 1833.224       | 1832.223 | 1839.225        | 1841.226       | 1840.225 | 1229.216        | 1222.741        | 1221.767        | L111 |
| Q120 | 1838.282        | 1841.283       | 1840.282 | 1849.273        | 1848.284       | 1848.284 | 1138.824        | <b>1149.656</b> | <b>1148.672</b> | Q119 |
| A111 | 1839.287        | 1832.280       | 1841.288 | 1837.281        | 1842.280       | 1841.280 | <b>908.526</b>  | <b>181.506</b>  | 186.514         | A110 |
| V121 | 2048.188        | 2041.189       | 2039.874 | 2050.187        | 2049.188       | 2048.188 | <b>927.537</b>  | <b>910.561</b>  | 908.537         | V118 |
| L121 | 2041.488        | 2044.489       | 2043.488 | 2049.484        | 2047.483       | 2046.483 | <b>878.519</b>  | <b>811.492</b>  | 810.508         | L117 |
| L124 | 2044.533        | 2047.534       | 2046.533 | 2049.540        | 2048.539       | 2048.539 | 715.435         | <b>698.468</b>  | <b>697.434</b>  | L115 |
| P125 | 2041.606        | 2044.607       | 2043.606 | 2049.604        | 2047.603       | 2046.603 | 650.329         | 488.271         | 487.281         | P114 |
| K126 | 2078.701        | 2081.702       | 2080.701 | 2087.696        | 2086.697       | 2086.697 | 505.254         | 488.271         | 487.281         | K110 |
| K127 | 2077.746        | 2080.747       | 2079.746 | 2085.741        | 2084.742       | 2083.742 | <b>377.265</b>  | 365.177         | 364.181         | K111 |
| L126 | 2088.844        | 2091.845       | 2090.844 | 2095.839        | 2094.840       | 2093.840 | 148.043         | 148.043         | 148.043         | L112 |
| E128 | 2071.838        | 2074.839       | 2073.838 | 2078.831        | 2077.832       | 2076.832 | 148.043         | 148.043         | 148.043         | E111 |



# sp | Q6GSS7 | H2A2A\_MOUSE

LNKLLGK<sup>Dimethyl</sup>VTIAQGGVLPNIQAVLLPKKTE<sup>28.03</sup>

- ▶ fragmentation table for charge state 2+
- ▶ specType=cid
- ▶ score=39.66
- ▶ F113278.dat
- ▶ query=q62529\_p1
- ▶ precursor=771.724070
- ▶ chargePrecursor=4
- ▶ itol=0.5

| AA  | a               | a <sup>+</sup> | a+2            | b               | b <sup>+</sup> | b+2            | y               | y <sup>+</sup> | y+2            | AA   |
|-----|-----------------|----------------|----------------|-----------------|----------------|----------------|-----------------|----------------|----------------|------|
| L1  | 48.002          | 0.504          | 0.504          | 57.540          | 0.504          | 0.504          | 1542.400        | 1553.930       | 1553.444       | L29  |
| R1  | 108.979         | 0.500          | 0.500          | 114.977         | 0.500          | 0.500          | 1491.933        | 1497.936       | 1496.950       | R20  |
| R1  | 104.021         | 1.000          | 1.000          | 178.010         | 1.100          | 0.504          | 1428.000        | 1420.371       | 1410.081       | K227 |
| L14 | 221.163         | 0.120          | 0.500          | 229.160         | 0.200          | 0.504          | 1304.830        | 1306.320       | 1305.833       | L26  |
| L15 | 227.160         | 0.000          | 0.500          | 289.160         | 0.000          | 0.500          | 1300.000        | 1299.700       | 1299.700       | L25  |
| G1  | 300.200         | 0.000          | 0.500          | 309.203         | 0.110          | 0.504          | 1281.350        | 1283.241       | 1282.740       | G24  |
| R17 | 304.210         | 0.000          | 0.500          | 309.210         | 0.000          | 0.504          | 1281.244        | 1284.734       | 1284.239       | R23  |
| V1  | 423.114         | 0.000          | 0.500          | 427.110         | 0.000          | 0.504          | 1152.127        | 1154.600       | 1154.100       | V22  |
| V19 | 504.137         | <b>475.823</b> | <b>475.331</b> | <b>498.334</b>  | 7.000          | 0.201          | 800.220         | 1005.000       | 1007.215       | V21  |
| I10 | <b>540.879</b>  | 0.000          | 0.000          | <b>554.876</b>  | <b>546.363</b> | <b>545.871</b> | <b>1045.173</b> | 1108.618       | 1108.117       | I21  |
| A11 | <b>576.397</b>  | 0.000          | 0.000          | <b>590.395</b>  | 0.000          | 0.000          | <b>581.390</b>  | <b>688.581</b> | 0.000          | A16  |
| G12 | <b>640.937</b>  | <b>631.913</b> | 0.000          | <b>654.930</b>  | <b>645.911</b> | <b>645.419</b> | <b>651.905</b>  | <b>844.549</b> | <b>844.057</b> | G10  |
| G13 | <b>648.937</b>  | 0.000          | 0.000          | <b>662.935</b>  | <b>674.422</b> | <b>673.930</b> | <b>688.035</b>  | <b>880.519</b> | <b>880.027</b> | G17  |
| G14 | <b>687.448</b>  | 0.000          | 0.000          | <b>711.444</b>  | <b>702.932</b> | <b>702.440</b> | <b>866.522</b>  | <b>852.009</b> | <b>851.517</b> | G16  |
| V13 | <b>746.982</b>  | <b>738.469</b> | <b>737.977</b> | <b>766.980</b>  | <b>772.467</b> | <b>771.974</b> | 0.000           | <b>821.490</b> | <b>821.006</b> | V15  |
| L10 | 803.524         | 0.000          | 0.000          | <b>794.519</b>  | <b>817.522</b> | <b>809.509</b> | <b>808.517</b>  | <b>782.477</b> | 775.004        | L14  |
| P12 | <b>852.061</b>  | <b>843.537</b> | <b>843.045</b> | 0.000           | 0.000          | 0.000          | <b>817.043</b>  | <b>745.935</b> | <b>747.422</b> | P13  |
| T14 | 887.074         | 0.000          | 0.000          | <b>823.070</b>  | <b>814.556</b> | 0.000          | 0.000           | <b>877.459</b> | <b>848.966</b> | T12  |
| T16 | 905.014         | 0.000          | 0.000          | 909.010         | 894.008        | 894.008        | 910.000         | <b>826.387</b> | 811.876        | T11  |
| G19 | 922.048         | 1.000          | 1.000          | 930.046         | 930.046        | 930.046        | 934.038         | <b>563.816</b> | <b>555.312</b> | G18  |
| A11 | <b>1065.162</b> | 1.000          | 1.000          | <b>1076.160</b> | 1.000          | 1.000          | <b>1076.154</b> | 994.018        | 994.018        | A10  |
| V12 | 1114.110        | 1.100          | 1.100          | 1125.108        | 1125.108       | 1125.108       | 1129.100        | 954.207        | 954.207        | V18  |
| L12 | 1171.708        | 1.000          | 1.000          | 1182.706        | 1182.706       | 1182.706       | 1186.700        | 414.100        | 408.250        | L17  |
| L14 | 1227.700        | 1.000          | 1.000          | <b>1241.778</b> | 1231.765       | 1231.765       | 1235.760        | 384.211        | 380.100        | L16  |
| P15 | 1276.800        | 0.000          | 0.000          | 1286.796        | 1286.796       | 1286.796       | 1290.790        | 301.810        | 295.100        | P16  |
| R19 | 1340.904        | 1.100          | 1.100          | 1351.902        | 1351.902       | 1351.902       | 1355.900        | 253.110        | 244.610        | R10  |
| K12 | 1404.802        | 1.000          | 1.000          | 1419.800        | 1419.800       | 1419.800       | 1423.800        | 180.500        | 180.100        | K15  |
| L16 | 1404.800        | 1.000          | 1.000          | 1419.800        | 1419.800       | 1419.800       | 1423.800        | 180.500        | 180.100        | L18  |
| E10 | 1519.447        | 1.000          | 1.000          | 1533.443        | 1533.444       | 1533.444       | 1537.440        | 74.514         | 0.500          | E11  |

# sp | Q6GSS7 | H2A2A\_MOUSE

LNKLLGK <sup>Dimethyl</sup> <sub>28.03</sub> VTIAQGGVLPNIQAVLLPKKTE

- ▶ fragmentation table for charge state 3+
- ▶ specType=cid
- ▶ score=39.66
- ▶ F113278.dat
- ▶ query=q62529.p1
- ▶ precursor=771.724070
- ▶ chargePrecursor=4
- ▶ itol=0.5

| AA   | a               | a <sup>+</sup>  | a <sup>2+</sup> | b              | b <sup>+</sup> | b <sup>2+</sup> | y              | y <sup>+</sup> | y <sup>2+</sup> | AA   |
|------|-----------------|-----------------|-----------------|----------------|----------------|-----------------|----------------|----------------|-----------------|------|
| L1   | 26.292          | 0.072           | 0.072           | 36.702         | 0.072          | 0.072           | 30.028         | 10.022         | 10.022          | L106 |
| R12  | 47.382          | 0.176           | 0.072           | 73.712         | 73.942         | 0.072           | 90.912         | 90.202         | 94.932          | R127 |
| R13  | 110.062         | 104.402         | 0.072           | 110.412        | 113.732        | 0.072           | <b>952.926</b> | 947.202        | 946.922         | R127 |
| L14  | 147.778         | 142.102         | 0.072           | 137.102        | 131.434        | 0.072           | <b>910.328</b> | <b>904.552</b> | <b>904.222</b>  | L126 |
| L15  | 185.492         | 179.762         | 0.072           | 180.902        | 174.738        | 0.072           | <b>875.532</b> | <b>866.532</b> | <b>866.532</b>  | L126 |
| G16  | 204.672         | 198.884         | 0.072           | 213.812        | 206.132        | 0.072           | <b>834.839</b> | <b>826.102</b> | <b>828.836</b>  | G124 |
| R17  | 216.522         | 210.846         | 0.072           | 208.852        | 202.172        | 0.072           | <b>815.832</b> | 810.126        | 809.712         | R125 |
| V18  | 238.844         | 233.088         | 0.072           | 228.832        | 222.202        | 0.072           | 787            | 782.144        | 781.708         | V122 |
| V19  | 257.562         | 251.762         | 0.072           | 247.222        | 240.582        | 0.072           | <b>730.747</b> | 725.092        | 724.762         | V121 |
| H19  | 269.822         | 264.046         | 0.072           | 254.732        | 248.072        | 0.072           | <b>697.064</b> | <b>691.406</b> | 691.002         | H120 |
| A111 | 284.062         | 278.282         | 0.072           | 267.502        | 260.822        | 0.072           | 669            | 664.114        | 663.746         | A110 |
| Q123 | 327.082         | 321.314         | 0.072           | 316.942        | 310.262        | 0.072           | <b>636.718</b> | <b>631.035</b> | 630.672         | Q123 |
| G113 | 346.282         | 340.514         | 0.072           | 335.432        | 328.752        | 0.072           | 609            | <b>587.340</b> | <b>587.022</b>  | G117 |
| G114 | 360.324         | 354.552         | 0.072           | 349.832        | 343.152        | 0.072           | 582            | 577.362        | 576.914         | G116 |
| L121 | <b>406.324</b>  | 400.552         | 0.072           | 387.852        | 381.172        | 0.072           | <b>335.618</b> | 330.938        | 330.582         | L121 |
| L116 | 438.542         | 432.772         | 0.072           | 426.262        | 419.582        | 0.072           | 306            | 301.912        | 301.562         | L114 |
| P117 | 456.812         | 451.042         | 0.072           | 445.252        | 438.572        | 0.072           | 277            | 272.582        | 272.232         | P113 |
| R118 | 469.842         | 464.072         | 0.072           | 454.242        | 447.562        | 0.072           | 248            | 243.572        | 243.222         | R114 |
| H118 | <b>644.075</b>  | 638.302         | <b>638.075</b>  | <b>615.718</b> | <b>617.735</b> | 609.712         | <b>451.942</b> | 446.262        | 445.932         | H114 |
| L118 | <b>646.765</b>  | 641.002         | 635.232         | <b>615.912</b> | <b>617.929</b> | 609.712         | 417            | 412.872        | 412.522         | L114 |
| Q120 | 660.765         | 655.002         | 650.232         | 636.962        | 638.972        | 630.942         | 378            | 373.812        | 373.462         | Q119 |
| A121 | 710.444         | 704.672         | 704.444         | <b>716.775</b> | <b>714.100</b> | 713.772         | 333            | 328.702        | 327.542         | A120 |
| V122 | <b>743.467</b>  | 737.702         | 737.467         | <b>752.798</b> | <b>749.123</b> | <b>746.745</b>  | 289            | 284.652        | 284.302         | V120 |
| L124 | 781.942         | 776.182         | 775.942         | <b>788.788</b> | <b>785.113</b> | 784.782         | 235            | 230.692        | 230.342         | L122 |
| L124 | 818.056         | 812.292         | 812.056         | <b>828.188</b> | <b>824.513</b> | 824.182         | 206            | 201.472        | 201.122         | L120 |
| P121 | 837.202         | 831.442         | <b>845.243</b>  | <b>866.539</b> | 862.864        | 862.532         | 161            | 156.782        | 156.432         | P119 |
| R126 | 893.502         | 887.742         | 887.502         | <b>903.237</b> | 899.562        | 899.232         | 139            | 134.222        | 133.872         | R124 |
| R127 | 918.064         | <b>930.928</b>  | <b>930.600</b>  | 946.132        | <b>941.260</b> | <b>939.932</b>  | 108            | 103.712        | 103.362         | R124 |
| L126 | 975.202         | 969.442         | 969.202         | 984.232        | 979.362        | 979.032         | 83             | 78.762         | 77.704          | L122 |
| R124 | <b>1011.300</b> | <b>1007.625</b> | 1007.300        | 1020.625       | 1015.750       | 1015.425        | 50             | 45.812         | 44.922          | R120 |



# sp | Q6GSS7 | H2A2A\_MOUSE

LNKLLGK <sup>Dimethyl</sup> <sub>28.03</sub> VTIAQGGVLPNIQAVLLPKKTE

- ▶ fragmentation table for charge state 1+
- ▶ specType=etd
- ▶ score=37.41
- ▶ F113278.dat
- ▶ query=q62530.p1
- ▶ precursor=771.724070
- ▶ chargePrecursor=4
- ▶ itol=0.5

| AA    | c               | y        | z+1             | z+2             | z              | AA    |
|-------|-----------------|----------|-----------------|-----------------|----------------|-------|
| L 1   | 131.118         | 3081.892 | 3067.873        | 0.000           | 3066.895       | L 29  |
| N 2   | 345.161         | 2970.808 | 2954.789        | 2955.797        | 2951.781       | N 28  |
| K 3   | 373.256         | 2856.765 | 2840.746        | 2841.754        | 2839.738       | K 27  |
| L 4   | <b>486.340</b>  | 2728.670 | 2712.651        | 2713.659        | 2711.643       | L 26  |
| L 5   | <b>599.424</b>  | 2615.585 | 2599.567        | 2600.575        | 2598.560       | L 25  |
| Q 6   | <b>656.445</b>  | 2502.502 | 2486.483        | 2487.491        | 2485.475       | Q 24  |
| K 7   | 812.572         | 2345.480 | 2429.462        | 2430.469        | 2428.454       | K 23  |
| V 8   | <b>911.640</b>  | 2288.554 | 2273.535        | 2274.543        | 2272.527       | V 22  |
| T 9   | 1012.688        | 2190.586 | 2174.567        | 2175.575        | 2173.559       | T 21  |
| I 10  | <b>1125.772</b> | 2089.238 | 2073.219        | 2074.227        | 2072.211       | I 20  |
| A 11  | 1196.859        | 1976.154 | <b>1960.135</b> | 1961.143        | 1959.127       | A 19  |
| Q 12  | 1324.887        | 1905.111 | 1889.092        | 1890.100        | 1888.084       | Q 18  |
| Q 13  | 1381.889        | 1777.055 | 1761.036        | 1762.044        | 1760.032       | Q 17  |
| G 14  | 1438.910        | 1720.037 | <b>1704.018</b> | 1705.026        | 1703.010       | G 16  |
| V 15  | 1537.879        | 1663.015 | 1646.997        | 1648.004        | 1645.989       | V 15  |
| L 16  | 1651.063        | 1563.947 | <b>1547.928</b> | 1548.936        | 1546.920       | L 14  |
| P 17  | 1748.116        | 1450.893 | 1434.874        | 1435.882        | 1433.866       | P 13  |
| TW 18 | 1892.159        | 1383.810 | <b>1337.791</b> | 1338.799        | 1336.783       | TW 12 |
| I 19  | 1975.243        | 1236.767 | <b>1223.748</b> | 1224.756        | 1222.741       | I 11  |
| Q 20  | 2103.301        | 1126.683 | 1110.664        | <b>1111.672</b> | 1109.656       | Q 10  |
| A 21  | 2174.336        | 996.624  | 980.606         | 981.614         | 981.598        | A 9   |
| V 22  | 2273.407        | 927.587  | <b>911.569</b>  | 912.576         | 910.561        | V 8   |
| L 23  | 2386.491        | 828.519  | 812.500         | <b>813.508</b>  | <b>811.492</b> | L 7   |
| L 24  | 2499.575        | 715.435  | <b>699.416</b>  | <b>700.424</b>  | 698.408        | L 6   |
| P 25  | 2596.626        | 602.351  | 586.332         | 587.340         | 585.324        | P 5   |
| K 26  | 2724.723        | 505.298  | <b>489.279</b>  | <b>490.287</b>  | 488.271        | K 4   |
| K 27  | 2852.816        | 377.203  | <b>361.184</b>  | <b>362.192</b>  | 360.177        | K 3   |
| T 28  | 2953.895        | 249.108  | 233.089         | 234.097         | 232.082        | T 2   |
| E 29  | 3082.938        | 148.060  | 132.042         | 133.050         | 131.034        | E 1   |

# sp | Q6GSS7 | H2A2A\_MOUSE

LNKLLGK <sup>Dimethyl</sup> <sub>28.03</sub> VTIAQGGVLPNIQAVLLPKKTE

- ▶ fragmentation table for charge state 2+
- ▶ specType=etd
- ▶ score=37.41
- ▶ F113278.dat
- ▶ query=q62530.p1
- ▶ precursor=771.724070
- ▶ chargePrecursor=4
- ▶ itol=0.5

| AA  | c               | y               | z+1             | z+2             | z               | AA   |
|-----|-----------------|-----------------|-----------------|-----------------|-----------------|------|
| L1  | 66.093          | <b>1542.450</b> | 1524.440        | 9.504           | 1533.930        | L120 |
| N12 | 123.084         | <b>1485.908</b> | <b>1477.898</b> | 1478.402        | <b>1477.394</b> | N120 |
| K13 | 187.132         | 1428.888        | <b>1420.877</b> | <b>1421.381</b> | 1420.373        | K127 |
| L14 | 243.674         | 1364.839        | <b>1356.829</b> | <b>1357.333</b> | 1356.325        | L126 |
| L15 | 300.216         | 1308.297        | 1300.287        | 1300.791        | 1299.783        | L125 |
| G16 | 358.758         | 1251.795        | <b>1243.745</b> | 1244.249        | <b>1243.241</b> | G124 |
| K17 | 406.799         | <b>1223.244</b> | <b>1215.234</b> | <b>1215.738</b> | <b>1214.731</b> | K123 |
| V18 | 456.324         | 1145.181        | 1137.171        | 1137.675        | 1136.667        | V122 |
| F19 | 506.840         | 1095.646        | <b>1087.637</b> | <b>1088.141</b> | 1087.133        | F121 |
| T10 | 563.390         | 1045.123        | <b>1037.113</b> | <b>1037.617</b> | 1036.609        | T20  |
| A11 | <b>598.908</b>  | <b>988.581</b>  | <b>980.571</b>  | <b>981.075</b>  | 980.067         | A119 |
| Q12 | 662.937         | 933.066         | 925.053         | 925.557         | 924.549         | Q118 |
| G13 | 691.448         | 889.033         | 881.023         | <b>881.527</b>  | 880.519         | G117 |
| G14 | 719.959         | 860.522         | 852.513         | 853.017         | 852.009         | G116 |
| V15 | 769.493         | <b>832.011</b>  | 824.002         | 824.506         | 823.498         | V115 |
| L16 | 820.035         | 782.477         | 774.468         | 774.972         | 773.964         | L114 |
| F17 | <b>874.561</b>  | 728.935         | 721.928         | 722.432         | 721.424         | F113 |
| N18 | <b>931.583</b>  | 677.400         | 669.390         | 669.893         | 668.885         | N112 |
| I19 | <b>988.125</b>  | 620.867         | 612.858         | 613.362         | 612.354         | I111 |
| Q20 | <b>1052.154</b> | 563.845         | 555.836         | 556.340         | 555.332         | Q110 |
| A21 | <b>1087.673</b> | 499.816         | 491.807         | 492.311         | 491.303         | A10  |
| V22 | 1127.207        | 484.297         | 476.288         | 476.792         | 475.784         | V10  |
| L23 | 1193.749        | 414.763         | 406.754         | 407.258         | 406.250         | L17  |
| L24 | 1250.291        | 358.221         | 350.212         | 350.716         | 349.708         | L16  |
| P25 | 1298.817        | 301.679         | 293.670         | 294.174         | 293.166         | P15  |
| K26 | <b>1362.865</b> | 253.153         | 245.143         | 245.647         | 244.639         | K14  |
| K27 | <b>1426.912</b> | 189.105         | 181.096         | 181.600         | 180.592         | K13  |
| T28 | <b>1477.436</b> | 125.058         | 117.048         | 117.552         | 116.544         | T12  |
| E29 | <b>1541.958</b> | 74.534          | 66.524          | 67.028          | 66.021          | E11  |

# sp | Q6GSS7 | H2A2A\_MOUSE

LNKLLGK <sup>Dimethyl</sup><sub>28.03</sub> VTIAQGGVLPNIQAVLLPKKTE

- ▶ fragmentation table for charge state 3+
- ▶ specType=etd
- ▶ score=37.41
- ▶ F113278.dat
- ▶ query=q62530.p1
- ▶ precursor=771.724070
- ▶ chargePrecursor=4
- ▶ itol=0.5

| AA  | c              | y               | z+1             | z+2            | z              | AA  |
|-----|----------------|-----------------|-----------------|----------------|----------------|-----|
| L1  | 44.377         | <b>1028.635</b> | <b>1023.296</b> | 0.672          | 1022.660       | L29 |
| N2  | 82.302         | 090.941         | <b>985.601</b>  | 955.937        | <b>985.265</b> | N28 |
| K3  | 125.090        | 952.329         | <b>947.587</b>  | <b>947.923</b> | 947.251        | K27 |
| L4  | 162.785        | 910.228         | 904.869         | 905.225        | 904.551        | L26 |
| L5  | 200.479        | 872.531         | 867.194         | 867.530        | 866.858        | L25 |
| G6  | 239.487        | 834.839         | 829.499         | 829.835        | 829.163        | G24 |
| K7  | 271.529        | 815.832         | 810.492         | 810.828        | 810.156        | K23 |
| V8  | 304.552        | 783.790         | 778.450         | 778.786        | 778.114        | V22 |
| T9  | 338.234        | 730.767         | 725.427         | 725.763        | 725.091        | T21 |
| I10 | 375.929        | 697.084         | 691.745         | 692.081        | 691.409        | I20 |
| A11 | 389.608        | 699.389         | 654.050         | 654.386        | 653.714        | A19 |
| Q12 | 442.294        | 636.710         | 630.371         | 630.707        | 630.035        | Q18 |
| G13 | 461.301        | 593.024         | 587.685         | 588.021        | 587.349        | G17 |
| G14 | 480.308        | 574.017         | 568.678         | 569.013        | 568.342        | G16 |
| V15 | 513.331        | 555.010         | 549.670         | 550.006        | 549.334        | V15 |
| L16 | 551.026        | 521.987         | 516.648         | 516.984        | 516.312        | L14 |
| P17 | 583.377        | 484.202         | 478.863         | 479.209        | 478.617        | P13 |
| N18 | 621.391        | 451.942         | 446.602         | 446.938        | 446.266        | N12 |
| I19 | 659.086        | 413.927         | 408.588         | 408.924        | 408.252        | I11 |
| Q20 | 701.772        | 376.233         | 370.893         | 371.229        | 370.557        | Q10 |
| A21 | 725.451        | 333.546         | 328.207         | 328.543        | 327.871        | A9  |
| V22 | 758.474        | 309.867         | 304.528         | 304.864        | 304.192        | V8  |
| L23 | 796.188        | 276.844         | 271.505         | 271.841        | 271.169        | L7  |
| L24 | 833.863        | 239.150         | 233.810         | 234.146        | 233.474        | L6  |
| T25 | 869.214        | 201.455         | 196.116         | 196.452        | 195.780        | T5  |
| K26 | 908.912        | 169.100         | 163.760         | 164.101        | 163.429        | K4  |
| K27 | <b>951.611</b> | 138.406         | 133.066         | 133.402        | 132.730        | K3  |
| T28 | <b>985.293</b> | 83.708          | 78.368          | 78.704         | 78.032         | T2  |
| E29 | 1028.307       | 50.025          | 44.685          | 45.021         | 44.349         | E1  |

# sp | Q6GSS7 | H2A2A\_MOUSE

LNKLLGK<sup>Dimethyl</sup>VTIAQGGVLPNIQAVLLPKKTE  
28.03

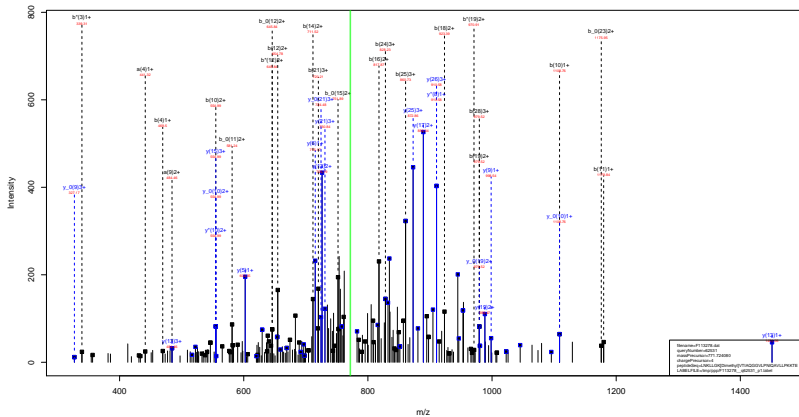

# sp | Q6GSS7 | H2A2A\_MOUSE

LNKLLGK <sup>Dimethyl</sup>VTIAQGGVLPNIQAVLLPKKTE  
28.03

- ▶ fragmentation table for charge state 1+
- ▶ specType=cid
- ▶ score=31.92
- ▶ F113278.dat
- ▶ query=q62531\_p1
- ▶ precursor=771.724080
- ▶ chargePrecursor=4
- ▶ itol=0.5

| AA  | a              | a'             | a <sub>0</sub> | b               | b'             | b <sub>0</sub> | y              | y'              | y <sub>0</sub>  | AA       |     |
|-----|----------------|----------------|----------------|-----------------|----------------|----------------|----------------|-----------------|-----------------|----------|-----|
| L1  | 380.080        | 0.000          | 0.000          | 114.061         | 0.000          | 0.000          | 368.019        | 0.000           | 0.000           | L20      |     |
| R1  | 392.100        | 183.111        | 0.000          | 208.144         | 0.000          | 0.000          | 462.003        | 0.000           | 0.000           | R20      |     |
| R2  | 438.254        | 331.265        | 0.000          | <b>356.329</b>  | <b>338.203</b> | 0.000          | 388.765        | 2639.738        | 2638.784        | R21      |     |
| L4  | <b>441.318</b> | 437.292        | 0.000          | <b>469.313</b>  | <b>452.277</b> | 0.000          | 2726.870       | 2711.043        | 2710.039        | L26      |     |
| L5  | 454.338        | <b>537.316</b> | 0.000          | <b>567.307</b>  | <b>565.311</b> | 0.000          | 2635.920       | 2628.928        | 2629.919        | L28      |     |
| G1  | 511.424        | 584.414        | 0.000          | 587.411         | <b>622.392</b> | 0.000          | 2522.928       | 2488.875        | 2484.861        | G24      |     |
| R7  | 587.500        | 580.538        | 0.000          | <b>795.545</b>  | 778.519        | 0.000          | 2448.480       | 2428.454        | 2427.410        | R23      |     |
| V1  | 689.614        | 682.642        | 0.000          | <b>894.613</b>  | 877.587        | 0.000          | 2240.260       | 2227.241        | 2226.248        | V22      |     |
| L9  | <b>917.646</b> | <b>849.592</b> | 949.000        | 908.584         | 878.530        | 977.000        | 2130.250       | 2117.251        | 2117.251        | L22      |     |
| I10 | 989.768        | 983.746        | 1084.746       | <b>1108.745</b> | 1081.719       | 1080.719       | 2088.210       | 2074.211        | 2074.211        | I21      |     |
| A11 | 1051.100       | 1124.762       | 1133.777       | <b>1179.762</b> | 1160.756       | 1161.772       | 1836.154       | 1999.127        | 1998.143        | A16      |     |
| G12 | 1179.806       | 1200.830       | 1264.830       | 1264.834        | 1266.834       | 1268.832       | 1820.141       | 1888.066        | 1887.076        | G18      |     |
| G13 | 1339.900       | 1330.844       | 1319.851       | 1364.844        | 1367.858       | 1366.856       | 1777.025       | 1760.022        | 1761.048        | G17      |     |
| G14 | 1393.000       | 1398.002       | 1379.000       | 1421.004        | 1404.007       | 1403.011       | 1720.020       | 1703.010        | 1702.026        | G16      |     |
| V15 | 1483.000       | 1470.001       | 1474.001       | 1520.002        | 1503.005       | 1502.001       | 1681.001       | 1648.000        | 1649.000        | V13      |     |
| L16 | 1506.041       | 1500.033       | 1508.033       | 1534.030        | 1537.033       | 1536.030       | 1583.041       | 1548.020        | 1545.030        | L14      |     |
| P17 | 1613.024       | 1588.000       | 1608.000       | 1638.004        | 1613.003       | 1614.003       | 1433.010       | <b>1450.863</b> | 1433.010        | 1432.002 | P13 |
| R18 | 1617.137       | 1601.130       | 1609.122       | 1640.132        | 1624.128       | 1623.124       | 1563.810       | 1530.783        | 1529.789        | R12      |     |
| I19 | 1739.012       | 1733.020       | 1742.011       | 1790.025        | 1781.000       | 1780.000       | 1428.791       | 1422.743        | 1421.737        | I11      |     |
| Q20 | 2058.000       | 2041.231       | 2040.200       | 2088.215        | 2086.248       | 2088.204       | 1128.000       | 1109.000        | <b>1108.072</b> | Q19      |     |
| A21 | 2139.117       | 2132.200       | 2111.300       | 2157.312        | 2140.205       | 2140.301       | <b>998.624</b> | 981.500         | <b>980.614</b>  | A19      |     |
| V22 | 2208.000       | 2213.000       | 2204.000       | 2226.000        | 2228.004       | 2228.000       | 988.000        | <b>910.561</b>  | 908.879         | V18      |     |
| L23 | 2441.200       | 2434.441       | 2434.400       | 2489.404        | 2487.400       | 2487.404       | <b>828.519</b> | 811.500         | 810.500         | L17      |     |
| L24 | 2654.000       | 2647.820       | 2636.540       | 2682.540        | 2685.540       | 2684.531       | <b>715.835</b> | 708.400         | <b>697.424</b>  | L19      |     |
| P25 | 2813.000       | 2824.000       | 2833.000       | 2879.000        | 2878.000       | 2878.000       | 682.000        | 688.200         | 687.200         | P19      |     |
| R26 | 2876.101       | 2882.010       | 2881.000       | 2937.000        | 2936.010       | 2936.010       | 688.010        | 688.200         | 687.200         | R24      |     |
| R27 | 2877.000       | 2780.000       | 2780.000       | 2838.000        | 2837.000       | 2837.000       | 377.000        | 360.177         | 359.183         | R25      |     |
| L28 | 2899.000       | 2883.000       | 2883.000       | 2938.000        | 2937.000       | 2937.000       | 368.000        | 368.000         | 367.000         | L24      |     |
| L29 | 3117.000       | 3030.000       | 3030.000       | 3080.001        | 3078.001       | 3078.001       | 140.000        | 140.000         | 139.000         | L21      |     |



# sp | Q6GSS7 | H2A2A\_MOUSE

LNKLLGK <sup>Dimethyl</sup> <sub>28.03</sub> VTIAQGGVLPNIQAVLLPKKTE

- ▶ fragmentation table for charge state 2+
- ▶ specType=cid
- ▶ score=31.92
- ▶ F113278.dat
- ▶ query=q62531.p1
- ▶ precursor=771.724080
- ▶ chargePrecursor=4
- ▶ itol=0.5

| AA   | a    | a*  | a±0   | b     | b*    | b±0   | y        | y*       | y±0      | AA   |      |     |      |     |      |     |      |      |      |      |
|------|------|-----|-------|-------|-------|-------|----------|----------|----------|------|------|-----|------|-----|------|-----|------|------|------|------|
| L1   | 41   | 552 | 0.504 | 0.504 | 0.504 | 0.504 | 1043.420 | 1043.420 | 1043.444 | L106 |      |     |      |     |      |     |      |      |      |      |
| R1   | 100  | 913 | 0.504 | 1.14  | 0.504 | 0.504 | 1493.903 | 1493.903 | 1493.928 | R120 |      |     |      |     |      |     |      |      |      |      |
| R1   | 184  | 832 | 1.06  | 1.08  | 0.504 | 1.16  | 1638.889 | 1426.373 | 1416.061 | R122 |      |     |      |     |      |     |      |      |      |      |
| L1   | 221  | 583 | 0.504 | 2.35  | 1.040 | 2.06  | 1364.833 | 1356.325 | 1356.333 | L126 |      |     |      |     |      |     |      |      |      |      |
| L1   | 277  | 720 | 0.504 | 3.00  | 1.020 | 3.03  | 1308.359 | 1299.780 | 1299.780 | L128 |      |     |      |     |      |     |      |      |      |      |
| Q1   | 306  | 528 | 2.07  | 1.00  | 0.504 | 1.00  | 1251.750 | 1243.242 | 1242.740 | Q124 |      |     |      |     |      |     |      |      |      |      |
| R1   | 371  | 700 | 0.504 | 3.08  | 2.00  | 3.00  | 1221.241 | 1214.733 | 1214.730 | R125 |      |     |      |     |      |     |      |      |      |      |
| V1   | 433  | 813 | 0.504 | 3.00  | 1.040 | 3.00  | 1148.111 | 1138.603 | 1138.610 | V129 |      |     |      |     |      |     |      |      |      |      |
| L1   | 484  | 337 | 0.504 | 4.75  | 2.00  | 4.00  | 1093.646 | 1087.138 | 1087.143 | L131 |      |     |      |     |      |     |      |      |      |      |
| I10  | 540  | 879 | 512   | 366   | 518   | 871   | 504      | 876      | 546      | 363  | 545  | 871 | 1045 | 123 | 1036 | 928 | 1036 | 111  | I133 |      |
| A11  | 576  | 397 | 2.07  | 2.00  | 3.00  | 3.00  | 981      | 390      | 581      | 882  | 581  | 390 | 980  | 882 | 980  | 882 | 979  | 575  | A135 |      |
| Q13  | 640  | 927 | 833   | 833   | 833   | 833   | 833      | 833      | 833      | 833  | 833  | 833 | 833  | 833 | 833  | 833 | 833  | 833  | 833  | Q139 |
| Q13  | 668  | 937 | 803   | 833   | 803   | 833   | 803      | 935      | 803      | 833  | 803  | 935 | 803  | 833 | 803  | 935 | 803  | 833  | Q137 |      |
| Q14  | 697  | 448 | 688   | 935   | 698   | 447   | 711      | 446      | 711      | 446  | 711  | 446 | 711  | 446 | 711  | 446 | 711  | 446  | Q136 |      |
| V13  | 749  | 803 | 1.06  | 1.00  | 1.00  | 1.00  | 1161     | 800      | 732      | 487  | 731  | 814 | 832  | 811 | 775  | 804 | 773  | 472  | V135 |      |
| L10  | 803  | 524 | 1.06  | 1.00  | 1.00  | 1.00  | 817      | 522      | 809      | 109  | 800  | 517 | 782  | 477 | 775  | 504 | 773  | 472  | L134 |      |
| F137 | 812  | 611 | 0.83  | 1.00  | 843   | 845   | 800      | 600      | 857      | 535  | 857  | 603 | 725  | 935 | 717  | 622 | 716  | 613  | F133 |      |
| R10  | 880  | 720 | 0.83  | 1.00  | 823   | 810   | 824      | 556      | 824      | 556  | 824  | 556 | 668  | 895 | 688  | 403 | 612  | 811  | R131 |      |
| L10  | 965  | 614 | 1.06  | 1.00  | 1.00  | 1.00  | 979      | 612      | 971      | 106  | 970  | 606 | 620  | 387 | 611  | 611 | 611  | 611  | L132 |      |
| Q20  | 1020 | 844 | 1.06  | 1.00  | 1.00  | 1.00  | 1043     | 844      | 1036     | 138  | 1034 | 834 | 555  | 332 | 554  | 840 | 510  | Q130 |      |      |
| A21  | 1091 | 582 | 1.06  | 1.00  | 1.00  | 1.00  | 1070     | 582      | 1070     | 582  | 1070 | 582 | 490  | 811 | 490  | 811 | 490  | 811  | A130 |      |
| V15  | 1114 | 806 | 1.06  | 1.00  | 1.00  | 1.00  | 1100     | 806      | 1100     | 806  | 1100 | 806 | 490  | 811 | 490  | 811 | 490  | 811  | V130 |      |
| L20  | 1111 | 538 | 1.06  | 1.00  | 1.00  | 1.00  | 1100     | 538      | 1100     | 538  | 1100 | 538 | 490  | 811 | 490  | 811 | 490  | 811  | L130 |      |
| L1   | 1227 | 100 | 1.06  | 1.00  | 1.00  | 1.00  | 1214     | 100      | 1214     | 100  | 1214 | 100 | 490  | 811 | 490  | 811 | 490  | 811  | L129 |      |
| F13  | 1277 | 307 | 1.06  | 1.00  | 1.00  | 1.00  | 1264     | 307      | 1264     | 307  | 1264 | 307 | 490  | 811 | 490  | 811 | 490  | 811  | F129 |      |
| R20  | 1340 | 354 | 1.06  | 1.00  | 1.00  | 1.00  | 1330     | 354      | 1330     | 354  | 1330 | 354 | 490  | 811 | 490  | 811 | 490  | 811  | R129 |      |
| R27  | 1404 | 402 | 1.06  | 1.00  | 1.00  | 1.00  | 1394     | 402      | 1394     | 402  | 1394 | 402 | 490  | 811 | 490  | 811 | 490  | 811  | R128 |      |
| L20  | 1434 | 620 | 1.06  | 1.00  | 1.00  | 1.00  | 1424     | 620      | 1424     | 620  | 1424 | 620 | 490  | 811 | 490  | 811 | 490  | 811  | L128 |      |
| L24  | 1519 | 497 | 1.06  | 1.00  | 1.00  | 1.00  | 1504     | 497      | 1504     | 497  | 1504 | 497 | 490  | 811 | 490  | 811 | 490  | 811  | L127 |      |

# sp | Q6GSS7 | H2A2A\_MOUSE

LNKLLGK <sup>Dimethyl</sup> <sub>28.03</sub> VTIAQGGVLPNIQAVLLPKKTE

- ▶ fragmentation table for charge state 3+
- ▶ specType=cid
- ▶ score=31.92
- ▶ F113278.dat
- ▶ query=q62531\_p1
- ▶ precursor=771.724080
- ▶ chargePrecursor=4
- ▶ itol=0.5

| AA  | a              | a <sup>+</sup>  | a-1             | b               | b <sup>+</sup> | b-1            | y              | y <sup>+</sup>  | y-1             | AA  |
|-----|----------------|-----------------|-----------------|-----------------|----------------|----------------|----------------|-----------------|-----------------|-----|
| L1  | 26.320         | 0.672           | 0.672           | 38.767          | 0.672          | 0.672          | 110.819        | <b>1022.960</b> | <b>1022.632</b> | L29 |
| K1  | 37.903         | 0.708           | 0.708           | 39.729          | 0.704          | 0.704          | 98.924         | 108.999         | 109.019         | K30 |
| R1  | 130.583        | 304.489         | 0.672           | 139.413         | 133.792        | 0.672          | <b>952.926</b> | 947.261         | <b>946.923</b>  | K27 |
| L4  | 147.778        | 182.207         | 0.672           | 157.107         | 151.434        | 0.672          | <b>910.228</b> | <b>904.553</b>  | 904.722         | L26 |
| L5  | 160.472        | 178.767         | 0.672           | 169.488         | 168.148        | 0.672          | <b>872.524</b> | 869.299         | 869.729         | L25 |
| G1  | 204.476        | 198.834         | 0.672           | 213.811         | 208.130        | 0.672          | <b>814.819</b> | 825.163         | 828.835         | G24 |
| K1  | 254.922        | 250.688         | 0.672           | 263.857         | 260.178        | 0.672          | <b>815.812</b> | 819.199         | 820.729         | K23 |
| V1  | 289.944        | 287.819         | 0.672           | 298.858         | 294.347        | 0.672          | 785.114        | <b>788.114</b>  | <b>787.788</b>  | V22 |
| L1  | 313.237        | 317.553         | 317.237         | 322.559         | <b>326.883</b> | 325.559        | <b>730.747</b> | 729.191         | <b>724.743</b>  | L21 |
| L10 | 380.832        | 408.208         | 384.918         | 390.291         | 384.918        | 384.209        | <b>697.084</b> | <b>691.469</b>  | 691.081         | L20 |
| A11 | 394.405        | 378.625         | 385.582         | 393.674         | 388.217        | 387.626        | <b>658.389</b> | <b>652.714</b>  | <b>653.389</b>  | A16 |
| G23 | 437.408        | 421.413         | 421.293         | 436.614         | <b>430.943</b> | 430.424        | 630.125        | <b>630.026</b>  | <b>629.701</b>  | G20 |
| G13 | 446.264        | 440.619         | 440.239         | 453.423         | 448.565        | 448.029        | 593.624        | 593.496         | 593.177         | G17 |
| G14 | 445.303        | 438.626         | 438.268         | 474.833         | 468.957        | 468.626        | 574.917        | 568.342         | 568.014         | G16 |
| V15 | 488.346        | 482.682         | 482.319         | 500.658         | 493.963        | 493.689        | <b>555.018</b> | 549.138         | 548.768         | V12 |
| L16 | 538.518        | 530.543         | 530.012         | 543.399         | 536.879        | 536.347        | <b>521.987</b> | <b>516.312</b>  | 515.984         | L14 |
| L17 | 566.384        | 562.688         | 562.308         | <b>577.761</b>  | 572.026        | 571.688        | <b>484.262</b> | 474.611         | 474.309         | L13 |
| K18 | <b>606.384</b> | 602.707         | 602.329         | 611.049         | 605.117        | 604.784        | 488.289        | 488.089         | 487.789         | K15 |
| L19 | <b>644.878</b> | <b>638.483</b>  | <b>638.075</b>  | <b>651.418</b>  | 647.720        | 647.430        | 413.922        | 405.252         | 407.824         | L11 |
| G20 | 685.203        | 681.689         | 681.284         | 696.998         | 690.421        | 689.983        | 378.222        | 370.279         | 370.279         | G19 |
| A12 | 707.444        | <b>704.768</b>  | <b>704.400</b>  | <b>713.775</b>  | 708.188        | 707.777        | 333.588        | 327.873         | <b>327.545</b>  | A10 |
| V21 | <b>743.467</b> | 737.919         | 737.451         | <b>752.769</b>  | 747.123        | <b>746.795</b> | 300.881        | 294.192         | 293.884         | V18 |
| L23 | 811.818        | 818.488         | 818.118         | <b>790.493</b>  | <b>784.817</b> | 784.448        | 278.944        | 271.169         | 270.841         | L17 |
| L24 | 849.288        | 841.188         | 841.188         | <b>826.188</b>  | 820.512        | 820.184        | 248.150        | 243.474         | 243.146         | L15 |
| K25 | <b>851.207</b> | <b>845.531</b>  | <b>845.203</b>  | <b>863.519</b>  | 857.813        | 857.484        | 203.450        | 192.780         | 192.452         | K20 |
| K26 | 865.959        | 868.229         | 867.919         | 883.211         | 876.211        | <b>867.561</b> | <b>867.213</b> | 860.214         | 863.426         | K14 |
| K27 | 930.624        | <b>936.928</b>  | <b>930.660</b>  | 945.970         | 940.290        | 939.912        | 126.460        | 120.790         | 120.462         | K13 |
| L26 | 930.908        | 928.819         | 928.819         | <b>919.618</b>  | 913.942        | 913.614        | 83.909         | 81.814          | 81.909          | L22 |
| E28 | 1011.309       | <b>1007.825</b> | <b>1007.287</b> | <b>1027.832</b> | 1020.960       | 1020.638       | 59.625         | 59.971          | 44.951          | E11 |



# sp | Q6GSS7 | H2A2A\_MOUSE

LNKLLGK <sup>Dimethyl</sup> 28.03 VTIAQGGVLPNIQAVLLPKKTE

- ▶ fragmentation table for charge state 1+
- ▶ specType=etd
- ▶ score=78.50
- ▶ F113278.dat
- ▶ query=q62533.p1
- ▶ precursor=617.580840
- ▶ chargePrecursor=5
- ▶ itol=0.5

| AA    | c               | y               | z+1            | z+2             | z              | AA    |
|-------|-----------------|-----------------|----------------|-----------------|----------------|-------|
| L[1]  | 131.118         | 3081.892        | 3087.873       | 0.000           | 3086.895       | L[29] |
| N[2]  | <b>245.161</b>  | 2970.838        | 2954.789       | 2955.797        | 2951.781       | N[28] |
| K[3]  | <b>373.256</b>  | 2856.795        | 2860.746       | 2841.754        | 2839.738       | K[27] |
| L[4]  | 486.340         | 2728.670        | 2712.651       | 2713.659        | 2711.643       | L[26] |
| L[5]  | <b>699.424</b>  | 2615.588        | 2599.567       | 2600.575        | 2598.560       | L[25] |
| Q[6]  | <b>856.445</b>  | 2502.507        | 2486.483       | 2487.491        | 2485.475       | Q[24] |
| K[7]  | 912.572         | 2445.480        | 2429.462       | 2430.469        | 2428.454       | K[23] |
| V[8]  | <b>911.640</b>  | 2389.354        | 2373.335       | 2374.343        | 2372.327       | V[22] |
| T[9]  | 1012.688        | 2196.286        | 2174.267       | 2175.275        | 2173.259       | T[21] |
| I[10] | <b>1125.772</b> | 2089.238        | 2073.219       | 2074.227        | 2072.211       | I[20] |
| A[11] | <b>1196.809</b> | 1976.154        | 1960.135       | 1961.143        | 1959.127       | A[19] |
| Q[12] | <b>1324.867</b> | 1869.117        | 1853.098       | 1854.106        | 1852.090       | Q[18] |
| G[13] | 1381.989        | 1777.058        | 1761.039       | <b>1762.047</b> | 1760.032       | G[17] |
| G[14] | 1438.910        | 1720.937        | 1704.918       | <b>1705.926</b> | 1703.910       | G[16] |
| V[15] | 1537.879        | 1663.015        | 1646.997       | 1646.004        | 1645.989       | V[15] |
| L[16] | 1651.063        | 1563.947        | 1547.928       | <b>1548.936</b> | 1546.920       | L[14] |
| F[17] | 1748.116        | <b>1450.863</b> | 1434.854       | 1435.862        | 1433.846       | F[13] |
| T[18] | 1862.159        | 1353.810        | 1337.791       | <b>1338.799</b> | 1336.783       | T[12] |
| I[19] | 1975.243        | 1239.767        | 1223.748       | 1224.756        | 1222.741       | I[11] |
| Q[20] | 2103.301        | 1126.683        | 1110.664       | 1111.672        | 1109.656       | Q[10] |
| A[21] | 2174.338        | 998.624         | 982.606        | 981.614         | 981.598        | A[9]  |
| V[22] | 2273.407        | 927.587         | <b>911.569</b> | <b>912.576</b>  | 910.561        | V[8]  |
| L[23] | 2386.491        | 828.519         | 812.500        | <b>813.508</b>  | <b>811.492</b> | L[7]  |
| L[24] | 2499.575        | 715.439         | <b>699.416</b> | <b>700.424</b>  | 698.409        | L[6]  |
| P[25] | 2596.626        | 602.351         | 586.332        | 587.340         | 585.324        | P[5]  |
| K[26] | 2724.723        | 505.290         | 489.279        | <b>490.287</b>  | 488.271        | K[4]  |
| K[27] | 2852.816        | 377.203         | <b>361.184</b> | <b>362.192</b>  | 360.177        | K[3]  |
| T[28] | 2953.895        | 249.108         | 233.089        | 234.097         | 232.082        | T[2]  |
| E[29] | 3082.968        | 148.060         | 132.042        | 133.050         | 131.034        | E[1]  |

# sp | Q6GSS7 | H2A2A\_MOUSE

LNKLLGK <sup>Dimethyl</sup> <sub>28.03</sub> VTIAQGGVLPNIQAVLLPKKTE

- ▶ fragmentation table for charge state 2+
- ▶ specType=etd
- ▶ score=78.50
- ▶ F113278.dat
- ▶ query=q62533.p1
- ▶ precursor=617.580840
- ▶ chargePrecursor=5
- ▶ itol=0.5

| AA    | c               | y              | z+1             | z+2             | z               | AA    |
|-------|-----------------|----------------|-----------------|-----------------|-----------------|-------|
| L[1]  | 66.063          | 1542.450       | 1536.440        | 0.504           | 1533.936        | L[26] |
| N[2]  | 123.084         | 1485.908       | <b>1477.898</b> | <b>1478.402</b> | 1477.304        | N[28] |
| K[3]  | 187.132         | 1426.886       | 1420.877        | 1421.381        | 1420.373        | K[27] |
| L[4]  | 243.674         | 1364.839       | 1356.820        | <b>1357.333</b> | 1356.325        | L[26] |
| L[5]  | 300.216         | 1308.297       | 1300.287        | 1300.791        | <b>1299.783</b> | L[25] |
| G[6]  | 359.276         | 1251.758       | 1243.749        | 1244.253        | 1243.245        | G[24] |
| K[7]  | <b>406.789</b>  | 1223.244       | 1215.235        | <b>1215.738</b> | 1214.731        | K[23] |
| V[8]  | <b>456.324</b>  | 1148.181       | 1137.171        | <b>1137.675</b> | 1136.667        | V[22] |
| T[9]  | <b>506.848</b>  | 1095.646       | 1087.637        | <b>1088.141</b> | 1087.133        | T[21] |
| T[10] | <b>563.390</b>  | 1045.123       | 1037.113        | <b>1037.617</b> | 1036.609        | T[20] |
| A[11] | 620.869         | <b>988.581</b> | <b>980.571</b>  | <b>981.075</b>  | 980.067         | A[19] |
| Q[12] | <b>662.537</b>  | 933.066        | 925.057         | 925.561         | 924.553         | Q[18] |
| G[13] | <b>691.448</b>  | <b>889.033</b> | <b>881.023</b>  | <b>881.527</b>  | 880.519         | G[17] |
| G[14] | <b>719.959</b>  | <b>860.522</b> | <b>852.513</b>  | <b>853.017</b>  | 852.009         | G[16] |
| V[15] | <b>769.493</b>  | 832.011        | <b>824.002</b>  | <b>824.506</b>  | 823.498         | V[15] |
| L[16] | 828.035         | <b>782.477</b> | <b>774.468</b>  | <b>774.972</b>  | 773.964         | L[14] |
| T[17] | <b>874.561</b>  | <b>725.935</b> | 717.926         | 718.430         | 717.422         | T[13] |
| N[18] | 933.583         | 677.409        | <b>669.399</b>  | <b>669.903</b>  | 668.895         | N[12] |
| I[19] | 988.125         | 626.387        | <b>612.378</b>  | <b>612.882</b>  | 611.874         | I[11] |
| Q[20] | <b>1052.154</b> | <b>563.845</b> | 555.836         | 556.340         | 555.332         | Q[10] |
| A[21] | 1087.673        | 499.816        | <b>491.807</b>  | <b>492.310</b>  | 491.302         | A[9]  |
| V[22] | 1137.207        | 464.297        | <b>456.288</b>  | <b>456.792</b>  | 455.784         | V[8]  |
| L[23] | <b>1193.749</b> | 414.783        | <b>406.754</b>  | <b>407.258</b>  | 406.250         | L[17] |
| L[24] | 1250.291        | 358.221        | 350.211         | 350.715         | 349.707         | L[6]  |
| P[25] | 1298.817        | 301.679        | 293.670         | 294.174         | 293.166         | P[5]  |
| K[26] | 1362.865        | 251.153        | <b>245.143</b>  | <b>245.647</b>  | 244.639         | K[4]  |
| K[27] | <b>1426.912</b> | 189.105        | 181.096         | 181.600         | 180.592         | K[3]  |
| T[28] | 1477.436        | 125.058        | 117.049         | 117.552         | 116.544         | T[2]  |
| E[29] | 1541.958        | 74.534         | 66.524          | 67.028          | 66.021          | E[1]  |

# sp | Q6GSS7 | H2A2A\_MOUSE

LNKLLGK <sup>Dimethyl</sup> <sub>28.03</sub> VTIAQGGVLPNIQAVLLPKKTE

- ▶ fragmentation table for charge state 3+
- ▶ specType=etd
- ▶ score=78.50
- ▶ F113278.dat
- ▶ query=q62533.p1
- ▶ precursor=617.580840
- ▶ chargePrecursor=5
- ▶ itol=0.5

| AA  | c              | y              | z+1            | z+2            | z              | AA  |
|-----|----------------|----------------|----------------|----------------|----------------|-----|
| L1  | 44.377         | 1028.035       | 1021.295       | 0.672          | 1022.960       | L29 |
| N2  | 82.302         | 995.943        | 985.601        | <b>985.937</b> | 985.265        | N28 |
| K3  | 125.090        | <b>952.926</b> | 947.587        | <b>947.923</b> | 947.251        | K27 |
| L4  | 163.785        | <b>910.228</b> | 904.889        | <b>905.225</b> | 904.563        | L26 |
| L5  | 200.479        | 872.533        | <b>867.194</b> | 867.530        | <b>866.858</b> | L25 |
| G6  | 219.487        | 834.838        | 829.499        | <b>829.835</b> | 829.163        | G24 |
| K7  | 271.529        | 815.832        | <b>810.492</b> | <b>810.828</b> | 810.156        | K23 |
| V8  | 304.552        | 763.790        | <b>758.450</b> | <b>758.786</b> | 758.114        | V22 |
| Y9  | 338.234        | 730.767        | 725.427        | 725.763        | 725.091        | Y21 |
| V10 | 375.929        | 697.084        | <b>691.745</b> | <b>692.081</b> | <b>691.409</b> | V20 |
| A11 | 399.608        | 659.389        | 654.050        | <b>654.386</b> | 653.714        | A19 |
| Q12 | 442.294        | 636.710        | 630.371        | 630.707        | 630.035        | Q18 |
| G13 | 461.301        | 593.024        | 587.685        | 588.021        | 587.349        | G17 |
| G14 | 480.308        | 574.017        | 568.678        | 569.013        | 568.343        | G16 |
| V15 | 513.331        | 555.010        | 549.670        | 550.006        | 549.334        | V15 |
| L16 | 551.026        | 521.987        | 516.648        | 516.984        | 516.312        | L14 |
| P17 | 583.377        | 484.292        | 478.953        | 479.289        | 478.617        | P13 |
| N18 | 621.391        | 451.942        | 446.602        | 446.938        | 446.266        | N12 |
| T19 | 659.086        | 413.927        | 408.588        | 408.924        | 408.252        | T11 |
| Q20 | 701.772        | 376.231        | 370.893        | 371.229        | 370.557        | Q10 |
| A21 | 725.451        | 333.546        | 328.207        | 328.543        | 327.871        | A9  |
| V22 | <b>758.474</b> | 309.867        | 304.528        | 304.864        | 304.192        | V8  |
| L23 | <b>796.168</b> | 276.844        | 271.505        | 271.841        | 271.169        | L7  |
| L24 | 833.863        | 239.150        | 233.810        | 234.146        | 233.474        | L6  |
| P25 | 866.214        | 201.455        | 196.116        | 196.451        | 195.780        | P5  |
| K26 | 908.912        | 169.104        | 163.765        | 164.101        | 163.429        | K4  |
| K27 | 951.611        | 126.806        | 121.466        | 121.802        | 120.790        | K3  |
| L28 | 985.293        | 83.709         | 78.369         | 78.704         | 78.032         | L2  |
| E29 | 1028.307       | 50.025         | 44.685         | 45.021         | 44.349         | E1  |

# sp | Q6GSS7 | H2A2A\_MOUSE

LNKLLGK <sup>Dimethyl</sup> <sub>28.03</sub> VTIAQGGVLPNIQAVLLPKKTE

- ▶ fragmentation table for charge state 4+
- ▶ specType=etd
- ▶ score=78.50
- ▶ F113278.dat
- ▶ query=q62533.p1
- ▶ precursor=617.580840
- ▶ chargePrecursor=5
- ▶ itol=0.5

| AA |    | c              | y              | z+1            | z+2            | z              | AA |    |
|----|----|----------------|----------------|----------------|----------------|----------------|----|----|
| L  | 1  | 33.535         | 771.728        | 767.724        | 0.756          | 767.472        | L  | 29 |
| N  | 2  | 62.046         | 743.451        | <b>739.453</b> | <b>739.705</b> | 739.201        | N  | 28 |
| K  | 3  | 94.059         | 714.941        | 710.947        | 711.194        | 710.690        | K  | 27 |
| L  | 4  | 122.340        | 687.923        | 678.918        | 679.170        | 678.666        | L  | 26 |
| L  | 5  | 150.611        | <b>654.652</b> | 650.647        | 650.899        | 650.395        | L  | 25 |
| G  | 6  | 164.867        | 626.381        | 622.376        | 622.628        | 622.124        | G  | 24 |
| K  | 7  | 203.898        | <b>612.126</b> | 608.121        | 608.373        | 607.869        | K  | 23 |
| V  | 8  | 228.665        | 573.094        | 569.089        | 569.341        | 568.837        | V  | 22 |
| T  | 9  | 253.927        | 548.327        | 544.322        | 544.574        | 544.070        | T  | 21 |
| I  | 10 | 262.198        | 523.065        | 519.060        | 519.312        | 518.808        | I  | 20 |
| A  | 11 | 269.958        | 494.794        | <b>490.789</b> | 491.041        | <b>490.537</b> | A  | 19 |
| Q  | 12 | 331.972        | 477.035        | 473.030        | 473.282        | 472.778        | Q  | 18 |
| G  | 13 | 346.228        | 445.020        | 441.015        | 441.267        | 440.763        | G  | 17 |
| G  | 14 | 360.483        | 430.765        | 426.760        | 427.012        | 426.508        | G  | 16 |
| V  | 15 | 385.250        | 416.509        | 412.505        | 412.757        | 412.253        | V  | 15 |
| L  | 16 | 413.521        | 391.742        | 387.737        | 387.989        | 387.486        | L  | 14 |
| P  | 17 | 437.784        | 363.471        | 359.466        | 359.718        | 359.215        | P  | 13 |
| N  | 18 | 466.295        | 339.208        | 335.203        | 335.455        | 334.951        | N  | 12 |
| I  | 19 | 494.566        | 310.897        | 306.891        | 306.945        | 306.441        | I  | 11 |
| Q  | 20 | 525.381        | 282.426        | 278.422        | 278.673        | 278.170        | Q  | 10 |
| A  | 21 | 544.340        | 250.412        | 246.407        | 246.659        | 246.155        | A  | 9  |
| V  | 22 | 569.107        | 232.652        | 228.648        | 228.900        | 228.396        | V  | 8  |
| L  | 23 | 597.378        | 207.885        | 203.881        | 204.132        | 203.629        | L  | 7  |
| L  | 24 | 625.649        | 179.614        | 175.609        | 175.861        | 175.358        | L  | 6  |
| P  | 25 | 649.912        | 151.343        | 147.338        | 147.590        | 147.087        | P  | 5  |
| K  | 26 | 681.936        | 127.080        | 123.075        | 123.327        | 122.823        | K  | 4  |
| K  | 27 | <b>713.960</b> | 95.056         | 91.052         | 91.304         | 90.800         | K  | 3  |
| T  | 28 | 739.222        | 63.032         | 59.028         | 59.280         | 58.776         | T  | 2  |
| E  | 29 | 773.462        | 37.771         | 33.766         | 34.018         | 33.514         | E  | 1  |





# sp | Q6GSS7 | H2A2A\_MOUSE

LNKLLGK <sup>Dimethyl</sup> 28.03 VTIAQGGVLPNIQAVLLPKKTE

- ▶ fragmentation table for charge state 1+
- ▶ specType=cid
- ▶ score=45.28
- ▶ F113278.dat
- ▶ query=q62534\_p1
- ▶ precursor=617.580840
- ▶ chargePrecursor=5
- ▶ itol=0.5

| AA   | a        | a*       | a,b      | b              | b*       | b,b      | r        | r*       | r,b      | AA   |
|------|----------|----------|----------|----------------|----------|----------|----------|----------|----------|------|
| L1   | 88.008   | 0.000    | 1.000    | 114.091        | 0.000    | 0.000    | 1063.893 | 1069.893 | 1063.893 | L208 |
| K12  | 2003.199 | 1033.113 | 0.000    | 2205.134       | 201.108  | 0.000    | 2070.820 | 2065.781 | 2062.797 | K206 |
| K13  | 626.634  | 611.209  | 0.000    | 366.279        | 330.203  | 0.000    | 2666.165 | 2659.738 | 2636.754 | K127 |
| L14  | 641.518  | 624.202  | 0.000    | <b>468.313</b> | 452.287  | 0.000    | 2126.810 | 2111.643 | 2110.688 | L206 |
| L15  | 254.402  | 237.478  | 0.000    | 266.394        | 246.374  | 0.000    | 2615.260 | 2606.269 | 2599.478 | L205 |
| Q16  | 81.1424  | 784.397  | 0.000    | 808.419        | 822.362  | 0.000    | 2002.200 | 2005.475 | 2004.461 | Q124 |
| K17  | 187.550  | 180.524  | 0.000    | 395.545        | 378.519  | 0.000    | 2443.480 | 2426.454 | 2427.470 | K125 |
| V18  | 858.618  | 849.367  | 0.000    | 884.613        | 877.267  | 0.000    | 2389.761 | 2372.571 | 2371.563 | V122 |
| V19  | 167.608  | 160.680  | 0.000    | 965.061        | 958.035  | 0.000    | 3171.051 | 3150.205 | 3133.255 | V121 |
| L20  | 1080.970 | 1063.124 | 1.000    | 1082.140       | 1081.719 | 1000.000 | 2089.238 | 2072.211 | 2071.227 | L203 |
| A11  | 1151.087 | 1134.163 | 1.133    | 1174.362       | 1162.790 | 1.164    | 1172.122 | 1166.124 | 1164.127 | A109 |
| Q12  | 1019.696 | 1002.619 | 1.000    | 1030.484       | 1026.014 | 1.000    | 1020.440 | 1009.111 | 1008.066 | Q108 |
| Q13  | 1008.867 | 1013.004 | 1.000    | 1034.963       | 1047.434 | 1.046    | 1004.959 | 1017.026 | 1016.033 | Q107 |
| G14  | 1383.889 | 1376.882 | 1.000    | 1421.884       | 1404.887 | 1403.873 | 1123.037 | 1103.010 | 1102.002 | G106 |
| V15  | 1402.877 | 1419.818 | 1414.866 | 1320.820       | 1303.806 | 1302.849 | 1083.019 | 1043.889 | 1042.899 | V105 |
| L16  | 1306.041 | 1309.013 | 1308.011 | 1304.035       | 1301.010 | 1301.026 | 1303.947 | 1304.920 | 1304.916 | L104 |
| P17  | 1003.094 | 1008.089 | 1005.084 | 1011.089       | 1014.093 | 1013.079 | 1440.863 | 1443.876 | 1442.872 | P103 |
| M18  | 1017.437 | 1005.111 | 1000.127 | 1045.132       | 1038.105 | 1027.121 | 1383.810 | 1338.763 | 1335.799 | M102 |
| T19  | 1009.074 | 1013.065 | 1012.051 | 1009.058       | 1004.066 | 1000.065 | 1329.780 | 1322.744 | 1321.711 | T101 |
| Q10  | 2006.200 | 2041.203 | 2040.200 | 2009.202       | 2004.204 | 2006.204 | 1126.400 | 1109.400 | 1108.377 | Q100 |
| A11  | 1132.517 | 1117.268 | 1111.300 | 1137.512       | 1121.800 | 1130.300 | 1068.624 | 1051.500 | 1050.514 | A100 |
| V12  | 2241.608 | 2241.309 | 2241.810 | 2239.308       | 2236.354 | 2238.310 | 1007.800 | 1001.300 | 1000.810 | V100 |
| L21  | 2241.499 | 2234.483 | 2233.470 | 2230.464       | 2227.438 | 2231.424 | 828.510  | 811.460  | 810.508  | L100 |
| L24  | 2434.633 | 2437.327 | 2436.345 | 2432.348       | 2430.322 | 2434.338 | 715.430  | 698.400  | 697.424  | L10  |
| P125 | 2051.606 | 2054.500 | 2053.500 | 2079.601       | 2062.675 | 2061.501 | 682.351  | 365.324  | 364.340  | P10  |
| K126 | 2076.702 | 2067.510 | 2064.000 | 2110.606       | 2086.610 | 2088.600 | 500.300  | 488.275  | 487.287  | K10  |
| K127 | 2087.196 | 2080.710 | 2078.700 | 2085.703       | 2081.194 | 2081.700 | 371.200  | 360.175  | 359.183  | K10  |
| L29  | 2008.874 | 2001.810 | 2000.851 | 2006.839       | 2010.812 | 2010.800 | 248.100  | 0.000    | 231.000  | L10  |
| L20  | 1017.608 | 1003.600 | 1010.610 | 1005.601       | 1000.604 | 1007.610 | 148.000  | 0.000    | 130.000  | L10  |

# sp | Q6GSS7 | H2A2A\_MOUSE

LNKLLGK <sup>Dimethyl</sup> <sub>28.03</sub> VTIAQGGVLPNIQAVLLPKKTE

- ▶ fragmentation table for charge state 2+
- ▶ specType=cid
- ▶ score=45.28
- ▶ F113278.dat
- ▶ query=q62534.p1
- ▶ precursor=617.580840
- ▶ chargePrecursor=5
- ▶ itol=0.5

| AA  | a              | a*             | a,b            | b              | b*             | b,b            | r               | r*              | r,b             | AA   |
|-----|----------------|----------------|----------------|----------------|----------------|----------------|-----------------|-----------------|-----------------|------|
| L1  | 43.552         | 0.564          | 7.501          | 31.549         | 0.504          | 0.504          | 1261.201        | 3333.139        | 3333.139        | L208 |
| N2  | 100.573        | 92.080         | 0.504          | 114.571        | 106.077        | 0.504          | 1485.901        | 2477.904        | 2476.902        | N206 |
| K3  | 184.621        | 156.439        | 0.504          | 178.618        | 170.495        | 0.504          | 1438.886        | 4420.371        | 4419.881        | K127 |
| L4  | 251.583        | 214.658        | 0.504          | 235.160        | 226.647        | 0.504          | 1384.833        | 3586.321        | 3585.831        | L206 |
| L5  | 277.678        | 236.101        | 0.504          | 261.162        | 252.188        | 0.504          | 1336.201        | 3169.181        | 3168.691        | L205 |
| G6  | 306.418        | 267.102        | 0.504          | 289.213        | 281.108        | 0.504          | 1291.701        | 2743.341        | 2742.748        | G24  |
| K7  | 384.719        | 316.105        | 0.504          | 366.212        | 358.163        | 0.504          | 1223.241        | 2124.731        | 2124.239        | K125 |
| V8  | 433.119        | 405.363        | 0.504          | 441.611        | 433.567        | 0.504          | 1181.181        | 1736.861        | 1736.376        | V22  |
| Y9  | <b>484.337</b> | <b>475.523</b> | <b>475.331</b> | <b>498.334</b> | <b>489.921</b> | <b>489.529</b> | <b>1059.645</b> | <b>1087.133</b> | <b>1086.941</b> | Y21  |
| I10 | 540.878        | 532.309        | 531.871        | <b>554.876</b> | 546.361        | <b>545.871</b> | 1045.121        | 2038.609        | 2038.117        | I20  |
| A11 | 616.597        | 587.854        | 587.382        | <b>598.395</b> | 591.682        | 591.190        | 988.581         | 988.581         | 979.575         | A19  |
| Q12 | 660.277        | 611.113        | 610.621        | <b>654.254</b> | 645.311        | 645.419        | 953.061         | 954.564         | 954.271         | Q10  |
| G13 | 698.837        | 660.404        | 660.431        | <b>687.935</b> | <b>674.422</b> | 674.109        | <b>889.031</b>  | 889.513         | 889.107         | G17  |
| G14 | 697.448        | 688.935        | 689.441        | <b>711.446</b> | <b>702.932</b> | <b>702.440</b> | 881.701         | 882.189         | 881.517         | G16  |
| V15 | 746.803        | 738.449        | 739.011        | <b>760.300</b> | <b>752.467</b> | <b>751.974</b> | <b>831.811</b>  | 832.489         | 832.036         | V19  |
| L16 | 803.524        | 795.111        | 794.513        | <b>817.522</b> | <b>809.069</b> | <b>808.517</b> | <b>782.477</b>  | <b>773.964</b>  | <b>773.472</b>  | L14  |
| P17 | 852.851        | 843.137        | 843.048        | 866.048        | 857.635        | 857.643        | <b>725.935</b>  | <b>717.422</b>  | 716.930         | P13  |
| N18 | 909.672        | 895.559        | 895.887        | 924.072        | 914.958        | 914.954        | <b>677.469</b>  | 668.995         | 668.403         | N12  |
| L19 | 968.814        | 954.401        | 954.963        | 978.814        | 971.966        | 971.966        | 601.066         | 611.874         | 611.782         | L11  |
| Q20 | 1009.844       | 1001.130       | 1000.635       | 1034.941       | 1025.128       | 1024.939       | <b>563.845</b>  | <b>555.332</b>  | 554.940         | Q10  |
| A21 | 1062.782       | 1055.689       | 1056.157       | 1097.180       | 1087.946       | 1087.914       | 488.811         | 491.111         | 490.811         | A19  |
| V22 | 1114.896       | 1105.181       | 1105.661       | 1124.894       | 1115.168       | 1115.168       | 489.289         | <b>455.784</b>  | 455.292         | V19  |
| L23 | 1171.238       | 1162.725       | 1163.231       | 1185.226       | 1176.222       | 1176.230       | 414.751         | 405.252         | 405.758         | L17  |
| L24 | 1227.480       | 1218.281       | 1218.776       | 1244.778       | 1235.385       | 1235.373       | 368.221         | 348.708         | 349.216         | L16  |
| P25 | 1276.507       | 1267.703       | 1267.301       | 1299.304       | 1281.791       | 1281.259       | 381.670         | 263.168         | 262.674         | P15  |
| K26 | 1340.204       | 1331.841       | 1331.769       | 1354.362       | 1345.614       | 1345.346       | 263.911         | 244.939         | 244.144         | K14  |
| K27 | 1404.402       | 1395.588       | 1395.391       | 1418.399       | 1409.886       | 1409.394       | 189.112         | 185.561         | 185.100         | K15  |
| L28 | 1464.926       | 1449.412       | 1449.360       | 1489.321       | 1480.812       | 1480.812       | 126.858         | 0.504           | 116.162         | L12  |
| E29 | 1519.447       | 1510.934       | 1510.440       | 1533.444       | 1524.931       | 1524.432       | 74.531          | 0.504           | 65.529          | E10  |

# sp | Q6GSS7 | H2A2A\_MOUSE

LNKLLGK <sup>Dimethyl</sup> 28.03 VTIAQGGVLPNIQAVLLPKKTE

- ▶ fragmentation table for charge state 3+
- ▶ specType=cid
- ▶ score=45.28
- ▶ F113278.dat
- ▶ query=q62534.p1
- ▶ precursor=617.580840
- ▶ chargePrecursor=5
- ▶ itol=0.5

| AA  | a              | a*             | a,b            | b              | b*             | b,b     | r              | r*             | r,b     | AA  |
|-----|----------------|----------------|----------------|----------------|----------------|---------|----------------|----------------|---------|-----|
| L1  | 28.178         | 0.07           | 0.07           | 58.102         | 0.072          | 0.072   | 0.03           | 0.03           | 0.022   | L28 |
| K1  | 67.585         | 61.750         | 0.672          | 78.715         | 71.941         | 0.672   | 960.941        | 965.265        | 964.921 | K28 |
| K1  | 110.681        | 104.407        | 0.672          | 116.413        | 113.739        | 0.672   | 962.520        | 947.251        | 946.921 | K27 |
| L4  | 147.778        | 142.125        | 0.672          | 157.109        | 151.434        | 0.672   | 940.228        | 904.503        | 904.225 | L28 |
| L5  | 188.874        | 179.197        | 0.672          | 194.864        | 188.128        | 0.672   | 912.521        | 866.825        | 866.578 | L25 |
| G1  | 204.478        | 198.104        | 0.672          | 213.811        | 208.136        | 0.672   | 894.839        | 826.183        | 826.181 | G24 |
| K7  | 258.522        | 250.988        | 0.672          | 265.853        | 260.178        | 0.672   | 811.832        | 810.158        | 809.828 | K22 |
| V1  | 289.544        | 281.869        | 0.672          | 298.878        | 293.203        | 0.672   | 781.728        | 788.114        | 787.788 | V22 |
| V1  | 323.227        | 317.551        | 0.672          | 332.555        | 326.883        | 0.672   | 526.520        | 526.520        | 526.191 | V21 |
| L20 | 380.622        | 375.288        | 0.672          | 389.611        | 384.278        | 0.672   | 484.220        | 467.084        | 467.081 | L20 |
| A11 | 384.601        | 378.225        | 0.672          | 393.915        | 388.257        | 0.672   | 469.328        | 463.714        | 463.388 | A19 |
| Q13 | 427.288        | 421.611        | 0.672          | <b>436.618</b> | 430.944        | 0.672   | 430.944        | 430.944        | 430.615 | Q10 |
| G13 | 446.204        | 440.515        | 0.672          | <b>455.626</b> | 449.950        | 0.672   | <b>501.024</b> | 507.348        | 507.021 | G17 |
| G14 | 462.301        | 456.628        | 0.672          | 471            | <b>468.957</b> | 463.278 | 463.278        | 464.103        | 463.814 | G16 |
| V15 | 486.244        | 480.569        | 0.672          | <b>507.850</b> | <b>501.900</b> | 0.672   | <b>555.010</b> | 549.154        | 548.828 | V15 |
| L10 | <b>536.019</b> | 530.343        | 0.672          | <b>545.350</b> | <b>539.675</b> | 0.672   | 521.927        | 525.312        | 525.084 | L14 |
| P17 | 566.870        | 560.494        | 0.672          | 567.701        | 562.026        | 0.672   | <b>484.292</b> | <b>478.617</b> | 478.289 | P13 |
| N18 | 608.184        | 600.708        | 0.672          | 615.718        | 610.040        | 0.672   | 429.212        | 451.942        | 446.268 | N12 |
| T19 | 644.878        | 638.493        | 0.672          | 651.815        | 646.138        | 0.672   | 467.407        | 413.902        | 408.292 | T11 |
| Q20 | 686.705        | 681.189        | 0.672          | 690.751        | 685.068        | 0.672   | 380.013        | 376.212        | 375.921 | Q10 |
| A21 | 712.644        | <b>704.768</b> | <b>704.440</b> | 717            | 714.102        | 711.772 | 521.540        | 527.871        | 527.542 | A11 |
| V22 | 742.877        | 737.167        | 0.672          | <b>752.790</b> | 747.123        | 0.672   | 389.889        | 384.182        | 383.854 | V11 |
| L23 | 781.161        | 775.485        | 0.672          | 789.967        | 784.317        | 0.672   | 364.489        | 278.944        | 277.185 | L21 |
| L24 | 818.856        | 813.180        | 0.672          | 826.188        | 820.612        | 0.672   | 184.120        | 238.150        | 233.474 | L16 |
| P25 | 851.207        | 845.531        | 0.672          | 860.539        | 854.863        | 0.672   | 284.535        | 281.482        | 280.788 | P15 |
| K26 | 893.896        | 888.193        | 0.672          | 900.751        | 895.075        | 0.672   | 307.413        | 188.184        | 183.420 | K14 |
| K27 | 936.604        | 930.928        | 0.672          | 945.921        | 940.246        | 0.672   | 139.426        | 126.426        | 125.162 | K13 |
| L28 | 979.288        | 974.611        | 0.672          | 989.813        | 984.142        | 0.672   | 87.614         | 81.718         | 81.672  | L12 |
| E29 | 1013.100       | 1007.822       | 0.672          | 1027.832       | 1022.658       | 0.672   | 101.628        | 50.023         | 0.672   | E10 |

# sp | Q6GSS7 | H2A2A\_MOUSE

LNKLLGK <sup>Dimethyl</sup>VTIAQGGVLPNIQAVLLPKKTE  
28.03

- ▶ fragmentation table for charge state 4+
- ▶ specType=cid
- ▶ score=45.28
- ▶ F113278.dat
- ▶ query=q62534.p1
- ▶ precursor=617.580840
- ▶ chargePrecursor=5
- ▶ itol=0.5

| AA  | a              | a*             | a0             | b              | b*      | b0             | y              | y*      | y0      | AA  |
|-----|----------------|----------------|----------------|----------------|---------|----------------|----------------|---------|---------|-----|
| L1  | 22.880         | 0.952          | 0.952          | 59.270         | 0.925   | 0.925          | 771.258        | 767.473 | 767.258 | L20 |
| N2  | 30.790         | 46.534         | 0.725          | 37.789         | 53.532  | 0.335          | 183.457        | 739.203 | 738.952 | N28 |
| K3  | 22.844         | 748.257        | 0.725          | 189.813        | 26.588  | 0.235          | 712.827        | 712.600 | 712.444 | K27 |
| L4  | 111.085        | 109.828        | 0.925          | 119.889        | 113.827 | 0.705          | <b>652.923</b> | 670.856 | 670.420 | L26 |
| L5  | 139.958        | 135.959        | 0.705          | 148.355        | 142.988 | 0.705          | <b>654.652</b> | 650.395 | 650.149 | L25 |
| G6  | 133.611        | 149.325        | 0.705          | 180.630        | 136.894 | 0.335          | 608.381        | 842.124 | 841.978 | G24 |
| K7  | 102.543        | 108.386        | 0.725          | 109.642        | 105.385 | 0.235          | 612.125        | 607.868 | 607.623 | K23 |
| V8  | 171.418        | 173.353        | 0.925          | 229.460        | 208.152 | 0.705          | 571.689        | 569.831 | 569.585 | V22 |
| T9  | 1242.872       | 238.415        | 238.189        | 249.671        | 245.414 | 245.168        | 548.537        | 544.070 | 543.824 | T21 |
| L10 | 2710.943       | 268.688        | 268.460        | 277.947        | 273.685 | 273.439        | 523.085        | 518.808 | 518.562 | L20 |
| A11 | 288.702        | 284.446        | 284.220        | 295.761        | 291.444 | 291.198        | 484.764        | 481.513 | 481.267 | A19 |
| G12 | 350.134        | 336.890        | 336.614        | 347.410        | 343.866 | 343.610        | 477.635        | 472.738 | 472.524 | G18 |
| G13 | 334.972        | 330.716        | 330.430        | 341.971        | 337.714 | 337.468        | 445.220        | 440.763 | 440.517 | G17 |
| G14 | 349.238        | 344.971        | 344.725        | 356.220        | 351.970 | 351.724        | 430.765        | 426.508 | 426.262 | G16 |
| V15 | 273.995        | 369.730        | 369.482        | 380.964        | 376.737 | 376.491        | 418.509        | 412.252 | 412.007 | V15 |
| L16 | 402.266        | 388.009        | 387.763        | 400.265        | 405.008 | 404.762        | 393.742        | 391.486 | 391.240 | L14 |
| P17 | 1426.520       | 422.272        | 422.026        | 433.520        | 429.271 | 429.025        | 353.471        | 359.215 | 358.969 | P13 |
| N18 | 435.040        | 430.783        | 430.537        | 462.038        | 457.782 | 457.536        | 339.288        | 334.951 | 334.705 | N12 |
| L19 | 463.111        | <b>479.854</b> | <b>478.888</b> | 490.372        | 486.053 | 485.807        | 310.887        | 306.441 | 306.195 | L11 |
| G20 | 515.326        | 511.069        | 510.823        | <b>523.334</b> | 519.067 | 518.821        | 282.438        | 278.139 | 277.844 | G19 |
| A21 | 533.080        | 528.823        | 528.577        | <b>540.083</b> | 535.827 | 535.581        | 250.412        | 246.115 | 245.869 | A16 |
| V22 | 587.852        | 583.595        | 583.349        | 564.851        | 560.594 | 560.348        | 232.887        | 228.589 | 228.343 | V16 |
| L23 | 586.135        | 581.878        | 581.632        | <b>593.122</b> | 588.865 | 588.619        | 207.885        | 203.628 | 203.383 | L17 |
| L24 | 614.984        | 610.727        | 610.481        | 622.766        | 618.509 | 618.263        | 179.814        | 175.557 | 175.311 | L21 |
| P25 | 1036.857       | 634.600        | 634.354        | 645.855        | 641.599 | 641.353        | 151.343        | 147.087 | 146.841 | P15 |
| K26 | 1061.681       | 668.424        | 668.178        | <b>677.679</b> | 673.423 | 673.177        | 127.889        | 123.632 | 123.377 | K14 |
| K27 | <b>702.704</b> | 698.448        | 698.202        | 700.703        | 705.447 | <b>705.201</b> | 95.056         | 90.800  | 90.554  | K13 |
| L28 | 716.786        | 712.529        | 712.283        | 724.969        | 720.713 | 720.467        | 83.852         | 79.595  | 79.349  | L22 |
| E29 | 780.227        | 755.970        | 755.724        | 767.226        | 762.969 | 762.723        | 37.771         | 0.755   | 0.528   | E11 |



# sp | Q6GSS7 | H2A2A\_MOUSE

LNKLLGK<sup>Dimethyl</sup>VTIAQGGVLPNIQAVLLPKKTE<sup>28.03</sup>

- ▶ fragmentation table for charge state 1+
- ▶ specType=cid
- ▶ score=37.95
- ▶ F113278.dat
- ▶ query=q62535\_p1
- ▶ precursor=771.724380
- ▶ chargePrecursor=4
- ▶ itol=0.5

| AA  | a          | a*         | a+D             | b        | b*              | b+D      | y        | y*              | y+D            | AA              |     |
|-----|------------|------------|-----------------|----------|-----------------|----------|----------|-----------------|----------------|-----------------|-----|
| L1  | 86         | 856        | 0.000           | 0.000    | 114.061         | 0.000    | 0.000    | 3883.892        | 2088.989       | 3999.081        | L29 |
| R1  | 200        | 195        | 181.113         | 0.000    | 226.134         | 0.114    | 0.000    | 2928.899        | 3853.782       | 2862.767        | R20 |
| R1  | 208        | 204        | 211.208         | 0.000    | <b>306.229</b>  | 1.301    | 0.000    | 2856.750        | 3819.726       | 2838.794        | R27 |
| L4  | <b>481</b> | <b>318</b> | 824.202         | 0.000    | <b>469.313</b>  | 482.287  | 0.000    | 2728.870        | 2711.843       | 2710.009        | L28 |
| L5  | <b>554</b> | <b>482</b> | 137.762         | 0.000    | <b>582.397</b>  | 105.711  | 0.000    | 2818.789        | 3868.789       | 2829.789        | L29 |
| G1  | 511        | 424        | 594.397         | 0.000    | 522.433         | 282.392  | 0.000    | 2652.522        | 2468.495       | 2884.961        | G24 |
| R7  | 397        | 393        | 378.524         | 0.000    | 399.243         | 178.618  | 0.000    | 2441.480        | 2748.454       | 2847.410        | R23 |
| V1  | <b>866</b> | <b>819</b> | <b>849.592</b>  | 0.000    | <b>804.513</b>  | 877.267  | 0.000    | 2591.791        | 2272.227       | 2171.247        | V22 |
| L9  | 357        | 352        | 340.242         | 849.592  | <b>905.601</b>  | 878.628  | 877.267  | 2170.229        | 2171.250       | 2172.251        | L21 |
| L10 | 388        | 382        | <b>1063.724</b> | 887.742  | <b>1108.745</b> | 1091.710 | 1089.701 | 2088.128        | 2022.211       | 2011.207        | L21 |
| A11 | 1151       | 1097       | 1124.253        | 1132.772 | <b>1179.782</b> | 2162.790 | 1161.772 | 2885.124        | 2898.122       | 2898.143        | A16 |
| G12 | 1278       | 1262       | 1262.629        | 1262.629 | 1278.784        | 2206.814 | 2206.812 | 1825.117        | 1825.096       | 1827.106        | G13 |
| G13 | 1336       | 1307       | 1318.834        | 1318.831 | 1384.854        | 1547.836 | 1386.852 | 1777.250        | 1769.022       | 1729.046        | G17 |
| G14 | 1353       | 1339       | 1376.832        | 1376.870 | 1421.884        | 1404.857 | 1403.871 | 1723.037        | 1703.010       | 1702.026        | G16 |
| V15 | 1403       | 1387       | 1478.843        | 1474.847 | 1524.852        | 1603.826 | 1502.862 | 1681.031        | 1649.889       | 1646.009        | V15 |
| L18 | 1508       | 1441       | 1589.835        | 1588.833 | 1654.830        | 2017.810 | 1816.820 | 1553.947        | 1548.920       | 1545.900        | L14 |
| P19 | 1613       | 1588       | 1688.868        | 1688.888 | 1714.880        | 1714.880 | 1714.880 | <b>1450.863</b> | 1433.830       | 1432.862        | P13 |
| R19 | 1617       | 1611       | 1662.821        | 1662.821 | 1662.821        | 1636.816 | 1617.811 | 134.818         | 138.783        | 138.789         | R12 |
| L16 | 1630       | 1614       | 1613.136        | 1612.211 | 1658.250        | 2041.190 | 1890.230 | 1236.921        | 1222.741       | 1221.767        | L11 |
| G20 | 1658       | 1641       | 1641.211        | 1640.208 | 1658.212        | 1658.240 | 1658.204 | 1138.648        | 1109.858       | <b>1106.877</b> | G19 |
| A21 | 1726       | 1707       | 1714.268        | 1714.268 | 1717.272        | 2040.268 | 1839.268 | <b>988.824</b>  | 985.789        | 980.814         | A18 |
| V22 | 1728       | 1712       | 1714.403        | 1713.371 | 1728.374        | 2038.374 | 1828.374 | 423.371         | <b>927.857</b> | <b>918.561</b>  | V18 |
| L23 | 1841       | 1809       | 1834.443        | 1833.430 | 1838.464        | 2352.438 | 2381.464 | <b>828.519</b>  | <b>811.492</b> | 810.508         | L17 |
| L24 | 1854       | 1833       | 1837.527        | 1836.543 | 1863.549        | 2405.522 | 2404.530 | <b>715.435</b>  | 688.408        | <b>687.436</b>  | L16 |
| P25 | 2031       | 1938       | 194.404         | 2033.368 | 2072.867        | 2062.876 | 2031.881 | <b>662.351</b>  | 669.324        | <b>664.340</b>  | P18 |
| R26 | 2078       | 2061       | 2052.270        | 2051.860 | 2077.866        | 2068.870 | 2069.890 | 488.271         | 488.271        | 488.271         | R10 |
| L27 | 2087       | 2068       | 2087.289        | 2087.289 | 2087.289        | 2018.264 | 2017.280 | <b>377.203</b>  | 388.177        | 388.181         | L15 |
| L14 | 2108       | 2107       | 2108.818        | 2108.818 | 2108.818        | 2108.818 | 2108.818 | 100.818         | 100.818        | 100.818         | L14 |
| E29 | 2037       | 2036       | 2036.886        | 2036.876 | 2036.881        | 2046.856 | 2047.871 | 148.856         | 148.856        | 148.856         | E11 |

# sp | Q6GSS7 | H2A2A\_MOUSE

LNKLLGK <sup>Dimethyl</sup> <sub>28.03</sub> VTIAQGGVLPNIQAVLLPKKTE

- ▶ fragmentation table for charge state 2+
- ▶ specType=cid
- ▶ score=37.95
- ▶ F113278.dat
- ▶ query=q62535\_p1
- ▶ precursor=771.724380
- ▶ chargePrecursor=4
- ▶ itol=0.5

| AA  | a              | a*             | a,Δ            | b               | b*              | b,Δ             | y               | y*             | y,Δ            | AA       |     |
|-----|----------------|----------------|----------------|-----------------|-----------------|-----------------|-----------------|----------------|----------------|----------|-----|
| L1  | 43             | 332            | 0.004          | 0.504           | 57.949          | 0.004           | 0.504           | 1542.450       | 1531.946       | 1033.644 | L29 |
| K2  | 100            | 333            | 0.004          | 0.504           | 57.951          | 0.004           | 0.504           | 1493.450       | 1482.946       | 984.640  | K30 |
| R1  | 104            | 333            | 1.000          | 0.504           | 57.950          | 1.000           | 0.504           | 1428.000       | 1420.371       | 919.001  | R27 |
| L4  | 121            | 333            | 212.850        | 0.504           | 57.950          | 220.847         | 0.504           | 1304.830       | 1300.320       | 830.033  | L26 |
| L5  | 127            | 333            | 280.130        | 0.504           | 57.950          | 288.089         | 0.504           | 1200.300       | 1199.780       | 729.501  | L25 |
| Q1  | 166            | 333            | 289.950        | 0.504           | 58.023          | 311.100         | 0.504           | 1251.350       | 1249.241       | 782.740  | Q24 |
| K7  | 184            | 333            | 330.100        | 0.504           | 58.076          | 338.163         | 0.504           | 1191.264       | 1188.754       | 724.239  | K23 |
| V8  | 181            | 333            | 420.000        | 0.504           | 58.080          | 428.247         | 0.504           | 1152.312       | 1150.800       | 692.270  | V22 |
| L9  | <b>484.517</b> | <b>475.823</b> | 429.151        | 429.154         | 749.214         | 439.239         | 1055.000        | 1057.251       | 2080.041       | L21      |     |
| I10 | <b>548.879</b> | <b>517.360</b> | <b>531.874</b> | <b>554.876</b>  | <b>546.363</b>  | 545.871         | <b>1045.173</b> | 1038.618       | 1708.117       | I20      |     |
| A11 | 570.329        | 572.854        | 565.362        | <b>590.395</b>  | 643.402         | <b>581.390</b>  | <b>688.581</b>  | 690.070        | <b>979.579</b> | A16      |     |
| Q12 | <b>648.437</b> | <b>611.913</b> | <b>631.421</b> | <b>654.424</b>  | <b>645.911</b>  | <b>645.410</b>  | <b>651.885</b>  | <b>644.549</b> | <b>944.547</b> | Q10      |     |
| G13 | <b>668.937</b> | 680.431        | 669.651        | <b>682.935</b>  | 674.422         | <b>671.930</b>  | <b>680.513</b>  | <b>680.510</b> | <b>880.027</b> | G17      |     |
| G14 | <b>697.448</b> | 688.930        | 689.463        | <b>711.446</b>  | 702.932         | <b>702.440</b>  | <b>686.522</b>  | <b>652.009</b> | <b>851.517</b> | G16      |     |
| V15 | 718.949        | <b>738.469</b> | <b>737.977</b> | <b>740.969</b>  | 732.460         | 732.968         | 733.477         | 733.480        | <b>821.006</b> | V15      |     |
| L16 | <b>803.524</b> | 795.013        | 794.501        | <b>817.522</b>  | <b>809.009</b>  | <b>808.517</b>  | <b>782.477</b>  | 773.468        | 773.022        | L14      |     |
| P17 | <b>852.051</b> | <b>843.537</b> | <b>843.045</b> | <b>857.048</b>  | 848.530         | 847.043         | <b>725.935</b>  | <b>717.427</b> | 718.930        | P13      |     |
| T18 | 869.074        | <b>900.539</b> | <b>900.047</b> | <b>912.070</b>  | <b>914.556</b>  | 914.074         | 914.577         | <b>648.265</b> | 648.763        | T12      |     |
| I19 | 905.514        | 900.023        | 900.005        | <b>919.512</b>  | 914.008         | 919.500         | <b>626.387</b>  | 626.885        | 611.382        | I11      |     |
| Q20 | 929.954        | 924.463        | 923.969        | 924.941         | 920.430         | 924.918         | <b>563.845</b>  | 565.340        | <b>534.840</b> | Q19      |     |
| A21 | 1054.392       | 1050.840       | 1050.321       | 1054.843        | 1050.290        | 1054.825        | 1054.818        | 1042.310       | 1042.311       | A18      |     |
| V22 | 1114.768       | 1110.213       | 1110.061       | <b>1128.694</b> | <b>1120.180</b> | <b>1119.668</b> | 1119.668        | 1104.160       | <b>455.262</b> | V18      |     |
| L23 | 1111.238       | 1106.720       | 1106.521       | 1107.721        | 1103.202        | 1107.200        | 414.189         | 408.226        | 405.708        | L17      |     |
| L24 | 1227.735       | 1218.202       | 1218.179       | 1241.718        | 1232.185        | 1232.173        | 358.251         | 349.700        | 349.216        | L16      |     |
| P25 | 1276.349       | 1270.793       | 1270.703       | 1280.304        | 1270.771        | 1270.760        | 301.813         | 293.260        | 292.664        | P19      |     |
| R26 | 1340.054       | 1331.841       | 1331.349       | 1334.852        | 1345.638        | 1345.146        | 253.133         | 244.630        | 244.147        | R10      |     |
| K27 | 1354.460       | 1346.000       | 1346.398       | 1416.399        | 1407.980        | 1407.980        | 189.285         | 181.500        | 181.100        | K15      |     |
| L28 | 1374.938       | 1400.811       | 1400.309       | 1400.811        | 1400.309        | 1400.309        | 170.000         | 170.000        | 169.500        | L22      |     |
| E29 | 1519.441       | 1515.934       | 1515.942       | 1533.844        | 1524.911        | 1524.910        | 74.534          | 0.500          | 65.500         | E11      |     |

# sp | Q6GSS7 | H2A2A\_MOUSE

LNKLLGK <sup>Dimethyl</sup> 28.03 VTIAQGGVLPNIQAVLLPKKTE

- ▶ fragmentation table for charge state 3+
- ▶ specType=cid
- ▶ score=37.95
- ▶ F113278.dat
- ▶ query=q62535.p1
- ▶ precursor=771.724380
- ▶ chargePrecursor=4
- ▶ itol=0.5

| AA   | a          | a*         | aΔ         | b          | b*         | bΔ         | y          | y*         | yΔ         | AA         |            |            |            |            |            |            |      |      |      |     |      |
|------|------------|------------|------------|------------|------------|------------|------------|------------|------------|------------|------------|------------|------------|------------|------------|------------|------|------|------|-----|------|
| L1   | 26         | 539        | 0.672      | 0.672      | 38         | 392        | 0.672      | 302        | 833        | 1122       | S12        |            |            |            |            |            |      |      |      |     |      |
| R1   | 37         | 303        | 1.1708     | 0.672      | 75         | 712        | 0.672      | 301        | 811        | 1091       | R10        |            |            |            |            |            |      |      |      |     |      |
| R1   | 132        | 683        | 104        | 489        | 0.672      | 118        | 411        | 1.1708     | 0.672      | <b>952</b> | <b>926</b> | 847        | 251        | 946        | 821        | R127       |      |      |      |     |      |
| L1   | 147        | 778        | 143        | 133        | 0.672      | 137        | 100        | 1.1708     | 0.672      | <b>910</b> | <b>328</b> | <b>904</b> | <b>353</b> | <b>904</b> | <b>225</b> | L126       |      |      |      |     |      |
| L1   | 155        | 872        | 179        | 300        | 0.672      | 168        | 369        | 1.1708     | 0.672      | <b>873</b> | <b>533</b> | <b>866</b> | <b>538</b> | <b>866</b> | <b>330</b> | L128       |      |      |      |     |      |
| Q1   | 204        | 476        | 108        | 504        | 0.672      | 213        | 811        | 208        | 130        | 0.672      | <b>834</b> | <b>839</b> | <b>829</b> | <b>163</b> | <b>829</b> | <b>835</b> | Q124 |      |      |     |      |
| R1   | 276        | 522        | 202        | 540        | 0.672      | 285        | 851        | 276        | 179        | 0.672      | <b>815</b> | <b>812</b> | 810        | 129        | 809        | 128        | R125 |      |      |     |      |
| V1   | 308        | 544        | 211        | 559        | 0.672      | 318        | 869        | 309        | 201        | 0.672      | 791        | 791        | <b>798</b> | <b>114</b> | <b>797</b> | <b>786</b> | V122 |      |      |     |      |
| L1   | 313        | 227        | 217        | 512        | 313        | 223        | 332        | 553        | 328        | 883        | 328        | 559        | 750        | 750        | <b>758</b> | <b>114</b> | L121 |      |      |     |      |
| H1   | 380        | 622        | 375        | 246        | 384        | 618        | 391        | 25         | 384        | 578        | 384        | 200        | <b>607</b> | <b>084</b> | 581        | 408        | 381  | H121 |      |     |      |
| A11  | 384        | 401        | 378        | 235        | 378        | 237        | 382        | 502        | 388        | 297        | 388        | 297        | 388        | 297        | <b>385</b> | <b>386</b> | A119 |      |      |     |      |
| Q12  | 427        | 208        | 421        | 813        | 421        | 801        | 438        | 813        | 438        | 813        | <b>635</b> | <b>719</b> | <b>630</b> | <b>835</b> | <b>629</b> | <b>707</b> | Q118 |      |      |     |      |
| Q11  | 476        | 204        | 470        | 618        | 476        | 606        | 489        | 618        | 489        | 618        | <b>455</b> | <b>626</b> |            |            |            |            | Q117 |      |      |     |      |
| Q14  | 482        | 382        | 479        | 330        | 479        | 338        | 474        | 551        | 488        | 357        | 488        | 357        | 488        | 357        | 474        | 257        | 588  | 347  | 708  | 314 | G116 |
| L12  | 488        | 174        | 483        | 618        | 488        | 606        | 501        | 618        | 501        | 618        | <b>335</b> | <b>618</b> | 548        | 294        | 548        | 294        | 444  | 608  | V115 |     |      |
| L16  | 536        | 528        | 536        | 543        | 536        | 543        | 545        | 528        | 539        | 525        | 539        | 525        | 539        | 525        | 539        | 525        | 539  | 525  | 539  | 525 | L114 |
| L17  | 648        | 471        | <b>562</b> | <b>694</b> | <b>562</b> | <b>366</b> | 137        | 101        | <b>577</b> | <b>626</b> | <b>571</b> | <b>698</b> | <b>484</b> | <b>292</b> | 478        | 411        | 478  | 292  | F113 |     |      |
| T118 | 656        | 584        | <b>660</b> | <b>788</b> | <b>660</b> | <b>388</b> | 137        | 101        | <b>618</b> | <b>540</b> | <b>609</b> | <b>712</b> | 253        | 282        | 448        | 288        | 448  | 288  | 448  | 288 | N112 |
| H18  | 694        | 678        | <b>638</b> | <b>403</b> | 638        | 419        | <b>651</b> | <b>410</b> | <b>647</b> | <b>735</b> | <b>647</b> | <b>407</b> | 413        | 407        | 403        | 282        | 403  | 282  | 403  | 282 | L111 |
| Q10  | 698        | 465        | 693        | 468        | 693        | 471        | 698        | 465        | 693        | 471        | 693        | 471        | 693        | 471        | 693        | 471        | 693  | 471  | 693  | 471 | Q110 |
| A11  | <b>718</b> | <b>444</b> | 714        | 738        | 714        | 738        | <b>718</b> | 738        | 714        | 738        | 714        | 738        | 714        | 738        | 714        | 738        | 714  | 738  | 714  | 738 | A10  |
| V12  | 718        | 444        | 714        | 738        | 714        | 738        | 714        | 738        | 714        | 738        | 714        | 738        | 714        | 738        | 714        | 738        | 714  | 738  | 714  | 738 | V10  |
| L12  | 718        | 444        | 714        | 738        | 714        | 738        | 714        | 738        | 714        | 738        | 714        | 738        | 714        | 738        | 714        | 738        | 714  | 738  | 714  | 738 | L10  |
| L12  | 718        | 444        | 714        | 738        | 714        | 738        | 714        | 738        | 714        | 738        | 714        | 738        | 714        | 738        | 714        | 738        | 714  | 738  | 714  | 738 | L10  |
| L12  | 718        | 444        | 714        | 738        | 714        | 738        | 714        | 738        | 714        | 738        | 714        | 738        | 714        | 738        | 714        | 738        | 714  | 738  | 714  | 738 | L10  |
| R12  | 718        | 444        | 714        | 738        | 714        | 738        | 714        | 738        | 714        | 738        | 714        | 738        | 714        | 738        | 714        | 738        | 714  | 738  | 714  | 738 | R10  |
| R12  | 718        | 444        | 714        | 738        | 714        | 738        | 714        | 738        | 714        | 738        | 714        | 738        | 714        | 738        | 714        | 738        | 714  | 738  | 714  | 738 | R10  |
| R12  | 718        | 444        | 714        | 738        | 714        | 738        | 714        | 738        | 714        | 738        | 714        | 738        | 714        | 738        | 714        | 738        | 714  | 738  | 714  | 738 | R10  |
| R12  | 718        | 444        | 714        | 738        | 714        | 738        | 714        | 738        | 714        | 738        | 714        | 738        | 714        | 738        | 714        | 738        | 714  | 738  | 714  | 738 | R10  |
| R12  | 718        | 444        | 714        | 738        | 714        | 738        | 714        | 738        | 714        | 738        | 714        | 738        | 714        | 738        | 714        | 738        | 714  | 738  | 714  | 738 | R10  |
| R12  | 718        | 444        | 714        | 738        | 714        | 738        | 714        | 738        | 714        | 738        | 714        | 738        | 714        | 738        | 714        | 738        | 714  | 738  | 714  | 738 | R10  |
| R12  | 718        | 444        | 714        | 738        | 714        | 738        | 714        | 738        | 714        | 738        | 714        | 738        | 714        | 738        | 714        | 738        | 714  | 738  | 714  | 738 | R10  |
| R12  | 718        | 444        | 714        | 738        | 714        | 738        | 714        | 738        | 714        | 738        | 714        | 738        | 714        | 738        | 714        | 738        | 714  | 738  | 714  | 738 | R10  |
| R12  | 718        | 444        | 714        | 738        | 714        | 738        | 714        | 738        | 714        | 738        | 714        | 738        | 714        | 738        | 714        | 738        | 714  | 738  | 714  | 738 | R10  |
| R12  | 718        | 444        | 714        | 738        | 714        | 738        | 714        | 738        | 714        | 738        | 714        | 738        | 714        | 738        | 714        | 738        | 714  | 738  | 714  | 738 | R10  |
| R12  | 718        | 444        | 714        | 738        | 714        | 738        | 714        | 738        | 714        | 738        | 714        | 738        | 714        | 738        | 714        | 738        | 714  | 738  | 714  | 738 | R10  |
| R12  | 718        | 444        | 714        | 738        | 714        | 738        | 714        | 738        | 714        | 738        | 714        | 738        | 714        | 738        | 714        | 738        | 714  | 738  | 714  | 738 | R10  |
| R12  | 718        | 444        | 714        | 738        | 714        | 738        | 714        | 738        | 714        | 738        | 714        | 738        | 714        | 738        | 714        | 738        | 714  | 738  | 714  | 738 | R10  |
| R12  | 718        | 444        | 714        | 738        | 714        | 738        | 714        | 738        | 714        | 738        | 714        | 738        | 714        | 738        | 714        | 738        | 714  | 738  | 714  | 738 | R10  |
| R12  | 718        | 444        | 714        | 738        | 714        | 738        | 714        | 738        | 714        | 738        | 714        | 738        | 714        | 738        | 714        | 738        | 714  | 738  | 714  | 738 | R10  |
| R12  | 718        | 444        | 714        | 738        | 714        | 738        | 714        | 738        | 714        | 738        | 714        | 738        | 714        | 738        | 714        | 738        | 714  | 738  | 714  | 738 | R10  |
| R12  | 718        | 444        | 714        | 738        | 714        | 738        | 714        | 738        | 714        | 738        | 714        | 738        | 714        | 738        | 714        | 738        | 714  | 738  | 714  | 738 | R10  |
| R12  | 718        | 444        | 714        | 738        | 714        | 738        | 714        | 738        | 714        | 738        | 714        | 738        | 714        | 738        | 714        | 738        | 714  | 738  | 714  | 738 | R10  |
| R12  | 718        | 444        | 714        | 738        | 714        | 738        | 714        | 738        | 714        | 738        | 714        | 738        | 714        | 738        | 714        | 738        | 714  | 738  | 714  | 738 | R10  |
| R12  | 718        | 444        | 714        | 738        | 714        | 738        | 714        | 738        | 714        | 738        | 714        | 738        | 714        | 738        | 714        | 738        | 714  | 738  | 714  | 738 | R10  |
| R12  | 718        | 444        | 714        | 738        | 714        | 738        | 714        | 738        | 714        | 738        | 714        | 738        | 714        | 738        | 714        | 738        | 714  | 738  | 714  | 738 | R10  |
| R12  | 718        | 444        | 714        | 738        | 714        | 738        | 714        | 738        | 714        | 738        | 714        | 738        | 714        | 738        | 714        | 738        | 714  | 738  | 714  | 738 | R10  |
| R12  | 718        | 444        | 714        | 738        | 714        | 738        | 714        | 738        | 714        | 738        | 714        | 738        | 714        | 738        | 714        | 738        | 714  | 738  | 714  | 738 | R10  |
| R12  | 718        | 444        | 714        | 738        | 714        | 738        | 714        | 738        | 714        | 738        | 714        | 738        | 714        | 738        | 714        | 738        | 714  | 738  | 714  | 738 | R10  |
| R12  | 718        | 444        | 714        | 738        | 714        | 738        | 714        | 738        | 714        | 738        | 714        | 738        | 714        | 738        | 714        | 738        | 714  | 738  | 714  | 738 | R10  |
| R12  | 718        | 444        | 714        | 738        | 714        | 738        | 714        | 738        | 714        | 738        | 714        | 738        | 714        | 738        | 714        | 738        | 714  | 738  | 714  | 738 | R10  |
| R12  | 718        | 444        | 714        | 738        | 714        | 738        | 714        | 738        | 714        | 738        | 714        | 738        | 714        | 738        | 714        | 738        | 714  | 738  | 714  | 738 | R10  |
| R12  | 718        | 444        | 714        | 738        | 714        | 738        | 714        | 738        | 714        | 738        | 714        | 738        | 714        | 738        | 714        | 738        | 714  | 738  | 714  | 738 | R10  |
| R12  | 718        | 444        | 714        | 738        | 714        | 738        | 714        | 738        | 714        | 738        | 714        | 738        | 714        | 738        | 714        | 738        | 714  | 738  | 714  | 738 | R10  |
| R12  | 718        | 444        | 714        | 738        | 714        | 738        | 714        | 738        | 714        | 738        | 714        | 738        | 714        | 738        | 714        | 738        | 714  | 738  | 714  | 738 | R10  |
| R12  | 718        | 444        | 714        | 738        | 714        | 738        | 714        | 738        | 714        | 738        | 714        | 738        | 714        | 738        | 714        | 738        | 714  | 738  | 714  | 738 | R10  |
| R12  | 718        | 444        | 714        | 738        | 714        | 738        | 714        | 738        | 714        | 738        | 714        | 738        | 714        | 738        | 714        | 738        | 714  | 738  | 714  | 738 | R10  |
| R12  | 718        | 444        | 714        | 738        | 714        | 738        | 714        | 738        | 714        | 738        | 714        | 738        | 714        | 738        | 714        | 738        | 714  | 738  | 714  | 738 | R10  |
| R12  | 718        | 444        | 714        | 738        | 714        | 738        | 714        | 738        | 714        | 738        | 714        | 738        | 714        | 738        | 714        | 738        | 714  | 738  | 714  | 738 | R10  |
| R12  | 718        | 444        | 714        | 738        | 714        | 738        | 714        | 738        | 714        | 738        | 714        | 738        | 714        | 738        | 714        | 738        | 714  | 738  | 714  | 738 | R10  |
| R12  | 718        | 444        | 714        | 738        | 714        | 738        | 714        | 738        | 714        | 738        | 714        | 738        | 714        | 738        | 714        | 738        | 714  | 738  | 714  | 738 | R10  |
| R12  | 718        | 444        | 714        | 738        | 714        | 738        | 714        | 738        | 714        | 738        | 714        | 738        | 714        | 738        | 714        | 738        | 714  | 738  | 714  | 738 | R10  |
| R12  | 718        | 444        | 714        | 738        | 714        | 738        | 714        | 738        | 714        | 738        | 714        | 738        | 714        | 738        | 714        | 738        | 714  | 738  | 714  | 738 | R10  |
| R12  | 718        | 444        | 714        | 738        | 714        | 738        | 714        | 738        | 714        | 738        | 714        | 738        | 714        | 738        | 714        | 738        | 714  | 738  | 714  | 738 | R10  |
| R12  | 718        | 444        | 714        | 738        | 714        | 738        | 714        | 738        | 714        | 738        | 714        | 738        | 714        | 738        | 714        | 738        | 714  | 738  | 714  | 738 | R10  |
| R12  | 718        | 444        | 714        | 738        | 714        | 738        | 714        | 738        | 714        | 738        | 714        | 738        | 714        | 738        | 714        | 738        | 714  | 738  | 714  | 738 | R10  |
| R12  | 718        | 444        | 714        | 738        | 714        | 738        | 714        | 738        | 714        | 738        | 714        | 738        | 714        | 738        | 714        | 738        | 714  | 738  | 714  | 738 | R10  |
| R12  | 718        | 444        | 714        | 738        | 714        | 738        | 714        | 738        | 714        | 738        | 714        | 738        | 714        | 738        | 714        | 738        | 714  | 738  | 714  | 738 | R10  |
| R12  | 718        | 444        | 714        | 738</      |            |            |            |            |            |            |            |            |            |            |            |            |      |      |      |     |      |



# sp | Q6GSS7 | H2A2A\_MOUSE

LNKLLGK <sup>Dimethyl</sup> VTIAQGGVLPNIQAVLLPKKTE  
28.03

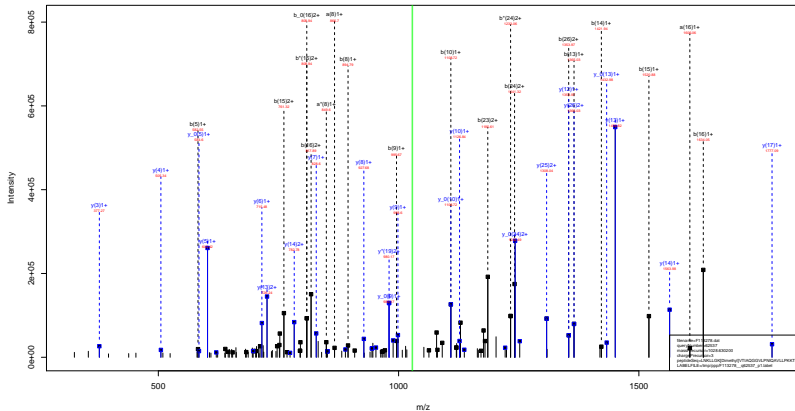

# sp | Q6GSS7 | H2A2A\_MOUSE

LNKLLGK <sup>Dimethyl</sup> <sub>28.03</sub> VTIAQGGVLPNIQAVLLPKKTE

- ▶ fragmentation table for charge state 1+
- ▶ specType=cid
- ▶ score=88.55
- ▶ F113278.dat
- ▶ query=q62537\_p1
- ▶ precursor=1028.630200
- ▶ chargePrecursor=3
- ▶ itol=0.5

| AA  | a        | a*    | a,0      | b        | b*    | b,0   | y        | y*        | y,0       | AA   |
|-----|----------|-------|----------|----------|-------|-------|----------|-----------|-----------|------|
| L1  | 88.598   | 0.000 | 0.000    | 134.001  | 0.000 | 0.000 | 363.180  | 1036.885  | 1036.881  | L129 |
| N1  | 100.129  | 0.011 | 0.000    | 136.124  | 0.011 | 0.000 | 363.180  | 1050.783  | 1050.787  | N130 |
| K1  | 126.234  | 0.112 | 0.000    | 135.225  | 0.100 | 0.000 | 359.770  | 1070.733  | 1070.794  | K127 |
| L14 | 144.118  | 0.042 | 0.000    | 139.747  | 0.042 | 0.000 | 2726.830 | 1211.963  | 1212.009  | L126 |
| L15 | 154.402  | 0.017 | 0.000    | 142.309  | 0.017 | 0.000 | 2815.961 | 1268.529  | 1268.578  | L125 |
| G1  | 161.124  | 0.041 | 0.000    | 142.309  | 0.000 | 0.000 | 2502.530 | 1248.475  | 1248.481  | G124 |
| K1  | 167.550  | 0.012 | 0.000    | 145.545  | 0.012 | 0.000 | 1465.481 | 12426.454 | 12427.470 | K123 |
| V1  | 169.619  | 0.000 | 0.000    | 154.613  | 0.000 | 0.000 | 2269.262 | 12572.329 | 12571.543 | V122 |
| L18 | 167.550  | 0.012 | 0.000    | 155.681  | 0.012 | 0.000 | 1716.038 | 1217.012  | 1216.992  | L121 |
| L16 | 1088.750 | 0.017 | 1062.740 | 1108.745 | 0.001 | 0.000 | 1089.251 | 1079.211  | 1079.127  | L120 |
| A11 | 1151.797 | 0.124 | 1051.752 | 1132.777 | 0.179 | 0.000 | 1162.750 | 1151.772  | 1151.752  | A119 |
| G12 | 1276.896 | 0.223 | 1026.876 | 1310.841 | 0.206 | 0.014 | 1209.835 | 1029.117  | 1029.090  | G118 |
| G13 | 1336.887 | 0.103 | 0.000    | 1364.883 | 0.147 | 0.000 | 1366.836 | 1777.058  | 1776.048  | G117 |
| G14 | 1385.888 | 0.008 | 0.000    | 1421.884 | 0.043 | 0.000 | 1423.875 | 1720.001  | 1720.000  | G116 |
| V15 | 1460.911 | 0.049 | 0.000    | 1478.905 | 0.130 | 0.000 | 1369.845 | 1661.633  | 1661.605  | V115 |
| L19 | 1506.941 | 0.001 | 0.000    | 1534.938 | 0.017 | 0.000 | 1519.759 | 1543.847  | 1543.838  | L114 |
| P17 | 1573.954 | 0.001 | 0.000    | 1591.960 | 0.171 | 0.000 | 1714.823 | 1413.319  | 1413.852  | P113 |
| N18 | 1607.919 | 0.011 | 1598.910 | 1608.910 | 0.000 | 0.000 | 1607.910 | 1333.810  | 1333.810  | N112 |
| L16 | 1636.921 | 0.013 | 1612.911 | 1642.911 | 0.000 | 0.000 | 1636.920 | 1222.741  | 1221.797  | L111 |
| G15 | 1693.944 | 0.041 | 0.000    | 1698.944 | 0.000 | 0.000 | 1693.944 | 1116.693  | 1116.693  | G110 |
| L17 | 1703.917 | 0.012 | 1688.905 | 1713.917 | 0.012 | 0.000 | 1703.917 | 1098.783  | 1098.783  | L109 |
| V12 | 2228.949 | 0.211 | 2210.974 | 2236.964 | 0.230 | 0.014 | 2236.910 | 927.587   | 926.594   | V108 |
| L12 | 2341.469 | 0.224 | 2323.495 | 2357.495 | 0.238 | 0.004 | 2352.438 | 881.454   | 879.519   | L107 |
| L14 | 2424.513 | 0.007 | 2406.540 | 2440.540 | 0.000 | 0.000 | 2424.513 | 815.435   | 815.435   | L106 |
| P16 | 2512.708 | 0.215 | 2494.730 | 2529.761 | 0.262 | 0.014 | 2512.712 | 692.331   | 690.424   | P105 |
| K16 | 2676.761 | 0.041 | 2658.788 | 2712.788 | 0.040 | 0.000 | 2676.761 | 565.298   | 565.271   | K104 |
| K17 | 2707.770 | 0.001 | 2689.797 | 2835.791 | 0.016 | 0.000 | 2717.755 | 377.253   | 366.172   | K103 |
| L16 | 2808.814 | 0.001 | 2790.839 | 2826.839 | 0.019 | 0.000 | 2808.814 | 318.166   | 318.166   | L102 |
| E16 | 2817.818 | 0.001 | 2798.841 | 2838.834 | 0.014 | 0.000 | 2817.818 | 191.668   | 191.668   | E101 |

# sp | Q6GSS7 | H2A2A\_MOUSE

LNKLLGK <sup>Dimethyl</sup> <sub>28.03</sub> VTIAQGGVLPNIQAVLLPKKTE

- ▶ fragmentation table for charge state 2+
- ▶ specType=cid
- ▶ score=88.55
- ▶ F113278.dat
- ▶ query=q62537\_p1
- ▶ precursor=1028.630200
- ▶ chargePrecursor=3
- ▶ itol=0.5

| AA   | a               | a*             | a,0            | b               | b*              | b,0             | r               | y*              | y,0            | AA   |
|------|-----------------|----------------|----------------|-----------------|-----------------|-----------------|-----------------|-----------------|----------------|------|
| L13  | 43.052          | 0.504          | 0.504          | 07.649          | 0.504           | 0.504           | 1347.457        | 1333.026        | 2333.444       | L129 |
| N12  | 100.074         | 0.504          | 0.504          | 114.074         | 0.504           | 0.504           | 2481.965        | 2471.965        | 2471.965       | N10  |
| K13  | 104.021         | 150.150        | 0.504          | 118.018         | 170.170         | 0.504           | 2438.855        | 1420.274        | 2443.881       | K129 |
| L14  | 221.481         | 247.050        | 0.504          | 235.142         | 256.641         | 0.504           | <b>1160.439</b> | 1150.125        | 2350.611       | L128 |
| L15  | 227.105         | 269.182        | 0.504          | 261.192         | 282.188         | 0.504           | <b>1300.267</b> | 1289.781        | 269.288        | L127 |
| G16  | 709.019         | 707.001        | 0.504          | 709.019         | 711.702         | 0.504           | <b>1283.755</b> | 1274.254        | 1282.740       | G14  |
| K17  | 384.470         | 403.160        | 0.504          | 388.470         | 408.161         | 0.504           | 1233.244        | 1224.717        | 414.739        | K123 |
| V18  | 443.011         | 428.262        | 0.504          | 447.011         | 430.267         | 0.504           | 1145.115        | <b>1138.663</b> | 713.015        | V122 |
| T19  | 484.118         | 474.021        | 477.311        | 488.118         | 489.312         | 489.312         | 1020.640        | 1010.311        | 478.041        | T121 |
| E19  | 440.870         | 434.369        | 431.874        | 444.870         | 446.368         | 446.368         | 1046.121        | 1036.606        | 438.817        | E19  |
| A111 | 176.587         | 187.284        | 187.282        | 187.582         | 198.279         | 198.279         | <b>900.581</b>  | <b>900.067</b>  | 270.271        | A110 |
| G112 | 186.077         | 193.613        | 193.612        | <b>194.424</b>  | 205.111         | <b>195.419</b>  | <b>953.062</b>  | <b>946.543</b>  | <b>944.027</b> | G110 |
| G113 | 168.837         | 180.424        | 180.422        | <b>182.035</b>  | 174.429         | 174.429         | <b>889.633</b>  | <b>880.511</b>  | 880.007        | G117 |
| G114 | <b>897.448</b>  | 888.933        | 888.931        | <b>911.446</b>  | <b>902.932</b>  | <b>902.440</b>  | <b>882.527</b>  | <b>852.009</b>  | <b>851.517</b> | G116 |
| V115 | <b>176.852</b>  | 178.449        | 177.871        | <b>180.360</b>  | <b>182.467</b>  | <b>181.874</b>  | 819.611         | 819.611         | 177.871        | V115 |
| L108 | 794.024         | <b>793.011</b> | <b>794.519</b> | <b>817.522</b>  | <b>809.009</b>  | <b>808.517</b>  | <b>782.477</b>  | <b>773.964</b>  | 773.974        | L104 |
| P117 | <b>852.051</b>  | 846.537        | 844.049        | <b>868.048</b>  | <b>867.535</b>  | <b>867.041</b>  | <b>725.935</b>  | 717.420         | 718.930        | P115 |
| N118 | <b>809.012</b>  | 800.500        | 800.009        | <b>809.010</b>  | 814.506         | 814.009         | 647.997         | 648.000         | 800.009        | N119 |
| L119 | <b>965.014</b>  | 957.121        | 956.000        | 972.112         | <b>971.098</b>  | 970.977         | <b>620.107</b>  | 613.074         | 611.062        | L121 |
| G120 | 1029.044        | 1021.130       | 1020.000       | <b>1029.039</b> | 1034.021        | 1034.000        | 561.000         | 559.320         | 1024.000       | G118 |
| P121 | 1009.010        | 1000.004       | 1000.000       | <b>1019.160</b> | 1019.014        | 1019.014        | 489.913         | 489.900         | 1000.000       | P119 |
| V122 | 1114.096        | 1106.181       | 1105.001       | <b>1128.094</b> | <b>1126.180</b> | <b>1126.000</b> | 454.201         | 453.184         | 1105.262       | V118 |
| L123 | <b>1171.218</b> | 1162.720       | 1162.000       | <b>1185.236</b> | <b>1183.738</b> | <b>1183.000</b> | 424.100         | 424.200         | 1162.720       | L119 |
| L124 | 1227.000        | 1219.000       | 1218.000       | <b>1241.778</b> | <b>1233.265</b> | <b>1232.773</b> | 381.221         | 381.100         | 1219.000       | L118 |
| K125 | 1225.207        | 1219.200       | 1219.201       | <b>1246.708</b> | 1246.708        | 1246.708        | 380.010         | 380.100         | 1219.201       | K118 |
| K126 | 1492.024        | 1481.001       | 1481.000       | <b>1504.352</b> | 1494.000        | 1494.000        | 281.151         | 281.000         | 1481.001       | K114 |
| K127 | 1424.204        | 1414.200       | 1414.200       | 1424.204        | 1424.204        | 1424.204        | 280.100         | 280.100         | 1414.200       | K113 |
| L128 | 1474.026        | 1465.413       | 1465.000       | 1485.812        | 1476.000        | 1476.000        | 125.000         | 0.504           | 115.002        | L122 |
| E129 | 1019.047        | 1010.000       | 1010.000       | 1031.044        | 1024.000        | 1024.000        | 78.504          | 0.504           | 68.000         | E111 |

# sp | Q6GSS7 | H2A2A\_MOUSE

LNKLLGK <sup>Dimethyl</sup>VTIAQGGVLPNIQAVLLPKKTE  
28.03

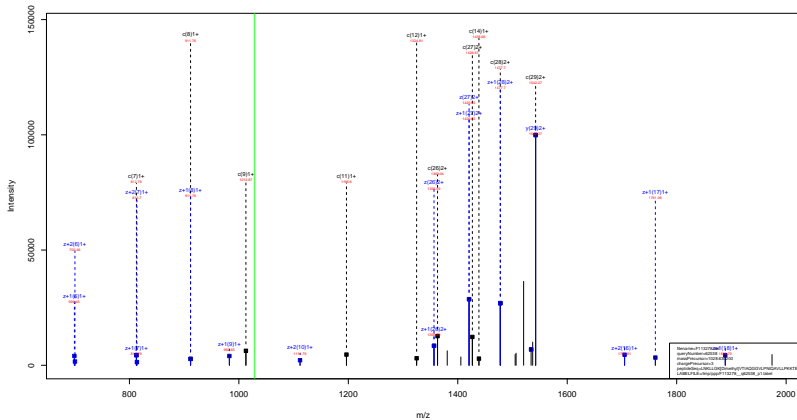

# sp | Q6GSS7 | H2A2A\_MOUSE

LNKLLGK <sup>Dimethyl</sup> 28.03 VTIAQGGVLPNIQAVLLPKKTE

- ▶ fragmentation table for charge state 1+
- ▶ specType=etd
- ▶ score=43.07
- ▶ F113278.dat
- ▶ query=q62538.p1
- ▶ precursor=1028.630200
- ▶ chargePrecursor=3
- ▶ itol=0.5

| AA    | c               | y        | z+1             | z+2             | z        | AA    |
|-------|-----------------|----------|-----------------|-----------------|----------|-------|
| L 1   | 131.118         | 3081.892 | 3067.873        | 0.000           | 3066.895 | L 29  |
| N 2   | 345.161         | 2970.808 | 2954.789        | 2955.797        | 2951.781 | N 28  |
| K 3   | 373.256         | 2856.765 | 2840.746        | 2841.754        | 2839.738 | K 27  |
| L 4   | 486.340         | 2728.670 | 2712.651        | 2713.659        | 2711.643 | L 26  |
| L 5   | 599.424         | 2615.585 | 2599.567        | 2600.575        | 2598.560 | L 25  |
| Q 6   | 694.448         | 2502.502 | 2486.483        | 2487.491        | 2485.475 | Q 24  |
| K 7   | <b>812.572</b>  | 2345.480 | 2429.462        | 2430.469        | 2428.454 | K 23  |
| V 8   | <b>911.640</b>  | 2288.354 | 2273.335        | 2274.343        | 2272.327 | V 22  |
| T 9   | <b>1012.688</b> | 2190.286 | 2174.267        | 2175.275        | 2173.259 | T 21  |
| I 10  | 1125.772        | 2089.238 | 2073.219        | 2074.227        | 2072.211 | I 20  |
| A 11  | <b>1196.809</b> | 1976.154 | 1960.135        | 1961.143        | 1959.127 | A 19  |
| Q 12  | <b>1324.867</b> | 1895.111 | <b>1889.098</b> | 1890.106        | 1888.090 | Q 18  |
| G 13  | 1381.889        | 1777.058 | <b>1761.039</b> | 1762.047        | 1760.032 | G 17  |
| G 14  | <b>1438.910</b> | 1720.937 | 1704.918        | <b>1705.026</b> | 1703.010 | G 16  |
| V 15  | 1537.879        | 1663.015 | 1646.997        | 1646.004        | 1645.989 | V 15  |
| L 16  | 1651.063        | 1563.947 | 1547.928        | 1548.936        | 1546.920 | L 14  |
| F 17  | 1748.116        | 1450.893 | 1434.864        | 1435.872        | 1433.856 | F 13  |
| TW 18 | 1892.159        | 1383.810 | 1367.791        | 1368.799        | 1366.783 | TW 12 |
| I 19  | 1975.243        | 1239.767 | 1223.748        | 1224.756        | 1222.741 | I 11  |
| Q 20  | 2103.301        | 1126.683 | 1110.664        | <b>1111.672</b> | 1109.656 | Q 10  |
| A 21  | 2174.336        | 998.624  | <b>982.606</b>  | 983.614         | 981.598  | A 9   |
| V 22  | 2273.407        | 927.587  | <b>911.569</b>  | 912.576         | 910.561  | V 8   |
| L 23  | 2386.491        | 828.519  | <b>812.500</b>  | <b>813.508</b>  | 811.492  | L 7   |
| L 24  | 2499.575        | 715.435  | <b>699.415</b>  | <b>700.424</b>  | 698.408  | L 6   |
| P 25  | 2596.626        | 602.351  | 586.332         | 587.340         | 585.324  | P 5   |
| K 26  | 2724.723        | 505.298  | 489.279         | 490.287         | 488.271  | K 4   |
| K 27  | 2852.816        | 377.203  | 361.184         | 362.192         | 360.177  | K 3   |
| T 28  | 2953.895        | 249.108  | 233.089         | 234.097         | 232.082  | T 2   |
| E 29  | 3082.938        | 148.060  | 132.042         | 133.050         | 131.034  | E 1   |

# sp | Q6GSS7 | H2A2A\_MOUSE

LNKLLGK <sup>Dimethyl</sup> <sub>28.03</sub> VTIAQGGVLPNIQAVLLPKKTE

- ▶ fragmentation table for charge state 2+
- ▶ specType=etd
- ▶ score=43.07
- ▶ F113278.dat
- ▶ query=q62538.p1
- ▶ precursor=1028.630200
- ▶ chargePrecursor=3
- ▶ itol=0.5

| AA   | c               | y               | z+1             | z+2      | z               | AA   |
|------|-----------------|-----------------|-----------------|----------|-----------------|------|
| L 1  | 66.063          | <b>1542.450</b> | <b>1534.440</b> | 0.504    | <b>1533.936</b> | L 26 |
| N 2  | 123.084         | 1485.905        | <b>1477.898</b> | 1478.402 | <b>1477.394</b> | N 28 |
| K 3  | 187.132         | 1428.888        | <b>1420.877</b> | 1421.381 | <b>1420.373</b> | K 27 |
| L 4  | 243.674         | 1364.839        | <b>1356.829</b> | 1357.333 | <b>1356.325</b> | L 26 |
| L 5  | 300.216         | 1308.297        | 1308.297        | 1300.791 | 1299.783        | L 25 |
| G 6  | 358.729         | 1251.755        | 1243.745        | 1244.249 | 1243.241        | G 24 |
| K 7  | 406.789         | 1223.244        | 1215.234        | 1215.738 | 1214.731        | K 23 |
| V 8  | 456.324         | 1145.181        | 1137.171        | 1137.675 | 1136.667        | V 22 |
| T 9  | 506.846         | 1095.646        | 1087.637        | 1088.141 | 1087.133        | T 21 |
| I 10 | 563.390         | 1045.123        | 1037.113        | 1037.617 | 1036.609        | I 20 |
| A 11 | 598.608         | 988.581         | 980.571         | 981.075  | 980.067         | A 19 |
| Q 12 | 662.937         | 953.062         | 945.053         | 945.557  | 944.549         | Q 18 |
| G 13 | 691.448         | 889.033         | 881.023         | 881.527  | 880.519         | G 17 |
| G 14 | 719.959         | 860.522         | 852.513         | 853.017  | 852.009         | G 16 |
| V 15 | 769.493         | 832.011         | 824.002         | 824.506  | 823.498         | V 15 |
| L 16 | 826.035         | 782.477         | 774.468         | 774.972  | 773.964         | L 14 |
| F 17 | 874.561         | 725.935         | 717.926         | 718.430  | 717.422         | F 13 |
| N 18 | 911.583         | 677.409         | 669.399         | 669.903  | 668.895         | N 12 |
| I 19 | 968.125         | 620.387         | 612.378         | 612.882  | 611.874         | I 11 |
| Q 20 | 1052.154        | 563.845         | 555.836         | 556.340  | 555.332         | Q 10 |
| A 21 | 1087.673        | 499.816         | 491.807         | 492.310  | 491.302         | A 9  |
| V 22 | 1137.207        | 464.297         | 456.288         | 456.792  | 455.784         | V 8  |
| L 23 | 1183.749        | 414.763         | 406.754         | 407.258  | 406.250         | L 7  |
| L 24 | 1250.291        | 358.221         | 350.212         | 350.716  | 349.708         | L 6  |
| P 25 | 1298.817        | 301.678         | 293.670         | 294.174  | 293.166         | P 5  |
| K 26 | <b>1362.865</b> | 253.153         | 245.143         | 245.647  | 244.639         | K 4  |
| K 27 | <b>1426.912</b> | 189.105         | 181.096         | 181.600  | 180.592         | K 3  |
| T 28 | <b>1477.436</b> | 125.058         | 117.048         | 117.552  | 116.544         | T 2  |
| E 29 | <b>1541.958</b> | 74.534          | 66.524          | 67.028   | 66.021          | E 1  |

# sp | Q6GSS7 | H2A2A\_MOUSE

LNKLLGK<sup>Dimethyl</sup>VTIAQGGVLPNIQAVLLPKKTE  
28.03

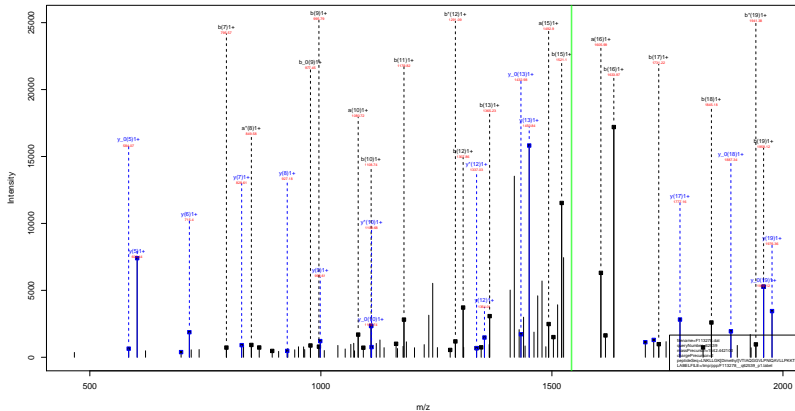

# sp | Q6GSS7 | H2A2A\_MOUSE

LNKLLGK <sup>Dimethyl</sup>VTIAQGGVLPNIQAVLLPKKTE  
28.03

- ▶ fragmentation table for charge state 1+
- ▶ specType=cid
- ▶ score=73.93
- ▶ F113278.dat
- ▶ query=q62539\_p1
- ▶ precursor=1542.442100
- ▶ chargePrecursor=2
- ▶ itol=0.5

| AA   | a               | a*             | a,Δ      | b               | b*              | b,Δ             | r               | y*              | y,Δ             | AA    |
|------|-----------------|----------------|----------|-----------------|-----------------|-----------------|-----------------|-----------------|-----------------|-------|
| L13  | 163.076         | 0.000          | 0.000    | 114.093         | 0.000           | 0.000           | 2081.893        | 1326.205        | 0.000           | L129  |
| N12  | 169.078         | 151.711        | 0.000    | 168.074         | 111.719         | 0.000           | 2078.893        | 1324.787        | 0.000           | N10   |
| K13  | 128.034         | 351.250        | 0.000    | 108.237         | 336.033         | 0.000           | 2076.193        | 1268.784        | 0.000           | K127  |
| L14  | 441.111         | 424.202        | 0.000    | 449.113         | 432.207         | 0.000           | 2128.473        | 2213.043        | 0.000           | L128  |
| L15  | 104.024         | 381.103        | 0.000    | 102.027         | 369.111         | 0.000           | 2073.500        | 1268.200        | 0.000           | L125  |
| G16  | 112.024         | 376.201        | 0.000    | 110.027         | 362.219         | 0.000           | 2059.201        | 1269.471        | 0.000           | G14   |
| K17  | 107.030         | 363.134        | 0.000    | 105.033         | 351.133         | 0.000           | 2045.464        | 1242.464        | 0.000           | K123  |
| V18  | <b>166.619</b>  | <b>648.582</b> | 0.000    | <b>164.613</b>  | <b>637.587</b>  | 0.000           | 2288.304        | 2072.327        | 0.000           | V122  |
| T19  | 178.078         | 161.642        | 0.000    | 175.081         | 171.632         | 0.000           | <b>977.451</b>  | 1129.201        | 0.000           | T121  |
| I10  | <b>1080.750</b> | 1081.744       | 1084.740 | <b>1108.745</b> | <b>1091.719</b> | 1096.714        | 3088.238        | 3074.211        | 3081.707        | I109  |
| A11  | 1131.077        | 1124.782       | 1131.777 | <b>1170.782</b> | <b>1162.756</b> | 1167.751        | <b>1616.154</b> | <b>1598.127</b> | <b>1590.143</b> | A116  |
| Q12  | <b>1279.846</b> | 1274.439       | 1278.436 | <b>1307.841</b> | <b>1296.814</b> | 1298.810        | 3109.111        | 3099.092        | <b>1587.106</b> | Q118  |
| GL13 | <b>1136.867</b> | 1131.844       | 1133.867 | <b>1364.862</b> | 1367.859        | <b>1366.852</b> | <b>1777.858</b> | 1768.833        | 1769.848        | GL127 |
| GL14 | <b>1107.887</b> | 1102.862       | 1104.878 | <b>1330.882</b> | 1334.879        | 1333.874        | <b>1720.837</b> | 1710.810        | <b>1702.826</b> | GL126 |
| V15  | <b>1492.957</b> | 1478.931       | 1474.944 | <b>1520.952</b> | 1504.927        | 1502.942        | 3102.912        | 3084.885        | 3084.885        | V105  |
| L108 | <b>1006.041</b> | 1000.030       | 1003.031 | <b>1034.036</b> | 1037.030        | <b>1035.026</b> | 3093.044        | 3078.026        | 3068.008        | L104  |
| P117 | 1103.034        | 1098.000       | 1098.000 | <b>1131.009</b> | 1124.003        | 1121.001        | <b>1400.863</b> | 1383.836        | <b>1432.852</b> | P113  |
| N118 | 1011.019        | 1006.011       | 1006.011 | <b>1045.015</b> | 1038.008        | 1035.006        | <b>1829.031</b> | <b>1815.003</b> | <b>1836.025</b> | N112  |
| I19  | 1131.021        | 1124.011       | 1124.011 | <b>1108.016</b> | <b>1041.190</b> | 1038.185        | 3122.044        | 3093.027        | 3093.027        | I121  |
| Q120 | 1018.008        | 1013.000       | 1013.000 | 1008.005        | 1003.000        | 1000.000        | 3098.028        | 3088.000        | 3088.000        | Q115  |
| A121 | 1019.011        | 1014.000       | 1014.000 | 1009.005        | 1004.000        | 1001.000        | <b>1068.024</b> | 1058.000        | 1058.000        | A119  |
| V122 | 1228.580        | 1221.570       | 1221.570 | 1224.575        | 1218.564        | 1216.554        | 3228.578        | 3213.551        | 3213.551        | V117  |
| L123 | 1341.400        | 1334.400       | 1334.400 | 1338.404        | 1332.400        | 1330.400        | <b>820.510</b>  | 814.499         | 814.499         | L117  |
| L124 | 1024.013        | 1017.000       | 1017.000 | 1012.004        | 1006.000        | 1004.000        | 3014.011        | 3004.000        | 3004.000        | L118  |
| P126 | 1011.006        | 1004.000       | 1004.000 | 1006.001        | 1000.000        | 1000.000        | 3011.010        | 3001.000        | 3001.000        | P120  |
| K129 | 1019.011        | 1012.000       | 1012.000 | 1007.004        | 1001.000        | 1000.000        | 3011.010        | 3001.000        | 3001.000        | K124  |
| K127 | 1017.006        | 1010.000       | 1010.000 | 1012.001        | 1006.000        | 1004.000        | 3011.010        | 3001.000        | 3001.000        | K119  |
| L128 | 1018.004        | 1011.000       | 1011.000 | 1013.001        | 1007.000        | 1005.000        | 3011.010        | 3001.000        | 3001.000        | L122  |
| E124 | 1017.006        | 1010.000       | 1010.000 | 1011.001        | 1005.000        | 1003.000        | 3011.010        | 3001.000        | 3001.000        | E111  |



sp | Q6ZWY9 | H2B1C\_MOUSE

PEPAKSAPAPKKGSK<sup>Acetyl</sup> KAVTKAQKKDGKKRKRSRKE  
42.01

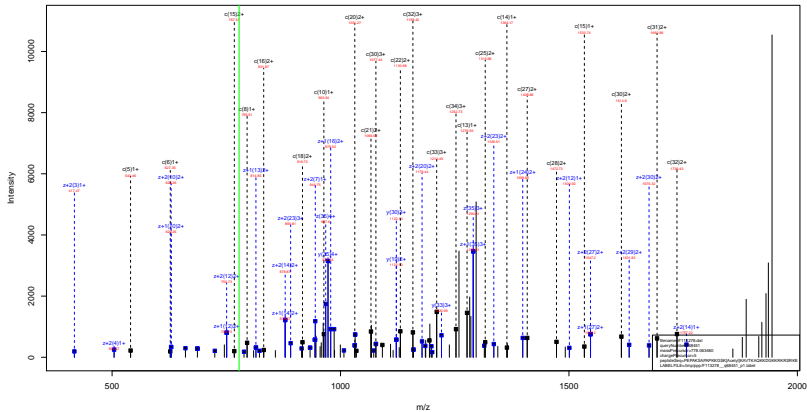

# sp | Q6ZWY9 | H2B1C\_MOUSE

PEPAKSAPAPKKGSK<sup>Acetyl</sup> KAVTKAQKKDGGKRRKRSRKE  
42.01

- ▶ fragmentation table for charge state 1+
- ▶ specType=etd
- ▶ score=66.35
- ▶ F113278.dat
- ▶ query=q68451.p1
- ▶ precursor=778.063460
- ▶ chargePrecursor=5
- ▶ itol=0.5

| AA  | c               | y        | z+1            | z+2             | z               | AA  |
|-----|-----------------|----------|----------------|-----------------|-----------------|-----|
| P1  | 115.087         | 3886.294 | 3870.275       | 0.000           | 3869.267        | P35 |
| E2  | 244.129         | 3789.241 | 3773.222       | 0.000           | 3772.214        | E34 |
| P3  | 341.182         | 3690.198 | 3644.180       | 0.000           | 3643.172        | P33 |
| A4  | 412.219         | 3563.146 | 3547.127       | 0.000           | 3546.119        | A32 |
| K5  | <b>548.314</b>  | 3492.108 | 3476.089       | 3473.068        | 3475.062        | K31 |
| S6  | <b>627.346</b>  | 3364.014 | 3347.995       | 3349.003        | 3346.991        | S30 |
| A7  | 698.383         | 3276.982 | 3260.963       | 3261.971        | 3259.955        | A29 |
| P8  | <b>795.436</b>  | 3205.944 | 3189.925       | 3190.933        | 3188.918        | P28 |
| A9  | 866.473         | 3108.892 | 3092.873       | 3093.881        | 3091.865        | A27 |
| P10 | <b>963.526</b>  | 3037.855 | 3021.836       | 3022.844        | 3020.829        | P26 |
| K11 | <b>1091.621</b> | 2940.802 | 2924.783       | 2925.791        | 2923.775        | K25 |
| K12 | 1219.718        | 2812.701 | 2796.682       | 2797.690        | 2795.674        | K24 |
| Q13 | <b>1276.737</b> | 2684.612 | 2668.593       | 2669.601        | 2667.585        | Q23 |
| S14 | <b>1363.769</b> | 2627.560 | 2611.542       | 2612.549        | 2610.534        | S22 |
| K15 | <b>1533.875</b> | 2540.508 | 2524.489       | 2525.497        | 2523.481        | K21 |
| K16 | 1661.970        | 2370.453 | 2354.434       | 2355.442        | 2353.426        | K20 |
| A17 | 1733.007        | 2242.398 | 2226.379       | 2227.387        | 2225.371        | A19 |
| V18 | 1832.078        | 2174.321 | 2158.302       | 2159.310        | 2157.294        | V18 |
| T19 | 1933.123        | 2072.252 | 2056.234       | 2057.241        | 2055.225        | T17 |
| K20 | 2061.218        | 1971.205 | 1955.186       | 1956.194        | 1954.178        | K16 |
| A21 | 2132.255        | 1843.110 | 1827.091       | 1828.099        | 1826.083        | A15 |
| Q22 | 2260.314        | 1772.073 | 1756.054       | <b>1757.062</b> | 1755.046        | Q14 |
| K23 | 2388.409        | 1644.014 | 1627.995       | 1629.003        | 1626.987        | K13 |
| R24 | 2516.504        | 1515.919 | 1499.900       | <b>1500.908</b> | 1498.884        | R12 |
| D25 | 2631.536        | 1387.824 | 1371.805       | 1372.813        | 1370.798        | D11 |
| G26 | 2688.552        | 1272.797 | 1256.778       | 1257.786        | 1255.771        | G10 |
| K27 | 2816.647        | 1171.716 | 1155.697       | <b>1200.765</b> | <b>1198.749</b> | K0  |
| K28 | 2944.742        | 1087.681 | 1071.662       | <b>1072.670</b> | 1070.654        | K0  |
| R29 | 3100.843        | 959.598  | <b>943.567</b> | <b>944.575</b>  | 942.559         | R7  |
| R30 | 3239.938        | 803.485  | 787.466        | <b>788.474</b>  | 786.458         | R0  |
| R31 | 3385.039        | 675.390  | 659.371        | <b>660.379</b>  | 658.363         | R5  |
| S32 | 3472.071        | 519.289  | 503.270        | <b>504.278</b>  | 502.262         | S4  |
| R33 | 3628.172        | 432.257  | 416.238        | <b>417.246</b>  | 415.230         | R3  |
| K34 | 3756.267        | 276.155  | 260.137        | 261.144         | 259.129         | K2  |
| E35 | 3885.310        | 148.060  | 132.042        | 133.050         | 131.034         | E1  |

# sp | Q6ZWY9 | H2B1C\_MOUSE

PEPAKSAPAPKKGSK<sup>Acetyl</sup><sub>42.01</sub> KAVTKAQKKDKGKRRKRSRKE

- ▶ fragmentation table for charge state 2+
- ▶ specType=etd
- ▶ score=66.35
- ▶ F113278.dat
- ▶ query=q68451\_p1
- ▶ precursor=778.063460
- ▶ chargePrecursor=5
- ▶ itol=0.5

| AA | c  | y               | #±1             | #±2             | z               | AA              |       |
|----|----|-----------------|-----------------|-----------------|-----------------|-----------------|-------|
| F  | 1  | 58.047          | 1043.651        | 1035.641        | 0.504           | 1935.117        | F(28) |
| E  | 2  | 122.508         | 1095.124        | 1087.115        | 0.504           | 1886.611        | E(34) |
| F  | 3  | 171.095         | 1030.603        | 1022.593        | 0.504           | 1822.000        | F(33) |
| A  | 4  | 208.613         | 1182.076        | 1174.067        | 0.504           | 1773.563        | A(32) |
| K  | 5  | 270.661         | 1746.558        | 1738.548        | 1739.052        | 1739.045        | K(31) |
| S  | 6  | 314.177         | 1682.510        | 1674.501        | <b>1675.005</b> | 1674.997        | S(30) |
| A  | 7  | 362.695         | 1638.994        | 1630.985        | <b>1631.489</b> | 1630.481        | A(29) |
| F  | 8  | 398.222         | 1603.476        | 1595.466        | 1595.970        | 1594.961        | F(28) |
| A  | 9  | 433.740         | 1554.949        | <b>1546.940</b> | <b>1547.444</b> | 1546.436        | A(27) |
| F  | 10 | 482.267         | 1519.431        | 1511.422        | 1511.925        | 1510.916        | F(26) |
| K  | 11 | 546.314         | 1470.905        | 1462.895        | 1463.399        | 1462.391        | K(25) |
| K  | 12 | 610.362         | 1426.378        | <b>1398.848</b> | 1399.352        | 1398.344        | K(24) |
| G  | 13 | 638.872         | 1342.810        | 1334.800        | <b>1335.304</b> | 1334.296        | G(23) |
| S  | 14 | 682.388         | <b>1314.299</b> | 1306.289        | 1306.793        | 1305.785        | S(22) |
| K  | 15 | <b>767.441</b>  | 1270.763        | 1262.753        | 1263.257        | 1262.250        | K(21) |
| K  | 16 | <b>831.488</b>  | <b>1185.730</b> | 1177.721        | <b>1178.225</b> | 1177.217        | K(20) |
| A  | 17 | 897.997         | <b>1121.683</b> | 1113.673        | 1114.177        | 1113.169        | A(19) |
| V  | 18 | <b>916.541</b>  | 1038.554        | 1030.545        | 1031.049        | <b>1077.051</b> | V(18) |
| T  | 19 | 967.065         | 1036.630        | 1028.620        | 1029.124        | 1028.117        | T(17) |
| K  | 20 | <b>1031.113</b> | <b>986.106</b>  | <b>978.097</b>  | <b>978.601</b>  | 977.593         | K(16) |
| A  | 21 | <b>1066.631</b> | 922.058         | 914.049         | <b>914.553</b>  | 913.545         | A(15) |
| Q  | 22 | <b>1130.660</b> | 898.540         | <b>878.531</b>  | <b>879.034</b>  | 878.027         | Q(14) |
| K  | 23 | <b>1194.708</b> | <b>822.511</b>  | <b>814.501</b>  | <b>815.005</b>  | 813.997         | K(13) |
| K  | 24 | 1258.157        | 758.463         | <b>750.454</b>  | <b>750.958</b>  | 749.950         | K(12) |
| D  | 25 | <b>1316.269</b> | 694.418         | <b>686.406</b>  | <b>686.910</b>  | 685.903         | D(11) |
| G  | 26 | 1364.780        | 636.902         | <b>628.893</b>  | <b>629.397</b>  | 628.389         | G(10) |
| K  | 27 | <b>1408.827</b> | 608.391         | 600.382         | 600.886         | 599.878         | K(9)  |
| K  | 28 | <b>1472.875</b> | 644.344         | 636.335         | 636.839         | 635.831         | K(8)  |
| R  | 29 | 1550.676        | 680.296         | 672.287         | 672.791         | 671.783         | R(7)  |
| K  | 30 | <b>1614.973</b> | 602.246         | 594.237         | 594.740         | 593.733         | K(6)  |
| R  | 31 | <b>1693.023</b> | 538.198         | 530.189         | 530.693         | 529.685         | R(5)  |
| S  | 32 | <b>1736.539</b> | 260.148         | 252.139         | 252.642         | 251.635         | S(4)  |
| K  | 33 | 1814.590        | 216.632         | 208.623         | 209.126         | 208.119         | K(3)  |
| K  | 34 | 1878.637        | 138.561         | 130.552         | 131.056         | 130.048         | K(2)  |
| E  | 35 | 1943.158        | 74.534          | 66.524          | 67.028          | 66.021          | E(1)  |

# sp | Q6ZWH9 | H2B1C\_MOUSE

PEPAKSAPAPKKGSK<sup>Acetyl</sup><sub>42.01</sub> KAVTKAQKKDGGKRRKRSRKE

- ▶ fragmentation table for charge state 3+
- ▶ specType=etd
- ▶ score=66.35
- ▶ F113278.dat
- ▶ query=q68451.p1
- ▶ precursor=778.063460
- ▶ chargePrecursor=5
- ▶ itol=0.5

| AA   | c               | y               | z+1             | z+2             | z               | AA   |
|------|-----------------|-----------------|-----------------|-----------------|-----------------|------|
| F 1  | 39.034          | 1296.123        | <b>1290.763</b> | 0.672           | <b>1290.427</b> | F 29 |
| E 2  | 82.048          | 1263.752        | 1258.432        | 0.672           | 1258.076        | E 34 |
| F 3  | 114.399         | <b>1220.738</b> | 1215.398        | 0.672           | 1215.062        | F 33 |
| A 4  | 138.076         | 1188.361        | 1183.047        | 0.672           | 1182.711        | A 32 |
| K 5  | 180.776         | 1164.708        | <b>1159.368</b> | <b>1159.704</b> | 1159.032        | K 31 |
| S 6  | 209.287         | <b>1122.009</b> | 1116.619        | 1117.006        | 1116.336        | S 30 |
| A 7  | 213.466         | 1092.959        | 1087.639        | 1087.996        | 1087.321        | A 29 |
| F 8  | 265.817         | 1069.320        | 1063.930        | 1064.316        | 1063.644        | F 28 |
| A 9  | 289.490         | 1036.969        | <b>1031.629</b> | <b>1031.965</b> | <b>1031.293</b> | A 27 |
| F 10 | 321.847         | 1013.290        | 1007.950        | 1008.286        | <b>1007.614</b> | F 26 |
| K 11 | 364.545         | 980.939         | 975.599         | 975.939         | 975.263         | K 25 |
| K 12 | 407.243         | 938.240         | <b>932.901</b>  | <b>933.237</b>  | 932.565         | K 24 |
| G 13 | 426.251         | 895.542         | 890.203         | <b>890.538</b>  | 889.867         | G 23 |
| S 14 | 455.261         | 876.535         | 871.195         | 871.531         | 870.859         | S 22 |
| K 15 | 511.963         | 847.524         | 842.185         | 842.521         | 841.849         | K 21 |
| K 16 | 554.661         | 790.822         | 785.483         | 785.819         | 785.147         | K 20 |
| A 17 | 578.340         | 748.124         | 742.785         | 743.120         | 742.448         | A 19 |
| V 18 | 611.393         | <b>724.445</b>  | 719.106         | 719.441         | 718.770         | V 18 |
| T 19 | 645.046         | 691.422         | 686.083         | <b>686.419</b>  | 685.747         | T 17 |
| K 20 | 687.744         | 657.740         | 652.400         | 652.736         | 652.064         | K 16 |
| A 21 | 711.423         | 615.041         | 609.702         | 610.038         | 609.366         | A 15 |
| Q 22 | 754.109         | 591.362         | 586.023         | 586.359         | 585.687         | Q 14 |
| K 23 | 796.808         | 548.676         | 543.337         | 543.673         | 543.001         | K 13 |
| K 24 | 839.506         | 505.975         | 500.636         | 500.974         | 500.302         | K 12 |
| D 25 | 877.248         | 463.280         | 457.940         | 458.276         | 457.604         | D 11 |
| G 26 | 896.655         | 424.917         | 419.578         | 419.914         | 419.242         | G 10 |
| K 27 | 939.554         | 405.930         | 400.590         | 400.926         | 400.255         | K 9  |
| K 28 | 952.252         | 363.232         | 357.893         | 358.229         | 357.557         | K 8  |
| R 29 | 994.949         | 320.531         | 315.194         | 315.530         | 314.858         | R 7  |
| K 30 | <b>1076.984</b> | 268.500         | 263.160         | 263.496         | 262.824         | K 6  |
| R 31 | 1129.619        | 225.801         | 220.462         | 220.798         | 220.126         | R 5  |
| S 32 | <b>1158.029</b> | 173.768         | 168.428         | 168.764         | 168.092         | S 4  |
| K 33 | <b>1210.062</b> | 144.757         | 139.417         | 139.753         | 139.082         | K 3  |
| K 34 | <b>1252.761</b> | 92.721          | 87.381          | 87.726          | 87.049          | K 2  |
| E 35 | 1295.775        | 50.025          | 44.685          | 45.021          | 44.349          | E 1  |

# sp | Q6ZWY9 | H2B1C\_MOUSE

PEPAKSAPAPKKGSK <sup>Acetyl</sup><sub>42.01</sub> KAVTKAQKKDGGKRRKRSRKE

- ▶ fragmentation table for charge state 4+
- ▶ specType=etd
- ▶ score=66.35
- ▶ F113278.dat
- ▶ query=q68451.p1
- ▶ precursor=778.063460
- ▶ chargePrecursor=5
- ▶ itol=0.5

| AA    | c       | y              | z+1            | z+2   | z              | AA    |
|-------|---------|----------------|----------------|-------|----------------|-------|
| P[1]  | 29.537  | <b>972.329</b> | 968.524        | 0.755 | <b>968.072</b> | P[35] |
| E[2]  | 61.788  | 948.066        | <b>944.061</b> | 0.755 | <b>943.809</b> | E[34] |
| P[3]  | 86.051  | 915.805        | 911.800        | 0.755 | 911.948        | P[33] |
| A[4]  | 103.810 | 891.542        | 887.537        | 0.755 | 887.285        | A[32] |
| K[5]  | 135.834 | 873.783        | 869.778        | 0.755 | 869.526        | K[31] |
| S[6]  | 157.592 | 841.759        | 837.754        | 0.755 | 837.502        | S[30] |
| A[7]  | 175.351 | 820.001        | 815.996        | 0.755 | 815.744        | A[29] |
| P[8]  | 199.614 | 802.242        | 798.237        | 0.755 | 797.985        | P[28] |
| A[9]  | 217.374 | 777.978        | 773.973        | 0.755 | 773.721        | A[27] |
| P[10] | 241.637 | 760.219        | 756.214        | 0.755 | 755.962        | P[26] |
| K[11] | 273.661 | 735.956        | 731.951        | 0.755 | 731.699        | K[25] |
| K[12] | 305.684 | 703.932        | 699.927        | 0.755 | 699.676        | K[24] |
| G[13] | 319.940 | 671.908        | 667.904        | 0.755 | 667.652        | G[23] |
| S[14] | 341.698 | 657.653        | 653.648        | 0.755 | 653.396        | S[22] |
| K[15] | 384.224 | 635.895        | 631.890        | 0.755 | 631.638        | K[21] |
| K[16] | 416.248 | 593.869        | 589.864        | 0.755 | 589.612        | K[20] |
| A[17] | 434.007 | 561.845        | 557.840        | 0.755 | 557.588        | A[19] |
| V[18] | 458.774 | 543.586        | 539.581        | 0.755 | 539.329        | V[18] |
| V[19] | 484.036 | 518.819        | 514.814        | 0.755 | 514.562        | V[17] |
| K[20] | 516.060 | 493.597        | 489.592        | 0.755 | 489.340        | K[16] |
| A[21] | 533.819 | 461.533        | 457.528        | 0.755 | 457.276        | A[15] |
| Q[22] | 565.834 | 443.774        | 439.769        | 0.755 | 439.517        | Q[14] |
| K[23] | 597.858 | 411.750        | 407.745        | 0.755 | 407.493        | K[13] |
| K[24] | 629.881 | 379.735        | 375.731        | 0.755 | 375.479        | K[12] |
| D[25] | 658.638 | 347.711        | 343.707        | 0.755 | 343.455        | D[11] |
| G[26] | 672.893 | 318.955        | 314.950        | 0.755 | 314.698        | G[10] |
| K[27] | 704.917 | 304.699        | 300.695        | 0.755 | 300.443        | K[9]  |
| K[28] | 736.941 | 272.676        | 268.671        | 0.755 | 268.419        | K[8]  |
| R[29] | 775.966 | 240.652        | 236.647        | 0.755 | 236.395        | R[7]  |
| K[30] | 807.990 | 201.627        | 197.622        | 0.755 | 197.370        | K[6]  |
| K[31] | 847.015 | 169.603        | 165.598        | 0.755 | 165.346        | K[5]  |
| S[32] | 888.774 | 139.578        | 135.573        | 0.755 | 135.321        | S[4]  |
| R[33] | 907.798 | 108.552        | 104.547        | 0.755 | 104.295        | R[3]  |
| K[34] | 939.822 | 69.524         | 65.519         | 0.755 | 65.267         | K[2]  |
| E[35] | 972.083 | 37.771         | 33.766         | 0.755 | 33.514         | E[1]  |

# sp | Q6ZWY9 | H2B1C\_MOUSE

PEPAKSAPAPKKGSK<sup>Acetyl</sup> KAVTKAQKKDGKKRKRSRKE  
42.01

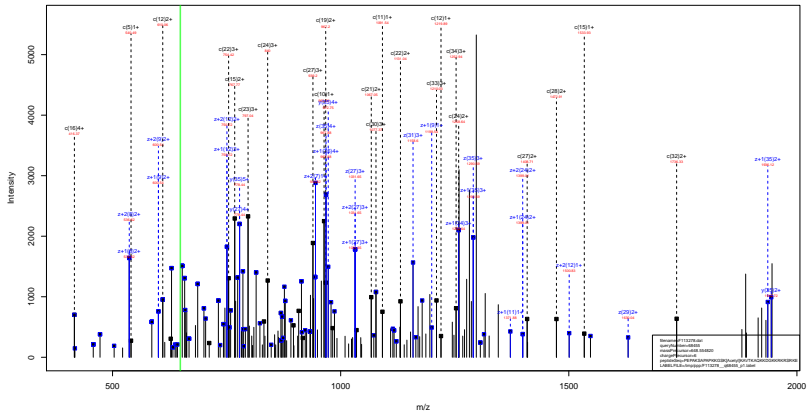

# sp | Q6ZWH9 | H2B1C\_MOUSE

PEPAKSAPAPKKGSK<sup>Acetyl</sup><sub>42.01</sub> KAVTKAQKKDGGKRRKRSRKE

- ▶ fragmentation table for charge state 1+
- ▶ specType=etd
- ▶ score=56.94
- ▶ F113278.dat
- ▶ query=q68455.p1
- ▶ precursor=648.554820
- ▶ chargePrecursor=6
- ▶ itol=0.5

| AA  | c               | y        | z+1             | z+2             | z              | AA  |
|-----|-----------------|----------|-----------------|-----------------|----------------|-----|
| P1  | 115.087         | 3886.294 | 3870.275        | 0.000           | 3869.267       | P35 |
| E2  | 244.129         | 3789.241 | 3773.232        | 0.000           | 3772.214       | E34 |
| P3  | 341.182         | 3690.198 | 3644.180        | 0.000           | 3643.172       | P33 |
| A4  | 412.219         | 3563.146 | 3547.127        | 0.000           | 3546.119       | A32 |
| K5  | <b>548.314</b>  | 3492.108 | 3476.089        | 3477.086        | 3475.082       | K31 |
| S6  | <b>627.346</b>  | 3364.014 | 3347.995        | 3349.033        | 3346.991       | S30 |
| A7  | 698.383         | 3276.982 | 3260.963        | 3261.971        | 3259.955       | A29 |
| P8  | 795.436         | 3205.944 | 3189.926        | 3190.933        | 3188.918       | P28 |
| A9  | 866.473         | 3108.892 | 3092.873        | 3093.881        | 3091.865       | A27 |
| P10 | <b>963.526</b>  | 3037.855 | 3021.836        | 3022.844        | 3020.828       | P26 |
| K11 | <b>1091.621</b> | 2940.802 | 2924.783        | 2925.791        | 2923.775       | K25 |
| K12 | <b>1218.716</b> | 2912.801 | 2796.688        | 2797.696        | 2795.680       | K24 |
| Q13 | 1276.737        | 2884.812 | 2868.793        | 2869.801        | 2867.785       | Q23 |
| S14 | 1363.789        | 2827.800 | 2611.572        | 2612.579        | 2610.564       | S22 |
| K15 | <b>1533.675</b> | 2640.858 | 2624.840        | 2625.847        | 2623.832       | K21 |
| K16 | 1661.970        | 2370.453 | 2354.434        | 2355.442        | 2353.426       | K20 |
| A17 | 1733.067        | 2242.368 | 2226.350        | 2227.347        | 2225.331       | A19 |
| V18 | 1832.078        | 2174.321 | 2158.302        | 2159.310        | 2157.294       | V18 |
| T19 | 1933.123        | 2072.252 | 2056.234        | 2057.241        | 2055.225       | T17 |
| K20 | 2061.218        | 1971.205 | 1955.186        | 1956.194        | 1954.178       | K16 |
| A21 | 2152.255        | 1843.110 | 1827.091        | 1828.099        | 1826.083       | A15 |
| Q22 | 2260.314        | 1772.073 | 1756.054        | 1757.062        | 1755.046       | Q14 |
| K23 | 2388.409        | 1644.014 | 1627.995        | 1628.003        | 1626.987       | K13 |
| K24 | 2516.504        | 1315.919 | 1499.900        | <b>1500.908</b> | 1498.884       | K12 |
| D25 | 2631.530        | 1387.824 | <b>1371.805</b> | 1372.813        | 1370.796       | D11 |
| G26 | 2688.552        | 1272.797 | 1256.778        | 1257.786        | 1255.771       | G10 |
| K27 | 2816.647        | 1215.776 | <b>1199.757</b> | 1200.765        | 1198.749       | K9  |
| K28 | 2944.742        | 1087.681 | 1071.662        | <b>1072.670</b> | 1070.654       | K8  |
| R29 | 3100.843        | 959.586  | 943.567         | <b>944.575</b>  | 942.559        | R7  |
| R30 | 3238.938        | 803.485  | <b>787.466</b>  | 788.474         | <b>786.455</b> | R6  |
| R31 | 3385.039        | 675.390  | <b>659.371</b>  | 660.379         | <b>658.363</b> | R5  |
| S32 | 3472.071        | 519.289  | <b>503.270</b>  | 504.278         | 502.262        | S4  |
| R33 | 3628.172        | 432.257  | <b>416.238</b>  | <b>417.246</b>  | 415.230        | R3  |
| K34 | 3756.267        | 276.155  | 260.137         | 261.144         | 259.129        | K2  |
| E35 | 3885.310        | 148.060  | 132.042         | 133.050         | 131.034        | E1  |

# sp | Q6ZWH9 | H2B1C\_MOUSE

PEPAKSAPAPKKGSK<sup>Acetyl</sup><sub>42.01</sub> KAVTKAQKKDKGKRRKRSRKE

- ▶ fragmentation table for charge state 2+
- ▶ specType=etd
- ▶ score=56.94
- ▶ F113278.dat
- ▶ query=q68455.p1
- ▶ precursor=648.554820
- ▶ chargePrecursor=6
- ▶ itol=0.5

| AA  | c               | y               | #+1             | #+2             | z               | AA   |
|-----|-----------------|-----------------|-----------------|-----------------|-----------------|------|
| F1  | 58.047          | <b>1943.651</b> | <b>1935.641</b> | 0.504           | 1935.117        | F129 |
| E1  | 122.508         | 1895.124        | 1887.115        | 0.504           | 1889.611        | E134 |
| F3  | 171.095         | 1830.603        | 1822.593        | 0.504           | 1822.000        | F133 |
| A4  | 208.613         | 1782.076        | 1774.067        | 0.504           | 1773.563        | A132 |
| K5  | 270.661         | 1746.558        | 1738.548        | 1739.052        | 1739.045        | K131 |
| S6  | 314.177         | 1686.510        | 1678.501        | 1679.506        | 1679.997        | S130 |
| A7  | 369.696         | 1638.994        | 1630.985        | 1631.989        | <b>1630.481</b> | A129 |
| F8  | 398.222         | 1603.476        | 1595.466        | 1595.970        | 1594.961        | F128 |
| A9  | 433.740         | 1554.949        | 1546.940        | <b>1547.444</b> | 1546.436        | A127 |
| F10 | 482.267         | 1519.431        | 1511.422        | 1511.925        | 1510.918        | F126 |
| K11 | 506.314         | 1470.905        | 1462.895        | 1463.399        | 1462.391        | K125 |
| K12 | <b>610.362</b>  | 1408.857        | <b>1398.848</b> | <b>1399.352</b> | 1399.344        | K124 |
| G13 | 638.362         | 1342.810        | 1334.800        | 1335.304        | 1334.296        | G123 |
| S14 | 682.388         | <b>1314.299</b> | <b>1306.289</b> | 1306.793        | <b>1305.786</b> | S122 |
| K15 | <b>767.441</b>  | 1270.763        | 1262.753        | 1263.257        | 1262.250        | K121 |
| K16 | <b>831.488</b>  | 1185.720        | 1177.711        | <b>1178.225</b> | 1177.217        | K120 |
| A17 | 897.997         | <b>1121.683</b> | 1113.673        | <b>1114.177</b> | 1113.169        | A119 |
| V18 | <b>916.541</b>  | 1058.554        | 1050.545        | 1051.049        | <b>1077.051</b> | V118 |
| T19 | <b>967.065</b>  | 1038.630        | 1028.620        | 1029.124        | 1028.117        | T117 |
| K20 | 1031.113        | <b>986.106</b>  | 978.097         | <b>978.601</b>  | 977.593         | K116 |
| A21 | <b>1066.631</b> | <b>922.058</b>  | <b>914.049</b>  | <b>914.553</b>  | 913.545         | A115 |
| Q22 | <b>1130.660</b> | 898.540         | <b>878.531</b>  | <b>879.034</b>  | 878.027         | Q114 |
| K23 | 1194.709        | <b>822.511</b>  | <b>814.503</b>  | <b>815.005</b>  | 813.997         | K113 |
| K24 | <b>1258.755</b> | <b>758.463</b>  | <b>750.454</b>  | <b>750.958</b>  | 749.950         | K112 |
| D25 | 1318.269        | 694.418         | <b>686.406</b>  | <b>686.910</b>  | 685.903         | D111 |
| G26 | 1364.700        | <b>636.902</b>  | <b>628.893</b>  | <b>629.397</b>  | 628.390         | G110 |
| K27 | <b>1468.827</b> | 608.391         | <b>600.382</b>  | <b>600.886</b>  | 599.878         | K109 |
| K28 | <b>1472.875</b> | 584.344         | <b>538.335</b>  | <b>538.839</b>  | 537.831         | K108 |
| R29 | 1550.676        | 480.296         | <b>472.287</b>  | <b>472.791</b>  | 471.783         | R107 |
| K30 | 1614.973        | 402.246         | 384.237         | 384.740         | 383.733         | K106 |
| R31 | 1681.023        | 338.198         | 330.189         | 330.693         | 329.685         | R105 |
| S32 | <b>1736.539</b> | 260.148         | 252.139         | 252.642         | 251.635         | S104 |
| K33 | 1814.590        | 216.632         | 208.623         | 209.126         | 208.119         | K103 |
| K34 | 1878.637        | 138.584         | 130.575         | 131.078         | 130.069         | K102 |
| E35 | 1943.158        | 74.534          | 66.524          | 67.028          | 66.021          | E101 |



# sp | Q6ZWH9 | H2B1C\_MOUSE

PEPAKSAPAPKKGSK<sup>Acetyl</sup><sub>42.01</sub> KAVTKAQKKDKGKKRKRSRKE

- ▶ fragmentation table for charge state 3+
- ▶ specType=etd
- ▶ score=56.94
- ▶ F113278.dat
- ▶ query=q68455.p1
- ▶ precursor=648.554820
- ▶ chargePrecursor=6
- ▶ itol=0.5

| AA  | c               | y               | #+1             | #+2             | z               | AA  |
|-----|-----------------|-----------------|-----------------|-----------------|-----------------|-----|
| P1  | 39.034          | 1296.103        | <b>1290.763</b> | 0.672           | <b>1290.427</b> | P10 |
| E1  | 82.048          | 1263.752        | <b>1258.412</b> | 0.672           | 1258.076        | E14 |
| P3  | 114.399         | 1220.738        | 1215.388        | 0.672           | 1215.062        | P13 |
| A4  | 138.078         | 1188.361        | 1183.047        | 0.672           | 1182.711        | A12 |
| K5  | 180.776         | <b>1164.708</b> | 1159.358        | 1159.704        | <b>1159.032</b> | K11 |
| S6  | 209.287         | <b>1122.009</b> | <b>1116.670</b> | <b>1117.006</b> | 1116.335        | S10 |
| A7  | 213.466         | 1092.929        | 1087.609        | 1087.955        | 1087.321        | A19 |
| P8  | 265.817         | 1069.320        | 1064.000        | 1064.316        | 1063.644        | P18 |
| A9  | 289.490         | 1036.969        | <b>1031.629</b> | <b>1031.965</b> | <b>1031.293</b> | A17 |
| P10 | 321.847         | 1013.290        | 1007.950        | 1008.286        | 1007.614        | P16 |
| K11 | 364.545         | 980.939         | 975.589         | 975.936         | 975.263         | K15 |
| K12 | 407.243         | 938.240         | <b>932.901</b>  | <b>933.237</b>  | <b>932.565</b>  | K14 |
| G13 | 426.251         | 895.542         | 890.203         | <b>890.538</b>  | 889.867         | G19 |
| S14 | 455.261         | <b>876.535</b>  | <b>871.195</b>  | <b>871.531</b>  | 870.859         | S19 |
| K15 | 511.063         | <b>847.524</b>  | 842.185         | 842.521         | 841.849         | K19 |
| K16 | 554.661         | <b>798.822</b>  | <b>785.483</b>  | <b>785.819</b>  | 785.147         | K18 |
| A17 | 578.340         | 748.124         | <b>742.785</b>  | <b>743.120</b>  | 742.448         | A19 |
| V18 | 611.393         | 724.485         | 719.146         | 719.481         | 718.770         | V18 |
| T19 | 645.046         | 691.422         | 686.083         | <b>686.419</b>  | 685.747         | T17 |
| K20 | 687.744         | <b>657.740</b>  | <b>652.400</b>  | <b>652.736</b>  | 652.064         | K16 |
| A21 | <b>711.423</b>  | 615.041         | <b>609.702</b>  | <b>610.038</b>  | 609.366         | A15 |
| Q22 | <b>754.109</b>  | 591.362         | <b>586.023</b>  | <b>586.359</b>  | <b>585.687</b>  | Q14 |
| K23 | <b>796.808</b>  | 548.676         | 543.337         | 543.672         | 543.000         | K13 |
| K24 | <b>839.506</b>  | 505.975         | 500.636         | 500.974         | 500.302         | K12 |
| D25 | 877.848         | 463.280         | <b>457.940</b>  | 458.276         | <b>457.604</b>  | D11 |
| G26 | <b>896.855</b>  | 424.917         | 419.578         | 419.914         | 419.262         | G10 |
| K27 | <b>939.554</b>  | 405.930         | 400.590         | 400.926         | 400.255         | K19 |
| K28 | <b>982.252</b>  | 363.232         | 357.892         | 358.228         | 357.556         | K18 |
| R29 | <b>1034.286</b> | 320.531         | 315.191         | 315.526         | 314.854         | R17 |
| K30 | <b>1076.984</b> | 288.500         | 283.160         | 283.496         | 282.824         | K16 |
| R31 | 1129.618        | 245.801         | 240.461         | 240.796         | 240.124         | R15 |
| S32 | 1158.029        | 173.768         | 168.428         | 168.764         | 168.092         | S14 |
| K33 | <b>1210.062</b> | 144.757         | 139.417         | 139.753         | 139.082         | K13 |
| K34 | <b>1252.761</b> | 92.721          | 87.381          | 87.726          | 87.046          | K13 |
| E35 | 1295.775        | 50.025          | 44.685          | 45.021          | 44.349          | E11 |

# sp | Q6ZWY9 | H2B1C\_MOUSE

PEPAKSAPAPKKGSK<sup>Acetyl</sup> KAVTKAQKKDGGKRRKRSRKE  
42.01

- ▶ fragmentation table for charge state 4+
- ▶ specType=etd
- ▶ score=56.94
- ▶ F113278.dat
- ▶ query=q68455.p1
- ▶ precursor=648.554820
- ▶ chargePrecursor=6
- ▶ itol=0.5

| AA    | c              | y              | z+1            | z+2            | z              | AA    |
|-------|----------------|----------------|----------------|----------------|----------------|-------|
| P[1]  | 29.527         | <b>972.329</b> | <b>968.324</b> | 0.755          | <b>958.072</b> | P[15] |
| E[2]  | 61.788         | 948.050        | <b>944.061</b> | 0.755          | <b>943.809</b> | E[34] |
| P[3]  | 86.051         | 915.805        | 911.800        | 0.755          | 911.548        | P[13] |
| A[4]  | 103.810        | 891.542        | 887.537        | 0.755          | 887.285        | A[32] |
| K[5]  | 135.834        | <b>873.783</b> | <b>869.778</b> | <b>870.030</b> | <b>869.526</b> | K[31] |
| S[6]  | 157.592        | 841.759        | 837.754        | 838.006        | 837.502        | S[30] |
| A[7]  | 175.351        | 820.001        | 815.990        | 816.248        | 815.744        | A[29] |
| P[8]  | 199.614        | 802.242        | 798.237        | 798.489        | 797.985        | P[28] |
| A[9]  | 217.374        | <b>777.978</b> | <b>773.974</b> | <b>774.226</b> | <b>773.722</b> | A[27] |
| T[10] | 243.837        | 756.215        | <b>756.214</b> | 756.466        | <b>755.962</b> | T[26] |
| K[11] | 273.081        | <b>735.956</b> | <b>731.951</b> | <b>732.203</b> | <b>731.699</b> | K[25] |
| K[12] | 305.284        | <b>703.932</b> | <b>699.927</b> | <b>700.179</b> | <b>699.675</b> | K[24] |
| G[13] | 319.940        | 671.968        | <b>667.964</b> | <b>668.156</b> | <b>667.652</b> | G[23] |
| S[14] | 341.698        | <b>657.653</b> | 653.648        | 653.900        | 653.396        | S[22] |
| K[15] | 384.224        | 635.695        | <b>631.890</b> | <b>632.142</b> | 631.638        | K[21] |
| K[16] | <b>416.248</b> | 593.369        | 589.364        | 589.616        | 589.112        | K[20] |
| A[17] | 434.007        | 561.345        | 557.340        | 557.592        | 557.088        | A[19] |
| V[18] | 458.774        | 543.586        | 539.581        | 539.833        | 539.329        | V[18] |
| T[19] | 484.036        | 518.819        | 514.813        | 515.066        | 514.562        | T[17] |
| K[20] | 518.060        | 493.551        | 489.547        | 489.804        | 489.300        | K[16] |
| A[21] | 533.819        | 461.533        | <b>457.528</b> | <b>457.780</b> | <b>457.276</b> | A[15] |
| Q[22] | 565.834        | 443.774        | 439.769        | 440.021        | 439.517        | Q[14] |
| K[23] | 597.858        | 411.759        | 407.754        | 408.006        | 407.502        | K[13] |
| K[24] | 629.881        | 379.735        | 375.731        | 375.982        | 375.479        | K[12] |
| D[25] | 658.638        | 347.711        | 343.707        | 343.959        | 343.455        | D[11] |
| G[26] | 672.893        | 318.955        | 314.950        | 315.202        | 314.698        | G[10] |
| K[27] | 704.917        | 304.699        | 300.695        | 300.947        | 300.443        | K[9]  |
| K[28] | 736.941        | 272.676        | 268.671        | 268.923        | 268.419        | K[8]  |
| K[29] | 775.966        | 240.652        | 236.647        | 236.899        | 236.395        | K[7]  |
| K[30] | 807.990        | 201.627        | 197.622        | 197.874        | 197.370        | K[6]  |
| R[31] | 847.015        | 169.603        | 165.598        | 165.850        | 165.346        | R[5]  |
| S[32] | <b>868.773</b> | 130.578        | 126.573        | 126.825        | 126.321        | S[4]  |
| R[33] | <b>907.798</b> | 108.620        | 104.615        | 105.067        | 104.563        | R[3]  |
| K[34] | 939.822        | 69.794         | 65.790         | 66.042         | 65.538         | K[2]  |
| E[35] | 972.083        | 37.771         | 33.766         | 34.018         | 33.514         | E[1]  |

# sp | Q6ZWH9 | H2B1C\_MOUSE

PEPAKSAPAPKKGSK<sup>Acetyl</sup><sub>42.01</sub> KAVTKAQKKDGGKRRKRSRKE

- ▶ fragmentation table for charge state 5+
- ▶ specType=etd
- ▶ score=56.94
- ▶ F113278.dat
- ▶ query=q68455.p1
- ▶ precursor=648.554820
- ▶ chargePrecursor=6
- ▶ itol=0.5

| AA    | c       | y              | z+1            | z+2            | z              | AA    |
|-------|---------|----------------|----------------|----------------|----------------|-------|
| P[1]  | 23.821  | <b>778.065</b> | 774.861        | 0.806          | <b>774.659</b> | P[35] |
| E[2]  | 49.632  | <b>758.654</b> | <b>755.450</b> | 0.806          | <b>755.249</b> | E[34] |
| P[3]  | 69.042  | 732.645        | 729.642        | 0.806          | 729.440        | P[33] |
| A[4]  | 83.250  | 713.435        | 710.231        | 0.806          | 710.030        | A[32] |
| K[5]  | 108.869 | 699.228        | 696.024        | 696.225        | 695.822        | K[31] |
| S[6]  | 126.275 | 673.609        | 670.405        | 670.606        | 670.203        | S[30] |
| A[7]  | 140.482 | 656.202        | <b>652.998</b> | <b>653.200</b> | <b>652.797</b> | A[29] |
| P[8]  | 159.891 | <b>641.995</b> | 638.791        | <b>638.993</b> | 638.589        | P[28] |
| A[9]  | 174.100 | 622.584        | 619.380        | 619.582        | 619.179        | A[27] |
| P[10] | 193.511 | 608.377        | 605.173        | 605.374        | 604.971        | P[26] |
| K[11] | 219.130 | 588.966        | <b>585.762</b> | <b>585.964</b> | <b>585.561</b> | K[25] |
| K[12] | 244.749 | 563.347        | 560.143        | 560.345        | 559.942        | K[24] |
| G[13] | 256.153 | 537.728        | 534.524        | 534.726        | 534.323        | G[23] |
| S[14] | 273.560 | 526.324        | 523.120        | 523.322        | 522.919        | S[22] |
| K[15] | 307.581 | 508.917        | 505.714        | 505.915        | 505.512        | K[21] |
| K[16] | 333.200 | 474.896        | 471.693        | 471.894        | 471.491        | K[20] |
| A[17] | 347.407 | 449.277        | 446.074        | 446.275        | 445.872        | A[19] |
| V[18] | 367.221 | 435.070        | 431.866        | 432.068        | 431.665        | V[18] |
| T[19] | 387.430 | 415.256        | 412.053        | 412.254        | 411.851        | T[17] |
| K[20] | 413.049 | 395.047        | 391.843        | 392.045        | 391.642        | K[16] |
| A[21] | 427.257 | 369.428        | 366.224        | 366.426        | 366.022        | A[15] |
| Q[22] | 452.869 | 355.220        | 352.017        | 352.218        | 351.815        | Q[14] |
| K[23] | 478.488 | 329.609        | 326.405        | 326.606        | 326.203        | K[13] |
| K[24] | 504.107 | 301.990        | 300.786        | 300.987        | 300.584        | K[12] |
| D[25] | 527.112 | 278.371        | 275.167        | 275.368        | 274.965        | D[11] |
| G[26] | 536.516 | 255.365        | 252.161        | 252.363        | 251.960        | G[10] |
| K[27] | 564.135 | 243.961        | 240.757        | 240.959        | 240.556        | K[9]  |
| K[28] | 589.754 | 218.342        | 215.138        | 215.340        | 214.937        | K[8]  |
| R[29] | 620.974 | 192.723        | 189.519        | 189.721        | 189.318        | R[7]  |
| K[30] | 646.593 | 161.303        | 158.299        | 158.501        | 158.097        | K[6]  |
| R[31] | 677.814 | 135.884        | 132.880        | 132.882        | 132.478        | R[5]  |
| S[32] | 695.220 | 104.664        | 101.460        | 101.661        | 101.258        | S[4]  |
| R[33] | 726.440 | 67.257         | 64.053         | 64.255         | 63.852         | R[3]  |
| K[34] | 752.059 | 56.037         | 52.833         | 53.035         | 52.632         | K[2]  |
| E[35] | 777.868 | 30.418         | 27.214         | 27.416         | 27.013         | E[1]  |



# sp | Q64525 | H2B2B\_MOUSE

PDKASAPAPKK<sup>Acetyl</sup> GSKKAVTKVQKKDGKRRKRSRKE  
42.01

- ▶ fragmentation table for charge state 1+
- ▶ specType=etd
- ▶ score=43.48
- ▶ F113278.dat
- ▶ query=q68529\_p1
- ▶ precursor=558.049830
- ▶ chargePrecursor=7
- ▶ itol=0.5

| AA  | c               | y               | z+1            | z+2             | z        | AA  |
|-----|-----------------|-----------------|----------------|-----------------|----------|-----|
| P1  | 115.087         | 3095.309        | 3884.291       | 0.000           | 3881.281 | P35 |
| D2  | 230.114         | 3803.257        | 3787.238       | 0.000           | 3786.230 | D34 |
| P3  | 327.106         | 3688.250        | 3672.211       | 0.000           | 3671.203 | P33 |
| A4  | 398.203         | 3591.177        | 3576.158       | 0.000           | 3574.150 | A32 |
| K5  | <b>536.296</b>  | 3520.140        | 3504.121       | 3856.120        | 3503.113 | K31 |
| S6  | <b>613.130</b>  | 3392.050        | 3376.030       | 3377.034        | 3375.015 | S30 |
| A7  | <b>684.368</b>  | 3305.011        | 3288.994       | 3290.002        | 3287.985 | A29 |
| P8  | <b>781.420</b>  | 3233.976        | 3217.957       | 3218.965        | 3216.949 | P28 |
| A9  | 852.457         | 3136.923        | 3120.904       | 3121.912        | 3119.896 | A27 |
| P10 | <b>949.510</b>  | 3065.880        | 3049.867       | 3050.875        | 3048.859 | P26 |
| K11 | <b>1077.895</b> | 2998.813        | 2982.814       | 2983.822        | 2981.807 | K25 |
| K12 | <b>1247.711</b> | 2840.740        | 2824.719       | 2825.727        | 2823.711 | K24 |
| G13 | 1304.732        | 2670.633        | 2654.614       | 2655.622        | 2653.606 | G23 |
| S14 | <b>1391.764</b> | 2611.611        | 2597.592       | 2598.600        | 2596.583 | S22 |
| K15 | 1519.859        | 2526.570        | 2510.560       | 2511.568        | 2509.551 | K21 |
| K16 | 1647.954        | 2399.484        | 2382.465       | 2383.473        | 2381.456 | K20 |
| A17 | 1718.991        | 2270.380        | 2254.370       | 2255.378        | 2253.361 | A19 |
| V18 | 1818.000        | 2199.352        | 2183.333       | 2184.341        | 2182.325 | V18 |
| T19 | 1919.107        | 2100.284        | 2084.265       | 2085.273        | 2083.257 | T17 |
| K20 | 2047.202        | 1999.230        | 1983.219       | 1984.225        | 1982.209 | K16 |
| V21 | 2146.271        | 1871.141        | 1855.120       | 1856.130        | 1854.114 | V15 |
| Q22 | 2274.230        | 1772.073        | 1756.054       | 1757.062        | 1755.046 | Q14 |
| K23 | 2462.424        | 1644.014        | 1627.995       | 1629.003        | 1626.987 | K13 |
| R24 | 2530.519        | 1515.910        | 1499.890       | 1500.908        | 1498.892 | R12 |
| D25 | 2645.546        | 1387.824        | 1371.805       | <b>1372.813</b> | 1370.796 | D11 |
| G26 | 2702.568        | <b>1272.797</b> | 1256.778       | <b>1257.786</b> | 1255.771 | G10 |
| K27 | 2830.663        | 1215.776        | 1199.757       | <b>1200.765</b> | 1198.749 | K0  |
| K28 | 2958.757        | 1087.681        | 1071.662       | 1072.670        | 1070.654 | K9  |
| R29 | 3114.850        | 959.586         | <b>943.567</b> | <b>944.575</b>  | 942.559  | R7  |
| R30 | 3212.854        | 892.483         | <b>787.466</b> | 786.474         | 786.458  | R0  |
| R31 | 3399.055        | 675.390         | <b>659.371</b> | 660.379         | 658.363  | R5  |
| S32 | 3486.087        | 519.289         | <b>503.270</b> | 504.278         | 502.262  | S4  |
| R33 | 3642.186        | 432.257         | <b>416.238</b> | <b>417.246</b>  | 415.230  | R3  |
| K34 | 3770.283        | 276.155         | <b>260.137</b> | <b>261.144</b>  | 259.129  | K2  |
| E35 | 3899.325        | 148.060         | 132.042        | 133.050         | 131.034  | E1  |

# sp | Q64525 | H2B2B\_MOUSE

PDKASAPAPKK<sup>Acetyl</sup><sub>42.01</sub> GSKKAVTKVQKKDGKKRKRSRKE

- ▶ fragmentation table for charge state 2+
- ▶ specType=etd
- ▶ score=43.48
- ▶ F113278.dat
- ▶ query=q68529\_p1
- ▶ precursor=558.049830
- ▶ chargePrecursor=7
- ▶ itol=0.5

| AA | c  | y               | z+1             | z+2             | z               | AA              |       |
|----|----|-----------------|-----------------|-----------------|-----------------|-----------------|-------|
| F  | 1  | 58.047          | 1950.659        | 1042.640        | 0.504           | 1842.141        | P[28] |
| D  | 2  | 115.500         | 1902.132        | 1094.123        | 0.504           | 1893.610        | D[34] |
| F  | 3  | 164.027         | 1844.618        | 1186.609        | 0.504           | 1838.105        | F[33] |
| A  | 4  | 199.605         | 1796.092        | 1188.083        | 0.504           | 1789.579        | A[32] |
| K  | 5  | 263.651         | 1740.574        | 1152.564        | 1753.068        | 1752.060        | K[31] |
| S  | 6  | 307.169         | 1696.529        | 1088.517        | 1689.521        | 1688.011        | S[30] |
| A  | 7  | 352.692         | 1653.010        | 1045.500        | 1646.505        | 1644.461        | A[29] |
| F  | 8  | 391.214         | 1617.491        | 1009.482        | 1609.986        | 1608.978        | F[28] |
| A  | 9  | 436.732         | 1568.965        | 1360.958        | 1561.460        | 1560.451        | A[27] |
| F  | 10 | 475.259         | 1533.447        | 1325.437        | 1525.941        | 1524.933        | F[26] |
| K  | 11 | <b>539.306</b>  | 1484.920        | 1240.911        | 1477.435        | 1476.401        | K[25] |
| K  | 12 | <b>624.359</b>  | 1438.873        | <b>1412.863</b> | <b>1413.367</b> | 1412.359        | K[24] |
| G  | 13 | 652.370         | 1395.820        | 1312.341        | 1328.314        | 1327.307        | G[23] |
| S  | 14 | <b>666.386</b>  | <b>1307.309</b> | 1269.330        | 1269.804        | 1268.796        | S[22] |
| K  | 15 | <b>760.433</b>  | <b>1263.793</b> | 1255.784        | 1256.288        | 1255.280        | K[21] |
| K  | 16 | <b>824.481</b>  | 1199.746        | <b>1191.736</b> | 1192.240        | <b>1191.232</b> | K[20] |
| A  | 17 | 859.999         | 1135.698        | <b>1127.689</b> | 1128.203        | <b>1127.185</b> | A[19] |
| V  | 18 | 895.513         | 1092.180        | 1092.180        | <b>1092.674</b> | 1091.666        | V[18] |
| T  | 19 | <b>960.057</b>  | 1050.645        | 1042.636        | 1043.140        | 1042.132        | T[17] |
| K  | 20 | <b>1024.105</b> | <b>1000.122</b> | <b>992.112</b>  | <b>992.616</b>  | 991.608         | K[16] |
| V  | 21 | <b>1073.639</b> | 936.074         | 928.065         | <b>928.569</b>  | 927.561         | V[15] |
| Q  | 22 | 1137.668        | <b>886.540</b>  | 878.531         | <b>879.034</b>  | 878.027         | Q[14] |
| R  | 23 | 1201.716        | <b>822.511</b>  | <b>814.501</b>  | <b>815.005</b>  | <b>813.997</b>  | R[13] |
| K  | 24 | 1265.763        | <b>758.463</b>  | <b>750.454</b>  | <b>750.958</b>  | 749.950         | K[12] |
| D  | 25 | 1323.277        | <b>694.416</b>  | <b>686.406</b>  | <b>686.910</b>  | 685.902         | D[11] |
| G  | 26 | 1381.297        | <b>636.902</b>  | <b>628.893</b>  | <b>629.397</b>  | 628.389         | G[10] |
| K  | 27 | 1435.815        | 608.391         | <b>600.382</b>  | <b>600.886</b>  | 599.878         | K[9]  |
| R  | 28 | <b>1479.862</b> | <b>544.344</b>  | <b>536.335</b>  | <b>536.839</b>  | 535.831         | R[8]  |
| R  | 29 | 1557.873        | 480.296         | <b>472.287</b>  | <b>472.791</b>  | 471.783         | R[7]  |
| K  | 30 | 1621.980        | 402.246         | 394.237         | 394.740         | 393.731         | K[6]  |
| R  | 31 | 1700.011        | 338.198         | <b>330.189</b>  | <b>330.693</b>  | 329.685         | R[5]  |
| S  | 32 | 1743.547        | <b>260.148</b>  | 252.139         | 252.642         | 251.635         | S[4]  |
| R  | 33 | 1821.598        | 216.632         | 208.623         | 209.126         | 208.119         | R[3]  |
| K  | 34 | 1885.645        | 138.581         | 130.572         | 131.076         | 130.068         | K[2]  |
| E  | 35 | 1950.156        | 74.534          | 66.524          | 67.028          | 66.021          | E[1]  |

# sp | Q64525 | H2B2B\_MOUSE

PDKSAPAPKK<sup>Acetyl</sup><sub>42.01</sub> GSKKAVTKVQKKDGGKRRKRSRKE

- ▶ fragmentation table for charge state 3+
- ▶ specType=etd
- ▶ score=43.48
- ▶ F113278.dat
- ▶ query=q68529\_p1
- ▶ precursor=558.049830
- ▶ chargePrecursor=7
- ▶ itol=0.5

| AA   | c               | y               | z+1             | z+2             | z               | AA   |
|------|-----------------|-----------------|-----------------|-----------------|-----------------|------|
| P1   | 39.034          | 1300.775        | <b>1295.435</b> | 0.672           | 1295.099        | P129 |
| D12  | 77.376          | <b>1268.424</b> | 1363.084        | 0.672           | 1262.748        | D134 |
| F13  | 109.727         | 1230.081        | 1224.742        | 0.672           | 1224.406        | F133 |
| A14  | 134.406         | 1197.730        | 1192.393        | 0.672           | <b>1192.055</b> | A132 |
| K15  | 176.104         | 1174.051        | 1168.712        | 1169.048        | 1168.376        | K131 |
| S16  | 205.215         | 1131.353        | 1126.014        | 1126.349        | 1125.676        | S130 |
| A17  | 228.794         | 1102.342        | 1097.003        | 1097.338        | <b>1096.667</b> | A129 |
| F18  | <b>261.145</b>  | 1079.061        | <b>1073.324</b> | <b>1073.660</b> | 1072.988        | F128 |
| A19  | 284.624         | 1046.312        | 1040.973        | 1041.309        | <b>1040.637</b> | A127 |
| F110 | 317.175         | 1022.633        | 1017.294        | 1017.630        | 1016.958        | F126 |
| K111 | 359.873         | 990.282         | <b>984.943</b>  | <b>985.279</b>  | 984.607         | K125 |
| K112 | <b>416.575</b>  | 967.594         | 962.255         | 962.591         | 961.919         | K124 |
| G113 | 435.352         | 930.882         | 925.543         | <b>925.879</b>  | 925.207         | G123 |
| S114 | 484.593         | 871.875         | <b>866.536</b>  | <b>866.872</b>  | <b>866.200</b>  | S122 |
| K115 | 507.201         | 842.865         | 837.525         | 837.861         | 837.189         | K121 |
| K116 | 549.950         | 800.156         | <b>794.827</b>  | <b>795.163</b>  | 794.491         | K120 |
| A117 | 673.669         | 757.468         | 752.128         | 752.464         | 751.792         | A119 |
| V118 | 698.691         | 733.782         | 728.442         | <b>728.785</b>  | 728.113         | V118 |
| T119 | <b>640.374</b>  | <b>700.766</b>  | 695.426         | 695.762         | 695.091         | T117 |
| K120 | 681.072         | <b>667.083</b>  | <b>661.744</b>  | <b>662.080</b>  | 661.408         | K116 |
| V211 | 718.095         | <b>624.385</b>  | <b>619.046</b>  | <b>619.382</b>  | 618.710         | V115 |
| Q122 | <b>756.761</b>  | 591.362         | <b>586.023</b>  | <b>586.359</b>  | 585.687         | Q114 |
| K123 | <b>801.480</b>  | 548.676         | <b>543.337</b>  | <b>543.673</b>  | 543.001         | K113 |
| K124 | <b>844.178</b>  | 505.975         | 500.635         | 500.974         | 500.302         | K112 |
| D125 | <b>882.520</b>  | 463.280         | 457.940         | 458.276         | 457.604         | D111 |
| G126 | <b>901.527</b>  | <b>424.937</b>  | 419.598         | 419.934         | 419.262         | G110 |
| K127 | <b>944.226</b>  | 405.930         | 400.590         | 400.926         | 400.255         | K109 |
| K128 | <b>986.924</b>  | 363.232         | 357.892         | 358.228         | 357.556         | K108 |
| R129 | <b>1038.958</b> | 320.533         | 315.194         | 315.530         | 314.858         | R117 |
| K130 | <b>1081.656</b> | 288.500         | 283.160         | 283.496         | 282.824         | K106 |
| R131 | <b>1133.690</b> | 245.801         | 240.462         | 240.798         | 240.126         | R105 |
| S132 | 1182.700        | 173.768         | 168.428         | 168.764         | 168.092         | S104 |
| R133 | <b>1214.734</b> | 144.757         | 139.417         | 139.753         | 139.082         | R103 |
| K134 | <b>1257.432</b> | 92.723          | 87.383          | 87.720          | 87.048          | K102 |
| E135 | 1300.447        | 50.025          | 44.685          | 45.021          | 44.349          | E111 |

# sp | Q64525 | H2B2B\_MOUSE

PDKASAPAPKK<sup>Acetyl</sup> GSKKAVTKVQKKDGGKRRKRSRKE  
42.01

- ▶ fragmentation table for charge state 4+
- ▶ specType=etd
- ▶ score=43.48
- ▶ F113278.dat
- ▶ query=q68529.p1
- ▶ precursor=558.049830
- ▶ chargePrecursor=7
- ▶ itol=0.5

| AA    | c              | y              | z+1            | z+2            | z              | AA    |
|-------|----------------|----------------|----------------|----------------|----------------|-------|
| P[1]  | 29.527         | <b>975.833</b> | 975.823        | 0.735          | 975.878        | P[15] |
| D[2]  | 58.284         | 951.570        | 947.560        | 0.735          | 947.313        | D[14] |
| P[3]  | 82.547         | 922.813        | 918.803        | 0.735          | 918.556        | P[13] |
| A[4]  | 100.306        | 898.550        | 894.540        | 0.735          | 894.293        | A[12] |
| K[5]  | 132.430        | 880.790        | <b>876.786</b> | <b>877.038</b> | <b>876.534</b> | K[11] |
| S[6]  | 154.088        | 848.767        | <b>844.762</b> | <b>845.014</b> | <b>844.510</b> | S[30] |
| A[7]  | 171.847        | 827.009        | <b>823.004</b> | <b>823.256</b> | <b>822.752</b> | A[29] |
| P[8]  | 196.111        | <b>809.249</b> | 805.243        | 805.497        | 804.993        | P[28] |
| A[9]  | 213.870        | 784.986        | <b>780.982</b> | <b>781.233</b> | 780.730        | A[27] |
| P[10] | 238.133        | 767.221        | 763.222        | 763.914        | 763.979        | P[26] |
| K[11] | 270.157        | 742.964        | <b>738.959</b> | <b>739.211</b> | <b>738.707</b> | K[25] |
| K[12] | 312.683        | 710.940        | 706.935        | <b>707.187</b> | 706.683        | K[24] |
| G[13] | 326.938        | 668.414        | <b>664.409</b> | <b>664.661</b> | 664.157        | G[23] |
| S[14] | 348.696        | 654.158        | 650.154        | 650.406        | 649.902        | S[22] |
| K[15] | 380.720        | 632.400        | 628.396        | 628.647        | 628.144        | K[21] |
| K[16] | 412.744        | <b>600.376</b> | <b>596.372</b> | <b>596.624</b> | <b>596.120</b> | K[20] |
| A[17] | 430.503        | 568.353        | 564.348        | 564.600        | 564.096        | A[19] |
| V[18] | 455.270        | 550.593        | <b>546.589</b> | <b>546.841</b> | <b>546.337</b> | V[18] |
| T[19] | 480.532        | 525.626        | 521.622        | 522.074        | 521.570        | T[17] |
| K[20] | 512.556        | 500.564        | 496.560        | 496.812        | 496.308        | K[16] |
| V[21] | 537.323        | 468.541        | 464.536        | 464.788        | 464.284        | V[15] |
| Q[22] | <b>569.338</b> | 443.774        | 439.769        | 440.021        | 439.517        | Q[14] |
| K[23] | 601.362        | 411.759        | 407.754        | 408.006        | 407.502        | K[13] |
| K[24] | <b>633.385</b> | 379.735        | 375.731        | 375.982        | 375.479        | K[12] |
| D[25] | <b>662.142</b> | 347.711        | 343.707        | 343.959        | 343.455        | D[11] |
| G[26] | <b>676.397</b> | 318.955        | 314.950        | 315.202        | 314.698        | G[10] |
| K[27] | 708.421        | 304.699        | 300.695        | 300.947        | 300.443        | K[9]  |
| K[28] | <b>740.445</b> | 272.676        | 268.671        | 268.923        | 268.419        | K[8]  |
| K[29] | 779.470        | 240.652        | 236.647        | 236.899        | 236.395        | K[7]  |
| K[30] | <b>811.494</b> | 201.627        | 197.622        | 197.874        | 197.370        | K[6]  |
| R[31] | <b>850.519</b> | 169.603        | 165.598        | 165.850        | 165.346        | R[5]  |
| S[32] | <b>872.277</b> | 130.578        | 126.573        | 126.825        | 126.321        | S[4]  |
| R[33] | 911.302        | 108.620        | 104.615        | 105.067        | 104.563        | R[3]  |
| K[34] | <b>943.326</b> | 69.794         | 65.790         | 66.042         | 65.538         | K[2]  |
| E[35] | 975.587        | 37.771         | 33.766         | 34.018         | 33.514         | E[1]  |



# sp | Q64525 | H2B2B\_MOUSE

PDKASAPAPKK<sup>Acetyl</sup><sub>42.01</sub> GSKKAVTKVQKKDGKRRKRSRKE

- ▶ fragmentation table for charge state 5+
- ▶ specType=etd
- ▶ score=43.48
- ▶ F113278.dat
- ▶ query=q68529\_p1
- ▶ precursor=558.049830
- ▶ chargePrecursor=7
- ▶ itol=0.5

| AA    | c              | y              | z+1            | z+2            | z              | AA    |
|-------|----------------|----------------|----------------|----------------|----------------|-------|
| P[1]  | 23.823         | 780.889        | 777.664        | 0.806          | 777.462        | P[13] |
| D[2]  | 46.829         | <b>761.457</b> | 758.251        | 0.806          | 758.052        | D[14] |
| P[3]  | 56.239         | <b>738.452</b> | 735.248        | 0.806          | 735.046        | P[13] |
| A[4]  | 80.447         | 719.041        | 715.837        | 0.806          | 715.636        | A[12] |
| K[5]  | 106.065        | 704.834        | 701.630        | 701.832        | <b>701.428</b> | K[11] |
| S[6]  | 123.472        | 679.215        | <b>676.011</b> | <b>676.213</b> | <b>675.809</b> | S[30] |
| A[7]  | 137.679        | <b>661.808</b> | 658.605        | 658.806        | 658.603        | A[29] |
| P[8]  | 157.090        | 647.601        | <b>644.397</b> | <b>644.599</b> | <b>644.196</b> | P[28] |
| A[9]  | 171.297        | 628.190        | <b>624.987</b> | <b>625.189</b> | <b>624.785</b> | A[27] |
| F[10] | 180.708        | 613.983        | <b>610.779</b> | <b>610.981</b> | <b>610.578</b> | F[26] |
| K[11] | 218.127        | 594.572        | 590.367        | <b>591.570</b> | 591.167        | K[25] |
| K[12] | 250.348        | 568.953        | 565.750        | 565.951        | 565.548        | K[24] |
| G[13] | <b>261.752</b> | 534.932        | 531.729        | 531.930        | 531.527        | G[23] |
| S[14] | 279.159        | 523.526        | 520.324        | 520.526        | 520.123        | S[22] |
| K[15] | 304.778        | 506.122        | <b>502.918</b> | <b>503.119</b> | 502.716        | K[21] |
| K[16] | <b>330.397</b> | 480.503        | 477.299        | 477.500        | 477.097        | K[20] |
| A[17] | 344.604        | 454.884        | 451.680        | 451.881        | 451.478        | A[19] |
| V[18] | 364.418        | 440.676        | 437.472        | 437.674        | 437.271        | V[18] |
| V[19] | 384.827        | 420.963        | <b>417.659</b> | <b>417.860</b> | <b>417.457</b> | V[17] |
| K[20] | 410.248        | 400.553        | 397.447        | 397.651        | 397.246        | K[16] |
| V[21] | 430.060        | 375.034        | 371.830        | 372.032        | 371.629        | V[15] |
| Q[22] | 456.672        | 355.220        | 352.017        | 352.218        | 351.815        | Q[14] |
| K[23] | 481.291        | 329.609        | 326.405        | 326.606        | 326.203        | K[13] |
| K[24] | 506.910        | 303.990        | 300.786        | 300.987        | 300.584        | K[12] |
| D[25] | 529.915        | 278.371        | 275.167        | 275.368        | 274.965        | D[11] |
| G[26] | 541.319        | 255.365        | 252.161        | 252.363        | 251.960        | G[10] |
| K[27] | 566.938        | 243.961        | 240.757        | 240.959        | 240.556        | K[9]  |
| K[28] | 582.357        | 218.342        | 215.138        | 215.340        | 214.937        | K[9]  |
| K[29] | 623.778        | 192.723        | 189.519        | 189.721        | 189.318        | K[1]  |
| K[30] | 649.397        | 161.503        | 158.299        | 158.501        | 158.097        | K[0]  |
| R[31] | <b>680.617</b> | 135.884        | 132.680        | 132.882        | 132.478        | R[9]  |
| S[32] | <b>698.023</b> | 104.664        | 101.460        | 101.661        | 101.258        | S[4]  |
| R[33] | <b>729.243</b> | 87.257         | 84.053         | 84.255         | 83.852         | R[3]  |
| K[34] | <b>754.862</b> | 56.037         | 52.833         | 53.035         | 52.632         | K[2]  |
| E[35] | 780.671        | 30.418         | 27.214         | 27.416         | 27.013         | E[1]  |

# sp | Q64525 | H2B2B\_MOUSE

PDKASAPAPKK<sup>Acetyl</sup><sub>42.01</sub> GSKKAVTKVQKKDGGKRRKRSRKE

- ▶ fragmentation table for charge state 6+
- ▶ specType=etd
- ▶ score=43.48
- ▶ F113278.dat
- ▶ query=q68529.p1
- ▶ precursor=558.049830
- ▶ chargePrecursor=7
- ▶ itol=0.5

| AA | c  | y              | z+1            | z+2            | z              | AA             |   |    |
|----|----|----------------|----------------|----------------|----------------|----------------|---|----|
| P  | 1  | 20.020         | <b>650.891</b> | 548.221        | 0.839          | 548.053        | P | 13 |
| D  | 2  | 39.192         | 634.715        | 632.040        | 0.839          | 631.878        | D | 34 |
| P  | 3  | 55.367         | <b>615.544</b> | 612.875        | 0.839          | 612.707        | P | 33 |
| A  | 4  | 67.207         | 599.369        | <b>596.699</b> | 0.839          | <b>596.531</b> | A | 32 |
| K  | 5  | 98.556         | 587.529        | 584.860        | 585.028        | 584.692        | K | 31 |
| S  | 6  | 103.061        | 566.180        | 563.510        | 563.678        | 563.342        | S | 30 |
| A  | 7  | 114.901        | 551.675        | <b>549.005</b> | <b>549.173</b> | 548.837        | A | 29 |
| P  | 8  | 131.076        | <b>539.835</b> | 537.166        | 537.334        | <b>536.998</b> | P | 28 |
| A  | 9  | 142.916        | 523.660        | 520.990        | 521.158        | 520.822        | A | 27 |
| P  | 10 | 159.091        | 511.520        | 509.151        | 509.319        | 508.983        | P | 26 |
| K  | 11 | 180.440        | 498.645        | 492.975        | 493.143        | 492.807        | K | 25 |
| K  | 12 | 208.791        | 474.296        | 471.626        | 471.794        | 471.458        | K | 24 |
| G  | 13 | 218.295        | 445.945        | 443.275        | 443.443        | 443.107        | G | 23 |
| S  | 14 | 232.600        | 436.441        | 433.771        | 433.939        | 433.603        | S | 22 |
| K  | 15 | 254.149        | 421.936        | 419.266        | 419.434        | 419.098        | K | 21 |
| K  | 16 | 275.498        | 400.587        | 397.917        | 398.085        | 397.749        | K | 20 |
| A  | 17 | 287.338        | 379.238        | 376.568        | 376.736        | 376.400        | A | 19 |
| V  | 18 | 303.649        | 367.398        | 364.728        | 364.896        | 364.560        | V | 18 |
| V  | 19 | 320.693        | 350.891        | 348.221        | 348.389        | 348.049        | V | 17 |
| K  | 20 | 342.040        | 334.043        | 331.373        | 331.541        | 331.206        | K | 16 |
| V  | 21 | 358.551        | 312.696        | 310.026        | 310.194        | 309.858        | V | 15 |
| Q  | 22 | 379.894        | 296.185        | 293.515        | 293.683        | 293.347        | Q | 14 |
| K  | 23 | 401.243        | 274.842        | 272.172        | 272.340        | 272.004        | K | 13 |
| K  | 24 | 422.593        | 253.493        | 250.823        | 250.991        | 250.655        | K | 12 |
| D  | 25 | 441.764        | 232.143        | 229.474        | 229.642        | 229.306        | D | 11 |
| G  | 26 | 451.267        | 212.972        | 210.302        | 210.470        | 210.134        | G | 10 |
| K  | 27 | <b>472.616</b> | 203.469        | 200.799        | 200.967        | 200.631        | K | 9  |
| K  | 28 | 483.968        | 182.120        | 179.450        | 179.618        | 179.282        | K | 9  |
| K  | 29 | 519.952        | 160.770        | 158.101        | 158.269        | 157.933        | K | 7  |
| K  | 30 | 541.132        | 134.753        | 132.084        | 132.252        | 131.916        | K | 6  |
| R  | 31 | 567.349        | 113.404        | 110.735        | 110.903        | 110.567        | R | 5  |
| S  | 32 | 581.854        | 87.387         | 84.718         | 84.886         | 84.550         | S | 4  |
| R  | 33 | 607.871        | 72.882         | 70.212         | 70.380         | 70.044         | R | 3  |
| K  | 34 | <b>629.220</b> | 46.865         | 44.196         | 44.363         | 44.028         | K | 2  |
| E  | 35 | <b>650.727</b> | 25.516         | 22.846         | 23.014         | 22.679         | E | 1  |



# sp | Q64525 | H2B2B\_MOUSE

PDKASAPAPKKGSK<sup>Acetyl</sup><sub>42.01</sub> KAVTKVQKKDGGKRRKRSRKE

- ▶ fragmentation table for charge state 1+
- ▶ specType=etd
- ▶ score=41.74
- ▶ F113278.dat
- ▶ query=q68532.p1
- ▶ precursor=780.867190
- ▶ chargePrecursor=5
- ▶ itol=0.5

| AA   | c               | y        | z+1             | z+2             | z              | AA   |
|------|-----------------|----------|-----------------|-----------------|----------------|------|
| P 1  | 115.087         | 3900.809 | 3884.291        | 0.000           | 3881.281       | P 35 |
| D 2  | 230.114         | 3801.257 | 3787.238        | 0.000           | 3786.230       | D 34 |
| F 3  | 327.106         | 3698.230 | 3672.211        | 0.000           | 3671.203       | F 33 |
| A 4  | 398.203         | 3591.177 | 3576.158        | 0.000           | 3574.150       | A 32 |
| K 5  | <b>526.298</b>  | 3520.140 | 3504.121        | 3856.120        | 3503.113       | K 31 |
| S 6  | 617.339         | 3392.085 | 3376.066        | 3377.054        | 3375.045       | S 30 |
| A 7  | 684.388         | 3305.013 | 3288.994        | 3290.002        | 3287.985       | A 29 |
| F 8  | 781.420         | 3233.976 | 3217.957        | 3218.965        | 3216.949       | F 28 |
| A 9  | 852.457         | 3136.923 | 3120.904        | 3121.912        | 3119.896       | A 27 |
| P 10 | <b>949.510</b>  | 3025.886 | 3049.867        | 3050.875        | 3048.859       | P 26 |
| K 11 | <b>1077.605</b> | 2968.832 | 2952.814        | 2953.822        | 2951.807       | K 25 |
| K 12 | 1269.590        | 2940.786 | 2924.767        | 2925.774        | 2923.758       | K 24 |
| Q 13 | 1262.722        | 2712.643 | 2696.624        | 2697.632        | 2695.617       | Q 23 |
| S 14 | <b>1349.754</b> | 2655.622 | 2639.603        | 2640.611        | 2638.595       | S 22 |
| K 15 | 1519.859        | 2606.566 | 2592.547        | 2593.554        | 2591.538       | K 21 |
| K 16 | 1647.954        | 2398.484 | 2382.465        | 2383.473        | 2381.456       | K 20 |
| A 17 | 1718.991        | 2270.389 | 2254.370        | 2255.378        | 2253.361       | A 19 |
| V 18 | 1818.006        | 2199.352 | 2183.333        | 2184.341        | 2182.325       | V 18 |
| T 19 | 1919.107        | 2100.284 | 2084.265        | 2085.273        | 2083.257       | T 17 |
| K 20 | 2047.202        | 1999.238 | 1983.219        | 1984.225        | 1982.209       | K 16 |
| V 21 | 2146.271        | 1871.141 | 1855.122        | 1856.130        | 1854.114       | V 15 |
| Q 22 | 2274.230        | 1772.073 | 1756.054        | 1757.062        | 1755.046       | Q 14 |
| K 23 | 2462.424        | 1644.014 | 1627.995        | 1629.003        | 1626.987       | K 13 |
| R 24 | 2530.519        | 1515.919 | 1499.900        | 1500.908        | 1498.892       | R 12 |
| D 25 | 2645.546        | 1387.824 | 1371.805        | <b>1372.813</b> | 1370.798       | D 11 |
| G 26 | 2702.588        | 1272.797 | 1256.778        | <b>1257.786</b> | 1255.771       | G 10 |
| K 27 | 2830.663        | 1215.776 | <b>1199.757</b> | 1200.765        | 1198.749       | K 9  |
| K 28 | 2958.757        | 1087.681 | 1071.662        | 1072.670        | 1070.654       | K 8  |
| R 29 | 3114.859        | 959.586  | 943.567         | 944.575         | <b>942.559</b> | R 7  |
| R 30 | 3242.954        | 803.485  | 787.466         | 788.474         | 786.458        | R 6  |
| R 31 | 3399.055        | 675.390  | 659.371         | <b>660.379</b>  | 658.363        | R 5  |
| S 32 | 3486.087        | 519.289  | 503.270         | <b>504.278</b>  | 502.262        | S 4  |
| R 33 | 3642.188        | 432.257  | 416.238         | <b>417.246</b>  | 415.230        | R 3  |
| K 34 | 3770.283        | 276.155  | 260.137         | 261.144         | 259.129        | K 2  |
| E 35 | 3899.325        | 148.060  | 132.042         | 133.050         | 131.034        | E 1  |

# sp | Q64525 | H2B2B\_MOUSE

PDKASAPAPKKGSK<sup>Acetyl</sup><sub>42.01</sub> KAVTKVQKKDGKKRKRSRKE

- ▶ fragmentation table for charge state 2+
- ▶ specType=etd
- ▶ score=41.74
- ▶ F113278.dat
- ▶ query=q68532.p1
- ▶ precursor=780.867190
- ▶ chargePrecursor=5
- ▶ itol=0.5

| AA   | c               | y               | z+1             | z+2             | z              | AA   |
|------|-----------------|-----------------|-----------------|-----------------|----------------|------|
| P 1  | 58.047          | 1950.058        | 1942.840        | 0.504           | 1942.145       | P 35 |
| D 2  | 115.560         | 1902.132        | 1894.123        | 0.504           | 1893.010       | D 34 |
| F 3  | 164.087         | 1844.618        | 1836.609        | 0.504           | 1836.105       | F 33 |
| A 4  | 199.605         | 1796.092        | 1788.083        | 0.504           | 1787.579       | A 32 |
| K 5  | 263.651         | 1700.574        | 1752.564        | 1753.068        | 1752.060       | K 31 |
| S 6  | 307.169         | 1696.526        | 1688.517        | 1689.021        | 1688.013       | S 30 |
| A 7  | 342.687         | 1653.010        | 1645.001        | 1645.505        | 1644.497       | A 29 |
| P 8  | 391.214         | 1617.491        | 1609.482        | 1609.986        | 1608.978       | P 28 |
| A 9  | 436.732         | 1568.965        | 1560.956        | <b>1561.460</b> | 1560.452       | A 27 |
| P 10 | 475.250         | 1533.447        | 1525.437        | 1525.941        | 1524.933       | P 26 |
| K 11 | 539.306         | 1484.920        | 1476.911        | <b>1477.415</b> | 1476.407       | K 25 |
| K 12 | 603.354         | 1420.871        | 1412.863        | 1413.367        | 1412.359       | K 24 |
| G 13 | 631.894         | 1395.925        | 1348.810        | <b>1349.320</b> | 1348.312       | G 23 |
| S 14 | 675.380         | 1328.314        | 1320.305        | 1320.809        | 1319.801       | S 22 |
| K 15 | 760.433         | 1284.796        | 1276.787        | 1277.291        | 1276.283       | K 21 |
| K 16 | <b>824.481</b>  | <b>1199.746</b> | <b>1191.736</b> | <b>1192.240</b> | 1191.232       | K 20 |
| A 17 | 859.959         | <b>1135.698</b> | <b>1127.689</b> | <b>1128.193</b> | 1127.185       | A 19 |
| V 18 | 909.513         | 1100.180        | 1092.171        | 1092.674        | 1091.666       | V 18 |
| V 19 | 960.057         | 1050.645        | 1042.636        | 1043.140        | 1042.132       | V 17 |
| K 20 | 1024.105        | <b>1000.122</b> | <b>992.112</b>  | <b>992.616</b>  | 991.608        | K 16 |
| V 21 | <b>1073.639</b> | 936.074         | 928.065         | 928.569         | 927.561        | V 15 |
| Q 22 | <b>1137.668</b> | 886.540         | <b>878.531</b>  | <b>879.034</b>  | 878.027        | Q 14 |
| K 23 | <b>1261.716</b> | 822.511         | <b>814.503</b>  | <b>815.005</b>  | 813.997        | K 13 |
| K 24 | 1295.763        | 758.463         | <b>750.454</b>  | <b>750.958</b>  | <b>749.950</b> | K 12 |
| D 25 | <b>1323.277</b> | 694.416         | 686.406         | 686.910         | 685.902        | D 11 |
| G 26 | <b>1351.787</b> | 636.902         | <b>628.893</b>  | <b>629.397</b>  | 628.389        | G 10 |
| K 27 | <b>1415.835</b> | 608.391         | 600.382         | 600.886         | 599.878        | K 9  |
| K 28 | 1479.882        | 544.344         | <b>536.335</b>  | <b>536.839</b>  | 535.831        | K 8  |
| R 29 | 1537.933        | 489.296         | 477.287         | 477.791         | 476.783        | R 7  |
| K 30 | <b>1621.980</b> | 427.240         | 394.217         | 394.740         | 393.732        | K 6  |
| R 31 | 1700.031        | 198.198         | 190.189         | 190.693         | 189.685        | R 5  |
| S 32 | <b>1743.547</b> | 200.148         | 252.139         | 252.642         | 251.635        | S 4  |
| R 33 | 1821.998        | 216.632         | 208.623         | 209.126         | 208.119        | R 3  |
| K 34 | 1885.645        | 138.581         | 130.572         | 131.076         | 130.068        | K 2  |
| E 35 | 1950.166        | 74.535          | 66.524          | 67.028          | 66.021         | E 1  |

# sp | Q64525 | H2B2B\_MOUSE

PDKASAPAPKKGSK<sup>Acetyl</sup><sub>42.01</sub> KAVTKVQKKDGKKRKRSRKE

- ▶ fragmentation table for charge state 3+
- ▶ specType=etd
- ▶ score=41.74
- ▶ F113278.dat
- ▶ query=q68532.p1
- ▶ precursor=780.867190
- ▶ chargePrecursor=5
- ▶ itol=0.5

| AA   | c               | y               | z+1             | z+2             | z               | AA   |
|------|-----------------|-----------------|-----------------|-----------------|-----------------|------|
| F 1  | 39.034          | <b>1300.775</b> | 1295.435        | 0.672           | 1295.099        | F(3) |
| D 2  | 77.376          | 1293.424        | 1283.054        | 0.672           | 1282.740        | D(4) |
| F 3  | 159.727         | 1230.081        | 1224.742        | 0.672           | 1224.400        | F(3) |
| A 4  | 151.406         | 1197.730        | <b>1192.391</b> | 0.672           | <b>1192.055</b> | A(3) |
| K 5  | 176.104         | 1174.051        | 1168.712        | <b>1169.048</b> | 1168.370        | K(3) |
| S 6  | 205.215         | 1131.353        | 1126.014        | 1126.340        | 1125.670        | S(3) |
| A 7  | 228.794         | 1102.942        | 1097.603        | 1097.930        | 1099.660        | A(2) |
| F 8  | 261.145         | 1079.061        | <b>1073.324</b> | <b>1073.600</b> | 1072.968        | F(2) |
| A 9  | 284.634         | 1046.312        | <b>1040.973</b> | <b>1041.309</b> | 1040.637        | A(2) |
| F 10 | 317.175         | 1022.633        | 1017.294        | 1017.630        | 1016.958        | F(2) |
| K 11 | 359.873         | 990.283         | <b>984.943</b>  | <b>985.279</b>  | 984.607         | K(2) |
| K 12 | 402.572         | <b>947.584</b>  | 942.245         | <b>942.581</b>  | 941.909         | K(2) |
| G 13 | 421.519         | 904.392         | <b>899.546</b>  | <b>899.882</b>  | 899.210         | G(2) |
| S 14 | 450.589         | <b>885.879</b>  | 880.539         | 880.875         | 880.203         | S(2) |
| K 15 | 507.291         | 856.868         | 851.528         | 851.864         | 851.191         | K(2) |
| K 16 | 549.990         | <b>800.166</b>  | 794.827         | 795.163         | 794.491         | K(2) |
| A 17 | 613.669         | 757.468         | 752.128         | 752.464         | 751.792         | A(1) |
| V 18 | 658.093         | 733.789         | 728.449         | 728.785         | 728.111         | V(1) |
| T 19 | 640.374         | 700.766         | 695.426         | 695.762         | 695.091         | T(1) |
| K 20 | 681.072         | 667.081         | 661.744         | 662.080         | 661.404         | K(1) |
| V 21 | 718.095         | 624.385         | 619.045         | 619.382         | 618.710         | V(1) |
| Q 22 | 758.761         | 591.362         | 586.023         | 586.359         | 585.687         | Q(1) |
| K 23 | 801.480         | 548.676         | 543.337         | 543.673         | 543.001         | K(1) |
| K 24 | 844.178         | 505.975         | 500.635         | 500.974         | 500.302         | K(1) |
| D 25 | 882.520         | 463.280         | 457.940         | 458.276         | 457.604         | D(1) |
| G 26 | 901.527         | 424.937         | 419.598         | 419.934         | 419.262         | G(1) |
| K 27 | 944.226         | 405.930         | 400.590         | 400.926         | 400.255         | K(1) |
| K 28 | 985.924         | 363.232         | 357.892         | 358.228         | 357.556         | K(1) |
| R 29 | <b>1038.958</b> | 320.531         | 315.194         | 315.530         | 314.858         | R(1) |
| K 30 | <b>1081.656</b> | 288.500         | 283.160         | 283.496         | 282.824         | K(1) |
| R 31 | <b>1133.690</b> | 225.801         | 220.462         | 220.798         | 220.126         | R(1) |
| S 32 | <b>1162.700</b> | 173.768         | 168.428         | 168.764         | 168.092         | S(1) |
| R 33 | <b>1214.734</b> | 144.757         | 139.417         | 139.753         | 139.082         | R(1) |
| T 34 | <b>1257.432</b> | 92.721          | 87.384          | 87.720          | 87.048          | T(1) |
| E 35 | 1300.447        | 50.025          | 44.685          | 45.021          | 44.349          | E(1) |

# sp | Q64525 | H2B2B\_MOUSE

PDKASAPAPKKGSK<sup>Acetyl</sup><sub>42.01</sub> KAVTKVQKKDGGKRRKRSRKE

- ▶ fragmentation table for charge state 4+
- ▶ specType=etd
- ▶ score=41.74
- ▶ F113278.dat
- ▶ query=q68532.p1
- ▶ precursor=780.867190
- ▶ chargePrecursor=5
- ▶ itol=0.5

| AA    | c       | y       | z+1            | z+2            | z              | AA    |
|-------|---------|---------|----------------|----------------|----------------|-------|
| P[1]  | 29.527  | 975.933 | <b>971.828</b> | 0.755          | <b>971.576</b> | P[35] |
| D[2]  | 58.284  | 951.570 | <b>947.565</b> | 0.755          | 947.313        | D[34] |
| P[3]  | 82.547  | 922.813 | 918.808        | 0.755          | 918.556        | P[33] |
| A[4]  | 100.306 | 898.550 | 894.545        | 0.755          | 894.293        | A[32] |
| K[5]  | 132.330 | 880.790 | 876.786        | 0.770          | 876.534        | K[31] |
| S[6]  | 154.088 | 848.767 | 844.762        | 0.845          | 844.510        | S[30] |
| A[7]  | 171.847 | 827.009 | 823.004        | 0.823          | 822.752        | A[29] |
| P[8]  | 196.111 | 809.249 | 805.245        | 0.805          | 804.993        | P[28] |
| A[9]  | 213.870 | 784.986 | 780.982        | 0.781          | 780.730        | A[27] |
| P[10] | 238.133 | 767.227 | 763.222        | 0.763          | 762.970        | P[26] |
| K[11] | 270.157 | 742.964 | <b>738.959</b> | <b>739.211</b> | <b>738.707</b> | K[25] |
| K[12] | 302.180 | 710.940 | 706.935        | 0.707          | 706.683        | K[24] |
| G[13] | 316.436 | 678.916 | 674.912        | 0.675          | 674.660        | G[23] |
| S[14] | 338.194 | 664.661 | <b>660.656</b> | <b>660.908</b> | <b>660.404</b> | S[22] |
| K[15] | 380.720 | 642.903 | 638.898        | 0.639          | 638.646        | K[21] |
| K[16] | 412.744 | 600.376 | 596.372        | 0.596          | 596.120        | K[20] |
| A[17] | 430.503 | 568.353 | 564.348        | 0.564          | 564.096        | A[19] |
| V[18] | 455.270 | 550.593 | 546.589        | 0.546          | 546.337        | V[18] |
| T[19] | 480.532 | 525.826 | 521.822        | 0.522          | 521.570        | T[17] |
| K[20] | 512.556 | 500.364 | 496.360        | 0.496          | 496.308        | K[16] |
| V[21] | 537.323 | 469.341 | 464.336        | 0.464          | 464.284        | V[15] |
| Q[22] | 569.338 | 443.774 | 439.769        | 0.440          | 439.517        | Q[14] |
| K[23] | 601.362 | 411.759 | 407.754        | 0.408          | 407.502        | K[13] |
| K[24] | 633.385 | 379.735 | 375.731        | 0.375          | 375.479        | K[12] |
| D[25] | 662.142 | 347.711 | 343.707        | 0.343          | 343.455        | D[11] |
| G[26] | 676.397 | 318.955 | 314.950        | 0.315          | 314.698        | G[10] |
| K[27] | 708.421 | 304.699 | 300.695        | 0.300          | 300.443        | K[9]  |
| K[28] | 740.445 | 272.676 | 268.671        | 0.268          | 268.419        | K[8]  |
| R[29] | 779.470 | 240.652 | 236.647        | 0.236          | 236.395        | R[7]  |
| K[30] | 811.494 | 201.627 | 197.622        | 0.197          | 197.370        | K[6]  |
| K[31] | 850.519 | 169.603 | 165.598        | 0.165          | 165.346        | K[5]  |
| S[32] | 872.277 | 130.978 | 126.973        | 0.126          | 126.721        | S[4]  |
| R[33] | 911.302 | 108.820 | 104.815        | 0.105          | 104.563        | R[3]  |
| K[34] | 943.326 | 89.794  | 85.790         | 0.085          | 85.538         | K[2]  |
| E[35] | 975.587 | 37.771  | 33.766         | 0.034          | 33.514         | E[1]  |





# sp | Q64525 | H2B2B\_MOUSE

PDKASAPAPKKGSK<sup>Acetyl</sup><sub>42.01</sub> KAVTKVQKKDGGKRRKRSRKE

- ▶ fragmentation table for charge state 1+
- ▶ specType=etd
- ▶ score=46.33
- ▶ F113278.dat
- ▶ query=q68535.p1
- ▶ precursor=650.890830
- ▶ chargePrecursor=6
- ▶ itol=0.5

| AA   | c               | y              | z+1             | z+2             | z              | AA   |
|------|-----------------|----------------|-----------------|-----------------|----------------|------|
| P 1  | 115.087         | 3900.809       | 8884.291        | 0.000           | 3881.281       | P 35 |
| D 2  | 230.114         | 3801.257       | 3787.238        | 0.000           | 3786.230       | D 34 |
| F 3  | 327.106         | 3698.230       | 3672.211        | 0.000           | 3671.203       | F 33 |
| A 4  | 398.203         | 3591.177       | 3575.158        | 0.000           | 3574.150       | A 32 |
| K 5  | <b>526.298</b>  | 3520.140       | 3504.121        | 3836.120        | 3503.113       | K 31 |
| S 6  | 617.339         | 3392.085       | 3376.066        | 3377.054        | 3375.015       | S 30 |
| A 7  | 684.388         | 3305.013       | 3288.994        | 3290.002        | 3287.985       | A 29 |
| F 8  | <b>781.420</b>  | 3233.976       | 3217.957        | 3218.965        | 3216.949       | F 28 |
| A 9  | 852.457         | 3136.923       | 3120.904        | 3121.912        | 3119.896       | A 27 |
| P 10 | <b>949.510</b>  | 3065.886       | 3049.867        | 3050.875        | 3048.859       | P 26 |
| K 11 | <b>1077.805</b> | 2998.832       | 2982.814        | 2983.822        | 2981.807       | K 25 |
| K 12 | <b>1205.700</b> | 2930.786       | 2914.767        | 2915.774        | 2913.758       | K 24 |
| Q 13 | 1262.722        | 2772.643       | 2696.624        | 2697.632        | 2695.617       | Q 23 |
| S 14 | <b>1349.754</b> | 2655.622       | 2639.603        | 2640.611        | 2638.595       | S 22 |
| K 15 | 1519.859        | 2568.590       | 2552.571        | 2553.579        | 2551.563       | K 21 |
| K 16 | 1647.954        | 2398.484       | 2382.465        | 2383.473        | 2381.458       | K 20 |
| A 17 | 1718.991        | 2270.389       | 2254.370        | 2255.378        | 2253.363       | A 19 |
| V 18 | <b>1818.060</b> | 2199.352       | 2183.333        | 2184.341        | 2182.325       | V 18 |
| T 19 | 1919.107        | 2100.284       | 2084.265        | 2085.273        | 2083.257       | T 17 |
| K 20 | 2047.202        | 1999.239       | 1983.219        | 1984.225        | 1982.209       | K 16 |
| V 21 | 2146.271        | 1871.141       | 1855.122        | 1856.130        | 1854.114       | V 15 |
| Q 22 | 2274.239        | 1772.073       | 1756.054        | 1757.062        | 1755.046       | Q 14 |
| K 23 | 2462.424        | 1644.016       | 1627.997        | 1629.003        | 1626.987       | K 13 |
| K 24 | 2530.319        | 1515.919       | <b>1499.900</b> | 1500.908        | 1498.892       | K 12 |
| D 25 | 2645.546        | 1387.824       | 1371.805        | <b>1372.813</b> | 1370.798       | D 11 |
| G 26 | 2702.568        | 1272.797       | 1256.778        | <b>1257.786</b> | 1255.771       | G 10 |
| K 27 | 2830.663        | 1215.776       | <b>1199.757</b> | 1200.765        | 1198.749       | K 9  |
| K 28 | 2958.757        | 1087.681       | 1071.662        | <b>1072.670</b> | 1070.654       | K 8  |
| K 29 | 3114.859        | 959.586        | <b>943.567</b>  | 944.575         | 942.559        | K 7  |
| R 30 | 3212.854        | 803.485        | <b>787.466</b>  | 788.474         | 786.458        | R 6  |
| R 31 | 3399.055        | <b>675.390</b> | <b>659.371</b>  | 660.379         | 658.363        | R 5  |
| S 32 | 3486.087        | 519.289        | 503.270         | 504.278         | <b>502.262</b> | S 4  |
| R 33 | 3642.188        | 432.257        | <b>416.238</b>  | 417.246         | 415.230        | R 3  |
| K 34 | 3770.283        | 276.155        | 260.137         | <b>261.144</b>  | 259.129        | K 2  |
| E 35 | 3899.325        | 148.060        | 132.042         | 133.050         | 131.034        | E 1  |

# sp | Q64525 | H2B2B\_MOUSE

PDKASAPAPKKGSK<sup>Acetyl</sup><sub>42.01</sub> KAVTKVQKKDGGKRRKRSRKE

- ▶ fragmentation table for charge state 2+
- ▶ specType=etd
- ▶ score=46.33
- ▶ F113278.dat
- ▶ query=q68535.p1
- ▶ precursor=650.890830
- ▶ chargePrecursor=6
- ▶ itol=0.5

| AA | c  | y               | #±1            | #±2            | z              | AA             |       |
|----|----|-----------------|----------------|----------------|----------------|----------------|-------|
| P  | 1  | 58.047          | 1926.658       | 1042.640       | 0.504          | 1842.141       | P[28] |
| D  | 2  | 135.500         | 1902.132       | 1894.123       | 0.504          | 1893.610       | D[34] |
| F  | 3  | 164.087         | 1844.618       | 1836.609       | 0.504          | 1838.105       | F[33] |
| A  | 4  | 199.605         | 1796.092       | 1788.083       | 0.504          | 1789.570       | A[32] |
| K  | 5  | 263.651         | 1760.574       | 1752.564       | 1753.068       | 1752.060       | K[31] |
| S  | 6  | 307.169         | 1696.526       | 1688.517       | 1689.021       | 1688.013       | S[30] |
| A  | 7  | 352.069         | 1653.010       | 1645.001       | 1645.505       | 1644.497       | A[29] |
| F  | 8  | 391.214         | 1617.491       | 1609.482       | 1609.986       | 1608.978       | F[28] |
| A  | 9  | 436.732         | 1568.965       | 1560.956       | 1561.460       | 1560.452       | A[27] |
| P  | 10 | 475.250         | 1533.447       | 1525.437       | 1525.941       | 1524.933       | P[26] |
| K  | 11 | 529.368         | 1484.920       | 1476.911       | 1477.415       | 1476.407       | K[25] |
| K  | 12 | <b>603.354</b>  | 1438.873       | 1431.863       | 1431.367       | 1431.359       | K[24] |
| G  | 13 | <b>631.804</b>  | 1390.825       | 1382.816       | 1383.320       | 1382.312       | G[23] |
| S  | 14 | <b>675.380</b>  | 1328.314       | 1320.305       | 1320.809       | 1319.801       | S[22] |
| K  | 15 | <b>760.433</b>  | 1264.798       | 1256.789       | 1257.293       | 1256.285       | K[21] |
| K  | 16 | <b>824.481</b>  | 1199.746       | 1191.736       | 1192.240       | 1191.232       | K[20] |
| A  | 17 | 869.999         | 1155.698       | 1127.689       | 1128.193       | 1127.185       | A[19] |
| V  | 18 | 909.533         | 1102.180       | 1092.170       | 1092.674       | 1091.666       | V[18] |
| T  | 19 | <b>960.057</b>  | 1050.645       | 1042.636       | 1043.140       | 1042.132       | T[17] |
| K  | 20 | <b>1024.105</b> | 1000.122       | 992.112        | 992.616        | 991.608        | K[16] |
| V  | 21 | 1073.630        | 936.074        | 928.065        | 928.569        | 927.561        | V[15] |
| Q  | 22 | <b>1137.668</b> | <b>886.540</b> | <b>878.531</b> | 879.034        | <b>878.027</b> | Q[14] |
| K  | 23 | <b>1201.716</b> | 828.513        | 814.503        | <b>815.005</b> | 814.997        | K[13] |
| K  | 24 | 1255.153        | <b>758.463</b> | <b>750.454</b> | <b>750.958</b> | 749.950        | K[12] |
| D  | 25 | 1323.277        | <b>694.416</b> | <b>686.406</b> | <b>686.910</b> | 685.902        | D[11] |
| G  | 26 | <b>1351.787</b> | <b>636.902</b> | <b>628.893</b> | <b>629.397</b> | 628.389        | G[10] |
| K  | 27 | <b>1415.835</b> | 608.391        | <b>600.382</b> | <b>600.886</b> | 599.878        | K[9]  |
| K  | 28 | <b>1479.882</b> | <b>544.344</b> | <b>536.335</b> | <b>536.839</b> | 535.831        | K[8]  |
| R  | 29 | 1557.819        | 480.296        | <b>472.287</b> | <b>472.791</b> | <b>471.783</b> | R[7]  |
| K  | 30 | <b>1621.980</b> | 402.246        | 394.237        | 394.740        | 393.731        | K[6]  |
| R  | 31 | 1700.011        | 338.198        | 330.189        | 330.691        | 329.683        | R[5]  |
| S  | 32 | 1743.547        | 260.148        | 252.139        | 252.642        | 251.635        | S[4]  |
| K  | 33 | 1821.598        | 216.632        | 208.623        | 209.126        | 208.119        | K[3]  |
| K  | 34 | 1889.649        | 138.581        | 130.572        | 131.076        | 130.068        | K[2]  |
| E  | 35 | 1950.156        | 74.534         | 66.524         | 67.028         | 66.021         | E[1]  |

# sp | Q64525 | H2B2B\_MOUSE

PDKASAPAPKKGSK<sup>Acetyl</sup><sub>42.01</sub> KAVTKVQKKDGGKRRKRSRKE

- ▶ fragmentation table for charge state 3+
- ▶ specType=etd
- ▶ score=46.33
- ▶ F113278.dat
- ▶ query=q68535.p1
- ▶ precursor=650.890830
- ▶ chargePrecursor=6
- ▶ itol=0.5

| AA   | c               | y              | z+1             | z+2             | z               | AA   |
|------|-----------------|----------------|-----------------|-----------------|-----------------|------|
| P 1  | 38.034          | 1300.775       | 1295.435        | 0.672           | 1295.092        | P 35 |
| D 2  | 77.376          | 1268.434       | 1263.084        | 0.672           | 1262.748        | D 34 |
| F 3  | 109.727         | 1230.081       | 1224.740        | 0.672           | 1224.408        | F 33 |
| A 4  | 133.408         | 1197.730       | <b>1192.391</b> | 0.672           | <b>1192.055</b> | A 32 |
| K 5  | 176.104         | 1174.051       | 1168.712        | <b>1169.048</b> | 1168.376        | K 31 |
| S 6  | 209.119         | 1131.383       | 1125.034        | <b>1128.349</b> | 1125.678        | S 30 |
| A 7  | 228.794         | 1102.342       | <b>1097.003</b> | <b>1097.339</b> | 1096.667        | A 29 |
| P 8  | <b>261.145</b>  | 1078.663       | 1073.324        | 1073.660        | <b>1072.988</b> | P 28 |
| A 9  | 284.824         | 1046.312       | <b>1040.973</b> | <b>1041.309</b> | 1040.637        | A 27 |
| P 10 | 317.375         | 1022.633       | 1017.304        | 1017.630        | 1016.958        | P 26 |
| K 11 | 359.873         | 990.283        | <b>984.943</b>  | <b>985.279</b>  | 984.607         | K 25 |
| K 12 | 402.572         | 947.584        | 942.245         | 942.581         | 941.909         | K 24 |
| G 13 | 421.579         | 904.886        | <b>899.546</b>  | <b>899.882</b>  | 899.210         | G 23 |
| S 14 | 450.589         | 885.879        | <b>880.539</b>  | <b>880.875</b>  | 880.203         | S 22 |
| K 15 | 507.201         | 856.868        | 851.529         | 851.864         | <b>851.193</b>  | K 21 |
| K 16 | 549.990         | 830.166        | <b>794.827</b>  | <b>795.163</b>  | 794.491         | K 20 |
| A 17 | 573.809         | 797.468        | 792.128         | 792.464         | <b>751.792</b>  | A 19 |
| V 18 | 608.093         | 733.789        | 728.449         | 728.785         | 728.113         | V 18 |
| T 19 | 640.374         | 700.769        | 695.430         | <b>695.762</b>  | <b>695.091</b>  | T 17 |
| K 20 | 683.072         | <b>667.083</b> | <b>661.744</b>  | <b>662.080</b>  | 661.408         | K 16 |
| V 21 | 716.095         | 624.385        | <b>619.046</b>  | <b>619.382</b>  | 618.710         | V 15 |
| Q 22 | <b>756.781</b>  | 591.362        | <b>586.023</b>  | <b>586.359</b>  | 585.687         | Q 14 |
| K 23 | <b>801.480</b>  | 548.076        | 543.737         | 543.072         | 542.401         | K 13 |
| K 24 | <b>844.178</b>  | 505.078        | 500.739         | 500.074         | 500.402         | K 12 |
| D 25 | 882.520         | 463.280        | 457.940         | 458.276         | 457.604         | D 11 |
| G 26 | 901.527         | 424.937        | 419.598         | 419.934         | 419.262         | G 10 |
| K 27 | <b>944.226</b>  | 405.930        | 400.590         | 400.926         | 400.255         | K 9  |
| K 28 | 988.024         | 363.232        | 357.892         | 358.228         | 357.556         | K 8  |
| T 29 | <b>1038.858</b> | 320.533        | 315.194         | 315.530         | 314.858         | T 7  |
| K 30 | <b>1081.656</b> | 288.520        | 283.180         | 283.496         | 282.824         | K 6  |
| R 31 | <b>1133.690</b> | 225.001        | 220.462         | 220.798         | 220.126         | R 5  |
| S 32 | <b>1162.700</b> | 173.768        | 168.428         | 168.764         | 168.092         | S 4  |
| R 33 | 1214.734        | 144.757        | 139.417         | 139.753         | 139.082         | R 3  |
| K 34 | <b>1257.432</b> | 92.721         | 87.384          | 87.720          | 87.048          | K 2  |
| E 35 | 1300.447        | 50.025         | 44.685          | 45.021          | 44.349          | E 1  |

# sp | Q64525 | H2B2B\_MOUSE

PDKAKSAPAPKKGSK<sup>Acetyl</sup><sub>42.01</sub> KAVTKVQKKDGGKRRKRSRKE

- ▶ fragmentation table for charge state 4+
- ▶ specType=etd
- ▶ score=46.33
- ▶ F113278.dat
- ▶ query=q68535.p1
- ▶ precursor=650.890830
- ▶ chargePrecursor=6
- ▶ itol=0.5

| AA    | c              | y              | z=1            | z=2            | z              | AA    |
|-------|----------------|----------------|----------------|----------------|----------------|-------|
| P[1]  | 29.527         | 975.813        | <b>971.828</b> | 0.735          | <b>971.576</b> | P[15] |
| D[2]  | 58.284         | <b>951.570</b> | 947.567        | 0.735          | 947.313        | D[34] |
| P[3]  | 82.547         | 922.813        | 918.808        | 0.735          | 918.556        | P[13] |
| A[4]  | 100.306        | 898.556        | <b>894.545</b> | 0.735          | <b>894.293</b> | A[32] |
| K[5]  | 132.430        | <b>880.790</b> | 876.786        | 877.038        | 876.534        | K[31] |
| S[6]  | 154.088        | 848.767        | <b>844.762</b> | <b>845.014</b> | <b>844.510</b> | S[30] |
| A[7]  | 171.847        | 827.009        | 823.004        | <b>823.256</b> | 822.752        | A[29] |
| P[8]  | 196.111        | 809.249        | 805.243        | 805.497        | 804.993        | P[28] |
| A[9]  | 213.870        | 784.986        | <b>780.982</b> | <b>781.233</b> | 780.730        | A[27] |
| P[10] | 238.133        | 767.227        | 763.222        | 763.474        | 762.970        | P[26] |
| K[11] | 270.157        | 742.964        | <b>738.959</b> | <b>739.211</b> | <b>738.707</b> | K[25] |
| K[12] | 302.180        | 710.940        | <b>706.935</b> | <b>707.187</b> | 706.683        | K[24] |
| G[13] | 316.436        | 678.916        | <b>674.912</b> | <b>675.164</b> | <b>674.660</b> | G[23] |
| S[14] | 338.194        | 664.661        | 660.656        | 660.908        | 660.404        | S[22] |
| K[15] | 380.720        | 642.903        | 638.898        | 639.150        | 638.646        | K[21] |
| K[16] | 412.744        | <b>600.376</b> | 596.372        | 596.624        | 596.120        | K[20] |
| A[17] | 430.503        | 568.353        | 564.348        | 564.600        | 564.096        | A[19] |
| V[18] | 455.270        | 550.593        | 546.589        | 546.841        | 546.337        | V[18] |
| T[19] | 480.532        | 535.626        | 529.622        | 529.874        | 529.370        | T[17] |
| K[20] | 512.556        | 500.564        | 496.560        | 496.812        | 496.308        | K[16] |
| V[21] | 537.323        | 468.541        | 464.536        | 464.788        | 464.284        | V[15] |
| Q[22] | 569.338        | 443.774        | 439.769        | 440.021        | 439.517        | Q[14] |
| K[23] | 601.362        | 411.759        | 407.754        | 408.006        | 407.502        | K[13] |
| K[24] | 633.385        | 379.735        | 375.731        | 375.982        | 375.479        | K[12] |
| D[25] | <b>662.142</b> | 347.711        | 343.707        | 343.959        | 343.455        | D[11] |
| G[26] | 676.397        | 318.955        | 314.950        | 315.202        | 314.698        | G[10] |
| K[27] | 708.421        | 304.699        | 300.695        | 300.947        | 300.443        | K[9]  |
| K[28] | 740.445        | 272.676        | 268.671        | 268.923        | 268.419        | K[8]  |
| K[29] | 779.470        | 240.652        | 236.647        | 236.899        | 236.395        | K[7]  |
| K[30] | 811.494        | 201.627        | 197.622        | 197.874        | 197.370        | K[6]  |
| R[31] | <b>850.519</b> | 169.603        | 165.598        | 165.850        | 165.346        | R[5]  |
| S[32] | <b>872.277</b> | 130.578        | 126.573        | 126.825        | 126.321        | S[4]  |
| R[33] | <b>911.302</b> | 108.620        | 104.615        | 105.067        | 104.563        | R[3]  |
| K[34] | 943.326        | 69.794         | 65.790         | 66.042         | 65.538         | K[2]  |
| E[35] | 975.587        | 37.771         | 33.766         | 34.018         | 33.514         | E[1]  |

# sp | Q64525 | H2B2B\_MOUSE

PDKASAPAPKKGSK<sup>Acetyl</sup><sub>42.01</sub> KAVTKVQKKDGKKRKRSRKE

- ▶ fragmentation table for charge state 5+
- ▶ specType=etd
- ▶ score=46.33
- ▶ F113278.dat
- ▶ query=q68535.p1
- ▶ precursor=650.890830
- ▶ chargePrecursor=6
- ▶ itol=0.5

| AA    | c              | y              | z+1            | z+2     | z       | AA    |
|-------|----------------|----------------|----------------|---------|---------|-------|
| P[1]  | 23.023         | <b>780.868</b> | <b>777.664</b> | 0.806   | 777.462 | P[35] |
| D[2]  | 46.629         | <b>761.457</b> | 758.253        | 0.806   | 758.052 | D[34] |
| P[3]  | 66.239         | <b>738.452</b> | 735.248        | 0.806   | 735.046 | P[33] |
| A[4]  | 80.447         | 719.041        | 715.837        | 0.806   | 715.636 | A[32] |
| K[5]  | 106.065        | 704.834        | 701.630        | 701.832 | 701.428 | K[31] |
| S[6]  | 123.472        | 679.215        | 676.011        | 676.213 | 675.809 | S[30] |
| A[7]  | 137.679        | <b>661.808</b> | 658.605        | 658.806 | 658.403 | A[29] |
| P[8]  | 157.090        | 647.601        | 644.397        | 644.599 | 644.196 | P[28] |
| A[9]  | 171.297        | 628.190        | 624.987        | 625.188 | 624.785 | A[27] |
| P[10] | 189.708        | 613.983        | 610.779        | 610.981 | 610.578 | P[26] |
| K[11] | 216.327        | 594.572        | 591.369        | 591.570 | 591.167 | K[25] |
| K[12] | 241.946        | 568.953        | 565.750        | 565.951 | 565.548 | K[24] |
| G[13] | 253.390        | 543.334        | 540.131        | 540.332 | 539.929 | G[23] |
| S[14] | 270.757        | 531.930        | 528.726        | 528.928 | 528.525 | S[22] |
| K[15] | 304.778        | 514.524        | 511.320        | 511.522 | 511.118 | K[21] |
| K[16] | 330.397        | 480.503        | 477.299        | 477.500 | 477.097 | K[20] |
| A[17] | 344.604        | 454.884        | 451.680        | 451.881 | 451.478 | A[19] |
| V[18] | 364.418        | 440.676        | 437.472        | 437.674 | 437.271 | V[18] |
| T[19] | 384.627        | 420.863        | 417.659        | 417.860 | 417.457 | T[17] |
| K[20] | 410.246        | 400.853        | 397.449        | 397.651 | 397.248 | K[16] |
| V[21] | 430.690        | 375.034        | 371.830        | 372.032 | 371.629 | V[15] |
| Q[22] | 455.672        | 355.220        | 352.017        | 352.218 | 351.815 | Q[14] |
| K[23] | 481.291        | 329.600        | 326.405        | 326.606 | 326.203 | K[13] |
| K[24] | 506.910        | 303.990        | 300.786        | 300.987 | 300.584 | K[12] |
| D[25] | 529.915        | 278.371        | 275.167        | 275.368 | 274.965 | D[11] |
| G[26] | 541.319        | 255.365        | 252.161        | 252.363 | 251.960 | G[10] |
| K[27] | 566.938        | 243.961        | 240.757        | 240.959 | 240.556 | K[9]  |
| K[28] | 592.557        | 218.342        | 215.138        | 215.340 | 214.937 | K[8]  |
| R[29] | 623.778        | 192.723        | 189.519        | 189.721 | 189.318 | R[7]  |
| K[30] | 649.397        | 161.503        | 158.299        | 158.501 | 158.097 | K[6]  |
| K[31] | 680.617        | 135.884        | 132.680        | 132.882 | 132.478 | K[5]  |
| S[32] | 698.223        | 104.664        | 101.460        | 101.661 | 101.258 | S[4]  |
| K[33] | 729.343        | 87.257         | 84.053         | 84.255  | 83.852  | K[3]  |
| K[34] | <b>754.862</b> | 58.037         | 52.833         | 53.035  | 52.632  | K[2]  |
| E[35] | 780.671        | 30.418         | 27.214         | 27.416  | 27.013  | E[1]  |

# sp | Q64525 | H2B2B\_MOUSE

PDKASAPAPKKGSK <sup>Acetyl</sup> 42.01 KAVTKVQKKDGKKRKRSRKE

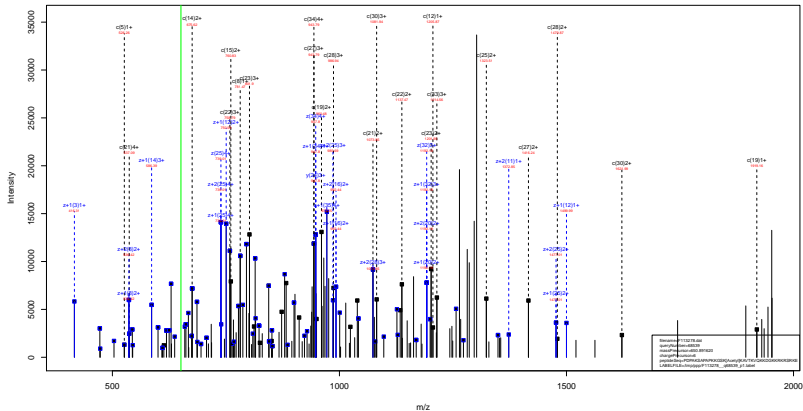

# sp | Q64525 | H2B2B\_MOUSE

PDKASAPAPKKGSK<sup>Acetyl</sup><sub>42.01</sub> KAVTKVQKKDGKKRKRSRKE

- ▶ fragmentation table for charge state 1+
- ▶ specType=etd
- ▶ score=42.92
- ▶ F113278.dat
- ▶ query=q68539\_p1
- ▶ precursor=650.891620
- ▶ chargePrecursor=6
- ▶ itol=0.5

| AA    | c               | y               | z+1             | z+2             | z        | AA    |
|-------|-----------------|-----------------|-----------------|-----------------|----------|-------|
| P[1]  | 115.087         | 3900.309        | 3854.201        | 0.000           | 3883.283 | P[35] |
| D[2]  | 230.114         | 3803.257        | 3787.238        | 0.000           | 3786.230 | D[34] |
| F[3]  | 337.166         | 3668.238        | 3632.211        | 0.000           | 3631.203 | F[33] |
| A[4]  | 398.203         | 3591.177        | 3575.158        | 0.000           | 3574.150 | A[32] |
| K[5]  | <b>526.298</b>  | 3520.140        | 3504.121        | 3508.129        | 3503.113 | K[31] |
| S[6]  | <b>613.330</b>  | 3392.049        | 3378.036        | 3377.034        | 3375.013 | S[30] |
| A[7]  | 684.368         | 3325.013        | 3288.994        | 3290.002        | 3287.986 | A[29] |
| P[8]  | <b>781.420</b>  | 3233.976        | 3217.957        | 3218.965        | 3210.948 | P[28] |
| A[9]  | <b>852.457</b>  | 3136.927        | 3120.904        | 3121.912        | 3119.899 | A[27] |
| P[10] | <b>949.510</b>  | 3065.890        | 3049.867        | 3050.875        | 3048.859 | P[26] |
| K[11] | 1077.805        | 2968.832        | 2952.814        | 2953.822        | 2951.803 | K[25] |
| K[12] | <b>1205.700</b> | 2840.738        | 2824.719        | 2825.727        | 2823.711 | K[24] |
| G[13] | 1302.722        | 2712.643        | 2696.624        | 2697.632        | 2695.617 | G[23] |
| S[14] | 1349.754        | 2655.622        | 2639.603        | 2640.611        | 2638.595 | S[22] |
| K[15] | 1519.859        | 2568.566        | 2552.571        | 2553.579        | 2551.561 | K[21] |
| K[16] | 1647.954        | 2398.484        | 2382.485        | 2383.473        | 2381.458 | K[20] |
| A[17] | 1718.991        | 2270.389        | 2254.370        | 2255.378        | 2253.363 | A[19] |
| V[18] | 1818.060        | 2199.352        | 2183.333        | 2184.341        | 2182.325 | V[18] |
| T[19] | <b>1919.107</b> | 2100.284        | 2084.265        | 2085.273        | 2083.257 | T[17] |
| K[20] | 2047.202        | 1999.238        | 1983.217        | 1984.225        | 1982.209 | K[16] |
| V[21] | 2146.271        | 1871.141        | 1855.122        | 1856.130        | 1854.114 | V[15] |
| Q[22] | 2274.320        | 1772.073        | 1756.054        | 1757.062        | 1755.046 | Q[14] |
| R[23] | 2402.424        | 1644.014        | 1627.995        | 1628.003        | 1626.987 | R[13] |
| K[24] | 2530.519        | 1515.915        | <b>1499.900</b> | 1500.908        | 1498.892 | K[12] |
| D[25] | 2645.546        | 1387.824        | 1371.805        | <b>1372.813</b> | 1370.798 | D[11] |
| G[26] | 2702.568        | <b>1272.797</b> | <b>1256.778</b> | 1257.786        | 1255.771 | G[10] |
| K[27] | 2830.663        | 1215.778        | <b>1199.757</b> | 1200.765        | 1198.749 | K[9]  |
| K[28] | 2958.757        | 1087.681        | 1071.672        | 1072.670        | 1070.654 | K[8]  |
| R[29] | 3114.859        | 959.588         | <b>943.567</b>  | 944.575         | 942.559  | R[7]  |
| K[30] | 3242.954        | 833.485         | <b>787.466</b>  | 788.474         | 786.458  | K[6]  |
| R[31] | 3399.055        | <b>675.390</b>  | <b>659.371</b>  | 660.379         | 658.361  | R[5]  |
| S[32] | 3486.087        | 619.289         | <b>503.270</b>  | 504.278         | 502.262  | S[4]  |
| R[33] | 3642.188        | 432.257         | <b>416.238</b>  | 417.246         | 415.230  | R[3]  |
| K[34] | 3770.283        | 276.155         | 260.137         | 261.144         | 259.129  | K[2]  |
| E[35] | 3889.325        | 148.060         | 132.042         | 133.050         | 131.034  | E[1]  |

# sp | Q64525 | H2B2B\_MOUSE

PDKASAPAPKKGSK<sup>Acetyl</sup><sub>42.01</sub> KAVTKVQKKGKRRKRSRKE

- ▶ fragmentation table for charge state 2+
- ▶ specType=etd
- ▶ score=42.92
- ▶ F113278.dat
- ▶ query=q68539\_p1
- ▶ precursor=650.891620
- ▶ chargePrecursor=6
- ▶ itol=0.5

| AA  | c               | y               | ±1              | ±2              | z               | AA  |
|-----|-----------------|-----------------|-----------------|-----------------|-----------------|-----|
| P1  | 58.047          | 1050.659        | 1042.640        | 0.504           | 1042.141        | P19 |
| D2  | 135.500         | 1002.132        | 1004.123        | 0.504           | 1003.610        | D34 |
| F3  | 164.087         | 1044.618        | 1036.609        | 0.504           | 1038.105        | F33 |
| A4  | 199.605         | 1196.092        | 1188.083        | 0.504           | 1189.570        | A32 |
| K5  | 263.651         | 1760.574        | 1752.564        | 1753.068        | 1752.060        | K31 |
| S6  | 307.169         | 1696.529        | 1688.517        | 1689.021        | 1688.011        | S30 |
| A7  | 352.687         | 1953.010        | 1945.001        | 1945.505        | 1944.491        | A29 |
| F8  | 391.214         | 1017.491        | 1009.482        | 1009.986        | 1008.978        | F28 |
| A9  | 436.732         | 1568.965        | 1560.956        | 1561.460        | 1560.451        | A27 |
| P10 | 475.259         | 1533.447        | 1525.437        | 1525.941        | 1524.933        | P26 |
| K11 | 539.306         | 1484.920        | <b>1476.911</b> | <b>1477.415</b> | 1476.407        | K25 |
| K12 | 603.354         | 1420.873        | 1412.863        | 1413.367        | 1412.359        | K24 |
| G13 | 631.894         | 1336.925        | <b>1348.816</b> | <b>1349.320</b> | 1348.312        | G23 |
| S14 | <b>675.380</b>  | 1328.314        | 1320.305        | 1320.809        | 1319.801        | S22 |
| K15 | <b>760.433</b>  | 1284.798        | 1276.789        | 1277.293        | 1276.285        | K21 |
| K16 | <b>824.481</b>  | <b>1199.746</b> | <b>1191.736</b> | <b>1192.240</b> | 1191.232        | K20 |
| A17 | 859.999         | 1135.098        | 1127.088        | <b>1128.193</b> | 1127.185        | A19 |
| V18 | 909.533         | 1100.180        | 1092.170        | 1092.674        | 1091.666        | V18 |
| T19 | <b>960.057</b>  | 1050.645        | 1042.636        | 1043.140        | <b>1042.132</b> | T17 |
| K20 | <b>1024.105</b> | <b>1000.122</b> | <b>992.112</b>  | <b>992.616</b>  | 991.608         | K16 |
| V21 | <b>1073.639</b> | 936.074         | 928.065         | <b>928.569</b>  | 927.561         | V15 |
| Q22 | <b>1137.668</b> | 898.540         | 890.531         | <b>879.034</b>  | 897.027         | Q14 |
| R23 | <b>1201.716</b> | <b>822.511</b>  | <b>814.501</b>  | <b>815.005</b>  | <b>813.997</b>  | R13 |
| K24 | 1255.153        | <b>758.463</b>  | <b>750.454</b>  | <b>750.958</b>  | 749.950         | K12 |
| D25 | <b>1323.277</b> | 694.018         | <b>686.406</b>  | <b>686.910</b>  | <b>685.902</b>  | D11 |
| G26 | 1361.707        | <b>636.902</b>  | <b>628.893</b>  | <b>629.397</b>  | 628.389         | G10 |
| K27 | <b>1415.835</b> | 608.391         | <b>600.382</b>  | <b>600.886</b>  | 599.878         | K9  |
| K28 | <b>1479.882</b> | <b>544.344</b>  | <b>536.335</b>  | <b>536.839</b>  | 535.831         | K8  |
| R29 | 1517.018        | 480.206         | <b>472.207</b>  | <b>472.711</b>  | 471.703         | R17 |
| K30 | <b>1621.980</b> | 402.246         | 394.237         | 394.740         | 393.733         | K6  |
| R31 | 1700.011        | 338.198         | 330.189         | 330.693         | 329.685         | R5  |
| S32 | 1743.547        | 260.148         | 252.139         | 252.642         | 251.635         | S4  |
| R33 | 1821.598        | 216.632         | 208.623         | 209.126         | 208.119         | R3  |
| K34 | 1889.649        | 138.561         | 130.552         | 131.056         | 130.048         | K2  |
| E35 | 1950.106        | 74.534          | 66.524          | 67.028          | 66.021          | E1  |



# sp | Q64525 | H2B2B\_MOUSE

PDKASAPAPKKGSK<sup>Acetyl</sup><sub>42.01</sub> KAVTKVQKKDGKKRKRSRKE

- ▶ fragmentation table for charge state 3+
- ▶ specType=etd
- ▶ score=42.92
- ▶ F113278.dat
- ▶ query=q68539\_p1
- ▶ precursor=650.891620
- ▶ chargePrecursor=6
- ▶ itol=0.5

| AA   | c               | y               | ±1              | ±2              | z               | AA   |
|------|-----------------|-----------------|-----------------|-----------------|-----------------|------|
| F 1  | 39.034          | 1300.775        | 1295.435        | 0.672           | 1295.099        | F(3) |
| D 2  | 77.376          | 1268.424        | 1263.084        | 0.672           | 1262.748        | D(4) |
| F 3  | 199.727         | 1230.081        | 1224.742        | 0.672           | 1224.406        | F(3) |
| A 4  | 134.406         | 1197.730        | <b>1192.391</b> | 0.672           | <b>1192.055</b> | A(3) |
| K 5  | 176.104         | 1174.051        | <b>1168.712</b> | <b>1169.048</b> | 1168.376        | K(3) |
| S 6  | 205.215         | 1134.353        | 1129.014        | <b>1134.349</b> | 1128.678        | S(6) |
| A 7  | 228.794         | 1102.342        | 1097.003        | <b>1097.339</b> | 1096.667        | A(2) |
| F 8  | 261.145         | <b>1078.663</b> | 1073.324        | <b>1073.660</b> | 1072.988        | F(2) |
| A 9  | 284.634         | 1046.312        | 1040.973        | <b>1041.309</b> | 1040.637        | A(2) |
| F 10 | 317.175         | 1022.633        | 1017.294        | 1017.630        | 1016.958        | F(2) |
| K 11 | 359.873         | 990.283         | 984.943         | <b>985.279</b>  | 984.607         | K(2) |
| K 12 | 402.572         | <b>947.584</b>  | 942.245         | 942.581         | 941.909         | K(4) |
| G 13 | 421.519         | 904.935         | <b>899.546</b>  | <b>899.882</b>  | 899.210         | G(2) |
| S 14 | 450.589         | <b>885.879</b>  | 880.539         | 880.875         | 880.203         | S(2) |
| K 15 | 507.201         | 856.968         | <b>851.528</b>  | <b>851.864</b>  | <b>851.193</b>  | K(2) |
| K 16 | 549.990         | 800.156         | <b>794.827</b>  | <b>795.163</b>  | 794.491         | K(2) |
| A 17 | 673.669         | 757.466         | 752.127         | 752.464         | 751.792         | A(1) |
| V 18 | 698.093         | 733.789         | 728.449         | 728.785         | 728.113         | V(1) |
| T 19 | 640.374         | 700.766         | <b>695.426</b>  | 695.762         | <b>695.091</b>  | T(1) |
| K 20 | 683.072         | <b>667.083</b>  | <b>661.744</b>  | <b>662.080</b>  | 661.408         | K(1) |
| V 21 | 718.095         | 624.385         | <b>619.046</b>  | <b>619.382</b>  | <b>618.710</b>  | V(1) |
| Q 22 | <b>758.781</b>  | 591.362         | <b>586.023</b>  | <b>586.359</b>  | 585.687         | Q(4) |
| K 23 | <b>801.480</b>  | 548.676         | 543.337         | <b>543.673</b>  | 543.001         | K(3) |
| K 24 | <b>844.178</b>  | 505.975         | 500.636         | 500.974         | 500.302         | K(2) |
| D 25 | <b>882.520</b>  | 463.280         | 457.940         | 458.276         | 457.604         | D(1) |
| G 26 | 901.527         | 424.937         | 419.598         | 419.934         | 419.262         | G(1) |
| K 27 | <b>944.226</b>  | 405.930         | 400.590         | 400.926         | 400.255         | K(9) |
| K 28 | <b>985.924</b>  | 363.232         | 357.892         | 358.228         | 357.556         | K(8) |
| R 29 | <b>1038.958</b> | 320.533         | 315.194         | 315.530         | 314.858         | R(7) |
| K 30 | <b>1081.656</b> | 288.500         | 283.160         | 283.496         | 282.824         | K(6) |
| R 31 | <b>1133.690</b> | 225.801         | 220.462         | 220.798         | 220.126         | R(5) |
| S 32 | 1182.700        | 173.768         | 168.428         | 168.764         | 168.092         | S(4) |
| K 33 | <b>1214.734</b> | 144.757         | 139.417         | 139.753         | 139.082         | K(3) |
| K 34 | 1257.433        | 92.723          | 87.384          | 87.720          | 87.048          | K(2) |
| E 35 | 1300.447        | 50.025          | 44.685          | 45.021          | 44.349          | E(1) |

# sp | Q64525 | H2B2B\_MOUSE

PDKASAPAPKKGSK<sup>Acetyl</sup><sub>42.01</sub> KAVTKVQKKDGKKRKRSRKE

- ▶ fragmentation table for charge state 4+
- ▶ specType=etd
- ▶ score=42.92
- ▶ F113278.dat
- ▶ query=q68539.p1
- ▶ precursor=650.891620
- ▶ chargePrecursor=6
- ▶ itol=0.5

| AA    | c              | y              | z+1            | z+2            | z              | AA    |
|-------|----------------|----------------|----------------|----------------|----------------|-------|
| P[1]  | 29.527         | 975.833        | <b>971.828</b> | 0.735          | 971.376        | P[15] |
| D[2]  | 58.284         | 951.570        | <b>947.565</b> | 0.735          | <b>947.313</b> | D[14] |
| P[3]  | 82.547         | <b>922.813</b> | 918.808        | 0.735          | 918.556        | P[13] |
| A[4]  | 100.306        | 898.550        | 894.545        | 0.735          | 894.293        | A[12] |
| K[5]  | 132.430        | 880.790        | 876.786        | 877.038        | 876.534        | K[11] |
| S[6]  | 154.088        | 848.767        | <b>844.762</b> | <b>845.014</b> | <b>844.510</b> | S[30] |
| A[7]  | 171.847        | 827.009        | <b>823.004</b> | <b>823.256</b> | <b>822.752</b> | A[29] |
| P[8]  | 196.111        | <b>809.249</b> | 805.243        | 805.497        | 804.993        | P[28] |
| A[9]  | 213.870        | 784.986        | <b>780.982</b> | <b>781.233</b> | 780.730        | A[27] |
| T[10] | 238.133        | <b>767.221</b> | 763.222        | <b>763.474</b> | 762.970        | T[26] |
| K[11] | 270.157        | 742.964        | <b>738.959</b> | <b>739.211</b> | <b>738.707</b> | K[25] |
| K[12] | 302.180        | 710.940        | <b>706.935</b> | <b>707.187</b> | 706.683        | K[24] |
| G[13] | 316.436        | 678.916        | <b>674.912</b> | <b>675.164</b> | <b>674.660</b> | G[23] |
| S[14] | 338.194        | 664.661        | 660.656        | 660.908        | 660.404        | S[22] |
| K[15] | 380.720        | 642.903        | 638.898        | 639.150        | 638.646        | K[21] |
| K[16] | 412.744        | <b>600.376</b> | 596.372        | 596.624        | 596.120        | K[20] |
| A[17] | 430.503        | 568.353        | 564.348        | 564.600        | 564.096        | A[19] |
| V[18] | 455.270        | 550.593        | 546.589        | 546.841        | 546.337        | V[18] |
| T[19] | 480.532        | <b>525.826</b> | 521.822        | 522.074        | 521.570        | T[17] |
| K[20] | 512.556        | 500.564        | 496.560        | 496.812        | 496.308        | K[16] |
| V[21] | <b>537.323</b> | 468.541        | 464.536        | 464.788        | 464.284        | V[15] |
| Q[22] | 569.338        | 443.774        | 439.769        | 440.021        | 439.517        | Q[14] |
| K[23] | 601.362        | 411.759        | 407.754        | 408.006        | 407.502        | K[13] |
| K[24] | 633.385        | 379.735        | 375.731        | 375.982        | 375.479        | K[12] |
| D[25] | <b>662.142</b> | 347.711        | 343.707        | 343.959        | 343.455        | D[11] |
| G[26] | 676.397        | 318.955        | 314.950        | 315.202        | 314.698        | G[10] |
| K[27] | 708.421        | 304.699        | 300.695        | 300.947        | 300.443        | K[9]  |
| K[28] | 740.445        | 272.676        | 268.671        | 268.923        | 268.419        | K[8]  |
| K[29] | 779.470        | 240.652        | 236.647        | 236.899        | 236.395        | K[7]  |
| K[30] | <b>811.494</b> | 201.627        | 197.622        | 197.874        | 197.370        | K[6]  |
| R[31] | <b>850.519</b> | 169.603        | 165.598        | 165.850        | 165.346        | R[5]  |
| S[32] | <b>872.277</b> | 130.578        | 126.573        | 126.825        | 126.321        | S[4]  |
| R[33] | <b>911.302</b> | 108.620        | 104.615        | 105.067        | 104.563        | R[3]  |
| K[34] | <b>943.326</b> | 69.794         | 65.790         | 66.042         | 65.538         | K[2]  |
| E[35] | 975.587        | 37.771         | 33.766         | 34.018         | 33.514         | E[1]  |

# sp | Q64525 | H2B2B\_MOUSE

PDKASAPAPKKGSK<sup>Acetyl</sup><sub>42.01</sub> KAVTKVQKKDGGKRRKRSRKE

- ▶ fragmentation table for charge state 5+
- ▶ specType=etd
- ▶ score=42.92
- ▶ F113278.dat
- ▶ query=q68539\_p1
- ▶ precursor=650.891620
- ▶ chargePrecursor=6
- ▶ itol=0.5

| AA    | c       | y              | z+1            | z+2            | z              | AA    |
|-------|---------|----------------|----------------|----------------|----------------|-------|
| P[1]  | 23.821  | 780.898        | <b>777.664</b> | 0.806          | <b>777.662</b> | P[35] |
| D[2]  | 46.829  | 761.457        | 758.253        | 0.806          | 758.052        | D[34] |
| P[3]  | 66.239  | 738.452        | 735.248        | 0.806          | 735.046        | P[33] |
| A[4]  | 80.447  | 719.041        | 715.837        | 0.806          | 715.636        | A[32] |
| K[5]  | 106.065 | 704.834        | 701.630        | 701.832        | 701.428        | K[31] |
| S[6]  | 123.472 | 679.215        | <b>676.011</b> | 676.213        | <b>675.809</b> | S[30] |
| A[7]  | 137.679 | <b>661.808</b> | 658.605        | 658.806        | 658.403        | A[29] |
| P[8]  | 157.090 | 647.601        | 644.397        | 644.599        | 644.196        | P[28] |
| A[9]  | 171.297 | 628.190        | <b>624.987</b> | <b>625.188</b> | <b>624.785</b> | A[27] |
| P[10] | 180.708 | 613.983        | <b>610.779</b> | 610.981        | <b>610.578</b> | P[26] |
| K[11] | 216.327 | 594.572        | 591.369        | 591.570        | 591.167        | K[25] |
| K[12] | 241.946 | 568.953        | 565.750        | 565.951        | 565.548        | K[24] |
| G[13] | 251.350 | 543.334        | 540.131        | 540.332        | 539.929        | G[23] |
| S[14] | 270.757 | 531.930        | 528.726        | 528.928        | 528.525        | S[22] |
| K[15] | 304.778 | 514.524        | 511.320        | 511.522        | 511.118        | K[21] |
| K[16] | 330.397 | 480.503        | 477.299        | 477.500        | 477.097        | K[20] |
| A[17] | 344.604 | 454.884        | 451.680        | 451.881        | 451.478        | A[19] |
| V[18] | 364.418 | 440.676        | 437.472        | 437.674        | 437.271        | V[18] |
| T[19] | 384.627 | 420.863        | 417.659        | 417.860        | 417.457        | T[17] |
| K[20] | 410.246 | 400.553        | 397.449        | 397.651        | 397.248        | K[16] |
| V[21] | 430.060 | 375.034        | 371.830        | 372.032        | 371.629        | V[15] |
| Q[22] | 455.672 | 355.220        | 352.017        | 352.218        | 351.815        | Q[14] |
| K[23] | 481.291 | 329.609        | 326.405        | 326.606        | 326.203        | K[13] |
| K[24] | 506.910 | 303.990        | 300.786        | 300.987        | 300.584        | K[12] |
| D[25] | 529.915 | 278.371        | 275.167        | 275.368        | 274.965        | D[11] |
| G[26] | 541.319 | 255.365        | 252.161        | 252.363        | 251.960        | G[10] |
| K[27] | 566.938 | 243.961        | 240.757        | 240.959        | 240.556        | K[9]  |
| K[28] | 592.557 | 218.342        | 215.138        | 215.340        | 214.937        | K[8]  |
| R[29] | 623.778 | 192.723        | 189.519        | 189.721        | 189.318        | R[7]  |
| K[30] | 649.397 | 164.503        | 158.299        | 158.501        | 158.097        | K[6]  |
| R[31] | 680.617 | 139.884        | 132.680        | 132.882        | 132.478        | R[5]  |
| S[12] | 698.023 | 104.664        | 101.460        | 101.661        | 101.258        | S[4]  |
| R[33] | 729.243 | 87.257         | 84.053         | 84.255         | 83.852         | R[3]  |
| K[34] | 754.862 | 56.037         | 52.833         | 53.035         | 52.632         | K[2]  |
| E[35] | 780.671 | 30.418         | 27.214         | 27.416         | 27.013         | E[1]  |

# sp | Q64525 | H2B2B\_MOUSE

PDKASAPAPKK Acetyl 42.01 GSK Acetyl 42.01 KAVTKVQKKDGGKRRSRKE

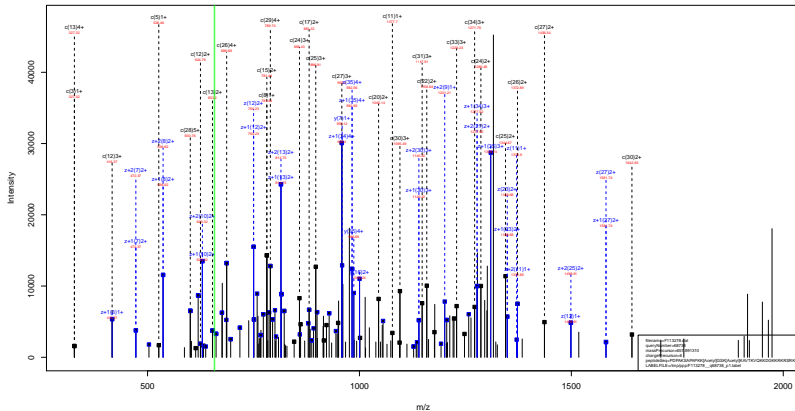

# sp | Q64525 | H2B2B\_MOUSE

PDKASAPAPKK Acetyl 42.01 GSK Acetyl 42.01 KAVTKVQKKDGKKRKRSRKE

- ▶ fragmentation table for charge state 1+
- ▶ specType=etd
- ▶ score=39.08
- ▶ F113278.dat
- ▶ query=q68738.p1
- ▶ precursor=657.891310
- ▶ chargePrecursor=6
- ▶ itol=0.5

| AA  | c               | y              | z+1            | z+2             | z               | AA  |
|-----|-----------------|----------------|----------------|-----------------|-----------------|-----|
| P1  | 115.087         | 3942.525       | 3926.301       | 0.000           | 3925.291        | P35 |
| D2  | 230.114         | 3845.267       | 3829.248       | 0.000           | 3828.241        | D34 |
| P3  | <b>327.166</b>  | 3730.240       | 3714.222       | 0.000           | 3713.214        | P33 |
| A4  | 398.203         | 3633.187       | 3617.169       | 0.000           | 3616.161        | A32 |
| K5  | <b>538.298</b>  | 3502.150       | 3486.132       | 3587.130        | 3545.124        | K31 |
| S6  | <b>613.130</b>  | 3434.055       | 3418.037       | 3419.085        | 3417.029        | S30 |
| A7  | 684.388         | 3347.023       | 3331.005       | 3332.012        | 3329.997        | A29 |
| F8  | <b>781.420</b>  | 3275.985       | 3259.968       | 3280.975        | 3258.960        | F28 |
| A9  | 852.457         | 3178.933       | 3162.915       | 3163.923        | 3161.907        | A27 |
| P10 | <b>949.510</b>  | 3107.896       | 3091.878       | 3092.885        | 3090.870        | P26 |
| K11 | <b>1077.895</b> | 3030.844       | 2994.825       | 2995.833        | 2993.811        | K25 |
| K12 | <b>1247.711</b> | 2982.740       | 2966.720       | 2967.728        | 2965.721        | K24 |
| G13 | 1304.732        | 2712.643       | 2696.624       | 2697.632        | 2695.611        | G23 |
| S14 | 1391.764        | 2655.622       | 2639.603       | 2640.611        | 2638.595        | S22 |
| K15 | 1561.870        | 2568.590       | 2552.571       | 2553.579        | 2551.561        | K21 |
| K16 | 1689.905        | 2398.484       | 2382.465       | 2383.473        | 2381.455        | K20 |
| A17 | 1761.002        | 2270.389       | 2254.370       | 2255.378        | 2253.361        | A19 |
| V18 | 1860.078        | 2199.352       | 2183.333       | 2184.341        | 2182.323        | V18 |
| T19 | 1961.118        | 2100.284       | 2084.265       | 2085.273        | 2083.257        | T17 |
| K20 | 2089.213        | 1999.238       | 1983.219       | 1984.225        | 1982.208        | K16 |
| V21 | 2188.281        | 1871.141       | 1855.122       | 1856.130        | 1854.114        | V15 |
| Q22 | 2316.340        | 1772.073       | 1756.054       | 1757.062        | 1755.046        | Q14 |
| K23 | 2444.435        | 1644.014       | 1627.995       | 1629.003        | 1627.987        | K13 |
| K24 | 2572.530        | 1515.919       | 1499.900       | 1500.908        | <b>1498.892</b> | K12 |
| D25 | 2687.557        | 1387.824       | 1371.805       | <b>1372.813</b> | <b>1370.798</b> | D11 |
| G26 | 2744.578        | 1272.797       | 1256.778       | <b>1257.786</b> | 1255.771        | G10 |
| K27 | 2872.673        | 1175.716       | 1159.697       | <b>1200.765</b> | 1168.749        | K10 |
| K28 | 3000.768        | 1087.681       | 1071.662       | 1072.670        | 1070.654        | K9  |
| K29 | 3156.869        | <b>959.586</b> | 943.567        | <b>944.575</b>  | 942.559         | K7  |
| R30 | 3284.954        | <b>803.485</b> | 787.466        | 788.474         | <b>786.458</b>  | R10 |
| R31 | 3441.065        | <b>675.390</b> | 659.371        | 660.379         | 658.361         | R5  |
| S32 | 3528.097        | 519.289        | <b>503.270</b> | 504.278         | 502.262         | S4  |
| R33 | 3684.198        | 432.257        | <b>416.238</b> | 417.246         | 415.230         | R3  |
| K34 | 3812.293        | 276.155        | 260.137        | 261.144         | 259.129         | K2  |
| E35 | 3941.336        | 148.060        | 132.042        | 133.050         | 131.034         | E1  |

# sp | Q64525 | H2B2B\_MOUSE

PDKAKSAPAPKK Acetyl 42.01 GSK Acetyl 42.01 KAVTKVQKKDKGKRRKRSRKE

- ▶ fragmentation table for charge state 2+
- ▶ specType=etd
- ▶ score=39.08
- ▶ F113278.dat
- ▶ query=q68738.p1
- ▶ precursor=657.891310
- ▶ chargePrecursor=6
- ▶ itol=0.5

| AA | c  | y               | z+1             | z+2             | z               | AA              |       |
|----|----|-----------------|-----------------|-----------------|-----------------|-----------------|-------|
| F  | 1  | 58.047          | 1071.654        | 1063.654        | 0.504           | 1063.150        | F[29] |
| D  | 2  | 135.500         | 1023.137        | 1015.138        | 0.504           | 1014.624        | D[34] |
| F  | 3  | 164.087         | 1065.624        | 1057.614        | 0.504           | 1057.110        | F[33] |
| A  | 4  | 199.605         | 1017.091        | 1009.088        | 0.504           | 1008.584        | A[32] |
| K  | 5  | 263.653         | 1781.579        | 1773.566        | 1774.073        | 1773.060        | K[31] |
| S  | 6  | 307.169         | 1747.533        | 1739.522        | 1740.026        | 1739.010        | S[30] |
| A  | 7  | 352.069         | 1074.015        | 1066.008        | 1066.510        | 1065.500        | A[29] |
| F  | 8  | 391.214         | 1038.497        | 1030.487        | 1030.991        | 1029.981        | F[28] |
| A  | 9  | 436.732         | 1589.970        | <b>1581.961</b> | 1582.465        | <b>1581.457</b> | A[27] |
| F  | 10 | 475.250         | 1554.452        | 1546.442        | 1546.946        | 1545.930        | F[26] |
| K  | 11 | 507.304         | 1505.925        | 1497.915        | <b>1498.420</b> | 1497.412        | K[25] |
| K  | 12 | <b>634.359</b>  | 1844.878        | 1833.909        | 1834.413        | 1833.395        | K[24] |
| G  | 13 | <b>652.870</b>  | 1336.925        | <b>1348.816</b> | 1349.320        | <b>1348.312</b> | G[23] |
| S  | 14 | <b>696.386</b>  | 1328.314        | 1320.305        | 1320.809        | 1319.801        | S[22] |
| K  | 15 | <b>761.438</b>  | 1284.768        | 1276.760        | <b>1277.263</b> | 1276.260        | K[21] |
| K  | 16 | <b>845.486</b>  | 1309.740        | 1301.736        | <b>1192.740</b> | 1191.252        | K[20] |
| A  | 17 | <b>881.005</b>  | <b>1135.698</b> | <b>1127.689</b> | <b>1128.193</b> | 1127.185        | A[19] |
| V  | 18 | 903.539         | 1100.150        | 1092.140        | 1092.644        | 1091.650        | V[18] |
| T  | 19 | 981.063         | 1050.645        | 1042.636        | 1043.140        | 1042.132        | T[17] |
| K  | 20 | <b>1045.110</b> | <b>1000.122</b> | 992.112         | 992.616         | 991.601         | K[16] |
| V  | 21 | <b>1094.644</b> | 936.074         | <b>928.065</b>  | <b>928.569</b>  | 927.561         | V[15] |
| Q  | 22 | <b>1158.674</b> | 898.540         | <b>878.531</b>  | <b>879.034</b>  | 878.027         | Q[14] |
| R  | 23 | <b>1222.721</b> | <b>822.511</b>  | <b>814.501</b>  | <b>815.005</b>  | 813.999         | R[13] |
| K  | 24 | <b>1286.768</b> | <b>758.463</b>  | <b>750.454</b>  | <b>750.958</b>  | <b>749.950</b>  | K[12] |
| D  | 25 | <b>1344.282</b> | 694.418         | <b>686.406</b>  | <b>686.910</b>  | <b>685.902</b>  | D[11] |
| G  | 26 | <b>1372.793</b> | <b>636.902</b>  | <b>628.893</b>  | <b>629.397</b>  | 628.390         | G[10] |
| K  | 27 | <b>1436.840</b> | 608.391         | <b>600.382</b>  | <b>600.886</b>  | 599.878         | K[9]  |
| K  | 28 | 1505.889        | 444.344         | <b>536.335</b>  | <b>536.839</b>  | 535.831         | K[8]  |
| R  | 29 | 1578.938        | 480.290         | <b>472.287</b>  | <b>472.791</b>  | 471.781         | R[7]  |
| K  | 30 | <b>1642.986</b> | 402.246         | 394.237         | 394.740         | 393.731         | K[6]  |
| R  | 31 | 1721.036        | 338.198         | 330.189         | 330.693         | 329.685         | R[5]  |
| S  | 32 | 1794.552        | 260.148         | 252.139         | 252.642         | 251.635         | S[4]  |
| K  | 33 | 1842.603        | 216.632         | 208.623         | 209.126         | 208.119         | K[3]  |
| K  | 34 | 1908.660        | 138.561         | 130.552         | 131.056         | 130.048         | K[2]  |
| E  | 35 | 1971.172        | 74.534          | 66.524          | 67.028          | 66.021          | E[1]  |

# sp | Q64525 | H2B2B\_MOUSE

PDKAKSAPAPKK <sup>Acetyl</sup>42.01 GSK <sup>Acetyl</sup>42.01 KAVTKVQKKDGKKRKRSRKE

- ▶ fragmentation table for charge state 3+
- ▶ specType=etd
- ▶ score=39.08
- ▶ F113278.dat
- ▶ query=q68738\_p1
- ▶ precursor=657.891310
- ▶ chargePrecursor=6
- ▶ itol=0.5

| AA   | c               | y              | z+1             | z+2             | z               | AA   |
|------|-----------------|----------------|-----------------|-----------------|-----------------|------|
| P 1  | 30.034          | 1314.778       | <b>1309.439</b> | 0.672           | 1309.103        | P 35 |
| D 2  | 77.376          | 1262.427       | <b>1277.088</b> | 0.672           | 1276.752        | D 34 |
| P 3  | 106.727         | 1244.085       | 1238.745        | 0.672           | 1238.409        | P 33 |
| A 4  | 133.408         | 1211.734       | <b>1206.394</b> | 0.672           | <b>1206.058</b> | A 32 |
| K 5  | 176.104         | 1188.055       | 1182.715        | 1183.051        | 1182.379        | K 31 |
| S 6  | 205.115         | 1148.397       | <b>1140.017</b> | <b>1140.353</b> | 1139.681        | S 30 |
| A 7  | 228.794         | 1116.346       | 1111.020        | 1111.343        | 1110.670        | A 29 |
| P 8  | 261.148         | 1092.667       | 1087.327        | 1087.663        | 1086.991        | P 28 |
| A 9  | 284.824         | 1060.316       | 1054.976        | <b>1055.312</b> | 1054.640        | A 27 |
| P 10 | 317.175         | 1036.637       | 1031.297        | 1031.633        | 1030.961        | P 26 |
| K 11 | 359.872         | 1004.286       | 998.946         | 999.282         | 998.611         | K 25 |
| K 12 | <b>416.575</b>  | 981.588        | 976.249         | 976.584         | 975.912         | K 24 |
| G 13 | 435.582         | 954.886        | <b>899.546</b>  | <b>899.882</b>  | 899.210         | G 23 |
| S 14 | 464.593         | 885.879        | 880.539         | <b>880.875</b>  | 880.203         | S 22 |
| K 15 | 521.295         | 856.868        | 851.528         | 851.864         | 851.191         | K 21 |
| K 16 | 563.993         | <b>800.166</b> | <b>794.827</b>  | <b>795.163</b>  | <b>794.491</b>  | K 20 |
| A 17 | 587.872         | 737.468        | 732.128         | 732.464         | 731.792         | A 19 |
| V 18 | 620.669         | 713.789        | 708.449         | 708.785         | 708.111         | V 18 |
| T 19 | 654.377         | 700.766        | 695.426         | <b>695.762</b>  | 695.091         | T 17 |
| K 20 | 697.076         | 667.083        | <b>661.744</b>  | <b>662.080</b>  | <b>661.408</b>  | K 16 |
| V 21 | 730.669         | <b>624.385</b> | <b>619.046</b>  | <b>619.382</b>  | 618.710         | V 15 |
| Q 22 | <b>772.785</b>  | 591.362        | 586.021         | 586.359         | 585.687         | Q 14 |
| K 23 | <b>815.483</b>  | 548.076        | 543.327         | 543.672         | 543.001         | K 13 |
| K 24 | <b>858.181</b>  | 505.078        | 500.639         | 500.974         | 500.302         | K 12 |
| D 25 | <b>896.524</b>  | 463.280        | 457.940         | 458.276         | 457.604         | D 11 |
| G 26 | <b>915.531</b>  | 424.937        | 419.598         | 419.934         | 419.262         | G 10 |
| K 27 | <b>958.229</b>  | 405.930        | 400.590         | 400.926         | 400.255         | K 9  |
| K 28 | <b>1000.928</b> | 363.232        | 357.892         | 358.228         | 357.556         | K 8  |
| R 29 | 1057.961        | 320.533        | 315.194         | 315.530         | 314.858         | R 7  |
| K 30 | <b>1095.660</b> | 268.520        | 263.180         | 263.496         | 262.824         | K 6  |
| R 31 | <b>1147.693</b> | 225.801        | 220.462         | 220.798         | 220.126         | R 5  |
| S 32 | <b>1176.704</b> | 173.768        | 168.428         | 168.764         | 168.092         | S 4  |
| R 33 | <b>1228.738</b> | 144.757        | 139.417         | 139.753         | 139.082         | R 3  |
| K 34 | <b>1271.436</b> | 92.721         | 87.381          | 87.720          | 87.046          | K 2  |
| E 35 | 1314.420        | 50.025         | 44.685          | 45.021          | 44.349          | E 1  |

# sp | Q64525 | H2B2B\_MOUSE

PDKAKSAPAPKK Acetyl 42.01 GSK Acetyl 42.01 KAVTKVQKKDGGKRRKRSRKE

- ▶ fragmentation table for charge state 4+
- ▶ specType=etd
- ▶ score=39.08
- ▶ F113278.dat
- ▶ query=q68738.p1
- ▶ precursor=657.891310
- ▶ chargePrecursor=6
- ▶ itol=0.5

| AA    | c              | y              | z+1            | z+2            | z              | AA    |
|-------|----------------|----------------|----------------|----------------|----------------|-------|
| P[1]  | 29.527         | <b>986.135</b> | <b>982.331</b> | 0.755          | <b>982.079</b> | P[15] |
| D[2]  | 58.284         | 952.072        | <b>958.068</b> | 0.755          | 957.810        | D[14] |
| P[3]  | 82.547         | 933.310        | 929.311        | 0.755          | 929.059        | P[13] |
| A[4]  | 100.306        | 909.052        | 905.048        | 0.755          | 904.799        | A[12] |
| K[5]  | 132.430        | <b>891.293</b> | <b>887.288</b> | <b>887.540</b> | <b>887.036</b> | K[11] |
| S[6]  | 154.088        | <b>859.269</b> | 855.265        | 851.517        | 851.013        | S[30] |
| A[7]  | 171.847        | 837.511        | 833.507        | 833.759        | 833.255        | A[29] |
| P[8]  | 196.111        | 819.752        | <b>815.747</b> | <b>815.999</b> | <b>815.495</b> | P[28] |
| A[9]  | 213.870        | 795.489        | 791.484        | 791.736        | 791.232        | A[27] |
| T[10] | 238.133        | 777.730        | 773.725        | 773.977        | <b>773.473</b> | T[26] |
| K[11] | 270.157        | 753.466        | 749.462        | 749.714        | 749.210        | K[25] |
| K[12] | 312.683        | 721.443        | <b>717.438</b> | <b>717.690</b> | 717.186        | K[24] |
| G[13] | <b>326.938</b> | 678.916        | 674.912        | <b>675.164</b> | 674.660        | G[23] |
| S[14] | 348.696        | 654.661        | 650.656        | 650.908        | 650.404        | S[22] |
| K[15] | 391.223        | 642.903        | 638.898        | 639.150        | 638.646        | K[21] |
| K[16] | 423.247        | <b>600.376</b> | 596.372        | 596.624        | 596.120        | K[20] |
| A[17] | 441.006        | 568.353        | 564.348        | 564.600        | 564.096        | A[19] |
| V[18] | 465.773        | 550.593        | 546.589        | 546.841        | 546.337        | V[18] |
| T[19] | 481.036        | 525.626        | 521.622        | 522.074        | 521.570        | T[17] |
| V[20] | 523.059        | 500.564        | 496.560        | 496.812        | 496.308        | K[16] |
| V[21] | 547.826        | 468.541        | 464.536        | 464.788        | 464.284        | V[15] |
| Q[22] | 579.840        | 443.774        | 439.769        | 440.021        | 439.517        | Q[14] |
| K[23] | 611.864        | 411.759        | 407.754        | 408.006        | 407.502        | K[13] |
| K[24] | 643.888        | 379.735        | 375.731        | 375.982        | 375.479        | K[12] |
| D[25] | 672.645        | 347.711        | 343.707        | 343.959        | 343.455        | D[11] |
| G[26] | <b>686.900</b> | 318.955        | 314.950        | 315.202        | 314.698        | G[10] |
| K[27] | 718.924        | 304.699        | 300.695        | 300.947        | 300.443        | K[9]  |
| K[28] | <b>750.947</b> | 272.676        | 268.671        | 268.923        | 268.419        | K[8]  |
| K[29] | <b>789.373</b> | 240.652        | 236.647        | 236.899        | 236.395        | K[7]  |
| K[30] | <b>821.996</b> | 201.627        | 197.622        | 197.874        | 197.370        | K[6]  |
| R[31] | <b>861.022</b> | 169.603        | 165.598        | 165.850        | 165.346        | R[5]  |
| S[32] | 882.780        | 138.578        | 134.573        | 134.825        | 134.321        | S[4]  |
| R[33] | <b>921.805</b> | 108.620        | 104.615        | 104.867        | 104.363        | R[3]  |
| K[34] | 953.829        | 69.794         | 65.790         | 66.042         | 65.538         | K[2]  |
| E[35] | 986.089        | 37.771         | 33.766         | 34.018         | 33.514         | E[1]  |



# sp | Q64525 | H2B2B\_MOUSE

PDKAKSAPAPKK Acetyl 42.01 GSK Acetyl 42.01 KAVTKVQKKDGKKRKRSRKE

- ▶ fragmentation table for charge state 5+
- ▶ specType=etd
- ▶ score=39.08
- ▶ F113278.dat
- ▶ query=q68738.p1
- ▶ precursor=657.891310
- ▶ chargePrecursor=6
- ▶ itol=0.5

| AA    | c              | y              | z+1            | z+2            | z              | AA    |
|-------|----------------|----------------|----------------|----------------|----------------|-------|
| P[1]  | 23.823         | <b>789.270</b> | <b>786.056</b> | 0.806          | 785.995        | P[15] |
| D[2]  | 46.829         | 709.859        | <b>766.656</b> | 0.806          | <b>766.454</b> | D[14] |
| P[3]  | 56.239         | 746.854        | 743.650        | 0.806          | 743.449        | P[13] |
| A[4]  | 90.447         | 727.443        | 724.240        | 0.806          | 724.038        | A[12] |
| K[5]  | 106.065        | 713.236        | 710.032        | 710.234        | 709.831        | K[11] |
| S[6]  | 123.472        | 687.617        | 684.413        | 684.615        | 684.212        | S[30] |
| A[7]  | 137.679        | 670.210        | 667.007        | 667.208        | 666.805        | A[29] |
| P[8]  | 157.090        | 656.003        | <b>652.799</b> | <b>653.001</b> | 652.598        | P[28] |
| A[9]  | 171.297        | 636.593        | 633.389        | 633.590        | 633.187        | A[27] |
| T[10] | 180.708        | 622.385        | <b>619.181</b> | <b>619.383</b> | <b>618.980</b> | T[26] |
| K[11] | 218.127        | 602.975        | 599.771        | 599.972        | 599.569        | K[25] |
| K[12] | 250.348        | 577.356        | 574.152        | 574.353        | 573.950        | K[24] |
| G[13] | 261.762        | 543.134        | 540.131        | 540.332        | 539.929        | G[23] |
| S[14] | 279.159        | 531.930        | 528.726        | 528.928        | 528.525        | S[22] |
| K[15] | 313.180        | 514.524        | 511.320        | 511.522        | 511.118        | K[21] |
| K[16] | 338.799        | 480.503        | 477.299        | 477.500        | 477.097        | K[20] |
| A[17] | 353.006        | 454.884        | 451.680        | 451.881        | 451.478        | A[19] |
| V[18] | 372.820        | 440.676        | 437.472        | 437.674        | 437.271        | V[18] |
| I[19] | 383.229        | 420.863        | 417.659        | 417.860        | 417.457        | I[17] |
| L[20] | 418.048        | 400.553        | 397.449        | 397.651        | 397.248        | L[16] |
| V[21] | 438.462        | 375.034        | 371.830        | 372.032        | 371.629        | V[15] |
| Q[22] | 464.074        | 355.220        | 352.017        | 352.218        | 351.815        | Q[14] |
| K[23] | 489.693        | 329.609        | 326.405        | 326.606        | 326.203        | K[13] |
| K[24] | 515.312        | 303.990        | 300.786        | 300.987        | 300.584        | K[12] |
| D[25] | 538.317        | 278.371        | 275.167        | 275.368        | 274.965        | D[11] |
| G[26] | 549.721        | 255.365        | 252.161        | 252.363        | 251.960        | G[10] |
| K[27] | 575.340        | 243.961        | 240.757        | 240.959        | 240.556        | K[9]  |
| K[28] | <b>600.959</b> | 218.342        | 215.138        | 215.340        | 214.937        | K[8]  |
| R[29] | <b>632.180</b> | 192.723        | 189.519        | 189.721        | 189.318        | R[1]  |
| K[30] | 657.799        | 161.503        | 158.299        | 158.501        | 158.097        | K[0]  |
| R[31] | 689.019        | 135.884        | 132.680        | 132.882        | 132.478        | R[9]  |
| S[32] | 706.425        | 104.664        | 101.460        | 101.661        | 101.258        | S[4]  |
| R[33] | 737.645        | 87.257         | 84.053         | 84.255         | 83.852         | R[3]  |
| K[34] | 763.264        | 56.037         | 52.833         | 53.035         | 52.632         | K[2]  |
| E[35] | 789.073        | 30.418         | 27.214         | 27.416         | 27.013         | E[1]  |

# sp | Q9D2U9 | H2B3A\_MOUSE

PEPSRSTPAPKK Acetyl GSKKAITKAQKKDGKKRKRGRKE  
42.01

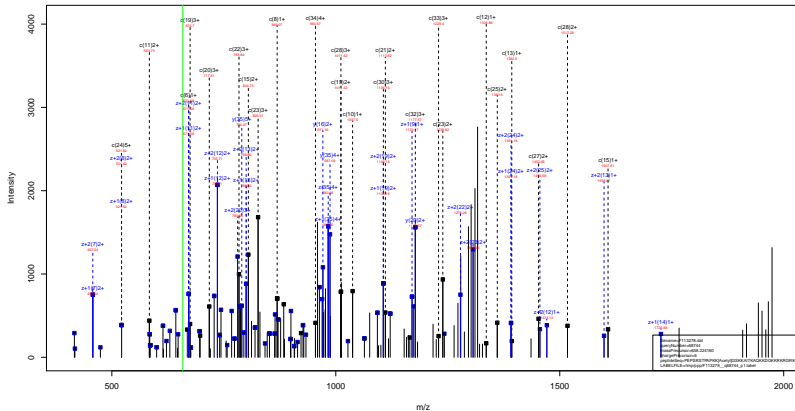

# sp | Q9D2U9 | H2B3A\_MOUSE

PEPSRSTPAPKK <sup>Acetyl</sup><sub>42.01</sub> GSKKAITKAQKKDGKKRKRGRKE

- ▶ fragmentation table for charge state 1+
- ▶ specType=etd
- ▶ score=74.59
- ▶ F113278.dat
- ▶ query=q68744.p1
- ▶ precursor=658.224160
- ▶ chargePrecursor=6
- ▶ itol=0.5

| AA   | c               | y               | z+1             | z+2             | z        | AA   |
|------|-----------------|-----------------|-----------------|-----------------|----------|------|
| P11  | 115.087         | 3044.310        | 3028.292        | 0.000           | 3027.284 | P135 |
| E12  | 244.129         | 3847.258        | 3831.239        | 0.000           | 3830.231 | E134 |
| F13  | 341.182         | 3718.215        | 3702.196        | 0.000           | 3701.188 | F133 |
| S14  | 428.214         | 3021.162        | 3005.144        | 0.000           | 3004.136 | S132 |
| R15  | <b>584.315</b>  | 3534.130        | 3518.112        | 3510.110        | 3517.104 | R131 |
| S16  | <b>671.347</b>  | 3378.029        | 3362.010        | 3353.018        | 3361.020 | S130 |
| T17  | 772.395         | 3290.997        | 3274.978        | 3275.986        | 3273.971 | T129 |
| P18  | <b>869.448</b>  | 3189.940        | 3173.921        | 3174.939        | 3172.921 | P128 |
| A19  | 960.485         | 3092.897        | 3076.878        | 3077.886        | 3075.870 | A127 |
| P110 | <b>1037.537</b> | 3021.860        | 3005.841        | 3006.849        | 3004.831 | P126 |
| K111 | <b>1105.632</b> | 2924.807        | 2908.788        | 2909.796        | 2907.780 | K125 |
| R112 | <b>1335.738</b> | 2796.711        | 2780.693        | 2781.701        | 2779.685 | R124 |
| G113 | <b>1392.759</b> | 2626.606        | 2610.588        | 2611.595        | 2609.580 | G123 |
| S114 | 1479.791        | 2569.585        | 2553.566        | 2554.574        | 2552.558 | S122 |
| K115 | <b>1667.886</b> | 2482.531        | 2466.514        | 2467.522        | 2465.506 | K121 |
| K116 | 1735.981        | 2354.450        | 2338.430        | 2339.447        | 2337.431 | K120 |
| A117 | 1807.218        | 2226.363        | 2210.344        | 2211.352        | 2209.336 | A119 |
| I118 | 1929.103        | 2155.326        | 2139.307        | 2140.315        | 2138.300 | I118 |
| T119 | 2021.150        | 2042.242        | 2026.223        | 2027.231        | 2025.215 | T117 |
| K120 | 2149.245        | 1941.194        | 1925.175        | 1926.183        | 1924.168 | K116 |
| A121 | 2220.282        | 1813.099        | 1797.080        | 1798.088        | 1796.073 | A115 |
| Q122 | 2348.341        | 1742.062        | <b>1726.043</b> | 1727.051        | 1725.035 | Q114 |
| R123 | 2476.436        | 1614.003        | 1597.985        | <b>1598.993</b> | 1596.977 | R113 |
| K124 | 2604.531        | 1485.950        | 1469.930        | <b>1470.938</b> | 1468.924 | K112 |
| D125 | 2719.558        | 1357.813        | 1341.795        | 1342.803        | 1340.787 | D111 |
| G126 | 2776.579        | <b>1242.787</b> | 1226.768        | 1227.776        | 1225.760 | G110 |
| K127 | 2904.674        | 1185.765        | <b>1169.746</b> | 1170.754        | 1168.739 | K109 |
| K128 | 3032.769        | 1057.610        | 1041.591        | 1042.600        | 1040.584 | K108 |
| R129 | 3168.870        | 929.575         | 913.556         | <b>914.564</b>  | 912.549  | R107 |
| K130 | 3316.965        | <b>773.474</b>  | <b>757.455</b>  | 758.463         | 756.447  | K106 |
| R131 | 3473.066        | 645.470         | <b>629.360</b>  | 630.368         | 628.353  | R105 |
| G132 | 3530.088        | 499.478         | 473.259         | <b>474.267</b>  | 472.251  | G104 |
| R133 | 3686.189        | 432.257         | <b>416.238</b>  | <b>417.246</b>  | 415.230  | R103 |
| K134 | 3814.284        | 276.155         | 260.137         | 261.144         | 259.129  | K102 |
| E135 | 3943.326        | 148.050         | 132.032         | 133.040         | 131.024  | E101 |

# sp | Q9D2U9 | H2B3A\_MOUSE

PEPSRSTPAPKK <sup>Acetyl</sup><sub>42.01</sub> GSKKAITKAQKKDGKKRKRGRKE

- ▶ fragmentation table for charge state 2+
- ▶ specType=etd
- ▶ score=74.59
- ▶ F113278.dat
- ▶ query=q68744.p1
- ▶ precursor=658.224160
- ▶ chargePrecursor=6
- ▶ itol=0.5

| AA   | c               | y               | z+1             | z+2             | z              | AA   |
|------|-----------------|-----------------|-----------------|-----------------|----------------|------|
| P 1  | 58.067          | 1972.059        | 1954.640        | 0.504           | 1964.146       | P 35 |
| E 2  | 122.568         | 1924.132        | 1916.123        | 0.504           | 1915.019       | E 34 |
| F 3  | 171.095         | 1859.611        | 1851.602        | 0.504           | 1851.098       | F 33 |
| S 4  | 214.611         | 1811.085        | 1803.075        | 0.504           | 1802.572       | S 32 |
| R 5  | 262.661         | 1767.569        | 1759.559        | 1.780           | 1759.056       | R 31 |
| S 6  | 336.377         | 1699.513        | 1691.503        | 1.882           | 1691.005       | S 30 |
| T 7  | 386.701         | 1646.002        | 1637.993        | 1638.497        | 1637.489       | T 29 |
| P 8  | 435.227         | 1595.478        | 1587.469        | 1587.973        | 1586.965       | P 28 |
| A 9  | 470.746         | 1546.957        | 1538.943        | 1539.447        | 1538.439       | A 27 |
| P 10 | 519.272         | 1511.433        | 1503.424        | 1503.928        | 1502.920       | P 26 |
| K 11 | <b>583.320</b>  | 1462.907        | 1454.898        | <b>1455.402</b> | 1454.394       | K 25 |
| R 12 | <b>608.373</b>  | 1398.086        | <b>1390.050</b> | <b>1391.554</b> | 1390.546       | R 24 |
| G 13 | <b>696.883</b>  | 1313.807        | 1305.797        | <b>1306.301</b> | 1305.294       | G 23 |
| S 14 | <b>740.399</b>  | 1285.206        | 1277.197        | <b>1277.791</b> | 1276.783       | S 22 |
| K 15 | <b>804.447</b>  | 1241.786        | 1233.771        | 1234.275        | 1233.267       | K 21 |
| K 16 | 868.494         | <b>1177.733</b> | <b>1169.723</b> | <b>1170.227</b> | 1169.219       | K 20 |
| A 17 | 904.013         | 1113.663        | <b>1105.676</b> | <b>1106.180</b> | 1105.172       | A 19 |
| I 18 | 969.555         | 1079.161        | 1070.157        | 1070.661        | 1069.653       | I 18 |
| T 19 | <b>1011.079</b> | 1021.025        | 1013.015        | 1014.119        | 1013.111       | T 17 |
| K 20 | 1075.126        | <b>971.101</b>  | <b>963.091</b>  | <b>963.595</b>  | 962.587        | K 16 |
| A 21 | <b>1110.645</b> | <b>907.053</b>  | <b>899.044</b>  | <b>899.548</b>  | <b>898.540</b> | A 15 |
| Q 22 | 1174.674        | <b>871.535</b>  | <b>863.525</b>  | <b>864.029</b>  | <b>863.021</b> | Q 14 |
| R 23 | <b>1238.722</b> | 797.205         | <b>799.456</b>  | <b>800.960</b>  | 799.952        | R 13 |
| K 24 | 1302.769        | <b>743.450</b>  | <b>735.440</b>  | <b>735.952</b>  | 734.945        | K 12 |
| D 25 | <b>1360.283</b> | 679.410         | <b>671.401</b>  | <b>671.905</b>  | 670.897        | D 11 |
| G 26 | 1386.793        | <b>621.897</b>  | <b>613.888</b>  | <b>614.391</b>  | 613.384        | G 10 |
| K 27 | <b>1452.841</b> | 593.389         | <b>585.377</b>  | <b>585.881</b>  | <b>584.873</b> | K 9  |
| K 28 | <b>1516.888</b> | 539.339         | <b>521.329</b>  | <b>521.833</b>  | 520.825        | K 8  |
| R 29 | 1584.939        | 485.291         | <b>457.282</b>  | <b>457.786</b>  | 456.778        | R 7  |
| K 30 | 1658.988        | 387.241         | 379.231         | 379.735         | 378.727        | K 6  |
| R 31 | 1737.037        | 323.193         | 315.184         | 315.688         | 314.680        | R 5  |
| G 32 | 1765.546        | 245.143         | 237.133         | 237.637         | 236.629        | G 4  |
| R 33 | 1843.598        | 216.632         | 208.623         | 209.126         | 208.119        | R 3  |
| K 34 | 1907.646        | 138.581         | 130.572         | 131.076         | 130.068        | K 2  |
| E 35 | 1972.197        | 74.535          | 66.524          | 67.028          | 66.021         | E 1  |

# sp | Q9D2U9 | H2B3A\_MOUSE

PEPSRSTPAPKK <sup>Acetyl</sup><sub>42.01</sub> GSKKAITKAQKKDGKKRKRGRKE

- ▶ fragmentation table for charge state 3+
- ▶ specType=etd
- ▶ score=74.59
- ▶ F113278.dat
- ▶ query=q68744.p1
- ▶ precursor=658.224160
- ▶ chargePrecursor=6
- ▶ itol=0.5

| AA   | c               | y               | ±1              | ±2              | z               | AA   |
|------|-----------------|-----------------|-----------------|-----------------|-----------------|------|
| F 1  | 39.034          | 1315.442        | 1188.103        | 0.672           | 1309.766        | F 28 |
| E 2  | 82.048          | 1283.093        | 1277.751        | 0.672           | 1277.415        | E 34 |
| F 3  | 114.399         | 1240.077        | 1234.737        | 0.672           | 1234.401        | F 33 |
| S 4  | 143.410         | 1207.726        | 1202.386        | 0.672           | 1202.050        | S 32 |
| R 5  | 195.443         | 1175.715        | 1173.375        | <b>1173.711</b> | 1173.039        | R 31 |
| S 6  | 224.454         | 1158.061        | <b>1121.342</b> | <b>1121.676</b> | <b>1121.006</b> | S 30 |
| T 7  | 256.136         | 1097.971        | <b>1092.331</b> | <b>1092.667</b> | 1091.991        | T 29 |
| F 8  | 290.487         | <b>1063.988</b> | 1058.648        | 1058.984        | 1058.312        | F 28 |
| A 9  | 314.166         | 1031.637        | 1026.298        | <b>1026.633</b> | 1025.967        | A 27 |
| F 10 | 348.517         | 1007.958        | 1002.618        | 1002.954        | 1002.283        | F 26 |
| K 11 | 369.216         | 979.607         | 970.265         | 970.603         | <b>969.932</b>  | K 25 |
| K 12 | 445.917         | <b>932.909</b>  | 927.569         | 927.905         | <b>927.233</b>  | K 24 |
| G 13 | 484.925         | 876.255         | <b>870.867</b>  | <b>871.203</b>  | 870.531         | G 23 |
| S 14 | 493.935         | 857.200         | <b>851.860</b>  | <b>852.196</b>  | <b>851.524</b>  | S 22 |
| K 15 | 536.634         | 828.189         | 822.850         | 823.186         | 822.514         | K 21 |
| K 16 | 579.332         | 795.491         | 780.151         | <b>780.487</b>  | 779.815         | K 20 |
| A 17 | 603.011         | 742.762         | 737.423         | 737.759         | 737.111         | A 19 |
| T 18 | 660.708         | 719.113         | 713.774         | 714.110         | 713.435         | T 18 |
| T 19 | <b>674.388</b>  | 681.416         | <b>676.079</b>  | <b>676.415</b>  | 675.741         | T 17 |
| K 20 | <b>717.087</b>  | <b>647.736</b>  | <b>642.397</b>  | <b>642.733</b>  | 642.061         | K 16 |
| A 21 | <b>740.766</b>  | 605.038         | <b>599.698</b>  | <b>600.034</b>  | 599.362         | A 15 |
| Q 22 | <b>783.452</b>  | 581.359         | 576.019         | 576.355         | 575.683         | Q 14 |
| K 23 | <b>828.150</b>  | 538.672         | 533.333         | 533.669         | 532.997         | K 13 |
| K 24 | <b>868.848</b>  | 495.974         | 490.635         | 490.971         | 490.299         | K 12 |
| D 25 | <b>907.191</b>  | 453.276         | 447.936         | 448.272         | 447.600         | D 11 |
| G 26 | 928.126         | 414.934         | 409.594         | 409.930         | 409.258         | G 10 |
| K 27 | 988.698         | 395.627         | 390.287         | 390.623         | 390.251         | K 9  |
| K 28 | <b>1011.595</b> | 353.228         | 347.889         | 348.225         | 347.553         | K 8  |
| R 29 | <b>1063.628</b> | 310.530         | 305.190         | 305.526         | 304.854         | R 7  |
| K 30 | <b>1106.327</b> | 268.466         | 263.127         | 263.463         | 262.821         | K 6  |
| R 31 | 1158.390        | 215.798         | 210.458         | 210.794         | 210.122         | R 5  |
| G 32 | <b>1177.367</b> | 163.764         | 158.425         | 158.761         | 158.089         | G 4  |
| R 33 | <b>1229.461</b> | 144.757         | 139.417         | 139.753         | 139.082         | R 3  |
| K 34 | 1273.669        | 92.723          | 87.384          | 87.720          | 87.048          | K 2  |
| E 35 | 1315.114        | 50.025          | 44.685          | 45.021          | 44.349          | E 1  |

# sp | Q9D2U9 | H2B3A\_MOUSE

PEPSRSTPAPKK <sup>Acetyl</sup><sub>42.01</sub> GSKKAITKAQKKDGKKRKRGRKE

- ▶ fragmentation table for charge state 4+
- ▶ specType=etd
- ▶ score=74.59
- ▶ F113278.dat
- ▶ query=q68744.p1
- ▶ precursor=658.224160
- ▶ chargePrecursor=6
- ▶ itol=0.5

| AA    | c              | y              | z+1            | z+2            | z              | AA    |
|-------|----------------|----------------|----------------|----------------|----------------|-------|
| P[1]  | 29.527         | <b>986.833</b> | <b>982.828</b> | 0.735          | <b>982.576</b> | P[15] |
| E[2]  | 61.788         | 962.570        | 958.565        | 0.735          | 958.313        | E[34] |
| P[3]  | 96.051         | 930.309        | <b>926.305</b> | 0.735          | 926.053        | P[13] |
| S[4]  | 107.809        | 906.046        | 902.041        | 0.735          | 901.789        | S[32] |
| R[5]  | 146.834        | 884.288        | 880.283        | 880.535        | 880.031        | R[31] |
| S[6]  | 168.592        | 845.263        | 841.258        | <b>841.510</b> | 841.006        | S[30] |
| T[7]  | 193.854        | 823.505        | <b>819.500</b> | <b>819.752</b> | <b>819.248</b> | T[29] |
| P[8]  | 218.117        | 798.243        | <b>794.238</b> | <b>794.490</b> | 793.986        | P[28] |
| A[9]  | 235.877        | <b>773.980</b> | 769.975        | 770.227        | 769.723        | A[27] |
| F[10] | 260.140        | 736.220        | 732.215        | 732.468        | 731.964        | F[26] |
| K[11] | 282.184        | 731.961        | <b>727.952</b> | <b>728.204</b> | 727.701        | K[25] |
| K[12] | 334.690        | 699.933        | <b>695.929</b> | <b>696.181</b> | <b>695.677</b> | K[24] |
| G[13] | 348.945        | 697.407        | 693.402        | 693.654        | 693.150        | G[23] |
| S[14] | 370.703        | <b>643.152</b> | 639.147        | 639.399        | 638.895        | S[22] |
| K[15] | 402.727        | 621.994        | 617.989        | 617.641        | 617.137        | K[21] |
| K[16] | 434.751        | 589.370        | <b>585.365</b> | <b>585.617</b> | <b>585.113</b> | K[20] |
| A[17] | 452.510        | 557.346        | 553.342        | 553.593        | 553.090        | A[19] |
| I[18] | 480.781        | 539.587        | 535.582        | 535.834        | 535.330        | I[18] |
| T[19] | 508.043        | 511.316        | 507.311        | 507.563        | 507.059        | T[17] |
| K[20] | 538.097        | 489.054        | 482.049        | 482.303        | 481.797        | K[16] |
| A[21] | 555.826        | 454.030        | 450.026        | 450.278        | 449.774        | A[15] |
| Q[22] | 587.841        | 436.271        | 432.266        | 432.518        | 432.014        | Q[14] |
| K[23] | 619.864        | 404.256        | 400.252        | 400.504        | 400.000        | K[13] |
| K[24] | 651.888        | 372.233        | 368.228        | 368.480        | 367.976        | K[12] |
| D[25] | 680.645        | 340.209        | 336.204        | 336.456        | 335.952        | D[11] |
| G[26] | 694.900        | 311.452        | 307.447        | 307.699        | 307.195        | G[10] |
| K[27] | 726.924        | 297.197        | 293.192        | 293.444        | 292.940        | K[9]  |
| K[28] | 758.948        | 265.173        | 261.168        | 261.420        | 260.916        | K[8]  |
| K[29] | 787.973        | 233.149        | 229.145        | 229.397        | 228.893        | K[7]  |
| K[30] | 829.997        | 194.124        | 190.119        | 190.371        | 189.867        | K[6]  |
| R[31] | <b>869.022</b> | 162.100        | 158.096        | 158.348        | 157.844        | R[5]  |
| G[32] | <b>883.277</b> | 123.075        | 119.070        | 119.322        | 118.818        | G[4]  |
| R[33] | <b>922.303</b> | 108.820        | 104.815        | 105.067        | 104.563        | R[3]  |
| K[34] | <b>954.326</b> | 69.794         | 65.790         | 66.042         | 65.538         | K[2]  |
| E[35] | 986.587        | 37.771         | 33.766         | 34.018         | 33.514         | E[1]  |

# sp | Q9D2U9 | H2B3A\_MOUSE

PEPSRSTPAPKK <sup>Acetyl</sup><sub>42.01</sub> GSKKAITKAQKKDGGKKRKRGRKE

- ▶ fragmentation table for charge state 5+
- ▶ specType=etd
- ▶ score=74.59
- ▶ F113278.dat
- ▶ query=q68744.p1
- ▶ precursor=658.224160
- ▶ chargePrecursor=6
- ▶ itol=0.5

| AA    | c              | y              | z+1            | z+2     | z              | AA    |
|-------|----------------|----------------|----------------|---------|----------------|-------|
| P[1]  | 21.023         | <b>789.668</b> | <b>786.464</b> | 0.806   | <b>786.263</b> | P[35] |
| E[2]  | 49.632         | 770.257        | <b>767.054</b> | 0.806   | 766.852        | E[34] |
| P[3]  | 69.042         | 744.449        | 741.245        | 0.806   | <b>741.044</b> | P[33] |
| S[4]  | 86.449         | 725.038        | 721.835        | 0.806   | 721.633        | S[32] |
| R[5]  | 117.669        | 707.632        | 704.428        | 704.630 | 704.227        | R[31] |
| S[6]  | 135.075        | <b>676.412</b> | 673.208        | 673.409 | 673.006        | S[30] |
| T[7]  | 155.285        | 659.005        | 655.802        | 656.003 | 655.600        | T[29] |
| P[8]  | 174.695        | 638.796        | 635.592        | 635.794 | 635.390        | P[28] |
| A[9]  | 188.903        | 619.385        | 616.181        | 616.383 | 615.980        | A[27] |
| P[10] | 208.313        | 600.173        | 601.974        | 602.176 | 601.772        | P[26] |
| K[11] | 213.932        | <b>585.767</b> | 582.563        | 582.765 | 582.362        | K[25] |
| K[12] | 267.953        | 565.148        | 556.944        | 557.146 | 556.743        | K[24] |
| G[13] | 279.386        | 526.127        | 522.923        | 523.125 | 522.722        | G[23] |
| S[14] | 296.764        | 514.723        | 511.519        | 511.721 | 511.317        | S[22] |
| K[15] | 322.383        | 497.316        | 494.113        | 494.314 | 493.911        | K[21] |
| K[16] | 348.002        | 471.697        | 468.494        | 468.695 | 468.292        | K[20] |
| A[17] | 362.210        | 446.078        | 442.875        | 443.076 | 442.673        | A[19] |
| T[18] | 384.826        | 431.871        | 428.667        | 428.869 | 428.466        | T[18] |
| T[19] | 405.036        | 409.254        | 406.050        | 406.252 | 405.849        | T[17] |
| K[20] | 430.655        | 389.043        | 385.841        | 386.042 | 385.639        | K[16] |
| A[21] | 444.262        | 363.426        | 360.222        | 360.423 | 360.020        | A[15] |
| Q[22] | 470.474        | 349.218        | 346.014        | 346.216 | 345.813        | Q[14] |
| K[23] | 496.093        | 321.607        | 320.403        | 320.604 | 320.201        | K[13] |
| K[24] | <b>521.712</b> | 297.988        | 294.784        | 294.985 | 294.582        | K[12] |
| D[25] | 544.717        | 272.369        | 269.165        | 269.366 | 268.963        | D[11] |
| G[26] | 556.122        | 249.363        | 246.159        | 246.361 | 245.958        | G[10] |
| K[27] | 581.741        | 237.959        | 234.755        | 234.957 | 234.554        | K[9]  |
| K[28] | 607.360        | 212.340        | 209.136        | 209.338 | 208.935        | K[8]  |
| R[29] | 638.580        | 186.721        | 183.517        | 183.719 | 183.316        | R[7]  |
| K[30] | 664.199        | 155.501        | 152.297        | 152.498 | 152.095        | K[6]  |
| R[31] | 695.419        | 129.882        | 126.678        | 126.879 | 126.476        | R[5]  |
| G[32] | 706.823        | 98.661         | 95.456         | 95.659  | 95.256         | G[4]  |
| R[33] | 738.044        | 87.257         | 84.053         | 84.255  | 83.852         | R[3]  |
| K[34] | 763.663        | 56.037         | 52.833         | 53.035  | 52.632         | K[2]  |
| E[35] | 789.471        | 30.418         | 27.214         | 27.416  | 27.013         | E[1]  |

# sp | Q6ZWY9 | H2B1C\_MOUSE

PEPAKSAPAPKKGSK (Acetyl) K Acetyl AVTK Acetyl AQKKDGKKRKRSRKE  
 (42.01) 42.01 42.01

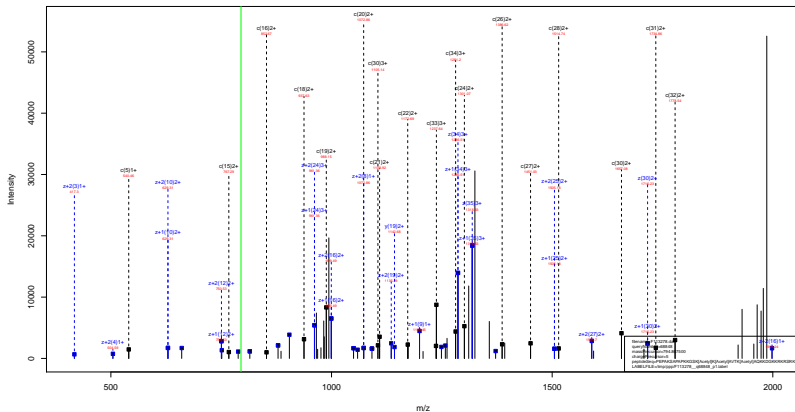



# sp | Q6ZWH9 | H2B1C\_MOUSE

PEPAKSAPAPKKGSK (Acetyl) K (Acetyl) AVTK (Acetyl) AQKKDGGKKRKRSRKE  
 (42.01) 42.01 42.01

- ▶ fragmentation table for charge state 1+
- ▶ specType=etd
- ▶ score=65.88
- ▶ F113278.dat
- ▶ query=q68848.p1
- ▶ precursor=794.867500
- ▶ chargePrecursor=5
- ▶ itol=0.5

| AA | c               | y        | z+1             | z+2             | z        | AA   |
|----|-----------------|----------|-----------------|-----------------|----------|------|
| P1 | 115.087         | 3970.315 | 3954.206        | 0.000           | 3953.288 | P135 |
| E1 | 244.129         | 3873.262 | 3857.243        | 0.000           | 3856.236 | E134 |
| P1 | 341.182         | 3744.230 | 3728.201        | 0.000           | 3727.193 | P133 |
| A1 | 412.219         | 3647.167 | 3631.148        | 0.000           | 3630.140 | A132 |
| K1 | <b>540.314</b>  | 3576.130 | 3560.111        | 3561.119        | 3559.103 | K131 |
| S1 | 637.350         | 3448.205 | 3432.203        | 3433.204        | 3431.205 | S130 |
| A1 | 698.353         | 3361.023 | 3344.984        | 3345.992        | 3343.976 | A129 |
| P1 | 795.436         | 3289.966 | 3273.947        | 3274.955        | 3272.939 | P128 |
| A1 | 866.473         | 3192.913 | 3176.894        | 3177.902        | 3175.888 | A127 |
| P1 | 963.530         | 3121.876 | 3105.857        | 3106.865        | 3104.849 | P126 |
| K1 | <b>1091.621</b> | 3024.823 | 3008.804        | 3009.812        | 3007.796 | K125 |
| K1 | 1219.716        | 2966.748 | 2950.730        | 2951.737        | 2949.714 | K124 |
| G1 | 1276.737        | 2798.633 | 2782.614        | 2783.622        | 2781.606 | G123 |
| S1 | 1363.769        | 2711.611 | 2695.593        | 2696.601        | 2694.585 | S122 |
| K1 | 1533.875        | 2624.579 | 2608.561        | 2609.569        | 2607.553 | K121 |
| K1 | 1703.980        | 2454.474 | 2438.455        | 2439.463        | 2437.447 | K120 |
| A1 | 1775.017        | 2384.368 | 2368.350        | 2369.358        | 2367.342 | A119 |
| V1 | 1874.086        | 2213.311 | 2197.293        | 2198.300        | 2196.285 | V118 |
| T1 | 1973.133        | 2114.263 | 2098.244        | 2099.252        | 2097.236 | T117 |
| K1 | 2145.230        | 2013.215 | 1997.196        | <b>1998.204</b> | 1996.189 | K116 |
| A1 | 2216.276        | 1943.110 | 1927.091        | 1928.099        | 1926.083 | A115 |
| Q1 | 2344.335        | 1772.073 | 1756.054        | 1757.062        | 1755.046 | Q114 |
| K1 | 2472.430        | 1644.014 | 1627.995        | 1629.003        | 1626.987 | K113 |
| K1 | 2602.525        | 1515.919 | 1499.900        | 1500.908        | 1498.892 | K112 |
| D1 | 2715.552        | 1387.824 | <b>1371.805</b> | 1372.813        | 1370.796 | D111 |
| G1 | 2772.575        | 1272.767 | 1256.748        | <b>1257.765</b> | 1255.751 | G110 |
| K1 | 2900.668        | 1215.716 | <b>1199.757</b> | 1200.765        | 1198.749 | K109 |
| K1 | 3028.763        | 1087.661 | 1071.642        | <b>1072.670</b> | 1070.654 | K108 |
| R1 | 3184.864        | 959.586  | 943.567         | 944.575         | 942.559  | R107 |
| K1 | 3312.959        | 831.485  | 815.466         | <b>816.474</b>  | 814.458  | K106 |
| R1 | 3469.056        | 675.390  | 659.371         | <b>660.379</b>  | 658.363  | R105 |
| S1 | 3556.092        | 519.289  | 503.270         | <b>504.278</b>  | 502.262  | S104 |
| R1 | 3712.193        | 432.257  | 416.238         | <b>417.246</b>  | 415.230  | R103 |
| K1 | 3840.288        | 276.155  | 260.137         | 261.144         | 259.129  | K102 |
| E1 | 3969.331        | 148.060  | 132.042         | 133.050         | 131.034  | E101 |

# sp | Q6ZWY9 | H2B1C\_MOUSE

PEPAKSAPAPKKGSK (Acetyl) K (42.01) Acetyl 42.01 AVTK Acetyl 42.01 AQKKDGGKKRKRSRKE

- ▶ fragmentation table for charge state 2+
- ▶ specType=etd
- ▶ score=65.88
- ▶ F113278.dat
- ▶ query=q68848.p1
- ▶ precursor=794.867500
- ▶ chargePrecursor=5
- ▶ itol=0.5

| AA  | c               | y        | s1 a+1          | a+2             | z               | AA   |
|-----|-----------------|----------|-----------------|-----------------|-----------------|------|
| P1  | 58.047          | 1093.961 | 1077.052        | 0.504           | 1077.140        | P155 |
| E2  | 122.568         | 1337.135 | 1320.125        | 0.504           | 1320.621        | E14  |
| F3  | 171.995         | 1872.613 | 1864.604        | 0.504           | 1864.100        | F133 |
| A4  | 206.613         | 1824.087 | 1816.078        | 0.504           | 1815.574        | A32  |
| K5  | 270.661         | 1789.568 | 1780.559        | 1781.063        | 1780.053        | K31  |
| S6  | 314.177         | 1734.521 | <b>1716.512</b> | 1717.016        | <b>1716.008</b> | S30  |
| A17 | 389.696         | 1688.309 | 1679.300        | 1679.800        | 1679.490        | A29  |
| F18 | 398.232         | 1645.486 | 1637.477        | 1637.981        | 1636.973        | F128 |
| A9  | 433.740         | 1596.960 | 1588.951        | <b>1589.455</b> | 1588.447        | A127 |
| F10 | 482.267         | 1561.441 | 1553.432        | 1553.936        | 1552.928        | F126 |
| K11 | 546.314         | 1512.915 | <b>1504.906</b> | <b>1505.410</b> | 1504.402        | K25  |
| K12 | 610.362         | 1448.898 | 1440.889        | 1441.392        | 1440.384        | K24  |
| G13 | 638.672         | 1364.560 | 1356.551        | 1357.055        | 1356.301        | G15  |
| S14 | 682.388         | 1356.309 | 1348.300        | 1348.804        | 1347.796        | S22  |
| K15 | <b>767.441</b>  | 1311.793 | 1304.784        | 1305.288        | 1304.280        | K21  |
| K16 | <b>852.494</b>  | 1227.743 | 1219.733        | 1220.237        | 1219.227        | K20  |
| A17 | 885.017         | 1157.199 | 1149.189        | 1149.694        | 1148.686        | A19  |
| V18 | <b>937.547</b>  | 1107.159 | 1099.149        | 1099.654        | 1098.646        | V18  |
| V19 | <b>988.070</b>  | 1057.635 | <b>1049.626</b> | <b>1050.130</b> | 1049.122        | V17  |
| K20 | <b>1073.123</b> | 1007.111 | <b>999.102</b>  | <b>999.606</b>  | 998.598         | K16  |
| A21 | <b>1108.642</b> | 922.058  | 914.049         | 914.553         | 913.545         | A15  |
| Q22 | <b>1172.671</b> | 896.540  | <b>878.531</b>  | <b>879.034</b>  | 878.027         | Q14  |
| R23 | <b>1236.718</b> | 822.511  | <b>814.501</b>  | <b>815.005</b>  | 813.997         | R13  |
| R24 | <b>1300.766</b> | 758.483  | <b>750.474</b>  | <b>750.978</b>  | 749.970         | R12  |
| D25 | 1358.279        | 694.612  | 686.603         | 686.910         | 685.902         | D11  |
| G26 | <b>1386.790</b> | 636.902  | <b>628.893</b>  | <b>629.397</b>  | 628.389         | G10  |
| K27 | <b>1450.838</b> | 608.391  | 600.382         | 600.886         | 599.878         | K19  |
| K28 | <b>1514.885</b> | 544.344  | 536.335         | 536.839         | 535.831         | K8   |
| R29 | 1442.923        | 489.296  | 481.287         | 481.791         | 479.783         | R17  |
| R30 | <b>1656.983</b> | 402.245  | 394.237         | 394.740         | 393.732         | R6   |
| R31 | <b>1735.034</b> | 338.198  | 330.189         | 330.693         | 329.685         | R5   |
| S32 | <b>1778.550</b> | 260.148  | 252.139         | 252.642         | 251.634         | S4   |
| R33 | 1856.600        | 216.632  | 208.623         | 209.126         | 208.119         | R3   |
| K34 | 1920.640        | 148.581  | 140.572         | 141.076         | 139.068         | K2   |
| E35 | 1985.192        | 74.534   | 66.524          | 67.028          | 66.021          | E1   |

# sp | Q6ZWY9 | H2B1C\_MOUSE

PEPAKSAPAPKKGSK (Acetyl) K (42.01) Acetyl 42.01 AVTK Acetyl 42.01 AQKKDGGKKRKRSRKE

- ▶ fragmentation table for charge state 3+
- ▶ specType=etd
- ▶ score=65.88
- ▶ F113278.dat
- ▶ query=q68848.p1
- ▶ precursor=794.867500
- ▶ chargePrecursor=5
- ▶ itol=0.5

| AA   | c               | y               | z+1             | z+2            | z               | AA   |
|------|-----------------|-----------------|-----------------|----------------|-----------------|------|
| P 1  | 39.034          | 1324.116        | <b>1318.770</b> | 0.672          | <b>1318.434</b> | P 50 |
| E 2  | 82.048          | 1291.750        | <b>1286.419</b> | 0.672          | <b>1286.083</b> | E 34 |
| P 3  | 114.399         | <b>1248.745</b> | 1243.405        | 0.672          | 1243.059        | P 33 |
| A 4  | 138.076         | 1216.394        | 1211.054        | 0.672          | 1210.718        | A 32 |
| K 5  | 180.776         | 1192.715        | 1187.375        | 1187.711       | 1187.039        | K 31 |
| S 6  | 209.287         | 1150.010        | 1144.671        | 1139.013       | 1144.341        | S 30 |
| A 7  | 213.466         | 1121.006        | 1115.666        | 1116.002       | 1115.336        | A 29 |
| P 8  | 265.817         | 1097.327        | <b>1091.987</b> | 1092.323       | <b>1091.651</b> | P 28 |
| A 9  | 289.496         | 1064.976        | 1059.636        | 1059.972       | <b>1059.300</b> | A 27 |
| P 10 | 321.847         | 1041.291        | 1035.951        | 1036.293       | 1035.621        | P 26 |
| K 11 | 364.545         | 1008.946        | 1003.606        | 1003.942       | 1003.270        | K 25 |
| K 12 | 407.243         | 986.247         | <b>960.968</b>  | <b>961.244</b> | 960.572         | K 24 |
| Q 13 | 436.251         | 963.549         | 958.210         | 958.546        | 957.874         | Q 23 |
| S 14 | 455.261         | <b>904.542</b>  | 899.202         | 899.538        | 898.866         | S 22 |
| K 15 | 511.963         | 875.511         | 870.172         | 870.508        | 869.836         | K 21 |
| K 16 | 568.665         | 848.829         | 843.490         | 843.826        | 843.154         | K 20 |
| A 17 | 592.344         | 792.126         | 786.788         | 787.124        | 786.452         | A 19 |
| V 18 | 623.307         | 758.440         | 753.100         | 753.445        | 752.771         | V 18 |
| V 19 | 659.049         | 705.425         | 700.086         | 700.422        | 699.750         | V 17 |
| K 20 | 715.751         | 671.743         | 666.404         | 666.740        | 666.068         | K 16 |
| A 21 | 739.430         | 615.041         | 609.702         | 610.038        | 609.366         | A 15 |
| Q 22 | 782.116         | 591.362         | 586.023         | 586.359        | 585.687         | Q 14 |
| K 23 | 824.815         | 548.676         | 543.337         | 543.673        | 543.001         | K 13 |
| R 24 | 867.513         | 505.978         | 500.639         | 500.974        | 500.302         | R 12 |
| D 25 | 905.255         | 463.280         | 457.940         | 458.276        | 457.604         | D 11 |
| G 26 | 924.863         | 424.937         | 419.598         | 419.934        | 419.262         | G 10 |
| K 27 | 967.561         | 405.930         | 400.590         | 400.926        | 400.254         | K 9  |
| K 28 | 1010.259        | 363.232         | 357.892         | 358.228        | 357.556         | K 8  |
| K 29 | 1052.957        | 320.533         | 315.194         | 315.530        | 314.858         | K 7  |
| R 30 | <b>1104.591</b> | 288.590         | 283.250         | 283.586        | 282.914         | R 6  |
| R 31 | 1157.225        | 225.803         | 220.462         | 220.798        | 220.126         | R 5  |
| S 32 | 1186.036        | 173.688         | 168.348         | 168.684        | 168.012         | S 4  |
| R 33 | <b>1238.069</b> | 144.757         | 139.417         | 139.753        | 139.081         | R 3  |
| K 34 | <b>1280.768</b> | 92.723          | 87.384          | 87.720         | 87.048          | K 2  |
| E 35 | 1423.782        | 50.625          | 44.685          | 45.021         | 44.349          | E 1  |

# sp | Q6ZWY9 | H2B1C\_MOUSE

PEPAKSAPAPKKGSK (Acetyl) K (Acetyl) AVTK (Acetyl) AQKKDGGKKRKRSRKE  
 (42.01) 42.01 42.01

- ▶ fragmentation table for charge state 4+
- ▶ specType=etd
- ▶ score=65.88
- ▶ F113278.dat
- ▶ query=q68848.p1
- ▶ precursor=794.867500
- ▶ chargePrecursor=5
- ▶ itol=0.5

| AA | c  | y       | z+1     | z+2     | z       | AA      |   |    |
|----|----|---------|---------|---------|---------|---------|---|----|
| P  | 1  | 29.527  | 993.334 | 989.320 | 0.755   | 989.078 | P | 35 |
| E  | 2  | 61.788  | 969.071 | 965.066 | 0.755   | 964.814 | E | 34 |
| P  | 3  | 86.051  | 936.810 | 932.806 | 0.755   | 932.554 | P | 33 |
| A  | 4  | 103.810 | 912.547 | 908.542 | 0.755   | 908.291 | A | 32 |
| K  | 5  | 135.834 | 894.788 | 890.783 | 891.035 | 890.531 | K | 31 |
| S  | 6  | 157.592 | 862.764 | 858.759 | 859.011 | 858.507 | S | 30 |
| A  | 7  | 175.351 | 841.006 | 837.001 | 837.253 | 836.749 | A | 29 |
| P  | 8  | 199.614 | 823.247 | 819.242 | 819.494 | 818.990 | P | 28 |
| A  | 9  | 217.374 | 798.984 | 794.979 | 795.231 | 794.727 | A | 27 |
| P  | 10 | 251.637 | 781.224 | 777.220 | 777.472 | 776.968 | P | 26 |
| K  | 11 | 273.561 | 756.961 | 752.956 | 753.208 | 752.705 | K | 25 |
| K  | 12 | 305.684 | 724.937 | 720.933 | 721.185 | 720.681 | K | 24 |
| G  | 13 | 319.940 | 692.914 | 688.909 | 689.161 | 688.657 | G | 23 |
| S  | 14 | 341.698 | 678.658 | 674.654 | 674.906 | 674.402 | S | 22 |
| K  | 15 | 384.224 | 656.900 | 652.896 | 653.148 | 652.644 | K | 21 |
| K  | 16 | 426.751 | 614.374 | 610.369 | 610.621 | 610.117 | K | 20 |
| A  | 17 | 444.510 | 571.848 | 567.843 | 568.095 | 567.591 | A | 19 |
| V  | 18 | 469.277 | 554.088 | 550.084 | 550.336 | 549.832 | V | 18 |
| T  | 19 | 494.539 | 529.321 | 525.316 | 525.568 | 525.065 | T | 17 |
| K  | 20 | 537.065 | 504.059 | 500.055 | 500.307 | 499.803 | K | 16 |
| A  | 21 | 554.824 | 461.533 | 457.528 | 457.780 | 457.276 | A | 15 |
| Q  | 22 | 588.839 | 443.774 | 439.769 | 440.021 | 439.517 | Q | 14 |
| K  | 23 | 618.863 | 411.759 | 407.754 | 408.006 | 407.502 | K | 13 |
| K  | 24 | 650.887 | 379.735 | 375.731 | 375.982 | 375.479 | K | 12 |
| D  | 25 | 679.643 | 347.711 | 343.707 | 343.959 | 343.455 | D | 11 |
| G  | 26 | 693.899 | 318.955 | 314.950 | 315.202 | 314.698 | G | 10 |
| K  | 27 | 725.922 | 304.699 | 300.695 | 300.947 | 300.443 | K | 9  |
| K  | 28 | 757.946 | 272.676 | 268.671 | 268.923 | 268.419 | K | 8  |
| R  | 29 | 796.971 | 240.652 | 236.647 | 236.899 | 236.395 | R | 7  |
| K  | 30 | 828.995 | 201.627 | 197.622 | 197.874 | 197.370 | K | 6  |
| R  | 31 | 868.020 | 169.603 | 165.598 | 165.850 | 165.346 | R | 5  |
| S  | 32 | 889.779 | 130.578 | 126.573 | 126.825 | 126.321 | S | 4  |
| R  | 33 | 928.804 | 108.820 | 104.815 | 105.067 | 104.563 | R | 3  |
| K  | 34 | 960.828 | 69.794  | 65.790  | 66.042  | 65.538  | K | 2  |
| E  | 35 | 993.088 | 37.771  | 33.766  | 34.018  | 33.514  | E | 1  |

# sp | P27661 | H2AX\_MOUSE

[Acetyl]SGRGKTGGKARAKAKSRSSRAGLQFPVGRVHLLRKGHYAE

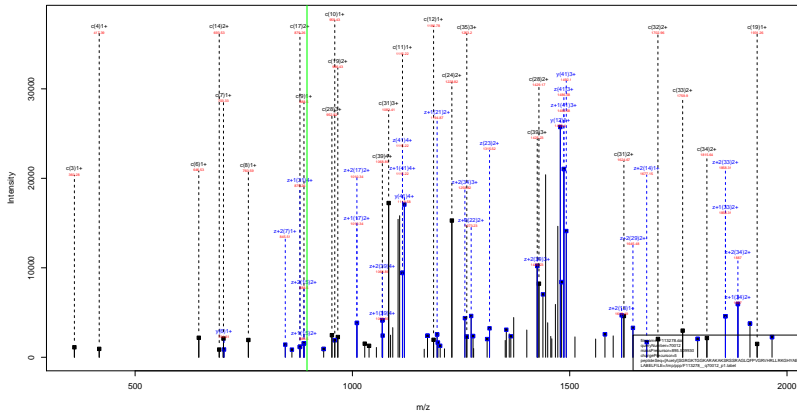

# sp | P27661 | H2AX\_MOUSE

[Acetyl]SGRGKTGGKARAKAKSRSSRAGLQFPVGRVHRLLRKGHYAE

- ▶ fragmentation table for charge state 1+
- ▶ specType=etd
- ▶ score=67.94
- ▶ F113278.dat
- ▶ query=q70012.p1
- ▶ precursor=895.509930
- ▶ chargePrecursor=5
- ▶ itol=0.5

| AA | c  | y               | z+1             | z+2      | z               | AA              |       |
|----|----|-----------------|-----------------|----------|-----------------|-----------------|-------|
| S  | 1  | 147.076         | 4473.515        | 4457.486 | 0.000           | 4456.489        | S[41] |
| G  | 2  | 204.098         | 4344.473        | 4328.454 | 0.000           | 4327.446        | G[40] |
| R  | 3  | <b>360.199</b>  | 4287.451        | 4271.432 | 4272.440        | 4270.425        | R[39] |
| G  | 4  | <b>417.220</b>  | 4131.350        | 4115.331 | 4116.339        | 4114.323        | G[38] |
| K  | 5  | 455.315         | 4074.328        | 4058.310 | 4059.318        | 4057.302        | K[37] |
| T  | 6  | <b>646.363</b>  | 3946.234        | 3930.215 | 3931.223        | 3929.207        | T[36] |
| G  | 7  | <b>703.385</b>  | 3845.180        | 3829.161 | 3830.175        | 3828.159        | G[35] |
| G  | 8  | <b>760.406</b>  | 3788.164        | 3772.146 | 3773.153        | 3771.138        | G[34] |
| K  | 9  | <b>868.501</b>  | 3731.143        | 3715.124 | 3716.132        | 3714.116        | K[33] |
| A  | 10 | <b>959.538</b>  | 3603.048        | 3587.029 | 3588.037        | 3586.021        | A[32] |
| R  | 11 | <b>1115.639</b> | 3532.011        | 3515.992 | 3517.000        | 3514.984        | R[31] |
| A  | 12 | <b>1188.676</b> | 3375.913        | 3359.894 | 3360.909        | 3358.893        | A[30] |
| R  | 13 | 1314.771        | 3304.873        | 3288.854 | 3289.862        | 3287.846        | R[29] |
| A  | 14 | 1385.808        | 3176.778        | 3160.759 | 3161.767        | 3159.751        | A[28] |
| K  | 15 | 1513.903        | 3105.741        | 3089.722 | 3090.730        | 3088.714        | K[27] |
| S  | 16 | 1600.935        | 2977.646        | 2961.627 | 2962.635        | 2960.619        | S[26] |
| R  | 17 | 1757.037        | 2890.614        | 2874.595 | 2875.603        | 2873.587        | R[25] |
| S  | 18 | 1844.069        | 2734.523        | 2718.504 | 2719.512        | 2717.496        | S[24] |
| S  | 19 | <b>1931.101</b> | 2647.480        | 2631.461 | 2632.470        | 2630.454        | S[23] |
| R  | 20 | 2087.202        | 2560.443        | 2544.424 | 2545.432        | 2543.416        | R[22] |
| A  | 21 | 2158.239        | 2404.347        | 2388.328 | 2389.336        | 2387.321        | A[21] |
| G  | 22 | 2215.260        | 2333.310        | 2317.291 | 2318.299        | 2316.284        | G[20] |
| L  | 23 | 2328.344        | 2276.280        | 2260.260 | 2261.270        | 2259.254        | L[19] |
| Q  | 24 | 2456.403        | 2163.259        | 2147.240 | 2148.248        | 2146.232        | Q[18] |
| F  | 25 | 2603.471        | 2055.146        | 2039.127 | 2040.135        | 2038.120        | F[17] |
| P  | 26 | 2700.524        | 1888.078        | 1872.059 | 1873.067        | 1871.051        | P[16] |
| V  | 27 | 2799.592        | 1791.025        | 1775.006 | 1776.014        | 1773.998        | V[15] |
| G  | 28 | 2856.614        | 1691.956        | 1675.938 | <b>1676.946</b> | 1674.930        | G[14] |
| R  | 29 | 2832.715        | 1534.878        | 1518.859 | <b>1619.924</b> | 1617.908        | R[13] |
| V  | 30 | 3111.783        | <b>1478.834</b> | 1462.815 | 1463.823        | 1461.807        | V[12] |
| H  | 31 | 3248.842        | 1319.765        | 1303.747 | <b>1364.755</b> | 1362.739        | H[11] |
| R  | 32 | 3404.943        | 1242.707        | 1226.688 | 1227.696        | 1225.680        | R[10] |
| L  | 33 | 3518.028        | 1086.605        | 1070.587 | 1071.595        | <b>1069.579</b> | L[9]  |
| L  | 34 | 3631.112        | 977.543         | 961.524  | 962.532         | 960.516         | L[8]  |
| R  | 35 | 3787.213        | <b>860.437</b>  | 844.419  | <b>845.426</b>  | 843.411         | R[7]  |
| K  | 36 | 3915.308        | <b>704.336</b>  | 688.317  | 689.325         | 687.310         | K[6]  |
| G  | 37 | 3972.329        | 676.241         | 660.221  | 661.230         | 659.215         | G[5]  |
| H  | 38 | 4109.388        | 619.220         | 603.200  | 604.209         | 602.193         | H[4]  |
| V  | 39 | 4272.451        | 382.161         | 366.143  | 367.150         | 365.134         | V[3]  |
| A  | 40 | 4343.489        | 219.086         | 203.070  | 204.087         | 202.071         | A[2]  |
| E  | 41 | 4472.531        | 148.060         | 132.042  | 133.050         | 131.034         | E[1]  |

# sp | P27661 | H2AX\_MOUSE

[Acetyl]SGRGKTGGKARAKAKSRSSRAGLQFPVGRVHRLLRKGHYAE

- ▶ fragmentation table for charge state 2+
- ▶ specType=etd
- ▶ score=67.94
- ▶ F113278.dat
- ▶ query=q70012.p1
- ▶ precursor=895.509930
- ▶ chargePrecursor=5
- ▶ itol=0.5

| AA | c  | y               | z+1      | z+2             | z               | AA              |       |
|----|----|-----------------|----------|-----------------|-----------------|-----------------|-------|
| S  | 1  | 74.042          | 2737.361 | 2729.257        | 0.504           | 2728.740        | S[41] |
| G  | 2  | 102.563         | 2172.740 | 2164.731        | 0.504           | 2164.227        | G[40] |
| R  | 3  | 180.603         | 2144.929 | 2138.220        | 2136.724        | 2135.718        | R[39] |
| G  | 4  | 209.114         | 2096.179 | 2058.160        | 2058.673        | 2057.665        | G[38] |
| K  | 5  | 273.161         | 2037.668 | 2029.659        | 2030.162        | 2029.155        | K[37] |
| T  | 6  | 313.689         | 1973.820 | <b>1905.611</b> | 1866.116        | <b>1965.107</b> | T[36] |
| G  | 7  | 352.198         | 1923.097 | <b>1915.087</b> | 1815.591        | <b>1914.583</b> | G[35] |
| G  | 8  | 380.707         | 1894.586 | <b>1886.576</b> | <b>1887.080</b> | 1886.073        | G[34] |
| K  | 9  | 444.754         | 1866.075 | <b>1858.066</b> | <b>1858.570</b> | 1857.563        | K[33] |
| A  | 10 | 480.273         | 1802.028 | <b>1794.018</b> | <b>1794.522</b> | 1793.514        | A[32] |
| R  | 11 | 558.323         | 1786.509 | 1738.500        | 1750.004        | 1757.006        | R[31] |
| A  | 12 | 593.832         | 1698.459 | 1680.449        | 1689.953        | 1679.945        | A[30] |
| R  | 13 | 657.889         | 1652.940 | 1644.931        | <b>1645.435</b> | 1644.427        | R[29] |
| A  | 14 | <b>693.408</b>  | 1588.892 | <b>1580.883</b> | <b>1581.387</b> | 1580.379        | A[28] |
| K  | 15 | 757.455         | 1553.374 | 1545.365        | 1545.868        | 1544.861        | K[27] |
| S  | 16 | 800.971         | 1489.326 | <b>1481.317</b> | <b>1481.821</b> | 1480.813        | S[26] |
| R  | 17 | <b>879.822</b>  | 1445.810 | 1437.801        | <b>1438.305</b> | 1437.297        | R[25] |
| S  | 18 | 923.328         | 1397.760 | 1359.750        | 1369.254        | 1369.246        | S[24] |
| S  | 19 | <b>966.054</b>  | 1324.244 | 1316.234        | 1316.738        | <b>1315.731</b> | S[23] |
| R  | 20 | 1044.104        | 1280.728 | 1272.719        | <b>1273.222</b> | 1272.215        | R[22] |
| A  | 21 | 1079.623        | 1202.677 | <b>1194.668</b> | <b>1195.172</b> | 1194.164        | A[21] |
| G  | 22 | 1108.134        | 1167.159 | 1159.149        | 1159.653        | 1158.646        | G[20] |
| L  | 23 | 1154.676        | 1136.640 | 1130.630        | 1131.133        | 1130.125        | L[19] |
| G  | 24 | <b>1228.705</b> | 1082.106 | 1074.097        | 1074.601        | 1073.593        | G[18] |
| F  | 25 | 1262.239        | 1018.077 | <b>1010.067</b> | <b>1010.571</b> | 1009.563        | F[17] |
| F  | 26 | 1350.766        | 944.542  | 936.533         | 937.037         | 936.029         | F[16] |
| V  | 27 | 1400.300        | 896.016  | <b>888.007</b>  | <b>888.511</b>  | 887.503         | V[15] |
| G  | 28 | <b>1428.811</b> | 846.482  | 838.473         | 838.976         | 837.969         | G[14] |
| V  | 29 | 1506.861        | 817.974  | 809.965         | 810.468         | 809.460         | V[13] |
| V  | 30 | 1596.395        | 749.921  | 731.911         | 732.415         | 731.407         | V[12] |
| H  | 31 | <b>1624.925</b> | 690.385  | 682.377         | 682.881         | 681.873         | H[11] |
| R  | 32 | <b>1702.975</b> | 631.857  | 613.848         | 614.351         | 613.344         | R[10] |
| L  | 33 | <b>1759.517</b> | 543.806  | 535.797         | 536.301         | 535.293         | L[9]  |
| L  | 34 | <b>1816.059</b> | 487.264  | 479.255         | 479.759         | 478.751         | L[8]  |
| R  | 35 | 1864.110        | 436.724  | 422.713         | 423.217         | 422.209         | R[7]  |
| K  | 36 | 1958.157        | 352.672  | 344.662         | 345.166         | 344.158         | K[6]  |
| G  | 37 | 1986.668        | 288.624  | 280.615         | 281.119         | 280.111         | G[5]  |
| H  | 38 | 2065.198        | 260.114  | 252.104         | 252.608         | 251.600         | H[4]  |
| V  | 39 | 2136.729        | 191.984  | 183.975         | 184.479         | 183.471         | V[3]  |
| A  | 40 | 2172.248        | 110.052  | 102.043         | 102.547         | 101.539         | A[2]  |
| E  | 41 | 2236.769        | 74.534   | 66.524          | 67.028          | 66.021          | E[1]  |

# sp | P27661 | H2AX\_MOUSE

[Acetyl]SGRGKTGGKARAKAKSRSSRAGLQFPVGRVHRLLRKGGHYAE

- ▶ fragmentation table for charge state 3+
- ▶ specType=etd
- ▶ score=67.94
- ▶ F113278.dat
- ▶ query=q70012.p1
- ▶ precursor=895.509930
- ▶ chargePrecursor=5
- ▶ itol=0.5

| AA | c  | y               | #s=1            | #s=2            | #s=3            | AA              |       |
|----|----|-----------------|-----------------|-----------------|-----------------|-----------------|-------|
| S  | 1  | 493.697         | <b>1491.843</b> | <b>1486.504</b> | 0.872           | <b>1486.166</b> | S[41] |
| G  | 2  | 66.704          | 1448.825        | 1443.487        | 0.672           | 1443.154        | G[49] |
| R  | 3  | 1307.18         | 1429.823        | 1424.482        | <b>1424.818</b> | 1424.146        | R[39] |
| G  | 4  | 139.745         | 1377.768        | 1372.449        | 1372.785        | 1372.111        | G[38] |
| K  | 5  | 182.443         | 1358.761        | 1353.441        | <b>1353.777</b> | 1353.107        | K[37] |
| T  | 6  | 216.126         | 1316.081        | 1310.743        | 1311.079        | <b>1310.407</b> | T[36] |
| G  | 7  | 235.133         | 1292.404        | <b>1277.061</b> | <b>1277.397</b> | 1276.723        | G[35] |
| G  | 8  | 254.146         | <b>1263.393</b> | 1258.053        | <b>1258.389</b> | 1257.717        | G[34] |
| K  | 9  | 296.639         | 1244.388        | 1239.048        | 1239.382        | 1238.710        | K[33] |
| A  | 10 | 320.518         | <b>1201.688</b> | <b>1196.348</b> | <b>1196.684</b> | 1196.017        | A[32] |
| R  | 11 | 372.551         | 1178.088        | <b>1172.669</b> | <b>1173.005</b> | <b>1172.333</b> | R[31] |
| A  | 12 | 389.239         | 1138.935        | 1133.635        | 1133.974        | 1133.299        | A[30] |
| K  | 13 | 438.929         | 1102.296        | 1096.956        | 1097.292        | 1096.620        | K[29] |
| A  | 14 | 462.668         | 1059.597        | 1054.258        | 1054.594        | 1053.922        | A[28] |
| K  | 15 | 505.306         | 1035.918        | 1030.579        | 1030.915        | 1030.243        | K[27] |
| S  | 16 | 534.317         | 993.220         | 987.880         | 988.216         | 987.543         | S[26] |
| R  | 17 | 586.250         | 984.200         | 978.873         | <b>958.206</b>  | 958.534         | R[25] |
| S  | 18 | 615.361         | 912.176         | 906.836         | 907.172         | 906.500         | S[24] |
| S  | 19 | 644.372         | 883.165         | 877.825         | 878.161         | 877.489         | S[23] |
| R  | 20 | 696.405         | 854.154         | 848.815         | 849.151         | 848.479         | R[22] |
| A  | 21 | 728.084         | 802.121         | 796.781         | 797.117         | 796.445         | A[21] |
| G  | 22 | 759.062         | 778.442         | 773.102         | 773.438         | 772.766         | G[20] |
| L  | 23 | 776.388         | 759.434         | 754.093         | 754.431         | 753.759         | L[19] |
| Q  | 24 | 819.472         | 721.740         | 716.400         | 716.736         | 716.064         | Q[18] |
| F  | 25 | 868.495         | 679.054         | 673.714         | 674.050         | 673.378         | F[17] |
| F  | 26 | 900.946         | 630.031         | 624.691         | 625.027         | 624.355         | F[16] |
| V  | 27 | <b>933.869</b>  | 597.680         | 592.340         | 592.676         | 592.004         | V[15] |
| G  | 28 | <b>952.876</b>  | 564.657         | 559.317         | 559.653         | 558.981         | G[14] |
| R  | 29 | 1004.919        | 545.656         | 540.316         | 540.652         | 539.980         | R[13] |
| V  | 30 | <b>1037.933</b> | 493.616         | 488.277         | 488.613         | 487.941         | V[12] |
| H  | 31 | <b>1083.619</b> | 460.593         | 455.254         | 455.590         | 454.918         | H[11] |
| R  | 32 | 1135.653        | 414.907         | 409.567         | 409.903         | 409.232         | R[10] |
| L  | 33 | 1173.347        | 362.873         | 357.534         | 357.870         | 357.198         | L[9]  |
| L  | 34 | 1211.043        | 328.176         | 322.836         | 323.172         | 322.500         | L[8]  |
| R  | 35 | <b>1263.876</b> | 287.484         | 282.144         | 282.480         | 281.808         | R[7]  |
| K  | 36 | 1305.774        | 235.460         | 230.121         | 230.447         | 229.775         | K[6]  |
| G  | 37 | 1344.761        | 192.752         | 187.412         | 187.748         | 187.076         | G[5]  |
| H  | 38 | 1370.468        | 173.745         | 168.405         | 168.741         | 168.069         | H[4]  |
| V  | 39 | <b>1424.822</b> | 128.098         | 122.758         | 123.094         | 122.422         | V[3]  |
| A  | 40 | 1448.825        | 73.304          | 67.964          | 68.300          | 67.628          | A[2]  |
| E  | 41 | 1491.515        | 50.025          | 44.685          | 45.021          | 44.349          | E[1]  |



# sp | P27661 | H2AX\_MOUSE

[Acetyl]SGRGKTGGKARAKAKSRSSRAGLQFPVGRVHRLLRKGHYAE

- ▶ fragmentation table for charge state 4+
- ▶ specType=etd
- ▶ score=67.94
- ▶ F113278.dat
- ▶ query=q70012.p1
- ▶ precursor=895.509930
- ▶ chargePrecursor=5
- ▶ itol=0.5

| AA    | c               | p               | #s1             | #s2             | #s              | AA    |
|-------|-----------------|-----------------|-----------------|-----------------|-----------------|-------|
| S[1]  | 37.505          | <b>1119.134</b> | <b>1115.130</b> | 0.705           | <b>1114.878</b> | S[41] |
| G[2]  | 51.780          | 1036.874        | 1032.869        | 0.795           | 1032.617        | G[40] |
| R[3]  | 90.805          | 1072.618        | <b>1068.614</b> | <b>1068.866</b> | 1068.362        | R[39] |
| G[4]  | 109.061         | 1033.593        | 1029.588        | 1029.840        | 1029.130        | G[38] |
| K[5]  | 137.064         | 1019.138        | 1015.133        | 1015.385        | 1015.081        | K[37] |
| T[6]  | 162.240         | 987.314         | 983.309         | 983.561         | 983.063         | T[36] |
| G[7]  | 178.602         | 952.052         | 948.047         | 948.299         | 947.795         | G[35] |
| G[8]  | 190.857         | 947.797         | 943.792         | 944.044         | 943.540         | G[34] |
| K[9]  | 232.681         | <b>933.541</b>  | 929.537         | 929.788         | 929.285         | K[33] |
| A[10] | 240.640         | 901.511         | 897.513         | 897.765         | 897.261         | A[32] |
| R[11] | 279.665         | 883.758         | <b>879.753</b>  | 880.005         | <b>879.502</b>  | R[31] |
| A[12] | 297.426         | 844.733         | 840.728         | 840.980         | 840.476         | A[30] |
| K[13] | 329.448         | 826.974         | 822.969         | 823.221         | 822.717         | K[29] |
| A[14] | 347.208         | 794.950         | 790.945         | 791.197         | 790.693         | A[28] |
| K[15] | 379.231         | 777.191         | 773.186         | 773.438         | 772.934         | K[27] |
| S[16] | 405.009         | 745.167         | 741.162         | 741.414         | 740.910         | S[26] |
| R[17] | 440.015         | 723.409         | 719.404         | 719.656         | 719.152         | R[25] |
| S[18] | 483.713         | 694.384         | 690.379         | 690.631         | 690.127         | S[24] |
| S[19] | 483.511         | 692.626         | 688.621         | 688.873         | 688.369         | S[23] |
| R[20] | 522.556         | 640.868         | 636.863         | 637.115         | 636.611         | R[22] |
| A[21] | 540.315         | 601.842         | 597.837         | 598.090         | 597.586         | A[21] |
| C[22] | 554.571         | 584.083         | 580.078         | 580.330         | 579.826         | C[20] |
| L[23] | 582.842         | 569.826         | 565.821         | 566.073         | 565.571         | L[19] |
| Q[24] | 614.856         | 541.557         | 537.552         | 537.804         | 537.302         | Q[18] |
| F[25] | 651.823         | 509.542         | 505.537         | 505.789         | 505.285         | F[17] |
| F[26] | 678.888         | 472.775         | 468.770         | 469.022         | 468.518         | F[16] |
| V[27] | 706.654         | 448.512         | 444.507         | 444.759         | 444.255         | V[15] |
| C[28] | 734.909         | 423.745         | 419.740         | 419.992         | 419.488         | C[14] |
| R[29] | 763.934         | 409.809         | 405.804         | 406.056         | 405.552         | R[13] |
| V[30] | 778.701         | 370.464         | 366.459         | 366.711         | 366.207         | V[12] |
| H[31] | 812.966         | 345.697         | 341.692         | 341.944         | 341.440         | H[11] |
| R[32] | 851.991         | 311.432         | 307.427         | 307.679         | 307.175         | R[10] |
| L[33] | 880.262         | 272.407         | 268.402         | 268.654         | 268.150         | L[9]  |
| L[34] | 885.513         | 264.736         | 260.731         | 260.983         | 260.479         | L[8]  |
| R[35] | 947.559         | 213.885         | 211.880         | 212.132         | 211.628         | R[7]  |
| K[36] | 979.582         | 176.840         | 172.835         | 173.087         | 172.583         | K[6]  |
| G[37] | 993.838         | 144.816         | 140.811         | 141.063         | 140.559         | G[5]  |
| H[38] | <b>1028.102</b> | 130.560         | 126.556         | 126.808         | 126.304         | H[4]  |
| V[39] | <b>1068.868</b> | 96.296          | 92.291          | 92.543          | 92.039          | V[3]  |
| A[40] | 1068.868        | 58.530          | 54.525          | 54.777          | 54.273          | A[2]  |
| E[41] | 1118.888        | 37.771          | 33.766          | 34.018          | 33.514          | E[1]  |

# sp | Q6GSS7 | H2A2A\_MOUSE

[Acetyl]SGRGKQGKKARAKAKSRSSRAGLQFPVGRVHLLRKGNYAE

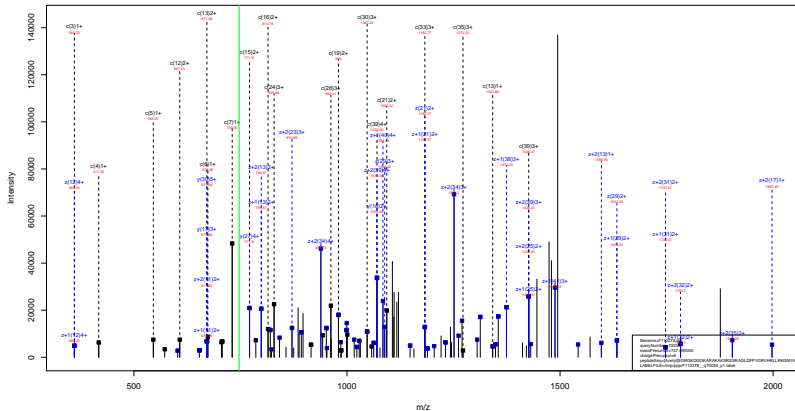

# sp | Q6GSS7 | H2A2A\_MOUSE

[Acetyl]SGRGKQGGKARAKAKSRSSRAGLQFPVGRVHRLLRKGN~~YAE~~

- ▶ fragmentation table for charge state 1+
- ▶ specType=etd
- ▶ score=41.54
- ▶ F113278.dat
- ▶ query=q70034\_p1
- ▶ precursor=747.090000
- ▶ chargePrecursor=6
- ▶ itol=0.5

| AA   | c               | y        | z+1             | z+2             | z              | AA   |
|------|-----------------|----------|-----------------|-----------------|----------------|------|
| S 1  | 147.076         | 4477.515 | 4481.491        | 0.000           | 4460.481       | S 41 |
| G 2  | 304.098         | 4348.467 | 4332.440        | 0.000           | 4331.441       | G 40 |
| R 3  | <b>360.199</b>  | 4291.446 | 4275.427        | 4276.435        | 4274.419       | R 39 |
| G 4  | <b>417.270</b>  | 4135.345 | 4119.326        | 4120.334        | 4118.319       | G 38 |
| K 5  | <b>545.315</b>  | 4078.323 | 4062.305        | 4063.313        | 4061.291       | K 37 |
| Q 6  | <b>673.374</b>  | 3950.228 | 3934.210        | 3935.218        | 3933.202       | Q 36 |
| G 7  | <b>730.395</b>  | 3822.170 | 3806.151        | 3807.159        | 3805.143       | G 35 |
| G 8  | 787.417         | 3765.148 | 3749.130        | 3750.138        | 3748.122       | G 34 |
| K 9  | <b>915.512</b>  | 3708.127 | 3692.108        | 3693.116        | 3691.100       | K 33 |
| A 10 | <b>986.549</b>  | 3580.032 | 3564.013        | 3565.021        | 3563.005       | A 32 |
| R 11 | 1142.050        | 3528.995 | 3492.975        | 3493.984        | 3491.968       | R 31 |
| A 12 | 1213.007        | 3352.984 | 3336.975        | 3337.983        | 3335.967       | A 30 |
| R 13 | <b>1341.782</b> | 3281.957 | 3265.938        | 3266.946        | 3264.930       | R 29 |
| A 14 | 1412.819        | 3153.762 | 3137.743        | 3138.751        | 3136.735       | A 28 |
| K 15 | 1540.914        | 3082.725 | 3066.706        | 3067.714        | 3065.698       | K 27 |
| S 16 | 1627.946        | 2954.630 | 2938.611        | 2939.619        | 2937.603       | S 26 |
| R 17 | 1784.047        | 2887.598 | 2851.579        | 2852.587        | 2850.571       | R 25 |
| S 18 | 1873.079        | 2711.496 | 2695.477        | 2696.486        | 2694.470       | S 24 |
| S 19 | 1958.111        | 2624.464 | 2608.446        | 2609.454        | 2607.438       | S 23 |
| R 20 | 2114.213        | 2537.432 | 2521.414        | 2522.422        | 2520.406       | R 22 |
| A 21 | 2185.250        | 2381.331 | 2365.313        | 2366.320        | 2364.305       | A 21 |
| G 22 | 2242.271        | 2310.294 | 2294.275        | 2295.283        | 2293.268       | G 20 |
| L 23 | 2355.355        | 2253.273 | 2237.254        | 2238.262        | 2236.246       | L 19 |
| Q 24 | 2483.414        | 2149.189 | 2134.170        | 2135.178        | 2133.162       | Q 18 |
| F 25 | 2630.482        | 2012.130 | 1996.111        | <b>1997.119</b> | 1995.104       | F 17 |
| P 26 | 2727.535        | 1895.062 | 1849.043        | 1850.051        | 1848.035       | P 16 |
| V 27 | 2826.603        | 1768.009 | 1751.990        | 1752.998        | 1750.982       | V 15 |
| G 28 | 2883.625        | 1698.940 | 1652.922        | 1653.930        | 1651.914       | G 14 |
| R 29 | 3039.726        | 1611.919 | 1595.900        | <b>1596.908</b> | 1594.892       | R 13 |
| V 30 | 3138.764        | 1495.818 | 1439.799        | 1440.807        | 1438.791       | V 12 |
| H 31 | 3275.853        | 1356.749 | 1340.731        | <b>1341.739</b> | 1339.723       | H 11 |
| R 32 | 3431.954        | 1219.691 | 1203.672        | <b>1204.680</b> | 1202.664       | R 10 |
| L 33 | 3545.038        | 1063.589 | <b>1047.571</b> | 1048.579        | 1046.563       | L 9  |
| L 34 | 3658.123        | 950.505  | 934.487         | 935.495         | 933.479        | L 8  |
| R 35 | 3814.224        | 837.421  | 821.403         | <b>822.410</b>  | <b>820.395</b> | R 7  |
| K 36 | 3932.319        | 683.300  | 667.282         | 668.290         | 666.274        | K 6  |
| G 37 | 3999.340        | 553.225  | 537.207         | 538.214         | 536.199        | G 5  |
| N 38 | 4113.383        | 496.204  | 480.185         | 481.193         | 479.177        | N 4  |
| Y 39 | 4276.446        | 382.161  | 366.142         | 367.150         | 365.134        | Y 3  |
| A 40 | 4347.483        | 219.098  | 203.079         | 204.087         | 202.071        | A 2  |
| E 41 | 4476.526        | 148.060  | 132.042         | 133.050         | 131.034        | E 1  |

# sp | Q6GSS7 | H2A2A\_MOUSE

[Acetyl]SGRGKQGGKARAKAKSRSSRAGLQFPVGRVHRLLRKGN~~YAE~~

- ▶ fragmentation table for charge state 2+
- ▶ specType=etd
- ▶ score=41.54
- ▶ F113278.dat
- ▶ query=q70034\_p1
- ▶ precursor=747.090000
- ▶ chargePrecursor=6
- ▶ itol=0.5

| AA | c  | w               | #s1             | #s2             | z               | AA              |       |
|----|----|-----------------|-----------------|-----------------|-----------------|-----------------|-------|
| S  | 1  | 74.062          | 2239.259        | 2231.260        | 8.804           | 2230.747        | S(41) |
| G  | 2  | 102.553         | 2174.737        | 2166.738        | 0.904           | 2166.234        | G(40) |
| R  | 3  | 180.603         | 2146.227        | 2138.217        | 2138.921        | 2137.713        | R(39) |
| G  | 4  | 209.114         | 2068.176        | 2060.167        | 2060.671        | 2059.663        | G(38) |
| K  | 5  | 273.161         | 2039.665        | 2031.656        | 2032.160        | 2031.152        | K(37) |
| G  | 6  | 337.194         | 1975.616        | 1967.606        | 1968.110        | 1967.102        | G(36) |
| G  | 7  | 365.703         | 1911.569        | 1903.579        | <b>1904.083</b> | 1903.075        | G(35) |
| G  | 8  | 394.212         | 1883.078        | 1875.088        | 1875.592        | 1874.585        | G(34) |
| K  | 9  | 458.260         | 1854.567        | 1846.558        | 1847.062        | 1846.054        | K(33) |
| A  | 10 | 493.778         | 1790.520        | <b>1782.510</b> | <b>1783.014</b> | 1782.006        | A(32) |
| R  | 11 | <b>571.829</b>  | 1735.001        | <b>1746.992</b> | <b>1747.496</b> | 1746.488        | R(31) |
| A  | 12 | <b>607.347</b>  | 1669.954        | 1661.963        | 1662.468        | 1661.460        | A(30) |
| K  | 13 | <b>671.395</b>  | 1641.432        | <b>1633.423</b> | 1633.927        | <b>1632.919</b> | K(29) |
| A  | 14 | <b>706.913</b>  | 1577.384        | 1569.375        | 1569.879        | 1568.871        | A(28) |
| K  | 15 | <b>770.961</b>  | <b>1541.866</b> | 1533.857        | 1534.360        | 1533.351        | K(27) |
| S  | 16 | <b>814.477</b>  | 1477.818        | 1469.809        | 1470.313        | 1469.305        | S(26) |
| R  | 17 | <b>892.527</b>  | 1434.302        | <b>1426.293</b> | <b>1426.797</b> | 1425.789        | R(25) |
| S  | 18 | 928.038         | 1369.262        | <b>1348.243</b> | <b>1348.746</b> | 1347.739        | S(24) |
| S  | 19 | <b>979.559</b>  | <b>1312.736</b> | 1304.726        | <b>1305.230</b> | 1304.222        | S(23) |
| R  | 20 | <b>1057.610</b> | 1269.220        | 1261.210        | <b>1261.714</b> | 1260.707        | R(22) |
| A  | 21 | <b>1093.128</b> | 1191.169        | <b>1183.160</b> | 1183.664        | <b>1182.656</b> | A(21) |
| G  | 22 | 1121.639        | 1135.051        | <b>1147.641</b> | <b>1148.145</b> | 1147.137        | G(20) |
| L  | 23 | 1178.383        | 1119.140        | 1111.130        | 1111.634        | 1110.626        | L(19) |
| Q  | 24 | 1242.211        | <b>1070.598</b> | <b>1062.589</b> | <b>1063.093</b> | 1062.085        | Q(18) |
| F  | 25 | 1315.745        | 1008.599        | <b>998.559</b>  | <b>999.063</b>  | 998.055         | F(17) |
| F  | 26 | 1364.271        | 933.034         | 925.025         | 925.529         | 924.521         | F(16) |
| V  | 27 | 1413.805        | 884.508         | 876.499         | 877.003         | 876.995         | V(15) |
| G  | 28 | 1462.316        | 834.974         | 826.965         | 827.469         | 826.461         | G(14) |
| R  | 29 | 1520.369        | 806.483         | <b>798.454</b>  | <b>798.958</b>  | 797.950         | R(13) |
| V  | 30 | 1569.901        | 729.413         | 720.403         | 720.907         | 719.899         | V(12) |
| H  | 31 | 1638.430        | 678.878         | <b>670.869</b>  | <b>671.373</b>  | 670.365         | H(11) |
| R  | 32 | 1716.481        | 610.349         | <b>602.340</b>  | <b>602.843</b>  | 601.835         | R(10) |
| L  | 33 | 1773.023        | 532.289         | 524.280         | 524.783         | 523.785         | L(9)  |
| L  | 34 | 1829.568        | 478.756         | 469.747         | 469.251         | 468.243         | L(8)  |
| R  | 35 | 1907.615        | 419.214         | 411.205         | 411.709         | 410.701         | R(7)  |
| K  | 36 | 1971.663        | 341.164         | 333.154         | 333.658         | 332.650         | K(6)  |
| G  | 37 | 2050.174        | 277.116         | 269.107         | 269.611         | 268.603         | G(5)  |
| N  | 38 | 2057.195        | 248.606         | 240.596         | 241.100         | 240.092         | N(4)  |
| V  | 39 | 2136.727        | 181.564         | 183.575         | 184.079         | 183.071         | V(3)  |
| A  | 40 | 2144.245        | 110.026         | 102.043         | 102.547         | 101.539         | A(2)  |
| E  | 41 | 2238.767        | 74.534          | 66.524          | 67.028          | 66.021          | E(1)  |

# sp | Q6GSS7 | H2A2A\_MOUSE

[Acetyl]SGRGKQGGKARAKAKSRSSRAGLQFPVGRVHRLLRKGN~~YAE~~

- ▶ fragmentation table for charge state 3+
- ▶ specType=etd
- ▶ score=41.54
- ▶ F113278.dat
- ▶ query=q70034\_p1
- ▶ precursor=747.090000
- ▶ chargePrecursor=6
- ▶ itol=0.5

| AA | c  | y               | #s1             | #s2             | z               | AA              |       |
|----|----|-----------------|-----------------|-----------------|-----------------|-----------------|-------|
| S  | 1  | 48.607          | 1492.178        | <b>1487.835</b> | 0.872           | 3487.404        | S(1)  |
| G  | 2  | 66.704          | 1450.181        | 1444.521        | 0.672           | 1444.485        | G(2)  |
| R  | 3  | 130.718         | <b>1431.154</b> | 1425.814        | <b>1426.150</b> | 1425.478        | R(3)  |
| G  | 4  | 139.745         | 1379.120        | <b>1373.780</b> | <b>1374.116</b> | 1373.444        | G(38) |
| K  | 5  | 182.443         | 1360.113        | <b>1354.773</b> | <b>1355.109</b> | <b>1354.437</b> | K(37) |
| Q  | 6  | 225.130         | 1317.414        | 1312.075        | <b>1312.411</b> | 1311.730        | Q(36) |
| G  | 7  | 244.137         | 1274.726        | 1269.389        | <b>1268.725</b> | 1269.055        | G(35) |
| G  | 8  | 263.144         | 1255.721        | 1250.381        | <b>1250.717</b> | 1250.045        | G(34) |
| K  | 9  | 305.642         | 1236.714        | <b>1231.374</b> | 1231.710        | <b>1231.038</b> | K(33) |
| A  | 10 | 329.521         | 1194.016        | <b>1188.676</b> | <b>1189.012</b> | <b>1188.340</b> | A(32) |
| R  | 11 | 381.555         | 1170.336        | 1164.997        | 1165.333        | 1164.661        | R(31) |
| A  | 12 | 405.234         | 1138.303        | 1133.963        | 1133.299        | 1133.593        | A(30) |
| K  | 13 | 447.932         | 1094.624        | 1089.284        | 1089.620        | <b>1088.948</b> | K(29) |
| A  | 14 | 471.611         | 1051.925        | 1046.586        | <b>1046.922</b> | 1046.250        | A(28) |
| K  | 15 | 514.310         | <b>1028.246</b> | <b>1022.907</b> | <b>1023.243</b> | 1022.571        | K(27) |
| S  | 16 | 543.320         | <b>985.548</b>  | <b>980.208</b>  | 980.544         | <b>979.873</b>  | S(26) |
| K  | 17 | 595.254         | 956.517         | <b>951.198</b>  | <b>951.534</b>  | 950.862         | K(25) |
| S  | 18 | 624.266         | 904.504         | 899.164         | 899.500         | 898.828         | S(24) |
| S  | 19 | <b>653.375</b>  | 875.493         | 870.153         | <b>870.489</b>  | 869.817         | S(23) |
| R  | 20 | <b>705.409</b>  | 846.482         | 841.143         | <b>841.479</b>  | 840.807         | R(22) |
| A  | 21 | 729.088         | 794.449         | 789.109         | 789.445         | 788.773         | A(21) |
| G  | 22 | 748.095         | 770.770         | 765.430         | 765.766         | 765.094         | G(20) |
| L  | 23 | <b>785.790</b>  | 751.762         | 746.423         | 746.759         | 746.087         | L(19) |
| Q  | 24 | <b>828.476</b>  | 724.085         | 718.745         | 719.084         | 718.312         | Q(18) |
| F  | 25 | 877.409         | <b>671.382</b>  | 666.042         | 666.378         | 665.706         | F(17) |
| F  | 26 | 909.950         | 622.359         | 617.019         | 617.355         | 616.683         | F(16) |
| V  | 27 | <b>942.873</b>  | 590.006         | 584.666         | 585.004         | 584.332         | V(15) |
| G  | 28 | <b>961.880</b>  | 558.985         | 553.645         | 553.981         | 553.309         | G(14) |
| R  | 29 | 1013.914        | 537.978         | 532.638         | 532.974         | 532.302         | R(13) |
| V  | 30 | <b>1046.936</b> | 485.944         | 480.604         | 480.941         | 480.269         | V(12) |
| H  | 31 | 1092.623        | 452.921         | 447.581         | 447.918         | 447.246         | H(11) |
| R  | 32 | 1184.656        | 407.235         | 401.895         | 402.231         | 401.560         | R(10) |
| L  | 33 | <b>1182.351</b> | 355.201         | 349.862         | 350.198         | 349.526         | L(9)  |
| L  | 34 | 1227.814        | 319.509         | 314.169         | 314.505         | 313.833         | L(8)  |
| R  | 35 | <b>1272.879</b> | 279.812         | 274.472         | 274.808         | 274.136         | R(7)  |
| K  | 36 | 1314.778        | 227.778         | 222.438         | 222.775         | 222.103         | K(6)  |
| G  | 37 | 1331.785        | 185.880         | 179.740         | 180.076         | 179.404         | G(5)  |
| N  | 38 | 1371.799        | 166.873         | 160.733         | 161.069         | 160.397         | N(4)  |
| V  | 39 | <b>1426.154</b> | 138.098         | 132.758         | 133.095         | 132.423         | V(3)  |
| A  | 40 | 1449.813        | 93.344          | 88.004          | 88.340          | 87.668          | A(2)  |
| E  | 41 | 1492.847        | 50.025          | 44.685          | 45.021          | 44.349          | E(1)  |

# sp | Q6GSS7 | H2A2A\_MOUSE

[Acetyl]SGRGKQGGKARAKAKSRSSRAGLQFPVGRVHRLLRKGN~~YAE~~

- ▶ fragmentation table for charge state 4+
- ▶ specType=etd
- ▶ score=41.54
- ▶ F113278.dat
- ▶ query=q70034\_p1
- ▶ precursor=747.090000
- ▶ chargePrecursor=6
- ▶ itol=0.5

| AA   | c               | y              | z+1             | z+2             | z              | AA   |
|------|-----------------|----------------|-----------------|-----------------|----------------|------|
| S 1  | 37.526          | 1120.133       | 1116.138        | 0.755           | 1115.878       | S 41 |
| G 2  | 51.780          | 1087.872       | <b>1083.868</b> | 0.755           | 1083.618       | G 40 |
| R 3  | 90.805          | 1073.617       | 1069.612        | <b>1069.864</b> | 1069.360       | R 39 |
| G 4  | 105.061         | 1034.592       | 1030.587        | 1030.839        | 1030.335       | G 38 |
| K 5  | 137.084         | 1020.336       | 1016.332        | <b>1016.384</b> | 1016.080       | K 37 |
| Q 6  | 169.099         | 988.313        | 984.308         | 984.560         | 984.056        | Q 36 |
| G 7  | 183.394         | 996.288        | 992.293         | <b>992.545</b>  | <b>992.041</b> | G 35 |
| G 8  | 197.610         | 942.043        | 938.038         | <b>938.290</b>  | 937.786        | G 34 |
| K 9  | 229.633         | 927.787        | 923.783         | 924.034         | 923.531        | K 33 |
| A 10 | 247.393         | 895.763        | 891.758         | 892.011         | 891.507        | A 32 |
| R 11 | 286.418         | 878.004        | 874.009         | 874.251         | 873.748        | R 31 |
| A 12 | 304.177         | 838.978        | 834.974         | 835.226         | 834.723        | A 30 |
| K 13 | 338.201         | 821.220        | 817.215         | 817.467         | 816.964        | K 29 |
| A 14 | 353.960         | 789.198        | 785.191         | 785.443         | 784.939        | A 28 |
| K 15 | 385.984         | <b>771.437</b> | 767.432         | 767.684         | 767.180        | K 27 |
| S 16 | 407.742         | 739.413        | 735.408         | 735.660         | 735.156        | S 26 |
| R 17 | 446.767         | 717.695        | 713.690         | 713.942         | 713.438        | R 25 |
| S 18 | 468.526         | 678.639        | 674.635         | 674.887         | 674.374        | S 24 |
| S 19 | 490.283         | 656.872        | 652.867         | <b>653.119</b>  | 652.615        | S 23 |
| R 20 | 529.309         | 635.114        | 631.109         | 631.361         | 630.857        | R 22 |
| A 21 | 547.068         | 606.089        | 602.084         | 602.336         | 601.833        | A 21 |
| G 22 | 561.323         | 578.329        | 574.324         | 574.576         | 574.072        | G 20 |
| L 23 | 589.594         | 564.074        | 560.069         | 560.321         | 559.817        | L 19 |
| Q 24 | 623.609         | 635.803        | 631.798         | 632.050         | 631.546        | Q 18 |
| F 25 | 658.376         | 503.788        | 499.783         | 500.035         | 499.531        | F 17 |
| P 26 | 682.639         | 487.021        | 483.016         | 483.268         | 482.764        | P 16 |
| V 27 | <b>707.406</b>  | 442.758        | 438.753         | 439.005         | 438.501        | V 15 |
| G 28 | 721.662         | 417.991        | 413.986         | 414.238         | 413.734        | G 14 |
| R 29 | 760.687         | 401.735        | 397.731         | 399.982         | 399.478        | R 13 |
| V 30 | 783.434         | 384.710        | <b>380.705</b>  | 380.957         | <b>380.453</b> | V 12 |
| H 31 | <b>819.719</b>  | 339.943        | 335.938         | 336.190         | 335.686        | H 11 |
| R 32 | 858.744         | 305.676        | 301.673         | 301.925         | 301.421        | R 10 |
| L 33 | 887.015         | 266.651        | 262.646         | 262.900         | 262.396        | L 9  |
| L 34 | <b>915.286</b>  | 238.382        | 234.377         | 234.629         | 234.125        | L 8  |
| R 35 | 957.511         | 210.111        | 206.106         | 206.358         | 205.854        | R 7  |
| K 36 | <b>986.135</b>  | 171.086        | 167.081         | 167.333         | 166.829        | K 6  |
| G 37 | <b>1000.590</b> | 139.062        | 135.057         | 135.309         | 134.805        | G 5  |
| N 38 | <b>1029.101</b> | 124.808        | 120.803         | 121.054         | 120.550        | N 4  |
| Y 39 | <b>1069.867</b> | 96.296         | 92.291          | 92.543          | 92.039         | Y 3  |
| A 40 | 1087.636        | 55.530         | 51.525          | 51.777          | 51.273         | A 2  |
| E 41 | 1119.887        | 37.771         | 33.766          | 34.018          | 33.514         | E 1  |

# sp | Q6GSS7 | H2A2A\_MOUSE

[Acetyl]SGRGKQGGKARAKAKSRSSRAGLQFPVGRVHLLRKGNYAE

- ▶ fragmentation table for charge state 5+
- ▶ specType=etd
- ▶ score=41.54
- ▶ F113278.dat
- ▶ query=q70034\_p1
- ▶ precursor=747.090000
- ▶ chargePrecursor=6
- ▶ itol=0.5

| AA    | c       | y              | z+1            | z+2     | z              | AA    |
|-------|---------|----------------|----------------|---------|----------------|-------|
| S[1]  | 30.221  | 896.308        | <b>893.104</b> | 0.806   | <b>892.903</b> | S[41] |
| G[2]  | 41.625  | <b>870.499</b> | 867.296        | 0.806   | 867.094        | G[40] |
| R[3]  | 72.846  | 859.095        | 855.891        | 856.093 | 855.890        | R[39] |
| G[4]  | 84.250  | 827.875        | 824.671        | 824.673 | 824.469        | G[38] |
| K[5]  | 109.869 | 816.471        | 813.267        | 813.468 | 813.065        | K[37] |
| Q[6]  | 135.481 | 790.852        | 787.648        | 787.849 | 787.446        | Q[36] |
| G[7]  | 148.885 | 786.240        | 782.036        | 782.238 | 781.834        | G[35] |
| G[8]  | 158.289 | 753.836        | 750.632        | 750.833 | 750.430        | G[34] |
| K[9]  | 183.908 | 742.431        | 739.227        | 739.429 | 739.026        | K[33] |
| A[10] | 198.116 | 716.812        | 713.608        | 713.810 | 713.407        | A[32] |
| R[11] | 229.336 | 702.605        | 699.401        | 699.603 | 699.199        | R[31] |
| A[12] | 243.543 | <b>671.385</b> | 668.181        | 668.382 | 667.979        | A[30] |
| K[13] | 269.162 | 667.177        | <b>653.973</b> | 654.175 | <b>653.772</b> | K[29] |
| A[14] | 283.370 | 631.558        | 628.354        | 628.556 | 628.153        | A[28] |
| K[15] | 308.989 | 617.351        | 614.147        | 614.349 | 613.945        | K[27] |
| S[16] | 326.395 | 591.732        | 588.528        | 588.730 | 588.326        | S[26] |
| R[17] | 357.615 | 574.325        | 571.122        | 571.323 | 570.920        | R[25] |
| S[18] | 373.022 | 543.105        | 539.901        | 540.103 | 539.700        | S[24] |
| S[19] | 392.428 | 528.699        | 522.495        | 522.697 | 522.293        | S[23] |
| R[20] | 423.648 | 508.292        | 505.089        | 505.290 | 504.887        | R[22] |
| A[21] | 437.856 | 477.072        | 473.868        | 474.070 | 473.667        | A[21] |
| G[22] | 449.260 | 462.865        | 459.661        | 459.862 | 459.459        | G[20] |
| L[23] | 471.877 | 451.460        | 448.257        | 448.458 | 448.055        | L[19] |
| Q[24] | 497.489 | 428.844        | 425.640        | 425.841 | 425.438        | Q[18] |
| F[25] | 526.902 | 403.232        | 400.028        | 400.230 | 399.827        | F[17] |
| P[26] | 546.313 | 373.818        | 370.614        | 370.816 | 370.413        | P[16] |
| V[27] | 566.126 | 354.408        | 351.204        | 351.405 | 351.002        | V[15] |
| G[28] | 577.531 | 334.594        | 331.390        | 331.592 | 331.189        | G[14] |
| R[29] | 608.751 | 323.190        | 319.986        | 320.187 | 319.784        | R[13] |
| V[30] | 628.565 | 291.969        | 288.765        | 288.967 | 288.564        | V[12] |
| H[31] | 655.976 | 272.156        | 268.952        | 269.154 | 268.750        | H[11] |
| R[32] | 687.197 | 244.744        | 241.540        | 241.742 | 241.339        | R[10] |
| L[33] | 709.814 | 213.524        | 210.320        | 210.522 | 210.118        | L[0]  |
| L[34] | 732.430 | 190.907        | 187.703        | 187.905 | 187.502        | L[8]  |
| R[35] | 763.651 | 168.290        | 165.086        | 165.288 | 164.885        | R[7]  |
| K[36] | 789.270 | 137.070        | 133.866        | 134.068 | 133.665        | K[6]  |
| G[37] | 800.674 | 111.451        | 108.247        | 108.449 | 108.046        | G[5]  |
| N[38] | 823.482 | 100.047        | 96.843         | 97.044  | 96.641         | N[4]  |
| Y[39] | 856.095 | 77.238         | 74.034         | 74.236  | 73.833         | Y[3]  |
| A[40] | 870.303 | 44.625         | 41.422         | 41.623  | 41.220         | A[2]  |
| E[41] | 896.111 | 30.418         | 27.214         | 27.416  | 27.013         | E[1]  |

# sp | Q6GSS7 | H2A2A\_MOUSE

[Acetyl]SGRGKQGGKARAKSRSSRAGLQFPVGRVHLLRKGNYAE

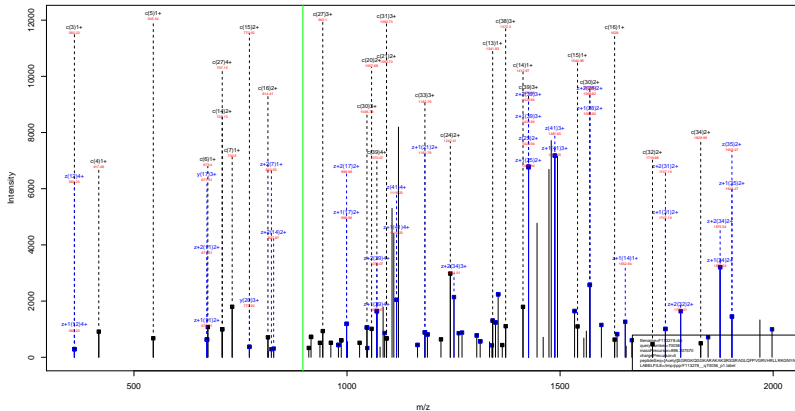



# sp | Q6GSS7 | H2A2A\_MOUSE

[Acetyl]SGRGKQGGKARAKAKSRSSRAGLQFPVGRVHRLLRKGNAYE

- ▶ fragmentation table for charge state 1+
- ▶ specType=etd
- ▶ score=71.84
- ▶ F113278.dat
- ▶ query=q70036.p1
- ▶ precursor=896.307570
- ▶ chargePrecursor=5
- ▶ itol=0.5

| AA | c  | y               | z+1      | z+2             | z               | AA              |       |
|----|----|-----------------|----------|-----------------|-----------------|-----------------|-------|
| S  | 1  | 147.076         | 4477.530 | 4461.481        | 0.000           | 4460.483        | S[41] |
| G  | 2  | 204.098         | 4348.467 | 4332.440        | 0.000           | 4331.441        | G[40] |
| R  | 3  | <b>300.199</b>  | 4291.448 | 4275.429        | 4276.435        | 4274.419        | R[39] |
| G  | 4  | <b>417.220</b>  | 4135.345 | 4119.320        | 4120.334        | 4118.310        | G[38] |
| K  | 5  | <b>545.315</b>  | 4078.323 | 4062.305        | 4063.313        | 4061.297        | K[37] |
| Q  | 6  | <b>673.374</b>  | 3926.208 | 3910.210        | 3910.218        | 3913.202        | Q[36] |
| G  | 7  | <b>730.395</b>  | 3822.170 | 3806.151        | 3807.159        | 3805.142        | G[35] |
| G  | 8  | 787.417         | 3765.148 | 3749.130        | 3750.138        | 3748.122        | G[34] |
| K  | 9  | <b>915.512</b>  | 3708.127 | 3692.108        | 3693.116        | 3691.100        | K[33] |
| A  | 10 | <b>986.549</b>  | 3590.032 | 3574.013        | 3575.021        | 3573.005        | A[32] |
| R  | 11 | 1142.650        | 3538.995 | 3492.970        | 3493.984        | 3491.966        | R[31] |
| A  | 12 | 1211.697        | 3352.894 | 3336.875        | 3337.883        | 3339.867        | A[30] |
| R  | 13 | <b>1341.782</b> | 3281.857 | 3265.838        | 3266.846        | 3264.830        | R[29] |
| A  | 14 | <b>1412.819</b> | 3153.762 | 3137.743        | 3138.751        | 3136.735        | A[28] |
| K  | 15 | <b>1540.914</b> | 3082.725 | 3066.706        | 3067.714        | 3065.698        | K[27] |
| S  | 16 | <b>1627.946</b> | 2954.630 | 2938.611        | 2939.619        | 2937.603        | S[26] |
| R  | 17 | 1784.047        | 2867.588 | 2851.570        | 2852.567        | 2850.551        | R[25] |
| S  | 18 | 1871.079        | 2713.466 | 2697.447        | 2698.456        | 2696.440        | S[24] |
| S  | 19 | 1958.111        | 2624.464 | 2608.446        | 2609.454        | 2607.438        | S[23] |
| R  | 20 | 2114.213        | 2537.432 | 2521.414        | 2522.422        | 2520.406        | R[22] |
| A  | 21 | 2185.250        | 2491.431 | 2485.413        | 2486.420        | 2484.405        | A[21] |
| G  | 22 | 2242.271        | 2310.294 | 2294.275        | 2295.283        | 2293.266        | G[20] |
| L  | 23 | 2355.308        | 2233.273 | 2217.256        | 2218.262        | 2216.246        | L[19] |
| Q  | 24 | 2483.414        | 2140.189 | 2124.170        | 2125.178        | 2123.162        | Q[18] |
| F  | 25 | 2630.482        | 2012.130 | 1996.111        | <b>1997.110</b> | 1995.104        | F[17] |
| F  | 26 | 2727.535        | 1895.062 | 1849.043        | 1850.051        | 1848.035        | F[16] |
| V  | 27 | 2826.603        | 1768.009 | 1753.990        | 1752.998        | 1750.982        | V[15] |
| G  | 28 | 2883.625        | 1668.940 | <b>1652.922</b> | 1653.930        | 1651.914        | G[14] |
| D  | 29 | 3030.726        | 1611.919 | 1595.900        | <b>1596.908</b> | 1594.892        | D[13] |
| H  | 30 | 3138.784        | 1495.818 | 1479.799        | 1480.807        | 1478.791        | H[12] |
| H  | 31 | 3275.853        | 1356.749 | 1340.731        | <b>1341.739</b> | <b>1339.723</b> | H[11] |
| R  | 32 | 3431.964        | 1219.691 | 1203.672        | 1204.680        | 1202.664        | R[10] |
| L  | 33 | 3545.038        | 1063.589 | <b>1047.571</b> | 1048.579        | <b>1046.563</b> | L[9]  |
| L  | 34 | 3658.123        | 950.500  | 934.487         | 935.495         | 933.479         | L[8]  |
| R  | 35 | 3814.224        | 837.421  | 821.403         | <b>822.410</b>  | 820.395         | R[7]  |
| K  | 36 | 3942.319        | 681.320  | 665.302         | 666.309         | 664.293         | K[6]  |
| G  | 37 | 3999.340        | 553.225  | 537.207         | 538.214         | 536.199         | G[5]  |
| N  | 38 | 4113.383        | 496.204  | 480.185         | 481.193         | 479.177         | N[4]  |
| V  | 39 | 4276.446        | 382.101  | 366.143         | 367.150         | 365.134         | V[3]  |
| A  | 40 | 4347.483        | 219.098  | 203.070         | 204.087         | 202.071         | A[2]  |
| E  | 41 | 4476.526        | 148.060  | 132.040         | 133.050         | 131.034         | E[1]  |

# sp | Q6GSS7 | H2A2A\_MOUSE

[Acetyl]SGRGKQGGKARAKAKSRSSRAGLQFPVGRVHRLLRKGN~~YAE~~

- ▶ fragmentation table for charge state 2+
- ▶ specType=etd
- ▶ score=71.84
- ▶ F113278.dat
- ▶ query=q70036.p1
- ▶ precursor=896.307570
- ▶ chargePrecursor=5
- ▶ itol=0.5

| AA | c  | w               | #s1             | #s2             | z               | AA              |       |
|----|----|-----------------|-----------------|-----------------|-----------------|-----------------|-------|
| S  | 1  | 74.062          | 2039.259        | 2231.260        | 0.804           | 2230.147        | S[41] |
| G  | 2  | 102.553         | 2174.737        | 2266.726        | 0.504           | 2166.254        | G[40] |
| R  | 3  | 180.603         | 2146.227        | 2138.217        | 2138.921        | 2117.713        | R[39] |
| G  | 4  | 209.114         | 2068.176        | 2060.167        | 2060.671        | 2059.663        | G[38] |
| K  | 5  | 273.161         | 2039.665        | 2031.656        | 2032.160        | 2031.152        | K[37] |
| G  | 6  | 327.194         | 1975.616        | 1967.607        | 1968.112        | 1967.105        | G[36] |
| G  | 7  | 385.703         | 1913.569        | <b>1903.579</b> | 1904.083        | <b>1903.075</b> | G[35] |
| G  | 8  | 394.212         | 1883.078        | <b>1875.068</b> | <b>1875.572</b> | 1874.565        | G[34] |
| K  | 9  | 458.260         | 1854.567        | 1846.558        | <b>1847.062</b> | 1846.054        | K[33] |
| A  | 10 | 493.778         | 1790.520        | 1782.510        | <b>1783.014</b> | 1782.006        | A[32] |
| R  | 11 | 571.829         | 1735.001        | <b>1746.992</b> | <b>1747.496</b> | 1746.489        | R[31] |
| A  | 12 | 609.889         | 1668.963        | 1660.953        | 1661.458        | <b>1660.437</b> | A[30] |
| K  | 13 | <b>671.395</b>  | 1643.432        | <b>1633.423</b> | <b>1633.927</b> | 1632.919        | K[29] |
| A  | 14 | <b>706.913</b>  | 1577.384        | <b>1569.375</b> | <b>1569.879</b> | 1568.871        | A[28] |
| K  | 15 | <b>770.961</b>  | 1541.866        | <b>1533.857</b> | <b>1534.360</b> | 1533.351        | K[27] |
| S  | 16 | <b>814.477</b>  | 1477.818        | 1469.809        | 1470.313        | 1469.305        | S[26] |
| R  | 17 | <b>852.527</b>  | 1404.362        | <b>1426.283</b> | 1426.787        | <b>1425.789</b> | R[25] |
| S  | 18 | <b>936.043</b>  | 1356.363        | <b>1348.243</b> | <b>1348.746</b> | 1347.739        | S[24] |
| S  | 19 | <b>979.559</b>  | <b>1312.736</b> | <b>1304.726</b> | 1305.230        | <b>1304.223</b> | S[23] |
| R  | 20 | <b>1057.610</b> | 1269.220        | 1261.210        | <b>1261.714</b> | 1260.707        | R[22] |
| A  | 21 | <b>1093.128</b> | 1191.169        | <b>1183.160</b> | 1183.664        | <b>1182.656</b> | A[21] |
| G  | 22 | 1121.639        | 1135.651        | 1147.641        | 1148.145        | 1147.137        | G[20] |
| L  | 23 | 1178.183        | 1127.146        | 1128.137        | 1129.130        | 1128.122        | L[19] |
| Q  | 24 | <b>1242.211</b> | 1063.586        | 1062.580        | 1063.083        | 1062.075        | Q[18] |
| F  | 25 | 1315.745        | 1006.599        | <b>998.559</b>  | <b>999.063</b>  | 998.055         | F[17] |
| F  | 26 | <b>1364.271</b> | 933.034         | 925.025         | 925.529         | 924.521         | F[16] |
| V  | 27 | 1413.805        | 884.500         | 876.490         | 877.003         | 876.005         | V[15] |
| G  | 28 | 1482.216        | 834.974         | 826.965         | <b>827.468</b>  | 826.461         | G[14] |
| R  | 29 | 1530.369        | 806.483         | 808.474         | 808.978         | 807.970         | R[13] |
| V  | 30 | <b>1569.901</b> | 728.413         | 720.403         | 720.907         | 719.899         | V[12] |
| H  | 31 | 1638.430        | 678.878         | <b>670.869</b>  | <b>671.373</b>  | 670.365         | H[11] |
| R  | 32 | <b>1716.481</b> | 610.349         | 602.340         | 602.843         | 601.835         | R[10] |
| L  | 33 | 1773.023        | 532.289         | 524.280         | 524.783         | 523.785         | L[9]  |
| L  | 34 | <b>1829.565</b> | 478.756         | 469.747         | 469.250         | 468.242         | L[8]  |
| R  | 35 | 1907.618        | 419.214         | 411.205         | 411.709         | 410.701         | R[7]  |
| K  | 36 | 1971.663        | 341.164         | 333.154         | 333.658         | 332.650         | K[6]  |
| G  | 37 | 2000.174        | 277.116         | 269.107         | 269.611         | 268.603         | G[5]  |
| N  | 38 | 2057.195        | 248.606         | 240.596         | 241.100         | 240.092         | N[4]  |
| V  | 39 | 2136.227        | 181.564         | 183.575         | 184.079         | 183.071         | V[3]  |
| A  | 40 | 2114.265        | 110.026         | 102.017         | 102.521         | 101.513         | A[2]  |
| E  | 41 | 2238.767        | 74.534          | 66.524          | 67.028          | 66.021          | E[1]  |

# sp | Q6GSS7 | H2A2A\_MOUSE

[Acetyl]SGRGKQGGKARAKAKSRSSRAGLQFPVGRVHRLLRKGNAYE

- ▶ fragmentation table for charge state 3+
- ▶ specType=etd
- ▶ score=71.84
- ▶ F113278.dat
- ▶ query=q70036.p1
- ▶ precursor=896.307570
- ▶ chargePrecursor=5
- ▶ itol=0.5

| AA   | c               | y              | z+1             | z+2             | z               | AA   |
|------|-----------------|----------------|-----------------|-----------------|-----------------|------|
| S 1  | 49.697          | 1493.175       | <b>1487.835</b> | 0.672           | <b>1487.499</b> | S 41 |
| G 2  | 68.704          | 1450.161       | 1444.821        | 0.672           | 1444.455        | G 40 |
| R 3  | 130.738         | 1431.154       | <b>1425.814</b> | <b>1426.150</b> | <b>1425.478</b> | R 39 |
| K 4  | 139.745         | 1379.120       | 1373.780        | 1374.116        | 1373.444        | K 38 |
| K 5  | 162.443         | 1360.113       | <b>1354.773</b> | <b>1355.109</b> | <b>1354.437</b> | K 37 |
| Q 6  | 235.330         | 1317.414       | <b>1312.075</b> | <b>1312.411</b> | 1311.761        | Q 36 |
| G 7  | 244.137         | 1274.725       | 1268.785        | <b>1269.725</b> | 1269.051        | G 35 |
| G 8  | 263.144         | 1255.721       | 1250.381        | <b>1250.717</b> | 1250.045        | G 34 |
| K 9  | 305.842         | 1236.714       | 1231.374        | 1231.710        | 1231.038        | K 33 |
| A 10 | 320.521         | 1194.015       | <b>1188.676</b> | <b>1189.012</b> | <b>1188.340</b> | A 32 |
| R 11 | 381.555         | 1170.136       | <b>1164.997</b> | <b>1165.333</b> | 1164.661        | R 31 |
| A 12 | 409.234         | 1118.303       | 1112.963        | 1113.299        | 1112.627        | A 30 |
| R 13 | 447.932         | 1094.024       | 1089.254        | 1089.620        | 1088.948        | R 29 |
| A 14 | 471.611         | 1051.925       | <b>1046.586</b> | <b>1046.922</b> | 1046.250        | A 28 |
| K 15 | 514.310         | 1028.246       | 1022.907        | 1023.243        | 1022.571        | K 27 |
| S 16 | 543.320         | 985.548        | <b>980.208</b>  | 980.544         | <b>979.873</b>  | S 26 |
| R 17 | 595.354         | 956.537        | 951.198         | 951.534         | 950.862         | R 25 |
| S 18 | 624.368         | 924.924        | 919.164         | 919.500         | 918.828         | S 24 |
| S 19 | 653.375         | 875.493        | 870.153         | 870.489         | 869.817         | S 23 |
| R 20 | 705.409         | 846.483        | 841.143         | 841.479         | 840.807         | R 22 |
| A 21 | 729.088         | 794.449        | 789.109         | 789.445         | 788.773         | A 21 |
| G 22 | 748.095         | <b>770.770</b> | 765.430         | 765.766         | 765.094         | G 20 |
| L 23 | 785.730         | 731.762        | 746.423         | 746.759         | 746.087         | L 19 |
| Q 24 | 828.478         | 714.069        | 708.729         | 709.064         | 708.392         | Q 19 |
| F 25 | 877.409         | <b>671.382</b> | 666.042         | 666.378         | 665.706         | F 17 |
| F 26 | <b>909.850</b>  | 622.359        | 617.019         | 617.355         | 616.683         | F 16 |
| V 27 | <b>942.873</b>  | 590.028        | 584.688         | 585.024         | 584.352         | V 15 |
| G 28 | <b>961.880</b>  | 556.985        | 551.645         | 551.981         | 551.309         | G 14 |
| V 29 | 1013.014        | 437.878        | 432.538         | 432.874         | 432.202         | V 13 |
| V 30 | <b>1046.936</b> | 488.944        | 483.604         | 483.941         | 483.269         | V 12 |
| H 31 | <b>1092.623</b> | 452.921        | 447.581         | 447.918         | 447.246         | H 11 |
| R 32 | 1144.656        | 407.735        | 402.395         | 402.731         | 402.059         | R 10 |
| L 33 | <b>1182.351</b> | 355.201        | 349.861         | 350.198         | 349.526         | L 9  |
| L 34 | <b>1220.046</b> | 317.507        | 312.167         | 312.503         | 311.831         | L 8  |
| R 35 | 1272.079        | 279.812        | 274.472         | 274.808         | 274.136         | R 7  |
| K 36 | 1314.778        | 237.778        | 232.438         | 232.775         | 232.103         | K 6  |
| G 37 | 1333.785        | 185.080        | 179.740         | 180.076         | 179.404         | G 5  |
| N 38 | <b>1371.799</b> | 166.073        | 160.733         | 161.069         | 160.397         | N 4  |
| V 39 | <b>1426.154</b> | 128.058        | 122.719         | 123.055         | 122.383         | V 3  |
| A 40 | 1449.831        | 73.704         | 68.364          | 68.700          | 68.028          | A 2  |
| E 41 | 1492.387        | 30.025         | 44.685          | 45.021          | 44.349          | E 1  |

# sp | Q6GSS7 | H2A2A\_MOUSE

[Acetyl]SGRGKQGGKARAKAKSRSSRAGLQFPVGRVHRLLRKGN<sup>+</sup>YAE

- ▶ fragmentation table for charge state 4+
- ▶ specType=etd
- ▶ score=71.84
- ▶ F113278.dat
- ▶ query=q70036.p1
- ▶ precursor=896.307570
- ▶ chargePrecursor=5
- ▶ itol=0.5

| AA    | c               | y               | #=1             | #=2             | #=3             | AA    |
|-------|-----------------|-----------------|-----------------|-----------------|-----------------|-------|
| S[1]  | 37.505          | 1120.147        | <b>1116.128</b> | 0.705           | <b>1115.876</b> | S[41] |
| G[2]  | 51.780          | <b>1087.872</b> | 1053.585        | 0.795           | 1023.610        | G[40] |
| R[3]  | 90.805          | 1073.617        | <b>1069.612</b> | <b>1069.864</b> | 1069.360        | R[39] |
| G[4]  | 109.061         | 1034.592        | 1030.587        | 1030.839        | 1030.135        | G[38] |
| K[5]  | 137.084         | 1020.139        | 1016.332        | 1016.584        | 1016.080        | K[37] |
| Q[6]  | 169.059         | 998.312         | 994.305         | 994.556         | 994.050         | Q[36] |
| G[7]  | 183.354         | 956.296         | 952.291         | 952.542         | 952.044         | G[35] |
| G[8]  | 197.610         | 942.043         | 938.038         | 938.290         | 937.792         | G[34] |
| K[9]  | 229.633         | 927.787         | 923.783         | 924.034         | 923.531         | K[33] |
| A[10] | 247.393         | 895.763         | 891.759         | 892.011         | 891.507         | A[32] |
| R[11] | 286.418         | 878.004         | 873.999         | 874.251         | 873.748         | R[31] |
| A[12] | 354.177         | 838.979         | 834.974         | 835.226         | 834.722         | A[30] |
| K[13] | 336.201         | 821.220         | 817.215         | 817.467         | 816.964         | K[29] |
| A[14] | 353.980         | 789.190         | 785.185         | 785.443         | 784.939         | A[28] |
| K[15] | 385.904         | 771.431         | 767.422         | 767.684         | 767.180         | K[27] |
| S[16] | 407.742         | 739.413         | 735.408         | 735.660         | 735.156         | S[26] |
| R[17] | 446.767         | 717.955         | 713.950         | 714.202         | 713.700         | R[25] |
| S[18] | 468.526         | 678.930         | 674.925         | 675.177         | 674.674         | S[24] |
| S[19] | 490.283         | 656.972         | 652.967         | 653.219         | 652.715         | S[23] |
| R[20] | 529.309         | 635.114         | 631.109         | 631.361         | 630.857         | R[22] |
| A[21] | 547.088         | 596.089         | 592.084         | 592.336         | 591.832         | A[21] |
| Q[22] | 561.323         | 578.329         | 574.324         | 574.576         | 574.072         | Q[20] |
| L[23] | 589.984         | 654.074         | 650.069         | 650.321         | 649.817         | L[19] |
| Q[24] | 621.609         | 535.803         | 531.798         | 532.050         | 531.546         | Q[18] |
| F[25] | 658.376         | 503.789         | 499.783         | 500.035         | 499.531         | F[17] |
| F[26] | 662.639         | 467.021         | 463.016         | 463.268         | 462.764         | F[16] |
| V[27] | <b>707.406</b>  | 442.750         | 438.753         | 439.005         | 438.501         | V[15] |
| Q[28] | 721.662         | 417.991         | 413.985         | 414.238         | 413.734         | Q[14] |
| R[29] | 760.687         | 403.735         | 399.711         | 399.962         | 399.458         | R[13] |
| V[30] | 785.454         | 364.710         | <b>360.705</b>  | 360.957         | <b>360.453</b>  | V[12] |
| H[31] | 816.710         | 339.843         | 335.938         | 336.190         | 335.686         | H[11] |
| R[32] | 858.744         | 305.678         | 301.673         | 301.925         | 301.421         | R[10] |
| L[33] | 887.615         | 266.657         | 262.648         | 262.900         | 262.396         | L[9]  |
| L[34] | <b>915.286</b>  | 238.362         | 234.377         | 234.628         | 234.123         | L[8]  |
| R[35] | 934.311         | 210.111         | 206.100         | 206.352         | 205.852         | R[7]  |
| K[36] | <b>966.335</b>  | 171.088         | 167.081         | 167.333         | 166.829         | K[6]  |
| G[37] | 1000.590        | 139.062         | 135.057         | 135.309         | 134.805         | G[5]  |
| N[38] | <b>1029.101</b> | 124.806         | 120.802         | 121.054         | 120.550         | N[4]  |
| V[39] | <b>1069.867</b> | 96.296          | 92.291          | 92.543          | 92.039          | V[3]  |
| A[40] | 1097.636        | 58.530          | 54.525          | 54.777          | 54.272          | A[2]  |
| E[41] | 1119.887        | 37.771          | 33.766          | 34.018          | 33.514          | E[1]  |



# sp | Q6GSS7 | H2A2A\_MOUSE

[Acetyl]SGRGKQGGKARAKAKSRSSRAGLQFPVGRVHRLLRKGN~~YAE~~

- ▶ fragmentation table for charge state 1+
- ▶ specType=etd
- ▶ score=41.87
- ▶ F113278.dat
- ▶ query=q70038.p1
- ▶ precursor=747.091020
- ▶ chargePrecursor=6
- ▶ itol=0.5

| AA | c  | y               | z+1      | z+2             | z               | AA             |       |
|----|----|-----------------|----------|-----------------|-----------------|----------------|-------|
| S  | 1  | 147.076         | 4477.515 | 4481.491        | 0.000           | 4460.481       | S[41] |
| G  | 2  | 304.098         | 4348.467 | 4332.440        | 0.000           | 4331.441       | G[40] |
| R  | 3  | <b>360.199</b>  | 4291.446 | 4275.427        | 4276.435        | 4274.419       | R[39] |
| G  | 4  | <b>417.270</b>  | 4135.345 | 4119.326        | 4120.334        | 4118.319       | G[38] |
| K  | 5  | <b>545.315</b>  | 4078.323 | 4062.305        | 4063.313        | 4061.291       | K[37] |
| Q  | 6  | <b>673.174</b>  | 3950.228 | 3934.210        | 3935.218        | 3933.202       | Q[36] |
| G  | 7  | <b>730.395</b>  | 3822.170 | 3806.151        | 3807.159        | 3805.143       | G[35] |
| G  | 8  | 787.417         | 3765.148 | 3749.130        | 3750.138        | 3748.122       | G[34] |
| K  | 9  | <b>915.512</b>  | 3708.127 | 3692.108        | 3693.116        | 3691.100       | K[33] |
| A  | 10 | 986.549         | 3680.032 | 3664.013        | 3665.021        | 3663.005       | A[32] |
| R  | 11 | 1142.650        | 3558.995 | 3492.975        | 3493.984        | 3491.968       | R[31] |
| A  | 12 | 1213.687        | 3352.984 | 3336.975        | 3337.983        | 3335.966       | A[30] |
| R  | 13 | 1541.782        | 3281.857 | 3265.838        | 3266.846        | 3264.830       | R[29] |
| A  | 14 | 1412.819        | 3153.762 | 3137.743        | 3138.751        | 3136.735       | A[28] |
| K  | 15 | <b>1540.914</b> | 3082.725 | 3066.706        | 3067.714        | 3065.698       | K[27] |
| S  | 16 | 1627.946        | 2954.630 | 2938.611        | 2939.619        | 2937.603       | S[26] |
| R  | 17 | 1784.047        | 2887.598 | 2871.579        | 2872.587        | 2870.571       | R[25] |
| S  | 18 | 1871.079        | 2711.496 | 2695.477        | 2696.486        | 2694.470       | S[24] |
| S  | 19 | 1958.111        | 2624.464 | 2608.446        | 2609.454        | 2607.438       | S[23] |
| R  | 20 | 2114.213        | 2537.432 | 2521.414        | 2522.422        | 2520.406       | R[22] |
| A  | 21 | 2185.250        | 2381.331 | 2365.313        | 2366.320        | 2364.305       | A[21] |
| G  | 22 | 2242.271        | 2310.294 | 2294.275        | 2295.283        | 2293.266       | G[20] |
| L  | 23 | 2355.355        | 2253.273 | 2237.254        | 2238.262        | 2236.246       | L[19] |
| Q  | 24 | 2483.414        | 2140.189 | 2124.170        | 2125.178        | 2123.162       | Q[18] |
| F  | 25 | 2630.482        | 2022.130 | 1996.111        | 1997.119        | 1995.104       | F[17] |
| F  | 26 | 2727.538        | 1885.062 | 1849.043        | 1850.051        | 1848.035       | F[16] |
| V  | 27 | 2826.603        | 1768.009 | 1751.990        | 1752.998        | 1750.982       | V[15] |
| G  | 28 | 2883.625        | 1658.940 | 1652.922        | 1653.930        | 1651.914       | G[14] |
| R  | 29 | 3039.726        | 1611.919 | 1595.900        | <b>1596.908</b> | 1594.892       | R[13] |
| V  | 30 | 3138.784        | 1485.818 | 1439.799        | 1440.807        | 1438.791       | V[12] |
| H  | 31 | 3275.853        | 1356.740 | 1340.721        | 1341.730        | 1339.713       | H[11] |
| R  | 32 | 3431.954        | 1219.601 | 1203.672        | <b>1204.680</b> | 1202.664       | R[10] |
| L  | 33 | 3545.038        | 1063.509 | <b>1047.571</b> | 1048.579        | 1046.563       | L[9]  |
| L  | 34 | 3658.123        | 950.505  | 934.487         | 935.495         | 933.479        | L[8]  |
| R  | 35 | 3814.224        | 837.421  | 821.403         | 822.410         | <b>820.395</b> | R[7]  |
| K  | 36 | 3932.319        | 681.320  | 665.302         | 666.309         | 664.293        | K[6]  |
| G  | 37 | 3999.340        | 553.225  | 537.207         | 538.214         | 536.199        | G[5]  |
| N  | 38 | 4113.383        | 496.204  | 480.185         | 481.193         | 479.177        | N[4]  |
| Y  | 39 | 4276.446        | 382.161  | 366.142         | 367.150         | 365.134        | Y[3]  |
| A  | 40 | 4347.483        | 219.098  | 203.079         | 204.087         | 202.071        | A[2]  |
| E  | 41 | 4476.526        | 148.060  | 132.042         | 133.050         | 131.034        | E[1]  |

# sp | Q6GSS7 | H2A2A\_MOUSE

[Acetyl]SGRGKQGGKARAKAKSRSSRAGLQFPVGRVHRLLRKGNAYE

- ▶ fragmentation table for charge state 2+
- ▶ specType=etd
- ▶ score=41.87
- ▶ F113278.dat
- ▶ query=q70038.p1
- ▶ precursor=747.091020
- ▶ chargePrecursor=6
- ▶ itol=0.5

| AA   | c               | y               | z+1             | z+2             | z              | AA   |
|------|-----------------|-----------------|-----------------|-----------------|----------------|------|
| S 1  | 74.042          | 2239.250        | 2231.240        | 0.504           | 2230.740       | S 41 |
| G 2  | 102.553         | 2174.737        | 2166.726        | 0.504           | 2166.234       | G 40 |
| R 3  | 180.603         | 2146.227        | 2138.217        | 2138.721        | 2137.711       | R 39 |
| G 4  | 209.114         | 2068.178        | 2060.167        | 2060.671        | 2059.663       | G 38 |
| K 5  | 273.161         | 2039.665        | 2031.656        | 2032.160        | 2031.152       | K 37 |
| Q 6  | 337.193         | 1975.613        | 1967.600        | 1968.112        | 1967.105       | Q 36 |
| G 7  | 365.703         | 1911.560        | 1903.570        | <b>1904.083</b> | 1903.075       | G 35 |
| G 8  | 394.212         | 1883.078        | 1875.088        | <b>1875.572</b> | 1874.565       | G 34 |
| K 9  | 458.260         | 1854.567        | <b>1846.558</b> | <b>1847.062</b> | 1846.054       | K 33 |
| A 10 | 493.778         | 1790.520        | 1782.510        | 1783.014        | 1782.006       | A 32 |
| R 11 | 577.829         | 1755.001        | 1746.992        | 1747.496        | 1746.488       | R 31 |
| A 12 | <b>607.347</b>  | 1676.951        | 1668.941        | 1669.445        | 1668.437       | A 30 |
| R 13 | <b>671.395</b>  | 1641.432        | 1633.423        | 1633.927        | 1632.919       | R 29 |
| A 14 | <b>706.913</b>  | 1577.384        | <b>1569.375</b> | <b>1569.879</b> | 1568.871       | A 28 |
| K 15 | <b>770.961</b>  | 1541.866        | <b>1533.857</b> | <b>1534.360</b> | 1533.351       | K 27 |
| S 16 | <b>814.477</b>  | 1477.818        | <b>1469.809</b> | <b>1470.313</b> | 1469.305       | S 26 |
| R 17 | <b>892.527</b>  | 1434.302        | <b>1426.293</b> | <b>1426.797</b> | 1425.789       | R 25 |
| S 18 | 938.833         | 1359.252        | 1351.243        | 1351.746        | 1350.739       | S 24 |
| S 19 | <b>979.559</b>  | <b>1312.736</b> | <b>1304.726</b> | <b>1305.230</b> | 1304.223       | S 23 |
| R 20 | <b>1057.610</b> | <b>1269.220</b> | 1261.210        | <b>1261.714</b> | 1260.707       | R 22 |
| A 21 | <b>1093.128</b> | 1191.169        | <b>1183.160</b> | <b>1183.664</b> | 1182.656       | A 21 |
| G 22 | 1121.639        | 1155.651        | 1147.641        | <b>1148.145</b> | 1147.137       | G 20 |
| L 23 | 1178.303        | 1127.145        | 1119.135        | 1119.639        | 1118.631       | L 19 |
| Q 24 | <b>1242.211</b> | <b>1070.590</b> | <b>1062.589</b> | <b>1063.093</b> | 1062.085       | Q 19 |
| F 25 | 1315.748        | 1008.566        | <b>998.559</b>  | <b>999.063</b>  | 998.055        | F 17 |
| F 26 | 1364.271        | 933.034         | 925.025         | 925.529         | <b>924.521</b> | F 16 |
| V 27 | 1413.805        | 884.506         | 876.499         | 877.003         | 875.995        | V 15 |
| G 28 | 1442.316        | 834.974         | 826.965         | 827.468         | 826.461        | G 14 |
| R 29 | 1525.387        | 809.463         | <b>798.454</b>  | <b>798.958</b>  | 797.950        | R 13 |
| V 30 | <b>1569.901</b> | 728.931         | 720.921         | 721.425         | 720.419        | V 12 |
| H 31 | 1638.430        | 678.878         | 670.869         | <b>671.373</b>  | 670.365        | H 11 |
| R 32 | 1716.481        | 610.340         | 602.330         | 602.833         | 601.826        | R 10 |
| L 33 | 1773.023        | 532.298         | 524.289         | 524.793         | 523.785        | L 9  |
| L 34 | 1826.565        | 475.756         | 467.747         | 468.251         | 467.243        | L 8  |
| R 35 | 1867.615        | 419.214         | 411.205         | 411.709         | 410.701        | R 7  |
| K 36 | 1971.663        | 341.184         | 333.174         | 333.678         | 332.670        | K 6  |
| G 37 | 2000.174        | 277.116         | 269.107         | 269.611         | 268.603        | G 5  |
| N 38 | 2067.195        | 248.606         | 240.596         | 241.100         | 240.092        | N 4  |
| V 39 | 2138.727        | 191.584         | 183.575         | 184.079         | 183.071        | V 3  |
| A 40 | 2174.245        | 116.052         | 108.043         | 108.547         | 107.539        | A 2  |
| E 41 | 2238.787        | 74.532          | 66.524          | 67.028          | 66.021         | E 1  |

# sp | Q6GSS7 | H2A2A\_MOUSE

[Acetyl]SGRGKQGGKARAKAKSRSSRAGLQFPVGRVHLLRKGN<sup>YAE</sup>

- ▶ fragmentation table for charge state 3+
- ▶ specType=etd
- ▶ score=41.87
- ▶ F113278.dat
- ▶ query=q70038.p1
- ▶ precursor=747.091020
- ▶ chargePrecursor=6
- ▶ itol=0.5

| AA | c  | y               | #s1             | #s2             | z               | AA              |       |
|----|----|-----------------|-----------------|-----------------|-----------------|-----------------|-------|
| S  | 1  | 489.607         | 1492.178        | <b>1487.835</b> | 0.872           | 3487.404        | S[1]  |
| G  | 2  | 66.704          | 1450.181        | 1444.521        | 0.672           | 1444.485        | G[2]  |
| R  | 3  | 1307.180        | 1431.154        | 1425.814        | <b>1420.150</b> | 1425.478        | R[3]  |
| G  | 4  | 139.745         | 1379.120        | <b>1373.780</b> | <b>1374.116</b> | 1373.444        | G[3]  |
| K  | 5  | 182.443         | 1360.113        | 1354.773        | <b>1355.109</b> | 1354.437        | K[37] |
| Q  | 6  | 225.130         | 1347.444        | <b>1312.075</b> | <b>1312.411</b> | 1311.730        | Q[58] |
| G  | 7  | 244.137         | 1314.725        | <b>1265.389</b> | <b>1269.725</b> | 1269.055        | G[55] |
| G  | 8  | 263.144         | 1295.721        | 1256.381        | 1250.717        | 1250.045        | G[34] |
| K  | 9  | 305.642         | 1236.714        | <b>1231.374</b> | 1231.710        | <b>1231.038</b> | K[33] |
| A  | 10 | 329.521         | 1194.010        | 1188.070        | <b>1189.012</b> | 1188.340        | A[32] |
| R  | 11 | 381.555         | <b>1170.336</b> | 1164.907        | 1165.233        | 1164.661        | R[31] |
| A  | 12 | 405.234         | 1133.303        | 1113.902        | 1113.998        | 1112.929        | A[38] |
| K  | 13 | 447.932         | 1094.624        | <b>1089.284</b> | <b>1089.620</b> | 1085.942        | K[29] |
| A  | 14 | 491.611         | 1051.925        | 1046.530        | <b>1046.922</b> | 1046.250        | A[28] |
| K  | 15 | 514.310         | 1028.246        | <b>1022.907</b> | <b>1023.243</b> | 1022.571        | K[27] |
| S  | 16 | 543.320         | 985.548         | <b>980.208</b>  | <b>980.544</b>  | <b>979.873</b>  | S[26] |
| R  | 17 | 595.254         | 956.537         | <b>951.198</b>  | <b>951.534</b>  | 950.862         | R[25] |
| S  | 18 | 624.365         | 904.504         | 882.134         | 882.800         | 880.520         | S[24] |
| S  | 19 | 653.375         | 875.493         | <b>870.153</b>  | <b>870.489</b>  | 869.817         | S[23] |
| R  | 20 | <b>705.409</b>  | 846.482         | <b>841.143</b>  | <b>841.479</b>  | 840.807         | R[22] |
| A  | 21 | 729.088         | 794.449         | 780.109         | 780.445         | 780.773         | A[21] |
| Q  | 22 | 748.095         | 770.710         | 765.430         | 765.766         | 765.094         | Q[20] |
| L  | 23 | <b>785.790</b>  | 751.762         | 746.423         | 746.759         | 746.087         | L[19] |
| Q  | 24 | <b>828.476</b>  | 714.085         | 708.725         | 709.064         | 708.392         | Q[18] |
| F  | 25 | 877.409         | <b>671.382</b>  | 666.042         | 666.378         | 665.706         | F[17] |
| F  | 26 | 909.950         | 622.359         | 617.019         | 617.355         | 616.683         | F[16] |
| V  | 27 | <b>942.873</b>  | 590.006         | 584.668         | 585.004         | 584.332         | V[15] |
| Q  | 28 | 961.860         | 556.985         | 551.645         | 551.981         | 551.309         | Q[14] |
| R  | 29 | 1013.914        | 519.976         | 514.638         | 514.974         | 514.302         | R[13] |
| V  | 30 | <b>1046.936</b> | 485.944         | 480.605         | 480.941         | 480.269         | V[12] |
| H  | 31 | 1092.623        | 452.921         | 447.582         | 447.918         | 447.246         | H[11] |
| R  | 32 | 1144.656        | 407.235         | 401.895         | 402.231         | 401.560         | R[10] |
| L  | 33 | 1182.351        | 355.201         | 349.862         | 350.198         | 349.526         | L[9]  |
| L  | 34 | 1230.646        | 319.509         | 314.169         | 314.505         | 313.833         | L[8]  |
| R  | 35 | 1272.019        | 273.812         | 274.472         | 274.808         | 274.136         | R[7]  |
| K  | 36 | 1314.778        | 227.778         | 222.439         | 222.775         | 222.103         | K[6]  |
| G  | 37 | 1333.785        | 185.880         | 179.740         | 180.076         | 179.404         | G[5]  |
| N  | 38 | 1371.799        | 146.873         | 140.733         | 141.069         | 140.397         | N[4]  |
| V  | 39 | <b>1426.154</b> | 108.098         | 102.719         | 103.055         | 102.383         | V[3]  |
| A  | 40 | 1443.813        | 73.344          | 68.384          | 68.720          | 68.048          | A[2]  |
| E  | 41 | 1492.847        | 30.025          | 44.638          | 45.021          | 44.349          | E[1]  |



# sp | Q6GSS7 | H2A2A\_MOUSE

[Acetyl]SGRGKQGGKARAKAKSRSSRAGLQFPVGRVHRLLRKGN<sup>YAE</sup>

- ▶ fragmentation table for charge state 4+
- ▶ specType=etd
- ▶ score=41.87
- ▶ F113278.dat
- ▶ query=q70038.p1
- ▶ precursor=747.091020
- ▶ chargePrecursor=6
- ▶ itol=0.5

| AA | c  | y               | #=1             | #=2             | #=3             | #=4             | AA    |
|----|----|-----------------|-----------------|-----------------|-----------------|-----------------|-------|
| S  | 1  | 37.505          | <b>1120.133</b> | <b>1116.128</b> | 0.705           | <b>1115.876</b> | S[41] |
| G  | 2  | 51.780          | 1027.872        | 1063.565        | 0.795           | 1083.610        | G[40] |
| R  | 3  | 90.805          | <b>1073.617</b> | 1069.612        | <b>1069.804</b> | 1069.360        | R[39] |
| G  | 4  | 109.001         | 1034.502        | <b>1030.587</b> | <b>1030.839</b> | 1030.135        | G[38] |
| K  | 5  | 137.084         | 1020.139        | 1016.332        | <b>1016.584</b> | 1016.080        | K[37] |
| G  | 6  | 169.059         | 998.312         | <b>994.308</b>  | <b>994.260</b>  | 996.223         | G[36] |
| G  | 7  | 193.354         | 956.296         | <b>952.293</b>  | <b>952.545</b>  | <b>952.041</b>  | G[35] |
| G  | 8  | 197.610         | 942.043         | 938.038         | <b>938.290</b>  | 937.995         | G[34] |
| K  | 9  | 229.633         | 927.787         | <b>923.783</b>  | <b>924.034</b>  | 923.531         | K[33] |
| A  | 10 | 247.393         | 895.763         | 891.759         | 892.011         | 891.507         | A[32] |
| R  | 11 | 286.418         | 878.004         | 873.999         | <b>874.251</b>  | 873.748         | R[31] |
| A  | 12 | 304.177         | 838.979         | 834.974         | 835.226         | 834.722         | A[30] |
| R  | 13 | 336.201         | 821.220         | 817.215         | 817.467         | 816.963         | R[29] |
| A  | 14 | 353.960         | 789.199         | 785.194         | 785.443         | 784.939         | A[28] |
| K  | 15 | 385.984         | <b>771.437</b>  | 767.432         | 767.684         | 767.180         | K[27] |
| S  | 16 | 407.742         | 739.413         | 735.408         | 735.660         | 735.156         | S[26] |
| R  | 17 | 446.767         | 717.955         | 713.950         | 714.202         | 713.698         | R[25] |
| S  | 18 | 468.526         | 678.930         | 674.925         | 674.977         | 674.977         | S[24] |
| S  | 19 | 490.283         | 656.972         | 652.967         | 653.119         | 652.615         | S[23] |
| R  | 20 | 529.309         | 635.114         | 631.109         | 631.361         | 630.857         | R[22] |
| A  | 21 | 547.068         | 596.089         | 592.084         | 592.336         | 591.832         | A[21] |
| G  | 22 | 561.323         | 578.329         | 574.324         | 574.576         | 574.072         | G[20] |
| L  | 23 | 589.084         | 648.074         | 644.069         | 644.321         | 643.817         | L[19] |
| Q  | 24 | 621.609         | 535.803         | 531.798         | 532.050         | 531.546         | Q[18] |
| F  | 25 | 658.376         | 503.789         | 499.783         | 500.035         | 499.531         | F[17] |
| F  | 26 | 662.639         | 467.021         | 463.016         | 463.268         | 462.764         | F[16] |
| V  | 27 | <b>707.406</b>  | 442.750         | 438.753         | 439.005         | 438.501         | V[15] |
| G  | 28 | 721.662         | 417.991         | 413.986         | 414.238         | 413.734         | G[14] |
| R  | 29 | 760.687         | 403.735         | 399.711         | 399.963         | 399.459         | R[13] |
| V  | 30 | 785.454         | 364.710         | <b>360.705</b>  | 360.957         | <b>360.453</b>  | V[12] |
| H  | 31 | <b>819.719</b>  | 339.643         | 335.638         | 336.100         | 335.600         | H[11] |
| R  | 32 | 858.744         | 305.678         | 301.673         | 301.925         | 301.421         | R[10] |
| L  | 33 | 887.015         | 266.653         | 262.648         | 262.900         | 262.396         | L[9]  |
| L  | 34 | <b>915.286</b>  | 238.362         | 234.357         | 234.609         | 234.105         | L[8]  |
| R  | 35 | 954.310         | 210.111         | 206.106         | 206.358         | 205.854         | R[7]  |
| K  | 36 | 986.335         | 171.086         | 167.081         | 167.333         | 166.829         | K[6]  |
| G  | 37 | <b>1006.590</b> | 139.062         | 135.057         | 135.309         | 134.805         | G[5]  |
| N  | 38 | <b>1029.101</b> | 124.806         | 120.802         | 121.054         | 120.550         | N[4]  |
| V  | 39 | <b>1069.867</b> | 96.296          | 92.291          | 92.543          | 92.039          | V[3]  |
| A  | 40 | 1097.626        | 58.530          | 54.525          | 54.777          | 54.273          | A[2]  |
| E  | 41 | 1119.887        | 37.771          | 33.766          | 34.018          | 33.514          | E[1]  |

# sp | Q6GSS7 | H2A2A\_MOUSE

[Acetyl]SGRGKQGGKARAKAKSRSSRAGLQFPVGRVHLLRKGNYAE

- ▶ fragmentation table for charge state 5+
- ▶ specType=etd
- ▶ score=41.87
- ▶ F113278.dat
- ▶ query=q70038\_p1
- ▶ precursor=747.091020
- ▶ chargePrecursor=6
- ▶ itol=0.5

| AA | c  | y              | z+1            | z#2            | z              | AA             |   |    |
|----|----|----------------|----------------|----------------|----------------|----------------|---|----|
| S  | 1  | 30.221         | <b>896.308</b> | <b>893.104</b> | 0.806          | <b>892.903</b> | S | 41 |
| G  | 2  | 41.625         | <b>870.499</b> | 867.296        | 0.806          | 867.094        | G | 40 |
| R  | 3  | 72.846         | <b>859.095</b> | <b>855.891</b> | <b>856.093</b> | 855.690        | R | 39 |
| G  | 4  | 84.250         | 827.875        | 824.671        | 824.873        | 824.469        | G | 38 |
| K  | 5  | 109.869        | 816.471        | 813.267        | 813.468        | 813.065        | K | 37 |
| Q  | 6  | 135.481        | 790.952        | 787.648        | 787.849        | 787.446        | Q | 36 |
| G  | 7  | 146.885        | 765.240        | 762.036        | 762.238        | 761.834        | G | 35 |
| G  | 8  | 158.289        | 751.836        | 750.632        | 750.833        | 750.430        | G | 34 |
| K  | 9  | 183.908        | 742.431        | 739.227        | 739.429        | 739.026        | K | 33 |
| A  | 10 | 198.116        | 716.812        | 713.608        | 713.810        | 713.407        | A | 32 |
| R  | 11 | 229.336        | 702.605        | 699.401        | 699.603        | 699.199        | R | 31 |
| A  | 12 | 243.543        | <b>671.385</b> | 668.181        | 668.382        | 667.979        | A | 30 |
| K  | 13 | 269.162        | 657.177        | 653.973        | 654.175        | 653.772        | K | 29 |
| A  | 14 | 283.370        | 631.558        | 628.354        | 628.556        | 628.153        | A | 28 |
| K  | 15 | 308.989        | 617.351        | 614.147        | 614.349        | 613.945        | K | 27 |
| S  | 16 | 326.395        | 591.732        | 588.528        | 588.730        | 588.326        | S | 26 |
| R  | 17 | 357.615        | 574.325        | 571.122        | 571.323        | 570.920        | R | 25 |
| S  | 18 | 375.022        | 548.105        | 539.901        | 540.103        | 539.700        | S | 24 |
| S  | 19 | 392.428        | 525.689        | 522.485        | 522.687        | 522.283        | S | 23 |
| R  | 20 | 423.648        | 508.282        | 505.079        | 505.280        | 504.877        | R | 22 |
| A  | 21 | 437.856        | 477.072        | 473.868        | 474.070        | 473.667        | A | 21 |
| G  | 22 | 449.260        | 462.865        | 459.661        | 459.862        | 459.459        | G | 20 |
| L  | 23 | 471.877        | 451.460        | 448.257        | 448.458        | 448.055        | L | 19 |
| Q  | 24 | 497.489        | 428.844        | 425.640        | 425.841        | 425.438        | Q | 18 |
| F  | 25 | 528.902        | 403.232        | 400.028        | 400.230        | 399.827        | F | 17 |
| P  | 26 | 546.313        | 373.816        | 370.614        | 370.816        | 370.413        | P | 16 |
| V  | 27 | 565.126        | 354.408        | 351.204        | 351.405        | 351.002        | V | 15 |
| G  | 28 | 577.531        | 334.594        | 331.390        | 331.592        | 331.189        | G | 14 |
| R  | 29 | 608.751        | 323.190        | 319.986        | 320.187        | 319.784        | R | 13 |
| V  | 30 | 628.565        | 291.969        | 288.766        | 288.967        | 288.564        | V | 12 |
| H  | 31 | 658.976        | 272.156        | 268.952        | 269.154        | 268.750        | H | 11 |
| K  | 32 | 687.197        | 244.744        | 241.540        | 241.742        | 241.339        | K | 10 |
| L  | 33 | 709.814        | 213.524        | 210.320        | 210.522        | 210.118        | L | 9  |
| L  | 34 | 732.430        | 190.907        | 187.703        | 187.905        | 187.502        | L | 8  |
| R  | 35 | 763.651        | 168.290        | 165.086        | 165.288        | 164.885        | R | 7  |
| K  | 36 | 789.270        | 137.070        | 133.866        | 134.068        | 133.665        | K | 6  |
| G  | 37 | 830.074        | 111.451        | 108.247        | 108.449        | 108.046        | G | 5  |
| N  | 38 | 823.482        | 100.047        | 96.843         | 97.044         | 96.641         | N | 4  |
| V  | 39 | <b>856.095</b> | 77.238         | 74.034         | 74.236         | 73.833         | V | 3  |
| A  | 40 | <b>870.303</b> | 44.625         | 41.422         | 41.623         | 41.220         | A | 2  |
| E  | 41 | 896.111        | 30.418         | 27.214         | 27.416         | 27.013         | E | 1  |



# sp | Q6GSS7 | H2A2A\_MOUSE

[Acetyl]SGRGKQGGKARAKAKSRSSRAGLQFPVGRVHRLLRKGNAYE

- ▶ fragmentation table for charge state 1+
- ▶ specType=etd
- ▶ score=40.38
- ▶ F113278.dat
- ▶ query=q70050.p1
- ▶ precursor=747.091330
- ▶ chargePrecursor=6
- ▶ itol=0.5

| AA   | c               | y        | z+1             | z+2             | z               | AA   |
|------|-----------------|----------|-----------------|-----------------|-----------------|------|
| S 1  | 147.076         | 4477.530 | 4461.481        | 0.000           | 4460.483        | S 41 |
| G 2  | 204.098         | 4348.467 | 4332.440        | 0.000           | 4331.441        | G 40 |
| R 3  | <b>360.199</b>  | 4291.448 | 4275.429        | 4276.435        | 4274.419        | R 39 |
| G 4  | <b>417.220</b>  | 4135.345 | 4119.320        | 4120.334        | 4118.318        | G 38 |
| K 5  | <b>545.315</b>  | 4078.323 | 4062.305        | 4063.313        | 4061.297        | K 37 |
| Q 6  | <b>673.374</b>  | 3926.208 | 3910.210        | 3915.218        | 3913.202        | Q 36 |
| G 7  | <b>730.395</b>  | 3822.170 | 3806.151        | 3807.159        | 3805.143        | G 35 |
| G 8  | <b>787.417</b>  | 3765.148 | 3749.130        | 3750.138        | 3748.122        | G 34 |
| K 9  | <b>915.512</b>  | 3708.127 | 3692.108        | 3693.116        | 3691.100        | K 33 |
| A 10 | <b>986.549</b>  | 3590.032 | 3574.013        | 3575.021        | 3573.005        | A 32 |
| R 11 | 1142.850        | 3538.995 | 3492.970        | 3493.984        | 3491.968        | R 31 |
| A 12 | 1211.897        | 3352.894 | 3336.875        | 3337.883        | 3335.867        | A 30 |
| R 13 | <b>1341.782</b> | 3281.857 | 3265.838        | 3266.846        | 3264.830        | R 29 |
| A 14 | <b>1412.819</b> | 3153.762 | 3137.743        | 3138.751        | 3136.735        | A 28 |
| K 15 | 1540.914        | 3082.725 | 3066.706        | 3067.714        | 3065.698        | K 27 |
| S 16 | 1627.946        | 2954.630 | 2938.611        | 2939.619        | 2937.603        | S 26 |
| R 17 | 1784.047        | 2867.598 | 2851.579        | 2852.587        | 2850.571        | R 25 |
| S 18 | 1871.079        | 2713.495 | 2697.476        | 2698.483        | 2696.467        | S 24 |
| S 19 | 1958.111        | 2624.464 | 2608.445        | 2609.454        | 2607.438        | S 23 |
| R 20 | 2114.213        | 2537.432 | 2521.414        | 2522.422        | 2520.406        | R 22 |
| A 21 | 2185.250        | 2491.331 | 2485.313        | 2486.320        | 2484.305        | A 21 |
| G 22 | 2242.271        | 2310.284 | 2294.275        | 2295.283        | 2293.268        | G 20 |
| L 23 | 2355.308        | 2233.273 | 2217.264        | 2218.272        | 2216.256        | L 19 |
| Q 24 | 2483.414        | 2149.189 | 2134.179        | 2135.178        | 2133.162        | Q 19 |
| F 25 | 2630.482        | 2012.130 | 1996.111        | <b>1997.119</b> | 1995.104        | F 17 |
| F 26 | 2727.535        | 1895.062 | 1849.043        | 1850.051        | <b>1848.035</b> | F 16 |
| V 27 | 2826.603        | 1768.009 | 1753.990        | 1752.998        | 1750.982        | V 15 |
| G 28 | 2883.625        | 1668.940 | 1652.922        | 1653.930        | 1651.914        | G 14 |
| D 29 | 2930.720        | 1613.919 | 1595.900        | <b>1596.908</b> | 1594.892        | D 13 |
| L 30 | 3138.794        | 1495.818 | 1479.799        | 1480.807        | 1478.791        | L 12 |
| H 31 | 3275.853        | 1356.749 | 1340.731        | <b>1341.739</b> | 1339.723        | H 11 |
| R 32 | 3431.964        | 1219.691 | 1203.672        | <b>1204.680</b> | 1202.664        | R 10 |
| L 33 | 3545.038        | 1063.589 | <b>1047.571</b> | 1048.579        | 1046.563        | L 9  |
| L 34 | 3658.123        | 950.500  | 934.487         | 935.495         | 933.479         | L 8  |
| R 35 | 3814.224        | 837.421  | 821.403         | 822.410         | <b>820.395</b>  | R 7  |
| K 36 | 3942.319        | 681.320  | 665.302         | 666.309         | 664.293         | K 6  |
| G 37 | 3999.340        | 553.225  | 537.207         | 538.214         | 536.199         | G 5  |
| N 38 | 4113.383        | 496.204  | 480.185         | 481.193         | 479.177         | N 4  |
| V 39 | 4276.446        | 382.161  | 366.143         | 367.150         | 365.134         | V 3  |
| A 40 | 4347.483        | 219.098  | 203.079         | 204.087         | 202.071         | A 2  |
| E 41 | 4476.528        | 148.060  | 132.040         | 133.050         | 131.034         | E 1  |

# sp | Q6GSS7 | H2A2A\_MOUSE

[Acetyl]SGRGKQGGKARAKAKSRSSRAGLQFPVGRVHRLLRKGNAYE

- ▶ fragmentation table for charge state 2+
- ▶ specType=etd
- ▶ score=40.38
- ▶ F113278.dat
- ▶ query=q70050\_p1
- ▶ precursor=747.091330
- ▶ chargePrecursor=6
- ▶ itol=0.5

| AA | c  | w               | #s=1            | #s=2            | z               | AA              |       |
|----|----|-----------------|-----------------|-----------------|-----------------|-----------------|-------|
| S  | 1  | 74.062          | 2239.259        | 2231.260        | 8.804           | 2230.147        | S[41] |
| G  | 2  | 102.553         | 2174.737        | 2166.738        | 0.504           | 2166.254        | G[40] |
| R  | 3  | 180.603         | 2146.227        | 2138.217        | 2138.921        | 2137.713        | R[39] |
| G  | 4  | 209.114         | 2068.176        | 2060.167        | 2060.671        | 2059.663        | G[38] |
| K  | 5  | 273.181         | 2039.665        | 2031.656        | 2032.160        | 2031.152        | K[37] |
| G  | 6  | 327.194         | 1975.618        | 1967.609        | 1968.112        | 1967.105        | G[36] |
| G  | 7  | 385.703         | 1911.569        | 1903.570        | 1904.083        | 1903.075        | G[35] |
| G  | 8  | 394.212         | 1883.078        | 1875.088        | 1875.592        | 1874.585        | G[34] |
| K  | 9  | 458.260         | 1854.567        | 1846.558        | 1847.062        | 1846.054        | K[33] |
| A  | 10 | 493.778         | 1790.520        | 1782.510        | 1783.014        | 1782.006        | A[32] |
| R  | 11 | <b>571.829</b>  | 1735.001        | 1726.992        | 1727.496        | 1726.488        | R[31] |
| A  | 12 | <b>607.347</b>  | 1678.951        | 1669.941        | <b>1669.945</b> | 1668.937        | A[30] |
| K  | 13 | <b>671.395</b>  | 1641.433        | 1633.423        | <b>1633.927</b> | 1632.919        | K[29] |
| A  | 14 | <b>706.913</b>  | 1577.384        | <b>1569.375</b> | <b>1569.879</b> | 1568.871        | A[28] |
| K  | 15 | <b>770.961</b>  | 1541.866        | 1533.857        | 1534.360        | 1533.351        | K[27] |
| S  | 16 | <b>814.477</b>  | 1477.818        | 1469.809        | 1470.313        | 1469.305        | S[26] |
| R  | 17 | <b>892.527</b>  | 1434.302        | <b>1426.293</b> | <b>1426.797</b> | 1425.789        | R[25] |
| S  | 18 | 928.618         | 1369.263        | 1360.253        | 1360.756        | 1359.748        | S[24] |
| S  | 19 | <b>970.559</b>  | <b>1312.736</b> | 1304.726        | <b>1305.230</b> | 1304.222        | S[23] |
| R  | 20 | 1057.610        | <b>1269.220</b> | 1261.210        | <b>1261.714</b> | 1260.707        | R[22] |
| A  | 21 | <b>1093.128</b> | 1191.169        | <b>1183.160</b> | 1183.664        | <b>1182.656</b> | A[21] |
| G  | 22 | 1121.639        | 1135.051        | 1127.041        | <b>1148.145</b> | 1147.137        | G[20] |
| L  | 23 | 1178.383        | 1119.140        | 1110.130        | 1110.633        | 1109.625        | L[19] |
| Q  | 24 | <b>1242.211</b> | <b>1070.598</b> | <b>1062.589</b> | <b>1063.093</b> | 1062.085        | Q[18] |
| F  | 25 | 1315.745        | 1008.599        | <b>998.559</b>  | <b>999.063</b>  | 998.055         | F[17] |
| F  | 26 | 1364.271        | 933.034         | 925.025         | 925.529         | <b>924.521</b>  | F[16] |
| V  | 27 | 1413.805        | 884.508         | 876.499         | 877.003         | 875.995         | V[15] |
| G  | 28 | 1462.316        | 834.974         | 826.965         | 827.468         | 826.461         | G[14] |
| R  | 29 | 1520.369        | 808.483         | <b>798.454</b>  | <b>798.958</b>  | 797.950         | R[13] |
| V  | 30 | <b>1569.901</b> | 728.413         | 720.403         | 720.907         | 719.899         | V[12] |
| H  | 31 | 1638.430        | 678.878         | <b>670.869</b>  | <b>671.373</b>  | 670.365         | H[11] |
| R  | 32 | 1716.481        | 610.349         | <b>602.340</b>  | <b>602.843</b>  | 601.835         | R[10] |
| L  | 33 | 1773.023        | 532.289         | 524.280         | 524.783         | 523.775         | L[9]  |
| L  | 34 | 1829.568        | 478.756         | 469.747         | 469.250         | 468.242         | L[8]  |
| R  | 35 | 1907.615        | 419.214         | 411.205         | 411.709         | 410.701         | R[7]  |
| K  | 36 | 1971.663        | 341.164         | 333.154         | 333.658         | 332.650         | K[6]  |
| G  | 37 | 2000.174        | 277.116         | 269.107         | 269.611         | 268.603         | G[5]  |
| N  | 38 | 2057.195        | 248.606         | 240.596         | 241.100         | 240.092         | N[4]  |
| V  | 39 | 2138.727        | 181.564         | 183.575         | 184.079         | 183.071         | V[3]  |
| A  | 40 | 2114.265        | 110.026         | 102.043         | 102.546         | 101.538         | A[2]  |
| E  | 41 | 2238.767        | 74.534          | 66.524          | 67.028          | 66.021          | E[1]  |

# sp | Q6GSS7 | H2A2A\_MOUSE

[Acetyl]SGRGKQGGKARAKAKSRSSRAGLQFPVGRVHLLRKGNYAE

- ▶ fragmentation table for charge state 3+
- ▶ specType=etd
- ▶ score=40.38
- ▶ F113278.dat
- ▶ query=q70050.p1
- ▶ precursor=747.091330
- ▶ chargePrecursor=6
- ▶ itol=0.5

| AA | c  | y               | s+1             | s+2             | z               | AA              |       |
|----|----|-----------------|-----------------|-----------------|-----------------|-----------------|-------|
| S  | 1  | 48.607          | 1492.178        | <b>1487.835</b> | 0.872           | 3487.404        | S[41] |
| G  | 2  | 66.704          | 1450.181        | 1444.521        | 0.672           | 1444.485        | G[40] |
| R  | 3  | 130.718         | <b>1431.154</b> | 1425.814        | <b>1426.150</b> | 1425.478        | R[30] |
| G  | 4  | 139.745         | 1379.120        | 1373.780        | 1374.416        | 1373.444        | G[38] |
| K  | 5  | 182.443         | 1360.113        | 1354.773        | <b>1355.109</b> | 1354.437        | K[37] |
| G  | 6  | 225.130         | 1317.414        | <b>1312.075</b> | <b>1312.411</b> | 1311.730        | G[36] |
| G  | 7  | 244.137         | 1274.725        | <b>1269.389</b> | <b>1269.725</b> | 1269.045        | G[35] |
| G  | 8  | 263.144         | 1235.721        | 1230.381        | <b>1230.717</b> | 1230.045        | G[34] |
| K  | 9  | 306.842         | 1236.714        | 1231.374        | 1231.710        | 1231.038        | K[33] |
| A  | 10 | 329.521         | 1194.016        | 1189.076        | <b>1189.012</b> | 1188.340        | A[32] |
| R  | 11 | 381.555         | 1170.338        | <b>1164.997</b> | <b>1165.333</b> | <b>1164.661</b> | R[31] |
| A  | 12 | 405.234         | 1131.301        | 1126.361        | 1127.000        | 1126.328        | A[30] |
| K  | 13 | 447.932         | <b>1094.624</b> | <b>1089.284</b> | 1089.620        | <b>1088.948</b> | K[29] |
| A  | 14 | 471.611         | 1051.925        | 1046.585        | <b>1046.922</b> | 1046.250        | A[28] |
| K  | 15 | 514.310         | 1028.246        | 1022.907        | <b>1023.243</b> | 1022.571        | K[27] |
| S  | 16 | 543.320         | 985.548         | <b>980.208</b>  | 980.544         | <b>979.873</b>  | S[26] |
| R  | 17 | 585.254         | 956.517         | <b>951.198</b>  | <b>951.534</b>  | 950.862         | R[25] |
| S  | 18 | 624.305         | 904.504         | 899.164         | 899.500         | 898.828         | S[24] |
| S  | 19 | 653.375         | 875.493         | <b>870.153</b>  | <b>870.489</b>  | 869.817         | S[23] |
| R  | 20 | <b>705.409</b>  | 846.482         | <b>841.143</b>  | <b>841.479</b>  | 840.807         | R[22] |
| A  | 21 | 729.088         | 794.449         | <b>789.109</b>  | <b>789.445</b>  | 788.773         | A[21] |
| G  | 22 | 748.095         | <b>770.770</b>  | 765.430         | 765.766         | 765.094         | G[20] |
| L  | 23 | 751.762         | 746.423         | 741.083         | 741.419         | 740.747         | L[19] |
| Q  | 24 | <b>828.476</b>  | 714.085         | 708.745         | 709.084         | 708.412         | Q[18] |
| F  | 25 | 877.409         | <b>671.382</b>  | 666.042         | 666.378         | 665.706         | F[17] |
| F  | 26 | 909.950         | 622.359         | 617.019         | 617.355         | 616.683         | F[16] |
| V  | 27 | <b>942.873</b>  | 590.006         | 584.666         | 585.004         | 584.332         | V[15] |
| G  | 28 | <b>961.860</b>  | 558.985         | 553.645         | 553.981         | 553.309         | G[14] |
| R  | 29 | 1013.914        | 537.978         | 532.638         | 532.974         | 532.302         | R[13] |
| V  | 30 | <b>1046.936</b> | 485.944         | 480.604         | 480.941         | 480.269         | V[12] |
| H  | 31 | <b>1092.623</b> | 453.921         | 447.581         | 447.918         | 447.246         | H[11] |
| R  | 32 | <b>1144.656</b> | 407.235         | 401.895         | 402.231         | 401.560         | R[10] |
| L  | 33 | <b>1182.351</b> | 355.201         | 349.862         | 350.198         | 349.526         | L[9]  |
| L  | 34 | <b>1220.046</b> | 312.509         | 307.169         | 307.505         | 306.833         | L[8]  |
| R  | 35 | 1257.741        | 270.812         | 265.472         | 265.808         | 265.136         | R[7]  |
| K  | 36 | 1314.778        | 227.778         | 222.438         | 222.775         | 222.103         | K[6]  |
| G  | 37 | 1333.785        | 185.080         | 179.740         | 180.076         | 179.404         | G[5]  |
| N  | 38 | 1371.799        | 146.073         | 140.733         | 141.069         | 140.397         | N[4]  |
| V  | 39 | <b>1426.154</b> | 108.098         | 102.758         | 103.094         | 102.422         | V[3]  |
| A  | 40 | 1445.813        | 73.304          | 67.964          | 68.300          | 67.628          | A[2]  |
| E  | 41 | 1492.847        | 30.025          | 44.685          | 45.021          | 44.349          | E[1]  |

# sp | Q6GSS7 | H2A2A\_MOUSE

[Acetyl]SGRGKQGGKARAKAKSRSSRAGLQFPVGRVHRLLRKGN~~YAE~~

- ▶ fragmentation table for charge state 4+
- ▶ specType=etd
- ▶ score=40.38
- ▶ F113278.dat
- ▶ query=q70050.p1
- ▶ precursor=747.091330
- ▶ chargePrecursor=6
- ▶ itol=0.5

| AA | c  | y               | z+1             | z+2             | z               | AA             |       |
|----|----|-----------------|-----------------|-----------------|-----------------|----------------|-------|
| S  | 1  | 37.525          | <b>1120.133</b> | 1116.130        | 0.755           | 1115.879       | S[41] |
| G  | 2  | 51.780          | 1087.872        | <b>1083.868</b> | 0.755           | 1083.616       | G[40] |
| R  | 3  | 90.805          | 1073.617        | 1069.612        | <b>1069.864</b> | 1069.360       | R[39] |
| G  | 4  | 105.061         | 1034.592        | 1030.587        | 1030.839        | 1030.335       | G[38] |
| K  | 5  | 137.084         | 1020.336        | 1016.331        | <b>1016.584</b> | 1016.080       | K[37] |
| Q  | 6  | 189.089         | 988.313         | 984.308         | <b>984.560</b>  | 984.056        | Q[36] |
| G  | 7  | 283.354         | 956.286         | 952.281         | <b>952.545</b>  | <b>952.041</b> | G[35] |
| G  | 8  | 397.810         | 942.043         | 938.038         | <b>938.290</b>  | 937.785        | G[34] |
| K  | 9  | 229.633         | 927.787         | 923.783         | <b>924.034</b>  | 923.531        | K[33] |
| A  | 10 | 247.393         | 895.763         | 891.759         | <b>892.011</b>  | 891.507        | A[32] |
| R  | 11 | 286.418         | 878.004         | 874.000         | 874.251         | 873.746        | R[31] |
| A  | 12 | 394.177         | 838.973         | 834.974         | 835.226         | 834.722        | A[30] |
| R  | 13 | 336.201         | 821.220         | 817.215         | 817.467         | 816.963        | R[29] |
| A  | 14 | 353.960         | <b>789.196</b>  | 785.191         | 785.443         | 784.939        | A[28] |
| K  | 15 | 389.984         | <b>771.437</b>  | 767.432         | 767.684         | 767.180        | K[27] |
| S  | 16 | 407.742         | 739.413         | 735.408         | 735.660         | 735.156        | S[26] |
| R  | 17 | 446.767         | 747.665         | 743.660         | 743.912         | 743.408        | R[25] |
| S  | 18 | 468.528         | 678.939         | 674.935         | 674.887         | 674.393        | S[24] |
| S  | 19 | 490.283         | 656.872         | 652.867         | 653.119         | 652.615        | S[23] |
| R  | 20 | 529.309         | 635.114         | 631.109         | 631.361         | 630.857        | R[22] |
| A  | 21 | 547.068         | 596.088         | 592.084         | 592.336         | 591.832        | A[21] |
| Q  | 22 | 561.323         | 578.329         | 574.324         | 574.576         | 574.072        | Q[20] |
| L  | 23 | 589.334         | 564.074         | 560.069         | 560.321         | 559.817        | L[19] |
| Q  | 24 | 621.609         | 536.803         | 531.798         | 532.050         | 531.546        | Q[18] |
| F  | 25 | 658.376         | 503.788         | 499.783         | 500.035         | 499.531        | F[17] |
| P  | 26 | 682.639         | 467.021         | 463.016         | 463.268         | 462.764        | P[16] |
| V  | 27 | <b>707.406</b>  | 442.758         | 438.753         | 439.005         | 438.501        | V[15] |
| G  | 28 | 721.662         | 417.991         | 413.986         | 414.238         | 413.734        | G[14] |
| V  | 29 | 760.687         | 403.735         | 399.731         | 399.983         | 399.479        | V[13] |
| V  | 30 | 785.454         | 384.710         | <b>360.705</b>  | 360.957         | <b>360.453</b> | V[12] |
| H  | 31 | <b>819.719</b>  | 339.943         | 335.938         | 336.190         | 335.686        | H[11] |
| R  | 32 | 858.744         | 305.678         | 301.673         | 301.925         | 301.421        | R[10] |
| L  | 33 | 887.015         | 266.653         | 262.648         | 262.900         | 262.396        | L[9]  |
| L  | 34 | <b>915.286</b>  | 238.382         | 234.377         | 234.629         | 234.125        | L[8]  |
| R  | 35 | 924.311         | 210.111         | 206.106         | 206.358         | 205.854        | R[7]  |
| R  | 36 | <b>986.335</b>  | 171.085         | 167.081         | 167.333         | 166.829        | R[6]  |
| G  | 37 | 1000.590        | 139.062         | 135.057         | 135.309         | 134.805        | G[5]  |
| N  | 38 | <b>1029.101</b> | 124.808         | 120.802         | 121.054         | 120.550        | N[4]  |
| V  | 39 | <b>1069.867</b> | 96.290          | 92.291          | 92.543          | 92.039         | V[3]  |
| A  | 40 | 1087.626        | 55.530          | 51.525          | 51.777          | 51.273         | A[2]  |
| E  | 41 | <b>1119.887</b> | 37.771          | 33.766          | 34.018          | 33.514         | E[1]  |

# sp | Q6GSS7 | H2A2A\_MOUSE

[Acetyl]SGRGGKQGGKARAKAKSRSSRAGLQFPVGRVHLLRKGNYAE

- ▶ fragmentation table for charge state 5+
- ▶ specType=etd
- ▶ score=40.38
- ▶ F113278.dat
- ▶ query=q70050\_p1
- ▶ precursor=747.091330
- ▶ chargePrecursor=6
- ▶ itol=0.5

| AA    | c              | y              | z+1            | z#2            | z              | AA    |
|-------|----------------|----------------|----------------|----------------|----------------|-------|
| S[1]  | 30.221         | <b>896.308</b> | <b>893.104</b> | 0.806          | <b>892.903</b> | S[41] |
| G[2]  | 41.625         | <b>870.499</b> | 867.296        | 0.806          | 867.094        | G[40] |
| R[3]  | 72.846         | 859.095        | 855.891        | <b>856.093</b> | 855.690        | R[39] |
| G[4]  | 84.250         | 827.875        | 824.671        | 824.873        | 824.469        | G[38] |
| K[5]  | 109.869        | 816.471        | 813.267        | 813.468        | 813.065        | K[37] |
| Q[6]  | 135.481        | 790.852        | <b>787.648</b> | <b>787.849</b> | <b>787.446</b> | Q[36] |
| G[7]  | 146.885        | 765.240        | 762.036        | 762.238        | 761.834        | G[35] |
| G[8]  | 158.289        | 753.836        | 750.632        | 750.833        | 750.430        | G[34] |
| K[9]  | 183.908        | 742.431        | 739.227        | 739.429        | 739.026        | K[33] |
| A[10] | 198.116        | 716.812        | 713.608        | 713.810        | 713.407        | A[32] |
| R[11] | 229.336        | 702.605        | 699.401        | 699.603        | 699.199        | R[31] |
| A[12] | 243.543        | <b>671.385</b> | 668.181        | 668.382        | 667.979        | A[30] |
| K[13] | 269.162        | 657.177        | 653.973        | 654.175        | 653.772        | K[29] |
| A[14] | 283.370        | 631.558        | 628.354        | 628.556        | 628.153        | A[28] |
| K[15] | 308.989        | 617.351        | 614.147        | 614.349        | 613.945        | K[27] |
| S[16] | 326.395        | 591.732        | 588.528        | 588.730        | 588.326        | S[26] |
| R[17] | 357.615        | 574.325        | 571.122        | 571.323        | 570.920        | R[25] |
| S[18] | 375.022        | 548.105        | 545.901        | 546.103        | 545.700        | S[24] |
| S[19] | 392.428        | 525.689        | 522.485        | 522.687        | 522.283        | S[23] |
| R[20] | 423.648        | 508.282        | 505.079        | 505.280        | 504.877        | R[22] |
| A[21] | 437.856        | 477.072        | 473.868        | 474.070        | 473.667        | A[21] |
| G[22] | 449.260        | 462.865        | 459.661        | 459.862        | 459.459        | G[20] |
| L[23] | 471.877        | 451.460        | 448.257        | 448.458        | 448.055        | L[19] |
| Q[24] | 497.489        | 428.844        | 425.640        | 425.841        | 425.438        | Q[18] |
| F[25] | 528.902        | 403.232        | 400.028        | 400.230        | 399.827        | F[17] |
| P[26] | 546.313        | 373.816        | 370.614        | 370.816        | 370.413        | P[16] |
| V[27] | 565.126        | 354.408        | 351.204        | 351.405        | 351.002        | V[15] |
| G[28] | 577.531        | 334.994        | 331.790        | 331.992        | 331.589        | G[14] |
| R[29] | <b>608.751</b> | 323.190        | 319.986        | 320.187        | 319.784        | R[13] |
| V[30] | 628.565        | 291.969        | 288.766        | 288.967        | 288.564        | V[12] |
| H[31] | 658.976        | 272.156        | 268.952        | 269.154        | 268.750        | H[11] |
| R[32] | 687.197        | 244.744        | 241.540        | 241.742        | 241.339        | R[10] |
| L[33] | 709.814        | 213.524        | 210.320        | 210.522        | 210.118        | L[9]  |
| L[34] | 732.430        | 190.907        | 187.703        | 187.905        | 187.502        | L[8]  |
| R[35] | 763.651        | 168.290        | 165.086        | 165.288        | 164.885        | R[7]  |
| R[36] | <b>789.270</b> | 137.070        | 133.866        | 134.068        | 133.665        | R[6]  |
| G[37] | 850.674        | 111.451        | 108.247        | 108.449        | 108.046        | G[5]  |
| N[38] | 823.482        | 100.047        | 96.843         | 97.044         | 96.641         | N[4]  |
| V[39] | <b>856.095</b> | 77.238         | 74.034         | 74.236         | 73.833         | V[3]  |
| A[40] | <b>870.303</b> | 44.625         | 41.422         | 41.623         | 41.220         | A[2]  |
| E[41] | 896.111        | 30.418         | 27.214         | 27.416         | 27.013         | E[1]  |



# sp | Q6GSS7 | H2A2A\_MOUSE

[Acetyl]SGRGKQGGKARAKAKSRSSRAGLQFPVGRVHLLRKGNYAE

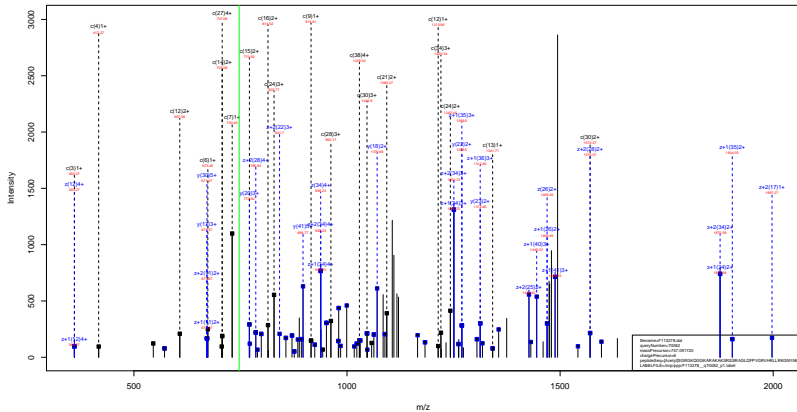

# sp | Q6GSS7 | H2A2A\_MOUSE

[Acetyl]SGRGKQGGKARAKAKSRSSRAGLQFPVGRVHRLLRKGN~~YAE~~

- ▶ fragmentation table for charge state 1+
- ▶ specType=etd
- ▶ score=43.93
- ▶ F113278.dat
- ▶ query=q70062.p1
- ▶ precursor=747.091720
- ▶ chargePrecursor=6
- ▶ itol=0.5

| AA | c  | y               | z+1      | z+2             | z               | AA              |       |
|----|----|-----------------|----------|-----------------|-----------------|-----------------|-------|
| S  | 1  | 147.076         | 4477.530 | 4461.481        | 0.000           | 4460.483        | S[41] |
| G  | 2  | 204.098         | 4348.467 | 4332.440        | 0.000           | 4331.441        | G[40] |
| R  | 3  | <b>360.199</b>  | 4291.448 | 4275.429        | 4276.435        | 4274.419        | R[39] |
| G  | 4  | <b>417.220</b>  | 4135.345 | 4119.320        | 4120.334        | 4118.310        | G[38] |
| K  | 5  | <b>545.315</b>  | 4078.323 | 4062.305        | 4063.313        | 4061.297        | K[37] |
| Q  | 6  | <b>673.374</b>  | 3995.208 | 3979.210        | 3978.218        | 3973.202        | Q[36] |
| G  | 7  | <b>730.395</b>  | 3922.170 | 3899.151        | 3907.159        | 3895.142        | G[35] |
| G  | 8  | 787.417         | 3765.148 | 3749.130        | 3750.138        | 3748.122        | G[34] |
| K  | 9  | <b>915.512</b>  | 3706.127 | 3667.100        | 3693.116        | 3691.100        | K[33] |
| A  | 10 | 986.549         | 3530.032 | 3564.013        | 3505.021        | 3563.009        | A[32] |
| R  | 11 | 1142.650        | 3538.995 | 3492.970        | 3493.984        | 3491.966        | R[31] |
| A  | 12 | <b>1213.687</b> | 3352.894 | 3338.875        | 3337.883        | 3339.867        | A[30] |
| R  | 13 | <b>1341.782</b> | 3281.857 | 3265.830        | 3266.846        | 3264.830        | R[29] |
| A  | 14 | 1412.819        | 3153.762 | 3137.743        | 3138.751        | 3136.735        | A[28] |
| K  | 15 | 1540.914        | 3082.725 | 3066.700        | 3067.714        | 3065.696        | K[27] |
| S  | 16 | 1627.946        | 2954.630 | 2938.611        | 2939.619        | 2937.603        | S[26] |
| R  | 17 | 1784.047        | 2867.588 | 2851.570        | 2852.587        | 2850.571        | R[25] |
| S  | 18 | 1871.079        | 2713.495 | 2695.471        | 2696.488        | 2694.470        | S[24] |
| S  | 19 | 1958.111        | 2624.464 | 2608.448        | 2609.454        | 2607.438        | S[23] |
| R  | 20 | 2114.213        | 2537.432 | 2521.414        | 2522.422        | 2520.406        | R[22] |
| A  | 21 | 2185.250        | 2491.411 | 2485.393        | 2486.400        | 2484.385        | A[21] |
| G  | 22 | 2242.271        | 2310.294 | 2294.275        | 2295.283        | 2293.266        | G[20] |
| L  | 23 | 2385.388        | 2253.273 | 2237.268        | 2238.262        | 2236.246        | L[19] |
| Q  | 24 | 2483.414        | 2149.189 | 2124.170        | 2125.178        | 2123.162        | Q[18] |
| F  | 25 | 2630.482        | 2012.130 | 1996.111        | <b>1997.110</b> | 1995.104        | F[17] |
| F  | 26 | 2727.535        | 1895.062 | 1849.043        | 1850.051        | 1848.035        | F[16] |
| V  | 27 | 2826.603        | 1768.009 | 1751.990        | 1752.998        | 1750.982        | V[15] |
| G  | 28 | 2883.625        | 1668.940 | 1652.922        | 1653.930        | 1651.914        | G[14] |
| D  | 29 | 2970.720        | 1611.919 | 1595.900        | <b>1596.908</b> | 1594.884        | D[13] |
| L  | 30 | 3138.794        | 1495.818 | 1479.799        | 1480.807        | 1478.791        | L[12] |
| H  | 31 | 3275.853        | 1356.749 | 1340.731        | <b>1341.739</b> | 1339.723        | H[11] |
| R  | 32 | 3431.964        | 1219.691 | 1203.672        | 1204.680        | 1202.664        | R[10] |
| L  | 33 | 3545.038        | 1063.589 | <b>1047.571</b> | 1048.579        | <b>1046.563</b> | L[9]  |
| L  | 34 | 3658.123        | 950.505  | 934.487         | 935.495         | 933.479         | L[8]  |
| R  | 35 | 3814.224        | 837.421  | 821.403         | 822.410         | 820.395         | R[7]  |
| K  | 36 | 3942.319        | 681.320  | 665.302         | 666.309         | 664.293         | K[6]  |
| G  | 37 | 3999.340        | 553.225  | 537.207         | 538.214         | 536.199         | G[5]  |
| N  | 38 | 4113.383        | 496.204  | 480.185         | 481.193         | 479.177         | N[4]  |
| V  | 39 | 4276.446        | 382.101  | 366.143         | 367.150         | 365.134         | V[3]  |
| A  | 40 | 4347.463        | 219.098  | 203.070         | 204.087         | 202.071         | A[2]  |
| E  | 41 | 4476.528        | 148.060  | 132.043         | 133.050         | 131.034         | E[1]  |

# sp | Q6GSS7 | H2A2A\_MOUSE

[Acetyl]SGRGKQGGKARAKAKSRSSRAGLQFPVGRVHRLLRKGNAYE

- ▶ fragmentation table for charge state 2+
- ▶ specType=etd
- ▶ score=43.93
- ▶ F113278.dat
- ▶ query=q70062.p1
- ▶ precursor=747.091720
- ▶ chargePrecursor=6
- ▶ itol=0.5

| AA | c  | w               | #s=1            | #s=2            | z               | AA              |       |
|----|----|-----------------|-----------------|-----------------|-----------------|-----------------|-------|
| S  | 1  | 74.062          | 2239.259        | 2231.300        | 8.804           | 2230.145        | S[41] |
| G  | 2  | 102.553         | 2174.737        | 2266.726        | 0.504           | 2166.254        | G[40] |
| R  | 3  | 180.603         | 2146.227        | 2138.217        | 2138.921        | 2117.313        | R[39] |
| G  | 4  | 209.114         | 2068.176        | 2060.167        | 2060.671        | 2059.663        | G[38] |
| K  | 5  | 273.161         | 2039.665        | 2031.656        | 2032.160        | 2031.152        | K[37] |
| G  | 6  | 327.194         | 1975.616        | 1967.607        | 1968.112        | 1967.105        | G[36] |
| G  | 7  | 385.703         | 1913.565        | <b>1903.579</b> | <b>1904.083</b> | 1903.075        | G[35] |
| G  | 8  | 394.212         | 1883.076        | <b>1875.068</b> | <b>1875.572</b> | 1874.565        | G[34] |
| K  | 9  | 458.260         | 1854.567        | 1846.558        | 1847.062        | 1846.054        | K[33] |
| A  | 10 | 493.778         | 1790.520        | 1782.510        | 1783.014        | 1782.006        | A[32] |
| R  | 11 | <b>571.829</b>  | 1735.001        | 1746.992        | 1747.496        | 1746.488        | R[31] |
| A  | 12 | <b>607.337</b>  | 1676.951        | 1668.941        | 1669.446        | 1668.439        | A[30] |
| R  | 13 | <b>671.395</b>  | 1643.432        | 1635.423        | 1635.927        | 1634.919        | R[29] |
| A  | 14 | <b>706.913</b>  | 1577.904        | 1569.895        | <b>1569.879</b> | 1568.871        | A[28] |
| K  | 15 | <b>770.961</b>  | <b>1541.866</b> | 1533.857        | 1534.360        | 1533.353        | K[27] |
| S  | 16 | <b>814.477</b>  | 1477.818        | <b>1469.809</b> | 1470.313        | <b>1469.305</b> | S[26] |
| R  | 17 | <b>892.527</b>  | 1434.302        | 1426.293        | <b>1426.797</b> | 1425.790        | R[25] |
| S  | 18 | 928.978         | <b>1356.252</b> | 1348.243        | 1348.746        | 1347.739        | S[24] |
| S  | 19 | <b>970.559</b>  | <b>1312.736</b> | <b>1304.726</b> | <b>1305.230</b> | 1304.223        | S[23] |
| R  | 20 | <b>1057.610</b> | <b>1269.220</b> | <b>1261.210</b> | <b>1261.714</b> | 1260.707        | R[22] |
| A  | 21 | <b>1093.128</b> | 1191.169        | <b>1183.160</b> | 1183.664        | <b>1182.656</b> | A[21] |
| G  | 22 | 1121.639        | 1135.651        | 1147.641        | 1148.145        | 1147.137        | G[20] |
| L  | 23 | 1179.183        | 1119.140        | 1131.130        | 1131.634        | 1130.627        | L[19] |
| Q  | 24 | <b>1242.211</b> | <b>1070.598</b> | <b>1062.589</b> | <b>1063.093</b> | 1062.085        | Q[18] |
| F  | 25 | 1315.745        | 1008.599        | 998.589         | <b>999.093</b>  | 998.085         | F[17] |
| F  | 26 | 1364.271        | 933.034         | 923.025         | 923.529         | <b>924.521</b>  | F[16] |
| V  | 27 | 1413.805        | <b>884.508</b>  | <b>876.499</b>  | 877.003         | <b>875.995</b>  | V[15] |
| G  | 28 | 1462.316        | 834.974         | 824.964         | 825.468         | 824.461         | G[14] |
| R  | 29 | 1520.369        | 806.463         | <b>798.454</b>  | <b>798.958</b>  | 797.951         | R[13] |
| V  | 30 | <b>1569.901</b> | 729.413         | 720.403         | 720.907         | 719.899         | V[12] |
| H  | 31 | 1638.430        | 678.878         | <b>670.869</b>  | <b>671.373</b>  | 670.365         | H[11] |
| R  | 32 | 1716.461        | 610.349         | 602.340         | 602.843         | 601.836         | R[10] |
| L  | 33 | 1773.023        | 532.289         | 524.280         | 524.783         | 523.775         | L[9]  |
| L  | 34 | 1829.568        | 478.756         | 469.747         | 469.251         | 468.243         | L[8]  |
| R  | 35 | 1907.615        | 419.214         | 411.205         | 411.709         | 410.701         | R[7]  |
| K  | 36 | 1971.663        | 341.164         | 333.154         | 333.658         | 332.650         | K[6]  |
| G  | 37 | 2000.174        | 277.116         | 269.107         | 269.611         | 268.603         | G[5]  |
| N  | 38 | 2057.195        | 248.606         | 240.596         | 241.100         | 240.092         | N[4]  |
| V  | 39 | 2136.227        | 181.564         | 183.575         | 184.079         | 183.071         | V[3]  |
| A  | 40 | 2114.265        | 110.026         | 102.017         | 102.521         | 101.513         | A[2]  |
| E  | 41 | 2238.767        | 74.534          | 66.524          | 67.028          | 66.021          | E[1]  |

# sp | Q6GSS7 | H2A2A\_MOUSE

[Acetyl]SGRGKQGGKARAKAKSRSSRAGLQFPVGRVHRLLRKGN~~YAE~~

- ▶ fragmentation table for charge state 3+
- ▶ specType=etd
- ▶ score=43.93
- ▶ F113278.dat
- ▶ query=q70062.p1
- ▶ precursor=747.091720
- ▶ chargePrecursor=6
- ▶ itol=0.5

| AA | c  | y               | #s1             | #s2             | z               | AA              |       |
|----|----|-----------------|-----------------|-----------------|-----------------|-----------------|-------|
| S  | 1  | 489.607         | 1592.178        | <b>1487.835</b> | 8.872           | 3487.467        | S[41] |
| G  | 2  | 66.704          | 1450.181        | <b>1444.821</b> | 0.672           | 1444.485        | G[40] |
| R  | 3  | 1307.788        | <b>1431.154</b> | 1425.814        | 1426.150        | 1425.478        | R[39] |
| G  | 4  | 139.745         | 1379.120        | 1373.780        | 1374.416        | 1373.444        | G[38] |
| K  | 5  | 182.443         | 1350.113        | 1354.773        | 1355.109        | 1354.437        | K[37] |
| G  | 6  | 225.130         | <b>1317.414</b> | <b>1312.075</b> | <b>1312.414</b> | 1311.778        | G[36] |
| G  | 7  | 264.137         | 1274.726        | <b>1269.389</b> | <b>1268.729</b> | <b>1269.053</b> | G[35] |
| G  | 8  | 263.144         | 1255.721        | <b>1250.381</b> | <b>1250.717</b> | 1250.045        | G[34] |
| K  | 9  | 305.642         | 1236.714        | 1231.374        | 1231.710        | 1231.038        | K[33] |
| A  | 10 | 329.521         | 1194.016        | 1188.676        | 1189.012        | 1188.340        | A[32] |
| R  | 11 | 381.555         | 1170.338        | 1164.997        | <b>1165.333</b> | 1164.661        | R[31] |
| A  | 12 | 405.234         | 1138.303        | 1132.963        | 1133.299        | 1132.623        | A[30] |
| K  | 13 | 447.932         | 1094.624        | <b>1089.284</b> | 1089.620        | <b>1088.948</b> | K[29] |
| A  | 14 | 471.611         | 1051.925        | <b>1046.586</b> | <b>1046.922</b> | 1046.250        | A[28] |
| K  | 15 | 514.310         | 1028.246        | <b>1022.907</b> | <b>1023.243</b> | <b>1022.571</b> | K[27] |
| S  | 16 | 543.320         | 985.548         | <b>980.208</b>  | <b>980.544</b>  | <b>979.873</b>  | S[26] |
| R  | 17 | 585.254         | 956.537         | <b>951.198</b>  | <b>951.534</b>  | 950.862         | R[25] |
| S  | 18 | 624.265         | 904.504         | 899.164         | 899.500         | 898.828         | S[24] |
| S  | 19 | 653.375         | 875.493         | 870.153         | <b>870.489</b>  | 869.817         | S[23] |
| R  | 20 | <b>705.409</b>  | 846.482         | 841.142         | <b>841.479</b>  | 840.807         | R[22] |
| A  | 21 | 729.088         | 794.449         | 789.109         | <b>789.445</b>  | 788.773         | A[21] |
| G  | 22 | 768.095         | <b>770.770</b>  | 765.430         | 765.766         | 765.094         | G[20] |
| L  | 23 | 751.762         | 746.423         | 741.083         | 741.419         | 740.747         | L[19] |
| G  | 24 | <b>828.476</b>  | 714.085         | 708.745         | 709.084         | 708.412         | G[18] |
| F  | 25 | 877.409         | <b>671.382</b>  | 666.042         | 666.378         | 665.706         | F[17] |
| F  | 26 | 909.950         | 622.359         | 617.019         | 617.355         | 616.683         | F[16] |
| V  | 27 | <b>942.873</b>  | 590.006         | 584.666         | 585.004         | 584.332         | V[15] |
| G  | 28 | <b>961.880</b>  | 558.985         | 553.645         | 553.981         | 553.309         | G[14] |
| R  | 29 | 1013.914        | 519.978         | 514.638         | 514.974         | 514.302         | R[13] |
| V  | 30 | <b>1046.936</b> | 485.944         | 480.604         | 480.941         | 480.269         | V[12] |
| H  | 31 | 1092.623        | 452.921         | 447.581         | 447.918         | 447.246         | H[11] |
| R  | 32 | 1144.656        | 407.235         | 401.895         | 402.231         | 401.559         | R[10] |
| L  | 33 | 1182.351        | 355.201         | 349.862         | 350.198         | 349.526         | L[9]  |
| L  | 34 | <b>1220.046</b> | 312.509         | 307.169         | 307.505         | 306.833         | L[8]  |
| R  | 35 | 1225.424        | 279.812         | 274.472         | 274.808         | 274.136         | R[7]  |
| K  | 36 | 1314.778        | 227.778         | 222.438         | 222.775         | 222.103         | K[6]  |
| G  | 37 | 1331.785        | 185.880         | 179.740         | 180.076         | 179.404         | G[5]  |
| N  | 38 | 1371.799        | 166.873         | 160.733         | 161.069         | 160.397         | N[4]  |
| V  | 39 | 1426.154        | 128.098         | 122.758         | 123.094         | 122.422         | V[3]  |
| A  | 40 | 1469.213        | 83.304          | 78.384          | 78.720          | 78.048          | A[2]  |
| E  | 41 | 1492.847        | 50.025          | 44.685          | 45.021          | 44.349          | E[1]  |

# sp | Q6GSS7 | H2A2A\_MOUSE

[Acetyl]SGRGKQGGKARAKAKSRSSRAGLQFPVGRVHRLLRKGN~~YAE~~

- ▶ fragmentation table for charge state 4+
- ▶ specType=etd
- ▶ score=43.93
- ▶ F113278.dat
- ▶ query=q70062.p1
- ▶ precursor=747.091720
- ▶ chargePrecursor=6
- ▶ itol=0.5

| AA   | c               | y              | z+1             | z+2             | z              | AA   |
|------|-----------------|----------------|-----------------|-----------------|----------------|------|
| S 1  | 17.526          | 1120.193       | 1116.138        | 0.755           | 1115.878       | S 41 |
| G 2  | 51.780          | 1087.872       | 1083.808        | 0.755           | 1083.618       | G 40 |
| R 3  | 90.805          | 1073.617       | 1069.612        | 1069.864        | 1069.360       | R 39 |
| G 4  | 105.061         | 1034.592       | <b>1030.587</b> | <b>1030.839</b> | 1030.335       | G 38 |
| K 5  | 137.084         | 1030.336       | 1016.352        | <b>1016.354</b> | 1016.060       | K 37 |
| Q 6  | 169.099         | 988.313        | 984.308         | <b>984.560</b>  | 984.056        | Q 36 |
| G 7  | 183.394         | 996.288        | 952.293         | 952.945         | <b>952.041</b> | G 35 |
| G 8  | 197.610         | 942.043        | <b>938.038</b>  | <b>938.290</b>  | <b>937.786</b> | G 34 |
| K 9  | 229.633         | 927.787        | 923.783         | <b>924.034</b>  | 923.531        | K 33 |
| A 10 | 247.303         | 895.763        | 891.758         | 892.011         | 891.507        | A 32 |
| R 11 | 286.418         | 878.004        | 873.999         | 874.251         | 873.748        | R 31 |
| A 12 | 304.177         | 838.978        | 834.974         | 835.226         | 834.722        | A 30 |
| K 13 | 338.201         | 821.220        | 817.215         | 817.467         | 816.963        | K 29 |
| A 14 | 353.960         | 789.198        | 785.191         | <b>785.443</b>  | 784.939        | A 28 |
| K 15 | 385.984         | <b>771.437</b> | 767.432         | 767.684         | 767.180        | K 27 |
| S 16 | 407.742         | 739.413        | 735.408         | 735.660         | 735.156        | S 26 |
| R 17 | 446.767         | 717.695        | 713.690         | 713.942         | 713.398        | R 25 |
| S 18 | 468.525         | 678.639        | 674.635         | 674.887         | 674.373        | S 24 |
| S 19 | 490.283         | 656.872        | 652.867         | 653.119         | 652.615        | S 23 |
| R 20 | 529.309         | 635.114        | 631.109         | 631.361         | 630.857        | R 22 |
| A 21 | 547.068         | 606.089        | 602.084         | 602.336         | 601.833        | A 21 |
| G 22 | 561.323         | 578.329        | 574.324         | 574.576         | 574.072        | G 20 |
| L 23 | 589.594         | 564.074        | 560.069         | 560.321         | 559.817        | L 19 |
| Q 24 | 623.609         | 635.803        | 631.798         | 632.050         | 631.546        | Q 18 |
| F 25 | 658.376         | 593.788        | 499.783         | 500.035         | 499.531        | F 17 |
| P 26 | 682.639         | 487.021        | 483.016         | 483.268         | 482.764        | P 16 |
| V 27 | <b>707.406</b>  | 442.759        | 438.753         | 439.005         | 438.501        | V 15 |
| G 28 | 721.662         | 417.991        | 413.986         | 414.238         | 413.734        | G 14 |
| R 29 | 860.884         | 401.735        | 397.731         | 397.982         | 397.478        | R 13 |
| Y 30 | <b>785.454</b>  | 384.710        | <b>369.705</b>  | 369.957         | <b>369.453</b> | Y 12 |
| H 31 | 819.719         | 339.943        | 335.938         | 336.190         | 335.686        | H 11 |
| R 32 | 858.744         | 305.676        | 301.673         | 301.925         | 301.421        | R 10 |
| L 33 | 887.015         | 266.651        | 262.648         | 262.900         | 262.396        | L 9  |
| L 34 | <b>915.286</b>  | 238.382        | 234.377         | 234.629         | 234.125        | L 8  |
| R 35 | 954.311         | 210.111        | 206.106         | 206.358         | 205.854        | R 7  |
| K 36 | 989.335         | 171.086        | 167.081         | 167.333         | 166.829        | K 6  |
| G 37 | 1020.590        | 139.062        | 135.057         | 135.309         | 134.805        | G 5  |
| N 38 | <b>1029.101</b> | 124.808        | 120.802         | 121.054         | 120.550        | N 4  |
| Y 39 | 1069.867        | 96.296         | 92.291          | 92.543          | 92.039         | Y 3  |
| A 40 | 1087.636        | 55.530         | 51.525          | 51.777          | 51.273         | A 2  |
| E 41 | 1119.887        | 37.771         | 33.766          | 34.018          | 33.514         | E 1  |

# sp | Q6GSS7 | H2A2A\_MOUSE

[Acetyl]SGRGKQGGKARAKAKSRSSRAGLQFPVGRVHLLRKGNYAE

- ▶ fragmentation table for charge state 5+
- ▶ specType=etd
- ▶ score=43.93
- ▶ F113278.dat
- ▶ query=q70062.p1
- ▶ precursor=747.091720
- ▶ chargePrecursor=6
- ▶ itol=0.5

| AA    | c              | y              | z+1            | z#2            | z              | AA    |
|-------|----------------|----------------|----------------|----------------|----------------|-------|
| S[1]  | 30.221         | <b>896.308</b> | <b>893.104</b> | 0.806          | <b>892.903</b> | S[41] |
| G[2]  | 41.625         | <b>870.499</b> | 867.298        | 0.806          | 867.094        | G[40] |
| R[3]  | 72.846         | 859.095        | 855.891        | <b>856.093</b> | 855.690        | R[39] |
| G[4]  | 84.250         | 827.875        | 824.671        | 824.873        | 824.469        | G[38] |
| K[5]  | 109.869        | 816.471        | 813.267        | 813.468        | 813.065        | K[37] |
| Q[6]  | 135.481        | 790.852        | 787.648        | 787.849        | 787.446        | Q[36] |
| G[7]  | 146.885        | 765.240        | 762.036        | 762.238        | 761.834        | G[35] |
| G[8]  | 158.289        | 751.836        | 750.632        | 750.833        | 750.430        | G[34] |
| K[9]  | 183.908        | 742.431        | 739.227        | 739.429        | 739.026        | K[33] |
| A[10] | 198.116        | 716.812        | 713.608        | 713.810        | 713.407        | A[32] |
| R[11] | 229.336        | 702.605        | 699.401        | 699.603        | 699.199        | R[31] |
| A[12] | 243.543        | <b>671.385</b> | 668.181        | 668.382        | 667.979        | A[30] |
| K[13] | 269.162        | 657.177        | 653.973        | 654.175        | 653.772        | K[29] |
| A[14] | 283.370        | 631.558        | 628.354        | 628.556        | 628.153        | A[28] |
| K[15] | 308.989        | 617.351        | 614.147        | 614.349        | 613.945        | K[27] |
| S[16] | 326.395        | 591.732        | 588.528        | 588.730        | 588.326        | S[26] |
| R[17] | 357.615        | 574.325        | 571.122        | <b>571.323</b> | 570.920        | R[25] |
| S[18] | 375.022        | 543.105        | 539.901        | 540.103        | 539.700        | S[24] |
| S[19] | 392.428        | 525.689        | 522.485        | 522.687        | 522.283        | S[23] |
| R[20] | 423.648        | 508.282        | 505.079        | 505.280        | 504.877        | R[22] |
| A[21] | 437.856        | 477.072        | 473.868        | 474.070        | 473.667        | A[21] |
| G[22] | 449.260        | 462.865        | 459.661        | 459.862        | 459.459        | G[20] |
| L[23] | 471.877        | 451.460        | 448.257        | 448.458        | 448.055        | L[19] |
| Q[24] | 497.489        | 428.844        | 425.640        | 425.841        | 425.438        | Q[18] |
| F[25] | 528.902        | 403.232        | 400.028        | 400.230        | 399.827        | F[17] |
| P[26] | 546.313        | 373.816        | 370.614        | 370.816        | 370.413        | P[16] |
| V[27] | 565.126        | 354.408        | 351.204        | 351.405        | 351.002        | V[15] |
| G[28] | 577.531        | 334.994        | 331.790        | 331.992        | 331.589        | G[14] |
| R[29] | 608.751        | 323.190        | 319.986        | 320.187        | 319.784        | R[13] |
| V[30] | 628.565        | 291.969        | 288.766        | 288.967        | 288.564        | V[12] |
| H[31] | 658.976        | 272.156        | 268.952        | 269.154        | 268.750        | H[11] |
| K[32] | 687.197        | 244.744        | 241.540        | 241.742        | 241.339        | K[10] |
| L[33] | 709.814        | 213.524        | 210.320        | 210.522        | 210.118        | L[9]  |
| L[34] | 732.430        | 190.907        | 187.703        | 187.905        | 187.502        | L[8]  |
| R[35] | 763.651        | 168.290        | 165.086        | 165.288        | 164.885        | R[7]  |
| K[36] | 789.270        | 137.070        | 133.866        | 134.068        | 133.665        | K[6]  |
| G[37] | 830.674        | 111.451        | 108.247        | 108.449        | 108.046        | G[5]  |
| N[38] | 823.482        | 100.047        | 96.843         | 97.044         | 96.641         | N[4]  |
| V[39] | <b>856.095</b> | 77.238         | 74.034         | 74.236         | 73.833         | V[3]  |
| A[40] | 870.303        | 44.625         | 41.422         | 41.623         | 41.220         | A[2]  |
| E[41] | 896.111        | 30.418         | 27.214         | 27.416         | 27.013         | E[1]  |



# sp | Q6GSS7 | H2A2A\_MOUSE

[Acetyl]SGRGKQGGKARAKAKSRSSRAGLQFPVGRVHRLLRKGNAYE

- ▶ fragmentation table for charge state 1+
- ▶ specType=etd
- ▶ score=58.64
- ▶ F113278.dat
- ▶ query=q70065.p1
- ▶ precursor=896.308690
- ▶ chargePrecursor=5
- ▶ itol=0.5

| AA | c  | y               | z+1             | z+2             | z               | AA       |       |
|----|----|-----------------|-----------------|-----------------|-----------------|----------|-------|
| S  | 1  | 147.076         | 4477.510        | 4461.491        | 0.000           | 4460.483 | S[41] |
| G  | 2  | 204.068         | 4348.467        | 4332.449        | 0.000           | 4331.441 | G[40] |
| R  | 3  | <b>360.199</b>  | 4201.448        | 4276.427        | 4476.435        | 4274.419 | R[39] |
| G  | 4  | <b>417.220</b>  | 4135.345        | 4119.326        | 4120.334        | 4118.318 | G[38] |
| K  | 5  | <b>545.315</b>  | 4078.323        | 4062.305        | 4063.313        | 4061.297 | K[37] |
| Q  | 6  | <b>673.374</b>  | 3969.278        | 3934.210        | 3935.218        | 3933.202 | Q[36] |
| G  | 7  | <b>730.395</b>  | 3822.170        | 3806.151        | 3807.159        | 3805.143 | G[35] |
| G  | 8  | 787.417         | 3765.148        | 3749.130        | 3750.138        | 3748.122 | G[34] |
| K  | 9  | <b>915.512</b>  | 3708.127        | 3692.108        | 3693.116        | 3691.100 | K[33] |
| A  | 10 | <b>986.549</b>  | 3580.032        | 3564.013        | 3565.021        | 3563.005 | A[32] |
| R  | 11 | <b>1142.650</b> | 3508.995        | 3492.976        | 3493.984        | 3491.968 | R[31] |
| A  | 12 | <b>1213.687</b> | 3352.994        | 3336.975        | 3337.983        | 3335.967 | A[30] |
| R  | 13 | <b>1341.782</b> | 3281.957        | 3265.938        | 3266.946        | 3264.930 | R[29] |
| A  | 14 | <b>1412.819</b> | 3153.962        | 3137.943        | 3138.951        | 3136.935 | A[28] |
| K  | 15 | <b>1540.914</b> | 3082.725        | 3066.706        | 3067.714        | 3065.698 | K[27] |
| S  | 16 | <b>1627.946</b> | 2954.630        | 2938.611        | 2939.619        | 2937.603 | S[26] |
| R  | 17 | 1784.047        | 2887.586        | 2871.579        | 2872.587        | 2870.571 | R[25] |
| S  | 18 | 1871.079        | 2741.490        | 2695.478        | 2696.486        | 2694.470 | S[24] |
| S  | 19 | 1958.111        | 2624.464        | 2608.446        | 2609.454        | 2607.438 | S[23] |
| R  | 20 | 2114.213        | 2537.432        | 2521.414        | 2522.422        | 2520.406 | R[22] |
| A  | 21 | 2185.250        | 2381.331        | 2365.313        | 2366.320        | 2364.305 | A[21] |
| G  | 22 | 2242.271        | 2310.294        | 2294.275        | 2295.283        | 2293.267 | G[20] |
| L  | 23 | 2385.308        | 2253.273        | 2237.254        | 2238.262        | 2236.246 | L[19] |
| Q  | 24 | 2483.414        | 2140.189        | 2124.170        | 2125.178        | 2123.162 | Q[18] |
| F  | 25 | 2630.482        | 2012.130        | 1996.111        | <b>1997.119</b> | 1995.104 | F[17] |
| P  | 26 | 2727.535        | 1895.062        | 1849.043        | 1850.051        | 1848.035 | P[16] |
| V  | 27 | 2826.603        | 1788.009        | 1751.990        | 1752.998        | 1750.982 | V[15] |
| G  | 28 | 2883.625        | 1668.940        | 1652.922        | <b>1653.930</b> | 1651.914 | G[14] |
| R  | 29 | 3030.726        | 1611.918        | 1595.900        | <b>1596.908</b> | 1594.892 | R[13] |
| H  | 30 | 3138.784        | 1455.812        | 1439.792        | 1440.801        | 1438.785 | H[12] |
| H  | 31 | 3275.853        | 1358.748        | 1342.731        | <b>1343.739</b> | 1340.723 | H[11] |
| R  | 32 | 3431.964        | <b>1219.691</b> | 1203.672        | <b>1204.680</b> | 1202.664 | R[10] |
| L  | 33 | 3545.038        | 1063.589        | <b>1047.571</b> | 1048.579        | 1046.563 | L[9]  |
| L  | 34 | 3658.121        | 950.505         | 934.487         | 935.495         | 933.479  | L[8]  |
| R  | 35 | 3814.224        | 837.421         | 821.403         | <b>822.410</b>  | 820.394  | R[7]  |
| R  | 36 | 3942.319        | 681.320         | 665.302         | 666.310         | 664.294  | R[6]  |
| G  | 37 | 3999.340        | 553.225         | 537.207         | 538.214         | 536.199  | G[5]  |
| N  | 38 | 4113.383        | 406.204         | 480.185         | 481.193         | 479.177  | N[4]  |
| V  | 39 | 4276.446        | 382.161         | 366.142         | 367.150         | 365.134  | V[3]  |
| A  | 40 | 4347.483        | 219.086         | 203.079         | 204.087         | 202.071  | A[2]  |
| E  | 41 | 4476.528        | 148.060         | 132.042         | 133.050         | 131.034  | E[1]  |



# sp | Q6GSS7 | H2A2A\_MOUSE

[Acetyl]SGRGKQGGKARAKAKSRSSRAGLQFPVGRVHRLLRKGN~~YAE~~

- ▶ fragmentation table for charge state 2+
- ▶ specType=etd
- ▶ score=58.64
- ▶ F113278.dat
- ▶ query=q70065.p1
- ▶ precursor=896.308690
- ▶ chargePrecursor=5
- ▶ itol=0.5

| AA | c  | w               | #±1             | #±2             | z               | AA              |       |
|----|----|-----------------|-----------------|-----------------|-----------------|-----------------|-------|
| S  | 1  | 74.062          | 2239.259        | 2231.300        | 8.804           | 2239.147        | S[41] |
| G  | 2  | 102.553         | 2174.737        | 2166.726        | 0.504           | 2166.254        | G[40] |
| R  | 3  | 180.603         | 2146.227        | 2138.217        | 2138.921        | 2137.713        | R[39] |
| G  | 4  | 209.114         | 2068.176        | 2060.167        | 2060.671        | 2059.663        | G[38] |
| K  | 5  | 273.161         | 2039.665        | 2031.656        | 2032.160        | 2031.152        | K[37] |
| G  | 6  | 327.194         | 1975.616        | 1967.607        | <b>1968.112</b> | 1967.105        | G[36] |
| G  | 7  | 385.703         | 1913.565        | <b>1903.579</b> | <b>1904.083</b> | 1903.075        | G[35] |
| G  | 8  | 394.212         | 1883.078        | <b>1875.068</b> | 1875.572        | <b>1874.565</b> | G[34] |
| K  | 9  | 458.260         | 1854.567        | 1846.558        | 1847.062        | 1846.054        | K[33] |
| A  | 10 | 493.778         | 1790.520        | <b>1782.510</b> | <b>1783.014</b> | 1782.006        | A[32] |
| R  | 11 | 571.829         | 1735.001        | <b>1746.992</b> | <b>1747.496</b> | 1746.488        | R[31] |
| A  | 12 | 609.839         | 1668.954        | 1660.945        | 1661.449        | 1660.441        | A[30] |
| K  | 13 | <b>671.395</b>  | 1643.432        | <b>1633.423</b> | <b>1633.927</b> | 1632.919        | K[29] |
| A  | 14 | <b>706.913</b>  | 1577.384        | 1569.375        | <b>1569.879</b> | 1568.871        | A[28] |
| K  | 15 | <b>770.961</b>  | 1541.866        | <b>1531.857</b> | 1534.360        | <b>1533.353</b> | K[27] |
| S  | 16 | 814.477         | 1477.818        | <b>1469.809</b> | <b>1470.313</b> | 1469.305        | S[26] |
| R  | 17 | <b>892.527</b>  | 1434.302        | <b>1425.293</b> | 1426.797        | <b>1425.789</b> | R[25] |
| S  | 18 | <b>936.043</b>  | 1368.263        | <b>1348.243</b> | <b>1348.746</b> | 1347.738        | S[24] |
| S  | 19 | 999.559         | 1312.736        | 1304.726        | 1305.230        | 1304.223        | S[23] |
| R  | 20 | <b>1057.610</b> | <b>1269.220</b> | <b>1261.210</b> | <b>1261.714</b> | 1260.707        | R[22] |
| A  | 21 | <b>1093.128</b> | 1191.169        | <b>1183.160</b> | <b>1183.664</b> | 1182.656        | A[21] |
| G  | 22 | 1121.639        | 1135.651        | 1147.641        | 1148.145        | 1147.137        | G[20] |
| L  | 23 | 1178.181        | 1127.140        | 1119.131        | 1119.635        | 1118.627        | L[19] |
| Q  | 24 | <b>1242.211</b> | 1063.595        | 1055.586        | 1056.090        | 1055.082        | Q[18] |
| F  | 25 | 1315.745        | 1006.569        | 998.559         | <b>999.063</b>  | 998.055         | F[17] |
| F  | 26 | 1364.271        | 933.034         | 925.025         | 925.529         | 924.521         | F[16] |
| V  | 27 | 1413.805        | 884.500         | 876.490         | 877.003         | 876.005         | V[15] |
| G  | 28 | 1462.316        | 834.974         | 826.965         | 827.468         | 826.461         | G[14] |
| R  | 29 | 1520.869        | 806.463         | 798.454         | 798.958         | 797.950         | R[13] |
| V  | 30 | <b>1569.901</b> | 728.413         | 720.403         | 720.907         | 719.899         | V[12] |
| H  | 31 | <b>1638.430</b> | 678.878         | 670.869         | <b>671.373</b>  | 670.365         | H[11] |
| R  | 32 | 1716.461        | 610.349         | 602.340         | 602.843         | 601.835         | R[10] |
| L  | 33 | 1713.023        | 532.299         | 524.289         | 524.793         | 523.785         | L[9]  |
| L  | 34 | <b>1829.565</b> | 478.756         | 469.747         | 469.251         | 468.243         | L[8]  |
| R  | 35 | 1907.618        | 419.214         | 411.205         | 411.709         | 410.701         | R[7]  |
| K  | 36 | 1971.663        | 341.164         | 333.154         | 333.658         | 332.650         | K[6]  |
| G  | 37 | 2050.174        | 277.116         | 269.107         | 269.611         | 268.603         | G[5]  |
| N  | 38 | 2057.195        | 248.606         | 240.596         | 241.100         | 240.092         | N[4]  |
| V  | 39 | 2136.227        | 181.564         | 183.575         | 184.079         | 183.071         | V[3]  |
| A  | 40 | 2114.265        | 110.054         | 102.045         | 102.549         | 101.541         | A[2]  |
| E  | 41 | 2238.767        | 74.534          | 66.524          | 67.028          | 66.021          | E[1]  |

# sp | Q6GSS7 | H2A2A\_MOUSE

[Acetyl]SGRGKQGQGGKARAKAKSRSSRAGLQFPVGRVHRLLRKGN~~YAE~~

- ▶ fragmentation table for charge state 3+
- ▶ specType=etd
- ▶ score=58.64
- ▶ F113278.dat
- ▶ query=q70065.p1
- ▶ precursor=896.308690
- ▶ chargePrecursor=5
- ▶ itol=0.5

| AA | c  | y               | #s1             | #s2             | z               | AA              |       |
|----|----|-----------------|-----------------|-----------------|-----------------|-----------------|-------|
| S  | 1  | 489.697         | <b>1493.175</b> | <b>1487.835</b> | 0.872           | 3487.487        | S[41] |
| G  | 2  | 66.704          | <b>1450.161</b> | 1444.521        | 0.872           | 1444.485        | G[40] |
| R  | 3  | 1307.718        | 1431.154        | <b>1425.814</b> | <b>1426.150</b> | 1425.478        | R[39] |
| G  | 4  | 139.745         | 1379.120        | 1373.780        | 1374.416        | 1373.444        | G[38] |
| K  | 5  | 182.443         | 1360.113        | <b>1354.773</b> | <b>1355.109</b> | 1354.437        | K[37] |
| G  | 6  | 225.130         | 1341.444        | <b>1312.075</b> | <b>1312.411</b> | <b>1311.739</b> | G[36] |
| G  | 7  | 244.137         | 1324.725        | <b>1269.389</b> | <b>1269.725</b> | <b>1269.053</b> | G[35] |
| G  | 8  | 263.144         | 1295.921        | <b>1250.381</b> | <b>1250.717</b> | <b>1250.045</b> | G[34] |
| K  | 9  | 305.642         | 1236.714        | 1231.374        | 1231.710        | 1231.038        | K[33] |
| A  | 10 | 329.521         | 1194.016        | 1189.676        | 1189.012        | 1188.340        | A[32] |
| R  | 11 | 381.555         | 1170.338        | <b>1164.997</b> | <b>1165.333</b> | 1164.661        | R[31] |
| A  | 12 | 489.234         | 1138.303        | 1133.963        | 1133.299        | 1132.627        | A[30] |
| K  | 13 | 447.932         | 1094.624        | 1089.284        | <b>1089.620</b> | 1088.948        | K[29] |
| A  | 14 | 471.611         | 1051.925        | 1046.585        | <b>1046.922</b> | 1046.250        | A[28] |
| K  | 15 | 514.310         | 1028.246        | 1022.907        | 1023.243        | 1022.571        | K[27] |
| S  | 16 | 543.320         | 985.548         | 980.208         | 980.544         | 979.873         | S[26] |
| R  | 17 | 595.254         | 956.537         | 951.198         | 951.534         | 950.862         | R[25] |
| S  | 18 | 624.265         | 904.504         | 899.164         | 899.500         | 898.828         | S[24] |
| S  | 19 | 653.275         | 875.493         | 870.153         | 870.489         | 869.817         | S[23] |
| R  | 20 | 705.409         | 846.482         | 841.143         | 841.479         | 840.807         | R[22] |
| A  | 21 | 729.088         | 794.449         | 789.109         | 789.445         | 788.773         | A[21] |
| G  | 22 | 748.095         | <b>770.770</b>  | 765.430         | 765.766         | 765.094         | G[20] |
| L  | 23 | 789.790         | 742.762         | 740.423         | 740.759         | 740.087         | L[19] |
| G  | 24 | 828.476         | 714.085         | 708.745         | 709.084         | 708.412         | G[18] |
| F  | 25 | 877.499         | <b>671.382</b>  | 666.042         | 666.378         | 665.706         | F[17] |
| F  | 26 | 909.950         | 622.359         | 617.019         | 617.355         | 616.683         | F[16] |
| V  | 27 | <b>942.873</b>  | 590.008         | 584.668         | 585.004         | 584.332         | V[15] |
| G  | 28 | <b>961.880</b>  | 558.985         | 553.645         | 553.981         | 553.309         | G[14] |
| K  | 29 | 1013.914        | 537.918         | 532.578         | 532.914         | 532.242         | K[13] |
| V  | 30 | <b>1046.936</b> | 485.944         | 480.604         | 480.941         | 480.269         | V[12] |
| H  | 31 | <b>1092.623</b> | 452.921         | 447.581         | 447.918         | 447.246         | H[11] |
| R  | 32 | 1144.656        | 407.235         | 401.895         | 402.231         | 401.559         | R[10] |
| L  | 33 | 1182.351        | 355.201         | 349.862         | 350.198         | 349.526         | L[9]  |
| L  | 34 | <b>1220.046</b> | 312.509         | 307.169         | 307.505         | 306.833         | L[8]  |
| R  | 35 | 1272.112        | 273.812         | 274.472         | 274.808         | 274.136         | R[7]  |
| K  | 36 | 1314.778        | 227.778         | 222.438         | 222.775         | 222.103         | K[6]  |
| G  | 37 | 1333.785        | 185.880         | 179.740         | 180.076         | 179.404         | G[5]  |
| N  | 38 | 1371.799        | 146.073         | 140.733         | 141.069         | 140.397         | N[4]  |
| V  | 39 | <b>1436.154</b> | 128.098         | 122.758         | 123.094         | 122.422         | V[3]  |
| A  | 40 | <b>1449.833</b> | 83.304          | 83.304          | 88.708          | 88.000          | A[2]  |
| E  | 41 | 1492.847        | 50.025          | 44.685          | 45.021          | 44.349          | E[1]  |

# sp | Q6GSS7 | H2A2A\_MOUSE

[Acetyl]SGRGKQGGKARAKAKSRSSRAGLQFPVGRVHRLLRKGN<sup>YAE</sup>

- ▶ fragmentation table for charge state 4+
- ▶ specType=etd
- ▶ score=58.64
- ▶ F113278.dat
- ▶ query=q70065.p1
- ▶ precursor=896.308690
- ▶ chargePrecursor=5
- ▶ itol=0.5

| AA | c  | y               | #=1             | #=2             | z               | AA              |       |
|----|----|-----------------|-----------------|-----------------|-----------------|-----------------|-------|
| S  | 1  | 37.505          | 1120.143        | <b>1116.128</b> | 0.755           | 1115.377        | S[41] |
| G  | 2  | 51.780          | <b>1087.872</b> | <b>1083.868</b> | 0.755           | <b>1083.616</b> | G[40] |
| R  | 3  | 90.805          | 1073.617        | <b>1069.612</b> | <b>1069.864</b> | 1069.360        | R[39] |
| G  | 4  | 109.061         | 1034.592        | 1030.587        | 1030.839        | 1030.135        | G[38] |
| K  | 5  | 137.084         | 1020.339        | 1016.332        | 1016.584        | 1016.080        | K[37] |
| Q  | 6  | 169.059         | 998.312         | 994.305         | 994.556         | 994.050         | Q[36] |
| G  | 7  | 183.354         | 956.296         | 952.291         | 952.542         | 952.044         | G[35] |
| G  | 8  | 197.610         | 942.043         | 938.038         | 938.290         | 937.792         | G[34] |
| K  | 9  | 229.633         | 927.787         | 923.783         | 924.034         | 923.531         | K[33] |
| A  | 10 | 247.393         | 895.763         | 891.759         | <b>892.011</b>  | 891.507         | A[32] |
| R  | 11 | 286.418         | 878.004         | 873.999         | 874.251         | 873.748         | R[31] |
| A  | 12 | 354.177         | 838.979         | 834.974         | 835.226         | 834.722         | A[30] |
| K  | 13 | 336.201         | 821.220         | 817.215         | 817.467         | 816.964         | K[29] |
| A  | 14 | 353.980         | 789.199         | 785.191         | 785.443         | 784.939         | A[28] |
| K  | 15 | 385.904         | <b>771.437</b>  | 767.432         | 767.684         | 767.180         | K[27] |
| S  | 16 | 407.742         | 739.413         | 735.408         | 735.660         | 735.156         | S[26] |
| R  | 17 | 446.767         | 717.955         | 713.950         | 714.202         | 713.700         | R[25] |
| S  | 18 | 468.526         | 678.930         | 674.925         | 675.177         | 674.674         | S[24] |
| S  | 19 | 490.283         | 656.972         | 652.967         | 653.219         | 652.715         | S[23] |
| R  | 20 | 529.309         | 635.114         | 631.109         | 631.361         | 630.857         | R[22] |
| A  | 21 | 547.088         | 596.089         | 592.084         | 592.336         | 591.832         | A[21] |
| Q  | 22 | 561.323         | 578.329         | 574.324         | 574.576         | 574.072         | Q[20] |
| L  | 23 | 589.984         | 564.074         | 560.069         | 560.321         | 559.817         | L[19] |
| Q  | 24 | 621.609         | 535.803         | 531.798         | 532.050         | 531.546         | Q[18] |
| F  | 25 | 658.376         | 503.789         | 499.783         | 500.035         | 499.531         | F[17] |
| F  | 26 | 662.639         | 467.021         | 463.016         | 463.268         | 462.764         | F[16] |
| V  | 27 | <b>707.406</b>  | 442.750         | 438.753         | 439.005         | 438.501         | V[15] |
| G  | 28 | 721.662         | 417.991         | 413.985         | 414.238         | 413.734         | G[14] |
| R  | 29 | 760.687         | 403.735         | 399.711         | 399.962         | 399.458         | R[13] |
| V  | 30 | 785.454         | 364.710         | <b>360.705</b>  | 360.957         | <b>360.453</b>  | V[12] |
| H  | 31 | 816.719         | 339.943         | 335.938         | 336.190         | 335.686         | H[11] |
| R  | 32 | 858.744         | 305.678         | 301.673         | 301.925         | 301.421         | R[10] |
| L  | 33 | 887.015         | 266.657         | 262.648         | 262.900         | 262.396         | L[9]  |
| L  | 34 | <b>915.286</b>  | 238.362         | 234.357         | 234.608         | 234.104         | L[8]  |
| R  | 35 | 934.311         | 210.111         | 206.100         | 206.352         | 205.848         | R[7]  |
| K  | 36 | <b>966.335</b>  | 171.088         | 167.081         | 167.333         | 166.829         | K[6]  |
| G  | 37 | <b>1000.590</b> | 139.062         | 135.057         | 135.309         | 134.805         | G[5]  |
| N  | 38 | 1029.101        | 124.806         | 120.802         | 121.054         | 120.550         | N[4]  |
| Y  | 39 | <b>1069.867</b> | 96.296          | 92.291          | 92.543          | 92.039          | Y[3]  |
| A  | 40 | <b>1087.826</b> | 58.530          | 54.525          | 54.777          | 54.273          | A[2]  |
| E  | 41 | 1119.887        | 37.771          | 33.766          | 34.018          | 33.514          | E[1]  |

# sp | Q6GSS7 | H2A2A\_MOUSE

[Acetyl]SGRGKQGGKARAKASRSSRAGLQFPVGRVHRLLRKGN<sup>YAE</sup>

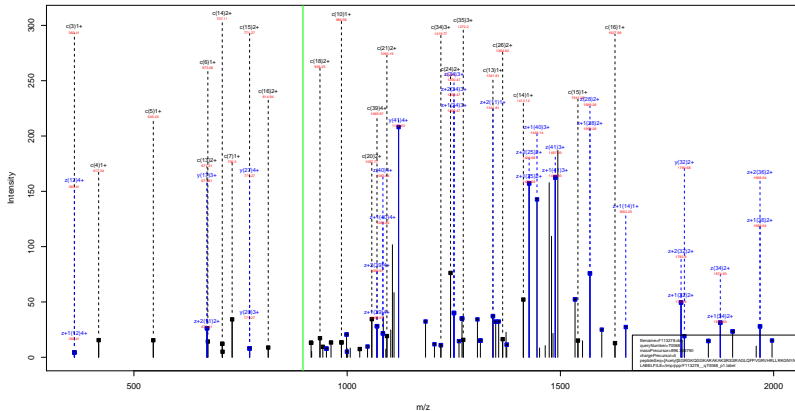

# sp | Q6GSS7 | H2A2A\_MOUSE

[Acetyl]SGRGKQGGKARAKAKSRSSRAGLQFPVGRVHLLRKGNYAE

- ▶ fragmentation table for charge state 1+
- ▶ specType=etd
- ▶ score=57.82
- ▶ F113278.dat
- ▶ query=q70068.p1
- ▶ precursor=896.308790
- ▶ chargePrecursor=5
- ▶ itol=0.5

| AA | c  | y               | z+1             | z+2             | z               | AA       |       |
|----|----|-----------------|-----------------|-----------------|-----------------|----------|-------|
| S  | 1  | 147.076         | 4477.510        | 4461.491        | 0.000           | 4460.483 | S[41] |
| G  | 2  | 204.068         | 4348.467        | 4332.449        | 0.000           | 4331.441 | G[40] |
| R  | 3  | <b>360.199</b>  | 4201.448        | 4276.427        | 4476.435        | 4274.419 | R[39] |
| G  | 4  | <b>417.220</b>  | 4135.345        | 4119.326        | 4120.334        | 4118.318 | G[38] |
| K  | 5  | <b>545.315</b>  | 4078.323        | 4062.305        | 4053.313        | 4061.297 | K[37] |
| Q  | 6  | <b>673.374</b>  | 3969.276        | 3934.210        | 3936.218        | 3933.202 | Q[36] |
| G  | 7  | <b>730.395</b>  | 3822.170        | 3806.151        | 3807.159        | 3805.143 | G[35] |
| G  | 8  | 787.417         | 3765.148        | 3749.130        | 3750.138        | 3748.122 | G[34] |
| K  | 9  | <b>915.512</b>  | 3708.127        | 3692.108        | 3693.116        | 3691.100 | K[33] |
| A  | 10 | <b>986.549</b>  | 3580.032        | 3564.013        | 3565.021        | 3563.005 | A[32] |
| R  | 11 | 1142.650        | 3508.995        | 3492.976        | 3493.984        | 3491.968 | R[31] |
| A  | 12 | 1213.687        | 3352.984        | 3336.975        | 3337.983        | 3335.967 | A[30] |
| R  | 13 | <b>1341.782</b> | 3281.857        | 3265.838        | 3266.846        | 3264.830 | R[29] |
| A  | 14 | <b>1412.819</b> | 3153.762        | 3137.743        | 3138.751        | 3136.735 | A[28] |
| K  | 15 | <b>1540.914</b> | 3082.725        | 3066.706        | 3067.714        | 3065.698 | K[27] |
| S  | 16 | <b>1627.946</b> | 2954.630        | 2938.611        | 2939.619        | 2937.603 | S[26] |
| R  | 17 | 1784.047        | 2887.586        | 2871.579        | 2852.587        | 2850.571 | R[25] |
| S  | 18 | 1871.079        | 2741.496        | 2695.476        | 2696.484        | 2694.473 | S[24] |
| S  | 19 | 1958.111        | 2624.464        | 2608.446        | 2609.454        | 2607.438 | S[23] |
| R  | 20 | 2114.213        | 2537.432        | 2521.414        | 2522.422        | 2520.406 | R[22] |
| A  | 21 | 2185.250        | 2381.331        | 2365.313        | 2366.320        | 2364.305 | A[21] |
| G  | 22 | 2242.271        | 2310.294        | 2294.275        | 2295.283        | 2293.268 | G[20] |
| L  | 23 | 2305.308        | 2253.273        | 2237.254        | 2238.262        | 2236.246 | L[19] |
| Q  | 24 | 2483.414        | 2140.189        | 2124.170        | 2125.178        | 2123.162 | Q[18] |
| F  | 25 | 2630.482        | 2012.150        | <b>1996.111</b> | 1997.119        | 1995.104 | F[17] |
| P  | 26 | 2727.535        | 1805.062        | 1849.043        | 1850.051        | 1848.035 | P[16] |
| V  | 27 | 2826.603        | 1748.009        | 1751.990        | 1752.998        | 1750.982 | V[15] |
| G  | 28 | 2883.625        | 1668.940        | <b>1652.922</b> | 1653.930        | 1651.914 | G[14] |
| D  | 29 | 3030.726        | 1611.910        | 1595.892        | <b>1596.908</b> | 1594.892 | D[13] |
| H  | 30 | 3138.794        | 1455.812        | 1439.792        | 1440.801        | 1438.785 | H[12] |
| H  | 31 | 3275.853        | 1358.748        | 1340.731        | <b>1341.739</b> | 1339.723 | H[11] |
| R  | 32 | 3431.954        | <b>1219.691</b> | 1203.672        | <b>1204.680</b> | 1202.664 | R[10] |
| L  | 33 | 3545.038        | 1063.589        | <b>1047.571</b> | 1048.579        | 1046.563 | L[9]  |
| L  | 34 | 3658.121        | 950.505         | 934.487         | 935.495         | 933.479  | L[8]  |
| R  | 35 | 3814.224        | 837.421         | 821.403         | 822.410         | 820.395  | R[7]  |
| R  | 36 | 3942.319        | 681.320         | 665.302         | 666.309         | 664.293  | R[6]  |
| G  | 37 | 3999.340        | 553.225         | 537.207         | 538.214         | 536.199  | G[5]  |
| N  | 38 | 4113.383        | 406.204         | 480.185         | 481.193         | 479.177  | N[4]  |
| V  | 39 | 4276.446        | 382.161         | 366.142         | 367.150         | 365.134  | V[3]  |
| A  | 40 | 4347.483        | 219.086         | 203.079         | 204.087         | 202.071  | A[2]  |
| E  | 41 | 4476.528        | 148.060         | 132.042         | 133.050         | 131.034  | E[1]  |

# sp | Q6GSS7 | H2A2A\_MOUSE

[Acetyl]SGRGKQGGKARAKAKSRSSRAGLQFPVGRVHRLLRKGNAYE

- ▶ fragmentation table for charge state 2+
- ▶ specType=etd
- ▶ score=57.82
- ▶ F113278.dat
- ▶ query=q70068.p1
- ▶ precursor=896.308790
- ▶ chargePrecursor=5
- ▶ itol=0.5

| AA | c  | w               | #±1             | #±2             | z               | AA              |       |
|----|----|-----------------|-----------------|-----------------|-----------------|-----------------|-------|
| S  | 1  | 74.063          | 2239.259        | 2231.260        | 8.804           | 2239.161        | S[41] |
| G  | 2  | 102.553         | 2174.737        | 2166.738        | 0.504           | 2166.254        | G[49] |
| R  | 3  | 180.603         | 2146.227        | 2138.217        | 2138.921        | 2137.713        | R[39] |
| G  | 4  | 209.114         | 2068.176        | 2060.167        | 2060.671        | 2059.663        | G[38] |
| K  | 5  | 273.161         | 2039.665        | 2031.656        | 2032.160        | 2031.152        | K[37] |
| Q  | 6  | 337.194         | 1975.616        | <b>1967.609</b> | <b>1968.112</b> | 1967.105        | Q[36] |
| G  | 7  | 365.703         | 1911.589        | <b>1903.579</b> | <b>1904.083</b> | 1903.075        | G[35] |
| G  | 8  | 394.212         | 1883.078        | <b>1875.068</b> | 1875.572        | <b>1874.565</b> | G[34] |
| K  | 9  | 458.260         | 1854.567        | <b>1846.558</b> | <b>1847.062</b> | 1846.054        | K[33] |
| A  | 10 | 493.778         | <b>1790.520</b> | <b>1782.510</b> | <b>1783.014</b> | 1782.006        | A[32] |
| R  | 11 | 571.829         | 1735.001        | 1746.982        | 1747.496        | 1746.488        | R[31] |
| A  | 12 | 609.389         | 1678.983        | 1668.983        | 1669.486        | 1668.479        | A[30] |
| K  | 13 | <b>671.395</b>  | 1643.432        | 1633.423        | 1633.927        | 1632.919        | K[29] |
| A  | 14 | <b>706.913</b>  | 1577.384        | <b>1569.375</b> | 1569.879        | <b>1568.871</b> | A[28] |
| K  | 15 | <b>770.961</b>  | 1541.866        | <b>1533.857</b> | <b>1534.360</b> | 1533.351        | K[27] |
| S  | 16 | <b>814.477</b>  | 1477.818        | 1469.809        | 1470.313        | 1469.305        | S[26] |
| R  | 17 | 872.527         | 1434.302        | <b>1426.293</b> | <b>1426.797</b> | 1425.790        | R[25] |
| S  | 18 | <b>936.043</b>  | 1359.263        | <b>1348.243</b> | <b>1348.746</b> | 1347.739        | S[24] |
| S  | 19 | 999.559         | <b>1312.736</b> | 1304.726        | <b>1305.230</b> | 1304.223        | S[23] |
| R  | 20 | <b>1057.610</b> | <b>1269.220</b> | 1261.210        | <b>1261.714</b> | 1260.707        | R[22] |
| A  | 21 | <b>1093.128</b> | 1191.169        | 1181.160        | <b>1183.664</b> | 1182.656        | A[21] |
| G  | 22 | 1121.639        | 1135.651        | 1147.641        | 1148.145        | 1147.137        | G[20] |
| L  | 23 | 1178.183        | 1127.146        | 1139.137        | 1139.640        | 1138.632        | L[19] |
| Q  | 24 | <b>1242.211</b> | 1073.595        | 1062.589        | 1063.093        | 1062.085        | Q[18] |
| F  | 25 | 1315.745        | 1006.599        | <b>998.559</b>  | <b>999.063</b>  | 998.055         | F[17] |
| F  | 26 | <b>1364.271</b> | 933.034         | 925.025         | 925.529         | 924.521         | F[16] |
| V  | 27 | 1413.805        | 884.506         | 876.499         | 877.003         | 875.995         | V[15] |
| G  | 28 | 1462.316        | 834.974         | 826.965         | 827.468         | 826.461         | G[14] |
| R  | 29 | 1520.369        | 806.483         | 798.474         | 798.978         | 797.970         | R[13] |
| V  | 30 | 1569.901        | 728.413         | 720.403         | 720.907         | 719.899         | V[12] |
| H  | 31 | 1638.430        | 678.878         | 670.869         | <b>671.373</b>  | 670.365         | H[11] |
| R  | 32 | 1716.461        | 610.349         | 602.340         | 602.843         | 601.835         | R[10] |
| L  | 33 | 1773.023        | 532.299         | 524.289         | 524.793         | 523.785         | L[9]  |
| L  | 34 | 1839.968        | 478.756         | 469.747         | 469.251         | 468.243         | L[8]  |
| R  | 35 | 1907.615        | 419.214         | 411.205         | 411.709         | 410.701         | R[7]  |
| K  | 36 | 1971.663        | 341.164         | 333.154         | 333.658         | 332.650         | K[6]  |
| G  | 37 | 2036.174        | 277.116         | 269.107         | 269.611         | 268.603         | G[5]  |
| N  | 38 | 2057.195        | 248.606         | 240.596         | 241.100         | 240.092         | N[4]  |
| V  | 39 | 2136.727        | 181.564         | 183.575         | 184.079         | 183.071         | V[3]  |
| A  | 40 | 2114.265        | 110.026         | 102.016         | 102.519         | 101.511         | A[2]  |
| E  | 41 | 2238.767        | 74.534          | 66.524          | 67.028          | 66.021          | E[1]  |

# sp | Q6GSS7 | H2A2A\_MOUSE

[Acetyl]SGRGKQGGKARAKAKSRSSRAGLQFPVGRVHRLLRKGN<sup>+</sup>YAE

- ▶ fragmentation table for charge state 3+
- ▶ specType=etd
- ▶ score=57.82
- ▶ F113278.dat
- ▶ query=q70068.p1
- ▶ precursor=896.308790
- ▶ chargePrecursor=5
- ▶ itol=0.5

| AA   | c               | y              | z+1             | z+2             | z               | AA   |
|------|-----------------|----------------|-----------------|-----------------|-----------------|------|
| S 1  | 49.697          | 1493.175       | <b>1487.835</b> | 0.672           | <b>1487.499</b> | G 41 |
| G 2  | 68.704          | 1450.161       | <b>1444.821</b> | 0.672           | 1444.455        | G 40 |
| R 3  | 130.738         | 1431.154       | 1425.814        | 1426.150        | 1425.478        | R 39 |
| G 4  | 139.745         | 1379.120       | <b>1373.780</b> | <b>1374.116</b> | 1373.444        | G 38 |
| K 5  | 182.443         | 1360.113       | 1354.773        | <b>1355.109</b> | 1354.437        | K 37 |
| Q 6  | 235.330         | 1317.414       | <b>1312.075</b> | <b>1312.411</b> | 1311.793        | Q 36 |
| G 7  | 244.137         | 1274.725       | <b>1269.389</b> | <b>1269.725</b> | <b>1269.053</b> | G 35 |
| G 8  | 263.144         | 1255.721       | <b>1250.381</b> | <b>1250.717</b> | <b>1250.045</b> | G 34 |
| K 9  | 305.842         | 1236.714       | 1231.374        | 1231.710        | 1231.038        | K 33 |
| A 10 | 329.521         | 1194.016       | 1188.676        | 1189.012        | 1188.340        | A 32 |
| R 11 | 381.555         | 1170.136       | 1164.997        | 1165.333        | 1164.661        | R 31 |
| A 12 | 409.234         | 1118.303       | 1112.963        | 1113.299        | 1112.627        | A 30 |
| R 13 | 447.932         | 1094.024       | 1089.254        | 1089.620        | 1088.948        | R 29 |
| A 14 | 471.611         | 1051.925       | 1046.589        | 1046.922        | 1046.250        | A 28 |
| K 15 | 514.310         | 1028.246       | 1022.907        | 1023.243        | 1022.571        | K 27 |
| S 16 | 543.320         | 985.548        | 980.208         | 980.544         | 979.872         | S 26 |
| R 17 | 595.254         | 956.537        | <b>951.198</b>  | <b>951.534</b>  | 950.862         | R 25 |
| S 18 | 624.305         | 924.504        | 919.164         | 919.500         | 918.828         | S 24 |
| S 19 | 653.375         | 875.493        | 870.153         | 870.489         | 869.817         | S 23 |
| R 20 | 705.409         | 846.482        | 841.142         | 841.479         | 840.807         | R 22 |
| A 21 | 729.088         | 794.449        | 789.109         | 789.445         | 788.773         | A 21 |
| G 22 | 748.095         | <b>770.770</b> | 765.430         | 765.766         | 765.094         | G 20 |
| L 23 | 785.730         | 731.762        | 746.423         | 746.759         | 746.087         | L 19 |
| Q 24 | 828.478         | 714.069        | 708.729         | 709.064         | 708.392         | Q 19 |
| F 25 | 877.409         | <b>671.382</b> | 666.042         | 666.378         | 665.706         | F 17 |
| F 26 | 909.850         | 622.359        | 617.019         | 617.355         | 616.683         | F 16 |
| V 27 | <b>942.873</b>  | 590.028        | 584.688         | 585.024         | 584.352         | V 15 |
| G 28 | <b>961.880</b>  | 556.985        | 551.645         | 551.981         | 551.309         | G 14 |
| R 29 | 1013.914        | 437.878        | 432.538         | 432.874         | 432.202         | R 13 |
| R 30 | 1246.938        | 488.944        | 483.604         | 483.941         | 483.269         | R 12 |
| H 31 | 1092.623        | 452.921        | 447.581         | 447.918         | 447.246         | H 11 |
| R 32 | 1144.656        | 407.735        | 402.395         | 402.731         | 402.059         | R 10 |
| L 33 | 1182.351        | 355.201        | 349.862         | 350.198         | 349.526         | L 9  |
| L 34 | <b>1220.046</b> | 317.507        | 312.167         | 312.503         | 311.831         | L 8  |
| R 35 | <b>1272.079</b> | 279.812        | 274.472         | 274.808         | 274.136         | R 7  |
| R 36 | 1314.718        | 227.778        | 222.438         | 222.775         | 222.103         | R 6  |
| G 37 | 1333.785        | 185.080        | 179.740         | 180.076         | 179.404         | G 5  |
| N 38 | 1371.799        | 166.073        | 160.733         | 161.069         | 160.397         | N 4  |
| V 39 | 1426.154        | 128.058        | 122.719         | 123.055         | 122.383         | V 3  |
| A 40 | 1449.831        | 73.704         | 68.364          | 68.700          | 68.028          | A 2  |
| E 41 | 1492.287        | 30.025         | 44.685          | 45.021          | 44.349          | E 1  |

# sp | Q6GSS7 | H2A2A\_MOUSE

[Acetyl]SGRGKQGGKARAKAKSRSSRAGLQFPVGRVHRLLRKGN~~YAE~~

- ▶ fragmentation table for charge state 4+
- ▶ specType=etd
- ▶ score=57.82
- ▶ F113278.dat
- ▶ query=q70068.p1
- ▶ precursor=896.308790
- ▶ chargePrecursor=5
- ▶ itol=0.5

| AA | c  | y               | #s1             | #s2             | z               | AA              |       |
|----|----|-----------------|-----------------|-----------------|-----------------|-----------------|-------|
| S  | 1  | 37.505          | <b>1120.133</b> | 1118.130        | 0.795           | 1115.077        | S[41] |
| G  | 2  | 51.780          | 1032.872        | <b>1083.868</b> | 0.795           | <b>1083.616</b> | G[40] |
| R  | 3  | 90.805          | 1073.617        | <b>1069.612</b> | <b>1069.864</b> | 1069.360        | R[39] |
| G  | 4  | 109.061         | 1034.592        | 1030.587        | 1030.839        | 1030.135        | G[38] |
| K  | 5  | 137.084         | 1020.339        | 1016.332        | 1016.584        | 1016.080        | K[37] |
| G  | 6  | 169.059         | 998.312         | 994.308         | 994.560         | 994.056         | G[36] |
| G  | 7  | 183.354         | 956.296         | 952.293         | 952.545         | 952.041         | G[35] |
| G  | 8  | 197.610         | 942.043         | 938.038         | 938.290         | 937.786         | G[34] |
| K  | 9  | 229.633         | 927.787         | 923.783         | 924.034         | 923.531         | K[33] |
| A  | 10 | 247.393         | 895.763         | 891.759         | 892.011         | 891.507         | A[32] |
| R  | 11 | 286.418         | 878.004         | 873.999         | 874.251         | 873.748         | R[31] |
| A  | 12 | 354.177         | 838.979         | 834.974         | 835.226         | 834.722         | A[30] |
| K  | 13 | 336.201         | 821.220         | 817.215         | 817.467         | 816.964         | K[29] |
| A  | 14 | 353.980         | 789.199         | 785.195         | 785.443         | 784.939         | A[28] |
| K  | 15 | 385.904         | <b>771.437</b>  | 767.432         | 767.684         | 767.180         | K[27] |
| S  | 16 | 407.742         | 739.413         | 735.408         | 735.660         | 735.156         | S[26] |
| R  | 17 | 446.767         | 717.955         | 713.950         | 714.202         | 713.698         | R[25] |
| S  | 18 | 468.526         | 678.930         | 674.925         | 675.177         | 674.673         | S[24] |
| S  | 19 | 490.283         | 656.972         | 652.967         | 653.219         | 652.715         | S[23] |
| R  | 20 | 529.309         | 635.114         | 631.109         | 631.361         | 630.857         | R[22] |
| A  | 21 | 547.088         | 596.089         | 592.084         | 592.336         | 591.832         | A[21] |
| G  | 22 | 561.323         | 578.329         | 574.324         | 574.576         | 574.072         | G[20] |
| L  | 23 | 589.984         | 648.074         | 644.069         | 644.321         | 643.817         | L[19] |
| Q  | 24 | 621.609         | 535.803         | 531.798         | 532.050         | 531.546         | Q[18] |
| F  | 25 | 658.376         | 503.789         | 499.783         | 500.035         | 499.531         | F[17] |
| F  | 26 | 662.639         | 467.021         | 463.016         | 463.268         | 462.764         | F[16] |
| V  | 27 | <b>707.406</b>  | 442.750         | 438.753         | 439.005         | 438.501         | V[15] |
| G  | 28 | 721.662         | 417.991         | 413.986         | 414.238         | 413.734         | G[14] |
| R  | 29 | 760.687         | 403.735         | 399.731         | 399.982         | 399.478         | R[13] |
| V  | 30 | 785.454         | 364.710         | <b>360.705</b>  | 360.957         | <b>360.453</b>  | V[12] |
| H  | 31 | 816.719         | 338.943         | 335.938         | 336.190         | 335.686         | H[11] |
| R  | 32 | 858.744         | 305.678         | 301.673         | 301.925         | 301.421         | R[10] |
| L  | 33 | 887.015         | 266.657         | 262.648         | 262.900         | 262.396         | L[9]  |
| L  | 34 | <b>915.286</b>  | 238.362         | 234.357         | 234.608         | 234.104         | L[8]  |
| R  | 35 | 934.311         | 210.111         | 206.106         | 206.358         | 205.854         | R[7]  |
| K  | 36 | <b>986.335</b>  | 171.088         | 167.081         | 167.333         | 166.829         | K[6]  |
| G  | 37 | 1000.590        | 139.064         | 135.057         | 135.309         | 134.805         | G[5]  |
| N  | 38 | <b>1029.101</b> | 124.806         | 120.802         | 121.054         | 120.550         | N[4]  |
| V  | 39 | <b>1069.867</b> | 96.296          | 92.291          | 92.543          | 92.039          | V[3]  |
| A  | 40 | 1087.626        | 58.530          | 54.525          | 54.777          | 54.273          | A[2]  |
| E  | 41 | 1119.887        | 37.771          | 33.766          | 34.018          | 33.514          | E[1]  |



# sp | Q6GSS7 | H2A2A\_MOUSE

[Acetyl]SGRGKQGKKARAKASRSSRAGLQFPVGRVHLLRKGN<sup>YAE</sup>

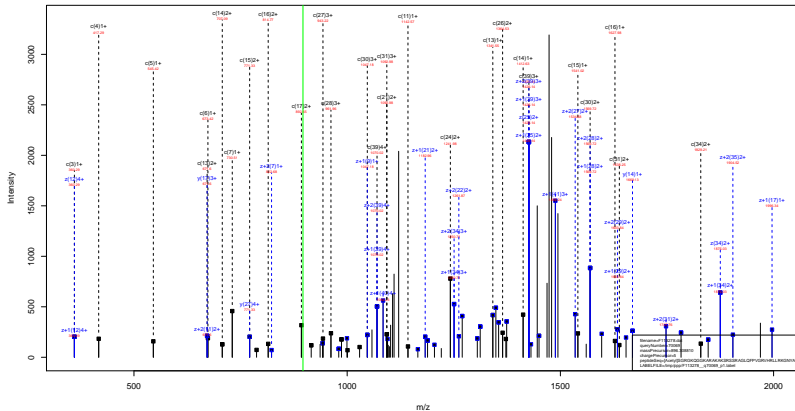

# sp | Q6GSS7 | H2A2A\_MOUSE

[Acetyl]SGRGKQGGKARAKAKSRSSRAGLQFPVGRVHRLLRKGNAYE

- ▶ fragmentation table for charge state 1+
- ▶ specType=etd
- ▶ score=66.53
- ▶ F113278.dat
- ▶ query=q70069\_p1
- ▶ precursor=896.308810
- ▶ chargePrecursor=5
- ▶ itol=0.5

| AA | c  | y               | z+1             | z+2             | z               | AA       |       |
|----|----|-----------------|-----------------|-----------------|-----------------|----------|-------|
| S  | 1  | 147.076         | 4477.510        | 4461.491        | 0.000           | 4460.483 | S[41] |
| G  | 2  | 204.068         | 4348.467        | 4332.449        | 0.000           | 4331.441 | G[40] |
| R  | 3  | <b>360.199</b>  | 4201.448        | 4276.427        | 4476.435        | 4274.419 | R[39] |
| G  | 4  | <b>417.220</b>  | 4135.345        | 4119.326        | 4120.334        | 4118.318 | G[38] |
| K  | 5  | <b>545.315</b>  | 4078.323        | 4062.305        | 4053.313        | 4051.297 | K[37] |
| Q  | 6  | <b>673.374</b>  | 3969.292        | 3934.270        | 3935.278        | 3933.262 | Q[36] |
| G  | 7  | <b>730.395</b>  | 3822.170        | 3805.151        | 3807.159        | 3805.143 | G[35] |
| G  | 8  | <b>787.417</b>  | 3765.148        | 3749.130        | 3750.138        | 3748.122 | G[34] |
| K  | 9  | <b>915.512</b>  | 3708.127        | 3692.108        | 3693.116        | 3691.100 | K[33] |
| A  | 10 | <b>986.549</b>  | 3580.032        | 3564.013        | 3565.021        | 3563.005 | A[32] |
| R  | 11 | <b>1142.650</b> | 3508.995        | 3492.976        | 3493.984        | 3491.968 | R[31] |
| A  | 12 | 1213.687        | 3352.994        | 3336.975        | 3337.983        | 3335.967 | A[30] |
| R  | 13 | <b>1341.782</b> | 3281.957        | 3265.938        | 3266.946        | 3264.930 | R[29] |
| A  | 14 | <b>1412.819</b> | 3153.902        | 3137.883        | 3138.891        | 3136.875 | A[28] |
| K  | 15 | <b>1540.914</b> | 3082.725        | 3066.706        | 3067.714        | 3065.698 | K[27] |
| S  | 16 | <b>1627.946</b> | 2954.630        | 2938.611        | 2939.619        | 2937.603 | S[26] |
| R  | 17 | 1784.047        | 2887.586        | 2871.579        | 2852.587        | 2850.571 | R[25] |
| S  | 18 | 1871.079        | 2741.490        | 2695.478        | 2696.486        | 2694.470 | S[24] |
| S  | 19 | 1958.111        | 2624.464        | 2608.446        | 2609.454        | 2607.438 | S[23] |
| R  | 20 | 2114.213        | 2537.432        | 2521.414        | 2522.422        | 2520.406 | R[22] |
| A  | 21 | 2185.250        | 2381.331        | 2365.313        | 2366.320        | 2364.305 | A[21] |
| G  | 22 | 2242.271        | 2310.294        | 2294.275        | 2295.283        | 2293.268 | G[20] |
| L  | 23 | 2385.388        | 2253.273        | 2237.254        | 2238.262        | 2236.246 | L[19] |
| Q  | 24 | 2483.414        | 2140.189        | 2124.170        | 2125.178        | 2123.162 | Q[18] |
| F  | 25 | 2630.482        | 2012.150        | <b>1996.111</b> | 1997.119        | 1995.104 | F[17] |
| P  | 26 | 2727.535        | 1895.062        | 1849.043        | 1850.051        | 1848.035 | P[16] |
| V  | 27 | 2826.603        | 1768.009        | 1751.990        | 1752.998        | 1750.982 | V[15] |
| G  | 28 | 2883.625        | <b>1568.940</b> | 1652.922        | <b>1653.930</b> | 1651.914 | G[14] |
| R  | 29 | 3030.726        | 1611.916        | 1595.897        | <b>1596.908</b> | 1594.892 | R[13] |
| L  | 30 | 3138.784        | 1455.812        | 1439.792        | 1440.801        | 1438.785 | L[12] |
| H  | 31 | 3275.853        | 1358.748        | 1342.731        | <b>1341.739</b> | 1339.723 | H[11] |
| R  | 32 | 3431.964        | 1219.691        | 1203.672        | <b>1204.680</b> | 1202.664 | R[10] |
| L  | 33 | 3545.038        | 1063.589        | <b>1047.571</b> | 1048.579        | 1046.563 | L[9]  |
| L  | 34 | 3658.121        | 950.505         | 934.487         | 935.495         | 933.479  | L[8]  |
| T  | 35 | 3814.224        | 837.421         | 821.403         | <b>822.410</b>  | 820.395  | T[7]  |
| R  | 36 | 3942.319        | 681.320         | 665.302         | 666.309         | 664.293  | R[6]  |
| G  | 37 | 3999.340        | 553.225         | 537.207         | 538.214         | 536.199  | G[5]  |
| N  | 38 | 4113.383        | 406.204         | 480.185         | 481.193         | 479.177  | N[4]  |
| V  | 39 | 4276.446        | 382.161         | 366.142         | 367.150         | 365.134  | V[3]  |
| A  | 40 | 4347.463        | 219.086         | 203.079         | 204.087         | 202.071  | A[2]  |
| E  | 41 | 4476.528        | 148.060         | 132.042         | 133.050         | 131.034  | E[1]  |

# sp | Q6GSS7 | H2A2A\_MOUSE

[Acetyl]SGRGKQGGKARAKAKSRSSRAGLQFPVGRVHRLLRKGN~~YAE~~

- ▶ fragmentation table for charge state 2+
- ▶ specType=etd
- ▶ score=66.53
- ▶ F113278.dat
- ▶ query=q70069\_p1
- ▶ precursor=896.308810
- ▶ chargePrecursor=5
- ▶ itol=0.5

| AA | c  | y               | z=1      | z=2             | z               | AA              |       |
|----|----|-----------------|----------|-----------------|-----------------|-----------------|-------|
| S  | 1  | 74.042          | 2739.269 | 2731.240        | 0.504           | 2730.740        | S[41] |
| G  | 2  | 102.563         | 2174.737 | 2166.720        | 0.504           | 2166.224        | G[40] |
| R  | 3  | 180.603         | 2146.627 | 2138.219        | 2138.721        | 2137.711        | R[39] |
| G  | 4  | 209.114         | 2098.176 | 2090.167        | 2090.671        | 2089.663        | G[38] |
| K  | 5  | 273.161         | 2039.665 | 2031.656        | 2032.160        | 2031.152        | K[37] |
| Q  | 6  | 337.193         | 1975.818 | 1967.809        | 1968.312        | 1967.305        | Q[36] |
| G  | 7  | 365.703         | 1911.969 | 1903.971        | <b>1904.083</b> | 1903.075        | G[35] |
| G  | 8  | 394.212         | 1883.078 | <b>1875.068</b> | 1875.572        | <b>1874.565</b> | G[34] |
| K  | 9  | 458.260         | 1854.567 | <b>1846.558</b> | <b>1847.062</b> | 1846.054        | K[33] |
| A  | 10 | 493.778         | 1790.620 | <b>1782.510</b> | <b>1783.014</b> | 1782.006        | A[32] |
| R  | 11 | 571.829         | 1755.081 | 1746.992        | <b>1747.496</b> | 1746.488        | R[31] |
| A  | 12 | 607.947         | 1676.951 | <b>1668.941</b> | <b>1669.445</b> | 1668.437        | A[30] |
| R  | 13 | <b>671.395</b>  | 1641.432 | <b>1633.423</b> | <b>1633.927</b> | 1632.919        | R[29] |
| A  | 14 | <b>706.913</b>  | 1577.384 | <b>1569.375</b> | <b>1569.879</b> | 1568.871        | A[28] |
| K  | 15 | <b>770.961</b>  | 1541.866 | 1533.857        | <b>1534.360</b> | 1533.351        | K[27] |
| S  | 16 | <b>814.477</b>  | 1477.818 | 1469.809        | 1470.313        | 1469.305        | S[26] |
| R  | 17 | <b>892.527</b>  | 1434.302 | <b>1426.293</b> | 1426.797        | <b>1425.789</b> | R[25] |
| S  | 18 | 930.933         | 1396.282 | <b>1388.243</b> | <b>1388.746</b> | 1387.739        | S[24] |
| S  | 19 | 979.559         | 1312.730 | <b>1304.726</b> | <b>1305.230</b> | 1304.223        | S[23] |
| R  | 20 | 1057.610        | 1269.220 | 1261.210        | <b>1261.714</b> | 1260.707        | R[22] |
| A  | 21 | <b>1093.128</b> | 1191.099 | <b>1183.100</b> | 1183.604        | <b>1182.606</b> | A[21] |
| G  | 22 | 1121.639        | 1155.051 | 1147.041        | 1148.045        | 1147.137        | G[20] |
| L  | 23 | 1178.301        | 1127.140 | 1119.130        | 1119.635        | 1118.627        | L[19] |
| Q  | 24 | <b>1242.211</b> | 970.589  | 962.580         | 963.093         | 962.085         | Q[18] |
| F  | 25 | 1315.748        | 906.569  | 908.550         | <b>909.063</b>  | 908.055         | F[17] |
| P  | 26 | <b>1364.271</b> | 933.034  | 925.025         | 925.529         | 924.521         | P[16] |
| V  | 27 | 1413.805        | 894.508  | 878.499         | 877.003         | 875.995         | V[15] |
| G  | 28 | 1442.316        | 834.074  | 826.065         | 827.468         | 826.461         | G[14] |
| R  | 29 | 1525.387        | 856.463  | 788.454         | 798.858         | 797.850         | R[13] |
| V  | 30 | <b>1569.901</b> | 728.413  | 720.401         | 720.907         | 719.899         | V[12] |
| H  | 31 | <b>1638.430</b> | 678.878  | 670.889         | <b>671.373</b>  | 670.365         | H[11] |
| R  | 32 | 1716.481        | 610.349  | 602.340         | 602.843         | 601.836         | R[10] |
| L  | 33 | 1773.023        | 532.298  | 524.289         | 524.793         | 523.785         | L[9]  |
| L  | 34 | <b>1829.565</b> | 475.756  | 467.747         | 468.251         | 467.243         | L[8]  |
| R  | 35 | 1867.815        | 419.214  | 411.205         | 411.709         | 410.701         | R[7]  |
| K  | 36 | 1971.963        | 341.164  | 333.154         | 333.658         | 332.650         | K[6]  |
| G  | 37 | 2000.174        | 277.118  | 269.107         | 269.611         | 268.603         | G[5]  |
| N  | 38 | 2067.195        | 248.606  | 240.596         | 241.100         | 240.092         | N[4]  |
| V  | 39 | 2138.727        | 191.984  | 183.975         | 184.079         | 183.071         | V[3]  |
| A  | 40 | 2174.245        | 110.052  | 102.043         | 102.547         | 101.539         | A[2]  |
| E  | 41 | 2238.787        | 74.534   | 66.524          | 67.028          | 66.021          | E[1]  |

# sp | Q6GSS7 | H2A2A\_MOUSE

[Acetyl]SGRGKQGGKARAKAKSRSSRAGLQFPVGRVHLLRKGNYAE

- ▶ fragmentation table for charge state 3+
- ▶ specType=etd
- ▶ score=66.53
- ▶ F113278.dat
- ▶ query=q70069\_p1
- ▶ precursor=896.308810
- ▶ chargePrecursor=5
- ▶ itol=0.5

| AA | c  | y               | #s1             | #s2             | z               | AA              |       |
|----|----|-----------------|-----------------|-----------------|-----------------|-----------------|-------|
| S  | 1  | 489.607         | 1392.178        | <b>1487.835</b> | 8.872           | 1487.407        | S[41] |
| G  | 2  | 66.704          | <b>1450.161</b> | 1444.521        | 0.672           | 1444.445        | G[40] |
| R  | 3  | 1307.788        | <b>1431.154</b> | <b>1425.814</b> | <b>1426.150</b> | 1425.478        | R[39] |
| G  | 4  | 139.745         | 1379.120        | <b>1373.780</b> | <b>1374.116</b> | 1373.444        | G[38] |
| K  | 5  | 182.443         | 1360.113        | <b>1354.773</b> | <b>1355.109</b> | 1354.437        | K[37] |
| G  | 6  | 225.130         | 1347.444        | <b>1342.075</b> | <b>1342.411</b> | 1341.739        | G[36] |
| G  | 7  | 244.137         | 1324.725        | <b>1269.389</b> | <b>1268.725</b> | 1269.061        | G[35] |
| G  | 8  | 263.144         | 1295.721        | <b>1250.381</b> | <b>1250.717</b> | 1250.045        | G[34] |
| K  | 9  | 305.642         | 1236.714        | 1231.374        | 1231.710        | 1231.038        | K[33] |
| A  | 10 | 329.521         | 1194.016        | <b>1188.676</b> | <b>1189.012</b> | <b>1188.340</b> | A[32] |
| R  | 11 | 381.555         | 1170.336        | 1164.907        | <b>1165.333</b> | 1164.661        | R[31] |
| A  | 12 | 405.234         | 1132.303        | 1127.903        | 1127.269        | 1127.597        | A[30] |
| K  | 13 | 447.932         | <b>1094.624</b> | 1089.234        | 1089.620        | 1089.942        | K[29] |
| A  | 14 | 471.611         | 1051.925        | 1046.530        | <b>1046.922</b> | 1046.250        | A[28] |
| K  | 15 | 514.310         | 1028.246        | 1022.907        | 1023.243        | 1022.571        | K[27] |
| S  | 16 | 543.320         | 985.548         | <b>980.208</b>  | <b>980.544</b>  | <b>979.873</b>  | S[26] |
| R  | 17 | 585.254         | 956.517         | 951.108         | 951.534         | 950.862         | R[25] |
| S  | 18 | 624.305         | 904.504         | 899.184         | 899.500         | 899.820         | S[24] |
| S  | 19 | 653.375         | 875.493         | 870.153         | 870.489         | 869.817         | S[23] |
| R  | 20 | 705.400         | 846.482         | 841.143         | 841.479         | 840.807         | R[22] |
| A  | 21 | 729.088         | 794.449         | 789.109         | 789.445         | 788.773         | A[21] |
| G  | 22 | 748.095         | 770.770         | 765.430         | 765.766         | 765.094         | G[20] |
| L  | 23 | 785.790         | 751.762         | 746.423         | 746.759         | 746.087         | L[19] |
| Q  | 24 | 828.476         | 714.085         | 708.735         | 709.064         | 708.392         | Q[18] |
| F  | 25 | 877.409         | <b>671.382</b>  | 666.042         | 666.378         | 665.706         | F[17] |
| F  | 26 | 909.950         | 622.359         | 617.019         | 617.355         | 616.683         | F[16] |
| V  | 27 | <b>942.873</b>  | 590.008         | 584.668         | 585.004         | 584.332         | V[15] |
| G  | 28 | <b>961.860</b>  | 556.985         | 551.645         | 551.981         | 551.309         | G[14] |
| R  | 29 | 1013.914        | 537.978         | 532.638         | 532.974         | 532.302         | R[13] |
| V  | 30 | <b>1046.936</b> | 485.944         | 480.604         | 480.941         | 480.269         | V[12] |
| H  | 31 | <b>1092.623</b> | 452.921         | 447.582         | 447.918         | 447.246         | H[11] |
| R  | 32 | 1144.656        | 407.235         | 401.895         | 402.231         | 401.560         | R[10] |
| L  | 33 | 1182.351        | 355.201         | 349.862         | 350.198         | 349.526         | L[9]  |
| L  | 34 | 1230.046        | 317.507         | 312.167         | 312.503         | 311.831         | L[8]  |
| R  | 35 | 1272.079        | 279.812         | 274.472         | 274.808         | 274.136         | R[7]  |
| K  | 36 | 1314.778        | 227.778         | 222.439         | 222.775         | 222.103         | K[6]  |
| G  | 37 | 1331.785        | 185.080         | 179.740         | 180.076         | 179.404         | G[5]  |
| N  | 38 | <b>1371.799</b> | 166.073         | 160.733         | 161.069         | 160.397         | N[4]  |
| V  | 39 | <b>1426.154</b> | 138.098         | 132.758         | 133.094         | 132.422         | V[3]  |
| A  | 40 | <b>1449.833</b> | 83.304          | 77.964          | 78.300          | 77.628          | A[2]  |
| E  | 41 | 1492.847        | 50.025          | 44.685          | 45.021          | 44.349          | E[1]  |

# sp | Q6GSS7 | H2A2A\_MOUSE

[Acetyl]SGRGKQGGKARAKAKSRSSRAGLQFPVGRVHRLLRKGN~~YAE~~

- ▶ fragmentation table for charge state 4+
- ▶ specType=etd
- ▶ score=66.53
- ▶ F113278.dat
- ▶ query=q70069\_p1
- ▶ precursor=896.308810
- ▶ chargePrecursor=5
- ▶ itol=0.5

| AA   | c               | y              | z+1             | z+2             | z              | AA   |
|------|-----------------|----------------|-----------------|-----------------|----------------|------|
| S 1  | 37.526          | 1120.133       | 1116.138        | 0.755           | 1115.878       | S 41 |
| G 2  | 51.780          | 1087.872       | <b>1083.868</b> | 0.755           | 1083.618       | G 40 |
| R 3  | 90.805          | 1073.617       | <b>1069.612</b> | <b>1069.864</b> | 1069.360       | R 39 |
| G 4  | 105.061         | 1034.592       | 1030.587        | 1030.839        | 1030.335       | G 38 |
| K 5  | 137.084         | 1030.336       | 1026.332        | 1026.584        | 1026.080       | K 37 |
| Q 6  | 169.099         | 988.313        | 984.308         | 984.560         | 984.056        | Q 36 |
| G 7  | 183.394         | 996.288        | 992.293         | 992.545         | 992.041        | G 35 |
| G 8  | 197.610         | <b>942.043</b> | 938.038         | 938.290         | 937.786        | G 34 |
| K 9  | 229.633         | 927.787        | 923.783         | 924.034         | 923.531        | K 33 |
| A 10 | 247.393         | 895.763        | 891.758         | 892.011         | 891.507        | A 32 |
| R 11 | 286.418         | 878.004        | 874.009         | 874.261         | 873.748        | R 31 |
| A 12 | 304.177         | 838.978        | 834.974         | 835.226         | 834.723        | A 30 |
| K 13 | 338.201         | 821.220        | 817.215         | 817.467         | 816.964        | K 29 |
| A 14 | 353.960         | 789.198        | 785.191         | 785.443         | 784.939        | A 28 |
| K 15 | 385.984         | <b>771.437</b> | 767.432         | 767.684         | 767.180        | K 27 |
| S 16 | 407.742         | 739.413        | 735.408         | 735.660         | 735.156        | S 26 |
| R 17 | 446.767         | 717.895        | 713.890         | 714.142         | 713.638        | R 25 |
| S 18 | 468.526         | 678.839        | 674.835         | 675.087         | 674.574        | S 24 |
| S 19 | 490.283         | 656.872        | 652.867         | 653.119         | 652.615        | S 23 |
| R 20 | 529.309         | 635.114        | 631.109         | 631.361         | 630.857        | R 22 |
| A 21 | 547.068         | 606.089        | 602.084         | 602.336         | 601.833        | A 21 |
| G 22 | 561.323         | 578.329        | 574.324         | 574.576         | 574.072        | G 20 |
| L 23 | 589.594         | 564.074        | 560.069         | 560.321         | 559.817        | L 19 |
| Q 24 | 623.609         | 635.803        | 631.798         | 632.050         | 631.546        | Q 18 |
| F 25 | 658.376         | 593.788        | 499.783         | 500.035         | 499.531        | F 17 |
| P 26 | 682.639         | 487.021        | 483.016         | 483.268         | 482.764        | P 16 |
| V 27 | <b>707.406</b>  | 442.758        | 438.753         | 439.005         | 438.501        | V 15 |
| G 28 | 721.662         | 417.991        | 413.986         | 414.238         | 413.734        | G 14 |
| R 29 | 760.687         | 401.735        | 397.731         | 397.982         | 397.478        | R 13 |
| V 30 | 785.454         | 384.710        | <b>367.705</b>  | 367.957         | <b>360.453</b> | V 12 |
| H 31 | 819.719         | 339.943        | 335.938         | 336.190         | 335.686        | H 11 |
| R 32 | 858.744         | 305.676        | 301.673         | 301.925         | 301.421        | R 10 |
| L 33 | 887.015         | 266.651        | 262.648         | 262.900         | 262.396        | L 9  |
| L 34 | <b>915.286</b>  | 238.382        | 234.377         | 234.629         | 234.125        | L 8  |
| R 35 | 954.311         | 210.111        | 206.106         | 206.358         | 205.854        | R 7  |
| K 36 | <b>986.335</b>  | 171.086        | 167.081         | 167.333         | 166.829        | K 6  |
| G 37 | <b>1000.590</b> | 139.062        | 135.057         | 135.309         | 134.805        | G 5  |
| N 38 | <b>1029.101</b> | 124.808        | 120.802         | 121.054         | 120.550        | N 4  |
| Y 39 | <b>1069.867</b> | 96.296         | 92.291          | 92.543          | 92.039         | Y 3  |
| A 40 | 1087.636        | 55.530         | 51.525          | 51.777          | 51.273         | A 2  |
| E 41 | 1119.887        | 37.771         | 33.766          | 34.018          | 33.514         | E 1  |



# sp | Q6GSS7 | H2A2A\_MOUSE

[Acetyl]SGRGKQGGKARAKAKSRSSRAGLQFPVGRVHRLLRKGN~~YAE~~

- ▶ fragmentation table for charge state 1+
- ▶ specType=etd
- ▶ score=58.11
- ▶ F113278.dat
- ▶ query=q70072.p1
- ▶ precursor=747.091920
- ▶ chargePrecursor=6
- ▶ itol=0.5

| AA | c  | y               | z+1      | z+2             | z               | AA             |       |
|----|----|-----------------|----------|-----------------|-----------------|----------------|-------|
| S  | 1  | 147.076         | 4477.515 | 4481.491        | 0.000           | 4460.481       | S[41] |
| G  | 2  | 304.098         | 4348.467 | 4332.440        | 0.000           | 4331.441       | G[40] |
| R  | 3  | <b>360.199</b>  | 4291.446 | 4275.427        | 4276.435        | 4274.419       | R[39] |
| G  | 4  | <b>417.220</b>  | 4135.345 | 4119.326        | 4120.334        | 4118.319       | G[38] |
| K  | 5  | <b>545.315</b>  | 4078.323 | 4062.305        | 4063.313        | 4061.297       | K[37] |
| Q  | 6  | <b>673.174</b>  | 3950.228 | 3934.210        | 3935.218        | 3933.202       | Q[36] |
| G  | 7  | <b>730.395</b>  | 3822.170 | 3806.151        | 3807.159        | 3805.143       | G[35] |
| G  | 8  | <b>787.417</b>  | 3765.148 | 3749.130        | 3750.138        | 3748.122       | G[34] |
| K  | 9  | <b>915.512</b>  | 3708.127 | 3692.108        | 3693.116        | 3691.100       | K[33] |
| A  | 10 | <b>986.549</b>  | 3650.032 | 3634.013        | 3635.021        | 3633.005       | A[32] |
| R  | 11 | 1147.850        | 3598.995 | 3492.975        | 3493.984        | 3491.968       | R[31] |
| A  | 12 | <b>1213.687</b> | 3352.984 | 3336.975        | 3337.983        | 3335.967       | A[30] |
| R  | 13 | <b>1341.782</b> | 3281.957 | 3265.938        | 3266.946        | 3264.930       | R[29] |
| A  | 14 | 1412.819        | 3153.762 | 3137.743        | 3138.751        | 3136.735       | A[28] |
| K  | 15 | 1540.914        | 3082.725 | 3066.706        | 3067.714        | 3065.698       | K[27] |
| S  | 16 | 1627.946        | 2954.630 | 2938.611        | 2939.619        | 2937.603       | S[26] |
| R  | 17 | 1784.047        | 2887.598 | 2871.579        | 2872.587        | 2870.571       | R[25] |
| S  | 18 | 1871.079        | 2711.496 | 2695.477        | 2696.486        | 2694.470       | S[24] |
| S  | 19 | 1958.111        | 2624.464 | 2608.445        | 2609.454        | 2607.438       | S[23] |
| R  | 20 | 2114.213        | 2537.432 | 2521.414        | 2522.422        | 2520.406       | R[22] |
| A  | 21 | 2185.250        | 2381.331 | 2365.313        | 2366.320        | 2364.305       | A[21] |
| G  | 22 | 2242.271        | 2310.294 | 2294.275        | 2295.283        | 2293.267       | G[20] |
| L  | 23 | 2355.355        | 2253.273 | 2237.254        | 2238.262        | 2236.246       | L[19] |
| Q  | 24 | 2483.414        | 2140.189 | 2124.170        | 2125.178        | 2123.162       | Q[18] |
| F  | 25 | 2630.482        | 2022.130 | 1996.111        | 1997.119        | 1995.104       | F[17] |
| P  | 26 | 2727.538        | 1895.062 | 1849.043        | 1850.051        | 1848.035       | P[16] |
| V  | 27 | 2826.603        | 1768.009 | 1751.990        | 1752.998        | 1750.982       | V[15] |
| G  | 28 | 2883.625        | 1698.940 | 1652.922        | 1653.930        | 1651.914       | G[14] |
| R  | 29 | 3039.726        | 1611.919 | <b>1595.900</b> | 1596.908        | 1594.892       | R[13] |
| V  | 30 | 3138.764        | 1495.818 | 1449.800        | 1450.807        | 1448.791       | V[12] |
| H  | 31 | 3275.853        | 1356.740 | <b>1340.731</b> | <b>1341.739</b> | 1339.723       | H[11] |
| R  | 32 | 3431.954        | 1219.691 | 1203.672        | 1204.680        | 1202.664       | R[10] |
| L  | 33 | 3545.038        | 1063.589 | <b>1047.571</b> | 1048.579        | 1046.563       | L[9]  |
| L  | 34 | 3658.123        | 950.505  | 934.487         | 935.495         | 933.479        | L[8]  |
| R  | 35 | 3814.224        | 837.421  | 821.403         | 822.410         | <b>820.395</b> | R[7]  |
| K  | 36 | 3932.319        | 693.300  | 665.282         | 666.289         | 664.273        | K[6]  |
| G  | 37 | 3999.340        | 553.225  | 537.207         | 538.214         | 536.199        | G[5]  |
| N  | 38 | 4113.383        | 496.204  | 480.185         | 481.193         | 479.177        | N[4]  |
| Y  | 39 | 4276.446        | 382.161  | 366.142         | 367.150         | 365.134        | Y[3]  |
| A  | 40 | 4347.483        | 219.098  | 203.079         | 204.087         | 202.071        | A[2]  |
| E  | 41 | 4476.526        | 148.060  | 132.042         | 133.050         | 131.034        | E[1]  |

# sp | Q6GSS7 | H2A2A\_MOUSE

[Acetyl]SGRGKQGGKARAKAKSRSSRAGLQFPVGRVHRLLRKGN<sup>+</sup>AE

- ▶ fragmentation table for charge state 2+
- ▶ specType=etd
- ▶ score=58.11
- ▶ F113278.dat
- ▶ query=q70072.p1
- ▶ precursor=747.091920
- ▶ chargePrecursor=6
- ▶ itol=0.5

| AA | c  | w               | #=1             | #=2             | z               | AA              |       |
|----|----|-----------------|-----------------|-----------------|-----------------|-----------------|-------|
| S  | 1  | 74.062          | 2239.259        | 2231.260        | 8.804           | 2232.147        | S[41] |
| G  | 2  | 102.553         | 2174.737        | 2266.726        | 0.504           | 2166.254        | G[49] |
| R  | 3  | 180.603         | 2146.227        | 2138.217        | 2138.921        | 2117.713        | R[39] |
| G  | 4  | 209.114         | 2068.176        | 2060.167        | 2060.671        | 2059.663        | G[38] |
| K  | 5  | 273.161         | 2039.665        | 2031.656        | 2032.160        | 2031.152        | K[37] |
| G  | 6  | 327.194         | 1975.618        | 1967.609        | <b>1968.112</b> | 1967.105        | G[36] |
| G  | 7  | 385.704         | 1911.569        | 1903.579        | <b>1904.083</b> | 1903.073        | G[35] |
| G  | 8  | 394.212         | 1883.078        | 1875.088        | <b>1875.572</b> | 1874.565        | G[34] |
| K  | 9  | 458.260         | 1854.567        | 1846.558        | <b>1847.062</b> | 1846.054        | K[33] |
| A  | 10 | 493.778         | 1790.520        | 1782.510        | 1783.014        | 1782.006        | A[32] |
| R  | 11 | 577.829         | 1735.001        | 1746.992        | <b>1747.496</b> | 1746.488        | R[31] |
| A  | 12 | <b>607.347</b>  | 1678.964        | 1669.943        | <b>1669.945</b> | 1668.937        | A[30] |
| K  | 13 | <b>671.395</b>  | 1643.432        | 1633.423        | <b>1633.927</b> | 1632.919        | K[29] |
| A  | 14 | <b>706.913</b>  | 1577.984        | 1569.170        | <b>1569.879</b> | 1568.871        | A[28] |
| K  | 15 | <b>770.961</b>  | <b>1541.866</b> | <b>1533.857</b> | <b>1534.360</b> | 1533.351        | K[27] |
| S  | 16 | <b>814.477</b>  | 1477.818        | <b>1469.809</b> | 1470.313        | <b>1469.305</b> | S[26] |
| R  | 17 | <b>892.527</b>  | 1434.302        | <b>1426.293</b> | 1426.797        | <b>1425.789</b> | R[25] |
| S  | 18 | 938.618         | 1369.763        | 1360.753        | 1368.746        | 1367.739        | S[24] |
| S  | 19 | 998.559         | <b>1312.736</b> | <b>1304.726</b> | <b>1305.230</b> | 1304.223        | S[23] |
| R  | 20 | <b>1057.610</b> | 1269.220        | <b>1261.210</b> | <b>1261.714</b> | 1260.707        | R[22] |
| A  | 21 | <b>1093.128</b> | 1191.169        | <b>1183.160</b> | <b>1183.664</b> | <b>1182.656</b> | A[21] |
| G  | 22 | 1127.639        | 1135.651        | 1147.641        | 1148.145        | 1147.137        | G[20] |
| L  | 23 | <b>1178.181</b> | 1129.140        | 1129.131        | 1119.828        | 1118.821        | L[19] |
| Q  | 24 | <b>1242.211</b> | <b>1070.598</b> | <b>1062.589</b> | 1063.093        | <b>1062.085</b> | Q[18] |
| F  | 25 | 1315.745        | 1008.599        | <b>998.559</b>  | <b>999.063</b>  | 998.955         | F[17] |
| F  | 26 | 1364.271        | 933.034         | 925.025         | 925.529         | 924.521         | F[16] |
| V  | 27 | 1413.805        | 884.508         | 876.499         | 877.003         | 875.995         | V[15] |
| G  | 28 | 1462.316        | 834.974         | 826.965         | 827.469         | 826.461         | G[14] |
| R  | 29 | 1528.369        | 808.483         | <b>798.454</b>  | <b>798.958</b>  | <b>797.950</b>  | R[13] |
| V  | 30 | <b>1569.901</b> | 728.413         | 720.403         | 720.907         | 719.899         | V[12] |
| H  | 31 | 1638.430        | 678.878         | 670.869         | <b>671.373</b>  | 670.365         | H[11] |
| R  | 32 | 1716.481        | 610.349         | 602.340         | 602.843         | 601.836         | R[10] |
| L  | 33 | 1773.023        | 532.289         | 524.280         | 524.783         | 523.785         | L[9]  |
| L  | 34 | 1829.568        | 478.756         | 469.747         | 469.251         | 468.243         | L[8]  |
| R  | 35 | 1907.615        | 419.214         | 411.205         | 411.709         | 410.701         | R[7]  |
| K  | 36 | 1971.663        | 341.164         | 333.154         | 333.658         | 332.650         | K[6]  |
| G  | 37 | 2050.174        | 277.116         | 269.107         | 269.611         | 268.603         | G[5]  |
| N  | 38 | 2057.195        | 248.606         | 240.596         | 241.100         | 240.092         | N[4]  |
| V  | 39 | 2136.727        | 181.564         | 183.575         | 184.079         | 183.071         | V[3]  |
| A  | 40 | 2114.245        | 110.026         | 102.043         | 102.547         | 101.539         | A[2]  |
| E  | 41 | 2238.767        | 74.534          | 66.524          | 67.028          | 66.021          | E[1]  |



# sp | Q6GSS7 | H2A2A\_MOUSE

[Acetyl]SGRGKQGGKARAKAKSRSSRAGLQFPVGRVHRLLRKGN~~YAE~~

- ▶ fragmentation table for charge state 3+
- ▶ specType=etd
- ▶ score=58.11
- ▶ F113278.dat
- ▶ query=q70072.p1
- ▶ precursor=747.091920
- ▶ chargePrecursor=6
- ▶ itol=0.5

| AA | c  | y               | #±1             | #±2             | z               | AA       |       |
|----|----|-----------------|-----------------|-----------------|-----------------|----------|-------|
| S  | 1  | 48.607          | 1492.172        | 1487.835        | 0.672           | 1487.467 | S(41) |
| G  | 2  | 66.704          | 1450.181        | 1444.931        | 0.672           | 1444.485 | G(40) |
| R  | 3  | 130.718         | <b>1431.154</b> | <b>1425.814</b> | <b>1420.150</b> | 1425.470 | R(39) |
| G  | 4  | 139.745         | 1379.120        | <b>1373.780</b> | <b>1374.116</b> | 1373.444 | G(38) |
| K  | 5  | 182.443         | 1350.113        | <b>1354.773</b> | <b>1355.109</b> | 1354.437 | K(37) |
| G  | 6  | 225.130         | <b>1317.414</b> | <b>1312.075</b> | <b>1312.411</b> | 1311.730 | G(36) |
| G  | 7  | 264.137         | 1274.728        | <b>1269.389</b> | <b>1268.725</b> | 1269.055 | G(35) |
| G  | 8  | 263.144         | 1255.721        | <b>1250.381</b> | <b>1250.717</b> | 1250.045 | G(34) |
| K  | 9  | 305.642         | 1236.714        | <b>1231.374</b> | <b>1231.710</b> | 1231.038 | K(33) |
| A  | 10 | 329.521         | 1194.016        | 1188.676        | 1189.012        | 1188.340 | A(32) |
| R  | 11 | 381.555         | 1170.336        | 1164.997        | <b>1165.333</b> | 1164.661 | R(31) |
| A  | 12 | 405.234         | 1138.303        | 1132.963        | 1133.299        | 1132.623 | A(30) |
| K  | 13 | 447.932         | 1094.624        | <b>1089.284</b> | <b>1089.620</b> | 1088.944 | K(29) |
| A  | 14 | 471.611         | 1051.925        | 1046.585        | <b>1046.922</b> | 1046.250 | A(28) |
| K  | 15 | 514.310         | <b>1028.246</b> | <b>1022.907</b> | <b>1023.243</b> | 1022.571 | K(27) |
| S  | 16 | 543.320         | 985.548         | <b>980.208</b>  | <b>980.544</b>  | 979.873  | S(26) |
| R  | 17 | 585.254         | 956.537         | <b>951.198</b>  | <b>951.534</b>  | 950.862  | R(25) |
| S  | 18 | 624.265         | 904.504         | 899.164         | 899.500         | 898.829  | S(24) |
| S  | 19 | 653.375         | 875.493         | <b>870.153</b>  | <b>870.489</b>  | 869.817  | S(23) |
| R  | 20 | <b>705.409</b>  | 846.482         | 841.143         | <b>841.479</b>  | 840.807  | R(22) |
| A  | 21 | 729.088         | 794.449         | 789.109         | 789.445         | 788.773  | A(21) |
| G  | 22 | 768.095         | <b>770.770</b>  | 765.430         | 765.766         | 765.094  | G(20) |
| L  | 23 | <b>785.790</b>  | 746.423         | 741.083         | 741.419         | 740.747  | L(19) |
| Q  | 24 | <b>828.476</b>  | 714.085         | 708.745         | 709.084         | 708.412  | Q(18) |
| F  | 25 | 877.409         | <b>671.382</b>  | 666.042         | 666.378         | 665.707  | F(17) |
| P  | 26 | 909.950         | 622.359         | 617.019         | 617.355         | 616.683  | P(16) |
| V  | 27 | <b>942.873</b>  | 590.006         | 584.666         | 585.004         | 584.332  | V(15) |
| G  | 28 | <b>961.880</b>  | 558.985         | 553.645         | 553.981         | 553.309  | G(14) |
| R  | 29 | <b>1013.914</b> | 537.976         | 532.636         | 532.974         | 532.302  | R(13) |
| V  | 30 | <b>1046.936</b> | 485.944         | 480.604         | 480.941         | 480.269  | V(12) |
| H  | 31 | <b>1092.623</b> | 453.921         | 448.581         | 448.918         | 448.246  | H(11) |
| R  | 32 | 1184.656        | 407.235         | 401.895         | 402.231         | 401.560  | R(10) |
| L  | 33 | <b>1182.351</b> | 355.201         | 349.862         | 350.198         | 349.526  | L(9)  |
| L  | 34 | 1224.618        | 319.509         | 314.169         | 314.505         | 313.833  | L(8)  |
| R  | 35 | <b>1272.879</b> | 279.812         | 274.472         | 274.808         | 274.136  | R(7)  |
| K  | 36 | 1314.778        | 227.778         | 222.438         | 222.775         | 222.103  | K(6)  |
| G  | 37 | 1333.785        | 185.880         | 179.740         | 180.076         | 179.404  | G(5)  |
| N  | 38 | 1371.799        | 166.873         | 160.733         | 161.069         | 160.397  | N(4)  |
| V  | 39 | <b>1426.154</b> | 128.098         | 122.758         | 123.095         | 122.423  | V(3)  |
| A  | 40 | 1449.813        | 83.304          | 78.384          | 78.720          | 78.048   | A(2)  |
| E  | 41 | 1492.847        | 50.025          | 44.685          | 45.021          | 44.349   | E(1)  |

# sp | Q6GSS7 | H2A2A\_MOUSE

[Acetyl]SGRGKQGGKARAKAKSRSSRAGLQFPVGRVHRLLRKGN<sup>+</sup>YAE

- ▶ fragmentation table for charge state 4+
- ▶ specType=etd
- ▶ score=58.11
- ▶ F113278.dat
- ▶ query=q70072.p1
- ▶ precursor=747.091920
- ▶ chargePrecursor=6
- ▶ itol=0.5

| AA | c  | y               | #=1             | #=2             | #=3             | AA              |       |
|----|----|-----------------|-----------------|-----------------|-----------------|-----------------|-------|
| S  | 1  | 37.505          | 1120.144        | 1118.135        | 0.755           | 1115.877        | S[41] |
| G  | 2  | 51.780          | <b>1087.872</b> | <b>1083.868</b> | 0.755           | 1083.610        | G[40] |
| R  | 3  | 90.805          | 1073.617        | <b>1069.612</b> | <b>1069.864</b> | 1069.360        | R[39] |
| G  | 4  | 109.001         | 1034.502        | <b>1030.587</b> | 1030.839        | <b>1030.335</b> | G[38] |
| K  | 5  | 137.084         | 1020.339        | <b>1016.332</b> | <b>1016.584</b> | 1016.080        | K[37] |
| G  | 6  | 169.059         | 998.312         | <b>994.308</b>  | <b>994.560</b>  | 994.055         | G[36] |
| G  | 7  | 193.254         | 956.296         | <b>952.293</b>  | <b>952.545</b>  | <b>952.041</b>  | G[35] |
| G  | 8  | 197.610         | 942.043         | <b>938.038</b>  | <b>938.290</b>  | 937.785         | G[34] |
| K  | 9  | 229.633         | 927.787         | 923.783         | 924.034         | 923.531         | K[33] |
| A  | 10 | 247.393         | 895.763         | 891.759         | 892.011         | 891.507         | A[32] |
| R  | 11 | 286.418         | 878.004         | <b>873.999</b>  | <b>874.251</b>  | 873.748         | R[31] |
| A  | 12 | 304.177         | 838.939         | 834.934         | 835.236         | 834.729         | A[30] |
| K  | 13 | 336.201         | 821.220         | 817.215         | 817.467         | 816.963         | K[29] |
| A  | 14 | 353.960         | 789.199         | 785.195         | <b>785.443</b>  | 784.939         | A[28] |
| K  | 15 | 385.984         | <b>771.437</b>  | 767.432         | 767.684         | 767.180         | K[27] |
| S  | 16 | 407.742         | 739.413         | 735.408         | 735.660         | 735.156         | S[26] |
| R  | 17 | 446.767         | 717.955         | 713.950         | 714.202         | 713.698         | R[25] |
| S  | 18 | 468.526         | 678.930         | 674.925         | 674.977         | 674.473         | S[24] |
| S  | 19 | 490.283         | 656.972         | 652.967         | 653.119         | 652.615         | S[23] |
| R  | 20 | 529.309         | 635.114         | 631.109         | 631.361         | 630.857         | R[22] |
| A  | 21 | 547.068         | 596.089         | 592.084         | 592.336         | 591.832         | A[21] |
| G  | 22 | 561.323         | 578.329         | 574.324         | 574.576         | 574.072         | G[20] |
| L  | 23 | 589.984         | 558.074         | 554.069         | 554.321         | 553.817         | L[19] |
| Q  | 24 | 621.609         | 535.803         | 531.798         | 532.050         | 531.546         | Q[18] |
| F  | 25 | 658.376         | 503.789         | 499.783         | 500.035         | 499.531         | F[17] |
| F  | 26 | 662.639         | 467.021         | 463.016         | 463.268         | 462.764         | F[16] |
| V  | 27 | 707.406         | 442.758         | 438.753         | 439.005         | 438.501         | V[15] |
| G  | 28 | 721.662         | 417.991         | 413.986         | 414.238         | 413.734         | G[14] |
| R  | 29 | 769.687         | 403.735         | 399.711         | 399.963         | 399.459         | R[13] |
| V  | 30 | <b>785.454</b>  | 364.710         | <b>360.705</b>  | 360.957         | <b>360.453</b>  | V[12] |
| H  | 31 | <b>819.719</b>  | 339.643         | 335.638         | 335.890         | 335.660         | H[11] |
| R  | 32 | 858.744         | 305.678         | 301.673         | 301.925         | 301.421         | R[10] |
| L  | 33 | 887.615         | 266.653         | 262.648         | 262.900         | 262.396         | L[9]  |
| L  | 34 | <b>915.286</b>  | 238.362         | 234.357         | 234.609         | 234.105         | L[8]  |
| R  | 35 | 954.311         | 213.111         | 209.106         | 209.358         | 208.854         | R[7]  |
| K  | 36 | <b>986.335</b>  | 171.086         | 167.081         | 167.333         | 166.829         | K[6]  |
| G  | 37 | <b>1000.590</b> | 139.062         | 135.057         | 135.309         | 134.805         | G[5]  |
| N  | 38 | 1029.101        | 124.806         | 120.802         | 121.054         | 120.550         | N[4]  |
| V  | 39 | <b>1059.867</b> | 96.296          | 92.291          | 92.543          | 92.039          | V[3]  |
| A  | 40 | <b>1087.826</b> | 58.530          | 54.525          | 54.777          | 54.273          | A[2]  |
| E  | 41 | 1119.887        | 37.771          | 33.766          | 34.018          | 33.514          | E[1]  |

# sp | Q6GSS7 | H2A2A\_MOUSE

[Acetyl]SGRGKQGGKARAKAKSRSSRAGLQFPVGRVHLLRKGNYAE

- ▶ fragmentation table for charge state 5+
- ▶ specType=etd
- ▶ score=58.11
- ▶ F113278.dat
- ▶ query=q70072.p1
- ▶ precursor=747.091920
- ▶ chargePrecursor=6
- ▶ itol=0.5

| AA    | c              | y              | z+1            | z#2            | z              | AA    |
|-------|----------------|----------------|----------------|----------------|----------------|-------|
| S[1]  | 30.221         | 306.308        | <b>893.104</b> | 0.806          | <b>892.903</b> | S[41] |
| G[2]  | 41.625         | <b>870.499</b> | 867.296        | 0.806          | 867.094        | G[40] |
| R[3]  | 72.846         | <b>859.095</b> | <b>855.891</b> | <b>856.093</b> | 855.690        | R[39] |
| G[4]  | 84.250         | 827.875        | 824.671        | 824.873        | 824.469        | G[38] |
| K[5]  | 109.869        | 816.471        | 813.267        | 813.468        | 813.065        | K[37] |
| Q[6]  | 135.481        | 790.952        | <b>787.548</b> | <b>787.849</b> | <b>787.446</b> | Q[36] |
| G[7]  | 146.885        | 765.240        | 762.036        | 762.238        | 761.834        | G[35] |
| G[8]  | 158.289        | 751.836        | 750.632        | 750.833        | 750.430        | G[34] |
| K[9]  | 183.908        | 742.431        | 739.227        | 739.429        | 739.026        | K[33] |
| A[10] | 198.116        | 716.812        | 713.608        | 713.810        | 713.407        | A[32] |
| R[11] | 229.336        | 702.605        | 699.401        | 699.603        | 699.199        | R[31] |
| A[12] | 243.543        | <b>671.385</b> | 668.181        | 668.382        | 667.979        | A[30] |
| K[13] | 269.162        | 657.177        | 653.973        | 654.175        | 653.772        | K[29] |
| A[14] | 283.370        | 631.558        | 628.354        | 628.556        | 628.153        | A[28] |
| K[15] | 308.989        | 617.351        | 614.147        | 614.349        | 613.945        | K[27] |
| S[16] | 326.395        | 591.732        | 588.528        | 588.730        | 588.326        | S[26] |
| R[17] | 357.615        | 574.325        | 571.122        | 571.323        | 570.920        | R[25] |
| S[18] | 375.022        | 548.105        | 539.901        | 540.103        | 539.700        | S[24] |
| S[19] | 392.428        | 525.689        | 522.485        | 522.687        | 522.283        | S[23] |
| R[20] | 423.648        | 508.282        | 505.079        | 505.280        | 504.877        | R[22] |
| A[21] | 437.856        | 477.072        | 473.868        | 474.070        | 473.667        | A[21] |
| G[22] | 449.260        | 462.865        | 459.661        | 459.862        | 459.459        | G[20] |
| L[23] | 471.877        | 451.460        | 448.257        | 448.458        | 448.055        | L[19] |
| Q[24] | 497.489        | 428.844        | 425.640        | 425.841        | 425.438        | Q[18] |
| F[25] | 528.902        | 403.232        | 400.028        | 400.230        | 399.827        | F[17] |
| P[26] | 546.313        | 373.816        | 370.614        | 370.816        | 370.413        | P[16] |
| V[27] | 565.126        | 354.408        | 351.204        | 351.405        | 351.002        | V[15] |
| G[28] | 577.531        | 334.994        | 331.790        | 331.992        | 331.589        | G[14] |
| R[29] | 608.751        | 323.190        | 319.986        | 320.187        | 319.784        | R[13] |
| V[30] | 628.565        | 291.969        | 288.766        | 288.967        | 288.564        | V[12] |
| H[31] | 658.976        | 272.156        | 268.952        | 269.154        | 268.750        | H[11] |
| R[32] | 687.197        | 244.744        | 241.540        | 241.742        | 241.339        | R[10] |
| L[33] | 709.814        | 213.524        | 210.320        | 210.522        | 210.118        | L[9]  |
| L[34] | 732.430        | 190.907        | 187.703        | 187.905        | 187.502        | L[8]  |
| R[35] | 763.651        | 168.290        | 165.086        | 165.288        | 164.885        | R[7]  |
| K[36] | 789.270        | 137.070        | 133.866        | 134.068        | 133.665        | K[6]  |
| G[37] | 830.074        | 111.451        | 108.247        | 108.449        | 108.046        | G[5]  |
| N[38] | 823.482        | 100.047        | 96.843         | 97.044         | 96.641         | N[4]  |
| V[39] | <b>856.095</b> | 77.238         | 74.034         | 74.236         | 73.833         | V[3]  |
| A[40] | <b>870.303</b> | 44.625         | 41.422         | 41.623         | 41.220         | A[2]  |
| E[41] | 896.111        | 30.418         | 27.214         | 27.416         | 27.013         | E[1]  |

# sp | Q6GSS7 | H2A2A\_MOUSE

[Acetyl]SGRGKQGGKARAKAKSRSSRAGLQFPVGRVHLLRKGNYAE

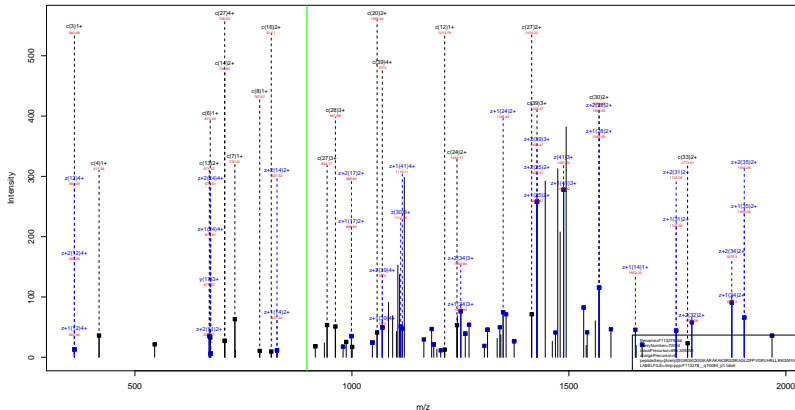

# sp | Q6GSS7 | H2A2A\_MOUSE

[Acetyl]SGRGKQGGKARAKAKSRSSRAGLQFPVGRVHRLLRKGNAYE

- ▶ fragmentation table for charge state 1+
- ▶ specType=etd
- ▶ score=65.57
- ▶ F113278.dat
- ▶ query=q70084.p1
- ▶ precursor=896.309250
- ▶ chargePrecursor=5
- ▶ itol=0.5

| AA | c  | y               | z+1             | z+2             | z               | AA       |       |
|----|----|-----------------|-----------------|-----------------|-----------------|----------|-------|
| S  | 1  | 147.076         | 4477.510        | 4461.491        | 0.000           | 4460.483 | S[41] |
| G  | 2  | 204.098         | 4348.467        | 4332.449        | 0.000           | 4331.441 | G[40] |
| R  | 3  | <b>360.199</b>  | 4201.448        | 4276.427        | 4476.435        | 4274.419 | R[39] |
| G  | 4  | <b>417.220</b>  | 4135.345        | 4119.326        | 4120.334        | 4118.318 | G[38] |
| K  | 5  | <b>545.315</b>  | 4078.323        | 4062.305        | 4053.313        | 4061.297 | K[37] |
| Q  | 6  | <b>673.374</b>  | 3969.278        | 3934.210        | 3936.218        | 3933.202 | Q[36] |
| G  | 7  | <b>730.395</b>  | 3822.170        | 3806.151        | 3807.159        | 3805.143 | G[35] |
| G  | 8  | <b>787.417</b>  | 3765.148        | 3749.130        | 3750.138        | 3748.122 | G[34] |
| K  | 9  | <b>915.512</b>  | 3708.127        | 3692.108        | 3693.116        | 3691.100 | K[33] |
| A  | 10 | <b>986.549</b>  | 3580.032        | 3564.013        | 3565.021        | 3563.005 | A[32] |
| R  | 11 | 1142.650        | 3508.995        | 3482.976        | 3493.984        | 3491.968 | R[31] |
| A  | 12 | <b>1213.687</b> | 3352.994        | 3336.975        | 3337.983        | 3335.967 | A[30] |
| R  | 13 | 1381.782        | 3281.957        | 3265.938        | 3266.946        | 3264.930 | R[29] |
| A  | 14 | 1412.819        | 3153.962        | 3137.943        | 3138.951        | 3136.935 | A[28] |
| K  | 15 | 1540.914        | 3082.925        | 3066.906        | 3067.914        | 3065.898 | K[27] |
| S  | 16 | 1627.946        | 2954.930        | 2938.911        | 2939.919        | 2937.903 | S[26] |
| R  | 17 | 1784.047        | 2887.898        | 2871.879        | 2852.887        | 2850.871 | R[25] |
| S  | 18 | 1871.079        | 2711.899        | 2695.879        | 2696.888        | 2694.872 | S[24] |
| S  | 19 | 1958.111        | 2624.864        | 2608.844        | 2609.854        | 2607.838 | S[23] |
| R  | 20 | 2114.213        | 2537.832        | 2521.814        | 2522.822        | 2520.806 | R[22] |
| A  | 21 | 2185.250        | 2381.831        | 2365.813        | 2366.820        | 2364.805 | A[21] |
| G  | 22 | 2242.271        | 2310.294        | 2294.275        | 2295.283        | 2293.267 | G[20] |
| L  | 23 | 2385.388        | 2253.273        | 2237.254        | 2238.262        | 2236.246 | L[19] |
| Q  | 24 | 2483.414        | 2140.189        | 2124.170        | 2125.178        | 2123.162 | Q[18] |
| F  | 25 | 2630.482        | 2012.135        | 1996.111        | 1997.119        | 1995.104 | F[17] |
| P  | 26 | 2727.535        | 1895.062        | 1879.043        | 1850.051        | 1848.035 | P[16] |
| V  | 27 | 2826.603        | 1788.009        | 1751.990        | 1752.998        | 1750.982 | V[15] |
| G  | 28 | 2883.625        | <b>1668.940</b> | <b>1652.922</b> | 1653.930        | 1651.914 | G[14] |
| R  | 29 | 3030.726        | 1611.916        | 1595.897        | <b>1596.908</b> | 1594.892 | R[13] |
| V  | 30 | 3138.794        | 1495.818        | 1479.799        | 1480.807        | 1478.791 | V[12] |
| H  | 31 | 3275.853        | 1358.748        | <b>1340.731</b> | 1341.739        | 1339.723 | H[11] |
| R  | 32 | 3431.964        | 1219.691        | 1203.672        | <b>1204.680</b> | 1202.664 | R[10] |
| L  | 33 | 3545.038        | 1063.589        | <b>1047.571</b> | 1048.579        | 1046.563 | L[9]  |
| L  | 34 | 3658.121        | 950.505         | 934.487         | 935.495         | 933.479  | L[8]  |
| R  | 35 | 3814.224        | 837.421         | 821.403         | 822.410         | 820.394  | R[7]  |
| R  | 36 | 3942.319        | 681.320         | 665.302         | 666.309         | 664.293  | R[6]  |
| G  | 37 | 3999.340        | 553.225         | 537.207         | 538.214         | 536.199  | G[5]  |
| N  | 38 | 4113.383        | 406.204         | 480.185         | 481.193         | 479.177  | N[4]  |
| V  | 39 | 4276.446        | 382.161         | 366.142         | 367.150         | 365.134  | V[3]  |
| A  | 40 | 4347.483        | 219.086         | 203.079         | 204.087         | 202.071  | A[2]  |
| E  | 41 | 4476.528        | 148.060         | 132.042         | 133.050         | 131.034  | E[1]  |

# sp | Q6GSS7 | H2A2A\_MOUSE

[Acetyl]SGRGKQGGKARAKAKSRSSRAGLQFPVGRVHRLLRKGNAYE

- ▶ fragmentation table for charge state 2+
- ▶ specType=etd
- ▶ score=65.57
- ▶ F113278.dat
- ▶ query=q70084\_p1
- ▶ precursor=896.309250
- ▶ chargePrecursor=5
- ▶ itol=0.5

| AA | c  | w               | #±1             | #±2             | z               | AA              |       |
|----|----|-----------------|-----------------|-----------------|-----------------|-----------------|-------|
| S  | 1  | 74.062          | 2039.259        | 2231.300        | 8.804           | 2230.747        | S[41] |
| G  | 2  | 102.553         | 2174.737        | 2366.726        | 0.504           | 2166.254        | G[40] |
| R  | 3  | 180.603         | 2146.227        | 2138.217        | 2138.921        | 2137.713        | R[39] |
| G  | 4  | 209.114         | 2068.176        | 2060.167        | 2060.671        | 2059.663        | G[38] |
| K  | 5  | 273.161         | 2039.665        | 2031.656        | 2032.160        | 2031.152        | K[37] |
| G  | 6  | 337.194         | 1975.618        | <b>1967.609</b> | <b>1968.112</b> | 1967.105        | G[36] |
| G  | 7  | 365.703         | 1911.569        | <b>1903.579</b> | <b>1904.083</b> | 1903.075        | G[35] |
| G  | 8  | 394.212         | 1883.078        | <b>1875.068</b> | <b>1875.572</b> | 1874.565        | G[34] |
| K  | 9  | 458.260         | 1854.567        | 1846.558        | 1847.062        | 1846.054        | K[33] |
| A  | 10 | 493.778         | 1790.520        | 1782.510        | <b>1783.014</b> | 1782.006        | A[32] |
| R  | 11 | 571.829         | 1735.001        | <b>1746.992</b> | <b>1747.496</b> | 1746.488        | R[31] |
| A  | 12 | 609.399         | 1668.954        | <b>1660.941</b> | 1661.445        | <b>1662.437</b> | A[30] |
| K  | 13 | <b>671.395</b>  | 1643.433        | 1635.423        | 1635.927        | 1634.919        | K[29] |
| A  | 14 | <b>706.913</b>  | 1577.384        | <b>1569.375</b> | <b>1569.879</b> | 1568.871        | A[28] |
| K  | 15 | 770.961         | <b>1541.866</b> | <b>1533.857</b> | <b>1534.360</b> | 1533.351        | K[27] |
| S  | 16 | <b>814.477</b>  | 1477.818        | 1469.808        | 1470.311        | <b>1469.305</b> | S[26] |
| R  | 17 | 862.527         | 1404.362        | <b>1426.293</b> | <b>1426.797</b> | 1425.789        | R[25] |
| S  | 18 | 938.683         | 1356.263        | <b>1348.243</b> | <b>1348.746</b> | 1347.738        | S[24] |
| S  | 19 | <b>979.559</b>  | <b>1312.736</b> | 1304.726        | <b>1305.230</b> | 1304.223        | S[23] |
| R  | 20 | <b>1057.610</b> | 1268.220        | <b>1261.210</b> | <b>1261.714</b> | 1260.707        | R[22] |
| A  | 21 | 1093.128        | 1191.169        | 1183.160        | <b>1183.664</b> | 1182.656        | A[21] |
| G  | 22 | 1121.639        | 1135.051        | 1147.041        | 1148.045        | 1147.137        | G[20] |
| L  | 23 | 1178.383        | 1127.146        | 1139.136        | 1139.639        | 1138.631        | L[19] |
| Q  | 24 | <b>1242.211</b> | 1073.595        | 1065.585        | 1066.088        | 1065.080        | Q[18] |
| F  | 25 | 1315.745        | 1006.599        | <b>998.559</b>  | <b>999.063</b>  | 998.055         | F[17] |
| F  | 26 | 1364.271        | 933.034         | 925.025         | 925.529         | 924.521         | F[16] |
| V  | 27 | <b>1413.805</b> | 884.500         | 876.490         | 877.003         | 876.005         | V[15] |
| G  | 28 | 1462.216        | 834.974         | <b>826.965</b>  | <b>827.468</b>  | 826.461         | G[14] |
| R  | 29 | 1526.369        | 806.483         | 808.473         | 808.976         | 807.968         | R[13] |
| V  | 30 | <b>1569.901</b> | 728.413         | 720.403         | 720.907         | 719.899         | V[12] |
| H  | 31 | 1638.430        | 678.878         | 670.868         | <b>671.373</b>  | 670.365         | H[11] |
| R  | 32 | 1716.461        | 610.349         | 602.340         | 602.843         | 601.835         | R[10] |
| L  | 33 | <b>1773.023</b> | 532.289         | 524.280         | 524.783         | 523.785         | L[9]  |
| L  | 34 | 1839.565        | 478.756         | 469.747         | 469.250         | 468.242         | L[8]  |
| R  | 35 | 1907.615        | 419.214         | 411.205         | 411.709         | 410.701         | R[7]  |
| K  | 36 | 1971.663        | 341.164         | 333.154         | 333.658         | 332.650         | K[6]  |
| G  | 37 | 2000.174        | 277.116         | 269.107         | 269.611         | 268.603         | G[5]  |
| N  | 38 | 2057.195        | 248.606         | 240.596         | 241.100         | 240.092         | N[4]  |
| V  | 39 | 2138.227        | 181.564         | 183.575         | 184.079         | 183.071         | V[3]  |
| A  | 40 | 2114.265        | 110.026         | 102.016         | 102.519         | 101.511         | A[2]  |
| E  | 41 | 2238.767        | 74.534          | 66.524          | 67.028          | 66.021          | E[1]  |

# sp | Q6GSS7 | H2A2A\_MOUSE

[Acetyl]SGRGKQGGKARAKAKSRSSRAGLQFPVGRVHRLLRKGNAYE

- ▶ fragmentation table for charge state 3+
- ▶ specType=etd
- ▶ score=65.57
- ▶ F113278.dat
- ▶ query=q70084.p1
- ▶ precursor=896.309250
- ▶ chargePrecursor=5
- ▶ itol=0.5

| AA   | c               | y              | z+1             | z+2             | z               | AA   |
|------|-----------------|----------------|-----------------|-----------------|-----------------|------|
| S 1  | 49.697          | 1493.175       | <b>1487.835</b> | 0.672           | <b>1487.499</b> | S 41 |
| G 2  | 68.704          | 1450.161       | 1444.821        | 0.672           | 1444.455        | G 40 |
| R 3  | 130.738         | 1431.154       | 1425.814        | <b>1426.150</b> | 1425.478        | R 39 |
| G 4  | 139.745         | 1379.120       | <b>1373.780</b> | <b>1374.116</b> | <b>1373.444</b> | G 38 |
| K 5  | 182.443         | 1360.113       | 1354.773        | <b>1355.109</b> | 1354.437        | K 37 |
| Q 6  | 235.330         | 1317.414       | <b>1312.075</b> | <b>1312.411</b> | 1311.795        | Q 36 |
| G 7  | 244.137         | 1274.758       | 1269.728        | <b>1269.725</b> | 1269.055        | G 35 |
| G 8  | 263.144         | 1255.721       | <b>1250.381</b> | <b>1250.717</b> | 1250.045        | G 34 |
| K 9  | 305.842         | 1236.714       | 1231.674        | 1231.710        | 1231.038        | K 33 |
| A 10 | 329.521         | 1194.015       | <b>1188.676</b> | <b>1189.012</b> | <b>1188.340</b> | A 32 |
| R 11 | 381.555         | 1170.136       | 1164.997        | <b>1165.333</b> | 1164.661        | R 31 |
| A 12 | 409.234         | 1118.303       | 1113.963        | 1113.999        | <b>1112.627</b> | A 30 |
| R 13 | 447.932         | 1094.024       | 1089.254        | 1089.620        | 1088.944        | R 29 |
| A 14 | 471.611         | 1051.925       | 1046.589        | <b>1046.922</b> | 1046.250        | A 28 |
| K 15 | 514.310         | 1028.246       | 1022.907        | 1023.243        | 1022.571        | K 27 |
| S 16 | 543.320         | 985.548        | 980.208         | 980.544         | <b>979.873</b>  | S 26 |
| R 17 | 595.354         | 956.537        | 951.198         | 951.534         | 950.862         | R 25 |
| S 18 | 624.365         | 924.504        | 899.164         | 899.500         | 898.828         | S 24 |
| S 19 | 653.375         | 875.493        | 870.153         | 870.489         | 869.817         | S 23 |
| R 20 | 705.409         | 846.482        | 841.143         | 841.479         | 840.807         | R 22 |
| A 21 | 729.088         | 794.449        | 789.109         | 789.445         | 788.773         | A 21 |
| G 22 | 748.095         | 770.770        | 765.430         | 765.766         | 765.094         | G 20 |
| L 23 | 785.730         | 733.762        | 746.423         | 746.759         | 746.087         | L 19 |
| Q 24 | 828.478         | 714.066        | 708.726         | 709.064         | 708.392         | Q 19 |
| F 25 | 877.409         | <b>671.382</b> | 665.042         | 666.378         | 665.706         | F 17 |
| P 26 | 909.850         | 622.359        | 617.019         | 617.355         | 616.683         | P 16 |
| V 27 | <b>942.873</b>  | 590.028        | 584.688         | 585.024         | 584.352         | V 15 |
| G 28 | <b>961.880</b>  | 556.985        | 551.645         | 551.981         | 551.309         | G 14 |
| R 29 | 1013.914        | 437.878        | 432.538         | 432.874         | 432.202         | R 13 |
| V 30 | <b>1046.936</b> | 488.944        | 483.604         | 483.941         | 483.269         | V 12 |
| H 31 | 1092.623        | 452.921        | 447.581         | 447.918         | 447.246         | H 11 |
| R 32 | 1144.656        | 407.735        | 402.395         | 402.731         | 402.059         | R 10 |
| L 33 | 1182.351        | 355.201        | 349.862         | 350.198         | 349.526         | L 9  |
| L 34 | 1220.046        | 317.507        | 312.167         | 312.503         | 311.831         | L 8  |
| R 35 | 1272.079        | 279.812        | 274.472         | 274.808         | 274.136         | R 7  |
| K 36 | 1314.778        | 237.778        | 232.438         | 232.775         | 232.103         | K 6  |
| G 37 | 1333.785        | 185.080        | 179.740         | 180.076         | 179.404         | G 5  |
| N 38 | 1371.799        | 166.073        | 160.733         | 161.069         | 160.397         | N 4  |
| V 39 | <b>1426.154</b> | 128.058        | 122.719         | 123.055         | 122.383         | V 3  |
| A 40 | 1449.831        | 73.704         | 68.364          | 68.700          | 68.028          | A 2  |
| E 41 | 1492.347        | 30.025         | 44.685          | 45.021          | 44.349          | E 1  |

# sp | Q6GSS7 | H2A2A\_MOUSE

[Acetyl]SGRGKQGGKARAKAKSRSSRAGLQFPVGRVHRLLRKGNAYE

- ▶ fragmentation table for charge state 4+
- ▶ specType=etd
- ▶ score=65.57
- ▶ F113278.dat
- ▶ query=q70084\_p1
- ▶ precursor=896.309250
- ▶ chargePrecursor=5
- ▶ itol=0.5

| AA   | c               | y        | z+1             | z+2             | z               | AA   |
|------|-----------------|----------|-----------------|-----------------|-----------------|------|
| S 1  | 57.525          | 1120.133 | <b>1116.120</b> | 0.755           | <b>1115.876</b> | G 41 |
| G 2  | 51.780          | 1067.672 | 1063.660        | 0.755           | 1063.616        | G 40 |
| R 3  | 90.805          | 1073.617 | <b>1069.612</b> | <b>1069.864</b> | 1069.360        | R 39 |
| G 4  | 105.061         | 1034.902 | 1030.887        | 1030.839        | 1030.339        | G 38 |
| K 5  | 137.084         | 1020.136 | 1016.132        | 1016.584        | 1016.080        | K 37 |
| Q 6  | 169.009         | 898.313  | 894.303         | 894.800         | 894.295         | Q 36 |
| G 7  | 353.354         | 958.288  | 952.293         | 952.545         | 952.041         | G 35 |
| G 8  | 197.810         | 942.043  | 938.039         | 938.290         | 937.788         | G 34 |
| K 9  | 229.633         | 927.787  | 923.783         | 924.034         | 923.531         | K 33 |
| A 10 | 247.393         | 895.763  | 891.750         | 892.011         | 891.507         | A 32 |
| R 11 | 286.418         | 878.004  | 873.990         | 874.251         | 873.746         | R 31 |
| A 12 | 304.177         | 838.978  | 834.974         | 835.226         | 834.722         | A 30 |
| R 13 | 336.201         | 821.220  | 817.215         | 817.467         | 816.963         | R 29 |
| A 14 | 353.960         | 789.190  | 785.191         | 785.443         | 784.939         | A 28 |
| K 15 | 389.984         | 771.437  | 767.432         | 767.684         | 767.180         | K 27 |
| S 16 | 407.742         | 739.413  | 735.408         | 735.660         | 735.156         | S 26 |
| R 17 | 446.767         | 717.695  | 713.690         | 713.942         | 713.438         | R 25 |
| S 18 | 468.528         | 678.830  | <b>674.825</b>  | <b>674.877</b>  | <b>674.373</b>  | S 24 |
| S 19 | 490.283         | 656.872  | 652.867         | 653.119         | 652.615         | S 23 |
| R 20 | 529.309         | 635.114  | 631.109         | 631.361         | 630.857         | R 22 |
| A 21 | 547.058         | 596.088  | 592.084         | 592.336         | 591.832         | A 21 |
| G 22 | 561.323         | 578.329  | 574.324         | 574.576         | 574.072         | G 20 |
| L 23 | 589.334         | 604.074  | 600.069         | 600.321         | 599.817         | L 19 |
| Q 24 | 621.809         | 535.803  | 531.798         | 532.050         | 531.546         | Q 19 |
| F 25 | 658.376         | 503.789  | 499.783         | 500.035         | 499.531         | F 17 |
| P 26 | 682.639         | 467.621  | 463.616         | 463.868         | 463.364         | P 16 |
| V 27 | <b>707.406</b>  | 442.759  | 438.753         | 439.005         | 438.501         | V 15 |
| G 28 | 721.662         | 417.991  | 413.986         | 414.238         | 413.734         | G 14 |
| R 29 | 760.887         | 403.739  | 399.733         | 400.002         | 399.478         | R 13 |
| V 30 | 785.454         | 364.710  | <b>360.705</b>  | <b>360.957</b>  | <b>360.453</b>  | V 12 |
| H 31 | 819.719         | 339.943  | 335.938         | 336.190         | 335.686         | H 11 |
| R 32 | 858.744         | 305.678  | 301.673         | 301.925         | 301.421         | R 10 |
| L 33 | 887.015         | 266.653  | 262.648         | 262.900         | 262.396         | L 9  |
| L 34 | <b>915.286</b>  | 238.382  | 234.377         | 234.629         | 234.125         | L 8  |
| R 35 | 954.311         | 210.114  | 206.109         | 206.358         | 205.854         | R 7  |
| R 36 | 986.335         | 171.088  | 167.083         | 167.333         | 166.829         | R 6  |
| G 37 | <b>1000.590</b> | 139.662  | 135.657         | 135.909         | 134.805         | G 5  |
| N 38 | 1029.101        | 124.806  | 120.802         | 121.054         | 120.550         | N 4  |
| V 39 | <b>1069.867</b> | 96.290   | 92.291          | 92.543          | 92.039          | V 3  |
| A 40 | 1087.626        | 55.530   | 51.525          | 51.777          | 51.273          | A 2  |
| E 41 | 1119.387        | 37.771   | 33.766          | 34.018          | 33.514          | E 1  |





# sp | Q6GSS7 | H2A2A\_MOUSE

[Acetyl]SGRGKQGGKARAKAKSRSSRAGLQFPVGRVHRLLRKGN~~YAE~~

- ▶ fragmentation table for charge state 1+
- ▶ specType=etd
- ▶ score=48.37
- ▶ F113278.dat
- ▶ query=q70090\_p1
- ▶ precursor=747.092540
- ▶ chargePrecursor=6
- ▶ itol=0.5

| AA | c  | y               | z+1      | z+2             | z               | AA             |       |
|----|----|-----------------|----------|-----------------|-----------------|----------------|-------|
| S  | 1  | 147.076         | 4477.515 | 4481.491        | 0.000           | 4460.481       | S[41] |
| G  | 2  | 304.098         | 4348.467 | 4332.440        | 0.000           | 4331.441       | G[40] |
| R  | 3  | <b>360.199</b>  | 4291.446 | 4275.427        | 4276.435        | 4274.419       | R[39] |
| G  | 4  | <b>417.220</b>  | 4135.345 | 4119.326        | 4120.334        | 4118.319       | G[38] |
| K  | 5  | <b>545.315</b>  | 4078.323 | 4062.305        | 4063.313        | 4061.291       | K[37] |
| Q  | 6  | <b>673.374</b>  | 3950.228 | 3934.210        | 3935.218        | 3933.202       | Q[36] |
| G  | 7  | <b>730.395</b>  | 3822.170 | 3806.151        | 3807.159        | 3805.143       | G[35] |
| G  | 8  | 787.417         | 3765.148 | 3749.130        | 3750.138        | 3748.122       | G[34] |
| K  | 9  | <b>915.512</b>  | 3708.127 | 3692.108        | 3693.116        | 3691.100       | K[33] |
| A  | 10 | <b>986.549</b>  | 3650.032 | 3634.013        | 3635.021        | 3633.005       | A[32] |
| R  | 11 | 1142.050        | 3598.995 | 3492.975        | 3493.984        | 3491.968       | R[31] |
| A  | 12 | 1213.007        | 3352.984 | 3336.975        | 3337.983        | 3335.967       | A[30] |
| R  | 13 | <b>1341.782</b> | 3281.857 | 3265.838        | 3266.846        | 3264.830       | R[29] |
| A  | 14 | 1412.819        | 3153.762 | 3137.743        | 3138.751        | 3136.735       | A[28] |
| K  | 15 | <b>1540.914</b> | 3082.725 | 3066.706        | 3067.714        | 3065.698       | K[27] |
| S  | 16 | 1627.946        | 2954.630 | 2938.611        | 2939.619        | 2937.603       | S[26] |
| R  | 17 | <b>1784.047</b> | 2887.598 | 2871.579        | 2872.587        | 2870.571       | R[25] |
| S  | 18 | 1873.079        | 2711.496 | 2695.477        | 2696.486        | 2694.470       | S[24] |
| S  | 19 | 1958.111        | 2624.464 | 2608.446        | 2609.454        | 2607.438       | S[23] |
| R  | 20 | 2114.213        | 2537.432 | 2521.414        | 2522.422        | 2520.406       | R[22] |
| A  | 21 | 2185.250        | 2381.331 | 2365.313        | 2366.320        | 2364.305       | A[21] |
| G  | 22 | 2242.271        | 2310.294 | 2294.275        | 2295.283        | 2293.268       | G[20] |
| L  | 23 | 2355.355        | 2253.273 | 2237.254        | 2238.262        | 2236.246       | L[19] |
| Q  | 24 | 2483.414        | 2140.189 | 2124.170        | 2125.178        | 2123.162       | Q[18] |
| F  | 25 | 2630.482        | 2022.130 | 1996.111        | <b>1997.119</b> | 1995.104       | F[17] |
| P  | 26 | 2727.538        | 1895.062 | 1849.043        | 1850.051        | 1848.035       | P[16] |
| V  | 27 | 2826.603        | 1768.009 | 1751.990        | 1752.998        | 1750.982       | V[15] |
| G  | 28 | 2883.625        | 1698.940 | 1652.922        | 1653.930        | 1651.914       | G[14] |
| R  | 29 | 3039.726        | 1611.919 | 1595.900        | 1596.908        | 1594.892       | R[13] |
| V  | 30 | 3138.764        | 1495.818 | 1439.799        | 1440.807        | 1438.791       | V[12] |
| H  | 31 | 3275.853        | 1356.740 | 1340.721        | <b>1341.729</b> | 1339.723       | H[11] |
| R  | 32 | 3431.954        | 1219.691 | 1203.672        | <b>1204.680</b> | 1202.664       | R[10] |
| L  | 33 | 3545.038        | 1063.589 | <b>1047.571</b> | 1048.579        | 1046.563       | L[9]  |
| L  | 34 | 3658.123        | 950.505  | 934.487         | 935.495         | 933.479        | L[8]  |
| R  | 35 | 3814.224        | 837.421  | 821.403         | <b>822.410</b>  | <b>820.395</b> | R[7]  |
| K  | 36 | 3932.319        | 681.300  | 665.282         | 666.290         | 664.274        | K[6]  |
| G  | 37 | 3999.340        | 553.225  | 537.207         | 538.214         | 536.199        | G[5]  |
| N  | 38 | 4113.383        | 496.204  | 480.185         | 481.193         | 479.177        | N[4]  |
| Y  | 39 | 4276.446        | 382.161  | 366.142         | 367.150         | 365.134        | Y[3]  |
| A  | 40 | 4347.483        | 219.098  | 203.079         | 204.087         | 202.071        | A[2]  |
| E  | 41 | 4476.526        | 148.060  | 132.042         | 133.050         | 131.034        | E[1]  |

# sp | Q6GSS7 | H2A2A\_MOUSE

[Acetyl]SGRGKQGGKARAKAKSRSSRAGLQFPVGRVHRLLRKGNAYE

- ▶ fragmentation table for charge state 2+
- ▶ specType=etd
- ▶ score=48.37
- ▶ F113278.dat
- ▶ query=q70090.p1
- ▶ precursor=747.092540
- ▶ chargePrecursor=6
- ▶ itol=0.5

| AA | c  | w               | #s1             | #s2             | z               | AA              |       |
|----|----|-----------------|-----------------|-----------------|-----------------|-----------------|-------|
| S  | 1  | 74.062          | 2239.259        | 2231.260        | 8.804           | 2232.161        | S[41] |
| G  | 2  | 102.553         | 2174.737        | 2266.726        | 0.504           | 2166.254        | G[40] |
| R  | 3  | 180.603         | 2146.227        | 2138.217        | 2138.921        | 2117.313        | R[39] |
| G  | 4  | 209.114         | 2068.176        | 2060.167        | 2060.671        | 2059.663        | G[38] |
| K  | 5  | 273.161         | 2039.665        | 2031.656        | 2032.160        | 2031.152        | K[37] |
| G  | 6  | 327.194         | 1975.616        | 1967.607        | 1968.112        | 1967.105        | G[36] |
| G  | 7  | 385.704         | 1913.565        | <b>1903.579</b> | <b>1904.083</b> | 1903.075        | G[35] |
| G  | 8  | 394.212         | 1883.078        | 1875.068        | <b>1875.572</b> | 1874.565        | G[34] |
| K  | 9  | 458.260         | 1854.567        | 1846.558        | 1847.062        | 1846.054        | K[33] |
| A  | 10 | 493.778         | 1790.520        | 1782.510        | 1783.014        | 1782.006        | A[32] |
| R  | 11 | <b>571.829</b>  | 1735.001        | 1746.992        | 1747.496        | 1746.488        | R[31] |
| A  | 12 | <b>607.337</b>  | 1676.951        | 1668.941        | 1669.446        | 1668.438        | A[30] |
| R  | 13 | <b>671.395</b>  | 1643.433        | 1635.423        | <b>1633.927</b> | 1633.910        | R[29] |
| A  | 14 | <b>706.913</b>  | 1577.384        | 1569.375        | <b>1569.879</b> | 1568.871        | A[28] |
| K  | 15 | <b>770.961</b>  | 1541.866        | 1533.857        | <b>1534.360</b> | 1533.351        | K[27] |
| S  | 16 | <b>814.477</b>  | 1477.818        | 1469.809        | 1470.313        | <b>1469.305</b> | S[26] |
| R  | 17 | <b>892.527</b>  | 1434.302        | 1426.293        | <b>1426.797</b> | 1425.789        | R[25] |
| S  | 18 | 938.918         | <b>1356.252</b> | 1348.243        | <b>1348.746</b> | 1347.738        | S[24] |
| S  | 19 | <b>979.559</b>  | <b>1312.736</b> | 1304.726        | <b>1305.230</b> | 1304.223        | S[23] |
| R  | 20 | 1057.610        | 1269.220        | 1261.210        | <b>1261.714</b> | 1260.707        | R[22] |
| A  | 21 | <b>1093.128</b> | 1191.169        | <b>1183.160</b> | 1183.664        | <b>1182.656</b> | A[21] |
| G  | 22 | 1121.639        | 1135.651        | 1147.641        | <b>1148.145</b> | 1147.137        | G[20] |
| L  | 23 | <b>1178.181</b> | 1129.140        | 1121.131        | 1121.635        | 1120.627        | L[19] |
| Q  | 24 | <b>1242.211</b> | <b>1070.596</b> | <b>1062.589</b> | <b>1063.093</b> | 1062.085        | Q[18] |
| F  | 25 | 1315.745        | 1008.599        | <b>998.559</b>  | <b>999.063</b>  | 998.055         | F[17] |
| F  | 26 | 1364.271        | 933.034         | 925.025         | 925.529         | 924.521         | F[16] |
| V  | 27 | <b>1413.805</b> | 884.506         | 876.496         | 877.001         | 875.993         | V[15] |
| G  | 28 | 1462.216        | 834.974         | 826.965         | 827.469         | 826.461         | G[14] |
| R  | 29 | 1526.369        | 806.483         | <b>798.454</b>  | <b>798.958</b>  | 797.950         | R[13] |
| V  | 30 | <b>1569.901</b> | 728.413         | 720.403         | 720.907         | 719.899         | V[12] |
| H  | 31 | 1636.430        | 678.878         | <b>670.869</b>  | <b>671.373</b>  | 670.365         | H[11] |
| R  | 32 | 1716.461        | 610.349         | 602.340         | 602.843         | 601.835         | R[10] |
| L  | 33 | 1773.023        | 532.299         | 524.289         | 524.793         | 523.785         | L[9]  |
| L  | 34 | 1829.568        | 478.756         | 469.747         | 469.251         | 468.243         | L[8]  |
| R  | 35 | 1907.615        | 419.214         | 411.205         | 411.709         | 410.701         | R[7]  |
| K  | 36 | 1971.663        | 341.164         | 333.154         | 333.658         | 332.650         | K[6]  |
| G  | 37 | 2000.174        | 277.116         | 269.107         | 269.611         | 268.603         | G[5]  |
| N  | 38 | 2057.195        | 248.606         | 240.596         | 241.100         | 240.092         | N[4]  |
| V  | 39 | 2136.227        | 181.564         | 183.575         | 184.079         | 183.071         | V[3]  |
| A  | 40 | 2114.265        | 110.026         | 102.043         | 102.547         | 101.539         | A[2]  |
| E  | 41 | 2238.767        | 74.534          | 66.524          | 67.028          | 66.021          | E[1]  |

# sp | Q6GSS7 | H2A2A\_MOUSE

[Acetyl]SGRGKQGGKARAKAKSRSSRAGLQFPVGRVHRLLRKGN~~YAE~~

- ▶ fragmentation table for charge state 3+
- ▶ specType=etd
- ▶ score=48.37
- ▶ F113278.dat
- ▶ query=q70090.p1
- ▶ precursor=747.092540
- ▶ chargePrecursor=6
- ▶ itol=0.5

| AA | c  | y               | #s1             | #s2             | #s3             | AA              |       |
|----|----|-----------------|-----------------|-----------------|-----------------|-----------------|-------|
| S  | 1  | 48.607          | 1492.172        | <b>1487.835</b> | 0.872           | <b>1487.499</b> | S[41] |
| G  | 2  | 66.704          | 1450.181        | 1444.521        | 0.672           | 1444.462        | G[40] |
| R  | 3  | 130.718         | <b>1431.154</b> | 1425.814        | 1420.150        | 1425.470        | R[39] |
| G  | 4  | 139.745         | 1379.120        | 1373.780        | <b>1374.116</b> | 1373.444        | G[38] |
| K  | 5  | 182.443         | 1360.113        | 1354.773        | 1355.109        | 1354.437        | K[37] |
| Q  | 6  | 225.130         | 1317.414        | 1312.075        | 1312.411        | 1311.730        | Q[36] |
| G  | 7  | 244.137         | 1274.725        | 1269.389        | <b>1269.725</b> | 1269.052        | G[35] |
| G  | 8  | 263.144         | 1235.921        | 1230.581        | <b>1250.717</b> | 1250.045        | G[34] |
| K  | 9  | 305.642         | 1236.714        | <b>1231.374</b> | <b>1231.710</b> | <b>1231.038</b> | K[33] |
| A  | 10 | 329.521         | 1194.016        | 1188.676        | 1189.012        | 1188.340        | A[32] |
| R  | 11 | 381.555         | <b>1170.336</b> | <b>1164.997</b> | <b>1165.333</b> | 1164.661        | R[31] |
| A  | 12 | 405.234         | 1133.303        | 1127.967        | 1127.300        | 1127.000        | A[30] |
| K  | 13 | 447.932         | 1094.624        | 1089.284        | <b>1089.620</b> | <b>1088.948</b> | K[29] |
| A  | 14 | 491.611         | 1051.925        | 1046.585        | <b>1046.922</b> | 1046.250        | A[28] |
| K  | 15 | 514.310         | 1028.246        | <b>1022.907</b> | <b>1023.243</b> | 1022.571        | K[27] |
| S  | 16 | 543.320         | <b>985.548</b>  | <b>980.208</b>  | <b>980.544</b>  | <b>979.873</b>  | S[26] |
| R  | 17 | 585.254         | 956.531         | <b>951.198</b>  | <b>951.534</b>  | 950.862         | R[25] |
| S  | 18 | 624.305         | 904.504         | 899.164         | 899.500         | 898.828         | S[24] |
| S  | 19 | 653.375         | 875.493         | <b>870.153</b>  | <b>870.489</b>  | 869.817         | S[23] |
| R  | 20 | 705.400         | 846.482         | 841.143         | <b>841.479</b>  | 840.807         | R[22] |
| A  | 21 | 729.088         | 794.449         | 789.109         | 789.445         | 788.773         | A[21] |
| Q  | 22 | 748.095         | <b>770.770</b>  | 765.430         | 765.766         | 765.094         | Q[20] |
| L  | 23 | 783.790         | 742.762         | 737.423         | 736.759         | 736.087         | L[19] |
| Q  | 24 | <b>828.476</b>  | 714.085         | 708.745         | 709.084         | 708.412         | Q[18] |
| F  | 25 | 877.409         | <b>671.382</b>  | 666.042         | 666.378         | 665.706         | F[17] |
| F  | 26 | 909.950         | 622.359         | 617.019         | 617.355         | 616.683         | F[16] |
| V  | 27 | <b>942.873</b>  | 590.006         | 584.666         | 585.004         | 584.332         | V[15] |
| Q  | 28 | <b>961.860</b>  | 556.985         | 551.645         | 551.981         | 551.309         | Q[14] |
| R  | 29 | 1013.914        | 519.016         | 513.676         | 514.014         | 513.342         | R[13] |
| V  | 30 | <b>1046.936</b> | 485.944         | 480.604         | 480.941         | 480.269         | V[12] |
| H  | 31 | 1092.623        | 452.921         | 447.581         | 447.918         | 447.246         | H[11] |
| R  | 32 | <b>1144.656</b> | 407.235         | 401.895         | 402.231         | 401.560         | R[10] |
| L  | 33 | 1182.351        | 355.201         | 349.862         | 350.198         | 349.526         | L[9]  |
| L  | 34 | 1230.046        | 319.509         | 314.169         | 314.505         | 313.833         | L[8]  |
| R  | 35 | 1272.079        | 279.812         | 274.472         | 274.808         | 274.136         | R[7]  |
| K  | 36 | 1314.778        | 227.778         | 222.438         | 222.775         | 222.103         | K[6]  |
| G  | 37 | 1333.785        | 185.880         | 179.740         | 180.076         | 179.404         | G[5]  |
| N  | 38 | 1371.799        | 146.073         | 140.733         | 141.069         | 140.397         | N[4]  |
| V  | 39 | 1426.154        | 128.098         | 122.758         | 123.095         | 122.423         | V[3]  |
| A  | 40 | 1469.213        | 83.304          | 78.384          | 78.720          | 78.048          | A[2]  |
| E  | 41 | 1492.847        | 50.025          | 44.685          | 45.021          | 44.349          | E[1]  |

# sp | Q6GSS7 | H2A2A\_MOUSE

[Acetyl]SGRGKQGGKARAKAKSRSSRAGLQFPVGRVHRLLRKGN~~YAE~~

- ▶ fragmentation table for charge state 4+
- ▶ specType=etd
- ▶ score=48.37
- ▶ F113278.dat
- ▶ query=q70090\_p1
- ▶ precursor=747.092540
- ▶ chargePrecursor=6
- ▶ itol=0.5

| AA   | c               | y               | z+1            | z+2             | z              | AA   |
|------|-----------------|-----------------|----------------|-----------------|----------------|------|
| S 1  | 17.526          | <b>1120.133</b> | 1116.138       | 0.755           | 1115.878       | S 41 |
| G 2  | 51.780          | 1087.872        | 1083.888       | 0.755           | 1083.618       | G 40 |
| R 3  | 90.805          | 1037.617        | 1033.612       | <b>1069.864</b> | 1039.360       | R 39 |
| G 4  | 105.061         | 1034.592        | 1030.587       | <b>1030.839</b> | 1030.335       | G 38 |
| K 5  | 137.084         | 1020.330        | 1016.332       | <b>1016.384</b> | 1016.080       | K 37 |
| G 6  | 169.099         | 999.311         | 994.308        | 994.350         | 994.050        | G 36 |
| G 7  | 183.394         | 956.290         | 952.293        | 952.345         | <b>952.041</b> | G 35 |
| G 8  | 197.610         | 942.043         | 938.038        | <b>938.290</b>  | 937.788        | G 34 |
| K 9  | 229.633         | 927.787         | 923.783        | 924.034         | 923.531        | K 33 |
| A 10 | 247.303         | 895.761         | <b>891.759</b> | <b>892.011</b>  | 891.507        | A 32 |
| R 11 | 286.418         | 878.004         | 873.999        | 874.251         | 873.748        | R 31 |
| A 12 | 304.177         | 838.979         | 834.974        | 835.226         | 834.723        | A 30 |
| K 13 | 338.201         | 821.250         | 817.215        | 817.467         | 816.965        | K 29 |
| A 14 | 353.960         | 789.190         | 785.191        | 785.443         | 784.939        | A 28 |
| K 15 | 385.984         | <b>771.437</b>  | 767.432        | 767.684         | 767.180        | K 27 |
| S 16 | 407.742         | 739.413         | 735.408        | 735.660         | 735.156        | S 26 |
| R 17 | 446.767         | 717.895         | 713.890        | 713.902         | 713.398        | R 25 |
| S 18 | 468.526         | 678.630         | 674.625        | 674.877         | 674.373        | S 24 |
| S 19 | 490.283         | 655.872         | 652.867        | 653.119         | 652.615        | S 23 |
| R 20 | 529.309         | 635.114         | 631.109        | 631.361         | 630.857        | R 22 |
| A 21 | 547.068         | 596.088         | 592.084        | 592.336         | 591.833        | A 21 |
| G 22 | 561.323         | 578.320         | 574.324        | 574.576         | 574.072        | G 20 |
| L 23 | 589.594         | 564.074         | 560.069        | 560.321         | 559.817        | L 19 |
| G 24 | 621.869         | 535.801         | 531.798        | 532.050         | 531.546        | G 18 |
| F 25 | 658.376         | 503.788         | 499.783        | 500.035         | 499.531        | F 17 |
| P 26 | 682.639         | 467.021         | 463.016        | 463.268         | 462.764        | P 16 |
| V 27 | <b>707.406</b>  | 442.758         | 438.753        | 439.005         | 438.501        | V 15 |
| G 28 | 721.662         | 417.991         | 413.988        | 414.238         | 413.734        | G 14 |
| R 29 | 860.627         | 401.735         | 397.731        | 399.982         | 399.478        | R 13 |
| V 30 | <b>785.454</b>  | 384.719         | <b>366.705</b> | 366.957         | <b>360.453</b> | V 12 |
| H 31 | 819.719         | 339.943         | 335.938        | 336.190         | 335.686        | H 11 |
| R 32 | 858.744         | 305.676         | 301.673        | 301.925         | 301.421        | R 10 |
| L 33 | <b>887.015</b>  | 266.653         | 262.648        | 262.900         | 262.396        | L 9  |
| L 34 | <b>915.286</b>  | 238.382         | 234.377        | 234.629         | 234.125        | L 8  |
| R 35 | 954.311         | 210.111         | 206.106        | 206.358         | 205.854        | R 7  |
| K 36 | <b>986.335</b>  | 171.088         | 167.083        | 167.335         | 166.831        | K 6  |
| G 37 | 1020.590        | 139.062         | 135.057        | 135.309         | 134.805        | G 5  |
| N 38 | 1029.101        | 124.800         | 120.802        | 121.054         | 120.550        | N 4  |
| Y 39 | <b>1069.867</b> | 96.296          | 92.291         | 92.543          | 92.039         | Y 3  |
| A 40 | 1087.626        | 55.530          | 51.525         | 51.777          | 51.273         | A 2  |
| E 41 | <b>1119.887</b> | 37.771          | 33.766         | 34.018          | 33.514         | E 1  |

# sp | Q6GSS7 | H2A2A\_MOUSE

[Acetyl]SGRGKQGGKARAKAKSRSSRAGLQFPVGRVHLLRKGNYAE

- ▶ fragmentation table for charge state 5+
- ▶ specType=etd
- ▶ score=48.37
- ▶ F113278.dat
- ▶ query=q70090\_p1
- ▶ precursor=747.092540
- ▶ chargePrecursor=6
- ▶ itol=0.5

| AA    | c              | y              | z+1            | z#2            | z              | AA    |
|-------|----------------|----------------|----------------|----------------|----------------|-------|
| S[1]  | 30.221         | <b>896.308</b> | 893.104        | 0.806          | 892.903        | S[41] |
| G[2]  | 41.625         | <b>870.499</b> | 867.296        | 0.806          | 867.094        | G[40] |
| R[3]  | 72.846         | 859.095        | <b>855.891</b> | <b>856.093</b> | 855.690        | R[39] |
| G[4]  | 84.250         | 827.875        | 824.671        | 824.873        | 824.469        | G[38] |
| K[5]  | 109.869        | 816.471        | 813.267        | 813.468        | 813.065        | K[37] |
| Q[6]  | 135.481        | 790.852        | 787.648        | 787.849        | 787.446        | Q[36] |
| G[7]  | 146.885        | 765.240        | 762.036        | 762.238        | 761.834        | G[35] |
| G[8]  | 158.289        | 753.836        | 750.632        | 750.833        | 750.430        | G[34] |
| K[9]  | 183.908        | 742.431        | 739.227        | 739.429        | 739.026        | K[33] |
| A[10] | 198.116        | 716.812        | 713.608        | 713.810        | 713.407        | A[32] |
| R[11] | 229.336        | 702.605        | 699.401        | 699.603        | 699.199        | R[31] |
| A[12] | 243.543        | <b>671.385</b> | 668.181        | 668.382        | 667.979        | A[30] |
| K[13] | 269.162        | 657.177        | <b>653.973</b> | <b>654.175</b> | <b>653.772</b> | K[29] |
| A[14] | 283.370        | 631.558        | 628.354        | 628.556        | 628.153        | A[28] |
| K[15] | 308.989        | 617.351        | 614.147        | 614.349        | 613.945        | K[27] |
| S[16] | 326.395        | 591.732        | 588.528        | 588.730        | 588.326        | S[26] |
| R[17] | 357.615        | 574.325        | 571.122        | 571.323        | 570.920        | R[25] |
| S[18] | 375.022        | 548.105        | 544.901        | 545.103        | 544.700        | S[24] |
| S[19] | 392.428        | 525.699        | 522.495        | 522.697        | 522.293        | S[23] |
| R[20] | 423.648        | 508.292        | 505.089        | 505.290        | 504.887        | R[22] |
| A[21] | 437.856        | 477.072        | 473.868        | 474.070        | 473.667        | A[21] |
| G[22] | 449.260        | 462.865        | 459.661        | 459.862        | 459.459        | G[20] |
| L[23] | 471.877        | 451.460        | 448.257        | 448.458        | 448.055        | L[19] |
| Q[24] | 497.489        | 428.844        | 425.640        | 425.841        | 425.438        | Q[18] |
| F[25] | 528.902        | 403.232        | 400.028        | 400.230        | 399.827        | F[17] |
| P[26] | 546.313        | 373.816        | 370.614        | 370.816        | 370.413        | P[16] |
| V[27] | 565.126        | 354.408        | 351.204        | 351.405        | 351.002        | V[15] |
| G[28] | 577.531        | 334.994        | 331.790        | 331.992        | 331.589        | G[14] |
| R[29] | 608.751        | 323.190        | 319.986        | 320.187        | 319.784        | R[13] |
| V[30] | 628.565        | 291.969        | 288.766        | 288.967        | 288.564        | V[12] |
| H[31] | 655.976        | 272.156        | 268.952        | 269.154        | 268.750        | H[11] |
| R[32] | 687.197        | 244.744        | 241.540        | 241.742        | 241.339        | R[10] |
| L[33] | 709.814        | 213.524        | 210.320        | 210.522        | 210.118        | L[9]  |
| L[34] | 732.430        | 190.907        | 187.703        | 187.905        | 187.502        | L[8]  |
| R[35] | 763.651        | 168.290        | 165.086        | 165.288        | 164.885        | R[7]  |
| K[36] | 789.270        | 137.070        | 133.866        | 134.068        | 133.665        | K[6]  |
| G[37] | 830.074        | 111.451        | 108.247        | 108.449        | 108.046        | G[5]  |
| N[38] | 823.482        | 100.047        | 96.843         | 97.044         | 96.641         | N[4]  |
| V[39] | <b>856.095</b> | 77.238         | 74.034         | 74.236         | 73.833         | V[3]  |
| A[40] | <b>870.303</b> | 44.625         | 41.422         | 41.623         | 41.220         | A[2]  |
| E[41] | 896.111        | 30.418         | 27.214         | 27.416         | 27.013         | E[1]  |



# sp | Q6GSS7 | H2A2A\_MOUSE

[Acetyl]SGRGKQGGKARAKAKSRSSRAGLQFPVGRVHRLLRKGNAYE

- ▶ fragmentation table for charge state 1+
- ▶ specType=etd
- ▶ score=71.60
- ▶ F113278.dat
- ▶ query=q70094\_p1
- ▶ precursor=896.309680
- ▶ chargePrecursor=5
- ▶ itol=0.5

| AA | c  | y               | z+1             | z+2             | z               | AA       |       |
|----|----|-----------------|-----------------|-----------------|-----------------|----------|-------|
| S  | 1  | 147.076         | 4477.510        | 4461.491        | 0.000           | 4460.483 | S[41] |
| G  | 2  | 204.068         | 4348.467        | 4332.449        | 0.000           | 4331.441 | G[40] |
| R  | 3  | <b>360.199</b>  | 4201.448        | 4276.427        | 4476.435        | 4274.419 | R[39] |
| G  | 4  | <b>417.220</b>  | 4135.345        | 4119.326        | 4120.334        | 4118.318 | G[38] |
| K  | 5  | <b>545.315</b>  | 4078.323        | 4062.305        | 4053.313        | 4051.297 | K[37] |
| Q  | 6  | <b>673.374</b>  | 3969.270        | 3934.210        | 3935.218        | 3933.202 | Q[36] |
| G  | 7  | <b>730.395</b>  | 3822.170        | 3806.151        | 3807.159        | 3805.143 | G[35] |
| G  | 8  | 787.417         | 3765.148        | 3749.130        | 3750.138        | 3748.122 | G[34] |
| K  | 9  | <b>915.512</b>  | 3708.127        | 3692.108        | 3693.116        | 3691.100 | K[33] |
| A  | 10 | <b>986.549</b>  | 3580.032        | 3564.013        | 3565.021        | 3563.005 | A[32] |
| R  | 11 | 1142.650        | 3508.995        | 3492.976        | 3493.984        | 3491.968 | R[31] |
| A  | 12 | <b>1213.687</b> | 3382.994        | 3338.975        | 3337.983        | 3335.967 | A[30] |
| R  | 13 | <b>1341.782</b> | 3281.957        | 3255.938        | 3256.946        | 3254.930 | R[29] |
| A  | 14 | 1412.819        | 3153.962        | 3137.943        | 3138.951        | 3136.935 | A[28] |
| K  | 15 | <b>1540.914</b> | 3062.725        | 3066.706        | 3067.714        | 3065.698 | K[27] |
| S  | 16 | <b>1627.946</b> | 2954.630        | 2938.611        | 2939.619        | 2937.603 | S[26] |
| R  | 17 | 1784.047        | 2897.598        | 2851.579        | 2852.587        | 2850.571 | R[25] |
| S  | 18 | 1871.079        | 2741.490        | 2695.471        | 2696.479        | 2694.463 | S[24] |
| S  | 19 | 1958.111        | 2624.464        | 2608.446        | 2609.454        | 2607.438 | S[23] |
| R  | 20 | 2114.213        | 2537.432        | 2521.414        | 2522.422        | 2520.406 | R[22] |
| A  | 21 | 2185.250        | 2381.331        | 2365.313        | 2366.320        | 2364.305 | A[21] |
| G  | 22 | 2242.271        | 2310.294        | 2294.275        | 2295.283        | 2293.267 | G[20] |
| L  | 23 | 2385.308        | 2253.273        | 2237.254        | 2238.262        | 2236.246 | L[19] |
| Q  | 24 | 2483.414        | 2140.189        | 2124.170        | 2125.178        | 2123.162 | Q[18] |
| F  | 25 | 2630.482        | 2012.150        | 1996.111        | <b>1997.119</b> | 1995.104 | F[17] |
| P  | 26 | 2727.535        | 1895.062        | 1849.043        | 1850.051        | 1848.035 | P[16] |
| V  | 27 | 2826.603        | 1788.009        | 1751.990        | 1752.998        | 1750.982 | V[15] |
| G  | 28 | 2883.625        | <b>1668.940</b> | <b>1652.922</b> | 1653.930        | 1651.914 | G[14] |
| R  | 29 | 3030.726        | 1611.916        | 1595.897        | <b>1596.908</b> | 1594.892 | R[13] |
| V  | 30 | 3138.784        | 1495.812        | 1439.792        | 1440.800        | 1438.784 | V[12] |
| H  | 31 | 3275.853        | 1358.748        | 1340.731        | <b>1341.739</b> | 1339.723 | H[11] |
| R  | 32 | 3431.964        | 1219.691        | 1203.672        | 1204.680        | 1202.664 | R[10] |
| L  | 33 | 3545.038        | 1063.589        | <b>1047.571</b> | 1048.579        | 1046.563 | L[9]  |
| L  | 34 | 3658.121        | 950.505         | 934.487         | 935.495         | 933.479  | L[8]  |
| R  | 35 | 3814.224        | 837.421         | 821.403         | 822.410         | 820.394  | R[7]  |
| K  | 36 | 3942.319        | 681.320         | 665.302         | 666.310         | 664.294  | K[6]  |
| G  | 37 | 3999.340        | 553.225         | 537.207         | 538.214         | 536.199  | G[5]  |
| N  | 38 | 4113.383        | 406.204         | 480.185         | 481.193         | 479.177  | N[4]  |
| V  | 39 | 4276.446        | 382.161         | 366.142         | 367.150         | 365.134  | V[3]  |
| A  | 40 | 4347.483        | 219.086         | 203.079         | 204.087         | 202.071  | A[2]  |
| E  | 41 | 4476.526        | 148.060         | 132.042         | 133.050         | 131.034  | E[1]  |



# sp | Q6GSS7 | H2A2A\_MOUSE

[Acetyl]SGRGKQGGKARAKAKSRSSRAGLQFPVGRVHRLLRKGNAYE

- ▶ fragmentation table for charge state 2+
- ▶ specType=etd
- ▶ score=71.60
- ▶ F113278.dat
- ▶ query=q70094\_p1
- ▶ precursor=896.309680
- ▶ chargePrecursor=5
- ▶ itol=0.5

| AA | c  | w               | #=1             | #=2             | z               | AA              |       |
|----|----|-----------------|-----------------|-----------------|-----------------|-----------------|-------|
| S  | 1  | 74.062          | 2039.259        | 2231.300        | 8.804           | 2230.147        | S[41] |
| G  | 2  | 102.553         | 2174.737        | 2266.726        | 0.504           | 2166.254        | G[40] |
| R  | 3  | 180.603         | 2146.227        | 2138.217        | 2138.921        | 2117.713        | R[39] |
| G  | 4  | 209.114         | 2068.176        | 2060.167        | 2060.671        | 2059.663        | G[38] |
| K  | 5  | 273.161         | 2039.665        | 2031.656        | 2032.160        | 2031.152        | K[37] |
| G  | 6  | 327.194         | 1975.618        | <b>1967.609</b> | 1968.112        | <b>1967.105</b> | G[36] |
| G  | 7  | 395.703         | 1911.569        | <b>1903.579</b> | 1904.083        | <b>1903.075</b> | G[35] |
| G  | 8  | 394.212         | 1883.078        | <b>1875.068</b> | 1875.572        | <b>1874.565</b> | G[34] |
| K  | 9  | 458.260         | 1854.567        | 1846.558        | 1847.062        | 1846.054        | K[33] |
| A  | 10 | 493.778         | 1790.520        | 1782.510        | <b>1783.014</b> | 1782.006        | A[32] |
| R  | 11 | 577.639         | 1735.001        | <b>1746.992</b> | <b>1747.986</b> | 1746.488        | R[31] |
| A  | 12 | <b>607.347</b>  | 1676.943        | <b>1668.941</b> | <b>1669.945</b> | 1668.439        | A[30] |
| K  | 13 | <b>671.395</b>  | 1643.433        | 1635.423        | <b>1633.927</b> | 1632.919        | K[29] |
| A  | 14 | <b>706.913</b>  | 1577.984        | <b>1569.975</b> | <b>1569.979</b> | 1568.971        | A[28] |
| K  | 15 | <b>770.961</b>  | 1541.966        | 1533.957        | <b>1534.360</b> | 1533.351        | K[27] |
| S  | 16 | <b>814.477</b>  | 1477.818        | 1469.809        | 1470.313        | 1469.305        | S[26] |
| R  | 17 | <b>892.527</b>  | 1434.802        | 1426.792        | <b>1426.797</b> | 1425.789        | R[25] |
| S  | 18 | <b>936.043</b>  | 1369.853        | <b>1348.243</b> | <b>1348.746</b> | <b>1347.739</b> | S[24] |
| S  | 19 | <b>979.559</b>  | <b>1312.736</b> | <b>1304.726</b> | <b>1305.230</b> | 1304.222        | S[23] |
| R  | 20 | <b>1057.610</b> | 1269.220        | <b>1261.210</b> | <b>1261.714</b> | 1260.707        | R[22] |
| A  | 21 | <b>1093.128</b> | 1191.169        | <b>1183.160</b> | 1183.664        | 1182.656        | A[21] |
| G  | 22 | 1121.639        | 1135.651        | 1147.641        | 1148.145        | 1147.137        | G[20] |
| L  | 23 | 1178.183        | 1127.146        | 1139.135        | 1139.639        | 1138.631        | L[19] |
| G  | 24 | <b>1242.211</b> | 1063.595        | 1052.589        | 1063.093        | 1062.085        | G[18] |
| F  | 25 | 1315.745        | 1006.599        | <b>998.559</b>  | <b>999.063</b>  | 998.055         | F[17] |
| F  | 26 | 1364.271        | 933.034         | 925.025         | 925.529         | 924.521         | F[16] |
| V  | 27 | <b>1413.805</b> | 884.500         | 876.490         | 877.003         | 876.005         | V[15] |
| G  | 28 | 1462.216        | 834.974         | <b>826.965</b>  | <b>827.468</b>  | 826.461         | G[14] |
| R  | 29 | 1526.809        | 806.483         | 804.474         | 804.978         | 803.970         | R[13] |
| V  | 30 | <b>1569.901</b> | 728.413         | 720.403         | 720.907         | 719.899         | V[12] |
| H  | 31 | 1636.430        | 678.878         | 670.869         | <b>671.373</b>  | 670.365         | H[11] |
| R  | 32 | 1716.461        | 610.349         | 602.340         | 602.843         | 601.835         | R[10] |
| L  | 33 | 1773.023        | 532.269         | 524.260         | 524.763         | 523.755         | L[9]  |
| L  | 34 | 1829.566        | 478.796         | 469.787         | 469.291         | 468.283         | L[8]  |
| R  | 35 | 1907.615        | 419.214         | 411.205         | 411.709         | 410.701         | R[7]  |
| K  | 36 | 1971.663        | 341.164         | 333.154         | 333.658         | 332.650         | K[6]  |
| G  | 37 | 2000.174        | 277.116         | 269.107         | 269.611         | 268.603         | G[5]  |
| N  | 38 | 2057.195        | 248.606         | 240.596         | 241.100         | 240.092         | N[4]  |
| V  | 39 | 2136.727        | 181.564         | 183.575         | 184.079         | 183.071         | V[3]  |
| A  | 40 | 2114.265        | 110.026         | 102.043         | 102.547         | 101.539         | A[2]  |
| E  | 41 | 2238.767        | 74.534          | 66.524          | 67.028          | 66.021          | E[1]  |

# sp | Q6GSS7 | H2A2A\_MOUSE

[Acetyl]SGRGKQGGKARAKAKSRSSRAGLQFPVGRVHRLLRKGN~~YAE~~

- ▶ fragmentation table for charge state 3+
- ▶ specType=etd
- ▶ score=71.60
- ▶ F113278.dat
- ▶ query=q70094\_p1
- ▶ precursor=896.309680
- ▶ chargePrecursor=5
- ▶ itol=0.5

| AA   | c               | y              | z+1             | z+2             | z              | AA   |
|------|-----------------|----------------|-----------------|-----------------|----------------|------|
| S 1  | 49.697          | 1493.175       | <b>1487.835</b> | 0.672           | 1487.499       | S 41 |
| G 2  | 68.704          | 1450.161       | 1444.831        | 0.672           | 1444.485       | G 40 |
| R 3  | 120.738         | 1431.154       | 1425.814        | 1426.150        | 1425.478       | R 39 |
| G 4  | 139.745         | 1379.120       | 1373.780        | 1374.116        | 1374.444       | G 38 |
| K 5  | 182.443         | 1360.113       | 1354.773        | <b>1355.109</b> | 1354.431       | K 37 |
| Q 6  | 225.139         | 1317.614       | 1312.625        | 1313.611        | 1311.739       | Q 36 |
| G 7  | 244.137         | 1274.728       | 1269.389        | <b>1269.725</b> | 1269.051       | G 35 |
| G 8  | 263.144         | 1255.721       | <b>1250.381</b> | <b>1250.717</b> | 1250.045       | G 34 |
| K 9  | 305.842         | 1236.714       | <b>1231.374</b> | <b>1231.710</b> | 1231.038       | K 33 |
| A 10 | 329.521         | 1194.016       | <b>1188.676</b> | <b>1189.012</b> | 1188.340       | A 32 |
| R 11 | 381.555         | 1170.330       | <b>1164.997</b> | <b>1165.333</b> | 1164.661       | R 31 |
| A 12 | 405.234         | 1118.303       | 1112.967        | 1113.999        | 1112.027       | A 30 |
| K 13 | 447.932         | 1094.624       | 1089.284        | 1089.620        | 1088.948       | K 29 |
| A 14 | 471.611         | 1051.925       | 1046.586        | 1046.922        | 1046.250       | A 28 |
| K 15 | 514.310         | 1028.246       | 1022.907        | 1023.243        | 1022.571       | K 27 |
| S 16 | 543.320         | 985.148        | <b>980.208</b>  | <b>980.544</b>  | <b>979.873</b> | S 26 |
| R 17 | 595.354         | 956.537        | 951.108         | 951.534         | 950.862        | R 25 |
| S 18 | 624.365         | 904.504        | 899.164         | 899.500         | 898.828        | S 24 |
| S 19 | 653.375         | 875.493        | 870.153         | 870.489         | 869.817        | S 23 |
| R 20 | 705.409         | 846.482        | 841.143         | 841.479         | 840.807        | R 22 |
| A 21 | 729.688         | 794.449        | 789.109         | 789.445         | 788.773        | A 21 |
| G 22 | 748.695         | <b>770.770</b> | 765.430         | 765.766         | 765.094        | G 20 |
| L 23 | 785.790         | 751.762        | 746.423         | 746.759         | 746.087        | L 19 |
| Q 24 | 828.478         | 714.696        | 709.357         | 709.694         | 709.022        | Q 18 |
| F 25 | 877.499         | <b>671.382</b> | 666.042         | 666.378         | 665.706        | F 17 |
| P 26 | 909.850         | 622.359        | 617.019         | 617.355         | 616.683        | P 16 |
| V 27 | <b>942.873</b>  | 590.009        | 584.668         | 585.004         | 584.332        | V 15 |
| G 28 | <b>961.880</b>  | 556.985        | 551.645         | 551.981         | 551.309        | G 14 |
| R 29 | 1013.014        | 537.978        | 532.638         | 532.974         | 532.302        | R 13 |
| V 30 | 1049.936        | 485.944        | 480.604         | 480.941         | 480.269        | V 12 |
| H 31 | 1092.623        | 452.921        | 447.581         | 447.918         | 447.246        | H 11 |
| R 32 | 1144.656        | 407.295        | 401.955         | 402.291         | 401.560        | R 10 |
| L 33 | 1182.351        | 355.201        | 349.862         | 350.198         | 349.526        | L 9  |
| L 34 | 1220.046        | 317.507        | 312.167         | 312.503         | 311.831        | L 8  |
| R 35 | <b>1272.079</b> | 279.812        | 274.472         | 274.808         | 274.136        | R 7  |
| K 36 | 1314.718        | 237.778        | 232.438         | 232.775         | 232.103        | K 6  |
| G 37 | 1333.785        | 185.980        | 179.740         | 180.076         | 179.404        | G 5  |
| N 38 | 1371.799        | 166.073        | 160.733         | 161.069         | 160.397        | N 4  |
| V 39 | 1426.184        | 128.058        | 122.718         | 123.055         | 122.383        | V 3  |
| A 40 | 1449.833        | 73.704         | 68.364          | 68.700          | 68.029         | A 2  |
| E 41 | 1492.847        | 30.025         | 44.685          | 45.021          | 44.349         | E 1  |

# sp | Q6GSS7 | H2A2A\_MOUSE

[Acetyl]SGRGKQGGKARAKAKSRSSRAGLQFPVGRVHRLLRKGN<sup>YAE</sup>

- ▶ fragmentation table for charge state 4+
- ▶ specType=etd
- ▶ score=71.60
- ▶ F113278.dat
- ▶ query=q70094\_p1
- ▶ precursor=896.309680
- ▶ chargePrecursor=5
- ▶ itol=0.5

| AA    | c               | y               | #=1             | #=2             | #=3             | #=4 | AA    |
|-------|-----------------|-----------------|-----------------|-----------------|-----------------|-----|-------|
| S[1]  | 37.505          | <b>1120.133</b> | <b>1116.128</b> | 0.705           | <b>1115.876</b> |     | S[41] |
| G[2]  | 51.780          | 1037.872        | 1063.568        | 0.795           | 1023.610        |     | G[40] |
| R[3]  | 90.805          | 1073.617        | <b>1069.612</b> | <b>1069.864</b> | 1069.360        |     | R[39] |
| G[4]  | 109.061         | 1034.592        | 1030.587        | 1030.839        | <b>1030.335</b> |     | G[38] |
| K[5]  | 137.084         | 1020.336        | 1016.332        | 1016.584        | 1016.080        |     | K[37] |
| G[6]  | 169.059         | 998.312         | 994.308         | 994.560         | 994.056         |     | G[36] |
| G[7]  | 183.354         | 956.296         | 962.293         | 952.545         | 952.041         |     | G[35] |
| G[8]  | 197.610         | 942.043         | 938.038         | 938.290         | 937.786         |     | G[34] |
| K[9]  | 229.633         | 927.787         | 923.783         | 924.034         | 923.531         |     | K[33] |
| A[10] | 247.393         | 895.763         | 891.759         | <b>892.011</b>  | 891.507         |     | A[32] |
| R[11] | 286.418         | 878.004         | 873.999         | 874.251         | 873.748         |     | R[31] |
| A[12] | 354.177         | 838.979         | 834.974         | 835.226         | 834.722         |     | A[30] |
| K[13] | 336.201         | 821.220         | 817.215         | 817.467         | 816.964         |     | K[29] |
| A[14] | 353.960         | 789.199         | 785.195         | 785.447         | 784.943         |     | A[28] |
| K[15] | 385.904         | <b>771.437</b>  | 767.432         | 767.684         | 767.180         |     | K[27] |
| S[16] | 407.742         | 739.413         | 735.408         | 735.660         | 735.156         |     | S[26] |
| R[17] | 446.767         | 717.955         | 713.950         | 714.202         | 713.698         |     | R[25] |
| S[18] | 468.526         | 678.930         | 674.925         | 675.177         | 674.673         |     | S[24] |
| S[19] | 490.283         | 656.672         | 652.667         | 652.919         | 652.415         |     | S[23] |
| R[20] | 529.309         | 635.114         | 631.109         | 631.361         | 630.857         |     | R[22] |
| A[21] | 547.088         | 596.089         | 592.084         | 592.336         | 591.832         |     | A[21] |
| G[22] | 561.323         | 578.329         | 574.324         | 574.576         | 574.072         |     | G[20] |
| L[23] | 589.984         | 664.074         | 660.069         | 660.321         | 659.817         |     | L[19] |
| Q[24] | 621.609         | 535.803         | 531.798         | 532.050         | 531.546         |     | Q[18] |
| F[25] | 658.376         | 503.788         | 499.783         | 500.035         | 499.531         |     | F[17] |
| F[26] | 662.639         | 467.021         | 463.016         | 463.268         | 462.764         |     | F[16] |
| V[27] | <b>707.406</b>  | 442.750         | 438.745         | 439.005         | 438.501         |     | V[15] |
| G[28] | 721.662         | 417.991         | 413.986         | 414.238         | 413.734         |     | G[14] |
| R[29] | 760.687         | 403.735         | 399.731         | 399.982         | 399.478         |     | R[13] |
| V[30] | 785.454         | 364.710         | <b>360.705</b>  | 360.957         | <b>360.453</b>  |     | V[12] |
| H[31] | 816.719         | 339.643         | 335.638         | 335.890         | 335.386         |     | H[11] |
| R[32] | 858.744         | 305.676         | 301.671         | 301.923         | 301.419         |     | R[10] |
| L[33] | 887.615         | 266.657         | 262.648         | 262.900         | 262.396         |     | L[9]  |
| L[34] | <b>915.286</b>  | 238.362         | 234.357         | 234.608         | 234.104         |     | L[8]  |
| R[35] | 924.311         | 210.111         | 206.106         | 206.358         | 205.854         |     | R[7]  |
| K[36] | <b>966.335</b>  | 171.086         | 167.081         | 167.333         | 166.829         |     | K[6]  |
| G[37] | 1000.590        | 139.064         | 135.059         | 135.309         | 134.805         |     | G[5]  |
| N[38] | 1028.101        | 124.806         | 120.802         | 121.054         | 120.550         |     | N[4]  |
| V[39] | <b>1069.867</b> | 96.296          | 92.291          | 92.543          | 92.039          |     | V[3]  |
| A[40] | 1067.606        | 58.530          | 54.525          | 54.777          | 54.273          |     | A[2]  |
| E[41] | 1119.887        | 37.771          | 33.766          | 34.018          | 33.514          |     | E[1]  |



# sp | Q6GSS7 | H2A2A\_MOUSE

[Acetyl]SGRGKQGGKARAKAKSRSSRAGLQFPVGRVHRLLRKGNAYE

- ▶ fragmentation table for charge state 1+
- ▶ specType=etd
- ▶ score=64.15
- ▶ F113278.dat
- ▶ query=q70095.p1
- ▶ precursor=896.309700
- ▶ chargePrecursor=5
- ▶ itol=0.5

| AA   | c               | y        | z+1             | z+2             | z        | AA   |
|------|-----------------|----------|-----------------|-----------------|----------|------|
| S 1  | 147.076         | 4477.515 | 4481.491        | 0.000           | 4460.481 | S 41 |
| G 2  | 304.098         | 4348.467 | 4332.440        | 0.000           | 4331.441 | G 40 |
| R 3  | <b>360.199</b>  | 4291.446 | 4275.427        | 4276.435        | 4274.419 | R 39 |
| G 4  | <b>417.270</b>  | 4135.345 | 4119.326        | 4120.334        | 4118.319 | G 38 |
| K 5  | <b>545.315</b>  | 4078.323 | 4062.305        | 4063.313        | 4061.291 | K 37 |
| Q 6  | <b>673.174</b>  | 3950.226 | 3934.210        | 3935.218        | 3933.202 | Q 36 |
| G 7  | <b>730.395</b>  | 3822.170 | 3806.151        | 3807.159        | 3805.143 | G 35 |
| G 8  | 787.417         | 3765.148 | 3749.130        | 3750.138        | 3748.122 | G 34 |
| K 9  | <b>915.512</b>  | 3708.127 | 3692.108        | 3693.116        | 3691.100 | K 33 |
| A 10 | <b>986.549</b>  | 3580.032 | 3564.013        | 3565.021        | 3563.005 | A 32 |
| R 11 | <b>1142.650</b> | 3528.995 | 3492.975        | 3493.984        | 3491.968 | R 31 |
| A 12 | 1213.677        | 3352.984 | 3336.975        | 3337.983        | 3335.966 | A 30 |
| R 13 | <b>1341.782</b> | 3281.857 | 3265.838        | 3266.846        | 3264.830 | R 29 |
| A 14 | 1412.819        | 3153.762 | 3137.743        | 3138.751        | 3136.735 | A 28 |
| K 15 | <b>1540.914</b> | 3082.725 | 3066.706        | 3067.714        | 3065.698 | K 27 |
| S 16 | <b>1627.946</b> | 2954.630 | 2938.611        | 2939.619        | 2937.603 | S 26 |
| R 17 | 1784.047        | 2887.598 | 2851.579        | 2852.587        | 2850.571 | R 25 |
| S 18 | 1873.079        | 2711.496 | 2695.477        | 2696.486        | 2694.470 | S 24 |
| S 19 | 1958.111        | 2624.464 | 2608.446        | 2609.454        | 2607.438 | S 23 |
| R 20 | 2114.213        | 2537.432 | 2521.414        | 2522.422        | 2520.406 | R 22 |
| A 21 | 2185.250        | 2381.331 | 2365.313        | 2366.320        | 2364.305 | A 21 |
| G 22 | 2242.271        | 2310.294 | 2294.275        | 2295.283        | 2293.266 | G 20 |
| L 23 | 2355.355        | 2253.273 | 2237.254        | 2238.262        | 2236.246 | L 19 |
| Q 24 | 2483.414        | 2140.189 | 2124.170        | 2125.178        | 2123.162 | Q 18 |
| F 25 | 2630.482        | 2022.130 | 1996.111        | 1997.119        | 1995.104 | F 17 |
| F 26 | 2727.538        | 1895.062 | 1849.043        | 1850.051        | 1848.035 | F 16 |
| V 27 | 2826.603        | 1768.009 | 1751.990        | 1752.998        | 1750.982 | V 15 |
| G 28 | 2883.625        | 1698.940 | 1652.922        | <b>1653.930</b> | 1651.914 | G 14 |
| R 29 | 3039.726        | 1611.919 | 1595.900        | <b>1596.908</b> | 1594.892 | R 13 |
| V 30 | 3138.764        | 1495.818 | 1439.799        | 1440.807        | 1438.791 | V 12 |
| H 31 | 3275.853        | 1356.740 | 1340.721        | <b>1341.739</b> | 1339.723 | H 11 |
| R 32 | 3431.954        | 1219.691 | 1203.672        | <b>1204.680</b> | 1202.664 | R 10 |
| L 33 | 3545.038        | 1063.589 | <b>1047.571</b> | 1048.579        | 1046.563 | L 9  |
| L 34 | 3658.123        | 950.505  | 934.487         | <b>935.495</b>  | 933.479  | L 8  |
| R 35 | 3814.224        | 837.421  | 821.403         | <b>822.410</b>  | 820.395  | R 7  |
| K 36 | 3932.319        | 681.300  | 665.282         | <b>666.290</b>  | 664.264  | K 6  |
| G 37 | 3999.340        | 553.225  | 537.207         | 538.214         | 536.199  | G 5  |
| N 38 | 4113.383        | 496.204  | 480.185         | 481.193         | 479.177  | N 4  |
| Y 39 | 4276.446        | 382.161  | 366.142         | 367.150         | 365.134  | Y 3  |
| A 40 | 4347.483        | 219.098  | 203.079         | 204.087         | 202.071  | A 2  |
| E 41 | 4476.526        | 148.060  | 132.042         | 133.050         | 131.034  | E 1  |

# sp | Q6GSS7 | H2A2A\_MOUSE

[Acetyl]SGRGKQGQGGKARAKAKSRSSRAGLQFPVGRVHRLLRKGNAYE

- ▶ fragmentation table for charge state 2+
- ▶ specType=etd
- ▶ score=64.15
- ▶ F113278.dat
- ▶ query=q70095.p1
- ▶ precursor=896.309700
- ▶ chargePrecursor=5
- ▶ itol=0.5

| AA | c  | w               | #±1             | #±2             | z               | AA              |       |
|----|----|-----------------|-----------------|-----------------|-----------------|-----------------|-------|
| S  | 1  | 74.062          | 2239.259        | 2231.260        | 8.804           | 2239.147        | S[41] |
| G  | 2  | 102.553         | 2174.737        | 2166.738        | 0.504           | 2166.254        | G[40] |
| R  | 3  | 180.603         | 2146.227        | 2138.217        | 2138.921        | 2137.713        | R[39] |
| G  | 4  | 209.114         | 2068.176        | 2060.167        | 2060.671        | 2059.663        | G[38] |
| K  | 5  | 273.161         | 2039.665        | 2031.656        | 2032.160        | 2031.152        | K[37] |
| G  | 6  | 337.194         | 1975.616        | <b>1967.609</b> | <b>1968.112</b> | 1967.205        | G[36] |
| G  | 7  | 365.703         | 1911.569        | <b>1903.579</b> | 1904.083        | <b>1903.075</b> | G[35] |
| G  | 8  | 394.212         | 1883.078        | <b>1875.068</b> | 1875.572        | <b>1874.565</b> | G[34] |
| K  | 9  | 458.260         | 1854.567        | 1846.558        | 1847.062        | 1846.054        | K[33] |
| A  | 10 | 493.778         | 1790.520        | 1782.510        | <b>1783.014</b> | 1782.006        | A[32] |
| R  | 11 | 571.820         | 1735.001        | <b>1746.992</b> | <b>1747.496</b> | 1746.488        | R[31] |
| A  | 12 | 607.889         | 1669.954        | 1661.943        | 1662.447        | 1661.439        | A[30] |
| K  | 13 | <b>671.395</b>  | 1643.433        | 1635.423        | <b>1633.927</b> | 1632.919        | K[29] |
| A  | 14 | <b>706.913</b>  | 1577.384        | <b>1569.375</b> | <b>1569.879</b> | 1568.871        | A[28] |
| K  | 15 | 770.961         | 1541.866        | <b>1533.857</b> | <b>1534.360</b> | 1533.351        | K[27] |
| S  | 16 | <b>814.477</b>  | 1477.818        | 1469.809        | 1470.313        | 1469.305        | S[26] |
| R  | 17 | <b>892.527</b>  | 1434.302        | <b>1426.293</b> | <b>1426.797</b> | 1425.789        | R[25] |
| S  | 18 | <b>936.043</b>  | 1369.263        | 1361.253        | <b>1348.746</b> | 1347.739        | S[24] |
| S  | 19 | 999.559         | <b>1312.736</b> | 1304.726        | <b>1305.230</b> | 1304.223        | S[23] |
| R  | 20 | <b>1057.610</b> | 1269.220        | 1261.210        | <b>1261.714</b> | 1260.707        | R[22] |
| A  | 21 | 1093.128        | 1191.169        | <b>1183.160</b> | <b>1183.664</b> | 1182.656        | A[21] |
| G  | 22 | 1121.639        | 1135.051        | 1147.041        | 1148.045        | 1147.137        | G[20] |
| L  | 23 | 1179.148        | 1119.140        | 1131.130        | 1131.935        | 1131.027        | L[19] |
| G  | 24 | <b>1242.211</b> | <b>1070.598</b> | 1062.589        | 1063.093        | 1062.085        | G[18] |
| F  | 25 | 1315.745        | 1005.599        | <b>998.559</b>  | <b>999.063</b>  | 998.055         | F[17] |
| F  | 26 | <b>1364.271</b> | 933.034         | 925.025         | 925.529         | 924.521         | F[16] |
| V  | 27 | <b>1413.805</b> | 884.500         | 876.490         | 877.003         | 875.995         | V[15] |
| G  | 28 | 1442.216        | 834.974         | 826.965         | 827.468         | 826.461         | G[14] |
| R  | 29 | 1500.269        | 808.483         | 800.474         | 798.958         | 797.950         | R[13] |
| V  | 30 | <b>1569.901</b> | 729.413         | 720.403         | 720.907         | 719.899         | V[12] |
| H  | 31 | <b>1638.430</b> | 678.878         | 670.869         | <b>671.373</b>  | 670.365         | H[11] |
| R  | 32 | 1716.481        | 610.349         | 602.340         | 602.843         | 601.835         | R[10] |
| L  | 33 | 1773.023        | 532.289         | 524.280         | 524.783         | 523.785         | L[9]  |
| L  | 34 | <b>1829.565</b> | 478.756         | 469.747         | 468.251         | 467.243         | L[8]  |
| R  | 35 | 1907.618        | 419.214         | 411.205         | 411.709         | 410.701         | R[7]  |
| K  | 36 | 1971.663        | 341.164         | 333.154         | 333.658         | 332.650         | K[6]  |
| G  | 37 | 2000.174        | 277.116         | 269.107         | 269.611         | 268.603         | G[5]  |
| N  | 38 | 2057.195        | 248.606         | 240.596         | 241.100         | 240.092         | N[4]  |
| V  | 39 | 2138.727        | 181.564         | 183.575         | 184.079         | 183.071         | V[3]  |
| A  | 40 | 2114.245        | 110.026         | 102.043         | 102.547         | 101.539         | A[2]  |
| E  | 41 | 2238.767        | 74.534          | 66.524          | 67.028          | 66.021          | E[1]  |

# sp | Q6GSS7 | H2A2A\_MOUSE

[Acetyl]SGRGKQGGKARAKAKSRSSRAGLQFPVGRVHRLLRKGNAYE

- ▶ fragmentation table for charge state 3+
- ▶ specType=etd
- ▶ score=64.15
- ▶ F113278.dat
- ▶ query=q70095.p1
- ▶ precursor=896.309700
- ▶ chargePrecursor=5
- ▶ itol=0.5

| AA   | c               | y               | z+1             | z+2             | z              | AA   |
|------|-----------------|-----------------|-----------------|-----------------|----------------|------|
| S 1  | 49.697          | <b>1493.175</b> | 1497.835        | 0.672           | 1497.499       | S 41 |
| G 2  | 68.704          | 1450.161        | 1444.821        | 0.672           | 1444.485       | G 40 |
| R 3  | 130.738         | 1431.154        | 1425.814        | <b>1426.150</b> | 1429.478       | R 39 |
| G 4  | 139.745         | 1379.120        | 1373.780        | 1374.116        | 1373.444       | G 38 |
| K 5  | 182.443         | 1360.113        | 1354.773        | <b>1355.109</b> | 1354.437       | K 37 |
| Q 6  | 235.330         | 1337.414        | 1332.676        | <b>1312.411</b> | 1331.790       | Q 36 |
| G 7  | 244.137         | 1274.725        | <b>1269.389</b> | <b>1269.725</b> | 1269.085       | G 35 |
| G 8  | 283.144         | 1255.721        | 1250.381        | <b>1250.717</b> | 1250.045       | G 34 |
| K 9  | 306.842         | 1236.714        | <b>1231.374</b> | <b>1231.710</b> | 1231.038       | K 33 |
| A 10 | 329.521         | 1194.010        | 1188.676        | 1189.012        | 1188.340       | A 32 |
| R 11 | 381.555         | 1170.336        | <b>1164.997</b> | <b>1165.333</b> | 1164.661       | R 31 |
| A 12 | 409.234         | 1138.303        | 1132.967        | 1133.299        | 1132.627       | A 30 |
| R 13 | 447.932         | 1094.628        | 1089.284        | 1089.620        | 1088.948       | R 29 |
| A 14 | 471.611         | 1051.925        | <b>1046.586</b> | <b>1046.922</b> | 1046.250       | A 28 |
| K 15 | 514.310         | 1028.246        | 1022.907        | 1023.243        | 1022.571       | K 27 |
| S 16 | 543.320         | <b>985.548</b>  | <b>980.208</b>  | <b>980.544</b>  | <b>979.873</b> | S 26 |
| R 17 | 595.354         | 956.517         | 951.176         | 951.514         | 950.842        | R 25 |
| S 18 | 624.365         | 924.509         | 919.164         | 919.500         | 918.828        | S 24 |
| S 19 | 653.375         | 875.493         | 870.153         | 870.489         | 869.817        | S 23 |
| R 20 | 705.409         | 846.482         | 841.143         | 841.479         | 840.807        | R 22 |
| A 21 | 729.088         | 794.449         | 789.109         | 789.445         | 788.773        | A 21 |
| G 22 | 748.095         | 770.770         | 765.430         | 765.766         | 765.094        | G 20 |
| L 23 | 785.730         | 751.762         | 746.423         | 746.759         | 746.087        | L 19 |
| Q 24 | 828.478         | 714.056         | 708.716         | 709.054         | 708.382        | Q 19 |
| F 25 | 877.409         | <b>671.382</b>  | 666.042         | 666.378         | 665.706        | F 17 |
| F 26 | <b>909.850</b>  | 622.359         | 617.019         | 617.355         | 616.683        | F 16 |
| V 27 | <b>942.873</b>  | 590.008         | 584.668         | 585.004         | 584.332        | V 15 |
| G 28 | <b>961.880</b>  | 556.985         | 551.645         | 551.981         | 551.309        | G 14 |
| V 29 | 1013.814        | 537.978         | 532.638         | 532.974         | 532.302        | V 13 |
| V 30 | <b>1046.836</b> | 489.944         | 484.604         | 484.941         | 484.269        | V 12 |
| H 31 | 1092.623        | 452.921         | 447.582         | 447.918         | 447.246        | H 11 |
| R 32 | 1144.656        | 407.235         | 401.895         | 402.231         | 401.560        | R 10 |
| L 33 | 1182.351        | 355.201         | 349.862         | 350.198         | 349.526        | L 9  |
| L 34 | <b>1220.646</b> | 317.507         | 312.167         | 312.503         | 311.831        | L 8  |
| R 35 | 1272.679        | 279.812         | 274.472         | 274.808         | 274.136        | R 7  |
| R 36 | 1314.778        | 227.778         | 222.438         | 222.775         | 222.103        | R 6  |
| G 37 | 1333.785        | 185.880         | 179.740         | 180.076         | 179.404        | G 5  |
| N 38 | 1371.799        | 166.073         | 160.733         | 161.069         | 160.397        | N 4  |
| V 39 | <b>1426.154</b> | 128.058         | 122.719         | 123.055         | 122.383        | V 3  |
| A 40 | 1449.831        | 73.704          | 68.364          | 68.700          | 68.028         | A 2  |
| E 41 | 1492.287        | 50.025          | 44.685          | 45.021          | 44.349         | E 1  |

# sp | Q6GSS7 | H2A2A\_MOUSE

[Acetyl]SGRGKQGGKARAKAKSRSSRAGLQFPVGRVHRLLRKGNAYE

- ▶ fragmentation table for charge state 4+
- ▶ specType=etd
- ▶ score=64.15
- ▶ F113278.dat
- ▶ query=q70095.p1
- ▶ precursor=896.309700
- ▶ chargePrecursor=5
- ▶ itol=0.5

| AA   | c               | y              | z+1             | z+2             | z               | AA   |
|------|-----------------|----------------|-----------------|-----------------|-----------------|------|
| S 1  | 57.525          | 1120.133       | <b>1116.120</b> | 0.755           | <b>1115.876</b> | S 41 |
| G 2  | 51.780          | 1067.672       | <b>1063.868</b> | 0.755           | 1063.616        | G 40 |
| R 3  | 90.805          | 1073.617       | 1069.612        | <b>1069.864</b> | 1069.309        | R 39 |
| G 4  | 105.061         | 1034.992       | 1030.987        | 1030.839        | 1030.339        | G 38 |
| K 5  | 137.084         | 1020.136       | 1016.132        | 1016.584        | 1016.080        | K 37 |
| Q 6  | 169.009         | 988.313        | 984.308         | 984.800         | 984.295         | Q 36 |
| G 7  | 353.354         | 958.288        | 952.283         | 952.545         | 952.041         | G 35 |
| G 8  | 197.810         | 942.043        | 938.038         | 938.290         | 937.788         | G 34 |
| K 9  | 229.633         | 927.787        | 923.783         | 924.034         | 923.531         | K 33 |
| A 10 | 247.393         | 895.763        | 891.759         | 892.011         | 891.507         | A 32 |
| R 11 | 286.418         | 878.004        | 874.000         | 874.251         | 873.746         | R 31 |
| A 12 | 304.177         | 838.978        | 834.974         | 835.226         | 834.722         | A 30 |
| R 13 | 336.201         | 821.220        | 817.215         | 817.467         | 816.963         | R 29 |
| A 14 | 353.960         | 789.196        | 785.191         | 785.443         | 784.939         | A 28 |
| K 15 | 389.984         | <b>771.437</b> | 767.432         | 767.684         | 767.180         | K 27 |
| S 16 | 407.742         | 739.413        | 735.408         | 735.660         | 735.156         | S 26 |
| R 17 | 446.767         | 717.655        | 713.650         | 713.902         | 713.398         | R 25 |
| S 18 | 468.528         | 678.630        | 674.625         | 674.877         | 674.373         | S 24 |
| S 19 | 490.283         | 656.872        | 652.867         | 653.119         | 652.615         | S 23 |
| R 20 | 529.309         | 635.114        | 631.109         | 631.361         | 630.857         | R 22 |
| A 21 | 547.068         | 596.088        | 592.084         | 592.336         | 591.832         | A 21 |
| G 22 | 561.323         | 578.329        | 574.324         | 574.576         | 574.072         | G 20 |
| L 23 | 589.334         | 604.074        | 600.069         | 600.321         | 599.817         | L 19 |
| Q 24 | 621.609         | 535.803        | 531.798         | 532.050         | 531.546         | Q 19 |
| F 25 | 658.376         | 503.789        | 499.784         | 500.036         | 499.531         | F 17 |
| P 26 | 682.639         | 467.021        | 463.016         | 463.268         | 462.764         | P 16 |
| V 27 | <b>707.406</b>  | 442.759        | 438.753         | 439.005         | 438.501         | V 15 |
| G 28 | 721.662         | 417.991        | 413.986         | 414.238         | 413.734         | G 14 |
| D 29 | 760.687         | 403.739        | 399.734         | 399.986         | 399.482         | D 13 |
| V 30 | 785.454         | 394.710        | <b>366.705</b>  | 366.957         | <b>360.453</b>  | V 12 |
| H 31 | 819.719         | 339.943        | 335.938         | 336.190         | 335.686         | H 11 |
| R 32 | 858.744         | 305.678        | 301.673         | 301.925         | 301.421         | R 10 |
| L 33 | 887.015         | 266.653        | 262.648         | 262.900         | 262.396         | L 9  |
| L 34 | <b>915.286</b>  | 238.382        | 234.377         | 234.629         | 234.125         | L 8  |
| R 35 | 954.311         | 210.114        | 206.109         | 206.361         | 205.857         | R 7  |
| R 36 | <b>986.335</b>  | 171.088        | 167.083         | 167.335         | 166.830         | R 6  |
| G 37 | <b>1000.590</b> | 139.062        | 135.057         | 135.309         | 134.805         | G 5  |
| N 38 | <b>1029.101</b> | 124.806        | 120.801         | 121.054         | 120.550         | N 4  |
| V 39 | <b>1069.867</b> | 96.290         | 92.281          | 92.543          | 92.039          | V 3  |
| A 40 | 1087.626        | 55.530         | 51.525          | 51.777          | 51.273          | A 2  |
| E 41 | 1119.387        | 37.771         | 33.766          | 34.018          | 33.514          | E 1  |





# sp | Q6GSS7 | H2A2A\_MOUSE

[Acetyl]SGRGKQGGKARAKAKSRSSRAGLQFPVGRVHRLLRKGN~~YAE~~

- ▶ fragmentation table for charge state 1+
- ▶ specType=etd
- ▶ score=52.52
- ▶ F113278.dat
- ▶ query=q70100.p1
- ▶ precursor=747.093040
- ▶ chargePrecursor=6
- ▶ itol=0.5

| AA | c  | y               | z+1      | z+2             | z               | AA             |       |
|----|----|-----------------|----------|-----------------|-----------------|----------------|-------|
| S  | 1  | 147.076         | 4477.515 | 4481.491        | 0.000           | 4460.481       | S[41] |
| G  | 2  | 304.098         | 4348.467 | 4332.440        | 0.000           | 4331.441       | G[40] |
| R  | 3  | <b>360.199</b>  | 4291.446 | 4275.427        | 4276.435        | 4274.419       | R[39] |
| G  | 4  | <b>417.270</b>  | 4135.345 | 4119.326        | 4120.334        | 4118.319       | G[38] |
| K  | 5  | <b>545.315</b>  | 4078.323 | 4062.305        | 4063.313        | 4061.297       | K[37] |
| Q  | 6  | <b>673.374</b>  | 3950.228 | 3934.210        | 3935.218        | 3933.202       | Q[36] |
| G  | 7  | <b>730.395</b>  | 3822.170 | 3806.151        | 3807.159        | 3805.143       | G[35] |
| G  | 8  | 787.417         | 3765.148 | 3749.130        | 3750.138        | 3748.122       | G[34] |
| K  | 9  | <b>915.512</b>  | 3708.127 | 3692.108        | 3693.116        | 3691.100       | K[33] |
| A  | 10 | <b>986.549</b>  | 3580.032 | 3564.013        | 3565.021        | 3563.005       | A[32] |
| R  | 11 | 1142.050        | 3528.995 | 3492.975        | 3493.984        | 3491.968       | R[31] |
| A  | 12 | 1213.007        | 3352.984 | 3336.975        | 3337.983        | 3335.967       | A[30] |
| R  | 13 | <b>1341.782</b> | 3281.957 | 3265.938        | 3266.946        | 3264.930       | R[29] |
| A  | 14 | 1412.819        | 3153.762 | 3137.743        | 3138.751        | 3136.735       | A[28] |
| K  | 15 | 1540.914        | 3082.725 | 3066.706        | 3067.714        | 3065.698       | K[27] |
| S  | 16 | 1627.946        | 2954.630 | 2938.611        | 2939.619        | 2937.603       | S[26] |
| R  | 17 | 1784.047        | 2887.598 | 2851.579        | 2852.587        | 2850.571       | R[25] |
| S  | 18 | 1871.079        | 2711.496 | 2695.477        | 2696.486        | 2694.470       | S[24] |
| S  | 19 | 1958.111        | 2624.464 | 2608.446        | 2609.454        | 2607.438       | S[23] |
| R  | 20 | 2114.213        | 2537.432 | 2521.414        | 2522.422        | 2520.406       | R[22] |
| A  | 21 | 2185.250        | 2381.331 | 2365.313        | 2366.320        | 2364.305       | A[21] |
| G  | 22 | 2242.271        | 2310.294 | 2294.275        | 2295.283        | 2293.268       | G[20] |
| L  | 23 | 2355.355        | 2253.273 | 2237.254        | 2238.262        | 2236.246       | L[19] |
| Q  | 24 | 2483.414        | 2140.189 | 2124.170        | 2125.178        | 2123.162       | Q[18] |
| F  | 25 | 2630.482        | 2022.130 | 1996.111        | <b>1997.119</b> | 1995.104       | F[17] |
| P  | 26 | 2727.535        | 1895.062 | 1849.043        | 1850.051        | 1848.035       | P[16] |
| V  | 27 | 2826.603        | 1768.009 | 1751.990        | 1752.998        | 1750.982       | V[15] |
| G  | 28 | 2883.625        | 1698.940 | 1652.922        | 1653.930        | 1651.914       | G[14] |
| R  | 29 | 3039.726        | 1611.919 | 1595.900        | <b>1596.908</b> | 1594.892       | R[13] |
| V  | 30 | 3138.784        | 1495.818 | 1439.799        | 1440.807        | 1438.791       | V[12] |
| H  | 31 | 3275.853        | 1356.740 | 1340.721        | <b>1341.729</b> | 1339.723       | H[11] |
| R  | 32 | 3431.954        | 1219.691 | 1203.672        | <b>1204.680</b> | 1202.664       | R[10] |
| L  | 33 | 3545.038        | 1063.589 | <b>1047.571</b> | 1048.579        | 1046.563       | L[9]  |
| L  | 34 | 3658.123        | 950.505  | 934.487         | 935.495         | 933.479        | L[8]  |
| R  | 35 | 3814.224        | 837.421  | 821.403         | <b>822.410</b>  | <b>820.395</b> | R[7]  |
| K  | 36 | 3932.319        | 681.300  | 665.282         | 666.290         | 664.274        | K[6]  |
| G  | 37 | 3999.340        | 553.225  | 537.207         | 538.214         | 536.199        | G[5]  |
| N  | 38 | 4113.383        | 496.204  | 480.185         | 481.193         | 479.177        | N[4]  |
| Y  | 39 | 4276.446        | 382.161  | 366.142         | 367.150         | 365.134        | Y[3]  |
| A  | 40 | 4347.483        | 219.098  | 203.079         | 204.087         | 202.071        | A[2]  |
| E  | 41 | 4476.526        | 148.060  | 132.042         | 133.050         | 131.034        | E[1]  |

# sp | Q6GSS7 | H2A2A\_MOUSE

[Acetyl]SGRGKQGGKARAKAKSRSSRAGLQFPVGRVHRLLRKGN~~YAE~~

- ▶ fragmentation table for charge state 2+
- ▶ specType=etd
- ▶ score=52.52
- ▶ F113278.dat
- ▶ query=q70100.p1
- ▶ precursor=747.093040
- ▶ chargePrecursor=6
- ▶ itol=0.5

| AA | c  | w               | #s1             | #s2             | z               | AA              |       |
|----|----|-----------------|-----------------|-----------------|-----------------|-----------------|-------|
| S  | 1  | 74.062          | 2239.259        | 2231.260        | 8.804           | 2230.147        | S[41] |
| G  | 2  | 102.553         | 2174.737        | 2266.726        | 0.504           | 2166.254        | G[40] |
| R  | 3  | 180.603         | 2146.227        | 2138.217        | 2138.921        | 2137.713        | R[39] |
| G  | 4  | 209.114         | 2068.176        | 2060.167        | 2060.671        | 2059.663        | G[38] |
| K  | 5  | 273.161         | 2039.665        | 2031.656        | 2032.160        | 2031.152        | K[37] |
| G  | 6  | 327.194         | 1975.618        | 1967.609        | <b>1968.112</b> | 1967.105        | G[36] |
| G  | 7  | 385.704         | 1911.569        | 1903.579        | 1904.083        | 1903.075        | G[35] |
| G  | 8  | 394.212         | 1883.078        | 1875.088        | 1875.592        | 1874.585        | G[34] |
| K  | 9  | 458.260         | 1854.567        | <b>1846.558</b> | <b>1847.062</b> | 1846.054        | K[33] |
| A  | 10 | 493.778         | 1790.520        | 1782.510        | 1783.014        | 1782.006        | A[32] |
| R  | 11 | <b>571.829</b>  | 1735.001        | 1746.992        | 1747.496        | 1746.488        | R[31] |
| A  | 12 | <b>607.347</b>  | 1678.981        | 1669.981        | 1669.486        | 1668.478        | A[30] |
| K  | 13 | <b>671.395</b>  | 1643.433        | 1633.433        | <b>1633.927</b> | 1632.919        | K[29] |
| A  | 14 | <b>706.913</b>  | 1577.984        | <b>1569.975</b> | <b>1569.879</b> | 1568.871        | A[28] |
| K  | 15 | <b>770.961</b>  | 1541.966        | <b>1533.857</b> | <b>1534.360</b> | 1533.351        | K[27] |
| S  | 16 | <b>814.477</b>  | 1477.818        | 1469.809        | 1470.313        | <b>1469.305</b> | S[26] |
| R  | 17 | <b>892.527</b>  | 1434.802        | 1425.792        | <b>1426.797</b> | 1425.789        | R[25] |
| S  | 18 | 938.613         | 1369.763        | <b>1348.243</b> | <b>1348.746</b> | 1347.739        | S[24] |
| S  | 19 | 998.559         | <b>1312.736</b> | 1304.726        | <b>1305.230</b> | 1304.223        | S[23] |
| R  | 20 | <b>1057.610</b> | <b>1269.220</b> | <b>1261.210</b> | <b>1261.714</b> | 1260.707        | R[22] |
| A  | 21 | <b>1093.128</b> | 1191.169        | <b>1183.160</b> | <b>1183.664</b> | 1182.656        | A[21] |
| G  | 22 | <b>1121.639</b> | 1135.051        | 1147.041        | 1148.546        | 1147.537        | G[20] |
| L  | 23 | <b>1178.161</b> | 1129.140        | 1119.140        | 1119.645        | 1118.637        | L[19] |
| Q  | 24 | <b>1242.211</b> | <b>1070.598</b> | <b>1062.589</b> | <b>1063.093</b> | 1062.085        | Q[18] |
| F  | 25 | 1315.745        | 1008.599        | <b>998.559</b>  | <b>999.063</b>  | 998.055         | F[17] |
| F  | 26 | 1364.271        | 933.034         | 925.025         | 925.529         | 924.521         | F[16] |
| V  | 27 | <b>1413.805</b> | <b>884.508</b>  | 876.499         | 877.003         | 875.995         | V[15] |
| G  | 28 | <b>1442.316</b> | 834.974         | 826.965         | 827.469         | 826.461         | G[14] |
| R  | 29 | 1528.858        | 808.483         | <b>798.454</b>  | <b>798.958</b>  | 797.950         | R[13] |
| V  | 30 | <b>1569.901</b> | 728.413         | 720.403         | 720.907         | 719.899         | V[12] |
| H  | 31 | 1638.430        | 678.878         | 670.869         | <b>671.373</b>  | 670.365         | H[11] |
| R  | 32 | 1716.461        | 610.349         | 602.340         | 602.843         | 601.835         | R[10] |
| L  | 33 | 1773.023        | 532.299         | 524.289         | 524.793         | 523.785         | L[9]  |
| L  | 34 | 1829.568        | 478.756         | 469.747         | 469.251         | 468.243         | L[8]  |
| R  | 35 | 1907.615        | 419.214         | 411.205         | 411.709         | 410.701         | R[7]  |
| K  | 36 | 1971.663        | 341.164         | 333.154         | 333.658         | 332.650         | K[6]  |
| G  | 37 | 2050.174        | 277.116         | 269.107         | 269.611         | 268.603         | G[5]  |
| N  | 38 | 2057.195        | 248.606         | 240.596         | 241.100         | 240.092         | N[4]  |
| V  | 39 | 2136.727        | 181.564         | 183.575         | 184.079         | 183.071         | V[3]  |
| A  | 40 | 2114.265        | 110.026         | 102.016         | 102.520         | 101.512         | A[2]  |
| E  | 41 | 2238.767        | 74.534          | 66.524          | 67.028          | 66.021          | E[1]  |

# sp | Q6GSS7 | H2A2A\_MOUSE

[Acetyl]SGRGKQGGKARAKAKSRSSRAGLQFPVGRVHLLRKGN~~YAE~~

- ▶ fragmentation table for charge state 3+
- ▶ specType=etd
- ▶ score=52.52
- ▶ F113278.dat
- ▶ query=q70100.p1
- ▶ precursor=747.093040
- ▶ chargePrecursor=6
- ▶ itol=0.5

| AA | c  | y               | s+1             | s+2             | z               | AA              |       |
|----|----|-----------------|-----------------|-----------------|-----------------|-----------------|-------|
| S  | 1  | 48.607          | 1492.178        | <b>1487.835</b> | 0.872           | 3487.407        | S[41] |
| G  | 2  | 66.704          | 1450.181        | 1444.521        | 0.672           | 1444.485        | G[40] |
| R  | 3  | 130.718         | <b>1431.154</b> | 1425.814        | 1426.150        | 1425.478        | R[39] |
| G  | 4  | 139.745         | 1379.120        | <b>1373.780</b> | <b>1374.116</b> | <b>1373.444</b> | G[38] |
| K  | 5  | 182.443         | 1360.113        | 1354.773        | <b>1355.109</b> | 1354.437        | K[37] |
| G  | 6  | 225.130         | 1317.444        | 1312.012        | <b>1312.411</b> | 1311.730        | G[36] |
| G  | 7  | 244.137         | 1274.725        | <b>1269.389</b> | <b>1268.725</b> | 1269.055        | G[35] |
| G  | 8  | 263.144         | 1235.721        | <b>1250.381</b> | <b>1250.717</b> | 1250.045        | G[34] |
| K  | 9  | 305.642         | 1236.714        | 1231.374        | 1231.710        | 1231.038        | K[33] |
| A  | 10 | 329.521         | 1194.016        | <b>1188.676</b> | <b>1189.012</b> | 1188.340        | A[32] |
| R  | 11 | 381.555         | 1170.336        | 1164.987        | <b>1165.333</b> | 1164.661        | R[31] |
| A  | 12 | 405.234         | 1138.303        | 1133.963        | 1133.289        | 1132.627        | A[30] |
| R  | 13 | 447.932         | 1094.624        | 1089.284        | 1089.620        | 1088.942        | R[29] |
| A  | 14 | 471.611         | 1051.925        | 1046.585        | <b>1046.922</b> | 1046.250        | A[28] |
| K  | 15 | 514.310         | 1028.246        | 1022.907        | <b>1023.243</b> | 1022.571        | K[27] |
| S  | 16 | 543.320         | 985.548         | <b>980.208</b>  | <b>980.544</b>  | <b>979.873</b>  | S[26] |
| R  | 17 | 585.254         | 956.517         | 951.178         | <b>951.534</b>  | 950.862         | R[25] |
| S  | 18 | 624.365         | 904.504         | 899.165         | 899.501         | 898.829         | S[24] |
| S  | 19 | 653.375         | 875.493         | 870.153         | <b>870.489</b>  | 869.817         | S[23] |
| R  | 20 | 705.409         | 846.482         | <b>841.143</b>  | <b>841.479</b>  | 840.807         | R[22] |
| A  | 21 | 729.088         | 794.449         | 789.109         | 789.445         | 788.773         | A[21] |
| G  | 22 | 748.095         | 770.770         | 765.430         | 765.766         | 765.094         | G[20] |
| L  | 23 | <b>783.790</b>  | 751.762         | 746.423         | 746.759         | 746.087         | L[19] |
| Q  | 24 | <b>828.476</b>  | 714.085         | 708.745         | 709.084         | 708.412         | Q[18] |
| F  | 25 | 877.499         | <b>671.382</b>  | 666.042         | 666.378         | 665.706         | F[17] |
| F  | 26 | 909.850         | 622.359         | 617.019         | 617.355         | 616.683         | F[16] |
| V  | 27 | <b>942.873</b>  | 590.006         | 584.666         | 585.004         | 584.332         | V[15] |
| G  | 28 | <b>961.880</b>  | 556.985         | 551.645         | 551.981         | 551.309         | G[14] |
| R  | 29 | 1013.814        | 519.918         | 514.578         | 514.914         | 514.242         | R[13] |
| V  | 30 | <b>1046.936</b> | 485.944         | 480.604         | 480.941         | 480.269         | V[12] |
| H  | 31 | <b>1092.623</b> | 452.921         | 447.581         | 447.918         | 447.246         | H[11] |
| R  | 32 | 1144.656        | 407.235         | 401.895         | 402.231         | 401.560         | R[10] |
| L  | 33 | 1182.351        | 355.201         | 349.862         | 350.198         | 349.526         | L[9]  |
| L  | 34 | 1230.666        | 319.509         | 314.169         | 314.505         | 313.833         | L[8]  |
| R  | 35 | 1272.019        | 278.812         | 273.472         | 273.808         | 273.136         | R[7]  |
| K  | 36 | 1314.778        | 227.778         | 222.438         | 222.775         | 222.103         | K[6]  |
| G  | 37 | 1331.785        | 185.880         | 179.740         | 180.076         | 179.404         | G[5]  |
| N  | 38 | 1371.799        | 146.873         | 140.733         | 141.069         | 140.397         | N[4]  |
| V  | 39 | 1426.154        | 128.098         | 122.719         | 123.055         | 122.383         | V[3]  |
| A  | 40 | 1469.813        | 83.304          | 78.384          | 78.720          | 78.048          | A[2]  |
| E  | 41 | 1492.847        | 50.025          | 44.635          | 45.021          | 44.349          | E[1]  |

# sp | Q6GSS7 | H2A2A\_MOUSE

[Acetyl]SGRGKQGGKARAKAKSRSSRAGLQFPVGRVHRLLRKGN~~YAE~~

- ▶ fragmentation table for charge state 4+
- ▶ specType=etd
- ▶ score=52.52
- ▶ F113278.dat
- ▶ query=q70100.p1
- ▶ precursor=747.093040
- ▶ chargePrecursor=6
- ▶ itol=0.5

| AA | c  | y               | #=1             | #=2             | #               | AA              |       |
|----|----|-----------------|-----------------|-----------------|-----------------|-----------------|-------|
| S  | 1  | 37.505          | <b>1120.133</b> | 1118.130        | 0.758           | 1115.371        | S[41] |
| G  | 2  | 51.780          | <b>1087.872</b> | <b>1083.868</b> | 0.795           | <b>1083.166</b> | G[40] |
| R  | 3  | 90.805          | <b>1073.617</b> | 1069.612        | <b>1069.804</b> | 1069.360        | R[39] |
| G  | 4  | 109.001         | 1034.502        | 1030.507        | <b>1030.839</b> | <b>1030.335</b> | G[38] |
| K  | 5  | 137.084         | 1020.336        | 1016.332        | <b>1016.584</b> | 1016.050        | K[37] |
| G  | 6  | 169.059         | 998.312         | <b>994.308</b>  | <b>994.560</b>  | <b>984.056</b>  | G[36] |
| G  | 7  | 193.254         | 956.298         | <b>952.293</b>  | <b>952.545</b>  | <b>952.041</b>  | G[35] |
| G  | 8  | 197.610         | 942.043         | <b>938.038</b>  | <b>938.290</b>  | 937.756         | G[34] |
| K  | 9  | 229.633         | 927.787         | 923.783         | 924.034         | 923.531         | K[33] |
| A  | 10 | 247.393         | 895.763         | 891.759         | 892.011         | 891.507         | A[32] |
| R  | 11 | 286.418         | 878.004         | 873.999         | 874.251         | 873.748         | R[31] |
| A  | 12 | 304.177         | 838.978         | 834.974         | 835.226         | 834.722         | A[30] |
| K  | 13 | 336.201         | 821.220         | 817.215         | 817.467         | 816.963         | K[29] |
| A  | 14 | 353.960         | 789.199         | 785.195         | 785.443         | 784.939         | A[28] |
| K  | 15 | 385.984         | <b>771.437</b>  | 767.432         | 767.684         | 767.180         | K[27] |
| S  | 16 | 407.742         | 739.413         | 735.408         | 735.660         | 735.156         | S[26] |
| R  | 17 | 446.767         | 717.955         | 713.950         | 714.202         | 713.698         | R[25] |
| S  | 18 | 468.526         | 678.930         | 674.925         | 675.177         | 674.673         | S[24] |
| S  | 19 | 490.283         | 656.972         | 652.967         | 653.219         | 652.715         | S[23] |
| R  | 20 | 529.309         | 635.114         | 631.109         | 631.361         | 630.857         | R[22] |
| A  | 21 | 547.068         | 596.089         | 592.084         | 592.336         | 591.832         | A[21] |
| G  | 22 | 561.323         | 578.329         | 574.324         | 574.576         | 574.072         | G[20] |
| L  | 23 | 589.344         | 564.074         | 560.069         | 560.321         | 559.817         | L[19] |
| Q  | 24 | 621.609         | 535.803         | 531.798         | 532.050         | 531.546         | Q[18] |
| F  | 25 | 658.376         | 503.789         | 499.783         | 500.035         | 499.531         | F[17] |
| F  | 26 | 662.639         | 467.021         | 463.016         | 463.268         | 462.764         | F[16] |
| V  | 27 | <b>707.406</b>  | 442.750         | 438.753         | 439.005         | 438.501         | V[15] |
| G  | 28 | 721.662         | 417.991         | 413.986         | 414.238         | 413.734         | G[14] |
| R  | 29 | 760.687         | 403.735         | 399.731         | 399.982         | 399.478         | R[13] |
| V  | 30 | 785.454         | 364.710         | <b>360.705</b>  | 360.957         | <b>360.453</b>  | V[12] |
| H  | 31 | 816.719         | 338.943         | 335.938         | 336.190         | 335.686         | H[11] |
| R  | 32 | <b>858.744</b>  | 305.678         | 301.673         | 301.925         | 301.421         | R[10] |
| L  | 33 | 887.015         | 266.653         | 262.648         | 262.900         | 262.396         | L[9]  |
| L  | 34 | <b>915.286</b>  | 238.362         | 234.357         | 234.609         | 234.105         | L[8]  |
| R  | 35 | 924.311         | 210.111         | 206.106         | 206.358         | 205.854         | R[7]  |
| K  | 36 | <b>966.335</b>  | 171.086         | 167.081         | 167.333         | 166.829         | K[6]  |
| G  | 37 | 1000.590        | 139.062         | 135.057         | 135.309         | 134.805         | G[5]  |
| N  | 38 | 1029.101        | 124.806         | 120.802         | 121.054         | 120.550         | N[4]  |
| Y  | 39 | <b>1069.867</b> | 96.296          | 92.291          | 92.543          | 92.039          | Y[3]  |
| A  | 40 | <b>1087.626</b> | 58.530          | 54.525          | 54.777          | 54.273          | A[2]  |
| E  | 41 | 1119.887        | 37.771          | 33.766          | 34.018          | 33.514          | E[1]  |

# sp | Q6GSS7 | H2A2A\_MOUSE

[Acetyl]SGRGKQGGKARAKAKSRSSRAGLQFPVGRVHLLRKGNYAE

- ▶ fragmentation table for charge state 5+
- ▶ specType=etd
- ▶ score=52.52
- ▶ F113278.dat
- ▶ query=q70100\_p1
- ▶ precursor=747.093040
- ▶ chargePrecursor=6
- ▶ itol=0.5

| AA    | c              | y              | z+1            | z#2            | z              | AA    |
|-------|----------------|----------------|----------------|----------------|----------------|-------|
| S[1]  | 30.221         | <b>896.308</b> | <b>893.104</b> | 0.806          | <b>892.903</b> | S[41] |
| G[2]  | 41.625         | <b>870.499</b> | 867.298        | 0.806          | 867.094        | G[40] |
| R[3]  | 72.846         | <b>859.095</b> | <b>855.891</b> | <b>856.093</b> | 855.690        | R[39] |
| G[4]  | 84.250         | 827.875        | 824.671        | 824.873        | 824.469        | G[38] |
| K[5]  | 109.869        | 816.471        | 813.267        | 813.468        | 813.065        | K[37] |
| Q[6]  | 135.481        | 790.952        | 787.648        | 787.849        | 787.446        | Q[36] |
| G[7]  | 146.885        | 765.240        | 762.036        | 762.238        | 761.834        | G[35] |
| G[8]  | 158.289        | 751.836        | 750.632        | 750.833        | 750.430        | G[34] |
| K[9]  | 183.908        | 742.431        | 739.227        | 739.429        | 739.026        | K[33] |
| A[10] | 198.116        | 716.812        | 713.608        | 713.810        | 713.407        | A[32] |
| R[11] | 229.336        | 702.605        | 699.401        | 699.603        | 699.199        | R[31] |
| A[12] | 243.543        | <b>671.385</b> | 668.181        | 668.382        | 667.979        | A[30] |
| K[13] | 269.162        | 657.177        | 653.973        | 654.175        | 653.772        | K[29] |
| A[14] | 283.370        | 631.558        | 628.354        | 628.556        | 628.153        | A[28] |
| K[15] | 308.989        | 617.351        | 614.147        | 614.349        | 613.945        | K[27] |
| S[16] | 326.395        | 591.732        | 588.528        | 588.730        | 588.326        | S[26] |
| R[17] | 357.615        | 574.325        | 571.122        | 571.323        | 570.920        | R[25] |
| S[18] | 375.022        | 548.105        | 539.901        | 540.103        | 539.700        | S[24] |
| S[19] | 392.428        | 525.689        | 522.485        | 522.687        | 522.283        | S[23] |
| R[20] | 423.648        | 508.282        | 505.079        | 505.280        | 504.877        | R[22] |
| A[21] | 437.856        | 477.072        | 473.868        | 474.070        | 473.667        | A[21] |
| G[22] | 449.260        | 462.865        | 459.661        | 459.862        | 459.459        | G[20] |
| L[23] | 471.877        | 451.460        | 448.257        | 448.458        | 448.055        | L[19] |
| Q[24] | 497.489        | 428.844        | 425.640        | 425.841        | 425.438        | Q[18] |
| F[25] | 528.902        | 403.232        | 400.028        | 400.230        | 399.827        | F[17] |
| P[26] | 546.313        | 373.816        | 370.614        | 370.816        | 370.413        | P[16] |
| V[27] | 565.126        | 354.408        | 351.204        | 351.405        | 351.002        | V[15] |
| G[28] | 577.531        | 334.994        | 331.790        | 331.992        | 331.589        | G[14] |
| R[29] | 608.751        | 323.190        | 319.986        | 320.187        | 319.784        | R[13] |
| V[30] | 628.565        | 291.969        | 288.766        | 288.967        | 288.564        | V[12] |
| H[31] | 658.976        | 272.156        | 268.952        | 269.154        | 268.750        | H[11] |
| R[32] | 687.197        | 244.744        | 241.540        | 241.742        | 241.339        | R[10] |
| L[33] | 709.814        | 213.524        | 210.320        | 210.522        | 210.118        | L[9]  |
| L[34] | 732.430        | 190.907        | 187.703        | 187.905        | 187.502        | L[8]  |
| R[35] | 763.651        | 168.290        | 165.086        | 165.288        | 164.885        | R[7]  |
| R[36] | 789.270        | 137.070        | 133.866        | 134.068        | 133.665        | R[6]  |
| G[37] | 830.074        | 111.451        | 108.247        | 108.449        | 108.046        | G[5]  |
| N[38] | 823.482        | 100.047        | 96.843         | 97.044         | 96.641         | N[4]  |
| V[39] | <b>856.095</b> | 77.238         | 74.034         | 74.236         | 73.833         | V[3]  |
| A[40] | <b>870.303</b> | 44.625         | 41.422         | 41.623         | 41.220         | A[2]  |
| E[41] | 896.111        | 30.418         | 27.214         | 27.416         | 27.013         | E[1]  |

# sp | Q6GSS7 | H2A2A\_MOUSE

[Acetyl]SGRGKQGGKARAKAKSRSSRAGLQFPVGRVHLLRKGNYAE

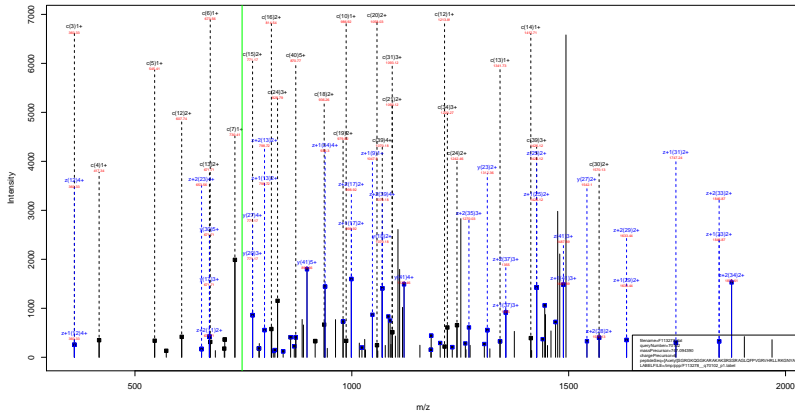

# sp | Q6GSS7 | H2A2A\_MOUSE

[Acetyl]SGRGKQGGKARAKAKSRSSRAGLQFPVGRVHRLLRKGN~~YAE~~

- ▶ fragmentation table for charge state 1+
- ▶ specType=etd
- ▶ score=46.92
- ▶ F113278.dat
- ▶ query=q70102.p1
- ▶ precursor=747.094390
- ▶ chargePrecursor=6
- ▶ itol=0.5

| AA | c  | y               | z+1      | z+2             | z               | AA             |       |
|----|----|-----------------|----------|-----------------|-----------------|----------------|-------|
| S  | 1  | 147.676         | 4477.515 | 4481.491        | 0.000           | 4460.481       | S[41] |
| G  | 2  | 304.098         | 4348.467 | 4332.440        | 0.000           | 4331.441       | G[40] |
| R  | 3  | <b>360.199</b>  | 4291.446 | 4275.427        | 4276.435        | 4274.419       | R[39] |
| G  | 4  | <b>417.270</b>  | 4135.345 | 4119.326        | 4120.334        | 4118.319       | G[38] |
| K  | 5  | <b>545.315</b>  | 4078.323 | 4062.305        | 4063.313        | 4061.291       | K[37] |
| Q  | 6  | <b>673.174</b>  | 3950.226 | 3934.210        | 3935.218        | 3933.202       | Q[36] |
| G  | 7  | <b>730.395</b>  | 3822.170 | 3806.151        | 3807.159        | 3805.143       | G[35] |
| G  | 8  | 787.417         | 3765.148 | 3749.130        | 3750.138        | 3748.122       | G[34] |
| K  | 9  | <b>915.512</b>  | 3708.127 | 3692.108        | 3693.116        | 3691.100       | K[33] |
| A  | 10 | <b>986.549</b>  | 3650.032 | 3634.013        | 3635.021        | 3633.005       | A[32] |
| R  | 11 | 1147.650        | 3598.995 | 3492.975        | 3493.984        | 3491.968       | R[31] |
| A  | 12 | <b>1213.687</b> | 3352.984 | 3336.975        | 3337.983        | 3335.967       | A[30] |
| R  | 13 | <b>1341.782</b> | 3281.957 | 3265.938        | 3266.946        | 3264.930       | R[29] |
| A  | 14 | <b>1412.819</b> | 3153.762 | 3137.743        | 3138.751        | 3136.735       | A[28] |
| K  | 15 | 1540.914        | 3082.725 | 3066.706        | 3067.714        | 3065.698       | K[27] |
| S  | 16 | 1627.946        | 2954.630 | 2938.611        | 2939.619        | 2937.603       | S[26] |
| R  | 17 | 1784.047        | 2887.598 | 2871.579        | 2872.587        | 2870.571       | R[25] |
| S  | 18 | 1871.079        | 2711.496 | 2695.477        | 2696.486        | 2694.470       | S[24] |
| S  | 19 | 1958.111        | 2624.464 | 2608.446        | 2609.454        | 2607.438       | S[23] |
| R  | 20 | 2114.213        | 2537.432 | 2521.414        | 2522.422        | 2520.406       | R[22] |
| A  | 21 | 2185.250        | 2381.331 | 2365.313        | 2366.320        | 2364.305       | A[21] |
| G  | 22 | 2242.271        | 2310.294 | 2294.275        | 2295.283        | 2293.268       | G[20] |
| L  | 23 | 2355.355        | 2253.273 | 2237.254        | 2238.262        | 2236.246       | L[19] |
| Q  | 24 | 2483.414        | 2140.189 | 2124.170        | 2125.178        | 2123.162       | Q[18] |
| F  | 25 | 2630.482        | 2022.130 | 1996.111        | 1997.119        | 1995.104       | F[17] |
| P  | 26 | 2727.538        | 1895.062 | 1849.043        | 1850.051        | 1848.035       | P[16] |
| V  | 27 | 2826.603        | 1768.009 | 1751.990        | 1752.998        | 1750.982       | V[15] |
| G  | 28 | 2883.625        | 1698.940 | 1652.922        | 1653.930        | 1651.914       | G[14] |
| R  | 29 | 3039.726        | 1611.919 | 1595.900        | 1596.908        | 1594.892       | R[13] |
| V  | 30 | 3138.764        | 1495.818 | <b>1439.799</b> | 1440.807        | 1438.791       | V[12] |
| H  | 31 | 3275.853        | 1356.740 | 1340.721        | <b>1341.739</b> | 1339.723       | H[11] |
| R  | 32 | 3431.954        | 1219.691 | <b>1203.672</b> | 1204.680        | 1202.664       | R[10] |
| L  | 33 | 3545.038        | 1063.589 | <b>1047.571</b> | 1048.579        | 1046.563       | L[9]  |
| L  | 34 | 3658.123        | 950.505  | 934.487         | 935.495         | 933.479        | L[8]  |
| R  | 35 | 3814.224        | 837.421  | 821.403         | <b>822.410</b>  | <b>820.395</b> | R[7]  |
| K  | 36 | 3932.319        | 683.300  | 667.282         | 668.290         | 666.274        | K[6]  |
| G  | 37 | 3999.340        | 553.225  | 537.207         | 538.214         | 536.199        | G[5]  |
| N  | 38 | 4113.383        | 496.204  | 480.185         | 481.193         | 479.177        | N[4]  |
| Y  | 39 | 4276.446        | 382.161  | 366.142         | 367.150         | 365.134        | Y[3]  |
| A  | 40 | 4347.483        | 219.098  | 203.079         | 204.087         | 202.071        | A[2]  |
| E  | 41 | 4476.526        | 148.060  | 132.042         | 133.050         | 131.034        | E[1]  |



# sp | Q6GSS7 | H2A2A\_MOUSE

[Acetyl]SGRGKQGGKARAKAKSRSSRAGLQFPVGRVHRLLRKGNAYE

- ▶ fragmentation table for charge state 2+
- ▶ specType=etd
- ▶ score=46.92
- ▶ F113278.dat
- ▶ query=q70102.p1
- ▶ precursor=747.094390
- ▶ chargePrecursor=6
- ▶ itol=0.5

| AA | c  | w               | #s1             | #s2             | z               | AA              |       |
|----|----|-----------------|-----------------|-----------------|-----------------|-----------------|-------|
| S  | 1  | 74.062          | 2239.259        | 2231.260        | 8.804           | 2239.147        | S[41] |
| G  | 2  | 102.553         | 2174.737        | 2266.726        | 0.504           | 2166.254        | G[40] |
| R  | 3  | 180.603         | 2146.227        | 2138.217        | 2138.921        | 2117.713        | R[39] |
| G  | 4  | 209.114         | 2068.176        | 2060.167        | 2060.671        | 2059.663        | G[38] |
| K  | 5  | 273.161         | 2039.665        | 2031.656        | 2032.160        | 2031.152        | K[37] |
| Q  | 6  | 327.194         | 1975.616        | 1967.606        | 1968.112        | 1967.105        | Q[36] |
| G  | 7  | 365.703         | 1911.569        | 1903.579        | 1904.083        | 1903.075        | G[35] |
| G  | 8  | 394.212         | 1883.078        | 1875.088        | <b>1875.572</b> | 1874.565        | G[34] |
| K  | 9  | 458.260         | 1854.567        | <b>1846.558</b> | <b>1847.062</b> | 1846.054        | K[33] |
| A  | 10 | 493.778         | 1790.520        | 1782.510        | 1783.014        | 1782.006        | A[32] |
| R  | 11 | <b>571.829</b>  | 1735.001        | <b>1746.992</b> | <b>1747.496</b> | 1746.488        | R[31] |
| A  | 12 | <b>607.347</b>  | 1668.963        | 1660.953        | 1661.456        | 1660.449        | A[30] |
| R  | 13 | <b>671.395</b>  | 1643.433        | <b>1633.423</b> | <b>1633.927</b> | 1632.919        | R[29] |
| A  | 14 | <b>706.913</b>  | 1577.384        | 1569.375        | <b>1569.879</b> | 1568.871        | A[28] |
| K  | 15 | <b>770.961</b>  | <b>1541.866</b> | 1533.857        | 1534.360        | 1533.353        | K[27] |
| S  | 16 | <b>814.477</b>  | 1477.818        | <b>1469.809</b> | 1470.313        | <b>1469.305</b> | S[26] |
| R  | 17 | <b>857.527</b>  | 1404.362        | <b>1426.293</b> | 1426.797        | <b>1425.789</b> | R[25] |
| S  | 18 | <b>936.043</b>  | 1356.263        | 1348.253        | 1348.756        | 1347.750        | S[24] |
| S  | 19 | <b>979.559</b>  | <b>1312.736</b> | 1304.726        | <b>1305.230</b> | 1304.223        | S[23] |
| R  | 20 | <b>1057.610</b> | 1269.220        | 1261.210        | <b>1261.714</b> | 1260.707        | R[22] |
| A  | 21 | <b>1093.128</b> | 1191.169        | <b>1183.160</b> | 1183.664        | <b>1182.656</b> | A[21] |
| G  | 22 | 1121.639        | 1135.651        | 1147.641        | 1148.145        | 1147.137        | G[20] |
| L  | 23 | 1178.183        | 1119.140        | 1119.133        | 1119.636        | 1118.629        | L[19] |
| Q  | 24 | <b>1242.211</b> | <b>1070.598</b> | 1062.589        | 1063.093        | 1062.085        | Q[18] |
| F  | 25 | 1315.745        | 1008.599        | <b>998.559</b>  | <b>999.063</b>  | 998.055         | F[17] |
| F  | 26 | 1364.271        | 933.034         | 925.025         | 925.529         | 924.521         | F[16] |
| V  | 27 | 1413.805        | 884.506         | 876.496         | 877.000         | 875.993         | V[15] |
| G  | 28 | 1462.316        | 834.974         | 826.964         | 827.468         | 826.461         | G[14] |
| R  | 29 | 1520.369        | 806.483         | <b>798.454</b>  | <b>798.958</b>  | 797.950         | R[13] |
| V  | 30 | <b>1569.901</b> | 729.413         | 720.403         | 720.907         | 719.899         | V[12] |
| H  | 31 | 1638.430        | 678.878         | 670.869         | <b>671.373</b>  | 670.365         | H[11] |
| R  | 32 | 1716.461        | 610.349         | 602.340         | 602.843         | 601.836         | R[10] |
| L  | 33 | 1773.023        | 532.299         | 524.289         | 524.793         | 523.785         | L[9]  |
| L  | 34 | 1829.968        | 478.756         | 469.747         | 469.251         | 468.243         | L[8]  |
| R  | 35 | 1907.615        | 419.214         | 411.205         | 411.709         | 410.701         | R[7]  |
| K  | 36 | 1971.663        | 341.164         | 333.154         | 333.658         | 332.650         | K[6]  |
| G  | 37 | 2000.174        | 277.116         | 269.107         | 269.611         | 268.603         | G[5]  |
| N  | 38 | 2057.195        | 248.606         | 240.596         | 241.100         | 240.092         | N[4]  |
| V  | 39 | 2136.727        | 181.564         | 183.575         | 184.079         | 183.071         | V[3]  |
| A  | 40 | 2114.265        | 110.026         | 102.043         | 102.547         | 101.539         | A[2]  |
| E  | 41 | 2238.767        | 74.534          | 66.524          | 67.028          | 66.021          | E[1]  |

# sp | Q6GSS7 | H2A2A\_MOUSE

[Acetyl]SGRGKQGGKARAKAKSRSSRAGLQFPVGRVHRLLRKGNAYE

- ▶ fragmentation table for charge state 3+
- ▶ specType=etd
- ▶ score=46.92
- ▶ F113278.dat
- ▶ query=q70102.p1
- ▶ precursor=747.094390
- ▶ chargePrecursor=6
- ▶ itol=0.5

| AA   | c               | y              | z+1             | z+2             | z               | AA   |
|------|-----------------|----------------|-----------------|-----------------|-----------------|------|
| S 1  | 49.697          | 1493.175       | <b>1487.835</b> | 0.672           | <b>1487.499</b> | G 41 |
| G 2  | 68.704          | 1450.161       | <b>1444.821</b> | 0.672           | <b>1444.485</b> | G 40 |
| R 3  | 130.738         | 1431.154       | <b>1425.814</b> | <b>1426.150</b> | 1425.478        | R 39 |
| G 4  | 139.745         | 1379.120       | 1373.780        | 1374.116        | 1373.444        | G 38 |
| K 5  | 182.443         | 1360.113       | <b>1354.773</b> | <b>1355.109</b> | 1354.437        | K 37 |
| Q 6  | 235.330         | 1317.014       | <b>1312.075</b> | <b>1312.411</b> | 1311.795        | Q 36 |
| G 7  | 244.137         | 1274.925       | 1268.885        | <b>1269.725</b> | 1269.055        | G 35 |
| G 8  | 263.144         | 1255.721       | 1250.381        | 1250.717        | 1250.045        | G 34 |
| K 9  | 305.842         | 1236.714       | <b>1231.374</b> | <b>1231.710</b> | 1231.038        | K 33 |
| A 10 | 329.521         | 1194.016       | 1188.676        | 1189.012        | 1188.340        | A 32 |
| R 11 | 381.555         | 1170.136       | 1164.997        | 1165.333        | 1164.661        | R 31 |
| A 12 | 409.234         | 1118.303       | 1112.963        | 1113.299        | 1112.623        | A 30 |
| R 13 | 447.932         | 1094.024       | 1089.254        | 1089.620        | 1088.944        | R 29 |
| A 14 | 471.611         | 1051.925       | 1046.585        | 1046.922        | 1046.250        | A 28 |
| K 15 | 514.310         | 1028.246       | <b>1022.907</b> | <b>1023.243</b> | 1022.571        | K 27 |
| S 16 | 543.320         | 985.548        | <b>980.208</b>  | 980.544         | <b>979.873</b>  | S 26 |
| R 17 | 595.254         | 956.537        | 951.198         | 951.534         | 950.862         | R 25 |
| S 18 | 624.305         | 904.504        | 899.164         | 899.500         | 898.825         | S 24 |
| S 19 | <b>653.375</b>  | 875.493        | 870.153         | <b>870.489</b>  | 869.817         | S 23 |
| R 20 | <b>705.409</b>  | 846.483        | <b>841.143</b>  | <b>841.479</b>  | 840.807         | R 22 |
| A 21 | 729.088         | 794.449        | 789.109         | 789.445         | 788.773         | A 21 |
| G 22 | 788.095         | <b>770.770</b> | 765.430         | 765.766         | 765.094         | G 20 |
| L 23 | <b>785.790</b>  | 731.762        | 746.423         | 746.759         | 746.087         | L 19 |
| Q 24 | <b>828.476</b>  | 714.058        | 708.720         | 709.054         | 708.382         | Q 19 |
| F 25 | 877.499         | <b>671.382</b> | 666.042         | 666.378         | 665.706         | F 17 |
| F 26 | 909.850         | 622.359        | 617.019         | 617.355         | 616.683         | F 16 |
| V 27 | 942.873         | 590.028        | 584.688         | 585.024         | 584.352         | V 15 |
| G 28 | 961.880         | 556.985        | 551.645         | 551.981         | 551.309         | G 14 |
| R 29 | 1013.014        | 437.878        | 432.538         | 432.874         | 432.202         | R 13 |
| R 30 | 1266.938        | 488.944        | 483.604         | 483.941         | 483.269         | R 12 |
| H 31 | <b>1092.623</b> | 452.921        | 447.582         | 447.918         | 447.246         | H 11 |
| R 32 | 1144.656        | 407.735        | 402.395         | 402.731         | 402.059         | R 10 |
| L 33 | <b>1182.351</b> | 355.201        | 349.862         | 350.198         | 349.526         | L 9  |
| L 34 | <b>1220.646</b> | 317.507        | 312.167         | 312.503         | 311.831         | L 8  |
| R 35 | 1272.079        | 279.812        | 274.472         | 274.808         | 274.136         | R 7  |
| R 36 | 1314.778        | 227.778        | 222.438         | 222.775         | 222.103         | R 6  |
| G 37 | 1333.785        | 185.080        | 179.740         | 180.076         | 179.404         | G 5  |
| N 38 | 1371.799        | 166.073        | 160.733         | 161.069         | 160.397         | N 4  |
| V 39 | <b>1426.154</b> | 128.058        | 122.719         | 123.055         | 122.383         | V 3  |
| A 40 | 1449.831        | 73.704         | 68.364          | 68.700          | 68.026          | A 2  |
| E 41 | 1492.287        | 30.025         | 44.685          | 45.021          | 44.347          | E 1  |

# sp | Q6GSS7 | H2A2A\_MOUSE

[Acetyl]SGRGKQGGKARAKAKSRSSRAGLQFPVGRVHRLLRKGN~~YAE~~

- ▶ fragmentation table for charge state 4+
- ▶ specType=etd
- ▶ score=46.92
- ▶ F113278.dat
- ▶ query=q70102.p1
- ▶ precursor=747.094390
- ▶ chargePrecursor=6
- ▶ itol=0.5

| AA   | c               | y               | z+1             | z+2             | z              | AA   |
|------|-----------------|-----------------|-----------------|-----------------|----------------|------|
| S 1  | 37.525          | <b>1120.133</b> | 1116.130        | 0.755           | 1115.870       | S 41 |
| G 2  | 51.700          | <b>1087.072</b> | <b>1083.868</b> | 0.755           | 1083.616       | G 40 |
| R 3  | 90.805          | 1073.617        | 1069.812        | <b>1069.864</b> | 1069.360       | R 39 |
| G 4  | 105.061         | 1034.592        | 1030.587        | 1030.839        | 1030.335       | G 38 |
| K 5  | 137.084         | 1020.336        | 1015.332        | 1016.584        | 1016.080       | K 37 |
| Q 6  | 189.009         | 989.313         | 988.308         | 984.500         | 984.000        | Q 36 |
| G 7  | 383.354         | 956.290         | 952.293         | 952.545         | 952.042        | G 35 |
| G 8  | 197.810         | 942.943         | <b>938.038</b>  | <b>938.290</b>  | 937.788        | G 34 |
| K 9  | 229.633         | 927.767         | 923.763         | 924.034         | 923.531        | K 33 |
| A 10 | 247.393         | 895.763         | 891.759         | 892.011         | 891.507        | A 32 |
| R 11 | 286.418         | 878.004         | 873.999         | 874.251         | 873.746        | R 31 |
| A 12 | 394.177         | 838.973         | 834.974         | 835.226         | 834.722        | A 30 |
| R 13 | 336.201         | 821.220         | 817.215         | 817.467         | 816.963        | R 29 |
| A 14 | 353.960         | 799.196         | 795.191         | <b>785.443</b>  | 784.939        | A 28 |
| K 15 | 385.984         | <b>771.437</b>  | 767.432         | 767.684         | 767.180        | K 27 |
| S 16 | 407.742         | 739.413         | 735.408         | 735.660         | 735.156        | S 26 |
| R 17 | 446.767         | 747.665         | 743.650         | 743.902         | 743.398        | R 25 |
| S 18 | 468.528         | 678.939         | 674.935         | 674.887         | 674.393        | S 24 |
| S 19 | 490.283         | 656.872         | 652.867         | <b>653.119</b>  | 652.615        | S 23 |
| R 20 | 529.309         | 635.114         | 631.109         | 631.361         | 630.857        | R 22 |
| A 21 | 547.668         | 596.088         | 592.084         | 592.336         | 591.832        | A 21 |
| G 22 | 561.323         | 578.329         | 574.324         | 574.576         | 574.072        | G 20 |
| L 23 | 589.304         | 564.074         | 560.069         | 560.321         | 559.817        | L 19 |
| Q 24 | 621.809         | 535.803         | 531.798         | 532.050         | 531.546        | Q 19 |
| F 25 | 658.376         | 503.788         | 499.783         | 500.035         | 499.531        | F 17 |
| P 26 | 682.639         | 467.021         | 463.016         | 463.268         | 462.764        | P 16 |
| V 27 | <b>707.406</b>  | 442.758         | 438.753         | 439.005         | 438.501        | V 15 |
| G 28 | 721.662         | 417.991         | 413.986         | 414.238         | 413.734        | G 14 |
| R 29 | 807.082         | 403.735         | 399.731         | 399.983         | 399.479        | R 13 |
| V 30 | <b>785.454</b>  | 384.710         | <b>360.705</b>  | 360.957         | <b>360.453</b> | V 12 |
| H 31 | <b>819.719</b>  | 339.943         | 335.938         | 336.190         | 335.686        | H 11 |
| R 32 | <b>858.744</b>  | 305.678         | 301.673         | 301.925         | 301.421        | R 10 |
| L 33 | 887.015         | 266.653         | 262.648         | 262.900         | 262.396        | L 9  |
| L 34 | <b>915.286</b>  | 238.382         | 234.377         | 234.629         | 234.125        | L 8  |
| R 35 | 954.311         | 210.111         | 206.106         | 206.358         | 205.854        | R 7  |
| K 36 | 986.335         | 171.085         | 167.081         | 167.333         | 166.829        | K 6  |
| G 37 | 1000.590        | 139.062         | 135.057         | 135.309         | 134.805        | G 5  |
| N 38 | 1029.101        | 124.806         | 120.802         | 121.054         | 120.550        | N 4  |
| V 39 | <b>1069.867</b> | 96.290          | 92.291          | 92.543          | 92.039         | V 3  |
| A 40 | 1087.626        | 55.530          | 51.525          | 51.777          | 51.273         | A 2  |
| E 41 | 1119.387        | 37.771          | 33.766          | 34.018          | 33.514         | E 1  |

# sp | Q6GSS7 | H2A2A\_MOUSE

[Acetyl]SGRGKQGGKARAKAKSRSSRAGLQFPVGRVHRLLRKGNAYE

- ▶ fragmentation table for charge state 5+
- ▶ specType=etd
- ▶ score=46.92
- ▶ F113278.dat
- ▶ query=q70102.p1
- ▶ precursor=747.094390
- ▶ chargePrecursor=6
- ▶ itol=0.5

| AA    | c              | y              | z+1            | z+2     | z              | AA    |
|-------|----------------|----------------|----------------|---------|----------------|-------|
| S[1]  | 80.221         | <b>896.308</b> | 893.104        | 0.806   | 892.903        | S[41] |
| G[2]  | 41.625         | <b>870.499</b> | <b>867.296</b> | 0.806   | <b>867.094</b> | G[40] |
| R[3]  | 72.846         | <b>859.095</b> | 855.891        | 856.093 | 855.690        | R[39] |
| G[4]  | 84.290         | 827.875        | 824.671        | 824.873 | 824.469        | G[38] |
| K[5]  | 109.859        | 816.471        | 813.267        | 813.468 | 813.065        | K[37] |
| Q[6]  | 135.481        | 790.852        | 787.648        | 787.849 | 787.446        | Q[36] |
| G[7]  | 146.885        | 765.240        | 762.036        | 762.238 | 761.834        | G[35] |
| G[8]  | 158.289        | 753.836        | 750.632        | 750.833 | 750.430        | G[34] |
| K[9]  | 183.908        | 742.431        | 739.227        | 739.429 | 739.026        | K[33] |
| A[10] | 198.116        | 716.812        | 713.608        | 713.810 | 713.407        | A[32] |
| R[11] | 229.336        | 702.605        | 699.401        | 699.603 | 699.199        | R[31] |
| A[12] | 243.543        | <b>671.385</b> | 668.181        | 668.382 | 667.979        | A[30] |
| K[13] | 269.162        | 657.177        | <b>653.973</b> | 654.175 | <b>653.772</b> | K[29] |
| A[14] | 283.370        | 631.558        | 628.354        | 628.556 | 628.153        | A[28] |
| K[15] | 308.989        | 617.351        | 614.147        | 614.349 | 613.945        | K[27] |
| S[16] | 326.395        | 591.732        | 588.528        | 588.730 | 588.326        | S[26] |
| R[17] | 357.615        | 574.325        | 571.122        | 571.323 | 570.920        | R[25] |
| S[18] | 375.022        | 543.105        | 539.901        | 540.103 | 539.700        | S[24] |
| S[19] | 392.428        | 528.889        | 522.498        | 522.697 | 522.393        | S[23] |
| R[20] | 423.648        | 508.292        | 505.089        | 505.290 | 504.887        | R[22] |
| A[21] | 437.856        | 477.072        | 473.868        | 474.070 | 473.667        | A[21] |
| G[22] | 449.260        | 462.865        | 459.661        | 459.862 | 459.459        | G[20] |
| L[23] | 471.877        | 451.460        | 448.256        | 448.458 | 448.055        | L[19] |
| Q[24] | 497.489        | 428.844        | 425.640        | 425.841 | 425.438        | Q[18] |
| F[25] | 526.902        | 403.232        | 400.028        | 400.230 | 399.827        | F[17] |
| P[26] | 546.313        | 373.818        | 370.614        | 370.816 | 370.413        | P[16] |
| V[27] | 566.126        | 354.408        | 351.204        | 351.405 | 351.002        | V[15] |
| V[28] | 577.531        | 334.595        | 331.390        | 331.592 | 331.189        | V[14] |
| K[29] | 608.751        | 323.190        | 319.985        | 320.187 | 319.784        | K[13] |
| V[30] | 628.565        | 291.965        | 288.760        | 288.962 | 288.564        | V[12] |
| H[31] | 655.976        | 272.155        | 268.952        | 269.154 | 268.750        | H[11] |
| R[32] | 687.197        | 244.744        | 241.540        | 241.742 | 241.339        | R[10] |
| L[33] | 709.814        | 213.524        | 210.320        | 210.522 | 210.118        | L[9]  |
| L[34] | 732.430        | 190.907        | 187.703        | 187.905 | 187.502        | L[8]  |
| R[35] | 763.651        | 168.290        | 165.086        | 165.288 | 164.885        | R[7]  |
| K[36] | 789.270        | 137.070        | 133.866        | 134.068 | 133.665        | K[6]  |
| G[37] | 800.674        | 111.451        | 108.247        | 108.449 | 108.046        | G[5]  |
| W[38] | 823.882        | 100.047        | 96.843         | 97.044  | 96.641         | W[4]  |
| L[39] | 856.098        | 77.234         | 74.034         | 74.236  | 73.833         | L[3]  |
| A[40] | <b>870.303</b> | 44.625         | 41.422         | 41.623  | 41.220         | A[2]  |
| E[41] | 896.111        | 30.418         | 27.214         | 27.416  | 27.013         | E[1]  |

# sp | Q8BFU2 | H2A3\_MOUSE

[Acetyl]SGRGKQGGKARAKAKSRSSRAGLQFPVGRVHLLRKGNYSE

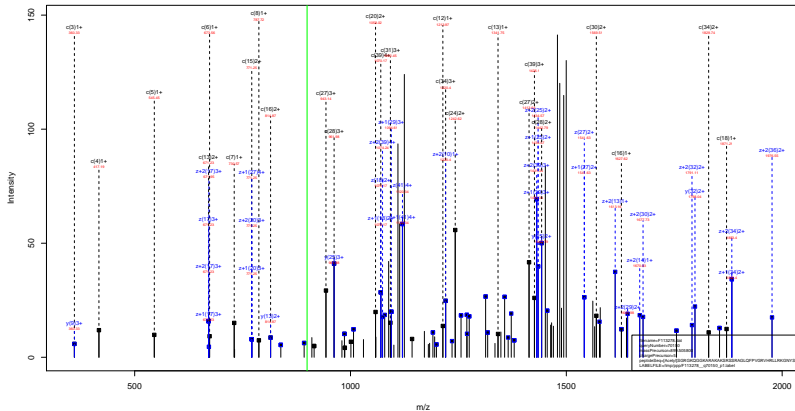

# sp | Q8BFU2 | H2A3\_MOUSE

[Acetyl]SGRGKQGGKARAKAKSRSSRAGLQFPVGRVHRLLRKGNYS

- ▶ fragmentation table for charge state 1+
- ▶ specType=etd
- ▶ score=60.46
- ▶ F113278.dat
- ▶ query=q70150.p1
- ▶ precursor=899.505800
- ▶ chargePrecursor=5
- ▶ itol=0.5

| AA   | c               | y               | z+1             | z+2             | z        | AA   |
|------|-----------------|-----------------|-----------------|-----------------|----------|------|
| S 1  | 147.076         | 4463.595        | 4477.486        | 0.000           | 4476.479 | S 41 |
| G 2  | 204.098         | 4384.462        | 4348.444        | 0.000           | 4347.436 | G 40 |
| R 3  | <b>360.199</b>  | 4307.441        | 4291.422        | 4392.430        | 4290.414 | R 39 |
| G 4  | <b>417.220</b>  | 4151.340        | 4135.321        | 4136.329        | 4134.313 | G 38 |
| K 5  | <b>545.315</b>  | 4094.318        | 4078.300        | 4079.307        | 4077.292 | K 37 |
| Q 6  | <b>673.374</b>  | 3999.272        | 3993.255        | 3953.272        | 3949.257 | Q 36 |
| G 7  | <b>730.395</b>  | 3838.195        | 3822.148        | 3823.154        | 3821.135 | G 35 |
| G 8  | <b>787.417</b>  | 3781.143        | 3765.125        | 3766.132        | 3764.111 | G 34 |
| K 9  | <b>915.512</b>  | 3724.122        | 3708.103        | 3709.111        | 3707.095 | K 33 |
| A 10 | <b>986.549</b>  | 3596.027        | 3580.008        | 3581.016        | 3579.000 | A 32 |
| R 11 | <b>1142.650</b> | 3524.990        | 3508.971        | 3509.979        | 3507.963 | R 31 |
| A 12 | <b>1213.687</b> | 3388.989        | 3382.970        | 3383.978        | 3381.962 | A 30 |
| R 13 | <b>1341.782</b> | 3297.952        | 3281.933        | 3282.941        | 3280.925 | R 29 |
| A 14 | 1412.819        | 3169.757        | 3153.738        | 3154.746        | 3152.730 | A 28 |
| K 15 | 1540.914        | 3098.719        | 3082.701        | 3083.709        | 3081.693 | K 27 |
| S 16 | <b>1627.946</b> | 2976.625        | 2954.606        | 2955.614        | 2953.598 | S 26 |
| R 17 | 1764.997        | 2883.562        | 2867.574        | 2868.582        | 2866.566 | R 25 |
| S 18 | <b>1871.079</b> | 2727.491        | 2711.473        | 2712.480        | 2710.465 | S 24 |
| S 19 | 1958.111        | 2640.459        | 2624.441        | 2625.448        | 2623.433 | S 23 |
| R 20 | 2114.213        | 2553.427        | 2537.409        | 2538.416        | 2536.401 | R 22 |
| A 21 | 2185.250        | 2397.326        | 2381.307        | 2382.315        | 2380.300 | A 21 |
| G 22 | 2242.271        | 2336.289        | 2310.270        | 2311.278        | 2309.263 | G 20 |
| L 23 | 2355.308        | 2299.268        | 2283.249        | 2284.257        | 2282.241 | L 19 |
| Q 24 | 2483.414        | 2156.184        | 2140.165        | 2141.173        | 2139.157 | Q 19 |
| F 25 | 2630.482        | 2028.125        | 2012.106        | 2013.114        | 2011.099 | F 17 |
| P 26 | 2727.535        | 1881.057        | 1865.038        | 1866.046        | 1864.030 | P 16 |
| V 27 | 2826.603        | 1784.004        | 1767.985        | 1768.993        | 1766.977 | V 15 |
| G 28 | 2883.625        | 1684.935        | 1668.917        | <b>1669.924</b> | 1667.909 | G 14 |
| R 29 | 3030.726        | <b>1627.914</b> | 1611.895        | <b>1612.903</b> | 1610.887 | R 13 |
| V 30 | 3138.784        |                 | <b>1455.794</b> | 1456.802        | 1454.786 | V 12 |
| H 31 | 3275.853        | <b>1372.744</b> | <b>1356.726</b> | 1357.734        | 1355.718 | H 11 |
| R 32 | 3431.954        | <b>1235.685</b> | 1219.667        | <b>1220.675</b> | 1218.659 | R 10 |
| L 33 | 3545.038        | <b>1079.584</b> | 1063.566        | 1064.573        | 1062.558 | L 9  |
| L 34 | 3658.121        | 966.500         | 950.482         | 951.489         | 949.474  | L 8  |
| T 35 | 3814.224        | 853.418         | 837.399         | <b>838.405</b>  | 836.390  | T 7  |
| K 36 | 3942.319        | 697.315         | 681.296         | 682.304         | 680.289  | K 6  |
| G 37 | 3999.340        | 549.220         | 533.201         | 534.209         | 532.194  | G 5  |
| N 38 | 4113.383        | 512.109         | 496.180         | 497.188         | 495.172  | N 4  |
| V 39 | 4276.446        | 398.159         | 382.137         | 383.145         | 381.129  | V 3  |
| S 40 | 4363.478        | 235.062         | 219.074         | 220.082         | 218.066  | S 2  |
| E 41 | 4492.521        | 148.060         | 132.042         | 133.050         | 131.034  | E 1  |

# sp | Q8BFU2 | H2A3\_MOUSE

[Acetyl]SGRGKQGGKARAKAKSRSSRAGLQFPVGRVHRLLRKGNYS

- ▶ fragmentation table for charge state 2+
- ▶ specType=etd
- ▶ score=60.46
- ▶ F113278.dat
- ▶ query=q70150.p1
- ▶ precursor=899.505800
- ▶ chargePrecursor=5
- ▶ itol=0.5

| AA | c  | y               | #s1             | #s2             | z               | AA              |       |
|----|----|-----------------|-----------------|-----------------|-----------------|-----------------|-------|
| S  | 1  | 74.062          | 2247.256        | 2229.257        | 0.804           | 2238.747        | S(1)  |
| G  | 2  | 102.553         | 2182.735        | 2174.726        | 0.504           | 2174.222        | G(2)  |
| R  | 3  | 180.603         | 2154.224        | 2146.215        | 2146.719        | 2145.711        | R(3)  |
| G  | 4  | 209.114         | 2076.174        | 2068.164        | 2068.666        | 2067.660        | G(4)  |
| K  | 5  | 273.161         | 2047.663        | 2039.653        | 2040.157        | 2039.150        | K(5)  |
| G  | 6  | 327.194         | 1988.615        | 1975.606        | <b>1976.110</b> | 1975.102        | G(6)  |
| G  | 7  | 385.704         | 1919.566        | 1911.557        |                 | 1911.077        | G(7)  |
| G  | 8  | 394.212         | 1891.075        | <b>1883.066</b> | <b>1883.570</b> | 1882.562        | G(8)  |
| K  | 9  | 458.260         | 1862.565        | <b>1854.555</b> | <b>1855.059</b> | 1854.051        | K(9)  |
| A  | 10 | 493.778         | <b>1798.517</b> | 1790.508        | <b>1791.012</b> | 1790.004        | A(10) |
| R  | 11 | 571.820         | 1762.999        | <b>1754.989</b> | <b>1755.493</b> | 1754.485        | R(11) |
| A  | 12 | 607.939         | 1684.944        | 1676.935        | <b>1677.439</b> | 1676.931        | A(12) |
| R  | 13 | <b>671.395</b>  | 1649.420        | 1641.410        | <b>1641.924</b> | 1640.916        | R(13) |
| A  | 14 | 706.913         | 1585.363        | 1577.353        | 1577.876        | <b>1576.869</b> | A(14) |
| K  | 15 | <b>770.961</b>  | 1549.861        | <b>1541.854</b> | 1542.358        | <b>1541.350</b> | K(15) |
| S  | 16 | <b>814.477</b>  | 1485.816        | 1477.807        | 1478.310        | 1477.303        | S(16) |
| R  | 17 | <b>892.527</b>  | <b>1442.300</b> | <b>1434.291</b> | <b>1434.794</b> | 1433.786        | R(17) |
| S  | 18 | 928.613         | 1384.246        | 1376.237        | <b>1376.744</b> | 1375.736        | S(18) |
| S  | 19 | 976.559         | 1320.733        | <b>1312.724</b> | <b>1313.228</b> | 1312.220        | S(19) |
| R  | 20 | <b>1057.610</b> | 1277.217        | <b>1269.208</b> | <b>1269.712</b> | 1268.704        | R(20) |
| A  | 21 | 1093.128        | <b>1199.167</b> | <b>1191.157</b> | 1191.661        | <b>1190.653</b> | A(21) |
| Q  | 22 | 1121.639        | 1103.648        | 1105.639        | 1106.143        | 1105.135        | Q(22) |
| L  | 23 | 1179.383        | 1038.137        | 1030.128        | 1030.632        | 1029.624        | L(23) |
| Q  | 24 | <b>1242.211</b> | 1078.595        | <b>1070.586</b> | 1071.090        | <b>1070.082</b> | Q(24) |
| F  | 25 | 1315.745        | 1014.506        | <b>1006.557</b> | <b>1007.061</b> | 1006.053        | F(25) |
| F  | 26 | 1364.271        | 941.033         | 933.023         | 933.526         | 932.519         | F(26) |
| V  | 27 | <b>1413.805</b> | <b>892.506</b>  | 884.496         | 885.000         | 883.992         | V(27) |
| G  | 28 | <b>1442.316</b> | 842.977         | 834.967         | 835.469         | 834.461         | G(28) |
| R  | 29 | <b>1528.859</b> | <b>814.461</b>  | 806.451         | 806.955         | 805.947         | R(29) |
| V  | 30 | <b>1569.901</b> | 736.410         | 728.401         | 728.905         | 727.897         | V(30) |
| H  | 31 | 1638.430        | 688.876         | 678.866         | 679.370         | 678.363         | H(31) |
| R  | 32 | 1716.481        | 618.346         | 610.337         | 610.841         | 609.833         | R(32) |
| L  | 33 | 1773.023        | 540.206         | 532.196         | 532.700         | 531.693         | L(33) |
| L  | 34 | <b>1829.565</b> | 483.754         | 473.743         | 474.246         | 473.239         | L(34) |
| R  | 35 | 1907.615        | 427.212         | 419.202         | 419.706         | 418.699         | R(35) |
| K  | 36 | 1971.663        | 349.161         | 341.152         | 341.656         | 340.648         | K(36) |
| G  | 37 | 2000.174        | 285.114         | 277.104         | 277.608         | 276.600         | G(37) |
| N  | 38 | 2057.195        | 256.603         | 248.594         | 249.098         | 248.090         | N(38) |
| V  | 39 | 2138.227        | 199.562         | 191.552         | 192.056         | 191.048         | V(39) |
| S  | 40 | 2182.243        | 118.056         | 110.047         | 110.551         | 109.543         | S(40) |
| E  | 41 | 2246.764        | 74.534          | 66.524          | 67.028          | 66.021          | E(41) |

# sp | Q8BFU2 | H2A3\_MOUSE

[Acetyl]SGRGKQGGKARAKAKSRSSRAGLQFPVGRVHRLLRKGNYS

- ▶ fragmentation table for charge state 3+
- ▶ specType=etd
- ▶ score=60.46
- ▶ F113278.dat
- ▶ query=q70150.p1
- ▶ precursor=899.505800
- ▶ chargePrecursor=5
- ▶ itol=0.5

| AA | c  | y               | #s1             | #s2             | z               | AA              |       |
|----|----|-----------------|-----------------|-----------------|-----------------|-----------------|-------|
| S  | 1  | 489.697         | 1398.361        | 1483.187        | 8.872           | 1482.831        | S(41) |
| G  | 2  | 86.704          | <b>1455.492</b> | 1450.153        | 0.672           | 1449.817        | G(40) |
| R  | 3  | 1307.718        | 1430.485        | <b>1431.140</b> | <b>1431.482</b> | 1430.810        | R(39) |
| G  | 4  | 139.745         | 1384.451        | <b>1379.112</b> | <b>1379.448</b> | <b>1378.776</b> | G(38) |
| K  | 5  | 182.443         | <b>1365.444</b> | 1360.105        | 1360.441        | 1359.769        | K(37) |
| G  | 6  | 225.130         | 1322.746        | <b>1317.406</b> | <b>1317.742</b> | 1317.070        | G(36) |
| G  | 7  | 244.137         | 1300.060        | <b>1274.729</b> | <b>1275.056</b> | 1274.384        | G(35) |
| G  | 8  | 263.144         | 1281.051        | <b>1255.713</b> | <b>1256.049</b> | 1255.377        | G(34) |
| K  | 9  | 305.642         | 1242.045        | 1236.706        | 1237.042        | 1236.370        | K(33) |
| A  | 10 | 329.521         | <b>1199.347</b> | 1194.008        | 1194.344        | 1193.672        | A(32) |
| R  | 11 | 381.555         | 1175.688        | 1170.329        | 1170.664        | 1169.993        | R(31) |
| A  | 12 | 405.234         | 1123.834        | 1118.399        | 1118.735        | 1118.063        | A(30) |
| R  | 13 | 447.932         | 1090.955        | <b>1094.616</b> | <b>1094.952</b> | <b>1094.280</b> | R(29) |
| A  | 14 | 491.611         | 1057.257        | 1051.917        | 1052.253        | 1051.581        | A(28) |
| K  | 15 | 514.310         | 1033.578        | 1028.238        | 1028.574        | 1027.902        | K(27) |
| S  | 16 | 543.320         | 990.880         | <b>985.540</b>  | <b>985.876</b>  | 985.204         | S(26) |
| R  | 17 | 595.254         | <b>961.069</b>  | 956.529         | 956.865         | 956.193         | R(25) |
| S  | 18 | 624.365         | 959.939         | 954.498         | 954.834         | 954.162         | S(24) |
| S  | 19 | 653.375         | 980.825         | 875.485         | 875.821         | 875.149         | S(23) |
| R  | 20 | 705.409         | 851.614         | 846.474         | 846.810         | 846.138         | R(22) |
| A  | 21 | 729.088         | 799.789         | 794.441         | 794.777         | 794.105         | A(21) |
| G  | 22 | 748.095         | 778.101         | <b>770.762</b>  | <b>771.098</b>  | 770.426         | G(20) |
| L  | 23 | 785.794         | 759.094         | 753.754         | 754.090         | 753.418         | L(19) |
| Q  | 24 | 828.412         | 739.305         | 734.000         | 734.336         | 733.621         | Q(18) |
| F  | 25 | 897.409         | 676.713         | <b>671.374</b>  | <b>671.710</b>  | <b>671.038</b>  | F(17) |
| F  | 26 | 909.850         | 627.600         | 622.351         | 622.687         | 622.015         | F(16) |
| V  | 27 | <b>942.873</b>  | 595.139         | 590.000         | 590.336         | 589.664         | V(15) |
| G  | 28 | <b>961.860</b>  | 562.317         | 556.977         | 557.313         | 556.641         | G(14) |
| R  | 29 | 1013.914        | 543.309         | 537.910         | 538.308         | 537.636         | R(13) |
| V  | 30 | 1046.936        | 491.275         | 485.938         | 486.272         | 485.600         | V(12) |
| H  | 31 | <b>1092.623</b> | 458.253         | 452.913         | 453.249         | 452.577         | H(11) |
| R  | 32 | 1144.656        | 412.567         | 407.227         | 407.563         | 406.891         | R(10) |
| L  | 33 | 1182.251        | <b>360.533</b>  | 355.193         | 355.529         | 354.857         | L(9)  |
| L  | 34 | <b>1220.046</b> | 322.874         | 317.489         | 317.825         | 317.153         | L(8)  |
| R  | 35 | 1222.222        | 285.144         | 279.804         | 280.140         | 279.468         | R(7)  |
| K  | 36 | 1314.778        | 233.110         | 227.770         | 228.106         | 227.434         | K(6)  |
| G  | 37 | 1333.785        | 190.412         | 185.072         | 185.408         | 184.736         | G(5)  |
| N  | 38 | 1371.799        | 171.404         | 166.065         | 166.401         | 165.729         | N(4)  |
| V  | 39 | <b>1426.154</b> | 133.390         | 128.051         | 128.386         | 127.715         | V(3)  |
| S  | 40 | 1453.164        | 99.136          | 93.796          | 94.132          | 93.460          | S(2)  |
| E  | 41 | 1498.178        | 50.025          | 44.685          | 45.021          | 44.349          | E(1)  |



# sp | Q8BFU2 | H2A3\_MOUSE

[Acetyl]SGRGKQGGKARAKAKSRSSRAGLQFPVGRVHRLLRKGNYS

- ▶ fragmentation table for charge state 4+
- ▶ specType=etd
- ▶ score=60.46
- ▶ F113278.dat
- ▶ query=q70150.p1
- ▶ precursor=899.505800
- ▶ chargePrecursor=5
- ▶ itol=0.5

| AA   | c               | y        | z+1             | z+2             | z               | AA   |
|------|-----------------|----------|-----------------|-----------------|-----------------|------|
| S 1  | 57.525          | 1124.132 | <b>1126.127</b> | 0.755           | <b>1119.875</b> | G 41 |
| G 2  | 51.780          | 1091.071 | 1097.866        | 0.755           | 1087.614        | G 40 |
| R 3  | 90.805          | 1077.616 | 1073.611        | <b>1073.863</b> | 1073.359        | R 39 |
| G 4  | 105.061         | 1038.590 | 1034.586        | 1034.838        | 1034.334        | G 38 |
| K 5  | 137.084         | 1024.135 | 1020.130        | 1020.562        | 1020.076        | K 37 |
| Q 6  | 169.009         | 992.311  | 988.307         | 988.359         | 988.057         | Q 36 |
| G 7  | 203.354         | 950.297  | 950.250         | 950.544         | 950.040         | G 35 |
| G 8  | 197.810         | 946.041  | 942.037         | 942.289         | 941.785         | G 34 |
| K 9  | 229.633         | 931.786  | 927.781         | 928.033         | 927.529         | K 33 |
| A 10 | 247.393         | 899.762  | 895.757         | 896.009         | 895.506         | A 32 |
| R 11 | 286.418         | 862.003  | 857.998         | 858.250         | 857.746         | R 31 |
| A 12 | 304.177         | 832.978  | <b>836.973</b>  | 839.275         | <b>838.721</b>  | A 30 |
| R 13 | 336.201         | 825.219  | 821.214         | 821.466         | 820.962         | R 29 |
| A 14 | 353.960         | 793.195  | 789.190         | 789.442         | 788.938         | A 28 |
| K 15 | 389.984         | 775.435  | <b>771.431</b>  | <b>771.683</b>  | <b>771.179</b>  | K 27 |
| S 16 | 407.742         | 743.412  | 739.407         | 739.659         | 739.155         | S 26 |
| R 17 | 446.767         | 721.694  | 717.689         | 717.941         | 717.437         | R 25 |
| S 18 | 488.526         | 682.828  | 678.824         | 679.076         | 678.572         | S 24 |
| S 19 | 490.283         | 660.870  | 656.866         | 657.118         | 656.614         | S 23 |
| R 20 | 529.309         | 639.112  | 635.108         | 635.360         | 634.856         | R 22 |
| A 21 | 547.068         | 600.087  | 596.082         | 596.334         | 595.830         | A 21 |
| G 22 | 561.323         | 582.126  | 578.121         | 578.373         | 577.870         | G 20 |
| L 23 | 589.334         | 566.072  | 562.068         | 562.320         | 561.816         | L 19 |
| Q 24 | 621.609         | 539.803  | 535.797         | 536.049         | 535.545         | Q 19 |
| F 25 | 658.176         | 507.787  | 503.782         | 504.034         | 503.530         | F 17 |
| P 26 | 682.639         | 471.020  | 467.015         | 467.267         | 466.763         | P 16 |
| V 27 | 707.406         | 446.756  | 442.752         | 443.004         | 442.500         | V 15 |
| G 28 | 721.662         | 421.989  | 417.985         | 418.237         | 417.733         | G 14 |
| R 29 | 760.687         | 407.734  | 403.729         | 403.981         | 403.477         | R 13 |
| V 30 | 785.454         | 368.709  | 364.704         | 364.956         | 364.452         | V 12 |
| H 31 | 819.719         | 343.942  | 339.937         | 340.189         | 339.685         | H 11 |
| R 32 | 858.744         | 309.677  | 305.672         | 305.924         | 305.420         | R 10 |
| L 33 | 887.015         | 270.652  | 266.647         | 266.899         | 266.395         | L 9  |
| L 34 | <b>915.286</b>  | 242.381  | 238.376         | 238.628         | 238.124         | L 8  |
| R 35 | 924.310         | 214.130  | 210.125         | 210.377         | 209.873         | R 7  |
| R 36 | <b>986.335</b>  | 175.084  | 171.080         | 171.332         | 170.828         | R 6  |
| G 37 | <b>1000.590</b> | 143.061  | 139.056         | 139.308         | 138.804         | G 5  |
| N 38 | 1029.101        | 128.805  | 124.800         | 125.052         | 124.548         | N 4  |
| V 39 | <b>1069.867</b> | 100.294  | 96.290          | 96.542          | 96.038          | V 3  |
| S 40 | 1091.625        | 59.529   | 55.524          | 55.776          | 55.272          | S 2  |
| E 41 | 1123.888        | 37.711   | 33.706          | 34.018          | 33.514          | E 1  |



# sp | Q8BFU2 | H2A3\_MOUSE

[Acetyl]SGRGKQGGKARAKAKSRSSRAGLQFPVGRVHRLLRKGNYS

- ▶ fragmentation table for charge state 1+
- ▶ specType=etd
- ▶ score=44.74
- ▶ F113278.dat
- ▶ query=q70152.p1
- ▶ precursor=899.506950
- ▶ chargePrecursor=5
- ▶ itol=0.5

| AA | c  | w               | #±1             | #±2             | z               | AA              |       |
|----|----|-----------------|-----------------|-----------------|-----------------|-----------------|-------|
| S  | 1  | 147.076         | 4392.569        | 4477.486        | 4.808           | 4476.411        | S(1)  |
| G  | 2  | 204.098         | 4364.462        | 4348.444        | 0.000           | 4347.430        | G(2)  |
| R  | 3  | <b>360.199</b>  | 4307.441        | 4291.422        | 4202.430        | 4200.414        | R(3)  |
| G  | 4  | <b>417.220</b>  | 4151.346        | 4135.321        | 4136.329        | 4134.311        | G(4)  |
| K  | 5  | <b>545.315</b>  | 4094.318        | 4078.300        | 4079.307        | 4077.292        | K(5)  |
| G  | 6  | <b>673.374</b>  | 3996.222        | 3990.205        | 3951.212        | 3949.191        | G(6)  |
| G  | 7  | <b>730.395</b>  | 3938.105        | 3922.149        | 3923.154        | 3921.138        | G(7)  |
| G  | 8  | 797.417         | 3781.143        | 3765.126        | 3766.132        | 3764.111        | G(8)  |
| K  | 9  | <b>915.512</b>  | 3724.122        | 3708.103        | 3709.111        | 3707.095        | K(9)  |
| A  | 10 | <b>960.549</b>  | 3596.027        | 3580.008        | 3581.016        | 3579.000        | A(10) |
| R  | 11 | <b>1142.650</b> | 3524.990        | 3508.971        | 3509.979        | 3507.961        | R(11) |
| A  | 12 | <b>1213.687</b> | 3398.989        | 3382.970        | 3383.978        | 3381.960        | A(12) |
| R  | 13 | <b>1341.782</b> | 3297.852        | 3281.833        | 3282.841        | 3280.825        | R(13) |
| A  | 14 | 1412.819        | 3169.757        | 3153.738        | 3154.746        | 3152.730        | A(14) |
| K  | 15 | 1540.914        | 3098.719        | 3082.701        | 3083.709        | 3081.693        | K(15) |
| S  | 16 | 1627.946        | 2970.625        | 2954.606        | 2955.614        | 2953.598        | S(16) |
| R  | 17 | 1784.047        | 2883.592        | 2867.574        | 2868.582        | 2866.566        | R(17) |
| S  | 18 | 1871.078        | 2727.491        | 2711.473        | 2712.480        | 2710.465        | S(18) |
| S  | 19 | 1958.111        | 2640.458        | 2624.441        | 2625.448        | 2623.433        | S(19) |
| R  | 20 | 2114.213        | 2553.427        | 2537.409        | 2538.416        | 2536.401        | R(20) |
| A  | 21 | 2185.250        | 2397.326        | 2381.307        | 2382.315        | 2380.300        | A(21) |
| G  | 22 | 2242.271        | 2326.289        | 2310.270        | 2311.278        | 2309.263        | G(22) |
| L  | 23 | 2305.303        | 2269.248        | 2253.249        | 2254.257        | 2252.241        | L(23) |
| G  | 24 | 2463.414        | 2158.184        | 2142.165        | 2143.173        | 2141.157        | G(24) |
| F  | 25 | 2630.482        | 2028.125        | 2012.106        | 2013.114        | 2011.100        | F(25) |
| F  | 26 | 2747.535        | 1881.051        | 1865.033        | 1866.040        | 1864.030        | F(26) |
| V  | 27 | 2826.603        | 1784.004        | 1767.985        | 1768.993        | 1766.977        | V(27) |
| G  | 28 | 2883.625        | 1684.935        | <b>1668.917</b> | 1669.924        | 1667.909        | G(28) |
| R  | 29 | 3029.726        | 1527.814        | <b>1511.805</b> | 1512.813        | 1510.800        | R(29) |
| V  | 30 | 3138.794        | 1471.813        | <b>1455.794</b> | 1456.802        | 1454.786        | V(30) |
| H  | 31 | 3275.853        | <b>1372.744</b> | 1356.726        | 1357.734        | <b>1355.718</b> | H(31) |
| R  | 32 | 3431.954        | <b>1235.685</b> | 1219.667        | <b>1220.675</b> | 1218.659        | R(32) |
| L  | 33 | 3545.038        | 1079.584        | 1063.566        | 1064.573        | 1062.558        | L(33) |
| L  | 34 | 3688.121        | 966.509         | 950.492         | 951.498         | 949.479         | L(34) |
| R  | 35 | 3814.224        | 853.416         | 837.398         | <b>838.405</b>  | 836.390         | R(35) |
| K  | 36 | 3942.319        | 697.315         | 681.296         | 682.304         | 680.289         | K(36) |
| G  | 37 | 3999.340        | 569.220         | 553.201         | 554.209         | 552.194         | G(37) |
| N  | 38 | 4113.383        | 512.199         | 496.180         | 497.188         | 495.172         | N(38) |
| V  | 39 | 4278.446        | 398.156         | 382.137         | 383.145         | 381.129         | V(39) |
| S  | 40 | 4353.476        | 278.104         | 262.084         | 263.092         | 261.076         | S(40) |
| E  | 41 | 4492.521        | 148.060         | 132.042         | 133.050         | 131.034         | E(41) |

# sp | Q8BFU2 | H2A3\_MOUSE

[Acetyl]SGRGKQGGKARAKAKSRSSRAGLQFPVGRVHRLLRKGNYS

- ▶ fragmentation table for charge state 2+
- ▶ specType=etd
- ▶ score=44.74
- ▶ F113278.dat
- ▶ query=q70152.p1
- ▶ precursor=899.506950
- ▶ chargePrecursor=5
- ▶ itol=0.5

| AA | c  | y               | #s1             | #s2             | z               | AA              |       |
|----|----|-----------------|-----------------|-----------------|-----------------|-----------------|-------|
| S  | 1  | 74.062          | 2247.256        | 2229.267        | 0.804           | 2238.747        | S[41] |
| G  | 2  | 102.553         | 2182.735        | 2174.726        | 0.504           | 2174.222        | G[40] |
| R  | 3  | 180.603         | 2154.224        | 2146.215        | 2146.719        | 2145.711        | R[39] |
| G  | 4  | 209.114         | 2076.174        | 2068.164        | 2068.666        | 2067.660        | G[38] |
| K  | 5  | 273.161         | 2047.663        | 2039.653        | 2040.157        | 2039.150        | K[37] |
| G  | 6  | 337.194         | 1983.615        | <b>1975.606</b> | <b>1976.110</b> | 1975.103        | G[36] |
| G  | 7  | 365.704         | 1919.566        | <b>1911.577</b> |                 | <b>1911.073</b> | G[35] |
| G  | 8  | 394.212         | 1891.075        | <b>1883.066</b> | 1883.570        | <b>1882.562</b> | G[34] |
| K  | 9  | 458.260         | 1862.565        | 1854.555        | <b>1855.059</b> | 1854.051        | K[33] |
| A  | 10 | 493.778         | 1798.517        | 1790.508        | <b>1791.012</b> | 1790.004        | A[32] |
| R  | 11 | 571.820         | 1762.999        | 1754.989        | <b>1755.493</b> | 1754.485        | R[31] |
| A  | 12 | 609.939         | 1688.944        | <b>1676.939</b> | 1677.443        | <b>1676.435</b> | A[30] |
| R  | 13 | <b>671.395</b>  | 1649.420        | 1641.410        | 1641.924        | 1640.915        | R[29] |
| A  | 14 | <b>706.913</b>  | 1585.363        | 1577.353        | <b>1577.876</b> | 1576.868        | A[28] |
| K  | 15 | <b>770.961</b>  | 1549.861        | <b>1541.854</b> | <b>1542.358</b> | 1541.350        | K[27] |
| S  | 16 | <b>814.477</b>  | 1485.816        | 1477.807        | 1478.310        | 1477.303        | S[26] |
| R  | 17 | <b>892.527</b>  | <b>1442.300</b> | <b>1434.291</b> | <b>1434.794</b> | 1433.787        | R[25] |
| S  | 18 | <b>936.043</b>  | 1384.249        | <b>1376.240</b> | 1376.744        | <b>1375.736</b> | S[24] |
| S  | 19 | <b>979.559</b>  | 1320.733        | 1312.724        | <b>1313.228</b> | 1312.220        | S[23] |
| R  | 20 | <b>1057.610</b> | 1277.217        | <b>1269.208</b> | <b>1269.712</b> | 1268.704        | R[22] |
| A  | 21 | <b>1093.128</b> | 1219.161        | 1211.157        | <b>1211.661</b> | 1210.653        | A[21] |
| G  | 22 | 1121.639        | 1163.648        | 1155.639        | 1156.143        | 1155.135        | G[20] |
| L  | 23 | 1179.383        | 1116.137        | 1107.128        | 1107.632        | 1106.624        | L[19] |
| G  | 24 | <b>1242.211</b> | <b>1078.595</b> | 1070.588        | 1071.090        | <b>1070.082</b> | G[18] |
| F  | 25 | 1315.745        | 1014.560        | <b>1006.557</b> | <b>1007.061</b> | 1006.053        | F[17] |
| F  | 26 | 1364.271        | 941.033         | 933.023         | 933.526         | 932.519         | F[16] |
| V  | 27 | <b>1413.805</b> | <b>892.506</b>  | 884.496         | 885.000         | 883.992         | V[15] |
| G  | 28 | <b>1442.316</b> | 834.452         | 826.442         | 826.946         | 825.938         | G[14] |
| R  | 29 | 1500.959        | <b>814.461</b>  | 806.451         | 806.955         | 805.947         | R[13] |
| V  | 30 | 1569.501        | 736.410         | 728.401         | 728.905         | 727.897         | V[12] |
| H  | 31 | 1638.430        | 668.876         | 678.866         | 679.370         | 678.363         | H[11] |
| R  | 32 | 1716.481        | 618.346         | 610.337         | 610.841         | 609.833         | R[10] |
| L  | 33 | 1773.023        | 540.296         | 532.286         | 532.790         | 531.783         | L[9]  |
| L  | 34 | 1829.968        | 469.754         | 479.743         | 479.246         | 478.240         | L[8]  |
| R  | 35 | 1907.515        | 427.212         | 419.202         | 419.706         | 418.699         | R[7]  |
| K  | 36 | 1971.663        | 349.161         | 341.152         | 341.656         | 340.648         | K[6]  |
| G  | 37 | 2000.174        | 285.114         | 277.104         | 277.608         | 276.600         | G[5]  |
| N  | 38 | 2057.195        | 256.603         | 248.594         | 249.098         | 248.090         | N[4]  |
| V  | 39 | 2138.227        | 199.562         | 191.572         | 192.076         | 191.068         | V[3]  |
| S  | 40 | 2192.243        | 118.056         | 110.047         | 110.549         | 109.541         | S[2]  |
| E  | 41 | 2246.764        | 74.534          | 66.524          | 67.028          | 66.021          | E[1]  |

# sp | Q8BFU2 | H2A3\_MOUSE

[Acetyl]SGRGKQGGKARAKAKSRSSRAGLQFPVGRVHRLLRKGNYS

- ▶ fragmentation table for charge state 3+
- ▶ specType=etd
- ▶ score=44.74
- ▶ F113278.dat
- ▶ query=q70152.p1
- ▶ precursor=899.506950
- ▶ chargePrecursor=5
- ▶ itol=0.5

| AA  | c               | y               | #s1             | #s2             | #s              | AA  |
|-----|-----------------|-----------------|-----------------|-----------------|-----------------|-----|
| S1  | 48.697          | 1308.391        | <b>1493.167</b> | 0.872           | <b>1492.831</b> | S41 |
| G2  | 86.704          | <b>1455.492</b> | 1450.153        | 0.672           | 1449.817        | G49 |
| R3  | 130.718         | 1436.485        | <b>1431.146</b> | <b>1431.482</b> | <b>1430.810</b> | R30 |
| G4  | 139.745         | 1384.451        | <b>1379.112</b> | <b>1379.448</b> | 1378.770        | G38 |
| K5  | 182.443         | 1305.444        | 1300.195        | 1300.441        | 1309.700        | K37 |
| G6  | 225.130         | 1322.746        | <b>1317.406</b> | <b>1317.742</b> | 1311.600        | G36 |
| G7  | 244.137         | 1380.060        | <b>1274.720</b> | <b>1275.056</b> | 1274.381        | G35 |
| G8  | 263.144         | 1261.051        | <b>1255.713</b> | <b>1256.049</b> | <b>1255.377</b> | G34 |
| K9  | 305.642         | <b>1242.045</b> | 1236.700        | 1237.042        | 1236.370        | K33 |
| A10 | 329.521         | 1199.347        | 1194.008        | <b>1194.344</b> | 1193.672        | A32 |
| R11 | 381.555         | 1175.668        | 1170.329        | 1170.664        | 1169.993        | R31 |
| A12 | 405.234         | 1123.834        | 1118.295        | 1118.631        | 1117.960        | A30 |
| K13 | 447.932         | 1090.955        | 1084.613        | <b>1094.952</b> | 1094.281        | K29 |
| A14 | 491.611         | 1057.257        | 1051.917        | 1052.253        | 1051.582        | A28 |
| K15 | 514.310         | 1033.578        | 1028.238        | 1028.574        | 1027.902        | K27 |
| S16 | 543.320         | 990.880         | 985.540         | 985.876         | 985.204         | S26 |
| R17 | 595.254         | <b>961.869</b>  | 956.529         | 956.865         | 956.193         | R25 |
| S18 | 624.265         | 959.335         | 954.485         | 954.832         | 954.160         | S24 |
| S19 | 653.275         | 980.825         | 875.485         | 875.821         | 875.149         | S23 |
| R20 | 705.409         | 851.614         | 846.474         | 846.810         | 846.138         | R22 |
| A21 | 729.088         | 799.780         | 794.441         | 794.777         | 794.105         | A21 |
| G22 | 748.095         | 776.101         | <b>770.762</b>  | <b>771.098</b>  | 770.426         | G28 |
| L23 | 785.794         | 759.094         | 753.754         | 754.090         | 753.418         | L19 |
| G24 | 828.476         | 719.305         | 714.000         | 714.306         | 713.721         | G19 |
| F25 | 897.409         | 676.713         | <b>671.374</b>  | <b>671.710</b>  | <b>671.038</b>  | F17 |
| F26 | 909.850         | 627.600         | 622.351         | 622.687         | 622.015         | F16 |
| V27 | <b>942.873</b>  | 595.139         | 590.000         | 590.336         | 589.664         | V15 |
| G28 | <b>961.880</b>  | 562.317         | 556.977         | 557.313         | 556.641         | G14 |
| R29 | 1013.614        | 443.309         | 437.970         | 438.306         | 437.634         | R13 |
| V30 | <b>1046.936</b> | 401.275         | 405.936         | 406.272         | 405.600         | V12 |
| H31 | 1092.623        | 458.253         | 452.913         | 453.249         | 452.577         | H11 |
| R32 | 1144.656        | 412.967         | 407.227         | 407.563         | 406.891         | R10 |
| L33 | 1182.351        | <b>360.533</b>  | 355.193         | 355.529         | 354.857         | L09 |
| L34 | <b>1220.046</b> | 322.874         | 317.489         | 317.825         | 317.153         | L08 |
| R35 | 1222.222        | 285.144         | 279.804         | 280.140         | 279.468         | R17 |
| K36 | 1314.778        | 233.110         | 227.770         | 228.106         | 227.434         | K06 |
| G37 | 1333.785        | 190.412         | 185.072         | 185.408         | 184.736         | G05 |
| N38 | 1371.799        | 171.404         | 166.065         | 166.401         | 165.729         | N04 |
| V39 | <b>1436.154</b> | 133.290         | 128.051         | 128.386         | 127.715         | V03 |
| S40 | <b>1455.164</b> | 99.136          | 93.796          | 94.132          | 93.460          | S01 |
| E41 | 1498.178        | 50.025          | 44.685          | 45.021          | 44.349          | E11 |

# sp | Q8BFU2 | H2A3\_MOUSE

[Acetyl]SGRGKQGGKARAKAKSRSSRAGLQFPVGRVHRLLRKGNYS

- ▶ fragmentation table for charge state 4+
- ▶ specType=etd
- ▶ score=44.74
- ▶ F113278.dat
- ▶ query=q70152.p1
- ▶ precursor=899.506950
- ▶ chargePrecursor=5
- ▶ itol=0.5

| AA   | c               | y               | z+1            | z+2             | z              | AA   |
|------|-----------------|-----------------|----------------|-----------------|----------------|------|
| S 1  | 17.526          | <b>1124.132</b> | 1120.137       | 0.755           | 1119.875       | S 41 |
| G 2  | 51.780          | 1091.871        | 1087.886       | 0.755           | 1087.614       | G 40 |
| R 3  | 90.805          | 1077.610        | 1071.611       | <b>1073.863</b> | 1073.359       | R 36 |
| G 4  | 105.061         | 1038.590        | 1034.588       | 1034.838        | 1034.334       | G 38 |
| K 5  | 137.084         | 1024.330        | 1020.330       | 1020.362        | 1020.078       | K 37 |
| Q 6  | 169.099         | 992.311         | 988.307        | 988.559         | 988.055        | Q 29 |
| G 7  | 183.394         | 960.297         | 956.292        | 956.544         | 956.040        | G 35 |
| G 8  | 197.610         | 946.041         | 942.037        | 942.289         | 941.785        | G 34 |
| K 9  | 229.633         | 931.786         | 927.781        | 928.033         | 927.529        | K 33 |
| A 10 | 247.393         | 899.752         | 895.757        | 896.009         | 895.505        | A 32 |
| R 11 | 286.418         | 882.003         | 877.998        | 878.250         | 877.746        | R 31 |
| A 12 | 304.177         | 843.979         | <b>838.973</b> | 839.225         | <b>838.721</b> | A 26 |
| K 13 | 338.201         | 825.218         | 821.214        | 821.466         | 820.962        | K 29 |
| A 14 | 353.960         | 793.195         | 789.190        | 789.442         | 788.938        | A 28 |
| K 15 | 385.984         | 775.435         | <b>771.431</b> | <b>771.683</b>  | <b>771.179</b> | K 27 |
| S 16 | 407.742         | 743.412         | 739.407        | 739.659         | 739.155        | S 26 |
| R 17 | 446.767         | 721.854         | 717.849        | 717.901         | 717.397        | R 25 |
| S 18 | 468.525         | 692.628         | 688.624        | 678.876         | 678.372        | S 24 |
| S 19 | 490.283         | 660.870         | 656.866        | 657.118         | 656.614        | S 23 |
| R 20 | 529.309         | 639.112         | 635.108        | 635.360         | 634.856        | R 22 |
| A 21 | 547.068         | 606.087         | 596.082        | 596.334         | 595.830        | A 21 |
| G 22 | 561.323         | 582.328         | 578.323        | 578.575         | 578.071        | G 20 |
| L 23 | 589.594         | 568.072         | 564.068        | 564.320         | 563.816        | L 19 |
| Q 24 | 621.869         | 539.861         | 535.797        | 536.049         | 535.545        | Q 18 |
| F 25 | 658.376         | 507.787         | 503.782        | 504.034         | 503.530        | F 17 |
| P 26 | 682.639         | 471.020         | 467.015        | 467.267         | 466.763        | P 16 |
| V 27 | <b>707.406</b>  | 446.756         | 442.752        | 443.004         | 442.500        | V 15 |
| G 28 | 721.662         | 421.989         | 417.985        | 418.237         | <b>417.733</b> | G 14 |
| R 29 | 760.687         | 407.734         | 403.729        | 403.981         | 403.477        | R 13 |
| V 30 | 785.454         | 389.769         | 384.764        | 384.966         | 384.462        | V 12 |
| H 31 | 819.719         | 343.942         | 339.937        | 340.189         | 339.685        | H 11 |
| R 32 | 858.744         | 309.677         | 305.672        | 305.924         | 305.420        | R 10 |
| L 33 | 887.015         | 270.652         | 266.647        | 266.899         | 266.395        | L 9  |
| L 34 | <b>915.286</b>  | 242.381         | 238.376        | 238.628         | 238.124        | L 8  |
| R 35 | 967.511         | 214.110         | 210.105        | 210.357         | 209.853        | R 7  |
| K 36 | <b>986.335</b>  | 175.984         | 171.980        | 172.232         | 171.728        | K 6  |
| G 37 | <b>1000.590</b> | 143.061         | 139.056        | 139.308         | 138.804        | G 5  |
| N 38 | <b>1029.101</b> | 128.805         | 124.800        | 125.052         | 124.548        | N 4  |
| Y 39 | <b>1069.867</b> | 100.294         | 96.290         | 96.542          | 96.038         | Y 3  |
| S 40 | 1091.625        | 59.520          | 55.524         | 55.776          | 55.272         | S 2  |
| E 41 | 1123.886        | 37.771          | 33.766         | 34.018          | 33.514         | E 1  |



# sp | Q8BFU2 | H2A3\_MOUSE

[Acetyl]SGRGKQGGKARAKAKSRSSRAGLQFPVGRVHRLLRKGNYS

- ▶ fragmentation table for charge state 1+
- ▶ specType=etd
- ▶ score=40.74
- ▶ F113278.dat
- ▶ query=q70154\_p1
- ▶ precursor=749.757440
- ▶ chargePrecursor=6
- ▶ itol=0.5

| AA   | c               | y        | z+1             | z+2             | z        | AA   |
|------|-----------------|----------|-----------------|-----------------|----------|------|
| S 1  | 147.076         | 4493.505 | 4477.486        | 0.000           | 4476.478 | S 41 |
| G 2  | 304.098         | 4364.463 | 4348.444        | 0.000           | 4347.436 | G 40 |
| R 3  | <b>360.199</b>  | 4307.441 | 4291.422        | 4292.430        | 4290.414 | R 39 |
| G 4  | <b>417.220</b>  | 4151.340 | 4135.321        | 4136.329        | 4134.313 | G 38 |
| K 5  | <b>543.315</b>  | 4094.318 | 4078.300        | 4079.307        | 4077.292 | K 37 |
| Q 6  | <b>673.374</b>  | 3956.273 | 3950.255        | 3951.262        | 3949.247 | Q 36 |
| G 7  | <b>730.395</b>  | 3836.165 | 3822.146        | 3823.154        | 3821.138 | G 35 |
| G 8  | <b>787.417</b>  | 3781.143 | 3765.125        | 3766.132        | 3764.117 | G 34 |
| K 9  | <b>915.512</b>  | 3724.122 | 3708.103        | 3709.111        | 3707.095 | K 33 |
| A 10 | 986.549         | 3696.027 | 3680.008        | 3681.016        | 3679.000 | A 32 |
| R 11 | 1147.650        | 3524.990 | 3508.971        | 3509.979        | 3507.963 | R 31 |
| A 12 | <b>1213.687</b> | 3368.989 | 3352.970        | 3353.978        | 3351.962 | A 30 |
| R 13 | 1341.782        | 3297.852 | 3281.833        | 3282.841        | 3280.825 | R 29 |
| A 14 | 1412.819        | 3169.757 | 3153.738        | 3154.746        | 3152.730 | A 28 |
| K 15 | 1540.914        | 3098.719 | 3082.700        | 3083.709        | 3081.693 | K 27 |
| S 16 | 1627.946        | 2970.625 | 2954.606        | 2955.614        | 2953.598 | S 26 |
| R 17 | 1784.047        | 2883.592 | 2867.574        | 2868.582        | 2866.566 | R 25 |
| S 18 | 1873.079        | 2727.491 | 2711.473        | 2712.480        | 2710.465 | S 24 |
| S 19 | 1958.111        | 2640.458 | 2624.441        | 2625.448        | 2623.433 | S 23 |
| R 20 | 2114.213        | 2553.427 | 2537.409        | 2538.416        | 2536.401 | R 22 |
| A 21 | 2185.250        | 2397.326 | 2381.307        | 2382.315        | 2380.300 | A 21 |
| G 22 | 2242.271        | 2326.289 | 2310.270        | 2311.278        | 2309.263 | G 20 |
| L 23 | 2355.355        | 2269.268 | 2253.249        | 2254.257        | 2252.241 | L 19 |
| Q 24 | 2483.414        | 2156.184 | 2140.165        | 2141.173        | 2139.157 | Q 18 |
| F 25 | 2630.482        | 2028.125 | 2012.106        | 2013.114        | 2011.098 | F 17 |
| P 26 | 2727.535        | 1881.057 | 1865.038        | 1866.046        | 1864.030 | P 16 |
| V 27 | 2826.603        | 1784.004 | 1767.985        | 1768.993        | 1766.977 | V 15 |
| G 28 | 2883.625        | 1684.935 | 1668.917        | 1669.924        | 1667.909 | G 14 |
| R 29 | 3039.726        | 1627.914 | 1611.895        | <b>1612.903</b> | 1610.887 | R 13 |
| V 30 | 3138.764        | 1511.833 | 1495.814        | 1496.822        | 1494.798 | V 12 |
| H 31 | 3275.853        | 1372.744 | 1356.726        | <b>1357.734</b> | 1355.718 | H 11 |
| R 32 | 3431.954        | 1235.685 | 1219.667        | <b>1220.675</b> | 1218.659 | R 10 |
| L 33 | 3545.030        | 1079.584 | <b>1063.566</b> | 1064.573        | 1062.558 | L 9  |
| L 34 | 3658.123        | 959.500  | 950.482         | 951.489         | 949.474  | L 8  |
| R 35 | 3814.224        | 853.416  | 837.398         | <b>838.405</b>  | 836.390  | R 7  |
| K 36 | 3932.319        | 697.335  | 688.318         | 689.324         | 687.309  | K 6  |
| G 37 | 3999.340        | 569.220  | 553.201         | 554.209         | 552.194  | G 5  |
| N 38 | 4113.383        | 512.109  | 496.100         | 497.108         | 495.172  | N 4  |
| V 39 | 4276.446        | 396.156  | 382.137         | 383.145         | 381.129  | V 3  |
| S 40 | 4363.478        | 235.092  | 219.074         | 220.082         | 218.066  | S 2  |
| E 41 | 4492.521        | 148.060  | 132.042         | 133.050         | 131.034  | E 1  |



# sp | Q8BFU2 | H2A3\_MOUSE

[Acetyl]SGRGKQGGKARAKAKSRSSRAGLQFPVGRVHRLLRKGNYS

- ▶ fragmentation table for charge state 2+
- ▶ specType=etd
- ▶ score=40.74
- ▶ F113278.dat
- ▶ query=q70154\_p1
- ▶ precursor=749.757440
- ▶ chargePrecursor=6
- ▶ itol=0.5

| AA   | c               | y               | #s1             | #s2             | z               | AA    |
|------|-----------------|-----------------|-----------------|-----------------|-----------------|-------|
| G 1  | 74.062          | 2247.256        | 2229.257        | 0.804           | 2238.747        | S(1)  |
| G 2  | 102.553         | 2182.735        | 2174.725        | 0.904           | 2174.222        | G(2)  |
| R 3  | 180.603         | 2154.224        | 2146.215        | 2146.719        | 2145.711        | R(3)  |
| G 4  | 209.114         | 2076.174        | 2068.164        | 2068.666        | 2067.660        | G(3)  |
| K 5  | 273.161         | 2047.663        | 2039.653        | 2040.157        | 2039.150        | K(37) |
| G 6  | 327.194         | 1983.615        | 1975.605        | 1976.109        | 1975.102        | G(36) |
| G 7  | 385.704         | 1919.566        | 1911.577        | <b>1912.081</b> | 1911.073        | G(35) |
| G 8  | 394.212         | 1891.075        | 1883.086        | <b>1883.570</b> | 1882.562        | G(34) |
| K 9  | 458.260         | 1862.565        | 1854.555        | 1855.059        | 1854.051        | K(33) |
| A 10 | 493.778         | 1798.517        | 1790.508        | 1791.012        | 1790.004        | A(32) |
| R 11 | 577.820         | 1762.999        | 1754.989        | 1755.493        | 1754.485        | R(31) |
| A 12 | <b>607.347</b>  | 1684.949        | 1676.939        | 1677.443        | 1676.435        | A(30) |
| R 13 | <b>671.395</b>  | 1649.420        | 1641.430        | 1641.924        | 1640.916        | R(29) |
| A 14 | <b>706.913</b>  | 1585.363        | <b>1577.373</b> | 1577.876        | <b>1576.869</b> | A(28) |
| K 15 | <b>770.961</b>  | 1549.861        | <b>1541.854</b> | 1542.358        | <b>1541.350</b> | K(27) |
| S 16 | <b>814.477</b>  | <b>1485.816</b> | 1477.807        | 1478.310        | 1477.303        | S(26) |
| R 17 | <b>892.527</b>  | <b>1442.300</b> | 1434.291        | 1434.794        | 1433.787        | R(25) |
| S 18 | <b>936.063</b>  | 1384.249        | 1376.240        | 1376.744        | 1375.736        | S(24) |
| S 19 | <b>979.559</b>  | 1320.733        | <b>1312.724</b> | <b>1313.228</b> | 1312.220        | S(23) |
| R 20 | 1057.610        | 1277.217        | 1269.208        | <b>1269.712</b> | 1268.704        | R(22) |
| A 21 | <b>1093.128</b> | 1239.161        | <b>1191.157</b> | <b>1191.661</b> | 1190.653        | A(21) |
| G 22 | 1127.639        | 1183.648        | 1175.639        | 1176.143        | 1175.135        | G(20) |
| L 23 | <b>1178.181</b> | 1138.137        | 1129.137        | 1129.641        | 1128.633        | L(19) |
| G 24 | <b>1242.211</b> | 1078.595        | <b>1070.586</b> | 1071.090        | <b>1070.082</b> | G(18) |
| F 25 | 1315.745        | 1014.566        | <b>1006.557</b> | <b>1007.061</b> | 1006.053        | F(17) |
| F 26 | 1364.271        | 941.033         | 933.023         | 933.526         | 932.519         | F(16) |
| V 27 | <b>1413.805</b> | <b>892.506</b>  | 884.496         | 885.000         | 884.992         | V(15) |
| G 28 | <b>1442.316</b> | 842.077         | <b>834.062</b>  | <b>835.066</b>  | 834.058         | G(14) |
| R 29 | 1520.859        | <b>814.461</b>  | <b>806.451</b>  | <b>806.955</b>  | 805.947         | R(13) |
| V 30 | 1569.901        | 736.410         | 728.401         | 728.905         | 727.897         | V(12) |
| H 31 | 1638.430        | 668.876         | 678.866         | 679.370         | 678.363         | H(11) |
| R 32 | 1716.461        | 618.346         | 610.337         | 610.841         | 609.833         | R(10) |
| L 33 | 1773.023        | 540.206         | 532.196         | 532.700         | 531.693         | L(9)  |
| L 34 | 1829.568        | 469.794         | 479.783         | 479.286         | 478.279         | L(8)  |
| R 35 | 1907.615        | 427.212         | 419.202         | 419.706         | 418.698         | R(7)  |
| K 36 | 1971.663        | 349.161         | 341.152         | 341.656         | 340.648         | K(6)  |
| G 37 | 2050.174        | 285.114         | 277.104         | 277.608         | 276.600         | G(5)  |
| N 38 | 2057.195        | 256.603         | 248.594         | 249.098         | 248.090         | N(4)  |
| V 39 | 2138.227        | 199.562         | 191.572         | 192.076         | 191.068         | V(3)  |
| S 40 | 2192.283        | 118.056         | 110.047         | 110.549         | 109.541         | S(2)  |
| E 41 | 2246.764        | 74.534          | 66.524          | 67.028          | 66.021          | E(1)  |

# sp | Q8BFU2 | H2A3\_MOUSE

[Acetyl]SGRGKQGQGGKARAKAKSRSSRAGLQFPVGRVHRLLRKGNYS

- ▶ fragmentation table for charge state 3+
- ▶ specType=etd
- ▶ score=40.74
- ▶ F113278.dat
- ▶ query=q70154\_p1
- ▶ precursor=749.757440
- ▶ chargePrecursor=6
- ▶ itol=0.5

| AA | c  | y               | #s=1            | #s=2            | z               | AA              |       |
|----|----|-----------------|-----------------|-----------------|-----------------|-----------------|-------|
| S  | 1  | 48.697          | <b>1498.507</b> | <b>1493.167</b> | 0.872           | 482.83          | S[41] |
| G  | 2  | 86.704          | 1455.452        | <b>1450.153</b> | 0.872           | 1449.817        | G[40] |
| R  | 3  | 130.718         | 1436.485        | <b>1431.146</b> | <b>1431.482</b> | 1430.810        | R[39] |
| G  | 4  | 159.745         | 1384.451        | <b>1379.112</b> | <b>1379.448</b> | <b>1378.776</b> | G[38] |
| K  | 5  | 182.443         | 1305.444        | 1300.105        | <b>1300.441</b> | 1359.709        | K[37] |
| G  | 6  | 225.130         | 1222.746        | 1217.408        | 1217.742        | 1311.670        | G[36] |
| G  | 7  | 244.137         | 1090.090        | 1094.751        | 1275.056        | 1274.384        | G[35] |
| G  | 8  | 263.144         | 1261.053        | 1255.713        | 1256.049        | 1255.377        | G[34] |
| K  | 9  | 305.642         | <b>1242.045</b> | <b>1236.706</b> | <b>1237.042</b> | <b>1236.370</b> | K[33] |
| A  | 10 | 329.521         | 1199.341        | 1194.003        | <b>1194.344</b> | 1193.672        | A[32] |
| R  | 11 | 381.555         | 1175.668        | 1170.329        | 1170.664        | 1169.993        | R[31] |
| A  | 12 | 405.234         | 1123.834        | 1118.295        | 1118.295        | 1117.959        | A[30] |
| K  | 13 | 447.932         | 1090.955        | 1084.613        | <b>1094.952</b> | 1094.281        | K[29] |
| A  | 14 | 491.611         | 1057.257        | 1051.917        | 1052.253        | 1051.582        | A[28] |
| K  | 15 | 514.310         | 1033.578        | 1028.239        | 1028.574        | 1027.902        | K[27] |
| S  | 16 | 543.320         | 990.887         | 985.548         | <b>985.876</b>  | 985.204         | S[26] |
| R  | 17 | 595.254         | <b>961.869</b>  | <b>956.529</b>  | <b>956.865</b>  | 956.193         | R[25] |
| S  | 18 | 624.265         | 959.879         | 954.428         | 954.813         | 954.160         | S[24] |
| S  | 19 | 653.275         | 980.825         | <b>875.485</b>  | <b>875.821</b>  | 875.149         | S[23] |
| R  | 20 | 705.409         | 951.814         | 946.474         | 946.810         | 946.138         | R[22] |
| A  | 21 | 729.088         | 799.789         | 794.441         | 794.777         | 794.105         | A[21] |
| G  | 22 | 748.095         | 776.101         | 770.762         | <b>771.098</b>  | 770.426         | G[20] |
| L  | 23 | <b>785.790</b>  | 770.094         | 764.754         | 765.096         | 764.419         | L[19] |
| Q  | 24 | 824.817         | 719.369         | 714.000         | 714.366         | 713.224         | Q[18] |
| F  | 25 | 877.409         | 676.713         | <b>671.374</b>  | <b>671.710</b>  | 671.038         | F[17] |
| F  | 26 | 909.950         | 627.600         | 622.251         | 622.687         | 622.015         | F[16] |
| V  | 27 | <b>942.873</b>  | 595.139         | 590.000         | 590.336         | 589.664         | V[15] |
| G  | 28 | <b>961.860</b>  | 562.317         | 556.977         | 557.313         | 556.641         | G[14] |
| R  | 29 | 1113.814        | 443.309         | 437.910         | 438.308         | 437.634         | R[13] |
| V  | 30 | <b>1046.936</b> | 409.275         | 403.936         | 404.272         | 403.600         | V[12] |
| H  | 31 | <b>1092.623</b> | 458.253         | 452.913         | 453.249         | 452.577         | H[11] |
| R  | 32 | 1144.656        | 412.967         | 407.227         | 407.563         | 406.891         | R[10] |
| L  | 33 | 1182.351        | <b>360.533</b>  | 355.193         | 355.529         | 354.857         | L[9]  |
| L  | 34 | 1230.046        | 322.876         | 317.489         | 317.826         | 317.154         | L[8]  |
| R  | 35 | 1272.079        | 285.144         | 279.804         | 280.140         | 279.468         | R[7]  |
| K  | 36 | 1314.778        | 233.110         | 227.770         | 228.106         | 227.434         | K[6]  |
| G  | 37 | 1333.785        | 190.412         | 185.072         | 185.408         | 184.736         | G[5]  |
| N  | 38 | 1371.799        | 171.404         | 166.065         | 166.401         | 165.729         | N[4]  |
| V  | 39 | 1426.154        | 133.290         | 128.051         | 128.386         | 127.715         | V[3]  |
| S  | 40 | 1455.166        | 99.139          | 93.799          | 94.134          | 93.462          | S[2]  |
| E  | 41 | <b>1498.178</b> | 50.025          | 44.685          | 45.021          | 44.349          | E[1]  |

# sp | Q8BFU2 | H2A3\_MOUSE

[Acetyl]SGRGKQGGKARAKAKSRSSRAGLQFPVGRVHLLRKGNYSE

- ▶ fragmentation table for charge state 4+
- ▶ specType=etd
- ▶ score=40.74
- ▶ F113278.dat
- ▶ query=q70154.p1
- ▶ precursor=749.757440
- ▶ chargePrecursor=6
- ▶ itol=0.5

| AA | c  | y               | s+1             | s+2             | z               | AA              |       |
|----|----|-----------------|-----------------|-----------------|-----------------|-----------------|-------|
| S  | 1  | 37.505          | <b>1124.132</b> | 1120.137        | 0.758           | 1119.877        | S[41] |
| G  | 2  | 51.780          | 1091.871        | <b>1087.866</b> | 0.755           | 1087.614        | G[40] |
| R  | 3  | 90.805          | 1077.616        | <b>1073.611</b> | <b>1073.863</b> | 1073.350        | R[39] |
| G  | 4  | 109.061         | 1038.500        | 1034.500        | <b>1034.838</b> | 1034.134        | G[38] |
| K  | 5  | 137.084         | 1024.335        | <b>1020.330</b> | <b>1020.582</b> | <b>1020.078</b> | K[37] |
| G  | 6  | 169.059         | 992.311         | 988.307         | <b>988.597</b>  | 988.055         | G[36] |
| G  | 7  | 183.354         | 950.291         | 946.287         | <b>946.544</b>  | 946.040         | G[35] |
| G  | 8  | 197.610         | 946.041         | <b>942.037</b>  | <b>942.289</b>  | 941.795         | G[34] |
| K  | 9  | 239.633         | 931.788         | 927.781         | 928.033         | 927.529         | K[33] |
| A  | 10 | 247.303         | <b>899.762</b>  | 895.757         | 896.009         | 895.500         | A[32] |
| R  | 11 | 286.419         | 882.003         | 877.998         | <b>878.250</b>  | 877.746         | R[31] |
| A  | 12 | 304.177         | 842.918         | 838.913         | 839.215         | <b>838.721</b>  | A[30] |
| R  | 13 | 336.203         | 825.215         | 821.214         | 821.466         | 820.962         | R[29] |
| A  | 14 | 353.960         | 793.195         | 789.190         | 789.442         | 788.938         | A[28] |
| K  | 15 | 385.904         | 775.435         | <b>771.431</b>  | <b>771.683</b>  | <b>771.179</b>  | K[27] |
| S  | 16 | 407.742         | 743.412         | 739.407         | 739.659         | 739.155         | S[26] |
| R  | 17 | 446.767         | 721.954         | 717.949         | 717.901         | 717.301         | R[25] |
| S  | 18 | 468.526         | 692.626         | 688.621         | 688.876         | 688.372         | S[24] |
| S  | 19 | 490.283         | 660.670         | 656.666         | 657.118         | 656.614         | S[23] |
| R  | 20 | 529.309         | 638.112         | 634.108         | 635.360         | 634.856         | R[22] |
| A  | 21 | 547.088         | 600.087         | 596.082         | 596.334         | 595.830         | A[21] |
| G  | 22 | 561.323         | 582.328         | 578.323         | 578.575         | 578.071         | G[20] |
| L  | 23 | 589.984         | 568.072         | 564.068         | 564.320         | 563.816         | L[19] |
| G  | 24 | 621.609         | 539.801         | 535.797         | 536.048         | 535.545         | G[18] |
| F  | 25 | 658.376         | 507.787         | 503.782         | 504.034         | 503.530         | F[17] |
| F  | 26 | 662.639         | 471.020         | 467.015         | 467.267         | 466.763         | F[16] |
| V  | 27 | <b>707.406</b>  | 446.756         | 442.752         | 443.004         | 442.500         | V[15] |
| G  | 28 | 721.662         | 421.989         | 417.985         | 418.237         | <b>417.733</b>  | G[14] |
| R  | 29 | 760.687         | 389.734         | 385.729         | 385.981         | 385.477         | R[13] |
| V  | 30 | 785.454         | 368.709         | 364.704         | 364.956         | 364.452         | V[12] |
| H  | 31 | <b>819.719</b>  | 343.942         | 339.937         | 340.189         | 339.685         | H[11] |
| R  | 32 | 858.744         | 309.677         | 305.672         | 305.924         | 305.420         | R[10] |
| L  | 33 | 897.615         | 270.652         | 266.647         | 266.899         | 266.395         | L[9]  |
| L  | 34 | <b>915.286</b>  | 242.361         | 238.356         | 238.608         | 238.104         | L[8]  |
| R  | 35 | 924.311         | 214.110         | 210.105         | 210.357         | 209.853         | R[7]  |
| K  | 36 | <b>966.335</b>  | 175.084         | 171.080         | 171.332         | 170.828         | K[6]  |
| G  | 37 | 1000.590        | 143.061         | 139.056         | 139.308         | 138.804         | G[5]  |
| N  | 38 | <b>1029.101</b> | 128.805         | 124.800         | 125.052         | 124.548         | N[4]  |
| V  | 39 | 1069.867        | 100.294         | 96.289          | 96.542          | 96.038          | V[3]  |
| S  | 40 | 1091.625        | 98.529          | 94.524          | 94.776          | 94.272          | S[2]  |
| E  | 41 | 1123.886        | 97.771          | 93.766          | 94.018          | 93.514          | E[1]  |

# sp | Q8BFU2 | H2A3\_MOUSE

[Acetyl]SGRGKQGGKARAKAKSRSSRAGLQFPVGRVHRLLRKGNYS

- ▶ fragmentation table for charge state 5+
- ▶ specType=etd
- ▶ score=40.74
- ▶ F113278.dat
- ▶ query=q70154\_p1
- ▶ precursor=749.757440
- ▶ chargePrecursor=6
- ▶ itol=0.5

| AA    | c              | y       | z+1            | z+2            | z       | AA    |
|-------|----------------|---------|----------------|----------------|---------|-------|
| S[1]  | 30.221         | 899.507 | 896.303        | 0.806          | 896.102 | S[41] |
| G[2]  | 41.625         | 873.698 | 870.495        | 0.806          | 870.293 | G[40] |
| R[3]  | 72.846         | 862.294 | 859.090        | <b>859.292</b> | 858.889 | R[39] |
| G[4]  | 84.250         | 831.074 | 827.870        | 828.072        | 827.668 | G[38] |
| K[5]  | 109.869        | 819.669 | 816.466        | 816.667        | 816.264 | K[37] |
| Q[6]  | 135.481        | 794.050 | 790.847        | 791.048        | 790.645 | Q[36] |
| G[7]  | 146.885        | 788.439 | 785.235        | 785.437        | 785.033 | G[35] |
| G[8]  | 158.289        | 757.034 | 753.831        | 754.032        | 753.629 | G[34] |
| K[9]  | 183.908        | 745.630 | 742.426        | 742.628        | 742.225 | K[33] |
| A[10] | 198.116        | 720.011 | 716.807        | 717.009        | 716.606 | A[32] |
| R[11] | 229.336        | 705.804 | 702.600        | 702.802        | 702.998 | R[31] |
| A[12] | 243.543        | 674.584 | <b>671.380</b> | <b>671.581</b> | 671.178 | A[30] |
| K[13] | 269.162        | 660.376 | 657.172        | 657.374        | 656.971 | K[29] |
| A[14] | 283.370        | 634.757 | 631.553        | 631.755        | 631.352 | A[28] |
| K[15] | 308.989        | 620.550 | 617.346        | 617.548        | 617.144 | K[27] |
| S[16] | 326.395        | 594.931 | 591.727        | 591.929        | 591.525 | S[26] |
| R[17] | 357.615        | 577.524 | 574.321        | 574.522        | 574.119 | R[25] |
| S[18] | 375.022        | 546.304 | 543.100        | 543.302        | 542.899 | S[24] |
| S[19] | 392.428        | 520.898 | 525.694        | 525.896        | 525.492 | S[23] |
| R[20] | 423.648        | 511.491 | 508.287        | 508.489        | 508.085 | R[22] |
| A[21] | 437.856        | 480.271 | 477.067        | 477.269        | 476.866 | A[21] |
| G[22] | 449.260        | 466.064 | 462.860        | 463.061        | 462.658 | G[20] |
| L[23] | 471.877        | 454.659 | 451.456        | 451.657        | 451.254 | L[19] |
| Q[24] | 497.489        | 432.043 | 428.839        | 429.040        | 428.637 | Q[18] |
| F[25] | 526.902        | 406.431 | 403.227        | 403.429        | 403.026 | F[17] |
| P[26] | 546.313        | 377.017 | 373.813        | 374.015        | 373.612 | P[16] |
| V[27] | 566.126        | 357.607 | 354.403        | 354.604        | 354.201 | V[15] |
| G[28] | 577.531        | 337.793 | 334.589        | 334.791        | 334.388 | G[14] |
| R[29] | 608.751        | 326.389 | 323.185        | 323.386        | 322.983 | R[13] |
| V[30] | 628.565        | 299.168 | 293.963        | 292.156        | 291.753 | V[12] |
| H[31] | 655.976        | 275.955 | 272.151        | 272.353        | 271.949 | H[11] |
| R[32] | 687.197        | 247.943 | 244.739        | 244.941        | 244.538 | R[10] |
| L[33] | 709.814        | 216.723 | 213.519        | 213.721        | 213.317 | L[0]  |
| L[34] | 732.430        | 194.106 | 190.902        | 191.104        | 190.701 | L[8]  |
| R[35] | 763.651        | 171.489 | 168.285        | 168.487        | 168.084 | R[7]  |
| K[36] | 789.270        | 140.269 | 137.065        | 137.267        | 136.864 | K[6]  |
| G[37] | 800.674        | 114.650 | 111.446        | 111.648        | 111.245 | G[5]  |
| N[38] | <b>823.482</b> | 103.240 | 100.042        | 100.243        | 99.840  | N[4]  |
| Y[39] | <b>856.095</b> | 80.437  | 77.233         | 77.435         | 77.032  | Y[3]  |
| S[40] | 873.501        | 47.824  | 44.621         | 44.822         | 44.419  | S[2]  |
| E[41] | 899.310        | 30.418  | 27.214         | 27.416         | 27.013  | E[1]  |



# sp | Q8BFU2 | H2A3\_MOUSE

[Acetyl]SGRGKQGGKARAKAKSRSSRAGLQFPVGRVHRLLRKGNYS

- ▶ fragmentation table for charge state 1+
- ▶ specType=etd
- ▶ score=51.00
- ▶ F113278.dat
- ▶ query=q70160\_p1
- ▶ precursor=749.757580
- ▶ chargePrecursor=6
- ▶ itol=0.5

| AA | c  | y              | z+1      | z+2             | z               | AA       |       |
|----|----|----------------|----------|-----------------|-----------------|----------|-------|
| S  | 1  | 147.076        | 4493.505 | 4477.489        | 0.000           | 4476.478 | S[41] |
| G  | 2  | 204.098        | 4364.402 | 4348.444        | 0.000           | 4347.436 | G[40] |
| R  | 3  | <b>360.199</b> | 4307.441 | 4291.422        | 4292.430        | 4290.414 | R[39] |
| K  | 4  | <b>417.220</b> | 4151.340 | 4135.321        | 4136.329        | 4134.311 | K[38] |
| K  | 5  | <b>545.315</b> | 4094.318 | 4078.300        | 4079.307        | 4077.292 | K[37] |
| Q  | 6  | <b>673.374</b> | 3936.223 | 3920.205        | 3921.212        | 3919.197 | Q[36] |
| G  | 7  | <b>730.395</b> | 3838.165 | 3822.146        | 3823.154        | 3821.138 | G[35] |
| G  | 8  | <b>787.417</b> | 3781.143 | 3765.125        | 3766.132        | 3764.117 | G[34] |
| K  | 9  | <b>915.512</b> | 3724.122 | 3708.103        | 3709.111        | 3707.095 | K[33] |
| A  | 10 | <b>986.549</b> | 3596.027 | 3580.008        | 3581.016        | 3579.000 | A[32] |
| R  | 11 | 1142.550       | 3524.960 | 3508.941        | 3509.949        | 3507.933 | R[31] |
| A  | 12 | 1213.607       | 3368.889 | 3352.871        | 3353.878        | 3351.862 | A[30] |
| K  | 13 | 1341.762       | 3297.852 | 3281.833        | 3282.841        | 3280.825 | K[29] |
| A  | 14 | 1412.819       | 3169.757 | 3153.738        | 3154.746        | 3152.730 | A[28] |
| K  | 15 | 1540.914       | 3098.719 | 3082.701        | 3083.709        | 3081.693 | K[27] |
| S  | 16 | 1627.946       | 2970.625 | 2954.606        | 2955.614        | 2953.598 | S[26] |
| R  | 17 | 1784.047       | 2883.592 | 2867.574        | 2868.582        | 2866.566 | R[25] |
| S  | 18 | 1871.079       | 2727.493 | 2711.473        | 2712.480        | 2710.465 | S[24] |
| S  | 19 | 1958.111       | 2648.459 | 2632.441        | 2633.448        | 2631.433 | S[23] |
| R  | 20 | 2114.213       | 2563.427 | 2547.409        | 2548.416        | 2546.401 | R[22] |
| A  | 21 | 2185.250       | 2397.326 | 2381.307        | 2382.315        | 2380.300 | A[21] |
| G  | 22 | 2242.271       | 2326.289 | 2310.270        | 2311.278        | 2309.263 | G[20] |
| L  | 23 | 2385.355       | 2269.268 | 2253.249        | 2254.257        | 2252.241 | L[19] |
| Q  | 24 | 2483.414       | 2126.184 | 2110.165        | 2111.173        | 2109.157 | Q[18] |
| F  | 25 | 2630.463       | 2028.125 | 2012.106        | 2013.114        | 2011.098 | F[17] |
| P  | 26 | 2727.515       | 1881.057 | 1865.038        | 1866.046        | 1864.030 | P[16] |
| V  | 27 | 2826.603       | 1784.004 | 1767.985        | 1768.993        | 1766.977 | V[15] |
| G  | 28 | 2883.625       | 1684.935 | 1668.917        | 1669.924        | 1667.909 | G[14] |
| R  | 29 | 3039.726       | 1627.914 | 1611.895        | <b>1612.903</b> | 1610.887 | R[13] |
| V  | 30 | 3126.764       | 1471.813 | 1455.794        | 1456.802        | 1454.786 | V[12] |
| I  | 31 | 3275.853       | 1372.744 | <b>1366.726</b> | 1367.734        | 1365.718 | I[11] |
| R  | 32 | 3431.954       | 1235.685 | <b>1219.667</b> | 1220.675        | 1218.659 | R[10] |
| L  | 33 | 3545.038       | 1079.584 | 1063.566        | 1064.573        | 1062.558 | L[9]  |
| L  | 34 | 3658.123       | 966.500  | 950.482         | 951.489         | 949.474  | L[8]  |
| R  | 35 | 3814.224       | 853.416  | 837.398         | <b>838.405</b>  | 836.390  | R[7]  |
| K  | 36 | 3942.319       | 697.315  | 681.296         | 682.304         | 680.289  | K[6]  |
| G  | 37 | 3999.340       | 569.220  | 553.201         | 554.209         | 552.194  | G[5]  |
| N  | 38 | 4113.353       | 512.199  | 496.180         | 497.188         | 495.172  | N[4]  |
| V  | 39 | 4276.446       | 398.156  | 382.137         | 383.145         | 381.129  | V[3]  |
| S  | 40 | 4363.478       | 235.062  | 219.074         | 220.082         | 218.066  | S[2]  |
| E  | 41 | 4492.521       | 148.060  | 132.042         | 133.050         | 131.034  | E[1]  |

# sp | Q8BFU2 | H2A3\_MOUSE

[Acetyl]SGRGKQGGKARAKAKSRSSRAGLQFPVGRVHRLLRKGNYS

- ▶ fragmentation table for charge state 2+
- ▶ specType=etd
- ▶ score=51.00
- ▶ F113278.dat
- ▶ query=q70160.p1
- ▶ precursor=749.757580
- ▶ chargePrecursor=6
- ▶ itol=0.5

| AA   | c               | y               | #s1             | #s2             | z               | AA   |
|------|-----------------|-----------------|-----------------|-----------------|-----------------|------|
| G 1  | 74.062          | 2247.256        | 2229.267        | 0.804           | 2238.747        | S(1) |
| G 2  | 102.553         | 2182.735        | 2174.726        | 0.504           | 2174.222        | G(2) |
| R 3  | 180.603         | 2154.224        | 2146.215        | 2146.719        | 2145.711        | R(3) |
| G 4  | 209.114         | 2076.174        | 2068.164        | 2068.666        | 2067.660        | G(3) |
| K 5  | 273.161         | 2047.663        | 2039.653        | 2040.157        | 2039.150        | K(3) |
| G 6  | 327.194         | 1988.615        | 1979.602        | 1978.110        | 1975.102        | G(6) |
| G 7  | 385.704         | 1919.586        | <b>1911.577</b> | <b>1912.081</b> | 1911.073        | G(5) |
| G 8  | 394.212         | 1891.075        | <b>1883.066</b> | <b>1883.570</b> | 1882.562        | G(4) |
| K 9  | 458.260         | 1862.565        | <b>1854.555</b> | 1855.059        | <b>1854.051</b> | K(3) |
| A 10 | 493.778         | 1798.511        | 1790.500        | 1791.012        | 1790.004        | A(3) |
| R 11 | <b>571.829</b>  | 1762.999        | 1754.989        | 1755.493        | 1754.485        | R(1) |
| A 12 | <b>607.347</b>  | 1684.949        | 1676.939        | <b>1677.443</b> | 1676.435        | A(3) |
| R 13 | <b>671.395</b>  | 1649.420        | 1641.410        | <b>1641.924</b> | 1640.916        | R(2) |
| A 14 | <b>706.913</b>  | 1585.363        | 1577.353        | <b>1577.876</b> | 1576.868        | A(2) |
| K 15 | <b>770.961</b>  | 1549.861        | <b>1541.854</b> | <b>1542.358</b> | 1541.350        | K(2) |
| S 16 | <b>814.477</b>  | 1485.816        | 1477.807        | 1478.310        | 1477.303        | S(2) |
| R 17 | 822.527         | <b>1442.300</b> | 1434.291        | <b>1434.794</b> | 1433.786        | R(2) |
| S 18 | <b>836.043</b>  | 1364.260        | 1356.250        | <b>1356.744</b> | 1355.736        | S(2) |
| S 19 | <b>870.559</b>  | 1320.733        | <b>1312.724</b> | <b>1313.228</b> | 1312.220        | S(2) |
| R 20 | 1057.610        | 1277.211        | 1269.200        | 1269.712        | 1268.704        | R(2) |
| A 21 | <b>1093.128</b> | 1199.161        | <b>1191.157</b> | <b>1191.661</b> | 1190.653        | A(1) |
| G 22 | 1121.639        | 1163.648        | 1155.639        | 1156.143        | 1155.135        | G(2) |
| L 23 | <b>1178.181</b> | 1128.137        | 1120.127        | 1120.630        | 1119.622        | L(1) |
| G 24 | <b>1242.211</b> | 1078.595        | <b>1070.586</b> | 1071.090        | <b>1070.082</b> | G(1) |
| F 25 | 1315.745        | 1014.566        | <b>1006.557</b> | <b>1007.061</b> | 1006.053        | F(1) |
| F 26 | 1364.271        | 941.034         | 933.023         | 933.526         | 932.519         | F(1) |
| V 27 | <b>1413.805</b> | 892.506         | 884.496         | 885.000         | 884.992         | V(1) |
| G 28 | <b>1442.316</b> | 842.971         | <b>834.962</b>  | <b>835.466</b>  | 834.458         | G(1) |
| R 29 | 1500.889        | <b>814.461</b>  | <b>806.451</b>  | <b>806.955</b>  | 805.947         | R(1) |
| V 30 | 1569.901        | 736.410         | 728.401         | 728.905         | 727.897         | V(1) |
| H 31 | 1638.430        | 688.876         | 678.866         | 679.370         | 678.363         | H(1) |
| R 32 | 1716.461        | 618.346         | <b>610.337</b>  | 610.841         | <b>609.833</b>  | R(1) |
| L 33 | 1773.023        | 540.296         | 532.286         | 532.790         | 531.783         | L(1) |
| L 34 | 1829.568        | 469.754         | 459.743         | 459.246         | 458.240         | L(1) |
| R 35 | 1907.615        | 427.212         | 419.202         | 419.706         | 418.699         | R(1) |
| K 36 | 1971.663        | 349.161         | 341.152         | 341.656         | 340.648         | K(1) |
| G 37 | 2000.174        | 285.114         | 277.104         | 277.608         | 276.600         | G(1) |
| N 38 | 2057.195        | 256.603         | 248.594         | 249.098         | 248.090         | N(1) |
| V 39 | 2138.227        | 199.562         | 191.552         | 192.056         | 191.048         | V(1) |
| S 40 | 2192.243        | 118.056         | 110.046         | 110.549         | 109.541         | S(1) |
| E 41 | 2246.764        | 74.534          | 66.524          | 67.028          | 66.021          | E(1) |

# sp | Q8BFU2 | H2A3\_MOUSE

[Acetyl]SGRGKQGGKARAKAKSRSSRAGLQFPVGRVHRLLRKGNYS

- ▶ fragmentation table for charge state 3+
- ▶ specType=etd
- ▶ score=51.00
- ▶ F113278.dat
- ▶ query=q70160.p1
- ▶ precursor=749.757580
- ▶ chargePrecursor=6
- ▶ itol=0.5

| AA | c  | y               | z+1             | z+2             | z               | AA       |       |
|----|----|-----------------|-----------------|-----------------|-----------------|----------|-------|
| S  | 1  | 49.697          | 1493.167        | 0.672           | 1492.831        | S[41]    |       |
| G  | 2  | 68.704          | 1455.492        | 1450.153        | 0.672           | 1449.811 | G[40] |
| R  | 3  | 130.738         | 1438.485        | 1431.140        | <b>1431.482</b> | 1430.810 | R[39] |
| G  | 4  | 139.745         | 1384.451        | 1379.112        | <b>1379.448</b> | 1378.770 | G[38] |
| K  | 5  | 182.443         | 1365.444        | 1360.105        | 1360.441        | 1359.769 | K[37] |
| Q  | 6  | 235.330         | 1322.740        | 1317.401        | 1317.742        | 1317.070 | Q[36] |
| G  | 7  | 244.137         | 1280.080        | <b>1274.720</b> | <b>1275.056</b> | 1274.388 | G[35] |
| G  | 8  | 283.144         | 1261.053        | <b>1255.713</b> | <b>1256.049</b> | 1255.377 | G[34] |
| K  | 9  | 305.842         | 1242.045        | <b>1236.706</b> | <b>1237.042</b> | 1236.370 | K[33] |
| A  | 10 | 329.521         | 1199.347        | 1194.008        | 1194.344        | 1193.672 | A[32] |
| R  | 11 | 381.555         | <b>1175.668</b> | <b>1170.329</b> | <b>1170.664</b> | 1169.993 | R[31] |
| A  | 12 | 409.234         | 1129.594        | 1124.255        | 1124.591        | 1123.920 | A[30] |
| R  | 13 | 447.932         | 1099.950        | <b>1094.616</b> | <b>1094.952</b> | 1094.280 | R[29] |
| A  | 14 | 471.611         | <b>1057.257</b> | <b>1051.917</b> | <b>1052.253</b> | 1051.582 | A[28] |
| K  | 15 | 514.310         | 1033.978        | 1028.238        | 1028.574        | 1027.902 | K[27] |
| S  | 16 | 543.320         | 990.880         | 985.540         | <b>985.876</b>  | 985.204  | S[26] |
| R  | 17 | 595.354         | <b>961.869</b>  | <b>956.529</b>  | <b>956.865</b>  | 956.193  | R[25] |
| S  | 18 | 624.365         | 909.390         | 904.050         | 904.386         | 903.714  | S[24] |
| S  | 19 | 653.375         | 880.825         | <b>875.485</b>  | <b>875.821</b>  | 875.149  | S[23] |
| R  | 20 | 705.409         | 851.814         | 846.474         | 846.810         | 846.138  | R[22] |
| A  | 21 | 729.088         | 799.760         | 794.421         | 794.757         | 794.085  | A[21] |
| G  | 22 | 798.095         | 776.101         | <b>770.762</b>  | <b>771.098</b>  | 770.426  | G[20] |
| L  | 23 | <b>785.790</b>  | 737.064         | 731.724         | 732.060         | 731.410  | L[19] |
| Q  | 24 | <b>828.476</b>  | 719.399         | 714.060         | 714.396         | 713.724  | Q[18] |
| F  | 25 | 877.499         | 676.713         | <b>671.374</b>  | <b>671.710</b>  | 671.038  | F[17] |
| P  | 26 | 909.850         | 627.600         | 622.261         | 622.607         | 622.015  | P[16] |
| V  | 27 | <b>942.873</b>  | 595.339         | 590.000         | 590.336         | 589.664  | V[15] |
| G  | 28 | <b>961.880</b>  | 562.317         | 556.977         | 557.313         | 556.641  | G[14] |
| D  | 29 | 1013.914        | 543.305         | 537.966         | 538.302         | 537.630  | D[13] |
| V  | 30 | 1046.938        | 491.276         | 485.936         | 486.272         | 485.600  | V[12] |
| H  | 31 | 1092.823        | 458.253         | 452.913         | 453.249         | 452.577  | H[11] |
| R  | 32 | 1144.656        | 412.567         | 407.227         | 407.563         | 406.891  | R[10] |
| L  | 33 | 1182.351        | <b>360.533</b>  | 355.193         | 355.529         | 354.857  | L[9]  |
| L  | 34 | <b>1220.646</b> | 322.836         | 317.496         | 317.832         | 317.161  | L[8]  |
| T  | 35 | 1272.679        | 285.144         | 279.804         | 280.140         | 279.468  | T[7]  |
| K  | 36 | 1314.778        | 233.110         | 227.770         | 228.106         | 227.434  | K[6]  |
| G  | 37 | 1333.785        | 190.412         | 185.072         | 185.408         | 184.736  | G[5]  |
| N  | 38 | 1371.799        | 171.404         | 166.064         | 166.401         | 165.729  | N[4]  |
| V  | 39 | 1426.154        | 133.390         | 128.051         | 128.387         | 127.715  | V[3]  |
| S  | 40 | 1455.164        | 79.036          | 73.696          | 74.032          | 73.360   | S[2]  |
| E  | 41 | 1498.178        | 50.025          | 44.685          | 45.021          | 44.349   | E[1]  |



# sp | Q8BFU2 | H2A3\_MOUSE

[Acetyl]SGRGKQGGKARAKAKSRSSRAGLQFPVGRVHLLRKGNYSE

- ▶ fragmentation table for charge state 4+
- ▶ specType=etd
- ▶ score=51.00
- ▶ F113278.dat
- ▶ query=q70160.p1
- ▶ precursor=749.757580
- ▶ chargePrecursor=6
- ▶ itol=0.5

| AA | c  | y               | #s1             | #s2             | z               | AA              |      |
|----|----|-----------------|-----------------|-----------------|-----------------|-----------------|------|
| S  | 1  | 37.505          | 1124.142        | 1120.137        | 0.758           | 1119.877        | S(4) |
| G  | 2  | 51.780          | <b>1091.871</b> | 1087.866        | 0.755           | 1087.614        | G(4) |
| R  | 3  | 90.805          | 1077.616        | 1073.611        | <b>1073.863</b> | 1073.350        | R(3) |
| G  | 4  | 109.061         | 1038.500        | <b>1034.586</b> | 1034.838        | <b>1034.334</b> | G(3) |
| K  | 5  | 137.084         | 1024.335        | 1020.330        | <b>1020.582</b> | 1020.078        | K(3) |
| G  | 6  | 169.059         | 992.311         | <b>988.307</b>  | <b>988.559</b>  | 988.055         | G(2) |
| G  | 7  | 183.354         | 956.291         | 952.287         | <b>956.544</b>  | 956.040         | G(5) |
| G  | 8  | 197.610         | 948.041         | 944.037         | <b>942.289</b>  | 941.785         | G(4) |
| K  | 9  | 239.633         | 931.788         | 927.783         | 928.033         | 927.529         | K(3) |
| A  | 10 | 247.303         | <b>899.762</b>  | 895.757         | 896.009         | 895.504         | A(3) |
| R  | 11 | 286.418         | 882.003         | 877.998         | 878.250         | 877.746         | R(3) |
| A  | 12 | 304.177         | 842.918         | <b>838.973</b>  | 839.225         | <b>838.721</b>  | A(3) |
| K  | 13 | 336.201         | 825.215         | 821.214         | 821.466         | 820.962         | K(2) |
| A  | 14 | 353.960         | 793.195         | 789.190         | 789.442         | 788.938         | A(2) |
| K  | 15 | 385.984         | 775.435         | <b>771.431</b>  | <b>771.683</b>  | <b>771.179</b>  | K(2) |
| S  | 16 | 407.742         | 743.412         | 739.407         | 739.659         | 739.155         | S(2) |
| R  | 17 | 446.767         | 721.954         | 717.949         | 717.901         | 717.397         | R(2) |
| S  | 18 | 468.526         | 692.628         | 688.623         | 688.876         | 688.372         | S(4) |
| S  | 19 | 490.283         | 660.870         | 656.866         | 657.118         | 656.614         | S(3) |
| R  | 20 | 529.309         | 638.112         | 634.108         | 635.360         | 634.856         | R(2) |
| A  | 21 | 547.088         | 600.087         | 596.082         | 596.334         | 595.830         | A(2) |
| G  | 22 | 561.323         | 582.328         | 578.323         | 578.575         | 578.071         | G(2) |
| L  | 23 | 589.384         | 568.072         | 564.068         | 564.320         | 563.816         | L(2) |
| Q  | 24 | 621.609         | 539.801         | 535.797         | 536.049         | 535.545         | Q(1) |
| F  | 25 | 658.376         | 507.787         | 503.782         | 504.034         | 503.530         | F(1) |
| F  | 26 | 682.639         | 471.020         | 467.015         | 467.267         | 466.763         | F(1) |
| V  | 27 | <b>707.406</b>  | 446.756         | 442.752         | 443.004         | 442.500         | V(1) |
| G  | 28 | 721.662         | 421.989         | 417.985         | 418.237         | <b>417.733</b>  | G(1) |
| R  | 29 | 760.687         | 389.734         | 385.729         | 385.981         | 385.477         | R(1) |
| V  | 30 | 785.454         | 368.709         | 364.704         | 364.956         | 364.452         | V(1) |
| H  | 31 | 819.710         | 343.942         | 339.937         | 340.189         | 339.685         | H(1) |
| R  | 32 | 858.744         | 309.677         | 305.672         | 305.924         | 305.420         | R(1) |
| L  | 33 | 887.015         | 270.652         | 266.647         | 266.899         | 266.395         | L(1) |
| L  | 34 | <b>915.286</b>  | 242.381         | 238.376         | 238.628         | 238.124         | L(1) |
| R  | 35 | 934.311         | 214.110         | 210.105         | 210.357         | 209.853         | R(1) |
| K  | 36 | <b>966.335</b>  | 175.084         | 171.080         | 171.332         | 170.828         | K(1) |
| G  | 37 | <b>1000.590</b> | 143.061         | 139.056         | 139.308         | 138.804         | G(1) |
| N  | 38 | <b>1029.101</b> | 128.805         | 124.800         | 125.052         | 124.548         | N(1) |
| V  | 39 | 1067.777        | 100.294         | 96.289          | 96.542          | 96.038          | V(1) |
| S  | 40 | <b>1091.825</b> | 98.529          | 94.524          | 94.776          | 94.272          | S(1) |
| E  | 41 | 1123.888        | 97.771          | 93.766          | 94.018          | 93.514          | E(1) |

# sp | Q8BFU2 | H2A3\_MOUSE

[Acetyl]SGRGKQGGKARAKAKSRSSRAGLQFPVGRVHRLLRKGNYS

- ▶ fragmentation table for charge state 5+
- ▶ specType=etd
- ▶ score=51.00
- ▶ F113278.dat
- ▶ query=q70160\_p1
- ▶ precursor=749.757580
- ▶ chargePrecursor=6
- ▶ itol=0.5

| AA    | c              | y       | z+1            | z+2            | z       | AA    |
|-------|----------------|---------|----------------|----------------|---------|-------|
| S[1]  | 30.221         | 899.507 | 896.303        | 0.806          | 896.102 | S[41] |
| G[2]  | 41.625         | 873.698 | 870.495        | 0.806          | 870.293 | G[40] |
| R[3]  | 72.846         | 862.294 | 859.090        | 859.292        | 858.889 | R[39] |
| G[4]  | 84.250         | 831.074 | 827.870        | 828.072        | 827.668 | G[38] |
| K[5]  | 109.869        | 819.669 | 816.466        | 816.667        | 816.264 | K[37] |
| Q[6]  | 135.481        | 794.050 | 790.847        | 791.048        | 790.645 | Q[36] |
| G[7]  | 146.885        | 788.439 | 785.235        | 785.437        | 785.033 | G[35] |
| G[8]  | 158.289        | 757.034 | 753.831        | 754.032        | 753.629 | G[34] |
| K[9]  | 183.908        | 745.630 | 742.426        | 742.628        | 742.225 | K[33] |
| A[10] | 198.116        | 720.011 | 716.807        | 717.009        | 716.606 | A[32] |
| R[11] | 229.336        | 705.804 | 702.600        | 702.802        | 702.998 | R[31] |
| A[12] | 243.543        | 674.584 | <b>671.380</b> | <b>671.581</b> | 671.178 | A[30] |
| K[13] | 269.162        | 660.376 | 657.172        | 657.374        | 656.971 | K[29] |
| A[14] | 283.370        | 634.757 | 631.553        | 631.755        | 631.352 | A[28] |
| K[15] | 308.989        | 620.550 | 617.346        | 617.548        | 617.144 | K[27] |
| S[16] | 326.395        | 594.931 | 591.727        | 591.929        | 591.525 | S[26] |
| R[17] | 357.615        | 577.524 | 574.321        | 574.522        | 574.119 | R[25] |
| S[18] | 375.022        | 546.304 | 543.100        | 543.302        | 542.899 | S[24] |
| S[19] | 392.428        | 520.898 | 525.694        | 525.896        | 525.492 | S[23] |
| R[20] | 423.648        | 511.491 | 508.287        | 508.489        | 508.086 | R[22] |
| A[21] | 437.856        | 480.271 | 477.067        | 477.269        | 476.866 | A[21] |
| G[22] | 449.260        | 466.064 | 462.860        | 463.061        | 462.658 | G[20] |
| L[23] | 471.877        | 454.659 | 451.456        | 451.657        | 451.254 | L[19] |
| Q[24] | 497.489        | 432.043 | 428.839        | 429.040        | 428.637 | Q[18] |
| F[25] | 526.902        | 406.431 | 403.227        | 403.429        | 403.026 | F[17] |
| P[26] | 546.313        | 377.017 | 373.813        | 374.015        | 373.612 | P[16] |
| V[27] | 566.126        | 357.607 | 354.403        | 354.604        | 354.201 | V[15] |
| G[28] | 577.531        | 337.793 | 334.589        | 334.791        | 334.388 | G[14] |
| R[29] | 608.751        | 326.389 | 323.185        | 323.386        | 322.983 | R[13] |
| V[30] | 628.555        | 299.168 | 293.963        | 292.156        | 291.753 | V[12] |
| H[31] | 655.976        | 275.955 | 272.151        | 272.353        | 271.949 | H[11] |
| R[32] | 687.197        | 247.943 | 244.739        | 244.941        | 244.538 | R[10] |
| L[33] | 709.814        | 216.723 | 213.519        | 213.721        | 213.317 | L[0]  |
| L[34] | 732.430        | 194.106 | 190.902        | 191.104        | 190.701 | L[8]  |
| R[35] | 763.651        | 171.489 | 168.285        | 168.487        | 168.084 | R[7]  |
| K[36] | 789.270        | 140.269 | 137.065        | 137.267        | 136.864 | K[6]  |
| G[37] | <b>800.674</b> | 114.650 | 111.446        | 111.648        | 111.245 | G[5]  |
| N[38] | 823.482        | 103.246 | 100.042        | 100.243        | 99.840  | N[4]  |
| Y[39] | <b>856.095</b> | 80.437  | 77.233         | 77.435         | 77.032  | Y[3]  |
| S[40] | 873.501        | 47.824  | 44.621         | 44.822         | 44.419  | S[2]  |
| E[41] | 899.310        | 30.418  | 27.214         | 27.416         | 27.013  | E[1]  |



# sp | Q8CGP5 | H2A1F\_MOUSE

[Acetyl]SGRGKQGGKARAKAKTRSSRAGLQFPVGRVHLLRKGNYSE

- ▶ fragmentation table for charge state 1+
- ▶ specType=etd
- ▶ score=47.11
- ▶ F113278.dat
- ▶ query=q70245.p1
- ▶ precursor=644.793150
- ▶ chargePrecursor=7
- ▶ itol=0.5

| AA   | c              | y               | z+1             | z+2             | z        | AA   |
|------|----------------|-----------------|-----------------|-----------------|----------|------|
| S 1  | 147.076        | 4507.521        | 4491.502        | 0.000           | 4490.494 | S 41 |
| G 2  | 204.098        | 4378.478        | 4362.459        | 0.000           | 4361.451 | G 40 |
| R 3  | <b>360.199</b> | 4321.457        | 4305.438        | 4306.448        | 4304.430 | R 39 |
| G 4  | <b>417.220</b> | 4165.355        | 4149.337        | 4150.345        | 4148.329 | G 38 |
| K 5  | <b>545.315</b> | 4106.334        | 4090.315        | 4093.322        | 4091.307 | K 37 |
| Q 6  | <b>673.374</b> | 3989.239        | 3974.220        | 3965.228        | 3963.211 | Q 36 |
| G 7  | <b>730.395</b> | 3852.180        | 3836.162        | 3837.170        | 3835.154 | G 35 |
| G 8  | 787.417        | 3795.159        | 3779.140        | 3780.148        | 3778.132 | G 34 |
| K 9  | <b>915.512</b> | 3738.138        | 3722.119        | 3723.127        | 3721.111 | K 33 |
| A 10 | <b>986.549</b> | 3610.043        | 3594.024        | 3595.032        | 3593.016 | A 32 |
| R 11 | 1142.050       | 3536.005        | 3522.987        | 3523.995        | 3521.979 | R 31 |
| A 12 | 1213.607       | 3382.904        | 3366.886        | 3367.893        | 3366.878 | A 30 |
| R 13 | 1341.782       | 3311.867        | 3295.848        | 3296.856        | 3294.841 | R 29 |
| A 14 | 1412.819       | 3183.772        | 3167.754        | 3168.761        | 3166.746 | A 28 |
| K 15 | 1540.914       | 3112.735        | 3096.716        | 3097.724        | 3095.709 | K 27 |
| T 16 | 1641.962       | 2984.640        | 2968.621        | 2969.629        | 2967.614 | T 26 |
| R 17 | 1796.053       | 2883.592        | 2867.574        | 2868.582        | 2866.566 | R 25 |
| S 18 | 1885.095       | 2727.491        | 2711.473        | 2712.480        | 2710.465 | S 24 |
| S 19 | 1972.127       | 2640.455        | 2624.441        | 2625.448        | 2623.433 | S 23 |
| R 20 | 2128.238       | 2553.427        | 2537.409        | 2538.416        | 2536.401 | R 22 |
| A 21 | 2199.269       | 2497.326        | 2481.307        | 2482.315        | 2480.300 | A 21 |
| G 22 | 2256.287       | 2326.289        | 2310.270        | 2311.278        | 2309.263 | G 20 |
| L 23 | 2369.371       | 2269.268        | 2253.249        | 2254.257        | 2252.241 | L 19 |
| Q 24 | 2497.439       | 2156.184        | 2140.165        | 2141.173        | 2139.157 | Q 18 |
| F 25 | 2644.498       | 2028.125        | 2012.106        | 2013.114        | 2011.099 | F 17 |
| F 26 | 2741.551       | 1881.057        | 1865.038        | 1866.046        | 1864.031 | F 16 |
| V 27 | 2840.619       | 1784.004        | 1767.985        | 1768.993        | 1766.977 | V 15 |
| G 28 | 2897.641       | <b>1684.935</b> | 1668.917        | 1669.924        | 1667.909 | G 14 |
| R 29 | 3053.742       | 1627.914        | 1611.895        | 1612.903        | 1610.887 | R 13 |
| V 30 | 3152.810       | 1514.833        | <b>1455.794</b> | 1456.802        | 1454.785 | V 12 |
| H 31 | 3259.889       | 1372.744        | <b>1356.726</b> | <b>1357.734</b> | 1355.718 | H 11 |
| R 32 | 3445.970       | 1235.665        | <b>1219.667</b> | 1220.675        | 1218.659 | R 10 |
| L 33 | 3559.054       | 1079.584        | 1063.566        | <b>1064.573</b> | 1062.558 | L 9  |
| L 34 | 3672.138       | <b>966.500</b>  | 950.482         | 951.489         | 949.474  | L 8  |
| R 35 | 3828.239       | 853.416         | 837.398         | 838.405         | 836.390  | R 7  |
| K 36 | 3958.334       | 697.335         | 681.316         | 682.324         | 680.309  | K 6  |
| G 37 | 4013.356       | 569.220         | 553.201         | 554.209         | 552.194  | G 5  |
| N 38 | 4127.399       | 512.109         | 496.100         | 497.108         | 495.172  | N 4  |
| V 39 | 4290.462       | 396.156         | 380.137         | 381.145         | 380.129  | V 3  |
| S 40 | 4377.494       | 235.092         | 219.074         | 220.082         | 218.066  | S 2  |
| E 41 | 4506.537       | 148.060         | 132.042         | 133.050         | 131.034  | E 1  |

# sp | Q8CGP5 | H2A1F\_MOUSE

[Acetyl]SGRGKQGGKARAKAKTRSSRAGLQFPVGRVHLLLRKGNYS

- ▶ fragmentation table for charge state 2+
- ▶ specType=etd
- ▶ score=47.11
- ▶ F113278.dat
- ▶ query=q70245.p1
- ▶ precursor=644.793150
- ▶ chargePrecursor=7
- ▶ itol=0.5

| AA | c  | y               | #s1             | #s2             | z               | AA              |       |
|----|----|-----------------|-----------------|-----------------|-----------------|-----------------|-------|
| S  | 1  | 74.062          | 2054.264        | 2266.255        | 8.804           | 2245.781        | S[41] |
| G  | 2  | 102.553         | 2189.743        | 2381.733        | 0.504           | 2181.220        | G[40] |
| R  | 3  | 180.603         | 2641.232        | 2153.233        | 2153.236        | 2152.710        | R[39] |
| G  | 4  | 209.114         | 2083.181        | 2075.172        | 2075.676        | 2074.660        | G[38] |
| K  | 5  | 273.181         | 2054.871        | 2046.681        | 2047.105        | 2046.157        | K[37] |
| G  | 6  | 337.194         | 1990.622        | 1982.614        | 1983.118        | 1982.110        | G[36] |
| G  | 7  | 385.703         | 1936.594        | 1928.584        | 1929.088        | 1928.080        | G[35] |
| G  | 8  | 394.212         | 1898.083        | 1890.074        | 1890.578        | 1889.570        | G[34] |
| K  | 9  | <b>458.260</b>  | 1869.572        | 1861.563        | 1862.067        | 1861.059        | K[33] |
| A  | 10 | 493.778         | 1805.525        | 1797.516        | 1798.019        | 1797.012        | A[32] |
| R  | 11 | <b>571.829</b>  | 1770.008        | 1761.997        | 1762.501        | 1761.493        | R[31] |
| A  | 12 | <b>607.347</b>  | 1692.956        | 1684.946        | 1685.450        | 1684.442        | A[30] |
| R  | 13 | <b>671.395</b>  | 1656.437        | 1648.428        | 1648.932        | 1647.924        | R[29] |
| A  | 14 | <b>706.913</b>  | 1592.390        | 1584.380        | 1584.884        | 1583.876        | A[28] |
| K  | 15 | <b>770.961</b>  | 1556.871        | 1548.862        | 1549.366        | 1548.358        | K[27] |
| T  | 16 | <b>821.485</b>  | 1492.824        | <b>1484.814</b> | 1485.318        | <b>1484.310</b> | T[26] |
| R  | 17 | 896.526         | <b>1442.300</b> | 1434.291        | 1434.794        | 1433.786        | R[25] |
| S  | 18 | 913.053         | 1364.249        | <b>1356.240</b> | <b>1356.744</b> | 1355.736        | S[24] |
| S  | 19 | <b>986.567</b>  | 1328.733        | <b>1312.724</b> | <b>1313.228</b> | 1312.220        | S[23] |
| R  | 20 | <b>1064.618</b> | 1277.217        | 1269.208        | <b>1269.712</b> | 1268.704        | R[22] |
| A  | 21 | <b>1100.136</b> | <b>1199.167</b> | <b>1191.157</b> | <b>1191.661</b> | 1190.653        | A[21] |
| G  | 22 | <b>1128.647</b> | 1153.648        | 1145.639        | 1146.143        | 1145.135        | G[20] |
| L  | 23 | 1155.165        | 1138.137        | 1129.128        | 1129.632        | 1128.624        | L[19] |
| Q  | 24 | <b>1249.218</b> | 1078.595        | <b>1070.586</b> | 1071.090        | <b>1070.082</b> | Q[18] |
| F  | 25 | <b>1322.753</b> | 1014.566        | <b>1006.557</b> | <b>1007.061</b> | 1006.053        | F[17] |
| F  | 26 | 1371.279        | 941.033         | 933.023         | 933.526         | 932.519         | F[16] |
| V  | 27 | 1420.811        | 892.506         | <b>884.496</b>  | <b>885.000</b>  | 883.992         | V[15] |
| G  | 28 | <b>1449.324</b> | <b>842.971</b>  | <b>834.962</b>  | <b>835.466</b>  | <b>834.458</b>  | G[14] |
| R  | 29 | 1527.814        | 814.441         | <b>806.431</b>  | <b>806.935</b>  | 805.927         | R[13] |
| V  | 30 | 1576.909        | 736.410         | 728.401         | 728.905         | 727.897         | V[12] |
| H  | 31 | 1645.438        | 688.876         | <b>678.866</b>  | <b>679.370</b>  | 678.363         | H[11] |
| R  | 32 | 1723.489        | 618.346         | 610.337         | 610.841         | 609.833         | R[10] |
| L  | 33 | 1780.031        | 540.296         | 532.286         | 532.790         | 531.783         | L[9]  |
| L  | 34 | 1836.573        | 469.764         | 461.754         | 462.258         | 461.250         | L[8]  |
| R  | 35 | 1914.623        | 427.232         | 419.222         | 419.726         | 418.718         | R[7]  |
| K  | 36 | 1978.671        | 349.181         | 341.172         | 341.676         | 340.668         | K[6]  |
| G  | 37 | 2067.181        | 285.114         | 277.104         | 277.608         | 276.600         | G[5]  |
| N  | 38 | 2094.203        | 256.603         | 248.594         | 249.098         | 248.090         | N[4]  |
| V  | 39 | 2145.736        | 189.562         | 181.552         | 182.056         | 181.048         | V[3]  |
| S  | 40 | 2199.251        | 118.056         | 110.046         | 110.550         | 109.542         | S[2]  |
| E  | 41 | 2253.772        | 74.534          | 66.524          | 67.028          | 66.021          | E[1]  |

# sp | Q8CGP5 | H2A1F\_MOUSE

[Acetyl]SGRGKQGGKARAKAKTRSSRAGLQFPVGRVHLLRKGNYSE

- ▶ fragmentation table for charge state 3+
- ▶ specType=etd
- ▶ score=47.11
- ▶ F113278.dat
- ▶ query=q70245.p1
- ▶ precursor=644.793150
- ▶ chargePrecursor=7
- ▶ itol=0.5

| AA   | c               | y               | z+1             | z+2             | z              | AA   |
|------|-----------------|-----------------|-----------------|-----------------|----------------|------|
| S 1  | 49.697          | 1503.175        | 1497.830        | 0.672           | 1497.503       | S 41 |
| G 2  | 68.704          | 1460.164        | 1454.825        | 0.672           | 1454.498       | G 40 |
| R 3  | 130.738         | 1441.157        | <b>1435.817</b> | <b>1436.153</b> | 1435.485       | R 39 |
| K 4  | 139.745         | 1389.127        | 1383.724        | 1384.120        | 1383.448       | K 38 |
| K 5  | 182.443         | 1370.116        | 1364.777        | <b>1365.113</b> | 1364.441       | K 37 |
| Q 6  | 235.788         | 1327.418        | 1322.876        | 1322.814        | 1323.741       | Q 36 |
| G 7  | 244.137         | 1384.732        | 1379.502        | 1379.125        | 1379.055       | G 35 |
| G 8  | 283.144         | 1295.725        | <b>1260.385</b> | <b>1260.721</b> | 1260.049       | G 34 |
| K 9  | 305.842         | 1246.711        | <b>1241.378</b> | <b>1241.714</b> | 1241.041       | K 33 |
| A 10 | 329.521         | 1234.019        | <b>1198.679</b> | <b>1199.015</b> | 1198.344       | A 32 |
| R 11 | 381.555         | 1199.948        | 1175.000        | 1175.336        | 1174.664       | R 31 |
| A 12 | 409.234         | <b>1128.308</b> | 1123.967        | 1123.303        | 1123.631       | A 30 |
| R 13 | 447.832         | 1104.627        | 1099.288        | 1099.624        | 1098.952       | R 29 |
| A 14 | 471.611         | 1061.929        | 1056.589        | 1056.925        | 1056.253       | A 28 |
| K 15 | 514.310         | <b>1038.250</b> | 1032.910        | 1033.246        | 1032.574       | K 27 |
| T 16 | 547.992         | 995.552         | <b>990.212</b>  | <b>990.548</b>  | <b>989.876</b> | T 26 |
| R 17 | 600.626         | 981.860         | 965.529         | 966.865         | 966.193        | R 25 |
| S 18 | 629.019         | 909.839         | 904.496         | 904.832         | 904.160        | S 24 |
| S 19 | <b>658.047</b>  | 880.825         | <b>875.485</b>  | <b>875.821</b>  | 875.149        | S 23 |
| R 20 | <b>710.081</b>  | 851.814         | <b>846.474</b>  | <b>846.810</b>  | <b>846.138</b> | R 22 |
| A 21 | 724.706         | 799.789         | <b>794.441</b>  | <b>794.777</b>  | <b>794.105</b> | A 21 |
| G 22 | <b>752.767</b>  | 778.101         | <b>770.762</b>  | <b>771.098</b>  | <b>770.426</b> | G 20 |
| L 23 | 797.932         | <b>757.094</b>  | 752.752         | 753.088         | 752.416        | L 19 |
| Q 24 | <b>833.148</b>  | 719.599         | <b>714.060</b>  | <b>714.396</b>  | 713.724        | Q 19 |
| F 25 | <b>882.171</b>  | 678.713         | <b>671.374</b>  | <b>671.710</b>  | 671.038        | F 17 |
| F 26 | 914.582         | 627.680         | 622.351         | 622.687         | 622.015        | F 16 |
| V 27 | 967.545         | 595.339         | 590.000         | 590.336         | 589.664        | V 15 |
| G 28 | <b>966.552</b>  | 562.317         | 556.977         | 557.313         | 556.641        | G 14 |
| R 29 | 1017.556        | 543.305         | 537.970         | 538.306         | 537.634        | R 12 |
| V 30 | <b>1051.608</b> | 491.279         | 485.936         | 486.272         | 485.600        | V 12 |
| H 31 | 1097.294        | <b>458.253</b>  | 452.913         | 453.249         | 452.577        | H 11 |
| R 32 | 1149.538        | 412.567         | 407.227         | 407.563         | 406.891        | R 10 |
| L 33 | 1187.023        | <b>360.533</b>  | 355.193         | 355.529         | 354.857        | L 9  |
| L 34 | 1224.718        | 322.858         | 317.509         | 317.835         | 317.163        | L 8  |
| R 35 | 1276.751        | 285.144         | 279.804         | 280.140         | 279.468        | R 7  |
| R 36 | 1319.450        | 233.110         | 227.770         | 228.105         | 227.433        | R 6  |
| G 37 | 1338.467        | 190.412         | 185.072         | 185.408         | 184.736        | G 5  |
| N 38 | 1376.471        | 171.404         | 166.065         | 166.401         | 165.729        | N 4  |
| V 39 | 1430.826        | 133.390         | 128.051         | 128.387         | 127.715        | V 3  |
| S 40 | 1459.836        | 79.036          | 73.696          | 74.032          | 73.360         | S 2  |
| E 41 | 1502.850        | 50.029          | 44.689          | 45.021          | 44.349         | E 1  |

# sp | Q8CGP5 | H2A1F\_MOUSE

[Acetyl]SGRGKQGGKARAKAKTRSSRAGLQFPVGRVHRLLRKGNYS

- ▶ fragmentation table for charge state 4+
- ▶ specType=etd
- ▶ score=47.11
- ▶ F113278.dat
- ▶ query=q70245.p1
- ▶ precursor=644.793150
- ▶ chargePrecursor=7
- ▶ itol=0.5

| AA   | c              | y               | z+1             | z+2             | z              | AA   |
|------|----------------|-----------------|-----------------|-----------------|----------------|------|
| S 1  | 57.535         | 1127.636        | 1123.631        | 0.755           | 1123.376       | S 41 |
| G 2  | 51.780         | 1095.375        | 1091.370        | 0.755           | 1091.118       | G 40 |
| R 3  | 90.805         | <b>1081.120</b> | <b>1077.115</b> | <b>1077.367</b> | 1076.863       | R 39 |
| G 4  | 105.061        | 1042.094        | 1038.090        | <b>1038.342</b> | 1037.839       | G 38 |
| K 5  | 137.004        | <b>1027.839</b> | 1023.834        | 1024.086        | 1023.582       | K 37 |
| Q 6  | 169.099        | 989.315         | 991.311         | 992.062         | 991.559        | Q 36 |
| G 7  | 183.354        | 983.801         | 959.796         | 960.048         | 959.544        | G 35 |
| G 8  | 197.610        | 949.545         | 945.541         | 945.792         | 945.289        | G 34 |
| K 9  | 229.631        | <b>935.290</b>  | 931.285         | <b>931.537</b>  | 931.033        | K 33 |
| A 10 | 247.323        | <b>903.266</b>  | 899.261         | 899.513         | 899.009        | A 32 |
| R 11 | 286.418        | 868.507         | 861.502         | 861.754         | 861.250        | R 31 |
| A 12 | 324.177        | <b>846.482</b>  | <b>842.477</b>  | <b>842.729</b>  | 842.225        | A 30 |
| R 13 | 336.201        | 826.722         | 824.718         | <b>824.970</b>  | 824.466        | R 29 |
| A 14 | 353.000        | 796.699         | <b>792.694</b>  | <b>792.946</b>  | 792.442        | A 28 |
| K 15 | 365.984        | 778.939         | 774.935         | 775.187         | 774.683        | K 27 |
| T 16 | 411.246        | 746.915         | <b>742.911</b>  | <b>743.163</b>  | 742.659        | T 26 |
| R 17 | 450.271        | 721.894         | 717.889         | 717.991         | 717.391        | R 25 |
| S 18 | 472.939        | 682.628         | 678.624         | <b>678.876</b>  | 678.372        | S 24 |
| S 19 | 483.787        | 660.870         | 656.866         | 657.118         | 656.614        | S 23 |
| R 20 | 532.813        | 639.112         | 635.108         | 635.360         | 634.856        | R 22 |
| A 21 | 550.572        | 600.087         | 596.082         | 596.334         | 595.830        | A 21 |
| G 22 | 564.827        | 582.320         | 578.315         | 578.575         | 578.071        | G 20 |
| L 23 | 593.098        | 558.072         | 564.068         | 564.320         | 563.816        | L 19 |
| Q 24 | 625.113        | 539.801         | 535.797         | 536.049         | 535.545        | Q 18 |
| F 25 | 661.880        | 507.787         | 503.782         | 504.034         | 503.530        | F 17 |
| P 26 | 686.143        | 471.020         | 467.015         | 467.267         | 466.763        | P 16 |
| V 27 | <b>710.910</b> | 446.756         | 442.752         | 443.004         | 442.500        | V 15 |
| G 28 | <b>725.166</b> | 421.989         | 417.985         | 418.237         | <b>417.733</b> | G 14 |
| R 29 | 764.191        | 407.734         | 403.729         | 403.981         | 403.477        | R 13 |
| V 30 | 785.958        | 386.709         | 384.704         | 384.956         | 384.452        | V 12 |
| H 31 | 823.223        | 343.942         | 339.937         | 340.189         | 339.685        | H 11 |
| R 32 | 882.248        | 309.677         | 305.672         | 305.924         | 305.420        | R 10 |
| L 33 | 890.519        | 270.652         | 266.647         | 266.899         | 266.395        | L 9  |
| L 34 | <b>918.790</b> | 242.381         | 238.376         | 238.628         | 238.124        | L 8  |
| R 35 | <b>957.815</b> | 214.110         | 210.105         | 210.357         | 209.853        | R 7  |
| K 36 | <b>985.839</b> | 176.984         | 171.980         | 172.232         | 171.728        | K 6  |
| C 37 | 1004.004       | 143.061         | 139.056         | 139.308         | 138.804        | C 5  |
| N 38 | 1032.605       | 128.805         | 124.800         | 125.052         | 124.548        | N 4  |
| V 39 | 1073.571       | 100.294         | 96.290          | 96.542          | 96.038         | V 3  |
| S 40 | 1095.129       | 59.529          | 55.524          | 55.776          | 55.272         | S 2  |
| E 41 | 1127.390       | 37.771          | 33.766          | 34.018          | 33.514         | E 1  |

# sp | Q8CGP5 | H2A1F\_MOUSE

[Acetyl]SGRGKQGGKARAKAKTRSSRAGLQFPVGRVHRLLRKGNYS

- ▶ fragmentation table for charge state 5+
- ▶ specType=etd
- ▶ score=47.11
- ▶ F113278.dat
- ▶ query=q70245\_p1
- ▶ precursor=644.793150
- ▶ chargePrecursor=7
- ▶ itol=0.5

| AA    | c              | y              | z+1            | z#2            | z              | AA    |
|-------|----------------|----------------|----------------|----------------|----------------|-------|
| S[1]  | 30.221         | 902.310        | 899.106        | 0.806          | 898.905        | S[41] |
| G[2]  | 41.625         | 876.501        | 873.298        | 0.806          | 873.096        | G[40] |
| R[3]  | 72.846         | <b>865.097</b> | 861.893        | 862.095        | 861.692        | R[39] |
| G[4]  | 84.250         | <b>833.877</b> | 830.673        | 830.875        | 830.472        | G[38] |
| K[5]  | 109.869        | 822.473        | <b>819.269</b> | <b>819.470</b> | <b>819.067</b> | K[37] |
| Q[6]  | 135.481        | 796.854        | <b>793.650</b> | 793.851        | <b>793.448</b> | Q[36] |
| G[7]  | 146.685        | <b>771.242</b> | 768.038        | <b>768.240</b> | 767.837        | G[35] |
| G[8]  | 158.289        | 759.838        | 756.634        | <b>756.835</b> | 756.432        | G[34] |
| K[9]  | 183.908        | 748.433        | <b>745.230</b> | <b>745.431</b> | <b>745.028</b> | K[33] |
| A[10] | 198.116        | 722.814        | 719.611        | 719.812        | 719.409        | A[32] |
| R[11] | 229.336        | 708.607        | 705.403        | 705.605        | 705.202        | R[31] |
| A[12] | 243.543        | 677.387        | 674.183        | 674.385        | <b>673.981</b> | A[30] |
| K[13] | 269.162        | 663.179        | 659.976        | 660.177        | 659.774        | K[29] |
| A[14] | 283.370        | 637.560        | 634.357        | 634.558        | 634.155        | A[28] |
| K[15] | 308.989        | 623.353        | 620.149        | 620.351        | 619.948        | K[27] |
| T[16] | 329.198        | 597.734        | 594.530        | 594.732        | 594.329        | T[26] |
| R[17] | <b>360.418</b> | 577.524        | 574.321        | 574.522        | 574.119        | R[25] |
| S[18] | 377.825        | 546.304        | 543.100        | 543.302        | 542.899        | S[24] |
| S[19] | 399.231        | 528.898        | 525.694        | 525.896        | 525.492        | S[23] |
| R[20] | 426.451        | 511.491        | 508.288        | 508.489        | 508.086        | R[22] |
| A[21] | 440.659        | 480.271        | 477.067        | 477.269        | 476.866        | A[21] |
| G[22] | 452.063        | 466.064        | 462.860        | 463.061        | 462.658        | G[20] |
| L[23] | 474.680        | 494.659        | 451.456        | 451.657        | 451.254        | L[19] |
| Q[24] | 500.292        | 432.043        | 428.839        | 429.040        | 428.637        | Q[18] |
| F[25] | 529.705        | 406.431        | 403.227        | 403.429        | 403.026        | F[17] |
| P[26] | 549.116        | 377.017        | 373.813        | 374.015        | 373.612        | P[16] |
| V[27] | 568.530        | 357.607        | 354.403        | 354.604        | 354.201        | V[15] |
| G[28] | 580.334        | 337.793        | 334.589        | 334.791        | 334.388        | G[14] |
| R[29] | 611.554        | 326.389        | 323.185        | 323.386        | 322.983        | R[13] |
| V[30] | 631.368        | 295.168        | 291.965        | 292.166        | 291.763        | V[12] |
| H[31] | <b>658.780</b> | 275.355        | 272.151        | 272.353        | 271.949        | H[11] |
| R[32] | 690.000        | 247.943        | 244.739        | 244.941        | 244.538        | R[10] |
| L[33] | 712.617        | 216.723        | 213.519        | 213.721        | 213.317        | L[9]  |
| L[34] | 735.233        | 194.109        | 190.902        | 191.104        | 190.701        | L[8]  |
| R[35] | 766.454        | 171.489        | 168.283        | 168.487        | 168.084        | R[7]  |
| K[36] | 782.073        | 140.269        | 137.065        | 137.267        | 136.864        | K[6]  |
| G[37] | 803.877        | 114.650        | 111.446        | 111.648        | 111.245        | G[5]  |
| N[38] | 826.286        | 103.246        | 100.042        | 100.243        | 99.840         | N[4]  |
| V[39] | 858.898        | 80.437         | 77.233         | 77.435         | 77.032         | V[3]  |
| S[40] | <b>876.305</b> | 47.824         | 44.621         | 44.822         | 44.419         | S[2]  |
| E[41] | 902.113        | 30.418         | 27.214         | 27.416         | 27.013         | E[1]  |



# sp | Q8CGP5 | H2A1F\_MOUSE

[Acetyl]SGRGKQGGKARAKAKTRSSRAGLQFPVGRVHRLLRKGNYS

- ▶ fragmentation table for charge state 6+
- ▶ specType=etd
- ▶ score=47.11
- ▶ F113278.dat
- ▶ query=q70245\_p1
- ▶ precursor=644.793150
- ▶ chargePrecursor=7
- ▶ itol=0.5

| AA    | c              | y              | z+1            | z+2     | z       | AA    |
|-------|----------------|----------------|----------------|---------|---------|-------|
| S[1]  | 25.352         | 752.093        | <b>749.423</b> | 0.839   | 749.295 | S[41] |
| G[2]  | 34.856         | <b>730.586</b> | 727.916        | 0.839   | 727.748 | G[40] |
| R[3]  | 60.873         | 721.082        | 716.412        | 718.580 | 718.244 | R[39] |
| G[4]  | 70.376         | 695.065        | 692.306        | 692.563 | 692.220 | G[38] |
| K[5]  | 91.725         | 685.562        | 682.892        | 683.060 | 682.724 | K[37] |
| Q[6]  | 113.068        | 664.213        | 661.543        | 661.711 | 661.375 | Q[36] |
| G[7]  | 122.572        | 642.869        | 640.200        | 640.368 | 640.032 | G[35] |
| G[8]  | 132.076        | 633.366        | 630.696        | 630.864 | 630.528 | G[34] |
| K[9]  | 153.425        | 623.862        | 621.193        | 621.360 | 621.025 | K[33] |
| A[10] | 165.264        | 602.513        | 599.843        | 600.011 | 599.675 | A[32] |
| R[11] | 191.281        | 590.674        | 588.004        | 588.172 | 587.836 | R[31] |
| A[12] | 203.121        | 564.657        | 561.987        | 562.155 | 561.819 | A[30] |
| K[13] | 224.470        | 552.617        | 550.147        | 550.315 | 549.980 | K[29] |
| A[14] | 236.309        | 531.468        | 528.798        | 528.966 | 528.630 | A[28] |
| K[15] | 257.658        | 519.629        | 516.959        | 517.127 | 516.791 | K[27] |
| T[16] | 274.500        | 498.279        | 495.610        | 495.778 | 495.442 | T[26] |
| R[17] | 300.517        | 481.438        | 478.768        | 478.936 | 478.600 | R[25] |
| S[18] | 315.022        | 458.421        | 452.752        | 453.919 | 452.584 | S[24] |
| S[19] | 329.527        | 440.916        | 438.306        | 438.474 | 438.138 | S[23] |
| R[20] | 355.544        | 426.411        | 423.741        | 423.909 | 423.573 | R[22] |
| A[21] | 367.384        | 400.394        | 397.724        | 397.892 | 397.556 | A[21] |
| G[22] | 376.887        | 388.554        | 385.884        | 386.052 | 385.716 | G[20] |
| L[23] | 395.735        | 379.051        | 376.381        | 376.549 | 376.213 | L[19] |
| Q[24] | <b>417.078</b> | <b>360.203</b> | 357.534        | 357.702 | 357.366 | Q[18] |
| F[25] | 441.589        | 338.889        | 336.190        | 336.358 | 336.022 | F[17] |
| P[26] | 457.765        | 314.349        | 311.679        | 311.847 | 311.511 | P[16] |
| V[27] | 474.276        | 298.173        | 295.504        | 295.672 | 295.336 | V[15] |
| G[28] | 483.779        | 281.662        | 278.992        | 279.160 | 278.824 | G[14] |
| R[29] | 509.796        | 272.158        | 269.489        | 269.657 | 269.321 | R[13] |
| V[30] | 528.308        | 246.141        | 243.472        | 243.640 | 243.304 | V[12] |
| H[31] | 549.151        | 229.630        | 226.960        | 227.128 | 226.792 | H[11] |
| R[32] | 575.168        | 206.787        | 204.117        | 204.285 | 203.949 | R[10] |
| L[33] | 594.015        | 180.770        | 178.100        | 178.268 | 177.932 | L[0]  |
| L[34] | 612.862        | 161.923        | 159.253        | 159.421 | 159.085 | L[8]  |
| R[35] | 638.879        | 143.075        | 140.406        | 140.574 | 140.238 | R[7]  |
| K[36] | 660.228        | 117.059        | 114.389        | 114.557 | 114.221 | K[6]  |
| G[37] | 669.732        | 95.709         | 93.040         | 93.208  | 92.872  | G[5]  |
| N[38] | 688.739        | 86.206         | 83.536         | 83.704  | 83.368  | N[4]  |
| V[39] | 715.916        | 67.199         | 64.529         | 64.697  | 64.361  | V[3]  |
| S[40] | <b>730.422</b> | 40.021         | 37.352         | 37.520  | 37.184  | S[2]  |
| E[41] | 751.929        | 25.516         | 22.846         | 23.014  | 22.678  | E[1]  |

# sp | Q8CGP5 | H2A1F\_MOUSE

[Acetyl]SGRGKQGGKARAKAKTRSSRAGLQFPVGRVHLLRKGNYSE

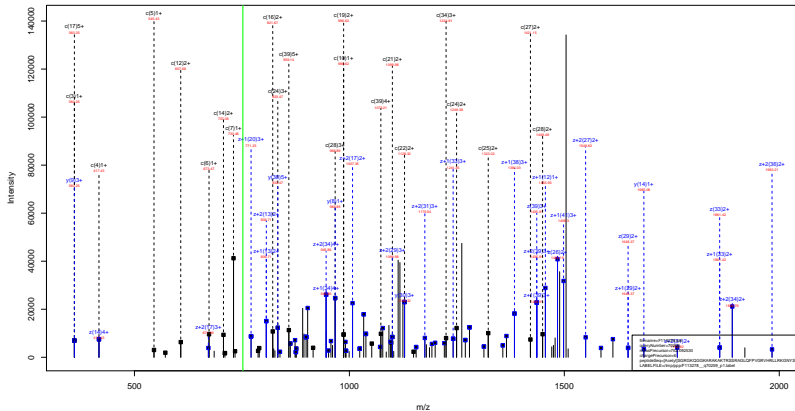

# sp | Q8CGP5 | H2A1F\_MOUSE

[Acetyl]SGRGKQGGKARAKAKTRSSRAGLQFPVGRVHLLRKGNYSE

- ▶ fragmentation table for charge state 1+
- ▶ specType=etd
- ▶ score=44.62
- ▶ F113278.dat
- ▶ query=q70259\_p1
- ▶ precursor=752.092530
- ▶ chargePrecursor=6
- ▶ itol=0.5

| AA   | c              | y               | z+1             | z+2             | z        | AA   |
|------|----------------|-----------------|-----------------|-----------------|----------|------|
| S 1  | 147.076        | 4507.521        | 4491.502        | 0.000           | 4490.494 | S 41 |
| G 2  | 204.098        | 4378.478        | 4362.459        | 0.000           | 4361.451 | G 40 |
| R 3  | <b>360.199</b> | 4321.457        | 4305.438        | 4306.448        | 4304.430 | R 39 |
| G 4  | <b>417.220</b> | 4165.355        | 4149.337        | 4150.345        | 4148.329 | G 38 |
| K 5  | <b>545.315</b> | 4106.334        | 4090.315        | 4093.322        | 4091.307 | K 37 |
| Q 6  | <b>673.374</b> | 3989.276        | 3974.259        | 3965.228        | 3963.213 | Q 36 |
| G 7  | <b>730.395</b> | 3852.180        | 3836.162        | 3837.170        | 3835.154 | G 35 |
| G 8  | <b>787.417</b> | 3795.159        | 3779.140        | 3780.148        | 3778.132 | G 34 |
| K 9  | <b>915.512</b> | 3738.138        | 3722.119        | 3723.127        | 3721.111 | K 33 |
| A 10 | <b>986.549</b> | 3610.043        | 3594.024        | 3595.032        | 3593.016 | A 32 |
| R 11 | 1142.050       | 3536.005        | 3522.987        | 3523.995        | 3521.979 | R 31 |
| A 12 | 1213.607       | 3382.904        | 3366.886        | 3367.893        | 3366.878 | A 30 |
| R 13 | 1341.782       | 3311.867        | 3295.848        | 3296.856        | 3294.841 | R 29 |
| A 14 | 1412.819       | 3183.772        | 3167.754        | 3168.761        | 3166.746 | A 28 |
| K 15 | 1540.914       | 3112.735        | 3096.716        | 3097.724        | 3095.709 | K 27 |
| T 16 | 1641.962       | 2984.640        | 2968.621        | 2969.629        | 2967.614 | T 26 |
| R 17 | 1796.053       | 2883.592        | 2867.574        | 2868.582        | 2866.566 | R 25 |
| S 18 | 1885.095       | 2727.491        | 2711.473        | 2712.480        | 2710.465 | S 24 |
| S 19 | 1972.127       | 2640.455        | 2624.441        | 2625.448        | 2623.433 | S 23 |
| R 20 | 2128.238       | 2553.427        | 2537.409        | 2538.416        | 2536.401 | R 22 |
| A 21 | 2199.269       | 2497.326        | 2481.307        | 2482.315        | 2480.300 | A 21 |
| G 22 | 2256.287       | 2326.289        | 2310.270        | 2311.278        | 2309.263 | G 20 |
| L 23 | 2369.371       | 2269.268        | 2253.249        | 2254.257        | 2252.241 | L 19 |
| Q 24 | 2497.479       | 2156.184        | 2140.165        | 2141.173        | 2139.157 | Q 18 |
| F 25 | 2644.498       | 2028.125        | 2012.106        | 2013.114        | 2011.098 | F 17 |
| F 26 | 2741.551       | 1881.057        | 1865.038        | 1866.046        | 1864.030 | F 16 |
| V 27 | 2840.619       | 1784.004        | 1767.985        | 1768.993        | 1766.977 | V 15 |
| G 28 | 2897.641       | <b>1684.935</b> | 1668.917        | 1669.924        | 1667.909 | G 14 |
| R 29 | 3053.742       | 1627.914        | 1611.895        | <b>1612.903</b> | 1610.887 | R 13 |
| V 30 | 3152.810       | 1514.833        | <b>1455.794</b> | 1456.802        | 1454.785 | V 12 |
| H 31 | 3259.889       | 1372.744        | <b>1356.726</b> | 1357.734        | 1355.718 | H 11 |
| R 32 | 3445.970       | 1235.685        | 1219.667        | <b>1220.675</b> | 1218.659 | R 10 |
| L 33 | 3559.054       | 1079.584        | 1063.566        | 1064.573        | 1062.558 | L 9  |
| L 34 | 3672.138       | <b>966.500</b>  | 950.482         | <b>951.489</b>  | 949.474  | L 8  |
| R 35 | 3828.239       | 853.416         | 837.398         | <b>838.405</b>  | 836.390  | R 7  |
| K 36 | 3958.334       | 697.315         | 681.298         | 682.304         | 680.289  | K 6  |
| G 37 | 4013.356       | 569.220         | 553.201         | 554.209         | 552.194  | G 5  |
| N 38 | 4127.399       | 512.109         | 496.100         | 497.108         | 495.172  | N 4  |
| V 39 | 4290.462       | 396.156         | 380.137         | 381.145         | 381.129  | V 3  |
| S 40 | 4377.494       | 235.092         | 219.074         | 220.082         | 218.066  | S 2  |
| E 41 | 4506.537       | 148.060         | 132.042         | 133.050         | 131.034  | E 1  |

# sp | Q8CGP5 | H2A1F\_MOUSE

[Acetyl]SGRGKQGGKARAKAKTRSSRAGLQFPVGRVHRLLRKGNYS

- ▶ fragmentation table for charge state 2+
- ▶ specType=etd
- ▶ score=44.62
- ▶ F113278.dat
- ▶ query=q70259.p1
- ▶ precursor=752.092530
- ▶ chargePrecursor=6
- ▶ itol=0.5

| AA | c  | y               | #s1             | #s2             | z               | AA              |       |
|----|----|-----------------|-----------------|-----------------|-----------------|-----------------|-------|
| S  | 1  | 74.092          | 2054.204        | 2266.205        | 0.804           | 2245.781        | S[41] |
| G  | 2  | 102.553         | 2189.743        | 2381.733        | 0.504           | 2181.220        | G[40] |
| R  | 3  | 180.603         | 2161.232        | 2153.233        | 2153.236        | 2152.710        | R[39] |
| G  | 4  | 209.114         | 2083.181        | 2075.172        | 2075.676        | 2074.660        | G[38] |
| K  | 5  | 273.181         | 2054.671        | 2046.661        | 2047.165        | 2046.157        | K[37] |
| Q  | 6  | 337.194         | 1990.622        | 1982.614        | <b>1983.118</b> | 1982.110        | Q[36] |
| G  | 7  | 365.703         | 1926.594        | 1918.584        | 1919.088        | 1918.080        | G[35] |
| G  | 8  | 394.212         | 1898.083        | 1890.074        | <b>1890.578</b> | 1889.570        | G[34] |
| K  | 9  | 458.260         | 1869.572        | <b>1861.563</b> | 1862.067        | <b>1861.059</b> | K[33] |
| A  | 10 | 493.778         | 1805.525        | 1797.516        | 1798.019        | 1797.012        | A[32] |
| R  | 11 | <b>571.829</b>  | 1770.008        | 1761.997        | <b>1762.501</b> | 1761.493        | R[31] |
| A  | 12 | <b>607.347</b>  | 1697.956        | 1689.946        | 1690.450        | 1689.443        | A[30] |
| R  | 13 | 671.376         | 1656.437        | <b>1648.428</b> | 1648.932        | <b>1647.924</b> | R[29] |
| A  | 14 | <b>706.913</b>  | 1592.900        | 1584.890        | <b>1584.884</b> | 1583.876        | A[28] |
| K  | 15 | <b>770.961</b>  | 1556.871        | 1548.862        | <b>1549.366</b> | 1548.358        | K[27] |
| T  | 16 | <b>821.485</b>  | 1492.824        | 1484.814        | 1485.318        | <b>1484.310</b> | T[26] |
| R  | 17 | <b>899.535</b>  | 1442.800        | 1434.791        | 1435.294        | 1434.287        | R[25] |
| S  | 18 | 933.651         | 1384.249        | 1376.240        | <b>1376.744</b> | 1375.736        | S[24] |
| S  | 19 | <b>986.567</b>  | 1320.733        | <b>1312.724</b> | <b>1313.228</b> | 1312.220        | S[23] |
| R  | 20 | 1064.618        | 1277.217        | <b>1269.208</b> | <b>1269.712</b> | 1268.704        | R[22] |
| A  | 21 | <b>1100.136</b> | <b>1199.167</b> | 1191.157        | <b>1191.661</b> | 1190.653        | A[21] |
| G  | 22 | <b>1128.647</b> | 1153.648        | <b>1155.639</b> | 1156.143        | <b>1155.135</b> | G[20] |
| L  | 23 | 1128.677        | 1128.137        | 1127.128        | 1127.632        | 1126.624        | L[19] |
| Q  | 24 | <b>1249.218</b> | 1078.595        | 1070.586        | <b>1071.090</b> | 1070.082        | Q[18] |
| F  | 25 | <b>1322.753</b> | 1014.566        | 1006.557        | <b>1007.061</b> | 1006.053        | F[17] |
| F  | 26 | 1371.279        | 941.033         | 933.023         | 933.526         | 932.518         | F[16] |
| V  | 27 | <b>1420.813</b> | 892.506         | 884.496         | 885.000         | 883.992         | V[15] |
| G  | 28 | <b>1449.324</b> | 842.971         | 834.962         | 835.466         | 834.458         | G[14] |
| R  | 29 | 1527.814        | 814.461         | <b>806.451</b>  | <b>806.955</b>  | 805.946         | R[13] |
| V  | 30 | 1576.909        | 736.410         | 728.401         | 728.905         | 727.897         | V[12] |
| H  | 31 | 1645.438        | 688.876         | 678.866         | 679.370         | 678.363         | H[11] |
| R  | 32 | 1723.489        | 618.346         | 610.337         | 610.841         | 609.833         | R[10] |
| L  | 33 | 1780.031        | 540.206         | 532.196         | 532.700         | 531.693         | L[9]  |
| L  | 34 | 1838.573        | 469.794         | 459.784         | 459.288         | 458.281         | L[8]  |
| R  | 35 | 1914.623        | 427.212         | 419.202         | 419.706         | 418.698         | R[7]  |
| K  | 36 | 1978.671        | 349.161         | 341.152         | 341.656         | 340.648         | K[6]  |
| G  | 37 | 2067.181        | 285.114         | 277.104         | 277.608         | 276.600         | G[5]  |
| N  | 38 | 2094.203        | 256.603         | 248.594         | 249.098         | 248.090         | N[4]  |
| V  | 39 | 2145.236        | 199.562         | 191.552         | 192.056         | 191.048         | V[3]  |
| S  | 40 | 2199.261        | 118.056         | 110.047         | 110.551         | 109.543         | S[2]  |
| E  | 41 | 2253.772        | 74.534          | 66.524          | 67.028          | 66.021          | E[1]  |

# sp | Q8CGP5 | H2A1F\_MOUSE

[Acetyl]SGRGKQGGKARAKAKTRSSRAGLQFPVGRVHRLLRKGNYS

- ▶ fragmentation table for charge state 3+
- ▶ specType=etd
- ▶ score=44.62
- ▶ F113278.dat
- ▶ query=q70259.p1
- ▶ precursor=752.092530
- ▶ chargePrecursor=6
- ▶ itol=0.5

| AA | c  | y               | z=1             | z=2             | z               | AA              |       |
|----|----|-----------------|-----------------|-----------------|-----------------|-----------------|-------|
| S  | 1  | 48.607          | 1502.178        | <b>1497.839</b> | 8.872           | 1497.567        | S[41] |
| G  | 2  | 86.704          | 1460.184        | 1454.275        | 0.672           | 1454.480        | G[40] |
| R  | 3  | 130.718         | 1441.157        | <b>1435.817</b> | <b>1436.153</b> | <b>1435.482</b> | R[39] |
| G  | 4  | 139.745         | 1389.123        | <b>1387.784</b> | <b>1384.120</b> | 1383.440        | G[38] |
| K  | 5  | 182.443         | 1370.110        | 1364.777        | <b>1365.113</b> | 1364.441        | K[37] |
| G  | 6  | 225.130         | 1327.418        | 1320.012        | 1327.318        | 1321.761        | G[36] |
| G  | 7  | 264.117         | 1284.733        | <b>1279.392</b> | <b>1279.728</b> | <b>1279.056</b> | G[35] |
| G  | 8  | 263.144         | 1265.725        | 1260.285        | 1260.721        | 1260.049        | G[34] |
| K  | 9  | 305.642         | 1246.717        | <b>1241.378</b> | <b>1241.714</b> | <b>1241.042</b> | K[33] |
| A  | 10 | 329.521         | 1204.010        | 1198.079        | 1199.015        | 1198.344        | A[32] |
| R  | 11 | 381.555         | 1188.240        | 1175.080        | <b>1175.336</b> | 1174.064        | R[31] |
| A  | 12 | 405.254         | <b>1178.306</b> | 1162.907        | 1171.917        | 1162.831        | A[30] |
| K  | 13 | 447.932         | 1104.527        | 1099.238        | <b>1099.624</b> | 1099.952        | K[29] |
| A  | 14 | 471.611         | 1061.929        | 1056.539        | 1056.925        | 1056.251        | A[28] |
| K  | 15 | 514.310         | <b>1038.250</b> | <b>1032.910</b> | <b>1033.246</b> | 1032.574        | K[27] |
| T  | 16 | 547.002         | 995.552         | 990.212         | <b>990.548</b>  | 989.870         | T[26] |
| R  | 17 | 600.626         | 961.869         | 956.529         | <b>956.865</b>  | 956.191         | R[25] |
| S  | 18 | 629.917         | 909.835         | 904.495         | 904.831         | 904.160         | S[24] |
| S  | 19 | 658.047         | 880.825         | <b>875.485</b>  | <b>875.821</b>  | <b>875.149</b>  | S[23] |
| R  | 20 | <b>710.081</b>  | 851.814         | 846.474         | 846.810         | 846.139         | R[22] |
| A  | 21 | <b>733.760</b>  | 799.780         | 794.441         | 794.777         | 794.101         | A[21] |
| G  | 22 | 762.767         | 776.101         | <b>770.762</b>  | <b>771.098</b>  | 770.426         | G[20] |
| L  | 23 | <b>796.462</b>  | 759.094         | 753.754         | 754.090         | 753.419         | L[19] |
| G  | 24 | <b>833.148</b>  | 719.306         | 714.000         | 714.366         | 713.624         | G[18] |
| F  | 25 | 882.171         | 676.713         | 671.374         | <b>671.710</b>  | 671.038         | F[17] |
| F  | 26 | 914.552         | 627.600         | 622.261         | 622.687         | 622.015         | F[16] |
| V  | 27 | 947.545         | 595.139         | 590.000         | 590.336         | 589.664         | V[15] |
| G  | 28 | <b>966.552</b>  | 562.317         | 556.977         | 557.313         | 556.641         | G[14] |
| R  | 29 | 1007.254        | 443.309         | 437.970         | 438.306         | 437.634         | R[13] |
| V  | 30 | <b>1051.608</b> | 480.276         | 485.038         | 486.272         | 485.600         | V[12] |
| H  | 31 | <b>1097.294</b> | 458.253         | 452.913         | 453.249         | 452.577         | H[11] |
| R  | 32 | <b>1149.328</b> | 412.967         | 407.227         | 407.563         | 406.891         | R[10] |
| L  | 33 | 1187.023        | <b>360.533</b>  | 355.193         | 355.529         | 354.857         | L[9]  |
| L  | 34 | <b>1224.718</b> | 322.574         | 317.489         | 317.825         | 317.153         | L[8]  |
| R  | 35 | 1225.173        | 285.144         | 279.804         | 280.140         | 279.468         | R[7]  |
| K  | 36 | 1319.450        | 233.110         | 227.770         | 228.106         | 227.434         | K[6]  |
| G  | 37 | 1338.457        | 190.412         | 185.072         | 185.408         | 184.736         | G[5]  |
| N  | 38 | 1376.471        | 171.404         | 166.065         | 166.401         | 165.729         | N[4]  |
| V  | 39 | 1436.826        | 133.390         | 128.051         | 128.386         | 127.715         | V[3]  |
| S  | 40 | 1459.836        | 98.136          | 93.000          | 93.336          | 92.664          | S[2]  |
| E  | 41 | 1502.850        | 50.025          | 44.685          | 45.021          | 44.349          | E[1]  |

# sp | Q8CGP5 | H2A1F\_MOUSE

[Acetyl]SGRGKQGGKARAKAKTRSSRAGLQFPVGRVHRLLRKGNYS

- ▶ fragmentation table for charge state 4+
- ▶ specType=etd
- ▶ score=44.62
- ▶ F113278.dat
- ▶ query=q70259\_p1
- ▶ precursor=752.092530
- ▶ chargePrecursor=6
- ▶ itol=0.5

| AA | c  | w               | #s=1            | #s=2            | #s=3            | AA              |       |
|----|----|-----------------|-----------------|-----------------|-----------------|-----------------|-------|
| S  | 1  | 37.505          | 1127.810        | 1123.811        | 0.758           | 1123.377        | S[41] |
| G  | 2  | 51.780          | <b>1095.375</b> | 1081.370        | 0.755           | 1091.116        | G[40] |
| R  | 3  | 90.805          | 1081.120        | 1077.115        | <b>1077.367</b> | 1076.863        | R[39] |
| G  | 4  | 109.001         | 1042.094        | <b>1038.090</b> | <b>1038.342</b> | 1037.836        | G[38] |
| K  | 5  | 137.084         | 1027.839        | <b>1023.834</b> | <b>1024.086</b> | <b>1023.582</b> | K[37] |
| G  | 6  | 169.059         | 995.815         | <b>991.811</b>  | <b>992.062</b>  | 991.557         | G[36] |
| G  | 7  | 193.254         | 963.803         | 959.798         | 959.548         | 959.544         | G[35] |
| G  | 8  | 197.610         | 949.545         | <b>945.541</b>  | <b>945.792</b>  | 945.289         | G[34] |
| K  | 9  | 239.633         | 935.290         | 931.285         | 931.537         | 931.033         | K[33] |
| A  | 10 | 247.303         | <b>903.266</b>  | <b>899.261</b>  | <b>899.513</b>  | <b>899.009</b>  | A[32] |
| R  | 11 | 286.418         | 895.507         | 891.502         | 891.754         | 891.250         | R[31] |
| A  | 12 | 304.177         | 868.482         | 864.477         | 864.729         | 864.225         | A[30] |
| R  | 13 | 336.201         | 828.722         | 824.718         | 824.970         | 824.466         | R[29] |
| A  | 14 | 353.980         | 796.699         | 792.694         | 792.946         | 792.442         | A[28] |
| K  | 15 | 385.904         | 778.939         | 774.935         | 775.187         | 774.683         | K[27] |
| T  | 16 | 411.246         | 746.915         | 742.911         | 743.163         | 742.659         | T[26] |
| R  | 17 | 459.271         | 721.954         | 717.949         | 718.201         | 717.697         | R[25] |
| S  | 18 | 472.629         | 692.629         | 688.624         | 688.876         | 688.372         | S[24] |
| S  | 19 | 493.787         | 660.970         | 656.966         | 657.218         | 656.714         | S[23] |
| R  | 20 | 532.613         | 639.112         | 635.108         | 635.360         | 634.856         | R[22] |
| A  | 21 | 550.572         | 600.087         | 596.082         | 596.334         | 595.830         | A[21] |
| G  | 22 | 564.827         | 582.328         | 578.323         | 578.575         | 578.071         | G[20] |
| L  | 23 | 593.098         | 568.072         | 564.068         | 564.320         | 563.816         | L[19] |
| Q  | 24 | 625.113         | 539.801         | 535.797         | 536.049         | 535.545         | Q[18] |
| F  | 25 | 661.880         | 507.787         | 503.782         | 504.034         | 503.530         | F[17] |
| F  | 26 | 698.143         | 471.020         | 467.015         | 467.267         | 466.763         | F[16] |
| V  | 27 | <b>710.910</b>  | 446.756         | 442.752         | 443.004         | 442.500         | V[15] |
| G  | 28 | 725.169         | 421.989         | 417.985         | 418.237         | <b>417.733</b>  | G[14] |
| R  | 29 | 764.181         | 389.734         | 385.729         | 385.981         | 385.477         | R[13] |
| V  | 30 | 788.958         | 368.709         | 364.704         | 364.956         | 364.452         | V[12] |
| H  | 31 | 823.223         | 343.942         | 339.937         | 340.189         | 339.685         | H[11] |
| R  | 32 | <b>862.248</b>  | 309.677         | 305.672         | 305.924         | 305.420         | R[10] |
| L  | 33 | 890.519         | 270.652         | 266.647         | 266.899         | 266.395         | L[9]  |
| L  | 34 | 918.989         | 242.381         | 238.376         | 238.628         | 238.124         | L[8]  |
| R  | 35 | 957.815         | 214.110         | 210.105         | 210.357         | 209.853         | R[7]  |
| K  | 36 | 989.839         | 175.084         | 171.079         | 171.331         | 170.827         | K[6]  |
| G  | 37 | 1004.094        | 143.061         | 139.056         | 139.308         | 138.804         | G[5]  |
| N  | 38 | 1032.605        | 128.805         | 124.800         | 125.052         | 124.548         | N[4]  |
| Y  | 39 | <b>1073.371</b> | 100.294         | 96.289          | 96.541          | 96.037          | Y[3]  |
| S  | 40 | 1095.139        | 99.529          | 95.524          | 95.776          | 95.272          | S[2]  |
| E  | 41 | 1127.390        | 97.771          | 93.766          | 94.018          | 93.514          | E[1]  |

# sp | Q8CGP5 | H2A1F\_MOUSE

[Acetyl]SGRGKQGGKARAKAKTRSSRAGLQFPVGRVHRLLRKGNYS

- ▶ fragmentation table for charge state 5+
- ▶ specType=etd
- ▶ score=44.62
- ▶ F113278.dat
- ▶ query=q70259\_p1
- ▶ precursor=752.092530
- ▶ chargePrecursor=6
- ▶ itol=0.5

| AA   | c              | y              | z+1            | z#2            | z              | AA   |
|------|----------------|----------------|----------------|----------------|----------------|------|
| S 1  | 30.221         | 902.310        | <b>899.106</b> | 0.806          | <b>898.905</b> | S 41 |
| G 2  | 41.625         | <b>876.501</b> | <b>873.298</b> | 0.806          | 873.095        | G 40 |
| R 3  | 72.846         | 805.097        | 801.893        | <b>062.095</b> | 801.692        | R 39 |
| G 4  | 84.250         | <b>833.877</b> | 830.673        | 830.875        | 830.472        | G 38 |
| K 5  | 109.869        | 822.473        | 819.269        | 819.470        | 819.067        | K 37 |
| Q 6  | 135.481        | 796.854        | 793.650        | 793.851        | 793.448        | Q 36 |
| G 7  | 146.685        | <b>771.242</b> | 768.038        | 768.240        | 767.837        | G 35 |
| G 8  | 158.289        | 759.838        | 756.634        | 756.835        | 756.432        | G 34 |
| K 9  | 183.908        | 748.833        | 745.230        | 745.431        | 745.028        | K 33 |
| A 10 | 198.116        | 722.814        | 719.611        | 719.812        | 719.409        | A 32 |
| R 11 | 229.336        | 708.607        | 705.403        | 705.605        | 705.202        | R 31 |
| A 12 | 243.543        | 677.387        | 674.183        | 674.385        | 673.981        | A 30 |
| K 13 | 269.162        | 663.179        | 659.976        | 660.177        | 659.774        | K 29 |
| A 14 | 283.370        | 637.960        | 634.357        | 634.559        | 634.155        | A 28 |
| K 15 | 308.989        | 623.753        | 620.149        | 620.351        | 619.948        | K 27 |
| T 16 | 329.198        | 597.734        | 594.530        | 594.732        | 594.329        | T 26 |
| R 17 | <b>360.418</b> | 577.524        | 574.321        | 574.522        | 574.119        | R 25 |
| S 18 | 377.825        | 546.304        | 543.100        | 543.302        | 542.899        | S 24 |
| S 19 | 399.231        | 538.898        | 529.694        | 529.896        | 529.492        | S 23 |
| R 20 | 426.451        | 511.491        | 508.288        | 508.489        | 508.086        | R 22 |
| A 21 | 440.659        | 480.271        | 477.067        | 477.269        | 476.866        | A 21 |
| G 22 | 452.063        | 466.064        | 462.860        | 463.061        | 462.658        | G 20 |
| L 23 | 474.680        | 494.659        | 451.456        | 451.657        | 451.254        | L 19 |
| Q 24 | 500.292        | 432.043        | 428.839        | 429.040        | 428.637        | Q 18 |
| F 25 | 529.705        | 406.831        | 403.227        | 403.429        | 403.026        | F 17 |
| P 26 | 549.116        | 377.017        | 373.813        | 374.015        | 373.612        | P 16 |
| V 27 | 568.530        | 357.807        | 354.403        | 354.604        | 354.201        | V 15 |
| G 28 | 589.334        | 337.793        | 334.389        | 334.791        | 334.388        | G 14 |
| R 29 | 611.554        | 326.389        | 323.185        | 323.386        | 322.983        | R 13 |
| V 30 | 631.368        | 295.168        | 291.965        | 292.166        | 291.763        | V 12 |
| H 31 | 658.780        | 275.355        | 272.151        | 272.353        | 271.949        | H 11 |
| R 32 | 690.000        | 247.943        | 244.739        | 244.941        | 244.538        | R 10 |
| L 33 | 712.617        | 216.723        | 213.519        | 213.721        | 213.317        | L 9  |
| L 34 | 735.233        | 194.109        | 190.902        | 191.104        | 190.701        | L 8  |
| R 35 | 766.454        | 171.489        | 168.283        | 168.487        | 168.084        | R 7  |
| K 36 | 782.273        | 140.269        | 137.065        | 137.267        | 136.864        | K 6  |
| G 37 | 803.877        | 114.650        | 111.446        | 111.648        | 111.245        | G 5  |
| N 38 | 826.286        | 103.240        | 100.042        | 100.243        | 99.840         | N 4  |
| V 39 | <b>858.898</b> | 80.437         | 77.233         | 77.435         | 77.032         | V 3  |
| S 40 | <b>876.305</b> | 47.824         | 44.621         | 44.822         | 44.419         | S 2  |
| E 41 | 902.113        | 30.418         | 27.214         | 27.416         | 27.013         | E 1  |

sp | Q8CGP5 | H2A1F\_MOUSE

[Acetyl]SGRGKQGGKARAKAKTRSSRAGLQFPVGRVHLLRKGNYS

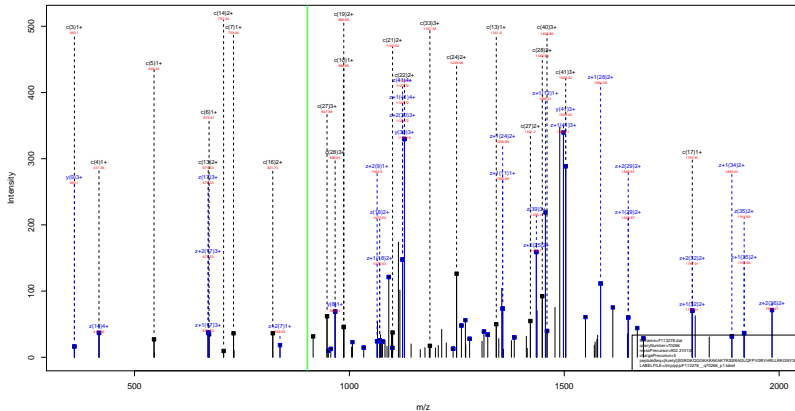



# sp | Q8CGP5 | H2A1F\_MOUSE

[Acetyl]SGRGKQGGKARAKAKTRSSRAGLQFPVGRVHRLLRKGNYS

- ▶ fragmentation table for charge state 1+
- ▶ specType=etd
- ▶ score=49.76
- ▶ F113278.dat
- ▶ query=q70266.p1
- ▶ precursor=902.310130
- ▶ chargePrecursor=5
- ▶ itol=0.5

| AA   | c               | y              | z+1             | z+2             | z        | AA   |
|------|-----------------|----------------|-----------------|-----------------|----------|------|
| S 1  | 147.676         | 4507.521       | 4491.502        | 0.000           | 4490.494 | S 41 |
| G 2  | 304.098         | 4378.478       | 4362.459        | 0.000           | 4361.451 | G 40 |
| R 3  | <b>360.199</b>  | 4321.457       | 4305.438        | 4306.448        | 4304.430 | R 39 |
| G 4  | <b>417.270</b>  | 4165.355       | 4149.337        | 4150.345        | 4148.329 | G 38 |
| K 5  | <b>545.315</b>  | 4108.334       | 4092.315        | 4093.323        | 4091.307 | K 37 |
| Q 6  | <b>673.174</b>  | 3989.239       | 3974.220        | 3985.228        | 3983.212 | Q 36 |
| G 7  | <b>730.395</b>  | 3852.180       | 3836.162        | 3837.170        | 3835.154 | G 35 |
| G 8  | 787.417         | 3795.159       | 3779.140        | 3780.148        | 3778.132 | G 34 |
| K 9  | <b>915.512</b>  | 3738.138       | 3722.119        | 3723.127        | 3721.111 | K 33 |
| A 10 | <b>986.549</b>  | 3610.043       | 3594.024        | 3595.032        | 3593.016 | A 32 |
| R 11 | 1142.650        | 3536.005       | 3522.987        | 3523.995        | 3521.979 | R 31 |
| A 12 | 1213.697        | 3382.904       | 3366.886        | 3367.893        | 3366.878 | A 30 |
| R 13 | <b>1341.782</b> | 3311.867       | 3295.848        | 3296.856        | 3294.841 | R 29 |
| A 14 | 1412.819        | 3183.772       | 3167.754        | 3168.761        | 3166.746 | A 28 |
| K 15 | 1540.914        | 3112.735       | 3096.716        | 3097.724        | 3095.709 | K 27 |
| T 16 | 1641.962        | 2984.640       | 2968.621        | 2969.629        | 2967.614 | T 26 |
| R 17 | <b>1798.063</b> | 2883.592       | 2867.574        | 2868.582        | 2866.566 | R 25 |
| S 18 | 1865.909        | 2727.491       | 2711.473        | 2712.480        | 2710.465 | S 24 |
| S 19 | 1972.127        | 2640.455       | 2624.441        | 2625.448        | 2623.433 | S 23 |
| R 20 | 2128.228        | 2553.427       | 2537.409        | 2538.416        | 2536.401 | R 22 |
| A 21 | 2199.265        | 2497.326       | 2481.307        | 2482.315        | 2480.300 | A 21 |
| G 22 | 2286.287        | 2426.289       | 2410.270        | 2411.278        | 2409.263 | G 20 |
| L 23 | 2369.371        | 2369.268       | 2353.249        | 2354.257        | 2352.241 | L 19 |
| Q 24 | 2497.429        | 2156.184       | 2140.165        | 2141.173        | 2139.157 | Q 18 |
| F 25 | 2644.698        | 2028.125       | 2012.106        | 2013.114        | 2011.099 | F 17 |
| P 26 | 2741.551        | 1881.057       | 1865.038        | 1866.046        | 1864.031 | P 16 |
| V 27 | 2840.619        | 1784.004       | 1767.985        | 1768.993        | 1766.977 | V 15 |
| G 28 | 2897.641        | 1684.935       | 1668.917        | <b>1669.924</b> | 1667.909 | G 14 |
| R 29 | 3053.742        | 1627.914       | 1611.895        | <b>1612.903</b> | 1610.887 | R 13 |
| V 30 | 3153.810        | 1419.833       | <b>1455.794</b> | 1456.802        | 1454.785 | V 12 |
| H 31 | 3289.869        | 1372.744       | <b>1356.726</b> | 1357.734        | 1355.718 | H 11 |
| R 32 | 3445.970        | 1235.685       | 1219.667        | 1220.675        | 1218.659 | R 10 |
| L 33 | 3559.054        | 1079.584       | 1063.566        | <b>1064.573</b> | 1062.558 | L 9  |
| L 34 | 3672.138        | <b>966.500</b> | 950.482         | <b>951.489</b>  | 949.474  | L 8  |
| R 35 | 3828.239        | 853.416        | 837.398         | <b>838.405</b>  | 836.390  | R 7  |
| K 36 | 3956.314        | 697.315        | 681.296         | 682.304         | 680.289  | K 6  |
| G 37 | 4013.356        | 569.220        | 553.201         | 554.209         | 552.194  | G 5  |
| N 38 | 4127.399        | 512.109        | 496.100         | 497.108         | 495.172  | N 4  |
| V 39 | 4290.462        | 396.156        | 380.137         | 381.145         | 381.129  | V 3  |
| S 40 | 4377.494        | 235.092        | 219.074         | 220.082         | 218.066  | S 2  |
| E 41 | 4506.537        | 148.060        | 132.042         | 133.050         | 131.034  | E 1  |

# sp | Q8CGP5 | H2A1F\_MOUSE

[Acetyl]SGRGKQGGKARAKAKTRSSRAGLQFPVGRVHRLLRKGNYS

- ▶ fragmentation table for charge state 2+
- ▶ specType=etd
- ▶ score=49.76
- ▶ F113278.dat
- ▶ query=q70266.p1
- ▶ precursor=902.310130
- ▶ chargePrecursor=5
- ▶ itol=0.5

| AA   | c               | y        | z+1             | z+2             | z               | AA   |
|------|-----------------|----------|-----------------|-----------------|-----------------|------|
| S 1  | 74.042          | 2754.364 | 2246.255        | 0.504           | 2245.751        | S 41 |
| G 2  | 102.563         | 2189.743 | 2181.731        | 0.504           | 2181.229        | G 40 |
| R 3  | 180.603         | 2161.732 | 2153.223        | 2153.726        | 2152.719        | R 39 |
| G 4  | 209.114         | 2083.181 | 2075.172        | 2075.676        | 2074.669        | G 38 |
| K 5  | 273.161         | 2054.671 | 2046.661        | 2047.165        | 2046.157        | K 37 |
| Q 6  | 337.193         | 2026.623 | 1982.611        | <b>1983.118</b> | 1982.111        | Q 36 |
| G 7  | 365.701         | 2026.584 | <b>1918.584</b> |                 | <b>1918.081</b> | G 35 |
| G 8  | 394.212         | 1898.083 | <b>1890.074</b> | 1890.578        | <b>1889.570</b> | G 34 |
| K 9  | 458.260         | 1869.672 | 1861.663        | 1862.067        | 1861.059        | K 33 |
| A 10 | 493.778         | 1805.625 | <b>1797.516</b> | <b>1798.019</b> | 1797.012        | A 32 |
| R 11 | 571.829         | 1770.096 | 1762.087        | 1762.591        | 1761.480        | R 31 |
| A 12 | 607.347         | 1693.956 | <b>1683.946</b> | <b>1684.450</b> | 1683.443        | A 30 |
| R 13 | <b>671.395</b>  | 1656.437 | <b>1648.428</b> | <b>1648.932</b> | 1647.925        | R 29 |
| A 14 | <b>706.913</b>  | 1592.390 | <b>1584.380</b> | <b>1584.884</b> | 1583.878        | A 28 |
| K 15 | 770.961         | 1556.671 | 1548.662        | <b>1549.366</b> | 1548.359        | K 27 |
| T 16 | <b>821.485</b>  | 1492.824 | 1484.814        | 1485.318        | 1484.310        | T 26 |
| R 17 | 899.535         | 1442.300 | 1434.289        | <b>1434.794</b> | 1433.787        | R 25 |
| S 18 | 983.053         | 1394.249 | <b>1356.240</b> | <b>1356.744</b> | 1355.738        | S 24 |
| S 19 | <b>986.567</b>  | 1320.733 | <b>1312.724</b> | <b>1313.228</b> | 1312.220        | S 23 |
| R 20 | <b>1064.618</b> | 1277.217 | 1269.208        | <b>1269.712</b> | 1268.704        | R 22 |
| A 21 | <b>1100.136</b> | 1199.067 | 1191.157        | 1191.661        | 1190.653        | A 21 |
| G 22 | <b>1128.647</b> | 1163.648 | 1155.639        | 1156.143        | 1155.135        | G 20 |
| L 23 | 1155.799        | 1136.137 | 1127.128        | 1127.632        | 1126.625        | L 19 |
| Q 24 | <b>1249.218</b> | 1078.595 | <b>1070.586</b> | 1071.090        | <b>1070.082</b> | Q 19 |
| F 25 | 1222.753        | 1014.568 | 1006.557        | <b>1007.061</b> | 1006.055        | F 17 |
| P 26 | 1371.279        | 941.032  | 933.023         | 933.526         | 932.519         | P 16 |
| V 27 | <b>1420.813</b> | 892.506  | 884.496         | 885.000         | 883.992         | V 15 |
| G 28 | <b>1449.324</b> | 842.671  | 834.662         | 835.166         | 834.159         | G 14 |
| R 29 | 1527.274        | 814.403  | 806.403         | 806.906         | 805.899         | R 13 |
| V 30 | 1578.969        | 738.410  | 729.401         | 729.905         | 727.897         | V 12 |
| H 31 | 1645.438        | 688.878  | 679.869         | 679.373         | 678.365         | H 11 |
| R 32 | 1723.489        | 618.346  | 610.337         | 610.841         | 609.833         | R 10 |
| L 33 | 1780.031        | 540.290  | 532.280         | 532.784         | 531.777         | L 9  |
| L 34 | 1836.573        | 483.754  | 475.744         | 476.248         | 475.241         | L 8  |
| T 35 | 1814.623        | 427.212  | 419.203         | 419.706         | 418.699         | T 7  |
| K 36 | 1978.671        | 349.161  | 341.152         | 341.656         | 340.649         | K 6  |
| G 37 | 2007.181        | 285.114  | 277.104         | 277.608         | 276.600         | G 5  |
| N 38 | 2064.203        | 256.603  | 248.594         | 249.098         | 248.090         | N 4  |
| V 39 | 2145.735        | 199.582  | 191.573         | 192.076         | 191.069         | V 3  |
| S 40 | 2189.251        | 118.050  | 110.041         | 110.544         | 109.537         | S 2  |
| E 41 | 2253.772        | 74.534   | 66.525          | 67.028          | 66.021          | E 1  |

# sp | Q8CGP5 | H2A1F\_MOUSE

[Acetyl]SGRGKQGGKARAKAKTRSSRAGLQFPVGRVHRLLRKGNYS

- ▶ fragmentation table for charge state 3+
- ▶ specType=etd
- ▶ score=49.76
- ▶ F113278.dat
- ▶ query=q70266.p1
- ▶ precursor=902.310130
- ▶ chargePrecursor=5
- ▶ itol=0.5

| AA | c  | y               | #s1             | #s2             | z               | AA              |      |
|----|----|-----------------|-----------------|-----------------|-----------------|-----------------|------|
| S  | 1  | 49.697          | <b>1503.178</b> | <b>1497.839</b> | 0.872           | 2497.567        | S(4) |
| G  | 2  | 66.704          | <b>1460.164</b> | 1454.525        | 0.872           | 1454.480        | G(4) |
| R  | 3  | 130.738         | 1441.157        | 1435.817        | 1436.153        | <b>1435.482</b> | R(3) |
| G  | 4  | 139.745         | 1389.123        | <b>1383.784</b> | <b>1384.120</b> | <b>1383.448</b> | G(3) |
| K  | 5  | 182.443         | 1370.116        | 1364.777        | 1365.113        | 1364.441        | K(3) |
| G  | 6  | 225.130         | 1327.418        | <b>1322.078</b> | <b>1322.414</b> | <b>1321.742</b> | G(3) |
| G  | 7  | 264.137         | 1284.733        | <b>1279.392</b> | <b>1279.728</b> | 1279.056        | G(3) |
| G  | 8  | 263.144         | 1265.725        | <b>1260.385</b> | <b>1260.721</b> | 1260.049        | G(3) |
| K  | 9  | 305.642         | 1246.717        | <b>1241.378</b> | <b>1241.714</b> | <b>1241.042</b> | K(3) |
| A  | 10 | 329.521         | 1204.019        | 1198.079        | 1199.015        | 1198.344        | A(3) |
| R  | 11 | 381.555         | 1180.340        | 1175.000        | 1175.336        | 1174.664        | R(3) |
| A  | 12 | 405.234         | <b>1128.306</b> | 1122.967        | <b>1123.302</b> | 1122.631        | A(3) |
| K  | 13 | 447.932         | 1104.627        | 1099.288        | <b>1099.624</b> | 1099.952        | K(3) |
| A  | 14 | 491.611         | 1081.929        | 1056.589        | 1056.925        | 1056.251        | A(3) |
| K  | 15 | 514.310         | 1038.250        | <b>1032.910</b> | <b>1033.246</b> | 1032.574        | K(3) |
| T  | 16 | 547.602         | 995.552         | 990.212         | 990.548         | 989.870         | T(3) |
| R  | 17 | 600.626         | 981.869         | <b>956.529</b>  | <b>956.865</b>  | 956.193         | R(3) |
| S  | 18 | 629.019         | 959.835         | 944.495         | 944.831         | 944.160         | S(3) |
| S  | 19 | 658.047         | 980.825         | 875.485         | 875.821         | 875.149         | S(3) |
| R  | 20 | 710.081         | 951.814         | 846.474         | 846.810         | 846.138         | R(3) |
| A  | 21 | 733.760         | 799.780         | 794.441         | 794.777         | 794.105         | A(3) |
| G  | 22 | 752.767         | 776.101         | 770.762         | 771.098         | 770.426         | G(3) |
| L  | 23 | 780.482         | 759.094         | 753.754         | 754.090         | 753.418         | L(3) |
| Q  | 24 | 833.148         | 733.366         | 714.000         | 714.336         | 713.664         | Q(3) |
| F  | 25 | 882.171         | 676.713         | <b>671.374</b>  | <b>671.710</b>  | <b>671.038</b>  | F(1) |
| F  | 26 | 914.552         | 627.600         | 622.261         | 622.597         | 621.925         | F(1) |
| V  | 27 | <b>947.545</b>  | 595.139         | 590.000         | 590.336         | 589.664         | V(1) |
| G  | 28 | <b>966.552</b>  | 562.317         | 556.977         | 557.313         | 556.641         | G(1) |
| R  | 29 | 1013.559        | 543.309         | 537.970         | 538.306         | 537.634         | R(1) |
| V  | 30 | 1051.608        | 490.276         | 485.038         | 485.374         | 484.702         | V(1) |
| H  | 31 | 1097.204        | 458.253         | 452.913         | 453.249         | 452.577         | H(1) |
| R  | 32 | 1189.328        | 412.567         | 407.227         | 407.563         | 406.891         | R(1) |
| L  | 33 | <b>1187.023</b> | <b>360.533</b>  | 355.193         | 355.529         | 354.857         | L(1) |
| L  | 34 | 1254.718        | 322.574         | 317.234         | 317.570         | 316.898         | L(1) |
| R  | 35 | 1276.751        | 285.144         | 279.804         | 280.140         | 279.468         | R(1) |
| K  | 36 | 1319.450        | 233.110         | 227.770         | 228.106         | 227.434         | K(1) |
| G  | 37 | 1338.457        | 190.412         | 185.072         | 185.408         | 184.736         | G(1) |
| N  | 38 | 1376.471        | 171.404         | 166.064         | 166.401         | 165.729         | N(1) |
| V  | 39 | 1430.524        | 133.390         | 128.051         | 128.387         | 127.715         | V(1) |
| S  | 40 | <b>1459.836</b> | 99.136          | 93.796          | 94.132          | 93.460          | S(1) |
| E  | 41 | <b>1502.850</b> | 50.025          | 44.685          | 45.021          | 44.349          | E(1) |

# sp | Q8CGP5 | H2A1F\_MOUSE

[Acetyl]SGRGKQGGKARAKAKTRSSRAGLQFPVGRVHRLLRKGNYS

- ▶ fragmentation table for charge state 4+
- ▶ specType=etd
- ▶ score=49.76
- ▶ F113278.dat
- ▶ query=q70266.p1
- ▶ precursor=902.310130
- ▶ chargePrecursor=5
- ▶ itol=0.5

| AA   | c        | y        | z+1             | z+2             | z               | AA   |
|------|----------|----------|-----------------|-----------------|-----------------|------|
| S 1  | 57.535   | 1127.636 | <b>1123.631</b> | 0.755           | <b>1123.379</b> | S 41 |
| G 2  | 51.780   | 1095.375 | <b>1091.370</b> | 0.755           | <b>1091.118</b> | G 40 |
| R 3  | 90.805   | 1081.120 | <b>1077.115</b> | <b>1077.367</b> | <b>1076.863</b> | R 39 |
| G 4  | 105.061  | 1042.094 | 1039.090        | 1038.342        | 1037.839        | G 38 |
| K 5  | 137.004  | 1027.839 | 1024.834        | 1024.206        | 1023.562        | K 37 |
| G 6  | 169.099  | 995.515  | 991.511         | 992.062         | 991.559         | G 36 |
| G 7  | 183.354  | 963.801  | 959.796         | 960.048         | 959.544         | G 35 |
| G 8  | 197.610  | 949.545  | 945.541         | 945.792         | 945.289         | G 34 |
| K 9  | 229.633  | 935.290  | 931.285         | 931.537         | 931.033         | K 33 |
| A 10 | 247.393  | 903.266  | 899.261         | 899.513         | 899.009         | A 32 |
| R 11 | 286.418  | 885.507  | 881.502         | 881.754         | 881.250         | R 31 |
| A 12 | 304.177  | 849.682  | 842.477         | 843.229         | 842.725         | A 30 |
| R 13 | 336.201  | 828.122  | 824.718         | 824.970         | 824.466         | R 29 |
| A 14 | 353.040  | 796.699  | 792.694         | 792.946         | 792.442         | A 28 |
| K 15 | 365.984  | 778.939  | 774.935         | 775.187         | 774.683         | K 27 |
| T 16 | 411.246  | 746.915  | 742.911         | 743.163         | 742.659         | T 26 |
| R 17 | 450.271  | 721.654  | 717.649         | 717.901         | 717.397         | R 25 |
| S 18 | 472.029  | 682.629  | 678.624         | 678.876         | 678.372         | S 24 |
| S 19 | 483.787  | 660.570  | 656.565         | 657.118         | 656.614         | S 23 |
| R 20 | 532.813  | 639.112  | 635.108         | 635.360         | 634.856         | R 22 |
| A 21 | 550.572  | 600.087  | 596.082         | 596.334         | 595.830         | A 21 |
| G 22 | 564.827  | 582.328  | 578.323         | 578.575         | 578.071         | G 20 |
| L 23 | 593.098  | 568.072  | 564.068         | 564.320         | 563.816         | L 19 |
| G 24 | 625.113  | 539.801  | 535.797         | 536.049         | 535.545         | G 18 |
| F 25 | 661.880  | 507.787  | 503.782         | 504.034         | 503.530         | F 17 |
| F 26 | 686.143  | 471.020  | 467.015         | 467.267         | 466.763         | F 16 |
| V 27 | 710.910  | 446.756  | 442.752         | 443.004         | 442.500         | V 15 |
| G 28 | 725.105  | 421.989  | 417.985         | 418.237         | <b>417.733</b>  | G 14 |
| R 29 | 764.191  | 407.734  | 403.729         | 403.981         | 403.477         | R 13 |
| V 30 | 783.958  | 386.709  | 384.704         | 384.956         | 384.452         | V 12 |
| H 31 | 823.223  | 343.942  | 339.937         | 340.189         | 339.685         | H 11 |
| R 32 | 882.248  | 309.677  | 305.672         | 305.924         | 305.420         | R 10 |
| L 33 | 890.519  | 270.652  | 266.647         | 266.899         | 266.395         | L 9  |
| L 34 | 918.790  | 242.301  | 238.296         | 238.548         | 238.044         | L 8  |
| R 35 | 967.815  | 214.110  | 210.105         | 210.357         | 209.853         | R 7  |
| K 36 | 989.839  | 175.084  | 171.079         | 171.331         | 170.827         | K 6  |
| G 37 | 1004.094 | 143.063  | 139.058         | 139.310         | 138.806         | G 5  |
| N 38 | 1032.605 | 128.805  | 124.800         | 125.052         | 124.548         | N 4  |
| V 39 | 1073.571 | 100.294  | 96.290          | 96.542          | 96.038          | V 3  |
| S 40 | 1095.129 | 59.529   | 55.524          | 55.776          | 55.272          | S 2  |
| E 41 | 1127.390 | 37.771   | 33.766          | 34.018          | 33.514          | E 1  |

# sp | Q8CGP5 | H2A1F\_MOUSE

[Acetyl]SGRGKQGGKARAKAKTRSSRAGLQFPVGRVHRLLRKGNYS

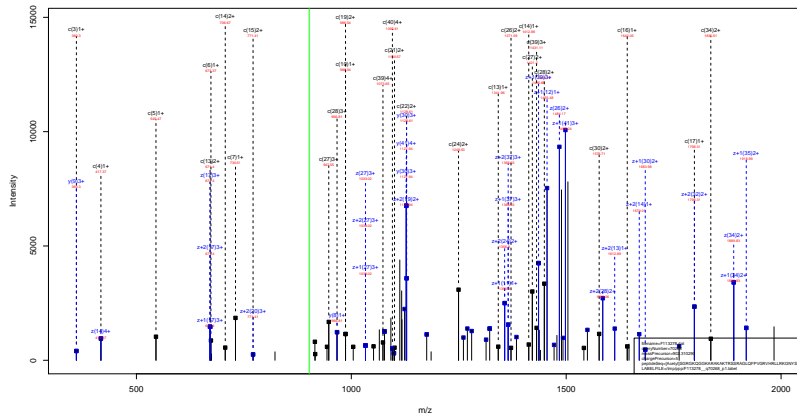

# sp | Q8CGP5 | H2A1F\_MOUSE

[Acetyl]SGRGKQGGKARAKAKTRSSRAGLQFPVGRVHRLLRKGNYS

- ▶ fragmentation table for charge state 1+
- ▶ specType=etd
- ▶ score=57.36
- ▶ F113278.dat
- ▶ query=q70268.p1
- ▶ precursor=902.310290
- ▶ chargePrecursor=5
- ▶ itol=0.5

| AA   | c               | y               | z+1             | z+2             | z        | AA   |
|------|-----------------|-----------------|-----------------|-----------------|----------|------|
| S 1  | 147.076         | 4507.921        | 4491.502        | 0.000           | 4490.484 | S 41 |
| G 2  | 204.068         | 4378.478        | 4362.459        | 0.000           | 4361.451 | G 40 |
| R 3  | <b>300.199</b>  | 4321.457        | 4305.438        | 4306.448        | 4304.430 | R 39 |
| G 4  | <b>417.220</b>  | 4185.355        | 4149.317        | 4150.345        | 4148.329 | G 38 |
| K 5  | <b>545.315</b>  | 4108.334        | 4062.315        | 4091.321        | 4091.307 | K 37 |
| Q 6  | <b>673.374</b>  | 3989.215        | 3964.200        | 3956.228        | 3963.211 | Q 36 |
| G 7  | <b>730.395</b>  | 3852.180        | 3836.162        | 3837.170        | 3835.154 | G 35 |
| G 8  | 787.417         | 3795.159        | 3779.140        | 3780.148        | 3778.132 | G 34 |
| K 9  | <b>915.512</b>  | 3738.138        | 3722.119        | 3723.127        | 3721.111 | K 33 |
| A 10 | <b>986.549</b>  | 3610.043        | 3594.024        | 3595.032        | 3593.016 | A 32 |
| R 11 | 1142.650        | 3539.005        | 3522.987        | 3523.995        | 3521.979 | R 31 |
| A 12 | 1213.687        | 3382.904        | 3368.886        | 3367.893        | 3366.877 | A 30 |
| R 13 | <b>1341.782</b> | 3311.887        | 3295.848        | 3296.856        | 3294.841 | R 29 |
| A 14 | <b>1412.819</b> | 3183.772        | 3167.754        | 3168.761        | 3166.746 | A 28 |
| K 15 | <b>1540.914</b> | 3112.735        | 3096.716        | 3097.724        | 3095.709 | K 27 |
| T 16 | <b>1641.962</b> | 2984.640        | 2968.621        | 2969.629        | 2967.614 | T 26 |
| R 17 | <b>1798.063</b> | 2881.562        | 2867.574        | 2868.582        | 2866.566 | R 25 |
| S 18 | 1885.959        | 2727.491        | 2713.473        | 2712.480        | 2710.465 | S 24 |
| S 19 | 1972.127        | 2640.459        | 2624.441        | 2625.448        | 2623.433 | S 23 |
| R 20 | 2138.228        | 2553.427        | 2537.409        | 2538.416        | 2536.401 | R 22 |
| A 21 | 2199.205        | 2397.326        | 2381.307        | 2382.315        | 2380.300 | A 21 |
| G 22 | 2256.287        | 2326.289        | 2310.270        | 2311.278        | 2309.263 | G 20 |
| L 23 | 2309.271        | 2209.268        | 2203.249        | 2204.257        | 2202.241 | L 19 |
| Q 24 | 3007.429        | 2156.184        | 2140.165        | 2141.173        | 2139.157 | Q 19 |
| F 25 | 3044.498        | 2028.125        | 2012.106        | 2013.114        | 2011.099 | F 17 |
| P 26 | 2741.951        | 1881.057        | 1865.038        | 1866.046        | 1864.030 | P 16 |
| V 27 | 2840.619        | 1784.004        | 1767.985        | 1768.993        | 1766.977 | V 15 |
| G 28 | 2897.641        | 1684.935        | 1668.917        | <b>1669.924</b> | 1667.909 | G 14 |
| R 29 | 3053.742        | 1527.814        | 1511.795        | <b>1612.903</b> | 1510.780 | R 13 |
| V 30 | 3152.810        | <b>1471.813</b> | <b>1455.794</b> | 1456.802        | 1454.786 | V 12 |
| H 31 | 3289.869        | 1372.744        | <b>1356.726</b> | 1357.734        | 1355.718 | H 11 |
| R 32 | 3445.970        | 1235.685        | 1219.667        | 1220.675        | 1218.659 | R 10 |
| L 33 | 3559.054        | 1079.584        | 1063.566        | 1064.573        | 1062.558 | L 9  |
| L 34 | 3672.138        | <b>966.500</b>  | 950.482         | 951.489         | 949.474  | L 8  |
| T 35 | 3838.239        | 853.418         | 837.399         | 838.406         | 836.390  | T 7  |
| K 36 | 3956.334        | 697.315         | 681.296         | 682.304         | 680.289  | K 6  |
| G 37 | 4013.366        | 649.220         | 633.201         | 634.209         | 632.194  | G 5  |
| N 38 | 4127.399        | 612.109         | 496.180         | 497.188         | 495.172  | N 4  |
| V 39 | 4290.462        | 398.159         | 382.139         | 383.145         | 381.129  | V 3  |
| S 40 | 4377.494        | 235.062         | 219.074         | 220.082         | 218.066  | S 2  |
| E 41 | 4406.537        | 148.006         | 132.042         | 133.050         | 131.034  | E 1  |

# sp | Q8CGP5 | H2A1F\_MOUSE

[Acetyl]SGRGKQGGKARAKAKTRSSRAGLQFPVGRVHRLLRKGNYS

- ▶ fragmentation table for charge state 2+
- ▶ specType=etd
- ▶ score=57.36
- ▶ F113278.dat
- ▶ query=q70268.p1
- ▶ precursor=902.310290
- ▶ chargePrecursor=5
- ▶ itol=0.5

| AA | c  | y               | #s1             | #s2             | z               | AA              |       |
|----|----|-----------------|-----------------|-----------------|-----------------|-----------------|-------|
| S  | 1  | 74.062          | 2054.204        | 2266.205        | 8.804           | 2245.78         | S[1]  |
| G  | 2  | 102.553         | 2189.743        | 2381.733        | 0.504           | 2181.220        | G[2]  |
| R  | 3  | 180.603         | 2161.232        | 2153.233        | 2153.236        | 2152.710        | R[3]  |
| G  | 4  | 209.114         | 2083.181        | 2075.172        | 2075.676        | 2074.660        | G[4]  |
| K  | 5  | 273.181         | 2054.671        | 2046.681        | 2047.105        | 2046.157        | K[5]  |
| G  | 6  | 337.194         | 1990.621        | 1992.622        | 1993.126        | 1992.110        | G[6]  |
| G  | 7  | 385.703         | 1936.594        | <b>1918.584</b> | <b>1918.088</b> | 1919.081        | G[7]  |
| G  | 8  | 394.212         | 1898.081        | <b>1890.074</b> | 1890.578        | <b>1889.570</b> | G[8]  |
| K  | 9  | 458.260         | 1869.572        | 1861.563        | 1862.067        | 1861.050        | K[9]  |
| A  | 10 | 493.778         | 1805.525        | 1797.516        | <b>1798.019</b> | 1797.012        | A[10] |
| R  | 11 | 571.829         | 1770.008        | 1762.007        | <b>1762.501</b> | 1761.493        | R[11] |
| A  | 12 | 607.937         | 1692.956        | <b>1683.946</b> | <b>1684.450</b> | 1683.443        | A[12] |
| K  | 13 | <b>671.395</b>  | 1656.437        | 1648.428        | 1648.932        | 1647.924        | K[13] |
| A  | 14 | <b>706.913</b>  | 1592.900        | 1584.890        | <b>1584.884</b> | 1583.876        | A[14] |
| K  | 15 | <b>770.961</b>  | 1556.871        | 1548.862        | <b>1549.366</b> | 1548.358        | K[15] |
| T  | 16 | 821.405         | <b>1492.824</b> | 1484.814        | 1485.318        | <b>1484.310</b> | T[16] |
| R  | 17 | 869.529         | 1442.802        | 1434.793        | 1435.296        | 1434.287        | R[17] |
| S  | 18 | <b>943.051</b>  | 1364.249        | 1356.240        | <b>1356.744</b> | 1355.736        | S[18] |
| S  | 19 | <b>986.567</b>  | 1320.733        | 1312.724        | <b>1313.228</b> | 1312.220        | S[19] |
| R  | 20 | 1064.618        | 1277.217        | 1269.208        | <b>1269.712</b> | 1268.704        | R[20] |
| A  | 21 | <b>1100.136</b> | 1199.163        | 1191.157        | 1191.661        | 1190.653        | A[21] |
| G  | 22 | <b>1128.647</b> | 1153.648        | 1145.639        | 1146.143        | 1145.135        | G[22] |
| L  | 23 | 1155.739        | 1138.137        | 1127.128        | <b>1127.632</b> | 1126.624        | L[23] |
| Q  | 24 | <b>1249.218</b> | 1073.595        | 1070.586        | <b>1071.090</b> | 1070.082        | Q[24] |
| F  | 25 | 1322.753        | 1014.566        | 1006.557        | 1007.061        | 1006.053        | F[25] |
| F  | 26 | <b>1371.279</b> | 941.033         | 933.023         | 933.526         | 932.518         | F[26] |
| V  | 27 | <b>1420.813</b> | 892.500         | 884.496         | 885.000         | 883.992         | V[27] |
| G  | 28 | <b>1449.324</b> | 842.971         | 834.962         | 835.466         | 834.458         | G[28] |
| R  | 29 | 1527.814        | 814.461         | 806.451         | 806.955         | 805.947         | R[29] |
| V  | 30 | <b>1576.909</b> | 736.410         | 728.401         | 728.905         | 727.897         | V[30] |
| H  | 31 | 1645.438        | 688.876         | 678.866         | 679.370         | 678.363         | H[31] |
| R  | 32 | 1723.489        | 618.346         | 610.337         | 610.841         | 609.833         | R[32] |
| L  | 33 | 1760.031        | 540.206         | 532.196         | 532.700         | 531.693         | L[33] |
| L  | 34 | <b>1836.573</b> | 483.754         | 475.743         | 476.246         | 475.240         | L[34] |
| R  | 35 | 1914.623        | 427.212         | 419.202         | 419.706         | 418.698         | R[35] |
| K  | 36 | 1978.671        | 349.161         | 341.152         | 341.656         | 340.648         | K[36] |
| G  | 37 | 2067.181        | 285.114         | 277.104         | 277.608         | 276.600         | G[37] |
| N  | 38 | 2094.203        | 256.603         | 248.594         | 249.098         | 248.090         | N[38] |
| V  | 39 | 2145.736        | 199.562         | 191.552         | 192.056         | 191.048         | V[39] |
| S  | 40 | 2189.251        | 118.056         | 110.047         | 110.551         | 109.543         | S[40] |
| E  | 41 | 2253.772        | 74.534          | 66.524          | 67.028          | 66.021          | E[41] |

# sp | Q8CGP5 | H2A1F\_MOUSE

[Acetyl]SGRGKQGGKARAKAKTRSSRAGLQFPVGRVHRLLRKGNYS

- ▶ fragmentation table for charge state 3+
- ▶ specType=etd
- ▶ score=57.36
- ▶ F113278.dat
- ▶ query=q70268.p1
- ▶ precursor=902.310290
- ▶ chargePrecursor=5
- ▶ itol=0.5

| AA | c  | y               | #s1             | #s2             | z               | AA              |       |
|----|----|-----------------|-----------------|-----------------|-----------------|-----------------|-------|
| S  | 1  | 48.607          | 1502.114        | <b>1497.839</b> | 0.872           | 2497.567        | S[41] |
| G  | 2  | 86.704          | 1460.184        | 1454.525        | 0.672           | 1454.480        | G[40] |
| R  | 3  | 130.718         | 1441.157        | <b>1435.817</b> | <b>1430.153</b> | <b>1435.482</b> | R[39] |
| G  | 4  | 139.745         | 1389.123        | 1383.784        | <b>1384.120</b> | 1383.440        | G[38] |
| K  | 5  | 182.443         | 1370.116        | <b>1364.777</b> | <b>1365.113</b> | 1364.441        | K[37] |
| G  | 6  | 225.130         | 1327.418        | <b>1322.078</b> | <b>1322.414</b> | <b>1321.742</b> | G[36] |
| G  | 7  | 244.137         | 1284.733        | 1279.392        | <b>1278.728</b> | 1278.056        | G[35] |
| G  | 8  | 263.144         | 1265.725        | 1260.385        | <b>1260.721</b> | 1260.049        | G[34] |
| K  | 9  | 305.842         | 1246.717        | 1241.378        | 1241.714        | 1241.042        | K[33] |
| A  | 10 | 329.521         | 1204.019        | 1198.079        | 1199.015        | 1198.344        | A[32] |
| R  | 11 | 381.555         | 1180.340        | <b>1175.000</b> | <b>1175.336</b> | 1174.664        | R[31] |
| A  | 12 | 405.234         | <b>1128.206</b> | 1123.067        | 1123.003        | 1122.331        | A[30] |
| K  | 13 | 447.932         | 1104.627        | <b>1099.288</b> | <b>1099.624</b> | <b>1098.952</b> | K[29] |
| A  | 14 | 491.611         | 1081.029        | 1076.589        | 1076.625        | 1076.251        | A[28] |
| K  | 15 | 514.310         | 1038.250        | <b>1032.910</b> | <b>1033.246</b> | <b>1032.574</b> | K[27] |
| T  | 16 | 547.002         | 995.552         | 990.212         | 990.548         | 989.870         | T[26] |
| R  | 17 | 600.626         | 981.869         | 976.529         | 976.865         | 976.187         | R[25] |
| S  | 18 | 629.017         | 959.835         | 954.495         | 954.832         | 954.160         | S[24] |
| S  | 19 | 658.047         | 980.825         | 875.485         | 875.821         | 875.149         | S[23] |
| R  | 20 | 710.081         | 951.814         | 846.474         | 846.810         | 846.138         | R[22] |
| A  | 21 | 733.760         | 799.780         | 794.441         | 794.777         | 794.105         | A[21] |
| G  | 22 | 752.767         | 776.101         | 770.762         | <b>771.098</b>  | 770.426         | G[20] |
| L  | 23 | 780.482         | 759.094         | 753.754         | 754.090         | 753.418         | L[19] |
| Q  | 24 | 833.148         | 739.305         | 734.000         | 734.366         | 733.721         | Q[18] |
| F  | 25 | 882.171         | 676.713         | <b>671.374</b>  | <b>671.710</b>  | <b>671.038</b>  | F[17] |
| F  | 26 | 914.552         | 627.600         | 622.351         | 622.687         | 622.015         | F[16] |
| V  | 27 | <b>947.545</b>  | 595.139         | 590.000         | 590.336         | 589.664         | V[15] |
| G  | 28 | <b>966.552</b>  | 562.317         | 556.977         | 557.313         | 556.641         | G[14] |
| R  | 29 | 1015.559        | 543.309         | 537.970         | 538.306         | 537.634         | R[13] |
| V  | 30 | <b>1051.608</b> | 490.275         | 485.036         | 486.272         | 485.600         | V[12] |
| H  | 31 | 1097.204        | 458.253         | 452.913         | 453.249         | 452.577         | H[11] |
| R  | 32 | 1149.328        | 412.967         | 407.227         | 407.563         | 406.891         | R[10] |
| L  | 33 | 1187.023        | <b>360.533</b>  | 355.193         | 355.529         | 354.857         | L[9]  |
| L  | 34 | 1234.718        | 322.876         | 317.489         | 317.825         | 317.153         | L[8]  |
| R  | 35 | 1276.751        | 285.144         | 279.804         | 280.140         | 279.468         | R[7]  |
| K  | 36 | 1319.450        | 233.110         | 227.770         | 228.106         | 227.434         | K[6]  |
| G  | 37 | 1338.457        | 190.412         | 185.072         | 185.408         | 184.736         | G[5]  |
| N  | 38 | 1378.471        | 171.404         | 166.065         | 166.401         | 165.729         | N[4]  |
| V  | 39 | <b>1430.826</b> | 133.390         | 128.051         | 128.386         | 127.715         | V[3]  |
| S  | 40 | 1459.819        | 98.136          | 93.000          | 93.336          | 92.664          | S[2]  |
| E  | 41 | 1502.850        | 50.025          | 44.685          | 45.021          | 44.349          | E[1]  |



# sp | Q8CGP5 | H2A1F\_MOUSE

[Acetyl]SGRGKQGGKARAKAKTRSSRAGLQFPVGRVHRLLRKGNYS

- ▶ fragmentation table for charge state 4+
- ▶ specType=etd
- ▶ score=57.36
- ▶ F113278.dat
- ▶ query=q70268.p1
- ▶ precursor=902.310290
- ▶ chargePrecursor=5
- ▶ itol=0.5

| AA | c  | p               | #s1             | #s2             | z               | AA              |       |
|----|----|-----------------|-----------------|-----------------|-----------------|-----------------|-------|
| S  | 1  | 37.505          | <b>1127.636</b> | <b>1123.631</b> | 0.708           | 1123.371        | S[41] |
| G  | 2  | 51.780          | <b>1095.375</b> | 1091.370        | 0.795           | 1091.110        | G[40] |
| R  | 3  | 90.805          | 1081.120        | <b>1077.115</b> | <b>1077.367</b> | <b>1076.863</b> | R[39] |
| G  | 4  | 109.001         | 1042.094        | 1038.090        | 1038.342        | 1037.839        | G[38] |
| K  | 5  | 137.084         | 1027.839        | 1023.834        | 1024.086        | 1023.583        | K[37] |
| G  | 6  | 169.099         | 995.915         | 991.911         | 992.062         | 991.559         | G[36] |
| G  | 7  | 183.354         | 963.801         | 959.796         | 960.048         | 959.545         | G[35] |
| G  | 8  | 197.610         | 949.545         | 945.541         | 945.792         | 945.289         | G[34] |
| K  | 9  | 239.633         | 935.290         | 931.285         | 931.537         | 931.033         | K[33] |
| A  | 10 | 247.393         | 903.266         | 899.261         | 899.513         | 899.010         | A[32] |
| R  | 11 | 286.418         | 895.507         | 891.502         | 891.754         | 891.250         | R[31] |
| A  | 12 | 304.177         | 864.848         | 860.843         | 861.095         | 860.592         | A[30] |
| K  | 13 | 336.201         | 828.722         | 824.718         | 824.970         | 824.466         | K[29] |
| A  | 14 | 353.960         | 796.699         | 792.694         | 792.946         | 792.442         | A[28] |
| K  | 15 | 385.984         | 778.939         | 774.935         | 775.187         | 774.683         | K[27] |
| T  | 16 | 411.246         | 746.915         | 742.911         | 743.163         | 742.659         | T[26] |
| R  | 17 | 459.271         | 721.954         | 717.949         | 718.201         | 717.697         | R[25] |
| S  | 18 | 472.029         | 692.629         | 688.624         | 688.876         | 688.372         | S[24] |
| S  | 19 | 493.787         | 660.670         | 656.666         | 656.918         | 656.414         | S[23] |
| R  | 20 | 532.813         | 638.112         | 634.108         | 634.360         | 633.856         | R[22] |
| A  | 21 | 539.572         | 600.087         | 596.082         | 596.334         | 595.830         | A[21] |
| G  | 22 | 564.827         | 582.328         | 578.323         | 578.575         | 578.071         | G[20] |
| L  | 23 | 593.098         | 568.072         | 564.068         | 564.320         | 563.816         | L[19] |
| Q  | 24 | 625.113         | 539.801         | 535.797         | 536.049         | 535.545         | Q[18] |
| F  | 25 | 661.880         | 507.787         | 503.782         | 504.034         | 503.530         | F[17] |
| P  | 26 | 698.143         | 471.020         | 467.015         | 467.267         | 466.763         | P[16] |
| V  | 27 | 710.910         | 446.756         | 442.752         | 443.004         | 442.500         | V[15] |
| G  | 28 | 725.169         | 421.989         | 417.985         | 418.237         | <b>417.733</b>  | G[14] |
| R  | 29 | 764.181         | 389.734         | 385.729         | 385.981         | 385.477         | R[13] |
| V  | 30 | 788.958         | 368.709         | 364.704         | 364.956         | 364.452         | V[12] |
| H  | 31 | 823.223         | 343.942         | 339.937         | 340.189         | 339.685         | H[11] |
| R  | 32 | 862.248         | 309.677         | 305.672         | 305.924         | 305.420         | R[10] |
| L  | 33 | 890.519         | 270.652         | 266.647         | 266.899         | 266.395         | L[9]  |
| L  | 34 | 918.369         | 242.361         | 238.356         | 238.608         | 238.104         | L[8]  |
| R  | 35 | 937.815         | 214.110         | 210.105         | 210.357         | 209.853         | R[7]  |
| K  | 36 | 989.839         | 175.084         | 171.079         | 171.331         | 170.827         | K[6]  |
| G  | 37 | <b>1004.094</b> | 143.061         | 139.056         | 139.308         | 138.804         | G[5]  |
| N  | 38 | <b>1032.605</b> | 128.805         | 124.800         | 125.052         | 124.548         | N[4]  |
| V  | 39 | <b>1073.371</b> | 100.294         | 96.289          | 96.541          | 96.037          | V[3]  |
| S  | 40 | <b>1095.129</b> | 99.529          | 95.524          | 95.776          | 95.272          | S[2]  |
| E  | 41 | 1127.390        | 97.771          | 93.766          | 94.018          | 93.514          | E[1]  |



# sp | Q8CGP5 | H2A1F\_MOUSE

[Acetyl]SGRGKQGGKARAKAKTRSSRAGLQFPVGRVHLLRKGNYSE

- ▶ fragmentation table for charge state 1+
- ▶ specType=etd
- ▶ score=40.18
- ▶ F113278.dat
- ▶ query=q70271.p1
- ▶ precursor=644.795160
- ▶ chargePrecursor=7
- ▶ itol=0.5

| AA    | c              | y              | z+1             | z+2             | z        | AA    |
|-------|----------------|----------------|-----------------|-----------------|----------|-------|
| S[1]  | 147.076        | 4507.521       | 4491.502        | 0.000           | 4490.494 | S[41] |
| G[2]  | 204.098        | 4378.478       | 4362.459        | 0.000           | 4361.451 | G[40] |
| R[3]  | <b>360.199</b> | 4321.457       | 4305.438        | 4306.446        | 4304.430 | R[39] |
| C[4]  | <b>417.220</b> | 4185.355       | 4148.337        | 4150.345        | 4148.329 | C[38] |
| K[5]  | <b>545.315</b> | 4108.334       | 4092.315        | 4093.323        | 4091.305 | K[37] |
| Q[6]  | <b>673.374</b> | 3989.239       | 3954.220        | 3955.228        | 3953.212 | Q[36] |
| G[7]  | <b>730.395</b> | 3852.180       | 3836.162        | 3837.170        | 3835.154 | G[35] |
| G[8]  | 787.417        | 3795.159       | 3779.140        | 3780.148        | 3778.132 | G[34] |
| K[9]  | <b>915.512</b> | 3738.138       | 3722.119        | 3723.127        | 3721.111 | K[33] |
| A[10] | <b>986.549</b> | 3610.043       | 3594.024        | 3595.032        | 3593.016 | A[32] |
| R[11] | 1142.550       | 3539.955       | 3523.936        | 3524.944        | 3522.928 | R[31] |
| A[12] | 1213.607       | 3382.904       | 3366.885        | 3367.893        | 3365.877 | A[30] |
| K[13] | 1341.762       | 3311.967       | 3295.948        | 3296.956        | 3294.941 | K[29] |
| A[14] | 1412.819       | 3183.972       | 3167.954        | 3168.961        | 3166.946 | A[28] |
| K[15] | 1540.914       | 3112.935       | 3096.916        | 3097.924        | 3095.909 | K[27] |
| T[16] | 1641.962       | 2984.940       | 2968.921        | 2969.929        | 2967.914 | T[26] |
| K[17] | 1798.063       | 2883.922       | 2867.904        | 2868.912        | 2866.896 | K[25] |
| S[18] | 1885.958       | 2727.893       | 2711.875        | 2712.883        | 2710.868 | S[24] |
| S[19] | 1972.127       | 2648.859       | 2632.841        | 2633.848        | 2631.833 | S[23] |
| R[20] | 2128.228       | 2563.827       | 2547.809        | 2548.816        | 2546.801 | R[22] |
| A[21] | 2199.265       | 2397.826       | 2381.807        | 2382.815        | 2380.800 | A[21] |
| G[22] | 2256.287       | 2326.789       | 2310.770        | 2311.778        | 2309.763 | G[20] |
| L[23] | 2369.371       | 2269.768       | 2253.749        | 2254.757        | 2252.741 | L[19] |
| Q[24] | 2497.429       | 2126.784       | 2110.765        | 2111.773        | 2109.757 | Q[18] |
| F[25] | 2644.488       | 2028.725       | 2012.706        | 2013.714        | 2011.699 | F[17] |
| P[26] | 2741.551       | 1881.657       | 1865.638        | 1866.646        | 1864.630 | P[16] |
| V[27] | 2840.619       | 1784.604       | 1768.585        | 1769.593        | 1767.577 | V[15] |
| G[28] | 2897.641       | 1684.535       | 1668.517        | <b>1669.524</b> | 1667.509 | G[14] |
| R[29] | 3053.742       | 1627.914       | 1611.895        | 1612.903        | 1610.887 | R[13] |
| V[30] | 3152.810       | 1471.813       | <b>1455.794</b> |                 | 1454.786 | V[12] |
| I[31] | 3269.869       | 1372.744       | 1356.725        | <b>1357.734</b> | 1355.718 | I[11] |
| R[32] | 3445.970       | 1235.685       | <b>1219.667</b> | 1220.675        | 1218.659 | R[10] |
| L[33] | 3550.054       | 1079.584       | <b>1063.566</b> | 1064.573        | 1062.558 | L[9]  |
| L[34] | 3672.118       | <b>966.500</b> | 950.482         | 951.489         | 949.474  | L[8]  |
| R[35] | 3828.219       | 853.416        | 837.398         | <b>838.405</b>  | 836.390  | R[7]  |
| K[36] | 3956.314       | 697.315        | 681.296         | 682.304         | 680.289  | K[6]  |
| C[37] | 4013.358       | 569.220        | 553.201         | 554.209         | 552.194  | C[5]  |
| N[38] | 4127.399       | 512.199        | 496.180         | 497.188         | 495.172  | N[4]  |
| V[39] | 4290.462       | 398.156        | 382.137         | 383.145         | 381.129  | V[3]  |
| S[40] | 4377.494       | 235.062        | 219.074         | 220.082         | 218.066  | S[2]  |
| E[41] | 4506.537       | 148.060        | 132.042         | 133.050         | 131.034  | E[1]  |

# sp | Q8CGP5 | H2A1F\_MOUSE

[Acetyl]SGRGKQGGKARAKAKTRSSRAGLQFPVGRVHRLLRKGNYS

- ▶ fragmentation table for charge state 2+
- ▶ specType=etd
- ▶ score=40.18
- ▶ F113278.dat
- ▶ query=q70271.p1
- ▶ precursor=644.795160
- ▶ chargePrecursor=7
- ▶ itol=0.5

| AA | c               | y               | #s1             | #s2             | c               | AA    |
|----|-----------------|-----------------|-----------------|-----------------|-----------------|-------|
| S  | 74.062          | 2054.264        | 2266.255        | 0.804           | 2245.781        | S[41] |
| G  | 102.553         | 2189.743        | 2381.733        | 0.904           | 2181.220        | G[40] |
| R  | 180.603         | 2641.232        | 2153.233        | 2153.236        | 2152.710        | R[39] |
| G  | 209.114         | 2083.181        | 2075.172        | 2075.676        | 2074.660        | G[38] |
| K  | 273.181         | 2054.671        | 2046.661        | 2047.165        | 2046.157        | K[37] |
| G  | 337.194         | 1990.622        | 1982.614        | 1983.118        | 1982.110        | G[36] |
| G  | 385.703         | 1706.594        | 1619.584        | 1619.888        | 1618.981        | G[35] |
| G  | 394.212         | 1898.083        | 1890.074        | 1890.578        | 1889.570        | G[34] |
| K  | <b>458.260</b>  | 1869.572        | 1861.563        | 1862.067        | 1861.059        | K[33] |
| A  | 493.778         | 1805.525        | 1797.516        | 1798.019        | 1797.012        | A[32] |
| R  | <b>571.829</b>  | 1770.008        | 1761.997        | 1762.501        | 1761.493        | R[31] |
| A  | <b>607.347</b>  | 1692.959        | 1684.949        | 1685.453        | 1684.444        | A[30] |
| K  | <b>671.395</b>  | 1656.437        | 1648.428        | <b>1648.932</b> | 1647.924        | K[29] |
| A  | <b>706.913</b>  | 1592.900        | 1584.890        | 1585.394        | 1584.386        | A[28] |
| K  | <b>770.961</b>  | 1556.871        | 1548.862        | 1549.366        | 1548.358        | K[27] |
| T  | <b>821.485</b>  | 1492.824        | <b>1484.814</b> | 1485.318        | <b>1484.310</b> | T[26] |
| R  | <b>899.535</b>  | 1442.800        | 1434.791        | <b>1434.794</b> | 1433.787        | R[25] |
| S  | 933.674         | 1384.249        | 1376.240        | 1376.744        | 1375.736        | S[24] |
| S  | <b>986.567</b>  | 1320.733        | 1312.724        | <b>1313.228</b> | 1312.220        | S[23] |
| R  | 1084.618        | <b>1277.217</b> | <b>1269.208</b> | <b>1269.712</b> | 1268.704        | R[22] |
| A  | 1100.136        | <b>1199.167</b> | <b>1191.157</b> | <b>1191.661</b> | 1190.653        | A[21] |
| G  | <b>1128.647</b> | 1153.648        | 1145.639        | 1146.143        | 1145.135        | G[20] |
| R  | 1183.709        | 1116.137        | 1108.128        | <b>1107.632</b> | 1106.624        | R[19] |
| Q  | 1249.218        | <b>1078.595</b> | <b>1070.586</b> | <b>1071.090</b> | 1070.082        | Q[18] |
| F  | <b>1322.753</b> | 1014.569        | <b>1006.557</b> | <b>1007.061</b> | 1006.053        | F[17] |
| F  | 1371.279        | 941.053         | 933.043         | <b>933.526</b>  | 932.519         | F[16] |
| V  | 1420.811        | 892.506         | 884.496         | 885.000         | 884.992         | V[15] |
| G  | 1489.324        | <b>842.971</b>  | <b>834.962</b>  | <b>835.466</b>  | 834.458         | G[14] |
| R  | 1572.834        | 814.441         | <b>806.451</b>  | <b>806.955</b>  | 805.947         | R[13] |
| V  | <b>1576.909</b> | 736.410         | 728.401         | 728.905         | 727.897         | V[12] |
| H  | 1645.438        | 688.876         | 678.866         | 679.370         | 678.363         | H[11] |
| R  | 1723.489        | 618.346         | 610.337         | 610.841         | 609.833         | R[10] |
| L  | 1780.031        | 540.206         | 532.196         | 532.700         | 531.693         | L[9]  |
| L  | 1838.573        | 489.794         | 479.783         | 479.286         | 478.279         | L[8]  |
| R  | 1914.623        | 427.212         | 419.202         | 419.706         | 418.698         | R[7]  |
| K  | 1978.671        | 349.161         | 341.152         | 341.656         | 340.648         | K[6]  |
| G  | 2067.181        | 285.114         | 277.104         | 277.608         | 276.600         | G[5]  |
| N  | 2094.203        | 256.603         | 248.594         | 249.098         | 248.090         | N[4]  |
| V  | 2145.736        | 199.562         | 191.552         | 192.056         | 191.048         | V[3]  |
| S  | 2189.261        | 118.056         | 110.047         | 110.551         | 109.543         | S[2]  |
| E  | 2253.772        | 74.534          | 66.524          | 67.028          | 66.021          | E[1]  |

# sp | Q8CGP5 | H2A1F\_MOUSE

[Acetyl]SGRGKQGGKARAKAKTRSSRAGLQFPVGRVHLLRKGNYSE

- ▶ fragmentation table for charge state 3+
- ▶ specType=etd
- ▶ score=40.18
- ▶ F113278.dat
- ▶ query=q70271.p1
- ▶ precursor=644.795160
- ▶ chargePrecursor=7
- ▶ itol=0.5

| AA   | c               | y               | z+1             | z+2             | z        | AA   |
|------|-----------------|-----------------|-----------------|-----------------|----------|------|
| S 1  | 49.697          | 1503.175        | 1497.830        | 0.672           | 1497.503 | S 41 |
| G 2  | 68.704          | 1460.164        | 1454.825        | 0.672           | 1454.498 | G 40 |
| R 3  | 130.738         | <b>1441.157</b> | 1435.817        | 1436.151        | 1435.482 | R 39 |
| G 4  | 139.745         | 1389.123        | <b>1383.784</b> | <b>1384.120</b> | 1383.449 | G 38 |
| K 5  | 182.443         | 1370.116        | <b>1364.777</b> | <b>1365.113</b> | 1364.441 | K 37 |
| Q 6  | 235.780         | 1327.418        | <b>1322.078</b> | <b>1322.414</b> | 1321.741 | Q 36 |
| G 7  | 244.137         | 1284.732        | 1279.725        | 1279.725        | 1279.056 | G 35 |
| G 8  | 263.144         | 1265.725        | 1260.718        | <b>1260.721</b> | 1260.049 | G 34 |
| K 9  | 305.842         | 1246.717        | <b>1241.378</b> | <b>1241.714</b> | 1241.041 | K 33 |
| A 10 | 329.521         | 1224.019        | 1198.679        | 1199.015        | 1198.344 | A 32 |
| R 11 | 381.555         | 1189.240        | 1175.000        | <b>1175.336</b> | 1174.664 | R 31 |
| A 12 | 409.234         | <b>1128.308</b> | 1123.667        | <b>1123.303</b> | 1122.931 | A 30 |
| R 13 | 447.932         | 1104.627        | <b>1099.288</b> | <b>1099.624</b> | 1098.952 | R 29 |
| A 14 | 471.611         | 1061.929        | 1056.589        | <b>1056.925</b> | 1056.251 | A 28 |
| K 15 | 514.310         | 1038.250        | 1032.910        | 1033.246        | 1032.574 | K 27 |
| T 16 | 547.992         | 995.552         | 990.212         | <b>990.548</b>  | 989.878  | T 26 |
| R 17 | 600.626         | 961.866         | 956.529         | <b>956.865</b>  | 956.193  | R 25 |
| S 18 | 629.019         | 909.839         | 904.498         | 904.835         | 904.166  | S 24 |
| S 19 | <b>658.047</b>  | 880.825         | 875.485         | 875.821         | 875.149  | S 23 |
| R 20 | <b>710.081</b>  | 851.814         | <b>846.474</b>  | <b>846.810</b>  | 846.138  | R 22 |
| A 21 | 724.706         | 799.789         | <b>794.441</b>  | <b>794.777</b>  | 794.105  | A 21 |
| G 22 | <b>752.767</b>  | 778.101         | 772.762         | <b>771.098</b>  | 770.426  | G 20 |
| L 23 | <b>790.462</b>  | <b>757.094</b>  | 751.754         | <b>752.090</b>  | 751.419  | L 19 |
| Q 24 | <b>833.148</b>  | 730.599         | <b>714.060</b>  | <b>714.396</b>  | 713.724  | Q 19 |
| F 25 | <b>882.171</b>  | 676.713         | <b>671.374</b>  | <b>671.710</b>  | 671.038  | F 17 |
| P 26 | 914.592         | 627.660         | 622.321         | 622.667         | 622.015  | P 16 |
| V 27 | 967.545         | 595.339         | 590.000         | 590.336         | 589.664  | V 15 |
| G 28 | <b>966.552</b>  | 562.317         | 556.977         | 557.313         | 556.641  | G 14 |
| R 29 | 1013.585        | 543.305         | 537.970         | 538.306         | 537.634  | R 13 |
| V 30 | 1051.608        | 491.276         | 485.936         | 486.272         | 485.601  | V 12 |
| H 31 | 1097.294        | <b>458.253</b>  | 452.913         | 453.249         | 452.577  | H 11 |
| R 32 | <b>1149.328</b> | 412.567         | 407.227         | 407.563         | 406.891  | R 10 |
| L 33 | 1187.623        | <b>360.533</b>  | 355.193         | 355.529         | 354.857  | L 9  |
| L 34 | 1224.718        | 322.856         | 317.499         | 317.835         | 317.163  | L 8  |
| R 35 | 1276.751        | 285.144         | 279.804         | 280.140         | 279.468  | R 7  |
| R 36 | 1319.450        | 233.110         | 227.770         | 228.105         | 227.433  | R 6  |
| G 37 | 1338.467        | 190.412         | 185.072         | 185.408         | 184.736  | G 5  |
| N 38 | 1376.471        | 171.404         | 166.065         | 166.401         | 165.729  | N 4  |
| V 39 | 1430.826        | 133.390         | 128.051         | 128.387         | 127.715  | V 3  |
| S 40 | 1459.836        | 79.036          | 73.696          | 74.032          | 73.360   | S 2  |
| E 41 | 1502.850        | 50.025          | 44.685          | 45.021          | 44.349   | E 1  |

# sp | Q8CGP5 | H2A1F\_MOUSE

[Acetyl]SGRGKQGGKARAKAKTRSSRAGLQFPVGRVHRLLRKGNYS

- ▶ fragmentation table for charge state 4+
- ▶ specType=etd
- ▶ score=40.18
- ▶ F113278.dat
- ▶ query=q70271.p1
- ▶ precursor=644.795160
- ▶ chargePrecursor=7
- ▶ itol=0.5

| AA   | c              | y               | z+1             | z+2             | z               | AA   |
|------|----------------|-----------------|-----------------|-----------------|-----------------|------|
| S 1  | 37.535         | <b>1127.636</b> | <b>1123.631</b> | 0.765           | <b>1123.379</b> | G 41 |
| G 2  | 51.780         | 1096.375        | 1091.370        | 0.795           | 1091.118        | G 40 |
| R 3  | 90.805         | <b>1081.120</b> | 1077.115        | <b>1077.367</b> | 1076.861        | R 39 |
| G 4  | 105.061        | 1042.094        | 1038.090        | 1038.342        | 1037.839        | G 38 |
| K 5  | 137.054        | 1027.839        | 1023.834        | 1024.086        | 1023.583        | K 37 |
| Q 6  | 169.059        | 998.815         | <b>991.811</b>  | <b>992.062</b>  | <b>991.559</b>  | Q 36 |
| G 7  | 353.354        | 953.803         | <b>955.796</b>  | <b>960.048</b>  | 959.545         | G 35 |
| G 8  | 197.810        | 949.545         | 945.541         | <b>945.792</b>  | 945.289         | G 34 |
| K 9  | 229.633        | 935.290         | 931.285         | 931.537         | 931.031         | K 33 |
| A 10 | 247.393        | <b>903.266</b>  | 899.261         | <b>899.513</b>  | 899.009         | A 32 |
| R 11 | 286.418        | <b>885.507</b>  | <b>881.502</b>  | <b>881.754</b>  | 881.250         | R 31 |
| A 12 | 308.117        | <b>846.482</b>  | 842.477         | 842.729         | 842.225         | A 30 |
| R 13 | 336.201        | 828.722         | 824.718         | <b>824.970</b>  | 824.466         | R 29 |
| A 14 | 353.900        | 796.699         | <b>792.694</b>  | <b>792.946</b>  | <b>792.442</b>  | A 28 |
| K 15 | 385.964        | 778.939         | 774.935         | 775.187         | 774.681         | K 27 |
| T 16 | 411.246        | 746.915         | 742.911         | 743.163         | 742.659         | T 26 |
| R 17 | 450.271        | 721.694         | 717.690         | 717.941         | 717.438         | R 25 |
| S 18 | 472.009        | 692.828         | 688.824         | 689.076         | 688.572         | S 24 |
| S 19 | 483.787        | 660.870         | 656.866         | 657.118         | 656.614         | S 23 |
| R 20 | 512.815        | 639.112         | 635.108         | 635.360         | 634.856         | R 22 |
| A 21 | 550.572        | 600.087         | 596.082         | 596.334         | 595.830         | A 21 |
| G 22 | 564.827        | 582.126         | 578.121         | 578.373         | 577.870         | G 20 |
| L 23 | 593.098        | 566.072         | 562.068         | 562.320         | 561.816         | L 19 |
| Q 24 | <b>625.113</b> | 539.803         | 535.797         | 536.049         | 535.545         | Q 19 |
| F 25 | 661.688        | 507.787         | 503.782         | 504.034         | 503.530         | F 17 |
| F 26 | 686.143        | 471.020         | 467.015         | 467.267         | 466.761         | F 16 |
| V 27 | <b>710.910</b> | 446.756         | 442.752         | 443.004         | 442.500         | V 15 |
| G 28 | 725.166        | 421.989         | 417.985         | 418.237         | <b>417.733</b>  | G 14 |
| R 29 | 758.193        | 407.734         | 403.729         | 403.981         | 403.477         | R 13 |
| V 30 | <b>788.958</b> | 368.709         | 364.704         | 364.956         | 364.452         | V 12 |
| H 31 | 823.223        | 343.942         | 339.937         | 340.189         | 339.685         | H 11 |
| R 32 | <b>862.248</b> | 309.677         | 305.672         | 305.924         | 305.420         | R 10 |
| L 33 | 890.519        | 270.652         | 266.647         | 266.899         | 266.395         | L 9  |
| L 34 | 918.790        | 242.381         | 238.376         | 238.628         | 238.124         | L 8  |
| R 35 | 967.815        | 214.110         | 210.105         | 210.357         | 209.851         | R 7  |
| R 36 | 989.839        | 175.084         | 171.080         | 171.332         | 170.828         | R 6  |
| G 37 | 1004.094       | 143.061         | 139.056         | 139.308         | 138.804         | G 5  |
| N 38 | 1032.605       | 128.805         | 124.800         | 125.052         | 124.548         | N 4  |
| V 39 | 1073.371       | 100.294         | 96.290          | 96.542          | 96.038          | V 3  |
| S 40 | 1095.129       | 59.529          | 55.524          | 55.776          | 55.272          | S 2  |
| E 41 | 1127.380       | 37.771          | 33.766          | 34.018          | 33.514          | E 1  |

# sp | Q8CGP5 | H2A1F\_MOUSE

[Acetyl]SGRGKQGGKARAKAKTRSSRAGLQFPVGRVHRLLRKGNYS

- ▶ fragmentation table for charge state 5+
- ▶ specType=etd
- ▶ score=40.18
- ▶ F113278.dat
- ▶ query=q70271.p1
- ▶ precursor=644.795160
- ▶ chargePrecursor=7
- ▶ itol=0.5

| AA    | c              | y              | z+1            | z#2            | z              | AA    |
|-------|----------------|----------------|----------------|----------------|----------------|-------|
| S[1]  | 30.221         | 902.310        | 899.108        | 0.806          | 898.905        | S[41] |
| G[2]  | 41.625         | 876.501        | 873.298        | 0.806          | 873.096        | G[40] |
| R[3]  | 72.846         | 865.097        | 861.893        | 862.095        | 861.692        | R[39] |
| G[4]  | 84.250         | <b>833.877</b> | 830.673        | 830.875        | 830.472        | G[38] |
| K[5]  | 109.869        | 822.473        | 819.269        | 819.470        | 819.067        | K[37] |
| Q[6]  | 135.481        | 796.854        | 793.650        | 793.851        | 793.448        | Q[36] |
| G[7]  | 146.885        | <b>771.242</b> | 768.038        | 768.240        | 767.837        | G[35] |
| G[8]  | 158.289        | 759.838        | <b>756.634</b> | <b>756.835</b> | 756.432        | G[34] |
| K[9]  | 183.908        | 748.433        | <b>745.230</b> | <b>745.431</b> | <b>745.028</b> | K[33] |
| A[10] | 198.116        | 722.814        | 719.611        | 719.812        | 719.409        | A[32] |
| R[11] | 229.336        | 708.607        | 705.403        | 705.605        | 705.202        | R[31] |
| A[12] | 243.543        | 677.387        | 674.183        | 674.385        | 673.981        | A[30] |
| K[13] | 269.162        | 663.179        | 659.976        | 660.177        | 659.774        | K[29] |
| A[14] | 283.370        | 637.560        | 634.357        | 634.558        | 634.155        | A[28] |
| K[15] | 308.989        | 623.353        | 620.149        | 620.351        | 619.948        | K[27] |
| T[16] | 329.198        | 597.734        | 594.530        | 594.732        | 594.329        | T[26] |
| R[17] | <b>360.418</b> | 577.524        | 574.321        | 574.522        | 574.119        | R[25] |
| S[18] | 377.825        | 546.304        | 543.100        | 543.302        | 542.899        | S[24] |
| S[19] | 399.231        | 528.898        | 525.694        | 525.896        | 525.492        | S[23] |
| R[20] | 426.451        | 511.491        | 508.288        | 508.489        | 508.086        | R[22] |
| A[21] | 440.659        | 480.271        | 477.067        | 477.269        | 476.866        | A[21] |
| G[22] | 452.063        | 466.064        | 462.860        | 463.061        | 462.658        | G[20] |
| L[23] | 474.680        | 454.659        | 451.456        | 451.657        | 451.254        | L[19] |
| Q[24] | 500.292        | 432.043        | 428.839        | 429.040        | 428.637        | Q[18] |
| F[25] | 529.705        | 406.431        | 403.227        | 403.429        | 403.026        | F[17] |
| P[26] | 549.116        | 377.017        | 373.813        | 374.015        | 373.612        | P[16] |
| V[27] | 568.530        | 357.607        | 354.403        | 354.604        | 354.201        | V[15] |
| G[28] | 589.334        | 337.793        | 334.589        | 334.791        | 334.388        | G[14] |
| R[29] | 611.554        | 326.389        | 323.185        | 323.386        | 322.983        | R[13] |
| V[30] | 631.368        | 295.168        | 291.965        | 292.166        | 291.763        | V[12] |
| H[31] | <b>658.780</b> | 275.355        | 272.151        | 272.353        | 271.949        | H[11] |
| R[32] | 690.000        | 247.943        | 244.739        | 244.941        | 244.538        | R[10] |
| L[33] | 712.617        | 216.723        | 213.519        | 213.721        | 213.317        | L[9]  |
| L[34] | <b>735.233</b> | 194.109        | 190.902        | 191.104        | 190.701        | L[8]  |
| R[35] | 766.454        | 171.489        | 168.283        | 168.487        | 168.084        | R[7]  |
| K[36] | 782.273        | 140.269        | 137.065        | 137.267        | 136.864        | K[6]  |
| G[37] | 803.477        | 114.650        | 111.446        | 111.648        | 111.245        | G[5]  |
| N[38] | 826.286        | 103.246        | 100.042        | 100.243        | 99.840         | N[4]  |
| V[39] | 858.898        | 80.437         | 77.233         | 77.435         | 77.032         | V[3]  |
| S[40] | 876.305        | 47.824         | 44.621         | 44.822         | 44.419         | S[2]  |
| E[41] | 902.113        | 30.418         | 27.214         | 27.416         | 27.013         | E[1]  |

# sp | Q8CGP5 | H2A1F\_MOUSE

[Acetyl]SGRGKQGGKARAKAKTRSSRAGLQFPVGRVHRLLRKGNYS

- ▶ fragmentation table for charge state 6+
- ▶ specType=etd
- ▶ score=40.18
- ▶ F113278.dat
- ▶ query=q70271.p1
- ▶ precursor=644.795160
- ▶ chargePrecursor=7
- ▶ itol=0.5

| AA    | c              | y              | z+1     | z+2     | z       | AA    |
|-------|----------------|----------------|---------|---------|---------|-------|
| S[1]  | 25.362         | <b>752.093</b> | 749.423 | 0.839   | 749.255 | S[41] |
| G[2]  | 34.856         | <b>730.586</b> | 727.916 | 0.839   | 727.748 | G[40] |
| R[3]  | 60.873         | 721.082        | 718.412 | 718.580 | 718.244 | R[39] |
| G[4]  | 70.376         | 695.065        | 692.396 | 692.563 | 692.228 | G[38] |
| K[5]  | 91.725         | 685.562        | 682.892 | 683.060 | 682.724 | K[37] |
| G[6]  | 113.668        | 668.213        | 665.543 | 665.711 | 665.375 | G[36] |
| G[7]  | 122.572        | 642.869        | 640.200 | 640.368 | 640.032 | G[35] |
| G[8]  | 132.076        | 633.366        | 630.696 | 630.864 | 630.528 | G[34] |
| K[9]  | 153.425        | 623.862        | 621.193 | 621.360 | 621.025 | K[33] |
| A[10] | 165.364        | 602.513        | 599.843 | 600.011 | 599.675 | A[32] |
| R[11] | 191.281        | 590.674        | 588.004 | 588.172 | 587.836 | R[31] |
| A[12] | 203.121        | 564.657        | 561.987 | 562.155 | 561.819 | A[30] |
| K[13] | 224.470        | 552.817        | 550.147 | 550.315 | 549.980 | K[29] |
| A[14] | 236.309        | 531.468        | 528.798 | 528.966 | 528.630 | A[28] |
| K[15] | 257.658        | 519.629        | 516.959 | 517.127 | 516.791 | K[27] |
| T[16] | 274.500        | 498.279        | 495.610 | 495.778 | 495.442 | T[26] |
| R[17] | 300.517        | 481.438        | 478.768 | 478.936 | 478.600 | R[25] |
| S[18] | 315.022        | 455.421        | 452.752 | 452.919 | 452.584 | S[24] |
| S[19] | 329.527        | 440.916        | 438.246 | 438.414 | 438.078 | S[23] |
| R[20] | 355.544        | 426.411        | 423.741 | 423.909 | 423.573 | R[22] |
| A[21] | 367.384        | 400.394        | 397.724 | 397.892 | 397.556 | A[21] |
| G[22] | 376.887        | 388.554        | 385.884 | 386.052 | 385.716 | G[20] |
| L[23] | 395.735        | 379.051        | 376.381 | 376.549 | 376.213 | L[19] |
| Q[24] | <b>417.078</b> | <b>360.203</b> | 357.534 | 357.702 | 357.366 | Q[18] |
| F[25] | 441.589        | 338.880        | 336.190 | 336.358 | 336.022 | F[17] |
| P[26] | 457.765        | 314.349        | 311.679 | 311.847 | 311.511 | P[16] |
| V[27] | 474.276        | 298.173        | 295.504 | 295.672 | 295.336 | V[15] |
| G[28] | 483.779        | 281.662        | 278.992 | 279.160 | 278.824 | G[14] |
| R[29] | 509.796        | 272.158        | 269.489 | 269.657 | 269.321 | R[13] |
| V[30] | 526.308        | 246.147        | 243.472 | 243.640 | 243.304 | V[12] |
| H[31] | 549.151        | 229.638        | 226.968 | 227.136 | 226.800 | H[11] |
| R[32] | 578.188        | 206.787        | 204.117 | 204.285 | 203.949 | R[10] |
| L[33] | 594.015        | 180.770        | 178.100 | 178.268 | 177.932 | L[9]  |
| L[34] | 612.862        | 161.923        | 159.253 | 159.421 | 159.085 | L[8]  |
| R[35] | 638.879        | 143.075        | 140.406 | 140.574 | 140.238 | R[7]  |
| K[36] | 660.228        | 117.059        | 114.389 | 114.557 | 114.221 | K[6]  |
| G[37] | 669.732        | 95.709         | 93.040  | 93.208  | 92.872  | G[5]  |
| N[38] | 688.739        | 86.206         | 83.536  | 83.704  | 83.368  | N[4]  |
| Y[39] | 715.916        | 67.190         | 64.529  | 64.697  | 64.361  | Y[3]  |
| S[40] | <b>736.422</b> | 40.021         | 37.352  | 37.520  | 37.184  | S[2]  |
| E[41] | <b>751.929</b> | 25.516         | 22.846  | 23.014  | 22.678  | E[1]  |





# sp | Q8CGP5 | H2A1F\_MOUSE

[Acetyl]SGRGKQGGKARAKAKTRSSRAGLQFPVGRVHLLRKGNYSE

- ▶ fragmentation table for charge state 1+
- ▶ specType=etd
- ▶ score=48.21
- ▶ F113278.dat
- ▶ query=q70273.p1
- ▶ precursor=752.093170
- ▶ chargePrecursor=6
- ▶ itol=0.5

| AA | c  | y              | z+1            | z+2             | z               | AA       |       |
|----|----|----------------|----------------|-----------------|-----------------|----------|-------|
| S  | 1  | 147.076        | 4507.521       | 4491.502        | 0.000           | 4400.494 | S[41] |
| G  | 2  | 204.098        | 4378.478       | 4362.459        | 0.000           | 4361.451 | G[46] |
| R  | 3  | <b>360.199</b> | 4321.457       | 4305.438        | 4306.446        | 4304.430 | R[39] |
| C  | 4  | <b>417.220</b> | 4185.355       | 4149.337        | 4150.345        | 4148.329 | C[38] |
| K  | 5  | <b>545.315</b> | 4108.134       | 4092.115        | 4093.123        | 4091.307 | K[17] |
| Q  | 6  | <b>673.374</b> | 3980.239       | 3954.220        | 3955.228        | 3953.212 | Q[36] |
| G  | 7  | <b>730.395</b> | 3852.180       | 3836.162        | 3837.170        | 3835.154 | G[35] |
| G  | 8  | <b>787.417</b> | 3795.159       | 3779.140        | 3780.148        | 3778.132 | G[34] |
| K  | 9  | <b>915.512</b> | 3738.139       | 3722.119        | 3723.127        | 3721.111 | K[33] |
| A  | 10 | <b>986.549</b> | 3610.043       | 3594.024        | 3595.032        | 3593.016 | A[32] |
| R  | 11 | 1142.650       | 3539.955       | 3523.936        | 3524.944        | 3522.928 | R[31] |
| A  | 12 | 1213.667       | 3382.904       | 3366.885        | 3367.893        | 3365.877 | A[30] |
| K  | 13 | 1341.782       | 3311.867       | 3295.848        | 3296.856        | 3294.841 | K[29] |
| A  | 14 | 1412.819       | 3183.772       | 3167.754        | 3168.761        | 3166.746 | A[28] |
| K  | 15 | 1540.914       | 3112.735       | 3096.716        | 3097.724        | 3095.709 | K[27] |
| T  | 16 | 1641.962       | 2984.640       | 2968.621        | 2969.629        | 2967.614 | T[26] |
| K  | 17 | 1798.063       | 2883.592       | 2867.574        | 2868.582        | 2866.566 | K[25] |
| S  | 18 | 1885.095       | 2727.493       | 2711.473        | 2712.480        | 2710.465 | S[24] |
| S  | 19 | 1972.127       | 2648.459       | 2632.441        | 2633.448        | 2631.433 | S[23] |
| R  | 20 | 2128.228       | 2563.427       | 2547.409        | 2548.416        | 2546.401 | R[22] |
| A  | 21 | 2199.265       | 2397.326       | 2381.307        | 2382.315        | 2380.300 | A[21] |
| G  | 22 | 2256.287       | 2326.289       | 2310.270        | 2311.278        | 2309.263 | G[20] |
| L  | 23 | 2369.371       | 2269.268       | 2253.249        | 2254.257        | 2252.241 | L[19] |
| Q  | 24 | 2497.459       | 2126.184       | 2110.165        | 2111.173        | 2109.157 | Q[18] |
| F  | 25 | 2644.498       | 2028.125       | 2012.106        | 2013.114        | 2011.098 | F[17] |
| P  | 26 | 2741.551       | 1981.057       | 1965.038        | 1966.046        | 1964.030 | P[16] |
| V  | 27 | 2840.619       | 1784.004       | 1767.985        | 1768.993        | 1766.977 | V[15] |
| G  | 28 | 2897.641       | 1684.935       | 1668.917        | 1669.924        | 1667.909 | G[14] |
| R  | 29 | 3053.742       | 1627.914       | 1611.895        | <b>1612.903</b> | 1610.887 | R[13] |
| V  | 30 | 3152.810       | 1471.813       | <b>1455.794</b> | 1456.802        | 1454.786 | V[12] |
| I  | 31 | 3269.869       | 1372.744       | <b>1356.726</b> | 1357.734        | 1355.718 | I[11] |
| R  | 32 | 3445.970       | 1235.685       | <b>1219.667</b> | 1220.675        | 1218.659 | R[10] |
| L  | 33 | 3550.054       | 1079.584       | 1063.566        | <b>1064.573</b> | 1062.558 | L[9]  |
| L  | 34 | 3672.118       | <b>966.500</b> | 950.482         | 951.489         | 949.474  | L[8]  |
| R  | 35 | 3828.219       | 853.416        | 837.398         | <b>838.405</b>  | 836.390  | R[7]  |
| K  | 36 | 3956.314       | 697.315        | 681.296         | 682.304         | 680.289  | K[6]  |
| C  | 37 | 4013.358       | 569.220        | 553.201         | 554.209         | 552.194  | C[5]  |
| N  | 38 | 4127.399       | 512.199        | 496.180         | 497.188         | 495.172  | N[4]  |
| V  | 39 | 4290.462       | 398.156        | 382.137         | 383.145         | 381.129  | V[3]  |
| S  | 40 | 4377.494       | 235.062        | 219.074         | 220.082         | 218.066  | S[2]  |
| E  | 41 | 4506.537       | 148.060        | 132.042         | 133.050         | 131.034  | E[1]  |

# sp | Q8CGP5 | H2A1F\_MOUSE

[Acetyl]SGRGKQGGKARAKAKTRSSRAGLQFPVGRVHRLLRKGNYS

- ▶ fragmentation table for charge state 2+
- ▶ specType=etd
- ▶ score=48.21
- ▶ F113278.dat
- ▶ query=q70273.p1
- ▶ precursor=752.093170
- ▶ chargePrecursor=6
- ▶ itol=0.5

| AA | c  | y               | #s1             | #s2             | z               | AA              |       |
|----|----|-----------------|-----------------|-----------------|-----------------|-----------------|-------|
| S  | 1  | 74.062          | 2054.264        | 2266.255        | 8.804           | 2245.781        | S[41] |
| G  | 2  | 102.553         | 2189.743        | 2381.733        | 0.504           | 2181.220        | G[40] |
| R  | 3  | 180.603         | 2641.232        | 2153.233        | 2153.236        | 2152.710        | R[39] |
| G  | 4  | 209.114         | 2083.181        | 2075.172        | 2075.676        | 2074.660        | G[38] |
| K  | 5  | 273.181         | 2054.871        | 2048.681        | 2047.105        | 2046.157        | K[37] |
| G  | 6  | 337.194         | 1690.622        | <b>1982.614</b> | <b>1983.118</b> | 1982.110        | G[36] |
| G  | 7  | 385.703         | 1326.594        | 1325.583        | 1324.598        | 1323.581        | G[35] |
| G  | 8  | 394.212         | 1098.081        | <b>1090.074</b> | <b>1090.578</b> | 1089.570        | G[34] |
| K  | 9  | 458.260         | 1869.572        | 1861.563        | 1862.067        | 1861.059        | K[33] |
| A  | 10 | 493.778         | 1805.525        | 1797.516        | 1798.019        | 1797.012        | A[32] |
| R  | 11 | <b>571.829</b>  | 1770.008        | 1761.997        | 1762.501        | 1761.493        | R[31] |
| A  | 12 | <b>607.347</b>  | 1692.966        | 1683.956        | 1684.460        | 1683.444        | A[30] |
| R  | 13 | <b>671.395</b>  | 1656.437        | 1648.428        | <b>1648.932</b> | 1647.924        | R[29] |
| A  | 14 | <b>706.913</b>  | 1592.900        | <b>1584.380</b> | <b>1584.884</b> | 1583.876        | A[28] |
| K  | 15 | <b>770.961</b>  | 1656.871        | 1548.862        | <b>1549.366</b> | 1548.358        | K[27] |
| T  | 16 | <b>821.485</b>  | 1492.824        | <b>1484.814</b> | 1485.318        | <b>1484.310</b> | T[26] |
| R  | 17 | <b>899.535</b>  | <b>1442.300</b> | 1434.291        | 1434.795        | 1433.787        | R[25] |
| S  | 18 | 903.853         | 1364.246        | <b>1356.240</b> | <b>1356.744</b> | 1355.736        | S[24] |
| S  | 19 | <b>986.567</b>  | 1320.733        | 1312.724        | <b>1313.228</b> | 1312.220        | S[23] |
| R  | 20 | <b>1064.618</b> | 1277.217        | 1269.208        | 1269.712        | 1268.704        | R[22] |
| A  | 21 | 1100.136        | <b>1199.167</b> | <b>1191.157</b> | <b>1191.661</b> | 1190.653        | A[21] |
| G  | 22 | <b>1128.647</b> | 1103.648        | 1105.639        | 1106.143        | 1105.135        | G[20] |
| L  | 23 | <b>1185.189</b> | 1038.137        | 1029.128        | 1029.632        | 1028.624        | L[19] |
| G  | 24 | <b>1249.218</b> | 1073.595        | 1070.586        | 1071.090        | 1070.082        | G[18] |
| F  | 25 | <b>1322.753</b> | 1014.566        | 1006.557        | <b>1007.061</b> | 1006.053        | F[17] |
| F  | 26 | 1371.279        | 941.033         | 933.023         | 933.526         | 932.519         | F[16] |
| V  | 27 | <b>1420.813</b> | 892.506         | 884.496         | 885.000         | 883.992         | V[15] |
| G  | 28 | <b>1449.324</b> | 842.971         | 834.962         | 835.466         | 834.458         | G[14] |
| R  | 29 | 1527.814        | 814.481         | <b>806.451</b>  | <b>806.955</b>  | 805.947         | R[13] |
| V  | 30 | 1576.909        | 736.410         | 728.401         | 728.905         | 727.897         | V[12] |
| H  | 31 | 1645.438        | 688.876         | 678.866         | 679.370         | 678.363         | H[11] |
| R  | 32 | 1723.489        | 618.346         | 610.337         | 610.841         | 609.833         | R[10] |
| L  | 33 | 1780.031        | 540.206         | 532.196         | 532.700         | 531.693         | L[9]  |
| L  | 34 | 1838.573        | 489.794         | 479.784         | 479.288         | 478.281         | L[8]  |
| R  | 35 | 1914.623        | 427.212         | 419.202         | 419.706         | 418.698         | R[7]  |
| K  | 36 | 1978.671        | 349.161         | 341.152         | 341.656         | 340.648         | K[6]  |
| G  | 37 | 2067.181        | 285.114         | 277.104         | 277.608         | 276.600         | G[5]  |
| N  | 38 | 2094.203        | 256.603         | 248.594         | 249.098         | 248.090         | N[4]  |
| V  | 39 | 2145.736        | 199.562         | 191.552         | 192.056         | 191.048         | V[3]  |
| S  | 40 | 2199.281        | 118.056         | 110.047         | 110.551         | 109.543         | S[2]  |
| E  | 41 | 2253.772        | 74.534          | 66.524          | 67.028          | 66.021          | E[1]  |

# sp | Q8CGP5 | H2A1F\_MOUSE

[Acetyl]SGRGKQGGKARAKAKTRSSRAGLQFPVGRVHRLLRKGNYS

- ▶ fragmentation table for charge state 3+
- ▶ specType=etd
- ▶ score=48.21
- ▶ F113278.dat
- ▶ query=q70273.p1
- ▶ precursor=752.093170
- ▶ chargePrecursor=6
- ▶ itol=0.5

| AA | c  | y               | #s1             | #s2             | z               | AA              |       |
|----|----|-----------------|-----------------|-----------------|-----------------|-----------------|-------|
| S  | 1  | 48.697          | 1502.174        | 1487.839        | 0.872           | 1487.561        | S[41] |
| G  | 2  | 86.704          | 1460.184        | 1454.925        | 0.672           | 1454.480        | G[40] |
| R  | 3  | 1307.710        | 1441.197        | <b>1435.817</b> | 1436.153        | <b>1435.482</b> | R[39] |
| G  | 4  | 139.745         | 1389.123        | <b>1383.784</b> | <b>1384.120</b> | 1383.446        | G[38] |
| K  | 5  | 182.443         | 1370.110        | 1364.777        | <b>1365.113</b> | 1364.441        | K[37] |
| G  | 6  | 225.130         | 1327.418        | <b>1322.078</b> | <b>1322.414</b> | 1321.742        | G[36] |
| G  | 7  | 284.137         | 1284.733        | <b>1279.392</b> | <b>1279.728</b> | 1279.056        | G[35] |
| G  | 8  | 283.144         | 1265.725        | 1266.389        | <b>1260.721</b> | 1260.049        | G[34] |
| K  | 9  | 305.642         | 1246.717        | <b>1241.378</b> | <b>1241.714</b> | 1241.042        | K[33] |
| A  | 10 | 329.521         | 1204.010        | 1198.079        | <b>1199.015</b> | 1198.344        | A[32] |
| R  | 11 | 381.555         | 1180.240        | 1175.000        | <b>1175.336</b> | 1174.664        | R[31] |
| A  | 12 | 405.254         | <b>1128.306</b> | 1122.997        | 1123.301        | 1122.833        | A[30] |
| K  | 13 | 447.932         | 1104.527        | <b>1099.288</b> | <b>1099.624</b> | 1098.952        | K[29] |
| A  | 14 | 471.611         | 1081.029        | 1056.539        | <b>1056.925</b> | 1056.251        | A[28] |
| K  | 15 | 514.310         | <b>1038.250</b> | 1032.910        | <b>1033.246</b> | 1032.574        | K[27] |
| T  | 16 | 547.002         | 995.552         | <b>990.212</b>  | <b>990.548</b>  | 989.870         | T[26] |
| R  | 17 | 608.026         | 981.989         | <b>956.529</b>  | <b>956.865</b>  | 956.181         | R[25] |
| S  | 18 | 629.019         | 959.835         | 944.485         | 944.819         | 944.160         | S[24] |
| S  | 19 | 658.047         | 930.025         | 895.485         | <b>895.821</b>  | 895.149         | S[23] |
| R  | 20 | <b>710.081</b>  | 951.014         | 846.474         | 846.810         | 846.138         | R[22] |
| A  | 21 | 733.100         | 799.780         | 794.441         | 794.777         | 794.101         | A[21] |
| G  | 22 | 752.767         | 776.101         | 770.762         | <b>771.098</b>  | 770.426         | G[20] |
| L  | 23 | 780.482         | 759.094         | 753.754         | 754.090         | 753.418         | L[19] |
| Q  | 24 | 833.148         | 733.366         | <b>714.060</b>  | <b>714.396</b>  | 713.721         | Q[18] |
| F  | 25 | 882.171         | 676.713         | <b>671.374</b>  | <b>671.710</b>  | <b>671.038</b>  | F[17] |
| F  | 26 | 914.552         | 627.600         | 622.261         | 622.607         | 622.015         | F[16] |
| V  | 27 | 947.545         | 595.139         | 590.000         | 590.336         | 589.664         | V[15] |
| G  | 28 | <b>966.552</b>  | 560.317         | 556.077         | 557.413         | 556.841         | G[14] |
| R  | 29 | 1101.559        | 443.309         | 437.970         | 438.306         | 437.834         | R[13] |
| V  | 30 | <b>1051.608</b> | 491.275         | 485.936         | 486.272         | 485.600         | V[12] |
| H  | 31 | 1097.204        | 458.253         | 452.913         | 453.249         | 452.577         | H[11] |
| R  | 32 | 1149.328        | 412.567         | 407.227         | 407.563         | 406.891         | R[10] |
| L  | 33 | 1187.023        | <b>360.533</b>  | 355.193         | 355.529         | 354.857         | L[9]  |
| L  | 34 | 1234.718        | 322.374         | 317.034         | 317.370         | 316.701         | L[8]  |
| R  | 35 | 1276.751        | 285.144         | 279.804         | 280.140         | 279.466         | R[7]  |
| K  | 36 | 1319.450        | 233.110         | 227.770         | 228.106         | 227.434         | K[6]  |
| G  | 37 | 1338.457        | 190.412         | 185.072         | 185.408         | 184.736         | G[5]  |
| N  | 38 | 1376.471        | 171.404         | 166.065         | 166.401         | 165.729         | N[4]  |
| V  | 39 | 1430.826        | 133.290         | 128.051         | 128.386         | 127.715         | V[3]  |
| S  | 40 | 1459.836        | 98.936          | 93.596          | 93.932          | 93.260          | S[2]  |
| E  | 41 | 1502.850        | 50.025          | 44.685          | 45.021          | 44.349          | E[1]  |

# sp | Q8CGP5 | H2A1F\_MOUSE

[Acetyl]SGRGKQGGKARAKAKTRSSRAGLQFPVGRVHRLLRKGNYS

- ▶ fragmentation table for charge state 4+
- ▶ specType=etd
- ▶ score=48.21
- ▶ F113278.dat
- ▶ query=q70273.p1
- ▶ precursor=752.093170
- ▶ chargePrecursor=6
- ▶ itol=0.5

| AA | c  | y               | z+1             | z+2             | z               | AA             |       |
|----|----|-----------------|-----------------|-----------------|-----------------|----------------|-------|
| S  | 1  | 57.525          | 1127.636        | 1123.631        | 0.755           | 1123.370       | S[41] |
| G  | 2  | 51.780          | 1095.375        | 1091.370        | 0.755           | 1091.118       | G[40] |
| R  | 3  | 90.805          | <b>1081.120</b> | <b>1077.115</b> | <b>1077.367</b> | 1076.861       | R[39] |
| G  | 4  | 105.061         | 1042.094        | 1038.090        | <b>1038.342</b> | 1037.839       | G[38] |
| K  | 5  | 137.084         | 1027.839        | 1023.834        | <b>1024.086</b> | 1023.583       | K[37] |
| Q  | 6  | 189.089         | 995.813         | 991.811         | <b>992.061</b>  | <b>991.559</b> | Q[36] |
| G  | 7  | 253.354         | 953.880         | <b>959.796</b>  | <b>960.048</b>  | <b>959.546</b> | G[35] |
| G  | 8  | 337.810         | 949.545         | 945.541         | <b>945.792</b>  | 945.289        | G[34] |
| K  | 9  | 229.633         | 935.200         | 931.205         | 931.537         | 931.031        | K[33] |
| A  | 10 | 247.393         | <b>903.266</b>  | <b>899.261</b>  | <b>899.513</b>  | <b>899.009</b> | A[32] |
| R  | 11 | 286.418         | 885.507         | 881.505         | 881.754         | 881.250        | R[31] |
| A  | 12 | 304.177         | 866.482         | 862.477         | 862.729         | 862.225        | A[30] |
| R  | 13 | 336.201         | 825.722         | 824.718         | 824.970         | 824.466        | R[29] |
| A  | 14 | 353.960         | 796.699         | 792.694         | 792.946         | 792.442        | A[28] |
| K  | 15 | 385.984         | 778.939         | 774.936         | 775.187         | 774.683        | K[27] |
| T  | 16 | 411.246         | 746.915         | 742.911         | 743.163         | 742.659        | T[26] |
| R  | 17 | 450.271         | 721.894         | 717.889         | 717.901         | 717.397        | R[25] |
| S  | 18 | 472.809         | 682.820         | 678.804         | 678.876         | 678.372        | S[24] |
| S  | 19 | 493.787         | 660.870         | 656.866         | 657.118         | 656.614        | S[23] |
| R  | 20 | 532.813         | 639.112         | 635.108         | 635.360         | 634.856        | R[22] |
| A  | 21 | 550.572         | 600.089         | 596.082         | 596.334         | 595.830        | A[21] |
| Q  | 22 | 564.827         | 582.320         | 578.323         | 578.575         | 578.071        | Q[20] |
| L  | 23 | 603.008         | 568.072         | 564.068         | 564.320         | 563.816        | L[19] |
| Q  | 24 | 625.113         | 539.801         | 535.797         | 536.049         | 535.545        | Q[18] |
| F  | 25 | 661.880         | 507.781         | 503.782         | 504.034         | 503.530        | F[17] |
| P  | 26 | 686.143         | 471.020         | 467.015         | 467.267         | 466.763        | P[16] |
| V  | 27 | <b>710.910</b>  | 446.756         | 442.752         | 443.004         | 442.500        | V[15] |
| G  | 28 | 725.166         | 421.989         | 417.985         | 418.237         | <b>417.733</b> | G[14] |
| R  | 29 | 754.189         | 407.734         | 403.729         | 403.981         | 403.477        | R[13] |
| V  | 30 | <b>788.958</b>  | 389.759         | 384.764         | 384.956         | 384.452        | V[12] |
| H  | 31 | 823.223         | 343.942         | 339.937         | 340.189         | 339.685        | H[11] |
| R  | 32 | <b>862.248</b>  | 309.677         | 305.672         | 305.924         | 305.420        | R[10] |
| L  | 33 | 890.519         | 270.652         | 266.647         | 266.899         | 266.395        | L[9]  |
| L  | 34 | 918.790         | 242.381         | 238.376         | 238.628         | 238.124        | L[8]  |
| R  | 35 | 957.815         | 214.113         | 210.108         | 210.360         | 209.856        | R[7]  |
| K  | 36 | 989.839         | 175.084         | 171.080         | 171.332         | 170.828        | K[6]  |
| G  | 37 | 1004.094        | 143.061         | 139.056         | 139.308         | 138.804        | G[5]  |
| N  | 38 | 1032.605        | 128.805         | 124.800         | 125.052         | 124.548        | N[4]  |
| V  | 39 | <b>1073.371</b> | 100.294         | 96.290          | 96.542          | 96.038         | V[3]  |
| S  | 40 | 1095.120        | 59.529          | 55.524          | 55.776          | 55.272         | S[2]  |
| E  | 41 | 1127.380        | 37.771          | 33.766          | 34.018          | 33.514         | E[1]  |

# sp | Q8CGP5 | H2A1F\_MOUSE

[Acetyl]SGRGKQGGKARAKAKTRSSRAGLQFPVGRVHRLLRKGNYS

- ▶ fragmentation table for charge state 5+
- ▶ specType=etd
- ▶ score=48.21
- ▶ F113278.dat
- ▶ query=q70273\_p1
- ▶ precursor=752.093170
- ▶ chargePrecursor=6
- ▶ itol=0.5

| AA | c  | y              | z+1            | z#2            | z              | AA                   |
|----|----|----------------|----------------|----------------|----------------|----------------------|
| S  | 1  | 30.221         | 902.310        | <b>899.106</b> | 0.806          | <b>898.905</b> S[41] |
| G  | 2  | 41.625         | 876.501        | <b>873.298</b> | 0.806          | 873.095 G[40]        |
| R  | 3  | 72.846         | 805.097        | 801.893        | <b>062.095</b> | 801.692 R[39]        |
| G  | 4  | 84.250         | <b>833.877</b> | 830.673        | 830.875        | 830.472 G[38]        |
| K  | 5  | 109.869        | 822.473        | 819.269        | 819.470        | 819.067 K[37]        |
| Q  | 6  | 135.481        | 796.854        | 793.650        | 793.851        | 793.448 Q[36]        |
| G  | 7  | 146.685        | <b>771.242</b> | 768.038        | 768.240        | 767.837 G[35]        |
| G  | 8  | 158.289        | 759.838        | 756.634        | 756.835        | 756.432 G[34]        |
| K  | 9  | 183.908        | 748.833        | 745.230        | 745.431        | 745.028 K[33]        |
| A  | 10 | 198.116        | 722.814        | 719.611        | 719.812        | 719.409 A[32]        |
| R  | 11 | 229.336        | 708.607        | 705.403        | 705.605        | 705.202 R[31]        |
| A  | 12 | 243.543        | 677.387        | 674.183        | 674.385        | <b>673.981</b> A[30] |
| K  | 13 | 269.162        | 663.179        | 659.976        | 660.177        | 659.774 K[29]        |
| A  | 14 | 283.370        | 637.560        | 634.357        | 634.558        | 634.155 A[28]        |
| K  | 15 | 308.989        | 623.353        | 620.149        | 620.351        | 619.948 K[27]        |
| T  | 16 | 329.198        | 597.734        | 594.530        | 594.732        | 594.329 T[26]        |
| R  | 17 | <b>360.418</b> | 577.524        | 574.321        | 574.522        | 574.119 R[25]        |
| S  | 18 | 377.825        | 546.304        | 543.100        | 543.302        | 542.899 S[24]        |
| S  | 19 | 399.231        | 528.686        | 525.694        | 525.896        | 525.492 S[23]        |
| R  | 20 | 426.451        | 511.491        | 508.288        | 508.489        | 508.086 R[22]        |
| A  | 21 | 440.659        | 480.271        | 477.067        | 477.269        | 476.866 A[21]        |
| G  | 22 | 452.063        | 466.064        | 462.860        | 463.061        | 462.658 G[20]        |
| L  | 23 | 474.680        | 454.659        | 451.456        | 451.657        | 451.254 L[19]        |
| Q  | 24 | 500.292        | 432.043        | 428.839        | 429.040        | 428.637 Q[18]        |
| F  | 25 | 529.705        | 406.831        | 403.227        | 403.429        | 403.026 F[17]        |
| P  | 26 | 549.116        | 377.017        | 373.813        | 374.015        | 373.612 P[16]        |
| V  | 27 | 568.530        | 357.607        | 354.403        | 354.604        | 354.201 V[15]        |
| G  | 28 | 589.334        | 337.793        | 334.589        | 334.791        | 334.388 G[14]        |
| R  | 29 | 611.554        | 326.380        | 323.176        | 323.378        | 322.973 R[13]        |
| V  | 30 | 631.368        | 295.168        | 291.965        | 292.166        | 291.763 V[12]        |
| H  | 31 | 658.780        | 275.355        | 272.151        | 272.353        | 271.949 H[11]        |
| R  | 32 | 690.000        | 247.943        | 244.739        | 244.941        | 244.538 R[10]        |
| L  | 33 | 712.617        | 216.723        | 213.519        | 213.721        | 213.317 L[9]         |
| L  | 34 | 735.233        | 194.106        | 190.902        | 191.104        | 190.701 L[8]         |
| R  | 35 | 766.454        | 171.489        | 168.283        | 168.487        | 168.084 R[7]         |
| K  | 36 | 782.073        | 140.269        | 137.065        | 137.267        | 136.864 K[6]         |
| G  | 37 | 803.877        | 114.650        | 111.446        | 111.648        | 111.245 G[5]         |
| N  | 38 | <b>826.286</b> | 101.240        | 100.042        | 100.243        | 99.840 N[4]          |
| V  | 39 | <b>858.898</b> | 80.437         | 77.233         | 77.435         | 77.032 V[3]          |
| S  | 40 | <b>876.305</b> | 47.824         | 44.621         | 44.822         | 44.419 S[2]          |
| E  | 41 | 902.113        | 30.418         | 27.214         | 27.416         | 27.013 E[1]          |

# sp | Q8CGP5 | H2A1F\_MOUSE

[Acetyl]SGRGKQGGKARAKATRSSRAGLQFPVGRVHLLRKGNYSE

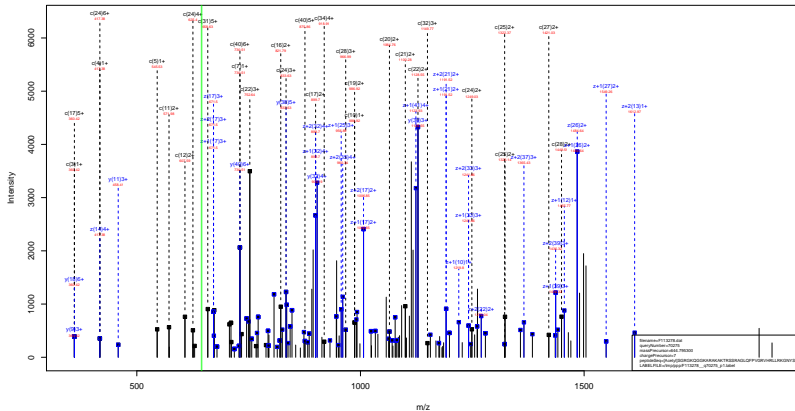

# sp | Q8CGP5 | H2A1F\_MOUSE

[Acetyl]SGRGKQGGKARAKAKTRSSRAGLQFPVGRVHRLLRKGNYS

- ▶ fragmentation table for charge state 1+
- ▶ specType=etd
- ▶ score=50.53
- ▶ F113278.dat
- ▶ query=q70275.p1
- ▶ precursor=644.795300
- ▶ chargePrecursor=7
- ▶ itol=0.5

| AA | c  | y              | z+1             | z+2             | z               | AA              |       |
|----|----|----------------|-----------------|-----------------|-----------------|-----------------|-------|
| S  | 1  | 147.070        | 4507.521        | 4491.503        | 0.000           | 4490.484        | S[41] |
| G  | 2  | 204.098        | 4376.478        | 4362.459        | 0.000           | 4361.451        | G[40] |
| R  | 3  | <b>360.199</b> | 4321.457        | 4305.438        | 4306.446        | 4304.439        | R[39] |
| G  | 4  | <b>417.220</b> | 4165.355        | 4149.337        | 4150.345        | 4148.329        | G[38] |
| K  | 5  | <b>545.315</b> | 4108.334        | 4092.315        | 4093.323        | 4091.307        | K[37] |
| Q  | 6  | <b>673.314</b> | 3989.239        | 3974.220        | 3975.228        | 3973.211        | Q[36] |
| G  | 7  | <b>730.395</b> | 3852.080        | 3836.100        | 3837.110        | 3835.154        | G[35] |
| G  | 8  | 787.417        | 3795.159        | 3779.140        | 3780.148        | 3778.132        | G[34] |
| K  | 9  | 915.512        | 3736.138        | 3722.119        | 3723.127        | 3721.111        | K[33] |
| A  | 10 | <b>986.549</b> | 3610.043        | 3594.024        | 3595.032        | 3593.016        | A[32] |
| R  | 11 | 1142.050       | 3539.005        | 3522.987        | 3523.995        | 3521.979        | R[31] |
| A  | 12 | 1213.607       | 3382.904        | 3366.885        | 3367.893        | 3365.877        | A[30] |
| R  | 13 | 1341.783       | 3311.967        | 3295.848        | 3296.856        | 3294.841        | R[29] |
| A  | 14 | 1412.819       | 3183.772        | 3167.754        | 3168.761        | 3166.746        | A[28] |
| K  | 15 | 1540.914       | 3112.735        | 3096.716        | 3097.724        | 3095.709        | K[27] |
| T  | 16 | 1641.962       | 2984.640        | 2968.621        | 2969.629        | 2967.614        | T[26] |
| R  | 17 | 1768.053       | 2853.592        | 2837.573        | 2838.582        | 2836.566        | R[25] |
| S  | 18 | 1885.095       | 2727.494        | 2711.474        | 2712.483        | 2710.467        | S[24] |
| S  | 19 | 1972.127       | 2640.459        | 2624.441        | 2625.448        | 2623.433        | S[23] |
| R  | 20 | 2138.238       | 2553.421        | 2537.400        | 2538.416        | 2536.401        | R[22] |
| A  | 21 | 2199.269       | 2397.326        | 2381.307        | 2382.315        | 2380.300        | A[21] |
| G  | 22 | 2256.267       | 2326.289        | 2310.270        | 2311.278        | 2309.263        | G[20] |
| L  | 23 | 2309.311       | 2209.260        | 2193.240        | 2194.247        | 2192.241        | L[19] |
| Q  | 24 | 2402.429       | 2158.184        | 2142.165        | 2143.173        | 2141.157        | Q[18] |
| F  | 25 | 2644.408       | 2028.125        | 2012.106        | 2013.114        | 2011.099        | F[17] |
| P  | 26 | 2741.551       | 1881.057        | 1865.038        | 1866.046        | 1864.030        | P[16] |
| V  | 27 | 2840.619       | 1784.004        | 1767.985        | 1768.993        | 1766.977        | V[15] |
| G  | 28 | 2897.641       | 1684.935        | 1668.917        | 1669.924        | 1667.909        | G[14] |
| R  | 29 | 3053.742       | 1627.814        | 1611.795        | <b>1612.803</b> | 1610.787        | R[13] |
| V  | 30 | 3152.810       | 1471.613        | <b>1455.794</b> | 1456.802        | 1454.786        | V[12] |
| H  | 31 | 3289.889       | 1372.744        | 1356.726        | <b>1357.734</b> | 1355.718        | H[11] |
| R  | 32 | 3445.970       | 1235.685        | <b>1219.667</b> | 1220.675        | 1218.659        | R[10] |
| L  | 33 | 3559.054       | <b>1079.584</b> | 1063.566        | <b>1064.573</b> | <b>1062.558</b> | L[9]  |
| L  | 34 | 3672.138       | <b>966.500</b>  | <b>950.482</b>  | 951.489         | 949.474         | L[8]  |
| I  | 35 | 3828.239       | 833.416         | 817.398         | <b>818.405</b>  | 816.390         | I[7]  |
| K  | 36 | 3956.334       | 697.315         | 681.296         | 682.304         | 680.289         | K[6]  |
| G  | 37 | 4013.356       | 569.220         | 553.201         | 554.209         | 552.194         | G[5]  |
| N  | 38 | 4127.399       | 512.109         | 496.100         | 497.108         | 495.172         | N[4]  |
| V  | 39 | 4290.462       | 398.156         | 382.137         | 383.145         | 381.129         | V[3]  |
| S  | 40 | 4377.484       | 235.082         | 219.074         | 220.082         | 218.066         | S[2]  |
| E  | 41 | 4566.537       | 148.960         | 132.943         | 133.950         | 131.934         | E[1]  |



# sp | Q8CGP5 | H2A1F\_MOUSE

[Acetyl]SGRGKQGGKARAKATRSSRAGLQFPVGRVHRLLRKGNYS

- ▶ fragmentation table for charge state 2+
- ▶ specType=etd
- ▶ score=50.53
- ▶ F113278.dat
- ▶ query=q70275.p1
- ▶ precursor=644.795300
- ▶ chargePrecursor=7
- ▶ itol=0.5

| AA | c  | y               | #s1             | #s2             | z               | AA              |       |
|----|----|-----------------|-----------------|-----------------|-----------------|-----------------|-------|
| S  | 1  | 74.062          | 2054.264        | 2266.255        | 0.804           | 2245.781        | S[41] |
| G  | 2  | 102.553         | 2189.743        | 2381.733        | 0.504           | 2181.220        | G[40] |
| R  | 3  | 180.603         | 2641.232        | 2153.233        | 2153.236        | 2152.710        | R[39] |
| G  | 4  | 209.114         | 2083.181        | 2075.172        | 2075.676        | 2074.660        | G[38] |
| K  | 5  | 273.181         | 2054.671        | 2046.661        | 2047.165        | 2046.157        | K[37] |
| G  | 6  | 337.194         | 1990.622        | 1982.614        | 1983.118        | 1982.110        | G[36] |
| G  | 7  | 385.703         | 1926.594        | 1918.584        | 1919.088        | 1918.081        | G[35] |
| G  | 8  | 394.212         | 1898.083        | 1890.074        | 1890.578        | 1889.570        | G[34] |
| K  | 9  | <b>458.260</b>  | 1869.572        | 1861.563        | 1862.067        | 1861.059        | K[33] |
| A  | 10 | 493.778         | 1805.525        | 1797.516        | 1798.019        | 1797.012        | A[32] |
| R  | 11 | <b>571.829</b>  | 1770.008        | 1761.997        | 1762.501        | 1761.493        | R[31] |
| A  | 12 | <b>607.397</b>  | 1692.995        | 1684.985        | 1685.489        | 1684.481        | A[30] |
| R  | 13 | <b>671.395</b>  | 1656.437        | 1648.428        | 1648.932        | 1647.924        | R[29] |
| A  | 14 | <b>706.913</b>  | 1592.900        | 1584.890        | 1584.884        | 1583.876        | A[28] |
| K  | 15 | <b>770.961</b>  | 1556.871        | <b>1548.862</b> | <b>1549.366</b> | 1548.358        | K[27] |
| T  | 16 | <b>821.485</b>  | 1492.824        | <b>1484.814</b> | 1485.318        | <b>1484.310</b> | T[26] |
| R  | 17 | <b>899.535</b>  | 1442.802        | 1434.793        | 1434.794        | 1433.787        | R[25] |
| S  | 18 | 913.853         | 1384.249        | 1376.240        | 1376.744        | 1375.736        | S[24] |
| S  | 19 | <b>986.567</b>  | 1332.733        | 1324.724        | 1325.228        | 1324.220        | S[23] |
| R  | 20 | <b>1064.618</b> | 1277.217        | 1269.208        | <b>1269.712</b> | 1268.704        | R[22] |
| A  | 21 | <b>1100.136</b> | <b>1199.167</b> | <b>1191.157</b> | <b>1191.661</b> | 1190.653        | A[21] |
| G  | 22 | <b>1128.647</b> | 1153.648        | 1145.639        | <b>1156.143</b> | 1155.135        | G[20] |
| L  | 23 | 1155.789        | 1138.137        | 1129.128        | 1129.128        | 1128.624        | L[19] |
| Q  | 24 | <b>1249.218</b> | 1078.595        | <b>1070.586</b> | <b>1071.090</b> | 1070.082        | Q[18] |
| F  | 25 | <b>1322.753</b> | 1014.569        | <b>1006.557</b> | <b>1007.061</b> | 1006.053        | F[17] |
| F  | 26 | 1371.279        | 941.053         | 933.043         | 933.520         | 932.510         | F[16] |
| V  | 27 | <b>1420.813</b> | 892.500         | 884.490         | <b>885.000</b>  | 883.992         | V[15] |
| G  | 28 | <b>1449.324</b> | <b>842.971</b>  | <b>834.962</b>  | <b>835.466</b>  | 834.458         | G[14] |
| R  | 29 | 1527.814        | <b>814.461</b>  | <b>806.451</b>  | <b>806.955</b>  | 805.947         | R[13] |
| V  | 30 | 1576.909        | 736.410         | <b>728.401</b>  | 728.905         | <b>727.897</b>  | V[12] |
| H  | 31 | 1645.438        | 688.876         | <b>678.866</b>  | <b>679.370</b>  | 678.363         | H[11] |
| R  | 32 | 1723.489        | 618.346         | 610.337         | 610.841         | 609.833         | R[10] |
| L  | 33 | 1780.031        | 540.296         | 532.286         | 532.790         | 531.783         | L[9]  |
| L  | 34 | 1838.573        | 469.794         | 461.784         | 462.288         | 461.281         | L[8]  |
| R  | 35 | 1914.623        | 427.212         | 419.202         | 419.706         | 418.698         | R[7]  |
| K  | 36 | 1978.671        | 349.161         | 341.152         | 341.656         | 340.648         | K[6]  |
| G  | 37 | 2067.181        | 285.114         | 277.104         | 277.608         | 276.600         | G[5]  |
| N  | 38 | 2094.203        | 256.603         | 248.594         | 249.098         | 248.090         | N[4]  |
| V  | 39 | 2145.736        | 189.562         | 181.552         | 182.056         | 181.048         | V[3]  |
| S  | 40 | 2189.281        | 118.056         | 110.047         | 110.551         | 109.543         | S[2]  |
| E  | 41 | 2253.772        | 74.534          | 66.524          | 67.028          | 66.021          | E[1]  |

# sp | Q8CGP5 | H2A1F\_MOUSE

[Acetyl]SGRGKQGGKARAKAKTRSSRAGLQFPVGRVHRLLRKGNYS

- ▶ fragmentation table for charge state 3+
- ▶ specType=etd
- ▶ score=50.53
- ▶ F113278.dat
- ▶ query=q70275.p1
- ▶ precursor=644.795300
- ▶ chargePrecursor=7
- ▶ itol=0.5

| AA | c  | y               | #s1             | #s2             | z               | AA              |       |
|----|----|-----------------|-----------------|-----------------|-----------------|-----------------|-------|
| S  | 1  | 489.697         | 1502.178        | 1487.839        | 8.872           | 1487.561        | S[41] |
| G  | 2  | 86.704          | 1460.184        | 1454.935        | 0.672           | 1454.480        | G[40] |
| R  | 3  | 1307.180        | <b>1441.157</b> | <b>1435.817</b> | <b>1436.153</b> | <b>1435.482</b> | R[39] |
| G  | 4  | 139.745         | 1389.123        | 1383.784        | <b>1384.120</b> | 1383.448        | G[38] |
| K  | 5  | 182.443         | 1370.118        | 1364.777        | <b>1365.113</b> | 1364.441        | K[37] |
| G  | 6  | 225.130         | 1327.418        | <b>1322.078</b> | <b>1322.414</b> | 1321.761        | G[36] |
| G  | 7  | 264.117         | 1284.733        | <b>1279.392</b> | <b>1279.728</b> | <b>1279.056</b> | G[35] |
| G  | 8  | 263.144         | 1265.725        | <b>1260.385</b> | <b>1260.721</b> | 1260.049        | G[34] |
| K  | 9  | 305.642         | <b>1246.717</b> | <b>1241.378</b> | <b>1241.714</b> | 1241.042        | K[33] |
| A  | 10 | 329.521         | 1234.019        | <b>1198.679</b> | <b>1199.015</b> | 1198.344        | A[32] |
| R  | 11 | 381.555         | 1180.340        | <b>1175.000</b> | <b>1175.336</b> | 1174.664        | R[31] |
| A  | 12 | 409.294         | <b>1128.306</b> | 1122.967        | 1123.303        | 1122.831        | A[30] |
| K  | 13 | 447.932         | 1104.627        | 1099.288        | 1099.624        | 1099.952        | K[29] |
| A  | 14 | 471.611         | 1081.929        | 1056.589        | 1056.925        | 1056.251        | A[28] |
| K  | 15 | 514.310         | 1038.250        | <b>1032.910</b> | <b>1033.246</b> | 1032.574        | K[27] |
| T  | 16 | 547.002         | 995.552         | 990.212         | <b>990.548</b>  | 989.870         | T[26] |
| R  | 17 | 600.024         | 961.869         | <b>956.529</b>  | <b>956.865</b>  | 956.181         | R[25] |
| S  | 18 | <b>629.837</b>  | 909.835         | 904.495         | 904.831         | 904.160         | S[24] |
| S  | 19 | 658.047         | 880.825         | <b>875.485</b>  | <b>875.821</b>  | 875.149         | S[23] |
| R  | 20 | <b>710.081</b>  | 851.814         | <b>846.474</b>  | <b>846.810</b>  | 846.138         | R[22] |
| A  | 21 | <b>733.760</b>  | 799.789         | <b>794.441</b>  | <b>794.777</b>  | <b>794.105</b>  | A[21] |
| G  | 22 | <b>752.767</b>  | 778.101         | <b>770.762</b>  | <b>771.098</b>  | 770.426         | G[20] |
| L  | 23 | 789.628         | 737.094         | 731.754         | 732.090         | 731.419         | L[19] |
| Q  | 24 | <b>833.148</b>  | 719.356         | 714.000         | 714.366         | 713.721         | Q[18] |
| F  | 25 | <b>882.171</b>  | 676.713         | <b>671.374</b>  | <b>671.710</b>  | <b>671.038</b>  | F[17] |
| F  | 26 | 914.552         | 627.600         | 622.251         | 622.687         | 622.015         | F[16] |
| V  | 27 | 947.545         | 595.139         | 590.000         | 590.336         | 589.664         | V[15] |
| G  | 28 | <b>966.552</b>  | 562.317         | 556.977         | 557.313         | 556.641         | G[14] |
| R  | 29 | 1000.899        | 543.309         | 537.970         | 538.306         | 537.634         | R[13] |
| V  | 30 | 1051.608        | 491.276         | 485.938         | 486.272         | 485.600         | V[12] |
| H  | 31 | 1097.394        | <b>458.253</b>  | 452.913         | 453.249         | 452.577         | H[11] |
| R  | 32 | <b>1149.328</b> | 412.967         | 407.227         | 407.563         | 406.891         | R[10] |
| L  | 33 | 1187.623        | <b>368.533</b>  | 363.193         | 363.529         | 362.857         | L[9]  |
| L  | 34 | 1234.718        | 322.874         | 317.489         | 317.825         | 317.161         | L[8]  |
| R  | 35 | 1276.751        | 288.144         | 279.804         | 280.140         | 279.466         | R[7]  |
| K  | 36 | 1319.450        | 233.110         | 227.770         | 228.106         | 227.434         | K[6]  |
| G  | 37 | 1338.457        | 190.412         | 185.072         | 185.408         | 184.736         | G[5]  |
| N  | 38 | 1376.471        | 171.404         | 166.065         | 166.401         | 165.729         | N[4]  |
| V  | 39 | 1430.826        | 133.390         | 128.051         | 128.386         | 127.715         | V[3]  |
| S  | 40 | 1459.836        | 99.136          | 93.796          | 94.132          | 93.460          | S[2]  |
| E  | 41 | 1502.850        | 50.025          | 44.685          | 45.021          | 44.349          | E[1]  |

# sp | Q8CGP5 | H2A1F\_MOUSE

[Acetyl]SGRGKQGGKARAKAKTRSSRAGLQFPVGRVHRLLRKGNYS

- ▶ fragmentation table for charge state 4+
- ▶ specType=etd
- ▶ score=50.53
- ▶ F113278.dat
- ▶ query=q70275.p1
- ▶ precursor=644.795300
- ▶ chargePrecursor=7
- ▶ itol=0.5

| AA   | c              | y               | z+1             | z+2             | z               | AA   |
|------|----------------|-----------------|-----------------|-----------------|-----------------|------|
| S 1  | 37.535         | 1127.636        | <b>1123.631</b> | 0.765           | 1123.370        | S 41 |
| G 2  | 51.780         | 1096.375        | 1091.870        | 0.795           | 1091.116        | G 40 |
| R 3  | 90.805         | <b>1081.120</b> | <b>1077.115</b> | <b>1077.367</b> | 1076.861        | R 39 |
| G 4  | 105.061        | 1042.094        | 1038.090        | 1038.342        | 1037.838        | G 38 |
| K 5  | 137.054        | 1027.839        | <b>1023.834</b> | <b>1024.086</b> | <b>1023.582</b> | K 37 |
| Q 6  | 169.099        | 998.815         | 994.811         | <b>992.062</b>  | 991.557         | Q 36 |
| G 7  | 183.354        | 953.903         | 950.150         | <b>960.048</b>  | 959.543         | G 35 |
| G 8  | 197.810        | 949.545         | <b>945.541</b>  | <b>945.792</b>  | 945.289         | G 34 |
| K 9  | 229.633        | 935.290         | 931.285         | <b>931.537</b>  | 931.031         | K 33 |
| A 10 | 247.393        | <b>903.266</b>  | <b>899.261</b>  | <b>899.513</b>  | 899.009         | A 32 |
| R 11 | 286.418        | <b>885.507</b>  | 881.502         | <b>881.754</b>  | 881.250         | R 31 |
| A 12 | 308.117        | <b>846.482</b>  | <b>842.477</b>  | <b>842.729</b>  | 842.225         | A 30 |
| R 13 | 336.201        | 828.722         | 824.718         | <b>824.970</b>  | 824.465         | R 29 |
| A 14 | 353.980        | 796.699         | 792.694         | <b>792.946</b>  | 792.442         | A 28 |
| K 15 | 385.964        | 778.939         | 774.935         | 775.187         | 774.681         | K 27 |
| T 16 | 411.246        | 746.915         | 742.911         | 743.163         | 742.659         | T 26 |
| R 17 | 450.271        | 721.694         | <b>717.689</b>  | <b>717.941</b>  | 717.437         | R 25 |
| S 18 | 472.609        | 692.828         | 688.824         | <b>678.876</b>  | 678.372         | S 24 |
| S 19 | 483.787        | 660.870         | 656.865         | 657.118         | 656.614         | S 23 |
| R 20 | 512.815        | 639.112         | 635.108         | 635.360         | 634.856         | R 22 |
| A 21 | 550.572        | 600.087         | 596.082         | 596.334         | 595.830         | A 21 |
| G 22 | 564.827        | 582.126         | 578.121         | 578.373         | 577.870         | G 20 |
| L 23 | 593.098        | 566.072         | 562.068         | 562.320         | 561.816         | L 19 |
| Q 24 | <b>625.113</b> | 539.803         | 535.799         | 536.049         | 535.545         | Q 19 |
| F 25 | 661.688        | 507.787         | 503.782         | 504.034         | 503.530         | F 17 |
| F 26 | 686.143        | 471.020         | 467.015         | 467.267         | 466.763         | F 16 |
| V 27 | <b>710.910</b> | 446.756         | 442.752         | 443.004         | 442.500         | V 15 |
| G 28 | 725.166        | 421.989         | 417.985         | 418.237         | <b>417.733</b>  | G 14 |
| R 29 | 765.193        | 407.734         | 403.729         | 403.981         | 403.477         | R 13 |
| V 30 | <b>788.958</b> | 368.709         | 364.704         | 364.956         | 364.452         | V 12 |
| H 31 | 823.223        | 343.942         | 339.937         | 340.189         | 339.685         | H 11 |
| R 32 | 862.248        | 309.677         | 305.672         | 305.924         | 305.420         | R 10 |
| L 33 | 890.519        | 270.652         | 266.647         | 266.899         | 266.395         | L 9  |
| L 34 | <b>918.796</b> | 242.381         | 238.376         | 238.628         | 238.124         | L 8  |
| R 35 | 967.815        | 214.130         | 210.125         | 210.377         | 209.873         | R 7  |
| R 36 | 989.839        | 175.084         | 171.080         | 171.332         | 170.828         | R 6  |
| G 37 | 1004.094       | 143.061         | 139.056         | 139.308         | 138.804         | G 5  |
| N 38 | 1032.605       | 128.805         | 124.800         | 125.052         | 124.548         | N 4  |
| V 39 | 1073.371       | 100.294         | 96.290          | 96.542          | 96.038          | V 3  |
| S 40 | 1095.129       | 59.529          | 55.524          | 55.776          | 55.272          | S 2  |
| E 41 | 1127.380       | 37.771          | 33.766          | 34.018          | 33.514          | E 1  |

# sp | Q8CGP5 | H2A1F\_MOUSE

[Acetyl]SGRGKQGGKARAKAKTRSSRAGLQFPVGRVHRLLRKGNYS

- ▶ fragmentation table for charge state 5+
- ▶ specType=etd
- ▶ score=50.53
- ▶ F113278.dat
- ▶ query=q70275\_p1
- ▶ precursor=644.795300
- ▶ chargePrecursor=7
- ▶ itol=0.5

| AA    | c              | y              | z+1            | z#2            | z              | AA    |
|-------|----------------|----------------|----------------|----------------|----------------|-------|
| S[1]  | 30.221         | 902.310        | 899.108        | 0.806          | 898.905        | S[41] |
| G[2]  | 41.625         | 876.501        | <b>873.298</b> | 0.806          | 873.096        | G[40] |
| R[3]  | 72.846         | 865.097        | 861.893        | 862.095        | 861.692        | R[39] |
| G[4]  | 84.250         | <b>833.877</b> | 830.673        | 830.875        | 830.472        | G[38] |
| K[5]  | 109.869        | 822.473        | <b>819.269</b> | <b>819.470</b> | <b>819.067</b> | K[37] |
| Q[6]  | 135.481        | 796.854        | <b>793.650</b> | 793.851        | <b>793.448</b> | Q[36] |
| G[7]  | 146.885        | <b>771.242</b> | 768.038        | <b>768.240</b> | 767.837        | G[35] |
| G[8]  | 158.289        | 759.838        | <b>756.634</b> | <b>756.835</b> | <b>756.432</b> | G[34] |
| K[9]  | 183.908        | 748.433        | <b>745.230</b> | <b>745.431</b> | <b>745.028</b> | K[33] |
| A[10] | 198.116        | 722.814        | 719.611        | 719.812        | 719.409        | A[32] |
| R[11] | 229.336        | 708.607        | 705.403        | 705.605        | 705.202        | R[31] |
| A[12] | 243.543        | 677.387        | 674.183        | 674.385        | 673.981        | A[30] |
| K[13] | 269.162        | 663.179        | 659.976        | 660.177        | 659.774        | K[29] |
| A[14] | 283.370        | 637.560        | 634.357        | 634.559        | 634.155        | A[28] |
| K[15] | 308.989        | 623.353        | 620.149        | 620.351        | 619.948        | K[27] |
| T[16] | 329.198        | 597.734        | 594.530        | 594.732        | 594.329        | T[26] |
| R[17] | <b>360.418</b> | 577.524        | 574.321        | 574.522        | 574.119        | R[25] |
| S[18] | 377.825        | 546.304        | 543.100        | 543.302        | 542.899        | S[24] |
| S[19] | 399.231        | 528.898        | 525.694        | 525.896        | 525.492        | S[23] |
| R[20] | 426.451        | 511.491        | 508.288        | 508.489        | 508.086        | R[22] |
| A[21] | 440.659        | 480.271        | 477.067        | 477.269        | 476.866        | A[21] |
| G[22] | 452.063        | 466.064        | 462.860        | 463.061        | 462.658        | G[20] |
| L[23] | 474.680        | 454.659        | 451.456        | 451.657        | 451.254        | L[19] |
| Q[24] | 500.292        | 432.043        | 428.839        | 429.040        | 428.637        | Q[18] |
| F[25] | 529.705        | 406.431        | 403.227        | 403.429        | 403.026        | F[17] |
| P[26] | 549.116        | 377.017        | 373.813        | 374.015        | 373.612        | P[16] |
| V[27] | 568.530        | 357.607        | 354.403        | 354.604        | 354.201        | V[15] |
| G[28] | 589.334        | 337.793        | 334.589        | 334.791        | 334.388        | G[14] |
| R[29] | 611.554        | 326.389        | 323.185        | 323.386        | 322.983        | R[13] |
| V[30] | 631.368        | 295.168        | 291.965        | 292.166        | 291.763        | V[12] |
| H[31] | <b>658.780</b> | 275.355        | 272.151        | 272.353        | 271.949        | H[11] |
| R[32] | 690.000        | 247.943        | 244.739        | 244.941        | 244.538        | R[10] |
| L[33] | 712.617        | 216.723        | 213.519        | 213.721        | 213.317        | L[9]  |
| L[34] | 735.233        | 194.109        | 190.902        | 191.104        | 190.701        | L[8]  |
| R[35] | <b>766.454</b> | 171.489        | 168.283        | 168.487        | 168.084        | R[7]  |
| K[36] | 782.073        | 140.269        | 137.065        | 137.267        | 136.864        | K[6]  |
| G[37] | 803.477        | 114.650        | 111.446        | 111.648        | 111.245        | G[5]  |
| N[38] | 826.286        | 103.246        | 100.042        | 100.243        | 99.840         | N[4]  |
| V[39] | 858.898        | 80.437         | 77.233         | 77.435         | 77.032         | V[3]  |
| S[40] | <b>876.305</b> | 47.824         | 44.621         | 44.822         | 44.419         | S[2]  |
| E[41] | 902.113        | 30.418         | 27.214         | 27.416         | 27.013         | E[1]  |

# sp | Q8CGP5 | H2A1F\_MOUSE

[Acetyl]SGRGKQGGKARAKAKTRSSRAGLQFPVGRVHRLLRKGNYS

- ▶ fragmentation table for charge state 6+
- ▶ specType=etd
- ▶ score=50.53
- ▶ F113278.dat
- ▶ query=q70275\_p1
- ▶ precursor=644.795300
- ▶ chargePrecursor=7
- ▶ itol=0.5

| AA    | c              | y              | z+1            | z+2     | z              | AA    |
|-------|----------------|----------------|----------------|---------|----------------|-------|
| S[1]  | 25.352         | 752.093        | <b>749.423</b> | 0.839   | 749.255        | S[41] |
| G[2]  | 34.856         | <b>730.586</b> | <b>727.916</b> | 0.839   | 727.748        | G[40] |
| R[3]  | 60.873         | 721.082        | <b>718.412</b> | 718.580 | <b>718.244</b> | R[39] |
| G[4]  | 70.376         | 695.065        | 692.396        | 692.563 | 692.228        | G[38] |
| K[5]  | 91.725         | 685.562        | 682.892        | 683.060 | 682.724        | K[37] |
| Q[6]  | 113.068        | 664.213        | 661.543        | 661.711 | 661.375        | Q[36] |
| G[7]  | 122.572        | 642.866        | 640.200        | 640.368 | 640.032        | G[35] |
| G[8]  | 132.076        | 633.366        | 630.698        | 630.864 | 630.528        | G[34] |
| K[9]  | 153.428        | 623.862        | 621.193        | 621.360 | 621.025        | K[33] |
| A[10] | 165.264        | 602.513        | 599.843        | 600.011 | 599.675        | A[32] |
| R[11] | 191.281        | 590.074        | 588.004        | 588.172 | 587.836        | R[31] |
| A[12] | 203.121        | 564.657        | 561.987        | 562.155 | 561.819        | A[30] |
| K[13] | 224.470        | 552.817        | 550.147        | 550.315 | 549.980        | K[29] |
| A[14] | 236.309        | 531.468        | 528.798        | 528.966 | 528.630        | A[28] |
| K[15] | 257.658        | 519.629        | 516.959        | 517.127 | 516.791        | K[27] |
| T[16] | 274.500        | 498.279        | 495.610        | 495.778 | 495.442        | T[26] |
| R[17] | 300.517        | 481.438        | 478.768        | 478.936 | 478.600        | R[25] |
| S[18] | 313.022        | 455.421        | 452.752        | 452.919 | 452.584        | S[24] |
| S[19] | 329.227        | 440.916        | 438.246        | 438.414 | 438.078        | S[23] |
| R[20] | 355.544        | 426.411        | 423.741        | 423.909 | 423.573        | R[22] |
| A[21] | 367.384        | 400.394        | 397.724        | 397.892 | 397.556        | A[21] |
| G[22] | 376.887        | 388.554        | 385.884        | 386.052 | 385.716        | G[20] |
| L[23] | 395.735        | 379.051        | 376.381        | 376.549 | 376.213        | L[19] |
| Q[24] | <b>417.078</b> | <b>366.203</b> | 357.534        | 357.702 | 357.366        | Q[18] |
| F[25] | 441.589        | 338.866        | 336.196        | 336.364 | 336.028        | F[17] |
| P[26] | 457.765        | 314.349        | 311.679        | 311.847 | 311.511        | P[16] |
| V[27] | 474.276        | 298.173        | 295.504        | 295.672 | 295.336        | V[15] |
| G[28] | 483.779        | 281.662        | 278.992        | 279.160 | 278.824        | G[14] |
| R[29] | 509.986        | 272.158        | 269.488        | 269.657 | 269.321        | R[13] |
| V[30] | 526.308        | 246.142        | 243.472        | 243.640 | 243.304        | V[12] |
| H[31] | 549.151        | 229.630        | 226.960        | 227.128 | 226.792        | H[11] |
| R[32] | 575.168        | 206.787        | 204.117        | 204.285 | 203.949        | R[10] |
| L[33] | 594.015        | 180.770        | 178.100        | 178.268 | 177.932        | L[9]  |
| L[34] | 612.862        | 161.923        | 159.253        | 159.421 | 159.085        | L[8]  |
| R[35] | 638.879        | 143.075        | 140.406        | 140.574 | 140.238        | R[7]  |
| K[36] | 660.228        | 117.059        | 114.389        | 114.557 | 114.221        | K[6]  |
| G[37] | 669.732        | 95.709         | 93.040         | 93.208  | 92.872         | G[5]  |
| R[38] | 688.739        | 86.206         | 83.536         | 83.704  | 83.368         | R[4]  |
| V[39] | 715.936        | 87.199         | 84.529         | 84.697  | 84.361         | V[3]  |
| S[40] | <b>730.422</b> | 40.021         | 37.352         | 37.520  | 37.184         | S[2]  |
| E[41] | 751.929        | 25.516         | 22.846         | 23.014  | 22.678         | E[1]  |

# sp | Q8CGP5 | H2A1F\_MOUSE

[Acetyl]SGRGKQGGKARAKATRSSRAGLQFPVGRVHLLRKGNYSE

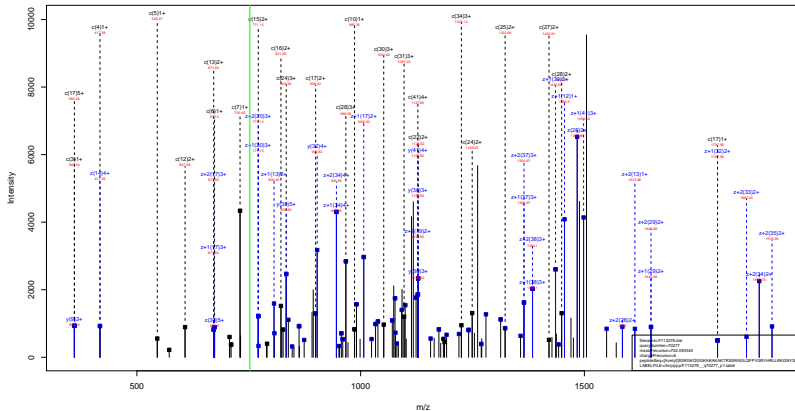

# sp | Q8CGP5 | H2A1F\_MOUSE

[Acetyl]SGRGKQGGKARAKAKTRSSRAGLQFPVGRVHRLLRKGNYS

- ▶ fragmentation table for charge state 1+
- ▶ specType=etd
- ▶ score=48.16
- ▶ F113278.dat
- ▶ query=q70277\_p1
- ▶ precursor=752.093340
- ▶ chargePrecursor=6
- ▶ itol=0.5

| AA   | c               | y              | z+1             | z+2             | z        | AA   |
|------|-----------------|----------------|-----------------|-----------------|----------|------|
| S 1  | 147.676         | 4507.521       | 4491.502        | 0.000           | 4490.494 | S 41 |
| G 2  | 304.098         | 4378.478       | 4362.459        | 0.000           | 4361.451 | G 40 |
| R 3  | <b>360.199</b>  | 4321.457       | 4305.438        | 4306.448        | 4304.430 | R 39 |
| G 4  | <b>417.270</b>  | 4165.355       | 4149.337        | 4150.345        | 4148.329 | G 38 |
| K 5  | <b>545.315</b>  | 4108.334       | 4092.315        | 4093.323        | 4091.307 | K 37 |
| Q 6  | <b>673.174</b>  | 3989.239       | 3974.220        | 3985.228        | 3983.212 | Q 36 |
| G 7  | <b>730.395</b>  | 3852.180       | 3836.162        | 3837.170        | 3835.154 | G 35 |
| G 8  | 787.417         | 3795.159       | 3779.140        | 3780.148        | 3778.132 | G 34 |
| K 9  | 915.512         | 3738.138       | 3722.119        | 3723.127        | 3721.111 | K 33 |
| A 10 | <b>986.549</b>  | 3610.043       | 3594.024        | 3595.032        | 3593.016 | A 32 |
| R 11 | 1142.650        | 3536.005       | 3522.987        | 3523.995        | 3521.979 | R 31 |
| A 12 | 1213.687        | 3382.904       | 3366.886        | 3367.893        | 3366.878 | A 30 |
| K 13 | 1341.782        | 3311.867       | 3295.848        | 3296.856        | 3294.841 | K 29 |
| A 14 | 1412.819        | 3183.772       | 3167.754        | 3168.761        | 3166.746 | A 28 |
| K 15 | 1540.914        | 3112.735       | 3096.716        | 3097.724        | 3095.709 | K 27 |
| T 16 | 1641.962        | 2984.640       | 2968.621        | 2969.629        | 2967.614 | T 26 |
| R 17 | <b>1798.063</b> | 2883.592       | 2867.574        | 2868.582        | 2866.566 | R 25 |
| S 18 | 1885.909        | 2727.491       | 2711.473        | 2712.480        | 2710.465 | S 24 |
| S 19 | 1972.127        | 2640.455       | 2624.441        | 2625.448        | 2623.433 | S 23 |
| R 20 | 2128.228        | 2553.427       | 2537.409        | 2538.416        | 2536.401 | R 22 |
| A 21 | 2199.265        | 2497.326       | 2481.307        | 2482.315        | 2480.300 | A 21 |
| G 22 | 2286.287        | 2326.289       | 2310.270        | 2311.278        | 2309.263 | G 20 |
| L 23 | 2369.371        | 2269.268       | 2253.249        | 2254.257        | 2252.241 | L 19 |
| Q 24 | 2497.429        | 2156.184       | 2140.165        | 2141.173        | 2139.157 | Q 18 |
| F 25 | 2644.698        | 2028.125       | 2012.106        | 2013.114        | 2011.099 | F 17 |
| P 26 | 2741.551        | 1881.057       | 1865.038        | 1866.046        | 1864.031 | P 16 |
| V 27 | 2840.619        | 1784.004       | 1767.985        | 1768.993        | 1766.977 | V 15 |
| G 28 | 2897.641        | 1684.935       | 1668.917        | 1669.924        | 1667.909 | G 14 |
| R 29 | 3053.742        | 1627.914       | 1611.895        | <b>1612.903</b> | 1610.887 | R 13 |
| V 30 | 3153.810        | 1474.833       | <b>1455.794</b> | 1456.801        | 1454.785 | V 12 |
| H 31 | 3289.869        | 1372.744       | 1356.726        | <b>1357.734</b> | 1355.718 | H 11 |
| R 32 | 3445.970        | 1235.685       | <b>1219.667</b> | 1220.675        | 1218.659 | R 10 |
| L 33 | 3559.054        | 1079.584       | 1063.566        | 1064.573        | 1062.558 | L 9  |
| L 34 | 3672.138        | <b>966.500</b> | 950.482         | <b>951.489</b>  | 949.474  | L 8  |
| R 35 | 3828.239        | 853.416        | 837.398         | <b>838.405</b>  | 836.390  | R 7  |
| K 36 | 3956.334        | 697.315        | 681.298         | 682.304         | 680.289  | K 6  |
| G 37 | 4013.356        | 569.220        | 553.201         | 554.209         | 552.194  | G 5  |
| N 38 | 4127.399        | 512.109        | 496.100         | 497.108         | 495.172  | N 4  |
| V 39 | 4290.462        | 396.156        | 380.137         | 381.145         | 381.129  | V 3  |
| S 40 | 4377.494        | 235.092        | 219.074         | 220.082         | 218.066  | S 2  |
| E 41 | 4506.537        | 148.060        | 132.042         | 133.050         | 131.034  | E 1  |

# sp | Q8CGP5 | H2A1F\_MOUSE

[Acetyl]SGRGKQGGKARAKAKTRSSRAGLQFPVGRVHLLLRKGNYS

- ▶ fragmentation table for charge state 2+
- ▶ specType=etd
- ▶ score=48.16
- ▶ F113278.dat
- ▶ query=q70277.p1
- ▶ precursor=752.093340
- ▶ chargePrecursor=6
- ▶ itol=0.5

| AA | c  | y               | #s1             | #s2             | c               | AA              |       |
|----|----|-----------------|-----------------|-----------------|-----------------|-----------------|-------|
| S  | 1  | 74.062          | 2054.264        | 2266.255        | 0.504           | 2245.751        | S(1)  |
| G  | 2  | 102.553         | 2189.743        | 2381.733        | 0.504           | 2181.229        | G(2)  |
| R  | 3  | 180.603         | 2641.232        | 2153.233        | 2153.236        | 2152.710        | R(3)  |
| G  | 4  | 209.114         | 2083.181        | 2075.172        | 2075.676        | 2074.660        | G(4)  |
| K  | 5  | 273.181         | 2054.671        | 2046.661        | 2047.165        | 2046.157        | K(5)  |
| G  | 6  | 337.194         | 1690.622        | 1982.614        | 1993.218        | 1992.210        | G(6)  |
| G  | 7  | 385.703         | 3106.594        | 1619.584        | <b>1919.088</b> | 1919.088        | G(7)  |
| G  | 8  | 394.212         | 1898.083        | 1890.074        | <b>1890.578</b> | 1889.570        | G(8)  |
| K  | 9  | 458.260         | 1869.572        | 1861.563        | <b>1862.067</b> | 1861.059        | K(9)  |
| A  | 10 | 493.778         | 1805.525        | <b>1797.516</b> | <b>1798.019</b> | 1797.012        | A(10) |
| R  | 11 | <b>571.829</b>  | 1770.008        | 1761.997        | 1762.501        | 1761.493        | R(11) |
| A  | 12 | <b>607.347</b>  | 1692.969        | 1684.959        | 1684.959        | 1683.944        | A(12) |
| R  | 13 | <b>671.395</b>  | 1656.437        | <b>1648.428</b> | <b>1648.932</b> | 1647.924        | R(13) |
| A  | 14 | <b>706.913</b>  | 1592.900        | 1584.890        | <b>1584.884</b> | 1583.876        | A(14) |
| K  | 15 | <b>770.961</b>  | 1556.871        | 1548.862        | <b>1549.366</b> | 1548.358        | K(15) |
| T  | 16 | <b>821.485</b>  | 1492.824        | 1484.814        | 1485.318        | <b>1484.310</b> | T(16) |
| R  | 17 | <b>899.535</b>  | <b>1442.300</b> | 1434.291        | 1434.794        | 1433.787        | R(17) |
| S  | 18 | 933.653         | 1364.249        | 1356.240        | 1356.744        | 1355.736        | S(18) |
| S  | 19 | <b>986.567</b>  | 1320.733        | <b>1312.724</b> | <b>1313.228</b> | 1312.220        | S(19) |
| R  | 20 | 1084.618        | 1277.217        | <b>1269.208</b> | <b>1269.712</b> | 1268.704        | R(20) |
| A  | 21 | 1100.136        | 1199.161        | 1191.151        | <b>1191.661</b> | 1190.653        | A(21) |
| G  | 22 | <b>1128.647</b> | 1163.640        | 1155.630        | <b>1156.143</b> | 1155.135        | G(22) |
| G  | 23 | <b>1185.189</b> | 1128.117        | 1120.107        | <b>1121.632</b> | 1120.624        | G(23) |
| Q  | 24 | <b>1249.218</b> | 1078.595        | <b>1070.586</b> | <b>1071.090</b> | 1070.082        | Q(24) |
| F  | 25 | <b>1322.753</b> | 1014.569        | <b>1006.557</b> | <b>1007.061</b> | 1006.053        | F(25) |
| F  | 26 | 1371.279        | 941.033         | 933.023         | 933.526         | 932.519         | F(26) |
| V  | 27 | <b>1420.813</b> | 892.506         | 884.496         | 885.000         | 883.992         | V(27) |
| G  | 28 | <b>1449.324</b> | 842.971         | 834.961         | 835.464         | 834.456         | G(28) |
| R  | 29 | 1527.814        | 814.481         | <b>806.451</b>  | <b>806.955</b>  | 805.947         | R(29) |
| V  | 30 | 1576.809        | 736.410         | 728.401         | 728.905         | 727.897         | V(30) |
| H  | 31 | 1645.438        | 688.876         | 678.866         | 679.370         | 678.363         | H(31) |
| R  | 32 | 1723.489        | 618.346         | 610.337         | 610.841         | 609.833         | R(32) |
| L  | 33 | 1780.031        | 540.296         | 532.286         | 532.790         | 531.783         | L(33) |
| L  | 34 | 1838.573        | 489.764         | 479.754         | 479.258         | 478.251         | L(34) |
| R  | 35 | 1914.623        | 427.232         | 419.222         | 419.726         | 418.719         | R(35) |
| K  | 36 | 1978.671        | 349.181         | 341.172         | 341.676         | 340.668         | K(36) |
| G  | 37 | 2067.181        | 285.114         | 277.104         | 277.608         | 276.600         | G(37) |
| N  | 38 | 2094.203        | 256.603         | 248.594         | 249.098         | 248.090         | N(38) |
| V  | 39 | 2145.736        | 199.562         | 191.552         | 192.056         | 191.048         | V(39) |
| S  | 40 | 2189.281        | 118.056         | 110.046         | 110.549         | 109.541         | S(40) |
| E  | 41 | 2253.772        | 74.534          | 66.524          | 67.028          | 66.021          | E(41) |



# sp | Q8CGP5 | H2A1F\_MOUSE

[Acetyl]SGRGKQGGKARAKAKTRSSRAGLQFPVGRVHRLLRKGNYS

- ▶ fragmentation table for charge state 3+
- ▶ specType=etd
- ▶ score=48.16
- ▶ F113278.dat
- ▶ query=q70277.p1
- ▶ precursor=752.093340
- ▶ chargePrecursor=6
- ▶ itol=0.5

| AA | c  | y               | z=1             | z=2             | z               | AA              |       |
|----|----|-----------------|-----------------|-----------------|-----------------|-----------------|-------|
| S  | 1  | 48.607          | 1502.178        | <b>1497.839</b> | 8.872           | 4497.561        | S(41) |
| G  | 2  | 86.704          | 1460.184        | 1454.275        | 0.672           | 1454.480        | G(40) |
| R  | 3  | 1307.710        | 1441.157        | <b>1435.817</b> | 1436.151        | <b>1435.482</b> | R(39) |
| G  | 4  | 139.745         | 1389.123        | <b>1383.784</b> | <b>1384.120</b> | 1383.446        | G(38) |
| K  | 5  | 182.443         | 1370.110        | <b>1364.777</b> | <b>1365.113</b> | 1364.441        | K(37) |
| G  | 6  | 225.130         | 1327.418        | 1322.078        | <b>1322.414</b> | 1321.742        | G(36) |
| G  | 7  | 264.137         | 1284.732        | 1279.392        | <b>1279.728</b> | 1279.056        | G(35) |
| G  | 8  | 263.144         | 1265.725        | 1260.385        | 1260.721        | 1260.049        | G(34) |
| K  | 9  | 305.642         | 1246.717        | <b>1241.378</b> | <b>1241.714</b> | <b>1241.042</b> | K(33) |
| A  | 10 | 329.521         | 1224.010        | 1199.079        | 1199.015        | 1198.344        | A(32) |
| R  | 11 | 381.555         | 1180.240        | <b>1175.000</b> | 1175.336        | <b>1174.664</b> | R(31) |
| A  | 12 | 409.234         | <b>1138.306</b> | 1123.907        | 1123.901        | 1122.931        | A(30) |
| K  | 13 | 447.932         | 1104.627        | <b>1099.288</b> | <b>1099.624</b> | 1098.952        | K(29) |
| A  | 14 | 491.611         | 1061.929        | 1056.589        | 1056.625        | 1056.251        | A(28) |
| K  | 15 | 514.310         | <b>1038.250</b> | <b>1032.910</b> | <b>1033.246</b> | 1032.574        | K(27) |
| T  | 16 | 547.602         | 995.552         | <b>990.212</b>  | <b>990.548</b>  | 989.870         | T(26) |
| R  | 17 | 600.626         | 961.869         | <b>956.529</b>  | <b>956.865</b>  | 956.183         | R(25) |
| S  | 18 | 629.919         | 909.835         | 904.485         | 904.832         | 904.160         | S(24) |
| S  | 19 | 658.047         | 880.825         | 875.485         | 875.821         | 875.149         | S(23) |
| R  | 20 | <b>710.081</b>  | 851.814         | 846.474         | <b>846.810</b>  | 846.138         | R(22) |
| A  | 21 | 731.760         | 799.780         | 794.441         | 794.777         | 794.101         | A(21) |
| G  | 22 | 752.769         | 776.101         | <b>770.762</b>  | <b>771.098</b>  | 770.426         | G(20) |
| L  | 23 | <b>796.462</b>  | 759.094         | 753.754         | 754.090         | 753.419         | L(19) |
| G  | 24 | <b>833.148</b>  | 719.305         | 714.000         | 714.306         | 713.224         | G(18) |
| F  | 25 | 882.171         | 676.713         | <b>671.374</b>  | <b>671.710</b>  | 671.038         | F(17) |
| F  | 26 | 914.552         | 627.600         | 622.351         | 622.687         | 622.015         | F(16) |
| V  | 27 | 947.545         | 595.139         | 590.000         | 590.336         | 589.664         | V(15) |
| G  | 28 | <b>966.552</b>  | 562.317         | 556.977         | 557.313         | 556.641         | G(14) |
| R  | 29 | 1002.234        | 543.309         | 537.970         | 538.306         | 537.634         | R(13) |
| V  | 30 | <b>1051.608</b> | 490.275         | 485.036         | 486.272         | 485.600         | V(12) |
| H  | 31 | <b>1097.294</b> | 458.253         | 452.913         | 453.249         | 452.577         | H(11) |
| R  | 32 | 1149.328        | 412.507         | 407.237         | 407.563         | 406.891         | R(10) |
| L  | 33 | <b>1187.023</b> | <b>360.533</b>  | 355.193         | 355.529         | 354.857         | L(9)  |
| L  | 34 | <b>1224.718</b> | 322.374         | 317.089         | 317.425         | 316.753         | L(8)  |
| R  | 35 | 1275.171        | 285.144         | 279.804         | 280.140         | 279.468         | R(7)  |
| K  | 36 | 1319.450        | 233.110         | 227.770         | 228.106         | 227.434         | K(6)  |
| G  | 37 | 1338.457        | 190.412         | 185.072         | 185.408         | 184.736         | G(5)  |
| N  | 38 | 1376.471        | 171.404         | 166.065         | 166.401         | 165.729         | N(4)  |
| V  | 39 | 1430.826        | 133.290         | 128.051         | 128.386         | 127.715         | V(3)  |
| S  | 40 | 1459.836        | 99.136          | 93.796          | 94.132          | 93.460          | S(2)  |
| E  | 41 | 1502.850        | 50.025          | 44.685          | 45.021          | 44.349          | E(1)  |

# sp | Q8CGP5 | H2A1F\_MOUSE

[Acetyl]SGRGKQGGKARAKAKTRSSRAGLQFPVGRVHRLLRKGNYS

- ▶ fragmentation table for charge state 4+
- ▶ specType=etd
- ▶ score=48.16
- ▶ F113278.dat
- ▶ query=q70277.p1
- ▶ precursor=752.093340
- ▶ chargePrecursor=6
- ▶ itol=0.5

| AA | c  | y               | #=1             | #=2             | #               | AA              |       |
|----|----|-----------------|-----------------|-----------------|-----------------|-----------------|-------|
| S  | 1  | 37.505          | <b>1127.636</b> | <b>1123.631</b> | 0.705           | <b>1123.370</b> | S[4]  |
| G  | 2  | 51.780          | 1095.375        | <b>1091.370</b> | 0.795           | 1092.112        | G[6]  |
| R  | 3  | 90.805          | <b>1081.120</b> | <b>1077.115</b> | <b>1077.367</b> | <b>1076.863</b> | R[30] |
| G  | 4  | 109.061         | 1042.094        | 1038.090        |                 |                 | G[38] |
| K  | 5  | 137.064         | 1027.839        | 1023.834        | <b>1024.086</b> | 1023.582        | K[37] |
| G  | 6  | 169.059         | 995.815         | 991.811         | 992.267         | 991.292         | G[36] |
| G  | 7  | 193.254         | 963.803         |                 | <b>959.796</b>  | <b>960.048</b>  | G[55] |
| G  | 8  | 197.610         | 949.545         | <b>945.541</b>  | <b>945.792</b>  | 945.299         | G[34] |
| K  | 9  | 229.633         | 935.290         | 931.285         | 931.537         | 931.033         | K[33] |
| A  | 10 | 247.303         | <b>903.266</b>  | <b>899.261</b>  | <b>899.513</b>  | <b>899.009</b>  | A[32] |
| R  | 11 | 286.418         | 895.507         | 891.502         | 891.754         | 891.250         | R[31] |
| A  | 12 | 304.177         | 864.848         | 860.843         | 862.229         | 862.229         | A[30] |
| K  | 13 | 336.201         | 828.722         | 824.718         | 824.970         | 824.466         | K[29] |
| A  | 14 | 353.960         | 796.699         | 792.694         | 792.946         | 792.442         | A[28] |
| K  | 15 | 385.984         | 778.939         | 774.935         | 775.187         | 774.683         | K[27] |
| T  | 16 | 411.246         | 746.915         | 742.911         | 743.163         | 742.659         | T[26] |
| R  | 17 | 459.271         | 721.894         | 717.889         | 717.901         | 717.397         | R[25] |
| S  | 18 | 472.629         | 692.628         | 688.624         | 688.876         | 688.372         | S[24] |
| S  | 19 | 493.787         | 660.610         | 656.606         | 657.118         | 656.614         | S[23] |
| R  | 20 | 532.613         | 638.112         | 634.108         | 635.360         | 634.856         | R[22] |
| A  | 21 | 550.572         | 600.087         | 596.082         | 596.334         | 595.830         | A[21] |
| G  | 22 | 564.827         | 582.328         | 578.323         | 578.575         | 578.071         | G[20] |
| L  | 23 | 593.098         | 568.072         | 564.068         | 564.320         | 563.816         | L[19] |
| Q  | 24 | 625.113         | 539.801         | 535.797         | 536.049         | 535.545         | Q[18] |
| F  | 25 | 661.880         | 507.787         | 503.782         | 504.034         | 503.530         | F[17] |
| F  | 26 | 698.143         | 471.020         | 467.015         | 467.267         | 466.763         | F[16] |
| V  | 27 | <b>710.910</b>  | 446.756         | 442.752         | 443.004         | 442.500         | V[15] |
| G  | 28 | 725.169         | 421.989         | 417.985         | 418.237         | <b>417.733</b>  | G[14] |
| R  | 29 | 764.181         | 389.734         | 385.729         | 385.981         | 385.477         | R[13] |
| V  | 30 | 788.958         | 368.709         | 364.704         | 364.956         | 364.452         | V[12] |
| H  | 31 | 823.223         | 343.942         | 339.937         | 340.189         | 339.685         | H[11] |
| R  | 32 | <b>862.248</b>  | 309.677         | 305.672         | 305.924         | 305.420         | R[10] |
| L  | 33 | 890.519         | 270.652         | 266.647         | 266.899         | 266.395         | L[9]  |
| L  | 34 | 918.969         | 242.361         | 238.356         | 238.608         | 238.104         | L[8]  |
| R  | 35 | 957.815         | 214.110         | 210.105         | 210.357         | 209.853         | R[7]  |
| K  | 36 | 989.839         | 175.084         | 171.079         | 171.331         | 170.827         | K[6]  |
| G  | 37 | 1064.094        | 143.061         | 139.056         | 139.308         | 138.804         | G[5]  |
| N  | 38 | 1032.605        | 128.805         | 124.800         | 125.052         | 124.548         | N[4]  |
| V  | 39 | 1078.371        | 100.294         | 96.289          | 96.541          | 96.037          | V[3]  |
| S  | 40 | 1095.128        | 99.529          | 95.524          | 95.776          | 95.272          | S[2]  |
| E  | 41 | <b>1127.390</b> | 97.771          | 93.766          | 94.018          | 93.514          | E[1]  |

# sp | Q8CGP5 | H2A1F\_MOUSE

[Acetyl]SGRGKQGGKARAKAKTRSSRAGLQFPVGRVHRLLRKGNYS

- ▶ fragmentation table for charge state 5+
- ▶ specType=etd
- ▶ score=48.16
- ▶ F113278.dat
- ▶ query=q70277\_p1
- ▶ precursor=752.093340
- ▶ chargePrecursor=6
- ▶ itol=0.5

| AA | c  | y              | z+1            | z#2            | z              | AA             |   |    |
|----|----|----------------|----------------|----------------|----------------|----------------|---|----|
| S  | 1  | 30.221         | 902.310        | <b>899.106</b> | 0.806          | 898.905        | S | 41 |
| G  | 2  | 41.625         | 876.501        | <b>873.298</b> | 0.806          | 873.096        | G | 40 |
| R  | 3  | 72.846         | 865.097        | <b>861.893</b> | <b>062.095</b> | 861.692        | R | 39 |
| G  | 4  | 84.250         | <b>833.877</b> | 830.673        | 830.875        | 830.472        | G | 38 |
| K  | 5  | 109.869        | 822.473        | 819.269        | 819.470        | 819.067        | K | 37 |
| Q  | 6  | 135.481        | 796.854        | 793.650        | 793.851        | 793.448        | Q | 36 |
| G  | 7  | 146.685        | <b>771.242</b> | 768.038        | 768.240        | 767.837        | G | 35 |
| G  | 8  | 158.289        | 759.838        | 756.634        | 756.835        | 756.432        | G | 34 |
| K  | 9  | 183.908        | 748.833        | 745.230        | 745.431        | 745.028        | K | 33 |
| A  | 10 | 198.116        | 722.814        | 719.611        | 719.812        | 719.409        | A | 32 |
| R  | 11 | 229.336        | 708.607        | 705.403        | 705.605        | 705.202        | R | 31 |
| A  | 12 | 243.543        | 677.387        | 674.183        | 674.385        | <b>673.981</b> | A | 30 |
| K  | 13 | 269.162        | 663.179        | 659.976        | 660.177        | 659.774        | K | 29 |
| A  | 14 | 283.370        | 637.560        | 634.357        | 634.558        | 634.155        | A | 28 |
| K  | 15 | 308.989        | 623.353        | 620.149        | 620.351        | 619.948        | K | 27 |
| T  | 16 | 329.198        | 597.734        | 594.530        | 594.732        | 594.329        | T | 26 |
| R  | 17 | <b>360.418</b> | 577.524        | 574.321        | 574.522        | 574.119        | R | 25 |
| S  | 18 | 377.825        | 546.304        | 543.100        | 543.302        | 542.899        | S | 24 |
| S  | 19 | 399.231        | 528.898        | 525.694        | 525.896        | 525.492        | S | 23 |
| R  | 20 | 426.451        | 511.491        | 508.288        | 508.489        | 508.086        | R | 22 |
| A  | 21 | 440.659        | 480.271        | 477.067        | 477.269        | 476.866        | A | 21 |
| G  | 22 | 452.063        | 466.064        | 462.860        | 463.061        | 462.658        | G | 20 |
| L  | 23 | 474.680        | 454.059        | 451.456        | 451.657        | 451.254        | L | 19 |
| Q  | 24 | 500.292        | 432.043        | 428.839        | 429.040        | 428.637        | Q | 18 |
| F  | 25 | 529.705        | 406.831        | 403.227        | 403.429        | 403.026        | F | 17 |
| P  | 26 | 549.116        | 377.017        | 373.813        | 374.015        | 373.612        | P | 16 |
| V  | 27 | 568.530        | 357.607        | 354.403        | 354.604        | 354.201        | V | 15 |
| G  | 28 | 589.334        | 337.793        | 334.589        | 334.791        | 334.388        | G | 14 |
| R  | 29 | 611.554        | 326.389        | 323.185        | 323.386        | 322.983        | R | 13 |
| V  | 30 | 631.368        | 295.168        | 291.965        | 292.166        | 291.763        | V | 12 |
| H  | 31 | 658.780        | 275.355        | 272.151        | 272.353        | 271.949        | H | 11 |
| R  | 32 | 690.000        | 247.943        | 244.739        | 244.941        | 244.538        | R | 10 |
| L  | 33 | 712.617        | 216.723        | 213.519        | 213.721        | 213.317        | L | 9  |
| L  | 34 | 735.233        | 194.109        | 190.902        | 191.104        | 190.701        | L | 8  |
| R  | 35 | 766.454        | 171.489        | 168.283        | 168.487        | 168.084        | R | 7  |
| K  | 36 | 782.073        | 140.269        | 137.065        | 137.267        | 136.864        | K | 6  |
| G  | 37 | 803.877        | 114.650        | 111.446        | 111.648        | 111.245        | G | 5  |
| N  | 38 | <b>826.286</b> | 101.246        | 100.042        | 100.243        | 99.840         | N | 4  |
| V  | 39 | 858.898        | 80.437         | 77.233         | 77.435         | 77.032         | V | 3  |
| S  | 40 | 876.305        | 47.824         | 44.621         | 44.822         | 44.419         | S | 2  |
| E  | 41 | 902.113        | 30.418         | 27.214         | 27.416         | 27.013         | E | 1  |



# sp | Q8CGP5 | H2A1F\_MOUSE

[Acetyl]SGRGKQGGKARAKAKTRSSRAGLQFPVGRVHLLRKGNYSE

- ▶ fragmentation table for charge state 1+
- ▶ specType=etd
- ▶ score=47.93
- ▶ F113278.dat
- ▶ query=q70279\_p1
- ▶ precursor=752.093370
- ▶ chargePrecursor=6
- ▶ itol=0.5

| AA | c  | y              | z+1            | z+2             | z               | AA       |       |
|----|----|----------------|----------------|-----------------|-----------------|----------|-------|
| S  | 1  | 147.076        | 4507.521       | 4491.502        | 0.000           | 4400.494 | S[41] |
| G  | 2  | 204.098        | 4378.478       | 4362.459        | 0.000           | 4361.451 | G[46] |
| R  | 3  | <b>360.199</b> | 4321.457       | 4305.438        | 4306.446        | 4304.430 | R[39] |
| C  | 4  | <b>417.220</b> | 4185.355       | 4148.337        | 4150.345        | 4148.329 | C[38] |
| K  | 5  | <b>545.315</b> | 4108.334       | 4092.315        | 4093.323        | 4091.307 | K[17] |
| Q  | 6  | <b>673.374</b> | 3980.239       | 3954.220        | 3955.228        | 3953.212 | Q[36] |
| G  | 7  | <b>730.395</b> | 3852.180       | 3836.162        | 3837.170        | 3835.154 | G[35] |
| G  | 8  | <b>787.417</b> | 3795.159       | 3779.140        | 3780.148        | 3778.132 | G[34] |
| K  | 9  | 915.512        | 3738.139       | 3722.119        | 3723.127        | 3721.111 | K[33] |
| A  | 10 | <b>986.549</b> | 3610.043       | 3594.024        | 3595.032        | 3593.016 | A[32] |
| R  | 11 | 1142.650       | 3539.955       | 3523.936        | 3524.944        | 3522.928 | R[31] |
| A  | 12 | 1213.667       | 3382.904       | 3366.885        | 3367.893        | 3365.877 | A[30] |
| K  | 13 | 1341.782       | 3311.867       | 3295.848        | 3296.856        | 3294.841 | K[29] |
| A  | 14 | 1412.819       | 3183.772       | 3167.754        | 3168.761        | 3166.746 | A[28] |
| K  | 15 | 1540.914       | 3112.735       | 3096.716        | 3097.724        | 3095.709 | K[27] |
| T  | 16 | 1641.962       | 2984.640       | 2968.621        | 2969.629        | 2967.614 | T[26] |
| K  | 17 | 1798.063       | 2883.592       | 2867.574        | 2868.582        | 2866.566 | K[25] |
| S  | 18 | 1885.095       | 2727.493       | 2711.473        | 2712.480        | 2710.465 | S[24] |
| S  | 19 | 1972.127       | 2648.459       | 2632.441        | 2633.448        | 2631.433 | S[23] |
| R  | 20 | 2128.228       | 2563.427       | 2547.409        | 2548.416        | 2546.401 | R[22] |
| A  | 21 | 2199.265       | 2397.326       | 2381.307        | 2382.315        | 2380.300 | A[21] |
| G  | 22 | 2256.287       | 2326.289       | 2310.270        | 2311.278        | 2309.263 | G[20] |
| L  | 23 | 2369.371       | 2269.268       | 2253.249        | 2254.257        | 2252.241 | L[19] |
| Q  | 24 | 2497.429       | 2126.184       | 2110.165        | 2111.173        | 2109.157 | Q[18] |
| F  | 25 | 2644.488       | 2028.125       | 2012.106        | 2013.114        | 2011.098 | F[17] |
| P  | 26 | 2741.551       | 1881.057       | 1865.038        | 1866.046        | 1864.030 | P[16] |
| V  | 27 | 2840.619       | 1784.004       | 1767.985        | 1768.993        | 1766.977 | V[15] |
| G  | 28 | 2897.641       | 1684.935       | 1668.917        | 1669.924        | 1667.909 | G[14] |
| R  | 29 | 3053.742       | 1627.914       | 1611.895        | <b>1612.903</b> | 1610.887 | R[13] |
| V  | 30 | 3152.810       | 1471.813       | <b>1455.794</b> | 1456.802        | 1454.786 | V[12] |
| I  | 31 | 3269.869       | 1372.744       | 1356.725        | <b>1357.734</b> | 1355.718 | I[11] |
| R  | 32 | 3445.970       | 1235.685       | 1219.667        | <b>1220.675</b> | 1218.659 | R[10] |
| L  | 33 | 3550.054       | 1079.584       | 1063.566        | <b>1064.573</b> | 1062.558 | L[9]  |
| L  | 34 | 3672.118       | <b>966.500</b> | 950.482         | 951.489         | 949.474  | L[8]  |
| R  | 35 | 3828.219       | 853.416        | 837.398         | 838.405         | 836.390  | R[7]  |
| K  | 36 | 3956.314       | 697.315        | 681.296         | 682.304         | 680.289  | K[6]  |
| C  | 37 | 4013.358       | 569.220        | 553.201         | 554.209         | 552.194  | C[5]  |
| N  | 38 | 4127.399       | 512.199        | 496.180         | 497.188         | 495.172  | N[4]  |
| V  | 39 | 4290.462       | 398.156        | 382.137         | 383.145         | 381.129  | V[3]  |
| S  | 40 | 4377.494       | 235.062        | 219.074         | 220.082         | 218.066  | S[2]  |
| E  | 41 | 4506.537       | 148.060        | 132.042         | 133.050         | 131.034  | E[1]  |

# sp | Q8CGP5 | H2A1F\_MOUSE

[Acetyl]SGRGKQGGKARAKAKTRSSRAGLQFPVGRVHRLLRKGNYS

- ▶ fragmentation table for charge state 2+
- ▶ specType=etd
- ▶ score=47.93
- ▶ F113278.dat
- ▶ query=q70279.p1
- ▶ precursor=752.093370
- ▶ chargePrecursor=6
- ▶ itol=0.5

| AA   | c               | y        | z+1             | z+2             | z               | AA   |
|------|-----------------|----------|-----------------|-----------------|-----------------|------|
| S 1  | 74.042          | 2754.364 | 2246.255        | 0.504           | 2245.751        | S 41 |
| G 2  | 102.563         | 2189.743 | 2181.731        | 0.504           | 2181.229        | G 40 |
| R 3  | 180.603         | 2161.732 | 2153.223        | 2153.726        | 2152.719        | R 39 |
| G 4  | 209.114         | 2083.181 | 2075.172        | 2075.676        | 2074.669        | G 38 |
| K 5  | 273.161         | 2054.671 | 2046.661        | 2047.165        | 2046.157        | K 37 |
| Q 6  | 337.193         | 1999.623 | 1992.613        | <b>1993.118</b> | 1992.111        | Q 36 |
| G 7  | 365.703         | 1926.564 | 1918.555        | <b>1919.088</b> | 1918.081        | G 35 |
| G 8  | 394.212         | 1868.083 | 1860.074        | <b>1860.578</b> | 1859.570        | G 34 |
| K 9  | 458.260         | 1809.672 | <b>1861.563</b> | <b>1862.067</b> | 1861.059        | K 33 |
| A 10 | 493.778         | 1805.625 | 1797.510        | 1798.019        | 1797.012        | A 32 |
| R 11 | 579.829         | 1770.096 | 1761.997        | 1762.501        | 1761.493        | R 31 |
| A 12 | <b>607.347</b>  | 1693.956 | 1683.949        | 1684.453        | 1683.445        | A 30 |
| R 13 | <b>671.395</b>  | 1656.437 | 1648.428        | <b>1648.932</b> | 1647.924        | R 29 |
| A 14 | <b>706.913</b>  | 1592.390 | 1584.380        | <b>1584.884</b> | 1583.876        | A 28 |
| K 15 | <b>770.961</b>  | 1556.671 | <b>1548.662</b> | <b>1549.366</b> | 1548.358        | K 27 |
| T 16 | <b>821.485</b>  | 1492.824 | <b>1484.814</b> | 1485.318        | <b>1484.310</b> | T 26 |
| R 17 | <b>899.535</b>  | 1442.300 | 1434.291        | <b>1434.794</b> | 1433.787        | R 25 |
| S 18 | 933.651         | 1394.249 | 1386.240        | 1386.744        | 1385.736        | S 24 |
| S 19 | <b>986.567</b>  | 1320.733 | <b>1312.724</b> | <b>1313.228</b> | 1312.220        | S 23 |
| R 20 | <b>1064.618</b> | 1277.217 | <b>1269.208</b> | <b>1269.712</b> | 1268.704        | R 22 |
| A 21 | 1109.136        | 1199.667 | <b>1191.157</b> | <b>1191.661</b> | 1190.653        | A 21 |
| G 22 | <b>1128.647</b> | 1163.648 | 1155.639        | 1156.143        | 1155.135        | G 20 |
| L 23 | <b>1185.189</b> | 1136.137 | 1127.128        | 1127.632        | 1126.624        | L 19 |
| Q 24 | <b>1249.218</b> | 1078.595 | <b>1070.586</b> | 1071.090        | <b>1070.082</b> | Q 19 |
| F 25 | <b>1322.753</b> | 1014.569 | <b>1006.557</b> | <b>1007.061</b> | 1006.053        | F 17 |
| P 26 | 1371.279        | 941.032  | 933.023         | 933.526         | 932.519         | P 16 |
| V 27 | 1420.813        | 892.506  | 884.496         | 885.000         | 883.992         | V 15 |
| G 28 | 1449.324        | 842.671  | 834.662         | 835.166         | 834.158         | G 14 |
| R 29 | 1527.874        | 814.403  | <b>806.451</b>  | <b>806.955</b>  | 805.947         | R 13 |
| V 30 | 1576.909        | 738.410  | 728.401         | 728.905         | 727.897         | V 12 |
| H 31 | 1645.438        | 688.878  | 678.869         | 679.373         | 678.365         | H 11 |
| R 32 | 1723.489        | 618.346  | 610.337         | 610.841         | 609.833         | R 10 |
| L 33 | 1780.031        | 540.290  | 532.280         | 532.784         | 531.777         | L 9  |
| L 34 | 1836.573        | 483.754  | 475.744         | 476.248         | 475.241         | L 8  |
| R 35 | 1814.623        | 427.212  | 419.202         | 419.706         | 418.698         | R 7  |
| R 36 | 1978.671        | 349.161  | 341.152         | 341.656         | 340.648         | R 6  |
| G 37 | 2007.181        | 295.114  | 277.104         | 277.608         | 276.600         | G 5  |
| N 38 | 2064.203        | 256.603  | 248.594         | 249.098         | 248.090         | N 4  |
| V 39 | 2145.735        | 199.582  | 191.573         | 192.076         | 191.068         | V 3  |
| S 40 | 2189.251        | 118.050  | 110.041         | 110.544         | 109.537         | S 2  |
| E 41 | 2253.772        | 74.534   | 68.524          | 67.028          | 66.031          | E 1  |

# sp | Q8CGP5 | H2A1F\_MOUSE

[Acetyl]SGRGKQGGKARAKAKTRSSRAGLQFPVGRVHRLLRKGNYS

- ▶ fragmentation table for charge state 3+
- ▶ specType=etd
- ▶ score=47.93
- ▶ F113278.dat
- ▶ query=q70279\_p1
- ▶ precursor=752.093370
- ▶ chargePrecursor=6
- ▶ itol=0.5

| AA | c  | y               | #s1             | #s2             | z               | AA              |       |
|----|----|-----------------|-----------------|-----------------|-----------------|-----------------|-------|
| S  | 1  | 48.607          | 1502.117        | <b>1497.839</b> | 0.872           | 1497.561        | S[41] |
| G  | 2  | 66.704          | 1460.184        | 1454.525        | 0.672           | 1454.480        | G[40] |
| R  | 3  | 130.718         | 1441.157        | 1435.817        | <b>1430.153</b> | 1435.482        | R[39] |
| G  | 4  | 139.745         | 1389.123        | 1383.784        | <b>1384.120</b> | 1383.440        | G[38] |
| K  | 5  | 182.443         | 1370.110        | 1364.777        | <b>1365.113</b> | 1364.441        | K[37] |
| G  | 6  | 225.130         | 1327.418        | <b>1322.078</b> | <b>1322.414</b> | 1321.742        | G[36] |
| G  | 7  | 244.137         | 1284.733        | 1279.732        | 1279.728        | 1279.056        | G[35] |
| G  | 8  | 263.144         | 1245.725        | 1240.385        | 1240.721        | 1240.049        | G[34] |
| K  | 9  | 305.642         | 1246.717        | <b>1241.378</b> | <b>1241.714</b> | <b>1241.042</b> | K[33] |
| A  | 10 | 329.521         | 1204.010        | 1198.079        | 1199.015        | 1198.344        | A[32] |
| R  | 11 | 381.555         | 1180.240        | 1175.000        | <b>1175.336</b> | 1174.664        | R[31] |
| A  | 12 | 405.234         | <b>1128.206</b> | 1123.007        | 1123.003        | 1122.331        | A[30] |
| K  | 13 | 447.932         | 1104.527        | <b>1099.288</b> | <b>1099.624</b> | <b>1098.952</b> | K[29] |
| A  | 14 | 471.611         | 1061.029        | <b>1056.509</b> | <b>1056.925</b> | <b>1056.253</b> | A[28] |
| K  | 15 | 514.310         | <b>1038.250</b> | <b>1032.910</b> | <b>1033.246</b> | 1032.574        | K[27] |
| T  | 16 | 547.002         | 995.552         | <b>990.212</b>  | <b>990.548</b>  | 989.870         | T[26] |
| R  | 17 | 600.626         | 961.869         | 956.529         | <b>956.865</b>  | 956.183         | R[25] |
| S  | 18 | 629.017         | 909.835         | 904.436         | 904.837         | 904.160         | S[24] |
| S  | 19 | 658.047         | 880.025         | <b>875.485</b>  | <b>875.821</b>  | 875.149         | S[23] |
| R  | 20 | <b>710.081</b>  | 851.014         | 846.474         | 846.810         | 846.138         | R[22] |
| A  | 21 | 733.760         | 799.780         | 794.441         | <b>794.777</b>  | 794.101         | A[21] |
| G  | 22 | 752.769         | 776.101         | <b>770.762</b>  | <b>771.098</b>  | 770.426         | G[20] |
| L  | 23 | <b>790.462</b>  | 759.094         | 753.754         | 754.090         | 753.419         | L[19] |
| Q  | 24 | <b>833.148</b>  | 733.305         | 724.000         | 724.396         | 723.724         | Q[18] |
| F  | 25 | 882.171         | 676.713         | <b>671.374</b>  | <b>671.710</b>  | 671.038         | F[17] |
| F  | 26 | <b>914.522</b>  | 627.600         | 622.261         | 622.687         | 622.015         | F[16] |
| V  | 27 | 947.545         | 595.139         | 590.000         | 590.336         | 589.664         | V[15] |
| G  | 28 | <b>966.552</b>  | 562.317         | 556.977         | 557.313         | 556.641         | G[14] |
| R  | 29 | 1010.259        | 443.309         | 437.970         | 438.306         | 437.634         | R[13] |
| V  | 30 | <b>1051.608</b> | 491.275         | 485.936         | 486.272         | 485.600         | V[12] |
| H  | 31 | 1097.204        | 458.253         | 452.913         | 453.249         | 452.577         | H[11] |
| R  | 32 | 1149.328        | 412.567         | 407.227         | 407.563         | 406.891         | R[10] |
| L  | 33 | 1187.023        | <b>360.533</b>  | 355.193         | 355.529         | 354.857         | L[9]  |
| L  | 34 | <b>1224.718</b> | 322.374         | 317.034         | 317.370         | 316.701         | L[8]  |
| R  | 35 | 1275.753        | 285.144         | 279.804         | 280.140         | 279.468         | R[7]  |
| K  | 36 | 1319.450        | 233.110         | 227.770         | 228.106         | 227.434         | K[6]  |
| G  | 37 | 1338.457        | 190.412         | 185.072         | 185.408         | 184.736         | G[5]  |
| N  | 38 | 1376.471        | 171.404         | 166.065         | 166.401         | 165.729         | N[4]  |
| V  | 39 | 1430.826        | 133.290         | 128.051         | 128.386         | 127.715         | V[3]  |
| S  | 40 | 1459.836        | 98.136          | 93.000          | 93.336          | 92.664          | S[2]  |
| E  | 41 | 1502.850        | 50.025          | 44.685          | 45.021          | 44.349          | E[1]  |

# sp | Q8CGP5 | H2A1F\_MOUSE

[Acetyl]SGRGKQGGKARAKAKTRSSRAGLQFPVGRVHRLLRKGNYS

- ▶ fragmentation table for charge state 4+
- ▶ specType=etd
- ▶ score=47.93
- ▶ F113278.dat
- ▶ query=q70279.p1
- ▶ precursor=752.093370
- ▶ chargePrecursor=6
- ▶ itol=0.5

| AA   | c               | y              | z+1             | z+2             | z               | AA   |
|------|-----------------|----------------|-----------------|-----------------|-----------------|------|
| S 1  | 37.525          | 1127.636       | 1123.631        | 0.765           | 1123.630        | S 41 |
| G 2  | 51.780          | 1096.375       | 1091.370        | 0.755           | 1091.118        | G 40 |
| R 3  | 90.805          | 1081.120       | 1077.115        | <b>1077.367</b> | 1076.861        | R 39 |
| G 4  | 105.061         | 1042.094       | <b>1038.090</b> | <b>1038.342</b> | <b>1037.838</b> | G 38 |
| K 5  | 137.084         | 1027.839       | 1023.834        | 1024.086        | 1023.582        | K 37 |
| Q 6  | 169.099         | 995.815        | 991.811         | 992.062         | 991.558         | Q 36 |
| G 7  | 203.354         | 953.603        | 950.599         | <b>960.048</b>  | 959.544         | G 35 |
| G 8  | 197.810         | 949.545        | 945.541         | <b>945.792</b>  | 945.289         | G 34 |
| K 9  | 229.633         | 935.290        | 931.286         | 931.537         | 931.033         | K 33 |
| A 10 | 247.393         | <b>903.266</b> | <b>899.261</b>  | <b>899.513</b>  | 899.009         | A 32 |
| R 11 | 286.418         | <b>885.507</b> | 881.502         | 881.754         | 881.250         | R 31 |
| A 12 | 304.177         | 876.668        | 872.664         | 872.916         | 872.412         | A 30 |
| R 13 | 336.201         | 828.722        | 824.718         | 824.970         | 824.466         | R 29 |
| A 14 | 353.960         | 796.699        | 792.694         | 792.946         | 792.442         | A 28 |
| K 15 | 389.984         | 778.939        | 774.935         | 775.187         | 774.683         | K 27 |
| T 16 | 411.246         | 746.915        | 742.911         | 743.163         | 742.659         | T 26 |
| R 17 | 450.271         | 721.684        | 717.680         | 717.931         | 717.428         | R 25 |
| S 18 | 472.629         | 682.828        | 678.824         | 679.076         | 678.572         | S 24 |
| S 19 | 493.787         | 660.870        | 656.866         | 657.118         | 656.614         | S 23 |
| R 20 | 532.813         | 639.112        | 635.108         | 635.360         | 634.856         | R 22 |
| A 21 | 550.572         | 600.087        | 596.082         | 596.334         | 595.830         | A 21 |
| G 22 | 564.827         | 582.128        | 578.123         | 578.375         | 577.871         | G 20 |
| L 23 | 603.036         | 566.072        | 562.068         | 562.320         | 561.816         | L 19 |
| Q 24 | 625.113         | 539.801        | 535.797         | 536.049         | 535.545         | Q 19 |
| F 25 | 661.880         | 507.787        | 503.782         | 504.034         | 503.530         | F 17 |
| P 26 | 686.143         | 471.020        | 467.015         | 467.267         | 466.763         | P 16 |
| V 27 | 710.910         | 446.756        | 442.752         | 443.004         | 442.500         | V 15 |
| G 28 | 725.166         | 421.989        | 417.985         | 418.237         | <b>417.733</b>  | G 14 |
| R 29 | 764.191         | 407.734        | 403.729         | 404.000         | 403.477         | R 13 |
| V 30 | 788.058         | 368.709        | 364.704         | 364.956         | 364.452         | V 12 |
| H 31 | 823.223         | 343.942        | 339.937         | 340.189         | 339.685         | H 11 |
| R 32 | <b>862.248</b>  | 309.677        | 305.672         | 305.924         | 305.420         | R 10 |
| L 33 | 890.519         | 270.652        | 266.647         | 266.899         | 266.395         | L 9  |
| L 34 | 918.790         | 242.381        | 238.376         | 238.628         | 238.124         | L 8  |
| R 35 | 957.815         | 214.110        | 210.105         | 210.357         | 209.853         | R 7  |
| R 36 | 989.839         | 175.084        | 171.080         | 171.332         | 170.828         | R 6  |
| G 37 | 1004.094        | 143.061        | 139.056         | 139.308         | 138.804         | G 5  |
| N 38 | 1032.605        | 128.805        | 124.800         | 125.052         | 124.548         | N 4  |
| V 39 | <b>1073.371</b> | 100.294        | 96.290          | 96.542          | 96.038          | V 3  |
| S 40 | 1095.120        | 59.529         | 55.524          | 55.776          | 55.272          | S 2  |
| E 41 | 1127.390        | 37.771         | 33.766          | 34.018          | 33.514          | E 1  |



# sp | Q8CGP5 | H2A1F\_MOUSE

[Acetyl]SGRGKQGGKARAKAKTRSSRAGLQFPVGRVHRLLRKGNYS

- ▶ fragmentation table for charge state 5+
- ▶ specType=etd
- ▶ score=47.93
- ▶ F113278.dat
- ▶ query=q70279\_p1
- ▶ precursor=752.093370
- ▶ chargePrecursor=6
- ▶ itol=0.5

| AA    | c              | y              | z+1            | z+2     | z              | AA    |
|-------|----------------|----------------|----------------|---------|----------------|-------|
| S[1]  | 30.221         | <b>902.310</b> | <b>899.106</b> | 0.806   | 898.905        | S[41] |
| G[2]  | 41.625         | 876.501        | 873.298        | 0.806   | 873.096        | G[40] |
| R[3]  | 72.846         | 865.097        | 861.893        | 862.095 | 861.692        | R[39] |
| G[4]  | 84.250         | <b>833.877</b> | 830.673        | 830.875 | 830.472        | G[38] |
| K[5]  | 109.859        | <b>822.473</b> | 819.269        | 819.470 | 819.067        | K[37] |
| Q[6]  | 135.481        | 796.854        | 793.650        | 793.851 | 793.448        | Q[36] |
| G[7]  | 146.885        | <b>771.242</b> | 768.038        | 768.240 | 767.837        | G[35] |
| G[8]  | 158.289        | 759.835        | 756.634        | 756.835 | 756.432        | G[34] |
| K[9]  | 183.908        | 748.431        | 745.230        | 745.431 | 745.028        | K[33] |
| A[10] | 198.116        | 722.814        | 719.611        | 719.812 | 719.409        | A[32] |
| R[11] | 229.136        | 708.007        | 705.403        | 705.605 | 705.202        | R[31] |
| A[12] | 243.543        | 677.387        | 674.183        | 674.385 | <b>673.981</b> | A[30] |
| K[13] | 269.162        | 663.179        | 659.976        | 660.177 | 659.774        | K[29] |
| A[14] | 283.370        | 637.560        | 634.357        | 634.558 | 634.155        | A[28] |
| K[15] | 308.989        | 623.353        | 620.149        | 620.351 | 619.948        | K[27] |
| T[16] | 329.198        | 597.734        | 594.530        | 594.732 | 594.329        | T[26] |
| R[17] | <b>360.418</b> | 577.524        | 574.321        | 574.522 | 574.119        | R[25] |
| S[18] | 377.825        | 546.305        | 543.100        | 543.302 | 542.899        | S[24] |
| S[19] | 399.231        | 528.899        | 525.694        | 525.896 | 525.492        | S[23] |
| R[20] | 426.451        | 511.491        | 508.288        | 508.489 | 508.086        | R[22] |
| A[21] | 440.659        | 480.271        | 477.067        | 477.269 | 476.866        | A[21] |
| G[22] | 452.063        | 466.064        | 462.860        | 463.061 | 462.658        | G[20] |
| L[23] | 474.680        | 454.659        | 451.456        | 451.657 | 451.254        | L[19] |
| Q[24] | 500.292        | 432.043        | 428.839        | 429.040 | 428.637        | Q[18] |
| F[25] | 529.705        | 406.431        | 403.227        | 403.429 | 403.026        | F[17] |
| P[26] | 549.116        | 377.017        | 373.813        | 374.015 | 373.612        | P[16] |
| V[27] | 568.930        | 357.607        | 354.403        | 354.604 | 354.201        | V[15] |
| G[28] | 589.334        | 337.793        | 334.589        | 334.791 | 334.388        | G[14] |
| K[29] | 611.354        | 326.389        | 323.185        | 323.386 | 322.983        | K[13] |
| V[30] | 631.368        | 295.165        | 291.960        | 292.166 | 291.763        | V[12] |
| H[31] | 658.780        | 275.355        | 272.151        | 272.353 | 271.949        | H[11] |
| R[32] | 690.000        | 247.943        | 244.739        | 244.941 | 244.538        | R[10] |
| L[33] | 712.617        | 216.723        | 213.519        | 213.721 | 213.317        | L[9]  |
| L[34] | 735.233        | 194.106        | 190.902        | 191.104 | 190.701        | L[8]  |
| R[35] | 766.454        | 171.489        | 168.285        | 168.487 | 168.084        | R[7]  |
| K[36] | 792.073        | 140.269        | 137.065        | 137.267 | 136.864        | K[6]  |
| G[37] | 803.477        | 114.650        | 111.446        | 111.648 | 111.245        | G[5]  |
| H[38] | 828.286        | 103.245        | 100.042        | 100.243 | 99.840         | H[6]  |
| V[39] | 859.698        | 80.431         | 77.223         | 77.425  | 77.022         | V[3]  |
| S[40] | <b>876.305</b> | 47.824         | 44.621         | 44.822  | 44.419         | S[2]  |
| E[41] | <b>902.113</b> | 30.418         | 27.214         | 27.416  | 27.013         | E[1]  |



# sp | Q8CGP5 | H2A1F\_MOUSE

[Acetyl]SGRGKQGGKARAKAKTRSSRAGLQFPVGRVHRLLRKGNYS

- ▶ fragmentation table for charge state 1+
- ▶ specType=etd
- ▶ score=44.18
- ▶ F113278.dat
- ▶ query=q70281\_p1
- ▶ precursor=644.795370
- ▶ chargePrecursor=7
- ▶ itol=0.5

| AA    | c               | y        | z+1             | z+2            | z        | AA    |
|-------|-----------------|----------|-----------------|----------------|----------|-------|
| S[1]  | 147.676         | 4507.521 | 4491.502        | 0.000          | 4490.494 | S[41] |
| G[2]  | 204.098         | 4378.478 | 4362.459        | 0.000          | 4361.451 | G[40] |
| R[3]  | <b>300.199</b>  | 4321.457 | 4305.438        | 4.306          | 4304.430 | R[39] |
| K[4]  | <b>417.220</b>  | 4185.395 | 4149.237        | 4150.345       | 4148.329 | K[38] |
| K[5]  | <b>545.115</b>  | 4108.334 | 4092.315        | 4093.323       | 4091.307 | K[37] |
| Q[6]  | <b>673.374</b>  | 3980.239 | 3954.220        | 3955.228       | 3953.212 | Q[36] |
| G[7]  | <b>730.395</b>  | 3852.180 | 3836.162        | 3837.170       | 3835.154 | G[35] |
| G[8]  | 787.417         | 3795.159 | 3779.140        | 3780.148       | 3778.132 | G[34] |
| K[9]  | <b>915.512</b>  | 3738.138 | 3722.119        | 3723.127       | 3721.111 | K[33] |
| A[10] | <b>986.549</b>  | 3610.043 | 3594.024        | 3595.032       | 3593.016 | A[32] |
| R[11] | <b>1142.550</b> | 3539.905 | 3523.887        | 3524.895       | 3522.879 | R[31] |
| A[12] | 1211.937        | 3382.904 | 3366.885        | 3367.893       | 3365.877 | A[30] |
| K[13] | 1341.782        | 3311.867 | 3295.848        | 3296.856       | 3294.841 | K[29] |
| A[14] | 1412.819        | 3183.772 | 3167.754        | 3168.761       | 3166.746 | A[28] |
| K[15] | 1540.914        | 3112.735 | 3096.716        | 3097.724       | 3095.709 | K[27] |
| T[16] | 1641.952        | 2984.640 | 2968.621        | 2969.629       | 2967.614 | T[26] |
| K[17] | 1798.053        | 2883.592 | 2867.574        | 2868.582       | 2866.566 | K[25] |
| S[18] | 1889.095        | 2727.493 | 2711.473        | 2712.480       | 2710.465 | S[24] |
| S[19] | 1972.127        | 2640.459 | 2624.441        | 2625.448       | 2623.433 | S[23] |
| R[20] | 2128.228        | 2553.427 | 2537.409        | 2538.416       | 2536.401 | R[22] |
| A[21] | 2199.265        | 2397.328 | 2381.307        | 2382.315       | 2380.300 | A[21] |
| G[22] | 2256.287        | 2320.289 | 2310.270        | 2311.278       | 2309.263 | G[20] |
| L[23] | 2369.371        | 2269.268 | 2253.249        | 2254.257       | 2252.241 | L[19] |
| Q[24] | 2497.429        | 2156.194 | 2140.175        | 2141.173       | 2139.157 | Q[18] |
| F[25] | 2644.698        | 2078.125 | 2012.106        | 2013.114       | 2011.098 | F[17] |
| P[26] | 2741.551        | 1981.057 | 1955.038        | 1956.046       | 1954.030 | P[16] |
| V[27] | 2940.619        | 1784.004 | 1767.985        | 1768.993       | 1766.977 | V[15] |
| G[28] | 2997.641        | 1684.935 | 1668.917        | 1669.924       | 1667.909 | G[14] |
| R[29] | 3051.742        | 1627.914 | 1611.895        | 1612.903       | 1610.887 | R[13] |
| V[30] | 3152.810        | 1471.812 | <b>1455.794</b> | 1456.802       | 1454.786 | V[12] |
| I[31] | 3289.869        | 1372.744 | <b>1356.726</b> | 1357.734       | 1355.718 | I[11] |
| R[32] | 3445.970        | 1235.685 | <b>1219.667</b> | 1220.675       | 1218.659 | R[10] |
| L[33] | 3569.054        | 1079.584 | <b>1063.566</b> | 1064.573       | 1062.558 | L[9]  |
| L[34] | 3672.138        | 966.500  | 950.482         | <b>951.489</b> | 949.474  | L[8]  |
| R[35] | 3828.239        | 853.416  | 837.398         | 838.405        | 836.390  | R[7]  |
| K[36] | 3956.334        | 697.315  | 681.296         | 682.304        | 680.289  | K[6]  |
| G[37] | 4013.366        | 599.232  | 583.213         | 584.220        | 582.194  | G[5]  |
| N[38] | 4127.599        | 512.199  | 496.180         | 497.188        | 495.172  | N[4]  |
| V[39] | 4260.402        | 398.156  | 382.137         | 383.145        | 381.129  | V[3]  |
| S[40] | 4377.494        | 235.092  | 219.074         | 220.082        | 218.066  | S[2]  |
| E[41] | 4506.537        | 148.060  | 132.042         | 133.050        | 131.034  | E[1]  |

# sp | Q8CGP5 | H2A1F\_MOUSE

[Acetyl]SGRGKQGGKARAKAKTRSSRAGLQFPVGRVHRLLRKGNYS

- ▶ fragmentation table for charge state 2+
- ▶ specType=etd
- ▶ score=44.18
- ▶ F113278.dat
- ▶ query=q70281.p1
- ▶ precursor=644.795370
- ▶ chargePrecursor=7
- ▶ itol=0.5

| AA | c               | w               | #s1             | #s2             | c               | AA    |
|----|-----------------|-----------------|-----------------|-----------------|-----------------|-------|
| S  | 74.002          | 2054.204        | 2266.255        | 0.804           | 2245.781        | S[41] |
| G  | 102.553         | 2189.743        | 2381.733        | 0.504           | 2181.220        | G[40] |
| R  | 180.603         | 2161.232        | 2153.233        | 2153.236        | 2152.710        | R[39] |
| G  | 209.114         | 2083.181        | 2075.172        | 2075.676        | 2074.660        | G[38] |
| K  | 273.181         | 2054.671        | 2046.661        | 2047.165        | 2046.157        | K[37] |
| G  | 337.194         | 1990.622        | 1982.614        | 1983.118        | 1982.110        | G[36] |
| G  | 385.703         | 1926.594        | 1918.584        | 1919.088        | 1918.080        | G[35] |
| G  | 394.212         | 1898.083        | 1890.074        | 1890.578        | 1889.570        | G[34] |
| K  | <b>458.260</b>  | 1869.572        | 1861.563        | 1862.067        | 1861.059        | K[33] |
| A  | 493.778         | 1805.525        | 1797.516        | 1798.019        | 1797.012        | A[32] |
| R  | <b>571.829</b>  | 1770.008        | 1761.997        | 1762.501        | 1761.493        | R[31] |
| A  | <b>607.347</b>  | 1692.959        | 1684.949        | 1685.453        | 1684.445        | A[30] |
| K  | <b>671.395</b>  | 1656.437        | <b>1648.428</b> | <b>1648.932</b> | 1647.924        | K[29] |
| A  | <b>706.913</b>  | 1592.900        | <b>1584.880</b> | <b>1584.884</b> | 1583.876        | A[28] |
| K  | <b>770.961</b>  | 1556.871        | 1548.862        | <b>1549.366</b> | 1548.358        | K[27] |
| T  | <b>821.485</b>  | 1492.824        | <b>1484.814</b> | <b>1485.318</b> | 1484.310        | T[26] |
| R  | <b>899.535</b>  | 1442.800        | <b>1434.791</b> | <b>1434.795</b> | <b>1433.787</b> | R[25] |
| S  | 933.875         | 1384.249        | <b>1356.240</b> | <b>1356.744</b> | 1355.736        | S[24] |
| S  | <b>986.567</b>  | 1320.733        | <b>1312.724</b> | <b>1313.228</b> | 1312.220        | S[23] |
| R  | 1084.618        | 1277.217        | 1269.208        | <b>1269.712</b> | 1268.704        | R[22] |
| A  | 1100.136        | <b>1199.167</b> | <b>1191.157</b> | <b>1191.661</b> | 1190.653        | A[21] |
| G  | <b>1128.647</b> | 1153.648        | 1145.639        | 1146.143        | 1145.135        | G[20] |
| L  | 1157.165        | 1138.137        | 1129.127        | <b>1127.632</b> | 1126.624        | L[19] |
| Q  | <b>1249.218</b> | 1078.595        | <b>1070.586</b> | <b>1071.090</b> | <b>1070.082</b> | Q[18] |
| F  | <b>1322.753</b> | 1014.569        | <b>1006.557</b> | <b>1007.061</b> | 1006.053        | F[17] |
| F  | 1371.279        | 941.053         | 933.043         | 933.546         | <b>932.519</b>  | F[16] |
| V  | <b>1420.813</b> | 892.500         | 884.496         | <b>885.000</b>  | 883.992         | V[15] |
| G  | 1466.224        | <b>842.971</b>  | <b>834.962</b>  | <b>835.466</b>  | 834.458         | G[14] |
| R  | 1527.874        | <b>814.461</b>  | <b>806.451</b>  | <b>806.955</b>  | 805.947         | R[13] |
| V  | 1576.909        | 736.410         | 728.401         | 728.905         | 727.897         | V[12] |
| H  | 1645.438        | 688.876         | 678.868         | 679.372         | 678.363         | H[11] |
| R  | 1723.489        | 618.346         | 610.337         | 610.841         | 609.833         | R[10] |
| L  | 1780.031        | 540.296         | 532.286         | 532.790         | 531.782         | L[9]  |
| L  | 1838.573        | 483.754         | 475.743         | 476.248         | 475.240         | L[8]  |
| R  | 1914.623        | 427.212         | 419.202         | 419.706         | 418.698         | R[7]  |
| K  | 1978.671        | 349.161         | 341.152         | 341.656         | 340.648         | K[6]  |
| G  | 2067.181        | 285.114         | 277.104         | 277.608         | 276.600         | G[5]  |
| N  | 2094.203        | 256.603         | 248.594         | 249.098         | 248.090         | N[4]  |
| V  | 2145.736        | 199.562         | 191.552         | 192.056         | 191.048         | V[3]  |
| S  | 2189.261        | 118.050         | 110.041         | 110.544         | 109.535         | S[2]  |
| E  | 2253.772        | 74.534          | 66.524          | 67.028          | 66.021          | E[1]  |

# sp | Q8CGP5 | H2A1F\_MOUSE

[Acetyl]SGRGKQGGKARAKAKTRSSRAGLQFPVGRVHRLLRKGNYS

- ▶ fragmentation table for charge state 3+
- ▶ specType=etd
- ▶ score=44.18
- ▶ F113278.dat
- ▶ query=q70281.p1
- ▶ precursor=644.795370
- ▶ chargePrecursor=7
- ▶ itol=0.5

| AA   | c              | y               | z+1             | z+2             | z               | AA   |
|------|----------------|-----------------|-----------------|-----------------|-----------------|------|
| S 1  | 49.697         | 1503.178        | 1497.830        | 0.672           | 1497.503        | S 41 |
| G 2  | 66.704         | 1460.164        | 1454.825        | 0.672           | 1454.458        | G 40 |
| R 3  | 120.738        | <b>1441.157</b> | <b>1435.817</b> | <b>1436.153</b> | 1435.485        | R 39 |
| G 4  | 139.745        | 1389.123        | 1383.784        | <b>1384.120</b> | 1383.448        | G 38 |
| K 5  | 182.443        | 1370.116        | 1364.777        | <b>1365.113</b> | 1364.441        | K 37 |
| Q 6  | 226.139        | 1327.418        | 1322.079        | <b>1322.414</b> | 1321.743        | Q 36 |
| G 7  | 244.137        | 1284.922        | 1279.391        | <b>1279.728</b> | 1279.056        | G 35 |
| G 8  | 263.144        | 1266.725        | 1260.385        | <b>1260.721</b> | 1260.049        | G 34 |
| K 9  | 306.642        | <b>1246.717</b> | <b>1241.378</b> | <b>1241.714</b> | 1241.041        | K 33 |
| A 10 | 329.521        | 1204.019        | 1198.679        | <b>1199.015</b> | 1198.344        | A 32 |
| R 11 | 381.955        | 1158.960        | <b>1175.000</b> | <b>1175.336</b> | <b>1174.664</b> | R 31 |
| A 12 | 409.234        | <b>1128.306</b> | 1122.967        | 1122.301        | 1122.629        | A 30 |
| R 13 | 447.926        | 1104.027        | <b>1099.288</b> | <b>1099.624</b> | <b>1098.952</b> | R 29 |
| A 14 | 471.611        | 1061.929        | 1056.589        | <b>1056.925</b> | 1056.253        | A 28 |
| K 15 | 514.310        | 1036.250        | <b>1032.910</b> | <b>1033.246</b> | 1032.574        | K 27 |
| T 16 | 547.992        | 995.552         | 990.212         | <b>990.548</b>  | 989.876         | T 26 |
| R 17 | 600.024        | 961.889         | 956.529         | <b>956.865</b>  | 956.193         | R 25 |
| S 18 | <b>629.037</b> | 909.835         | 904.469         | 904.833         | 904.160         | S 24 |
| S 19 | <b>658.047</b> | 880.825         | <b>875.485</b>  | <b>875.821</b>  | 875.149         | S 23 |
| R 20 | 710.081        | 851.814         | <b>846.474</b>  | <b>846.810</b>  | 846.138         | R 22 |
| A 21 | 753.760        | 799.780         | <b>794.441</b>  | <b>794.777</b>  | <b>794.105</b>  | A 21 |
| G 22 | <b>752.767</b> | 776.101         | <b>770.762</b>  | <b>771.098</b>  | 770.426         | G 20 |
| L 23 | <b>796.462</b> | <b>757.094</b>  | 751.755         | <b>752.090</b>  | 751.417         | L 19 |
| Q 24 | <b>833.148</b> | 719.589         | <b>714.060</b>  | <b>714.396</b>  | 713.724         | Q 19 |
| F 25 | 852.174        | 676.713         | <b>671.374</b>  | <b>671.710</b>  | 671.038         | F 17 |
| F 26 | 914.532        | 627.660         | 623.351         | 623.697         | 623.015         | F 16 |
| V 27 | 947.545        | 595.139         | 590.000         | 590.336         | 589.664         | V 15 |
| G 28 | 966.552        | 562.317         | 556.977         | 557.313         | 556.641         | G 14 |
| R 29 | 1018.585       | 543.306         | 537.970         | 538.306         | 537.634         | R 12 |
| V 30 | 1051.608       | 491.276         | 485.939         | 486.272         | 485.600         | V 12 |
| H 31 | 1097.294       | <b>458.253</b>  | 452.913         | 453.249         | 452.577         | H 11 |
| R 32 | 1149.338       | 412.567         | 407.227         | 407.563         | 406.891         | R 10 |
| L 33 | 1187.023       | <b>360.533</b>  | 355.193         | 355.529         | 354.857         | L 9  |
| L 34 | 1224.718       | 327.838         | 317.490         | 317.835         | 317.163         | L 8  |
| R 35 | 1276.731       | 286.144         | 279.869         | 280.149         | 279.466         | R 7  |
| K 36 | 1319.450       | 233.110         | 227.770         | 228.106         | 227.433         | K 6  |
| G 37 | 1338.457       | 190.412         | 185.072         | 185.408         | 184.736         | G 5  |
| N 38 | 1376.471       | 171.404         | 166.065         | 166.401         | 165.729         | N 4  |
| V 39 | 1430.826       | 133.390         | 128.051         | 128.386         | 127.713         | V 3  |
| S 40 | 1459.836       | 79.036          | 73.696          | 74.032          | 73.360          | S 2  |
| E 41 | 1502.830       | 30.025          | 44.685          | 45.021          | 44.349          | E 1  |

# sp | Q8CGP5 | H2A1F\_MOUSE

[Acetyl]SGRGKQGGKARAKAKTRSSRAGLQFPVGRVHRLLRKGNYS

- ▶ fragmentation table for charge state 4+
- ▶ specType=etd
- ▶ score=44.18
- ▶ F113278.dat
- ▶ query=q70281.p1
- ▶ precursor=644.795370
- ▶ chargePrecursor=7
- ▶ itol=0.5

| AA   | c              | y               | z+1             | z+2             | z              | AA   |
|------|----------------|-----------------|-----------------|-----------------|----------------|------|
| S 1  | 37.535         | <b>1127.636</b> | 1121.631        | 0.755           | 1123.376       | S 41 |
| G 2  | 51.780         | 1095.375        | 1091.370        | 0.755           | 1091.118       | G 40 |
| R 3  | 90.805         | <b>1081.120</b> | <b>1077.115</b> | <b>1077.367</b> | 1076.863       | R 39 |
| G 4  | 105.061        | 1042.094        | 1038.090        | 1038.342        | 1037.839       | G 38 |
| K 5  | 137.004        | 1027.839        | 1023.834        | <b>1024.086</b> | 1023.583       | K 37 |
| G 6  | 169.099        | 995.815         | 991.811         | 992.062         | 991.559        | G 36 |
| G 7  | 183.354        | 983.801         | 979.796         | 980.048         | 979.544        | G 35 |
| G 8  | 197.610        | 949.545         | 945.541         | <b>945.792</b>  | 945.289        | G 34 |
| K 9  | 229.633        | 935.290         | 931.285         | 931.537         | 931.033        | K 33 |
| A 10 | 247.323        | <b>903.266</b>  | 899.261         | <b>899.513</b>  | 899.009        | A 32 |
| R 11 | 286.418        | <b>885.507</b>  | <b>881.502</b>  | <b>881.754</b>  | <b>881.250</b> | R 31 |
| A 12 | 328.177        | <b>846.482</b>  | <b>842.477</b>  | <b>842.729</b>  | 842.225        | A 30 |
| R 13 | 336.201        | 844.564         | 840.559         | 840.811         | 840.307        | R 29 |
| A 14 | 353.040        | 796.699         | 792.694         | 792.946         | 792.442        | A 28 |
| K 15 | 365.984        | 778.939         | 774.935         | 775.187         | 774.683        | K 27 |
| T 16 | 411.246        | 746.915         | <b>742.911</b>  | <b>743.163</b>  | 742.659        | T 26 |
| R 17 | 450.271        | 721.894         | <b>717.649</b>  | <b>717.901</b>  | 717.397        | R 25 |
| S 18 | 472.039        | 682.628         | 678.624         | 678.876         | 678.372        | S 24 |
| S 19 | 483.787        | 660.870         | 656.865         | 657.117         | 656.614        | S 23 |
| R 20 | 532.813        | 639.112         | 635.108         | 635.360         | 634.856        | R 22 |
| A 21 | 550.572        | 600.087         | 596.082         | 596.334         | 595.830        | A 21 |
| G 22 | 564.827        | 582.320         | 578.315         | 578.575         | 578.071        | G 20 |
| L 23 | 593.096        | 568.072         | 564.068         | 564.320         | 563.816        | L 19 |
| G 24 | <b>625.113</b> | 539.801         | 535.797         | 536.049         | 535.545        | G 18 |
| F 25 | 663.880        | 507.787         | 503.782         | 504.034         | 503.530        | F 17 |
| F 26 | 686.143        | 471.020         | 467.015         | 467.267         | 466.763        | F 16 |
| V 27 | <b>710.910</b> | 446.756         | 442.752         | 443.004         | 442.500        | V 15 |
| G 28 | 725.105        | 421.989         | 417.985         | 418.237         | <b>417.733</b> | G 14 |
| R 29 | 764.191        | 407.734         | 403.729         | 403.981         | 403.477        | R 13 |
| V 30 | 788.988        | 386.709         | 382.704         | 382.956         | 382.452        | V 12 |
| H 31 | 823.273        | 343.942         | 339.937         | 340.189         | 339.685        | H 11 |
| R 32 | <b>862.248</b> | 309.677         | 305.672         | 305.924         | 305.420        | R 10 |
| L 33 | 890.519        | 270.652         | 266.647         | 266.899         | 266.395        | L 9  |
| L 34 | 918.790        | 242.381         | 238.376         | 238.628         | 238.124        | L 8  |
| R 35 | 957.815        | 214.110         | 210.105         | 210.357         | 209.853        | R 7  |
| K 36 | 989.839        | 175.884         | 171.880         | 172.132         | 171.628        | K 6  |
| G 37 | 1004.094       | 143.961         | 139.956         | 139.208         | 138.804        | G 5  |
| N 38 | 1032.605       | 128.805         | 124.800         | 125.052         | 124.548        | N 4  |
| V 39 | 1073.571       | 100.294         | 96.290          | 96.542          | 96.038         | V 3  |
| S 40 | 1095.129       | 59.529          | 55.524          | 55.776          | 55.272         | S 2  |
| E 41 | 1127.390       | 37.771          | 33.766          | 34.018          | 33.514         | E 1  |

# sp | Q8CGP5 | H2A1F\_MOUSE

[Acetyl]SGRGKQGGKARAKAKTRSSRAGLQFPVGRVHRLLRKGNYS

- ▶ fragmentation table for charge state 5+
- ▶ specType=etd
- ▶ score=44.18
- ▶ F113278.dat
- ▶ query=q70281.p1
- ▶ precursor=644.795370
- ▶ chargePrecursor=7
- ▶ itol=0.5

| AA    | c              | y              | z+1            | z#2            | z              | AA    |
|-------|----------------|----------------|----------------|----------------|----------------|-------|
| S[1]  | 30.221         | 902.310        | 899.108        | 0.806          | 898.905        | S[41] |
| G[2]  | 41.625         | 876.501        | 873.298        | 0.806          | 873.096        | G[40] |
| R[3]  | 72.846         | 865.097        | 861.893        | 862.095        | 861.692        | R[39] |
| G[4]  | 84.250         | <b>833.877</b> | 830.673        | 830.875        | 830.472        | G[38] |
| K[5]  | 109.869        | 822.473        | 819.269        | 819.470        | 819.067        | K[37] |
| Q[6]  | 135.481        | 796.854        | 793.650        | 793.851        | 793.448        | Q[36] |
| G[7]  | 146.885        | <b>771.242</b> | 768.038        | 768.240        | 767.837        | G[35] |
| G[8]  | 158.289        | 759.838        | <b>756.634</b> | <b>756.835</b> | 756.432        | G[34] |
| K[9]  | 183.908        | 748.433        | <b>745.230</b> | <b>745.431</b> | <b>745.028</b> | K[33] |
| A[10] | 198.116        | 722.814        | 719.611        | 719.812        | 719.409        | A[32] |
| R[11] | 229.336        | 708.607        | 705.403        | 705.605        | 705.202        | R[31] |
| A[12] | 243.543        | 677.387        | 674.183        | 674.385        | 673.981        | A[30] |
| K[13] | 269.162        | 663.179        | 659.976        | 660.177        | <b>659.774</b> | K[29] |
| A[14] | 283.370        | 637.560        | 634.357        | 634.558        | 634.155        | A[28] |
| K[15] | 308.989        | 623.353        | 620.149        | 620.351        | 619.948        | K[27] |
| T[16] | 329.198        | 597.734        | 594.530        | 594.732        | 594.329        | T[26] |
| K[17] | <b>360.418</b> | 577.524        | 574.321        | 574.522        | 574.119        | K[25] |
| S[18] | 377.825        | 546.304        | 543.100        | 543.302        | 542.899        | S[24] |
| S[19] | 399.231        | 528.898        | 525.694        | 525.896        | 525.492        | S[23] |
| R[20] | 426.451        | 511.491        | 508.288        | 508.489        | 508.086        | R[22] |
| A[21] | 440.659        | 480.271        | 477.067        | 477.269        | 476.866        | A[21] |
| G[22] | 452.063        | 466.064        | 462.860        | 463.061        | 462.658        | G[20] |
| L[23] | 474.680        | 454.659        | 451.456        | 451.657        | 451.254        | L[19] |
| Q[24] | 500.292        | 432.043        | 428.839        | 429.040        | 428.637        | Q[18] |
| F[25] | 529.705        | 406.431        | 403.227        | 403.429        | 403.026        | F[17] |
| P[26] | 549.116        | 377.017        | 373.813        | 374.015        | 373.612        | P[16] |
| V[27] | 568.530        | 357.607        | 354.403        | 354.604        | 354.201        | V[15] |
| G[28] | 589.334        | 337.793        | 334.589        | 334.791        | 334.388        | G[14] |
| R[29] | 611.554        | 326.389        | 323.185        | 323.386        | 322.983        | R[13] |
| V[30] | 631.368        | 295.168        | 291.965        | 292.166        | 291.763        | V[12] |
| H[31] | <b>658.780</b> | 275.355        | 272.151        | 272.353        | 271.949        | H[11] |
| R[32] | 690.000        | 247.943        | 244.739        | 244.941        | 244.538        | R[10] |
| L[33] | 712.617        | 216.723        | 213.519        | 213.721        | 213.317        | L[9]  |
| L[34] | 735.233        | 194.109        | 190.902        | 191.104        | 190.701        | L[8]  |
| R[35] | 766.454        | 171.489        | 168.283        | 168.487        | 168.084        | R[7]  |
| K[36] | 782.073        | 140.269        | 137.065        | 137.267        | 136.864        | K[6]  |
| G[37] | 803.877        | 114.650        | 111.446        | 111.648        | 111.245        | G[5]  |
| N[38] | 826.286        | 103.246        | 100.042        | 100.243        | 99.840         | N[4]  |
| V[39] | 858.898        | 80.437         | 77.233         | 77.435         | 77.032         | V[3]  |
| S[40] | <b>876.305</b> | 47.824         | 44.621         | 44.822         | 44.419         | S[2]  |
| E[41] | 902.113        | 30.418         | 27.214         | 27.416         | 27.013         | E[1]  |

# sp | Q8CGP5 | H2A1F\_MOUSE

[Acetyl]SGRGKQGGKARAKAKTRSSRAGLQFPVGRVHRLLRKGNYS

- ▶ fragmentation table for charge state 6+
- ▶ specType=etd
- ▶ score=44.18
- ▶ F113278.dat
- ▶ query=q70281.p1
- ▶ precursor=644.795370
- ▶ chargePrecursor=7
- ▶ itol=0.5

| AA    | c              | y              | z+1            | z+2     | z              | AA    |
|-------|----------------|----------------|----------------|---------|----------------|-------|
| S[1]  | 25.352         | <b>752.093</b> | 749.433        | 0.839   | 749.295        | S[41] |
| G[2]  | 34.856         | <b>730.586</b> | 727.916        | 0.839   | 727.748        | G[40] |
| R[3]  | 60.873         | 721.082        | <b>718.412</b> | 718.580 | <b>718.244</b> | R[39] |
| G[4]  | 70.376         | 695.065        | 692.396        | 692.563 | 692.228        | G[38] |
| K[5]  | 91.725         | 685.562        | 682.892        | 683.060 | 682.724        | K[37] |
| Q[6]  | 113.068        | 664.213        | 661.543        | 661.711 | 661.375        | Q[36] |
| G[7]  | 122.572        | 642.866        | 640.200        | 640.368 | 640.032        | G[35] |
| G[8]  | 132.076        | 633.366        | 630.698        | 630.864 | 630.526        | G[34] |
| K[9]  | 153.428        | 623.862        | 621.193        | 621.360 | 621.025        | K[33] |
| A[10] | 165.264        | 602.513        | 599.843        | 600.011 | 599.675        | A[32] |
| R[11] | 191.281        | 590.074        | 588.004        | 588.172 | 587.836        | R[31] |
| A[12] | 203.121        | 564.657        | 561.987        | 562.155 | 561.819        | A[30] |
| K[13] | 224.470        | 552.817        | 550.147        | 550.315 | 549.980        | K[29] |
| A[14] | 236.309        | 531.468        | 528.798        | 528.966 | 528.630        | A[28] |
| K[15] | 257.658        | 519.629        | 516.959        | 517.127 | 516.791        | K[27] |
| T[16] | 274.500        | 498.279        | 495.610        | 495.778 | 495.442        | T[26] |
| R[17] | 300.517        | 481.438        | 478.768        | 478.936 | 478.600        | R[25] |
| S[18] | 313.022        | 455.421        | 452.752        | 452.919 | 452.584        | S[24] |
| S[19] | 329.227        | 440.916        | 438.246        | 438.414 | 438.078        | S[23] |
| R[20] | 355.544        | 426.411        | 423.741        | 423.909 | 423.573        | R[22] |
| A[21] | 367.384        | 400.394        | 397.724        | 397.892 | 397.556        | A[21] |
| G[22] | 376.887        | 388.554        | 385.884        | 386.052 | 385.716        | G[20] |
| L[23] | 395.735        | 379.051        | 376.381        | 376.549 | 376.213        | L[19] |
| Q[24] | <b>417.078</b> | <b>366.203</b> | 357.534        | 357.702 | 357.366        | Q[18] |
| F[25] | 441.589        | 338.866        | 336.196        | 336.364 | 336.028        | F[17] |
| P[26] | 457.765        | 314.349        | 311.679        | 311.847 | 311.511        | P[16] |
| V[27] | 474.276        | 298.173        | 295.504        | 295.672 | 295.336        | V[15] |
| G[28] | 483.779        | 281.662        | 278.992        | 279.160 | 278.824        | G[14] |
| R[29] | 509.986        | 272.158        | 269.488        | 269.657 | 269.321        | R[13] |
| V[30] | 526.308        | 246.142        | 243.472        | 243.640 | 243.304        | V[12] |
| H[31] | 549.151        | 229.630        | 226.960        | 227.128 | 226.792        | H[11] |
| R[32] | 575.168        | 206.787        | 204.117        | 204.285 | 203.949        | R[10] |
| L[33] | 594.015        | 180.770        | 178.100        | 178.268 | 177.932        | L[9]  |
| L[34] | 612.862        | 161.923        | 159.253        | 159.421 | 159.085        | L[8]  |
| R[35] | 638.879        | 143.075        | 140.406        | 140.574 | 140.238        | R[7]  |
| K[36] | 660.228        | 117.059        | 114.389        | 114.557 | 114.221        | K[6]  |
| G[37] | 669.732        | 95.709         | 93.040         | 93.208  | 92.872         | G[5]  |
| R[38] | 688.739        | 86.206         | 83.536         | 83.704  | 83.368         | R[4]  |
| V[39] | 715.936        | 87.199         | 84.529         | 84.697  | 84.361         | V[3]  |
| S[40] | <b>730.422</b> | 40.021         | 37.352         | 37.520  | 37.184         | S[2]  |
| E[41] | <b>751.929</b> | 25.516         | 22.846         | 23.014  | 22.678         | E[1]  |





# sp | Q8CGP5 | H2A1F\_MOUSE

[Acetyl]SGRGKQGGKARAKAKTRSSRAGLQFPVGRVHLLLRKGNYS

- ▶ fragmentation table for charge state 1+
- ▶ specType=etd
- ▶ score=46.30
- ▶ F113278.dat
- ▶ query=q70283.p1
- ▶ precursor=752.093420
- ▶ chargePrecursor=6
- ▶ itol=0.5

| AA   | c               | y              | z+1             | z+2             | z        | AA   |
|------|-----------------|----------------|-----------------|-----------------|----------|------|
| S 1  | 147.076         | 4507.521       | 4491.502        | 0.000           | 4490.494 | S 41 |
| G 2  | 304.098         | 4378.478       | 4362.459        | 0.000           | 4361.451 | G 40 |
| R 3  | <b>360.199</b>  | 4321.457       | 4305.438        | 4306.448        | 4304.430 | R 39 |
| G 4  | <b>417.220</b>  | 4165.355       | 4149.337        | 4150.345        | 4148.329 | G 38 |
| K 5  | <b>545.315</b>  | 4108.334       | 4092.315        | 4093.323        | 4091.307 | K 37 |
| Q 6  | <b>673.174</b>  | 3989.239       | 3974.220        | 3965.228        | 3963.211 | Q 36 |
| G 7  | <b>730.395</b>  | 3852.180       | 3836.162        | 3837.170        | 3835.154 | G 35 |
| G 8  | 787.417         | 3795.159       | 3779.140        | 3780.148        | 3778.132 | G 34 |
| K 9  | 915.512         | 3738.138       | 3722.119        | 3723.127        | 3721.111 | K 33 |
| A 10 | <b>986.549</b>  | 3610.043       | 3594.024        | 3595.032        | 3593.016 | A 32 |
| R 11 | 1147.650        | 3536.005       | 3520.987        | 3521.995        | 3521.979 | R 31 |
| A 12 | <b>1213.687</b> | 3392.904       | 3386.886        | 3387.893        | 3386.876 | A 30 |
| R 13 | 1341.782        | 3311.867       | 3295.848        | 3296.856        | 3294.841 | R 29 |
| A 14 | 1412.819        | 3183.772       | 3167.754        | 3168.761        | 3166.746 | A 28 |
| K 15 | 1540.914        | 3112.735       | 3096.716        | 3097.724        | 3095.709 | K 27 |
| T 16 | 1641.962        | 2984.640       | 2968.621        | 2969.629        | 2967.614 | T 26 |
| R 17 | <b>1798.063</b> | 2883.592       | 2867.574        | 2868.582        | 2866.566 | R 25 |
| S 18 | 1889.909        | 2727.491       | 2711.473        | 2712.480        | 2710.465 | S 24 |
| S 19 | 1972.127        | 2640.455       | 2624.441        | 2625.448        | 2623.433 | S 23 |
| R 20 | 2128.228        | 2553.427       | 2537.409        | 2538.416        | 2536.401 | R 22 |
| A 21 | 2199.265        | 2497.326       | 2481.307        | 2482.315        | 2480.300 | A 21 |
| G 22 | 2286.287        | 2426.289       | 2410.270        | 2411.278        | 2409.261 | G 20 |
| L 23 | 2369.371        | 2369.268       | 2353.249        | 2354.257        | 2352.241 | L 19 |
| Q 24 | 2497.429        | 2156.184       | 2140.165        | 2141.173        | 2139.157 | Q 18 |
| F 25 | 2644.698        | 2028.125       | 2012.106        | 2013.114        | 2011.099 | F 17 |
| P 26 | 2741.551        | 1881.057       | 1865.038        | 1866.046        | 1864.030 | P 16 |
| V 27 | 2840.619        | 1784.004       | 1767.985        | 1768.993        | 1766.977 | V 15 |
| G 28 | 2897.641        | 1684.935       | 1668.917        | 1669.924        | 1667.909 | G 14 |
| R 29 | 3051.742        | 1627.914       | 1611.895        | <b>1612.903</b> | 1610.887 | R 13 |
| V 30 | 3153.810        | 1519.833       | <b>1455.794</b> | 1456.802        | 1454.785 | V 12 |
| H 31 | 3289.869        | 1372.744       | <b>1356.726</b> | 1357.734        | 1355.718 | H 11 |
| R 32 | 3445.970        | 1235.685       | 1219.667        | <b>1220.675</b> | 1218.659 | R 10 |
| L 33 | 3559.054        | 1079.584       | 1063.566        | 1064.573        | 1062.558 | L 9  |
| L 34 | 3672.138        | <b>966.509</b> | 950.482         | 951.489         | 949.474  | L 8  |
| R 35 | 3828.239        | 851.416        | 835.398         | <b>836.405</b>  | 834.390  | R 7  |
| K 36 | 3956.314        | 697.315        | 681.298         | 682.304         | 680.289  | K 6  |
| G 37 | 4013.356        | 569.220        | 553.201         | 554.209         | 552.194  | G 5  |
| N 38 | 4127.399        | 512.109        | 496.100         | 497.108         | 495.172  | N 4  |
| V 39 | 4290.462        | 396.156        | 380.137         | 381.145         | 381.129  | V 3  |
| S 40 | 4377.494        | 235.092        | 219.074         | 220.082         | 218.066  | S 2  |
| E 41 | 4506.537        | 148.060        | 132.042         | 133.050         | 131.034  | E 1  |

# sp | Q8CGP5 | H2A1F\_MOUSE

[Acetyl]SGRGKQGGKARAKAKTRSSRAGLQFPVGRVHRLLRKGNYS

- ▶ fragmentation table for charge state 2+
- ▶ specType=etd
- ▶ score=46.30
- ▶ F113278.dat
- ▶ query=q70283.p1
- ▶ precursor=752.093420
- ▶ chargePrecursor=6
- ▶ itol=0.5

| AA   | c               | y        | z+1             | z+2             | z               | AA   |
|------|-----------------|----------|-----------------|-----------------|-----------------|------|
| S 1  | 74.042          | 2754.364 | 2246.255        | 0.504           | 2245.751        | S 41 |
| G 2  | 102.563         | 2189.743 | 2181.731        | 0.504           | 2181.229        | G 40 |
| R 3  | 180.603         | 2161.732 | 2153.223        | 2153.726        | 2152.719        | R 39 |
| G 4  | 209.114         | 2083.181 | 2075.172        | 2075.676        | 2074.669        | G 38 |
| K 5  | 273.161         | 2054.671 | 2046.661        | 2047.165        | 2046.157        | K 37 |
| Q 6  | 337.193         | 1999.623 | 1992.613        | <b>1983.118</b> | 1982.111        | Q 36 |
| G 7  | 395.701         | 1926.584 | 1918.580        | 1919.088        | 1918.081        | G 35 |
| G 8  | 394.212         | 1898.083 | <b>1890.074</b> | 1890.578        | <b>1889.570</b> | G 34 |
| K 9  | 458.260         | 1869.672 | 1861.563        | <b>1862.067</b> | 1861.059        | K 33 |
| A 10 | 493.778         | 1805.625 | <b>1797.516</b> | <b>1798.019</b> | 1797.012        | A 32 |
| R 11 | <b>571.829</b>  | 1770.096 | 1761.997        | 1762.501        | 1761.494        | R 31 |
| A 12 | <b>607.347</b>  | 1693.956 | 1685.949        | 1686.453        | 1685.443        | A 30 |
| R 13 | 671.395         | 1656.437 | <b>1648.428</b> | <b>1648.932</b> | 1647.925        | R 29 |
| A 14 | <b>706.913</b>  | 1592.390 | 1584.380        | <b>1584.884</b> | 1583.876        | A 28 |
| K 15 | <b>770.961</b>  | 1556.671 | 1548.662        | 1549.166        | 1548.159        | K 27 |
| T 16 | <b>821.485</b>  | 1492.824 | 1484.814        | 1485.318        | <b>1484.310</b> | T 26 |
| R 17 | 899.536         | 1442.300 | 1434.291        | 1434.794        | 1433.787        | R 25 |
| S 18 | 983.051         | 1394.249 | 1386.240        | <b>1356.744</b> | 1355.736        | S 24 |
| S 19 | <b>986.567</b>  | 1320.733 | <b>1312.724</b> | <b>1313.228</b> | 1312.220        | S 23 |
| R 20 | 1064.618        | 1277.217 | 1269.208        | <b>1269.712</b> | 1268.704        | R 22 |
| A 21 | <b>1100.136</b> | 1199.087 | <b>1191.157</b> | <b>1191.661</b> | 1190.653        | A 21 |
| G 22 | <b>1128.647</b> | 1163.648 | 1155.639        | 1156.143        | <b>1155.135</b> | G 20 |
| L 23 | <b>1185.189</b> | 1136.137 | 1127.128        | 1127.632        | 1126.625        | L 19 |
| Q 24 | 1269.116        | 1078.595 | 1070.586        | 1071.090        | 1070.082        | Q 19 |
| F 25 | <b>1322.753</b> | 1014.569 | <b>1006.557</b> | <b>1007.061</b> | 1006.053        | F 17 |
| F 26 | 1371.279        | 941.032  | 933.023         | 933.526         | 932.519         | F 16 |
| V 27 | 1420.813        | 892.506  | 884.496         | 885.000         | 883.992         | V 15 |
| G 28 | 1449.324        | 842.071  | 834.062         | 834.566         | 834.456         | G 14 |
| R 29 | 1527.874        | 814.463  | <b>806.451</b>  | <b>806.955</b>  | <b>805.947</b>  | R 13 |
| V 30 | 1576.909        | 738.410  | 728.401         |                 |                 | V 12 |
| H 31 | 1645.438        | 688.878  | 678.868         | 679.370         | 678.363         | H 11 |
| R 32 | 1723.489        | 618.346  | 610.337         | 610.841         | 609.833         | R 10 |
| L 33 | 1780.031        | 540.290  | 532.280         | 532.780         | 531.783         | L 9  |
| L 34 | 1836.573        | 483.754  | 475.744         | 476.248         | 475.241         | L 8  |
| R 35 | 1814.623        | 427.212  | 419.202         | 419.706         | 418.698         | R 7  |
| K 36 | 1978.671        | 349.161  | 341.152         | 341.656         | 340.648         | K 6  |
| G 37 | 2007.181        | 285.114  | 277.104         | 277.608         | 276.600         | G 5  |
| N 38 | 2064.203        | 256.603  | 248.594         | 249.098         | 248.090         | N 4  |
| V 39 | 2145.735        | 199.982  | 191.973         | 192.476         | 191.068         | V 3  |
| S 40 | 2189.251        | 118.050  | 110.041         | 110.544         | 109.537         | S 2  |
| E 41 | 2253.772        | 74.534   | 66.524          | 67.028          | 66.021          | E 1  |

# sp | Q8CGP5 | H2A1F\_MOUSE

[Acetyl]SGRGKQGGKARAKAKTRSSRAGLQFPVGRVHRLLRKGNYS

- ▶ fragmentation table for charge state 3+
- ▶ specType=etd
- ▶ score=46.30
- ▶ F113278.dat
- ▶ query=q70283.p1
- ▶ precursor=752.093420
- ▶ chargePrecursor=6
- ▶ itol=0.5

| AA | c  | y               | #s1             | #s2             | z               | AA              |       |
|----|----|-----------------|-----------------|-----------------|-----------------|-----------------|-------|
| S  | 1  | 489.697         | 1502.178        | 1487.830        | 0.872           | 1487.561        | S[41] |
| G  | 2  | 86.704          | 1460.184        | 1454.925        | 0.672           | 1454.480        | G[40] |
| R  | 3  | 1307.788        | 1441.157        | <b>1435.817</b> | 1436.153        | <b>1435.482</b> | R[39] |
| G  | 4  | 139.745         | 1389.123        | <b>1383.784</b> | <b>1384.120</b> | 1383.446        | G[38] |
| K  | 5  | 182.443         | 1370.110        | 1364.777        | <b>1365.113</b> | 1364.441        | K[37] |
| G  | 6  | 225.130         | 1327.418        | <b>1322.078</b> | <b>1322.414</b> | 1321.742        | G[36] |
| G  | 7  | 244.137         | 1284.733        | 1275.732        |                 | <b>1278.728</b> | G[35] |
| G  | 8  | 263.144         | 1265.725        | 1256.735        | <b>1260.721</b> | 1260.049        | G[34] |
| K  | 9  | 305.642         | 1246.717        | <b>1241.378</b> | 1241.714        | <b>1241.042</b> | K[33] |
| A  | 10 | 329.521         | 1204.019        | 1198.019        | 1199.015        | 1198.344        | A[32] |
| R  | 11 | 381.555         | 1180.240        | 1175.000        | <b>1175.336</b> | 1174.664        | R[31] |
| A  | 12 | 405.234         | <b>1128.306</b> | 1122.987        | 1123.011        | 1122.833        | A[30] |
| K  | 13 | 447.932         | 1104.627        | 1099.238        | <b>1099.624</b> | 1099.952        | K[29] |
| A  | 14 | 491.611         | 1081.929        | <b>1056.589</b> | <b>1056.925</b> | 1056.251        | A[28] |
| K  | 15 | 514.310         | 1038.250        | <b>1032.910</b> | <b>1033.246</b> | 1032.574        | K[27] |
| T  | 16 | 547.602         | 995.552         | <b>990.212</b>  | <b>990.548</b>  | <b>989.876</b>  | T[26] |
| R  | 17 | 600.626         | 981.869         | 976.529         | <b>956.865</b>  | 956.193         | R[25] |
| S  | 18 | 629.917         | 959.835         | 954.485         | 954.519         | 954.160         | S[24] |
| S  | 19 | 658.047         | 938.025         | 935.485         | <b>875.821</b>  | 875.149         | S[23] |
| R  | 20 | 710.081         | 951.614         | 946.474         | <b>846.810</b>  | 846.138         | R[22] |
| A  | 21 | 733.760         | 799.780         | 794.441         | 794.777         | 794.101         | A[21] |
| G  | 22 | 752.767         | 776.101         | <b>770.762</b>  | <b>771.098</b>  | 770.426         | G[20] |
| L  | 23 | 789.682         | 759.094         | 751.754         | 752.090         | 751.419         | L[19] |
| Q  | 24 | <b>833.148</b>  | 733.366         | 724.000         | 714.968         | 713.224         | Q[18] |
| F  | 25 | 882.171         | 676.713         | 671.374         | 671.710         | 671.038         | F[17] |
| P  | 26 | <b>914.522</b>  | 627.600         | 622.261         | 622.887         | 622.015         | P[16] |
| V  | 27 | 947.545         | 595.139         | 590.000         | 590.336         | 589.664         | V[15] |
| G  | 28 | <b>966.552</b>  | 562.317         | 556.977         | 557.313         | 556.641         | G[14] |
| R  | 29 | 1013.666        | 543.309         | 537.970         | 538.306         | 537.634         | R[13] |
| V  | 30 | <b>1051.608</b> | 490.276         | 485.038         | 486.272         | 485.600         | V[12] |
| H  | 31 | <b>1097.294</b> | 458.253         | 452.913         | 453.249         | 452.577         | H[11] |
| R  | 32 | 1149.328        | 412.967         | 407.227         | 407.563         | 406.891         | R[10] |
| L  | 33 | 1187.023        | <b>360.533</b>  | 355.193         | 355.529         | 354.857         | L[9]  |
| L  | 34 | <b>1224.718</b> | 322.316         | 317.489         | 317.826         | 317.154         | L[8]  |
| R  | 35 | 1275.753        | 285.144         | 279.804         | 280.140         | 279.468         | R[7]  |
| K  | 36 | 1319.450        | 233.110         | 227.770         | 228.106         | 227.434         | K[6]  |
| G  | 37 | 1338.457        | 190.412         | 185.072         | 185.408         | 184.736         | G[5]  |
| N  | 38 | 1376.471        | 171.404         | 166.065         | 166.401         | 165.729         | N[4]  |
| V  | 39 | 1430.826        | 133.290         | 128.051         | 128.386         | 127.715         | V[3]  |
| S  | 40 | 1459.836        | 98.136          | 93.000          | 93.336          | 92.664          | S[2]  |
| E  | 41 | 1502.850        | 50.025          | 44.685          | 45.021          | 44.349          | E[1]  |

# sp | Q8CGP5 | H2A1F\_MOUSE

[Acetyl]SGRGKQGGKARAKATRSSRAGLQFPVGRVHRLLRKGNYS

- ▶ fragmentation table for charge state 4+
- ▶ specType=etd
- ▶ score=46.30
- ▶ F113278.dat
- ▶ query=q70283.p1
- ▶ precursor=752.093420
- ▶ chargePrecursor=6
- ▶ itol=0.5

| AA | c  | w               | s+1             | s+2             | c               | AA              |       |
|----|----|-----------------|-----------------|-----------------|-----------------|-----------------|-------|
| S  | 1  | 37.505          | 1127.839        | 1123.831        | 0.759           | 1123.377        | S[41] |
| G  | 2  | 51.780          | <b>1095.375</b> | 1091.370        | 0.755           | 1091.115        | G[40] |
| R  | 3  | 90.805          | 1081.120        | 1077.115        | 1077.307        | 1076.861        | R[39] |
| G  | 4  | 109.001         | 1042.094        | 1038.090        | 1038.342        | 1037.839        | G[38] |
| K  | 5  | 137.084         | 1027.839        | <b>1023.834</b> | <b>1024.086</b> | <b>1023.582</b> | K[37] |
| Q  | 6  | 169.059         | 995.815         | 991.811         | 992.297         | <b>991.559</b>  | Q[36] |
| G  | 7  | 193.254         | 983.303         | <b>979.796</b>  | <b>980.048</b>  | <b>979.544</b>  | G[35] |
| G  | 8  | 197.810         | 949.545         | 945.541         | <b>945.792</b>  | 945.289         | G[34] |
| K  | 9  | 239.633         | 935.290         | 931.285         | <b>931.537</b>  | 931.033         | K[33] |
| A  | 10 | 247.393         | <b>903.266</b>  | 899.261         | 899.513         | 899.009         | A[32] |
| R  | 11 | 286.418         | 895.507         | <b>891.502</b>  | <b>891.754</b>  | <b>891.250</b>  | R[31] |
| A  | 12 | 304.199         | 868.882         | 864.877         | 865.297         | 864.793         | A[30] |
| K  | 13 | 336.201         | 828.722         | 824.718         | 824.970         | 824.466         | K[29] |
| A  | 14 | 353.980         | 796.699         | 792.694         | 792.946         | 792.442         | A[28] |
| K  | 15 | 385.984         | 778.939         | 774.935         | 775.187         | 774.683         | K[27] |
| T  | 16 | 411.246         | 746.915         | 742.911         | 743.163         | 742.659         | T[26] |
| R  | 17 | 458.274         | 721.894         | 717.889         | 717.901         | 717.397         | R[25] |
| S  | 18 | 472.609         | 692.628         | 688.624         | 688.876         | 688.372         | S[24] |
| S  | 19 | 493.787         | 660.870         | 656.866         | 657.118         | 656.614         | S[23] |
| R  | 20 | 532.813         | 639.112         | 635.108         | 635.360         | 634.856         | R[22] |
| A  | 21 | 550.572         | 600.087         | 596.082         | 596.334         | 595.830         | A[21] |
| Q  | 22 | 564.827         | 582.328         | 578.323         | 578.575         | 578.071         | Q[20] |
| L  | 23 | 593.098         | 568.072         | 564.068         | 564.320         | 563.816         | L[19] |
| Q  | 24 | 625.113         | 539.801         | 535.797         | 536.049         | 535.545         | Q[18] |
| F  | 25 | 661.880         | 507.787         | 503.782         | 504.034         | 503.530         | F[17] |
| F  | 26 | 698.143         | 471.020         | 467.015         | 467.267         | 466.763         | F[16] |
| V  | 27 | 710.910         | 446.756         | 442.752         | 443.004         | 442.500         | V[15] |
| Q  | 28 | 725.169         | 421.989         | 417.985         | 418.237         | <b>417.733</b>  | Q[14] |
| R  | 29 | 764.181         | 389.734         | 385.729         | 385.981         | 385.477         | R[13] |
| V  | 30 | 788.958         | 368.709         | 364.704         | 364.956         | 364.452         | V[12] |
| H  | 31 | 823.223         | 343.942         | 339.937         | 340.189         | 339.685         | H[11] |
| R  | 32 | <b>862.248</b>  | 309.677         | 305.672         | 305.924         | 305.420         | R[10] |
| L  | 33 | <b>890.519</b>  | 270.652         | 266.647         | 266.899         | 266.395         | L[9]  |
| L  | 34 | 918.289         | 242.381         | 238.376         | 238.628         | 238.124         | L[8]  |
| R  | 35 | 957.815         | 214.110         | 210.105         | 210.357         | 209.853         | R[7]  |
| K  | 36 | <b>989.839</b>  | 175.084         | 171.080         | 171.332         | 170.828         | K[6]  |
| G  | 37 | 1064.094        | 143.061         | 139.056         | 139.308         | 138.804         | G[5]  |
| N  | 38 | 1032.605        | 128.805         | 124.800         | 125.052         | 124.548         | N[4]  |
| V  | 39 | <b>1073.371</b> | 100.294         | 96.289          | 96.542          | 96.038          | V[3]  |
| S  | 40 | 1068.139        | 98.529          | 94.524          | 94.776          | 94.272          | S[2]  |
| E  | 41 | 1127.390        | 97.771          | 93.766          | 94.018          | 93.514          | E[1]  |

# sp | Q8CGP5 | H2A1F\_MOUSE

[Acetyl]SGRGKQGGKARAKAKTRSSRAGLQFPVGRVHRLLRKGNYS

- ▶ fragmentation table for charge state 5+
- ▶ specType=etd
- ▶ score=46.30
- ▶ F113278.dat
- ▶ query=q70283.p1
- ▶ precursor=752.093420
- ▶ chargePrecursor=6
- ▶ itol=0.5

| AA | c  | y              | z+1            | z#2            | z              | AA             |   |    |
|----|----|----------------|----------------|----------------|----------------|----------------|---|----|
| S  | 1  | 30.221         | 902.110        | 899.108        | 0.806          | 898.905        | S | 41 |
| G  | 2  | 41.625         | <b>876.501</b> | 873.298        | 0.806          | 873.096        | G | 40 |
| R  | 3  | 72.846         | 805.097        | <b>861.893</b> | <b>062.095</b> | 861.692        | R | 39 |
| G  | 4  | 84.250         | <b>833.877</b> | 830.673        | 830.875        | 830.472        | G | 38 |
| K  | 5  | 109.869        | 822.473        | 819.269        | 819.470        | 819.067        | K | 37 |
| Q  | 6  | 135.481        | 796.854        | 793.650        | 793.851        | 793.448        | Q | 36 |
| G  | 7  | 146.685        | <b>771.242</b> | 768.038        | 768.240        | 767.837        | G | 35 |
| G  | 8  | 158.289        | 759.838        | 756.634        | 756.835        | 756.432        | G | 34 |
| K  | 9  | 183.908        | 748.833        | 745.230        | 745.431        | 745.028        | K | 33 |
| A  | 10 | 198.116        | 722.814        | 719.611        | 719.812        | 719.409        | A | 32 |
| R  | 11 | 229.336        | 708.607        | 705.403        | 705.605        | 705.202        | R | 31 |
| A  | 12 | 243.543        | 677.387        | 674.183        | 674.385        | <b>673.981</b> | A | 30 |
| K  | 13 | 269.162        | 663.179        | 659.976        | 660.177        | 659.774        | K | 29 |
| A  | 14 | 283.370        | 637.560        | 634.357        | 634.559        | 634.155        | A | 28 |
| K  | 15 | 308.989        | 623.353        | 620.149        | 620.351        | 619.948        | K | 27 |
| T  | 16 | 329.198        | 597.734        | 594.530        | 594.732        | 594.329        | T | 26 |
| R  | 17 | <b>360.418</b> | 577.524        | 574.321        | 574.522        | 574.119        | R | 25 |
| S  | 18 | 377.825        | 546.304        | 543.100        | 543.302        | 542.899        | S | 24 |
| S  | 19 | 399.231        | 528.886        | 525.684        | 525.886        | 525.482        | S | 23 |
| R  | 20 | 426.451        | 511.491        | 508.288        | 508.489        | 508.086        | R | 22 |
| A  | 21 | 440.659        | 480.271        | 477.067        | 477.269        | 476.866        | A | 21 |
| G  | 22 | 452.063        | 466.064        | 462.860        | 463.061        | 462.658        | G | 20 |
| L  | 23 | 474.680        | 494.659        | 451.456        | 451.657        | 451.254        | L | 19 |
| Q  | 24 | 500.292        | 432.043        | 428.839        | 429.040        | 428.637        | Q | 18 |
| F  | 25 | 529.705        | 406.831        | 403.227        | 403.429        | 403.026        | F | 17 |
| P  | 26 | 549.116        | 377.017        | 373.813        | 374.015        | 373.612        | P | 16 |
| V  | 27 | 568.530        | 357.607        | 354.403        | 354.604        | 354.201        | V | 15 |
| G  | 28 | 589.334        | 337.793        | 334.589        | 334.791        | 334.388        | G | 14 |
| R  | 29 | 611.554        | 326.389        | 323.185        | 323.386        | 322.983        | R | 13 |
| V  | 30 | 631.368        | 295.168        | 291.965        | 292.166        | 291.763        | V | 12 |
| H  | 31 | 658.780        | 275.355        | 272.151        | 272.353        | 271.949        | H | 11 |
| R  | 32 | 690.000        | 247.943        | 244.739        | 244.941        | 244.538        | R | 10 |
| L  | 33 | 712.617        | 216.723        | 213.519        | 213.721        | 213.317        | L | 9  |
| L  | 34 | 735.233        | 194.109        | 190.902        | 191.104        | 190.701        | L | 8  |
| R  | 35 | 766.454        | 171.489        | 168.283        | 168.487        | 168.084        | R | 7  |
| K  | 36 | 782.273        | 140.269        | 137.065        | 137.267        | 136.864        | K | 6  |
| G  | 37 | 803.877        | 114.650        | 111.446        | 111.648        | 111.245        | G | 5  |
| N  | 38 | 826.286        | 103.246        | 100.042        | 100.243        | 99.840         | N | 4  |
| V  | 39 | <b>858.898</b> | 80.437         | 77.233         | 77.435         | 77.032         | V | 3  |
| S  | 40 | <b>876.305</b> | 47.824         | 44.621         | 44.822         | 44.419         | S | 2  |
| E  | 41 | 902.113        | 30.418         | 27.214         | 27.416         | 27.013         | E | 1  |



# sp | Q8CGP5 | H2A1F\_MOUSE

[Acetyl]SGRGKQGGKARAKATRSSRAGLQFPVGRVHRLLRKGNYS

- ▶ fragmentation table for charge state 1+
- ▶ specType=etd
- ▶ score=73.90
- ▶ F113278.dat
- ▶ query=q70285.p1
- ▶ precursor=902.310680
- ▶ chargePrecursor=5
- ▶ itol=0.5

| AA | c  | y               | z+1            | z+2             | z               | AA       |       |
|----|----|-----------------|----------------|-----------------|-----------------|----------|-------|
| S  | 1  | 147.076         | 4507.521       | 4491.502        | 0.000           | 4490.494 | S[41] |
| G  | 2  | 304.098         | 4378.478       | 4362.459        | 0.000           | 4361.451 | G[40] |
| R  | 3  | <b>360.199</b>  | 4321.457       | 4305.438        | 4306.448        | 4304.430 | R[39] |
| G  | 4  | <b>417.220</b>  | 4165.355       | 4149.337        | 4150.345        | 4148.329 | G[38] |
| K  | 5  | <b>543.315</b>  | 4108.334       | 4092.315        | 4093.323        | 4091.307 | K[37] |
| Q  | 6  | <b>673.374</b>  | 3989.239       | 3974.220        | 3985.228        | 3983.212 | Q[36] |
| G  | 7  | <b>730.395</b>  | 3892.180       | 3876.162        | 3877.170        | 3875.154 | G[35] |
| G  | 8  | 787.417         | 3795.159       | 3779.140        | 3780.148        | 3778.132 | G[34] |
| K  | 9  | <b>915.512</b>  | 3738.138       | 3722.119        | 3723.127        | 3721.111 | K[33] |
| A  | 10 | <b>986.549</b>  | 3610.043       | 3594.024        | 3595.032        | 3593.016 | A[32] |
| R  | 11 | <b>1142.650</b> | 3536.005       | 3522.987        | 3523.995        | 3521.979 | R[31] |
| A  | 12 | 1213.677        | 3382.904       | 3366.886        | 3367.893        | 3366.878 | A[30] |
| K  | 13 | <b>1341.782</b> | 3311.867       | 3295.848        | 3296.856        | 3294.841 | K[29] |
| A  | 14 | <b>1412.819</b> | 3183.772       | 3167.754        | 3168.761        | 3166.746 | A[28] |
| K  | 15 | <b>1540.914</b> | 3112.735       | 3096.716        | 3097.724        | 3095.709 | K[27] |
| T  | 16 | <b>1641.962</b> | 2984.640       | 2968.621        | 2969.629        | 2967.614 | T[26] |
| R  | 17 | 1798.063        | 2883.562       | 2867.544        | 2868.552        | 2866.536 | R[25] |
| S  | 18 | 1885.098        | 2727.491       | 2711.473        | 2712.480        | 2710.465 | S[24] |
| S  | 19 | 1972.127        | 2640.458       | 2624.441        | 2625.448        | 2623.433 | S[23] |
| R  | 20 | 2128.228        | 2553.427       | 2537.409        | 2538.416        | 2536.401 | R[22] |
| A  | 21 | 2199.265        | 2497.326       | 2481.307        | 2482.315        | 2480.300 | A[21] |
| G  | 22 | 2286.287        | 2326.289       | 2310.270        | 2311.278        | 2309.263 | G[20] |
| L  | 23 | 2369.371        | 2269.268       | 2253.249        | 2254.257        | 2252.241 | L[19] |
| Q  | 24 | 2497.429        | 2156.184       | 2140.165        | 2141.173        | 2139.157 | Q[18] |
| F  | 25 | 2644.698        | 2028.125       | 2012.106        | 2013.114        | 2011.099 | F[17] |
| P  | 26 | 2741.551        | 1881.057       | 1865.038        | 1866.046        | 1864.031 | P[16] |
| V  | 27 | 2840.619        | 1784.004       | 1767.985        | 1768.993        | 1766.977 | V[15] |
| G  | 28 | 2897.641        | 1684.935       | 1668.917        | <b>1669.924</b> | 1667.909 | G[14] |
| R  | 29 | 3053.742        | 1627.914       | 1611.895        | <b>1612.903</b> | 1610.887 | R[13] |
| V  | 30 | 3153.810        | 1491.833       | <b>1455.794</b> | 1456.802        | 1454.785 | V[12] |
| H  | 31 | 3289.869        | 1372.744       | <b>1356.726</b> | 1357.734        | 1355.718 | H[11] |
| R  | 32 | 3445.970        | 1235.685       | 1219.667        | 1220.675        | 1218.659 | R[10] |
| L  | 33 | 3559.054        | 1079.584       | 1063.566        | <b>1064.573</b> | 1062.558 | L[9]  |
| L  | 34 | 3672.138        | <b>966.509</b> | 950.482         | 951.489         | 949.474  | L[8]  |
| R  | 35 | 3828.239        | 853.416        | 837.398         | 838.405         | 836.390  | R[7]  |
| K  | 36 | 3956.334        | 697.315        | 681.296         | 682.304         | 680.289  | K[6]  |
| G  | 37 | 4013.356        | 569.220        | 553.201         | 554.209         | 552.194  | G[5]  |
| N  | 38 | 4127.399        | 512.109        | 496.100         | 497.108         | 495.172  | N[4]  |
| V  | 39 | 4290.462        | 396.156        | 380.137         | 381.145         | 381.129  | V[3]  |
| S  | 40 | 4377.494        | 235.092        | 219.074         | 220.082         | 218.066  | S[2]  |
| E  | 41 | 4506.537        | 148.060        | 132.042         | 133.050         | 131.034  | E[1]  |



# sp | Q8CGP5 | H2A1F\_MOUSE

[Acetyl]SGRGKQGGKARAKAKTRSSRAGLQFPVGRVHLLRKGNYSE

- ▶ fragmentation table for charge state 2+
- ▶ specType=etd
- ▶ score=73.90
- ▶ F113278.dat
- ▶ query=q70285.p1
- ▶ precursor=902.310680
- ▶ chargePrecursor=5
- ▶ itol=0.5

| AA | c  | y               | #s1             | #s2             | z               | AA              |       |
|----|----|-----------------|-----------------|-----------------|-----------------|-----------------|-------|
| S  | 1  | 74.062          | 2054.264        | 2268.255        | 8.804           | 2245.781        | S[41] |
| G  | 2  | 102.553         | 2189.743        | 2381.733        | 0.504           | 2181.220        | G[40] |
| R  | 3  | 180.603         | 2161.232        | 2153.233        | 2153.236        | 2152.710        | R[39] |
| G  | 4  | 209.114         | 2083.181        | 2075.172        | 2075.676        | 2074.660        | G[38] |
| K  | 5  | 273.181         | 2054.671        | 2048.681        | 2047.105        | 2046.157        | K[37] |
| G  | 6  | 337.194         | 1990.622        | <b>1982.614</b> | <b>1983.118</b> | 1982.110        | G[36] |
| G  | 7  | 385.703         | 1926.594        | 1915.583        |                 | <b>1918.088</b> | G[35] |
| G  | 8  | 394.212         | 1898.083        | <b>1890.074</b> | <b>1890.578</b> | 1889.570        | G[34] |
| K  | 9  | 458.260         | 1869.572        | 1861.563        | 1862.067        | 1861.050        | K[33] |
| A  | 10 | 493.778         | 1805.525        | <b>1797.516</b> | 1798.019        | <b>1797.012</b> | A[32] |
| R  | 11 | 571.829         | 1770.008        | <b>1761.997</b> | 1762.501        | <b>1761.493</b> | R[31] |
| A  | 12 | 609.897         | 1692.956        | 1683.945        | 1684.450        | 1683.443        | A[30] |
| R  | 13 | <b>671.395</b>  | 1656.437        | 1648.428        | 1648.932        | 1647.924        | R[29] |
| A  | 14 | <b>706.913</b>  | 1592.900        | <b>1584.380</b> | <b>1584.884</b> | 1583.876        | A[28] |
| K  | 15 | 770.961         | 1556.871        | <b>1548.862</b> | <b>1549.366</b> | 1548.358        | K[27] |
| T  | 16 | <b>821.485</b>  | 1492.824        | <b>1484.814</b> | <b>1485.318</b> | 1484.310        | T[26] |
| R  | 17 | 869.829         | 1442.800        | 1434.791        | 1434.296        | 1433.287        | R[25] |
| S  | 18 | <b>943.051</b>  | 1384.249        | <b>1356.240</b> | <b>1356.744</b> | 1355.736        | S[24] |
| S  | 19 | <b>986.567</b>  | 1320.733        | <b>1312.724</b> | <b>1313.228</b> | 1312.220        | S[23] |
| R  | 20 | <b>1064.618</b> | 1277.217        | <b>1269.208</b> | <b>1269.712</b> | 1268.704        | R[22] |
| A  | 21 | <b>1100.136</b> | <b>1199.167</b> | <b>1191.157</b> | <b>1191.661</b> | 1190.653        | A[21] |
| G  | 22 | <b>1128.647</b> | 1153.648        | 1155.639        | 1156.143        | 1155.135        | G[20] |
| L  | 23 | 1155.700        | 1138.137        | 1129.128        | 1129.632        | 1128.624        | L[19] |
| Q  | 24 | <b>1249.218</b> | 1078.595        | 1070.586        | 1071.090        | 1070.082        | Q[18] |
| F  | 25 | <b>1322.753</b> | 1014.569        | <b>1006.557</b> | <b>1007.061</b> | 1006.053        | F[17] |
| F  | 26 | <b>1371.279</b> | 941.033         | 933.023         | 933.526         | 932.519         | F[16] |
| V  | 27 | 1420.811        | 892.506         | 884.496         | 885.000         | 883.992         | V[15] |
| G  | 28 | <b>1449.324</b> | 842.971         | 834.962         | 835.466         | 834.458         | G[14] |
| R  | 29 | 1527.814        | 814.461         | 806.451         | 806.955         | 805.947         | R[13] |
| V  | 30 | 1576.909        | 736.410         | 728.401         | 728.905         | 727.897         | V[12] |
| H  | 31 | <b>1645.438</b> | 688.876         | 678.866         | 679.370         | 678.363         | H[11] |
| R  | 32 | 1723.489        | 618.346         | 610.337         | 610.841         | 609.833         | R[10] |
| L  | 33 | 1780.031        | 540.296         | 532.286         | 532.790         | 531.783         | L[9]  |
| L  | 34 | 1838.573        | 483.754         | 475.744         | 476.248         | 475.241         | L[8]  |
| R  | 35 | 1914.623        | 427.212         | 419.202         | 419.706         | 418.698         | R[7]  |
| K  | 36 | 1978.671        | 349.161         | 341.152         | 341.656         | 340.648         | K[6]  |
| G  | 37 | 2067.181        | 285.114         | 277.104         | 277.608         | 276.600         | G[5]  |
| N  | 38 | 2094.203        | 256.603         | 248.594         | 249.098         | 248.090         | N[4]  |
| V  | 39 | 2145.236        | 199.562         | 191.552         | 192.056         | 191.048         | V[3]  |
| S  | 40 | 2199.251        | 118.056         | 110.047         | 110.551         | 109.543         | S[2]  |
| E  | 41 | 2253.772        | 74.534          | 66.524          | 67.028          | 66.021          | E[1]  |

# sp | Q8CGP5 | H2A1F\_MOUSE

[Acetyl]SGRGKQGCGKARAKAKTRSSRAGLQFPVGRVHRLLRKGNYS

- ▶ fragmentation table for charge state 3+
- ▶ specType=etd
- ▶ score=73.90
- ▶ F113278.dat
- ▶ query=q70285.p1
- ▶ precursor=902.310680
- ▶ chargePrecursor=5
- ▶ itol=0.5

| AA | c  | y               | #s1             | #s2             | z               | AA              |       |
|----|----|-----------------|-----------------|-----------------|-----------------|-----------------|-------|
| S  | 1  | 489.697         | <b>1503.178</b> | 1487.830        | 0.872           | 1487.561        | S[41] |
| G  | 2  | 86.704          | 1495.184        | 1454.925        | 0.672           | 1454.480        | G[49] |
| R  | 3  | 1307.788        | <b>1441.157</b> | <b>1435.817</b> | 1436.151        | <b>1435.482</b> | R[30] |
| G  | 4  | 139.745         | 1389.123        | 1383.784        | 1384.420        | 1383.448        | G[38] |
| K  | 5  | 182.443         | 1370.116        | <b>1364.777</b> | <b>1365.113</b> | 1364.441        | K[37] |
| G  | 6  | 225.130         | 1327.418        | 1322.019        | 1322.814        | 1321.742        | G[36] |
| G  | 7  | 244.137         | 1284.783        | <b>1279.392</b> | <b>1279.728</b> | 1279.056        | G[35] |
| G  | 8  | 263.144         | 1265.725        | 1260.385        | <b>1260.721</b> | 1260.049        | G[34] |
| K  | 9  | 305.642         | 1246.717        | 1241.378        | 1241.714        | 1241.042        | K[33] |
| A  | 10 | 329.521         | 1204.019        | 1198.679        | <b>1199.015</b> | 1198.344        | A[32] |
| R  | 11 | 381.555         | 1180.340        | 1175.000        | <b>1175.336</b> | 1174.664        | R[31] |
| A  | 12 | 405.234         | <b>1128.306</b> | 1122.967        | <b>1123.303</b> | 1122.631        | A[30] |
| K  | 13 | 447.932         | 1104.627        | 1099.288        | 1099.624        | 1098.952        | K[29] |
| A  | 14 | 471.611         | 1061.929        | 1056.589        | 1056.925        | 1056.253        | A[28] |
| K  | 15 | 514.310         | 1038.250        | 1032.910        | 1033.246        | 1032.574        | K[27] |
| T  | 16 | 547.002         | 995.552         | 990.212         | 990.548         | 989.876         | T[26] |
| R  | 17 | 600.626         | 961.869         | 956.529         | 956.865         | 956.193         | R[25] |
| S  | 18 | 629.017         | 909.835         | 904.495         | 904.832         | 904.160         | S[24] |
| S  | 19 | 658.047         | 880.825         | 875.485         | 875.821         | 875.149         | S[23] |
| R  | 20 | 710.081         | 851.814         | 846.474         | 846.810         | 846.138         | R[22] |
| A  | 21 | 733.760         | 799.780         | 794.441         | 794.777         | 794.105         | A[21] |
| G  | 22 | 752.767         | 776.101         | 770.762         | 771.098         | 770.426         | G[20] |
| L  | 23 | 780.482         | 759.094         | 753.754         | 754.090         | 753.418         | L[19] |
| Q  | 24 | 833.148         | 733.366         | 728.026         | 728.362         | 727.690         | Q[18] |
| F  | 25 | 882.171         | 676.713         | <b>671.374</b>  | <b>671.710</b>  | 671.038         | F[17] |
| F  | 26 | <b>914.522</b>  | 627.600         | 622.261         | 622.597         | 621.925         | F[16] |
| V  | 27 | <b>947.545</b>  | 595.139         | 590.000         | 590.336         | 589.664         | V[15] |
| G  | 28 | <b>966.552</b>  | 562.317         | 556.977         | 557.313         | 556.641         | G[14] |
| R  | 29 | 1013.556        | 543.309         | 537.970         | 538.306         | 537.634         | R[13] |
| V  | 30 | <b>1051.608</b> | 490.275         | 485.036         | 485.372         | 484.700         | V[12] |
| H  | 31 | 1097.204        | 458.253         | 452.913         | 453.249         | 452.577         | H[11] |
| R  | 32 | 1149.328        | 412.967         | 407.227         | 407.563         | 406.891         | R[10] |
| L  | 33 | <b>1187.023</b> | <b>360.533</b>  | 355.193         | 355.529         | 354.857         | L[9]  |
| L  | 34 | 1234.718        | 322.576         | 317.236         | 317.572         | 316.900         | L[8]  |
| R  | 35 | 1276.751        | 285.144         | 279.804         | 280.140         | 279.468         | R[7]  |
| K  | 36 | 1319.450        | 233.110         | 227.770         | 228.106         | 227.434         | K[6]  |
| G  | 37 | 1338.457        | 190.412         | 185.072         | 185.408         | 184.736         | G[5]  |
| N  | 38 | <b>1376.471</b> | 171.404         | 166.065         | 166.401         | 165.729         | N[4]  |
| V  | 39 | 1430.826        | 133.390         | 128.051         | 128.387         | 127.715         | V[3]  |
| S  | 40 | 1459.836        | 99.136          | 93.796          | 94.132          | 93.460          | S[2]  |
| E  | 41 | 1502.850        | 50.025          | 44.685          | 45.021          | 44.349          | E[1]  |

# sp | Q8CGP5 | H2A1F\_MOUSE

[Acetyl]SGRGKQGGKARAKAKTRSSRAGLQFPVGRVHRLLRKGNYS

- ▶ fragmentation table for charge state 4+
- ▶ specType=etd
- ▶ score=73.90
- ▶ F113278.dat
- ▶ query=q70285.p1
- ▶ precursor=902.310680
- ▶ chargePrecursor=5
- ▶ itol=0.5

| AA   | c               | y        | z+1             | z+2             | z               | AA   |
|------|-----------------|----------|-----------------|-----------------|-----------------|------|
| S 1  | 57.525          | 1127.636 | <b>1123.631</b> | 0.755           | <b>1123.379</b> | G 41 |
| G 2  | 51.780          | 1095.375 | <b>1091.370</b> | 0.755           | 1091.118        | G 40 |
| R 3  | 90.805          | 1081.120 | <b>1077.115</b> | <b>1077.367</b> | 1076.861        | R 39 |
| G 4  | 105.061         | 1042.094 | 1038.090        | 1038.342        | 1037.839        | G 38 |
| K 5  | 137.684         | 1027.839 | 1023.834        | 1024.086        | 1023.582        | K 37 |
| Q 6  | 189.099         | 995.815  | 991.811         | 992.062         | 991.559         | Q 36 |
| G 7  | 253.354         | 953.603  | 950.750         | 950.048         | 950.544         | G 35 |
| G 8  | 197.810         | 949.545  | 945.541         | 945.792         | 945.289         | G 34 |
| K 9  | 229.633         | 935.290  | 931.285         | 931.537         | 931.031         | K 33 |
| A 10 | 247.393         | 903.266  | 899.261         | 899.513         | 899.009         | A 32 |
| R 11 | 286.418         | 885.507  | 881.502         | 881.754         | 881.250         | R 31 |
| A 12 | 304.177         | 846.482  | 842.477         | 842.729         | 842.225         | A 30 |
| R 13 | 336.201         | 828.722  | 824.718         | 824.970         | 824.466         | R 29 |
| A 14 | 353.960         | 796.699  | 792.694         | 792.946         | 792.442         | A 28 |
| K 15 | 385.984         | 778.939  | 774.935         | 775.187         | 774.681         | K 27 |
| T 16 | 411.246         | 746.915  | 742.911         | 743.163         | 742.659         | T 26 |
| R 17 | 450.271         | 721.694  | 717.690         | 717.941         | 717.438         | R 25 |
| S 18 | 472.809         | 682.828  | 678.824         | 679.076         | 678.572         | S 24 |
| S 19 | 493.787         | 660.870  | 656.866         | 657.118         | 656.614         | S 23 |
| R 20 | 532.813         | 639.112  | 635.108         | 635.360         | 634.856         | R 22 |
| A 21 | 550.572         | 600.087  | 596.082         | 596.334         | 595.830         | A 21 |
| G 22 | 564.827         | 582.128  | 578.123         | 578.375         | 577.871         | G 20 |
| L 23 | 593.036         | 566.072  | 562.068         | 562.320         | 561.816         | L 19 |
| Q 24 | 625.113         | 539.803  | 535.799         | 536.049         | 535.545         | Q 19 |
| F 25 | 661.880         | 507.787  | 503.782         | 504.034         | 503.530         | F 17 |
| P 26 | 686.143         | 471.020  | 467.015         | 467.267         | 466.763         | P 16 |
| V 27 | 710.910         | 446.756  | 442.752         | 443.004         | 442.500         | V 15 |
| G 28 | 725.166         | 421.989  | 417.985         | 418.237         | <b>417.733</b>  | G 14 |
| R 29 | 764.193         | 407.734  | 403.729         | 403.981         | 403.477         | R 13 |
| V 30 | 786.058         | 366.709  | 364.704         | 364.956         | 364.452         | V 12 |
| H 31 | <b>823.223</b>  | 343.942  | 339.937         | 340.189         | 339.685         | H 11 |
| R 32 | 862.248         | 309.677  | 305.672         | 305.924         | 305.420         | R 10 |
| L 33 | 890.519         | 270.652  | 266.647         | 266.899         | 266.395         | L 9  |
| L 34 | 918.790         | 242.381  | 238.376         | 238.628         | 238.124         | L 8  |
| R 35 | 957.815         | 214.130  | 210.125         | 210.377         | 209.873         | R 7  |
| R 36 | 989.539         | 175.084  | 171.080         | 171.332         | 170.828         | R 6  |
| G 37 | <b>1004.094</b> | 143.061  | 139.056         | 139.308         | 138.804         | G 5  |
| N 38 | 1032.605        | 126.805  | 124.800         | 125.052         | 124.548         | N 4  |
| V 39 | 1073.371        | 100.294  | 96.290          | 96.542          | 96.038          | V 3  |
| S 40 | 1095.120        | 59.529   | 55.524          | 55.776          | 55.272          | S 2  |
| E 41 | 1127.390        | 37.771   | 33.766          | 34.018          | 33.514          | E 1  |



# sp | Q8CGP5 | H2A1F\_MOUSE

[Acetyl]SGRGKQGGKARAKAKTRSSRAGLQFPVGRVHRLLRKGNYS

- ▶ fragmentation table for charge state 1+
- ▶ specType=etd
- ▶ score=39.14
- ▶ F113278.dat
- ▶ query=q70287.p1
- ▶ precursor=752.093610
- ▶ chargePrecursor=6
- ▶ itol=0.5

| AA | c  | y               | z+1             | z+2             | z               | AA       |       |
|----|----|-----------------|-----------------|-----------------|-----------------|----------|-------|
| S  | 1  | 147.076         | 4507.921        | 4491.502        | 0.000           | 4490.484 | S[41] |
| G  | 2  | 204.068         | 4378.478        | 4362.459        | 0.000           | 4361.451 | G[40] |
| R  | 3  | <b>300.199</b>  | 4321.467        | 4305.438        | 4.906           | 4304.430 | R[39] |
| G  | 4  | <b>417.220</b>  | 4185.355        | 4149.317        | 4150.345        | 4148.329 | G[38] |
| K  | 5  | <b>545.315</b>  | 4108.334        | 4062.315        | 4091.321        | 4091.307 | K[37] |
| Q  | 6  | <b>673.374</b>  | 3989.293        | 3964.250        | 3956.228        | 3963.211 | Q[36] |
| G  | 7  | <b>730.395</b>  | 3852.180        | 3836.162        | 3837.170        | 3835.154 | G[35] |
| G  | 8  | <b>787.417</b>  | 3795.159        | 3779.140        | 3780.148        | 3778.132 | G[34] |
| K  | 9  | 915.512         | 3738.138        | 3722.119        | 3723.127        | 3721.111 | K[33] |
| A  | 10 | <b>986.549</b>  | 3610.043        | 3594.024        | 3595.032        | 3593.016 | A[32] |
| R  | 11 | 1142.650        | 3539.005        | 3522.987        | 3523.995        | 3521.979 | R[31] |
| A  | 12 | <b>1213.687</b> | 3382.904        | 3366.886        | 3367.893        | 3365.877 | A[30] |
| R  | 13 | 1381.782        | 3311.867        | 3295.848        | 3296.856        | 3294.841 | R[29] |
| A  | 14 | 1412.819        | 3183.772        | 3167.754        | 3168.761        | 3166.746 | A[28] |
| K  | 15 | 1540.914        | 3112.735        | 3096.716        | 3097.724        | 3095.709 | K[27] |
| T  | 16 | 1541.962        | 2984.640        | 2968.621        | 2969.629        | 2967.614 | T[26] |
| R  | 17 | 1708.063        | 2883.562        | 2867.544        | 2868.562        | 2866.546 | R[25] |
| S  | 18 | 1885.008        | 2727.491        | 2711.473        | 2712.480        | 2710.465 | S[24] |
| S  | 19 | 1972.127        | 2640.459        | 2624.441        | 2625.448        | 2623.433 | S[23] |
| R  | 20 | 2138.228        | 2553.427        | 2537.409        | 2538.416        | 2536.401 | R[22] |
| A  | 21 | 2199.265        | 2397.345        | 2381.327        | 2382.335        | 2380.320 | A[21] |
| Q  | 22 | 2256.287        | 2336.289        | 2310.270        | 2311.278        | 2309.263 | Q[20] |
| L  | 23 | 2369.371        | 2299.268        | 2283.249        | 2284.257        | 2282.241 | L[19] |
| Q  | 24 | 3007.429        | 2156.184        | 2140.165        | 2141.173        | 2139.157 | Q[18] |
| F  | 25 | 3044.488        | 2028.125        | 2012.106        | 2013.114        | 2011.099 | F[17] |
| P  | 26 | 2741.551        | 1881.057        | 1865.038        | 1866.046        | 1864.030 | P[16] |
| V  | 27 | 2860.619        | 1784.004        | 1767.985        | 1768.993        | 1766.977 | V[15] |
| G  | 28 | 2897.641        | <b>1684.935</b> | 1668.917        | 1669.924        | 1667.909 | G[14] |
| D  | 29 | 3013.742        | 1627.814        | 1611.795        | <b>1612.803</b> | 1610.787 | D[13] |
| V  | 30 | 3152.810        | 1471.811        | <b>1455.794</b> | 1456.802        | 1454.786 | V[12] |
| H  | 31 | 3289.869        | 1372.744        | <b>1356.726</b> | 1357.734        | 1355.718 | H[11] |
| R  | 32 | 3445.970        | 1235.685        | <b>1219.667</b> | 1220.675        | 1218.659 | R[10] |
| L  | 33 | 3559.054        | 1079.584        | 1063.566        | 1064.573        | 1062.558 | L[9]  |
| L  | 34 | 3672.138        | 966.500         | 950.482         | 951.489         | 949.474  | L[8]  |
| T  | 35 | 3838.239        | 853.418         | <b>837.398</b>  | 838.405         | 836.390  | T[7]  |
| K  | 36 | 3956.334        | 697.315         | 681.296         | 682.304         | 680.289  | K[6]  |
| G  | 37 | 4013.366        | 569.220         | 553.201         | 554.209         | 552.194  | G[5]  |
| N  | 38 | 4127.399        | 512.109         | 496.100         | 497.108         | 495.172  | N[4]  |
| V  | 39 | 4290.462        | 398.150         | 382.131         | 383.145         | 381.129  | V[3]  |
| S  | 40 | 4377.494        | 235.062         | 219.074         | 220.082         | 218.066  | S[2]  |
| E  | 41 | 4406.537        | 148.000         | 132.042         | 133.050         | 131.034  | E[1]  |

# sp | Q8CGP5 | H2A1F\_MOUSE

[Acetyl]SGRGKQGGKARAKAKTRSSRAGLQFPVGRVHLLRKGNYSE

- ▶ fragmentation table for charge state 2+
- ▶ specType=etd
- ▶ score=39.14
- ▶ F113278.dat
- ▶ query=q70287.p1
- ▶ precursor=752.093610
- ▶ chargePrecursor=6
- ▶ itol=0.5

| AA | c               | y               | #s1             | #s2             | z               | AA    |
|----|-----------------|-----------------|-----------------|-----------------|-----------------|-------|
| S  | 74.062          | 2054.264        | 2268.255        | 8.804           | 2245.78         | S[41] |
| G  | 102.553         | 2189.743        | 2381.733        | 0.504           | 2181.220        | G[40] |
| R  | 180.603         | 2641.232        | 2153.233        | 2153.236        | 2152.710        | R[39] |
| G  | 209.114         | 2083.181        | 2075.172        | 2075.676        | 2074.660        | G[38] |
| K  | 273.181         | 2054.671        | 2046.661        | 2047.165        | 2046.157        | K[37] |
| G  | 337.194         | 1990.622        | 1982.614        | 1983.118        | 1982.110        | G[36] |
| G  | 385.703         | 1926.594        | 1918.584        | 1919.088        | 1918.080        | G[35] |
| G  | 394.212         | 1898.083        | 1890.074        | <b>1890.578</b> | 1889.570        | G[34] |
| K  | 458.260         | 1869.572        | <b>1861.563</b> | <b>1862.067</b> | 1861.059        | K[33] |
| A  | 493.778         | 1805.525        | 1797.516        | 1798.019        | 1797.012        | A[32] |
| R  | 577.829         | 1770.008        | 1761.997        | 1762.501        | 1761.493        | R[31] |
| A  | <b>607.337</b>  | 1692.956        | 1684.946        | 1685.450        | 1684.442        | A[30] |
| K  | 671.395         | 1656.437        | 1648.428        | <b>1648.932</b> | 1647.924        | K[29] |
| A  | <b>706.913</b>  | 1592.900        | 1584.890        | <b>1584.884</b> | 1583.876        | A[28] |
| K  | <b>770.961</b>  | 1556.871        | 1548.862        | 1549.366        | 1548.358        | K[27] |
| T  | <b>821.485</b>  | 1492.824        | <b>1484.814</b> | 1485.318        | <b>1484.310</b> | T[26] |
| R  | <b>899.535</b>  | 1442.800        | 1434.791        | <b>1434.784</b> | 1433.776        | R[25] |
| S  | 933.853         | 1384.249        | <b>1356.240</b> | <b>1356.744</b> | 1355.736        | S[24] |
| S  | <b>986.567</b>  | 1320.733        | 1312.724        | <b>1313.228</b> | 1312.220        | S[23] |
| R  | <b>1064.618</b> | 1277.217        | <b>1269.208</b> | <b>1269.712</b> | 1268.704        | R[22] |
| A  | 1100.136        | <b>1199.167</b> | 1191.157        | <b>1191.661</b> | 1190.653        | A[21] |
| G  | <b>1128.647</b> | 1153.648        | 1145.639        | <b>1156.143</b> | 1155.135        | G[20] |
| L  | <b>1185.189</b> | 1138.137        | 1129.128        | 1127.119        | 1128.624        | L[19] |
| G  | <b>1249.218</b> | 1078.595        | 1070.586        | 1071.090        | 1070.082        | G[18] |
| F  | <b>1322.753</b> | 1014.569        | <b>1006.557</b> | <b>1007.061</b> | 1006.053        | F[17] |
| F  | 1371.279        | 941.033         | 933.023         | 933.526         | 932.519         | F[16] |
| V  | 1420.811        | 892.506         | 884.496         | 885.000         | 883.992         | V[15] |
| G  | <b>1449.324</b> | <b>842.971</b>  | 834.962         | 835.466         | 834.458         | G[14] |
| R  | 1507.874        | 814.441         | <b>806.431</b>  | <b>806.935</b>  | <b>805.947</b>  | R[13] |
| V  | 1576.909        | 736.410         | 728.401         | 728.905         | 727.897         | V[12] |
| H  | 1645.438        | 688.876         | 678.866         | 679.370         | 678.363         | H[11] |
| R  | 1723.489        | 618.346         | 610.337         | 610.841         | 609.833         | R[10] |
| L  | 1780.031        | 540.206         | 532.196         | 532.700         | 531.713         | L[9]  |
| L  | 1838.573        | 483.754         | 475.744         | 476.248         | 475.241         | L[8]  |
| R  | 1914.623        | 427.212         | 419.202         | 419.706         | 418.698         | R[7]  |
| K  | 1978.671        | 349.161         | 341.152         | 341.656         | 340.648         | K[6]  |
| G  | 2067.181        | 285.114         | 277.104         | 277.608         | 276.600         | G[5]  |
| N  | 2094.203        | 256.603         | 248.594         | 249.098         | 248.090         | N[4]  |
| V  | 2145.736        | 199.562         | 191.552         | 192.056         | 191.066         | V[3]  |
| S  | 2199.261        | 118.056         | 110.047         | 110.544         | 109.537         | S[2]  |
| E  | 2253.772        | 74.534          | 66.524          | 67.028          | 66.021          | E[1]  |

# sp | Q8CGP5 | H2A1F\_MOUSE

[Acetyl]SGRGKQGGKARAKAKTRSSRAGLQFPVGRVHRLLRKGNYS

- ▶ fragmentation table for charge state 3+
- ▶ specType=etd
- ▶ score=39.14
- ▶ F113278.dat
- ▶ query=q70287.p1
- ▶ precursor=752.093610
- ▶ chargePrecursor=6
- ▶ itol=0.5

| AA   | c               | y               | z+1             | z+2             | z              | AA   |
|------|-----------------|-----------------|-----------------|-----------------|----------------|------|
| S 1  | 49.697          | 1503.178        | 1497.830        | 0.672           | 1497.503       | S 41 |
| G 2  | 68.704          | 1460.164        | <b>1454.825</b> | 0.672           | 1454.489       | G 40 |
| R 3  | 130.738         | <b>1441.157</b> | 1435.817        | 1436.153        | 1435.482       | R 39 |
| G 4  | 139.745         | 1389.123        | 1383.794        | 1384.120        | 1383.449       | G 38 |
| K 5  | 182.443         | 1370.116        | <b>1364.777</b> | <b>1365.113</b> | 1364.441       | K 37 |
| Q 6  | 235.330         | 1327.418        | 1322.471        | <b>1322.414</b> | 1321.743       | Q 36 |
| G 7  | 244.137         | 1284.732        | <b>1279.392</b> | <b>1279.728</b> | 1279.059       | G 35 |
| G 8  | 283.144         | 1265.725        | <b>1260.385</b> | <b>1260.721</b> | 1260.049       | G 34 |
| K 9  | 305.842         | 1246.717        | <b>1241.378</b> | <b>1241.714</b> | 1241.041       | K 33 |
| A 10 | 329.521         | 1204.019        | 1198.879        | 1199.015        | 1198.344       | A 32 |
| R 11 | 381.555         | 1189.240        | <b>1175.000</b> | <b>1175.336</b> | 1174.664       | R 31 |
| A 12 | 408.234         | <b>1128.308</b> | 1123.867        | 1123.903        | 1123.631       | A 30 |
| R 13 | 447.932         | 1104.627        | <b>1099.288</b> | <b>1099.624</b> | 1098.952       | R 29 |
| A 14 | 471.611         | 1061.929        | 1056.589        | <b>1056.925</b> | 1056.253       | A 28 |
| K 15 | 514.310         | <b>1038.250</b> | <b>1032.910</b> | <b>1033.246</b> | 1032.574       | K 27 |
| T 16 | 547.992         | 995.552         | <b>990.212</b>  | <b>990.548</b>  | <b>989.876</b> | T 26 |
| R 17 | 600.626         | 981.886         | <b>956.529</b>  | <b>956.865</b>  | <b>956.193</b> | R 25 |
| S 18 | 629.033         | 959.839         | 954.898         | 954.934         | 954.169        | S 24 |
| S 19 | 658.047         | 880.825         | <b>875.485</b>  | <b>875.821</b>  | 875.149        | S 23 |
| R 20 | 710.081         | 851.814         | 846.474         | 846.810         | 846.138        | R 22 |
| A 21 | 723.769         | 799.769         | 794.441         | <b>794.777</b>  | 794.105        | A 21 |
| G 22 | 752.767         | 776.101         | <b>770.762</b>  | <b>771.098</b>  | 770.426        | G 20 |
| L 23 | 760.482         | 757.994         | 751.754         | 752.090         | 751.417        | L 19 |
| Q 24 | 813.168         | 719.399         | 714.060         | 714.396         | 713.724        | Q 19 |
| F 25 | 882.171         | 676.713         | 671.374         | <b>671.710</b>  | 671.038        | F 17 |
| P 26 | <b>914.522</b>  | 627.690         | 622.351         | 622.687         | 622.015        | P 16 |
| V 27 | 947.545         | 595.339         | 590.000         | 590.336         | 589.664        | V 15 |
| G 28 | 966.552         | 562.317         | 556.977         | 557.313         | 556.641        | G 14 |
| R 29 | 1013.096        | 543.305         | 537.966         | 538.302         | 537.630        | R 13 |
| V 30 | <b>1051.608</b> | 491.276         | 485.936         | 486.272         | 485.600        | V 12 |
| H 31 | 1097.294        | 458.253         | 452.913         | 453.249         | 452.577        | H 11 |
| R 32 | 1149.328        | 412.567         | 407.227         | 407.563         | 406.891        | R 10 |
| L 33 | 1187.023        | <b>360.533</b>  | 355.193         | 355.529         | 354.857        | L 9  |
| L 34 | <b>1224.718</b> | 322.836         | 317.496         | 317.832         | 317.161        | L 8  |
| R 35 | 1276.151        | 285.144         | 279.804         | 280.140         | 279.468        | R 7  |
| R 36 | 1319.450        | 233.110         | 227.770         | 228.106         | 227.434        | R 6  |
| G 37 | 1338.467        | 190.412         | 185.072         | 185.408         | 184.736        | G 5  |
| N 38 | 1376.471        | 171.404         | 166.065         | 166.401         | 165.729        | N 4  |
| V 39 | 1430.826        | 133.390         | 128.051         | 128.387         | 127.715        | V 3  |
| S 40 | 1459.836        | 79.036          | 73.696          | 74.032          | 73.360         | S 2  |
| E 41 | 1502.850        | 50.025          | 44.685          | 45.021          | 44.349         | E 1  |

# sp | Q8CGP5 | H2A1F\_MOUSE

[Acetyl]SGRGKQGGKARAKAKTRSSRAGLQFPVGRVHRLLRKGNYS

- ▶ fragmentation table for charge state 4+
- ▶ specType=etd
- ▶ score=39.14
- ▶ F113278.dat
- ▶ query=q70287.p1
- ▶ precursor=752.093610
- ▶ chargePrecursor=6
- ▶ itol=0.5

| AA   | c               | y        | z+1             | z+2             | z               | AA   |
|------|-----------------|----------|-----------------|-----------------|-----------------|------|
| S 1  | 37.525          | 1127.636 | <b>1123.631</b> | 0.755           | 1123.370        | S 41 |
| G 2  | 51.780          | 1096.375 | 1091.370        | 0.755           | 1091.118        | G 40 |
| R 3  | 90.805          | 1081.120 | <b>1077.115</b> | <b>1077.367</b> | 1076.861        | R 39 |
| G 4  | 105.061         | 1042.094 | <b>1038.090</b> | <b>1038.342</b> | <b>1037.838</b> | G 38 |
| K 5  | 137.084         | 1027.839 | 1023.834        | 1024.086        | 1023.582        | K 37 |
| Q 6  | 189.099         | 995.815  | 991.811         | 992.062         | 991.559         | Q 36 |
| G 7  | 253.354         | 953.903  | 950.900         | <b>960.048</b>  | 959.545         | G 35 |
| G 8  | 397.610         | 949.545  | 945.541         | <b>945.792</b>  | 945.289         | G 34 |
| K 9  | 229.633         | 935.290  | 931.286         | 931.537         | 931.031         | K 33 |
| A 10 | 247.393         | 903.266  | <b>899.261</b>  | <b>899.513</b>  | 899.009         | A 32 |
| R 11 | 286.418         | 895.507  | 891.502         | 891.754         | 891.250         | R 31 |
| A 12 | 304.177         | 846.868  | 842.871         | <b>842.729</b>  | 842.225         | A 30 |
| R 13 | 336.201         | 828.722  | 824.718         | 824.970         | 824.466         | R 29 |
| A 14 | 353.960         | 796.699  | 792.694         | 792.946         | 792.442         | A 28 |
| K 15 | 385.984         | 778.939  | 774.935         | 775.187         | 774.681         | K 27 |
| T 16 | 411.246         | 746.915  | 742.911         | 743.163         | 742.659         | T 26 |
| R 17 | 450.271         | 721.684  | 717.680         | 717.901         | 717.397         | R 25 |
| S 18 | 472.029         | 692.828  | 678.824         | 679.076         | 678.572         | S 24 |
| S 19 | 493.787         | 660.870  | 656.866         | 657.118         | 656.614         | S 23 |
| R 20 | 532.813         | 639.112  | 635.108         | 635.360         | 634.856         | R 22 |
| A 21 | 550.572         | 600.087  | 596.082         | 596.334         | 595.830         | A 21 |
| G 22 | 564.827         | 582.128  | 578.123         | 578.375         | 577.871         | G 20 |
| L 23 | 603.036         | 566.072  | 562.068         | 562.320         | 561.816         | L 19 |
| Q 24 | 625.113         | 539.804  | 535.797         | 536.049         | 535.545         | Q 19 |
| F 25 | 661.880         | 507.787  | 503.782         | 504.034         | 503.530         | F 17 |
| P 26 | 686.143         | 471.020  | 467.015         | 467.267         | 466.761         | P 16 |
| V 27 | 710.910         | 446.756  | 442.752         | 443.004         | 442.500         | V 15 |
| G 28 | 725.166         | 421.989  | 417.985         | 418.237         | <b>417.733</b>  | G 14 |
| R 29 | 764.191         | 407.734  | 403.729         | 404.000         | 403.477         | R 13 |
| V 30 | 788.058         | 368.709  | 364.704         | 364.956         | 364.452         | V 12 |
| H 31 | 823.223         | 343.942  | 339.937         | 340.189         | 339.685         | H 11 |
| R 32 | 862.248         | 309.677  | 305.672         | 305.924         | 305.420         | R 10 |
| L 33 | 890.519         | 270.652  | 266.647         | 266.899         | 266.395         | L 9  |
| L 34 | <b>918.790</b>  | 242.381  | 238.376         | 238.628         | 238.124         | L 8  |
| R 35 | 957.545         | 214.130  | 210.125         | 210.377         | 209.873         | R 7  |
| R 36 | <b>989.839</b>  | 175.084  | 171.080         | 171.332         | 170.828         | R 6  |
| G 37 | 1004.094        | 143.061  | 139.056         | 139.308         | 138.804         | G 5  |
| N 38 | <b>1032.605</b> | 126.805  | 124.800         | 125.052         | 124.548         | N 4  |
| V 39 | <b>1073.371</b> | 100.294  | 96.290          | 96.542          | 96.038          | V 3  |
| S 40 | 1095.120        | 59.529   | 55.524          | 55.776          | 55.272          | S 2  |
| E 41 | 1127.390        | 37.771   | 33.766          | 34.018          | 33.514          | E 1  |



# sp | Q8CGP5 | H2A1F\_MOUSE

[Acetyl]SGRGKQGGKARAKAKTRSSRAGLQFPVGRVHRLLRKGNYS

- ▶ fragmentation table for charge state 5+
- ▶ specType=etd
- ▶ score=39.14
- ▶ F113278.dat
- ▶ query=q70287\_p1
- ▶ precursor=752.093610
- ▶ chargePrecursor=6
- ▶ itol=0.5

| AA    | c              | y              | z+1     | z+2     | z       | AA    |
|-------|----------------|----------------|---------|---------|---------|-------|
| S[1]  | 30.221         | <b>902.310</b> | 899.106 | 0.806   | 898.905 | S[41] |
| G[2]  | 41.625         | 876.501        | 873.298 | 0.806   | 873.096 | G[40] |
| R[3]  | 72.845         | 865.097        | 861.893 | 862.095 | 861.692 | R[39] |
| G[4]  | 84.250         | <b>833.877</b> | 830.673 | 830.875 | 830.472 | G[38] |
| K[5]  | 109.869        | 822.473        | 819.269 | 819.470 | 819.067 | K[37] |
| G[6]  | 135.481        | 798.262        | 793.650 | 793.851 | 793.448 | G[36] |
| G[7]  | 146.885        | <b>771.242</b> | 768.038 | 768.240 | 767.837 | G[35] |
| G[8]  | 158.289        | 759.837        | 756.634 | 756.835 | 756.432 | G[34] |
| K[9]  | 183.908        | 748.433        | 745.230 | 745.431 | 745.028 | K[33] |
| A[10] | 198.116        | 722.814        | 719.611 | 719.812 | 719.409 | A[32] |
| R[11] | 229.336        | 708.609        | 705.405 | 705.605 | 705.202 | R[31] |
| A[12] | 243.943        | 677.387        | 674.183 | 674.385 | 673.981 | A[30] |
| K[13] | 269.162        | 663.179        | 659.976 | 660.177 | 659.774 | K[29] |
| A[14] | 283.370        | 637.560        | 634.357 | 634.558 | 634.155 | A[28] |
| K[15] | 308.989        | 623.353        | 620.149 | 620.351 | 619.948 | K[27] |
| T[16] | 329.198        | 597.734        | 594.530 | 594.732 | 594.329 | T[26] |
| R[17] | <b>360.418</b> | 577.524        | 574.321 | 574.522 | 574.119 | R[25] |
| S[18] | 377.625        | 546.304        | 543.100 | 543.302 | 542.899 | S[24] |
| S[19] | 399.231        | 529.898        | 525.694 | 525.896 | 525.492 | S[23] |
| R[20] | 426.451        | 511.491        | 508.288 | 508.489 | 508.088 | R[22] |
| A[21] | 440.659        | 480.271        | 477.067 | 477.269 | 476.866 | A[21] |
| G[22] | 452.063        | 466.064        | 462.860 | 463.061 | 462.658 | G[20] |
| L[23] | 474.680        | 454.659        | 451.456 | 451.657 | 451.254 | L[19] |
| Q[24] | 500.292        | 432.043        | 428.839 | 429.040 | 428.637 | Q[18] |
| F[25] | 529.705        | 406.431        | 403.227 | 403.429 | 403.026 | F[17] |
| P[26] | 549.116        | 377.017        | 373.813 | 374.015 | 373.612 | P[16] |
| V[27] | 568.930        | 357.607        | 354.403 | 354.604 | 354.201 | V[15] |
| G[28] | 580.334        | 337.793        | 334.589 | 334.791 | 334.388 | G[14] |
| R[29] | 611.554        | 326.389        | 323.185 | 323.386 | 322.983 | R[13] |
| V[30] | 631.368        | 299.168        | 295.965 | 296.166 | 295.763 | V[12] |
| H[31] | 658.780        | 275.350        | 272.147 | 272.349 | 271.946 | H[11] |
| R[32] | 690.000        | 247.943        | 244.739 | 244.941 | 244.538 | R[10] |
| L[33] | 712.617        | 216.723        | 213.519 | 213.721 | 213.317 | L[9]  |
| L[34] | 735.233        | 194.108        | 190.902 | 191.104 | 190.701 | L[8]  |
| R[35] | 766.454        | 171.489        | 168.285 | 168.487 | 168.084 | R[7]  |
| K[36] | 792.073        | 140.269        | 137.065 | 137.267 | 136.864 | K[6]  |
| G[37] | 803.477        | 114.650        | 111.446 | 111.648 | 111.245 | G[5]  |
| N[38] | 826.286        | 103.246        | 100.042 | 100.243 | 99.840  | N[4]  |
| Y[39] | <b>858.898</b> | 80.437         | 77.233  | 77.435  | 77.032  | Y[3]  |
| S[40] | <b>876.305</b> | 47.824         | 44.621  | 44.822  | 44.419  | S[2]  |
| E[41] | 902.113        | 30.418         | 27.214  | 27.416  | 27.013  | E[1]  |



# sp | Q8CGP5 | H2A1F\_MOUSE

[Acetyl]SGRGKQGGKARAKAKTRSSRAGLQFPVGRVHLLRKGNYSE

- ▶ fragmentation table for charge state 1+
- ▶ specType=etd
- ▶ score=46.04
- ▶ F113278.dat
- ▶ query=q70288.p1
- ▶ precursor=902.311020
- ▶ chargePrecursor=5
- ▶ itol=0.5

| AA   | c               | y              | z+1             | z+2             | z               | AA   |
|------|-----------------|----------------|-----------------|-----------------|-----------------|------|
| S 1  | 147.076         | 4507.521       | 4491.503        | 0.000           | 4490.486        | S 41 |
| G 2  | 204.068         | 4378.478       | 4362.459        | 0.000           | 4361.451        | G 40 |
| R 3  | <b>360.199</b>  | 4317.457       | 4305.438        | 4308.446        | 4304.438        | R 39 |
| G 4  | <b>417.220</b>  | 4165.355       | 4149.337        | 4150.345        | 4148.329        | G 38 |
| K 5  | <b>545.315</b>  | 4108.334       | 4092.315        | 4093.323        | 4091.307        | K 37 |
| Q 6  | <b>673.374</b>  | 3985.238       | 3969.220        | 3965.228        | 3963.211        | Q 36 |
| G 7  | <b>730.395</b>  | 3852.080       | 3836.100        | 3837.110        | 3835.150        | G 35 |
| G 8  | 787.417         | 3795.159       | 3779.140        | 3780.148        | 3778.132        | G 34 |
| K 9  | 915.512         | 3736.138       | 3722.119        | 3723.127        | 3721.111        | K 33 |
| A 10 | <b>986.549</b>  | 3610.043       | 3594.024        | 3595.032        | 3593.016        | A 32 |
| R 11 | 1142.650        | 3539.095       | 3522.987        | 3523.995        | 3521.979        | R 31 |
| A 12 | <b>1213.687</b> | 3382.904       | 3366.885        | 3367.893        | 3365.877        | A 30 |
| R 13 | <b>1341.782</b> | 3311.867       | 3295.848        | 3296.856        | 3294.841        | R 29 |
| A 14 | <b>1412.819</b> | 3183.772       | 3167.754        | 3168.761        | 3166.746        | A 28 |
| K 15 | <b>1540.914</b> | 3112.735       | 3096.716        | 3097.724        | 3095.709        | K 27 |
| T 16 | 1641.962        | 2984.640       | 2968.621        | 2969.629        | 2967.614        | T 26 |
| R 17 | <b>1798.063</b> | 2863.592       | 2847.573        | 2848.582        | 2846.566        | R 25 |
| S 18 | 1883.959        | 2797.494       | 2781.475        | 2782.483        | 2780.467        | S 24 |
| S 19 | 1972.127        | 2640.459       | 2624.441        | 2625.448        | 2623.433        | S 23 |
| R 20 | 2138.228        | 2553.427       | 2537.409        | 2538.416        | 2536.401        | R 22 |
| A 21 | 2199.205        | 2497.326       | 2481.307        | 2482.315        | 2480.300        | A 21 |
| G 22 | 2256.287        | 2326.289       | 2310.270        | 2311.278        | 2309.263        | G 20 |
| L 23 | 2309.271        | 2209.260       | 2203.240        | 2204.247        | 2202.241        | L 19 |
| Q 24 | 3007.429        | 2158.184       | 2142.165        | 2143.173        | 2141.157        | Q 19 |
| F 25 | 3644.498        | 2028.125       | 2012.106        | 2013.114        | 2011.099        | F 17 |
| F 26 | 2741.551        | 1881.057       | 1865.038        | 1866.046        | 1864.030        | F 16 |
| V 27 | 2840.619        | 1784.004       | 1767.985        | 1768.993        | 1766.977        | V 15 |
| G 28 | 2897.641        | 1684.935       | <b>1668.917</b> | 1669.924        | 1667.909        | G 14 |
| R 29 | 3633.742        | 1627.824       | 1611.805        | <b>1612.803</b> | 1610.787        | R 12 |
| V 30 | 3152.810        | 1471.813       | <b>1455.794</b> | 1456.802        | 1454.787        | V 12 |
| H 31 | 3289.869        | 1372.744       | 1356.726        | 1357.734        | <b>1355.718</b> | H 11 |
| R 32 | 3445.970        | 1235.685       | 1219.667        | <b>1220.675</b> | 1218.659        | R 10 |
| L 33 | 3559.054        | 1079.584       | 1063.566        | <b>1064.573</b> | 1062.558        | L 9  |
| L 34 | 3672.138        | <b>966.500</b> | 950.482         | <b>951.489</b>  | 949.474         | L 8  |
| R 35 | 3638.239        | 853.418        | 837.399         | 838.406         | 836.390         | R 7  |
| K 36 | 3956.334        | 697.315        | 681.296         | 682.304         | 680.289         | K 6  |
| G 37 | 4013.356        | 569.220        | 553.201         | 554.209         | 552.194         | G 5  |
| N 38 | 4127.399        | 512.109        | 496.180         | 497.188         | 495.172         | N 4  |
| V 39 | 4290.462        | 398.158        | 382.139         | 383.145         | 381.129         | V 3  |
| S 40 | 4377.494        | 235.082        | 219.074         | 220.082         | 218.066         | S 2  |
| E 41 | 4408.537        | 148.060        | 132.043         | 133.050         | 131.034         | E 1  |

# sp | Q8CGP5 | H2A1F\_MOUSE

[Acetyl]SGRGKQGGKARAKAKTRSSRAGLQFPVGRVHRLLRKGNYS

- ▶ fragmentation table for charge state 2+
- ▶ specType=etd
- ▶ score=46.04
- ▶ F113278.dat
- ▶ query=q70288.p1
- ▶ precursor=902.311020
- ▶ chargePrecursor=5
- ▶ itol=0.5

| AA   | c               | y        | z+1             | z+2             | z               | AA   |
|------|-----------------|----------|-----------------|-----------------|-----------------|------|
| S 1  | 74.042          | 2754.364 | 2246.255        | 0.504           | 2245.751        | S 41 |
| G 2  | 102.563         | 2189.743 | 2181.731        | 0.504           | 2181.229        | G 40 |
| R 3  | 180.603         | 2181.732 | 2153.229        | 2153.726        | 2152.719        | R 39 |
| G 4  | 209.114         | 2083.181 | 2075.172        | 2075.676        | 2074.669        | G 38 |
| K 5  | 273.161         | 2054.671 | 2046.661        | 2047.165        | 2046.157        | K 37 |
| Q 6  | 337.193         | 1926.623 | 1892.612        | 1893.116        | 1892.110        | Q 36 |
| G 7  | 365.703         | 1926.594 | <b>1918.584</b> | <b>1919.088</b> | 1915.082        | G 35 |
| G 8  | 394.212         | 1898.083 | 1890.074        | 1890.578        | 1889.570        | G 34 |
| K 9  | 458.260         | 1869.672 | <b>1861.563</b> | <b>1862.067</b> | 1861.059        | K 33 |
| A 10 | 493.778         | 1805.625 | <b>1797.516</b> | <b>1798.019</b> | 1797.012        | A 32 |
| R 11 | 571.829         | 1770.096 | 1761.997        | <b>1762.501</b> | 1761.493        | R 31 |
| A 12 | 607.347         | 1693.956 | 1683.949        | 1684.453        | 1683.445        | A 30 |
| R 13 | <b>671.395</b>  | 1656.437 | <b>1648.428</b> | <b>1648.932</b> | 1647.925        | R 29 |
| A 14 | 706.913         | 1592.390 | 1584.380        | <b>1584.884</b> | 1583.876        | A 28 |
| K 15 | <b>770.961</b>  | 1556.671 | <b>1548.662</b> | <b>1549.166</b> | 1548.159        | K 27 |
| T 16 | 821.485         | 1492.824 | 1484.814        | 1485.318        | <b>1484.310</b> | T 26 |
| R 17 | 869.526         | 1454.300 | 1446.290        | 1446.794        | 1445.787        | R 25 |
| S 18 | <b>943.051</b>  | 1394.249 | <b>1356.240</b> | 1356.744        | <b>1355.736</b> | S 24 |
| S 19 | <b>986.567</b>  | 1320.731 | <b>1312.724</b> | 1313.228        | <b>1312.220</b> | S 23 |
| R 20 | <b>1064.618</b> | 1277.217 | 1269.208        | 1269.712        | 1268.704        | R 22 |
| A 21 | <b>1100.136</b> | 1199.067 | 1191.057        | 1191.561        | 1190.553        | A 21 |
| G 22 | 1128.647        | 1163.648 | 1155.639        | 1156.143        | 1155.135        | G 20 |
| L 23 | 1185.398        | 1136.137 | 1127.128        | <b>1127.632</b> | 1126.624        | L 19 |
| Q 24 | <b>1249.218</b> | 1078.595 | 1070.586        | 1071.090        | 1070.082        | Q 19 |
| F 25 | <b>1322.753</b> | 1014.569 | <b>1006.557</b> | <b>1007.061</b> | 1006.053        | F 17 |
| P 26 | 1371.279        | 941.032  | 933.023         | 933.526         | 932.519         | P 16 |
| V 27 | <b>1420.813</b> | 892.506  | 884.496         | 885.000         | 883.992         | V 15 |
| G 28 | <b>1449.324</b> | 842.071  | 834.062         | 835.066         | 834.058         | G 14 |
| R 29 | 1527.874        | 814.463  | 806.453         | <b>806.955</b>  | 805.947         | R 13 |
| V 30 | <b>1576.909</b> | 738.410  | 729.401         | 730.405         | 727.397         | V 12 |
| H 31 | 1595.438        | 688.878  | 678.868         | 679.870         | 678.863         | H 11 |
| R 32 | 1723.489        | 618.346  | 610.337         | 610.841         | 609.833         | R 10 |
| L 33 | 1780.031        | 540.290  | 532.280         | 532.780         | 531.783         | L 9  |
| L 34 | 1836.573        | 483.754  | 475.744         | 476.748         | 475.741         | L 8  |
| R 35 | 1814.623        | 427.212  | 419.202         | 419.706         | 418.698         | R 7  |
| K 36 | 1978.671        | 349.161  | 341.152         | 341.656         | 340.648         | K 6  |
| G 37 | 2007.181        | 285.114  | 277.104         | 277.608         | 276.600         | G 5  |
| N 38 | 2064.203        | 256.603  | 248.594         | 249.098         | 248.090         | N 4  |
| V 39 | 2145.735        | 199.582  | 191.573         | 192.076         | 191.068         | V 3  |
| S 40 | 2189.251        | 118.050  | 110.041         | 110.544         | 109.537         | S 2  |
| E 41 | 2253.772        | 74.534   | 66.524          | 67.028          | 66.021          | E 1  |

# sp | Q8CGP5 | H2A1F\_MOUSE

[Acetyl]SGRGKQGGKARAKAKTRSSRAGLQFPVGRVHRLLRKGNYS

- ▶ fragmentation table for charge state 3+
- ▶ specType=etd
- ▶ score=46.04
- ▶ F113278.dat
- ▶ query=q70288.p1
- ▶ precursor=902.311020
- ▶ chargePrecursor=5
- ▶ itol=0.5

| AA | c  | y               | #s1             | #s2             | #s              | AA              |       |
|----|----|-----------------|-----------------|-----------------|-----------------|-----------------|-------|
| S  | 1  | 48.607          | 1502.118        | <b>1497.839</b> | 0.872           | <b>1497.563</b> | S[41] |
| G  | 2  | 86.704          | <b>1460.164</b> | 1454.575        | 0.672           | 1454.450        | G[40] |
| R  | 3  | 130.718         | 1841.157        | <b>1435.817</b> | <b>1430.153</b> | <b>1435.482</b> | R[39] |
| G  | 4  | 139.745         | 1389.123        | <b>1383.784</b> | <b>1384.120</b> | 1383.446        | G[38] |
| K  | 5  | 182.443         | 1370.116        | <b>1364.777</b> | <b>1365.113</b> | 1364.441        | K[37] |
| G  | 6  | 225.130         | 1327.418        | <b>1322.078</b> | <b>1322.414</b> | 1321.761        | G[36] |
| G  | 7  | 264.137         | 1284.733        | <b>1279.392</b> | <b>1278.728</b> | <b>1279.056</b> | G[35] |
| G  | 8  | 263.144         | 1265.725        | 1260.585        | <b>1260.721</b> | 1260.049        | G[34] |
| K  | 9  | 305.842         | 1246.717        | 1241.578        | 1241.714        | 1241.042        | K[33] |
| A  | 10 | 329.521         | 1204.019        | 1198.079        | 1199.015        | 1198.344        | A[32] |
| R  | 11 | 381.555         | 1180.390        | <b>1175.000</b> | <b>1175.336</b> | 1174.664        | R[31] |
| A  | 12 | 405.234         | <b>1128.206</b> | 1123.007        | <b>1123.303</b> | 1122.631        | A[30] |
| K  | 13 | 447.932         | 1104.627        | <b>1099.288</b> | <b>1099.624</b> | 1098.951        | K[29] |
| A  | 14 | 491.611         | 1081.029        | 1076.539        | 1076.625        | 1076.251        | A[28] |
| K  | 15 | 514.310         | 1038.250        | <b>1032.910</b> | <b>1033.246</b> | <b>1032.574</b> | K[27] |
| T  | 16 | 547.002         | 995.552         | 990.212         | 990.548         | 989.870         | T[26] |
| R  | 17 | 600.626         | 981.869         | 976.529         | 976.865         | 976.187         | R[25] |
| S  | 18 | 629.017         | 959.835         | 954.495         | 954.832         | 954.160         | S[24] |
| S  | 19 | 658.047         | 980.825         | 875.485         | 875.821         | 875.149         | S[23] |
| R  | 20 | 710.081         | 851.814         | 846.474         | 846.810         | 846.138         | R[22] |
| A  | 21 | 733.760         | 799.780         | 794.441         | 794.777         | 794.101         | A[21] |
| G  | 22 | 752.767         | 776.101         | <b>770.762</b>  | <b>771.098</b>  | 770.426         | G[20] |
| L  | 23 | 786.482         | 759.094         | 753.754         | 754.090         | 753.418         | L[19] |
| Q  | 24 | 833.148         | 739.305         | 734.000         | 734.306         | 733.721         | Q[18] |
| F  | 25 | 882.171         | 676.713         | <b>671.374</b>  | <b>671.710</b>  | <b>671.038</b>  | F[17] |
| F  | 26 | <b>914.522</b>  | 627.600         | 622.351         | 622.687         | 622.015         | F[16] |
| V  | 27 | <b>947.545</b>  | 595.139         | 590.000         | 590.336         | 589.664         | V[15] |
| G  | 28 | <b>966.552</b>  | 562.317         | 556.977         | 557.313         | 556.641         | G[14] |
| R  | 29 | 1013.555        | 543.309         | 537.970         | 538.306         | 537.634         | R[13] |
| V  | 30 | <b>1051.608</b> | 490.275         | 485.036         | 485.372         | 484.699         | V[12] |
| H  | 31 | 1097.204        | 458.253         | 452.913         | 453.249         | 452.577         | H[11] |
| R  | 32 | 1149.328        | 412.967         | 407.227         | 407.563         | 406.891         | R[10] |
| L  | 33 | <b>1187.023</b> | <b>360.533</b>  | 355.193         | 355.529         | 354.857         | L[9]  |
| L  | 34 | 1234.718        | 322.876         | 317.489         | 317.825         | 317.153         | L[8]  |
| R  | 35 | 1276.751        | 285.144         | 279.804         | 280.140         | 279.468         | R[7]  |
| K  | 36 | 1319.450        | 233.110         | 227.770         | 228.106         | 227.434         | K[6]  |
| G  | 37 | 1338.457        | 190.412         | 185.072         | 185.408         | 184.736         | G[5]  |
| N  | 38 | 1378.471        | 171.404         | 166.065         | 166.401         | 165.729         | N[4]  |
| V  | 39 | <b>1430.826</b> | 133.390         | 128.051         | 128.387         | 127.715         | V[3]  |
| S  | 40 | <b>1459.836</b> | 99.136          | 93.796          | 94.132          | 93.460          | S[2]  |
| E  | 41 | 1502.850        | 50.025          | 44.685          | 45.021          | 44.349          | E[1]  |

# sp | Q8CGP5 | H2A1F\_MOUSE

[Acetyl]SGRGKQGGKARAKAKTRSSRAGLQFPVGRVHRLLRKGNYS

- ▶ fragmentation table for charge state 4+
- ▶ specType=etd
- ▶ score=46.04
- ▶ F113278.dat
- ▶ query=q70288.p1
- ▶ precursor=902.311020
- ▶ chargePrecursor=5
- ▶ itol=0.5

| AA |    | c               | m               | p               | #s=1            | #s=2            | #s    | AA  |
|----|----|-----------------|-----------------|-----------------|-----------------|-----------------|-------|-----|
| S  | 1  | 37.505          | <b>1127.636</b> | <b>1123.631</b> | 0.705           | <b>1123.370</b> | 0.541 | G40 |
| G  | 2  | 51.780          | 1026.375        | <b>1091.370</b> | 0.795           | 1021.110        | 0.460 | R30 |
| R  | 3  | 90.805          | 1081.120        | <b>1077.115</b> | <b>1077.367</b> | 1076.861        | R30   |     |
| G  | 4  | 105.061         | 1042.094        | 1038.090        | 1038.342        | 1037.830        | G38   |     |
| K  | 5  | 137.064         | 1027.839        | 1021.834        | 1024.086        | 1023.587        | K37   |     |
| G  | 6  | 169.059         | 995.915         | 991.911         | 992.062         | 991.559         | Q36   |     |
| G  | 7  | 183.354         | 983.361         | 980.356         | 980.508         | 979.544         | G35   |     |
| G  | 8  | 197.610         | 949.545         | 945.541         | 945.792         | 945.289         | G34   |     |
| K  | 9  | 239.613         | 935.290         | 931.285         | 931.537         | 931.033         | K33   |     |
| A  | 10 | 247.393         | 903.266         | 899.261         | 899.513         | 899.009         | A32   |     |
| R  | 11 | 286.418         | 895.507         | 891.502         | 891.754         | 891.250         | R31   |     |
| A  | 12 | 304.199         | 868.482         | 864.477         | 864.729         | 864.225         | A30   |     |
| K  | 13 | 336.201         | 828.722         | 824.718         | 824.970         | 824.466         | K29   |     |
| A  | 14 | 353.980         | 796.699         | 792.694         | 792.946         | 792.442         | A28   |     |
| K  | 15 | 385.984         | 778.939         | 774.935         | 775.187         | 774.683         | K27   |     |
| T  | 16 | 411.246         | 746.915         | 742.911         | 743.163         | 742.659         | T26   |     |
| R  | 17 | 459.271         | 721.954         | 717.949         | 717.901         | 717.301         | R25   |     |
| S  | 18 | 472.609         | 692.626         | 688.621         | 688.873         | 688.370         | S24   |     |
| S  | 19 | 493.787         | 660.970         | 656.966         | 657.118         | 656.614         | S23   |     |
| R  | 20 | 532.813         | 639.112         | 635.108         | 635.360         | 634.856         | R22   |     |
| A  | 21 | 550.572         | 600.087         | 596.082         | 596.334         | 595.830         | A21   |     |
| G  | 22 | 564.827         | 582.328         | 578.323         | 578.575         | 578.071         | G20   |     |
| L  | 23 | 593.098         | 568.072         | 564.068         | 564.320         | 563.816         | L19   |     |
| Q  | 24 | 625.113         | 539.801         | 535.797         | 536.049         | 535.545         | Q18   |     |
| F  | 25 | 661.880         | 507.787         | 503.782         | 504.034         | 503.530         | F17   |     |
| F  | 26 | 698.143         | 471.020         | 467.015         | 467.267         | 466.763         | F16   |     |
| V  | 27 | 710.910         | 446.756         | 442.752         | 443.004         | 442.500         | V15   |     |
| G  | 28 | 725.169         | 421.989         | 417.985         | 418.237         | <b>417.733</b>  | G14   |     |
| R  | 29 | 764.181         | 389.734         | 385.729         | 385.981         | 385.477         | R13   |     |
| V  | 30 | 788.958         | 368.709         | 364.704         | 364.956         | 364.452         | V12   |     |
| H  | 31 | 823.223         | 343.942         | 339.937         | 340.189         | 339.685         | H11   |     |
| R  | 32 | 862.248         | 309.677         | 305.672         | 305.924         | 305.420         | R10   |     |
| L  | 33 | 890.519         | 270.652         | 266.647         | 266.899         | 266.395         | L9    |     |
| L  | 34 | 918.369         | 242.381         | 238.376         | 238.628         | 238.124         | L8    |     |
| R  | 35 | 937.815         | 214.110         | 210.105         | 210.357         | 209.853         | R7    |     |
| K  | 36 | 989.839         | 175.084         | 171.080         | 171.332         | 170.828         | K6    |     |
| G  | 37 | 1064.094        | 143.061         | 139.056         | 139.308         | 138.804         | G5    |     |
| N  | 38 | <b>1032.605</b> | 128.805         | 124.800         | 125.052         | 124.548         | N4    |     |
| V  | 39 | <b>1073.371</b> | 100.294         | 96.289          | 96.542          | 96.038          | V3    |     |
| S  | 40 | 1095.419        | 98.529          | 94.524          | 94.776          | 94.272          | S2    |     |
| E  | 41 | 1127.590        | 97.771          | 93.766          | 94.018          | 93.514          | E1    |     |

# sp | Q8CGP5 | H2A1F\_MOUSE

[Acetyl]SGRGKQGGKARAKATRSSRAGLQFPVGRVHLLRKGNYSE

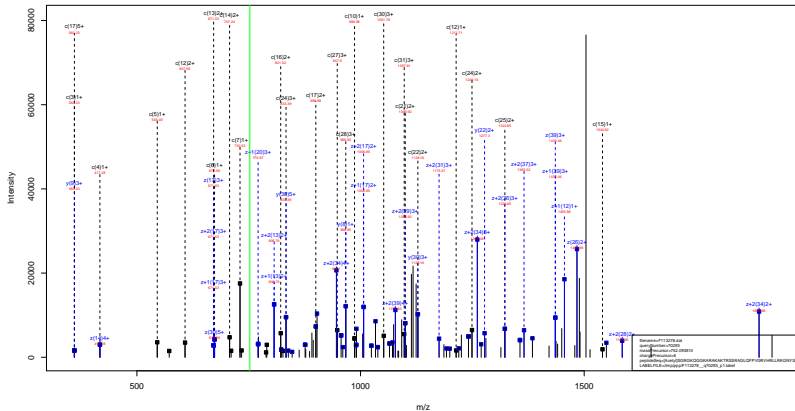

# sp | Q8CGP5 | H2A1F\_MOUSE

[Acetyl]SGRGKQGGKARAKAKTRSSRAGLQFPVGRVHLLRKGNYSE

- ▶ fragmentation table for charge state 1+
- ▶ specType=etd
- ▶ score=40.49
- ▶ F113278.dat
- ▶ query=q70293.p1
- ▶ precursor=752.093810
- ▶ chargePrecursor=6
- ▶ itol=0.5

| AA   | c               | y              | z+1             | z+2             | z        | AA   |
|------|-----------------|----------------|-----------------|-----------------|----------|------|
| S 1  | 147.076         | 4507.521       | 4491.502        | 0.000           | 4490.494 | S 41 |
| G 2  | 304.098         | 4378.478       | 4362.459        | 0.000           | 4361.451 | G 40 |
| R 3  | <b>360.199</b>  | 4321.457       | 4305.438        | 4306.448        | 4304.430 | R 39 |
| G 4  | <b>417.220</b>  | 4165.355       | 4149.337        | 4150.345        | 4148.329 | G 38 |
| K 5  | <b>545.315</b>  | 4108.334       | 4092.315        | 4093.323        | 4091.307 | K 37 |
| Q 6  | <b>673.174</b>  | 3989.239       | 3974.220        | 3985.228        | 3983.212 | Q 36 |
| G 7  | <b>730.395</b>  | 3852.180       | 3836.162        | 3837.170        | 3835.154 | G 35 |
| G 8  | 787.417         | 3795.159       | 3779.140        | 3780.148        | 3778.132 | G 34 |
| K 9  | 915.512         | 3738.138       | 3722.119        | 3723.127        | 3721.111 | K 33 |
| A 10 | <b>986.549</b>  | 3610.043       | 3594.024        | 3595.032        | 3593.016 | A 32 |
| R 11 | 1147.050        | 3536.005       | 3522.987        | 3523.995        | 3521.979 | R 31 |
| A 12 | <b>1213.687</b> | 3392.904       | 3386.886        | 3387.893        | 3386.876 | A 30 |
| K 13 | 1341.782        | 3311.867       | 3295.848        | 3296.856        | 3294.841 | K 29 |
| A 14 | 1412.819        | 3183.772       | 3167.754        | 3168.761        | 3166.746 | A 28 |
| K 15 | <b>1540.914</b> | 3112.735       | 3096.716        | 3097.724        | 3095.709 | K 27 |
| T 16 | 1541.962        | 2984.640       | 2968.621        | 2969.629        | 2967.614 | T 26 |
| K 17 | 1798.063        | 2883.592       | 2867.574        | 2868.582        | 2866.566 | K 25 |
| S 18 | 1885.098        | 2727.491       | 2711.473        | 2712.480        | 2710.465 | S 24 |
| S 19 | 1972.127        | 2640.455       | 2624.441        | 2625.448        | 2623.433 | S 23 |
| R 20 | 2128.228        | 2553.427       | 2537.409        | 2538.416        | 2536.401 | R 22 |
| A 21 | 2199.265        | 2497.326       | 2481.307        | 2482.315        | 2480.300 | A 21 |
| G 22 | 2286.287        | 2326.289       | 2310.270        | 2311.278        | 2309.263 | G 20 |
| L 23 | 2369.371        | 2269.268       | 2253.249        | 2254.257        | 2252.241 | L 19 |
| Q 24 | 2497.429        | 2156.184       | 2140.165        | 2141.173        | 2139.157 | Q 18 |
| F 25 | 2644.498        | 2028.125       | 2012.106        | 2013.114        | 2011.099 | F 17 |
| P 26 | 2741.551        | 1881.057       | 1865.038        | 1866.046        | 1864.030 | P 16 |
| V 27 | 2840.619        | 1784.004       | 1767.985        | 1768.993        | 1766.977 | V 15 |
| G 28 | 2897.641        | 1684.935       | 1668.917        | 1669.924        | 1667.909 | G 14 |
| R 29 | 3053.742        | 1627.914       | 1611.895        | 1612.903        | 1610.887 | R 13 |
| V 30 | 3153.810        | 1518.833       | <b>1455.794</b> | 1456.802        | 1454.785 | V 12 |
| H 31 | 3289.869        | 1372.744       | <b>1356.726</b> | 1357.734        | 1355.718 | H 11 |
| R 32 | 3445.970        | 1235.685       | <b>1219.667</b> | 1220.675        | 1218.659 | R 10 |
| L 33 | 3559.054        | 1079.584       | 1063.566        | <b>1064.573</b> | 1062.558 | L 9  |
| L 34 | 3672.138        | <b>966.500</b> | 950.482         | 951.489         | 949.474  | L 8  |
| R 35 | 3828.239        | 853.416        | 837.398         | <b>838.405</b>  | 836.390  | R 7  |
| K 36 | 3956.334        | 697.315        | 681.298         | 682.304         | 680.289  | K 6  |
| G 37 | 4013.356        | 569.220        | 553.201         | 554.209         | 552.194  | G 5  |
| N 38 | 4127.399        | 512.109        | 496.100         | 497.108         | 495.172  | N 4  |
| V 39 | 4290.462        | 396.156        | 380.137         | 381.145         | 381.129  | V 3  |
| S 40 | 4377.494        | 235.092        | 219.074         | 220.082         | 218.066  | S 2  |
| E 41 | 4506.537        | 148.060        | 132.042         | 133.050         | 131.034  | E 1  |



# sp | Q8CGP5 | H2A1F\_MOUSE

[Acetyl]SGRGKQGGKARAKAKTRSSRAGLQFPVGRVHLLRKGNYSE

- ▶ fragmentation table for charge state 2+
- ▶ specType=etd
- ▶ score=40.49
- ▶ F113278.dat
- ▶ query=q70293.p1
- ▶ precursor=752.093810
- ▶ chargePrecursor=6
- ▶ itol=0.5

| AA | c  | y               | #s1             | #s2             | z               | AA              |       |
|----|----|-----------------|-----------------|-----------------|-----------------|-----------------|-------|
| S  | 1  | 74.062          | 2034.264        | 2266.255        | 0.804           | 2245.78         | S[41] |
| G  | 2  | 102.553         | 2189.743        | 2381.733        | 0.504           | 2181.220        | G[40] |
| R  | 3  | 180.603         | 2641.232        | 2153.233        | 2153.236        | 2152.710        | R[39] |
| G  | 4  | 209.114         | 2083.181        | 2075.172        | 2075.676        | 2074.660        | G[38] |
| K  | 5  | 273.181         | 2054.671        | 2046.661        | 2047.165        | 2046.157        | K[37] |
| G  | 6  | 337.194         | 1990.622        | 1982.614        | 1983.118        | 1982.110        | G[36] |
| G  | 7  | 385.703         | 1706.594        | 1619.584        | 1619.088        | 1618.081        | G[35] |
| G  | 8  | 394.212         | 1898.083        | 1890.074        | <b>1890.578</b> | 1889.570        | G[34] |
| K  | 9  | 458.260         | 1869.572        | 1861.563        | 1862.067        | 1861.059        | K[33] |
| A  | 10 | 493.778         | 1805.525        | 1797.516        | 1798.019        | 1797.012        | A[32] |
| R  | 11 | <b>571.829</b>  | 1770.008        | 1761.997        | 1762.501        | 1761.493        | R[31] |
| A  | 12 | <b>607.347</b>  | 1692.956        | 1684.946        | 1685.450        | 1684.443        | A[30] |
| R  | 13 | <b>671.395</b>  | 1656.437        | 1648.428        | 1648.932        | 1647.924        | R[29] |
| A  | 14 | <b>706.913</b>  | 1592.900        | 1584.890        | <b>1584.884</b> | 1583.876        | A[28] |
| K  | 15 | <b>770.961</b>  | 1556.871        | 1548.862        | <b>1549.366</b> | 1548.358        | K[27] |
| T  | 16 | <b>821.485</b>  | 1492.824        | 1484.814        | 1485.318        | <b>1484.310</b> | T[26] |
| R  | 17 | <b>899.535</b>  | 1442.800        | 1434.790        | 1435.294        | 1434.287        | R[25] |
| S  | 18 | 903.875         | 1384.249        | <b>1356.240</b> | <b>1356.744</b> | 1355.736        | S[24] |
| S  | 19 | <b>986.567</b>  | 1330.733        | 1312.724        | 1313.228        | 1312.220        | S[23] |
| R  | 20 | <b>1064.618</b> | <b>1277.217</b> | 1269.208        | <b>1269.712</b> | 1268.704        | R[22] |
| A  | 21 | <b>1100.136</b> | <b>1199.167</b> | 1191.157        | <b>1191.661</b> | 1190.653        | A[21] |
| G  | 22 | <b>1128.647</b> | 1153.648        | 1145.639        | 1146.143        | 1145.135        | G[20] |
| L  | 23 | 1155.709        | 1138.137        | 1129.128        | 1129.632        | 1128.624        | L[19] |
| Q  | 24 | <b>1249.218</b> | 1078.595        | 1070.586        | <b>1071.090</b> | 1070.082        | Q[18] |
| F  | 25 | <b>1322.753</b> | 1014.569        | <b>1006.557</b> | <b>1007.061</b> | 1006.053        | F[17] |
| F  | 26 | 1371.279        | 941.033         | 933.023         | 933.526         | 932.519         | F[16] |
| V  | 27 | 1420.811        | 892.506         | 884.496         | 885.000         | 883.992         | V[15] |
| G  | 28 | 1469.324        | 842.971         | 834.961         | 835.465         | 834.457         | G[14] |
| R  | 29 | 1527.834        | 814.481         | <b>806.451</b>  | <b>806.955</b>  | 805.947         | R[13] |
| V  | 30 | 1576.909        | 736.410         | 728.401         | 728.905         | 727.897         | V[12] |
| H  | 31 | 1645.438        | 688.876         | 678.866         | 679.370         | 678.363         | H[11] |
| R  | 32 | 1723.489        | 618.346         | 610.337         | 610.841         | 609.833         | R[10] |
| L  | 33 | 1780.031        | 540.296         | 532.286         | 532.790         | 531.783         | L[9]  |
| L  | 34 | 1838.573        | 489.754         | 479.744         | 479.248         | 478.241         | L[8]  |
| R  | 35 | 1914.623        | 427.212         | 419.202         | 419.706         | 418.698         | R[7]  |
| K  | 36 | 1978.671        | 349.161         | 341.152         | 341.656         | 340.648         | K[6]  |
| G  | 37 | 2067.181        | 285.114         | 277.104         | 277.608         | 276.600         | G[5]  |
| N  | 38 | 2094.203        | 256.603         | 248.594         | 249.098         | 248.090         | N[4]  |
| V  | 39 | 2145.736        | 199.562         | 191.552         | 192.056         | 191.048         | V[3]  |
| S  | 40 | 2199.261        | 118.056         | 110.046         | 110.550         | 109.543         | S[2]  |
| E  | 41 | 2253.772        | 74.534          | 66.524          | 67.028          | 66.021          | E[1]  |

# sp | Q8CGP5 | H2A1F\_MOUSE

[Acetyl]SGRGKQGGKARAKAKTRSSRAGLQFPVGRVHRLLRKGNYS

- ▶ fragmentation table for charge state 3+
- ▶ specType=etd
- ▶ score=40.49
- ▶ F113278.dat
- ▶ query=q70293.p1
- ▶ precursor=752.093810
- ▶ chargePrecursor=6
- ▶ itol=0.5

| AA | c  | y               | #s1             | #s2             | z               | AA              |       |
|----|----|-----------------|-----------------|-----------------|-----------------|-----------------|-------|
| S  | 1  | 48.607          | 1502.178        | 1487.830        | 0.872           | 1487.567        | S[41] |
| G  | 2  | 86.704          | 1460.184        | 1454.935        | 0.672           | 1454.480        | G[40] |
| R  | 3  | 1307.788        | 1441.157        | <b>1435.817</b> | 1436.153        | <b>1435.482</b> | R[30] |
| G  | 4  | 139.745         | 1389.123        | 1383.784        | <b>1384.120</b> | 1383.440        | G[38] |
| K  | 5  | 182.443         | 1370.118        | 1364.777        | <b>1365.113</b> | 1364.441        | K[37] |
| G  | 6  | 225.130         | 1327.418        | 1322.078        | <b>1322.414</b> | 1321.742        | G[36] |
| G  | 7  | 244.137         | 1284.732        | 1279.392        | 1279.728        | 1279.056        | G[35] |
| G  | 8  | 263.144         | 1265.725        | 1260.385        | <b>1260.721</b> | 1260.049        | G[34] |
| K  | 9  | 305.642         | 1246.717        | <b>1241.378</b> | <b>1241.714</b> | <b>1241.042</b> | K[33] |
| A  | 10 | 329.521         | 1204.019        | 1198.679        | 1199.015        | 1198.344        | A[32] |
| R  | 11 | 381.555         | 1180.240        | 1175.000        | <b>1175.336</b> | 1174.664        | R[31] |
| A  | 12 | 405.234         | <b>1128.206</b> | 1122.967        | 1123.303        | 1122.631        | A[30] |
| K  | 13 | 447.932         | 1104.627        | 1099.288        | <b>1099.624</b> | 1099.952        | K[29] |
| A  | 14 | 471.611         | 1061.929        | 1056.589        | 1056.925        | 1056.253        | A[28] |
| K  | 15 | 514.310         | <b>1038.250</b> | 1032.910        | <b>1033.246</b> | 1032.574        | K[27] |
| T  | 16 | 547.002         | 995.552         | <b>990.212</b>  | <b>990.548</b>  | <b>989.876</b>  | T[26] |
| R  | 17 | 600.626         | 961.869         | <b>956.529</b>  | <b>956.865</b>  | <b>956.193</b>  | R[25] |
| S  | 18 | 629.017         | 909.835         | 904.485         | 904.821         | 904.150         | S[24] |
| S  | 19 | 658.047         | 880.825         | 875.485         | <b>875.821</b>  | 875.149         | S[23] |
| R  | 20 | 710.081         | 851.814         | 846.474         | <b>846.810</b>  | 846.138         | R[22] |
| A  | 21 | <b>733.760</b>  | 799.780         | 794.441         | 794.777         | 794.105         | A[21] |
| G  | 22 | 752.767         | 776.101         | <b>770.762</b>  | <b>771.098</b>  | 770.426         | G[20] |
| L  | 23 | <b>790.462</b>  | 759.094         | 753.754         | 754.090         | 753.418         | L[19] |
| Q  | 24 | <b>833.148</b>  | 733.305         | 727.965         | 728.301         | 727.629         | Q[18] |
| F  | 25 | 882.171         | 676.713         | <b>671.374</b>  | <b>671.710</b>  | <b>671.038</b>  | F[17] |
| F  | 26 | 914.552         | 627.600         | 622.261         | 622.597         | 622.015         | F[16] |
| V  | 27 | <b>947.545</b>  | 595.139         | 590.000         | 590.336         | 589.664         | V[15] |
| G  | 28 | <b>966.552</b>  | 562.317         | 556.977         | 557.313         | 556.641         | G[14] |
| R  | 29 | 1013.559        | 443.309         | 437.970         | 438.306         | 437.634         | R[13] |
| V  | 30 | <b>1051.608</b> | 401.275         | 405.936         | 406.272         | 405.600         | V[12] |
| H  | 31 | <b>1097.294</b> | 458.253         | 452.913         | 453.249         | 452.577         | H[11] |
| R  | 32 | 1149.328        | 412.567         | 407.227         | 407.563         | 406.891         | R[10] |
| L  | 33 | 1187.023        | <b>360.533</b>  | 355.193         | 355.529         | 354.857         | L[9]  |
| L  | 34 | 1234.718        | 322.378         | 317.038         | 317.374         | 316.702         | L[8]  |
| R  | 35 | 1276.752        | 285.144         | 279.804         | 280.140         | 279.468         | R[7]  |
| K  | 36 | 1319.450        | 233.110         | 227.770         | 228.106         | 227.434         | K[6]  |
| G  | 37 | 1338.457        | 190.412         | 185.072         | 185.408         | 184.736         | G[5]  |
| N  | 38 | 1376.471        | 171.404         | 166.065         | 166.401         | 165.729         | N[4]  |
| V  | 39 | 1430.826        | 133.290         | 128.051         | 128.387         | 127.715         | V[3]  |
| S  | 40 | 1459.836        | 98.136          | 93.000          | 93.336          | 92.664          | S[2]  |
| E  | 41 | 1502.850        | 50.025          | 44.685          | 45.021          | 44.349          | E[1]  |

# sp | Q8CGP5 | H2A1F\_MOUSE

[Acetyl]SGRGKQGGKARAKAKTRSSRAGLQFPVGRVHLLRKGNYSE

- ▶ fragmentation table for charge state 4+
- ▶ specType=etd
- ▶ score=40.49
- ▶ F113278.dat
- ▶ query=q70293.p1
- ▶ precursor=752.093810
- ▶ chargePrecursor=6
- ▶ itol=0.5

| AA | c  | y              | z+1      | z+2             | z               | AA             |       |
|----|----|----------------|----------|-----------------|-----------------|----------------|-------|
| S  | 1  | 37.525         | 1127.636 | 4123.631        | 0.795           | 1123.376       | S[41] |
| G  | 2  | 51.780         | 1095.375 | 1091.370        | 0.795           | 1091.118       | G[40] |
| R  | 3  | 90.805         | 1081.120 | 1077.115        | <b>1077.367</b> | 1076.863       | R[39] |
| C  | 4  | 105.061        | 1042.094 | 1038.089        | <b>1038.342</b> | 1037.838       | C[38] |
| K  | 5  | 137.684        | 1027.839 | <b>1023.834</b> | <b>1024.086</b> | 1023.582       | K[37] |
| Q  | 6  | 169.059        | 995.615  | 991.611         | 992.062         | 991.559        | Q[36] |
| G  | 7  | 183.354        | 963.601  | 959.596         | <b>960.048</b>  | 959.544        | G[35] |
| G  | 8  | 197.610        | 949.545  | 945.541         | <b>945.792</b>  | 945.289        | G[34] |
| K  | 9  | 229.613        | 935.290  | 931.285         | 931.537         | 931.033        | K[33] |
| A  | 10 | 247.303        | 903.266  | 899.261         | <b>899.513</b>  | 899.009        | A[32] |
| R  | 11 | 289.418        | 888.307  | 884.302         | 884.754         | 884.250        | R[31] |
| A  | 12 | 304.177        | 846.482  | 842.477         | 842.729         | 842.225        | A[30] |
| K  | 13 | 336.201        | 828.722  | 824.718         | 824.970         | 824.466        | K[29] |
| A  | 14 | 353.960        | 796.689  | 792.694         | 792.946         | 792.442        | A[28] |
| K  | 15 | 385.984        | 778.939  | 774.935         | 775.187         | 774.683        | K[27] |
| T  | 16 | 411.246        | 746.915  | 742.911         | 743.163         | 742.659        | T[26] |
| K  | 17 | 450.271        | 721.684  | 717.680         | 717.901         | 717.397        | K[25] |
| S  | 18 | 472.659        | 682.828  | 678.824         | 678.876         | 678.372        | S[24] |
| S  | 19 | 493.787        | 660.870  | 656.865         | 657.118         | 656.614        | S[23] |
| R  | 20 | 532.813        | 639.112  | 635.108         | 635.360         | 634.856        | R[22] |
| A  | 21 | 550.572        | 600.987  | 596.982         | 596.934         | 596.630        | A[21] |
| G  | 22 | 564.827        | 582.328  | 578.323         | 578.575         | 578.071        | G[20] |
| L  | 23 | 583.058        | 568.072  | 564.068         | 564.320         | 563.816        | L[19] |
| Q  | 24 | 623.113        | 539.801  | 535.797         | 536.049         | 535.545        | Q[18] |
| F  | 25 | 661.880        | 507.787  | 503.782         | 504.034         | 503.530        | F[17] |
| P  | 26 | 686.143        | 471.020  | 467.015         | 467.267         | 466.763        | P[16] |
| V  | 27 | <b>710.910</b> | 446.756  | 442.752         | 443.004         | 442.500        | V[15] |
| G  | 28 | 725.166        | 421.989  | 417.985         | 418.237         | <b>417.733</b> | G[14] |
| R  | 29 | 764.191        | 407.734  | 403.729         | 403.981         | 403.477        | R[13] |
| V  | 30 | <b>788.958</b> | 368.709  | 364.704         | 364.956         | 364.452        | V[12] |
| I  | 31 | <b>823.223</b> | 343.842  | 339.837         | 340.089         | 339.585        | I[11] |
| R  | 32 | <b>862.548</b> | 309.677  | 305.672         | 305.924         | 305.420        | R[10] |
| L  | 33 | 890.519        | 270.652  | 266.647         | 266.899         | 266.395        | L[9]  |
| L  | 34 | 918.790        | 242.981  | 238.976         | 239.228         | 238.724        | L[8]  |
| R  | 35 | 957.815        | 214.110  | 210.105         | 210.357         | 209.853        | R[7]  |
| K  | 36 | <b>989.839</b> | 175.084  | 171.080         | 171.332         | 170.828        | K[6]  |
| C  | 37 | 1043.954       | 143.261  | 139.256         | 139.508         | 138.904        | C[5]  |
| N  | 38 | 1032.605       | 128.805  | 124.800         | 125.052         | 124.548        | N[4]  |
| V  | 39 | 1073.371       | 100.294  | 96.290          | 96.542          | 96.038         | V[3]  |
| S  | 40 | 1095.129       | 59.629   | 55.524          | 55.776          | 55.272         | S[2]  |
| E  | 41 | 1127.990       | 37.771   | 33.766          | 34.018          | 33.514         | E[1]  |

# sp | Q8CGP5 | H2A1F\_MOUSE

[Acetyl]SGRGKQGGKARAKAKTRSSRAGLQFPVGRVHRLLRKGNYS

- ▶ fragmentation table for charge state 5+
- ▶ specType=etd
- ▶ score=40.49
- ▶ F113278.dat
- ▶ query=q70293.p1
- ▶ precursor=752.093810
- ▶ chargePrecursor=6
- ▶ itol=0.5

| AA    | c              | y              | z+1     | z+2     | z              | AA    |
|-------|----------------|----------------|---------|---------|----------------|-------|
| S[1]  | 30.221         | <b>902.310</b> | 899.106 | 0.806   | 898.905        | S[41] |
| G[2]  | 41.625         | <b>876.501</b> | 873.298 | 0.806   | 873.096        | G[40] |
| R[3]  | 72.846         | 865.097        | 861.893 | 862.095 | 861.892        | R[39] |
| G[4]  | 84.250         | <b>833.877</b> | 830.673 | 830.675 | 830.472        | G[38] |
| K[5]  | 109.869        | <b>822.473</b> | 819.269 | 819.470 | 819.067        | K[37] |
| Q[6]  | 135.481        | 796.854        | 793.650 | 793.851 | 793.448        | Q[36] |
| G[7]  | 146.885        | <b>771.242</b> | 768.038 | 768.240 | 767.837        | G[35] |
| G[8]  | 158.289        | 759.238        | 756.034 | 756.235 | 755.832        | G[34] |
| K[9]  | 181.908        | 748.431        | 745.230 | 745.431 | 745.028        | K[33] |
| A[10] | 198.116        | 722.814        | 719.611 | 719.812 | 719.409        | A[32] |
| R[11] | 229.336        | 708.607        | 705.403 | 705.605 | 705.202        | R[31] |
| A[12] | 243.543        | 677.387        | 674.183 | 674.385 | <b>673.981</b> | A[30] |
| K[13] | 269.162        | 663.179        | 659.976 | 660.177 | 659.774        | K[29] |
| A[14] | 283.370        | 637.560        | 634.357 | 634.558 | 634.155        | A[28] |
| K[15] | 308.989        | 623.353        | 620.149 | 620.351 | 619.948        | K[27] |
| T[16] | 329.198        | 597.734        | 594.530 | 594.732 | 594.329        | T[26] |
| R[17] | <b>360.418</b> | 577.524        | 574.321 | 574.522 | 574.119        | R[25] |
| S[18] | 377.625        | 546.304        | 543.100 | 543.302 | 542.899        | S[24] |
| S[19] | 399.231        | 528.896        | 525.694 | 525.896 | 525.492        | S[23] |
| R[20] | 426.451        | 511.491        | 508.288 | 508.489 | 508.086        | R[22] |
| A[21] | 440.659        | 480.271        | 477.067 | 477.269 | 476.866        | A[21] |
| G[22] | 452.063        | 468.064        | 464.860 | 465.061 | 464.658        | G[20] |
| L[23] | 474.680        | 454.659        | 451.456 | 451.657 | 451.254        | L[19] |
| Q[24] | 500.292        | 432.045        | 428.839 | 429.040 | 428.637        | Q[18] |
| F[25] | 529.705        | 408.431        | 403.227 | 403.429 | 403.026        | F[17] |
| P[26] | 549.116        | 377.017        | 373.813 | 374.015 | 373.612        | P[16] |
| V[27] | 568.930        | 357.607        | 354.403 | 354.604 | 354.201        | V[15] |
| G[28] | 580.334        | 337.793        | 334.589 | 334.791 | 334.388        | G[14] |
| R[29] | 611.554        | 326.389        | 323.185 | 323.386 | 322.983        | R[13] |
| V[30] | 633.368        | 295.169        | 291.965 | 292.166 | 291.763        | V[12] |
| H[31] | 658.780        | 275.955        | 272.751 | 272.953 | 271.949        | H[11] |
| R[32] | 690.000        | 247.941        | 244.738 | 244.941 | 244.538        | R[10] |
| L[33] | 712.617        | 216.721        | 213.519 | 213.721 | 213.317        | L[0]  |
| L[34] | 735.233        | 194.106        | 190.902 | 191.104 | 190.701        | L[8]  |
| R[35] | 766.454        | 171.489        | 168.285 | 168.487 | 168.084        | R[7]  |
| K[36] | 792.073        | 140.269        | 137.065 | 137.267 | 136.864        | K[6]  |
| G[37] | 803.477        | 114.650        | 111.446 | 111.648 | 111.245        | G[5]  |
| N[38] | <b>826.286</b> | 103.246        | 100.042 | 100.243 | 99.840         | N[4]  |
| V[39] | 858.898        | 80.437         | 77.233  | 77.435  | 77.032         | V[3]  |
| S[40] | <b>876.305</b> | 47.824         | 44.621  | 44.822  | 44.419         | S[2]  |
| E[41] | 902.113        | 30.418         | 27.214  | 27.416  | 27.013         | E[1]  |

# sp | Q8CGP5 | H2A1F\_MOUSE

[Acetyl]SGRGKQGGKARAKAKTRSSRAGLQFPVGRVHLLRKGNYSE

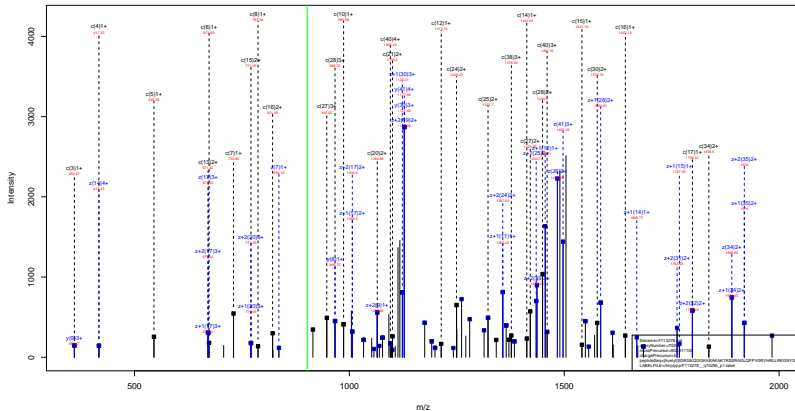

# sp | Q8CGP5 | H2A1F\_MOUSE

[Acetyl]SGRGKQGGKARAKTRSSRAGLQFPVGRVHRLLRKGNYS

- ▶ fragmentation table for charge state 1+
- ▶ specType=etd
- ▶ score=75.59
- ▶ F113278.dat
- ▶ query=q70295.p1
- ▶ precursor=902.311150
- ▶ chargePrecursor=5
- ▶ itol=0.5

| AA   | c               | y              | z+1             | z+2             | z              | AA   |
|------|-----------------|----------------|-----------------|-----------------|----------------|------|
| S 1  | 147.076         | 4507.521       | 4491.502        | 0.000           | 4490.494       | S 41 |
| G 2  | 304.098         | 4378.478       | 4362.459        | 0.000           | 4361.451       | G 40 |
| R 3  | <b>360.199</b>  | 4321.457       | 4305.438        | 4306.448        | 4304.430       | R 39 |
| G 4  | <b>417.220</b>  | 4165.355       | 4149.337        | 4150.345        | 4148.329       | G 38 |
| K 5  | <b>543.315</b>  | 4108.334       | 4092.315        | 4093.323        | 4091.307       | K 37 |
| Q 6  | <b>673.374</b>  | 3989.239       | 3974.220        | 3965.228        | 3963.212       | Q 36 |
| G 7  | <b>730.395</b>  | 3892.180       | 3876.162        | 3877.170        | 3875.154       | G 35 |
| G 8  | <b>787.417</b>  | 3795.159       | 3779.140        | 3780.148        | 3778.132       | G 34 |
| K 9  | <b>915.512</b>  | 3738.138       | 3722.119        | 3723.127        | 3721.111       | K 33 |
| A 10 | <b>986.549</b>  | 3610.043       | 3594.024        | 3595.032        | 3593.016       | A 32 |
| R 11 | 1147.050        | 3536.005       | 3520.987        | 3521.995        | 3520.979       | R 31 |
| A 12 | <b>1213.687</b> | 3392.904       | 3376.886        | 3377.893        | 3376.878       | A 30 |
| K 13 | <b>1341.782</b> | 3311.867       | 3295.848        | 3296.856        | 3294.841       | K 29 |
| A 14 | <b>1412.819</b> | 3183.772       | 3167.754        | 3168.761        | 3166.746       | A 28 |
| K 15 | <b>1540.914</b> | 3112.735       | 3096.716        | 3097.724        | 3095.709       | K 27 |
| T 16 | <b>1641.962</b> | 2984.640       | 2968.621        | 2969.629        | 2967.614       | T 26 |
| R 17 | <b>1798.063</b> | 2883.592       | 2867.574        | 2868.582        | 2866.566       | R 25 |
| S 18 | 1883.909        | 2727.491       | 2711.473        | 2712.480        | 2710.465       | S 24 |
| S 19 | 1972.127        | 2640.455       | 2624.441        | 2625.448        | 2623.433       | S 23 |
| R 20 | 2128.228        | 2553.427       | 2537.409        | 2538.416        | 2536.401       | R 22 |
| A 21 | 2199.205        | 2497.326       | 2481.307        | 2482.315        | 2480.300       | A 21 |
| G 22 | 2286.287        | 2426.289       | 2410.270        | 2411.278        | 2409.263       | G 20 |
| L 23 | 2369.371        | 2369.268       | 2353.249        | 2354.257        | 2352.241       | L 19 |
| Q 24 | 2497.429        | 2156.184       | 2140.165        | 2141.173        | 2139.157       | Q 18 |
| F 25 | 2644.698        | 2028.125       | 2012.106        | 2013.114        | 2011.099       | F 17 |
| P 26 | 2741.551        | 1881.057       | 1865.038        | 1866.046        | 1864.030       | P 16 |
| V 27 | 2840.619        | 1784.004       | <b>1767.985</b> | 1768.993        | 1766.977       | V 15 |
| G 28 | 2897.641        | 1684.935       | <b>1668.917</b> | 1669.924        | 1667.909       | G 14 |
| R 29 | 3053.742        | 1627.914       | .011.893        | <b>1612.903</b> | 1610.887       | R 13 |
| V 30 | 3153.810        | 1519.833       | <b>1453.794</b> | 1454.802        | 1452.786       | V 12 |
| H 31 | 3289.869        | 1372.744       | <b>1356.726</b> | 1357.734        | 1355.718       | H 11 |
| R 32 | 3445.970        | 1235.685       | 1219.667        | 1220.675        | 1218.659       | R 10 |
| L 33 | 3559.054        | 1079.584       | 1063.566        | <b>1064.573</b> | 1062.558       | L 9  |
| L 34 | 3672.138        | <b>966.500</b> | 950.482         | 951.489         | 949.474        | L 8  |
| R 35 | 3828.239        | 853.416        | 837.398         | 838.405         | <b>836.390</b> | R 7  |
| K 36 | 3956.334        | 697.315        | 681.298         | 682.304         | 680.289        | K 6  |
| G 37 | 4013.356        | 569.220        | 553.201         | 554.209         | 552.194        | G 5  |
| N 38 | 4127.399        | 512.109        | 496.100         | 497.108         | 495.172        | N 4  |
| V 39 | 4290.462        | 396.156        | 380.137         | 381.145         | 380.129        | V 3  |
| S 40 | 4377.494        | 235.092        | 219.074         | 220.082         | 218.066        | S 2  |
| E 41 | 4506.537        | 148.060        | 132.042         | 133.050         | 131.034        | E 1  |

# sp | Q8CGP5 | H2A1F\_MOUSE

[Acetyl]SGRGKQGGKARAKAKTRSSRAGLQFPVGRVHRLLRKGNYS

- ▶ fragmentation table for charge state 2+
- ▶ specType=etd
- ▶ score=75.59
- ▶ F113278.dat
- ▶ query=q70295.p1
- ▶ precursor=902.311150
- ▶ chargePrecursor=5
- ▶ itol=0.5

| AA | c  | y               | #s1             | #s2             | z               | AA              |       |
|----|----|-----------------|-----------------|-----------------|-----------------|-----------------|-------|
| S  | 1  | 74.062          | 2054.204        | 2266.205        | 0.804           | 2245.781        | S[41] |
| G  | 2  | 102.553         | 2189.743        | 2381.733        | 0.504           | 2181.220        | G[40] |
| R  | 3  | 180.603         | 2161.232        | 2153.233        | 2153.236        | 2152.710        | R[39] |
| G  | 4  | 209.114         | 2083.181        | 2075.172        | 2075.676        | 2074.660        | G[38] |
| K  | 5  | 273.181         | 2054.671        | 2046.681        | 2047.105        | 2046.157        | K[37] |
| G  | 6  | 337.194         | 1990.621        | 1992.122        | <b>1983.118</b> | 1982.110        | G[36] |
| G  | 7  | 385.703         | 1936.594        | <b>1918.584</b> | <b>1918.088</b> | 1918.081        | G[35] |
| G  | 8  | 394.212         | 1898.081        | <b>1890.074</b> | 1890.576        | <b>1889.570</b> | G[34] |
| K  | 9  | 458.260         | 1869.572        | 1861.563        | 1862.067        | 1861.059        | K[33] |
| A  | 10 | 493.778         | 1805.525        | 1797.516        | <b>1798.019</b> | 1797.012        | A[32] |
| R  | 11 | 571.829         | 1770.008        | 1763.009        | <b>1762.501</b> | 1761.493        | R[31] |
| A  | 12 | 607.937         | 1692.995        | <b>1683.946</b> | <b>1684.450</b> | 1683.443        | A[30] |
| K  | 13 | <b>671.395</b>  | 1656.437        | 1648.428        | 1648.932        | 1647.924        | K[29] |
| A  | 14 | 706.913         | 1592.900        | <b>1584.380</b> | <b>1584.884</b> | 1583.876        | A[28] |
| K  | 15 | <b>770.961</b>  | <b>1556.871</b> | <b>1548.862</b> | <b>1549.366</b> | 1548.358        | K[27] |
| T  | 16 | <b>821.485</b>  | 1492.824        | 1484.814        | 1485.318        | <b>1484.310</b> | T[26] |
| R  | 17 | 899.526         | 1442.800        | <b>1434.291</b> | <b>1434.794</b> | 1433.787        | R[25] |
| S  | 18 | 933.051         | 1384.249        | 1385.249        | <b>1376.744</b> | 1375.736        | S[24] |
| S  | 19 | <b>986.567</b>  | 1330.733        | 1332.734        | <b>1313.228</b> | 1312.220        | S[23] |
| R  | 20 | <b>1064.618</b> | 1277.217        | 1269.208        | 1269.712        | 1268.704        | R[22] |
| A  | 21 | <b>1100.136</b> | <b>1199.167</b> | <b>1191.157</b> | <b>1191.661</b> | 1190.653        | A[21] |
| G  | 22 | 1128.647        | 1103.648        | 1105.639        | 1106.143        | 1105.135        | G[20] |
| L  | 23 | 1185.308        | 1038.337        | 1027.328        | <b>1127.832</b> | 1126.824        | L[19] |
| Q  | 24 | <b>1249.218</b> | 1073.595        | 1075.596        | 1071.590        | <b>1070.082</b> | Q[18] |
| F  | 25 | <b>1322.753</b> | 1014.569        | <b>1006.557</b> | <b>1007.061</b> | 1006.053        | F[17] |
| F  | 26 | <b>1371.279</b> | 941.033         | 933.023         | 933.526         | 932.519         | F[16] |
| V  | 27 | <b>1420.813</b> | 892.500         | 884.496         | 885.000         | 883.992         | V[15] |
| G  | 28 | <b>1449.324</b> | 842.971         | 834.962         | 835.466         | 834.458         | G[14] |
| R  | 29 | 1527.874        | 814.481         | 806.471         | 806.975         | 805.967         | R[13] |
| V  | 30 | <b>1576.909</b> | 736.410         | 728.401         | 728.905         | 727.897         | V[12] |
| H  | 31 | 1645.438        | 688.876         | 678.868         | 679.372         | 678.364         | H[11] |
| R  | 32 | 1723.489        | 618.346         | 610.337         | 610.841         | 609.833         | R[10] |
| L  | 33 | 1760.031        | 540.206         | 532.196         | 532.700         | 531.692         | L[9]  |
| L  | 34 | <b>1836.573</b> | 483.754         | 475.743         | 476.246         | 475.238         | L[8]  |
| R  | 35 | 1914.623        | 427.212         | 419.202         | 419.706         | 418.698         | R[7]  |
| K  | 36 | 1978.671        | 349.161         | 341.152         | 341.656         | 340.648         | K[6]  |
| G  | 37 | 2067.181        | 285.114         | 277.104         | 277.608         | 276.600         | G[5]  |
| N  | 38 | 2094.203        | 256.603         | 248.594         | 249.098         | 248.090         | N[4]  |
| V  | 39 | 2145.236        | 199.562         | 191.552         | 192.056         | 191.048         | V[3]  |
| S  | 40 | 2189.261        | 118.056         | 110.047         | 110.551         | 109.543         | S[2]  |
| E  | 41 | 2253.772        | 74.534          | 66.524          | 67.028          | 66.021          | E[1]  |

# sp | Q8CGP5 | H2A1F\_MOUSE

[Acetyl]SGRGKQGGKARAKAKTRSSRAGLQFPVGRVHRLLRKGNYS

- ▶ fragmentation table for charge state 3+
- ▶ specType=etd
- ▶ score=75.59
- ▶ F113278.dat
- ▶ query=q70295.p1
- ▶ precursor=902.311150
- ▶ chargePrecursor=5
- ▶ itol=0.5

| AA | c  | y               | #s1             | #s2             | z               | AA              |       |
|----|----|-----------------|-----------------|-----------------|-----------------|-----------------|-------|
| S  | 1  | 489.697         | 1502.118        | 1487.830        | 0.872           | <b>1497.52</b>  | S[41] |
| G  | 2  | 66.704          | <b>1460.164</b> | 1454.925        | 0.672           | 1454.450        | G[40] |
| R  | 3  | 1307.718        | 1441.157        | 1435.817        | <b>1436.153</b> | 1435.482        | R[39] |
| G  | 4  | 139.745         | 1389.123        | <b>1383.784</b> | <b>1384.120</b> | 1383.448        | G[38] |
| K  | 5  | 182.443         | 1370.116        | <b>1364.777</b> | <b>1365.113</b> | <b>1364.441</b> | K[37] |
| G  | 6  | 225.130         | 1327.418        | 1322.078        | <b>1322.414</b> | 1321.742        | G[36] |
| G  | 7  | 244.137         | 1284.723        | 1279.382        | <b>1279.728</b> | 1279.056        | G[35] |
| G  | 8  | 263.144         | 1245.925        | 1240.385        | <b>1260.721</b> | 1260.049        | G[34] |
| K  | 9  | 305.642         | 1246.717        | 1241.378        | <b>1241.714</b> | 1241.042        | K[33] |
| A  | 10 | 329.521         | 1204.019        | 1198.679        | <b>1199.015</b> | 1198.344        | A[32] |
| R  | 11 | 381.555         | 1180.340        | <b>1175.000</b> | <b>1175.336</b> | 1174.664        | R[31] |
| A  | 12 | 485.234         | <b>1128.206</b> | <b>1122.967</b> | <b>1123.303</b> | 1122.631        | A[30] |
| K  | 13 | 447.932         | 1104.627        | <b>1099.288</b> | <b>1099.624</b> | 1099.952        | K[29] |
| A  | 14 | 491.611         | 1061.929        | 1056.539        | <b>1056.925</b> | 1056.253        | A[28] |
| K  | 15 | 514.310         | 1038.250        | <b>1032.910</b> | <b>1033.246</b> | 1032.574        | K[27] |
| T  | 16 | 547.602         | 995.552         | 990.212         | 990.548         | 989.870         | T[26] |
| R  | 17 | 600.626         | 961.869         | 956.529         | 956.865         | 956.193         | R[25] |
| S  | 18 | 629.917         | 909.835         | 904.495         | 904.832         | 904.160         | S[24] |
| S  | 19 | 658.047         | 880.825         | 875.485         | 875.821         | 875.149         | S[23] |
| R  | 20 | 710.081         | 851.814         | 846.474         | 846.810         | 846.138         | R[22] |
| A  | 21 | 733.760         | 799.780         | 794.441         | 794.777         | 794.105         | A[21] |
| G  | 22 | 752.767         | 776.101         | <b>770.762</b>  | <b>771.098</b>  | 770.426         | G[20] |
| L  | 23 | 786.482         | 729.094         | 723.754         | 724.090         | 723.418         | L[19] |
| Q  | 24 | 833.148         | 719.305         | 714.000         | 714.306         | 713.721         | Q[18] |
| F  | 25 | 882.171         | 676.713         | <b>671.374</b>  | <b>671.710</b>  | <b>671.038</b>  | F[17] |
| F  | 26 | 914.552         | 627.600         | 622.351         | 622.687         | 622.015         | F[16] |
| V  | 27 | <b>947.545</b>  | 595.139         | 590.000         | 590.336         | 589.664         | V[15] |
| G  | 28 | <b>966.552</b>  | 562.317         | 556.977         | 557.313         | 556.641         | G[14] |
| R  | 29 | 1018.858        | 543.309         | 537.910         | 538.308         | 537.636         | R[13] |
| V  | 30 | 1051.608        | 490.275         | 485.036         | 486.272         | 485.600         | V[12] |
| H  | 31 | 1097.204        | 458.253         | 452.913         | 453.249         | 452.577         | H[11] |
| R  | 32 | 1149.328        | 412.567         | 407.227         | 407.563         | 406.891         | R[10] |
| L  | 33 | 1187.023        | <b>360.533</b>  | 355.193         | 355.529         | 354.857         | L[9]  |
| L  | 34 | 1234.718        | 322.574         | 317.489         | 317.826         | 317.154         | L[8]  |
| R  | 35 | 1276.751        | 285.144         | 279.804         | 280.140         | 279.468         | R[7]  |
| K  | 36 | 1319.450        | 233.110         | 227.770         | 228.106         | 227.434         | K[6]  |
| G  | 37 | 1338.457        | 190.412         | 185.072         | 185.408         | 184.736         | G[5]  |
| N  | 38 | <b>1376.471</b> | 171.404         | 166.065         | 166.401         | 165.729         | N[4]  |
| V  | 39 | 1430.824        | 133.390         | 128.051         | 128.386         | 127.715         | V[3]  |
| S  | 40 | <b>1459.836</b> | 99.136          | 93.696          | 94.032          | 93.360          | S[2]  |
| E  | 41 | 1502.850        | 50.025          | 44.685          | 45.021          | 44.349          | E[1]  |



# sp | Q8CGP5 | H2A1F\_MOUSE

[Acetyl]SGRGKQGGKARAKAKTRSSRAGLQFPVGRVHRLLRKGNYS

- ▶ fragmentation table for charge state 4+
- ▶ specType=etd
- ▶ score=75.59
- ▶ F113278.dat
- ▶ query=q70295.p1
- ▶ precursor=902.311150
- ▶ chargePrecursor=5
- ▶ itol=0.5

| AA    | c               | p               | #s1             | #s2             | #s              | AA    |
|-------|-----------------|-----------------|-----------------|-----------------|-----------------|-------|
| S[1]  | 37.505          | <b>1127.636</b> | <b>1123.631</b> | 0.705           | <b>1123.379</b> | S[41] |
| G[2]  | 51.780          | <b>1095.375</b> | 1091.370        | 0.795           | 1091.112        | G[40] |
| R[3]  | 90.805          | 1081.120        | <b>1077.115</b> | <b>1077.367</b> | <b>1076.863</b> | R[39] |
| G[4]  | 109.001         | 1042.094        | 1038.090        | 1038.342        | 1037.839        | G[38] |
| K[5]  | 137.064         | 1027.839        | 1023.834        | 1024.086        | 1023.582        | K[37] |
| G[6]  | 169.099         | 995.915         | 991.911         | 992.062         | 991.559         | G[36] |
| G[7]  | 183.354         | 983.303         | 979.300         | 979.552         | 979.049         | G[35] |
| G[8]  | 197.610         | 949.545         | 945.541         | 945.792         | 945.289         | G[34] |
| K[9]  | 239.633         | 935.290         | 931.285         | 931.537         | 931.033         | K[33] |
| A[10] | 247.393         | 903.266         | 899.261         | 899.513         | 899.010         | A[32] |
| R[11] | 286.418         | 895.507         | 891.502         | 891.754         | 891.250         | R[31] |
| A[12] | 304.177         | 866.842         | 862.837         | 862.939         | 862.243         | A[30] |
| K[13] | 336.201         | 828.722         | 824.718         | 824.970         | 824.466         | K[29] |
| A[14] | 353.960         | 796.699         | 792.694         | 792.946         | 792.442         | A[28] |
| K[15] | 385.984         | 778.939         | 774.935         | 775.187         | 774.683         | K[27] |
| T[16] | 411.246         | 746.915         | 742.911         | 743.163         | 742.659         | T[26] |
| R[17] | 459.271         | 721.954         | 717.949         | 717.901         | 717.30          | R[25] |
| S[18] | 472.609         | 692.629         | 688.624         | 688.876         | 688.372         | S[24] |
| S[19] | 493.787         | 660.970         | 656.966         | 657.118         | 656.614         | S[23] |
| R[20] | 532.613         | 639.112         | 635.108         | 635.360         | 634.856         | R[22] |
| A[21] | 550.572         | 600.087         | 596.082         | 596.334         | 595.830         | A[21] |
| G[22] | 564.827         | 582.329         | 578.323         | 578.575         | 578.071         | G[20] |
| L[23] | 593.098         | 668.072         | 664.068         | 664.320         | 663.816         | L[19] |
| Q[24] | 625.113         | 539.803         | 535.797         | 536.049         | 535.545         | Q[18] |
| F[25] | 661.880         | 507.797         | 503.792         | 504.034         | 503.530         | F[17] |
| F[26] | 698.143         | 471.020         | 467.015         | 467.267         | 466.763         | F[16] |
| V[27] | 710.910         | 446.756         | 442.752         | 443.004         | 442.500         | V[15] |
| G[28] | 725.169         | 421.989         | 417.985         | 418.237         | <b>417.733</b>  | G[14] |
| R[29] | 764.181         | 389.734         | 385.729         | 385.981         | 385.477         | R[13] |
| V[30] | 788.958         | 368.709         | 364.704         | 364.956         | 364.452         | V[12] |
| H[31] | 823.223         | 343.942         | 339.937         | 340.189         | 339.685         | H[11] |
| R[32] | 862.248         | 309.677         | 305.672         | 305.924         | 305.420         | R[10] |
| L[33] | 890.519         | 270.652         | 266.647         | 266.899         | 266.395         | L[9]  |
| L[34] | 918.399         | 242.361         | 238.356         | 238.608         | 238.104         | L[8]  |
| R[35] | 937.815         | 214.110         | 210.105         | 210.357         | 209.853         | R[7]  |
| K[36] | 989.839         | 175.084         | 171.080         | 171.332         | 170.828         | K[6]  |
| G[37] | 1064.094        | 143.061         | 139.056         | 139.308         | 138.804         | G[5]  |
| N[38] | 1032.605        | 128.805         | 124.800         | 125.052         | 124.548         | N[4]  |
| V[39] | 1172.874        | 100.294         | 96.289          | 96.542          | 96.038          | V[3]  |
| S[40] | <b>1095.129</b> | 98.529          | 95.524          | 95.776          | 95.272          | S[2]  |
| E[41] | 1127.390        | 97.771          | 93.766          | 94.018          | 93.514          | E[1]  |



# sp | Q8CGP5 | H2A1F\_MOUSE

[Acetyl]SGRGKQGGKARAKAKTRSSRAGLQFPVGRVHRLLRKGNYS

- ▶ fragmentation table for charge state 1+
- ▶ specType=etd
- ▶ score=44.26
- ▶ F113278.dat
- ▶ query=q70297\_p1
- ▶ precursor=752.093860
- ▶ chargePrecursor=6
- ▶ itol=0.5

| AA   | c               | y        | z+1             | z+2             | z        | AA   |
|------|-----------------|----------|-----------------|-----------------|----------|------|
| S 1  | 147.676         | 4507.521 | 4491.502        | 0.000           | 4490.494 | S 41 |
| G 2  | 304.098         | 4378.478 | 4362.459        | 0.000           | 4361.451 | G 40 |
| R 3  | <b>360.199</b>  | 4321.457 | 4305.438        | 4306.448        | 4304.430 | R 39 |
| G 4  | <b>417.220</b>  | 4165.355 | 4149.337        | 4150.345        | 4148.329 | G 38 |
| K 5  | <b>545.315</b>  | 4108.334 | 4092.315        | 4093.323        | 4091.307 | K 37 |
| Q 6  | <b>673.174</b>  | 3989.239 | 3974.220        | 3985.228        | 3983.212 | Q 36 |
| G 7  | <b>730.395</b>  | 3852.180 | 3836.162        | 3837.170        | 3835.154 | G 35 |
| G 8  | <b>787.417</b>  | 3795.159 | 3779.140        | 3780.148        | 3778.132 | G 34 |
| K 9  | <b>915.512</b>  | 3738.138 | 3722.119        | 3723.127        | 3721.111 | K 33 |
| A 10 | <b>986.549</b>  | 3610.043 | 3594.024        | 3595.032        | 3593.016 | A 32 |
| R 11 | 1142.650        | 3536.005 | 3522.987        | 3523.995        | 3521.979 | R 31 |
| A 12 | 1213.687        | 3382.904 | 3366.886        | 3367.893        | 3366.878 | A 30 |
| R 13 | 1541.782        | 3311.867 | 3295.848        | 3296.856        | 3294.841 | R 29 |
| A 14 | <b>1412.819</b> | 3183.772 | 3167.754        | 3168.761        | 3166.746 | A 28 |
| K 15 | 1540.914        | 3112.735 | 3096.716        | 3097.724        | 3095.709 | K 27 |
| T 16 | <b>1641.962</b> | 2984.640 | 2968.621        | 2969.629        | 2967.614 | T 26 |
| R 17 | 1798.063        | 2883.592 | 2867.574        | 2868.582        | 2866.566 | R 25 |
| S 18 | 1885.098        | 2727.491 | 2711.473        | 2712.480        | 2710.465 | S 24 |
| S 19 | 1972.127        | 2640.455 | 2624.441        | 2625.448        | 2623.433 | S 23 |
| R 20 | 2128.228        | 2553.427 | 2537.409        | 2538.416        | 2536.401 | R 22 |
| A 21 | 2199.265        | 2497.326 | 2481.307        | 2482.315        | 2480.300 | A 21 |
| G 22 | 2286.287        | 2326.289 | 2310.270        | 2311.278        | 2309.263 | G 20 |
| L 23 | 2369.371        | 2269.268 | 2253.249        | 2254.257        | 2252.241 | L 19 |
| Q 24 | 2497.429        | 2156.184 | 2140.165        | 2141.173        | 2139.157 | Q 18 |
| F 25 | 2644.698        | 2028.125 | 2012.106        | 2013.114        | 2011.099 | F 17 |
| P 26 | 2741.551        | 1881.057 | 1865.038        | 1866.046        | 1864.031 | P 16 |
| V 27 | 2840.619        | 1784.004 | 1767.985        | 1768.993        | 1766.977 | V 15 |
| G 28 | 2897.641        | 1684.935 | 1668.917        | 1669.924        | 1667.909 | G 14 |
| R 29 | 3053.742        | 1627.914 | 1611.895        | <b>1612.903</b> | 1610.887 | R 13 |
| V 30 | 3153.810        | 1491.833 | <b>1455.794</b> | 1456.802        | 1454.785 | V 12 |
| H 31 | 3289.869        | 1372.744 | <b>1356.726</b> | 1357.734        | 1355.718 | H 11 |
| R 32 | 3445.970        | 1235.685 | 1219.667        | 1220.675        | 1218.659 | R 10 |
| L 33 | 3559.054        | 1079.584 | 1063.566        | <b>1064.573</b> | 1062.558 | L 9  |
| L 34 | 3672.138        | 966.500  | 950.482         | 951.489         | 949.474  | L 8  |
| R 35 | 3828.239        | 853.416  | 837.398         | 838.405         | 836.390  | R 7  |
| K 36 | 3956.334        | 697.315  | 681.296         | 682.304         | 680.289  | K 6  |
| G 37 | 4013.356        | 569.220  | 553.201         | 554.209         | 552.194  | G 5  |
| N 38 | 4127.399        | 512.109  | 496.100         | 497.108         | 495.172  | N 4  |
| V 39 | 4290.462        | 396.156  | 380.137         | 381.145         | 381.129  | V 3  |
| S 40 | 4377.494        | 235.092  | 219.074         | 220.082         | 218.066  | S 2  |
| E 41 | 4506.537        | 148.060  | 132.042         | 133.050         | 131.034  | E 1  |

# sp | Q8CGP5 | H2A1F\_MOUSE

[Acetyl]SGRGKQGGKARAKAKTRSSRAGLQFPVGRVHRLLRKGNYS

- ▶ fragmentation table for charge state 2+
- ▶ specType=etd
- ▶ score=44.26
- ▶ F113278.dat
- ▶ query=q70297.p1
- ▶ precursor=752.093860
- ▶ chargePrecursor=6
- ▶ itol=0.5

| AA   | c               | y        | z+1             | z+2             | z               | AA   |
|------|-----------------|----------|-----------------|-----------------|-----------------|------|
| S 1  | 74.042          | 2754.364 | 2246.255        | 0.504           | 2245.751        | S 41 |
| G 2  | 102.563         | 2189.743 | 2181.731        | 0.504           | 2181.229        | G 40 |
| R 3  | 180.603         | 2161.732 | 2153.223        | 2153.726        | 2152.719        | R 39 |
| G 4  | 209.114         | 2083.181 | 2075.172        | 2075.676        | 2074.669        | G 38 |
| K 5  | 273.161         | 2054.671 | 2046.661        | 2047.165        | 2046.157        | K 37 |
| Q 6  | 337.193         | 1999.623 | 1992.613        | <b>1983.118</b> | 1992.111        | Q 36 |
| G 7  | 365.703         | 1928.584 | 1918.582        | 1919.089        | 1918.081        | G 35 |
| G 8  | 394.212         | 1898.083 | 1890.074        | 1890.578        | 1889.570        | G 34 |
| K 9  | 458.260         | 1869.672 | 1861.563        | 1862.067        | 1861.059        | K 33 |
| A 10 | 493.778         | 1805.525 | 1797.510        | 1798.019        | 1797.012        | A 32 |
| R 11 | 574.829         | 1770.066 | 1761.997        | 1762.501        | 1761.490        | R 31 |
| A 12 | <b>607.347</b>  | 1691.966 | 1683.949        | 1684.450        | 1683.443        | A 30 |
| R 13 | <b>671.395</b>  | 1656.437 | 1648.426        | <b>1648.932</b> | 1647.924        | R 29 |
| A 14 | <b>706.913</b>  | 1592.390 | 1584.380        | 1584.884        | 1583.876        | A 28 |
| K 15 | <b>770.961</b>  | 1556.671 | 1548.662        | <b>1549.366</b> | 1548.359        | K 27 |
| T 16 | <b>821.485</b>  | 1492.824 | <b>1484.814</b> | 1485.318        | <b>1484.310</b> | T 26 |
| R 17 | <b>899.535</b>  | 1454.300 | 1446.289        | 1446.794        | 1445.787        | R 25 |
| S 18 | 933.651         | 1394.249 | <b>1356.240</b> | <b>1356.744</b> | 1355.736        | S 24 |
| S 19 | <b>986.567</b>  | 1320.733 | 1312.724        | <b>1313.228</b> | 1312.220        | S 23 |
| R 20 | <b>1064.618</b> | 1277.217 | <b>1269.208</b> | <b>1269.712</b> | 1268.704        | R 22 |
| A 21 | 1109.136        | 1199.067 | <b>1191.157</b> | <b>1191.661</b> | 1190.657        | A 21 |
| G 22 | <b>1128.647</b> | 1163.648 | 1155.630        | 1156.143        | 1155.135        | G 20 |
| L 23 | 1159.709        | 1136.137 | 1127.128        | 1127.632        | 1126.624        | L 19 |
| Q 24 | <b>1249.218</b> | 978.595  | 1070.586        | 1071.090        | 1070.082        | Q 19 |
| F 25 | <b>1322.753</b> | 1014.569 | <b>1006.557</b> | <b>1007.061</b> | 1006.053        | F 17 |
| F 26 | 1371.279        | 941.032  | 933.023         | 933.526         | 932.519         | F 16 |
| V 27 | <b>1420.813</b> | 892.506  | 884.496         | 885.000         | 883.992         | V 15 |
| G 28 | <b>1449.324</b> | 842.671  | 834.662         | 835.166         | 834.158         | G 14 |
| R 29 | 1527.274        | 814.463  | <b>806.451</b>  | <b>806.955</b>  | 805.947         | R 13 |
| V 30 | 1576.809        | 738.410  | 728.401         | 728.904         | 727.897         | V 12 |
| H 31 | 1645.438        | 688.876  | 678.868         | 679.370         | 678.363         | H 11 |
| R 32 | 1723.489        | 618.346  | 610.337         | 610.841         | 609.833         | R 10 |
| L 33 | 1780.031        | 540.290  | 532.280         | 532.790         | 531.783         | L 9  |
| L 34 | 1836.573        | 483.754  | 475.744         | 476.248         | 475.241         | L 8  |
| R 35 | 1814.623        | 427.212  | 419.202         | 419.706         | 418.699         | R 7  |
| R 36 | 1978.671        | 349.161  | 341.152         | 341.656         | 340.648         | R 6  |
| G 37 | 2007.181        | 285.114  | 277.104         | 277.608         | 276.600         | G 5  |
| N 38 | 2064.203        | 256.603  | 248.594         | 249.098         | 248.090         | N 4  |
| V 39 | 2145.735        | 199.582  | 191.573         | 192.076         | 191.069         | V 3  |
| S 40 | 2189.251        | 118.050  | 110.041         | 110.544         | 109.537         | S 2  |
| E 41 | 2253.772        | 74.534   | 66.524          | 67.028          | 66.021          | E 1  |

# sp | Q8CGP5 | H2A1F\_MOUSE

[Acetyl]SGRGKQGGKARAKAKTRSSRAGLQFPVGRVHRLLRKGNYS

- ▶ fragmentation table for charge state 3+
- ▶ specType=etd
- ▶ score=44.26
- ▶ F113278.dat
- ▶ query=q70297\_p1
- ▶ precursor=752.093860
- ▶ chargePrecursor=6
- ▶ itol=0.5

| AA | c  | y               | #s1             | #s2             | z               | AA              |       |
|----|----|-----------------|-----------------|-----------------|-----------------|-----------------|-------|
| S  | 1  | 48.607          | 1502.178        | <b>1497.839</b> | 8.872           | 2497.561        | S[41] |
| G  | 2  | 86.704          | 1460.184        | 1454.225        | 0.672           | 1454.480        | G[40] |
| R  | 3  | 1307.180        | <b>1441.157</b> | <b>1435.817</b> | <b>1436.153</b> | <b>1435.482</b> | R[30] |
| G  | 4  | 139.745         | 1389.123        | 1383.784        | 1384.420        | 1383.448        | G[38] |
| K  | 5  | 182.443         | 1370.116        | <b>1364.777</b> | <b>1365.113</b> | <b>1364.441</b> | K[37] |
| G  | 6  | 225.130         | 1327.418        | 1322.078        | <b>1322.414</b> | 1321.742        | G[36] |
| G  | 7  | 264.137         | 1284.732        | 1279.392        | 1279.728        | 1279.056        | G[35] |
| G  | 8  | 263.144         | 1265.725        | <b>1260.385</b> | <b>1260.721</b> | 1260.049        | G[34] |
| K  | 9  | 305.642         | 1246.717        | <b>1241.378</b> | <b>1241.714</b> | <b>1241.042</b> | K[33] |
| A  | 10 | 329.521         | 1204.010        | 1198.670        | 1199.015        | 1198.344        | A[32] |
| R  | 11 | 361.555         | 1180.240        | <b>1175.000</b> | 1175.336        | <b>1174.664</b> | R[31] |
| A  | 12 | 409.254         | <b>1138.306</b> | 1132.966        | 1133.302        | 1132.631        | A[30] |
| K  | 13 | 447.932         | 1104.527        | <b>1099.288</b> | 1099.624        | <b>1098.952</b> | K[29] |
| A  | 14 | 491.611         | 1061.029        | 1056.539        | <b>1056.925</b> | 1056.251        | A[28] |
| K  | 15 | 514.310         | <b>1038.250</b> | <b>1032.910</b> | <b>1033.246</b> | 1032.574        | K[27] |
| T  | 16 | 547.602         | 995.552         | <b>990.212</b>  | <b>990.548</b>  | <b>989.876</b>  | T[26] |
| R  | 17 | 606.626         | 961.869         | <b>956.529</b>  | <b>956.865</b>  | 956.193         | R[25] |
| S  | 18 | 628.019         | 959.835         | 954.495         | 954.831         | 954.160         | S[24] |
| S  | 19 | <b>658.047</b>  | 938.025         | <b>875.485</b>  | <b>875.821</b>  | 875.149         | S[23] |
| R  | 20 | <b>710.081</b>  | 951.014         | <b>846.474</b>  | <b>846.810</b>  | <b>846.138</b>  | R[22] |
| A  | 21 | 731.190         | 799.780         | 794.441         | 794.777         | 794.106         | A[21] |
| G  | 22 | 752.787         | 776.101         | 770.762         | <b>771.098</b>  | 770.426         | G[20] |
| L  | 23 | <b>796.462</b>  | 759.094         | 753.754         | 754.090         | 753.419         | L[19] |
| Q  | 24 | <b>833.148</b>  | 733.305         | 724.960         | 724.396         | 723.724         | Q[18] |
| F  | 25 | 882.171         | 676.713         | <b>671.374</b>  | <b>671.710</b>  | 671.038         | F[17] |
| F  | 26 | 914.552         | 627.600         | 622.261         | 622.607         | 622.015         | F[16] |
| V  | 27 | 947.545         | 595.139         | 590.000         | 590.336         | 589.664         | V[15] |
| G  | 28 | 966.552         | 562.317         | 556.977         | 557.313         | 556.641         | G[14] |
| R  | 29 | 1018.905        | 443.309         | 437.970         | 438.306         | 437.634         | R[13] |
| V  | 30 | 1051.608        | 491.275         | 485.936         | 486.272         | 485.600         | V[12] |
| H  | 31 | <b>1097.294</b> | 458.253         | 452.913         | 453.249         | 452.577         | H[11] |
| R  | 32 | 1149.328        | 412.967         | 407.227         | 407.563         | 406.891         | R[10] |
| L  | 33 | 1187.023        | <b>360.533</b>  | 355.193         | 355.529         | 354.857         | L[9]  |
| L  | 34 | <b>1224.718</b> | 322.184         | 317.489         | 317.825         | 317.153         | L[8]  |
| R  | 35 | 1225.815        | 285.144         | 279.804         | 280.140         | 279.468         | R[7]  |
| K  | 36 | 1319.450        | 233.110         | 227.770         | 228.106         | 227.434         | K[6]  |
| G  | 37 | 1338.457        | 190.412         | 185.072         | 185.408         | 184.736         | G[5]  |
| N  | 38 | 1376.471        | 171.404         | 166.065         | 166.401         | 165.729         | N[4]  |
| V  | 39 | <b>1436.826</b> | 133.390         | 128.051         | 128.386         | 127.715         | V[3]  |
| S  | 40 | 1449.819        | 99.136          | 93.796          | 94.132          | 93.460          | S[2]  |
| E  | 41 | 1502.850        | 50.025          | 44.685          | 45.021          | 44.349          | E[1]  |

# sp | Q8CGP5 | H2A1F\_MOUSE

[Acetyl]SGRGKQGGKARAKAKTRSSRAGLQFPVGRVHRLLRKGNYS

- ▶ fragmentation table for charge state 4+
- ▶ specType=etd
- ▶ score=44.26
- ▶ F113278.dat
- ▶ query=q70297.p1
- ▶ precursor=752.093860
- ▶ chargePrecursor=6
- ▶ itol=0.5

| AA | c  | y               | z+1             | z+2             | z               | AA             |       |
|----|----|-----------------|-----------------|-----------------|-----------------|----------------|-------|
| S  | 1  | 37.525          | 1127.636        | 1123.631        | 0.755           | 1123.370       | S[41] |
| G  | 2  | 51.780          | <b>1095.375</b> | 1091.370        | 0.755           | 1091.116       | G[40] |
| R  | 3  | 90.805          | 1081.120        | 1077.115        | 1.077           | 1076.861       | R[39] |
| G  | 4  | 105.061         | 1042.094        | <b>1038.090</b> | <b>1038.342</b> | 1037.838       | G[38] |
| K  | 5  | 137.084         | 1027.839        | 1023.834        | 1024.080        | 1023.582       | K[37] |
| Q  | 6  | 189.089         | 995.813         | 991.811         | <b>992.062</b>  | 991.561        | Q[36] |
| G  | 7  | 253.354         | 953.082         | <b>953.796</b>  | <b>960.048</b>  | 959.542        | G[35] |
| G  | 8  | 337.810         | 949.545         | 945.541         | <b>945.792</b>  | 945.289        | G[34] |
| K  | 9  | 229.633         | 935.260         | 931.265         | 931.537         | 931.031        | K[33] |
| A  | 10 | 247.393         | <b>903.266</b>  | <b>899.261</b>  | <b>899.513</b>  | 899.009        | A[32] |
| R  | 11 | 286.418         | <b>889.267</b>  | 885.267         | 885.505         | 881.754        | R[31] |
| A  | 12 | 304.177         | <b>846.482</b>  | 842.477         | 842.729         | 842.225        | A[30] |
| R  | 13 | 336.201         | 825.722         | 824.718         | 824.970         | 824.466        | R[29] |
| A  | 14 | 353.960         | 798.699         | 792.694         | 792.946         | 792.442        | A[28] |
| K  | 15 | 385.984         | 778.939         | 774.936         | 775.187         | 774.681        | K[27] |
| T  | 16 | 411.246         | 746.915         | 742.911         | 743.163         | 742.659        | T[26] |
| R  | 17 | 450.271         | 721.864         | 717.869         | 717.901         | 717.397        | R[25] |
| S  | 18 | 472.829         | 682.828         | 678.834         | 678.876         | 678.372        | S[24] |
| S  | 19 | 493.787         | 660.870         | 656.866         | 657.118         | 656.614        | S[23] |
| R  | 20 | 532.813         | 639.112         | 635.108         | 635.360         | 634.856        | R[22] |
| A  | 21 | 550.572         | 600.089         | 596.082         | 596.334         | 595.830        | A[21] |
| Q  | 22 | 564.827         | 582.320         | 578.323         | 578.575         | 578.071        | Q[20] |
| L  | 23 | 603.008         | 568.072         | 564.068         | 564.320         | 563.816        | L[19] |
| Q  | 24 | 625.113         | 539.801         | 535.797         | 536.049         | 535.545        | Q[18] |
| F  | 25 | 661.880         | 507.781         | 503.782         | 504.034         | 503.530        | F[17] |
| P  | 26 | 686.143         | 471.020         | 467.015         | 467.267         | 466.763        | P[16] |
| V  | 27 | <b>710.910</b>  | 446.756         | 442.752         | 443.004         | 442.500        | V[15] |
| G  | 28 | 725.166         | 421.989         | 417.985         | 418.237         | <b>417.733</b> | G[14] |
| R  | 29 | 764.191         | 407.734         | 403.729         | 403.981         | 403.477        | R[13] |
| V  | 30 | 788.058         | 369.759         | 364.764         | 364.956         | 364.452        | V[12] |
| H  | 31 | 823.223         | 343.942         | 339.937         | 340.189         | 339.685        | H[11] |
| R  | 32 | <b>862.248</b>  | 309.677         | 305.672         | 305.924         | 305.420        | R[10] |
| L  | 33 | 890.519         | 270.652         | 266.647         | 266.899         | 266.395        | L[9]  |
| L  | 34 | 918.790         | 242.381         | 238.376         | 238.628         | 238.124        | L[8]  |
| R  | 35 | 957.815         | 214.113         | 210.108         | 210.360         | 209.856        | R[7]  |
| R  | 36 | <b>989.839</b>  | 175.084         | 171.080         | 171.332         | 170.828        | R[6]  |
| G  | 37 | 1004.094        | 143.061         | 139.056         | 139.308         | 138.804        | G[5]  |
| N  | 38 | 1032.605        | 128.805         | 124.800         | 125.052         | 124.548        | N[4]  |
| V  | 39 | <b>1073.371</b> | 100.294         | 96.290          | 96.542          | 96.038         | V[3]  |
| S  | 40 | <b>1095.129</b> | 59.529          | 55.524          | 55.776          | 55.272         | S[2]  |
| E  | 41 | 1127.392        | 37.771          | 33.766          | 34.018          | 33.514         | E[1]  |

# sp | Q8CGP5 | H2A1F\_MOUSE

[Acetyl]SGRGKQGGKARAKAKTRSSRAGLQFPVGRVHLLRKGNYSE

- ▶ fragmentation table for charge state 5+
- ▶ specType=etd
- ▶ score=44.26
- ▶ F113278.dat
- ▶ query=q70297\_p1
- ▶ precursor=752.093860
- ▶ chargePrecursor=6
- ▶ itol=0.5

| AA | c  | y              | z+1            | z#2            | z              | AA             |   |    |
|----|----|----------------|----------------|----------------|----------------|----------------|---|----|
| S  | 1  | 30.221         | 902.310        | <b>899.106</b> | 0.806          | 898.905        | S | 41 |
| G  | 2  | 41.625         | <b>876.501</b> | 873.298        | 0.806          | 873.096        | G | 40 |
| R  | 3  | 72.846         | 865.097        | <b>861.893</b> | <b>062.095</b> | 861.692        | R | 39 |
| G  | 4  | 84.250         | <b>833.877</b> | 830.673        | 830.875        | 830.472        | G | 38 |
| K  | 5  | 109.869        | 822.473        | 819.269        | 819.470        | 819.067        | K | 37 |
| Q  | 6  | 135.481        | 796.854        | 793.650        | 793.851        | 793.448        | Q | 36 |
| G  | 7  | 146.685        | <b>771.242</b> | 768.038        | 768.240        | 767.837        | G | 35 |
| G  | 8  | 158.289        | 759.838        | 756.634        | 756.835        | 756.432        | G | 34 |
| K  | 9  | 183.908        | 748.833        | 745.230        | 745.431        | 745.028        | K | 33 |
| A  | 10 | 198.116        | 722.814        | 719.611        | 719.812        | 719.409        | A | 32 |
| R  | 11 | 229.336        | 708.607        | 705.403        | 705.605        | 705.202        | R | 31 |
| A  | 12 | 243.543        | 677.387        | 674.183        | <b>674.385</b> | <b>673.981</b> | A | 30 |
| K  | 13 | 269.162        | 663.179        | 659.976        | 660.177        | 659.774        | K | 29 |
| A  | 14 | 283.370        | 637.960        | 634.357        | 634.558        | 634.155        | A | 28 |
| K  | 15 | 308.989        | 623.753        | 620.149        | 620.351        | 619.948        | K | 27 |
| T  | 16 | 329.198        | 597.734        | 594.530        | 594.732        | 594.329        | T | 26 |
| R  | 17 | <b>360.418</b> | 577.524        | 574.321        | 574.522        | 574.119        | R | 25 |
| S  | 18 | 377.825        | 546.304        | 543.100        | 543.302        | 542.899        | S | 24 |
| S  | 19 | 399.231        | 528.886        | 525.681        | 525.886        | 525.482        | S | 23 |
| R  | 20 | 426.451        | 511.491        | 508.288        | 508.489        | 508.086        | R | 22 |
| A  | 21 | 440.659        | 480.271        | 477.067        | 477.269        | 476.866        | A | 21 |
| G  | 22 | 452.063        | 466.064        | 462.860        | 463.061        | 462.658        | G | 20 |
| L  | 23 | 474.680        | 494.659        | 451.456        | 451.657        | 451.254        | L | 19 |
| Q  | 24 | 500.292        | 432.043        | 428.839        | 429.040        | 428.637        | Q | 18 |
| F  | 25 | 529.705        | 406.831        | 403.227        | 403.429        | 403.026        | F | 17 |
| P  | 26 | 549.116        | 377.017        | 373.813        | 374.015        | 373.612        | P | 16 |
| V  | 27 | 568.530        | 357.607        | 354.403        | 354.604        | 354.201        | V | 15 |
| G  | 28 | 589.334        | 337.793        | 334.589        | 334.791        | 334.388        | G | 14 |
| R  | 29 | 611.554        | 326.389        | 323.185        | 323.386        | 322.983        | R | 13 |
| V  | 30 | 631.368        | 295.168        | 291.965        | 292.166        | 291.763        | V | 12 |
| H  | 31 | <b>658.780</b> | 275.355        | 272.151        | 272.353        | 271.949        | H | 11 |
| R  | 32 | 690.000        | 247.943        | 244.739        | 244.941        | 244.538        | R | 10 |
| L  | 33 | 712.617        | 216.723        | 213.519        | 213.721        | 213.317        | L | 9  |
| L  | 34 | 735.233        | 194.106        | 190.902        | 191.104        | 190.701        | L | 8  |
| R  | 35 | 766.454        | 171.489        | 168.285        | 168.487        | 168.084        | R | 7  |
| K  | 36 | 782.073        | 140.269        | 137.065        | 137.267        | 136.864        | K | 6  |
| G  | 37 | <b>803.477</b> | 114.650        | 111.446        | 111.648        | 111.245        | G | 5  |
| N  | 38 | <b>826.286</b> | 103.240        | 100.042        | 100.243        | 99.840         | N | 4  |
| V  | 39 | <b>858.898</b> | 80.437         | 77.233         | 77.435         | 77.032         | V | 3  |
| S  | 40 | <b>876.305</b> | 47.824         | 44.621         | 44.822         | 44.419         | S | 2  |
| E  | 41 | 902.113        | 30.418         | 27.214         | 27.416         | 27.013         | E | 1  |





# sp | Q8CGP5 | H2A1F\_MOUSE

[Acetyl]SGRGKQGGKARAKAKTRSSRAGLQFPVGRVHRLLRKGNYS

- ▶ fragmentation table for charge state 1+
- ▶ specType=etd
- ▶ score=51.79
- ▶ F113278.dat
- ▶ query=q70299\_p1
- ▶ precursor=1127.637400
- ▶ chargePrecursor=4
- ▶ itol=0.5

| AA | c  | y               | #+1             | #+2             | z               | AA              |       |
|----|----|-----------------|-----------------|-----------------|-----------------|-----------------|-------|
| S  | 1  | 147.076         | 4507.541        | 4481.503        | 4.800           | 4480.484        | S[41] |
| G  | 2  | 204.098         | 4378.475        | 4362.430        | 0.000           | 4361.451        | G[40] |
| R  | 3  | 360.199         | 4321.467        | 4305.430        | 4306.446        | 4304.430        | R[39] |
| G  | 4  | <b>417.220</b>  | 4165.355        | 4149.317        | 4150.345        | 4148.329        | G[38] |
| K  | 5  | <b>545.315</b>  | 4108.134        | 4092.315        | 4093.323        | 4091.307        | K[37] |
| G  | 6  | 602.214         | 3980.239        | 3964.220        | 3965.226        | 3963.212        | G[36] |
| G  | 7  | <b>730.395</b>  | 3852.180        | 3836.142        | 3837.170        | 3835.154        | G[35] |
| G  | 8  | 787.417         | 3795.158        | 3779.140        | 3780.148        | 3778.132        | G[34] |
| K  | 9  | <b>915.512</b>  | 3738.138        | 3722.119        | 3723.127        | 3721.111        | K[33] |
| A  | 10 | <b>980.549</b>  | 3610.043        | 3594.024        | 3595.032        | 3593.016        | A[32] |
| R  | 11 | 1142.050        | 3539.005        | 3522.987        | 3523.995        | 3521.979        | R[31] |
| A  | 12 | 1213.089        | 3382.904        | 3366.886        | 3367.893        | 3365.879        | A[30] |
| K  | 13 | 1341.752        | 3311.867        | 3295.848        | 3296.856        | 3294.841        | K[29] |
| A  | 14 | <b>1412.819</b> | 3183.772        | 3167.754        | 3168.761        | 3166.746        | A[28] |
| K  | 15 | <b>1540.914</b> | 3112.735        | 3096.716        | 3097.724        | 3095.709        | K[27] |
| T  | 16 | 1641.962        | 2984.640        | 2968.621        | 2969.629        | 2967.614        | T[26] |
| R  | 17 | <b>1798.063</b> | 2883.592        | 2867.574        | 2868.582        | 2866.566        | R[25] |
| S  | 18 | 1883.958        | 2727.491        | 2711.473        | 2712.480        | 2710.465        | S[24] |
| S  | 19 | 1972.127        | 2640.458        | 2624.441        | 2625.448        | 2623.433        | S[23] |
| R  | 20 | 2138.228        | 2553.427        | 2537.409        | 2538.416        | 2536.401        | R[22] |
| A  | 21 | 2199.265        | 2397.326        | 2381.307        | 2382.315        | 2380.300        | A[21] |
| G  | 22 | 2256.287        | 2236.289        | 2220.270        | 2221.278        | 2219.263        | G[20] |
| L  | 23 | 2309.374        | 2089.248        | 2073.229        | 2074.237        | 2072.221        | L[19] |
| Q  | 24 | 2407.420        | 2158.184        | 2142.165        | 2143.173        | 2141.157        | Q[18] |
| F  | 25 | 2644.498        | 2028.125        | 2012.106        | 2013.114        | 2011.100        | F[17] |
| P  | 26 | 2741.551        | 1881.051        | 1865.038        | 1866.046        | 1864.030        | P[16] |
| V  | 27 | 2840.610        | 1784.004        | 1767.985        | 1768.993        | 1766.977        | V[15] |
| G  | 28 | 2887.641        | <b>1684.935</b> | 1668.917        | <b>1669.924</b> | 1667.909        | G[14] |
| R  | 29 | 3053.743        | 1537.814        | 1521.795        | 1522.803        | 1520.787        | R[13] |
| V  | 30 | 3152.810        | <b>1471.813</b> | 1455.794        | 1456.802        | <b>1454.786</b> | V[12] |
| H  | 31 | 3289.889        | 1372.744        | <b>1356.726</b> | 1357.734        | 1355.718        | H[11] |
| R  | 32 | 3445.970        | 1235.685        | 1219.667        | 1220.675        | 1218.659        | R[10] |
| L  | 33 | 3559.054        | 1079.584        | 1063.565        | 1064.573        | 1062.558        | L[9]  |
| L  | 34 | 3672.138        | 868.509         | 852.492         | 853.499         | 851.484         | L[8]  |
| R  | 35 | 3826.239        | 653.416         | 637.398         | 638.405         | 636.390         | R[7]  |
| K  | 36 | 3956.334        | 497.315         | 481.296         | 482.304         | 480.289         | K[6]  |
| G  | 37 | 4013.356        | 509.220         | 493.201         | 494.209         | 492.194         | G[5]  |
| N  | 38 | 4127.399        | 512.199         | 496.180         | 497.188         | 495.172         | N[4]  |
| V  | 39 | 4286.462        | 398.156         | 382.137         | 383.145         | 381.129         | V[3]  |
| S  | 40 | 4317.486        | 278.102         | 262.084         | 263.092         | 261.076         | S[2]  |
| E  | 41 | 4508.537        | 148.060         | 132.042         | 133.050         | 131.034         | E[1]  |

# sp | Q8CGP5 | H2A1F\_MOUSE

[Acetyl]SGRGKQGGKARAKAKTRSSRAGLQFPVGRVHRLLRKGNYS

- ▶ fragmentation table for charge state 2+
- ▶ specType=etd
- ▶ score=51.79
- ▶ F113278.dat
- ▶ query=q70299\_p1
- ▶ precursor=1127.637400
- ▶ chargePrecursor=4
- ▶ itol=0.5

| AA   | c               | y        | z+1             | z+2             | z               | AA   |
|------|-----------------|----------|-----------------|-----------------|-----------------|------|
| S 1  | 74.042          | 2754.364 | 2246.255        | 0.504           | 2245.751        | S 41 |
| G 2  | 102.563         | 2189.743 | 2181.731        | 0.504           | 2181.229        | G 40 |
| R 3  | 180.603         | 2181.732 | 2153.223        | 2153.726        | 2152.719        | R 39 |
| G 4  | 209.114         | 2083.181 | 2075.172        | 2075.676        | 2074.669        | G 38 |
| K 5  | 273.161         | 2054.671 | 2046.661        | 2047.165        | 2046.157        | K 37 |
| Q 6  | 337.193         | 1999.623 | <b>1982.614</b> | 1983.118        | <b>1982.110</b> | Q 36 |
| G 7  | 395.701         | 1928.584 | 1919.575        | 1919.088        | 1918.081        | G 35 |
| G 8  | 394.212         | 1988.083 | <b>1990.074</b> | <b>1990.578</b> | 1989.570        | G 34 |
| K 9  | 458.260         | 1899.672 | 1861.563        | 1862.067        | 1861.059        | K 33 |
| A 10 | 493.778         | 1805.625 | <b>1797.516</b> | <b>1798.019</b> | 1797.012        | A 32 |
| R 11 | 571.829         | 1770.096 | 1761.997        | 1762.501        | 1761.494        | R 31 |
| A 12 | 607.387         | 1693.566 | 1683.560        | <b>1684.450</b> | 1683.443        | A 30 |
| R 13 | <b>671.395</b>  | 1656.437 | <b>1648.428</b> | 1648.932        | <b>1647.924</b> | R 29 |
| A 14 | 706.913         | 1592.390 | <b>1584.380</b> | <b>1584.884</b> | 1583.878        | A 28 |
| K 15 | 770.961         | 1556.671 | 1548.662        | 1549.166        | 1548.159        | K 27 |
| T 16 | 821.485         | 1492.824 | 1484.814        | 1485.318        | <b>1484.310</b> | T 26 |
| R 17 | 899.536         | 1454.300 | 1438.291        | 1438.794        | 1437.787        | R 25 |
| S 18 | 953.051         | 1394.249 | <b>1356.240</b> | <b>1356.744</b> | 1355.738        | S 24 |
| S 19 | <b>986.567</b>  | 1320.731 | <b>1312.724</b> | <b>1313.228</b> | 1312.221        | S 23 |
| R 20 | 1064.618        | 1277.217 | 1269.208        | 1269.712        | 1268.704        | R 22 |
| A 21 | 1100.136        | 1199.667 | 1191.157        | 1191.661        | 1190.654        | A 21 |
| G 22 | 1128.647        | 1163.648 | 1155.639        | 1156.143        | 1155.135        | G 20 |
| L 23 | 1185.398        | 1136.137 | 1127.128        | 1127.632        | 1126.625        | L 19 |
| Q 24 | <b>1249.218</b> | 1078.595 | 1070.586        | 1071.090        | 1070.082        | Q 19 |
| F 25 | 1222.753        | 1014.568 | 1006.559        | 1007.061        | 1006.053        | F 17 |
| F 26 | 1371.279        | 941.032  | 933.023         | 933.526         | 932.519         | F 16 |
| V 27 | <b>1420.813</b> | 892.506  | 884.496         | 885.000         | 883.992         | V 15 |
| G 28 | 1449.324        | 842.071  | 834.062         | 835.466         | 834.458         | G 14 |
| R 29 | 1527.874        | 814.461  | 806.451         | 806.955         | 805.947         | R 13 |
| V 30 | 1576.909        | 738.410  | 729.401         | 729.905         | 727.897         | V 12 |
| H 31 | <b>1645.438</b> | 688.876  | 678.868         | 679.370         | 678.363         | H 11 |
| R 32 | 1723.489        | 618.346  | 610.337         | 610.841         | 609.833         | R 10 |
| L 33 | 1780.031        | 540.290  | 532.280         | 532.790         | 531.783         | L 9  |
| L 34 | 1836.573        | 483.754  | 475.744         | 476.248         | 475.241         | L 8  |
| R 35 | 1814.623        | 427.212  | 419.202         | 419.706         | 418.699         | R 7  |
| R 36 | 1978.671        | 349.161  | 341.152         | 341.656         | 340.648         | R 6  |
| G 37 | 2007.181        | 285.114  | 277.104         | 277.608         | 276.601         | G 5  |
| N 38 | 2064.203        | 256.603  | 248.594         | 249.098         | 248.090         | N 4  |
| V 39 | 2145.735        | 199.582  | 191.573         | 192.076         | 191.069         | V 3  |
| S 40 | 2189.251        | 118.050  | 110.041         | 110.544         | 109.537         | S 2  |
| E 41 | 2253.772        | 74.534   | 66.524          | 67.028          | 66.021          | E 1  |

# sp | Q8CGP5 | H2A1F\_MOUSE

[Acetyl]SGRGKQGGKARAKAKTRSSRAGLQFPVGRVHRLLRKGNYS

- ▶ fragmentation table for charge state 3+
- ▶ specType=etd
- ▶ score=51.79
- ▶ F113278.dat
- ▶ query=q70299.p1
- ▶ precursor=1127.637400
- ▶ chargePrecursor=4
- ▶ itol=0.5

| AA   | c               | y        | z+1             | z+2             | z               | AA   |
|------|-----------------|----------|-----------------|-----------------|-----------------|------|
| S 1  | 49.697          | 1503.178 | <b>1497.839</b> | 0.672           | <b>1497.503</b> | S 41 |
| G 2  | 68.704          | 1460.164 | <b>1454.825</b> | 0.672           | 1454.458        | G 40 |
| R 3  | 130.738         | 1441.157 | <b>1435.817</b> | <b>1436.153</b> | 1435.482        | R 39 |
| G 4  | 139.745         | 1389.123 | 1383.784        | 1384.120        | 1383.448        | G 38 |
| K 5  | 182.443         | 1370.116 | 1364.777        | 1365.113        | 1364.441        | K 37 |
| Q 6  | 235.330         | 1327.418 | 1322.070        | 1322.414        | 1321.741        | Q 36 |
| G 7  | 244.137         | 1284.122 | 1279.355        | 1279.728        | 1279.055        | G 35 |
| G 8  | 263.144         | 1265.725 | 1260.385        | 1260.721        | 1260.040        | G 34 |
| K 9  | 305.842         | 1246.717 | 1241.378        | 1241.714        | 1241.041        | K 33 |
| A 10 | 329.521         | 1204.019 | 1198.670        | 1199.015        | 1198.344        | A 32 |
| R 11 | 381.555         | 1180.940 | 1175.000        | 1175.336        | 1174.664        | R 31 |
| A 12 | 409.234         | 1178.306 | 1172.967        | 1173.303        | 1172.631        | A 30 |
| R 13 | 447.932         | 1104.827 | 1099.258        | 1099.624        | 1098.952        | R 29 |
| A 14 | 471.611         | 1061.929 | 1056.589        | 1056.925        | 1056.251        | A 28 |
| K 15 | 514.310         | 1038.250 | 1032.910        | 1033.246        | 1032.574        | K 27 |
| T 16 | 547.992         | 995.152  | 990.212         | 990.548         | 989.878         | T 26 |
| R 17 | 600.226         | 961.889  | 956.529         | 956.865         | 956.193         | R 25 |
| S 18 | 629.037         | 929.835  | 924.469         | 924.832         | 924.160         | S 24 |
| S 19 | 658.047         | 880.825  | 875.485         | 875.821         | 875.149         | S 23 |
| R 20 | 710.081         | 851.814  | 846.474         | 846.810         | 846.138         | R 22 |
| A 21 | 723.760         | 799.780  | 794.441         | 794.777         | 794.105         | A 21 |
| G 22 | 752.767         | 776.101  | 770.762         | 771.098         | 770.426         | G 20 |
| L 23 | 760.482         | 737.094  | 731.755         | 732.090         | 731.417         | L 19 |
| Q 24 | 813.148         | 719.399  | 714.060         | 714.396         | 713.724         | Q 19 |
| F 25 | 882.171         | 676.713  | <b>671.374</b>  | <b>671.710</b>  | <b>671.038</b>  | F 17 |
| P 26 | 914.552         | 627.690  | 622.351         | 622.687         | 622.015         | P 16 |
| V 27 | 947.545         | 595.339  | 590.000         | 590.336         | 589.664         | V 15 |
| G 28 | 966.552         | 562.117  | 556.977         | 557.313         | 556.641         | G 14 |
| R 29 | 1013.595        | 543.109  | 537.870         | 538.206         | 537.534         | R 12 |
| D 30 | 1051.608        | 491.276  | 485.938         | 486.272         | 485.600         | D 12 |
| H 31 | 1097.294        | 458.253  | 452.913         | 453.249         | 452.577         | H 11 |
| R 32 | 1149.328        | 412.567  | 407.227         | 407.563         | 406.891         | R 10 |
| L 33 | 1187.823        | 360.533  | 355.193         | 355.529         | 354.857         | L 9  |
| L 34 | 1224.718        | 322.838  | 317.499         | 317.835         | 317.163         | L 8  |
| T 35 | 1276.751        | 285.144  | 279.804         | 280.140         | 279.468         | T 7  |
| K 36 | 1319.450        | 233.110  | 227.770         | 228.106         | 227.434         | K 6  |
| G 37 | 1338.457        | 190.412  | 185.072         | 185.408         | 184.736         | G 5  |
| N 38 | 1376.471        | 171.404  | 166.065         | 166.401         | 165.729         | N 4  |
| V 39 | <b>1430.826</b> | 133.390  | 128.051         | 128.386         | 127.715         | V 3  |
| S 40 | 1459.836        | 79.036   | 73.696          | 74.032          | 73.360          | S 2  |
| E 41 | 1502.850        | 30.025   | 44.685          | 45.021          | 44.349          | E 1  |

sp | Q8CGP5 | H2A1F\_MOUSE

[Acetyl]SGRGKQGGKARAKTRSSRAGLQFPVGRVHLLRKGNYSE

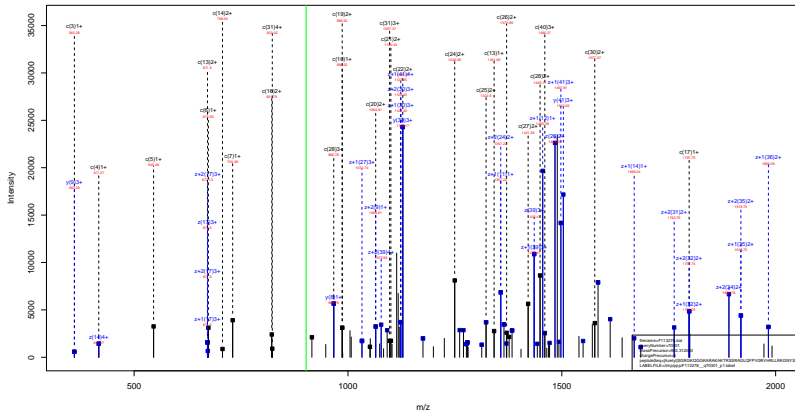

# sp | Q8CGP5 | H2A1F\_MOUSE

[Acetyl]SGRGKQGGKARAKAKTRSSRAGLQFPVGRVHRLLRKGNYS

- ▶ fragmentation table for charge state 1+
- ▶ specType=etd
- ▶ score=55.92
- ▶ F113278.dat
- ▶ query=q70301.p1
- ▶ precursor=902.312050
- ▶ chargePrecursor=5
- ▶ itol=0.5

| AA | c  | y               | z+1             | z+2             | z               | AA       |       |
|----|----|-----------------|-----------------|-----------------|-----------------|----------|-------|
| S  | 1  | 147.076         | 4507.921        | 4491.502        | 0.000           | 4490.484 | S[41] |
| G  | 2  | 204.068         | 4378.478        | 4362.459        | 0.000           | 4361.451 | G[40] |
| R  | 3  | <b>360.199</b>  | 4321.457        | 4305.438        | 4306.448        | 4304.430 | R[39] |
| G  | 4  | <b>417.220</b>  | 4185.355        | 4149.317        | 4150.345        | 4148.329 | G[38] |
| K  | 5  | <b>545.315</b>  | 4108.334        | 4062.315        | 4091.321        | 4091.307 | K[37] |
| Q  | 6  | <b>673.374</b>  | 3989.278        | 3964.250        | 3956.228        | 3963.211 | Q[36] |
| G  | 7  | <b>730.395</b>  | 3852.180        | 3836.162        | 3837.170        | 3835.154 | G[35] |
| G  | 8  | 787.417         | 3795.159        | 3779.140        | 3780.148        | 3778.132 | G[34] |
| K  | 9  | <b>915.512</b>  | 3738.138        | 3722.119        | 3723.127        | 3721.111 | K[33] |
| A  | 10 | <b>986.549</b>  | 3610.043        | 3594.024        | 3595.032        | 3593.016 | A[32] |
| R  | 11 | 1142.650        | 3539.005        | 3522.987        | 3523.995        | 3521.979 | R[31] |
| A  | 12 | 1213.687        | 3382.904        | 3366.886        | 3367.893        | 3365.877 | A[30] |
| R  | 13 | <b>1341.782</b> | 3311.887        | 3295.868        | 3296.876        | 3294.861 | R[29] |
| A  | 14 | 1412.819        | 3183.772        | 3167.754        | 3168.761        | 3166.746 | A[28] |
| K  | 15 | 1540.914        | 3112.735        | 3096.716        | 3097.724        | 3095.709 | K[27] |
| T  | 16 | 1641.962        | 2984.640        | 2968.621        | 2969.629        | 2967.614 | T[26] |
| R  | 17 | <b>1798.063</b> | 2881.562        | 2865.544        | 2866.552        | 2864.536 | R[25] |
| S  | 18 | 1889.099        | 2727.491        | 2711.473        | 2712.480        | 2710.465 | S[24] |
| S  | 19 | 1972.127        | 2640.459        | 2624.441        | 2625.448        | 2623.433 | S[23] |
| R  | 20 | 2138.228        | 2553.427        | 2537.409        | 2538.416        | 2536.401 | R[22] |
| A  | 21 | 2199.265        | 2397.326        | 2381.307        | 2382.315        | 2380.300 | A[21] |
| G  | 22 | 2256.287        | 2326.289        | 2310.270        | 2311.278        | 2309.263 | G[20] |
| L  | 23 | 2369.371        | 2209.268        | 2193.249        | 2194.257        | 2192.241 | L[19] |
| Q  | 24 | 3007.429        | 2156.184        | 2140.165        | 2141.173        | 2139.157 | Q[18] |
| F  | 25 | 3644.488        | 2028.125        | 2012.106        | 2013.114        | 2011.099 | F[17] |
| P  | 26 | 2741.951        | 1881.057        | 1865.038        | 1866.046        | 1864.030 | P[16] |
| V  | 27 | 2840.619        | 1784.004        | 1767.985        | 1768.993        | 1766.977 | V[15] |
| G  | 28 | 2897.641        | <b>1684.935</b> | <b>1668.917</b> | 1669.924        | 1667.909 | G[14] |
| R  | 29 | 3623.742        | 1627.747        | 1611.728        | <b>1612.903</b> | 1610.887 | R[13] |
| V  | 30 | 3152.810        | <b>1471.813</b> | <b>1455.794</b> | 1456.802        | 1454.786 | V[12] |
| H  | 31 | 3289.869        | 1392.744        | <b>1356.726</b> | 1357.734        | 1355.718 | H[11] |
| R  | 32 | 3445.970        | 1235.685        | 1219.667        | 1220.675        | 1218.659 | R[10] |
| L  | 33 | 3559.054        | 1079.584        | 1063.566        | <b>1064.573</b> | 1062.558 | L[9]  |
| L  | 34 | 3672.138        | <b>966.500</b>  | 950.482         | 951.489         | 949.474  | L[8]  |
| I  | 35 | 3838.239        | 853.418         | 837.399         | 838.406         | 836.390  | I[7]  |
| K  | 36 | 3956.334        | 697.315         | 681.296         | 682.304         | 680.289  | K[6]  |
| G  | 37 | 4013.356        | 549.220         | 533.201         | 534.209         | 532.194  | G[5]  |
| N  | 38 | 4127.399        | 512.109         | 496.180         | 497.188         | 495.172  | N[4]  |
| V  | 39 | 4290.462        | 398.150         | 382.131         | 383.145         | 381.129  | V[3]  |
| S  | 40 | 4377.494        | 235.062         | 219.074         | 220.082         | 218.066  | S[2]  |
| E  | 41 | 4406.537        | 148.000         | 132.042         | 133.050         | 131.034  | E[1]  |

# sp | Q8CGP5 | H2A1F\_MOUSE

[Acetyl]SGRGKQGGKARAKAKTRSSRAGLQFPVGRVHLLRKGNYSE

- ▶ fragmentation table for charge state 2+
- ▶ specType=etd
- ▶ score=55.92
- ▶ F113278.dat
- ▶ query=q70301.p1
- ▶ precursor=902.312050
- ▶ chargePrecursor=5
- ▶ itol=0.5

| AA | c  | y               | #s1             | #s2             | z               | AA              |       |
|----|----|-----------------|-----------------|-----------------|-----------------|-----------------|-------|
| S  | 1  | 74.062          | 2054.204        | 2266.205        | 8.804           | 2245.78         | S[41] |
| G  | 2  | 102.553         | 2189.743        | 2381.733        | 0.504           | 2181.220        | G[40] |
| R  | 3  | 180.603         | 2641.232        | 2153.233        | 2153.236        | 2152.710        | R[39] |
| G  | 4  | 209.114         | 2083.181        | 2075.172        | 2075.876        | 2074.660        | G[38] |
| K  | 5  | 273.181         | 2054.871        | 2048.861        | 2047.305        | 2046.157        | K[37] |
| G  | 6  | 337.194         | 1990.621        | <b>1982.614</b> | <b>1983.118</b> | 1982.110        | G[36] |
| G  | 7  | 385.703         | 1706.594        | <b>1915.584</b> | <b>1919.088</b> | 1918.06         | G[35] |
| G  | 8  | 394.212         | 1898.083        | 1890.074        | <b>1890.578</b> | 1889.570        | G[34] |
| K  | 9  | 458.260         | 1869.572        | 1861.563        | 1862.067        | 1861.059        | K[33] |
| A  | 10 | 493.778         | 1805.525        | <b>1797.516</b> | <b>1798.019</b> | 1797.011        | A[32] |
| R  | 11 | 571.829         | 1770.008        | 1761.997        | <b>1762.501</b> | 1761.493        | R[31] |
| A  | 12 | 607.997         | 1692.956        | 1683.948        | <b>1684.450</b> | 1683.442        | A[30] |
| R  | 13 | <b>671.395</b>  | 1656.437        | 1648.428        | 1648.932        | 1647.924        | R[29] |
| A  | 14 | <b>706.913</b>  | 1592.900        | <b>1584.380</b> | <b>1584.884</b> | 1583.876        | A[28] |
| K  | 15 | 770.961         | 1556.871        | 1548.862        | <b>1549.366</b> | 1548.358        | K[27] |
| T  | 16 | <b>821.485</b>  | <b>1492.824</b> | 1484.814        | 1485.318        | <b>1484.310</b> | T[26] |
| R  | 17 | 899.526         | <b>1442.300</b> | 1434.291        | 1434.795        | 1433.787        | R[25] |
| S  | 18 | 913.051         | 1384.249        | 1376.240        | <b>1376.744</b> | 1375.736        | S[24] |
| S  | 19 | <b>986.567</b>  | 1337.733        | <b>1312.724</b> | <b>1313.228</b> | 1312.220        | S[23] |
| R  | 20 | <b>1064.618</b> | <b>1277.217</b> | 1269.208        | <b>1269.712</b> | 1268.704        | R[22] |
| A  | 21 | <b>1100.136</b> | 1199.161        | 1191.157        | 1191.661        | 1190.653        | A[21] |
| G  | 22 | <b>1128.647</b> | 1163.648        | 1155.639        | 1156.143        | 1155.135        | G[20] |
| L  | 23 | 1155.708        | 1138.137        | 1127.128        | 1127.632        | 1126.624        | L[19] |
| G  | 24 | <b>1249.218</b> | 1073.595        | 1070.588        | 1071.092        | 1070.082        | G[18] |
| F  | 25 | <b>1322.753</b> | 1014.566        | 1006.557        | 1007.061        | 1006.053        | F[17] |
| F  | 26 | <b>1371.279</b> | 941.033         | 933.023         | 933.526         | 932.518         | F[16] |
| V  | 27 | <b>1420.813</b> | 892.500         | 884.496         | 885.000         | 883.992         | V[15] |
| G  | 28 | <b>1449.324</b> | 842.971         | 834.962         | 835.466         | 834.458         | G[14] |
| R  | 29 | 1527.814        | 814.481         | 806.471         | 806.975         | 805.967         | R[13] |
| V  | 30 | <b>1576.909</b> | 736.410         | 728.401         | 728.905         | 727.897         | V[12] |
| H  | 31 | 1645.438        | 688.876         | 678.868         | 679.372         | 678.363         | H[11] |
| R  | 32 | 1723.489        | 618.346         | 610.337         | 610.841         | 609.833         | R[10] |
| L  | 33 | 1780.031        | 540.296         | 532.286         | 532.790         | 531.782         | L[9]  |
| L  | 34 | 1836.573        | 469.754         | 459.743         | 459.246         | 458.238         | L[8]  |
| R  | 35 | 1914.623        | 427.212         | 419.202         | 419.706         | 418.698         | R[7]  |
| K  | 36 | 1978.671        | 349.161         | 341.152         | 341.656         | 340.648         | K[6]  |
| G  | 37 | 2067.181        | 285.114         | 277.104         | 277.608         | 276.600         | G[5]  |
| N  | 38 | 2094.203        | 256.603         | 248.594         | 249.098         | 248.090         | N[4]  |
| V  | 39 | 2145.726        | 199.562         | 191.552         | 192.056         | 191.048         | V[3]  |
| S  | 40 | 2199.251        | 118.056         | 110.047         | 110.551         | 109.543         | S[2]  |
| E  | 41 | 2253.772        | 74.534          | 66.524          | 67.028          | 66.021          | E[1]  |

# sp | Q8CGP5 | H2A1F\_MOUSE

[Acetyl]SGRGKQGGKARAKAKTRSSRAGLQFPVGRVHLLRKGNYSE

- ▶ fragmentation table for charge state 3+
- ▶ specType=etd
- ▶ score=55.92
- ▶ F113278.dat
- ▶ query=q70301.p1
- ▶ precursor=902.312050
- ▶ chargePrecursor=5
- ▶ itol=0.5

| AA | c  | y               | #s1             | #s2             | #s              | AA              |       |
|----|----|-----------------|-----------------|-----------------|-----------------|-----------------|-------|
| S  | 1  | 489.697         | <b>1503.178</b> | <b>1497.839</b> | 0.872           | <b>1497.563</b> | S[41] |
| G  | 2  | 86.704          | <b>1460.164</b> | 1454.575        | 0.672           | 1454.450        | G[40] |
| R  | 3  | 1307.788        | 1341.157        | <b>1435.817</b> | 1436.153        | <b>1435.482</b> | R[39] |
| G  | 4  | 139.745         | 1389.123        | <b>1383.784</b> | <b>1384.120</b> | <b>1383.448</b> | G[38] |
| K  | 5  | 182.443         | <b>1370.116</b> | <b>1364.777</b> | <b>1365.113</b> | <b>1364.441</b> | K[37] |
| G  | 6  | 225.130         | 1327.418        | 1321.013        | <b>1322.814</b> | 1321.761        | G[36] |
| G  | 7  | 264.137         | 1284.785        | <b>1279.392</b> | <b>1279.728</b> | <b>1279.056</b> | G[35] |
| G  | 8  | 263.144         | 1265.725        | 1260.385        | <b>1260.721</b> | 1260.049        | G[34] |
| K  | 9  | 305.642         | 1246.717        | 1241.378        | 1241.714        | 1241.042        | K[33] |
| A  | 10 | 329.521         | 1204.019        | 1198.679        | 1199.015        | 1198.344        | A[32] |
| R  | 11 | 381.555         | 1180.340        | <b>1175.000</b> | <b>1175.336</b> | 1174.664        | R[31] |
| A  | 12 | 485.234         | <b>1128.306</b> | <b>1122.967</b> | <b>1123.303</b> | 1122.631        | A[30] |
| K  | 13 | 447.932         | 1104.627        | 1099.285        | 1099.624        | 1098.952        | K[29] |
| A  | 14 | 471.611         | 1061.929        | 1056.589        | 1056.925        | 1056.253        | A[28] |
| K  | 15 | 514.310         | 1038.250        | <b>1032.910</b> | 1033.246        | <b>1032.574</b> | K[27] |
| T  | 16 | 547.002         | 995.552         | 990.212         | 990.548         | 989.876         | T[26] |
| R  | 17 | 600.626         | 961.869         | 956.529         | 956.865         | 956.193         | R[25] |
| S  | 18 | 629.017         | 909.835         | 904.495         | 904.832         | 904.160         | S[24] |
| S  | 19 | 658.047         | 880.825         | 875.485         | 875.821         | 875.149         | S[23] |
| R  | 20 | 710.081         | 851.814         | 846.474         | 846.810         | 846.138         | R[22] |
| A  | 21 | 733.760         | 799.780         | 794.441         | 794.777         | 794.105         | A[21] |
| G  | 22 | 752.767         | 776.101         | 770.762         | 771.098         | 770.426         | G[20] |
| L  | 23 | 780.482         | 759.094         | 753.754         | 754.090         | 753.418         | L[19] |
| Q  | 24 | 833.148         | 733.366         | 728.026         | 728.362         | 727.690         | Q[18] |
| F  | 25 | 882.171         | 676.713         | <b>671.374</b>  | <b>671.710</b>  | <b>671.038</b>  | F[17] |
| F  | 26 | 914.552         | 627.600         | 622.261         | 622.597         | 621.925         | F[16] |
| V  | 27 | 947.545         | 595.139         | 590.000         | 590.336         | 589.664         | V[15] |
| G  | 28 | <b>966.552</b>  | 562.317         | 556.977         | 557.313         | 556.641         | G[14] |
| R  | 29 | 1013.556        | 543.309         | 537.970         | 538.306         | 537.634         | R[13] |
| V  | 30 | <b>1051.608</b> | 490.276         | 485.036         | 485.372         | 484.700         | V[12] |
| H  | 31 | <b>1097.294</b> | 458.253         | 452.913         | 453.249         | 452.577         | H[11] |
| R  | 32 | 1149.328        | 412.567         | 407.227         | 407.563         | 406.891         | R[10] |
| L  | 33 | 1187.023        | <b>360.533</b>  | 355.193         | 355.529         | 354.857         | L[9]  |
| L  | 34 | 1224.718        | 322.376         | 317.036         | 317.372         | 316.700         | L[8]  |
| R  | 35 | <b>1276.751</b> | 285.144         | 279.804         | 280.140         | 279.468         | R[7]  |
| K  | 36 | 1319.450        | 233.110         | 227.770         | 228.106         | 227.434         | K[6]  |
| G  | 37 | 1338.457        | 190.412         | 185.072         | 185.408         | 184.736         | G[5]  |
| N  | 38 | <b>1376.471</b> | 171.404         | 166.064         | 166.400         | 165.728         | N[4]  |
| V  | 39 | 1435.526        | 133.390         | 128.050         | 128.386         | 127.714         | V[3]  |
| S  | 40 | <b>1459.836</b> | 99.136          | 93.796          | 94.132          | 93.460          | S[2]  |
| E  | 41 | 1502.850        | 50.025          | 44.685          | 45.021          | 44.349          | E[1]  |

# sp | Q8CGP5 | H2A1F\_MOUSE

[Acetyl]SGRGKQGGKARAKAKTRSSRAGLQFPVGRVHLLRKGNYSE

- ▶ fragmentation table for charge state 4+
- ▶ specType=etd
- ▶ score=55.92
- ▶ F113278.dat
- ▶ query=q70301.p1
- ▶ precursor=902.312050
- ▶ chargePrecursor=5
- ▶ itol=0.5

| AA   | c               | y        | z+1             | z+2             | z               | AA   |
|------|-----------------|----------|-----------------|-----------------|-----------------|------|
| S 1  | 37.525          | 1127.636 | <b>1123.631</b> | 0.755           | <b>1123.379</b> | G 41 |
| G 2  | 51.780          | 1096.375 | <b>1091.370</b> | 0.755           | 1091.118        | G 40 |
| R 3  | 90.805          | 1081.120 | 1077.115        | <b>1077.367</b> | 1076.861        | R 39 |
| G 4  | 105.061         | 1042.094 | 1038.090        | 1038.342        | 1037.839        | G 38 |
| K 5  | 137.084         | 1027.839 | 1023.834        | 1024.086        | 1023.582        | K 37 |
| Q 6  | 189.099         | 995.815  | 991.811         | 992.062         | 991.559         | Q 36 |
| G 7  | 253.354         | 953.803  | 950.798         | 950.048         | 950.544         | G 35 |
| G 8  | 397.810         | 949.545  | 945.541         | 945.792         | 945.289         | G 34 |
| K 9  | 229.633         | 935.290  | 931.285         | 931.537         | 931.031         | K 33 |
| A 10 | 247.393         | 903.266  | 899.261         | 899.513         | 899.009         | A 32 |
| R 11 | 286.418         | 885.507  | 881.502         | 881.754         | 881.250         | R 31 |
| A 12 | 304.177         | 846.482  | 842.477         | 842.729         | 842.225         | A 30 |
| R 13 | 336.201         | 828.722  | 824.718         | 824.970         | 824.464         | R 29 |
| A 14 | 353.960         | 796.699  | 792.694         | 792.946         | 792.442         | A 28 |
| K 15 | 389.984         | 778.939  | 774.935         | 775.187         | 774.681         | K 27 |
| T 16 | 411.246         | 746.915  | 742.911         | 743.163         | 742.659         | T 26 |
| R 17 | 450.271         | 721.694  | 717.690         | 717.941         | 717.438         | R 25 |
| S 18 | 472.809         | 682.828  | 678.824         | 679.076         | 678.572         | S 24 |
| S 19 | 493.787         | 660.870  | 656.866         | 657.118         | 656.614         | S 23 |
| R 20 | 532.813         | 639.112  | 635.108         | 635.360         | 634.856         | R 22 |
| A 21 | 550.572         | 600.087  | 596.082         | 596.334         | 595.830         | A 21 |
| G 22 | 564.827         | 582.128  | 578.123         | 578.375         | 577.871         | G 20 |
| L 23 | 603.006         | 566.072  | 562.068         | 562.320         | 561.816         | L 19 |
| Q 24 | 625.113         | 539.803  | 535.799         | 536.049         | 535.545         | Q 19 |
| F 25 | 661.880         | 507.787  | 503.782         | 504.034         | 503.530         | F 17 |
| P 26 | 686.143         | 471.020  | 467.015         | 467.267         | 466.763         | P 16 |
| V 27 | 710.910         | 446.756  | 442.752         | 443.004         | 442.500         | V 15 |
| G 28 | 725.166         | 421.989  | 417.985         | 418.237         | <b>417.733</b>  | G 14 |
| R 29 | 764.193         | 407.734  | 403.729         | 403.981         | 403.477         | R 13 |
| V 30 | 786.058         | 366.709  | 364.704         | 364.956         | 364.452         | V 12 |
| H 31 | <b>823.223</b>  | 343.942  | 339.937         | 340.189         | 339.685         | H 11 |
| R 32 | 862.248         | 309.677  | 305.672         | 305.924         | 305.420         | R 10 |
| L 33 | 890.519         | 270.652  | 266.647         | 266.899         | 266.395         | L 9  |
| L 34 | 918.790         | 242.381  | 238.376         | 238.628         | 238.124         | L 8  |
| R 35 | 957.815         | 214.130  | 210.125         | 210.377         | 209.873         | R 7  |
| R 36 | 989.839         | 175.084  | 171.080         | 171.332         | 170.828         | R 6  |
| G 37 | 1004.094        | 143.061  | 139.056         | 139.308         | 138.804         | G 5  |
| N 38 | <b>1032.605</b> | 126.805  | 124.800         | 125.052         | 124.548         | N 4  |
| V 39 | 1073.371        | 100.294  | 96.290          | 96.542          | 96.038          | V 3  |
| S 40 | 1095.120        | 59.529   | 55.524          | 55.776          | 55.272          | S 2  |
| E 41 | 1127.393        | 37.771   | 33.766          | 34.018          | 33.514          | E 1  |





# sp | Q6GSS7 | H2A2A\_MOUSE

[Acetyl]SGRGK<sup>Acetyl</sup><sub>42.01</sub> QGGKARAKAKSRSSRAGLQFPVGRVHLLLRKGN<sup>YAE</sup>

- ▶ fragmentation table for charge state 1+
- ▶ specType=etd
- ▶ score=53.63
- ▶ F113278.dat
- ▶ query=q70355.p1
- ▶ precursor=904.710330
- ▶ chargePrecursor=5
- ▶ itol=0.5

| AA   | c               | y               | z+1             | z+2             | z        | AA   |
|------|-----------------|-----------------|-----------------|-----------------|----------|------|
| S 1  | 147.076         | 4519.521        | 4503.502        | 0.000           | 4502.484 | S 41 |
| G 2  | 204.068         | 4390.478        | 4374.459        | 0.000           | 4373.451 | G 40 |
| R 3  | <b>360.199</b>  | 4333.457        | 4317.438        | 4318.448        | 4316.439 | R 39 |
| G 4  | <b>417.220</b>  | 4177.355        | 4161.337        | 4162.345        | 4160.329 | G 38 |
| K 5  | <b>587.326</b>  | 4120.334        | 4104.315        | 4105.323        | 4103.307 | K 37 |
| Q 6  | <b>715.345</b>  | 3959.270        | 3943.251        | 3945.261        | 3943.245 | Q 36 |
| G 7  | <b>772.406</b>  | 3822.170        | 3806.151        | 3807.159        | 3805.143 | G 35 |
| G 8  | 829.427         | 3705.148        | 3749.130        | 3750.138        | 3748.122 | G 34 |
| K 9  | <b>957.522</b>  | 3708.127        | 3692.108        | 3693.116        | 3691.101 | K 33 |
| A 10 | 1028.560        | 3580.032        | 3564.013        | 3565.021        | 3563.005 | A 32 |
| R 11 | 1184.661        | 3508.995        | 3492.976        | 3493.984        | 3491.968 | R 31 |
| A 12 | 1255.698        | 3352.984        | 3336.975        | 3337.983        | 3335.967 | A 30 |
| R 13 | 1383.793        | 3281.957        | 3265.938        | 3266.946        | 3264.930 | R 29 |
| A 14 | 1454.830        | 3153.962        | 3137.943        | 3138.951        | 3136.935 | A 28 |
| K 15 | <b>1582.925</b> | 3092.725        | 3076.706        | 3077.714        | 3075.699 | K 27 |
| S 16 | 1609.957        | 2954.630        | 2938.611        | 2939.619        | 2937.603 | S 26 |
| R 17 | 1826.058        | 2897.598        | 2881.579        | 2882.587        | 2880.571 | R 25 |
| S 18 | 1913.090        | 2741.490        | 2695.478        | 2696.486        | 2694.471 | S 24 |
| S 19 | 2000.122        | 2624.464        | 2608.446        | 2609.454        | 2607.438 | S 23 |
| R 20 | 2186.223        | 2537.432        | 2521.414        | 2522.422        | 2520.406 | R 22 |
| A 21 | 2227.260        | 2381.331        | 2365.313        | 2366.320        | 2364.305 | A 21 |
| G 22 | 2284.282        | 2310.294        | 2294.275        | 2295.283        | 2293.267 | G 20 |
| L 23 | 2107.886        | 2253.273        | 2237.254        | 2238.262        | 2236.246 | L 19 |
| Q 24 | 2525.424        | 2140.189        | 2124.170        | 2125.178        | 2123.162 | Q 19 |
| F 25 | 2672.493        | 2012.130        | <b>1996.111</b> | 1997.119        | 1995.104 | F 17 |
| P 26 | 2769.546        | 1805.062        | 1849.043        | 1850.051        | 1848.035 | P 16 |
| V 27 | 2868.614        | 1768.009        | 1751.990        | 1752.998        | 1750.982 | V 15 |
| G 28 | 2925.635        | <b>1568.940</b> | 1652.922        | <b>1653.930</b> | 1651.914 | G 14 |
| R 29 | 3081.237        | 1611.910        | 1595.891        | <b>1596.908</b> | 1594.882 | R 13 |
| H 30 | 3180.808        | 1485.811        | <b>1439.799</b> | 1440.807        | 1438.791 | H 12 |
| H 31 | 3317.864        | 1358.748        | 1340.731        | <b>1341.739</b> | 1339.723 | H 11 |
| R 32 | 3473.965        | 1219.691        | 1203.672        | <b>1204.680</b> | 1202.664 | R 10 |
| L 33 | 3587.049        | 1063.589        | 1047.571        | 1048.579        | 1046.563 | L 9  |
| L 34 | 3700.133        | 950.505         | 934.487         | 935.495         | 933.479  | L 8  |
| T 35 | 3856.234        | 837.421         | 821.403         | <b>822.410</b>  | 820.394  | T 7  |
| R 36 | 3984.329        | 681.320         | 665.302         | 666.310         | 664.294  | R 6  |
| G 37 | 4041.361        | 553.225         | 537.207         | 538.214         | 536.199  | G 5  |
| N 38 | 4155.394        | 406.204         | 480.185         | 481.193         | 479.177  | N 4  |
| V 39 | 4318.457        | 382.161         | 366.142         | 367.150         | 365.134  | V 3  |
| A 40 | 4389.494        | 219.086         | 203.079         | 204.087         | 202.071  | A 2  |
| E 41 | 4518.537        | 148.060         | 132.042         | 133.050         | 131.034  | E 1  |

# sp | Q6GSS7 | H2A2A\_MOUSE

[Acetyl]SGR<sup>Acetyl</sup>RGK<sub>42.01</sub> QGGKARAKAKSRSSRAGLQFPVGRVHRLLRKGN<sup>YAE</sup>

- ▶ fragmentation table for charge state 2+
- ▶ specType=etd
- ▶ score=53.63
- ▶ F113278.dat
- ▶ query=q70355.p1
- ▶ precursor=904.710330
- ▶ chargePrecursor=5
- ▶ itol=0.5

| AA | c  | w               | #s1             | #s2             | z               | AA              |       |
|----|----|-----------------|-----------------|-----------------|-----------------|-----------------|-------|
| S  | 1  | 74.092          | 2036.294        | 2252.455        | 0.804           | 2251.781        | S[41] |
| G  | 2  | 102.553         | 2195.743        | 2387.733        | 0.504           | 2187.220        | G[40] |
| R  | 3  | 180.603         | 2167.232        | 2159.233        | 2159.726        | 2158.710        | R[39] |
| G  | 4  | 209.114         | 2089.181        | 2081.172        | 2081.676        | 2080.660        | G[38] |
| K  | 5  | 294.167         | 2050.671        | 2052.661        | 2053.165        | 2052.157        | K[37] |
| G  | 6  | 358.196         | 1975.618        | 1967.602        | 1968.112        | 1967.105        | G[36] |
| G  | 7  | 388.377         | 1711.589        | <b>1903.579</b> | <b>1904.083</b> | 1903.073        | G[35] |
| G  | 8  | 435.217         | 1883.078        | 1875.068        | <b>1875.572</b> | 1874.565        | G[34] |
| K  | 9  | 479.265         | 1854.567        | 1846.558        | 1847.062        | 1846.054        | K[33] |
| A  | 10 | 514.703         | 1790.520        | <b>1782.510</b> | 1783.014        | <b>1782.006</b> | A[32] |
| R  | 11 | 562.834         | 1735.001        | 1746.992        | <b>1747.496</b> | 1746.489        | R[31] |
| A  | 12 | 608.953         | 1668.954        | <b>1660.941</b> | 1661.445        | <b>1660.437</b> | A[30] |
| K  | 13 | <b>662.400</b>  | 1643.433        | 1635.423        | <b>1633.927</b> | 1632.919        | K[29] |
| A  | 14 | <b>727.919</b>  | 1577.384        | <b>1569.375</b> | <b>1569.879</b> | 1568.871        | A[28] |
| K  | 15 | 791.966         | 1541.866        | <b>1533.857</b> | <b>1534.360</b> | 1533.351        | K[27] |
| S  | 16 | 835.462         | 1477.818        | 1469.809        | <b>1470.313</b> | 1469.305        | S[26] |
| R  | 17 | <b>913.533</b>  | <b>1434.302</b> | <b>1426.293</b> | <b>1425.799</b> | 1424.791        | R[25] |
| S  | 18 | <b>957.049</b>  | <b>1356.252</b> | <b>1348.243</b> | <b>1348.746</b> | 1347.739        | S[24] |
| S  | 19 | <b>1000.565</b> | 1312.735        | <b>1304.726</b> | <b>1305.230</b> | 1304.223        | S[23] |
| R  | 20 | <b>1078.615</b> | 1269.220        | <b>1261.210</b> | <b>1261.714</b> | 1260.707        | R[22] |
| A  | 21 | 1114.134        | 1191.169        | 1183.160        | <b>1183.664</b> | 1182.656        | A[21] |
| G  | 22 | <b>1142.644</b> | 1135.651        | 1147.641        | 1148.145        | 1147.137        | G[20] |
| L  | 23 | 1159.970        | 1127.140        | 1119.131        | 1119.635        | 1118.627        | L[19] |
| G  | 24 | <b>1263.216</b> | 1073.595        | 1062.589        | 1063.093        | 1062.085        | G[18] |
| F  | 25 | 1336.750        | 1006.599        | <b>998.559</b>  | <b>999.063</b>  | 998.055         | F[17] |
| F  | 26 | <b>1385.276</b> | 933.034         | 925.025         | 925.529         | 924.521         | F[16] |
| V  | 27 | 1434.811        | 884.507         | 876.499         | 877.003         | 876.005         | V[15] |
| G  | 28 | <b>1463.321</b> | 834.974         | 826.965         | 827.469         | 826.461         | G[14] |
| R  | 29 | 1543.374        | 808.463         | 800.454         | 800.958         | 799.950         | R[13] |
| V  | 30 | <b>1590.906</b> | <b>728.413</b>  | 720.403         | 720.907         | 719.899         | V[12] |
| H  | 31 | 1659.436        | 678.878         | 670.869         | 671.373         | 670.365         | H[11] |
| R  | 32 | 1737.486        | 610.349         | 602.340         | 602.843         | 601.835         | R[10] |
| L  | 33 | 1794.028        | 532.269         | 524.260         | 524.763         | 523.755         | L[9]  |
| L  | 34 | 1859.970        | 478.796         | 469.787         | 469.291         | 468.283         | L[8]  |
| R  | 35 | 1928.612        | 419.214         | 411.205         | 411.709         | 410.701         | R[7]  |
| K  | 36 | 1992.668        | 341.164         | 333.154         | 333.658         | 332.650         | K[6]  |
| G  | 37 | 2021.179        | 277.116         | 269.107         | 269.611         | 268.603         | G[5]  |
| N  | 38 | 2078.200        | 248.606         | 240.596         | 241.100         | 240.092         | N[4]  |
| V  | 39 | 2159.732        | 181.564         | 183.575         | 184.079         | 183.071         | V[3]  |
| A  | 40 | 2195.261        | 110.026         | 102.043         | 102.547         | 101.539         | A[2]  |
| E  | 41 | 2259.772        | 74.534          | 66.524          | 67.028          | 66.021          | E[1]  |

# sp | Q6GSS7 | H2A2A\_MOUSE

[Acetyl]SGRGGK<sup>Acetyl</sup><sub>42.01</sub> QGGKARAKAKSRSSRAGLQFPVGRVHLLLRKGN<sup>YAE</sup>

- ▶ fragmentation table for charge state 3+
- ▶ specType=etd
- ▶ score=53.63
- ▶ F113278.dat
- ▶ query=q70355.p1
- ▶ precursor=904.710330
- ▶ chargePrecursor=5
- ▶ itol=0.5

| AA | c  | y               | #=1             | #=2             | #=3             | AA              |       |
|----|----|-----------------|-----------------|-----------------|-----------------|-----------------|-------|
| S  | 1  | 489.697         | 1507.178        | <b>1501.839</b> | 0.872           | <b>1501.563</b> | S[41] |
| G  | 2  | 66.704          | 1464.184        | <b>1458.825</b> | 0.672           | <b>1458.489</b> | G[40] |
| R  | 3  | 1307.718        | 1445.157        | <b>1439.817</b> | <b>1440.153</b> | 1439.482        | R[39] |
| G  | 4  | 139.745         | 1393.123        | 1387.784        | <b>1388.120</b> | 1387.448        | G[38] |
| K  | 5  | 196.447         | 1374.116        | <b>1368.777</b> | <b>1369.113</b> | 1368.441        | K[37] |
| G  | 6  | 239.133         | 1317.414        | <b>1312.075</b> | <b>1312.411</b> | <b>1311.739</b> | G[36] |
| G  | 7  | 288.140         | 1274.726        | 1269.387        | <b>1269.725</b> | 1269.051        | G[35] |
| G  | 8  | 277.147         | 1255.721        | <b>1250.381</b> | <b>1250.717</b> | <b>1250.045</b> | G[34] |
| K  | 9  | 319.646         | 1236.714        | 1231.374        | 1231.710        | 1231.036        | K[33] |
| A  | 10 | 383.525         | 1194.016        | 1188.676        | 1189.012        | 1188.340        | A[32] |
| R  | 11 | 395.558         | 1170.336        | 1164.997        | <b>1165.333</b> | 1164.661        | R[31] |
| A  | 12 | 419.237         | 1132.303        | 1127.003        | 1127.309        | 1126.629        | A[30] |
| R  | 13 | 461.936         | <b>1094.624</b> | 1089.284        | 1089.620        | 1088.942        | R[29] |
| A  | 14 | 485.615         | 1051.925        | 1046.586        | 1046.922        | 1046.250        | A[28] |
| K  | 15 | 528.313         | 1028.246        | 1022.907        | 1023.243        | 1022.571        | K[27] |
| S  | 16 | 557.324         | 985.548         | 980.208         | 980.544         | 979.873         | S[26] |
| R  | 17 | 609.258         | 956.517         | 951.178         | 951.514         | 950.842         | R[25] |
| S  | 18 | 638.368         | 904.584         | 899.244         | 899.580         | 898.909         | S[24] |
| S  | 19 | 687.376         | 875.493         | 870.153         | 870.489         | 869.817         | S[23] |
| R  | 20 | 719.413         | 846.482         | 841.143         | 841.479         | 840.807         | R[22] |
| A  | 21 | 743.002         | 794.449         | 789.109         | 789.445         | 788.773         | A[21] |
| G  | 22 | 762.099         | 770.770         | 765.430         | 765.766         | 765.094         | G[20] |
| L  | 23 | 799.273         | 754.762         | 749.423         | 749.759         | 749.087         | L[19] |
| G  | 24 | 842.480         | 714.085         | 708.745         | 709.084         | 708.412         | G[18] |
| F  | 25 | 891.502         | 671.382         | 666.042         | 666.378         | 665.707         | F[17] |
| F  | 26 | 923.853         | 622.359         | 617.019         | 617.355         | 616.683         | F[16] |
| V  | 27 | <b>956.876</b>  | 590.008         | 584.668         | 585.004         | 584.332         | V[15] |
| G  | 28 | <b>975.863</b>  | 558.985         | 553.645         | 553.981         | 553.309         | G[14] |
| R  | 29 | 1027.619        | 519.976         | 514.636         | 514.974         | 514.302         | R[13] |
| V  | 30 | 1060.940        | 485.944         | 480.604         | 480.941         | 480.269         | V[12] |
| H  | 31 | 1106.626        | 452.921         | 447.581         | 447.918         | 447.246         | H[11] |
| R  | 32 | 1138.660        | 407.235         | 401.895         | 402.231         | 401.560         | R[10] |
| L  | 33 | 1187.955        | 355.201         | 349.862         | 350.198         | 349.526         | L[9]  |
| L  | 34 | <b>1234.049</b> | 319.509         | 314.169         | 314.505         | 313.833         | L[8]  |
| R  | 35 | <b>1284.083</b> | 279.812         | 274.472         | 274.808         | 274.136         | R[7]  |
| K  | 36 | 1328.781        | 227.778         | 222.438         | 222.775         | 222.103         | K[6]  |
| G  | 37 | 1347.788        | 185.880         | 179.740         | 180.076         | 179.404         | G[5]  |
| N  | 38 | 1385.803        | 146.073         | 140.733         | 141.069         | 140.397         | N[4]  |
| V  | 39 | <b>1440.157</b> | 128.098         | 122.758         | 123.095         | 122.423         | V[3]  |
| A  | 40 | 1443.816        | 83.348          | 78.008          | 78.344          | 77.672          | A[2]  |
| E  | 41 | 1506.850        | 50.025          | 44.685          | 45.021          | 44.349          | E[1]  |

# sp | Q6GSS7 | H2A2A\_MOUSE

[Acetyl]SGRGRK<sup>Acetyl</sup><sub>42.01</sub> QGGKARAKAKSRSSRAGLQFPVGRVHLLLRKGN<sup>YAE</sup>

- ▶ fragmentation table for charge state 4+
- ▶ specType=etd
- ▶ score=53.63
- ▶ F113278.dat
- ▶ query=q70355.p1
- ▶ precursor=904.710330
- ▶ chargePrecursor=5
- ▶ itol=0.5

| AA   | c               | y               | z+1            | z+2             | z              | AA   |
|------|-----------------|-----------------|----------------|-----------------|----------------|------|
| S 1  | 17.526          | <b>1130.630</b> | 1126.631       | 0.755           | 1128.379       | S 41 |
| G 2  | 51.780          | <b>1098.375</b> | 1094.370       | 0.755           | 1094.118       | G 40 |
| R 3  | 90.805          | 1084.120        | 1080.115       | <b>1080.367</b> | 1079.867       | R 30 |
| G 4  | 105.061         | 1045.094        | 1041.090       | 1041.342        | 1040.830       | G 38 |
| K 5  | 147.587         | 1030.839        | 1026.834       | 1027.086        | 1026.562       | K 19 |
| Q 6  | 179.802         | 999.311         | 994.308        | 994.560         | 994.056        | Q 29 |
| G 7  | 193.897         | 956.290         | 952.293        | 952.545         | 952.041        | G 35 |
| G 8  | 208.112         | 942.043         | 938.038        | 938.290         | 937.788        | G 34 |
| K 9  | 240.136         | 927.787         | 923.783        | 924.034         | 923.531        | K 33 |
| A 10 | 257.895         | 895.763         | 891.758        | 892.011         | 891.507        | A 32 |
| R 11 | 296.821         | 878.004         | 873.999        | 874.251         | 873.748        | R 31 |
| A 12 | 314.080         | 838.979         | 834.974        | 835.226         | 834.723        | A 20 |
| K 13 | 346.104         | 821.220         | 817.215        | 817.467         | 816.965        | K 29 |
| A 14 | 364.463         | 789.190         | 785.191        | 785.443         | 784.939        | A 28 |
| K 15 | 396.487         | 774.437         | 767.432        | 767.684         | 767.180        | K 27 |
| S 16 | 418.245         | 739.413         | 735.408        | 735.660         | 735.156        | S 26 |
| R 17 | 457.270         | 717.895         | 713.890        | 713.902         | 713.398        | R 25 |
| S 18 | 479.028         | 678.630         | 674.625        | 674.877         | 674.373        | S 24 |
| S 19 | 500.786         | 655.872         | 652.867        | 653.119         | 652.615        | S 23 |
| R 20 | 539.811         | 635.114         | 631.109        | 631.361         | 630.857        | R 22 |
| A 21 | 557.571         | 596.088         | 592.084        | 592.336         | 591.833        | A 21 |
| G 22 | 571.826         | 578.320         | 574.324        | 574.576         | 574.072        | G 20 |
| L 23 | 600.097         | 564.074         | 560.069        | 560.321         | 559.817        | L 19 |
| Q 24 | 632.112         | 535.803         | 531.798        | 532.050         | 531.546        | Q 18 |
| F 25 | 658.579         | 503.758         | 499.753        | 500.005         | 499.533        | F 17 |
| P 26 | <b>693.142</b>  | 467.021         | 463.016        | 463.268         | 462.764        | P 16 |
| V 27 | 717.909         | 442.758         | 438.753        | 439.005         | 438.501        | V 15 |
| G 28 | 732.164         | 417.991         | 413.986        | 414.238         | 413.734        | G 14 |
| R 29 | 771.190         | 403.735         | 399.731        | 399.982         | 399.478        | R 13 |
| V 30 | 895.887         | 384.719         | <b>368.705</b> | 368.957         | <b>368.453</b> | V 12 |
| H 31 | 830.221         | 339.943         | 335.938        | 336.190         | 335.686        | H 11 |
| R 32 | 869.247         | 305.679         | 301.673        | 301.925         | 301.421        | R 10 |
| L 33 | 897.518         | 266.653         | 262.648        | 262.900         | 262.396        | L 9  |
| L 34 | 925.789         | 238.382         | 234.377        | 234.629         | 234.125        | L 8  |
| R 35 | 964.814         | 210.111         | 206.106        | 206.358         | 205.854        | R 7  |
| K 36 | 999.038         | 171.088         | 167.083        | 167.335         | 166.831        | K 6  |
| G 37 | <b>1011.093</b> | 139.062         | 135.057        | 135.309         | 134.805        | G 5  |
| N 38 | <b>1039.604</b> | 124.800         | 120.800        | 121.054         | 120.550        | N 4  |
| Y 39 | <b>1080.370</b> | 96.296          | 92.291         | 92.543          | 92.039         | Y 3  |
| A 40 | 1098.129        | 55.530          | 51.525         | 51.777          | 51.273         | A 2  |
| E 41 | 1130.300        | 37.771          | 33.766         | 34.018          | 33.514         | E 1  |

# sp | Q8BFU2 | H2A3\_MOUSE

[Acetyl]SGR<sup>Acetyl</sup>RGK 42.01 QGGKARAKAKSRSSRAGLQFPVGRVHLLLRKGNYS

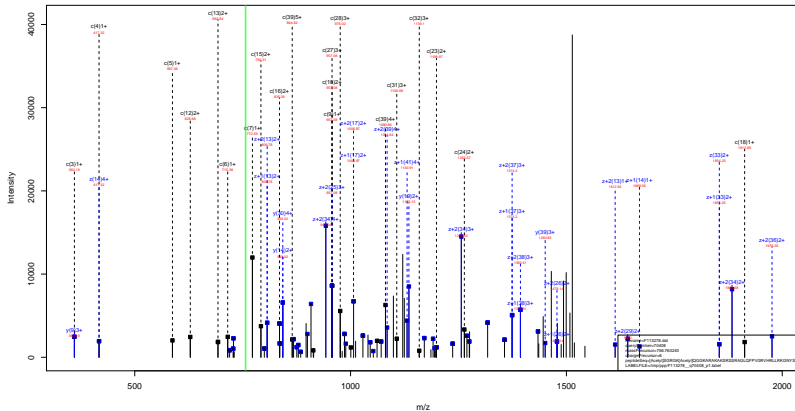

# sp | Q8BFU2 | H2A3\_MOUSE

[Acetyl]SGRGRK<sup>Acetyl</sup><sub>42.01</sub> QGGKARAKAKSRSSRAGLQFPVGRVHLLLRKGNYS

- ▶ fragmentation table for charge state 1+
- ▶ specType=etd
- ▶ score=39.79
- ▶ F113278.dat
- ▶ query=q70408.p1
- ▶ precursor=756.760240
- ▶ chargePrecursor=6
- ▶ itol=0.5

| AA | c  | y               | z+1      | z+2             | z               | AA             |       |
|----|----|-----------------|----------|-----------------|-----------------|----------------|-------|
| S  | 1  | 147.076         | 4535.515 | 4519.497        | 0.000           | 4518.480       | S[41] |
| G  | 2  | 304.098         | 4406.473 | 4390.454        | 0.000           | 4389.448       | G[40] |
| R  | 3  | <b>360.199</b>  | 4349.451 | 4333.433        | 4334.441        | 4332.423       | R[39] |
| G  | 4  | <b>417.220</b>  | 4193.350 | 4177.332        | 4178.339        | 4176.324       | G[38] |
| K  | 5  | <b>587.326</b>  | 4136.329 | 4120.310        | 4121.318        | 4119.302       | K[37] |
| Q  | 6  | <b>715.385</b>  | 3996.273 | 3980.255        | 3981.262        | 3980.197       | Q[36] |
| G  | 7  | <b>772.406</b>  | 3838.165 | 3822.146        | 3823.154        | 3821.138       | G[35] |
| G  | 8  | 829.427         | 3781.143 | 3765.125        | 3766.132        | 3764.117       | G[34] |
| K  | 9  | <b>957.522</b>  | 3724.122 | 3708.103        | 3709.111        | 3707.095       | K[33] |
| A  | 10 | <b>1028.560</b> | 3596.027 | 3580.008        | 3581.016        | 3579.000       | A[32] |
| R  | 11 | 1154.051        | 3524.990 | 3508.971        | 3509.979        | 3507.963       | R[31] |
| A  | 12 | 1254.038        | 3398.959 | 3382.939        | 3383.948        | 3381.961       | A[30] |
| K  | 13 | 1363.993        | 3297.852 | 3281.833        | 3282.841        | 3280.825       | K[29] |
| A  | 14 | 1454.830        | 3169.757 | 3153.738        | 3154.746        | 3152.730       | A[28] |
| K  | 15 | 1562.825        | 3098.719 | 3082.700        | 3083.709        | 3081.693       | K[27] |
| S  | 16 | 1669.957        | 2970.625 | 2954.606        | 2955.614        | 2953.598       | S[26] |
| R  | 17 | 1803.058        | 2883.592 | 2867.574        | 2868.582        | 2866.566       | R[25] |
| S  | 18 | <b>1913.090</b> | 2727.491 | 2711.473        | 2712.480        | 2710.465       | S[24] |
| S  | 19 | 2000.122        | 2640.458 | 2624.441        | 2625.448        | 2623.433       | S[23] |
| R  | 20 | 2156.223        | 2553.427 | 2537.409        | 2538.416        | 2536.401       | R[22] |
| A  | 21 | 2227.260        | 2497.326 | 2481.307        | 2482.315        | 2480.300       | A[21] |
| G  | 22 | 2284.282        | 2426.289 | 2410.270        | 2411.278        | 2409.263       | G[20] |
| L  | 23 | 2397.366        | 2359.268 | 2343.249        | 2344.257        | 2342.241       | L[19] |
| Q  | 24 | 2525.424        | 2156.184 | 2140.165        | 2141.173        | 2139.157       | Q[18] |
| F  | 25 | 2672.493        | 2028.125 | 2012.106        | 2013.114        | 2011.098       | F[17] |
| F  | 26 | 2769.546        | 1881.057 | 1865.038        | 1866.046        | 1864.030       | F[16] |
| V  | 27 | 2866.614        | 1784.004 | 1767.985        | 1768.993        | 1766.977       | V[15] |
| G  | 28 | 2925.635        | 1684.935 | <b>1668.917</b> | 1669.924        | 1667.909       | G[14] |
| R  | 29 | 3081.737        | 1627.914 | 1611.895        | <b>1612.903</b> | 1610.887       | R[13] |
| V  | 30 | 3190.805        | 1491.813 | 1475.794        | 1476.802        | 1474.786       | V[12] |
| H  | 31 | 3317.864        | 1372.744 | <b>1356.726</b> | 1357.734        | 1355.718       | H[11] |
| R  | 32 | 3473.965        | 1235.685 | 1219.667        | 1220.675        | 1218.659       | R[10] |
| L  | 33 | 3587.049        | 1079.584 | 1063.566        | 1064.573        | 1062.558       | L[9]  |
| L  | 34 | 3700.133        | 966.500  | 950.482         | 951.489         | 949.474        | L[8]  |
| R  | 35 | 3856.234        | 853.416  | 837.398         | 838.405         | <b>836.390</b> | R[7]  |
| K  | 36 | 3954.229        | 697.315  | 681.296         | 682.304         | 680.289        | K[6]  |
| G  | 37 | 4041.351        | 569.220  | 553.201         | 554.209         | 552.194        | G[5]  |
| N  | 38 | 4155.394        | 512.109  | 496.100         | 497.108         | 495.172        | N[4]  |
| V  | 39 | 4318.457        | 396.156  | 380.137         | 381.145         | 381.129        | V[3]  |
| S  | 40 | 4405.489        | 235.092  | 219.074         | 220.082         | 218.066        | S[2]  |
| E  | 41 | 4534.532        | 148.060  | 132.042         | 133.050         | 131.034        | E[1]  |

# sp | Q8BFU2 | H2A3\_MOUSE

[Acetyl]SGR<sup>Acetyl</sup>RGK<sub>42.01</sub> QGGKARAKAKSRSSRAGLQFPVGRVHRLLRKGNYS

- ▶ fragmentation table for charge state 2+
- ▶ specType=etd
- ▶ score=39.79
- ▶ F113278.dat
- ▶ query=q70408.p1
- ▶ precursor=756.760240
- ▶ chargePrecursor=6
- ▶ itol=0.5

| AA | c  | y               | #s1             | #s2             | z               | AA              |       |
|----|----|-----------------|-----------------|-----------------|-----------------|-----------------|-------|
| S  | 1  | 74.062          | 2308.241        | 2309.250        | 0.804           | 2309.746        | S[41] |
| G  | 2  | 102.553         | 2303.740        | 2305.731        | 0.504           | 2305.227        | G[40] |
| R  | 3  | 180.603         | 2175.229        | 2187.230        | 2167.724        | 2168.710        | R[39] |
| G  | 4  | 209.114         | 2097.179        | 2099.169        | 2089.673        | 2088.660        | G[38] |
| K  | 5  | 294.167         | 2058.668        | 2060.659        | 2051.163        | 2050.155        | K[37] |
| G  | 6  | 358.196         | 1983.615        | 1975.605        | <b>1976.110</b> | 1975.102        | G[36] |
| G  | 7  | 388.187         | 1919.566        | 1911.577        | 1912.573        | 1911.977        | G[35] |
| G  | 8  | 435.217         | 1891.075        | 1883.086        | <b>1883.570</b> | 1882.562        | G[34] |
| K  | 9  | 479.265         | 1863.565        | <b>1854.555</b> | 1855.059        | <b>1854.051</b> | K[33] |
| A  | 10 | 514.263         | 1798.511        | 1790.508        | 1791.012        | 1790.004        | A[32] |
| R  | 11 | 552.524         | 1762.999        | 1754.989        | 1755.493        | 1754.485        | R[31] |
| A  | 12 | <b>628.353</b>  | 1684.948        | 1676.938        | 1677.442        | 1676.434        | A[30] |
| R  | 13 | <b>662.400</b>  | 1649.420        | 1641.430        | <b>1641.924</b> | 1640.916        | R[29] |
| A  | 14 | <b>727.919</b>  | 1585.383        | 1577.373        | 1577.876        | 1576.868        | A[28] |
| K  | 15 | <b>791.966</b>  | 1549.863        | 1541.854        | 1542.358        | 1541.350        | K[27] |
| S  | 16 | <b>835.482</b>  | 1485.816        | <b>1477.807</b> | <b>1478.310</b> | 1477.303        | S[26] |
| R  | 17 | <b>913.533</b>  | 1442.300        | <b>1434.291</b> | <b>1434.794</b> | <b>1433.787</b> | R[25] |
| S  | 18 | <b>957.000</b>  | 1384.249        | <b>1356.240</b> | <b>1356.744</b> | 1355.736        | S[24] |
| S  | 19 | <b>1000.505</b> | 1330.733        | 1312.724        | 1313.228        | 1312.220        | S[23] |
| R  | 20 | 1078.615        | 1277.217        | <b>1269.208</b> | <b>1269.712</b> | 1268.704        | R[22] |
| A  | 21 | 1114.134        | <b>1199.167</b> | <b>1191.157</b> | <b>1191.661</b> | 1190.653        | A[21] |
| G  | 22 | 1142.644        | 1103.648        | 1105.639        | 1106.143        | 1105.135        | G[20] |
| L  | 23 | <b>1199.187</b> | <b>1135.137</b> | 1137.129        | 1137.633        | 1136.625        | L[19] |
| G  | 24 | <b>1263.216</b> | <b>1076.587</b> | <b>1070.586</b> | <b>1071.090</b> | 1070.082        | G[18] |
| F  | 25 | 1336.750        | 1014.560        | <b>1006.557</b> | <b>1007.061</b> | 1006.053        | F[17] |
| F  | 26 | 1385.276        | 941.033         | 933.023         | 933.526         | 932.519         | F[16] |
| V  | 27 | 1434.811        | 892.500         | <b>884.496</b>  | 885.000         | <b>883.992</b>  | V[15] |
| G  | 28 | 1483.321        | <b>842.971</b>  | <b>834.962</b>  | <b>835.466</b>  | 834.458         | G[14] |
| R  | 29 | 1541.872        | 814.483         | <b>806.451</b>  | <b>806.955</b>  | 805.947         | R[13] |
| V  | 30 | 1590.906        | 736.410         | <b>728.401</b>  | <b>728.905</b>  | <b>727.897</b>  | V[12] |
| H  | 31 | 1659.436        | 688.876         | 678.886         | 679.370         | 678.363         | H[11] |
| R  | 32 | 1737.488        | 618.346         | 610.337         | 610.841         | 609.833         | R[10] |
| L  | 33 | 1794.028        | 540.206         | 532.200         | 532.700         | 531.703         | L[9]  |
| L  | 34 | 1859.570        | 489.794         | 479.749         | 479.248         | 478.241         | L[8]  |
| R  | 35 | 1928.612        | 427.212         | 419.202         | 419.706         | 418.698         | R[7]  |
| K  | 36 | 1992.668        | 349.161         | 341.152         | 341.656         | 340.648         | K[6]  |
| G  | 37 | 2021.179        | 285.114         | 277.104         | 277.608         | 276.600         | G[5]  |
| N  | 38 | 2078.200        | 256.603         | 248.594         | 249.098         | 248.090         | N[4]  |
| V  | 39 | 2159.232        | 199.562         | 191.572         | 192.076         | 191.068         | V[3]  |
| S  | 40 | 2203.246        | 118.056         | 110.041         | 110.544         | 109.537         | S[2]  |
| E  | 41 | 2287.769        | 74.534          | 66.524          | 67.028          | 66.021          | E[1]  |



# sp | Q8BFU2 | H2A3\_MOUSE

[Acetyl]SGR<sup>Acetyl</sup>RGK<sub>42.01</sub> QGGKARAKAKSRSSRAGLQFPVGRVHLLLRKGNYS

- ▶ fragmentation table for charge state 3+
- ▶ specType=etd
- ▶ score=39.79
- ▶ F113278.dat
- ▶ query=q70408.p1
- ▶ precursor=756.760240
- ▶ chargePrecursor=6
- ▶ itol=0.5

| AA | c  | y               | #±1             | #±2             | z               | AA              |       |
|----|----|-----------------|-----------------|-----------------|-----------------|-----------------|-------|
| S  | 1  | 489.697         | 1512.310        | 1267.133        | 8.872           | 1509.833        | S[41] |
| G  | 2  | 86.704          | 1469.496        | 1464.156        | 0.672           | 1463.820        | G[49] |
| R  | 3  | 1207.718        | <b>1450.489</b> | 1445.149        | 1445.485        | 1444.811        | R[39] |
| G  | 4  | 139.745         | 1398.455        | <b>1393.115</b> | <b>1393.451</b> | 1392.770        | G[38] |
| K  | 5  | 196.447         | 1379.448        | <b>1374.108</b> | <b>1374.444</b> | <b>1373.772</b> | K[37] |
| G  | 6  | 239.133         | 1322.746        | <b>1317.406</b> | <b>1317.742</b> | <b>1317.070</b> | G[36] |
| G  | 7  | 288.140         | 1266.060        | <b>1274.720</b> | <b>1275.056</b> | 1274.381        | G[35] |
| G  | 8  | 297.147         | 1261.053        | 1255.713        | <b>1256.049</b> | 1255.377        | G[34] |
| K  | 9  | 319.646         | 1242.045        | <b>1236.706</b> | <b>1237.042</b> | <b>1236.370</b> | K[33] |
| A  | 10 | 383.525         | <b>1199.347</b> | 1194.008        | <b>1194.344</b> | 1193.677        | A[32] |
| R  | 11 | 395.558         | 1175.068        | <b>1170.329</b> | <b>1170.664</b> | 1169.991        | R[31] |
| A  | 12 | 439.239         | 1133.834        | 1128.507        | 1128.831        | 1128.156        | A[30] |
| K  | 13 | 461.936         | 1099.955        | 1094.615        | 1094.952        | 1094.281        | K[29] |
| A  | 14 | 485.615         | 1057.257        | 1051.917        | <b>1052.253</b> | 1051.581        | A[28] |
| K  | 15 | 508.313         | 1033.578        | <b>1028.238</b> | <b>1028.574</b> | 1027.907        | K[27] |
| S  | 16 | 557.324         | 990.880         | <b>985.540</b>  | <b>985.876</b>  | 985.204         | S[26] |
| R  | 17 | 606.258         | 948.989         | 943.649         | <b>956.865</b>  | 946.143         | R[25] |
| S  | 18 | 638.368         | 909.835         | 904.495         | 904.831         | 904.160         | S[24] |
| S  | 19 | 667.376         | 880.825         | <b>875.485</b>  | <b>875.821</b>  | <b>875.149</b>  | S[23] |
| R  | 20 | <b>719.413</b>  | 851.814         | 846.474         | 846.810         | 846.139         | R[22] |
| A  | 21 | 783.092         | <b>799.780</b>  | 794.441         | 794.777         | 794.101         | A[21] |
| G  | 22 | 762.099         | 776.101         | 770.762         | 771.098         | 770.426         | G[20] |
| L  | 23 | <b>799.793</b>  | 757.094         | 751.754         | 752.090         | 751.414         | L[19] |
| G  | 24 | <b>824.239</b>  | <b>719.399</b>  | 714.060         | 714.396         | 713.721         | G[18] |
| F  | 25 | 891.502         | 676.713         | 671.374         | 671.710         | 671.038         | F[17] |
| F  | 26 | 923.853         | 627.600         | 622.261         | 622.597         | 621.915         | F[16] |
| V  | 27 | <b>956.876</b>  | 595.139         | 590.000         | 590.336         | 589.664         | V[15] |
| G  | 28 | <b>975.863</b>  | 562.317         | 556.977         | 557.313         | 556.641         | G[14] |
| R  | 29 | 1022.614        | 443.309         | 437.970         | 438.306         | 437.634         | R[13] |
| V  | 30 | <b>1060.940</b> | 401.275         | 405.936         | 406.272         | 405.600         | V[12] |
| H  | 31 | <b>1106.626</b> | 458.253         | 452.913         | 453.249         | 452.577         | H[11] |
| R  | 32 | <b>1158.660</b> | 412.567         | 407.227         | 407.563         | 406.891         | R[10] |
| L  | 33 | 1196.355        | <b>360.533</b>  | 355.193         | 355.529         | 354.857         | L[9]  |
| L  | 34 | 1234.049        | 322.584         | 317.244         | 317.580         | 316.908         | L[8]  |
| R  | 35 | 1298.053        | 285.144         | 279.804         | 280.140         | 279.468         | R[7]  |
| K  | 36 | 1328.781        | 233.110         | 227.770         | 228.106         | 227.434         | K[6]  |
| G  | 37 | 1347.788        | 190.412         | 185.072         | 185.408         | 184.736         | G[5]  |
| N  | 38 | 1385.803        | 171.404         | 166.065         | 166.401         | 165.729         | N[4]  |
| V  | 39 | 1440.157        | 133.390         | 128.051         | 128.386         | 127.715         | V[3]  |
| S  | 40 | 1469.166        | 99.136          | 93.796          | 94.132          | 93.460          | S[2]  |
| E  | 41 | 1512.182        | 50.025          | 44.685          | 45.021          | 44.349          | E[1]  |

# sp | Q8BFU2 | H2A3\_MOUSE

[Acetyl]SGR<sup>Acetyl</sup>RGK<sub>42.01</sub> QGGKARAKAKSRSSRAGLQFPVGRVHRLLRKGNYS

- ▶ fragmentation table for charge state 4+
- ▶ specType=etd
- ▶ score=39.79
- ▶ F113278.dat
- ▶ query=q70408.p1
- ▶ precursor=756.760240
- ▶ chargePrecursor=6
- ▶ itol=0.5

| AA   | c               | y              | z+1             | z+2             | z              | AA   |
|------|-----------------|----------------|-----------------|-----------------|----------------|------|
| S 1  | 17.526          | 1134.684       | <b>1130.630</b> | 0.755           | 1130.378       | S 41 |
| G 2  | 51.780          | 1102.374       | 1068.369        | 0.755           | 1068.117       | G 40 |
| R 3  | 90.805          | 1088.118       | 1084.114        | <b>1084.366</b> | 1083.862       | R 39 |
| G 4  | 105.061         | 1049.093       | <b>1045.088</b> | <b>1045.340</b> | 1044.836       | G 38 |
| K 5  | 147.587         | 1034.938       | 1030.933        | 1031.189        | 1030.561       | K 37 |
| G 6  | 179.602         | 992.311        | 988.307         | <b>988.559</b>  | 988.055        | G 36 |
| G 7  | 193.857         | 960.267        | 956.262         | 956.544         | 956.040        | G 35 |
| G 8  | 208.112         | 946.041        | 942.037         | <b>942.289</b>  | 941.785        | G 34 |
| K 9  | 240.136         | 931.786        | 927.781         | 928.033         | 927.529        | K 33 |
| A 10 | 257.895         | <b>899.762</b> | 895.757         | 896.009         | 895.506        | A 32 |
| R 11 | 296.821         | <b>884.504</b> | 881.498         | 881.750         | 881.246        | R 31 |
| A 12 | 314.680         | <b>842.978</b> | 838.973         | 839.225         | 838.721        | A 30 |
| K 13 | 346.704         | 825.215        | 821.214         | 821.466         | 820.962        | K 29 |
| A 14 | 364.463         | 793.195        | 789.190         | 789.442         | 788.938        | A 28 |
| K 15 | 396.487         | 775.435        | 771.431         | 771.683         | 771.179        | K 27 |
| S 16 | 418.245         | 743.412        | 739.407         | 739.659         | 739.155        | S 26 |
| R 17 | 457.270         | 721.894        | 717.889         | 717.901         | 717.397        | R 25 |
| S 18 | 479.028         | 682.628        | 678.624         | 678.876         | 678.372        | S 24 |
| S 19 | 500.786         | 660.870        | 656.866         | 657.118         | 656.614        | S 23 |
| R 20 | 539.811         | 639.112        | 635.108         | 635.360         | 634.856        | R 22 |
| A 21 | 557.571         | 600.087        | 596.082         | 596.334         | 595.830        | A 21 |
| G 22 | 571.826         | 582.320        | 578.323         | 578.575         | 578.071        | G 20 |
| L 23 | 600.097         | 568.072        | 564.068         | 564.320         | 563.816        | L 19 |
| G 24 | 632.112         | 539.801        | 535.797         | 536.049         | 535.545        | G 18 |
| F 25 | 668.879         | 507.787        | 503.782         | 504.034         | 503.530        | F 17 |
| P 26 | <b>693.142</b>  | 471.020        | 467.015         | 467.267         | 466.763        | P 16 |
| V 27 | 717.809         | 446.756        | 442.752         | 443.004         | 442.500        | V 15 |
| G 28 | 732.164         | 421.989        | 417.985         | 418.237         | <b>417.733</b> | G 14 |
| R 29 | 771.190         | 407.734        | 403.729         | 403.981         | 403.477        | R 13 |
| V 30 | 795.937         | 388.709        | 384.704         | 384.956         | 384.452        | V 12 |
| H 31 | 830.221         | 343.942        | 339.937         | 340.189         | 339.685        | H 11 |
| R 32 | 869.247         | 309.677        | 305.672         | 305.924         | 305.420        | R 10 |
| L 33 | 897.518         | 270.652        | 266.647         | 266.899         | 266.395        | L 9  |
| L 34 | 925.789         | 242.881        | 238.876         | 239.128         | 238.624        | L 8  |
| R 35 | 964.814         | 214.110        | 210.105         | 210.357         | 209.853        | R 7  |
| K 36 | 999.838         | 175.884        | 171.880         | 172.132         | 171.628        | K 6  |
| G 37 | 1011.093        | 143.061        | 139.056         | 139.308         | 138.804        | G 5  |
| N 38 | 1039.604        | 128.805        | 124.800         | 125.052         | 124.548        | N 4  |
| Y 39 | <b>1080.370</b> | 100.294        | 96.290          | 96.542          | 96.038         | Y 3  |
| S 40 | 1102.128        | 59.529         | 55.524          | 55.776          | 55.272         | S 2  |
| E 41 | 1114.388        | 37.771         | 33.766          | 34.018          | 33.514         | E 1  |

# sp | Q8BFU2 | H2A3\_MOUSE

[Acetyl]SGR<sup>Acetyl</sup>RGK<sub>42.01</sub> QGGKARAKAKSRSSRAGLQFPVGRVHRLLRKGNYS

- ▶ fragmentation table for charge state 5+
- ▶ specType=etd
- ▶ score=39.79
- ▶ F113278.dat
- ▶ query=q70408\_p1
- ▶ precursor=756.76240
- ▶ chargePrecursor=6
- ▶ itol=0.5

| AA | c  | y              | z+1            | z#2            | z              | AA             |   |    |
|----|----|----------------|----------------|----------------|----------------|----------------|---|----|
| S  | 1  | 30.221         | <b>907.909</b> | 904.708        | 0.806          | 904.904        | S | 41 |
| G  | 2  | 41.625         | 892.100        | <b>878.897</b> | 0.806          | <b>878.695</b> | G | 40 |
| R  | 3  | 72.846         | 870.696        | <b>867.492</b> | <b>867.694</b> | 867.291        | R | 39 |
| G  | 4  | 84.250         | 839.476        | <b>836.272</b> | <b>836.474</b> | <b>836.071</b> | G | 38 |
| K  | 5  | 118.271        | 828.072        | 824.868        | 825.069        | 824.666        | K | 37 |
| Q  | 6  | 143.883        | 794.050        | 790.847        | 791.048        | 790.645        | Q | 36 |
| G  | 7  | 195.287        | 768.439        | 765.235        | 765.437        | 765.033        | G | 35 |
| G  | 8  | 166.691        | 757.034        | 753.831        | 754.032        | 753.629        | G | 34 |
| K  | 9  | 192.310        | 745.630        | 742.428        | 742.628        | 742.225        | K | 33 |
| A  | 10 | 208.518        | <b>720.011</b> | 716.807        | 717.009        | 716.606        | A | 32 |
| R  | 11 | 237.738        | 705.804        | 702.600        | 702.802        | 702.398        | R | 31 |
| A  | 12 | 251.945        | 674.584        | 671.380        | 671.581        | 671.178        | A | 30 |
| K  | 13 | 277.564        | 660.376        | 657.172        | 657.374        | 656.971        | K | 29 |
| A  | 14 | 291.772        | 634.757        | 631.553        | 631.755        | 631.352        | A | 28 |
| K  | 15 | 317.391        | 620.550        | 617.346        | 617.548        | 617.144        | K | 27 |
| S  | 16 | 334.797        | 594.931        | 591.727        | 591.929        | 591.525        | S | 26 |
| R  | 17 | 366.017        | 577.524        | 574.321        | 574.522        | 574.119        | R | 25 |
| S  | 18 | 383.424        | 546.304        | 543.100        | 543.302        | 542.899        | S | 24 |
| S  | 19 | 400.830        | 528.696        | 525.494        | 525.696        | 525.292        | S | 23 |
| R  | 20 | 432.050        | 511.491        | 508.288        | 508.489        | 508.086        | R | 22 |
| A  | 21 | 446.258        | 480.271        | 477.067        | 477.269        | 476.866        | A | 21 |
| G  | 22 | 457.662        | 466.064        | 462.860        | 463.061        | 462.658        | G | 20 |
| L  | 23 | 480.279        | 494.659        | 451.456        | 451.657        | 451.254        | L | 19 |
| Q  | 24 | 505.891        | 432.043        | 428.839        | 429.040        | 428.637        | Q | 18 |
| F  | 25 | 535.304        | 406.431        | 403.227        | 403.429        | 403.026        | F | 17 |
| P  | 26 | 554.715        | 377.017        | 373.813        | 374.015        | 373.612        | P | 16 |
| V  | 27 | 574.520        | 357.807        | 354.603        | 354.804        | 354.401        | V | 15 |
| G  | 28 | 585.933        | 337.793        | 334.589        | 334.791        | 334.388        | G | 14 |
| R  | 29 | 617.153        | 326.380        | 323.176        | 323.378        | 322.975        | R | 13 |
| V  | 30 | 636.967        | 295.168        | 291.965        | 292.166        | 291.763        | V | 12 |
| H  | 31 | 664.379        | 275.355        | 272.151        | 272.353        | 271.949        | H | 11 |
| R  | 32 | 695.599        | 247.943        | 244.739        | 244.941        | 244.538        | R | 10 |
| L  | 33 | 718.216        | 216.723        | 213.519        | 213.721        | 213.317        | L | 9  |
| L  | 34 | 740.832        | 194.106        | 190.902        | 191.104        | 190.701        | L | 8  |
| R  | 35 | 772.053        | 171.489        | 168.285        | 168.487        | 168.084        | R | 7  |
| K  | 36 | 787.872        | 140.269        | 137.065        | 137.267        | 136.864        | K | 6  |
| G  | 37 | 839.078        | 114.650        | 111.446        | 111.648        | 111.245        | G | 5  |
| N  | 38 | 831.885        | 103.246        | 100.042        | 100.243        | 99.840         | N | 4  |
| V  | 39 | <b>864.497</b> | 80.437         | 77.233         | 77.435         | 77.032         | V | 3  |
| S  | 40 | 881.904        | 47.824         | 44.621         | 44.822         | 44.419         | S | 2  |
| E  | 41 | 907.712        | 30.418         | 27.214         | 27.416         | 27.013         | E | 1  |

# sp | Q8BFU2 | H2A3\_MOUSE

[Acetyl]SGR<sup>Acetyl</sup>RGK 42.01 QGGKARAKAKSRSSRAGLQFPVGRVHLLRKGNYSE

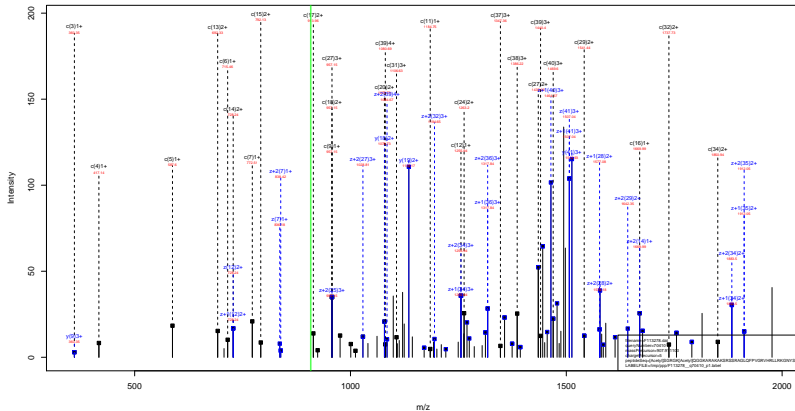

# sp | Q8BFU2 | H2A3\_MOUSE

[Acetyl]SGRGRK<sup>Acetyl</sup><sub>42.01</sub> QGGKARAKAKSRSSRAGLQFPVGRVHLLLRKGNYS

- ▶ fragmentation table for charge state 1+
- ▶ specType=etd
- ▶ score=54.57
- ▶ F113278.dat
- ▶ query=q70410.p1
- ▶ precursor=907.911100
- ▶ chargePrecursor=5
- ▶ itol=0.5

| AA   | c               | y        | z+1             | z+2             | z              | AA   |
|------|-----------------|----------|-----------------|-----------------|----------------|------|
| S 1  | 147.076         | 4535.515 | 4519.497        | 0.000           | 4518.480       | S 41 |
| G 2  | 304.095         | 4406.473 | 4390.454        | 0.000           | 4389.445       | G 40 |
| R 3  | <b>360.199</b>  | 4349.451 | 4333.433        | 4334.441        | 4332.423       | R 39 |
| G 4  | <b>417.220</b>  | 4193.350 | 4177.332        | 4178.339        | 4176.324       | G 38 |
| K 5  | <b>587.326</b>  | 4136.329 | 4120.310        | 4121.318        | 4119.302       | K 37 |
| Q 6  | <b>715.385</b>  | 3996.273 | 3980.255        | 3981.262        | 3980.197       | Q 36 |
| G 7  | <b>772.406</b>  | 3838.165 | 3822.146        | 3823.154        | 3821.138       | G 35 |
| G 8  | 829.427         | 3781.143 | 3765.125        | 3766.132        | 3764.117       | G 34 |
| K 9  | <b>957.522</b>  | 3724.122 | 3708.103        | 3709.111        | 3707.095       | K 33 |
| A 10 | <b>1028.560</b> | 3666.027 | 3650.008        | 3651.016        | 3649.000       | A 32 |
| R 11 | <b>1184.661</b> | 3524.990 | 3508.971        | 3509.979        | 3507.963       | R 31 |
| A 12 | <b>1255.698</b> | 3368.959 | 3352.939        | 3353.948        | 3351.962       | A 30 |
| R 13 | 1354.799        | 3297.852 | 3281.833        | 3282.841        | 3280.825       | R 29 |
| A 14 | 1454.830        | 3169.757 | 3153.738        | 3154.746        | 3152.730       | A 28 |
| K 15 | 1562.925        | 3098.719 | 3082.700        | 3083.709        | 3081.693       | K 27 |
| S 16 | <b>1669.957</b> | 2970.625 | 2954.606        | 2955.614        | 2953.598       | S 26 |
| R 17 | 1826.058        | 2883.592 | 2867.574        | 2868.582        | 2866.566       | R 25 |
| S 18 | 1913.090        | 2727.491 | 2711.473        | 2712.480        | 2710.465       | S 24 |
| S 19 | 2000.122        | 2640.455 | 2624.441        | 2625.448        | 2623.433       | S 23 |
| R 20 | 2156.223        | 2553.427 | 2537.409        | 2538.416        | 2536.401       | R 22 |
| A 21 | 2227.260        | 2497.326 | 2481.307        | 2482.315        | 2480.300       | A 21 |
| G 22 | 2284.282        | 2326.289 | 2310.270        | 2311.278        | 2309.263       | G 20 |
| L 23 | 2397.366        | 2269.268 | 2253.249        | 2254.257        | 2252.241       | L 19 |
| Q 24 | 2525.424        | 2156.184 | 2140.165        | 2141.173        | 2139.157       | Q 18 |
| F 25 | 2672.493        | 2028.125 | 2012.106        | 2013.114        | 2011.098       | F 17 |
| P 26 | 2769.546        | 1881.057 | 1865.038        | 1866.046        | 1864.030       | P 16 |
| V 27 | 2866.614        | 1784.004 | 1767.985        | 1768.993        | 1766.977       | V 15 |
| G 28 | 2925.635        | 1684.935 | 1668.917        | <b>1669.924</b> | 1667.909       | G 14 |
| R 29 | 3081.737        | 1627.914 | 1611.895        | <b>1612.903</b> | 1610.887       | R 13 |
| V 30 | 3190.806        | 1519.833 | <b>1455.794</b> | 1456.802        | 1454.785       | V 12 |
| H 31 | 3317.864        | 1372.744 | <b>1356.726</b> | 1357.734        | 1355.718       | H 11 |
| R 32 | 3473.965        | 1235.685 | 1219.667        | <b>1220.675</b> | 1218.659       | R 10 |
| L 33 | 3587.049        | 1079.584 | 1063.566        | 1064.573        | 1062.558       | L 9  |
| L 34 | 3700.133        | 999.500  | 990.482         | 991.489         | 989.474        | L 8  |
| R 35 | 3856.234        | 853.416  | 837.398         | <b>838.405</b>  | <b>836.390</b> | R 7  |
| K 36 | 3954.259        | 697.315  | 681.298         | 682.304         | 680.290        | K 6  |
| G 37 | 4041.351        | 569.220  | 553.201         | 554.209         | 552.194        | G 5  |
| N 38 | 4155.394        | 512.109  | 496.100         | 497.108         | 495.172        | N 4  |
| V 39 | 4318.457        | 396.156  | 380.137         | 381.145         | 381.129        | V 3  |
| S 40 | 4405.489        | 235.092  | 219.074         | 220.082         | 218.066        | S 2  |
| E 41 | 4534.532        | 148.060  | 132.042         | 133.050         | 131.034        | E 1  |

# sp | Q8BFU2 | H2A3\_MOUSE

[Acetyl]SGR<sup>Acetyl</sup>RGK<sub>42.01</sub> QGGKARAKAKSRSSRAGLQFPVGRVHRLLRKGNYS

- ▶ fragmentation table for charge state 2+
- ▶ specType=etd
- ▶ score=54.57
- ▶ F113278.dat
- ▶ query=q70410.p1
- ▶ precursor=907.911100
- ▶ chargePrecursor=5
- ▶ itol=0.5

| AA | c  | y               | #s=1            | #s=2            | z               | AA              |       |
|----|----|-----------------|-----------------|-----------------|-----------------|-----------------|-------|
| S  | 1  | 74.062          | 2308.241        | 2309.257        | 8.804           | 2309.741        | S(1)  |
| G  | 2  | 102.553         | 2303.740        | 2305.731        | 0.504           | 2305.227        | G(2)  |
| R  | 3  | 180.603         | 2175.229        | 2187.230        | 2167.724        | 2168.710        | R(3)  |
| G  | 4  | 209.114         | 2097.179        | 2099.169        | 2089.673        | 2088.660        | G(4)  |
| K  | 5  | 294.167         | 2058.658        | 2060.658        | 2061.163        | 2060.155        | K(5)  |
| G  | 6  | 358.196         | 1983.615        | 1979.622        | 1978.120        | 1975.112        | G(6)  |
| G  | 7  | 388.377         | 1919.586        | <b>1911.577</b> | <b>1912.081</b> | 1911.077        | G(7)  |
| G  | 8  | 435.217         | 1891.075        | <b>1883.066</b> | <b>1883.570</b> | 1882.562        | G(8)  |
| K  | 9  | 479.205         | 1863.565        | 1854.555        | 1855.059        | 1854.051        | K(9)  |
| A  | 10 | 514.203         | 1798.517        | <b>1790.508</b> | <b>1791.012</b> | 1790.004        | A(10) |
| R  | 11 | 562.834         | 1762.999        | <b>1754.989</b> | <b>1755.493</b> | 1754.485        | R(11) |
| A  | 12 | 639.853         | 1688.948        | <b>1678.939</b> | 1677.933        | <b>1676.435</b> | A(12) |
| R  | 13 | <b>692.400</b>  | 1649.420        | 1641.420        | <b>1641.924</b> | 1640.916        | R(13) |
| A  | 14 | <b>727.919</b>  | <b>1585.382</b> | <b>1577.373</b> | <b>1577.876</b> | <b>1576.869</b> | A(14) |
| K  | 15 | <b>791.966</b>  | 1549.863        | <b>1541.854</b> | 1542.358        | <b>1541.350</b> | K(15) |
| S  | 16 | 835.482         | 1485.816        | 1477.807        | <b>1478.310</b> | 1477.303        | S(16) |
| R  | 17 | <b>913.533</b>  | 1442.300        | 1434.291        | <b>1434.794</b> | 1433.786        | R(17) |
| S  | 18 | <b>957.049</b>  | 1384.249        | 1376.240        | <b>1376.744</b> | 1375.736        | S(18) |
| S  | 19 | <b>1000.565</b> | 1330.733        | <b>1312.724</b> | 1313.228        | <b>1312.220</b> | S(19) |
| R  | 20 | <b>1078.615</b> | 1277.217        | 1269.208        | <b>1269.712</b> | 1268.704        | R(20) |
| A  | 21 | 1114.134        | 1199.167        | 1191.157        | 1191.661        | 1190.653        | A(21) |
| G  | 22 | 1142.644        | 1103.049        | 1105.039        | 1106.043        | 1105.035        | G(22) |
| L  | 23 | 1199.188        | <b>1135.137</b> | 1127.128        | 1127.632        | 1126.624        | L(23) |
| Q  | 24 | <b>1263.216</b> | <b>1078.995</b> | 1070.985        | 1071.989        | 1070.982        | Q(24) |
| F  | 25 | 1336.750        | 1014.566        | 1006.557        | 1007.561        | 1006.553        | F(25) |
| F  | 26 | 1385.276        | 941.033         | 933.023         | 933.526         | 932.519         | F(26) |
| V  | 27 | <b>1434.811</b> | 892.500         | 884.488         | 885.000         | 883.992         | V(27) |
| G  | 28 | 1483.327        | 834.971         | 834.963         | 835.466         | 834.458         | G(28) |
| R  | 29 | <b>1541.372</b> | 814.481         | 806.471         | 806.975         | 805.967         | R(29) |
| V  | 30 | 1590.906        | 736.410         | <b>728.401</b>  | 728.905         | <b>727.897</b>  | V(30) |
| H  | 31 | 1659.436        | 688.876         | 678.866         | 679.370         | 678.363         | H(31) |
| R  | 32 | <b>1737.486</b> | 618.346         | 610.337         | 610.841         | 609.833         | R(32) |
| L  | 33 | 1764.028        | 540.206         | 532.196         | 532.700         | 531.693         | L(33) |
| L  | 34 | <b>1850.570</b> | 483.754         | 475.743         | 476.246         | 475.239         | L(34) |
| R  | 35 | 1928.102        | 427.212         | 419.202         | 419.706         | 418.698         | R(35) |
| K  | 36 | 1992.638        | 349.161         | 341.152         | 341.656         | 340.648         | K(36) |
| G  | 37 | 2021.179        | 285.114         | 277.104         | 277.608         | 276.600         | G(37) |
| N  | 38 | 2078.200        | 256.603         | 248.594         | 249.098         | 248.090         | N(38) |
| V  | 39 | 2159.732        | 199.582         | 191.572         | 192.076         | 191.068         | V(39) |
| S  | 40 | 2203.246        | 118.056         | 110.047         | 110.551         | 109.543         | S(40) |
| E  | 41 | 2287.769        | 74.534          | 66.524          | 67.028          | 66.021          | E(41) |

# sp | Q8BFU2 | H2A3\_MOUSE

[Acetyl]SGRGRK<sup>Acetyl</sup><sub>42.01</sub> QGGKARAKAKSRSSRAGLQFPVGRVHRLLRKGNYS

- ▶ fragmentation table for charge state 3+
- ▶ specType=etd
- ▶ score=54.57
- ▶ F113278.dat
- ▶ query=q70410.p1
- ▶ precursor=907.911100
- ▶ chargePrecursor=5
- ▶ itol=0.5

| AA    | c               | p               | #s=1            | #s=2            | #s=3            | AA    |
|-------|-----------------|-----------------|-----------------|-----------------|-----------------|-------|
| S[1]  | 489.697         | <b>1512.510</b> | <b>1507.170</b> | 0.872           | <b>1506.835</b> | S[41] |
| G[2]  | 86.704          | <b>1469.496</b> | <b>1464.156</b> | 0.672           | 1463.820        | G[49] |
| R[3]  | 1307.718        | 1450.489        | <b>1445.149</b> | <b>1445.485</b> | 1444.811        | R[30] |
| G[4]  | 139.745         | 1398.455        | <b>1393.115</b> | <b>1393.451</b> | 1392.779        | G[38] |
| K[5]  | 196.447         | 1379.448        | <b>1374.108</b> | <b>1374.444</b> | 1373.772        | K[37] |
| G[6]  | 239.133         | 1322.746        | <b>1317.406</b> | <b>1317.742</b> | 1317.070        | G[36] |
| G[7]  | 288.140         | 1266.060        | 1261.720        | <b>1275.056</b> | 1274.384        | G[35] |
| G[8]  | 277.147         | 1261.051        | <b>1255.713</b> | <b>1256.049</b> | 1255.377        | G[34] |
| K[9]  | 319.646         | 1242.045        | 1236.706        | 1237.042        | 1236.370        | K[33] |
| A[10] | 383.525         | 1199.347        | 1194.008        | <b>1194.344</b> | 1193.672        | A[32] |
| R[11] | 395.558         | 1175.668        | <b>1170.329</b> | <b>1170.664</b> | 1169.993        | R[31] |
| A[12] | 419.237         | 1123.834        | 1119.494        | 1119.830        | 1119.158        | A[30] |
| K[13] | 461.936         | 1099.955        | 1094.616        | 1094.952        | 1094.280        | K[29] |
| A[14] | 485.615         | 1057.257        | 1051.917        | 1052.253        | 1051.581        | A[28] |
| K[15] | 528.313         | 1033.578        | 1028.238        | <b>1028.574</b> | 1027.902        | K[27] |
| S[16] | 557.324         | 990.880         | 985.540         | 985.876         | 985.204         | S[26] |
| R[17] | 609.258         | 961.869         | 956.529         | <b>956.865</b>  | 956.193         | R[25] |
| S[18] | 638.368         | 909.835         | 904.495         | 904.831         | 904.159         | S[24] |
| S[19] | 667.379         | 888.825         | 883.485         | 883.821         | 883.149         | S[23] |
| R[20] | 719.413         | 851.814         | 846.474         | 846.810         | 846.138         | R[22] |
| A[21] | 743.092         | 799.789         | 794.449         | 794.787         | 794.115         | A[21] |
| G[22] | 762.099         | 776.101         | 770.762         | 771.098         | 770.426         | G[20] |
| L[23] | 799.273         | 753.094         | 747.754         | 748.090         | 747.418         | L[19] |
| Q[24] | 842.480         | 719.306         | 714.000         | 714.306         | 713.624         | Q[18] |
| F[25] | 891.502         | 676.713         | 671.374         | 671.710         | 671.038         | F[17] |
| F[26] | <b>923.853</b>  | 627.690         | 622.351         | 622.687         | 622.015         | F[16] |
| V[27] | <b>956.876</b>  | 595.139         | 590.000         | 590.336         | 589.664         | V[15] |
| G[28] | <b>975.883</b>  | 562.317         | 556.977         | 557.313         | 556.641         | G[14] |
| R[29] | 1027.618        | 543.309         | 537.970         | 538.306         | 537.634         | R[13] |
| V[30] | 1060.940        | 490.275         | 485.036         | 485.372         | 484.699         | V[12] |
| H[31] | <b>1106.626</b> | 458.253         | 452.913         | 453.249         | 452.577         | H[11] |
| R[32] | 1158.660        | 412.967         | 407.227         | 407.563         | 406.891         | R[10] |
| L[33] | 1196.355        | <b>360.533</b>  | 355.193         | 355.529         | 354.857         | L[9]  |
| L[34] | 1234.049        | 322.874         | 317.489         | 317.825         | 317.153         | L[8]  |
| L[35] | 1266.653        | 285.144         | 279.804         | 280.140         | 279.468         | L[7]  |
| K[36] | 1328.781        | 233.110         | 227.770         | 228.106         | 227.434         | K[6]  |
| G[37] | <b>1347.788</b> | 190.412         | 185.072         | 185.408         | 184.736         | G[5]  |
| N[38] | <b>1385.803</b> | 171.404         | 166.065         | 166.401         | 165.729         | N[4]  |
| Y[39] | <b>1440.157</b> | 133.390         | 128.051         | 128.386         | 127.715         | Y[3]  |
| S[40] | <b>1469.168</b> | 99.136          | 93.796          | 94.132          | 93.460          | S[2]  |
| E[41] | 1512.182        | 50.025          | 44.685          | 45.021          | 44.349          | E[1]  |

# sp | Q8BFU2 | H2A3\_MOUSE

[Acetyl]SGR<sup>Acetyl</sup>RGK<sub>42.01</sub> QGGKARAKAKSRSSRAGLQFPVGRVHLLLRKGNYS

- ▶ fragmentation table for charge state 4+
- ▶ specType=etd
- ▶ score=54.57
- ▶ F113278.dat
- ▶ query=q70410.p1
- ▶ precursor=907.911100
- ▶ chargePrecursor=5
- ▶ itol=0.5

| AA | c  | y               | z+1      | z+2      | z               | AA             |       |
|----|----|-----------------|----------|----------|-----------------|----------------|-------|
| S  | 1  | 37.525          | 1134.634 | 1130.630 | 0.795           | 1130.378       | S[41] |
| G  | 2  | 51.780          | 1102.374 | 1096.369 | 0.795           | 1096.117       | G[40] |
| R  | 3  | 90.805          | 1088.118 | 1084.114 | <b>1084.366</b> | 1083.862       | R[39] |
| K  | 4  | 105.061         | 1049.093 | 1045.088 | 1045.340        | 1044.836       | K[38] |
| K  | 5  | 147.587         | 1034.838 | 1030.833 | 1031.085        | 1030.581       | K[37] |
| Q  | 6  | 179.602         | 992.311  | 988.307  | 988.559         | 988.055        | Q[36] |
| G  | 7  | 193.857         | 960.297  | 956.292  | 956.544         | 956.040        | G[35] |
| G  | 8  | 208.112         | 946.041  | 942.037  | 942.289         | 941.785        | G[34] |
| K  | 9  | 240.136         | 931.786  | 927.781  | 928.033         | 927.529        | K[33] |
| A  | 10 | 257.895         | 899.762  | 895.757  | 896.009         | 895.505        | A[32] |
| R  | 11 | 296.921         | 882.503  | 877.998  | 878.250         | 877.746        | R[31] |
| A  | 12 | 314.680         | 842.978  | 838.973  | 839.225         | <b>838.721</b> | A[30] |
| K  | 13 | 346.704         | 825.218  | 821.214  | 821.466         | 820.962        | K[29] |
| A  | 14 | 364.463         | 793.195  | 789.190  | 789.442         | 788.938        | A[28] |
| K  | 15 | 396.487         | 775.435  | 771.431  | 771.683         | 771.179        | K[27] |
| S  | 16 | 418.245         | 743.412  | 739.407  | 739.659         | 739.155        | S[26] |
| R  | 17 | 457.270         | 721.654  | 717.649  | 717.901         | 717.397        | R[25] |
| S  | 18 | 479.028         | 682.628  | 678.624  | 678.876         | 678.372        | S[24] |
| S  | 19 | 500.786         | 650.870  | 646.865  | 647.117         | 646.613        | S[23] |
| R  | 20 | 539.811         | 639.112  | 635.108  | 635.360         | 634.856        | R[22] |
| A  | 21 | 557.571         | 600.087  | 596.082  | 596.334         | 595.830        | A[21] |
| G  | 22 | 571.826         | 582.328  | 578.323  | 578.575         | 578.071        | G[20] |
| L  | 23 | 600.097         | 568.072  | 564.068  | 564.320         | 563.816        | L[19] |
| Q  | 24 | 632.112         | 539.803  | 535.797  | 536.049         | 535.545        | Q[18] |
| F  | 25 | 668.679         | 507.787  | 503.782  | 504.034         | 503.530        | F[17] |
| P  | 26 | 693.142         | 471.020  | 467.015  | 467.267         | 466.763        | P[16] |
| V  | 27 | 717.909         | 446.756  | 442.752  | 443.004         | 442.500        | V[15] |
| G  | 28 | 732.164         | 421.989  | 417.985  | 418.237         | 417.733        | G[14] |
| R  | 29 | 771.190         | 407.734  | 403.729  | 403.981         | 403.477        | R[13] |
| V  | 30 | 795.957         | 388.709  | 384.704  | 384.956         | 384.452        | V[12] |
| L  | 31 | 832.221         | 343.942  | 339.937  | 340.189         | 339.685        | L[11] |
| R  | 32 | 869.247         | 309.677  | 305.672  | 305.924         | 305.420        | R[10] |
| L  | 33 | 897.518         | 270.652  | 266.647  | 266.899         | 266.395        | L[9]  |
| L  | 34 | 925.789         | 242.381  | 238.376  | 238.628         | 238.124        | L[8]  |
| R  | 35 | 964.814         | 214.110  | 210.105  | 210.357         | 209.853        | R[7]  |
| K  | 36 | 996.838         | 175.084  | 171.080  | 171.332         | 170.828        | K[6]  |
| G  | 37 | <b>1011.093</b> | 143.961  | 139.956  | 140.208         | 139.704        | G[5]  |
| N  | 38 | 1030.004        | 128.805  | 124.800  | 125.052         | 124.548        | N[4]  |
| V  | 39 | <b>1080.370</b> | 100.294  | 96.290   | 96.542          | 96.038         | V[3]  |
| S  | 40 | 1102.128        | 98.529   | 94.524   | 94.776          | 94.272         | S[2]  |
| E  | 41 | 1134.888        | 37.771   | 33.766   | 34.018          | 33.514         | E[1]  |





# sp | Q8CGP5 | H2A1F\_MOUSE

[Acetyl]SGR<sup>Acetyl</sup>RGK<sub>42.01</sub> QGGKARAKAKTRSSRAGLQFPVGRVHRLLRKGNYS

- ▶ fragmentation table for charge state 1+
- ▶ specType=etd
- ▶ score=40.98
- ▶ F113278.dat
- ▶ query=q70494.p1
- ▶ precursor=759.094720
- ▶ chargePrecursor=6
- ▶ itol=0.5

| AA | c  | y               | z+1      | z+2             | z               | AA              |       |
|----|----|-----------------|----------|-----------------|-----------------|-----------------|-------|
| S  | 1  | 147.076         | 4549.531 | 4533.531        | 0.000           | 4532.505        | S[41] |
| G  | 2  | 204.068         | 4420.489 | 4404.470        | 0.000           | 4403.462        | G[40] |
| R  | 3  | <b>360.199</b>  | 4301.467 | 4284.448        | 4368.456        | 4346.441        | R[39] |
| G  | 4  | <b>417.220</b>  | 4207.366 | 4191.347        | 4192.355        | 4190.339        | G[38] |
| K  | 5  | <b>587.326</b>  | 4150.345 | 4134.326        | 4135.334        | 4133.316        | K[37] |
| Q  | 6  | <b>715.345</b>  | 3989.328 | 3974.320        | 3965.328        | 3963.311        | Q[36] |
| G  | 7  | <b>772.406</b>  | 3852.480 | 3836.461        | 3837.470        | 3835.454        | G[35] |
| G  | 8  | 829.427         | 3795.159 | 3779.140        | 3780.148        | 3778.132        | G[34] |
| K  | 9  | 957.522         | 3736.138 | 3722.119        | 3723.127        | 3721.111        | K[33] |
| A  | 10 | 1028.560        | 3610.043 | 3594.024        | 3595.032        | 3593.016        | A[32] |
| R  | 11 | 1104.661        | 3539.005 | 3522.987        | 3523.995        | 3521.979        | R[31] |
| A  | 12 | <b>1255.698</b> | 3382.904 | 3366.885        | 3367.893        | 3365.877        | A[30] |
| R  | 13 | 1383.793        | 3311.867 | 3295.848        | 3296.856        | 3294.841        | R[29] |
| A  | 14 | <b>1454.830</b> | 3183.772 | 3167.754        | 3168.761        | 3166.746        | A[28] |
| K  | 15 | 1582.925        | 3112.735 | 3096.716        | 3097.724        | 3095.709        | K[27] |
| T  | 16 | <b>1683.973</b> | 2984.640 | 2968.621        | 2969.629        | 2967.614        | T[26] |
| R  | 17 | 1840.074        | 2883.582 | 2867.563        | 2868.562        | 2866.546        | R[25] |
| S  | 18 | 1929.008        | 2797.494 | 2781.475        | 2782.483        | 2780.467        | S[24] |
| S  | 19 | 2014.138        | 2640.459 | 2624.441        | 2625.448        | 2623.433        | S[23] |
| R  | 20 | 2170.239        | 2553.421 | 2537.402        | 2538.410        | 2536.401        | R[22] |
| A  | 21 | 2241.276        | 2497.326 | 2481.307        | 2482.315        | 2480.300        | A[21] |
| G  | 22 | 2298.297        | 2326.289 | 2310.270        | 2311.278        | 2309.263        | G[20] |
| L  | 23 | 2411.381        | 2209.260 | 2193.240        | 2194.247        | 2192.241        | L[19] |
| Q  | 24 | 2539.440        | 2158.184 | 2142.165        | 2143.173        | 2141.157        | Q[18] |
| F  | 25 | 2686.508        | 2028.125 | 2012.106        | 2013.114        | 2011.098        | F[17] |
| F  | 26 | 2783.561        | 1881.057 | 1865.038        | 1866.046        | 1864.030        | F[16] |
| V  | 27 | 2822.630        | 1784.004 | 1767.985        | 1768.993        | 1766.977        | V[15] |
| G  | 28 | 2939.651        | 1684.935 | 1668.917        | 1669.924        | 1667.909        | G[14] |
| R  | 29 | 3076.732        | 1627.814 | 1611.795        | <b>1612.803</b> | 1610.787        | R[13] |
| D  | 30 | 3194.821        | 1471.813 | 1455.794        | 1456.802        | <b>1454.786</b> | D[12] |
| H  | 31 | 3331.880        | 1372.744 | 1356.726        | <b>1357.734</b> | 1355.718        | H[11] |
| R  | 32 | 3487.981        | 1235.685 | <b>1219.667</b> | 1220.675        | 1218.659        | R[10] |
| L  | 33 | 3601.065        | 1079.584 | 1063.566        | 1064.573        | 1062.558        | L[9]  |
| L  | 34 | 3714.149        | 966.500  | 950.482         | 951.489         | 949.474         | L[8]  |
| R  | 35 | 3870.250        | 833.416  | 817.398         | 818.405         | 816.390         | R[7]  |
| K  | 36 | 3998.345        | 697.315  | 681.296         | 682.304         | 680.289         | K[6]  |
| G  | 37 | 4055.366        | 569.220  | 553.201         | 554.209         | 552.194         | G[5]  |
| N  | 38 | 4169.409        | 512.099  | 496.180         | 497.188         | 495.172         | N[4]  |
| V  | 39 | 4312.473        | 398.156  | 382.137         | 383.145         | 381.129         | V[3]  |
| S  | 40 | 4419.505        | 235.082  | 219.074         | 220.082         | 218.066         | S[2]  |
| E  | 41 | 4548.547        | 148.060  | 132.043         | 133.050         | 131.034         | E[1]  |

# sp | Q8CGP5 | H2A1F\_MOUSE

[Acetyl]SGR<sup>Acetyl</sup>RGK<sub>42.01</sub> QGGKARAKAKTRSSRAGLQFPVGRVHRLLRKGNYS

- ▶ fragmentation table for charge state 2+
- ▶ specType=etd
- ▶ score=40.98
- ▶ F113278.dat
- ▶ query=q70494\_p1
- ▶ precursor=759.094720
- ▶ chargePrecursor=6
- ▶ itol=0.5

| AA | c  | w               | #s1             | #s2             | c               | AA              |       |
|----|----|-----------------|-----------------|-----------------|-----------------|-----------------|-------|
| S  | 1  | 74.062          | 2278.206        | 2287.280        | 8.804           | 2286.187        | S[41] |
| G  | 2  | 102.553         | 3210.748        | 3203.730        | 0.504           | 3202.232        | G[40] |
| R  | 3  | 180.603         | 2182.237        | 2174.238        | 2174.732        | 2173.724        | R[39] |
| G  | 4  | 209.114         | 2104.187        | 2096.177        | 2096.681        | 2095.673        | G[38] |
| K  | 5  | 294.187         | 2075.876        | 2067.887        | 2068.170        | 2067.163        | K[37] |
| G  | 6  | 358.196         | 1990.622        | <b>1982.614</b> | <b>1983.118</b> | 1982.110        | G[36] |
| G  | 7  | 388.197         | 1926.594        | 1918.593        | 1919.889        | 1918.880        | G[35] |
| G  | 8  | 435.217         | 1868.081        | <b>1890.074</b> | <b>1890.578</b> | 1889.570        | G[34] |
| K  | 9  | 478.265         | 1869.572        | <b>1861.563</b> | <b>1862.067</b> | 1861.059        | K[33] |
| A  | 10 | 514.283         | 1805.525        | 1797.516        | 1798.819        | 1797.812        | A[32] |
| R  | 11 | <b>592.834</b>  | 1770.008        | 1762.007        | 1762.501        | 1761.493        | R[31] |
| A  | 12 | <b>628.353</b>  | 1692.995        | <b>1683.986</b> | 1684.480        | <b>1683.443</b> | A[30] |
| R  | 13 | <b>692.400</b>  | 1656.437        | <b>1648.428</b> | <b>1648.932</b> | 1647.924        | R[29] |
| A  | 14 | <b>727.919</b>  | 1592.900        | <b>1584.380</b> | <b>1584.884</b> | 1583.876        | A[28] |
| K  | 15 | <b>791.966</b>  | 1556.871        | <b>1548.862</b> | <b>1549.366</b> | 1548.358        | K[27] |
| T  | 16 | <b>842.490</b>  | <b>1492.824</b> | <b>1484.814</b> | 1485.318        | <b>1484.310</b> | T[26] |
| R  | 17 | <b>877.540</b>  | <b>1442.300</b> | 1434.291        | <b>1434.794</b> | 1433.786        | R[25] |
| S  | 18 | <b>964.056</b>  | 1364.249        | 1356.240        | 1356.744        | 1355.736        | S[24] |
| S  | 19 | <b>1007.572</b> | 1328.733        | 1321.724        | <b>1313.228</b> | 1312.220        | S[23] |
| R  | 20 | 1085.623        | 1277.217        | 1269.208        | <b>1269.712</b> | 1268.704        | R[22] |
| A  | 21 | 1121.142        | 1199.161        | <b>1191.157</b> | <b>1191.661</b> | <b>1190.653</b> | A[21] |
| G  | 22 | 1149.652        | 1133.648        | 1125.639        | 1126.143        | 1125.135        | G[20] |
| L  | 23 | <b>1206.194</b> | 1078.337        | 1071.328        | 1071.832        | 1070.824        | L[19] |
| Q  | 24 | <b>1270.224</b> | 1013.995        | 1007.986        | 1007.990        | 1007.082        | Q[18] |
| F  | 25 | 1343.758        | 1014.566        | <b>1006.557</b> | <b>1007.061</b> | 1006.053        | F[17] |
| F  | 26 | 1392.284        | 941.033         | 933.023         | 933.526         | 932.518         | F[16] |
| V  | 27 | <b>1441.818</b> | 892.506         | 884.496         | <b>885.000</b>  | 883.992         | V[15] |
| G  | 28 | <b>1470.329</b> | <b>842.971</b>  | 834.962         | <b>834.458</b>  | 833.450         | G[14] |
| R  | 29 | 1545.844        | 774.443         | <b>806.451</b>  | <b>806.955</b>  | 805.947         | R[13] |
| V  | 30 | 1597.914        | 736.410         | <b>728.401</b>  | 728.905         | <b>727.897</b>  | V[12] |
| H  | 31 | 1666.443        | 688.876         | 678.886         | 679.370         | 678.363         | H[11] |
| R  | 32 | 1744.494        | 618.346         | 610.337         | 610.841         | 609.833         | R[10] |
| L  | 33 | 1803.036        | 540.206         | 532.206         | 532.700         | 531.703         | L[9]  |
| L  | 34 | 1887.878        | 483.794         | 475.783         | 476.286         | 475.281         | L[8]  |
| R  | 35 | 1935.820        | 427.212         | 419.202         | 419.706         | 418.699         | R[7]  |
| K  | 36 | 1999.876        | 349.161         | 341.152         | 341.656         | 340.648         | K[6]  |
| G  | 37 | 2028.187        | 285.114         | 277.104         | 277.608         | 276.600         | G[5]  |
| N  | 38 | 2085.208        | 256.603         | 248.594         | 249.098         | 248.090         | N[4]  |
| V  | 39 | 2166.740        | 199.582         | 191.572         | 192.076         | 191.068         | V[3]  |
| S  | 40 | 2219.296        | 118.056         | 110.041         | 110.544         | 109.537         | S[2]  |
| E  | 41 | 2274.777        | 74.534          | 66.524          | 67.028          | 66.021          | E[1]  |

# sp | Q8CGP5 | H2A1F\_MOUSE

[Acetyl]SGR<sup>Acetyl</sup>RGK<sup>42.01</sup> QGGKARAKAKTRSSRAGLQFPVGRVHRLLRKGNYS

- ▶ fragmentation table for charge state 3+
- ▶ specType=etd
- ▶ score=40.98
- ▶ F113278.dat
- ▶ query=q70494\_p1
- ▶ precursor=759.094720
- ▶ chargePrecursor=6
- ▶ itol=0.5

| AA | c  | y               | #s1             | #s2             | z               | AA              |       |
|----|----|-----------------|-----------------|-----------------|-----------------|-----------------|-------|
| S  | 1  | 489.697         | 1511.184        | <b>1511.842</b> | 0.872           | 1311.567        | S(41) |
| G  | 2  | 86.704          | 1474.188        | 1468.528        | 0.672           | 1468.402        | G(40) |
| R  | 3  | 1307.188        | <b>1455.161</b> | <b>1449.821</b> | <b>1450.157</b> | 1449.485        | R(39) |
| G  | 4  | 139.745         | 1460.127        | 1397.787        | 1396.423        | 1397.451        | G(38) |
| K  | 5  | 196.447         | 1384.120        | 1378.790        | <b>1379.116</b> | 1378.441        | K(37) |
| G  | 6  | 239.123         | 1327.418        | <b>1322.078</b> | <b>1322.414</b> | <b>1321.742</b> | G(36) |
| G  | 7  | 288.140         | 1264.733        | 1259.303        | <b>1279.728</b> | 1278.956        | G(35) |
| G  | 8  | 297.147         | 1265.725        | 1260.385        | <b>1260.721</b> | 1260.040        | G(34) |
| K  | 9  | 319.646         | 1246.717        | 1241.378        | 1241.714        | 1241.042        | K(33) |
| A  | 10 | 383.525         | 1204.019        | 1198.079        | 1199.015        | 1198.344        | A(32) |
| R  | 11 | 395.558         | 1189.240        | 1175.080        | 1175.436        | 1174.064        | R(31) |
| A  | 12 | 439.239         | <b>1178.306</b> | 1172.967        | 1173.303        | 1172.631        | A(30) |
| K  | 13 | 461.936         | 1104.627        | 1099.288        | 1099.624        | 1098.952        | K(29) |
| A  | 14 | 485.615         | 1061.929        | 1056.589        | <b>1056.925</b> | 1056.253        | A(28) |
| K  | 15 | 508.313         | 1038.250        | <b>1032.910</b> | <b>1033.246</b> | 1032.574        | K(27) |
| T  | 16 | 561.996         | 995.552         | <b>990.212</b>  | <b>990.548</b>  | <b>989.876</b>  | T(26) |
| R  | 17 | 614.629         | <b>961.069</b>  | <b>956.529</b>  | <b>956.865</b>  | <b>956.193</b>  | R(25) |
| S  | 18 | 693.090         | 959.879         | 964.465         | 964.814         | 964.160         | S(24) |
| S  | 19 | <b>672.051</b>  | 880.825         | 875.485         | <b>875.821</b>  | 875.149         | S(23) |
| R  | 20 | <b>724.084</b>  | 851.614         | 846.474         | <b>846.810</b>  | 846.138         | R(22) |
| A  | 21 | 787.303         | 799.780         | 794.441         | 794.777         | 794.102         | A(21) |
| G  | 22 | <b>766.771</b>  | 776.101         | 770.762         | 771.098         | 770.426         | G(20) |
| L  | 23 | 759.094         | 769.094         | 763.755         | 764.090         | 763.419         | L(19) |
| G  | 24 | <b>847.152</b>  | 739.366         | 734.027         | 734.363         | 733.691         | G(18) |
| F  | 25 | 886.174         | 676.713         | 671.374         | 671.710         | 671.038         | F(17) |
| F  | 26 | 938.525         | 627.600         | 622.261         | 622.597         | 621.925         | F(16) |
| V  | 27 | <b>961.548</b>  | 595.139         | 590.000         | 590.336         | 589.664         | V(15) |
| G  | 28 | <b>980.555</b>  | 562.317         | 556.977         | 557.313         | 556.641         | G(14) |
| R  | 29 | 1000.554        | 464.309         | 458.970         | 459.306         | 458.634         | R(13) |
| V  | 30 | <b>1065.612</b> | 401.275         | 405.936         | 406.272         | 405.600         | V(12) |
| H  | 31 | <b>1111.298</b> | 458.253         | 452.913         | 453.249         | 452.577         | H(11) |
| R  | 32 | 1183.132        | 412.967         | 407.227         | 407.563         | 406.891         | R(10) |
| L  | 33 | 1201.026        | <b>360.533</b>  | 355.193         | 355.529         | 354.857         | L(9)  |
| L  | 34 | 1236.271        | 322.448         | 317.109         | 317.445         | 316.773         | L(8)  |
| R  | 35 | 1280.752        | 268.144         | 272.804         | 273.140         | 272.468         | R(7)  |
| K  | 36 | 1333.453        | 233.110         | 227.770         | 228.106         | 227.434         | K(6)  |
| G  | 37 | 1352.460        | 190.412         | 185.072         | 185.408         | 184.736         | G(5)  |
| N  | 38 | 1390.475        | 171.404         | 166.065         | 166.401         | 165.729         | N(4)  |
| V  | 39 | 1444.829        | 133.290         | 128.051         | 128.386         | 127.715         | V(3)  |
| S  | 40 | 1471.580        | 99.136          | 93.796          | 94.132          | 93.460          | S(2)  |
| E  | 41 | 1516.854        | 50.025          | 44.685          | 45.021          | 44.349          | E(1)  |

# sp | Q8CGP5 | H2A1F\_MOUSE

[Acetyl]SGR<sup>Acetyl</sup>RGK<sub>42.01</sub> QGGKARAKAKTRSSRAGLQFPVGRVHRLLRKGNYS

- ▶ fragmentation table for charge state 4+
- ▶ specType=etd
- ▶ score=40.98
- ▶ F113278.dat
- ▶ query=q70494\_p1
- ▶ precursor=759.094720
- ▶ chargePrecursor=6
- ▶ itol=0.5

| AA   | c               | y              | z+1             | z+2             | z               | AA   |
|------|-----------------|----------------|-----------------|-----------------|-----------------|------|
| S 1  | 57.525          | 1138.136       | <b>1134.134</b> | 0.755           | 1133.862        | S 41 |
| G 2  | 51.780          | 1105.878       | 1101.873        | 0.755           | 1101.621        | G 40 |
| R 3  | 90.805          | 1091.622       | 1087.618        | <b>1087.870</b> | 1087.356        | R 39 |
| G 4  | 105.061         | 1052.597       | <b>1048.592</b> | <b>1048.844</b> | 1048.340        | G 38 |
| K 5  | 147.587         | 1038.342       | <b>1034.337</b> | <b>1034.589</b> | <b>1034.085</b> | K 37 |
| Q 6  | 179.802         | 895.815        | 891.811         | 892.062         | 891.545         | Q 36 |
| G 7  | 183.957         | 953.803        | 950.798         | 950.048         | 950.544         | G 35 |
| G 8  | 208.112         | 949.545        | 945.541         | <b>945.792</b>  | 945.289         | G 34 |
| K 9  | 240.136         | 935.290        | 931.285         | 931.537         | 931.031         | K 33 |
| A 10 | 257.895         | 903.260        | 899.251         | <b>899.513</b>  | 899.009         | A 32 |
| R 11 | 296.621         | <b>885.507</b> | <b>881.502</b>  | <b>881.754</b>  | <b>881.250</b>  | R 31 |
| A 12 | 314.688         | 846.856        | <b>842.477</b>  | <b>842.729</b>  | <b>842.225</b>  | A 30 |
| R 13 | 346.704         | 828.722        | 824.718         | 824.970         | 824.466         | R 29 |
| A 14 | 384.463         | 796.699        | <b>792.694</b>  | <b>792.946</b>  | <b>792.442</b>  | A 28 |
| K 15 | 396.487         | 778.939        | 774.935         | 775.187         | 774.681         | K 27 |
| T 16 | 421.749         | 746.915        | 742.911         | 743.163         | 742.659         | T 26 |
| R 17 | 460.774         | 721.684        | 717.680         | 717.901         | 717.397         | R 25 |
| S 18 | 482.932         | 682.828        | 678.824         | 679.076         | 678.572         | S 24 |
| S 19 | 504.290         | 660.870        | 656.866         | 657.118         | 656.614         | S 23 |
| R 20 | 543.315         | 639.112        | 635.108         | 635.360         | 634.856         | R 22 |
| A 21 | 561.074         | 600.087        | 596.082         | 596.334         | 595.830         | A 21 |
| G 22 | 575.330         | 582.126        | 578.121         | 578.375         | 577.871         | G 20 |
| L 23 | 603.801         | 568.072        | 564.068         | 564.320         | 563.816         | L 19 |
| Q 24 | 635.015         | 539.803        | 535.797         | 536.049         | 535.545         | Q 19 |
| F 25 | <b>672.383</b>  | 507.787        | 503.782         | 504.034         | 503.530         | F 17 |
| F 26 | 696.646         | 471.020        | 467.015         | 467.267         | 466.763         | F 16 |
| V 27 | 721.413         | 446.756        | 442.752         | 443.004         | 442.500         | V 15 |
| G 28 | 735.668         | 421.989        | 417.985         | 418.237         | <b>417.733</b>  | G 14 |
| D 29 | 774.894         | 407.734        | 403.729         | 403.981         | 403.477         | D 13 |
| D 30 | 799.051         | 368.709        | 364.704         | 364.956         | 364.452         | D 12 |
| H 31 | <b>833.725</b>  | 343.942        | 339.937         | 340.189         | 339.685         | H 11 |
| R 32 | 872.751         | 309.677        | 305.672         | 305.924         | 305.420         | R 10 |
| L 33 | 901.022         | 270.652        | 266.647         | 266.899         | 266.395         | L 9  |
| L 34 | 929.293         | 242.381        | 238.376         | 238.628         | 238.124         | L 8  |
| R 35 | 968.318         | 214.130        | 210.125         | 210.377         | 209.873         | R 7  |
| R 36 | 1000.342        | 175.084        | 171.080         | 171.332         | 170.828         | R 6  |
| G 37 | 1014.597        | 143.061        | 139.056         | 139.308         | 138.804         | G 5  |
| N 38 | 1043.108        | 126.805        | 124.800         | 125.052         | 124.548         | N 4  |
| V 39 | <b>1083.874</b> | 100.294        | 96.290          | 96.542          | 96.038          | V 3  |
| S 40 | 1105.632        | 59.529         | 55.524          | 55.776          | 55.272          | S 2  |
| E 41 | 1137.892        | 37.771         | 33.766          | 34.018          | 33.514          | E 1  |

# sp | Q8CGP5 | H2A1F\_MOUSE

[Acetyl]SGR<sup>Acetyl</sup>RGK<sub>42.01</sub> QGGKARAKAKTRSSRAGLQFPVGRVHRLLRKGNYS

- ▶ fragmentation table for charge state 5+
- ▶ specType=etd
- ▶ score=40.98
- ▶ F113278.dat
- ▶ query=q70494\_p1
- ▶ precursor=759.094720
- ▶ chargePrecursor=6
- ▶ itol=0.5

| AA    | c              | y              | z+1            | z+2     | z              | AA    |
|-------|----------------|----------------|----------------|---------|----------------|-------|
| S[1]  | 30.221         | <b>910.712</b> | 907.508        | 0.806   | 907.307        | S[41] |
| G[2]  | 41.625         | <b>884.904</b> | <b>881.700</b> | 0.806   | <b>881.496</b> | G[40] |
| R[3]  | 72.846         | 873.499        | 870.295        | 870.497 | 870.094        | R[39] |
| G[4]  | 84.250         | <b>842.279</b> | 839.075        | 839.277 | 838.874        | G[38] |
| K[5]  | 118.271        | 830.875        | 827.671        | 827.873 | 827.469        | K[37] |
| Q[6]  | 143.883        | 796.854        | 793.650        | 793.851 | 793.448        | Q[36] |
| G[7]  | 155.287        | 771.242        | 768.038        | 768.240 | 767.837        | G[35] |
| G[8]  | 166.691        | 759.836        | 756.634        | 756.835 | 756.432        | G[34] |
| K[9]  | 192.310        | 748.431        | 745.230        | 745.431 | 745.028        | K[33] |
| A[10] | 206.515        | 722.814        | 719.611        | 719.812 | 719.409        | A[32] |
| R[11] | 237.738        | 708.607        | 705.403        | 705.605 | 705.202        | R[31] |
| A[12] | 251.945        | 677.387        | 674.183        | 674.385 | <b>673.981</b> | A[30] |
| K[13] | 277.564        | 663.179        | 659.976        | 660.177 | 659.774        | K[29] |
| A[14] | 291.772        | 637.560        | 634.357        | 634.558 | 634.155        | A[28] |
| K[15] | 317.391        | 623.353        | 620.149        | 620.351 | 619.948        | K[27] |
| T[16] | 337.600        | 597.734        | 594.530        | 594.732 | 594.329        | T[26] |
| R[17] | 368.821        | 577.524        | 574.321        | 574.522 | 574.119        | R[25] |
| S[18] | 388.227        | 546.305        | 543.100        | 543.302 | 542.899        | S[24] |
| S[19] | 403.633        | 528.898        | 525.694        | 525.896 | 525.492        | S[23] |
| R[20] | 434.854        | 511.491        | 508.288        | 508.489 | 508.086        | R[22] |
| A[21] | 449.061        | 480.271        | 477.067        | 477.269 | 476.866        | A[21] |
| G[22] | 460.465        | 466.054        | 462.850        | 463.051 | 462.650        | G[20] |
| L[23] | 483.082        | 454.650        | 451.456        | 451.657 | 451.254        | L[19] |
| Q[24] | 508.694        | 432.043        | 428.839        | 429.040 | 428.637        | Q[18] |
| F[25] | 538.108        | 406.431        | 403.227        | 403.429 | 403.026        | F[17] |
| P[26] | 557.518        | 377.017        | 373.813        | 374.015 | 373.612        | P[16] |
| V[27] | 577.332        | 357.607        | 354.403        | 354.604 | 354.201        | V[15] |
| E[28] | 588.736        | 337.793        | 334.589        | 334.791 | 334.388        | E[14] |
| K[29] | 619.956        | 326.389        | 323.185        | 323.386 | 322.983        | K[13] |
| V[30] | 639.770        | 295.165        | 291.960        | 292.166 | 291.763        | V[12] |
| H[31] | 667.182        | 275.355        | 272.151        | 272.353 | 271.949        | H[11] |
| R[32] | 698.402        | 247.943        | 244.739        | 244.941 | 244.538        | R[10] |
| L[33] | 721.019        | 216.723        | 213.519        | 213.721 | 213.317        | L[9]  |
| L[34] | 743.636        | 194.106        | 190.902        | 191.104 | 190.701        | L[8]  |
| R[35] | 774.856        | 171.489        | 168.285        | 168.487 | 168.084        | R[7]  |
| K[36] | 800.475        | 140.269        | 137.065        | 137.267 | 136.864        | K[6]  |
| G[37] | <b>811.879</b> | 114.650        | 111.446        | 111.648 | 111.245        | G[5]  |
| N[38] | 834.688        | 103.245        | 100.042        | 100.243 | 99.840         | N[4]  |
| V[39] | 897.800        | 80.431         | 77.233         | 77.435  | 77.032         | V[3]  |
| S[40] | <b>884.707</b> | 47.824         | 44.621         | 44.822  | 44.419         | S[2]  |
| E[41] | 910.515        | 30.418         | 27.214         | 27.416  | 27.013         | E[1]  |



# sp | Q8CGP5 | H2A1F\_MOUSE

[Acetyl]SGR<sup>Acetyl</sup>RGK<sub>42.01</sub> QGGKARAKAKTRSSRAGLQFPVGRVHRLLRKGNYS

- ▶ fragmentation table for charge state 1+
- ▶ specType=etd
- ▶ score=58.96
- ▶ F113278.dat
- ▶ query=q70495.p1
- ▶ precursor=910.713460
- ▶ chargePrecursor=5
- ▶ itol=0.5

| AA | c               | y               | #s1             | #s2             | z               | AA    |
|----|-----------------|-----------------|-----------------|-----------------|-----------------|-------|
| S  | 147.076         | 4549.531        | 4533.537        | 0.000           | 4532.562        | S[41] |
| G  | 204.098         | 4420.689        | 4404.470        | 0.000           | 4403.462        | G[40] |
| R  | <b>360.199</b>  | 4363.467        | 4347.440        | 4348.456        | 4346.441        | R[39] |
| G  | <b>417.220</b>  | 4207.366        | 4191.347        | 4192.355        | 4190.339        | G[38] |
| K  | <b>587.326</b>  | 4150.345        | 4134.326        | 4135.334        | 4133.318        | K[37] |
| G  | <b>715.265</b>  | 3980.239        | 3964.220        | 3965.228        | 3963.212        | G[36] |
| G  | <b>772.406</b>  | 3852.180        | 3836.161        | 3837.170        | 3835.154        | G[35] |
| G  | 859.427         | 3795.158        | 3779.140        | 3780.148        | 3778.132        | G[34] |
| K  | <b>957.522</b>  | 3738.138        | 3722.119        | 3723.127        | 3721.111        | K[33] |
| A  | <b>1028.560</b> | 3610.043        | 3594.024        | 3595.032        | 3593.016        | A[32] |
| R  | 1184.661        | 3539.005        | 3522.987        | 3523.995        | 3521.979        | R[31] |
| A  | 1255.698        | 3482.904        | 3466.886        | 3467.893        | 3465.878        | A[30] |
| R  | <b>1383.793</b> | 3331.867        | 3325.848        | 3326.856        | 3324.841        | R[29] |
| A  | 1454.830        | 3183.772        | 3167.754        | 3168.761        | 3166.746        | A[28] |
| K  | 1562.925        | 3112.735        | 3096.716        | 3097.724        | 3095.709        | K[27] |
| T  | <b>1683.973</b> | 2984.640        | 2968.621        | 2969.629        | 2967.614        | T[26] |
| R  | 1840.074        | 2883.592        | 2867.574        | 2868.582        | 2866.566        | R[25] |
| S  | 1929.106        | 2797.491        | 2781.473        | 2782.480        | 2780.465        | S[24] |
| S  | 2014.138        | 2640.458        | 2624.441        | 2625.448        | 2623.433        | S[23] |
| R  | 2170.239        | 2553.427        | 2537.409        | 2538.416        | 2536.401        | R[22] |
| A  | 2241.276        | 2397.326        | 2381.307        | 2382.315        | 2380.300        | A[21] |
| G  | 2286.297        | 2326.289        | 2310.270        | 2311.278        | 2309.263        | G[20] |
| L  | 2413.381        | 2269.268        | 2253.249        | 2254.257        | 2252.241        | L[19] |
| G  | 2530.440        | 2156.184        | 2140.165        | 2141.173        | 2139.157        | G[18] |
| F  | 2686.508        | 2028.125        | 2012.106        | 2013.114        | 2011.100        | F[17] |
| P  | 2783.561        | 1881.051        | 1865.038        | 1866.046        | 1864.030        | P[16] |
| V  | 2823.630        | 1784.004        | 1767.985        | 1768.993        | 1766.977        | V[15] |
| G  | 2939.651        | 1684.935        | <b>1668.917</b> | 1669.924        | 1667.909        | G[14] |
| R  | 3025.752        | 1629.914        | 1613.895        | <b>1612.903</b> | 1610.888        | R[13] |
| V  | 3194.821        | 1471.813        | <b>1455.794</b> | 1456.802        | 1454.786        | V[12] |
| H  | 3331.880        | 1372.744        | <b>1356.726</b> | 1357.734        | 1355.718        | H[11] |
| R  | 3487.981        | 1235.685        | 1219.667        | <b>1220.675</b> | 1218.659        | R[10] |
| L  | 3601.065        | <b>1079.584</b> | 1063.565        | 1064.573        | <b>1062.558</b> | L[9]  |
| L  | 3714.149        | 946.500         | 930.482         | 931.490         | 929.474         | L[8]  |
| R  | 3810.250        | 853.416         | 837.398         | 838.406         | 836.390         | R[7]  |
| K  | 3998.345        | 697.315         | 681.296         | 682.304         | 680.289         | K[6]  |
| G  | 4058.366        | 569.220         | 553.201         | 554.209         | 552.194         | G[5]  |
| N  | 4169.409        | 512.199         | 496.180         | 497.188         | 495.172         | N[4]  |
| V  | 4324.473        | 398.156         | 382.137         | 383.145         | 381.129         | V[3]  |
| S  | 4435.505        | 278.104         | 262.084         | 263.092         | 261.076         | S[2]  |
| E  | 4548.547        | 148.060         | 132.042         | 133.050         | 131.034         | E[1]  |



# sp | Q8CGP5 | H2A1F\_MOUSE

[Acetyl]SGR<sup>Acetyl</sup>RGK<sub>42.01</sub> QGGKARAKAKTRSSRAGLQFPVGRVHRLLRKGNYS

- ▶ fragmentation table for charge state 2+
- ▶ specType=etd
- ▶ score=58.96
- ▶ F113278.dat
- ▶ query=q70495.p1
- ▶ precursor=910.713460
- ▶ chargePrecursor=5
- ▶ itol=0.5

| AA | c  | w               | #±1             | #±2             | z               | AA              |       |
|----|----|-----------------|-----------------|-----------------|-----------------|-----------------|-------|
| S  | 1  | 74.062          | 2278.206        | 2287.280        | 8.804           | 2286.187        | S[41] |
| G  | 2  | 102.553         | 2210.748        | 2203.730        | 0.504           | 2202.235        | G[40] |
| R  | 3  | 180.603         | 2182.297        | 2174.238        | 2174.732        | 2173.724        | R[39] |
| G  | 4  | 209.114         | 2104.187        | 2096.177        | 2096.681        | 2095.673        | G[38] |
| K  | 5  | 294.187         | 2075.876        | 2067.887        | 2068.170        | 2067.163        | K[37] |
| G  | 6  | 358.156         | 1990.621        | 1992.612        | <b>1983.118</b> | 1982.110        | G[36] |
| G  | 7  | 388.197         | 1926.594        | <b>1918.584</b> | <b>1918.088</b> | 1918.080        | G[35] |
| G  | 8  | 435.217         | 1868.083        | 1869.074        | <b>1890.578</b> | 1889.570        | G[34] |
| K  | 9  | 479.265         | 1869.572        | 1861.583        | 1862.567        | 1861.050        | K[33] |
| A  | 10 | 514.283         | 1805.525        | <b>1797.516</b> | 1798.019        | <b>1797.012</b> | A[32] |
| R  | 11 | 592.834         | 1770.008        | 1761.997        | <b>1762.561</b> | 1761.460        | R[31] |
| A  | 12 | 638.953         | 1692.956        | <b>1683.946</b> | 1684.950        | <b>1683.443</b> | A[30] |
| R  | 13 | <b>692.400</b>  | 1656.437        | <b>1648.428</b> | <b>1648.932</b> | 1647.924        | R[29] |
| A  | 14 | <b>727.919</b>  | 1592.900        | <b>1584.380</b> | <b>1584.884</b> | 1583.876        | A[28] |
| K  | 15 | <b>791.966</b>  | <b>1556.871</b> | <b>1548.862</b> | 1549.366        | <b>1548.358</b> | K[27] |
| T  | 16 | <b>842.490</b>  | 1492.824        | <b>1484.814</b> | <b>1485.318</b> | 1484.310        | T[26] |
| R  | 17 | <b>920.540</b>  | 1442.800        | <b>1434.281</b> | <b>1434.784</b> | 1433.780        | R[25] |
| S  | 18 | 964.976         | 1384.249        | <b>1356.240</b> | <b>1356.744</b> | 1355.736        | S[24] |
| S  | 19 | <b>1007.572</b> | 1320.733        | <b>1312.724</b> | <b>1313.228</b> | 1312.220        | S[23] |
| R  | 20 | <b>1085.623</b> | 1277.217        | 1269.208        | <b>1269.712</b> | 1268.704        | R[22] |
| A  | 21 | 1121.142        | 1199.187        | 1191.157        | 1191.661        | 1190.653        | A[21] |
| G  | 22 | <b>1149.652</b> | 1163.648        | 1155.639        | 1156.143        | 1155.135        | G[20] |
| L  | 23 | 1207.194        | 1138.137        | 1129.128        | <b>1127.632</b> | 1128.624        | L[19] |
| Q  | 24 | <b>1270.224</b> | 1078.595        | 1070.586        | 1071.090        | 1070.082        | Q[18] |
| F  | 25 | 1343.758        | <b>1014.566</b> | 1006.557        | <b>1007.061</b> | 1006.053        | F[17] |
| F  | 26 | 1392.284        | 941.033         | 933.023         | 933.526         | 932.519         | F[16] |
| V  | 27 | <b>1441.818</b> | 892.506         | 884.496         | 885.000         | 883.992         | V[15] |
| G  | 28 | 1498.359        | 842.971         | 834.962         | 835.466         | 834.458         | G[14] |
| R  | 29 | <b>1548.380</b> | 814.481         | 806.471         | 806.975         | 805.968         | R[13] |
| V  | 30 | <b>1587.914</b> | 736.410         | <b>728.401</b>  | 728.905         | <b>727.897</b>  | V[12] |
| H  | 31 | 1666.443        | 688.876         | 678.886         | 679.370         | 678.363         | H[11] |
| R  | 32 | 1744.494        | 618.346         | 610.337         | 610.841         | 609.833         | R[10] |
| L  | 33 | 1803.036        | 540.206         | 532.200         | 532.700         | 531.703         | L[9]  |
| L  | 34 | <b>1857.578</b> | 489.794         | 479.783         | 479.286         | 478.281         | L[8]  |
| R  | 35 | 1935.459        | 427.212         | 419.202         | 419.706         | 418.698         | R[7]  |
| K  | 36 | 1999.676        | 349.161         | 341.152         | 341.656         | 340.648         | K[6]  |
| G  | 37 | 2028.187        | 285.114         | 277.104         | 277.608         | 276.600         | G[5]  |
| N  | 38 | 2085.208        | 256.603         | 248.594         | 249.098         | 248.090         | N[4]  |
| V  | 39 | 2166.740        | 189.582         | 181.573         | 182.076         | 181.068         | V[3]  |
| S  | 40 | 2210.266        | 118.056         | 110.047         | 110.549         | 109.541         | S[2]  |
| E  | 41 | 2274.777        | 74.534          | 66.524          | 67.028          | 66.021          | E[1]  |

# sp | Q8CGP5 | H2A1F\_MOUSE

[Acetyl]SGR<sup>Acetyl</sup>RGK<sub>42.01</sub> QGGKARAKAKTRSSRAGLQFPVGRVHRLLRKGNYS

- ▶ fragmentation table for charge state 3+
- ▶ specType=etd
- ▶ score=58.96
- ▶ F113278.dat
- ▶ query=q70495.p1
- ▶ precursor=910.713460
- ▶ chargePrecursor=5
- ▶ itol=0.5

| AA | c  | y               | #s1             | #s2             | #s              | AA              |       |
|----|----|-----------------|-----------------|-----------------|-----------------|-----------------|-------|
| S  | 1  | 49.697          | <b>1517.182</b> | <b>1511.842</b> | 0.872           | <b>1511.506</b> | S[41] |
| G  | 2  | 86.704          | 1474.155        | 1468.528        | 0.672           | 1468.402        | G[40] |
| R  | 3  | 1307.188        | 1455.161        | <b>1449.821</b> | <b>1450.157</b> | <b>1440.485</b> | R[30] |
| G  | 4  | 139.745         | 1403.127        | 1397.787        | 1396.423        | 1397.451        | G[38] |
| K  | 5  | 196.447         | <b>1384.120</b> | <b>1378.780</b> | <b>1379.116</b> | 1378.441        | K[37] |
| G  | 6  | 239.133         | 1327.418        | 1322.079        | <b>1322.414</b> | 1321.742        | G[36] |
| G  | 7  | 288.140         | 1284.783        | <b>1279.392</b> | <b>1279.728</b> | 1279.056        | G[35] |
| G  | 8  | 277.147         | 1265.725        | 1260.385        | <b>1260.721</b> | 1260.049        | G[34] |
| K  | 9  | 319.846         | 1246.717        | 1241.378        | 1241.714        | 1241.042        | K[33] |
| A  | 10 | 383.525         | 1204.019        | 1198.679        | 1199.015        | 1198.344        | A[32] |
| R  | 11 | 395.558         | 1180.340        | 1175.000        | 1175.336        | 1174.664        | R[31] |
| A  | 12 | 419.237         | <b>1128.206</b> | 1122.867        | <b>1123.203</b> | 1122.531        | A[30] |
| K  | 13 | 461.936         | 1104.627        | 1099.288        | 1099.624        | 1098.952        | K[29] |
| A  | 14 | 485.615         | <b>1061.929</b> | 1056.589        | 1056.925        | 1056.253        | A[28] |
| K  | 15 | 528.313         | 1038.250        | 1032.910        | 1033.246        | 1032.574        | K[27] |
| T  | 16 | 561.996         | 995.552         | 990.212         | 990.548         | 989.876         | T[26] |
| R  | 17 | 614.629         | <b>961.869</b>  | 956.529         | <b>956.865</b>  | 956.193         | R[25] |
| S  | 18 | 643.090         | 959.835         | 954.495         | 954.831         | 954.160         | S[24] |
| S  | 19 | 672.051         | 980.825         | 875.485         | 875.821         | 875.149         | S[23] |
| R  | 20 | 734.084         | 851.814         | 846.474         | 846.810         | 846.138         | R[22] |
| A  | 21 | 747.763         | 799.780         | 794.441         | 794.777         | 794.105         | A[21] |
| G  | 22 | 766.771         | 776.101         | 770.762         | 771.098         | 770.426         | G[20] |
| L  | 23 | 804.468         | 759.094         | 753.754         | 754.090         | 753.418         | L[19] |
| Q  | 24 | 847.152         | 733.895         | 728.555         | 728.891         | 728.219         | Q[18] |
| F  | 25 | 896.174         | 676.713         | 671.374         | 671.710         | 671.038         | F[17] |
| P  | 26 | 928.525         | 627.600         | 622.261         | 622.597         | 621.925         | P[16] |
| V  | 27 | <b>961.548</b>  | 595.139         | 590.000         | 590.336         | 589.664         | V[15] |
| G  | 28 | <b>980.555</b>  | 562.317         | 556.977         | 557.313         | 556.641         | G[14] |
| R  | 29 | 1012.849        | 543.309         | 537.970         | 538.306         | 537.634         | R[13] |
| V  | 30 | 1065.612        | 490.275         | 485.036         | 485.372         | 484.700         | V[12] |
| H  | 31 | <b>1111.298</b> | 458.253         | 452.913         | 453.249         | 452.577         | H[11] |
| R  | 32 | 1183.332        | 412.967         | 407.227         | 407.563         | 406.891         | R[10] |
| L  | 33 | 1261.029        | <b>360.533</b>  | 355.193         | 355.529         | 354.857         | L[9]  |
| L  | 34 | <b>1238.721</b> | 322.836         | 317.496         | 317.832         | 317.160         | L[8]  |
| R  | 35 | 1295.859        | 285.144         | 279.804         | 280.140         | 279.468         | R[7]  |
| K  | 36 | 1333.453        | 233.110         | 227.770         | 228.106         | 227.434         | K[6]  |
| G  | 37 | 1352.460        | 190.412         | 185.072         | 185.408         | 184.736         | G[5]  |
| N  | 38 | 1390.475        | 171.404         | 166.064         | 166.400         | 165.728         | N[4]  |
| V  | 39 | 1444.829        | 133.390         | 128.050         | 128.386         | 127.714         | V[3]  |
| S  | 40 | 1471.840        | 99.136          | 93.796          | 94.132          | 93.460          | S[2]  |
| E  | 41 | 1516.854        | 50.025          | 44.685          | 45.021          | 44.349          | E[1]  |

# sp | Q8CGP5 | H2A1F\_MOUSE

[Acetyl]SGR<sup>Acetyl</sup>RGK<sub>42.01</sub> QGGKARAKAKTRSSRAGLQFPVGRVHRLLRKGNYS

- ▶ fragmentation table for charge state 4+
- ▶ specType=etd
- ▶ score=58.96
- ▶ F113278.dat
- ▶ query=q70495.p1
- ▶ precursor=910.713460
- ▶ chargePrecursor=5
- ▶ itol=0.5

| AA | c  | y               | #s=1            | #s=2            | #s              | AA              |       |
|----|----|-----------------|-----------------|-----------------|-----------------|-----------------|-------|
| S  | 1  | 37.505          | <b>1138.138</b> | <b>1134.134</b> | 0.705           | <b>1133.882</b> | S[41] |
| G  | 2  | 51.780          | 1125.875        | <b>1101.873</b> | 0.795           | <b>1101.621</b> | G[40] |
| R  | 3  | 90.805          | 1091.622        | 1087.618        | <b>1087.870</b> | 1087.366        | R[39] |
| G  | 4  | 109.001         | <b>1052.597</b> | 1048.592        | 1048.844        | 1048.340        | G[38] |
| K  | 5  | 147.587         | 1038.342        | 1034.337        | 1034.589        | 1034.085        | K[37] |
| G  | 6  | 179.602         | 995.815         | 991.811         | 992.062         | 991.559         | G[36] |
| G  | 7  | 193.857         | 983.303         | 979.299         | 979.550         | 979.046         | G[35] |
| G  | 8  | 208.112         | 949.545         | 945.541         | 945.792         | 945.289         | G[34] |
| K  | 9  | 240.136         | 935.290         | 931.285         | 931.537         | 931.033         | K[33] |
| A  | 10 | 257.895         | 903.266         | 899.261         | 899.513         | 899.009         | A[32] |
| R  | 11 | 296.921         | 895.507         | 891.502         | 891.754         | 891.250         | R[31] |
| A  | 12 | 314.880         | 868.582         | <b>842.477</b>  | 832.239         | <b>842.225</b>  | A[30] |
| K  | 13 | 346.704         | 838.722         | 834.718         | 834.970         | 834.466         | K[29] |
| A  | 14 | 384.483         | 796.699         | 792.694         | 792.946         | <b>792.442</b>  | A[28] |
| K  | 15 | 396.487         | 778.939         | 774.935         | 775.187         | 774.683         | K[27] |
| T  | 16 | 421.749         | 746.915         | 742.911         | 743.163         | 742.659         | T[26] |
| R  | 17 | 469.774         | 721.894         | 717.889         | 717.901         | 717.397         | R[25] |
| S  | 18 | 482.512         | 692.626         | 688.621         | 688.873         | 688.369         | S[24] |
| S  | 19 | 504.290         | 660.870         | 656.866         | 657.118         | 656.614         | S[23] |
| R  | 20 | 543.315         | 638.112         | 634.108         | 634.360         | 634.856         | R[22] |
| A  | 21 | 581.074         | 600.087         | 596.082         | 596.334         | 595.830         | A[21] |
| G  | 22 | 575.130         | 582.328         | 578.323         | 578.575         | 578.071         | G[20] |
| L  | 23 | 603.881         | 568.072         | 564.068         | 564.320         | 563.816         | L[19] |
| Q  | 24 | 635.615         | 539.805         | 535.797         | 536.049         | 535.545         | Q[18] |
| F  | 25 | 672.383         | 507.587         | 503.578         | 504.034         | 503.530         | F[17] |
| P  | 26 | 698.646         | 471.020         | 467.015         | 467.267         | 466.763         | P[16] |
| V  | 27 | 721.413         | 446.756         | 442.752         | 443.004         | 442.500         | V[15] |
| G  | 28 | 735.869         | 421.989         | 417.985         | 418.237         | <b>417.733</b>  | G[14] |
| R  | 29 | 774.694         | 389.734         | 385.729         | 385.981         | 385.477         | R[13] |
| V  | 30 | 799.461         | 368.709         | 364.704         | 364.956         | 364.452         | V[12] |
| H  | 31 | 833.725         | 343.942         | 339.937         | 340.189         | 339.685         | H[11] |
| R  | 32 | 872.751         | 309.677         | 305.672         | 305.924         | 305.420         | R[10] |
| L  | 33 | 901.622         | 270.652         | 266.647         | 266.899         | 266.395         | L[9]  |
| L  | 34 | 929.289         | 242.381         | 238.376         | 238.628         | 238.124         | L[8]  |
| R  | 35 | 968.318         | 214.110         | 210.105         | 210.357         | 209.853         | R[7]  |
| K  | 36 | 1000.342        | 175.084         | 171.080         | 171.332         | 170.828         | K[6]  |
| G  | 37 | <b>1014.597</b> | 143.061         | 139.056         | 139.308         | 138.804         | G[5]  |
| N  | 38 | 1043.108        | 128.805         | 124.800         | 125.052         | 124.548         | N[4]  |
| Y  | 39 | <b>1083.874</b> | 100.294         | 96.289          | 96.542          | 96.038          | Y[3]  |
| S  | 40 | 1118.638        | 59.529          | 55.524          | 55.776          | 55.272          | S[2]  |
| E  | 41 | <b>1137.892</b> | 37.771          | 33.766          | 34.018          | 33.514          | E[1]  |

# sp | Q6GSS7 | H2A2A\_MOUSE

[Acetyl]SGR GK <sup>Acetyl</sup> 42.01 QGGK <sup>Acetyl</sup> 42.01 ARAKAKSRSSRAGLQFPVGRVHLLLRKGN YAE

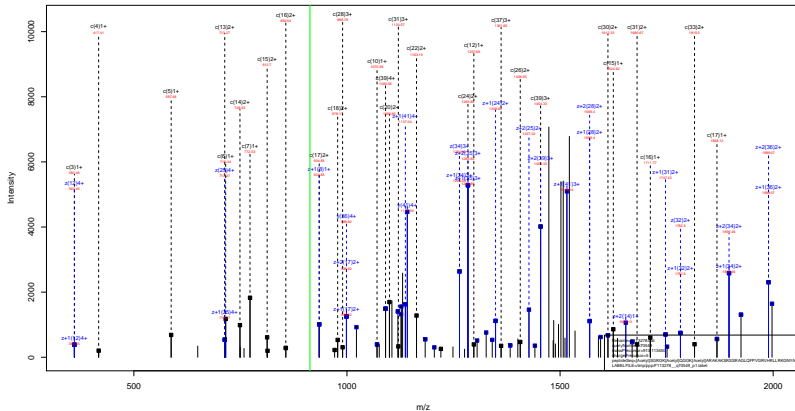

# sp | Q6GSS7 | H2A2A\_MOUSE

[Acetyl]SGR<sup>Acetyl</sup>RGK<sup>42.01</sup> QGGK<sup>Acetyl</sup> ARAKAKSRSSRAGLQFPVGRVHLLLRKGN<sup>42.01</sup>YAE

- ▶ fragmentation table for charge state 1+
- ▶ specType=etd
- ▶ score=72.26
- ▶ F113278.dat
- ▶ query=q70549\_p1
- ▶ precursor=913.113450
- ▶ chargePrecursor=5
- ▶ itol=0.5

| AA | c  | y               | #s1             | #s2             | z               | AA              |       |
|----|----|-----------------|-----------------|-----------------|-----------------|-----------------|-------|
| S  | 1  | 147.076         | 4561.311        | 4565.312        | 0.000           | 4544.307        | S[1]  |
| G  | 2  | 204.098         | 4432.489        | 4416.470        | 0.000           | 4415.462        | G[2]  |
| R  | 3  | <b>360.199</b>  | 4375.467        | 4359.448        | 4360.456        | 4358.441        | R[3]  |
| G  | 4  | <b>417.220</b>  | 4219.366        | 4203.347        | 4204.355        | 4202.339        | G[38] |
| K  | 5  | <b>587.326</b>  | 4162.345        | 4146.326        | 4147.334        | 4145.318        | K[37] |
| Q  | 6  | <b>715.265</b>  | 3992.239        | 3976.220        | 3977.228        | 3975.212        | Q[36] |
| G  | 7  | <b>772.406</b>  | 3854.180        | 3838.161        | 3839.170        | 3847.156        | G[35] |
| G  | 8  | 859.427         | 3807.158        | 3791.140        | 3792.148        | 3790.132        | G[34] |
| K  | 9  | 896.533         | 3760.138        | 3744.119        | 3745.127        | 3733.111        | K[33] |
| A  | 10 | <b>1070.570</b> | 3680.012        | 3664.013        | 3665.021        | 3663.005        | A[32] |
| R  | 11 | 1223.571        | 3538.995        | 3492.976        | 3493.984        | 3491.968        | R[31] |
| A  | 12 | <b>1297.708</b> | 3382.984        | 3336.975        | 3337.983        | 3335.967        | A[30] |
| R  | 13 | 1425.524        | 3281.857        | 3265.838        | 3266.846        | 3264.830        | R[29] |
| A  | 14 | 1496.640        | 3153.762        | 3137.743        | 3138.751        | 3136.735        | A[28] |
| K  | 15 | <b>1624.935</b> | 3082.725        | 3066.706        | 3067.714        | 3065.699        | K[27] |
| S  | 16 | <b>1711.967</b> | 2954.630        | 2938.611        | 2939.619        | 2937.603        | S[26] |
| R  | 17 | <b>1868.069</b> | 2897.598        | 2881.579        | 2882.587        | 2880.571        | R[25] |
| S  | 18 | 1955.153        | 2711.496        | 2695.477        | 2696.486        | 2694.470        | S[24] |
| S  | 19 | 2042.133        | 2634.464        | 2618.446        | 2619.454        | 2617.438        | S[23] |
| R  | 20 | 2186.234        | 2537.433        | 2521.414        | 2522.422        | 2520.406        | R[22] |
| A  | 21 | 2289.271        | 2381.311        | 2365.292        | 2366.300        | 2364.284        | A[21] |
| Q  | 22 | 2326.292        | 2310.294        | 2294.275        | 2295.283        | 2293.267        | Q[20] |
| L  | 23 | 2439.378        | 2253.271        | 2237.252        | 2238.260        | 2236.244        | L[19] |
| Q  | 24 | 2507.435        | 2140.185        | 2124.170        | 2125.178        | 2123.162        | Q[18] |
| F  | 25 | 2714.503        | 2012.130        | 1996.111        | <b>1997.119</b> | 1995.104        | F[17] |
| F  | 26 | 2811.556        | 1895.062        | 1849.043        | 1850.051        | 1848.035        | F[16] |
| V  | 27 | 3010.625        | 1748.009        | 1751.990        | 1752.998        | <b>1750.982</b> | V[15] |
| Q  | 28 | 2967.646        | <b>1668.940</b> | 1682.922        | <b>1653.930</b> | 1681.914        | Q[14] |
| R  | 29 | 3123.617        | <b>1611.919</b> | 1595.902        | <b>1596.910</b> | <b>1594.892</b> | R[13] |
| V  | 30 | 3222.616        | 1455.816        | 1439.799        | <b>1440.807</b> | 1438.791        | V[12] |
| H  | 31 | 3356.674        | 1358.749        | <b>1340.731</b> | 1341.739        | 1339.723        | H[11] |
| R  | 32 | 3515.976        | 1219.691        | 1203.672        | <b>1204.680</b> | 1202.664        | R[10] |
| L  | 33 | 3629.060        | 1083.589        | 1047.571        | 1048.579        | 1046.563        | L[9]  |
| L  | 34 | 3742.144        | 958.505         | <b>934.487</b>  | 935.496         | 933.479         | L[8]  |
| R  | 35 | 3896.245        | 837.422         | 821.403         | 822.410         | 820.394         | R[7]  |
| K  | 36 | 4026.340        | 681.320         | 665.302         | 666.309         | 664.294         | K[6]  |
| G  | 37 | 4083.361        | 583.225         | 537.207         | 538.214         | 536.199         | G[5]  |
| N  | 38 | 4197.404        | 496.204         | 480.185         | 481.193         | 479.177         | N[4]  |
| V  | 39 | 4366.467        | 382.161         | 366.142         | 367.150         | 365.134         | V[3]  |
| A  | 40 | 4431.505        | 219.096         | 203.079         | 204.087         | 202.071         | A[2]  |
| E  | 41 | 4560.547        | 148.060         | 132.042         | 133.050         | 131.034         | E[1]  |

# sp | Q6GSS7 | H2A2A\_MOUSE

[Acetyl]SGRGK<sup>Acetyl</sup><sub>42.01</sub> QGGK<sup>Acetyl</sup><sub>42.01</sub> ARAKAKSRSSRAGLQFPVGRVHRLLRKGN<sup>Acetyl</sup>YAE

- ▶ fragmentation table for charge state 2+
- ▶ specType=etd
- ▶ score=72.26
- ▶ F113278.dat
- ▶ query=q70549.p1
- ▶ precursor=913.113450
- ▶ chargePrecursor=5
- ▶ itol=0.5

| AA | c  | w               | #±1             | #±2             | z               | AA              |       |
|----|----|-----------------|-----------------|-----------------|-----------------|-----------------|-------|
| S  | 1  | 74.982          | 2081.206        | 2273.260        | 8.804           | 2272.767        | S(41) |
| G  | 2  | 102.553         | 2216.745        | 2208.730        | 0.504           | 2208.235        | G(40) |
| R  | 3  | 180.603         | 2188.237        | 2180.230        | 2180.732        | 2179.724        | R(39) |
| G  | 4  | 209.114         | 2110.187        | 2102.177        | 2102.681        | 2101.673        | G(38) |
| K  | 5  | 294.187         | 2081.676        | 2073.667        | 2074.170        | 2073.163        | K(37) |
| G  | 6  | 358.196         | 1996.622        | <b>1988.614</b> | <b>1989.118</b> | 1988.110        | G(36) |
| G  | 7  | 388.187         | 1932.594        | <b>1924.584</b> | 1923.588        | <b>1924.081</b> | G(35) |
| G  | 8  | 435.217         | 1904.083        | <b>1896.074</b> | <b>1896.578</b> | 1895.570        | G(34) |
| K  | 9  | 500.270         | 1875.572        | 1867.563        | <b>1868.067</b> | 1867.059        | K(33) |
| A  | 10 | 535.789         | 1790.520        | <b>1782.510</b> | 1781.014        | <b>1782.006</b> | A(32) |
| R  | 11 | 613.839         | 1735.001        | <b>1746.992</b> | <b>1747.496</b> | 1746.488        | R(31) |
| A  | 12 | 689.958         | 1678.913        | <b>1668.901</b> | <b>1669.405</b> | 1668.400        | A(30) |
| K  | 13 | <b>713.405</b>  | 1643.433        | 1633.423        | 1633.927        | 1632.919        | K(29) |
| A  | 14 | <b>748.924</b>  | 1577.384        | <b>1569.375</b> | <b>1569.879</b> | 1568.871        | A(28) |
| K  | 15 | <b>812.971</b>  | 1541.866        | 1533.857        | 1534.360        | 1533.351        | K(27) |
| S  | 16 | <b>856.487</b>  | 1477.818        | 1469.809        | 1470.313        | 1469.305        | S(26) |
| R  | 17 | <b>934.538</b>  | 1434.362        | 1426.352        | <b>1426.797</b> | 1425.790        | R(25) |
| S  | 18 | <b>978.054</b>  | 1356.363        | <b>1348.243</b> | <b>1348.746</b> | 1347.739        | S(24) |
| S  | 19 | 1021.570        | 1312.738        | 1304.728        | <b>1305.230</b> | 1304.223        | S(23) |
| R  | 20 | <b>1099.620</b> | 1269.220        | 1261.210        | 1261.714        | 1260.707        | R(22) |
| A  | 21 | 1135.139        | 1191.169        | <b>1183.160</b> | <b>1183.664</b> | 1182.656        | A(21) |
| C  | 22 | <b>1163.650</b> | 1135.650        | 1147.641        | 1148.145        | 1147.137        | C(20) |
| L  | 23 | <b>1220.192</b> | <b>1127.140</b> | <b>1119.131</b> | <b>1119.635</b> | 1118.627        | L(19) |
| Q  | 24 | <b>1284.221</b> | <b>1070.598</b> | 1082.589        | 1083.093        | 1082.085        | Q(18) |
| F  | 25 | 1357.755        | 1008.509        | <b>998.559</b>  | <b>999.063</b>  | 998.055         | F(17) |
| F  | 26 | <b>1406.282</b> | 933.034         | 925.025         | 925.529         | 924.521         | F(16) |
| V  | 27 | 1455.816        | 884.508         | 876.499         | 877.003         | 876.995         | V(15) |
| C  | 28 | 1484.327        | 834.074         | 826.065         | 827.068         | 826.061         | C(14) |
| R  | 29 | 1552.874        | 808.483         | 800.474         | 800.978         | 799.970         | R(13) |
| V  | 30 | <b>1611.911</b> | 728.413         | 720.403         | 720.907         | 719.899         | V(12) |
| H  | 31 | <b>1660.441</b> | 678.878         | 670.869         | 671.373         | 670.365         | H(11) |
| R  | 32 | 1738.491        | 610.349         | 602.340         | 602.843         | 601.835         | R(10) |
| L  | 33 | <b>1815.033</b> | 532.289         | 524.280         | 524.783         | 523.785         | L(9)  |
| L  | 34 | 1813.576        | 478.756         | 469.747         | 469.251         | 468.243         | L(8)  |
| R  | 35 | 1869.626        | 419.214         | 411.205         | 411.709         | 410.701         | R(7)  |
| K  | 36 | 2013.674        | 341.164         | 333.154         | 333.658         | 332.650         | K(6)  |
| G  | 37 | 2042.184        | 277.116         | 269.107         | 269.611         | 268.603         | G(5)  |
| N  | 38 | 2099.206        | 248.606         | 240.596         | 241.100         | 240.092         | N(4)  |
| V  | 39 | 2180.727        | 181.564         | 183.575         | 184.079         | 183.071         | V(3)  |
| A  | 40 | 2218.266        | 110.026         | 102.017         | 102.521         | 101.513         | A(2)  |
| E  | 41 | 2280.777        | 74.534          | 66.524          | 67.028          | 66.021          | E(1)  |

# sp | Q6GSS7 | H2A2A\_MOUSE

[Acetyl]SGR<sup>Acetyl</sup>GRK<sup>42.01</sup> QGGK<sup>Acetyl</sup> ARAKAKSRSSRAGLQFPVGRVHLLLRKGN<sup>42.01</sup>YAE

- ▶ fragmentation table for charge state 3+
- ▶ specType=etd
- ▶ score=72.26
- ▶ F113278.dat
- ▶ query=q70549\_p1
- ▶ precursor=913.113450
- ▶ chargePrecursor=5
- ▶ itol=0.5

| AA   | c               | y        | z+1             | z+2             | z               | AA   |
|------|-----------------|----------|-----------------|-----------------|-----------------|------|
| S 1  | 49.697          | 1571.182 | <b>1515.842</b> | 0.672           | 1515.506        | S 41 |
| G 2  | 68.704          | 1476.168 | 1472.820        | 0.672           | 1472.492        | G 40 |
| R 3  | 130.738         | 1459.161 | 1453.821        | <b>1454.157</b> | 1453.485        | R 39 |
| G 4  | 139.745         | 1407.127 | 1403.787        | 1402.123        | 1401.451        | G 38 |
| K 5  | 106.447         | 1358.120 | <b>1382.780</b> | <b>1383.116</b> | 1382.444        | K 37 |
| Q 6  | 239.333         | 1331.416 | 1329.076        | <b>1326.414</b> | 1326.741        | Q 36 |
| G 7  | 226.140         | 1288.735 | <b>1283.392</b> | <b>1283.728</b> | 1283.056        | G 35 |
| G 8  | 277.147         | 1269.725 | <b>1264.385</b> | 1264.721        | <b>1264.049</b> | G 34 |
| K 9  | 331.849         | 1250.717 | 1245.370        | 1245.714        | 1245.042        | K 33 |
| A 10 | 357.528         | 1194.016 | 1188.676        | 1189.012        | 1188.340        | A 32 |
| R 11 | 409.562         | 1170.136 | 1164.997        | 1165.331        | 1164.661        | R 31 |
| A 12 | 433.291         | 1116.303 | 1112.963        | 1113.299        | 1112.627        | A 30 |
| R 13 | 475.939         | 1094.024 | 1089.254        | 1089.620        | 1088.946        | R 29 |
| A 14 | 499.618         | 1051.925 | 1046.589        | 1046.922        | 1046.250        | A 28 |
| K 15 | 542.317         | 1026.246 | 1022.907        | 1023.243        | <b>1022.571</b> | K 27 |
| S 16 | 571.327         | 985.548  | 980.208         | 980.544         | 979.871         | S 26 |
| R 17 | 623.361         | 956.537  | 951.198         | 951.534         | 950.862         | R 25 |
| S 18 | 652.372         | 904.504  | 899.164         | 899.500         | 898.828         | S 24 |
| S 19 | 681.382         | 875.493  | 870.153         | 870.489         | 869.817         | S 23 |
| R 20 | 731.416         | 846.463  | 841.143         | 841.479         | 840.807         | R 22 |
| A 21 | 757.095         | 794.449  | 789.109         | 789.445         | 788.773         | A 21 |
| G 22 | 776.102         | 770.770  | 765.430         | 765.766         | 765.094         | G 20 |
| L 23 | <b>813.797</b>  | 751.762  | 746.423         | 746.759         | 746.087         | L 19 |
| Q 24 | <b>856.463</b>  | 714.666  | 709.326         | 709.664         | 708.992         | Q 19 |
| F 25 | 905.506         | 671.382  | 666.042         | 666.378         | 665.706         | F 17 |
| P 26 | 937.857         | 622.359  | 617.019         | 617.355         | 616.683         | P 16 |
| V 27 | <b>970.880</b>  | 590.028  | 584.688         | 585.024         | 584.352         | V 15 |
| G 28 | <b>989.887</b>  | 556.985  | 551.645         | 551.981         | 551.309         | G 14 |
| R 29 | 1047.921        | 437.878  | 432.538         | 432.874         | 432.202         | R 13 |
| V 30 | 1074.943        | 408.844  | 403.504         | 403.841         | 403.169         | V 12 |
| H 31 | <b>1120.630</b> | 452.921  | 447.581         | 447.918         | 447.246         | H 11 |
| R 32 | 1172.663        | 407.735  | 402.395         | 402.731         | 402.059         | R 10 |
| L 33 | 1210.358        | 355.201  | 349.862         | 350.198         | 349.526         | L 9  |
| L 34 | 1248.051        | 317.507  | 312.167         | 312.503         | 311.831         | L 8  |
| R 35 | 1300.086        | 279.812  | 274.472         | 274.808         | 274.136         | R 7  |
| R 36 | 1342.785        | 232.778  | 227.438         | 227.775         | 227.103         | R 6  |
| G 37 | <b>1361.792</b> | 185.080  | 179.740         | 180.076         | 179.404         | G 5  |
| N 38 | 1399.806        | 166.073  | 160.733         | 161.069         | 160.397         | N 4  |
| V 39 | <b>1454.161</b> | 128.058  | 122.719         | 123.055         | 122.383         | V 3  |
| A 40 | 1477.840        | 73.704   | 68.364          | 68.700          | 68.028          | A 2  |
| E 41 | 1520.374        | 30.025   | 44.685          | 45.021          | 44.349          | E 1  |

# sp | Q6GSS7 | H2A2A\_MOUSE

[Acetyl]SGRGGK<sup>Acetyl</sup><sub>42.01</sub> QGGK<sup>Acetyl</sup><sub>42.01</sub> ARAKAKSRSSRAGLQFPVGRVHLLRKGN<sup>Acetyl</sup>YAE

- ▶ fragmentation table for charge state 4+
- ▶ specType=etd
- ▶ score=72.26
- ▶ F113278.dat
- ▶ query=q70549\_p1
- ▶ precursor=913.113450
- ▶ chargePrecursor=5
- ▶ itol=0.5

| AA    | c               | y               | #=1             | #=2             | #=3             | AA    |
|-------|-----------------|-----------------|-----------------|-----------------|-----------------|-------|
| S[1]  | 37.505          | <b>1141.136</b> | <b>1137.134</b> | 0.705           | <b>1136.882</b> | S[41] |
| G[2]  | 51.780          | 1128.875        | 1124.873        | 0.795           | 1124.621        | G[40] |
| R[3]  | 90.805          | 1094.623        | <b>1090.618</b> | <b>1090.870</b> | <b>1090.366</b> | R[39] |
| G[4]  | 109.061         | 1055.597        | 1051.592        | 1051.844        | 1051.340        | G[38] |
| K[5]  | 147.587         | 1041.342        | 1037.337        | 1037.589        | 1037.085        | K[37] |
| G[6]  | 179.602         | <b>998.815</b>  | 994.813         | 995.062         | 994.559         | G[36] |
| G[7]  | 193.857         | 956.574         | 962.789         | 963.036         | 962.544         | G[35] |
| G[8]  | 208.112         | 952.545         | 948.541         | 948.792         | 948.289         | G[34] |
| K[9]  | 250.630         | 938.290         | 934.285         | <b>934.537</b>  | 934.033         | K[33] |
| A[10] | 268.398         | 895.763         | 891.759         | 892.011         | 891.507         | A[32] |
| R[11] | 307.423         | 878.004         | 873.999         | 874.251         | 873.748         | R[31] |
| A[12] | 325.183         | 838.979         | 834.974         | 835.226         | 834.722         | A[30] |
| K[13] | 357.206         | 821.220         | 817.215         | 817.467         | 816.964         | K[29] |
| A[14] | 374.966         | 789.190         | 785.185         | 785.443         | 784.939         | A[28] |
| K[15] | 408.989         | 771.431         | 767.427         | 767.684         | 767.180         | K[27] |
| S[16] | 428.747         | 739.413         | 735.408         | 735.660         | 735.156         | S[26] |
| R[17] | 467.773         | 721.655         | <b>713.650</b>  | 713.902         | <b>713.398</b>  | R[25] |
| S[18] | 489.513         | 678.830         | 674.825         | 674.877         | 674.373         | S[24] |
| S[19] | 511.259         | 656.872         | 652.867         | 653.119         | 652.615         | S[23] |
| R[20] | 550.314         | 635.114         | 631.109         | 631.361         | 630.857         | R[22] |
| A[21] | 588.073         | 596.089         | 592.084         | 592.336         | 591.832         | A[21] |
| G[22] | 582.329         | 578.329         | 574.324         | 574.576         | 574.072         | G[20] |
| L[23] | 610.660         | 648.074         | 644.069         | 644.321         | 643.817         | L[19] |
| Q[24] | 642.614         | 635.803         | 631.798         | 632.050         | 631.546         | Q[18] |
| F[25] | 679.351         | 593.789         | 499.673         | 500.025         | 499.521         | F[17] |
| F[26] | 703.644         | 667.021         | 463.016         | 463.268         | 462.764         | F[16] |
| V[27] | 728.412         | 442.750         | 438.753         | 439.005         | 438.501         | V[15] |
| G[28] | 742.667         | 417.991         | 413.986         | 414.238         | 413.734         | G[14] |
| R[29] | 761.692         | 403.735         | 399.731         | 399.982         | 399.478         | R[13] |
| V[30] | 806.459         | 364.710         | <b>360.705</b>  | 360.957         | <b>360.453</b>  | V[12] |
| H[31] | 840.724         | 339.843         | 335.838         | 336.100         | 335.606         | H[11] |
| R[32] | 879.749         | 305.678         | 301.673         | 301.925         | 301.421         | R[10] |
| L[33] | 908.020         | 266.657         | 262.648         | 262.900         | 262.396         | L[9]  |
| L[34] | 936.291         | 238.392         | 234.387         | 234.638         | 234.134         | L[8]  |
| R[35] | 975.317         | 210.111         | 206.106         | 206.358         | 205.854         | R[7]  |
| K[36] | 1007.340        | 171.088         | 167.081         | 167.333         | 166.829         | K[6]  |
| G[37] | 1021.596        | 139.062         | 135.057         | 135.309         | 134.805         | G[5]  |
| N[38] | 1050.106        | 124.806         | 120.802         | 121.054         | 120.550         | N[4]  |
| V[39] | <b>1090.872</b> | 96.296          | 92.291          | 92.543          | 92.039          | V[3]  |
| A[40] | 1140.819        | 55.530          | 51.525          | 51.777          | 51.273          | A[2]  |
| E[41] | 1140.892        | 37.771          | 33.766          | 34.018          | 33.514          | E[1]  |



# sp | Q8BFU2 | H2A3\_MOUSE

[Acetyl]SGRGK<sup>Acetyl</sup><sub>42.01</sub> QGGK<sup>Acetyl</sup><sub>42.01</sub> ARAKAKSRSSRAGLQFPVGRVHLLRKGNYS

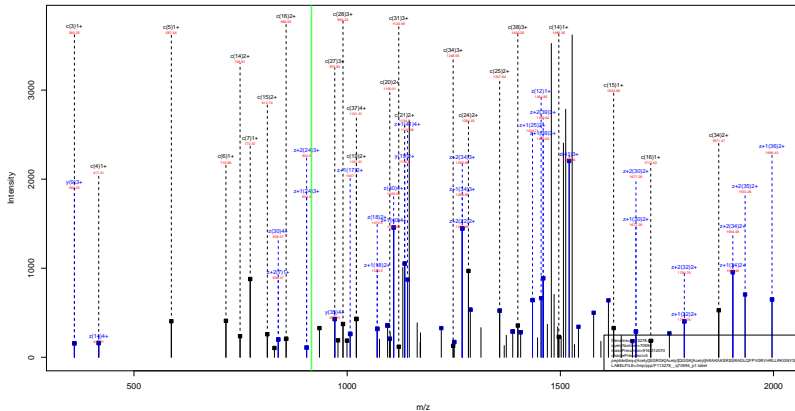

# sp | Q8BFU2 | H2A3\_MOUSE

[Acetyl]SGR<sup>Acetyl</sup>GRK<sup>42.01</sup> QGGK<sup>Acetyl</sup> ARAKAKSRSSRAGLQFPVGRVHLLRKGNYSE<sup>42.01</sup>

- ▶ fragmentation table for charge state 1+
- ▶ specType=etd
- ▶ score=47.95
- ▶ F113278.dat
- ▶ query=q70594.p1
- ▶ precursor=916.312070
- ▶ chargePrecursor=5
- ▶ itol=0.5

| AA   | c               | y        | z+1             | z+2             | z               | AA   |
|------|-----------------|----------|-----------------|-----------------|-----------------|------|
| S 1  | 147.076         | 4377.526 | 4361.507        | 0.000           | 4560.500        | S 41 |
| G 2  | 204.068         | 4446.483 | 4432.465        | 0.000           | 4431.457        | G 40 |
| R 3  | <b>360.199</b>  | 4391.462 | 4375.443        | 4376.451        | 4374.435        | R 30 |
| G 4  | <b>417.220</b>  | 4235.361 | 4219.342        | 4220.350        | 4218.334        | G 38 |
| K 5  | <b>587.326</b>  | 4178.139 | 4162.321        | 4163.329        | 4161.313        | K 37 |
| Q 6  | <b>713.385</b>  | 4020.234 | 3999.215        | 3993.223        | 3991.207        | Q 36 |
| G 7  | <b>772.406</b>  | 3980.173 | 3959.155        | 3955.164        | 3953.148        | G 35 |
| G 8  | <b>829.427</b>  | 3823.154 | 3807.135        | 3808.143        | 3806.127        | G 34 |
| K 9  | <b>999.533</b>  | 3766.132 | 3750.114        | 3751.122        | 3749.106        | K 33 |
| A 10 | <b>1070.570</b> | 3596.027 | 3580.008        | 3581.016        | 3579.000        | A 32 |
| R 11 | 1226.671        | 3524.990 | 3508.971        | 3509.979        | 3507.963        | R 31 |
| A 12 | 1297.708        | 3368.968 | 3352.950        | 3353.978        | 3351.962        | A 30 |
| R 13 | 1425.803        | 3297.952 | 3281.933        | 3282.941        | 3280.925        | R 29 |
| A 14 | <b>1496.840</b> | 3169.937 | 3153.918        | 3154.946        | 3152.930        | A 28 |
| K 15 | <b>1624.936</b> | 3098.919 | 3082.901        | 3083.909        | 3081.893        | K 27 |
| S 16 | <b>1711.967</b> | 2970.902 | 2954.883        | 2955.911        | 2953.895        | S 26 |
| R 17 | 1868.069        | 2883.882 | 2867.863        | 2868.872        | 2866.856        | R 25 |
| S 18 | 1955.103        | 2797.864 | 2781.845        | 2782.873        | 2780.857        | S 24 |
| S 19 | 2042.133        | 2640.850 | 2624.831        | 2625.848        | 2623.833        | S 23 |
| R 20 | 2198.234        | 2553.827 | 2537.808        | 2538.816        | 2536.800        | R 22 |
| A 21 | 2269.271        | 2497.810 | 2481.791        | 2482.819        | 2480.803        | A 21 |
| G 22 | 2326.292        | 2326.789 | 2310.770        | 2311.778        | 2309.762        | G 20 |
| L 23 | 2439.376        | 2269.768 | 2253.749        | 2254.757        | 2252.741        | L 19 |
| Q 24 | 267.435         | 2158.184 | 2142.165        | 2143.173        | 2141.157        | Q 19 |
| F 25 | 2714.503        | 2028.125 | 2012.106        | 2013.114        | 2011.098        | F 17 |
| F 26 | 2811.556        | 1881.057 | 1865.038        | 1866.046        | 1864.030        | F 16 |
| V 27 | 2910.625        | 1784.004 | 1767.985        | 1768.993        | 1766.977        | V 15 |
| G 28 | 2967.646        | 1684.935 | <b>1668.917</b> | 1669.924        | 1667.908        | G 14 |
| R 29 | 3123.747        | 1627.814 | 1611.795        | <b>1612.803</b> | 1610.787        | R 13 |
| R 30 | 3232.816        | 1471.613 | 1455.594        | 1456.602        | <b>1454.780</b> | R 12 |
| H 31 | 3359.874        | 1372.744 | 1356.726        | <b>1357.734</b> | 1355.718        | H 11 |
| R 32 | 3515.976        | 1235.685 | 1219.666        | <b>1220.675</b> | 1218.659        | R 10 |
| L 33 | 3629.060        | 1079.584 | 1063.565        | 1064.573        | 1062.558        | L 9  |
| L 34 | 3742.144        | 966.500  | 950.482         | 951.489         | 949.474         | L 8  |
| R 35 | 3898.245        | 833.416  | 817.398         | <b>818.405</b>  | 816.390         | R 7  |
| R 36 | 4026.340        | 697.315  | 681.296         | 682.304         | 680.289         | R 6  |
| G 37 | 4083.361        | 569.220  | 553.201         | 554.209         | 552.194         | G 5  |
| N 38 | 4197.404        | 512.109  | 496.100         | 497.108         | 495.112         | N 4  |
| V 39 | 4300.467        | 398.150  | 382.137         | 383.145         | 381.129         | V 3  |
| S 40 | 4447.499        | 235.082  | 219.074         | 220.082         | 218.066         | S 2  |
| E 41 | 4576.542        | 144.060  | 132.043         | 133.050         | 131.034         | E 1  |

# sp | Q8BFU2 | H2A3\_MOUSE

[Acetyl]SGR<sup>Acetyl</sup>RGK<sup>42.01</sup> QGGK<sup>Acetyl</sup> ARAKAKSRSSRAGLQFPVGRVHLLRKGNYS<sup>42.01</sup>E

- ▶ fragmentation table for charge state 2+
- ▶ specType=etd
- ▶ score=47.95
- ▶ F113278.dat
- ▶ query=q70594\_p1
- ▶ precursor=916.312070
- ▶ chargePrecursor=5
- ▶ itol=0.5

| AA | c  | y               | #s1             | #s2             | z               | AA              |       |
|----|----|-----------------|-----------------|-----------------|-----------------|-----------------|-------|
| S  | 1  | 74.062          | 2089.241        | 2281.257        | 8.804           | 2280.781        | S(41) |
| G  | 2  | 102.553         | 2224.745        | 2228.736        | 0.504           | 2216.232        | G(49) |
| R  | 3  | 180.603         | 2196.235        | 2198.235        | 2188.720        | 2187.721        | R(39) |
| G  | 4  | 209.114         | 2118.184        | 2110.175        | 2110.679        | 2109.671        | G(38) |
| K  | 5  | 294.167         | 2089.673        | 2081.664        | 2082.168        | 2081.167        | K(37) |
| G  | 6  | 358.196         | 2094.621        | <b>1996.611</b> | <b>1997.115</b> | <b>1996.107</b> | G(36) |
| G  | 7  | 388.197         | 1940.591        | 1932.582        |                 | 1931.088        | G(35) |
| G  | 8  | 435.217         | 1912.081        | <b>1904.071</b> | <b>1904.575</b> | 1903.567        | G(34) |
| K  | 9  | 500.270         | 1883.570        | 1875.560        | 1876.064        | 1875.057        | K(33) |
| A  | 10 | 535.789         | 1798.517        | <b>1790.508</b> | <b>1791.012</b> | 1790.004        | A(32) |
| R  | 11 | 613.839         | 1762.999        | 1754.989        | <b>1755.493</b> | 1754.485        | R(31) |
| A  | 12 | 689.358         | 1684.948        | <b>1676.939</b> | <b>1677.443</b> | 1676.435        | A(30) |
| R  | 13 | 713.405         | 1649.420        | 1641.410        | 1641.914        | 1640.910        | R(29) |
| A  | 14 | <b>748.924</b>  | 1585.383        | 1577.373        | <b>1577.876</b> | 1576.869        | A(28) |
| K  | 15 | <b>812.971</b>  | 1549.863        | 1541.854        | <b>1542.358</b> | 1541.350        | K(27) |
| S  | 16 | <b>856.487</b>  | 1485.816        | 1477.807        | 1478.310        | 1477.303        | S(26) |
| R  | 17 | <b>934.538</b>  | 1442.800        | <b>1434.291</b> | <b>1434.794</b> | 1433.787        | R(25) |
| S  | 18 | <b>978.054</b>  | 1384.249        | 1376.240        | 1376.744        | 1375.736        | S(24) |
| S  | 19 | <b>1021.570</b> | 1326.733        | 1318.724        | 1319.228        | 1318.220        | S(23) |
| R  | 20 | <b>1099.620</b> | 1277.217        | 1269.208        | <b>1269.712</b> | 1268.704        | R(22) |
| A  | 21 | <b>1135.139</b> | 1229.167        | 1221.157        | 1221.661        | 1220.653        | A(21) |
| G  | 22 | 1163.650        | 1183.648        | 1175.639        | 1176.143        | 1175.135        | G(20) |
| L  | 23 | 1232.084        | 1136.597        | 1128.587        | 1129.091        | 1128.083        | L(19) |
| Q  | 24 | <b>1284.221</b> | <b>1135.137</b> | <b>1127.128</b> | <b>1127.632</b> | <b>1126.624</b> | Q(18) |
| F  | 25 | <b>1357.755</b> | 1074.596        | <b>1066.557</b> | <b>1067.061</b> | 1066.053        | F(17) |
| F  | 26 | 1408.282        | 941.033         | 933.023         | 933.526         | 932.519         | F(16) |
| V  | 27 | 1455.816        | 892.500         | 884.490         | 885.000         | 883.992         | V(15) |
| G  | 28 | 1484.327        | 842.971         | 834.962         | 835.466         | 834.458         | G(14) |
| R  | 29 | 1562.918        | 814.481         | 806.471         | 806.975         | 805.967         | R(13) |
| V  | 30 | 1611.911        | 736.410         | 728.401         | 728.905         | 727.897         | V(12) |
| H  | 31 | 1680.441        | 688.876         | 678.866         | 679.370         | 678.363         | H(11) |
| R  | 32 | 1758.491        | 618.346         | 610.337         | 610.841         | 609.833         | R(10) |
| L  | 33 | 1815.033        | 540.296         | 532.286         | 532.790         | 531.783         | L(9)  |
| L  | 34 | <b>1871.575</b> | 483.754         | 475.744         | 476.248         | 475.241         | L(8)  |
| R  | 35 | 1949.625        | 427.212         | 419.202         | 419.706         | 418.698         | R(7)  |
| K  | 36 | 2013.674        | 349.161         | 341.152         | 341.656         | 340.648         | K(6)  |
| G  | 37 | 2042.184        | 285.114         | 277.104         | 277.608         | 276.600         | G(5)  |
| N  | 38 | 2099.206        | 256.603         | 248.594         | 249.098         | 248.090         | N(4)  |
| V  | 39 | 2180.727        | 199.562         | 191.552         | 192.056         | 191.048         | V(3)  |
| S  | 40 | 2244.253        | 118.056         | 110.046         | 110.549         | 109.541         | S(2)  |
| E  | 41 | 2288.775        | 74.534          | 66.524          | 67.028          | 66.021          | E(1)  |

# sp | Q8BFU2 | H2A3\_MOUSE

[Acetyl]SGRGGK<sup>Acetyl</sup><sub>42.01</sub> QGGK<sup>Acetyl</sup><sub>42.01</sub> ARAKAKSRSSRAGLQFPVGRVHRLLRKGNYSK

- ▶ fragmentation table for charge state 3+
- ▶ specType=etd
- ▶ score=47.95
- ▶ F113278.dat
- ▶ query=q70594\_p1
- ▶ precursor=916.312070
- ▶ chargePrecursor=5
- ▶ itol=0.5

| AA | c  | y               | #z1             | #z2             | z               | AA              |      |
|----|----|-----------------|-----------------|-----------------|-----------------|-----------------|------|
| S  | 1  | 48.676          | 1526.514        | 1521.174        | 0.872           | <b>1520.830</b> | S(4) |
| G  | 2  | 86.704          | 1483.499        | 1478.160        | 0.872           | 1477.824        | G(4) |
| R  | 3  | 130.718         | 1464.493        | <b>1459.153</b> | <b>1459.489</b> | 1458.817        | R(3) |
| G  | 4  | 139.745         | 1412.458        | <b>1407.119</b> | 1407.405        | <b>1406.783</b> | G(3) |
| K  | 5  | 196.447         | 1393.451        | <b>1388.112</b> | <b>1388.448</b> | <b>1387.776</b> | K(3) |
| G  | 6  | 239.133         | 1336.749        | 1331.410        | 1331.796        | 1331.073        | G(3) |
| G  | 7  | 288.140         | 1294.083        | <b>1288.724</b> | <b>1289.060</b> | <b>1288.388</b> | G(3) |
| G  | 8  | 297.147         | 1275.056        | <b>1269.717</b> | <b>1270.053</b> | 1269.381        | G(3) |
| K  | 9  | 333.649         | 1256.049        | <b>1250.709</b> | <b>1251.045</b> | 1250.373        | K(3) |
| A  | 10 | 357.528         | 1199.347        | 1194.008        | 1194.344        | 1193.672        | A(3) |
| R  | 11 | 409.562         | 1175.668        | 1170.329        | 1170.664        | 1169.993        | R(3) |
| A  | 12 | 433.241         | 1133.945        | 1128.606        | 1128.942        | 1128.270        | A(3) |
| K  | 13 | 475.919         | <b>1099.955</b> | <b>1094.616</b> | <b>1094.952</b> | 1094.280        | K(3) |
| A  | 14 | 499.618         | 1057.257        | 1051.917        | 1052.253        | 1051.581        | A(3) |
| K  | 15 | 542.317         | 1033.578        | 1028.238        | 1028.574        | 1027.902        | K(3) |
| S  | 16 | 571.327         | 090.880         | 985.540         | 985.876         | 985.204         | S(2) |
| R  | 17 | 623.264         | 981.869         | 976.529         | 976.865         | 976.193         | R(2) |
| S  | 18 | 652.372         | 959.835         | <b>904.496</b>  | <b>904.832</b>  | 904.160         | S(2) |
| S  | 19 | 681.382         | 980.825         | 875.485         | 875.821         | 875.149         | S(2) |
| R  | 20 | 733.416         | 951.814         | 946.474         | 946.810         | 946.138         | R(2) |
| A  | 21 | 757.095         | 799.780         | 794.441         | 794.777         | 794.105         | A(2) |
| G  | 22 | 776.102         | 776.101         | 770.762         | 771.098         | 770.426         | G(2) |
| L  | 23 | 813.289         | 759.094         | 753.754         | 754.090         | 753.418         | L(2) |
| Q  | 24 | <b>856.483</b>  | 719.309         | 714.000         | 714.306         | 713.624         | Q(2) |
| F  | 25 | 905.508         | 676.713         | 671.374         | 671.710         | 671.038         | F(2) |
| F  | 26 | 937.857         | 627.600         | 622.313         | 622.687         | 622.015         | F(2) |
| V  | 27 | <b>970.880</b>  | 595.139         | 590.000         | 590.336         | 589.664         | V(2) |
| G  | 28 | <b>989.887</b>  | 562.317         | 556.977         | 557.313         | 556.641         | G(2) |
| R  | 29 | 1041.804        | 443.309         | 437.910         | 438.308         | 437.636         | R(2) |
| V  | 30 | 1074.943        | 490.276         | 485.038         | 486.272         | 485.600         | V(2) |
| H  | 31 | <b>1120.630</b> | 458.253         | 452.913         | 453.249         | 452.577         | H(2) |
| R  | 32 | 1172.663        | 412.967         | 407.227         | 407.563         | 406.891         | R(2) |
| L  | 33 | 1210.358        | <b>360.533</b>  | 355.193         | 355.529         | 354.857         | L(2) |
| L  | 34 | <b>1248.053</b> | 322.374         | 317.089         | 317.426         | 316.754         | L(2) |
| R  | 35 | 1348.888        | 285.144         | 279.804         | 280.140         | 279.468         | R(2) |
| K  | 36 | 1342.785        | 233.110         | 227.770         | 228.106         | 227.434         | K(2) |
| G  | 37 | 1381.792        | 190.412         | 185.072         | 185.408         | 184.736         | G(2) |
| N  | 38 | <b>1399.806</b> | 171.404         | 166.065         | 166.401         | 165.729         | N(2) |
| V  | 39 | 1454.161        | 133.390         | 128.051         | 128.386         | 127.715         | V(2) |
| S  | 40 | 1483.114        | 98.136          | 93.000          | 93.336          | 92.664          | S(2) |
| E  | 41 | 1526.136        | 50.025          | 44.685          | 45.021          | 44.349          | E(2) |

# sp | Q8BFU2 | H2A3\_MOUSE

[Acetyl]SGR<sup>Acetyl</sup>RGK<sup>42.01</sup> QGGK<sup>Acetyl</sup> ARAKAKSRSSRAGLQFPVGRVHLLLRKGNYS<sup>42.01</sup>E

- ▶ fragmentation table for charge state 4+
- ▶ specType=etd
- ▶ score=47.95
- ▶ F113278.dat
- ▶ query=q70594.p1
- ▶ precursor=916.312070
- ▶ chargePrecursor=5
- ▶ itol=0.5

| AA   | c               | y              | z+1             | z+2             | z               | AA   |
|------|-----------------|----------------|-----------------|-----------------|-----------------|------|
| S 1  | 37.525          | 1145.137       | <b>1141.132</b> | 0.755           | 1140.880        | S 41 |
| G 2  | 51.780          | 1112.876       | <b>1108.872</b> | 0.755           | <b>1108.620</b> | G 40 |
| R 3  | 90.805          | 1098.621       | <b>1094.616</b> | <b>1094.868</b> | <b>1094.364</b> | R 39 |
| G 4  | 105.061         | 1059.596       | 1055.591        | 1055.843        | 1055.139        | G 38 |
| K 5  | 147.567         | 1045.340       | 1041.336        | 1041.588        | 1041.084        | K 37 |
| Q 6  | 179.602         | 1029.214       | 999.800         | 999.801         | 999.557         | Q 36 |
| G 7  | 193.557         | <b>970.799</b> | 966.795         | 967.047         | 966.542         | G 35 |
| G 8  | 208.112         | 956.544        | 952.539         | 952.791         | 952.287         | G 34 |
| K 9  | 250.639         | 942.289        | 938.284         | 938.536         | 938.032         | K 33 |
| A 10 | 268.398         | 899.762        | 895.757         | 896.009         | 895.506         | A 32 |
| R 11 | 307.421         | 882.083        | 877.998         | 878.250         | 877.746         | R 31 |
| A 12 | 324.183         | 842.978        | 838.973         | 839.225         | <b>838.721</b>  | A 30 |
| R 13 | 357.206         | 825.218        | 821.214         | 821.466         | 820.962         | R 29 |
| A 14 | 374.966         | 793.195        | 789.190         | 789.442         | 788.938         | A 28 |
| K 15 | 406.989         | 775.435        | 771.431         | 771.683         | 771.179         | K 27 |
| S 16 | 426.747         | 743.412        | 739.407         | 739.659         | 739.155         | S 26 |
| R 17 | 467.773         | 721.694        | 717.689         | 717.941         | 717.437         | R 25 |
| S 18 | 489.531         | 682.828        | 678.824         | 679.076         | 678.572         | S 24 |
| S 19 | 511.289         | 660.870        | 656.866         | 657.118         | 656.614         | S 23 |
| R 20 | 550.314         | 639.112        | 635.108         | 635.360         | 634.856         | R 22 |
| A 21 | 568.073         | 600.087        | 596.082         | 596.334         | 595.830         | A 21 |
| G 22 | 582.329         | 582.328        | 578.323         | 578.575         | 578.071         | G 20 |
| L 23 | 610.800         | 598.072        | 594.068         | 594.320         | 593.816         | L 19 |
| Q 24 | 642.014         | 539.803        | 535.797         | 536.049         | 535.545         | Q 19 |
| F 25 | 679.381         | 507.787        | 503.782         | 504.034         | 503.530         | F 17 |
| P 26 | 703.644         | 471.020        | 467.015         | 467.267         | 466.763         | P 16 |
| V 27 | 728.412         | 446.756        | 442.752         | 443.004         | 442.500         | V 15 |
| G 28 | 742.667         | 421.989        | 417.985         | 418.237         | <b>417.733</b>  | G 14 |
| R 29 | 761.692         | 407.734        | 403.729         | 403.981         | 403.477         | R 13 |
| V 30 | 808.459         | 368.709        | 364.704         | 364.956         | 364.452         | V 12 |
| H 31 | 840.724         | 343.942        | 339.937         | 340.189         | 339.685         | H 11 |
| R 32 | 879.749         | 309.677        | 305.672         | 305.924         | 305.420         | R 10 |
| L 33 | 908.620         | 270.652        | 266.647         | 266.899         | 266.395         | L 9  |
| L 34 | 936.291         | 242.381        | 238.376         | 238.628         | 238.124         | L 8  |
| R 35 | 975.317         | 214.130        | 210.125         | 210.377         | 209.873         | R 7  |
| R 36 | <b>1067.340</b> | 175.084        | 171.080         | 171.332         | 170.828         | R 6  |
| G 37 | <b>1021.596</b> | 143.061        | 139.056         | 139.308         | 138.804         | G 5  |
| N 38 | 1050.106        | 128.805        | 124.800         | 125.052         | 124.548         | N 4  |
| V 39 | 1090.872        | 100.294        | 96.290          | 96.542          | 96.038          | V 3  |
| S 40 | 1112.630        | 59.529         | 55.524          | 55.776          | 55.272          | S 2  |
| E 41 | 1144.391        | 37.771         | 33.766          | 34.018          | 33.514          | E 1  |



# sp | Q6GSS7 | H2A2A\_MOUSE

[Acetyl]SGR<sup>Acetyl</sup>GRK<sup>42.01</sup> QGGK<sup>Crotonaldehyde</sup> ARAKAKRS<sup>70.04</sup>SRAGLQFPVGRVHLLRKGNYAE

- ▶ fragmentation table for charge state 1+
- ▶ specType=etd
- ▶ score=42.87
- ▶ F113278.dat
- ▶ query=q70640.p1
- ▶ precursor=765.767410
- ▶ chargePrecursor=6
- ▶ itol=0.5

| AA   | c               | y        | z+1             | z+2             | z        | AA   |
|------|-----------------|----------|-----------------|-----------------|----------|------|
| S 1  | 147.076         | 4389.562 | 4571.544        | 0.000           | 4572.536 | S 41 |
| G 2  | 304.098         | 4460.520 | 4444.501        | 0.000           | 4443.493 | G 40 |
| R 3  | <b>360.199</b>  | 4401.498 | 4387.480        | 4308.488        | 4386.472 | R 39 |
| G 4  | <b>417.220</b>  | 4247.397 | 4231.379        | 4232.366        | 4230.371 | G 38 |
| K 5  | <b>587.226</b>  | 4100.376 | 4114.361        | 4175.360        | 4172.346 | K 37 |
| Q 6  | <b>715.185</b>  | 4039.276 | 4004.252        | 4005.259        | 4003.244 | Q 36 |
| G 7  | <b>772.406</b>  | 3892.212 | 3876.193        | 3877.201        | 3875.185 | G 35 |
| G 8  | 829.427         | 3835.190 | 3819.172        | 3820.179        | 3818.164 | G 34 |
| K 9  | 1027.504        | 3778.169 | 3762.150        | 3763.158        | 3761.142 | K 33 |
| A 10 | <b>1098.601</b> | 3680.032 | 3664.013        | 3665.021        | 3663.005 | A 32 |
| R 11 | <b>1254.703</b> | 3538.995 | 3492.975        | 3493.984        | 3491.968 | R 31 |
| A 12 | 1323.749        | 3352.994 | 3336.975        | 3337.983        | 3335.967 | A 30 |
| K 13 | 1453.835        | 3281.957 | 3265.938        | 3266.946        | 3264.930 | K 29 |
| A 14 | 1524.872        | 3153.762 | 3137.743        | 3138.751        | 3136.735 | A 28 |
| K 15 | 1652.967        | 3082.725 | 3066.706        | 3067.714        | 3065.698 | K 27 |
| S 16 | 1739.999        | 2954.630 | 2938.611        | 2939.619        | 2937.603 | S 26 |
| R 17 | 1896.100        | 2887.598 | 2851.579        | 2852.587        | 2850.571 | R 25 |
| S 18 | 1983.132        | 2711.496 | 2695.477        | 2696.486        | 2694.470 | S 24 |
| S 19 | 2070.184        | 2524.464 | 2508.446        | 2509.454        | 2507.438 | S 23 |
| R 20 | 2226.265        | 2537.432 | 2521.414        | 2522.422        | 2520.406 | R 22 |
| A 21 | 2297.302        | 2381.331 | 2365.313        | 2366.320        | 2364.305 | A 21 |
| G 22 | 2384.324        | 2310.294 | 2294.275        | 2295.283        | 2293.268 | G 20 |
| L 23 | 2467.408        | 2253.272 | 2237.254        | 2238.262        | 2236.246 | L 19 |
| Q 24 | 2595.466        | 2148.189 | 2132.171        | 2133.178        | 2131.162 | Q 18 |
| F 25 | 2742.535        | 2012.130 | <b>1996.111</b> | 1997.119        | 1995.104 | F 17 |
| F 26 | 2839.587        | 1895.062 | 1849.043        | 1850.051        | 1848.035 | F 16 |
| V 27 | 2938.656        | 1768.009 | 1752.990        | 1753.998        | 1751.982 | V 15 |
| G 28 | 2995.677        | 1658.940 | 1652.922        | 1653.930        | 1651.914 | G 14 |
| R 29 | 3151.778        | 1611.919 | 1595.900        | <b>1596.908</b> | 1594.892 | R 13 |
| V 30 | 3350.847        | 1495.818 | 1439.799        | 1440.807        | 1438.791 | V 12 |
| H 31 | 3387.908        | 1356.740 | 1340.721        | <b>1341.729</b> | 1339.722 | H 11 |
| R 32 | 3544.007        | 1219.601 | 1203.672        | <b>1204.680</b> | 1202.664 | R 10 |
| L 33 | 3657.091        | 1063.509 | <b>1047.571</b> | 1048.579        | 1046.563 | L 9  |
| L 34 | 3770.175        | 950.505  | 934.487         | 935.495         | 933.479  | L 8  |
| R 35 | 3926.276        | 837.421  | 821.403         | 822.410         | 820.395  | R 7  |
| K 36 | 4054.271        | 691.320  | 665.302         | 666.309         | 664.294  | K 6  |
| G 37 | 4111.362        | 553.225  | 537.207         | 538.214         | 536.199  | G 5  |
| N 38 | 4225.435        | 496.204  | 480.185         | 481.193         | 479.177  | N 4  |
| Y 39 | 4388.499        | 382.161  | 366.142         | 367.150         | 365.134  | Y 3  |
| A 40 | 4459.530        | 219.098  | 203.079         | 204.087         | 202.071  | A 2  |
| E 41 | 4588.578        | 148.060  | 132.042         | 133.050         | 131.034  | E 1  |

# sp | Q6GSS7 | H2A2A\_MOUSE

[Acetyl]SGR<sup>Acetyl</sup>GRK<sup>42.01</sup> QGGK<sup>Crotonaldehyde</sup> ARAKAKRS<sup>70.04</sup>SSRAGLQFPVGRVHLLRKGNYAE

- ▶ fragmentation table for charge state 2+
- ▶ specType=etd
- ▶ score=42.87
- ▶ F113278.dat
- ▶ query=q70640.p1
- ▶ precursor=765.767410
- ▶ chargePrecursor=6
- ▶ itol=0.5

| AA   | c               | y              | z+1             | z+2             | z               | AA   |
|------|-----------------|----------------|-----------------|-----------------|-----------------|------|
| S 1  | 74.042          | 2795.385       | 2797.270        | 0.504           | 2886.772        | S 41 |
| G 2  | 102.563         | 2230.764       | 2222.754        | 0.504           | 2222.250        | G 40 |
| R 3  | 180.603         | 2202.953       | 2194.243        | 2194.747        | 2193.740        | R 30 |
| G 4  | 209.114         | 2124.202       | 2116.193        | 2116.697        | 2115.689        | G 38 |
| K 5  | 204.167         | 2095.692       | 2087.682        | 2088.186        | 2087.176        | K 37 |
| Q 6  | 385.196         | 2010.639       | 2002.629        | 2003.133        | 2002.126        | Q 30 |
| G 7  | 386.792         | 1948.630       | 1938.620        | <b>1939.104</b> | 1938.095        | G 32 |
| G 8  | 415.217         | 1918.099       | 1910.089        | <b>1910.593</b> | 1909.585        | G 34 |
| K 9  | 514.286         | 1889.588       | <b>1881.579</b> | <b>1882.083</b> | 1881.075        | K 33 |
| A 10 | 549.804         | 1790.620       | 1782.510        | 1783.014        | 1782.006        | A 32 |
| R 11 | 677.853         | 1755.081       | 1746.992        | 1747.496        | 1746.488        | R 31 |
| A 12 | <b>663.373</b>  | 1676.951       | 1668.941        | 1669.445        | 1668.437        | A 29 |
| R 13 | <b>727.421</b>  | 1641.432       | <b>1633.423</b> | <b>1633.927</b> | 1632.919        | R 29 |
| A 14 | <b>762.940</b>  | 1577.384       | 1569.375        | 1569.879        | 1568.871        | A 28 |
| K 15 | <b>826.987</b>  | 1541.866       | 1533.857        | 1534.360        | 1533.351        | K 27 |
| S 16 | <b>870.503</b>  | 1477.818       | 1469.809        | <b>1470.313</b> | 1469.305        | S 26 |
| R 17 | 868.554         | 1434.302       | <b>1426.293</b> | <b>1426.797</b> | 1425.789        | R 25 |
| S 18 | <b>992.070</b>  | 1356.952       | <b>1348.243</b> | <b>1348.746</b> | 1347.739        | S 24 |
| S 19 | <b>1035.586</b> | 1312.736       | <b>1304.726</b> | 1305.230        | <b>1304.223</b> | S 23 |
| R 20 | 1113.636        | 1269.220       | <b>1261.210</b> | <b>1261.714</b> | 1260.707        | R 22 |
| A 21 | <b>1149.155</b> | 1191.069       | 1183.060        | 1183.564        | <b>1182.056</b> | A 21 |
| G 22 | 1177.665        | 1155.051       | 1147.041        | 1148.545        | 1147.137        | G 20 |
| L 23 | <b>1234.207</b> | 1127.140       | 1119.131        | <b>1119.635</b> | 1118.627        | L 19 |
| Q 24 | 1289.273        | 1070.588       | <b>1062.589</b> | <b>1063.093</b> | 1062.085        | Q 19 |
| F 25 | 1371.711        | 1006.969       | <b>998.959</b>  | <b>999.063</b>  | 998.055         | F 17 |
| P 26 | 1430.297        | 933.034        | 925.025         | 925.529         | 924.521         | P 16 |
| V 27 | 1469.832        | <b>884.508</b> | 876.499         | 877.003         | 875.995         | V 15 |
| G 28 | 1498.342        | 834.074        | <b>826.965</b>  | <b>827.468</b>  | 826.461         | G 14 |
| D 29 | 1575.393        | 806.463        | <b>798.454</b>  | <b>798.958</b>  | 797.950         | D 13 |
| V 30 | 1625.927        | 728.413        | 720.404         | 720.907         | 719.899         | V 12 |
| H 31 | 1694.456        | 678.878        | 670.869         | 671.373         | 670.365         | H 11 |
| R 32 | 1772.507        | 610.349        | 602.340         | 602.843         | 601.836         | R 10 |
| L 33 | 1829.049        | 532.298        | 524.289         | 524.793         | 523.785         | L 9  |
| L 34 | 1885.591        | 475.756        | 467.747         | 468.251         | 467.243         | L 8  |
| R 35 | 1983.642        | 419.214        | 411.205         | 411.709         | 410.701         | R 7  |
| K 36 | 2027.889        | 341.164        | 333.154         | 333.658         | 332.650         | K 6  |
| G 37 | 2056.200        | 277.118        | 269.109         | 269.611         | 268.603         | G 5  |
| N 38 | 2113.221        | 248.606        | 240.596         | 241.100         | 240.092         | N 4  |
| V 39 | 2194.753        | 191.084        | 183.075         | 184.079         | 183.071         | V 3  |
| A 40 | 2230.272        | 110.052        | 102.043         | 102.547         | 101.539         | A 2  |
| E 41 | 2294.793        | 74.534         | 66.525          | 67.028          | 66.021          | E 1  |



# sp | Q6GSS7 | H2A2A\_MOUSE

[Acetyl]SGR<sup>Acetyl</sup>GRK<sup>42.01</sup> QGGK<sup>Crotonaldehyde</sup> ARAKAKRSRRAGLQFPVGRVHLLRKGNYAE<sup>70.04</sup>

- ▶ fragmentation table for charge state 3+
- ▶ specType=etd
- ▶ score=42.87
- ▶ F113278.dat
- ▶ query=q70640.p1
- ▶ precursor=765.767410
- ▶ chargePrecursor=6
- ▶ itol=0.5

| AA | c  | w               | #±1             | #±2             | c               | AA              |       |
|----|----|-----------------|-----------------|-----------------|-----------------|-----------------|-------|
| S  | 1  | 49.697          | 1536.549        | 1528.195        | 8.872           | 1524.851        | S[41] |
| G  | 2  | 66.704          | 1487.511        | <b>1482.172</b> | 0.672           | 1481.836        | G[49] |
| R  | 3  | 130.718         | <b>1468.504</b> | <b>1463.165</b> | <b>1463.501</b> | 1462.829        | R[39] |
| G  | 4  | 139.745         | 1416.471        | 1411.131        | 1411.467        | 1410.795        | G[38] |
| K  | 5  | 196.447         | 1397.463        | 1392.124        | 1392.460        | 1391.788        | K[37] |
| Q  | 6  | 239.129         | 1340.762        | <b>1335.422</b> | <b>1335.758</b> | <b>1335.086</b> | Q[36] |
| G  | 7  | 288.140         | 1296.076        | 1290.737        | <b>1293.072</b> | 1289.400        | G[35] |
| G  | 8  | 297.147         | 1279.068        | 1273.729        | 1274.065        | 1273.393        | G[34] |
| K  | 9  | 343.193         | 1260.061        | <b>1254.722</b> | <b>1255.057</b> | <b>1254.386</b> | K[33] |
| A  | 10 | 398.672         | 1194.016        | 1188.676        | 1189.012        | 1188.340        | A[32] |
| R  | 11 | 418.006         | 1170.138        | 1164.797        | 1165.133        | 1164.461        | R[31] |
| A  | 12 | 482.889         | 1118.303        | <b>1112.963</b> | <b>1113.299</b> | <b>1112.627</b> | A[30] |
| K  | 13 | 485.283         | 1084.624        | 1079.284        | 1079.620        | 1078.948        | K[29] |
| A  | 14 | 508.992         | 1051.925        | 1046.586        | 1046.922        | 1046.250        | A[28] |
| K  | 15 | 551.660         | 1028.246        | <b>1022.907</b> | <b>1023.243</b> | 1022.571        | K[27] |
| S  | 16 | 586.671         | 985.548         | 980.208         | <b>980.544</b>  | 979.873         | S[26] |
| R  | 17 | 632.205         | <b>956.537</b>  | <b>951.198</b>  | <b>951.534</b>  | <b>950.862</b>  | R[25] |
| S  | 18 | 661.715         | 924.504         | 919.164         | 919.500         | <b>918.828</b>  | S[24] |
| S  | 19 | 696.726         | 875.493         | <b>870.153</b>  | <b>870.489</b>  | 869.817         | S[23] |
| R  | 20 | <b>742.760</b>  | 846.482         | 841.143         | <b>841.479</b>  | 840.807         | R[22] |
| A  | 21 | 786.439         | 794.449         | 789.109         | 789.445         | 788.773         | A[21] |
| G  | 22 | 825.446         | 770.770         | 765.430         | 765.766         | 765.094         | G[20] |
| L  | 23 | <b>823.141</b>  | 754.762         | 749.423         | 749.759         | 749.087         | L[19] |
| Q  | 24 | <b>865.827</b>  | 714.085         | 708.745         | 709.081         | 708.409         | Q[18] |
| F  | 25 | 914.850         | 671.382         | 666.042         | 666.378         | 665.706         | F[17] |
| F  | 26 | 947.201         | 622.359         | 617.019         | 617.355         | 616.683         | F[16] |
| V  | 27 | 980.221         | 590.006         | 584.666         | 585.004         | 584.332         | V[15] |
| G  | 28 | <b>999.231</b>  | 558.985         | 553.645         | 553.981         | 553.309         | G[14] |
| R  | 29 | 1051.454        | 519.016         | 513.676         | 514.012         | 513.340         | R[13] |
| V  | 30 | <b>1084.287</b> | 485.944         | 480.604         | 480.941         | 480.269         | V[12] |
| H  | 31 | <b>1129.973</b> | 452.921         | 447.581         | 447.917         | 447.245         | H[11] |
| R  | 32 | <b>1182.007</b> | 407.235         | 401.895         | 402.231         | 401.559         | R[10] |
| L  | 33 | 1219.702        | 355.201         | 349.862         | 350.198         | 349.526         | L[9]  |
| L  | 34 | 1287.889        | 319.509         | 314.169         | 314.505         | 313.833         | L[8]  |
| R  | 35 | 1359.430        | 279.812         | 274.472         | 274.808         | 274.136         | R[7]  |
| K  | 36 | 1352.129        | 227.778         | 222.438         | 222.775         | 222.103         | K[6]  |
| G  | 37 | 1371.136        | 185.880         | 179.740         | 180.076         | 179.404         | G[5]  |
| N  | 38 | 1409.110        | 166.073         | 160.733         | 161.069         | 160.397         | N[4]  |
| V  | 39 | <b>1463.504</b> | 128.098         | 122.758         | 123.094         | 122.422         | V[3]  |
| A  | 40 | 1461.813        | 83.304          | 77.964          | 78.300          | 77.628          | A[2]  |
| E  | 41 | 1530.198        | 50.025          | 44.685          | 45.021          | 44.349          | E[1]  |

# sp | Q6GSS7 | H2A2A\_MOUSE

[Acetyl]SGR<sup>Acetyl</sup>GRK<sup>42.01</sup> QGGK<sup>Crotonaldehyde</sup> ARAKAKSRSSRAGLQFPVGRVHRLLRKGN<sup>70.04</sup>YAE

- ▶ fragmentation table for charge state 4+
- ▶ specType=etd
- ▶ score=42.87
- ▶ F113278.dat
- ▶ query=q70640.p1
- ▶ precursor=765.767410
- ▶ chargePrecursor=6
- ▶ itol=0.5

| AA | c  | y               | #+1             | #+2             | #               | AA                    |
|----|----|-----------------|-----------------|-----------------|-----------------|-----------------------|
| S  | 1  | 37.505          | 1148.140        | <b>1144.141</b> | 0.705           | <b>1141.889</b> S[41] |
| G  | 2  | 51.780          | <b>1115.885</b> | <b>1111.881</b> | 0.705           | <b>1111.629</b> G[40] |
| R  | 3  | 90.805          | 1101.630        | 1097.625        | <b>1097.877</b> | 1097.371 R[39]        |
| G  | 4  | 109.001         | <b>1062.605</b> | <b>1058.600</b> | 1058.852        | <b>1058.348</b> G[38] |
| K  | 5  | 147.587         | 1048.349        | 1044.345        | <b>1044.597</b> | 1044.091 K[37]        |
| G  | 6  | 179.604         | 1036.821        | <b>1001.818</b> | <b>1002.870</b> | 1001.560 G[36]        |
| G  | 7  | 193.857         | 973.806         | 969.802         | <b>970.056</b>  | 969.552 G[35]         |
| G  | 8  | 208.112         | 959.551         | 955.548         | <b>955.800</b>  | 955.296 G[34]         |
| K  | 9  | 257.647         | 945.298         | 941.293         | 941.545         | 941.041 K[33]         |
| A  | 10 | 275.406         | 895.763         | 891.759         | 892.011         | 891.507 A[32]         |
| R  | 11 | 314.411         | 878.004         | 873.999         | 874.251         | 873.748 R[31]         |
| A  | 12 | 332.190         | 838.979         | 834.974         | 835.226         | 834.722 A[30]         |
| K  | 13 | 364.214         | 821.220         | 817.215         | 817.467         | 816.964 K[29]         |
| A  | 14 | 381.973         | 789.190         | 785.185         | 785.443         | 784.939 A[28]         |
| K  | 15 | 413.997         | 771.431         | 767.427         | 767.684         | 767.180 K[27]         |
| S  | 16 | 435.755         | 739.413         | 735.408         | 735.660         | 735.156 S[26]         |
| R  | 17 | 474.760         | 717.950         | 713.945         | 714.202         | 713.698 R[25]         |
| S  | 18 | 498.538         | 678.930         | 674.925         | 675.177         | 674.673 S[24]         |
| S  | 19 | 518.296         | 656.672         | 652.667         | 652.919         | 652.415 S[23]         |
| R  | 20 | 557.322         | 635.114         | 631.109         | 631.361         | 630.857 R[22]         |
| A  | 21 | 575.081         | 596.089         | 592.084         | 592.336         | 591.832 A[21]         |
| G  | 22 | 589.136         | 578.329         | 574.324         | 574.576         | 574.072 G[20]         |
| L  | 23 | 617.687         | 648.074         | 644.069         | 644.321         | 643.817 L[19]         |
| Q  | 24 | 649.632         | 635.803         | 631.798         | 632.050         | 631.546 Q[18]         |
| F  | 25 | 688.389         | 593.788         | 499.783         | 500.035         | 499.531 F[17]         |
| F  | 26 | 710.652         | 667.021         | 463.018         | 463.268         | 462.764 F[16]         |
| V  | 27 | 735.419         | 442.758         | 438.753         | 439.005         | 438.501 V[15]         |
| G  | 28 | 746.675         | 417.991         | 413.986         | 414.238         | 413.734 G[14]         |
| R  | 29 | 758.934         | 403.735         | 399.731         | 399.982         | 399.478 R[13]         |
| V  | 30 | <b>813.467</b>  | 364.710         | <b>360.705</b>  | 360.957         | <b>360.453</b> V[12]  |
| H  | 31 | 847.732         | 339.843         | 335.838         | 336.089         | 335.586 H[11]         |
| R  | 32 | 886.757         | 305.678         | 301.673         | 301.925         | 301.421 R[10]         |
| L  | 33 | 915.028         | 266.657         | 262.648         | 262.900         | 262.396 L[9]          |
| L  | 34 | <b>943.299</b>  | 238.362         | 234.357         | 234.608         | 234.104 L[8]          |
| R  | 35 | 982.324         | 210.111         | 206.106         | 206.358         | 205.854 R[7]          |
| K  | 36 | <b>1014.348</b> | 171.088         | 167.081         | 167.333         | 166.829 K[6]          |
| G  | 37 | 1028.604        | 139.064         | 135.059         | 135.309         | 134.805 G[5]          |
| N  | 38 | 1057.114        | 124.806         | 120.802         | 121.054         | 120.550 N[4]          |
| V  | 39 | <b>1097.880</b> | 96.266          | 92.261          | 92.513          | 92.009 V[3]           |
| A  | 40 | 1115.889        | 58.530          | 54.525          | 54.777          | 54.273 A[2]           |
| E  | 41 | 1147.900        | 37.771          | 33.766          | 34.018          | 33.514 E[1]           |

# sp | Q6GSS7 | H2A2A\_MOUSE

[Acetyl]SGR<sup>Acetyl</sup>GRK<sub>42.01</sub> QGGK<sup>Crotonaldehyde</sup> ARAKAKSRSSRAGLQFPVGRVHLLRKGN<sub>70.04</sub>YAE

- ▶ fragmentation table for charge state 5+
- ▶ specType=etd
- ▶ score=42.87
- ▶ F113278.dat
- ▶ query=q70640\_p1
- ▶ precursor=765.767410
- ▶ chargePrecursor=6
- ▶ itol=0.5

| AA    | c              | y              | z+1            | z#2            | z              | AA    |
|-------|----------------|----------------|----------------|----------------|----------------|-------|
| S[1]  | 30.221         | <b>918.718</b> | <b>915.515</b> | 0.806          | 015.313        | S[41] |
| G[2]  | 41.625         | 892.910        | <b>889.706</b> | 0.806          | <b>889.504</b> | G[40] |
| R[3]  | 72.846         | 881.506        | 878.302        | <b>878.503</b> | 878.100        | R[39] |
| G[4]  | 84.250         | 850.285        | 847.082        | 847.283        | 846.880        | G[38] |
| K[5]  | 118.271        | 838.881        | 835.677        | 835.879        | 835.476        | K[37] |
| Q[6]  | 143.883        | 804.960        | 801.656        | 801.858        | 801.455        | Q[36] |
| G[7]  | 195.287        | 779.248        | 776.044        | 776.246        | 775.843        | G[35] |
| G[8]  | 166.691        | 767.844        | 764.640        | 764.842        | 764.439        | G[34] |
| K[9]  | 208.319        | 756.440        | 753.238        | 753.437        | 753.036        | K[33] |
| A[10] | 220.526        | 718.812        | 715.608        | 715.810        | 715.407        | A[32] |
| R[11] | 251.746        | 702.605        | 699.401        | 699.603        | 699.199        | R[31] |
| A[12] | 265.964        | 671.385        | 668.181        | 668.382        | 667.979        | A[30] |
| K[13] | 291.573        | 657.177        | 653.973        | 654.175        | 653.772        | K[29] |
| A[14] | 305.780        | 631.958        | <b>628.354</b> | <b>628.556</b> | 628.153        | A[28] |
| K[15] | 331.399        | 617.351        | 614.147        | 614.349        | 613.945        | K[27] |
| S[16] | 348.806        | 591.732        | 588.528        | 588.730        | 588.326        | S[26] |
| R[17] | 380.026        | 574.325        | 571.122        | 571.323        | 570.920        | R[25] |
| S[18] | 397.432        | 543.105        | 539.901        | 540.103        | 539.700        | S[24] |
| S[19] | 414.839        | 525.699        | 522.495        | 522.697        | 522.293        | S[23] |
| R[20] | 446.059        | 508.292        | 505.089        | 505.290        | 504.887        | R[22] |
| A[21] | 460.266        | 477.072        | 473.868        | 474.070        | 473.667        | A[21] |
| G[22] | 471.671        | 462.865        | 459.661        | 459.862        | 459.459        | G[20] |
| L[23] | 494.287        | 451.460        | 448.257        | 448.458        | 448.055        | L[19] |
| Q[24] | 519.899        | 428.844        | 425.640        | 425.841        | 425.438        | Q[18] |
| F[25] | 549.313        | 403.232        | 400.028        | 400.230        | 399.827        | F[17] |
| P[26] | 568.723        | 373.818        | 370.614        | 370.816        | 370.413        | P[16] |
| V[27] | 588.137        | 354.408        | 351.203        | 351.405        | 351.002        | V[15] |
| G[28] | 599.941        | 334.994        | 331.790        | 331.992        | 331.589        | G[14] |
| R[29] | 631.161        | 323.190        | 319.986        | 320.187        | 319.784        | R[13] |
| V[30] | 650.975        | 291.969        | 288.766        | 288.967        | 288.564        | V[12] |
| H[31] | 678.387        | 272.150        | 268.952        | 269.154        | 268.750        | H[11] |
| R[32] | 709.607        | 244.744        | 241.540        | 241.742        | 241.339        | R[10] |
| L[33] | 732.224        | 213.524        | 210.320        | 210.522        | 210.118        | L[9]  |
| L[34] | 794.841        | 190.907        | 187.703        | 187.905        | 187.502        | L[8]  |
| R[35] | 798.061        | 168.290        | 165.086        | 165.288        | 164.885        | R[7]  |
| K[36] | 817.680        | 137.070        | 133.866        | 134.068        | 133.665        | K[6]  |
| G[37] | <b>823.084</b> | 111.451        | 108.247        | 108.449        | 108.046        | G[5]  |
| N[38] | 385.893        | 100.047        | 96.843         | 97.044         | 96.641         | N[4]  |
| V[39] | <b>878.506</b> | 77.238         | 74.034         | 74.236         | 73.833         | V[3]  |
| A[40] | 892.713        | 44.625         | 41.422         | 41.623         | 41.220         | A[2]  |
| E[41] | 918.522        | 30.418         | 27.214         | 27.416         | 27.013         | E[1]  |



# sp | Q8CGP5 | H2A1F\_MOUSE

SHHKPKGK<sup>Acetyl</sup>  
42.01

- ▶ fragmentation table for charge state 1+
- ▶ specType=etd
- ▶ score=33.23
- ▶ F113278.dat
- ▶ query=q9575\_p1
- ▶ precursor=320.851570
- ▶ chargePrecursor=3
- ▶ itol=0.5

| AA   | c              | y              | z+1            | z+2            | z              | AA   |
|------|----------------|----------------|----------------|----------------|----------------|------|
| S[1] | 105.066        | <b>960.537</b> | <b>944.519</b> | 0.000          | 943.511        | S[8] |
| H[2] | <b>242.125</b> | 873.505        | <b>857.487</b> | 0.000          | 856.479        | H[7] |
| H[3] | <b>379.184</b> | <b>736.446</b> | <b>720.428</b> | 0.000          | 719.420        | H[6] |
| K[4] | 507.279        | <b>599.388</b> | <b>583.369</b> | <b>584.377</b> | 582.361        | K[5] |
| P[5] | <b>604.331</b> | 471.293        | 455.274        | 456.282        | <b>454.266</b> | P[4] |
| R[6] | <b>732.426</b> | 374.240        | <b>358.221</b> | 359.229        | 357.213        | R[3] |
| G[7] | <b>789.448</b> | <b>246.145</b> | 230.126        | <b>231.134</b> | 229.118        | G[2] |
| R[8] | 959.353        | 189.123        | 173.105        | 174.112        | 172.097        | R[1] |

# sp | Q8CGP5 | H2A1F\_MOUSE

SHHKPKGK<sup>Acetyl</sup>  
42.01

- ▶ fragmentation table for charge state 2+
- ▶ specType=etd
- ▶ score=33.23
- ▶ F113278.dat
- ▶ query=q9575\_p1
- ▶ precursor=320.851570
- ▶ chargePrecursor=3
- ▶ itol=0.5

| AA   | c              | y              | z+1            | z+2     | z              | AA   |
|------|----------------|----------------|----------------|---------|----------------|------|
| S[1] | 93.037         | <b>480.772</b> | <b>472.763</b> | 0.504   | <b>472.259</b> | S[8] |
| H[2] | 121.566        | <b>437.256</b> | <b>429.247</b> | 0.504   | 428.743        | H[7] |
| H[3] | 190.095        | <b>368.727</b> | 360.717        | 0.504   | 360.214        | H[6] |
| K[4] | 254.143        | 300.197        | 292.188        | 292.692 | 291.684        | K[5] |
| P[5] | 302.669        | 236.150        | 228.141        | 228.644 | 227.637        | P[4] |
| K[6] | <b>366.717</b> | 187.624        | 179.614        | 180.118 | 179.110        | K[3] |
| G[7] | <b>395.228</b> | 123.576        | 115.567        | 116.071 | 115.063        | G[2] |
| K[8] | 480.280        | 95.065         | 87.056         | 87.560  | 86.552         | K[1] |

# sp | P68433 | H31\_MOUSE

IAQDFK Dimethyl TD  
28.03

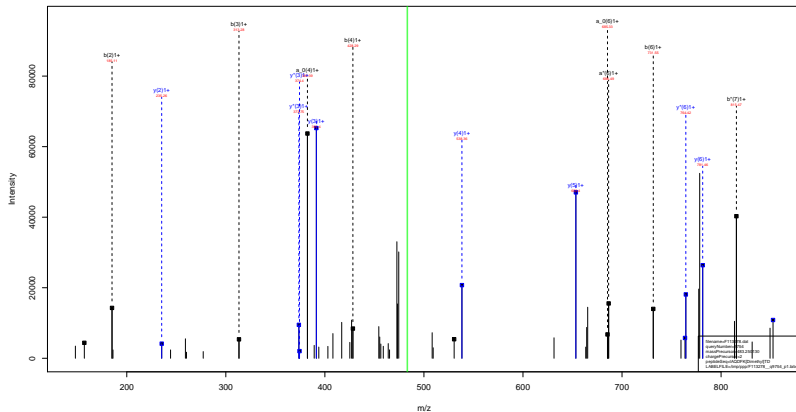

# sp | P68433 | H31\_MOUSE

IAQDFK<sup>Dimethyl</sup> TD  
28.03

- ▶ fragmentation table for charge state 1+
- ▶ specType=cid
- ▶ score=41.62
- ▶ F113278.dat
- ▶ query=q9754\_p1
- ▶ precursor=483.250130
- ▶ chargePrecursor=2
- ▶ itol=0.5

| AA  | a              | a*             | a:0            | b              | b*             | b:0     | y              | y*             | y:0            | AA |
|-----|----------------|----------------|----------------|----------------|----------------|---------|----------------|----------------|----------------|----|
| T 1 | 483.250        | 0.000          | 0.000          | 114.100        | 0.000          | 0.000   | 653.410        | 0.000          | 0.000          | 18 |
| A 2 | <b>157.134</b> | 0.000          | 0.000          | <b>185.128</b> | 0.000          | 0.000   | <b>653.410</b> | 0.000          | 0.000          | 19 |
| Q 3 | 285.192        | 288.166        | 0.000          | <b>313.187</b> | 298.160        | 0.000   | <b>781.373</b> | <b>764.346</b> | <b>763.362</b> | Q6 |
| L 4 | 400.219        | 383.193        | <b>387.208</b> | <b>428.214</b> | 411.187        | 401.203 | <b>653.314</b> | 636.288        | 635.304        | L6 |
| F 5 | 547.287        | <b>530.261</b> | 523.235        | 575.251        | 558.256        | 557.272 | <b>530.287</b> | 512.261        | 530.277        | F4 |
| R 6 | 703.414        | <b>686.387</b> | <b>685.403</b> | <b>731.409</b> | 714.383        | 713.398 | <b>301.219</b> | <b>374.192</b> | 363.206        | R3 |
| T 7 | 854.461        | 787.435        | 786.451        | 852.458        | <b>815.430</b> | 814.446 | <b>235.092</b> | 0.000          | 237.082        | T2 |
| L 8 | 919.488        | 892.462        | 891.478        | 947.483        | 930.457        | 929.473 | 134.040        | 0.000          | 136.034        | L0 |



sp | P62806 | H4\_MOUSE

[Acetyl]SGRGKGGKGLGKGGAKRHRK Dimethyl VLRD  
28.03

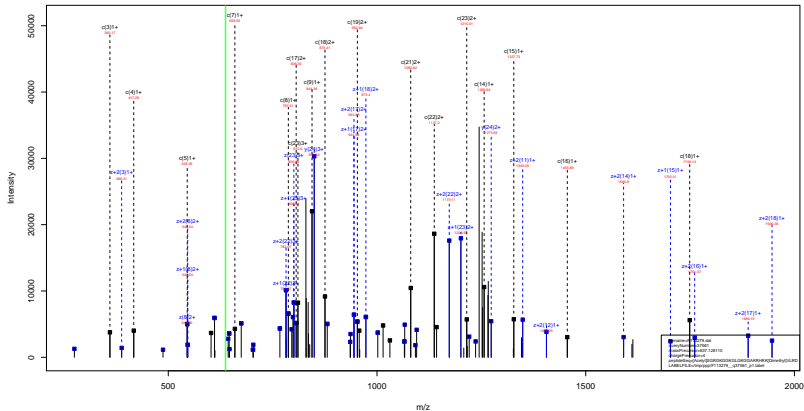

# sp | P62806 | H4\_MOUSE

[Acetyl]SGRGKGGKGLGKGGAKRHRK<sup>Dimethyl</sup>VLRD<sub>28.03</sub>

- ▶ fragmentation table for charge state 1+
- ▶ specType=etd
- ▶ score=122.89
- ▶ F113279.dat
- ▶ query=q37561\_p1
- ▶ precursor=637.128110
- ▶ chargePrecursor=4
- ▶ itol=0.5

| AA    | c               | y               | z+1             | z+2             | z        | AA    |
|-------|-----------------|-----------------|-----------------|-----------------|----------|-------|
| S[1]  | 147.076         | 2545.507        | 2529.483        | 0.000           | 2528.418 | S[24] |
| G[2]  | 204.098         | 2416.460        | 2400.441        | 0.000           | 2399.433 | G[23] |
| R[3]  | <b>360.199</b>  | 2399.438        | 2383.419        | 2344.427        | 2342.412 | R[22] |
| G[4]  | <b>417.220</b>  | 2203.371        | 2187.358        | 2188.326        | 2186.310 | G[21] |
| K[5]  | <b>945.315</b>  | 2146.318        | 2130.297        | 2131.305        | 2129.289 | K[20] |
| G[6]  | <b>602.337</b>  | 2018.221        | 2002.202        | 2003.210        | 2001.194 | G[19] |
| G[7]  | <b>659.358</b>  | 1961.159        | 1945.140        | <b>1946.188</b> | 1944.173 | G[18] |
| K[8]  | <b>787.453</b>  | 1904.178        | 1888.159        | <b>1889.167</b> | 1887.151 | K[17] |
| G[9]  | <b>844.475</b>  | 1776.083        | 1760.064        | <b>1761.072</b> | 1759.056 | G[16] |
| L[10] | <b>957.559</b>  | 1729.061        | <b>1703.043</b> | 1704.050        | 1702.035 | L[15] |
| Q[11] | <b>1014.580</b> | 1605.977        | 1589.958        | <b>1590.966</b> | 1588.951 | Q[14] |
| K[12] | <b>1142.675</b> | 1548.956        | 1532.937        | 1533.945        | 1531.929 | K[13] |
| G[13] | 1199.697        | 1420.861        | 1404.842        | <b>1405.850</b> | 1403.834 | G[12] |
| G[14] | <b>1256.718</b> | 1363.839        | 1347.821        | <b>1348.828</b> | 1346.813 | G[11] |
| A[15] | <b>1327.755</b> | 1306.818        | 1290.798        | 1291.807        | 1289.791 | A[10] |
| R[16] | <b>1455.850</b> | <b>1235.781</b> | 1219.762        | <b>1220.770</b> | 1217.754 | R[9]  |
| R[17] | 1611.951        | 1107.688        | <b>1091.667</b> | 1092.675        | 1090.659 | R[8]  |
| H[18] | <b>1749.010</b> | 951.585         | <b>935.566</b>  | <b>936.574</b>  | 934.558  | H[7]  |
| R[19] | 1905.111        | 814.526         | <b>798.507</b>  | 799.515         | 797.499  | R[6]  |
| K[20] | 2061.238        | 658.425         | 642.406         | <b>643.414</b>  | 641.398  | K[5]  |
| V[21] | 2190.306        | 502.366         | 486.348         | <b>487.357</b>  | 485.342  | V[4]  |
| L[22] | 2273.399        | 463.299         | 447.279         | <b>448.288</b>  | 446.271  | L[3]  |
| R[23] | 2429.491        | 290.146         | 274.127         | <b>275.135</b>  | 273.119  | R[2]  |
| D[24] | 2544.518        | 134.045         | 118.026         | 119.034         | 117.018  | D[1]  |

# sp | P62806 | H4\_MOUSE

[Acetyl]SGRGKGGKGLGKGGAKRHRK<sup>Dimethyl</sup>VLRD<sub>28.03</sub>

- ▶ fragmentation table for charge state 2+
- ▶ specType=etd
- ▶ score=122.89
- ▶ F113279.dat
- ▶ query=q37561\_p1
- ▶ precursor=637.128110
- ▶ chargePrecursor=4
- ▶ itol=0.5

| AA    | c               | y               | z+1             | z+2             | z               | AA    |
|-------|-----------------|-----------------|-----------------|-----------------|-----------------|-------|
| S[1]  | 74.042          | <b>1273.255</b> | 1265.265        | 0.504           | 1264.741        | S[24] |
| G[2]  | 102.553         | 1238.733        | <b>1200.724</b> | 0.504           | 1200.220        | G[23] |
| K[3]  | 180.603         | 1180.223        | 1172.213        | <b>1172.717</b> | 1171.700        | K[22] |
| G[4]  | 259.114         | 1102.172        | 1094.163        | <b>1094.667</b> | 1093.659        | G[21] |
| K[5]  | 273.153         | 1073.661        | <b>1065.652</b> | <b>1066.156</b> | <b>1065.148</b> | K[20] |
| G[6]  | 301.672         | 1009.614        | <b>1001.605</b> | <b>1002.108</b> | 1001.101        | G[19] |
| G[7]  | 330.183         | 981.103         | <b>973.094</b>  | <b>973.598</b>  | 972.590         | G[18] |
| K[8]  | 394.230         | <b>952.592</b>  | <b>944.583</b>  | <b>945.087</b>  | 944.070         | K[17] |
| G[9]  | 422.741         | 898.545         | <b>890.536</b>  | <b>891.040</b>  | 890.032         | G[16] |
| L[10] | 479.293         | 860.036         | 852.027         | <b>852.529</b>  | 851.521         | L[15] |
| G[11] | 507.794         | 803.492         | <b>795.483</b>  | <b>795.987</b>  | 794.979         | G[14] |
| K[12] | 571.841         | 774.982         | <b>766.972</b>  | <b>767.476</b>  | 766.468         | K[13] |
| G[13] | 600.352         | 710.934         | <b>702.925</b>  | <b>703.429</b>  | <b>702.421</b>  | G[12] |
| G[14] | 638.863         | 682.423         | <b>674.414</b>  | <b>674.918</b>  | 673.910         | G[11] |
| A[15] | 684.381         | 653.913         | <b>645.903</b>  | <b>646.407</b>  | 645.399         | A[10] |
| R[16] | 739.430         | 618.394         | <b>610.385</b>  | <b>610.889</b>  | 609.881         | R[9]  |
| R[17] | <b>806.479</b>  | 554.347         | <b>546.337</b>  | <b>546.841</b>  | <b>545.833</b>  | R[8]  |
| H[18] | <b>875.009</b>  | 476.290         | 468.280         | 468.781         | 467.783         | H[7]  |
| R[19] | <b>953.059</b>  | 407.767         | 399.757         | 400.261         | 399.263         | R[6]  |
| K[20] | <b>1031.122</b> | 339.716         | 331.707         | 332.211         | 331.203         | K[5]  |
| V[21] | <b>1080.667</b> | 293.663         | 285.653         | 286.157         | 285.149         | V[4]  |
| L[22] | <b>1137.199</b> | 202.119         | 194.109         | 194.613         | 193.605         | L[3]  |
| R[23] | <b>1215.249</b> | 145.577         | 137.567         | 138.071         | 137.063         | R[2]  |
| D[24] | 1272.703        | 67.526          | 59.517          | 60.021          | 59.013          | D[1]  |

# sp | P62806 | H4\_MOUSE

[Acetyl]SGRGKGGKGLGKGGAKRHRK<sup>Dimethyl</sup>VLRD<sub>28.03</sub>

- ▶ fragmentation table for charge state 3+
- ▶ specType=etd
- ▶ score=122.89
- ▶ F113279.dat
- ▶ query=q37561.p1
- ▶ precursor=637.128110
- ▶ chargePrecursor=4
- ▶ itol=0.5

| AA    | c              | y              | z+1            | z+2            | z              | AA    |
|-------|----------------|----------------|----------------|----------------|----------------|-------|
| S[1]  | 49.697         | <b>849.172</b> | 843.833        | 0.672          | 843.897        | S[24] |
| G[2]  | 58.704         | <b>806.158</b> | <b>800.818</b> | 0.672          | <b>800.483</b> | G[23] |
| R[3]  | 150.738        | <b>787.151</b> | <b>781.811</b> | <b>782.147</b> | 781.475        | R[22] |
| G[4]  | 139.745        | 735.117        | 729.778        | 730.114        | 729.442        | G[21] |
| K[5]  | 182.443        | 716.110        | 710.770        | 711.106        | 710.435        | K[20] |
| G[6]  | 201.450        | 673.412        | 668.072        | 668.408        | 667.736        | G[19] |
| G[7]  | 220.458        | 654.405        | 649.065        | 649.401        | 648.729        | G[18] |
| K[8]  | 263.156        | 635.397        | 630.058        | 630.394        | 629.722        | K[17] |
| G[9]  | 282.163        | 592.699        | 587.359        | 587.695        | 587.024        | G[16] |
| L[10] | 319.658        | 573.692        | 568.352        | 568.688        | 568.016        | L[15] |
| G[11] | 338.665        | 535.997        | 530.658        | 530.994        | 530.322        | G[14] |
| K[12] | 381.563        | 516.990        | 511.651        | 511.986        | 511.315        | K[13] |
| G[13] | 400.570        | 474.292        | 468.952        | 469.288        | 468.616        | G[12] |
| G[14] | 419.578        | 455.285        | 449.945        | 450.281        | 449.609        | G[11] |
| A[15] | 443.257        | 436.277        | 430.938        | 431.274        | 430.602        | A[10] |
| K[16] | 485.955        | 412.598        | 407.259        | 407.595        | 406.923        | K[9]  |
| R[17] | 537.989        | 369.900        | 364.561        | 364.896        | 364.225        | R[8]  |
| H[18] | 583.675        | 317.866        | 312.527        | 312.863        | 312.191        | H[7]  |
| R[19] | 635.709        | 272.180        | 266.841        | 267.176        | 266.505        | R[6]  |
| K[20] | 687.751        | 220.140        | 214.801        | 215.143        | 214.471        | K[5]  |
| V[21] | 720.774        | 168.104        | 162.765        | 163.101        | 162.429        | V[4]  |
| L[22] | 758.468        | 135.082        | 129.742        | 130.078        | 129.406        | L[3]  |
| R[23] | <b>810.502</b> | 97.387         | 92.047         | 92.383         | 91.711         | R[2]  |
| D[24] | 848.844        | 45.353         | 40.014         | 40.349         | 39.678         | D[1]  |



# sp | P62806 | H4\_MOUSE

[Acetyl]SGRGKGGKGLGKGGAKRHRK<sup>Dimethyl</sup>VLRD<sub>28.03</sub>

- ▶ fragmentation table for charge state 1+
- ▶ specType=etd
- ▶ score=67.78
- ▶ F113279.dat
- ▶ query=q37563.p1
- ▶ precursor=849.174880
- ▶ chargePrecursor=3
- ▶ itol=0.5

| AA    | c               | y              | z+1             | z+2             | z        | AA    |
|-------|-----------------|----------------|-----------------|-----------------|----------|-------|
| S[1]  | 347.676         | 2545.502       | 2529.483        | 0.000           | 2528.478 | S[24] |
| G[2]  | 204.098         | 2416.460       | 2400.441        | 0.000           | 2399.433 | G[23] |
| R[3]  | <b>368.199</b>  | 2389.438       | 2343.419        | 2344.427        | 2342.412 | R[22] |
| G[4]  | <b>417.220</b>  | 2203.337       | 2187.318        | 2188.326        | 2186.310 | G[21] |
| K[5]  | <b>545.315</b>  | 2146.316       | 2130.297        | 2131.305        | 2129.289 | K[20] |
| G[6]  | <b>602.337</b>  | 2018.221       | 2002.200        | 2003.210        | 2001.194 | G[19] |
| G[7]  | <b>659.358</b>  | 1961.199       | <b>1945.180</b> | 1946.188        | 1944.173 | G[18] |
| K[8]  | <b>787.453</b>  | 1904.178       | <b>1888.159</b> | 1889.167        | 1887.151 | K[17] |
| G[9]  | 844.575         | 1776.083       | <b>1760.064</b> | 1761.072        | 1759.056 | G[16] |
| L[10] | <b>957.559</b>  | 1719.061       | 1703.043        | <b>1704.050</b> | 1702.035 | L[15] |
| G[11] | <b>1014.580</b> | 1662.037       | 1589.028        | <b>1590.066</b> | 1588.051 | G[14] |
| K[12] | 1142.675        | 1548.950       | <b>1532.937</b> | 1533.945        | 1531.929 | K[13] |
| G[13] | 1199.697        | 1420.861       | 1404.840        | <b>1405.850</b> | 1403.834 | G[12] |
| G[14] | <b>1256.718</b> | 1363.839       | <b>1347.821</b> | 1348.828        | 1346.813 | G[11] |
| A[15] | 1327.755        | 1306.818       | 1290.797        | 1291.807        | 1289.791 | A[10] |
| R[16] | 1489.850        | 1238.781       | <b>1219.762</b> | <b>1220.770</b> | 1218.754 | R[9]  |
| R[17] | 1611.951        | 1107.685       | 1051.667        | <b>1092.675</b> | 1090.659 | R[8]  |
| H[18] | 1749.010        | 951.585        | 935.566         | <b>936.574</b>  | 934.558  | H[7]  |
| R[19] | 1905.111        | 814.526        | <b>798.507</b>  | <b>799.515</b>  | 797.499  | R[6]  |
| K[20] | 2061.238        | <b>658.425</b> | 642.405         | 643.414         | 641.398  | K[5]  |
| V[21] | 2180.306        | 502.298        | 486.280         | 487.287         | 485.272  | V[4]  |
| L[22] | 2273.390        | 403.230        | 387.211         | 388.219         | 386.203  | L[3]  |
| R[23] | 2429.491        | 280.140        | 274.127         | 275.135         | 273.119  | R[2]  |
| D[24] | 2544.518        | 134.045        | 118.026         | 119.034         | 117.018  | D[1]  |

# sp | P62806 | H4\_MOUSE

[Acetyl]SGRGKGGKGLGKGGAKRHRK <sup>Dimethyl</sup> VLRD  
28.03

- ▶ fragmentation table for charge state 2+
- ▶ specType=etd
- ▶ score=67.78
- ▶ F113279.dat
- ▶ query=q37563.p1
- ▶ precursor=849.174880
- ▶ chargePrecursor=3
- ▶ itol=0.5

| AA |    | c               | y               | z+1             | z+2             | z              | AA    |
|----|----|-----------------|-----------------|-----------------|-----------------|----------------|-------|
| S  | 1  | 74.042          | <b>1273.255</b> | <b>1265.245</b> | 0.504           | 1264.741       | S[24] |
| G  | 2  | 102.553         | 1238.733        | <b>1200.724</b> | 0.504           | 1200.220       | G[23] |
| R  | 3  | 180.603         | 1180.222        | <b>1172.213</b> | <b>1172.717</b> | 1171.709       | R[22] |
| G  | 4  | 269.114         | 1102.172        | 1064.153        | 1054.661        | 1093.659       | G[21] |
| K  | 5  | 273.161         | 1073.062        | 1055.052        | 1006.155        | 1065.148       | K[20] |
| G  | 6  | 301.672         | 1009.614        | 1001.605        | 1002.108        | 1001.101       | G[19] |
| G  | 7  | 330.183         | 961.103         | 973.094         | 973.596         | 972.590        | G[18] |
| K  | 8  | 394.230         | 952.592         | 944.583         | 945.087         | 944.079        | K[17] |
| G  | 9  | 422.741         | 888.545         | 880.536         | 881.040         | 880.032        | G[16] |
| L  | 10 | 479.293         | 860.036         | 852.027         | 852.529         | 851.521        | L[15] |
| G  | 11 | 507.794         | 803.492         | 795.483         | 795.987         | 794.979        | G[14] |
| K  | 12 | 571.841         | 774.982         | 766.972         | 767.476         | 766.468        | K[13] |
| G  | 13 | 600.352         | 710.934         | 702.925         | 703.429         | 702.421        | G[12] |
| G  | 14 | 628.863         | 682.423         | 674.414         | 674.918         | 673.910        | G[11] |
| A  | 15 | 664.361         | 653.913         | 645.903         | 646.407         | 645.399        | A[10] |
| R  | 16 | 702.409         | 618.398         | 610.389         | 610.893         | 609.885        | R[9]  |
| R  | 17 | 806.479         | 554.341         | 546.331         | 546.841         | <b>545.833</b> | R[8]  |
| H  | 18 | 875.009         | 476.290         | 468.281         | 468.791         | 467.783        | H[7]  |
| R  | 19 | 953.059         | 407.767         | 399.757         | 400.261         | 399.253        | R[6]  |
| K  | 20 | 1031.122        | 329.716         | 321.707         | 322.211         | 321.203        | K[5]  |
| V  | 21 | 1059.657        | 251.663         | 243.653         | 244.147         | 243.140        | V[4]  |
| L  | 22 | <b>1137.199</b> | 302.132         | 194.119         | 194.613         | 193.605        | L[3]  |
| R  | 23 | 1215.249        | 145.577         | 137.567         | 138.071         | 137.063        | R[2]  |
| D  | 24 | 1272.763        | 67.526          | 59.517          | 60.021          | 59.013         | D[1]  |





# sp | P62806 | H4\_MOUSE

[Acetyl]SGRGKGGKGLGKGGAKRHRK<sup>Dimethyl</sup>VLRD<sub>28.03</sub>

- ▶ fragmentation table for charge state 1+
- ▶ specType=etd
- ▶ score=129.61
- ▶ F113279.dat
- ▶ query=q37564\_p1
- ▶ precursor=637.132980
- ▶ chargePrecursor=4
- ▶ itol=0.5

| AA | c  | y               | z+1      | z+2             | z               | AA       |       |
|----|----|-----------------|----------|-----------------|-----------------|----------|-------|
| S  | 1  | 147.676         | 2545.502 | 2529.483        | 0.000           | 2528.478 | S[24] |
| G  | 2  | 204.098         | 2416.460 | 2400.441        | 0.000           | 2399.433 | G[23] |
| R  | 3  | <b>368.199</b>  | 2289.438 | 2243.419        | 2244.427        | 2242.412 | R[22] |
| G  | 4  | <b>417.220</b>  | 2203.337 | 2187.318        | 2188.326        | 2186.310 | G[21] |
| K  | 5  | <b>545.315</b>  | 2146.316 | 2130.297        | 2131.305        | 2129.289 | K[20] |
| G  | 6  | <b>602.337</b>  | 2018.221 | 2002.200        | 2003.210        | 2001.194 | G[19] |
| G  | 7  | <b>659.358</b>  | 1961.199 | 1945.180        | <b>1946.188</b> | 1944.173 | G[18] |
| K  | 8  | <b>787.453</b>  | 1904.178 | 1888.159        | <b>1889.167</b> | 1887.151 | K[17] |
| G  | 9  | <b>844.475</b>  | 1776.083 | 1760.064        | <b>1761.072</b> | 1759.056 | G[16] |
| L  | 10 | <b>927.559</b>  | 1719.061 | 1703.043        | 1704.050        | 1702.035 | L[15] |
| G  | 11 | <b>1014.580</b> | 1605.977 | 1589.958        | 1590.966        | 1588.951 | G[14] |
| K  | 12 | <b>1142.675</b> | 1548.956 | <b>1532.937</b> | 1533.945        | 1531.929 | K[13] |
| G  | 13 | 1109.697        | 1420.861 | 1404.842        | <b>1405.850</b> | 1403.834 | G[12] |
| G  | 14 | <b>1256.718</b> | 1363.839 | <b>1347.821</b> | <b>1348.828</b> | 1346.813 | G[11] |
| A  | 15 | 1227.755        | 1306.818 | 1290.799        | <b>1291.807</b> | 1289.791 | A[10] |
| R  | 16 | <b>1455.850</b> | 1218.781 | 1219.782        | <b>1220.770</b> | 1218.764 | R[9]  |
| R  | 17 | <b>1611.951</b> | 1107.685 | 1091.667        | 1092.675        | 1090.659 | R[8]  |
| H  | 18 | 1749.010        | 951.585  | <b>935.566</b>  | <b>936.574</b>  | 934.558  | H[7]  |
| R  | 19 | <b>1905.111</b> | 814.526  | <b>798.507</b>  | 799.515         | 797.499  | R[6]  |
| K  | 20 | 2061.238        | 658.425  | 642.406         | <b>643.414</b>  | 641.398  | K[5]  |
| V  | 21 | 2180.306        | 502.298  | 486.280         | <b>487.287</b>  | 485.272  | V[4]  |
| L  | 22 | 2273.390        | 401.230  | 387.211         | <b>388.219</b>  | 386.203  | L[3]  |
| R  | 23 | 2429.491        | 290.146  | 274.127         | <b>275.135</b>  | 273.119  | R[2]  |
| D  | 24 | 2544.518        | 134.045  | 118.026         | 119.034         | 117.018  | D[1]  |

# sp | P62806 | H4\_MOUSE

[Acetyl]SGRGKGGKGLGKGGAKRHRK<sup>Dimethyl</sup>VLRD<sub>28.03</sub>

- ▶ fragmentation table for charge state 2+
- ▶ specType=etd
- ▶ score=129.61
- ▶ F113279.dat
- ▶ query=q37564\_p1
- ▶ precursor=637.132980
- ▶ chargePrecursor=4
- ▶ itol=0.5

| AA    | c               | y               | z+1             | z+2             | z              | AA    |
|-------|-----------------|-----------------|-----------------|-----------------|----------------|-------|
| S[1]  | 74.042          | <b>1273.255</b> | <b>1265.245</b> | 0.504           | 1264.741       | S[24] |
| G[2]  | 102.553         | 1208.733        | <b>1200.724</b> | 0.504           | 1200.220       | G[23] |
| R[3]  | 180.603         | 1180.222        | <b>1172.213</b> | <b>1172.717</b> | 1171.709       | R[22] |
| G[4]  | 269.114         | 1102.172        | <b>1094.163</b> | <b>1094.667</b> | 1093.659       | G[21] |
| K[5]  | 273.161         | 1073.062        | <b>1065.052</b> | <b>1064.156</b> | 1065.148       | K[20] |
| G[6]  | 351.672         | 1009.614        | <b>1001.605</b> | <b>1002.108</b> | 1001.101       | G[19] |
| G[7]  | 330.193         | 981.103         | <b>973.094</b>  | <b>973.598</b>  | 972.590        | G[18] |
| K[8]  | 394.230         | 952.592         | <b>944.583</b>  | <b>945.087</b>  | <b>944.079</b> | K[17] |
| G[9]  | 422.741         | 888.545         | <b>880.536</b>  | <b>881.040</b>  | 880.032        | G[16] |
| L[10] | 479.293         | 860.036         | 851.027         | 852.529         | 851.521        | L[15] |
| G[11] | 507.794         | 803.492         | <b>795.483</b>  | <b>795.987</b>  | 794.979        | G[14] |
| K[12] | 571.841         | 774.982         | <b>766.972</b>  | <b>767.476</b>  | 766.468        | K[13] |
| G[13] | 600.352         | 710.934         | <b>702.925</b>  | <b>703.429</b>  | 702.421        | G[12] |
| G[14] | 628.863         | 682.423         | <b>674.414</b>  | <b>674.918</b>  | 673.910        | G[11] |
| A[15] | 664.361         | 653.913         | <b>645.903</b>  | <b>646.407</b>  | 645.399        | A[10] |
| R[16] | 728.292         | 618.369         | <b>610.360</b>  | <b>610.864</b>  | 609.856        | R[9]  |
| R[17] | <b>806.479</b>  | 554.341         | <b>546.337</b>  | <b>546.841</b>  | 545.833        | R[8]  |
| H[18] | <b>875.009</b>  | 476.200         | 468.207         | 468.701         | 467.783        | H[7]  |
| R[19] | <b>953.059</b>  | 407.767         | 399.757         | 400.261         | 399.253        | R[6]  |
| K[20] | <b>1031.122</b> | 329.716         | 321.707         | 322.211         | 321.203        | K[5]  |
| V[21] | <b>1080.657</b> | 251.663         | 243.653         | 244.147         | 243.140        | V[4]  |
| L[22] | <b>1137.199</b> | 202.119         | 194.109         | 194.613         | 193.605        | L[3]  |
| R[23] | <b>1215.248</b> | 145.577         | 137.567         | 138.071         | 137.063        | R[2]  |
| D[24] | 1272.763        | 67.526          | 59.517          | 60.021          | 59.013         | D[1]  |

# sp | P62806 | H4\_MOUSE

[Acetyl]SGRGKGGKGLGKGGAKRHRK<sup>Dimethyl</sup>VLRD<sub>28.03</sub>

- ▶ fragmentation table for charge state 3+
- ▶ specType=etd
- ▶ score=129.61
- ▶ F113279.dat
- ▶ query=q37564.p1
- ▶ precursor=637.132980
- ▶ chargePrecursor=4
- ▶ itol=0.5

| AA    | c              | y              | z+1            | z+2            | z       | AA    |
|-------|----------------|----------------|----------------|----------------|---------|-------|
| S[1]  | 49.597         | <b>849.172</b> | <b>843.833</b> | 0.572          | 843.497 | S[24] |
| G[2]  | 58.704         | <b>806.158</b> | 800.818        | 0.572          | 800.483 | G[23] |
| R[3]  | 120.738        | <b>787.151</b> | <b>781.811</b> | <b>782.147</b> | 781.475 | R[22] |
| G[4]  | 139.745        | 735.117        | 729.778        | 730.114        | 729.442 | G[21] |
| K[5]  | 182.443        | 716.110        | 710.770        | 711.106        | 710.435 | K[20] |
| G[6]  | 201.450        | 673.412        | 668.072        | 668.408        | 667.736 | G[19] |
| G[7]  | 220.458        | 654.405        | 649.065        | 649.401        | 648.729 | G[18] |
| K[8]  | 263.156        | 635.397        | 630.058        | 630.394        | 629.722 | K[17] |
| G[9]  | 282.163        | 592.899        | 587.559        | 587.896        | 587.224 | G[16] |
| L[10] | 319.258        | 573.892        | 568.552        | 568.888        | 568.216 | L[15] |
| G[11] | 338.265        | 535.997        | 530.658        | 530.994        | 530.322 | G[14] |
| K[12] | 381.563        | 516.990        | 511.651        | 511.986        | 511.315 | K[13] |
| G[13] | 400.570        | 474.292        | 468.952        | 469.288        | 468.616 | G[12] |
| G[14] | 419.578        | 455.285        | 449.945        | 450.281        | 449.609 | G[11] |
| A[15] | 443.297        | 436.277        | 430.938        | 431.274        | 430.602 | A[10] |
| K[16] | 485.955        | 412.598        | 407.259        | 407.595        | 406.923 | K[9]  |
| R[17] | 537.989        | 369.900        | 364.561        | 364.896        | 364.225 | R[8]  |
| H[18] | 583.675        | 317.866        | 312.527        | 312.863        | 312.191 | H[7]  |
| R[19] | 635.709        | 272.180        | 266.841        | 267.176        | 266.505 | R[6]  |
| K[20] | 687.751        | 220.140        | 214.801        | 215.137        | 214.471 | K[5]  |
| V[21] | 720.774        | 188.104        | 182.765        | 183.101        | 182.429 | V[4]  |
| L[22] | 758.468        | 135.082        | 129.742        | 130.078        | 129.406 | L[3]  |
| R[23] | <b>810.502</b> | 97.387         | 92.047         | 92.383         | 91.711  | R[2]  |
| D[24] | 848.844        | 45.353         | 40.014         | 40.349         | 39.678  | D[1]  |

# sp | P62806 | H4\_MOUSE

[Acetyl]SGRGKGGKGLGKGGAKRHRK <sup>Dimethyl</sup>VLRD  
28.03

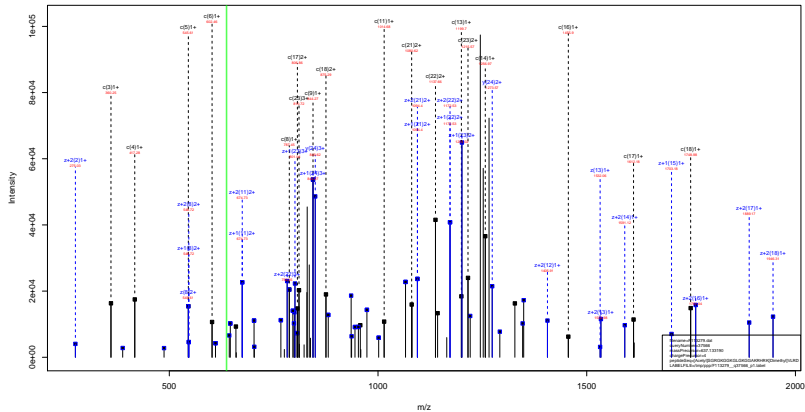

# sp | P62806 | H4\_MOUSE

[Acetyl]SGRGKGGKGLGKGGAKRHRK<sup>Dimethyl</sup>VLRD<sub>28.03</sub>

- ▶ fragmentation table for charge state 1+
- ▶ specType=etd
- ▶ score=134.88
- ▶ F113279.dat
- ▶ query=q37566.p1
- ▶ precursor=637.133190
- ▶ chargePrecursor=4
- ▶ itol=0.5

| AA | c  | y               | z+1      | z+2             | z               | AA              |       |
|----|----|-----------------|----------|-----------------|-----------------|-----------------|-------|
| S  | 1  | 147.076         | 2545.502 | 2529.463        | 0.000           | 2528.416        | S(24) |
| G  | 2  | 204.008         | 2416.460 | 2400.441        | 0.000           | 2399.433        | G(23) |
| R  | 3  | <b>360.199</b>  | 2359.438 | 2343.410        | 2344.427        | 2342.412        | R(22) |
| G  | 4  | <b>417.220</b>  | 2303.397 | 2187.318        | 2188.326        | 2186.310        | G(21) |
| K  | 5  | <b>545.315</b>  | 2144.316 | 2130.297        | 2131.305        | 2129.289        | K(20) |
| G  | 6  | <b>602.337</b>  | 2018.221 | 2002.202        | 2003.210        | 2001.194        | G(19) |
| G  | 7  | <b>659.358</b>  | 1961.199 | 1945.180        | <b>1946.188</b> | 1944.172        | G(18) |
| K  | 8  | <b>787.453</b>  | 1904.178 | 1888.159        | <b>1889.167</b> | 1887.151        | K(17) |
| G  | 9  | <b>844.475</b>  | 1776.083 | 1760.064        | <b>1761.072</b> | 1759.056        | G(16) |
| L  | 10 | <b>927.559</b>  | 1719.061 | <b>1703.043</b> | 1704.050        | 1702.035        | L(15) |
| Q  | 11 | <b>1014.580</b> | 1605.977 | 1589.958        | <b>1590.966</b> | 1588.951        | Q(14) |
| K  | 12 | <b>1142.675</b> | 1548.956 | 1532.937        | <b>1533.945</b> | <b>1531.929</b> | K(13) |
| G  | 13 | <b>1199.697</b> | 1420.861 | 1404.842        | <b>1405.850</b> | 1403.834        | G(12) |
| G  | 14 | <b>1296.718</b> | 1363.839 | 1347.821        | <b>1348.828</b> | <b>1346.813</b> | G(11) |
| A  | 15 | <b>1327.755</b> | 1306.818 | 1290.799        | <b>1291.807</b> | 1289.791        | A(10) |
| R  | 16 | <b>1455.850</b> | 1249.794 | 1233.765        | <b>1234.770</b> | 1232.754        | R(9)  |
| R  | 17 | <b>1611.951</b> | 1107.686 | 1091.667        | 1092.675        | 1090.659        | R(8)  |
| H  | 18 | <b>1749.010</b> | 951.585  | <b>935.566</b>  | <b>936.574</b>  | 934.558         | H(7)  |
| R  | 19 | 1905.111        | 814.526  | <b>798.507</b>  | <b>799.515</b>  | 797.499         | R(6)  |
| K  | 20 | 2061.238        | 658.425  | 642.406         | <b>643.414</b>  | 641.398         | K(5)  |
| V  | 21 | 2199.306        | 502.366  | 486.348         | <b>487.357</b>  | 485.342         | V(4)  |
| L  | 22 | 2273.369        | 403.320  | 387.211         | <b>388.219</b>  | 386.203         | L(3)  |
| R  | 23 | 2429.491        | 290.148  | 274.129         | <b>275.135</b>  | 273.119         | R(2)  |
| D  | 24 | 2544.518        | 134.045  | 118.026         | 119.034         | 117.018         | D(1)  |

# sp | P62806 | H4\_MOUSE

[Acetyl]SGRGKGGKGLGKGGAKRHRK<sup>Dimethyl</sup>VLRD<sub>28.03</sub>

- ▶ fragmentation table for charge state 2+
- ▶ specType=etd
- ▶ score=134.88
- ▶ F113279.dat
- ▶ query=q37566.p1
- ▶ precursor=637.133190
- ▶ chargePrecursor=4
- ▶ itol=0.5

| AA | c  | y               | z+1             | z+2             | z               | AA              |       |
|----|----|-----------------|-----------------|-----------------|-----------------|-----------------|-------|
| S  | 1  | 74.042          | <b>1273.255</b> | 1266.265        | 0.504           | 1264.741        | S[24] |
| G  | 2  | 102.553         | 1208.733        | <b>1200.724</b> | 0.504           | 1200.220        | G[23] |
| R  | 3  | 180.603         | 1180.223        | <b>1172.213</b> | <b>1172.717</b> | 1171.700        | R[22] |
| G  | 4  | 259.114         | 1102.172        | <b>1094.163</b> | <b>1094.667</b> | 1093.659        | G[21] |
| R  | 5  | 273.153         | 1073.661        | <b>1065.652</b> | <b>1066.156</b> | 1065.148        | R[20] |
| G  | 6  | 303.672         | 1009.614        | <b>1001.605</b> | 1002.109        | <b>1001.101</b> | G[19] |
| G  | 7  | 330.183         | 981.103         | <b>973.094</b>  | <b>973.598</b>  | 972.590         | G[18] |
| R  | 8  | 394.230         | <b>952.592</b>  | <b>944.583</b>  | <b>945.087</b>  | 944.070         | R[17] |
| G  | 9  | 422.741         | 898.545         | <b>890.536</b>  | <b>891.040</b>  | 890.032         | G[16] |
| L  | 10 | 479.293         | 860.036         | 852.027         | 853.029         | 851.521         | L[15] |
| G  | 11 | 507.794         | 803.492         | <b>795.483</b>  | <b>795.987</b>  | 794.979         | G[14] |
| R  | 12 | 571.841         | 774.982         | <b>766.972</b>  | <b>767.476</b>  | 766.468         | R[13] |
| G  | 13 | 600.352         | 710.934         | <b>702.925</b>  | <b>703.429</b>  | 702.421         | G[12] |
| G  | 14 | 638.863         | 682.423         | <b>674.414</b>  | <b>674.918</b>  | 673.910         | G[11] |
| A  | 15 | 684.381         | 653.913         | <b>645.903</b>  | <b>646.407</b>  | 645.399         | A[10] |
| R  | 16 | 739.430         | 618.394         | <b>610.385</b>  | <b>610.889</b>  | 609.881         | R[9]  |
| R  | 17 | <b>806.479</b>  | 554.347         | <b>546.337</b>  | <b>546.841</b>  | <b>545.833</b>  | R[8]  |
| H  | 18 | <b>875.009</b>  | 476.290         | 468.282         | 469.281         | 467.783         | H[7]  |
| R  | 19 | <b>953.059</b>  | 407.767         | 399.757         | 400.261         | 399.253         | R[6]  |
| R  | 20 | 1031.127        | 339.716         | 321.707         | 322.211         | 321.203         | R[5]  |
| V  | 21 | <b>1080.657</b> | 293.693         | 285.683         | 286.187         | 285.180         | V[4]  |
| L  | 22 | <b>1137.199</b> | 202.139         | 194.130         | 194.633         | 193.625         | L[3]  |
| R  | 23 | <b>1215.249</b> | 145.577         | 137.567         | 138.071         | 137.063         | R[2]  |
| D  | 24 | 1272.763        | 67.526          | 59.517          | 60.021          | 59.013          | D[1]  |

# sp | P62806 | H4\_MOUSE

[Acetyl]SGRGKGGKGLGKGGAKRHRK<sup>Dimethyl</sup>VLRD<sub>28.03</sub>

- ▶ fragmentation table for charge state 3+
- ▶ specType=etd
- ▶ score=134.88
- ▶ F113279.dat
- ▶ query=q37566.p1
- ▶ precursor=637.133190
- ▶ chargePrecursor=4
- ▶ itol=0.5

| AA    | c              | y              | z+1            | z+2            | z       | AA    |
|-------|----------------|----------------|----------------|----------------|---------|-------|
| S[1]  | 49.597         | <b>849.172</b> | <b>843.833</b> | 0.572          | 843.497 | S[24] |
| G[2]  | 58.704         | <b>806.150</b> | <b>800.818</b> | 0.572          | 800.483 | G[23] |
| R[3]  | 120.738        | <b>787.151</b> | 781.811        | <b>782.147</b> | 781.475 | R[22] |
| G[4]  | 139.745        | 735.117        | 729.778        | 730.114        | 729.442 | G[21] |
| K[5]  | 182.443        | 716.110        | 710.770        | 711.106        | 710.435 | K[20] |
| G[6]  | 201.450        | 673.412        | 668.072        | 668.408        | 667.736 | G[19] |
| G[7]  | 220.458        | 654.405        | 649.065        | 649.401        | 648.729 | G[18] |
| K[8]  | 263.156        | 635.397        | 630.058        | 630.394        | 629.722 | K[17] |
| G[9]  | 282.163        | 592.899        | 587.559        | 587.895        | 587.224 | G[16] |
| L[10] | 319.258        | 573.892        | 568.552        | 568.888        | 568.216 | L[15] |
| G[11] | 338.265        | 535.997        | 530.658        | 530.994        | 530.322 | G[14] |
| K[12] | 381.563        | 516.990        | 511.651        | 511.986        | 511.315 | K[13] |
| G[13] | 400.570        | 474.292        | 468.952        | 469.288        | 468.616 | G[12] |
| G[14] | 419.578        | 455.285        | 449.945        | 450.281        | 449.609 | G[11] |
| A[15] | 443.297        | 436.277        | 430.938        | 431.274        | 430.602 | A[10] |
| K[16] | 485.955        | 412.598        | 407.259        | 407.595        | 406.923 | K[9]  |
| R[17] | 537.989        | 369.900        | 364.561        | 364.896        | 364.225 | R[8]  |
| H[18] | 583.675        | 317.866        | 312.527        | 312.863        | 312.191 | H[7]  |
| R[19] | 635.709        | 272.180        | 266.841        | 267.176        | 266.505 | R[6]  |
| K[20] | 687.751        | 220.140        | 214.801        | 215.143        | 214.471 | K[5]  |
| V[21] | 720.774        | 188.104        | 182.765        | 183.101        | 182.429 | V[4]  |
| L[22] | 758.468        | 135.082        | 129.742        | 130.078        | 129.406 | L[3]  |
| R[23] | <b>810.502</b> | 97.387         | 92.047         | 92.383         | 91.711  | R[2]  |
| D[24] | 848.844        | 45.353         | 40.014         | 40.349         | 39.678  | D[1]  |





# sp | P62806 | H4\_MOUSE

[Acetyl]SGRGKGGKGLGKGGAKRHRK<sup>Dimethyl</sup>VLRD<sub>28.03</sub>

- ▶ fragmentation table for charge state 1+
- ▶ specType=etd
- ▶ score=71.44
- ▶ F113279.dat
- ▶ query=q37567\_p1
- ▶ precursor=849.175680
- ▶ chargePrecursor=3
- ▶ itol=0.5

| AA | c  | y               | z+1            | z+2             | z               | AA       |   |    |
|----|----|-----------------|----------------|-----------------|-----------------|----------|---|----|
| S  | 1  | 147.076         | 2545.502       | 2520.483        | 0.000           | 2528.478 | S | 24 |
| G  | 2  | 204.098         | 2416.460       | 2400.441        | 0.000           | 2399.433 | G | 23 |
| R  | 3  | <b>360.199</b>  | 2389.438       | 2343.419        | 2344.427        | 2342.412 | R | 22 |
| G  | 4  | <b>417.220</b>  | 2303.337       | 2187.318        | 2188.326        | 2186.310 | G | 21 |
| K  | 5  | <b>545.315</b>  | 2146.316       | 2130.297        | 2131.305        | 2129.289 | K | 20 |
| G  | 6  | <b>602.337</b>  | 2018.221       | 2002.200        | 2003.210        | 2001.194 | G | 19 |
| G  | 7  | <b>659.358</b>  | 1961.199       | <b>1945.180</b> | 1946.188        | 1944.173 | G | 18 |
| K  | 8  | <b>787.453</b>  | 1904.178       | <b>1889.159</b> | 1889.167        | 1887.151 | K | 17 |
| G  | 9  | <b>844.475</b>  | 1776.083       | <b>1760.064</b> | 1761.072        | 1759.056 | G | 16 |
| L  | 10 | <b>927.559</b>  | 1719.061       | <b>1703.043</b> | 1704.050        | 1702.035 | L | 15 |
| G  | 11 | <b>1014.580</b> | 1605.977       | 1589.958        | 1590.966        | 1588.951 | G | 14 |
| K  | 12 | 1142.075        | 1548.956       | <b>1532.937</b> | 1533.945        | 1531.929 | K | 13 |
| G  | 13 | 1199.097        | 1420.861       | 1404.840        | <b>1405.850</b> | 1403.834 | G | 12 |
| G  | 14 | <b>1256.718</b> | 1363.839       | <b>1347.821</b> | 1348.828        | 1346.813 | G | 11 |
| A  | 15 | <b>1327.795</b> | 1306.818       | 1290.797        | 1291.807        | 1289.791 | A | 10 |
| R  | 16 | 1469.850        | 1238.781       | <b>1219.762</b> | 1220.770        | 1218.754 | R | 9  |
| R  | 17 | 1611.951        | 1107.685       | <b>1091.667</b> | 1092.675        | 1090.659 | R | 8  |
| H  | 18 | 1749.010        | 951.585        | 935.566         | <b>936.574</b>  | 934.558  | H | 7  |
| R  | 19 | 1905.111        | 814.526        | 798.507         | <b>799.515</b>  | 797.499  | R | 6  |
| K  | 20 | 2061.238        | <b>658.425</b> | 642.405         | 643.414         | 641.398  | K | 5  |
| V  | 21 | 2180.306        | 502.298        | 486.280         | 487.287         | 485.272  | V | 4  |
| L  | 22 | 2273.390        | 403.230        | 387.211         | 388.219         | 386.203  | L | 3  |
| R  | 23 | 2429.491        | 280.146        | 274.127         | 275.135         | 273.119  | R | 2  |
| D  | 24 | 2544.518        | 134.045        | 118.026         | 119.034         | 117.018  | D | 1  |

# sp | P62806 | H4\_MOUSE

[Acetyl]SGRGKGGKGLGKGGAKRHRK<sup>Dimethyl</sup>VLRD<sub>28.03</sub>

- ▶ fragmentation table for charge state 2+
- ▶ specType=etd
- ▶ score=71.44
- ▶ F113279.dat
- ▶ query=q37567\_p1
- ▶ precursor=849.175680
- ▶ chargePrecursor=3
- ▶ itol=0.5

| AA |    | c               | y               | z+1             | z+2             | z              | AA    |
|----|----|-----------------|-----------------|-----------------|-----------------|----------------|-------|
| S  | 1  | 74.042          | <b>1273.255</b> | <b>1265.245</b> | 0.504           | 1264.741       | S[24] |
| G  | 2  | 102.553         | 1238.733        | <b>1200.724</b> | 0.504           | 1200.220       | G[23] |
| R  | 3  | 180.603         | 1180.222        | <b>1172.213</b> | <b>1172.717</b> | 1171.709       | R[22] |
| G  | 4  | 269.114         | 1102.172        | 1064.153        | 1054.661        | 1093.659       | G[21] |
| K  | 5  | 273.161         | 1073.062        | 1055.052        | 1006.155        | 1065.148       | K[20] |
| G  | 6  | 301.672         | 1009.614        | 1001.605        | 1002.108        | 1001.101       | G[19] |
| G  | 7  | 330.183         | 961.103         | 973.094         | 973.596         | 972.590        | G[18] |
| K  | 8  | 394.230         | 952.592         | 944.583         | 945.087         | 944.079        | K[17] |
| G  | 9  | 422.741         | 888.545         | 880.536         | 881.040         | 880.032        | G[16] |
| L  | 10 | 479.293         | 860.036         | 852.027         | 852.529         | 851.521        | L[15] |
| G  | 11 | 507.794         | 803.492         | 795.483         | 795.987         | 794.979        | G[14] |
| K  | 12 | 571.841         | 774.982         | 766.972         | 767.476         | 766.468        | K[13] |
| G  | 13 | 600.352         | 710.934         | 702.925         | 703.429         | 702.421        | G[12] |
| G  | 14 | 628.863         | 682.423         | 674.414         | 674.918         | 673.910        | G[11] |
| A  | 15 | 664.361         | 653.913         | 645.903         | 646.407         | 645.399        | A[10] |
| R  | 16 | 702.409         | 618.398         | 610.389         | 610.893         | 609.885        | R[9]  |
| R  | 17 | 806.479         | 554.341         | 546.331         | 546.841         | <b>545.833</b> | R[8]  |
| H  | 18 | 875.009         | 476.200         | 468.191         | 468.701         | 467.783        | H[7]  |
| R  | 19 | 953.059         | 407.767         | 399.757         | 400.261         | 399.253        | R[6]  |
| K  | 20 | 1031.122        | 329.716         | 321.707         | 322.211         | 321.203        | K[5]  |
| V  | 21 | 1087.667        | 251.663         | 243.653         | 244.147         | 243.140        | V[4]  |
| L  | 22 | <b>1117.199</b> | 302.112         | 194.103         | 194.613         | 193.605        | L[3]  |
| R  | 23 | <b>1215.240</b> | 145.577         | 137.567         | 138.071         | 137.063        | R[2]  |
| D  | 24 | 1272.763        | 67.526          | 59.517          | 60.021          | 59.013         | D[1]  |

# sp | P62806 | H4\_MOUSE

[Acetyl]SGRGKGGKGLGKGGAK <sup>Acetyl</sup>RHRK <sup>Dimethyl</sup>VLRD  
42.01 28.03

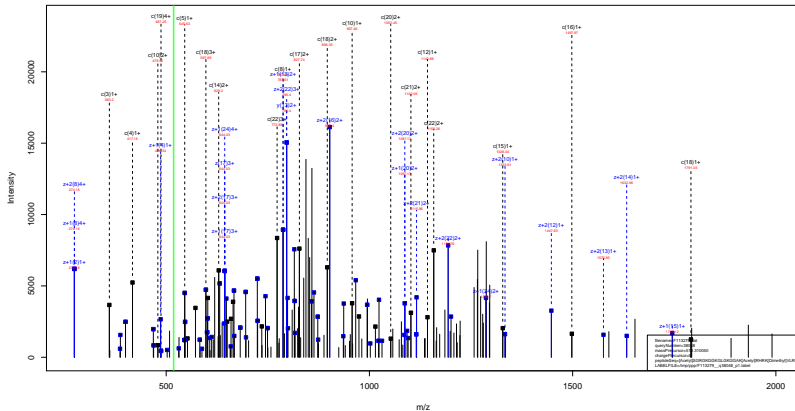

# sp | P62806 | H4\_MOUSE

[Acetyl]SGRGKGGKGLGKGGAK<sup>Acetyl</sup> RHRK<sup>Dimethyl</sup> VLRD<sup>28.03</sup>

- ▶ fragmentation table for charge state 1+
- ▶ specType=etd
- ▶ score=78.28
- ▶ F113279.dat
- ▶ query=q38048.p1
- ▶ precursor=518.310050
- ▶ chargePrecursor=5
- ▶ itol=0.5

| AA | c  | y               | z+1            | z+2             | z               | AA             |       |
|----|----|-----------------|----------------|-----------------|-----------------|----------------|-------|
| S  | 1  | 347.676         | 2587.513       | 2571.494        | 0.000           | 2570.486       | S[24] |
| G  | 2  | 204.098         | 2458.470       | 2442.451        | 0.000           | 2441.444       | G[23] |
| R  | 3  | <b>388.199</b>  | 2620.440       | 2385.430        | 2386.438        | 2384.422       | R[22] |
| G  | 4  | <b>417.230</b>  | 2345.340       | 2229.330        | 2230.337        | 2228.321       | G[21] |
| K  | 5  | <b>545.315</b>  | 2188.326       | 2172.307        | 2173.315        | 2171.300       | K[20] |
| G  | 6  | <b>602.337</b>  | 2060.231       | 2044.210        | 2045.220        | 2043.205       | G[19] |
| G  | 7  | <b>659.358</b>  | 2003.210       | 1987.190        | 1988.199        | 1986.183       | G[18] |
| K  | 8  | <b>787.453</b>  | 1946.188       | 1930.170        | 1931.177        | 1929.162       | K[17] |
| G  | 9  | 814.575         | 1818.093       | 1802.075        | 1803.082        | 1801.067       | G[16] |
| L  | 10 | <b>957.559</b>  | 1783.072       | <b>1745.053</b> | 1746.061        | 1744.045       | L[15] |
| G  | 11 | <b>1014.580</b> | 1647.985       | 1631.969        | <b>1632.977</b> | 1630.961       | G[14] |
| K  | 12 | <b>1142.675</b> | 1590.969       | 1574.948        | <b>1575.955</b> | 1573.940       | K[13] |
| G  | 13 | 1199.697        | 1462.871       | 1446.853        | <b>1447.860</b> | 1445.845       | G[12] |
| G  | 14 | 1256.718        | 1405.850       | 1389.831        | 1390.839        | 1388.823       | G[11] |
| A  | 15 | <b>1327.795</b> | 1348.828       | 1332.810        | <b>1333.818</b> | 1331.802       | A[10] |
| R  | 16 | <b>1497.881</b> | 1277.791       | 1261.773        | 1262.780        | 1260.765       | R[9]  |
| R  | 17 | 1553.962        | 1107.685       | 1091.667        | <b>1092.675</b> | 1090.659       | R[8]  |
| H  | 18 | <b>1791.021</b> | 951.585        | <b>935.566</b>  | <b>936.574</b>  | 934.558        | H[7]  |
| R  | 19 | 1947.122        | 814.526        | <b>798.507</b>  | <b>799.515</b>  | 797.499        | R[6]  |
| K  | 20 | 2103.248        | <b>658.425</b> | <b>642.406</b>  | 643.414         | 641.398        | K[5]  |
| V  | 21 | 2202.317        | <b>502.298</b> | <b>486.280</b>  | <b>487.287</b>  | 485.272        | V[4]  |
| L  | 22 | 2319.401        | 403.230        | <b>387.211</b>  | 388.219         | <b>386.203</b> | L[3]  |
| R  | 23 | 2471.502        | 280.146        | <b>274.127</b>  | 275.135         | 273.119        | R[2]  |
| D  | 24 | 2586.529        | 134.045        | 118.026         | 119.034         | 117.018        | D[1]  |

# sp | P62806 | H4\_MOUSE

[Acetyl]SGRGKGGKGLGKGGAK<sup>Acetyl</sup>42.01 RHRK<sup>Dimethyl</sup>28.03 VLRD

- ▶ fragmentation table for charge state 2+
- ▶ specType=etd
- ▶ score=78.28
- ▶ F113279.dat
- ▶ query=q38048.p1
- ▶ precursor=518.310050
- ▶ chargePrecursor=5
- ▶ itol=0.5

| AA    | c               | y               | z+1             | z+2             | z               | AA    |
|-------|-----------------|-----------------|-----------------|-----------------|-----------------|-------|
| S[1]  | 74.042          | 1204.200        | <b>1286.251</b> | 0.504           | 1285.747        | S[24] |
| G[2]  | 102.553         | 1229.739        | 1221.729        | 0.504           | 1221.225        | G[23] |
| R[3]  | 180.603         | <b>1261.228</b> | 1191.719        | <b>1193.723</b> | 1192.715        | R[22] |
| G[4]  | 259.114         | 1123.777        | <b>1115.108</b> | <b>1115.072</b> | 1114.666        | G[21] |
| K[5]  | 273.103         | <b>1094.667</b> | <b>1086.657</b> | <b>1087.161</b> | <b>1086.153</b> | K[20] |
| G[6]  | 303.672         | <b>1030.619</b> | <b>1022.610</b> | <b>1023.114</b> | <b>1022.106</b> | G[19] |
| G[7]  | 330.183         | <b>1002.108</b> | <b>994.099</b>  | <b>994.603</b>  | 993.595         | G[18] |
| K[8]  | 394.230         | 973.590         | 965.588         | <b>966.092</b>  | 965.084         | K[17] |
| G[9]  | 427.741         | 959.560         | 961.561         | <b>962.065</b>  | 961.057         | G[16] |
| L[10] | <b>479.283</b>  | 939.040         | <b>871.030</b>  | <b>873.534</b>  | <b>872.526</b>  | L[15] |
| G[11] | 507.794         | 924.468         | <b>816.488</b>  | <b>816.992</b>  | <b>815.984</b>  | G[14] |
| K[12] | <b>571.841</b>  | <b>795.987</b>  | <b>787.977</b>  | 788.481         | <b>787.474</b>  | K[13] |
| G[13] | <b>600.352</b>  | 731.939         | <b>723.930</b>  | <b>724.434</b>  | 723.426         | G[12] |
| G[14] | <b>628.863</b>  | 703.429         | <b>695.419</b>  | <b>695.923</b>  | 694.915         | G[11] |
| A[15] | <b>664.381</b>  | 674.919         | <b>665.908</b>  | <b>667.412</b>  | <b>666.405</b>  | A[10] |
| R[16] | <b>749.434</b>  | 639.399         | <b>631.390</b>  | <b>631.894</b>  | 630.886         | R[9]  |
| R[17] | <b>827.485</b>  | 554.347         | <b>546.337</b>  | <b>546.841</b>  | <b>545.833</b>  | R[8]  |
| H[18] | <b>896.014</b>  | 476.290         | <b>468.287</b>  | <b>468.791</b>  | 467.783         | H[7]  |
| R[19] | <b>974.065</b>  | 407.767         | <b>399.757</b>  | <b>400.261</b>  | 399.253         | R[6]  |
| K[20] | <b>1052.128</b> | 329.716         | 321.707         | 322.211         | 321.203         | K[5]  |
| V[21] | <b>1101.662</b> | 252.693         | 243.683         | 244.187         | 243.180         | V[4]  |
| L[22] | <b>1158.204</b> | 202.119         | 194.109         | 194.613         | 193.605         | L[3]  |
| R[23] | 1236.255        | 145.577         | 137.567         | 138.071         | 137.063         | R[2]  |
| D[24] | 1293.768        | 67.526          | 59.517          | 60.021          | 59.013          | D[1]  |

# sp | P62806 | H4\_MOUSE

[Acetyl]SGRGKGGKGLGKGGAK<sup>Acetyl</sup> RHRK<sup>Dimethyl</sup> VLRD<sup>28.03</sup>

- ▶ fragmentation table for charge state 3+
- ▶ specType=etd
- ▶ score=78.28
- ▶ F113279.dat
- ▶ query=q38048.p1
- ▶ precursor=518.310050
- ▶ chargePrecursor=5
- ▶ itol=0.5

| AA    | c              | y              | z+1            | z+2            | z              | AA    |
|-------|----------------|----------------|----------------|----------------|----------------|-------|
| S[1]  | 49.697         | <b>863.176</b> | <b>657.836</b> | 0.672          | <b>857.500</b> | S[24] |
| G[2]  | 58.704         | 320.162        | <b>814.822</b> | 0.672          | 314.486        | G[23] |
| R[3]  | 120.738        | 801.154        | 795.815        | <b>796.151</b> | 795.479        | R[22] |
| G[4]  | 130.745        | <b>749.121</b> | 743.781        | <b>744.117</b> | 743.445        | G[21] |
| K[5]  | 182.443        | 730.114        | <b>724.774</b> | <b>725.110</b> | <b>724.438</b> | K[20] |
| G[6]  | 201.450        | 687.415        | <b>682.076</b> | <b>682.412</b> | <b>681.740</b> | G[19] |
| G[7]  | 220.458        | 668.408        | 663.069        | 663.404        | 662.733        | G[18] |
| K[8]  | 263.156        | 649.401        | <b>644.061</b> | <b>644.397</b> | <b>643.725</b> | K[17] |
| G[9]  | 282.163        | <b>606.703</b> | <b>601.363</b> | <b>601.699</b> | <b>601.027</b> | G[16] |
| L[10] | 319.958        | <b>587.695</b> | <b>582.356</b> | <b>582.692</b> | 582.020        | L[15] |
| G[11] | 338.965        | 550.001        | <b>544.661</b> | <b>544.997</b> | 544.325        | G[14] |
| K[12] | 381.563        | <b>510.994</b> | 525.654        | 525.990        | 525.318        | K[13] |
| G[13] | 400.570        | 488.295        | 482.956        | 483.292        | 482.620        | G[12] |
| G[14] | 419.578        | <b>469.288</b> | 463.949        | 464.285        | 463.613        | G[11] |
| A[15] | 443.257        | 450.281        | 444.941        | 445.277        | 444.605        | A[10] |
| K[16] | 469.958        | 426.002        | 421.262        | 421.598        | 420.926        | K[9]  |
| R[17] | <b>551.992</b> | 369.900        | 364.561        | 364.896        | 364.225        | R[8]  |
| H[18] | <b>597.678</b> | 317.866        | 312.527        | 312.863        | 312.191        | H[7]  |
| R[19] | <b>649.712</b> | 272.180        | 266.941        | 267.176        | 266.505        | R[6]  |
| K[20] | 701.754        | 220.140        | 214.807        | 215.143        | 214.471        | K[5]  |
| V[21] | <b>734.777</b> | 168.104        | 162.765        | 163.101        | 162.429        | V[4]  |
| L[22] | <b>772.472</b> | 135.082        | 129.742        | 130.078        | 129.406        | L[3]  |
| R[23] | 824.505        | 97.387         | 92.047         | 92.383         | 91.711         | R[2]  |
| D[24] | 862.848        | 45.353         | 40.014         | 40.349         | 39.678         | D[1]  |

# sp | P62806 | H4\_MOUSE

[Acetyl]SGRGKGGKGLGKGGAK<sup>Acetyl</sup> RHRK<sup>Dimethyl</sup> VLRD<sup>28.03</sup>

- ▶ fragmentation table for charge state 4+
- ▶ specType=etd
- ▶ score=78.28
- ▶ F113279.dat
- ▶ query=q38048.p1
- ▶ precursor=518.310050
- ▶ chargePrecursor=5
- ▶ itol=0.5

| AA    | c              | y              | z+1            | z+2            | z       | AA    |
|-------|----------------|----------------|----------------|----------------|---------|-------|
| S[1]  | 37.525         | <b>647.634</b> | <b>643.629</b> | 0.755          | 643.377 | S[24] |
| G[2]  | 51.780         | 615.373        | <b>611.368</b> | 0.795          | 611.116 | G[23] |
| R[3]  | 90.805         | <b>601.118</b> | 597.113        | <b>597.365</b> | 596.861 | R[22] |
| G[4]  | 105.061        | 562.092        | 558.088        | 558.340        | 557.836 | G[21] |
| K[5]  | 137.084        | 547.837        | 543.832        | 544.084        | 543.580 | K[20] |
| G[6]  | 151.340        | 515.813        | 511.809        | 512.061        | 511.557 | G[19] |
| G[7]  | 165.595        | 501.558        | 497.553        | 497.805        | 497.301 | G[18] |
| K[8]  | 197.619        | <b>487.303</b> | 483.298        | 483.550        | 483.046 | K[17] |
| G[9]  | 211.874        | 458.279        | 454.274        | 454.526        | 454.022 | G[16] |
| L[10] | 240.145        | 441.021        | 437.019        | 437.271        | 436.767 | L[15] |
| G[11] | 254.401        | 412.752        | 408.748        | 409.000        | 408.496 | G[14] |
| K[12] | 286.424        | 398.497        | 394.492        | 394.744        | 394.240 | K[13] |
| G[13] | 300.680        | 386.473        | 382.469        | 382.721        | 382.217 | G[12] |
| G[14] | 314.935        | 352.218        | 348.213        | 348.465        | 347.961 | G[11] |
| A[15] | 332.694        | 337.963        | 333.958        | 334.210        | 333.706 | A[10] |
| K[16] | 375.221        | 320.203        | 316.199        | 316.451        | 315.947 | K[9]  |
| R[17] | 414.246        | 277.671        | <b>273.672</b> | <b>273.924</b> | 273.420 | R[8]  |
| H[18] | 448.511        | 238.652        | 234.647        | 234.899        | 234.395 | H[7]  |
| R[19] | <b>487.536</b> | 204.387        | 200.382        | 200.634        | 200.130 | R[6]  |
| K[20] | 520.568        | 186.362        | 181.357        | 181.609        | 181.105 | K[5]  |
| V[21] | 551.135        | 126.330        | 122.325        | 122.577        | 122.073 | V[4]  |
| L[22] | 579.606        | 101.563        | 97.558         | 97.810         | 97.306  | L[3]  |
| R[23] | 618.631        | 73.292         | 69.287         | 69.539         | 69.035  | R[2]  |
| D[24] | 647.388        | 34.267         | 30.262         | 30.514         | 30.010  | D[1]  |





# sp | P62806 | H4\_MOUSE

[Acetyl]SGRGKGGKGLGKGGAK<sup>Acetyl</sup> RHRK<sup>Dimethyl</sup> VLRD<sup>28.03</sup>

- ▶ fragmentation table for charge state 1+
- ▶ specType=etd
- ▶ score=119.26
- ▶ F113279.dat
- ▶ query=q38050\_p1
- ▶ precursor=647.636290
- ▶ chargePrecursor=4
- ▶ itol=0.5

| AA | c  | y               | z+1            | z+2             | z               | AA       |       |
|----|----|-----------------|----------------|-----------------|-----------------|----------|-------|
| S  | 1  | 347.676         | 2587.513       | 2571.494        | 0.000           | 2570.486 | S[24] |
| G  | 2  | 204.098         | 2458.470       | 2442.451        | 0.000           | 2441.444 | G[23] |
| R  | 3  | <b>388.199</b>  | 2620.440       | 2385.430        | 2386.438        | 2384.422 | R[22] |
| G  | 4  | <b>417.230</b>  | 2345.340       | 2229.330        | 2230.337        | 2228.321 | G[21] |
| K  | 5  | <b>545.315</b>  | 2188.326       | 2172.307        | 2173.315        | 2171.300 | K[20] |
| G  | 6  | <b>602.337</b>  | 2060.231       | 2044.210        | 2045.220        | 2043.205 | G[19] |
| G  | 7  | <b>659.358</b>  | 2003.210       | <b>1987.191</b> | 1988.199        | 1986.183 | G[18] |
| K  | 8  | <b>787.453</b>  | 1946.189       | 1930.170        | 1931.177        | 1929.162 | K[17] |
| G  | 9  | <b>844.475</b>  | 1818.093       | <b>1802.075</b> | 1803.082        | 1801.067 | G[16] |
| L  | 10 | <b>957.559</b>  | 1763.072       | 1746.953        | 1748.061        | 1744.943 | L[15] |
| G  | 11 | <b>1014.580</b> | 1647.985       | 1631.960        | 1632.977        | 1630.961 | G[14] |
| K  | 12 | <b>1142.675</b> | 1590.969       | <b>1574.948</b> | 1575.955        | 1573.940 | K[13] |
| G  | 13 | <b>1199.697</b> | 1462.871       | <b>1446.853</b> | 1447.860        | 1445.845 | G[12] |
| G  | 14 | <b>1256.718</b> | 1405.850       | 1389.831        | <b>1390.839</b> | 1388.823 | G[11] |
| A  | 15 | 1327.739        | 1348.828       | 1332.810        | <b>1333.818</b> | 1331.802 | A[10] |
| R  | 16 | <b>1497.861</b> | 1277.791       | 1261.773        | 1262.780        | 1260.765 | R[9]  |
| R  | 17 | <b>1653.962</b> | 1107.680       | 1091.667        | <b>1092.675</b> | 1090.659 | R[8]  |
| H  | 18 | <b>1791.021</b> | 951.585        | <b>935.566</b>  | <b>936.574</b>  | 934.558  | H[7]  |
| R  | 19 | 1947.122        | <b>814.526</b> | <b>798.507</b>  | 799.515         | 797.499  | R[6]  |
| K  | 20 | 2103.248        | 658.425        | 642.405         | <b>643.414</b>  | 641.398  | K[5]  |
| V  | 21 | 2202.317        | 502.298        | 486.280         | 487.287         | 485.272  | V[4]  |
| L  | 22 | 2319.401        | 403.230        | 387.211         | <b>388.219</b>  | 386.203  | L[3]  |
| R  | 23 | 2471.502        | 298.146        | 274.127         | <b>275.135</b>  | 273.119  | R[2]  |
| D  | 24 | 2586.529        | 134.045        | 118.026         | 119.034         | 117.018  | D[1]  |

# sp | P62806 | H4\_MOUSE

[Acetyl]SGRGKGGKGLGKGGAK<sup>Acetyl</sup> RHRK<sup>Dimethyl</sup> VLRD<sup>28.03</sup>

- ▶ fragmentation table for charge state 2+
- ▶ specType=etd
- ▶ score=119.26
- ▶ F113279.dat
- ▶ query=q38050\_p1
- ▶ precursor=647.636290
- ▶ chargePrecursor=4
- ▶ itol=0.5

| AA    | c               | y               | z+1             | z+2             | z               | AA    |
|-------|-----------------|-----------------|-----------------|-----------------|-----------------|-------|
| S[1]  | 74.042          | <b>1294.260</b> | 1286.261        | 0.504           | 1289.747        | S[24] |
| G[2]  | 102.553         | 1229.739        | 1221.739        | 0.504           | 1221.235        | G[23] |
| R[3]  | 180.603         | 1201.229        | <b>1193.219</b> | <b>1193.723</b> | 1192.715        | R[22] |
| G[4]  | 259.114         | 1123.177        | <b>1115.168</b> | <b>1115.672</b> | 1114.666        | G[21] |
| K[5]  | 273.153         | 1094.667        | <b>1086.657</b> | <b>1087.161</b> | 1086.151        | K[20] |
| G[6]  | 301.672         | 1030.619        | <b>1022.610</b> | 1023.114        | <b>1022.106</b> | G[19] |
| G[7]  | 330.183         | 1002.108        | <b>994.099</b>  | <b>994.603</b>  | 993.595         | G[18] |
| K[8]  | 394.230         | <b>973.598</b>  | <b>965.588</b>  | <b>966.092</b>  | 965.084         | K[17] |
| G[9]  | 422.741         | 909.550         | <b>901.541</b>  | <b>902.045</b>  | 901.037         | G[16] |
| L[10] | 479.293         | 869.040         | <b>871.030</b>  | <b>871.534</b>  | 872.526         | L[15] |
| G[11] | 507.794         | <b>824.498</b>  | <b>816.488</b>  | <b>816.992</b>  | 815.984         | G[14] |
| K[12] | 571.841         | <b>795.987</b>  | <b>787.977</b>  | <b>788.481</b>  | <b>787.474</b>  | K[13] |
| G[13] | 600.352         | 731.939         | <b>723.930</b>  | <b>724.434</b>  | 723.426         | G[12] |
| G[14] | 628.863         | 703.429         | <b>695.419</b>  | <b>695.923</b>  | 694.915         | G[11] |
| A[15] | 664.381         | 674.919         | 665.909         | <b>667.912</b>  | 666.904         | A[10] |
| R[16] | 749.434         | 639.399         | <b>631.390</b>  | <b>631.894</b>  | 630.886         | R[9]  |
| R[17] | <b>827.485</b>  | 554.347         | <b>546.337</b>  | <b>546.841</b>  | 545.833         | R[8]  |
| H[18] | <b>896.014</b>  | 476.296         | 468.287         | 468.791         | 467.783         | H[7]  |
| R[19] | <b>974.065</b>  | 407.767         | 399.757         | 400.261         | 399.253         | R[6]  |
| K[20] | <b>1052.128</b> | 329.716         | 321.707         | 322.211         | 321.203         | K[5]  |
| V[21] | <b>1101.662</b> | 251.663         | 243.653         | 244.157         | 243.149         | V[4]  |
| L[22] | <b>1158.204</b> | 202.119         | 194.109         | 194.613         | 193.605         | L[3]  |
| R[23] | <b>1236.255</b> | 145.577         | 137.567         | 138.071         | 137.063         | R[2]  |
| D[24] | 1293.768        | 67.526          | 59.517          | 60.021          | 59.013          | D[1]  |

# sp | P62806 | H4\_MOUSE

[Acetyl]SGRGKGGKGLGKGGAK<sup>Acetyl</sup>42.01 RHRK<sup>Dimethyl</sup>28.03 VLRD

- ▶ fragmentation table for charge state 3+
- ▶ specType=etd
- ▶ score=119.26
- ▶ F113279.dat
- ▶ query=q38050.p1
- ▶ precursor=647.636290
- ▶ chargePrecursor=4
- ▶ itol=0.5

| AA    | c              | y              | z+1            | z+2            | z     | AA                   |
|-------|----------------|----------------|----------------|----------------|-------|----------------------|
| S[1]  | 49.697         | <b>863.176</b> | <b>857.836</b> |                | 0.672 | 857.900 S[24]        |
| G[2]  | 58.704         | 820.162        | <b>814.822</b> |                | 0.672 | <b>814.486</b> G[23] |
| R[3]  | 120.738        | 801.154        | <b>795.815</b> | <b>796.151</b> |       | 795.479 R[22]        |
| G[4]  | 139.745        | 749.121        | 743.781        | 744.117        |       | 743.445 G[21]        |
| K[5]  | 182.443        | 730.114        | 724.774        | 725.110        |       | <b>724.438</b> K[20] |
| G[6]  | 201.450        | 687.415        | 682.076        | 682.412        |       | 681.740 G[19]        |
| G[7]  | 220.458        | 668.408        | 663.069        | 663.404        |       | 662.733 G[18]        |
| K[8]  | 263.156        | 649.401        | 644.061        | 644.397        |       | <b>643.725</b> K[17] |
| G[9]  | 282.163        | 606.703        | 601.363        | 601.699        |       | 601.027 G[16]        |
| L[10] | 319.958        | 587.695        | 582.355        | 582.691        |       | 582.020 L[15]        |
| G[11] | 338.965        | 550.001        | 544.661        | <b>544.997</b> |       | 544.325 G[14]        |
| K[12] | 381.563        | 530.994        | 525.654        | 525.990        |       | 525.318 K[13]        |
| G[13] | 400.570        | 488.295        | 482.956        | 483.292        |       | 482.620 G[12]        |
| G[14] | 419.578        | 469.288        | 463.949        | 464.285        |       | 463.613 G[11]        |
| A[15] | 443.257        | 450.281        | 444.941        | 445.277        |       | 444.605 A[10]        |
| K[16] | 469.958        | 426.602        | 421.262        | 421.598        |       | 420.926 K[9]         |
| R[17] | 551.992        | 369.900        | 364.561        | 364.896        |       | 364.225 R[8]         |
| H[18] | 597.678        | 317.866        | 312.527        | 312.863        |       | 312.191 H[7]         |
| R[19] | 649.712        | 272.180        | 266.841        | 267.176        |       | 266.505 R[6]         |
| K[20] | 701.754        | 220.146        | 214.807        | 215.143        |       | 214.471 K[5]         |
| V[21] | 734.777        | 168.104        | 162.765        | 163.101        |       | 162.429 V[4]         |
| L[22] | 772.472        | 135.082        | 129.742        | 130.078        |       | 129.408 L[3]         |
| R[23] | <b>824.505</b> | 97.387         | 92.047         | 92.383         |       | 91.711 R[2]          |
| D[24] | 862.848        | 45.353         | 40.014         | 40.349         |       | 39.678 D[1]          |



# sp | P62806 | H4\_MOUSE

[Acetyl]SGRGK<sup>Acetyl</sup><sub>42.01</sub> GGKGLGKGGAKR<sup>Dimethyl</sup><sub>28.03</sub> HRK<sup>Acetyl</sup><sub>42.01</sub> VLRD

- ▶ fragmentation table for charge state 1+
- ▶ specType=etd
- ▶ score=56.12
- ▶ F113279.dat
- ▶ query=q38490\_p1
- ▶ precursor=526.710680
- ▶ chargePrecursor=5
- ▶ itol=0.5

| AA | c  | y               | z+1            | z+2             | z               | AA       |       |
|----|----|-----------------|----------------|-----------------|-----------------|----------|-------|
| S  | 1  | 347.676         | 2629.523       | 2613.505        | 0.000           | 2612.497 | S[24] |
| G  | 2  | 204.098         | 2500.481       | 2484.462        | 0.000           | 2483.454 | G[23] |
| R  | 3  | <b>368.199</b>  | 2443.459       | 2427.441        | 2426.448        | 2426.413 | R[22] |
| G  | 4  | <b>417.230</b>  | 2387.368       | 2371.330        | 2372.347        | 2370.333 | G[21] |
| K  | 5  | <b>587.326</b>  | 2230.337       | 2214.318        | 2215.326        | 2213.310 | K[20] |
| G  | 6  | <b>644.347</b>  | 2060.231       | 2044.212        | 2045.220        | 2043.205 | G[19] |
| G  | 7  | <b>701.369</b>  | 2003.210       | 1987.191        | <b>1988.199</b> | 1986.183 | G[18] |
| K  | 8  | <b>829.464</b>  | 1946.189       | 1930.170        | 1931.177        | 1929.162 | K[17] |
| G  | 9  | <b>886.485</b>  | 1818.093       | 1802.075        | 1803.082        | 1801.067 | G[16] |
| L  | 10 | <b>939.569</b>  | 1763.072       | 1746.053        | <b>1746.061</b> | 1744.045 | L[15] |
| G  | 11 | <b>1056.591</b> | 1647.985       | 1631.966        | 1632.977        | 1630.961 | G[14] |
| K  | 12 | <b>1184.686</b> | 1590.966       | <b>1574.948</b> | 1575.955        | 1573.940 | K[13] |
| G  | 13 | <b>1241.707</b> | 1462.871       | 1446.853        | 1447.860        | 1445.845 | G[12] |
| G  | 14 | <b>1298.729</b> | 1405.850       | <b>1389.831</b> | 1390.839        | 1388.823 | G[11] |
| A  | 15 | <b>1369.766</b> | 1348.828       | <b>1332.810</b> | 1333.818        | 1331.802 | A[10] |
| R  | 16 | 1497.883        | 1277.791       | 1261.773        | <b>1262.780</b> | 1260.765 | R[9]  |
| R  | 17 | 1681.993        | 1149.696       | 1133.678        | 1134.685        | 1132.670 | R[8]  |
| H  | 18 | 1819.052        | <b>965.564</b> | 949.545         | 950.553         | 948.537  | H[7]  |
| R  | 19 | 1975.153        | 828.505        | 812.486         | 813.494         | 811.478  | R[6]  |
| K  | 20 | 2145.259        | 672.404        | 656.385         | 657.393         | 655.377  | K[5]  |
| V  | 21 | 2244.327        | 502.298        | <b>486.280</b>  | 487.287         | 485.272  | V[4]  |
| L  | 22 | 2357.411        | 403.230        | <b>387.211</b>  | 388.219         | 386.203  | L[3]  |
| R  | 23 | 2513.512        | 280.146        | <b>274.127</b>  | <b>275.135</b>  | 273.119  | R[2]  |
| D  | 24 | 2628.539        | 134.045        | 118.026         | 119.034         | 117.018  | D[1]  |

# sp | P62806 | H4\_MOUSE

[Acetyl]SGR<sup>Acetyl</sup>RGK<sub>42.01</sub> GGKGLGKGGAKR<sup>Dimethyl</sup> HRK<sup>Acetyl</sup> VLRD<sub>28.03 42.01</sub>

- ▶ fragmentation table for charge state 2+
- ▶ specType=etd
- ▶ score=56.12
- ▶ F113279.dat
- ▶ query=q38490\_p1
- ▶ precursor=526.710680
- ▶ chargePrecursor=5
- ▶ itol=0.5

| AA | c  | y               | z+1             | z+2             | z               | AA              |       |
|----|----|-----------------|-----------------|-----------------|-----------------|-----------------|-------|
| S  | 1  | 74.042          | 1315.205        | <b>1307.256</b> | 0.504           | 1306.750        | S[24] |
| G  | 2  | 102.553         | 1250.744        | 1242.735        | 0.504           | <b>1242.231</b> | G[23] |
| R  | 3  | 180.603         | <b>1222.233</b> | 1214.224        | <b>1214.728</b> | 1213.720        | R[22] |
| G  | 4  | 259.114         | 1144.183        | <b>1136.173</b> | <b>1136.677</b> | 1135.669        | G[21] |
| K  | 5  | 294.157         | 1115.672        | <b>1107.663</b> | <b>1108.167</b> | <b>1107.159</b> | K[20] |
| G  | 6  | 322.677         | 1030.619        | <b>1022.610</b> | <b>1023.114</b> | 1022.106        | G[19] |
| G  | 7  | 351.188         | 1002.108        | 994.099         | <b>994.603</b>  | 993.595         | G[18] |
| K  | 8  | 435.236         | <b>973.598</b>  | <b>965.588</b>  | <b>966.092</b>  | 965.084         | K[17] |
| G  | 9  | <b>443.746</b>  | <b>909.550</b>  | 901.541         | <b>902.045</b>  | 901.037         | G[16] |
| L  | 10 | <b>509.208</b>  | 839.140         | <b>871.030</b>  | <b>873.534</b>  | <b>872.526</b>  | L[15] |
| G  | 11 | <b>528.799</b>  | <b>824.498</b>  | <b>816.488</b>  | <b>816.992</b>  | <b>815.984</b>  | G[14] |
| K  | 12 | <b>592.847</b>  | <b>795.987</b>  | 787.977         | <b>788.481</b>  | <b>787.474</b>  | K[13] |
| G  | 13 | <b>621.357</b>  | 731.939         | <b>723.930</b>  | <b>724.434</b>  | 723.426         | G[12] |
| G  | 14 | <b>649.868</b>  | 703.429         | <b>695.419</b>  | <b>695.923</b>  | 694.915         | G[11] |
| A  | 15 | <b>685.387</b>  | 674.919         | <b>666.908</b>  | <b>667.412</b>  | 666.404         | A[10] |
| R  | 16 | <b>749.434</b>  | 639.399         | <b>631.390</b>  | <b>631.894</b>  | 630.886         | R[9]  |
| R  | 17 | 841.500         | 575.362         | 567.342         | 567.846         | 566.838         | R[8]  |
| H  | 18 | <b>910.030</b>  | 483.280         | 475.270         | 475.780         | 474.772         | H[7]  |
| R  | 19 | <b>988.080</b>  | 414.750         | 406.740         | 407.251         | 406.243         | R[6]  |
| K  | 20 | <b>1073.133</b> | 336.706         | 328.696         | 329.200         | 328.192         | K[5]  |
| V  | 21 | <b>1122.667</b> | 252.683         | 244.673         | 244.187         | 243.180         | V[4]  |
| L  | 22 | 1179.209        | 202.139         | 194.129         | 194.643         | 193.635         | L[3]  |
| R  | 23 | 1257.260        | 145.577         | 137.567         | 138.071         | 137.063         | R[2]  |
| D  | 24 | 1314.773        | 67.526          | 59.517          | 60.021          | 59.013          | D[1]  |

# sp | P62806 | H4\_MOUSE

[Acetyl]SGR GK <sup>Acetyl</sup><sub>42.01</sub> GGKGLGKGGAKR <sup>Dimethyl</sup><sub>28.03</sub> HRK <sup>Acetyl</sup><sub>42.01</sub> VL RD

- ▶ fragmentation table for charge state 3+
- ▶ specType=etd
- ▶ score=56.12
- ▶ F113279.dat
- ▶ query=q38490.p1
- ▶ precursor=526.710680
- ▶ chargePrecursor=5
- ▶ itol=0.5

| AA    | c              | y              | z+1            | z+2            | z              | AA    |
|-------|----------------|----------------|----------------|----------------|----------------|-------|
| S[1]  | 49.697         | <b>877.179</b> | 871.840        | 0.672          | 871.904        | S[24] |
| G[2]  | 58.704         | <b>834.165</b> | 828.826        | 0.672          | 828.490        | G[23] |
| R[3]  | 150.738        | 815.158        | 809.819        | <b>810.154</b> | 809.482        | R[22] |
| G[4]  | 139.745        | 763.124        | <b>757.785</b> | <b>750.121</b> | 757.449        | G[21] |
| K[5]  | 196.447        | 744.117        | <b>738.778</b> | <b>739.113</b> | 738.442        | K[20] |
| G[6]  | 215.454        | 687.415        | <b>682.076</b> | <b>682.412</b> | <b>681.740</b> | G[19] |
| G[7]  | 234.461        | 668.408        | 663.069        | 663.404        | 662.733        | G[18] |
| K[8]  | 277.159        | <b>649.401</b> | <b>644.061</b> | <b>644.397</b> | <b>643.725</b> | K[17] |
| C[9]  | 286.167        | <b>606.703</b> | <b>601.363</b> | <b>601.699</b> | 601.047        | C[16] |
| L[10] | 333.881        | <b>587.695</b> | <b>582.356</b> | <b>582.692</b> | 582.020        | L[15] |
| G[11] | 352.888        | 550.051        | 544.661        | <b>544.997</b> | 544.325        | G[14] |
| K[12] | 395.567        | 530.994        | 525.654        | 525.990        | 525.318        | K[13] |
| G[13] | 414.574        | 488.295        | 482.956        | 483.292        | 482.620        | G[12] |
| G[14] | 433.581        | 469.288        | 463.949        | 464.285        | 463.613        | G[11] |
| A[15] | 457.260        | 450.281        | 444.941        | 445.277        | 444.605        | A[10] |
| K[16] | 499.958        | 426.602        | 421.262        | 421.598        | 420.926        | K[9]  |
| R[17] | 561.336        | 383.904        | 378.564        | 378.900        | 378.228        | R[8]  |
| H[18] | <b>607.022</b> | 322.526        | 317.187        | 317.523        | 316.851        | H[7]  |
| R[19] | <b>659.056</b> | 276.840        | 271.500        | 271.836        | 271.164        | R[6]  |
| K[20] | <b>715.758</b> | 224.806        | 219.467        | 219.803        | 219.131        | K[5]  |
| V[21] | <b>748.781</b> | 168.104        | 162.765        | 163.101        | 162.429        | V[4]  |
| L[22] | 786.475        | 135.082        | 129.742        | 130.078        | 129.406        | L[3]  |
| R[23] | <b>838.509</b> | 97.387         | 92.047         | 92.383         | 91.711         | R[2]  |
| D[24] | 876.851        | 45.353         | 40.014         | 40.349         | 39.678         | D[1]  |

# sp | P62806 | H4\_MOUSE

[Acetyl]SGR<sup>Acetyl</sup>RGK<sub>42.01</sub> GGKGLGKGGAKR<sup>Dimethyl</sup> HRK<sup>Acetyl</sup> VLRD<sub>28.03 42.01</sub>

- ▶ fragmentation table for charge state 4+
- ▶ specType=etd
- ▶ score=56.12
- ▶ F113279.dat
- ▶ query=q38490\_p1
- ▶ precursor=526.710680
- ▶ chargePrecursor=5
- ▶ itol=0.5

| AA    | c       | y              | z+1            | z+2     | z              | AA    |
|-------|---------|----------------|----------------|---------|----------------|-------|
| S[1]  | 37.525  | <b>658.136</b> | <b>654.132</b> | 0.755   | 653.880        | S[24] |
| G[2]  | 51.780  | 625.876        | <b>621.871</b> | 0.755   | <b>621.619</b> | G[23] |
| R[3]  | 90.895  | <b>611.620</b> | <b>607.616</b> | 607.868 | <b>607.364</b> | R[22] |
| G[4]  | 105.061 | 572.995        | 568.590        | 568.842 | 568.338        | G[21] |
| K[5]  | 147.587 | 558.340        | 554.335        | 554.587 | 554.083        | K[20] |
| G[6]  | 161.842 | 515.813        | 511.809        | 512.061 | 511.557        | G[19] |
| G[7]  | 176.098 | 501.558        | 497.553        | 497.805 | 497.301        | G[18] |
| K[8]  | 208.121 | 487.303        | 483.298        | 483.550 | 483.046        | K[17] |
| G[9]  | 222.377 | 459.279        | 455.274        | 455.526 | 455.022        | G[16] |
| L[10] | 250.648 | 441.023        | 437.019        | 437.271 | 436.767        | L[15] |
| G[11] | 264.903 | 412.752        | 408.748        | 409.000 | 408.496        | G[14] |
| K[12] | 296.927 | 398.497        | 394.492        | 394.744 | 394.240        | K[13] |
| G[13] | 311.182 | 366.473        | 362.469        | 362.721 | 362.217        | G[12] |
| G[14] | 325.438 | 352.218        | 348.213        | 348.465 | 347.961        | G[11] |
| A[15] | 343.197 | 337.963        | 333.958        | 334.210 | 333.706        | A[10] |
| K[16] | 375.221 | 320.203        | 316.199        | 316.451 | 315.947        | K[9]  |
| R[17] | 421.254 | 288.180        | 284.175        | 284.427 | 283.923        | R[8]  |
| H[18] | 455.518 | 242.146        | 238.142        | 238.394 | 237.890        | H[7]  |
| R[19] | 464.544 | 207.882        | 203.877        | 204.129 | 203.625        | R[6]  |
| K[20] | 537.070 | 168.856        | 164.852        | 165.104 | 164.600        | K[5]  |
| V[21] | 563.837 | 126.330        | 122.325        | 122.577 | 122.073        | V[4]  |
| L[22] | 590.108 | 101.563        | 97.558         | 97.810  | 97.306         | L[3]  |
| R[23] | 629.134 | 73.292         | 69.287         | 69.539  | 69.035         | R[2]  |
| D[24] | 657.890 | 34.267         | 30.262         | 30.514  | 30.010         | D[1]  |





# sp | P62806 | H4\_MOUSE

[Acetyl]SGR<sup>Acetyl</sup>RGK<sup>42.01</sup> GGKGLGKGGAKRHR<sup>Dimethyl</sup> K<sup>28.03</sup> AcetylVLRD<sup>42.01</sup>

- ▶ fragmentation table for charge state 1+
- ▶ specType=etd
- ▶ score=52.13
- ▶ F113279.dat
- ▶ query=q38491\_p1
- ▶ precursor=658.138440
- ▶ chargePrecursor=4
- ▶ itol=0.5

| AA    | c               | y               | z+1      | z+2             | z        | AA    |
|-------|-----------------|-----------------|----------|-----------------|----------|-------|
| S[1]  | 147.676         | 2029.523        | 2613.505 | 0.000           | 2612.497 | S[24] |
| G[2]  | 204.008         | 2500.481        | 2484.462 | 0.000           | 2483.454 | G[23] |
| R[3]  | <b>368.199</b>  | 2843.450        | 2827.441 | 2420.448        | 2420.433 | R[22] |
| G[4]  | <b>417.220</b>  | 2297.386        | 2271.330 | 2272.347        | 2270.332 | G[21] |
| K[5]  | <b>587.326</b>  | 2230.337        | 2214.318 | 2215.326        | 2213.310 | K[20] |
| G[6]  | <b>644.347</b>  | 2060.231        | 2044.210 | 2045.220        | 2043.205 | G[19] |
| G[7]  | <b>701.369</b>  | 2003.210        | 1987.191 | <b>1988.199</b> | 1986.183 | G[18] |
| K[8]  | <b>829.464</b>  | 1946.180        | 1930.170 | 1931.177        | 1929.162 | K[17] |
| G[9]  | <b>885.485</b>  | 1818.093        | 1802.075 | <b>1803.082</b> | 1801.067 | G[16] |
| L[10] | <b>999.569</b>  | 1763.072        | 1748.053 | 1749.061        | 1744.043 | L[15] |
| G[11] | <b>1056.591</b> | 1647.958        | 1631.900 | 1632.977        | 1630.961 | G[14] |
| K[12] | <b>1184.686</b> | 1590.950        | 1574.940 | 1575.955        | 1573.940 | K[13] |
| G[13] | 1241.707        | 1462.871        | 1446.853 | 1447.860        | 1445.845 | G[12] |
| G[14] | 1298.729        | 1405.850        | 1389.831 | <b>1390.839</b> | 1388.823 | G[11] |
| A[15] | 1369.766        | 1348.828        | 1332.810 | 1333.818        | 1331.802 | A[10] |
| R[16] | 1499.883        | <b>1277.791</b> | 1261.773 | <b>1262.780</b> | 1260.765 | R[9]  |
| R[17] | 1653.962        | 1149.696        | 1133.678 | 1134.685        | 1132.670 | R[8]  |
| H[18] | 1791.021        | 993.599         | 977.579  | 978.584         | 976.569  | H[7]  |
| R[19] | <b>1975.153</b> | 856.530         | 840.518  | 841.525         | 839.510  | R[6]  |
| K[20] | 2145.259        | 672.404         | 656.385  | 657.393         | 655.377  | K[5]  |
| V[21] | 2244.327        | 502.268         | 486.260  | 487.267         | 485.272  | V[4]  |
| L[22] | 2357.411        | 403.239         | 387.211  | 388.219         | 386.203  | L[3]  |
| R[23] | 2513.512        | 290.140         | 274.127  | 275.135         | 273.119  | R[2]  |
| D[24] | 2628.539        | 134.045         | 118.020  | 119.034         | 117.018  | D[1]  |

# sp | P62806 | H4\_MOUSE

[Acetyl]SGR<sup>Acetyl</sup>RGK<sub>42.01</sub> GGKGLGKGGAKR<sup>Dimethyl</sup>RH<sub>28.03</sub> K<sup>Acetyl</sup>VLRD<sub>42.01</sub>

- ▶ fragmentation table for charge state 2+
- ▶ specType=etd
- ▶ score=52.13
- ▶ F113279.dat
- ▶ query=q38491\_p1
- ▶ precursor=658.138440
- ▶ chargePrecursor=4
- ▶ itol=0.5

| AA    | c               | y               | z+1             | z+2             | z              | AA    |
|-------|-----------------|-----------------|-----------------|-----------------|----------------|-------|
| S[1]  | 74.042          | <b>1315.265</b> | 1307.256        | 0.504           | 1306.752       | S[24] |
| G[2]  | 102.553         | 1250.744        | <b>1242.735</b> | 0.504           | 1242.231       | G[23] |
| R[3]  | 180.603         | 1222.233        | 1214.224        | <b>1214.720</b> | 1213.720       | R[22] |
| G[4]  | 209.114         | 1144.181        | <b>1136.173</b> | <b>1136.677</b> | 1135.669       | G[21] |
| K[5]  | 294.167         | 1115.672        | 1107.663        | <b>1108.167</b> | 1107.159       | K[20] |
| G[6]  | 322.677         | 1030.619        | <b>1022.610</b> | <b>1023.114</b> | 1022.106       | G[19] |
| G[7]  | 351.188         | 1002.108        | 994.099         | 994.603         | 993.595        | G[18] |
| K[8]  | 415.236         | 973.598         | <b>965.588</b>  | 966.092         | <b>965.084</b> | K[17] |
| G[9]  | 443.746         | 909.550         | <b>901.541</b>  | <b>902.045</b>  | <b>901.037</b> | G[16] |
| L[10] | 509.288         | 881.040         | 873.031         | 873.534         | <b>872.526</b> | L[15] |
| G[11] | 528.799         | 824.498         | <b>816.488</b>  | 816.992         | <b>815.984</b> | G[14] |
| K[12] | 592.847         | 795.987         | <b>787.977</b>  | <b>788.481</b>  | 787.474        | K[13] |
| G[13] | 621.357         | 731.939         | 723.930         | <b>724.434</b>  | 723.426        | G[12] |
| G[14] | 649.868         | 703.429         | <b>695.419</b>  | <b>695.923</b>  | 694.915        | G[11] |
| A[15] | 685.367         | 674.918         | <b>666.908</b>  | <b>667.412</b>  | 666.404        | A[10] |
| R[16] | 749.434         | 639.399         | <b>631.390</b>  | <b>631.894</b>  | 630.886        | R[9]  |
| R[17] | 827.488         | 575.352         | 567.342         | 567.846         | 566.839        | R[8]  |
| H[18] | 896.014         | 497.301         | 489.292         | 489.796         | 488.788        | H[7]  |
| R[19] | 968.080         | 428.772         | 420.762         | 421.266         | 420.259        | R[6]  |
| K[20] | 1073.133        | 336.706         | 328.696         | 329.200         | 328.192        | K[5]  |
| V[21] | <b>1122.867</b> | 251.653         | 243.643         | 244.147         | 243.140        | V[4]  |
| L[22] | <b>1178.799</b> | 202.133         | 194.123         | 194.627         | 193.620        | L[3]  |
| R[23] | 1257.260        | 145.577         | 137.567         | 138.071         | 137.063        | R[2]  |
| D[24] | 1314.773        | 67.526          | 59.517          | 60.021          | 59.013         | D[1]  |

# sp | P62806 | H4\_MOUSE

[Acetyl]SGR<sup>Acetyl</sup>RGK<sub>42.01</sub> GGKGLGKGGAKR<sup>Dimethyl</sup>RH<sub>28.03</sub> K<sup>Acetyl</sup>VLR<sub>42.01</sub>D

- ▶ fragmentation table for charge state 3+
- ▶ specType=etd
- ▶ score=52.13
- ▶ F113279.dat
- ▶ query=q38491.p1
- ▶ precursor=658.138440
- ▶ chargePrecursor=4
- ▶ itol=0.5

| AA    | c              | y              | z+1            | z+2            | z              | AA    |
|-------|----------------|----------------|----------------|----------------|----------------|-------|
| S[1]  | 49.697         | 877.179        | 871.840        | 0.672          | 871.904        | S[24] |
| G[2]  | 58.704         | 934.165        | 828.826        | 0.672          | 828.490        | G[23] |
| R[3]  | 120.738        | 815.158        | <b>809.818</b> | <b>810.154</b> | 809.482        | R[22] |
| G[4]  | 139.745        | 763.124        | 757.785        | 758.121        | 757.449        | G[21] |
| K[5]  | 196.447        | 744.117        | 738.778        | 739.113        | 738.442        | K[20] |
| G[6]  | 215.454        | 687.415        | 682.076        | 682.412        | 681.740        | G[19] |
| G[7]  | 234.461        | 668.408        | 663.069        | 663.404        | 662.733        | G[18] |
| K[8]  | 277.159        | 649.401        | <b>644.061</b> | <b>644.397</b> | <b>643.725</b> | K[17] |
| G[9]  | 286.167        | 638.793        | 633.454        | 633.789        | 633.127        | G[16] |
| L[10] | 313.881        | <b>587.695</b> | <b>582.356</b> | <b>582.692</b> | <b>582.020</b> | L[15] |
| G[11] | 352.888        | 550.001        | 544.661        | 544.997        | 544.325        | G[14] |
| K[12] | 395.567        | 530.994        | 525.654        | 525.990        | 525.318        | K[13] |
| G[13] | 414.574        | 488.295        | 482.956        | 483.292        | 482.620        | G[12] |
| G[14] | 433.581        | 469.288        | 463.949        | 464.285        | 463.613        | G[11] |
| A[15] | 457.260        | 450.281        | 444.941        | 445.277        | 444.605        | A[10] |
| K[16] | 499.958        | 426.002        | 421.262        | 421.598        | 420.926        | K[9]  |
| R[17] | 551.992        | 383.904        | 378.564        | 378.900        | 378.228        | R[8]  |
| H[18] | 597.678        | 331.870        | 326.530        | 326.866        | 326.194        | H[7]  |
| R[19] | 659.056        | 296.184        | 290.844        | 291.180        | 290.508        | R[6]  |
| K[20] | 715.758        | 224.806        | 219.467        | 219.803        | 219.131        | K[5]  |
| V[21] | 748.781        | 168.104        | 162.765        | 163.101        | 162.429        | V[4]  |
| L[22] | 786.475        | 135.082        | 129.742        | 130.078        | 129.406        | L[3]  |
| R[23] | <b>838.509</b> | 97.387         | 92.047         | 92.383         | 91.711         | R[2]  |
| D[24] | 876.851        | 45.353         | 40.014         | 40.349         | 39.678         | D[1]  |

# sp | Q6ZWY9 | H2B1C\_MOUSE

PEPAKSAPAPKK Acetyl GSKKAVTKAQKKD  
42.01

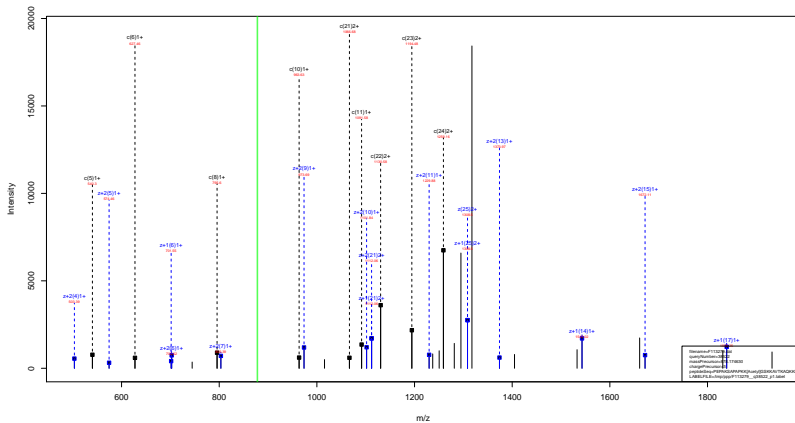

# sp | Q6ZWY9 | H2B1C\_MOUSE

PEPAKSAPAPKK <sup>Acetyl</sup><sub>42.01</sub> GSKKAVTKAQKKD

- ▶ fragmentation table for charge state 1+
- ▶ specType=etd
- ▶ score=51.88
- ▶ F113279.dat
- ▶ query=q38522\_p1
- ▶ precursor=878.174630
- ▶ chargePrecursor=3
- ▶ itol=0.5

| AA  | c               | y        | z+1             | z+2             | z        | AA  |
|-----|-----------------|----------|-----------------|-----------------|----------|-----|
| P1  | 115.087         | 2032.514 | 2018.495        | 0.000           | 2015.485 | P25 |
| E2  | 244.129         | 2535.462 | 2519.443        | 0.000           | 2519.435 | E24 |
| P13 | 341.182         | 2906.415 | 2390.400        | 0.000           | 2389.393 | P23 |
| A4  | 412.219         | 2309.366 | 2293.348        | 0.000           | 2292.340 | A22 |
| K5  | <b>540.314</b>  | 2238.329 | 2222.311        | 2223.318        | 2221.303 | K21 |
| S6  | <b>627.346</b>  | 2110.234 | 2094.216        | 2095.223        | 2093.208 | S20 |
| A7  | 696.353         | 2023.202 | 2007.184        | 2008.191        | 2006.176 | A19 |
| P18 | <b>795.436</b>  | 1952.165 | 1936.146        | 1937.154        | 1935.139 | P15 |
| A9  | 866.473         | 1855.112 | <b>1839.094</b> | 1840.101        | 1838.086 | A17 |
| P10 | <b>963.526</b>  | 1784.075 | 1768.057        | 1769.064        | 1767.049 | P16 |
| K11 | <b>1091.621</b> | 1687.022 | 1671.004        | <b>1672.012</b> | 1669.996 | K15 |
| K12 | 1261.726        | 1558.928 | <b>1542.909</b> | 1543.917        | 1541.901 | K14 |
| G13 | 1318.748        | 1388.822 | 1372.803        | <b>1373.811</b> | 1371.795 | G13 |
| S14 | 1405.780        | 1331.801 | 1315.782        | 1316.790        | 1314.774 | S12 |
| K15 | 1533.875        | 1244.765 | 1228.750        | <b>1229.758</b> | 1227.742 | K11 |
| K16 | 1661.970        | 1158.674 | 1140.655        | <b>1101.663</b> | 1099.647 | K10 |
| A17 | 1733.007        | 988.579  | 972.560         | <b>973.568</b>  | 971.552  | A0  |
| V18 | 1832.075        | 917.541  | 901.523         | 902.531         | 900.515  | V8  |
| T10 | 1933.123        | 818.472  | 802.454         | <b>803.462</b>  | 801.446  | T7  |
| P20 | 2093.218        | 717.425  | <b>701.407</b>  | <b>702.414</b>  | 700.399  | P6  |
| A21 | 2132.255        | 589.330  | 573.312         | <b>574.320</b>  | 572.304  | A5  |
| Q22 | 2260.314        | 518.293  | 502.275         | <b>503.282</b>  | 501.267  | Q4  |
| K23 | 2388.409        | 400.235  | 374.216         | 375.224         | 373.208  | K3  |
| K24 | 2516.504        | 282.140  | 246.121         | 247.129         | 245.113  | K2  |
| D25 | 2631.530        | 134.045  | 118.028         | 119.034         | 117.018  | D1  |

# sp | Q6ZWY9 | H2B1C\_MOUSE

PEPAKSAPAPKK <sup>Acetyl</sup>42.01 GSKKAVTKAQKKD

- ▶ fragmentation table for charge state 2+
- ▶ specType=etd
- ▶ score=51.88
- ▶ F113279.dat
- ▶ query=q38522\_p1
- ▶ precursor=878.174630
- ▶ chargePrecursor=3
- ▶ itol=0.5

| AA  | c               | y        | z+1             | z+2             | z               | AA  |
|-----|-----------------|----------|-----------------|-----------------|-----------------|-----|
| P1  | 58.647          | 1316.761 | <b>1308.752</b> | 0.504           | <b>1308.248</b> | P25 |
| E1  | 132.586         | 1206.234 | 1206.225        | 0.504           | 1206.721        | E24 |
| P1  | 171.095         | 1203.713 | 1195.704        | 0.504           | 1195.200        | P23 |
| A1  | 206.613         | 1195.187 | 1147.177        | 0.504           | 1146.674        | A22 |
| K1  | 270.661         | 1119.666 | <b>1111.659</b> | <b>1112.163</b> | 1111.155        | K21 |
| S1  | 314.177         | 1055.621 | 1047.611        | 1048.115        | 1047.107        | S20 |
| A1  | 349.695         | 1012.105 | 1004.095        | 1004.599        | 1003.591        | A19 |
| P1  | 389.222         | 976.566  | 968.557         | 969.061         | 968.054         | P18 |
| A1  | 433.740         | 928.060  | 920.050         | 920.554         | 919.547         | A17 |
| P10 | 482.267         | 892.541  | 884.532         | 885.036         | 884.028         | P16 |
| K11 | 546.314         | 844.015  | 836.006         | 836.509         | 835.502         | K15 |
| K12 | 631.367         | 779.967  | 771.958         | 772.462         | 771.454         | K14 |
| Q13 | 659.276         | 694.932  | 686.923         | 687.427         | 686.420         | Q13 |
| S14 | 703.394         | 656.404  | 650.395         | 650.898         | 649.891         | S12 |
| K15 | 767.441         | 622.888  | 614.879         | 615.382         | 614.375         | K11 |
| K16 | 831.488         | 558.840  | 550.831         | 551.335         | 550.327         | K10 |
| A17 | 867.007         | 494.793  | 486.784         | 487.287         | 486.280         | A9  |
| V18 | 916.541         | 459.274  | 451.265         | 451.769         | 450.761         | V9  |
| T19 | 967.085         | 439.749  | 431.740         | 432.243         | 431.237         | T17 |
| K20 | 1031.113        | 359.216  | 351.207         | 351.711         | 350.703         | K6  |
| A21 | <b>1066.631</b> | 395.169  | 287.159         | 287.663         | 286.656         | A5  |
| Q22 | <b>1130.660</b> | 269.650  | 251.641         | 252.145         | 251.137         | Q4  |
| K23 | <b>1194.708</b> | 195.621  | 187.612         | 188.116         | 187.108         | K3  |
| K24 | <b>1258.755</b> | 131.574  | 123.564         | 124.068         | 123.060         | K2  |
| D25 | 1338.269        | 87.526   | 89.537          | 89.021          | 89.013          | D1  |





# sp | Q64525 | H2B2B\_MOUSE

PDKASAPAPKKGSKKAVTK<sup>Acetyl</sup><sub>42.01</sub> VQKKD

- ▶ fragmentation table for charge state 1+
- ▶ specType=etd
- ▶ score=39.70
- ▶ F113279.dat
- ▶ query=q38681\_p1
- ▶ precursor=882.844990
- ▶ chargePrecursor=3
- ▶ itol=0.5

| AA | c       | y               | z+1      | z+2             | z               | AA       |    |    |
|----|---------|-----------------|----------|-----------------|-----------------|----------|----|----|
| F  | 115.087 | 2046.539        | 2030.513 | 0.000           | 2029.504        | F        | 25 |    |
| D  | 230.114 | 2546.877        | 2533.400 | 0.000           | 2532.451        | D        | 24 |    |
| P  | 327.166 | 2634.450        | 2418.432 | 0.000           | 2417.426        | P        | 23 |    |
| A  | 398.203 | 2337.898        | 2321.379 | 0.000           | 2320.371        | A        | 22 |    |
| K  | 526.208 | 2206.901        | 2250.342 | 2251.350        | 2249.334        | K        | 21 |    |
| S  | 6       | <b>613.330</b>  | 2138.266 | 2122.247        | 2123.255        | 2121.239 | S  | 20 |
| A  | 7       | 664.368         | 2051.294 | 2035.215        | 2036.223        | 2034.207 | A  | 19 |
| P  | 8       | <b>781.420</b>  | 1980.196 | 1964.178        | 1968.186        | 1963.179 | P  | 18 |
| A  | 9       | 852.457         | 1883.144 | 1867.125        | <b>1868.133</b> | 1866.117 | A  | 17 |
| P  | 10      | <b>949.510</b>  | 1812.107 | 1796.088        | 1797.096        | 1795.080 | P  | 16 |
| K  | 11      | <b>1077.605</b> | 1715.054 | 1699.035        | <b>1700.043</b> | 1698.027 | K  | 15 |
| K  | 12      | 1205.700        | 1586.959 | <b>1570.940</b> | 1571.948        | 1569.932 | K  | 14 |
| G  | 13      | 1262.727        | 1458.864 | <b>1442.845</b> | 1443.853        | 1441.837 | G  | 13 |
| S  | 14      | <b>1349.754</b> | 1403.842 | 1385.824        | <b>1386.831</b> | 1384.815 | S  | 12 |
| K  | 15      | 1472.849        | 1314.810 | 1298.792        | 1299.799        | 1297.784 | K  | 11 |
| K  | 16      | 1605.944        | 1186.715 | 1170.697        | <b>1171.705</b> | 1169.689 | K  | 10 |
| A  | 17      | 1676.981        | 1058.620 | <b>1042.602</b> | <b>1043.610</b> | 1041.594 | A  | 9  |
| V  | 18      | 1776.049        | 987.583  | 971.565         | 972.572         | 970.557  | V  | 8  |
| T  | 19      | 1872.097        | 888.515  | 872.496         | <b>873.504</b>  | 871.488  | T  | 7  |
| P  | 20      | 2047.202        | 787.469  | 771.449         | <b>772.456</b>  | 770.441  | P  | 6  |
| V  | 21      | 2146.271        | 617.362  | 601.343         | 602.351         | 600.335  | V  | 5  |
| Q  | 22      | 2274.320        | 518.293  | 502.275         | <b>503.282</b>  | 501.267  | Q  | 4  |
| K  | 23      | 2402.424        | 400.235  | 374.216         | 375.224         | 373.208  | K  | 3  |
| K  | 24      | 2530.519        | 282.140  | 246.121         | 247.129         | 245.113  | K  | 2  |
| D  | 25      | 2645.546        | 134.045  | 118.028         | 119.034         | 117.018  | D  | 1  |

# sp | Q64525 | H2B2B\_MOUSE

PDKASAPAPKKGSKKAVTK <sup>Acetyl</sup> 42.01 VQKKD

- ▶ fragmentation table for charge state 2+
- ▶ specType=etd
- ▶ score=39.70
- ▶ F113279.dat
- ▶ query=q38681\_p1
- ▶ precursor=882.844990
- ▶ chargePrecursor=3
- ▶ itol=0.5

| AA |    | c               | y        | a+1             | a+2             | z               | AA    |
|----|----|-----------------|----------|-----------------|-----------------|-----------------|-------|
| P  | 1  | 58.047          | 1323.709 | <b>1315.759</b> | 0.504           | <b>1315.255</b> | P[25] |
| D  | 3  | 115.560         | 1275.262 | <b>1267.233</b> | 0.504           | 1259.725        | D[24] |
| P  | 3  | 104.087         | 1217.729 | 1209.710        | 0.504           | 1209.210        | P[23] |
| A  | 4  | 199.605         | 1169.202 | 1161.193        | 0.504           | 1160.689        | A[22] |
| K  | 5  | 263.653         | 1133.684 | 1125.675        | <b>1126.178</b> | 1125.171        | K[21] |
| S  | 6  | 307.169         | 1069.636 | 1061.627        | <b>1062.131</b> | 1061.123        | S[20] |
| A  | 7  | 362.667         | 1026.120 | 1018.111        | 1018.615        | 1017.607        | A[19] |
| P  | 8  | 391.214         | 999.602  | 992.592         | 993.096         | 992.089         | P[18] |
| A  | 9  | 426.732         | 942.075  | 934.066         | 934.570         | 933.562         | A[17] |
| P  | 10 | 475.259         | 906.557  | 898.548         | 899.051         | 898.044         | P[16] |
| K  | 11 | 539.306         | 858.031  | 850.021         | 850.525         | 849.517         | K[15] |
| K  | 12 | 603.354         | 793.983  | 785.974         | 786.478         | 785.470         | K[14] |
| Q  | 13 | 631.894         | 729.936  | 721.926         | 722.430         | 721.422         | Q[13] |
| S  | 14 | 675.389         | 701.425  | 693.415         | 693.919         | 692.911         | S[12] |
| K  | 15 | 739.428         | 657.909  | 649.899         | 650.403         | 649.396         | K[11] |
| K  | 16 | 803.475         | 593.861  | 585.852         | 586.356         | 585.348         | K[10] |
| A  | 17 | 838.994         | 529.814  | 521.804         | 522.308         | 521.301         | A[9]  |
| V  | 18 | 888.526         | 464.795  | 456.786         | 457.290         | 456.282         | V[8]  |
| T  | 19 | 939.052         | 414.761  | 406.752         | 407.256         | 406.248         | T[7]  |
| K  | 20 | 1024.105        | 394.237  | 386.228         | 386.732         | 385.725         | K[6]  |
| V  | 21 | <b>1073.639</b> | 309.184  | 301.175         | 301.679         | 300.671         | V[5]  |
| Q  | 22 | <b>1137.668</b> | 259.650  | 251.641         | 252.145         | 251.137         | Q[4]  |
| K  | 23 | <b>1201.716</b> | 195.621  | 187.612         | 188.116         | 187.108         | K[3]  |
| K  | 24 | 1265.763        | 131.574  | 123.564         | 124.068         | 123.060         | K[2]  |
| D  | 25 | 1323.277        | 87.526   | 89.517          | 89.021          | 89.013          | D[1]  |



# sp | P62806 | H4\_MOUSE

[Acetyl]SGRGKGGK <sup>Acetyl</sup><sub>42.01</sub> GLGK <sup>Acetyl</sup><sub>42.01</sub> GGAK <sup>Acetyl</sup><sub>42.01</sub> RHRK <sup>Dimethyl</sup><sub>28.03</sub> VLRD

- ▶ fragmentation table for charge state 1+
- ▶ specType=etd
- ▶ score=110.50
- ▶ F113279.dat
- ▶ query=q38863.p1
- ▶ precursor=668.640280
- ▶ chargePrecursor=4
- ▶ itol=0.5

| AA | c  | y               | z+1      | z+2            | z               | AA       |       |
|----|----|-----------------|----------|----------------|-----------------|----------|-------|
| S  | 1  | 147.076         | 2071.534 | 2055.515       | 0.000           | 2054.507 | S[24] |
| G  | 2  | 254.596         | 2542.491 | 2526.473       | 0.000           | 2525.465 | G[23] |
| T  | 3  | <b>360.199</b>  | 2428.470 | 2409.451       | 2670.459        | 2408.443 | T[22] |
| G  | 4  | <b>417.220</b>  | 2329.369 | 2313.350       | 2314.358        | 2312.342 | G[21] |
| K  | 5  | <b>545.115</b>  | 2272.347 | 2256.329       | 2257.336        | 2255.321 | K[20] |
| G  | 6  | <b>602.337</b>  | 2144.253 | 2128.234       | 2129.241        | 2127.226 | G[19] |
| G  | 7  | <b>659.358</b>  | 2087.231 | 2071.212       | 2072.220        | 2070.204 | G[18] |
| K  | 8  | <b>829.464</b>  | 2030.209 | 2014.191       | 2015.198        | 2013.183 | K[17] |
| G  | 9  | <b>886.485</b>  | 1890.104 | 1884.085       | <b>1845.093</b> | 1843.077 | G[16] |
| L  | 10 | <b>959.549</b>  | 1803.082 | 1787.064       | 1788.071        | 1786.056 | L[15] |
| G  | 11 | <b>1056.591</b> | 1689.998 | 1673.980       | <b>1674.987</b> | 1672.972 | G[14] |
| K  | 12 | <b>1226.696</b> | 1632.977 | 1616.958       | <b>1617.965</b> | 1615.950 | K[13] |
| G  | 13 | <b>1283.718</b> | 1462.871 | 1446.853       | 1447.860        | 1445.845 | G[12] |
| G  | 14 | <b>1340.739</b> | 1405.850 | 1389.831       | <b>1390.839</b> | 1388.823 | G[11] |
| A  | 15 | <b>1411.776</b> | 1348.829 | 1332.810       | 1333.818        | 1331.802 | A[10] |
| K  | 16 | <b>1581.882</b> | 1277.791 | 1261.773       | 1262.780        | 1260.765 | K[9]  |
| R  | 17 | <b>1737.983</b> | 1197.686 | 1191.667       | <b>1092.675</b> | 1090.659 | R[8]  |
| H  | 18 | <b>1875.042</b> | 951.585  | <b>935.566</b> | <b>936.574</b>  | 934.558  | H[7]  |
| R  | 19 | 2031.143        | 814.526  | <b>798.507</b> | <b>799.515</b>  | 797.499  | R[6]  |
| K  | 20 | 2187.209        | 658.425  | 642.406        | <b>643.414</b>  | 641.398  | K[5]  |
| V  | 21 | 2286.338        | 602.398  | 486.280        | 487.287         | 485.272  | V[4]  |
| L  | 22 | 2399.422        | 460.295  | 387.211        | <b>388.219</b>  | 386.203  | L[3]  |
| T  | 23 | 2529.523        | 290.140  | 274.121        | <b>275.129</b>  | 273.113  | T[2]  |
| D  | 24 | 2670.550        | 134.045  | 118.026        | 119.034         | 117.018  | D[1]  |

# sp | P62806 | H4\_MOUSE

[Acetyl]SGRGKGGK <sup>Acetyl</sup><sub>42.01</sub> GLGK <sup>Acetyl</sup><sub>42.01</sub> GGAK <sup>Acetyl</sup><sub>42.01</sub> RHRK <sup>Dimethyl</sup><sub>28.03</sub> VLRD

- ▶ fragmentation table for charge state 2+
- ▶ specType=etd
- ▶ score=110.50
- ▶ F113279.dat
- ▶ query=q38863.p1
- ▶ precursor=668.640280
- ▶ chargePrecursor=4
- ▶ itol=0.5

| AA | c  | y               | z+1             | z+2             | z               | AA              |       |
|----|----|-----------------|-----------------|-----------------|-----------------|-----------------|-------|
| S  | 1  | 74.642          | <b>1336.271</b> | <b>1328.261</b> | 0.504           | 1327.757        | S[24] |
| G  | 2  | 102.553         | 1271.749        | <b>1263.740</b> | 0.504           | 1263.236        | G[23] |
| R  | 3  | 180.603         | 1243.239        | <b>1235.229</b> | <b>1235.733</b> | 1234.725        | R[22] |
| G  | 4  | 259.114         | 1165.189        | <b>1157.179</b> | <b>1157.683</b> | 1156.675        | G[21] |
| K  | 5  | 273.151         | 1136.677        | <b>1128.668</b> | <b>1129.172</b> | 1128.164        | K[20] |
| G  | 6  | 301.672         | 1072.630        | 1064.620        | <b>1065.124</b> | 1064.117        | G[19] |
| G  | 7  | 330.183         | 1044.119        | <b>1036.110</b> | <b>1036.614</b> | 1035.606        | G[18] |
| K  | 8  | 415.216         | <b>1015.608</b> | <b>1007.599</b> | <b>1008.103</b> | <b>1007.095</b> | K[17] |
| G  | 9  | 443.746         | 0.30356         | <b>922.546</b>  | <b>923.050</b>  | 922.042         | G[16] |
| L  | 10 | 509.268         | 892.045         | 884.035         | 884.539         | 883.531         | L[15] |
| G  | 11 | 538.799         | 845.503         | <b>837.493</b>  | <b>837.997</b>  | 836.990         | G[14] |
| K  | 12 | 613.852         | 816.992         | <b>808.983</b>  | <b>809.487</b>  | 808.479         | K[13] |
| G  | 13 | 642.363         | 731.939         | <b>723.930</b>  | <b>724.434</b>  | 723.426         | G[12] |
| G  | 14 | 670.873         | 703.429         | <b>695.419</b>  | <b>695.923</b>  | 694.915         | G[11] |
| A  | 15 | 698.394         | 674.918         | 666.908         | 667.412         | 666.404         | A[10] |
| R  | 16 | <b>791.445</b>  | 639.399         | <b>631.390</b>  | <b>631.894</b>  | 630.886         | R[9]  |
| R  | 17 | 869.495         | 554.347         | <b>546.337</b>  | <b>546.841</b>  | 545.833         | R[8]  |
| H  | 18 | <b>938.025</b>  | 476.296         | 468.287         | 468.791         | 467.783         | H[7]  |
| R  | 19 | 1016.075        | 407.747         | 399.737         | 400.241         | 399.233         | R[6]  |
| K  | 20 | 1094.126        | 329.196         | 321.187         | 321.691         | 320.683         | K[5]  |
| V  | 21 | <b>1143.673</b> | 251.643         | 243.633         | 244.137         | 243.129         | V[4]  |
| L  | 22 | <b>1200.215</b> | 202.119         | 194.109         | 194.613         | 193.605         | L[3]  |
| R  | 23 | <b>1278.265</b> | 145.577         | 137.567         | 138.071         | 137.063         | R[2]  |
| D  | 24 | 1336.779        | 67.526          | 59.517          | 60.021          | 59.013          | D[1]  |

# sp | P62806 | H4\_MOUSE

[Acetyl]SGRGKGGK <sup>Acetyl</sup><sub>42.01</sub> GLGK <sup>Acetyl</sup><sub>42.01</sub> GGAK <sup>Acetyl</sup><sub>42.01</sub> RHRK <sup>Dimethyl</sup><sub>28.03</sub> VLRD

- ▶ fragmentation table for charge state 3+
- ▶ specType=etd
- ▶ score=110.50
- ▶ F113279.dat
- ▶ query=q38863.p1
- ▶ precursor=668.640280
- ▶ chargePrecursor=4
- ▶ itol=0.5

| AA    | c              | y              | z+1            | z+2            | z       | AA    |
|-------|----------------|----------------|----------------|----------------|---------|-------|
| S[1]  | 49.597         | <b>891.183</b> | <b>885.843</b> | 0.572          | 885.507 | S[24] |
| G[2]  | 58.704         | 846.159        | <b>842.829</b> | 0.572          | 842.493 | G[23] |
| R[3]  | 130.738        | <b>829.161</b> | <b>823.822</b> | <b>824.158</b> | 823.486 | R[22] |
| G[4]  | 139.745        | 777.128        | 771.788        | 772.124        | 771.452 | G[21] |
| K[5]  | 182.443        | 758.121        | 752.781        | 753.117        | 752.445 | K[20] |
| G[6]  | 201.450        | 715.422        | 710.083        | 710.419        | 709.747 | G[19] |
| G[7]  | 220.458        | 696.415        | 691.075        | 691.412        | 690.740 | G[18] |
| K[8]  | 277.159        | 677.408        | 672.068        | 672.404        | 671.732 | K[17] |
| G[9]  | 296.167        | 658.705        | 653.367        | 653.703        | 653.031 | G[16] |
| L[10] | 313.891        | 651.699        | 596.359        | 596.695        | 596.023 | L[15] |
| G[11] | 352.888        | 654.054        | 558.665        | 559.001        | 558.329 | G[14] |
| K[12] | 409.570        | <b>544.997</b> | 539.658        | 539.994        | 539.322 | K[13] |
| G[13] | 428.577        | 488.295        | 482.956        | 483.292        | 482.620 | G[12] |
| G[14] | 447.585        | 469.288        | 463.949        | 464.285        | 463.613 | G[11] |
| A[15] | 471.264        | 450.281        | 444.941        | 445.277        | 444.605 | A[10] |
| K[16] | 527.966        | 426.602        | 421.262        | 421.598        | 420.926 | K[9]  |
| R[17] | 579.999        | 369.900        | 364.561        | 364.896        | 364.225 | R[8]  |
| H[18] | 625.686        | 317.866        | 312.527        | 312.863        | 312.191 | H[7]  |
| R[19] | 677.719        | 272.180        | 266.841        | 267.176        | 266.505 | R[6]  |
| K[20] | 729.761        | 220.140        | 214.801        | 215.137        | 214.471 | K[5]  |
| V[21] | 762.784        | 188.194        | 182.795        | 183.101        | 182.429 | V[4]  |
| L[22] | 830.479        | 135.082        | 129.742        | 130.078        | 129.406 | L[3]  |
| R[23] | <b>852.513</b> | 97.387         | 92.047         | 92.383         | 91.711  | R[2]  |
| D[24] | 890.855        | 45.353         | 40.014         | 40.349         | 39.678  | D[1]  |



# sp | P62806 | H4\_MOUSE

[Acetyl]SGRGKGGK <sup>Acetyl</sup><sub>42.01</sub> GLGK <sup>Acetyl</sup><sub>42.01</sub> GGAK <sup>Acetyl</sup><sub>42.01</sub> RHR <sup>Dimethyl</sup><sub>28.03</sub> KVLRD

- ▶ fragmentation table for charge state 1+
- ▶ specType=etd
- ▶ score=67.31
- ▶ F113279.dat
- ▶ query=q38866\_p1
- ▶ precursor=535.114350
- ▶ chargePrecursor=5
- ▶ itol=0.5

| AA    | c               | y        | z+1             | z+2             | z              | AA    |
|-------|-----------------|----------|-----------------|-----------------|----------------|-------|
| S[1]  | 147.076         | 2671.534 | 2655.515        | 0.000           | 2654.507       | S[24] |
| G[2]  | 204.098         | 2542.491 | 2526.473        | 0.000           | 2525.465       | G[23] |
| R[3]  | <b>350.199</b>  | 2486.470 | 2469.451        | 2470.459        | 2468.443       | R[22] |
| G[4]  | <b>417.230</b>  | 2329.369 | 2313.350        | 2314.358        | 2312.341       | G[21] |
| K[5]  | <b>545.315</b>  | 2272.347 | 2256.329        | 2257.336        | 2255.321       | K[20] |
| G[6]  | <b>602.337</b>  | 2144.252 | 2128.234        | 2129.241        | 2127.226       | G[19] |
| G[7]  | 659.358         | 2087.231 | 2071.213        | 2072.220        | 2070.204       | G[18] |
| K[8]  | <b>829.464</b>  | 2030.209 | 2014.191        | 2015.198        | 2013.183       | K[17] |
| G[9]  | <b>885.485</b>  | 1980.184 | <b>1844.085</b> | 1845.093        | 1843.077       | G[16] |
| L[10] | <b>929.549</b>  | 1933.062 | 1797.064        | 1798.071        | 1796.056       | L[15] |
| G[11] | <b>1056.591</b> | 1889.998 | <b>1673.980</b> | 1674.987        | 1672.972       | G[14] |
| K[12] | <b>1226.696</b> | 1832.977 | 1616.958        | 1617.966        | 1615.950       | K[13] |
| G[13] | 1283.718        | 1462.971 | 1446.953        | <b>1447.860</b> | 1445.845       | G[12] |
| G[14] | <b>1340.739</b> | 1405.950 | <b>1389.831</b> | 1390.839        | 1388.823       | G[11] |
| A[15] | <b>1411.776</b> | 1348.928 | 1332.810        | <b>1333.818</b> | 1331.802       | A[10] |
| R[16] | 1541.882        | 1277.911 | 1261.793        | <b>1262.760</b> | 1260.765       | R[9]  |
| R[17] | 1737.983        | 1107.885 | 1091.667        | 1092.675        | 1090.659       | R[8]  |
| H[18] | 1875.042        | 951.585  | <b>935.566</b>  | 936.574         | 934.558        | H[7]  |
| R[19] | 2059.174        | 814.526  | <b>798.507</b>  | 799.515         | <b>797.499</b> | R[6]  |
| K[20] | 2187.269        | 630.393  | <b>614.375</b>  | <b>615.382</b>  | 613.367        | K[5]  |
| V[21] | 2286.338        | 502.298  | <b>486.280</b>  | 487.287         | 485.272        | V[4]  |
| L[22] | 2399.422        | 403.230  | <b>387.211</b>  | 388.219         | 386.203        | L[3]  |
| R[23] | 2555.523        | 290.146  | <b>274.127</b>  | 275.135         | 273.119        | R[2]  |
| D[24] | 2670.550        | 134.045  | 118.026         | 119.034         | 117.018        | D[1]  |



# sp | P62806 | H4\_MOUSE

[Acetyl]SGRGKGGK <sup>Acetyl</sup><sub>42.01</sub> GLGK <sup>Acetyl</sup><sub>42.01</sub> GGAK <sup>Acetyl</sup><sub>42.01</sub> RHR <sup>Dimethyl</sup><sub>28.03</sub> KVLRD

- ▶ fragmentation table for charge state 2+
- ▶ specType=etd
- ▶ score=67.31
- ▶ F113279.dat
- ▶ query=q38866.p1
- ▶ precursor=535.114350
- ▶ chargePrecursor=5
- ▶ itol=0.5

| AA    | c               | y               | z+1             | z+2             | z               | AA    |
|-------|-----------------|-----------------|-----------------|-----------------|-----------------|-------|
| S[1]  | 74.042          | 1138.271        | 1126.261        | 0.504           | 1327.757        | S[24] |
| G[2]  | 102.551         | 1271.746        | 1263.740        | 0.504           | <b>1263.236</b> | G[23] |
| R[3]  | 180.603         | 1243.239        | <b>1235.229</b> | <b>1235.733</b> | 1234.725        | R[22] |
| G[4]  | 259.114         | 1165.189        | <b>1157.179</b> | <b>1157.683</b> | 1156.675        | G[21] |
| K[5]  | 273.151         | 1138.677        | <b>1128.668</b> | <b>1129.172</b> | 1128.164        | K[20] |
| G[6]  | 301.672         | 1072.630        | <b>1064.620</b> | <b>1065.124</b> | 1064.117        | G[19] |
| G[7]  | 330.183         | <b>1044.119</b> | <b>1036.110</b> | <b>1036.614</b> | <b>1035.606</b> | G[18] |
| K[8]  | <b>415.236</b>  | <b>1015.608</b> | <b>1007.599</b> | <b>1008.103</b> | 1007.095        | K[17] |
| G[9]  | <b>443.746</b>  | <b>930.556</b>  | <b>922.546</b>  | <b>923.050</b>  | 922.042         | G[16] |
| L[10] | <b>500.288</b>  | <b>902.045</b>  | 894.035         | 894.539         | 893.531         | L[15] |
| G[11] | <b>528.799</b>  | 845.503         | <b>837.493</b>  | <b>837.997</b>  | <b>836.990</b>  | G[14] |
| K[12] | <b>613.852</b>  | 816.992         | <b>808.983</b>  | <b>809.487</b>  | 808.479         | K[13] |
| G[13] | <b>642.363</b>  | 731.939         | <b>723.930</b>  | <b>724.434</b>  | 723.426         | G[12] |
| G[14] | <b>670.873</b>  | 703.429         | <b>695.419</b>  | <b>695.923</b>  | 694.915         | G[11] |
| A[15] | <b>708.392</b>  | 674.918         | 666.908         | 667.412         | 666.404         | A[10] |
| R[16] | <b>791.445</b>  | <b>639.399</b>  | <b>631.390</b>  | <b>631.894</b>  | 630.886         | R[9]  |
| R[17] | <b>869.495</b>  | 554.347         | <b>546.337</b>  | <b>546.841</b>  | <b>545.833</b>  | R[8]  |
| H[18] | <b>938.025</b>  | 476.296         | <b>468.287</b>  | <b>468.791</b>  | 467.783         | H[7]  |
| R[19] | 1038.001        | <b>407.767</b>  | <b>399.757</b>  | 400.261         | <b>399.253</b>  | R[6]  |
| K[20] | <b>1094.138</b> | 315.700         | 307.691         | 308.195         | 307.187         | K[5]  |
| V[21] | 1143.673        | 251.653         | 243.643         | 244.147         | 243.140         | V[4]  |
| L[22] | <b>1200.215</b> | 202.119         | 194.109         | 194.613         | 193.605         | L[3]  |
| R[23] | 1276.265        | 145.577         | 137.567         | 138.071         | 137.063         | R[2]  |
| D[24] | 1336.779        | 67.526          | 59.517          | 60.021          | 59.013          | D[1]  |

# sp | P62806 | H4\_MOUSE

[Acetyl]SGRGKGGK <sup>Acetyl</sup><sub>42.01</sub> GLGK <sup>Acetyl</sup><sub>42.01</sub> GGAK <sup>Acetyl</sup><sub>42.01</sub> RHR <sup>Dimethyl</sup><sub>28.03</sub> KVLRD

- ▶ fragmentation table for charge state 3+
- ▶ specType=etd
- ▶ score=67.31
- ▶ F113279.dat
- ▶ query=q38866.p1
- ▶ precursor=535.114350
- ▶ chargePrecursor=5
- ▶ itol=0.5

| AA    | c              | y              | z+1            | z+2            | z              | AA    |
|-------|----------------|----------------|----------------|----------------|----------------|-------|
| S[1]  | 49.697         | <b>891.183</b> | 885.841        | 0.672          | 885.507        | S[24] |
| G[2]  | 58.704         | 848.169        | 842.829        | 0.672          | 842.493        | G[23] |
| R[3]  | 150.738        | <b>829.161</b> | 823.822        | <b>824.158</b> | 823.486        | R[22] |
| G[4]  | 139.745        | 777.128        | <b>771.788</b> | <b>772.124</b> | 771.452        | G[21] |
| K[5]  | 182.443        | 798.121        | <b>752.781</b> | <b>753.117</b> | <b>752.445</b> | K[20] |
| G[6]  | 201.450        | 715.422        | <b>710.083</b> | <b>710.419</b> | 709.747        | G[19] |
| G[7]  | 220.458        | 696.415        | <b>691.076</b> | <b>691.412</b> | 690.740        | G[18] |
| K[8]  | 277.159        | 677.408        | <b>672.068</b> | 672.404        | <b>671.732</b> | K[17] |
| G[9]  | 296.167        | <b>620.705</b> | <b>615.367</b> | <b>615.703</b> | 615.031        | G[16] |
| L[10] | 313.681        | <b>601.699</b> | <b>596.359</b> | <b>596.695</b> | 596.023        | L[15] |
| G[11] | 352.868        | 504.024        | 558.667        | 559.001        | 558.329        | G[14] |
| K[12] | 409.570        | <b>544.997</b> | 539.658        | <b>539.994</b> | 539.322        | K[13] |
| G[13] | 428.577        | 488.295        | 482.956        | 483.292        | 482.620        | G[12] |
| G[14] | 447.585        | <b>469.288</b> | 463.949        | 464.285        | 463.613        | G[11] |
| A[15] | 471.264        | 450.281        | 444.941        | 445.277        | 444.605        | A[10] |
| K[16] | 527.966        | 426.602        | 421.262        | 421.598        | 420.926        | K[9]  |
| R[17] | <b>579.999</b> | 369.900        | 364.561        | 364.896        | 364.225        | R[8]  |
| H[18] | <b>625.686</b> | 317.866        | 312.527        | 312.863        | 312.191        | H[7]  |
| R[19] | 667.063        | 272.180        | 266.841        | 267.176        | 266.506        | R[6]  |
| K[20] | 729.791        | 210.803        | 205.463        | 205.799        | 205.127        | K[5]  |
| V[21] | <b>762.784</b> | 168.104        | 162.765        | 163.101        | 162.429        | V[4]  |
| L[22] | <b>800.479</b> | 135.082        | 129.742        | 130.078        | 129.406        | L[3]  |
| R[23] | <b>852.513</b> | 97.387         | 92.047         | 92.383         | 91.711         | R[2]  |
| D[24] | <b>890.855</b> | 45.353         | 40.014         | 40.349         | 39.678         | D[1]  |

# sp | P62806 | H4\_MOUSE

[Acetyl]SGRGKGGK <sup>Acetyl</sup><sub>42.01</sub> GLGK <sup>Acetyl</sup><sub>42.01</sub> GGAK <sup>Acetyl</sup><sub>42.01</sub> RHR <sup>Dimethyl</sup><sub>28.03</sub> KVLRD

- ▶ fragmentation table for charge state 4+
- ▶ specType=etd
- ▶ score=67.31
- ▶ F113279.dat
- ▶ query=q38866.p1
- ▶ precursor=535.114350
- ▶ chargePrecursor=5
- ▶ itol=0.5

| AA    | c              | y              | z+1            | z+2            | z              | AA    |
|-------|----------------|----------------|----------------|----------------|----------------|-------|
| S[1]  | 37.525         | <b>668.639</b> | <b>664.634</b> | 0.755          | 664.382        | S[24] |
| G[2]  | 51.780         | <b>636.378</b> | <b>632.374</b> | 0.755          | <b>632.122</b> | G[23] |
| R[3]  | 90.805         | 622.123        | <b>618.118</b> | <b>618.370</b> | 617.866        | R[22] |
| G[4]  | 105.061        | 583.098        | 579.093        | 579.345        | 578.841        | G[21] |
| K[5]  | 137.084        | 568.842        | 564.838        | 565.090        | 564.586        | K[20] |
| G[6]  | 151.340        | 536.819        | 532.814        | 533.066        | 532.562        | G[19] |
| G[7]  | 165.595        | 522.563        | 518.558        | 518.810        | 518.307        | G[18] |
| K[8]  | 208.121        | <b>508.308</b> | 504.303        | 504.555        | 504.051        | K[17] |
| G[9]  | 222.377        | 495.781        | 491.777        | 492.029        | 491.525        | G[16] |
| L[10] | 250.048        | 451.526        | 447.521        | 447.773        | 447.269        | L[15] |
| G[11] | 264.303        | 423.255        | 419.250        | 419.502        | 418.998        | G[14] |
| K[12] | 307.430        | 400.000        | 404.995        | 405.247        | 404.743        | K[13] |
| G[13] | 321.685        | 366.473        | 362.469        | 362.721        | 362.217        | G[12] |
| G[14] | 335.940        | 352.218        | 348.213        | 348.465        | 347.961        | G[11] |
| A[15] | 353.700        | 337.963        | 333.958        | 334.210        | 333.706        | A[10] |
| K[16] | 398.226        | 320.203        | 316.199        | 316.451        | 315.947        | K[9]  |
| R[17] | 435.251        | -77.877        | <b>273.672</b> | <b>273.924</b> | -73.420        | R[8]  |
| H[18] | <b>469.516</b> | 238.652        | 234.647        | 234.899        | 234.395        | H[7]  |
| R[19] | 513.549        | 204.397        | 200.392        | 200.644        | 200.140        | R[6]  |
| K[20] | 547.573        | 158.354        | 154.349        | 154.601        | 154.097        | K[5]  |
| V[21] | 572.340        | 126.330        | 122.325        | 122.577        | 122.073        | V[4]  |
| L[22] | 600.611        | 101.563        | 97.558         | 97.810         | 97.306         | L[3]  |
| R[23] | <b>639.636</b> | 73.292         | 69.287         | 69.539         | 69.035         | R[2]  |
| D[24] | 668.393        | 34.267         | 30.262         | 30.514         | 30.010         | D[1]  |



# sp | P62806 | H4\_MOUSE

[Acetyl]SGRGKGGK <sup>Acetyl</sup><sub>42.01</sub> GLGK <sup>Acetyl</sup><sub>42.01</sub> GGAK <sup>Acetyl</sup><sub>42.01</sub> RHR <sup>Dimethyl</sup><sub>28.03</sub> KVLRD

- ▶ fragmentation table for charge state 1+
- ▶ specType=etd
- ▶ score=55.01
- ▶ F113279.dat
- ▶ query=q38868\_p1
- ▶ precursor=535.114580
- ▶ chargePrecursor=5
- ▶ itol=0.5

| AA | c  | y               | z+1             | z+2            | z               | AA       |       |
|----|----|-----------------|-----------------|----------------|-----------------|----------|-------|
| S  | 1  | 147.076         | 2073.534        | 2055.515       | 0.000           | 2054.507 | S[24] |
| G  | 2  | 204.008         | 2542.491        | 2526.473       | 0.000           | 2525.465 | G[23] |
| R  | 3  | <b>350.190</b>  | 2495.470        | 2469.451       | 2470.439        | 2468.443 | R[22] |
| G  | 4  | <b>417.230</b>  | 2329.369        | 2313.350       | 2314.338        | 2312.341 | G[21] |
| K  | 5  | <b>545.315</b>  | 2272.347        | 2256.329       | 2257.320        | 2255.321 | K[20] |
| G  | 6  | <b>602.337</b>  | 2144.252        | 2128.234       | 2129.241        | 2127.238 | G[19] |
| G  | 7  | 659.358         | 2087.231        | 2071.215       | 2072.220        | 2070.204 | G[18] |
| K  | 8  | <b>829.464</b>  | 2030.209        | 2014.191       | 2015.198        | 2013.183 | K[17] |
| G  | 9  | <b>885.485</b>  | 1865.104        | 1844.085       | <b>1845.093</b> | 1843.077 | G[16] |
| L  | 10 | <b>929.549</b>  | 1803.082        | 1787.064       | 1788.071        | 1786.056 | L[15] |
| G  | 11 | <b>1056.591</b> | 1689.968        | 1673.950       | 1674.967        | 1672.972 | G[14] |
| K  | 12 | <b>1226.696</b> | 1632.977        | 1616.958       | 1617.966        | 1615.950 | K[13] |
| G  | 13 | <b>1283.718</b> | 1462.871        | 1446.853       | <b>1447.860</b> | 1445.845 | G[12] |
| G  | 14 | <b>1340.739</b> | 1405.850        | 1389.831       | <b>1390.839</b> | 1388.823 | G[11] |
| A  | 15 | <b>1411.776</b> | 1348.828        | 1332.810       | 1333.818        | 1331.802 | A[10] |
| R  | 16 | 1543.882        | <b>1277.791</b> | 1261.773       | 1262.780        | 1260.765 | R[9]  |
| R  | 17 | 1737.983        | 1107.668        | 1091.657       | <b>1092.675</b> | 1090.659 | R[8]  |
| H  | 18 | 1875.042        | 951.585         | <b>935.566</b> | 936.574         | 934.558  | H[7]  |
| R  | 19 | 2059.174        | 814.520         | <b>798.507</b> | 799.515         | 797.499  | R[6]  |
| K  | 20 | 2187.269        | 630.393         | <b>614.375</b> | <b>615.382</b>  | 613.367  | K[5]  |
| V  | 21 | 2286.338        | <b>502.298</b>  | <b>486.280</b> | 487.287         | 485.272  | V[4]  |
| L  | 22 | 2399.422        | 403.229         | <b>387.211</b> | 388.219         | 386.203  | L[3]  |
| R  | 23 | 2555.523        | 290.140         | <b>274.127</b> | 275.135         | 273.119  | R[2]  |
| D  | 24 | 2670.550        | 134.045         | 135.050        | 136.054         | 137.018  | D[1]  |

# sp | P62806 | H4\_MOUSE

[Acetyl]SGRGKGGK <sup>Acetyl</sup><sub>42.01</sub> GLGK <sup>Acetyl</sup><sub>42.01</sub> GGAK <sup>Acetyl</sup><sub>42.01</sub> RHR <sup>Dimethyl</sup><sub>28.03</sub> KVLRD

- ▶ fragmentation table for charge state 2+
- ▶ specType=etd
- ▶ score=55.01
- ▶ F113279.dat
- ▶ query=q38868.p1
- ▶ precursor=535.114580
- ▶ chargePrecursor=5
- ▶ itol=0.5

| AA    | c               | y               | z+1             | z+2             | z               | AA    |
|-------|-----------------|-----------------|-----------------|-----------------|-----------------|-------|
| S[1]  | 74.042          | 1138.271        | <b>1328.261</b> | 0.504           | 1327.757        | S[24] |
| G[2]  | 102.551         | 1271.749        | <b>1263.740</b> | 0.504           | <b>1263.236</b> | G[23] |
| R[3]  | 180.603         | <b>1243.239</b> | 1238.250        | <b>1235.733</b> | 1234.725        | R[22] |
| G[4]  | 259.114         | 1165.169        | <b>1157.179</b> | <b>1157.683</b> | 1156.675        | G[21] |
| K[5]  | 274.161         | 1130.697        | 1125.698        | <b>1129.172</b> | 1128.164        | K[20] |
| G[6]  | 301.672         | 1072.630        | <b>1064.620</b> | <b>1065.124</b> | 1064.117        | G[19] |
| G[7]  | 330.183         | 1044.119        | <b>1036.110</b> | <b>1036.614</b> | 1035.606        | G[18] |
| K[8]  | <b>415.236</b>  | <b>1015.608</b> | <b>1007.599</b> | <b>1008.103</b> | 1007.095        | K[17] |
| G[9]  | <b>443.746</b>  | 930.566         | <b>922.546</b>  | <b>923.050</b>  | 922.042         | G[16] |
| L[10] | <b>509.268</b>  | 902.045         | 894.025         | 894.529         | 893.521         | L[15] |
| G[11] | <b>528.799</b>  | 845.503         | <b>837.493</b>  | <b>837.997</b>  | <b>836.990</b>  | G[14] |
| K[12] | <b>613.852</b>  | 816.992         | <b>808.983</b>  | <b>809.487</b>  | 808.479         | K[13] |
| G[13] | <b>642.363</b>  | 731.939         | <b>723.930</b>  | <b>724.434</b>  | 723.426         | G[12] |
| G[14] | <b>670.873</b>  | 703.429         | <b>695.419</b>  | <b>695.923</b>  | 694.915         | G[11] |
| A[15] | <b>706.392</b>  | 674.918         | 665.908         | 667.412         | 666.404         | A[10] |
| R[16] | <b>751.445</b>  | 639.399         | <b>631.390</b>  | <b>631.894</b>  | 630.886         | R[9]  |
| R[17] | 869.495         | 554.347         | <b>546.337</b>  | <b>546.841</b>  | <b>545.833</b>  | R[8]  |
| H[18] | <b>938.025</b>  | 476.206         | <b>468.207</b>  | <b>468.791</b>  | 467.783         | H[7]  |
| R[19] | 1038.001        | 407.767         | <b>399.757</b>  | <b>400.261</b>  | 399.253         | R[6]  |
| K[20] | <b>1094.138</b> | 315.700         | 307.681         | 308.185         | 307.187         | K[5]  |
| V[21] | 1153.673        | 251.653         | 243.643         | 244.147         | 243.149         | V[4]  |
| L[22] | <b>1200.215</b> | 202.119         | 194.109         | 194.613         | 193.605         | L[3]  |
| R[23] | 1276.265        | 145.577         | 137.567         | 138.071         | 137.063         | R[2]  |
| D[24] | 1336.779        | 67.526          | 59.517          | 60.021          | 59.013          | D[1]  |

# sp | P62806 | H4\_MOUSE

[Acetyl]SGRGKGGK <sup>Acetyl</sup><sub>42.01</sub> GLGK <sup>Acetyl</sup><sub>42.01</sub> GGAK <sup>Acetyl</sup><sub>42.01</sub> RHR <sup>Dimethyl</sup><sub>28.03</sub> KVLRD

- ▶ fragmentation table for charge state 3+
- ▶ specType=etd
- ▶ score=55.01
- ▶ F113279.dat
- ▶ query=q38868.p1
- ▶ precursor=535.114580
- ▶ chargePrecursor=5
- ▶ itol=0.5

| AA    | c              | y              | z+1            | z+2            | z              | AA    |
|-------|----------------|----------------|----------------|----------------|----------------|-------|
| S[1]  | 49.697         | <b>891.183</b> | 885.843        | 0.672          | 885.507        | S[24] |
| G[2]  | 58.704         | <b>848.169</b> | 842.829        | 0.672          | 842.493        | G[23] |
| R[3]  | 150.738        | <b>829.161</b> | 823.822        | <b>824.158</b> | 823.486        | R[22] |
| G[4]  | 139.745        | 777.128        | 771.788        | <b>772.124</b> | 771.452        | G[21] |
| K[5]  | 182.443        | 798.121        | <b>752.781</b> | <b>753.117</b> | 752.445        | K[20] |
| G[6]  | 201.450        | 715.422        | <b>710.083</b> | <b>710.419</b> | <b>709.747</b> | G[19] |
| G[7]  | 220.458        | <b>696.415</b> | 691.076        | 691.412        | 690.740        | G[18] |
| K[8]  | 277.159        | 677.408        | 672.068        | 672.404        | 671.732        | K[17] |
| G[9]  | 296.167        | 620.709        | <b>615.367</b> | <b>615.703</b> | 615.031        | G[16] |
| L[10] | 313.681        | <b>601.699</b> | <b>596.359</b> | <b>596.695</b> | 596.023        | L[15] |
| G[11] | 352.868        | 504.054        | <b>558.665</b> | <b>559.001</b> | 558.329        | G[14] |
| K[12] | 409.570        | <b>544.997</b> | 539.658        | 539.994        | 539.322        | K[13] |
| G[13] | 428.577        | 488.295        | 482.956        | 483.292        | 482.620        | G[12] |
| G[14] | 447.585        | <b>469.288</b> | 463.949        | 464.285        | 463.613        | G[11] |
| A[15] | 471.264        | 450.281        | 444.941        | 445.277        | 444.605        | A[10] |
| K[16] | 527.966        | 426.602        | 421.262        | 421.598        | 420.926        | K[9]  |
| R[17] | <b>579.999</b> | 369.900        | 364.561        | 364.896        | 364.225        | R[8]  |
| H[18] | <b>625.686</b> | 317.866        | 312.527        | 312.863        | 312.191        | H[7]  |
| R[19] | 657.953        | 272.180        | 266.841        | 267.176        | 266.506        | R[6]  |
| K[20] | <b>729.761</b> | 210.803        | 205.463        | 205.799        | 205.127        | K[5]  |
| V[21] | <b>762.784</b> | 168.104        | 162.765        | 163.101        | 162.429        | V[4]  |
| L[22] | <b>800.479</b> | 135.082        | 129.742        | 130.078        | 129.406        | L[3]  |
| R[23] | <b>852.513</b> | 97.387         | 92.047         | 92.383         | 91.711         | R[2]  |
| D[24] | <b>896.855</b> | 45.353         | 40.014         | 40.349         | 39.678         | D[1]  |

# sp | P62806 | H4\_MOUSE

[Acetyl]SGRGKGGK <sup>Acetyl</sup><sub>42.01</sub> GLGK <sup>Acetyl</sup><sub>42.01</sub> GGAK <sup>Acetyl</sup><sub>42.01</sub> RHR <sup>Dimethyl</sup><sub>28.03</sub> KVLRD

- ▶ fragmentation table for charge state 4+
- ▶ specType=etd
- ▶ score=55.01
- ▶ F113279.dat
- ▶ query=q38868.p1
- ▶ precursor=535.114580
- ▶ chargePrecursor=5
- ▶ itol=0.5

| AA    | c              | y              | z+1            | z+2            | z              | AA    |
|-------|----------------|----------------|----------------|----------------|----------------|-------|
| S[1]  | 37.525         | 668.630        | <b>664.634</b> | 0.795          | <b>664.182</b> | S[24] |
| G[2]  | 51.780         | <b>636.378</b> | 632.374        | 0.795          | <b>632.122</b> | G[23] |
| R[3]  | 90.805         | 622.121        | <b>618.118</b> | <b>618.370</b> | <b>617.866</b> | R[22] |
| G[4]  | 105.061        | 583.098        | 579.093        | 579.345        | 578.841        | G[21] |
| K[5]  | 137.084        | 568.842        | 564.838        | 565.090        | 564.586        | K[20] |
| G[6]  | 151.340        | 536.819        | 532.814        | 533.066        | 532.562        | G[19] |
| G[7]  | 165.595        | 522.563        | 518.558        | 518.810        | 518.307        | G[18] |
| K[8]  | 208.121        | <b>508.308</b> | 504.303        | 504.555        | 504.051        | K[17] |
| G[9]  | 222.377        | 495.781        | 491.777        | 492.029        | 491.525        | G[16] |
| L[10] | 250.048        | 451.526        | 447.521        | 447.773        | 447.269        | L[15] |
| G[11] | 264.303        | 423.255        | 419.250        | 419.502        | 418.998        | G[14] |
| K[12] | 307.430        | 409.000        | 404.995        | 405.247        | 404.743        | K[13] |
| G[13] | 321.685        | 366.473        | 362.469        | 362.721        | 362.217        | G[12] |
| G[14] | 335.940        | 352.218        | 348.213        | 348.465        | 347.961        | G[11] |
| A[15] | 353.700        | 337.963        | 333.958        | 334.210        | 333.706        | A[10] |
| K[16] | 398.226        | 320.203        | 316.199        | 316.451        | 315.947        | K[9]  |
| R[17] | 435.251        | 277.677        | 273.672        | <b>273.924</b> | 273.420        | R[8]  |
| H[18] | <b>469.516</b> | 238.652        | 234.647        | 234.899        | 234.395        | H[7]  |
| R[19] | 513.549        | 204.397        | 200.392        | 200.644        | 200.140        | R[6]  |
| K[20] | 547.573        | 158.354        | 154.349        | 154.601        | 154.097        | K[5]  |
| V[21] | 572.340        | 126.330        | 122.325        | 122.577        | 122.073        | V[4]  |
| L[22] | 600.611        | 101.563        | 97.558         | 97.810         | 97.306         | L[3]  |
| R[23] | 636.636        | 73.292         | 69.287         | 69.539         | 69.035         | R[2]  |
| D[24] | 668.393        | 34.267         | 30.262         | 30.514         | 30.010         | D[1]  |



# sp | P62806 | H4\_MOUSE

[Acetyl]SGRGKGGK <sup>Acetyl</sup> 42.01 GLGK <sup>Acetyl</sup> 42.01 GGAK <sup>Acetyl</sup> 42.01 RHRK <sup>Dimethyl</sup> 28.03 VLRD

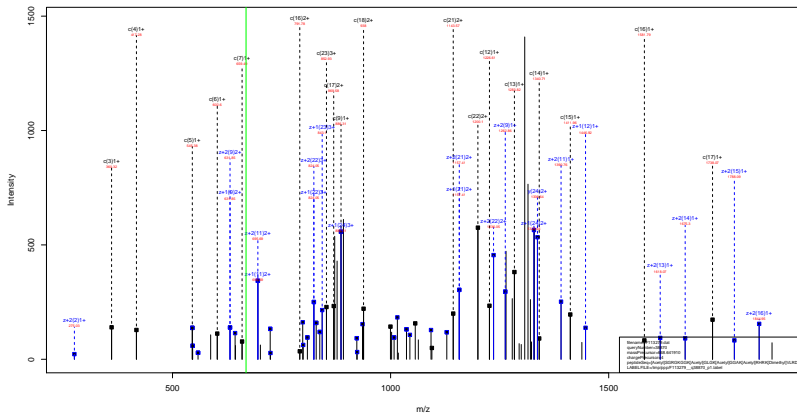

# sp | P62806 | H4\_MOUSE

[Acetyl]SGRGKGGK <sup>Acetyl</sup><sub>42.01</sub> GLGK <sup>Acetyl</sup><sub>42.01</sub> GGAK <sup>Acetyl</sup><sub>42.01</sub> RHRK <sup>Dimethyl</sup><sub>28.03</sub> VLRD

- ▶ fragmentation table for charge state 1+
- ▶ specType=etd
- ▶ score=100.43
- ▶ F113279.dat
- ▶ query=q38870\_p1
- ▶ precursor=668.641910
- ▶ chargePrecursor=4
- ▶ itol=0.5

| AA | c  | y               | z+1      | z+2             | z               | AA       |       |
|----|----|-----------------|----------|-----------------|-----------------|----------|-------|
| S  | 1  | 147.076         | 2671.534 | 2655.515        | 0.000           | 2654.507 | S[24] |
| G  | 2  | 204.008         | 2542.491 | 2526.473        | 0.000           | 2525.465 | G[23] |
| R  | 3  | <b>350.199</b>  | 2486.470 | 2469.451        | 2470.439        | 2468.443 | R[22] |
| G  | 4  | <b>417.230</b>  | 2329.369 | 2313.350        | 2314.368        | 2312.341 | G[21] |
| K  | 5  | <b>545.315</b>  | 2272.347 | 2256.329        | 2257.336        | 2255.321 | K[20] |
| G  | 6  | <b>602.337</b>  | 2144.252 | 2128.234        | 2129.241        | 2127.226 | G[19] |
| G  | 7  | <b>659.358</b>  | 2087.231 | 2071.213        | 2072.220        | 2070.204 | G[18] |
| K  | 8  | <b>829.464</b>  | 2030.209 | 2014.191        | 2015.198        | 2013.183 | K[17] |
| G  | 9  | <b>886.485</b>  | 1980.104 | 1844.085        | <b>1845.093</b> | 1843.077 | G[16] |
| L  | 10 | <b>929.569</b>  | 1803.062 | 1787.044        | <b>1788.071</b> | 1786.056 | L[15] |
| G  | 11 | <b>1056.591</b> | 1688.998 | 1673.980        | <b>1674.987</b> | 1672.972 | G[14] |
| K  | 12 | <b>1226.696</b> | 1632.977 | 1616.958        | <b>1617.966</b> | 1615.950 | K[13] |
| G  | 13 | <b>1283.718</b> | 1462.871 | <b>1446.853</b> | 1447.860        | 1445.845 | G[12] |
| G  | 14 | <b>1340.739</b> | 1405.850 | 1389.831        | <b>1390.839</b> | 1388.823 | G[11] |
| A  | 15 | <b>1411.776</b> | 1348.828 | 1332.810        | 1333.818        | 1331.802 | A[10] |
| R  | 16 | <b>1581.882</b> | 1277.791 | 1261.773        | <b>1262.780</b> | 1260.765 | R[9]  |
| R  | 17 | <b>1737.983</b> | 1107.685 | 1091.667        | <b>1092.675</b> | 1090.659 | R[8]  |
| H  | 18 | 1875.042        | 951.585  | <b>935.566</b>  | 936.574         | 934.558  | H[7]  |
| R  | 19 | 2031.143        | 814.526  | <b>798.507</b>  | <b>799.515</b>  | 797.499  | R[6]  |
| K  | 20 | 2187.209        | 658.425  | 642.406         | <b>643.414</b>  | 641.398  | K[5]  |
| V  | 21 | 2286.338        | 502.298  | 486.280         | 487.287         | 485.272  | V[4]  |
| L  | 22 | 2399.422        | 403.230  | 387.211         | 388.219         | 386.203  | L[3]  |
| R  | 23 | 2555.523        | 290.146  | 274.127         | <b>275.135</b>  | 273.119  | R[2]  |
| D  | 24 | 2670.550        | 134.045  | 118.026         | 119.034         | 117.018  | D[1]  |

# sp | P62806 | H4\_MOUSE

[Acetyl]SGRGKGGK <sup>Acetyl</sup><sub>42.01</sub> GLGK <sup>Acetyl</sup><sub>42.01</sub> GGAK <sup>Acetyl</sup><sub>42.01</sub> RHRK <sup>Dimethyl</sup><sub>28.03</sub> VLRD

- ▶ fragmentation table for charge state 2+
- ▶ specType=etd
- ▶ score=100.43
- ▶ F113279.dat
- ▶ query=q38870\_p1
- ▶ precursor=668.641910
- ▶ chargePrecursor=4
- ▶ itol=0.5

| AA    | c               | y               | z+1             | z+2             | z               | AA    |
|-------|-----------------|-----------------|-----------------|-----------------|-----------------|-------|
| S[1]  | 74.642          | <b>1336.271</b> | <b>1328.261</b> | 0.504           | 1327.757        | S[24] |
| G[2]  | 102.551         | 1271.746        | 1263.740        | 0.504           | <b>1263.236</b> | G[23] |
| R[3]  | 180.601         | 1243.239        | 1235.233        | <b>1235.733</b> | 1234.728        | R[22] |
| G[4]  | 259.114         | 1165.189        | <b>1157.179</b> | <b>1157.683</b> | 1156.677        | G[21] |
| K[5]  | 273.151         | 1136.677        | <b>1128.668</b> | <b>1129.172</b> | 1128.165        | K[20] |
| G[6]  | 301.672         | 1072.630        | 1064.620        | 1065.124        | 1064.117        | G[19] |
| G[7]  | 330.183         | <b>1044.119</b> | <b>1036.110</b> | <b>1036.614</b> | 1035.606        | G[18] |
| K[8]  | 415.216         | <b>1015.608</b> | <b>1007.599</b> | <b>1008.103</b> | 1007.097        | K[17] |
| G[9]  | 443.746         | 0.30356         | <b>922.546</b>  | <b>923.050</b>  | <b>922.042</b>  | G[16] |
| L[10] | 509.268         | 002.045         | 864.023         | 864.529         | 863.523         | L[15] |
| G[11] | 528.799         | 845.501         | <b>837.493</b>  | <b>837.997</b>  | 836.990         | G[14] |
| K[12] | 613.852         | 816.902         | <b>808.903</b>  | <b>809.407</b>  | 808.400         | K[13] |
| G[13] | 662.363         | 731.939         | <b>723.930</b>  | <b>724.434</b>  | 723.426         | G[12] |
| G[14] | 670.873         | 703.429         | <b>695.419</b>  | <b>695.923</b>  | 694.915         | G[11] |
| A[15] | 698.394         | 674.918         | 665.909         | 667.412         | 666.405         | A[10] |
| R[16] | <b>791.445</b>  | 639.399         | <b>631.390</b>  | <b>631.894</b>  | 630.886         | R[9]  |
| R[17] | <b>809.495</b>  | 554.347         | <b>546.337</b>  | 546.841         | <b>545.833</b>  | R[8]  |
| H[18] | <b>938.025</b>  | 476.290         | 468.287         | 468.791         | 467.783         | H[7]  |
| R[19] | 1018.075        | 407.767         | 399.757         | 400.261         | 399.253         | R[6]  |
| K[20] | <b>1094.138</b> | 329.716         | 321.707         | 322.211         | 321.203         | K[5]  |
| V[21] | <b>1143.673</b> | 251.653         | 243.643         | 244.147         | 243.140         | V[4]  |
| L[22] | <b>1200.215</b> | 202.119         | 194.109         | 194.613         | 193.605         | L[3]  |
| R[23] | 1278.265        | 145.577         | 137.567         | 138.071         | 137.063         | R[2]  |
| D[24] | 1335.779        | 67.526          | 59.517          | 60.021          | 59.013          | D[1]  |

# sp | P62806 | H4\_MOUSE

[Acetyl]SGRGKGGK <sup>Acetyl</sup><sub>42.01</sub> GLGK <sup>Acetyl</sup><sub>42.01</sub> GGAK <sup>Acetyl</sup><sub>42.01</sub> RHRK <sup>Dimethyl</sup><sub>28.03</sub> VLRD

- ▶ fragmentation table for charge state 3+
- ▶ specType=etd
- ▶ score=100.43
- ▶ F113279.dat
- ▶ query=q38870.p1
- ▶ precursor=668.641910
- ▶ chargePrecursor=4
- ▶ itol=0.5

| AA    | c              | y              | z+1            | z+2            | z              | AA    |
|-------|----------------|----------------|----------------|----------------|----------------|-------|
| S[1]  | 49.697         | 891.183        | <b>685.843</b> | 0.672          | 885.507        | S[24] |
| G[2]  | 58.704         | 948.165        | <b>842.829</b> | 0.672          | 842.493        | G[23] |
| R[3]  | 150.738        | <b>829.161</b> | <b>823.822</b> | <b>824.158</b> | 823.486        | R[22] |
| G[4]  | 139.745        | 777.128        | 771.788        | 772.124        | 771.452        | G[21] |
| K[5]  | 182.443        | 798.121        | 752.781        | 753.117        | 752.445        | K[20] |
| G[6]  | 201.450        | 715.422        | 710.083        | 710.419        | 709.747        | G[19] |
| G[7]  | 220.458        | 696.415        | 691.076        | 691.412        | 690.740        | G[18] |
| K[8]  | 277.159        | 677.408        | 672.068        | 672.404        | 671.732        | K[17] |
| G[9]  | 296.167        | 630.795        | 615.367        | 615.703        | 615.031        | G[16] |
| L[10] | 313.681        | 601.699        | 596.359        | 596.695        | 596.023        | L[15] |
| G[11] | 352.868        | 564.054        | <b>558.665</b> | <b>559.001</b> | <b>558.329</b> | G[14] |
| K[12] | 409.570        | <b>544.997</b> | 539.658        | 539.994        | 539.322        | K[13] |
| G[13] | 428.577        | 488.295        | 482.956        | 483.292        | 482.620        | G[12] |
| G[14] | 447.585        | 469.288        | 463.949        | 464.285        | 463.613        | G[11] |
| A[15] | 471.264        | 450.281        | 444.941        | 445.277        | 444.605        | A[10] |
| K[16] | 527.966        | 426.602        | 421.262        | 421.598        | 420.926        | K[9]  |
| R[17] | 579.999        | 369.900        | 364.561        | 364.896        | 364.225        | R[8]  |
| H[18] | 625.686        | 317.896        | 312.527        | 312.863        | 312.191        | H[7]  |
| R[19] | 677.719        | 272.180        | 266.841        | 267.176        | 266.505        | R[6]  |
| K[20] | 729.761        | 220.146        | 214.807        | 215.143        | 214.471        | K[5]  |
| V[21] | 762.784        | 168.104        | 162.765        | 163.101        | 162.429        | V[4]  |
| L[22] | 800.479        | 135.082        | 129.742        | 130.078        | 129.406        | L[3]  |
| R[23] | <b>852.513</b> | 97.387         | 92.047         | 92.383         | 91.711         | R[2]  |
| D[24] | 890.855        | 45.353         | 40.014         | 40.349         | 39.678         | D[1]  |

# sp | P62806 | H4\_MOUSE

[Acetyl]SGRGK Acetyl 42.01 GGK Acetyl 42.01 GLGK Acetyl 42.01 GGAK Acetyl 42.01 RHRK Dimethyl 28.03 VLRD

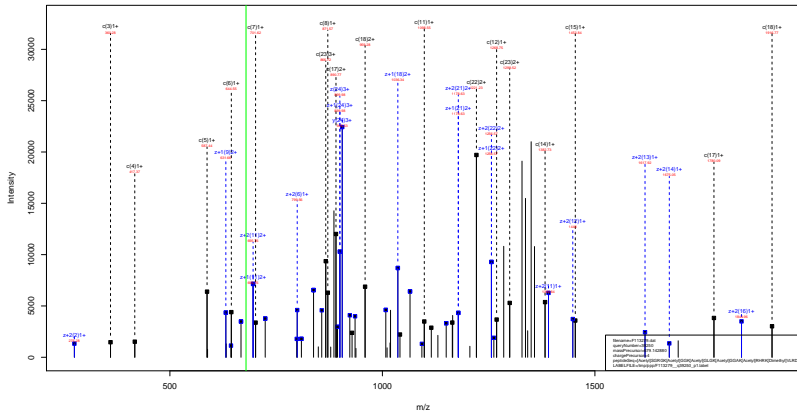

# sp | P62806 | H4\_MOUSE

[Acetyl]SGRGK<sub>42.01</sub><sup>Acetyl</sup> GGK<sub>42.01</sub><sup>Acetyl</sup> GLGK<sub>42.01</sub><sup>Acetyl</sup> GGAK<sub>42.01</sub><sup>Acetyl</sup> RHRK<sub>28.03</sub><sup>Dimethyl</sup> VLRD

- ▶ fragmentation table for charge state 1+
- ▶ specType=etd
- ▶ score=104.86
- ▶ F113279.dat
- ▶ query=q39250\_p1
- ▶ precursor=679.142880
- ▶ chargePrecursor=4
- ▶ itol=0.5

| AA | c  | y               | z+1      | z+2             | z               | AA       |       |
|----|----|-----------------|----------|-----------------|-----------------|----------|-------|
| S  | 1  | 147.076         | 273.544  | 2697.526        | 0.000           | 2696.518 | S[24] |
| G  | 2  | 204.098         | 2584.502 | 2568.483        | 0.000           | 2567.475 | G[23] |
| R  | 3  | <b>350.199</b>  | 2527.480 | 2511.463        | 2512.470        | 2510.454 | R[22] |
| G  | 4  | <b>417.230</b>  | 2371.379 | 2355.361        | 2356.368        | 2354.353 | G[21] |
| K  | 5  | <b>587.326</b>  | 2314.358 | 2298.339        | 2299.347        | 2297.331 | K[20] |
| G  | 6  | <b>644.347</b>  | 2144.252 | 2128.234        | 2129.241        | 2127.226 | G[19] |
| G  | 7  | <b>701.369</b>  | 2087.231 | 2071.213        | 2072.220        | 2070.204 | G[18] |
| K  | 8  | <b>871.474</b>  | 2030.209 | 2014.191        | 2015.198        | 2013.183 | K[17] |
| G  | 9  | <b>928.496</b>  | 1860.104 | 1844.085        | <b>1845.093</b> | 1843.077 | G[16] |
| L  | 10 | <b>1041.580</b> | 1803.082 | 1787.064        | 1788.071        | 1786.056 | L[15] |
| G  | 11 | <b>1098.601</b> | 1588.995 | 1673.980        | <b>1674.987</b> | 1672.972 | G[14] |
| K  | 12 | <b>1268.707</b> | 1632.977 | 1616.958        | <b>1617.966</b> | 1615.950 | K[13] |
| G  | 13 | 1325.728        | 1462.871 | 1446.853        | <b>1447.860</b> | 1445.845 | G[12] |
| G  | 14 | <b>1382.750</b> | 1405.850 | 1389.831        | <b>1390.839</b> | 1388.823 | G[11] |
| A  | 15 | <b>1453.787</b> | 1348.828 | 1332.810        | 1333.818        | 1331.802 | A[10] |
| R  | 16 | 1524.823        | 1277.791 | <b>1261.773</b> | 1262.780        | 1260.765 | R[9]  |
| R  | 17 | <b>1779.994</b> | 1107.685 | 1091.667        | <b>1092.675</b> | 1090.659 | R[8]  |
| H  | 18 | <b>1917.053</b> | 951.585  | <b>935.566</b>  | 936.574         | 934.558  | H[7]  |
| R  | 19 | 2073.194        | 814.526  | <b>798.507</b>  | <b>799.515</b>  | 797.499  | R[6]  |
| K  | 20 | 2229.280        | 658.425  | 642.406         | <b>643.414</b>  | 641.398  | K[5]  |
| V  | 21 | 2326.348        | 502.298  | 486.280         | 487.287         | 485.272  | V[4]  |
| L  | 22 | 2441.432        | 403.230  | 387.211         | 388.219         | 386.203  | L[3]  |
| R  | 23 | 2587.534        | 280.146  | 274.127         | <b>275.135</b>  | 273.119  | R[2]  |
| D  | 24 | 2712.560        | 134.045  | 118.026         | 119.034         | 117.018  | D[1]  |

# sp | P62806 | H4\_MOUSE

[Acetyl]SGRGK<sub>Acetyl</sub><sub>42.01</sub> GGK<sub>Acetyl</sub><sub>42.01</sub> GLGK<sub>Acetyl</sub><sub>42.01</sub> GGAK<sub>Acetyl</sub><sub>42.01</sub> RHRK<sub>Dimethyl</sub><sub>28.03</sub> VLRD

- ▶ fragmentation table for charge state 2+
- ▶ specType=etd
- ▶ score=104.86
- ▶ F113279.dat
- ▶ query=q39250\_p1
- ▶ precursor=679.142880
- ▶ chargePrecursor=4
- ▶ itol=0.5

| AA    | c               | y        | z+1             | z+2             | z        | AA    |
|-------|-----------------|----------|-----------------|-----------------|----------|-------|
| S[1]  | 74.642          | 1357.276 | 1340.267        | 0.504           | 1348.763 | S[24] |
| G[2]  | 102.553         | 1292.755 | 1284.745        | 0.504           | 1284.241 | G[23] |
| R[3]  | 180.603         | 1284.244 | <b>1256.234</b> | <b>1256.738</b> | 1295.711 | R[22] |
| G[4]  | 209.114         | 1136.193 | <b>1178.184</b> | <b>1178.688</b> | 1177.689 | G[21] |
| K[5]  | 204.167         | 1157.683 | <b>1149.673</b> | <b>1150.177</b> | 1149.169 | K[20] |
| G[6]  | 322.677         | 1072.630 | <b>1064.620</b> | <b>1065.124</b> | 1064.117 | G[19] |
| G[7]  | 351.188         | 1044.119 | <b>1036.110</b> | <b>1036.614</b> | 1035.606 | G[18] |
| K[8]  | 436.241         | 1015.608 | <b>1007.599</b> | <b>1008.103</b> | 1007.095 | K[17] |
| G[9]  | 464.752         | 930.596  | <b>922.586</b>  | <b>923.090</b>  | 922.042  | G[16] |
| L[10] | 501.294         | 902.045  | <b>894.035</b>  | <b>894.539</b>  | 893.532  | L[15] |
| G[11] | 549.804         | 945.503  | 837.493         | <b>837.997</b>  | 836.990  | G[14] |
| K[12] | 534.857         | 816.992  | <b>808.983</b>  | <b>809.487</b>  | 808.479  | K[13] |
| G[13] | 663.366         | 731.939  | <b>723.930</b>  | <b>724.434</b>  | 723.426  | G[12] |
| G[14] | 691.879         | 703.429  | <b>695.419</b>  | <b>695.923</b>  | 694.915  | G[11] |
| A[15] | 727.397         | 674.918  | <b>666.908</b>  | <b>667.412</b>  | 666.405  | A[10] |
| R[16] | 812.450         | 639.399  | <b>631.390</b>  | <b>631.894</b>  | 630.886  | R[9]  |
| R[17] | <b>890.500</b>  | 554.347  | 546.337         | 546.841         | 545.833  | R[8]  |
| H[18] | <b>959.030</b>  | 476.290  | 468.280         | 468.791         | 467.783  | H[7]  |
| R[19] | 1037.080        | 407.767  | 399.757         | 400.261         | 399.253  | R[6]  |
| K[20] | <b>1115.144</b> | 329.716  | 321.707         | 322.211         | 321.203  | K[5]  |
| V[21] | <b>1164.678</b> | 251.653  | 243.643         | 244.147         | 243.140  | V[4]  |
| L[22] | <b>1221.220</b> | 202.119  | 194.109         | 194.613         | 193.605  | L[3]  |
| R[23] | <b>1299.270</b> | 145.577  | 137.567         | 138.073         | 137.063  | R[2]  |
| D[24] | 1356.784        | 67.526   | 59.517          | 60.021          | 59.013   | D[1]  |

# sp | P62806 | H4\_MOUSE

[Acetyl]SGR**GK** <sup>Acetyl</sup><sub>42.01</sub> **G**G**K** <sup>Acetyl</sup><sub>42.01</sub> **G**L**G****K** <sup>Acetyl</sup><sub>42.01</sub> **G**G**A****K** <sup>Acetyl</sup><sub>42.01</sub> **R**H**R****K** <sup>Dimethyl</sup><sub>28.03</sub> **V**L**R****D**

- ▶ fragmentation table for charge state 3+
- ▶ specType=etd
- ▶ score=104.86
- ▶ F113279.dat
- ▶ query=q39250.p1
- ▶ precursor=679.142880
- ▶ chargePrecursor=4
- ▶ itol=0.5

| AA    | c              | y              | z+1            | z+2            | z              | AA    |
|-------|----------------|----------------|----------------|----------------|----------------|-------|
| S[1]  | 49.697         | <b>905.186</b> | <b>699.847</b> | 0.672          | <b>899.511</b> | S[24] |
| G[2]  | 58.704         | 352.172        | <b>856.833</b> | 0.672          | 356.497        | G[23] |
| R[3]  | 120.738        | 843.165        | <b>837.825</b> | <b>838.161</b> | 837.489        | R[22] |
| G[4]  | 139.745        | 791.131        | 785.792        | 786.128        | 785.456        | G[21] |
| K[5]  | 196.447        | 772.124        | 766.785        | 767.120        | 766.449        | K[20] |
| G[6]  | 215.454        | 715.422        | 710.083        | 710.419        | 709.747        | G[19] |
| G[7]  | 234.461        | 696.415        | 691.076        | 691.412        | 690.740        | G[18] |
| K[8]  | 291.163        | 677.408        | 672.068        | 672.404        | 671.732        | K[17] |
| G[9]  | 310.170        | 620.706        | 615.367        | 615.703        | 615.031        | G[16] |
| L[10] | 317.885        | 601.699        | 596.359        | 596.695        | 596.023        | L[15] |
| G[11] | 356.872        | 554.004        | 558.665        | 559.001        | 558.329        | G[14] |
| K[12] | 423.574        | 544.997        | 539.658        | 539.994        | 539.322        | K[13] |
| G[13] | 442.581        | 488.295        | 482.956        | 483.292        | 482.620        | G[12] |
| G[14] | 461.588        | 469.288        | 463.949        | 464.285        | 463.613        | G[11] |
| A[15] | 485.267        | 450.281        | 444.941        | 445.277        | 444.605        | A[10] |
| K[16] | 541.969        | 426.602        | 421.262        | 421.598        | 420.926        | K[9]  |
| R[17] | 594.003        | 369.900        | 364.561        | 364.896        | 364.225        | R[8]  |
| H[18] | 639.689        | 317.896        | 312.527        | 312.863        | 312.191        | H[7]  |
| R[19] | 691.723        | 272.180        | 266.841        | 267.176        | 266.505        | R[6]  |
| K[20] | 743.765        | 220.146        | 214.807        | 215.143        | 214.471        | K[5]  |
| V[21] | 776.788        | 168.104        | 162.765        | 163.101        | 162.429        | V[4]  |
| L[22] | 814.482        | 135.082        | 129.742        | 130.078        | 129.406        | L[3]  |
| R[23] | <b>866.516</b> | 97.387         | 92.047         | 92.383         | 91.711         | R[2]  |
| D[24] | 904.858        | 45.353         | 40.014         | 40.349         | 39.678         | D[1]  |





# sp | P62806 | H4\_MOUSE

[Acetyl]SGR**GK**<sup>Acetyl</sup><sub>42.01</sub> **G**G**K**<sup>Acetyl</sup><sub>42.01</sub> **G**L**G****K**<sup>Acetyl</sup><sub>42.01</sub> **G**G**A****K**<sup>Acetyl</sup><sub>42.01</sub> **R**H**R****K**<sup>Dimethyl</sup><sub>28.03</sub> **V**L**R****D**

- ▶ fragmentation table for charge state 1+
- ▶ specType=etd
- ▶ score=91.42
- ▶ F113279.dat
- ▶ query=q39251\_p1
- ▶ precursor=543.515780
- ▶ chargePrecursor=5
- ▶ itol=0.5

| AA | c  | y               | z+1            | z+2             | z               | AA       |       |
|----|----|-----------------|----------------|-----------------|-----------------|----------|-------|
| S  | 1  | 147.076         | 273.544        | 2697.526        | 0.000           | 2696.518 | S[24] |
| G  | 2  | 204.098         | 2584.502       | 2568.483        | 0.000           | 2567.475 | G[23] |
| R  | 3  | <b>350.199</b>  | 2527.480       | 2511.463        | 2512.470        | 2510.454 | R[22] |
| G  | 4  | <b>417.230</b>  | 2371.379       | 2356.361        | 2356.368        | 2354.353 | G[21] |
| K  | 5  | <b>587.326</b>  | 2314.358       | 2298.339        | 2299.347        | 2297.331 | K[20] |
| G  | 6  | <b>644.347</b>  | 2144.252       | 2128.234        | 2129.241        | 2127.226 | G[19] |
| G  | 7  | <b>701.369</b>  | 2087.231       | 2071.213        | 2072.220        | 2070.204 | G[18] |
| K  | 8  | <b>871.474</b>  | 2030.209       | 2014.191        | 2015.198        | 2013.183 | K[17] |
| G  | 9  | <b>928.496</b>  | 1880.104       | 1864.085        | 1865.093        | 1863.077 | G[16] |
| L  | 10 | <b>1041.580</b> | 1803.062       | 1787.044        | 1788.051        | 1786.035 | L[15] |
| G  | 11 | <b>1098.601</b> | 1588.998       | 1573.980        | 1574.987        | 1572.972 | G[14] |
| K  | 12 | <b>1268.707</b> | 1632.977       | 1616.958        | 1617.966        | 1615.950 | K[13] |
| G  | 13 | <b>1325.728</b> | 1462.871       | 1446.853        | 1447.860        | 1445.845 | G[12] |
| G  | 14 | <b>1382.750</b> | 1405.850       | 1389.831        | <b>1390.839</b> | 1388.823 | G[11] |
| A  | 15 | <b>1453.787</b> | 1348.828       | 1332.810        | 1333.818        | 1331.802 | A[10] |
| R  | 16 | 1623.833        | 1277.791       | <b>1261.773</b> | 1262.780        | 1260.765 | R[9]  |
| R  | 17 | <b>1779.994</b> | 1107.685       | 1091.667        | <b>1092.675</b> | 1090.659 | R[8]  |
| H  | 18 | 1917.053        | 951.585        | 935.566         | <b>936.574</b>  | 934.558  | H[7]  |
| R  | 19 | 2073.194        | <b>814.526</b> | <b>798.507</b>  | <b>799.515</b>  | 797.499  | R[6]  |
| K  | 20 | 2229.280        | 658.425        | <b>642.406</b>  | 643.414         | 641.398  | K[5]  |
| V  | 21 | 2326.348        | 502.298        | <b>486.280</b>  | 487.287         | 485.272  | V[4]  |
| L  | 22 | 2441.432        | 403.230        | <b>387.211</b>  | <b>388.219</b>  | 386.203  | L[3]  |
| R  | 23 | 2587.534        | 280.146        | <b>274.127</b>  | 275.135         | 273.119  | R[2]  |
| D  | 24 | 2712.560        | 134.045        | 118.026         | 119.034         | 117.018  | D[1]  |

# sp | P62806 | H4\_MOUSE

[Acetyl]SGR**GGK**<sup>Acetyl</sup><sub>42.01</sub> **GGK**<sup>Acetyl</sup><sub>42.01</sub> **GLGK**<sup>Acetyl</sup><sub>42.01</sub> **GGAK**<sup>Acetyl</sup><sub>42.01</sub> **RHRK**<sup>Dimethyl</sup><sub>28.03</sub> **VLRD**

- ▶ fragmentation table for charge state 2+
- ▶ specType=etd
- ▶ score=91.42
- ▶ F113279.dat
- ▶ query=q39251\_p1
- ▶ precursor=543.515780
- ▶ chargePrecursor=5
- ▶ itol=0.5

| AA | c  | y               | z+1             | z+2             | z               | AA              |       |
|----|----|-----------------|-----------------|-----------------|-----------------|-----------------|-------|
| S  | 1  | 74.042          | 1157.276        | <b>1349.267</b> | 0.504           | 1349.761        | S[24] |
| G  | 2  | 102.553         | 1292.755        | 1284.745        | 0.504           | 1284.241        | G[23] |
| R  | 3  | 180.603         | 1264.244        | 1256.234        | 1258.738        | 1255.731        | R[22] |
| G  | 4  | 259.114         | 1158.193        | 1179.183        | <b>1178.688</b> | 1177.689        | G[21] |
| K  | 5  | 294.157         | 1157.683        | <b>1149.673</b> | 1150.177        | <b>1149.169</b> | K[20] |
| G  | 6  | 322.677         | 1072.630        | <b>1064.620</b> | <b>1065.124</b> | <b>1064.117</b> | G[19] |
| G  | 7  | 351.188         | <b>1044.119</b> | <b>1036.110</b> | <b>1036.614</b> | 1035.606        | G[18] |
| K  | 8  | 436.241         | <b>1015.608</b> | 1007.599        | <b>1008.103</b> | 1007.599        | K[17] |
| G  | 9  | 464.752         | 930.556         | 922.546         | <b>923.050</b>  | 922.042         | G[16] |
| L  | 10 | 511.294         | 902.045         | 894.035         | <b>894.539</b>  | 893.531         | L[15] |
| G  | 11 | 540.804         | 845.503         | <b>837.493</b>  | <b>837.997</b>  | 836.990         | G[14] |
| K  | 12 | 634.857         | 816.992         | 808.983         | <b>809.487</b>  | 808.479         | K[13] |
| G  | 13 | 663.368         | 731.939         | <b>723.930</b>  | <b>724.434</b>  | 723.426         | G[12] |
| G  | 14 | <b>691.879</b>  | 703.429         | <b>695.419</b>  | <b>695.923</b>  | <b>694.915</b>  | G[11] |
| A  | 15 | 720.397         | <b>674.918</b>  | 666.908         | <b>667.412</b>  | 666.404         | A[10] |
| R  | 16 | 812.450         | <b>639.399</b>  | 631.390         | <b>631.894</b>  | 630.886         | R[9]  |
| R  | 17 | <b>890.500</b>  | 554.347         | <b>546.337</b>  | <b>546.841</b>  | 545.833         | R[8]  |
| H  | 18 | <b>959.030</b>  | 476.290         | <b>468.287</b>  | <b>468.791</b>  | 467.783         | H[7]  |
| R  | 19 | <b>1037.080</b> | 407.767         | <b>399.757</b>  | <b>400.261</b>  | 399.253         | R[6]  |
| K  | 20 | 1112.144        | 329.716         | 321.707         | 322.211         | 321.203         | K[5]  |
| V  | 21 | <b>1164.678</b> | 253.653         | 245.643         | 246.147         | 245.140         | V[4]  |
| L  | 22 | <b>1221.220</b> | 202.119         | 194.109         | 194.613         | 193.605         | L[3]  |
| R  | 23 | <b>1299.270</b> | 145.577         | 137.567         | 138.071         | 137.063         | R[2]  |
| D  | 24 | 1356.704        | 67.526          | 59.517          | 60.021          | 59.013          | D[1]  |

# sp | P62806 | H4\_MOUSE

[Acetyl]SGR**GGK**<sup>Acetyl</sup><sub>42.01</sub> **GGK**<sup>Acetyl</sup><sub>42.01</sub> **GLGK**<sup>Acetyl</sup><sub>42.01</sub> **GGAK**<sup>Acetyl</sup><sub>42.01</sub> **RHRK**<sup>Dimethyl</sup><sub>28.03</sub> **VLRD**

- ▶ fragmentation table for charge state 3+
- ▶ specType=etd
- ▶ score=91.42
- ▶ F113279.dat
- ▶ query=q39251.p1
- ▶ precursor=543.515780
- ▶ chargePrecursor=5
- ▶ itol=0.5

| AA    | c              | y              | z+1            | z+2            | z              | AA    |
|-------|----------------|----------------|----------------|----------------|----------------|-------|
| S[1]  | 49.697         | 305.199        | 899.847        | 0.672          | 899.511        | S[24] |
| G[2]  | 58.704         | <b>862.172</b> | 856.831        | 0.672          | 856.497        | G[23] |
| R[3]  | 120.738        | 841.165        | <b>837.825</b> | <b>830.161</b> | <b>837.489</b> | R[22] |
| G[4]  | 139.745        | 791.131        | 785.792        | <b>786.128</b> | 785.456        | G[21] |
| K[5]  | 196.447        | 772.124        | 766.785        | <b>767.120</b> | 766.449        | K[20] |
| G[6]  | 215.454        | 715.422        | <b>710.083</b> | <b>710.419</b> | <b>709.747</b> | G[19] |
| G[7]  | 234.461        | <b>696.415</b> | 691.076        | <b>691.412</b> | 690.740        | G[18] |
| K[8]  | 291.163        | 677.408        | 672.068        | <b>672.404</b> | 671.732        | K[17] |
| G[9]  | 310.170        | 620.705        | <b>615.367</b> | <b>615.703</b> | 615.031        | G[16] |
| L[10] | 347.885        | 601.699        | <b>596.359</b> | <b>596.695</b> | 596.023        | L[15] |
| G[11] | 396.872        | 564.004        | <b>558.665</b> | <b>559.001</b> | 558.329        | G[14] |
| K[12] | 423.574        | 544.997        | <b>539.658</b> | <b>539.994</b> | <b>539.322</b> | K[13] |
| G[13] | 442.581        | 488.295        | 482.956        | 483.292        | 482.620        | G[12] |
| G[14] | 461.588        | 469.288        | <b>463.949</b> | <b>464.285</b> | <b>463.613</b> | G[11] |
| A[15] | 485.267        | 450.281        | 444.941        | 445.277        | 444.605        | A[10] |
| K[16] | 541.969        | 426.602        | 421.262        | <b>421.598</b> | 420.926        | K[9]  |
| R[17] | 594.683        | 369.900        | 364.561        | 364.896        | 364.225        | R[8]  |
| H[18] | <b>639.689</b> | 317.866        | 312.527        | 312.863        | 312.191        | H[7]  |
| R[19] | <b>691.723</b> | 272.180        | 266.841        | 267.176        | 266.505        | R[6]  |
| K[20] | <b>743.765</b> | 220.140        | 214.807        | 215.143        | 214.471        | K[5]  |
| V[21] | 776.788        | 168.104        | 162.765        | 163.101        | 162.429        | V[4]  |
| L[22] | <b>814.482</b> | 135.082        | 129.742        | 130.078        | 129.406        | L[3]  |
| R[23] | 886.516        | 97.387         | 92.047         | 92.383         | 91.711         | R[2]  |
| D[24] | 904.858        | 45.353         | 40.014         | 40.349         | 39.678         | D[1]  |

# sp | P62806 | H4\_MOUSE

[Acetyl]SGR**GGK**<sup>Acetyl</sup><sub>42.01</sub> **GGK**<sup>Acetyl</sup><sub>42.01</sub> **GLGK**<sup>Acetyl</sup><sub>42.01</sub> **GGAK**<sup>Acetyl</sup><sub>42.01</sub> **RHRK**<sup>Dimethyl</sup><sub>28.03</sub> **VLRD**

- ▶ fragmentation table for charge state 4+
- ▶ specType=etd
- ▶ score=91.42
- ▶ F113279.dat
- ▶ query=q39251.p1
- ▶ precursor=543.515780
- ▶ chargePrecursor=5
- ▶ itol=0.5

| AA    | c              | y              | z+1            | z+2            | z              | AA    |
|-------|----------------|----------------|----------------|----------------|----------------|-------|
| S[1]  | 37.525         | <b>679.142</b> | <b>675.137</b> | 0.755          | <b>674.085</b> | S[24] |
| G[2]  | 51.780         | 546.081        | <b>642.876</b> | 0.755          | <b>642.624</b> | G[23] |
| R[3]  | 90.805         | <b>632.626</b> | <b>628.621</b> | <b>628.873</b> | 628.369        | R[22] |
| G[4]  | 105.061        | 593.600        | 589.596        | 589.848        | 589.344        | G[21] |
| K[5]  | 147.587        | 579.345        | 575.340        | 575.592        | 575.088        | K[20] |
| G[6]  | 161.842        | 536.819        | 532.814        | 533.066        | 532.562        | G[19] |
| G[7]  | 176.098        | 522.563        | 518.558        | 518.810        | 518.307        | G[18] |
| K[8]  | 218.624        | 508.308        | 504.303        | 504.555        | 504.051        | K[17] |
| G[9]  | 232.879        | 495.781        | 491.777        | 492.029        | 491.525        | G[16] |
| L[10] | 261.150        | 451.526        | 447.521        | 447.773        | 447.269        | L[15] |
| G[11] | 275.406        | 423.255        | 419.250        | 419.502        | 418.998        | G[14] |
| K[12] | 317.932        | 409.000        | 404.995        | 405.247        | 404.743        | K[13] |
| G[13] | 332.188        | 366.473        | 362.469        | 362.721        | 362.217        | G[12] |
| G[14] | 346.443        | 352.218        | 348.213        | 348.465        | 347.961        | G[11] |
| A[15] | 364.202        | 337.963        | 333.958        | 334.210        | 333.706        | A[10] |
| K[16] | 406.729        | 320.203        | 316.199        | 316.451        | 315.947        | K[9]  |
| R[17] | <b>445.754</b> | -277.877       | 273.872        | <b>273.924</b> | -273.420       | R[8]  |
| H[18] | 460.010        | 238.652        | 234.647        | 234.899        | 234.395        | H[7]  |
| R[19] | <b>519.044</b> | 204.397        | 200.392        | 200.644        | 200.140        | R[6]  |
| K[20] | 568.075        | 185.362        | 181.357        | 181.609        | 181.105        | K[5]  |
| V[21] | 582.843        | 126.330        | 122.325        | 122.577        | 122.073        | V[4]  |
| L[22] | 611.114        | 101.563        | 97.558         | 97.810         | 97.306         | L[3]  |
| R[23] | 650.139        | 73.292         | 69.287         | 69.539         | 69.035         | R[2]  |
| D[24] | 678.896        | 34.267         | 30.262         | 30.514         | 30.010         | D[1]  |

# sp | P62806 | H4\_MOUSE

[Acetyl]SGRGK Acetyl 42.01 GGK Acetyl 42.01 GLGK Acetyl 42.01 GGAK Acetyl 42.01 RHRK Dimethyl 28.03 VLRD

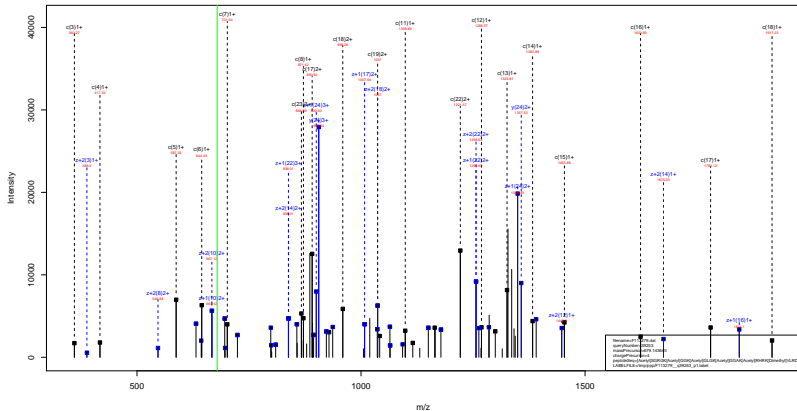

# sp | P62806 | H4\_MOUSE

[Acetyl]SGR**GK**<sup>Acetyl</sup><sub>42.01</sub> **G**G**K**<sup>Acetyl</sup><sub>42.01</sub> **G**L**G****K**<sup>Acetyl</sup><sub>42.01</sub> **G**G**A****K**<sup>Acetyl</sup><sub>42.01</sub> **R**H**R****K**<sup>Dimethyl</sup><sub>28.03</sub> **V**L**R****D**

- ▶ fragmentation table for charge state 1+
- ▶ specType=etd
- ▶ score=105.84
- ▶ F113279.dat
- ▶ query=q39253.p1
- ▶ precursor=679.143640
- ▶ chargePrecursor=4
- ▶ itol=0.5

| AA | c  | y               | z+1      | z+2             | z               | AA       |       |
|----|----|-----------------|----------|-----------------|-----------------|----------|-------|
| S  | 1  | 147.676         | 273.544  | 2697.526        | 0.000           | 2696.518 | S[24] |
| G  | 2  | 204.098         | 2584.502 | 2568.483        | 0.000           | 2567.475 | G[23] |
| R  | 3  | <b>358.199</b>  | 2527.480 | 2511.463        | 2512.470        | 2510.454 | R[22] |
| G  | 4  | <b>417.220</b>  | 2371.379 | 2355.361        | 2356.368        | 2354.353 | G[21] |
| K  | 5  | <b>587.326</b>  | 2314.358 | 2298.339        | 2299.347        | 2297.331 | K[20] |
| G  | 6  | <b>644.347</b>  | 2144.252 | 2128.234        | 2129.241        | 2127.226 | G[19] |
| G  | 7  | <b>701.369</b>  | 2087.231 | 2071.213        | 2072.220        | 2070.204 | G[18] |
| K  | 8  | <b>871.474</b>  | 2030.209 | 2014.191        | 2015.198        | 2013.183 | K[17] |
| G  | 9  | <b>928.496</b>  | 1880.104 | <b>1844.085</b> | 1845.093        | 1843.077 | G[16] |
| L  | 10 | <b>1041.580</b> | 1803.062 | 1787.044        | 1788.051        | 1786.035 | L[15] |
| G  | 11 | <b>1098.601</b> | 1588.998 | 1673.980        | <b>1674.987</b> | 1672.972 | G[14] |
| K  | 12 | <b>1268.707</b> | 1632.977 | 1616.958        | 1617.966        | 1615.950 | K[13] |
| G  | 13 | <b>1325.728</b> | 1462.871 | 1446.853        | <b>1447.860</b> | 1445.845 | G[12] |
| G  | 14 | <b>1382.750</b> | 1405.850 | 1389.831        | <b>1390.839</b> | 1388.823 | G[11] |
| A  | 15 | <b>1453.787</b> | 1348.828 | 1332.810        | 1333.818        | 1331.802 | A[10] |
| R  | 16 | <b>1623.893</b> | 1277.791 | 1261.773        | <b>1262.780</b> | 1260.765 | R[9]  |
| R  | 17 | <b>1779.994</b> | 1107.685 | 1091.667        | <b>1092.675</b> | 1090.659 | R[8]  |
| H  | 18 | <b>1917.053</b> | 951.585  | 935.566         | <b>936.574</b>  | 934.558  | H[7]  |
| R  | 19 | 2073.194        | 814.526  | <b>798.507</b>  | <b>799.515</b>  | 797.499  | R[6]  |
| K  | 20 | 2229.280        | 658.425  | 642.406         | <b>643.414</b>  | 641.398  | K[5]  |
| V  | 21 | 2328.348        | 502.298  | 486.280         | 487.287         | 485.272  | V[4]  |
| L  | 22 | 2441.432        | 403.230  | 387.211         | <b>388.219</b>  | 386.203  | L[3]  |
| R  | 23 | 2587.534        | 280.146  | 274.127         | 275.135         | 273.119  | R[2]  |
| D  | 24 | 2712.590        | 134.045  | 118.026         | 119.034         | 117.018  | D[1]  |

# sp | P62806 | H4\_MOUSE

[Acetyl]SGRGK<sup>Acetyl</sup><sub>42.01</sub> GGK<sup>Acetyl</sup><sub>42.01</sub> GLGK<sup>Acetyl</sup><sub>42.01</sub> GGAK<sup>Acetyl</sup><sub>42.01</sub> RHRK<sup>Dimethyl</sup><sub>28.03</sub> VLRD

- ▶ fragmentation table for charge state 2+
- ▶ specType=etd
- ▶ score=105.84
- ▶ F113279.dat
- ▶ query=q39253.p1
- ▶ precursor=679.143640
- ▶ chargePrecursor=4
- ▶ itol=0.5

| AA    | c               | y               | z+1             | z+2             | z               | AA    |
|-------|-----------------|-----------------|-----------------|-----------------|-----------------|-------|
| S[1]  | 74.642          | <b>1357.276</b> | <b>1349.267</b> | 0.504           | 1348.763        | S[24] |
| G[2]  | 102.553         | 1292.755        | <b>1284.745</b> | 0.504           | 1284.241        | G[23] |
| R[3]  | 180.603         | 1264.244        | <b>1256.234</b> | <b>1256.738</b> | 1255.731        | R[22] |
| G[4]  | 259.114         | 1198.193        | <b>1178.184</b> | <b>1178.688</b> | 1177.681        | G[21] |
| K[5]  | 294.157         | 1157.683        | <b>1149.673</b> | <b>1150.177</b> | 1149.169        | K[20] |
| G[6]  | 322.677         | 1072.630        | <b>1064.620</b> | <b>1065.124</b> | <b>1064.117</b> | G[19] |
| G[7]  | 351.188         | 1044.119        | <b>1036.110</b> | <b>1036.614</b> | 1035.606        | G[18] |
| K[8]  | 436.241         | 1015.608        | <b>1007.599</b> | <b>1008.103</b> | 1007.095        | K[17] |
| G[9]  | 464.752         | 930.556         | <b>922.546</b>  | <b>923.050</b>  | 922.042         | G[16] |
| L[10] | 511.294         | 902.045         | <b>894.035</b>  | <b>894.539</b>  | 893.531         | L[15] |
| G[11] | 549.804         | 845.503         | 837.493         | <b>837.997</b>  | 836.990         | G[14] |
| K[12] | 634.857         | 816.992         | <b>808.983</b>  | <b>809.487</b>  | 808.479         | K[13] |
| G[13] | 663.368         | 731.939         | <b>723.930</b>  | <b>724.434</b>  | 723.426         | G[12] |
| G[14] | 691.879         | 703.429         | <b>695.419</b>  | <b>695.923</b>  | 694.915         | G[11] |
| A[15] | 720.389         | 674.918         | <b>666.908</b>  | <b>667.412</b>  | 666.404         | A[10] |
| R[16] | 812.450         | 639.399         | <b>631.390</b>  | <b>631.894</b>  | 630.886         | R[9]  |
| R[17] | <b>890.500</b>  | 554.347         | 546.337         | <b>546.841</b>  | 545.833         | R[8]  |
| H[18] | <b>959.030</b>  | 476.290         | 468.280         | 468.784         | 467.776         | H[7]  |
| R[19] | <b>1037.080</b> | 407.767         | 399.757         | 400.261         | 399.253         | R[6]  |
| K[20] | <b>1115.144</b> | 329.716         | 321.707         | 322.211         | 321.203         | K[5]  |
| V[21] | <b>1164.678</b> | 251.663         | 243.653         | 244.157         | 243.149         | V[4]  |
| L[22] | <b>1221.220</b> | 202.119         | 194.109         | 194.613         | 193.605         | L[3]  |
| R[23] | <b>1299.270</b> | 145.577         | 137.567         | 138.071         | 137.063         | R[2]  |
| D[24] | 1356.704        | 67.526          | 59.517          | 60.021          | 59.013          | D[1]  |



# sp | P62806 | H4\_MOUSE

[Acetyl]SGR**GGK** Acetyl 42.01 **GGK** Acetyl 42.01 **GLGK** Acetyl 42.01 **GGAK** Acetyl 42.01 **RHRK** Dimethyl 28.03 **VLRD**

- ▶ fragmentation table for charge state 3+
- ▶ specType=etd
- ▶ score=105.84
- ▶ F113279.dat
- ▶ query=q39253.p1
- ▶ precursor=679.143640
- ▶ chargePrecursor=4
- ▶ itol=0.5

| AA    | c              | y              | z+1            | z+2            | z              | AA    |
|-------|----------------|----------------|----------------|----------------|----------------|-------|
| S[1]  | 49.697         | <b>905.186</b> | <b>699.847</b> | 0.672          | 899.511        | S[24] |
| G[2]  | 58.704         | 392.172        | <b>856.833</b> | 0.672          | <b>856.497</b> | G[23] |
| R[3]  | 120.738        | 843.165        | <b>837.825</b> | <b>838.161</b> | 837.489        | R[22] |
| G[4]  | 139.745        | 791.131        | 785.792        | 786.128        | 785.456        | G[21] |
| K[5]  | 196.447        | 772.124        | 766.785        | 767.120        | 766.449        | K[20] |
| G[6]  | 215.454        | 715.422        | 710.083        | 710.419        | 709.747        | G[19] |
| G[7]  | 234.461        | <b>696.415</b> | 691.076        | 691.412        | 690.740        | G[18] |
| K[8]  | 291.163        | 677.408        | 672.068        | 672.404        | 671.732        | K[17] |
| G[9]  | 310.170        | 620.706        | 615.367        | 615.703        | 615.031        | G[16] |
| L[10] | 317.885        | 601.699        | 596.359        | 596.695        | 596.023        | L[15] |
| G[11] | 396.872        | 564.004        | 558.665        | 559.001        | 558.329        | G[14] |
| K[12] | 423.574        | 544.997        | 539.658        | 539.994        | 539.322        | K[13] |
| G[13] | 442.581        | 488.295        | 482.956        | 483.292        | 482.620        | G[12] |
| G[14] | 461.588        | 469.288        | 463.949        | 464.285        | 463.613        | G[11] |
| A[15] | 485.267        | 450.281        | 444.941        | 445.277        | 444.605        | A[10] |
| K[16] | 541.969        | 426.602        | 421.262        | 421.598        | 420.926        | K[9]  |
| R[17] | 594.003        | 369.900        | 364.561        | 364.896        | 364.225        | R[8]  |
| H[18] | 639.689        | 317.896        | 312.527        | 312.863        | 312.191        | H[7]  |
| R[19] | 691.723        | 272.180        | 266.841        | 267.176        | 266.505        | R[6]  |
| K[20] | 743.765        | 220.146        | 214.807        | 215.143        | 214.471        | K[5]  |
| V[21] | 776.788        | 168.104        | 162.765        | 163.101        | 162.429        | V[4]  |
| L[22] | 814.482        | 135.082        | 129.742        | 130.078        | 129.406        | L[3]  |
| R[23] | <b>866.516</b> | 97.387         | 92.047         | 92.383         | 91.711         | R[2]  |
| D[24] | 904.858        | 45.353         | 40.014         | 40.349         | 39.678         | D[1]  |

# sp | P62806 | H4\_MOUSE

[Acetyl]SGR**GK** Acetyl 42.01 GGK Acetyl 42.01 GLGK Acetyl 42.01 GGAK Acetyl 42.01 RHRK Dimethyl 28.03 VL**RD**

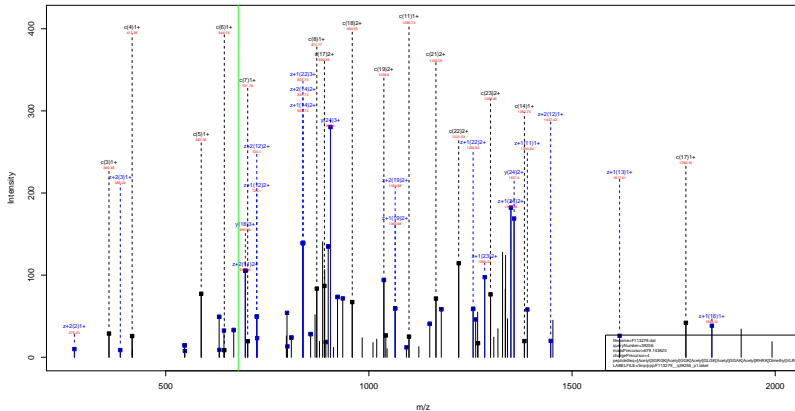

# sp | P62806 | H4\_MOUSE

[Acetyl]SGRGK<sup>Acetyl</sup><sub>42.01</sub> GGK<sup>Acetyl</sup><sub>42.01</sub> GLGK<sup>Acetyl</sup><sub>42.01</sub> GGAK<sup>Acetyl</sup><sub>42.01</sub> RHRK<sup>Dimethyl</sup><sub>28.03</sub> VLRD

- ▶ fragmentation table for charge state 1+
- ▶ specType=etd
- ▶ score=97.01
- ▶ F113279.dat
- ▶ query=q39256\_p1
- ▶ precursor=679.143820
- ▶ chargePrecursor=4
- ▶ itol=0.5

| AA | c  | y               | z+1      | z+2             | z               | AA       |       |
|----|----|-----------------|----------|-----------------|-----------------|----------|-------|
| S  | 1  | 147.076         | 273.544  | 2697.526        | 0.000           | 2696.518 | S[24] |
| G  | 2  | 204.098         | 2584.502 | 2568.483        | 0.000           | 2567.475 | G[23] |
| R  | 3  | <b>368.199</b>  | 2527.480 | 2511.463        | 2512.470        | 2510.454 | R[22] |
| G  | 4  | <b>417.230</b>  | 2371.379 | 2356.361        | 2356.368        | 2354.353 | G[21] |
| K  | 5  | <b>587.326</b>  | 2314.358 | 2298.339        | 2299.347        | 2297.331 | K[20] |
| G  | 6  | <b>644.347</b>  | 2144.252 | 2128.234        | 2129.241        | 2127.226 | G[19] |
| G  | 7  | <b>701.369</b>  | 2087.231 | 2071.215        | 2072.220        | 2070.204 | G[18] |
| K  | 8  | <b>871.474</b>  | 2030.209 | 2014.191        | 2015.198        | 2013.183 | K[17] |
| G  | 9  | <b>930.506</b>  | 1890.104 | <b>1844.085</b> | 1845.093        | 1843.077 | G[16] |
| L  | 10 | <b>1041.580</b> | 1803.062 | 1787.045        | 1788.071        | 1786.056 | L[15] |
| G  | 11 | <b>1098.601</b> | 1588.998 | 1673.980        | 1674.987        | 1672.972 | G[14] |
| K  | 12 | <b>1268.707</b> | 1632.977 | <b>1616.958</b> | 1617.966        | 1615.950 | K[13] |
| G  | 13 | 1325.728        | 1462.871 | 1446.853        | <b>1447.860</b> | 1445.845 | G[12] |
| G  | 14 | <b>1382.750</b> | 1405.850 | <b>1389.831</b> | 1390.839        | 1388.823 | G[11] |
| A  | 15 | 1453.787        | 1348.828 | 1332.810        | 1333.818        | 1331.802 | A[10] |
| R  | 16 | 1623.883        | 1277.791 | 1261.773        | <b>1262.780</b> | 1260.765 | R[9]  |
| R  | 17 | <b>1779.994</b> | 1107.685 | 1091.667        | <b>1092.675</b> | 1090.659 | R[8]  |
| H  | 18 | 1917.053        | 951.585  | <b>935.566</b>  | 936.574         | 934.558  | H[7]  |
| R  | 19 | 2073.154        | 814.526  | <b>798.507</b>  | <b>799.515</b>  | 797.499  | R[6]  |
| K  | 20 | 2229.280        | 658.425  | 642.408         | <b>643.414</b>  | 641.398  | K[5]  |
| V  | 21 | 2328.348        | 502.298  | 486.280         | 487.287         | 485.272  | V[4]  |
| L  | 22 | 2441.432        | 403.230  | 387.213         | <b>388.219</b>  | 386.203  | L[3]  |
| R  | 23 | 2587.534        | 286.146  | 274.127         | <b>275.135</b>  | 273.119  | R[2]  |
| D  | 24 | 2712.560        | 134.045  | 118.028         | 119.034         | 117.018  | D[1]  |

# sp | P62806 | H4\_MOUSE

[Acetyl]SGRGK<sub>Acetyl</sub><sub>42.01</sub> GGK<sub>Acetyl</sub><sub>42.01</sub> GLGK<sub>Acetyl</sub><sub>42.01</sub> GGAK<sub>Acetyl</sub><sub>42.01</sub> RHRK<sub>Dimethyl</sub><sub>28.03</sub> VLRD

- ▶ fragmentation table for charge state 2+
- ▶ specType=etd
- ▶ score=97.01
- ▶ F113279.dat
- ▶ query=q39256.p1
- ▶ precursor=679.143820
- ▶ chargePrecursor=4
- ▶ itol=0.5

| AA | c  | y               | z+1             | z+2             | z               | AA       |       |
|----|----|-----------------|-----------------|-----------------|-----------------|----------|-------|
| S  | 1  | 74.042          | <b>1357.276</b> | <b>1349.267</b> | 0.504           | 1348.761 | S[24] |
| G  | 2  | 102.553         | 1292.755        | <b>1284.745</b> | 0.504           | 1284.241 | G[23] |
| R  | 3  | 180.803         | 1264.244        | <b>1256.234</b> | <b>1256.738</b> | 1255.731 | R[22] |
| G  | 4  | 259.114         | 1199.193        | <b>1179.184</b> | <b>1178.688</b> | 1177.680 | G[21] |
| K  | 5  | 294.167         | 1157.682        | <b>1149.673</b> | <b>1150.177</b> | 1149.169 | K[20] |
| G  | 6  | 352.677         | 1072.630        | <b>1064.620</b> | <b>1065.124</b> | 1064.117 | G[19] |
| G  | 7  | 351.188         | 1044.119        | 1036.110        | <b>1036.614</b> | 1035.606 | G[18] |
| K  | 8  | 436.241         | 1015.608        | 1007.599        | 1008.103        | 1007.095 | K[17] |
| G  | 9  | 464.752         | 930.556         | <b>922.546</b>  | <b>923.050</b>  | 922.042  | G[16] |
| L  | 10 | 511.294         | 902.045         | <b>894.035</b>  | <b>894.539</b>  | 893.532  | L[15] |
| G  | 11 | 549.804         | 845.503         | <b>837.493</b>  | <b>837.997</b>  | 836.990  | G[14] |
| K  | 12 | 634.857         | 816.992         | <b>808.983</b>  | <b>809.487</b>  | 808.479  | K[13] |
| G  | 13 | 663.368         | 731.939         | <b>723.930</b>  | <b>724.434</b>  | 723.426  | G[12] |
| G  | 14 | 691.879         | 703.429         | 695.419         | <b>695.923</b>  | 694.915  | G[11] |
| A  | 15 | 727.389         | 614.916         | <b>606.906</b>  | <b>607.412</b>  | 606.404  | A[10] |
| R  | 16 | 812.450         | 639.399         | <b>631.390</b>  | <b>631.894</b>  | 630.886  | R[9]  |
| R  | 17 | <b>890.500</b>  | 554.347         | <b>546.337</b>  | <b>546.841</b>  | 545.833  | R[8]  |
| R  | 18 | <b>959.030</b>  | 476.290         | 468.282         | 468.791         | 467.783  | R[7]  |
| R  | 19 | <b>1037.060</b> | 407.767         | 399.757         | 400.261         | 399.253  | R[6]  |
| K  | 20 | 1115.144        | 329.716         | 321.707         | 322.211         | 321.203  | K[5]  |
| V  | 21 | <b>1164.678</b> | 251.663         | 243.653         | 244.147         | 243.140  | V[4]  |
| L  | 22 | <b>1271.720</b> | 202.119         | 194.109         | 194.613         | 193.605  | L[3]  |
| R  | 23 | <b>1299.270</b> | 145.577         | 137.567         | 138.071         | 137.063  | R[2]  |
| D  | 24 | 1356.784        | 67.526          | 59.517          | 60.021          | 59.013   | D[1]  |

# sp | P62806 | H4\_MOUSE

[Acetyl]SGRGK Acetyl  
42.01 **GGK** Acetyl  
42.01 **GLGK** Acetyl  
42.01 **GGAK** Acetyl  
42.01 **RHRK** Dimethyl  
28.03 **VLRD**

- ▶ fragmentation table for charge state 3+
- ▶ specType=etd
- ▶ score=97.01
- ▶ F113279.dat
- ▶ query=q39256.p1
- ▶ precursor=679.143820
- ▶ chargePrecursor=4
- ▶ itol=0.5

| AA    | c       | y              | z+1            | z+2            | z              | AA    |
|-------|---------|----------------|----------------|----------------|----------------|-------|
| S[1]  | 49.697  | <b>905.186</b> | <b>899.847</b> | 0.672          | <b>899.511</b> | S[24] |
| G[2]  | 68.704  | 852.172        | <b>856.833</b> | 0.672          | <b>856.497</b> | G[23] |
| R[3]  | 120.738 | 843.165        | <b>837.825</b> | <b>838.161</b> | <b>837.489</b> | R[22] |
| G[4]  | 139.745 | 791.131        | 785.792        | 786.128        | 785.456        | G[21] |
| K[5]  | 196.447 | 772.124        | 766.785        | 767.120        | 766.449        | K[20] |
| G[6]  | 215.454 | 715.422        | 710.083        | 710.419        | 709.747        | G[19] |
| G[7]  | 234.461 | <b>696.415</b> | 691.076        | 691.412        | 690.740        | G[18] |
| K[8]  | 291.163 | 677.408        | 672.068        | 672.404        | 671.732        | K[17] |
| G[9]  | 310.170 | 620.796        | 615.367        | 615.703        | 615.031        | G[16] |
| L[10] | 347.855 | 601.999        | 596.359        | 596.695        | 596.023        | L[15] |
| G[11] | 356.872 | 564.024        | 558.665        | 559.001        | 558.329        | G[14] |
| K[12] | 423.574 | 544.997        | 539.658        | 539.994        | 539.322        | K[13] |
| G[13] | 442.581 | 488.295        | 482.956        | 483.292        | 482.620        | G[12] |
| G[14] | 461.588 | 469.288        | 463.949        | 464.285        | 463.613        | G[11] |
| A[15] | 485.267 | 450.281        | 444.941        | 445.277        | 444.605        | A[10] |
| K[16] | 541.969 | 426.602        | 421.262        | 421.598        | 420.926        | K[9]  |
| R[17] | 594.003 | 369.900        | 364.561        | 364.896        | 364.225        | R[8]  |
| H[18] | 639.689 | 317.866        | 312.527        | 312.863        | 312.191        | H[7]  |
| R[19] | 691.723 | 272.180        | 266.841        | 267.176        | 266.505        | R[6]  |
| K[20] | 743.765 | 220.346        | 214.997        | 215.343        | 214.671        | K[5]  |
| V[21] | 776.798 | 198.104        | 192.765        | 193.101        | 192.429        | V[4]  |
| L[22] | 814.482 | 135.082        | 129.742        | 130.078        | 129.406        | L[3]  |
| R[23] | 866.516 | 97.387         | 92.047         | 92.383         | 91.711         | R[2]  |
| D[24] | 904.858 | 45.353         | 40.014         | 40.349         | 39.678         | D[1]  |



# sp | Q6GSS7 | H2A2A\_MOUSE

LNKLLGK<sup>Dimethyl</sup>VTIAQGGVLPNIQAVLLPKKTE  
28.03

- ▶ fragmentation table for charge state 1+
- ▶ specType=cid
- ▶ score=52.29
- ▶ F113279.dat
- ▶ query=q41550\_p1
- ▶ precursor=771.723810
- ▶ chargePrecursor=4
- ▶ itol=0.5

| AA   | a              | a'             | a <sub>0</sub> | b               | b'             | b <sub>0</sub> | y        | y'              | y <sub>0</sub> | AA              |      |
|------|----------------|----------------|----------------|-----------------|----------------|----------------|----------|-----------------|----------------|-----------------|------|
| L1   | 380.080        | 380.080        | 0.000          | 334.294         | 0.000          | 0.000          | 3483.882 | 3486.981        | 3486.981       | L259            |      |
| R1   | 337.139        | 337.139        | 0.000          | 288.345         | 0.000          | 0.000          | 3071.870 | 3074.911        | 3074.911       | R20             |      |
| R1   | 338.254        | 338.254        | 0.000          | <b>356.229</b>  | <b>338.203</b> | 0.000          | 3086.765 | 3089.738        | 3089.744       | R207            |      |
| L1   | 407.133        | 407.133        | 0.000          | <b>469.313</b>  | <b>452.287</b> | 0.000          | 2726.870 | 2731.543        | 2731.609       | L206            |      |
| L15  | <b>544.462</b> | <b>537.374</b> | 0.000          | <b>502.307</b>  | <b>505.313</b> | 0.000          | 2635.500 | 2638.500        | 2639.000       | L205            |      |
| Q1   | <b>811.424</b> | 384.314        | 0.000          | <b>639.415</b>  | 559.313        | 0.000          | 2362.500 | 2366.475        | 2364.461       | Q24             |      |
| R1   | 337.252        | 337.252        | 0.000          | <b>795.345</b>  | 778.313        | 0.000          | 2446.461 | 2438.454        | 2427.410       | R223            |      |
| V1   | <b>866.619</b> | <b>849.592</b> | 0.000          | <b>894.613</b>  | 877.313        | 0.000          | 2180.260 | 2177.261        | 2174.264       | V22             |      |
| L1   | 387.038        | 387.038        | 0.000          | 366.364         | 378.313        | 0.000          | 3177.261 | 3179.261        | 3177.261       | L221            |      |
| I10  | 388.389        | 388.389        | 0.000          | <b>1108.745</b> | 381.313        | 0.000          | 3086.210 | 3074.211        | 3071.207       | I201            |      |
| A11  | 1151.191       | 1151.191       | 0.000          | <b>1139.777</b> | 1120.313       | 0.000          | 3186.172 | 3186.174        | 3186.174       | A116            |      |
| Q12  | 1279.486       | 1279.486       | 0.000          | <b>1198.836</b> | 1184.313       | 0.000          | 3189.142 | 3189.141        | 3188.066       | Q128            |      |
| Q13  | 1339.389       | 1339.389       | 0.000          | 1184.414        | 1307.313       | 0.000          | 3177.261 | 3180.000        | 3178.048       | Q137            |      |
| Q14  | 1393.389       | 1393.389       | 0.000          | 1421.884        | 1404.313       | 0.000          | 3183.871 | 3179.000        | 3179.000       | Q116            |      |
| L11  | 1483.187       | 1483.187       | 0.000          | 1474.847        | 1478.313       | 0.000          | 3181.961 | 3181.000        | 3180.000       | L115            |      |
| L106 | 1506.941       | 1506.941       | 0.000          | 1504.003        | 1507.313       | 0.000          | 3183.941 | 3184.000        | 3183.000       | L104            |      |
| P117 | 1613.024       | 1613.024       | 0.000          | 1609.068        | 1611.313       | 0.000          | 3183.000 | 3183.000        | 3182.000       | P113            |      |
| R116 | 1617.137       | 1617.137       | 0.000          | 1609.221        | 1604.313       | 0.000          | 3207.121 | 3203.813        | 3203.769       | R112            |      |
| I108 | 1739.432       | 1739.432       | 0.000          | 1734.211        | 1736.313       | 0.000          | 3209.200 | 3209.200        | 3207.143       | I101            |      |
| Q120 | 2058.288       | 2048.293       | 0.000          | 2046.266        | 2088.313       | 0.000          | 2088.200 | <b>1126.683</b> | 1109.658       | <b>1108.672</b> | Q120 |
| A111 | 2139.117       | 2139.120       | 0.000          | 2131.308        | 2127.313       | 0.000          | 2130.361 | <b>998.624</b>  | 0.000          | <b>998.614</b>  | A10  |
| V123 | 2208.268       | 2218.269       | 0.000          | 2204.326        | 2206.313       | 0.000          | 2208.313 | <b>921.587</b>  | <b>918.561</b> | 906.579         | V10  |
| L124 | 2441.269       | 2434.431       | 0.000          | 2434.406        | 2439.404       | 0.000          | 2439.404 | <b>828.519</b>  | 811.569        | 810.568         | L117 |
| L124 | 2654.933       | 2647.827       | 0.000          | 2648.543        | 2642.540       | 0.000          | 2644.533 | <b>715.435</b>  | 708.408        | <b>697.428</b>  | L10  |
| P125 | 2813.338       | 2824.340       | 0.000          | 2819.338        | 2819.337       | 0.000          | 2819.338 | <b>602.381</b>  | 588.344        | <b>584.340</b>  | P101 |
| R126 | 2876.101       | 2882.074       | 0.000          | 2861.986        | 2867.986       | 0.000          | 2868.074 | <b>505.298</b>  | 488.291        | 487.287         | R10  |
| R227 | 2877.198       | 2780.197       | 0.000          | 2839.193        | 2831.313       | 0.000          | 2837.198 | <b>377.203</b>  | 360.177        | 359.183         | R10  |
| L127 | 2899.444       | 2888.443       | 0.000          | 2888.443        | 2888.443       | 0.000          | 2888.444 | 288.120         | 0.000          | 281.000         | L10  |
| L201 | 3117.688       | 3026.687       | 0.000          | 3026.687        | 3026.687       | 0.000          | 3026.688 | 148.000         | 0.000          | 139.000         | L101 |

# sp | Q6GSS7 | H2A2A\_MOUSE

LNKLLGK <sup>Dimethyl</sup> <sub>28.03</sub> VTIAQGGVLPNIQAVLLPKKTE

- ▶ fragmentation table for charge state 2+
- ▶ specType=cid
- ▶ score=52.29
- ▶ F113279.dat
- ▶ query=q41550.p1
- ▶ precursor=771.723810
- ▶ chargePrecursor=4
- ▶ itol=0.5

| AA  | a               | a <sup>+</sup>  | a-Δ          | b               | b <sup>+</sup>  | b-Δ          | y               | y <sup>+</sup>  | y-Δ             | AA   |
|-----|-----------------|-----------------|--------------|-----------------|-----------------|--------------|-----------------|-----------------|-----------------|------|
| L1  | 41.552          | 8.504           | 8.504        | 35.943          | 0.504           | 0.504        | 1642.420        | 1232.000        | 1332.444        | L156 |
| R1  | 154.632         | 136.130         | 8.504        | 178.614         | 170.110         | 8.504        | 1438.880        | 1420.377        | 1416.861        | R127 |
| L4  | 221.551         | 212.050         | 8.504        | 210.048         | 225.647         | 8.504        | 1364.830        | 1350.325        | 1355.833        | L126 |
| L15 | 277.630         | 269.129         | 8.504        | 269.100         | 285.100         | 8.504        | 1330.370        | 1320.700        | 1326.700        | L125 |
| Q4  | 306.550         | 297.750         | 8.504        | 320.213         | 311.700         | 8.504        | 1251.750        | 1243.243        | 1242.740        | Q24  |
| R7  | 384.270         | 375.770         | 8.504        | 380.270         | 388.763         | 8.504        | 1221.244        | 1214.737        | 1214.739        | R125 |
| V6  | 433.111         | 425.360         | 8.504        | 444.611         | 436.107         | 8.504        | 1148.181        | 1142.674        | 1142.676        | V124 |
| V19 | <b>484.337</b>  | <b>475.833</b>  | <b>8.504</b> | <b>498.334</b>  | <b>489.821</b>  | <b>8.504</b> | <b>1070.540</b> | <b>1067.533</b> | <b>1067.541</b> | V121 |
| I10 | <b>540.879</b>  | <b>532.366</b>  | <b>8.504</b> | <b>554.874</b>  | <b>546.363</b>  | <b>8.504</b> | <b>1045.123</b> | <b>1038.616</b> | <b>1038.617</b> | I120 |
| A11 | <b>576.397</b>  | <b>567.884</b>  | <b>8.504</b> | <b>590.393</b>  | <b>581.882</b>  | <b>8.504</b> | <b>980.581</b>  | <b>980.067</b>  | <b>979.575</b>  | A119 |
| Q12 | <b>628.277</b>  | <b>619.763</b>  | <b>8.504</b> | <b>644.274</b>  | <b>635.763</b>  | <b>8.504</b> | <b>951.062</b>  | <b>944.549</b>  | <b>944.552</b>  | Q118 |
| Q13 | <b>669.777</b>  | <b>660.254</b>  | <b>8.504</b> | <b>685.772</b>  | <b>677.263</b>  | <b>8.504</b> | <b>899.533</b>  | <b>890.510</b>  | <b>890.527</b>  | Q117 |
| Q14 | <b>697.448</b>  | <b>688.935</b>  | <b>8.504</b> | <b>711.444</b>  | <b>702.932</b>  | <b>8.504</b> | <b>860.522</b>  | <b>852.009</b>  | <b>852.017</b>  | Q116 |
| V12 | <b>716.987</b>  | <b>708.480</b>  | <b>8.504</b> | <b>732.987</b>  | <b>724.477</b>  | <b>8.504</b> | <b>832.511</b>  | <b>824.000</b>  | <b>823.996</b>  | V115 |
| L10 | <b>803.524</b>  | <b>795.017</b>  | <b>8.504</b> | <b>817.523</b>  | <b>809.000</b>  | <b>8.504</b> | <b>781.477</b>  | <b>773.964</b>  | <b>773.972</b>  | L114 |
| P17 | <b>812.021</b>  | <b>803.510</b>  | <b>8.504</b> | <b>826.020</b>  | <b>817.503</b>  | <b>8.504</b> | <b>725.830</b>  | <b>718.322</b>  | <b>718.320</b>  | P113 |
| R16 | <b>860.524</b>  | <b>852.017</b>  | <b>8.504</b> | <b>874.523</b>  | <b>866.010</b>  | <b>8.504</b> | <b>684.264</b>  | <b>676.753</b>  | <b>676.753</b>  | R112 |
| L18 | <b>900.024</b>  | <b>891.517</b>  | <b>8.504</b> | <b>914.023</b>  | <b>905.510</b>  | <b>8.504</b> | <b>620.387</b>  | <b>612.874</b>  | <b>612.882</b>  | L111 |
| Q10 | <b>932.844</b>  | <b>924.337</b>  | <b>8.504</b> | <b>946.843</b>  | <b>938.332</b>  | <b>8.504</b> | <b>581.871</b>  | <b>574.358</b>  | <b>574.366</b>  | Q110 |
| A21 | <b>939.152</b>  | <b>930.645</b>  | <b>8.504</b> | <b>953.151</b>  | <b>944.640</b>  | <b>8.504</b> | <b>520.124</b>  | <b>512.611</b>  | <b>512.619</b>  | A20  |
| V15 | <b>1114.808</b> | <b>1106.301</b> | <b>8.504</b> | <b>1128.804</b> | <b>1120.293</b> | <b>8.504</b> | <b>458.257</b>  | <b>450.744</b>  | <b>450.752</b>  | V109 |
| L28 | <b>1117.538</b> | <b>1109.031</b> | <b>8.504</b> | <b>1131.537</b> | <b>1123.026</b> | <b>8.504</b> | <b>454.751</b>  | <b>447.238</b>  | <b>447.246</b>  | L108 |
| L24 | <b>1227.180</b> | <b>1218.673</b> | <b>8.504</b> | <b>1241.179</b> | <b>1232.668</b> | <b>8.504</b> | <b>388.221</b>  | <b>380.708</b>  | <b>380.716</b>  | L106 |
| P14 | <b>1276.367</b> | <b>1267.860</b> | <b>8.504</b> | <b>1290.366</b> | <b>1281.855</b> | <b>8.504</b> | <b>311.811</b>  | <b>304.298</b>  | <b>304.306</b>  | P105 |
| R20 | <b>1340.334</b> | <b>1331.827</b> | <b>8.504</b> | <b>1354.333</b> | <b>1345.822</b> | <b>8.504</b> | <b>253.533</b>  | <b>246.020</b>  | <b>246.028</b>  | R104 |
| R27 | <b>1404.402</b> | <b>1395.895</b> | <b>8.504</b> | <b>1418.401</b> | <b>1409.890</b> | <b>8.504</b> | <b>188.100</b>  | <b>180.587</b>  | <b>180.595</b>  | R103 |
| L26 | <b>1434.336</b> | <b>1425.829</b> | <b>8.504</b> | <b>1448.335</b> | <b>1439.824</b> | <b>8.504</b> | <b>125.000</b>  | <b>117.487</b>  | <b>117.495</b>  | L102 |
| L25 | <b>1519.497</b> | <b>1510.990</b> | <b>8.504</b> | <b>1533.496</b> | <b>1524.985</b> | <b>8.504</b> | <b>74.500</b>   | <b>66.987</b>   | <b>66.995</b>   | L101 |



# sp | Q6GSS7 | H2A2A\_MOUSE

LNKLLGK<sup>Dimethyl</sup>VTIAQGGVLPNIQAVLLPKKTE<sup>28.03</sup>

- ▶ fragmentation table for charge state 3+
- ▶ specType=cid
- ▶ score=52.29
- ▶ F113279.dat
- ▶ query=q41550.p1
- ▶ precursor=771.723810
- ▶ chargePrecursor=4
- ▶ itol=0.5

| AA  | a              | a*             | a,b            | b              | b*             | b,b            | y              | y*             | y,b            | AA  |
|-----|----------------|----------------|----------------|----------------|----------------|----------------|----------------|----------------|----------------|-----|
| L1  | 28.178         | 0.87           | 0.87           | 38.102         | 0.872          | 0.872          | 1033.533       | 1022.99        | 1022.992       | L26 |
| N2  | 67.585         | 61.736         | 0.872          | 76.715         | 71.843         | 0.872          | 660.941        | 665.265        | 664.937        | N26 |
| K3  | 110.681        | 104.407        | 0.872          | 119.413        | 113.739        | 0.872          | <b>952.926</b> | 949.251        | 949.021        | K27 |
| L4  | 147.778        | 142.125        | 0.872          | 157.109        | 151.434        | 0.872          | <b>910.228</b> | <b>904.553</b> | <b>904.225</b> | L26 |
| L5  | 185.874        | 179.397        | 0.872          | 194.884        | 189.124        | 0.872          | 876.513        | <b>866.526</b> | <b>866.510</b> | L26 |
| Q6  | 264.478        | 258.004        | 0.872          | 273.811        | 268.136        | 0.872          | <b>834.839</b> | 829.163        | <b>828.835</b> | Q24 |
| K7  | 298.522        | 291.988        | 0.872          | 308.853        | 303.178        | 0.872          | 813.852        | 810.156        | 809.826        | K25 |
| V8  | 339.544        | 332.869        | 0.872          | 348.878        | 343.203        | 0.872          | 783.729        | 780.114        | 779.788        | V22 |
| Y9  | 323.227        | 317.553        | 317.221        | 333.595        | <b>326.883</b> | 326.555        | <b>730.747</b> | 725.091        | 724.763        | Y21 |
| I10 | 360.822        | 354.288        | 354.013        | 370.251        | 364.676        | 364.201        | <b>697.664</b> | 691.409        | 691.081        | I20 |
| A11 | 394.601        | 387.825        | 387.567        | 393.912        | 388.257        | 387.826        | 675.331        | <b>653.714</b> | <b>653.386</b> | A19 |
| Q12 | 427.281        | 421.411        | 421.261        | 438.113        | 432.284        | 432.015        | <b>635.710</b> | <b>630.035</b> | <b>629.707</b> | Q10 |
| G13 | 446.204        | 440.015        | 440.255        | <b>455.626</b> | 449.596        | 449.629        | 614.110        |                |                | G17 |
| G14 | 482.544        | 476.028        | 476.267        | 474.637        | <b>468.957</b> | 468.628        | 574.011        | 569.342        | 568.914        | G16 |
| V15 | <b>498.224</b> | 492.009        | 492.249        | 507.768        | 501.766        | 501.766        | <b>535.010</b> | 529.154        | 528.668        | V19 |
| L16 | 526.678        | 520.343        | 520.583        | 545.395        | 539.079        | 539.347        | <b>521.987</b> | 515.312        | 515.084        | L14 |
| P17 | 566.870        | 560.494        | 560.766        | 577.701        | 572.026        | 571.689        | <b>484.292</b> | 478.611        | 478.289        | P13 |
| N18 | 606.084        | 600.258        | 600.386        | 615.710        | 610.046        | 609.712        | <b>451.942</b> | 446.268        | 445.936        | N15 |
| L19 | 644.878        | 638.443        | <b>638.075</b> | <b>653.418</b> | 647.758        | 647.401        | 433.950        | 428.292        | 427.924        | L17 |
| Q20 | 686.705        | 681.189        | 681.115        | 696.345        | <b>690.421</b> | 690.093        | 376.215        | 370.567        | 370.228        | Q10 |
| A21 | 724.884        | <b>704.768</b> | <b>704.440</b> | <b>719.775</b> | 714.100        | 713.772        | 331.540        | 327.897        | <b>327.543</b> | A19 |
| V22 | <b>742.467</b> | 737.817        | 737.461        | <b>752.766</b> | <b>747.123</b> | <b>746.795</b> | 300.889        | 297.162        | 296.804        | V19 |
| L23 | 781.451        | 775.486        | 775.129        | 792.493        | 786.617        | 786.454        | 278.944        | 273.185        | 272.841        | L17 |
| L24 | 813.856        | 813.189        | 812.892        | <b>828.188</b> | <b>822.512</b> | 822.184        | 239.150        | 233.474        | 233.146        | L16 |
| P25 | 851.207        | <b>845.531</b> | 845.201        | <b>860.539</b> | 854.863        | 854.535        | 201.403        | 195.789        | 195.452        | P15 |
| K26 | 883.806        | 883.806        | 883.806        | 898.727        | 898.727        | 898.727        | 169.154        | 163.426        | 163.100        | K14 |
| K27 | 926.804        | 926.804        | 926.804        | <b>946.903</b> | <b>940.912</b> | <b>940.912</b> | 126.426        | 120.730        | 120.402        | K15 |
| T28 | 970.288        | 964.611        | 964.261        | <b>975.618</b> | 971.942        | 971.614        | 83.738         | 80.872         | 80.544         | T12 |
| E29 | 1013.556       | 1007.852       | 1007.267       | 1022.832       | 1018.056       | 1017.628       | 30.029         | 0.872          | 44.021         | E10 |

# sp | Q6GSS7 | H2A2A\_MOUSE

LNKLLGK<sup>Dimethyl</sup>VTIAQGGVLPNIQAVLLPKKTE  
28.03

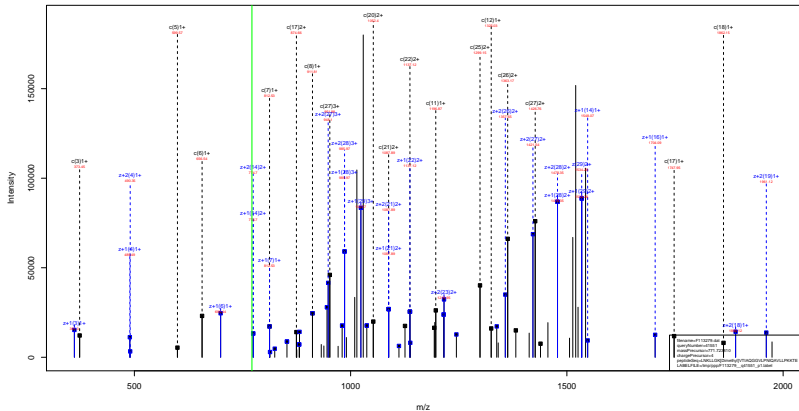

# sp | Q6GSS7 | H2A2A\_MOUSE

LNKLLGK <sup>Dimethyl</sup> <sub>28.03</sub> VTIAQGGVLPNIQAVLLPKKTE

- ▶ fragmentation table for charge state 1+
- ▶ specType=etd
- ▶ score=88.20
- ▶ F113279.dat
- ▶ query=q41551.p1
- ▶ precursor=771.723810
- ▶ chargePrecursor=4
- ▶ itol=0.5

| AA    | c               | y        | z+1             | z+2             | z        | AA    |
|-------|-----------------|----------|-----------------|-----------------|----------|-------|
| L[1]  | 131.118         | 3081.892 | 3067.873        | 0.000           | 3066.895 | L[29] |
| N[2]  | 345.161         | 2970.808 | 2954.789        | 2955.797        | 2951.781 | N[28] |
| K[3]  | <b>373.256</b>  | 2856.765 | 2840.746        | 2841.754        | 2839.738 | K[27] |
| L[4]  | 486.340         | 2728.670 | 2712.651        | 2713.659        | 2711.643 | L[26] |
| L[5]  | <b>509.424</b>  | 2615.585 | 2599.567        | 2600.575        | 2598.560 | L[25] |
| Q[6]  | <b>656.445</b>  | 2502.502 | 2486.483        | 2487.491        | 2485.475 | Q[24] |
| K[7]  | <b>812.572</b>  | 2345.480 | 2429.462        | 2430.469        | 2428.454 | K[23] |
| V[8]  | <b>911.640</b>  | 2288.354 | 2273.335        | 2274.343        | 2272.327 | V[22] |
| T[9]  | 1017.688        | 2190.286 | 2174.267        | 2175.275        | 2173.259 | T[21] |
| I[10] | <b>1125.772</b> | 2089.238 | 2073.219        | 2074.227        | 2072.211 | I[20] |
| A[11] | <b>1196.809</b> | 1976.154 | 1960.135        | <b>1961.143</b> | 1959.127 | A[19] |
| Q[12] | <b>1324.867</b> | 1905.111 | 1889.092        | <b>1890.100</b> | 1888.086 | Q[18] |
| G[13] | <b>1381.889</b> | 1777.058 | 1761.039        | 1762.047        | 1760.032 | G[17] |
| G[14] | <b>1438.910</b> | 1720.937 | <b>1704.918</b> | 1705.926        | 1703.910 | G[16] |
| V[15] | 1537.879        | 1661.015 | 1646.997        | 1646.004        | 1645.989 | V[15] |
| L[16] | 1651.063        | 1563.947 | <b>1547.928</b> | 1548.936        | 1546.920 | L[14] |
| P[17] | <b>1748.116</b> | 1450.893 | 1434.874        | 1435.882        | 1433.866 | P[13] |
| T[18] | <b>1862.159</b> | 1383.810 | <b>1337.791</b> | 1338.799        | 1336.783 | T[12] |
| I[19] | 1975.243        | 1239.767 | 1223.748        | 1224.756        | 1222.741 | I[11] |
| Q[20] | 2103.301        | 1126.683 | 1110.664        | <b>1111.672</b> | 1109.656 | Q[10] |
| A[21] | 2174.336        | 998.624  | 982.606         | 981.614         | 981.598  | A[9]  |
| V[22] | 2273.407        | 927.587  | <b>911.569</b>  | 912.576         | 910.561  | V[8]  |
| L[23] | 2386.491        | 828.519  | <b>812.500</b>  | <b>813.508</b>  | 811.492  | L[7]  |
| L[24] | 2499.575        | 715.435  | <b>699.415</b>  | 700.424         | 698.408  | L[6]  |
| P[25] | 2596.626        | 602.351  | 586.332         | 587.340         | 585.324  | P[5]  |
| K[26] | 2724.723        | 505.298  | <b>489.279</b>  | <b>490.287</b>  | 488.271  | K[4]  |
| K[27] | 2852.816        | 377.203  | <b>361.184</b>  | 362.192         | 360.177  | K[3]  |
| T[28] | 2953.895        | 249.108  | 233.089         | 234.097         | 232.082  | T[2]  |
| E[29] | 3082.938        | 148.060  | 132.042         | 133.050         | 131.034  | E[1]  |

# sp | Q6GSS7 | H2A2A\_MOUSE

LNKLLGK <sup>Dimethyl</sup> <sub>28.03</sub> VTIAQGGVLPNIQAVLLPKKTE

- ▶ fragmentation table for charge state 2+
- ▶ specType=etd
- ▶ score=88.20
- ▶ F113279.dat
- ▶ query=q41551.p1
- ▶ precursor=771.723810
- ▶ chargePrecursor=4
- ▶ itol=0.5

| AA   | c               | y        | z+1             | z+2             | z               | AA   |
|------|-----------------|----------|-----------------|-----------------|-----------------|------|
| L 1  | 66.063          | 1542.450 | <b>1534.440</b> | 0.504           | <b>1533.936</b> | L 26 |
| N 2  | 123.084         | 1485.908 | <b>1477.898</b> | <b>1478.402</b> | 1477.354        | N 26 |
| K 3  | 187.132         | 1426.886 | 1426.877        | <b>1421.381</b> | 1420.373        | K 27 |
| L 4  | 243.674         | 1364.839 | 1356.820        | <b>1357.333</b> | 1356.325        | L 26 |
| L 5  | 300.216         | 1308.297 | 1300.287        | 1299.791        | 1299.783        | L 25 |
| G 6  | 358.726         | 1251.758 | 1243.749        | <b>1244.249</b> | 1243.241        | G 24 |
| K 7  | 406.789         | 1223.244 | <b>1215.234</b> | <b>1215.738</b> | <b>1214.731</b> | K 23 |
| V 8  | 456.324         | 1145.181 | <b>1137.171</b> | <b>1137.675</b> | <b>1136.667</b> | V 22 |
| T 9  | 506.846         | 1095.646 | <b>1087.637</b> | <b>1088.141</b> | 1087.133        | T 21 |
| I 10 | 563.390         | 1045.123 | <b>1037.113</b> | <b>1037.617</b> | 1036.609        | I 20 |
| A 11 | 608.608         | 988.581  | <b>980.571</b>  | 981.075         | <b>980.067</b>  | A 19 |
| Q 12 | 662.937         | 933.062  | <b>945.053</b>  | <b>945.557</b>  | 944.549         | Q 18 |
| G 13 | 691.448         | 889.033  | <b>881.023</b>  | <b>881.527</b>  | 880.519         | G 17 |
| G 14 | 719.959         | 860.522  | <b>852.513</b>  | <b>853.017</b>  | 852.009         | G 16 |
| V 15 | 769.493         | 832.011  | 824.002         | <b>824.506</b>  | 823.498         | V 15 |
| L 16 | 826.035         | 782.477  | <b>774.468</b>  | <b>774.972</b>  | 773.964         | L 14 |
| F 17 | <b>874.561</b>  | 725.935  | 717.926         | 718.430         | 717.422         | F 13 |
| N 18 | 913.583         | 677.409  | 669.399         | 669.903         | 668.895         | N 12 |
| I 19 | 968.125         | 626.367  | 618.358         | 618.862         | 617.854         | I 11 |
| Q 20 | <b>1052.154</b> | 563.845  | 555.836         | 556.340         | 555.332         | Q 10 |
| A 21 | <b>1087.673</b> | 499.616  | 491.607         | 492.110         | 491.102         | A 9  |
| V 22 | <b>1137.207</b> | 464.297  | 456.288         | 456.792         | 455.784         | V 8  |
| L 23 | <b>1193.749</b> | 414.763  | 406.754         | 407.258         | 406.250         | L 7  |
| L 24 | 1250.291        | 358.221  | 350.211         | 350.716         | 349.708         | L 6  |
| P 25 | <b>1298.817</b> | 301.679  | 293.670         | 294.174         | 293.166         | P 5  |
| K 26 | <b>1362.865</b> | 253.153  | 245.143         | 245.647         | 244.639         | K 4  |
| K 27 | <b>1426.912</b> | 189.105  | 181.096         | 181.600         | 180.592         | K 3  |
| T 28 | 1477.436        | 125.058  | 117.048         | 117.552         | 116.544         | T 2  |
| E 29 | 1541.958        | 74.534   | 66.524          | 67.028          | 66.021          | E 1  |

# sp | Q6GSS7 | H2A2A\_MOUSE

LNKLLGK <sup>Dimethyl</sup> <sub>28.03</sub> VTIAQGGVLPNIQAVLLPKKTE

- ▶ fragmentation table for charge state 3+
- ▶ specType=etd
- ▶ score=88.20
- ▶ F113279.dat
- ▶ query=q41551.p1
- ▶ precursor=771.723810
- ▶ chargePrecursor=4
- ▶ itol=0.5

| AA  | c              | y        | z+1             | z+2            | z        | AA  |
|-----|----------------|----------|-----------------|----------------|----------|-----|
| L1  | 44.377         | 1028.635 | <b>1023.296</b> | 0.672          | 1022.960 | L29 |
| N2  | 82.392         | 990.941  | <b>985.601</b>  | <b>985.937</b> | 985.265  | N28 |
| K3  | 125.090        | 952.926  | 947.587         | <b>945.923</b> | 947.251  | K27 |
| L4  | 162.795        | 910.228  | 904.889         | 905.225        | 904.553  | L26 |
| L5  | 200.479        | 872.533  | 867.194         | 867.530        | 866.858  | L25 |
| G6  | 219.487        | 834.838  | 829.499         | 829.835        | 829.163  | G24 |
| K7  | 271.529        | 815.832  | 810.492         | 810.828        | 810.156  | K23 |
| V8  | 304.552        | 763.790  | 758.450         | 758.786        | 758.114  | V22 |
| T9  | 338.234        | 730.767  | 725.427         | 725.763        | 725.091  | T21 |
| I10 | 375.929        | 697.084  | 691.745         | 692.081        | 691.409  | I20 |
| A11 | 399.608        | 659.389  | 654.050         | 654.386        | 653.714  | A19 |
| Q12 | 442.294        | 638.710  | 633.371         | 633.707        | 633.035  | Q18 |
| G13 | 461.301        | 593.024  | 587.685         | 588.021        | 587.349  | G17 |
| G14 | 480.308        | 574.017  | 568.678         | 569.013        | 568.342  | G16 |
| V15 | 513.331        | 555.010  | 549.670         | 550.006        | 549.334  | V15 |
| L16 | 551.026        | 521.987  | 516.648         | 516.984        | 516.312  | L14 |
| P17 | 583.377        | 484.292  | 478.953         | 479.289        | 478.617  | P13 |
| N18 | 621.391        | 451.942  | 446.602         | 446.938        | 446.266  | N12 |
| I19 | 659.098        | 413.927  | 408.588         | 408.924        | 408.252  | I11 |
| Q20 | 701.772        | 376.233  | 370.893         | 371.229        | 370.557  | Q10 |
| A21 | 725.451        | 333.548  | 328.207         | 328.543        | 327.871  | A9  |
| V22 | 758.474        | 309.867  | 304.528         | 304.864        | 304.192  | V8  |
| L23 | 796.168        | 276.844  | 271.505         | 271.841        | 271.169  | L7  |
| L24 | 833.861        | 239.150  | 233.810         | 234.146        | 233.474  | L6  |
| P25 | 866.214        | 201.455  | 196.116         | 196.451        | 195.780  | P5  |
| K26 | 905.912        | 169.104  | 163.765         | 164.101        | 163.429  | K4  |
| K27 | <b>951.611</b> | 126.406  | 121.066         | 121.402        | 120.730  | K3  |
| T28 | 985.293        | 83.708   | 78.368          | 78.704         | 78.032   | T2  |
| E29 | 1028.397       | 50.025   | 44.685          | 45.021         | 44.349   | E1  |



# sp | Q6GSS7 | H2A2A\_MOUSE

LNKLLGK <sup>Dimethyl</sup> <sub>28.03</sub> VTIAQGGVLPNIQAVLLPKKTE

- ▶ fragmentation table for charge state 1+
- ▶ specType=etd
- ▶ score=45.76
- ▶ F113279.dat
- ▶ query=q41552.p1
- ▶ precursor=617.580530
- ▶ chargePrecursor=5
- ▶ itol=0.5

| AA    | c               | y               | z+1             | z+2             | z              | AA    |
|-------|-----------------|-----------------|-----------------|-----------------|----------------|-------|
| L[1]  | 131.118         | 3083.892        | 3067.873        | 0.000           | 3066.865       | L[20] |
| N[2]  | <b>245.161</b>  | 2970.808        | 2954.789        | 2938.797        | 2953.781       | N[20] |
| K[3]  | <b>373.256</b>  | 2856.765        | 2840.746        | 2841.754        | 2839.738       | K[27] |
| L[4]  | 488.340         | 2728.670        | 2712.651        | 2713.659        | 2711.643       | L[26] |
| L[5]  | <b>699.424</b>  | 2615.586        | 2599.567        | 2600.575        | 2598.559       | L[25] |
| G[6]  | <b>836.445</b>  | 2502.500        | 2486.483        | 2487.491        | 2485.475       | G[24] |
| K[7]  | <b>912.572</b>  | 2445.460        | 2429.442        | 2430.449        | 2428.434       | K[23] |
| V[8]  | <b>911.640</b>  | 2289.354        | 2273.335        | 2274.343        | 2272.327       | V[22] |
| T[9]  | 1012.688        | 2190.288        | 2174.267        | 2175.275        | 2173.259       | T[21] |
| I[10] | 1125.772        | 2089.230        | 2073.210        | 2074.227        | 2072.211       | I[20] |
| A[11] | <b>1196.809</b> | 1976.154        | 1960.135        | 1961.143        | 1959.127       | A[19] |
| Q[12] | <b>1324.867</b> | 1905.111        | 1889.098        | <b>1890.106</b> | 1888.090       | Q[18] |
| G[13] | <b>1381.889</b> | 1777.058        | 1761.039        | <b>1762.047</b> | 1760.032       | G[17] |
| G[14] | 1438.910        | 1720.037        | 1704.018        | 1705.026        | 1703.010       | G[16] |
| V[15] | 1537.979        | 1663.015        | 1646.997        | 1648.004        | 1646.989       | V[15] |
| L[16] | 1651.063        | <b>1563.947</b> | 1547.928        | <b>1548.936</b> | 1546.920       | L[14] |
| F[17] | 1768.116        | <b>1450.863</b> | 1434.844        | 1435.852        | 1433.836       | F[13] |
| N[18] | 1862.159        | 1383.819        | <b>1337.791</b> | 1338.799        | 1336.783       | N[12] |
| I[19] | 1975.243        | 1239.767        | 1223.748        | <b>1224.756</b> | 1222.741       | I[11] |
| Q[20] | 2103.301        | <b>1126.683</b> | 1110.664        | 1111.672        | 1109.656       | Q[10] |
| A[21] | 2174.338        | 998.624         | 982.606         | 983.614         | 981.598        | A[9]  |
| V[22] | 2273.407        | 927.587         | <b>911.569</b>  | <b>912.576</b>  | 910.561        | V[8]  |
| L[23] | 2389.491        | 808.513         | <b>813.509</b>  | 813.509         | <b>811.492</b> | L[7]  |
| L[24] | 2499.575        | 715.435         | <b>699.416</b>  | <b>700.424</b>  | 698.408        | L[6]  |
| P[25] | 2596.628        | 602.351         | 586.332         | 587.340         | 585.324        | P[5]  |
| K[26] | 2724.723        | 505.268         | 489.249         | 490.257         | 488.271        | K[4]  |
| K[27] | 2852.818        | 377.203         | <b>361.184</b>  | <b>362.192</b>  | 360.177        | K[3]  |
| T[28] | 2953.865        | 249.106         | 233.089         | 234.097         | 232.082        | T[2]  |
| E[29] | 3082.008        | 148.060         | 132.042         | 133.050         | 131.034        | E[1]  |

# sp | Q6GSS7 | H2A2A\_MOUSE

LNKLLGK <sup>Dimethyl</sup> <sub>28.03</sub> VTIAQGGVLPNIQAVLLPKKTE

- ▶ fragmentation table for charge state 2+
- ▶ specType=etd
- ▶ score=45.76
- ▶ F113279.dat
- ▶ query=q41552.p1
- ▶ precursor=617.580530
- ▶ chargePrecursor=5
- ▶ itol=0.5

| AA    | c               | y              | z+1             | z+2             | z               | AA    |
|-------|-----------------|----------------|-----------------|-----------------|-----------------|-------|
| L[1]  | 66.063          | 1542.450       | 1536.440        | 0.504           | 1533.936        | L[26] |
| N[2]  | 123.084         | 1485.908       | 1477.890        | <b>1478.402</b> | 1477.394        | N[28] |
| K[3]  | 187.132         | 1426.886       | 1420.877        | 1421.381        | 1420.373        | K[27] |
| L[4]  | 243.674         | 1364.839       | 1356.820        | <b>1357.333</b> | 1356.325        | L[26] |
| L[5]  | 300.216         | 1308.297       | 1300.287        | 1300.791        | <b>1299.783</b> | L[25] |
| G[6]  | 358.729         | 1251.755       | 1243.745        | 1244.249        | 1243.241        | G[24] |
| K[7]  | 406.789         | 1223.244       | 1215.234        | 1215.738        | 1214.731        | K[23] |
| V[8]  | <b>456.324</b>  | 1145.181       | 1137.171        | <b>1137.675</b> | 1136.667        | V[22] |
| T[9]  | 506.846         | 1095.646       | 1087.637        | <b>1088.141</b> | 1087.133        | T[21] |
| I[10] | <b>563.390</b>  | 1045.123       | <b>1037.113</b> | <b>1037.617</b> | 1036.609        | I[20] |
| A[11] | 620.808         | 988.581        | <b>980.571</b>  | <b>981.075</b>  | <b>980.067</b>  | A[19] |
| Q[12] | <b>662.937</b>  | 933.060        | 925.050         | 925.554         | 924.546         | Q[18] |
| G[13] | <b>691.448</b>  | <b>869.033</b> | <b>861.023</b>  | <b>861.527</b>  | 860.519         | G[17] |
| G[14] | <b>719.959</b>  | <b>860.522</b> | <b>852.513</b>  | <b>853.017</b>  | 852.009         | G[16] |
| V[15] | <b>769.493</b>  | <b>832.011</b> | <b>824.002</b>  | <b>824.506</b>  | 823.498         | V[15] |
| L[16] | 828.035         | <b>782.477</b> | 774.468         | 774.972         | 773.964         | L[14] |
| T[17] | <b>874.561</b>  | <b>725.935</b> | 717.925         | 718.429         | 717.421         | T[13] |
| N[18] | <b>931.583</b>  | 677.409        | <b>669.399</b>  | <b>669.903</b>  | 668.895         | N[12] |
| I[19] | 988.125         | 626.387        | 618.378         | <b>612.882</b>  | 611.874         | I[11] |
| Q[20] | 1052.154        | <b>563.845</b> | 555.836         | 556.340         | 555.332         | Q[10] |
| A[21] | 1087.673        | 499.616        | <b>491.607</b>  | <b>492.110</b>  | 491.102         | A[9]  |
| V[22] | 1137.207        | 464.297        | <b>456.288</b>  | <b>456.792</b>  | 455.784         | V[8]  |
| L[23] | <b>1193.749</b> | 414.763        | 406.753         | 407.256         | 406.248         | L[17] |
| L[24] | 1250.291        | 358.221        | 350.211         | 350.715         | 349.707         | L[6]  |
| P[25] | 1298.817        | 301.679        | 293.670         | 294.174         | 293.166         | P[5]  |
| K[26] | 1362.885        | 253.153        | <b>245.143</b>  | <b>245.647</b>  | 244.639         | K[4]  |
| K[27] | <b>1426.912</b> | 189.105        | 181.096         | 181.600         | 180.592         | K[3]  |
| T[28] | 1477.436        | 125.058        | 117.049         | 117.552         | 116.544         | T[2]  |
| E[29] | 1541.958        | 74.534         | 66.524          | 67.028          | 66.021          | E[1]  |



# sp | Q6GSS7 | H2A2A\_MOUSE

LNKLLGK <sup>Dimethyl</sup> <sub>28.03</sub> VTIAQGGVLPNIQAVLLPKKTE

- ▶ fragmentation table for charge state 3+
- ▶ specType=etd
- ▶ score=45.76
- ▶ F113279.dat
- ▶ query=q41552.p1
- ▶ precursor=617.580530
- ▶ chargePrecursor=5
- ▶ itol=0.5

| AA  | c        | y              | z+1            | z+2            | z              | AA  |
|-----|----------|----------------|----------------|----------------|----------------|-----|
| L1  | 44.377   | 1028.035       | 1021.295       | 0.672          | 1022.960       | L29 |
| N2  | 82.302   | 990.941        | 985.601        | <b>985.937</b> | 985.265        | N28 |
| K3  | 125.090  | 952.925        | 947.587        | 947.251        | 947.251        | K27 |
| L4  | 183.785  | <b>910.228</b> | 904.889        | <b>905.225</b> | 904.553        | L26 |
| L5  | 230.479  | 872.531        | 867.194        | 867.530        | 866.858        | L25 |
| G6  | 219.487  | 834.839        | <b>829.499</b> | <b>829.835</b> | 829.163        | G24 |
| K7  | 271.529  | 815.832        | 810.492        | <b>810.828</b> | <b>810.156</b> | K23 |
| V8  | 304.552  | 763.790        | 758.450        | 758.786        | 758.114        | V22 |
| Y9  | 338.234  | 730.767        | 725.427        | <b>725.763</b> | 725.091        | Y21 |
| V10 | 375.929  | 697.084        | <b>691.745</b> | <b>692.081</b> | <b>691.409</b> | V20 |
| A11 | 399.608  | 659.389        | 654.050        | 654.386        | 653.714        | A19 |
| Q12 | 442.294  | 636.710        | 630.371        | <b>630.707</b> | 630.035        | Q18 |
| Q13 | 461.301  | 593.024        | 587.685        | 588.021        | 587.349        | Q17 |
| G14 | 480.308  | 574.017        | 568.678        | 569.013        | 568.343        | G16 |
| V15 | 513.331  | 555.010        | 549.670        | 550.006        | 549.334        | V15 |
| L16 | 551.026  | 521.987        | 516.648        | 516.984        | 516.312        | L14 |
| P17 | 583.377  | <b>484.292</b> | 478.953        | 479.289        | 478.617        | P13 |
| N18 | 621.391  | 451.942        | 446.602        | 446.938        | 446.266        | N12 |
| T19 | 659.086  | 413.927        | 408.588        | 408.924        | 408.252        | T11 |
| Q20 | 701.772  | 376.231        | 370.893        | 371.229        | 370.557        | Q10 |
| A21 | 725.451  | 333.546        | 328.207        | 328.543        | 327.871        | A9  |
| V22 | 758.474  | 309.867        | 304.528        | 304.864        | 304.192        | V8  |
| L23 | 796.168  | 276.844        | 271.505        | 271.841        | 271.169        | L7  |
| L24 | 833.863  | 239.150        | 233.810        | 234.146        | 233.474        | L6  |
| P25 | 866.214  | 201.455        | 196.116        | 196.451        | 195.780        | P5  |
| K26 | 908.912  | 169.104        | 163.765        | 164.101        | 163.429        | K4  |
| K27 | 951.611  | 126.806        | 121.468        | 121.802        | 120.790        | K3  |
| L28 | 985.293  | 83.709         | 78.369         | 78.704         | 78.032         | L2  |
| E29 | 1028.307 | 50.025         | 44.685         | 45.021         | 44.349         | E1  |

# sp | Q6GSS7 | H2A2A\_MOUSE

LNKLLGK <sup>Dimethyl</sup> <sub>28.03</sub> VTIAQGGVLPNIQAVLLPKKTE

- ▶ fragmentation table for charge state 4+
- ▶ specType=etd
- ▶ score=45.76
- ▶ F113279.dat
- ▶ query=q41552.p1
- ▶ precursor=617.580530
- ▶ chargePrecursor=5
- ▶ itol=0.5

| AA    | c              | y              | z+1            | z+2            | z       | AA    |
|-------|----------------|----------------|----------------|----------------|---------|-------|
| L[1]  | 333.95         | 771.726        | 767.756        | 0.756          | 767.412 | L[29] |
| W[2]  | 62.046         | 743.491        | <b>739.453</b> | <b>739.705</b> | 739.201 | N[26] |
| K[3]  | 94.069         | 714.947        | 710.962        | 711.194        | 710.690 | K[27] |
| L[4]  | 122.540        | <b>682.923</b> | 678.918        | 679.170        | 678.666 | L[26] |
| L[5]  | 150.611        | 654.652        | 650.647        | 650.899        | 650.395 | L[25] |
| G[6]  | 164.867        | 626.381        | 622.376        | 622.628        | 622.124 | G[24] |
| K[7]  | 203.898        | 612.126        | 608.121        | 608.373        | 607.869 | K[23] |
| V[8]  | 228.665        | 573.094        | 569.089        | 569.341        | 568.837 | V[22] |
| T[9]  | 253.927        | 648.327        | 644.322        | 644.574        | 644.070 | T[21] |
| T[10] | 262.198        | 623.065        | 619.060        | 619.312        | 618.808 | T[20] |
| A[11] | 299.958        | 694.795        | 690.789        | 691.041        | 690.537 | A[19] |
| Q[12] | 311.972        | 477.035        | 473.030        | 473.282        | 472.778 | Q[18] |
| G[13] | 346.228        | 445.020        | 441.015        | 441.267        | 440.763 | G[17] |
| G[14] | 360.483        | 430.765        | 426.760        | 427.012        | 426.508 | G[16] |
| V[15] | 385.290        | 416.509        | 412.504        | 412.757        | 412.253 | V[15] |
| L[16] | 413.521        | 391.742        | 387.737        | 387.989        | 387.486 | L[14] |
| P[17] | 437.784        | 363.471        | 359.466        | 359.718        | 359.215 | P[13] |
| N[18] | 466.295        | 339.208        | 335.203        | 335.455        | 334.951 | N[12] |
| T[19] | 494.566        | 310.697        | 306.693        | 306.945        | 306.441 | T[11] |
| Q[20] | 536.581        | 282.426        | 278.422        | 278.673        | 278.170 | Q[10] |
| A[21] | 544.340        | 250.412        | 246.407        | 246.659        | 246.155 | A[9]  |
| V[22] | 569.107        | 232.652        | 228.648        | 228.900        | 228.396 | V[8]  |
| L[23] | 597.178        | 207.885        | 203.881        | 204.132        | 203.629 | L[7]  |
| L[24] | 625.649        | 179.614        | 175.609        | 175.861        | 175.358 | L[6]  |
| P[25] | 649.912        | 151.343        | 147.338        | 147.590        | 147.087 | P[5]  |
| K[26] | 681.936        | 127.080        | 123.075        | 123.327        | 122.823 | K[4]  |
| K[27] | <b>713.960</b> | 95.056         | 91.052         | 91.304         | 90.800  | K[3]  |
| T[28] | 739.222        | 63.032         | 59.028         | 59.280         | 58.776  | T[2]  |
| E[29] | 771.482        | 37.771         | 33.766         | 34.018         | 33.514  | E[1]  |

# sp | Q6GSS7 | H2A2A\_MOUSE

LNKLLGK<sup>Dimethyl</sup>VTIAQGGVLPNIQAVLLPKKTE  
28.03

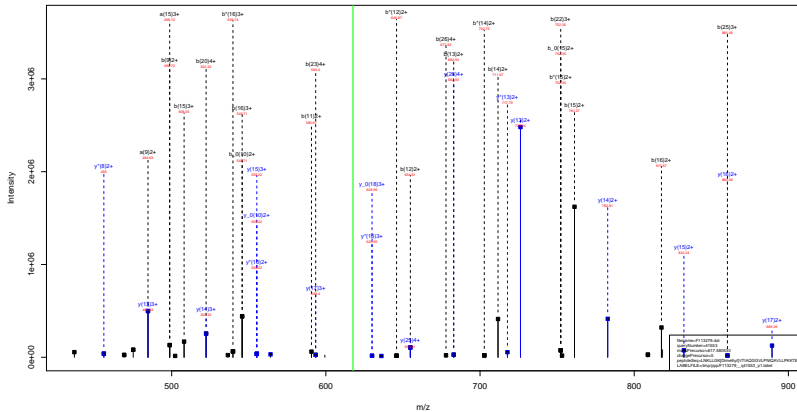

# sp | Q6GSS7 | H2A2A\_MOUSE

LNKLLGK <sup>Dimethyl</sup> <sub>28.03</sub> VTIAQGGVLPNIQAVLLPKKTE

- ▶ fragmentation table for charge state 1+
- ▶ specType=cid
- ▶ score=45.06
- ▶ F113279.dat
- ▶ query=q41553.p1
- ▶ precursor=617.580530
- ▶ chargePrecursor=5
- ▶ itol=0.5

| AA   | a        | a*       | a,b      | b              | b*       | b,b      | r        | r*       | r,b      | AA   |
|------|----------|----------|----------|----------------|----------|----------|----------|----------|----------|------|
| L11  | 88.868   | 0.000    | 1.000    | 114.091        | 0.000    | 0.000    | 1063.893 | 1069.899 | 1063.893 | L12G |
| K12  | 2003.199 | 103.113  | 0.000    | 2205.134       | 231.108  | 0.000    | 2070.820 | 2195.178 | 2092.797 | K12G |
| K13  | 626.634  | 61.120   | 0.000    | 366.273        | 330.203  | 0.000    | 266.160  | 2839.738 | 2836.754 | K12T |
| L14  | 641.518  | 624.202  | 0.000    | <b>468.312</b> | 462.287  | 0.000    | 2128.810 | 2111.643 | 2110.608 | L12G |
| L15  | 254.402  | 217.478  | 0.000    | 266.394        | 266.374  | 0.000    | 2615.260 | 2700.263 | 2699.278 | L12S |
| Q16  | 81.1424  | 104.397  | 0.000    | 808.418        | 822.362  | 0.000    | 2002.200 | 2140.475 | 2144.461 | Q124 |
| K17  | 187.550  | 193.524  | 0.000    | 195.545        | 178.519  | 0.000    | 2443.480 | 2420.454 | 2427.470 | K12S |
| V18  | 816.818  | 809.362  | 0.000    | 804.813        | 817.267  | 0.000    | 2309.261 | 2272.237 | 2271.243 | V12S |
| V19  | 107.008  | 100.660  | 849.658  | 995.061        | 1018.035 | 877.051  | 2190.205 | 2115.205 | 2112.215 | V121 |
| I20  | 1080.970 | 1063.124 | 1062.140 | 1108.749       | 1091.719 | 1090.719 | 2089.238 | 2072.211 | 2071.227 | I20S |
| A111 | 1151.087 | 1154.103 | 1132.717 | 1174.362       | 1162.290 | 1161.272 | 1406.124 | 1404.127 | 1404.143 | A11S |
| Q112 | 1219.096 | 1262.619 | 1261.821 | 1301.484       | 1296.014 | 1295.028 | 1920.117 | 1899.096 | 1898.108 | Q11S |
| Q113 | 1308.867 | 1313.884 | 1318.891 | 1324.963       | 1347.834 | 1346.852 | 1777.020 | 1769.013 | 1768.024 | Q11T |
| G14  | 1383.889 | 1376.882 | 1375.871 | 1421.884       | 1404.867 | 1403.873 | 1721.037 | 1703.010 | 1702.032 | G11S |
| V15  | 1402.877 | 1419.818 | 1414.866 | 1428.823       | 1403.806 | 1402.849 | 1681.019 | 1643.989 | 1642.995 | V11S |
| L116 | 1306.041 | 1309.013 | 1308.011 | 1304.035       | 1317.010 | 1316.026 | 1363.947 | 1349.920 | 1345.896 | L114 |
| P117 | 1103.094 | 1098.098 | 1085.084 | 1111.089       | 1114.081 | 1113.079 | 1440.863 | 1413.838 | 1412.852 | P113 |
| M181 | 1017.437 | 1005.111 | 1000.127 | 1045.132       | 1028.105 | 1027.121 | 1383.810 | 1338.783 | 1335.799 | M11S |
| T111 | 1009.071 | 1013.065 | 1012.051 | 1009.058       | 1004.106 | 1003.095 | 1329.780 | 1222.741 | 1221.757 | T111 |
| Q111 | 1006.000 | 1011.263 | 1000.251 | 1009.275       | 1004.248 | 1003.264 | 1126.400 | 1119.955 | 1118.971 | Q110 |
| A111 | 1110.117 | 1112.089 | 1111.300 | 1115.112       | 1110.100 | 1110.100 | 1001.821 | 981.589  | 980.814  | A111 |
| V122 | 1218.068 | 1211.369 | 1210.378 | 1209.388       | 1208.354 | 1207.318 | 1007.889 | 1011.361 | 1008.877 | V111 |
| L121 | 1241.499 | 1234.483 | 1233.470 | 1230.464       | 1232.438 | 1231.424 | 828.519  | 811.462  | 810.538  | L11T |
| L124 | 2434.631 | 2437.327 | 2436.345 | 2442.548       | 2445.622 | 2444.638 | 715.430  | 688.408  | 687.424  | L11S |
| P125 | 2051.606 | 2054.580 | 2053.590 | 2079.601       | 2062.675 | 2061.591 | 682.351  | 365.324  | 364.340  | P11S |
| K126 | 2076.702 | 2071.671 | 2066.660 | 2110.688       | 2086.619 | 2085.606 | 600.465  | 448.275  | 447.291  | K114 |
| K127 | 2087.196 | 2080.710 | 2078.708 | 2085.701       | 2081.194 | 2081.190 | 317.201  | 306.177  | 305.163  | K11S |
| L129 | 1008.814 | 1001.817 | 1000.831 | 1006.839       | 1018.812 | 1017.808 | 248.108  | 0.000    | 231.008  | L11S |
| L121 | 1017.808 | 1003.802 | 1019.819 | 1009.801       | 1046.824 | 1047.811 | 148.000  | 0.000    | 130.000  | L111 |

# sp | Q6GSS7 | H2A2A\_MOUSE

LNKLLGK <sup>Dimethyl</sup> <sub>28.03</sub> VTIAQGGVLPNIQAVLLPKKTE

- ▶ fragmentation table for charge state 2+
- ▶ specType=cid
- ▶ score=45.06
- ▶ F113279.dat
- ▶ query=q41553.p1
- ▶ precursor=617.580530
- ▶ chargePrecursor=5
- ▶ itol=0.5

| AA  | a              | a*             | a,b            | b              | b*             | b,b            | r               | r*              | r,b             | AA  |
|-----|----------------|----------------|----------------|----------------|----------------|----------------|-----------------|-----------------|-----------------|-----|
| L1  | 43.552         | 0.561          | 0.561          | 31.549         | 0.504          | 0.504          | 1262.201        | 3333.338        | 3333.344        | L28 |
| R1  | 100.573        | 92.080         | 0.504          | 114.571        | 106.077        | 0.504          | 1485.931        | 2477.304        | 2476.302        | R26 |
| K1  | 184.621        | 156.438        | 0.504          | 178.618        | 170.405        | 0.504          | 1428.886        | 4420.371        | 4419.881        | K27 |
| L4  | 251.583        | 214.658        | 0.504          | 235.160        | 226.947        | 0.504          | 1384.833        | 2486.325        | 2485.331        | L26 |
| L5  | 277.678        | 238.102        | 0.504          | 261.162        | 252.948        | 0.504          | 1338.201        | 2426.183        | 2425.201        | L25 |
| G6  | 308.118        | 267.102        | 0.504          | 300.213        | 291.998        | 0.504          | 1291.701        | 1243.343        | 1242.348        | G24 |
| K7  | 384.719        | 316.105        | 0.504          | 388.212        | 380.001        | 0.504          | 1223.241        | 1214.731        | 1214.739        | K25 |
| V8  | 413.119        | 405.363        | 0.504          | 441.613        | 432.367        | 0.504          | 1185.181        | 1136.881        | 1136.878        | V22 |
| Y9  | <b>484.337</b> | <b>475.523</b> | <b>475.331</b> | <b>498.334</b> | <b>489.521</b> | <b>489.329</b> | <b>1059.045</b> | <b>1087.133</b> | <b>1088.041</b> | Y21 |
| I10 | 540.878        | 532.309        | 531.874        | <b>554.876</b> | 546.301        | <b>545.871</b> | 1045.121        | 2038.809        | 2038.117        | I20 |
| A11 | 616.587        | 587.854        | 587.382        | <b>590.395</b> | 581.827        | 581.355        | 980.161         | 980.161         | 979.215         | A19 |
| Q12 | 660.277        | 611.513        | 611.521        | <b>554.424</b> | <b>645.311</b> | <b>645.419</b> | 953.001         | 884.584         | 884.578         | Q10 |
| G13 | 688.577        | 660.504        | 660.512        | <b>687.935</b> | 674.522        | 674.531        | <b>889.031</b>  | 889.513         | 889.507         | G17 |
| G14 | 689.448        | 688.935        | 688.441        | <b>711.446</b> | <b>702.932</b> | <b>702.440</b> | <b>860.522</b>  | 862.039         | 861.517         | G16 |
| V15 | 746.803        | 738.349        | 737.871        | <b>760.360</b> | <b>752.467</b> | <b>751.974</b> | <b>821.911</b>  | 823.488         | 823.008         | V19 |
| L16 | 803.524        | 795.111        | 794.513        | <b>817.522</b> | <b>809.009</b> | <b>808.517</b> | <b>782.477</b>  | 773.064         | 773.472         | L14 |
| P17 | 852.851        | 843.137        | 843.048        | 866.048        | 857.635        | 857.643        | <b>725.935</b>  | <b>717.422</b>  | 716.930         | P13 |
| M18 | 908.672        | 895.559        | 895.087        | 924.072        | 914.558        | 914.564        | 617.054         | 868.895         | 868.403         | M12 |
| T19 | 960.414        | 947.401        | 946.900        | 976.412        | 967.398        | 967.406        | 601.005         | 913.874         | 913.382         | T11 |
| Q20 | 1009.844       | 1002.130       | 1002.030       | 1043.841       | 1035.128       | 1034.939       | <b>563.845</b>  | <b>555.332</b>  | <b>554.840</b>  | Q10 |
| A21 | 1062.182       | 1055.669       | 1055.157       | 1097.180       | 1088.666       | 1088.674       | 488.811         | 781             | 488.811         | A10 |
| V22 | 1114.896       | 1107.381       | 1107.881       | 1122.894       | 1114.380       | 1114.888       | 489.289         | <b>455.784</b>  | 455.292         | V10 |
| L23 | 1171.428       | 1162.725       | 1162.231       | 1185.225       | 1176.722       | 1176.230       | 414.751         | 405.252         | 405.758         | L17 |
| L24 | 1227.480       | 1218.281       | 1218.776       | 1244.778       | 1235.385       | 1235.773       | 388.221         | 348.708         | 349.216         | L16 |
| P25 | 1276.507       | 1267.703       | 1267.301       | 1290.304       | 1281.791       | 1281.299       | 381.670         | 263.168         | 262.674         | P15 |
| K26 | 1340.204       | 1331.841       | 1331.360       | 1354.363       | 1345.850       | 1345.858       | 263.151         | 244.839         | 244.344         | K14 |
| R27 | 1404.402       | 1395.588       | 1395.300       | 1418.300       | 1409.888       | 1409.394       | 189.110         | 189.561         | 189.100         | R13 |
| L28 | 1464.926       | 1449.412       | 1449.560       | 1488.562       | 1480.049       | 1480.057       | 126.802         | 0.504           | 116.312         | L12 |
| E29 | 1519.447       | 1511.934       | 1511.440       | 1533.444       | 1524.931       | 1524.439       | 74.531          | 0.504           | 85.039          | E10 |

# sp | Q6GSS7 | H2A2A\_MOUSE

LNKLLGK <sup>Dimethyl</sup>VTIAQGGVLPNIQAVLLPKKTE  
28.03

- ▶ fragmentation table for charge state 3+
- ▶ specType=cid
- ▶ score=45.06
- ▶ F113279.dat
- ▶ query=q41553.p1
- ▶ precursor=617.580530
- ▶ chargePrecursor=5
- ▶ itol=0.5

| AA | l              | a        | a*       | a,b            | b              | b*             | b,b            | r              | r*             | r,b            | AA  |
|----|----------------|----------|----------|----------------|----------------|----------------|----------------|----------------|----------------|----------------|-----|
| L1 | 28             | 1718     | 0.872    | 8972           | 58             | 102            | 0.872          | 0.872          | 1028.033       | 1022.999       | L28 |
| K1 | 97             | 585      | 81.730   | 0.872          | 78.715         | 71.041         | 0.872          | 962.941        | 965.265        | 964.921        | K28 |
| K1 | 110            | 681      | 104.407  | 0.872          | 114.413        | 113.739        | 0.872          | 952.520        | 947.251        | 946.921        | K27 |
| L1 | 147            | 778      | 124.125  | 0.872          | 157.109        | 151.434        | 0.872          | 940.228        | 944.503        | 944.225        | L28 |
| L1 | 158            | 874      | 174.907  | 0.872          | 184.894        | 188.128        | 0.872          | 812.521        | 806.852        | 806.738        | L25 |
| G1 | 204            | 478      | 100.004  | 0.872          | 123.811        | 108.138        | 0.872          | 824.839        | 826.183        | 826.931        | G24 |
| K1 | 258            | 522      | 201.008  | 0.872          | 205.853        | 200.178        | 0.872          | 813.832        | 810.158        | 809.828        | K22 |
| V1 | 268            | 544      | 203.869  | 0.872          | 208.878        | 204.301        | 0.872          | 783.729        | 788.114        | 787.709        | V22 |
| V1 | 323            | 227      | 317.551  | 317.221        | 333.505        | 328.883        | 326.505        | 730.767        | 725.091        | 724.763        | V21 |
| I1 | 360            | 822      | 325.288  | 324.918        | 319.251        | 384.878        | 384.289        | 687.084        | 681.408        | 681.081        | I20 |
| A1 | 384            | 601      | 378.825  | 378.567        | 373.919        | 388.257        | 387.826        | 659.388        | 653.714        | 653.288        | A19 |
| Q1 | 427            | 281      | 421.411  | 421.261        | <b>436.818</b> | 430.184        | 430.818        | <b>635.710</b> | <b>630.035</b> | <b>629.767</b> | Q10 |
| G1 | 448            | 524      | 480.812  | 480.251        | <b>485.826</b> | 448.568        | 449.822        | <b>581.024</b> | 584.274        | 587.021        | G17 |
| G1 | 452            | 508      | 459.828  | 459.287        | <b>474.833</b> | <b>468.957</b> | 480.828        | 574.101        | 569.382        | 568.114        | G16 |
| V1 | <b>498.124</b> | 489.828  | 489.521  | <b>507.856</b> | <b>501.980</b> | 491.828        | <b>535.810</b> | 549.184        | 548.609        | 548.609        | V15 |
| L1 | <b>536.019</b> | 530.583  | 530.013  | <b>545.350</b> | <b>539.875</b> | <b>539.347</b> | <b>521.987</b> | 535.312        | 535.084        | 534.814        | L14 |
| P1 | 566.870        | 564.494  | 562.960  | 567.701        | 572.826        | 571.488        | <b>484.292</b> | 478.611        | 478.289        | 478.289        | P13 |
| N1 | 608.184        | 605.708  | 604.380  | 615.718        | 621.048        | 620.712        | 481.942        | 444.268        | 445.036        | 445.036        | N12 |
| T1 | 644.878        | 638.483  | 638.013  | 643.518        | 648.748        | 647.409        | 413.891        | 408.292        | 408.044        | 408.044        | T11 |
| Q1 | 686.705        | 681.189  | 680.751  | 685.988        | 690.421        | 690.013        | 376.251        | 375.507        | 375.228        | 375.228        | Q10 |
| A1 | 712.414        | 704.788  | 704.448  | 709.688        | 714.102        | 713.772        | 331.548        | 327.891        | 327.942        | 327.942        | A10 |
| V1 | 742.889        | 737.417  | 737.489  | <b>752.780</b> | 747.124        | 746.788        | 389.889        | 384.182        | 383.854        | 383.854        | V10 |
| L2 | 781.161        | 775.488  | 775.158  | 780.993        | 784.817        | 784.489        | 278.844        | 277.185        | 276.941        | 276.941        | L17 |
| L2 | 818.856        | 813.189  | 812.858  | 828.188        | 822.812        | 822.484        | 238.188        | 237.474        | 237.146        | 237.146        | L16 |
| P1 | 851.207        | 845.531  | 845.201  | <b>860.539</b> | 854.863        | 854.535        | 281.483        | 198.788        | 198.452        | 198.452        | P15 |
| K1 | 883.888        | 878.212  | 877.882  | <b>893.918</b> | 888.242        | 887.914        | 188.188        | 187.480        | 187.144        | 187.144        | K14 |
| K2 | 916.654        | 910.978  | 910.650  | 945.915        | 940.289        | 939.912        | 126.480        | 125.732        | 125.402        | 125.402        | K13 |
| L2 | 950.288        | 944.611  | 944.281  | 979.813        | 974.187        | 973.814        | 81.718         | 81.872         | 81.872         | 81.872         | L12 |
| L2 | 1013.188       | 1007.512 | 1007.201 | 1022.832       | 1016.958       | 1016.628       | 381.028        | 381.872        | 381.872        | 381.872        | L10 |

# sp | Q6GSS7 | H2A2A\_MOUSE

LNKLLGK<sup>Dimethyl</sup>VTIAQGGVLPNIQAVLLPKKTE<sup>28.03</sup>

- ▶ fragmentation table for charge state 4+
- ▶ specType=cid
- ▶ score=45.06
- ▶ F113279.dat
- ▶ query=q41553.p1
- ▶ precursor=617.580530
- ▶ chargePrecursor=5
- ▶ itol=0.5

| AA  | a              | a*      | a.0     | b              | b*      | b.0     | y              | y*       | y.0     | AA  |
|-----|----------------|---------|---------|----------------|---------|---------|----------------|----------|---------|-----|
| L1  | 222860         | 0.755   | 0.750   | 292720         | 0.755   | 0.750   | 771.720        | 787.472  | 667.220 | L20 |
| N2  | 50.790         | 46.534  | 0.755   | 57.780         | 53.532  | 0.755   | 143.457        | 7.39.201 | 738.955 | N38 |
| R3  | 28.874         | 78.857  | 0.750   | 30.811         | 86.856  | 0.750   | 719.349        | 719.666  | 719.444 | R27 |
| L4  | 111.085        | 108.626 | 0.755   | 113.084        | 113.827 | 0.755   | <b>682.923</b> | 678.666  | 678.420 | L26 |
| L5  | 138.908        | 135.099 | 0.750   | 144.325        | 142.898 | 0.750   | <b>654.652</b> | 650.309  | 650.149 | L25 |
| G6  | 155.611        | 149.375 | 0.755   | 160.639        | 156.354 | 0.755   | 626.381        | 622.124  | 621.876 | G24 |
| R7  | 162.943        | 158.208 | 0.750   | 168.643        | 166.385 | 0.750   | 612.126        | 607.869  | 607.621 | R33 |
| V8  | 177.410        | 173.153 | 0.750   | 179.450        | 178.152 | 0.750   | 571.960        | 568.827  | 568.570 | V22 |
| T9  | 242.672        | 238.415 | 238.100 | 248.671        | 246.414 | 246.100 | 548.323        | 544.070  | 543.824 | T01 |
| D10 | 270.943        | 266.686 | 266.440 | 277.942        | 273.685 | 273.439 | 523.050        | 518.803  | 518.552 | D20 |
| A11 | 286.702        | 284.446 | 284.200 | 295.701        | 291.444 | 291.188 | 484.794        | 480.537  | 480.291 | A19 |
| G12 | 330.731        | 318.466 | 318.219 | 327.730        | 323.459 | 323.213 | 477.431        | 472.178  | 472.018 | G18 |
| G13 | 334.972        | 330.716 | 330.470 | 341.971        | 337.714 | 337.468 | 445.020        | 440.763  | 440.517 | G17 |
| G14 | 349.229        | 344.971 | 344.725 | 356.228        | 351.970 | 351.724 | 430.765        | 426.508  | 426.252 | G16 |
| V15 | 373.995        | 369.738 | 369.492 | 384.994        | 376.737 | 376.491 | 416.500        | 412.253  | 412.007 | V15 |
| L16 | 402.266        | 398.009 | 397.763 | 409.265        | 405.008 | 404.762 | 381.742        | 378.485  | 378.240 | L14 |
| P17 | 426.529        | 422.272 | 422.026 | 433.528        | 429.271 | 429.025 | 363.471        | 359.215  | 358.969 | P13 |
| N18 | 450.040        | 450.783 | 450.537 | 462.039        | 462.782 | 462.536 | 339.200        | 334.943  | 334.700 | N12 |
| R19 | 463.311        | 479.054 | 478.808 | 490.309        | 486.053 | 485.807 | 310.697        | 306.441  | 306.195 | R11 |
| L20 | 515.329        | 511.080 | 510.834 | <b>522.324</b> | 518.067 | 517.821 | 282.429        | 278.170  | 277.924 | L24 |
| A21 | 533.085        | 528.828 | 528.582 | <b>540.083</b> | 535.827 | 535.581 | 250.411        | 246.155  | 245.909 | A15 |
| V22 | 557.852        | 553.595 | 553.349 | 564.851        | 560.594 | 560.348 | 232.652        | 228.396  | 228.150 | V18 |
| L23 | 586.123        | 581.866 | 581.620 | <b>593.122</b> | 588.865 | 588.619 | 207.895        | 203.639  | 203.393 | L17 |
| L24 | 614.394        | 610.137 | 609.891 | 623.393        | 617.136 | 616.890 | 179.611        | 175.355  | 175.112 | L16 |
| R25 | 638.924        | 634.667 | 634.421 | <b>645.656</b> | 641.400 | 641.154 | 151.343        | 147.087  | 146.843 | R19 |
| R26 | 670.681        | 666.424 | 666.178 | <b>677.679</b> | 673.423 | 673.177 | 127.080        | 122.823  | 122.577 | R14 |
| K27 | <b>702.704</b> | 698.447 | 698.201 | 708.703        | 705.447 | 705.201 | 95.050         | 90.800   | 90.554  | K18 |
| T28 | 727.966        | 723.710 | 723.464 | 734.965        | 730.708 | 730.462 | 63.032         | 0.755    | 68.530  | T12 |
| E29 | 780.227        | 785.970 | 785.724 | 787.228        | 782.969 | 782.723 | 37.770         | 0.750    | 33.268  | E10 |

# sp | Q6GSS7 | H2A2A\_MOUSE

LNKLLGK<sup>Dimethyl</sup>VTIAQGGVLPNIQAVLLPKKTE  
28.03

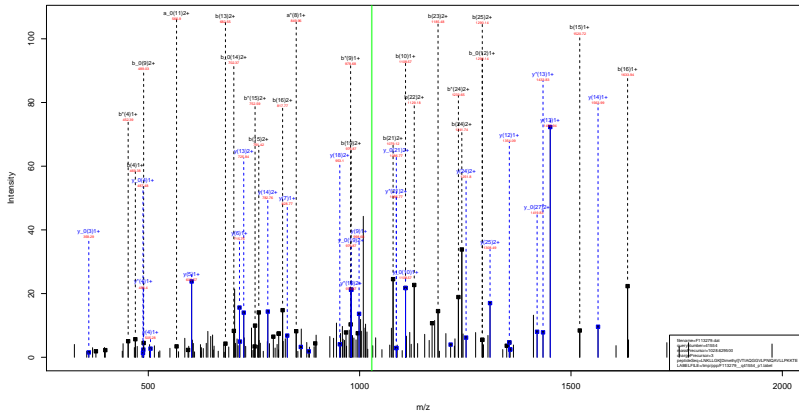



# sp | Q6GSS7 | H2A2A\_MOUSE

LNKLLGK <sup>Dimethyl</sup> <sub>28.03</sub> VTIAQGGVLPNIQAVLLPKKTE

- ▶ fragmentation table for charge state 1+
- ▶ specType=cid
- ▶ score=32.73
- ▶ F113279.dat
- ▶ query=q41554\_p1
- ▶ precursor=1028.629500
- ▶ chargePrecursor=3
- ▶ itol=0.5

| AA  | a              | a*             | a,β      | b               | b*              | b,β      | y               | y*              | y,β             | AA   |
|-----|----------------|----------------|----------|-----------------|-----------------|----------|-----------------|-----------------|-----------------|------|
| L1  | 30.000         | 30.000         | 0.000    | 114.081         | 0.000           | 0.000    | 300.891         | 300.891         | 300.891         | L129 |
| N1  | 30.000         | 30.000         | 0.000    | 114.081         | 0.000           | 0.000    | 270.891         | 270.891         | 270.891         | N130 |
| K1  | 329.258        | 311.258        | 0.000    | 306.229         | 339.229         | 0.000    | 2876.793        | 2876.793        | 2876.794        | K127 |
| L14 | 411.338        | 429.260        | 0.000    | <b>409.213</b>  | <b>452.207</b>  | 0.000    | 2720.870        | 2711.863        | 2720.859        | L128 |
| L15 | 414.440        | 431.000        | 0.000    | 422.187         | 465.181         | 0.000    | 2635.981        | 2668.509        | 2637.019        | L125 |
| G1  | 511.424        | <b>594.387</b> | 0.000    | 539.419         | 622.352         | 0.000    | 2550.922        | 2487.473        | 2484.461        | G124 |
| K1  | 587.480        | 700.212        | 0.000    | 735.545         | 878.619         | 0.000    | 2445.468        | 2428.454        | 2427.470        | K123 |
| V1  | 626.514        | <b>849.592</b> | 0.000    | <b>894.615</b>  | 1077.674        | 0.000    | 2280.954        | 2272.929        | 2271.943        | V122 |
| L18 | <b>867.616</b> | 980.699        | 0.000    | <b>935.504</b>  | <b>978.435</b>  | 0.000    | 197.611         | 2490.909        | 2492.894        | L121 |
| L16 | 1008.709       | 1081.778       | 100.748  | <b>1108.745</b> | 1081.719        | 100.719  | 3088.719        | 3079.711        | 3079.727        | L120 |
| A11 | 1155.797       | 1134.792       | 1133.777 | 1179.792        | 1159.792        | 1149.792 | 3496.792        | 3496.792        | 3496.792        | A119 |
| G13 | 1278.406       | 1300.816       | 1298.416 | 1307.816        | 1299.816        | 1289.816 | <b>1289.816</b> | 1959.816        | 1959.816        | G118 |
| G19 | 1336.389       | 1319.814       | 1318.817 | 1364.817        | <b>1347.816</b> | 1340.817 | 3777.816        | 1760.816        | 1760.816        | G117 |
| G14 | 1393.389       | 1376.812       | 1375.816 | 1421.816        | 1404.817        | 1403.817 | 3720.817        | 1760.816        | 1760.816        | G116 |
| V15 | 1492.400       | 1470.813       | 1469.816 | <b>1520.817</b> | 1503.816        | 1502.817 | 1959.816        | 1648.816        | 1648.816        | V115 |
| L19 | 1609.384       | 1590.811       | 1589.814 | <b>1634.816</b> | 1617.815        | 1616.816 | <b>1561.847</b> | 1548.815        | 1548.815        | L114 |
| P17 | 1613.389       | 1596.810       | 1595.814 | 1713.815        | 1714.815        | 1713.815 | <b>1450.863</b> | <b>1431.839</b> | 1432.852        | P113 |
| N18 | 1617.384       | 1600.811       | 1599.814 | 1656.815        | 1639.816        | 1638.816 | <b>1351.818</b> | 1338.817        | 1339.830        | N112 |
| L16 | 1659.384       | 1643.810       | 1642.813 | 1688.813        | 1671.814        | 1670.814 | 1944.814        | 1922.813        | 1923.827        | L111 |
| Q10 | 1659.389       | 1643.810       | 1642.813 | 1688.813        | 1671.814        | 1670.814 | 3081.814        | 1199.814        | <b>1108.872</b> | Q110 |
| A12 | 1719.384       | 1703.810       | 1702.813 | 1746.813        | 1729.814        | 1728.814 | <b>908.824</b>  | 887.813         | 888.844         | A10  |
| V12 | 2226.380       | 2211.810       | 2210.813 | 2256.813        | 2239.814        | 2238.814 | 3226.814        | 3226.814        | 3226.814        | V10  |
| L12 | 2341.400       | 2326.844       | 2325.849 | 2368.844        | 2351.845        | 2350.844 | 2331.844        | 111.492         | 110.508         | L107 |
| L14 | 2454.400       | 2439.842       | 2438.845 | 2480.845        | 2463.846        | 2462.845 | 2443.845        | 108.408         | 107.424         | L108 |
| P10 | 2514.416       | 2499.850       | 2498.853 | 2539.853        | 2522.854        | 2521.853 | <b>715.438</b>  | 693.427         | 694.442         | P10  |
| K10 | 2574.416       | 2559.851       | 2558.854 | 2601.854        | 2584.855        | 2583.854 | <b>505.298</b>  | <b>488.271</b>  | <b>487.287</b>  | K14  |
| K17 | 2697.400       | 2682.840       | 2681.843 | 2733.843        | 2716.844        | 2715.843 | 267.253         | 196.177         | <b>195.193</b>  | K13  |
| L10 | 2708.400       | 2693.841       | 2692.844 | 2743.844        | 2726.845        | 2725.844 | 268.844         | 197.769         | 198.783         | L10  |
| E10 | 2817.400       | 2802.841       | 2801.844 | 2853.844        | 2836.845        | 2835.844 | 148.000         | 0.000           | 0.000           | E11  |

# sp | Q6GSS7 | H2A2A\_MOUSE

LNKLLGK <sup>Dimethyl</sup>VTIAQGGVLPNIQAVLLPKKTE  
28.03

- ▶ fragmentation table for charge state 2+
- ▶ specType=cid
- ▶ score=32.73
- ▶ F113279.dat
- ▶ query=q41554\_p1
- ▶ precursor=1028.629500
- ▶ chargePrecursor=3
- ▶ itol=0.5

| AA  | a               | a*             | a,Δ            | b               | b*              | b,Δ            | y              | y*              | y,Δ             | AA              |      |
|-----|-----------------|----------------|----------------|-----------------|-----------------|----------------|----------------|-----------------|-----------------|-----------------|------|
| L1  | 43.502          | 0.504          | 43.004         | 37.549          | 0.504           | 3.524          | 1547.450       | 1531.930        | 1533.444        | L29             |      |
| K1  | 109.073         | 0.504          | 108.574        | 116.874         | 0.504           | 3.524          | 1480.900       | 1477.374        | 1478.888        | K30             |      |
| K1  | 184.521         | 0.504          | 184.024        | 170.633         | 0.504           | 3.524          | 1430.850       | 1427.324        | 1428.838        | K22             |      |
| L14 | 241.183         | 0.504          | 240.684        | 210.180         | 0.504           | 3.524          | 1387.830       | 1384.304        | 1385.818        | L26             |      |
| L15 | 277.058         | 0.504          | 276.564        | 247.920         | 0.504           | 3.524          | 1340.290       | 1336.764        | 1338.278        | L25             |      |
| G1  | 308.258         | 0.504          | 307.764        | 282.213         | 0.504           | 3.524          | 1298.290       | 1294.764        | 1296.278        | G24             |      |
| K1  | 384.270         | <b>375.765</b> | 383.774        | <b>346.270</b>  | 0.504           | 3.524          | 1252.144       | <b>1214.731</b> | 1216.245        | K23             |      |
| V1  | 443.013         | 425.200        | 442.514        | 447.010         | 0.504           | 3.524          | 1140.510       | 1136.984        | 1138.498        | V22             |      |
| L19 | 468.719         | 479.802        | 468.224        | 486.804         | 0.504           | 3.524          | <b>486.320</b> | 1099.814        | <b>1107.133</b> | <b>1108.047</b> | F121 |
| L16 | 540.870         | 534.300        | 539.874        | 504.870         | 0.504           | 3.524          | 1048.914       | 1045.388        | 1046.902        | L20             |      |
| A11 | 576.587         | 567.050        | <b>567.392</b> | 590.585         | 0.504           | 3.524          | 1002.768       | 999.242         | <b>999.067</b>  | <b>999.575</b>  | A16  |
| G12 | 646.877         | 633.613        | 643.874        | 654.624         | 0.504           | 3.524          | 930.419        | <b>931.062</b>  | 931.576         | G18             |      |
| G13 | 648.837         | 660.424        | 668.833        | <b>662.935</b>  | 0.504           | 3.524          | 893.930        | 890.404         | <b>890.027</b>  | G17             |      |
| G14 | 697.448         | 680.800        | 696.444        | 717.440         | 0.504           | 3.524          | <b>702.480</b> | <b>666.522</b>  | 667.036         | G16             |      |
| V15 | 746.900         | 738.400        | 745.904        | <b>746.900</b>  | <b>752.947</b>  | <b>751.914</b> | 630.910        | 627.384         | 628.898         | V10             |      |
| L18 | 801.524         | 793.024        | 798.510        | <b>817.522</b>  | <b>809.000</b>  | <b>808.517</b> | <b>702.477</b> | 713.964         | 715.472         | L14             |      |
| P17 | 867.051         | 841.530        | 865.048        | 880.048         | 0.504           | 3.524          | 667.264        | <b>725.935</b>  | 717.422         | <b>716.930</b>  | P13  |
| L11 | 907.072         | 880.500        | 906.574        | 920.500         | 0.504           | 3.524          | 621.264        | 617.738         | 618.752         | L12             |      |
| L10 | 955.914         | 937.100        | 956.800        | <b>979.812</b>  | 0.504           | 3.524          | 560.800        | 557.274         | 558.288         | L11             |      |
| G20 | 1009.844        | 981.100        | 1008.730       | 1020.100        | 0.504           | 3.524          | 500.340        | 496.814         | 497.828         | G15             |      |
| K21 | 1068.124        | 1035.100       | 1067.110       | <b>1079.140</b> | 0.504           | 3.524          | 440.880        | 437.354         | 438.368         | K18             |      |
| V22 | 1114.966        | 1100.100       | 1105.866       | <b>1126.694</b> | 0.504           | 3.524          | 381.420        | 404.250         | 405.758         | V18             |      |
| L23 | <b>1171.238</b> | 1160.200       | 1161.233       | <b>1185.236</b> | 0.504           | 3.524          | 321.960        | 414.790         | 406.290         | 408.798         | L17  |
| L14 | 1227.080        | 1210.200       | 1216.770       | <b>1241.770</b> | <b>1233.265</b> | 1232.770       | 262.500        | 380.210         | 381.718         | L10             |      |
| P26 | 1276.370        | 1257.700       | 1278.402       | <b>1291.304</b> | 0.504           | 3.524          | 203.040        | 303.870         | 305.378         | 306.886         | P20  |
| K26 | 1461.074        | 1431.600       | 1431.944       | <b>1354.352</b> | 0.504           | 3.524          | 145.580        | 253.110         | 244.610         | 244.544         | K14  |
| K27 | 1504.402        | 1470.800       | 1470.560       | 1470.560        | 0.504           | 3.524          | 100.120        | 180.500         | 180.000         | K13             |      |
| L26 | 1562.976        | 1540.000       | 1540.964       | 1540.964        | 0.504           | 3.524          | 49.660         | 140.900         | 140.400         | L16             |      |
| E29 | 1531.447        | 1500.800       | 1531.444       | 1531.444        | 0.504           | 3.524          | 44.400         | 114.500         | 114.000         | E11             |      |



# sp | Q6GSS7 | H2A2A\_MOUSE

LNKLLGK <sup>Dimethyl</sup><sub>28.03</sub> VTIAQGGVLPNIQAVLLPKKTE

- ▶ fragmentation table for charge state 1+
- ▶ specType=etd
- ▶ score=76.59
- ▶ F113279.dat
- ▶ query=q41555.p1
- ▶ precursor=617.580630
- ▶ chargePrecursor=5
- ▶ itol=0.5

| AA | c               | y               | z+1             | z+2             | z               | AA   |
|----|-----------------|-----------------|-----------------|-----------------|-----------------|------|
| L1 | 131.119         | 3083.892        | 3067.873        | 9.000           | 3066.865        | L129 |
| N1 | <b>245.161</b>  | 3970.808        | 2954.789        | 2955.797        | 2953.781        | N20  |
| K1 | <b>373.256</b>  | 3856.705        | 2840.746        | 2841.754        | 2839.738        | K27  |
| L1 | 489.340         | 3728.670        | 2712.653        | 2713.659        | 2711.643        | L26  |
| L1 | <b>599.424</b>  | 3615.588        | 2599.567        | 2600.575        | 2598.559        | L25  |
| G1 | <b>658.445</b>  | 3502.502        | 2480.483        | 2481.491        | 2479.475        | G24  |
| K1 | <b>812.572</b>  | 3345.480        | 2420.462        | 2420.469        | 2420.454        | K23  |
| V1 | <b>911.640</b>  | 2289.954        | 2273.935        | 2274.943        | 2272.927        | V22  |
| F1 | 1012.688        | 2100.286        | 2174.267        | 2175.275        | 2173.259        | F21  |
| T1 | <b>1125.772</b> | 2089.238        | 2073.219        | 2074.227        | 2072.211        | T20  |
| A1 | <b>1196.809</b> | 1978.154        | 1960.135        | 1961.143        | 1959.127        | A19  |
| Q1 | <b>1324.867</b> | 1905.111        | 1889.093        | 1890.101        | 1889.085        | Q18  |
| G1 | <b>1381.889</b> | 1777.058        | 1761.039        | <b>1762.047</b> | 1760.032        | G17  |
| G1 | 1438.910        | 1720.037        | 1704.018        | 1705.026        | 1703.010        | G16  |
| V1 | 1537.979        | 1663.015        | 1646.997        | <b>1648.004</b> | 1645.989        | V15  |
| L1 | 1651.063        | <b>1563.947</b> | 1547.928        | <b>1548.936</b> | <b>1546.920</b> | L14  |
| F1 | 1788.318        | <b>1450.863</b> | 1434.844        | 1435.852        | 1433.836        | F13  |
| N1 | 1862.159        | 1353.610        | <b>1337.791</b> | 1338.799        | 1336.783        | N12  |
| I1 | 1975.243        | 1239.767        | <b>1223.748</b> | 1224.756        | 1222.741        | I11  |
| Q1 | 2163.301        | <b>1126.683</b> | 1110.664        | 1111.672        | 1109.656        | Q10  |
| A1 | 2174.338        | <b>998.624</b>  | 982.606         | 983.614         | <b>981.598</b>  | A10  |
| V1 | 2273.407        | 927.567         | <b>911.560</b>  | 912.576         | 910.561         | V9   |
| L1 | 2388.493        | 828.519         | <b>812.500</b>  | 813.508         | 811.492         | L17  |
| L1 | 2499.575        | 715.435         | <b>699.416</b>  | <b>700.424</b>  | 698.408         | L16  |
| P1 | 2596.628        | 602.351         | 586.332         | 587.340         | 585.324         | P15  |
| K1 | 2724.723        | 505.290         | 489.279         | 490.287         | 488.271         | K14  |
| K1 | 2852.818        | 377.203         | <b>361.184</b>  | 362.192         | 360.177         | K13  |
| T1 | 2953.885        | 249.108         | 233.089         | 234.097         | 232.082         | T12  |
| E1 | 3062.968        | 148.060         | 132.042         | 133.050         | 131.034         | E11  |

# sp | Q6GSS7 | H2A2A\_MOUSE

LNKLLGK <sup>Dimethyl</sup> <sub>28.03</sub> VTIAQGGVLPNIQAVLLPKKTE

- ▶ fragmentation table for charge state 2+
- ▶ specType=etd
- ▶ score=76.59
- ▶ F113279.dat
- ▶ query=q41555.p1
- ▶ precursor=617.580630
- ▶ chargePrecursor=5
- ▶ itol=0.5

| AA | c               | y              | z+1             | z+2             | z               | AA   |
|----|-----------------|----------------|-----------------|-----------------|-----------------|------|
| L1 | 66.063          | 1542.450       | 1534.440        | 0.504           | 1533.936        | L126 |
| N1 | 123.084         | 1485.908       | <b>1477.898</b> | 1478.402        | <b>1477.394</b> | N128 |
| K1 | 187.132         | 1426.886       | 1420.877        | 1421.381        | 1420.373        | K127 |
| L1 | 243.674         | 1364.839       | <b>1356.829</b> | <b>1357.333</b> | 1356.325        | L126 |
| L1 | 300.216         | 1308.297       | 1299.288        | 1299.791        | <b>1299.783</b> | L125 |
| G1 | 358.729         | 1251.755       | <b>1243.745</b> | <b>1244.249</b> | 1243.241        | G124 |
| K1 | 406.789         | 1223.244       | 1215.235        | <b>1215.738</b> | 1214.731        | K123 |
| V1 | <b>456.324</b>  | 1145.181       | <b>1137.171</b> | <b>1137.675</b> | 1136.667        | V122 |
| T1 | <b>506.848</b>  | 1095.646       | 1087.637        | <b>1088.141</b> | 1087.133        | T121 |
| T1 | <b>563.390</b>  | 1045.123       | <b>1037.113</b> | <b>1037.617</b> | 1036.609        | T120 |
| A1 | 620.908         | 998.581        | 990.571         | <b>991.075</b>  | 990.067         | A119 |
| Q1 | <b>662.537</b>  | 953.060        | <b>945.053</b>  | <b>945.557</b>  | 944.549         | Q118 |
| G1 | <b>691.448</b>  | <b>889.033</b> | <b>881.023</b>  | <b>881.527</b>  | <b>880.519</b>  | G117 |
| G1 | <b>719.959</b>  | 860.522        | <b>852.513</b>  | <b>853.017</b>  | <b>852.009</b>  | G116 |
| V1 | <b>769.493</b>  | <b>832.011</b> | <b>824.002</b>  | <b>824.506</b>  | 823.498         | V115 |
| L1 | 826.035         | <b>782.477</b> | 774.468         | 774.972         | 773.964         | L114 |
| T1 | 884.581         | <b>725.935</b> | 717.926         | 718.430         | 717.422         | T113 |
| N1 | 931.983         | 677.409        | 669.399         | <b>669.903</b>  | 668.895         | N112 |
| I1 | 988.125         | 626.387        | 618.378         | 618.882         | 617.874         | I111 |
| Q1 | <b>1052.154</b> | <b>563.845</b> | <b>555.836</b>  | <b>556.340</b>  | 555.332         | Q110 |
| A1 | 1087.673        | 499.816        | <b>491.807</b>  | <b>492.310</b>  | 491.302         | A109 |
| V1 | <b>1137.207</b> | 464.297        | <b>456.288</b>  | <b>456.792</b>  | 455.784         | V108 |
| L1 | 1183.749        | 414.763        | 406.754         | 407.258         | 406.250         | L107 |
| L1 | 1260.291        | 358.221        | 350.211         | 350.715         | 349.707         | L106 |
| P1 | 1298.817        | 301.679        | 293.670         | 294.174         | 293.166         | P105 |
| K1 | <b>1362.865</b> | 253.153        | <b>245.143</b>  | <b>245.647</b>  | 244.639         | K104 |
| K1 | <b>1426.912</b> | 189.105        | 181.096         | 181.600         | 180.592         | K103 |
| T1 | <b>1477.436</b> | 125.058        | 117.049         | 117.552         | 116.544         | T102 |
| E1 | 1541.959        | 74.534         | 66.524          | 67.028          | 66.021          | E101 |

# sp | Q6GSS7 | H2A2A\_MOUSE

LNKLLGK <sup>Dimethyl</sup> <sub>28.03</sub> VTIAQGGVLPNIQAVLLPKKTE

- ▶ fragmentation table for charge state 3+
- ▶ specType=etd
- ▶ score=76.59
- ▶ F113279.dat
- ▶ query=q41555.p1
- ▶ precursor=617.580630
- ▶ chargePrecursor=5
- ▶ itol=0.5

| AA  | c              | y        | z+1             | z+2            | z              | AA  |
|-----|----------------|----------|-----------------|----------------|----------------|-----|
| L1  | 44.377         | 1028.635 | <b>1023.296</b> | 0.672          | 1022.960       | L29 |
| N2  | 82.392         | 990.941  | 985.601         | <b>985.937</b> | 985.265        | N28 |
| K3  | 125.090        | 952.926  | 947.587         | <b>947.923</b> | 947.251        | K27 |
| L4  | 162.795        | 910.228  | 904.889         | <b>905.225</b> | 904.553        | L26 |
| L5  | 200.479        | 872.533  | 867.194         | 861.853        | 866.858        | L25 |
| G6  | 219.487        | 834.839  | 829.499         | <b>829.835</b> | 829.163        | G24 |
| K7  | 271.529        | 815.832  | <b>810.492</b>  | <b>810.828</b> | <b>810.156</b> | K23 |
| V8  | 304.952        | 763.790  | <b>758.450</b>  | <b>758.786</b> | <b>758.114</b> | V22 |
| T9  | 338.234        | 730.767  | 725.427         | <b>725.763</b> | 725.091        | T21 |
| I10 | 375.929        | 697.084  | <b>691.745</b>  | <b>692.081</b> | <b>691.409</b> | I20 |
| A11 | 399.608        | 659.389  | 654.050         | <b>654.386</b> | 653.714        | A19 |
| Q12 | 442.294        | 638.710  | <b>633.371</b>  | <b>633.707</b> | 633.035        | Q18 |
| G13 | 461.301        | 593.024  | 587.685         | 588.021        | 587.349        | G17 |
| G14 | 480.308        | 574.017  | 568.678         | 569.013        | 568.342        | G16 |
| V15 | 513.331        | 555.010  | 549.670         | 550.006        | 549.334        | V15 |
| L16 | 551.026        | 521.987  | 516.648         | 516.984        | 516.312        | L14 |
| P17 | 583.377        | 484.292  | 478.953         | 479.289        | 478.617        | P13 |
| N18 | 621.391        | 451.942  | 446.602         | 446.938        | 446.266        | N12 |
| I19 | 659.098        | 413.927  | 408.588         | 408.924        | 408.252        | I11 |
| Q10 | 701.772        | 376.233  | 370.893         | 371.229        | 370.557        | Q10 |
| A21 | 725.451        | 333.548  | 328.207         | 328.543        | 327.871        | A9  |
| V22 | <b>758.474</b> | 309.867  | 304.528         | 304.864        | 304.192        | V8  |
| L23 | 796.168        | 276.844  | 271.505         | 271.841        | 271.169        | L7  |
| L24 | 833.863        | 239.150  | 233.810         | 234.146        | 233.474        | L6  |
| P25 | 869.234        | 201.455  | 196.116         | 196.451        | 195.780        | P9  |
| K26 | <b>908.812</b> | 169.104  | 163.765         | 164.101        | 163.429        | K4  |
| K27 | <b>951.611</b> | 126.400  | 121.060         | 121.402        | 120.730        | K3  |
| T28 | 985.293        | 83.708   | 78.368          | 78.704         | 78.032         | T2  |
| E29 | 1028.397       | 50.025   | 44.685          | 45.021         | 44.349         | E1  |

# sp | Q6GSS7 | H2A2A\_MOUSE

LNKLLGK <sup>Dimethyl</sup> <sub>28.03</sub> VTIAQGGVLPNIQAVLLPKKTE

- ▶ fragmentation table for charge state 4+
- ▶ specType=etd
- ▶ score=76.59
- ▶ F113279.dat
- ▶ query=q41555\_p1
- ▶ precursor=617.580630
- ▶ chargePrecursor=5
- ▶ itol=0.5

| AA    | c              | y              | z+1            | z+2            | z       | AA    |
|-------|----------------|----------------|----------------|----------------|---------|-------|
| L[1]  | 333.35         | 771.728        | 787.754        | 0.758          | 787.412 | L[29] |
| N[2]  | 82.046         | 743.481        | <b>739.453</b> | <b>739.705</b> | 739.201 | N[26] |
| K[3]  | 94.059         | 714.947        | 710.942        | <b>711.194</b> | 710.690 | K[27] |
| L[4]  | 122.540        | 582.923        | 678.918        | 679.170        | 678.666 | L[26] |
| L[5]  | 150.611        | <b>654.652</b> | 650.647        | 650.899        | 650.395 | L[25] |
| G[6]  | 164.867        | 626.381        | 622.376        | 622.628        | 622.124 | G[24] |
| K[7]  | 203.898        | 612.126        | 608.121        | 608.373        | 607.869 | K[23] |
| V[8]  | 228.665        | 573.094        | 569.089        | 569.341        | 568.837 | V[22] |
| T[9]  | 253.927        | 648.327        | 544.322        | 544.574        | 544.070 | T[21] |
| T[10] | 262.198        | 523.065        | 519.060        | 519.312        | 518.808 | T[20] |
| A[11] | 299.958        | 494.795        | 490.789        | 491.041        | 490.537 | A[19] |
| Q[12] | 311.972        | 477.035        | 473.030        | 473.282        | 472.778 | Q[18] |
| G[13] | 346.228        | 445.020        | 441.015        | 441.267        | 440.763 | G[17] |
| G[14] | 360.483        | 430.765        | 426.760        | 427.012        | 426.508 | G[16] |
| V[15] | 385.250        | 416.509        | 412.504        | 412.757        | 412.253 | V[15] |
| L[16] | 413.521        | 391.742        | 387.737        | 387.989        | 387.486 | L[14] |
| P[17] | 437.784        | 363.471        | 359.466        | 359.718        | 359.215 | P[13] |
| N[18] | 466.295        | 339.208        | 335.203        | 335.455        | 334.951 | N[12] |
| T[19] | 494.566        | 310.697        | 306.693        | 306.945        | 306.441 | T[11] |
| Q[20] | 536.581        | 282.426        | 278.422        | 278.673        | 278.170 | Q[10] |
| A[21] | 544.340        | 250.412        | 246.407        | 246.659        | 246.155 | A[9]  |
| V[22] | 569.107        | 232.652        | 228.648        | 228.900        | 228.396 | V[8]  |
| L[23] | 597.178        | 207.885        | 203.881        | 204.132        | 203.629 | L[7]  |
| L[24] | 625.649        | 179.614        | 175.609        | 175.861        | 175.358 | L[6]  |
| P[25] | 649.912        | 151.343        | 147.338        | 147.590        | 147.087 | P[5]  |
| K[26] | 681.936        | 127.080        | 123.075        | 123.327        | 122.823 | K[4]  |
| K[27] | <b>713.960</b> | 95.056         | 91.052         | 91.304         | 90.800  | K[3]  |
| T[28] | <b>739.222</b> | 63.032         | 59.028         | 59.280         | 58.776  | T[2]  |
| E[29] | 771.482        | 37.771         | 33.766         | 34.018         | 33.514  | E[1]  |

# sp | Q6GSS7 | H2A2A\_MOUSE

LNKLLGK <sup>Dimethyl</sup>VTIAQGGVLPNIQAVLLPKKTE  
28.03

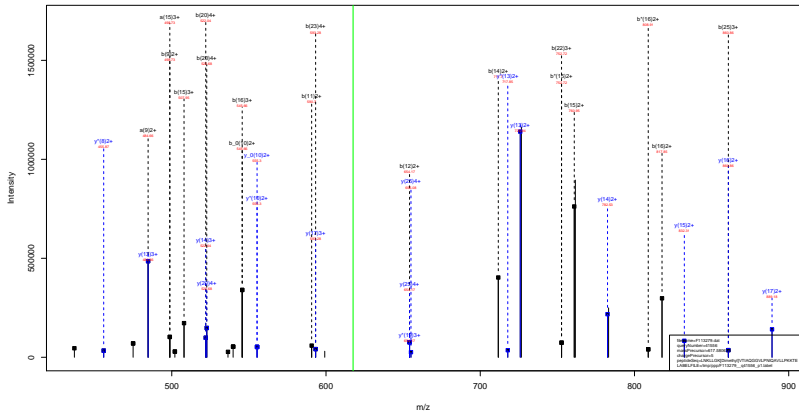



# sp | Q6GSS7 | H2A2A\_MOUSE

LNKLLGK <sup>Dimethyl</sup> 28.03 VTIAQGGVLPNIQAVLLPKKTE

- ▶ fragmentation table for charge state 1+
- ▶ specType=cid
- ▶ score=33.29
- ▶ F113279.dat
- ▶ query=q41556.p1
- ▶ precursor=617.580630
- ▶ chargePrecursor=5
- ▶ itol=0.5

| AA  | a        | a*       | a,b      | b        | b*       | b,b      | r        | r*       | r,b      | AA   |
|-----|----------|----------|----------|----------|----------|----------|----------|----------|----------|------|
| L1  | 88.008   | 0.000    | 1.000    | 114.091  | 0.000    | 0.000    | 1063.893 | 1069.899 | 1063.893 | L128 |
| K12 | 2003.199 | 103.113  | 0.000    | 2205.134 | 231.108  | 0.000    | 2070.820 | 2195.178 | 2092.797 | K126 |
| K13 | 626.034  | 61.120   | 0.000    | 366.223  | 330.203  | 0.000    | 266.165  | 2839.738 | 2836.754 | K127 |
| L14 | 441.518  | 424.202  | 0.000    | 466.511  | 452.287  | 0.000    | 2128.810 | 2111.643 | 2110.688 | L126 |
| L15 | 254.402  | 217.478  | 0.000    | 262.361  | 246.374  | 0.000    | 2615.260 | 2166.263 | 2099.478 | L125 |
| Q16 | 81.1424  | 584.397  | 0.000    | 608.418  | 622.362  | 0.000    | 2002.200 | 2148.475 | 2144.461 | Q124 |
| K17 | 187.550  | 703.524  | 0.000    | 705.545  | 778.519  | 0.000    | 2443.480 | 2420.454 | 2427.470 | K123 |
| V18 | 816.018  | 809.382  | 0.000    | 808.411  | 817.387  | 0.000    | 2309.261 | 2172.237 | 2171.263 | V122 |
| V19 | 167.008  | 160.680  | 849.658  | 165.665  | 168.635  | 877.651  | 2190.205 | 2115.205 | 2112.215 | V121 |
| I20 | 1080.970 | 1063.124 | 1062.140 | 1108.743 | 1091.719 | 1090.719 | 2089.238 | 2072.211 | 2071.227 | I20  |
| A11 | 1151.087 | 1154.053 | 1133.717 | 1174.262 | 1162.290 | 1161.272 | 1405.124 | 1404.127 | 1404.143 | A10  |
| Q12 | 1219.098 | 1262.019 | 1261.821 | 1301.884 | 1296.814 | 1295.820 | 1305.111 | 1300.096 | 1298.108 | Q10  |
| G13 | 1308.867 | 1313.884 | 1318.870 | 1324.862 | 1347.838 | 1346.852 | 1377.020 | 1369.013 | 1368.044 | G17  |
| G14 | 1383.889 | 1376.882 | 1375.871 | 1421.884 | 1404.867 | 1403.873 | 1721.037 | 1703.010 | 1702.032 | G16  |
| V15 | 1402.877 | 1479.818 | 1474.866 | 1520.821 | 1503.806 | 1502.849 | 1681.019 | 1643.989 | 1642.999 | V19  |
| L16 | 1306.041 | 1309.013 | 1308.011 | 1354.026 | 1337.010 | 1336.026 | 1353.947 | 1349.920 | 1345.916 | L14  |
| P17 | 1703.094 | 1698.090 | 1685.084 | 1711.089 | 1714.081 | 1713.079 | 1440.863 | 1443.838 | 1432.852 | P13  |
| M18 | 1817.437 | 1805.111 | 1790.127 | 1845.132 | 1828.105 | 1827.121 | 1383.810 | 1338.763 | 1335.799 | M15  |
| T19 | 1009.071 | 1013.065 | 1012.051 | 1039.058 | 1041.066 | 1040.065 | 1329.780 | 1322.741 | 1321.751 | T11  |
| Q10 | 2006.200 | 2041.203 | 2040.201 | 2099.215 | 2084.248 | 2083.264 | 1126.400 | 1119.395 | 1118.377 | Q10  |
| A11 | 1170.517 | 1172.509 | 1171.500 | 1175.512 | 1174.500 | 1173.501 | 868.624  | 867.589  | 867.614  | A10  |
| V15 | 1218.608 | 1211.597 | 1210.589 | 1219.598 | 1218.584 | 1218.591 | 867.589  | 867.581  | 868.577  | V10  |
| L12 | 2241.499 | 2224.483 | 2223.470 | 2269.484 | 2252.458 | 2251.454 | 828.513  | 811.492  | 810.508  | L17  |
| L14 | 2454.653 | 2437.627 | 2436.545 | 2482.548 | 2465.522 | 2464.538 | 715.430  | 688.408  | 687.424  | L16  |
| P16 | 2051.606 | 2034.580 | 2033.590 | 2079.601 | 2062.575 | 2061.561 | 682.351  | 385.324  | 384.340  | P15  |
| L14 | 2078.702 | 2061.673 | 2060.680 | 2110.688 | 2093.619 | 2092.630 | 682.351  | 488.275  | 487.287  | L14  |
| K17 | 2007.196 | 2000.710 | 2000.708 | 2055.701 | 2038.194 | 2037.189 | 371.201  | 366.177  | 366.193  | K15  |
| L12 | 1808.874 | 1801.817 | 1800.831 | 1806.839 | 1818.812 | 1817.820 | 248.108  | 0.000    | 251.088  | L12  |
| L14 | 1017.808 | 1015.802 | 1014.810 | 1019.810 | 1040.824 | 1047.811 | 148.000  | 0.000    | 130.000  | L12  |

# sp | Q6GSS7 | H2A2A\_MOUSE

LNKLLGK <sup>Dimethyl</sup> 28.03 VTIAQGGVLPNIQAVLLPKKTE

- ▶ fragmentation table for charge state 2+
- ▶ specType=cid
- ▶ score=33.29
- ▶ F113279.dat
- ▶ query=q41556.p1
- ▶ precursor=617.580630
- ▶ chargePrecursor=5
- ▶ itol=0.5

| AA  | a              | a*       | a,b            | b              | b*             | b,b            | y              | y*             | y,b            | AA  |
|-----|----------------|----------|----------------|----------------|----------------|----------------|----------------|----------------|----------------|-----|
| L1  | 43.552         | 0.564    | 7.501          | 31.549         | 0.504          | 0.504          | 1262.291       | 3333.139       | 3333.144       | L26 |
| R1  | 100.573        | 92.080   | 0.504          | 114.571        | 106.077        | 0.504          | 1485.903       | 2477.904       | 2476.902       | R26 |
| K1  | 184.621        | 156.439  | 0.504          | 178.618        | 170.030        | 0.504          | 1428.886       | 2420.371       | 2419.081       | K27 |
| L4  | 251.583        | 214.658  | 0.504          | 235.160        | 226.647        | 0.504          | 1384.833       | 2366.325       | 2365.031       | L26 |
| L5  | 277.078        | 236.102  | 0.504          | 251.162        | 242.188        | 0.504          | 1336.291       | 2309.183       | 2308.294       | L25 |
| G6  | 306.418        | 267.102  | 0.504          | 300.213        | 291.168        | 0.504          | 1291.701       | 2263.343       | 2262.148       | G24 |
| R7  | 384.270        | 316.705  | 0.504          | 388.070        | 380.763        | 0.504          | 1223.241       | 2124.731       | 2124.239       | R25 |
| V6  | 413.113        | 405.363  | 0.504          | 441.613        | 432.267        | 0.504          | 1183.181       | 2136.661       | 2136.176       | V22 |
| Y9  | <b>484.337</b> | 475.523  | <b>475.331</b> | <b>498.334</b> | 489.921        | 489.520        | 1059.045       | 1987.133       | 1986.941       | Y21 |
| I10 | 540.878        | 532.309  | 531.871        | <b>554.876</b> | 546.381        | <b>545.871</b> | 1045.121       | 2038.609       | 2038.117       | I20 |
| A11 | 626.597        | 587.854  | 587.382        | <b>590.395</b> | 581.682        | 581.390        | 988.581        | 1980.881       | 1979.575       | A19 |
| Q13 | 660.277        | 611.513  | 611.542        | <b>654.424</b> | 645.011        | 645.410        | 953.910        | 1944.964       | 1944.270       | Q10 |
| G13 | 666.577        | 604.924  | 604.924        | 674.522        | 667.100        | <b>669.631</b> | 985.513        | 1984.027       | 1983.027       | G17 |
| G14 | 687.448        | 688.935  | 688.441        | <b>711.446</b> | 705.422        | 702.480        | <b>860.522</b> | 1852.039       | 1851.517       | G16 |
| V15 | 748.833        | 748.849  | 747.891        | <b>768.300</b> | <b>752.467</b> | 751.918        | <b>822.911</b> | 1827.488       | 1826.938       | V15 |
| L16 | 803.524        | 795.111  | 794.513        | <b>817.522</b> | <b>809.069</b> | <b>808.517</b> | <b>782.477</b> | 1773.984       | 1773.472       | L14 |
| P17 | 852.851        | 843.137  | 843.048        | 866.048        | 857.635        | 857.643        | <b>725.915</b> | <b>717.422</b> | 1716.630       | P13 |
| R18 | 909.672        | 895.559  | 895.087        | 924.070        | 914.958        | 914.654        | 637.482        | 1668.895       | 1668.403       | R15 |
| L19 | 968.814        | 957.491  | 956.960        | 976.812        | 967.366        | 967.665        | 568.360        | 1613.874       | 1613.382       | L17 |
| Q20 | 1009.844       | 1002.130 | 1000.630       | 1034.941       | 1025.128       | 1024.930       | 593.955        | <b>555.332</b> | <b>554.840</b> | Q10 |
| A21 | 1082.782       | 1065.669 | 1064.157       | 1099.180       | 1091.048       | 1091.124       | 488.811        | 1501           | 1499.811       | A19 |
| V22 | 1114.896       | 1108.181 | 1106.669       | 1122.894       | 1114.680       | 1114.848       | 488.289        | <b>455.784</b> | 1455.282       | V19 |
| L23 | 1171.238       | 1162.725 | 1162.251       | 1185.226       | 1176.722       | 1176.230       | 414.791        | 1405.252       | 1405.758       | L19 |
| L24 | 1227.480       | 1218.281 | 1218.770       | 1241.778       | 1233.385       | 1233.773       | 358.221        | 1348.708       | 1348.216       | L16 |
| P25 | 1276.507       | 1267.793 | 1267.301       | 1290.304       | 1281.791       | 1281.259       | 381.670        | 1263.168       | 1262.674       | P15 |
| L26 | 1340.294       | 1331.841 | 1331.369       | 1354.362       | 1345.818       | 1345.346       | 283.911        | 1244.939       | 1244.144       | L14 |
| R27 | 1404.402       | 1395.588 | 1395.390       | 1418.390       | 1409.898       | 1409.394       | 189.110        | 1185.561       | 1185.100       | R15 |
| L29 | 1454.926       | 1446.412 | 1445.920       | 1468.921       | 1460.410       | 1460.912       | 126.850        | 1116.162       | 1115.712       | L12 |
| E29 | 1519.447       | 1510.934 | 1510.440       | 1533.444       | 1524.931       | 1524.432       | 74.539         | 1104           | 1099.539       | E10 |

# sp | Q6GSS7 | H2A2A\_MOUSE

LNKLLGK <sup>Dimethyl</sup> 28.03 VTIAQGGVLPNIQAVLLPKKTE

- ▶ fragmentation table for charge state 3+
- ▶ specType=cid
- ▶ score=33.29
- ▶ F113279.dat
- ▶ query=q41556.p1
- ▶ precursor=617.580630
- ▶ chargePrecursor=5
- ▶ itol=0.5

| AA  | a        | a*       | a,β   | b        | b*       | b,β   | γ        | γ*       | γ,β      | AA  |
|-----|----------|----------|-------|----------|----------|-------|----------|----------|----------|-----|
| L1  | 28.719   | 0.072    | 0.072 | 58.102   | 0.072    | 0.072 | 1033.031 | 1022.966 | 1022.892 | L26 |
| K2  | 67.585   | 61.700   | 0.072 | 78.715   | 71.041   | 0.072 | 960.941  | 965.265  | 964.921  | K26 |
| K3  | 110.681  | 104.407  | 0.072 | 119.411  | 113.739  | 0.072 | 952.520  | 947.251  | 946.921  | K27 |
| L4  | 147.778  | 142.125  | 0.072 | 157.109  | 151.434  | 0.072 | 940.228  | 934.503  | 934.225  | L26 |
| L5  | 188.874  | 179.497  | 0.072 | 194.884  | 189.128  | 0.072 | 912.521  | 906.825  | 906.578  | L25 |
| Q6  | 204.478  | 198.004  | 0.072 | 213.811  | 208.138  | 0.072 | 894.839  | 889.163  | 888.931  | Q24 |
| K7  | 258.522  | 250.908  | 0.072 | 265.831  | 260.178  | 0.072 | 811.832  | 810.158  | 809.820  | K22 |
| V6  | 289.044  | 281.869  | 0.072 | 298.878  | 293.301  | 0.072 | 781.798  | 780.114  | 779.788  | V22 |
| V9  | 323.227  | 317.551  | 0.072 | 337.221  | 332.595  | 0.072 | 750.505  | 748.767  | 748.461  | V21 |
| L10 | 360.822  | 355.288  | 0.072 | 370.251  | 364.878  | 0.072 | 697.084  | 691.409  | 691.081  | L20 |
| A11 | 384.601  | 378.825  | 0.072 | 393.257  | 388.257  | 0.072 | 657.626  | 652.380  | 652.089  | A19 |
| Q12 | 427.288  | 421.411  | 0.072 | 436.818  | 430.984  | 0.072 | 609.615  | 605.719  | 605.428  | Q10 |
| G13 | 446.204  | 440.015  | 0.072 | 455.626  | 449.588  | 0.072 | 593.024  | 587.948  | 587.621  | G17 |
| G14 | 482.008  | 475.828  | 0.072 | 494.833  | 488.895  | 0.072 | 574.101  | 569.382  | 569.014  | G16 |
| V15 | 498.124  | 492.048  | 0.072 | 507.850  | 501.900  | 0.072 | 555.051  | 549.154  | 548.788  | V15 |
| L16 | 536.019  | 530.383  | 0.072 | 545.350  | 539.675  | 0.072 | 521.987  | 516.312  | 515.984  | L14 |
| P17 | 566.870  | 560.494  | 0.072 | 575.701  | 572.026  | 0.072 | 484.292  | 478.611  | 478.289  | P13 |
| M18 | 608.084  | 600.708  | 0.072 | 615.718  | 610.040  | 0.072 | 459.212  | 453.942  | 453.536  | M12 |
| T19 | 644.878  | 638.483  | 0.072 | 653.815  | 648.718  | 0.072 | 407.400  | 413.900  | 408.292  | T11 |
| Q20 | 686.705  | 681.189  | 0.072 | 695.049  | 690.421  | 0.072 | 380.093  | 376.251  | 375.951  | Q10 |
| A21 | 712.444  | 704.788  | 0.072 | 724.440  | 719.124  | 0.072 | 331.540  | 327.891  | 327.942  | A11 |
| V22 | 742.809  | 737.481  | 0.072 | 752.790  | 747.124  | 0.072 | 300.889  | 304.182  | 304.044  | V11 |
| L23 | 781.161  | 775.489  | 0.072 | 790.493  | 784.817  | 0.072 | 278.944  | 277.185  | 276.941  | L17 |
| L24 | 818.856  | 813.189  | 0.072 | 826.189  | 820.812  | 0.072 | 184.184  | 180.150  | 180.474  | L16 |
| P25 | 851.207  | 845.511  | 0.072 | 860.539  | 854.863  | 0.072 | 164.535  | 161.483  | 161.789  | P15 |
| K26 | 889.806  | 883.881  | 0.072 | 895.919  | 890.000  | 0.072 | 107.913  | 108.184  | 107.420  | K14 |
| K27 | 928.054  | 921.928  | 0.072 | 945.915  | 940.260  | 0.072 | 126.420  | 126.730  | 126.602  | K13 |
| L28 | 970.288  | 964.811  | 0.072 | 981.813  | 975.942  | 0.072 | 81.718   | 81.718   | 81.672   | L12 |
| L29 | 1013.558 | 1007.822 | 0.072 | 1027.832 | 1021.958 | 0.072 | 30.023   | 30.023   | 30.023   | L10 |

# sp | Q6GSS7 | H2A2A\_MOUSE

LNKLLGK<sup>Dimethyl</sup>VTIAQGGVLPNIQAVLLPKKTE<sup>28.03</sup>

- ▶ fragmentation table for charge state 4+
- ▶ specType=cid
- ▶ score=33.29
- ▶ F113279.dat
- ▶ query=q41556.p1
- ▶ precursor=617.580630
- ▶ chargePrecursor=5
- ▶ itol=0.5

| AA  | a       | a*      | a,d     | b              | b*      | b,d     | y              | y*      | y,d     | AA  |
|-----|---------|---------|---------|----------------|---------|---------|----------------|---------|---------|-----|
| L1  | 22.280  | 0.755   | 0.755   | 29.278         | 0.355   | 0.755   | 171.728        | 176.472 | 181.226 | L29 |
| N2  | 50.790  | 46.534  | 0.755   | 57.789         | 53.532  | 0.755   | 243.457        | 239.201 | 234.955 | N38 |
| K3  | 82.814  | 78.558  | 0.755   | 89.813         | 85.556  | 0.755   | 315.240        | 310.984 | 306.728 | K27 |
| L4  | 111.085 | 106.828 | 0.755   | 118.084        | 113.827 | 0.755   | 386.923        | 382.666 | 378.410 | L28 |
| L5  | 139.356 | 135.099 | 0.755   | 146.355        | 142.098 | 0.755   | <b>654.652</b> | 650.395 | 646.138 | L25 |
| G6  | 153.611 | 149.355 | 0.755   | 160.610        | 156.354 | 0.755   | 626.381        | 622.124 | 617.878 | G24 |
| K7  | 182.843 | 178.586 | 0.755   | 189.842        | 185.585 | 0.755   | 612.128        | 607.871 | 603.614 | K23 |
| V8  | 217.431 | 213.174 | 0.755   | 224.430        | 220.173 | 0.755   | 574.059        | 569.799 | 565.541 | V22 |
| T9  | 242.672 | 238.415 | 238.188 | 249.671        | 245.414 | 245.188 | 548.327        | 544.070 | 539.812 | T21 |
| D10 | 270.943 | 266.686 | 266.440 | 277.942        | 273.685 | 273.439 | <b>523.065</b> | 518.808 | 514.551 | D20 |
| A11 | 288.202 | 283.945 | 283.700 | 295.201        | 290.944 | 290.700 | 484.792        | 480.535 | 476.278 | A19 |
| G12 | 329.717 | 325.460 | 325.214 | 337.716        | 333.459 | 333.213 | 477.030        | 472.773 | 468.515 | G18 |
| G13 | 334.972 | 330.715 | 330.470 | 341.971        | 337.714 | 337.468 | 445.020        | 440.763 | 436.507 | G17 |
| G14 | 349.470 | 344.971 | 344.725 | 356.228        | 351.970 | 351.724 | 430.765        | 426.508 | 422.251 | G16 |
| V15 | 373.995 | 369.738 | 369.492 | 380.994        | 376.737 | 376.491 | 416.500        | 412.253 | 408.000 | V15 |
| L16 | 402.266 | 398.009 | 397.763 | 409.265        | 405.008 | 404.762 | 381.747        | 377.489 | 373.240 | L14 |
| F17 | 426.529 | 422.272 | 422.026 | 433.528        | 429.271 | 429.025 | 363.471        | 359.213 | 354.956 | F13 |
| N18 | 459.640 | 455.383 | 455.137 | 462.639        | 458.382 | 458.136 | 339.208        | 334.951 | 330.694 | N12 |
| D19 | 503.211 | 498.954 | 498.708 | 509.209        | 504.952 | 504.706 | 319.997        | 315.739 | 311.482 | D11 |
| G20 | 535.226 | 530.969 | 530.723 | <b>532.224</b> | 527.967 | 527.721 | 282.428        | 278.170 | 273.913 | G14 |
| A21 | 533.085 | 528.828 | 528.582 | <b>540.083</b> | 535.826 | 535.580 | 292.411        | 288.153 | 283.896 | A17 |
| V22 | 557.052 | 552.795 | 552.549 | 564.051        | 559.794 | 559.548 | 252.652        | 248.394 | 244.137 | V18 |
| L23 | 586.123 | 581.866 | 581.620 | <b>593.122</b> | 588.865 | 588.619 | 207.895        | 203.637 | 199.380 | L17 |
| L24 | 614.394 | 610.137 | 609.891 | 621.393        | 617.136 | 616.890 | 176.614        | 172.356 | 168.100 | L16 |
| T25 | 638.859 | 634.602 | 634.356 | 644.858        | 640.601 | 640.355 | 161.353        | 157.095 | 152.838 | T21 |
| K26 | 670.081 | 665.824 | 665.578 | 677.079        | 672.822 | 672.576 | 127.081        | 122.823 | 118.566 | K18 |
| K27 | 702.704 | 698.446 | 698.200 | 709.703        | 705.446 | 705.200 | 85.009         | 80.751  | 76.494  | K15 |
| T28 | 727.968 | 723.711 | 723.464 | 734.967        | 730.710 | 730.464 | 63.037         | 0.755   | 85.330  | T22 |
| E29 | 760.227 | 755.970 | 755.724 | 767.226        | 762.969 | 762.723 | 37.771         | 0.755   | 33.288  | E11 |

# sp | Q6GSS7 | H2A2A\_MOUSE

LNKLLGK <sup>Dimethyl</sup>VTIAQGGVLPNIQAVLLPKKTE  
28.03

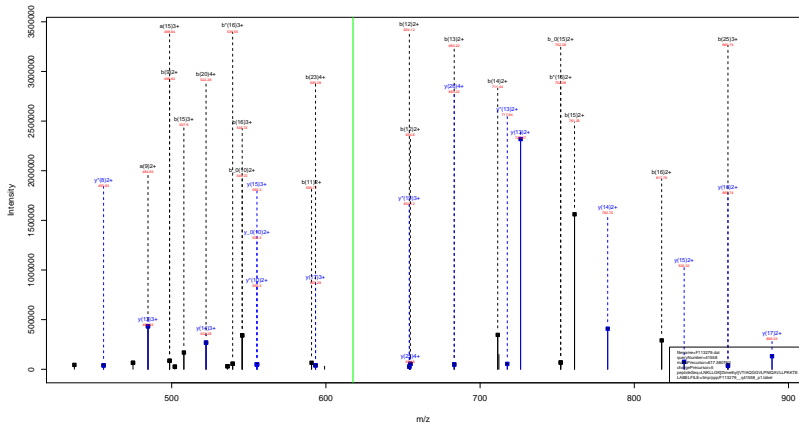

# sp | Q6GSS7 | H2A2A\_MOUSE

LNKLLGK <sup>Dimethyl</sup> 28.03 VTIAQGGVLPNIQAVLLPKKTE

- ▶ fragmentation table for charge state 1+
- ▶ specType=cid
- ▶ score=42.95
- ▶ F113279.dat
- ▶ query=q41558\_p1
- ▶ precursor=617.580760
- ▶ chargePrecursor=5
- ▶ itol=0.5

| AA  | a        | a*       | a,b      | b        | b*       | b,b      | r        | r*       | r,b      | AA   |
|-----|----------|----------|----------|----------|----------|----------|----------|----------|----------|------|
| L1  | 88.008   | 0.000    | 1.000    | 114.091  | 0.000    | 0.000    | 1063.893 | 1069.893 | 1063.893 | L208 |
| K12 | 2003.199 | 103.113  | 0.000    | 2205.134 | 201.108  | 0.000    | 2070.803 | 2195.178 | 2092.797 | K206 |
| K13 | 426.434  | 101.209  | 0.000    | 366.229  | 130.203  | 0.000    | 2496.165 | 2839.138 | 2636.754 | K127 |
| L14 | 441.518  | 424.202  | 0.000    | 466.511  | 452.287  | 0.000    | 2126.810 | 2711.643 | 2710.608 | L206 |
| L15 | 254.402  | 517.478  | 0.000    | 352.391  | 426.374  | 0.000    | 2615.260 | 2766.263 | 2699.478 | L205 |
| Q16 | 81.1424  | 584.397  | 0.000    | 608.418  | 622.362  | 0.000    | 2002.202 | 2486.475 | 2484.461 | Q124 |
| K17 | 187.550  | 700.524  | 0.000    | 705.545  | 778.519  | 0.000    | 2443.480 | 2740.454 | 2742.470 | K125 |
| V18 | 816.118  | 809.382  | 0.000    | 804.111  | 817.387  | 0.000    | 2309.761 | 2272.237 | 2271.263 | V122 |
| V19 | 167.608  | 650.680  | 649.655  | 965.661  | 1018.635 | 877.611  | 2190.205 | 2115.295 | 2112.275 | V121 |
| I20 | 1080.470 | 1063.124 | 1062.140 | 1108.749 | 1091.719 | 1090.719 | 2089.238 | 2072.211 | 2071.227 | I203 |
| A11 | 1151.087 | 1154.163 | 1153.717 | 1174.362 | 1162.790 | 1161.772 | 1406.154 | 1404.127 | 1404.143 | A109 |
| Q12 | 1219.696 | 1262.619 | 1261.821 | 1301.484 | 1296.814 | 1295.826 | 1920.111 | 1908.096 | 1908.106 | Q110 |
| Q13 | 1308.867 | 1313.884 | 1313.870 | 1324.962 | 1347.434 | 1346.952 | 1777.020 | 1769.013 | 1769.004 | Q117 |
| G14 | 1383.889 | 1376.882 | 1376.871 | 1421.884 | 1404.887 | 1403.873 | 1721.037 | 1703.010 | 1702.032 | G116 |
| V15 | 1402.877 | 1479.818 | 1474.866 | 1520.821 | 1503.806 | 1502.849 | 1681.019 | 1643.989 | 1642.999 | V119 |
| L16 | 1306.041 | 1309.013 | 1308.011 | 1354.026 | 1317.010 | 1316.026 | 1563.947 | 1546.920 | 1545.916 | L114 |
| P17 | 1703.034 | 1698.009 | 1695.004 | 1711.009 | 1714.001 | 1713.019 | 1440.863 | 1413.836 | 1412.852 | P113 |
| M18 | 1817.437 | 1805.111 | 1799.127 | 1845.132 | 1828.105 | 1827.121 | 1383.810 | 1338.763 | 1335.799 | M115 |
| T19 | 1000.071 | 1013.005 | 1012.251 | 1036.018 | 1041.006 | 1040.266 | 1329.760 | 1322.744 | 1321.751 | T111 |
| Q10 | 2006.200 | 2041.203 | 2040.200 | 2099.215 | 2084.248 | 2083.264 | 1126.400 | 1109.950 | 1108.977 | Q100 |
| A11 | 1170.517 | 1172.509 | 1171.300 | 1175.512 | 1181.500 | 1180.301 | 868.624  | 861.589  | 860.614  | A111 |
| V12 | 2206.668 | 2211.309 | 2210.871 | 2256.308 | 2258.354 | 2258.310 | 807.889  | 801.361  | 800.877  | V110 |
| L21 | 2241.499 | 2254.483 | 2253.470 | 2269.464 | 2282.438 | 2281.424 | 828.519  | 811.462  | 810.538  | L117 |
| L24 | 2454.651 | 2457.227 | 2456.245 | 2462.548 | 2465.622 | 2464.638 | 715.430  | 698.408  | 697.424  | L16  |
| P15 | 2051.606 | 2054.580 | 2053.590 | 2079.601 | 2062.675 | 2061.591 | 682.351  | 665.324  | 664.340  | P15  |
| K20 | 2076.702 | 2081.512 | 2080.460 | 2110.468 | 2093.619 | 2092.465 | 626.465  | 609.275  | 608.291  | K14  |
| K27 | 1907.196 | 1909.710 | 1908.708 | 1925.701 | 1918.194 | 1917.189 | 317.201  | 300.177  | 300.193  | K15  |
| L29 | 1808.874 | 1801.817 | 1800.851 | 1836.839 | 1819.812 | 1818.826 | 248.108  | 0.000    | 231.008  | L12  |
| L26 | 1017.608 | 1020.602 | 1019.610 | 1040.611 | 1046.604 | 1045.612 | 148.000  | 0.000    | 130.000  | L10  |

# sp | Q6GSS7 | H2A2A\_MOUSE

LNKLLGK <sup>Dimethyl</sup> 28.03 VTIAQGGVLPNIQAVLLPKKTE

- ▶ fragmentation table for charge state 2+
- ▶ specType=cid
- ▶ score=42.95
- ▶ F113279.dat
- ▶ query=q41558.p1
- ▶ precursor=617.580760
- ▶ chargePrecursor=5
- ▶ itol=0.5

| AA  | a              | a*       | a,b            | b              | b*       | b,b            | r              | r*             | r,b            | AA  |
|-----|----------------|----------|----------------|----------------|----------|----------------|----------------|----------------|----------------|-----|
| L1  | 43.552         | 0.561    | 7.501          | 31.549         | 0.504    | 0.501          | 1261.201       | 3333.139       | 3333.144       | L26 |
| R1  | 100.573        | 92.180   | 0.504          | 114.571        | 106.197  | 0.504          | 1485.931       | 2477.904       | 2476.902       | R26 |
| K1  | 184.621        | 156.438  | 0.504          | 178.618        | 170.495  | 0.504          | 1428.886       | 2420.371       | 2419.381       | K27 |
| L4  | 251.583        | 214.658  | 0.504          | 255.160        | 226.647  | 0.504          | 1384.833       | 2366.321       | 2365.331       | L28 |
| L5  | 277.678        | 236.101  | 0.504          | 281.162        | 253.188  | 0.504          | 1358.201       | 2309.183       | 2308.201       | L29 |
| Q1  | 308.118        | 267.102  | 0.504          | 309.213        | 281.188  | 0.504          | 1321.701       | 2243.341       | 2242.348       | Q24 |
| K17 | 384.270        | 316.105  | 0.504          | 388.270        | 360.163  | 0.504          | 1223.241       | 2124.731       | 2124.739       | K25 |
| V1  | 413.113        | 375.303  | 0.504          | 417.113        | 392.267  | 0.504          | 1185.181       | 2106.661       | 2106.678       | V22 |
| Y1  | <b>484.337</b> | 473.523  | <b>475.331</b> | <b>498.334</b> | 489.521  | 489.520        | 1059.645       | 1987.133       | 1988.043       | Y21 |
| I20 | 540.878        | 532.309  | 531.874        | <b>554.876</b> | 546.301  | <b>545.871</b> | 1045.121       | 2028.609       | 2028.117       | I20 |
| A11 | 676.597        | 587.854  | 587.362        | <b>590.395</b> | 581.682  | 581.350        | 988.581        | 1881.681       | 1879.576       | A19 |
| Q13 | 690.277        | 611.513  | 611.521        | <b>654.424</b> | 645.511  | 645.410        | 953.931        | 1844.564       | 1844.270       | Q10 |
| G15 | 698.577        | 600.424  | 600.432        | <b>682.935</b> | 674.422  | 673.930        | 951.931        | 1845.513       | 1845.027       | G17 |
| G14 | 697.448        | 608.935  | 608.441        | <b>711.446</b> | 699.432  | 699.340        | <b>860.522</b> | 1852.030       | 1851.517       | G16 |
| V15 | 748.833        | 692.469  | 691.971        | <b>760.360</b> | 752.467  | 751.974        | <b>822.911</b> | 1827.489       | 1826.968       | V15 |
| L16 | 803.524        | 795.111  | 794.513        | <b>817.522</b> | 809.109  | 808.517        | <b>782.477</b> | 1773.964       | 1773.472       | L14 |
| P17 | 852.651        | 843.137  | 843.046        | 866.648        | 857.635  | 857.043        | <b>725.935</b> | <b>717.422</b> | 716.930        | P13 |
| N18 | 909.672        | 895.559  | 895.067        | 924.670        | 914.556  | 914.064        | 637.482        | 1668.995       | 1668.403       | N15 |
| T19 | 959.814        | 947.401  | 946.909        | 976.812        | 967.806  | 967.306        | 608.901        | 1613.874       | 1613.381       | T17 |
| Q20 | 1009.944       | 1001.131 | 1000.639       | 1024.941       | 1015.128 | 1014.636       | 583.955        | <b>555.332</b> | <b>554.840</b> | Q10 |
| A21 | 1062.182       | 1053.669 | 1053.177       | 1079.180       | 1070.666 | 1070.174       | 488.811        | 1481.111       | 1480.611       | A10 |
| V22 | 1114.406       | 1105.893 | 1105.399       | 1129.404       | 1120.889 | 1120.397       | 459.269        | <b>425.744</b> | 425.252        | V10 |
| L23 | 1171.238       | 1162.725 | 1162.231       | 1185.236       | 1176.722 | 1176.230       | 414.761        | 405.252        | 405.758        | L17 |
| L24 | 1227.480       | 1218.201 | 1218.770       | 1244.778       | 1233.385 | 1233.774       | 388.221        | 348.708        | 349.216        | L16 |
| P25 | 1276.507       | 1267.763 | 1267.301       | 1290.304       | 1281.791 | 1281.299       | 381.670        | 293.168        | 292.674        | P15 |
| K26 | 1340.254       | 1331.841 | 1331.360       | 1354.362       | 1345.849 | 1345.368       | 353.911        | 244.939        | 244.144        | K14 |
| R27 | 1404.402       | 1395.589 | 1395.300       | 1418.399       | 1409.886 | 1409.394       | 189.110        | 185.561        | 185.100        | R15 |
| L29 | 1454.926       | 1446.412 | 1445.920       | 1468.921       | 1460.410 | 1460.918       | 178.010        | 0.504          | 118.112        | L12 |
| E28 | 1519.447       | 1510.934 | 1510.440       | 1533.444       | 1524.931 | 1524.439       | 74.531         | 0.504          | 85.530         | E10 |

# sp | Q6GSS7 | H2A2A\_MOUSE

LNKLLGK <sup>Dimethyl</sup> 28.03 VTIAQGGVLPNIQAVLLPKKTE

- ▶ fragmentation table for charge state 3+
- ▶ specType=cid
- ▶ score=42.95
- ▶ F113279.dat
- ▶ query=q41558\_p1
- ▶ precursor=617.580760
- ▶ chargePrecursor=5
- ▶ itol=0.5

| AA  | a        | a*       | a,b   | b        | b*       | b,b   | r     | r*    | r,b   | AA  |
|-----|----------|----------|-------|----------|----------|-------|-------|-------|-------|-----|
| L11 | 28.178   | 0.07     | 0.07  | 38.102   | 0.072    | 0.072 | 0.023 | 0.022 | 0.022 | L28 |
| K12 | 67.585   | 61.759   | 0.072 | 78.715   | 71.941   | 0.072 | 0.001 | 0.001 | 0.001 | K26 |
| K13 | 110.681  | 104.407  | 0.072 | 119.413  | 113.739  | 0.072 | 0.002 | 0.002 | 0.002 | K27 |
| L14 | 147.778  | 142.125  | 0.072 | 157.109  | 151.434  | 0.072 | 0.010 | 0.010 | 0.010 | L28 |
| L15 | 188.874  | 179.197  | 0.072 | 194.884  | 188.128  | 0.072 | 0.012 | 0.012 | 0.012 | L28 |
| G16 | 204.478  | 198.384  | 0.072 | 213.811  | 208.138  | 0.072 | 0.004 | 0.004 | 0.004 | G24 |
| K17 | 258.522  | 250.988  | 0.072 | 265.851  | 260.178  | 0.072 | 0.013 | 0.013 | 0.013 | K25 |
| V18 | 289.544  | 281.869  | 0.072 | 298.878  | 293.201  | 0.072 | 0.013 | 0.013 | 0.013 | V22 |
| V19 | 323.227  | 317.551  | 0.072 | 332.555  | 326.883  | 0.072 | 0.005 | 0.005 | 0.005 | V21 |
| L20 | 360.822  | 352.288  | 0.072 | 370.251  | 364.578  | 0.072 | 0.004 | 0.004 | 0.004 | L20 |
| A11 | 384.601  | 378.625  | 0.072 | 393.919  | 388.257  | 0.072 | 0.006 | 0.006 | 0.006 | A19 |
| Q12 | 427.288  | 421.411  | 0.072 | 436.818  | 430.944  | 0.072 | 0.005 | 0.005 | 0.005 | Q10 |
| G13 | 446.204  | 440.015  | 0.072 | 455.626  | 449.588  | 0.072 | 0.003 | 0.003 | 0.003 | G17 |
| G14 | 482.000  | 475.628  | 0.072 | 494.633  | 488.598  | 0.072 | 0.004 | 0.004 | 0.004 | G16 |
| V15 | 498.214  | 492.049  | 0.072 | 507.850  | 501.800  | 0.072 | 0.004 | 0.004 | 0.004 | V15 |
| L16 | 538.019  | 530.383  | 0.072 | 545.350  | 539.675  | 0.072 | 0.007 | 0.007 | 0.007 | L16 |
| P17 | 566.870  | 560.494  | 0.072 | 577.701  | 572.026  | 0.072 | 0.004 | 0.004 | 0.004 | P13 |
| M18 | 608.584  | 600.708  | 0.072 | 615.718  | 610.046  | 0.072 | 0.011 | 0.011 | 0.011 | M15 |
| T19 | 644.878  | 638.401  | 0.072 | 653.815  | 648.138  | 0.072 | 0.007 | 0.007 | 0.007 | T11 |
| Q20 | 686.705  | 681.189  | 0.072 | 695.949  | 690.421  | 0.072 | 0.003 | 0.003 | 0.003 | Q10 |
| A21 | 712.444  | 704.788  | 0.072 | 719.719  | 714.002  | 0.072 | 0.011 | 0.011 | 0.011 | A19 |
| V22 | 742.809  | 737.480  | 0.072 | 752.788  | 747.123  | 0.072 | 0.005 | 0.005 | 0.005 | V19 |
| L23 | 781.161  | 775.489  | 0.072 | 790.493  | 784.817  | 0.072 | 0.004 | 0.004 | 0.004 | L17 |
| L24 | 818.856  | 813.189  | 0.072 | 828.189  | 822.812  | 0.072 | 0.004 | 0.004 | 0.004 | L16 |
| P25 | 851.207  | 845.511  | 0.072 | 860.539  | 854.863  | 0.072 | 0.011 | 0.011 | 0.011 | P15 |
| K26 | 889.806  | 883.824  | 0.072 | 899.191  | 893.209  | 0.072 | 0.003 | 0.003 | 0.003 | K18 |
| K27 | 928.654  | 920.568  | 0.072 | 938.931  | 932.960  | 0.072 | 0.003 | 0.003 | 0.003 | K18 |
| L28 | 970.288  | 964.811  | 0.072 | 981.813  | 975.814  | 0.072 | 0.011 | 0.011 | 0.011 | L12 |
| L29 | 1013.558 | 1007.822 | 0.072 | 1022.832 | 1016.958 | 0.072 | 0.003 | 0.003 | 0.003 | L10 |



# sp | Q6GSS7 | H2A2A\_MOUSE

LNKLLGK <sup>Dimethyl</sup>VTIAQGGVLPNIQAVLLPKKTE  
28.03

- ▶ fragmentation table for charge state 4+
- ▶ specType=cid
- ▶ score=42.95
- ▶ F113279.dat
- ▶ query=q41558.p1
- ▶ precursor=617.580760
- ▶ chargePrecursor=5
- ▶ itol=0.5

| AA  | a       | a*      | a,d     | b              | b*             | b,d     | y              | y*       | y,d     | AA  |
|-----|---------|---------|---------|----------------|----------------|---------|----------------|----------|---------|-----|
| L1  | 22.280  | 0.755   | 0.755   | 29.278         | 0.755          | 0.755   | 171.720        | 176.472  | 167.220 | L20 |
| N2  | 50.190  | 46.534  | 0.755   | 57.189         | 53.532         | 0.755   | 143.457        | 7.39.201 | 138.955 | N38 |
| R3  | 82.814  | 83.587  | 0.755   | 88.813         | 88.566         | 0.755   | 715.360        | 718.560  | 110.444 | R27 |
| L4  | 111.085 | 109.820 | 0.755   | 113.084        | 113.027        | 0.755   | <b>682.923</b> | 678.666  | 678.420 | L26 |
| L5  | 139.856 | 138.089 | 0.755   | 146.305        | 142.898        | 0.755   | <b>654.652</b> | 650.305  | 650.140 | L25 |
| G6  | 153.611 | 149.355 | 0.755   | 160.610        | 156.354        | 0.755   | 626.381        | 622.124  | 621.876 | G34 |
| R7  | 182.643 | 180.288 | 0.755   | 189.642        | 186.286        | 0.755   | 612.120        | 607.863  | 607.615 | R33 |
| V8  | 217.618 | 215.153 | 0.755   | 224.609        | 220.152        | 0.755   | 573.060        | 568.803  | 568.555 | V22 |
| T9  | 262.672 | 258.415 | 288.189 | 268.611        | 265.414        | 285.189 | 548.321        | 544.070  | 543.824 | T01 |
| D10 | 270.943 | 266.686 | 266.440 | 277.942        | 273.685        | 273.439 | 523.060        | 518.803  | 518.557 | D20 |
| A11 | 288.702 | 284.445 | 284.200 | 295.701        | 291.444        | 291.188 | 484.792        | 480.535  | 480.289 | A19 |
| G12 | 329.717 | 325.460 | 325.214 | 337.716        | 333.459        | 333.213 | 477.630        | 473.373  | 473.127 | G18 |
| G13 | 354.972 | 350.715 | 350.470 | 364.971        | 359.714        | 359.468 | 445.020        | 440.763  | 440.517 | G17 |
| G14 | 349.420 | 344.971 | 344.725 | 356.726        | 351.970        | 351.724 | 430.795        | 426.538  | 426.292 | G16 |
| V15 | 373.905 | 369.738 | 369.492 | 380.944        | 376.737        | 376.491 | 416.500        | 412.253  | 412.007 | V15 |
| L16 | 402.266 | 398.089 | 397.793 | 409.265        | 405.068        | 404.792 | 381.742        | 377.485  | 377.240 | L14 |
| P17 | 526.529 | 422.272 | 422.025 | 433.528        | 329.271        | 439.025 | 363.471        | 199.215  | 308.969 | P13 |
| N18 | 455.040 | 450.783 | 450.537 | 461.038        | 457.782        | 457.536 | 339.200        | 134.951  | 334.705 | N12 |
| I19 | 483.311 | 479.054 | 478.808 | 490.309        | 486.053        | 485.807 | 310.697        | 106.441  | 306.105 | I11 |
| G20 | 515.576 | 511.289 | 511.043 | <b>522.324</b> | 518.067        | 517.821 | 282.420        | 278.163  | 277.917 | G24 |
| A21 | 533.085 | 528.828 | 528.582 | 540.924        | <b>535.827</b> | 535.581 | 250.411        | 146.155  | 245.909 | A15 |
| V22 | 557.852 | 553.595 | 553.349 | 564.851        | 560.594        | 560.348 | 232.652        | 128.396  | 228.150 | V18 |
| L23 | 586.123 | 581.866 | 581.620 | <b>593.122</b> | 588.865        | 588.619 | 207.895        | 103.629  | 203.353 | L17 |
| L24 | 614.394 | 610.137 | 609.891 | 621.393        | 617.136        | 616.890 | 179.613        | 175.356  | 175.112 | L16 |
| R25 | 638.659 | 634.402 | 634.156 | 646.658        | 642.401        | 642.155 | 151.343        | 147.087  | 146.843 | R19 |
| R26 | 650.681 | 646.424 | 646.178 | 657.679        | 653.423        | 653.177 | 127.080        | 122.823  | 122.577 | R14 |
| K27 | 702.704 | 698.447 | 698.201 | 709.703        | 705.447        | 705.201 | 95.050         | 90.800   | 90.554  | K18 |
| T28 | 727.968 | 723.711 | 723.464 | 734.967        | 730.710        | 730.464 | 63.032         | 0.755    | 68.530  | T12 |
| E29 | 760.237 | 756.000 | 755.754 | 767.236        | 763.000        | 762.754 | 37.770         | 0.755    | 33.268  | E10 |

# sp | Q6GSS7 | H2A2A\_MOUSE

LNKLLGK<sup>Dimethyl</sup>VTIAQGGVLPNIQAVLLPKKTE  
28.03

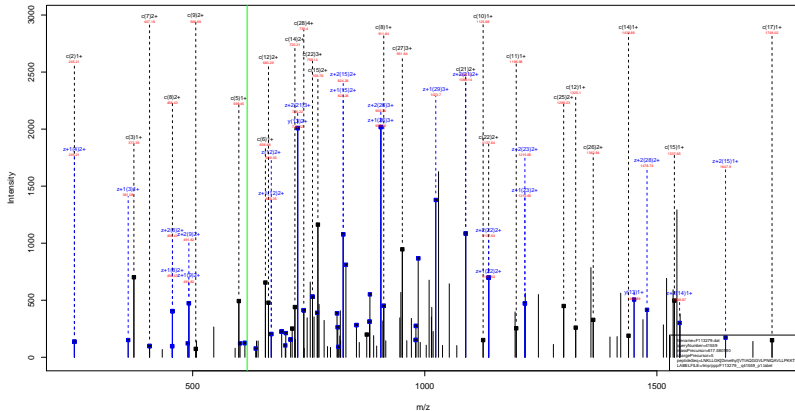

# sp | Q6GSS7 | H2A2A\_MOUSE

LNKLLGK <sup>Dimethyl</sup><sub>28.03</sub> VTIAQGGVLPNIQAVLLPKKTE

- ▶ fragmentation table for charge state 1+
- ▶ specType=etd
- ▶ score=55.26
- ▶ F113279.dat
- ▶ query=q41559\_p1
- ▶ precursor=617.580780
- ▶ chargePrecursor=5
- ▶ itol=0.5

| AA    | c               | y               | z+1            | z+2             | z              | AA    |
|-------|-----------------|-----------------|----------------|-----------------|----------------|-------|
| L 1   | 131.118         | 3081.892        | 3087.873       | 0.000           | 3086.895       | L 29  |
| N 2   | <b>245.161</b>  | 2970.808        | 2954.789       | 2955.797        | 2951.781       | N 28  |
| K 3   | <b>373.256</b>  | 2856.765        | 2860.746       | 2841.754        | 2839.738       | K 27  |
| L 4   | 486.340         | 2728.670        | 2712.651       | 2713.659        | 2711.643       | L 26  |
| L 5   | <b>599.424</b>  | 2615.586        | 2599.567       | 2600.575        | 2598.560       | L 25  |
| Q 6   | <b>656.445</b>  | 2502.500        | 2486.483       | 2487.491        | 2485.475       | Q 24  |
| K 7   | <b>812.572</b>  | 2445.480        | 2429.462       | 2430.469        | 2428.454       | K 23  |
| V 8   | <b>911.640</b>  | 2389.354        | 2373.335       | 2374.343        | 2372.327       | V 22  |
| T 9   | 1012.688        | 2196.286        | 2174.267       | 2175.275        | 2173.259       | T 21  |
| I 10  | <b>1125.772</b> | 2089.238        | 2073.219       | 2074.227        | 2072.211       | I 20  |
| A 11  | <b>1196.809</b> | 1976.154        | 1960.135       | 1961.143        | 1959.127       | A 19  |
| Q 12  | <b>1324.867</b> | 1869.117        | 1853.098       | 1854.106        | 1852.090       | Q 18  |
| G 13  | 1381.889        | 1777.058        | 1761.039       | 1762.047        | 1760.032       | G 17  |
| G 14  | <b>1438.910</b> | 1720.037        | 1704.018       | 1705.026        | 1703.010       | G 16  |
| V 15  | <b>1537.979</b> | 1663.015        | 1646.997       | <b>1648.004</b> | 1645.989       | V 15  |
| L 16  | 1651.063        | 1563.947        | 1547.928       | <b>1548.936</b> | 1546.920       | L 14  |
| F 17  | <b>1748.116</b> | <b>1450.863</b> | 1434.844       | 1435.852        | 1433.836       | F 13  |
| TW 18 | 1862.159        | 1353.810        | 1337.791       | 1338.799        | 1336.783       | TW 12 |
| I 19  | 1975.243        | 1239.767        | 1223.748       | 1224.756        | 1222.741       | I 11  |
| Q 20  | 2103.301        | 1126.683        | 1110.664       | 1111.672        | 1109.656       | Q 10  |
| A 21  | 2174.338        | 998.624         | 982.606        | 983.614         | 981.598        | A 9   |
| V 22  | 2273.407        | 927.587         | <b>911.569</b> | 912.576         | 910.561        | V 8   |
| L 23  | 2386.491        | 828.510         | <b>812.500</b> | <b>813.508</b>  | <b>811.492</b> | L 7   |
| L 24  | 2499.575        | 715.433         | <b>699.415</b> | <b>700.424</b>  | 698.408        | L 6   |
| P 25  | 2598.628        | <b>602.351</b>  | 586.332        | 587.340         | 585.324        | P 5   |
| K 26  | 2724.723        | 505.268         | <b>489.279</b> | 490.287         | 488.271        | K 4   |
| K 27  | 2852.818        | 377.203         | <b>361.184</b> | 362.192         | 360.177        | K 3   |
| T 28  | 2953.895        | 249.108         | 233.089        | 234.097         | 232.082        | T 2   |
| E 29  | 3082.968        | 148.060         | 132.042        | 133.050         | 131.034        | E 1   |

# sp | Q6GSS7 | H2A2A\_MOUSE

LNKLLGK <sup>Dimethyl</sup> <sub>28.03</sub> VTIAQGGVLPNIQAVLLPKKTE

- ▶ fragmentation table for charge state 2+
- ▶ specType=etd
- ▶ score=55.26
- ▶ F113279.dat
- ▶ query=q41559\_p1
- ▶ precursor=617.580780
- ▶ chargePrecursor=5
- ▶ itol=0.5

| AA    | c               | y              | z+1             | z+2             | z              | AA    |
|-------|-----------------|----------------|-----------------|-----------------|----------------|-------|
| L[1]  | 66.063          | 1542.450       | 1534.440        | 0.504           | 1533.936       | L[29] |
| N[2]  | 123.084         | 1485.908       | 1477.898        | <b>1478.402</b> | 1477.304       | N[28] |
| K[3]  | 187.132         | 1428.886       | 1420.877        | 1421.381        | 1420.373       | K[27] |
| L[4]  | 243.674         | 1364.839       | 1356.829        | 1357.333        | 1356.325       | L[26] |
| L[5]  | 300.216         | 1308.297       | 1300.287        | 1300.791        | 1299.783       | L[25] |
| Q[6]  | 358.758         | 1251.755       | 1243.745        | 1244.249        | 1243.241       | Q[24] |
| K[7]  | <b>406.789</b>  | 1223.244       | <b>1215.234</b> | <b>1215.738</b> | 1214.731       | K[23] |
| V[8]  | <b>456.324</b>  | 1145.181       | <b>1137.171</b> | <b>1137.675</b> | 1136.667       | V[22] |
| T[9]  | <b>506.848</b>  | 1095.646       | 1087.637        | <b>1088.141</b> | 1087.133       | T[21] |
| I[10] | 563.300         | 1045.123       | 1037.113        | 1037.617        | 1036.609       | I[20] |
| A[11] | 620.848         | 988.581        | <b>980.571</b>  | <b>981.075</b>  | <b>980.067</b> | A[19] |
| Q[12] | <b>662.937</b>  | 933.062        | 925.053         | 925.557         | 924.549        | Q[18] |
| G[13] | <b>691.448</b>  | 889.033        | <b>881.023</b>  | <b>881.527</b>  | <b>880.519</b> | G[17] |
| G[14] | <b>719.959</b>  | 860.522        | <b>852.513</b>  | <b>853.017</b>  | 852.010        | G[16] |
| V[15] | <b>769.493</b>  | 832.011        | <b>824.002</b>  | <b>824.506</b>  | 823.498        | V[15] |
| L[16] | 826.035         | 782.477        | 774.468         | 774.972         | 773.964        | L[14] |
| P[17] | <b>874.561</b>  | <b>725.935</b> | 717.926         | 718.430         | 717.422        | P[13] |
| T[18] | 933.583         | 677.406        | <b>669.399</b>  | 669.903         | <b>668.895</b> | T[12] |
| I[19] | 988.125         | 626.387        | <b>612.378</b>  | <b>612.882</b>  | 611.874        | I[11] |
| Q[20] | 1052.154        | 583.845        | 575.836         | 576.340         | 575.332        | Q[10] |
| A[21] | <b>1087.673</b> | 499.816        | <b>491.807</b>  | <b>492.310</b>  | 491.303        | A[9]  |
| V[22] | <b>1137.207</b> | 464.297        | <b>456.288</b>  | <b>456.792</b>  | <b>455.784</b> | V[8]  |
| L[23] | 1193.749        | 414.763        | <b>406.754</b>  | <b>407.258</b>  | 406.250        | L[7]  |
| L[24] | 1259.291        | 358.221        | 350.212         | 350.716         | 349.708        | L[6]  |
| P[25] | <b>1298.817</b> | 303.679        | 295.670         | 296.174         | 295.166        | P[5]  |
| K[26] | <b>1362.865</b> | 253.153        | <b>245.143</b>  | <b>245.647</b>  | 244.639        | K[4]  |
| K[27] | 1428.912        | 189.105        | 181.096         | 181.600         | 180.592        | K[3]  |
| T[28] | 1477.436        | 125.058        | 117.048         | 117.552         | 116.544        | T[2]  |
| E[29] | 1541.958        | 74.534         | 66.524          | 67.028          | 66.021         | E[1]  |

# sp | Q6GSS7 | H2A2A\_MOUSE

LNKLLGK <sup>Dimethyl</sup> <sub>28.03</sub> VTIAQGGVLPNIQAVLLPKKTE

- ▶ fragmentation table for charge state 3+
- ▶ specType=etd
- ▶ score=55.26
- ▶ F113279.dat
- ▶ query=q41559\_p1
- ▶ precursor=617.580780
- ▶ chargePrecursor=5
- ▶ itol=0.5

| AA  | c              | y              | z+1             | z+2            | z              | AA  |
|-----|----------------|----------------|-----------------|----------------|----------------|-----|
| L1  | 44.377         | 1028.635       | <b>1023.296</b> | 0.672          | 1022.960       | L29 |
| N2  | 82.392         | 990.941        | <b>985.601</b>  | <b>985.937</b> | 985.265        | N28 |
| K3  | 125.090        | 952.926        | 947.597         | 947.923        | 947.251        | K27 |
| L4  | 162.795        | 910.228        | <b>904.889</b>  | <b>905.225</b> | 904.553        | L26 |
| L5  | 200.479        | 872.533        | 867.194         | 867.530        | 866.856        | L25 |
| G6  | 219.487        | 834.838        | 829.499         | <b>829.835</b> | 829.163        | G24 |
| K7  | 271.529        | 815.832        | 810.492         | <b>810.828</b> | 810.156        | K23 |
| V8  | 304.952        | 763.790        | <b>758.450</b>  | 758.786        | <b>758.114</b> | V22 |
| T9  | 338.234        | 730.767        | 725.427         | <b>725.763</b> | 725.091        | T21 |
| I10 | 375.929        | 697.084        | <b>691.745</b>  | <b>692.081</b> | <b>691.409</b> | I20 |
| A11 | 399.698        | 659.399        | 654.059         | 654.396        | 653.714        | A19 |
| Q12 | 442.294        | <b>619.710</b> | 614.371         | 614.707        | 614.030        | Q18 |
| G13 | 461.301        | 593.024        | 587.685         | 588.021        | 587.349        | G17 |
| G14 | 480.308        | 574.017        | 568.678         | 569.013        | 568.342        | G16 |
| V15 | 513.331        | 555.010        | 549.670         | 550.006        | 549.334        | V15 |
| L16 | 551.026        | 521.987        | 516.648         | 516.984        | 516.312        | L14 |
| P17 | 583.377        | 484.292        | 478.953         | 479.289        | 478.617        | P13 |
| N18 | 621.391        | 451.942        | 446.602         | 446.938        | 446.266        | N12 |
| I19 | 659.698        | 413.927        | 408.588         | 408.924        | 408.252        | I11 |
| Q10 | 701.772        | 376.233        | 370.893         | 371.229        | 370.557        | Q10 |
| A21 | 725.451        | 333.548        | 328.207         | 328.543        | 327.871        | A9  |
| V22 | <b>758.474</b> | 309.867        | 304.528         | 304.864        | 304.192        | V8  |
| L23 | 796.168        | 276.844        | 271.505         | 271.841        | 271.169        | L7  |
| L24 | 833.863        | 239.150        | 233.810         | 234.146        | 233.474        | L6  |
| P25 | 866.214        | 201.455        | 196.116         | 196.451        | 195.780        | P9  |
| K26 | 928.532        | 169.104        | 163.765         | 164.101        | 163.429        | K4  |
| K27 | <b>951.611</b> | 126.406        | 121.066         | 121.402        | 120.730        | K3  |
| T28 | 985.293        | 83.708         | 78.368          | 78.704         | 78.032         | T2  |
| E29 | 1028.397       | 50.025         | 44.685          | 45.021         | 44.349         | E1  |

# sp | Q6GSS7 | H2A2A\_MOUSE

LNKLLGK <sup>Dimethyl</sup> <sub>28.03</sub> VTIAQGGVLPNIQAVLLPKKTE

- ▶ fragmentation table for charge state 4+
- ▶ specType=etd
- ▶ score=55.26
- ▶ F113279.dat
- ▶ query=q41559\_p1
- ▶ precursor=617.580780
- ▶ chargePrecursor=5
- ▶ itol=0.5

| AA    | c              | y              | z+1            | z+2            | z              | AA    |
|-------|----------------|----------------|----------------|----------------|----------------|-------|
| L[1]  | 83.535         | 771.728        | <b>767.724</b> | 8.756          | 787.812        | L[29] |
| N[2]  | 62.046         | 743.451        | <b>739.453</b> | <b>739.705</b> | <b>739.201</b> | N[28] |
| K[3]  | 94.059         | 714.947        | <b>710.942</b> | <b>711.194</b> | <b>710.690</b> | K[27] |
| L[4]  | 122.340        | 682.923        | 678.918        | 679.170        | 678.666        | L[26] |
| L[5]  | 150.611        | 654.652        | 650.647        | 650.899        | 650.395        | L[25] |
| G[6]  | 164.867        | 626.381        | 622.376        | 622.628        | 622.124        | G[24] |
| K[7]  | 203.898        | <b>612.126</b> | 608.121        | 608.373        | 607.869        | K[23] |
| V[8]  | 228.665        | 573.094        | 569.089        | 569.341        | 568.837        | V[22] |
| T[9]  | 253.927        | 548.327        | 544.322        | 544.574        | 544.070        | T[21] |
| T[10] | 262.198        | 523.065        | 519.060        | 519.312        | 518.808        | T[20] |
| A[11] | 269.958        | 494.794        | 490.789        | 491.041        | 490.537        | A[19] |
| Q[12] | 331.972        | 477.035        | 473.030        | 473.282        | 472.778        | Q[18] |
| G[13] | 346.228        | 445.020        | 441.015        | 441.267        | 440.763        | G[17] |
| G[14] | 360.483        | 430.765        | 426.760        | 427.012        | 426.508        | G[16] |
| V[15] | 385.250        | 416.509        | 412.505        | 412.757        | 412.253        | V[15] |
| L[16] | 413.521        | 391.742        | 387.737        | 387.989        | 387.486        | L[14] |
| P[17] | 437.784        | 363.471        | 359.466        | 359.718        | 359.215        | P[13] |
| N[18] | 466.295        | 339.208        | 335.203        | 335.455        | 334.951        | N[12] |
| T[19] | 494.566        | 310.897        | 306.891        | 307.143        | 306.641        | T[11] |
| Q[20] | 525.381        | 282.426        | 278.422        | 278.673        | 278.170        | Q[15] |
| A[21] | 544.340        | 250.412        | 246.407        | 246.659        | 246.155        | A[9]  |
| V[22] | 569.107        | 232.652        | 228.648        | 228.900        | 228.396        | V[8]  |
| L[23] | 597.378        | 207.885        | 203.881        | 204.132        | 203.629        | L[7]  |
| L[24] | 625.649        | 179.614        | 175.609        | 175.861        | 175.358        | L[6]  |
| P[25] | 649.912        | 151.343        | 147.338        | 147.590        | 147.087        | P[5]  |
| K[26] | 681.936        | 127.080        | 123.075        | 123.327        | 122.823        | K[4]  |
| K[27] | <b>713.960</b> | 95.056         | 91.052         | 91.304         | 90.800         | K[3]  |
| T[28] | <b>739.222</b> | 63.032         | 59.028         | 59.280         | 58.776         | T[2]  |
| E[29] | 773.462        | 37.771         | 33.766         | 34.018         | 33.514         | E[1]  |



# sp | Q6GSS7 | H2A2A\_MOUSE

LNKLLGK<sup>Dimethyl</sup>VTIAQGGVLPNIQAVLLPKKTE<sup>28.03</sup>

- ▶ fragmentation table for charge state 1+
- ▶ specType=cid
- ▶ score=35.16
- ▶ F113279.dat
- ▶ query=q41560.p1
- ▶ precursor=617.580780
- ▶ chargePrecursor=5
- ▶ itol=0.5

| AA   | a        | a*       | a,b      | b        | b*       | b,b      | r        | r*       | r,b      | AA   |
|------|----------|----------|----------|----------|----------|----------|----------|----------|----------|------|
| L11  | 88.008   | 0.000    | 1.000    | 114.091  | 0.000    | 0.000    | 1063.893 | 1069.899 | 1065.892 | L12G |
| K12  | 2003.199 | 103.113  | 0.000    | 2205.134 | 231.108  | 0.000    | 2070.820 | 2195.781 | 2292.797 | K12G |
| K13  | 426.434  | 111.209  | 0.000    | 366.229  | 330.203  | 0.000    | 2496.166 | 2839.738 | 2836.754 | K12T |
| L14  | 441.518  | 424.202  | 0.000    | 466.517  | 452.287  | 0.000    | 2122.810 | 2111.843 | 2110.808 | L12G |
| L15  | 254.402  | 317.478  | 0.000    | 352.391  | 406.374  | 0.000    | 2615.260 | 2766.263 | 2699.278 | L12S |
| Q16  | 81.1424  | 104.107  | 0.000    | 808.418  | 822.362  | 0.000    | 2002.300 | 2348.475 | 2484.461 | Q124 |
| K17  | 187.550  | 193.524  | 0.000    | 195.545  | 178.519  | 0.000    | 2443.480 | 2420.454 | 2427.470 | K122 |
| V18  | 816.118  | 809.102  | 0.000    | 804.113  | 817.107  | 0.000    | 2389.761 | 2372.737 | 2371.743 | V122 |
| V19  | 167.608  | 160.600  | 849.658  | 165.605  | 168.635  | 877.651  | 2190.205 | 2115.205 | 2112.215 | V121 |
| I20  | 1080.470 | 1063.124 | 1062.140 | 1108.749 | 1091.719 | 1090.719 | 2089.238 | 2072.211 | 2071.227 | I20  |
| A111 | 1151.087 | 1154.103 | 1133.717 | 1174.102 | 1162.790 | 1161.772 | 1405.124 | 1404.127 | 1404.143 | A11G |
| Q112 | 1219.096 | 1262.019 | 1261.821 | 1301.884 | 1296.814 | 1295.820 | 1920.111 | 1898.096 | 1898.106 | Q110 |
| Q113 | 1308.867 | 1313.884 | 1318.870 | 1324.862 | 1347.838 | 1346.852 | 1777.020 | 1769.013 | 1768.044 | Q117 |
| G14  | 1383.889 | 1376.882 | 1375.871 | 1421.884 | 1404.867 | 1403.873 | 1721.037 | 1703.010 | 1702.032 | G116 |
| V115 | 1402.877 | 1419.818 | 1414.866 | 1428.820 | 1405.806 | 1402.848 | 1681.010 | 1643.989 | 1642.999 | V115 |
| L116 | 1306.041 | 1309.013 | 1308.011 | 1354.035 | 1317.010 | 1316.026 | 1353.947 | 1349.920 | 1345.916 | L114 |
| P117 | 1103.094 | 1098.090 | 1085.084 | 1111.089 | 1114.081 | 1113.079 | 1440.863 | 1413.838 | 1412.852 | P113 |
| M18  | 1017.437 | 1005.111 | 1090.127 | 1045.132 | 1028.105 | 1027.121 | 1383.810 | 1338.783 | 1335.799 | M112 |
| T19  | 1009.071 | 1013.065 | 1012.051 | 1039.058 | 1041.066 | 1040.065 | 1329.780 | 1322.741 | 1321.757 | T111 |
| Q120 | 2056.500 | 2041.263 | 2040.250 | 2099.275 | 2084.248 | 2086.264 | 1126.400 | 1119.395 | 1118.377 | Q110 |
| A121 | 1170.517 | 1172.509 | 1171.500 | 1175.512 | 1170.500 | 1170.501 | 1681.624 | 1681.599 | 1681.614 | A111 |
| V122 | 2268.608 | 2241.369 | 2231.870 | 2259.380 | 2236.354 | 2236.341 | 1607.889 | 1611.361 | 1608.877 | V111 |
| L123 | 2241.499 | 2224.483 | 2223.470 | 2269.484 | 2252.458 | 2251.454 | 1628.519 | 1611.492 | 1610.508 | L117 |
| L124 | 2434.631 | 2417.527 | 2416.545 | 2462.548 | 2445.522 | 2444.538 | 1115.430 | 1098.408 | 1097.424 | L116 |
| P125 | 2051.606 | 2034.500 | 2033.500 | 2079.601 | 2062.575 | 2061.561 | 1682.351 | 1665.324 | 1664.340 | P115 |
| V126 | 1076.702 | 1071.701 | 1061.691 | 1111.698 | 1096.670 | 1095.665 | 1606.360 | 1608.275 | 1607.287 | V114 |
| K127 | 2077.196 | 2060.710 | 2059.708 | 2095.701 | 2078.194 | 2077.189 | 1017.200 | 1002.177 | 1001.193 | K115 |
| L128 | 1008.814 | 1001.817 | 1000.811 | 1006.819 | 1018.812 | 1017.805 | 248.108  | 0.000    | 251.108  | L112 |
| E129 | 1017.808 | 1010.800 | 1010.810 | 1005.801 | 1016.804 | 1017.811 | 148.000  | 0.000    | 150.000  | E111 |



# sp | Q6GSS7 | H2A2A\_MOUSE

LNKLLGK <sup>Dimethyl</sup> <sub>28.03</sub> VTIAQGGVLPNIQAVLLPKKTE

- ▶ fragmentation table for charge state 2+
- ▶ specType=cid
- ▶ score=35.16
- ▶ F113279.dat
- ▶ query=q41560.p1
- ▶ precursor=617.580780
- ▶ chargePrecursor=5
- ▶ itol=0.5

| AA  | a              | a*       | a,b            | b              | b*             | b,b            | r              | r*             | r,b            | AA  |
|-----|----------------|----------|----------------|----------------|----------------|----------------|----------------|----------------|----------------|-----|
| L1  | 43.552         | 0.561    | 7.501          | 31.549         | 0.504          | 0.504          | 1261.201       | 3333.139       | 3333.144       | L26 |
| R1  | 100.573        | 92.080   | 0.504          | 114.571        | 106.077        | 0.504          | 1485.903       | 2477.904       | 2476.902       | R26 |
| K1  | 184.621        | 156.439  | 0.504          | 178.618        | 170.495        | 0.504          | 1428.886       | 2420.373       | 2419.881       | K27 |
| L4  | 251.583        | 214.658  | 0.504          | 235.160        | 226.647        | 0.504          | 1384.833       | 2366.325       | 2365.831       | L28 |
| L5  | 277.678        | 236.102  | 0.504          | 251.162        | 242.188        | 0.504          | 1358.201       | 2309.183       | 2308.201       | L29 |
| G6  | 306.418        | 267.102  | 0.504          | 300.213        | 291.188        | 0.504          | 1291.701       | 2143.343       | 2142.748       | G24 |
| K7  | 384.270        | 316.105  | 0.504          | 380.070        | 380.763        | 0.504          | 1223.241       | 2124.731       | 2124.239       | K25 |
| V8  | 413.119        | 405.363  | 0.504          | 411.011        | 409.267        | 0.504          | 1185.181       | 2136.861       | 2136.376       | V22 |
| Y9  | <b>484.337</b> | 473.523  | <b>475.331</b> | <b>488.334</b> | 489.021        | 489.520        | 1059.045       | 1087.133       | 1088.043       | Y21 |
| I10 | 540.878        | 532.309  | 531.871        | <b>554.876</b> | 546.381        | <b>545.871</b> | 1045.121       | 2038.809       | 2038.117       | I20 |
| A11 | 616.597        | 587.054  | 587.382        | <b>590.395</b> | 581.082        | 581.390        | 980.581        | 980.881        | 979.575        | A19 |
| Q12 | 660.277        | 611.913  | 611.621        | <b>654.424</b> | 645.911        | 645.410        | 953.903        | 984.584        | 984.278        | Q10 |
| G13 | 698.637        | 660.924  | 660.924        | 674.622        | 673.909        | 673.909        | <b>889.033</b> | 985.513        | 985.027        | G17 |
| G14 | 697.448        | 688.935  | <b>688.443</b> | <b>711.446</b> | 692.932        | 692.932        | <b>860.522</b> | 982.039        | 981.517        | G16 |
| V15 | 748.003        | 698.469  | 697.971        | <b>760.300</b> | <b>732.467</b> | 732.467        | <b>781.974</b> | <b>822.911</b> | 823.489        | V19 |
| L16 | 803.524        | 795.011  | 794.513        | <b>817.522</b> | 809.009        | 808.517        | <b>782.477</b> | 773.984        | 773.472        | L14 |
| P17 | 852.051        | 843.137  | 843.040        | 866.048        | 857.635        | 857.683        | <b>725.935</b> | <b>717.422</b> | 716.930        | P13 |
| M18 | 909.672        | 895.559  | 895.067        | 924.070        | 914.558        | 914.654        | 637.482        | 868.895        | 868.403        | M15 |
| T19 | 968.814        | 951.401  | 950.903        | 976.812        | 967.386        | 967.485        | 569.381        | 813.874        | 813.387        | T17 |
| Q20 | 1009.944       | 1001.130 | 1000.632       | 1043.941       | 1035.128       | 1034.930       | <b>563.845</b> | <b>555.332</b> | <b>554.840</b> | Q10 |
| A21 | 1082.162       | 1065.689 | 1065.191       | 1099.180       | 1090.348       | 1090.314       | 488.811        | 481.311        | 480.811        | A18 |
| V22 | 1114.896       | 1105.118 | 1104.661       | 1121.894       | 1112.109       | 1112.109       | 489.289        | 483.184        | 482.682        | V18 |
| L23 | 1171.238       | 1150.725 | 1150.231       | 1185.235       | 1176.722       | 1176.230       | 414.751        | 405.250        | 404.758        | L17 |
| L24 | 1227.480       | 1218.281 | 1218.776       | 1244.778       | 1233.385       | 1233.773       | 388.221        | 348.708        | 348.216        | L16 |
| P25 | 1276.507       | 1267.703 | 1267.301       | 1290.304       | 1281.791       | 1281.299       | 381.670        | 293.168        | 292.674        | P15 |
| K26 | 1340.204       | 1311.841 | 1311.360       | 1354.363       | 1345.818       | 1345.346       | 283.911        | 244.839        | 244.344        | K14 |
| R27 | 1404.402       | 1395.588 | 1395.360       | 1418.390       | 1409.884       | 1409.394       | 189.102        | 185.561        | 185.100        | R13 |
| L28 | 1454.926       | 1446.412 | 1445.902       | 1469.321       | 1460.812       | 1460.812       | 178.002        | 0.504          | 118.102        | L12 |
| L29 | 1519.447       | 1510.934 | 1510.440       | 1533.444       | 1524.931       | 1524.432       | 74.531         | 0.504          | 65.030         | L10 |

# sp | Q6GSS7 | H2A2A\_MOUSE

LNKLLGK <sup>Dimethyl</sup> 28.03 VTIAQGGVLPNIQAVLLPKKTE

- ▶ fragmentation table for charge state 3+
- ▶ specType=cid
- ▶ score=35.16
- ▶ F113279.dat
- ▶ query=q41560.p1
- ▶ precursor=617.580780
- ▶ chargePrecursor=5
- ▶ itol=0.5

| AA  | a              | a*       | a,β   | b              | b*             | b,β            | γ              | γ*       | γ,β      | AA  |
|-----|----------------|----------|-------|----------------|----------------|----------------|----------------|----------|----------|-----|
| L1  | 28.719         | 0.072    | 0.072 | 70.715         | 0.072          | 0.072          | 1020.031       | 1022.999 | 1022.912 | L28 |
| K2  | 97.595         | 01.700   | 0.072 | 70.715         | 71.041         | 0.072          | 960.941        | 965.265  | 964.921  | K26 |
| K3  | 110.681        | 104.407  | 0.072 | 110.413        | 113.739        | 0.072          | 952.520        | 947.251  | 946.921  | K27 |
| L4  | 147.778        | 142.125  | 0.072 | 157.109        | 151.434        | 0.072          | 940.228        | 904.501  | 904.225  | L26 |
| L5  | 188.874        | 179.107  | 0.072 | 194.804        | 189.128        | 0.072          | 932.511        | 866.825  | 866.738  | L25 |
| Q6  | 204.478        | 190.104  | 0.072 | 213.811        | 208.136        | 0.072          | 824.839        | 826.183  | 826.131  | Q24 |
| K7  | 256.522        | 250.908  | 0.072 | 265.815        | 260.178        | 0.072          | 811.832        | 810.159  | 809.820  | K22 |
| V8  | 289.544        | 283.969  | 0.072 | 298.878        | 293.261        | 0.072          | 781.729        | 786.114  | 787.008  | V22 |
| V9  | 323.227        | 317.551  | 0.072 | 333.595        | 328.003        | 0.072          | 526.505        | 530.767  | 529.091  | V21 |
| I10 | 360.822        | 355.208  | 0.072 | 370.251        | 364.678        | 0.072          | 494.200        | 497.084  | 491.081  | I20 |
| A11 | 394.601        | 378.825  | 0.072 | 403.974        | 398.297        | 0.072          | 459.350        | 463.714  | 463.389  | A19 |
| Q12 | 427.288        | 421.611  | 0.072 | 436.261        | 430.584        | 0.072          | 430.815        | 435.179  | 435.035  | Q10 |
| G13 | 446.204        | 440.518  | 0.072 | 450.255        | 444.568        | 0.072          | 591.024        | 587.349  | 587.021  | G17 |
| G14 | 480.000        | 474.325  | 0.072 | 474.833        | 469.157        | 0.072          | 480.628        | 474.101  | 469.114  | G16 |
| V15 | <b>498.214</b> | 492.540  | 0.072 | <b>507.856</b> | 502.180        | 0.072          | <b>539.019</b> | 540.354  | 540.030  | V19 |
| L16 | <b>536.019</b> | 530.343  | 0.072 | <b>545.350</b> | <b>539.675</b> | <b>539.347</b> | <b>521.987</b> | 525.312  | 525.004  | L14 |
| P17 | 566.870        | 561.194  | 0.072 | 577.701        | 572.026        | 0.072          | 484.292        | 478.611  | 478.289  | P13 |
| N18 | 606.184        | 600.508  | 0.072 | 615.718        | 610.042        | 0.072          | 451.942        | 446.268  | 445.936  | N12 |
| T19 | 644.878        | 639.199  | 0.072 | 653.813        | 648.138        | 0.072          | 407.400        | 413.900  | 409.292  | T11 |
| Q20 | 686.705        | 681.029  | 0.072 | 695.646        | 690.021        | 0.072          | 376.251        | 370.571  | 370.229  | Q10 |
| A21 | 712.444        | 706.768  | 0.072 | 724.440        | 718.815        | 0.072          | 331.540        | 327.871  | 327.542  | A11 |
| V22 | 742.907        | 737.181  | 0.072 | <b>752.718</b> | 747.124        | 0.072          | 300.899        | 304.182  | 303.854  | V11 |
| L23 | 781.161        | 775.485  | 0.072 | 790.491        | 784.817        | 0.072          | 278.944        | 271.185  | 270.941  | L17 |
| L24 | 818.856        | 813.180  | 0.072 | 829.103        | 823.412        | 0.072          | 239.150        | 233.474  | 233.146  | L16 |
| P25 | 851.207        | 845.531  | 0.072 | <b>860.539</b> | 854.863        | 0.072          | 204.535        | 201.483  | 199.700  | P15 |
| K26 | 889.806        | 884.130  | 0.072 | 898.162        | 892.486        | 0.072          | 169.913        | 169.194  | 169.420  | K14 |
| K27 | 928.054        | 922.378  | 0.072 | 945.915        | 940.200        | 0.072          | 126.420        | 126.420  | 126.402  | K13 |
| L28 | 970.280        | 964.611  | 0.072 | 979.813        | 974.142        | 0.072          | 81.710         | 81.710   | 81.672   | L12 |
| L29 | 1013.500       | 1007.822 | 0.072 | 1027.832       | 1022.156       | 0.072          | 30.020         | 30.020   | 30.021   | L10 |

# sp | Q6GSS7 | H2A2A\_MOUSE

LNKLLGK<sup>Dimethyl</sup>VTIAQGGVLPNIQAVLLPKKTE<sup>28.03</sup>

- ▶ fragmentation table for charge state 4+
- ▶ specType=cid
- ▶ score=35.16
- ▶ F113279.dat
- ▶ query=q41560.p1
- ▶ precursor=617.580780
- ▶ chargePrecursor=5
- ▶ itol=0.5

| AA  | a       | a*      | a,d   | b              | b*      | b,d   | y              | y*       | y,d     | AA  |
|-----|---------|---------|-------|----------------|---------|-------|----------------|----------|---------|-----|
| L1  | 22.280  | 0.755   | 0.755 | 29.276         | 0.355   | 0.755 | 171.728        | 1767.472 | 181.236 | L29 |
| N2  | 50.790  | 46.534  | 0.755 | 57.789         | 53.532  | 0.755 | 743.457        | 739.201  | 738.955 | N38 |
| K3  | 82.814  | 78.557  | 0.755 | 86.833         | 82.576  | 0.755 | 118.241        | 113.984  | 113.444 | K27 |
| L4  | 111.085 | 106.828 | 0.755 | 118.084        | 113.827 | 0.755 | 662.923        | 678.666  | 678.420 | L28 |
| L5  | 139.356 | 135.099 | 0.755 | 146.355        | 142.098 | 0.755 | <b>654.652</b> | 650.395  | 650.148 | L25 |
| G6  | 153.611 | 149.355 | 0.755 | 160.610        | 156.354 | 0.755 | 636.381        | 632.124  | 631.876 | G24 |
| K7  | 182.643 | 178.386 | 0.755 | 189.642        | 185.385 | 0.755 | 612.126        | 607.869  | 607.621 | K23 |
| V8  | 217.431 | 213.173 | 0.755 | 224.429        | 220.172 | 0.755 | 574.059        | 569.802  | 569.554 | V22 |
| T9  | 242.672 | 238.415 | 0.755 | 249.671        | 245.414 | 0.755 | 548.327        | 544.070  | 543.822 | T21 |
| D10 | 270.943 | 266.686 | 0.755 | 277.942        | 273.685 | 0.755 | 523.055        | 518.798  | 518.550 | D20 |
| A11 | 288.202 | 283.945 | 0.755 | 295.201        | 290.944 | 0.755 | 498.793        | 494.536  | 494.288 | A19 |
| G12 | 329.717 | 325.460 | 0.755 | 337.016        | 332.759 | 0.755 | 473.521        | 469.264  | 469.016 | G18 |
| G13 | 334.972 | 330.715 | 0.755 | 342.014        | 337.757 | 0.755 | 445.020        | 440.763  | 440.515 | G17 |
| G14 | 349.470 | 345.213 | 0.755 | 356.226        | 351.970 | 0.755 | 430.765        | 426.508  | 426.260 | G16 |
| V15 | 373.995 | 369.738 | 0.755 | 380.994        | 376.737 | 0.755 | 416.500        | 412.243  | 412.000 | V15 |
| L16 | 402.266 | 398.009 | 0.755 | 409.265        | 405.008 | 0.755 | 404.782        | 398.486  | 397.940 | L14 |
| F17 | 426.520 | 422.262 | 0.755 | 433.520        | 429.263 | 0.755 | 383.471        | 379.214  | 378.966 | F13 |
| N18 | 455.640 | 451.383 | 0.755 | 462.639        | 458.382 | 0.755 | 379.208        | 374.951  | 374.703 | N12 |
| D19 | 483.211 | 478.954 | 0.755 | 490.210        | 485.953 | 0.755 | 359.997        | 355.740  | 355.491 | D11 |
| G20 | 515.226 | 510.969 | 0.755 | <b>522.225</b> | 517.968 | 0.755 | 342.426        | 338.169  | 337.920 | G15 |
| A21 | 533.085 | 528.828 | 0.755 | <b>540.083</b> | 535.826 | 0.755 | 329.541        | 325.284  | 325.036 | A17 |
| V22 | 557.852 | 553.595 | 0.755 | 564.851        | 560.594 | 0.755 | 322.652        | 318.395  | 318.147 | V18 |
| L23 | 586.123 | 581.866 | 0.755 | <b>593.122</b> | 588.865 | 0.755 | 307.895        | 303.638  | 303.390 | L17 |
| L24 | 614.394 | 610.137 | 0.755 | 621.393        | 617.136 | 0.755 | 316.880        | 312.623  | 312.375 | L16 |
| T25 | 638.859 | 634.602 | 0.755 | 646.858        | 642.601 | 0.755 | 304.193        | 300.936  | 300.688 | T21 |
| K26 | 670.081 | 665.824 | 0.755 | 677.879        | 673.622 | 0.755 | 277.081        | 272.824  | 272.576 | K14 |
| K27 | 702.704 | 698.447 | 0.755 | 709.703        | 705.446 | 0.755 | 265.070        | 260.813  | 260.565 | K13 |
| T28 | 727.968 | 723.711 | 0.755 | 734.967        | 730.710 | 0.755 | 260.440        | 256.183  | 255.935 | T22 |
| E29 | 786.227 | 781.970 | 0.755 | 793.226        | 788.969 | 0.755 | 247.723        | 243.466  | 243.218 | E11 |



# sp | Q6GSS7 | H2A2A\_MOUSE

LNKLLGK <sup>Dimethyl</sup> <sub>28.03</sub> VTIAQGGVLPNIQAVLLPKKTE

- ▶ fragmentation table for charge state 1+
- ▶ specType=cid
- ▶ score=57.73
- ▶ F113279.dat
- ▶ query=q41561\_p1
- ▶ precursor=771.724160
- ▶ chargePrecursor=4
- ▶ itol=0.5

| AA  | a              | a*             | aΔ              | b               | b*       | bΔ             | y               | y*             | yΔ              | AA  |
|-----|----------------|----------------|-----------------|-----------------|----------|----------------|-----------------|----------------|-----------------|-----|
| L1  | 98.095         | 0.000          | 0.000           | 114.061         | 0.000    | 0.000          | 3883.892        | 0.000          | 0.000           | K29 |
| K2  | 200.135        | 1.03171        | 0.000           | 228.134         | 0.11188  | 0.000          | 2920.899        | 0.000          | 0.000           | K20 |
| R1  | 328.274        | 111.220        | 0.000           | <b>306.228</b>  | 130.201  | 0.000          | 2856.750        | 0.000          | 0.000           | K27 |
| L4  |                | 428.262        | 0.000           | <b>469.313</b>  | 152.097  | 0.000          | 2728.870        | 0.000          | 0.000           | L28 |
| L5  | <b>554.402</b> | 131.870        | 0.000           | <b>542.389</b>  | 165.371  | 0.000          | 2618.789        | 0.000          | 0.000           | L29 |
| Q1  | 511.424        | 536.300        | 0.000           | <b>639.418</b>  | 182.004  | 0.000          | 2522.520        | 0.000          | 0.000           | Q24 |
| K7  | 187.500        | 100.530        | 0.000           | <b>795.545</b>  | 178.618  | 0.000          | 2441.480        | 0.000          | 0.000           | K23 |
| V1  | 189.414        | <b>849.582</b> | 0.000           | <b>894.513</b>  | 177.007  | 0.000          | 2372.521        | 0.000          | 0.000           | V22 |
| L9  | 367.500        | 920.540        | 949.050         | <b>905.461</b>  | 179.030  | <b>877.851</b> | 2170.250        | 2171.250       | 2172.250        | L21 |
| H10 | 388.500        | 1061.720       | <b>1062.740</b> | <b>1108.745</b> | 1091.710 | 0.000          | 1980.130        | 2029.211       | 2031.207        | H25 |
| A11 | 1151.200       | 1130.760       | 1132.770        | <b>1179.782</b> | 1162.790 | 1161.770       | 1810.154        | 1958.123       | 1958.143        | A16 |
| Q12 | 1278.400       | 1200.820       | 1200.820        | 1200.820        | 1200.820 | 1200.820       | 1820.111        | 1880.090       | 1880.100        | Q18 |
| Q13 | 1336.500       | 1130.820       | 1130.820        | 1184.820        | 1147.836 | 1336.500       | 1777.250        | 1760.020       | 1759.048        | Q17 |
| G14 | 1393.500       | 1330.800       | 1370.870        | 1421.884        | 1404.857 | 1403.831       | 1720.037        | 1703.010       | 1702.026        | G16 |
| V15 | 1450.500       | 1430.870       | 1474.940        | 1520.950        | 1503.926 | 1502.901       | 1680.051        | 1649.089       | 1648.099        | V19 |
| L16 | 1508.541       | 1500.010       | 1528.051        | 1524.020        | 1517.010 | 1516.020       | 1583.947        | 1548.920       | 1549.000        | L14 |
| P17 | 1567.500       | 1568.000       | 1588.080        | 1588.080        | 1571.080 | 1571.080       | <b>1450.863</b> | 1434.830       | 1432.802        | P13 |
| V18 | 1617.414       | 1600.111       | 1708.221        | 1695.120        | 1698.108 | 1697.141       | 1330.811        | 1328.783       | 1328.789        | V12 |
| H19 | 1676.211       | 1673.100       | 1822.211        | 1820.200        | 1841.190 | 1840.200       | 1230.741        | 1222.741       | 1221.767        | H11 |
| Q20 | 1698.200       | 1691.720       | 1848.200        | 1848.210        | 1836.240 | 1836.240       | 1130.648        | 1109.658       | <b>1108.677</b> | Q19 |
| A21 | 1758.200       | 1742.200       | 1811.950        | 1811.910        | 1840.200 | 1839.200       | <b>988.654</b>  | 988.200        | 988.044         | A18 |
| V22 | 1758.200       | 1741.870       | 1820.210        | 1820.190        | 1838.194 | 1838.194       | <b>927.557</b>  | <b>918.561</b> | 918.571         | V18 |
| L23 | 1841.400       | 1834.444       | 1823.400        | 1808.404        | 1802.438 | 1801.404       | <b>830.519</b>  | 831.400        | 831.508         | L17 |
| L24 | 1854.553       | 1837.527       | 1830.543        | 1840.549        | 1849.522 | 1848.530       | <b>715.435</b>  | 688.408        | <b>687.426</b>  | L20 |
| P25 | 1931.608       | 1920.500       | 1933.500        | 1927.607        | 1936.676 | 1935.681       | <b>662.351</b>  | 669.324        | <b>664.340</b>  | P19 |
| R26 | 1978.500       | 1960.210       | 1963.800        | 1977.800        | 1986.870 | 1985.880       | 548.271         | 548.271        | 548.271         | R10 |
| K27 | 1987.600       | 1980.710       | 1989.760        | 1989.761        | 1988.764 | 1987.760       | <b>377.203</b>  | 388.177        | 389.181         | K15 |
| L28 | 1988.618       | 1988.618       | 1988.618        | 1988.618        | 1988.618 | 1988.618       | 148.000         | 148.000        | 148.000         | L22 |
| E29 | 2037.600       | 2030.820       | 2039.870        | 2039.861        | 2048.930 | 2047.911       | 148.000         | 148.000        | 148.000         | E11 |

# sp | Q6GSS7 | H2A2A\_MOUSE

LNKLLGK <sup>Dimethyl</sup> <sub>28.03</sub> VTIAQGGVLPNIQAVLLPKKTE

- ▶ fragmentation table for charge state 2+
- ▶ specType=cid
- ▶ score=57.73
- ▶ F113279.dat
- ▶ query=q41561.p1
- ▶ precursor=771.724160
- ▶ chargePrecursor=4
- ▶ itol=0.5

| AA   | a              | a'             | a+d            | b               | b'             | b+d            | y               | y'             | y+d            | AA   |
|------|----------------|----------------|----------------|-----------------|----------------|----------------|-----------------|----------------|----------------|------|
| L1   | 41.552         | 8.504          | 8.504          | 35.947          | 0.504          | 0.504          | 34.423          | 12.010         | 13.514         | L156 |
| R1   | 100.914        | 12.010         | 8.504          | 114.924         | 100.907        | 0.504          | 149.930         | 147.920        | 149.424        | R120 |
| R2   | 164.632        | 136.110        | 0.504          | 179.618         | 170.106        | 0.504          | 149.889         | 1426.371       | 1416.861       | R122 |
| L4   | 221.561        | 212.650        | 0.504          | 219.160         | 226.647        | 0.504          | 1364.830        | 1356.320       | 1358.824       | L126 |
| L15  | 277.500        | 269.990        | 0.504          | 279.490         | 286.980        | 0.504          | 1308.291        | 1299.780       | 1302.284       | L128 |
| G4   | 306.228        | <b>297.762</b> | 0.504          | 309.213         | 311.700        | 0.504          | 1291.750        | 1283.240       | 1285.744       | G24  |
| R7   | 313.670        | 313.700        | 0.504          | 309.210         | 308.763        | 0.504          | 1221.241        | 1214.730       | 1217.234       | R125 |
| V4   | <b>433.813</b> | 425.300        | 0.504          | 444.810         | 439.247        | 0.504          | 1148.181        | 1141.670       | 1144.174       | V122 |
| L9   | 438.130        | 475.620        | 475.110        | <b>498.334</b>  | 489.821        | 489.310        | 1095.640        | 1087.130       | 1089.634       | L121 |
| H10  | <b>540.879</b> | 532.360        | 531.850        | <b>554.876</b>  | 546.360        | <b>545.871</b> | <b>1045.123</b> | 1036.610       | 1039.114       | H124 |
| A11  | <b>576.307</b> | 567.790        | 567.280        | <b>590.305</b>  | <b>581.792</b> | <b>581.290</b> | <b>988.581</b>  | <b>980.067</b> | <b>981.575</b> | A119 |
| Q12  | 589.227        | 626.710        | 626.200        | <b>654.428</b>  | <b>645.911</b> | <b>645.419</b> | <b>951.863</b>  | <b>944.349</b> | <b>945.858</b> | Q118 |
| G13  | 609.227        | 600.710        | <b>609.832</b> | <b>682.935</b>  | <b>674.422</b> | <b>673.930</b> | <b>889.933</b>  | <b>881.419</b> | <b>882.927</b> | G117 |
| G14  | <b>697.448</b> | 688.930        | 688.420        | <b>711.446</b>  | <b>702.932</b> | <b>702.440</b> | <b>860.523</b>  | <b>852.009</b> | 853.517        | G116 |
| V121 | <b>746.363</b> | 737.840        | 737.330        | <b>760.360</b>  | <b>751.847</b> | <b>751.354</b> | 737.840         | 729.326        | 730.834        | V115 |
| L10  | 769.529        | 760.010        | 759.500        | <b>817.523</b>  | <b>809.000</b> | <b>808.517</b> | <b>782.477</b>  | 773.964        | 775.472        | L104 |
| P17  | <b>852.651</b> | 843.130        | 842.620        | <b>866.649</b>  | <b>858.130</b> | <b>857.641</b> | <b>725.935</b>  | 717.422        | 718.930        | P113 |
| R16  | 869.212        | 860.690        | 860.180        | <b>873.876</b>  | <b>865.360</b> | <b>864.864</b> | 847.350         | 838.830        | 840.340        | R114 |
| L18  | 889.214        | 880.690        | 880.180        | <b>879.812</b>  | <b>871.290</b> | <b>870.797</b> | <b>620.387</b>  | 611.870        | 613.374        | L111 |
| Q20  | 929.844        | 921.320        | 920.810        | 938.838         | 930.320        | 929.810        | 911.810         | 903.290        | <b>904.798</b> | Q110 |
| A21  | 939.152        | 930.630        | 930.120        | <b>1019.160</b> | 1010.640       | 1010.134       | 489.811         | 481.290        | 482.794        | A19  |
| V122 | 1114.600       | 1106.080       | 1105.570       | 1124.600        | 1116.080       | 1115.570       | 489.290         | 480.770        | 482.274        | V119 |
| L24  | 1111.238       | 1102.720       | 1102.210       | <b>1185.238</b> | 1176.720       | 1176.210       | 454.750         | 446.230        | 447.734        | L19  |
| L24  | 1227.160       | 1218.640       | 1218.130       | 1242.170        | 1233.650       | 1233.140       | 388.221         | 380.700        | 382.204        | L19  |
| P124 | 1276.307       | 1267.790       | 1267.280       | 1287.300        | 1278.780       | 1278.270       | 381.811         | 373.290        | 374.794        | P119 |
| R26  | 1340.594       | 1332.070       | 1331.560       | 1351.580        | 1343.060       | 1342.550       | 255.570         | 247.050        | 248.554        | R14  |
| R27  | 1354.420       | 1345.900       | 1345.390       | 1414.390        | 1405.870       | 1405.360       | 148.100         | 139.580        | 141.084        | R14  |
| L26  | 1434.520       | 1426.000       | 1425.490       | 1445.520        | 1437.000       | 1436.490       | 149.810         | 141.290        | 142.794        | L19  |
| L24  | 1519.491       | 1510.970       | 1510.460       | 1531.480        | 1522.960       | 1522.450       | 79.510          | 71.000         | 72.504         | L19  |

# sp | Q6GSS7 | H2A2A\_MOUSE

LNKLLGK <sup>Dimethyl</sup> <sub>28.03</sub> VTIAQGGVLPNIQAVLLPKKTE

- ▶ fragmentation table for charge state 3+
- ▶ specType=cid
- ▶ score=57.73
- ▶ F113279.dat
- ▶ query=q41561.p1
- ▶ precursor=771.724160
- ▶ chargePrecursor=4
- ▶ itol=0.5

| AA  | a              | a*       | a,b            | b              | b*             | b,b            | y              | y*             | y,b            | AA  |
|-----|----------------|----------|----------------|----------------|----------------|----------------|----------------|----------------|----------------|-----|
| L1  | 28.178         | 0.07     | 0.07           | 58.102         | 0.072          | 0.072          | 1028.031       | 1022.961       | 1022.962       | L28 |
| N2  | 67.585         | 61.706   | 0.672          | 76.715         | 71.041         | 0.672          | 660.941        | 665.265        | 664.921        | N26 |
| K3  | 110.681        | 104.407  | 0.672          | 119.413        | 113.739        | 0.672          | <b>952.926</b> | 947.251        | 946.921        | K27 |
| L4  | 147.778        | 142.125  | 0.672          | 157.109        | 151.434        | 0.672          | <b>910.228</b> | <b>904.553</b> | 904.225        | L26 |
| L5  | 185.874        | 179.997  | 0.672          | 194.864        | 189.124        | 0.672          | <b>872.531</b> | <b>866.958</b> | 866.730        | L25 |
| Q6  | 264.478        | 258.004  | 0.672          | 273.611        | 268.136        | 0.672          | 824.839        | 829.163        | <b>828.835</b> | Q24 |
| K7  | 298.522        | 291.668  | 0.672          | 308.353        | 302.178        | 0.672          | 813.832        | 818.156        | 808.832        | K22 |
| V8  | 339.544        | 331.969  | 0.672          | 348.876        | 342.301        | 0.672          | 763.709        | 768.124        | 757.709        | V22 |
| Y9  | 323.227        | 317.551  | 0.672          | 332.221        | 325.595        | 0.672          | <b>730.747</b> | 725.091        | 724.743        | Y21 |
| I10 | 360.622        | 352.289  | <b>354.918</b> | 370.251        | 364.676        | 0.672          | <b>697.064</b> | 691.409        | 691.061        | I20 |
| A11 | 394.601        | 387.625  | 316.567        | 393.912        | 388.257        | 316.567        | <b>658.389</b> | <b>653.714</b> | <b>653.386</b> | A19 |
| Q12 | 427.288        | 421.611  | 624.261        | 436.814        | 430.944        | 624.261        | <b>626.742</b> | <b>621.025</b> | <b>620.707</b> | Q10 |
| G13 | 446.204        | 440.013  | 480.250        | 458.249        | 448.566        | 480.250        | 589.629        | 593.155        | 583.249        | G17 |
| G14 | 482.944        | 476.628  | 489.261        | 474.833        | <b>468.957</b> | 489.261        | 574.111        | 568.342        | 568.114        | G16 |
| V15 | <b>498.224</b> | 492.669  | 488.261        | 507.668        | 511.766        | 488.261        | <b>535.010</b> | 529.194        | 528.669        | V19 |
| L16 | 526.619        | 520.343  | 530.013        | <b>545.505</b> | 539.079        | 539.347        | 521.907        | 516.312        | 515.984        | L14 |
| P17 | 566.870        | 560.494  | 562.960        | 577.703        | 572.026        | 571.489        | 464.267        | 478.611        | 478.269        | P13 |
| N18 | 606.184        | 600.208  | 602.360        | 613.719        | 603.046        | 609.212        | 481.942        | 444.268        | 444.036        | N12 |
| T19 | 644.678        | 638.402  | <b>638.075</b> | <b>653.418</b> | 647.748        | 647.401        | 413.920        | 408.292        | 407.944        | T11 |
| Q20 | 686.705        | 681.289  | 680.711        | <b>696.096</b> | 690.421        | 690.093        | 376.251        | 370.567        | 370.228        | Q10 |
| A21 | 724.844        | 718.768  | 718.440        | <b>719.775</b> | 714.217        | 713.719        | 331.540        | 327.817        | 327.542        | A19 |
| V22 | <b>742.467</b> | 737.461  | 737.461        | <b>752.769</b> | <b>747.223</b> | <b>746.795</b> | 309.897        | 304.162        | 303.894        | V19 |
| L23 | 781.451        | 775.486  | 775.158        | 792.463        | 784.817        | 784.489        | 278.944        | 273.195        | 272.941        | L17 |
| L24 | 818.656        | 813.189  | 812.860        | <b>828.188</b> | <b>822.512</b> | <b>822.184</b> | 239.150        | 233.474        | 233.146        | L16 |
| P25 | 851.207        | 845.511  | 845.201        | <b>866.539</b> | 854.983        | 854.535        | 201.403        | 195.709        | 195.492        | P15 |
| K26 | 893.806        | 888.160  | 887.860        | 904.727        | 898.762        | 898.213        | 169.104        | 163.420        | 163.100        | K14 |
| R27 | 936.054        | 930.509  | 930.630        | 945.933        | 940.260        | 939.912        | 126.426        | 120.732        | 120.602        | R13 |
| T28 | 970.286        | 964.611  | 964.261        | <b>976.619</b> | 971.942        | 971.614        | 81.708         | 0.672          | 77.104         | T12 |
| E29 | 1013.556       | 1007.852 | 1007.261       | 1022.532       | 1016.956       | 1016.628       | 30.020         | 0.672          | 24.022         | E10 |





# sp | Q6GSS7 | H2A2A\_MOUSE

LNKLLGK <sup>Dimethyl</sup> <sub>28.03</sub> VTIAQGGVLPNIQAVLLPKKTE

- ▶ fragmentation table for charge state 1+
- ▶ specType=etd
- ▶ score=91.90
- ▶ F113279.dat
- ▶ query=q41562.p1
- ▶ precursor=771.724160
- ▶ chargePrecursor=4
- ▶ itol=0.5

| AA     | c               | y        | z+1             | z+2             | z        | AA     |
|--------|-----------------|----------|-----------------|-----------------|----------|--------|
| L[1]   | 131.118         | 3081.892 | 3067.873        | 0.000           | 3066.895 | L[29]  |
| N[2]   | 345.161         | 2970.808 | 2954.789        | 2955.797        | 2951.781 | N[28]  |
| K[3]   | <b>373.256</b>  | 2856.765 | 2840.746        | 2841.754        | 2839.738 | K[27]  |
| L[4]   | 486.340         | 2728.670 | 2712.651        | 2713.659        | 2711.643 | L[26]  |
| L[5]   | <b>599.424</b>  | 2615.585 | 2599.567        | 2600.575        | 2598.560 | L[25]  |
| Q[6]   | <b>656.445</b>  | 2502.502 | 2486.483        | 2487.491        | 2485.475 | Q[24]  |
| K[7]   | <b>812.572</b>  | 2345.480 | 2429.462        | 2430.469        | 2428.454 | K[23]  |
| V[8]   | <b>911.640</b>  | 2288.354 | 2273.335        | 2274.343        | 2272.327 | V[22]  |
| T[9]   | 1017.688        | 2190.286 | 2174.267        | 2175.275        | 2173.259 | T[21]  |
| I[10]  | <b>1125.772</b> | 2089.238 | 2073.219        | 2074.227        | 2072.211 | I[20]  |
| A[11]  | <b>1196.899</b> | 1976.154 | 1960.135        | <b>1961.143</b> | 1959.127 | A[19]  |
| Q[12]  | <b>1244.967</b> | 1905.111 | 1889.092        | <b>1890.100</b> | 1888.084 | Q[18]  |
| G[13]  | <b>1381.889</b> | 1777.055 | 1761.036        | <b>1762.044</b> | 1760.032 | G[17]  |
| G[14]  | 1438.910        | 1720.937 | 1704.918        | <b>1705.926</b> | 1703.910 | G[16]  |
| V[15]  | 1537.879        | 1663.015 | 1646.997        | 1646.004        | 1645.989 | V[15]  |
| L[16]  | 1651.063        | 1563.947 | 1547.928        | <b>1548.936</b> | 1546.920 | L[14]  |
| F[17]  | <b>1748.116</b> | 1450.893 | 1434.874        | 1435.882        | 1433.866 | F[13]  |
| TW[18] | 1867.159        | 1383.810 | <b>1337.791</b> | 1338.799        | 1336.783 | TW[12] |
| I[19]  | 1975.243        | 1236.767 | <b>1223.748</b> | 1224.756        | 1222.741 | I[11]  |
| Q[20]  | 2103.301        | 1126.683 | <b>1110.664</b> | 1111.672        | 1109.656 | Q[10]  |
| A[21]  | 2174.336        | 998.624  | <b>982.606</b>  | 983.614         | 981.598  | A[9]   |
| V[22]  | 2273.407        | 927.587  | <b>911.569</b>  | 912.576         | 910.561  | V[8]   |
| L[23]  | 2386.491        | 828.519  | <b>812.500</b>  | <b>813.508</b>  | 811.492  | L[7]   |
| L[24]  | 2499.575        | 715.435  | <b>699.415</b>  | <b>700.424</b>  | 698.408  | L[6]   |
| P[25]  | 2596.626        | 602.351  | 586.332         | 587.340         | 585.324  | P[5]   |
| K[26]  | 2724.723        | 505.298  | <b>489.279</b>  | 490.287         | 488.271  | K[4]   |
| K[27]  | 2852.816        | 377.203  | <b>361.184</b>  | 362.192         | 360.177  | K[3]   |
| T[28]  | 2953.895        | 249.108  | 233.089         | 234.097         | 232.082  | T[2]   |
| E[29]  | 3082.968        | 148.060  | 132.042         | 133.050         | 131.034  | E[1]   |

# sp | Q6GSS7 | H2A2A\_MOUSE

LNKLLGK <sup>Dimethyl</sup> <sub>28.03</sub> VTIAQGGVLPNIQAVLLPKKTE

- ▶ fragmentation table for charge state 2+
- ▶ specType=etd
- ▶ score=91.90
- ▶ F113279.dat
- ▶ query=q41562.p1
- ▶ precursor=771.724160
- ▶ chargePrecursor=4
- ▶ itol=0.5

| AA   | c               | y              | z+1             | z+2             | z               | AA   |
|------|-----------------|----------------|-----------------|-----------------|-----------------|------|
| L 1  | 66.063          | 1542.450       | 1538.440        | 0.504           | 1533.930        | L 26 |
| N 2  | 123.084         | 1485.908       | <b>1477.890</b> | <b>1478.402</b> | <b>1477.394</b> | N 28 |
| K 3  | 187.132         | 1436.886       | <b>1420.877</b> | <b>1421.381</b> | 1420.373        | K 27 |
| L 4  | 243.674         | 1384.839       | <b>1356.829</b> | 1357.333        | <b>1356.325</b> | L 26 |
| L 5  | 300.216         | 1338.297       | 1339.299        | 1339.794        | 1299.783        | L 25 |
| G 6  | 358.726         | 1291.758       | <b>1243.745</b> | <b>1244.249</b> | 1243.241        | G 24 |
| K 7  | 406.789         | 1223.244       | <b>1215.234</b> | <b>1215.738</b> | 1214.731        | K 23 |
| V 8  | 456.324         | 1145.181       | <b>1137.171</b> | <b>1137.675</b> | 1136.667        | V 22 |
| T 9  | 506.846         | 1095.646       | <b>1087.637</b> | <b>1088.141</b> | 1087.133        | T 21 |
| I 10 | 563.390         | 1045.123       | <b>1037.113</b> | <b>1037.617</b> | 1036.609        | I 20 |
| A 11 | 608.608         | <b>988.581</b> | <b>988.571</b>  | <b>989.075</b>  | <b>988.067</b>  | A 19 |
| Q 12 | 662.937         | 933.956        | <b>945.953</b>  | <b>945.557</b>  | 944.549         | Q 18 |
| G 13 | 691.448         | 889.033        | <b>881.023</b>  | <b>881.527</b>  | <b>880.519</b>  | G 17 |
| G 14 | 719.959         | 860.522        | <b>852.513</b>  | <b>853.017</b>  | 852.009         | G 16 |
| V 15 | 769.493         | 832.011        | 824.002         | 824.506         | 823.498         | V 15 |
| L 16 | 828.035         | 782.477        | <b>774.468</b>  | <b>774.972</b>  | 773.964         | L 14 |
| T 17 | <b>874.561</b>  | 725.935        | 717.926         | 718.430         | 717.422         | T 13 |
| N 18 | <b>931.583</b>  | 671.409        | 663.399         | 663.903         | 662.895         | N 12 |
| I 19 | <b>988.125</b>  | 626.387        | 612.378         | 612.882         | 611.874         | I 11 |
| Q 20 | <b>1052.154</b> | 563.945        | 555.839         | 556.343         | 555.335         | Q 10 |
| A 21 | <b>1087.673</b> | 499.616        | 491.607         | 492.110         | 491.102         | A 9  |
| V 22 | <b>1137.207</b> | 464.297        | 456.288         | 456.792         | 455.784         | V 8  |
| L 23 | <b>1193.749</b> | 414.763        | 406.754         | 407.258         | 406.250         | L 7  |
| L 24 | 1250.291        | 358.221        | 350.211         | 350.715         | 349.707         | L 6  |
| P 25 | <b>1298.817</b> | 301.679        | 293.670         | 294.174         | 293.166         | P 5  |
| K 26 | <b>1362.865</b> | 251.153        | 243.143         | 243.647         | 242.639         | K 4  |
| K 27 | <b>1426.912</b> | 189.105        | 181.096         | 181.600         | 180.592         | K 3  |
| T 28 | <b>1477.436</b> | 125.058        | 117.048         | 117.552         | 116.544         | T 2  |
| E 29 | 1541.959        | 74.534         | 66.524          | 67.028          | 66.021          | E 1  |

# sp | Q6GSS7 | H2A2A\_MOUSE

LNKLLGK <sup>Dimethyl</sup> <sub>28.03</sub> VTIAQGGVLPNIQAVLLPKKTE

- ▶ fragmentation table for charge state 3+
- ▶ specType=etd
- ▶ score=91.90
- ▶ F113279.dat
- ▶ query=q41562.p1
- ▶ precursor=771.724160
- ▶ chargePrecursor=4
- ▶ itol=0.5

| AA    | c              | y               | z+1             | z+2            | z              | AA    |
|-------|----------------|-----------------|-----------------|----------------|----------------|-------|
| L[1]  | 44.377         | <b>1028.635</b> | <b>1023.296</b> | 0.672          | 1022.660       | L[29] |
| N[2]  | 62.302         | <b>990.941</b>  | <b>985.601</b>  | <b>985.937</b> | <b>985.265</b> | N[28] |
| K[3]  | 125.090        | 952.326         | <b>947.587</b>  | <b>947.923</b> | 947.251        | K[27] |
| L[4]  | 162.785        | 910.228         | 904.889         | 905.225        | 904.551        | L[26] |
| L[5]  | 200.479        | 872.531         | 867.194         | 867.530        | 866.858        | L[25] |
| G[6]  | 239.487        | 834.839         | 829.499         | 829.835        | 829.163        | G[24] |
| K[7]  | 271.529        | 815.833         | 810.492         | 810.828        | 810.156        | K[23] |
| V[8]  | 304.552        | 783.790         | 778.450         | 778.786        | 778.114        | V[22] |
| T[9]  | 338.234        | 730.767         | 725.427         | 725.763        | 725.091        | T[21] |
| I[10] | 375.929        | 697.084         | 691.745         | 692.081        | 691.409        | I[20] |
| A[11] | 389.608        | 699.380         | 654.050         | 654.386        | 653.714        | A[19] |
| Q[12] | 442.294        | 636.710         | 630.371         | 630.707        | 630.035        | Q[18] |
| G[13] | 461.301        | 593.024         | 587.685         | 588.021        | 587.349        | G[17] |
| G[14] | 480.308        | 574.017         | 568.678         | 569.013        | 568.342        | G[16] |
| V[15] | 513.131        | 555.010         | 549.670         | 550.006        | 549.334        | V[15] |
| L[16] | 551.026        | 521.987         | 516.648         | 516.984        | 516.312        | L[14] |
| P[17] | 583.377        | 484.202         | 478.863         | 479.209        | 478.517        | P[13] |
| N[18] | 621.391        | 451.942         | 446.602         | 446.938        | 446.266        | N[12] |
| I[19] | 659.086        | 413.927         | 408.588         | 408.924        | 408.252        | I[11] |
| Q[20] | 701.772        | 376.233         | 370.893         | 371.229        | 370.557        | Q[10] |
| A[21] | 725.451        | 333.546         | 328.207         | 328.543        | 327.871        | A[9]  |
| V[22] | 758.474        | 309.867         | 304.528         | 304.864        | 304.192        | V[8]  |
| L[23] | 796.188        | 276.844         | 271.505         | 271.841        | 271.169        | L[7]  |
| L[24] | 833.863        | 239.150         | 233.810         | 234.146        | 233.474        | L[6]  |
| T[25] | 869.214        | 201.455         | 196.116         | 196.452        | 195.780        | T[5]  |
| K[26] | 908.912        | 169.100         | 163.760         | 164.101        | 163.429        | K[4]  |
| K[27] | <b>951.611</b> | 138.406         | 133.066         | 133.402        | 132.730        | K[3]  |
| T[28] | <b>985.293</b> | 83.708          | 78.368          | 78.704         | 78.032         | T[2]  |
| E[29] | 1028.307       | 50.025          | 44.685          | 45.021         | 44.349         | E[1]  |



# sp | Q6GSS7 | H2A2A\_MOUSE

LNKLLGK <sup>Dimethyl</sup> <sub>28.03</sub> VTIAQGGVLPNIQAVLLPKKTE

- ▶ fragmentation table for charge state 1+
- ▶ specType=cid
- ▶ score=86.66
- ▶ F113279.dat
- ▶ query=q41563\_p1
- ▶ precursor=1028.629900
- ▶ chargePrecursor=3
- ▶ itol=0.5

| AA  | a               | a*             | a,Δ      | b               | b*             | b,Δ             | y               | y*              | y,Δ             | AA   |
|-----|-----------------|----------------|----------|-----------------|----------------|-----------------|-----------------|-----------------|-----------------|------|
| L1  | 88.998          | 0.000          | 8.000    | 114.001         | 0.000          | 0.000           | 3081.891        | 3084.891        | 3085.001        | L129 |
| N1  | 108.119         | 101.111        | 0.000    | 128.114         | 111.111        | 0.000           | 2974.891        | 3084.781        | 3082.781        | N130 |
| K1  | 128.234         | 111.226        | 0.000    | 168.229         | <b>119.203</b> | 0.000           | 2876.793        | 3079.733        | 3078.794        | K127 |
| L14 | 144.118         | 144.202        | 0.000    | 168.313         | 168.203        | 0.000           | 2728.877        | 3111.864        | 3110.869        | L126 |
| L15 | 154.402         | 161.391        | 0.000    | <b>162.387</b>  | 162.371        | 0.000           | 2631.981        | 3088.970        | 3087.970        | L125 |
| G1  | 161.124         | 164.391        | 0.000    | 1.637.417       | 162.392        | 0.000           | 2552.922        | 2485.475        | 2484.481        | G124 |
| K1  | <b>167.550</b>  | 169.529        | 0.000    | 169.543         | 178.539        | 0.000           | 2445.481        | 2428.454        | 2427.470        | K123 |
| V1  | <b>169.619</b>  | <b>149.582</b> | 0.000    | <b>184.613</b>  | 187.607        | 0.000           | 2280.954        | 2074.929        | 2071.941        | V122 |
| V16 | <b>167.540</b>  | 169.529        | 0.000    | <b>195.601</b>  | 191.610        | <b>177.621</b>  | 2419.959        | 242.924         | 2424.929        | V121 |
| L16 | 168.790         | 163.724        | 104.741  | <b>1108.745</b> | 104.719        | <b>1090.735</b> | 3088.731        | 3074.711        | 3071.727        | L120 |
| A11 | 1151.797        | 1124.781       | 1113.777 | <b>1179.762</b> | 1129.756       | 1161.772        | 1496.754        | 1498.727        | 1498.741        | A116 |
| G12 | 1276.786        | 1227.819       | 1113.816 | 1151.811        | 1126.804       | 1109.810        | 1600.811        | 1600.786        | 1600.796        | G119 |
| G13 | 1138.807        | 1133.801       | 1113.801 | <b>1364.862</b> | 1347.836       | 1340.831        | <b>1777.658</b> | 1769.631        | 1769.648        | G117 |
| G14 | 1385.888        | 1378.882       | 1378.878 | 1477.887        | 1454.857       | 1443.871        | 1720.857        | 1708.810        | 1708.826        | G116 |
| V13 | 1460.891        | 1424.881       | 1424.874 | <b>1520.892</b> | 1500.861       | 1491.847        | 1601.831        | 1604.808        | 1604.809        | V115 |
| L18 | <b>1508.941</b> | 1493.910       | 1498.911 | <b>1634.916</b> | 1617.910       | 1610.912        | <b>1561.947</b> | 1548.910        | 1548.918        | L114 |
| P17 | 1703.904        | 1680.880       | 1688.884 | 1711.889        | 1714.880       | 1711.879        | <b>1450.861</b> | 1431.830        | <b>1432.852</b> | P113 |
| N18 | 1819.911        | 1800.871       | 1809.873 | 1820.878        | 1828.869       | 1827.871        | <b>1351.818</b> | 1348.810        | 1348.789        | N112 |
| L19 | 1836.921        | 1813.910       | 1813.911 | 1858.915        | 1844.909       | 1846.910        | 1333.810        | <b>1322.741</b> | 1321.767        | L111 |
| G15 | 1888.988        | 1841.981       | 1846.982 | 1888.978        | 1881.981       | 1881.980        | <b>1178.683</b> | <b>1169.656</b> | <b>1168.672</b> | G110 |
| A12 | 1118.117        | 1112.109       | 1111.109 | 1117.112        | 1116.111       | 1116.111        | <b>986.624</b>  | 986.708         | 986.614         | A18  |
| V12 | 2228.910        | 2211.910       | 2210.910 | 2258.914        | 2236.914       | 2236.910        | <b>627.587</b>  | 625.581         | 626.577         | V18  |
| L12 | 2341.469        | 2324.467       | 2324.459 | 2389.464        | 2367.463       | 2367.454        | <b>828.519</b>  | 811.492         | 809.500         | L17  |
| L14 | 2424.511        | 2417.507       | 2416.504 | 2462.509        | 2449.502       | 2449.511        | <b>715.438</b>  | 688.408         | <b>687.424</b>  | L16  |
| P15 | 2712.708        | 2634.700       | 2633.700 | 2692.701        | 2712.712       | 2670.701        | <b>603.351</b>  | 605.324         | <b>584.340</b>  | P15  |
| K16 | 2676.701        | 2661.691       | 2661.691 | 2707.696        | 2696.691       | 2688.691        | <b>505.298</b>  | 488.271         | 487.281         | K14  |
| K17 | 2887.790        | 2870.770       | 2870.769 | 2888.761        | 2878.754       | 2877.752        | <b>377.203</b>  | 386.173         | 386.181         | K13  |
| L16 | 2988.814        | 2981.801       | 2980.801 | 2988.804        | 2981.801       | 2981.801        | 140.801         | 140.789         | 140.789         | L13  |
| E19 | 3017.818        | 3000.801       | 3000.811 | 3008.811        | 3004.804       | 3004.811        | 140.801         | 0.000           | 1.00000         | E11  |

# sp | Q6GSS7 | H2A2A\_MOUSE

LNKLLGK <sup>Dimethyl</sup> <sub>28.03</sub> VTIAQGGVLPNIQAVLLPKKTE

- ▶ fragmentation table for charge state 2+
- ▶ specType=cid
- ▶ score=86.66
- ▶ F113279.dat
- ▶ query=q41563.p1
- ▶ precursor=1028.629900
- ▶ chargePrecursor=3
- ▶ itol=0.5

| AA   | a               | a*             | a,0            | b               | b*              | b,0             | r               | y*              | y,0             | AA   |
|------|-----------------|----------------|----------------|-----------------|-----------------|-----------------|-----------------|-----------------|-----------------|------|
| L13  | 43.202          | 0.504          | 0.504          | 07.849          | 0.504           | 0.504           | 1347.457        | 1133.026        | 1033.444        | L129 |
| N12  | 100.074         | 0.504          | 0.504          | 114.014         | 0.504           | 0.504           | 2481.905        | 1474.986        | 1244.909        | N104 |
| K13  | 104.021         | 150.130        | 0.504          | 118.010         | 170.100         | 0.504           | 1438.855        | <b>1430.373</b> | <b>1419.881</b> | K127 |
| L14  | 221.481         | 217.030        | 0.504          | 235.140         | 236.641         | 0.504           | 1394.631        | <b>1356.325</b> | <b>1355.833</b> | L108 |
| L15  | 227.100         | 209.180        | 0.504          | 201.100         | 203.180         | 0.504           | 1380.307        | 1299.783        | 1299.291        | L120 |
| G10  | 700.010         | 707.001        | 0.504          | 800.010         | 811.000         | 0.504           | 1249.910        | 1243.294        | 1242.799        | G04  |
| K17  | 104.020         | 103.100        | 0.504          | 100.010         | 100.010         | 0.504           | <b>1223.244</b> | 1124.713        | 1114.700        | K123 |
| V10  | 411.011         | 420.100        | 0.504          | 447.010         | 450.100         | 0.504           | 1145.111        | <b>1136.667</b> | 1130.170        | V122 |
| T19  | 404.110         | 413.010        | 473.111        | 408.110         | 409.110         | 409.110         | 1020.640        | 1001.111        | 1000.041        | T121 |
| D10  | <b>540.070</b>  | 534.000        | 531.004        | <b>554.076</b>  | 546.000         | 546.000         | 948.014         | 934.121         | 933.606         | D109 |
| A11  | 470.107         | 467.004        | 467.004        | 467.004         | 467.004         | 467.004         | 801.100         | <b>800.581</b>  | <b>800.067</b>  | A119 |
| G12  | 466.077         | 463.010        | <b>631.421</b> | <b>634.424</b>  | <b>646.011</b>  | 644.010         | 801.000         | <b>800.543</b>  | 800.000         | G101 |
| G13  | 668.037         | 660.424        | 660.600        | <b>682.035</b>  | 674.420         | 673.600         | <b>800.033</b>  | 800.511         | 800.007         | G127 |
| G14  | <b>807.448</b>  | 800.000        | <b>888.443</b> | <b>911.446</b>  | <b>902.832</b>  | <b>902.440</b>  | <b>860.522</b>  | 860.000         | 860.000         | G136 |
| V15  | <b>740.952</b>  | <b>738.409</b> | 738.010        | <b>740.950</b>  | <b>832.407</b>  | <b>751.914</b>  | 811.000         | 811.400         | <b>813.006</b>  | V100 |
| L108 | <b>803.524</b>  | <b>795.011</b> | 794.510        | <b>817.522</b>  | <b>806.009</b>  | <b>808.517</b>  | <b>782.477</b>  | <b>773.964</b>  | <b>773.472</b>  | L104 |
| P117 | 803.061         | 804.557        | 841.049        | <b>868.048</b>  | 867.535         | 867.041         | <b>725.935</b>  | 717.467         | <b>748.930</b>  | P115 |
| N108 | 800.010         | 800.000        | 800.000        | <b>813.010</b>  | 814.000         | 814.000         | 600.000         | 600.000         | 600.000         | N100 |
| L109 | <b>865.014</b>  | 861.100        | 860.000        | <b>870.012</b>  | <b>871.008</b>  | <b>870.000</b>  | 430.000         | 411.010         | 411.000         | L121 |
| G120 | 860.130         | 850.000        | 850.000        | 850.000         | 850.000         | 850.000         | 381.000         | <b>555.332</b>  | <b>554.840</b>  | G118 |
| A121 | <b>1065.182</b> | 1050.000       | 1050.000       | <b>1070.180</b> | <b>1070.180</b> | <b>1070.180</b> | 300.000         | 300.000         | 300.000         | A109 |
| V122 | 1114.006        | 1100.110       | 1100.000       | <b>1126.004</b> | <b>1126.100</b> | 1119.000        | 454.000         | <b>455.784</b>  | <b>455.292</b>  | V108 |
| L123 | 1111.010        | 1102.100       | 1102.010       | <b>1125.010</b> | <b>1125.010</b> | 1120.010        | 424.100         | 420.200         | 420.100         | L107 |
| L124 | 1102.000        | 1101.100       | 1101.100       | <b>1241.776</b> | <b>1233.265</b> | <b>1232.773</b> | 300.000         | 300.000         | 300.000         | L106 |
| L126 | 1226.107        | 1209.200       | 1209.200       | 1209.200        | 1209.200        | 1209.200        | 300.000         | 293.100         | 292.004         | L105 |
| K120 | 1242.014        | 1231.000       | 1231.000       | <b>1354.352</b> | 1345.000        | 1345.000        | 293.100         | 248.010         | 244.147         | K104 |
| K127 | 1244.010        | 1243.000       | 1243.000       | <b>1416.390</b> | 1400.000        | 1400.000        | 140.000         | 140.000         | 140.000         | K110 |
| L128 | 1414.100        | 1400.000       | 1400.000       | 1400.000        | 1400.000        | 1400.000        | 120.000         | 120.000         | 110.000         | L122 |
| E101 | 1410.040        | 1400.000       | 1400.000       | 1400.000        | 1400.000        | 1400.000        | 70.000          | 0.000           | 60.000          | E101 |



# sp | Q6GSS7 | H2A2A\_MOUSE

LNKLLGK <sup>Dimethyl</sup> <sub>28.03</sub> VTIAQGGVLPNIQAVLLPKKTE

- ▶ fragmentation table for charge state 1+
- ▶ specType=etd
- ▶ score=32.10
- ▶ F113279.dat
- ▶ query=q41564.p1
- ▶ precursor=1028.629900
- ▶ chargePrecursor=3
- ▶ itol=0.5

| AA  | c               | y               | z+1            | z+2             | z               | AA  |
|-----|-----------------|-----------------|----------------|-----------------|-----------------|-----|
| L1  | 131.118         | 3083.892        | 3067.873       | 0.000           | 3066.866        | L26 |
| N2  | 245.161         | 2970.808        | 2954.789       | 2955.797        | 2953.781        | N28 |
| K3  | 373.256         | 2856.765        | 2840.746       | 2841.754        | 2839.738        | K27 |
| L4  | 486.340         | 2738.670        | 2712.651       | 2713.659        | 2711.643        | L26 |
| L5  | 599.424         | 2615.586        | 2599.567       | 2600.575        | 2598.559        | L25 |
| G6  | 699.483         | 2502.502        | 2486.483       | 2487.491        | 2485.475        | G24 |
| K7  | 812.572         | 2445.480        | 2429.462       | 2430.469        | 2428.454        | K23 |
| V8  | <b>911.640</b>  | 2289.354        | 2273.335       | 2274.343        | 2272.327        | V22 |
| T9  | <b>1012.688</b> | 2190.288        | 2174.269       | 2175.275        | 2173.259        | T21 |
| T10 | <b>1125.772</b> | 2089.230        | 2073.210       | 2074.217        | 2072.211        | T20 |
| A11 | <b>1196.809</b> | 1976.154        | 1960.135       | 1961.143        | <b>1959.127</b> | A19 |
| Q12 | 1214.857        | 1905.111        | 1889.092       | 1890.100        | 1888.084        | Q18 |
| G13 | 1381.889        | 1777.058        | 1761.039       | 1762.047        | 1760.032        | G17 |
| G14 | 1438.910        | 1720.037        | 1704.018       | <b>1705.026</b> | 1703.010        | G16 |
| V15 | 1537.979        | 1663.015        | 1646.997       | 1648.004        | 1646.989        | V15 |
| L16 | 1651.063        | 1563.947        | 1547.928       | 1548.936        | 1546.920        | L14 |
| T17 | 1748.116        | 1490.863        | 1474.844       | 1475.852        | 1473.836        | T13 |
| N18 | 1862.159        | 1353.810        | 1337.791       | 1338.799        | 1336.783        | N12 |
| I19 | 1975.243        | 1239.767        | 1223.748       | 1224.756        | 1222.741        | I11 |
| Q20 | 2103.301        | <b>1126.683</b> | 1119.664       | <b>1111.672</b> | 1109.656        | Q10 |
| A21 | 2174.338        | 998.624         | 982.605        | <b>983.614</b>  | 981.598         | A9  |
| V22 | 2273.407        | 927.587         | <b>911.569</b> | 912.576         | 910.561         | V8  |
| L23 | 2389.491        | 808.513         | 792.494        | <b>813.508</b>  | 811.492         | L7  |
| L24 | 2499.575        | 715.435         | <b>699.416</b> | <b>708.424</b>  | 698.408         | L6  |
| P25 | 2596.628        | 602.351         | 586.332        | 587.340         | 585.324         | P5  |
| K26 | 2724.723        | 505.268         | 489.249        | <b>498.267</b>  | 488.251         | K4  |
| K27 | 2852.818        | 377.203         | 361.184        | 362.192         | 360.177         | K3  |
| T28 | 2953.865        | 249.106         | 233.087        | 234.095         | 232.082         | T2  |
| E29 | 3082.908        | 148.060         | 132.042        | 133.050         | 131.034         | E1  |



# sp | Q6GSS7 | H2A2A\_MOUSE

LNKLLGK <sup>Dimethyl</sup> <sub>28.03</sub> VTIAQGGVLPNIQAVLLPKKTE

- ▶ fragmentation table for charge state 2+
- ▶ specType=etd
- ▶ score=32.10
- ▶ F113279.dat
- ▶ query=q41564\_p1
- ▶ precursor=1028.629900
- ▶ chargePrecursor=3
- ▶ itol=0.5

| AA   | c               | y               | z+1             | z+2             | z               | AA   |
|------|-----------------|-----------------|-----------------|-----------------|-----------------|------|
| L1   | 66.053          | <b>1542.450</b> | 1524.440        | 9.504           | <b>1533.936</b> | L129 |
| N12  | 123.054         | 1485.905        | <b>1477.898</b> | <b>1478.402</b> | 1477.391        | N020 |
| K13  | 187.132         | 1428.889        | <b>1420.877</b> | <b>1421.381</b> | 1420.373        | K027 |
| L14  | 243.674         | 1364.839        | 1356.829        | 1357.333        | <b>1356.325</b> | L126 |
| L15  | 300.216         | 1308.297        | 1300.287        | 1300.791        | 1299.783        | L125 |
| G16  | 358.759         | 1251.755        | 1243.745        | 1244.249        | 1243.241        | G024 |
| K17  | 406.799         | 1223.244        | 1215.234        | 1215.738        | 1214.731        | K023 |
| V18  | 456.324         | 1145.181        | 1137.171        | 1137.675        | 1136.667        | V022 |
| F19  | 506.849         | 1095.646        | 1087.637        | 1088.141        | 1087.133        | F121 |
| T10  | 563.390         | 1045.123        | 1037.113        | 1037.617        | 1036.609        | T020 |
| A111 | 588.909         | 988.581         | 980.571         | 981.075         | 980.067         | A119 |
| G112 | 602.937         | 953.065         | 945.055         | 945.559         | 944.551         | G118 |
| G113 | 691.448         | 889.033         | 881.023         | 881.527         | 880.519         | G117 |
| G14  | 719.959         | 860.522         | 852.512         | 853.017         | 852.009         | G116 |
| V15  | 769.493         | 832.011         | 824.002         | 824.506         | 823.498         | V115 |
| L16  | 826.035         | 782.477         | 774.468         | 774.972         | 773.964         | L114 |
| F117 | 874.581         | 728.935         | 720.925         | 721.429         | 720.421         | F113 |
| N118 | 931.583         | 677.400         | 669.390         | 669.893         | 668.885         | N112 |
| I19  | 988.125         | 620.867         | 612.857         | 613.361         | 612.353         | I111 |
| Q120 | 1052.154        | 563.845         | 555.835         | 556.340         | 555.332         | Q110 |
| A121 | 1087.673        | 499.816         | 491.807         | 492.311         | 491.303         | A10  |
| V122 | 1127.207        | 484.297         | 476.288         | 476.792         | 475.784         | V18  |
| L123 | 1193.749        | 414.763         | 406.753         | 407.257         | 406.250         | L117 |
| L124 | 1250.291        | 358.221         | 350.211         | 350.715         | 349.708         | L16  |
| P125 | 1298.817        | 301.679         | 293.670         | 294.174         | 293.166         | P15  |
| K126 | <b>1362.865</b> | 253.153         | 245.143         | 245.647         | 244.639         | K14  |
| K127 | <b>1426.912</b> | 189.105         | 181.096         | 181.600         | 180.592         | K13  |
| T128 | 1477.436        | 125.058         | 117.048         | 117.552         | 116.544         | T12  |
| E129 | 1541.958        | 74.534          | 66.524          | 67.028          | 66.021          | E11  |

# sp | Q6GSS7 | H2A2A\_MOUSE

LNKLLGK<sup>Dimethyl</sup>VTIAQGGVLPNIQAVLLPKKTE  
28.03

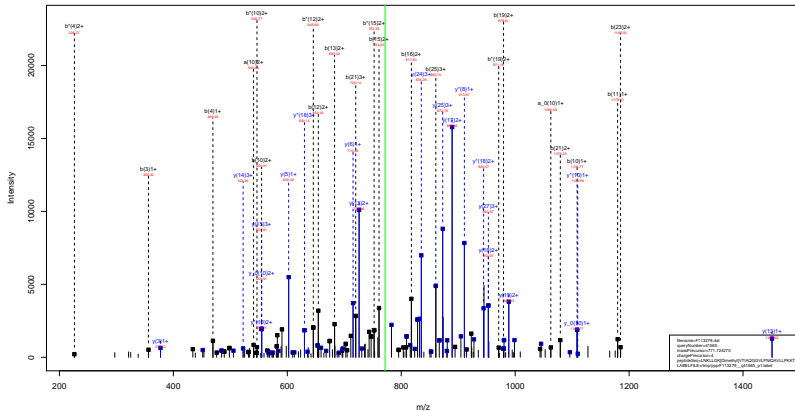

# sp | Q6GSS7 | H2A2A\_MOUSE

LNKLLGK <sup>Dimethyl</sup>VTIAQGGVLPNIQAVLLPKKTE  
28.03

- ▶ fragmentation table for charge state 1+
- ▶ specType=cid
- ▶ score=68.47
- ▶ F113279.dat
- ▶ query=q41565\_p1
- ▶ precursor=771.724270
- ▶ chargePrecursor=4
- ▶ itol=0.5

| AA  | a   | a*   | aΔ    | b   | b*   | bΔ    | y     | y*   | yΔ    | AA   |
|-----|-----|------|-------|-----|------|-------|-------|------|-------|------|
| L1  | 88  | 0.00 | 0.000 | 114 | 0.01 | 0.000 | 10.81 | 0.00 | 10.81 | L129 |
| K1  | 100 | 1.00 | 1.000 | 108 | 1.00 | 1.000 | 10.81 | 1.00 | 10.81 | K130 |
| R1  | 126 | 1.04 | 1.040 | 105 | 1.05 | 1.050 | 10.82 | 1.05 | 10.82 | K127 |
| L14 | 141 | 1.08 | 1.080 | 102 | 1.06 | 1.060 | 10.82 | 1.06 | 10.82 | L126 |
| L15 | 154 | 1.12 | 1.120 | 99  | 1.04 | 1.040 | 10.82 | 1.04 | 10.82 | L125 |
| G16 | 161 | 1.14 | 1.140 | 96  | 1.02 | 1.020 | 10.82 | 1.02 | 10.82 | G124 |
| K17 | 187 | 1.20 | 1.200 | 93  | 1.00 | 1.000 | 10.82 | 1.00 | 10.82 | K123 |
| V18 | 186 | 1.19 | 1.190 | 90  | 0.98 | 0.980 | 10.82 | 0.98 | 10.82 | V122 |
| L19 | 189 | 1.20 | 1.200 | 87  | 0.96 | 0.960 | 10.82 | 0.96 | 10.82 | L121 |
| I10 | 186 | 1.19 | 1.190 | 84  | 0.94 | 0.940 | 10.82 | 0.94 | 10.82 | I101 |
| A11 | 115 | 1.09 | 1.090 | 81  | 0.92 | 0.920 | 10.82 | 0.92 | 10.82 | A116 |
| G12 | 119 | 1.10 | 1.100 | 78  | 0.90 | 0.900 | 10.82 | 0.90 | 10.82 | G120 |
| G13 | 136 | 1.16 | 1.160 | 75  | 0.88 | 0.880 | 10.82 | 0.88 | 10.82 | G117 |
| G14 | 135 | 1.15 | 1.150 | 72  | 0.86 | 0.860 | 10.82 | 0.86 | 10.82 | G116 |
| V15 | 139 | 1.17 | 1.170 | 69  | 0.84 | 0.840 | 10.82 | 0.84 | 10.82 | V115 |
| L16 | 156 | 1.24 | 1.240 | 66  | 0.82 | 0.820 | 10.82 | 0.82 | 10.82 | L114 |
| L17 | 161 | 1.26 | 1.260 | 63  | 0.80 | 0.800 | 10.82 | 0.80 | 10.82 | L113 |
| N18 | 171 | 1.30 | 1.300 | 60  | 0.78 | 0.780 | 10.82 | 0.78 | 10.82 | N112 |
| L19 | 170 | 1.29 | 1.290 | 57  | 0.76 | 0.760 | 10.82 | 0.76 | 10.82 | L111 |
| Q20 | 155 | 1.23 | 1.230 | 54  | 0.74 | 0.740 | 10.82 | 0.74 | 10.82 | Q20  |
| R21 | 128 | 1.11 | 1.110 | 51  | 0.72 | 0.720 | 10.82 | 0.72 | 10.82 | R21  |
| V22 | 128 | 1.11 | 1.110 | 48  | 0.70 | 0.700 | 10.82 | 0.70 | 10.82 | V22  |
| L23 | 141 | 1.18 | 1.180 | 45  | 0.68 | 0.680 | 10.82 | 0.68 | 10.82 | L23  |
| L24 | 145 | 1.21 | 1.210 | 42  | 0.66 | 0.660 | 10.82 | 0.66 | 10.82 | L24  |
| P25 | 151 | 1.25 | 1.250 | 39  | 0.64 | 0.640 | 10.82 | 0.64 | 10.82 | P25  |
| K26 | 176 | 1.36 | 1.360 | 36  | 0.62 | 0.620 | 10.82 | 0.62 | 10.82 | K26  |
| K27 | 187 | 1.40 | 1.400 | 33  | 0.60 | 0.600 | 10.82 | 0.60 | 10.82 | K27  |
| L28 | 189 | 1.41 | 1.410 | 30  | 0.58 | 0.580 | 10.82 | 0.58 | 10.82 | L28  |
| E29 | 187 | 1.39 | 1.390 | 27  | 0.56 | 0.560 | 10.82 | 0.56 | 10.82 | E29  |

# sp | Q6GSS7 | H2A2A\_MOUSE

LNKLLGK <sup>Dimethyl</sup> <sub>28.03</sub> VTIAQGGVLPNIQAVLLPKKTE

- ▶ fragmentation table for charge state 2+
- ▶ specType=cid
- ▶ score=68.47
- ▶ F113279.dat
- ▶ query=q41565.p1
- ▶ precursor=771.724270
- ▶ chargePrecursor=4
- ▶ itol=0.5

| AA  | a               | a*             | a±0            | b               | b*              | b±0             | y               | y*             | y±0            | AA   |
|-----|-----------------|----------------|----------------|-----------------|-----------------|-----------------|-----------------|----------------|----------------|------|
| L1  | 41.552          | 8.524          | 8.524          | 22.543          | 0.524           | 0.524           | 1542.420        | 1533.896       | 1533.444       | L156 |
| R1  | 154.632         | 156.100        | 8.524          | 134.574         | 0.524           | 0.524           | 1455.961        | 1471.395       | 1476.920       | R120 |
| R2  | 154.632         | 156.100        | 8.524          | 139.618         | 170.106         | 8.524           | 1455.961        | 1476.373       | 1476.981       | R122 |
| L4  | 221.551         | 212.650        | 8.524          | 219.164         | <b>226.647</b>  | 8.524           | 1364.830        | 1359.325       | 1355.833       | L126 |
| L5  | 217.720         | 209.391        | 8.524          | 209.765         | 215.189         | 8.524           | 1359.325        | 1359.760       | 1359.969       | L128 |
| Q4  | 306.228         | 297.750        | 8.524          | 305.213         | 311.700         | 8.524           | 1251.241        | 1243.241       | 1242.740       | Q24  |
| R7  | 306.228         | 297.750        | 8.524          | 309.274         | 308.763         | 8.524           | 1221.241        | 1214.731       | 1214.230       | R125 |
| V6  | <b>433.813</b>  | 425.381        | 8.524          | 444.812         | 438.947         | 8.524           | 1141.141        | 1134.481       | 1134.019       | V129 |
| V9  | <b>484.337</b>  | <b>475.823</b> | 475.371        | <b>488.334</b>  | <b>489.821</b>  | <b>489.339</b>  | <b>1095.546</b> | 1087.533       | 1088.043       | V121 |
| I10 | <b>540.879</b>  | <b>532.366</b> | <b>531.874</b> | <b>554.874</b>  | <b>546.363</b>  | <b>545.871</b>  | <b>1045.123</b> | 1036.928       | 1036.431       | I123 |
| A11 | 576.397         | <b>567.884</b> | <b>567.392</b> | <b>590.393</b>  | <b>581.882</b>  | <b>581.390</b>  | <b>980.581</b>  | <b>980.087</b> | <b>979.575</b> | A119 |
| Q12 | 689.927         | 681.393        | 680.900        | <b>694.424</b>  | <b>685.911</b>  | <b>685.419</b>  | <b>951.062</b>  | <b>944.549</b> | 944.048        | Q118 |
| Q13 | 689.927         | 681.393        | 680.900        | <b>687.935</b>  | <b>674.422</b>  | <b>673.930</b>  | <b>889.833</b>  | <b>880.319</b> | <b>880.227</b> | Q117 |
| Q14 | <b>697.448</b>  | 688.935        | 688.441        | <b>711.444</b>  | <b>702.932</b>  | <b>702.440</b>  | <b>860.322</b>  | <b>852.009</b> | 851.517        | Q116 |
| V12 | <b>1146.302</b> | 1138.449       | 1137.971       | <b>1160.300</b> | <b>1152.447</b> | <b>1151.974</b> | <b>832.591</b>  | <b>823.498</b> | 823.006        | V115 |
| L10 | <b>803.524</b>  | <b>795.011</b> | 794.521        | <b>817.522</b>  | <b>809.009</b>  | <b>808.517</b>  | <b>782.477</b>  | 773.412        | 773.412        | L104 |
| P17 | <b>852.651</b>  | 843.707        | 843.000        | <b>859.644</b>  | <b>851.670</b>  | <b>851.670</b>  | <b>725.830</b>  | 717.422        | 717.019        | P113 |
| R16 | 909.212         | 900.300        | 899.800        | <b>923.876</b>  | <b>914.356</b>  | 914.356         | 624.254         | 617.424        | 616.925        | R114 |
| L18 | 909.214         | 901.411        | 900.800        | <b>919.612</b>  | <b>911.098</b>  | 911.098         | 619.819         | 610.301        | <b>611.874</b> | L111 |
| Q20 | 939.844         | 931.111        | 930.611        | <b>943.641</b>  | 935.438         | 935.438         | 581.811         | <b>555.332</b> | <b>554.840</b> | Q110 |
| A21 | 939.842         | 930.640        | 930.141        | <b>1079.160</b> | 1070.646        | 1070.154        | 489.811         | 481.301        | 480.811        | A19  |
| V15 | 1114.408        | 1105.981       | 1105.500       | 1118.408        | 1110.100        | 1110.100        | 454.751         | 446.250        | 445.750        | V109 |
| L24 | 1111.238        | 1102.720       | 1102.211       | <b>1185.238</b> | 1176.722        | 1176.722        | 454.751         | 446.250        | 445.750        | L107 |
| L24 | 1227.160        | 1218.200       | 1217.771       | 1241.774        | 1233.260        | 1232.771        | 388.221         | 380.700        | 380.210        | L106 |
| P15 | 1276.307        | 1267.781       | 1267.481       | 1290.304        | 1281.774        | 1281.774        | 381.811         | 380.300        | 380.000        | P101 |
| R26 | 1340.534        | 1331.921       | 1331.349       | 1354.342        | 1345.830        | 1345.830        | 255.531         | 244.020        | 244.174        | R104 |
| R27 | 1354.402        | 1345.880       | 1345.360       | 1414.390        | 1405.880        | 1405.880        | 148.100         | 148.700        | 148.100        | R103 |
| L26 | 1434.326        | 1425.412       | 1424.920       | 1448.322        | 1440.410        | 1439.919        | 125.300         | 125.800        | 125.300        | L102 |
| L24 | 1519.497        | 1510.920       | 1510.441       | 1533.444        | 1524.911        | 1524.419        | 78.419          | 84.920         | 85.320         | L101 |

# sp | Q6GSS7 | H2A2A\_MOUSE

LNKLLGK <sup>Dimethyl</sup>VTIAQGGVLPNIQAVLLPKKTE  
28.03

- ▶ fragmentation table for charge state 3+
- ▶ specType=cid
- ▶ score=68.47
- ▶ F113279.dat
- ▶ query=q41565.p1
- ▶ precursor=771.724270
- ▶ chargePrecursor=4
- ▶ itol=0.5

| AA  | a              | a*             | a,b      | b              | b*             | b,b      | y              | y*             | y,b            | AA      |     |
|-----|----------------|----------------|----------|----------------|----------------|----------|----------------|----------------|----------------|---------|-----|
| L1  | 28.178         | 0.07           | 0.07     | 58.102         | 0.072          | 0.072    | 1003.031       | 1022.966       | 1022.962       | L26     |     |
| N2  | 67.585         | 61.706         | 0.672    | 76.715         | 71.041         | 0.672    | 660.941        | 665.265        | 664.937        | N26     |     |
| K3  | 110.681        | 104.407        | 0.672    | 119.413        | 113.739        | 0.672    | <b>952.926</b> | 947.251        | 946.921        | K27     |     |
| L4  | 147.778        | 142.102        | 0.672    | 157.109        | 151.434        | 0.672    | 852.225        | <b>844.553</b> | 844.225        | L26     |     |
| L5  | 188.872        | 179.397        | 0.672    | 194.864        | 189.128        | 0.672    | <b>872.511</b> | <b>866.835</b> | <b>866.510</b> | L26     |     |
| Q6  | 204.478        | 198.104        | 0.672    | 213.611        | 208.136        | 0.672    | <b>834.839</b> | <b>829.163</b> | <b>828.835</b> | Q24     |     |
| K7  | 256.522        | 250.248        | 0.672    | 265.851        | 260.176        | 0.672    | <b>815.832</b> | 810.156        | <b>809.828</b> | K22     |     |
| V8  | 298.544        | 292.269        | 0.672    | 308.878        | 303.203        | 0.672    | 761.709        | 756.114        | 755.788        | V22     |     |
| Y9  | 323.227        | 317.551        | 0.672    | 332.221        | 326.545        | 0.672    | <b>730.747</b> | 725.071        | 724.743        | Y21     |     |
| I10 | 360.622        | 354.248        | 0.641    | 370.251        | 364.876        | 0.641    | <b>697.064</b> | 691.409        | <b>691.081</b> | I20     |     |
| A11 | 384.601        | 378.225        | 0.667    | 394.912        | 389.237        | 0.667    | <b>650.389</b> | 644.714        | <b>644.386</b> | A19     |     |
| Q12 | 427.208        | 421.411        | 0.626    | 436.814        | 430.984        | 0.626    | <b>635.710</b> | <b>630.035</b> | <b>629.707</b> | Q10     |     |
| G13 | 446.204        | 440.011        | 0.600    | 455.245        | 449.056        | 0.600    | 614.141        | 608.274        | 607.947        | G17     |     |
| G14 | 488.244        | 482.028        | 0.612    | 497.437        | 491.057        | 0.612    | <b>574.017</b> | <b>568.342</b> | <b>568.014</b> | G16     |     |
| V15 | <b>508.214</b> | 499.929        | 0.683    | 517.508        | 510.766        | 0.683    | <b>525.019</b> | 519.154        | 518.789        | V19     |     |
| L16 | 526.619        | 520.343        | 0.663    | 545.505        | 539.079        | 0.663    | <b>521.987</b> | 516.312        | 515.984        | L14     |     |
| P17 | <b>568.370</b> | 562.094        | 0.627    | 577.703        | 572.026        | 0.627    | <b>484.292</b> | 478.611        | 478.280        | P13     |     |
| N18 | 606.184        | 600.708        | 0.600    | 615.380        | 609.904        | 0.600    | <b>606.712</b> | <b>451.942</b> | 446.268        | 445.938 | N12 |
| T19 | 644.678        | 638.402        | 0.676    | <b>653.410</b> | 647.638        | 0.676    | 487.407        | 481.592        | 480.924        | T11     |     |
| Q20 | 686.705        | 681.189        | 0.600    | <b>696.090</b> | <b>690.421</b> | 0.600    | 376.251        | 370.571        | 370.242        | Q10     |     |
| A21 | 688.484        | <b>704.768</b> | 164.440  | <b>719.775</b> | 714.100        | 164.440  | 331.540        | 327.871        | 327.542        | A10     |     |
| V22 | <b>712.867</b> | 707.191        | 137.460  | <b>732.788</b> | <b>727.123</b> | 137.460  | 380.897        | 376.162        | 375.834        | V10     |     |
| L23 | 751.151        | 745.486        | 175.150  | 762.943        | 757.011        | 175.150  | 276.944        | 272.195        | 271.841        | L17     |     |
| L24 | 813.856        | 813.189        | 0.627    | 826.189        | 822.612        | 0.627    | 239.150        | 234.474        | 234.146        | L16     |     |
| P25 | 851.207        | 845.511        | 0.645    | <b>860.539</b> | 854.863        | 0.645    | 281.455        | 276.706        | 276.452        | P15     |     |
| K26 | 893.806        | 888.109        | 0.649    | 905.460        | 899.763        | 0.649    | 307.413        | 302.194        | 301.920        | K14     |     |
| K27 | 936.004        | 930.308        | 0.600    | 945.053        | 939.280        | 0.600    | 126.426        | 121.730        | 121.402        | K15     |     |
| T28 | 970.208        | 964.611        | 0.641    | <b>975.618</b> | 970.192        | 0.641    | 81.710         | 81.027         | 80.714         | T12     |     |
| E29 | 1013.100       | 1007.022       | 1007.209 | 1022.832       | 1016.956       | 1016.956 | 301.020        | 0.672          | 44.021         | E10     |     |

# sp | Q6GSS7 | H2A2A\_MOUSE

LNKLLGK <sup>Dimethyl</sup>VTIAQGGVLPNIQAVLLPKKTE  
28.03

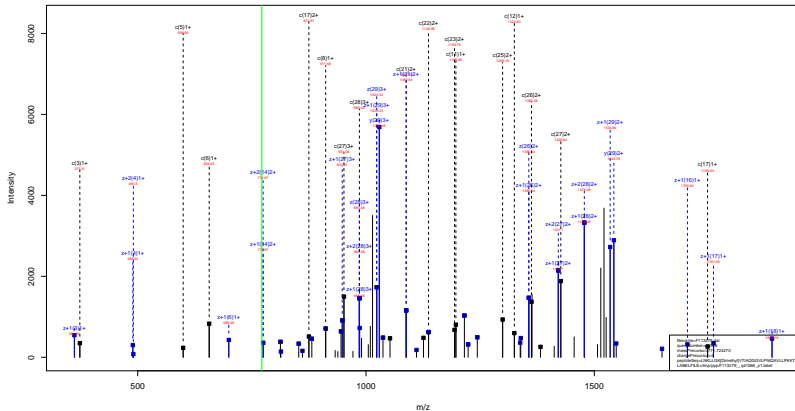

# sp | Q6GSS7 | H2A2A\_MOUSE

LNKLLGK <sup>Dimethyl</sup> <sub>28.03</sub> VTIAQGGVLPNIQAVLLPKKTE

- ▶ fragmentation table for charge state 1+
- ▶ specType=etd
- ▶ score=97.34
- ▶ F113279.dat
- ▶ query=q41566.p1
- ▶ precursor=771.724270
- ▶ chargePrecursor=4
- ▶ itol=0.5

| AA    | c               | y        | z+1             | z+2             | z        | AA    |
|-------|-----------------|----------|-----------------|-----------------|----------|-------|
| L[1]  | 131.118         | 3081.892 | 3067.873        | 0.000           | 3066.895 | L[29] |
| N[2]  | 345.161         | 2970.808 | 2954.789        | 2955.797        | 2951.781 | N[28] |
| K[3]  | <b>373.256</b>  | 2856.765 | 2840.746        | 2841.754        | 2839.738 | K[27] |
| L[4]  | 486.340         | 2728.670 | 2712.651        | 2713.659        | 2711.643 | L[26] |
| L[5]  | <b>599.424</b>  | 2615.585 | 2599.567        | 2600.575        | 2598.560 | L[25] |
| Q[6]  | <b>656.445</b>  | 2502.502 | 2486.483        | 2487.491        | 2485.475 | Q[24] |
| K[7]  | <b>812.572</b>  | 2345.480 | 2429.462        | 2430.469        | 2428.454 | K[23] |
| V[8]  | <b>911.640</b>  | 2288.354 | 2273.335        | 2274.343        | 2272.327 | V[22] |
| T[9]  | 1017.688        | 2190.286 | 2174.267        | 2175.275        | 2173.259 | T[21] |
| I[10] | <b>1125.772</b> | 2089.238 | 2073.219        | 2074.227        | 2072.211 | I[20] |
| A[11] | <b>1196.809</b> | 1976.154 | 1960.135        | 1961.143        | 1959.127 | A[19] |
| Q[12] | <b>1324.867</b> | 1895.111 | <b>1889.098</b> | 1890.106        | 1888.090 | Q[18] |
| G[13] | <b>1381.889</b> | 1777.058 | <b>1761.039</b> | 1762.047        | 1760.032 | G[17] |
| G[14] | 1438.910        | 1720.937 | <b>1704.918</b> | 1705.926        | 1703.910 | G[16] |
| V[15] | 1537.979        | 1663.915 | 1646.907        | <b>1648.004</b> | 1645.989 | V[15] |
| L[16] | 1651.063        | 1563.947 | <b>1547.928</b> | 1548.936        | 1546.920 | L[14] |
| P[17] | <b>1748.116</b> | 1450.893 | 1434.874        | 1435.882        | 1433.866 | P[13] |
| T[18] | 1867.159        | 1383.810 | <b>1377.791</b> | <b>1338.799</b> | 1336.783 | T[12] |
| I[19] | 1975.243        | 1236.767 | <b>1223.748</b> | 1224.756        | 1222.741 | I[11] |
| Q[20] | 2103.301        | 1126.683 | <b>1110.664</b> | 1111.672        | 1109.656 | Q[10] |
| A[21] | 2174.336        | 998.624  | 982.606         | 983.614         | 981.598  | A[9]  |
| V[22] | 2273.407        | 927.587  | <b>911.569</b>  | 912.576         | 910.561  | V[8]  |
| L[23] | 2386.491        | 828.519  | <b>812.500</b>  | <b>813.508</b>  | 811.492  | L[7]  |
| L[24] | 2499.576        | 715.435  | <b>699.415</b>  | 700.424         | 698.408  | L[6]  |
| P[25] | 2596.626        | 602.351  | 586.332         | 587.340         | 585.324  | P[5]  |
| K[26] | 2724.723        | 505.298  | <b>489.279</b>  | <b>490.287</b>  | 488.271  | K[4]  |
| K[27] | 2852.816        | 377.203  | <b>361.184</b>  | 362.192         | 360.177  | K[3]  |
| T[28] | 2951.905        | 249.108  | 233.089         | 234.097         | 232.082  | T[2]  |
| E[29] | 3087.938        | 148.060  | 132.042         | 133.050         | 131.034  | E[1]  |

# sp | Q6GSS7 | H2A2A\_MOUSE

LNKLLGK <sup>Dimethyl</sup><sub>28.03</sub> VTIAQGGVLPNIQAVLLPKKTE

- ▶ fragmentation table for charge state 2+
- ▶ specType=etd
- ▶ score=97.34
- ▶ F113279.dat
- ▶ query=q41566.p1
- ▶ precursor=771.724270
- ▶ chargePrecursor=4
- ▶ itol=0.5

| AA  | c               | y               | z+1             | z+2             | z               | AA   |
|-----|-----------------|-----------------|-----------------|-----------------|-----------------|------|
| L1  | 66.053          | <b>1542.450</b> | <b>1534.440</b> | 8.504           | 1533.930        | L120 |
| N1  | 123.054         | 1485.905        | <b>1477.898</b> | <b>1478.402</b> | 1477.304        | N20  |
| K1  | 187.132         | 1428.889        | <b>1420.877</b> | <b>1421.381</b> | 1420.373        | K27  |
| L14 | 243.674         | 1364.839        | <b>1356.829</b> | 1357.333        | <b>1356.325</b> | L26  |
| L15 | 300.216         | 1308.297        | 1300.287        | 1300.791        | 1299.781        | L25  |
| G16 | 358.258         | 1251.755        | <b>1243.745</b> | 1244.249        | <b>1243.241</b> | G24  |
| K17 | 406.799         | <b>1223.244</b> | <b>1215.234</b> | <b>1215.738</b> | 1214.731        | K23  |
| V18 | 456.324         | 1145.181        | <b>1137.171</b> | 1137.675        | <b>1136.667</b> | V22  |
| T19 | 506.849         | 1095.646        | <b>1087.637</b> | <b>1088.141</b> | 1087.133        | T21  |
| T10 | 563.390         | 1045.123        | <b>1037.113</b> | <b>1037.617</b> | 1036.609        | T20  |
| A11 | 608.909         | 988.581         | 980.571         | 981.075         | 980.067         | A19  |
| G12 | 662.937         | 933.065         | <b>945.053</b>  | <b>945.557</b>  | 944.549         | G18  |
| G13 | 691.448         | 889.033         | <b>881.023</b>  | <b>881.527</b>  | 880.519         | G17  |
| G14 | 719.959         | <b>860.522</b>  | <b>852.513</b>  | <b>853.017</b>  | 852.009         | G16  |
| V15 | 769.493         | 832.011         | 824.002         | 824.506         | 823.498         | V15  |
| L16 | 838.035         | 782.477         | <b>774.468</b>  | <b>774.972</b>  | 773.964         | L14  |
| T17 | <b>874.561</b>  | 728.935         | 721.925         | 722.429         | 721.421         | T13  |
| N18 | 911.553         | 677.405         | 669.395         | 669.900         | 668.892         | N12  |
| I19 | 968.125         | 620.867         | 612.858         | 613.362         | 612.354         | I11  |
| Q10 | <b>1052.154</b> | 563.845         | 555.836         | 556.340         | 555.332         | Q10  |
| A21 | <b>1087.673</b> | 499.816         | 491.807         | 492.311         | 491.303         | A0   |
| V22 | <b>1137.207</b> | 484.297         | 476.288         | 476.792         | 475.784         | V8   |
| L23 | <b>1193.709</b> | 414.763         | 406.754         | 407.258         | 406.250         | L17  |
| L24 | 1250.291        | 358.221         | 350.212         | 350.716         | 349.708         | L16  |
| P25 | <b>1298.817</b> | 301.679         | 293.670         | 294.174         | 293.166         | P5   |
| K26 | <b>1362.865</b> | 253.153         | 245.143         | 245.647         | 244.639         | K4   |
| K27 | <b>1426.912</b> | 189.105         | 181.096         | 181.600         | 180.592         | K3   |
| T28 | 1477.436        | 125.058         | 117.049         | 117.552         | 116.544         | T12  |
| E10 | 1541.958        | 74.534          | 66.524          | 67.028          | 66.021          | E10  |



# sp | Q6GSS7 | H2A2A\_MOUSE

LNKLLGK <sup>Dimethyl</sup> <sub>28.03</sub> VTIAQGGVLPNIQAVLLPKKTE

- ▶ fragmentation table for charge state 3+
- ▶ specType=etd
- ▶ score=97.34
- ▶ F113279.dat
- ▶ query=q41566.p1
- ▶ precursor=771.724270
- ▶ chargePrecursor=4
- ▶ itol=0.5

| AA    | c              | y               | z+1             | z+2            | z     | AA                   |
|-------|----------------|-----------------|-----------------|----------------|-------|----------------------|
| L 1   | 44.377         | <b>1028.635</b> | <b>1023.296</b> |                | 0.672 | <b>1022.960</b> L 29 |
| N 2   | 62.392         | 990.941         | <b>985.601</b>  | <b>985.937</b> |       | <b>985.265</b> N 28  |
| K 3   | 125.090        | 952.026         | <b>947.587</b>  | <b>947.923</b> |       | 947.251 K 27         |
| L 4   | 162.795        | 910.229         | 904.889         | 905.225        |       | 904.553 L 26         |
| L 5   | 200.479        | 872.523         | 867.124         | 867.550        |       | 866.955 L 25         |
| G 6   | 219.487        | 834.839         | 829.409         | 829.835        |       | 829.161 G 24         |
| K 7   | 271.529        | 815.832         | 810.492         | 810.828        |       | 810.158 K 23         |
| V 8   | 304.552        | 763.790         | 758.450         | 758.786        |       | 758.114 V 22         |
| T 9   | 336.234        | 730.767         | 725.427         | 725.763        |       | 725.091 T 21         |
| I 10  | 375.929        | 697.084         | 691.745         | 692.081        |       | 691.409 I 20         |
| A 11  | 399.608        | 659.389         | 654.050         | 654.386        |       | 653.714 A 19         |
| Q 12  | 442.294        | 636.720         | 630.371         | 630.707        |       | 630.033 Q 18         |
| G 13  | 461.301        | 593.024         | 587.685         | 588.021        |       | 587.349 G 17         |
| G 14  | 480.308        | 574.017         | 568.678         | 569.013        |       | 568.342 G 16         |
| V 15  | 513.331        | 555.010         | 549.670         | 550.006        |       | 549.334 V 15         |
| L 16  | 551.026        | 521.987         | 516.648         | 516.984        |       | 516.312 L 14         |
| F 17  | 583.377        | 484.292         | 478.953         | 479.289        |       | 478.611 F 13         |
| Tu 18 | 621.391        | 451.942         | 446.603         | 446.939        |       | 446.265 Tu 12        |
| I 19  | 659.086        | 413.927         | 408.588         | 408.924        |       | 408.252 I 11         |
| Q 20  | 701.772        | 376.213         | 370.893         | 371.229        |       | 370.551 Q 10         |
| A 21  | 725.451        | 333.546         | 328.207         | 328.543        |       | 327.871 A 9          |
| V 22  | 758.474        | 309.867         | 304.528         | 304.864        |       | 304.192 V 8          |
| L 23  | 796.168        | 276.844         | 271.505         | 271.841        |       | 271.169 L 7          |
| L 24  | 833.863        | 239.350         | 233.910         | 234.246        |       | 233.474 L 6          |
| P 25  | 866.214        | 201.655         | 196.116         | 196.451        |       | 195.785 P 5          |
| K 26  | 908.912        | 169.104         | 163.765         | 164.101        |       | 163.429 K 4          |
| K 27  | <b>951.611</b> | 126.406         | 121.066         | 121.402        |       | 120.730 K 3          |
| T 28  | <b>985.293</b> | 83.708          | 78.368          | 78.704         |       | 78.032 T 2           |
| E 29  | 1028.307       | 50.025          | 44.685          | 45.021         |       | 44.349 E 1           |



# sp | Q6GSS7 | H2A2A\_MOUSE

LNKLLGK <sup>Dimethyl</sup>VTIAQGGVLPNIQAVLLPKKTE  
28.03

- ▶ fragmentation table for charge state 1+
- ▶ specType=cid
- ▶ score=69.14
- ▶ F113279.dat
- ▶ query=q41567\_p1
- ▶ precursor=1542.441600
- ▶ chargePrecursor=2
- ▶ itol=0.5

| AA | a   | a*  | a,0   | b     | b*   | b,0   | r     | y*       | y,0      | AA    |      |
|----|-----|-----|-------|-------|------|-------|-------|----------|----------|-------|------|
| L1 | 30  | 30  | 0.000 | 0.000 | 1.14 | 0.000 | 0.000 | 2081.891 | 1548.020 | 0.000 | L129 |
| N1 | 32  | 32  | 0.000 | 0.000 | 1.08 | 0.000 | 0.000 | 2078.952 | 1545.781 | 0.000 | N130 |
| K1 | 33  | 33  | 0.000 | 0.000 | 1.02 | 0.000 | 0.000 | 2076.013 | 1543.542 | 0.000 | K131 |
| L1 | 34  | 34  | 0.000 | 0.000 | 0.96 | 0.000 | 0.000 | 2073.074 | 1541.303 | 0.000 | L132 |
| L1 | 35  | 35  | 0.000 | 0.000 | 0.90 | 0.000 | 0.000 | 2070.135 | 1539.064 | 0.000 | L133 |
| G1 | 36  | 36  | 0.000 | 0.000 | 0.84 | 0.000 | 0.000 | 2067.196 | 1536.825 | 0.000 | G134 |
| K1 | 37  | 37  | 0.000 | 0.000 | 0.78 | 0.000 | 0.000 | 2064.257 | 1534.586 | 0.000 | K135 |
| V1 | 38  | 38  | 0.000 | 0.000 | 0.72 | 0.000 | 0.000 | 2061.318 | 1532.347 | 0.000 | V136 |
| T1 | 39  | 39  | 0.000 | 0.000 | 0.66 | 0.000 | 0.000 | 2058.379 | 1530.108 | 0.000 | T137 |
| I1 | 40  | 40  | 0.000 | 0.000 | 0.60 | 0.000 | 0.000 | 2055.440 | 1527.869 | 0.000 | I138 |
| A1 | 41  | 41  | 0.000 | 0.000 | 0.54 | 0.000 | 0.000 | 2052.501 | 1525.630 | 0.000 | A139 |
| G1 | 42  | 42  | 0.000 | 0.000 | 0.48 | 0.000 | 0.000 | 2049.562 | 1523.391 | 0.000 | G140 |
| G1 | 43  | 43  | 0.000 | 0.000 | 0.42 | 0.000 | 0.000 | 2046.623 | 1521.152 | 0.000 | G141 |
| G1 | 44  | 44  | 0.000 | 0.000 | 0.36 | 0.000 | 0.000 | 2043.684 | 1518.913 | 0.000 | G142 |
| V1 | 45  | 45  | 0.000 | 0.000 | 0.30 | 0.000 | 0.000 | 2040.745 | 1516.674 | 0.000 | V143 |
| L1 | 46  | 46  | 0.000 | 0.000 | 0.24 | 0.000 | 0.000 | 2037.806 | 1514.435 | 0.000 | L144 |
| P1 | 47  | 47  | 0.000 | 0.000 | 0.18 | 0.000 | 0.000 | 2034.867 | 1512.196 | 0.000 | P145 |
| T1 | 48  | 48  | 0.000 | 0.000 | 0.12 | 0.000 | 0.000 | 2031.928 | 1509.957 | 0.000 | T146 |
| I1 | 49  | 49  | 0.000 | 0.000 | 0.06 | 0.000 | 0.000 | 2028.989 | 1507.718 | 0.000 | I147 |
| G1 | 50  | 50  | 0.000 | 0.000 | 0.00 | 0.000 | 0.000 | 2026.050 | 1505.479 | 0.000 | G148 |
| G1 | 51  | 51  | 0.000 | 0.000 | 0.00 | 0.000 | 0.000 | 2023.111 | 1503.240 | 0.000 | G149 |
| V1 | 52  | 52  | 0.000 | 0.000 | 0.00 | 0.000 | 0.000 | 2020.172 | 1500.999 | 0.000 | V150 |
| L1 | 53  | 53  | 0.000 | 0.000 | 0.00 | 0.000 | 0.000 | 2017.233 | 1498.760 | 0.000 | L151 |
| L1 | 54  | 54  | 0.000 | 0.000 | 0.00 | 0.000 | 0.000 | 2014.294 | 1496.521 | 0.000 | L152 |
| P1 | 55  | 55  | 0.000 | 0.000 | 0.00 | 0.000 | 0.000 | 2011.355 | 1494.282 | 0.000 | P153 |
| T1 | 56  | 56  | 0.000 | 0.000 | 0.00 | 0.000 | 0.000 | 2008.416 | 1492.043 | 0.000 | T154 |
| I1 | 57  | 57  | 0.000 | 0.000 | 0.00 | 0.000 | 0.000 | 2005.477 | 1489.804 | 0.000 | I155 |
| G1 | 58  | 58  | 0.000 | 0.000 | 0.00 | 0.000 | 0.000 | 2002.538 | 1487.565 | 0.000 | G156 |
| K1 | 59  | 59  | 0.000 | 0.000 | 0.00 | 0.000 | 0.000 | 2000.000 | 1485.326 | 0.000 | K157 |
| K1 | 60  | 60  | 0.000 | 0.000 | 0.00 | 0.000 | 0.000 | 1997.461 | 1483.087 | 0.000 | K158 |
| K1 | 61  | 61  | 0.000 | 0.000 | 0.00 | 0.000 | 0.000 | 1994.922 | 1480.848 | 0.000 | K159 |
| K1 | 62  | 62  | 0.000 | 0.000 | 0.00 | 0.000 | 0.000 | 1992.383 | 1478.609 | 0.000 | K160 |
| K1 | 63  | 63  | 0.000 | 0.000 | 0.00 | 0.000 | 0.000 | 1989.844 | 1476.370 | 0.000 | K161 |
| K1 | 64  | 64  | 0.000 | 0.000 | 0.00 | 0.000 | 0.000 | 1987.305 | 1474.131 | 0.000 | K162 |
| K1 | 65  | 65  | 0.000 | 0.000 | 0.00 | 0.000 | 0.000 | 1984.766 | 1471.892 | 0.000 | K163 |
| K1 | 66  | 66  | 0.000 | 0.000 | 0.00 | 0.000 | 0.000 | 1982.227 | 1469.653 | 0.000 | K164 |
| K1 | 67  | 67  | 0.000 | 0.000 | 0.00 | 0.000 | 0.000 | 1979.688 | 1467.414 | 0.000 | K165 |
| K1 | 68  | 68  | 0.000 | 0.000 | 0.00 | 0.000 | 0.000 | 1977.149 | 1465.175 | 0.000 | K166 |
| K1 | 69  | 69  | 0.000 | 0.000 | 0.00 | 0.000 | 0.000 | 1974.610 | 1462.936 | 0.000 | K167 |
| K1 | 70  | 70  | 0.000 | 0.000 | 0.00 | 0.000 | 0.000 | 1972.071 | 1460.697 | 0.000 | K168 |
| K1 | 71  | 71  | 0.000 | 0.000 | 0.00 | 0.000 | 0.000 | 1969.532 | 1458.458 | 0.000 | K169 |
| K1 | 72  | 72  | 0.000 | 0.000 | 0.00 | 0.000 | 0.000 | 1966.993 | 1456.219 | 0.000 | K170 |
| K1 | 73  | 73  | 0.000 | 0.000 | 0.00 | 0.000 | 0.000 | 1964.454 | 1453.980 | 0.000 | K171 |
| K1 | 74  | 74  | 0.000 | 0.000 | 0.00 | 0.000 | 0.000 | 1961.915 | 1451.741 | 0.000 | K172 |
| K1 | 75  | 75  | 0.000 | 0.000 | 0.00 | 0.000 | 0.000 | 1959.376 | 1449.502 | 0.000 | K173 |
| K1 | 76  | 76  | 0.000 | 0.000 | 0.00 | 0.000 | 0.000 | 1956.837 | 1447.263 | 0.000 | K174 |
| K1 | 77  | 77  | 0.000 | 0.000 | 0.00 | 0.000 | 0.000 | 1954.298 | 1445.024 | 0.000 | K175 |
| K1 | 78  | 78  | 0.000 | 0.000 | 0.00 | 0.000 | 0.000 | 1951.759 | 1442.785 | 0.000 | K176 |
| K1 | 79  | 79  | 0.000 | 0.000 | 0.00 | 0.000 | 0.000 | 1949.220 | 1440.546 | 0.000 | K177 |
| K1 | 80  | 80  | 0.000 | 0.000 | 0.00 | 0.000 | 0.000 | 1946.681 | 1438.307 | 0.000 | K178 |
| K1 | 81  | 81  | 0.000 | 0.000 | 0.00 | 0.000 | 0.000 | 1944.142 | 1436.068 | 0.000 | K179 |
| K1 | 82  | 82  | 0.000 | 0.000 | 0.00 | 0.000 | 0.000 | 1941.603 | 1433.829 | 0.000 | K180 |
| K1 | 83  | 83  | 0.000 | 0.000 | 0.00 | 0.000 | 0.000 | 1939.064 | 1431.590 | 0.000 | K181 |
| K1 | 84  | 84  | 0.000 | 0.000 | 0.00 | 0.000 | 0.000 | 1936.525 | 1429.351 | 0.000 | K182 |
| K1 | 85  | 85  | 0.000 | 0.000 | 0.00 | 0.000 | 0.000 | 1933.986 | 1427.112 | 0.000 | K183 |
| K1 | 86  | 86  | 0.000 | 0.000 | 0.00 | 0.000 | 0.000 | 1931.447 | 1424.873 | 0.000 | K184 |
| K1 | 87  | 87  | 0.000 | 0.000 | 0.00 | 0.000 | 0.000 | 1928.908 | 1422.634 | 0.000 | K185 |
| K1 | 88  | 88  | 0.000 | 0.000 | 0.00 | 0.000 | 0.000 | 1926.369 | 1420.395 | 0.000 | K186 |
| K1 | 89  | 89  | 0.000 | 0.000 | 0.00 | 0.000 | 0.000 | 1923.830 | 1418.156 | 0.000 | K187 |
| K1 | 90  | 90  | 0.000 | 0.000 | 0.00 | 0.000 | 0.000 | 1921.291 | 1415.917 | 0.000 | K188 |
| K1 | 91  | 91  | 0.000 | 0.000 | 0.00 | 0.000 | 0.000 | 1918.752 | 1413.678 | 0.000 | K189 |
| K1 | 92  | 92  | 0.000 | 0.000 | 0.00 | 0.000 | 0.000 | 1916.213 | 1411.439 | 0.000 | K190 |
| K1 | 93  | 93  | 0.000 | 0.000 | 0.00 | 0.000 | 0.000 | 1913.674 | 1409.200 | 0.000 | K191 |
| K1 | 94  | 94  | 0.000 | 0.000 | 0.00 | 0.000 | 0.000 | 1911.135 | 1406.961 | 0.000 | K192 |
| K1 | 95  | 95  | 0.000 | 0.000 | 0.00 | 0.000 | 0.000 | 1908.596 | 1404.722 | 0.000 | K193 |
| K1 | 96  | 96  | 0.000 | 0.000 | 0.00 | 0.000 | 0.000 | 1906.057 | 1402.483 | 0.000 | K194 |
| K1 | 97  | 97  | 0.000 | 0.000 | 0.00 | 0.000 | 0.000 | 1903.518 | 1400.244 | 0.000 | K195 |
| K1 | 98  | 98  | 0.000 | 0.000 | 0.00 | 0.000 | 0.000 | 1900.979 | 1398.005 | 0.000 | K196 |
| K1 | 99  | 99  | 0.000 | 0.000 | 0.00 | 0.000 | 0.000 | 1898.440 | 1395.766 | 0.000 | K197 |
| K1 | 100 | 100 | 0.000 | 0.000 | 0.00 | 0.000 | 0.000 | 1895.901 | 1393.527 | 0.000 | K198 |
| K1 | 101 | 101 | 0.000 | 0.000 | 0.00 | 0.000 | 0.000 | 1893.362 | 1391.288 | 0.000 | K199 |
| K1 | 102 | 102 | 0.000 | 0.000 | 0.00 | 0.000 | 0.000 | 1890.823 | 1389.049 | 0.000 | K200 |

# sp | Q6GSS7 | H2A2A\_MOUSE

LNKLLGK <sup>Dimethyl</sup> VTIAQGGVLPNIQAVLLPKKTE  
28.03

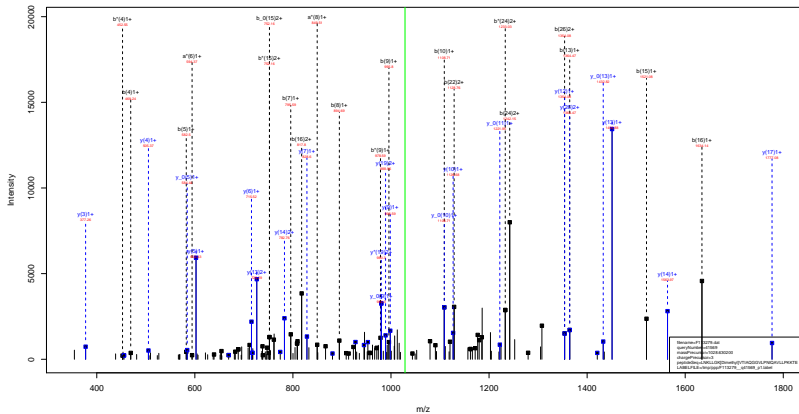

# sp | Q6GSS7 | H2A2A\_MOUSE

LNKLLGK<sup>Dimethyl</sup>VTIAQGGVLPNIQAVLLPKKTE<sub>28.03</sub>

- ▶ fragmentation table for charge state 1+
- ▶ specType=cid
- ▶ score=84.70
- ▶ F113279.dat
- ▶ query=q41569\_p1
- ▶ precursor=1028.630200
- ▶ chargePrecursor=3
- ▶ itol=0.5

| AA   | a               | a <sup>h</sup> | a <sup>o</sup> | b               | b <sup>h</sup>  | b <sup>o</sup>  | y        | y <sup>h</sup> | y <sup>o</sup> | AA   |
|------|-----------------|----------------|----------------|-----------------|-----------------|-----------------|----------|----------------|----------------|------|
| L1   | 86.096          | 0.000          | 0.000          | 114.091         | 0.000           | 0.000           | 383.091  | 0.004869       | 3029.881       | L129 |
| K1   | 309.192         | 311.193        | 0.000          | 209.194         | 0.11300         | 0.000           | 309.200  | 0.005783       | 2092.769       | K130 |
| K1   | 328.234         | 311.209        | 0.000          | 309.249         | 0.000           | 0.000           | 309.255  | 0.005783       | 2092.794       | K127 |
| L1   | 141.118         | 624.202        | 0.000          | <b>469.313</b>  | <b>452.207</b>  | 0.000           | 272.810  | 0.111543       | 2728.029       | L126 |
| L1   | 154.042         | 617.181        | 0.000          | <b>382.207</b>  | 0.000           | 0.000           | 281.788  | 0.098759       | 2727.078       | L125 |
| G1   | 311.424         | <b>594.397</b> | 0.000          | <b>639.418</b>  | 0.000           | 0.000           | 250.521  | 0.248747       | 2484.461       | G124 |
| K1   | 187.030         | <b>750.524</b> | 0.000          | <b>795.545</b>  | 0.178313        | 0.000           | 343.480  | 0.242454       | 2427.470       | K123 |
| V1   | <b>694.619</b>  | <b>848.592</b> | 0.000          | <b>894.613</b>  | 0.177549        | 0.000           | 248.594  | 0.222729       | 2229.543       | V122 |
| L1   | 187.030         | 900.592        | 0.000          | <b>905.601</b>  | <b>878.615</b>  | 0.000           | 377.593  | 0.150209       | 2117.250       | L121 |
| L1   | 100.192         | 983.794        | 0.000          | <b>1108.745</b> | 0.011319        | <b>1086.735</b> | 308.239  | 0.074211       | 2077.927       | L120 |
| A11  | 131.107         | 1124.763       | 0.000          | <b>1129.772</b> | <b>1119.782</b> | 0.000           | 196.772  | 0.008154       | 1958.141       | A119 |
| G12  | <b>1279.848</b> | 1277.819       | 0.000          | <b>1307.841</b> | 0.000           | 0.000           | 190.811  | 0.003096       | 1907.708       | G118 |
| G13  | 1336.867        | 1333.863       | 0.000          | <b>1364.862</b> | 0.000           | 0.000           | 197.859  | 0.003096       | 1929.648       | G117 |
| G14  | 1363.889        | 1326.882       | 0.000          | 1379.879        | 0.000           | 0.000           | 1493.873 | 0.170107       | 1703.010       | G116 |
| V15  | 1460.909        | 1458.911       | 0.000          | <b>1520.925</b> | 0.000           | 0.000           | 190.942  | 0.003096       | 1904.866       | V115 |
| L16  | 1506.941        | 1509.935       | 0.000          | <b>1634.936</b> | 0.011209        | 0.000           | 191.936  | 0.003096       | 1914.898       | L114 |
| L17  | 1613.964        | 1598.960       | 0.000          | 1628.964        | 0.111000        | 0.111000        | 191.936  | 0.003096       | 1914.898       | L113 |
| K18  | 1613.119        | 1610.113       | 0.000          | 1649.113        | 0.000           | 0.000           | 197.917  | 0.003096       | 1922.741       | K112 |
| L19  | 1630.223        | 1633.220       | 0.000          | 1695.223        | 0.000           | 0.000           | 196.226  | 0.003096       | 1922.741       | L111 |
| G19  | 2038.262        | 2041.261       | 0.000          | 2049.269        | 0.000           | 0.000           | 204.264  | 0.003096       | 2041.261       | G110 |
| A11  | 2038.317        | 2032.310       | 0.000          | 2111.309        | 0.000           | 0.000           | 210.317  | 0.003096       | 2041.261       | A109 |
| V19  | 2229.301        | 2231.300       | 0.000          | 2259.304        | 0.000           | 0.000           | 229.304  | 0.003096       | 2229.301       | V108 |
| L121 | 2241.400        | 2247.401       | 0.000          | 2269.404        | 0.011400        | 0.011400        | 231.400  | 0.003096       | 2241.400       | L107 |
| L124 | 2454.533        | 2457.532       | 0.000          | 2436.540        | 0.000           | 0.000           | 2404.538 | 0.145435       | 1454.468       | L106 |
| K125 | 2454.608        | 2454.609       | 0.000          | 2436.540        | 0.000           | 0.000           | 2404.538 | 0.145435       | 1454.468       | K105 |
| K126 | 2476.702        | 2482.703       | 0.000          | 2487.699        | 0.000           | 0.000           | 248.702  | 0.003096       | 248.702        | K104 |
| K127 | 2607.796        | 2606.793       | 0.000          | 2700.789        | 0.000           | 0.000           | 261.793  | 0.003096       | 261.793        | K103 |
| L128 | 2608.844        | 2607.841       | 0.000          | 2699.839        | 0.000           | 0.000           | 261.844  | 0.003096       | 261.793        | L102 |
| K129 | 2637.838        | 2636.835       | 0.000          | 2636.835        | 0.000           | 0.000           | 267.837  | 0.003096       | 267.837        | K101 |

# sp | Q6GSS7 | H2A2A\_MOUSE

LNKLLGK <sup>Dimethyl</sup> <sub>28.03</sub> VTIAQGGVLPNIQAVLLPKKTE

- ▶ fragmentation table for charge state 2+
- ▶ specType=cid
- ▶ score=84.70
- ▶ F113279.dat
- ▶ query=q41569\_p1
- ▶ precursor=1028.630200
- ▶ chargePrecursor=3
- ▶ itol=0.5

| AA   | a               | a*             | aΔ              | b               | b*              | bΔ              | y               | y*              | yΔ             | AA   |
|------|-----------------|----------------|-----------------|-----------------|-----------------|-----------------|-----------------|-----------------|----------------|------|
| L13  | 43.202          | 0.504          | 0.500           | 19.540          | 0.504           | 0.504           | 104.400         | 133.830         | 133.326        | L129 |
| K12  | 100.714         | 0.504          | 0.500           | 124.374         | 0.504           | 0.504           | 140.910         | 241.390         | 240.886        | K104 |
| K13  | 104.921         | 150.150        | 0.504           | 179.016         | 179.100         | 0.504           | 143.810         | <b>1420.373</b> | 1419.869       | K127 |
| L14  | 121.181         | 167.050        | 0.504           | 233.160         | 232.647         | 0.504           | <b>1304.839</b> | 1300.327        | 1299.823       | L120 |
| L15  | 127.100         | 169.100        | 0.504           | 240.700         | 240.187         | 0.504           | 1300.207        | 1295.700        | 1295.196       | L120 |
| G16  | 168.710         | 197.900        | 0.504           | 309.210         | 310.100         | 0.504           | 1311.410        | 1297.200        | 1296.696       | G104 |
| K17  | 184.470         | 193.100        | 0.504           | 368.770         | 369.700         | 0.504           | 1323.100        | 1314.710        | 1314.206       | K123 |
| V18  | 411.011         | 426.300        | 0.504           | 447.011         | 439.207         | 0.504           | 1118.110        | 1118.600        | 1118.096       | V122 |
| T19  | 484.110         | 474.510        | 475.510         | 499.104         | 499.610         | 0.504           | 909.100         | 1005.600        | 1005.096       | T121 |
| R20  | 440.870         | 504.300        | 501.870         | 504.860         | 504.360         | 0.504           | 430.810         | 1004.100        | 1003.596       | R101 |
| A11  | 170.587         | 187.004        | 187.392         | 187.392         | 181.082         | 0.504           | <b>908.581</b>  | <b>900.067</b>  | 899.563        | A119 |
| G12  | 186.272         | 631.610        | 631.424         | <b>654.424</b>  | 663.011         | 0.504           | <b>913.062</b>  | <b>944.549</b>  | 944.045        | G103 |
| G13  | <b>668.037</b>  | 680.424        | 680.610         | <b>682.930</b>  | 674.422         | 0.718           | 807.800         | <b>800.510</b>  | 800.007        | G127 |
| G14  | <b>688.680</b>  | <b>688.935</b> | <b>688.943</b>  | <b>711.446</b>  | 707.200         | 0.718           | 800.820         | 802.000         | 801.510        | G126 |
| V15  | <b>746.882</b>  | <b>728.409</b> | <b>737.077</b>  | <b>746.900</b>  | <b>752.487</b>  | <b>741.974</b>  | 800.810         | 801.400         | 800.896        | V100 |
| L100 | 101.104         | 101.104        | 101.104         | <b>817.522</b>  | <b>800.000</b>  | <b>808.517</b>  | <b>782.477</b>  | <b>773.004</b>  | 772.477        | L104 |
| P117 | 102.044         | 102.044        | 102.044         | 833.000         | 807.500         | 814.000         | <b>725.935</b>  | <b>717.422</b>  | <b>716.930</b> | P115 |
| V118 | <b>809.072</b>  | 809.072        | 809.072         | 833.870         | 814.900         | <b>814.064</b>  | 777.900         | <b>808.900</b>  | 808.396        | V102 |
| L119 | 101.014         | <b>807.101</b> | <b>906.609</b>  | 876.011         | <b>871.090</b>  | <b>870.606</b>  | 820.300         | 811.380         | 810.876        | L121 |
| G125 | 102.044         | 102.130        | 102.044         | <b>1043.641</b> | 1035.120        | 1034.600        | 803.800         | 803.130         | 802.626        | G110 |
| A121 | 100.000         | 100.000        | 100.000         | <b>1078.160</b> | 1069.640        | 1069.140        | 800.000         | 801.000         | 800.496        | A101 |
| V122 | 114.000         | 1100.110       | 1100.000        | <b>1128.004</b> | <b>1130.180</b> | 1119.000        | 454.200         | <b>455.704</b>  | <b>455.200</b> | V110 |
| L123 | <b>1171.218</b> | 1162.720       | <b>1162.253</b> | <b>1185.230</b> | <b>1176.722</b> | 1170.200        | 414.300         | 408.200         | 407.700        | L117 |
| L124 | 1172.000        | 1163.700       | 1163.700        | <b>1241.778</b> | <b>1233.265</b> | <b>1232.773</b> | 408.200         | 401.700         | 401.200        | L118 |
| L126 | 1192.200        | 1183.700       | 1183.700        | 1248.000        | 1240.500        | 1240.000        | 393.800         | 387.300         | 386.800        | L116 |
| K129 | 1192.204        | 1181.000       | 1181.190        | <b>1354.572</b> | 1345.000        | 1344.500        | 403.100         | 394.610         | 394.110        | K114 |
| K127 | 1194.400        | 1185.000       | 1185.190        | 1410.200        | 1400.700        | 1400.200        | 390.100         | 383.600         | 383.100        | K113 |
| L128 | 1194.500        | 1184.410       | 1184.520        | 1400.520        | 1400.010        | 1400.510        | 415.000         | 410.500         | 410.000        | L112 |
| E120 | 1193.400        | 1183.000       | 1183.440        | 1403.944        | 1404.910        | 1404.400        | 383.000         | 376.500         | 376.000        | E111 |

# sp | Q6GSS7 | H2A2A\_MOUSE

LNKLLGK<sup>Dimethyl</sup>VTIAQGGVLPNIQAVLLPKKTE  
28.03

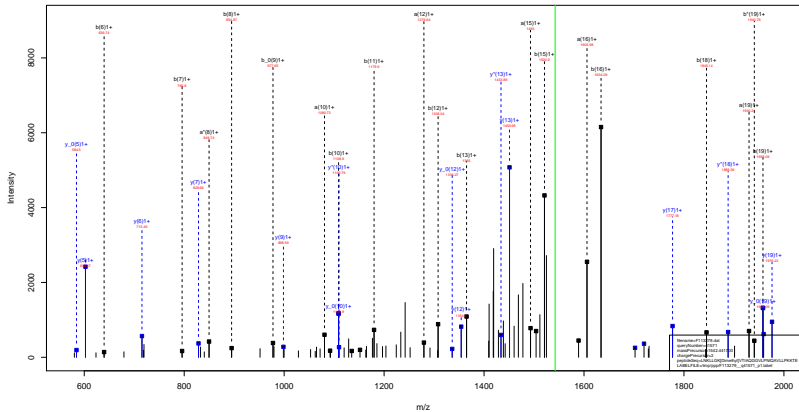

# sp | Q6GSS7 | H2A2A\_MOUSE

LNKLLGK <sup>Dimethyl</sup>VTIAQGGVLPNIQAVLLPKKTE  
28.03

- ▶ fragmentation table for charge state 1+
- ▶ specType=cid
- ▶ score=70.74
- ▶ F113279.dat
- ▶ query=q41571\_p1
- ▶ precursor=1542.441700
- ▶ chargePrecursor=2
- ▶ itol=0.5

| AA   | a               | a*              | a,0   | b               | b*              | b,0   | r     | y*              | y,0             | AA   |
|------|-----------------|-----------------|-------|-----------------|-----------------|-------|-------|-----------------|-----------------|------|
| L13  | 263926          | 0.000           | 0.000 | 114.000         | 0.000           | 0.000 | 0.000 | 2081.000        | 2080.000        | L129 |
| N12  | 209710          | 0.000           | 0.000 | 228.150         | 0.000           | 0.000 | 0.000 | 2078.000        | 2077.000        | N10  |
| K13  | 128.194         | 0.000           | 0.000 | 355.225         | 0.000           | 0.000 | 0.000 | 2076.000        | 2075.000        | K129 |
| L14  | 441.116         | 0.000           | 0.000 | 468.113         | 0.000           | 0.000 | 0.000 | 2120.000        | 2119.000        | L128 |
| L15  | 324.400         | 0.000           | 0.000 | 582.200         | 0.000           | 0.000 | 0.000 | 2080.000        | 2079.000        | L127 |
| G13  | 312.924         | 0.000           | 0.000 | 696.319         | 0.000           | 0.000 | 0.000 | 2050.000        | 2049.000        | G12  |
| K17  | 187.000         | 0.000           | 0.000 | 705.345         | 0.000           | 0.000 | 0.000 | 2420.000        | 2419.000        | K123 |
| V18  | 288.010         | <b>848.592</b>  | 0.000 | <b>894.613</b>  | 0.000           | 0.000 | 0.000 | 2072.000        | 2071.000        | V122 |
| T19  | 182.000         | 0.000           | 0.000 | 908.000         | 0.000           | 0.000 | 0.000 | 1920.000        | 1919.000        | T121 |
| I10  | <b>1080.750</b> | 1801.158        | 0.000 | <b>1108.745</b> | <b>1081.719</b> | 0.000 | 0.000 | 2088.200        | 2087.200        | I10  |
| A11  | <b>1151.787</b> | <b>1134.764</b> | 0.000 | <b>1132.777</b> | <b>1179.762</b> | 0.000 | 0.000 | <b>1816.154</b> | <b>1908.127</b> | A10  |
| Q12  | <b>1279.848</b> | 0.000           | 0.000 | <b>1301.841</b> | 0.000           | 0.000 | 0.000 | 1900.000        | 1899.000        | Q10  |
| G13  | 1138.000        | 1318.000        | 0.000 | <b>1364.862</b> | 0.000           | 0.000 | 0.000 | <b>1777.000</b> | 1776.000        | G12  |
| G14  | 1107.000        | 1376.000        | 0.000 | 1471.000        | 0.000           | 0.000 | 0.000 | <b>1720.000</b> | <b>1719.000</b> | G10  |
| V15  | <b>1492.957</b> | 1478.000        | 0.000 | <b>1520.952</b> | <b>1583.926</b> | 0.000 | 0.000 | 1840.000        | 1839.000        | V10  |
| L16  | <b>1506.041</b> | <b>1589.015</b> | 0.000 | <b>1573.030</b> | 0.000           | 0.000 | 0.000 | 1540.000        | 1539.000        | L14  |
| P17  | 1503.000        | 1680.000        | 0.000 | 1680.000        | 0.000           | 0.000 | 0.000 | <b>1433.000</b> | <b>1432.000</b> | P15  |
| N18  | 1611.000        | 1800.000        | 0.000 | <b>1845.153</b> | 0.000           | 0.000 | 0.000 | <b>1351.000</b> | <b>1350.000</b> | N10  |
| I19  | <b>1930.221</b> | 1913.100        | 0.000 | <b>1982.218</b> | <b>1941.190</b> | 0.000 | 0.000 | 1222.000        | 1221.000        | I11  |
| G120 | 2088.000        | 2041.000        | 0.000 | 2088.000        | 2088.000        | 0.000 | 0.000 | <b>1109.000</b> | <b>1108.000</b> | G118 |
| A121 | 2099.011        | 2139.011        | 0.000 | 2139.011        | 2140.000        | 0.000 | 0.000 | <b>808.000</b>  | 0.000           | A10  |
| V122 | 2238.000        | 2211.000        | 0.000 | 2238.000        | 2232.000        | 0.000 | 0.000 | 932.000         | 931.000         | V10  |
| L123 | 1841.000        | 2224.000        | 0.000 | 2224.000        | 2212.000        | 0.000 | 0.000 | <b>820.000</b>  | 819.000         | L10  |
| P124 | 2028.013        | 2017.013        | 0.000 | 2028.013        | 2028.013        | 0.000 | 0.000 | <b>711.000</b>  | 0.000           | P10  |
| P125 | 2051.000        | 2054.000        | 0.000 | 2051.000        | 2052.000        | 0.000 | 0.000 | <b>602.000</b>  | 0.000           | P10  |
| K126 | 2078.011        | 2062.011        | 0.000 | 2078.011        | 2078.011        | 0.000 | 0.000 | 590.000         | 589.000         | K14  |
| K127 | 2087.000        | 2080.000        | 0.000 | 2087.000        | 2087.000        | 0.000 | 0.000 | 577.000         | 576.000         | K10  |
| L128 | 2102.000        | 2091.000        | 0.000 | 2102.000        | 2102.000        | 0.000 | 0.000 | 519.000         | 518.000         | L10  |
| E129 | 2107.000        | 2099.000        | 0.000 | 2107.000        | 2107.000        | 0.000 | 0.000 | 518.000         | 517.000         | E11  |





# sp | Q6GSS7 | H2A2A\_MOUSE

LNKLLGK <sup>Dimethyl</sup>VTIAQGGVLPNIQAVLLPKKTE  
28.03

- ▶ fragmentation table for charge state 1+
- ▶ specType=cid
- ▶ score=39.30
- ▶ F113279.dat
- ▶ query=q41572\_p1
- ▶ precursor=1028.630400
- ▶ chargePrecursor=3
- ▶ itol=0.5

| AA  | a              | a'             | b        | b'              | y               | y'       | AA              |
|-----|----------------|----------------|----------|-----------------|-----------------|----------|-----------------|
| L1  | 88.050         | 18.000         | 0.000    | 1.14.091        | 0.000           | 0.000    | 3081.892        |
| K1  | 282.710        | 128.151        | 0.000    | 266.554         | 0.11.300        | 0.000    | 3079.026        |
| R1  | 328.354        | 131.200        | 0.000    | 356.220         | 159.200         | 0.000    | 3088.783        |
| L4  | 141.108        | 428.200        | 0.000    | 468.311         | 482.200         | 0.000    | 2728.071        |
| L5  | 174.401        | 337.200        | 0.000    | 402.207         | 438.211         | 0.000    | 2818.588        |
| G10 | <b>811.424</b> | 594.350        | 0.000    | <b>639.419</b>  | 622.360         | 0.000    | 2252.525        |
| K17 | 187.000        | 780.530        | 0.000    | <b>795.545</b>  | 478.510         | 0.000    | 2448.400        |
| V18 | 188.014        | <b>849.582</b> | 0.000    | <b>894.613</b>  | 877.580         | 0.000    | 2488.186        |
| L19 | <b>867.866</b> | 909.540        | 949.050  | 938.510         | 918.530         | 977.051  | 2130.255        |
| L10 | 388.100        | 388.100        | 1081.748 | <b>1108.745</b> | <b>1091.719</b> | 1081.719 | 3088.218        |
| A11 | 1151.100       | 1134.182       | 1133.777 | 1178.782        | 1162.756        | 1148.732 | 1810.150        |
| G12 | 1178.800       | 1178.800       | 1178.800 | 1178.800        | 1178.800        | 1178.800 | 1810.150        |
| G13 | 1136.800       | 1139.884       | 1138.887 | 1184.882        | 1167.856        | 1148.832 | 1777.684        |
| G14 | 1151.800       | 1158.882       | 1157.878 | 1202.884        | 1184.857        | 1163.831 | 1720.031        |
| V15 | 1182.800       | 1184.880       | 1184.880 | <b>1234.882</b> | 1218.856        | 1198.830 | 1688.038        |
| L16 | 1058.941       | 1039.933       | 1038.931 | <b>1034.936</b> | 1017.910        | 1000.884 | <b>1563.947</b> |
| P17 | 1010.800       | 1008.800       | 1008.800 | 1011.800        | 1014.800        | 1011.800 | <b>1450.803</b> |
| L18 | 1117.810       | 1098.810       | 1098.810 | 1114.810        | 1111.810        | 1111.810 | 1432.810        |
| L19 | 1130.810       | 1111.810       | 1111.810 | 1134.810        | 1131.810        | 1131.810 | 1414.810        |
| G20 | 1018.200       | 1040.200       | 1040.200 | 1018.200        | 1018.200        | 1018.200 | 1329.791        |
| R21 | 1128.710       | 1112.710       | 1112.710 | 1131.710        | 1128.710        | 1128.710 | 1322.741        |
| K22 | 1138.720       | 1120.720       | 1120.720 | 1139.720        | 1136.720        | 1136.720 | 1321.741        |
| R23 | 1148.730       | 1130.730       | 1130.730 | 1149.730        | 1146.730        | 1146.730 | 1320.741        |
| K24 | 1158.740       | 1140.740       | 1140.740 | 1159.740        | 1156.740        | 1156.740 | 1319.741        |
| K25 | 1168.750       | 1150.750       | 1150.750 | 1169.750        | 1166.750        | 1166.750 | 1318.741        |
| K26 | 1178.760       | 1160.760       | 1160.760 | 1179.760        | 1176.760        | 1176.760 | 1317.741        |
| K27 | 1188.770       | 1170.770       | 1170.770 | 1189.770        | 1186.770        | 1186.770 | 1316.741        |
| K28 | 1198.780       | 1180.780       | 1180.780 | 1199.780        | 1196.780        | 1196.780 | 1315.741        |
| K29 | 1208.790       | 1190.790       | 1190.790 | 1209.790        | 1206.790        | 1206.790 | 1314.741        |
| K30 | 1218.800       | 1200.800       | 1200.800 | 1219.800        | 1216.800        | 1216.800 | 1313.741        |
| K31 | 1228.810       | 1210.810       | 1210.810 | 1229.810        | 1226.810        | 1226.810 | 1312.741        |
| K32 | 1238.820       | 1220.820       | 1220.820 | 1239.820        | 1236.820        | 1236.820 | 1311.741        |
| K33 | 1248.830       | 1230.830       | 1230.830 | 1249.830        | 1246.830        | 1246.830 | 1310.741        |
| K34 | 1258.840       | 1240.840       | 1240.840 | 1259.840        | 1256.840        | 1256.840 | 1309.741        |
| K35 | 1268.850       | 1250.850       | 1250.850 | 1269.850        | 1266.850        | 1266.850 | 1308.741        |
| K36 | 1278.860       | 1260.860       | 1260.860 | 1279.860        | 1276.860        | 1276.860 | 1307.741        |
| K37 | 1288.870       | 1270.870       | 1270.870 | 1289.870        | 1286.870        | 1286.870 | 1306.741        |
| K38 | 1298.880       | 1280.880       | 1280.880 | 1299.880        | 1296.880        | 1296.880 | 1305.741        |
| K39 | 1308.890       | 1290.890       | 1290.890 | 1309.890        | 1306.890        | 1306.890 | 1304.741        |
| K40 | 1318.900       | 1300.900       | 1300.900 | 1319.900        | 1316.900        | 1316.900 | 1303.741        |
| K41 | 1328.910       | 1310.910       | 1310.910 | 1329.910        | 1326.910        | 1326.910 | 1302.741        |
| K42 | 1338.920       | 1320.920       | 1320.920 | 1339.920        | 1336.920        | 1336.920 | 1301.741        |
| K43 | 1348.930       | 1330.930       | 1330.930 | 1349.930        | 1346.930        | 1346.930 | 1300.741        |
| K44 | 1358.940       | 1340.940       | 1340.940 | 1359.940        | 1356.940        | 1356.940 | 1299.741        |
| K45 | 1368.950       | 1350.950       | 1350.950 | 1369.950        | 1366.950        | 1366.950 | 1298.741        |
| K46 | 1378.960       | 1360.960       | 1360.960 | 1379.960        | 1376.960        | 1376.960 | 1297.741        |
| K47 | 1388.970       | 1370.970       | 1370.970 | 1389.970        | 1386.970        | 1386.970 | 1296.741        |
| K48 | 1398.980       | 1380.980       | 1380.980 | 1399.980        | 1396.980        | 1396.980 | 1295.741        |
| K49 | 1408.990       | 1390.990       | 1390.990 | 1409.990        | 1406.990        | 1406.990 | 1294.741        |
| K50 | 1418.000       | 1400.000       | 1400.000 | 1419.000        | 1416.000        | 1416.000 | 1293.741        |

# sp | Q6GSS7 | H2A2A\_MOUSE

LNKLLGK <sup>Dimethyl</sup>VTIAQGGVLPNIQAVLLPKKTE  
28.03

- ▶ fragmentation table for charge state 2+
- ▶ specType=cid
- ▶ score=39.30
- ▶ F113279.dat
- ▶ query=q41572\_p1
- ▶ precursor=1028.630400
- ▶ chargePrecursor=3
- ▶ itol=0.5

| AA   | a              | a'             | b              | b'              | y               | y'              | AA              |                |                 |                |      |
|------|----------------|----------------|----------------|-----------------|-----------------|-----------------|-----------------|----------------|-----------------|----------------|------|
| L1   | 43.532         | 0.504          | 0.504          | 57.549          | 0.504           | 0.504           | 1542.450        | 1533.936       | 1533.444        | L126           |      |
| K1   | 150.918        | 0.504          | 0.504          | 114.594         | 0.504           | 0.504           | 1426.950        | 1447.458       | 1449.966        | K126           |      |
| R1   | 154.931        | 156.150        | 0.504          | 116.618         | 116.156         | 0.504           | 1426.950        | 1435.375       | 1449.966        | K127           |      |
| L1   | 121.183        | 122.688        | 0.504          | 118.160         | 118.688         | 0.504           | 1544.831        | 1536.325       | 1535.811        | L126           |      |
| L1   | 177.678        | 180.180        | 0.504          | 120.180         | 120.180         | 0.504           | 1467.267        | 1499.769       | 1499.769        | L125           |      |
| Q1   | 106.126        | 207.252        | 0.504          | 120.213         | 111.760         | 0.504           | <b>1251.735</b> | 1243.241       | 1242.749        | Q124           |      |
| K1   | 184.279        | 195.780        | 0.504          | 146.276         | 148.311         | 0.504           | 1221.264        | 1214.731       | 1214.731        | K123           |      |
| V1   | 143.414        | 145.908        | 0.504          | 144.410         | 143.908         | 0.504           | 1146.181        | 1139.667       | <b>1136.175</b> | V124           |      |
| L1   | 194.117        | 176.821        | 145.131        | 149.114         | 149.114         | 0.504           | 1095.203        | 1087.133       | 1088.561        | L121           |      |
| L1   | 140.819        | 147.366        | 151.874        | 154.876         | 146.366         | 0.504           | 1045.471        | 1039.969       | 1038.417        | L124           |      |
| A111 | 176.167        | 167.664        | 167.162        | 168.160         | 167.160         | 167.160         | <b>988.581</b>  | <b>980.067</b> | <b>979.575</b>  | A116           |      |
| Q123 | <b>848.437</b> | 830.921        | 831.421        | 834.424         | 835.411         | 835.411         | <b>951.082</b>  | <b>944.549</b> | 944.057         | Q123           |      |
| G123 | 868.169        | 860.421        | 869.922        | 861.911         | 874.422         | 873.910         | <b>889.933</b>  | 884.510        | 885.021         | G117           |      |
| G14  | 837.448        | <b>838.933</b> | <b>168.443</b> | <b>711.446</b>  | 832.933         | 832.933         | 866.527         | 854.030        | 851.517         | G116           |      |
| V124 | 140.819        | <b>748.408</b> | 149.819        | <b>140.810</b>  | <b>782.467</b>  | <b>781.874</b>  | 839.011         | 824.488        | 823.988         | V115           |      |
| L124 | 109.524        | <b>795.811</b> | 104.522        | <b>817.522</b>  | <b>808.009</b>  | 808.517         | <b>782.477</b>  | 773.964        | 773.472         | L114           |      |
| L117 | 182.183        | 181.181        | 181.180        | 181.180         | 181.180         | 181.180         | <b>857.043</b>  | <b>725.935</b> | <b>717.422</b>  | <b>716.930</b> | L115 |
| L118 | 182.183        | 181.181        | 181.180        | <b>813.179</b>  | 181.180         | 181.180         | 814.178         | 814.178        | 814.178         | L113           |      |
| L116 | <b>965.814</b> | 977.321        | <b>956.609</b> | <b>979.612</b>  | 971.586         | 970.586         | 930.586         | 920.357        | <b>611.874</b>  | L111           |      |
| Q125 | 1029.644       | 1022.130       | 1022.630       | 1024.633        | 1025.130        | 1024.630        | 983.630         | 975.112        | 974.640         | Q122           |      |
| A117 | 1088.944       | 1080.430       | 1080.930       | <b>1078.160</b> | 1079.160        | 1078.160        | 1001.160        | 999.643        | 999.160         | A116           |      |
| V123 | 1114.586       | 1106.071       | 1105.571       | <b>1118.591</b> | <b>1118.108</b> | <b>1118.608</b> | 1054.261        | 1052.744       | <b>1052.267</b> | V118           |      |
| L123 | 1111.240       | 1102.727       | 1103.211       | 1103.710        | <b>1118.722</b> | <b>1118.230</b> | 1014.710        | 1013.200       | 1012.700        | L117           |      |
| L124 | 1227.156       | 1218.642       | 1219.125       | <b>1241.778</b> | <b>1235.265</b> | <b>1232.775</b> | 1067.222        | 1045.705       | 1045.216        | L116           |      |
| P124 | 1276.167       | 1267.654       | 1268.154       | 1268.154        | 1268.154        | 1268.154        | 1011.654        | 1010.143       | 1009.634        | P119           |      |
| K126 | 1340.314       | 1331.801       | 1332.301       | <b>1354.352</b> | 1345.838        | 1345.338        | 1285.338        | 1283.811       | 1283.311        | K114           |      |
| K127 | 1404.432       | 1395.919       | 1396.419       | 1418.419        | 1409.904        | 1409.404        | 1346.404        | 1344.877       | 1344.377        | K113           |      |
| L124 | 1334.632       | 1326.119       | 1326.619       | 1326.619        | 1326.619        | 1326.619        | 1266.619        | 1265.102       | 1264.602        | L118           |      |
| E126 | 1319.447       | 1310.934       | 1311.434       | 1311.444        | 1311.444        | 1311.444        | 1204.444        | 1202.927       | 1202.427        | E111           |      |

# sp | Q6GSS7 | H2A2A\_MOUSE

LNKLLGK<sup>Dimethyl</sup>VTIAQGGVLPNIQAVLLPKKTE  
28.03

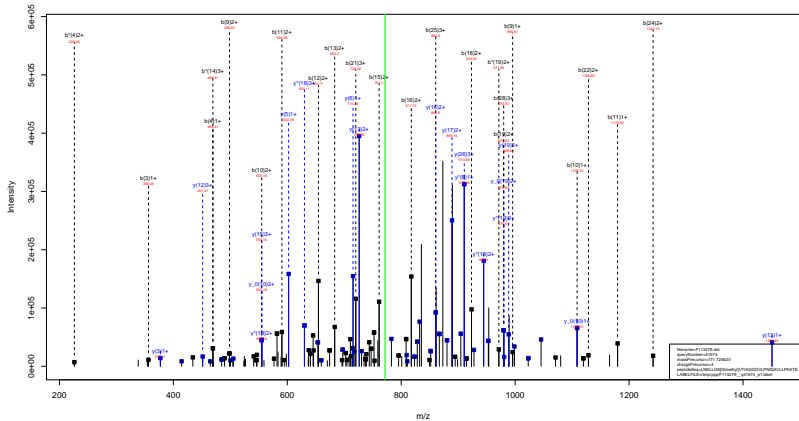

MassSpec-F112376.daw  
Scan: 1606466412175  
Acq: 06/06/2010 07:17:00:00  
File: 06060606.daw  
Protein: LNKLLGKVTIAQGGVLPNIQAVLLPKKTE  
LNKLLGKVTIAQGGVLPNIQAVLLPKKTE

# sp | Q6GSS7 | H2A2A\_MOUSE

LNKLLGK <sup>Dimethyl</sup>VTIAQGGVLPNIQAVLLPKKTE  
28.03

- ▶ fragmentation table for charge state 1+
- ▶ specType=cid
- ▶ score=62.06
- ▶ F113279.dat
- ▶ query=q41574.p1
- ▶ precursor=771.724620
- ▶ chargePrecursor=4
- ▶ itol=0.5

| AA   | a    | a'   | a <sub>0</sub> | b     | b'  | b <sub>0</sub> | y     | y'   | y <sub>0</sub> | AA   |      |
|------|------|------|----------------|-------|-----|----------------|-------|------|----------------|------|------|
| L1   | 385  | 385  | 0.000          | 0.000 | 114 | 0.000          | 0.000 | 3083 | 3083           | 3083 | L209 |
| R1   | 392  | 392  | 0.000          | 0.000 | 120 | 0.000          | 0.000 | 3139 | 3139           | 3139 | R20  |
| R2   | 398  | 398  | 0.000          | 0.000 | 126 | 0.000          | 0.000 | 3195 | 3195           | 3195 | R21  |
| L2   | 404  | 404  | 0.000          | 0.000 | 132 | 0.000          | 0.000 | 3251 | 3251           | 3251 | L206 |
| L3   | 410  | 410  | 0.000          | 0.000 | 138 | 0.000          | 0.000 | 3307 | 3307           | 3307 | L207 |
| L4   | 416  | 416  | 0.000          | 0.000 | 144 | 0.000          | 0.000 | 3363 | 3363           | 3363 | L208 |
| L5   | 422  | 422  | 0.000          | 0.000 | 150 | 0.000          | 0.000 | 3419 | 3419           | 3419 | L209 |
| L6   | 428  | 428  | 0.000          | 0.000 | 156 | 0.000          | 0.000 | 3475 | 3475           | 3475 | L210 |
| L7   | 434  | 434  | 0.000          | 0.000 | 162 | 0.000          | 0.000 | 3531 | 3531           | 3531 | L211 |
| L8   | 440  | 440  | 0.000          | 0.000 | 168 | 0.000          | 0.000 | 3587 | 3587           | 3587 | L212 |
| L9   | 446  | 446  | 0.000          | 0.000 | 174 | 0.000          | 0.000 | 3643 | 3643           | 3643 | L213 |
| L10  | 452  | 452  | 0.000          | 0.000 | 180 | 0.000          | 0.000 | 3699 | 3699           | 3699 | L214 |
| L11  | 458  | 458  | 0.000          | 0.000 | 186 | 0.000          | 0.000 | 3755 | 3755           | 3755 | L215 |
| L12  | 464  | 464  | 0.000          | 0.000 | 192 | 0.000          | 0.000 | 3811 | 3811           | 3811 | L216 |
| L13  | 470  | 470  | 0.000          | 0.000 | 198 | 0.000          | 0.000 | 3867 | 3867           | 3867 | L217 |
| L14  | 476  | 476  | 0.000          | 0.000 | 204 | 0.000          | 0.000 | 3923 | 3923           | 3923 | L218 |
| L15  | 482  | 482  | 0.000          | 0.000 | 210 | 0.000          | 0.000 | 3979 | 3979           | 3979 | L219 |
| L16  | 488  | 488  | 0.000          | 0.000 | 216 | 0.000          | 0.000 | 4035 | 4035           | 4035 | L220 |
| L17  | 494  | 494  | 0.000          | 0.000 | 222 | 0.000          | 0.000 | 4091 | 4091           | 4091 | L221 |
| L18  | 500  | 500  | 0.000          | 0.000 | 228 | 0.000          | 0.000 | 4147 | 4147           | 4147 | L222 |
| L19  | 506  | 506  | 0.000          | 0.000 | 234 | 0.000          | 0.000 | 4203 | 4203           | 4203 | L223 |
| L20  | 512  | 512  | 0.000          | 0.000 | 240 | 0.000          | 0.000 | 4259 | 4259           | 4259 | L224 |
| L21  | 518  | 518  | 0.000          | 0.000 | 246 | 0.000          | 0.000 | 4315 | 4315           | 4315 | L225 |
| L22  | 524  | 524  | 0.000          | 0.000 | 252 | 0.000          | 0.000 | 4371 | 4371           | 4371 | L226 |
| L23  | 530  | 530  | 0.000          | 0.000 | 258 | 0.000          | 0.000 | 4427 | 4427           | 4427 | L227 |
| L24  | 536  | 536  | 0.000          | 0.000 | 264 | 0.000          | 0.000 | 4483 | 4483           | 4483 | L228 |
| L25  | 542  | 542  | 0.000          | 0.000 | 270 | 0.000          | 0.000 | 4539 | 4539           | 4539 | L229 |
| L26  | 548  | 548  | 0.000          | 0.000 | 276 | 0.000          | 0.000 | 4595 | 4595           | 4595 | L230 |
| L27  | 554  | 554  | 0.000          | 0.000 | 282 | 0.000          | 0.000 | 4651 | 4651           | 4651 | L231 |
| L28  | 560  | 560  | 0.000          | 0.000 | 288 | 0.000          | 0.000 | 4707 | 4707           | 4707 | L232 |
| L29  | 566  | 566  | 0.000          | 0.000 | 294 | 0.000          | 0.000 | 4763 | 4763           | 4763 | L233 |
| L30  | 572  | 572  | 0.000          | 0.000 | 300 | 0.000          | 0.000 | 4819 | 4819           | 4819 | L234 |
| L31  | 578  | 578  | 0.000          | 0.000 | 306 | 0.000          | 0.000 | 4875 | 4875           | 4875 | L235 |
| L32  | 584  | 584  | 0.000          | 0.000 | 312 | 0.000          | 0.000 | 4931 | 4931           | 4931 | L236 |
| L33  | 590  | 590  | 0.000          | 0.000 | 318 | 0.000          | 0.000 | 4987 | 4987           | 4987 | L237 |
| L34  | 596  | 596  | 0.000          | 0.000 | 324 | 0.000          | 0.000 | 5043 | 5043           | 5043 | L238 |
| L35  | 602  | 602  | 0.000          | 0.000 | 330 | 0.000          | 0.000 | 5099 | 5099           | 5099 | L239 |
| L36  | 608  | 608  | 0.000          | 0.000 | 336 | 0.000          | 0.000 | 5155 | 5155           | 5155 | L240 |
| L37  | 614  | 614  | 0.000          | 0.000 | 342 | 0.000          | 0.000 | 5211 | 5211           | 5211 | L241 |
| L38  | 620  | 620  | 0.000          | 0.000 | 348 | 0.000          | 0.000 | 5267 | 5267           | 5267 | L242 |
| L39  | 626  | 626  | 0.000          | 0.000 | 354 | 0.000          | 0.000 | 5323 | 5323           | 5323 | L243 |
| L40  | 632  | 632  | 0.000          | 0.000 | 360 | 0.000          | 0.000 | 5379 | 5379           | 5379 | L244 |
| L41  | 638  | 638  | 0.000          | 0.000 | 366 | 0.000          | 0.000 | 5435 | 5435           | 5435 | L245 |
| L42  | 644  | 644  | 0.000          | 0.000 | 372 | 0.000          | 0.000 | 5491 | 5491           | 5491 | L246 |
| L43  | 650  | 650  | 0.000          | 0.000 | 378 | 0.000          | 0.000 | 5547 | 5547           | 5547 | L247 |
| L44  | 656  | 656  | 0.000          | 0.000 | 384 | 0.000          | 0.000 | 5603 | 5603           | 5603 | L248 |
| L45  | 662  | 662  | 0.000          | 0.000 | 390 | 0.000          | 0.000 | 5659 | 5659           | 5659 | L249 |
| L46  | 668  | 668  | 0.000          | 0.000 | 396 | 0.000          | 0.000 | 5715 | 5715           | 5715 | L250 |
| L47  | 674  | 674  | 0.000          | 0.000 | 402 | 0.000          | 0.000 | 5771 | 5771           | 5771 | L251 |
| L48  | 680  | 680  | 0.000          | 0.000 | 408 | 0.000          | 0.000 | 5827 | 5827           | 5827 | L252 |
| L49  | 686  | 686  | 0.000          | 0.000 | 414 | 0.000          | 0.000 | 5883 | 5883           | 5883 | L253 |
| L50  | 692  | 692  | 0.000          | 0.000 | 420 | 0.000          | 0.000 | 5939 | 5939           | 5939 | L254 |
| L51  | 698  | 698  | 0.000          | 0.000 | 426 | 0.000          | 0.000 | 5995 | 5995           | 5995 | L255 |
| L52  | 704  | 704  | 0.000          | 0.000 | 432 | 0.000          | 0.000 | 6051 | 6051           | 6051 | L256 |
| L53  | 710  | 710  | 0.000          | 0.000 | 438 | 0.000          | 0.000 | 6107 | 6107           | 6107 | L257 |
| L54  | 716  | 716  | 0.000          | 0.000 | 444 | 0.000          | 0.000 | 6163 | 6163           | 6163 | L258 |
| L55  | 722  | 722  | 0.000          | 0.000 | 450 | 0.000          | 0.000 | 6219 | 6219           | 6219 | L259 |
| L56  | 728  | 728  | 0.000          | 0.000 | 456 | 0.000          | 0.000 | 6275 | 6275           | 6275 | L260 |
| L57  | 734  | 734  | 0.000          | 0.000 | 462 | 0.000          | 0.000 | 6331 | 6331           | 6331 | L261 |
| L58  | 740  | 740  | 0.000          | 0.000 | 468 | 0.000          | 0.000 | 6387 | 6387           | 6387 | L262 |
| L59  | 746  | 746  | 0.000          | 0.000 | 474 | 0.000          | 0.000 | 6443 | 6443           | 6443 | L263 |
| L60  | 752  | 752  | 0.000          | 0.000 | 480 | 0.000          | 0.000 | 6499 | 6499           | 6499 | L264 |
| L61  | 758  | 758  | 0.000          | 0.000 | 486 | 0.000          | 0.000 | 6555 | 6555           | 6555 | L265 |
| L62  | 764  | 764  | 0.000          | 0.000 | 492 | 0.000          | 0.000 | 6611 | 6611           | 6611 | L266 |
| L63  | 770  | 770  | 0.000          | 0.000 | 498 | 0.000          | 0.000 | 6667 | 6667           | 6667 | L267 |
| L64  | 776  | 776  | 0.000          | 0.000 | 504 | 0.000          | 0.000 | 6723 | 6723           | 6723 | L268 |
| L65  | 782  | 782  | 0.000          | 0.000 | 510 | 0.000          | 0.000 | 6779 | 6779           | 6779 | L269 |
| L66  | 788  | 788  | 0.000          | 0.000 | 516 | 0.000          | 0.000 | 6835 | 6835           | 6835 | L270 |
| L67  | 794  | 794  | 0.000          | 0.000 | 522 | 0.000          | 0.000 | 6891 | 6891           | 6891 | L271 |
| L68  | 800  | 800  | 0.000          | 0.000 | 528 | 0.000          | 0.000 | 6947 | 6947           | 6947 | L272 |
| L69  | 806  | 806  | 0.000          | 0.000 | 534 | 0.000          | 0.000 | 7003 | 7003           | 7003 | L273 |
| L70  | 812  | 812  | 0.000          | 0.000 | 540 | 0.000          | 0.000 | 7059 | 7059           | 7059 | L274 |
| L71  | 818  | 818  | 0.000          | 0.000 | 546 | 0.000          | 0.000 | 7115 | 7115           | 7115 | L275 |
| L72  | 824  | 824  | 0.000          | 0.000 | 552 | 0.000          | 0.000 | 7171 | 7171           | 7171 | L276 |
| L73  | 830  | 830  | 0.000          | 0.000 | 558 | 0.000          | 0.000 | 7227 | 7227           | 7227 | L277 |
| L74  | 836  | 836  | 0.000          | 0.000 | 564 | 0.000          | 0.000 | 7283 | 7283           | 7283 | L278 |
| L75  | 842  | 842  | 0.000          | 0.000 | 570 | 0.000          | 0.000 | 7339 | 7339           | 7339 | L279 |
| L76  | 848  | 848  | 0.000          | 0.000 | 576 | 0.000          | 0.000 | 7395 | 7395           | 7395 | L280 |
| L77  | 854  | 854  | 0.000          | 0.000 | 582 | 0.000          | 0.000 | 7451 | 7451           | 7451 | L281 |
| L78  | 860  | 860  | 0.000          | 0.000 | 588 | 0.000          | 0.000 | 7507 | 7507           | 7507 | L282 |
| L79  | 866  | 866  | 0.000          | 0.000 | 594 | 0.000          | 0.000 | 7563 | 7563           | 7563 | L283 |
| L80  | 872  | 872  | 0.000          | 0.000 | 600 | 0.000          | 0.000 | 7619 | 7619           | 7619 | L284 |
| L81  | 878  | 878  | 0.000          | 0.000 | 606 | 0.000          | 0.000 | 7675 | 7675           | 7675 | L285 |
| L82  | 884  | 884  | 0.000          | 0.000 | 612 | 0.000          | 0.000 | 7731 | 7731           | 7731 | L286 |
| L83  | 890  | 890  | 0.000          | 0.000 | 618 | 0.000          | 0.000 | 7787 | 7787           | 7787 | L287 |
| L84  | 896  | 896  | 0.000          | 0.000 | 624 | 0.000          | 0.000 | 7843 | 7843           | 7843 | L288 |
| L85  | 902  | 902  | 0.000          | 0.000 | 630 | 0.000          | 0.000 | 7899 | 7899           | 7899 | L289 |
| L86  | 908  | 908  | 0.000          | 0.000 | 636 | 0.000          | 0.000 | 7955 | 7955           | 7955 | L290 |
| L87  | 914  | 914  | 0.000          | 0.000 | 642 | 0.000          | 0.000 | 8011 | 8011           | 8011 | L291 |
| L88  | 920  | 920  | 0.000          | 0.000 | 648 | 0.000          | 0.000 | 8067 | 8067           | 8067 | L292 |
| L89  | 926  | 926  | 0.000          | 0.000 | 654 | 0.000          | 0.000 | 8123 | 8123           | 8123 | L293 |
| L90  | 932  | 932  | 0.000          | 0.000 | 660 | 0.000          | 0.000 | 8179 | 8179           | 8179 | L294 |
| L91  | 938  | 938  | 0.000          | 0.000 | 666 | 0.000          | 0.000 | 8235 | 8235           | 8235 | L295 |
| L92  | 944  | 944  | 0.000          | 0.000 | 672 | 0.000          | 0.000 | 8291 | 8291           | 8291 | L296 |
| L93  | 950  | 950  | 0.000          | 0.000 | 678 | 0.000          | 0.000 | 8347 | 8347           | 8347 | L297 |
| L94  | 956  | 956  | 0.000          | 0.000 | 684 | 0.000          | 0.000 | 8403 | 8403           | 8403 | L298 |
| L95  | 962  | 962  | 0.000          | 0.000 | 690 | 0.000          | 0.000 | 8459 | 8459           | 8459 | L299 |
| L96  | 968  | 968  | 0.000          | 0.000 | 696 | 0.000          | 0.000 | 8515 | 8515           | 8515 | L300 |
| L97  | 974  | 974  | 0.000          | 0.000 | 702 | 0.000          | 0.000 | 8571 | 8571           | 8571 | L301 |
| L98  | 980  | 980  | 0.000          | 0.000 | 708 | 0.000          | 0.000 | 8627 | 8627           | 8627 | L302 |
| L99  | 986  | 986  | 0.000          | 0.000 | 714 | 0.000          | 0.000 | 8683 | 8683           | 8683 | L303 |
| L100 | 992  | 992  | 0.000          | 0.000 | 720 | 0.000          | 0.000 | 8739 | 8739           | 8739 | L304 |
| L101 | 998  | 998  | 0.000          | 0.000 | 726 | 0.000          | 0.000 | 8795 | 8795           | 8795 | L305 |
| L102 | 1004 | 1004 | 0.000          | 0.000 | 732 | 0.000          | 0.000 | 8851 | 8851           | 8851 | L306 |
| L103 | 1010 | 1010 | 0.000          | 0.000 | 738 | 0.000          | 0.000 | 8907 | 8907           | 8907 | L307 |
| L104 | 1016 | 1016 | 0.000          | 0.000 | 744 | 0.000          | 0.000 | 8963 | 8963           | 8963 | L308 |
| L105 | 1022 | 1022 | 0.000          | 0.000 | 750 | 0.000          | 0.000 | 9019 | 9019           | 9019 | L309 |
| L106 | 1028 | 1028 | 0.000          | 0.000 | 756 | 0.000          | 0.000 | 9075 |                |      |      |

# sp | Q6GSS7 | H2A2A\_MOUSE

LNKLLGK <sup>Dimethyl</sup> <sub>28.03</sub> VTIAQGGVLPNIQAVLLPKKTE

- ▶ fragmentation table for charge state 2+
- ▶ specType=cid
- ▶ score=62.06
- ▶ F113279.dat
- ▶ query=q41574.p1
- ▶ precursor=771.724620
- ▶ chargePrecursor=4
- ▶ itol=0.5

| AA  | a    | a*  | a,Δ   | b     | b*       | b,Δ   | y     | y*       | y,Δ      | AA       |     |
|-----|------|-----|-------|-------|----------|-------|-------|----------|----------|----------|-----|
| L1  | 43   | 332 | 0.504 | 0.504 | 57.949   | 0.504 | 0.504 | 1542.450 | 1531.930 | 1531.944 | L29 |
| R1  | 100  | 333 | 0.504 | 0.504 | 57.949   | 0.504 | 0.504 | 1493.933 | 1483.413 | 1483.427 | R20 |
| R1  | 104  | 333 | 1.008 | 0.504 | 57.949   | 0.504 | 0.504 | 1428.930 | 1420.371 | 1420.385 | R27 |
| L1  | 121  | 333 | 1.008 | 0.504 | 57.949   | 0.504 | 0.504 | 1304.930 | 1296.371 | 1296.385 | L26 |
| L1  | 127  | 333 | 1.008 | 0.504 | 57.949   | 0.504 | 0.504 | 1200.930 | 1192.371 | 1192.385 | L25 |
| Q1  | 156  | 333 | 1.008 | 0.504 | 57.949   | 0.504 | 0.504 | 1051.930 | 1043.371 | 1043.385 | Q24 |
| R1  | 167  | 333 | 1.008 | 0.504 | 57.949   | 0.504 | 0.504 | 1021.930 | 1013.371 | 1013.385 | R23 |
| V1  | 183  | 333 | 1.008 | 0.504 | 57.949   | 0.504 | 0.504 | 1152.930 | 1144.371 | 1144.385 | V22 |
| L1  | 194  | 333 | 1.008 | 0.504 | 57.949   | 0.504 | 0.504 | 1095.930 | 1087.371 | 1087.385 | L21 |
| L10 | 548  | 879 | 1.512 | 0.504 | 57.949   | 0.504 | 0.504 | 1045.123 | 1036.564 | 1036.578 | L20 |
| A11 | 576  | 297 | 1.008 | 0.504 | 57.949   | 0.504 | 0.504 | 988.521  | 980.962  | 979.975  | A16 |
| Q12 | 586  | 427 | 0.504 | 0.504 | 654.424  | 0.504 | 0.504 | 945.419  | 935.860  | 935.874  | Q10 |
| Q13 | 588  | 427 | 0.504 | 0.504 | 656.932  | 0.504 | 0.504 | 889.815  | 880.256  | 880.270  | Q17 |
| Q14 | 607  | 448 | 0.504 | 0.504 | 711.446  | 0.504 | 0.504 | 866.572  | 857.013  | 857.027  | Q16 |
| V15 | 746  | 987 | 1.512 | 0.504 | 740.989  | 0.504 | 0.504 | 751.974  | 742.415  | 742.429  | V13 |
| L10 | 853  | 558 | 1.008 | 0.504 | 817.522  | 0.504 | 0.504 | 782.477  | 772.918  | 772.932  | L14 |
| R17 | 852  | 851 | 0.504 | 0.504 | 823.870  | 0.504 | 0.504 | 725.935  | 717.422  | 716.930  | R13 |
| R18 | 888  | 77  | 0.504 | 0.504 | 823.870  | 0.504 | 0.504 | 614.864  | 605.351  | 605.365  | R12 |
| L10 | 905  | 514 | 0.504 | 0.504 | 939.812  | 0.504 | 0.504 | 525.581  | 517.070  | 517.084  | L11 |
| Q19 | 929  | 644 | 1.008 | 0.504 | 920.838  | 0.504 | 0.504 | 481.689  | 473.176  | 473.190  | Q19 |
| A21 | 1054 | 342 | 1.008 | 0.504 | 1055.342 | 0.504 | 0.504 | 408.816  | 400.257  | 400.271  | A18 |
| V22 | 1114 | 750 | 1.008 | 0.504 | 1120.961 | 0.504 | 0.504 | 311.840  | 303.281  | 303.295  | V18 |
| L23 | 1111 | 230 | 1.008 | 0.504 | 1162.521 | 0.504 | 0.504 | 414.783  | 406.224  | 406.238  | L17 |
| L24 | 1227 | 730 | 1.008 | 0.504 | 1241.778 | 0.504 | 0.504 | 332.773  | 324.214  | 324.228  | L16 |
| R25 | 1276 | 349 | 1.008 | 0.504 | 1282.354 | 0.504 | 0.504 | 231.349  | 222.790  | 222.804  | R19 |
| R26 | 1340 | 354 | 1.008 | 0.504 | 1354.349 | 0.504 | 0.504 | 253.133  | 244.574  | 244.588  | R18 |
| R27 | 1354 | 422 | 1.008 | 0.504 | 1366.344 | 0.504 | 0.504 | 189.385  | 180.826  | 180.840  | R15 |
| L24 | 1374 | 438 | 1.008 | 0.504 | 1386.339 | 0.504 | 0.504 | 149.819  | 141.260  | 141.274  | L15 |
| E20 | 1510 | 441 | 1.008 | 0.504 | 1522.342 | 0.504 | 0.504 | 74.534   | 65.975   | 65.989   | E11 |







# sp | Q6GSS7 | H2A2A\_MOUSE

LNKLLGK <sup>Dimethyl</sup> <sub>28.03</sub> VTIAQGGVLPNIQAVLLPKKTE

- ▶ fragmentation table for charge state 1+
- ▶ specType=etd
- ▶ score=92.26
- ▶ F113279.dat
- ▶ query=q41575.p1
- ▶ precursor=771.724620
- ▶ chargePrecursor=4
- ▶ itol=0.5

| AA     | c               | y        | z+1             | z+2             | z        | AA     |
|--------|-----------------|----------|-----------------|-----------------|----------|--------|
| L[1]   | 131.118         | 3081.892 | 3067.873        | 0.000           | 3066.895 | L[29]  |
| N[2]   | 345.161         | 2970.808 | 2954.789        | 2955.797        | 2951.781 | N[28]  |
| K[3]   | <b>373.256</b>  | 2856.765 | 2840.746        | 2841.754        | 2839.738 | K[27]  |
| L[4]   | 486.340         | 2728.670 | 2712.651        | 2713.659        | 2711.643 | L[26]  |
| L[5]   | <b>599.424</b>  | 2615.585 | 2599.567        | 2600.575        | 2598.560 | L[25]  |
| G[6]   | <b>656.445</b>  | 2502.502 | 2486.483        | 2487.491        | 2485.475 | G[24]  |
| K[7]   | <b>812.572</b>  | 2345.480 | 2429.462        | 2430.469        | 2428.454 | K[23]  |
| V[8]   | <b>911.640</b>  | 2288.354 | 2273.335        | 2274.343        | 2272.327 | V[22]  |
| T[9]   | 1017.688        | 2190.286 | 2174.267        | 2175.275        | 2173.259 | T[21]  |
| I[10]  | <b>1125.772</b> | 2089.238 | 2073.219        | 2074.227        | 2072.211 | I[20]  |
| A[11]  | <b>1196.809</b> | 1976.154 | <b>1960.135</b> | 1961.143        | 1959.127 | A[19]  |
| Q[12]  | <b>1324.867</b> | 1895.111 | 1889.093        | <b>1890.106</b> | 1888.090 | Q[18]  |
| G[13]  | <b>1381.889</b> | 1777.058 | 1761.039        | 1762.047        | 1760.032 | G[17]  |
| G[14]  | 1438.910        | 1720.937 | 1704.918        | <b>1705.926</b> | 1703.910 | G[16]  |
| V[15]  | 1537.979        | 1663.015 | 1646.997        | 1646.004        | 1645.989 | V[15]  |
| L[16]  | 1651.063        | 1563.947 | 1547.928        | <b>1548.936</b> | 1546.920 | L[14]  |
| F[17]  | <b>1748.116</b> | 1450.893 | 1434.864        | 1435.852        | 1433.836 | F[13]  |
| TW[18] | 1867.159        | 1383.810 | <b>1337.791</b> | 1338.799        | 1336.783 | TW[12] |
| I[19]  | 1975.243        | 1236.767 | <b>1223.748</b> | 1224.756        | 1222.741 | I[11]  |
| Q[20]  | 2103.301        | 1126.683 | <b>1110.664</b> | 1111.672        | 1109.656 | Q[10]  |
| A[21]  | 2174.336        | 998.624  | 982.606         | 981.614         | 981.598  | A[9]   |
| V[22]  | 2273.407        | 927.587  | <b>911.569</b>  | 912.576         | 910.561  | V[8]   |
| L[23]  | 2386.491        | 828.519  | <b>812.500</b>  | 813.508         | 811.492  | L[7]   |
| L[24]  | 2499.575        | 715.435  | <b>699.415</b>  | <b>700.424</b>  | 698.408  | L[6]   |
| P[25]  | 2596.626        | 602.351  | 586.332         | 587.340         | 585.324  | P[5]   |
| K[26]  | 2724.723        | 505.298  | <b>489.279</b>  | <b>490.287</b>  | 488.271  | K[4]   |
| K[27]  | 2852.816        | 377.203  | <b>361.184</b>  | 362.192         | 360.177  | K[3]   |
| T[28]  | 2951.905        | 249.108  | 233.089         | 234.097         | 232.082  | T[2]   |
| E[29]  | 3087.938        | 148.060  | 132.042         | 133.050         | 131.034  | E[1]   |

# sp | Q6GSS7 | H2A2A\_MOUSE

LNKLLGK <sup>Dimethyl</sup><sub>28.03</sub> VTIAQGGVLPNIQAVLLPKKTE

- ▶ fragmentation table for charge state 2+
- ▶ specType=etd
- ▶ score=92.26
- ▶ F113279.dat
- ▶ query=q41575.p1
- ▶ precursor=771.724620
- ▶ chargePrecursor=4
- ▶ itol=0.5

| AA  | c               | y               | z+1             | z+2             | z               | AA   |
|-----|-----------------|-----------------|-----------------|-----------------|-----------------|------|
| L1  | 66.093          | <b>1542.450</b> | 1534.440        | 9.504           | 1533.930        | L120 |
| N1  | 123.084         | 1485.908        | <b>1477.898</b> | <b>1478.402</b> | 1477.304        | N20  |
| K1  | 187.132         | 1428.888        | 1420.877        | <b>1421.381</b> | 1420.373        | K27  |
| L14 | 243.674         | 1364.839        | <b>1356.829</b> | 1357.333        | <b>1356.325</b> | L26  |
| L15 | 300.216         | 1308.297        | 1300.287        | 1300.791        | 1299.783        | L25  |
| G16 | 358.758         | 1251.795        | <b>1243.745</b> | <b>1244.249</b> | 1243.241        | G24  |
| K17 | 406.799         | <b>1223.244</b> | <b>1215.234</b> | <b>1215.738</b> | 1214.731        | K23  |
| V18 | 456.324         | 1145.181        | <b>1137.171</b> | <b>1137.675</b> | 1136.667        | V22  |
| F19 | 506.840         | 1095.646        | <b>1087.637</b> | 1088.141        | <b>1087.133</b> | F21  |
| T10 | 563.390         | 1045.123        | <b>1037.113</b> | <b>1037.617</b> | 1036.609        | T20  |
| A11 | 608.608         | 988.581         | <b>980.571</b>  | 981.075         | <b>980.067</b>  | A19  |
| Q12 | 662.937         | 933.060         | 925.053         | 925.557         | 924.549         | Q18  |
| G13 | 691.448         | 889.033         | <b>881.023</b>  | <b>881.527</b>  | 880.519         | G17  |
| G14 | 719.959         | 860.522         | <b>852.513</b>  | <b>853.017</b>  | 852.009         | G16  |
| V15 | 769.493         | 812.011         | <b>804.002</b>  | <b>804.506</b>  | 803.498         | V15  |
| L16 | 820.025         | 762.477         | <b>754.468</b>  | <b>754.972</b>  | 753.964         | L14  |
| F17 | <b>874.561</b>  | <b>725.935</b>  | 717.928         | 718.432         | 717.424         | F19  |
| N18 | <b>931.583</b>  | 677.400         | 669.390         | 669.903         | 668.895         | N12  |
| I19 | 988.125         | 630.867         | 622.858         | 623.362         | 622.354         | I11  |
| Q20 | <b>1052.154</b> | 583.848         | 575.838         | 576.342         | 575.334         | Q10  |
| A21 | <b>1087.673</b> | 499.816         | 491.807         | 492.311         | 491.303         | A0   |
| V22 | <b>1137.207</b> | 404.297         | 406.288         | 406.792         | 405.784         | V8   |
| L23 | <b>1193.749</b> | 414.763         | 406.754         | 407.258         | 406.250         | L17  |
| L24 | 1250.291        | 358.221         | 350.213         | 350.716         | 349.708         | L16  |
| P25 | <b>1298.817</b> | 301.679         | 293.670         | 294.174         | 293.166         | P5   |
| K26 | <b>1362.865</b> | 253.153         | 245.143         | 245.647         | 244.639         | K4   |
| K27 | <b>1426.912</b> | 189.105         | 181.096         | 181.600         | 180.592         | K3   |
| T28 | 1477.436        | 125.058         | 117.048         | 117.552         | 116.544         | T12  |
| E29 | 1541.958        | 74.534          | 66.524          | 67.028          | 66.021          | E1   |

# sp | Q6GSS7 | H2A2A\_MOUSE

LNKLLGK <sup>Dimethyl</sup> <sub>28.03</sub> VTIAQGGVLPNIQAVLLPKKTE

- ▶ fragmentation table for charge state 3+
- ▶ specType=etd
- ▶ score=92.26
- ▶ F113279.dat
- ▶ query=q41575.p1
- ▶ precursor=771.724620
- ▶ chargePrecursor=4
- ▶ itol=0.5

| AA  | c              | y        | z+1             | z+2            | z              | AA  |
|-----|----------------|----------|-----------------|----------------|----------------|-----|
| L1  | 44.377         | 1028.635 | <b>1023.296</b> | 0.672          | 1022.960       | L29 |
| N2  | 82.392         | 990.941  | <b>985.601</b>  | <b>985.937</b> | 985.265        | N28 |
| K3  | 125.090        | 952.926  | <b>947.587</b>  | <b>947.923</b> | <b>947.251</b> | K27 |
| L4  | 162.795        | 910.228  | 904.897         | 904.225        | 904.553        | L26 |
| L5  | 200.479        | 872.533  | 867.194         | 867.530        | 866.858        | L25 |
| G6  | 219.487        | 834.838  | 829.499         | 829.835        | 829.163        | G24 |
| K7  | 271.529        | 815.832  | 810.492         | 810.828        | 810.156        | K23 |
| V8  | 304.552        | 761.790  | 756.450         | 756.786        | 756.114        | V22 |
| T9  | 338.234        | 730.767  | 725.427         | 725.763        | 725.091        | T21 |
| I10 | 375.929        | 697.084  | 691.745         | 692.081        | 691.409        | I20 |
| A11 | 399.608        | 659.389  | 654.050         | 654.386        | 653.714        | A19 |
| Q12 | 442.294        | 638.710  | 633.371         | 633.707        | 633.035        | Q18 |
| G13 | 461.301        | 593.024  | 587.685         | 588.021        | 587.349        | G17 |
| G14 | 480.308        | 574.017  | 568.678         | 569.013        | 568.342        | G16 |
| V15 | 513.331        | 555.010  | 549.670         | 550.006        | 549.334        | V15 |
| L16 | 551.026        | 521.987  | 516.648         | 516.984        | 516.312        | L14 |
| P17 | 583.377        | 484.292  | 478.953         | 479.289        | 478.617        | P13 |
| N18 | 621.391        | 451.942  | 446.602         | 446.938        | 446.266        | N12 |
| I19 | 659.088        | 413.927  | 408.588         | 408.924        | 408.252        | I11 |
| Q20 | 701.772        | 376.233  | 370.893         | 371.229        | 370.557        | Q10 |
| A21 | 725.451        | 333.548  | 328.207         | 328.543        | 327.871        | A9  |
| V22 | 758.474        | 309.867  | 304.528         | 304.864        | 304.192        | V8  |
| L23 | 796.168        | 276.844  | 271.505         | 271.841        | 271.169        | L7  |
| L24 | 833.861        | 239.150  | 233.810         | 234.146        | 233.474        | L6  |
| P25 | 866.214        | 201.455  | 196.116         | 196.451        | 195.780        | P5  |
| K26 | 928.532        | 169.104  | 163.765         | 164.101        | 163.429        | K4  |
| K27 | <b>951.611</b> | 126.406  | 121.066         | 121.402        | 120.730        | K3  |
| T28 | 985.293        | 83.708   | 78.368          | 78.704         | 78.032         | T2  |
| E29 | 1028.397       | 50.025   | 44.685          | 45.021         | 44.349         | E1  |

# sp | Q6GSS7 | H2A2A\_MOUSE

LNKLLGK<sup>Dimethyl</sup>VTIAQGGVLPNIQAVLLPKKTE  
28.03

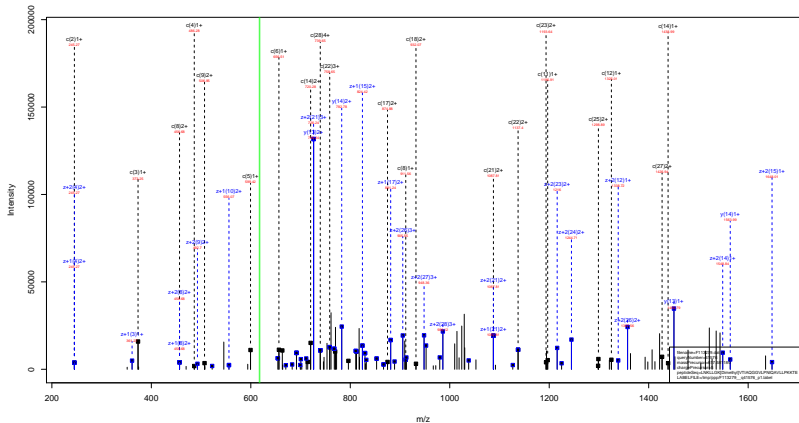

# sp | Q6GSS7 | H2A2A\_MOUSE

LNKLLGK <sup>Dimethyl</sup> 28.03 VTIAQGGVLPNIQAVLLPKKTE

- ▶ fragmentation table for charge state 1+
- ▶ specType=etd
- ▶ score=51.36
- ▶ F113279.dat
- ▶ query=q41576.p1
- ▶ precursor=617.581180
- ▶ chargePrecursor=5
- ▶ itol=0.5

| AA    | c               | y               | z+1            | z+2             | z              | AA    |
|-------|-----------------|-----------------|----------------|-----------------|----------------|-------|
| L[1]  | 131.118         | 3081.892        | 3087.873       | 0.000           | 3066.895       | L[29] |
| N[2]  | <b>245.161</b>  | 2970.838        | 2954.789       | 2955.797        | 2951.781       | N[28] |
| K[3]  | <b>373.256</b>  | 2856.795        | 2860.746       | 2841.754        | 2839.738       | K[27] |
| L[4]  | <b>486.340</b>  | 2728.670        | 2712.651       | 2713.659        | 2711.643       | L[26] |
| L[5]  | <b>599.424</b>  | 2615.588        | 2599.567       | 2600.575        | 2598.560       | L[25] |
| Q[6]  | <b>656.445</b>  | 2502.507        | 2486.483       | 2487.491        | 2485.475       | Q[24] |
| K[7]  | <b>812.572</b>  | 2445.480        | 2429.462       | 2430.469        | 2428.454       | K[23] |
| V[8]  | <b>911.640</b>  | 2389.354        | 2373.335       | 2374.343        | 2372.327       | V[22] |
| T[9]  | 1012.688        | 2196.286        | 2174.267       | 2175.275        | 2173.259       | T[21] |
| I[10] | 1125.772        | 2089.238        | 2073.219       | 2074.227        | 2072.211       | I[20] |
| A[11] | <b>1196.809</b> | 1976.154        | 1960.135       | 1961.143        | 1959.127       | A[19] |
| Q[12] | <b>1324.867</b> | 1869.117        | 1853.098       | 1854.106        | 1852.090       | Q[18] |
| G[13] | 1381.889        | 1777.058        | 1761.039       | 1762.047        | 1760.032       | G[17] |
| G[14] | <b>1438.910</b> | 1720.937        | 1704.918       | 1705.926        | 1703.910       | G[16] |
| V[15] | 1537.879        | 1663.015        | 1646.997       | <b>1648.004</b> | 1645.989       | V[15] |
| L[16] | 1651.063        | <b>1563.947</b> | 1547.928       | <b>1548.936</b> | 1546.920       | L[14] |
| F[17] | 1748.116        | <b>1450.863</b> | 1434.864       | 1435.872        | 1433.856       | F[13] |
| T[18] | 1862.159        | 1393.810        | 1377.791       | <b>1378.799</b> | 1376.783       | T[12] |
| I[19] | 1975.243        | 1239.767        | 1223.748       | <b>1224.756</b> | 1222.741       | I[11] |
| Q[20] | 2103.301        | <b>1126.683</b> | 1110.664       | 1111.672        | 1109.656       | Q[10] |
| A[21] | 2174.338        | 998.624         | 982.606        | 983.614         | 981.598        | A[9]  |
| V[22] | 2273.407        | 927.587         | <b>911.569</b> | <b>912.576</b>  | 910.561        | V[8]  |
| L[23] | 2386.491        | 828.510         | <b>812.500</b> | 813.508         | <b>811.492</b> | L[7]  |
| L[24] | 2499.575        | 715.439         | <b>699.415</b> | <b>700.424</b>  | 698.408        | L[6]  |
| P[25] | 2596.626        | 602.351         | 586.332        | 587.340         | 585.324        | P[5]  |
| K[26] | 2724.723        | 505.290         | 489.279        | 490.287         | 488.271        | K[4]  |
| K[27] | 2852.816        | 377.203         | <b>361.184</b> | 362.192         | 360.177        | K[3]  |
| T[28] | 2953.895        | 249.108         | 233.089        | 234.097         | 232.082        | T[2]  |
| E[29] | 3082.938        | 148.060         | 132.042        | 133.050         | 131.034        | E[1]  |

# sp | Q6GSS7 | H2A2A\_MOUSE

LNKLLGK <sup>Dimethyl</sup><sub>28.03</sub> VTIAQGGVLPNIQAVLLPKKTE

- ▶ fragmentation table for charge state 2+
- ▶ specType=etd
- ▶ score=51.36
- ▶ F113279.dat
- ▶ query=q41576.p1
- ▶ precursor=617.581180
- ▶ chargePrecursor=5
- ▶ itol=0.5

| AA    | c               | y              | z+1             | z+2             | z              | AA    |
|-------|-----------------|----------------|-----------------|-----------------|----------------|-------|
| L[1]  | 66.063          | 1542.450       | 1534.440        | 0.504           | 1533.930       | L[29] |
| N[2]  | 123.084         | 1485.908       | 1477.898        | 1478.402        | 1477.304       | N[28] |
| K[3]  | 187.132         | 1428.886       | 1420.877        | 1421.381        | 1420.373       | K[27] |
| L[4]  | 243.674         | 1364.839       | 1356.829        | <b>1357.333</b> | 1356.325       | L[26] |
| L[5]  | 300.216         | 1308.297       | 1300.287        | 1300.791        | 1299.783       | L[25] |
| Q[6]  | 358.758         | 1251.755       | 1243.745        | <b>1244.249</b> | 1243.241       | Q[24] |
| K[7]  | 406.789         | 1223.244       | 1215.234        | <b>1215.738</b> | 1214.731       | K[23] |
| V[8]  | <b>456.324</b>  | 1145.181       | <b>1137.171</b> | <b>1137.675</b> | 1136.667       | V[22] |
| T[9]  | <b>506.848</b>  | 1095.646       | <b>1087.637</b> | <b>1088.141</b> | 1087.133       | T[21] |
| I[10] | 563.390         | 1045.123       | 1037.113        | <b>1037.617</b> | 1036.609       | I[20] |
| A[11] | 609.838         | 988.581        | 980.571         | 981.075         | <b>980.067</b> | A[19] |
| Q[12] | <b>662.937</b>  | 933.062        | 925.053         | 925.557         | 924.549        | Q[18] |
| G[13] | <b>691.448</b>  | <b>889.033</b> | <b>881.023</b>  | <b>881.527</b>  | 880.519        | G[17] |
| G[14] | <b>719.959</b>  | 860.522        | <b>852.513</b>  | <b>853.017</b>  | 852.009        | G[16] |
| V[15] | <b>769.493</b>  | <b>832.011</b> | <b>824.002</b>  | <b>824.506</b>  | 823.498        | V[15] |
| L[16] | 826.035         | <b>782.477</b> | 774.468         | 774.972         | 773.964        | L[14] |
| F[17] | <b>874.561</b>  | <b>725.935</b> | 717.926         | 718.430         | 717.422        | F[13] |
| T[18] | <b>931.583</b>  | 677.406        | 669.396         | <b>669.903</b>  | 668.895        | T[12] |
| I[19] | 988.125         | 620.387        | 612.378         | 612.882         | 611.874        | I[11] |
| Q[20] | 1052.154        | 563.845        | <b>555.836</b>  | <b>556.340</b>  | 555.332        | Q[10] |
| A[21] | <b>1087.673</b> | 499.816        | 491.807         | <b>492.310</b>  | 491.303        | A[9]  |
| V[22] | <b>1137.207</b> | 464.297        | <b>456.288</b>  | <b>456.792</b>  | 455.784        | V[8]  |
| L[23] | <b>1193.749</b> | 414.763        | 406.754         | 407.258         | 406.250        | L[7]  |
| L[24] | 1259.291        | 358.221        | 350.212         | 350.716         | 349.708        | L[6]  |
| P[25] | <b>1298.817</b> | 301.679        | 293.670         | 294.174         | 293.166        | P[5]  |
| K[26] | 1362.865        | 253.153        | <b>245.143</b>  | <b>245.647</b>  | 244.639        | K[4]  |
| K[27] | <b>1426.912</b> | 189.105        | 181.096         | 181.600         | 180.592        | K[3]  |
| T[28] | 1477.436        | 125.058        | 117.048         | 117.552         | 116.544        | T[2]  |
| E[29] | 1541.958        | 74.534         | 66.524          | 67.028          | 66.021         | E[1]  |

# sp | Q6GSS7 | H2A2A\_MOUSE

LNKLLGK <sup>Dimethyl</sup> <sub>28.03</sub> VTIAQGGVLPNIQAVLLPKKTE

- ▶ fragmentation table for charge state 3+
- ▶ specType=etd
- ▶ score=51.36
- ▶ F113279.dat
- ▶ query=q41576.p1
- ▶ precursor=617.581180
- ▶ chargePrecursor=5
- ▶ itol=0.5

| AA |    | c              | y              | z+1            | z+2            | z              | AA  |
|----|----|----------------|----------------|----------------|----------------|----------------|-----|
| L  | 1  | 44.377         | 1028.035       | 1021.295       | 0.672          | 1022.960       | L29 |
| N  | 2  | 82.302         | 990.943        | 985.601        | <b>985.937</b> | 985.265        | N28 |
| K  | 3  | 125.090        | <b>952.926</b> | 947.587        | <b>947.923</b> | 947.251        | K27 |
| L  | 4  | 162.385        | 910.229        | 904.889        | <b>905.225</b> | 904.553        | L26 |
| L  | 5  | 200.479        | 872.533        | <b>867.194</b> | <b>867.530</b> | <b>866.858</b> | L25 |
| G  | 6  | 239.487        | 834.839        | <b>829.499</b> | <b>829.835</b> | <b>829.163</b> | G24 |
| K  | 7  | 271.529        | 815.832        | 810.492        | <b>810.828</b> | 810.156        | K23 |
| V  | 8  | 304.552        | 783.790        | <b>758.450</b> | <b>758.786</b> | 758.114        | V22 |
| Y  | 9  | 338.234        | 730.767        | 725.427        | <b>725.763</b> | 725.091        | Y21 |
| V  | 10 | 375.929        | 697.084        | <b>691.745</b> | <b>692.081</b> | <b>691.409</b> | V20 |
| A  | 11 | 399.608        | 659.389        | <b>654.050</b> | <b>654.386</b> | 653.714        | A19 |
| Q  | 12 | 442.294        | 636.735        | 587.371        | 630.707        | 630.035        | Q18 |
| Q  | 13 | 461.301        | 593.024        | 587.685        | 588.021        | 587.349        | Q17 |
| G  | 14 | 480.308        | 574.017        | 568.678        | 569.013        | 568.342        | G16 |
| V  | 15 | 513.331        | 555.010        | 549.670        | 550.006        | 549.334        | V15 |
| L  | 16 | 551.026        | <b>521.987</b> | 516.648        | 516.984        | 516.312        | L14 |
| P  | 17 | 583.377        | 484.292        | 478.953        | 479.289        | 478.617        | P13 |
| N  | 18 | 621.391        | 451.942        | 446.602        | 446.938        | 446.266        | N12 |
| T  | 19 | 659.086        | 413.927        | 408.588        | 408.924        | 408.252        | T11 |
| Q  | 20 | 701.772        | 376.231        | 370.893        | 371.229        | 370.557        | Q10 |
| A  | 21 | 725.451        | 333.540        | 328.207        | 328.543        | 327.871        | A9  |
| V  | 22 | <b>758.474</b> | 309.807        | 304.428        | 304.804        | 304.192        | V8  |
| L  | 23 | <b>796.168</b> | 276.844        | 271.505        | 271.841        | 271.169        | L7  |
| L  | 24 | 833.863        | 239.150        | 233.810        | 234.146        | 233.474        | L6  |
| P  | 25 | 866.214        | 201.455        | 196.116        | 196.451        | 195.780        | P5  |
| K  | 26 | 908.912        | 169.104        | 163.765        | 164.101        | 163.429        | K4  |
| K  | 27 | 951.611        | 126.806        | 121.468        | 121.802        | 121.130        | K3  |
| L  | 28 | 985.293        | 83.709         | 78.369         | 78.704         | 78.032         | L2  |
| E  | 29 | 1028.307       | 50.025         | 44.685         | 45.021         | 44.349         | E1  |

# sp | Q6GSS7 | H2A2A\_MOUSE

LNKLLGK <sup>Dimethyl</sup><sub>28.03</sub> VTIAQGGVLPNIQAVLLPKKTE

- ▶ fragmentation table for charge state 4+
- ▶ specType=etd
- ▶ score=51.36
- ▶ F113279.dat
- ▶ query=q41576.p1
- ▶ precursor=617.581180
- ▶ chargePrecursor=5
- ▶ itol=0.5

| AA    | c              | y              | z+1            | z+2            | z              | AA    |
|-------|----------------|----------------|----------------|----------------|----------------|-------|
| L[1]  | 33.535         | 771.728        | <b>767.724</b> | 0.758          | <b>767.412</b> | L[29] |
| N[2]  | 62.046         | 743.451        | <b>739.453</b> | <b>739.705</b> | <b>739.201</b> | N[28] |
| K[3]  | 94.059         | 714.941        | 710.942        | <b>711.194</b> | 710.690        | K[27] |
| L[4]  | 122.340        | <b>682.923</b> | 678.918        | 678.170        | 678.666        | L[26] |
| L[5]  | 150.611        | <b>654.652</b> | 650.647        | 650.899        | 650.395        | L[25] |
| G[6]  | 164.867        | 626.381        | 622.376        | 622.628        | 622.124        | G[24] |
| K[7]  | 203.898        | 612.126        | 608.121        | 608.373        | 607.869        | K[23] |
| V[8]  | 228.665        | 573.094        | 569.089        | 569.341        | 568.837        | V[22] |
| T[9]  | 253.927        | 548.327        | 544.322        | 544.574        | 544.070        | T[21] |
| T[10] | 262.198        | 523.065        | 519.060        | 519.312        | 518.808        | T[20] |
| A[11] | 269.958        | 494.794        | 490.789        | 491.041        | 490.537        | A[19] |
| Q[12] | 331.972        | 477.035        | 473.030        | 473.282        | 472.778        | Q[18] |
| G[13] | 346.228        | 445.020        | 441.015        | 441.267        | 440.763        | G[17] |
| G[14] | 360.483        | 430.765        | 426.760        | 427.012        | 426.508        | G[16] |
| V[15] | 385.250        | 416.509        | 412.505        | 412.757        | 412.253        | V[15] |
| L[16] | 413.521        | 391.742        | 387.737        | 387.989        | 387.486        | L[14] |
| P[17] | 437.784        | 363.471        | 359.466        | 359.718        | 359.215        | P[13] |
| N[18] | 466.295        | 339.208        | 335.203        | 335.455        | 334.951        | N[12] |
| T[19] | 494.566        | 310.897        | 306.891        | 307.143        | 306.641        | T[11] |
| Q[20] | 526.381        | 282.426        | 278.422        | 278.673        | 278.170        | Q[10] |
| A[21] | 544.340        | 250.412        | 246.407        | 246.659        | 246.155        | A[9]  |
| V[22] | 569.107        | 232.652        | 228.648        | 228.900        | 228.396        | V[8]  |
| L[23] | 597.378        | 207.885        | 203.881        | 204.132        | 203.629        | L[7]  |
| L[24] | 625.649        | 179.614        | 175.609        | 175.861        | 175.358        | L[6]  |
| P[25] | 649.912        | 151.343        | 147.338        | 147.590        | 147.087        | P[5]  |
| K[26] | 681.936        | 127.080        | 123.075        | 123.327        | 122.823        | K[4]  |
| K[27] | <b>713.960</b> | 95.056         | 91.052         | 91.304         | 90.800         | K[3]  |
| T[28] | <b>739.222</b> | 63.032         | 59.028         | 59.280         | 58.776         | T[2]  |
| E[29] | 771.462        | 37.771         | 33.766         | 34.018         | 33.514         | E[1]  |



# sp | Q6GSS7 | H2A2A\_MOUSE

LNKLLGK<sup>Dimethyl</sup>VTIAQGGVLPNIQAVLLPKKTE  
28.03

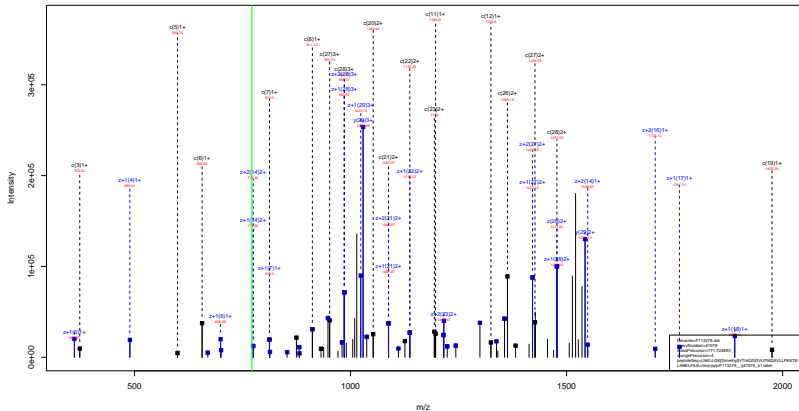

# sp | Q6GSS7 | H2A2A\_MOUSE

LNKLLGK <sup>Dimethyl</sup> <sub>28.03</sub> VTIAQGGVLPNIQAVLLPKKTE

- ▶ fragmentation table for charge state 1+
- ▶ specType=etd
- ▶ score=86.00
- ▶ F113279.dat
- ▶ query=q41578.p1
- ▶ precursor=771.724690
- ▶ chargePrecursor=4
- ▶ itol=0.5

| AA     | c               | y        | z+1             | z+2             | z        | AA     |
|--------|-----------------|----------|-----------------|-----------------|----------|--------|
| L[1]   | 131.118         | 3081.892 | 3067.873        | 0.000           | 3066.895 | L[29]  |
| N[2]   | 345.161         | 2970.808 | 2954.789        | 2955.797        | 2951.781 | N[28]  |
| K[3]   | <b>373.256</b>  | 2856.765 | 2840.746        | 2841.754        | 2839.738 | K[27]  |
| L[4]   | 486.340         | 2728.670 | 2712.651        | 2713.659        | 2711.643 | L[26]  |
| L[5]   | <b>599.424</b>  | 2615.585 | 2599.567        | 2600.575        | 2598.560 | L[25]  |
| Q[6]   | <b>656.445</b>  | 2502.502 | 2486.483        | 2487.491        | 2485.475 | Q[24]  |
| K[7]   | <b>812.572</b>  | 2345.480 | 2429.462        | 2430.469        | 2428.454 | K[23]  |
| V[8]   | <b>911.640</b>  | 2288.354 | 2273.335        | 2274.343        | 2272.327 | V[22]  |
| T[9]   | 1017.688        | 2190.286 | 2174.267        | 2175.275        | 2173.259 | T[21]  |
| I[10]  | <b>1125.772</b> | 2089.238 | 2073.219        | 2074.227        | 2072.211 | I[20]  |
| A[11]  | <b>1196.809</b> | 1976.154 | 1960.135        | 1961.143        | 1959.127 | A[19]  |
| Q[12]  | <b>1244.867</b> | 1905.111 | <b>1889.098</b> | 1890.106        | 1888.090 | Q[18]  |
| G[13]  | <b>1381.889</b> | 1777.058 | <b>1761.039</b> | 1762.047        | 1760.032 | G[17]  |
| G[14]  | 1438.910        | 1720.937 | 1704.918        | <b>1705.026</b> | 1703.010 | G[16]  |
| V[15]  | 1537.879        | 1663.015 | 1646.997        | 1646.004        | 1645.989 | V[15]  |
| L[16]  | 1651.063        | 1563.947 | 1547.928        | <b>1548.936</b> | 1546.920 | L[14]  |
| F[17]  | 1748.116        | 1490.893 | 1474.864        | 1475.852        | 1473.836 | F[13]  |
| Tu[18] | 1852.159        | 1383.810 | <b>1337.791</b> | 1338.799        | 1336.783 | Tu[12] |
| I[19]  | <b>1975.243</b> | 1236.767 | <b>1223.748</b> | 1224.756        | 1222.741 | I[11]  |
| Q[20]  | 2103.301        | 1126.683 | <b>1110.664</b> | 1111.672        | 1109.656 | Q[10]  |
| A[21]  | 2174.336        | 998.624  | 982.606         | 983.614         | 981.598  | A[9]   |
| V[22]  | 2273.407        | 927.587  | <b>911.569</b>  | 912.576         | 910.561  | V[8]   |
| L[23]  | 2386.491        | 828.519  | <b>812.500</b>  | <b>813.508</b>  | 811.492  | L[7]   |
| L[24]  | 2499.575        | 715.435  | <b>699.415</b>  | <b>700.424</b>  | 698.408  | L[6]   |
| P[25]  | 2596.626        | 602.351  | 586.332         | 587.340         | 585.324  | P[5]   |
| K[26]  | 2724.723        | 505.298  | <b>489.279</b>  | 490.287         | 488.271  | K[4]   |
| K[27]  | 2852.816        | 377.203  | <b>361.184</b>  | 362.192         | 360.177  | K[3]   |
| T[28]  | 2953.895        | 249.108  | 233.089         | 234.097         | 232.082  | T[2]   |
| E[29]  | 3082.968        | 148.060  | 132.042         | 133.050         | 131.034  | E[1]   |

# sp | Q6GSS7 | H2A2A\_MOUSE

LNKLLGK <sup>Dimethyl</sup><sub>28.03</sub> VTIAQGGVLPNIQAVLLPKKTE

- ▶ fragmentation table for charge state 2+
- ▶ specType=etd
- ▶ score=86.00
- ▶ F113279.dat
- ▶ query=q41578.p1
- ▶ precursor=771.724690
- ▶ chargePrecursor=4
- ▶ itol=0.5

| AA  | c               | y               | z+1             | z+2             | z               | AA   |
|-----|-----------------|-----------------|-----------------|-----------------|-----------------|------|
| L1  | 66.053          | <b>1542.450</b> | 1534.440        | 8.504           | 1533.930        | L120 |
| N12 | 123.054         | 1485.905        | <b>1477.898</b> | 1478.402        | <b>1477.394</b> | N120 |
| K13 | 187.132         | 1428.889        | <b>1420.877</b> | <b>1421.381</b> | 1420.373        | K127 |
| L14 | 243.674         | 1364.839        | <b>1356.829</b> | 1357.333        | <b>1356.325</b> | L126 |
| L15 | 300.216         | 1308.297        | 1300.287        | 1300.791        | <b>1299.783</b> | L125 |
| G16 | 358.758         | 1251.755        | <b>1243.745</b> | 1244.249        | <b>1243.241</b> | G124 |
| K17 | 406.799         | <b>1223.244</b> | <b>1215.234</b> | <b>1215.738</b> | <b>1214.731</b> | K123 |
| V18 | 456.324         | 1145.181        | <b>1137.171</b> | <b>1137.675</b> | 1136.667        | V122 |
| F19 | 506.840         | 1095.646        | <b>1087.637</b> | <b>1088.141</b> | 1087.133        | F121 |
| T10 | 563.390         | 1045.123        | <b>1037.113</b> | <b>1037.617</b> | 1036.609        | T120 |
| A11 | 608.908         | 988.581         | <b>980.571</b>  | 981.075         | <b>980.067</b>  | A119 |
| Q12 | 662.937         | 933.060         | 925.053         | 925.557         | 924.549         | Q118 |
| G13 | 691.448         | 889.033         | <b>881.023</b>  | <b>881.527</b>  | 880.519         | G117 |
| G14 | 719.959         | 860.522         | 852.513         | <b>853.017</b>  | 852.009         | G116 |
| V15 | 769.493         | 832.011         | 824.002         | 824.506         | 823.498         | V115 |
| L16 | 820.035         | 782.477         | <b>774.468</b>  | <b>774.972</b>  | 773.964         | L114 |
| F17 | <b>874.561</b>  | 728.935         | 721.928         | 722.432         | 721.424         | F113 |
| N18 | <b>931.583</b>  | 677.400         | <b>669.390</b>  | <b>669.903</b>  | 668.895         | N112 |
| I19 | 988.125         | 620.867         | 612.858         | 613.362         | 612.354         | I111 |
| Q10 | <b>1052.154</b> | 563.845         | 555.836         | 556.340         | 555.332         | Q110 |
| A11 | <b>1087.673</b> | 499.816         | 491.807         | 492.311         | 491.303         | A109 |
| V12 | <b>1137.207</b> | 484.297         | 476.288         | 476.792         | 475.784         | V108 |
| L13 | <b>1193.749</b> | 414.763         | 406.754         | 407.258         | 406.250         | L107 |
| L14 | 1250.291        | 358.221         | 350.212         | 350.716         | 349.708         | L106 |
| P15 | 1298.817        | 301.679         | 293.670         | 294.174         | 293.166         | P105 |
| K16 | <b>1362.865</b> | 253.153         | 245.143         | 245.647         | 244.639         | K104 |
| K17 | <b>1426.912</b> | 189.105         | 181.096         | 181.600         | 180.592         | K103 |
| T18 | <b>1477.436</b> | 125.058         | 117.048         | 117.552         | 116.544         | T102 |
| E19 | 1541.958        | 74.534          | 66.524          | 67.028          | 66.021          | E101 |

# sp | Q6GSS7 | H2A2A\_MOUSE

LNKLLGK <sup>Dimethyl</sup> <sub>28.03</sub> VTIAQGGVLPNIQAVLLPKKTE

- ▶ fragmentation table for charge state 3+
- ▶ specType=etd
- ▶ score=86.00
- ▶ F113279.dat
- ▶ query=q41578.p1
- ▶ precursor=771.724690
- ▶ chargePrecursor=4
- ▶ itol=0.5

| AA    | c              | y               | z+1             | z+2            | z              | AA    |
|-------|----------------|-----------------|-----------------|----------------|----------------|-------|
| L[1]  | 44.377         | <b>1028.635</b> | <b>1023.296</b> | 0.672          | 1023.660       | L[29] |
| N[2]  | 62.302         | 090.941         | <b>985.601</b>  | <b>985.937</b> | <b>985.265</b> | N[28] |
| K[3]  | 125.090        | 952.326         | <b>947.587</b>  | <b>947.923</b> | 947.251        | K[27] |
| L[4]  | 162.785        | 910.228         | 904.269         | 905.225        | 904.551        | L[26] |
| L[5]  | 200.479        | 872.531         | 867.194         | 867.530        | 866.858        | L[25] |
| G[6]  | 239.487        | 834.835         | 829.499         | 829.835        | 829.163        | G[24] |
| K[7]  | 271.529        | 815.832         | 810.492         | 810.828        | 810.156        | K[23] |
| V[8]  | 304.552        | 763.790         | 758.450         | 758.786        | 758.114        | V[22] |
| T[9]  | 338.234        | 730.767         | 725.427         | 725.763        | 725.091        | T[21] |
| I[10] | 375.929        | 697.084         | 691.745         | 692.081        | 691.409        | I[20] |
| A[11] | 399.608        | 659.389         | 654.050         | 654.386        | 653.714        | A[19] |
| Q[12] | 442.294        | 626.710         | 621.371         | 621.707        | 621.035        | Q[18] |
| G[13] | 461.301        | 593.024         | 587.685         | 588.021        | 587.349        | G[17] |
| G[14] | 480.308        | 574.017         | 568.678         | 569.013        | 568.342        | G[16] |
| V[15] | 513.131        | 555.010         | 549.670         | 550.006        | 549.334        | V[15] |
| L[16] | 551.026        | 521.987         | 516.648         | 516.984        | 516.312        | L[14] |
| P[17] | 583.377        | 484.202         | 478.863         | 479.209        | 478.537        | P[13] |
| N[18] | 621.391        | 451.942         | 446.602         | 446.938        | 446.266        | N[12] |
| I[19] | 659.086        | 413.927         | 408.588         | 408.924        | 408.252        | I[11] |
| Q[20] | 701.772        | 376.233         | 370.893         | 371.229        | 370.557        | Q[10] |
| A[21] | 725.451        | 333.546         | 328.207         | 328.543        | 327.871        | A[9]  |
| V[22] | 758.474        | 309.867         | 304.528         | 304.864        | 304.192        | V[8]  |
| L[23] | 796.188        | 276.844         | 271.505         | 271.841        | 271.169        | L[7]  |
| L[24] | 833.863        | 239.150         | 233.810         | 234.146        | 233.474        | L[6]  |
| T[25] | 869.214        | 201.455         | 196.116         | 196.452        | 195.780        | T[5]  |
| K[26] | 908.912        | 169.100         | 163.760         | 164.100        | 163.429        | K[4]  |
| K[27] | <b>951.611</b> | 138.406         | 133.066         | 133.402        | 132.730        | K[3]  |
| T[28] | <b>985.293</b> | 83.708          | 78.368          | 78.704         | 78.032         | T[2]  |
| E[29] | 1028.307       | 50.025          | 44.685          | 45.021         | 44.349         | E[1]  |

# sp | Q6GSS7 | H2A2A\_MOUSE

LNKLLGK<sup>Dimethyl</sup>VTIAQGGVLPNIQAVLLPKKTE  
28.03

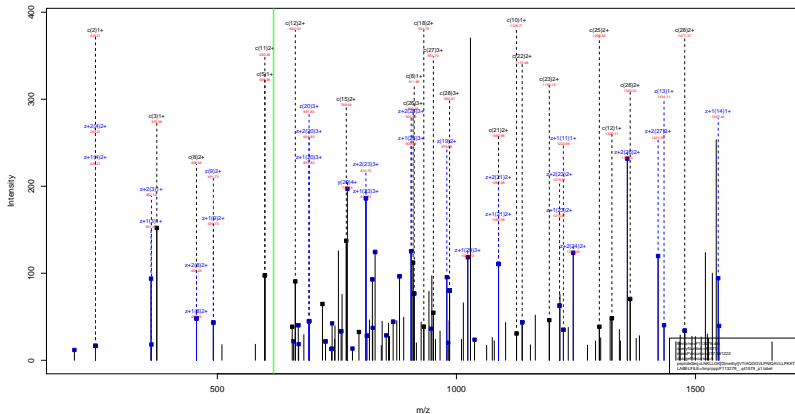

# sp | Q6GSS7 | H2A2A\_MOUSE

LNKLLGK <sup>Dimethyl</sup> <sub>28.03</sub> VTIAQGGVLPNIQAVLLPKKTE

- ▶ fragmentation table for charge state 1+
- ▶ specType=etd
- ▶ score=57.82
- ▶ F113279.dat
- ▶ query=q41579\_p1
- ▶ precursor=617.581220
- ▶ chargePrecursor=5
- ▶ itol=0.5

| AA  | c               | y        | z+1             | z+2             | z               | AA  |
|-----|-----------------|----------|-----------------|-----------------|-----------------|-----|
| L1  | 131.118         | 3083.802 | 2067.873        | 0.000           | 3066.885        | L26 |
| N2  | <b>245.161</b>  | 2970.808 | 2954.789        | 2955.797        | 2953.781        | N28 |
| K3  | <b>373.256</b>  | 2856.765 | 2840.746        | 2841.754        | 2839.738        | K27 |
| L4  | 488.340         | 2728.670 | 2712.651        | 2713.659        | 2711.643        | L26 |
| L5  | <b>999.424</b>  | 2615.586 | 2599.567        | 2600.575        | 2598.559        | L25 |
| G6  | <b>656.445</b>  | 2502.502 | 2486.483        | 2487.491        | 2485.475        | G24 |
| K7  | <b>812.572</b>  | 2445.480 | 2429.462        | 2430.469        | 2428.454        | K23 |
| V8  | <b>911.640</b>  | 2389.354 | 2373.335        | 2374.343        | 2372.327        | V22 |
| T9  | 1012.688        | 2190.286 | 2174.267        | 2175.275        | 2173.259        | T21 |
| I10 | <b>1125.772</b> | 2089.238 | 2073.219        | 2074.227        | 2072.211        | I20 |
| A11 | <b>1129.809</b> | 1976.154 | 1960.135        | 1961.143        | 1959.127        | A19 |
| Q12 | <b>1324.867</b> | 1909.111 | 1893.092        | 1894.100        | 1892.084        | Q18 |
| G13 | 1381.889        | 1777.058 | 1761.039        | 1762.047        | 1760.032        | G17 |
| G14 | 1438.910        | 1720.937 | 1704.918        | 1705.926        | 1703.910        | G16 |
| V15 | 1537.979        | 1603.015 | 1587.997        | 1589.004        | 1587.989        | V15 |
| L16 | 1651.063        | 1563.947 | <b>1547.928</b> | <b>1548.936</b> | 1546.920        | L14 |
| T17 | 1768.116        | 1450.883 | 1434.864        | 1435.872        | <b>1433.856</b> | T13 |
| N18 | 1882.159        | 1353.810 | 1337.791        | 1338.799        | 1336.783        | N12 |
| I19 | 1975.243        | 1239.767 | <b>1223.748</b> | 1224.756        | 1222.741        | I11 |
| Q20 | 2103.301        | 1126.683 | 1110.664        | 1111.672        | 1109.656        | Q10 |
| A21 | 2174.338        | 998.624  | <b>982.606</b>  | 983.614         | 981.598         | A9  |
| V22 | 2273.407        | 827.587  | <b>811.569</b>  | 812.576         | 810.561         | V8  |
| L23 | 2389.491        | 629.519  | <b>612.500</b>  | 613.508         | 611.492         | L7  |
| L24 | 2499.575        | 415.435  | 699.416         | 700.424         | 698.408         | L6  |
| P25 | 2596.628        | 602.351  | 586.332         | 587.340         | 585.324         | P5  |
| K26 | 2724.723        | 505.298  | 489.279         | 490.287         | 488.271         | K4  |
| K27 | 2852.818        | 377.203  | <b>361.184</b>  | <b>362.192</b>  | 360.177         | K3  |
| T28 | 2953.865        | 249.108  | 233.089         | 234.097         | 232.082         | T2  |
| E29 | 3082.008        | 148.060  | 132.042         | 133.050         | 131.034         | E1  |

# sp | Q6GSS7 | H2A2A\_MOUSE

LNKLLGK <sup>Dimethyl</sup> <sub>28.03</sub> VTIAQGGVLPNIQAVLLPKKTE

- ▶ fragmentation table for charge state 2+
- ▶ specType=etd
- ▶ score=57.82
- ▶ F113279.dat
- ▶ query=q41579.p1
- ▶ precursor=617.581220
- ▶ chargePrecursor=5
- ▶ itol=0.5

| AA  | c               | y               | z+1             | z+2             | z               | AA   |
|-----|-----------------|-----------------|-----------------|-----------------|-----------------|------|
| L1  | 66.053          | 1542.850        | 1524.440        | 9.504           | 1533.930        | L120 |
| N12 | 123.054         | 1485.905        | 1477.898        | 1478.402        | <b>1477.394</b> | N120 |
| K13 | 187.132         | 1428.888        | 1420.877        | <b>1421.381</b> | 1420.373        | K127 |
| L14 | 243.674         | 1364.839        | 1356.829        | <b>1357.333</b> | 1356.325        | L126 |
| L15 | 300.216         | 1308.297        | 1300.287        | 1300.791        | 1299.783        | L125 |
| G16 | 358.758         | 1251.755        | 1243.745        | <b>1244.249</b> | 1243.241        | G124 |
| K17 | 406.799         | <b>1223.244</b> | <b>1215.234</b> | <b>1215.738</b> | 1214.731        | K123 |
| V18 | <b>456.324</b>  | 1145.181        | <b>1137.171</b> | <b>1137.675</b> | 1136.667        | V122 |
| F19 | 506.640         | 1095.646        | <b>1087.637</b> | <b>1088.141</b> | 1087.133        | F121 |
| T10 | 563.590         | 1045.123        | 1037.113        | <b>1037.617</b> | 1036.609        | T20  |
| A11 | <b>586.908</b>  | 988.581         | 980.571         | 981.075         | <b>980.067</b>  | A119 |
| G12 | <b>602.837</b>  | 933.062         | 925.053         | 925.557         | 924.549         | G118 |
| G13 | <b>691.448</b>  | 889.033         | <b>881.023</b>  | 881.527         | <b>880.519</b>  | G117 |
| G14 | <b>719.959</b>  | 860.522         | 852.513         | <b>853.017</b>  | 852.009         | G116 |
| V15 | <b>769.493</b>  | 832.011         | <b>824.002</b>  | <b>824.506</b>  | 823.498         | V115 |
| L16 | 826.035         | <b>782.477</b>  | 774.468         | 774.972         | 773.964         | L114 |
| F17 | 874.581         | <b>725.335</b>  | 717.326         | 717.830         | 716.822         | F113 |
| N18 | <b>931.583</b>  | 677.805         | <b>669.399</b>  | <b>669.903</b>  | <b>668.895</b>  | N112 |
| I19 | 988.125         | 630.287         | 622.278         | 622.782         | 621.774         | I111 |
| Q10 | 1042.154        | 583.845         | 575.836         | 576.340         | 575.332         | Q110 |
| A11 | <b>1087.673</b> | 499.816         | <b>491.807</b>  | 492.310         | <b>491.303</b>  | A10  |
| V12 | <b>1137.207</b> | 404.297         | <b>456.288</b>  | <b>456.792</b>  | 455.784         | V10  |
| L13 | <b>1193.749</b> | 414.763         | 406.754         | 407.258         | 406.250         | L11  |
| L14 | 1250.291        | 358.221         | 350.212         | 350.716         | 349.708         | L10  |
| P15 | <b>1298.817</b> | 301.679         | 293.670         | 294.174         | 293.166         | P10  |
| K16 | <b>1362.865</b> | 253.153         | <b>245.143</b>  | <b>245.647</b>  | 244.639         | K14  |
| K17 | 1428.912        | 199.105         | 191.096         | 191.600         | 190.592         | K13  |
| T18 | <b>1477.436</b> | 125.058         | 117.048         | 117.552         | 116.544         | T12  |
| E19 | 1541.958        | 74.534          | 66.524          | 67.028          | 66.021          | E11  |

# sp | Q6GSS7 | H2A2A\_MOUSE

LNKLLGK <sup>Dimethyl</sup><sub>28.03</sub> VTIAQGGVLPNIQAVLLPKKTE

- ▶ fragmentation table for charge state 3+
- ▶ specType=etd
- ▶ score=57.82
- ▶ F113279.dat
- ▶ query=q41579\_p1
- ▶ precursor=617.581220
- ▶ chargePrecursor=5
- ▶ itol=0.5

| AA    | c              | y              | z+1             | z+2            | z              | AA    |
|-------|----------------|----------------|-----------------|----------------|----------------|-------|
| L[1]  | 44.377         | 1028.635       | <b>1023.296</b> | 0.672          | 1022.960       | L[29] |
| N[2]  | 82.392         | 990.941        | <b>985.601</b>  | <b>985.937</b> | <b>985.265</b> | N[28] |
| K[3]  | 125.090        | 952.926        | 947.577         | 947.923        | <b>947.251</b> | K[27] |
| L[4]  | 162.795        | 910.228        | <b>904.889</b>  | <b>905.225</b> | 904.581        | L[26] |
| L[5]  | 200.479        | 872.533        | <b>867.194</b>  | <b>867.530</b> | 866.858        | L[25] |
| G[6]  | 219.487        | 834.839        | <b>829.499</b>  | <b>829.835</b> | 829.163        | G[24] |
| K[7]  | 271.529        | 815.832        | <b>810.492</b>  | <b>810.828</b> | 810.156        | K[23] |
| V[8]  | 304.952        | 761.790        | <b>758.450</b>  | <b>758.786</b> | 758.114        | V[22] |
| T[9]  | 338.234        | 730.767        | 725.427         | <b>725.763</b> | 725.091        | T[21] |
| I[10] | 375.929        | 687.084        | <b>691.745</b>  | <b>692.081</b> | <b>691.409</b> | I[20] |
| A[11] | 399.608        | <b>659.389</b> | 654.050         | 654.386        | 653.714        | A[19] |
| Q[12] | 442.294        | 638.716        | 630.371         | 630.707        | 630.035        | Q[18] |
| G[13] | 461.301        | 593.024        | 587.685         | 588.021        | 587.349        | G[17] |
| G[14] | 480.308        | 574.017        | 568.678         | 569.013        | 568.342        | G[16] |
| V[15] | 513.331        | 555.010        | 549.670         | 550.006        | 549.334        | V[15] |
| L[16] | 551.026        | 521.987        | 516.648         | 516.984        | 516.312        | L[14] |
| P[17] | 583.377        | 484.292        | 478.953         | 479.289        | 478.617        | P[13] |
| N[18] | 607.394        | 451.942        | 446.602         | 446.938        | 446.266        | N[12] |
| I[19] | <b>659.886</b> | 413.927        | 408.588         | 408.924        | 408.252        | I[11] |
| Q[20] | 703.772        | 376.233        | 370.893         | 371.229        | 370.557        | Q[10] |
| A[21] | 725.451        | 333.548        | 328.207         | 328.543        | 327.871        | A[9]  |
| V[22] | <b>758.474</b> | 309.867        | 304.528         | 304.864        | 304.192        | V[8]  |
| L[23] | <b>796.168</b> | 276.844        | 271.505         | 271.841        | 271.169        | L[7]  |
| L[24] | 833.863        | 239.150        | 233.810         | 234.146        | 233.474        | L[6]  |
| P[25] | 866.234        | <b>201.455</b> | 196.116         | 196.451        | 195.780        | P[5]  |
| K[26] | <b>908.812</b> | 159.104        | 153.765         | 154.101        | 153.429        | K[4]  |
| K[27] | <b>951.611</b> | 126.406        | 121.066         | 121.402        | 120.730        | K[3]  |
| T[28] | <b>985.293</b> | 83.708         | 78.368          | 78.704         | 78.032         | T[2]  |
| E[29] | 1028.397       | 50.025         | 44.685          | 45.021         | 44.349         | E[1]  |



# sp | Q6GSS7 | H2A2A\_MOUSE

LNKLLGK <sup>Dimethyl</sup> <sub>28.03</sub> VTIAQGGVLPNIQAVLLPKKTE

- ▶ fragmentation table for charge state 4+
- ▶ specType=etd
- ▶ score=57.82
- ▶ F113279.dat
- ▶ query=q41579\_p1
- ▶ precursor=617.581220
- ▶ chargePrecursor=5
- ▶ itol=0.5

| AA |    | c              | y              | z+1            | z+2            | z              | AA              |
|----|----|----------------|----------------|----------------|----------------|----------------|-----------------|
| L  | 1  | 33.535         | <b>771.726</b> | 767.724        | 0.756          | 767.472        | L <sub>29</sub> |
| N  | 2  | 62.046         | 743.451        | <b>739.453</b> | <b>739.705</b> | <b>739.201</b> | N <sub>26</sub> |
| K  | 3  | 94.059         | 714.941        | 710.94         | 711.194        | 710.690        | K <sub>27</sub> |
| L  | 4  | 122.340        | 687.923        | 678.918        | 679.170        | 678.666        | L <sub>26</sub> |
| L  | 5  | 150.611        | 654.652        | 650.647        | 650.899        | 650.395        | L <sub>25</sub> |
| G  | 6  | 164.867        | 626.381        | 622.376        | 622.628        | 622.124        | G <sub>24</sub> |
| K  | 7  | 203.898        | 612.126        | 608.121        | 608.373        | 607.869        | K <sub>23</sub> |
| V  | 8  | 228.665        | 573.094        | 569.089        | 569.341        | 568.837        | V <sub>22</sub> |
| T  | 9  | 253.927        | 548.327        | 544.322        | 544.574        | 544.070        | T <sub>21</sub> |
| T  | 10 | 262.198        | 523.065        | 519.060        | 519.312        | 518.808        | T <sub>20</sub> |
| A  | 11 | 269.958        | 494.794        | 490.789        | 491.041        | 490.537        | A <sub>19</sub> |
| Q  | 12 | 331.972        | 477.035        | 473.030        | 473.282        | 472.778        | Q <sub>18</sub> |
| G  | 13 | 346.228        | 445.020        | 441.015        | 441.267        | 440.763        | G <sub>17</sub> |
| G  | 14 | 350.483        | 430.765        | 426.760        | 427.012        | 426.508        | G <sub>16</sub> |
| V  | 15 | 385.250        | 416.509        | 412.505        | 412.757        | 412.253        | V <sub>15</sub> |
| L  | 16 | 413.521        | 391.742        | 387.737        | 387.989        | 387.486        | L <sub>14</sub> |
| P  | 17 | 437.784        | 363.471        | 359.466        | 359.718        | 359.215        | P <sub>13</sub> |
| N  | 18 | 466.295        | 339.208        | 335.203        | 335.455        | 334.951        | N <sub>12</sub> |
| T  | 19 | 494.566        | 310.897        | 306.891        | 307.143        | 306.641        | T <sub>11</sub> |
| Q  | 20 | 525.381        | 282.426        | 278.422        | 278.673        | 278.170        | Q <sub>10</sub> |
| A  | 21 | 544.340        | 250.412        | 246.407        | 246.659        | 246.155        | A <sub>9</sub>  |
| V  | 22 | 569.107        | 232.652        | 228.646        | 228.898        | 228.396        | V <sub>8</sub>  |
| L  | 23 | 597.378        | 207.885        | 203.881        | 204.132        | 203.629        | L <sub>7</sub>  |
| L  | 24 | 625.649        | 179.614        | 175.609        | 175.861        | 175.358        | L <sub>6</sub>  |
| P  | 25 | 649.912        | 151.343        | 147.338        | 147.590        | 147.087        | P <sub>5</sub>  |
| K  | 26 | 681.936        | 127.080        | 123.075        | 123.327        | 122.823        | K <sub>4</sub>  |
| K  | 27 | 713.960        | 95.056         | 91.052         | 91.304         | 90.800         | K <sub>3</sub>  |
| T  | 28 | <b>739.222</b> | 63.032         | 59.028         | 59.280         | 58.776         | T <sub>2</sub>  |
| E  | 29 | 771.462        | 37.771         | 33.766         | 34.018         | 33.514         | E <sub>1</sub>  |



# sp | Q6GSS7 | H2A2A\_MOUSE

LNKLLGK <sup>Dimethyl</sup> <sub>28.03</sub> VTIAQGGVLPNIQAVLLPKKTE

- ▶ fragmentation table for charge state 1+
- ▶ specType=etd
- ▶ score=89.03
- ▶ F113279.dat
- ▶ query=q41580.p1
- ▶ precursor=771.724860
- ▶ chargePrecursor=4
- ▶ itol=0.5

| AA     | c               | y        | z+1             | z+2             | z        | AA     |
|--------|-----------------|----------|-----------------|-----------------|----------|--------|
| L[1]   | 131.118         | 3081.892 | 3067.873        | 0.000           | 3066.895 | L[29]  |
| N[2]   | 345.161         | 2970.808 | 2954.789        | 2955.797        | 2951.781 | N[28]  |
| K[3]   | <b>373.256</b>  | 2856.765 | 2840.746        | 2841.754        | 2839.738 | K[27]  |
| L[4]   | 486.340         | 2728.670 | 2712.651        | 2713.659        | 2711.643 | L[26]  |
| L[5]   | <b>599.424</b>  | 2615.585 | 2599.567        | 2600.575        | 2598.559 | L[25]  |
| Q[6]   | <b>656.445</b>  | 2502.502 | 2486.483        | 2487.491        | 2485.475 | Q[24]  |
| K[7]   | <b>812.572</b>  | 2345.480 | 2429.462        | 2430.469        | 2428.454 | K[23]  |
| V[8]   | <b>911.640</b>  | 2248.394 | 2233.335        | 2274.343        | 2272.327 | V[22]  |
| T[9]   | 1017.688        | 2100.288 | 2174.267        | 2175.275        | 2173.259 | T[21]  |
| I[10]  | <b>1125.772</b> | 2089.238 | 2073.219        | 2074.227        | 2072.211 | I[20]  |
| A[11]  | <b>1196.809</b> | 1976.154 | <b>1960.135</b> | 1961.143        | 1959.127 | A[19]  |
| Q[12]  | <b>1324.867</b> | 1805.111 | 1806.068        | <b>1890.106</b> | 1888.090 | Q[18]  |
| G[13]  | <b>1381.889</b> | 1777.058 | <b>1761.039</b> | 1762.047        | 1760.032 | G[17]  |
| G[14]  | 1438.910        | 1720.037 | <b>1704.018</b> | 1705.026        | 1703.010 | G[16]  |
| V[15]  | 1537.879        | 1663.015 | 1646.997        | 1646.004        | 1645.989 | V[15]  |
| L[16]  | 1651.063        | 1563.947 | 1547.928        | 1548.936        | 1546.920 | L[14]  |
| P[17]  | <b>1748.116</b> | 1450.893 | 1434.864        | 1435.852        | 1433.836 | P[13]  |
| TW[18] | 1867.159        | 1383.810 | <b>1337.791</b> | 1338.799        | 1336.783 | TW[12] |
| I[19]  | 1975.243        | 1236.767 | <b>1223.748</b> | 1224.756        | 1222.741 | I[11]  |
| Q[20]  | 2103.301        | 1126.683 | <b>1110.664</b> | 1111.672        | 1109.656 | Q[10]  |
| A[21]  | 2174.336        | 996.624  | 980.606         | 981.614         | 981.598  | A[9]   |
| V[22]  | 2273.407        | 927.587  | <b>911.569</b>  | 912.576         | 910.561  | V[8]   |
| L[23]  | 2386.491        | 828.519  | <b>812.500</b>  | <b>813.508</b>  | 811.492  | L[7]   |
| L[24]  | 2499.575        | 715.435  | <b>693.415</b>  | <b>700.424</b>  | 698.408  | L[6]   |
| P[25]  | 2596.626        | 602.351  | 586.332         | 587.340         | 585.324  | P[5]   |
| K[26]  | 2724.723        | 505.298  | <b>489.279</b>  | 490.287         | 488.271  | K[4]   |
| K[27]  | 2852.816        | 377.203  | <b>361.184</b>  | 362.192         | 360.177  | K[3]   |
| T[28]  | 2953.895        | 249.108  | 233.089         | 234.097         | 232.082  | T[2]   |
| E[29]  | 3087.908        | 148.060  | 132.042         | 133.050         | 131.034  | E[1]   |

# sp | Q6GSS7 | H2A2A\_MOUSE

LNKLLGK <sup>Dimethyl</sup><sub>28.03</sub> VTIAQGGVLPNIQAVLLPKKTE

- ▶ fragmentation table for charge state 2+
- ▶ specType=etd
- ▶ score=89.03
- ▶ F113279.dat
- ▶ query=q41580.p1
- ▶ precursor=771.724860
- ▶ chargePrecursor=4
- ▶ itol=0.5

| AA  | c               | y               | z+1             | z+2             | z               | AA   |
|-----|-----------------|-----------------|-----------------|-----------------|-----------------|------|
| L1  | 66.053          | <b>1542.450</b> | 1524.440        | 9.504           | 1533.930        | L120 |
| N12 | 123.054         | 1485.905        | <b>1477.898</b> | <b>1478.402</b> | 1477.304        | N020 |
| K13 | 187.132         | 1428.889        | <b>1420.877</b> | <b>1421.381</b> | 1420.373        | K027 |
| L14 | 243.674         | 1364.839        | <b>1356.829</b> | 1357.333        | <b>1356.325</b> | L126 |
| L15 | 300.216         | 1308.297        | 1309.297        | 1309.791        | 1309.701        | L125 |
| G16 | 358.759         | 1251.795        | <b>1243.745</b> | <b>1244.249</b> | <b>1243.241</b> | G024 |
| K17 | 406.799         | <b>1223.244</b> | <b>1215.234</b> | 1215.738        | <b>1214.731</b> | K023 |
| V18 | 456.324         | 1145.181        | <b>1137.171</b> | <b>1137.675</b> | 1136.667        | V022 |
| T19 | 506.840         | 1095.646        | <b>1087.637</b> | 1088.141        | <b>1087.133</b> | T121 |
| T10 | 563.390         | 1045.123        | <b>1037.113</b> | <b>1037.617</b> | 1036.609        | T020 |
| A11 | 608.909         | 988.581         | 989.571         | 990.075         | 990.067         | A119 |
| G12 | 662.937         | 933.060         | 933.053         | 933.557         | 934.549         | G118 |
| G13 | 691.448         | 889.033         | <b>881.023</b>  | <b>881.527</b>  | 880.519         | G117 |
| G14 | 719.959         | 860.522         | 852.513         | <b>853.017</b>  | 852.009         | G116 |
| V15 | 769.493         | 832.011         | 824.002         | 824.506         | 823.498         | V115 |
| L16 | 830.035         | 782.477         | 774.468         | 774.972         | 773.964         | L114 |
| T17 | <b>874.561</b>  | 728.935         | 719.926         | 719.430         | 717.422         | T113 |
| N18 | <b>931.583</b>  | 677.400         | 669.390         | 669.903         | 668.895         | N112 |
| I19 | 988.125         | 620.867         | 612.858         | 612.862         | 611.874         | I111 |
| Q10 | <b>1052.154</b> | 563.845         | 555.836         | 556.340         | 555.332         | Q110 |
| A21 | <b>1087.673</b> | 499.816         | 491.807         | 492.310         | 491.303         | A10  |
| V22 | <b>1137.207</b> | 494.297         | 486.288         | 486.792         | 485.784         | V10  |
| L23 | <b>1193.749</b> | 414.763         | 406.754         | 407.258         | 406.250         | L11  |
| L24 | 1250.291        | 358.221         | 350.212         | 350.716         | 349.708         | L10  |
| P25 | <b>1298.817</b> | 301.679         | 293.670         | 294.174         | 293.166         | P10  |
| K26 | <b>1362.865</b> | 253.153         | 245.143         | 245.647         | 244.639         | K10  |
| K27 | <b>1426.912</b> | 189.105         | 181.096         | 181.600         | 180.592         | K10  |
| T28 | 1477.436        | 125.058         | 117.049         | 117.552         | 116.544         | T10  |
| E29 | 1541.958        | 74.534          | 66.524          | 67.028          | 66.021          | E10  |

# sp | Q6GSS7 | H2A2A\_MOUSE

LNKLLGK <sup>Dimethyl</sup> <sub>28.03</sub> VTIAQGGVLPNIQAVLLPKKTE

- ▶ fragmentation table for charge state 3+
- ▶ specType=etd
- ▶ score=89.03
- ▶ F113279.dat
- ▶ query=q41580.p1
- ▶ precursor=771.724860
- ▶ chargePrecursor=4
- ▶ itol=0.5

| AA  | c              | y               | z+1             | z+2            | z              | AA  |
|-----|----------------|-----------------|-----------------|----------------|----------------|-----|
| L1  | 44.377         | <b>1028.635</b> | <b>1023.296</b> | 0.672          | 1023.660       | L29 |
| N2  | 62.302         | 090.941         | <b>985.601</b>  | <b>985.937</b> | <b>985.265</b> | N28 |
| K3  | 125.090        | 952.326         | <b>947.587</b>  | <b>947.923</b> | 947.251        | K27 |
| L4  | 162.785        | 910.228         | 904.869         | 905.225        | 904.551        | L26 |
| L5  | 200.479        | 872.531         | 867.194         | 867.530        | 866.858        | L25 |
| G6  | 239.487        | 834.835         | 829.499         | 829.835        | 829.163        | G24 |
| K7  | 271.529        | 815.833         | 810.492         | 810.828        | 810.156        | K23 |
| V8  | 304.552        | 763.790         | 758.450         | 758.786        | 758.114        | V22 |
| T9  | 338.234        | 730.767         | 725.427         | 725.763        | 725.091        | T21 |
| I10 | 375.929        | 697.084         | 691.745         | 692.081        | 691.409        | I20 |
| A11 | 389.608        | 699.389         | 654.050         | 654.386        | 653.714        | A19 |
| Q12 | 442.294        | 636.710         | 630.371         | 630.707        | 630.035        | Q18 |
| G13 | 461.301        | 593.024         | 587.685         | 588.021        | 587.349        | G17 |
| G14 | 480.308        | 574.017         | 568.678         | 569.013        | 568.342        | G16 |
| V15 | 513.331        | 555.010         | 549.670         | 550.006        | 549.334        | V15 |
| L16 | 551.026        | 521.987         | 516.648         | 516.984        | 516.312        | L14 |
| P17 | 583.377        | 484.202         | 478.863         | 479.209        | 478.617        | P13 |
| N18 | 621.391        | 451.942         | 446.602         | 446.938        | 446.266        | N12 |
| I19 | 659.086        | 413.927         | 408.588         | 408.924        | 408.252        | I11 |
| Q20 | 701.772        | 376.233         | 370.893         | 371.229        | 370.557        | Q10 |
| A21 | 725.451        | 333.546         | 328.207         | 328.543        | 327.871        | A9  |
| V22 | 758.474        | 309.867         | 304.528         | 304.864        | 304.192        | V8  |
| L23 | 796.168        | 276.844         | 271.505         | 271.841        | 271.169        | L7  |
| L24 | 833.863        | 239.150         | 233.810         | 234.146        | 233.474        | L6  |
| T25 | 869.214        | 201.493         | 196.154         | 196.490        | 195.818        | T5  |
| K26 | 908.912        | 169.103         | 163.765         | 164.101        | 163.429        | K4  |
| K27 | <b>951.611</b> | 138.406         | 133.066         | 133.402        | 132.730        | K3  |
| T28 | <b>985.293</b> | 83.708          | 78.368          | 78.704         | 78.032         | T2  |
| E29 | 1028.307       | 50.025          | 44.685          | 45.021         | 44.349         | E1  |



# sp | Q6GSS7 | H2A2A\_MOUSE

LNKLLGK <sup>Dimethyl</sup> <sub>28.03</sub> VTIAQGGVLPNIQAVLLPKKTE

- ▶ fragmentation table for charge state 1+
- ▶ specType=cid
- ▶ score=65.97
- ▶ F113279.dat
- ▶ query=q41581\_p1
- ▶ precursor=1028.630800
- ▶ chargePrecursor=3
- ▶ itol=0.5

| AA   | a               | a*             | a,0             | b               | b*              | b,0             | r               | y*              | y,0             | AA              |      |
|------|-----------------|----------------|-----------------|-----------------|-----------------|-----------------|-----------------|-----------------|-----------------|-----------------|------|
| L1   | 38              | 392            | 0               | 0               | 0               | 0               | 0               | 0               | 0               | L129            |      |
| N1   | 138             | 139            | 0               | 0               | 0               | 0               | 0               | 0               | 0               | N130            |      |
| K1   | 138             | 134            | 111             | 280             | 0               | 0               | 0               | 0               | 0               | K127            |      |
| L14  | 441             | 418            | 424             | 202             | 0               | 0               | 0               | 0               | 0               | L128            |      |
| L15  | 104             | 102            | 0               | 0               | 0               | 0               | 0               | 0               | 0               | L129            |      |
| G16  | <b>811.424</b>  | <b>394.397</b> | 0               | 0               | <b>582.397</b>  | 0               | 0               | 0               | 0               | G125            |      |
| K17  | 187             | 182            | 187             | 184             | 0               | 0               | 0               | 0               | 0               | K123            |      |
| V18  | <b>866.619</b>  | <b>848.592</b> | 0               | 0               | <b>894.613</b>  | <b>877.587</b>  | 0               | 0               | 0               | V122            |      |
| T19  | <b>187.656</b>  | 0              | 0               | 0               | <b>905.661</b>  | 0               | 0               | 0               | 0               | T121            |      |
| I20  | 108             | 105            | <b>1083.724</b> | 1087.745        | <b>1108.745</b> | <b>1081.719</b> | 0               | 0               | 0               | I20             |      |
| A11  | 1131            | 107            | 1134            | 104             | <b>1132.777</b> | <b>1119.762</b> | <b>1162.736</b> | 1161.762        | 1160.754        | A109            |      |
| Q12  | 1179            | 108            | 1182            | 104             | <b>1181.811</b> | 1180.844        | 1180.844        | 1180.811        | 1180.804        | Q118            |      |
| G13  | 1138            | 107            | 1139            | 104             | <b>1138.862</b> | 1147.836        | 1146.862        | <b>1177.850</b> | 1168.833        | G117            |      |
| G14  | 1187            | 107            | 1176            | 103             | <b>1187.894</b> | 1184.867        | 1183.891        | 1182.867        | 1182.859        | G116            |      |
| V15  | <b>1492.957</b> | 1479.941       | 1474.944        | <b>1520.932</b> | 1519.916        | 1518.942        | 1518.916        | 1518.911        | 1518.904        | V115            |      |
| L16  | 1519            | 1514           | 1519            | 1514            | <b>1514.930</b> | 1511.910        | 1511.910        | <b>1561.947</b> | 1548.926        | L114            |      |
| P17  | 1513            | 1514           | 1510            | 1508            | 1510.984        | 1511.989        | 1514.983        | <b>1561.983</b> | <b>1433.936</b> | P113            |      |
| L18  | 1511            | 1510           | 1511            | 1510            | 1511.997        | 1510.995        | 1510.997        | <b>1551.910</b> | 1538.891        | L113            |      |
| I19  | 1511            | 1511           | 1511            | 1511            | 1512.012        | 1511.004        | 1511.004        | 1522.941        | 1521.927        | I111            |      |
| Q120 | 1510            | 1509           | 1511            | 1509            | 1510.020        | 1509.013        | 1509.013        | 1510.000        | 1509.988        | <b>1108.672</b> | Q110 |
| A11  | 1509            | 1511           | 1510            | 1509            | 1510.035        | 1509.028        | 1509.028        | 1510.000        | 1509.988        | 1509.984        | A108 |
| V122 | 1508            | 1506           | 1511            | 1506            | 1510.050        | 1509.043        | 1509.043        | 1510.000        | 1509.988        | 1509.984        | V110 |
| L123 | 1507            | 1506           | 1507            | 1506            | 1508.065        | 1507.058        | 1507.058        | <b>827.587</b>  | 818.561         | L110            |      |
| L124 | 1506            | 1505           | 1507            | 1506            | 1508.080        | 1507.073        | 1507.073        | <b>828.510</b>  | 819.484         | L107            |      |
| L125 | 1505            | 1504           | 1506            | 1505            | 1508.095        | 1507.088        | 1507.088        | <b>713.438</b>  | 688.468         | <b>887.424</b>  | L101 |
| P126 | 1504            | 1503           | 1504            | 1503            | 1507.110        | 1506.103        | 1506.103        | <b>682.351</b>  | 588.324         | <b>584.340</b>  | P106 |
| K128 | 1503            | 1501           | 1504            | 1501            | 1507.125        | 1506.118        | 1506.118        | <b>500.290</b>  | 488.277         | 487.267         | K114 |
| K127 | 1502            | 1500           | 1503            | 1500            | 1507.140        | 1506.133        | 1506.133        | <b>377.203</b>  | 368.177         | <b>358.193</b>  | K113 |
| L129 | 1502            | 1504           | 1501            | 1511            | 1506.155        | 1505.148        | 1505.148        | 1506.133        | 1505.116        | 1505.102        | L112 |
| E121 | 1501            | 1500           | 1501            | 1501            | 1506.170        | 1505.163        | 1505.163        | 1506.133        | 1505.116        | 1505.102        | E111 |

# sp | Q6GSS7 | H2A2A\_MOUSE

LNKLLGK <sup>Dimethyl</sup> <sub>28.03</sub> VTIAQGGVLPNIQAVLLPKKTE

- ▶ fragmentation table for charge state 2+
- ▶ specType=cid
- ▶ score=65.97
- ▶ F113279.dat
- ▶ query=q41581\_p1
- ▶ precursor=1028.630800
- ▶ chargePrecursor=3
- ▶ itol=0.5

| AA   | a               | a'              | a,Δ             | b               | b'              | b,Δ             | y               | y'              | y,Δ             | AA              |      |
|------|-----------------|-----------------|-----------------|-----------------|-----------------|-----------------|-----------------|-----------------|-----------------|-----------------|------|
| L1   | 45              | 901             | 0.500           | 0.500           | 07944           | 0.504           | 0.504           | 1007.490        | 1113.034        | 1113.444        | L120 |
| N1   | 100             | 200             | 0.500           | 0.504           | 114371          | 0.504           | 0.504           | 1007.500        | 247.000         | 247.000         | L204 |
| P1   | 104             | 208             | 0.504           | 0.504           | 119103          | 0.504           | 0.504           | 1007.500        | <b>1420.373</b> | <b>1419.001</b> | P277 |
| L4   | 221             | 442             | 0.504           | 0.504           | 239100          | 0.504           | 0.504           | <b>1384.630</b> | 1390.520        | 1391.051        | L128 |
| L5   | 227             | 454             | 0.504           | 0.504           | 247100          | 0.504           | 0.504           | 1390.520        | 1390.520        | 1390.521        | L124 |
| G16  | 306             | 612             | 0.504           | 0.504           | 323111          | 0.504           | 0.504           | <b>1251.755</b> | 1451.241        | 1452.796        | L294 |
| K17  | 304             | 608             | 0.504           | 0.504           | 308110          | 0.504           | 0.504           | 1251.244        | 1214.711        | 1214.230        | K122 |
| V18  | 431             | 862             | 0.504           | 0.504           | 447100          | 0.504           | 0.504           | 1126.121        | 1130.680        | 1130.519        | V121 |
| T19  | 404             | 808             | 0.504           | 0.504           | 400114          | 0.504           | 0.504           | 1007.490        | 1007.490        | 1007.491        | T121 |
| E19  | 440             | 880             | <b>0.52388</b>  | 0.52388         | 504891          | 0.52388         | 0.52388         | 1006.114        | 1006.114        | 1006.111        | E20  |
| A111 | 676             | 1352            | <b>0.67384</b>  | <b>0.67382</b>  | 705117          | 0.67382         | 0.67382         | <b>986.581</b>  | <b>986.087</b>  | <b>979.575</b>  | A119 |
| G123 | 690             | 1380            | 0.690           | 0.690           | 754424          | 0.690           | 0.690           | <b>933.082</b>  | <b>944.549</b>  | 944.549         | G120 |
| G13  | 688             | 1376            | 0.688           | 0.688           | 682930          | 0.688           | 0.688           | <b>888.033</b>  | <b>888.519</b>  | <b>888.027</b>  | G17  |
| G14  | <b>897.648</b>  | 1795.297        | <b>0.688443</b> | <b>0.688443</b> | <b>711.446</b>  | <b>0.702932</b> | <b>702.440</b>  | <b>880.522</b>  | 882.050         | 881.511         | G16  |
| V125 | <b>748.982</b>  | <b>1497.964</b> | <b>0.748982</b> | <b>0.748982</b> | <b>748.980</b>  | <b>0.752462</b> | <b>751.814</b>  | <b>832.011</b>  | 833.499         | 832.966         | V120 |
| L138 | <b>883.524</b>  | <b>1767.048</b> | <b>0.883524</b> | <b>0.883524</b> | <b>887.522</b>  | <b>0.888008</b> | <b>888.811</b>  | <b>782.477</b>  | <b>773.964</b>  | <b>773.472</b>  | L134 |
| P17  | 888             | 1776            | 0.888           | 0.888           | 843100          | 0.888           | 0.888           | <b>725.935</b>  | 727.422         | <b>716.930</b>  | P113 |
| N148 | <b>908.972</b>  | <b>1817.944</b> | <b>0.908972</b> | <b>0.908972</b> | <b>908.968</b>  | <b>0.914468</b> | <b>914.468</b>  | 915.956         | 916.444         | 915.911         | N143 |
| E19  | 907             | 1814            | 0.907           | 0.907           | <b>979.612</b>  | <b>0.971088</b> | 970.200         | 930.107         | <b>811.874</b>  | <b>811.382</b>  | P111 |
| G120 | 1025            | 2050            | 1.025           | 1.025           | 1030.630        | 1.030630        | 1030.630        | 1031.620        | 1031.620        | 1031.620        | G118 |
| A119 | 1000            | 2000            | 1.000           | 1.000           | <b>1076.100</b> | <b>1.080660</b> | <b>1076.104</b> | <b>498.498</b>  | 499.986         | 498.991         | A117 |
| V122 | <b>1114.696</b> | <b>2229.392</b> | <b>1.114696</b> | <b>1.114696</b> | <b>1120.694</b> | <b>1.126180</b> | <b>1127.119</b> | 1128.607        | <b>455.784</b>  | <b>455.292</b>  | V120 |
| L123 | <b>1171.238</b> | <b>2342.476</b> | <b>1.171238</b> | <b>1.171238</b> | <b>1180.236</b> | <b>1.187722</b> | <b>1176.230</b> | 1177.718        | 1178.206        | 1177.717        | L121 |
| L124 | 1171            | 2342            | 1.171           | 1.171           | <b>1241.716</b> | <b>1.253260</b> | <b>1242.713</b> | 1243.710        | 1244.707        | 1244.707        | L122 |
| P121 | 1271            | 2542            | 1.271           | 1.271           | <b>1354.352</b> | <b>1.348838</b> | 1344.350        | 1345.348        | 1346.345        | 1346.345        | P119 |
| K130 | 1360            | 2720            | 1.360           | 1.360           | 1361.360        | 1.361360        | 1361.360        | 1362.357        | 1363.354        | 1363.354        | K124 |
| K131 | 1362            | 2724            | 1.362           | 1.362           | 1411.362        | 1.411362        | 1411.362        | 1412.359        | 1413.356        | 1413.356        | K125 |
| T128 | 1454            | 2908            | 1.454           | 1.454           | 1455.452        | 1.456452        | 1455.452        | 1456.449        | 1457.446        | 1457.446        | T122 |
| E130 | 1510            | 3020            | 1.510           | 1.510           | 1511.510        | 1.512510        | 1511.510        | 1512.507        | 1513.504        | 1513.504        | E121 |



# sp | Q6GSS7 | H2A2A\_MOUSE

LNKLLGK<sup>Dimethyl</sup>VTIAQGGVLPNIQAVLLPKKTE  
28.03

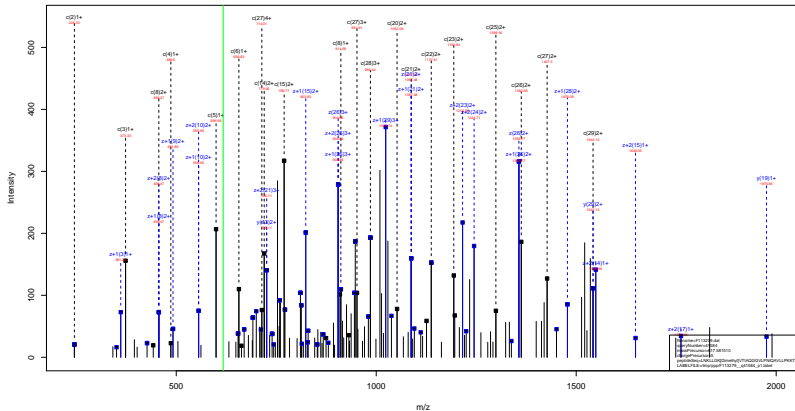

# sp | Q6GSS7 | H2A2A\_MOUSE

LNKLLGK <sup>Dimethyl</sup> <sub>28.03</sub> VTIAQGGVLPNIQAVLLPKKTE

- ▶ fragmentation table for charge state 1+
- ▶ specType=etd
- ▶ score=50.90
- ▶ F113279.dat
- ▶ query=q41584.p1
- ▶ precursor=617.581510
- ▶ chargePrecursor=5
- ▶ itol=0.5

| AA    | c               | y               | z+1             | z+2             | z        | AA    |
|-------|-----------------|-----------------|-----------------|-----------------|----------|-------|
| L[1]  | 131.118         | 3083.892        | 3067.873        | 0.000           | 3066.895 | L[28] |
| N[2]  | <b>245.161</b>  | 2970.808        | 2954.789        | 2955.797        | 2953.781 | N[28] |
| K[3]  | <b>373.256</b>  | 2856.705        | 2840.746        | 2841.754        | 2839.738 | K[27] |
| L[4]  | <b>486.340</b>  | 2728.670        | 2712.651        | 2713.659        | 2711.643 | L[26] |
| L[5]  | <b>599.424</b>  | 2615.585        | 2599.567        | 2600.575        | 2598.559 | L[25] |
| G[6]  | <b>658.445</b>  | 2502.500        | 2486.483        | 2487.491        | 2485.475 | G[24] |
| K[7]  | <b>812.572</b>  | 2445.480        | 2429.462        | 2430.469        | 2428.454 | K[23] |
| V[8]  | <b>911.640</b>  | 2289.354        | 2273.335        | 2274.343        | 2272.327 | V[22] |
| T[9]  | 1012.688        | 2190.288        | 2174.267        | 2175.275        | 2173.259 | T[21] |
| I[10] | <b>1125.772</b> | 2089.230        | 2073.210        | 2074.227        | 2072.211 | I[20] |
| A[11] | <b>1196.809</b> | <b>1976.154</b> | 1960.135        | 1961.143        | 1959.127 | A[19] |
| Q[12] | 1214.857        | 1925.111        | 1899.088        | 1900.106        | 1898.090 | Q[18] |
| G[13] | 1381.889        | 1777.058        | 1761.039        | <b>1762.047</b> | 1760.032 | G[17] |
| G[14] | 1438.910        | 1720.037        | 1704.018        | 1705.026        | 1703.010 | G[16] |
| V[15] | 1537.979        | 1663.015        | 1646.997        | <b>1648.004</b> | 1645.989 | V[15] |
| L[16] | 1651.063        | 1583.947        | 1547.928        | <b>1548.936</b> | 1546.920 | L[14] |
| F[17] | 1768.116        | <b>1450.863</b> | 1434.844        | 1435.852        | 1433.836 | F[13] |
| N[18] | 1862.159        | 1393.819        | <b>1337.791</b> | 1338.799        | 1336.783 | N[12] |
| I[19] | 1975.243        | 1239.767        | 1223.748        | <b>1224.756</b> | 1222.741 | I[11] |
| Q[20] | 2103.301        | 1126.683        | 1110.664        | <b>1111.672</b> | 1109.656 | Q[10] |
| A[21] | 2174.338        | 998.624         | 982.605         | 983.614         | 981.598  | A[9]  |
| V[22] | 2273.407        | 927.587         | <b>911.569</b>  | 912.576         | 910.561  | V[8]  |
| L[23] | 2389.491        | <b>828.513</b>  | <b>812.500</b>  | <b>813.508</b>  | 811.492  | L[7]  |
| L[24] | 2499.575        | 715.435         | 699.416         | <b>700.424</b>  | 698.409  | L[6]  |
| P[25] | 2596.628        | 602.351         | 586.332         | 587.340         | 585.324  | P[5]  |
| K[26] | 2724.723        | 505.268         | 489.249         | 490.257         | 488.241  | K[4]  |
| K[27] | 2852.818        | 377.203         | <b>361.184</b>  | 362.192         | 360.177  | K[3]  |
| T[28] | 2953.865        | 249.106         | 233.089         | 234.097         | 232.082  | T[2]  |
| E[29] | 3082.008        | 148.060         | 132.042         | 133.050         | 131.034  | E[1]  |

# sp | Q6GSS7 | H2A2A\_MOUSE

LNKLLGK <sup>Dimethyl</sup> <sub>28.03</sub> VTIAQGGVLPNIQAVLLPKKTE

- ▶ fragmentation table for charge state 2+
- ▶ specType=etd
- ▶ score=50.90
- ▶ F113279.dat
- ▶ query=q41584.p1
- ▶ precursor=617.581510
- ▶ chargePrecursor=5
- ▶ itol=0.5

| AA  | c               | y               | z+1             | z+2             | z               | AA   |
|-----|-----------------|-----------------|-----------------|-----------------|-----------------|------|
| L1  | 66.053          | <b>1542.450</b> | 1524.440        | 9.504           | 1533.926        | L128 |
| N12 | 123.054         | 1485.905        | <b>1477.898</b> | <b>1478.402</b> | 1477.304        | N20  |
| K13 | 187.132         | 1428.886        | 1420.877        | 1421.381        | 1420.373        | K27  |
| L14 | 243.674         | 1364.839        | <b>1356.829</b> | 1357.333        | <b>1356.325</b> | L26  |
| L15 | 300.216         | 1308.297        | 1300.287        | 1300.791        | 1299.783        | L25  |
| G16 | 358.759         | 1251.755        | 1243.745        | <b>1244.249</b> | 1243.241        | G24  |
| K17 | 406.799         | 1223.244        | 1215.234        | <b>1215.738</b> | 1214.731        | K23  |
| V18 | <b>456.324</b>  | 1145.181        | <b>1137.171</b> | <b>1137.675</b> | 1136.667        | V22  |
| F19 | 506.640         | <b>1095.646</b> | <b>1087.637</b> | 1088.141        | <b>1087.133</b> | F21  |
| T10 | 563.390         | 1045.123        | 1037.113        | <b>1037.617</b> | 1036.609        | T20  |
| A11 | 620.928         | 988.561         | <b>980.571</b>  | 981.075         | <b>980.067</b>  | A19  |
| Q12 | <b>662.937</b>  | 933.062         | <b>945.053</b>  | <b>945.557</b>  | 944.550         | Q18  |
| G13 | <b>691.448</b>  | 889.033         | 881.023         | 881.527         | <b>880.519</b>  | G17  |
| G14 | <b>719.959</b>  | 860.522         | <b>852.513</b>  | <b>853.017</b>  | 852.009         | G16  |
| V15 | <b>769.493</b>  | 832.011         | <b>824.002</b>  | 824.506         | <b>823.498</b>  | V15  |
| L16 | 826.035         | 782.477         | 774.468         | 774.972         | 773.964         | L14  |
| F17 | <b>874.561</b>  | <b>725.935</b>  | 717.925         | 718.429         | 717.422         | F13  |
| N18 | <b>931.583</b>  | 677.422         | <b>669.399</b>  | <b>669.903</b>  | 668.895         | N12  |
| I19 | 988.125         | 630.967         | 622.957         | 623.461         | 622.453         | I11  |
| Q20 | <b>1052.154</b> | 583.845         | <b>555.836</b>  | <b>556.340</b>  | 555.332         | Q10  |
| A21 | <b>1087.673</b> | 499.816         | <b>491.807</b>  | <b>492.310</b>  | 491.303         | A10  |
| V22 | <b>1137.207</b> | 404.297         | <b>456.288</b>  | <b>456.792</b>  | 455.784         | V18  |
| L23 | <b>1193.749</b> | 414.763         | 406.753         | 407.257         | 406.250         | L17  |
| L24 | 1250.291        | 358.221         | 350.211         | <b>350.716</b>  | 349.708         | L16  |
| P25 | <b>1288.817</b> | 303.679         | 293.670         | 294.174         | 293.166         | P15  |
| K26 | <b>1362.805</b> | 253.153         | <b>245.143</b>  | <b>245.647</b>  | 244.639         | K14  |
| K27 | <b>1426.912</b> | 189.105         | 181.096         | 181.600         | 180.592         | K13  |
| T28 | <b>1477.438</b> | 125.058         | 117.048         | 117.552         | 116.544         | T12  |
| E29 | <b>1541.958</b> | 74.534          | 66.524          | 67.028          | 66.021          | E11  |

# sp | Q6GSS7 | H2A2A\_MOUSE

LNKLLGK <sup>Dimethyl</sup> <sub>28.03</sub> VTIAQGGVLPNIQAVLLPKKTE

- ▶ fragmentation table for charge state 3+
- ▶ specType=etd
- ▶ score=50.90
- ▶ F113279.dat
- ▶ query=q41584.p1
- ▶ precursor=617.581510
- ▶ chargePrecursor=5
- ▶ itol=0.5

| AA  | c              | y        | z+1             | z+2            | z              | AA  |
|-----|----------------|----------|-----------------|----------------|----------------|-----|
| L1  | 44.377         | 1028.635 | <b>1023.296</b> | 0.672          | 1022.960       | L29 |
| N2  | 82.392         | 990.941  | <b>985.601</b>  | <b>985.937</b> | <b>985.265</b> | N28 |
| K3  | 125.090        | 952.926  | <b>947.597</b>  | <b>947.923</b> | <b>947.251</b> | K27 |
| L4  | 162.798        | 910.228  | <b>904.889</b>  | <b>905.225</b> | <b>904.553</b> | L26 |
| L5  | 200.479        | 872.533  | <b>867.194</b>  | <b>867.530</b> | <b>866.858</b> | L25 |
| G6  | 219.487        | 834.839  | <b>829.499</b>  | <b>829.835</b> | <b>829.163</b> | G24 |
| K7  | 271.529        | 815.832  | <b>810.492</b>  | <b>810.828</b> | <b>810.156</b> | K23 |
| V8  | 304.952        | 763.790  | <b>758.450</b>  | <b>758.786</b> | <b>758.114</b> | V22 |
| T9  | 338.234        | 730.767  | 725.427         | <b>725.763</b> | 725.091        | T21 |
| I10 | 375.929        | 697.084  | <b>691.745</b>  | <b>692.081</b> | <b>691.409</b> | I20 |
| A11 | 397.068        | 659.389  | <b>654.050</b>  | <b>654.386</b> | <b>653.714</b> | A19 |
| Q12 | <b>442.294</b> | 638.710  | 634.371         | 630.032        | 630.395        | Q18 |
| G13 | 461.301        | 593.024  | 587.685         | 588.021        | 587.349        | G17 |
| G14 | 480.308        | 574.017  | 568.678         | 569.013        | 568.342        | G16 |
| V15 | 513.331        | 555.010  | 549.670         | 550.006        | 549.334        | V15 |
| L16 | 551.026        | 521.987  | 516.648         | 516.984        | 516.312        | L14 |
| P17 | 583.377        | 484.292  | 478.953         | 479.289        | 478.617        | P13 |
| N18 | 621.391        | 451.942  | 446.602         | 446.938        | 446.266        | N12 |
| I19 | 659.098        | 413.927  | 408.588         | 408.924        | 408.252        | I11 |
| Q10 | 701.772        | 376.233  | 370.893         | 371.229        | 370.557        | Q10 |
| A21 | 725.451        | 333.548  | 328.207         | 328.543        | 327.871        | A9  |
| V22 | <b>758.474</b> | 309.867  | 304.528         | 304.864        | 304.192        | V8  |
| L23 | 796.168        | 276.844  | 271.505         | 271.841        | 271.169        | L7  |
| L24 | 833.863        | 239.150  | 233.810         | 234.146        | 233.474        | L6  |
| P25 | 866.214        | 201.455  | 196.116         | 196.451        | 195.780        | P9  |
| K26 | <b>908.812</b> | 169.104  | 163.765         | 164.101        | 163.429        | K4  |
| K27 | <b>951.611</b> | 126.406  | 121.066         | 121.402        | 120.730        | K3  |
| T28 | <b>985.293</b> | 83.708   | 78.368          | 78.704         | 78.032         | T2  |
| E29 | 1028.397       | 50.025   | 44.685          | 45.021         | 44.349         | E1  |

# sp | Q6GSS7 | H2A2A\_MOUSE

LNKLLGK <sup>Dimethyl</sup> <sub>28.03</sub> VTIAQGGVLPNIQAVLLPKKTE

- ▶ fragmentation table for charge state 4+
- ▶ specType=etd
- ▶ score=50.90
- ▶ F113279.dat
- ▶ query=q41584.p1
- ▶ precursor=617.581510
- ▶ chargePrecursor=5
- ▶ itol=0.5

| AA    | c              | y              | z+1            | z+2            | z              | AA    |
|-------|----------------|----------------|----------------|----------------|----------------|-------|
| L[1]  | 33.535         | <b>771.728</b> | 767.724        | 0.758          | 767.472        | L[29] |
| N[2]  | 62.046         | <b>743.457</b> | <b>739.453</b> | <b>739.705</b> | <b>739.201</b> | N[26] |
| K[3]  | 94.059         | 114.947        | 710.942        | <b>711.194</b> | 110.990        | K[27] |
| L[4]  | 122.340        | 582.923        | 678.918        | 678.170        | 678.666        | L[26] |
| L[5]  | 150.611        | <b>654.652</b> | 650.647        | 650.899        | 650.395        | L[25] |
| G[6]  | 164.867        | 626.381        | 622.376        | 622.628        | 622.124        | G[24] |
| K[7]  | 203.898        | 612.126        | 608.121        | 608.373        | 607.869        | K[23] |
| V[8]  | 228.665        | 573.094        | 569.089        | 569.341        | 568.837        | V[22] |
| T[9]  | 253.927        | 548.327        | 544.322        | 544.574        | 544.070        | T[21] |
| T[10] | 262.198        | 523.065        | 519.060        | 519.312        | 518.808        | T[20] |
| A[11] | 269.958        | 494.794        | 490.789        | 491.041        | 490.537        | A[19] |
| Q[12] | 311.972        | 477.035        | 473.030        | 473.282        | 472.778        | Q[18] |
| G[13] | 346.228        | 445.020        | 441.015        | 441.267        | 440.763        | G[17] |
| G[14] | 350.483        | 430.765        | <b>426.760</b> | <b>427.012</b> | 426.508        | G[16] |
| V[15] | 385.250        | 416.509        | 412.505        | 412.757        | 412.253        | V[15] |
| L[16] | 413.521        | 391.742        | 387.737        | 387.989        | 387.486        | L[14] |
| P[17] | 437.784        | 363.471        | 359.466        | 359.718        | 359.215        | P[13] |
| N[18] | 466.295        | 339.208        | 335.203        | 335.455        | 334.951        | N[12] |
| T[19] | 494.566        | 310.897        | 306.891        | 307.143        | 306.641        | T[11] |
| Q[20] | 525.381        | 282.426        | 278.422        | 278.673        | 278.170        | Q[15] |
| A[21] | 544.340        | 250.412        | 246.407        | 246.659        | 246.155        | A[9]  |
| V[22] | 569.107        | 232.652        | 228.648        | 228.900        | 228.396        | V[8]  |
| L[23] | 597.378        | 207.885        | 203.881        | 204.132        | 203.629        | L[7]  |
| L[24] | 625.649        | 179.614        | 175.609        | 175.861        | 175.358        | L[6]  |
| P[25] | 649.912        | 151.343        | 147.338        | 147.590        | 147.087        | P[5]  |
| K[26] | 681.936        | 127.080        | 123.075        | 123.327        | 122.823        | K[4]  |
| K[27] | <b>713.960</b> | 95.056         | 91.052         | 91.304         | 90.800         | K[3]  |
| T[28] | <b>739.222</b> | 63.032         | 59.028         | 59.280         | 58.776         | T[2]  |
| E[29] | <b>771.482</b> | 37.771         | 33.766         | 34.018         | 33.514         | E[1]  |



# sp | Q6GSS7 | H2A2A\_MOUSE

LNKLLGK <sup>Dimethyl</sup>VTIAQGGVLPNIQAVLLPKKTE  
28.03

- ▶ fragmentation table for charge state 1+
- ▶ specType=cid
- ▶ score=38.48
- ▶ F113279.dat
- ▶ query=q41585.p1
- ▶ precursor=617.581510
- ▶ chargePrecursor=5
- ▶ itol=0.5

| AA   | a        | a*       | a,b      | b        | b*       | b,b      | r        | r*       | r,b      | AA   |
|------|----------|----------|----------|----------|----------|----------|----------|----------|----------|------|
| L1   | 88.008   | 0.000    | 1.000    | 114.091  | 0.000    | 0.000    | 1063.893 | 1069.899 | 1063.893 | L128 |
| K12  | 2003.199 | 1033.113 | 0.000    | 2205.134 | 201.108  | 0.000    | 2070.803 | 2095.918 | 2092.797 | K126 |
| K13  | 626.034  | 611.209  | 0.000    | 366.229  | 336.203  | 0.000    | 2666.165 | 2839.738 | 2836.754 | K127 |
| L14  | 441.518  | 424.202  | 0.000    | 466.511  | 452.287  | 0.000    | 2126.810 | 2111.643 | 2110.608 | L126 |
| L15  | 254.402  | 217.478  | 0.000    | 262.361  | 246.374  | 0.000    | 2615.260 | 2766.263 | 2699.478 | L125 |
| Q16  | 81.1424  | 584.397  | 0.000    | 608.416  | 622.362  | 0.000    | 2002.202 | 2348.475 | 2484.461 | Q124 |
| K17  | 187.550  | 193.524  | 0.000    | 195.545  | 178.519  | 0.000    | 2443.483 | 2426.454 | 2427.470 | K123 |
| V18  | 816.119  | 809.382  | 0.000    | 804.111  | 817.387  | 0.000    | 2389.761 | 2372.521 | 2371.543 | V122 |
| V19  | 167.608  | 160.680  | 649.655  | 965.061  | 978.035  | 977.051  | 2190.205 | 2115.295 | 2112.215 | V121 |
| I129 | 1080.970 | 1063.124 | 1062.140 | 1108.749 | 1091.719 | 1090.733 | 2089.238 | 2072.211 | 2071.227 | I120 |
| A111 | 1151.087 | 1124.163 | 1123.717 | 1174.362 | 1162.790 | 1161.712 | 2406.124 | 2394.127 | 2393.143 | A110 |
| Q113 | 1019.096 | 1002.019 | 1001.821 | 1001.484 | 1006.014 | 1005.014 | 1920.141 | 1899.096 | 1898.776 | Q110 |
| Q115 | 1008.867 | 1013.004 | 1013.004 | 1047.624 | 1047.624 | 1046.952 | 1777.026 | 1769.013 | 1768.004 | Q117 |
| G114 | 1383.889 | 1376.882 | 1376.871 | 1421.884 | 1404.867 | 1403.873 | 1721.037 | 1703.010 | 1702.022 | G116 |
| V115 | 1402.877 | 1419.818 | 1419.806 | 1520.821 | 1503.806 | 1502.842 | 1881.013 | 1843.989 | 1842.999 | V119 |
| L116 | 1306.041 | 1309.013 | 1308.011 | 1354.035 | 1357.010 | 1356.026 | 1563.947 | 1549.920 | 1548.936 | L114 |
| P117 | 1003.094 | 1008.099 | 1008.084 | 1013.089 | 1014.081 | 1013.079 | 1440.863 | 1413.838 | 1412.852 | P113 |
| M118 | 1017.437 | 1005.111 | 1000.127 | 1045.132 | 1038.105 | 1027.121 | 1383.810 | 1338.763 | 1335.799 | M115 |
| T119 | 1009.071 | 1013.065 | 1013.051 | 1009.058 | 1004.186 | 1003.266 | 1329.780 | 1222.741 | 1221.757 | T111 |
| Q120 | 2006.200 | 2041.203 | 2040.201 | 2099.215 | 2084.248 | 2088.284 | 1126.400 | 1119.995 | 1118.977 | Q110 |
| A121 | 1170.517 | 1172.509 | 1171.508 | 1171.517 | 1171.500 | 1170.501 | 1881.624 | 1871.589 | 1870.614 | A111 |
| V122 | 2006.008 | 2011.009 | 2011.010 | 2056.008 | 2056.004 | 2056.010 | 1007.989 | 1011.981 | 1008.977 | V111 |
| L123 | 2241.499 | 2224.483 | 2223.470 | 2269.484 | 2262.438 | 2261.424 | 828.513  | 811.462  | 810.538  | L117 |
| L124 | 2454.651 | 2437.627 | 2436.545 | 2482.548 | 2465.622 | 2464.638 | 715.430  | 698.408  | 697.424  | L116 |
| P125 | 2051.606 | 2034.580 | 2033.590 | 2079.601 | 2062.676 | 2061.591 | 682.351  | 369.324  | 368.340  | P115 |
| L126 | 2076.702 | 2061.671 | 2060.681 | 2111.688 | 2096.619 | 2095.630 | 608.466  | 488.225  | 487.241  | L114 |
| K127 | 2007.196 | 2000.710 | 2000.708 | 2005.701 | 2018.194 | 2017.189 | 317.201  | 306.177  | 305.193  | K115 |
| L128 | 2008.814 | 2001.710 | 2001.651 | 2006.639 | 2019.612 | 2018.620 | 248.108  | 0.000    | 231.008  | L112 |
| L129 | 2017.608 | 2005.902 | 2004.819 | 2009.801 | 2046.824 | 2047.811 | 148.000  | 0.000    | 130.000  | L111 |

# sp | Q6GSS7 | H2A2A\_MOUSE

LNKLLGK <sup>Dimethyl</sup>VTIAQGGVLPNIQAVLLPKKTE  
28.03

- ▶ fragmentation table for charge state 2+
- ▶ specType=cid
- ▶ score=38.48
- ▶ F113279.dat
- ▶ query=q41585.p1
- ▶ precursor=617.581510
- ▶ chargePrecursor=5
- ▶ itol=0.5

| AA  | a              | a*             | a,b            | b              | b*             | b,b            | r              | r*             | r,b            | AA   |
|-----|----------------|----------------|----------------|----------------|----------------|----------------|----------------|----------------|----------------|------|
| L1  | 43.552         | 0.504          | 0.504          | 31.549         | 0.504          | 0.504          | 1561.201       | 3333.338       | 3333.344       | L206 |
| R1  | 100.573        | 92.080         | 0.504          | 114.571        | 106.077        | 0.504          | 1485.931       | 2477.904       | 2476.902       | N206 |
| K1  | 184.621        | 156.438        | 0.504          | 178.618        | 170.405        | 0.504          | 1438.886       | 2420.373       | 2419.681       | K127 |
| L4  | 251.583        | 214.658        | 0.504          | 235.160        | 226.947        | 0.504          | 1384.838       | 2366.325       | 2365.531       | L206 |
| L5  | 277.678        | 236.101        | 0.504          | 261.162        | 252.948        | 0.504          | 1336.201       | 2299.183       | 2298.281       | L206 |
| Q1  | 308.418        | 267.102        | 0.504          | 300.213        | 291.708        | 0.504          | 1291.701       | 2243.341       | 2242.748       | G124 |
| K17 | 384.270        | 316.705        | 0.504          | 388.070        | 380.763        | 0.504          | 1223.241       | 2124.731       | 2124.230       | K125 |
| V1  | 433.111        | 405.363        | 0.504          | 441.611        | 433.207        | 0.504          | 1165.181       | 2136.661       | 2136.176       | V122 |
| Y1  | <b>494.337</b> | 475.523        | <b>475.331</b> | <b>498.334</b> | 489.921        | 489.520        | 1059.945       | 1987.133       | 1986.941       | I121 |
| I10 | 540.878        | 512.389        | 531.874        | <b>554.876</b> | 546.381        | <b>545.871</b> | 1045.121       | 2038.609       | 2038.117       | I120 |
| A11 | 616.597        | <b>587.884</b> | <b>587.382</b> | <b>590.395</b> | <b>581.882</b> | <b>581.390</b> | 988.581        | 1881.081       | 1880.715       | A119 |
| Q13 | 660.277        | 631.513        | 624.507        | <b>654.424</b> | 645.418        | 644.412        | 935.001        | 1844.584       | 1844.270       | Q110 |
| G15 | <b>668.937</b> | 640.454        | 633.451        | <b>682.935</b> | 674.422        | 673.416        | <b>889.831</b> | 1685.513       | 1685.027       | G117 |
| G14 | 687.448        | 658.935        | 651.931        | <b>711.446</b> | <b>702.932</b> | <b>702.440</b> | <b>860.522</b> | 1621.030       | 1620.517       | G116 |
| V15 | 746.803        | 718.489        | <b>717.917</b> | <b>740.360</b> | <b>732.487</b> | <b>731.914</b> | <b>832.911</b> | 1527.488       | 1527.008       | V115 |
| L16 | 803.524        | 765.111        | 758.113        | <b>817.522</b> | <b>809.009</b> | 805.517        | <b>781.477</b> | 1223.964       | 1223.472       | L124 |
| P17 | 852.851        | 814.537        | 804.048        | 866.048        | 857.635        | 857.043        | <b>725.935</b> | 1117.422       | 1116.930       | P113 |
| N18 | 909.672        | 865.559        | 855.067        | 924.070        | 914.558        | 914.054        | <b>677.469</b> | <b>668.895</b> | <b>668.403</b> | N112 |
| T19 | 968.414        | 924.201        | 913.693        | 978.812        | 971.286        | 970.691        | 611.001        | 1011.001       | 1010.511       | T111 |
| Q10 | 1009.844       | 1021.131       | 1010.630       | 1043.941       | 1035.128       | 1034.630       | <b>563.845</b> | <b>555.332</b> | <b>554.840</b> | Q110 |
| A21 | 1062.182       | 1016.688       | 1006.191       | 1079.180       | 1070.948       | 1070.124       | 488.811        | 888.811        | 888.311        | A111 |
| V22 | 1114.896       | 1116.113       | 1105.616       | 1124.894       | 1116.100       | 1115.604       | 489.201        | <b>425.784</b> | 425.282        | V111 |
| L23 | 1171.428       | 1150.225       | 1140.231       | 1185.226       | 1176.222       | 1175.230       | 414.751        | 405.252        | 404.758        | L117 |
| L24 | 1227.480       | 1218.201       | 1208.175       | 1244.178       | 1233.385       | 1232.373       | 388.221        | 348.708        | 348.216        | L116 |
| P25 | 1276.507       | 1267.753       | 1257.501       | 1290.304       | 1281.191       | 1281.209       | 381.670        | 263.168        | 262.674        | P115 |
| K26 | 1340.204       | 1311.841       | 1301.350       | 1354.305       | 1345.818       | 1345.346       | 263.151        | 244.839        | 244.344        | K114 |
| K27 | 1404.402       | 1395.588       | 1385.390       | 1418.390       | 1409.888       | 1409.394       | 189.110        | 189.502        | 189.100        | K113 |
| L28 | 1464.926       | 1446.412       | 1435.920       | 1480.921       | 1470.812       | 1470.812       | 125.810        | 0.504          | 0.504          | L112 |
| E29 | 1519.447       | 1511.934       | 1501.440       | 1533.444       | 1524.931       | 1524.432       | 74.531         | 0.504          | 0.504          | E111 |



# sp | Q6GSS7 | H2A2A\_MOUSE

LNKLLGK<sup>Dimethyl</sup>VTIAQGGVLPNIQAVLLPKKTE<sup>28.03</sup>

- ▶ fragmentation table for charge state 3+
- ▶ specType=cid
- ▶ score=38.48
- ▶ F113279.dat
- ▶ query=q41585.p1
- ▶ precursor=617.581510
- ▶ chargePrecursor=5
- ▶ itol=0.5

| AA   |                | a       | a*             | a,b            | b              | b*             | b,b            | r              | r*       | r,b            | AA   |
|------|----------------|---------|----------------|----------------|----------------|----------------|----------------|----------------|----------|----------------|------|
| L11  | 28             | 178     | 0.872          | 0.872          | 38             | 102            | 0.872          | 0.872          | 1028.033 | 1022.999       | L126 |
| K12  | 67             | 385     | 0.170          | 0.872          | 78             | 715            | 71.041         | 0.872          | 960.941  | 965.265        | K126 |
| K13  | 110            | 681     | 104.407        | 0.872          | 119            | 1113           | 113.739        | 0.872          | 952.526  | 947.251        | K127 |
| L14  | 147            | 778     | 142.125        | 0.872          | 157            | 1091           | 151.434        | 0.872          | 910.228  | 904.503        | L126 |
| L15  | 185            | 874     | 219.397        | 0.872          | 194            | 904            | 198.128        | 0.872          | 812.511  | 806.826        | L125 |
| Q16  | 204            | 878     | 188.004        | 0.872          | 213            | 811            | 208.138        | 0.872          | 834.839  | 829.163        | Q124 |
| K17  | 258            | 522     | 250.888        | 0.872          | 265            | 857            | 260.178        | 0.872          | 813.832  | 810.158        | K125 |
| V18  | 289            | 544     | 263.869        | 0.872          | 298            | 878            | 293.261        | 0.872          | 783.729  | 788.114        | V122 |
| V19  | 323            | 227     | 317.551        | 317.221        | 333            | 595            | 328.883        | 328.595        | 730.767  | 725.091        | V121 |
| I120 | 380            | 822     | 325.288        | 324.918        | 319            | 251            | 384.878        | 384.294        | 667.084  | 661.408        | I120 |
| A111 | 384            | 601     | 378.825        | 378.567        | 373            | 213            | 388.257        | 387.826        | 659.383  | 653.714        | A119 |
| Q112 | 427            | 281     | 421.611        | 421.281        | <b>436.618</b> | 430.284        | 430.618        | 629.710        | 630.035  | 626.787        | Q110 |
| G113 | 446            | 524     | 440.613        | 440.251        | <b>455.626</b> | 448.566        | 449.622        | <b>531.624</b> | 537.348  | 537.011        | G117 |
| G114 | 482            | 501     | 478.628        | 478.267        | <b>474.633</b> | <b>468.367</b> | <b>468.629</b> | 574.101        | 569.382  | <b>568.614</b> | G116 |
| V115 | <b>498.124</b> | 489.848 | 489.510        | <b>507.826</b> | <b>501.360</b> | <b>501.652</b> | <b>528.610</b> | 549.154        | 550.769  | V119           |      |
| L116 | <b>538.019</b> | 530.383 | 530.013        | <b>545.350</b> | <b>539.675</b> | <b>539.347</b> | <b>521.987</b> | 535.312        | 535.984  | L114           |      |
| P117 | 566            | 870     | 562.694        | 562.366        | <b>577.761</b> | 672.626        | 671.688        | <b>484.292</b> | 478.611  | 476.289        | P113 |
| K118 | 608            | 584     | <b>606.768</b> | 606.380        | 615.718        | 603.046        | 609.212        | 451.942        | 446.268  | 445.036        | K115 |
| T119 | 644            | 878     | 640.483        | 640.103        | 649.635        | 648.758        | 649.487        | 413.891        | 408.292  | 409.044        | T117 |
| Q120 | 686            | 705     | 681.189        | 680.751        | 689.049        | 688.421        | 689.093        | 376.231        | 370.567  | 370.228        | Q110 |
| A121 | 712            | 444     | 707.644        | 707.264        | 716.802        | 714.302        | 715.772        | 531.549        | 527.871  | 527.542        | A111 |
| V122 | 716            | 887     | <b>717.761</b> | <b>717.463</b> | <b>732.760</b> | 719.123        | 718.769        | 801.887        | 804.162  | 803.844        | V111 |
| L123 | 781            | 151     | 775.458        | 775.128        | 780.461        | 774.817        | 784.489        | 278.944        | 277.185  | 276.941        | L117 |
| L124 | 818            | 856     | 813.189        | 812.859        | 828.189        | 822.812        | 824.184        | 239.150        | 233.474  | 233.146        | L116 |
| P125 | 851            | 207     | 845.511        | 845.201        | <b>860.539</b> | 854.883        | 854.535        | 281.483        | 278.789  | 278.492        | P115 |
| K126 | 883            | 886     | 878.322        | 878.012        | 887.322        | 886.762        | 887.313        | 188.184        | 183.426  | 183.180        | K114 |
| K127 | 938            | 654     | 930.658        | 930.655        | 945.951        | 940.286        | 939.912        | 126.426        | 125.730  | 125.603        | K113 |
| L128 | 970            | 288     | 964.611        | 964.281        | 979.611        | 973.942        | 973.614        | 81.718         | 81.872   | 81.714         | L112 |
| E129 | 1013           | 158     | 1007.652       | 1007.281       | 1022.652       | 1016.958       | 1016.628       | 381.023        | 381.872  | 381.021        | E111 |

# sp | Q6GSS7 | H2A2A\_MOUSE

LNKLLGK <sup>Dimethyl</sup> <sub>28.03</sub> VTIAQGGVLPNIQAVLLPKKTE

- ▶ fragmentation table for charge state 4+
- ▶ specType=cid
- ▶ score=38.48
- ▶ F113279.dat
- ▶ query=q41585.p1
- ▶ precursor=617.581510
- ▶ chargePrecursor=5
- ▶ itol=0.5

| AA  | a              | a'             | a <sub>0</sub> | b              | b'             | b <sub>0</sub> | y              | y'      | y <sub>0</sub> | AA  |
|-----|----------------|----------------|----------------|----------------|----------------|----------------|----------------|---------|----------------|-----|
| L1  | 22.280         | 0.755          | 0.755          | 29.210         | 0.755          | 0.755          | 771.720        | 767.472 | 767.230        | L20 |
| M2  | 30.730         | 46.534         | 0.755          | 57.789         | 53.534         | 0.755          | 743.493        | 739.201 | 738.955        | M20 |
| K3  | 62.034         | 70.557         | 0.755          | 88.813         | 86.556         | 0.755          | 715.255        | 710.990 | 710.444        | K27 |
| L4  | 111.085        | 139.838        | 0.755          | 149.088        | 145.821        | 0.755          | <b>682.923</b> | 678.566 | 678.320        | L20 |
| L5  | 130.356        | 135.039        | 0.755          | 146.355        | 142.068        | 0.755          | <b>654.652</b> | 650.365 | 650.140        | L20 |
| Q6  | 133.611        | 149.203        | 0.755          | 160.819        | 156.354        | 0.755          | 626.391        | 622.124 | 621.878        | Q20 |
| K7  | 162.043        | 168.208        | 0.755          | 168.043        | 165.205        | 0.755          | 612.121        | 607.889 | <b>607.623</b> | K23 |
| V8  | 171.416        | 173.253        | 0.755          | 209.460        | 206.352        | 0.755          | 593.589        | 589.837 | 589.611        | V20 |
| T9  | 192.872        | 238.415        | 238.139        | 309.671        | 305.414        | 285.138        | 548.317        | 544.070 | 543.524        | T21 |
| L10 | 270.943        | 286.688        | 286.440        | 277.947        | 273.689        | 271.439        | 523.090        | 518.838 | 518.592        | L20 |
| A11 | 288.702        | 294.446        | 294.200        | 296.393        | 291.444        | 291.138        | 484.792        | 480.517 | 480.291        | A10 |
| Q12 | 306.714        | 318.460        | 318.214        | 327.718        | 323.899        | 323.114        | 471.037        | 467.186 | 467.532        | Q18 |
| G13 | 334.972        | 330.716        | 330.470        | 341.971        | 337.714        | 337.468        | 445.030        | 440.763 | 440.517        | G17 |
| G14 | 349.238        | 344.971        | 344.725        | 356.239        | 351.970        | 351.724        | 430.790        | 426.508 | 426.262        | G18 |
| V15 | 373.095        | 369.738        | 369.492        | 380.994        | 376.737        | 376.491        | 415.500        | 411.253 | 411.007        | V15 |
| L16 | 402.266        | 398.009        | 397.763        | 409.269        | 405.000        | 404.754        | 393.747        | 389.486 | 389.240        | L14 |
| P17 | 426.529        | 422.272        | 422.026        | 433.528        | 429.271        | 429.025        | 383.471        | 379.215 | 378.969        | P13 |
| M18 | 495.040        | 490.783        | 490.537        | 492.039        | 487.782        | 487.536        | 359.200        | 354.944 | 354.700        | M12 |
| L19 | 483.311        | 479.054        | 478.808        | 489.315        | 485.057        | 484.807        | 310.667        | 306.441 | 306.195        | L11 |
| Q20 | 515.526        | 511.269        | 511.023        | <b>522.324</b> | 518.019        | 517.664        | 285.420        | 278.130 | 277.834        | Q18 |
| A21 | 533.085        | 528.828        | 528.582        | <b>540.083</b> | <b>535.827</b> | 535.581        | 250.412        | 246.155 | 245.909        | A10 |
| V22 | 557.852        | 553.595        | 553.349        | <b>564.851</b> | 560.594        | 560.348        | 232.652        | 228.396 | 228.150        | V18 |
| L23 | 586.121        | <b>581.866</b> | <b>581.620</b> | <b>593.122</b> | 588.865        | 588.619        | 207.085        | 202.829 | 202.583        | L17 |
| L24 | 614.384        | 610.127        | 609.881        | 621.388        | 617.130        | 616.884        | 189.842        | 176.396 | 176.112        | L18 |
| P25 | 638.657        | 634.400        | 634.154        | 645.656        | 641.399        | 641.153        | 151.343        | 147.087 | 146.841        | P15 |
| K26 | 670.981        | 666.724        | 666.478        | <b>677.679</b> | 673.423        | 673.177        | 127.080        | 122.823 | 122.577        | K14 |
| K27 | <b>702.784</b> | 698.486        | 698.239        | 698.713        | 694.447        | 694.201        | 85.050         | 80.800  | 80.554         | K13 |
| L28 | 714.486        | 710.229        | 709.983        | 720.489        | 716.232        | 715.986        | 63.821         | 60.321  | 60.075         | L18 |
| E20 | 780.227        | 775.970        | 775.724        | 787.228        | 782.969        | 782.723        | 37.771         | 0.755   | 31.268         | E11 |

# sp | Q6GSS7 | H2A2A\_MOUSE

LNKLLGK <sup>Dimethyl</sup>VTIAQGGVLPNIQAVLLPKKTE  
28.03

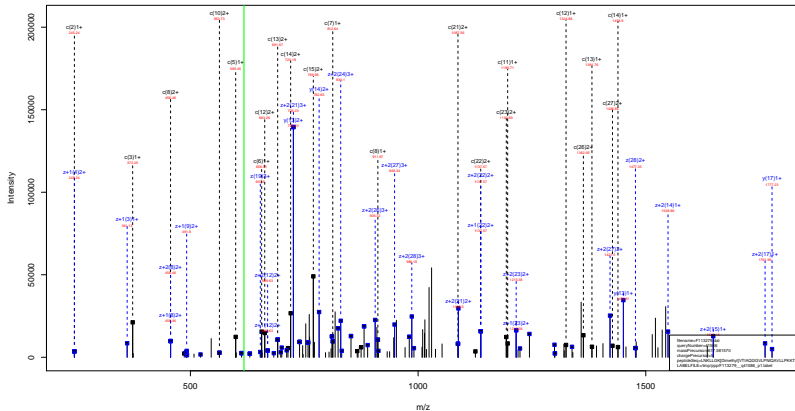

# sp | Q6GSS7 | H2A2A\_MOUSE

LNKLLGK <sup>Dimethyl</sup> <sub>28.03</sub> VTIAQGGVLPNIQAVLLPKKTE

- ▶ fragmentation table for charge state 1+
- ▶ specType=etd
- ▶ score=74.02
- ▶ F113279.dat
- ▶ query=q41586.p1
- ▶ precursor=617.581570
- ▶ chargePrecursor=5
- ▶ itol=0.5

| AA    | c               | y               | z+1             | z+2             | z              | AA    |
|-------|-----------------|-----------------|-----------------|-----------------|----------------|-------|
| L[1]  | 131.118         | 3083.892        | 3067.873        | 0.000           | 3066.895       | L[28] |
| N[2]  | <b>245.161</b>  | 2970.808        | 2954.789        | 2955.797        | 2953.781       | N[28] |
| K[3]  | <b>373.256</b>  | 2856.765        | 2840.746        | 2841.754        | 2839.738       | K[27] |
| L[4]  | <b>486.340</b>  | 2738.670        | 2712.651        | 2713.659        | 2711.643       | L[26] |
| L[5]  | <b>599.424</b>  | 2615.585        | 2589.567        | 2600.575        | 2598.559       | L[25] |
| G[6]  | <b>658.445</b>  | 2502.500        | 2486.483        | 2487.491        | 2485.475       | G[24] |
| K[7]  | <b>812.572</b>  | 2445.480        | 2429.462        | 2430.469        | 2428.454       | K[23] |
| V[8]  | <b>911.640</b>  | 2289.354        | 2273.335        | 2274.343        | 2272.327       | V[22] |
| T[9]  | 1012.688        | 2190.288        | 2174.267        | 2175.275        | 2173.259       | T[21] |
| I[10] | <b>1125.772</b> | 2089.230        | 2073.210        | 2074.227        | 2072.211       | I[20] |
| A[11] | <b>1196.809</b> | 1976.154        | 1960.135        | 1961.143        | 1959.127       | A[19] |
| Q[12] | <b>1324.867</b> | 1905.111        | 1889.098        | 1890.106        | 1888.090       | Q[18] |
| G[13] | <b>1381.889</b> | <b>1777.058</b> | 1761.039        | <b>1762.047</b> | 1760.032       | G[17] |
| G[14] | <b>1438.910</b> | 1720.037        | 1704.018        | 1705.026        | 1703.010       | G[16] |
| V[15] | 1537.879        | 1663.015        | 1646.997        | <b>1648.004</b> | 1645.989       | V[15] |
| L[16] | 1651.063        | 1583.947        | 1547.928        | <b>1548.936</b> | 1546.920       | L[14] |
| F[17] | 1768.116        | <b>1450.863</b> | 1434.844        | 1435.852        | 1433.836       | F[13] |
| N[18] | 1862.159        | 1383.819        | <b>1337.791</b> | 1338.799        | 1336.783       | N[12] |
| I[19] | 1975.243        | 1293.761        | <b>1223.748</b> | 1224.756        | 1222.741       | I[11] |
| Q[20] | 2103.301        | 1126.683        | 1110.664        | 1111.672        | 1109.656       | Q[10] |
| A[21] | 2174.338        | 998.624         | 982.606         | 983.614         | 981.598        | A[9]  |
| V[22] | 2273.407        | 927.587         | <b>911.569</b>  | <b>912.576</b>  | 910.561        | V[8]  |
| L[23] | 2388.491        | 858.513         | <b>812.560</b>  | 813.568         | 811.552        | L[7]  |
| L[24] | 2499.575        | 715.435         | 699.416         | <b>700.424</b>  | <b>698.408</b> | L[6]  |
| P[25] | 2596.628        | 602.351         | 586.332         | 587.340         | 585.324        | P[5]  |
| K[26] | 2724.723        | 505.268         | 489.249         | <b>490.287</b>  | 488.271        | K[4]  |
| K[27] | 2852.818        | 377.203         | <b>361.184</b>  | 362.192         | 360.177        | K[3]  |
| T[28] | 2953.865        | 249.108         | 233.089         | 234.097         | 232.082        | T[2]  |
| E[29] | 3082.008        | 148.060         | 132.042         | 133.050         | 131.034        | E[1]  |

# sp | Q6GSS7 | H2A2A\_MOUSE

LNKLLGK <sup>Dimethyl</sup> <sub>28.03</sub> VTIAQGGVLPNIQAVLLPKKTE

- ▶ fragmentation table for charge state 2+
- ▶ specType=etd
- ▶ score=74.02
- ▶ F113279.dat
- ▶ query=q41586.p1
- ▶ precursor=617.581570
- ▶ chargePrecursor=5
- ▶ itol=0.5

| AA  | c               | y              | z+1             | z+2             | z               | AA   |
|-----|-----------------|----------------|-----------------|-----------------|-----------------|------|
| L1  | 66.063          | 1542.450       | 1536.440        | 0.504           | 1533.936        | L126 |
| N2  | 123.084         | 1485.908       | 1477.899        | 1478.402        | <b>1477.394</b> | N28  |
| K3  | 187.132         | 1426.886       | 1420.877        | <b>1421.381</b> | 1420.373        | K27  |
| L4  | 243.674         | 1364.839       | 1356.829        | 1357.333        | 1356.325        | L26  |
| L5  | 300.216         | 1308.297       | <b>1300.287</b> | <b>1300.791</b> | <b>1299.783</b> | L25  |
| G6  | 358.729         | 1251.758       | 1243.749        | <b>1244.249</b> | 1243.241        | G24  |
| K7  | 406.789         | 1223.244       | <b>1215.234</b> | <b>1215.738</b> | 1214.731        | K23  |
| V8  | <b>456.324</b>  | 1145.181       | <b>1137.171</b> | <b>1137.675</b> | 1136.667        | V22  |
| T9  | 506.846         | 1095.646       | <b>1087.637</b> | <b>1088.141</b> | <b>1087.133</b> | T21  |
| T10 | <b>563.390</b>  | 1045.123       | 1037.113        | 1037.617        | 1036.609        | T20  |
| A11 | 620.900         | 988.581        | <b>980.571</b>  | <b>981.075</b>  | 980.067         | A19  |
| Q12 | <b>662.937</b>  | 933.060        | 925.051         | 925.555         | 924.547         | Q18  |
| G13 | <b>691.448</b>  | <b>889.033</b> | <b>881.023</b>  | <b>881.527</b>  | 880.519         | G17  |
| G14 | <b>719.959</b>  | 860.522        | <b>852.513</b>  | <b>853.017</b>  | 852.009         | G16  |
| V15 | <b>769.493</b>  | <b>832.011</b> | <b>824.002</b>  | <b>824.506</b>  | 823.498         | V15  |
| L16 | 828.035         | <b>782.477</b> | 774.468         | 774.972         | 773.964         | L14  |
| T17 | <b>874.561</b>  | <b>725.935</b> | 717.926         | 718.430         | 717.422         | T13  |
| N18 | 933.583         | 677.409        | <b>669.399</b>  | <b>669.903</b>  | 668.895         | N12  |
| I19 | 988.125         | 626.387        | <b>612.378</b>  | <b>612.882</b>  | 611.874         | I11  |
| Q20 | 1052.154        | <b>563.845</b> | 555.836         | 556.340         | 555.332         | Q10  |
| A21 | <b>1087.673</b> | 499.616        | <b>491.607</b>  | <b>492.110</b>  | 491.102         | A9   |
| V22 | <b>1137.207</b> | 464.297        | <b>456.288</b>  | <b>456.792</b>  | 455.784         | V8   |
| L23 | <b>1193.749</b> | 414.763        | 406.754         | 407.258         | 406.250         | L17  |
| L24 | 1250.293        | 358.221        | 350.211         | 350.715         | 349.707         | L16  |
| P25 | 1298.817        | 301.679        | 293.670         | 294.174         | 293.166         | P15  |
| K26 | <b>1362.865</b> | 253.153        | <b>245.143</b>  | <b>245.647</b>  | 244.639         | K4   |
| K27 | <b>1426.912</b> | 189.105        | 181.096         | 181.600         | 180.592         | K3   |
| T28 | <b>1477.436</b> | 125.058        | 117.049         | 117.552         | 116.544         | T2   |
| E29 | 1541.959        | 74.534         | 66.524          | 67.028          | 66.021          | E1   |

# sp | Q6GSS7 | H2A2A\_MOUSE

LNKLLGK <sup>Dimethyl</sup> <sub>28.03</sub> VTIAQGGVLPNIQAVLLPKKTE

- ▶ fragmentation table for charge state 3+
- ▶ specType=etd
- ▶ score=74.02
- ▶ F113279.dat
- ▶ query=q41586.p1
- ▶ precursor=617.581570
- ▶ chargePrecursor=5
- ▶ itol=0.5

| AA  | c              | y              | z+1            | z+2            | z              | AA  |
|-----|----------------|----------------|----------------|----------------|----------------|-----|
| L1  | 44.377         | 1028.635       | 1021.296       | 0.672          | 1022.960       | L29 |
| N2  | 82.302         | <b>990.941</b> | 985.601        | <b>985.937</b> | 985.265        | N28 |
| K3  | 125.090        | 952.926        | 947.587        | <b>947.923</b> | 947.251        | K27 |
| L4  | 163.785        | 910.225        | 904.885        | <b>905.225</b> | 904.553        | L26 |
| L5  | 200.479        | 872.533        | 867.194        | 867.530        | 866.858        | L25 |
| G6  | 219.487        | 834.839        | 829.499        | <b>829.835</b> | 829.163        | G24 |
| K7  | 271.529        | 815.832        | <b>810.492</b> | <b>810.828</b> | 810.156        | K23 |
| V8  | 304.552        | 763.790        | <b>758.450</b> | <b>758.786</b> | <b>758.114</b> | V22 |
| Y9  | 338.234        | 730.767        | 725.427        | <b>725.763</b> | 725.091        | Y21 |
| V10 | 375.929        | 697.084        | <b>691.745</b> | <b>692.081</b> | <b>691.409</b> | V20 |
| A11 | 399.608        | 659.389        | 654.050        | 654.386        | <b>653.718</b> | A19 |
| Q12 | 442.294        | 636.710        | <b>630.371</b> | <b>630.707</b> | <b>630.035</b> | Q18 |
| Q13 | 461.301        | 593.024        | 587.685        | 588.021        | 587.349        | Q17 |
| G14 | 480.308        | 574.017        | 568.678        | 569.013        | 568.343        | G16 |
| V15 | 513.331        | 555.010        | 549.670        | 550.006        | 549.334        | V15 |
| L16 | 551.026        | <b>521.987</b> | 516.648        | 516.984        | 516.312        | L14 |
| P17 | 583.377        | 484.202        | 478.953        | 479.289        | 478.617        | P13 |
| N18 | 621.391        | 451.942        | 446.602        | 446.938        | 446.266        | N12 |
| T19 | 659.086        | 413.927        | 408.588        | 408.924        | 408.252        | T11 |
| Q20 | 701.772        | 376.231        | 370.893        | 371.229        | 370.557        | Q10 |
| A21 | 725.451        | 333.546        | 328.207        | 328.543        | 327.871        | A9  |
| V22 | <b>758.474</b> | 309.867        | 304.528        | 304.864        | 304.192        | V8  |
| L23 | 796.168        | 276.844        | 271.505        | 271.841        | 271.169        | L7  |
| L24 | 833.863        | 239.150        | 233.810        | 234.146        | 233.474        | L6  |
| P25 | <b>866.214</b> | 201.455        | 196.116        | 196.451        | 195.780        | P5  |
| K26 | 908.912        | 169.104        | 163.765        | 164.101        | 163.429        | K4  |
| K27 | 951.611        | 126.806        | 121.468        | 121.802        | 120.790        | K3  |
| L28 | 989.293        | 83.709         | 78.369         | 78.704         | 78.032         | L2  |
| E29 | 1028.307       | 50.025         | 44.685         | 45.021         | 44.349         | E1  |

# sp | Q6GSS7 | H2A2A\_MOUSE

LNKLLGK<sup>Dimethyl</sup>VTIAQGGVLPNIQAVLLPKKTE<sub>28.03</sub>

- ▶ fragmentation table for charge state 4+
- ▶ specType=etd
- ▶ score=74.02
- ▶ F113279.dat
- ▶ query=q41586.p1
- ▶ precursor=617.581570
- ▶ chargePrecursor=5
- ▶ itol=0.5

| AA    | c              | y              | z+1            | z+2            | z              | AA    |
|-------|----------------|----------------|----------------|----------------|----------------|-------|
| L[1]  | 33.535         | 771.728        | 767.724        | 0.758          | 767.472        | L[29] |
| N[2]  | 62.046         | 743.451        | <b>739.453</b> | <b>739.705</b> | 739.201        | N[28] |
| K[3]  | 94.059         | 714.941        | 710.94         | <b>711.194</b> | 710.690        | K[27] |
| L[4]  | 122.340        | <b>682.923</b> | 678.918        | 678.170        | 678.666        | L[26] |
| L[5]  | 150.611        | 654.652        | 650.647        | 650.899        | 650.395        | L[25] |
| G[6]  | 164.867        | 626.381        | 622.376        | 622.628        | 622.124        | G[24] |
| K[7]  | 203.898        | <b>612.126</b> | 608.121        | 608.373        | 607.869        | K[23] |
| V[8]  | 228.665        | 573.094        | 569.089        | 569.341        | 568.837        | V[22] |
| T[9]  | 253.927        | 548.327        | 544.322        | 544.574        | 544.070        | T[21] |
| I[10] | 262.198        | 523.065        | 519.060        | 519.312        | 518.808        | I[20] |
| A[11] | 289.958        | 494.794        | <b>490.789</b> | 491.041        | <b>490.537</b> | A[19] |
| Q[12] | 311.972        | 477.026        | 473.021        | 473.282        | 472.778        | Q[18] |
| G[13] | 346.228        | 445.020        | 441.015        | 441.267        | 440.763        | G[17] |
| G[14] | 360.483        | 430.765        | 426.760        | 427.012        | 426.508        | G[16] |
| V[15] | 385.250        | 416.509        | 412.504        | 412.757        | 412.253        | V[15] |
| L[16] | 413.521        | 391.742        | 387.737        | 387.989        | 387.486        | L[14] |
| P[17] | 437.784        | 363.471        | 359.466        | 359.718        | 359.215        | P[13] |
| N[18] | 466.295        | 339.208        | 335.203        | 335.455        | 334.951        | N[12] |
| I[19] | 494.566        | 310.897        | 306.891        | 306.945        | 306.441        | I[11] |
| Q[20] | 526.381        | 282.426        | 278.422        | 278.673        | 278.170        | Q[18] |
| A[21] | 544.340        | 250.412        | 246.407        | 246.659        | 246.155        | A[9]  |
| V[22] | 569.107        | 232.652        | 228.646        | 228.900        | 228.396        | V[8]  |
| L[23] | 597.378        | 207.885        | 203.881        | 204.132        | 203.629        | L[7]  |
| L[24] | 625.649        | 179.614        | 175.609        | 175.861        | 175.358        | L[6]  |
| P[25] | 649.912        | 151.343        | 147.338        | 147.590        | 147.087        | P[5]  |
| K[26] | 681.936        | 127.080        | 123.075        | 123.327        | 122.823        | K[4]  |
| K[27] | <b>713.960</b> | 95.056         | 91.052         | 91.304         | 90.800         | K[3]  |
| T[28] | <b>739.222</b> | 63.032         | 59.028         | 59.280         | 58.776         | T[2]  |
| E[29] | 771.462        | 37.771         | 33.766         | 34.018         | 33.514         | E[1]  |





# sp | Q6GSS7 | H2A2A\_MOUSE

LNKLLGK <sup>Dimethyl</sup> 28.03 VTIAQGGVLPNIQAVLLPKKTE

- ▶ fragmentation table for charge state 1+
- ▶ specType=cid
- ▶ score=64.49
- ▶ F113279.dat
- ▶ query=q41587\_p1
- ▶ precursor=771.725160
- ▶ chargePrecursor=4
- ▶ itol=0.5

| AA  | a               | a <sup>+</sup> | a-0.4           | b               | b <sup>+</sup> | b-0.4    | y              | y <sup>+</sup> | AA              |      |
|-----|-----------------|----------------|-----------------|-----------------|----------------|----------|----------------|----------------|-----------------|------|
| L1  | 88.098          | 0.000          | 0.000           | 114.093         | 0.000          | 0.000    | 383.093        | 304.899        | 305.881         | L129 |
| K1  | 308.160         | 334.319        | 0.000           | 248.139         | 311.708        | 0.000    | 309.000        | 305.788        | 303.769         | K30  |
| R1  | 338.234         | 311.268        | 0.000           | <b>355.279</b>  | <b>139.283</b> | 0.000    | 385.055        | 385.738        | 388.794         | K227 |
| L4  | <b>441.318</b>  | 424.282        | 0.000           | <b>469.313</b>  | <b>452.287</b> | 0.000    | 272.878        | 271.843        | 272.028         | L36  |
| L5  | 244.100         | 317.381        | 0.000           | <b>382.397</b>  | <b>355.371</b> | 0.000    | 381.388        | 398.339        | 397.078         | L35  |
| G1  | 311.424         | 384.389        | 0.000           | <b>039.419</b>  | <b>622.392</b> | 0.000    | 250.252        | 248.745        | 244.461         | G24  |
| K1  | 787.020         | 693.624        | 0.000           | <b>795.545</b>  | 778.619        | 0.000    | 343.480        | 342.454        | 342.710         | K23  |
| V1  | <b>886.619</b>  | <b>888.582</b> | 0.000           | <b>984.613</b>  | 977.687        | 0.000    | 288.854        | 292.249        | 291.543         | V22  |
| L1  | 189.088         | 300.929        | 0.000           | 384.923         | 378.007        | 0.000    | 377.033        | 219.200        | 217.200         | L21  |
| L10 | <b>1088.750</b> | 1071.724       | <b>1062.740</b> | <b>1108.745</b> | 1091.719       | 1086.703 | 308.238        | 307.211        | 307.427         | L24  |
| A11 | 1151.787        | 1134.761       | 1123.777        | <b>1179.782</b> | 1162.756       | 1151.772 | 180.154        | 180.127        | 180.143         | A16  |
| G23 | 219.066         | 322.019        | 320.879         | 324.060         | 326.014        | 326.000  | 190.111        | 189.066        | 189.026         | G10  |
| G13 | 1336.887        | 1319.839       | 1313.873        | 1304.884        | 1287.836       | 1286.850 | 177.028        | 176.003        | 175.048         | G17  |
| G14 | 1381.889        | 1376.882       | 1375.878        | 1421.880        | 1406.857       | 1403.873 | 170.017        | 170.010        | 170.026         | G16  |
| V15 | 1460.889        | 1445.881       | 1444.874        | 1438.880        | 1423.862       | 1422.848 | 168.011        | 164.866        | 164.809         | V16  |
| L18 | 1606.041        | 1589.033       | 1588.031        | 1674.036        | 1657.030       | 1656.036 | 155.047        | 154.900        | 154.938         | L14  |
| P17 | 1703.048        | 1686.039       | 1685.038        | 1761.043        | 1744.037       | 1743.041 | <b>140.863</b> | 141.826        | 141.802         | P15  |
| K18 | 1811.127        | 1800.111       | 1789.121        | 1841.126        | 1830.109       | 1819.127 | 140.863        | 140.863        | 140.863         | K13  |
| L16 | 1830.223        | 1813.205       | 1812.211        | 1890.216        | 1874.199       | 1873.205 | 123.971        | 122.941        | 122.977         | L21  |
| G20 | 2038.282        | 2041.281       | 2040.280        | 2089.275        | 2092.248       | 2091.254 | 110.893        | 110.899        | <b>1108.872</b> | G19  |
| A12 | 2248.387        | 2247.386       | 2246.384        | 2297.381        | 2296.380       | 2295.378 | <b>98.824</b>  | 98.798         | 98.814          | A14  |
| V22 | 2248.387        | 2247.386       | 2246.384        | 2297.381        | 2296.380       | 2295.378 | <b>927.507</b> | <b>910.561</b> | 909.577         | V18  |
| L21 | 2341.480        | 2341.479       | 2341.478        | 2390.485        | 2390.483       | 2390.481 | <b>828.519</b> | 811.963        | 810.988         | L17  |
| L24 | 2454.533        | 2452.527       | 2450.543        | 2462.540        | 2460.532       | 2458.538 | <b>715.435</b> | 698.480        | <b>687.434</b>  | L18  |
| P23 | 2614.606        | 2614.602       | 2613.599        | 2673.601        | 2672.602       | 2671.601 | <b>602.351</b> | 603.324        | 604.304         | P19  |
| K24 | 2673.702        | 2673.679       | 2673.661        | 2727.699        | 2726.698       | 2726.699 | <b>488.371</b> | 488.371        | 487.387         | K10  |
| K27 | 3007.749        | 3006.739       | 3006.738        | 3055.740        | 3054.740       | 3053.740 | <b>377.283</b> | 368.177        | 369.181         | K15  |
| L26 | 3068.844        | 3068.844       | 3068.844        | 3118.846        | 3118.846       | 3118.846 | 308.818        | 308.818        | 308.818         | L22  |
| E26 | 3071.888        | 3070.889       | 3070.878        | 3070.888        | 3070.888       | 3070.877 | 140.928        | 0.000          | 130.900         | E11  |

# sp | Q6GSS7 | H2A2A\_MOUSE

LNKLLGK <sup>Dimethyl</sup> <sub>28.03</sub> VTIAQGGVLPNIQAVLLPKKTE

- ▶ fragmentation table for charge state 2+
- ▶ specType=cid
- ▶ score=64.49
- ▶ F113279.dat
- ▶ query=q41587\_p1
- ▶ precursor=771.725160
- ▶ chargePrecursor=4
- ▶ itol=0.5

| AA  | a          | a'         | a <sub>0</sub> | b          | b'         | b <sub>0</sub> | y           | y'         | y <sub>0</sub> | AA         |             |
|-----|------------|------------|----------------|------------|------------|----------------|-------------|------------|----------------|------------|-------------|
| L1  | 41         | 302        | 316            | 8704       | 59         | 549            | 8704        | 1542       | 202            | 1533       | 144         |
| R2  | 102        | 312        | 326            | 8704       | 114        | 512            | 8704        | 1533       | 202            | 144        | 100         |
| R3  | 154        | 322        | 336            | 8704       | 178        | 616            | 8704        | 1438       | 202            | 144        | 100         |
| L4  | 193        | 333        | 347            | 8704       | 216        | 704            | 8704        | 1364       | 202            | 135        | 133         |
| L5  | 217        | 345        | 359            | 8704       | 255        | 789            | 8704        | 1308       | 202            | 129        | 128         |
| Q6  | 236        | 358        | 372            | 8704       | 302        | 871            | 8704        | 1251       | 202            | 124        | 124         |
| R7  | 251        | 370        | 384            | 8704       | 350        | 956            | 8704        | 1203       | 202            | 119        | 119         |
| V8  | 263        | 382        | 396            | 8704       | 400        | 1041           | 8704        | 1164       | 202            | 114        | 114         |
| V9  | <b>484</b> | <b>317</b> | <b>475</b>     | <b>823</b> | <b>475</b> | <b>331</b>     | <b>488</b>  | <b>134</b> | <b>488</b>     | <b>823</b> | <b>134</b>  |
| I10 | <b>548</b> | <b>879</b> | <b>532</b>     | <b>368</b> | <b>531</b> | <b>874</b>     | <b>554</b>  | <b>876</b> | <b>546</b>     | <b>361</b> | <b>545</b>  |
| A11 | <b>576</b> | <b>397</b> | <b>567</b>     | <b>884</b> | <b>567</b> | <b>392</b>     | <b>580</b>  | <b>882</b> | <b>581</b>     | <b>390</b> | <b>580</b>  |
| Q12 | <b>548</b> | <b>427</b> | <b>534</b>     | <b>861</b> | <b>424</b> | <b>854</b>     | <b>424</b>  | <b>845</b> | <b>418</b>     | <b>851</b> | <b>418</b>  |
| Q13 |            |            |                |            |            |                |             |            |                |            |             |
| Q14 | <b>897</b> | <b>448</b> | <b>888</b>     | <b>531</b> | <b>888</b> | <b>443</b>     | <b>711</b>  | <b>446</b> | <b>702</b>     | <b>932</b> | <b>702</b>  |
| V15 |            |            |                |            |            |                |             |            |                |            |             |
| L16 | 803        | 524        | <b>795</b>     | <b>811</b> | <b>794</b> | <b>523</b>     | <b>788</b>  | <b>809</b> | <b>787</b>     | <b>517</b> | <b>787</b>  |
| P17 | <b>852</b> | <b>051</b> | <b>843</b>     | <b>537</b> | <b>843</b> | <b>049</b>     | <b>889</b>  | <b>049</b> | <b>887</b>     | <b>035</b> | <b>887</b>  |
| R18 | 859        | 517        | 850            | 538        | 840        | 516            | <b>821</b>  | <b>870</b> | <b>814</b>     | <b>504</b> | <b>814</b>  |
| I19 | 899        | 414        | 891            | 423        | 884        | 420            | <b>919</b>  | <b>412</b> | <b>911</b>     | <b>068</b> | <b>910</b>  |
| Q20 | 1039       | 444        | 1031           | 453        | 1023       | 450            | 1041        | 441        | 1035           | 438        | 1034        |
| A21 | 1095       | 152        | 1086           | 162        | 1078       | 159            | <b>1079</b> | <b>160</b> | 1070           | 146        | 1070        |
| V22 | 1114       | 408        | 1106           | 417        | 1099       | 414            | <b>1128</b> | <b>404</b> | <b>1120</b>    | <b>408</b> | <b>1120</b> |
| L23 | 1114       | 288        | 1106           | 297        | 1100       | 293            | <b>1185</b> | <b>290</b> | <b>1176</b>    | <b>272</b> | <b>1176</b> |
| L24 | 1227       | 788        | 1219           | 797        | 1211       | 790            | 1241        | 779        | 1231           | 769        | 1231        |
| P25 | 1276       | 317        | 1267           | 326        | 1259       | 320            | 1289        | 309        | 1279           | 302        | 1279        |
| R26 | 1380       | 304        | 1371           | 313        | 1363       | 307            | 1394        | 296        | 1384           | 289        | 1384        |
| K27 | 1404       | 402        | 1395           | 411        | 1387       | 404            | 1419        | 393        | 1409           | 384        | 1409        |
| L28 | 1424       | 474        | 1415           | 483        | 1407       | 476            | 1439        | 465        | 1429           | 456        | 1429        |
| E29 | 1519       | 447        | 1510           | 456        | 1502       | 449            | 1533        | 444        | 1524           | 437        | 1524        |

# sp | Q6GSS7 | H2A2A\_MOUSE

LNKLLGK <sup>Dimethyl</sup> <sub>28.03</sub> VTIAQGGVLPNIQAVLLPKKTE

- ▶ fragmentation table for charge state 3+
- ▶ specType=cid
- ▶ score=64.49
- ▶ F113279.dat
- ▶ query=q41587.p1
- ▶ precursor=771.725160
- ▶ chargePrecursor=4
- ▶ itol=0.5

| AA  | a          | a*         | aΔ         | b          | b*         | bΔ         | y          | y*         | yΔ         | AA  |
|-----|------------|------------|------------|------------|------------|------------|------------|------------|------------|-----|
| T1  | 26         | 309        | 334        | 75         | 75         | 0          | 0          | 0          | 0          | Low |
| R2  | 67         | 309        | 63         | 759        | 0          | 0          | 0          | 0          | 0          | N20 |
| K3  | 110        | 683        | 104        | 407        | 0          | 0          | 139        | 413        | 113        | K27 |
| L4  | 147        | 718        | 142        | 104        | 0          | 0          | 137        | 100        | 131        | L26 |
| L5  | 188        | 872        | 179        | 707        | 0          | 0          | 159        | 626        | 159        | L26 |
| G6  | 204        | 479        | 198        | 804        | 0          | 0          | 213        | 811        | 208        | G24 |
| K7  | 276        | 522        | 270        | 546        | 0          | 0          | 289        | 357        | 290        | K25 |
| V8  | 289        | 844        | 283        | 859        | 0          | 0          | 289        | 281        | 293        | V22 |
| V9  | 323        | 227        | 317        | 551        | 317        | 233        | 332        | 559        | 328        | V22 |
| I10 | 360        | 622        | 355        | 498        | <b>354</b> | <b>918</b> | 370        | 251        | 364        | I20 |
| A11 | 384        | 601        | 378        | 625        | 378        | 557        | 380        | 572        | 387        | A19 |
| Q12 | 427        | 208        | 421        | 811        | 421        | 282        | 430        | 843        | 425        | Q18 |
| G13 | 436        | 504        | 430        | 514        | <b>435</b> | <b>455</b> | 448        | 504        | 443        | G17 |
| G14 | 468        | 484        | 462        | 492        | <b>468</b> | <b>957</b> | 468        | 470        | 469        | G16 |
| V15 | 536        | 519        | 530        | 543        | <b>545</b> | <b>559</b> | 539        | 519        | <b>521</b> | V15 |
| P16 | 568        | 470        | 562        | 494        | 562        | 389        | 577        | 757        | 572        | P13 |
| N18 | 600        | 584        | 590        | 516        | 590        | 516        | 610        | 547        | <b>451</b> | N13 |
| I19 | 644        | 719        | 638        | 612        | 638        | 612        | 651        | 421        | <b>690</b> | I13 |
| Q20 | 686        | 765        | 681        | 589        | 681        | 589        | <b>647</b> | <b>735</b> | <b>647</b> | Q18 |
| A21 | 710        | 444        | <b>704</b> | <b>768</b> | <b>710</b> | <b>775</b> | 714        | 130        | 713        | A16 |
| V22 | 743        | 807        | 737        | 741        | <b>752</b> | <b>798</b> | 747        | 123        | 749        | V18 |
| L23 | 793        | 351        | 775        | 486        | 775        | 486        | 799        | 333        | 784        | L19 |
| L24 | 813        | 656        | 811        | 180        | 812        | 657        | 822        | 184        | 810        | L16 |
| P25 | <b>851</b> | <b>207</b> | 845        | 531        | <b>846</b> | <b>579</b> | 854        | 583        | 854        | P15 |
| K27 | 836        | 654        | 830        | 620        | 830        | 620        | 859        | 512        | 859        | K24 |
| K27 | 836        | 654        | 830        | 620        | 830        | 620        | 848        | 500        | 848        | K25 |
| T28 | 870        | 585        | 864        | 511        | <b>874</b> | <b>618</b> | 873        | 514        | 85         | T12 |
| E29 | 913        | 530        | <b>907</b> | <b>425</b> | 913        | 270        | 918        | 426        | 913        | E11 |

# sp | Q6GSS7 | H2A2A\_MOUSE

LNKLLGK <sup>Dimethyl</sup>VTIAQGGVLPNIQAVLLPKKTE  
28.03

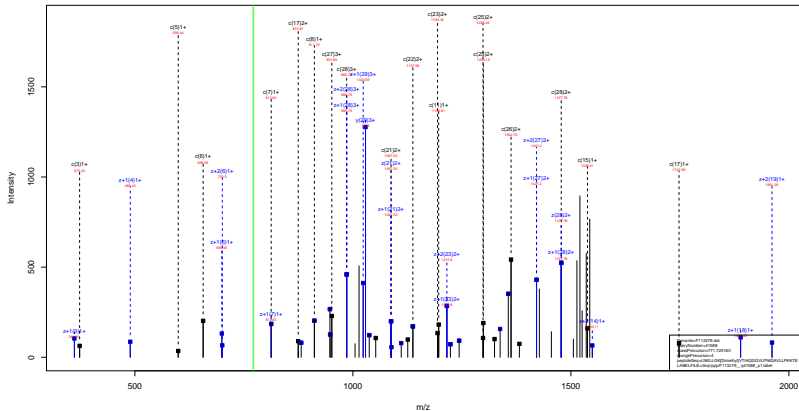

# sp | Q6GSS7 | H2A2A\_MOUSE

LNKLLGK <sup>Dimethyl</sup> 28.03 VTIAQGGVLPNIQAVLLPKKTE

- ▶ fragmentation table for charge state 1+
- ▶ specType=etd
- ▶ score=81.51
- ▶ F113279.dat
- ▶ query=q41588.p1
- ▶ precursor=771.725160
- ▶ chargePrecursor=4
- ▶ itol=0.5

| AA    | c               | y        | z+1             | z+2             | z        | AA    |
|-------|-----------------|----------|-----------------|-----------------|----------|-------|
| L 1   | 131.118         | 3081.892 | 3067.873        | 0.000           | 3066.895 | L 29  |
| N 2   | 345.161         | 2970.808 | 2954.789        | 2955.797        | 2951.781 | N 28  |
| K 3   | <b>373.256</b>  | 2856.765 | 2840.746        | 2841.754        | 2839.738 | K 27  |
| L 4   | 486.340         | 2728.670 | 2712.651        | 2713.659        | 2711.643 | L 26  |
| L 5   | <b>599.424</b>  | 2615.585 | 2599.567        | 2600.575        | 2598.560 | L 25  |
| Q 6   | <b>656.445</b>  | 2502.502 | 2486.483        | 2487.491        | 2485.475 | Q 24  |
| K 7   | <b>812.572</b>  | 2345.480 | 2429.462        | 2430.469        | 2428.454 | K 23  |
| V 8   | <b>911.640</b>  | 2288.354 | 2273.335        | 2274.343        | 2272.327 | V 22  |
| T 9   | 1017.688        | 2190.286 | 2174.267        | 2175.275        | 2173.259 | T 21  |
| I 10  | <b>1125.772</b> | 2089.238 | 2073.219        | 2074.227        | 2072.211 | I 20  |
| A 11  | <b>1196.809</b> | 1976.154 | 1960.135        | <b>1961.143</b> | 1959.127 | A 19  |
| Q 12  | <b>1324.867</b> | 1905.111 | <b>1889.094</b> | 1890.108        | 1888.090 | Q 18  |
| G 13  | <b>1381.889</b> | 1777.058 | 1761.039        | 1762.047        | 1760.032 | G 17  |
| G 14  | 1438.910        | 1720.937 | 1704.918        | 1705.926        | 1703.910 | G 16  |
| V 15  | <b>1537.979</b> | 1663.015 | 1646.997        | 1646.004        | 1645.989 | V 15  |
| L 16  | 1651.063        | 1563.947 | 1547.928        | <b>1548.936</b> | 1546.920 | L 14  |
| F 17  | <b>1748.116</b> | 1450.893 | 1434.874        | 1435.882        | 1433.866 | F 13  |
| TW 18 | 1867.159        | 1383.810 | <b>1337.791</b> | 1338.799        | 1336.783 | TW 12 |
| I 19  | 1975.243        | 1236.767 | <b>1223.748</b> | 1224.756        | 1222.741 | I 11  |
| Q 20  | 2103.301        | 1126.683 | <b>1110.664</b> | 1111.672        | 1109.656 | Q 10  |
| A 21  | 2174.336        | 998.624  | 982.606         | 981.614         | 981.598  | A 9   |
| V 22  | 2273.407        | 927.587  | <b>911.569</b>  | 912.576         | 910.561  | V 8   |
| L 23  | 2386.491        | 828.519  | <b>812.500</b>  | 813.508         | 811.492  | L 7   |
| L 24  | 2499.575        | 715.435  | <b>699.415</b>  | <b>700.424</b>  | 698.408  | L 6   |
| P 25  | 2596.626        | 602.351  | 586.332         | 587.340         | 585.324  | P 5   |
| K 26  | 2724.723        | 505.298  | <b>489.279</b>  | 490.287         | 488.271  | K 4   |
| K 27  | 2852.816        | 377.203  | <b>361.184</b>  | 362.192         | 360.177  | K 3   |
| T 28  | 2951.905        | 249.108  | 233.089         | 234.097         | 232.082  | T 2   |
| E 29  | 3087.938        | 148.060  | 132.042         | 133.050         | 131.034  | E 1   |

# sp | Q6GSS7 | H2A2A\_MOUSE

LNKLLGK <sup>Dimethyl</sup><sub>28.03</sub> VTIAQGGVLPNIQAVLLPKKTE

- ▶ fragmentation table for charge state 2+
- ▶ specType=etd
- ▶ score=81.51
- ▶ F113279.dat
- ▶ query=q41588.p1
- ▶ precursor=771.725160
- ▶ chargePrecursor=4
- ▶ itol=0.5

| AA | c               | y               | z+1             | z+2             | z               | AA   |
|----|-----------------|-----------------|-----------------|-----------------|-----------------|------|
| L1 | 66.053          | 1542.850        | 1524.440        | 9.504           | 1533.930        | L120 |
| N1 | 123.084         | 1485.905        | <b>1477.898</b> | 1478.402        | <b>1477.394</b> | N120 |
| K1 | 187.132         | 1428.889        | <b>1420.877</b> | <b>1421.381</b> | 1420.373        | K127 |
| L1 | 243.674         | 1364.839        | <b>1356.829</b> | 1357.333        | <b>1356.325</b> | L126 |
| L1 | 300.216         | 1308.297        | 1300.287        | 1300.791        | 1299.781        | L125 |
| G1 | 356.758         | 1251.755        | <b>1243.745</b> | 1244.249        | <b>1243.241</b> | G124 |
| K1 | 406.799         | <b>1223.244</b> | <b>1215.234</b> | <b>1215.738</b> | 1214.731        | K123 |
| V1 | 456.324         | 1145.181        | <b>1137.171</b> | <b>1137.675</b> | 1136.667        | V122 |
| T1 | 506.840         | 1095.646        | <b>1087.637</b> | <b>1088.141</b> | <b>1087.133</b> | T121 |
| T1 | 563.390         | 1045.123        | <b>1037.113</b> | <b>1037.617</b> | 1036.609        | T120 |
| A1 | 608.608         | 988.581         | 980.571         | 981.075         | 980.067         | A119 |
| G1 | 662.937         | 933.060         | 925.053         | 925.557         | 924.549         | G118 |
| G1 | 691.448         | 889.033         | <b>881.023</b>  | <b>881.527</b>  | 880.519         | G117 |
| G1 | 719.959         | 860.522         | 852.515         | 853.017         | 852.009         | G116 |
| V1 | 769.493         | 812.011         | 804.002         | 804.506         | 803.498         | V115 |
| L1 | 820.035         | 762.477         | 774.468         | 774.972         | 773.964         | L114 |
| T1 | <b>874.561</b>  | 728.935         | 719.928         | 719.430         | 717.422         | T113 |
| N1 | 911.553         | 677.400         | 669.390         | 669.903         | 668.895         | N112 |
| I1 | 968.125         | 620.867         | 612.858         | 612.862         | 611.874         | I111 |
| Q1 | <b>1052.154</b> | 563.845         | 555.836         | 556.340         | 555.332         | Q110 |
| A1 | <b>1087.673</b> | 499.816         | 491.807         | 492.310         | 491.303         | A10  |
| V1 | <b>1137.207</b> | 484.297         | 456.288         | 456.792         | 455.784         | V10  |
| L1 | <b>1193.749</b> | 414.763         | 406.754         | 407.258         | 406.250         | L10  |
| L1 | 1250.291        | 358.221         | 350.212         | 350.716         | 349.708         | L10  |
| P1 | <b>1298.817</b> | 301.679         | 293.670         | 294.174         | 293.166         | P10  |
| K1 | <b>1362.865</b> | 253.153         | 245.143         | 245.647         | 244.639         | K10  |
| K1 | 1428.917        | 189.105         | 181.096         | 181.600         | 180.592         | K10  |
| T1 | <b>1477.436</b> | 125.058         | 117.048         | 117.552         | 116.544         | T10  |
| E1 | 1541.958        | 74.534          | 66.524          | 67.028          | 66.021          | E10  |

# sp | Q6GSS7 | H2A2A\_MOUSE

LNKLLGK <sup>Dimethyl</sup> <sub>28.03</sub> VTIAQGGVLPNIQAVLLPKKTE

- ▶ fragmentation table for charge state 3+
- ▶ specType=etd
- ▶ score=81.51
- ▶ F113279.dat
- ▶ query=q41588.p1
- ▶ precursor=771.725160
- ▶ chargePrecursor=4
- ▶ itol=0.5

| AA  | c              | y               | z+1             | z+2            | z              | AA  |
|-----|----------------|-----------------|-----------------|----------------|----------------|-----|
| L1  | 44.377         | <b>1028.635</b> | <b>1023.296</b> | 0.672          | 1022.660       | L29 |
| N2  | 62.302         | 090.941         | <b>985.601</b>  | <b>985.937</b> | 985.265        | N28 |
| K3  | 125.090        | 952.329         | <b>947.587</b>  | <b>947.923</b> | <b>947.251</b> | K27 |
| L4  | 162.785        | 910.228         | 904.269         | 905.225        | 904.551        | L26 |
| L5  | 200.479        | 872.531         | 867.194         | 867.530        | 866.858        | L25 |
| G6  | 239.487        | 834.835         | 829.499         | 829.835        | 829.163        | G24 |
| K7  | 271.529        | 815.832         | 810.492         | 810.828        | 810.156        | K23 |
| V8  | 304.552        | 763.790         | 758.450         | 758.786        | 758.114        | V22 |
| T9  | 338.234        | 730.767         | 725.427         | 725.763        | 725.091        | T21 |
| I10 | 375.929        | 697.084         | 691.745         | 692.081        | 691.409        | I20 |
| A11 | 399.608        | 659.389         | 654.050         | 654.386        | 653.714        | A19 |
| Q12 | 442.294        | 626.710         | 621.371         | 621.707        | 621.035        | Q18 |
| G13 | 461.301        | 593.024         | 587.685         | 588.021        | 587.349        | G17 |
| G14 | 480.308        | 574.017         | 568.678         | 569.013        | 568.342        | G16 |
| V15 | 513.131        | 555.010         | 549.670         | 550.006        | 549.334        | V15 |
| L16 | 551.026        | 521.987         | 516.648         | 516.984        | 516.312        | L14 |
| P17 | 583.377        | 484.202         | 478.863         | 479.209        | 478.617        | P13 |
| N18 | 621.391        | 451.942         | 446.602         | 446.938        | 446.266        | N12 |
| I19 | 659.086        | 413.927         | 408.588         | 408.924        | 408.252        | I11 |
| Q20 | 701.772        | 376.233         | 370.893         | 371.229        | 370.557        | Q10 |
| A21 | 725.451        | 333.546         | 328.207         | 328.543        | 327.871        | A9  |
| V22 | 758.474        | 309.867         | 304.528         | 304.864        | 304.192        | V8  |
| L23 | 796.188        | 276.844         | 271.505         | 271.841        | 271.169        | L7  |
| L24 | 833.863        | 239.150         | 233.810         | 234.146        | 233.474        | L6  |
| T25 | 869.214        | 201.455         | 196.116         | 196.452        | 195.780        | T5  |
| K26 | 908.912        | 169.100         | 163.760         | 164.100        | 163.429        | K4  |
| K27 | <b>951.611</b> | 138.406         | 133.066         | 133.402        | 132.730        | K3  |
| T28 | <b>985.293</b> | 83.708          | 78.368          | 78.704         | 78.032         | T2  |
| E29 | 1028.307       | 50.025          | 44.685          | 45.021         | 44.349         | E1  |

# sp | Q6GSS7 | H2A2A\_MOUSE

LNKLLGK <sup>Dimethyl</sup> VTIAQGGVLPNIQAVLLPKKTE  
28.03

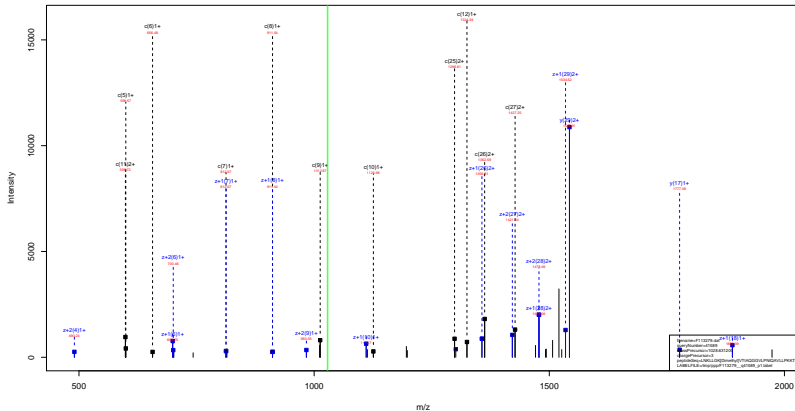



# sp | Q6GSS7 | H2A2A\_MOUSE

LNKLLGK<sup>Dimethyl  
28.03</sup>VTIAQGGVLPNIQAVLLPKKTE

- ▶ fragmentation table for charge state 1+
- ▶ specType=etd
- ▶ score=39.25
- ▶ F113279.dat
- ▶ query=q41589\_p1
- ▶ precursor=1028.631200
- ▶ chargePrecursor=3
- ▶ itol=0.5

| AA  | c               | y               | z+1             | z+2            | z        | AA   |
|-----|-----------------|-----------------|-----------------|----------------|----------|------|
| L1  | 131.118         | 3081.892        | 3067.873        | 0.000          | 3066.895 | L129 |
| N2  | 345.161         | 2970.808        | 2954.789        | 2955.797       | 2951.781 | N28  |
| K3  | 373.256         | 2956.795        | 2940.746        | 2941.754       | 2939.739 | K27  |
| L4  | 486.340         | 2728.670        | 2712.651        | 2713.659       | 2711.643 | L26  |
| L5  | <b>999.424</b>  | 2615.586        | 2609.567        | 2600.575       | 2598.560 | L25  |
| Q6  | <b>656.445</b>  | 2502.502        | 2488.483        | 2487.491       | 2485.475 | Q24  |
| K7  | <b>812.572</b>  | 2445.480        | 2429.462        | 2430.469       | 2428.454 | K23  |
| V8  | <b>911.640</b>  | 2389.354        | 2373.335        | 2374.343       | 2372.327 | V22  |
| T9  | <b>1012.688</b> | 2196.268        | 2174.267        | 2175.275       | 2173.260 | T21  |
| I10 | <b>1125.772</b> | 2089.238        | 2073.219        | 2074.227       | 2072.211 | I20  |
| A11 | 1126.809        | 1976.154        | 1960.135        | 1961.143       | 1959.127 | A19  |
| Q12 | <b>1274.967</b> | 1769.117        | <b>1899.098</b> | 1906.106       | 1888.090 | Q18  |
| G13 | 1381.989        | <b>1777.058</b> | 1761.039        | 1762.047       | 1760.032 | G17  |
| G14 | 1438.910        | 1720.937        | 1704.918        | 1705.926       | 1703.910 | G16  |
| V15 | 1537.879        | 1663.815        | 1646.997        | 1646.004       | 1645.989 | V15  |
| L16 | 1651.863        | 1563.947        | 1547.928        | 1548.936       | 1546.920 | L14  |
| P17 | 1748.116        | 1496.863        | 1484.844        | 1435.852       | 1433.836 | P13  |
| T18 | 1862.159        | 1393.810        | 1377.791        | 1338.799       | 1336.783 | T12  |
| I19 | 1975.243        | 1239.767        | 1223.748        | 1224.756       | 1222.741 | I11  |
| Q20 | 2103.301        | 1126.683        | <b>1110.664</b> | 1111.672       | 1109.656 | Q10  |
| A21 | 2174.338        | 998.624         | 982.606         | <b>983.614</b> | 981.598  | A9   |
| V22 | 2273.407        | 927.587         | <b>911.569</b>  | 912.576        | 910.561  | V8   |
| L23 | 2386.491        | 828.519         | <b>812.500</b>  | 813.508        | 811.492  | L7   |
| L24 | 2499.575        | 715.433         | <b>699.416</b>  | <b>700.424</b> | 698.408  | L6   |
| P25 | 2596.626        | 602.351         | 586.332         | 587.340        | 585.324  | P5   |
| K26 | 2724.723        | 505.268         | 489.279         | <b>490.287</b> | 488.271  | K4   |
| K27 | 2852.816        | 377.203         | 361.184         | 362.192        | 360.177  | K3   |
| T28 | 2951.895        | 249.108         | 233.089         | 234.097        | 232.082  | T2   |
| E29 | 3087.938        | 148.060         | 132.042         | 133.050        | 131.034  | E1   |

# sp | Q6GSS7 | H2A2A\_MOUSE

LNKLLGK <sup>Dimethyl</sup><sub>28.03</sub> VTIAQGGVLPNIQAVLLPKKTE

- ▶ fragmentation table for charge state 2+
- ▶ specType=etd
- ▶ score=39.25
- ▶ F113279.dat
- ▶ query=q41589\_p1
- ▶ precursor=1028.631200
- ▶ chargePrecursor=3
- ▶ itol=0.5

| AA  | c               | y               | z+1             | z+2             | z               | AA  |
|-----|-----------------|-----------------|-----------------|-----------------|-----------------|-----|
| L1  | 66.053          | <b>1542.450</b> | <b>1534.440</b> | 9.504           | 1533.930        | L19 |
| N1  | 123.054         | 1485.905        | <b>1477.898</b> | <b>1478.402</b> | 1477.304        | N20 |
| K1  | 187.132         | 1428.886        | 1420.877        | <b>1421.381</b> | 1420.373        | K27 |
| L14 | 243.674         | 1364.839        | <b>1356.829</b> | 1357.333        | <b>1356.325</b> | L26 |
| L15 | 300.216         | 1308.297        | 1300.287        | <b>1300.791</b> | 1299.783        | L25 |
| G16 | 358.750         | 1251.755        | 1243.745        | 1244.249        | 1243.241        | G24 |
| K17 | 406.790         | 1223.244        | 1215.234        | 1215.738        | 1214.731        | K23 |
| V18 | 456.324         | 1145.181        | 1137.171        | 1137.675        | 1136.667        | V22 |
| T19 | 506.840         | 1095.646        | 1087.637        | 1088.141        | 1087.133        | T21 |
| T10 | 563.390         | 1045.123        | 1037.113        | 1037.617        | 1036.609        | T20 |
| A11 | <b>598.908</b>  | 988.581         | 980.571         | 981.075         | 980.067         | A19 |
| G12 | 662.937         | 933.065         | 925.055         | 925.559         | 924.551         | G18 |
| G13 | 691.448         | 889.033         | 881.023         | 881.527         | 880.519         | G17 |
| G14 | 719.959         | 860.522         | 852.512         | 853.017         | 852.009         | G16 |
| V15 | 769.493         | 832.011         | 824.002         | 824.506         | 823.498         | V15 |
| L16 | 826.035         | 782.477         | 774.468         | 774.972         | 773.964         | L14 |
| T17 | 874.581         | 728.935         | 720.925         | 721.429         | 720.421         | T13 |
| N18 | 931.583         | 677.400         | 669.390         | 669.893         | 668.885         | N12 |
| I19 | 988.125         | 620.867         | 612.857         | 613.361         | 612.353         | I11 |
| Q20 | 1052.154        | 563.845         | 555.836         | 556.340         | 555.332         | Q10 |
| A21 | 1087.673        | 499.816         | 491.807         | 492.311         | 491.303         | A0  |
| V22 | 1127.207        | 484.297         | 476.288         | 476.792         | 475.784         | V8  |
| L23 | 1193.700        | 414.763         | 406.754         | 407.258         | 406.250         | L17 |
| L24 | 1250.291        | 358.221         | 350.212         | 350.716         | 349.708         | L16 |
| P25 | <b>1298.817</b> | 301.679         | 293.670         | 294.174         | 293.166         | P5  |
| K26 | <b>1362.865</b> | 253.153         | 245.143         | 245.647         | 244.639         | K4  |
| K27 | <b>1426.912</b> | 189.105         | 181.096         | 181.600         | 180.592         | K3  |
| T28 | 1477.436        | 125.058         | 117.048         | 117.552         | 116.544         | T12 |
| E29 | 1541.958        | 74.534          | 66.524          | 67.028          | 66.021          | E1  |



# sp | Q6GSS7 | H2A2A\_MOUSE

LNKLLGK <sup>Dimethyl</sup><sub>28.03</sub> VTIAQGGVLPNIQAVLLPKKTE

- ▶ fragmentation table for charge state 1+
- ▶ specType=etd
- ▶ score=75.18
- ▶ F113279.dat
- ▶ query=q41591.p1
- ▶ precursor=617.581750
- ▶ chargePrecursor=5
- ▶ itol=0.5

| AA   | c               | y               | z+1             | z+2             | z              | AA   |
|------|-----------------|-----------------|-----------------|-----------------|----------------|------|
| L 1  | 131.118         | 3083.892        | 3067.873        | 0.000           | 3066.865       | L 26 |
| N 2  | <b>245.161</b>  | 2970.808        | 2954.789        | 2938.769        | 2953.781       | N 28 |
| K 3  | <b>373.256</b>  | 2856.765        | 2840.746        | 2841.754        | 2839.738       | K 27 |
| L 4  | <b>486.340</b>  | 2728.670        | 2712.651        | 2713.659        | 2711.643       | L 26 |
| L 5  | <b>599.424</b>  | 2615.585        | 2599.567        | 2600.575        | 2598.559       | L 25 |
| G 6  | <b>638.445</b>  | 2502.500        | 2486.483        | 2487.491        | 2485.475       | G 24 |
| K 7  | <b>812.572</b>  | 2445.480        | 2429.462        | 2430.469        | 2428.454       | K 23 |
| V 8  | 911.640         | 2289.354        | 2273.335        | 2274.343        | 2272.327       | V 22 |
| T 9  | 1012.688        | 2190.288        | 2174.267        | 2175.275        | 2173.259       | T 21 |
| I 10 | <b>1125.772</b> | 2089.230        | 2073.210        | 2074.227        | 2072.211       | I 20 |
| A 11 | <b>1196.809</b> | 1976.154        | 1960.135        | 1961.143        | 1959.127       | A 19 |
| Q 12 | <b>1324.867</b> | 1905.111        | 1889.098        | 1890.106        | 1888.090       | Q 18 |
| G 13 | <b>1381.889</b> | 1777.058        | 1761.039        | <b>1762.047</b> | 1760.032       | G 17 |
| G 14 | <b>1438.910</b> | 1720.037        | 1704.018        | 1705.026        | 1703.010       | G 16 |
| V 15 | <b>1537.979</b> | 1663.015        | 1646.997        | <b>1648.004</b> | 1645.989       | V 15 |
| L 16 | 1651.063        | <b>1563.947</b> | <b>1547.928</b> | <b>1548.936</b> | 1546.920       | L 14 |
| F 17 | 1768.116        | <b>1450.863</b> | 1434.844        | 1435.852        | 1433.836       | F 13 |
| N 18 | 1862.159        | 1383.819        | <b>1337.791</b> | 1338.799        | 1336.783       | N 12 |
| I 19 | 1975.243        | 1239.767        | 1223.748        | 1224.756        | 1222.741       | I 11 |
| Q 20 | 2103.301        | 1126.683        | <b>1110.664</b> | 1111.672        | 1109.656       | Q 10 |
| A 21 | 2174.338        | 998.624         | 992.606         | 993.614         | <b>981.598</b> | A 9  |
| V 22 | 2273.407        | 927.587         | 911.569         | 912.576         | 910.561        | V 8  |
| L 23 | 2389.491        | 808.513         | <b>813.500</b>  | 813.508         | 811.492        | L 7  |
| L 24 | 2499.575        | 715.435         | <b>699.416</b>  | <b>700.424</b>  | 698.408        | L 6  |
| P 25 | 2596.628        | <b>602.351</b>  | 586.332         | 587.340         | 585.324        | P 5  |
| K 26 | 2724.723        | 505.298         | 489.279         | <b>490.287</b>  | 488.271        | K 4  |
| K 27 | 2852.818        | 377.203         | <b>361.184</b>  | 362.192         | 360.177        | K 3  |
| T 28 | 2953.865        | 249.106         | 243.089         | 234.097         | 232.082        | T 2  |
| E 29 | 3082.008        | 148.060         | 132.042         | 133.050         | 131.034        | E 1  |

# sp | Q6GSS7 | H2A2A\_MOUSE

LNKLLGK <sup>Dimethyl</sup><sub>28.03</sub> VTIAQGGVLPNIQAVLLPKKTE

- ▶ fragmentation table for charge state 2+
- ▶ specType=etd
- ▶ score=75.18
- ▶ F113279.dat
- ▶ query=q41591.p1
- ▶ precursor=617.581750
- ▶ chargePrecursor=5
- ▶ itol=0.5

| AA   | c               | y              | z+1             | z+2             | z               | AA   |
|------|-----------------|----------------|-----------------|-----------------|-----------------|------|
| L 1  | 66.063          | 1542.450       | 1536.440        | 0.504           | 1533.936        | L 26 |
| N 2  | 123.084         | 1485.908       | <b>1477.898</b> | <b>1478.402</b> | 1477.304        | N 28 |
| K 3  | 187.132         | 1436.886       | <b>1428.877</b> | <b>1421.381</b> | 1420.371        | K 27 |
| L 4  | 243.674         | 1384.839       | 1356.820        | 1357.333        | 1356.325        | L 26 |
| L 5  | 300.216         | 1338.297       | 1308.287        | 1309.791        | 1299.783        | L 25 |
| G 6  | 358.729         | 1291.755       | 1243.745        | <b>1244.249</b> | 1243.241        | G 24 |
| K 7  | 406.789         | 1223.244       | 1215.230        | 1215.738        | 1214.731        | K 23 |
| V 8  | <b>456.324</b>  | 1145.181       | <b>1137.171</b> | <b>1137.675</b> | 1136.667        | V 22 |
| T 9  | <b>506.848</b>  | 1095.646       | <b>1087.637</b> | <b>1088.141</b> | <b>1087.133</b> | T 21 |
| T 10 | <b>563.390</b>  | 1045.123       | <b>1037.113</b> | <b>1037.617</b> | <b>1036.609</b> | T 20 |
| A 11 | 620.888         | <b>988.581</b> | <b>988.571</b>  | <b>981.675</b>  | <b>980.667</b>  | A 19 |
| Q 12 | <b>662.537</b>  | 933.056        | 943.063         | 943.577         | 944.544         | Q 18 |
| G 13 | <b>691.448</b>  | <b>889.033</b> | <b>881.023</b>  | <b>881.527</b>  | 880.519         | G 17 |
| G 14 | <b>719.959</b>  | <b>860.522</b> | <b>852.513</b>  | <b>853.017</b>  | 852.009         | G 16 |
| V 15 | <b>769.493</b>  | <b>832.011</b> | <b>824.002</b>  | <b>824.506</b>  | 823.498         | V 15 |
| L 16 | 828.035         | <b>782.477</b> | 774.468         | 774.972         | 773.964         | L 14 |
| T 17 | <b>874.561</b>  | <b>725.935</b> | 717.926         | 718.430         | 717.422         | T 13 |
| N 18 | 913.583         | 677.409        | <b>669.399</b>  | <b>669.903</b>  | 668.895         | N 12 |
| I 19 | 988.125         | 626.387        | <b>612.378</b>  | <b>612.882</b>  | 611.874         | I 11 |
| Q 20 | <b>1052.154</b> | <b>563.845</b> | <b>555.836</b>  | <b>556.340</b>  | 555.332         | Q 10 |
| A 21 | <b>1087.673</b> | 499.616        | 491.607         | <b>492.110</b>  | 491.303         | A 9  |
| V 22 | <b>1137.207</b> | 464.297        | <b>456.288</b>  | <b>456.792</b>  | <b>455.784</b>  | V 8  |
| L 23 | <b>1193.749</b> | 414.763        | 406.754         | 407.258         | 406.250         | L 7  |
| L 24 | 1260.291        | 358.221        | <b>350.212</b>  | <b>350.716</b>  | 349.708         | L 6  |
| P 25 | <b>1298.817</b> | 301.679        | 293.670         | 294.174         | 293.166         | P 5  |
| K 26 | 1362.885        | 251.153        | <b>245.143</b>  | <b>245.647</b>  | 244.639         | K 4  |
| K 27 | 1426.912        | 189.105        | 181.096         | 181.600         | 180.592         | K 3  |
| T 28 | 1477.436        | 125.058        | 117.049         | 117.552         | 116.544         | T 2  |
| E 29 | 1541.959        | 74.534         | 66.526          | 67.028          | 66.021          | E 1  |

# sp | Q6GSS7 | H2A2A\_MOUSE

LNKLLGK <sup>Dimethyl</sup><sub>28.03</sub> VTIAQGGVLPNIQAVLLPKKTE

- ▶ fragmentation table for charge state 3+
- ▶ specType=etd
- ▶ score=75.18
- ▶ F113279.dat
- ▶ query=q41591\_p1
- ▶ precursor=617.581750
- ▶ chargePrecursor=5
- ▶ itol=0.5

| AA    | c              | y              | z+1             | z+2            | z              | AA    |
|-------|----------------|----------------|-----------------|----------------|----------------|-------|
| L[1]  | 44.377         | 1028.635       | <b>1023.296</b> | 0.672          | 1022.960       | L[29] |
| N[2]  | 82.392         | 990.941        | <b>985.601</b>  | <b>985.937</b> | 985.265        | N[28] |
| K[3]  | 125.090        | 952.926        | <b>947.587</b>  | <b>947.923</b> | 947.251        | K[27] |
| L[4]  | 162.795        | 910.228        | <b>904.889</b>  | <b>905.225</b> | <b>904.553</b> | L[26] |
| L[5]  | 200.479        | 872.533        | <b>867.194</b>  | <b>867.530</b> | <b>866.856</b> | L[25] |
| G[6]  | 219.487        | 834.839        | <b>829.499</b>  | <b>829.835</b> | 829.163        | G[24] |
| K[7]  | 271.529        | 815.832        | <b>810.492</b>  | <b>810.828</b> | 810.156        | K[23] |
| V[8]  | 304.562        | 763.790        | 758.450         | 758.786        | 758.114        | V[22] |
| T[9]  | 338.234        | 730.767        | 725.427         | <b>725.763</b> | 725.091        | T[21] |
| I[10] | 375.929        | 697.084        | <b>691.745</b>  | <b>692.081</b> | 691.409        | I[20] |
| A[11] | 399.608        | 659.389        | <b>654.050</b>  | <b>654.386</b> | 653.714        | A[19] |
| Q[12] | 442.294        | 638.710        | 633.371         | <b>633.707</b> | 633.035        | Q[18] |
| G[13] | 461.301        | 593.024        | 587.685         | 588.021        | 587.349        | G[17] |
| G[14] | 480.308        | 574.017        | 568.678         | 569.013        | 568.342        | G[16] |
| V[15] | 513.331        | 555.010        | 549.670         | 550.006        | 549.334        | V[15] |
| L[16] | 551.026        | <b>521.987</b> | 516.648         | 516.984        | 516.312        | L[14] |
| P[17] | 583.377        | 484.292        | 478.953         | 479.289        | 478.617        | P[13] |
| N[18] | 621.391        | 451.942        | 446.602         | 446.938        | 446.266        | N[12] |
| I[19] | 659.698        | 413.927        | 408.588         | 408.924        | 408.252        | I[11] |
| Q[20] | 701.772        | 376.233        | 370.893         | 371.229        | 370.557        | Q[10] |
| A[21] | 725.451        | 333.548        | 328.207         | 328.543        | 327.871        | A[9]  |
| V[22] | 758.474        | 309.867        | 304.528         | 304.864        | 304.192        | V[8]  |
| L[23] | <b>796.168</b> | 276.844        | 271.505         | 271.841        | 271.169        | L[7]  |
| L[24] | <b>833.863</b> | 239.150        | 233.810         | 234.146        | 233.474        | L[6]  |
| P[25] | 886.214        | 201.455        | 196.116         | 196.451        | 195.780        | P[5]  |
| K[26] | 905.912        | 169.104        | 163.765         | 164.101        | 163.429        | K[4]  |
| K[27] | 951.611        | 126.406        | 121.066         | 121.402        | 120.730        | K[3]  |
| T[28] | 985.293        | 83.708         | 78.368          | 78.704         | 78.032         | T[2]  |
| E[29] | 1028.397       | 50.025         | 44.685          | 45.021         | 44.349         | E[1]  |

# sp | Q6GSS7 | H2A2A\_MOUSE

LNKLLGK <sup>Dimethyl</sup> <sub>28.03</sub> VTIAQGGVLPNIQAVLLPKKTE

- ▶ fragmentation table for charge state 4+
- ▶ specType=etd
- ▶ score=75.18
- ▶ F113279.dat
- ▶ query=q41591.p1
- ▶ precursor=617.581750
- ▶ chargePrecursor=5
- ▶ itol=0.5

| AA  | c              | y              | z+1            | z+2            | z              | AA  |
|-----|----------------|----------------|----------------|----------------|----------------|-----|
| L1  | 33.535         | 771.728        | 767.724        | 0.756          | 767.472        | L29 |
| N2  | 62.046         | 743.507        | <b>739.453</b> | <b>739.705</b> | <b>739.201</b> | N26 |
| K3  | 94.059         | <b>714.947</b> | 710.942        | 711.194        | 710.690        | K21 |
| L4  | 122.340        | 502.923        | 678.918        | 679.170        | 678.666        | L26 |
| L5  | 150.611        | <b>654.652</b> | 650.647        | 650.899        | 650.395        | L25 |
| G6  | 164.867        | 626.381        | 622.376        | 622.628        | 622.124        | G24 |
| K7  | 203.898        | 612.126        | 608.121        | 608.373        | 607.869        | K23 |
| V8  | 228.665        | 573.094        | 569.089        | 569.341        | 568.837        | V22 |
| T9  | 253.927        | 548.327        | 544.322        | 544.574        | 544.070        | T21 |
| T10 | 262.198        | 523.065        | 519.060        | 519.312        | 518.808        | T20 |
| A11 | 269.958        | 494.794        | <b>490.739</b> | 491.041        | <b>490.537</b> | A19 |
| Q12 | 311.972        | 477.035        | 473.030        | 473.282        | 472.778        | Q18 |
| G13 | 346.228        | 445.020        | 441.015        | 441.267        | 440.763        | G17 |
| G14 | 360.483        | 430.765        | 426.760        | 427.012        | 426.508        | G16 |
| V15 | 385.250        | 416.509        | 412.505        | 412.757        | 412.253        | V15 |
| L16 | 413.521        | 391.742        | 387.737        | 387.989        | 387.486        | L14 |
| F17 | 437.784        | 363.471        | 359.466        | 359.718        | 359.215        | F13 |
| N18 | 466.295        | 339.208        | 335.203        | 335.455        | 334.951        | N12 |
| T19 | 494.566        | 310.897        | 306.891        | 307.143        | 306.641        | T11 |
| Q20 | 526.381        | 282.426        | 278.422        | 278.673        | 278.170        | Q15 |
| A21 | 544.340        | 250.412        | 246.407        | 246.659        | 246.155        | A9  |
| V22 | 569.107        | 232.652        | 228.648        | 228.900        | 228.396        | V8  |
| L23 | 597.378        | 207.885        | 203.881        | 204.132        | 203.629        | L7  |
| L24 | 625.649        | 179.614        | 175.609        | 175.861        | 175.358        | L0  |
| P25 | 649.912        | 151.343        | 147.338        | 147.590        | 147.087        | P5  |
| K26 | 681.936        | 127.080        | 123.075        | 123.327        | 122.823        | K4  |
| K27 | 713.960        | 95.056         | 91.052         | 91.304         | 90.800         | K3  |
| T28 | <b>739.222</b> | 63.032         | 59.028         | 59.280         | 58.776         | T2  |
| E29 | 771.462        | 37.771         | 33.766         | 34.018         | 33.514         | E1  |

# sp | Q6GSS7 | H2A2A\_MOUSE

LNK<sup>Dimethyl</sup><sub>28.03</sub> LLGKVTIAQGGVLPNIQAVLLPKKTE

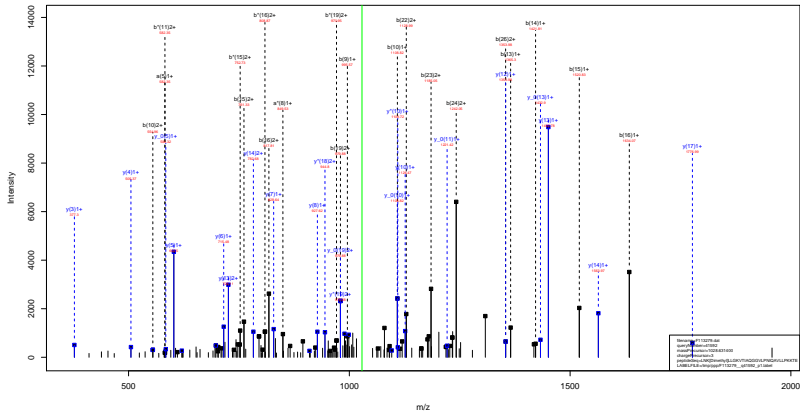



# sp | Q6GSS7 | H2A2A\_MOUSE

LNK<sup>Dimethyl</sup><sub>28.03</sub> LLGKVTIAQGGVLPNIQAVLLPKKTE

- ▶ fragmentation table for charge state 1+
- ▶ specType=cid
- ▶ score=84.86
- ▶ F113279.dat
- ▶ query=q41592\_p1
- ▶ precursor=1028.631400
- ▶ chargePrecursor=3
- ▶ itol=0.5

| AA  | a              | a*             | a,β   | b               | b*              | b,β      | y        | y*       | y,β      | AA  |
|-----|----------------|----------------|-------|-----------------|-----------------|----------|----------|----------|----------|-----|
| L1  | 30             | 30             | 0.000 | 114.081         | 0.000           | 0.000    | 304.892  | 304.892  | 305.011  | L29 |
| K1  | 30             | 30             | 0.000 | 114.081         | 0.000           | 0.000    | 304.892  | 304.892  | 305.011  | K29 |
| L2  | 30             | 30             | 0.000 | 384.261         | 0.000           | 0.000    | 255.793  | 255.793  | 255.794  | K22 |
| L4  | 30             | 30             | 0.000 | 384.261         | 0.000           | 0.000    | 255.793  | 255.793  | 255.794  | L26 |
| L5  | <b>102.414</b> | 102.414        | 0.000 | <b>110.429</b>  | 0.000           | 0.000    | 2474.471 | 2474.471 | 2474.471 | G24 |
| G1  | 102.414        | 102.414        | 0.000 | <b>110.429</b>  | 0.000           | 0.000    | 2474.471 | 2474.471 | 2474.471 | G24 |
| K1  | 102.414        | 102.414        | 0.000 | <b>110.429</b>  | 0.000           | 0.000    | 2474.471 | 2474.471 | 2474.471 | K23 |
| V1  | 102.414        | <b>845.592</b> | 0.000 | <b>884.613</b>  | 0.000           | 0.000    | 2250.354 | 2250.324 | 2251.343 | V22 |
| L10 | <b>107.816</b> | 107.816        | 0.000 | <b>905.343</b>  | 0.000           | 0.000    | 197.611  | 197.611  | 197.611  | F21 |
| L10 | 107.816        | 107.816        | 0.000 | <b>905.343</b>  | 0.000           | 0.000    | 197.611  | 197.611  | 197.611  | F21 |
| A11 | 113.217        | 113.217        | 0.000 | <b>1176.792</b> | <b>1182.756</b> | 1182.756 | 1461.772 | 1461.754 | 1461.723 | A16 |
| G13 | 113.217        | 113.217        | 0.000 | <b>1176.792</b> | <b>1182.756</b> | 1182.756 | 1461.772 | 1461.754 | 1461.723 | G16 |
| G13 | 113.217        | 113.217        | 0.000 | <b>1176.792</b> | <b>1182.756</b> | 1182.756 | 1461.772 | 1461.754 | 1461.723 | G17 |
| G14 | 113.217        | 113.217        | 0.000 | <b>1176.792</b> | <b>1182.756</b> | 1182.756 | 1461.772 | 1461.754 | 1461.723 | G16 |
| V15 | 113.217        | 113.217        | 0.000 | <b>1176.792</b> | <b>1182.756</b> | 1182.756 | 1461.772 | 1461.754 | 1461.723 | V15 |
| L16 | 113.217        | 113.217        | 0.000 | <b>1176.792</b> | <b>1182.756</b> | 1182.756 | 1461.772 | 1461.754 | 1461.723 | L14 |
| L17 | 113.217        | 113.217        | 0.000 | <b>1176.792</b> | <b>1182.756</b> | 1182.756 | 1461.772 | 1461.754 | 1461.723 | L15 |
| L18 | 113.217        | 113.217        | 0.000 | <b>1176.792</b> | <b>1182.756</b> | 1182.756 | 1461.772 | 1461.754 | 1461.723 | L13 |
| L18 | 113.217        | 113.217        | 0.000 | <b>1176.792</b> | <b>1182.756</b> | 1182.756 | 1461.772 | 1461.754 | 1461.723 | L21 |
| G20 | 113.217        | 113.217        | 0.000 | <b>1176.792</b> | <b>1182.756</b> | 1182.756 | 1461.772 | 1461.754 | 1461.723 | G19 |
| V22 | 113.217        | 113.217        | 0.000 | <b>1176.792</b> | <b>1182.756</b> | 1182.756 | 1461.772 | 1461.754 | 1461.723 | V22 |
| L23 | 113.217        | 113.217        | 0.000 | <b>1176.792</b> | <b>1182.756</b> | 1182.756 | 1461.772 | 1461.754 | 1461.723 | L17 |
| L24 | 113.217        | 113.217        | 0.000 | <b>1176.792</b> | <b>1182.756</b> | 1182.756 | 1461.772 | 1461.754 | 1461.723 | L18 |
| F25 | 113.217        | 113.217        | 0.000 | <b>1176.792</b> | <b>1182.756</b> | 1182.756 | 1461.772 | 1461.754 | 1461.723 | F25 |
| K26 | 113.217        | 113.217        | 0.000 | <b>1176.792</b> | <b>1182.756</b> | 1182.756 | 1461.772 | 1461.754 | 1461.723 | K14 |
| K27 | 113.217        | 113.217        | 0.000 | <b>1176.792</b> | <b>1182.756</b> | 1182.756 | 1461.772 | 1461.754 | 1461.723 | K13 |
| L28 | 113.217        | 113.217        | 0.000 | <b>1176.792</b> | <b>1182.756</b> | 1182.756 | 1461.772 | 1461.754 | 1461.723 | L28 |
| E29 | 113.217        | 113.217        | 0.000 | <b>1176.792</b> | <b>1182.756</b> | 1182.756 | 1461.772 | 1461.754 | 1461.723 | E21 |

# sp | Q6GSS7 | H2A2A\_MOUSE

LNK<sup>Dimethyl</sup><sub>28.03</sub> LLGKVTIAQGGVLPNIQAVLLPKKTE

- ▶ fragmentation table for charge state 2+
- ▶ specType=cid
- ▶ score=84.86
- ▶ F113279.dat
- ▶ query=q41592.p1
- ▶ precursor=1028.631400
- ▶ chargePrecursor=3
- ▶ itol=0.5

| AA   | a         | a*       | aΔ       | b        | b*       | bΔ       | y        | y*       | yΔ       | AA   |
|------|-----------|----------|----------|----------|----------|----------|----------|----------|----------|------|
| L13  | 43.202    | 0.500    | 0.500    | 197.909  | 0.500    | 0.500    | 1042.402 | 4331.830 | 4333.444 | L129 |
| R12  | 10097.714 | 102.000  | 0.500    | 1181.911 | 100.000  | 0.500    | 1002.000 | 1217.390 | 1219.000 | R104 |
| R13  | 1178.536  | 116.120  | 0.500    | 192.831  | 184.121  | 0.500    | 1428.800 | 1430.371 | 1431.881 | R129 |
| L14  | 173.170   | 0.500    | 0.500    | 140.170  | 264.663  | 0.500    | 1030.611 | 1032.111 | 1034.611 | L108 |
| L15  | 261.721   | 261.221  | 0.500    | 300.100  | 267.200  | 0.500    | 1094.201 | 1095.701 | 1097.201 | L120 |
| G16  | 1007.919  | 111.400  | 0.500    | 339.609  | 329.101  | 0.500    | 1017.400 | 1018.900 | 1020.400 | G104 |
| R17  | 384.470   | 378.100  | 0.500    | 186.170  | 385.761  | 0.500    | 1030.430 | 1031.930 | 1033.430 | R123 |
| V18  | 411.011   | 426.300  | 0.500    | 447.010  | 419.200  | 0.500    | 1130.111 | 1131.611 | 1133.111 | V122 |
| T19  | 484.101   | 479.100  | 0.500    | 499.101  | 469.611  | 0.500    | 1095.646 | 1097.146 | 1098.646 | T121 |
| E10  | 140.870   | 147.100  | 161.874  | 554.876  | 548.361  | 548.871  | 1036.430 | 1037.930 | 1039.430 | E109 |
| A11  | 170.197   | 167.604  | 167.192  | 190.195  | 581.882  | 581.380  | 888.581  | 890.081  | 891.581  | A119 |
| G12  | 196.077   | 191.101  | 191.473  | 199.473  | 199.473  | 199.473  | 874.077  | 875.577  | 877.077  | G103 |
| G13  | 168.837   | 166.434  | 166.837  | 166.837  | 166.837  | 166.837  | 889.837  | 891.337  | 892.837  | G127 |
| G14  | 897.448   | 897.448  | 897.448  | 897.448  | 897.448  | 897.448  | 897.448  | 897.448  | 897.448  | G126 |
| V15  | 748.882   | 748.888  | 749.887  | 748.888  | 752.461  | 751.974  | 871.874  | 873.374  | 874.874  | V105 |
| L108 | 803.524   | 795.011  | 794.510  | 817.522  | 809.009  | 808.517  | 782.477  | 783.977  | 785.477  | L104 |
| P117 | 897.951   | 883.539  | 883.045  | 886.048  | 897.539  | 897.045  | 775.935  | 777.435  | 778.935  | P115 |
| R118 | 1007.919  | 993.300  | 993.800  | 921.919  | 1014.300 | 1014.800 | 877.919  | 879.419  | 880.919  | R102 |
| L119 | 965.814   | 957.101  | 956.609  | 978.812  | 971.000  | 970.500  | 826.307  | 827.807  | 829.307  | L121 |
| G120 | 1011.100  | 1011.100 | 1011.100 | 1011.100 | 1011.100 | 1011.100 | 1011.100 | 1011.100 | 1011.100 | G118 |
| R121 | 1085.182  | 1080.910 | 1080.910 | 1079.180 | 1090.740 | 1090.740 | 1090.740 | 1092.240 | 1093.740 | R101 |
| V122 | 1114.096  | 1106.181 | 1105.581 | 1128.094 | 1120.181 | 1119.580 | 864.200  | 865.700  | 867.200  | V108 |
| L123 | 1117.070  | 1182.725 | 1182.725 | 1182.725 | 1185.230 | 1176.722 | 1176.722 | 1178.222 | 1179.722 | L117 |
| L104 | 1227.780  | 1218.267 | 1218.765 | 1241.778 | 1233.265 | 1232.763 | 1082.271 | 1083.771 | 1085.271 | L101 |
| L126 | 1316.294  | 1310.261 | 1310.261 | 1310.261 | 1310.261 | 1310.261 | 1010.261 | 1011.761 | 1013.261 | L106 |
| R129 | 1492.054  | 1481.001 | 1481.001 | 1354.352 | 1443.810 | 1443.340 | 873.111  | 874.611  | 876.111  | R124 |
| R127 | 1494.464  | 1483.200 | 1483.200 | 1414.399 | 1440.100 | 1440.100 | 1001.100 | 1002.600 | 1004.100 | R113 |
| L128 | 1544.610  | 1540.412 | 1540.412 | 1540.412 | 1540.412 | 1540.412 | 1010.412 | 1011.912 | 1013.412 | L122 |
| E109 | 1559.401  | 1553.000 | 1553.000 | 1553.444 | 1544.911 | 1544.409 | 74.934   | 76.434   | 77.934   | E111 |



# sp | Q6GSS7 | H2A2A\_MOUSE

LNKLLGK <sup>Dimethyl</sup> <sub>28.03</sub> VTIAQGGVLPNIQAVLLPKKTE

- ▶ fragmentation table for charge state 1+
- ▶ specType=etd
- ▶ score=89.44
- ▶ F113279.dat
- ▶ query=q41594\_p1
- ▶ precursor=771.725370
- ▶ chargePrecursor=4
- ▶ itol=0.5

| AA    | c               | y        | z+1             | z+2             | z        | AA    |
|-------|-----------------|----------|-----------------|-----------------|----------|-------|
| L[1]  | 131.118         | 3081.892 | 3067.873        | 0.000           | 3066.895 | L[29] |
| N[2]  | 345.161         | 2970.808 | 2954.789        | 2955.797        | 2951.781 | N[28] |
| K[3]  | <b>373.256</b>  | 2856.765 | 2840.746        | 2841.754        | 2839.738 | K[27] |
| L[4]  | 486.340         | 2728.670 | 2712.651        | 2713.659        | 2711.643 | L[26] |
| L[5]  | <b>599.424</b>  | 2615.585 | 2599.567        | 2600.575        | 2598.560 | L[25] |
| G[6]  | <b>656.445</b>  | 2502.502 | 2486.483        | 2487.491        | 2485.475 | G[24] |
| K[7]  | <b>812.572</b>  | 2345.480 | 2429.462        | 2430.469        | 2428.454 | K[23] |
| V[8]  | <b>911.640</b>  | 2288.354 | 2273.335        | 2274.343        | 2272.327 | V[22] |
| T[9]  | <b>1012.688</b> | 2190.286 | 2174.267        | 2175.275        | 2173.259 | T[21] |
| I[10] | <b>1125.772</b> | 2089.238 | 2073.219        | 2074.227        | 2072.211 | I[20] |
| A[11] | <b>1196.809</b> | 1976.154 | 1960.135        | <b>1961.143</b> | 1959.127 | A[19] |
| Q[12] | <b>1324.867</b> | 1895.111 | 1889.093        | <b>1890.106</b> | 1888.090 | Q[18] |
| G[13] | <b>1381.889</b> | 1777.058 | 1761.039        | 1762.047        | 1760.032 | G[17] |
| G[14] | 1438.910        | 1720.937 | 1704.918        | <b>1705.926</b> | 1703.910 | G[16] |
| V[15] | 1537.879        | 1663.015 | 1646.997        | 1646.004        | 1645.989 | V[15] |
| L[16] | 1651.063        | 1563.947 | <b>1547.928</b> | 1548.936        | 1546.920 | L[14] |
| P[17] | <b>1748.116</b> | 1450.893 | 1434.874        | 1435.882        | 1433.866 | P[13] |
| T[18] | 1867.159        | 1383.810 | <b>1337.791</b> | 1338.799        | 1336.783 | T[12] |
| I[19] | 1975.243        | 1239.767 | <b>1223.748</b> | 1224.756        | 1222.741 | I[11] |
| Q[20] | 2103.301        | 1126.683 | 1110.664        | 1111.672        | 1109.656 | Q[10] |
| A[21] | 2174.336        | 998.624  | 982.606         | 981.614         | 981.598  | A[9]  |
| V[22] | 2273.407        | 927.587  | <b>911.569</b>  | 912.576         | 910.561  | V[8]  |
| L[23] | 2386.491        | 828.519  | <b>812.500</b>  | <b>813.508</b>  | 811.492  | L[7]  |
| L[24] | 2499.575        | 715.435  | <b>693.415</b>  | <b>700.424</b>  | 698.408  | L[6]  |
| P[25] | 2596.626        | 602.351  | 586.332         | 587.340         | 585.324  | P[5]  |
| K[26] | 2724.723        | 505.298  | <b>489.279</b>  | 490.287         | 488.271  | K[4]  |
| K[27] | 2852.816        | 377.203  | <b>361.184</b>  | 362.192         | 360.177  | K[3]  |
| T[28] | 2953.905        | 249.108  | 233.089         | 234.097         | 232.082  | T[2]  |
| E[29] | 3082.938        | 148.060  | 132.042         | 133.050         | 131.034  | E[1]  |

# sp | Q6GSS7 | H2A2A\_MOUSE

LNKLLGK <sup>Dimethyl</sup><sub>28.03</sub> VTIAQGGVLPNIQAVLLPKKTE

- ▶ fragmentation table for charge state 2+
- ▶ specType=etd
- ▶ score=89.44
- ▶ F113279.dat
- ▶ query=q41594.p1
- ▶ precursor=771.725370
- ▶ chargePrecursor=4
- ▶ itol=0.5

| AA   | c               | y               | z+1             | z+2             | z               | AA   |
|------|-----------------|-----------------|-----------------|-----------------|-----------------|------|
| L1   | 66.053          | <b>1542.450</b> | <b>1534.440</b> | 8.504           | 1533.930        | L128 |
| N12  | 123.084         | 1485.905        | <b>1477.898</b> | 1478.402        | <b>1477.394</b> | N128 |
| K13  | 187.132         | 1428.889        | <b>1420.877</b> | <b>1421.381</b> | 1420.373        | K127 |
| L14  | 243.674         | 1364.839        | <b>1356.829</b> | 1357.333        | <b>1356.325</b> | L126 |
| L15  | 300.216         | 1308.297        | 1300.287        | 1300.791        | 1299.783        | L125 |
| G16  | 358.759         | 1251.755        | 1243.745        | <b>1244.249</b> | 1243.241        | G124 |
| K17  | 406.799         | 1223.244        | <b>1215.234</b> | <b>1215.738</b> | 1214.731        | K123 |
| V18  | 456.324         | 1145.181        | <b>1137.171</b> | <b>1137.675</b> | 1136.667        | V122 |
| T19  | 506.849         | 1095.646        | <b>1087.637</b> | <b>1088.141</b> | 1087.133        | T121 |
| T110 | 563.390         | 1045.123        | <b>1037.113</b> | <b>1037.617</b> | 1036.609        | T120 |
| A111 | <b>598.908</b>  | 988.581         | <b>980.571</b>  | 981.075         | <b>980.067</b>  | A119 |
| G112 | 662.937         | 933.060         | 925.053         | 925.557         | 924.549         | G118 |
| G113 | 691.448         | 889.033         | <b>881.023</b>  | <b>881.527</b>  | 880.519         | G117 |
| G114 | 719.959         | 860.522         | <b>852.513</b>  | <b>853.017</b>  | 852.009         | G116 |
| V115 | 769.493         | 832.011         | 824.002         | 824.506         | 823.498         | V115 |
| L116 | 838.035         | 782.477         | <b>774.468</b>  | <b>774.972</b>  | 773.964         | L114 |
| T117 | <b>874.561</b>  | 728.935         | 721.928         | 722.432         | 721.424         | T113 |
| N118 | 911.553         | 677.400         | 669.390         | 669.893         | 668.885         | N112 |
| I119 | 988.125         | 620.867         | 612.858         | 612.862         | 611.874         | I111 |
| Q120 | <b>1052.154</b> | 563.845         | 555.836         | 556.340         | 555.332         | Q110 |
| A121 | <b>1087.673</b> | 499.816         | 491.807         | 492.310         | 491.303         | A10  |
| V122 | <b>1137.207</b> | 484.297         | 476.288         | 476.792         | 475.784         | V18  |
| L123 | <b>1193.749</b> | 414.763         | 406.754         | 407.258         | 406.251         | L17  |
| L124 | 1250.291        | 358.221         | 350.212         | 350.716         | 349.708         | L16  |
| P125 | <b>1288.817</b> | 301.679         | 293.670         | 294.174         | 293.166         | P15  |
| K126 | <b>1362.865</b> | 253.153         | 245.143         | 245.647         | 244.639         | K14  |
| K127 | <b>1426.912</b> | 189.105         | 181.096         | 181.600         | 180.592         | K13  |
| T128 | <b>1477.436</b> | 125.058         | 117.048         | 117.552         | 116.544         | T12  |
| E129 | 1541.958        | 74.534          | 66.524          | 67.028          | 66.021          | E11  |

# sp | Q6GSS7 | H2A2A\_MOUSE

LNKLLGK <sup>Dimethyl</sup> <sub>28.03</sub> VTIAQGGVLPNIQAVLLPKKTE

- ▶ fragmentation table for charge state 3+
- ▶ specType=etd
- ▶ score=89.44
- ▶ F113279.dat
- ▶ query=q41594.p1
- ▶ precursor=771.725370
- ▶ chargePrecursor=4
- ▶ itol=0.5

| AA  | c              | y               | z+1             | z+2            | z        | AA  |
|-----|----------------|-----------------|-----------------|----------------|----------|-----|
| L1  | 44.377         | <b>1028.635</b> | <b>1023.296</b> | 0.672          | 1022.660 | L20 |
| N2  | 82.302         | 090.941         | <b>985.601</b>  | <b>985.937</b> | 985.265  | N28 |
| K3  | 125.090        | 952.326         | <b>947.587</b>  | <b>947.923</b> | 947.251  | K27 |
| L4  | 162.785        | 910.228         | 904.869         | 905.225        | 904.551  | L26 |
| L5  | 200.479        | 872.531         | 867.194         | 867.530        | 866.858  | L25 |
| G6  | 239.487        | 834.835         | 829.499         | 829.835        | 829.163  | G24 |
| K7  | 271.529        | 815.832         | 810.492         | 810.828        | 810.156  | K23 |
| V8  | 304.552        | 793.790         | 788.450         | 788.786        | 788.114  | V22 |
| T9  | 338.234        | 730.767         | 725.427         | 725.763        | 725.091  | T21 |
| I10 | 375.929        | 697.084         | 691.745         | 692.081        | 691.409  | I20 |
| A11 | 389.608        | 699.380         | 654.050         | 654.386        | 653.714  | A19 |
| Q12 | 442.294        | 636.710         | 630.371         | 630.707        | 630.035  | Q18 |
| G13 | 461.301        | 593.024         | 587.685         | 588.021        | 587.349  | G17 |
| G14 | 480.308        | 574.017         | 568.678         | 569.013        | 568.342  | G16 |
| V15 | 513.131        | 555.010         | 549.670         | 550.006        | 549.334  | V15 |
| L16 | 551.026        | 521.987         | 516.648         | 516.984        | 516.312  | L14 |
| P17 | 583.377        | 484.202         | 478.863         | 479.209        | 478.617  | P13 |
| N18 | 621.391        | 451.942         | 446.602         | 446.938        | 446.266  | N12 |
| I19 | 659.086        | 413.927         | 408.588         | 408.924        | 408.252  | I11 |
| Q20 | 701.772        | 376.233         | 370.893         | 371.229        | 370.557  | Q10 |
| A21 | 725.451        | 333.546         | 328.207         | 328.543        | 327.871  | A9  |
| V22 | 758.474        | 309.867         | 304.526         | 304.864        | 304.192  | V8  |
| L23 | 796.188        | 276.844         | 271.505         | 271.841        | 271.169  | L7  |
| L24 | 833.863        | 239.150         | 233.810         | 234.146        | 233.474  | L6  |
| T25 | 869.214        | 201.455         | 196.116         | 196.452        | 195.780  | T5  |
| K26 | 908.912        | 169.100         | 163.760         | 164.100        | 163.429  | K4  |
| K27 | <b>951.611</b> | 138.406         | 133.066         | 133.402        | 132.730  | K3  |
| T28 | 985.293        | 83.708          | 78.368          | 78.704         | 78.032   | T2  |
| E29 | 1028.307       | 50.025          | 44.685          | 45.021         | 44.349   | E1  |



# sp | Q6GSS7 | H2A2A\_MOUSE

LNKLLGK <sup>Dimethyl</sup>VTIAQGGVLPNIQAVLLPKKTE  
28.03

- ▶ fragmentation table for charge state 1+
- ▶ specType=cid
- ▶ score=65.30
- ▶ F113279.dat
- ▶ query=q41595\_p1
- ▶ precursor=771.725390
- ▶ chargePrecursor=4
- ▶ itol=0.5

| AA  | a          | a'         | a <sub>0</sub> | b          | b'    | b <sub>0</sub> | y          | y'         | y <sub>0</sub> | AA   |
|-----|------------|------------|----------------|------------|-------|----------------|------------|------------|----------------|------|
| L1  | 380        | 380        | 0.000          | 0.000      | 314   | 381            | 0.000      | 0.000      | 3683           | 380  |
| R1  | 380        | 380        | 0.000          | 0.000      | 314   | 381            | 0.000      | 0.000      | 3683           | 380  |
| R2  | 381        | 384        | 331            | 330        | 0.000 | 309            | 309        | <b>338</b> | 203            | 381  |
| L4  | 341        | 338        | 454            | 262        | 0.000 | <b>469</b>     | <b>333</b> | <b>452</b> | 267            | 341  |
| L5  | 334        | 332        | 339            | 330        | 0.000 | <b>362</b>     | 362        | 307        | 334            | 334  |
| Q1  | 311        | 324        | 384            | 310        | 0.000 | 302            | 302        | 0.000      | 2922           | 311  |
| R7  | 312        | 302        | <b>750</b>     | <b>524</b> | 0.000 | <b>795</b>     | <b>545</b> | 378        | 312            | 312  |
| V1  | <b>866</b> | <b>819</b> | <b>849</b>     | <b>592</b> | 0.000 | <b>894</b>     | <b>613</b> | 377        | 819            | 866  |
| L9  | 367        | 358        | 360            | 362        | 489   | 0.000          | <b>905</b> | <b>661</b> | <b>677</b>     | 367  |
| I10 | 380        | 380        | 0.000          | 0.000      | 314   | 381            | 0.000      | 0.000      | 3683           | 380  |
| A11 | 1151       | 1151       | 1151           | 1151       | 1151  | 1151           | 1151       | 1151       | 1151           | 1151 |
| Q12 | 1179       | 1186       | 1170           | 1181       | 1170  | 1181           | 1170       | 1181       | 1170           | 1186 |
| G13 | 1139       | 1139       | 1139           | 1139       | 1139  | 1139           | 1139       | 1139       | 1139           | 1139 |
| G14 | 1193       | 1189       | 1193           | 1189       | 1193  | 1189           | 1193       | 1189       | 1193           | 1189 |
| L15 | 1483       | 1477       | 1479           | 1471       | 1479  | 1471           | 1479       | 1471       | 1479           | 1483 |
| L16 | 1306       | 1311       | 1306           | 1311       | 1306  | 1311           | 1306       | 1311       | 1306           | 1311 |
| P17 | 1013       | 1024       | 1008           | 1000       | 1008  | 1000           | 1008       | 1000       | 1008           | 1013 |
| R18 | 1317       | 1317       | 1317           | 1317       | 1317  | 1317           | 1317       | 1317       | 1317           | 1317 |
| I19 | 1170       | 1172       | 1173           | 1174       | 1173  | 1174           | 1173       | 1174       | 1173           | 1170 |
| Q20 | 1058       | 1060       | 1041           | 1041       | 1040  | 1040           | 1041       | 1040       | 1041           | 1058 |
| A21 | 1139       | 1137       | 1139           | 1137       | 1139  | 1137           | 1139       | 1137       | 1139           | 1139 |
| V22 | 1208       | 1208       | 1213           | 1209       | 1208  | 1209           | 1213       | 1209       | 1208           | 1208 |
| L23 | 1241       | 1259       | 1234           | 1241       | 1234  | 1240           | 1239       | 1240       | 1239           | 1241 |
| L24 | 1054       | 1053       | 1047           | 1047       | 1046  | 1046           | 1047       | 1046       | 1047           | 1054 |
| P25 | 1013       | 1018       | 1008           | 1000       | 1008  | 1000           | 1008       | 1000       | 1008           | 1013 |
| R26 | 1216       | 1211       | 1202           | 1212       | 1201  | 1201           | 1202       | 1201       | 1202           | 1216 |
| K27 | 1017       | 1000       | 1000           | 1000       | 1000  | 1000           | 1000       | 1000       | 1000           | 1017 |
| L28 | 1059       | 1054       | 1048           | 1048       | 1047  | 1047           | 1048       | 1047       | 1048           | 1059 |
| L29 | 1117       | 1108       | 1103           | 1103       | 1102  | 1102           | 1103       | 1102       | 1103           | 1117 |



# sp | Q6GSS7 | H2A2A\_MOUSE

LNKLLGK <sup>Dimethyl</sup> <sub>28.03</sub> VTIAQGGVLPNIQAVLLPKKTE

- ▶ fragmentation table for charge state 2+
- ▶ specType=cid
- ▶ score=65.30
- ▶ F113279.dat
- ▶ query=q41595.p1
- ▶ precursor=771.725390
- ▶ chargePrecursor=4
- ▶ itol=0.5

| AA   | a              | a*             | a±0            | b               | b*             | b±0            | y               | y*             | y±0            | AA   |
|------|----------------|----------------|----------------|-----------------|----------------|----------------|-----------------|----------------|----------------|------|
| L1   | 41.552         | 8.528          | 8.528          | 32.943          | 0.504          | 0.504          | 1542.420        | 1233.838       | 1332.444       | L156 |
| R12  | 100.374        | 12.093         | 8.528          | 134.374         | 1.00393        | 0.504          | 1493.953        | 1471.366       | 1416.981       | R122 |
| R13  | 164.632        | 136.118        | 8.528          | 178.618         | 170.106        | 0.504          | 1438.889        | 1426.375       | 1416.981       | R122 |
| L14  | 221.583        | 212.650        | 8.528          | 235.188         | 226.647        | 0.504          | 1384.833        | 1359.325       | 1358.533       | L126 |
| L15  | 277.703        | 269.339        | 8.528          | 286.958         | 280.388        | 0.504          | 1330.359        | 1299.783       | 1299.993       | L126 |
| Q16  | 336.228        | 297.718        | 8.528          | 339.213         | 311.700        | 0.504          | 1276.755        | 1243.241       | 1242.740       | Q124 |
| R17  | 395.387        | 356.700        | 8.528          | 398.278         | 368.763        | 0.504          | 1223.284        | 1214.770       | 1214.739       | R125 |
| V18  | 453.813        | 425.381        | 8.528          | 447.818         | 418.849        | 0.504          | 1169.811        | 1168.481       | 1168.189       | V122 |
| V19  | <b>484.337</b> | 475.823        | 475.323        | <b>488.334</b>  | <b>489.821</b> | 489.320        | <b>1095.846</b> | 1087.233       | 1100.943       | V121 |
| I10  | <b>540.879</b> | <b>532.366</b> | <b>531.874</b> | <b>554.876</b>  | 546.361        | <b>545.871</b> | <b>1045.123</b> | 1036.509       | 1036.111       | I128 |
| A11  | <b>576.397</b> | <b>567.884</b> | 567.382        | <b>590.395</b>  | 581.877        | <b>581.390</b> | <b>986.581</b>  | <b>980.967</b> | <b>979.575</b> | A119 |
| Q123 | <b>640.427</b> | 631.914        | 631.412        | <b>654.424</b>  | <b>645.911</b> | <b>645.419</b> | <b>951.862</b>  | <b>944.543</b> | <b>944.057</b> | Q118 |
| Q111 | <b>680.434</b> | 671.921        | <b>682.935</b> | <b>674.432</b>  | <b>673.930</b> | <b>689.933</b> | <b>889.515</b>  | <b>889.027</b> | <b>887.537</b> | Q117 |
| Q14  | <b>697.448</b> | 688.935        | 688.433        | <b>711.444</b>  | <b>702.932</b> | <b>702.440</b> | <b>860.522</b>  | <b>852.009</b> | <b>851.517</b> | Q116 |
| V121 | <b>746.563</b> | <b>738.049</b> | <b>737.571</b> | <b>760.568</b>  | 752.049        | <b>751.914</b> | <b>832.581</b>  | 824.068        | 823.576        | V115 |
| L108 | <b>768.589</b> | <b>765.011</b> | 764.513        | <b>817.523</b>  | <b>809.000</b> | <b>809.517</b> | <b>782.471</b>  | 773.958        | 773.472        | L104 |
| P117 | <b>852.651</b> | 844.137        | 843.635        | <b>866.644</b>  | 858.127        | <b>857.643</b> | <b>729.830</b>  | <b>717.422</b> | 716.935        | P113 |
| R116 | 868.674        | 860.159        | 859.657        | <b>873.676</b>  | <b>874.556</b> | <b>874.064</b> | 877.428         | 868.915        | 868.403        | R114 |
| L118 | 908.694        | 901.177        | 900.675        | <b>916.632</b>  | <b>917.098</b> | 916.597        | 920.381         | 911.874        | 911.372        | L114 |
| Q120 | 932.844        | 924.328        | 923.826        | 938.841         | 930.324        | 929.826        | 941.811         | <b>555.332</b> | <b>554.840</b> | Q119 |
| A121 | 958.382        | 950.865        | 950.363        | <b>1079.360</b> | 1070.843       | 1070.354       | 1003.833        | 491.321        | 490.811        | A116 |
| V122 | 1114.408       | 1106.891       | 1106.389       | <b>1128.904</b> | 1120.387       | 1119.889       | <b>484.297</b>  | 485.789        | 485.286        | V118 |
| L128 | 1111.238       | 1103.721       | 1103.219       | <b>1185.238</b> | 1176.722       | 1176.212       | 454.754         | 456.246        | 455.740        | L122 |
| L124 | 1227.388       | 1219.871       | 1219.370       | <b>1241.778</b> | 1233.262       | 1232.753       | 388.221         | 389.710        | 389.210        | L120 |
| P124 | 1276.377       | 1267.860       | 1267.358       | 1287.861        | 1279.344       | 1278.835       | 381.691         | 383.180        | 382.678        | P121 |
| R126 | 1340.354       | 1331.837       | 1331.335       | 1349.352        | 1340.835       | 1340.326       | 255.533         | 244.025        | 244.524        | R124 |
| R127 | 1404.402       | 1395.885       | 1395.383       | 1419.398        | 1410.881       | 1410.372       | 188.381         | 189.870        | 189.368        | R124 |
| L126 | 1434.326       | 1425.809       | 1425.307       | 1445.320        | 1436.803       | 1436.294       | 125.288         | 8.528          | 116.807        | L122 |
| L124 | 1518.401       | 1510.884       | 1510.382       | 1529.401        | 1520.884       | 1520.375       | 78.433          | 84.928         | 85.426         | L121 |

# sp | Q6GSS7 | H2A2A\_MOUSE

LNKLLGK <sup>Dimethyl</sup> 28.03 VTIAQGGVLPNIQAVLLPKKTE

- ▶ fragmentation table for charge state 3+
- ▶ specType=cid
- ▶ score=65.30
- ▶ F113279.dat
- ▶ query=q41595.p1
- ▶ precursor=771.725390
- ▶ chargePrecursor=4
- ▶ itol=0.5

| AA  | a        | a <sup>+</sup> | a <sup>2+</sup> | b        | b <sup>+</sup> | b <sup>2+</sup> | y        | y <sup>+</sup> | y <sup>2+</sup> | AA   |
|-----|----------|----------------|-----------------|----------|----------------|-----------------|----------|----------------|-----------------|------|
| T1  | 26.305   | 38.72          | 0.87            | 75.755   | 77.942         | 0.872           | 102.181  | 102.269        | 102.357         | L269 |
| R2  | 67.305   | 63.709         | 0.872           | 109.415  | 111.739        | 0.872           | 145.241  | 145.255        | 145.270         | R260 |
| R3  | 110.083  | 104.407        | 0.872           | 149.415  | 151.939        | 0.872           | 192.926  | 194.251        | 195.622         | R227 |
| L4  | 147.718  | 142.104        | 0.872           | 187.080  | 191.434        | 0.872           | 240.228  | 244.553        | 248.225         | L236 |
| L15 | 238.472  | 229.707        | 0.872           | 269.804  | 274.928        | 0.872           | 327.533  | 336.558        | 344.530         | L235 |
| G6  | 294.479  | 286.804        | 0.872           | 313.811  | 318.135        | 0.872           | 384.533  | 392.163        | 399.835         | G24  |
| R7  | 326.522  | 320.846        | 0.872           | 359.857  | 364.119        | 0.872           | 431.832  | 439.159        | 446.828         | R225 |
| G8  | 389.544  | 383.869        | 0.872           | 424.881  | 429.235        | 0.872           | 509.789  | 516.114        | 522.786         | G222 |
| V9  | 423.227  | 417.551        | 0.872           | 461.225  | 465.583        | 0.872           | 558.747  | 565.069        | 571.743         | V221 |
| L10 | 460.822  | 455.146        | 0.872           | 500.251  | 504.575        | 0.872           | 607.084  | 614.408        | 621.081         | L220 |
| A11 | 494.601  | 488.925        | 0.872           | 540.925  | 545.249        | 0.872           | 656.382  | 663.714        | 670.387         | A119 |
| G12 | 527.208  | 521.532        | 0.872           | 582.524  | 586.848        | 0.872           | 705.441  | 712.773        | 719.446         | G118 |
| G13 | 560.804  | 555.128        | 0.872           | 624.524  | 628.848        | 0.872           | 754.441  | 761.773        | 768.446         | G117 |
| G14 | 594.401  | 588.725        | 0.872           | 666.524  | 670.848        | 0.872           | 803.441  | 810.773        | 817.446         | G116 |
| V15 | 627.997  | 622.321        | 0.872           | 708.524  | 712.848        | 0.872           | 852.441  | 859.773        | 866.446         | V115 |
| L16 | 661.594  | 655.918        | 0.872           | 750.524  | 754.848        | 0.872           | 901.441  | 908.773        | 915.446         | L164 |
| L17 | 695.191  | 689.515        | 0.872           | 792.524  | 796.848        | 0.872           | 950.441  | 957.773        | 964.446         | L173 |
| R18 | 728.788  | 723.112        | 0.872           | 834.524  | 838.848        | 0.872           | 1000.441 | 1007.773       | 1014.446        | R182 |
| L19 | 762.385  | 756.709        | 0.872           | 876.524  | 880.848        | 0.872           | 1050.441 | 1057.773       | 1064.446        | L191 |
| G20 | 795.982  | 790.306        | 0.872           | 918.524  | 922.848        | 0.872           | 1100.441 | 1107.773       | 1114.446        | G200 |
| A21 | 829.579  | 823.903        | 0.872           | 960.524  | 964.848        | 0.872           | 1150.441 | 1157.773       | 1164.446        | A210 |
| V22 | 863.176  | 857.500        | 0.872           | 1002.524 | 1006.848       | 0.872           | 1200.441 | 1207.773       | 1214.446        | V220 |
| L23 | 896.773  | 891.097        | 0.872           | 1044.524 | 1048.848       | 0.872           | 1250.441 | 1257.773       | 1264.446        | L230 |
| L24 | 930.370  | 924.694        | 0.872           | 1086.524 | 1090.848       | 0.872           | 1300.441 | 1307.773       | 1314.446        | L240 |
| R25 | 963.967  | 958.291        | 0.872           | 1128.524 | 1132.848       | 0.872           | 1350.441 | 1357.773       | 1364.446        | R250 |
| R26 | 1000.564 | 994.888        | 0.872           | 1170.524 | 1174.848       | 0.872           | 1400.441 | 1407.773       | 1414.446        | R260 |
| R27 | 1034.161 | 1028.485       | 0.872           | 1212.524 | 1216.848       | 0.872           | 1450.441 | 1457.773       | 1464.446        | R270 |
| R28 | 1067.758 | 1062.082       | 0.872           | 1254.524 | 1258.848       | 0.872           | 1500.441 | 1507.773       | 1514.446        | R280 |
| R29 | 1101.355 | 1095.679       | 0.872           | 1296.524 | 1300.848       | 0.872           | 1550.441 | 1557.773       | 1564.446        | R290 |



# sp | Q6GSS7 | H2A2A\_MOUSE

LNKLLGK <sup>Dimethyl</sup> <sub>28.03</sub> VTIAQGGVLPNIQAVLLPKKTE

- ▶ fragmentation table for charge state 1+
- ▶ specType=etd
- ▶ score=75.29
- ▶ F113279.dat
- ▶ query=q41596.p1
- ▶ precursor=771.725390
- ▶ chargePrecursor=4
- ▶ itol=0.5

| AA     | c               | y        | z+1             | z+2             | z        | AA     |
|--------|-----------------|----------|-----------------|-----------------|----------|--------|
| L[1]   | 131.118         | 3081.892 | 3067.873        | 0.000           | 3066.895 | L[29]  |
| N[2]   | 345.161         | 2970.808 | 2954.789        | 2955.797        | 2951.781 | N[28]  |
| K[3]   | <b>373.256</b>  | 2856.765 | 2840.746        | 2841.754        | 2839.738 | K[27]  |
| L[4]   | <b>486.340</b>  | 2728.670 | 2712.651        | 2713.659        | 2711.643 | L[26]  |
| L[5]   | 657.424         | 2615.585 | 2599.567        | 2600.575        | 2598.560 | L[25]  |
| Q[6]   | <b>656.445</b>  | 2502.502 | 2486.483        | 2487.491        | 2485.475 | Q[24]  |
| K[7]   | <b>812.572</b>  | 2345.480 | 2429.462        | 2430.469        | 2428.454 | K[23]  |
| V[8]   | <b>911.640</b>  | 2288.354 | 2273.335        | 2274.343        | 2272.327 | V[22]  |
| T[9]   | 1017.688        | 2190.286 | 2174.267        | 2175.275        | 2173.259 | T[21]  |
| I[10]  | <b>1125.772</b> | 2089.238 | 2073.219        | 2074.227        | 2072.211 | I[20]  |
| A[11]  | <b>1196.809</b> | 1976.154 | <b>1960.135</b> | 1961.143        | 1959.127 | A[19]  |
| Q[12]  | <b>1324.867</b> | 1895.111 | <b>1889.098</b> | 1890.106        | 1888.090 | Q[18]  |
| G[13]  | <b>1381.889</b> | 1777.058 | 1761.039        | 1762.047        | 1760.032 | G[17]  |
| G[14]  | <b>1438.910</b> | 1720.937 | 1704.918        | 1705.926        | 1703.910 | G[16]  |
| V[15]  | 1537.879        | 1663.015 | 1646.997        | 1646.004        | 1645.989 | V[15]  |
| L[16]  | 1651.063        | 1563.947 | 1547.928        | <b>1548.936</b> | 1546.920 | L[14]  |
| P[17]  | 1748.116        | 1450.893 | 1434.864        | 1435.852        | 1433.836 | P[13]  |
| TW[18] | 1852.159        | 1383.810 | <b>1337.791</b> | 1338.799        | 1336.783 | TW[12] |
| I[19]  | <b>1975.243</b> | 1236.767 | <b>1223.748</b> | 1224.756        | 1222.741 | I[11]  |
| Q[20]  | 2103.301        | 1126.683 | <b>1110.664</b> | 1111.672        | 1109.656 | Q[10]  |
| A[21]  | 2174.336        | 998.624  | 982.606         | 981.614         | 981.598  | A[9]   |
| V[22]  | 2273.407        | 927.587  | <b>911.569</b>  | 912.576         | 910.561  | V[8]   |
| L[23]  | 2386.491        | 828.519  | <b>812.500</b>  | 813.508         | 811.492  | L[7]   |
| L[24]  | 2499.575        | 715.435  | <b>699.415</b>  | <b>700.424</b>  | 698.408  | L[6]   |
| P[25]  | 2596.626        | 602.351  | 586.332         | 587.340         | 585.324  | P[5]   |
| K[26]  | 2724.723        | 505.298  | <b>489.279</b>  | 490.287         | 488.271  | K[4]   |
| K[27]  | 2852.816        | 377.203  | <b>361.184</b>  | 362.192         | 360.177  | K[3]   |
| T[28]  | 2953.895        | 249.108  | 233.089         | 234.097         | 232.082  | T[2]   |
| E[29]  | 3082.938        | 148.060  | 132.042         | 133.050         | 131.034  | E[1]   |

# sp | Q6GSS7 | H2A2A\_MOUSE

LNKLLGK <sup>Dimethyl</sup><sub>28.03</sub> VTIAQGGVLPNIQAVLLPKKTE

- ▶ fragmentation table for charge state 2+
- ▶ specType=etd
- ▶ score=75.29
- ▶ F113279.dat
- ▶ query=q41596.p1
- ▶ precursor=771.725390
- ▶ chargePrecursor=4
- ▶ itol=0.5

| AA  | c               | y               | z+1             | z+2             | z               | AA   |
|-----|-----------------|-----------------|-----------------|-----------------|-----------------|------|
| L1  | 66.053          | <b>1542.450</b> | <b>1534.440</b> | 8.504           | 1533.930        | L120 |
| N12 | 123.054         | 1485.905        | <b>1477.898</b> | <b>1478.402</b> | <b>1477.394</b> | N08  |
| K13 | 187.132         | 1428.889        | <b>1420.877</b> | <b>1421.381</b> | 1420.373        | K27  |
| L14 | 243.674         | 1364.839        | <b>1356.829</b> | 1357.333        | <b>1356.325</b> | L26  |
| L15 | 300.216         | 1308.297        | 1300.287        | 1300.791        | <b>1299.783</b> | L25  |
| G16 | 358.759         | 1251.755        | 1243.745        | 1244.249        | 1243.241        | G24  |
| K17 | 406.799         | 1223.244        | <b>1215.234</b> | <b>1215.738</b> | 1214.731        | K23  |
| V18 | 456.324         | 1145.181        | <b>1137.171</b> | <b>1137.675</b> | 1136.667        | V22  |
| T19 | 506.849         | 1095.646        | <b>1087.637</b> | 1088.141        | <b>1087.133</b> | T21  |
| T10 | 563.390         | 1045.123        | <b>1037.113</b> | <b>1037.617</b> | <b>1036.609</b> | T20  |
| A11 | 608.909         | 988.591         | <b>980.571</b>  | 981.075         | <b>980.067</b>  | A19  |
| G12 | 662.937         | 933.065         | 925.053         | 925.557         | 924.549         | G18  |
| G13 | 691.448         | 889.033         | <b>881.023</b>  | <b>881.527</b>  | 880.519         | G17  |
| G14 | 719.959         | 860.522         | <b>852.513</b>  | <b>853.017</b>  | 852.009         | G16  |
| V15 | 769.493         | 832.011         | 824.002         | 824.506         | 823.498         | V15  |
| L16 | 820.035         | 782.477         | 774.468         | 774.972         | 773.964         | L14  |
| T17 | <b>874.561</b>  | 728.935         | 720.926         | 721.430         | 720.422         | T13  |
| N18 | <b>931.583</b>  | 677.405         | 669.396         | 669.900         | 668.892         | N12  |
| I19 | 988.125         | 620.867         | 612.858         | 613.362         | 612.354         | I11  |
| Q20 | <b>1052.154</b> | 563.845         | 555.836         | 556.340         | 555.332         | Q10  |
| A21 | <b>1087.673</b> | 499.816         | 491.807         | 492.311         | 491.303         | A0   |
| V22 | <b>1137.207</b> | 484.297         | 476.288         | 476.792         | 475.784         | V8   |
| L23 | <b>1193.749</b> | 414.763         | 406.754         | 407.258         | 406.250         | L17  |
| L24 | 1250.291        | 358.221         | 350.212         | 350.716         | 349.708         | L16  |
| P25 | <b>1298.817</b> | 301.679         | 293.670         | 294.174         | 293.166         | P5   |
| K26 | <b>1362.865</b> | 253.153         | 245.143         | 245.647         | 244.639         | K4   |
| K27 | <b>1426.912</b> | 189.105         | 181.096         | 181.600         | 180.592         | K3   |
| T28 | <b>1477.436</b> | 125.058         | 117.049         | 117.552         | 116.544         | T12  |
| E29 | 1541.958        | 74.534          | 66.524          | 67.028          | 66.021          | E1   |

# sp | Q6GSS7 | H2A2A\_MOUSE

LNKLLGK <sup>Dimethyl</sup> <sub>28.03</sub> VTIAQGGVLPNIQAVLLPKKTE

- ▶ fragmentation table for charge state 3+
- ▶ specType=etd
- ▶ score=75.29
- ▶ F113279.dat
- ▶ query=q41596.p1
- ▶ precursor=771.725390
- ▶ chargePrecursor=4
- ▶ itol=0.5

| AA  | c              | y               | z+1             | z+2            | z              | AA  |
|-----|----------------|-----------------|-----------------|----------------|----------------|-----|
| L1  | 44.377         | <b>1028.635</b> | <b>1023.296</b> | 0.672          | 1022.660       | L29 |
| N2  | 62.302         | <b>990.941</b>  | <b>985.601</b>  | <b>985.937</b> | <b>985.265</b> | N28 |
| K3  | 125.090        | 952.326         | <b>947.587</b>  | <b>947.923</b> | 947.251        | K27 |
| L4  | 162.785        | 910.228         | 904.889         | 905.225        | 904.551        | L26 |
| L5  | 200.479        | 872.531         | 867.194         | 867.530        | 866.858        | L25 |
| G6  | 239.487        | 834.839         | 829.499         | 829.835        | 829.163        | G24 |
| K7  | 271.529        | 815.832         | 810.492         | 810.828        | 810.156        | K23 |
| V8  | 304.552        | 793.790         | 788.450         | 788.786        | 788.114        | V22 |
| T9  | 338.234        | 780.767         | 775.427         | 775.763        | 775.091        | T21 |
| I10 | 375.929        | 697.084         | 691.745         | 692.081        | 691.409        | I20 |
| A11 | 389.608        | 699.389         | 654.050         | 654.386        | 653.714        | A19 |
| Q12 | 442.294        | 636.710         | 630.371         | 630.707        | 630.035        | Q18 |
| G13 | 461.301        | 593.024         | 587.685         | 588.021        | 587.349        | G17 |
| G14 | 480.308        | 574.017         | 568.678         | 569.013        | 568.342        | G16 |
| V15 | 513.131        | 555.010         | 549.670         | 550.006        | 549.334        | V15 |
| L16 | 551.026        | 521.987         | 516.648         | 516.984        | 516.312        | L14 |
| P17 | 583.377        | 484.202         | 478.863         | 479.209        | 478.617        | P13 |
| N18 | 621.391        | 451.942         | 446.602         | 446.938        | 446.266        | N12 |
| I19 | 659.086        | 413.927         | 408.588         | 408.924        | 408.252        | I11 |
| Q20 | 701.772        | 376.233         | 370.893         | 371.229        | 370.557        | Q10 |
| A21 | 725.451        | 333.546         | 328.207         | 328.543        | 327.871        | A9  |
| V22 | 758.474        | 309.867         | 304.528         | 304.864        | 304.192        | V8  |
| L23 | 796.188        | 276.844         | 271.505         | 271.841        | 271.169        | L7  |
| L24 | 833.863        | 239.150         | 233.810         | 234.146        | 233.474        | L6  |
| T25 | 869.214        | 201.455         | 196.116         | 196.452        | 195.780        | T5  |
| K26 | 908.912        | 169.100         | 163.760         | 164.101        | 163.429        | K4  |
| K27 | <b>951.611</b> | 138.406         | 133.066         | 133.402        | 132.730        | K3  |
| T28 | <b>985.293</b> | 83.708          | 78.368          | 78.704         | 78.032         | T2  |
| E29 | 1028.307       | 50.025          | 44.685          | 45.021         | 44.349         | E1  |



# sp | Q6GSS7 | H2A2A\_MOUSE

LNKLLGK <sup>Dimethyl</sup><sub>28.03</sub> VTIAQGGVLPNIQAVLLPKKTE

- ▶ fragmentation table for charge state 1+
- ▶ specType=etd
- ▶ score=96.46
- ▶ F113279.dat
- ▶ query=q41597\_p1
- ▶ precursor=617.581770
- ▶ chargePrecursor=5
- ▶ itol=0.5

| AA | c               | y               | z+1             | z+2             | z               | AA   |
|----|-----------------|-----------------|-----------------|-----------------|-----------------|------|
| L1 | 131.119         | 2083.892        | 3067.873        | 9.000           | 2066.865        | L129 |
| N1 | <b>245.161</b>  | 2970.808        | 2954.789        | 2055.797        | 2953.781        | N20  |
| K1 | <b>373.256</b>  | 2856.705        | 2840.746        | 2841.754        | 2839.738        | K27  |
| L1 | <b>480.340</b>  | 2728.670        | 2712.653        | 2713.659        | 2711.643        | L26  |
| L1 | <b>599.424</b>  | 2615.588        | 2599.567        | 2600.575        | 2598.559        | L25  |
| G1 | <b>658.465</b>  | 2502.502        | 2486.483        | 2487.491        | 2485.475        | G24  |
| K1 | <b>812.572</b>  | 2445.480        | 2429.462        | 2430.469        | 2428.454        | K23  |
| V1 | <b>911.640</b>  | 2289.354        | 2273.335        | 2274.343        | 2272.327        | V22  |
| F1 | 1012.688        | 2100.266        | 2174.267        | 2175.275        | 2173.259        | F21  |
| T1 | <b>1125.772</b> | 2089.238        | 2073.219        | 2074.227        | 2072.211        | T20  |
| A1 | <b>1196.809</b> | 1976.154        | 1960.135        | 1961.143        | 1959.127        | A19  |
| Q1 | <b>1324.867</b> | 1905.111        | 1889.093        | 1890.101        | 1888.085        | Q18  |
| G1 | <b>1381.889</b> | 1777.058        | 1761.039        | <b>1762.047</b> | 1760.032        | G17  |
| G1 | 1438.910        | 1720.037        | 1704.018        | 1705.026        | 1703.010        | G16  |
| V1 | 1537.979        | 1663.015        | 1646.997        | <b>1648.004</b> | 1645.989        | V15  |
| L1 | 1651.063        | <b>1563.947</b> | 1547.928        | <b>1548.936</b> | 1546.920        | L14  |
| F1 | 1768.316        | <b>1450.863</b> | 1434.844        | 1435.852        | <b>1433.836</b> | F13  |
| N1 | 1862.159        | 1353.610        | <b>1337.791</b> | 1338.799        | 1336.783        | N12  |
| I1 | 1975.243        | 1239.767        | <b>1223.748</b> | 1224.756        | 1222.741        | I11  |
| Q1 | 2161.301        | 1126.683        | <b>1110.664</b> | 1111.672        | 1109.656        | Q10  |
| A2 | 2174.338        | 998.624         | 982.606         | 983.614         | 981.598         | A9   |
| V2 | 2273.407        | 927.587         | <b>911.568</b>  | 912.576         | 910.561         | V8   |
| L2 | 2388.493        | 828.539         | <b>812.500</b>  | 813.508         | 811.492         | L7   |
| L2 | 2499.575        | 715.435         | <b>699.416</b>  | <b>700.424</b>  | 698.408         | L6   |
| P2 | 2596.628        | 602.351         | 586.332         | 587.340         | 585.324         | P5   |
| K2 | 2724.723        | 505.298         | <b>489.279</b>  | 490.287         | 488.271         | K4   |
| K2 | 2852.818        | 377.203         | <b>361.184</b>  | 362.192         | 360.177         | K3   |
| T2 | 2953.885        | 249.108         | 233.089         | 234.097         | 232.081         | T2   |
| E2 | 3062.968        | 148.060         | 132.042         | 133.050         | 131.034         | E1   |



# sp | Q6GSS7 | H2A2A\_MOUSE

LNKLLGK <sup>Dimethyl</sup><sub>28.03</sub> VTIAQGGVLPNIQAVLLPKKTE

- ▶ fragmentation table for charge state 2+
- ▶ specType=etd
- ▶ score=96.46
- ▶ F113279.dat
- ▶ query=q41597.p1
- ▶ precursor=617.581770
- ▶ chargePrecursor=5
- ▶ itol=0.5

| AA    | c               | y              | z+1             | z+2             | z              | AA    |
|-------|-----------------|----------------|-----------------|-----------------|----------------|-------|
| L[1]  | 66.063          | 1542.450       | 1534.440        | 6.504           | 1533.930       | L[29] |
| N[2]  | 123.084         | 1485.908       | <b>1477.898</b> | <b>1478.402</b> | 1477.304       | N[28] |
| K[3]  | 187.132         | 1428.886       | <b>1420.877</b> | <b>1421.381</b> | 1420.373       | K[27] |
| L[4]  | 243.674         | 1364.839       | 1356.829        | <b>1357.333</b> | 1356.325       | L[26] |
| L[5]  | 300.216         | 1308.297       | 1300.287        | 1292.277        | 1291.269       | L[25] |
| G[6]  | 358.758         | 1251.755       | <b>1243.745</b> | <b>1244.249</b> | 1243.241       | G[24] |
| K[7]  | <b>406.789</b>  | 1223.244       | 1215.234        | <b>1215.738</b> | 1214.731       | K[23] |
| V[8]  | <b>456.324</b>  | 1145.181       | <b>1137.171</b> | <b>1137.675</b> | 1136.667       | V[22] |
| T[9]  | <b>506.848</b>  | 1095.646       | <b>1087.637</b> | <b>1088.141</b> | 1087.133       | T[21] |
| I[10] | 563.390         | 1045.123       | 1037.113        | <b>1037.617</b> | 1036.609       | I[20] |
| A[11] | 620.932         | 988.581        | <b>980.571</b>  | <b>981.075</b>  | 980.067        | A[19] |
| Q[12] | <b>652.937</b>  | 933.062        | <b>945.053</b>  | <b>945.557</b>  | 944.549        | Q[18] |
| G[13] | <b>691.448</b>  | <b>889.033</b> | <b>881.023</b>  | <b>881.527</b>  | <b>880.519</b> | G[17] |
| G[14] | <b>719.959</b>  | <b>860.522</b> | <b>852.513</b>  | <b>853.017</b>  | 852.009        | G[16] |
| V[15] | <b>769.493</b>  | <b>832.011</b> | <b>824.002</b>  | <b>824.506</b>  | 823.498        | V[15] |
| L[16] | 826.035         | <b>782.477</b> | 774.468         | 774.972         | 773.964        | L[14] |
| F[17] | <b>874.561</b>  | <b>725.935</b> | <b>717.926</b>  | 718.430         | <b>717.422</b> | F[13] |
| T[18] | <b>931.583</b>  | 677.406        | <b>669.399</b>  | <b>669.903</b>  | 668.895        | T[12] |
| I[19] | 988.125         | 620.387        | <b>612.378</b>  | <b>612.882</b>  | 611.874        | I[11] |
| Q[20] | <b>1052.154</b> | <b>563.845</b> | <b>555.836</b>  | <b>556.340</b>  | 555.332        | Q[10] |
| A[21] | <b>1087.673</b> | 499.616        | <b>491.607</b>  | <b>492.110</b>  | 491.103        | A[9]  |
| V[22] | <b>1137.207</b> | 464.297        | <b>456.288</b>  | <b>456.792</b>  | 455.784        | V[8]  |
| L[23] | <b>1193.749</b> | 434.763        | <b>406.754</b>  | <b>407.258</b>  | 406.250        | L[7]  |
| L[24] | 1250.291        | 398.221        | 390.212         | 390.716         | 389.708        | L[6]  |
| P[25] | <b>1298.817</b> | 363.679        | 363.670         | 364.174         | 363.166        | P[5]  |
| K[26] | <b>1362.865</b> | 253.153        | <b>245.143</b>  | 245.647         | <b>244.639</b> | K[4]  |
| K[27] | <b>1426.912</b> | 189.105        | 181.096         | 181.600         | 180.592        | K[3]  |
| T[28] | 1477.436        | 125.058        | 117.048         | 117.552         | 116.544        | T[2]  |
| E[29] | 1541.958        | 74.534         | 66.524          | 67.028          | 66.021         | E[1]  |

# sp | Q6GSS7 | H2A2A\_MOUSE

LNKLLGK <sup>Dimethyl</sup> <sub>28.03</sub> VTIAQGGVLPNIQAVLLPKKTE

- ▶ fragmentation table for charge state 3+
- ▶ specType=etd
- ▶ score=96.46
- ▶ F113279.dat
- ▶ query=q14597\_p1
- ▶ precursor=617.581770
- ▶ chargePrecursor=5
- ▶ itol=0.5

| AA   | c              | y              | z+1             | z+2            | z               | AA   |
|------|----------------|----------------|-----------------|----------------|-----------------|------|
| L 1  | 44.377         | 1028.635       | <b>1021.296</b> | 0.672          | <b>1022.960</b> | L 29 |
| N 2  | 82.302         | 690.841        | <b>985.661</b>  | <b>985.937</b> | 985.265         | N 28 |
| K 3  | 125.090        | 952.930        | 947.587         | <b>947.923</b> | 947.251         | K 27 |
| L 4  | 162.785        | <b>910.228</b> | 905.887         | <b>905.225</b> | 904.263         | L 26 |
| L 5  | 200.479        | 872.333        | <b>867.194</b>  | 862.130        | <b>866.858</b>  | L 25 |
| Q 6  | 239.487        | 834.839        | <b>829.499</b>  | <b>829.835</b> | 829.153         | Q 24 |
| K 7  | 271.529        | 815.832        | <b>810.492</b>  | <b>810.828</b> | 810.156         | K 23 |
| V 8  | 304.552        | 763.790        | <b>758.450</b>  | 758.786        | <b>758.114</b>  | V 22 |
| T 9  | 338.234        | 730.787        | 725.437         | <b>725.763</b> | 725.091         | T 21 |
| I 10 | 375.929        | 697.084        | <b>691.745</b>  | <b>692.081</b> | <b>691.409</b>  | I 20 |
| A 11 | 389.608        | 659.389        | <b>654.050</b>  | <b>654.386</b> | 653.714         | A 19 |
| Q 12 | 442.294        | 639.710        | 634.371         | 630.707        | 630.035         | Q 18 |
| Q 13 | 461.301        | 593.024        | 587.685         | 588.021        | 587.349         | Q 17 |
| G 14 | 480.308        | 574.017        | 568.678         | 569.013        | 568.342         | G 16 |
| V 15 | 513.331        | 555.010        | 549.670         | 550.006        | 549.334         | V 15 |
| L 16 | 551.026        | 521.987        | 516.648         | 516.984        | 516.312         | L 14 |
| P 17 | 583.377        | <b>484.292</b> | 478.953         | 479.289        | 478.617         | P 13 |
| T 18 | 621.391        | 451.942        | 446.602         | 446.938        | 446.266         | T 12 |
| I 19 | 659.086        | 413.927        | 408.588         | 408.924        | 408.252         | I 11 |
| Q 20 | 701.772        | 376.233        | 370.893         | 371.229        | 370.557         | Q 10 |
| A 21 | 725.451        | 333.946        | 328.207         | 328.543        | 327.871         | A 9  |
| V 22 | <b>758.474</b> | 309.867        | 304.528         | 304.864        | 304.192         | V 8  |
| L 23 | <b>796.168</b> | 276.844        | 271.505         | 271.841        | 271.169         | L 7  |
| L 24 | 833.863        | 239.150        | 233.810         | 234.146        | 233.474         | L 6  |
| T 25 | 892.214        | 201.458        | 196.118         | 196.453        | 195.781         | T 5  |
| K 26 | <b>908.912</b> | 169.104        | 163.765         | 164.101        | 163.429         | K 4  |
| K 27 | 951.611        | 126.406        | 121.066         | 121.402        | 120.730         | K 3  |
| T 28 | 985.293        | 83.708         | 78.368          | 78.704         | 78.032          | T 2  |
| E 29 | 1028.307       | 50.025         | 44.685          | 45.021         | 44.349          | E 1  |

# sp | Q6GSS7 | H2A2A\_MOUSE

LNKLLGK <sup>Dimethyl</sup> <sub>28.03</sub> VTIAQGGVLPNIQAVLLPKKTE

- ▶ fragmentation table for charge state 4+
- ▶ specType=etd
- ▶ score=96.46
- ▶ F113279.dat
- ▶ query=q41597\_p1
- ▶ precursor=617.581770
- ▶ chargePrecursor=5
- ▶ itol=0.5

| AA |    | c              | y              | z+1            | z+2            | z              | AA              |
|----|----|----------------|----------------|----------------|----------------|----------------|-----------------|
| L  | 1  | 33.535         | <b>771.726</b> | 767.724        | 0.756          | 767.472        | L <sub>29</sub> |
| N  | 2  | 62.046         | 743.451        | <b>739.453</b> | <b>739.705</b> | <b>739.201</b> | N <sub>26</sub> |
| K  | 3  | 94.059         | 714.947        | 710.945        | 711.194        | 710.690        | K <sub>27</sub> |
| L  | 4  | 122.340        | 687.923        | 678.918        | 679.170        | 678.666        | L <sub>26</sub> |
| L  | 5  | 150.611        | <b>654.652</b> | 650.647        | 650.899        | 650.395        | L <sub>25</sub> |
| G  | 6  | 164.867        | 626.381        | 622.376        | 622.628        | 622.124        | G <sub>24</sub> |
| K  | 7  | 203.898        | 612.126        | 608.121        | 608.373        | 607.869        | K <sub>23</sub> |
| V  | 8  | 228.665        | 573.094        | 569.089        | 569.341        | 568.837        | V <sub>22</sub> |
| T  | 9  | 253.927        | 548.327        | 544.322        | 544.574        | 544.070        | T <sub>21</sub> |
| T  | 10 | 262.198        | 523.065        | 519.060        | 519.312        | 518.808        | T <sub>20</sub> |
| A  | 11 | 269.958        | 494.794        | 490.789        | 491.041        | 490.537        | A <sub>19</sub> |
| Q  | 12 | 331.972        | 477.035        | 473.030        | 473.282        | 472.778        | Q <sub>18</sub> |
| G  | 13 | 346.228        | 445.020        | 441.015        | 441.267        | 440.763        | G <sub>17</sub> |
| G  | 14 | 360.483        | 430.765        | 426.760        | 427.012        | 426.508        | G <sub>16</sub> |
| V  | 15 | 385.250        | 416.509        | 412.505        | 412.757        | 412.253        | V <sub>15</sub> |
| L  | 16 | 413.521        | 391.742        | 387.737        | 387.989        | 387.486        | L <sub>14</sub> |
| P  | 17 | 437.784        | 363.471        | 359.466        | 359.718        | 359.215        | P <sub>13</sub> |
| N  | 18 | 466.295        | 339.208        | 335.203        | 335.455        | 334.951        | N <sub>12</sub> |
| T  | 19 | 494.566        | 310.897        | 306.891        | 307.143        | 306.641        | T <sub>11</sub> |
| Q  | 20 | 526.381        | 282.426        | 278.422        | 278.673        | 278.170        | Q <sub>10</sub> |
| A  | 21 | 544.340        | 250.412        | 246.407        | 246.659        | 246.155        | A <sub>9</sub>  |
| V  | 22 | 569.107        | 232.652        | 228.648        | 228.900        | 228.396        | V <sub>8</sub>  |
| L  | 23 | 597.378        | 207.885        | 203.881        | 204.132        | 203.629        | L <sub>7</sub>  |
| L  | 24 | 625.649        | 179.614        | 175.609        | 175.861        | 175.358        | L <sub>6</sub>  |
| P  | 25 | 649.912        | 151.343        | 147.338        | 147.590        | 147.087        | P <sub>5</sub>  |
| K  | 26 | 681.936        | 127.080        | 123.075        | 123.327        | 122.823        | K <sub>4</sub>  |
| K  | 27 | <b>713.960</b> | 95.056         | 91.052         | 91.304         | 90.800         | K <sub>3</sub>  |
| T  | 28 | <b>739.222</b> | 63.032         | 59.028         | 59.280         | 58.776         | T <sub>2</sub>  |
| E  | 29 | 771.462        | 37.771         | 33.766         | 34.018         | 33.514         | E <sub>1</sub>  |



# sp | Q6GSS7 | H2A2A\_MOUSE

LNKLLGK<sup>Dimethyl</sup>VTIAQGGVLPNIQAVLLPKKTE  
28.03

- ▶ fragmentation table for charge state 1+
- ▶ specType=cid
- ▶ score=76.65
- ▶ F113279.dat
- ▶ query=q41598.p1
- ▶ precursor=1028.631500
- ▶ chargePrecursor=3
- ▶ itol=0.5

| AA  | a        | a*       | a,Δ   | b       | b*    | b,Δ   | r        | y*       | y,Δ   | AA   |
|-----|----------|----------|-------|---------|-------|-------|----------|----------|-------|------|
| L13 | 981.000  | 981.000  | 0.000 | 114.000 | 0.000 | 0.000 | 2081.000 | 1038.000 | 0.000 | L129 |
| N12 | 1017.111 | 1017.111 | 0.000 | 108.778 | 0.000 | 0.000 | 2119.000 | 1076.000 | 0.000 | N10  |
| K13 | 1053.222 | 1053.222 | 0.000 | 103.556 | 0.000 | 0.000 | 2157.000 | 1114.000 | 0.000 | K129 |
| L14 | 1089.333 | 1089.333 | 0.000 | 98.333  | 0.000 | 0.000 | 2195.000 | 1152.000 | 0.000 | L128 |
| L15 | 1125.444 | 1125.444 | 0.000 | 93.111  | 0.000 | 0.000 | 2233.000 | 1190.000 | 0.000 | L127 |
| L16 | 1161.556 | 1161.556 | 0.000 | 87.889  | 0.000 | 0.000 | 2271.000 | 1228.000 | 0.000 | L126 |
| G17 | 1197.667 | 1197.667 | 0.000 | 82.667  | 0.000 | 0.000 | 2309.000 | 1266.000 | 0.000 | G15  |
| K17 | 1233.778 | 1233.778 | 0.000 | 77.444  | 0.000 | 0.000 | 2347.000 | 1304.000 | 0.000 | K125 |
| V18 | 1269.889 | 1269.889 | 0.000 | 72.222  | 0.000 | 0.000 | 2385.000 | 1342.000 | 0.000 | V17  |
| T19 | 1305.999 | 1305.999 | 0.000 | 67.000  | 0.000 | 0.000 | 2423.000 | 1380.000 | 0.000 | T16  |
| D20 | 1342.111 | 1342.111 | 0.000 | 61.778  | 0.000 | 0.000 | 2461.000 | 1418.000 | 0.000 | D19  |
| A11 | 1378.222 | 1378.222 | 0.000 | 56.556  | 0.000 | 0.000 | 2499.000 | 1456.000 | 0.000 | A10  |
| G12 | 1414.333 | 1414.333 | 0.000 | 51.333  | 0.000 | 0.000 | 2537.000 | 1494.000 | 0.000 | G11  |
| G13 | 1450.444 | 1450.444 | 0.000 | 46.111  | 0.000 | 0.000 | 2575.000 | 1532.000 | 0.000 | G17  |
| G14 | 1486.556 | 1486.556 | 0.000 | 40.889  | 0.000 | 0.000 | 2613.000 | 1570.000 | 0.000 | G16  |
| V15 | 1522.667 | 1522.667 | 0.000 | 35.667  | 0.000 | 0.000 | 2651.000 | 1608.000 | 0.000 | V14  |
| L16 | 1558.778 | 1558.778 | 0.000 | 30.444  | 0.000 | 0.000 | 2689.000 | 1646.000 | 0.000 | L14  |
| P17 | 1594.889 | 1594.889 | 0.000 | 25.222  | 0.000 | 0.000 | 2727.000 | 1684.000 | 0.000 | P13  |
| N18 | 1630.999 | 1630.999 | 0.000 | 20.000  | 0.000 | 0.000 | 2765.000 | 1722.000 | 0.000 | N16  |
| D19 | 1667.111 | 1667.111 | 0.000 | 14.778  | 0.000 | 0.000 | 2803.000 | 1760.000 | 0.000 | D15  |
| G20 | 1703.222 | 1703.222 | 0.000 | 9.556   | 0.000 | 0.000 | 2841.000 | 1798.000 | 0.000 | G18  |
| A21 | 1739.333 | 1739.333 | 0.000 | 4.333   | 0.000 | 0.000 | 2879.000 | 1836.000 | 0.000 | A19  |
| V22 | 1775.444 | 1775.444 | 0.000 | -0.889  | 0.000 | 0.000 | 2917.000 | 1874.000 | 0.000 | V18  |
| L23 | 1811.556 | 1811.556 | 0.000 | -5.667  | 0.000 | 0.000 | 2955.000 | 1912.000 | 0.000 | L17  |
| L24 | 1847.667 | 1847.667 | 0.000 | -10.444 | 0.000 | 0.000 | 2993.000 | 1950.000 | 0.000 | L18  |
| P25 | 1883.778 | 1883.778 | 0.000 | -15.222 | 0.000 | 0.000 | 3031.000 | 1988.000 | 0.000 | P16  |
| K26 | 1919.889 | 1919.889 | 0.000 | -20.000 | 0.000 | 0.000 | 3069.000 | 2026.000 | 0.000 | K14  |
| K27 | 1955.999 | 1955.999 | 0.000 | -24.778 | 0.000 | 0.000 | 3107.000 | 2064.000 | 0.000 | K13  |
| L28 | 1992.111 | 1992.111 | 0.000 | -29.556 | 0.000 | 0.000 | 3145.000 | 2102.000 | 0.000 | L19  |
| E29 | 2028.222 | 2028.222 | 0.000 | -34.333 | 0.000 | 0.000 | 3183.000 | 2140.000 | 0.000 | E11  |

# sp | Q6GSS7 | H2A2A\_MOUSE

LNKLLGK <sup>Dimethyl</sup> <sub>28.03</sub> VTIAQGGVLPNIQAVLLPKKTE

- ▶ fragmentation table for charge state 2+
- ▶ specType=cid
- ▶ score=76.65
- ▶ F113279.dat
- ▶ query=q41598\_p1
- ▶ precursor=1028.631500
- ▶ chargePrecursor=3
- ▶ itol=0.5

| AA  | a               | a <sup>0</sup>  | a,β   | b               | b <sup>0</sup>  | b,β             | y               | y <sup>0</sup> | a,β            | AA   |
|-----|-----------------|-----------------|-------|-----------------|-----------------|-----------------|-----------------|----------------|----------------|------|
| L1  | 41.592          | 0.500           | 0.500 | 37.540          | 0.500           | 0.500           | 1042.490        | 1531.830       | 1533.444       | L126 |
| K1  | 100.174         | 0.500           | 0.500 | 144.574         | 0.500           | 0.500           | 4019.380        | 1471.260       | 1478.000       | K120 |
| K1  | 184.521         | 1.000           | 0.500 | 178.013         | 1.000           | 0.500           | 1436.000        | 1430.572       | 1431.081       | K122 |
| L14 | 241.181         | 0.125           | 0.500 | 236.100         | 240.044         | 0.500           | <b>1304.210</b> | 1300.300       | 1305.811       | L126 |
| L15 | 227.050         | 0.125           | 0.500 | 222.100         | 220.100         | 0.500           |                 | 220.700        | 220.700        | L126 |
| Q1  | 306.710         | 2.000           | 0.500 | 330.211         | 311.100         | 0.500           | <b>1251.755</b> | 1243.241       | 1242.749       | Q124 |
| K1  | 384.270         | 0.125           | 0.500 | 388.270         | 389.763         | 0.500           | 1071.044        | 1114.710       | 1114.210       | K122 |
| V1  | 433.011         | 4.500           | 0.500 | 447.011         | 432.207         | 0.500           | 1145.101        | 1130.460       | 1130.174       | V122 |
| L16 | 468.710         | 0.125           | 0.500 | 469.211         | 469.211         | 0.500           | 760.207         | 760.207        | 760.211        | L124 |
| L16 | 440.870         | 0.125           | 0.500 | <b>554.876</b>  | 548.361         | 0.500           | 645.491         | 645.491        | 646.000        | L124 |
| A11 | 576.507         | 3.000           | 0.500 | <b>590.505</b>  | 581.007         | 0.500           | <b>980.017</b>  | <b>979.515</b> | <b>979.515</b> | A116 |
| Q12 | 646.077         | 0.125           | 0.500 | <b>654.424</b>  | <b>645.911</b>  | <b>645.413</b>  | <b>651.082</b>  | <b>644.540</b> | <b>644.540</b> | Q116 |
| Q13 | 646.077         | 0.625           | 0.500 | 670.676         | 674.622         | 0.500           | 809.030         | 800.510        | 800.017        | Q117 |
| Q14 | <b>697.448</b>  | 0.125           | 0.500 | <b>711.448</b>  | <b>702.932</b>  | <b>702.440</b>  | 809.707         | <b>852.000</b> | <b>851.517</b> | Q116 |
| V15 | <b>748.382</b>  | <b>748.460</b>  | 0.125 | <b>760.381</b>  | <b>752.407</b>  | 0.500           | 819.810         | 819.810        | 819.810        | V116 |
| L16 | <b>801.524</b>  | <b>795.811</b>  | 0.625 | <b>817.522</b>  | <b>809.009</b>  | <b>808.517</b>  | <b>782.477</b>  | 771.000        | 771.477        | L114 |
| P17 | <b>852.491</b>  | 0.125           | 0.500 | <b>866.048</b>  | 857.530         | 857.043         | <b>775.915</b>  | <b>717.422</b> | 716.930        | P115 |
| K13 | <b>899.372</b>  | 0.125           | 0.500 | 899.372         | 899.372         | 0.500           | 104.000         | 104.000        | 104.000        | K112 |
| L16 | <b>965.814</b>  | 0.625           | 0.500 | <b>979.812</b>  | <b>971.003</b>  | <b>970.006</b>  | 936.509         | <b>611.874</b> | <b>611.382</b> | L111 |
| Q15 | 1009.044        | 0.125           | 0.500 | 1009.044        | 1009.044        | 0.500           | 101.200         | 101.200        | <b>554.840</b> | Q115 |
| K1  | 1009.044        | 0.625           | 0.500 | <b>1079.160</b> | <b>1070.640</b> | <b>1070.154</b> | 1019.100        | 101.200        | 101.200        | K116 |
| V12 | 1114.000        | 1.125           | 0.500 | <b>1120.004</b> | <b>1120.180</b> | 1119.700        | 404.200         | <b>455.784</b> | <b>455.292</b> | V116 |
| L12 | 1177.230        | <b>1162.725</b> | 1.000 | <b>1185.230</b> | <b>1176.723</b> | <b>1176.230</b> | 414.000         | 408.200        | 408.700        | L117 |
| L14 | <b>1227.780</b> | 0.125           | 0.500 | <b>1241.778</b> | <b>1233.263</b> | <b>1232.773</b> | 108.200         | 100.700        | 100.200        | L111 |
| P15 | 1276.371        | 0.125           | 0.500 | 1276.371        | 1276.371        | 0.500           | 104.000         | 104.000        | 104.000        | P115 |
| K16 | 1461.074        | 0.125           | 0.500 | 1461.074        | 1461.074        | 0.500           | 111.000         | 111.000        | 111.000        | K114 |
| K17 | 1404.402        | 0.625           | 0.500 | <b>1418.399</b> | 1409.880        | 1409.394        | 109.100         | 100.100        | 100.100        | K111 |
| L16 | 1466.074        | 0.125           | 0.500 | 1466.074        | 1466.074        | 0.500           | 110.000         | 110.000        | 110.000        | L111 |
| E16 | 1510.447        | 0.125           | 0.500 | 1510.447        | 1510.447        | 0.500           | 14.000          | 0.500          | 0.500          | E111 |

# sp | Q6GSS7 | H2A2A\_MOUSE

LNKLLGK<sup>Dimethyl</sup>VTIAQGGVLPNIQAVLLPKKTE  
28.03

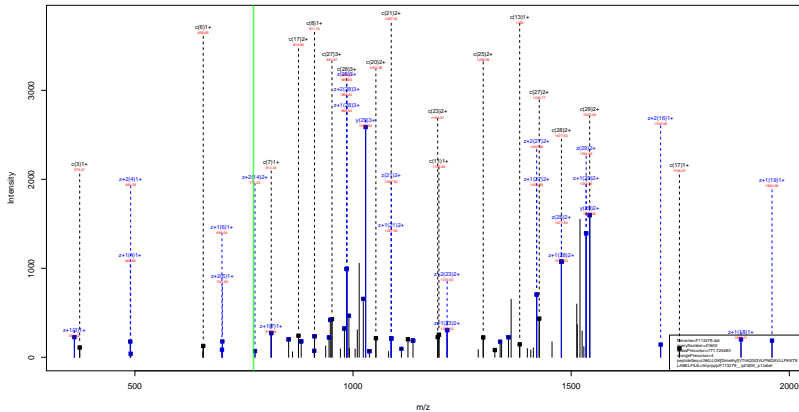

# sp | Q6GSS7 | H2A2A\_MOUSE

LNKLLGK <sup>Dimethyl</sup> <sub>28.03</sub> VTIAQGGVLPNIQAVLLPKKTE

- ▶ fragmentation table for charge state 1+
- ▶ specType=etd
- ▶ score=59.44
- ▶ F113279.dat
- ▶ query=q41600.p1
- ▶ precursor=771.725480
- ▶ chargePrecursor=4
- ▶ itol=0.5

| AA    | c               | y        | z+1             | z+2             | z               | AA    |
|-------|-----------------|----------|-----------------|-----------------|-----------------|-------|
| L[1]  | 131.118         | 3083.802 | 3067.873        | 0.000           | 3066.865        | L[26] |
| N[2]  | 245.161         | 2970.808 | 2954.789        | 2955.797        | 2953.781        | N[28] |
| K[3]  | <b>373.256</b>  | 2856.765 | 2840.746        | 2841.754        | 2839.738        | K[27] |
| L[4]  | 486.340         | 2728.670 | 2712.651        | 2713.659        | 2711.643        | L[26] |
| L[5]  | 597.424         | 2615.586 | 2599.567        | 2600.575        | 2598.559        | L[25] |
| G[6]  | <b>656.445</b>  | 2502.502 | 2486.483        | 2487.491        | 2485.475        | G[24] |
| K[7]  | <b>812.572</b>  | 2445.480 | 2429.462        | 2430.469        | 2428.454        | K[23] |
| V[8]  | <b>911.640</b>  | 2389.354 | 2373.335        | 2374.343        | 2372.327        | V[22] |
| T[9]  | 1012.688        | 2190.266 | 2174.267        | 2175.275        | 2173.259        | T[21] |
| I[10] | <b>1125.772</b> | 2089.238 | 2073.219        | 2074.227        | 2072.211        | I[20] |
| A[11] | <b>1196.809</b> | 1976.154 | <b>1960.135</b> | 1961.143        | 1959.127        | A[19] |
| Q[12] | <b>1244.867</b> | 1909.111 | <b>1893.090</b> | 1894.108        | 1892.090        | Q[18] |
| G[13] | <b>1381.889</b> | 1777.058 | 1761.039        | 1762.047        | 1760.032        | G[17] |
| G[14] | 1438.910        | 1720.937 | 1704.918        | <b>1705.926</b> | 1703.910        | G[16] |
| V[15] | 1537.979        | 1603.015 | 1648.997        | 1648.004        | 1645.989        | V[15] |
| L[16] | 1651.063        | 1563.947 | 1547.928        | 1548.936        | 1546.920        | L[14] |
| T[17] | <b>1748.116</b> | 1450.863 | 1434.844        | 1435.852        | 1433.836        | T[13] |
| N[18] | 1862.159        | 1353.810 | 1337.791        | 1338.799        | <b>1336.783</b> | N[12] |
| I[19] | 1975.243        | 1239.767 | 1223.748        | 1224.756        | 1222.741        | I[11] |
| Q[20] | 2103.301        | 1126.683 | <b>1110.664</b> | 1111.672        | 1109.656        | Q[10] |
| A[21] | 2174.338        | 998.624  | 982.605         | 983.614         | 981.598         | A[9]  |
| V[22] | 2273.407        | 927.587  | <b>911.569</b>  | 912.576         | <b>910.561</b>  | V[8]  |
| L[23] | 2389.491        | 828.519  | <b>812.500</b>  | 813.508         | 811.492         | L[7]  |
| L[24] | 2499.575        | 715.435  | <b>699.416</b>  | <b>700.424</b>  | 698.408         | L[6]  |
| P[25] | 2596.626        | 602.351  | 586.332         | 587.340         | 585.324         | P[5]  |
| K[26] | 2724.723        | 505.298  | <b>489.279</b>  | <b>490.287</b>  | 488.271         | K[4]  |
| K[27] | 2852.818        | 377.203  | <b>361.184</b>  | 362.192         | 360.177         | K[3]  |
| T[28] | 2953.865        | 249.108  | 233.089         | 234.097         | 232.082         | T[2]  |
| E[29] | 3082.908        | 148.060  | 132.042         | 133.050         | 131.034         | E[1]  |



# sp | Q6GSS7 | H2A2A\_MOUSE

LNKLLGK <sup>Dimethyl</sup> <sub>28.03</sub> VTIAQGGVLPNIQAVLLPKKTE

- ▶ fragmentation table for charge state 2+
- ▶ specType=etd
- ▶ score=59.44
- ▶ F113279.dat
- ▶ query=q41600.p1
- ▶ precursor=771.725480
- ▶ chargePrecursor=4
- ▶ itol=0.5

| AA  | c               | y               | z+1             | z+2             | z               | AA   |
|-----|-----------------|-----------------|-----------------|-----------------|-----------------|------|
| L1  | 66.053          | <b>1542.450</b> | <b>1534.440</b> | 9.504           | <b>1533.936</b> | L120 |
| N1  | 123.054         | 1485.905        | <b>1477.898</b> | 1478.402        | <b>1477.394</b> | N120 |
| K1  | 187.132         | 1428.889        | <b>1420.877</b> | <b>1421.381</b> | 1420.373        | K127 |
| L14 | 243.674         | 1364.839        | <b>1356.829</b> | 1357.333        | <b>1356.325</b> | L126 |
| L15 | 300.216         | 1308.297        | 1300.287        | 1300.791        | 1299.783        | L125 |
| G16 | 358.759         | 1251.755        | 1243.745        | 1244.249        | 1243.241        | G124 |
| K17 | 406.799         | 1223.244        | <b>1215.234</b> | <b>1215.738</b> | 1214.731        | K123 |
| V18 | 456.324         | 1145.181        | <b>1137.171</b> | <b>1137.675</b> | 1136.667        | V122 |
| T19 | 506.849         | 1095.646        | <b>1087.637</b> | 1088.141        | <b>1087.133</b> | T121 |
| T10 | 563.390         | 1045.123        | <b>1037.113</b> | <b>1037.617</b> | 1036.609        | T20  |
| A11 | 608.908         | 988.581         | <b>980.571</b>  | 981.075         | <b>980.067</b>  | A119 |
| G12 | 662.937         | 933.060         | <b>943.053</b>  | 943.557         | <b>944.549</b>  | G118 |
| G13 | 691.448         | 889.033         | <b>881.023</b>  | <b>881.527</b>  | 880.519         | G117 |
| G14 | 719.959         | 860.522         | <b>852.513</b>  | 853.017         | <b>852.009</b>  | G116 |
| V15 | 769.493         | 812.011         | 804.002         | 804.506         | 803.498         | V115 |
| L16 | 838.035         | 782.477         | 774.468         | <b>774.972</b>  | 773.964         | L114 |
| T17 | <b>874.561</b>  | 728.935         | 721.928         | 722.432         | 721.424         | T113 |
| N18 | 911.553         | 677.400         | 669.390         | 669.893         | 668.885         | N112 |
| I19 | 968.125         | 620.867         | 612.858         | 612.862         | 611.874         | I111 |
| Q10 | <b>1052.154</b> | 563.845         | 555.836         | 556.340         | 555.332         | Q110 |
| A21 | <b>1087.673</b> | 499.816         | 491.807         | 492.310         | 491.303         | A10  |
| V22 | <b>1137.207</b> | 484.297         | 476.288         | 476.792         | 475.784         | V19  |
| L23 | <b>1193.749</b> | 414.763         | 406.754         | 407.258         | 406.251         | L17  |
| L24 | 1250.291        | 358.221         | 350.213         | 350.716         | 349.708         | L16  |
| P25 | <b>1288.817</b> | 301.679         | 293.670         | 294.174         | 293.166         | P15  |
| K26 | 1362.805        | 253.153         | 245.143         | 245.647         | 244.639         | K14  |
| K27 | <b>1426.912</b> | 189.105         | 181.096         | 181.600         | 180.592         | K13  |
| T28 | <b>1477.436</b> | 125.058         | 117.048         | 117.552         | 116.544         | T12  |
| E29 | <b>1541.958</b> | 74.534          | 66.524          | 67.028          | 66.021          | E11  |

# sp | Q6GSS7 | H2A2A\_MOUSE

LNKLLGK <sup>Dimethyl</sup> <sub>28.03</sub> VTIAQGGVLPNIQAVLLPKKTE

- ▶ fragmentation table for charge state 3+
- ▶ specType=etd
- ▶ score=59.44
- ▶ F113279.dat
- ▶ query=q41600.p1
- ▶ precursor=771.725480
- ▶ chargePrecursor=4
- ▶ itol=0.5

| AA  | c              | y               | z+1             | z+2            | z              | AA  |
|-----|----------------|-----------------|-----------------|----------------|----------------|-----|
| L1  | 44.377         | <b>1028.635</b> | <b>1023.296</b> | 0.672          | 1022.960       | L29 |
| N2  | 62.302         | <b>990.941</b>  | <b>985.601</b>  | <b>985.937</b> | <b>985.265</b> | N28 |
| K3  | 125.090        | 952.326         | <b>947.587</b>  | <b>947.923</b> | 947.251        | K27 |
| L4  | 162.785        | 910.228         | 904.889         | 905.225        | 904.551        | L26 |
| L5  | 200.479        | 872.531         | 867.194         | 867.530        | 866.858        | L25 |
| G6  | 239.487        | 834.835         | 829.499         | 829.835        | 829.163        | G24 |
| K7  | 271.529        | 815.832         | 810.492         | 810.828        | 810.156        | K23 |
| V8  | 304.552        | 793.790         | 788.450         | 788.786        | 788.114        | V22 |
| T9  | 338.234        | 780.767         | 775.427         | 775.763        | 775.091        | T21 |
| I10 | 375.929        | 697.084         | 691.745         | 692.081        | 691.409        | I20 |
| A11 | 389.608        | 699.389         | 654.050         | 654.386        | 653.714        | A19 |
| Q12 | 442.294        | 636.710         | 630.371         | 630.707        | 630.035        | Q18 |
| G13 | 461.301        | 593.024         | 587.685         | 588.021        | 587.349        | G17 |
| G14 | 480.308        | 574.017         | 568.678         | 569.013        | 568.342        | G16 |
| V15 | 513.331        | 555.010         | 549.670         | 550.006        | 549.334        | V15 |
| L16 | 551.026        | 521.987         | 516.648         | 516.984        | 516.312        | L14 |
| P17 | 583.377        | 484.202         | 478.863         | 479.200        | 478.527        | P13 |
| N18 | 621.391        | 451.942         | 446.602         | 446.938        | 446.266        | N12 |
| I19 | 659.086        | 413.927         | 408.588         | 408.924        | 408.252        | I11 |
| Q20 | 701.772        | 376.233         | 370.893         | 371.229        | 370.557        | Q10 |
| A21 | 725.451        | 333.546         | 328.207         | 328.543        | 327.871        | A9  |
| V22 | 758.474        | 309.867         | 304.528         | 304.864        | 304.192        | V8  |
| L23 | 796.188        | 276.844         | 271.505         | 271.841        | 271.169        | L7  |
| L24 | 833.863        | 239.150         | 233.810         | 234.146        | 233.474        | L6  |
| T25 | 869.214        | 201.455         | 196.116         | 196.452        | 195.780        | T5  |
| K26 | 908.912        | 169.100         | 163.760         | 164.100        | 163.429        | K4  |
| K27 | <b>951.611</b> | 138.406         | 133.066         | 133.402        | 132.730        | K3  |
| T28 | <b>985.293</b> | 83.708          | 78.368          | 78.704         | 78.032         | T2  |
| E29 | 1028.307       | 50.025          | 44.685          | 45.021         | 44.349         | E1  |



# sp | Q6GSS7 | H2A2A\_MOUSE

LNKLLGK <sup>Dimethyl</sup> <sub>28.03</sub> VTIAQGGVLPNIQAVLLPKKTE

- ▶ fragmentation table for charge state 1+
- ▶ specType=etd
- ▶ score=88.85
- ▶ F113279.dat
- ▶ query=q41601.p1
- ▶ precursor=771.725490
- ▶ chargePrecursor=4
- ▶ itol=0.5

| AA    | c               | y        | z+1             | z+2             | z              | AA    |
|-------|-----------------|----------|-----------------|-----------------|----------------|-------|
| L[1]  | 131.118         | 3081.892 | 3067.873        | 0.000           | 3066.895       | L[29] |
| N[2]  | 345.161         | 2970.808 | 2954.789        | 2955.797        | 2951.781       | N[28] |
| K[3]  | <b>373.256</b>  | 2856.765 | 2840.746        | 2841.754        | 2839.738       | K[27] |
| L[4]  | 486.340         | 2728.670 | 2712.651        | 2713.659        | 2711.643       | L[26] |
| L[5]  | <b>599.424</b>  | 2613.585 | 2599.567        | 2600.575        | 2598.560       | L[25] |
| Q[6]  | <b>656.445</b>  | 2502.502 | 2488.483        | 2487.491        | 2485.475       | Q[24] |
| K[7]  | <b>812.572</b>  | 2345.480 | 2429.462        | 2430.469        | 2428.454       | K[23] |
| V[8]  | <b>911.640</b>  | 2288.354 | 2273.335        | 2274.343        | 2272.327       | V[22] |
| T[9]  | 1017.688        | 2190.286 | 2174.267        | 2175.275        | 2173.259       | T[21] |
| I[10] | <b>1125.772</b> | 2089.238 | 2073.219        | 2074.227        | 2072.211       | I[20] |
| A[11] | <b>1196.809</b> | 1978.154 | <b>1966.135</b> | 1961.143        | 1959.127       | A[19] |
| Q[12] | <b>1324.867</b> | 1895.111 | <b>1889.098</b> | 1890.106        | 1888.090       | Q[18] |
| G[13] | 1381.889        | 1777.058 | 1761.039        | <b>1762.047</b> | 1760.032       | G[17] |
| G[14] | 1438.910        | 1720.937 | 1704.918        | <b>1705.926</b> | 1703.910       | G[16] |
| V[15] | <b>1537.979</b> | 1663.015 | 1646.997        | 1646.004        | 1645.989       | V[15] |
| L[16] | 1651.063        | 1563.947 | 1547.928        | <b>1548.936</b> | 1546.920       | L[14] |
| P[17] | 1748.116        | 1450.863 | 1434.844        | 1435.852        | 1433.836       | P[13] |
| T[18] | 1852.159        | 1383.810 | <b>1337.791</b> | 1338.799        | 1336.783       | T[12] |
| I[19] | 1975.243        | 1238.767 | <b>1223.748</b> | 1224.756        | 1222.741       | I[11] |
| Q[20] | 2103.301        | 1126.683 | <b>1110.664</b> | 1111.672        | 1109.656       | Q[10] |
| A[21] | 2174.336        | 998.624  | 982.606         | 981.614         | <b>981.598</b> | A[9]  |
| V[22] | 2273.407        | 927.587  | <b>911.569</b>  | 912.576         | 910.561        | V[8]  |
| L[23] | 2386.491        | 828.519  | <b>812.500</b>  | 813.508         | 811.492        | L[7]  |
| L[24] | 2499.575        | 715.435  | <b>699.415</b>  | <b>700.424</b>  | 698.408        | L[6]  |
| P[25] | 2596.626        | 602.351  | 586.332         | 587.340         | 585.324        | P[5]  |
| K[26] | 2724.723        | 505.298  | <b>489.279</b>  | 490.287         | 488.271        | K[4]  |
| K[27] | 2852.816        | 377.203  | <b>361.184</b>  | 362.192         | 360.177        | K[3]  |
| T[28] | 2951.895        | 249.108  | 233.089         | 234.097         | 232.082        | T[2]  |
| E[29] | 3082.938        | 148.060  | 132.042         | 133.050         | 131.034        | E[1]  |

# sp | Q6GSS7 | H2A2A\_MOUSE

LNKLLGK <sup>Dimethyl</sup> <sub>28.03</sub> VTIAQGGVLPNIQAVLLPKKTE

- ▶ fragmentation table for charge state 2+
- ▶ specType=etd
- ▶ score=88.85
- ▶ F113279.dat
- ▶ query=q41601.p1
- ▶ precursor=771.725490
- ▶ chargePrecursor=4
- ▶ itol=0.5

| AA  | c               | y               | z+1             | z+2             | z               | AA   |
|-----|-----------------|-----------------|-----------------|-----------------|-----------------|------|
| L1  | 66.053          | <b>1542.450</b> | <b>1534.440</b> | 9.504           | <b>1533.936</b> | L126 |
| N12 | 123.084         | 1485.905        | <b>1477.898</b> | 1478.402        | <b>1477.394</b> | N120 |
| K13 | 187.132         | 1428.889        | <b>1420.877</b> | <b>1421.381</b> | 1420.373        | K127 |
| L14 | 243.674         | 1364.839        | 1366.620        | 1357.333        | <b>1356.325</b> | L126 |
| L15 | 300.216         | 1308.297        | 1309.787        | 1300.791        | <b>1299.783</b> | L125 |
| G16 | 358.758         | 1251.755        | <b>1243.745</b> | 1244.249        | <b>1243.241</b> | G124 |
| K17 | 406.799         | <b>1223.244</b> | <b>1215.234</b> | <b>1215.738</b> | 1214.731        | K123 |
| V18 | 456.324         | 1145.181        | <b>1137.171</b> | <b>1137.675</b> | 1136.667        | V122 |
| F19 | 506.840         | 1095.646        | <b>1087.637</b> | 1088.141        | <b>1087.133</b> | F121 |
| T10 | 563.390         | 1045.123        | <b>1037.113</b> | <b>1037.617</b> | 1036.609        | T20  |
| A11 | 608.908         | 988.581         | 989.117         | <b>981.075</b>  | 980.067         | A119 |
| G12 | 662.937         | 933.062         | <b>945.053</b>  | <b>945.557</b>  | 944.549         | G118 |
| G13 | 691.448         | 889.033         | <b>881.023</b>  | <b>881.527</b>  | 880.519         | G117 |
| G14 | 719.959         | 860.522         | <b>852.513</b>  | <b>853.017</b>  | 852.009         | G116 |
| V15 | 769.493         | 832.011         | <b>824.002</b>  | <b>824.506</b>  | 823.498         | V115 |
| L16 | 820.035         | 782.477         | <b>774.468</b>  | <b>774.972</b>  | 773.964         | L114 |
| F17 | <b>874.561</b>  | 728.935         | 729.468         | 728.936         | 727.428         | F113 |
| N18 | <b>931.583</b>  | 677.400         | 669.390         | 669.903         | 668.895         | N112 |
| I19 | 988.125         | 620.867         | 612.870         | 612.882         | 611.874         | I111 |
| Q10 | <b>1052.154</b> | 563.845         | 555.838         | 556.340         | 555.332         | Q110 |
| A11 | <b>1087.673</b> | 499.816         | 491.807         | 492.310         | 491.303         | A10  |
| V12 | <b>1137.207</b> | 484.297         | 456.288         | 456.792         | 455.784         | V10  |
| L13 | <b>1193.749</b> | 414.763         | 406.754         | 407.258         | 406.250         | L11  |
| L14 | 1250.291        | 358.221         | 350.213         | 350.716         | 349.708         | L10  |
| P15 | <b>1298.817</b> | 301.679         | 293.670         | 294.174         | 293.166         | P10  |
| K16 | <b>1362.865</b> | 253.153         | 245.143         | 245.647         | 244.639         | K14  |
| K17 | <b>1426.912</b> | 189.105         | 181.096         | 181.600         | 180.592         | K13  |
| T18 | <b>1477.436</b> | 125.058         | 117.048         | 117.552         | 116.544         | T12  |
| E19 | 1541.958        | 74.534          | 66.524          | 67.028          | 66.021          | E11  |

# sp | Q6GSS7 | H2A2A\_MOUSE

LNKLLGK <sup>Dimethyl</sup> <sub>28.03</sub> VTIAQGGVLPNIQAVLLPKKTE

- ▶ fragmentation table for charge state 3+
- ▶ specType=etd
- ▶ score=88.85
- ▶ F113279.dat
- ▶ query=q41601.p1
- ▶ precursor=771.725490
- ▶ chargePrecursor=4
- ▶ itol=0.5

| AA  | c              | y               | z+1             | z+2            | z              | AA  |
|-----|----------------|-----------------|-----------------|----------------|----------------|-----|
| L1  | 44.377         | <b>1028.635</b> | <b>1023.296</b> | 0.672          | 1023.660       | L29 |
| N2  | 62.302         | <b>990.941</b>  | <b>985.601</b>  | <b>985.937</b> | <b>985.265</b> | N28 |
| K3  | 125.090        | 952.326         | 947.587         | <b>947.923</b> | 947.251        | K27 |
| L4  | 162.785        | 910.228         | 904.889         | 905.225        | 904.551        | L26 |
| L5  | 200.479        | 872.531         | 867.194         | 867.530        | 866.858        | L25 |
| G6  | 239.487        | 834.835         | 829.499         | 829.835        | 829.163        | G24 |
| K7  | 271.529        | 815.832         | 810.492         | 810.828        | 810.156        | K23 |
| V8  | 304.552        | 793.790         | 788.450         | 788.786        | 788.114        | V22 |
| T9  | 338.234        | 730.767         | 725.427         | 725.763        | 725.091        | T21 |
| I10 | 375.929        | 697.084         | 691.745         | 692.081        | 691.409        | I20 |
| A11 | 399.608        | 659.389         | 654.050         | 654.386        | 653.714        | A19 |
| Q12 | 442.294        | 626.710         | 621.371         | 621.707        | 621.035        | Q18 |
| G13 | 461.301        | 593.024         | 587.685         | 588.021        | 587.349        | G17 |
| G14 | 480.308        | 574.017         | 568.678         | 569.013        | 568.342        | G16 |
| V15 | 513.131        | 555.010         | 549.670         | 550.006        | 549.334        | V15 |
| L16 | 551.026        | 521.987         | 516.648         | 516.984        | 516.312        | L14 |
| P17 | 583.377        | 484.202         | 478.863         | 479.200        | 478.527        | P13 |
| N18 | 621.391        | 451.942         | 446.602         | 446.938        | 446.266        | N12 |
| I19 | 659.086        | 413.927         | 408.588         | 408.924        | 408.252        | I11 |
| Q20 | 701.772        | 376.233         | 370.893         | 371.229        | 370.557        | Q10 |
| A21 | 725.451        | 333.546         | 328.207         | 328.543        | 327.871        | A9  |
| V22 | 758.474        | 309.867         | 304.528         | 304.864        | 304.192        | V8  |
| L23 | 796.188        | 276.844         | 271.505         | 271.841        | 271.169        | L7  |
| L24 | 833.863        | 239.150         | 233.810         | 234.146        | 233.474        | L6  |
| T25 | 869.214        | 201.455         | 196.116         | 196.452        | 195.780        | T5  |
| K26 | 908.912        | 169.100         | 163.760         | 164.101        | 163.429        | K4  |
| K27 | <b>951.611</b> | 138.406         | 133.066         | 133.402        | 132.730        | K3  |
| T28 | <b>985.293</b> | 83.708          | 78.368          | 78.704         | 78.032         | T2  |
| E29 | 1028.307       | 50.025          | 44.685          | 45.021         | 44.349         | E1  |

# sp | Q6GSS7 | H2A2A\_MOUSE

LNKLLGK <sup>Dimethyl</sup>VTIAQGGVLPNIQAVLLPKKTE  
28.03

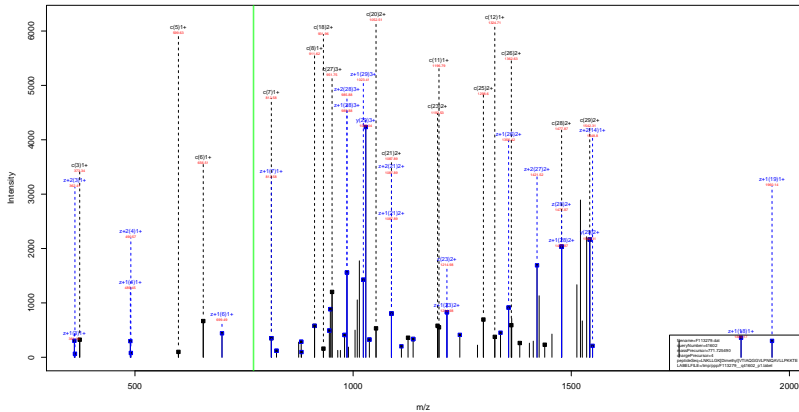

# sp | Q6GSS7 | H2A2A\_MOUSE

LNKLLGK <sup>Dimethyl</sup> 28.03 VTIAQGGVLPNIQAVLLPKKTE

- ▶ fragmentation table for charge state 1+
- ▶ specType=etd
- ▶ score=71.45
- ▶ F113279.dat
- ▶ query=q41602.p1
- ▶ precursor=771.725490
- ▶ chargePrecursor=4
- ▶ itol=0.5

| AA     | c               | y        | z+1             | z+2             | z        | AA     |
|--------|-----------------|----------|-----------------|-----------------|----------|--------|
| L[1]   | 131.118         | 3081.892 | 3067.873        | 0.000           | 3066.895 | L[29]  |
| N[2]   | 345.161         | 2970.808 | 2954.789        | 2955.797        | 2951.781 | N[28]  |
| K[3]   | <b>373.256</b>  | 2856.765 | 2840.746        | 2841.754        | 2839.738 | K[27]  |
| L[4]   | 486.340         | 2728.670 | 2712.651        | 2713.659        | 2711.643 | L[26]  |
| L[5]   | <b>599.424</b>  | 2615.585 | 2599.567        | 2600.575        | 2598.559 | L[25]  |
| Q[6]   | <b>656.445</b>  | 2502.502 | 2486.483        | 2487.491        | 2485.475 | Q[24]  |
| K[7]   | <b>812.572</b>  | 2345.480 | 2429.462        | 2430.469        | 2428.454 | K[23]  |
| V[8]   | <b>911.640</b>  | 2288.354 | 2273.335        | 2274.343        | 2272.327 | V[22]  |
| T[9]   | 1017.688        | 2190.288 | 2174.269        | 2175.275        | 2173.259 | T[21]  |
| I[10]  | <b>1125.772</b> | 2089.238 | 2073.219        | 2074.227        | 2072.211 | I[20]  |
| A[11]  | <b>1196.809</b> | 1976.154 | <b>1960.135</b> | 1961.143        | 1959.127 | A[19]  |
| Q[12]  | <b>1324.867</b> | 1895.111 | <b>1889.098</b> | 1890.106        | 1888.090 | Q[18]  |
| G[13]  | <b>1381.889</b> | 1777.058 | 1761.039        | 1762.047        | 1760.032 | G[17]  |
| G[14]  | <b>1438.910</b> | 1720.937 | 1704.918        | 1705.926        | 1703.910 | G[16]  |
| V[15]  | 1537.879        | 1663.015 | 1646.997        | 1646.004        | 1645.989 | V[15]  |
| L[16]  | 1651.063        | 1563.947 | 1547.928        | <b>1548.936</b> | 1546.920 | L[14]  |
| F[17]  | 1748.116        | 1450.893 | 1434.874        | 1435.882        | 1433.866 | F[13]  |
| TW[18] | 1852.159        | 1383.810 | <b>1337.791</b> | 1338.799        | 1336.783 | TW[12] |
| I[19]  | 1975.243        | 1236.767 | 1223.748        | 1224.756        | 1222.741 | I[11]  |
| Q[20]  | 2103.301        | 1126.683 | <b>1110.664</b> | 1111.672        | 1109.656 | Q[10]  |
| A[21]  | 2174.336        | 998.624  | 982.606         | 981.614         | 981.598  | A[9]   |
| V[22]  | 2273.407        | 927.587  | <b>911.569</b>  | 912.576         | 910.561  | V[8]   |
| L[23]  | 2386.491        | 828.519  | <b>812.500</b>  | 813.508         | 811.492  | L[7]   |
| L[24]  | 2499.575        | 715.435  | <b>699.415</b>  | 700.424         | 698.408  | L[6]   |
| P[25]  | 2596.626        | 602.351  | 586.332         | 587.340         | 585.324  | P[5]   |
| K[26]  | 2724.723        | 505.298  | <b>489.279</b>  | <b>490.287</b>  | 488.271  | K[4]   |
| K[27]  | 2852.816        | 377.203  | <b>361.184</b>  | <b>362.192</b>  | 360.177  | K[3]   |
| T[28]  | 2953.895        | 249.108  | 233.089         | 234.097         | 232.082  | T[2]   |
| E[29]  | 3082.908        | 148.060  | 132.042         | 133.050         | 131.034  | E[1]   |



# sp | Q6GSS7 | H2A2A\_MOUSE

LNKLLGK <sup>Dimethyl</sup> <sub>28.03</sub> VTIAQGGVLPNIQAVLLPKKTE

- ▶ fragmentation table for charge state 2+
- ▶ specType=etd
- ▶ score=71.45
- ▶ F113279.dat
- ▶ query=q41602.p1
- ▶ precursor=771.725490
- ▶ chargePrecursor=4
- ▶ itol=0.5

| AA  | c               | y               | z+1             | z+2             | z               | AA   |
|-----|-----------------|-----------------|-----------------|-----------------|-----------------|------|
| L1  | 66.053          | <b>1542.450</b> | 1524.440        | 9.504           | 1533.930        | L120 |
| N1  | 123.054         | 1485.905        | <b>1477.898</b> | 1478.402        | <b>1477.394</b> | N120 |
| K1  | 187.132         | 1428.886        | 1420.877        | <b>1421.381</b> | 1420.373        | K127 |
| L14 | 243.674         | 1364.839        | <b>1356.829</b> | 1357.333        | <b>1356.325</b> | L126 |
| L15 | 300.216         | 1308.297        | 1300.287        | 1300.791        | 1299.783        | L125 |
| G16 | 358.750         | 1251.755        | 1243.745        | <b>1244.249</b> | 1243.241        | G124 |
| K17 | 406.790         | 1223.244        | <b>1215.234</b> | 1215.738        | <b>1214.731</b> | K123 |
| V18 | 456.324         | 1145.181        | <b>1137.171</b> | <b>1137.675</b> | 1136.667        | V122 |
| T19 | 506.840         | 1095.646        | <b>1087.637</b> | <b>1088.141</b> | 1087.133        | T121 |
| T10 | 563.390         | 1045.123        | <b>1037.113</b> | <b>1037.617</b> | 1036.609        | T20  |
| A11 | 608.908         | 988.581         | <b>980.571</b>  | 981.075         | <b>980.067</b>  | A119 |
| G12 | 662.937         | 933.060         | <b>945.053</b>  | <b>945.557</b>  | 944.549         | G118 |
| G13 | 691.448         | 889.033         | <b>881.023</b>  | <b>881.527</b>  | <b>880.519</b>  | G117 |
| G14 | 719.959         | 860.522         | 852.513         | 853.017         | 852.009         | G116 |
| V15 | 769.493         | 832.011         | <b>824.002</b>  | <b>824.506</b>  | 823.498         | V115 |
| L16 | 826.035         | 782.477         | 774.468         | 774.972         | 773.964         | L114 |
| T17 | 874.581         | 728.935         | 721.926         | 722.430         | 721.422         | T113 |
| N18 | <b>931.583</b>  | 677.400         | 669.390         | 669.903         | 668.895         | N112 |
| I19 | 988.125         | 620.867         | 612.858         | 612.862         | 611.874         | I111 |
| Q10 | <b>1052.154</b> | 563.845         | 555.836         | 556.340         | 555.332         | Q110 |
| A11 | <b>1087.673</b> | 499.816         | 491.807         | 492.310         | 491.303         | A10  |
| V12 | <b>1137.207</b> | 484.297         | 476.288         | 476.792         | 475.784         | V10  |
| L13 | <b>1193.749</b> | 414.763         | 406.754         | 407.258         | 406.250         | L11  |
| L14 | 1250.291        | 358.221         | 350.212         | 350.716         | 349.708         | L10  |
| P15 | <b>1298.817</b> | 301.679         | 293.670         | 294.174         | 293.166         | P10  |
| K16 | <b>1362.865</b> | 253.153         | 245.143         | 245.647         | 244.639         | K14  |
| K17 | 1428.917        | 199.105         | 181.096         | 181.600         | 180.592         | K13  |
| T18 | <b>1477.436</b> | 125.058         | 117.048         | 117.552         | 116.544         | T12  |
| E19 | <b>1541.958</b> | 74.534          | 66.524          | 67.028          | 66.021          | E11  |

# sp | Q6GSS7 | H2A2A\_MOUSE

LNKLLGK <sup>Dimethyl</sup> <sub>28.03</sub> VTIAQGGVLPNIQAVLLPKKTE

- ▶ fragmentation table for charge state 3+
- ▶ specType=etd
- ▶ score=71.45
- ▶ F113279.dat
- ▶ query=q41602.p1
- ▶ precursor=771.725490
- ▶ chargePrecursor=4
- ▶ itol=0.5

| AA    | c              | y               | z+1             | z+2            | z     | AA                   |
|-------|----------------|-----------------|-----------------|----------------|-------|----------------------|
| L 1   | 44.377         | <b>1028.635</b> | <b>1023.296</b> |                | 0.672 | <b>1022.960</b> L 29 |
| N 2   | 62.392         | 990.941         | <b>985.601</b>  | <b>985.937</b> |       | 985.265 N 28         |
| K 3   | 125.090        | 952.026         | <b>947.587</b>  | <b>947.923</b> |       | 947.251 K 27         |
| L 4   | 162.795        | 910.228         | 904.889         | 905.225        |       | 904.553 L 26         |
| L 5   | 200.479        | 872.533         | 867.134         | 867.530        |       | 866.955 L 25         |
| G 6   | 219.487        | 834.839         | 829.400         | 829.835        |       | 829.163 G 24         |
| K 7   | 271.529        | 815.832         | 810.402         | 810.828        |       | 810.158 K 23         |
| V 8   | 304.552        | 763.790         | 758.450         | 758.786        |       | 758.114 V 22         |
| T 9   | 336.234        | 730.767         | 725.427         | 725.763        |       | 725.091 T 21         |
| I 10  | 375.929        | 697.084         | 691.745         | 692.081        |       | 691.409 I 20         |
| A 11  | 399.608        | 659.389         | 654.050         | 654.386        |       | 653.714 A 19         |
| Q 12  | 442.294        | 636.720         | 630.374         | 630.707        |       | 630.033 Q 18         |
| G 13  | 461.301        | 593.024         | 587.685         | 588.021        |       | 587.349 G 17         |
| G 14  | 480.308        | 574.017         | 568.678         | 569.013        |       | 568.342 G 16         |
| V 15  | 513.331        | 555.010         | 549.670         | 550.006        |       | 549.334 V 15         |
| L 16  | 551.026        | 521.987         | 516.648         | 516.984        |       | 516.312 L 14         |
| F 17  | 583.377        | 484.292         | 478.953         | 479.289        |       | 478.613 F 13         |
| Tu 18 | 621.391        | 451.942         | 446.603         | 446.938        |       | 446.266 Tu 12        |
| I 19  | 659.088        | 413.927         | 408.588         | 408.924        |       | 408.252 I 11         |
| Q 20  | 701.772        | 376.213         | 370.893         | 371.229        |       | 370.557 Q 10         |
| A 21  | 725.451        | 333.546         | 328.207         | 328.543        |       | 327.871 A 9          |
| V 22  | 758.474        | 309.867         | 304.528         | 304.864        |       | 304.192 V 8          |
| L 23  | 796.168        | 276.844         | 271.505         | 271.841        |       | 271.169 L 7          |
| L 24  | 833.863        | 239.350         | 233.950         | 234.348        |       | 233.674 L 6          |
| P 25  | 866.214        | 201.655         | 196.116         | 196.451        |       | 195.785 P 5          |
| K 26  | 908.912        | 169.104         | 163.765         | 164.101        |       | 163.428 K 4          |
| K 27  | <b>951.611</b> | 126.406         | 121.066         | 121.402        |       | 120.730 K 3          |
| T 28  | 995.293        | 83.708          | 78.368          | 78.704         |       | 78.032 T 2           |
| E 29  | 1028.307       | 50.025          | 44.685          | 45.021         |       | 44.349 E 1           |

# sp | Q6GSS7 | H2A2A\_MOUSE

LNKLLGK<sup>Dimethyl</sup>VTIAQGGVLPNIQAVLLPKKTE  
28.03

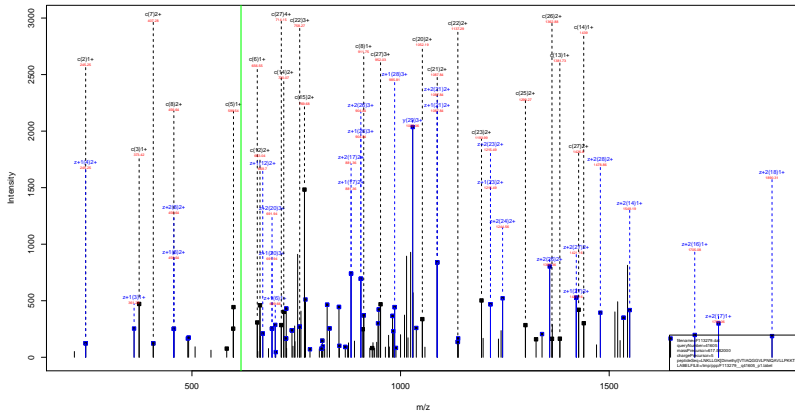

# sp | Q6GSS7 | H2A2A\_MOUSE

LNKLLGK <sup>Dimethyl</sup> <sub>28.03</sub> VTIAQGGVLPNIQAVLLPKKTE

- ▶ fragmentation table for charge state 1+
- ▶ specType=etd
- ▶ score=102.49
- ▶ F113279.dat
- ▶ query=q41605.p1
- ▶ precursor=617.582000
- ▶ chargePrecursor=5
- ▶ itol=0.5

| AA    | c               | y        | z+1             | z+2             | z        | AA    |
|-------|-----------------|----------|-----------------|-----------------|----------|-------|
| L 1   | 131.118         | 3081.892 | 3067.873        | 0.000           | 3066.895 | L 29  |
| N 2   | <b>245.161</b>  | 2970.808 | 2954.789        | 2955.797        | 2951.781 | N 28  |
| K 3   | <b>373.256</b>  | 2856.765 | 2840.746        | 2841.754        | 2839.738 | K 27  |
| L 4   | 486.340         | 2728.670 | 2712.651        | 2713.659        | 2711.643 | L 26  |
| L 5   | <b>599.424</b>  | 2615.585 | 2599.567        | 2600.575        | 2598.560 | L 25  |
| G 6   | <b>656.445</b>  | 2502.502 | 2486.483        | 2487.491        | 2485.475 | G 24  |
| K 7   | <b>812.572</b>  | 2345.480 | 2429.462        | 2430.469        | 2428.454 | K 23  |
| V 8   | <b>911.640</b>  | 2288.354 | 2273.335        | 2274.343        | 2272.327 | V 22  |
| T 9   | 1012.688        | 2190.286 | 2174.267        | 2175.275        | 2173.259 | T 21  |
| I 10  | 1125.772        | 2089.238 | 2073.219        | 2074.227        | 2072.211 | I 20  |
| A 11  | 1169.809        | 1976.154 | 1960.135        | 1961.143        | 1959.127 | A 19  |
| Q 12  | <b>1324.867</b> | 1905.111 | 1889.092        | <b>1890.106</b> | 1888.086 | Q 18  |
| G 13  | <b>1381.889</b> | 1777.058 | 1761.039        | <b>1762.047</b> | 1760.032 | G 17  |
| G 14  | <b>1438.910</b> | 1720.937 | 1704.918        | <b>1705.926</b> | 1703.910 | G 16  |
| V 15  | 1537.879        | 1663.015 | <b>1646.997</b> | 1646.004        | 1645.989 | V 15  |
| L 16  | 1651.063        | 1563.947 | 1547.928        | <b>1548.936</b> | 1546.920 | L 14  |
| F 17  | 1748.116        | 1450.893 | 1434.864        | 1435.872        | 1433.856 | F 13  |
| Tu 18 | 1862.159        | 1383.810 | 1367.791        | <b>1368.799</b> | 1366.783 | Tu 12 |
| I 19  | 1975.243        | 1236.767 | 1223.748        | 1224.756        | 1222.741 | I 11  |
| Q 20  | 2103.301        | 1126.683 | 1110.664        | 1111.672        | 1109.656 | Q 10  |
| A 21  | 2174.336        | 998.624  | <b>982.606</b>  | 983.614         | 981.598  | A 9   |
| V 22  | 2273.407        | 927.587  | <b>911.569</b>  | 912.576         | 910.561  | V 8   |
| L 23  | 2386.491        | 828.519  | <b>812.500</b>  | <b>813.508</b>  | 811.492  | L 7   |
| L 24  | 2499.576        | 715.435  | <b>699.415</b>  | <b>700.424</b>  | 698.408  | L 6   |
| P 25  | 2596.626        | 602.351  | 586.332         | 587.340         | 585.324  | P 5   |
| K 26  | 2724.723        | 505.298  | 489.279         | <b>490.287</b>  | 488.271  | K 4   |
| K 27  | 2852.816        | 377.203  | <b>361.184</b>  | 362.192         | 360.177  | K 3   |
| T 28  | 2953.895        | 249.108  | 233.089         | 234.097         | 232.082  | T 2   |
| E 29  | 3082.938        | 148.060  | 132.042         | 133.050         | 131.034  | E 1   |

# sp | Q6GSS7 | H2A2A\_MOUSE

LNKLLGK <sup>Dimethyl</sup> <sub>28.03</sub> VTIAQGGVLPNIQAVLLPKKTE

- ▶ fragmentation table for charge state 2+
- ▶ specType=etd
- ▶ score=102.49
- ▶ F113279.dat
- ▶ query=q41605.p1
- ▶ precursor=617.582000
- ▶ chargePrecursor=5
- ▶ itol=0.5

| AA   | c               | y              | z+1             | z+2             | z               | AA   |
|------|-----------------|----------------|-----------------|-----------------|-----------------|------|
| L 1  | 66.063          | 1542.450       | <b>1534.440</b> | 0.504           | <b>1533.936</b> | L 20 |
| N 2  | 123.084         | 1485.908       | 1477.899        | <b>1478.402</b> | 1477.354        | N 20 |
| K 3  | 187.132         | 1426.886       | <b>1420.877</b> | <b>1421.381</b> | 1420.373        | K 27 |
| L 4  | 243.674         | 1364.839       | 1356.829        | <b>1357.333</b> | 1356.325        | L 26 |
| L 5  | 300.216         | 1308.297       | 1300.287        | 1292.279        | 1299.783        | L 25 |
| G 6  | 359.726         | 1251.758       | 1243.748        | <b>1244.249</b> | 1243.241        | G 24 |
| K 7  | <b>406.789</b>  | 1223.244       | <b>1215.234</b> | <b>1215.738</b> | 1214.731        | K 23 |
| V 8  | <b>456.324</b>  | 1145.181       | <b>1137.171</b> | <b>1137.675</b> | 1136.667        | V 22 |
| T 9  | 506.846         | 1095.646       | <b>1087.637</b> | <b>1088.141</b> | 1087.133        | T 21 |
| T 10 | 563.390         | 1045.123       | 1037.113        | <b>1037.617</b> | 1036.609        | T 20 |
| A 11 | <b>598.908</b>  | <b>988.581</b> | <b>980.571</b>  | <b>981.075</b>  | 980.067         | A 19 |
| Q 12 | <b>662.937</b>  | 913.066        | 905.056         | <b>905.557</b>  | 904.549         | Q 18 |
| G 13 | <b>691.448</b>  | 899.033        | <b>881.023</b>  | <b>881.527</b>  | 880.519         | G 17 |
| G 14 | <b>719.959</b>  | 860.522        | <b>852.513</b>  | <b>853.017</b>  | <b>852.009</b>  | G 16 |
| V 15 | <b>769.493</b>  | 832.011        | <b>824.002</b>  | <b>824.506</b>  | 823.498         | V 15 |
| L 16 | 826.035         | <b>782.477</b> | 774.468         | 774.972         | 773.964         | L 14 |
| T 17 | 874.561         | <b>725.935</b> | 717.926         | 718.430         | 717.422         | T 13 |
| N 18 | <b>931.583</b>  | 677.409        | <b>669.399</b>  | <b>669.903</b>  | 668.895         | N 12 |
| I 19 | 988.125         | 626.887        | 618.878         | 619.382         | 618.374         | I 11 |
| Q 20 | <b>1052.154</b> | 563.845        | 555.836         | 556.340         | 555.332         | Q 10 |
| A 21 | <b>1087.673</b> | 499.816        | <b>491.807</b>  | <b>492.310</b>  | 491.302         | A 9  |
| V 22 | <b>1137.207</b> | 464.297        | <b>456.288</b>  | <b>456.792</b>  | 455.784         | V 8  |
| L 23 | <b>1193.749</b> | 414.763        | 406.754         | <b>407.258</b>  | 406.250         | L 7  |
| L 24 | 1250.291        | 358.221        | 350.211         | 350.715         | 349.707         | L 6  |
| P 25 | <b>1298.817</b> | 301.679        | 293.670         | 294.174         | 293.166         | P 5  |
| K 26 | <b>1362.865</b> | 251.153        | <b>243.143</b>  | <b>243.647</b>  | 244.639         | K 4  |
| K 27 | <b>1426.912</b> | 189.105        | 181.096         | 181.600         | 180.592         | K 3  |
| T 28 | 1477.436        | 125.058        | 117.049         | 117.552         | 116.544         | T 2  |
| E 29 | 1541.959        | 74.534         | 66.524          | 67.028          | 66.021          | E 1  |

# sp | Q6GSS7 | H2A2A\_MOUSE

LNKLLGK <sup>Dimethyl</sup><sub>28.03</sub> VTIAQGGVLPNIQAVLLPKKTE

- ▶ fragmentation table for charge state 3+
- ▶ specType=etd
- ▶ score=102.49
- ▶ F113279.dat
- ▶ query=q41605.p1
- ▶ precursor=617.582000
- ▶ chargePrecursor=5
- ▶ itol=0.5

| AA  | c              | y               | z+1            | z+2            | z              | AA  |
|-----|----------------|-----------------|----------------|----------------|----------------|-----|
| L1  | 44.377         | <b>1028.635</b> | 1023.206       | 0.672          | 1022.960       | L29 |
| N2  | 82.392         | 990.941         | <b>985.601</b> | <b>985.937</b> | 985.265        | N28 |
| K3  | 125.090        | 952.926         | <b>947.597</b> | <b>947.923</b> | 947.251        | K27 |
| L4  | 162.795        | 910.728         | <b>904.809</b> | <b>905.225</b> | <b>904.553</b> | L26 |
| L5  | 200.479        | 872.511         | <b>867.194</b> | <b>867.530</b> | 866.956        | L25 |
| G6  | 219.487        | 834.830         | <b>829.499</b> | <b>829.835</b> | 829.163        | G24 |
| K7  | 271.529        | 815.832         | <b>810.492</b> | <b>810.828</b> | 810.156        | K23 |
| V8  | 304.952        | 763.790         | <b>758.450</b> | 758.786        | <b>758.114</b> | V22 |
| T9  | 338.214        | 730.767         | <b>725.427</b> | <b>725.763</b> | <b>725.091</b> | T21 |
| I10 | 375.929        | 697.084         | <b>691.745</b> | <b>692.081</b> | 691.409        | I20 |
| A11 | 399.608        | 659.389         | 654.050        | 654.386        | 653.714        | A19 |
| Q12 | 442.294        | 630.710         | 630.371        | 630.707        | 630.035        | Q18 |
| G13 | 461.301        | 593.024         | 587.685        | 588.021        | 587.349        | G17 |
| G14 | 480.308        | 574.017         | 568.678        | 569.013        | 568.342        | G16 |
| V15 | 513.331        | 555.010         | 549.670        | 550.006        | 549.334        | V15 |
| L16 | 551.026        | 521.987         | 516.648        | 516.984        | 516.312        | L14 |
| P17 | <b>583.377</b> | 484.292         | 478.953        | 479.289        | 478.617        | P13 |
| N18 | 621.391        | 451.342         | 446.002        | 446.338        | 445.666        | N12 |
| I19 | 659.088        | 413.927         | 408.588        | 408.924        | 408.252        | I11 |
| Q20 | 701.772        | 376.231         | 370.893        | 371.229        | 370.557        | Q10 |
| A21 | <b>725.451</b> | 333.546         | 328.207        | 328.543        | 327.871        | A9  |
| V22 | <b>758.474</b> | 309.867         | 304.528        | 304.864        | 304.192        | V8  |
| L23 | 796.168        | 276.844         | 271.505        | 271.841        | 271.169        | L7  |
| L24 | 833.861        | 239.150         | 233.810        | 234.146        | 233.474        | L6  |
| P25 | 866.214        | 201.455         | 196.116        | 196.451        | 195.780        | P9  |
| K26 | <b>908.812</b> | 169.154         | 163.785        | 164.121        | 163.429        | K4  |
| K27 | <b>951.611</b> | 126.400         | 121.066        | 121.402        | 120.730        | K3  |
| T28 | 985.293        | 83.708          | 78.368         | 78.704         | 78.032         | T2  |
| E29 | 1028.397       | 50.025          | 44.685         | 45.021         | 44.349         | E1  |

# sp | Q6GSS7 | H2A2A\_MOUSE

LNKLLGK <sup>Dimethyl</sup> <sub>28.03</sub> VTIAQGGVLPNIQAVLLPKKTE

- ▶ fragmentation table for charge state 4+
- ▶ specType=etd
- ▶ score=102.49
- ▶ F113279.dat
- ▶ query=q41605.p1
- ▶ precursor=617.582000
- ▶ chargePrecursor=5
- ▶ itol=0.5

| AA |    | c              | y              | z+1            | z+2            | z              | AA |
|----|----|----------------|----------------|----------------|----------------|----------------|----|
| L  | 1  | 33.535         | <b>771.726</b> | 767.724        | 0.756          | 767.472        | L  |
| N  | 2  | 62.046         | 743.451        | <b>739.453</b> | <b>739.705</b> | <b>739.201</b> | N  |
| K  | 3  | 94.059         | 714.947        | 710.945        | 711.194        | 710.690        | K  |
| L  | 4  | 122.340        | 687.923        | 678.918        | 679.170        | 678.666        | L  |
| L  | 5  | 150.611        | 654.652        | 650.647        | 650.899        | 650.395        | L  |
| G  | 6  | 164.867        | 626.381        | 622.376        | 622.628        | 622.124        | G  |
| K  | 7  | 203.898        | 612.126        | 608.121        | 608.373        | 607.869        | K  |
| V  | 8  | 228.665        | 573.094        | 569.089        | 569.341        | 568.837        | V  |
| T  | 9  | 253.927        | 548.327        | 544.322        | 544.574        | 544.070        | T  |
| T  | 10 | 262.198        | 523.065        | 519.060        | 519.312        | 518.808        | T  |
| A  | 11 | 269.958        | 494.794        | 490.789        | 491.041        | 490.537        | A  |
| Q  | 12 | 331.972        | 477.035        | 473.030        | 473.282        | 472.778        | Q  |
| G  | 13 | 346.228        | 445.020        | 441.015        | 441.267        | 440.763        | G  |
| G  | 14 | 360.483        | 430.765        | 426.760        | 427.012        | 426.508        | G  |
| V  | 15 | 385.250        | 416.509        | 412.504        | 412.757        | 412.253        | V  |
| L  | 16 | 413.521        | 391.742        | 387.737        | 387.989        | 387.486        | L  |
| P  | 17 | 437.784        | 363.471        | 359.466        | 359.718        | 359.215        | P  |
| N  | 18 | 466.295        | 339.208        | 335.203        | 335.455        | 334.951        | N  |
| T  | 19 | 494.566        | 310.897        | 306.891        | 307.143        | 306.641        | T  |
| Q  | 20 | 526.381        | 282.426        | 278.422        | 278.673        | 278.170        | Q  |
| A  | 21 | 544.340        | 250.412        | 246.407        | 246.659        | 246.155        | A  |
| V  | 22 | 569.107        | 232.652        | 228.648        | 228.900        | 228.396        | V  |
| L  | 23 | 597.378        | 207.885        | 203.881        | 204.132        | 203.629        | L  |
| L  | 24 | 625.649        | 179.614        | 175.609        | 175.861        | 175.358        | L  |
| P  | 25 | 649.912        | 151.343        | 147.338        | 147.590        | 147.087        | P  |
| K  | 26 | 681.936        | 127.080        | 123.075        | 123.327        | 122.823        | K  |
| K  | 27 | <b>713.960</b> | 95.056         | 91.052         | 91.304         | 90.800         | K  |
| T  | 28 | <b>739.222</b> | 63.032         | 59.028         | 59.280         | 58.776         | T  |
| E  | 29 | 771.462        | 37.771         | 33.766         | 34.018         | 33.514         | E  |

# sp | Q6GSS7 | H2A2A\_MOUSE

LNKLLGK<sup>Dimethyl</sup>VTIAQGGVLPNIQAVLLPKKTE  
28.03

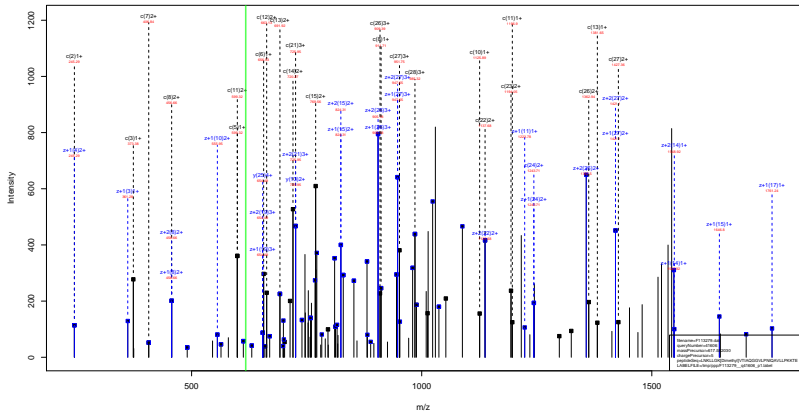



# sp | Q6GSS7 | H2A2A\_MOUSE

LNKLLGK <sup>Dimethyl</sup><sub>28.03</sub> VTIAQGGVLPNIQAVLLPKKTE

- ▶ fragmentation table for charge state 1+
- ▶ specType=etd
- ▶ score=91.70
- ▶ F113279.dat
- ▶ query=q41606.p1
- ▶ precursor=617.582030
- ▶ chargePrecursor=5
- ▶ itol=0.5

| AA    | c               | y        | z+1             | z+2             | z              | AA    |
|-------|-----------------|----------|-----------------|-----------------|----------------|-------|
| L[1]  | 131.118         | 3081.892 | 3067.873        | 0.000           | 3066.895       | L[29] |
| N[2]  | <b>245.161</b>  | 2970.808 | 2954.789        | 2955.797        | 2951.781       | N[28] |
| K[3]  | <b>373.256</b>  | 2856.765 | 2840.746        | 2841.754        | 2839.738       | K[27] |
| L[4]  | 486.340         | 2728.670 | 2712.651        | 2713.659        | 2711.643       | L[26] |
| L[5]  | <b>599.424</b>  | 2615.585 | 2599.567        | 2600.575        | 2598.560       | L[25] |
| Q[6]  | <b>656.445</b>  | 2502.502 | 2486.483        | 2487.491        | 2485.475       | Q[24] |
| K[7]  | <b>812.572</b>  | 2345.480 | 2429.462        | 2430.469        | 2428.454       | K[23] |
| V[8]  | <b>911.640</b>  | 2288.354 | 2273.335        | 2274.343        | 2272.327       | V[22] |
| T[9]  | <b>1012.688</b> | 2190.286 | 2174.267        | 2175.275        | 2173.259       | T[21] |
| I[10] | <b>1125.772</b> | 2089.238 | 2073.219        | 2074.227        | 2072.211       | I[20] |
| A[11] | <b>1196.809</b> | 1976.154 | 1960.135        | 1961.143        | 1959.127       | A[19] |
| Q[12] | <b>1324.867</b> | 1895.111 | 1889.093        | 1890.101        | 1888.085       | Q[18] |
| G[13] | <b>1381.889</b> | 1777.058 | <b>1761.039</b> | 1762.047        | 1760.032       | G[17] |
| G[14] | 1438.910        | 1720.937 | 1704.918        | <b>1705.026</b> | 1703.010       | G[16] |
| V[15] | 1537.879        | 1663.015 | <b>1646.997</b> | 1646.004        | 1645.989       | V[15] |
| L[16] | 1651.063        | 1563.947 | <b>1547.928</b> | <b>1548.936</b> | 1546.920       | L[14] |
| F[17] | 1748.116        | 1450.893 | 1434.864        | 1435.852        | 1433.836       | F[13] |
| T[18] | 1852.159        | 1383.810 | 1377.791        | 1378.799        | 1376.783       | T[12] |
| I[19] | 1975.243        | 1236.767 | <b>1223.748</b> | 1224.756        | 1222.741       | I[11] |
| Q[20] | 2103.301        | 1126.683 | 1110.664        | 1111.672        | 1109.656       | Q[10] |
| A[21] | 2174.336        | 998.624  | 982.606         | 983.614         | 981.598        | A[9]  |
| V[22] | 2273.407        | 927.587  | <b>911.569</b>  | 912.576         | 910.561        | V[8]  |
| L[23] | 2386.491        | 828.519  | <b>812.500</b>  | 813.508         | 811.493        | L[7]  |
| L[24] | 2499.576        | 715.435  | <b>699.415</b>  | <b>700.424</b>  | <b>698.408</b> | L[6]  |
| P[25] | 2596.626        | 602.351  | 586.332         | 587.340         | 585.324        | P[5]  |
| K[26] | 2724.723        | 505.298  | 489.279         | <b>490.287</b>  | 488.271        | K[4]  |
| K[27] | 2852.816        | 377.203  | <b>361.184</b>  | 362.192         | 360.177        | K[3]  |
| T[28] | 2953.895        | 249.108  | 233.089         | 234.097         | 232.082        | T[2]  |
| E[29] | 3082.938        | 148.060  | 132.042         | 133.050         | 131.034        | E[1]  |

# sp | Q6GSS7 | H2A2A\_MOUSE

LNKLLGK <sup>Dimethyl</sup> <sub>28.03</sub> VTIAQGGVLPNIQAVLLPKKTE

- ▶ fragmentation table for charge state 2+
- ▶ specType=etd
- ▶ score=91.70
- ▶ F113279.dat
- ▶ query=q41606.p1
- ▶ precursor=617.582030
- ▶ chargePrecursor=5
- ▶ itol=0.5

| AA    | c               | y              | z+1             | z+2             | z               | AA    |
|-------|-----------------|----------------|-----------------|-----------------|-----------------|-------|
| L[1]  | 66.063          | 1542.450       | 1536.440        | 0.504           | 1533.936        | L[26] |
| N[2]  | 123.084         | 1485.908       | 1477.899        | 1478.402        | 1477.394        | N[28] |
| K[3]  | 187.132         | 1436.886       | <b>1426.877</b> | <b>1421.381</b> | 1420.373        | K[27] |
| L[4]  | 243.674         | 1364.839       | 1356.829        | <b>1357.333</b> | 1356.325        | L[26] |
| L[5]  | 300.216         | 1308.297       | 1300.287        | 1300.791        | 1299.783        | L[25] |
| G[6]  | 358.770         | 1251.755       | <b>1243.745</b> | 1244.249        | <b>1243.241</b> | G[24] |
| K[7]  | <b>406.789</b>  | 1223.244       | 1215.235        | 1215.738        | 1214.731        | K[23] |
| V[8]  | <b>456.324</b>  | 1145.181       | 1137.171        | <b>1137.675</b> | 1136.667        | V[22] |
| T[9]  | 506.846         | 1095.646       | 1087.637        | <b>1088.141</b> | 1087.133        | T[21] |
| I[10] | <b>563.390</b>  | 1045.123       | <b>1037.113</b> | <b>1037.617</b> | 1036.609        | I[20] |
| A[11] | <b>598.908</b>  | <b>986.581</b> | <b>986.571</b>  | <b>987.075</b>  | <b>986.067</b>  | A[19] |
| Q[12] | <b>662.937</b>  | 933.058        | <b>945.053</b>  | <b>945.557</b>  | 944.549         | Q[18] |
| G[13] | <b>691.448</b>  | <b>889.033</b> | <b>881.023</b>  | <b>881.527</b>  | 880.519         | G[17] |
| G[14] | <b>719.959</b>  | 860.522        | <b>852.513</b>  | <b>853.017</b>  | 852.009         | G[16] |
| V[15] | <b>769.493</b>  | 832.011        | <b>824.002</b>  | <b>824.506</b>  | 823.498         | V[15] |
| L[16] | 826.035         | <b>782.477</b> | 774.468         | 774.972         | 773.964         | L[14] |
| F[17] | 874.581         | <b>725.935</b> | 717.926         | 718.430         | 717.422         | F[13] |
| N[18] | 931.983         | 677.409        | <b>669.399</b>  | <b>669.903</b>  | 668.895         | N[12] |
| I[19] | <b>988.125</b>  | 626.887        | <b>612.378</b>  | <b>612.882</b>  | 611.874         | I[11] |
| Q[20] | <b>1052.154</b> | <b>563.845</b> | <b>555.836</b>  | <b>556.340</b>  | 555.332         | Q[10] |
| A[21] | 1087.673        | 499.616        | 491.607         | 492.110         | 491.102         | A[9]  |
| V[22] | <b>1137.207</b> | 464.297        | <b>456.288</b>  | <b>456.792</b>  | 455.784         | V[9]  |
| L[23] | <b>1193.749</b> | 414.763        | <b>406.754</b>  | <b>407.258</b>  | 406.250         | L[7]  |
| L[24] | 1260.293        | 358.221        | 350.211         | 350.715         | 349.707         | L[6]  |
| P[25] | <b>1298.817</b> | 301.679        | 293.670         | 294.174         | 293.166         | P[5]  |
| K[26] | <b>1362.865</b> | 253.153        | <b>245.143</b>  | <b>245.647</b>  | 244.639         | K[4]  |
| K[27] | <b>1426.912</b> | 189.105        | 181.096         | 181.600         | 180.592         | K[3]  |
| T[28] | 1477.436        | 125.058        | 117.049         | 117.552         | 116.544         | T[2]  |
| E[29] | 1541.959        | 74.534         | 66.525          | 67.028          | 66.021          | E[1]  |

# sp | Q6GSS7 | H2A2A\_MOUSE

LNKLLGK <sup>Dimethyl</sup> <sub>28.03</sub> VTIAQGGVLPNIQAVLLPKKTE

- ▶ fragmentation table for charge state 3+
- ▶ specType=etd
- ▶ score=91.70
- ▶ F113279.dat
- ▶ query=q41606.p1
- ▶ precursor=617.582030
- ▶ chargePrecursor=5
- ▶ itol=0.5

| AA    | c              | y              | z+1             | z+2            | z              | AA    |
|-------|----------------|----------------|-----------------|----------------|----------------|-------|
| L[1]  | 44.377         | 1028.635       | <b>1023.296</b> | 0.672          | 1022.960       | L[29] |
| N[2]  | 82.392         | 990.943        | <b>985.601</b>  | 985.937        | <b>985.265</b> | N[28] |
| K[3]  | 125.090        | <b>952.926</b> | <b>947.587</b>  | <b>947.923</b> | <b>947.251</b> | K[27] |
| L[4]  | 162.795        | 939.229        | <b>904.889</b>  | <b>905.225</b> | 904.953        | L[26] |
| L[5]  | 200.479        | 872.533        | 867.194         | 867.530        | 866.958        | L[25] |
| G[6]  | 219.487        | 834.839        | <b>829.499</b>  | <b>829.835</b> | <b>829.163</b> | G[24] |
| K[7]  | 271.529        | <b>815.832</b> | <b>810.492</b>  | <b>810.828</b> | 810.156        | K[23] |
| V[8]  | 304.952        | 763.790        | <b>758.450</b>  | <b>758.786</b> | <b>758.114</b> | V[22] |
| T[9]  | 338.234        | 730.767        | 725.427         | <b>725.763</b> | 725.091        | T[21] |
| I[10] | 375.929        | 667.084        | <b>691.745</b>  | <b>692.081</b> | 691.409        | I[20] |
| A[11] | 399.608        | <b>659.389</b> | <b>654.050</b>  | <b>654.386</b> | 653.714        | A[19] |
| Q[12] | 442.294        | 639.730        | <b>636.371</b>  | <b>636.707</b> | 636.035        | Q[18] |
| G[13] | 461.301        | 593.024        | 587.685         | 588.021        | 587.349        | G[17] |
| G[14] | 480.308        | 574.017        | 568.678         | 569.013        | 568.342        | G[16] |
| V[15] | 513.331        | 555.010        | 549.670         | 550.006        | 549.334        | V[15] |
| L[16] | 551.026        | 521.987        | 516.648         | 516.984        | 516.312        | L[14] |
| P[17] | 583.377        | 484.292        | 478.953         | 479.289        | 478.617        | P[13] |
| N[18] | 651.391        | 451.942        | 446.602         | 446.938        | 446.266        | N[12] |
| I[19] | <b>659.606</b> | 413.927        | 408.588         | 408.924        | 408.252        | I[11] |
| Q[20] | <b>701.772</b> | 376.233        | 370.893         | 371.229        | 370.557        | Q[10] |
| A[21] | <b>725.451</b> | 333.548        | 328.207         | 328.543        | 327.871        | A[9]  |
| V[22] | <b>758.474</b> | 309.867        | 304.528         | 304.864        | 304.192        | V[8]  |
| L[23] | <b>796.168</b> | 276.844        | 271.505         | 271.841        | 271.169        | L[7]  |
| L[24] | 833.663        | 239.150        | 233.810         | 234.146        | 233.474        | L[6]  |
| P[25] | 866.234        | 201.455        | 196.116         | 196.451        | 195.780        | P[5]  |
| K[26] | <b>908.912</b> | 169.104        | 163.765         | 164.101        | 163.429        | K[4]  |
| K[27] | <b>951.611</b> | 126.406        | 121.066         | 121.402        | 120.730        | K[3]  |
| T[28] | <b>985.293</b> | 83.708         | 78.368          | 78.704         | 78.032         | T[2]  |
| E[29] | 1028.307       | 50.025         | 44.685          | 45.021         | 44.349         | E[1]  |

# sp | Q6GSS7 | H2A2A\_MOUSE

LNKLLGK <sup>Dimethyl</sup> <sub>28.03</sub> VTIAQGGVLPNIQAVLLPKKTE

- ▶ fragmentation table for charge state 4+
- ▶ specType=etd
- ▶ score=91.70
- ▶ F113279.dat
- ▶ query=q41606.p1
- ▶ precursor=617.582030
- ▶ chargePrecursor=5
- ▶ itol=0.5

| AA |    | c              | y              | z+1            | z+2            | z              | AA |
|----|----|----------------|----------------|----------------|----------------|----------------|----|
| L  | 1  | 33.535         | <b>771.728</b> | <b>767.724</b> | 0.756          | 707.472        | L  |
| N  | 2  | 62.046         | 743.451        | <b>739.453</b> | <b>739.705</b> | 730.201        | N  |
| K  | 3  | 94.059         | 714.947        | 710.947        | 711.194        | 710.690        | K  |
| L  | 4  | 122.340        | 682.923        | 678.918        | 679.170        | 678.666        | L  |
| L  | 5  | 150.611        | <b>654.652</b> | 650.647        | 650.899        | 650.395        | L  |
| G  | 6  | 164.867        | 626.381        | 622.376        | 622.628        | 622.124        | G  |
| K  | 7  | 203.898        | <b>612.126</b> | 608.121        | 608.373        | 607.869        | K  |
| V  | 8  | 228.665        | 573.094        | 569.089        | 569.341        | 568.837        | V  |
| T  | 9  | 253.927        | 548.327        | 544.322        | 544.574        | 544.070        | T  |
| T  | 10 | 262.198        | 523.065        | 519.060        | 519.312        | 518.808        | T  |
| A  | 11 | 269.958        | 494.794        | <b>490.789</b> | 491.041        | <b>490.537</b> | A  |
| Q  | 12 | 311.972        | 477.035        | 473.030        | 473.282        | 472.778        | Q  |
| G  | 13 | 346.228        | 445.020        | 441.015        | 441.267        | 440.763        | G  |
| G  | 14 | 360.483        | 430.765        | 426.760        | 427.012        | 426.508        | G  |
| V  | 15 | 385.250        | 416.509        | 412.505        | 412.757        | 412.253        | V  |
| L  | 16 | 413.521        | 391.742        | 387.737        | 387.989        | 387.486        | L  |
| P  | 17 | 437.784        | 363.471        | 359.466        | 359.718        | 359.215        | P  |
| N  | 18 | 466.295        | 339.208        | 335.203        | 335.455        | 334.951        | N  |
| T  | 19 | 494.566        | 310.897        | 306.891        | 307.143        | 306.641        | T  |
| Q  | 20 | 526.381        | 282.426        | 278.422        | 278.673        | 278.170        | Q  |
| A  | 21 | 544.340        | 250.412        | 246.407        | 246.659        | 246.155        | A  |
| V  | 22 | 569.107        | 232.652        | 228.646        | 228.898        | 228.396        | V  |
| L  | 23 | 597.378        | 207.885        | 203.881        | 204.132        | 203.629        | L  |
| L  | 24 | 625.649        | 179.614        | 175.609        | 175.861        | 175.358        | L  |
| P  | 25 | 649.912        | 151.343        | 147.338        | 147.590        | 147.087        | P  |
| K  | 26 | 681.936        | 127.080        | 123.075        | 123.327        | 122.823        | K  |
| K  | 27 | <b>713.960</b> | 95.056         | 91.052         | 91.304         | 90.800         | K  |
| T  | 28 | 739.222        | 63.032         | 59.028         | 59.280         | 58.776         | T  |
| E  | 29 | 771.462        | 37.771         | 33.766         | 34.018         | 33.514         | E  |

# sp | Q6GSS7 | H2A2A\_MOUSE

LNKLLGK<sup>Dimethyl</sup>VTIAQGGVLPNIQAVLLPKKTE  
28.03

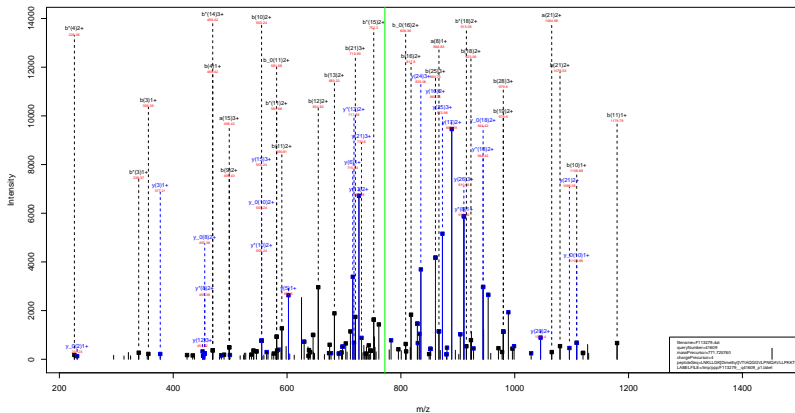

# sp | Q6GSS7 | H2A2A\_MOUSE

LNKLLGK<sup>Dimethyl</sup>VTIAQGGVLPNIQAVLLPKKTE<sup>28.03</sup>

- ▶ fragmentation table for charge state 1+
- ▶ specType=cid
- ▶ score=54.77
- ▶ F113279.dat
- ▶ query=q41609.p1
- ▶ precursor=771.725760
- ▶ chargePrecursor=4
- ▶ itol=0.5

| AA   | a              | a*             | aΔ       | b               | b*             | bΔ             | y              | y*             | yΔ              | AA      |      |
|------|----------------|----------------|----------|-----------------|----------------|----------------|----------------|----------------|-----------------|---------|------|
| L1   | 86.099         | 0.000          | 0.000    | 114.901         | 0.000          | 0.000          | 2603.903       | 2604.903       | 2604.903        | L106    |      |
| R12  | 100.139        | 181.111        | 0.000    | 129.144         | 211.108        | 0.000          | 2670.003       | 2523.181       | 2523.181        | R120    |      |
| R13  | 138.434        | 181.000        | 0.000    | <b>156.279</b>  | <b>319.203</b> | 0.000          | 2696.763       | 2639.738       | 2639.738        | R127    |      |
| L14  | 841.518        | <b>424.282</b> | 0.000    | <b>469.313</b>  | <b>452.287</b> | 0.000          | 2720.670       | 2711.643       | 2710.616        | L106    |      |
| L15  | 154.402        | <b>337.376</b> | 0.000    | <b>362.307</b>  | 0.000          | 0.000          | 2619.000       | 2608.000       | 2607.000        | L106    |      |
| G16  | 111.424        | 0.000          | 0.000    | 169.411         | 202.000        | 0.000          | 2622.003       | 2683.475       | 2684.476        | G124    |      |
| R17  | 112.424        | 203.239        | 0.000    | <b>785.545</b>  | 778.319        | 0.000          | 2440.480       | 2418.454       | 2417.410        | R125    |      |
| V18  | <b>864.619</b> | <b>648.582</b> | 0.000    | 100.411         | 167.000        | 0.000          | 2590.200       | 2572.120       | 2571.140        | V102    |      |
| L19  | 100.100        | 905.602        | 989.050  | <b>905.661</b>  | 1019.020       | <b>877.851</b> | 2190.200       | 2117.200       | 2112.270        | L101    |      |
| H10  | 100.100        | 1061.700       | 1060.740 | <b>1108.745</b> | 1081.710       | 1060           | 2080.234       | 2072.111       | 2071.220        | H10     |      |
| A111 | 1151.107       | 1124.703       | 1114.777 | <b>1179.782</b> | 1162.790       | 1161.772       | 2470.154       | 2499.127       | 2498.143        | A119    |      |
| Q123 | 1279.200       | 1292.410       | 1290.820 | 1314.844        | 1306.814       | 1305.810       | 1659.111       | 1668.066       | 1667.106        | Q118    |      |
| G111 | 1319.200       | 1319.810       | 1319.810 | 1317.810        | 1317.810       | 1316.810       | 1779.111       | 1780.066       | 1779.066        | G117    |      |
| G114 | 1319.200       | 1319.802       | 1319.878 | 1421.804        | 1404.807       | 1403.807       | 1720.037       | 1703.010       | 1702.026        | G114    |      |
| L121 | 1403.107       | 1403.107       | 1414.941 | 1404.941        | 1403.936       | 1402.941       | 1661.011       | 1644.989       | 1643.970        | L121    |      |
| L106 | 1506.944       | 1506.913       | 1506.913 | 1514.913        | 1514.913       | 1513.913       | 1583.940       | 1548.920       | 1547.916        | L104    |      |
| P117 | 1613.014       | 1608.000       | 1608.000 | 1713.000        | 1714.000       | 1713.000       | 1450.000       | 1411.018       | 1412.012        | P113    |      |
| R108 | 1617.107       | 1603.111       | 1619.122 | 1604.112        | 1608.100       | 1627.112       | 1553.010       | 1530.703       | 1530.700        | R114    |      |
| L106 | 1719.211       | 1713.171       | 1714.211 | 1709.211        | 1704.190       | 1704.211       | 1676.211       | 1622.741       | 1621.717        | L101    |      |
| Q101 | 1818.200       | 1811.211       | 1810.200 | 1808.211        | 1805.200       | 1804.211       | 1138.001       | 1109.000       | <b>1108.672</b> | Q110    |      |
| A121 | 1819.117       | 1812.200       | 1811.300 | 1817.112        | 1816.000       | 1816.101       | 1818.101       | <b>198.624</b> | 197.000         | 196.614 | A101 |
| V125 | 1918.100       | 1911.900       | 1910.100 | 1909.100        | 1909.100       | 1908.100       | 1628.111       | <b>827.587</b> | <b>816.561</b>  | 806.919 | V101 |
| L126 | 2014.000       | 2014.410       | 2013.410 | 2009.404        | 2012.430       | 2011.410       | <b>828.519</b> | 101.192        | 101.000         | L107    |      |
| L124 | 2014.013       | 2017.010       | 2016.541 | 2012.540        | 2013.522       | 2014.511       | <b>715.435</b> | 100.410        | <b>697.424</b>  | L101    |      |
| P121 | 2111.000       | 2114.010       | 2113.000 | 2107.001        | 2102.076       | 2101.701       | <b>662.311</b> | 100.124        | <b>104.540</b>  | P101    |      |
| R120 | 2219.102       | 2205.075       | 2205.075 | 2207.075        | 2200.070       | 2200.070       | 1000.000       | 900.200        | 488.221         | R104    |      |
| R127 | 2307.100       | 2300.110       | 2300.110 | 2301.110        | 2301.104       | 2301.111       | <b>377.203</b> | 100.177        | 100.110         | R103    |      |
| L106 | 2408.044       | 2401.011       | 2400.010 | 2398.010        | 2399.012       | 2400.010       | 240.100        | 0.000          | <b>231.098</b>  | L102    |      |
| L124 | 2517.010       | 2501.000       | 2501.010 | 2501.010        | 2504.000       | 2501.010       | 140.100        | 0.000          | 140.000         | L101    |      |

# sp | Q6GSS7 | H2A2A\_MOUSE

LNKLLGK <sup>Dimethyl</sup> <sub>28.03</sub> VTIAQGGVLPNIQAVLLPKKTE

- ▶ fragmentation table for charge state 2+
- ▶ specType=cid
- ▶ score=54.77
- ▶ F113279.dat
- ▶ query=q141609\_p1
- ▶ precursor=771.725760
- ▶ chargePrecursor=4
- ▶ itol=0.5

| AA  | a        | a <sup>+</sup> | a:0   | b        | b <sup>+</sup> | b:0   | y     | y <sup>+</sup> | y:0   | AA   |      |
|-----|----------|----------------|-------|----------|----------------|-------|-------|----------------|-------|------|------|
| L1  | 43.932   | 0.504          | 0.504 | 57.549   | 0.504          | 0.504 | 15.42 | 45.0           | 15.13 | 44.4 | L126 |
| K1  | 100.919  | 0.504          | 0.504 | 114.591  | 0.504          | 0.504 | 14.90 | 50.0           | 14.90 | 49.5 | K20  |
| K1  | 104.921  | 0.504          | 0.504 | 118.611  | 0.504          | 0.504 | 14.38 | 50.0           | 14.38 | 49.0 | K22  |
| L1  | 121.183  | 0.504          | 0.504 | 135.161  | 0.504          | 0.504 | 13.84 | 50.0           | 13.84 | 48.5 | L126 |
| L1  | 127.185  | 0.504          | 0.504 | 141.163  | 0.504          | 0.504 | 13.32 | 50.0           | 13.32 | 48.0 | L126 |
| Q1  | 160.210  | 0.504          | 0.504 | 173.213  | 0.504          | 0.504 | 12.71 | 50.0           | 12.71 | 47.5 | Q24  |
| K1  | 164.209  | 0.504          | 0.504 | 177.212  | 0.504          | 0.504 | 12.19 | 50.0           | 12.19 | 47.0 | K23  |
| V1  | 183.813  | 0.504          | 0.504 | 197.816  | 0.504          | 0.504 | 11.67 | 50.0           | 11.67 | 46.5 | V22  |
| L1  | 194.337  | 0.504          | 0.504 | 208.340  | 0.504          | 0.504 | 11.15 | 50.0           | 11.15 | 46.0 | L121 |
| L10 | 140.878  | 0.504          | 0.504 | 154.876  | 0.504          | 0.504 | 10.63 | 50.0           | 10.63 | 45.5 | L10  |
| A11 | 176.397  | 0.504          | 0.504 | 190.395  | 0.504          | 0.504 | 10.11 | 50.0           | 10.11 | 45.0 | A116 |
| Q12 | 160.427  | 0.504          | 0.504 | 174.424  | 0.504          | 0.504 | 9.59  | 50.0           | 9.59  | 44.5 | Q12  |
| Q13 | 166.937  | 0.504          | 0.504 | 180.935  | 0.504          | 0.504 | 9.07  | 50.0           | 9.07  | 44.0 | Q13  |
| Q14 | 167.448  | 0.504          | 0.504 | 181.446  | 0.504          | 0.504 | 8.55  | 50.0           | 8.55  | 43.5 | Q14  |
| V15 | 140.967  | 0.504          | 0.504 | 144.965  | 0.504          | 0.504 | 8.03  | 50.0           | 8.03  | 43.0 | V15  |
| L16 | 161.524  | 0.504          | 0.504 | 165.522  | 0.504          | 0.504 | 7.51  | 50.0           | 7.51  | 42.5 | L16  |
| L17 | 162.051  | 0.504          | 0.504 | 166.049  | 0.504          | 0.504 | 6.99  | 50.0           | 6.99  | 42.0 | L17  |
| L18 | 162.578  | 0.504          | 0.504 | 166.576  | 0.504          | 0.504 | 6.47  | 50.0           | 6.47  | 41.5 | L18  |
| L19 | 163.104  | 0.504          | 0.504 | 167.102  | 0.504          | 0.504 | 5.95  | 50.0           | 5.95  | 41.0 | L19  |
| Q20 | 163.644  | 0.504          | 0.504 | 167.642  | 0.504          | 0.504 | 5.43  | 50.0           | 5.43  | 40.5 | Q20  |
| A12 | 165.162  | 0.504          | 0.504 | 169.160  | 0.504          | 0.504 | 4.91  | 50.0           | 4.91  | 40.0 | A12  |
| V22 | 1114.506 | 1.008          | 1.008 | 1119.504 | 1.008          | 1.008 | 11.10 | 100.0          | 11.10 | 99.0 | V22  |
| L23 | 1171.708 | 1.008          | 1.008 | 1176.706 | 1.008          | 1.008 | 10.58 | 100.0          | 10.58 | 98.5 | L23  |
| L24 | 1227.700 | 1.008          | 1.008 | 1232.698 | 1.008          | 1.008 | 10.06 | 100.0          | 10.06 | 98.0 | L24  |
| K25 | 1276.902 | 1.008          | 1.008 | 1281.900 | 1.008          | 1.008 | 9.54  | 100.0          | 9.54  | 97.5 | K25  |
| K26 | 1340.104 | 1.008          | 1.008 | 1345.102 | 1.008          | 1.008 | 9.02  | 100.0          | 9.02  | 97.0 | K26  |
| K27 | 1404.402 | 1.008          | 1.008 | 1409.400 | 1.008          | 1.008 | 8.50  | 100.0          | 8.50  | 96.5 | K27  |
| L26 | 1468.606 | 1.008          | 1.008 | 1473.604 | 1.008          | 1.008 | 7.98  | 100.0          | 7.98  | 96.0 | L26  |
| E26 | 1519.447 | 1.008          | 1.008 | 1524.445 | 1.008          | 1.008 | 7.46  | 100.0          | 7.46  | 95.5 | E1   |

# sp | Q6GSS7 | H2A2A\_MOUSE

LNKLLGK <sup>Dimethyl</sup> <sub>28.03</sub> VTIAQGGVLPNIQAVLLPKKTE

- ▶ fragmentation table for charge state 3+
- ▶ specType=cid
- ▶ score=54.77
- ▶ F113279.dat
- ▶ query=q41609\_p1
- ▶ precursor=771.725760
- ▶ chargePrecursor=4
- ▶ itol=0.5

| AA         | a   | a <sup>b</sup> | aΔ <sup>b</sup> | b   | b <sup>a</sup> | bΔ <sup>a</sup> | y               | y <sup>a</sup> | yΔ <sup>a</sup> | AA         |
|------------|-----|----------------|-----------------|-----|----------------|-----------------|-----------------|----------------|-----------------|------------|
| <b>T1</b>  | 26  | 676            | 0.676           | 36  | 1296           | 0.324           | <b>1028.635</b> | 1022.466       | 1022.466        | <b>L69</b> |
| <b>R2</b>  | 67  | 399            | 0.399           | 67  | 4489           | 0.021           | 995.511         | 985.295        | 984.919         | <b>N20</b> |
| <b>K3</b>  | 110 | 121            | 0.121           | 110 | 1210           | 0.009           | <b>952.926</b>  | 949.293        | 948.921         | <b>K27</b> |
| <b>L4</b>  | 147 | 71             | 0.071           | 147 | 2169           | 0.005           | <b>910.228</b>  | <b>904.553</b> | <b>904.295</b>  | <b>L26</b> |
| <b>L5</b>  | 189 | 47             | 0.047           | 189 | 3582           | 0.003           | <b>872.533</b>  | <b>866.858</b> | <b>866.530</b>  | <b>L25</b> |
| <b>G6</b>  | 204 | 47             | 0.047           | 204 | 4181           | 0.002           | <b>854.810</b>  | <b>829.163</b> | <b>828.835</b>  | <b>G24</b> |
| <b>K7</b>  | 216 | 52             | 0.052           | 216 | 4752           | 0.002           | 813.852         | 810.159        | 809.828         | <b>K25</b> |
| <b>V8</b>  | 228 | 54             | 0.054           | 228 | 5292           | 0.002           | 783.789         | 780.144        | 779.788         | <b>V22</b> |
| <b>V9</b>  | 223 | 53             | 0.053           | 223 | 5019           | 0.002           | <b>730.747</b>  | 725.095        | 724.743         | <b>V21</b> |
| <b>I10</b> | 260 | 62             | 0.062           | 260 | 6760           | 0.001           | <b>697.064</b>  | <b>691.408</b> | <b>691.061</b>  | <b>I20</b> |
| <b>A11</b> | 284 | 61             | 0.061           | 284 | 8016           | 0.001           | 650.383         | 653.714        | 653.385         | <b>A19</b> |
| <b>Q12</b> | 277 | 61             | 0.061           | 277 | 7589           | 0.001           | <b>630.815</b>  | <b>629.707</b> | <b>629.707</b>  | <b>Q18</b> |
| <b>G13</b> | 316 | 58             | 0.058           | 316 | 6398           | 0.001           | <b>615.426</b>  | <b>614.318</b> | <b>614.318</b>  | <b>G17</b> |
| <b>G14</b> | 308 | 58             | 0.058           | 308 | 6184           | 0.001           | <b>608.957</b>  | <b>608.820</b> | <b>608.820</b>  | <b>G16</b> |
| <b>V15</b> | 302 | 61             | 0.061           | 302 | 9066           | 0.001           | <b>583.011</b>  | <b>583.011</b> | <b>583.011</b>  | <b>V15</b> |
| <b>L16</b> | 336 | 51             | 0.051           | 336 | 5776           | 0.001           | 535.191         | 535.191        | 535.084         | <b>L14</b> |
| <b>P17</b> | 308 | 51             | 0.051           | 308 | 5776           | 0.001           | <b>494.292</b>  | 494.813        | 494.292         | <b>P13</b> |
| <b>N18</b> | 308 | 54             | 0.054           | 308 | 5514           | 0.001           | <b>451.942</b>  | 448.268        | 448.268         | <b>N12</b> |
| <b>I19</b> | 344 | 51             | 0.051           | 344 | 6356           | 0.001           | <b>413.989</b>  | 409.292        | 409.292         | <b>I11</b> |
| <b>Q20</b> | 386 | 50             | 0.050           | 386 | 6306           | 0.001           | 376.231         | 376.231        | 376.231         | <b>Q19</b> |
| <b>A21</b> | 448 | 48             | 0.048           | 448 | 7184           | 0.001           | 333.540         | 327.871        | 327.843         | <b>A10</b> |
| <b>V22</b> | 417 | 48             | 0.048           | 417 | 7524           | 0.001           | <b>300.891</b>  | 294.191        | 293.894         | <b>V10</b> |
| <b>L23</b> | 453 | 45             | 0.045           | 453 | 8313           | 0.001           | 276.824         | 273.195        | 273.043         | <b>L19</b> |
| <b>L24</b> | 413 | 45             | 0.045           | 413 | 8019           | 0.001           | 239.130         | 233.414        | 233.146         | <b>L16</b> |
| <b>P25</b> | 451 | 45             | 0.045           | 451 | 8313           | 0.001           | 243.455         | 238.790        | 238.452         | <b>P15</b> |
| <b>K26</b> | 418 | 45             | 0.045           | 418 | 7911           | 0.001           | 199.819         | 193.474        | 193.116         | <b>K14</b> |
| <b>K27</b> | 430 | 45             | 0.045           | 430 | 8313           | 0.001           | 178.468         | 170.730        | 170.462         | <b>K10</b> |
| <b>T28</b> | 492 | 45             | 0.045           | 492 | 9774           | 0.001           | 153.783         | 147.071        | 146.714         | <b>T12</b> |
| <b>E29</b> | 513 | 42             | 0.042           | 513 | 10596          | 0.001           | 103.628         | 97.812         | 97.412          | <b>E11</b> |





# sp | Q6GSS7 | H2A2A\_MOUSE

LNKLLGK <sup>Dimethyl</sup> <sub>28.03</sub> VTIAQGGVLPNIQAVLLPKKTE

- ▶ fragmentation table for charge state 1+
- ▶ specType=etd
- ▶ score=96.01
- ▶ F113279.dat
- ▶ query=q41610.p1
- ▶ precursor=771.725760
- ▶ chargePrecursor=4
- ▶ itol=0.5

| AA  | c               | y        | z+1             | z+2             | z              | AA  |
|-----|-----------------|----------|-----------------|-----------------|----------------|-----|
| L1  | 131.118         | 3081.892 | 3067.873        | 0.000           | 3066.895       | L29 |
| N2  | 345.161         | 2970.808 | 2954.789        | 2955.797        | 2951.781       | N38 |
| K3  | <b>373.256</b>  | 2856.765 | 2840.746        | 2841.754        | 2839.738       | K27 |
| L4  | 486.340         | 2728.670 | 2712.651        | 2713.659        | 2711.643       | L26 |
| L5  | <b>599.424</b>  | 2615.585 | 2599.567        | 2600.575        | 2598.560       | L25 |
| Q6  | <b>656.445</b>  | 2502.502 | 2486.483        | 2487.491        | 2485.475       | Q24 |
| K7  | <b>812.572</b>  | 2345.480 | 2429.462        | 2430.469        | 2428.454       | K23 |
| V8  | <b>911.640</b>  | 2248.394 | 2233.335        | 2274.343        | 2272.327       | V22 |
| T9  | 1017.688        | 2100.288 | 2174.267        | 2175.275        | 2173.259       | T21 |
| I10 | <b>1125.772</b> | 2089.238 | 2073.219        | 2074.227        | 2072.211       | I20 |
| A11 | <b>1196.809</b> | 1976.154 | <b>1960.135</b> | 1961.143        | 1959.127       | A19 |
| Q12 | <b>1244.867</b> | 1905.111 | <b>1889.093</b> | 1890.108        | 1888.090       | Q18 |
| G13 | <b>1381.889</b> | 1777.058 | <b>1761.039</b> | 1762.047        | 1760.032       | G17 |
| G14 | <b>1438.910</b> | 1720.037 | 1704.018        | <b>1705.026</b> | 1703.010       | G16 |
| V15 | <b>1537.979</b> | 1663.015 | 1646.997        | 1646.004        | 1645.989       | V15 |
| L16 | 1651.063        | 1563.947 | 1547.928        | <b>1548.936</b> | 1546.920       | L14 |
| P17 | <b>1748.116</b> | 1450.893 | 1434.864        | 1435.852        | 1433.836       | P13 |
| T18 | 1867.159        | 1383.810 | <b>1337.791</b> | 1338.799        | 1336.783       | T12 |
| I19 | <b>1975.243</b> | 1236.767 | <b>1223.748</b> | 1224.756        | 1222.741       | I11 |
| Q20 | 2103.301        | 1126.683 | <b>1110.664</b> | 1111.672        | 1109.656       | Q10 |
| A21 | 2174.336        | 998.624  | 982.606         | 981.614         | <b>981.598</b> | A9  |
| V22 | 2273.407        | 927.587  | <b>911.569</b>  | 912.576         | 910.561        | V8  |
| L23 | 2386.491        | 828.519  | <b>812.500</b>  | 813.508         | 811.493        | L7  |
| L24 | 2499.575        | 715.435  | <b>699.415</b>  | 700.424         | <b>698.408</b> | L6  |
| P25 | 2596.626        | 602.351  | 586.332         | 587.340         | 585.325        | P5  |
| K26 | 2724.723        | 505.298  | <b>489.279</b>  | 490.287         | 488.271        | K4  |
| K27 | 2852.816        | 377.203  | <b>361.184</b>  | 362.192         | 360.177        | K3  |
| T28 | 2951.895        | 249.108  | 233.089         | 234.097         | 232.082        | T2  |
| E29 | 3087.908        | 148.060  | 132.042         | 133.050         | 131.034        | E1  |

# sp | Q6GSS7 | H2A2A\_MOUSE

LNKLLGK <sup>Dimethyl</sup><sub>28.03</sub> VTIAQGGVLPNIQAVLLPKKTE

- ▶ fragmentation table for charge state 2+
- ▶ specType=etd
- ▶ score=96.01
- ▶ F113279.dat
- ▶ query=q41610.p1
- ▶ precursor=771.725760
- ▶ chargePrecursor=4
- ▶ itol=0.5

| AA    | c               | y        | z+1             | z+2             | z               | AA    |
|-------|-----------------|----------|-----------------|-----------------|-----------------|-------|
| L[1]  | 66.063          | 1542.450 | 1538.440        | 0.504           | 1533.930        | L[26] |
| N[2]  | 123.084         | 1485.908 | <b>1477.890</b> | 1478.402        | <b>1477.394</b> | N[28] |
| K[3]  | 187.132         | 1436.886 | <b>1420.877</b> | <b>1421.381</b> | 1420.373        | K[27] |
| L[4]  | 243.674         | 1384.839 | 1356.820        | 1357.333        | <b>1356.325</b> | L[26] |
| L[5]  | 300.216         | 1338.297 | 1309.287        | <b>1300.791</b> | 1299.783        | L[25] |
| G[6]  | 358.726         | 1291.755 | <b>1243.745</b> | <b>1244.249</b> | 1243.241        | G[24] |
| K[7]  | 406.789         | 1223.244 | <b>1215.234</b> | <b>1215.738</b> | 1214.731        | K[23] |
| V[8]  | 456.324         | 1145.181 | <b>1137.171</b> | <b>1137.675</b> | 1136.667        | V[22] |
| T[9]  | 506.846         | 1095.646 | <b>1087.637</b> | <b>1088.141</b> | 1087.133        | T[21] |
| T[10] | 563.390         | 1045.123 | <b>1037.113</b> | <b>1037.617</b> | <b>1036.609</b> | T[20] |
| A[11] | 608.608         | 988.581  | 980.571         | <b>981.075</b>  | 980.067         | A[19] |
| Q[12] | 662.937         | 933.062  | 943.053         | <b>945.557</b>  | 944.549         | Q[18] |
| G[13] | 691.448         | 889.033  | <b>881.023</b>  | <b>881.527</b>  | 880.519         | G[17] |
| G[14] | 719.959         | 860.522  | <b>852.513</b>  | <b>853.017</b>  | 852.009         | G[16] |
| V[15] | 769.493         | 832.011  | <b>824.002</b>  | <b>824.506</b>  | 823.498         | V[15] |
| L[16] | 826.035         | 782.477  | <b>774.468</b>  | <b>774.972</b>  | 773.964         | L[14] |
| T[17] | <b>874.561</b>  | 725.935  | 717.926         | 718.430         | 717.422         | T[13] |
| N[18] | 913.583         | 677.409  | 599.399         | 609.393         | 598.385         | N[12] |
| I[19] | 968.125         | 626.387  | 612.378         | 612.882         | 611.874         | I[11] |
| Q[20] | <b>1052.154</b> | 563.945  | 555.836         | 556.340         | 555.332         | Q[10] |
| A[21] | <b>1087.673</b> | 499.616  | 491.607         | 492.110         | 491.103         | A[9]  |
| V[22] | <b>1137.207</b> | 464.297  | 456.288         | 456.792         | 455.784         | V[8]  |
| L[23] | <b>1193.749</b> | 414.763  | 406.754         | 407.258         | 406.251         | L[7]  |
| L[24] | 1250.291        | 358.221  | 350.211         | 350.716         | 349.709         | L[6]  |
| P[25] | <b>1298.817</b> | 301.679  | 293.670         | 294.174         | 293.166         | P[5]  |
| K[26] | <b>1362.865</b> | 253.153  | 245.143         | 245.647         | 244.639         | K[4]  |
| K[27] | 1426.912        | 189.105  | 181.096         | 181.600         | 180.592         | K[3]  |
| T[28] | <b>1477.436</b> | 125.058  | 117.048         | 117.552         | 116.544         | T[2]  |
| E[29] | 1541.959        | 74.534   | 66.524          | 67.028          | 66.021          | E[1]  |

# sp | Q6GSS7 | H2A2A\_MOUSE

LNKLLGK <sup>Dimethyl</sup> <sub>28.03</sub> VTIAQGGVLPNIQAVLLPKKTE

- ▶ fragmentation table for charge state 3+
- ▶ specType=etd
- ▶ score=96.01
- ▶ F113279.dat
- ▶ query=q41610.p1
- ▶ precursor=771.725760
- ▶ chargePrecursor=4
- ▶ itol=0.5

| AA    | c              | y               | z+1             | z+2            | z              | AA    |
|-------|----------------|-----------------|-----------------|----------------|----------------|-------|
| L[1]  | 44.377         | <b>1028.635</b> | <b>1023.296</b> | 0.672          | 1022.660       | L[29] |
| N[2]  | 62.302         | <b>990.941</b>  | <b>985.601</b>  | <b>985.937</b> | <b>985.265</b> | N[28] |
| K[3]  | 125.090        | 952.326         | <b>947.587</b>  | <b>947.923</b> | 947.251        | K[27] |
| L[4]  | 162.785        | 910.228         | 904.889         | 905.225        | 904.551        | L[26] |
| L[5]  | 200.479        | 872.531         | 867.194         | 867.530        | 866.858        | L[25] |
| G[6]  | 239.487        | 834.835         | 829.499         | 829.835        | 829.163        | G[24] |
| K[7]  | 271.529        | 815.832         | 810.492         | 810.828        | 810.156        | K[23] |
| V[8]  | 304.552        | 793.790         | 788.450         | 788.786        | 788.114        | V[22] |
| T[9]  | 338.234        | 780.767         | 775.427         | 775.763        | 775.091        | T[21] |
| I[10] | 375.929        | 697.084         | 691.745         | 692.081        | 691.409        | I[20] |
| A[11] | 389.608        | 699.388         | 654.050         | 654.386        | 653.714        | A[19] |
| Q[12] | 442.294        | 636.710         | 630.371         | 630.707        | 630.035        | Q[18] |
| G[13] | 461.301        | 593.024         | 587.685         | 588.021        | 587.349        | G[17] |
| G[14] | 480.308        | 574.017         | 568.678         | 569.013        | 568.342        | G[16] |
| V[15] | 513.131        | 555.010         | 549.670         | 550.006        | 549.334        | V[15] |
| L[16] | 551.026        | 521.987         | 516.648         | 516.984        | 516.312        | L[14] |
| P[17] | 583.377        | 484.202         | 478.863         | 479.209        | 478.617        | P[13] |
| N[18] | 621.391        | 451.942         | 446.602         | 446.938        | 446.266        | N[12] |
| I[19] | 659.086        | 413.927         | 408.588         | 408.924        | 408.252        | I[11] |
| Q[20] | 701.772        | 376.233         | 370.893         | 371.229        | 370.557        | Q[10] |
| A[21] | 725.451        | 333.546         | 328.207         | 328.543        | 327.871        | A[9]  |
| V[22] | 758.474        | 309.867         | 304.528         | 304.864        | 304.192        | V[8]  |
| L[23] | 796.188        | 276.844         | 271.505         | 271.841        | 271.169        | L[7]  |
| L[24] | 833.863        | 239.150         | 233.810         | 234.146        | 233.474        | L[6]  |
| T[25] | 869.214        | 201.455         | 196.116         | 196.452        | 195.780        | T[5]  |
| K[26] | 908.912        | 169.100         | 163.760         | 164.101        | 163.429        | K[4]  |
| K[27] | <b>951.611</b> | 138.406         | 133.066         | 133.402        | 132.730        | K[3]  |
| T[28] | <b>985.293</b> | 83.708          | 78.368          | 78.704         | 78.032         | T[2]  |
| E[29] | 1028.307       | 50.025          | 44.685          | 45.021         | 44.349         | E[1]  |

# sp | Q6GSS7 | H2A2A\_MOUSE

LNK<sup>Dimethyl</sup><sub>28.03</sub> LLGKVTIAQGGVLPNIQAVLLPKKTE

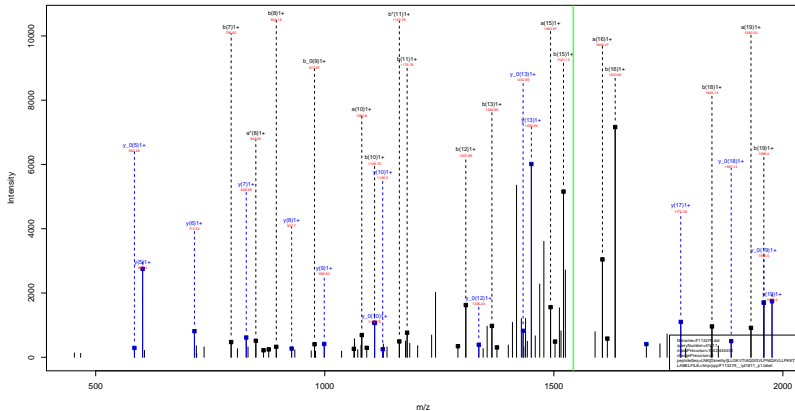

# sp | Q6GSS7 | H2A2A\_MOUSE

LNK<sup>Dimethyl</sup><sub>28.03</sub> LLGKVTIAQGGVLPNIQAVLLPKKTE

- ▶ fragmentation table for charge state 1+
- ▶ specType=cid
- ▶ score=71.42
- ▶ F113279.dat
- ▶ query=q41611.p1
- ▶ precursor=1542.444400
- ▶ chargePrecursor=2
- ▶ itol=0.5

| AA   | a               | a*              | a,0      | b               | b*              | b,0             | y               | y*       | y,0             | AA   |
|------|-----------------|-----------------|----------|-----------------|-----------------|-----------------|-----------------|----------|-----------------|------|
| L1   | 86302           | 8391            | 0.000    | 119.091         | 0.000           | 0.000           | 3681.091        | 3689.091 | 3693.091        | L129 |
| N1   | 200.130         | 181.111         | 0.000    | 226.134         | 211.108         | 0.000           | 2471.108        | 2481.101 | 2592.104        | N20  |
| K1   | 709.208         | 739.219         | 0.000    | 399.201         | 397.234         | 0.000           | 2599.234        | 2679.230 | 3129.234        | K177 |
| L14  | 499.300         | 497.191         | 0.000    | 497.191         | 493.118         | 0.000           | 2199.118        | 2498.114 | 2893.109        | L134 |
| L15  | 1002.414        | 1000.400        | 0.000    | 1000.400        | 1002.402        | 0.000           | 2492.402        | 2512.408 | 3099.404        | L124 |
| G16  | 919.510         | 914.412         | 0.000    | 997.450         | 992.643         | 0.000           | 2514.643        | 2671.444 | 3249.600        | G140 |
| K17  | 1077.600        | 1081.504        | 0.000    | 705.540         | 709.019         | 0.000           | 2417.019        | 2408.424 | 3399.438        | K123 |
| V18  | <b>866.619</b>  | <b>849.592</b>  | 0.000    | <b>894.613</b>  | <b>877.587</b>  | 0.000           | 2398.584        | 2112.117 | 3211.541        | V122 |
| T19  | 700.600         | 700.600         | 0.000    | 890.600         | 890.600         | 0.000           | 3171.600        | 3171.600 | 3171.600        | T121 |
| E19  | <b>1088.758</b> | <b>1083.724</b> | 0.000    | 1082.749        | <b>1108.748</b> | <b>1091.719</b> | 1090.718        | 2089.208 | 3097.211        | E020 |
| A111 | 1151.787        | 1154.781        | 1143.771 | <b>1178.782</b> | <b>1162.756</b> | 1143.772        | <b>1876.154</b> | 1990.171 | <b>1958.143</b> | A109 |
| G123 | 1179.808        | 1182.803        | 1181.814 | <b>1301.841</b> | <b>1350.814</b> | 1289.819        | 1309.811        | 1899.808 | <b>1887.108</b> | G120 |
| G15  | 1130.889        | 1133.884        | 1138.888 | <b>1364.862</b> | 1371.854        | 1346.862        | <b>1777.858</b> | 1992.814 | 2102.814        | G127 |
| G14  | 1107.897        | 1109.892        | 1115.896 | 1424.892        | 1434.887        | 1409.891        | 1729.891        | 1982.892 | <b>1762.826</b> | G146 |
| V125 | <b>1482.937</b> | 1479.948        | 1474.948 | <b>1530.952</b> | 1534.950        | 1519.952        | <b>1982.942</b> | 1981.942 | 1984.940        | V100 |
| L168 | <b>1008.944</b> | 1009.939        | 1008.934 | <b>1634.936</b> | <b>1617.910</b> | 1614.908        | 1614.908        | 1648.926 | 1648.926        | L114 |
| P117 | 1110.994        | 1109.989        | 1105.984 | 1681.984        | 1714.981        | 1711.974        | <b>1458.963</b> | 1443.939 | <b>1432.892</b> | P115 |
| N168 | 1611.119        | 1609.114        | 1609.114 | <b>1845.112</b> | 1838.106        | 1837.111        | 1837.106        | 1838.106 | <b>1835.796</b> | N121 |
| E19  | <b>1938.221</b> | 1933.209        | 1932.211 | <b>1958.218</b> | 1944.190        | 1940.206        | 1939.211        | 2222.241 | 2222.241        | E121 |
| G120 | 1098.989        | 1094.201        | 1092.200 | 2098.200        | 2099.200        | 2098.204        | <b>1136.881</b> | 1140.890 | <b>1108.872</b> | G118 |
| A121 | 1028.989        | 1024.201        | 1022.200 | 2148.200        | 2149.200        | 2148.204        | 1136.881        | 1140.890 | 1140.890        | A119 |
| V122 | 1028.989        | 1023.201        | 1022.200 | 2208.200        | 2209.204        | 2208.204        | 1136.881        | 1140.890 | 1140.890        | V120 |
| L123 | 1034.989        | 1034.413        | 1031.409 | 2258.404        | 2259.408        | 2258.414        | <b>858.518</b>  | 841.499  | 810.500         | L121 |
| L124 | 1044.913        | 1041.901        | 1041.901 | 2401.901        | 2401.901        | 2401.901        | 1136.881        | 1140.890 | 1140.890        | L121 |
| P126 | 2051.006        | 2048.504        | 2043.000 | 2678.000        | 2683.000        | 2681.500        | <b>882.381</b>  | 883.274  | <b>884.340</b>  | P124 |
| K126 | 2051.006        | 2047.000        | 2041.000 | 2707.000        | 2707.000        | 2707.000        | 882.381         | 883.274  | 883.274         | K124 |
| L127 | 2051.006        | 2047.000        | 2041.000 | 2707.000        | 2707.000        | 2707.000        | 882.381         | 883.274  | 883.274         | L124 |
| L128 | 2058.044        | 2053.031        | 2050.013 | 2918.013        | 2918.013        | 2918.013        | 249.100         | 249.100  | 231.000         | L124 |
| E129 | 1017.000        | 1016.000        | 1016.000 | 3009.000        | 3009.000        | 3009.011        | 249.100         | 249.100  | 130.000         | E111 |

# sp | Q6GSS7 | H2A2A\_MOUSE

LNKLLGK<sup>Dimethyl</sup>VTIAQGGVLPNIQAVLLPKKTE  
28.03

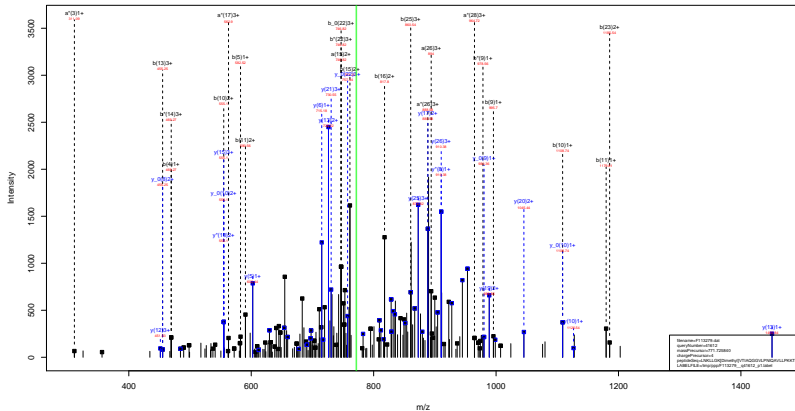

MassBank:FT12076.DSP  
Scan: (Yield=12182)  
MS:MS1:Scan:FT12076.DSP  
MS1:MS1:Scan:FT12076.DSP  
MS1:MS1:Scan:FT12076.DSP  
MS1:MS1:Scan:FT12076.DSP

# sp | Q6GSS7 | H2A2A\_MOUSE

LNKLLGK <sup>Dimethyl</sup>VTIAQGGVLPNIQAVLLPKKTE  
28.03

- ▶ fragmentation table for charge state 1+
- ▶ specType=cid
- ▶ score=44.78
- ▶ F113279.dat
- ▶ query=q41612.p1
- ▶ precursor=771.725840
- ▶ chargePrecursor=4
- ▶ itol=0.5

| AA   | a        | a*             | aΔ    | b               | b*              | bΔ       | y        | y*              | yΔ             | AA              |      |
|------|----------|----------------|-------|-----------------|-----------------|----------|----------|-----------------|----------------|-----------------|------|
| L1   | 380.080  | 380.080        | 0.000 | 114.081         | 0.000           | 0.000    | 3682.882 | 3682.882        | 3682.881       | L209            |      |
| R1   | 392.139  | 392.139        | 0.000 | 126.140         | 0.000           | 0.000    | 3803.941 | 3803.941        | 3803.940       | R200            |      |
| R2   | 404.198  | <b>311.208</b> | 0.000 | <b>138.199</b>  | 0.000           | 0.000    | 3925.000 | 3925.000        | 3925.000       | R201            |      |
| L4   | 441.138  | 441.138        | 0.000 | <b>469.133</b>  | 469.133         | 0.000    | 2726.870 | 2711.643        | 3710.000       | L206            |      |
| L15  | 454.404  | <b>537.374</b> | 0.000 | <b>162.369</b>  | 0.000           | 0.000    | 3253.500 | 3253.500        | 3253.500       | L205            |      |
| Q1   | 411.424  | 411.424        | 0.000 | 139.425         | 0.000           | 0.000    | 3262.520 | 3262.520        | 3262.519       | Q204            |      |
| R7   | 472.462  | <b>750.524</b> | 0.000 | 186.465         | 0.000           | 0.000    | 3448.480 | 3428.484        | 3427.470       | R223            |      |
| V1   | 482.482  | <b>849.592</b> | 0.000 | <b>194.613</b>  | 0.000           | 0.000    | 3520.280 | 3527.281        | 3511.000       | V202            |      |
| L19  | 498.508  | 498.508        | 0.000 | <b>905.611</b>  | <b>978.615</b>  | 978.615  | 377.200  | 2130.200        | 2137.200       | L202            |      |
| I10  | 488.588  | 488.588        | 0.000 | <b>1108.745</b> | 1108.745        | 0.000    | 3888.240 | 3874.241        | 3871.000       | I201            |      |
| A11  | 1151.109 | 1151.109       | 0.000 | <b>1118.777</b> | <b>1178.782</b> | 1178.782 | 3186.154 | 3199.157        | 3198.143       | A116            |      |
| Q12  | 1179.486 | 1179.486       | 0.000 | 1184.484        | 1184.484        | 0.000    | 3369.144 | 3368.000        | 3368.000       | Q108            |      |
| Q13  | 1139.466 | 1139.466       | 0.000 | 1144.464        | 1144.464        | 0.000    | 3377.000 | 3376.000        | 3376.000       | Q117            |      |
| Q14  | 1193.486 | 1193.486       | 0.000 | 1204.484        | 1204.484        | 0.000    | 3463.000 | 3453.000        | 3453.000       | Q116            |      |
| L11  | 1483.107 | 1483.107       | 0.000 | 1494.104        | 1494.104        | 0.000    | 3601.000 | 3591.000        | 3591.000       | L115            |      |
| L106 | 1306.041 | 1306.041       | 0.000 | 1316.038        | 1316.038        | 0.000    | 3583.000 | 3583.000        | 3583.000       | L104            |      |
| P17  | 1613.024 | 1613.024       | 0.000 | 1623.021        | 1623.021        | 0.000    | 3743.000 | <b>1450.863</b> | 3433.000       | 3432.000        | P113 |
| R16  | 1317.137 | 1317.137       | 0.000 | 1327.134        | 1327.134        | 0.000    | 3587.124 | 3583.824        | 3583.760       | R112            |      |
| L101 | 1170.412 | 1170.412       | 0.000 | 1180.409        | 1180.409        | 0.000    | 3509.200 | 3499.200        | 3499.200       | L100            |      |
| Q20  | 1058.480 | 1058.480       | 0.000 | 1068.477        | 1068.477        | 0.000    | 3388.200 | <b>1126.683</b> | 1109.000       | <b>1108.672</b> | Q100 |
| A21  | 1139.117 | 1139.117       | 0.000 | 1149.114        | 1149.114        | 0.000    | 3130.000 | <b>998.624</b>  | 981.000        | <b>998.614</b>  | A100 |
| V12  | 1238.400 | 1238.400       | 0.000 | 1248.397        | 1248.397        | 0.000    | 3238.000 | <b>927.581</b>  | <b>910.561</b> | 903.000         | V100 |
| L24  | 1411.409 | 1411.409       | 0.000 | 1421.406        | 1421.406        | 0.000    | 3381.000 | <b>878.519</b>  | <b>861.492</b> | 854.000         | L111 |
| L24  | 1354.403 | 1354.403       | 0.000 | 1364.400        | 1364.400        | 0.000    | 3284.000 | <b>715.435</b>  | 708.000        | <b>697.424</b>  | L101 |
| P15  | 1313.100 | 1313.100       | 0.000 | 1323.097        | 1323.097        | 0.000    | 3288.000 | <b>662.351</b>  | 655.000        | 648.000         | P101 |
| R16  | 1216.101 | 1216.101       | 0.000 | 1226.098        | 1226.098        | 0.000    | 3189.000 | 688.211         | 681.000        | 674.000         | R101 |
| R27  | 1017.100 | 1017.100       | 0.000 | 1027.097        | 1027.097        | 0.000    | 307.000  | 300.177         | 300.183        | R101            |      |
| L20  | 1017.100 | 1017.100       | 0.000 | 1027.097        | 1027.097        | 0.000    | 307.000  | 300.177         | 300.183        | L101            |      |
| L20  | 1017.100 | 1017.100       | 0.000 | 1027.097        | 1027.097        | 0.000    | 307.000  | 300.177         | 300.183        | L101            |      |



# sp | Q6GSS7 | H2A2A\_MOUSE

LNKLLGK <sup>Dimethyl</sup>VTIAQGGVLPNIQAVLLPKKTE  
28.03

- ▶ fragmentation table for charge state 2+
- ▶ specType=cid
- ▶ score=44.78
- ▶ F113279.dat
- ▶ query=q41612.p1
- ▶ precursor=771.725840
- ▶ chargePrecursor=4
- ▶ itol=0.5

| AA  | a              | a*             | a±0            | b               | b*              | b±0             | y              | y*             | y±0            | AA   |
|-----|----------------|----------------|----------------|-----------------|-----------------|-----------------|----------------|----------------|----------------|------|
| L1  | 41.552         | 8.524          | 8.524          | 19.543          | 0.524           | 0.524           | 1642.420       | 1233.036       | 1331.444       | L156 |
| R2  | 100.913        | 12.020         | 8.524          | 124.974         | 1.020           | 0.524           | 1493.961       | 1471.956       | 1416.061       | R220 |
| R3  | 164.632        | 136.110        | 8.524          | 178.618         | 110.106         | 0.524           | 1438.889       | 1426.371       | 1416.061       | R222 |
| L4  | 221.561        | 212.650        | 8.524          | 238.160         | 226.647         | 0.524           | 1364.830       | 1356.325       | 1356.325       | L126 |
| L5  | 277.500        | 269.970        | 8.524          | 290.700         | 282.180         | 0.524           | 1308.397       | 1299.760       | 1299.760       | L128 |
| Q6  | 336.438        | 297.710        | 8.524          | 339.213         | 311.190         | 0.524           | 1261.750       | 1243.241       | 1242.740       | Q24  |
| R7  | 384.270        | 351.700        | 8.524          | 389.270         | 368.763         | 0.524           | 1221.244       | 1214.731       | 1214.731       | R225 |
| V8  | 434.111        | 425.360        | 8.524          | 444.611         | 436.847         | 0.524           | 1185.187       | 1178.669       | 1178.669       | V222 |
| V9  | <b>484.337</b> | 475.623        | 475.371        | <b>488.334</b>  | <b>489.821</b>  | <b>489.329</b>  | 1095.949       | 1087.133       | 1100.943       | V221 |
| I10 | <b>540.878</b> | 532.088        | 531.874        | <b>554.876</b>  | <b>556.363</b>  | <b>555.871</b>  | 1045.123       | 1036.569       | 1036.111       | I221 |
| A11 | 596.587        | 587.796        | 587.582        | <b>599.395</b>  | <b>591.882</b>  | <b>591.390</b>  | <b>988.581</b> | <b>980.967</b> | 979.216        | A119 |
| Q12 | <b>648.427</b> | <b>631.933</b> | <b>631.423</b> | <b>654.424</b>  | <b>656.911</b>  | <b>656.419</b>  | <b>953.862</b> | <b>944.549</b> | 944.549        | Q119 |
| Q13 | 699.267        | 690.476        | <b>659.932</b> | <b>682.935</b>  | <b>674.432</b>  | <b>673.939</b>  | <b>889.833</b> | <b>880.515</b> | <b>880.027</b> | Q117 |
| Q14 | <b>697.448</b> | 688.657        | 688.443        | <b>711.444</b>  | <b>702.932</b>  | <b>702.440</b>  | <b>860.522</b> | <b>852.020</b> | <b>851.517</b> | Q116 |
| V15 | <b>746.963</b> | <b>738.469</b> | 738.255        | <b>760.960</b>  | <b>752.467</b>  | <b>751.974</b>  | <b>832.981</b> | 824.479        | 824.479        | V119 |
| L16 | 800.269        | <b>795.011</b> | <b>794.518</b> | <b>817.523</b>  | <b>809.000</b>  | <b>808.517</b>  | <b>782.477</b> | 773.964        | 773.472        | L124 |
| F17 | 852.011        | <b>843.537</b> | 843.282        | <b>866.044</b>  | <b>857.532</b>  | <b>857.040</b>  | <b>725.935</b> | <b>717.422</b> | <b>716.930</b> | F113 |
| R18 | 900.212        | 891.520        | <b>900.067</b> | <b>923.070</b>  | <b>914.556</b>  | <b>914.064</b>  | <b>677.409</b> | 668.896        | 668.404        | R123 |
| L19 | 950.014        | 941.422        | 941.208        | <b>971.098</b>  | <b>962.586</b>  | <b>962.094</b>  | <b>611.874</b> | 603.361        | 602.869        | L111 |
| Q20 | 1000.844       | 991.251        | 991.036        | <b>1014.841</b> | <b>1006.328</b> | <b>1005.836</b> | <b>565.312</b> | <b>556.800</b> | 556.308        | Q110 |
| A21 | 1050.582       | 1040.640       | 1040.425       | 1070.169        | 1060.646        | 1060.154        | 489.813        | 481.301        | 480.811        | A20  |
| V22 | 1114.408       | 1103.983       | 1103.960       | 1133.980        | 1124.930        | 1124.907        | 404.297        | 400.760        | <b>405.922</b> | V20  |
| L23 | 1171.238       | 1160.720       | 1160.711       | <b>1185.236</b> | 1176.722        | 1176.710        | 354.792        | 350.260        | 350.730        | L12  |
| L24 | 1227.068       | 1216.260       | 1216.270       | 1241.770        | 1233.260        | 1233.270        | 304.291        | 300.760        | 300.730        | L10  |
| F25 | 1276.307       | 1267.780       | 1267.481       | 1296.340        | 1287.910        | 1287.790        | 254.811        | 250.760        | 250.730        | F11  |
| R26 | 1340.034       | 1331.931       | 1331.949       | 1354.962        | 1346.930        | 1346.930        | 205.533        | 204.620        | 204.710        | R24  |
| R27 | 1404.402       | 1396.880       | 1396.960       | 1418.360        | 1410.880        | 1410.880        | 148.100        | 148.700        | 148.100        | R23  |
| L28 | 1454.036       | 1446.412       | 1446.500       | 1468.922        | 1460.410        | 1460.918        | 125.000        | 125.500        | 125.000        | L12  |
| L29 | 1518.497       | 1510.920       | 1510.494       | 1533.484        | 1524.910        | 1524.418        | 74.910         | 84.920         | 85.200         | L11  |

# sp | Q6GSS7 | H2A2A\_MOUSE

LNKLLGK <sup>Dimethyl</sup>VTIAQGGVLPNIQAVLLPKKTE  
28.03

- ▶ fragmentation table for charge state 3+
- ▶ specType=cid
- ▶ score=44.78
- ▶ F113279.dat
- ▶ query=q41612.p1
- ▶ precursor=771.725840
- ▶ chargePrecursor=4
- ▶ itol=0.5

| AA  | a          | a*         | aΔ           | b            | b*           | bΔ         | y          | y*         | yΔ          | AA          |            |
|-----|------------|------------|--------------|--------------|--------------|------------|------------|------------|-------------|-------------|------------|
| L1  | 26         | 209        | 0.672        | 0.672        | 38           | 392        | 0.672      | 302        | 823         | 1122        | 52         |
| R2  | 19         | 200        | 0.708        | 0.672        | 35           | 371        | 0.672      | 300        | 811         | 1093        | 36         |
| R3  | 152        | 683        | 0.64         | 0.672        | 118          | 415        | 1.13       | 739        | 872         | <b>952</b>  | <b>926</b> |
| L4  | 147        | 778        | 1.62         | 1.02         | 137          | 100        | 1.51       | 434        | 0.672       | <b>910</b>  | <b>328</b> |
| L5  | 135        | 872        | 1.78         | 1.00         | 0.672        | 168        | 369        | 1.38       | 0.672       | <b>872</b>  | <b>533</b> |
| Q6  | 204        | 476        | 1.08         | 1.00         | 0.672        | 213        | 811        | 2.08       | 1.00        | <b>834</b>  | <b>839</b> |
| R7  | 276        | 522        | 2.02         | 1.00         | 0.672        | 288        | 881        | 2.02       | 1.00        | <b>815</b>  | <b>832</b> |
| V8  | 338        | 644        | 2.01         | 1.00         | 0.672        | 368        | 911        | 2.01       | 1.00        | <b>788</b>  | <b>614</b> |
| L9  | 323        | 227        | 2.17         | 1.512        | 3.12         | 223        | 332        | 5.03       | 1.00        | <b>730</b>  | <b>747</b> |
| I10 | 380        | 622        | 2.05         | 1.00         | 0.672        | 384        | 578        | 2.05       | 1.00        | <b>697</b>  | <b>684</b> |
| A11 | 384        | 601        | 2.08         | 1.025        | 2.08         | 502        | 388        | 2.07       | 1.025       | <b>659</b>  | <b>388</b> |
| Q12 | 477        | 209        | 2.01         | 1.012        | 2.01         | 438        | 811        | 2.01       | 1.012       | <b>630</b>  | <b>635</b> |
| Q13 | 476        | 208        | 2.00         | 1.012        | 2.00         | 435        | 808        | 2.00       | 1.012       | <b>628</b>  | <b>632</b> |
| Q14 | 488        | 214        | 2.09         | 1.030        | 2.09         | 474        | 833        | 2.09       | 1.030       | <b>618</b>  | <b>617</b> |
| L15 | 536        | 708        | 2.02         | 1.00         | 0.672        | 545        | 525        | 2.02       | 1.00        | <b>585</b>  | <b>618</b> |
| L16 | 536        | 708        | 2.02         | 1.00         | 0.672        | 545        | 525        | 2.02       | 1.00        | <b>578</b>  | <b>618</b> |
| P17 | 602        | 577        | <b>3.62</b>  | <b>4.094</b> | <b>3.62</b>  | 366        | 137        | 1.00       | <b>377</b>  | <b>626</b>  |            |
| T18 | 686        | 384        | 0.672        | 0.672        | 0.672        | 618        | 540        | 0.672      | 0.672       | <b>451</b>  | <b>642</b> |
| I19 | 644        | 279        | <b>0.18</b>  | <b>4.03</b>  | <b>0.18</b>  | 375        | 413        | 0.175      | <b>647</b>  | <b>735</b>  |            |
| Q20 | 688        | 492        | 0.672        | 0.672        | 0.672        | 688        | 421        | 0.672      | 0.672       | <b>690</b>  | <b>685</b> |
| A21 | 710        | 444        | <b>7.64</b>  | <b>7.68</b>  | <b>7.64</b>  | <b>718</b> | <b>775</b> | <b>714</b> | <b>1100</b> | <b>713</b>  | <b>772</b> |
| V22 | 718        | 600        | 1.00         | 1.00         | 1.00         | <b>723</b> | <b>790</b> | <b>747</b> | <b>1233</b> | <b>748</b>  | <b>730</b> |
| L23 | <b>781</b> | <b>161</b> | 1.75         | 1.00         | 1.75         | 138        | 180        | 1.88       | 1.00        | <b>278</b>  | <b>284</b> |
| L24 | 811        | 130        | 1.13         | 1.00         | 1.13         | 828        | 182        | 1.13       | 1.00        | <b>822</b>  | <b>184</b> |
| P25 | <b>851</b> | <b>207</b> | 2.07         | 1.00         | 2.07         | <b>860</b> | <b>539</b> | 2.07       | 1.00        | <b>851</b>  | <b>207</b> |
| R26 | <b>893</b> | <b>505</b> | <b>8.88</b>  | <b>2.30</b>  | 0.672        | 903        | 519        | 0.672      | 0.672       | <b>897</b>  | <b>505</b> |
| R27 | <b>938</b> | <b>404</b> | 0.672        | 0.672        | 0.672        | 948        | 269        | 0.672      | 0.672       | <b>938</b>  | <b>404</b> |
| L28 | 970        | 288        | <b>9.64</b>  | <b>2.63</b>  | 0.672        | 979        | 611        | 0.672      | 0.672       | <b>973</b>  | <b>614</b> |
| L29 | 1013       | 209        | <b>1.007</b> | <b>4.25</b>  | <b>1.007</b> | 1023       | 209        | 1.007      | 4.25        | <b>1013</b> | <b>209</b> |

# sp | Q6GSS7 | H2A2A\_MOUSE

LNKLLGK<sup>Dimethyl</sup>VTIAQGGVLPNIQAVLLPKKTE  
28.03

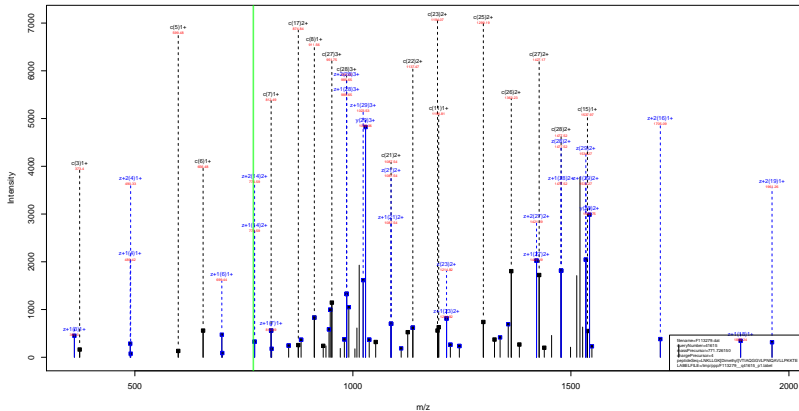

# sp | Q6GSS7 | H2A2A\_MOUSE

LNKLLGK <sup>Dimethyl</sup> 28.03 VTIAQGGVLPNIQAVLLPKKTE

- ▶ fragmentation table for charge state 1+
- ▶ specType=etd
- ▶ score=96.64
- ▶ F113279.dat
- ▶ query=q41615.p1
- ▶ precursor=771.726150
- ▶ chargePrecursor=4
- ▶ itol=0.5

| AA     | c               | y        | z+1             | z+2             | z        | AA     |
|--------|-----------------|----------|-----------------|-----------------|----------|--------|
| L[1]   | 131.118         | 3081.892 | 3067.873        | 0.000           | 3066.895 | L[29]  |
| N[2]   | 345.161         | 2970.808 | 2954.789        | 2955.797        | 2951.781 | N[28]  |
| K[3]   | <b>373.256</b>  | 2856.765 | 2840.746        | 2841.754        | 2839.738 | K[27]  |
| L[4]   | 486.340         | 2728.670 | 2712.651        | 2713.659        | 2711.643 | L[26]  |
| L[5]   | <b>599.424</b>  | 2615.585 | 2599.567        | 2600.575        | 2598.560 | L[25]  |
| Q[6]   | <b>656.445</b>  | 2502.502 | 2486.483        | 2487.491        | 2485.475 | Q[24]  |
| K[7]   | <b>812.572</b>  | 2345.480 | 2429.462        | 2430.469        | 2428.454 | K[23]  |
| V[8]   | <b>911.640</b>  | 2288.354 | 2273.335        | 2274.343        | 2272.327 | V[22]  |
| T[9]   | 1017.688        | 2190.286 | 2174.267        | 2175.275        | 2173.259 | T[21]  |
| I[10]  | <b>1125.772</b> | 2089.238 | 2073.219        | 2074.227        | 2072.211 | I[20]  |
| A[11]  | <b>1196.809</b> | 1976.154 | 1960.135        | <b>1961.143</b> | 1959.127 | A[19]  |
| Q[12]  | <b>1324.867</b> | 1895.111 | <b>1889.098</b> | 1890.106        | 1888.090 | Q[18]  |
| G[13]  | <b>1381.889</b> | 1777.058 | 1761.039        | 1762.047        | 1760.032 | G[17]  |
| G[14]  | <b>1438.910</b> | 1720.937 | 1704.918        | <b>1705.926</b> | 1703.910 | G[16]  |
| V[15]  | <b>1537.979</b> | 1663.015 | 1646.997        | 1646.004        | 1645.989 | V[15]  |
| L[16]  | 1651.063        | 1563.947 | <b>1547.928</b> | 1548.936        | 1546.920 | L[14]  |
| P[17]  | 1748.116        | 1450.893 | 1434.874        | 1435.882        | 1433.866 | P[13]  |
| TW[18] | 1852.159        | 1383.810 | <b>1337.791</b> | 1338.799        | 1336.783 | TW[12] |
| I[19]  | 1975.243        | 1236.767 | <b>1223.748</b> | 1224.756        | 1222.741 | I[11]  |
| Q[20]  | 2103.301        | 1126.683 | <b>1110.664</b> | 1111.672        | 1109.656 | Q[10]  |
| A[21]  | 2174.336        | 998.624  | 982.606         | 981.614         | 981.598  | A[9]   |
| V[22]  | 2273.407        | 927.587  | <b>911.569</b>  | 912.576         | 910.561  | V[8]   |
| L[23]  | 2386.491        | 828.519  | <b>812.500</b>  | <b>813.508</b>  | 811.492  | L[7]   |
| L[24]  | 2499.576        | 715.435  | <b>699.415</b>  | <b>700.424</b>  | 698.408  | L[6]   |
| P[25]  | 2596.626        | 602.351  | 586.332         | 587.340         | 585.324  | P[5]   |
| K[26]  | 2724.723        | 505.298  | <b>489.279</b>  | <b>490.287</b>  | 488.271  | K[4]   |
| K[27]  | 2852.816        | 377.203  | <b>361.184</b>  | 362.192         | 360.177  | K[3]   |
| T[28]  | 2953.895        | 249.108  | 233.089         | 234.097         | 232.082  | T[2]   |
| E[29]  | 3082.938        | 148.060  | 132.042         | 133.050         | 131.034  | E[1]   |

# sp | Q6GSS7 | H2A2A\_MOUSE

LNKLLGK <sup>Dimethyl</sup> <sub>28.03</sub> VTIAQGGVLPNIQAVLLPKKTE

- ▶ fragmentation table for charge state 2+
- ▶ specType=etd
- ▶ score=96.64
- ▶ F113279.dat
- ▶ query=q41615.p1
- ▶ precursor=771.726150
- ▶ chargePrecursor=4
- ▶ itol=0.5

| AA | c               | y               | z+1             | z+2             | z               | AA   |
|----|-----------------|-----------------|-----------------|-----------------|-----------------|------|
| L1 | 66.053          | <b>1542.450</b> | <b>1534.440</b> | 9.504           | <b>1533.936</b> | L126 |
| N1 | 123.054         | 1485.905        | <b>1477.898</b> | 1478.402        | <b>1477.394</b> | N128 |
| K1 | 187.132         | 1428.889        | <b>1420.877</b> | <b>1421.381</b> | 1420.373        | K127 |
| L1 | 243.674         | 1364.839        | 1366.620        | 1357.333        | <b>1356.325</b> | L126 |
| L1 | 300.216         | 1308.297        | 1300.287        | 1290.791        | 1299.783        | L125 |
| G1 | 358.758         | 1251.755        | <b>1243.745</b> | <b>1244.249</b> | 1243.241        | G124 |
| K1 | 406.799         | <b>1223.244</b> | <b>1215.234</b> | 1215.738        | <b>1214.731</b> | K123 |
| V1 | 456.324         | 1145.181        | <b>1137.171</b> | <b>1137.675</b> | 1136.667        | V122 |
| T1 | 506.840         | 1095.646        | <b>1087.637</b> | 1088.141        | <b>1087.133</b> | T121 |
| T1 | 563.380         | 1045.123        | <b>1037.113</b> | <b>1037.617</b> | 1036.609        | T20  |
| A1 | 608.909         | 988.581         | <b>980.571</b>  | <b>981.075</b>  | <b>980.067</b>  | A119 |
| G1 | 662.937         | 933.060         | <b>945.053</b>  | <b>945.557</b>  | 944.549         | G118 |
| G1 | 691.448         | 889.033         | <b>881.023</b>  | <b>881.527</b>  | 880.519         | G117 |
| G1 | 719.959         | 860.522         | <b>852.513</b>  | <b>853.017</b>  | 852.009         | G116 |
| V1 | 769.493         | 832.011         | 824.002         | 824.506         | 823.498         | V115 |
| L1 | 820.035         | 782.477         | <b>774.468</b>  | <b>774.972</b>  | 773.964         | L114 |
| T1 | <b>874.561</b>  | 728.935         | 721.925         | 718.916         | 717.421         | T113 |
| N1 | <b>931.583</b>  | 677.400         | 669.390         | 669.903         | 668.905         | N112 |
| I1 | 988.125         | 620.867         | 612.858         | 612.862         | 611.874         | I111 |
| Q1 | <b>1052.154</b> | 563.845         | 555.836         | 556.340         | 555.332         | Q110 |
| A2 | <b>1087.673</b> | 499.816         | 491.807         | 492.310         | 491.303         | A10  |
| V2 | <b>1137.207</b> | 494.297         | 486.288         | 486.792         | 485.784         | V9   |
| L2 | <b>1193.749</b> | 434.763         | 426.754         | 427.258         | 426.251         | L11  |
| L2 | 1250.291        | 358.221         | 350.212         | 350.716         | 349.708         | L10  |
| P2 | <b>1298.817</b> | 301.679         | 293.670         | 294.174         | 293.166         | P9   |
| K2 | <b>1362.865</b> | 253.153         | 245.143         | 245.647         | 244.639         | K4   |
| K2 | <b>1426.912</b> | 189.105         | 181.096         | 181.600         | 180.592         | K3   |
| T2 | <b>1477.436</b> | 125.058         | 117.048         | 117.552         | 116.544         | T1   |
| E2 | 1541.958        | 74.534          | 66.524          | 67.028          | 66.021          | E1   |

# sp | Q6GSS7 | H2A2A\_MOUSE

LNKLLGK <sup>Dimethyl</sup> <sub>28.03</sub> VTIAQGGVLPNIQAVLLPKKTE

- ▶ fragmentation table for charge state 3+
- ▶ specType=etd
- ▶ score=96.64
- ▶ F113279.dat
- ▶ query=q41615.p1
- ▶ precursor=771.726150
- ▶ chargePrecursor=4
- ▶ itol=0.5

| AA   | c              | y               | z+1             | z+2            | z              | AA   |
|------|----------------|-----------------|-----------------|----------------|----------------|------|
| L 1  | 44.377         | <b>1028.635</b> | <b>1023.296</b> | 0.672          | 1022.960       | L 29 |
| N 2  | 62.302         | <b>990.941</b>  | <b>985.601</b>  | <b>985.937</b> | <b>985.265</b> | N 28 |
| K 3  | 125.090        | 952.326         | <b>947.587</b>  | <b>947.923</b> | 947.251        | K 27 |
| L 4  | 162.785        | 910.228         | 904.889         | 905.225        | 904.551        | L 26 |
| L 5  | 200.479        | 872.531         | 867.194         | 867.530        | 866.858        | L 25 |
| G 6  | 239.487        | 834.839         | 829.499         | 829.835        | 829.163        | G 24 |
| K 7  | 271.529        | 815.832         | 810.492         | 810.828        | 810.156        | K 23 |
| V 8  | 304.552        | 783.790         | 778.450         | 778.786        | 778.114        | V 22 |
| T 9  | 338.234        | 730.767         | 725.427         | 725.763        | 725.091        | T 21 |
| I 10 | 375.929        | 697.084         | 691.745         | 692.081        | 691.409        | I 20 |
| A 11 | 399.608        | 659.388         | 654.050         | 654.386        | 653.714        | A 19 |
| Q 12 | 442.294        | 626.710         | 621.371         | 621.707        | 621.035        | Q 18 |
| G 13 | 461.301        | 593.024         | 587.685         | 588.021        | 587.349        | G 17 |
| G 14 | 480.308        | 574.017         | 568.678         | 569.013        | 568.342        | G 16 |
| V 15 | 513.131        | 555.010         | 549.670         | 550.006        | 549.334        | V 15 |
| L 16 | 551.026        | 521.987         | 516.648         | 516.984        | 516.312        | L 14 |
| P 17 | 583.377        | 484.202         | 478.863         | 479.200        | 478.517        | P 13 |
| N 18 | 621.391        | 451.942         | 446.602         | 446.938        | 446.266        | N 12 |
| I 19 | 659.086        | 413.927         | 408.588         | 408.924        | 408.252        | I 11 |
| Q 20 | 701.772        | 376.233         | 370.893         | 371.229        | 370.557        | Q 10 |
| A 21 | 725.451        | 333.546         | 328.207         | 328.543        | 327.871        | A 9  |
| V 22 | 758.474        | 309.867         | 304.528         | 304.864        | 304.192        | V 8  |
| L 23 | 796.188        | 276.844         | 271.505         | 271.841        | 271.169        | L 7  |
| L 24 | 833.863        | 239.150         | 233.810         | 234.146        | 233.474        | L 6  |
| T 25 | 869.214        | 201.455         | 196.116         | 196.452        | 195.780        | T 5  |
| K 26 | 908.912        | 169.100         | 163.760         | 164.101        | 163.429        | K 4  |
| K 27 | <b>951.611</b> | 138.406         | 133.066         | 133.402        | 132.730        | K 3  |
| T 28 | <b>985.293</b> | 83.708          | 78.368          | 78.704         | 78.032         | T 2  |
| E 29 | 1028.307       | 50.025          | 44.685          | 45.021         | 44.349         | E 1  |



# sp | Q6GSS7 | H2A2A\_MOUSE

LNKLLGK <sup>Dimethyl</sup>VTIAQGGVLPNIQAVLLPKKTE  
28.03

- ▶ fragmentation table for charge state 1+
- ▶ specType=cid
- ▶ score=46.34
- ▶ F113279.dat
- ▶ query=q41616\_p1
- ▶ precursor=771.726190
- ▶ chargePrecursor=4
- ▶ itol=0.5

| AA  | a               | a*              | a/b      | b               | b*       | b/a      | y               | y*             | y/a            | AA   |
|-----|-----------------|-----------------|----------|-----------------|----------|----------|-----------------|----------------|----------------|------|
| L1  | 80.000          | 0.000           | 0.000    | 114.000         | 0.000    | 0.000    | 300.000         | 0.000          | 0.000          | L129 |
| K1  | 300.000         | 0.000           | 0.000    | 240.000         | 0.000    | 0.000    | 300.000         | 0.000          | 0.000          | K30  |
| R1  | 300.234         | 0.111           | 0.000    | <b>355.279</b>  | 0.000    | 0.000    | 300.000         | 0.000          | 0.000          | K227 |
| L4  | <b>441.318</b>  | 0.244           | 0.000    | <b>469.313</b>  | 0.000    | 0.000    | 272.000         | 0.000          | 0.000          | L326 |
| L5  | 244.000         | 0.111           | 0.000    | <b>582.387</b>  | 0.000    | 0.000    | 300.000         | 0.000          | 0.000          | L325 |
| G6  | 011.424         | 0.044           | 0.000    | <b>632.392</b>  | 0.000    | 0.000    | 250.000         | 0.000          | 0.000          | G24  |
| K7  | 771.726         | 0.772           | 0.000    | <b>795.545</b>  | 0.000    | 0.000    | 340.000         | 0.000          | 0.000          | K23  |
| V8  | <b>856.619</b>  | <b>856.619</b>  | 0.000    | 856.619         | 0.000    | 0.000    | 280.000         | 0.000          | 0.000          | V22  |
| L9  | 300.000         | 0.000           | 0.000    | 900.000         | 0.000    | 0.000    | 300.000         | 0.000          | 0.000          | L21  |
| L10 | <b>1080.750</b> | <b>1080.724</b> | 1080.740 | <b>1108.745</b> | 1080.740 | 1080.730 | 300.000         | 0.000          | 0.000          | L20  |
| A11 | 1131.707        | 1131.700        | 1131.717 | <b>1170.702</b> | 1131.700 | 1131.712 | 300.000         | 0.000          | 0.000          | A16  |
| G12 | 1131.666        | 1131.659        | 1131.673 | 1131.666        | 1131.666 | 1131.666 | 300.000         | 0.000          | 0.000          | G10  |
| G13 | 1131.667        | 1131.660        | 1131.673 | 1131.667        | 1131.667 | 1131.667 | 300.000         | 0.000          | 0.000          | G17  |
| G14 | 1131.669        | 1131.662        | 1131.673 | 1131.669        | 1131.669 | 1131.669 | 300.000         | 0.000          | 0.000          | G16  |
| V15 | 1300.000        | 0.000           | 0.000    | 1300.000        | 0.000    | 0.000    | 300.000         | 0.000          | 0.000          | V10  |
| L16 | 1300.041        | 1300.034        | 1300.034 | 1300.034        | 1300.034 | 1300.034 | 300.000         | 0.000          | 0.000          | L14  |
| P17 | 1710.000        | 0.000           | 0.000    | 1710.000        | 0.000    | 0.000    | 1710.000        | 0.000          | 0.000          | P15  |
| T18 | 1710.010        | 1710.003        | 1710.003 | 1710.003        | 1710.003 | 1710.003 | <b>1450.863</b> | 1450.863       | 1450.863       | T13  |
| L19 | 3000.222        | 3000.215        | 3000.211 | 3000.210        | 3000.210 | 3000.210 | 3000.210        | 3000.210       | 3000.210       | L11  |
| G20 | 3000.200        | 3000.193        | 3000.193 | 3000.193        | 3000.193 | 3000.193 | <b>1120.683</b> | 1120.683       | 1120.672       | G19  |
| P21 | 3000.210        | 3000.203        | 3000.203 | 3000.203        | 3000.203 | 3000.203 | <b>900.834</b>  | <b>900.834</b> | <b>900.834</b> | P18  |
| V22 | 3000.200        | 3000.193        | 3000.193 | 3000.193        | 3000.193 | 3000.193 | <b>827.507</b>  | <b>827.507</b> | <b>827.507</b> | V16  |
| L23 | 3000.180        | 3000.173        | 3000.173 | 3000.173        | 3000.173 | 3000.173 | <b>828.519</b>  | 828.519        | 828.508        | L17  |
| L24 | 3000.150        | 3000.143        | 3000.143 | 3000.143        | 3000.143 | 3000.143 | <b>715.435</b>  | <b>698.468</b> | 698.457        | L16  |
| P25 | 3000.160        | 3000.153        | 3000.153 | 3000.153        | 3000.153 | 3000.153 | <b>602.351</b>  | 602.340        | 602.330        | P19  |
| K26 | 3000.170        | 3000.163        | 3000.163 | 3000.163        | 3000.163 | 3000.163 | 602.340         | 602.330        | 602.320        | K10  |
| K27 | 3000.180        | 3000.173        | 3000.173 | 3000.173        | 3000.173 | 3000.173 | 300.000         | 300.000        | 300.000        | K13  |
| L28 | 3000.184        | 3000.177        | 3000.177 | 3000.177        | 3000.177 | 3000.177 | 300.000         | 300.000        | 300.000        | L18  |
| E29 | 3000.180        | 3000.173        | 3000.173 | 3000.173        | 3000.173 | 3000.173 | 300.000         | 300.000        | 300.000        | E11  |



# sp | Q6GSS7 | H2A2A\_MOUSE

LNKLLGK <sup>Dimethyl</sup>VTIAQGGVLPNIQAVLLPKKTE  
28.03

- ▶ fragmentation table for charge state 2+
- ▶ specType=cid
- ▶ score=46.34
- ▶ F113279.dat
- ▶ query=q41616.p1
- ▶ precursor=771.726190
- ▶ chargePrecursor=4
- ▶ itol=0.5

| AA   | a               | a'              | a-d             | b               | b'              | b-d             | y               | y'             | y-d            | AA   |
|------|-----------------|-----------------|-----------------|-----------------|-----------------|-----------------|-----------------|----------------|----------------|------|
| L1   | 41.552          | 8.524           | 0.504           | 15.543          | 0.504           | 0.504           | 1642.420        | 1233.036       | 1333.444       | L156 |
| R1   | 154.832         | 156.100         | 0.504           | 178.974         | 0.504           | 0.504           | 1493.961        | 1471.956       | 1476.962       | R120 |
| R1   | 154.832         | 156.100         | 0.504           | 178.974         | 0.504           | 0.504           | 1493.961        | 1476.971       | 1476.961       | R122 |
| L1   | 221.551         | 212.650         | 0.504           | 219.164         | <b>226.647</b>  | 0.504           | 1364.833        | 1356.325       | 1355.833       | L126 |
| L1   | 277.726         | 269.291         | 0.504           | 269.785         | 275.789         | 0.504           | 1308.297        | 1299.789       | 1299.297       | L128 |
| Q1   | 306.259         | 297.750         | 0.504           | 305.213         | 311.700         | 0.504           | 1251.251        | 1243.241       | 1242.749       | Q124 |
| R1   | 384.279         | 375.750         | 0.504           | 380.279         | 386.763         | 0.504           | 1221.241        | 1214.731       | 1214.239       | R125 |
| V1   | 433.111         | 425.361         | 0.504           | 441.611         | 448.104         | 0.504           | 1183.111        | 1176.601       | 1176.109       | V122 |
| V1   | <b>484.337</b>  | <b>475.823</b>  | <b>475.323</b>  | <b>498.334</b>  | <b>499.821</b>  | <b>489.329</b>  | 1095.843        | 1087.333       | 1086.841       | V121 |
| I10  | <b>540.879</b>  | <b>532.366</b>  | <b>531.874</b>  | <b>554.876</b>  | <b>546.363</b>  | <b>545.871</b>  | <b>1045.123</b> | 1036.609       | 1036.117       | I121 |
| A11  | <b>576.397</b>  | <b>567.884</b>  | <b>567.392</b>  | <b>590.393</b>  | <b>581.882</b>  | <b>581.390</b>  | <b>988.581</b>  | <b>980.067</b> | <b>979.575</b> | A119 |
| Q12  | <b>640.927</b>  | <b>632.413</b>  | <b>631.921</b>  | <b>654.424</b>  | <b>645.911</b>  | <b>645.419</b>  | <b>953.062</b>  | <b>944.548</b> | <b>944.057</b> | Q118 |
| Q12  | <b>640.927</b>  | <b>632.413</b>  | <b>631.921</b>  | <b>654.422</b>  | <b>645.912</b>  | <b>645.420</b>  | <b>889.033</b>  | <b>880.519</b> | <b>880.027</b> | Q117 |
| Q14  | <b>146.363</b>  | <b>148.355</b>  | <b>148.443</b>  | <b>160.365</b>  | <b>162.357</b>  | <b>162.445</b>  | <b>860.522</b>  | <b>852.009</b> | <b>851.517</b> | Q116 |
| V121 | <b>146.363</b>  | <b>148.355</b>  | <b>148.443</b>  | <b>160.365</b>  | <b>162.357</b>  | <b>162.445</b>  | <b>832.591</b>  | <b>824.078</b> | <b>823.586</b> | V119 |
| L10  | <b>195.365</b>  | <b>195.011</b>  | <b>195.521</b>  | <b>207.367</b>  | <b>207.013</b>  | <b>207.523</b>  | <b>783.477</b>  | <b>775.964</b> | <b>775.472</b> | L124 |
| F117 | <b>612.011</b>  | <b>643.537</b>  | <b>643.045</b>  | <b>646.048</b>  | <b>677.573</b>  | <b>677.081</b>  | <b>725.935</b>  | <b>717.422</b> | <b>716.930</b> | F113 |
| R118 | <b>660.012</b>  | <b>691.537</b>  | <b>691.045</b>  | <b>694.047</b>  | <b>725.572</b>  | <b>725.080</b>  | <b>677.409</b>  | <b>668.895</b> | <b>668.403</b> | R114 |
| L118 | <b>660.014</b>  | <b>691.539</b>  | <b>691.047</b>  | <b>694.049</b>  | <b>725.574</b>  | <b>725.082</b>  | <b>649.479</b>  | <b>641.966</b> | <b>641.474</b> | L111 |
| Q120 | <b>632.844</b>  | <b>664.370</b>  | <b>663.878</b>  | <b>666.881</b>  | <b>698.406</b>  | <b>697.914</b>  | <b>563.845</b>  | <b>555.332</b> | <b>554.840</b> | Q115 |
| A121 | <b>691.582</b>  | <b>723.107</b>  | <b>722.615</b>  | <b>725.618</b>  | <b>757.143</b>  | <b>756.651</b>  | <b>493.811</b>  | <b>485.298</b> | <b>484.806</b> | A116 |
| V122 | <b>1114.408</b> | <b>1105.893</b> | <b>1105.399</b> | <b>1117.898</b> | <b>1109.383</b> | <b>1109.887</b> | <b>439.405</b>  | <b>430.892</b> | <b>430.399</b> | V118 |
| L128 | <b>1111.238</b> | <b>1102.723</b> | <b>1102.229</b> | <b>1105.238</b> | <b>1116.722</b> | <b>1116.226</b> | <b>454.751</b>  | <b>446.238</b> | <b>445.746</b> | L112 |
| L12  | <b>1227.160</b> | <b>1218.645</b> | <b>1218.149</b> | <b>1241.178</b> | <b>1232.663</b> | <b>1233.167</b> | <b>388.221</b>  | <b>379.708</b> | <b>379.216</b> | L10  |
| F121 | <b>1176.307</b> | <b>1207.791</b> | <b>1207.295</b> | <b>1210.298</b> | <b>1241.782</b> | <b>1241.286</b> | <b>311.811</b>  | <b>303.298</b> | <b>302.806</b> | F111 |
| R126 | <b>1340.334</b> | <b>1331.819</b> | <b>1331.323</b> | <b>1334.332</b> | <b>1345.816</b> | <b>1345.320</b> | <b>255.533</b>  | <b>247.020</b> | <b>246.528</b> | R124 |
| R127 | <b>1054.402</b> | <b>1045.887</b> | <b>1045.391</b> | <b>1048.394</b> | <b>1059.878</b> | <b>1059.382</b> | <b>188.101</b>  | <b>180.588</b> | <b>180.096</b> | R123 |
| L126 | <b>1434.326</b> | <b>1425.811</b> | <b>1425.315</b> | <b>1428.318</b> | <b>1440.802</b> | <b>1440.306</b> | <b>125.000</b>  | <b>0.504</b>   | <b>116.487</b> | L12  |
| L124 | <b>1518.491</b> | <b>1510.976</b> | <b>1510.480</b> | <b>1513.483</b> | <b>1524.967</b> | <b>1524.471</b> | <b>78.433</b>   | <b>0.504</b>   | <b>69.920</b>  | L12  |

# sp | Q6GSS7 | H2A2A\_MOUSE

LNKLLGK <sup>Dimethyl</sup>VTIAQGGVLPNIQAVLLPKKTE  
28.03

- ▶ fragmentation table for charge state 3+
- ▶ specType=cid
- ▶ score=46.34
- ▶ F113279.dat
- ▶ query=q41616.p1
- ▶ precursor=771.726190
- ▶ chargePrecursor=4
- ▶ itol=0.5

| AA  | a        | a*       | a,b      | b        | b*       | b,b      | y        | y*       | y,b      | AA  |
|-----|----------|----------|----------|----------|----------|----------|----------|----------|----------|-----|
| L1  | 28.178   | 0.872    | 0.872    | 38.102   | 0.872    | 0.872    | 1028.031 | 1022.999 | 1022.822 | L28 |
| N2  | 67.585   | 81.730   | 0.872    | 78.715   | 71.941   | 0.872    | 660.941  | 665.265  | 664.937  | N26 |
| K3  | 110.681  | 104.407  | 0.872    | 119.413  | 113.739  | 0.872    | 852.926  | 847.251  | 846.923  | K27 |
| L4  | 147.778  | 142.125  | 0.872    | 157.109  | 151.434  | 0.872    | 810.228  | 804.553  | 804.225  | L26 |
| L5  | 188.874  | 179.397  | 0.872    | 194.884  | 189.210  | 0.872    | 670.511  | 666.835  | 666.510  | L25 |
| Q6  | 204.478  | 198.804  | 0.872    | 213.811  | 208.136  | 0.872    | 834.839  | 829.163  | 828.835  | Q24 |
| K7  | 258.522  | 250.888  | 0.872    | 265.821  | 260.146  | 0.872    | 815.832  | 810.156  | 809.828  | K25 |
| V8  | 289.848  | 281.869  | 0.872    | 298.878  | 293.203  | 0.872    | 761.769  | 756.114  | 755.786  | V22 |
| Y9  | 323.227  | 317.551  | 0.872    | 331.221  | 325.545  | 0.872    | 526.505  | 521.747  | 521.419  | Y21 |
| I10 | 360.822  | 352.288  | 0.872    | 370.251  | 364.576  | 0.872    | 684.209  | 679.084  | 678.756  | I20 |
| A11 | 384.601  | 378.625  | 0.872    | 393.912  | 388.237  | 0.872    | 659.389  | 653.714  | 653.386  | A19 |
| Q12 | 427.208  | 421.811  | 0.872    | 436.261  | 430.586  | 0.872    | 526.742  | 521.035  | 520.707  | Q10 |
| G13 | 446.524  | 440.611  | 0.872    | 456.258  | 450.583  | 0.872    | 449.622  | 444.115  | 443.787  | G17 |
| G14 | 488.848  | 480.828  | 0.872    | 499.201  | 493.526  | 0.872    | 468.620  | 463.017  | 462.684  | G16 |
| V15 | 518.214  | 509.849  | 0.872    | 527.850  | 522.175  | 0.872    | 535.010  | 529.334  | 529.006  | V15 |
| L16 | 538.619  | 530.383  | 530.815  | 545.560  | 539.879  | 539.347  | 521.907  | 516.312  | 515.984  | L14 |
| P17 | 568.370  | 560.494  | 562.360  | 577.703  | 572.028  | 571.489  | 484.292  | 478.611  | 478.280  | P13 |
| N18 | 608.584  | 600.708  | 602.382  | 613.716  | 608.040  | 607.511  | 451.942  | 446.268  | 445.936  | N15 |
| T19 | 644.878  | 636.443  | 638.015  | 653.418  | 647.743  | 647.407  | 413.997  | 408.292  | 407.964  | T11 |
| Q20 | 686.785  | 681.089  | 680.751  | 696.096  | 690.421  | 689.913  | 376.251  | 370.557  | 370.228  | Q10 |
| A21 | 710.444  | 704.788  | 704.440  | 719.775  | 714.100  | 713.762  | 331.540  | 327.817  | 327.542  | A19 |
| V22 | 742.897  | 737.067  | 736.969  | 752.740  | 747.123  | 746.785  | 301.889  | 298.162  | 297.894  | V19 |
| L23 | 781.161  | 775.486  | 775.150  | 790.493  | 784.817  | 784.480  | 278.944  | 275.195  | 274.941  | L17 |
| L24 | 818.856  | 813.189  | 812.852  | 829.188  | 823.512  | 823.184  | 239.150  | 235.474  | 235.146  | L16 |
| P25 | 851.037  | 845.511  | 845.201  | 860.539  | 854.863  | 854.535  | 201.451  | 197.780  | 197.492  | P15 |
| K26 | 893.365  | 888.249  | 888.149  | 908.712  | 903.111  | 902.813  | 169.184  | 165.420  | 165.180  | K14 |
| K27 | 936.894  | 930.929  | 930.632  | 945.935  | 940.260  | 939.932  | 126.426  | 122.730  | 122.462  | K13 |
| T28 | 970.286  | 964.811  | 964.261  | 976.618  | 971.014  | 970.716  | 83.718   | 80.027   | 79.784   | T12 |
| E29 | 1011.506 | 1007.022 | 1007.269 | 1022.832 | 1017.058 | 1016.828 | 30.023   | 0.872    | 44.121   | E10 |

# sp | Q64522 | H2A2B\_MOUSE

ELNK <sup>Crotonaldehyde</sup> 70.04 LLGGVTIAQGGVLPNIQAVLLPKKTE

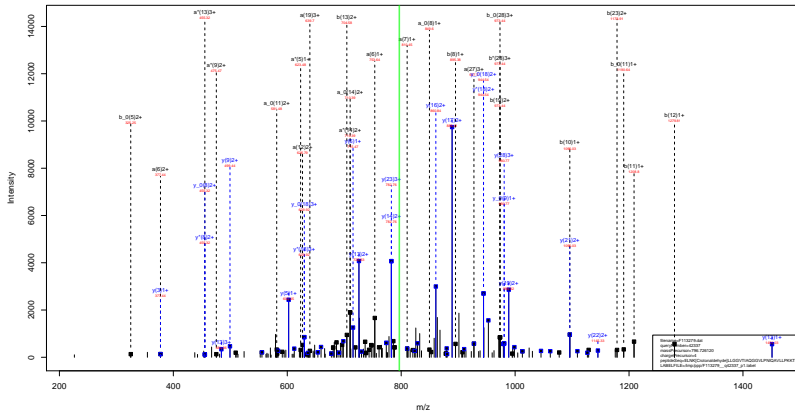

# sp | Q64522 | H2A2B\_MOUSE

ELNK<sup>Crotonaldehyde</sup><sub>70.04</sub> LLGGVTIAQGGVLPNIQAVLLPKKTE

- ▶ fragmentation table for charge state 1+
- ▶ specType=cid
- ▶ score=47.68
- ▶ F113279.dat
- ▶ query=q42337\_p1
- ▶ precursor=796.726120
- ▶ chargePrecursor=4
- ▶ itol=0.5

| AA   | a              | a'             | b              | b'              | c              | c'              | d               | d'              | e              | e'       | f        | f'       | g        | g'       | h        | h'       | AA   |
|------|----------------|----------------|----------------|-----------------|----------------|-----------------|-----------------|-----------------|----------------|----------|----------|----------|----------|----------|----------|----------|------|
| E1   | 203.078        | 0.000          | 26.044         | 236.088         | 0.000          | 113.259         | 191.831         | 0.000           | 308.090        | 0.000    | 0.000    | 0.000    | 0.000    | 0.000    | 0.000    | 0.000    | L131 |
| L2   | 215.100        | 0.000          | 107.120        | 243.184         | 0.000          | 225.151         | 304.824         | 0.000           | 0.000          | 0.000    | 0.000    | 0.000    | 0.000    | 0.000    | 0.000    | 0.000    | L129 |
| N3   | 229.120        | 132.120        | 111.112        | 337.177         | 140.120        | 339.120         | 241.143         | 252.174         | 252.174        | 252.174  | 252.174  | 252.174  | 252.174  | 252.174  | 252.174  | 252.174  | N29  |
| R4   | 237.033        | 131.022        | <b>500.308</b> | <b>655.314</b>  | 138.033        | 337.033         | 227.077         | 227.077         | 227.077        | 227.077  | 227.077  | 227.077  | 227.077  | 227.077  | 227.077  | 227.077  | K127 |
| L15  | 240.403        | <b>623.376</b> | 100.399        | 308.399         | 303.391        | 353.391         | 262.435         | 262.435         | 262.435        | 262.435  | 262.435  | 262.435  | 262.435  | 262.435  | 262.435  | 262.435  | L150 |
| L16  | <b>753.407</b> | <b>736.460</b> | 752.400        | 101.400         | 101.400        | 101.400         | 101.400         | 101.400         | 101.400        | 101.400  | 101.400  | 101.400  | 101.400  | 101.400  | 101.400  | 101.400  | L125 |
| G17  | <b>818.508</b> | 103.400        | 792.400        | 104.400         | 104.400        | 104.400         | <b>620.403</b>  | 243.400         | 243.400        | 243.400  | 243.400  | 243.400  | 243.400  | 243.400  | 243.400  | 243.400  | G24  |
| G18  | 819.529        | 820.529        | <b>848.519</b> | <b>890.525</b>  | <b>878.498</b> | 877.512         | 877.512         | 877.512         | 877.512        | 877.512  | 877.512  | 877.512  | 877.512  | 877.512  | 877.512  | 877.512  | V122 |
| V19  | 868.528        | 868.528        | 868.528        | <b>904.593</b>  | 877.512        | 877.512         | 877.512         | 877.512         | 877.512        | 877.512  | 877.512  | 877.512  | 877.512  | 877.512  | 877.512  | 877.512  | V121 |
| T110 | 1007.645       | 1000.613       | 1048.635       | <b>1095.641</b> | 1078.614       | <b>1077.630</b> | 1140.280        | 1140.280        | 1140.280       | 1140.280 | 1140.280 | 1140.280 | 1140.280 | 1140.280 | 1140.280 | 1140.280 | T111 |
| T111 | 1100.743       | 1110.743       | 1140.719       | <b>1200.725</b> | 1140.466       | <b>1130.714</b> | 1200.719        | 1200.719        | 1200.719       | 1200.719 | 1200.719 | 1200.719 | 1200.719 | 1200.719 | 1200.719 | 1200.719 | T110 |
| A121 | 1201.767       | 1216.741       | 1213.767       | <b>1279.762</b> | 1267.739       | 1267.739        | 1267.739        | 1267.739        | 1267.739       | 1267.739 | 1267.739 | 1267.739 | 1267.739 | 1267.739 | 1267.739 | 1267.739 | A119 |
| Q13  | 1319.200       | 1320.200       | 1301.814       | 1407.821        | 1390.708       | 1390.820        | 1395.111        | 1400.000        | 1400.000       | 1400.000 | 1400.000 | 1400.000 | 1400.000 | 1400.000 | 1400.000 | 1400.000 | Q131 |
| Q14  | 1418.207       | 1419.207       | 1418.207       | 1448.204        | 1447.818       | 1448.018        | 1448.018        | 1448.018        | 1448.018       | 1448.018 | 1448.018 | 1448.018 | 1448.018 | 1448.018 | 1448.018 | 1448.018 | Q117 |
| Q15  | 1469.580       | 1470.542       | 1470.580       | 1501.584        | 1504.557       | 1503.933        | 1510.933        | 1510.933        | 1510.933       | 1510.933 | 1510.933 | 1510.933 | 1510.933 | 1510.933 | 1510.933 | 1510.933 | Q116 |
| V119 | 1592.937       | 1593.937       | 1574.920       | 1624.932        | 1621.905       | 1621.905        | 1621.905        | 1621.905        | 1621.905       | 1621.905 | 1621.905 | 1621.905 | 1621.905 | 1621.905 | 1621.905 | 1621.905 | V115 |
| L17  | 1709.211       | 1709.211       | 1709.211       | 1744.218        | 1744.218       | 1744.218        | 1744.218        | 1744.218        | 1744.218       | 1744.218 | 1744.218 | 1744.218 | 1744.218 | 1744.218 | 1744.218 | 1744.218 | L14  |
| F118 | 1803.014       | 1800.000       | 1799.003       | 1831.008        | 1834.012       | 1833.012        | <b>1450.813</b> | 1453.820        | 1452.822       | 1452.822 | 1452.822 | 1452.822 | 1452.822 | 1452.822 | 1452.822 | 1452.822 | F113 |
| N119 | 1817.41        | 1816.000       | 1816.000       | 1844.112        | 1844.112       | 1844.112        | 1844.112        | 1844.112        | 1844.112       | 1844.112 | 1844.112 | 1844.112 | 1844.112 | 1844.112 | 1844.112 | 1844.112 | N112 |
| T20  | 2030.203       | 2023.134       | 2022.190       | 2058.196        | 2044.128       | 2040.102        | 2110.200        | 2110.200        | 2110.200       | 2110.200 | 2110.200 | 2110.200 | 2110.200 | 2110.200 | 2110.200 | 2110.200 | T11  |
| Q211 | 2108.208       | 2110.211       | 2140.206       | 2168.204        | 2178.208       | 2178.208        | <b>1176.611</b> | <b>1169.656</b> | 1169.656       | 1169.656 | 1169.656 | 1169.656 | 1169.656 | 1169.656 | 1169.656 | 1169.656 | Q120 |
| A121 | 2209.209       | 2210.211       | 2211.209       | 2251.201        | 2240.209       | 2239.208        | <b>860.624</b>  | 861.626         | <b>860.614</b> | 860.614  | 860.614  | 860.614  | 860.614  | 860.614  | 860.614  | 860.614  | A10  |
| V121 | 2310.205       | 2311.205       | 2310.204       | 2350.200        | 2339.213       | 2338.200        | <b>927.587</b>  | <b>910.563</b>  | 909.577        | 909.577  | 909.577  | 909.577  | 909.577  | 909.577  | 909.577  | 909.577  | V10  |
| L124 | 2341.400       | 2340.400       | 2342.400       | 2380.404        | 2370.404       | 2370.404        | <b>930.319</b>  | 931.321         | <b>930.308</b> | 930.308  | 930.308  | 930.308  | 930.308  | 930.308  | 930.308  | 930.308  | L10  |
| L124 | 2354.433       | 2353.433       | 2353.543       | 2392.538        | 2385.501       | 2384.511        | <b>715.435</b>  | <b>698.408</b>  | 697.408        | 697.408  | 697.408  | 697.408  | 697.408  | 697.408  | 697.408  | 697.408  | L10  |
| P125 | 2354.433       | 2354.433       | 2353.510       | 2392.507        | 2384.509       | 2383.501        | <b>602.351</b>  | 603.353         | <b>584.340</b> | 584.340  | 584.340  | 584.340  | 584.340  | 584.340  | 584.340  | 584.340  | P10  |
| L124 | 2378.411       | 2378.411       | 2378.510       | 2417.507        | 2407.509       | 2406.501        | <b>377.203</b>  | 378.205         | 379.207        | 379.207  | 379.207  | 379.207  | 379.207  | 379.207  | 379.207  | 379.207  | L10  |
| R126 | 2407.710       | 2406.704       | 2405.705       | 2445.710        | 2434.744       | 2433.730        | <b>377.203</b>  | 380.171         | 380.171        | 380.171  | 380.171  | 380.171  | 380.171  | 380.171  | 380.171  | 380.171  | R12  |
| T127 | 2408.611       | 2408.611       | 2408.611       | 2448.616        | 2437.618       | 2436.610        | 448.100         | 448.100         | 448.100        | 448.100  | 448.100  | 448.100  | 448.100  | 448.100  | 448.100  | 448.100  | T12  |
| E10  | 1137.000       | 1140.810       | 1140.800       | 1184.804        | 1184.814       | 1184.800        | 148.000         | 148.000         | 148.000        | 148.000  | 148.000  | 148.000  | 148.000  | 148.000  | 148.000  | 148.000  | E10  |

# sp | Q64522 | H2A2B\_MOUSE

ELNK<sup>Crotonaldehyde</sup><sub>70.04</sub> LLGGVTIAQGGVLPNIQAVLLPKKTE

- ▶ fragmentation table for charge state 2+
- ▶ specType=cid
- ▶ score=47.68
- ▶ F113279.dat
- ▶ query=q42337\_p1
- ▶ precursor=796.726120
- ▶ chargePrecursor=4
- ▶ itol=0.5

| AA  | a    | a'  | a <sub>0</sub> | b   | b'   | b <sub>0</sub> | y     | y'  | y <sub>0</sub> | AA   |      |      |      |      |      |     |      |     |     |
|-----|------|-----|----------------|-----|------|----------------|-------|-----|----------------|------|------|------|------|------|------|-----|------|-----|-----|
| E1  | 55   | 533 | 0.539          | 42  | 523  | 0.529          | 58    | 533 | 1363           | 430  | 1363 |      |      |      |      |     |      |     |     |
| L2  | 188  | 673 | 0.676          | 89  | 684  | 1.22071        | 0.864 | 111 | 689            | 1627 | 819  | 1618 | 611  | 1326 |      |     |      |     |     |
| K3  | 185  | 595 | 156            | 581 | 156  | 589            | 179   | 592 | 170            | 579  | 170  | 587  | 141  | 131  | 1462 | 861 | 1462 | 131 | N26 |
| R4  | 254  | 813 | 253            | 803 | 253  | 813            | 273   | 808 | 269            | 807  | 269  | 813  | 283  | 813  | 1459 | 841 | 1459 | 841 | K27 |
| L5  | 120  | 505 | 122            | 110 | 111  | 505            | 124   | 511 | 125            | 109  | 109  | 125  | 209  | 125  | 1205 | 773 | 1205 | 773 | L26 |
| L6  | 377  | 247 | 383            | 79  | 388  | 247            | 392   | 245 | 382            | 773  | 382  | 239  | 128  | 184  | 1292 | 211 | 1249 | 779 | L25 |
| G7  | 469  | 758 | 467            | 748 | 467  | 758            | 478   | 753 | 471            | 742  | 470  | 747  | 757  | 757  | 1211 | 888 | 1211 | 888 | G24 |
| G8  | 474  | 209 | 475            | 203 | 449  | 203            | 449   | 193 | 439            | 203  | 1173 | 591  | 1193 | 173  | 1194 | 608 | 1194 | 608 | G25 |
| V9  | 481  | 601 | 475            | 289 | 478  | 71             | 491   | 601 | 480            | 587  | 488  | 71   | 1145 | 181  | 1136 | 611 | 1136 | 611 | V22 |
| T10 | 334  | 52  | 335            | 425 | 335  | 425            | 344   | 524 | 339            | 611  | 339  | 519  | 1095 | 646  | 1097 | 133 | 1089 | 641 | T21 |
| T11 | 580  | 869 | 582            | 385 | 581  | 863            | 584   | 864 | 586            | 863  | 585  | 861  | 1045 | 123  | 1039 | 836 | 1039 | 836 | T20 |
| A12 | 626  | 387 | 617            | 73  | 619  | 387            | 645   | 387 | 631            | 871  | 631  | 379  | 988  | 581  | 988  | 681 | 979  | 575 | A19 |
| Q13 | 690  | 416 | 681            | 207 | 671  | 704            | 414   | 695 | 961            | 685  | 407  | 951  | 682  | 944  | 549  | 944 | 657  | 918 | Q18 |
| Q14 | 188  | 718 | 414            | 709 | 522  | 188            | 522   | 724 | 414            | 187  | 513  | 718  | 888  | 833  | 888  | 513 | 888  | 627 | Q17 |
| Q15 | 747  | 438 | 749            | 653 | 738  | 433            | 761   | 435 | 752            | 522  | 752  | 428  | 860  | 522  | 860  | 522 | 860  | 522 | Q16 |
| V16 | 196  | 671 | 788            | 459 | 787  | 367            | 196   | 671 | 862            | 456  | 861  | 684  | 102  | 101  | 823  | 466 | 823  | 466 | V15 |
| L17 | 553  | 514 | 545            | 201 | 544  | 514            | 587   | 512 | 588            | 508  | 508  | 588  | 782  | 477  | 773  | 964 | 773  | 472 | L14 |
| P18 | 792  | 294 | 801            | 577 | 801  | 294            | 807   | 525 | 807            | 613  | 807  | 525  | 111  | 624  | 111  | 624 | 111  | 624 | P13 |
| N19 | 839  | 682 | 860            | 549 | 860  | 682            | 973   | 685 | 964            | 546  | 964  | 549  | 677  | 409  | 668  | 685 | 668  | 405 | N12 |
| L20 | 1113 | 654 | 1087           | 681 | 1088 | 589            | 1028  | 681 | 1021           | 588  | 1028 | 588  | 636  | 381  | 611  | 874 | 611  | 382 | L13 |
| Q21 | 1278 | 813 | 1279           | 813 | 1009 | 509            | 1009  | 813 | 1009           | 118  | 1009 | 813  | 981  | 819  | 981  | 819 | 981  | 819 | Q19 |
| A22 | 1115 | 552 | 1108           | 619 | 1108 | 541            | 1120  | 148 | 1120           | 636  | 1120 | 144  | 499  | 816  | 499  | 816 | 499  | 816 | A18 |
| V23 | 1114 | 888 | 1108           | 117 | 1109 | 888            | 1178  | 884 | 1178           | 117  | 1109 | 888  | 694  | 797  | 655  | 784 | 655  | 784 | V18 |
| L24 | 1099 | 688 | 1102           | 713 | 1102 | 688            | 1102  | 713 | 1102           | 712  | 1102 | 712  | 414  | 701  | 406  | 701 | 406  | 701 | L12 |
| L25 | 1177 | 672 | 1176           | 672 | 1169 | 672            | 1169  | 672 | 1169           | 672  | 1169 | 672  | 489  | 701  | 489  | 701 | 489  | 701 | L11 |
| P26 | 1136 | 587 | 1137           | 581 | 1137 | 581            | 1146  | 584 | 1131           | 581  | 1131 | 581  | 681  | 611  | 681  | 611 | 681  | 611 | P11 |
| K27 | 1091 | 544 | 1081           | 611 | 1081 | 544            | 1094  | 544 | 1089           | 611  | 1089 | 544  | 283  | 131  | 244  | 639 | 244  | 647 | K16 |
| K28 | 1014 | 478 | 1013           | 478 | 1006 | 478            | 1006  | 478 | 1006           | 478  | 1006 | 478  | 100  | 611  | 100  | 611 | 100  | 611 | K15 |
| L29 | 1004 | 552 | 1000           | 458 | 1000 | 458            | 1018  | 552 | 1018           | 458  | 1000 | 458  | 100  | 552  | 100  | 552 | 100  | 552 | L10 |
| E30 | 1088 | 417 | 1088           | 417 | 1088 | 417            | 1088  | 417 | 1088           | 417  | 1088 | 417  | 18   | 514  | 0    | 504 | 65   | 510 | E11 |

# sp | Q64522 | H2A2B\_MOUSE

ELNK<sup>Crotonaldehyde</sup> LLGGVTIAQGGVLPNIQAVLLPKKTE  
70.04

- ▶ fragmentation table for charge state 3+
- ▶ specType=cid
- ▶ score=47.68
- ▶ F113279.dat
- ▶ query=q42337\_p1
- ▶ precursor=796.726120
- ▶ chargePrecursor=4
- ▶ itol=0.5

| AA  | a    | a'  | a+b  | b    | b'  | b+a' | 1001.062 | a''     | a+b''   | AA  |
|-----|------|-----|------|------|-----|------|----------|---------|---------|-----|
| E1  | 34   | 309 | 343  | 34   | 309 | 343  | 1001.062 | 203.527 | 203.527 | E10 |
| L1  | 32   | 309 | 341  | 32   | 309 | 341  |          |         |         | L10 |
| K1  | 113  | 309 | 422  | 113  | 309 | 422  |          |         |         | K10 |
| R1  | 113  | 309 | 422  | 113  | 309 | 422  |          |         |         | R10 |
| L2  | 116  | 444 | 560  | 116  | 444 | 560  |          |         |         | L20 |
| L3  | 114  | 136 | 250  | 114  | 136 | 250  |          |         |         | L30 |
| L4  | 211  | 424 | 635  | 211  | 424 | 635  |          |         |         | L40 |
| G1  | 210  | 424 | 634  | 210  | 424 | 634  |          |         |         | G10 |
| G2  | 209  | 424 | 633  | 209  | 424 | 633  |          |         |         | G20 |
| V1  | 332  | 471 | 803  | 332  | 471 | 803  |          |         |         | V10 |
| T10 | 336  | 503 | 841  | 336  | 503 | 841  |          |         |         | T10 |
| I13 | 334  | 466 | 800  | 334  | 466 | 800  |          |         |         | I13 |
| A13 | 417  | 507 | 924  | 417  | 507 | 924  |          |         |         | A13 |
| Q13 | 382  | 513 | 895  | 382  | 513 | 895  |          |         |         | Q13 |
| Q14 | 419  | 513 | 932  | 419  | 513 | 932  |          |         |         | Q14 |
| Q15 | 468  | 520 | 988  | 468  | 520 | 988  |          |         |         | Q15 |
| V16 | 511  | 611 | 1122 | 511  | 611 | 1122 |          |         |         | V16 |
| L17 | 569  | 540 | 1109 | 569  | 540 | 1109 |          |         |         | L17 |
| P18 | 513  | 598 | 1111 | 513  | 598 | 1111 |          |         |         | P18 |
| R19 | 638  | 718 | 1356 | 638  | 718 | 1356 |          |         |         | R19 |
| T20 | 677  | 695 | 1372 | 677  | 695 | 1372 |          |         |         | T20 |
| Q21 | 720  | 681 | 1401 | 720  | 681 | 1401 |          |         |         | Q21 |
| A22 | 743  | 770 | 1513 | 743  | 770 | 1513 |          |         |         | A22 |
| V23 | 776  | 783 | 1559 | 776  | 783 | 1559 |          |         |         | V23 |
| L24 | 814  | 808 | 1622 | 814  | 808 | 1622 |          |         |         | L24 |
| L26 | 852  | 183 | 1035 | 852  | 183 | 1035 |          |         |         | L26 |
| P26 | 891  | 811 | 1702 | 891  | 811 | 1702 |          |         |         | P26 |
| R27 | 927  | 232 | 1159 | 927  | 232 | 1159 |          |         |         | R27 |
| R28 | 928  | 232 | 1160 | 928  | 232 | 1160 |          |         |         | R28 |
| L29 | 1003 | 811 | 1814 | 1003 | 811 | 1814 |          |         |         | L29 |
| E30 | 1046 | 827 | 1873 | 1046 | 827 | 1873 |          |         |         | E30 |



# sp | Q64522 | H2A2B\_MOUSE

ELNK<sup>Crotonaldehyde</sup><sub>70.04</sub> LLGGVTIAQGGVLPNIQAVLLPKKTE

- ▶ fragmentation table for charge state 1+
- ▶ specType=etd
- ▶ score=48.79
- ▶ F113279.dat
- ▶ query=q42338.p1
- ▶ precursor=796.726120
- ▶ chargePrecursor=4
- ▶ itol=0.5

| AA   | c               | y               | z+1             | z+2             | z               | AA   |
|------|-----------------|-----------------|-----------------|-----------------|-----------------|------|
| E 1  | 147.076         | 3183.872        | 3167.853        | 0.000           | 3166.845        | E 30 |
| L 2  | 260.100         | 3054.829        | 3036.810        | 0.000           | 3037.803        | L 29 |
| N 3  | 374.203         | 2941.745        | 2925.726        | 2936.734        | 2924.718        | N 28 |
| K 4  | 512.240         | 2827.702        | 2811.683        | 2812.691        | 2810.675        | K 27 |
| L 5  | 683.424         | 2629.555        | 2613.536        | 2614.554        | 2612.535        | L 26 |
| L 6  | 798.508         | 2516.481        | 2500.462        | 2501.470        | 2499.454        | L 25 |
| G 7  | 855.530         | 2403.397        | 2387.378        | 2388.386        | 2386.370        | G 24 |
| G 8  | 912.551         | 2246.376        | 2230.357        | 2231.365        | 2229.349        | G 23 |
| V 9  | <b>1011.620</b> | 2289.354        | 2273.335        | 2274.343        | 2272.327        | V 22 |
| T 10 | <b>1112.667</b> | 2180.299        | 2174.287        | 2175.278        | 2173.291        | T 21 |
| I 11 | <b>1225.751</b> | 2089.235        | 2073.219        | 2074.227        | 2072.211        | I 20 |
| A 12 | <b>1296.789</b> | 1976.154        | 1960.135        | 1961.143        | 1959.127        | A 19 |
| Q 13 | <b>1424.847</b> | 1905.117        | 1889.099        | <b>1890.106</b> | 1888.090        | Q 18 |
| G 14 | 1481.869        | 1777.059        | 1761.039        | 1762.047        | 1760.032        | G 17 |
| C 15 | 1538.899        | 1720.037        | 1704.018        | 1705.026        | 1703.011        | C 16 |
| V 16 | <b>1637.938</b> | 1663.015        | 1646.997        | 1648.004        | 1646.989        | V 15 |
| L 17 | 1753.043        | <b>1563.947</b> | 1547.928        | <b>1548.936</b> | <b>1546.920</b> | L 14 |
| F 18 | <b>1848.095</b> | 1450.863        | 1434.844        | 1435.852        | 1433.836        | F 13 |
| N 19 | 1962.138        | 1353.810        | <b>1337.791</b> | 1338.799        | 1336.783        | N 12 |
| I 20 | 2075.222        | 1239.767        | <b>1223.748</b> | 1224.756        | 1222.741        | I 11 |
| Q 21 | 2203.281        | 1126.683        | 1110.665        | 1111.672        | 1109.656        | Q 10 |
| A 22 | 2274.318        | 998.624         | 982.606         | 983.614         | 981.599         | A 9  |
| V 23 | 2373.386        | 927.587         | <b>911.569</b>  | 912.576         | 910.561         | V 8  |
| L 24 | 2466.470        | 828.519         | <b>812.500</b>  | 813.508         | 811.492         | L 7  |
| L 25 | 2599.555        | 715.435         | <b>699.416</b>  | <b>700.424</b>  | 698.408         | L 6  |
| T 26 | 2698.607        | 602.351         | 586.332         | 587.340         | 585.325         | T 5  |
| K 27 | 2824.702        | 505.296         | <b>489.279</b>  | 490.287         | 488.272         | K 4  |
| K 28 | 2952.797        | 377.263         | <b>361.184</b>  | 362.192         | 360.177         | K 3  |
| T 29 | 3053.845        | 249.108         | 233.089         | 234.097         | 232.082         | T 2  |
| E 30 | 3182.897        | 148.060         | 132.042         | 133.050         | 131.034         | E 1  |



# sp | Q64522 | H2A2B\_MOUSE

ELNK<sup>Crotonaldehyde</sup><sub>70.04</sub> LLGGVTIAQGGVLPNIQAVLLPKKTE

- ▶ fragmentation table for charge state 2+
- ▶ specType=etd
- ▶ score=48.79
- ▶ F113279.dat
- ▶ query=q42338.p1
- ▶ precursor=796.726120
- ▶ chargePrecursor=4
- ▶ itol=0.5

| AA   | c               | y               | z+1             | z+2             | z               | AA   |
|------|-----------------|-----------------|-----------------|-----------------|-----------------|------|
| E 1  | 74.042          | 1502.439        | <b>1584.430</b> | 0.504           | <b>1583.926</b> | E 30 |
| L 2  | 130.504         | <b>1527.918</b> | 1519.909        | 0.504           | 1519.405        | L 29 |
| N 3  | 187.605         | 1471.376        | 1463.367        | 1463.871        | 1462.863        | N 28 |
| N 4  | 208.674         | 1414.325        | 1406.389        | 1406.849        | 1405.841        | N 27 |
| L 5  | 353.216         | 1315.265        | 1307.277        | 1307.781        | 1306.771        | L 26 |
| L 6  | 399.758         | 1258.744        | 1250.735        | 1251.239        | 1250.231        | L 25 |
| G 7  | 438.289         | 1202.202        | 1194.193        | 1194.697        | 1193.689        | G 24 |
| G 8  | 456.779         | 1173.691        | 1165.682        | 1166.186        | 1165.178        | G 23 |
| V 9  | 506.313         | 1145.181        | 1137.172        | 1137.676        | 1136.667        | V 22 |
| T 10 | 556.837         | 1095.646        | <b>1087.637</b> | <b>1088.141</b> | 1087.131        | T 21 |
| I 11 | 613.379         | 1045.123        | <b>1037.113</b> | <b>1037.617</b> | <b>1036.609</b> | I 20 |
| A 12 | 648.898         | 988.581         | <b>980.571</b>  | <b>981.075</b>  | 980.067         | A 19 |
| Q 13 | 712.927         | 933.062         | <b>945.053</b>  | <b>945.557</b>  | 944.549         | Q 18 |
| G 14 | 741.416         | 889.033         | 881.023         | 881.527         | 880.519         | G 17 |
| G 15 | 769.949         | 860.522         | 852.513         | <b>853.017</b>  | 852.009         | G 16 |
| V 16 | 819.483         | 832.011         | 824.002         | 824.506         | 823.497         | V 15 |
| L 17 | 876.025         | 782.477         | <b>774.468</b>  | <b>774.972</b>  | 773.964         | L 14 |
| F 18 | 934.561         | 725.935         | 717.926         | 718.430         | 717.422         | F 13 |
| N 19 | 981.573         | 677.409         | 669.399         | 669.903         | 668.895         | N 12 |
| I 20 | <b>1038.115</b> | 620.387         | 612.378         | 612.882         | 611.874         | I 11 |
| Q 21 | 1182.144        | 563.845         | 555.836         | 556.340         | 555.331         | Q 10 |
| A 22 | 1137.663        | 499.816         | 491.807         | 492.310         | 491.302         | A 9  |
| V 23 | <b>1187.197</b> | 464.297         | 456.288         | 456.792         | 455.784         | V 8  |
| L 24 | <b>1243.739</b> | 414.763         | 406.754         | 407.258         | 406.250         | L 7  |
| L 25 | 1300.281        | 358.221         | 350.212         | 350.716         | 349.708         | L 6  |
| T 26 | <b>1348.807</b> | 308.679         | 298.639         | 299.144         | 298.136         | T 5  |
| K 27 | <b>1412.855</b> | 253.153         | 245.143         | 245.647         | 244.639         | K 4  |
| K 28 | <b>1476.902</b> | 189.055         | 181.046         | 181.550         | 180.542         | K 3  |
| T 29 | <b>1527.426</b> | 125.058         | 117.048         | 117.552         | 116.544         | T 2  |
| E 30 | 1591.947        | 74.534          | 66.524          | 67.028          | 66.021          | E 1  |

# sp | Q64522 | H2A2B\_MOUSE

ELNK <sup>Crotonaldehyde</sup><sub>70.04</sub> LLGGVTIAQGGVLPNIQAVLLPKKTE

- ▶ fragmentation table for charge state 3+
- ▶ specType=etd
- ▶ score=48.79
- ▶ F113279.dat
- ▶ query=q42338.p1
- ▶ precursor=796.726120
- ▶ chargePrecursor=4
- ▶ itol=0.5

| AA |    | c              | y               | z+1             | z+2     | z               | AA              |
|----|----|----------------|-----------------|-----------------|---------|-----------------|-----------------|
| E  | 1  | 49.697         | <b>1061.962</b> | <b>1056.622</b> | 0.672   | <b>1056.287</b> | E <sub>30</sub> |
| L  | 2  | 87.262         | 1038.945        | 1013.608        | 0.672   | 1012.272        | L <sub>29</sub> |
| T  | 3  | 125.408        | <b>981.253</b>  | 975.914         | 978.250 | 976.578         | T <sub>28</sub> |
| K  | 4  | 151.452        | 934.239         | 937.899         | 938.236 | 937.563         | K <sub>27</sub> |
| L  | 5  | 229.148        | 877.193         | 871.854         | 872.190 | 871.518         | L <sub>26</sub> |
| L  | 6  | 266.841        | 839.499         | 834.159         | 834.495 | 833.823         | L <sub>25</sub> |
| G  | 7  | 285.948        | 801.804         | 796.464         | 796.800 | 796.128         | G <sub>24</sub> |
| G  | 8  | 304.855        | 782.797         | 777.457         | 777.793 | 777.121         | G <sub>23</sub> |
| V  | 9  | 337.878        | 743.790         | 738.450         | 738.786 | 738.114         | V <sub>22</sub> |
| I  | 10 | 371.501        | 738.783         | 725.437         | 725.773 | 725.091         | I <sub>21</sub> |
| I  | 11 | 409.255        | 697.084         | 691.745         | 692.081 | 691.409         | I <sub>20</sub> |
| A  | 12 | 432.934        | 659.389         | 654.050         | 654.386 | 653.714         | A <sub>19</sub> |
| Q  | 13 | 475.621        | 635.710         | 630.371         | 630.707 | 630.035         | Q <sub>18</sub> |
| G  | 14 | 494.628        | 593.024         | 587.685         | 588.021 | 587.349         | G <sub>17</sub> |
| G  | 15 | 513.635        | 574.017         | 568.678         | 569.013 | 568.342         | G <sub>16</sub> |
| V  | 16 | 548.658        | 555.010         | 549.670         | 550.006 | 549.334         | V <sub>15</sub> |
| L  | 17 | 584.352        | 521.987         | 516.648         | 516.984 | 516.312         | L <sub>14</sub> |
| F  | 18 | 616.703        | 484.292         | 478.953         | 479.289 | 478.617         | F <sub>13</sub> |
| N  | 19 | 654.718        | 451.942         | 446.602         | 446.938 | 446.266         | N <sub>12</sub> |
| I  | 20 | 692.412        | 413.927         | 408.588         | 408.924 | 408.252         | I <sub>11</sub> |
| Q  | 21 | 735.098        | 376.233         | 370.893         | 371.229 | 370.557         | Q <sub>10</sub> |
| A  | 22 | 758.778        | 333.546         | 328.207         | 328.543 | 327.871         | A <sub>9</sub>  |
| V  | 23 | 791.883        | 308.301         | 302.962         | 303.298 | 302.626         | V <sub>8</sub>  |
| L  | 24 | 829.405        | 276.844         | 271.505         | 271.841 | 271.169         | L <sub>7</sub>  |
| L  | 25 | 867.190        | 239.150         | 233.810         | 234.146 | 233.474         | L <sub>6</sub>  |
| P  | 26 | 899.541        | 201.455         | 196.116         | 196.451 | 195.780         | P <sub>5</sub>  |
| K  | 27 | 942.239        | 169.104         | 163.765         | 164.101 | 163.429         | K <sub>4</sub>  |
| K  | 28 | <b>984.937</b> | 126.406         | 121.066         | 121.402 | 120.730         | K <sub>3</sub>  |
| T  | 29 | 1018.650       | 83.708          | 78.368          | 78.704  | 78.032          | T <sub>2</sub>  |
| E  | 30 | 1091.634       | 50.025          | 44.685          | 45.021  | 44.349          | E <sub>1</sub>  |



# sp | Q64522 | H2A2B\_MOUSE

ELNK<sup>Crotonaldehyde</sup><sub>70.04</sub> LLGGVTIAQGGVLPNIQAVLLPKKTE

- ▶ fragmentation table for charge state 1+
- ▶ specType=etd
- ▶ score=49.58
- ▶ F113279.dat
- ▶ query=q42339\_p1
- ▶ precursor=796.727000
- ▶ chargePrecursor=4
- ▶ itol=0.5

| AA   | c               | y               | z+1             | z+2             | z        | AA   |
|------|-----------------|-----------------|-----------------|-----------------|----------|------|
| E 1  | 147.076         | 3183.874        | 3167.853        | 0.000           | 3166.845 | E 30 |
| L 2  | 200.100         | 3054.829        | 3038.810        | 0.000           | 3037.802 | L 29 |
| N 3  | 374.203         | 2941.745        | 2925.726        | 2926.734        | 2924.716 | N 28 |
| K 4  | 872.340         | 2827.702        | 2813.683        | 2812.691        | 2810.673 | K 27 |
| L 5  | 685.424         | 2620.565        | 2613.546        | 2614.554        | 2612.535 | L 26 |
| L 6  | 798.508         | 2516.481        | 2500.462        | 2501.470        | 2499.454 | L 25 |
| G 7  | 855.530         | 2401.397        | 2387.378        | 2388.386        | 2386.370 | G 24 |
| G 8  | <b>912.551</b>  | 2346.370        | 2330.357        | 2331.365        | 2329.349 | G 23 |
| V 9  | <b>1011.620</b> | 2289.354        | 2273.335        | 2274.343        | 2272.327 | V 22 |
| T 10 | <b>1112.667</b> | 2190.288        | 2174.267        | 2175.275        | 2173.259 | T 21 |
| I 11 | <b>1225.751</b> | 2089.238        | 2073.219        | 2074.227        | 2072.211 | I 20 |
| A 12 | <b>1296.789</b> | 1976.154        | <b>1960.135</b> | 1961.143        | 1959.127 | A 19 |
| Q 13 | <b>1424.847</b> | 1905.117        | 1889.098        | <b>1890.106</b> | 1888.090 | Q 18 |
| G 14 | 1481.869        | 1777.050        | 1761.039        | 1762.047        | 1760.032 | G 17 |
| G 15 | 1538.890        | 1720.037        | 1704.024        | 1705.030        | 1703.016 | G 16 |
| V 16 | <b>1637.958</b> | 1663.013        | 1646.997        | 1648.004        | 1646.989 | V 15 |
| L 17 | 1751.043        | <b>1563.947</b> | 1547.928        | <b>1548.936</b> | 1546.920 | L 14 |
| P 18 | 1848.095        | 1450.863        | 1434.844        | 1435.852        | 1433.836 | P 13 |
| N 19 | 1962.138        | 1353.810        | <b>1337.791</b> | 1338.799        | 1336.783 | N 12 |
| I 20 | 2075.222        | 1239.767        | <b>1223.748</b> | 1224.756        | 1222.741 | I 11 |
| Q 21 | 2203.281        | 1126.682        | <b>1110.664</b> | 1111.672        | 1109.656 | Q 10 |
| A 22 | 2274.318        | 999.624         | 983.605         | 984.614         | 982.599  | A 9  |
| V 23 | 2373.386        | 927.587         | 911.569         | <b>912.576</b>  | 910.561  | V 8  |
| L 24 | 2486.470        | 828.519         | 812.500         | <b>813.508</b>  | 811.492  | L 7  |
| L 25 | 2599.555        | 715.435         | <b>699.416</b>  | <b>700.424</b>  | 698.408  | L 6  |
| P 26 | 2696.607        | 602.351         | 586.333         | 587.340         | 585.324  | P 5  |
| K 27 | 2824.702        | 509.266         | <b>489.249</b>  | 490.257         | 488.241  | K 4  |
| K 28 | 2952.797        | 377.203         | <b>361.184</b>  | 362.192         | 360.177  | K 3  |
| T 29 | 3051.845        | 249.108         | 233.089         | 234.097         | 232.082  | T 2  |
| E 30 | 3182.887        | 148.060         | 132.042         | 133.050         | 131.034  | E 1  |

# sp | Q64522 | H2A2B\_MOUSE

ELNK<sup>Crotonaldehyde</sup><sub>70.04</sub> LLGGVTIAQGGVLPNIQAVLLPKKTE

- ▶ fragmentation table for charge state 2+
- ▶ specType=etd
- ▶ score=49.58
- ▶ F113279.dat
- ▶ query=q42339\_p1
- ▶ precursor=796.727000
- ▶ chargePrecursor=4
- ▶ itol=0.5

| AA | c  | y               | z+1             | z+2             | z               | AA              |   |    |
|----|----|-----------------|-----------------|-----------------|-----------------|-----------------|---|----|
| E  | 1  | 74.042          | 1502.439        | <b>1584.430</b> | 0.504           | <b>1583.926</b> | E | 30 |
| L  | 2  | 130.504         | <b>1527.918</b> | <b>1519.909</b> | 0.504           | 1519.405        | L | 29 |
| N  | 3  | 187.005         | 1471.376        | 1483.367        | 1463.871        | 1462.863        | N | 28 |
| N  | 4  | 208.074         | 1414.355        | <b>1406.345</b> | <b>1406.849</b> | 1405.841        | N | 27 |
| L  | 5  | 353.216         | 1315.266        | 1320.279        | 1309.761        | 1305.771        | L | 26 |
| L  | 6  | 399.758         | 1258.744        | 1250.735        | 1251.239        | 1250.231        | L | 25 |
| G  | 7  | 438.269         | <b>1202.202</b> | <b>1194.193</b> | 1194.697        | <b>1193.689</b> | G | 24 |
| G  | 8  | 456.779         | 1173.691        | 1165.682        | 1166.186        | 1165.178        | G | 23 |
| V  | 9  | 506.313         | 1145.181        | 1137.173        | <b>1137.675</b> | 1136.667        | V | 22 |
| T  | 10 | 556.837         | 1095.646        | <b>1087.637</b> | <b>1088.141</b> | 1087.133        | T | 21 |
| I  | 11 | 613.379         | 1045.123        | <b>1037.113</b> | <b>1037.617</b> | 1036.609        | I | 20 |
| A  | 12 | 648.898         | 988.581         | 980.571         | 981.075         | 980.067         | A | 19 |
| Q  | 13 | 712.927         | 933.062         | <b>945.053</b>  | <b>945.557</b>  | 944.549         | Q | 18 |
| G  | 14 | 741.436         | 889.033         | 881.023         | 881.527         | 880.519         | G | 17 |
| G  | 15 | 769.949         | 860.522         | 852.512         | 853.017         | 852.009         | G | 16 |
| V  | 16 | 819.483         | 832.011         | <b>824.002</b>  | <b>824.506</b>  | 823.498         | V | 15 |
| L  | 17 | 876.025         | 782.477         | 774.468         | 774.972         | 773.964         | L | 14 |
| P  | 18 | 934.561         | 725.935         | 717.926         | 718.430         | 717.422         | P | 13 |
| N  | 19 | 981.573         | 677.409         | 669.399         | 669.903         | 668.895         | N | 12 |
| I  | 20 | 1038.115        | 630.387         | 612.378         | 612.882         | 611.874         | I | 11 |
| Q  | 21 | <b>1102.144</b> | 583.845         | 565.836         | 566.340         | 565.332         | Q | 10 |
| A  | 22 | <b>1137.663</b> | 499.816         | 481.807         | 482.310         | 481.302         | A | 9  |
| V  | 23 | <b>1187.197</b> | 464.297         | 456.288         | 456.792         | 455.784         | V | 8  |
| L  | 24 | 1243.739        | 414.763         | 406.754         | 407.258         | 406.250         | L | 7  |
| L  | 25 | 1300.281        | 358.221         | 350.212         | 350.716         | 349.708         | L | 6  |
| T  | 26 | 1358.827        | 306.679         | 288.670         | 289.174         | 288.166         | T | 5  |
| K  | 27 | 1412.855        | 253.153         | 245.143         | 245.647         | 244.639         | K | 4  |
| K  | 28 | <b>1476.902</b> | 189.105         | 181.096         | 181.600         | 180.592         | K | 3  |
| T  | 29 | 1527.420        | 125.058         | 117.048         | 117.552         | 116.544         | T | 2  |
| E  | 30 | 1591.947        | 74.534          | 66.524          | 67.028          | 66.021          | E | 1  |

# sp | Q64522 | H2A2B\_MOUSE

ELNK <sup>Crotonaldehyde</sup><sub>70.04</sub> LLGGVTIAQGGVLPNIQAVLLPKKTE

- ▶ fragmentation table for charge state 3+
- ▶ specType=etd
- ▶ score=49.58
- ▶ F113279.dat
- ▶ query=q42339\_p1
- ▶ precursor=796.727000
- ▶ chargePrecursor=4
- ▶ itol=0.5

| AA     | c               | y               | z+1      | z+2   | z               | AA     |
|--------|-----------------|-----------------|----------|-------|-----------------|--------|
| E [1]  | 49.697          | <b>1061.962</b> | 1056.622 | 0.672 | <b>1056.287</b> | E [30] |
| L [2]  | 87.292          | 1018.945        | 1013.606 | 0.672 | 1012.272        | L [29] |
| N [3]  | 125.496         | 981.253         | 975.914  | 0.752 | 975.575         | N [28] |
| K [4]  | 191.452         | 943.230         | 937.891  | 0.832 | 937.553         | K [27] |
| L [5]  | 229.146         | 877.193         | 871.854  | 0.720 | 871.515         | L [26] |
| L [6]  | 266.841         | 839.499         | 834.159  | 0.840 | 833.821         | L [25] |
| G [7]  | 285.848         | 801.804         | 796.464  | 0.800 | 796.125         | G [24] |
| G [8]  | 304.855         | 782.797         | 777.457  | 0.770 | 777.117         | G [23] |
| V [9]  | 337.878         | 743.780         | 738.440  | 0.820 | 738.101         | V [22] |
| T [10] | 371.583         | 738.767         | 725.427  | 0.750 | 725.091         | T [21] |
| I [11] | 409.255         | 697.584         | 693.745  | 0.692 | 693.406         | I [20] |
| A [12] | 432.934         | 659.389         | 654.050  | 0.840 | 653.714         | A [19] |
| Q [13] | 475.621         | 635.710         | 630.371  | 0.707 | 630.035         | Q [18] |
| G [14] | 494.629         | 593.024         | 587.685  | 0.821 | 587.349         | G [17] |
| G [15] | 513.635         | 574.017         | 568.678  | 0.693 | 568.342         | G [16] |
| V [16] | 546.858         | 535.010         | 529.670  | 0.806 | 529.334         | V [15] |
| L [17] | 584.352         | 521.987         | 516.648  | 0.804 | 516.312         | L [14] |
| M [18] | 616.703         | 484.292         | 478.953  | 0.709 | 478.617         | M [13] |
| N [19] | 664.718         | 451.942         | 446.602  | 0.698 | 446.266         | N [12] |
| I [20] | 692.412         | 413.927         | 408.588  | 0.924 | 408.252         | I [11] |
| Q [21] | 735.098         | 376.233         | 370.893  | 0.720 | 370.557         | Q [10] |
| A [22] | 758.778         | 333.540         | 328.200  | 0.843 | 327.871         | A [9]  |
| V [23] | 791.809         | 303.867         | 298.528  | 0.804 | 298.192         | V [8]  |
| L [24] | 829.495         | 278.844         | 273.505  | 0.781 | 273.169         | L [7]  |
| L [25] | 867.190         | 239.150         | 233.810  | 0.846 | 233.474         | L [6]  |
| P [26] | 899.541         | 201.455         | 196.116  | 0.961 | 195.780         | P [5]  |
| K [27] | 942.239         | 169.104         | 163.765  | 1.041 | 163.429         | K [4]  |
| K [28] | <b>984.937</b>  | 126.406         | 121.066  | 1.140 | 120.730         | K [3]  |
| T [29] | 1013.626        | 83.708          | 78.368   | 1.104 | 78.032          | T [2]  |
| E [30] | <b>1061.634</b> | 50.025          | 44.685   | 0.521 | 44.349          | E [1]  |

# sp | Q6GSS7 | H2A2A\_MOUSE

ELNKLKLGK<sup>Dimethyl</sup>VTIAQGGVLPNIQAVLLPKKTE  
28.03

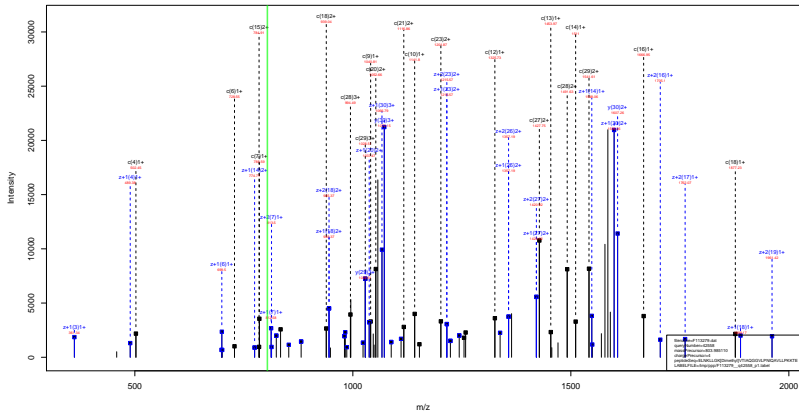

# sp | Q6GSS7 | H2A2A\_MOUSE

ELNKLKLGK<sup>Dimethyl</sup>VTIAQGGVLPNIQAVLLPKKTE  
28.03

- ▶ fragmentation table for charge state 1+
- ▶ specType=etd
- ▶ score=100.28
- ▶ F113279.dat
- ▶ query=q42558.p1
- ▶ precursor=803.985110
- ▶ chargePrecursor=4
- ▶ itol=0.5

| AA |    | c               | y        | z+1             | z+2             | z              | AA |    |
|----|----|-----------------|----------|-----------------|-----------------|----------------|----|----|
| E  | 1  | 147.676         | 3212.934 | 3196.916        | 0.000           | 3195.908       | E  | 30 |
| L  | 2  | 260.160         | 3083.892 | 3067.873        | 0.000           | 3066.865       | L  | 29 |
| R  | 3  | 374.333         | 2970.869 | 2954.789        | 2855.797        | 2953.781       | R  | 28 |
| R  | 4  | <b>502.298</b>  | 2956.765 | 2940.746        | 2841.754        | 2839.735       | R  | 27 |
| L  | 5  | 615.382         | 2728.670 | 2712.651        | 2713.659        | 2711.643       | L  | 26 |
| L  | 6  | <b>728.466</b>  | 2615.586 | 2599.569        | 2600.575        | 2598.559       | L  | 25 |
| G  | 7  | <b>785.488</b>  | 2502.502 | 2486.483        | 2487.491        | 2485.475       | G  | 24 |
| K  | 8  | 941.614         | 2445.480 | 2429.462        | 2430.469        | 2428.454       | K  | 23 |
| V  | 9  | <b>1048.683</b> | 2389.364 | 2373.355        | 2274.343        | 2272.327       | V  | 22 |
| I  | 10 | <b>1141.730</b> | 2190.286 | 2174.267        | 2175.275        | 2173.259       | I  | 21 |
| I  | 11 | <b>1254.814</b> | 2089.238 | 2073.219        | 2074.227        | 2072.211       | I  | 20 |
| A  | 12 | <b>1325.851</b> | 1978.154 | 1962.135        | <b>1961.143</b> | 1959.127       | A  | 19 |
| Q  | 13 | <b>1453.910</b> | 1905.117 | <b>1889.098</b> | 1890.106        | 1888.090       | Q  | 18 |
| G  | 14 | <b>1510.932</b> | 1777.058 | 1761.039        | <b>1762.047</b> | 1760.032       | G  | 17 |
| G  | 15 | 1567.954        | 1730.037 | 1704.018        | <b>1705.026</b> | 1703.010       | G  | 16 |
| V  | 16 | <b>1667.021</b> | 1583.015 | 1549.997        | 1548.994        | 1546.989       | V  | 15 |
| L  | 17 | 1780.105        | 1563.947 | <b>1547.928</b> | <b>1548.936</b> | 1546.920       | L  | 14 |
| P  | 18 | <b>1877.158</b> | 1450.863 | 1434.844        | 1435.852        | 1433.836       | P  | 13 |
| N  | 19 | 1991.201        | 1353.810 | <b>1337.791</b> | 1336.799        | 1336.783       | N  | 12 |
| I  | 20 | 2104.285        | 1239.767 | <b>1223.748</b> | 1224.756        | 1222.741       | I  | 11 |
| Q  | 21 | 2232.344        | 1136.682 | <b>1118.664</b> | 1111.672        | 1109.656       | Q  | 10 |
| A  | 22 | 2303.393        | 998.624  | <b>982.606</b>  | 983.614         | 981.599        | A  | 9  |
| V  | 23 | 2402.449        | 927.587  | 911.569         | 912.576         | 910.561        | V  | 8  |
| L  | 24 | 2515.533        | 828.519  | <b>812.500</b>  | <b>813.508</b>  | 811.492        | L  | 7  |
| L  | 25 | 3058.617        | 715.435  | <b>699.416</b>  | <b>700.424</b>  | <b>698.408</b> | L  | 6  |
| P  | 26 | 2725.670        | 602.351  | 586.332         | 587.340         | 585.324        | P  | 5  |
| K  | 27 | 2853.765        | 505.296  | <b>489.279</b>  | 490.287         | 488.271        | K  | 4  |
| R  | 28 | 2883.886        | 377.263  | <b>361.184</b>  | 362.192         | 360.175        | R  | 3  |
| T  | 29 | 3082.908        | 249.188  | 233.099         | 234.097         | 232.082        | T  | 2  |
| E  | 30 | 3211.950        | 148.060  | 132.042         | 133.050         | 131.034        | E  | 1  |



# sp | Q6GSS7 | H2A2A\_MOUSE

ELNKLKLGK<sup>Dimethyl</sup>VTIAQGGVLPNIQAVLLPKKTE  
28.03

- ▶ fragmentation table for charge state 2+
- ▶ specType=etd
- ▶ score=100.28
- ▶ F113279.dat
- ▶ query=q42558.p1
- ▶ precursor=803.985110
- ▶ chargePrecursor=4
- ▶ itol=0.5

| AA |    | c               | y               | z+1             | z+2             | z        | AA |    |
|----|----|-----------------|-----------------|-----------------|-----------------|----------|----|----|
| E  | 1  | 74.042          | <b>1606.971</b> | <b>1598.962</b> | 0.904           | 1598.458 | E  | 30 |
| L  | 2  | 130.584         | 1542.450        | 1534.440        | 0.904           | 1533.936 | L  | 29 |
| N  | 3  | 187.005         | 1485.908        | 1477.898        | 1478.402        | 1477.394 | N  | 28 |
| K  | 4  | 251.953         | 1428.886        | <b>1420.877</b> | <b>1421.381</b> | 1420.377 | K  | 27 |
| L  | 5  | 308.195         | 1384.839        | <b>1356.829</b> | <b>1357.333</b> | 1356.325 | L  | 26 |
| L  | 6  | 364.737         | 1308.297        | 1300.287        | 1300.791        | 1299.783 | L  | 25 |
| G  | 7  | 393.248         | 1251.755        | <b>1243.745</b> | <b>1244.249</b> | 1243.241 | G  | 24 |
| K  | 8  | 471.311         | <b>1223.244</b> | <b>1215.234</b> | <b>1215.738</b> | 1214.731 | K  | 23 |
| V  | 9  | 520.845         | 1145.181        | 1137.171        | 1137.675        | 1136.667 | V  | 22 |
| T  | 10 | 573.369         | 1095.644        | <b>1087.637</b> | <b>1088.141</b> | 1087.133 | T  | 21 |
| N  | 11 | 627.911         | 1045.123        | <b>1037.113</b> | <b>1037.617</b> | 1036.609 | N  | 20 |
| A  | 12 | 683.429         | 988.581         | <b>980.571</b>  | <b>981.075</b>  | 980.067  | A  | 19 |
| Q  | 13 | 727.459         | 953.062         | <b>945.053</b>  | <b>945.557</b>  | 944.549  | Q  | 18 |
| G  | 14 | 785.969         | 889.033         | <b>881.023</b>  | <b>881.527</b>  | 880.519  | G  | 17 |
| G  | 15 | <b>784.480</b>  | 899.522         | 892.512         | <b>853.017</b>  | 892.009  | G  | 16 |
| V  | 16 | <b>834.014</b>  | 832.011         | <b>824.002</b>  | <b>824.506</b>  | 823.498  | V  | 15 |
| L  | 17 | 890.556         | 782.477         | <b>774.468</b>  | <b>774.972</b>  | 773.964  | L  | 14 |
| P  | 18 | <b>939.083</b>  | 725.935         | 717.926         | 718.430         | 717.422  | P  | 13 |
| N  | 19 | 996.104         | 677.409         | 669.399         | 669.903         | 668.895  | N  | 12 |
| T  | 20 | <b>1052.646</b> | 620.387         | 612.378         | 612.882         | 611.874  | T  | 11 |
| Q  | 21 | <b>1118.676</b> | 563.845         | 555.836         | 556.340         | 555.332  | Q  | 10 |
| A  | 22 | <b>1152.194</b> | 499.819         | 491.807         | 492.310         | 491.303  | A  | 9  |
| V  | 23 | <b>1201.728</b> | 464.297         | 456.288         | 456.792         | 455.784  | V  | 8  |
| L  | 24 | <b>1258.270</b> | 414.763         | 406.754         | 407.258         | 406.250  | L  | 7  |
| L  | 25 | 1314.812        | 358.221         | 350.212         | 350.716         | 349.708  | L  | 6  |
| P  | 26 | 1373.339        | 301.676         | 293.670         | 294.174         | 293.166  | P  | 5  |
| K  | 27 | <b>1427.386</b> | 253.151         | 245.143         | 245.647         | 244.639  | K  | 4  |
| K  | 28 | <b>1481.434</b> | 189.195         | 181.186         | 181.690         | 180.682  | K  | 3  |
| T  | 29 | <b>1541.958</b> | 125.058         | 117.048         | 117.552         | 116.544  | T  | 2  |
| E  | 30 | 1606.479        | 74.534          | 66.524          | 67.028          | 66.021   | E  | 1  |

# sp | Q6GSS7 | H2A2A\_MOUSE

ELNKLKLGK<sup>Dimethyl</sup>VTIAQGGVLPNIQAVLLPKKTE  
28.03

- ▶ fragmentation table for charge state 3+
- ▶ specType=etd
- ▶ score=100.28
- ▶ F113279.dat
- ▶ query=q42558.p1
- ▶ precursor=803.985110
- ▶ chargePrecursor=4
- ▶ itol=0.5

| AA | c  | y               | z+1             | z+2             | z              | AA              |   |    |
|----|----|-----------------|-----------------|-----------------|----------------|-----------------|---|----|
| E  | 1  | 49.697          | <b>1071.650</b> | <b>1066.310</b> | 0.672          | 1005.974        | E | 30 |
| L  | 2  | 87.302          | <b>1028.635</b> | <b>1023.296</b> | 0.672          | <b>1022.960</b> | L | 29 |
| K  | 3  | 125.406         | 990.941         | 985.601         | <b>985.937</b> | 985.205         | K | 28 |
| K  | 4  | 168.204         | 952.926         | 947.587         | 947.923        | 947.251         | K | 27 |
| L  | 5  | 205.799         | 910.228         | 904.889         | 905.225        | 904.553         | L | 26 |
| L  | 6  | 243.494         | 872.531         | 867.194         | 867.530        | 866.858         | L | 25 |
| G  | 7  | 282.501         | 834.839         | 829.499         | 829.835        | 829.163         | G | 24 |
| K  | 8  | 314.543         | 815.832         | 810.492         | 810.828        | 810.156         | K | 23 |
| V  | 9  | 347.566         | 783.790         | 778.450         | 778.786        | 778.114         | V | 22 |
| V  | 10 | 381.248         | 750.767         | 745.427         | 745.763        | 745.091         | V | 21 |
| I  | 11 | 418.943         | 697.084         | 691.745         | 692.081        | 691.409         | I | 20 |
| A  | 12 | 442.622         | 659.389         | 654.050         | 654.386        | 653.714         | A | 19 |
| Q  | 13 | 485.308         | 635.711         | 630.371         | 630.707        | 630.035         | Q | 18 |
| G  | 14 | 504.315         | 593.024         | 587.685         | 588.021        | 587.349         | G | 17 |
| G  | 15 | 523.123         | 574.017         | 568.678         | 569.013        | 568.342         | G | 16 |
| V  | 16 | 556.345         | 559.011         | 549.670         | 550.006        | 549.334         | V | 15 |
| L  | 17 | 594.040         | 521.987         | 516.648         | 516.984        | 516.312         | L | 14 |
| P  | 18 | 626.891         | 484.202         | 478.963         | 479.299        | 478.617         | P | 13 |
| N  | 19 | 664.405         | 451.942         | 446.602         | 446.938        | 446.266         | N | 12 |
| I  | 20 | 702.100         | 413.927         | 408.588         | 408.924        | 408.252         | I | 11 |
| Q  | 21 | 744.786         | 376.213         | 370.873         | 371.209        | 370.537         | Q | 10 |
| A  | 22 | 788.465         | 333.546         | 328.207         | 328.543        | 327.871         | A | 9  |
| V  | 23 | 801.488         | 309.967         | 304.628         | 304.964        | 304.292         | V | 8  |
| L  | 24 | 839.183         | 276.844         | 271.505         | 271.841        | 271.169         | L | 7  |
| L  | 25 | 876.877         | 239.150         | 233.810         | 234.146        | 233.474         | L | 6  |
| P  | 26 | 909.238         | 201.455         | 196.116         | 196.451        | 195.780         | P | 5  |
| K  | 27 | 951.627         | 169.104         | 163.765         | 164.101        | 163.429         | K | 4  |
| K  | 28 | <b>994.625</b>  | 129.420         | 124.081         | 124.417        | 123.745         | K | 3  |
| I  | 29 | <b>1028.307</b> | 83.708          | 78.368          | 78.704         | 78.032          | I | 2  |
| E  | 30 | 1071.822        | 50.025          | 44.685          | 45.021         | 44.349          | E | 1  |

# sp | Q6GSS7 | H2A2A\_MOUSE

ELNKLLGK<sup>Dimethyl</sup>VTIAQGGVLPNIQAVLLPKKTE  
28.03

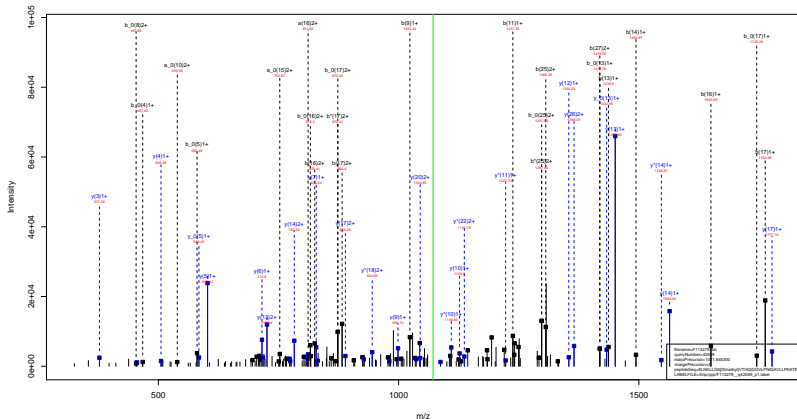

# sp | Q6GSS7 | H2A2A\_MOUSE

ELNKLKLGK<sup>Dimethyl</sup>VTIAQGGVLPNIQAVLLPKKTE<sup>28.03</sup>

- ▶ fragmentation table for charge state 1+
- ▶ specType=cid
- ▶ score=55.10
- ▶ F113279.dat
- ▶ query=q42559\_p1
- ▶ precursor=1071.645300
- ▶ chargePrecursor=3
- ▶ itol=0.5

| AA | s  | s*       | a,p      | b        | b*       | b,p      | y        | s*       | a,p      | AA       |      |
|----|----|----------|----------|----------|----------|----------|----------|----------|----------|----------|------|
| E  | 1  | 225.130  | 10.950   | 187.124  | 131.070  | 0.950    | 113.070  | 222.174  | 109.985  | 1194.824 | E280 |
| L  | 2  | 225.130  | 10.950   | 187.124  | 243.114  | 0.950    | 255.113  | 202.972  | 109.985  | 2009.931 | L129 |
| N  | 3  | 329.180  | 137.150  | 111.172  | 487.177  | 141.150  | 137.150  | 329.180  | 145.178  | 1052.727 | N120 |
| N  | 4  | 329.177  | 487.150  | 145.166  | 109.177  | 109.177  | 487.150  | 329.177  | 109.178  | 1038.754 | N121 |
| L  | 5  | 419.161  | 353.574  | 152.160  | 306.159  | 161.159  | 353.574  | 353.574  | 211.141  | 2120.039 | L126 |
| L  | 6  | 481.480  | 666.410  | 165.434  | 711.440  | 164.433  | 666.410  | 666.410  | 206.151  | 1037.071 | L125 |
| G  | 7  | 740.457  | 723.440  | 723.450  | 723.450  | 723.450  | 723.450  | 723.450  | 2485.479 | 2484.481 | G104 |
| N  | 8  | 826.518  | 826.500  | 826.500  | 826.500  | 826.500  | 826.500  | 826.500  | 2629.454 | 2627.452 | N123 |
| V  | 9  | 905.581  | 905.580  | 905.580  | 905.580  | 905.580  | 905.580  | 905.580  | 2697.521 | 2691.543 | V102 |
| T  | 10 | 1095.700 | 1095.680 | 1095.680 | 1124.704 | 1107.677 | 1107.677 | 2180.385 | 2174.203 | 2172.216 | T121 |
| L  | 11 | 1209.400 | 1129.700 | 1101.700 | 1217.700 | 1217.700 | 1217.700 | 2009.219 | 1897.211 | 1891.212 | L101 |
| A  | 12 | 1309.500 | 1263.800 | 1262.810 | 1291.798 | 1291.798 | 1291.798 | 1976.154 | 1959.121 | 1956.143 | A119 |
| Q  | 13 | 1439.580 | 1391.800 | 1390.810 | 1438.804 | 1431.767 | 1418.875 | 1888.040 | 1887.100 | 1887.100 | Q111 |
| Q  | 14 | 1489.700 | 1444.800 | 1443.800 | 1493.805 | 1486.768 | 1473.821 | 1777.058 | 1769.049 | 1769.049 | Q112 |
| G  | 15 | 1522.500 | 1505.900 | 1504.910 | 1533.905 | 1533.905 | 1533.905 | 1724.011 | 1703.000 | 1702.000 | G110 |
| V  | 16 | 1622.000 | 1606.000 | 1605.010 | 1646.995 | 1631.958 | 1619.011 | 1724.011 | 1703.000 | 1702.000 | V115 |
| L  | 17 | 1781.000 | 1733.000 | 1732.010 | 1783.019 | 1783.019 | 1783.019 | 1743.008 | 1741.041 | 1740.529 | L114 |
| P  | 18 | 1834.100 | 1816.100 | 1814.100 | 1846.110 | 1846.110 | 1846.110 | 1455.001 | 1443.001 | 1442.852 | P113 |
| N  | 19 | 1845.100 | 1827.100 | 1826.100 | 1874.110 | 1874.110 | 1874.110 | 1351.810 | 1339.781 | 1338.799 | N112 |
| E  | 20 | 2119.400 | 2040.400 | 2040.400 | 2119.400 | 2119.400 | 2119.400 | 1222.741 | 1211.741 | 1211.741 | E111 |
| A  | 21 | 2179.500 | 2179.500 | 2179.500 | 2215.517 | 2215.517 | 2215.517 | 1176.611 | 1108.636 | 1108.637 | A118 |
| A  | 22 | 2208.500 | 2241.100 | 2240.949 | 2268.514 | 2268.510 | 2268.514 | 998.624  | 881.589  | 980.614  | A109 |
| V  | 23 | 2257.400 | 2240.400 | 2239.410 | 2287.413 | 2287.409 | 2287.413 | 927.589  | 810.563  | 920.563  | V108 |
| L  | 24 | 2314.100 | 2297.810 | 2296.760 | 2347.708 | 2347.708 | 2347.708 | 878.519  | 811.492  | 810.508  | L117 |
| L  | 25 | 2411.100 | 2396.100 | 2394.101 | 2411.101 | 2411.101 | 2411.101 | 715.435  | 686.416  | 687.424  | L101 |
| P  | 26 | 2609.600 | 2601.620 | 2602.610 | 2708.644 | 2691.617 | 2680.631 | 662.351  | 658.324  | 654.340  | P105 |
| L  | 27 | 2708.600 | 2701.610 | 2702.610 | 2808.619 | 2808.619 | 2808.619 | 619.219  | 608.219  | 608.219  | L104 |
| R  | 28 | 2816.500 | 2819.510 | 2818.500 | 2854.514 | 2847.509 | 2846.514 | 377.201  | 365.171  | 366.181  | R103 |
| T  | 29 | 3137.200 | 3045.800 | 3039.810 | 3146.811 | 3146.811 | 3146.811 | 246.180  | 235.180  | 231.000  | T102 |
| E  | 30 | 3268.100 | 3148.800 | 3146.810 | 3277.814 | 3277.814 | 3277.814 | 148.000  | 139.000  | 133.000  | E101 |

# sp | Q6GSS7 | H2A2A\_MOUSE

ELNKLKLGK<sup>Dimethyl</sup><sub>28.03</sub>VTIAQGGLPNIQAVLLPKKTE

- ▶ fragmentation table for charge state 2+
- ▶ specType=cid
- ▶ score=55.10
- ▶ F113279.dat
- ▶ query=q42559\_p1
- ▶ precursor=1071.645300
- ▶ chargePrecursor=3
- ▶ itol=0.5

| AA | a               | a*             | aΔ              | b               | b*              | bΔ              | y               | y*              | yΔ              | AA   |
|----|-----------------|----------------|-----------------|-----------------|-----------------|-----------------|-----------------|-----------------|-----------------|------|
| E  | 31.031          | 0.000          | 42.529          | 48.529          | 0.000           | 56.571          | 1658.371        | 168.451         | 1697.821        | E184 |
| L  | 110.014         | 0.004          | 79.999          | 123.014         | 0.004           | 115.005         | 1542.405        | 1551.919        | 1551.044        | L126 |
| N  | 133.059         | 108.100        | 138.059         | 119.060         | 119.060         | 119.060         | 1435.361        | 1435.361        | 1417.361        | N120 |
| K  | 229.142         | 203.820        | 220.137         | 241.140         | 234.820         | 234.134         | 1342.361        | 1342.361        | 1410.361        | K127 |
| L  | 102.004         | 107.411        | 109.010         | 109.010         | 104.100         | 104.100         | <b>1304.439</b> | 1305.323        | 1305.323        | L126 |
| L  | 141.036         | 141.913        | 141.913         | 141.913         | 141.913         | 141.913         | 1308.399        | 1308.399        | 1309.380        | L126 |
| G  | 110.017         | 103.224        | 101.732         | 104.734         | 101.211         | 101.211         | 1281.725        | 1283.241        | 1282.740        | G124 |
| K  | 148.009         | 149.327        | 149.762         | 149.762         | 144.264         | 144.264         | <b>453.192</b>  | 1323.349        | 1323.349        | K125 |
| V  | 146.014         | 146.891        | 146.891         | 147.834         | 146.811         | 146.811         | 1301.381        | 1318.181        | <b>1136.667</b> | V122 |
| T  | 148.038         | 149.241        | <b>539.853</b>  | 149.241         | 154.242         | 153.330         | 1301.381        | <b>1087.133</b> | 1088.241        | T121 |
| E  | 105.000         | 105.887        | 105.887         | 105.887         | 101.888         | 101.888         | 1305.133        | <b>1036.600</b> | 1037.717        | E121 |
| A  | 144.010         | 144.450        | 144.450         | 144.450         | 144.450         | 144.450         | 1301.381        | 1301.381        | 1301.381        | A120 |
| Q  | <b>704.948</b>  | 686.435        | <b>695.943</b>  | 718.946         | 718.432         | <b>709.940</b>  | 845.911         | <b>844.549</b>  | 844.567         | Q118 |
| G  | 144.010         | 144.450        | 144.450         | 144.450         | 144.450         | 144.450         | 1301.381        | 1301.381        | 1301.381        | G117 |
| G  | 144.010         | 144.450        | <b>752.964</b>  | 144.450         | 144.450         | <b>746.962</b>  | 845.911         | 845.911         | 845.911         | G117 |
| V  | <b>811.504</b>  | <b>802.490</b> | <b>802.490</b>  | <b>825.501</b>  | <b>816.988</b>  | <b>816.490</b>  | <b>852.011</b>  | 852.011         | 852.011         | V115 |
| T  | <b>103.940</b>  | <b>103.931</b> | 103.931         | <b>102.343</b>  | <b>105.330</b>  | <b>102.338</b>  | <b>782.017</b>  | <b>771.964</b>  | <b>773.472</b>  | T114 |
| F  | 155.012         | 155.521        | 155.521         | 155.521         | 155.521         | 155.521         | 1211.554        | <b>725.935</b>  | <b>711.422</b>  | F113 |
| N  | 171.023         | 161.200        | 164.199         | 164.199         | 164.199         | 164.199         | 1071.391        | 1071.391        | 1061.411        | N112 |
| R  | 168.028         | 161.200        | 164.199         | <b>1044.133</b> | 1044.133        | 1044.133        | <b>1035.128</b> | 1035.128        | 1035.128        | R111 |
| Q  | 1594.100        | 1595.232       | 1595.232        | 1595.232        | 1595.232        | 1595.232        | 1033.915        | 1033.915        | 1033.915        | Q109 |
| A  | <b>1129.083</b> | 1121.130       | 1120.130        | <b>1143.081</b> | 1139.130        | 1134.130        | 689.011         | 689.011         | 689.011         | A107 |
| V  | 1179.110        | 1169.100       | 1169.110        | <b>1193.215</b> | <b>1184.702</b> | <b>1184.210</b> | 684.261         | <b>455.764</b>  | <b>455.262</b>  | V106 |
| L  | 1119.100        | 1107.200       | 1107.200        | <b>1140.215</b> | <b>1141.244</b> | <b>1140.752</b> | 614.212         | 614.212         | 614.212         | L107 |
| L  | <b>1292.302</b> | 1283.100       | 1283.100        | <b>1306.299</b> | <b>1297.786</b> | <b>1297.294</b> | 538.211         | 538.211         | 538.211         | L106 |
| V  | 1341.030        | 1332.131       | <b>1331.823</b> | 1332.131        | 1332.131        | 1332.131        | 538.211         | 538.211         | 538.211         | V105 |
| K  | 1414.016        | 1405.363       | 1405.363        | <b>1418.873</b> | 1414.363        | 1414.363        | 499.800         | 499.800         | 499.800         | K104 |
| K  | 1440.047        | 1430.439       | 1430.439        | 1441.900        | 1434.407        | 1434.407        | 488.108         | 488.108         | 488.108         | K103 |
| L  | 1319.047        | 1310.004       | 1310.442        | 1313.444        | 1304.911        | 1304.439        | 329.000         | 0.000           | 118.000         | L102 |
| L  | 1313.038        | 1313.439       | 1313.439        | 1313.439        | 1313.439        | 1313.439        | 174.212         | 0.000           | 85.000          | L101 |

# sp | Q6GSS7 | H2A2A\_MOUSE

ELNKLKLGK<sup>Dimethyl</sup>VTIAQGGVLPNIQAVLLPKKTE  
28.03

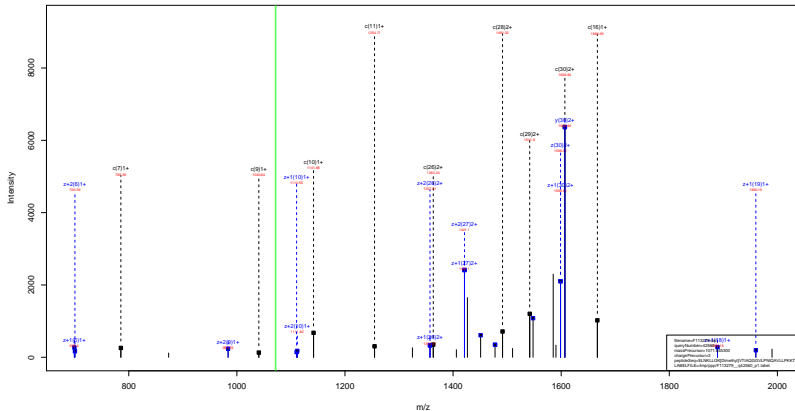

# sp | Q6GSS7 | H2A2A\_MOUSE

ELNKLKLGK<sup>Dimethyl</sup>VTIAQGGVLPNIQAVLLPKKTE  
28.03

- ▶ fragmentation table for charge state 1+
- ▶ specType=etd
- ▶ score=37.34
- ▶ F113279.dat
- ▶ query=q42560.p1
- ▶ precursor=1071.645300
- ▶ chargePrecursor=3
- ▶ itol=0.5

| AA | c  | y               | z+1             | z+2             | z               | AA       |      |
|----|----|-----------------|-----------------|-----------------|-----------------|----------|------|
| E  | 1  | 147.076         | 3212.934        | 3106.916        | 0.000           | 3195.908 | E 30 |
| L  | 2  | 200.160         | 3083.892        | 3067.873        | 0.000           | 3056.855 | L 29 |
| K  | 3  | 174.203         | 2970.808        | 2954.789        | 2938.797        | 2953.781 | K 28 |
| K  | 4  | 302.298         | 2856.765        | 2840.746        | 2824.734        | 2839.720 | K 27 |
| L  | 5  | 815.382         | 2728.670        | 2712.651        | 2713.650        | 2711.643 | L 26 |
| L  | 6  | 728.466         | 2615.586        | 2599.567        | 2600.575        | 2598.559 | L 25 |
| G  | 7  | <b>785.488</b>  | 2502.500        | 2486.483        | 2487.491        | 2485.475 | G 24 |
| K  | 8  | 941.614         | 2445.480        | 2429.462        | 2430.469        | 2428.454 | K 23 |
| V  | 9  | <b>1040.583</b> | 2289.354        | 2273.335        | 2274.343        | 2272.327 | V 22 |
| T  | 10 | <b>1141.730</b> | 2190.288        | 2174.267        | 2175.275        | 2173.259 | T 21 |
| H  | 11 | <b>1254.814</b> | 2089.238        | 2073.219        | 2074.227        | 2072.211 | H 20 |
| A  | 12 | 1325.851        | 1976.154        | <b>1960.135</b> | 1961.143        | 1959.127 | A 19 |
| Q  | 13 | 1453.910        | 1905.117        | <b>1889.098</b> | 1890.106        | 1888.090 | Q 18 |
| G  | 14 | 1510.932        | 1777.050        | 1761.030        | 1762.047        | 1760.032 | G 17 |
| Q  | 15 | 1597.953        | 1720.010        | 1704.000        | 1705.008        | 1703.010 | Q 16 |
| V  | 16 | <b>1667.021</b> | 1663.013        | 1646.997        | 1648.004        | 1646.989 | V 15 |
| L  | 17 | 1780.105        | 1563.949        | <b>1547.928</b> | 1548.936        | 1546.920 | L 14 |
| P  | 18 | 1877.158        | <b>1450.863</b> | 1434.844        | 1435.852        | 1433.836 | P 13 |
| N  | 19 | 1991.201        | 1353.810        | 1337.791        | 1338.799        | 1336.783 | N 12 |
| T  | 20 | 2104.285        | 1239.767        | 1223.748        | 1224.756        | 1222.741 | T 11 |
| Q  | 21 | 2232.344        | 1126.682        | <b>1110.664</b> | <b>1111.672</b> | 1109.656 | Q 10 |
| A  | 22 | 2303.391        | 999.624         | <b>983.605</b>  | <b>983.614</b>  | 981.599  | A 9  |
| V  | 23 | 2402.449        | 927.587         | 911.569         | 912.576         | 910.561  | V 8  |
| L  | 24 | 2515.533        | 828.519         | 812.500         | 813.508         | 811.492  | L 7  |
| L  | 25 | 2628.617        | 715.435         | <b>699.416</b>  | <b>700.424</b>  | 698.408  | L 6  |
| P  | 26 | 2725.670        | 602.351         | 586.332         | 587.340         | 585.324  | P 5  |
| K  | 27 | 2833.765        | 509.266         | 489.249         | 490.257         | 488.241  | K 4  |
| K  | 28 | 2981.860        | 377.203         | 361.184         | 362.192         | 360.177  | K 3  |
| T  | 29 | 3062.908        | 249.108         | 233.089         | 234.097         | 232.082  | T 2  |
| E  | 30 | 3211.950        | 148.060         | 132.042         | 133.050         | 131.034  | E 1  |

# sp | Q6GSS7 | H2A2A\_MOUSE

ELNKLKLGK<sup>Dimethyl</sup>VTIAQGGVLPNIQAVLLPKKTE  
28.03

- ▶ fragmentation table for charge state 2+
- ▶ specType=etd
- ▶ score=37.34
- ▶ F113279.dat
- ▶ query=q42560.p1
- ▶ precursor=1071.645300
- ▶ chargePrecursor=3
- ▶ itol=0.5

| AA   | c               | y               | z+1             | z+2             | z               | AA   |
|------|-----------------|-----------------|-----------------|-----------------|-----------------|------|
| E 1  | 74.042          | <b>1606.971</b> | <b>1598.962</b> | 0.504           | <b>1598.458</b> | E 30 |
| L 2  | 130.504         | 1542.456        | 1534.440        | 0.504           | 1533.936        | L 29 |
| N 3  | 187.605         | 1485.908        | <b>1477.898</b> | 1479.402        | <b>1477.394</b> | N 28 |
| K 4  | 251.653         | 1428.869        | <b>1420.877</b> | <b>1421.381</b> | 1420.371        | K 27 |
| L 5  | 308.195         | 1364.839        | <b>1356.829</b> | <b>1357.333</b> | 1355.323        | L 26 |
| L 6  | 364.737         | 1308.297        | 1300.287        | 1300.791        | 1299.781        | L 25 |
| G 7  | 391.240         | 1251.755        | 1243.745        | 1244.249        | 1243.241        | G 24 |
| K 8  | 471.311         | 1223.244        | 1215.234        | 1215.738        | 1214.731        | K 23 |
| V 9  | 520.845         | 1148.181        | 1137.171        | 1137.675        | 1136.667        | V 22 |
| T 10 | 573.369         | 1095.646        | 1087.637        | 1088.141        | 1087.131        | T 21 |
| I 11 | 627.911         | 1045.123        | 1037.113        | 1037.617        | 1036.609        | I 20 |
| A 12 | 683.429         | 988.581         | 980.571         | 981.075         | 980.067         | A 19 |
| Q 13 | 727.459         | 933.062         | 945.053         | 945.557         | 944.549         | Q 18 |
| G 14 | 755.969         | 889.033         | 881.023         | 881.527         | 880.519         | G 17 |
| C 15 | 784.480         | 869.522         | 862.513         | 863.017         | 862.009         | C 16 |
| V 16 | 834.014         | 832.011         | 824.002         | 824.506         | 823.497         | V 15 |
| L 17 | 890.556         | 782.477         | 774.468         | 774.972         | 773.964         | L 14 |
| F 18 | 936.083         | 725.935         | 717.926         | 718.430         | 717.422         | F 13 |
| N 19 | 996.104         | 677.409         | 669.399         | 669.903         | 668.895         | N 12 |
| I 20 | 1052.646        | 620.387         | 612.378         | 612.882         | 611.874         | I 11 |
| Q 21 | 1118.678        | 563.845         | 565.836         | 566.340         | 565.331         | Q 10 |
| A 22 | 1152.194        | 499.816         | 491.807         | 492.310         | 491.301         | A 9  |
| V 23 | 1201.728        | 464.297         | 456.288         | 456.792         | 455.784         | V 8  |
| L 24 | 1258.270        | 414.763         | 406.754         | 407.258         | 406.250         | L 7  |
| L 25 | 1314.812        | 358.221         | 350.212         | 350.716         | 349.708         | L 6  |
| F 26 | <b>1363.339</b> | 301.679         | 293.670         | 294.174         | 293.165         | F 5  |
| K 27 | 1427.356        | 253.153         | 245.143         | 245.647         | 244.639         | K 4  |
| K 28 | <b>1491.434</b> | 189.055         | 181.046         | 181.550         | 180.542         | K 3  |
| T 29 | <b>1541.958</b> | 125.058         | 117.048         | 117.552         | 116.544         | T 2  |
| E 30 | <b>1606.479</b> | 74.534          | 66.524          | 67.028          | 66.021          | E 1  |



# sp | Q6GSS7 | H2A2A\_MOUSE

ELNK<sup>Dimethyl</sup><sub>28.03</sub> LLGKV<sup>Dimethyl</sup>TIAQGGVLPNIQAVLLPKKTE

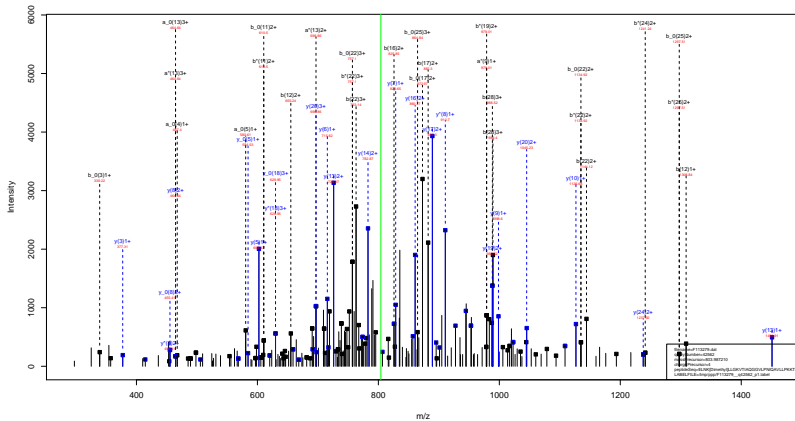

# sp | Q6GSS7 | H2A2A\_MOUSE

ELNK<sup>Dimethyl</sup><sub>28.03</sub> LLGKVTIAQGGVLPNIQAVLLPKKTE

- ▶ fragmentation table for charge state 1+
- ▶ specType=cid
- ▶ score=37.27
- ▶ F113279.dat
- ▶ query=q42562.p1
- ▶ precursor=803.987210
- ▶ chargePrecursor=4
- ▶ itol=0.5

| AA  | a        | a'       | a,Δ      | b        | b'       | b,Δ      | y        | y'       | AA   |
|-----|----------|----------|----------|----------|----------|----------|----------|----------|------|
| L1  | 2052.558 | 2052.558 | 2052.558 | 1336.986 | 1336.986 | 1336.986 | 3052.557 | 3052.557 | L131 |
| L2  | 2155.158 | 2155.158 | 2155.158 | 1443.154 | 1443.154 | 1443.154 | 2855.156 | 2855.156 | L129 |
| N3  | 2475.348 | 2475.348 | 2475.348 | 1777.777 | 1777.777 | 1777.777 | 2655.347 | 2655.347 | N128 |
| N4  | 485.103  | 485.103  | 485.103  | 514.311  | 514.311  | 514.311  | 899.292  | 899.292  | N27  |
| L5  | 598.192  | 598.192  | 598.192  | 625.287  | 625.287  | 625.287  | 998.191  | 998.191  | L126 |
| L6  | 711.476  | 711.476  | 711.476  | 739.471  | 739.471  | 739.471  | 1097.470 | 1097.470 | L125 |
| N7  | 768.606  | 768.606  | 768.606  | 796.743  | 796.743  | 796.743  | 1247.605 | 1247.605 | N26  |
| N8  | 898.593  | 898.593  | 898.593  | 929.593  | 929.593  | 929.593  | 1397.592 | 1397.592 | N25  |
| V9  | 995.656  | 995.656  | 995.656  | 1023.656 | 1023.656 | 1023.656 | 1496.651 | 1496.651 | V22  |
| T10 | 1095.709 | 1095.709 | 1095.709 | 1120.688 | 1120.688 | 1120.688 | 1595.700 | 1595.700 | T21  |
| L11 | 1198.813 | 1198.813 | 1198.813 | 1217.798 | 1217.798 | 1217.798 | 1694.812 | 1694.812 | L21  |
| A12 | 1300.908 | 1300.908 | 1300.908 | 1317.908 | 1317.908 | 1317.908 | 1793.907 | 1793.907 | A19  |
| Q13 | 1402.989 | 1402.989 | 1402.989 | 1419.989 | 1419.989 | 1419.989 | 1892.988 | 1892.988 | Q18  |
| Q14 | 1505.059 | 1505.059 | 1505.059 | 1522.059 | 1522.059 | 1522.059 | 1991.059 | 1991.059 | Q17  |
| Q15 | 1557.512 | 1557.512 | 1557.512 | 1574.512 | 1574.512 | 1574.512 | 2089.512 | 2089.512 | Q16  |
| V16 | 1659.558 | 1659.558 | 1659.558 | 1626.558 | 1626.558 | 1626.558 | 2187.557 | 2187.557 | V15  |
| L17 | 1761.601 | 1761.601 | 1761.601 | 1728.601 | 1728.601 | 1728.601 | 2285.600 | 2285.600 | L14  |
| F18 | 2352.517 | 2352.517 | 2352.517 | 2352.517 | 2352.517 | 2352.517 | 1450.863 | 1450.863 | F13  |
| N19 | 2448.589 | 2448.589 | 2448.589 | 2448.589 | 2448.589 | 2448.589 | 1359.763 | 1359.763 | N12  |
| N20 | 2550.642 | 2550.642 | 2550.642 | 2550.642 | 2550.642 | 2550.642 | 1258.742 | 1258.742 | N11  |
| Q21 | 2652.702 | 2652.702 | 2652.702 | 2652.702 | 2652.702 | 2652.702 | 1156.672 | 1156.672 | Q19  |
| A22 | 2754.789 | 2754.789 | 2754.789 | 2754.789 | 2754.789 | 2754.789 | 995.624  | 995.624  | A18  |
| V23 | 2857.426 | 2857.426 | 2857.426 | 2857.426 | 2857.426 | 2857.426 | 927.587  | 927.587  | V16  |
| L24 | 2959.513 | 2959.513 | 2959.513 | 2959.513 | 2959.513 | 2959.513 | 826.519  | 826.519  | L17  |
| L25 | 3061.598 | 3061.598 | 3061.598 | 3061.598 | 3061.598 | 3061.598 | 715.435  | 715.435  | L16  |
| P26 | 3163.689 | 3163.689 | 3163.689 | 3163.689 | 3163.689 | 3163.689 | 602.351  | 602.351  | P15  |
| K27 | 3265.782 | 3265.782 | 3265.782 | 3265.782 | 3265.782 | 3265.782 | 508.268  | 508.268  | K14  |
| R28 | 3367.873 | 3367.873 | 3367.873 | 3367.873 | 3367.873 | 3367.873 | 377.203  | 377.203  | R13  |
| T29 | 3469.964 | 3469.964 | 3469.964 | 3469.964 | 3469.964 | 3469.964 | 246.119  | 246.119  | T12  |
| E30 | 3572.052 | 3572.052 | 3572.052 | 3572.052 | 3572.052 | 3572.052 | 148.000  | 148.000  | E11  |

# sp | Q6GSS7 | H2A2A\_MOUSE

ELNK<sup>Dimethyl</sup><sub>28.03</sub> LLGKV<sup>Dimethyl</sup>TIAQGGVLPNIQAVLLPKKTE

- ▶ fragmentation table for charge state 2+
- ▶ specType=cid
- ▶ score=37.27
- ▶ F113279.dat
- ▶ query=q42562.p1
- ▶ precursor=803.987210
- ▶ chargePrecursor=4
- ▶ itol=0.5

| AA   | a               | a <sup>+</sup>  | a <sup>2+</sup> | b               | b <sup>+</sup>  | b <sup>2+</sup> | y               | y <sup>+</sup>  | y <sup>2+</sup> | AA   |
|------|-----------------|-----------------|-----------------|-----------------|-----------------|-----------------|-----------------|-----------------|-----------------|------|
| E1   | 111.059         | 9.354           | 44.229          | 109.249         | 9.354           | 44.229          | 208.249         | 118.603         | 163.968         | L131 |
| L12  | 108.073         | 9.354           | 38.955          | 112.081         | 9.354           | 38.955          | 174.455         | 115.935         | 151.944         | L129 |
| N13  | 105.088         | 9.354           | 33.680          | 114.932         | 9.354           | 33.680          | 140.760         | 113.262         | 147.952         | N128 |
| R14  | 102.102         | 9.354           | 28.405          | 117.783         | 9.354           | 28.405          | 107.065         | 110.589         | 144.968         | R127 |
| L15  | 100.102         | 9.354           | 25.444          | 119.087         | 9.354           | 25.444          | 104.972         | 110.513         | 134.973         | L126 |
| L16  | 100.042         | 9.354           | 24.719          | 119.719         | 9.354           | 24.719          | 104.334         | 110.438         | 133.978         | L125 |
| N17  | 100.032         | 9.354           | 24.444          | 120.789         | 9.354           | 24.444          | 103.747         | 110.363         | 132.983         | N124 |
| R18  | 100.000         | 9.354           | 23.169          | 123.640         | 9.354           | 23.169          | 103.160         | 110.288         | 131.988         | R123 |
| V19  | <b>998.334</b>  | <b>488.821</b>  | <b>488.378</b>  | <b>488.378</b>  | <b>503.618</b>  | <b>503.175</b>  | <b>1146.381</b> | <b>1146.381</b> | <b>1146.381</b> | V122 |
| T101 | 100.000         | 9.354           | 23.169          | 123.640         | 9.354           | 23.169          | 103.160         | 110.288         | 131.988         | T121 |
| L11  | <b>605.400</b>  | <b>598.887</b>  | <b>598.395</b>  | <b>614.388</b>  | <b>614.388</b>  | <b>610.884</b>  | <b>610.884</b>  | <b>1045.123</b> | <b>1045.123</b> | L104 |
| A12  | <b>648.919</b>  | <b>648.435</b>  | <b>648.435</b>  | <b>654.916</b>  | <b>648.483</b>  | <b>648.911</b>  | <b>648.911</b>  | <b>648.911</b>  | <b>648.911</b>  | A119 |
| Q13  | <b>648.919</b>  | <b>648.435</b>  | <b>648.435</b>  | <b>718.945</b>  | <b>718.432</b>  | <b>709.940</b>  | <b>653.062</b>  | <b>644.549</b>  | <b>644.549</b>  | Q118 |
| Q14  | <b>733.455</b>  | <b>733.455</b>  | <b>733.455</b>  | <b>733.455</b>  | <b>733.455</b>  | <b>733.455</b>  | <b>733.455</b>  | <b>733.455</b>  | <b>733.455</b>  | Q117 |
| Q15  | 101.000         | 9.354           | 32.544          | 125.967         | 9.354           | 32.544          | 108.967         | 110.513         | 133.978         | Q116 |
| V16  | 111.004         | 9.354           | 39.498          | <b>825.501</b>  | <b>816.988</b>  | <b>816.496</b>  | <b>816.496</b>  | <b>816.496</b>  | <b>816.496</b>  | V115 |
| L17  | 108.004         | 9.354           | 34.244          | <b>882.043</b>  | <b>873.530</b>  | <b>873.038</b>  | <b>782.477</b>  | <b>773.964</b>  | <b>773.472</b>  | L114 |
| F18  | 104.012         | 9.354           | 30.793          | 100.000         | 9.354           | 30.793          | 100.000         | 100.000         | 100.000         | F113 |
| N19  | 101.000         | 9.354           | 32.544          | <b>907.591</b>  | <b>879.078</b>  | <b>878.586</b>  | <b>877.409</b>  | <b>868.895</b>  | <b>868.403</b>  | N112 |
| R20  | 100.000         | 9.354           | 23.169          | <b>1044.133</b> | <b>1035.620</b> | <b>1035.128</b> | <b>826.367</b>  | <b>821.874</b>  | <b>821.382</b>  | R111 |
| Q21  | <b>1094.105</b> | <b>1094.105</b> | <b>1094.105</b> | <b>1108.162</b> | <b>1108.162</b> | <b>1108.162</b> | <b>1108.162</b> | <b>1108.162</b> | <b>1108.162</b> | Q110 |
| A22  | 110.000         | 9.354           | 31.818          | <b>1143.681</b> | <b>1135.168</b> | <b>1134.676</b> | <b>899.889</b>  | <b>891.376</b>  | <b>890.884</b>  | A109 |
| V23  | 119.018         | 11.029          | 37.624          | <b>1193.215</b> | <b>1184.702</b> | <b>1184.210</b> | <b>464.297</b>  | <b>455.784</b>  | <b>455.292</b>  | V108 |
| L24  | 108.000         | 9.354           | 32.544          | <b>1248.744</b> | <b>1240.231</b> | <b>1240.732</b> | <b>814.763</b>  | <b>814.763</b>  | <b>814.763</b>  | L107 |
| L25  | 106.000         | 9.354           | 30.584          | <b>1309.269</b> | <b>1297.786</b> | <b>1297.294</b> | <b>848.755</b>  | <b>848.755</b>  | <b>848.755</b>  | L106 |
| P26  | 1140.018        | 1132.533        | 1132.829        | <b>1354.825</b> | <b>1346.312</b> | <b>1345.820</b> | <b>882.819</b>  | <b>883.310</b>  | <b>883.801</b>  | P105 |
| R27  | 1140.018        | 1132.533        | 1132.829        | <b>1419.819</b> | <b>1411.306</b> | <b>1410.814</b> | <b>893.811</b>  | <b>894.302</b>  | <b>894.793</b>  | R104 |
| R28  | 1140.018        | 1132.533        | 1132.829        | <b>1484.813</b> | <b>1476.300</b> | <b>1475.808</b> | <b>894.811</b>  | <b>895.302</b>  | <b>895.793</b>  | R103 |
| L29  | 113.014         | 10.018          | 44.011          | <b>1533.444</b> | <b>1524.931</b> | <b>1524.439</b> | <b>924.803</b>  | <b>925.294</b>  | <b>925.785</b>  | L102 |
| E30  | 103.008         | 9.354           | 31.481          | <b>1597.889</b> | <b>1589.376</b> | <b>1588.884</b> | <b>938.803</b>  | <b>939.294</b>  | <b>939.785</b>  | E101 |

# sp | Q6GSS7 | H2A2A\_MOUSE

ELNK<sup>Dimethyl</sup><sub>28.03</sub> LLGKV<sup>Dimethyl</sup>TIAQGGVLPNIQAVLLPKKTE

- ▶ fragmentation table for charge state 3+
- ▶ specType=cid
- ▶ score=37.27
- ▶ F113279.dat
- ▶ query=q42562.p1
- ▶ precursor=803.987210
- ▶ chargePrecursor=4
- ▶ itol=0.5

| AA | a  | a*              | a,D            | b              | b*              | b,D             | y               | y*             | y,D             | AA              |   |
|----|----|-----------------|----------------|----------------|-----------------|-----------------|-----------------|----------------|-----------------|-----------------|---|
| E  | 1  | 46.000          | 0.000          | 46.000         | 46.000          | 0.000           | 0.000           | 0.000          | 0.000           | E               |   |
| L  | 2  | 72.300          | 0.000          | 95.300         | 83.700          | 0.000           | 75.713          | 1020.670       | <b>1022.960</b> | <b>1022.632</b> | L |
| N  | 3  | 110.900         | 0.000          | 109.700        | 110.700         | 0.000           | 113.227         | 980.943        | 980.203         | 984.017         | N |
| R  | 4  | 162.444         | 0.000          | 160.444        | 161.779         | 0.000           | 160.949         | <b>852.826</b> | 849.293         | 849.044         | R |
| L  | 5  | 202.110         | 0.000          | 199.110        | 200.900         | 0.000           | 203.792         | 803.404        | <b>800.834</b>  | <b>805.200</b>  | L |
| L  | 6  | 237.630         | 0.000          | 235.630        | 237.020         | 0.000           | 241.406         | 741.100        | 740.100         | <b>807.144</b>  | L |
| G  | 7  | 268.837         | 0.000          | 266.837        | 268.160         | 0.000           | 270.494         | 680.250        | <b>675.495</b>  | 670.810         | G |
| R  | 8  | 296.730         | 0.000          | 294.730        | 296.000         | 0.000           | 303.332         | 612.000        | <b>600.420</b>  | 600.000         | R |
| V  | 9  | 332.600         | 0.000          | 330.600        | 332.000         | 0.000           | 336.416         | 530.000        | 530.000         | 530.000         | V |
| T  | 10 | 368.241         | 0.000          | 366.241        | 367.576         | 0.000           | 370.500         | 460.000        | <b>607.004</b>  | <b>601.400</b>  | T |
| L  | 11 | 403.910         | 0.000          | 401.910        | 403.200         | 0.000           | 407.000         | 400.000        | <b>601.000</b>  | <b>601.000</b>  | L |
| A  | 12 | 427.010         | 0.000          | 425.010        | 426.345         | 0.000           | 431.271         | 430.000        | <b>650.300</b>  | 650.714         | A |
| Q  | 13 | 450.010         | <b>454.826</b> | <b>454.200</b> | 451.000         | 0.000           | 475.000         | 370.000        | <b>630.030</b>  | <b>628.707</b>  | Q |
| G  | 14 | <b>460.300</b>  | 460.000        | <b>460.400</b> | <b>460.400</b>  | 0.000           | 460.000         | 300.000        | 300.000         | 300.000         | G |
| G  | 15 | 488.110         | 0.000          | 486.110        | 487.000         | 0.000           | 491.000         | 250.000        | <b>560.342</b>  | <b>560.014</b>  | G |
| V  | 16 | 541.110         | 0.000          | 539.110        | 540.000         | 0.000           | 544.000         | 200.000        | 200.000         | 200.000         | V |
| L  | 17 | 590.010         | 0.000          | 588.010        | 589.000         | 0.000           | 592.000         | 150.000        | 150.000         | 150.000         | L |
| P  | 18 | 611.000         | <b>605.700</b> | <b>605.300</b> | <b>620.715</b>  | 0.000           | 614.914         | 100.000        | 100.000         | 100.000         | P |
| N  | 19 | 640.000         | 640.000        | <b>643.395</b> | <b>650.730</b>  | 0.000           | 647.000         | 50.000         | 50.000          | 50.000          | N |
| E  | 20 | <b>667.000</b>  | <b>661.417</b> | <b>661.000</b> | <b>666.424</b>  | <b>680.740</b>  | <b>680.421</b>  | 410.000        | 410.000         | 410.000         | E |
| Q  | 21 | <b>720.770</b>  | <b>720.000</b> | <b>720.111</b> | <b>733.435</b>  | <b>733.107</b>  | 730.000         | 300.000        | 300.000         | 300.000         | Q |
| A  | 22 | 753.400         | <b>747.782</b> | 749.400        | <b>762.790</b>  | <b>757.114</b>  | <b>750.780</b>  | 200.000        | 200.000         | 200.000         | A |
| V  | 23 | 780.400         | 780.000        | 780.000        | <b>795.812</b>  | 790.000         | 790.000         | 100.000        | 100.000         | 100.000         | V |
| L  | 24 | 804.110         | 800.000        | 803.110        | <b>813.500</b>  | <b>807.000</b>  | <b>827.504</b>  | 50.000         | 50.000          | 50.000          | L |
| L  | 25 | 861.010         | 860.000        | 860.000        | 861.000         | 860.000         | <b>865.100</b>  | 50.000         | 50.000          | 50.000          | L |
| P  | 26 | 894.210         | 890.000        | 890.000        | 893.553         | 897.000         | 897.000         | 50.000         | 50.000          | 50.000          | P |
| L  | 27 | 900.010         | 900.000        | 900.000        | 900.000         | 900.000         | 900.000         | 50.000         | 50.000          | 50.000          | L |
| R  | 28 | 930.010         | 930.000        | 930.000        | <b>930.000</b>  | <b>933.274</b>  | 930.000         | 50.000         | 50.000          | 50.000          | R |
| T  | 29 | <b>1013.300</b> | 1010.000       | 1010.000       | <b>1022.632</b> | <b>1016.936</b> | <b>1016.620</b> | 50.000         | 50.000          | 50.000          | T |
| E  | 30 | 1050.010        | 1050.000       | 1050.000       | <b>1050.000</b> | <b>1050.000</b> | 1050.000        | 50.000         | 50.000          | 50.000          | E |



# sp | Q6GSS7 | H2A2A\_MOUSE

ELNKLKLGK<sup>Dimethyl</sup><sub>28.03</sub>VTIAQGGVLPNIQAVLLPKKTE

- ▶ fragmentation table for charge state 1+
- ▶ specType=etd
- ▶ score=68.02
- ▶ F113279.dat
- ▶ query=q42563.p1
- ▶ precursor=803.987210
- ▶ chargePrecursor=4
- ▶ itol=0.5

| AA | c  | y               | z+1      | z+2             | z              | AA             |   |    |
|----|----|-----------------|----------|-----------------|----------------|----------------|---|----|
| E  | 1  | 147.076         | 3212.934 | 3196.916        | 0.000          | 3195.908       | E | 30 |
| L  | 2  | 260.160         | 3083.892 | 3067.873        | 0.000          | 3066.865       | L | 29 |
| T  | 3  | 374.203         | 2970.808 | 2954.789        | 2955.797       | 2953.781       | N | 28 |
| K  | 4  | <b>502.298</b>  | 2856.765 | 2840.746        | 2841.754       | 2839.738       | K | 27 |
| L  | 5  | <b>615.382</b>  | 2728.670 | 2712.651        | 2713.659       | 2711.643       | L | 26 |
| L  | 6  | <b>728.466</b>  | 2615.588 | 2599.567        | 2600.575       | 2598.559       | L | 25 |
| G  | 7  | <b>785.488</b>  | 2502.503 | 2486.483        | 2487.491       | 2485.475       | G | 24 |
| K  | 8  | 941.614         | 2445.480 | 2429.462        | 2430.469       | 2428.454       | K | 23 |
| V  | 9  | <b>1040.683</b> | 2289.354 | 2273.335        | 2274.343       | 2272.327       | V | 22 |
| I  | 10 | <b>1141.730</b> | 2190.286 | 2174.267        | 2175.275       | 2173.259       | I | 21 |
| I  | 11 | 1254.614        | 2089.238 | 2073.219        | 2074.227       | 2072.211       | I | 20 |
| A  | 12 | <b>1325.851</b> | 1976.154 | 1960.135        | 1961.143       | 1959.127       | A | 19 |
| Q  | 13 | <b>1453.910</b> | 1905.117 | <b>1889.098</b> | 1890.106       | 1888.090       | Q | 18 |
| G  | 14 | <b>1510.932</b> | 1777.058 | 1761.039        | 1762.047       | 1760.032       | G | 17 |
| G  | 15 | 1567.953        | 1720.019 | <b>1704.018</b> | 1705.026       | 1703.010       | G | 16 |
| V  | 16 | <b>1667.021</b> | 1623.953 | 1607.937        | 1608.944       | 1606.929       | V | 15 |
| L  | 17 | 1780.105        | 1553.947 | <b>1547.928</b> | 1548.936       | 1546.920       | L | 14 |
| P  | 18 | 1877.158        | 1450.863 | 1434.844        | 1435.852       | 1433.836       | P | 13 |
| N  | 19 | 1991.201        | 1353.810 | <b>1337.791</b> | 1338.799       | 1336.783       | N | 12 |
| I  | 20 | 2104.285        | 1239.763 | 1223.748        | 1224.756       | 1222.741       | I | 11 |
| Q  | 21 | 2232.344        | 1126.683 | 1110.664        | 1111.672       | 1109.656       | Q | 10 |
| A  | 22 | 2303.281        | 1098.624 | 1082.606        | 1083.614       | <b>981.598</b> | A | 9  |
| V  | 23 | 2402.449        | 927.587  | <b>911.569</b>  | 912.576        | 910.561        | V | 8  |
| L  | 24 | 2515.533        | 828.519  | 812.500         | <b>813.508</b> | 811.492        | L | 7  |
| L  | 25 | 2628.617        | 715.435  | <b>699.416</b>  | 700.424        | 698.408        | L | 6  |
| P  | 26 | 2725.670        | 602.351  | 586.332         | 587.340        | 585.324        | P | 5  |
| K  | 27 | 2853.765        | 505.298  | <b>489.279</b>  | 490.287        | 488.271        | K | 4  |
| K  | 28 | 2961.860        | 377.203  | <b>361.184</b>  | <b>362.192</b> | 360.177        | K | 3  |
| T  | 29 | 3087.908        | 249.108  | 233.089         | 234.097        | 232.082        | T | 2  |
| E  | 30 | 3211.950        | 148.060  | 132.042         | 133.050        | 131.034        | E | 1  |

# sp | Q6GSS7 | H2A2A\_MOUSE

ELNKLKLGK<sup>Dimethyl</sup>VTIAQGGVLPNIQAVLLPKKTE  
28.03

- ▶ fragmentation table for charge state 2+
- ▶ specType=etd
- ▶ score=68.02
- ▶ F113279.dat
- ▶ query=q42563.p1
- ▶ precursor=803.987210
- ▶ chargePrecursor=4
- ▶ itol=0.5

| AA    | c               | y               | z+1             | z+2             | z               | AA    |
|-------|-----------------|-----------------|-----------------|-----------------|-----------------|-------|
| E[1]  | 74.042          | <b>1606.971</b> | 1598.952        | 0.504           | 4598.458        | E[30] |
| L[2]  | 130.504         | <b>1542.450</b> | 1534.440        | 0.504           | 4533.930        | L[29] |
| N[3]  | 187.605         | 1485.908        | 1477.898        | 1478.402        | 1477.394        | N[28] |
| K[4]  | 251.653         | 1428.809        | <b>1429.877</b> | <b>1421.381</b> | <b>1420.373</b> | K[27] |
| L[5]  | 308.195         | 1364.830        | <b>1356.829</b> | <b>1357.333</b> | 1356.325        | L[26] |
| L[6]  | 364.737         | 1308.297        | <b>1300.287</b> | <b>1300.791</b> | 1299.783        | L[25] |
| G[7]  | 381.240         | 1251.755        | 1243.745        | 1244.249        | 1243.241        | G[24] |
| K[8]  | 471.311         | 1223.244        | <b>1215.234</b> | <b>1215.738</b> | 1214.731        | K[23] |
| V[9]  | 530.845         | 1148.181        | 1139.713        | 1139.679        | 1138.667        | V[22] |
| T[10] | 573.389         | 1095.646        | <b>1087.637</b> | <b>1088.141</b> | 1087.133        | T[21] |
| I[11] | 627.911         | 1045.123        | <b>1037.113</b> | <b>1037.617</b> | 1036.609        | I[20] |
| A[12] | 683.429         | 988.581         | <b>980.571</b>  | <b>981.075</b>  | 980.067         | A[19] |
| Q[13] | 727.450         | 933.062         | <b>945.053</b>  | <b>945.557</b>  | 944.549         | Q[18] |
| G[14] | 755.969         | 889.633         | 881.023         | 881.527         | 880.519         | G[17] |
| C[15] | 794.488         | <b>860.522</b>  | <b>852.513</b>  | <b>853.017</b>  | 852.009         | C[16] |
| V[16] | <b>834.014</b>  | <b>860.522</b>  | <b>852.513</b>  | <b>824.506</b>  | 823.498         | V[15] |
| L[17] | 890.556         | 782.477         | 774.468         | 774.972         | 773.964         | L[14] |
| P[18] | <b>939.083</b>  | 725.935         | 717.926         | 718.430         | 717.422         | P[13] |
| N[19] | <b>996.104</b>  | 677.409         | 669.399         | 669.903         | 668.895         | N[12] |
| I[20] | <b>1052.646</b> | 620.387         | 612.378         | 612.882         | 611.874         | I[11] |
| Q[21] | <b>1116.676</b> | 563.845         | 555.836         | 556.340         | 555.332         | Q[10] |
| A[22] | 1152.194        | 499.810         | 491.801         | 492.305         | 491.297         | A[9]  |
| V[23] | 1201.728        | 464.297         | 456.288         | 456.792         | 455.784         | V[8]  |
| L[24] | <b>1258.270</b> | 414.763         | 406.754         | 407.258         | 406.250         | L[7]  |
| L[25] | 1314.812        | 358.221         | 350.212         | 350.716         | 349.708         | L[6]  |
| T[26] | <b>1363.330</b> | 301.679         | 293.670         | 294.174         | 293.166         | T[5]  |
| K[27] | <b>1427.386</b> | 253.153         | 245.143         | 245.647         | 244.639         | K[4]  |
| K[28] | <b>1491.434</b> | 189.105         | 181.096         | 181.600         | 180.592         | K[3]  |
| T[29] | <b>1541.958</b> | 125.058         | 117.048         | 117.552         | 116.544         | T[2]  |
| E[30] | <b>1606.479</b> | 74.534          | 66.524          | 67.028          | 66.021          | E[1]  |

# sp | Q6GSS7 | H2A2A\_MOUSE

ELNKLKLGK<sup>Dimethyl</sup> VTIAGGGVLPNIQAVLLPKKTE  
28.03

- ▶ fragmentation table for charge state 3+
- ▶ specType=etd
- ▶ score=68.02
- ▶ F113279.dat
- ▶ query=q42563.p1
- ▶ precursor=803.987210
- ▶ chargePrecursor=4
- ▶ itol=0.5

| AA |    | c               | y               | z+1             | z+2            | z               | AA |    |
|----|----|-----------------|-----------------|-----------------|----------------|-----------------|----|----|
| E  | 1  | 49.697          | <b>1071.650</b> | <b>1066.310</b> | 0.672          | 1005.974        | E  | 30 |
| L  | 2  | 87.302          | <b>1028.635</b> | <b>1023.296</b> | 0.672          | <b>1022.960</b> | L  | 29 |
| K  | 3  | 125.406         | 990.941         | 985.601         | <b>985.937</b> | 985.205         | K  | 28 |
| K  | 4  | 168.204         | 952.926         | 947.587         | 947.923        | 947.251         | K  | 27 |
| L  | 5  | 205.799         | 910.228         | 904.889         | 905.225        | 904.553         | L  | 26 |
| L  | 6  | 243.494         | 872.531         | 867.194         | 867.530        | 866.858         | L  | 25 |
| G  | 7  | 282.501         | 834.839         | 829.499         | 829.835        | 829.163         | G  | 24 |
| K  | 8  | 314.543         | 815.832         | 810.492         | 810.828        | 810.156         | K  | 23 |
| V  | 9  | 347.566         | 783.790         | 778.450         | 778.786        | 778.114         | V  | 22 |
| V  | 10 | 381.248         | 750.767         | 745.427         | 745.763        | 745.091         | V  | 21 |
| I  | 11 | 418.943         | 697.084         | 691.745         | 692.081        | 691.409         | I  | 20 |
| A  | 12 | 442.622         | 659.389         | 654.050         | 654.386        | 653.714         | A  | 19 |
| Q  | 13 | 485.308         | 635.710         | 630.371         | 630.707        | 630.035         | Q  | 18 |
| G  | 14 | 504.315         | 593.024         | 587.685         | 588.021        | 587.349         | G  | 17 |
| G  | 15 | 523.223         | 574.017         | 568.678         | 569.013        | 568.342         | G  | 16 |
| V  | 16 | 556.345         | 559.010         | 549.670         | 550.006        | 549.334         | V  | 15 |
| L  | 17 | 594.040         | 521.987         | 516.648         | 516.984        | 516.312         | L  | 14 |
| P  | 18 | 626.891         | 484.202         | 478.963         | 479.299        | 478.617         | P  | 13 |
| N  | 19 | 664.405         | 451.942         | 446.602         | 446.938        | 446.266         | N  | 12 |
| I  | 20 | 702.100         | 413.927         | 408.588         | 408.924        | 408.252         | I  | 11 |
| Q  | 21 | 744.786         | 376.213         | 370.893         | 371.229        | 370.557         | Q  | 10 |
| A  | 22 | 788.465         | 333.546         | 328.207         | 328.543        | 327.871         | A  | 9  |
| V  | 23 | 801.488         | 309.867         | 304.528         | 304.864        | 304.192         | V  | 8  |
| L  | 24 | <b>839.183</b>  | 276.844         | 271.505         | 271.841        | 271.169         | L  | 7  |
| L  | 25 | 876.877         | 239.150         | 233.810         | 234.146        | 233.474         | L  | 6  |
| P  | 26 | 909.228         | 201.455         | 196.116         | 196.451        | 195.780         | P  | 5  |
| K  | 27 | 951.827         | 169.104         | 163.765         | 164.101        | 163.429         | K  | 4  |
| K  | 28 | <b>994.625</b>  | 129.420         | 124.081         | 124.417        | 123.745         | K  | 3  |
| I  | 29 | <b>1028.307</b> | 83.700          | 78.368          | 78.704         | 78.032          | I  | 2  |
| E  | 30 | 1071.822        | 50.025          | 44.685          | 45.021         | 44.349          | E  | 1  |





# sp | Q3THW5 | H2AV\_MOUSE

LDSLKATIAGGGVIPHIHKSLLIGKKGQQK <sup>Dimethyl</sup> TA  
28.03

- ▶ fragmentation table for charge state 1+
- ▶ specType=cid
- ▶ score=39.72
- ▶ F113279.dat
- ▶ query=q43316.p1
- ▶ precursor=827.746920
- ▶ chargePrecursor=4
- ▶ itol=0.5

| AA   | a              | a'       | a <sub>0</sub> | b               | b'             | b <sub>0</sub>  | y               | y'       | y <sub>0</sub>  | AA   |
|------|----------------|----------|----------------|-----------------|----------------|-----------------|-----------------|----------|-----------------|------|
| L1   | 88.980         | 0.000    | 19.000         | 114.980         | 0.000          | 0.000           | 107.980         | 1369.980 | 1289.980        | L121 |
| D12  | 101.717        | 0.000    | 103.717        | 124.717         | 0.000          | 211.717         | 1019.717        | 1177.717 | 1177.717        | D121 |
| S13  | 208.752        | 0.000    | 209.752        | 210.752         | 0.000          | 209.752         | 1019.752        | 1062.752 | 1062.752        | S131 |
| L14  | 401.289        | 0.000    | <b>381.279</b> | <b>420.234</b>  | 0.000          | 411.234         | 1049.234        | 1091.768 | 1091.768        | L129 |
| T15  | <b>514.224</b> | 0.000    | 496.211        | <b>542.218</b>  | 0.000          | 528.218         | 1079.218        | 1082.704 | 1082.704        | T128 |
| R16  | 612.478        | 0.000    | 604.468        | <b>610.413</b>  | 0.000          | 601.413         | 1119.413        | 1144.924 | 1144.924        | R127 |
| A17  | 711.636        | 0.000    | 696.439        | 709.460         | <b>741.451</b> | 734.424         | 1214.424        | 1261.935 | 1261.935        | A126 |
| T18  | 811.939        | 187.477  | 796.463        | 804.938         | 825.472        | 824.480         | 1247.514        | 1335.488 | 1349.504        | T125 |
| T19  | <b>917.587</b> | 170.560  | 896.577        | <b>955.582</b>  | 938.566        | 937.572         | 1248.444        | 1344.444 | 1344.444        | T124 |
| A109 | <b>998.824</b> | 681.528  | 988.024        | <b>1026.819</b> | 1009.509       | 1008.828        | 1315.328        | 1339.368 | 1339.372        | A122 |
| G111 | 1035.548       | 1030.839 | 1031.839       | 1033.841        | 1036.814       | <b>1065.630</b> | 1282.340        | 1298.310 | 1294.332        | G122 |
| G112 | 1119.889       | 1099.894 | 1099.891       | 1101.894        | 1104.852       | 1107.819        | 1221.319        | 1229.368 | 1229.368        | G121 |
| T113 | 1189.888       | 1152.882 | 1151.878       | <b>1197.884</b> | 1188.852       | 1179.818        | 1248.318        | 1251.348 | 1252.362        | T120 |
| V14  | 1268.937       | 1231.931 | 1230.927       | <b>1296.752</b> | 1287.728       | 1278.702        | 1211.328        | 1264.358 | 1261.272        | V119 |
| T16  | 1361.924       | 1326.918 | 1325.914       | <b>1409.836</b> | 1394.810       | 1381.828        | 1212.212        | 1265.188 | 1264.242        | T118 |
| F108 | 1418.924       | 1415.918 | 1409.904       | 1414.918        | 1419.912       | 1423.910        | 1219.212        | 1262.102 | 1261.118        | F117 |
| H11  | 1511.928       | 1486.824 | 1487.844       | 1514.844        | 1505.828       | 1501.811        | 1249.211        | 1269.044 | 1264.064        | H110 |
| T106 | 1729.937       | 1712.931 | 1711.927       | 1757.932        | 1746.928       | 1739.921        | 1248.921        | 1247.996 | 1247.008        | T115 |
| T104 | 1806.968       | 1806.968 | 1804.958       | 1804.958        | 1807.964       | 1809.968        | 1253.918        | 1254.908 | 1253.922        | T104 |
| R126 | 1894.936       | 1877.924 | 1876.920       | 1892.924        | 1895.938       | 1894.934        | 1244.834        | 1267.847 | 1266.851        | R123 |
| S121 | 1911.928       | 1904.138 | 1903.912       | 1908.918        | 1902.910       | 1901.901        | <b>1285.778</b> | 1288.933 | 1288.708        | S122 |
| L122 | 2004.987       | 1979.978 | 1978.968       | 2002.978        | 1996.970       | 1995.961        | 1238.961        | 1262.968 | 1261.988        | L121 |
| T124 | 2007.981       | 2006.980 | 2005.981       | 2007.988        | 2011.986       | 2011.976        | 1068.974        | 1068.938 | <b>1068.952</b> | T123 |
| G124 | 2024.911       | 2027.908 | 2026.920       | 2027.927        | 2031.928       | 2031.907        | <b>971.578</b>  | 989.573  | <b>958.588</b>  | G123 |
| R125 | 2052.940       | 2045.930 | 2044.940       | 2045.944        | 2049.942       | 2049.921        | 1019.921        | 1019.912 | 1018.944        | R124 |
| R127 | 2102.942       | 2095.932 | 2094.942       | 2101.942        | 2105.940       | 2105.929        | 1019.929        | 1019.920 | 1018.952        | R127 |
| G127 | 2177.924       | 2161.916 | 2160.911       | 2161.918        | 2166.918       | 2167.916        | <b>860.368</b>  | 841.341  | 841.307         | G126 |
| G128 | 2205.933       | 2180.926 | 2179.922       | 2181.927        | 2184.925       | 2183.927        | 843.340         | 848.328  | 848.335         | G125 |
| G129 | 2113.914       | 2098.912 | 2097.911       | 2098.916        | 2104.916       | 2104.905        | 1061.905        | 1061.902 | 1061.911        | G128 |
| R130 | 2269.987       | 2257.984 | 2257.987       | 2257.982        | 2264.988       | 2264.979        | <b>347.229</b>  | 358.202  | 329.218         | R131 |
| T131 | 1180.915       | 1171.899 | 1170.904       | 1171.910        | 1181.893       | 1180.906        | 108.103         | 0.000    | 173.992         | T129 |
| A114 | 1081.916       | 1074.903 | 1074.904       | 1076.911        | 1079.911       | 1079.910        | 107.910         | 0.000    | 108.000         | A113 |

# sp | Q3THW5 | H2AV\_MOUSE

LDSLKATIAGGGVIPHIHKSLLIGKKGQQK Dimethyl TA  
28.03

- ▶ fragmentation table for charge state 2+
- ▶ specType=cid
- ▶ score=39.72
- ▶ F113279.dat
- ▶ query=q43316.p1
- ▶ precursor=827.746920
- ▶ chargePrecursor=4
- ▶ itol=0.5

| AA  | a              | a'              | a,Δ            | b              | b'             | b,Δ            | r               | y'              | y,Δ             | AA   |
|-----|----------------|-----------------|----------------|----------------|----------------|----------------|-----------------|-----------------|-----------------|------|
| L1  | 43.262         | 0.509           | 41.521         | 57.549         | 0.504          | 55.521         | 1024.461        | 1045.969        | 1045.477        | L121 |
| D2  | 101.022        | 0.511           | 99.760         | 119.589        | 0.504          | 118.597        | 1297.866        | 1299.427        | 1298.916        | D111 |
| S3  | 144.501        | 0.504           | 139.576        | 158.579        | 0.504          | 149.574        | 1540.427        | 1551.914        | 1551.422        | S120 |
| L4  | 201.471        | 0.504           | 197.119        | 215.171        | 0.504          | 209.119        | 1496.611        | 1498.368        | 1487.606        | L129 |
| D5  | 257.655        | 0.504           | 249.655        | 271.661        | 0.504          | 262.655        | 1443.362        | 1441.895        | 1431.364        | D121 |
| R6  | 314.713        | 0.512           | 310.500        | 329.740        | 0.507          | 326.970        | 1376.872        | 1375.354        | 1364.822        | R127 |
| A7  | 367.451        | 0.468           | 366.220        | 371.029        | 0.467          | 369.224        | 1319.770        | 1311.366        | 1310.774        | A126 |
| T8  | 407.735        | 0.509           | 402.793        | 421.751        | 0.513          | 413.747        | 1284.261        | 1279.148        | 1275.256        | T125 |
| D9  | 464.977        | <b>455.284</b>  | <b>455.292</b> | 478.259        | 468.761        | 460.269        | 1223.973        | 1220.224        | 1214.629        | D124 |
| A10 | 509.916        |                 | 503.915        | 508.304        | 504.800        |                | 1177.350        | 1169.682        | 1168.180        | A125 |
| G11 | <b>578.527</b> | 573.613         | 570.321        | <b>542.324</b> | 533.911        |                | <b>1141.676</b> | 1131.151        | <b>1132.671</b> | G122 |
| G12 | 639.977        | 632.914         | 629.620        | 637.819        | 629.219        |                | <b>581.330</b>  | <b>1112.168</b> | 1104.669        | G121 |
| G13 | 696.946        | 676.636         | 676.341        | <b>599.346</b> | <b>590.812</b> | <b>590.340</b> | <b>1084.635</b> | 1076.142        | 1075.650        | G120 |
| V14 | 734.692        | 728.309         | 726.877        | <b>649.889</b> | <b>640.366</b> | <b>639.874</b> | <b>1056.144</b> | 1047.611        | 1047.139        | V119 |
| V15 | 801.424        | 802.411         | 802.412        | 788.422        | 788.408        |                | 986.412         | <b>1026.678</b> | 995.097         | V118 |
| R16 | 878.202        | 874.418         | 870.992        | 851.941        | 850.420        |                | 194.693         | <b>956.048</b>  | <b>941.555</b>  | R117 |
| H17 | 938.488        | 939.490         | <b>938.475</b> | 922.476        | 911.924        | 911.477        | <b>901.542</b>  | 891.026         | 891.538         | H116 |
| H18 | 995.027        | <b>856.509</b>  | 886.017        | 879.010        | 870.506        | 870.014        | 831.012         | 824.494         | 824.007         | H115 |
| H19 | 1033.953       | 1030.914        | 1029.549       | 947.949        | 939.466        | 938.544        | 1004.441        | 993.899         | 993.466         | H114 |
| R20 | 1077.594       | 1069.596        | 1068.594       | 1051.597       | 1043.591       | 1042.261       | 767.641         | 699.427         | 698.636         | R113 |
| S21 | 1091.110       | <b>1012.602</b> | 1002.110       | 1006.110       | 1006.110       | 1006.109       | 641.601         | 635.380         | 634.888         | S112 |
| L22 | 1097.667       | 1096.667        | 1096.667       | 1111.667       | 1111.667       | 1111.667       | 601.667         | 591.664         | 591.171         | L111 |
| D23 | 1154.109       | 1146.006        | 1145.124       | 1148.097       | 1139.653       | 1139.151       | <b>543.835</b>  | 535.127         | 534.630         | D110 |
| G24 | 1202.110       | 1174.109        | 1174.110       | 1196.109       | 1188.109       | 1187.109       | 467.109         | 474.769         | 474.269         | G109 |
| R25 | 1246.757       | 1238.254        | 1237.752       | 1240.755       | 1232.242       | 1231.752       | 448.752         | 450.269         | 448.777         | R108 |
| R26 | 1310.876       | 1302.268        | 1301.862       | 1314.862       | 1306.268       | 1305.769       | 113.876         | 368.712         | 368.222         | R107 |
| G27 | 1339.316       | 1330.309        | 1330.311       | 1303.311       | 1303.311       | 1304.309       | 330.309         | 327.174         | 321.846         | G106 |
| G28 | 1363.345       | 1354.832        | 1354.340       | 1417.342       | 1408.830       | 1408.337       | 302.337         | 293.651         | 293.171         | G105 |
| G29 | 1489.874       | 1481.361        | 1480.869       | 1448.872       | 1440.360       | 1439.867       | 347.360         | 344.144         | 343.644         | G104 |
| R30 | 1549.437       | 1538.504        | 1538.432       | 1539.435       | 1530.502       | 1530.432       | 100.432         | 174.111         | 165.605         | R103 |
| T31 | 1695.961       | 1687.448        | 1686.956       | 1688.959       | 1681.445       | 1680.953       | 98.445          | 94.504          | 87.059          | T102 |
| A12 | 1831.488       | 1822.608        | 1822.472       | 1849.477       | 1836.654       | 1836.472       | 45.511          | 0.504           | 0.504           | A101 |

# sp | Q3THW5 | H2AV\_MOUSE

LDSLKATIAGGGVIPHIHKSLLIGKKGQQK <sup>Dimethyl</sup> TA  
28.03

- ▶ fragmentation table for charge state 3+
- ▶ specType=cid
- ▶ score=39.72
- ▶ F113279.dat
- ▶ query=q43316.p1
- ▶ precursor=827.746920
- ▶ chargePrecursor=4
- ▶ itol=0.5

| AA   | a        | a <sup>+</sup> | a <sup>+</sup> Δ | b              | b <sup>+</sup> | b <sup>+</sup> Δ | y               | y <sup>+</sup> | y <sup>+</sup> Δ | AA   |
|------|----------|----------------|------------------|----------------|----------------|------------------|-----------------|----------------|------------------|------|
| L1   | 26.970   | 0.829          | 0.672            | 38.702         | 0.872          | 0.822            | 110.282         | 1109.948       | 1097.211         | L121 |
| D121 | 87.973   | 0.829          | 61.709           | 77.044         | 0.872          | 71.049           | <b>1065.620</b> | 1059.954       | 1059.826         | Q131 |
| S131 | 96.923   | 0.829          | 93.723           | 108.093        | 0.872          | 100.921          | 1057.297        | 1101.813       | 1101.984         | S130 |
| L14  | 114.418  | 0.829          | 128.437          | 143.720        | 0.872          | 137.748          | <b>998.276</b>  | 1002.273       | 1120             | L120 |
| T151 | 172.113  | 0.829          | 186.132          | 201.844        | 0.872          | 191.841          | 991.252         | <b>994.508</b> | 1054.118         | L281 |
| R161 | 214.611  | 2.091          | 239.897          | 224.143        | 2.186          | 215.117          | <b>922.887</b>  | 937.211        | 1018.933         | R221 |
| A171 | 238.400  | 1.021          | 252.489          | 247.921        | 1.021          | 242.146          | 911.811         | 890.181        | <b>874.513</b>   | A120 |
| L181 | 272.213  | 2.091          | 298.469          | 281.504        | 2.186          | 275.530          | <b>856.510</b>  | <b>850.834</b> | <b>850.506</b>   | L120 |
| L191 | 296.978  | 2.091          | 323.692          | 304.599        | 2.186          | 311.512          | 847.252         | <b>831.335</b> | <b>816.824</b>   | L281 |
| A110 | 311.946  | 1.021          | 327.414          | 342.398        | 1.021          | 331.414          | <b>785.132</b>  | <b>779.451</b> | <b>779.120</b>   | A120 |
| G111 | 332.353  | <b>346.878</b> | 346.570          | 361.895        | 356.310        | 351.891          | <b>761.453</b>  | <b>755.778</b> | <b>755.450</b>   | G221 |
| G121 | 372.853  | 1.021          | 387.821          | 399.897        | 1.021          | 391.838          | <b>742.446</b>  | 742.446        | 742.446          | G221 |
| G131 | 390.598  | 394.394        | 394.524          | 399.899        | 394.234        | 393.938          | <b>723.438</b>  | <b>717.764</b> | <b>717.436</b>   | G201 |
| V141 | 423.591  | 427.939        | 427.939          | 432.922        | 427.267        | 426.919          | <b>704.432</b>  | 698.758        | 698.428          | V119 |
| I151 | 461.285  | <b>455.616</b> | <b>455.282</b>   | 470.617        | 464.941        | 464.613          | <b>671.409</b>  | 665.734        | 665.404          | I121 |
| F114 | 493.678  | 497.987        | 497.987          | 502.969        | 497.302        | 496.983          | <b>653.714</b>  | <b>628.038</b> | <b>627.711</b>   | F121 |
| R117 | 536.123  | 533.647        | 533.121          | 540.694        | 542.979        | <b>542.691</b>   | <b>601.383</b>  | 595.698        | 595.369          | R110 |
| L118 | 577.617  | 571.382        | 571.021          | 586.389        | 580.673        | 580.341          | <b>555.677</b>  | 550.002        | 549.674          | L121 |
| R119 | 622.164  | 617.881        | 618.199          | 620.829        | 626.369        | 626.891          | 541.866         | 532.389        | 531.979          | R114 |
| K120 | 665.902  | 659.726        | 659.365          | 674.113        | 669.599        | 669.278          | 472.259         | 465.621        | 465.293          | K118 |
| S121 | 694.411  | 688.297        | 688.499          | 692.244        | 688.693        | 687.749          | <b>429.588</b>  | 423.922        | 423.594          | S112 |
| L122 | 732.597  | 728.422        | <b>728.104</b>   | <b>741.439</b> | 736.154        | 735.411          | 400.007         | 394.912        | 394.584          | L111 |
| L123 | 768.924  | 764.429        | 764.429          | <b>776.135</b> | <b>773.458</b> | <b>773.130</b>   | 400.007         | 394.912        | 394.584          | L101 |
| G124 | 788.859  | 784.134        | 782.898          | <b>798.141</b> | 792.459        | 792.117          | 336.181         | 318.522        | 318.184          | G101 |
| K125 | 831.507  | 826.829        | 826.829          | 830.277        | 835.183        | 834.839          | 336.181         | 300.515        | 300.187          | K101 |
| K126 | 874.360  | <b>868.538</b> | <b>868.202</b>   | <b>883.537</b> | 877.823        | 877.823          | 281.959         | 287.814        | 287.486          | K101 |
| G127 | 893.213  | 887.537        | 887.201          | 892.544        | 896.999        | 896.514          | 240.794         | 245.133        | 244.791          | G101 |
| G128 | 915.899  | 910.224        | 909.898          | 915.211        | 919.595        | 919.227          | 201.797         | 196.111        | 195.783          | G101 |
| G129 | 938.585  | 932.928        | 932.592          | 937.917        | 942.241        | 941.813          | 158.103         | 153.428        | 153.097          | G101 |
| K130 | 1209.072 | 1204.962       | 1204.624         | 1209.994       | 1216.213       | 1215.923         | 118.424         | 113.749        | 113.411          | K101 |
| L131 | 1384.100 | 1378.834       | 1378.308         | 1383.642       | 1389.366       | 1389.839         | 64.572          | 61.871         | 61.540           | L101 |
| A132 | 1387.989 | 1382.513       | 1381.988         | 1387.521       | 1393.045       | 1393.131         | 30.660          | 31.872         | 31.872           | A101 |

# sp | Q3THW5 | H2AV\_MOUSE

LDSLIKATIAGGGVIPHIHKSLLIGKKGQQK Dimethyl TA 28.03

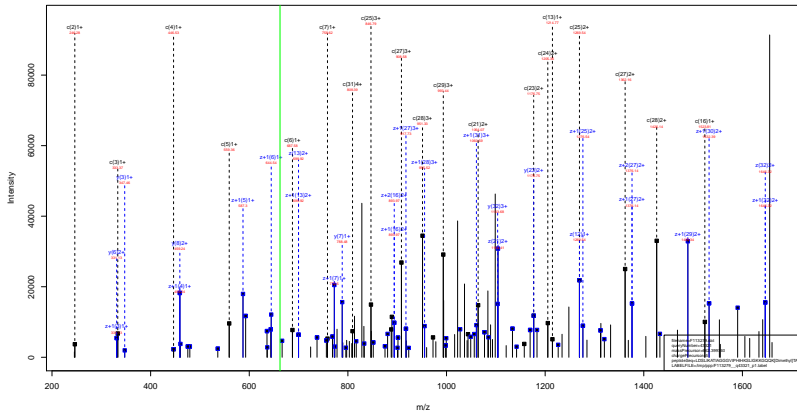

# sp | Q3THW5 | H2AV\_MOUSE

LDSLKATIAGGGVIPHIHKSLLIGKKGQQK<sup>Dimethyl</sup> TA  
28.03

- ▶ fragmentation table for charge state 1+
- ▶ specType=etd
- ▶ score=85.95
- ▶ F113279.dat
- ▶ query=q43321.p1
- ▶ precursor=662.399740
- ▶ chargePrecursor=5
- ▶ itol=0.5

| AA |    | c               | y              | z+1             | z+2            | z               | AA    |
|----|----|-----------------|----------------|-----------------|----------------|-----------------|-------|
| L  | 1  | 111.118         | 1307.958       | 1591.939        | 0.000          | 1260.931        | L[32] |
| D  | 2  | <b>246.145</b>  | 3194.874       | 3178.855        | 0.000          | 3177.847        | D[31] |
| S  | 3  | <b>333.177</b>  | 3079.847       | 3061.828        | 0.000          | 3062.820        | S[30] |
| L  | 4  | <b>446.261</b>  | 2992.815       | 2976.796        | 0.000          | 2975.788        | L[29] |
| L  | 5  | <b>559.345</b>  | 2879.731       | 2863.712        | 0.000          | 2862.704        | L[28] |
| K  | 6  | <b>607.440</b>  | 2766.646       | 2750.628        | 0.000          | 2749.620        | K[27] |
| A  | 7  | <b>758.477</b>  | 2638.562       | 2622.533        | 2623.541       | 2621.525        | A[26] |
| T  | 8  | 859.525         | 2567.514       | 2551.490        | 2552.504       | 2550.488        | T[25] |
| I  | 9  | <b>972.609</b>  | 2466.467       | 2450.448        | 2451.456       | 2449.440        | I[24] |
| A  | 10 | <b>1043.646</b> | 2353.383       | 2337.364        | 2338.372       | 2336.356        | A[23] |
| G  | 11 | 1100.697        | 2262.346       | 2246.327        | 2247.335       | 2245.319        | G[22] |
| G  | 12 | <b>1157.689</b> | 2178.324       | 2209.305        | 2210.313       | 2208.298        | G[21] |
| G  | 13 | <b>1214.710</b> | 2108.303       | 2152.284        | 2153.292       | 2151.276        | G[20] |
| V  | 14 | 1313.779        | 2111.281       | 2095.262        | 2096.270       | 2094.255        | V[19] |
| I  | 15 | 1426.863        | 2032.213       | 1996.194        | 1997.202       | 1995.188        | I[18] |
| P  | 16 | <b>1523.916</b> | 1899.129       | 1883.110        | 1884.118       | 1882.102        | P[17] |
| K  | 17 | 1660.074        | 1802.076       | 1786.057        | 1787.065       | 1785.049        | K[16] |
| I  | 18 | 1774.859        | 1805.017       | 1848.998        | 1850.006       | 1847.990        | I[15] |
| H  | 19 | 1911.117        | 1551.933       | 1535.914        | 1536.922       | 1534.906        | H[14] |
| K  | 20 | 2039.212        | 1414.874       | 1398.855        | 1399.863       | 1397.847        | K[13] |
| S  | 21 | 2126.244        | 1286.779       | 1270.760        | 1271.768       | <b>1269.753</b> | S[12] |
| L  | 22 | 2239.328        | 1199.747       | <b>1183.728</b> | 1184.736       | 1182.720        | L[11] |
| L  | 23 | 2352.413        | 1088.663       | 1070.644        | 1071.652       | 1069.636        | L[10] |
| G  | 24 | 2469.434        | 973.579        | 957.560         | 958.568        | 956.552         | G[9]  |
| K  | 25 | 2537.529        | 916.557        | <b>900.539</b>  | <b>901.547</b> | 899.531         | K[8]  |
| K  | 26 | 2665.624        | <b>788.462</b> | <b>772.444</b>  | <b>773.452</b> | 771.436         | K[7]  |
| G  | 27 | 2722.645        | 660.368        | <b>644.349</b>  | 645.357        | <b>643.341</b>  | G[6]  |
| Q  | 28 | 2850.704        | 603.349        | <b>587.327</b>  | 588.335        | 586.320         | Q[5]  |
| Q  | 29 | 2978.763        | <b>475.287</b> | <b>459.269</b>  | <b>460.277</b> | 458.261         | Q[4]  |
| K  | 30 | 3134.889        | <b>347.229</b> | <b>331.210</b>  | 332.218        | 330.202         | K[3]  |
| L  | 31 | 3235.937        | 191.103        | 185.084         | 176.092        | 174.076         | L[2]  |
| A  | 32 | 3306.974        | 90.055         | 74.036          | 75.044         | 73.028          | A[1]  |

# sp | Q3THW5 | H2AV\_MOUSE

LDSLKATIAGGGVIPHIHKSLLIGKKGQQK <sup>Dimethyl</sup> TA  
28.03

- ▶ fragmentation table for charge state 2+
- ▶ specType=etd
- ▶ score=85.95
- ▶ F113279.dat
- ▶ query=q43321.p1
- ▶ precursor=662.399740
- ▶ chargePrecursor=5
- ▶ itol=0.5

| AA | c  | y               | z+1             | z+2             | z               | AA              |       |
|----|----|-----------------|-----------------|-----------------|-----------------|-----------------|-------|
| L  | 1  | 86.083          | 1654.482        | <b>1646.473</b> | 0.504           | <b>1646.969</b> | L[32] |
| D  | 2  | 123.576         | 1597.046        | <b>1589.931</b> | 0.504           | 1579.427        | D[31] |
| S  | 3  | 167.092         | 1540.427        | <b>1532.418</b> | 0.504           | <b>1531.914</b> | S[30] |
| L  | 4  | 223.634         | 1496.911        | <b>1488.902</b> | 0.504           | 1488.398        | L[29] |
| I  | 5  | 280.176         | 1440.389        | <b>1432.360</b> | 0.504           | 1431.856        | I[28] |
| K  | 6  | 344.224         | 1393.873        | <b>1375.818</b> | 0.504           | <b>1376.321</b> | K[27] |
| A  | 7  | 379.742         | <b>1319.779</b> | <b>1311.770</b> | <b>1312.274</b> | 1311.265        | A[26] |
| T  | 8  | 430.266         | 1284.261        | <b>1276.251</b> | <b>1276.755</b> | 1275.748        | T[25] |
| I  | 9  | 486.808         | 1233.737        | 1225.728        | <b>1226.232</b> | 1225.224        | I[24] |
| A  | 10 | 522.327         | <b>1177.195</b> | <b>1169.186</b> | <b>1169.690</b> | 1168.682        | A[23] |
| G  | 11 | 558.837         | <b>1141.676</b> | <b>1133.667</b> | <b>1134.171</b> | 1133.163        | G[22] |
| G  | 12 | 579.348         | 1133.166        | 1125.158        | 1125.662        | 1124.654        | G[21] |
| G  | 13 | 607.859         | <b>1084.655</b> | <b>1076.646</b> | <b>1077.149</b> | 1076.142        | G[20] |
| V  | 14 | 657.393         | <b>1056.144</b> | 1048.135        | <b>1048.639</b> | 1047.631        | V[19] |
| I  | 15 | 713.935         | 1006.616        | <b>998.601</b>  | <b>999.105</b>  | <b>998.097</b>  | I[18] |
| P  | 16 | 762.461         | 950.088         | 942.079         | 942.583         | 941.575         | P[17] |
| H  | 17 | 830.991         | <b>901.542</b>  | <b>893.532</b>  | <b>894.036</b>  | 893.028         | H[16] |
| I  | 18 | <b>887.533</b>  | <b>833.012</b>  | 825.003         | 825.507         | 824.499         | I[15] |
| H  | 19 | 956.052         | 776.476         | <b>768.461</b>  | <b>768.965</b>  | 767.957         | H[14] |
| K  | 20 | 1026.110        | 707.941         | <b>699.931</b>  | 700.435         | <b>699.427</b>  | K[13] |
| S  | 21 | <b>1063.626</b> | <b>643.893</b>  | <b>635.884</b>  | <b>636.388</b>  | 635.380         | S[12] |
| L  | 22 | 1120.168        | 600.377         | <b>592.368</b>  | <b>592.872</b>  | 591.864         | L[11] |
| L  | 23 | <b>1176.710</b> | 543.859         | <b>535.826</b>  | <b>536.330</b>  | 535.322         | L[10] |
| G  | 24 | <b>1205.221</b> | 487.293         | <b>479.284</b>  | <b>479.788</b>  | 478.780         | G[9]  |
| K  | 25 | <b>1269.268</b> | <b>458.782</b>  | 450.773         | 451.277         | 450.269         | K[8]  |
| K  | 26 | 1333.316        | 394.725         | 386.726         | 387.229         | 386.222         | K[7]  |
| G  | 27 | <b>1361.826</b> | <b>330.687</b>  | 322.678         | 323.182         | 322.174         | G[6]  |
| G  | 28 | <b>1425.856</b> | 282.177         | 284.187         | 284.691         | 283.683         | G[5]  |
| G  | 29 | 1489.895        | 238.147         | 230.138         | 230.642         | 229.634         | G[4]  |
| K  | 30 | 1567.948        | 174.118         | 166.109         | 166.613         | 165.605         | K[3]  |
| T  | 31 | 1618.472        | 98.055          | 88.048          | 88.550          | 87.542          | T[2]  |
| A  | 32 | 1653.000        | 45.511          | 37.522          | 38.026          | 37.018          | A[1]  |

# sp | Q3THW5 | H2AV\_MOUSE

LDSLKATIAGGGVIPHIHKSLLIGKKGQQK <sup>Dimethyl</sup> TA  
28.03

- ▶ fragmentation table for charge state 3+
- ▶ specType=etd
- ▶ score=85.95
- ▶ F113279.dat
- ▶ query=q43321\_p1
- ▶ precursor=662.399740
- ▶ chargePrecursor=5
- ▶ itol=0.5

| AA    | c              | y               | z+1             | z+2            | z              | AA    |
|-------|----------------|-----------------|-----------------|----------------|----------------|-------|
| L[1]  | 44.377         | <b>1103.324</b> | 1097.904        | 0.672          | 1097.649       | L[32] |
| D[2]  | 82.720         | 1065.629        | <b>1060.290</b> | 0.672          | 1059.954       | D[31] |
| S[3]  | 111.730        | <b>1027.287</b> | 1021.947        | 0.672          | 1021.612       | S[30] |
| L[4]  | 149.425        | <b>998.276</b>  | 992.937         | 0.672          | 992.601        | L[29] |
| T[5]  | 187.130        | 960.582         | <b>955.242</b>  | 0.672          | 954.906        | T[28] |
| K[6]  | 229.818        | <b>922.887</b>  | <b>917.547</b>  | <b>917.883</b> | 917.211        | K[27] |
| A[7]  | 253.497        | <b>880.189</b>  | <b>874.849</b>  | <b>875.185</b> | 874.513        | A[26] |
| T[8]  | 287.180        | 856.510         | <b>851.170</b>  | <b>851.506</b> | 850.834        | T[25] |
| I[9]  | 324.874        | 822.827         | 817.488         | 817.823        | <b>817.152</b> | I[24] |
| A[10] | 348.553        | 785.132         | 779.793         | 780.129        | 779.457        | A[23] |
| G[11] | 387.561        | 761.453         | <b>756.114</b>  | <b>756.450</b> | 755.778        | G[22] |
| G[12] | 389.568        | 742.444         | <b>737.107</b>  | <b>737.443</b> | 736.771        | G[21] |
| G[13] | 465.575        | 723.439         | 718.099         | 718.435        | 717.764        | G[20] |
| V[14] | 438.598        | 704.432         | 699.092         | <b>699.428</b> | 698.756        | V[19] |
| I[15] | 476.292        | 671.409         | 666.070         | <b>666.405</b> | 665.734        | I[18] |
| P[16] | 508.643        | 633.714         | 628.375         | 628.711        | 628.039        | P[17] |
| H[17] | 554.330        | 601.363         | 596.024         | 596.360        | 595.688        | H[16] |
| T[18] | 592.824        | 555.877         | 550.538         | 550.874        | 550.202        | T[15] |
| H[19] | 637.711        | 517.962         | 512.643         | 512.979        | 512.307        | H[14] |
| K[20] | 680.409        | 472.296         | 466.957         | 467.293        | 466.621        | K[13] |
| S[21] | 709.420        | 429.598         | 424.258         | 424.594        | 423.922        | S[12] |
| L[22] | 747.114        | 400.587         | 395.248         | 395.584        | 394.912        | L[11] |
| T[23] | 784.809        | 362.893         | 357.553         | 357.889        | 357.217        | T[10] |
| G[24] | 867.816        | 325.196         | 319.856         | 320.194        | 319.522        | G[9]  |
| T[25] | <b>846.515</b> | 306.191         | 300.851         | 301.187        | 300.515        | T[8]  |
| K[26] | <b>889.213</b> | 263.462         | 258.123         | 258.459        | 257.787        | K[7]  |
| G[27] | <b>908.220</b> | 230.794         | 215.454         | 215.790        | 215.118        | G[6]  |
| Q[28] | <b>950.906</b> | 201.787         | 196.447         | 196.783        | 196.111        | Q[5]  |
| Q[29] | <b>993.592</b> | 159.101         | 153.761         | 154.097        | 153.425        | Q[4]  |
| K[30] | 1045.634       | 116.414         | 111.075         | 111.411        | 110.739        | K[3]  |
| T[31] | 1079.217       | 64.372          | 59.033          | 59.369         | 58.697         | T[2]  |
| A[32] | 1102.996       | 30.690          | 25.350          | 25.686         | 25.014         | A[1]  |



# sp | Q3THW5 | H2AV\_MOUSE

LDSLKATIAGGGVIPHIHKSILIGKKGQQK <sup>Dimethyl</sup> 28.03 TA

- ▶ fragmentation table for charge state 4+
- ▶ specType=etd
- ▶ score=85.95
- ▶ F113279.dat
- ▶ query=q43321.p1
- ▶ precursor=662.399740
- ▶ chargePrecursor=5
- ▶ itol=0.5

| AA    | c              | y              | z+1            | z+2     | z              | AA    |
|-------|----------------|----------------|----------------|---------|----------------|-------|
| L[1]  | 33.535         | 827.745        | 823.760        | 0.755   | 823.488        | L[12] |
| D[2]  | 82.292         | 799.474        | <b>795.469</b> | 0.755   | 795.217        | D[11] |
| S[3]  | 84.050         | 770.717        | 766.712        | 0.755   | 766.460        | S[30] |
| L[4]  | 112.921        | 748.959        | 744.954        | 0.755   | 744.702        | L[29] |
| I[5]  | 140.592        | 720.688        | 716.683        | 0.755   | 716.431        | I[28] |
| K[6]  | 172.615        | 692.417        | 688.412        | 688.664 | 688.160        | K[27] |
| A[7]  | 190.375        | 660.393        | 656.389        | 656.641 | 656.137        | A[26] |
| T[8]  | 215.637        | 642.634        | 638.629        | 638.881 | 638.377        | T[25] |
| I[9]  | 243.908        | 617.372        | 613.367        | 613.619 | 613.116        | I[24] |
| A[10] | 261.667        | 589.101        | 585.096        | 585.348 | 584.844        | A[23] |
| G[11] | 279.922        | 571.342        | 567.337        | 567.589 | 567.085        | G[22] |
| G[12] | 290.178        | 557.086        | 553.082        | 553.334 | 552.830        | G[21] |
| G[13] | 304.433        | 542.831        | 538.826        | 539.078 | 538.574        | G[20] |
| V[14] | 329.200        | 528.576        | 524.571        | 524.823 | 524.319        | V[19] |
| I[15] | 357.471        | 503.809        | 499.804        | 500.056 | 499.552        | I[18] |
| P[16] | 381.734        | <b>475.538</b> | 471.533        | 471.785 | 471.281        | P[17] |
| H[17] | 415.999        | 451.274        | 447.270        | 447.522 | <b>447.018</b> | H[16] |
| I[18] | 444.270        | 417.010        | 413.005        | 413.257 | 412.753        | I[15] |
| H[19] | 478.535        | 388.739        | 384.734        | 384.986 | 384.482        | H[14] |
| K[20] | 510.559        | 364.474        | 360.469        | 360.721 | 360.217        | K[13] |
| S[21] | 532.317        | 332.485        | 328.480        | 328.697 | 328.194        | S[12] |
| L[22] | 560.588        | 300.692        | 296.688        | 296.939 | 296.436        | L[11] |
| I[23] | 588.859        | 272.421        | 268.417        | 268.668 | 268.165        | I[10] |
| G[24] | 603.114        | 244.150        | 240.146        | 240.397 | 239.894        | G[9]  |
| K[25] | 635.138        | 229.895        | 225.890        | 226.142 | 225.638        | K[8]  |
| K[26] | 667.361        | 197.973        | 193.968        | 194.118 | 193.614        | K[7]  |
| G[27] | 681.417        | 165.847        | 161.843        | 162.005 | 161.591        | G[6]  |
| Q[28] | 713.431        | 151.592        | 147.587        | 147.839 | 147.335        | Q[5]  |
| Q[29] | 745.446        | 119.577        | 115.573        | 115.825 | 115.321        | Q[4]  |
| K[30] | 769.478        | 87.563         | 83.558         | 83.810  | 83.306         | K[3]  |
| T[31] | <b>809.740</b> | 48.531         | 44.526         | 44.778  | 44.274         | T[2]  |
| A[32] | 827.469        | 23.269         | 19.265         | 19.516  | 19.013         | A[1]  |

# sp | Q3THW5 | H2AV\_MOUSE

LDSLIKATIAGGGVIPHIHKSLLIGKKGQQK Dimethyl TA  
28.03

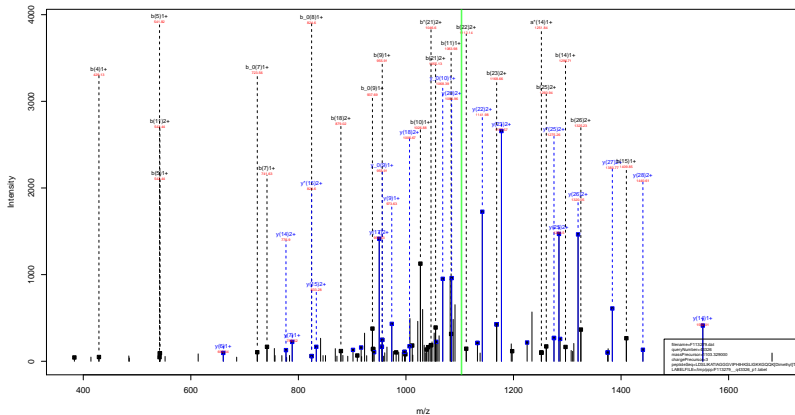

# sp | Q3THW5 | H2AV\_MOUSE

LDSLKATIAGGGVIPHIHKSLLIGKKGQQK <sup>Dimethyl</sup> TA  
28.03

- ▶ fragmentation table for charge state 1+
- ▶ specType=cid
- ▶ score=64.29
- ▶ F113279.dat
- ▶ query=q43326.p1
- ▶ precursor=1103.329000
- ▶ chargePrecursor=3
- ▶ itol=0.5

| AA   | a              | a*              | a,β            | b               | b*             | b,β            | y              | y*              | y,β      | AA              |      |
|------|----------------|-----------------|----------------|-----------------|----------------|----------------|----------------|-----------------|----------|-----------------|------|
| L1   | 88.900         | 0.000           | 0.000          | 114.801         | 0.000          | 0.000          | 107.950        | 1300.512        | 1089.974 | L121            |      |
| D12  | 101.717        | 0.000           | 101.717        | 200.718         | 0.000          | 0.11180        | 1918.814       | 1177.847        | 1171.803 | D131            |      |
| S13  | 200.718        | 0.000           | 200.718        | 315.150         | 0.000          | 0.001100       | 3070.847       | 1562.520        | 1561.838 | S131            |      |
| L14  | 401.200        | 0.000           | <b>381.220</b> | <b>429.214</b>  | 0.000          | 0.111100       | 3987.838       | 1879.768        | 1874.804 | L129            |      |
| T15  | 614.154        | 0.000           | 490.711        | <b>542.318</b>  | 0.000          | 0.001100       | 5081.300       | 2670.710        | 2669.704 | T161            |      |
| R16  | 814.410        | 0.001           | 629.460        | 744.411         | 0.001100       | 0.011400       | 6700.840       | 3749.820        | 3748.820 | R171            |      |
| A17  | 1114.406       | 0.001           | 839.440        | 989.441         | <b>741.451</b> | 174.434        | <b>723.440</b> | 3870.530        | 3867.526 | A120            |      |
| T18  | 1314.503       | 7.071           | 737.477        | 736.483         | 864.493        | 826.472        | <b>824.488</b> | 3547.514        | 3550.488 | T120            |      |
| T19  | 1514.500       | 0.000           | 1037.477       | <b>905.577</b>  | <b>925.545</b> | <b>938.556</b> | <b>937.572</b> | 2400.440        | 2400.440 | T121            |      |
| A101 | <b>998.624</b> | <b>981.598</b>  | 1007.611       | <b>1028.618</b> | 1008.619       | 1009.619       | 1009.619       | 2155.310        | 2156.300 | A122            |      |
| G111 | 1103.548       | <b>1038.618</b> | 1107.611       | <b>1083.641</b> | 1098.614       | 1099.614       | 1099.614       | 4700.110        | 4704.110 | G122            |      |
| G112 | 1113.611       | 1098.611        | 1108.611       | 1144.611        | 1113.611       | 1113.611       | 1113.611       | 2210.110        | 2209.104 | G121            |      |
| G113 | 1109.610       | 1152.610        | 1151.610       | <b>1107.634</b> | 1100.607       | 1119.610       | 2456.310       | 2151.240        | 2150.267 | G120            |      |
| V144 | 1088.587       | <b>1251.731</b> | 1250.747       | <b>1296.752</b> | 1270.740       | 1269.742       | 2111.201       | 2044.750        | 2043.277 | V110            |      |
| T124 | 1181.624       | 1204.625        | 1203.624       | <b>1409.830</b> | 1382.610       | 1381.620       | 2012.212       | 1895.188        | 1894.242 | T121            |      |
| R125 | 1314.624       | 1311.624        | 1309.624       | 1454.624        | 1454.624       | 1454.624       | 1454.624       | 1852.100        | 1851.118 | R121            |      |
| H117 | 1415.624       | 1391.624        | 1387.624       | 1443.644        | 1430.622       | 1430.622       | 1430.622       | 4100.040        | 4104.044 | H120            |      |
| T118 | 1329.627       | 1712.611        | 1711.627       | 1757.627        | 1740.605       | 1739.621       | 2251.104       | 1847.990        | 1847.008 | T121            |      |
| T119 | 1306.606       | 1840.606        | 1834.606       | 1894.612        | 1877.604       | 1876.609       | 1876.609       | 1554.800        | 1553.822 | T120            |      |
| R120 | 1394.610       | 1972.614        | 1970.610       | 2022.618        | 2006.610       | 2004.610       | 2414.614       | 1367.647        | 1366.651 | R121            |      |
| S121 | 1501.620       | 2004.618        | 2001.621       | 2100.621        | 2082.611       | 2081.621       | 2081.621       | <b>1286.778</b> | 1288.753 | S120            |      |
| L122 | 1594.620       | 2119.620        | 2116.620       | 2209.620        | 2200.619       | 2200.619       | 2200.619       | 1130.610        | 1129.608 | L111            |      |
| T126 | 2007.621       | 2296.620        | 2293.621       | 2335.620        | 2316.609       | 2315.620       | 2315.620       | 1040.611        | 1040.630 | <b>1048.852</b> | T121 |
| G124 | 2014.611       | 2347.620        | 2346.611       | 2392.620        | 2375.611       | 2374.611       | 2374.611       | <b>973.579</b>  | 969.570  | <b>958.588</b>  | G121 |
| R126 | 2012.620       | 2474.621        | 2474.621       | 2520.621        | 2503.610       | 2502.621       | 2502.621       | <b>915.579</b>  | 910.574  | 908.541         | R121 |
| R126 | 2102.621       | 2515.619        | 2514.621       | 2560.621        | 2543.614       | 2542.621       | 2542.621       | 1714.430        | 1712.420 | R121            |      |
| G127 | 2177.624       | 2601.619        | 2600.611       | 2646.611        | 2630.610       | 2629.610       | 2629.610       | <b>660.768</b>  | 643.741  | 641.307         | G121 |
| G128 | 2095.611       | 2708.619        | 2707.622       | 2814.617        | 2814.611       | 2813.667       | 840.340        | 788.320         | 785.335  | G121            |      |
| G129 | 2113.611       | 2698.619        | 2697.611       | 2764.619        | 2764.619       | 2763.619       | 470.310        | 400.261         | 397.024  | G121            |      |
| R130 | 2098.607       | 3172.614        | 3171.611       | 3117.663        | 3100.636       | 3099.607       | 147.230        | 300.202         | 297.218  | R121            |      |
| T131 | 3110.610       | 3173.608        | 3172.600       | 3218.610        | 3201.603       | 3200.606       | 101.101        | 0.000           | 173.007  | T121            |      |
| A114 | 3083.600       | 3244.600        | 3243.600       | 3289.604        | 3272.601       | 3271.604       | 3271.604       | 90.000          | 90.000   | A121            |      |

# sp | Q3THW5 | H2AV\_MOUSE

LDSLKATIAGGGVIPHIHKSLLIGKKGQQK <sup>Dimethyl</sup> 28.03 TA

- ▶ fragmentation table for charge state 2+
- ▶ specType=cid
- ▶ score=64.29
- ▶ F113279.dat
- ▶ query=q43326.p1
- ▶ precursor=1103.329000
- ▶ chargePrecursor=3
- ▶ itol=0.5

| AA  | a        | a'    | b        | b'    | y        | y'       | AA   |
|-----|----------|-------|----------|-------|----------|----------|------|
| L1  | 41.602   | 0.504 | 40.504   | 0.504 | 1084.488 | 1084.488 | L112 |
| D1  | 131.081  | 0.504 | 81.581   | 0.504 | 1084.992 | 1084.992 | D131 |
| S1  | 144.081  | 0.504 | 116.581  | 0.504 | 1085.496 | 1085.496 | S144 |
| L14 | 201.121  | 0.504 | 185.121  | 0.504 | 1086.000 | 1086.000 | L120 |
| L15 | 207.661  | 0.504 | 191.661  | 0.504 | 1086.504 | 1086.504 | L120 |
| T1  | 211.119  | 0.504 | 195.119  | 0.504 | 1087.008 | 1087.008 | T211 |
| A1  | 211.619  | 0.504 | 195.619  | 0.504 | 1087.512 | 1087.512 | A120 |
| T1  | 407.759  | 0.504 | 396.759  | 0.504 | 1088.016 | 1088.016 | T120 |
| E1  | 408.259  | 0.504 | 397.259  | 0.504 | 1088.520 | 1088.520 | E120 |
| A10 | 408.816  | 0.504 | 397.816  | 0.504 | 1089.024 | 1089.024 | A120 |
| G13 | 418.271  | 0.504 | 413.271  | 0.504 | 1089.528 | 1089.528 | G122 |
| G12 | 420.271  | 0.504 | 415.271  | 0.504 | 1090.032 | 1090.032 | G122 |
| G13 | 555.948  | 0.504 | 550.948  | 0.504 | 1090.536 | 1090.536 | G120 |
| V14 | 614.602  | 0.504 | 609.602  | 0.504 | 1091.040 | 1091.040 | V120 |
| E15 | 662.624  | 0.504 | 657.624  | 0.504 | 1091.544 | 1091.544 | E120 |
| P16 | 710.741  | 0.504 | 705.741  | 0.504 | 1092.048 | 1092.048 | P116 |
| H17 | 800.800  | 0.504 | 795.800  | 0.504 | 1092.552 | 1092.552 | H124 |
| L18 | 889.882  | 0.504 | 884.882  | 0.504 | 1093.056 | 1093.056 | L120 |
| H18 | 111.556  | 0.504 | 109.556  | 0.504 | 1093.560 | 1093.560 | H114 |
| K20 | 907.550  | 0.504 | 902.550  | 0.504 | 1094.064 | 1094.064 | K113 |
| S21 | 1041.115 | 0.504 | 1036.115 | 0.504 | 1094.568 | 1094.568 | S111 |
| L22 | 1070.414 | 0.504 | 1065.414 | 0.504 | 1095.072 | 1095.072 | L111 |
| G23 | 1154.180 | 0.504 | 1149.180 | 0.504 | 1095.576 | 1095.576 | G109 |
| G24 | 1184.712 | 0.504 | 1179.712 | 0.504 | 1096.080 | 1096.080 | G109 |
| K26 | 1206.717 | 0.504 | 1201.717 | 0.504 | 1096.584 | 1096.584 | K109 |
| K26 | 1111.505 | 0.504 | 1106.505 | 0.504 | 1097.088 | 1097.088 | K109 |
| G27 | 1139.116 | 0.504 | 1134.116 | 0.504 | 1097.592 | 1097.592 | G109 |
| G28 | 1200.800 | 0.504 | 1195.800 | 0.504 | 1098.096 | 1098.096 | G109 |
| G29 | 1407.114 | 0.504 | 1402.114 | 0.504 | 1098.600 | 1098.600 | G109 |
| K30 | 1435.817 | 0.504 | 1430.817 | 0.504 | 1099.104 | 1099.104 | K109 |
| L31 | 1509.612 | 0.504 | 1504.612 | 0.504 | 1099.608 | 1099.608 | L109 |
| A32 | 1631.760 | 0.504 | 1626.760 | 0.504 | 1099.612 | 1099.612 | A109 |



# sp | Q64525 | H2B2B\_MOUSE

PDKASAPAPKKGSKKAVTK<sup>Acetyl</sup><sub>42.01</sub> VQKKDGKKRKRSRKE

- ▶ fragmentation table for charge state 1+
- ▶ specType=etd
- ▶ score=42.31
- ▶ F113279.dat
- ▶ query=q44917.p1
- ▶ precursor=558.051670
- ▶ chargePrecursor=7
- ▶ itol=0.5

| AA  | c               | y              | z+1             | z+2             | z              | AA  |
|-----|-----------------|----------------|-----------------|-----------------|----------------|-----|
| P1  | 115.087         | 3900.809       | 8884.291        | 0.000           | 3881.281       | P35 |
| D2  | 230.114         | 3803.257       | 3787.238        | 0.000           | 3786.230       | D34 |
| F3  | 327.106         | 3688.230       | 3672.211        | 0.000           | 3671.203       | F33 |
| A4  | 398.203         | 3591.177       | 3576.158        | 0.000           | 3574.150       | A32 |
| K5  | <b>538.298</b>  | 3520.140       | 3504.121        | 3836.120        | 3503.113       | K31 |
| S6  | <b>613.130</b>  | 3392.085       | 3376.066        | 3377.054        | 3375.045       | S30 |
| A7  | 684.388         | 3305.013       | 3288.994        | 3290.002        | 3287.985       | A29 |
| F8  | <b>781.420</b>  | 3233.976       | 3217.957        | 3218.965        | 3216.949       | F28 |
| A9  | 852.457         | 3136.923       | 3120.904        | 3121.912        | 3119.896       | A27 |
| F10 | <b>949.510</b>  | 3065.886       | 3049.867        | 3050.875        | 3048.859       | F26 |
| K11 | <b>1077.605</b> | 2988.832       | 2982.814        | 2983.822        | 2981.807       | K25 |
| K12 | 1209.700        | 2940.786       | 2924.767        | 2925.774        | 2923.758       | K24 |
| G13 | 1262.722        | 2712.643       | 2696.624        | 2697.632        | 2695.617       | G23 |
| S14 | 1349.754        | 2655.622       | 2639.603        | 2640.611        | 2638.595       | S22 |
| K15 | <b>1477.649</b> | 2568.590       | 2552.571        | 2553.579        | 2551.563       | K21 |
| K16 | 1605.944        | 2440.495       | 2424.476        | 2425.484        | 2423.468       | K20 |
| A17 | 1676.981        | 2312.400       | 2296.381        | 2297.389        | 2295.373       | A19 |
| V18 | 1774.008        | 2241.363       | 2225.344        | 2226.352        | 2224.336       | V18 |
| T19 | <b>1877.097</b> | 2142.294       | 2126.275        | 2127.283        | 2125.267       | T17 |
| K20 | 2047.202        | 2041.246       | 2025.228        | 2026.236        | 2024.220       | K16 |
| V21 | 2146.271        | 1871.141       | 1855.122        | 1856.130        | 1854.114       | V15 |
| Q22 | 2274.230        | 1772.073       | 1756.054        | 1757.062        | 1755.046       | Q14 |
| K23 | 2462.424        | 1644.016       | 1627.997        | <b>1629.003</b> | 1626.987       | K13 |
| K24 | 2530.319        | 1515.919       | <b>1499.900</b> | 1500.908        | 1498.892       | K12 |
| D25 | 2645.546        | 1387.824       | 1371.805        | <b>1372.813</b> | 1370.799       | D11 |
| G26 | 2702.568        | 1272.797       | 1256.778        | <b>1257.786</b> | 1255.771       | G10 |
| K27 | 2830.663        | 1215.776       | <b>1199.757</b> | 1200.765        | 1198.749       | K0  |
| K28 | 2958.757        | 1087.681       | 1071.662        | <b>1072.670</b> | 1070.654       | K9  |
| R29 | 3114.859        | 959.585        | 943.567         | <b>944.575</b>  | <b>942.559</b> | R7  |
| R30 | 3212.854        | <b>883.485</b> | <b>787.466</b>  | 788.474         | 786.458        | R6  |
| R31 | 3399.055        | <b>675.390</b> | <b>659.371</b>  | 660.379         | 658.363        | R5  |
| S32 | 3486.087        | 519.289        | <b>503.270</b>  | 504.278         | 502.262        | S4  |
| R33 | 3642.188        | 432.257        | <b>416.238</b>  | 417.246         | 415.230        | R3  |
| K34 | 3770.283        | 276.155        | <b>260.137</b>  | <b>261.144</b>  | 259.129        | K2  |
| E35 | 3899.325        | 148.060        | 132.042         | 133.050         | 131.034        | E1  |

# sp | Q64525 | H2B2B\_MOUSE

PDKASAPAPKKGSKKAVTK<sup>Acetyl</sup><sub>42.01</sub> VQKKDGGKRRKRSRKE

- ▶ fragmentation table for charge state 2+
- ▶ specType=etd
- ▶ score=42.31
- ▶ F113279.dat
- ▶ query=q44917.p1
- ▶ precursor=558.051670
- ▶ chargePrecursor=7
- ▶ itol=0.5

| AA   | c               | y              | z+1             | z+2             | z              | AA   |
|------|-----------------|----------------|-----------------|-----------------|----------------|------|
| P 1  | 58.047          | 1990.658       | 1942.649        | 0.504           | 1942.145       | P 35 |
| D 2  | 115.960         | 1902.132       | 1894.123        | 0.504           | 1893.619       | D 34 |
| P 3  | 104.697         | 1844.618       | 1836.609        | 0.504           | 1836.105       | P 33 |
| A 4  | 199.605         | 1796.092       | 1788.083        | 0.504           | 1787.579       | A 32 |
| K 5  | 263.453         | 1750.574       | 1742.564        | 1753.068        | 1752.060       | K 31 |
| S 6  | 307.169         | 1696.526       | 1688.517        | 1699.021        | 1689.013       | S 30 |
| A 7  | 342.697         | 1653.010       | 1645.001        | 1645.505        | 1644.497       | A 29 |
| P 8  | 391.214         | 1617.491       | 1609.482        | 1609.986        | 1608.978       | P 28 |
| A 9  | 426.732         | 1568.965       | 1560.956        | 1561.460        | 1560.452       | A 27 |
| P 10 | 475.250         | 1533.447       | 1525.437        | 1525.941        | 1524.933       | P 26 |
| K 11 | <b>539.306</b>  | 1484.920       | 1476.911        | <b>1477.415</b> | 1476.407       | K 25 |
| K 12 | <b>603.354</b>  | 1430.893       | 1419.883        | <b>1413.367</b> | 1412.359       | K 24 |
| G 13 | 631.804         | 1386.825       | <b>1348.816</b> | <b>1349.320</b> | 1348.312       | G 23 |
| S 14 | <b>675.380</b>  | 1338.314       | 1330.305        | 1320.809        | 1319.801       | S 22 |
| K 15 | <b>739.428</b>  | 1284.798       | 1276.789        | 1277.293        | 1276.285       | K 21 |
| K 16 | <b>803.475</b>  | 1220.751       | 1212.742        | 1213.246        | 1212.238       | K 20 |
| A 17 | 838.994         | 1166.703       | <b>1148.694</b> | <b>1149.198</b> | 1148.190       | A 19 |
| V 18 | 888.528         | 1122.365       | 1113.355        | 1113.859        | 1112.852       | V 18 |
| T 19 | <b>939.052</b>  | 1071.651       | 1063.641        | 1064.145        | 1063.137       | T 17 |
| K 20 | <b>1024.105</b> | 1021.127       | 1013.118        | <b>1013.621</b> | 1012.614       | K 16 |
| V 21 | 1073.639        | 936.074        | <b>928.065</b>  | <b>928.569</b>  | 927.561        | V 15 |
| Q 22 | <b>1137.668</b> | <b>886.540</b> | <b>878.531</b>  | <b>879.034</b>  | 878.027        | Q 14 |
| K 23 | <b>1201.716</b> | <b>822.511</b> | <b>814.501</b>  | <b>815.005</b>  | <b>813.997</b> | K 13 |
| T 24 | <b>1255.183</b> | <b>758.463</b> | <b>750.454</b>  | <b>750.958</b>  | 749.950        | T 12 |
| D 25 | <b>1323.277</b> | <b>694.416</b> | <b>686.406</b>  | <b>686.910</b>  | <b>685.902</b> | D 11 |
| G 26 | 1351.797        | <b>636.902</b> | <b>628.893</b>  | <b>629.397</b>  | 628.389        | G 10 |
| K 27 | <b>1415.835</b> | <b>608.391</b> | <b>600.382</b>  | <b>600.886</b>  | 599.878        | K 9  |
| K 28 | <b>1479.882</b> | 544.344        | <b>536.335</b>  | <b>536.839</b>  | 535.831        | K 8  |
| K 29 | 1557.833        | 480.296        | <b>472.287</b>  | <b>472.791</b>  | <b>471.783</b> | K 7  |
| R 30 | 1623.980        | 402.246        | 394.237         | 394.740         | 393.732        | R 6  |
| R 31 | 1700.031        | 338.198        | 330.189         | 330.693         | 329.685        | R 5  |
| S 32 | 1743.547        | <b>260.148</b> | 252.139         | 252.642         | 251.635        | S 4  |
| R 33 | 1821.598        | 216.632        | 208.623         | 209.126         | 208.119        | R 3  |
| K 34 | 1885.645        | 138.581        | 130.572         | 131.076         | 130.068        | K 2  |
| E 35 | 1950.166        | 74.534         | 66.524          | 67.028          | 66.021         | E 1  |

# sp | Q64525 | H2B2B\_MOUSE

PDKASAPAPKKGSKKAVTK<sup>Acetyl</sup><sub>42.01</sub> VQKKDGGKRRKRSRKE

- ▶ fragmentation table for charge state 3+
- ▶ specType=etd
- ▶ score=42.31
- ▶ F113279.dat
- ▶ query=q44917\_p1
- ▶ precursor=558.051670
- ▶ chargePrecursor=7
- ▶ itol=0.5

| AA   | c               | y               | ±1              | ±2              | z               | AA   |
|------|-----------------|-----------------|-----------------|-----------------|-----------------|------|
| F 1  | 39.034          | 1300.775        | 1295.435        | 0.672           | 1295.099        | F 29 |
| D 2  | 77.376          | 1268.424        | 1263.054        | 0.672           | 1262.740        | D 34 |
| F 3  | 109.727         | 1230.081        | 1224.742        | 0.672           | 1224.400        | F 33 |
| A 4  | 134.406         | 1197.730        | <b>1192.391</b> | 0.672           | <b>1192.055</b> | A 32 |
| K 5  | 176.104         | <b>1174.051</b> | <b>1168.712</b> | <b>1169.048</b> | 1169.370        | K 31 |
| S 6  | 205.215         | 1131.353        | <b>1125.014</b> | 1124.797        | <b>1125.878</b> | S 30 |
| A 7  | 229.794         | 1102.942        | <b>1097.603</b> | <b>1097.339</b> | 1099.599        | A 29 |
| F 8  | <b>261.145</b>  | 1079.663        | 1074.324        | 1073.660        | <b>1072.988</b> | F 28 |
| A 9  | 284.824         | 1046.312        | 1040.973        | 1041.309        | 1040.637        | A 27 |
| F 10 | 317.175         | <b>1022.633</b> | 1017.294        | 1017.630        | 1016.958        | F 26 |
| K 11 | 359.873         | 990.262         | 984.943         | <b>985.279</b>  | 984.807         | K 25 |
| K 12 | 402.572         | 947.594         | 942.255         | <b>942.581</b>  | 941.900         | K 24 |
| G 13 | 421.519         | 904.895         | <b>899.546</b>  | <b>899.882</b>  | 899.210         | G 23 |
| S 14 | 450.589         | <b>885.879</b>  | 880.539         | <b>880.875</b>  | 880.203         | S 22 |
| K 15 | 493.288         | 856.868         | 851.529         | 851.864         | 851.191         | K 21 |
| K 16 | 535.996         | <b>814.170</b>  | 808.830         | <b>809.166</b>  | 808.484         | K 20 |
| A 17 | 559.665         | 774.473         | 769.132         | 769.466         | 769.799         | A 19 |
| V 18 | 592.888         | 747.792         | <b>742.453</b>  | <b>742.789</b>  | 742.117         | V 18 |
| T 19 | <b>626.370</b>  | 714.770         | 709.430         | 709.766         | <b>709.094</b>  | T 17 |
| K 20 | 683.072         | <b>681.087</b>  | <b>675.747</b>  | 676.081         | <b>675.412</b>  | K 16 |
| V 21 | <b>716.095</b>  | <b>624.385</b>  | 619.046         | 619.382         | 618.710         | V 15 |
| Q 22 | <b>758.781</b>  | 591.362         | <b>586.023</b>  | <b>586.359</b>  | <b>585.687</b>  | Q 14 |
| K 23 | <b>801.480</b>  | 548.676         | <b>543.337</b>  | <b>543.673</b>  | 543.001         | K 13 |
| K 24 | 844.119         | 505.975         | 500.636         | 500.974         | 500.302         | K 12 |
| D 25 | 882.520         | 463.280         | 457.940         | 458.276         | 457.604         | D 11 |
| G 26 | <b>901.527</b>  | 424.937         | 419.598         | 419.934         | 419.262         | G 10 |
| K 27 | 944.226         | 405.930         | 400.590         | 400.926         | 400.255         | K 9  |
| K 28 | <b>985.824</b>  | 363.232         | 357.892         | 358.228         | 357.556         | K 8  |
| R 29 | 1038.659        | 320.533         | 315.194         | 315.530         | 314.858         | R 7  |
| K 30 | 1081.656        | 288.500         | 283.160         | 283.496         | 282.824         | K 6  |
| R 31 | <b>1133.690</b> | 225.801         | 220.462         | 220.798         | 220.126         | R 5  |
| S 32 | 1182.700        | 173.768         | 168.428         | 168.764         | 168.092         | S 4  |
| R 33 | 1218.134        | 144.757         | 139.417         | 139.753         | 139.082         | R 3  |
| T 34 | <b>1257.432</b> | 92.723          | 87.384          | 87.720          | 87.048          | T 2  |
| E 35 | 1300.447        | 50.025          | 44.685          | 45.021          | 44.349          | E 1  |



# sp | Q64525 | H2B2B\_MOUSE

PDKASAPAPKKGSKKAVTK <sup>Acetyl</sup> <sub>42.01</sub> VQKKDGGKKRKRSRKE

- ▶ fragmentation table for charge state 4+
- ▶ specType=etd
- ▶ score=42.31
- ▶ F113279.dat
- ▶ query=q44917.p1
- ▶ precursor=558.051670
- ▶ chargePrecursor=7
- ▶ itol=0.5

| AA    | c              | y              | z+1            | z+2            | z              | AA    |
|-------|----------------|----------------|----------------|----------------|----------------|-------|
| P[1]  | 29.527         | 975.833        | 975.833        | 0.735          | 0.735          | P[15] |
| D[2]  | 58.284         | 951.570        | 947.560        | 0.735          | 0.47.313       | D[14] |
| P[3]  | 82.547         | <b>922.813</b> | 918.808        | 0.735          | 918.556        | P[13] |
| A[4]  | 100.306        | 898.550        | <b>894.545</b> | 0.735          | 894.293        | A[12] |
| K[5]  | 132.430        | <b>880.790</b> | 876.786        | 877.038        | 876.534        | K[11] |
| S[6]  | 154.088        | 848.767        | <b>844.762</b> | <b>845.014</b> | <b>844.510</b> | S[30] |
| A[7]  | 171.847        | 827.009        | 823.004        | 823.256        | <b>822.752</b> | A[29] |
| P[8]  | 196.111        | <b>809.249</b> | 805.243        | 805.497        | 804.993        | P[28] |
| A[9]  | 213.870        | <b>784.986</b> | <b>780.982</b> | <b>781.233</b> | 780.730        | A[27] |
| P[10] | 238.133        | 767.221        | 763.222        | 763.814        | 762.970        | P[26] |
| K[11] | 270.157        | <b>742.964</b> | <b>738.959</b> | <b>739.211</b> | 738.707        | K[25] |
| K[12] | 302.180        | 710.940        | <b>706.935</b> | <b>707.187</b> | <b>706.683</b> | K[24] |
| G[13] | 316.436        | 678.918        | 674.912        | <b>675.164</b> | 674.660        | G[23] |
| S[14] | 338.194        | <b>664.661</b> | 660.656        | 660.908        | 660.404        | S[22] |
| K[15] | 370.218        | 642.903        | 638.898        | 639.150        | 638.646        | K[21] |
| K[16] | 402.241        | <b>610.879</b> | 606.874        | <b>607.126</b> | 606.622        | K[20] |
| A[17] | 420.001        | 578.855        | 574.851        | 575.103        | 574.599        | A[19] |
| V[18] | 444.768        | 561.096        | 557.091        | 557.343        | 556.839        | V[18] |
| V[19] | 470.030        | <b>536.329</b> | 532.324        | 532.576        | 532.072        | V[17] |
| K[20] | 512.556        | 511.560        | 507.562        | 507.814        | 506.810        | K[16] |
| V[21] | 537.323        | 468.541        | 464.536        | 464.788        | 464.284        | V[15] |
| Q[22] | 569.138        | 443.774        | 439.769        | 440.021        | 439.517        | Q[14] |
| K[23] | 601.362        | 411.759        | 407.754        | 408.006        | 407.502        | K[13] |
| K[24] | <b>633.305</b> | 379.735        | 375.731        | 375.982        | 375.479        | K[12] |
| D[25] | <b>662.142</b> | 347.711        | 343.707        | 343.959        | 343.455        | D[11] |
| G[26] | <b>676.397</b> | 318.955        | 314.950        | 315.202        | 314.698        | G[10] |
| K[27] | <b>708.421</b> | 304.699        | 300.695        | 300.947        | 300.443        | K[9]  |
| K[28] | <b>740.445</b> | 272.676        | 268.671        | 268.923        | 268.419        | K[8]  |
| K[29] | 779.470        | 240.652        | 236.647        | 236.899        | 236.395        | K[7]  |
| K[30] | 811.494        | 201.627        | 197.622        | 197.874        | 197.370        | K[6]  |
| R[31] | <b>850.519</b> | 169.603        | 165.598        | 165.850        | 165.346        | R[5]  |
| S[32] | 872.277        | 130.578        | 126.573        | 126.825        | 126.321        | S[4]  |
| R[33] | 911.302        | 108.620        | 104.615        | 104.867        | 104.363        | R[3]  |
| K[34] | <b>943.326</b> | 69.794         | 65.790         | 66.042         | 65.538         | K[2]  |
| E[35] | 975.587        | 37.771         | 33.766         | 34.018         | 33.514         | E[1]  |

# sp | Q64525 | H2B2B\_MOUSE

PDKASAPAPKKGSKKAVTK <sup>Acetyl</sup><sub>42.01</sub> VQKKDGGKRRKRSRKE

- ▶ fragmentation table for charge state 5+
- ▶ specType=etd
- ▶ score=42.31
- ▶ F113279.dat
- ▶ query=q44917.p1
- ▶ precursor=558.051670
- ▶ chargePrecursor=7
- ▶ itol=0.5

| AA    | c              | y              | z+1            | z+2            | z              | AA    |
|-------|----------------|----------------|----------------|----------------|----------------|-------|
| P[1]  | 23.823         | 780.888        | <b>777.664</b> | 0.806          | 777.462        | P[18] |
| D[2]  | 46.829         | 761.451        | 758.251        | 0.806          | 758.052        | D[34] |
| P[3]  | 56.239         | 738.452        | 735.248        | 0.806          | 735.046        | P[13] |
| A[4]  | 50.447         | 719.041        | <b>715.837</b> | 0.806          | 715.636        | A[32] |
| K[5]  | 106.065        | 704.834        | 701.630        | 701.832        | 701.428        | K[31] |
| S[6]  | 123.472        | 679.215        | 676.011        | <b>676.213</b> | <b>675.809</b> | S[30] |
| A[7]  | 137.679        | <b>661.808</b> | 658.605        | 658.806        | 658.403        | A[29] |
| P[8]  | 157.090        | 647.601        | 644.397        | 644.599        | 644.196        | P[28] |
| A[9]  | 171.297        | 628.190        | 624.987        | 625.188        | <b>624.785</b> | A[27] |
| F[10] | 180.708        | 613.983        | <b>610.779</b> | <b>610.981</b> | 610.578        | F[26] |
| K[11] | 218.127        | <b>594.572</b> | 591.369        | 591.570        | 591.167        | K[25] |
| K[12] | 281.946        | 568.951        | 565.750        | 565.951        | 565.548        | K[24] |
| G[13] | 283.390        | <b>543.334</b> | <b>540.131</b> | <b>540.332</b> | <b>539.929</b> | G[23] |
| S[14] | 270.757        | 531.930        | 528.726        | 528.928        | 528.525        | S[22] |
| K[15] | 296.376        | 514.524        | 511.320        | 511.522        | 511.118        | K[21] |
| K[16] | 321.995        | 488.905        | 485.701        | 485.903        | 485.499        | K[20] |
| A[17] | 338.202        | 463.286        | <b>460.082</b> | 460.284        | <b>459.880</b> | A[19] |
| V[18] | 356.016        | 449.078        | 445.875        | 446.076        | 445.673        | V[18] |
| V[19] | 378.225        | 429.265        | 426.061        | 426.262        | 425.859        | V[17] |
| L[20] | 410.248        | 409.055        | 405.851        | 406.053        | 405.650        | L[16] |
| V[21] | 430.060        | 375.034        | 371.830        | 372.032        | 371.629        | V[15] |
| Q[22] | 456.672        | 355.220        | 352.017        | 352.218        | 351.815        | Q[14] |
| K[23] | 481.291        | 329.609        | 326.405        | 326.606        | 326.203        | K[13] |
| K[24] | 506.910        | 303.990        | 300.786        | 300.987        | 300.584        | K[12] |
| D[25] | 529.915        | 278.371        | 275.167        | 275.368        | 274.965        | D[11] |
| G[26] | 541.319        | 255.365        | 252.161        | 252.363        | 251.960        | G[10] |
| K[27] | 566.938        | 243.961        | 240.757        | 240.959        | 240.556        | K[9]  |
| K[28] | 582.357        | 218.342        | 215.138        | 215.340        | 214.937        | K[8]  |
| K[29] | 623.778        | 192.723        | 189.519        | 189.721        | 189.318        | K[7]  |
| K[30] | <b>649.397</b> | 161.503        | 158.299        | 158.501        | 158.097        | K[6]  |
| R[31] | 680.617        | 135.884        | 132.680        | 132.882        | 132.478        | R[5]  |
| S[32] | 688.023        | 104.664        | 101.460        | 101.661        | 101.258        | S[4]  |
| R[33] | 729.243        | 87.257         | 84.053         | 84.255         | 83.852         | R[3]  |
| K[34] | <b>754.862</b> | 56.037         | 52.833         | 53.035         | 52.632         | K[2]  |
| E[35] | 780.671        | 30.418         | 27.214         | 27.416         | 27.013         | E[1]  |

# sp | Q64525 | H2B2B\_MOUSE

PDKASAPAPKKGSKKAVTK<sup>Acetyl</sup><sub>42.01</sub> VQKKDGGKRRKRSRKE

- ▶ fragmentation table for charge state 6+
- ▶ specType=etd
- ▶ score=42.31
- ▶ F113279.dat
- ▶ query=q44917.p1
- ▶ precursor=558.051670
- ▶ chargePrecursor=7
- ▶ itol=0.5

| AA    | c              | y              | z+1            | z+2            | z              | AA    |
|-------|----------------|----------------|----------------|----------------|----------------|-------|
| P[1]  | 20.020         | 050.891        | 048.221        | 0.839          | 048.053        | P[15] |
| D[2]  | 39.192         | 034.715        | 032.040        | 0.839          | 031.878        | D[14] |
| P[3]  | 55.367         | 015.544        | 012.875        | 0.839          | 012.707        | P[13] |
| A[4]  | 67.207         | 599.869        | <b>596.659</b> | 0.839          | <b>596.531</b> | A[12] |
| K[5]  | 86.556         | 567.529        | 584.860        | 585.026        | 584.692        | K[11] |
| S[6]  | 103.061        | 566.180        | 563.510        | 563.678        | 563.342        | S[30] |
| A[7]  | 114.901        | 551.675        | 549.005        | 549.173        | 548.837        | A[29] |
| P[8]  | 131.076        | <b>539.835</b> | 537.166        | 537.334        | <b>536.998</b> | P[28] |
| A[9]  | 142.916        | 521.660        | 520.990        | 521.158        | 520.822        | A[27] |
| P[10] | 159.091        | 511.520        | 509.151        | 509.319        | 508.983        | P[26] |
| K[11] | 180.440        | 496.645        | 492.975        | 493.143        | 492.807        | K[25] |
| K[12] | 201.789        | 474.296        | 471.626        | <b>471.794</b> | 471.458        | K[24] |
| G[13] | 211.293        | 492.947        | 490.277        | 490.445        | 489.109        | G[23] |
| S[14] | 225.798        | 443.443        | 440.773        | 440.941        | 440.605        | S[22] |
| K[15] | 247.147        | 426.938        | 426.268        | 426.436        | 426.100        | K[21] |
| K[16] | 268.497        | 407.589        | 404.919        | 405.087        | 404.751        | K[20] |
| A[17] | 280.336        | 386.239        | 383.570        | 383.738        | 383.402        | A[19] |
| V[18] | 296.648        | 374.400        | 371.730        | 371.898        | 371.562        | V[18] |
| T[19] | 313.089        | 357.068        | 355.219        | 355.387        | 355.051        | T[17] |
| K[20] | 342.040        | 341.047        | 338.377        | 338.545        | 338.209        | K[16] |
| V[21] | 358.551        | 312.696        | 310.026        | 310.194        | 309.858        | V[15] |
| Q[22] | 379.894        | 296.185        | 293.515        | 293.683        | 293.347        | Q[14] |
| K[23] | 401.243        | 274.842        | 272.172        | 272.340        | 272.004        | K[13] |
| K[24] | 422.593        | 253.493        | 250.823        | 250.991        | 250.655        | K[12] |
| D[25] | 441.764        | 232.143        | 229.474        | 229.642        | 229.306        | D[11] |
| G[26] | 451.267        | 212.972        | 210.302        | 210.470        | 210.134        | G[10] |
| K[27] | <b>472.616</b> | 203.469        | 200.799        | 200.967        | 200.631        | K[9]  |
| K[28] | 483.966        | 182.120        | 179.450        | 179.618        | 179.282        | K[8]  |
| K[29] | 519.952        | 160.770        | 158.101        | 158.269        | 157.933        | K[7]  |
| K[30] | 541.132        | 134.753        | 132.084        | 132.252        | 131.916        | K[6]  |
| R[31] | 567.349        | 113.404        | 110.735        | 110.903        | 110.567        | R[5]  |
| S[32] | 581.854        | 87.387         | 84.718         | 84.886         | 84.550         | S[4]  |
| R[33] | <b>607.871</b> | 72.882         | 70.212         | 70.380         | 70.044         | R[3]  |
| K[34] | <b>629.220</b> | 46.865         | 44.196         | 44.363         | 44.028         | K[2]  |
| E[35] | 650.727        | 25.516         | 22.846         | 23.014         | 22.678         | E[1]  |

# sp | P27661 | H2AX\_MOUSE

[Acetyl]SGRGKTGGKARAKAKSRSSRAGLQFPVGRVHLLRKGHYAE

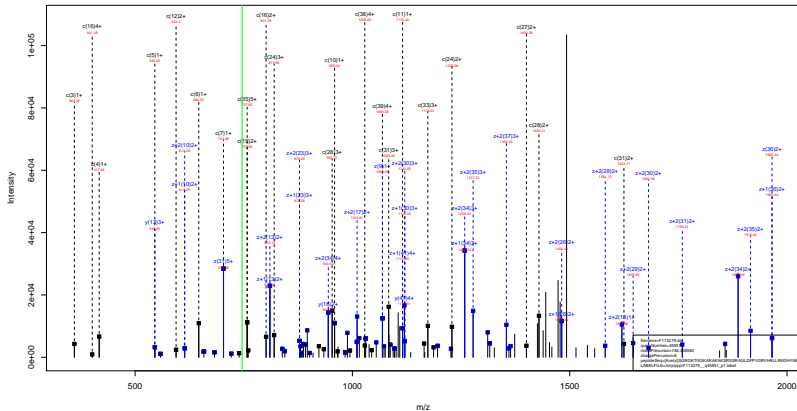

# sp | P27661 | H2AX\_MOUSE

[Acetyl]SGRGKTGGKARAKAKSRSSRAGLQFPVGRVHRLLRKGHYAE

- ▶ fragmentation table for charge state 1+
- ▶ specType=etd
- ▶ score=48.84
- ▶ F113279.dat
- ▶ query=q45951.p1
- ▶ precursor=746.428560
- ▶ chargePrecursor=6
- ▶ itol=0.5

| AA | c  | y               | #±1             | #±2             | z               | AA              |       |
|----|----|-----------------|-----------------|-----------------|-----------------|-----------------|-------|
| S  | 1  | 147.076         | 4473.525        | 4487.400        | 4.800           | 4485.480        | S[1]  |
| G  | 2  | 204.098         | 4344.473        | 4328.454        | 4.000           | 4327.446        | G[2]  |
| R  | 3  | <b>360.199</b>  | 4287.461        | 4271.432        | 4272.440        | 4270.425        | R[3]  |
| G  | 4  | <b>417.220</b>  | 4131.350        | 4115.331        | 4116.339        | 4114.323        | G[4]  |
| K  | 5  | <b>545.315</b>  | 4074.329        | 4058.310        | 4059.318        | 4057.302        | K[5]  |
| T  | 6  | <b>646.363</b>  | 3946.234        | 3930.215        | 3931.223        | 3929.207        | T[6]  |
| G  | 7  | <b>703.385</b>  | 3845.199        | 3829.187        | 3830.178        | 3829.159        | G[7]  |
| G  | 8  | <b>760.406</b>  | 3788.164        | 3772.146        | 3773.153        | 3771.138        | G[8]  |
| K  | 9  | 888.501         | 3731.143        | 3715.124        | 3716.132        | 3714.116        | K[9]  |
| A  | 10 | <b>959.538</b>  | 3603.048        | 3587.029        | 3588.037        | 3586.021        | A[10] |
| R  | 11 | <b>1115.639</b> | 3532.011        | 3515.992        | 3517.000        | 3514.984        | R[11] |
| A  | 12 | <b>1186.676</b> | 3378.919        | 3362.901        | 3363.899        | 3362.883        | A[12] |
| K  | 13 | 1314.771        | 3304.873        | 3288.854        | 3289.862        | 3287.846        | K[13] |
| A  | 14 | 1385.808        | 3178.778        | 3162.759        | 3163.767        | 3161.751        | A[14] |
| K  | 15 | 1513.903        | 3105.741        | 3089.722        | 3090.730        | 3088.714        | K[15] |
| S  | 16 | 1600.935        | 2977.646        | 2961.627        | 2962.635        | 2960.619        | S[16] |
| R  | 17 | 1757.027        | 2890.614        | 2874.595        | 2875.603        | 2873.587        | R[17] |
| S  | 18 | 1844.059        | 2754.512        | 2738.493        | 2739.502        | 2737.486        | S[18] |
| S  | 19 | 1931.101        | 2647.480        | 2631.462        | 2632.470        | 2630.454        | S[19] |
| R  | 20 | 2087.202        | 2560.448        | 2544.430        | 2545.437        | 2543.421        | R[20] |
| A  | 21 | 2138.239        | 2404.347        | 2388.329        | 2389.336        | 2387.321        | A[21] |
| G  | 22 | 2215.260        | 2333.310        | 2317.291        | 2318.299        | 2316.284        | G[22] |
| L  | 23 | 2325.344        | 2278.289        | 2262.270        | 2263.278        | 2261.262        | L[23] |
| Q  | 24 | 2456.403        | 2163.255        | 2147.236        | 2148.244        | 2146.229        | Q[24] |
| F  | 25 | 2603.471        | 2035.148        | 2019.129        | 2020.136        | 2018.120        | F[25] |
| F  | 26 | 2700.524        | 1888.078        | 1872.059        | 1873.067        | 1871.051        | F[26] |
| V  | 27 | 2799.592        | 1791.025        | 1775.006        | 1776.014        | 1774.998        | V[27] |
| G  | 28 | 2856.614        | 1691.995        | 1675.976        | 1676.984        | 1674.968        | G[28] |
| R  | 29 | 3012.115        | 1534.935        | 1518.916        | <b>1619.924</b> | 1517.900        | R[29] |
| V  | 30 | 3111.283        | 1478.874        | 1462.855        | 1463.863        | 1461.847        | V[30] |
| H  | 31 | 3246.842        | 1378.795        | <b>1363.747</b> | 1364.755        | 1362.739        | H[31] |
| R  | 32 | 3404.943        | 1242.707        | <b>1226.668</b> | 1227.676        | 1225.660        | R[32] |
| L  | 33 | 3518.028        | <b>1086.605</b> | 1070.587        | 1071.595        | <b>1069.579</b> | L[33] |
| L  | 34 | 3633.112        | 973.521         | 957.502         | 958.510         | 956.494         | L[34] |
| R  | 35 | 3707.213        | 869.437         | <b>844.419</b>  | 845.426         | 843.411         | R[35] |
| K  | 36 | 3915.308        | 704.338         | 688.319         | 689.327         | 687.311         | K[36] |
| G  | 37 | 3972.329        | 676.241         | 660.223         | 661.230         | 659.215         | G[37] |
| H  | 38 | 4109.388        | 619.220         | 603.201         | 604.209         | 602.193         | H[38] |
| V  | 39 | 4272.451        | 582.161         | 566.142         | 567.150         | 565.134         | V[39] |
| A  | 40 | 4343.489        | 519.098         | 503.079         | 504.087         | 502.071         | A[40] |
| E  | 41 | 4472.531        | 148.060         | 132.042         | 133.050         | 131.034         | E[41] |

# sp | P27661 | H2AX\_MOUSE

[Acetyl]SGRGKTGGKARAKAKSRSSRAGLQFPVGRVHRLLRKGGHYAE

- ▶ fragmentation table for charge state 2+
- ▶ specType=etd
- ▶ score=48.84
- ▶ F113279.dat
- ▶ query=q45951.p1
- ▶ precursor=746.428560
- ▶ chargePrecursor=6
- ▶ itol=0.5

| AA | c  | y               | z+1            | z+2             | z               | AA              |       |
|----|----|-----------------|----------------|-----------------|-----------------|-----------------|-------|
| S  | 1  | 74.042          | 2737.361       | 2729.257        | 0.504           | 2728.740        | S[41] |
| G  | 2  | 102.553         | 2172.740       | 2164.731        | 0.504           | 2164.227        | G[40] |
| R  | 3  | 180.603         | 2144.929       | 2138.220        | 2138.724        | 2135.718        | R[39] |
| G  | 4  | 209.114         | 2096.179       | 2058.169        | 2058.673        | 2057.669        | G[38] |
| K  | 5  | 273.161         | 2037.668       | 2029.659        | 2030.162        | 2029.155        | K[37] |
| T  | 6  | 313.688         | 1973.620       | <b>1965.611</b> | 1966.114        | <b>1965.107</b> | T[36] |
| G  | 7  | 352.198         | 1923.997       | 1915.987        | <b>1915.591</b> | 1914.585        | G[35] |
| G  | 8  | 380.707         | 1894.586       | 1886.576        | <b>1887.080</b> | 1886.073        | G[34] |
| K  | 9  | 444.754         | 1866.075       | 1858.066        | 1858.570        | <b>1857.562</b> | K[33] |
| A  | 10 | 480.273         | 1802.028       | 1794.018        | 1794.522        | 1793.514        | A[32] |
| R  | 11 | <b>558.323</b>  | 1786.509       | 1778.500        | <b>1759.064</b> | 1757.066        | R[31] |
| A  | 12 | <b>593.842</b>  | 1698.459       | 1690.449        | <b>1680.953</b> | 1679.945        | A[30] |
| R  | 13 | <b>657.889</b>  | 1652.940       | 1644.931        | <b>1645.435</b> | 1644.427        | R[29] |
| A  | 14 | 693.408         | 1588.892       | 1580.883        | 1581.387        | 1580.379        | A[28] |
| K  | 15 | <b>757.455</b>  | 1503.374       | 1545.365        | 1545.868        | 1544.861        | K[27] |
| S  | 16 | <b>800.971</b>  | 1489.335       | <b>1481.317</b> | <b>1481.821</b> | 1480.813        | S[26] |
| R  | 17 | 879.622         | 1445.810       | 1437.801        | 1438.305        | 1437.297        | R[25] |
| S  | 18 | <b>922.538</b>  | 1309.760       | <b>1359.750</b> | <b>1360.254</b> | 1359.246        | S[24] |
| S  | 19 | <b>966.054</b>  | 1324.244       | <b>1316.234</b> | 1316.738        | <b>1315.731</b> | S[23] |
| R  | 20 | <b>1044.104</b> | 1380.728       | 1272.719        | 1273.222        | 1272.215        | R[22] |
| A  | 21 | 1079.623        | 1202.677       | 1194.668        | 1195.172        | 1194.164        | A[21] |
| G  | 22 | 1108.134        | 1167.159       | 1159.149        | 1159.653        | 1158.645        | G[20] |
| L  | 23 | <b>1164.676</b> | 1138.640       | 1130.630        | 1131.134        | 1130.126        | L[19] |
| G  | 24 | <b>1228.705</b> | 1092.106       | 1074.097        | 1074.601        | 1073.593        | G[18] |
| F  | 25 | 1402.239        | 1018.077       | <b>1010.067</b> | <b>1010.571</b> | 1009.563        | F[17] |
| P  | 26 | 1350.766        | <b>944.542</b> | 938.533         | 937.037         | 936.029         | P[16] |
| V  | 27 | <b>1400.300</b> | <b>896.016</b> | <b>888.007</b>  | 888.511         | <b>887.503</b>  | V[15] |
| G  | 28 | <b>1428.811</b> | 846.482        | <b>838.473</b>  | <b>838.976</b>  | 837.969         | G[14] |
| D  | 29 | 1506.861        | 817.971        | <b>809.962</b>  | <b>810.466</b>  | 809.458         | D[13] |
| L  | 30 | 1596.366        | 739.921        | 731.911         | 732.415         | 731.407         | L[12] |
| H  | 31 | <b>1624.925</b> | 690.385        | <b>682.377</b>  | <b>682.881</b>  | 681.873         | H[11] |
| R  | 32 | 1702.975        | 611.857        | <b>613.848</b>  | <b>614.351</b>  | 613.344         | R[10] |
| L  | 33 | 1759.517        | 543.808        | 535.797         | 536.301         | 535.293         | L[9]  |
| L  | 34 | 1816.059        | 487.264        | 479.255         | 479.759         | 478.751         | L[8]  |
| R  | 35 | 1884.110        | 438.722        | 427.713         | 423.217         | 422.209         | R[7]  |
| K  | 36 | 1958.157        | 352.672        | 344.662         | 345.166         | 344.158         | K[6]  |
| G  | 37 | 1986.668        | 288.624        | 280.615         | 281.119         | 280.111         | G[5]  |
| H  | 38 | 2065.198        | 260.114        | 252.104         | 252.608         | 251.600         | H[4]  |
| V  | 39 | 2136.729        | 191.984        | 183.975         | 184.079         | 183.071         | V[3]  |
| A  | 40 | 2172.248        | 110.052        | 102.043         | 102.547         | 101.539         | A[2]  |
| E  | 41 | 2236.789        | 74.534         | 66.524          | 67.028          | 66.021          | E[1]  |

# sp | P27661 | H2AX\_MOUSE

[Acetyl]SGRGKTGGKARAKAKSRSSRAGLQFPVGRVHRLLRKGGHYAE

- ▶ fragmentation table for charge state 3+
- ▶ specType=etd
- ▶ score=48.84
- ▶ F113279.dat
- ▶ query=q45951.p1
- ▶ precursor=746.428560
- ▶ chargePrecursor=6
- ▶ itol=0.5

| AA | c  | y               | #±1             | #±2             | z               | AA              |       |
|----|----|-----------------|-----------------|-----------------|-----------------|-----------------|-------|
| S  | 1  | 49.697          | 1391.843        | 1488.505        | 0.672           | 1489.167        | S[1]  |
| G  | 2  | 66.704          | 1448.826        | 1443.480        | 0.672           | 1443.154        | G[2]  |
| R  | 3  | 130.718         | 1420.822        | 1424.482        | 1424.818        | 1424.146        | R[3]  |
| G  | 4  | 139.745         | 1377.788        | 1372.449        | 1372.785        | 1372.113        | G[38] |
| K  | 5  | 182.443         | 1338.781        | 1351.441        | <b>1353.777</b> | 1351.105        | K[37] |
| T  | 6  | 238.126         | <b>1316.083</b> | 1310.743        | <b>1311.679</b> | 1310.401        | T[36] |
| G  | 7  | 251.133         | 1298.836        | 1277.081        | <b>1277.397</b> | 1276.725        | G[35] |
| G  | 8  | 254.140         | 1263.901        | <b>1258.053</b> | <b>1258.389</b> | 1257.717        | G[34] |
| K  | 9  | 296.839         | 1244.388        | 1239.046        | 1239.382        | 1238.710        | K[33] |
| A  | 10 | 320.518         | 1201.688        | <b>1196.348</b> | 1196.684        | <b>1196.012</b> | A[32] |
| R  | 11 | 372.551         | 1178.008        | 1172.668        | 1173.004        | 1172.333        | R[31] |
| A  | 12 | 389.230         | 1138.919        | <b>1123.635</b> | <b>1120.971</b> | <b>1120.299</b> | A[30] |
| K  | 13 | 438.920         | 1102.296        | <b>1096.956</b> | <b>1097.292</b> | <b>1096.620</b> | K[29] |
| A  | 14 | 482.608         | 1059.597        | 1054.258        | <b>1054.594</b> | 1053.922        | A[28] |
| K  | 15 | 509.306         | 1035.918        | <b>1030.579</b> | <b>1030.915</b> | <b>1030.243</b> | K[27] |
| S  | 16 | 534.317         | 993.220         | 987.880         | <b>988.216</b>  | 987.545         | S[26] |
| R  | 17 | 586.250         | 984.200         | <b>958.870</b>  | <b>958.206</b>  | 958.534         | R[25] |
| S  | 18 | 618.981         | 912.179         | 906.839         | 907.179         | 906.507         | S[24] |
| S  | 19 | 644.372         | <b>883.165</b>  | <b>877.825</b>  | <b>878.161</b>  | 877.489         | S[23] |
| R  | 20 | 696.405         | 854.154         | 848.815         | 849.151         | 848.479         | R[22] |
| A  | 21 | 728.084         | 802.121         | 796.781         | 797.117         | 796.445         | A[21] |
| G  | 22 | <b>739.892</b>  | 778.442         | 773.102         | 773.438         | 772.766         | G[20] |
| L  | 23 | 770.788         | 759.431         | 754.091         | 754.431         | 753.759         | L[19] |
| G  | 24 | <b>819.472</b>  | <b>721.740</b>  | 716.400         | 716.736         | 716.064         | G[18] |
| F  | 25 | 868.495         | 679.054         | 673.714         | 674.050         | 673.378         | F[17] |
| F  | 26 | 900.946         | 630.031         | 624.691         | 625.027         | 624.355         | F[16] |
| V  | 27 | <b>933.869</b>  | 597.680         | 592.340         | 592.676         | 592.004         | V[15] |
| G  | 28 | <b>952.876</b>  | 556.051         | 550.711         | 551.051         | <b>550.381</b>  | G[14] |
| K  | 29 | 1004.919        | <b>545.650</b>  | 540.310         | 540.646         | 539.974         | K[13] |
| V  | 30 | 1037.933        | 491.616         | 486.276         | 486.613         | 485.941         | V[12] |
| H  | 31 | <b>1083.619</b> | 460.593         | 455.254         | 455.590         | 454.918         | H[11] |
| R  | 32 | 1135.653        | 414.907         | 409.567         | 409.903         | 409.232         | R[10] |
| L  | 33 | <b>1173.347</b> | 362.873         | 357.534         | 357.870         | 357.198         | L[9]  |
| L  | 34 | 1211.043        | 326.179         | 320.839         | 321.179         | 320.507         | L[8]  |
| R  | 35 | 1253.076        | 287.484         | 282.144         | 282.480         | 281.808         | R[7]  |
| K  | 36 | 1305.774        | 235.460         | 230.121         | 230.447         | 229.775         | K[6]  |
| G  | 37 | 1364.781        | 192.752         | 187.412         | 187.748         | 187.076         | G[5]  |
| H  | 38 | 1370.468        | 173.745         | 168.405         | 168.741         | 168.069         | H[4]  |
| V  | 39 | 1424.822        | 128.098         | 122.758         | 123.095         | 122.423         | V[3]  |
| A  | 40 | 1448.501        | 73.304          | 67.964          | 68.304          | 67.632          | A[2]  |
| E  | 41 | 1491.515        | 50.025          | 44.685          | 45.021          | 44.349          | E[1]  |

# sp | P27661 | H2AX\_MOUSE

[Acetyl]SGRGKTGGKARAKAKSRSSRAGLQFPVGRVHRLLRKGHYAE

- ▶ fragmentation table for charge state 4+
- ▶ specType=etd
- ▶ score=48.84
- ▶ F113279.dat
- ▶ query=q45951.p1
- ▶ precursor=746.428560
- ▶ chargePrecursor=6
- ▶ itol=0.5

| AA    | c               | y               | z+1             | z+2             | z              | AA    |
|-------|-----------------|-----------------|-----------------|-----------------|----------------|-------|
| S[1]  | 37.525          | <b>1119.134</b> | <b>1115.130</b> | 0.755           | 1114.879       | S[41] |
| G[2]  | 51.780          | <b>1086.074</b> | 1082.869        | 0.755           | 1082.611       | G[40] |
| R[3]  | 90.805          | <b>1072.618</b> | <b>1068.614</b> | <b>1068.866</b> | 1068.361       | R[39] |
| G[4]  | 105.061         | 1033.593        | 1029.588        | 1029.840        | 1029.339       | G[38] |
| K[5]  | 137.684         | 1019.336        | 1015.333        | <b>1015.585</b> | 1015.081       | K[37] |
| T[6]  | 182.388         | 987.316         | <b>983.309</b>  | <b>983.561</b>  | <b>983.057</b> | T[36] |
| G[7]  | 176.692         | 982.052         | 978.047         | 978.299         | 977.797        | G[35] |
| G[8]  | 190.857         | 947.797         | 943.792         | <b>944.044</b>  | 943.540        | G[34] |
| K[9]  | 222.881         | 933.541         | 929.537         | 929.789         | 929.287        | K[33] |
| A[10] | 240.640         | <b>901.517</b>  | 897.513         | 897.765         | 897.261        | A[32] |
| R[11] | 279.665         | <b>883.798</b>  | 879.793         | 880.005         | 879.502        | R[31] |
| A[12] | 297.425         | <b>844.733</b>  | 840.728         | 840.980         | 840.476        | A[30] |
| R[13] | 329.448         | 825.974         | 822.969         | 823.221         | 822.717        | R[29] |
| A[14] | 347.208         | 794.950         | 790.945         | 791.197         | 790.693        | A[28] |
| K[15] | 379.231         | 777.191         | 773.186         | 773.438         | 772.934        | K[27] |
| S[16] | <b>400.989</b>  | 745.167         | 741.162         | 741.414         | 740.910        | S[26] |
| R[17] | 440.215         | 721.400         | 717.395         | 717.647         | 717.142        | R[25] |
| S[18] | 481.713         | 684.384         | 680.379         | 680.631         | 680.127        | S[24] |
| S[19] | 483.531         | 662.626         | <b>658.621</b>  | 658.873         | <b>658.369</b> | S[23] |
| R[20] | 522.956         | 640.868         | 636.863         | 637.115         | 636.611        | R[22] |
| A[21] | 540.315         | 601.842         | 597.837         | 598.090         | 597.586        | A[21] |
| G[22] | 554.571         | 584.083         | 580.078         | 580.330         | 579.826        | G[20] |
| L[23] | 582.842         | 569.826         | 565.821         | 566.073         | 565.571        | L[19] |
| Q[24] | 614.858         | 541.557         | 537.552         | 537.804         | 537.300        | Q[19] |
| F[25] | 651.623         | 509.942         | 505.937         | 506.189         | 505.685        | F[17] |
| P[26] | 675.888         | 472.775         | 468.770         | 469.022         | 468.518        | P[16] |
| V[27] | 700.654         | 448.512         | 444.507         | 444.759         | 444.255        | V[15] |
| G[28] | 714.909         | 423.745         | 419.740         | 419.992         | 419.488        | G[14] |
| D[29] | 753.934         | 400.488         | 396.483         | 396.735         | 396.231        | D[12] |
| V[30] | 778.701         | 370.489         | 366.484         | 366.736         | 366.231        | V[12] |
| H[31] | 812.966         | 345.697         | 341.692         | 341.944         | 341.440        | H[11] |
| R[32] | 851.991         | 311.432         | 307.427         | 307.679         | 307.175        | R[10] |
| L[33] | <b>880.262</b>  | 272.407         | 268.402         | 268.654         | 268.150        | L[9]  |
| L[34] | 908.533         | 244.136         | 240.131         | 240.383         | 239.879        | L[8]  |
| H[35] | 947.559         | 215.865         | 211.860         | 212.112         | 211.608        | H[7]  |
| K[36] | 979.582         | 178.940         | 172.935         | 173.087         | 172.583        | K[6]  |
| G[37] | <b>993.838</b>  | 144.816         | 140.811         | 141.063         | 140.559        | G[5]  |
| H[38] | <b>1028.102</b> | 130.560         | 126.555         | 126.808         | 126.304        | H[4]  |
| V[39] | <b>1068.868</b> | 96.290          | 92.291          | 92.543          | 92.039         | V[3]  |
| A[40] | <b>1086.628</b> | 55.530          | 51.525          | 51.777          | 51.273         | A[2]  |
| E[41] | 1138.888        | 37.771          | 33.766          | 34.018          | 33.514         | E[1]  |



# sp | P27661 | H2AX\_MOUSE

[Acetyl]SGRGKTGGKARAKAKSRSSRAGLQFPVGRVHLLLRKGHYAE

- ▶ fragmentation table for charge state 5+
- ▶ specType=etd
- ▶ score=48.84
- ▶ F113279.dat
- ▶ query=q45951.p1
- ▶ precursor=746.428560
- ▶ chargePrecursor=6
- ▶ itol=0.5

| AA    | c              | y              | z+1            | z#2            | z              | AA    |
|-------|----------------|----------------|----------------|----------------|----------------|-------|
| S[1]  | 30.221         | 395.509        | <b>892.305</b> | 0.806          | <b>892.104</b> | S[41] |
| G[2]  | 41.625         | 500.700        | 806.497        | 0.806          | 806.295        | G[40] |
| R[3]  | 72.846         | 858.296        | 855.092        | 855.294        | 854.891        | R[39] |
| G[4]  | 84.250         | 827.076        | 823.872        | 824.074        | 823.671        | G[38] |
| K[5]  | 109.869        | 815.672        | 812.468        | 812.669        | 812.268        | K[37] |
| T[6]  | 130.078        | 790.053        | 786.849        | 787.050        | 786.647        | T[36] |
| G[7]  | 141.483        | 769.843        | 766.639        | 766.841        | 766.438        | G[35] |
| G[8]  | 152.887        | 758.439        | 755.235        | 755.437        | 755.033        | G[34] |
| K[9]  | 178.506        | 737.034        | 743.831        | 744.032        | 743.629        | K[33] |
| A[10] | 192.713        | <b>721.415</b> | 718.212        | 718.413        | 718.010        | A[32] |
| R[11] | 223.934        | 707.208        | 704.004        | 704.206        | <b>703.803</b> | R[31] |
| A[12] | 238.141        | 675.988        | 672.784        | 672.986        | 672.582        | A[30] |
| K[13] | 263.760        | 661.780        | <b>658.577</b> | <b>658.778</b> | <b>658.375</b> | K[29] |
| A[14] | 277.968        | 636.161        | 632.958        | 633.159        | 632.756        | A[28] |
| K[15] | 303.586        | 621.954        | 618.750        | 618.952        | 618.549        | K[27] |
| S[16] | 320.993        | 596.335        | 593.131        | 593.333        | 592.930        | S[26] |
| R[17] | 352.213        | 578.929        | 575.725        | 575.926        | 575.523        | R[25] |
| S[18] | 389.620        | 527.708        | 544.503        | 544.706        | 544.303        | S[24] |
| S[19] | 397.028        | 530.302        | 527.098        | 527.300        | 526.897        | S[23] |
| R[20] | 418.246        | 512.895        | 509.692        | 509.893        | 509.490        | R[22] |
| A[21] | 432.454        | 481.675        | 478.472        | 478.673        | 478.270        | A[21] |
| G[22] | 443.858        | 467.468        | 464.264        | 464.466        | 464.063        | G[20] |
| L[23] | 466.475        | 456.064        | 452.860        | 453.061        | 452.658        | L[19] |
| Q[24] | 492.089        | 433.447        | 430.243        | 430.445        | 430.041        | Q[18] |
| F[25] | 521.500        | 407.835        | 404.631        | 404.833        | 404.430        | F[17] |
| P[26] | 540.011        | 378.421        | 375.218        | 375.419        | 375.016        | P[16] |
| V[27] | 560.724        | 359.011        | 355.807        | 356.009        | 355.605        | V[15] |
| G[28] | 572.129        | 339.191        | 335.987        | 336.189        | 335.782        | G[14] |
| R[29] | 603.349        | 327.793        | 324.589        | 324.791        | 324.388        | R[13] |
| V[30] | 623.163        | 296.573        | 293.369        | 293.570        | 293.167        | V[12] |
| H[31] | 650.574        | 276.759        | 273.555        | 273.757        | 273.354        | H[11] |
| R[32] | 681.795        | 249.347        | 246.143        | 246.345        | 245.942        | R[10] |
| L[33] | 704.411        | 218.127        | 214.923        | 215.125        | 214.722        | L[9]  |
| L[34] | 727.028        | 195.510        | 192.306        | 192.508        | 192.105        | L[8]  |
| R[35] | <b>758.248</b> | 172.893        | 169.689        | 169.891        | 169.488        | R[7]  |
| K[36] | 783.867        | 141.673        | 138.469        | 138.671        | 138.268        | K[6]  |
| G[37] | 795.272        | 116.054        | 112.850        | 113.052        | 112.649        | G[5]  |
| H[38] | 822.683        | 104.650        | 101.446        | 101.648        | 101.244        | H[4]  |
| V[39] | 855.296        | 77.238         | 74.034         | 74.236         | 73.833         | V[3]  |
| A[40] | 869.504        | 44.625         | 41.422         | 41.623         | 41.220         | A[2]  |
| E[41] | 895.312        | 30.418         | 27.214         | 27.416         | 27.013         | E[1]  |



# sp | P27661 | H2AX\_MOUSE

[Acetyl]SGRGKTGGKARAKAKSRSSRAGLQFPVGRVHRLLRKGHYAE

- ▶ fragmentation table for charge state 1+
- ▶ specType=etd
- ▶ score=56.94
- ▶ F113279.dat
- ▶ query=q45955.p1
- ▶ precursor=895.513320
- ▶ chargePrecursor=5
- ▶ itol=0.5

| AA   | c               | y        | z+1      | z+2             | z               | AA   |
|------|-----------------|----------|----------|-----------------|-----------------|------|
| S 1  | 147.076         | 4473.515 | 4467.496 | 0.000           | 4456.489        | S 41 |
| G 2  | 304.098         | 4344.473 | 4328.454 | 0.000           | 4327.446        | G 40 |
| R 3  | <b>360.199</b>  | 4207.451 | 4271.432 | 4272.440        | 4270.423        | R 39 |
| G 4  | <b>417.220</b>  | 4131.350 | 4115.331 | 4116.339        | 4114.323        | G 38 |
| K 5  | <b>545.315</b>  | 4074.329 | 4058.310 | 4059.318        | 4057.302        | K 37 |
| T 6  | <b>646.363</b>  | 3946.234 | 3930.215 | 3931.223        | 3929.207        | T 36 |
| G 7  | <b>703.385</b>  | 3845.186 | 3829.167 | 3830.175        | 3828.159        | G 35 |
| G 8  | <b>760.406</b>  | 3788.164 | 3772.146 | 3773.153        | 3771.138        | G 34 |
| K 9  | 888.501         | 3731.143 | 3715.124 | 3716.132        | 3714.116        | K 33 |
| A 10 | 955.538         | 3603.048 | 3587.029 | 3588.037        | 3586.021        | A 32 |
| R 11 | <b>1115.639</b> | 3532.011 | 3515.992 | 3517.000        | 3514.984        | R 31 |
| A 12 | <b>1186.676</b> | 3376.930 | 3359.911 | 3360.919        | 3358.903        | A 30 |
| R 13 | 1353.698        | 3304.873 | 3288.854 | 3289.862        | 3287.846        | R 29 |
| A 14 | 1385.808        | 3176.778 | 3160.759 | 3161.767        | 3159.751        | A 28 |
| K 15 | <b>1513.903</b> | 3105.741 | 3089.722 | 3090.730        | 3088.714        | K 27 |
| S 16 | <b>1600.935</b> | 2977.646 | 2961.627 | 2962.635        | 2960.619        | S 26 |
| R 17 | 1757.037        | 2890.614 | 2874.595 | 2875.603        | 2873.587        | R 25 |
| S 18 | 1844.069        | 2734.512 | 2718.494 | 2719.502        | 2717.486        | S 24 |
| S 19 | 1931.101        | 2647.480 | 2631.462 | 2632.470        | 2630.454        | S 23 |
| R 20 | 2087.202        | 2560.448 | 2544.430 | 2545.437        | 2543.421        | R 22 |
| A 21 | 2158.239        | 2404.347 | 2388.329 | 2389.336        | 2387.321        | A 21 |
| G 22 | 2215.260        | 2333.310 | 2317.291 | 2318.299        | 2316.284        | G 20 |
| L 23 | 2328.344        | 2276.289 | 2260.270 | 2261.278        | 2259.262        | L 19 |
| G 24 | 2459.403        | 2183.256 | 2167.238 | 2168.246        | 2166.231        | G 18 |
| F 25 | 2603.471        | 2036.146 | 2019.127 | 2020.135        | 2018.120        | F 17 |
| P 26 | 2700.524        | 1888.078 | 1872.059 | 1873.067        | 1871.051        | P 16 |
| V 27 | 2799.592        | 1791.025 | 1775.006 | 1776.014        | 1774.998        | V 15 |
| G 28 | 2856.614        | 1691.956 | 1675.938 | 1676.946        | 1674.930        | G 14 |
| R 29 | 3012.715        | 1634.935 | 1618.916 | <b>1619.924</b> | 1617.908        | R 13 |
| V 30 | 3113.783        | 1476.834 | 1460.815 | 1461.823        | 1460.807        | V 12 |
| H 31 | 3248.842        | 1379.765 | 1363.747 | 1364.755        | 1362.739        | H 11 |
| R 32 | 3404.943        | 1242.707 | 1226.688 | 1227.696        | 1225.680        | R 10 |
| L 33 | 3518.026        | 1086.605 | 1070.587 | 1071.595        | <b>1069.579</b> | L 9  |
| L 34 | 3611.112        | 973.521  | 957.503  | <b>958.510</b>  | 956.495         | L 8  |
| R 35 | 3787.213        | 860.437  | 844.419  | <b>845.426</b>  | 843.411         | R 7  |
| K 36 | 3819.268        | 754.336  | 738.317  | 739.325         | 737.310         | K 6  |
| G 37 | 3972.329        | 576.241  | 560.221  | 561.230         | 559.215         | G 5  |
| H 38 | 4109.388        | 519.220  | 503.201  | 504.209         | 502.193         | H 4  |
| V 39 | 4272.451        | 382.161  | 366.142  | 367.150         | 365.134         | V 3  |
| A 40 | 4343.489        | 219.098  | 203.079  | 204.087         | 202.071         | A 2  |
| E 41 | 4472.531        | 148.060  | 132.042  | 133.050         | 131.034         | E 1  |

# sp | P27661 | H2AX\_MOUSE

[Acetyl]SGRGKTGGKARAKAKSRSSRAGLQFPVGRVHRLLRKGHYAE

- ▶ fragmentation table for charge state 2+
- ▶ specType=etd
- ▶ score=56.94
- ▶ F113279.dat
- ▶ query=q45955.p1
- ▶ precursor=895.513320
- ▶ chargePrecursor=5
- ▶ itol=0.5

| AA | c  | y               | #s1             | #s2             | z               | AA              |       |
|----|----|-----------------|-----------------|-----------------|-----------------|-----------------|-------|
| S  | 1  | 74.062          | 2237.241        | 2229.255        | 8.804           | 2238.746        | S[1]  |
| G  | 2  | 102.553         | 2172.740        | 2164.731        | 0.504           | 2164.277        | G[2]  |
| R  | 3  | 180.603         | 2144.229        | 2136.230        | 2136.724        | 2135.710        | R[3]  |
| G  | 4  | 209.114         | 2096.179        | 2088.169        | 2088.673        | 2087.665        | G[4]  |
| K  | 5  | 273.161         | 2037.668        | 2029.659        | 2030.162        | 2029.155        | K[5]  |
| T  | 6  | 323.695         | 1973.620        | <b>1965.611</b> | <b>1966.115</b> | 1965.107        | T[6]  |
| G  | 7  | 352.196         | 1925.091        | <b>1915.087</b> |                 | <b>1914.583</b> | G[7]  |
| G  | 8  | 380.707         | 1874.588        | 1866.576        | <b>1867.080</b> | 1866.073        | G[8]  |
| K  | 9  | 444.754         | 1866.075        | <b>1858.066</b> | <b>1858.570</b> | 1857.562        | K[9]  |
| A  | 10 | 480.273         | <b>1802.028</b> | 1794.018        | <b>1794.522</b> | 1793.514        | A[10] |
| R  | 11 | 558.223         | 1766.509        | <b>1758.500</b> | <b>1759.004</b> | 1757.996        | R[11] |
| A  | 12 | 603.692         | 1688.959        | <b>1680.949</b> | 1670.937        | <b>1670.945</b> | A[12] |
| K  | 13 | <b>657.889</b>  | 1652.940        | <b>1644.931</b> | <b>1645.435</b> | 1644.427        | K[13] |
| A  | 14 | 693.458         | 1588.902        | <b>1580.893</b> | <b>1581.397</b> | 1580.379        | A[14] |
| K  | 15 | <b>757.455</b>  | 1553.374        | <b>1545.365</b> | <b>1545.868</b> | 1544.861        | K[15] |
| S  | 16 | 805.971         | 1489.320        | 1481.317        | <b>1481.821</b> | 1480.813        | S[16] |
| R  | 17 | 879.672         | 1445.810        | <b>1437.801</b> | <b>1438.305</b> | 1437.297        | R[17] |
| S  | 18 | <b>927.538</b>  | 1387.760        | <b>1379.750</b> | <b>1380.254</b> | 1379.246        | S[18] |
| S  | 19 | <b>966.054</b>  | 1324.244        | <b>1316.234</b> | 1316.738        | <b>1315.731</b> | S[19] |
| R  | 20 | 1044.104        | 1280.728        | <b>1272.718</b> | <b>1273.222</b> | 1272.215        | R[20] |
| A  | 21 | 1079.623        | 1202.677        | 1194.668        | 1195.172        | 1194.164        | A[21] |
| G  | 22 | <b>1108.134</b> | 1167.159        | 1159.149        | 1159.653        | 1158.645        | G[22] |
| L  | 23 | 1187.678        | 1138.649        | 1130.639        | 1131.143        | 1130.135        | L[23] |
| G  | 24 | <b>1228.705</b> | 1082.156        | 1074.147        | 1074.651        | <b>1073.593</b> | G[24] |
| F  | 25 | 1302.239        | 1018.077        | <b>1010.067</b> | <b>1010.571</b> | 1009.563        | F[25] |
| F  | 26 | 1350.766        | 944.543         | 936.533         | 937.037         | 936.029         | F[26] |
| V  | 27 | <b>1400.300</b> | 896.016         | 888.007         | 888.511         | 887.503         | V[27] |
| G  | 28 | 1438.811        | 846.492         | 838.473         | 838.977         | 837.969         | G[28] |
| R  | 29 | 1508.663        | 811.911         | 803.902         | <b>810.406</b>  | 809.400         | R[29] |
| V  | 30 | <b>1556.395</b> | 759.021         | 751.011         | 752.015         | 751.007         | V[30] |
| H  | 31 | <b>1624.925</b> | 690.388         | 682.377         | 682.881         | 681.873         | H[31] |
| R  | 32 | 1702.975        | 621.857         | 613.848         | 614.351         | 613.344         | R[32] |
| L  | 33 | 1769.517        | 643.808         | 635.797         | 636.301         | 635.293         | L[33] |
| L  | 34 | 1818.668        | 482.264         | 474.253         | 474.757         | 473.751         | L[34] |
| R  | 35 | 1894.110        | 433.722         | 425.713         | 426.217         | 425.210         | R[35] |
| K  | 36 | 1958.157        | 352.672         | 344.662         | 345.166         | 344.158         | K[36] |
| G  | 37 | 1988.668        | 288.624         | 280.615         | 281.119         | 280.111         | G[37] |
| H  | 38 | 2055.198        | 260.114         | 252.104         | 252.608         | 251.600         | H[38] |
| V  | 39 | 2136.729        | 191.584         | 183.575         | 184.079         | 183.071         | V[39] |
| A  | 40 | 2172.246        | 110.054         | 102.045         | 102.549         | 101.541         | A[40] |
| E  | 41 | 2238.769        | 74.534          | 66.524          | 67.028          | 66.021          | E[41] |

# sp | P27661 | H2AX\_MOUSE

[Acetyl]SGRGKTGGKARAKAKSRSSRAGLQFPVGRVHRLLRKGGHYAE

- ▶ fragmentation table for charge state 3+
- ▶ specType=etd
- ▶ score=56.94
- ▶ F113279.dat
- ▶ query=q45955.p1
- ▶ precursor=895.513320
- ▶ chargePrecursor=5
- ▶ itol=0.5

| AA | c  | y               | #s1             | #s2             | z               | AA              |       |
|----|----|-----------------|-----------------|-----------------|-----------------|-----------------|-------|
| S  | 1  | 493.697         | <b>1491.843</b> | <b>1486.504</b> | 0.872           | 1488.167        | S[1]  |
| G  | 2  | 66.704          | 1448.825        | 1443.487        | 0.672           | 1443.154        | G[2]  |
| R  | 3  | 1307.748        | <b>1429.822</b> | 1424.482        | <b>1424.818</b> | 1424.146        | R[3]  |
| G  | 4  | 139.745         | 1377.769        | <b>1372.449</b> | <b>1372.785</b> | 1372.111        | G[38] |
| K  | 5  | 182.443         | 1338.781        | 1333.441        | <b>1353.777</b> | 1353.105        | K[37] |
| T  | 6  | 236.126         | <b>1316.083</b> | 1310.743        | 1311.079        | 1310.401        | T[36] |
| G  | 7  | 255.133         | 1296.436        | 1291.096        | 1291.397        | 1290.725        | G[35] |
| G  | 8  | 254.140         | 1263.931        | <b>1258.053</b> | 1258.389        | <b>1257.717</b> | G[34] |
| K  | 9  | 296.639         | 1244.388        | 1239.048        | 1239.382        | 1238.710        | K[33] |
| A  | 10 | 320.518         | 1201.688        | 1196.348        | 1196.684        | 1196.012        | A[32] |
| R  | 11 | 372.551         | 1178.008        | <b>1172.669</b> | <b>1173.005</b> | 1172.333        | R[31] |
| A  | 12 | 389.230         | 1138.919        | 1133.579        | 1133.914        | 1133.242        | A[30] |
| K  | 13 | 438.929         | 1102.296        | <b>1096.956</b> | 1097.292        | <b>1096.620</b> | K[29] |
| A  | 14 | 482.608         | 1059.597        | 1054.257        | 1054.594        | 1053.922        | A[28] |
| K  | 15 | 505.306         | 1035.918        | 1030.578        | 1030.915        | 1030.243        | K[27] |
| S  | 16 | 534.317         | 993.220         | 987.880         | 988.216         | 987.543         | S[26] |
| R  | 17 | 586.250         | 954.200         | <b>956.870</b>  | 959.206         | <b>958.534</b>  | R[25] |
| S  | 18 | 615.261         | 912.179         | 906.839         | 907.172         | 906.500         | S[24] |
| S  | 19 | 644.372         | 883.165         | 877.825         | 878.161         | 877.489         | S[23] |
| R  | 20 | 696.405         | 854.154         | 848.815         | 849.151         | 848.479         | R[22] |
| A  | 21 | 720.084         | <b>802.121</b>  | 796.781         | 797.117         | 796.445         | A[21] |
| G  | 22 | 759.092         | 778.442         | 773.102         | 773.438         | 772.766         | G[20] |
| L  | 23 | 776.388         | 759.434         | 754.094         | 754.431         | 753.759         | L[19] |
| G  | 24 | 819.472         | 721.740         | 716.400         | 716.736         | 716.064         | G[18] |
| F  | 25 | 868.495         | 679.054         | 673.714         | 674.050         | 673.378         | F[17] |
| F  | 26 | 900.946         | 630.031         | 624.691         | 625.027         | 624.355         | F[16] |
| V  | 27 | <b>933.869</b>  | 597.680         | 592.340         | 592.676         | 592.004         | V[15] |
| G  | 28 | <b>952.876</b>  | 558.051         | 552.711         | 553.047         | 552.375         | G[14] |
| R  | 29 | <b>1004.910</b> | <b>545.650</b>  | 540.310         | 540.646         | 539.974         | R[13] |
| V  | 30 | 1037.933        | 491.616         | 486.276         | 486.613         | 485.941         | V[12] |
| H  | 31 | 1083.619        | 460.593         | 455.253         | 455.589         | 454.917         | H[11] |
| R  | 32 | 1135.653        | 414.907         | 409.567         | 409.903         | 409.231         | R[10] |
| L  | 33 | <b>1173.347</b> | 362.873         | 357.533         | 357.870         | 357.198         | L[9]  |
| L  | 34 | 1211.043        | 326.179         | 320.839         | 321.175         | 320.503         | L[8]  |
| R  | 35 | 1253.076        | 287.484         | 282.144         | 282.480         | 281.808         | R[7]  |
| K  | 36 | 1305.774        | 235.460         | 230.120         | 230.457         | 229.785         | K[6]  |
| G  | 37 | 1344.781        | 192.752         | 187.412         | 187.748         | 187.076         | G[5]  |
| H  | 38 | 1370.468        | 173.745         | 168.405         | 168.741         | 168.069         | H[4]  |
| V  | 39 | <b>1424.822</b> | 128.098         | 122.758         | 123.094         | 122.422         | V[3]  |
| A  | 40 | 1448.825        | 73.304          | 67.964          | 68.300          | 67.628          | A[2]  |
| E  | 41 | 1491.515        | 50.025          | 44.685          | 45.021          | 44.349          | E[1]  |

# sp | P27661 | H2AX\_MOUSE

[Acetyl]SGRGKTGGKARAKAKSRSSRAGLQFPVGRVHRLLRKGHYAE

- ▶ fragmentation table for charge state 4+
- ▶ specType=etd
- ▶ score=56.94
- ▶ F113279.dat
- ▶ query=q45955.p1
- ▶ precursor=895.513320
- ▶ chargePrecursor=5
- ▶ itol=0.5

| AA    | c               | y               | z+1             | z+2             | z        | AA    |
|-------|-----------------|-----------------|-----------------|-----------------|----------|-------|
| S[1]  | 37.525          | <b>1119.134</b> | <b>1115.130</b> | 0.755           | 1114.879 | S[41] |
| G[2]  | 51.780          | 1088.974        | <b>1082.969</b> | 0.755           | 1082.617 | G[40] |
| R[3]  | 90.805          | 1072.618        | 1068.614        | <b>1068.866</b> | 1068.361 | R[30] |
| G[4]  | 105.061         | 1033.593        | 1029.588        | 1029.840        | 1029.336 | G[38] |
| K[5]  | 137.084         | 1019.336        | 1015.333        | 1015.585        | 1015.081 | K[37] |
| T[6]  | 182.388         | 997.314         | 993.309         | 993.561         | 993.057  | T[36] |
| G[7]  | 226.002         | <b>962.052</b>  | 958.047         | <b>958.299</b>  | 957.795  | G[35] |
| G[8]  | 290.257         | 947.797         | 943.792         | 944.044         | 943.540  | G[34] |
| K[9]  | 222.881         | <b>933.541</b>  | 929.537         | 929.789         | 929.285  | K[33] |
| A[10] | 240.640         | 901.517         | 897.513         | 897.765         | 897.261  | A[32] |
| R[11] | 278.665         | 881.795         | 879.753         | 880.005         | 879.502  | R[31] |
| A[12] | 297.425         | <b>844.733</b>  | 840.728         | 840.980         | 840.476  | A[30] |
| R[13] | 329.448         | 825.974         | 822.969         | 823.221         | 822.717  | R[29] |
| A[14] | 347.208         | 794.950         | 790.945         | 791.197         | 790.693  | A[28] |
| K[15] | 379.231         | 777.191         | 773.186         | 773.438         | 772.934  | K[27] |
| S[16] | <b>400.989</b>  | 745.167         | 741.162         | 741.414         | 740.910  | S[26] |
| R[17] | 440.215         | 721.400         | 719.406         | 719.658         | 719.154  | R[25] |
| S[18] | 481.718         | 694.384         | 690.379         | 690.631         | 690.127  | S[24] |
| S[19] | 483.531         | 662.626         | 658.621         | 658.873         | 658.369  | S[23] |
| R[20] | 522.556         | 640.868         | 636.863         | 637.115         | 636.611  | R[22] |
| A[21] | 540.315         | 601.842         | 597.838         | 598.090         | 597.586  | A[21] |
| G[22] | 554.571         | 584.083         | 580.078         | 580.330         | 579.826  | G[20] |
| L[23] | 582.842         | 569.826         | 565.823         | 566.075         | 565.571  | L[19] |
| Q[24] | 614.058         | 541.557         | 537.552         | 537.804         | 537.300  | Q[19] |
| F[25] | 651.623         | 509.542         | 505.537         | 505.789         | 505.285  | F[17] |
| P[26] | 675.888         | 472.775         | 468.770         | 469.022         | 468.518  | P[16] |
| V[27] | 700.654         | 448.512         | 444.507         | 444.759         | 444.255  | V[15] |
| G[28] | 714.909         | 423.745         | 419.740         | 419.992         | 419.488  | G[14] |
| D[29] | 753.034         | 400.488         | 396.483         | 396.735         | 396.231  | D[12] |
| V[30] | 778.701         | 370.469         | 366.464         | 366.716         | 366.212  | V[12] |
| H[31] | 812.966         | 345.097         | 341.092         | 341.344         | 340.840  | H[11] |
| R[32] | <b>851.991</b>  | 311.432         | 307.427         | 307.679         | 307.175  | R[10] |
| L[33] | 880.262         | 272.407         | 268.402         | 268.654         | 268.150  | L[9]  |
| L[34] | 908.533         | 244.136         | 240.131         | 240.383         | 239.879  | L[8]  |
| R[35] | 947.559         | 215.865         | 211.860         | 212.112         | 211.608  | R[7]  |
| K[36] | 979.582         | 178.940         | 172.935         | 173.087         | 172.583  | K[6]  |
| G[37] | 993.838         | 144.816         | 140.811         | 141.063         | 140.559  | G[5]  |
| H[38] | <b>1028.102</b> | 130.560         | 126.556         | 126.808         | 126.304  | H[4]  |
| V[39] | <b>1068.868</b> | 96.290          | 92.291          | 92.543          | 92.039   | V[3]  |
| A[40] | 1086.628        | 55.530          | 51.525          | 51.777          | 51.273   | A[2]  |
| E[41] | 1118.888        | 37.771          | 33.766          | 34.018          | 33.514   | E[1]  |

# sp | P27661 | H2AX\_MOUSE

[Acetyl]SGRGKTGGKARAKAKSRSSRAGLQFPVGRVHLLLRKGHYAE

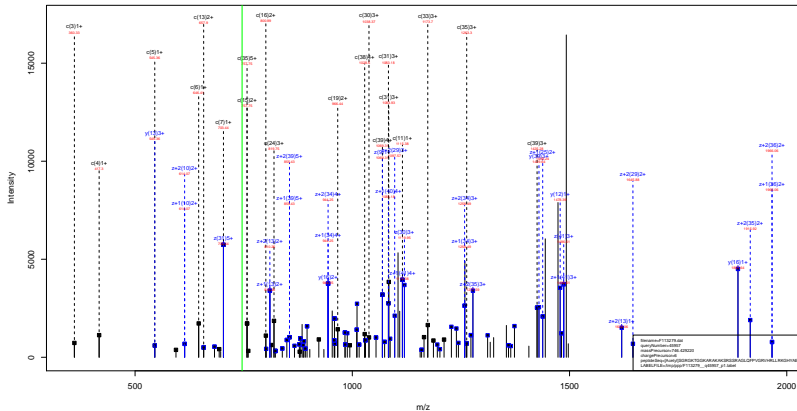

# sp | P27661 | H2AX\_MOUSE

[Acetyl]SGRGKTGGKARAKAKSRSSRAGLQFPVGRVHRLLRKGHYAE

- ▶ fragmentation table for charge state 1+
- ▶ specType=etd
- ▶ score=45.50
- ▶ F113279.dat
- ▶ query=q45957.p1
- ▶ precursor=746.429220
- ▶ chargePrecursor=6
- ▶ itol=0.5

| AA   | c               | y               | z+1      | z+2             | z               | AA   |
|------|-----------------|-----------------|----------|-----------------|-----------------|------|
| S 1  | 147.076         | 4473.515        | 4457.486 | 0.000           | 4450.489        | S 41 |
| G 2  | 204.098         | 4344.473        | 4328.454 | 0.000           | 4327.446        | G 40 |
| R 3  | <b>360.199</b>  | 4287.451        | 4271.432 | 4272.440        | 4270.425        | R 39 |
| G 4  | <b>417.220</b>  | 4131.350        | 4115.331 | 4116.339        | 4114.323        | G 38 |
| K 5  | <b>545.315</b>  | 4074.328        | 4058.310 | 4059.318        | 4057.302        | K 37 |
| T 6  | <b>648.343</b>  | 3946.234        | 3930.215 | 3931.223        | 3929.207        | T 36 |
| G 7  | <b>703.385</b>  | 3845.180        | 3829.161 | 3830.175        | 3828.159        | G 35 |
| G 8  | <b>760.406</b>  | 3788.164        | 3772.146 | 3773.153        | 3771.138        | G 34 |
| K 9  | <b>868.501</b>  | 3731.143        | 3715.124 | 3716.132        | 3714.116        | K 33 |
| A 10 | <b>959.538</b>  | 3603.048        | 3587.029 | 3588.037        | 3586.021        | A 32 |
| R 11 | <b>1115.639</b> | 3532.011        | 3515.992 | 3517.000        | 3514.984        | R 31 |
| A 12 | <b>1188.676</b> | 3375.913        | 3359.894 | 3360.909        | 3358.893        | A 30 |
| R 13 | 1314.771        | 3304.873        | 3288.854 | 3289.862        | 3287.846        | R 29 |
| A 14 | 1385.808        | 3176.778        | 3160.759 | 3161.767        | 3159.751        | A 28 |
| K 15 | 1511.903        | 3105.741        | 3089.722 | 3090.730        | 3088.714        | K 27 |
| S 16 | 1600.935        | 2977.646        | 2961.627 | 2962.635        | 2960.619        | S 26 |
| R 17 | 1757.037        | 2890.614        | 2874.595 | 2875.603        | 2873.587        | R 25 |
| S 18 | 1844.069        | 2744.513        | 2728.494 | 2729.502        | 2727.486        | S 24 |
| S 19 | 1931.101        | 2647.480        | 2631.461 | 2632.470        | 2630.454        | S 23 |
| R 20 | 2087.202        | 2560.443        | 2544.424 | 2545.432        | 2543.416        | R 22 |
| A 21 | 2158.239        | 2404.347        | 2388.329 | 2389.336        | 2387.321        | A 21 |
| G 22 | 2215.260        | 2333.310        | 2317.291 | 2318.299        | 2316.284        | G 20 |
| L 23 | 2328.344        | 2278.280        | 2262.260 | 2263.270        | 2261.254        | L 19 |
| Q 24 | 2456.403        | 2163.259        | 2147.239 | 2148.244        | 2146.230        | Q 19 |
| F 25 | 2603.471        | 2035.146        | 2019.127 | 2020.135        | 2018.120        | F 17 |
| P 26 | 2700.524        | <b>1888.078</b> | 1872.059 | 1873.067        | 1871.051        | P 16 |
| V 27 | 2709.592        | 1791.025        | 1775.006 | 1776.014        | 1773.999        | V 15 |
| G 28 | 2856.614        | 1691.956        | 1675.938 | 1676.946        | 1674.930        | G 14 |
| R 29 | 2832.715        | 1534.878        | 1518.858 | <b>1619.824</b> | 1517.842        | R 13 |
| V 30 | 3111.783        | <b>1478.834</b> | 1462.814 | 1463.821        | 1461.807        | V 12 |
| H 31 | 3248.842        | 1319.765        | 1303.747 | <b>1364.755</b> | 1302.739        | H 11 |
| R 32 | 3404.943        | 1242.707        | 1226.688 | <b>1227.696</b> | 1225.680        | R 10 |
| L 33 | 3518.028        | 1088.605        | 1070.587 | 1071.595        | <b>1069.579</b> | L 9  |
| L 34 | 3631.112        | 973.521         | 957.503  | <b>958.510</b>  | 956.495         | L 8  |
| T 35 | 3787.213        | 869.431         | 844.413  | 845.420         | 843.411         | T 7  |
| K 36 | 3915.308        | 704.330         | 688.311  | 689.325         | 687.310         | K 6  |
| G 37 | 3972.329        | 576.241         | 560.221  | 561.230         | 559.215         | G 5  |
| H 38 | 4109.388        | 519.220         | 503.201  | 504.209         | 502.193         | H 4  |
| V 39 | 4272.451        | 382.161         | 366.143  | 367.150         | 365.134         | V 3  |
| A 40 | 4343.489        | 219.086         | 203.070  | 204.087         | 202.071         | A 2  |
| E 41 | 4472.531        | 148.060         | 132.043  | 133.050         | 131.034         | E 1  |



# sp | P27661 | H2AX\_MOUSE

[Acetyl]SGRGKTGGKARAKAKSRSSRAGLQFPVGRVHRLLRKGGHYAE

- ▶ fragmentation table for charge state 2+
- ▶ specType=etd
- ▶ score=45.50
- ▶ F113279.dat
- ▶ query=q45957.p1
- ▶ precursor=746.429220
- ▶ chargePrecursor=6
- ▶ itol=0.5

| AA | c  | y               | z+1            | z+2             | z               | AA              |       |
|----|----|-----------------|----------------|-----------------|-----------------|-----------------|-------|
| S  | 1  | 74.042          | 2737.361       | 2729.257        | 0.504           | 2728.740        | S[41] |
| G  | 2  | 102.563         | 2172.740       | 2164.731        | 0.504           | 2164.227        | G[40] |
| R  | 3  | 180.603         | 2144.929       | 2138.220        | 2136.724        | 2135.718        | R[39] |
| G  | 4  | 209.114         | 2096.179       | 2058.169        | 2058.673        | 2057.669        | G[38] |
| K  | 5  | 273.161         | 2037.668       | 2029.660        | 2029.162        | 2029.155        | K[37] |
| T  | 6  | 353.688         | 1973.620       | <b>1965.611</b> | <b>1966.115</b> | 1966.107        | T[36] |
| G  | 7  | 352.198         | 1923.097       | 1915.089        | <b>1915.591</b> | 1914.582        | G[35] |
| G  | 8  | 380.707         | 1894.586       | 1886.576        | 1887.080        | 1886.073        | G[34] |
| K  | 9  | 444.754         | 1866.075       | 1858.066        | 1858.570        | 1857.562        | K[33] |
| A  | 10 | 480.273         | 1802.028       | 1794.018        | 1794.522        | 1793.514        | A[32] |
| R  | 11 | 522.823         | 1756.509       | 1758.503        | 1759.004        | 1757.996        | R[31] |
| A  | 12 | <b>593.842</b>  | 1698.459       | 1690.449        | 1690.953        | 1689.945        | A[30] |
| R  | 13 | <b>657.889</b>  | 1652.940       | 1644.931        | <b>1645.435</b> | 1644.427        | R[29] |
| A  | 14 | <b>693.408</b>  | 1588.892       | 1580.883        | 1581.387        | 1580.379        | A[28] |
| K  | 15 | <b>757.455</b>  | 1503.374       | 1545.365        | 1545.868        | 1544.861        | K[27] |
| S  | 16 | <b>800.971</b>  | 1489.326       | <b>1481.317</b> | <b>1481.821</b> | 1480.813        | S[26] |
| R  | 17 | <b>879.622</b>  | 1445.810       | <b>1437.801</b> | <b>1438.305</b> | 1437.297        | R[25] |
| S  | 18 | <b>922.538</b>  | 1389.760       | <b>1359.750</b> | 1359.754        | <b>1359.247</b> | S[24] |
| S  | 19 | <b>966.054</b>  | 1324.244       | 1316.234        | 1316.738        | 1315.731        | S[23] |
| R  | 20 | 1044.104        | 1280.728       | <b>1272.718</b> | <b>1273.222</b> | 1272.215        | R[22] |
| A  | 21 | 1079.623        | 1202.677       | 1194.668        | 1195.172        | 1194.164        | A[21] |
| G  | 22 | 1108.134        | 1167.159       | <b>1159.149</b> | <b>1159.653</b> | 1158.646        | G[20] |
| L  | 23 | <b>1164.576</b> | 1136.640       | 1138.630        | 1137.623        | 1136.615        | L[19] |
| G  | 24 | 1228.678        | 1082.106       | <b>1074.097</b> | <b>1074.601</b> | 1073.593        | G[18] |
| F  | 25 | 1302.239        | 1018.077       | <b>1010.067</b> | <b>1010.571</b> | 1009.563        | F[17] |
| P  | 26 | 1350.766        | <b>944.542</b> | 938.533         | 937.037         | 936.029         | P[16] |
| V  | 27 | 1400.300        | <b>896.016</b> | 888.007         | <b>888.511</b>  | <b>887.503</b>  | V[15] |
| G  | 28 | 1428.811        | 846.482        | <b>838.473</b>  | <b>838.976</b>  | 837.969         | G[14] |
| R  | 29 | 1506.861        | 817.971        | <b>809.962</b>  | <b>810.466</b>  | 809.458         | R[13] |
| V  | 30 | 1566.395        | 739.621        | 731.611         | 732.115         | 731.107         | V[12] |
| H  | 31 | 1624.925        | 690.385        | <b>682.377</b>  | <b>682.881</b>  | 681.873         | H[11] |
| R  | 32 | 1702.975        | 611.857        | <b>613.848</b>  | <b>614.351</b>  | 613.344         | R[10] |
| L  | 33 | 1759.517        | 543.808        | 535.797         | 536.301         | 535.293         | L[9]  |
| L  | 34 | 1816.059        | 487.264        | 479.253         | 479.757         | 478.751         | L[8]  |
| R  | 35 | 1884.110        | 436.722        | 427.713         | 428.217         | 427.209         | R[7]  |
| K  | 36 | 1958.157        | 352.672        | 344.662         | 345.166         | 344.158         | K[6]  |
| G  | 37 | 1986.668        | 288.624        | 280.613         | 281.117         | 280.111         | G[5]  |
| H  | 38 | 2065.198        | 200.114        | 252.104         | 252.608         | 251.600         | H[4]  |
| V  | 39 | 2136.729        | 191.984        | 183.973         | 184.477         | 183.071         | V[3]  |
| A  | 40 | 2172.248        | 110.052        | 102.043         | 102.547         | 101.539         | A[2]  |
| E  | 41 | 2236.789        | 74.534         | 66.524          | 67.028          | 66.021          | E[1]  |

# sp | P27661 | H2AX\_MOUSE

[Acetyl]SGRGKTGGKARAKAKSRSSRAGLQFPVGRVHRLLRKGHYAE

- ▶ fragmentation table for charge state 3+
- ▶ specType=etd
- ▶ score=45.50
- ▶ F113279.dat
- ▶ query=q45957.p1
- ▶ precursor=746.429220
- ▶ chargePrecursor=6
- ▶ itol=0.5

| AA  | c               | y               | #s1             | #s2             | #s              | AA   |
|-----|-----------------|-----------------|-----------------|-----------------|-----------------|------|
| S1  | 489.697         | 1491.843        | <b>1486.504</b> | 0.872           | <b>1486.166</b> | S(4) |
| G2  | 66.704          | 1448.825        | 1443.480        | 0.672           | 1443.154        | G(4) |
| R3  | 1307.188        | <b>1429.822</b> | 1424.482        | <b>1424.818</b> | 1424.146        | R(3) |
| G4  | 139.745         | 1377.788        | 1372.449        | <b>1372.785</b> | 1372.111        | G(3) |
| K5  | 182.443         | 1358.781        | 1353.441        | 1353.777        | 1353.105        | K(3) |
| T6  | 238.126         | 1338.083        | 1332.743        | <b>1333.079</b> | 1332.401        | T(3) |
| G7  | 255.133         | 1322.400        | 1317.061        | <b>1317.397</b> | 1316.723        | G(3) |
| G8  | 254.140         | <b>1263.393</b> | <b>1258.053</b> | <b>1258.389</b> | 1257.711        | G(3) |
| K9  | 296.639         | <b>1244.386</b> | 1239.046        | <b>1239.382</b> | 1238.710        | K(3) |
| A10 | 320.518         | <b>1201.688</b> | 1196.348        | <b>1196.684</b> | <b>1196.012</b> | A(3) |
| R11 | 372.551         | 1178.088        | 1172.748        | 1173.085        | 1172.383        | R(3) |
| A12 | 389.230         | 1158.935        | 1153.595        | 1153.931        | <b>1153.269</b> | A(3) |
| R13 | 438.929         | 1102.296        | 1096.956        | <b>1097.292</b> | 1096.620        | R(3) |
| A14 | 482.688         | 1059.597        | <b>1054.258</b> | <b>1054.594</b> | 1053.922        | A(3) |
| K15 | 509.306         | 1035.918        | <b>1030.579</b> | 1030.915        | <b>1030.243</b> | K(3) |
| S16 | 534.317         | 993.220         | 987.880         | <b>988.216</b>  | 987.543         | S(3) |
| R17 | 586.250         | 984.200         | <b>958.870</b>  | <b>959.206</b>  | <b>958.534</b>  | R(3) |
| S18 | 615.363         | 932.176         | 926.836         | 927.172         | 926.500         | S(3) |
| S19 | 644.372         | 883.165         | <b>877.825</b>  | <b>878.161</b>  | 877.489         | S(3) |
| R20 | 696.405         | 854.154         | <b>848.815</b>  | <b>849.151</b>  | 848.479         | R(3) |
| A21 | 728.084         | <b>802.121</b>  | 796.781         | 797.117         | 796.443         | A(3) |
| G22 | 759.092         | 778.442         | 773.102         | 773.438         | 772.766         | G(3) |
| L23 | 778.388         | 759.434         | 754.094         | 754.431         | 753.759         | L(3) |
| Q24 | <b>819.472</b>  | 721.740         | 716.400         | 716.736         | 716.064         | Q(3) |
| F25 | 868.495         | 674.054         | 673.714         | 674.050         | 673.378         | F(3) |
| F26 | 900.946         | 630.031         | 624.691         | 625.027         | 624.355         | F(3) |
| V27 | 933.889         | 597.680         | 592.340         | 592.676         | 592.004         | V(3) |
| G28 | 952.876         | 556.661         | 551.321         | 551.657         | 550.985         | G(3) |
| R29 | 1004.910        | <b>545.650</b>  | 540.310         | 540.646         | 539.974         | R(3) |
| V30 | <b>1037.933</b> | 491.610         | 486.270         | 486.613         | 485.941         | V(3) |
| H31 | <b>1083.619</b> | 460.593         | 455.254         | 455.590         | 454.918         | H(3) |
| R32 | 1135.653        | 414.907         | 409.567         | 409.903         | 409.232         | R(3) |
| L33 | <b>1173.347</b> | 362.873         | 357.534         | 357.870         | 357.198         | L(3) |
| L34 | <b>1211.042</b> | 328.176         | 318.839         | 319.175         | 318.503         | L(3) |
| R35 | <b>1263.076</b> | 287.484         | 282.144         | 282.480         | 281.808         | R(3) |
| K36 | 1305.774        | 235.460         | 230.121         | 230.447         | 229.775         | K(3) |
| G37 | 1344.781        | 192.752         | 187.412         | 187.748         | 187.076         | G(3) |
| H38 | 1370.468        | 173.745         | 168.405         | 168.741         | 168.069         | H(3) |
| V39 | <b>1424.822</b> | 128.098         | 122.758         | 123.094         | 122.422         | V(3) |
| A40 | 1448.884        | 83.304          | 78.384          | 78.720          | 78.048          | A(3) |
| E41 | 1491.515        | 50.025          | 44.685          | 45.021          | 44.349          | E(3) |

# sp | P27661 | H2AX\_MOUSE

[Acetyl]SGRGKTGGKARAKAKSRSSRAGLQFPVGRVHRLLRKGHYAE

- ▶ fragmentation table for charge state 4+
- ▶ specType=etd
- ▶ score=45.50
- ▶ F113279.dat
- ▶ query=q45957.p1
- ▶ precursor=746.429220
- ▶ chargePrecursor=6
- ▶ itol=0.5

| AA    | c               | y               | z+1             | z+2             | z              | AA    |
|-------|-----------------|-----------------|-----------------|-----------------|----------------|-------|
| S[1]  | 57.525          | 1119.130        | <b>1115.130</b> | 0.755           | 1114.879       | S[41] |
| G[2]  | 51.780          | <b>1086.074</b> | <b>1082.869</b> | 0.755           | 1082.611       | G[40] |
| R[3]  | 90.805          | 1072.618        | 1068.614        | <b>1068.866</b> | 1068.361       | R[39] |
| G[4]  | 105.061         | 1033.593        | 1029.588        | <b>1029.840</b> | 1029.339       | G[38] |
| K[5]  | 137.084         | 1019.338        | <b>1015.333</b> | <b>1015.585</b> | 1015.081       | K[37] |
| T[6]  | 182.388         | 987.314         | <b>983.309</b>  | <b>983.561</b>  | <b>983.057</b> | T[36] |
| G[7]  | 226.602         | 962.052         | <b>958.047</b>  | <b>958.299</b>  | 957.791        | G[35] |
| G[8]  | 280.857         | 947.797         | <b>943.792</b>  | <b>944.044</b>  | 943.540        | G[34] |
| K[9]  | 222.881         | 933.541         | 929.537         | 929.788         | 929.285        | K[33] |
| A[10] | 240.640         | 901.517         | 897.513         | 897.765         | 897.261        | A[32] |
| R[11] | 278.665         | 881.756         | <b>879.753</b>  | <b>880.005</b>  | 879.502        | R[31] |
| A[12] | 297.425         | 844.733         | 840.728         | 840.980         | 840.476        | A[30] |
| R[13] | 329.448         | 825.974         | <b>822.969</b>  | <b>823.221</b>  | <b>822.717</b> | R[29] |
| A[14] | 347.208         | 794.950         | 790.945         | 791.197         | 790.693        | A[28] |
| K[15] | 379.231         | 777.191         | 773.186         | 773.438         | 772.934        | K[27] |
| S[16] | 400.989         | 745.167         | 741.162         | 741.414         | 740.910        | S[26] |
| R[17] | 440.215         | 721.400         | 717.395         | 717.647         | 717.142        | R[25] |
| S[18] | 481.718         | 694.384         | 690.379         | 690.631         | 690.127        | S[24] |
| S[19] | 483.531         | 662.626         | 658.621         | 658.873         | <b>658.369</b> | S[23] |
| R[20] | 522.956         | 640.868         | 636.863         | 637.115         | 636.611        | R[22] |
| A[21] | 540.315         | 601.842         | 597.837         | 598.090         | 597.586        | A[21] |
| G[22] | 554.571         | 584.083         | 580.078         | 580.330         | 579.826        | G[20] |
| L[23] | 582.842         | 569.826         | 565.821         | 566.073         | 565.571        | L[19] |
| Q[24] | 614.858         | 541.557         | 537.552         | 537.804         | 537.300        | Q[19] |
| F[25] | 651.623         | 509.942         | 505.937         | 506.189         | 505.685        | F[17] |
| P[26] | 675.888         | 472.775         | 468.770         | 469.022         | 468.518        | P[16] |
| V[27] | 700.654         | 448.512         | 444.507         | 444.759         | 444.255        | V[15] |
| G[28] | 714.909         | 423.745         | 419.740         | 419.992         | 419.488        | G[14] |
| D[29] | 753.934         | 400.488         | 396.483         | 396.735         | 396.231        | D[12] |
| V[30] | 778.701         | 370.469         | 366.464         | 366.717         | 366.213        | V[12] |
| H[31] | <b>812.966</b>  | 345.097         | 341.092         | 341.344         | 341.440        | H[11] |
| R[32] | 851.991         | 311.432         | 307.427         | 307.679         | 307.175        | R[10] |
| L[33] | <b>880.262</b>  | 272.407         | 268.402         | 268.654         | 268.150        | L[9]  |
| L[34] | 908.533         | 244.136         | 240.131         | 240.383         | 239.879        | L[8]  |
| H[35] | 947.559         | 215.865         | 211.860         | 212.112         | 211.608        | H[7]  |
| K[36] | 979.582         | 178.940         | 172.935         | 173.087         | 172.583        | K[6]  |
| G[37] | <b>993.838</b>  | 144.816         | 140.811         | 141.063         | 140.559        | G[5]  |
| H[38] | <b>1028.102</b> | 130.560         | 126.555         | 126.808         | 126.304        | H[4]  |
| V[39] | <b>1068.868</b> | 96.290          | 92.291          | 92.543          | 92.039         | V[3]  |
| A[40] | 1086.628        | 55.530          | 51.525          | 51.777          | 51.273         | A[2]  |
| E[41] | 1118.888        | 37.771          | 33.766          | 34.018          | 33.514         | E[1]  |

# sp | P27661 | H2AX\_MOUSE

[Acetyl]SGRGKTGGKARAKAKSRSSRAGLQFPVGRVHRLLRKGHYAE

- ▶ fragmentation table for charge state 5+
- ▶ specType=etd
- ▶ score=45.50
- ▶ F113279.dat
- ▶ query=q45957\_p1
- ▶ precursor=746.429220
- ▶ chargePrecursor=6
- ▶ itol=0.5

| AA    | c              | y              | z+1            | z#2            | z              | AA    |
|-------|----------------|----------------|----------------|----------------|----------------|-------|
| S[1]  | 30.221         | <b>895.509</b> | <b>892.305</b> | 0.806          | <b>892.104</b> | S[41] |
| G[2]  | 41.625         | 899.700        | <b>866.497</b> | 0.806          | 896.295        | G[40] |
| R[3]  | 72.846         | 898.296        | <b>855.092</b> | <b>855.294</b> | 894.891        | R[39] |
| G[4]  | 84.250         | 827.076        | 823.872        | 824.074        | 823.671        | G[38] |
| K[5]  | 109.869        | 815.672        | 812.468        | 812.669        | 812.266        | K[37] |
| T[6]  | 130.078        | 790.053        | 786.849        | 787.050        | 786.647        | T[36] |
| G[7]  | 141.483        | 769.843        | 766.639        | 766.841        | 766.438        | G[35] |
| G[8]  | 152.887        | 758.439        | 755.235        | 755.437        | 755.033        | G[34] |
| K[9]  | 178.506        | 747.034        | 743.831        | 744.032        | 743.629        | K[33] |
| A[10] | 192.713        | 721.415        | 718.212        | 718.413        | 718.010        | A[32] |
| R[11] | 223.934        | 707.208        | 704.004        | 704.206        | <b>703.803</b> | R[31] |
| A[12] | 238.141        | 675.988        | 672.784        | 672.986        | 672.582        | A[30] |
| K[13] | 263.760        | 661.780        | 658.577        | 658.778        | <b>658.375</b> | K[29] |
| A[14] | 277.968        | 636.161        | 632.958        | 633.159        | 632.756        | A[28] |
| K[15] | 303.586        | 621.954        | 618.750        | 618.952        | 618.549        | K[27] |
| S[16] | 320.993        | 596.335        | 593.131        | 593.333        | 592.930        | S[26] |
| R[17] | 352.213        | 578.929        | 575.725        | 575.926        | 575.523        | R[25] |
| S[18] | 389.620        | 547.708        | 544.503        | 544.706        | 544.303        | S[24] |
| S[19] | 397.028        | 530.302        | 527.098        | 527.300        | 526.897        | S[23] |
| R[20] | 418.246        | 512.895        | 509.692        | 509.893        | 509.490        | R[22] |
| A[21] | 432.454        | 481.675        | 478.472        | 478.673        | 478.270        | A[21] |
| G[22] | 443.858        | 467.468        | 464.264        | 464.466        | 464.063        | G[20] |
| L[23] | 466.475        | 456.064        | 452.860        | 453.061        | 452.658        | L[19] |
| Q[24] | 492.089        | 433.447        | 430.243        | 430.445        | 430.041        | Q[18] |
| F[25] | 521.500        | 407.835        | 404.631        | 404.833        | 404.430        | F[17] |
| P[26] | 540.911        | 378.421        | 375.218        | 375.419        | 375.016        | P[16] |
| V[27] | 560.724        | 359.011        | 355.807        | 356.009        | 355.605        | V[15] |
| G[28] | 572.129        | 339.191        | 335.987        | 336.189        | 335.782        | G[14] |
| R[29] | 603.349        | 327.793        | 324.589        | 324.791        | 324.388        | R[13] |
| V[30] | 623.163        | 296.573        | 293.369        | 293.570        | 293.167        | V[12] |
| H[31] | 650.574        | 276.759        | 273.555        | 273.757        | 273.354        | H[11] |
| R[32] | 681.795        | 249.347        | 246.143        | 246.345        | 245.942        | R[10] |
| L[33] | 704.411        | 218.127        | 214.923        | 215.125        | 214.722        | L[9]  |
| L[34] | 727.028        | 195.510        | 192.306        | 192.508        | 192.105        | L[8]  |
| R[35] | <b>758.248</b> | 172.893        | 169.689        | 169.891        | 169.488        | R[7]  |
| K[36] | 783.867        | 141.673        | 138.469        | 138.671        | 138.268        | K[6]  |
| G[37] | 799.272        | 116.054        | 112.850        | 113.052        | 112.649        | G[5]  |
| H[38] | <b>822.683</b> | 104.650        | 101.446        | 101.648        | 101.244        | H[4]  |
| V[39] | <b>855.296</b> | 77.238         | 74.034         | 74.236         | 73.833         | V[3]  |
| A[40] | 869.504        | 44.625         | 41.422         | 41.623         | 41.220         | A[2]  |
| E[41] | 895.312        | 30.418         | 27.214         | 27.416         | 27.013         | E[1]  |

# sp | Q6GSS7 | H2A2A\_MOUSE

[Acetyl]SGRGKQGGKARAKAKSRSSRAGLQFPVGRVHLLRKGNYAE

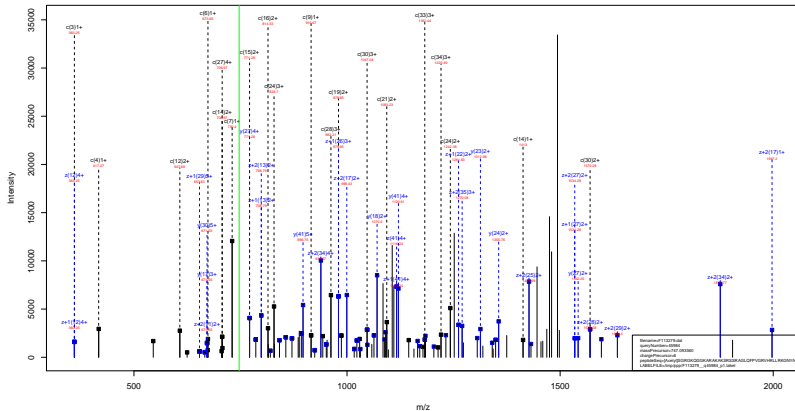

# sp | Q6GSS7 | H2A2A\_MOUSE

[Acetyl]SGRGKQGGKARAKAKSRSSRAGLQFPVGRVHRLLRKGN~~YAE~~

- ▶ fragmentation table for charge state 1+
- ▶ specType=etd
- ▶ score=44.97
- ▶ F113279.dat
- ▶ query=q45984.p1
- ▶ precursor=747.093360
- ▶ chargePrecursor=6
- ▶ itol=0.5

| AA | c  | y               | #±1             | #±2             | z               | AA              |       |
|----|----|-----------------|-----------------|-----------------|-----------------|-----------------|-------|
| S  | 1  | 147.076         | 4377.535        | 4461.403        | 4.800           | 4460.481        | S[1]  |
| G  | 2  | 204.098         | 4348.467        | 4332.440        | 0.000           | 4333.441        | G[2]  |
| R  | 3  | <b>360.199</b>  | 4291.446        | 4275.427        | 4276.435        | 4274.410        | R[3]  |
| G  | 4  | <b>417.220</b>  | 4135.345        | 4119.320        | 4120.334        | 4118.310        | G[4]  |
| K  | 5  | <b>545.315</b>  | 4078.323        | 4062.305        | 4063.313        | 4061.297        | K[5]  |
| G  | 6  | <b>673.374</b>  | 3950.228        | 3934.210        | 3935.218        | 3933.202        | G[6]  |
| G  | 7  | <b>730.395</b>  | 3922.170        | 3899.151        | 3907.159        | 3895.141        | G[7]  |
| G  | 8  | 797.417         | 3765.148        | 3749.130        | 3750.138        | 3748.122        | G[8]  |
| K  | 9  | <b>915.512</b>  | 3708.127        | 3692.108        | 3693.116        | 3691.100        | K[9]  |
| A  | 10 | <b>960.549</b>  | 3680.032        | 3664.013        | 3665.021        | 3663.005        | A[10] |
| R  | 11 | 1142.630        | 3538.995        | 3492.976        | 3493.984        | 3491.968        | R[11] |
| A  | 12 | <b>1213.687</b> | 3392.944        | 3376.915        | 3377.923        | 3375.907        | A[12] |
| K  | 13 | 1341.752        | 3281.857        | 3265.838        | 3266.846        | 3264.830        | K[13] |
| A  | 14 | <b>1412.819</b> | 3153.762        | 3137.743        | 3138.751        | 3136.735        | A[14] |
| K  | 15 | 1540.914        | 3022.725        | 3006.706        | 3007.714        | 3005.699        | K[15] |
| S  | 16 | 1627.946        | 2954.630        | 2938.611        | 2939.619        | 2937.603        | S[16] |
| R  | 17 | 1784.047        | 2897.598        | 2881.579        | 2882.587        | 2880.571        | R[17] |
| S  | 18 | 1871.079        | 2711.496        | 2695.475        | 2696.483        | 2694.467        | S[18] |
| S  | 19 | 1958.111        | 2624.464        | 2608.446        | 2609.454        | 2607.438        | S[19] |
| R  | 20 | 2114.213        | 2537.432        | 2521.414        | 2522.422        | 2520.406        | R[20] |
| A  | 21 | 2185.250        | 2381.311        | 2365.292        | 2366.300        | 2364.284        | A[21] |
| G  | 22 | 2242.271        | 2310.294        | 2294.275        | 2295.283        | 2293.267        | G[22] |
| L  | 23 | 2305.308        | 2253.271        | 2237.252        | 2238.260        | 2236.244        | L[23] |
| Q  | 24 | 2463.414        | 2140.185        | 2124.170        | 2125.178        | 2123.162        | Q[24] |
| F  | 25 | 2630.482        | 2012.130        | 1996.111        | <b>1997.119</b> | 1995.104        | F[25] |
| F  | 26 | 2747.535        | 1895.062        | 1880.043        | 1880.051        | 1878.035        | F[26] |
| V  | 27 | 2826.603        | 1768.009        | 1751.990        | 1752.998        | 1750.982        | V[27] |
| G  | 28 | 2883.625        | 1698.945        | 1682.922        | 1683.930        | 1681.914        | G[28] |
| R  | 29 | 3039.736        | 1611.915        | 1595.892        | <b>1596.908</b> | 1594.892        | R[29] |
| V  | 30 | 3138.794        | 1455.815        | 1439.799        | 1440.807        | 1438.791        | V[30] |
| H  | 31 | 3275.853        | 1358.749        | <b>1340.731</b> | 1341.739        | 1339.723        | H[31] |
| R  | 32 | 3431.954        | 1219.691        | <b>1203.672</b> | 1204.680        | 1202.664        | R[32] |
| L  | 33 | 3545.038        | <b>1063.589</b> | <b>1047.571</b> | 1048.579        | <b>1046.563</b> | L[33] |
| L  | 34 | 3688.121        | 950.505         | 934.487         | 935.495         | 933.479         | L[34] |
| R  | 35 | 3814.224        | 837.422         | 821.403         | 822.410         | <b>820.395</b>  | R[35] |
| K  | 36 | 3942.319        | 691.320         | 665.302         | <b>666.309</b>  | 664.294         | K[36] |
| G  | 37 | 3999.340        | 583.225         | 537.207         | 538.214         | 536.199         | G[37] |
| N  | 38 | 4113.383        | 496.204         | 480.185         | 481.193         | 479.177         | N[38] |
| V  | 39 | 4278.446        | 382.161         | 366.142         | 367.150         | 365.134         | V[39] |
| A  | 40 | 4347.483        | 219.096         | 203.079         | 204.087         | 202.071         | A[40] |
| E  | 41 | 4476.526        | 148.060         | 132.042         | 133.050         | 131.034         | E[41] |

# sp | Q6GSS7 | H2A2A\_MOUSE

[Acetyl]SGRGKQGGKARAKAKSRSSRAGLQFPVGRVHLLRKGN<sup>+</sup>YAE

- ▶ fragmentation table for charge state 2+
- ▶ specType=etd
- ▶ score=44.97
- ▶ F113279.dat
- ▶ query=q45984.p1
- ▶ precursor=747.093360
- ▶ chargePrecursor=6
- ▶ itol=0.5

| AA | c  | w               | #s1             | #s2             | z               | AA              |       |
|----|----|-----------------|-----------------|-----------------|-----------------|-----------------|-------|
| S  | 1  | 74.062          | 2239.259        | 2231.260        | 8.804           | 2230.747        | S[41] |
| G  | 2  | 102.553         | 2174.737        | 2266.728        | 0.504           | 2166.254        | G[40] |
| R  | 3  | 180.603         | 2146.227        | 2138.217        | 2138.921        | 2117.713        | R[39] |
| G  | 4  | 209.114         | 2098.176        | 2060.167        | 2060.671        | 2059.663        | G[38] |
| K  | 5  | 273.161         | 2039.665        | 2031.656        | 2032.160        | 2031.152        | K[37] |
| Q  | 6  | 327.194         | 1975.616        | 1967.608        | 1968.112        | 1967.105        | Q[36] |
| G  | 7  | 365.704         | 1911.569        | 1903.570        | 1904.083        | 1903.075        | G[35] |
| G  | 8  | 394.212         | 1883.078        | 1875.078        | <b>1875.572</b> | 1874.565        | G[34] |
| K  | 9  | 458.260         | 1854.567        | 1846.558        | 1847.062        | 1846.054        | K[33] |
| A  | 10 | 493.778         | 1790.520        | 1782.510        | 1783.014        | 1782.006        | A[32] |
| R  | 11 | 577.829         | 1735.001        | 1746.992        | 1747.496        | 1746.488        | R[31] |
| A  | 12 | <b>607.347</b>  | 1676.954        | 1668.943        | 1669.446        | 1668.439        | A[30] |
| K  | 13 | <b>671.395</b>  | 1643.432        | 1635.423        | <b>1633.927</b> | 1632.919        | K[29] |
| A  | 14 | <b>706.913</b>  | 1577.904        | 1569.895        | <b>1569.879</b> | 1568.871        | A[28] |
| K  | 15 | <b>770.961</b>  | <b>1541.866</b> | <b>1533.857</b> | <b>1534.360</b> | 1533.351        | K[27] |
| S  | 16 | <b>814.477</b>  | 1477.818        | 1469.809        | 1470.313        | 1469.305        | S[26] |
| R  | 17 | <b>892.527</b>  | 1434.302        | 1426.293        | <b>1426.797</b> | 1425.789        | R[25] |
| S  | 18 | 928.033         | <b>1356.252</b> | <b>1348.243</b> | <b>1348.746</b> | 1347.739        | S[24] |
| S  | 19 | <b>979.559</b>  | <b>1312.736</b> | 1304.726        | <b>1305.230</b> | 1304.223        | S[23] |
| R  | 20 | 1057.610        | 1269.220        | <b>1261.210</b> | <b>1261.714</b> | 1260.707        | R[22] |
| A  | 21 | <b>1093.128</b> | 1191.169        | 1183.160        | <b>1183.664</b> | <b>1182.656</b> | A[21] |
| G  | 22 | 1127.639        | 1135.651        | 1147.641        | 1148.145        | 1147.137        | G[20] |
| L  | 23 | <b>1178.181</b> | 1129.140        | 1120.131        | 1119.978        | 1118.970        | L[19] |
| Q  | 24 | <b>1242.211</b> | <b>1070.598</b> | 1062.589        | <b>1063.093</b> | 1062.085        | Q[18] |
| F  | 25 | 1315.745        | 1006.599        | 998.589         | <b>999.093</b>  | 998.085         | F[17] |
| F  | 26 | 1364.271        | 933.034         | 925.025         | 925.529         | <b>924.521</b>  | F[16] |
| V  | 27 | 1413.805        | 884.506         | 876.496         | 877.000         | 875.992         | V[15] |
| G  | 28 | 1462.316        | 834.974         | 826.964         | 827.468         | 826.461         | G[14] |
| R  | 29 | 1528.369        | 806.483         | <b>798.454</b>  | <b>798.958</b>  | 797.950         | R[13] |
| V  | 30 | <b>1569.901</b> | 729.413         | 720.403         | 720.907         | 719.899         | V[12] |
| H  | 31 | 1636.430        | 678.878         | 670.868         | <b>671.373</b>  | 670.365         | H[11] |
| R  | 32 | 1716.461        | 610.349         | 602.340         | 602.843         | 601.835         | R[10] |
| L  | 33 | 1773.023        | 532.299         | 524.289         | 524.793         | 523.785         | L[9]  |
| L  | 34 | 1829.568        | 478.756         | 469.747         | 469.251         | 468.243         | L[8]  |
| R  | 35 | 1907.615        | 419.214         | 411.205         | 411.709         | 410.701         | R[7]  |
| K  | 36 | 1971.663        | 341.164         | 333.154         | 333.658         | 332.650         | K[6]  |
| G  | 37 | 2000.174        | 277.116         | 269.107         | 269.611         | 268.603         | G[5]  |
| M  | 38 | 2057.195        | 248.606         | 240.596         | 241.100         | 240.092         | M[4]  |
| V  | 39 | 2136.727        | 181.564         | 183.575         | 184.079         | 183.071         | V[3]  |
| A  | 40 | 2114.265        | 110.026         | 102.043         | 102.547         | 101.539         | A[2]  |
| E  | 41 | 2238.767        | 74.534          | 66.524          | 67.028          | 66.021          | E[1]  |

# sp | Q6GSS7 | H2A2A\_MOUSE

[Acetyl]SGRGKQGGKARAKAKSRSSRAGLQFPVGRVHRLLRKGNAYE

- ▶ fragmentation table for charge state 3+
- ▶ specType=etd
- ▶ score=44.97
- ▶ F113279.dat
- ▶ query=q45984.p1
- ▶ precursor=747.093360
- ▶ chargePrecursor=6
- ▶ itol=0.5

| AA | c  | y               | #±1             | #±2             | z               | AA              |       |
|----|----|-----------------|-----------------|-----------------|-----------------|-----------------|-------|
| S  | 1  | 48.607          | 1492.172        | 1487.835        | 0.672           | 1487.467        | S[41] |
| G  | 2  | 66.704          | 1450.181        | 1444.921        | 0.672           | 1444.485        | G[40] |
| R  | 3  | 1307.788        | <b>1431.154</b> | 1425.814        | 1426.150        | 1425.478        | R[39] |
| G  | 4  | 139.745         | 1379.120        | 1373.780        | 1374.416        | 1373.444        | G[38] |
| K  | 5  | 182.443         | 1360.113        | 1354.773        | 1355.109        | 1354.437        | K[37] |
| Q  | 6  | 225.130         | 1347.444        | 1342.075        | 1342.411        | 1341.730        | Q[36] |
| G  | 7  | 244.137         | 1324.725        | 1319.359        | <b>1299.725</b> | 1299.055        | G[35] |
| G  | 8  | 263.144         | 1295.921        | 1290.581        | 1290.917        | 1290.045        | G[34] |
| K  | 9  | 305.642         | 1236.714        | 1231.374        | <b>1231.710</b> | 1231.038        | K[33] |
| A  | 10 | 329.521         | 1194.016        | 1188.676        | 1189.012        | 1188.340        | A[32] |
| R  | 11 | 381.555         | <b>1170.336</b> | 1164.997        | <b>1165.333</b> | 1164.661        | R[31] |
| A  | 12 | 405.234         | 1138.303        | 1132.963        | 1133.299        | 1132.627        | A[30] |
| K  | 13 | 447.932         | 1094.624        | 1089.284        | <b>1089.620</b> | 1088.948        | K[29] |
| A  | 14 | 491.611         | 1051.925        | <b>1046.586</b> | <b>1046.922</b> | 1046.250        | A[28] |
| K  | 15 | 514.310         | 1028.246        | <b>1022.907</b> | <b>1023.243</b> | <b>1022.571</b> | K[27] |
| S  | 16 | 543.320         | 985.548         | <b>980.208</b>  | 980.544         | <b>979.873</b>  | S[26] |
| R  | 17 | 625.354         | 956.537         | <b>951.196</b>  | <b>951.534</b>  | <b>950.862</b>  | R[25] |
| S  | 18 | <b>624.365</b>  | 904.564         | 900.183         | 900.519         | 899.847         | S[24] |
| S  | 19 | <b>653.375</b>  | 875.493         | 870.153         | <b>870.489</b>  | 869.817         | S[23] |
| R  | 20 | <b>705.409</b>  | 846.483         | <b>841.143</b>  | <b>841.479</b>  | 840.807         | R[22] |
| A  | 21 | 729.088         | 794.449         | 789.109         | 789.445         | 788.773         | A[21] |
| Q  | 22 | 748.095         | 770.770         | 765.430         | 765.766         | 765.094         | Q[20] |
| L  | 23 | <b>785.790</b>  | 751.762         | 746.423         | 746.759         | 746.087         | L[19] |
| Q  | 24 | <b>828.476</b>  | 714.085         | 708.745         | 709.084         | 708.412         | Q[18] |
| F  | 25 | 877.409         | <b>671.382</b>  | <b>666.042</b>  | <b>666.378</b>  | 665.706         | F[17] |
| F  | 26 | 909.950         | 622.359         | 617.019         | 617.355         | 616.683         | F[16] |
| V  | 27 | <b>942.873</b>  | 590.008         | 584.668         | 585.004         | 584.332         | V[15] |
| Q  | 28 | <b>961.880</b>  | 556.985         | 551.645         | 551.981         | 551.309         | Q[14] |
| R  | 29 | 1013.914        | 519.978         | 514.638         | 514.974         | 514.302         | R[13] |
| V  | 30 | <b>1046.936</b> | 485.944         | 480.604         | 480.941         | 480.269         | V[12] |
| H  | 31 | 1092.623        | 452.921         | 447.581         | 447.918         | 447.246         | H[11] |
| R  | 32 | <b>1144.656</b> | 407.235         | 401.895         | 402.231         | 401.559         | R[10] |
| L  | 33 | <b>1182.351</b> | 355.201         | 349.862         | 350.198         | 349.526         | L[9]  |
| L  | 34 | <b>1220.046</b> | 312.509         | 307.169         | 307.505         | 306.833         | L[8]  |
| R  | 35 | 1277.812        | 274.472         | 269.132         | 269.468         | 268.796         | R[7]  |
| K  | 36 | 1314.778        | 227.778         | 222.438         | 222.775         | 222.103         | K[6]  |
| G  | 37 | 1331.785        | 185.880         | 179.740         | 180.076         | 179.404         | G[5]  |
| N  | 38 | 1371.799        | 146.873         | 140.733         | 141.069         | 140.397         | N[4]  |
| V  | 39 | 1426.154        | 128.098         | 122.758         | 123.094         | 122.422         | V[3]  |
| A  | 40 | 1469.813        | 83.344          | 78.004          | 78.340          | 77.668          | A[2]  |
| E  | 41 | 1492.847        | 50.025          | 44.685          | 45.021          | 44.349          | E[1]  |



# sp | Q6GSS7 | H2A2A\_MOUSE

[Acetyl]SGRGKQGGKARAKAKSRSSRAGLQFPVGRVHRLLRKGN<sup>+</sup>YAE

- ▶ fragmentation table for charge state 4+
- ▶ specType=etd
- ▶ score=44.97
- ▶ F113279.dat
- ▶ query=q45984.p1
- ▶ precursor=747.093360
- ▶ chargePrecursor=6
- ▶ itol=0.5

| AA |    | c               | y               | #s=1            | #s=2            | #s=3            | AA    |
|----|----|-----------------|-----------------|-----------------|-----------------|-----------------|-------|
| S  | 1  | 37.505          | <b>1120.133</b> | <b>1116.128</b> | 0.705           | <b>1115.876</b> | S[41] |
| G  | 2  | 51.780          | <b>1087.872</b> | 1083.585        | 0.755           | 1083.610        | G[40] |
| R  | 3  | 90.805          | 1073.617        | 1069.612        | 1069.894        | 1069.360        | R[39] |
| G  | 4  | 109.061         | 1034.502        | 1030.587        | <b>1030.839</b> | 1030.135        | G[38] |
| K  | 5  | 137.084         | 1020.136        | <b>1016.332</b> | <b>1016.584</b> | 1016.080        | K[37] |
| G  | 6  | 169.059         | 998.312         | 994.305         | 994.590         | 994.050         | G[36] |
| G  | 7  | 183.354         | 956.296         | 952.293         | 952.545         | 952.041         | G[35] |
| G  | 8  | 197.610         | 942.043         | 938.038         | <b>938.290</b>  | 937.795         | G[34] |
| K  | 9  | 229.633         | 927.787         | <b>923.783</b>  | <b>924.034</b>  | 923.531         | K[33] |
| A  | 10 | 247.393         | 895.763         | 891.759         | 892.011         | 891.507         | A[32] |
| R  | 11 | 286.418         | 878.004         | 873.999         | 874.251         | 873.748         | R[31] |
| A  | 12 | 304.177         | 838.979         | 834.974         | 835.226         | 834.722         | A[30] |
| K  | 13 | 336.201         | 821.220         | 817.215         | 817.467         | 816.963         | K[29] |
| A  | 14 | 353.960         | 789.199         | 785.195         | <b>785.443</b>  | 784.939         | A[28] |
| K  | 15 | 385.984         | <b>771.437</b>  | 767.432         | 767.684         | 767.180         | K[27] |
| S  | 16 | 407.742         | 739.413         | 735.408         | 735.660         | 735.156         | S[26] |
| R  | 17 | 446.767         | 717.955         | 713.950         | 714.202         | 713.698         | R[25] |
| S  | 18 | 468.526         | 678.930         | 674.925         | 675.177         | 674.673         | S[24] |
| S  | 19 | 490.283         | 656.972         | 652.967         | 653.219         | 652.715         | S[23] |
| R  | 20 | 529.309         | 635.114         | 631.109         | 631.361         | 630.857         | R[22] |
| A  | 21 | 547.068         | 596.089         | 592.084         | 592.336         | 591.832         | A[21] |
| G  | 22 | 561.323         | 578.329         | 574.324         | 574.576         | 574.072         | G[20] |
| L  | 23 | 589.984         | 564.074         | 560.069         | 560.321         | 559.817         | L[19] |
| Q  | 24 | 621.609         | 535.803         | 531.798         | 532.050         | 531.546         | Q[18] |
| F  | 25 | 658.376         | 503.789         | 499.783         | 500.035         | 499.531         | F[17] |
| F  | 26 | 682.639         | 467.021         | 463.016         | 463.268         | 462.764         | F[16] |
| V  | 27 | <b>707.406</b>  | 442.750         | 438.753         | 439.005         | 438.501         | V[15] |
| G  | 28 | 721.662         | 417.991         | 413.985         | 414.238         | 413.734         | G[14] |
| R  | 29 | 760.687         | 403.735         | 399.731         | 399.982         | 399.478         | R[13] |
| V  | 30 | <b>785.454</b>  | 384.710         | <b>380.705</b>  | 380.957         | <b>380.453</b>  | V[12] |
| H  | 31 | <b>819.719</b>  | 339.643         | 335.638         | 335.890         | 335.660         | H[11] |
| R  | 32 | 858.744         | 305.678         | 301.673         | 301.925         | 301.421         | R[10] |
| L  | 33 | 887.615         | 266.653         | 262.648         | 262.900         | 262.396         | L[9]  |
| L  | 34 | <b>915.286</b>  | 238.362         | 234.357         | 234.609         | 234.105         | L[8]  |
| R  | 35 | 954.311         | 210.111         | 206.106         | 206.358         | 205.854         | R[7]  |
| K  | 36 | <b>986.335</b>  | 171.086         | 167.081         | 167.333         | 166.829         | K[6]  |
| G  | 37 | 1000.590        | 139.064         | 135.059         | 135.309         | 134.805         | G[5]  |
| N  | 38 | <b>1029.101</b> | 124.806         | 120.802         | 121.054         | 120.550         | N[4]  |
| V  | 39 | 1069.867        | 96.296          | 92.291          | 92.543          | 92.039          | V[3]  |
| A  | 40 | 1097.606        | 58.530          | 54.525          | 54.777          | 54.273          | A[2]  |
| E  | 41 | 1119.887        | 37.771          | 33.766          | 34.018          | 33.514          | E[1]  |

# sp | Q6GSS7 | H2A2A\_MOUSE

[Acetyl]SGRGKQGGKARAKAKSRSSRAGLQFPVGRVHLLRKGNYAE

- ▶ fragmentation table for charge state 5+
- ▶ specType=etd
- ▶ score=44.97
- ▶ F113279.dat
- ▶ query=q45984\_p1
- ▶ precursor=747.093360
- ▶ chargePrecursor=6
- ▶ itol=0.5

| AA    | c              | y              | z+1            | z#2            | z              | AA    |
|-------|----------------|----------------|----------------|----------------|----------------|-------|
| S[1]  | 30.221         | <b>896.308</b> | <b>893.104</b> | 0.806          | <b>892.903</b> | S[41] |
| G[2]  | 41.625         | <b>870.499</b> | 867.298        | 0.806          | 867.094        | G[40] |
| R[3]  | 72.846         | 859.095        | <b>855.891</b> | <b>856.093</b> | 855.690        | R[39] |
| G[4]  | 84.250         | 827.875        | 824.671        | 824.873        | 824.469        | G[38] |
| K[5]  | 109.869        | 816.471        | 813.267        | 813.468        | 813.065        | K[37] |
| Q[6]  | 135.481        | 790.952        | 787.648        | 787.849        | 787.446        | Q[36] |
| G[7]  | 146.885        | 765.240        | 762.036        | 762.238        | 761.834        | G[35] |
| G[8]  | 158.289        | 751.836        | 750.632        | 750.833        | 750.430        | G[34] |
| K[9]  | 183.908        | 742.831        | 739.227        | 739.429        | 739.026        | K[33] |
| A[10] | 198.116        | 716.812        | 713.608        | 713.810        | 713.407        | A[32] |
| R[11] | 229.336        | 702.605        | 699.401        | 699.603        | 699.199        | R[31] |
| A[12] | 243.543        | <b>671.385</b> | 668.181        | 668.382        | 667.979        | A[30] |
| K[13] | 269.162        | 657.177        | <b>653.973</b> | <b>654.175</b> | <b>653.772</b> | K[29] |
| A[14] | 283.370        | 631.558        | 628.354        | 628.556        | 628.153        | A[28] |
| K[15] | 308.989        | 617.351        | 614.147        | 614.349        | 613.945        | K[27] |
| S[16] | 326.395        | 591.732        | 588.528        | 588.730        | 588.326        | S[26] |
| R[17] | 357.615        | 574.325        | 571.122        | 571.323        | 570.920        | R[25] |
| S[18] | 375.022        | 548.105        | 539.901        | 540.103        | 539.700        | S[24] |
| S[19] | 392.428        | 525.699        | 522.495        | 522.697        | 522.293        | S[23] |
| R[20] | 423.648        | 508.292        | 505.089        | 505.290        | 504.887        | R[22] |
| A[21] | 437.856        | 477.072        | 473.868        | 474.070        | 473.667        | A[21] |
| G[22] | 449.260        | 462.865        | 459.661        | 459.862        | 459.459        | G[20] |
| L[23] | 471.877        | 451.460        | 448.257        | 448.458        | 448.055        | L[19] |
| Q[24] | 497.489        | 428.844        | 425.640        | 425.841        | 425.438        | Q[18] |
| F[25] | 528.902        | 403.232        | 400.028        | 400.230        | 399.827        | F[17] |
| P[26] | 546.313        | 373.816        | 370.614        | 370.816        | 370.413        | P[16] |
| V[27] | 565.126        | 354.408        | 351.203        | 351.405        | 351.002        | V[15] |
| G[28] | 577.531        | 334.994        | 331.790        | 331.992        | 331.589        | G[14] |
| R[29] | 608.751        | 323.190        | 319.986        | 320.187        | 319.784        | R[13] |
| V[30] | 628.565        | 291.969        | 288.766        | 288.967        | 288.564        | V[12] |
| H[31] | 658.976        | 272.156        | 268.952        | 269.154        | 268.750        | H[11] |
| K[32] | 687.197        | 244.744        | 241.540        | 241.742        | 241.339        | K[10] |
| L[33] | 709.814        | 213.524        | 210.320        | 210.522        | 210.118        | L[9]  |
| L[34] | 732.430        | 190.907        | 187.703        | 187.905        | 187.502        | L[8]  |
| R[35] | 763.651        | 168.290        | 165.086        | 165.288        | 164.885        | R[7]  |
| K[36] | 789.270        | 137.070        | 133.866        | 134.068        | 133.665        | K[6]  |
| G[37] | 830.074        | 111.451        | 108.247        | 108.449        | 108.046        | G[5]  |
| N[38] | 823.487        | 100.047        | 96.843         | 97.044         | 96.641         | N[4]  |
| V[39] | <b>856.095</b> | 77.238         | 74.034         | 74.236         | 73.833         | V[3]  |
| A[40] | <b>870.303</b> | 44.625         | 41.422         | 41.623         | 41.220         | A[2]  |
| E[41] | 896.111        | 30.418         | 27.214         | 27.416         | 27.013         | E[1]  |



# sp | Q6GSS7 | H2A2A\_MOUSE

[Acetyl]SGRGKQGGKARAKAKSRSSRAGLQFPVGRVHLLLRKGNAYE

- ▶ fragmentation table for charge state 1+
- ▶ specType=etd
- ▶ score=51.17
- ▶ F113279.dat
- ▶ query=q45990.p1
- ▶ precursor=747.093990
- ▶ chargePrecursor=6
- ▶ itol=0.5

| AA | c  | y               | z+1             | z+2             | z               | AA       |       |
|----|----|-----------------|-----------------|-----------------|-----------------|----------|-------|
| S  | 1  | 147.076         | 4477.510        | 4461.491        | 0.000           | 4460.483 | S[41] |
| G  | 2  | 204.068         | 4348.467        | 4332.449        | 0.000           | 4331.441 | G[40] |
| R  | 3  | <b>360.199</b>  | 4201.448        | 4276.427        | 4476.435        | 4274.419 | R[39] |
| G  | 4  | <b>417.220</b>  | 4135.345        | 4119.326        | 4120.334        | 4118.318 | G[38] |
| K  | 5  | <b>545.315</b>  | 4078.323        | 4062.305        | 4051.313        | 4051.297 | K[37] |
| Q  | 6  | <b>673.374</b>  | 3969.279        | 3934.210        | 3935.218        | 3933.202 | Q[36] |
| G  | 7  | <b>730.395</b>  | 3822.170        | 3805.151        | 3807.159        | 3805.143 | G[35] |
| G  | 8  | 787.417         | 3705.148        | 3749.130        | 3750.138        | 3748.122 | G[34] |
| K  | 9  | <b>915.512</b>  | 3708.127        | 3662.108        | 3661.116        | 3661.100 | K[33] |
| A  | 10 | <b>986.549</b>  | 3580.032        | 3564.013        | 3565.021        | 3563.005 | A[32] |
| R  | 11 | 1142.650        | 3508.995        | 3462.976        | 3463.984        | 3461.968 | R[31] |
| A  | 12 | <b>1213.687</b> | 3352.994        | 3338.975        | 3337.983        | 3335.967 | A[30] |
| R  | 13 | 1381.782        | 3281.857        | 3265.838        | 3266.846        | 3264.830 | R[29] |
| A  | 14 | 1412.819        | 3153.762        | 3137.743        | 3138.751        | 3136.735 | A[28] |
| K  | 15 | 1540.914        | 3062.725        | 3066.706        | 3067.714        | 3065.698 | K[27] |
| S  | 16 | 1627.946        | 2954.630        | 2938.611        | 2939.619        | 2937.603 | S[26] |
| R  | 17 | 1784.047        | 2887.586        | 2851.579        | 2852.587        | 2850.571 | R[25] |
| S  | 18 | 1871.079        | 2711.490        | 2695.478        | 2696.486        | 2694.470 | S[24] |
| S  | 19 | 1958.111        | 2624.464        | 2608.446        | 2609.454        | 2607.438 | S[23] |
| R  | 20 | 2114.213        | 2537.432        | 2521.414        | 2522.422        | 2520.406 | R[22] |
| A  | 21 | 2185.250        | 2381.331        | 2365.313        | 2366.320        | 2364.305 | A[21] |
| G  | 22 | 2242.271        | 2310.294        | 2294.275        | 2295.283        | 2293.267 | G[20] |
| L  | 23 | 2305.308        | 2253.273        | 2237.254        | 2238.262        | 2236.246 | L[19] |
| Q  | 24 | 2483.414        | 2140.189        | 2124.170        | 2125.178        | 2123.162 | Q[18] |
| F  | 25 | 2630.482        | 2012.150        | 1996.111        | <b>1997.119</b> | 1995.104 | F[17] |
| P  | 26 | 2727.535        | 1805.062        | 1849.043        | 1850.051        | 1848.035 | P[16] |
| V  | 27 | 2826.603        | 1748.009        | 1751.990        | 1752.998        | 1750.982 | V[15] |
| G  | 28 | 2883.625        | 1668.940        | 1652.922        | 1653.930        | 1651.914 | G[14] |
| V  | 29 | 3030.726        | 1431.813        | 1526.800        | <b>1596.908</b> | 1594.892 | V[13] |
| V  | 30 | 3138.794        | <b>1455.818</b> | 1439.799        | 1440.807        | 1438.791 | V[12] |
| H  | 31 | 3275.853        | 1356.748        | <b>1340.731</b> | 1341.739        | 1339.723 | H[11] |
| R  | 32 | 3431.954        | 1219.691        | 1203.672        | 1204.680        | 1202.664 | R[10] |
| L  | 33 | 3545.038        | <b>1063.589</b> | <b>1047.571</b> | 1048.579        | 1046.563 | L[9]  |
| L  | 34 | 3658.121        | 950.505         | 934.487         | 935.495         | 933.479  | L[8]  |
| R  | 35 | 3814.224        | 837.421         | 821.403         | 822.410         | 820.395  | R[7]  |
| R  | 36 | 3942.319        | 681.320         | 665.302         | 666.309         | 664.293  | R[6]  |
| G  | 37 | 3999.340        | 553.225         | 537.207         | 538.214         | 536.199  | G[5]  |
| N  | 38 | 4113.383        | 406.204         | 480.185         | 481.193         | 479.177  | N[4]  |
| V  | 39 | 4276.446        | 382.161         | 366.142         | 367.150         | 365.134  | V[3]  |
| A  | 40 | 4347.483        | 219.086         | 203.079         | 204.087         | 202.071  | A[2]  |
| E  | 41 | 4476.528        | 148.060         | 132.042         | 133.050         | 131.034  | E[1]  |

# sp | Q6GSS7 | H2A2A\_MOUSE

[Acetyl]SGRGKQGGKARAKAKSRSSRAGLQFPVGRVHRLLRKGN~~YAE~~

- ▶ fragmentation table for charge state 2+
- ▶ specType=etd
- ▶ score=51.17
- ▶ F113279.dat
- ▶ query=q45990.p1
- ▶ precursor=747.093990
- ▶ chargePrecursor=6
- ▶ itol=0.5

| AA | c  | w               | #s=1            | #s=2            | z               | AA              |       |
|----|----|-----------------|-----------------|-----------------|-----------------|-----------------|-------|
| S  | 1  | 74.062          | 2239.259        | 2231.260        | 8.804           | 2230.747        | S[41] |
| G  | 2  | 102.553         | 2174.737        | 2266.726        | 0.504           | 2166.254        | G[40] |
| R  | 3  | 180.603         | 2146.227        | 2138.217        | 2138.921        | 2117.713        | R[39] |
| G  | 4  | 209.114         | 2068.176        | 2060.167        | 2060.671        | 2059.663        | G[38] |
| K  | 5  | 273.161         | 2039.665        | 2031.656        | 2032.160        | 2031.152        | K[37] |
| G  | 6  | 327.194         | 1975.616        | 1967.609        | <b>1968.112</b> | 1967.202        | G[36] |
| G  | 7  | 365.704         | 1911.569        | 1903.579        | <b>1904.083</b> | 1903.070        | G[35] |
| G  | 8  | 394.212         | 1883.078        | 1875.088        | <b>1875.572</b> | 1874.565        | G[34] |
| K  | 9  | 458.260         | 1854.567        | <b>1846.558</b> | 1847.062        | <b>1846.054</b> | K[33] |
| A  | 10 | 493.778         | 1790.520        | 1782.510        | 1783.014        | 1782.006        | A[32] |
| R  | 11 | <b>571.829</b>  | 1735.001        | 1746.992        | <b>1747.496</b> | 1746.488        | R[31] |
| A  | 12 | <b>607.347</b>  | 1669.964        | 1669.963        | <b>1669.945</b> | 1669.439        | A[30] |
| R  | 13 | <b>671.395</b>  | 1643.433        | <b>1633.423</b> | <b>1633.927</b> | 1633.910        | R[29] |
| A  | 14 | <b>706.913</b>  | 1577.384        | 1569.375        | <b>1569.879</b> | 1568.871        | A[28] |
| K  | 15 | <b>770.961</b>  | 1541.866        | <b>1533.857</b> | <b>1534.360</b> | 1533.351        | K[27] |
| S  | 16 | <b>814.477</b>  | 1477.818        | 1469.809        | 1470.313        | 1469.305        | S[26] |
| R  | 17 | <b>892.527</b>  | 1434.302        | 1426.293        | <b>1426.797</b> | 1425.789        | R[25] |
| S  | 18 | 928.618         | 1369.262        | 1369.263        | 1368.766        | 1347.759        | S[24] |
| S  | 19 | <b>979.559</b>  | <b>1312.736</b> | 1304.726        | <b>1305.230</b> | 1304.223        | S[23] |
| R  | 20 | <b>1057.610</b> | 1269.220        | 1261.210        | <b>1261.714</b> | 1260.707        | R[22] |
| A  | 21 | <b>1093.128</b> | 1191.169        | <b>1183.160</b> | 1183.664        | <b>1182.656</b> | A[21] |
| G  | 22 | 1127.839        | 1135.651        | 1147.641        | <b>1148.145</b> | 1147.137        | G[20] |
| L  | 23 | <b>1178.181</b> | 1129.140        | 1139.131        | 1139.635        | 1138.627        | L[19] |
| G  | 24 | <b>1242.211</b> | <b>1070.598</b> | 1062.589        | 1063.093        | 1062.085        | G[18] |
| F  | 25 | 1315.745        | 1006.599        | <b>998.559</b>  | <b>999.063</b>  | 998.055         | F[17] |
| F  | 26 | 1364.271        | 933.034         | 925.025         | 925.529         | 924.521         | F[16] |
| V  | 27 | 1413.805        | 884.506         | 876.496         | 877.003         | 875.995         | V[15] |
| G  | 28 | 1462.216        | 834.974         | 826.965         | 827.469         | 826.461         | G[14] |
| R  | 29 | 1526.369        | 806.483         | <b>798.454</b>  | <b>798.958</b>  | 797.950         | R[13] |
| V  | 30 | <b>1569.901</b> | 729.413         | 720.403         | 720.907         | 719.899         | V[12] |
| H  | 31 | 1636.430        | 678.878         | 670.869         | <b>671.373</b>  | 670.365         | H[11] |
| R  | 32 | 1716.481        | 610.349         | 602.340         | 602.843         | 601.835         | R[10] |
| L  | 33 | 1773.023        | 532.209         | 524.200         | 524.703         | 523.795         | L[9]  |
| L  | 34 | 1829.568        | 478.756         | 469.747         | 469.251         | 467.243         | L[8]  |
| R  | 35 | 1907.615        | 419.214         | 411.205         | 411.709         | 410.701         | R[7]  |
| K  | 36 | 1971.663        | 341.164         | 333.154         | 333.658         | 332.650         | K[6]  |
| G  | 37 | 2000.174        | 277.116         | 269.107         | 269.611         | 268.603         | G[5]  |
| N  | 38 | 2057.195        | 248.606         | 240.596         | 241.100         | 240.092         | N[4]  |
| V  | 39 | 2136.727        | 181.564         | 183.575         | 184.079         | 183.071         | V[3]  |
| A  | 40 | 2114.265        | 110.026         | 102.043         | 102.547         | 101.539         | A[2]  |
| E  | 41 | 2238.767        | 74.534          | 66.524          | 67.028          | 66.021          | E[1]  |

# sp | Q6GSS7 | H2A2A\_MOUSE

[Acetyl]SGRGKQGGKARAKAKSRSSRAGLQFPVGRVHRLLRKGNAYE

- ▶ fragmentation table for charge state 3+
- ▶ specType=etd
- ▶ score=51.17
- ▶ F113279.dat
- ▶ query=q45990.p1
- ▶ precursor=747.093990
- ▶ chargePrecursor=6
- ▶ itol=0.5

| AA   | c               | y              | z+1             | z+2             | z              | AA   |
|------|-----------------|----------------|-----------------|-----------------|----------------|------|
| S 1  | 49.697          | 1493.175       | <b>1487.835</b> | 0.672           | 1487.499       | S 41 |
| G 2  | 68.704          | 1450.161       | 1444.831        | 0.672           | 1444.485       | G 40 |
| R 3  | 120.738         | 1431.154       | 1425.814        | 1426.150        | 1425.478       | R 39 |
| G 4  | 139.745         | 1379.120       | 1373.790        | 1374.116        | 1373.444       | G 38 |
| K 5  | 182.443         | 1360.113       | <b>1354.773</b> | <b>1355.109</b> | 1354.431       | K 37 |
| Q 6  | 225.139         | 1317.614       | 1312.605        | <b>1312.411</b> | 1311.739       | Q 36 |
| G 7  | 244.137         | 1274.728       | 1269.389        | <b>1269.725</b> | 1269.051       | G 35 |
| G 8  | 263.144         | 1255.721       | 1250.381        | <b>1250.717</b> | 1250.045       | G 34 |
| K 9  | 305.842         | 1236.714       | 1231.374        | <b>1231.710</b> | 1231.038       | K 33 |
| A 10 | 329.521         | 1194.016       | 1188.676        | <b>1189.012</b> | 1188.340       | A 32 |
| R 11 | 381.555         | 1170.336       | <b>1164.997</b> | <b>1165.333</b> | 1164.661       | R 31 |
| A 12 | 405.234         | 1118.303       | 1112.963        | 1113.299        | 1112.627       | A 30 |
| K 13 | 447.932         | 1094.624       | <b>1089.284</b> | <b>1089.620</b> | 1088.948       | K 29 |
| A 14 | 471.611         | 1051.925       | <b>1046.586</b> | <b>1046.922</b> | 1046.250       | A 28 |
| K 15 | 514.310         | 1028.246       | 1022.907        | <b>1023.243</b> | 1022.571       | K 27 |
| S 16 | 543.320         | <b>985.548</b> | <b>980.208</b>  | <b>980.544</b>  | <b>979.873</b> | S 26 |
| R 17 | 595.354         | 956.537        | 951.198         | <b>951.534</b>  | 950.862        | R 25 |
| S 18 | 624.365         | 904.504        | 899.164         | 899.500         | 898.828        | S 24 |
| S 19 | 653.375         | 875.493        | <b>870.153</b>  | <b>870.489</b>  | 869.817        | S 23 |
| R 20 | <b>705.409</b>  | 846.482        | <b>841.143</b>  | <b>841.479</b>  | 840.807        | R 22 |
| A 21 | 729.688         | 794.449        | <b>789.109</b>  | <b>789.445</b>  | 788.773        | A 21 |
| G 22 | 748.695         | 770.770        | 765.430         | 765.766         | 765.094        | G 20 |
| L 23 | <b>785.790</b>  | 751.762        | <b>746.423</b>  | <b>746.759</b>  | 746.087        | L 19 |
| Q 24 | 832.476         | 714.699        | 708.723         | 709.064         | 708.392        | Q 18 |
| F 25 | 877.499         | <b>671.382</b> | 665.942         | 666.378         | 665.705        | F 17 |
| P 26 | 909.850         | 622.359        | 617.019         | 617.355         | 616.683        | P 16 |
| V 27 | <b>942.873</b>  | 590.009        | 584.668         | 585.004         | 584.332        | V 15 |
| G 28 | <b>961.880</b>  | 556.985        | 551.645         | 551.981         | 551.309        | G 14 |
| R 29 | 1011.914        | 537.978        | 532.638         | 532.974         | 532.302        | R 13 |
| V 30 | <b>1046.936</b> | 488.944        | 483.604         | 483.941         | 483.269        | V 12 |
| H 31 | <b>1092.623</b> | 452.921        | 447.582         | 447.918         | 447.246        | H 11 |
| R 32 | <b>1144.656</b> | 407.295        | 401.955         | 402.291         | 401.560        | R 10 |
| L 33 | 1182.351        | 355.201        | 349.862         | 350.198         | 349.526        | L 9  |
| L 34 | 1220.046        | 317.507        | 312.167         | 312.503         | 311.831        | L 8  |
| R 35 | 1272.079        | 279.812        | 274.472         | 274.808         | 274.136        | R 7  |
| K 36 | 1314.978        | 237.778        | 232.438         | 232.778         | 232.101        | K 6  |
| G 37 | 1333.785        | 185.980        | 179.740         | 180.076         | 179.404        | G 5  |
| N 38 | 1371.799        | 166.073        | 160.733         | 161.069         | 160.397        | N 4  |
| Y 39 | 1426.154        | 128.058        | 122.718         | 123.055         | 122.383        | Y 3  |
| A 40 | 1449.833        | 73.704         | 68.364          | 68.700          | 68.029         | A 2  |
| E 41 | 1492.847        | 50.025         | 44.685          | 45.021          | 44.349         | E 1  |

# sp | Q6GSS7 | H2A2A\_MOUSE

[Acetyl]SGRGKQGGKARAKAKSRSSRAGLQFPVGRVHRLLRKGN~~YAE~~

- ▶ fragmentation table for charge state 4+
- ▶ specType=etd
- ▶ score=51.17
- ▶ F113279.dat
- ▶ query=q45990.p1
- ▶ precursor=747.093990
- ▶ chargePrecursor=6
- ▶ itol=0.5

| AA   | c               | y               | z+1            | z+2             | z              | AA   |
|------|-----------------|-----------------|----------------|-----------------|----------------|------|
| S 1  | 17.526          | <b>1120.133</b> | 1116.138       | 0.755           | 1115.876       | S 41 |
| G 2  | 51.780          | 1087.872        | 1083.888       | 0.755           | 1083.618       | G 40 |
| R 3  | 90.805          | 1073.617        | 1069.612       | <b>1069.864</b> | 1069.360       | R 39 |
| G 4  | 105.061         | 1034.592        | 1030.587       | 1030.839        | 1030.335       | G 38 |
| K 5  | 137.084         | 1020.336        | 1016.332       | <b>1016.384</b> | 1016.080       | K 37 |
| Q 6  | 169.099         | 989.311         | 984.308        | 984.559         | 984.056        | Q 36 |
| G 7  | 183.394         | 956.290         | 952.293        | <b>952.545</b>  | <b>952.041</b> | G 35 |
| G 8  | 197.610         | 942.043         | <b>938.038</b> | <b>938.290</b>  | 937.788        | G 34 |
| K 9  | 229.633         | 927.787         | 923.783        | 924.034         | 923.531        | K 33 |
| A 10 | 247.393         | 895.763         | 891.758        | 892.011         | 891.507        | A 32 |
| R 11 | 286.418         | 875.004         | 871.009        | <b>874.251</b>  | 873.748        | R 31 |
| A 12 | 304.177         | 838.979         | 834.974        | 835.226         | 834.723        | A 30 |
| K 13 | 338.201         | 821.220         | 817.215        | 817.467         | 816.963        | K 29 |
| A 14 | 353.960         | <b>789.196</b>  | 785.191        | <b>785.443</b>  | 784.939        | A 28 |
| K 15 | 385.984         | <b>771.437</b>  | 767.432        | 767.684         | 767.180        | K 27 |
| S 16 | 407.742         | 739.413         | 735.408        | 735.660         | 735.156        | S 26 |
| R 17 | 446.767         | 717.895         | 713.890        | 713.902         | 713.398        | R 25 |
| S 18 | 468.526         | 678.630         | 674.625        | 674.877         | 674.373        | S 24 |
| S 19 | 490.283         | 655.872         | 652.867        | 653.119         | 652.615        | S 23 |
| R 20 | 529.309         | 635.114         | 631.109        | 631.361         | 630.857        | R 22 |
| A 21 | 547.066         | 596.088         | 592.084        | 592.336         | 591.833        | A 21 |
| G 22 | 561.323         | 578.329         | 574.324        | 574.576         | 574.072        | G 20 |
| L 23 | 589.594         | 564.074         | 560.069        | 560.321         | 559.817        | L 19 |
| Q 24 | 621.869         | 535.803         | 531.798        | 532.050         | 531.546        | Q 18 |
| F 25 | 658.376         | 503.788         | 499.783        | 500.035         | 499.531        | F 17 |
| P 26 | 682.639         | 467.021         | 463.016        | 463.268         | 462.764        | P 16 |
| V 27 | <b>707.406</b>  | 442.758         | 438.753        | 439.005         | 438.501        | V 15 |
| G 28 | 721.662         | 411.991         | 411.988        | 414.238         | 413.734        | G 14 |
| R 29 | 760.684         | 403.735         | 399.731        | 399.982         | 399.478        | R 13 |
| V 30 | <b>785.454</b>  | 384.719         | <b>368.705</b> | 368.957         | <b>368.453</b> | V 12 |
| H 31 | 819.719         | 339.943         | 335.938        | 336.190         | 335.686        | H 11 |
| R 32 | 858.744         | 305.676         | 301.673        | 301.925         | 301.421        | R 10 |
| L 33 | 887.015         | 266.653         | 262.648        | 262.900         | 262.396        | L 9  |
| L 34 | <b>915.286</b>  | 238.382         | 234.377        | 234.629         | 234.125        | L 8  |
| R 35 | <b>954.311</b>  | 210.111         | 206.106        | 206.358         | 205.854        | R 7  |
| K 36 | 959.316         | 171.088         | 167.083        | 167.335         | 166.831        | K 6  |
| G 37 | 1000.590        | 139.062         | 135.057        | 135.309         | 134.805        | G 5  |
| N 38 | 1029.101        | 124.800         | 120.802        | 121.054         | 120.550        | N 4  |
| Y 39 | <b>1069.867</b> | 96.296          | 92.291         | 92.543          | 92.039         | Y 3  |
| A 40 | 1087.626        | 55.530          | 51.525         | 51.777          | 51.273         | A 2  |
| E 41 | 1119.887        | 37.771          | 33.766         | 34.018          | 33.514         | E 1  |

# sp | Q6GSS7 | H2A2A\_MOUSE

[Acetyl]SGRGKQGGKARAKAKSRSSRAGLQFPVGRVHLLRKGNYAE

- ▶ fragmentation table for charge state 5+
- ▶ specType=etd
- ▶ score=51.17
- ▶ F113279.dat
- ▶ query=q45990\_p1
- ▶ precursor=747.093990
- ▶ chargePrecursor=6
- ▶ itol=0.5

| AA    | c              | y              | z+1            | z#2            | z              | AA    |
|-------|----------------|----------------|----------------|----------------|----------------|-------|
| S[1]  | 30.221         | 306.308        | <b>893.104</b> | 0.806          | <b>892.903</b> | S[41] |
| G[2]  | 41.625         | <b>870.499</b> | 867.298        | 0.806          | 867.094        | G[40] |
| R[3]  | 72.846         | 859.095        | <b>855.891</b> | <b>856.093</b> | 855.690        | R[39] |
| G[4]  | 84.250         | 827.875        | 824.671        | 824.873        | 824.469        | G[38] |
| K[5]  | 109.869        | 816.471        | 813.267        | 813.468        | 813.065        | K[37] |
| Q[6]  | 135.481        | 790.852        | 787.648        | 787.849        | 787.446        | Q[36] |
| G[7]  | 146.885        | 765.240        | 762.036        | 762.238        | 761.834        | G[35] |
| G[8]  | 158.289        | 753.836        | 750.632        | 750.833        | 750.430        | G[34] |
| K[9]  | 183.908        | 742.431        | 739.227        | 739.429        | 739.026        | K[33] |
| A[10] | 198.116        | 716.812        | 713.608        | 713.810        | 713.407        | A[32] |
| R[11] | 229.336        | 702.605        | 699.401        | 699.603        | 699.199        | R[31] |
| A[12] | 243.543        | <b>671.385</b> | 668.181        | 668.382        | 667.979        | A[30] |
| K[13] | 269.162        | 657.177        | <b>653.973</b> | <b>654.175</b> | <b>653.772</b> | K[29] |
| A[14] | 283.370        | 631.558        | 628.354        | 628.556        | 628.153        | A[28] |
| K[15] | 308.989        | 617.351        | 614.147        | 614.349        | 613.945        | K[27] |
| S[16] | 326.395        | 591.732        | 588.528        | 588.730        | 588.326        | S[26] |
| R[17] | 357.615        | 574.325        | 571.122        | 571.323        | 570.920        | R[25] |
| S[18] | 375.022        | 548.105        | 539.901        | 540.103        | 539.700        | S[24] |
| S[19] | 392.428        | 525.689        | 522.485        | 522.687        | 522.283        | S[23] |
| R[20] | 423.648        | 508.282        | 505.079        | 505.280        | 504.877        | R[22] |
| A[21] | 437.856        | 477.072        | 473.868        | 474.070        | 473.667        | A[21] |
| G[22] | 449.260        | 462.865        | 459.661        | 459.862        | 459.459        | G[20] |
| L[23] | 471.877        | 451.460        | 448.257        | 448.458        | 448.055        | L[19] |
| Q[24] | 497.489        | 428.844        | 425.640        | 425.841        | 425.438        | Q[18] |
| F[25] | 528.902        | 403.232        | 400.028        | 400.230        | 399.827        | F[17] |
| P[26] | 546.313        | 373.816        | 370.614        | 370.816        | 370.413        | P[16] |
| V[27] | 565.126        | 354.408        | 351.203        | 351.405        | 351.002        | V[15] |
| G[28] | 577.531        | 334.994        | 331.790        | 331.992        | 331.589        | G[14] |
| R[29] | 608.751        | 323.190        | 319.986        | 320.187        | 319.784        | R[13] |
| V[30] | 628.565        | 291.969        | 288.766        | 288.967        | 288.564        | V[12] |
| H[31] | 658.976        | 272.156        | 268.952        | 269.154        | 268.750        | H[11] |
| K[32] | 687.197        | 244.744        | 241.540        | 241.742        | 241.339        | K[10] |
| L[33] | 709.814        | 213.524        | 210.320        | 210.522        | 210.118        | L[9]  |
| L[34] | 732.430        | 190.907        | 187.703        | 187.905        | 187.502        | L[8]  |
| R[35] | 763.651        | 168.290        | 165.086        | 165.288        | 164.885        | R[7]  |
| K[36] | <b>789.270</b> | 137.070        | 133.866        | 134.068        | 133.665        | K[6]  |
| G[37] | 839.074        | 111.851        | 108.247        | 108.449        | 108.046        | G[5]  |
| N[38] | <b>823.482</b> | 100.047        | 96.843         | 97.044         | 96.641         | N[4]  |
| V[39] | <b>856.095</b> | 77.238         | 74.034         | 74.236         | 73.833         | V[3]  |
| A[40] | <b>870.303</b> | 44.625         | 41.422         | 41.623         | 41.220         | A[2]  |
| E[41] | 896.111        | 30.418         | 27.214         | 27.416         | 27.013         | E[1]  |





# sp | Q6GSS7 | H2A2A\_MOUSE

[Acetyl]SGRGKQGGKARAKAKSRSSRAGLQFPVGRVHRLLRKGNAYE

- ▶ fragmentation table for charge state 1+
- ▶ specType=etd
- ▶ score=84.32
- ▶ F113279.dat
- ▶ query=q45994.p1
- ▶ precursor=896.312700
- ▶ chargePrecursor=5
- ▶ itol=0.5

| AA | c  | y               | z+1             | z+2             | z               | AA       |       |
|----|----|-----------------|-----------------|-----------------|-----------------|----------|-------|
| S  | 1  | 147.076         | 4477.510        | 4461.491        | 0.000           | 4460.483 | S[41] |
| G  | 2  | 204.068         | 4348.467        | 4332.449        | 0.000           | 4331.441 | G[40] |
| R  | 3  | <b>360.199</b>  | 4201.448        | 4276.427        | 4476.435        | 4274.419 | R[39] |
| G  | 4  | <b>417.220</b>  | 4135.345        | 4119.326        | 4120.334        | 4118.318 | G[38] |
| K  | 5  | <b>545.315</b>  | 4078.323        | 4062.305        | 4053.313        | 4061.297 | K[37] |
| Q  | 6  | <b>673.374</b>  | 3969.278        | 3934.210        | 3936.218        | 3933.202 | Q[36] |
| G  | 7  | <b>730.395</b>  | 3822.170        | 3806.151        | 3807.159        | 3805.143 | G[35] |
| G  | 8  | 787.417         | 3765.148        | 3749.130        | 3750.138        | 3748.122 | G[34] |
| K  | 9  | <b>915.512</b>  | 3708.127        | 3692.108        | 3693.116        | 3691.100 | K[33] |
| A  | 10 | <b>986.549</b>  | 3580.032        | 3564.013        | 3565.021        | 3563.005 | A[32] |
| R  | 11 | 1142.650        | 3508.995        | 3492.976        | 3493.984        | 3491.968 | R[31] |
| A  | 12 | 1213.687        | 3352.994        | 3336.975        | 3337.983        | 3335.967 | A[30] |
| R  | 13 | 1341.782        | 3281.857        | 3265.838        | 3266.846        | 3264.830 | R[29] |
| A  | 14 | 1412.819        | 3153.762        | 3137.743        | 3138.751        | 3136.735 | A[28] |
| K  | 15 | <b>1540.914</b> | 3082.725        | 3066.706        | 3067.714        | 3065.698 | K[27] |
| S  | 16 | <b>1627.946</b> | 2954.630        | 2938.611        | 2939.619        | 2937.603 | S[26] |
| R  | 17 | 1784.047        | 2887.586        | 2871.579        | 2852.587        | 2890.571 | R[25] |
| S  | 18 | 1871.078        | 2741.496        | 2695.476        | 2696.484        | 2694.473 | S[24] |
| S  | 19 | <b>1958.111</b> | 2624.464        | 2608.446        | 2609.454        | 2607.438 | S[23] |
| R  | 20 | 2114.213        | 2537.432        | 2521.414        | 2522.422        | 2520.406 | R[22] |
| A  | 21 | 2185.250        | 2381.331        | 2365.313        | 2366.320        | 2364.305 | A[21] |
| G  | 22 | 2242.271        | 2310.294        | 2294.275        | 2295.283        | 2293.267 | G[20] |
| L  | 23 | 2305.308        | 2253.273        | 2237.254        | 2238.262        | 2236.246 | L[19] |
| Q  | 24 | 2483.414        | 2140.189        | 2124.170        | 2125.178        | 2123.162 | Q[18] |
| F  | 25 | 2630.482        | 2012.130        | <b>1996.111</b> | 1997.119        | 1995.104 | F[17] |
| P  | 26 | 2727.535        | 1895.062        | 1849.043        | 1850.051        | 1848.035 | P[16] |
| V  | 27 | 2826.603        | 1788.009        | 1751.990        | <b>1752.998</b> | 1750.982 | V[15] |
| G  | 28 | 2883.625        | 1668.940        | 1652.922        | <b>1653.930</b> | 1651.914 | G[14] |
| D  | 29 | 2930.226        | 1611.918        | 1595.900        | <b>1596.908</b> | 1594.892 | D[13] |
| D  | 30 | 3138.794        | 1455.818        | 1439.799        | 1440.807        | 1438.791 | D[12] |
| H  | 31 | 3275.853        | 1358.748        | <b>1340.731</b> | 1341.739        | 1339.723 | H[11] |
| R  | 32 | 3431.964        | <b>1219.691</b> | 1203.672        | <b>1204.680</b> | 1202.664 | R[10] |
| L  | 33 | 3545.038        | 1063.589        | 1047.571        | 1048.579        | 1046.563 | L[9]  |
| L  | 34 | 3658.121        | 950.505         | 934.487         | 935.495         | 933.479  | L[8]  |
| R  | 35 | 3814.224        | 837.421         | 821.403         | 822.410         | 820.394  | R[7]  |
| K  | 36 | 3942.319        | 681.320         | 665.302         | 666.309         | 664.293  | K[6]  |
| G  | 37 | 3999.340        | 553.225         | 537.207         | 538.214         | 536.199  | G[5]  |
| N  | 38 | 4113.383        | 406.204         | 480.185         | 481.193         | 479.177  | N[4]  |
| V  | 39 | 4276.446        | 382.161         | 366.142         | 367.150         | 365.134  | V[3]  |
| A  | 40 | 4347.463        | 219.086         | 203.079         | 204.087         | 202.071  | A[2]  |
| E  | 41 | 4476.528        | 148.060         | 132.042         | 133.050         | 131.034  | E[1]  |

# sp | Q6GSS7 | H2A2A\_MOUSE

[Acetyl]SGRGKQGQGGKARAKAKSRSSRAGLQFPVGRVHRLLRKGNAYE

- ▶ fragmentation table for charge state 2+
- ▶ specType=etd
- ▶ score=84.32
- ▶ F113279.dat
- ▶ query=q45994\_p1
- ▶ precursor=896.312700
- ▶ chargePrecursor=5
- ▶ itol=0.5

| AA | c  | w               | #±1             | #±2             | z               | AA              |       |
|----|----|-----------------|-----------------|-----------------|-----------------|-----------------|-------|
| S  | 1  | 74.062          | 2239.259        | 2231.260        | 8.804           | 2239.147        | S[41] |
| G  | 2  | 102.553         | 2174.737        | 2266.726        | 0.504           | 2166.254        | G[49] |
| R  | 3  | 180.603         | 2146.227        | 2138.217        | 2138.921        | 2117.713        | R[39] |
| G  | 4  | 209.114         | 2068.176        | 2060.167        | 2060.671        | 2059.663        | G[38] |
| K  | 5  | 273.161         | 2039.665        | 2031.656        | 2032.160        | 2031.152        | K[37] |
| Q  | 6  | 337.194         | 1975.616        | <b>1967.609</b> | <b>1966.112</b> | 1967.205        | Q[36] |
| G  | 7  | 365.703         | 1911.569        | <b>1903.579</b> | 1914.983        | <b>1903.075</b> | G[35] |
| G  | 8  | 394.212         | 1883.078        | <b>1875.068</b> | <b>1875.572</b> | 1874.565        | G[34] |
| K  | 9  | 458.260         | 1854.567        | 1846.558        | 1847.062        | 1846.054        | K[33] |
| A  | 10 | 493.778         | 1790.520        | 1782.510        | <b>1783.014</b> | 1782.006        | A[32] |
| R  | 11 | 571.820         | 1735.001        | 1746.992        | <b>1747.496</b> | 1746.488        | R[31] |
| A  | 12 | 609.839         | 1668.963        | 1660.953        | <b>1661.457</b> | 1660.449        | A[30] |
| K  | 13 | <b>671.395</b>  | 1643.432        | <b>1633.423</b> | 1633.927        | <b>1632.919</b> | K[29] |
| A  | 14 | <b>706.913</b>  | 1577.384        | 1569.375        | <b>1569.879</b> | 1568.871        | A[28] |
| K  | 15 | <b>770.961</b>  | 1541.866        | <b>1533.857</b> | <b>1534.360</b> | 1533.351        | K[27] |
| S  | 16 | 814.477         | 1477.818        | 1469.809        | 1470.313        | 1469.305        | S[26] |
| R  | 17 | <b>892.527</b>  | 1434.302        | <b>1426.293</b> | <b>1426.797</b> | 1425.789        | R[25] |
| S  | 18 | <b>936.043</b>  | 1368.262        | <b>1348.243</b> | <b>1348.746</b> | 1347.738        | S[24] |
| S  | 19 | 999.559         | <b>1312.736</b> | <b>1304.726</b> | <b>1305.230</b> | 1304.221        | S[23] |
| R  | 20 | <b>1057.610</b> | 1269.220        | <b>1261.210</b> | <b>1261.714</b> | 1260.707        | R[22] |
| A  | 21 | <b>1093.128</b> | 1191.169        | <b>1183.160</b> | 1183.664        | <b>1182.656</b> | A[21] |
| G  | 22 | 1121.639        | 1135.651        | 1147.641        | 1148.145        | 1147.137        | G[20] |
| L  | 23 | 1178.188        | 1119.140        | 1129.131        | 1129.635        | 1128.627        | L[19] |
| Q  | 24 | <b>1242.211</b> | <b>1070.598</b> | 1062.589        | 1063.093        | 1062.085        | Q[18] |
| F  | 25 | 1315.745        | 1008.599        | <b>998.559</b>  | <b>999.063</b>  | 998.055         | F[17] |
| F  | 26 | <b>1364.271</b> | 933.034         | 925.025         | 925.529         | 924.521         | F[16] |
| V  | 27 | <b>1413.805</b> | 884.508         | 876.499         | 877.003         | 875.995         | V[15] |
| G  | 28 | 1442.216        | 834.974         | 826.965         | 827.469         | 826.461         | G[14] |
| R  | 29 | 1528.269        | 808.483         | <b>798.454</b>  | <b>798.958</b>  | 797.950         | R[13] |
| V  | 30 | <b>1569.901</b> | 728.413         | 720.403         | 720.907         | 719.899         | V[12] |
| H  | 31 | <b>1638.430</b> | 678.878         | <b>670.869</b>  | <b>671.373</b>  | 670.365         | H[11] |
| R  | 32 | 1716.481        | 610.349         | 602.340         | 602.843         | 601.835         | R[10] |
| L  | 33 | 1733.023        | 532.289         | 524.280         | 524.783         | 523.775         | L[9]  |
| L  | 34 | <b>1829.565</b> | 478.756         | 469.747         | 469.251         | 468.243         | L[8]  |
| R  | 35 | 1907.618        | 419.214         | 411.205         | 411.709         | 410.701         | R[7]  |
| K  | 36 | 1971.663        | 341.164         | 333.154         | 333.658         | 332.650         | K[6]  |
| G  | 37 | 2000.174        | 277.116         | 269.107         | 269.611         | 268.603         | G[5]  |
| N  | 38 | 2057.195        | 248.606         | 240.596         | 241.100         | 240.092         | N[4]  |
| V  | 39 | 2136.227        | 181.564         | 183.575         | 184.079         | 183.071         | V[3]  |
| A  | 40 | 2114.265        | 110.026         | 102.017         | 102.521         | 101.513         | A[2]  |
| E  | 41 | 2238.767        | 74.534          | 66.524          | 67.028          | 66.021          | E[1]  |

# sp | Q6GSS7 | H2A2A\_MOUSE

[Acetyl]SGRGKQGGKARAKAKSRSSRAGLQFPVGRVHRLLRKGNAYE

- ▶ fragmentation table for charge state 3+
- ▶ specType=etd
- ▶ score=84.32
- ▶ F113279.dat
- ▶ query=q45994.p1
- ▶ precursor=896.312700
- ▶ chargePrecursor=5
- ▶ itol=0.5

| AA   | c               | y              | z+1             | z+2             | z               | AA   |
|------|-----------------|----------------|-----------------|-----------------|-----------------|------|
| S 1  | 49.697          | 1493.175       | <b>1487.835</b> | 0.672           | <b>1487.499</b> | S 41 |
| G 2  | 68.704          | 1450.161       | <b>1444.821</b> | 0.672           | <b>1444.485</b> | G 40 |
| R 3  | 130.738         | 1431.154       | 1425.814        | <b>1426.150</b> | 1425.478        | R 39 |
| G 4  | 139.745         | 1379.120       | 1373.780        | 1374.116        | 1373.444        | G 38 |
| K 5  | 182.443         | 1360.113       | 1354.773        | <b>1355.109</b> | 1354.437        | K 37 |
| Q 6  | 235.330         | 1317.414       | 1312.070        | <b>1312.411</b> | 1311.795        | Q 36 |
| G 7  | 244.137         | 1274.725       | 1269.255        | 1269.725        | 1269.055        | G 35 |
| G 8  | 283.144         | 1255.721       | <b>1250.381</b> | <b>1250.717</b> | 1250.045        | G 34 |
| K 9  | 305.842         | 1236.714       | 1231.374        | 1231.710        | 1231.038        | K 33 |
| A 10 | 329.521         | 1194.015       | 1188.676        | 1189.012        | 1188.340        | A 32 |
| R 11 | 381.555         | 1170.136       | 1164.997        | <b>1165.333</b> | 1164.661        | R 31 |
| A 12 | 409.234         | 1118.303       | 1112.963        | 1113.299        | 1112.627        | A 30 |
| R 13 | 447.932         | 1094.024       | 1089.254        | 1089.620        | 1088.948        | R 29 |
| A 14 | 471.611         | 1051.925       | 1046.589        | 1046.922        | 1046.250        | A 28 |
| K 15 | 514.310         | 1028.246       | 1022.907        | 1023.243        | 1022.571        | K 27 |
| S 16 | 543.320         | 985.548        | 980.208         | 980.544         | 979.871         | S 26 |
| R 17 | 595.354         | 956.537        | 951.198         | 951.534         | 950.862         | R 25 |
| S 18 | 624.365         | 924.504        | 919.164         | 919.500         | 918.828         | S 24 |
| S 19 | 653.375         | 875.493        | 870.153         | 870.489         | 869.817         | S 23 |
| R 20 | 705.409         | 846.482        | 841.143         | 841.479         | 840.807         | R 22 |
| A 21 | 729.088         | 794.449        | 789.109         | 789.445         | 788.773         | A 21 |
| G 22 | 748.095         | <b>770.770</b> | 765.430         | 765.766         | 765.094         | G 20 |
| L 23 | 785.730         | 731.762        | 746.423         | 746.759         | 746.087         | L 19 |
| Q 24 | 828.478         | 714.069        | 708.729         | 709.064         | 708.392         | Q 19 |
| F 25 | 877.409         | <b>671.382</b> | 666.042         | 666.378         | 665.706         | F 17 |
| F 26 | <b>909.850</b>  | 622.359        | 617.019         | 617.355         | 616.683         | F 16 |
| V 27 | <b>942.873</b>  | 590.028        | 584.688         | 585.024         | 584.352         | V 15 |
| G 28 | <b>961.880</b>  | 556.985        | 551.645         | 551.981         | 551.309         | G 14 |
| R 29 | 1013.914        | 537.978        | 532.638         | 532.974         | 532.302         | R 13 |
| R 30 | 1046.938        | 488.944        | 483.604         | 483.941         | 483.269         | R 12 |
| H 31 | 1092.823        | 452.921        | 447.581         | 447.918         | 447.246         | H 11 |
| R 32 | 1144.656        | 407.935        | 402.595         | 402.931         | 402.260         | R 10 |
| L 33 | 1182.351        | 355.201        | 349.862         | 350.198         | 349.526         | L 9  |
| L 34 | <b>1220.646</b> | 317.507        | 312.167         | 312.503         | 311.831         | L 8  |
| R 35 | 1272.079        | 278.812        | 274.472         | 274.808         | 274.136         | R 7  |
| R 36 | 1314.778        | 227.778        | 222.438         | 222.775         | 222.103         | R 6  |
| G 37 | 1333.785        | 185.080        | 179.740         | 180.076         | 179.404         | G 5  |
| N 38 | <b>1371.799</b> | 166.073        | 160.733         | 161.069         | 160.397         | N 4  |
| V 39 | <b>1426.154</b> | 128.058        | 122.719         | 123.055         | 122.383         | V 3  |
| A 40 | 1449.831        | 73.704         | 68.364          | 68.700          | 68.028          | A 2  |
| E 41 | 1492.287        | 30.025         | 44.685          | 45.021          | 44.349          | E 1  |

# sp | Q6GSS7 | H2A2A\_MOUSE

[Acetyl]SGRGKQGGKARAKAKSRSSRAGLQFPVGRVHRLLRKGNAYE

- ▶ fragmentation table for charge state 4+
- ▶ specType=etd
- ▶ score=84.32
- ▶ F113279.dat
- ▶ query=q45994.p1
- ▶ precursor=896.312700
- ▶ chargePrecursor=5
- ▶ itol=0.5

| AA    | c               | y               | z+1             | z+2             | z              | AA    |
|-------|-----------------|-----------------|-----------------|-----------------|----------------|-------|
| S[1]  | 57.525          | 1120.133        | <b>1116.128</b> | 0.755           | 1115.879       | S[41] |
| G[2]  | 51.780          | <b>1087.872</b> | 1083.888        | 0.755           | 1083.616       | G[40] |
| R[3]  | 90.805          | 1073.617        | 1069.812        | <b>1069.864</b> | 1069.350       | R[30] |
| G[4]  | 105.061         | 1034.592        | 1030.587        | 1030.839        | 1030.335       | G[38] |
| K[5]  | 137.084         | 1020.336        | 1015.332        | 1016.584        | 1016.080       | K[37] |
| Q[6]  | 189.009         | 989.313         | 984.308         | 984.560         | 984.056        | Q[30] |
| G[7]  | 253.254         | 956.290         | 952.293         | 952.545         | 952.041        | G[35] |
| G[8]  | 197.810         | 942.043         | 938.038         | 938.290         | 937.786        | G[34] |
| K[9]  | 229.633         | 927.787         | 923.783         | 924.034         | 923.531        | K[33] |
| A[10] | 247.393         | 895.763         | 891.759         | 892.011         | 891.507        | A[32] |
| R[11] | 286.418         | 878.004         | 873.999         | 874.251         | 873.746        | R[31] |
| A[12] | 304.177         | 838.978         | 834.974         | 835.226         | 834.722        | A[30] |
| R[13] | 336.201         | 821.220         | 817.215         | 817.467         | 816.963        | R[29] |
| A[14] | 353.960         | 799.196         | 795.191         | 795.443         | 794.939        | A[28] |
| K[15] | 385.984         | <b>771.437</b>  | 767.432         | 767.684         | 767.180        | K[27] |
| S[16] | 407.742         | 739.413         | 735.408         | 735.660         | 735.156        | S[26] |
| R[17] | 446.767         | 747.665         | 743.659         | 743.912         | 743.408        | R[25] |
| S[18] | 468.526         | 678.939         | 674.935         | 675.187         | 674.683        | S[24] |
| S[19] | 490.283         | 656.872         | 652.867         | 653.119         | 652.615        | S[23] |
| R[20] | 529.309         | 635.114         | 631.109         | 631.361         | 630.857        | R[22] |
| A[21] | 547.068         | 596.088         | 592.084         | 592.336         | 591.832        | A[21] |
| Q[22] | 561.323         | 578.329         | 574.324         | 574.576         | 574.072        | Q[20] |
| L[23] | 589.334         | 564.074         | 560.069         | 560.321         | 559.817        | L[19] |
| Q[24] | 621.609         | 536.803         | 532.798         | 533.050         | 532.546        | Q[19] |
| F[25] | 658.376         | 503.788         | 499.783         | 500.035         | 499.531        | F[17] |
| F[26] | 682.639         | 467.021         | 463.016         | 463.268         | 462.764        | F[16] |
| V[27] | <b>707.406</b>  | 442.758         | 438.753         | 439.005         | 438.501        | V[15] |
| G[28] | 721.662         | 417.991         | 413.986         | 414.238         | 413.734        | G[14] |
| D[29] | 750.687         | 403.735         | 399.731         | 399.983         | 399.479        | D[13] |
| V[30] | 785.454         | 384.710         | <b>360.705</b>  | 360.957         | <b>360.453</b> | V[12] |
| H[31] | 819.719         | 339.943         | 335.938         | 336.190         | 335.686        | H[11] |
| R[32] | 858.744         | 305.678         | 301.673         | 301.925         | 301.421        | R[10] |
| L[33] | 887.015         | 266.653         | 262.648         | 262.900         | 262.396        | L[9]  |
| L[34] | <b>915.286</b>  | 238.382         | 234.377         | 234.629         | 234.125        | L[8]  |
| R[35] | 954.313         | 210.111         | 206.106         | 206.358         | 205.854        | R[7]  |
| R[36] | <b>986.335</b>  | 171.085         | 167.081         | 167.333         | 166.829        | R[6]  |
| G[37] | 1000.590        | 139.062         | 135.057         | 135.309         | 134.805        | G[5]  |
| N[38] | 1029.101        | 124.808         | 120.802         | 121.054         | 120.550        | N[4]  |
| V[39] | <b>1069.867</b> | 96.290          | 92.291          | 92.543          | 92.039         | V[3]  |
| A[40] | <b>1087.626</b> | 55.530          | 51.525          | 51.777          | 51.273         | A[2]  |
| E[41] | 1119.887        | 37.771          | 33.766          | 34.018          | 33.514         | E[1]  |



# sp | Q6GSS7 | H2A2A\_MOUSE

[Acetyl]SGRGKQGGKARAKAKSRSSRAGLQFPVGRVHRLLRKGNAYE

- ▶ fragmentation table for charge state 1+
- ▶ specType=etd
- ▶ score=60.30
- ▶ F113279.dat
- ▶ query=q45995.p1
- ▶ precursor=896.313160
- ▶ chargePrecursor=5
- ▶ itol=0.5

| AA   | c               | y               | z+1             | z+2             | z        | AA   |
|------|-----------------|-----------------|-----------------|-----------------|----------|------|
| S 1  | 147.076         | 4477.510        | 4461.491        | 0.000           | 4460.483 | S 41 |
| G 2  | 204.098         | 4348.467        | 4332.449        | 0.000           | 4331.441 | G 40 |
| R 3  | <b>360.199</b>  | 4201.448        | 4276.427        | 4276.435        | 4274.419 | R 39 |
| G 4  | <b>417.220</b>  | 4135.345        | 4119.326        | 4120.334        | 4118.318 | G 38 |
| K 5  | <b>545.315</b>  | 4078.323        | 4062.305        | 4063.313        | 4061.297 | K 37 |
| Q 6  | <b>673.374</b>  | 3969.278        | 3934.210        | 3935.218        | 3933.202 | Q 36 |
| G 7  | <b>730.395</b>  | 3822.170        | 3806.151        | 3807.159        | 3805.143 | G 35 |
| G 8  | <b>787.417</b>  | 3765.148        | 3749.130        | 3750.138        | 3748.122 | G 34 |
| K 9  | <b>915.512</b>  | 3708.127        | 3692.108        | 3693.116        | 3691.100 | K 33 |
| A 10 | <b>986.549</b>  | 3580.032        | 3564.013        | 3565.021        | 3563.005 | A 32 |
| R 11 | <b>1142.650</b> | 3508.995        | 3492.976        | 3493.984        | 3491.968 | R 31 |
| A 12 | 1213.687        | 3352.984        | 3336.975        | 3337.983        | 3335.967 | A 30 |
| R 13 | <b>1341.782</b> | 3281.957        | 3265.938        | 3266.946        | 3264.930 | R 29 |
| A 14 | 1412.819        | 3153.962        | 3137.943        | 3138.951        | 3136.935 | A 28 |
| K 15 | 1540.914        | 3082.725        | 3066.706        | 3067.714        | 3065.698 | K 27 |
| S 16 | <b>1627.946</b> | 2954.630        | 2938.611        | 2939.619        | 2937.603 | S 26 |
| R 17 | 1784.047        | 2887.586        | 2871.579        | 2872.587        | 2870.571 | R 25 |
| S 18 | 1871.079        | 2711.490        | 2695.478        | 2696.486        | 2694.470 | S 24 |
| S 19 | 1958.111        | 2624.464        | 2608.446        | 2609.454        | 2607.438 | S 23 |
| R 20 | 2114.213        | 2537.432        | 2521.414        | 2522.422        | 2520.406 | R 22 |
| A 21 | 2185.250        | 2381.331        | 2365.313        | 2366.320        | 2364.305 | A 21 |
| G 22 | 2242.271        | 2310.294        | 2294.275        | 2295.283        | 2293.267 | G 20 |
| L 23 | 2385.308        | 2253.273        | 2237.254        | 2238.262        | 2236.246 | L 19 |
| Q 24 | 2483.414        | 2140.189        | 2124.170        | 2125.178        | 2123.162 | Q 19 |
| F 25 | 2630.482        | 2012.135        | 1996.111        | <b>1997.119</b> | 1995.104 | F 17 |
| P 26 | 2727.535        | 1895.062        | 1849.043        | 1850.051        | 1848.035 | P 16 |
| V 27 | 2826.603        | 1788.009        | 1751.990        | 1752.998        | 1750.982 | V 15 |
| G 28 | 2883.625        | <b>1568.940</b> | 1652.922        | <b>1653.930</b> | 1651.914 | G 14 |
| R 29 | 3030.726        | 1611.910        | 1595.890        | <b>1596.908</b> | 1594.882 | R 13 |
| V 30 | 3138.784        | 1455.812        | 1439.792        | 1440.800        | 1438.784 | V 12 |
| H 31 | 3275.853        | 1358.748        | 1340.731        | <b>1341.739</b> | 1339.723 | H 11 |
| R 32 | 3431.964        | 1219.691        | <b>1203.672</b> | 1204.680        | 1202.664 | R 10 |
| L 33 | 3545.038        | 1063.589        | <b>1047.571</b> | 1048.579        | 1046.563 | L 9  |
| L 34 | 3658.121        | 950.505         | 934.487         | 935.495         | 933.479  | L 8  |
| T 35 | 3814.224        | 837.421         | 821.403         | <b>822.410</b>  | 820.394  | T 7  |
| R 36 | 3942.319        | 681.320         | 665.302         | 666.310         | 664.294  | R 6  |
| G 37 | 3999.340        | 553.225         | 537.207         | 538.214         | 536.199  | G 5  |
| N 38 | 4113.383        | 406.204         | 480.185         | 481.193         | 479.177  | N 4  |
| V 39 | 4276.446        | 382.161         | 366.142         | 367.150         | 365.134  | V 3  |
| A 40 | 4347.483        | 219.086         | 203.079         | 204.087         | 202.071  | A 2  |
| E 41 | 4476.528        | 148.060         | 132.042         | 133.050         | 131.034  | E 1  |

# sp | Q6GSS7 | H2A2A\_MOUSE

[Acetyl]SGRGKQGGKARAKAKSRSSRAGLQFPVGRVHRLLRKGNAYE

- ▶ fragmentation table for charge state 2+
- ▶ specType=etd
- ▶ score=60.30
- ▶ F113279.dat
- ▶ query=q45995.p1
- ▶ precursor=896.313160
- ▶ chargePrecursor=5
- ▶ itol=0.5

| AA | c  | w               | #s1             | #s2             | z               | AA              |       |
|----|----|-----------------|-----------------|-----------------|-----------------|-----------------|-------|
| S  | 1  | 74.062          | 2039.259        | 2221.300        | 8.804           | 2230.147        | S[41] |
| G  | 2  | 102.553         | 2174.737        | 2266.726        | 0.504           | 2166.254        | G[40] |
| R  | 3  | 180.603         | 2146.227        | 2138.217        | 2138.921        | 2117.713        | R[39] |
| G  | 4  | 209.114         | 2068.176        | 2060.167        | 2060.671        | 2059.663        | G[38] |
| K  | 5  | 273.161         | 2039.665        | 2031.656        | 2032.160        | 2031.152        | K[37] |
| G  | 6  | 327.194         | 1975.616        | 1967.608        | <b>1968.112</b> | 1967.105        | G[36] |
| G  | 7  | 365.703         | 1911.569        | 1903.579        | 1904.583        | 1903.570        | G[35] |
| G  | 8  | 394.212         | 1883.078        | <b>1875.068</b> | <b>1875.572</b> | 1874.565        | G[34] |
| K  | 9  | 458.260         | 1854.567        | 1846.558        | 1847.562        | 1846.554        | K[33] |
| A  | 10 | 493.778         | 1790.520        | <b>1782.510</b> | <b>1783.014</b> | 1782.006        | A[32] |
| R  | 11 | 571.829         | 1735.001        | <b>1746.992</b> | 1747.496        | <b>1746.488</b> | R[31] |
| A  | 12 | 609.899         | 1678.954        | <b>1668.941</b> | 1669.446        | <b>1668.437</b> | A[30] |
| K  | 13 | <b>671.395</b>  | 1643.433        | 1635.423        | <b>1633.927</b> | 1632.921        | K[29] |
| A  | 14 | <b>706.913</b>  | 1577.384        | 1569.375        | <b>1569.879</b> | 1568.871        | A[28] |
| K  | 15 | <b>770.961</b>  | <b>1541.866</b> | 1533.857        | <b>1534.360</b> | 1533.351        | K[27] |
| S  | 16 | <b>814.477</b>  | 1477.818        | 1469.809        | 1470.313        | 1469.305        | S[26] |
| R  | 17 | 862.527         | 1404.362        | 1425.762        | <b>1426.797</b> | 1425.789        | R[25] |
| S  | 18 | 938.683         | 1356.762        | <b>1348.243</b> | 1349.247        | <b>1347.739</b> | S[24] |
| S  | 19 | <b>970.559</b>  | <b>1312.736</b> | 1304.726        | <b>1305.230</b> | 1304.223        | S[23] |
| R  | 20 | <b>1057.610</b> | 1269.220        | <b>1261.210</b> | <b>1261.714</b> | 1260.707        | R[22] |
| A  | 21 | 1093.128        | 1191.169        | <b>1183.160</b> | <b>1183.664</b> | 1182.656        | A[21] |
| G  | 22 | 1121.639        | 1135.651        | 1147.641        | 1148.145        | 1147.137        | G[20] |
| L  | 23 | 1179.683        | 1127.146        | 1119.137        | 1119.639        | 1118.631        | L[19] |
| G  | 24 | <b>1242.211</b> | 1063.586        | 1055.580        | 1063.093        | 1062.085        | G[18] |
| F  | 25 | 1315.745        | 1006.599        | <b>998.559</b>  | <b>999.063</b>  | <b>998.055</b>  | F[17] |
| F  | 26 | <b>1364.271</b> | 933.034         | 925.025         | 925.529         | 924.521         | F[16] |
| V  | 27 | <b>1413.805</b> | 884.506         | 876.496         | 877.003         | 875.993         | V[15] |
| G  | 28 | 1442.216        | 834.974         | 826.965         | 827.468         | 826.461         | G[14] |
| R  | 29 | 1526.369        | 806.483         | 798.474         | 798.978         | 797.970         | R[13] |
| V  | 30 | <b>1569.901</b> | 729.413         | 720.403         | 720.907         | 719.899         | V[12] |
| H  | 31 | <b>1638.430</b> | 678.878         | 670.869         | <b>671.373</b>  | 670.365         | H[11] |
| R  | 32 | <b>1716.481</b> | 610.349         | 602.340         | 602.843         | 601.835         | R[10] |
| L  | 33 | 1773.023        | 532.269         | 524.260         | 524.763         | 523.755         | L[9]  |
| L  | 34 | 1829.566        | 478.756         | 469.747         | 469.251         | 468.243         | L[8]  |
| R  | 35 | 1907.615        | 419.214         | 411.205         | 411.709         | 410.701         | R[7]  |
| K  | 36 | 1971.663        | 341.164         | 333.154         | 333.658         | 332.650         | K[6]  |
| G  | 37 | 2000.174        | 277.116         | 269.107         | 269.611         | 268.603         | G[5]  |
| N  | 38 | 2057.195        | 248.606         | 240.596         | 241.100         | 240.092         | N[4]  |
| V  | 39 | 2136.227        | 181.564         | 183.575         | 184.079         | 183.071         | V[3]  |
| A  | 40 | 2114.265        | 110.026         | 102.043         | 102.547         | 101.539         | A[2]  |
| E  | 41 | 2238.767        | 74.534          | 66.524          | 67.028          | 66.021          | E[1]  |



# sp | Q6GSS7 | H2A2A\_MOUSE

[Acetyl]SGRGKQGGKARAKAKSRSSRAGLQFPVGRVHLLRKGNYAE

- ▶ fragmentation table for charge state 3+
- ▶ specType=etd
- ▶ score=60.30
- ▶ F113279.dat
- ▶ query=q45995.p1
- ▶ precursor=896.313160
- ▶ chargePrecursor=5
- ▶ itol=0.5

| AA | c  | y               | #s1             | #s2             | z               | AA              |       |
|----|----|-----------------|-----------------|-----------------|-----------------|-----------------|-------|
| S  | 1  | 489.607         | 1392.178        | <b>1487.835</b> | 0.872           | <b>1487.499</b> | S[41] |
| G  | 2  | 66.704          | <b>1450.161</b> | 1444.521        | 0.672           | 1444.462        | G[40] |
| R  | 3  | 1307.718        | 1431.154        | 1425.814        | 1426.150        | 1425.478        | R[39] |
| G  | 4  | 139.745         | 1379.120        | 1373.780        | 1374.416        | 1373.444        | G[38] |
| K  | 5  | 182.443         | 1360.113        | <b>1354.773</b> | <b>1355.109</b> | 1354.437        | K[37] |
| Q  | 6  | 225.130         | 1347.444        | 1342.075        | <b>1342.441</b> | 1341.730        | Q[36] |
| G  | 7  | 244.137         | 1324.725        | 1289.339        | <b>1289.725</b> | 1289.055        | G[35] |
| G  | 8  | 263.144         | 1295.721        | 1250.381        | <b>1250.717</b> | 1250.045        | G[34] |
| K  | 9  | 305.642         | 1236.714        | 1231.374        | 1231.710        | 1231.038        | K[33] |
| A  | 10 | 329.521         | 1194.016        | 1188.676        | 1189.012        | 1188.340        | A[32] |
| R  | 11 | 381.555         | 1170.338        | 1164.997        | 1165.333        | 1164.661        | R[31] |
| A  | 12 | 485.234         | 1118.303        | 1112.963        | 1113.300        | 1112.627        | A[30] |
| K  | 13 | 447.932         | 1084.624        | 1089.284        | 1089.620        | 1088.948        | K[29] |
| A  | 14 | 471.611         | 1051.925        | 1046.585        | <b>1046.922</b> | 1046.250        | A[28] |
| K  | 15 | 514.310         | 1028.246        | 1022.907        | 1023.243        | 1022.571        | K[27] |
| S  | 16 | 543.320         | 985.548         | 980.208         | 980.544         | <b>979.873</b>  | S[26] |
| R  | 17 | 595.254         | 956.537         | 951.198         | 951.534         | 950.862         | R[25] |
| S  | 18 | 624.365         | 904.504         | 909.164         | 909.500         | 908.828         | S[24] |
| S  | 19 | 653.375         | 875.493         | 870.153         | 870.489         | 869.817         | S[23] |
| R  | 20 | 705.409         | 846.482         | 841.143         | 841.479         | 840.807         | R[22] |
| A  | 21 | 729.088         | 794.449         | 789.109         | 789.445         | 788.773         | A[21] |
| G  | 22 | 748.095         | 770.770         | 765.430         | 765.766         | 765.094         | G[20] |
| L  | 23 | 785.790         | 754.762         | 749.423         | 749.759         | 749.087         | L[19] |
| Q  | 24 | 828.476         | 714.085         | 708.745         | 709.084         | 708.362         | Q[18] |
| F  | 25 | <b>877.499</b>  | <b>671.382</b>  | 666.042         | 666.378         | 665.706         | F[17] |
| F  | 26 | 909.850         | 622.359         | 617.019         | 617.355         | 616.683         | F[16] |
| V  | 27 | <b>942.873</b>  | 590.008         | 584.668         | 585.004         | 584.332         | V[15] |
| G  | 28 | <b>961.860</b>  | 558.985         | 553.645         | 553.981         | 553.309         | G[14] |
| K  | 29 | 1013.814        | 519.976         | 514.636         | 514.974         | 514.302         | K[13] |
| V  | 30 | <b>1046.936</b> | 485.944         | 480.604         | 480.941         | 480.269         | V[12] |
| H  | 31 | 1092.623        | 452.921         | 447.581         | 447.918         | 447.246         | H[11] |
| R  | 32 | 1144.656        | 407.235         | 401.895         | 402.231         | 401.560         | R[10] |
| L  | 33 | 1182.353        | 355.201         | 349.862         | 350.198         | 349.526         | L[9]  |
| L  | 34 | <b>1220.046</b> | 312.509         | 307.169         | 307.505         | 306.833         | L[8]  |
| R  | 35 | 1257.743        | 273.812         | 274.472         | 274.808         | 274.136         | R[7]  |
| K  | 36 | 1314.778        | 227.778         | 222.439         | 222.775         | 222.103         | K[6]  |
| G  | 37 | 1333.785        | 185.880         | 179.740         | 180.076         | 179.404         | G[5]  |
| N  | 38 | <b>1371.799</b> | 166.873         | 160.733         | 161.069         | 160.397         | N[4]  |
| V  | 39 | 1426.154        | 128.098         | 122.719         | 123.055         | 122.383         | V[3]  |
| A  | 40 | 1469.213        | 83.304          | 83.304          | 83.304          | 83.304          | A[2]  |
| E  | 41 | 1492.847        | 50.025          | 44.635          | 45.021          | 44.349          | E[1]  |

# sp | Q6GSS7 | H2A2A\_MOUSE

[Acetyl]SGRGKQGGKARAKAKSRSSRAGLQFPVGRVHLLRKGNYAE

- ▶ fragmentation table for charge state 4+
- ▶ specType=etd
- ▶ score=60.30
- ▶ F113279.dat
- ▶ query=q45995.p1
- ▶ precursor=896.313160
- ▶ chargePrecursor=5
- ▶ itol=0.5

| AA   | c               | y               | z+1             | z+2             | z              | AA   |
|------|-----------------|-----------------|-----------------|-----------------|----------------|------|
| S 1  | 37.525          | <b>1120.133</b> | <b>1116.128</b> | 0.755           | 1115.879       | S 41 |
| G 2  | 51.780          | 1087.872        | <b>1083.868</b> | 0.755           | 1083.618       | G 40 |
| R 3  | 90.805          | 1073.611        | <b>1069.612</b> | <b>1069.864</b> | 1069.360       | R 39 |
| G 4  | 105.061         | 1034.592        | 1030.587        | 1030.839        | 1030.335       | G 38 |
| K 5  | 137.084         | 1020.336        | 1016.331        | 1016.584        | 1016.080       | K 37 |
| Q 6  | 189.089         | 988.313         | 984.308         | 984.560         | 984.056        | Q 36 |
| G 7  | 253.354         | 956.288         | 952.283         | 952.545         | 952.041        | G 35 |
| G 8  | 397.810         | 942.043         | 938.038         | 938.290         | 937.786        | G 34 |
| K 9  | 229.633         | 927.787         | 923.783         | 924.034         | 923.531        | K 33 |
| A 10 | 247.393         | 895.763         | 891.759         | 892.011         | 891.507        | A 32 |
| R 11 | 288.418         | <b>878.004</b>  | 874.000         | 874.251         | 873.746        | R 31 |
| A 12 | 394.177         | 838.973         | 834.974         | 835.226         | 834.722        | A 30 |
| R 13 | 336.201         | 821.220         | 817.215         | 817.467         | 816.963        | R 29 |
| A 14 | 353.960         | 799.196         | 795.191         | 795.443         | 794.939        | A 28 |
| K 15 | 389.984         | <b>771.437</b>  | 767.432         | 767.684         | 767.180        | K 27 |
| S 16 | 407.742         | 739.413         | 735.408         | 735.660         | 735.156        | S 26 |
| R 17 | 448.767         | 747.665         | 743.660         | 743.912         | 743.408        | R 25 |
| S 18 | 488.528         | 678.939         | 674.935         | 675.187         | 674.683        | S 24 |
| S 19 | 490.283         | 656.872         | 652.867         | 653.119         | 652.615        | S 23 |
| R 20 | 529.309         | 635.114         | 631.109         | 631.361         | 630.857        | R 22 |
| A 21 | 547.068         | 596.088         | 592.084         | 592.336         | 591.832        | A 21 |
| Q 22 | 561.323         | 578.329         | 574.324         | 574.576         | 574.072        | Q 20 |
| L 23 | 589.334         | 564.074         | 560.069         | 560.321         | 559.817        | L 19 |
| Q 24 | 621.609         | 536.803         | 532.798         | 533.050         | 532.546        | Q 19 |
| F 25 | 658.376         | 503.788         | 499.783         | 500.035         | 499.531        | F 17 |
| F 26 | 682.639         | 467.021         | 463.016         | 463.268         | 462.764        | F 16 |
| V 27 | <b>707.406</b>  | 442.758         | 438.753         | 439.005         | 438.501        | V 15 |
| G 28 | 721.662         | 417.991         | 413.986         | 414.238         | 413.734        | G 14 |
| V 29 | 760.887         | 403.735         | 399.731         | 400.083         | 399.479        | V 13 |
| V 30 | 785.454         | 384.710         | <b>360.705</b>  | 360.957         | <b>360.453</b> | V 12 |
| H 31 | 819.719         | 339.943         | 335.938         | 336.190         | 335.686        | H 11 |
| R 32 | 858.744         | 305.678         | 301.673         | 301.925         | 301.421        | R 10 |
| L 33 | 887.015         | 266.653         | 262.648         | 262.900         | 262.396        | L 9  |
| L 34 | <b>915.286</b>  | 238.387         | 234.377         | 234.629         | 234.125        | L 8  |
| R 35 | 954.313         | 210.111         | 206.106         | 206.358         | 205.854        | R 7  |
| R 36 | <b>986.335</b>  | 171.085         | 167.081         | 167.333         | 166.829        | R 6  |
| G 37 | <b>1000.590</b> | 139.062         | 135.057         | 135.309         | 134.805        | G 5  |
| N 38 | <b>1029.101</b> | 124.808         | 120.802         | 121.054         | 120.550        | N 4  |
| V 39 | <b>1069.867</b> | 96.290          | 92.291          | 92.543          | 92.039         | V 3  |
| A 40 | 1087.626        | 55.530          | 51.525          | 51.777          | 51.273         | A 2  |
| E 41 | 1119.387        | 37.771          | 33.766          | 34.018          | 33.514         | E 1  |



# sp | Q8BFU2 | H2A3\_MOUSE

[Acetyl]SGRGKQGGKARAKAKSRSSRAGLQFPVGRVHRLLRKGNYS

- ▶ fragmentation table for charge state 1+
- ▶ specType=etd
- ▶ score=40.16
- ▶ F113279.dat
- ▶ query=q46030.p1
- ▶ precursor=749.760050
- ▶ chargePrecursor=6
- ▶ itol=0.5

| AA | c  | w               | #±1             | #±2             | z               | AA              |       |
|----|----|-----------------|-----------------|-----------------|-----------------|-----------------|-------|
| S  | 1  | 147.076         | 4392.569        | 4477.486        | 4.800           | 4476.414        | S[41] |
| G  | 2  | 204.098         | 4364.462        | 4348.444        | 0.000           | 4347.430        | G[40] |
| R  | 3  | <b>360.199</b>  | 4307.441        | 4291.422        | 4202.430        | 4200.414        | R[39] |
| G  | 4  | <b>417.220</b>  | 4151.346        | 4135.321        | 4136.320        | 4134.311        | G[38] |
| K  | 5  | <b>545.315</b>  | 4094.318        | 4078.300        | 4079.307        | 4077.292        | K[37] |
| G  | 6  | <b>613.374</b>  | 3998.222        | 3990.205        | 3951.212        | 3949.210        | G[36] |
| G  | 7  | <b>730.395</b>  | 3938.105        | 3922.149        | 3913.154        | 3911.138        | G[35] |
| G  | 8  | <b>787.417</b>  | 3781.143        | 3765.126        | 3766.132        | 3764.117        | G[34] |
| K  | 9  | <b>915.512</b>  | 3724.122        | 3708.103        | 3709.111        | 3707.095        | K[33] |
| A  | 10 | <b>986.549</b>  | 3596.027        | 3580.008        | 3581.016        | 3579.000        | A[32] |
| R  | 11 | 1142.650        | 3524.990        | 3508.971        | 3509.979        | 3507.963        | R[31] |
| A  | 12 | <b>1213.687</b> | 3388.989        | 3382.970        | 3353.978        | 3351.962        | A[30] |
| K  | 13 | 1341.752        | 3297.852        | 3281.833        | 3282.841        | 3280.825        | K[29] |
| A  | 14 | <b>1412.819</b> | 3169.757        | 3153.738        | 3154.746        | 3152.730        | A[28] |
| K  | 15 | <b>1540.914</b> | 3098.719        | 3082.701        | 3083.709        | 3081.693        | K[27] |
| S  | 16 | <b>1627.946</b> | 2970.625        | 2954.606        | 2955.614        | 2953.598        | S[26] |
| R  | 17 | 1784.047        | 2883.592        | 2867.574        | 2868.582        | 2866.566        | R[25] |
| S  | 18 | 1871.078        | 2727.491        | 2711.473        | 2712.480        | 2710.465        | S[24] |
| S  | 19 | 1958.111        | 2640.458        | 2624.441        | 2625.448        | 2623.433        | S[23] |
| R  | 20 | 2114.213        | 2553.427        | 2537.409        | 2538.416        | 2536.401        | R[22] |
| A  | 21 | 2185.250        | 2397.326        | 2381.307        | 2382.315        | 2380.300        | A[21] |
| G  | 22 | 2242.271        | 2326.289        | 2310.270        | 2311.278        | 2309.263        | G[20] |
| L  | 23 | 2305.288        | 2269.248        | 2253.249        | 2254.257        | 2252.241        | L[19] |
| G  | 24 | 2463.414        | 2158.184        | 2142.185        | 2143.173        | 2141.157        | G[18] |
| F  | 25 | 2630.482        | 2028.125        | 2012.106        | 2013.114        | 2011.100        | F[17] |
| F  | 26 | 2747.535        | 1881.051        | 1865.038        | 1866.046        | 1864.030        | F[16] |
| V  | 27 | 2826.603        | 1784.004        | 1767.985        | 1768.993        | 1766.977        | V[15] |
| G  | 28 | 2883.625        | 1698.973        | 1682.917        | <b>1668.824</b> | 1667.800        | G[14] |
| R  | 29 | 3039.726        | <b>1627.914</b> | 1611.809        | <b>1612.903</b> | 1610.808        | R[13] |
| V  | 30 | 3138.794        | 1471.813        | 1455.794        | 1456.802        | 1454.786        | V[12] |
| H  | 31 | 3275.853        | 1372.744        | 1356.726        | 1357.734        | <b>1355.718</b> | H[11] |
| R  | 32 | 3431.954        | 1235.685        | <b>1219.667</b> | <b>1220.675</b> | 1218.659        | R[10] |
| L  | 33 | 3545.038        | 1079.584        | <b>1063.566</b> | 1064.573        | 1062.558        | L[9]  |
| L  | 34 | 3688.121        | 968.509         | 956.482         | 951.468         | 949.413         | L[8]  |
| R  | 35 | 3814.224        | 853.436         | 837.390         | 838.405         | 836.350         | R[7]  |
| K  | 36 | 3942.319        | 697.315         | 681.296         | 682.304         | 680.289         | K[6]  |
| G  | 37 | 3999.340        | 569.220         | 553.201         | 554.209         | 552.194         | G[5]  |
| N  | 38 | 4113.383        | 512.199         | 496.180         | 497.188         | 495.172         | N[4]  |
| V  | 39 | 4278.446        | 398.156         | 382.137         | 383.145         | 381.129         | V[3]  |
| S  | 40 | 4353.476        | 278.104         | 262.084         | 263.092         | 261.066         | S[2]  |
| E  | 41 | 4492.521        | 148.060         | 132.042         | 133.050         | 131.034         | E[1]  |

# sp | Q8BFU2 | H2A3\_MOUSE

[Acetyl]SGRGKQGGKARAKAKSRSSRAGLQFPVGRVHRLLRKGNYS

- ▶ fragmentation table for charge state 2+
- ▶ specType=etd
- ▶ score=40.16
- ▶ F113279.dat
- ▶ query=q46030.p1
- ▶ precursor=749.760050
- ▶ chargePrecursor=6
- ▶ itol=0.5

| AA   | c               | y               | #s1             | #s2             | z               | AA    |
|------|-----------------|-----------------|-----------------|-----------------|-----------------|-------|
| G 1  | 74.062          | 2247.256        | 2229.257        | 8.804           | 2238.747        | S(41) |
| G 2  | 102.553         | 2182.735        | 2174.726        | 0.504           | 2174.222        | G(49) |
| R 3  | 180.603         | 2154.224        | 2146.215        | 2146.719        | 2145.711        | R(39) |
| G 4  | 209.114         | 2076.174        | 2068.164        | 2068.666        | 2067.660        | G(38) |
| K 5  | 273.161         | 2047.663        | 2039.653        | 2040.157        | 2039.150        | K(37) |
| G 6  | 337.194         | 1983.615        | <b>1975.606</b> | <b>1976.110</b> | 1975.102        | G(36) |
| G 7  | 365.703         | 1919.566        | <b>1911.577</b> | <b>1912.081</b> | 1911.073        | G(35) |
| G 8  | 394.212         | 1891.075        | 1883.066        | 1883.570        | 1882.562        | G(34) |
| K 9  | 458.260         | 1862.565        | 1854.555        | <b>1855.059</b> | 1854.051        | K(33) |
| A 10 | 493.778         | 1798.517        | 1790.508        | 1791.012        | 1790.004        | A(32) |
| R 11 | 577.829         | 1762.999        | 1754.989        | 1755.493        | 1754.485        | R(31) |
| A 12 | <b>607.337</b>  | 1684.949        | 1676.939        | 1677.443        | 1676.435        | A(30) |
| R 13 | <b>671.395</b>  | 1649.429        | 1641.420        | <b>1641.924</b> | 1640.916        | R(29) |
| A 14 | <b>706.913</b>  | 1585.383        | 1577.373        | 1577.876        | 1576.868        | A(28) |
| K 15 | <b>770.961</b>  | 1549.863        | <b>1541.854</b> | 1542.358        | <b>1541.350</b> | K(27) |
| S 16 | <b>814.477</b>  | 1485.816        | 1477.807        | 1478.310        | 1477.303        | S(26) |
| R 17 | <b>852.527</b>  | <b>1442.300</b> | 1434.291        | <b>1434.794</b> | 1433.786        | R(25) |
| S 18 | <b>936.043</b>  | 1384.249        | <b>1376.240</b> | 1376.744        | <b>1375.736</b> | S(24) |
| S 19 | <b>979.559</b>  | 1320.733        | <b>1312.724</b> | 1313.228        | <b>1312.220</b> | S(23) |
| R 20 | <b>1057.610</b> | 1277.217        | 1269.208        | 1269.712        | 1268.704        | R(22) |
| A 21 | 1093.128        | 1199.167        | 1191.157        | 1191.661        | 1190.653        | A(21) |
| G 22 | 1127.639        | 1163.648        | 1155.639        | <b>1156.143</b> | 1155.135        | G(20) |
| L 23 | 1179.183        | 1128.137        | 1120.127        | 1120.631        | 1119.623        | L(19) |
| Q 24 | <b>1242.211</b> | 1078.595        | <b>1070.586</b> | 1071.090        | <b>1070.082</b> | Q(18) |
| F 25 | 1315.745        | 1014.569        | <b>1006.557</b> | <b>1007.061</b> | 1006.053        | F(17) |
| F 26 | 1364.271        | 941.033         | 933.023         | 933.526         | 932.519         | F(16) |
| V 27 | <b>1413.805</b> | 892.506         | 884.496         | 885.000         | 884.992         | V(15) |
| G 28 | <b>1442.316</b> | 842.971         | <b>834.962</b>  | <b>835.466</b>  | 834.458         | G(14) |
| R 29 | 1500.509        | <b>814.461</b>  | <b>806.451</b>  | <b>806.955</b>  | 805.947         | R(13) |
| V 30 | 1569.901        | 736.410         | 728.401         | 728.905         | 727.897         | V(12) |
| H 31 | 1638.430        | 688.876         | <b>678.866</b>  | <b>679.370</b>  | 678.363         | H(11) |
| R 32 | 1716.461        | 618.346         | 610.337         | 610.841         | 609.833         | R(10) |
| L 33 | 1773.023        | 540.296         | 532.286         | 532.790         | 531.783         | L(9)  |
| L 34 | 1829.968        | 489.794         | 481.783         | 482.287         | 481.280         | L(8)  |
| R 35 | 1907.915        | 427.212         | 419.202         | 419.706         | 418.699         | R(7)  |
| K 36 | 1971.663        | 349.161         | 341.152         | 341.656         | 340.648         | K(6)  |
| G 37 | 2000.174        | 285.114         | 277.104         | 277.608         | 276.600         | G(5)  |
| N 38 | 2057.195        | 256.603         | 248.594         | 249.098         | 248.090         | N(4)  |
| V 39 | 2138.227        | 199.562         | 191.572         | 192.076         | 191.068         | V(3)  |
| S 40 | 2192.813        | 118.056         | 110.047         | 110.551         | 109.543         | S(2)  |
| E 41 | 2246.764        | 74.534          | 66.524          | 67.028          | 66.021          | E(1)  |

# sp | Q8BFU2 | H2A3\_MOUSE

[Acetyl]SGRGKQGGKARAKAKSRSSRAGLQFPVGRVHRLLRKGNYS

- ▶ fragmentation table for charge state 3+
- ▶ specType=etd
- ▶ score=40.16
- ▶ F113279.dat
- ▶ query=q46030.p1
- ▶ precursor=749.760050
- ▶ chargePrecursor=6
- ▶ itol=0.5

| AA | c  | y               | #s1             | #s2             | z               | AA              |       |
|----|----|-----------------|-----------------|-----------------|-----------------|-----------------|-------|
| S  | 1  | 48.697          | 1598.561        | 1483.187        | 8.872           | 1482.831        | S[41] |
| G  | 2  | 86.704          | 1455.492        | 1450.153        | 0.672           | 1449.817        | G[40] |
| R  | 3  | 1307.176        | 1436.485        | <b>1431.140</b> | <b>1431.402</b> | 1430.810        | R[39] |
| G  | 4  | 139.745         | 1384.451        | 1379.112        | 1379.446        | 1378.776        | G[38] |
| K  | 5  | 182.443         | 1305.444        | <b>1360.105</b> | <b>1360.441</b> | <b>1359.769</b> | K[37] |
| Q  | 6  | 225.130         | 1322.746        | 1317.408        | <b>1317.742</b> | 1317.070        | Q[36] |
| G  | 7  | 244.137         | 1306.090        | 1291.739        | <b>1275.056</b> | 1274.384        | G[35] |
| G  | 8  | 263.144         | 1261.051        | <b>1255.713</b> | <b>1256.049</b> | 1255.377        | G[34] |
| K  | 9  | 305.642         | <b>1242.045</b> | <b>1236.706</b> | <b>1237.042</b> | <b>1236.370</b> | K[33] |
| A  | 10 | 329.521         | 1199.347        | 1194.008        | 1194.344        | 1193.672        | A[32] |
| R  | 11 | 381.555         | 1175.668        | 1170.329        | <b>1170.664</b> | 1169.993        | R[31] |
| A  | 12 | 405.934         | 1133.834        | 1118.295        | 1118.631        | 1117.959        | A[30] |
| K  | 13 | 447.932         | 1090.955        | 1084.613        | <b>1094.952</b> | 1094.281        | K[29] |
| A  | 14 | 491.611         | 1057.257        | 1051.917        | 1052.253        | 1051.581        | A[28] |
| K  | 15 | 514.310         | 1033.578        | <b>1028.238</b> | <b>1028.574</b> | 1027.902        | K[27] |
| S  | 16 | 543.320         | 0990.880        | <b>985.540</b>  | <b>985.876</b>  | 985.204         | S[26] |
| R  | 17 | 585.254         | 961.969         | <b>956.529</b>  | <b>956.865</b>  | 956.193         | R[25] |
| S  | 18 | 624.365         | 909.835         | 904.495         | 904.831         | 904.160         | S[24] |
| S  | 19 | 653.375         | 880.825         | <b>875.485</b>  | <b>875.821</b>  | 875.149         | S[23] |
| R  | 20 | <b>705.409</b>  | 851.814         | <b>846.474</b>  | <b>846.810</b>  | 846.138         | R[22] |
| A  | 21 | 729.088         | 799.789         | <b>794.441</b>  | <b>794.777</b>  | 794.105         | A[21] |
| G  | 22 | 768.095         | 776.101         | 770.762         | <b>771.098</b>  | 770.426         | G[20] |
| L  | 23 | <b>785.790</b>  | 759.094         | 753.754         | 754.090         | 753.418         | L[19] |
| Q  | 24 | <b>828.476</b>  | 733.365         | 724.000         | 724.336         | 723.664         | Q[18] |
| F  | 25 | 877.409         | 676.713         | <b>671.374</b>  | <b>671.710</b>  | <b>671.038</b>  | F[17] |
| F  | 26 | 909.850         | 627.600         | 622.351         | 622.687         | 622.015         | F[16] |
| V  | 27 | <b>942.873</b>  | 595.139         | 590.000         | 590.336         | 589.664         | V[15] |
| G  | 28 | 981.880         | 562.317         | 556.977         | 557.313         | 556.641         | G[14] |
| R  | 29 | 1013.914        | 443.309         | 437.970         | 438.306         | 437.634         | R[13] |
| V  | 30 | <b>1046.936</b> | 490.275         | 485.036         | 486.372         | 485.699         | V[12] |
| H  | 31 | <b>1092.623</b> | 458.253         | 452.913         | 453.249         | 452.577         | H[11] |
| R  | 32 | 1144.656        | 412.967         | 407.227         | 407.563         | 406.891         | R[10] |
| L  | 33 | <b>1182.351</b> | <b>360.533</b>  | 355.193         | 355.529         | 354.857         | L[9]  |
| L  | 34 | <b>1220.046</b> | 322.574         | 317.489         | 317.825         | 317.153         | L[8]  |
| R  | 35 | 1271.979        | 285.144         | 279.804         | 280.140         | 279.468         | R[7]  |
| K  | 36 | 1314.778        | 233.110         | 227.770         | 228.106         | 227.434         | K[6]  |
| G  | 37 | 1333.785        | 190.412         | 185.072         | 185.408         | 184.736         | G[5]  |
| N  | 38 | 1371.799        | 171.404         | 166.065         | 166.401         | 165.729         | N[4]  |
| V  | 39 | 1426.154        | 133.390         | 128.051         | 128.387         | 127.715         | V[3]  |
| S  | 40 | 1455.164        | 99.136          | 93.796          | 94.132          | 93.460          | S[2]  |
| E  | 41 | 1498.178        | 50.025          | 44.685          | 45.021          | 44.349          | E[1]  |

# sp | Q8BFU2 | H2A3\_MOUSE

[Acetyl]SGRGKQGGKARAKAKSRSSRAGLQFPVGRVHRLLRKGNYS

- ▶ fragmentation table for charge state 4+
- ▶ specType=etd
- ▶ score=40.16
- ▶ F113279.dat
- ▶ query=q46030.p1
- ▶ precursor=749.760050
- ▶ chargePrecursor=6
- ▶ itol=0.5

| AA   | c               | y               | z+1            | z+2             | z              | AA   |
|------|-----------------|-----------------|----------------|-----------------|----------------|------|
| S 1  | 17.526          | <b>1124.132</b> | 1120.137       | 0.755           | 1119.875       | S 41 |
| G 2  | 51.780          | <b>1091.871</b> | 1087.886       | 0.755           | 1087.614       | G 40 |
| R 3  | 90.805          | 1077.610        | 1071.611       | <b>1073.863</b> | 1073.359       | R 39 |
| G 4  | 105.061         | 1039.590        | 1034.588       | <b>1034.838</b> | 1034.334       | G 38 |
| K 5  | 137.084         | 1024.329        | 1020.330       | 1020.330        | 1020.076       | K 37 |
| G 6  | 169.099         | 992.311         | <b>998.307</b> | <b>998.559</b>  | 998.055        | G 36 |
| G 7  | 183.394         | 960.297         | 956.302        | <b>956.544</b>  | 956.040        | G 35 |
| G 8  | 197.610         | 946.041         | <b>942.037</b> | <b>942.289</b>  | 941.785        | G 34 |
| K 9  | 229.633         | 931.780         | 927.781        | 928.033         | 927.529        | K 33 |
| A 10 | 247.303         | <b>899.762</b>  | 895.757        | 896.009         | 895.506        | A 32 |
| R 11 | 286.418         | 862.003         | 857.998        | 858.250         | 857.746        | R 31 |
| A 12 | 304.177         | 843.970         | 838.973        | 839.225         | 838.721        | A 30 |
| K 13 | 338.201         | 825.218         | 821.214        | 821.466         | 820.960        | K 29 |
| A 14 | 353.960         | 793.195         | 789.190        | 789.442         | 788.938        | A 28 |
| K 15 | 385.984         | 775.435         | <b>771.431</b> | <b>771.683</b>  | <b>771.179</b> | K 27 |
| S 16 | 407.742         | 743.412         | 739.407        | 739.659         | 739.155        | S 26 |
| R 17 | 446.767         | 721.854         | 717.849        | 717.991         | 717.391        | R 25 |
| S 18 | 468.525         | 692.626         | 688.631        | <b>678.876</b>  | 678.372        | S 24 |
| S 19 | 490.283         | 660.870         | 656.866        | 657.118         | 656.614        | S 23 |
| R 20 | 529.309         | 639.112         | 635.108        | 635.360         | 634.856        | R 22 |
| A 21 | 547.068         | 606.087         | 596.082        | 596.334         | 595.830        | A 21 |
| G 22 | 561.323         | 582.328         | 578.323        | 578.575         | 578.071        | G 20 |
| L 23 | 589.594         | 568.072         | 564.068        | 564.320         | 563.816        | L 19 |
| G 24 | 621.869         | 539.861         | 535.857        | 536.049         | 535.545        | G 18 |
| F 25 | 658.376         | 507.787         | 503.782        | 504.034         | 503.530        | F 17 |
| P 26 | 682.639         | 471.020         | 467.015        | 467.267         | 466.763        | P 16 |
| V 27 | <b>707.406</b>  | 446.756         | 442.752        | 443.004         | 442.500        | V 15 |
| G 28 | 721.662         | 421.989         | 417.985        | 418.237         | <b>417.733</b> | G 14 |
| R 29 | 760.687         | 407.734         | 403.729        | 403.981         | 403.477        | R 13 |
| V 30 | 785.454         | 389.769         | 384.764        | 384.956         | 384.452        | V 12 |
| H 31 | 819.719         | 343.942         | 339.937        | 340.189         | 339.685        | H 11 |
| R 32 | 858.744         | 309.677         | 305.672        | 305.924         | 305.420        | R 10 |
| L 33 | 887.015         | 270.652         | 266.647        | 266.899         | 266.395        | L 9  |
| L 34 | <b>915.286</b>  | 242.381         | 238.376        | 238.628         | 238.124        | L 8  |
| R 35 | 954.311         | 214.110         | 210.105        | 210.357         | 209.853        | R 7  |
| K 36 | <b>936.135</b>  | 175.984         | 171.980        | 172.232         | 171.728        | K 6  |
| G 37 | 1000.590        | 143.061         | 139.056        | 139.308         | 138.804        | G 5  |
| N 38 | <b>1029.101</b> | 128.805         | 124.800        | 125.052         | 124.548        | N 4  |
| Y 39 | <b>1069.867</b> | 100.294         | 96.290         | 96.542          | 96.038         | Y 3  |
| S 40 | 1091.625        | 59.520          | 55.524         | 55.776          | 55.272         | S 2  |
| E 41 | 1123.886        | 37.771          | 33.766         | 34.018          | 33.514         | E 1  |

# sp | Q8BFU2 | H2A3\_MOUSE

[Acetyl]SGRGKQGGKARAKAKSRSSRAGLQFPVGRVHLLRKGNYSE

- ▶ fragmentation table for charge state 5+
- ▶ specType=etd
- ▶ score=40.16
- ▶ F113279.dat
- ▶ query=q46030\_p1
- ▶ precursor=749.760050
- ▶ chargePrecursor=6
- ▶ itol=0.5

| AA | c  | y              | z+1            | z#2            | z              | AA             |   |    |
|----|----|----------------|----------------|----------------|----------------|----------------|---|----|
| S  | 1  | 30.221         | 899.507        | 896.303        | 0.806          | 896.102        | S | 41 |
| G  | 2  | 41.625         | 873.698        | 870.458        | 0.806          | 870.293        | G | 40 |
| R  | 3  | 72.846         | 862.294        | <b>859.090</b> | <b>859.292</b> | 858.889        | R | 39 |
| G  | 4  | 84.250         | 831.074        | 827.870        | 828.072        | 827.668        | G | 38 |
| K  | 5  | 109.869        | 819.669        | 816.465        | 816.667        | 816.264        | K | 37 |
| Q  | 6  | 135.481        | 794.050        | 790.847        | 791.048        | 790.645        | Q | 36 |
| G  | 7  | 146.885        | 768.439        | 765.235        | 765.437        | 765.033        | G | 35 |
| G  | 8  | 158.289        | 757.034        | 753.831        | 754.032        | 753.629        | G | 34 |
| K  | 9  | 183.908        | 745.930        | 742.428        | 742.628        | 742.225        | K | 33 |
| A  | 10 | 198.116        | 720.011        | 716.807        | 717.009        | 716.606        | A | 32 |
| R  | 11 | 229.336        | <b>705.804</b> | 702.600        | 702.802        | 702.398        | R | 31 |
| A  | 12 | 243.543        | 674.984        | <b>671.380</b> | <b>671.581</b> | <b>671.178</b> | A | 30 |
| K  | 13 | 269.162        | 660.376        | 657.172        | 657.374        | 656.971        | K | 29 |
| A  | 14 | 283.370        | 634.757        | 631.553        | 631.755        | 631.352        | A | 28 |
| K  | 15 | 308.989        | 620.550        | 617.346        | 617.548        | 617.144        | K | 27 |
| S  | 16 | 326.395        | 594.931        | 591.727        | 591.929        | 591.525        | S | 26 |
| R  | 17 | 357.615        | 577.524        | 574.321        | 574.522        | 574.119        | R | 25 |
| S  | 18 | 375.022        | 546.304        | 543.100        | 543.302        | 542.899        | S | 24 |
| S  | 19 | 392.428        | 528.898        | 525.694        | 525.896        | 525.492        | S | 23 |
| R  | 20 | 423.648        | 511.491        | 508.288        | 508.489        | 508.086        | R | 22 |
| A  | 21 | 437.856        | 480.271        | 477.067        | 477.269        | 476.866        | A | 21 |
| G  | 22 | 449.260        | 466.064        | 462.860        | 463.061        | 462.658        | G | 20 |
| L  | 23 | 471.877        | 494.659        | 451.456        | 451.657        | 451.254        | L | 19 |
| Q  | 24 | 497.489        | 432.043        | 428.839        | 429.040        | 428.637        | Q | 18 |
| F  | 25 | 528.902        | 406.431        | 403.227        | 403.429        | 403.026        | F | 17 |
| P  | 26 | 546.313        | 377.017        | 373.813        | 374.015        | 373.612        | P | 16 |
| V  | 27 | 565.126        | 357.607        | 354.403        | 354.604        | 354.201        | V | 15 |
| G  | 28 | 577.531        | 337.793        | 334.589        | 334.791        | 334.388        | G | 14 |
| R  | 29 | 608.751        | 326.386        | 323.182        | 323.384        | 322.981        | R | 13 |
| V  | 30 | 628.565        | 295.168        | 291.965        | 292.166        | 291.763        | V | 12 |
| H  | 31 | 658.976        | 275.355        | 272.151        | 272.353        | 271.949        | H | 11 |
| R  | 32 | 687.197        | 247.943        | 244.739        | 244.941        | 244.538        | R | 10 |
| L  | 33 | 709.814        | 216.723        | 213.519        | 213.721        | 213.317        | L | 9  |
| L  | 34 | 732.430        | 194.106        | 190.902        | 191.104        | 190.701        | L | 8  |
| R  | 35 | 763.651        | 171.489        | 168.285        | 168.487        | 168.084        | R | 7  |
| K  | 36 | 789.270        | 140.269        | 137.065        | 137.267        | 136.864        | K | 6  |
| G  | 37 | 839.674        | 114.650        | 111.446        | 111.648        | 111.245        | G | 5  |
| N  | 38 | <b>823.482</b> | 103.246        | 100.042        | 100.243        | 99.840         | N | 4  |
| V  | 39 | <b>856.095</b> | 80.437         | 77.233         | 77.435         | 77.032         | V | 3  |
| S  | 40 | 873.501        | 47.824         | 44.621         | 44.822         | 44.419         | S | 2  |
| E  | 41 | 899.310        | 30.418         | 27.214         | 27.416         | 27.013         | E | 1  |



sp | Q8BFU2 | H2A3\_MOUSE

[Acetyl]SGRGKQGGKARAKAKSRSSRAGLQFPVGRVHLLRKGNYSE

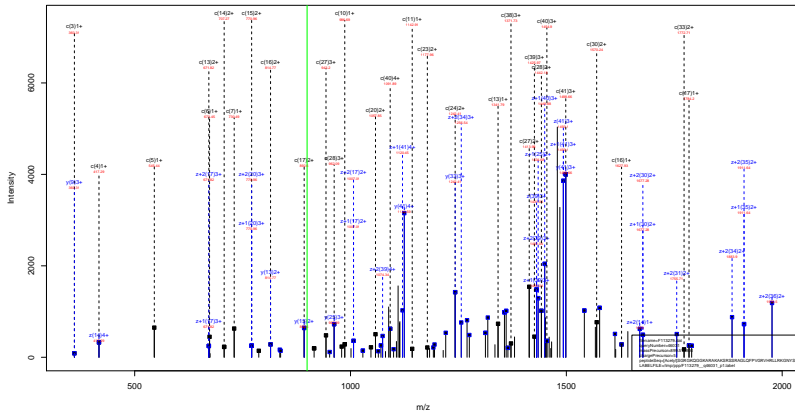

# sp | Q8BFU2 | H2A3\_MOUSE

[Acetyl]SGRGKQGGKARAKAKSRSSRAGLQFPVGRVHRLLRKGNYS

- ▶ fragmentation table for charge state 1+
- ▶ specType=etd
- ▶ score=74.77
- ▶ F113279.dat
- ▶ query=q46031.p1
- ▶ precursor=899.510800
- ▶ chargePrecursor=5
- ▶ itol=0.5

| AA | c  | w               | #+1             | #+2             | z               | AA              |       |
|----|----|-----------------|-----------------|-----------------|-----------------|-----------------|-------|
| S  | 1  | 147.076         | 4392.562        | 4477.486        | 4.800           | 4476.411        | S[41] |
| G  | 2  | 204.098         | 4364.462        | 4348.444        | 0.000           | 4347.430        | G[40] |
| R  | 3  | <b>360.199</b>  | 4307.441        | 4291.422        | 4202.430        | 4200.414        | R[39] |
| G  | 4  | <b>417.220</b>  | 4151.346        | 4135.321        | 4136.320        | 4134.311        | G[38] |
| K  | 5  | <b>545.315</b>  | 4094.318        | 4078.300        | 4079.307        | 4077.292        | K[37] |
| G  | 6  | <b>613.374</b>  | 3998.222        | 3990.205        | 3951.212        | 3949.210        | G[36] |
| G  | 7  | <b>730.395</b>  | 3938.105        | 3820.149        | 3873.154        | 3821.138        | G[35] |
| G  | 8  | <b>787.417</b>  | 3781.143        | 3765.126        | 3766.132        | 3764.117        | G[34] |
| K  | 9  | <b>915.512</b>  | 3724.122        | 3708.103        | 3709.111        | 3707.095        | K[33] |
| A  | 10 | <b>960.549</b>  | 3596.027        | 3580.008        | 3581.016        | 3579.000        | A[32] |
| R  | 11 | <b>1142.650</b> | 3524.990        | 3508.971        | 3509.979        | 3507.963        | R[31] |
| A  | 12 | <b>1213.697</b> | 3368.989        | 3352.970        | 3353.978        | 3351.962        | A[30] |
| R  | 13 | <b>1341.782</b> | 3297.952        | 3281.933        | 3282.941        | 3280.925        | R[29] |
| A  | 14 | <b>1432.819</b> | 3169.927        | 3153.908        | 3154.916        | 3152.900        | A[28] |
| K  | 15 | 1540.914        | 3098.919        | 3082.901        | 3083.909        | 3081.893        | K[27] |
| S  | 16 | <b>1627.946</b> | 2970.875        | 2954.856        | 2955.864        | 2953.848        | S[26] |
| R  | 17 | <b>1784.047</b> | 2883.922        | 2867.904        | 2868.912        | 2866.896        | R[25] |
| S  | 18 | 1813.079        | 2727.891        | 2711.873        | 2712.880        | 2710.864        | S[24] |
| S  | 19 | 1958.111        | 2640.858        | 2624.841        | 2625.848        | 2623.833        | S[23] |
| R  | 20 | 2114.213        | 2553.827        | 2537.809        | 2538.816        | 2536.801        | R[22] |
| A  | 21 | 2185.250        | 2397.792        | 2381.773        | 2382.781        | 2380.765        | A[21] |
| G  | 22 | 2242.271        | 2236.769        | 2220.750        | 2221.758        | 2219.743        | G[20] |
| L  | 23 | 2305.288        | 2089.748        | 2073.729        | 2074.737        | 2072.721        | L[19] |
| G  | 24 | 2463.414        | 2158.744        | 2142.725        | 2143.733        | 2141.717        | G[18] |
| F  | 25 | 2630.482        | 2028.725        | 2012.706        | 2013.714        | 2011.700        | F[17] |
| F  | 26 | 2747.535        | 1881.651        | 1865.638        | 1866.646        | 1864.630        | F[16] |
| V  | 27 | 2826.603        | <b>1784.004</b> | 1767.985        | 1768.993        | 1766.977        | V[15] |
| G  | 28 | 2883.625        | 1688.617        | <b>1666.524</b> | 1667.532        | 1665.516        | G[14] |
| R  | 29 | 3039.706        | <b>1627.914</b> | 1611.895        | <b>1612.903</b> | 1610.887        | R[13] |
| V  | 30 | 3138.794        | 1471.813        | 1455.794        | 1456.802        | <b>1454.786</b> | V[12] |
| H  | 31 | 3275.853        | 1372.744        | <b>1356.726</b> | 1357.734        | 1355.718        | H[11] |
| R  | 32 | 3431.954        | 1235.685        | 1219.667        | <b>1220.675</b> | 1218.659        | R[10] |
| L  | 33 | 3545.038        | 1079.584        | 1063.565        | <b>1064.573</b> | 1062.557        | L[9]  |
| L  | 34 | 3689.121        | 868.509         | 852.492         | <b>851.489</b>  | 849.473         | L[8]  |
| R  | 35 | 3814.224        | 653.416         | 637.398         | <b>638.405</b>  | <b>636.390</b>  | R[7]  |
| K  | 36 | 3942.319        | 497.315         | 481.296         | 482.304         | 480.289         | K[6]  |
| G  | 37 | 3999.340        | 509.220         | 493.201         | 494.209         | 492.194         | G[5]  |
| N  | 38 | 4113.383        | 512.199         | 496.180         | 497.188         | 495.172         | N[4]  |
| V  | 39 | 4278.446        | 398.156         | 382.137         | 383.145         | 381.129         | V[3]  |
| S  | 40 | 4353.476        | 278.104         | 262.084         | 263.092         | 261.076         | S[2]  |
| E  | 41 | 4492.521        | 148.060         | 132.042         | 133.050         | 131.034         | E[1]  |

# sp | Q8BFU2 | H2A3\_MOUSE

[Acetyl]SGRGKQGGKARAKAKSRSSRAGLQFPVGRVHRLLRKGNYS

- ▶ fragmentation table for charge state 2+
- ▶ specType=etd
- ▶ score=74.77
- ▶ F113279.dat
- ▶ query=q46031.p1
- ▶ precursor=899.510800
- ▶ chargePrecursor=5
- ▶ itol=0.5

| AA | c  | y               | #s1             | #s2             | z               | AA              |       |
|----|----|-----------------|-----------------|-----------------|-----------------|-----------------|-------|
| S  | 1  | 74.062          | 2247.256        | 2229.257        | 0.804           | 2238.747        | S[41] |
| G  | 2  | 102.553         | 2182.735        | 2174.726        | 0.504           | 2174.222        | G[40] |
| R  | 3  | 180.603         | 2154.224        | 2146.215        | 2146.719        | 2145.711        | R[39] |
| G  | 4  | 209.114         | 2076.174        | 2068.164        | 2068.666        | 2067.660        | G[38] |
| K  | 5  | 273.161         | 2047.663        | 2039.653        | 2040.157        | 2039.150        | K[37] |
| G  | 6  | 327.194         | 1988.615        | 1979.602        | <b>1976.110</b> | 1975.102        | G[36] |
| G  | 7  | 385.704         | 1919.586        | <b>1911.577</b> | <b>1912.081</b> | 1911.073        | G[35] |
| G  | 8  | 394.212         | 1891.075        | 1883.066        | <b>1883.570</b> | 1882.562        | G[34] |
| K  | 9  | 458.260         | 1862.565        | 1854.555        | 1855.059        | 1854.051        | K[33] |
| A  | 10 | 493.778         | 1798.517        | <b>1790.508</b> | 1791.012        | <b>1790.004</b> | A[32] |
| R  | 11 | 571.820         | 1762.999        | 1754.989        | <b>1755.493</b> | 1754.485        | R[31] |
| A  | 12 | 609.939         | 1684.944        | <b>1676.939</b> | <b>1677.443</b> | 1676.435        | A[30] |
| R  | 13 | <b>671.395</b>  | 1649.420        | 1641.410        | 1641.924        | 1640.916        | R[29] |
| A  | 14 | <b>706.913</b>  | 1585.363        | <b>1577.373</b> | 1577.876        | <b>1576.869</b> | A[28] |
| K  | 15 | <b>770.961</b>  | 1549.861        | <b>1541.854</b> | 1542.358        | <b>1541.350</b> | K[27] |
| S  | 16 | <b>814.477</b>  | 1485.816        | 1477.807        | 1478.310        | 1477.303        | S[26] |
| R  | 17 | <b>892.527</b>  | <b>1442.260</b> | <b>1434.261</b> | <b>1434.764</b> | 1433.762        | R[25] |
| S  | 18 | 928.618         | <b>1364.249</b> | <b>1356.240</b> | <b>1356.744</b> | 1355.736        | S[24] |
| S  | 19 | <b>970.559</b>  | 1320.731        | <b>1312.724</b> | 1313.228        | <b>1312.220</b> | S[23] |
| R  | 20 | <b>1057.610</b> | 1277.217        | 1269.208        | <b>1269.712</b> | 1268.704        | R[22] |
| A  | 21 | 1093.128        | 1199.167        | 1191.157        | <b>1191.661</b> | 1190.653        | A[21] |
| G  | 22 | 1129.639        | 1163.648        | 1155.639        | 1156.143        | 1155.135        | G[20] |
| L  | 23 | <b>1178.181</b> | 1128.137        | 1120.127        | 1120.632        | 1119.624        | L[19] |
| Q  | 24 | <b>1242.211</b> | 1078.595        | <b>1070.586</b> | 1071.090        | <b>1070.082</b> | Q[18] |
| F  | 25 | 1315.745        | 1014.566        | <b>1006.557</b> | <b>1007.061</b> | 1006.053        | F[17] |
| F  | 26 | <b>1364.271</b> | 941.033         | 933.023         | 933.526         | 932.519         | F[16] |
| V  | 27 | <b>1413.805</b> | <b>892.506</b>  | 884.496         | 885.000         | 883.992         | V[15] |
| G  | 28 | <b>1442.316</b> | 824.962         | 816.952         | 817.456         | 816.448         | G[14] |
| R  | 29 | 1525.859        | <b>814.461</b>  | 806.451         | 806.955         | 805.947         | R[13] |
| V  | 30 | <b>1569.901</b> | 736.410         | 728.401         | 728.905         | 727.897         | V[12] |
| H  | 31 | 1638.430        | 668.876         | 660.866         | 661.370         | 660.363         | H[11] |
| R  | 32 | 1776.461        | 618.346         | 610.337         | 610.841         | 609.833         | R[10] |
| L  | 33 | <b>1773.023</b> | 540.206         | 532.196         | 532.700         | 531.693         | L[9]  |
| L  | 34 | 1829.565        | 469.794         | 461.783         | 462.288         | 461.281         | L[8]  |
| R  | 35 | 1907.615        | 427.212         | 419.202         | 419.706         | 418.699         | R[7]  |
| K  | 36 | 1971.663        | 349.161         | 341.152         | 341.656         | 340.648         | K[6]  |
| G  | 37 | 2008.174        | 285.114         | 277.104         | 277.608         | 276.601         | G[5]  |
| N  | 38 | 2057.195        | 256.603         | 248.594         | 249.098         | 248.090         | N[4]  |
| V  | 39 | 2138.227        | 189.562         | 181.572         | 182.076         | 181.068         | V[3]  |
| S  | 40 | 2182.613        | 118.056         | 110.047         | 110.551         | 109.543         | S[2]  |
| E  | 41 | 2246.764        | 74.534          | 66.524          | 67.028          | 66.021          | E[1]  |

# sp | Q8BFU2 | H2A3\_MOUSE

[Acetyl]SGRGKQGGKARAKAKSRSSRAGLQFPVGRVHRLLRKGNYS

- ▶ fragmentation table for charge state 3+
- ▶ specType=etd
- ▶ score=74.77
- ▶ F113279.dat
- ▶ query=q46031.p1
- ▶ precursor=899.510800
- ▶ chargePrecursor=5
- ▶ itol=0.5

| AA | c  | y               | #s1             | #s2             | #s              | AA              |       |
|----|----|-----------------|-----------------|-----------------|-----------------|-----------------|-------|
| S  | 1  | 489.607         | <b>1498.507</b> | <b>1493.167</b> | 0.672           | <b>1492.831</b> | S[41] |
| G  | 2  | 66.704          | 1455.452        | <b>1450.153</b> | 0.672           | <b>1449.817</b> | G[40] |
| R  | 3  | 1307.190        | 1436.485        | <b>1431.146</b> | <b>1431.482</b> | <b>1430.810</b> | R[39] |
| G  | 4  | 139.745         | 1384.451        | 1379.132        | 1379.446        | 1378.770        | G[38] |
| K  | 5  | 182.443         | 1365.444        | <b>1360.105</b> | <b>1360.441</b> | 1359.769        | K[37] |
| G  | 6  | 225.130         | 1322.746        | 1317.408        | <b>1317.742</b> | 1317.070        | G[36] |
| G  | 7  | 244.137         | 1306.090        | 1291.739        | <b>1275.056</b> | 1274.384        | G[35] |
| G  | 8  | 263.144         | 1261.053        | 1255.713        | <b>1256.049</b> | 1255.377        | G[34] |
| K  | 9  | 305.642         | <b>1242.045</b> | 1236.706        | 1237.042        | 1236.370        | K[33] |
| A  | 10 | 329.521         | 1199.341        | 1194.008        | <b>1194.344</b> | 1193.672        | A[32] |
| R  | 11 | 381.555         | 1175.668        | 1170.329        | 1170.664        | 1169.993        | R[31] |
| A  | 12 | 405.234         | 1133.835        | 1128.295        | 1128.631        | 1127.959        | A[30] |
| K  | 13 | 447.932         | <b>1099.955</b> | 1094.618        | 1094.952        | 1094.281        | K[29] |
| A  | 14 | 491.611         | 1057.257        | 1051.917        | 1052.253        | 1051.582        | A[28] |
| K  | 15 | 514.310         | 1033.578        | <b>1028.238</b> | <b>1028.574</b> | 1027.902        | K[27] |
| S  | 16 | 543.320         | 990.880         | 985.540         | 985.876         | 985.204         | S[26] |
| R  | 17 | 595.354         | <b>961.969</b>  | 956.529         | 956.865         | 956.193         | R[25] |
| S  | 18 | 624.365         | 959.875         | 954.495         | 954.832         | 954.160         | S[24] |
| S  | 19 | 653.375         | 980.825         | 875.485         | 875.821         | 875.149         | S[23] |
| R  | 20 | 705.409         | 851.614         | 846.474         | 846.810         | 846.138         | R[22] |
| A  | 21 | 729.088         | 799.789         | 794.441         | 794.777         | 794.105         | A[21] |
| G  | 22 | 748.095         | 776.101         | <b>770.762</b>  | <b>771.098</b>  | 770.426         | G[20] |
| L  | 23 | 785.794         | 739.094         | 734.754         | 735.090         | 734.419         | L[19] |
| Q  | 24 | 828.476         | 719.366         | 714.000         | 714.366         | 713.724         | Q[18] |
| F  | 25 | 897.409         | 676.713         | <b>671.374</b>  | <b>671.710</b>  | 671.038         | F[17] |
| F  | 26 | 909.950         | 627.600         | 622.351         | 622.687         | 622.015         | F[16] |
| V  | 27 | <b>942.873</b>  | 595.139         | 590.000         | 590.336         | 589.664         | V[15] |
| G  | 28 | <b>961.860</b>  | 562.317         | 556.977         | 557.313         | 556.641         | G[14] |
| R  | 29 | 1013.814        | 443.309         | 437.910         | 438.268         | 437.624         | R[13] |
| V  | 30 | <b>1046.936</b> | 490.275         | 485.036         | 486.272         | 485.600         | V[12] |
| H  | 31 | 1092.623        | 458.253         | 452.913         | 453.249         | 452.577         | H[11] |
| R  | 32 | 1144.656        | 412.967         | 407.227         | 407.563         | 406.891         | R[10] |
| L  | 33 | 1182.351        | <b>360.533</b>  | 355.193         | 355.529         | 354.857         | L[9]  |
| L  | 34 | 1230.046        | 322.876         | 317.489         | 317.826         | 317.154         | L[8]  |
| R  | 35 | 1272.079        | 285.144         | 279.804         | 280.140         | 279.466         | R[7]  |
| K  | 36 | 1314.778        | 233.110         | 227.770         | 228.106         | 227.434         | K[6]  |
| G  | 37 | 1333.785        | 190.412         | 185.072         | 185.408         | 184.736         | G[5]  |
| N  | 38 | <b>1371.799</b> | 171.404         | 166.065         | 166.401         | 165.729         | N[4]  |
| V  | 39 | <b>1426.154</b> | 133.390         | 128.051         | 128.386         | 127.715         | V[3]  |
| S  | 40 | <b>1455.164</b> | 99.036          | 93.696          | 94.032          | 93.360          | S[2]  |
| E  | 41 | <b>1498.178</b> | 50.025          | 44.685          | 45.021          | 44.349          | E[1]  |

# sp | Q8BFU2 | H2A3\_MOUSE

[Acetyl]SGRGKQGGKARAKAKSRSSRAGLQFPVGRVHRLLRKGNYS

- ▶ fragmentation table for charge state 4+
- ▶ specType=etd
- ▶ score=74.77
- ▶ F113279.dat
- ▶ query=q46031.p1
- ▶ precursor=899.510800
- ▶ chargePrecursor=5
- ▶ itol=0.5

| AA   | c               | y               | z+1             | z+2             | z              | AA   |
|------|-----------------|-----------------|-----------------|-----------------|----------------|------|
| S 1  | 37.525          | <b>1124.132</b> | <b>1120.127</b> | 0.755           | 1119.875       | S 41 |
| G 2  | 51.780          | <b>1091.071</b> | 1087.866        | 0.755           | 1087.614       | G 40 |
| R 3  | 90.805          | 1077.618        | 1073.611        | <b>1073.863</b> | 1073.359       | R 39 |
| G 4  | 105.061         | 1038.590        | 1034.586        | 1034.838        | 1034.334       | G 38 |
| K 5  | 137.084         | 1024.335        | 1020.330        | 1020.582        | 1020.078       | K 37 |
| Q 6  | 189.089         | 992.311         | 988.307         | 988.559         | 988.055        | Q 36 |
| G 7  | 253.354         | 950.290         | 946.282         | 946.544         | 946.040        | G 35 |
| G 8  | 397.810         | 948.041         | 942.037         | 942.289         | 941.785        | G 34 |
| K 9  | 229.633         | 931.788         | 927.781         | 928.033         | 927.529        | K 33 |
| A 10 | 247.393         | 899.762         | 895.757         | 896.009         | 895.506        | A 32 |
| R 11 | 286.418         | 882.003         | 877.998         | 878.250         | 877.746        | R 31 |
| A 12 | 394.177         | 842.978         | 838.973         | 839.225         | 838.721        | A 30 |
| R 13 | 336.201         | 825.218         | 821.214         | 821.466         | 820.962        | R 29 |
| A 14 | 353.960         | 793.195         | 789.190         | 789.442         | 788.938        | A 28 |
| K 15 | 385.984         | 775.435         | <b>771.431</b>  | 771.683         | <b>771.179</b> | K 27 |
| S 16 | 407.742         | 743.412         | 739.407         | 739.659         | 739.155        | S 26 |
| R 17 | 446.767         | 721.854         | 717.849         | 718.101         | 717.597        | R 25 |
| S 18 | 468.526         | 682.628         | 678.624         | 678.876         | 678.372        | S 24 |
| S 19 | 490.283         | 660.870         | 656.866         | 657.118         | 656.614        | S 23 |
| R 20 | 529.309         | 639.112         | 635.108         | 635.360         | 634.856        | R 22 |
| A 21 | 547.068         | 600.889         | 596.882         | 596.134         | 595.830        | A 21 |
| G 22 | 561.323         | 582.320         | 578.323         | 578.575         | 578.071        | G 20 |
| L 23 | 589.334         | 568.072         | 564.068         | 564.320         | 563.816        | L 19 |
| Q 24 | 621.869         | 539.801         | 535.797         | 536.049         | 535.545        | Q 19 |
| F 25 | 658.376         | 507.781         | 503.782         | 504.034         | 503.530        | F 17 |
| P 26 | 682.639         | 471.020         | 467.021         | 467.267         | 466.763        | P 16 |
| V 27 | <b>707.406</b>  | 446.758         | 442.752         | 443.004         | 442.500        | V 15 |
| G 28 | 721.662         | 421.989         | 417.985         | 418.237         | <b>417.733</b> | G 14 |
| R 29 | 760.887         | 407.734         | 403.729         | 403.981         | 403.477        | R 13 |
| H 30 | 785.454         | 388.759         | 384.754         | 384.956         | 384.452        | H 12 |
| H 31 | 819.719         | 343.942         | 339.937         | 340.189         | 339.685        | H 11 |
| R 32 | 858.744         | 309.677         | 305.672         | 305.924         | 305.420        | R 10 |
| L 33 | 887.015         | 270.652         | 266.647         | 266.899         | 266.395        | L 9  |
| L 34 | <b>915.286</b>  | 242.381         | 238.376         | 238.628         | 238.124        | L 8  |
| R 35 | 924.113         | 214.113         | 210.108         | 210.360         | 209.856        | R 7  |
| R 36 | <b>986.335</b>  | 175.084         | 171.080         | 171.332         | 170.828        | R 6  |
| G 37 | 1000.590        | 143.061         | 139.056         | 139.308         | 138.804        | G 5  |
| N 38 | 1029.101        | 128.805         | 124.800         | 125.052         | 124.548        | N 4  |
| V 39 | 1099.887        | 100.294         | 96.290          | 96.542          | 96.038         | V 3  |
| S 40 | <b>1091.625</b> | 99.529          | 95.524          | 95.776          | 95.272         | S 2  |
| E 41 | 1123.888        | 97.771          | 93.766          | 94.018          | 93.514         | E 1  |



# sp | Q8BFU2 | H2A3\_MOUSE

[Acetyl]SGRGKQGGKARAKAKSRSSRAGLQFPVGRVHRLLRKGNYS

- ▶ fragmentation table for charge state 1+
- ▶ specType=etd
- ▶ score=69.18
- ▶ F113279.dat
- ▶ query=q46035.p1
- ▶ precursor=899.511040
- ▶ chargePrecursor=5
- ▶ itol=0.5

| AA | c  | w               | #±1             | #±2             | z               | AA              |       |
|----|----|-----------------|-----------------|-----------------|-----------------|-----------------|-------|
| S  | 1  | 147.076         | 4392.562        | 5477.486        | 8.808           | 5478.411        | S[41] |
| G  | 2  | 204.098         | 4364.462        | 4348.444        | 0.000           | 4347.430        | G[40] |
| R  | 3  | <b>360.199</b>  | 4307.441        | 4291.422        | 4292.430        | 4290.414        | R[39] |
| G  | 4  | <b>417.220</b>  | 4151.346        | 4135.321        | 4136.329        | 4134.311        | G[38] |
| K  | 5  | <b>545.315</b>  | 4094.318        | 4078.300        | 4079.307        | 4077.292        | K[37] |
| G  | 6  | <b>613.374</b>  | 3998.222        | 3990.205        | 3951.212        | 3949.210        | G[36] |
| G  | 7  | <b>730.395</b>  | 3938.105        | 3820.149        | 3819.154        | 3821.158        | G[35] |
| G  | 8  | <b>787.417</b>  | 3781.143        | 3765.126        | 3766.132        | 3764.111        | G[34] |
| K  | 9  | <b>915.512</b>  | 3724.122        | 3708.103        | 3709.111        | 3707.095        | K[33] |
| A  | 10 | <b>980.549</b>  | 3596.027        | 3580.008        | 3581.016        | 3579.000        | A[32] |
| R  | 11 | <b>1142.650</b> | 3524.990        | 3508.971        | 3509.979        | 3507.961        | R[31] |
| A  | 12 | 1213.697        | 3388.989        | 3382.970        | 3353.978        | 3351.960        | A[30] |
| K  | 13 | <b>1341.782</b> | 3297.852        | 3281.833        | 3282.841        | 3280.825        | K[29] |
| A  | 14 | <b>1412.819</b> | 3169.757        | 3153.738        | 3154.746        | 3152.730        | A[28] |
| K  | 15 | 1540.914        | 3098.719        | 3082.701        | 3083.709        | 3081.693        | K[27] |
| S  | 16 | <b>1627.946</b> | 2970.625        | 2954.606        | 2955.614        | 2953.598        | S[26] |
| R  | 17 | <b>1784.047</b> | 2883.592        | 2867.574        | 2868.582        | 2866.566        | R[25] |
| S  | 18 | 1813.079        | 2727.491        | 2711.473        | 2712.480        | 2710.465        | S[24] |
| S  | 19 | 1958.111        | 2640.458        | 2624.441        | 2625.448        | 2623.433        | S[23] |
| R  | 20 | 2114.213        | 2553.427        | 2537.409        | 2538.416        | 2536.401        | R[22] |
| A  | 21 | 2185.250        | 2397.326        | 2381.307        | 2382.315        | 2380.300        | A[21] |
| G  | 22 | 2242.271        | 2236.289        | 2220.270        | 2211.278        | 2209.263        | G[20] |
| L  | 23 | 2305.308        | 2089.248        | 2073.249        | 2074.257        | 2072.241        | L[19] |
| G  | 24 | 2463.414        | 2158.184        | 2142.185        | 2143.173        | 2139.157        | G[18] |
| F  | 25 | 2630.482        | 2028.125        | 2012.106        | 2013.114        | 2011.098        | F[17] |
| F  | 26 | 2747.535        | 1881.051        | 1865.030        | 1866.046        | 1864.030        | F[16] |
| V  | 27 | 2826.603        | <b>1784.004</b> | 1767.985        | 1768.993        | 1766.977        | V[15] |
| G  | 28 | 2883.625        | 1698.917        | 1682.917        | <b>1668.924</b> | 1667.907        | G[14] |
| R  | 29 | 3039.706        | <b>1627.914</b> | 1611.895        | <b>1612.903</b> | 1610.888        | R[13] |
| V  | 30 | 3138.794        | 1471.813        | <b>1455.794</b> | 1456.802        | 1454.786        | V[12] |
| H  | 31 | 3275.853        | <b>1372.744</b> | <b>1356.726</b> | 1367.734        | <b>1355.718</b> | H[11] |
| R  | 32 | 3431.954        | 1235.685        | <b>1219.667</b> | 1220.675        | 1218.659        | R[10] |
| L  | 33 | 3545.038        | 1079.584        | 1063.585        | 1064.593        | 1062.555        | L[9]  |
| L  | 34 | 3689.121        | 968.509         | 952.482         | <b>951.489</b>  | 949.411         | L[8]  |
| R  | 35 | 3814.224        | 853.416         | 837.398         | <b>836.405</b>  | 835.388         | R[7]  |
| K  | 36 | 3942.319        | 697.315         | 681.296         | 682.304         | 680.289         | K[6]  |
| G  | 37 | 3999.340        | 569.220         | 553.201         | 554.209         | 552.194         | G[5]  |
| N  | 38 | 4113.383        | 512.199         | 496.180         | 497.188         | 495.172         | N[4]  |
| V  | 39 | 4278.446        | 398.156         | 382.137         | 383.145         | 381.129         | V[3]  |
| S  | 40 | 4353.476        | 278.104         | 262.084         | 263.092         | 261.066         | S[2]  |
| E  | 41 | 4492.521        | 148.060         | 132.042         | 133.050         | 131.034         | E[1]  |

# sp | Q8BFU2 | H2A3\_MOUSE

[Acetyl]SGRGKQGGKARAKAKSRSSRAGLQFPVGRVHRLLRKGNYS

- ▶ fragmentation table for charge state 2+
- ▶ specType=etd
- ▶ score=69.18
- ▶ F113279.dat
- ▶ query=q46035.p1
- ▶ precursor=899.511040
- ▶ chargePrecursor=5
- ▶ itol=0.5

| AA   | c               | y              | z+1             | z+2             | z               | AA   |
|------|-----------------|----------------|-----------------|-----------------|-----------------|------|
| S 1  | 74.042          | 2347.256       | 2739.247        | 0.504           | 2238.743        | S 41 |
| G 2  | 102.553         | 2162.735       | 2174.725        | 0.504           | 2174.222        | G 40 |
| R 3  | 180.603         | 2154.824       | 2146.219        | 2146.719        | 2145.711        | R 39 |
| G 4  | 209.114         | 2076.174       | 2068.164        | 2068.668        | 2067.660        | G 38 |
| K 5  | 273.161         | 2047.663       | 2039.653        | 2040.157        | 2039.150        | K 37 |
| Q 6  | 337.193         | 1983.816       | <b>1975.406</b> | 1976.110        | <b>1975.102</b> | Q 36 |
| G 7  | 365.701         | 1919.588       | <b>1911.577</b> | <b>1912.081</b> | 1911.073        | G 35 |
| G 8  | 394.212         | 1891.075       | <b>1883.066</b> | 1883.570        | <b>1882.562</b> | G 34 |
| K 9  | 458.260         | 1862.565       | 1854.555        | 1855.059        | 1854.051        | K 33 |
| A 10 | 493.778         | 1798.517       | <b>1790.508</b> | 1791.012        | <b>1790.004</b> | A 32 |
| R 11 | 571.829         | 1762.999       | 1754.989        | <b>1755.493</b> | 1754.485        | R 31 |
| A 12 | 607.387         | 1694.948       | 1676.938        | <b>1677.443</b> | 1676.435        | A 30 |
| R 13 | <b>671.395</b>  | 1649.429       | 1641.420        | <b>1641.924</b> | 1640.916        | R 29 |
| A 14 | <b>706.913</b>  | 1585.382       | <b>1577.373</b> | <b>1577.876</b> | 1576.869        | A 28 |
| K 15 | <b>770.961</b>  | 1549.803       | <b>1541.854</b> | 1542.358        | <b>1541.350</b> | K 27 |
| S 16 | <b>814.477</b>  | 1485.816       | 1477.807        | 1478.310        | 1477.303        | S 26 |
| R 17 | <b>892.527</b>  | 1442.300       | <b>1434.291</b> | <b>1434.794</b> | 1433.787        | R 25 |
| S 18 | <b>936.043</b>  | 1394.250       | 1386.240        | <b>1386.744</b> | <b>1385.736</b> | S 24 |
| S 19 | 979.559         | 1320.733       | <b>1312.724</b> | <b>1313.228</b> | 1312.220        | S 23 |
| R 20 | <b>1057.610</b> | 1277.217       | <b>1269.208</b> | <b>1269.712</b> | 1268.704        | R 22 |
| A 21 | <b>1093.128</b> | 1199.067       | <b>1191.157</b> | <b>1191.661</b> | 1190.653        | A 21 |
| Q 22 | 1121.639        | 1163.048       | 1155.039        | 1156.143        | 1155.135        | Q 20 |
| L 23 | <b>1178.181</b> | 1126.137       | 1122.128        | 1122.632        | 1121.624        | L 19 |
| Q 24 | <b>1242.211</b> | 1078.595       | <b>1070.586</b> | 1071.090        | <b>1070.082</b> | Q 19 |
| F 25 | 1315.748        | 1014.568       | <b>1006.557</b> | <b>1007.061</b> | 1006.053        | F 17 |
| F 26 | 1364.271        | 941.032        | 933.023         | 933.526         | 932.519         | F 16 |
| V 27 | 1413.805        | <b>892.506</b> | <b>884.496</b>  | <b>885.000</b>  | 883.992         | V 15 |
| G 28 | 1442.316        | 842.071        | 834.062         | 835.466         | 834.458         | G 14 |
| V 29 | 1525.387        | <b>814.461</b> | 806.451         | <b>806.955</b>  | 805.947         | V 13 |
| V 30 | <b>1569.901</b> | 738.430        | 728.421         | 728.924         | 727.916         | V 12 |
| H 31 | <b>1638.430</b> | 686.876        | 678.866         | 679.370         | 678.363         | H 11 |
| R 32 | <b>1716.481</b> | 618.346        | 610.337         | 610.841         | 609.833         | R 10 |
| L 33 | 1773.023        | 540.290        | 532.280         | 532.790         | 531.783         | L 9  |
| L 34 | 1829.565        | 483.754        | 475.744         | 476.248         | 475.241         | L 8  |
| R 35 | 1867.815        | 427.212        | 419.202         | 419.706         | <b>418.698</b>  | R 7  |
| R 36 | 1971.963        | 349.161        | 341.152         | 341.656         | 340.648         | R 6  |
| G 37 | 2000.174        | 285.114        | 277.104         | 277.608         | 276.600         | G 5  |
| N 38 | 2067.195        | 256.603        | 248.594         | 249.098         | 248.090         | N 4  |
| V 39 | 2138.727        | 199.982        | 191.973         | 192.476         | 191.469         | V 3  |
| S 40 | 2182.241        | 118.050        | 110.041         | 110.544         | 109.537         | S 2  |
| E 41 | 2246.784        | 74.534         | 66.524          | 67.028          | 66.021          | E 1  |



# sp | Q8BFU2 | H2A3\_MOUSE

[Acetyl]SGRGKQGQGGKARAKAKSRSSRAGLQFPVGRVHRLLRKGNYS

- ▶ fragmentation table for charge state 3+
- ▶ specType=etd
- ▶ score=69.18
- ▶ F113279.dat
- ▶ query=q46035.p1
- ▶ precursor=899.511040
- ▶ chargePrecursor=5
- ▶ itol=0.5

| AA | c  | y               | #s1             | #s2             | z               | AA              |       |
|----|----|-----------------|-----------------|-----------------|-----------------|-----------------|-------|
| S  | 1  | 489.697         | <b>1498.507</b> | <b>1493.167</b> | 0.872           | 2482.831        | S[41] |
| G  | 2  | 66.704          | <b>1455.492</b> | 1450.153        | 0.872           | 1449.817        | G[40] |
| R  | 3  | 1307.718        | 1439.485        | 1431.140        | 1431.482        | 1430.810        | R[39] |
| G  | 4  | 139.745         | 1384.451        | 1379.112        | <b>1379.448</b> | 1378.770        | G[38] |
| K  | 5  | 182.443         | <b>1365.444</b> | <b>1360.105</b> | <b>1360.441</b> | 1359.707        | K[37] |
| G  | 6  | 225.130         | 1322.746        | 1317.407        | <b>1317.742</b> | 1317.070        | G[36] |
| G  | 7  | 244.137         | 1289.095        | <b>1274.720</b> | <b>1275.056</b> | <b>1274.384</b> | G[35] |
| G  | 8  | 263.144         | 1261.051        | <b>1255.713</b> | <b>1256.049</b> | 1255.377        | G[34] |
| K  | 9  | 305.642         | <b>1242.045</b> | 1236.706        | 1237.042        | 1236.370        | K[33] |
| A  | 10 | 329.521         | 1199.347        | 1194.008        | <b>1194.344</b> | 1193.672        | A[32] |
| R  | 11 | 381.555         | 1175.688        | <b>1170.329</b> | 1170.664        | <b>1169.993</b> | R[31] |
| A  | 12 | 405.234         | 1132.934        | 1128.297        | 1128.631        | 1127.959        | A[30] |
| K  | 13 | 447.932         | 1099.955        | 1094.615        | 1094.952        | 1094.280        | K[29] |
| A  | 14 | 491.611         | <b>1057.257</b> | 1051.917        | 1052.253        | 1051.580        | A[28] |
| K  | 15 | 514.310         | 1033.578        | 1028.238        | 1028.574        | 1027.902        | K[27] |
| S  | 16 | 543.320         | 990.887         | 985.548         | 985.876         | 985.204         | S[26] |
| R  | 17 | 595.254         | <b>961.869</b>  | 956.529         | 956.865         | 956.193         | R[25] |
| S  | 18 | 624.265         | 959.937         | 954.598         | 954.932         | 954.260         | S[24] |
| S  | 19 | 653.275         | 920.825         | 915.485         | 915.821         | 915.149         | S[23] |
| R  | 20 | 705.409         | 951.814         | 946.474         | 946.810         | 946.138         | R[22] |
| A  | 21 | 729.088         | 799.789         | 794.441         | 794.777         | 794.101         | A[21] |
| G  | 22 | 748.095         | 778.101         | <b>770.762</b>  | <b>771.098</b>  | 770.426         | G[20] |
| L  | 23 | 785.790         | 739.094         | 733.754         | 734.090         | 733.419         | L[19] |
| Q  | 24 | 828.476         | 719.309         | 714.000         | 714.306         | 713.224         | Q[18] |
| F  | 25 | 897.409         | 676.713         | <b>671.374</b>  | <b>671.710</b>  | 671.038         | F[17] |
| F  | 26 | 909.950         | 627.600         | 622.351         | 622.687         | 622.015         | F[16] |
| V  | 27 | <b>942.873</b>  | 595.139         | 590.000         | 590.336         | 589.664         | V[15] |
| G  | 28 | <b>961.860</b>  | 562.317         | 556.977         | 557.313         | 556.641         | G[14] |
| R  | 29 | 1013.614        | 543.309         | 537.910         | 538.208         | 537.524         | R[13] |
| V  | 30 | <b>1046.936</b> | 490.276         | 485.038         | 486.272         | 485.600         | V[12] |
| H  | 31 | 1092.623        | 458.253         | 452.913         | 453.249         | 452.577         | H[11] |
| R  | 32 | 1184.656        | 412.967         | 407.227         | 407.563         | 406.891         | R[10] |
| L  | 33 | <b>1182.351</b> | <b>360.533</b>  | 355.193         | 355.529         | 354.857         | L[9]  |
| L  | 34 | <b>1220.046</b> | 322.874         | 317.489         | 317.825         | 317.151         | L[8]  |
| R  | 35 | 1272.804        | 285.144         | 279.804         | 280.140         | 279.468         | R[7]  |
| K  | 36 | 1314.778        | 233.110         | 227.770         | 228.106         | 227.434         | K[6]  |
| G  | 37 | <b>1333.785</b> | 190.412         | 185.072         | 185.408         | 184.736         | G[5]  |
| N  | 38 | <b>1371.799</b> | 171.404         | 166.065         | 166.401         | 165.729         | N[4]  |
| V  | 39 | 1426.154        | 133.290         | 128.051         | 128.386         | 127.715         | V[3]  |
| S  | 40 | 1455.104        | 99.139          | 93.900          | 94.232          | 93.560          | S[2]  |
| E  | 41 | <b>1498.178</b> | 50.025          | 44.685          | 45.021          | 44.349          | E[1]  |

# sp | Q8BFU2 | H2A3\_MOUSE

[Acetyl]SGRGKQGGKARAKAKSRSSRAGLQFPVGRVHLLRKGNYSE

- ▶ fragmentation table for charge state 4+
- ▶ specType=etd
- ▶ score=69.18
- ▶ F113279.dat
- ▶ query=q46035.p1
- ▶ precursor=899.511040
- ▶ chargePrecursor=5
- ▶ itol=0.5

| AA |    | c               | y               | #s1             | #s2             | #s              | AA    |
|----|----|-----------------|-----------------|-----------------|-----------------|-----------------|-------|
| S  | 1  | 37.505          | <b>1124.132</b> | <b>1120.127</b> | 0.705           | <b>1110.975</b> | S[41] |
| G  | 2  | 51.780          | <b>1091.871</b> | <b>1087.866</b> | 0.795           | <b>1087.614</b> | G[40] |
| R  | 3  | 90.805          | 1077.610        | 1073.611        | <b>1073.863</b> | 1073.590        | R[39] |
| G  | 4  | 109.061         | 1038.590        | 1034.589        | 1034.838        | 1034.334        | G[38] |
| K  | 5  | 137.084         | 1024.335        | 1020.330        | 1020.582        | 1020.078        | K[37] |
| G  | 6  | 169.059         | 992.311         | 988.307         | 988.559         | 988.055         | G[36] |
| G  | 7  | 183.354         | 956.291         | 952.287         | 952.544         | 952.040         | G[35] |
| G  | 8  | 197.610         | 940.041         | 942.037         | 942.289         | 941.795         | G[34] |
| K  | 9  | 229.633         | 931.788         | 927.781         | 928.033         | 927.529         | K[33] |
| A  | 10 | 247.393         | 899.762         | 895.757         | 896.009         | 895.505         | A[32] |
| R  | 11 | 266.418         | 882.003         | 877.998         | 878.250         | 877.746         | R[31] |
| A  | 12 | 304.177         | 842.918         | <b>838.973</b>  | 839.225         | <b>834.721</b>  | A[30] |
| K  | 13 | 336.201         | 825.215         | 821.214         | 821.466         | 820.962         | K[29] |
| A  | 14 | 353.960         | 793.195         | 789.189         | 789.442         | 788.938         | A[28] |
| K  | 15 | 385.984         | 775.435         | <b>771.431</b>  | 771.683         | <b>771.179</b>  | K[27] |
| S  | 16 | 407.742         | 743.412         | 739.407         | 739.659         | 739.155         | S[26] |
| R  | 17 | 446.767         | 721.954         | 717.949         | 717.901         | 717.397         | R[25] |
| S  | 18 | 468.526         | 692.629         | 688.624         | 688.876         | 688.372         | S[24] |
| S  | 19 | 490.283         | 660.670         | 656.666         | 657.118         | 656.614         | S[23] |
| R  | 20 | 529.309         | 638.112         | 634.108         | 635.360         | 634.856         | R[22] |
| A  | 21 | 547.068         | 600.087         | 596.082         | 596.334         | 595.830         | A[21] |
| G  | 22 | 561.323         | 582.328         | 578.323         | 578.575         | 578.071         | G[20] |
| L  | 23 | 589.394         | 568.072         | 564.068         | 564.320         | 563.816         | L[19] |
| Q  | 24 | 621.609         | 539.801         | 535.797         | 536.049         | 535.545         | Q[18] |
| F  | 25 | 658.376         | 507.787         | 503.782         | 504.034         | 503.530         | F[17] |
| F  | 26 | 682.639         | 471.020         | 467.015         | 467.267         | 466.763         | F[16] |
| V  | 27 | <b>707.406</b>  | 446.756         | 442.752         | 443.004         | 442.500         | V[15] |
| G  | 28 | 721.662         | 421.989         | 417.985         | <b>418.237</b>  | <b>417.733</b>  | G[14] |
| R  | 29 | 760.687         | 389.134         | 385.129         | 385.381         | 384.877         | R[13] |
| V  | 30 | 785.454         | 368.709         | 364.704         | 364.956         | 364.452         | V[12] |
| H  | 31 | 819.710         | 343.942         | 339.937         | 340.189         | 339.685         | H[11] |
| R  | 32 | 858.744         | 309.677         | 305.672         | 305.924         | 305.420         | R[10] |
| L  | 33 | 897.015         | 270.652         | 266.647         | 266.899         | 266.395         | L[9]  |
| L  | 34 | <b>915.286</b>  | 242.361         | 238.356         | 238.608         | 238.104         | L[8]  |
| R  | 35 | 934.313         | 214.110         | 210.105         | 210.357         | 209.853         | R[7]  |
| K  | 36 | <b>966.335</b>  | 175.084         | 171.080         | 171.332         | 170.828         | K[6]  |
| G  | 37 | <b>1000.590</b> | 143.061         | 139.056         | 139.308         | 138.804         | G[5]  |
| N  | 38 | <b>1029.101</b> | 128.805         | 124.800         | 125.052         | 124.548         | N[4]  |
| V  | 39 | 1067.777        | 100.294         | 96.289          | 96.542          | 96.038          | V[3]  |
| S  | 40 | <b>1091.625</b> | 98.529          | 94.524          | 94.776          | 94.272          | S[2]  |
| E  | 41 | <b>1123.886</b> | 97.771          | 93.766          | 94.018          | 93.514          | E[1]  |

# sp | Q8BFU2 | H2A3\_MOUSE

[Acetyl]SGRGKQGGKARAKAKSRSSRAGLQFPVGRVHLLLRKGNYS

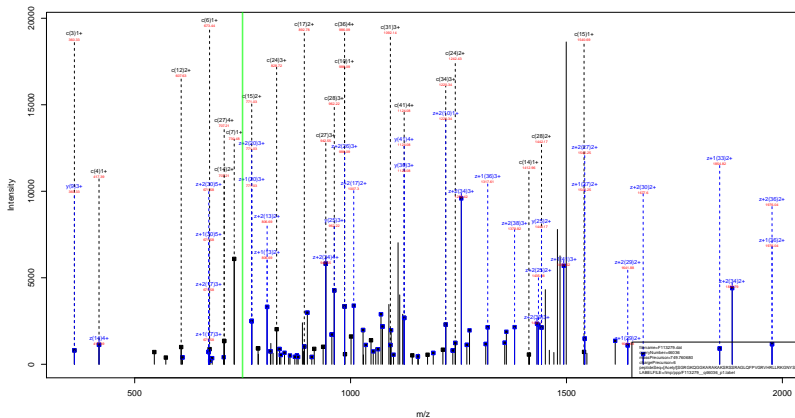

# sp | Q8BFU2 | H2A3\_MOUSE

[Acetyl]SGRGKQGGKARAKAKSRSSRAGLQFPVGRVHRLLRKGNYS

- ▶ fragmentation table for charge state 1+
- ▶ specType=etd
- ▶ score=72.49
- ▶ F113279.dat
- ▶ query=q46036.p1
- ▶ precursor=749.760680
- ▶ chargePrecursor=6
- ▶ itol=0.5

| AA   | c               | y        | z+1             | z+2             | z        | AA   |
|------|-----------------|----------|-----------------|-----------------|----------|------|
| S 1  | 147.076         | 4493.505 | 4477.486        | 0.000           | 4476.478 | S 41 |
| G 2  | 304.098         | 4364.463 | 4348.444        | 0.000           | 4347.436 | G 40 |
| R 3  | <b>360.199</b>  | 4307.441 | 4291.422        | 4292.430        | 4290.414 | R 39 |
| G 4  | <b>417.220</b>  | 4151.340 | 4135.321        | 4136.329        | 4134.313 | G 38 |
| K 5  | <b>543.315</b>  | 4094.318 | 4078.300        | 4079.307        | 4077.292 | K 37 |
| Q 6  | <b>673.174</b>  | 3956.273 | 3950.255        | 3951.212        | 3949.197 | Q 36 |
| G 7  | <b>730.395</b>  | 3836.165 | 3822.146        | 3823.154        | 3821.138 | G 35 |
| G 8  | 787.417         | 3781.143 | 3765.125        | 3766.132        | 3764.117 | G 34 |
| K 9  | <b>915.512</b>  | 3724.122 | 3708.103        | 3709.111        | 3707.095 | K 33 |
| A 10 | <b>986.549</b>  | 3696.027 | 3680.008        | 3681.016        | 3679.000 | A 32 |
| R 11 | <b>1142.850</b> | 3524.990 | 3508.971        | 3509.979        | 3507.963 | R 31 |
| A 12 | <b>1213.687</b> | 3368.989 | 3352.970        | 3353.978        | 3351.962 | A 30 |
| K 13 | 1354.799        | 3297.852 | 3281.833        | 3282.841        | 3280.825 | K 29 |
| A 14 | <b>1412.819</b> | 3169.757 | 3153.738        | 3154.746        | 3152.730 | A 28 |
| K 15 | <b>1540.914</b> | 3098.719 | 3082.700        | 3083.709        | 3081.693 | K 27 |
| S 16 | 1627.946        | 2970.625 | 2954.606        | 2955.614        | 2953.598 | S 26 |
| R 17 | 1784.047        | 2883.592 | 2867.574        | 2868.582        | 2866.566 | R 25 |
| S 18 | 1873.079        | 2727.491 | 2711.473        | 2712.480        | 2710.465 | S 24 |
| S 19 | 1958.111        | 2640.458 | 2624.441        | 2625.448        | 2623.433 | S 23 |
| R 20 | 2114.213        | 2553.427 | 2537.409        | 2538.416        | 2536.401 | R 22 |
| A 21 | 2185.250        | 2497.326 | 2481.307        | 2482.315        | 2480.300 | A 21 |
| G 22 | 2242.271        | 2326.289 | 2310.270        | 2311.278        | 2309.263 | G 20 |
| L 23 | 2355.355        | 2269.268 | 2253.249        | 2254.257        | 2252.241 | L 19 |
| Q 24 | 2483.414        | 2156.184 | 2140.165        | 2141.173        | 2139.157 | Q 18 |
| F 25 | 2630.482        | 2028.125 | 2012.106        | 2013.114        | 2011.098 | F 17 |
| P 26 | 2727.535        | 1881.057 | 1865.038        | 1866.046        | 1864.030 | P 16 |
| V 27 | 2826.603        | 1784.004 | 1767.985        | 1768.993        | 1766.977 | V 15 |
| G 28 | 2883.625        | 1684.935 | 1668.916        | 1669.924        | 1667.909 | G 14 |
| R 29 | 3039.726        | 1627.914 | 1611.895        | <b>1612.903</b> | 1610.887 | R 13 |
| V 30 | 3138.764        | 1519.833 | 1503.814        | 1504.822        | 1502.806 | V 12 |
| H 31 | 3275.853        | 1372.744 | <b>1356.726</b> | 1357.734        | 1355.718 | H 11 |
| R 32 | 3431.954        | 1235.685 | 1219.667        | <b>1220.675</b> | 1218.659 | R 10 |
| L 33 | 3545.038        | 1079.584 | <b>1063.566</b> | 1064.573        | 1062.558 | L 9  |
| L 34 | 3658.123        | 959.500  | 950.482         | 951.489         | 949.474  | L 8  |
| R 35 | 3814.224        | 853.416  | 837.398         | <b>838.405</b>  | 836.390  | R 7  |
| K 36 | 3932.319        | 697.315  | 681.296         | 682.304         | 680.289  | K 6  |
| G 37 | 3999.340        | 569.220  | 553.201         | 554.209         | 552.194  | G 5  |
| N 38 | 4113.383        | 512.109  | 496.100         | 497.108         | 495.172  | N 4  |
| Y 39 | 4276.446        | 396.156  | 380.137         | 381.145         | 381.129  | Y 3  |
| S 40 | 4363.478        | 235.092  | 219.074         | 220.082         | 218.066  | S 2  |
| E 41 | 4492.521        | 148.060  | 132.042         | 133.050         | 131.034  | E 1  |

# sp | Q8BFU2 | H2A3\_MOUSE

[Acetyl]SGRGKQGGKARAKAKSRSSRAGLQFPVGRVHRLLRKGNYS

- ▶ fragmentation table for charge state 2+
- ▶ specType=etd
- ▶ score=72.49
- ▶ F113279.dat
- ▶ query=q46036.p1
- ▶ precursor=749.760680
- ▶ chargePrecursor=6
- ▶ itol=0.5

| AA   | c               | y               | #s=1            | #s=2            | z               | AA    |
|------|-----------------|-----------------|-----------------|-----------------|-----------------|-------|
| G 1  | 74.062          | 2247.256        | 2229.267        | 0.804           | 2238.74         | S(1)  |
| G 2  | 102.553         | 2182.735        | 2174.726        | 0.504           | 2174.222        | G(2)  |
| R 3  | 180.603         | 2154.224        | 2146.215        | 2146.719        | 2145.711        | R(3)  |
| G 4  | 209.114         | 2076.174        | 2068.164        | 2068.666        | 2067.660        | G(3)  |
| K 5  | 273.161         | 2047.663        | 2039.653        | 2040.157        | 2039.150        | K(37) |
| G 6  | 327.194         | 1983.615        | <b>1975.606</b> | <b>1976.110</b> | 1975.102        | G(36) |
| G 7  | 365.703         | 1919.566        | 1911.557        | 1912.061        | 1911.053        | G(35) |
| G 8  | 394.212         | 1891.075        | 1883.066        | <b>1883.570</b> | 1882.562        | G(34) |
| K 9  | 458.260         | 1862.565        | <b>1854.555</b> | <b>1855.059</b> | 1854.051        | K(33) |
| A 10 | 493.773         | 1798.517        | 1790.508        | 1791.012        | 1790.004        | A(32) |
| R 11 | <b>571.829</b>  | 1762.999        | 1754.989        | 1755.493        | 1754.485        | R(31) |
| A 12 | <b>607.347</b>  | 1698.454        | 1690.445        | <b>1690.949</b> | 1689.941        | A(30) |
| R 13 | <b>671.395</b>  | 1649.420        | <b>1641.420</b> | <b>1641.924</b> | 1640.916        | R(29) |
| A 14 | <b>706.913</b>  | 1585.363        | 1577.353        | 1577.857        | 1576.849        | A(28) |
| K 15 | <b>770.961</b>  | 1549.861        | <b>1541.854</b> | <b>1542.358</b> | 1541.350        | K(27) |
| S 16 | <b>814.477</b>  | 1485.816        | 1477.807        | 1478.310        | 1477.303        | S(26) |
| R 17 | <b>892.527</b>  | <b>1442.300</b> | 1434.291        | <b>1434.794</b> | 1433.786        | R(25) |
| S 18 | <b>936.043</b>  | 1384.259        | 1376.250        | <b>1376.744</b> | 1375.736        | S(24) |
| S 19 | 999.559         | 1320.733        | <b>1312.724</b> | <b>1313.228</b> | 1312.220        | S(23) |
| R 20 | 1057.610        | 1277.217        | <b>1269.208</b> | <b>1269.712</b> | 1268.704        | R(22) |
| A 21 | 1093.128        | 1199.161        | <b>1191.157</b> | <b>1191.661</b> | 1190.653        | A(21) |
| G 22 | 1121.639        | 1163.648        | <b>1155.639</b> | <b>1156.143</b> | 1155.135        | G(20) |
| L 23 | <b>1178.181</b> | 1108.137        | 1100.127        | 1100.631        | 1099.623        | L(19) |
| G 24 | <b>1242.211</b> | 1078.595        | <b>1070.586</b> | 1071.090        | <b>1070.082</b> | G(18) |
| F 25 | 1315.745        | 1014.506        | 1006.559        | <b>1007.061</b> | 1006.053        | F(17) |
| F 26 | 1364.271        | 941.033         | 933.033         | 933.536         | 932.519         | F(16) |
| V 27 | 1413.805        | <b>892.506</b>  | 884.496         | 885.000         | 884.992         | V(15) |
| G 28 | <b>1442.316</b> | 827.071         | <b>819.062</b>  | <b>819.566</b>  | 818.558         | G(14) |
| R 29 | 1503.559        | <b>814.461</b>  | <b>806.451</b>  | <b>806.955</b>  | 805.947         | R(13) |
| V 30 | 1569.901        | 736.410         | 728.401         | 728.905         | 727.897         | V(12) |
| H 31 | 1636.430        | 668.876         | 678.886         | <b>679.370</b>  | 678.363         | H(11) |
| R 32 | 1716.481        | 618.346         | <b>610.337</b>  | <b>610.841</b>  | 609.833         | R(10) |
| L 33 | 1773.023        | 540.206         | 532.206         | 532.709         | 531.703         | L(9)  |
| L 34 | 1829.565        | 469.754         | 479.764         | 479.268         | 478.261         | L(8)  |
| R 35 | 1907.615        | 427.212         | 419.202         | 419.706         | 418.699         | R(7)  |
| K 36 | 1971.663        | 349.161         | 341.152         | 341.656         | 340.648         | K(6)  |
| G 37 | 2000.174        | 285.114         | 277.104         | 277.608         | 276.600         | G(5)  |
| N 38 | 2057.195        | 256.603         | 248.594         | 249.098         | 248.090         | N(4)  |
| V 39 | 2138.227        | 199.562         | 191.572         | 192.076         | 191.068         | V(3)  |
| S 40 | 2192.243        | 118.056         | 110.047         | 110.544         | 109.537         | S(2)  |
| E 41 | 2246.764        | 74.534          | 66.524          | 67.028          | 66.021          | E(1)  |

# sp | Q8BFU2 | H2A3\_MOUSE

[Acetyl]SGRGKQGGKARAKAKSRSSRAGLQFPVGRVHRLLRKGNYS

- ▶ fragmentation table for charge state 3+
- ▶ specType=etd
- ▶ score=72.49
- ▶ F113279.dat
- ▶ query=q46036.p1
- ▶ precursor=749.760680
- ▶ chargePrecursor=6
- ▶ itol=0.5

| AA | c  | y               | #=1             | #=2             | #=3             | AA              |       |
|----|----|-----------------|-----------------|-----------------|-----------------|-----------------|-------|
| S  | 1  | 48.697          | 1598.561        | <b>1493.167</b> | 8.872           | 2402.831        | S[41] |
| G  | 2  | 66.704          | 1455.492        | 1450.153        | 0.672           | 1449.817        | G[40] |
| R  | 3  | 130.718         | 1436.485        | 1431.146        | <b>1431.482</b> | 1430.810        | R[39] |
| G  | 4  | 139.745         | 1384.451        | 1379.112        | <b>1379.448</b> | 1378.770        | G[38] |
| K  | 5  | 182.443         | 1305.444        | 1300.105        | <b>1300.441</b> | 1300.700        | K[37] |
| G  | 6  | 225.130         | 1222.746        | <b>1217.406</b> | <b>1217.742</b> | 1217.070        | G[36] |
| G  | 7  | 244.137         | 1090.090        | 1084.751        | <b>1085.087</b> | 1084.366        | G[35] |
| G  | 8  | 263.144         | 1061.053        | 1055.713        | <b>1056.049</b> | 1055.377        | G[34] |
| K  | 9  | 305.642         | <b>1242.045</b> | <b>1236.706</b> | <b>1237.042</b> | <b>1236.370</b> | K[33] |
| A  | 10 | 329.521         | 1199.347        | 1194.008        | 1194.344        | 1193.672        | A[32] |
| R  | 11 | 381.555         | 1174.689        | 1170.350        | 1170.684        | 1169.993        | R[31] |
| A  | 12 | 405.234         | <b>1123.534</b> | 1118.205        | 1118.536        | 1117.855        | A[30] |
| R  | 13 | 447.932         | <b>1099.955</b> | 1094.616        | 1094.952        | <b>1094.280</b> | R[29] |
| A  | 14 | 491.611         | 1057.257        | 1051.917        | <b>1052.253</b> | 1051.565        | A[28] |
| K  | 15 | 514.310         | 1033.578        | 1028.239        | <b>1028.574</b> | 1027.902        | K[27] |
| S  | 16 | 543.320         | 990.880         | 985.540         | <b>985.876</b>  | 985.204         | S[26] |
| R  | 17 | 585.254         | <b>961.860</b>  | <b>956.520</b>  | <b>956.855</b>  | <b>956.183</b>  | R[25] |
| S  | 18 | 624.365         | <b>909.835</b>  | 904.495         | 904.830         | 904.160         | S[24] |
| S  | 19 | 653.375         | 880.625         | <b>875.485</b>  | <b>875.821</b>  | 875.149         | S[23] |
| R  | 20 | 705.409         | 851.614         | 846.474         | <b>846.810</b>  | 846.138         | R[22] |
| A  | 21 | 729.088         | 799.780         | 794.441         | 794.777         | 794.105         | A[21] |
| G  | 22 | 748.095         | 776.101         | <b>770.762</b>  | <b>771.098</b>  | 770.426         | G[20] |
| L  | 23 | <b>785.790</b>  | 750.094         | 744.754         | 745.090         | 744.419         | L[19] |
| Q  | 24 | <b>828.476</b>  | 719.369         | 714.030         | 714.366         | 713.694         | Q[18] |
| F  | 25 | 877.499         | 676.713         | <b>671.374</b>  | <b>671.710</b>  | 671.038         | F[17] |
| F  | 26 | <b>909.850</b>  | 627.690         | 622.351         | 622.687         | 622.015         | F[16] |
| V  | 27 | <b>942.873</b>  | 595.139         | 590.000         | 590.336         | 589.664         | V[15] |
| G  | 28 | <b>961.880</b>  | 562.317         | 556.977         | 557.313         | 556.641         | G[14] |
| R  | 29 | 1103.814        | 443.309         | 437.970         | 438.306         | 437.634         | R[13] |
| V  | 30 | <b>1046.936</b> | 400.275         | 405.036         | 406.272         | 405.600         | V[12] |
| H  | 31 | <b>1092.623</b> | 458.253         | 452.913         | 453.249         | 452.577         | H[11] |
| R  | 32 | 1144.656        | 412.967         | 407.227         | 407.563         | 406.891         | R[10] |
| L  | 33 | 1182.351        | <b>360.533</b>  | 355.193         | 355.529         | 354.857         | L[9]  |
| L  | 34 | <b>1220.046</b> | 322.876         | 317.489         | 317.825         | 317.153         | L[8]  |
| R  | 35 | 1222.222        | 285.144         | 279.804         | 280.140         | 279.468         | R[7]  |
| K  | 36 | 1314.778        | 233.110         | 227.770         | 228.106         | 227.434         | K[6]  |
| G  | 37 | 1333.785        | 190.412         | 185.072         | 185.408         | 184.736         | G[5]  |
| N  | 38 | 1371.799        | 171.404         | 166.065         | 166.401         | 165.729         | N[4]  |
| V  | 39 | 1426.154        | 133.390         | 128.051         | 128.387         | 127.715         | V[3]  |
| S  | 40 | 1455.164        | 99.136          | 93.796          | 94.132          | 93.460          | S[2]  |
| E  | 41 | 1498.178        | 50.025          | 44.685          | 45.021          | 44.349          | E[1]  |

# sp | Q8BFU2 | H2A3\_MOUSE

[Acetyl]SGRGKQGGKARAKAKSRSSRAGLQFPVGRVHRLLRKGNYS

- ▶ fragmentation table for charge state 4+
- ▶ specType=etd
- ▶ score=72.49
- ▶ F113279.dat
- ▶ query=q46036.p1
- ▶ precursor=749.760680
- ▶ chargePrecursor=6
- ▶ itol=0.5

| AA |    | c               | y               | s+1             | s+2             | z               | AA    |
|----|----|-----------------|-----------------|-----------------|-----------------|-----------------|-------|
| S  | 1  | 37.505          | <b>1124.132</b> | 1120.137        | 0.758           | 1119.877        | S[4]  |
| G  | 2  | 51.780          | <b>1091.871</b> | 1087.866        | 0.755           | 1087.614        | G[6]  |
| R  | 3  | 90.805          | 1077.610        | <b>1073.611</b> | <b>1073.613</b> | <b>1073.359</b> | R[30] |
| G  | 4  | 109.001         | 1038.500        | 1034.500        | <b>1034.838</b> | 1034.134        | G[38] |
| K  | 5  | 137.084         | 1024.335        | 1020.330        | 1020.362        | 1020.078        | K[37] |
| G  | 6  | 169.059         | 992.311         | 988.307         | 988.299         | 988.055         | G[36] |
| G  | 7  | 183.254         | 950.291         | <b>956.292</b>  | <b>956.544</b>  | 955.940         | G[25] |
| G  | 8  | 197.610         | 948.041         | 942.037         | <b>942.289</b>  | 941.795         | G[34] |
| K  | 9  | 229.633         | 931.788         | 927.781         | 928.033         | 927.520         | K[33] |
| A  | 10 | 247.303         | <b>899.762</b>  | 895.757         | 896.009         | 895.500         | A[32] |
| R  | 11 | 286.418         | 852.003         | 847.998         | <b>878.250</b>  | 877.746         | R[31] |
| A  | 12 | 304.177         | 842.878         | 838.873         | 839.225         | <b>838.721</b>  | A[30] |
| R  | 13 | 336.201         | 825.215         | 821.214         | 821.466         | 820.962         | R[29] |
| A  | 14 | 353.960         | 793.195         | 789.190         | 789.442         | 788.938         | A[28] |
| K  | 15 | 385.984         | 775.435         | <b>771.431</b>  | 771.683         | <b>771.179</b>  | K[27] |
| S  | 16 | 407.742         | 743.412         | 739.407         | 739.659         | 739.153         | S[26] |
| R  | 17 | 446.767         | 721.954         | 717.949         | 717.961         | 717.30          | R[25] |
| S  | 18 | 468.526         | 692.629         | 688.624         | 688.876         | 688.372         | S[24] |
| S  | 19 | 490.283         | 660.870         | 656.866         | 657.118         | 656.614         | S[23] |
| R  | 20 | 529.300         | 638.112         | 634.108         | 635.360         | 634.856         | R[22] |
| A  | 21 | 547.088         | 600.087         | 596.082         | 596.334         | 595.830         | A[21] |
| G  | 22 | 561.323         | 582.328         | 578.323         | 578.575         | 578.071         | G[20] |
| L  | 23 | 589.394         | 568.072         | 564.068         | 564.320         | 563.816         | L[19] |
| G  | 24 | 621.609         | 539.801         | 535.797         | 536.049         | 535.545         | G[18] |
| F  | 25 | 658.376         | 507.787         | 503.782         | 504.034         | 503.530         | F[17] |
| F  | 26 | 682.639         | 471.020         | 467.015         | 467.267         | 466.763         | F[16] |
| V  | 27 | <b>707.406</b>  | 446.756         | 442.752         | 443.004         | 442.500         | V[15] |
| G  | 28 | 721.662         | 421.989         | 417.985         | 418.237         | <b>417.733</b>  | G[14] |
| R  | 29 | 790.687         | 389.734         | 385.729         | 385.981         | 385.477         | R[13] |
| V  | 30 | <b>785.454</b>  | 368.709         | 364.704         | 364.956         | 364.452         | V[12] |
| H  | 31 | 816.710         | 343.942         | 339.937         | 340.189         | 339.685         | H[11] |
| R  | 32 | 858.744         | 309.677         | 305.672         | 305.924         | 305.420         | R[10] |
| L  | 33 | 887.015         | 270.652         | 266.647         | 266.899         | 266.395         | L[9]  |
| L  | 34 | 915.288         | 242.381         | 238.376         | 238.628         | 238.124         | L[8]  |
| R  | 35 | 954.311         | 214.110         | 210.105         | 210.357         | 209.853         | R[7]  |
| K  | 36 | <b>986.335</b>  | 175.084         | 171.080         | 171.332         | 170.828         | K[6]  |
| G  | 37 | <b>1006.590</b> | 143.061         | 139.056         | 139.308         | 138.804         | G[5]  |
| N  | 38 | <b>1029.101</b> | 128.805         | 124.800         | 125.052         | 124.548         | N[4]  |
| V  | 39 | 1069.867        | 100.294         | 96.289          | 96.542          | 96.038          | V[3]  |
| S  | 40 | 1091.625        | 59.529          | 55.524          | 55.776          | 55.272          | S[2]  |
| E  | 41 | <b>1123.886</b> | 37.771          | 33.766          | 34.018          | 33.514          | E[1]  |

# sp | Q8BFU2 | H2A3\_MOUSE

[Acetyl]SGRGKQGGKARAKAKSRSSRAGLQFPVGRVHRLLRKGNYS

- ▶ fragmentation table for charge state 5+
- ▶ specType=etd
- ▶ score=72.49
- ▶ F113279.dat
- ▶ query=q46036.p1
- ▶ precursor=749.760680
- ▶ chargePrecursor=6
- ▶ itol=0.5

| AA    | c       | y              | z+1            | z+2            | z              | AA    |
|-------|---------|----------------|----------------|----------------|----------------|-------|
| S[1]  | 30.221  | <b>899.507</b> | 899.303        | 0.806          | 896.102        | S[41] |
| G[2]  | 41.625  | 873.698        | <b>870.495</b> | 0.806          | 870.293        | G[40] |
| R[3]  | 72.846  | 862.294        | 859.090        | <b>859.292</b> | 858.889        | R[39] |
| G[4]  | 84.250  | 831.074        | 827.870        | 828.072        | 827.866        | G[38] |
| K[5]  | 109.869 | 819.669        | 816.466        | 816.667        | 816.264        | K[37] |
| Q[6]  | 135.481 | 794.050        | 790.847        | 791.048        | 790.645        | Q[36] |
| G[7]  | 146.885 | 768.439        | 765.235        | 765.437        | 765.033        | G[35] |
| G[8]  | 158.289 | 757.034        | 753.831        | 754.032        | 753.629        | G[34] |
| K[9]  | 183.908 | 745.630        | 742.426        | 742.628        | 742.225        | K[13] |
| A[10] | 198.116 | 730.011        | 716.807        | 717.009        | 716.606        | A[12] |
| R[11] | 229.336 | <b>705.804</b> | 702.600        | 702.802        | 702.398        | R[31] |
| A[12] | 243.543 | <b>674.584</b> | <b>671.380</b> | <b>671.581</b> | <b>671.178</b> | A[30] |
| K[13] | 269.162 | 660.376        | 657.172        | 657.374        | 656.971        | K[29] |
| A[14] | 283.370 | 634.757        | 631.553        | 631.755        | 631.352        | A[28] |
| K[15] | 308.989 | 620.550        | 617.346        | 617.548        | 617.144        | K[27] |
| S[16] | 326.395 | 594.931        | 591.727        | 591.929        | 591.525        | S[26] |
| R[17] | 357.615 | 577.524        | 574.321        | 574.522        | 574.119        | R[25] |
| S[18] | 373.022 | 546.304        | 543.100        | 543.302        | 542.899        | S[24] |
| S[19] | 392.433 | 529.898        | 526.694        | 526.896        | 526.493        | S[23] |
| R[20] | 423.648 | 511.491        | 508.288        | 508.489        | 508.086        | R[22] |
| A[21] | 437.856 | 480.271        | 477.067        | 477.269        | 476.866        | A[21] |
| G[22] | 449.260 | 466.064        | 462.860        | 463.061        | 462.658        | G[20] |
| L[23] | 471.877 | 454.659        | 451.456        | 451.657        | 451.254        | L[19] |
| Q[24] | 497.489 | 432.043        | 428.839        | 429.040        | 428.637        | Q[18] |
| F[25] | 526.902 | 406.431        | 403.227        | 403.429        | 403.026        | F[17] |
| P[26] | 546.313 | 377.017        | 373.813        | 374.015        | 373.612        | P[16] |
| V[27] | 566.126 | 357.607        | 354.403        | 354.604        | 354.201        | V[15] |
| G[28] | 577.531 | 337.793        | 334.589        | 334.791        | 334.388        | G[14] |
| R[29] | 606.751 | 326.389        | 323.185        | 323.386        | 322.983        | R[13] |
| V[30] | 628.565 | 295.168        | 291.965        | 292.166        | 291.763        | V[12] |
| H[31] | 655.976 | 275.355        | 272.151        | 272.353        | 271.949        | H[11] |
| R[32] | 687.197 | 247.943        | 244.739        | 244.941        | 244.538        | R[10] |
| L[33] | 709.814 | 216.723        | 213.519        | 213.721        | 213.317        | L[9]  |
| L[34] | 732.430 | 194.106        | 190.902        | 191.104        | 190.701        | L[8]  |
| R[35] | 763.651 | 171.489        | 168.285        | 168.487        | 168.084        | R[7]  |
| K[36] | 789.270 | 140.269        | 137.065        | 137.267        | 136.864        | K[6]  |
| G[37] | 800.674 | 114.650        | 111.446        | 111.648        | 111.245        | G[5]  |
| N[38] | 823.482 | 103.246        | 100.042        | 100.243        | 99.840         | N[6]  |
| V[39] | 856.095 | 80.437         | 77.233         | 77.435         | 77.032         | V[3]  |
| S[40] | 873.501 | 47.824         | 44.621         | 44.822         | 44.419         | S[2]  |
| E[41] | 899.310 | 30.418         | 27.214         | 27.416         | 27.013         | E[1]  |





# sp | Q8CGP5 | H2A1F\_MOUSE

[Acetyl]SGRGKQGGKARAKAKTRSSRAGLQFPVGRVHRLLRKGNYS

- ▶ fragmentation table for charge state 1+
- ▶ specType=etd
- ▶ score=48.11
- ▶ F113279.dat
- ▶ query=q46069\_p1
- ▶ precursor=644.796740
- ▶ chargePrecursor=7
- ▶ itol=0.5

| AA   | c               | y        | z+1             | z+2             | z        | AA   |
|------|-----------------|----------|-----------------|-----------------|----------|------|
| S 1  | 147.076         | 4507.521 | 4491.502        | 0.000           | 4490.494 | S 41 |
| G 2  | 304.098         | 4378.478 | 4362.459        | 0.000           | 4361.451 | G 40 |
| R 3  | <b>360.199</b>  | 4321.457 | 4305.438        | 4306.448        | 4304.430 | R 39 |
| G 4  | <b>417.220</b>  | 4165.355 | 4149.337        | 4150.345        | 4148.329 | G 38 |
| K 5  | <b>543.315</b>  | 4108.334 | 4092.315        | 4093.323        | 4091.307 | K 37 |
| Q 6  | <b>673.174</b>  | 3989.239 | 3974.220        | 3985.228        | 3983.212 | Q 36 |
| G 7  | <b>730.395</b>  | 3852.180 | 3836.162        | 3837.170        | 3835.154 | G 35 |
| G 8  | <b>787.417</b>  | 3795.159 | 3779.140        | 3780.148        | 3778.132 | G 34 |
| K 9  | 915.512         | 3738.138 | 3722.119        | 3723.127        | 3721.111 | K 33 |
| A 10 | <b>986.549</b>  | 3610.043 | 3594.024        | 3595.032        | 3593.016 | A 32 |
| R 11 | 1142.650        | 3536.005 | 3522.987        | 3523.995        | 3521.979 | R 31 |
| A 12 | 1213.687        | 3382.904 | 3366.886        | 3367.893        | 3365.878 | A 30 |
| R 13 | 1541.792        | 3311.867 | 3295.848        | 3296.856        | 3294.841 | R 29 |
| A 14 | <b>1412.819</b> | 3183.772 | 3167.754        | 3168.761        | 3166.746 | A 28 |
| K 15 | 1540.914        | 3132.735 | 3096.716        | 3097.724        | 3095.709 | K 27 |
| T 16 | 1541.962        | 2984.640 | 2968.621        | 2969.629        | 2967.614 | T 26 |
| R 17 | 1798.063        | 2883.592 | 2867.574        | 2868.582        | 2866.566 | R 25 |
| S 18 | 1885.098        | 2727.491 | 2711.473        | 2712.480        | 2710.465 | S 24 |
| S 19 | 1972.127        | 2640.455 | 2624.441        | 2625.448        | 2623.433 | S 23 |
| R 20 | 2128.228        | 2553.427 | 2537.409        | 2538.416        | 2536.401 | R 22 |
| A 21 | 2199.265        | 2397.326 | 2381.307        | 2382.315        | 2380.300 | A 21 |
| G 22 | 2286.287        | 2326.289 | 2310.270        | 2311.278        | 2309.263 | G 20 |
| L 23 | 2369.371        | 2269.268 | 2253.249        | 2254.257        | 2252.241 | L 19 |
| Q 24 | 2497.429        | 2156.184 | 2140.165        | 2141.173        | 2139.157 | Q 18 |
| F 25 | 2644.498        | 2028.125 | 2012.106        | 2013.114        | 2011.099 | F 17 |
| P 26 | 2741.551        | 1881.057 | 1865.038        | 1866.046        | 1864.031 | P 16 |
| V 27 | 2840.619        | 1784.004 | 1767.985        | 1768.993        | 1766.977 | V 15 |
| G 28 | 2897.641        | 1684.935 | 1668.917        | 1669.924        | 1667.909 | G 14 |
| R 29 | 3053.742        | 1627.914 | 1611.895        | <b>1612.903</b> | 1610.887 | R 13 |
| V 30 | 3153.810        | 1518.833 | <b>1455.794</b> | 1456.802        | 1454.785 | V 12 |
| H 31 | 3289.869        | 1372.744 | <b>1356.726</b> | 1357.734        | 1355.718 | H 11 |
| R 32 | 3445.970        | 1235.685 | <b>1219.667</b> | <b>1220.675</b> | 1218.659 | R 10 |
| L 33 | 3559.054        | 1079.584 | <b>1063.566</b> | 1064.573        | 1062.558 | L 9  |
| L 34 | 3872.138        | 956.500  | <b>950.482</b>  | 951.489         | 949.474  | L 8  |
| R 35 | 3828.239        | 853.416  | 837.398         | 838.405         | 836.390  | R 7  |
| K 36 | 3956.314        | 697.315  | 681.296         | 682.304         | 680.289  | K 6  |
| G 37 | 4013.356        | 569.220  | 553.201         | 554.209         | 552.194  | G 5  |
| N 38 | 4127.399        | 512.109  | 496.100         | 497.108         | 495.172  | N 4  |
| V 39 | 4290.462        | 396.156  | 382.137         | 383.145         | 381.129  | V 3  |
| S 40 | 4377.494        | 235.092  | 219.074         | 220.082         | 218.066  | S 2  |
| E 41 | 4506.537        | 148.060  | 132.042         | 133.050         | 131.034  | E 1  |

# sp | Q8CGP5 | H2A1F\_MOUSE

[Acetyl]SGRGKQGGKARAKAKTRSSRAGLQFPVGRVHLLRKGNYSE

- ▶ fragmentation table for charge state 2+
- ▶ specType=etd
- ▶ score=48.11
- ▶ F113279.dat
- ▶ query=q46069.p1
- ▶ precursor=644.796740
- ▶ chargePrecursor=7
- ▶ itol=0.5

| AA | c               | w               | s+1             | s+2             | c               | AA    |
|----|-----------------|-----------------|-----------------|-----------------|-----------------|-------|
| S  | 74.062          | 2054.204        | 2269.287        | 0.804           | 2245.781        | S[41] |
| G  | 102.553         | 2189.743        | 2381.733        | 0.504           | 2181.220        | G[40] |
| R  | 180.603         | 2161.232        | 2153.233        | 2153.236        | 2152.710        | R[39] |
| G  | 209.114         | 2083.181        | 2075.172        | 2075.676        | 2074.660        | G[38] |
| K  | 273.181         | 2054.671        | 2046.661        | 2047.165        | 2046.157        | K[37] |
| G  | 337.194         | 1990.622        | 1982.614        | <b>1983.118</b> | 1982.110        | G[36] |
| G  | 385.703         | 1706.594        | 1619.584        |                 | 1619.088        | G[35] |
| G  | 394.212         | 1898.083        | 1890.074        | <b>1890.578</b> | 1889.570        | G[34] |
| K  | <b>458.260</b>  | <b>1869.572</b> | 1861.563        | <b>1862.067</b> | 1861.059        | K[33] |
| A  | 493.778         | 1805.525        | 1797.516        | 1798.019        | 1797.012        | A[32] |
| R  | <b>571.829</b>  | 1770.008        | 1761.997        | 1762.501        | 1761.493        | R[31] |
| A  | <b>607.247</b>  | 1692.995        | 1684.986        | 1685.490        | 1684.482        | A[30] |
| R  | <b>671.395</b>  | 1656.437        | 1648.428        | 1648.932        | 1647.924        | R[29] |
| A  | <b>706.913</b>  | 1592.900        | 1584.890        | <b>1584.884</b> | 1583.876        | A[28] |
| K  | <b>770.961</b>  | 1556.871        | 1548.862        | 1549.366        | 1548.358        | K[27] |
| T  | <b>821.485</b>  | 1492.824        | <b>1484.814</b> | 1485.318        | <b>1484.310</b> | T[26] |
| R  | <b>899.535</b>  | 1442.800        | 1434.791        | 1435.295        | 1434.287        | R[25] |
| S  | <b>943.051</b>  | 1384.249        | <b>1356.240</b> | <b>1356.744</b> | 1355.736        | S[24] |
| S  | <b>986.567</b>  | 1326.733        | 1318.724        | 1319.228        | 1318.220        | S[23] |
| R  | 1084.618        | 1277.217        | <b>1269.208</b> | <b>1269.712</b> | 1268.704        | R[22] |
| A  | <b>1100.136</b> | 1199.161        | <b>1191.157</b> | <b>1191.661</b> | 1190.653        | A[21] |
| G  | <b>1128.647</b> | 1103.040        | <b>1155.639</b> | <b>1156.143</b> | 1155.135        | G[20] |
| L  | 1155.789        |                 | <b>1135.137</b> | 1127.128        | <b>1127.632</b> | L[19] |
| Q  | <b>1249.218</b> | <b>1078.595</b> | 1070.586        | <b>1071.090</b> | 1070.082        | Q[18] |
| F  | <b>1322.753</b> | 1014.566        | <b>1006.557</b> | <b>1007.061</b> | 1006.053        | F[17] |
| F  | 1371.279        | <b>941.032</b>  | 933.023         | <b>933.526</b>  | 932.519         | F[16] |
| V  | 1420.811        | 892.506         | 884.496         | <b>885.000</b>  | 884.992         | V[15] |
| G  | 1469.324        | <b>842.971</b>  | <b>834.962</b>  | <b>835.466</b>  | 834.458         | G[14] |
| R  | 1527.874        | <b>814.461</b>  | <b>806.451</b>  | <b>806.955</b>  | <b>805.947</b>  | R[13] |
| V  | 1576.909        | 736.410         | 728.401         | 728.905         | 727.897         | V[12] |
| H  | 1645.438        | 688.876         | 678.868         | <b>679.370</b>  | 678.363         | H[11] |
| R  | 1723.489        | 618.346         | 610.337         | 610.841         | 609.833         | R[10] |
| L  | 1780.031        | 540.206         | 532.196         | 532.700         | 531.693         | L[9]  |
| L  | 1838.573        | 483.754         | 475.745         | 476.249         | 475.241         | L[8]  |
| R  | 1914.623        | 427.212         | 419.202         | 419.706         | 418.698         | R[7]  |
| K  | 1978.671        | 349.161         | 341.152         | 341.656         | 340.648         | K[6]  |
| G  | 2067.181        | 285.114         | 277.104         | 277.608         | 276.600         | G[5]  |
| N  | 2094.203        | 256.603         | 248.594         | 249.098         | 248.090         | N[4]  |
| V  | 2145.236        | 199.562         | 191.552         | 192.056         | 191.048         | V[3]  |
| S  | 2199.281        | 118.056         | 110.047         | 110.551         | 109.543         | S[2]  |
| E  | 2253.772        | 74.534          | 66.524          | 67.028          | 66.021          | E[1]  |

# sp | Q8CGP5 | H2A1F\_MOUSE

[Acetyl]SGRGKQGGKARAKAKTRSSRAGLQFPVGRVHRLLRKGNYS

- ▶ fragmentation table for charge state 3+
- ▶ specType=etd
- ▶ score=48.11
- ▶ F113279.dat
- ▶ query=q46069\_p1
- ▶ precursor=644.796740
- ▶ chargePrecursor=7
- ▶ itol=0.5

| AA | c  | y               | #s1             | #s2             | z               | AA              |       |
|----|----|-----------------|-----------------|-----------------|-----------------|-----------------|-------|
| S  | 1  | 48.697          | 1502.178        | 1487.830        | 8.872           | 1487.561        | S[41] |
| G  | 2  | 86.704          | 1460.184        | 1454.925        | 0.672           | 1454.480        | G[40] |
| R  | 3  | 1307.788        | <b>1441.157</b> | <b>1435.817</b> | <b>1436.153</b> | <b>1435.482</b> | R[30] |
| G  | 4  | 139.745         | 1389.123        | 1383.784        | <b>1384.120</b> | 1383.448        | G[38] |
| K  | 5  | 182.443         | 1370.116        | <b>1364.777</b> | <b>1365.113</b> | <b>1364.441</b> | K[37] |
| G  | 6  | 225.130         | 1327.418        | 1322.078        | <b>1322.414</b> | 1321.742        | G[36] |
| G  | 7  | 244.137         | 1284.732        | 1279.392        | 1279.728        | 1279.056        | G[35] |
| G  | 8  | 263.144         | 1265.725        | 1260.385        | 1260.721        | 1260.049        | G[34] |
| K  | 9  | 305.642         | <b>1246.717</b> | 1241.378        | <b>1241.714</b> | 1241.042        | K[33] |
| A  | 10 | 329.521         | 1204.019        | 1198.679        | 1199.015        | 1198.344        | A[32] |
| R  | 11 | 381.555         | 1180.340        | 1175.000        | 1175.336        | 1174.664        | R[31] |
| A  | 12 | 485.234         | 1128.309        | 1122.969        | 1123.305        | 1122.633        | A[30] |
| K  | 13 | 447.932         | 1104.627        | 1099.288        | <b>1099.624</b> | 1098.952        | K[29] |
| A  | 14 | 471.811         | 1081.929        | 1076.589        | <b>1076.925</b> | 1076.253        | A[28] |
| K  | 15 | 514.310         | <b>1038.250</b> | 1032.910        | <b>1033.246</b> | 1032.574        | K[27] |
| T  | 16 | 547.602         | 995.552         | <b>990.212</b>  | <b>990.548</b>  | 989.876         | T[26] |
| R  | 17 | 600.626         | <b>961.869</b>  | <b>956.529</b>  | <b>956.865</b>  | 956.193         | R[25] |
| S  | 18 | 629.019         | 939.835         | 934.495         | 934.831         | 934.160         | S[24] |
| S  | 19 | 658.047         | 880.825         | 875.485         | <b>875.821</b>  | 875.149         | S[23] |
| R  | 20 | 710.081         | 851.814         | 846.474         | <b>846.810</b>  | 846.138         | R[22] |
| A  | 21 | <b>733.760</b>  | 799.780         | 794.440         | 794.777         | 794.105         | A[21] |
| G  | 22 | <b>752.767</b>  | 776.101         | <b>770.762</b>  | <b>771.098</b>  | <b>770.426</b>  | G[20] |
| L  | 23 | 780.682         | 752.084         | 746.744         | <b>752.090</b>  | 751.418         | L[19] |
| G  | 24 | 833.148         | 733.395         | <b>714.060</b>  | <b>714.396</b>  | 713.724         | G[18] |
| F  | 25 | 882.171         | 676.713         | <b>671.374</b>  | <b>671.710</b>  | 671.038         | F[17] |
| F  | 26 | 914.552         | 627.600         | 622.260         | 622.597         | 621.925         | F[16] |
| V  | 27 | 947.545         | 595.139         | 590.000         | 590.336         | 589.664         | V[15] |
| G  | 28 | 966.552         | 562.317         | 556.977         | 557.313         | 556.641         | G[14] |
| R  | 29 | 1018.595        | 443.309         | 437.970         | 438.306         | 437.634         | R[13] |
| V  | 30 | <b>1051.608</b> | 401.275         | 405.936         | 406.272         | 405.600         | V[12] |
| H  | 31 | 1097.204        | <b>458.253</b>  | 452.913         | 453.249         | 452.577         | H[11] |
| R  | 32 | 1149.328        | 412.567         | 407.227         | 407.563         | 406.891         | R[10] |
| L  | 33 | 1187.023        | <b>360.533</b>  | 355.193         | 355.529         | 354.857         | L[9]  |
| L  | 34 | 1224.718        | 322.375         | 317.035         | 317.371         | 316.700         | L[8]  |
| R  | 35 | 1276.751        | 285.144         | 279.804         | 280.140         | 279.468         | R[7]  |
| K  | 36 | <b>1319.450</b> | 233.110         | 227.770         | 228.106         | 227.434         | K[6]  |
| G  | 37 | 1338.457        | 190.412         | 185.072         | 185.408         | 184.736         | G[5]  |
| N  | 38 | 1376.471        | 171.404         | 166.065         | 166.401         | 165.729         | N[4]  |
| V  | 39 | 1430.826        | 133.390         | 128.051         | 128.387         | 127.715         | V[3]  |
| S  | 40 | 1459.836        | 99.136          | 93.796          | 94.132          | 93.460          | S[2]  |
| E  | 41 | 1502.850        | 50.025          | 44.685          | 45.021          | 44.349          | E[1]  |

# sp | Q8CGP5 | H2A1F\_MOUSE

[Acetyl]SGRGKQGGKARAKATRSSRAGLQFPVGRVHLLRKGNYSE

- ▶ fragmentation table for charge state 4+
- ▶ specType=etd
- ▶ score=48.11
- ▶ F113279.dat
- ▶ query=q46069.p1
- ▶ precursor=644.796740
- ▶ chargePrecursor=7
- ▶ itol=0.5

| AA    | c               | y               | z+1             | z+2             | z              | AA    |
|-------|-----------------|-----------------|-----------------|-----------------|----------------|-------|
| S[1]  | 37.525          | <b>1127.630</b> | 1123.631        | 0.755           | 1123.370       | S[41] |
| G[2]  | 51.780          | 1095.375        | 1091.370        | 0.755           | 1091.118       | G[40] |
| R[3]  | 90.805          | <b>1081.120</b> | 1077.115        | <b>1077.367</b> | 1076.861       | R[30] |
| G[4]  | 105.061         | 1042.094        | <b>1038.090</b> | <b>1038.342</b> | 1037.838       | G[38] |
| K[5]  | 137.084         | 1027.830        | 1023.834        | 1024.086        | 1023.582       | K[37] |
| Q[6]  | 189.089         | 995.813         | 991.811         | 992.063         | <b>991.559</b> | Q[30] |
| G[7]  | 253.354         | 963.880         | 959.790         | <b>960.048</b>  | 959.544        | G[35] |
| G[8]  | 397.810         | 949.545         | 945.541         | 945.792         | 945.289        | G[34] |
| K[9]  | 229.633         | 935.200         | 931.205         | <b>931.537</b>  | 931.031        | K[33] |
| A[10] | 247.393         | <b>903.266</b>  | 899.261         | <b>899.513</b>  | 899.009        | A[32] |
| R[11] | 286.418         | <b>885.507</b>  | 881.509         | 881.758         | 881.250        | R[31] |
| A[12] | 394.177         | 849.562         | <b>842.477</b>  | <b>842.729</b>  | 842.225        | A[28] |
| R[13] | 336.201         | 825.722         | 824.718         | 824.970         | <b>824.466</b> | R[29] |
| A[14] | 353.960         | 798.690         | <b>792.694</b>  | <b>792.946</b>  | 792.442        | A[28] |
| K[15] | 389.984         | 778.930         | 774.930         | 775.187         | 774.681        | K[27] |
| T[16] | 411.246         | 746.915         | 742.911         | <b>743.163</b>  | 742.659        | T[26] |
| R[17] | 450.271         | 721.854         | 717.859         | 717.901         | 717.390        | R[25] |
| S[18] | 472.829         | 682.820         | 678.824         | 678.876         | 678.372        | S[24] |
| S[19] | 493.787         | 660.870         | 656.866         | 657.115         | 656.614        | S[23] |
| R[20] | 532.813         | 639.112         | 635.108         | 635.360         | 634.854        | R[22] |
| A[21] | 550.572         | 600.089         | 596.082         | 596.334         | 595.830        | A[21] |
| G[22] | 564.827         | 582.320         | 578.323         | 578.575         | 578.071        | G[20] |
| L[23] | 593.098         | 568.072         | 564.068         | 564.320         | 563.816        | L[19] |
| Q[24] | <b>625.113</b>  | 539.801         | 535.797         | 536.049         | 535.545        | Q[19] |
| F[25] | 661.880         | 507.781         | 503.782         | 504.034         | 503.530        | F[17] |
| P[26] | 686.143         | 471.020         | 467.015         | 467.267         | 466.763        | P[16] |
| V[27] | <b>710.910</b>  | 446.750         | 442.752         | 443.004         | 442.500        | V[15] |
| G[28] | <b>725.166</b>  | 421.989         | 417.985         | 418.237         | <b>417.733</b> | G[14] |
| R[29] | 754.191         | 407.733         | 403.729         | 403.981         | 403.477        | R[13] |
| V[30] | 788.058         | 386.759         | 384.764         | 384.956         | 384.452        | V[12] |
| H[31] | 823.223         | 343.942         | 339.937         | 340.189         | 339.685        | H[11] |
| R[32] | <b>862.248</b>  | 309.677         | 305.672         | 305.924         | 305.420        | R[10] |
| L[33] | 890.519         | 270.652         | 266.647         | 266.899         | 266.395        | L[9]  |
| L[34] | <b>918.790</b>  | 242.381         | 238.376         | 238.628         | 238.124        | L[8]  |
| R[35] | <b>957.815</b>  | 214.113         | 210.108         | 210.360         | 209.856        | R[7]  |
| K[36] | 983.339         | 175.084         | 171.080         | 171.332         | 170.828        | K[6]  |
| G[37] | 1004.094        | 143.061         | 139.056         | 139.308         | 138.804        | G[5]  |
| N[38] | 1032.605        | 128.805         | 124.800         | 125.052         | 124.548        | N[4]  |
| V[39] | 1073.371        | 100.294         | 96.290          | 96.542          | 96.038         | V[3]  |
| S[40] | 1095.120        | 59.520          | 55.524          | 55.776          | 55.272         | S[2]  |
| E[41] | <b>1127.390</b> | 37.771          | 33.766          | 34.018          | 33.514         | E[1]  |

# sp | Q8CGP5 | H2A1F\_MOUSE

[Acetyl]SGRGKQGGKARAKAKTRSSRAGLQFPVGRVHRLLRKGNYS

- ▶ fragmentation table for charge state 5+
- ▶ specType=etd
- ▶ score=48.11
- ▶ F113279.dat
- ▶ query=q46069\_p1
- ▶ precursor=644.796740
- ▶ chargePrecursor=7
- ▶ itol=0.5

| AA | c  | y              | z+1            | z#2            | z              | AA             |   |    |
|----|----|----------------|----------------|----------------|----------------|----------------|---|----|
| S  | 1  | 30.221         | 902.110        | 899.108        | 0.806          | 898.905        | S | 41 |
| G  | 2  | 41.625         | <b>876.501</b> | 873.298        | 0.806          | 873.096        | G | 40 |
| R  | 3  | 72.846         | 805.097        | 801.893        | <b>062.095</b> | 801.692        | R | 39 |
| G  | 4  | 84.250         | <b>833.877</b> | 830.673        | 830.875        | 830.472        | G | 38 |
| K  | 5  | 109.869        | 822.473        | <b>819.269</b> | <b>819.470</b> | <b>819.067</b> | K | 37 |
| Q  | 6  | 135.481        | 796.854        | 793.650        | 793.851        | <b>793.448</b> | Q | 36 |
| G  | 7  | 146.685        | <b>771.242</b> | 768.038        | 768.240        | 767.837        | G | 35 |
| G  | 8  | 158.289        | 759.838        | 756.634        | 756.835        | 756.432        | G | 34 |
| K  | 9  | 183.908        | 748.833        | <b>745.230</b> | <b>745.431</b> | 745.028        | K | 33 |
| A  | 10 | 198.116        | 722.814        | 719.611        | 719.812        | 719.409        | A | 32 |
| R  | 11 | 229.336        | 708.607        | 705.403        | 705.605        | 705.202        | R | 31 |
| A  | 12 | 243.543        | 677.387        | 674.183        | 674.385        | <b>673.981</b> | A | 30 |
| K  | 13 | 269.162        | 663.179        | 659.976        | 660.177        | 659.774        | K | 29 |
| A  | 14 | 283.370        | 637.960        | 634.757        | 634.958        | 634.555        | A | 28 |
| K  | 15 | 308.989        | 623.753        | 620.549        | 620.751        | 619.948        | K | 27 |
| T  | 16 | 329.198        | 597.734        | 594.530        | 594.732        | 594.329        | T | 26 |
| K  | 17 | <b>360.418</b> | 577.524        | 574.321        | 574.522        | 574.119        | K | 25 |
| S  | 18 | 377.825        | 546.304        | 543.100        | 543.302        | 542.899        | S | 24 |
| S  | 19 | 399.231        | 528.888        | 525.684        | 525.886        | 525.482        | S | 23 |
| R  | 20 | 426.451        | 511.491        | 508.288        | 508.489        | 508.086        | R | 22 |
| A  | 21 | 440.659        | 480.271        | 477.067        | 477.269        | 476.866        | A | 21 |
| G  | 22 | 452.063        | 466.064        | 462.860        | 463.061        | 462.658        | G | 20 |
| L  | 23 | 474.680        | 494.659        | 451.456        | 451.657        | 451.254        | L | 19 |
| Q  | 24 | 500.292        | 432.043        | 428.839        | 429.040        | 428.637        | Q | 18 |
| F  | 25 | 529.705        | 406.831        | 403.227        | 403.429        | 403.026        | F | 17 |
| P  | 26 | 549.116        | 377.017        | 373.813        | 374.015        | 373.612        | P | 16 |
| V  | 27 | 568.530        | 357.807        | 354.603        | 354.804        | 354.201        | V | 15 |
| G  | 28 | 589.334        | 337.793        | 334.589        | 334.791        | 334.388        | G | 14 |
| R  | 29 | 611.554        | 326.389        | 323.185        | 323.386        | 322.983        | R | 13 |
| V  | 30 | 631.368        | 295.168        | 291.965        | 292.166        | 291.763        | V | 12 |
| H  | 31 | <b>658.780</b> | 275.355        | 272.151        | 272.353        | 271.949        | H | 11 |
| K  | 32 | 690.000        | 247.943        | 244.739        | 244.941        | 244.538        | K | 10 |
| L  | 33 | 712.617        | 216.723        | 213.519        | 213.721        | 213.317        | L | 9  |
| L  | 34 | 735.233        | 194.109        | 190.902        | 191.104        | 190.701        | L | 8  |
| R  | 35 | 766.454        | 171.489        | 168.283        | 168.487        | 168.084        | R | 7  |
| K  | 36 | 782.273        | 140.269        | 137.065        | 137.267        | 136.864        | K | 6  |
| G  | 37 | 803.877        | 114.650        | 111.446        | 111.648        | 111.245        | G | 5  |
| N  | 38 | 826.286        | 103.246        | 100.042        | 100.243        | 99.840         | N | 4  |
| V  | 39 | 858.898        | 80.437         | 77.233         | 77.435         | 77.032         | V | 3  |
| S  | 40 | <b>876.305</b> | 47.824         | 44.621         | 44.822         | 44.419         | S | 2  |
| E  | 41 | 902.113        | 30.418         | 27.214         | 27.416         | 27.013         | E | 1  |

# sp | Q8CGP5 | H2A1F\_MOUSE

[Acetyl]SGRGKQGGKARAKAKTRSSRAGLQFPVGRVHRLLRKGNYS

- ▶ fragmentation table for charge state 6+
- ▶ specType=etd
- ▶ score=48.11
- ▶ F113279.dat
- ▶ query=q46069\_p1
- ▶ precursor=644.796740
- ▶ chargePrecursor=7
- ▶ itol=0.5

| AA    | c              | y              | z+1     | z+2     | z       | AA    |
|-------|----------------|----------------|---------|---------|---------|-------|
| S[1]  | 25.362         | <b>752.093</b> | 749.423 | 0.839   | 749.255 | S[41] |
| G[2]  | 34.856         | <b>730.586</b> | 727.916 | 0.839   | 727.748 | G[40] |
| R[3]  | 60.873         | 721.082        | 718.412 | 718.580 | 718.244 | R[39] |
| G[4]  | 70.376         | 695.065        | 692.396 | 692.563 | 692.228 | G[38] |
| K[5]  | 91.725         | 685.562        | 682.892 | 683.060 | 682.724 | K[37] |
| G[6]  | 113.668        | 668.213        | 665.543 | 665.711 | 665.375 | G[36] |
| G[7]  | 122.572        | 642.869        | 640.200 | 640.368 | 640.032 | G[35] |
| G[8]  | 132.076        | 633.366        | 630.696 | 630.864 | 630.528 | G[34] |
| K[9]  | 153.425        | 623.862        | 621.193 | 621.360 | 621.025 | K[33] |
| A[10] | 165.364        | 602.513        | 599.843 | 600.011 | 599.675 | A[32] |
| R[11] | 191.281        | 590.674        | 588.004 | 588.172 | 587.836 | R[31] |
| A[12] | 203.121        | 564.657        | 561.987 | 562.155 | 561.819 | A[30] |
| K[13] | 224.470        | 552.817        | 550.147 | 550.315 | 549.980 | K[29] |
| A[14] | 236.309        | 531.468        | 528.798 | 528.966 | 528.630 | A[28] |
| K[15] | 257.658        | 519.629        | 516.959 | 517.127 | 516.791 | K[27] |
| T[16] | 274.500        | 498.279        | 495.610 | 495.778 | 495.442 | T[26] |
| R[17] | 300.517        | 481.438        | 478.768 | 478.936 | 478.600 | R[25] |
| S[18] | 315.022        | 455.421        | 452.752 | 452.919 | 452.584 | S[24] |
| S[19] | 329.527        | 440.916        | 438.246 | 438.414 | 438.078 | S[23] |
| R[20] | 355.544        | 426.411        | 423.741 | 423.909 | 423.573 | R[22] |
| A[21] | 367.384        | 400.394        | 397.724 | 397.892 | 397.556 | A[21] |
| G[22] | 376.887        | 388.554        | 385.884 | 386.052 | 385.716 | G[20] |
| L[23] | 395.735        | 379.051        | 376.381 | 376.549 | 376.213 | L[19] |
| Q[24] | <b>417.078</b> | <b>360.203</b> | 357.534 | 357.702 | 357.366 | Q[18] |
| F[25] | 441.589        | 338.880        | 336.190 | 336.358 | 336.022 | F[17] |
| P[26] | 457.765        | 314.349        | 311.679 | 311.847 | 311.511 | P[16] |
| V[27] | 474.276        | 298.173        | 295.504 | 295.672 | 295.336 | V[15] |
| G[28] | 483.779        | 281.662        | 278.992 | 279.160 | 278.824 | G[14] |
| R[29] | 509.796        | 272.158        | 269.489 | 269.657 | 269.321 | R[13] |
| V[30] | 526.308        | 246.147        | 243.472 | 243.640 | 243.304 | V[12] |
| H[31] | 549.151        | 229.638        | 226.968 | 227.136 | 226.800 | H[11] |
| R[32] | 578.188        | 206.787        | 204.117 | 204.285 | 203.949 | R[10] |
| L[33] | 594.015        | 180.770        | 178.100 | 178.268 | 177.932 | L[9]  |
| L[34] | 612.862        | 161.923        | 159.253 | 159.421 | 159.085 | L[8]  |
| R[35] | 638.879        | 143.075        | 140.406 | 140.574 | 140.238 | R[7]  |
| K[36] | 660.228        | 117.059        | 114.389 | 114.557 | 114.221 | K[6]  |
| G[37] | 669.732        | 95.709         | 93.040  | 93.208  | 92.872  | G[5]  |
| N[38] | 688.739        | 86.206         | 83.536  | 83.704  | 83.368  | N[4]  |
| Y[39] | 715.916        | 67.190         | 64.529  | 64.697  | 64.361  | Y[3]  |
| S[40] | <b>736.422</b> | 40.021         | 37.352  | 37.520  | 37.184  | S[2]  |
| E[41] | <b>751.929</b> | 25.516         | 22.846  | 23.014  | 22.678  | E[1]  |





# sp | Q8CGP5 | H2A1F\_MOUSE

[Acetyl]SGRGKQGGKARAKAKTRSSRAGLQFPVGRVHLLRKGNYSE

- ▶ fragmentation table for charge state 1+
- ▶ specType=etd
- ▶ score=61.79
- ▶ F113279.dat
- ▶ query=q46071.p1
- ▶ precursor=752.095290
- ▶ chargePrecursor=6
- ▶ itol=0.5

| AA | c  | y              | z+1      | z+2             | z               | AA       |       |
|----|----|----------------|----------|-----------------|-----------------|----------|-------|
| S  | 1  | 147.076        | 4507.521 | 4491.502        | 0.000           | 4490.494 | S[41] |
| G  | 2  | 204.098        | 4378.478 | 4362.459        | 0.000           | 4361.451 | G[46] |
| R  | 3  | <b>360.199</b> | 4321.457 | 4305.438        | 4306.446        | 4304.430 | R[39] |
| C  | 4  | <b>417.220</b> | 4185.355 | 4148.337        | 4150.345        | 4148.329 | C[38] |
| K  | 5  | <b>545.315</b> | 4108.334 | 4092.315        | 4093.323        | 4091.307 | K[15] |
| Q  | 6  | <b>673.374</b> | 3989.239 | 3954.220        | 3955.228        | 3953.212 | Q[36] |
| G  | 7  | <b>730.395</b> | 3852.180 | 3836.162        | 3837.170        | 3835.154 | G[35] |
| G  | 8  | <b>787.417</b> | 3795.159 | 3779.140        | 3780.148        | 3778.132 | G[34] |
| K  | 9  | <b>915.512</b> | 3738.139 | 3722.119        | 3723.127        | 3721.111 | K[33] |
| A  | 10 | <b>986.549</b> | 3610.043 | 3594.024        | 3595.032        | 3593.016 | A[32] |
| R  | 11 | 1142.650       | 3539.955 | 3523.936        | 3524.944        | 3522.928 | R[31] |
| A  | 12 | 1213.667       | 3382.904 | 3366.885        | 3367.893        | 3365.877 | A[30] |
| K  | 13 | 1341.782       | 3311.867 | 3295.848        | 3296.856        | 3294.841 | K[29] |
| A  | 14 | 1412.819       | 3183.772 | 3167.754        | 3168.761        | 3166.746 | A[28] |
| K  | 15 | 1540.914       | 3112.735 | 3096.716        | 3097.724        | 3095.709 | K[27] |
| T  | 16 | 1641.962       | 2984.640 | 2968.621        | 2969.629        | 2967.614 | T[26] |
| K  | 17 | 1798.063       | 2883.592 | 2867.574        | 2868.582        | 2866.566 | K[25] |
| S  | 18 | 1885.095       | 2727.493 | 2711.473        | 2712.480        | 2710.465 | S[24] |
| S  | 19 | 1972.127       | 2648.459 | 2632.441        | 2633.448        | 2631.433 | S[23] |
| R  | 20 | 2128.228       | 2563.427 | 2547.409        | 2548.416        | 2546.401 | R[22] |
| A  | 21 | 2199.265       | 2397.326 | 2381.307        | 2382.315        | 2380.300 | A[21] |
| G  | 22 | 2256.287       | 2326.289 | 2310.270        | 2311.278        | 2309.263 | G[20] |
| L  | 23 | 2369.371       | 2269.268 | 2253.249        | 2254.257        | 2252.241 | L[19] |
| Q  | 24 | 2497.459       | 2126.184 | 2110.165        | 2111.173        | 2109.157 | Q[18] |
| F  | 25 | 2644.498       | 2028.125 | 2012.106        | 2013.114        | 2011.098 | F[17] |
| P  | 26 | 2741.551       | 1881.057 | 1865.038        | 1866.046        | 1864.030 | P[16] |
| V  | 27 | 2840.619       | 1784.004 | 1767.985        | 1768.993        | 1766.977 | V[15] |
| G  | 28 | 2897.641       | 1684.935 | 1668.917        | 1669.924        | 1667.909 | G[14] |
| R  | 29 | 3053.742       | 1627.914 | 1611.895        | <b>1612.903</b> | 1610.887 | R[13] |
| V  | 30 | 3152.810       | 1471.813 | <b>1455.794</b> | 1456.802        | 1454.786 | V[12] |
| I  | 31 | 3269.869       | 1372.744 | <b>1356.726</b> | 1357.734        | 1355.718 | I[11] |
| R  | 32 | 3445.970       | 1235.685 | 1219.666        | <b>1220.675</b> | 1218.659 | R[10] |
| L  | 33 | 3550.054       | 1079.584 | 1063.566        | <b>1064.573</b> | 1062.558 | L[9]  |
| L  | 34 | 3672.138       | 966.500  | <b>950.482</b>  | 951.489         | 949.474  | L[8]  |
| R  | 35 | 3828.239       | 853.416  | 837.398         | <b>838.405</b>  | 836.390  | R[7]  |
| K  | 36 | 3956.334       | 697.315  | 681.296         | 682.304         | 680.289  | K[6]  |
| C  | 37 | 4013.358       | 569.220  | 553.201         | 554.209         | 552.194  | C[5]  |
| N  | 38 | 4127.399       | 512.199  | 496.180         | 497.188         | 495.172  | N[4]  |
| V  | 39 | 4290.462       | 398.156  | 382.137         | 383.145         | 381.129  | V[3]  |
| S  | 40 | 4377.494       | 235.062  | 219.074         | 220.082         | 218.066  | S[2]  |
| E  | 41 | 4506.537       | 148.060  | 132.042         | 133.050         | 131.034  | E[1]  |

# sp | Q8CGP5 | H2A1F\_MOUSE

[Acetyl]SGRGKQGGKARAKAKTRSSRAGLQFPVGRVHRLLRKGNYS

- ▶ fragmentation table for charge state 2+
- ▶ specType=etd
- ▶ score=61.79
- ▶ F113279.dat
- ▶ query=q46071.p1
- ▶ precursor=752.095290
- ▶ chargePrecursor=6
- ▶ itol=0.5

| AA | c  | y               | #s1             | #s2             | c               | AA              |       |
|----|----|-----------------|-----------------|-----------------|-----------------|-----------------|-------|
| S  | 1  | 74.062          | 2054.264        | 2266.255        | 0.804           | 2245.781        | S(1)  |
| G  | 2  | 102.553         | 2189.743        | 2381.733        | 0.904           | 2181.220        | G(2)  |
| R  | 3  | 180.603         | 2641.232        | 2153.233        | 2153.236        | 2152.710        | R(3)  |
| G  | 4  | 209.114         | 2083.181        | 2075.172        | 2075.876        | 2074.660        | G(4)  |
| K  | 5  | 273.181         | 2054.871        | 2046.681        | 2047.305        | 2046.157        | K(5)  |
| G  | 6  | 337.194         | 1690.622        | 1682.614        | <b>1683.118</b> | 1682.110        | G(6)  |
| G  | 7  | 385.703         | 1706.594        | 1678.584        | <b>1919.088</b> | 1678.066        | G(7)  |
| G  | 8  | 394.212         | 1898.083        | 1890.074        | <b>1890.578</b> | 1889.570        | G(8)  |
| K  | 9  | 458.260         | 1869.572        | 1861.563        | <b>1862.067</b> | 1861.059        | K(9)  |
| A  | 10 | 493.778         | 1895.525        | 1797.516        | 1798.019        | 1797.012        | A(10) |
| R  | 11 | <b>571.829</b>  | 1770.008        | 1761.997        | 1762.501        | 1761.493        | R(11) |
| A  | 12 | <b>607.347</b>  | 1692.969        | 1684.960        | 1684.960        | 1683.944        | A(12) |
| R  | 13 | <b>671.395</b>  | 1656.437        | <b>1648.428</b> | <b>1648.932</b> | 1647.924        | R(13) |
| A  | 14 | <b>706.913</b>  | 1592.900        | 1584.890        | <b>1584.884</b> | 1583.876        | A(14) |
| K  | 15 | <b>770.961</b>  | 1556.871        | 1548.862        | <b>1549.366</b> | 1548.358        | K(15) |
| T  | 16 | <b>821.485</b>  | 1492.824        | <b>1484.814</b> | 1485.318        | <b>1484.310</b> | T(16) |
| R  | 17 | <b>899.535</b>  | 1452.291        | 1444.282        | <b>1434.294</b> | 1433.287        | R(17) |
| S  | 18 | 903.875         | <b>1364.249</b> | <b>1356.240</b> | <b>1356.744</b> | 1355.736        | S(18) |
| S  | 19 | <b>986.567</b>  | 1320.733        | <b>1312.724</b> | <b>1313.228</b> | 1312.220        | S(19) |
| R  | 20 | <b>1064.618</b> | 1277.217        | <b>1269.208</b> | <b>1269.712</b> | 1268.704        | R(20) |
| A  | 21 | <b>1100.136</b> | <b>1199.167</b> | 1191.157        | 1191.661        | 1190.653        | A(21) |
| G  | 22 | <b>1126.647</b> | 1153.648        | <b>1155.639</b> | <b>1156.143</b> | 1155.135        | G(22) |
| L  | 23 | <b>1185.189</b> | 1138.137        | 1127.128        | 1127.632        | 1126.624        | L(23) |
| Q  | 24 | <b>1249.218</b> | 1073.595        | 1070.586        | <b>1071.090</b> | 1070.082        | Q(24) |
| F  | 25 | <b>1322.753</b> | 1014.566        | 1006.557        | <b>1007.061</b> | 1006.053        | F(25) |
| F  | 26 | 1371.279        | 941.034         | 933.024         | 933.528         | 932.519         | F(26) |
| V  | 27 | <b>1420.813</b> | 892.506         | 884.496         | 885.000         | 883.992         | V(27) |
| G  | 28 | <b>1449.324</b> | 842.971         | 834.961         | <b>835.466</b>  | 834.458         | G(28) |
| R  | 29 | 1507.874        | 814.481         | <b>806.451</b>  | <b>806.955</b>  | 805.947         | R(29) |
| V  | 30 | 1576.909        | 736.410         | 728.401         | 728.905         | 727.897         | V(30) |
| H  | 31 | 1645.438        | 688.876         | 678.866         | 679.370         | 678.363         | H(31) |
| R  | 32 | 1723.489        | 618.346         | 610.337         | 610.841         | 609.833         | R(32) |
| L  | 33 | 1780.031        | 540.296         | 532.286         | 532.790         | 531.783         | L(33) |
| L  | 34 | 1838.573        | 489.764         | 479.749         | 479.248         | 478.241         | L(34) |
| R  | 35 | 1914.623        | 427.212         | 419.202         | 419.706         | 418.698         | R(35) |
| K  | 36 | 1978.671        | 349.161         | 341.152         | 341.656         | 340.648         | K(36) |
| G  | 37 | 2067.181        | 285.114         | 277.104         | 277.608         | 276.600         | G(37) |
| N  | 38 | 2094.203        | 256.603         | 248.594         | 249.098         | 248.090         | N(38) |
| V  | 39 | 2145.736        | 199.562         | 191.552         | 192.056         | 191.048         | V(39) |
| S  | 40 | 2189.261        | 118.056         | 110.041         | 110.544         | 109.537         | S(40) |
| E  | 41 | 2253.772        | 74.534          | 66.524          | 67.028          | 66.021          | E(41) |

# sp | Q8CGP5 | H2A1F\_MOUSE

[Acetyl]SGRGKQGGKARAKAKTRSSRAGLQFPVGRVHLLRKGNYSE

- ▶ fragmentation table for charge state 3+
- ▶ specType=etd
- ▶ score=61.79
- ▶ F113279.dat
- ▶ query=q46071.p1
- ▶ precursor=752.095290
- ▶ chargePrecursor=6
- ▶ itol=0.5

| AA | c  | y               | #s1             | #s2             | z               | AA              |       |
|----|----|-----------------|-----------------|-----------------|-----------------|-----------------|-------|
| S  | 1  | 48.607          | 1502.178        | 1487.830        | 0.872           | 1487.561        | S[41] |
| G  | 2  | 86.704          | 1460.184        | 1454.935        | 0.672           | 1454.480        | G[40] |
| R  | 3  | 1307.188        | <b>1441.157</b> | <b>1435.817</b> | <b>1436.153</b> | <b>1435.482</b> | R[30] |
| G  | 4  | 139.745         | 1389.123        | <b>1383.784</b> | <b>1384.120</b> | <b>1383.448</b> | G[38] |
| K  | 5  | 182.443         | 1370.116        | <b>1364.777</b> | 1365.113        | <b>1364.441</b> | K[37] |
| G  | 6  | 225.130         | 1327.418        | <b>1322.078</b> | <b>1322.414</b> | 1321.742        | G[36] |
| G  | 7  | 244.137         | 1284.733        | 1285.332        | <b>1279.728</b> | 1279.056        | G[35] |
| G  | 8  | 263.144         | 1265.725        | <b>1260.385</b> | <b>1260.721</b> | 1260.049        | G[34] |
| K  | 9  | 305.642         | 1246.717        | 1241.378        | 1241.714        | 1241.042        | K[33] |
| A  | 10 | 329.521         | 1204.019        | <b>1198.679</b> | <b>1199.015</b> | 1198.344        | A[32] |
| R  | 11 | 381.555         | 1180.340        | <b>1175.000</b> | <b>1175.336</b> | <b>1174.664</b> | R[31] |
| A  | 12 | 405.234         | <b>1128.306</b> | 1128.907        | <b>1123.303</b> | 1122.931        | A[30] |
| R  | 13 | 447.932         | 1104.627        | 1099.288        | <b>1099.624</b> | 1098.952        | R[29] |
| A  | 14 | 491.611         | 1081.929        | 1056.589        | <b>1056.925</b> | 1056.253        | A[28] |
| K  | 15 | 514.310         | <b>1038.250</b> | <b>1032.910</b> | <b>1033.246</b> | 1032.574        | K[27] |
| T  | 16 | 547.002         | 995.552         | <b>990.212</b>  | <b>990.548</b>  | 989.870         | T[26] |
| R  | 17 | 600.626         | 981.869         | <b>956.529</b>  | <b>956.865</b>  | 956.193         | R[25] |
| S  | 18 | 629.017         | 959.835         | 964.435         | 964.833         | 964.160         | S[24] |
| S  | 19 | 658.047         | 980.825         | <b>875.485</b>  | <b>875.821</b>  | 875.149         | S[23] |
| R  | 20 | 710.081         | 951.814         | 846.474         | 846.810         | 846.138         | R[22] |
| A  | 21 | 733.760         | 799.780         | 794.441         | 794.777         | 794.105         | A[21] |
| G  | 22 | 762.789         | 776.101         | 770.762         | <b>771.098</b>  | 770.426         | G[20] |
| L  | 23 | <b>790.462</b>  | 759.094         | 761.783         | 752.266         | 763.410         | L[19] |
| Q  | 24 | <b>833.148</b>  | 719.366         | 714.026         | 714.366         | 713.224         | Q[18] |
| F  | 25 | 882.171         | 676.713         | <b>671.374</b>  | <b>671.710</b>  | 671.038         | F[17] |
| F  | 26 | 914.552         | 627.600         | 622.351         | 622.687         | 622.015         | F[16] |
| V  | 27 | 947.545         | 595.139         | 590.000         | 590.336         | 589.664         | V[15] |
| G  | 28 | 966.552         | 562.317         | 556.977         | 557.313         | 556.641         | G[14] |
| R  | 29 | 1018.966        | 543.309         | 537.970         | 538.306         | 537.634         | R[13] |
| V  | 30 | <b>1051.608</b> | 490.275         | 485.036         | 486.272         | 485.600         | V[12] |
| H  | 31 | 1097.204        | 458.253         | 452.913         | 453.249         | 452.577         | H[11] |
| R  | 32 | <b>1149.328</b> | 412.967         | 407.227         | 407.563         | 406.891         | R[10] |
| L  | 33 | 1187.023        | <b>360.533</b>  | 355.193         | 355.529         | 354.857         | L[9]  |
| L  | 34 | <b>1224.718</b> | 322.374         | 317.034         | 317.370         | 316.701         | L[8]  |
| R  | 35 | 1275.753        | 285.144         | 279.804         | 280.140         | 279.466         | R[7]  |
| K  | 36 | 1319.450        | 233.110         | 227.770         | 228.106         | 227.434         | K[6]  |
| G  | 37 | 1338.457        | 190.412         | 185.072         | 185.408         | 184.736         | G[5]  |
| N  | 38 | 1376.471        | 171.404         | 166.065         | 166.401         | 165.729         | N[4]  |
| V  | 39 | 1430.826        | 133.390         | 128.051         | 128.386         | 127.715         | V[3]  |
| S  | 40 | 1459.836        | 99.136          | 93.796          | 94.132          | 93.460          | S[2]  |
| E  | 41 | 1502.850        | 50.025          | 44.685          | 45.021          | 44.349          | E[1]  |

# sp | Q8CGP5 | H2A1F\_MOUSE

[Acetyl]SGRGKQGGKARAKAKTRSSRAGLQFPVGRVHRLLRKGNYS

- ▶ fragmentation table for charge state 4+
- ▶ specType=etd
- ▶ score=61.79
- ▶ F113279.dat
- ▶ query=q46071.p1
- ▶ precursor=752.095290
- ▶ chargePrecursor=6
- ▶ itol=0.5

| AA   | c              | y              | z+1             | z+2             | z               | AA   |
|------|----------------|----------------|-----------------|-----------------|-----------------|------|
| S 1  | 57.535         | 1127.636       | <b>1123.631</b> | 0.755           | <b>1123.379</b> | S 41 |
| G 2  | 51.780         | 1095.375       | <b>1091.370</b> | 0.755           | 1001.118        | G 40 |
| R 3  | 90.805         | 1081.120       | 1077.115        | <b>1077.367</b> | 1076.863        | R 39 |
| G 4  | 105.061        | 1042.094       | 1038.090        | <b>1038.342</b> | 1037.839        | G 38 |
| K 5  | 137.004        | 1027.839       | 1023.834        | <b>1024.086</b> | 1023.583        | K 37 |
| G 6  | 169.099        | 995.315        | 991.311         | 993.662         | 991.559         | G 36 |
| G 7  | 183.354        | 963.801        | <b>959.796</b>  | <b>960.048</b>  | <b>959.544</b>  | G 35 |
| G 8  | 197.610        | 949.545        | 945.541         | <b>945.792</b>  | 945.289         | G 34 |
| K 9  | 229.633        | 935.290        | 931.285         | <b>931.537</b>  | 931.033         | K 33 |
| A 10 | 247.393        | <b>903.266</b> | <b>899.261</b>  | <b>899.513</b>  | <b>899.009</b>  | A 32 |
| R 11 | 286.418        | 885.307        | 881.302         | 881.754         | 881.250         | R 31 |
| A 12 | 308.177        | 869.062        | 864.477         | 863.229         | 862.229         | A 30 |
| R 13 | 336.201        | <b>828.722</b> | 824.718         | 824.870         | 824.465         | R 29 |
| A 14 | 353.040        | 796.699        | 792.694         | 792.946         | 792.442         | A 28 |
| K 15 | 365.984        | 778.939        | 774.935         | 775.187         | 774.683         | K 27 |
| T 16 | 411.246        | 746.915        | 742.911         | 743.163         | 742.659         | T 26 |
| R 17 | 450.271        | 721.654        | 717.649         | 717.901         | 717.397         | R 25 |
| S 18 | 472.029        | 682.828        | 678.824         | 678.876         | 678.372         | S 24 |
| S 19 | 483.787        | 660.570        | 656.566         | 657.118         | 656.614         | S 23 |
| R 20 | 532.813        | 639.112        | 635.108         | 635.360         | 634.856         | R 22 |
| A 21 | 550.572        | 600.087        | 596.082         | 596.334         | 595.830         | A 21 |
| G 22 | 564.827        | 582.328        | 578.323         | 578.575         | 578.071         | G 20 |
| L 23 | 593.098        | 568.072        | 564.068         | 564.320         | 563.816         | L 19 |
| G 24 | 625.113        | 539.801        | 535.797         | 536.049         | 535.545         | G 18 |
| F 25 | 661.880        | 507.787        | 503.782         | 504.034         | 503.530         | F 17 |
| P 26 | 686.143        | 471.020        | 467.015         | 467.267         | 466.763         | P 16 |
| V 27 | 710.910        | 446.756        | 442.752         | 443.004         | 442.500         | V 15 |
| G 28 | 725.105        | 421.989        | 417.985         | 418.237         | <b>417.733</b>  | G 14 |
| R 29 | 764.191        | 407.734        | 403.729         | 403.981         | 403.477         | R 13 |
| V 30 | 783.958        | 386.709        | 384.704         | 384.956         | 384.452         | V 12 |
| H 31 | 823.223        | 343.942        | 339.937         | 340.189         | 339.685         | H 11 |
| R 32 | <b>862.248</b> | 309.877        | 305.872         | 305.924         | 305.420         | R 10 |
| L 33 | 890.519        | 270.652        | 266.647         | 266.899         | 266.395         | L 9  |
| L 34 | <b>918.790</b> | 242.301        | 238.296         | 238.628         | 238.124         | L 8  |
| R 35 | 957.815        | 214.110        | 210.105         | 210.357         | 209.853         | R 7  |
| K 36 | 989.839        | 175.084        | 171.080         | 171.332         | 170.828         | K 6  |
| G 37 | 1004.094       | 143.063        | 139.058         | 139.308         | 138.804         | G 5  |
| N 38 | 1032.605       | 128.805        | 124.800         | 125.052         | 124.548         | N 4  |
| V 39 | 1073.571       | 100.294        | 96.290          | 96.542          | 96.038          | V 3  |
| S 40 | 1095.129       | 59.529         | 55.524          | 55.776          | 55.272          | S 2  |
| E 41 | 1127.390       | 37.771         | 33.766          | 34.018          | 33.514          | E 1  |

# sp | Q8CGP5 | H2A1F\_MOUSE

[Acetyl]SGRGKQGGKARAKAKTRSSRAGLQFPVGRVHRLLRKGNYS

- ▶ fragmentation table for charge state 5+
- ▶ specType=etd
- ▶ score=61.79
- ▶ F113279.dat
- ▶ query=q46071\_p1
- ▶ precursor=752.095290
- ▶ chargePrecursor=6
- ▶ itol=0.5

| AA | c  | y              | z+1            | z#2            | z              | AA             |   |    |
|----|----|----------------|----------------|----------------|----------------|----------------|---|----|
| S  | 1  | 30.221         | 902.310        | <b>899.106</b> | 0.806          | 898.905        | S | 41 |
| G  | 2  | 41.625         | 876.501        | 873.288        | 0.806          | 873.096        | G | 40 |
| R  | 3  | 72.846         | 805.097        | 801.893        | <b>062.095</b> | 801.692        | R | 39 |
| G  | 4  | 84.250         | <b>833.877</b> | 830.673        | 830.875        | 830.472        | G | 38 |
| K  | 5  | 109.869        | 822.473        | 819.269        | 819.470        | 819.067        | K | 37 |
| Q  | 6  | 135.481        | 796.854        | 793.650        | 793.851        | 793.448        | Q | 36 |
| G  | 7  | 146.685        | <b>771.242</b> | 768.038        | 768.240        | 767.837        | G | 35 |
| G  | 8  | 158.289        | 759.838        | 756.634        | 756.835        | 756.432        | G | 34 |
| K  | 9  | 183.908        | 748.833        | 745.230        | 745.431        | 745.028        | K | 33 |
| A  | 10 | 198.116        | 722.814        | 719.611        | 719.812        | 719.409        | A | 32 |
| R  | 11 | 229.336        | 708.607        | 705.403        | 705.605        | 705.202        | R | 31 |
| A  | 12 | 243.543        | 677.387        | 674.183        | 674.385        | <b>673.981</b> | A | 30 |
| K  | 13 | 269.162        | 663.179        | 659.976        | 660.177        | 659.774        | K | 29 |
| A  | 14 | 283.370        | 637.960        | 634.357        | 634.558        | 634.155        | A | 28 |
| K  | 15 | 308.989        | 623.753        | 620.149        | 620.351        | 619.948        | K | 27 |
| T  | 16 | 329.198        | 597.734        | 594.530        | 594.732        | 594.329        | T | 26 |
| R  | 17 | <b>360.418</b> | 577.524        | 574.321        | 574.522        | 574.119        | R | 25 |
| S  | 18 | 377.825        | 546.304        | 543.100        | 543.302        | 542.899        | S | 24 |
| S  | 19 | 399.231        | 528.886        | 525.684        | 525.886        | 525.482        | S | 23 |
| R  | 20 | 426.451        | 511.491        | 508.288        | 508.489        | 508.086        | R | 22 |
| A  | 21 | 440.659        | 480.271        | 477.067        | 477.269        | 476.866        | A | 21 |
| G  | 22 | 452.063        | 466.064        | 462.860        | 463.061        | 462.658        | G | 20 |
| L  | 23 | 474.680        | 494.659        | 451.456        | 451.657        | 451.254        | L | 19 |
| Q  | 24 | 500.292        | 432.043        | 428.839        | 429.040        | 428.637        | Q | 18 |
| F  | 25 | 529.705        | 406.831        | 403.227        | 403.429        | 403.026        | F | 17 |
| P  | 26 | 549.116        | 377.017        | 373.813        | 374.015        | 373.612        | P | 16 |
| V  | 27 | 568.530        | 357.807        | 354.403        | 354.604        | 354.201        | V | 15 |
| G  | 28 | 589.334        | 337.793        | 334.389        | 334.791        | 334.388        | G | 14 |
| R  | 29 | 611.554        | 326.389        | 323.185        | 323.386        | 322.983        | R | 13 |
| V  | 30 | 631.368        | 295.168        | 291.965        | 292.166        | 291.763        | V | 12 |
| H  | 31 | 658.780        | 275.355        | 272.151        | 272.353        | 271.949        | H | 11 |
| R  | 32 | 690.000        | 247.943        | 244.739        | 244.941        | 244.538        | R | 10 |
| L  | 33 | 712.617        | 216.723        | 213.519        | 213.721        | 213.317        | L | 9  |
| L  | 34 | 735.233        | 194.109        | 190.902        | 191.104        | 190.701        | L | 8  |
| R  | 35 | 766.454        | 171.489        | 168.283        | 168.487        | 168.084        | R | 7  |
| K  | 36 | 782.073        | 140.269        | 137.065        | 137.267        | 136.864        | K | 6  |
| G  | 37 | 803.877        | 114.650        | 111.446        | 111.648        | 111.245        | G | 5  |
| N  | 38 | <b>826.286</b> | 103.246        | 100.042        | 100.243        | 99.840         | N | 4  |
| V  | 39 | <b>858.898</b> | 80.437         | 77.233         | 77.435         | 77.032         | V | 3  |
| S  | 40 | 876.305        | 47.824         | 44.621         | 44.822         | 44.419         | S | 2  |
| E  | 41 | 902.113        | 30.418         | 27.214         | 27.416         | 27.013         | E | 1  |



# sp | Q8CGP5 | H2A1F\_MOUSE

[Acetyl]SGRGKQGGKARAKAKTRSSRAGLQFPVGRVHLLRKGNYSE

- ▶ fragmentation table for charge state 1+
- ▶ specType=etd
- ▶ score=51.25
- ▶ F113279.dat
- ▶ query=q46075.p1
- ▶ precursor=752.095700
- ▶ chargePrecursor=6
- ▶ itol=0.5

| AA | c  | y               | z+1            | z+2             | z               | AA              |       |
|----|----|-----------------|----------------|-----------------|-----------------|-----------------|-------|
| S  | 1  | 147.076         | 4507.521       | 4493.503        | 0.000           | 4490.484        | S[41] |
| G  | 2  | 204.068         | 4378.478       | 4362.459        | 0.000           | 4361.451        | G[40] |
| R  | 3  | <b>360.199</b>  | 4321.457       | 4305.438        | 4308.446        | 4304.439        | R[39] |
| G  | 4  | <b>417.220</b>  | 4165.355       | 4149.337        | 4150.345        | 4148.329        | G[38] |
| K  | 5  | <b>545.315</b>  | 4108.334       | 4092.315        | 4093.323        | 4091.307        | K[37] |
| Q  | 6  | <b>613.374</b>  | 3985.238       | 3969.220        | 3965.228        | 3963.211        | Q[36] |
| G  | 7  | <b>730.395</b>  | 3852.080       | 3836.100        | 3837.110        | 3835.154        | G[35] |
| G  | 8  | <b>787.417</b>  | 3795.159       | 3779.140        | 3780.148        | 3778.132        | G[34] |
| K  | 9  | 915.512         | 3736.138       | 3722.119        | 3723.127        | 3721.111        | K[33] |
| A  | 10 | <b>986.549</b>  | 3610.043       | 3594.024        | 3595.032        | 3593.016        | A[32] |
| R  | 11 | <b>1142.650</b> | 3539.005       | 3522.987        | 3523.995        | 3521.979        | R[31] |
| A  | 12 | <b>1213.687</b> | 3382.904       | 3366.885        | 3367.893        | 3365.877        | A[30] |
| R  | 13 | 1381.782        | 3311.867       | 3295.848        | 3296.856        | 3294.841        | R[29] |
| A  | 14 | 1412.819        | 3183.772       | 3167.754        | 3168.761        | 3166.746        | A[28] |
| K  | 15 | <b>1540.914</b> | 3112.735       | 3096.716        | 3097.724        | 3095.709        | K[27] |
| T  | 16 | <b>1641.962</b> | 2984.640       | 2968.621        | 2969.629        | 2967.614        | T[26] |
| R  | 17 | 1708.063        | 2853.582       | 2837.563        | 2838.562        | 2836.546        | R[25] |
| S  | 18 | 1885.005        | 2779.494       | 2763.475        | 2764.483        | 2762.467        | S[24] |
| S  | 19 | 1972.127        | 2640.459       | 2624.441        | 2625.448        | 2623.433        | S[23] |
| R  | 20 | 2138.228        | 2553.427       | 2537.409        | 2538.416        | 2536.401        | R[22] |
| A  | 21 | 2199.205        | 2497.326       | 2481.307        | 2482.315        | 2480.300        | A[21] |
| G  | 22 | 2256.287        | 2326.289       | 2310.270        | 2311.278        | 2309.263        | G[20] |
| L  | 23 | 2309.371        | 2209.280       | 2193.260        | 2194.267        | 2192.241        | L[19] |
| Q  | 24 | 3007.429        | 2158.184       | 2142.165        | 2143.173        | 2141.157        | Q[18] |
| F  | 25 | 3644.488        | 2028.125       | 2012.106        | 2013.114        | 2011.099        | F[17] |
| P  | 26 | 2741.551        | 1881.057       | 1865.038        | 1866.046        | 1864.030        | P[16] |
| V  | 27 | 2840.619        | 1794.004       | 1778.985        | 1779.993        | 1777.977        | V[15] |
| G  | 28 | 2897.641        | 1684.935       | 1668.917        | 1669.924        | 1667.909        | G[14] |
| R  | 29 | 3633.742        | 1627.824       | 1611.805        | <b>1612.803</b> | 1610.787        | R[13] |
| V  | 30 | 3152.810        | 1471.613       | <b>1455.794</b> | 4456.902        | 1454.788        | V[12] |
| H  | 31 | 3289.869        | 1372.744       | 1356.726        | <b>1357.734</b> | 1355.718        | H[11] |
| R  | 32 | 3445.970        | 1235.685       | <b>1219.667</b> | 1220.675        | 1218.659        | R[10] |
| L  | 33 | 3559.054        | 1079.584       | 1063.565        | <b>1064.573</b> | <b>1062.558</b> | L[9]  |
| L  | 34 | 3672.138        | <b>966.500</b> | 950.482         | 951.489         | 949.473         | L[8]  |
| R  | 35 | 3838.239        | 833.416        | 817.398         | 818.405         | <b>816.390</b>  | R[7]  |
| K  | 36 | 3956.334        | 697.315        | 681.296         | 682.304         | 680.289         | K[6]  |
| G  | 37 | 4013.356        | 569.220        | 553.201         | 554.209         | 552.194         | G[5]  |
| N  | 38 | 4127.399        | 512.109        | 496.180         | 497.188         | 495.172         | N[4]  |
| V  | 39 | 4290.462        | 398.158        | 382.139         | 383.145         | 381.129         | V[3]  |
| S  | 40 | 4377.494        | 235.082        | 219.074         | 220.082         | 218.066         | S[2]  |
| E  | 41 | 4408.537        | 148.060        | 132.043         | 133.050         | 131.034         | E[1]  |

# sp | Q8CGP5 | H2A1F\_MOUSE

[Acetyl]SGRGKQGGKARAKATRSSRAGLQFPVGRVHRLLRKGNYS

- ▶ fragmentation table for charge state 2+
- ▶ specType=etd
- ▶ score=51.25
- ▶ F113279.dat
- ▶ query=q46075.p1
- ▶ precursor=752.095700
- ▶ chargePrecursor=6
- ▶ itol=0.5

| AA | c  | y               | #s1             | #s2             | c               | AA              |       |
|----|----|-----------------|-----------------|-----------------|-----------------|-----------------|-------|
| S  | 1  | 74.062          | 2054.264        | 2266.255        | 0.804           | 2245.781        | S[41] |
| G  | 2  | 102.553         | 2189.743        | 2381.733        | 0.504           | 2181.220        | G[40] |
| R  | 3  | 180.603         | 2161.232        | 2153.233        | 2153.236        | 2152.710        | R[39] |
| G  | 4  | 209.114         | 2083.181        | 2075.172        | 2075.676        | 2074.660        | G[38] |
| K  | 5  | 273.181         | 2054.671        | 2048.681        | 2047.305        | 2046.157        | K[37] |
| G  | 6  | 337.194         | 1990.622        | <b>1982.614</b> | <b>1983.118</b> | 1982.110        | G[36] |
| G  | 7  | 385.193         | 1936.594        | 1927.583        |                 | <b>1919.088</b> | G[35] |
| G  | 8  | 394.212         | 1898.083        | 1890.074        | <b>1890.578</b> | 1889.570        | G[34] |
| K  | 9  | 458.260         | 1869.572        | 1861.563        | 1862.067        | 1861.059        | K[33] |
| A  | 10 | 493.778         | 1805.525        | 1797.516        | 1798.019        | 1797.012        | A[32] |
| R  | 11 | <b>571.829</b>  | 1770.008        | 1764.007        | 1762.501        | 1761.493        | R[31] |
| A  | 12 | <b>607.237</b>  | 1692.956        | <b>1683.946</b> | <b>1684.450</b> | 1683.443        | A[30] |
| R  | 13 | <b>671.395</b>  | 1656.437        | <b>1648.428</b> | <b>1648.932</b> | 1647.924        | R[29] |
| A  | 14 | <b>706.913</b>  | 1592.900        | 1584.891        | 1584.884        | 1583.876        | A[28] |
| K  | 15 | <b>770.961</b>  | 1556.871        | 1548.862        | <b>1549.366</b> | 1548.358        | K[27] |
| T  | 16 | <b>821.485</b>  | 1492.824        | 1484.814        | 1485.318        | <b>1484.310</b> | T[26] |
| R  | 17 | <b>899.535</b>  | <b>1442.300</b> | <b>1434.291</b> | 1434.794        | <b>1433.787</b> | R[25] |
| S  | 18 | 933.875         | 1384.246        | 1376.237        | 1376.741        | 1375.733        | S[24] |
| S  | 19 | <b>986.567</b>  | 1320.733        | 1312.724        | <b>1313.228</b> | 1312.220        | S[23] |
| R  | 20 | <b>1064.618</b> | 1277.217        | 1269.208        | <b>1269.712</b> | 1268.704        | R[22] |
| A  | 21 | 1109.136        | <b>1199.167</b> | 1191.157        | <b>1191.661</b> | 1190.653        | A[21] |
| G  | 22 | <b>1128.647</b> | 1153.648        | 1145.639        | 1146.143        | 1145.135        | G[20] |
| L  | 23 | <b>1185.189</b> | 1118.137        | 1110.127        | 1110.631        | 1109.623        | L[19] |
| Q  | 24 | <b>1249.218</b> | 1078.595        | <b>1070.586</b> | <b>1071.090</b> | 1070.082        | Q[18] |
| F  | 25 | <b>1322.753</b> | 1014.566        | <b>1006.557</b> | <b>1007.061</b> | 1006.053        | F[17] |
| F  | 26 | 1371.279        | 941.033         | 933.023         | 933.526         | 932.519         | F[16] |
| V  | 27 | <b>1420.813</b> | 892.506         | 884.496         | 885.000         | 883.992         | V[15] |
| G  | 28 | 1466.224        | 842.971         | 834.961         | 835.465         | 834.457         | G[14] |
| R  | 29 | 1527.874        | 814.461         | <b>806.451</b>  | <b>806.955</b>  | 805.947         | R[13] |
| V  | 30 | 1576.909        | 736.410         | 728.401         | 728.905         | 727.897         | V[12] |
| H  | 31 | 1645.438        | 688.876         | <b>678.866</b>  | <b>679.370</b>  | 678.363         | H[11] |
| R  | 32 | 1723.489        | 618.346         | 610.337         | 610.841         | 609.833         | R[10] |
| L  | 33 | 1780.031        | 540.296         | 532.286         | 532.790         | 531.783         | L[9]  |
| L  | 34 | 1838.573        | 489.794         | 481.783         | 482.287         | 481.280         | L[8]  |
| R  | 35 | 1914.623        | 427.212         | 419.202         | 419.706         | 418.699         | R[7]  |
| K  | 36 | 1978.671        | 349.161         | 341.152         | 341.656         | 340.648         | K[6]  |
| G  | 37 | 2067.181        | 285.114         | 277.104         | 277.608         | 276.600         | G[5]  |
| N  | 38 | 2094.203        | 256.603         | 248.594         | 249.098         | 248.090         | N[4]  |
| V  | 39 | 2145.236        | 189.562         | 181.552         | 182.056         | 181.048         | V[3]  |
| S  | 40 | 2189.261        | 118.056         | 110.046         | 110.549         | 109.541         | S[2]  |
| E  | 41 | 2253.772        | 74.534          | 66.524          | 67.028          | 66.021          | E[1]  |



# sp | Q8CGP5 | H2A1F\_MOUSE

[Acetyl]SGRGKQGGKARAKAKTRSSRAGLQFPVGRVHRLLRKGNYS

- ▶ fragmentation table for charge state 3+
- ▶ specType=etd
- ▶ score=51.25
- ▶ F113279.dat
- ▶ query=q46075.p1
- ▶ precursor=752.095700
- ▶ chargePrecursor=6
- ▶ itol=0.5

| AA | c  | y               | #s1             | #s2             | z               | AA              |       |
|----|----|-----------------|-----------------|-----------------|-----------------|-----------------|-------|
| S  | 1  | 48.607          | 1502.178        | 1487.830        | 0.872           | 1487.561        | S[41] |
| G  | 2  | 86.704          | 1460.184        | 1454.925        | 0.672           | 1454.480        | G[40] |
| R  | 3  | 1307.788        | 1441.157        | <b>1435.817</b> | <b>1430.153</b> | <b>1435.482</b> | R[30] |
| G  | 4  | 139.745         | 1389.123        | 1383.784        | 1384.420        | 1383.448        | G[38] |
| K  | 5  | 182.443         | 1370.118        | 1364.777        | <b>1365.113</b> | 1364.441        | K[37] |
| G  | 6  | 225.130         | 1327.418        | 1322.078        | 1322.314        | 1321.742        | G[36] |
| G  | 7  | 244.137         | 1284.732        | 1279.392        | <b>1279.728</b> | 1279.056        | G[35] |
| G  | 8  | 263.144         | 1245.725        | 1240.385        | 1240.721        | 1240.049        | G[34] |
| K  | 9  | 305.642         | 1246.717        | <b>1241.378</b> | 1241.714        | <b>1241.042</b> | K[33] |
| A  | 10 | 329.521         | 1204.019        | 1198.679        | <b>1199.015</b> | 1198.344        | A[32] |
| R  | 11 | 381.555         | 1180.240        | <b>1175.000</b> | <b>1175.336</b> | 1174.664        | R[31] |
| A  | 12 | 405.234         | <b>1128.206</b> | 1122.907        | 1123.303        | 1122.831        | A[30] |
| R  | 13 | 447.932         | 1104.627        | <b>1099.288</b> | 1099.624        | <b>1098.952</b> | R[29] |
| A  | 14 | 471.611         | 1061.929        | 1056.589        | <b>1056.925</b> | 1056.251        | A[28] |
| K  | 15 | 514.310         | <b>1038.250</b> | <b>1032.910</b> | <b>1033.246</b> | <b>1032.574</b> | K[27] |
| T  | 16 | 547.602         | 995.552         | <b>990.212</b>  | <b>990.548</b>  | 989.870         | T[26] |
| R  | 17 | 606.626         | 961.869         | 956.529         | <b>956.865</b>  | 956.191         | R[25] |
| S  | 18 | 629.917         | 909.835         | 904.495         | 904.832         | 904.160         | S[24] |
| S  | 19 | 658.047         | 880.825         | 875.485         | 875.821         | 875.149         | S[23] |
| R  | 20 | 710.081         | 851.814         | 846.474         | <b>846.810</b>  | 846.138         | R[22] |
| A  | 21 | 733.760         | 799.789         | <b>794.441</b>  | <b>794.777</b>  | 794.101         | A[21] |
| G  | 22 | 752.769         | 776.101         | <b>770.762</b>  | <b>771.098</b>  | 770.426         | G[20] |
| L  | 23 | <b>790.462</b>  | 759.094         | 753.754         | <b>754.090</b>  | 753.418         | L[19] |
| Q  | 24 | <b>833.148</b>  | 739.305         | 734.000         | <b>734.396</b>  | 733.724         | Q[18] |
| F  | 25 | <b>882.171</b>  | 676.713         | <b>671.374</b>  | <b>671.710</b>  | 671.038         | F[17] |
| F  | 26 | 914.522         | 627.600         | 622.351         | 622.687         | 622.015         | F[16] |
| V  | 27 | 947.545         | 595.139         | 590.000         | 590.336         | 589.664         | V[15] |
| G  | 28 | <b>966.552</b>  | 562.317         | 556.977         | 557.313         | 556.641         | G[14] |
| R  | 29 | 1013.858        | 543.309         | 537.910         | 538.306         | 537.634         | R[13] |
| V  | 30 | 1051.608        | 490.275         | 485.036         | 485.272         | 485.600         | V[12] |
| H  | 31 | 1097.204        | 458.253         | 452.913         | 453.249         | 452.577         | H[11] |
| R  | 32 | 1149.328        | 412.567         | 407.227         | 407.563         | 406.891         | R[10] |
| L  | 33 | 1187.023        | <b>360.533</b>  | 355.193         | 355.529         | 354.857         | L[9]  |
| L  | 34 | <b>1224.718</b> | 322.374         | 317.034         | 317.428         | 317.161         | L[8]  |
| R  | 35 | 1275.815        | 285.144         | 279.804         | 280.140         | 279.468         | R[7]  |
| K  | 36 | 1319.450        | 233.110         | 227.770         | 228.106         | 227.434         | K[6]  |
| G  | 37 | 1338.457        | 190.412         | 185.072         | 185.408         | 184.736         | G[5]  |
| N  | 38 | 1376.471        | 171.404         | 166.065         | 166.401         | 165.729         | N[4]  |
| V  | 39 | 1436.826        | 133.290         | 128.051         | 128.386         | 127.715         | V[3]  |
| S  | 40 | 1459.836        | 98.136          | 93.000          | 93.336          | 92.664          | S[2]  |
| E  | 41 | 1502.850        | 50.025          | 44.685          | 45.021          | 44.349          | E[1]  |

# sp | Q8CGP5 | H2A1F\_MOUSE

[Acetyl]SGRGKQGGKARAKAKTRSSRAGLQFPVGRVHLLRKGNYSE

- ▶ fragmentation table for charge state 4+
- ▶ specType=etd
- ▶ score=51.25
- ▶ F113279.dat
- ▶ query=q46075.p1
- ▶ precursor=752.095700
- ▶ chargePrecursor=6
- ▶ itol=0.5

| AA    | c               | y              | z+1            | z+2             | z              | AA    |
|-------|-----------------|----------------|----------------|-----------------|----------------|-------|
| S[1]  | 37.525          | 1127.630       | 2123.631       | 0.755           | 1123.370       | S[41] |
| G[2]  | 51.780          | 1095.375       | 1091.370       | 0.755           | 1091.118       | G[40] |
| R[3]  | 90.805          | 1081.120       | 1077.115       | <b>1077.367</b> | 1076.863       | R[39] |
| G[4]  | 105.061         | 1042.094       | 1038.090       | <b>1038.342</b> | 1037.838       | G[38] |
| K[5]  | 137.084         | 1027.839       | 1023.834       | 1023.586        | 1023.362       | K[37] |
| Q[6]  | 169.099         | 995.815        | 991.811        | 992.062         | 991.559        | Q[36] |
| G[7]  | 183.354         | 963.801        | 959.796        | <b>960.048</b>  | 959.544        | G[35] |
| G[8]  | 197.610         | 949.545        | <b>945.541</b> | <b>945.792</b>  | 945.289        | G[34] |
| K[9]  | 229.633         | 935.290        | 931.285        | 931.537         | 931.033        | K[33] |
| A[10] | 247.393         | <b>903.266</b> | 899.261        | <b>899.513</b>  | <b>899.009</b> | A[32] |
| R[11] | 268.418         | 895.507        | 891.502        | <b>891.754</b>  | 891.250        | R[31] |
| A[12] | 304.177         | 846.482        | 842.477        | 842.729         | 842.225        | A[30] |
| K[13] | 336.201         | 828.722        | 824.718        | 824.970         | 824.466        | K[29] |
| A[14] | 353.960         | 796.699        | 792.694        | 792.946         | 792.442        | A[28] |
| K[15] | 385.984         | 778.939        | 774.935        | 775.187         | 774.683        | K[27] |
| T[16] | 411.246         | 746.915        | 742.911        | 743.163         | 742.659        | T[26] |
| K[17] | 450.271         | 721.694        | 717.689        | 717.941         | 717.390        | K[25] |
| S[18] | 472.039         | 692.628        | <b>678.624</b> | <b>678.876</b>  | 678.372        | S[24] |
| S[19] | 493.787         | 650.870        | 646.865        | 647.117         | 646.614        | S[23] |
| R[20] | 532.813         | 639.112        | 635.108        | 635.360         | 634.856        | R[22] |
| A[21] | 590.572         | 600.087        | 596.082        | 596.334         | 595.830        | A[21] |
| G[22] | 594.827         | 582.328        | 578.323        | 578.575         | 578.071        | G[20] |
| L[23] | 593.098         | 568.072        | 564.068        | 564.320         | 563.816        | L[19] |
| Q[24] | 625.113         | 539.803        | 535.797        | 536.049         | 535.545        | Q[18] |
| F[25] | 661.880         | 507.787        | 503.782        | 504.034         | 503.530        | F[17] |
| P[26] | 686.143         | 471.020        | 467.015        | 467.267         | 466.763        | P[16] |
| V[27] | <b>710.910</b>  | 446.756        | 442.752        | 443.004         | 442.500        | V[15] |
| G[28] | 725.166         | 421.989        | 417.985        | 418.237         | <b>417.733</b> | G[14] |
| R[29] | 764.191         | 407.734        | 403.729        | 403.981         | 403.477        | R[13] |
| V[30] | 788.958         | 388.709        | 384.704        | 384.956         | 384.452        | V[12] |
| I[31] | 823.942         | 343.942        | 339.937        | 340.189         | 339.685        | I[11] |
| R[32] | <b>862.248</b>  | 309.677        | 305.672        | 305.924         | 305.420        | R[10] |
| L[33] | 890.519         | 270.652        | 266.647        | 266.899         | 266.395        | L[9]  |
| L[34] | 918.790         | 242.381        | 238.376        | 238.628         | 238.124        | L[8]  |
| R[35] | 957.815         | 214.110        | 210.105        | 210.357         | 209.853        | R[7]  |
| K[36] | 989.839         | 175.084        | 171.080        | 171.332         | 170.828        | K[6]  |
| G[37] | 1024.894        | 143.061        | 139.056        | 139.308         | 138.804        | G[5]  |
| N[38] | <b>1032.605</b> | 128.805        | 124.800        | 125.052         | 124.548        | N[4]  |
| V[39] | <b>1073.371</b> | 100.294        | 96.290         | 96.542          | 96.038         | V[3]  |
| S[40] | 1095.120        | 59.529         | 55.524         | 55.776          | 55.272         | S[2]  |
| E[41] | 1127.390        | 37.771         | 33.766         | 34.018          | 33.514         | E[1]  |

# sp | Q8CGP5 | H2A1F\_MOUSE

[Acetyl]SGRGKQGGKARAKAKTRSSRAGLQFPVGRVHRLLRKGNYS

- ▶ fragmentation table for charge state 5+
- ▶ specType=etd
- ▶ score=51.25
- ▶ F113279.dat
- ▶ query=q46075\_p1
- ▶ precursor=752.095700
- ▶ chargePrecursor=6
- ▶ itol=0.5

| AA    | c              | y              | z+1            | z#2            | z              | AA    |
|-------|----------------|----------------|----------------|----------------|----------------|-------|
| S[1]  | 30.221         | 902.310        | <b>899.106</b> | 0.806          | <b>898.905</b> | S[41] |
| G[2]  | 41.625         | <b>876.501</b> | <b>873.298</b> | 0.806          | 873.095        | G[40] |
| R[3]  | 72.846         | 805.097        | 801.893        | <b>062.095</b> | 801.692        | R[39] |
| G[4]  | 84.250         | <b>833.877</b> | 830.673        | 830.875        | 830.472        | G[38] |
| K[5]  | 109.869        | 822.473        | 819.269        | 819.470        | 819.067        | K[37] |
| Q[6]  | 135.481        | 796.854        | 793.650        | 793.851        | 793.448        | Q[36] |
| G[7]  | 146.885        | <b>771.242</b> | 768.038        | 768.240        | 767.837        | G[35] |
| G[8]  | 158.289        | 759.838        | 756.634        | 756.835        | 756.432        | G[34] |
| K[9]  | 183.908        | 748.833        | 745.230        | 745.431        | 745.028        | K[33] |
| A[10] | 198.116        | 722.814        | 719.611        | 719.812        | 719.409        | A[32] |
| R[11] | 229.336        | 708.607        | 705.403        | 705.605        | 705.202        | R[31] |
| A[12] | 243.543        | 677.387        | 674.183        | 674.385        | 673.981        | A[30] |
| K[13] | 269.162        | 663.179        | 659.976        | 660.177        | 659.774        | K[29] |
| A[14] | 283.370        | 637.960        | 634.357        | 634.559        | 634.155        | A[28] |
| K[15] | 308.989        | 623.753        | 620.149        | 620.351        | 619.948        | K[27] |
| T[16] | 329.198        | 597.734        | 594.530        | 594.732        | 594.329        | T[26] |
| R[17] | <b>360.418</b> | 577.524        | 574.321        | 574.522        | 574.119        | R[25] |
| S[18] | 377.825        | 546.304        | 543.100        | 543.302        | 542.899        | S[24] |
| S[19] | 399.231        | 528.886        | 525.681        | 525.886        | 525.482        | S[23] |
| R[20] | 426.451        | 511.491        | 508.288        | 508.489        | 508.086        | R[22] |
| A[21] | 440.659        | 480.271        | 477.067        | 477.269        | 476.866        | A[21] |
| G[22] | 452.063        | 466.064        | 462.860        | 463.061        | 462.658        | G[20] |
| L[23] | 474.680        | 494.659        | 451.456        | 451.657        | 451.254        | L[19] |
| Q[24] | 500.292        | 432.043        | 428.839        | 429.040        | 428.637        | Q[18] |
| F[25] | 529.705        | 406.831        | 403.227        | 403.429        | 403.026        | F[17] |
| P[26] | 549.116        | 377.017        | 373.813        | 374.015        | 373.612        | P[16] |
| V[27] | 568.530        | 357.807        | 354.403        | 354.604        | 354.201        | V[15] |
| G[28] | 589.334        | 337.793        | 334.389        | 334.791        | 334.388        | G[14] |
| R[29] | 611.554        | 326.389        | 323.185        | 323.386        | 322.983        | R[13] |
| V[30] | 631.368        | 295.168        | 291.965        | 292.166        | 291.763        | V[12] |
| H[31] | 658.780        | 275.355        | 272.151        | 272.353        | 271.949        | H[11] |
| R[32] | 690.000        | 247.943        | 244.739        | 244.941        | 244.538        | R[10] |
| L[33] | 712.617        | 216.723        | 213.519        | 213.721        | 213.317        | L[9]  |
| L[34] | 735.233        | 194.109        | 190.902        | 191.104        | 190.701        | L[8]  |
| R[35] | 766.454        | 171.489        | 168.283        | 168.487        | 168.084        | R[7]  |
| K[36] | 782.073        | 140.269        | 137.065        | 137.267        | 136.864        | K[6]  |
| G[37] | 803.877        | 114.650        | 111.446        | 111.648        | 111.245        | G[5]  |
| N[38] | 826.286        | 103.246        | 100.042        | 100.243        | 99.840         | N[4]  |
| V[39] | 858.898        | 80.437         | 77.233         | 77.435         | 77.032         | V[3]  |
| S[40] | <b>876.305</b> | 47.824         | 44.621         | 44.822         | 44.419         | S[2]  |
| E[41] | 902.113        | 30.418         | 27.214         | 27.416         | 27.013         | E[1]  |



# sp | Q8CGP5 | H2A1F\_MOUSE

[Acetyl]SGRGKQGGKARAKAKTRSSRAGLQFPVGRVHLLRKGNYSE

- ▶ fragmentation table for charge state 1+
- ▶ specType=etd
- ▶ score=38.48
- ▶ F113279.dat
- ▶ query=q46077.p1
- ▶ precursor=752.095800
- ▶ chargePrecursor=6
- ▶ itol=0.5

| AA | c  | y               | z+1            | z+2             | z               | AA              |       |
|----|----|-----------------|----------------|-----------------|-----------------|-----------------|-------|
| S  | 1  | 147.076         | 4507.521       | 4493.503        | 0.000           | 4490.484        | S[41] |
| G  | 2  | 204.068         | 4378.478       | 4362.459        | 0.000           | 4361.451        | G[40] |
| R  | 3  | <b>360.199</b>  | 4321.457       | 4305.438        | 4308.446        | 4304.438        | R[39] |
| G  | 4  | <b>417.220</b>  | 4165.355       | 4149.337        | 4150.345        | 4148.329        | G[38] |
| K  | 5  | <b>545.315</b>  | 4108.334       | 4092.315        | 4093.323        | 4091.307        | K[37] |
| Q  | 6  | <b>673.374</b>  | 3989.238       | 3974.220        | 3975.228        | 3973.211        | Q[36] |
| G  | 7  | <b>730.395</b>  | 3852.080       | 3836.100        | 3837.110        | 3835.154        | G[35] |
| G  | 8  | <b>787.417</b>  | 3795.159       | 3779.140        | 3780.148        | 3778.132        | G[34] |
| K  | 9  | <b>915.512</b>  | 3736.138       | 3722.119        | 3723.127        | 3721.111        | K[33] |
| A  | 10 | <b>986.549</b>  | 3610.043       | 3594.024        | 3595.032        | 3593.016        | A[32] |
| R  | 11 | 1142.650        | 3539.005       | 3522.987        | 3523.995        | 3521.979        | R[31] |
| A  | 12 | 1213.687        | 3382.904       | 3366.885        | 3367.893        | 3365.877        | A[30] |
| R  | 13 | 1341.782        | 3311.867       | 3295.848        | 3296.856        | 3294.841        | R[29] |
| A  | 14 | 1412.819        | 3183.772       | 3167.754        | 3168.761        | 3166.746        | A[28] |
| K  | 15 | <b>1540.914</b> | 3112.735       | 3096.716        | 3097.724        | 3095.709        | K[27] |
| T  | 16 | 1541.962        | 2984.640       | 2968.621        | 2969.629        | 2967.614        | T[26] |
| R  | 17 | 1708.063        | 2853.592       | 2837.573        | 2838.582        | 2836.566        | R[25] |
| S  | 18 | 1885.005        | 2729.494       | 2713.475        | 2714.483        | 2712.467        | S[24] |
| S  | 19 | 1972.127        | 2640.459       | 2624.441        | 2625.448        | 2623.433        | S[23] |
| R  | 20 | 2138.228        | 2553.421       | 2537.402        | 2538.410        | 2536.394        | R[22] |
| A  | 21 | 2199.265        | 2497.326       | 2481.307        | 2482.315        | 2480.300        | A[21] |
| G  | 22 | 2256.287        | 2326.289       | 2310.270        | 2311.278        | 2309.263        | G[20] |
| L  | 23 | 2309.371        | 2209.260       | 2193.240        | 2194.249        | 2192.241        | L[19] |
| Q  | 24 | 3007.429        | 2158.184       | 2142.165        | 2143.173        | 2141.157        | Q[18] |
| F  | 25 | 3644.498        | 2028.125       | 2012.106        | 2013.114        | 2011.099        | F[17] |
| P  | 26 | 2741.551        | 1881.057       | 1865.038        | 1866.046        | 1864.030        | P[16] |
| V  | 27 | 2840.619        | 1784.004       | 1767.985        | 1768.993        | 1766.977        | V[15] |
| G  | 28 | 2897.641        | 1684.935       | 1668.917        | 1669.924        | 1667.909        | G[14] |
| R  | 29 | 3633.742        | 1627.824       | 1611.805        | <b>1612.803</b> | 1610.787        | R[13] |
| V  | 30 | 3152.810        | 1471.813       | 1455.794        | <b>1456.802</b> | <b>1454.786</b> | V[12] |
| H  | 31 | 3289.869        | 1372.744       | <b>1356.726</b> | 1357.734        | 1355.718        | H[11] |
| R  | 32 | 3445.970        | 1235.685       | 1219.667        | 1220.675        | 1218.659        | R[10] |
| L  | 33 | 3559.054        | 1079.584       | 1063.566        | 1064.573        | 1062.558        | L[9]  |
| L  | 34 | 3672.138        | <b>966.500</b> | 950.482         | 951.489         | 949.474         | L[8]  |
| T  | 35 | 3838.239        | 833.418        | 817.399         | <b>818.405</b>  | 816.390         | T[7]  |
| K  | 36 | 3956.334        | 697.315        | 681.296         | 682.304         | 680.289         | K[6]  |
| G  | 37 | 4013.356        | 569.220        | 553.201         | 554.209         | 552.194         | G[5]  |
| N  | 38 | 4127.399        | 512.109        | 496.180         | 497.188         | 495.172         | N[4]  |
| V  | 39 | 4290.462        | 398.158        | 382.139         | 383.145         | 381.129         | V[3]  |
| S  | 40 | 4377.494        | 235.082        | 219.074         | 220.082         | 218.066         | S[2]  |
| E  | 41 | 4406.537        | 148.060        | 132.043         | 133.050         | 131.034         | E[1]  |

# sp | Q8CGP5 | H2A1F\_MOUSE

[Acetyl]SGRGKQGGKARAKAKTRSSRAGLQFPVGRVHRLLRKGNYS

- ▶ fragmentation table for charge state 2+
- ▶ specType=etd
- ▶ score=38.48
- ▶ F113279.dat
- ▶ query=q46077.p1
- ▶ precursor=752.095800
- ▶ chargePrecursor=6
- ▶ itol=0.5

| AA | c               | y               | #s1             | #s2             | c               | AA    |
|----|-----------------|-----------------|-----------------|-----------------|-----------------|-------|
| S  | 74.062          | 2054.264        | 2266.255        | 0.804           | 2245.781        | S[41] |
| G  | 102.553         | 2189.743        | 2381.733        | 0.504           | 2181.220        | G[40] |
| R  | 180.603         | 2641.232        | 2153.233        | 2153.236        | 2152.710        | R[39] |
| G  | 209.114         | 2083.181        | 2075.172        | 2075.676        | 2074.660        | G[38] |
| K  | 273.181         | 2054.671        | 2048.681        | 2047.305        | 2046.157        | K[37] |
| G  | 337.194         | 1990.622        | <b>1982.614</b> | <b>1983.118</b> | 1982.110        | G[36] |
| G  | 365.704         | 3106.594        | 3223.583        | 3119.588        | 3118.081        | G[35] |
| G  | 394.212         | 1898.083        | 1890.074        | <b>1890.578</b> | 1889.570        | G[34] |
| K  | 458.260         | 1869.572        | 1861.563        | 1862.067        | 1861.059        | K[33] |
| A  | 493.778         | 1805.525        | 1797.516        | 1798.019        | 1797.012        | A[32] |
| R  | <b>571.829</b>  | 1770.008        | 1761.997        | 1762.501        | 1761.493        | R[31] |
| A  | 607.337         | 1692.956        | 1684.946        | 1684.450        | 1683.443        | A[30] |
| R  | <b>671.395</b>  | 1656.437        | 1648.428        | <b>1648.932</b> | 1647.924        | R[29] |
| A  | <b>706.913</b>  | 1592.900        | 1584.890        | <b>1584.884</b> | 1583.876        | A[28] |
| K  | <b>770.961</b>  | 1556.871        | <b>1548.862</b> | <b>1549.366</b> | 1548.358        | K[27] |
| T  | <b>821.485</b>  | 1492.824        | <b>1484.814</b> | 1485.318        | <b>1484.310</b> | T[26] |
| R  | <b>899.535</b>  | <b>1442.300</b> | <b>1434.291</b> | <b>1434.794</b> | 1433.787        | R[25] |
| S  | 923.853         | 1364.246        | <b>1356.240</b> | <b>1356.744</b> | 1355.736        | S[24] |
| S  | <b>986.567</b>  | 1328.733        | 1312.724        | <b>1313.228</b> | 1312.220        | S[23] |
| R  | <b>1064.618</b> | 1277.217        | 1269.208        | 1269.712        | 1268.704        | R[22] |
| A  | 1100.136        | 1199.167        | 1191.157        | 1191.661        | 1190.653        | A[21] |
| G  | <b>1128.647</b> | 1163.648        | 1155.639        | 1156.143        | 1155.135        | G[20] |
| L  | 1185.169        | 1138.137        | 1127.128        | <b>1127.632</b> | 1126.624        | L[19] |
| Q  | 1249.218        | 1078.595        | <b>1070.586</b> | <b>1071.090</b> | 1070.082        | Q[18] |
| F  | <b>1322.753</b> | 1014.569        | <b>1006.557</b> | <b>1007.061</b> | 1006.053        | F[17] |
| F  | 1371.279        | 941.053         | 933.043         | 933.546         | 932.539         | F[16] |
| V  | <b>1420.813</b> | 892.506         | 884.496         | 885.000         | 883.992         | V[15] |
| G  | <b>1449.324</b> | 842.971         | 834.961         | 835.465         | 834.457         | G[14] |
| R  | 1507.874        | 814.461         | <b>806.451</b>  | <b>806.955</b>  | 805.947         | R[13] |
| V  | 1576.909        | 736.410         | 728.401         | 728.905         | 727.897         | V[12] |
| H  | 1645.438        | 688.876         | 678.866         | 679.370         | 678.363         | H[11] |
| R  | 1723.489        | 618.346         | 610.337         | 610.841         | 609.833         | R[10] |
| L  | 1780.011        | 540.296         | 532.286         | 532.790         | 531.783         | L[9]  |
| L  | 1836.573        | 469.794         | 459.783         | 459.286         | 458.280         | L[8]  |
| R  | 1914.623        | 427.232         | 419.222         | 419.726         | 418.720         | R[7]  |
| K  | 1978.671        | 349.181         | 341.172         | 341.676         | 340.668         | K[6]  |
| G  | 2067.181        | 285.114         | 277.104         | 277.608         | 276.600         | G[5]  |
| N  | 2094.203        | 256.603         | 248.594         | 249.098         | 248.090         | N[4]  |
| V  | 2145.736        | 189.562         | 181.552         | 182.056         | 181.048         | V[3]  |
| S  | 2189.261        | 118.056         | 110.047         | 110.549         | 109.541         | S[2]  |
| E  | 2253.772        | 74.534          | 66.524          | 67.028          | 66.021          | E[1]  |

# sp | Q8CGP5 | H2A1F\_MOUSE

[Acetyl]SGRGKQGGKARAKAKTRSSRAGLQFPVGRVHRLLRKGNYS

- ▶ fragmentation table for charge state 3+
- ▶ specType=etd
- ▶ score=38.48
- ▶ F113279.dat
- ▶ query=q46077.p1
- ▶ precursor=752.095800
- ▶ chargePrecursor=6
- ▶ itol=0.5

| AA | c  | y               | #s1             | #s2             | z               | AA              |       |
|----|----|-----------------|-----------------|-----------------|-----------------|-----------------|-------|
| S  | 1  | 489.607         | 1502.178        | <b>1497.839</b> | 0.872           | 2497.567        | S[41] |
| G  | 2  | 66.704          | 1460.184        | <b>1454.825</b> | 0.672           | 1454.480        | G[40] |
| R  | 3  | 1307.718        | 1441.157        | <b>1435.817</b> | <b>1436.153</b> | 1435.482        | R[39] |
| G  | 4  | 139.745         | 1389.123        | 1383.784        | <b>1384.120</b> | 1383.440        | G[38] |
| K  | 5  | 182.443         | 1370.116        | 1364.777        | <b>1365.113</b> | 1364.441        | K[37] |
| G  | 6  | 225.130         | 1327.418        | <b>1322.078</b> | <b>1322.414</b> | 1321.742        | G[36] |
| G  | 7  | 244.137         | 1284.733        | <b>1278.392</b> | <b>1278.728</b> | 1278.056        | G[35] |
| G  | 8  | 263.144         | 1265.725        | <b>1260.385</b> | <b>1260.721</b> | 1260.049        | G[34] |
| K  | 9  | 305.842         | 1246.717        | 1241.378        | 1241.714        | 1241.042        | K[33] |
| A  | 10 | 329.521         | 1204.019        | 1198.679        | 1199.015        | 1198.344        | A[32] |
| R  | 11 | 381.555         | 1180.390        | <b>1175.000</b> | 1175.336        | <b>1174.664</b> | R[31] |
| A  | 12 | 405.234         | <b>1128.306</b> | <b>1122.967</b> | <b>1123.303</b> | 1122.631        | A[30] |
| K  | 13 | 447.932         | 1104.627        | <b>1099.288</b> | <b>1099.624</b> | 1099.952        | K[29] |
| A  | 14 | 491.611         | 1081.029        | <b>1056.589</b> | <b>1056.925</b> | 1056.251        | A[28] |
| K  | 15 | 514.310         | <b>1038.250</b> | <b>1032.910</b> | <b>1033.246</b> | <b>1032.574</b> | K[27] |
| T  | 16 | 547.002         | 995.552         | <b>990.212</b>  | <b>990.548</b>  | <b>989.876</b>  | T[26] |
| R  | 17 | 600.626         | 981.869         | <b>956.529</b>  | <b>956.865</b>  | 956.193         | R[25] |
| S  | 18 | 629.017         | 959.835         | 954.496         | 954.832         | 954.160         | S[24] |
| S  | 19 | 658.047         | 938.025         | <b>875.485</b>  | <b>875.821</b>  | 875.149         | S[23] |
| R  | 20 | 710.081         | 951.814         | 846.474         | 846.810         | 846.138         | R[22] |
| A  | 21 | 733.760         | 799.780         | 794.441         | 794.777         | 794.105         | A[21] |
| G  | 22 | 752.769         | 778.101         | <b>770.762</b>  | <b>771.098</b>  | 770.426         | G[20] |
| L  | 23 | <b>790.462</b>  | 759.094         | 751.755         | 752.091         | 751.419         | L[19] |
| Q  | 24 | <b>833.148</b>  | 733.305         | 724.900         | 724.266         | 723.521         | Q[18] |
| F  | 25 | <b>882.171</b>  | 676.713         | <b>671.374</b>  | <b>671.710</b>  | <b>671.038</b>  | F[17] |
| F  | 26 | 914.522         | 627.600         | 622.261         | 622.597         | 622.015         | F[16] |
| V  | 27 | 947.545         | 595.139         | 590.000         | 590.336         | 589.664         | V[15] |
| G  | 28 | <b>966.552</b>  | 562.317         | 556.977         | 557.313         | 556.641         | G[14] |
| R  | 29 | 1013.858        | 543.309         | 537.970         | 538.306         | 537.634         | R[13] |
| V  | 30 | 1051.608        | 490.276         | 485.938         | 486.272         | 485.600         | V[12] |
| H  | 31 | <b>1097.294</b> | 458.253         | 452.913         | 453.249         | 452.577         | H[11] |
| R  | 32 | 1149.328        | 412.967         | 407.227         | 407.563         | 406.891         | R[10] |
| L  | 33 | <b>1187.023</b> | <b>360.533</b>  | 355.193         | 355.529         | 354.857         | L[9]  |
| L  | 34 | <b>1224.718</b> | 322.574         | 317.489         | 317.825         | 317.153         | L[8]  |
| R  | 35 | 1275.733        | 285.144         | 279.804         | 280.140         | 279.468         | R[7]  |
| K  | 36 | 1319.450        | 233.110         | 227.770         | 228.106         | 227.434         | K[6]  |
| G  | 37 | 1338.457        | 190.412         | 185.072         | 185.408         | 184.736         | G[5]  |
| N  | 38 | 1376.471        | 171.404         | 166.065         | 166.401         | 165.729         | N[4]  |
| V  | 39 | 1430.826        | 133.390         | 128.051         | 128.386         | 127.715         | V[3]  |
| S  | 40 | 1459.836        | 99.136          | 93.796          | 94.132          | 93.460          | S[2]  |
| E  | 41 | 1502.850        | 50.025          | 44.685          | 45.021          | 44.349          | E[1]  |

# sp | Q8CGP5 | H2A1F\_MOUSE

[Acetyl]SGRGKQGGKARAKAKTRSSRAGLQFPVGRVHRLLRKGNYS

- ▶ fragmentation table for charge state 4+
- ▶ specType=etd
- ▶ score=38.48
- ▶ F113279.dat
- ▶ query=q46077.p1
- ▶ precursor=752.095800
- ▶ chargePrecursor=6
- ▶ itol=0.5

| AA | c  | m               | p               | #=1             | #=2             | #               | AA   |
|----|----|-----------------|-----------------|-----------------|-----------------|-----------------|------|
| S  | 1  | 37.505          | <b>1127.636</b> | <b>1123.631</b> | 0.705           | <b>1123.370</b> | S(4) |
| G  | 2  | 51.780          | 1026.375        | <b>1091.370</b> | 0.795           | 1091.110        | G(4) |
| R  | 3  | 90.805          | 1081.120        | 1077.115        | <b>1077.367</b> | 1076.861        | R(3) |
| G  | 4  | 109.001         | 1042.094        | <b>1038.090</b> | <b>1038.342</b> | 1037.830        | G(3) |
| K  | 5  | 137.064         | 1027.839        | <b>1023.834</b> | <b>1024.086</b> | 1023.587        | K(3) |
| G  | 6  | 169.059         | 995.815         | <b>991.811</b>  | <b>992.063</b>  | 991.559         | G(2) |
| G  | 7  | 193.254         | 963.801         | <b>959.796</b>  | <b>960.048</b>  | 959.544         | G(2) |
| G  | 8  | 197.610         | 949.545         | <b>945.541</b>  | <b>945.792</b>  | 945.289         | G(4) |
| K  | 9  | 229.633         | 935.290         | 931.285         | 931.537         | 931.033         | K(3) |
| A  | 10 | 247.303         | <b>903.266</b>  | <b>899.261</b>  | <b>899.513</b>  | <b>899.009</b>  | A(3) |
| R  | 11 | 286.418         | 895.507         | <b>881.502</b>  | <b>881.754</b>  | 881.250         | R(3) |
| A  | 12 | 304.177         | 868.842         | <b>864.837</b>  | <b>865.089</b>  | 864.585         | A(3) |
| K  | 13 | 336.201         | 828.722         | 824.718         | 824.970         | 824.466         | K(2) |
| A  | 14 | 353.960         | 796.699         | 792.694         | 792.946         | 792.442         | A(2) |
| K  | 15 | 385.984         | 778.939         | 774.935         | 775.187         | 774.683         | K(2) |
| T  | 16 | 411.246         | 746.915         | 742.911         | 743.163         | 742.659         | T(2) |
| R  | 17 | 459.271         | 721.894         | 717.889         | 718.141         | 717.637         | R(2) |
| S  | 18 | 472.629         | 692.629         | 688.624         | 688.876         | 688.372         | S(2) |
| S  | 19 | 493.787         | 660.610         | 656.606         | 657.118         | 656.614         | S(2) |
| R  | 20 | 532.613         | 638.112         | 634.108         | 635.360         | 634.856         | R(2) |
| A  | 21 | 550.572         | 600.087         | 596.082         | 596.334         | 595.830         | A(2) |
| G  | 22 | 564.827         | 582.328         | 578.323         | 578.575         | 578.071         | G(2) |
| L  | 23 | 593.098         | 568.072         | 564.068         | 564.320         | 563.816         | L(2) |
| Q  | 24 | 625.113         | 539.801         | 535.797         | 536.049         | 535.545         | Q(1) |
| F  | 25 | 661.880         | 507.787         | 503.782         | 504.034         | 503.530         | F(1) |
| F  | 26 | 698.143         | 471.020         | 467.015         | 467.267         | 466.763         | F(1) |
| V  | 27 | <b>710.910</b>  | 446.756         | 442.752         | 443.004         | 442.500         | V(1) |
| G  | 28 | 725.169         | 421.989         | 417.985         | 418.237         | <b>417.733</b>  | G(1) |
| R  | 29 | 764.181         | 389.734         | 385.729         | 385.981         | 385.477         | R(1) |
| V  | 30 | 788.958         | 368.709         | 364.704         | 364.956         | 364.452         | V(1) |
| H  | 31 | 823.223         | 343.942         | 339.937         | 340.189         | 339.685         | H(1) |
| R  | 32 | <b>862.248</b>  | 309.677         | 305.672         | 305.924         | 305.420         | R(1) |
| L  | 33 | 890.519         | 270.652         | 266.647         | 266.899         | 266.395         | L(1) |
| L  | 34 | 918.969         | 242.381         | 238.376         | 238.628         | 238.124         | L(1) |
| R  | 35 | 957.815         | 214.110         | 210.105         | 210.357         | 209.853         | R(1) |
| K  | 36 | <b>989.839</b>  | 175.084         | 171.080         | 171.332         | 170.828         | K(1) |
| G  | 37 | 1064.094        | 143.061         | 139.056         | 139.308         | 138.804         | G(1) |
| N  | 38 | <b>1032.605</b> | 128.805         | 124.800         | 125.052         | 124.548         | N(1) |
| V  | 39 | 1078.271        | 100.294         | 96.289          | 96.541          | 96.037          | V(1) |
| S  | 40 | 1095.129        | 99.529          | 95.524          | 95.776          | 95.272          | S(1) |
| E  | 41 | 1127.590        | 97.771          | 93.766          | 94.018          | 93.514          | E(1) |



# sp | Q8CGP5 | H2A1F\_MOUSE

[Acetyl]SGRGKQGGKARAKAKTRSSRAGLQFPVGRVHRLLRKGNYS

- ▶ fragmentation table for charge state 5+
- ▶ specType=etd
- ▶ score=38.48
- ▶ F113279.dat
- ▶ query=q46077\_p1
- ▶ precursor=752.095800
- ▶ chargePrecursor=6
- ▶ itol=0.5

| AA    | c              | y              | z+1            | z#2            | z              | AA    |
|-------|----------------|----------------|----------------|----------------|----------------|-------|
| S[1]  | 30.221         | 902.310        | <b>899.106</b> | 0.806          | 898.905        | S[41] |
| G[2]  | 41.625         | 876.501        | <b>873.298</b> | 0.806          | <b>873.096</b> | G[40] |
| R[3]  | 72.846         | 805.097        | 801.893        | <b>062.095</b> | 801.692        | R[39] |
| G[4]  | 84.250         | <b>833.877</b> | 830.673        | 830.875        | 830.472        | G[38] |
| K[5]  | 109.869        | 822.473        | 819.269        | 819.470        | 819.067        | K[37] |
| Q[6]  | 135.481        | 796.854        | 793.650        | 793.851        | 793.448        | Q[36] |
| G[7]  | 146.685        | <b>771.242</b> | 768.038        | 768.240        | 767.837        | G[35] |
| G[8]  | 158.289        | 759.838        | 756.634        | 756.835        | 756.432        | G[34] |
| K[9]  | 183.908        | 748.833        | 745.230        | 745.431        | 745.028        | K[33] |
| A[10] | 198.116        | 722.814        | 719.611        | 719.812        | 719.409        | A[32] |
| R[11] | 229.336        | 708.607        | 705.403        | 705.605        | 705.202        | R[31] |
| A[12] | 243.543        | 677.387        | 674.183        | 674.385        | 673.981        | A[30] |
| K[13] | 269.162        | 663.179        | 659.976        | 660.177        | 659.774        | K[29] |
| A[14] | 283.370        | 637.960        | 634.357        | 634.559        | 634.155        | A[28] |
| K[15] | 308.989        | 623.753        | 620.149        | 620.351        | 619.948        | K[27] |
| T[16] | 329.198        | 597.734        | 594.530        | 594.732        | 594.329        | T[26] |
| R[17] | <b>360.418</b> | 577.524        | 574.321        | 574.522        | 574.119        | R[25] |
| S[18] | 377.825        | 546.304        | 543.100        | 543.302        | 542.899        | S[24] |
| S[19] | 399.211        | 528.886        | 525.684        | 525.886        | 525.482        | S[23] |
| R[20] | 426.451        | 511.491        | 508.288        | 508.489        | 508.086        | R[22] |
| A[21] | 440.659        | 480.271        | 477.067        | 477.269        | 476.866        | A[21] |
| G[22] | 452.063        | 466.064        | 462.860        | 463.061        | 462.658        | G[20] |
| L[23] | 474.680        | 494.659        | 451.456        | 451.657        | 451.254        | L[19] |
| Q[24] | 500.292        | 432.043        | 428.839        | 429.040        | 428.637        | Q[18] |
| F[25] | 529.705        | 406.831        | 403.227        | 403.429        | 403.026        | F[17] |
| P[26] | 549.116        | 377.017        | 373.813        | 374.015        | 373.612        | P[16] |
| V[27] | 568.530        | 357.607        | 354.403        | 354.604        | 354.201        | V[15] |
| G[28] | 589.334        | 337.793        | 334.589        | 334.791        | 334.388        | G[14] |
| R[29] | 611.554        | 326.389        | 323.185        | 323.386        | 322.983        | R[13] |
| V[30] | 631.368        | 295.168        | 291.965        | 292.166        | 291.763        | V[12] |
| H[31] | 658.780        | 275.355        | 272.151        | 272.353        | 271.949        | H[11] |
| R[32] | 690.000        | 247.943        | 244.739        | 244.941        | 244.538        | R[10] |
| L[33] | 712.617        | 216.723        | 213.519        | 213.721        | 213.317        | L[9]  |
| L[34] | 735.233        | 194.109        | 190.902        | 191.104        | 190.701        | L[8]  |
| R[35] | 766.454        | 171.489        | 168.283        | 168.487        | 168.084        | R[7]  |
| K[36] | 782.073        | 140.269        | 137.065        | 137.267        | 136.864        | K[6]  |
| G[37] | 803.877        | 114.650        | 111.446        | 111.648        | 111.245        | G[5]  |
| N[38] | 826.286        | 103.246        | 100.042        | 100.243        | 99.840         | N[4]  |
| V[39] | <b>858.898</b> | 80.437         | 77.233         | 77.435         | 77.032         | V[3]  |
| S[40] | <b>876.305</b> | 47.824         | 44.621         | 44.822         | 44.419         | S[2]  |
| E[41] | 902.113        | 30.418         | 27.214         | 27.416         | 27.013         | E[1]  |

sp | Q8CGP5 | H2A1F\_MOUSE

[Acetyl]SGRGKQGGKARAKAKTRSSRAGLQFPVGRVHRLLRKGNYS

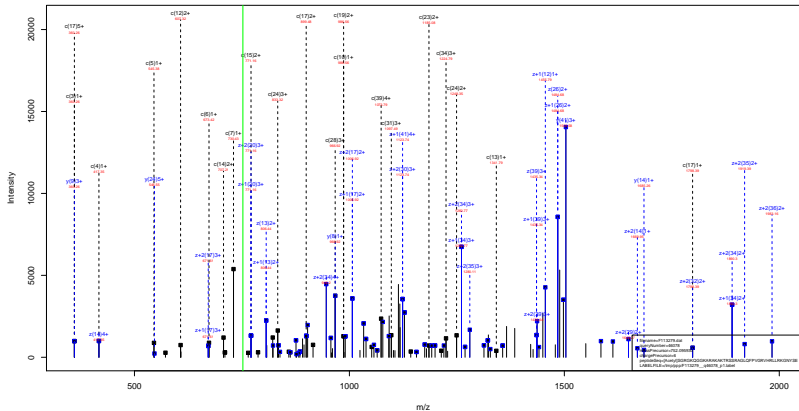

# sp | Q8CGP5 | H2A1F\_MOUSE

[Acetyl]SGRGKQGGKARAKAKTRSSRAGLQFPVGRVHRLLRKGNYS

- ▶ fragmentation table for charge state 1+
- ▶ specType=etd
- ▶ score=50.30
- ▶ F113279.dat
- ▶ query=q46078.p1
- ▶ precursor=752.095930
- ▶ chargePrecursor=6
- ▶ itol=0.5

| AA | c  | y               | z+1             | z+2             | z               | AA       |       |
|----|----|-----------------|-----------------|-----------------|-----------------|----------|-------|
| S  | 1  | 147.076         | 4507.921        | 4491.502        | 0.000           | 4490.484 | S[41] |
| G  | 2  | 204.068         | 4378.478        | 4362.459        | 0.000           | 4361.451 | G[40] |
| R  | 3  | <b>360.199</b>  | 4321.467        | 4305.438        | 4306.448        | 4304.439 | R[39] |
| G  | 4  | <b>417.220</b>  | 4185.355        | 4149.317        | 4150.345        | 4148.329 | G[38] |
| K  | 5  | <b>545.315</b>  | 4108.334        | 4062.315        | 4091.321        | 4091.307 | K[37] |
| Q  | 6  | <b>673.374</b>  | 3989.293        | 3964.250        | 3956.228        | 3963.211 | Q[36] |
| G  | 7  | <b>730.395</b>  | 3852.180        | 3836.162        | 3837.170        | 3835.154 | G[35] |
| G  | 8  | <b>787.417</b>  | 3795.159        | 3779.140        | 3780.148        | 3778.132 | G[34] |
| K  | 9  | <b>915.512</b>  | 3738.138        | 3722.119        | 3723.127        | 3721.111 | K[33] |
| A  | 10 | <b>966.549</b>  | 3610.043        | 3594.024        | 3595.032        | 3593.016 | A[32] |
| R  | 11 | <b>1142.650</b> | 3539.005        | 3522.987        | 3523.995        | 3521.979 | R[31] |
| A  | 12 | <b>1213.667</b> | 3382.904        | 3366.886        | 3367.893        | 3365.878 | A[30] |
| R  | 13 | <b>1341.782</b> | 3311.867        | 3295.848        | 3296.856        | 3294.840 | R[29] |
| A  | 14 | 1412.819        | 3183.772        | 3167.754        | 3168.761        | 3166.746 | A[28] |
| K  | 15 | 1540.914        | 3112.735        | 3096.716        | 3097.724        | 3095.709 | K[27] |
| T  | 16 | 1641.962        | 2984.640        | 2968.621        | 2969.629        | 2967.614 | T[26] |
| R  | 17 | <b>1798.063</b> | 2883.562        | 2867.574        | 2868.582        | 2866.566 | R[25] |
| S  | 18 | 1883.959        | 2727.491        | 2711.473        | 2712.480        | 2710.465 | S[24] |
| S  | 19 | 1972.127        | 2640.459        | 2624.441        | 2625.448        | 2623.433 | S[23] |
| R  | 20 | 2138.228        | 2553.427        | 2537.409        | 2538.416        | 2536.401 | R[22] |
| A  | 21 | 2199.205        | 2397.326        | 2381.307        | 2382.315        | 2380.300 | A[21] |
| G  | 22 | 2256.287        | 2336.289        | 2310.270        | 2311.278        | 2309.263 | G[20] |
| L  | 23 | 2369.371        | 2299.268        | 2283.249        | 2284.257        | 2282.241 | L[19] |
| Q  | 24 | 3007.429        | 2156.184        | 2140.165        | 2141.173        | 2139.157 | Q[18] |
| F  | 25 | 3644.488        | 2028.125        | 2012.106        | 2013.114        | 2011.099 | F[17] |
| P  | 26 | 2741.951        | 1881.057        | 1865.038        | 1866.046        | 1864.030 | P[16] |
| V  | 27 | 2860.619        | 1784.004        | 1767.985        | 1768.993        | 1766.977 | V[15] |
| G  | 28 | 2897.641        | <b>1684.935</b> | 1668.917        | <b>1669.924</b> | 1667.909 | G[14] |
| D  | 29 | 3613.742        | 1627.914        | 1611.895        | <b>1612.903</b> | 1610.888 | D[13] |
| R  | 30 | 3152.810        | 1471.811        | <b>1455.794</b> | 1456.802        | 1454.786 | R[12] |
| H  | 31 | 3289.869        | 1372.744        | <b>1356.726</b> | 1357.734        | 1355.718 | H[11] |
| R  | 32 | 3445.970        | 1235.685        | <b>1219.667</b> | 1220.675        | 1218.659 | R[10] |
| L  | 33 | 3559.054        | 1079.584        | 1063.566        | <b>1064.573</b> | 1062.558 | L[9]  |
| L  | 34 | 3672.138        | <b>966.500</b>  | 950.482         | 951.490         | 949.474  | L[8]  |
| T  | 35 | 3838.239        | 853.418         | 837.399         | <b>838.405</b>  | 836.389  | T[7]  |
| K  | 36 | 3956.334        | 697.315         | 681.296         | 682.304         | 680.289  | K[6]  |
| G  | 37 | 4013.356        | 569.220         | 553.201         | 554.209         | 552.194  | G[5]  |
| N  | 38 | 4127.399        | 512.199         | 496.180         | 497.188         | 495.172  | N[4]  |
| V  | 39 | 4290.462        | 398.150         | 382.131         | 383.145         | 381.129  | V[3]  |
| S  | 40 | 4377.494        | 235.062         | 219.074         | 220.082         | 218.066  | S[2]  |
| E  | 41 | 4406.537        | 148.000         | 132.042         | 133.050         | 131.034  | E[1]  |

# sp | Q8CGP5 | H2A1F\_MOUSE

[Acetyl]SGRGKQGGKARAKAKTRSSRAGLQFPVGRVHLLRKGNYSE

- ▶ fragmentation table for charge state 2+
- ▶ specType=etd
- ▶ score=50.30
- ▶ F113279.dat
- ▶ query=q46078.p1
- ▶ precursor=752.095930
- ▶ chargePrecursor=6
- ▶ itol=0.5

| AA | c               | y               | #s1             | #s2             | c               | AA    |
|----|-----------------|-----------------|-----------------|-----------------|-----------------|-------|
| S  | 74.062          | 2054.264        | 2266.255        | 8.804           | 2245.781        | S[41] |
| G  | 102.553         | 2189.743        | 2381.733        | 0.504           | 2181.220        | G[40] |
| R  | 180.603         | 2161.232        | 2153.233        | 2153.236        | 2152.710        | R[39] |
| G  | 209.114         | 2083.181        | 2075.172        | 2075.676        | 2074.660        | G[38] |
| K  | 273.181         | 2054.671        | 2046.661        | 2047.165        | 2046.157        | K[37] |
| G  | 337.194         | 1990.622        | 1982.614        | <b>1983.118</b> | 1982.110        | G[36] |
| G  | 385.703         | 1926.594        | 1918.584        | <b>1919.088</b> | 1918.080        | G[35] |
| G  | 394.212         | 1898.083        | <b>1899.074</b> | <b>1899.578</b> | 1898.570        | G[34] |
| K  | 458.260         | 1869.572        | 1861.563        | 1862.067        | 1861.059        | K[33] |
| A  | 493.778         | 1805.525        | 1797.516        | <b>1798.019</b> | 1797.012        | A[32] |
| R  | <b>571.829</b>  | 1770.008        | 1761.997        | 1762.501        | 1761.493        | R[31] |
| A  | <b>607.337</b>  | 1692.959        | 1684.949        | 1685.453        | 1684.444        | A[30] |
| R  | <b>671.395</b>  | 1656.437        | 1648.428        | <b>1648.932</b> | 1647.924        | R[29] |
| A  | <b>706.913</b>  | 1592.900        | 1584.890        | <b>1584.884</b> | 1583.876        | A[28] |
| K  | <b>770.961</b>  | 1556.871        | 1548.862        | 1549.366        | 1548.358        | K[27] |
| T  | <b>821.485</b>  | 1492.824        | <b>1484.814</b> | 1485.318        | <b>1484.310</b> | T[26] |
| R  | <b>899.535</b>  | 1442.800        | 1434.791        | 1435.294        | 1434.286        | R[25] |
| S  | 933.651         | 1384.249        | <b>1356.240</b> | <b>1356.744</b> | 1355.736        | S[24] |
| S  | <b>986.567</b>  | 1320.733        | <b>1312.724</b> | <b>1313.228</b> | 1312.220        | S[23] |
| R  | <b>1064.618</b> | 1277.217        | <b>1269.208</b> | 1269.712        | <b>1268.704</b> | R[22] |
| A  | 1100.136        | <b>1199.167</b> | <b>1191.157</b> | <b>1191.661</b> | 1190.653        | A[21] |
| G  | 1138.647        | 1153.648        | <b>1155.639</b> | <b>1156.143</b> | 1155.135        | G[20] |
| L  | <b>1185.189</b> | 1138.137        | 1127.128        | <b>1127.632</b> | 1126.624        | L[19] |
| Q  | <b>1249.218</b> | 1073.595        | 1070.586        | <b>1071.090</b> | 1070.082        | Q[18] |
| F  | 1322.753        | 1014.566        | <b>1006.557</b> | <b>1007.061</b> | 1006.053        | F[17] |
| F  | 1371.279        | 941.033         | 933.023         | 933.526         | 932.519         | F[16] |
| V  | 1420.811        | 892.506         | <b>884.496</b>  | <b>885.000</b>  | 883.992         | V[15] |
| G  | 1469.324        | 842.971         | <b>834.962</b>  | <b>835.466</b>  | 834.458         | G[14] |
| R  | 1527.874        | 814.461         | <b>806.451</b>  | <b>806.955</b>  | <b>805.947</b>  | R[13] |
| V  | 1576.909        | 736.410         | 728.401         | 728.905         | 727.897         | V[12] |
| H  | 1645.438        | 688.876         | 678.866         | 679.370         | 678.363         | H[11] |
| R  | 1723.489        | 618.346         | 610.337         | 610.841         | 609.833         | R[10] |
| L  | 1780.031        | 540.296         | 532.286         | 532.790         | 531.783         | L[9]  |
| L  | 1838.573        | 483.754         | 475.744         | 476.248         | 475.241         | L[8]  |
| R  | 1914.623        | 427.212         | 419.202         | 419.706         | 418.699         | R[7]  |
| K  | 1978.671        | 349.161         | 341.152         | 341.656         | 340.648         | K[6]  |
| G  | 2067.181        | 285.114         | 277.104         | 277.608         | 276.600         | G[5]  |
| N  | 2094.203        | 256.603         | 248.594         | 249.098         | 248.090         | N[4]  |
| V  | 2145.236        | 199.562         | 191.552         | 192.056         | 191.048         | V[3]  |
| S  | 2199.261        | 118.056         | 110.046         | 110.549         | 109.541         | S[2]  |
| E  | 2253.772        | 74.534          | 66.524          | 67.028          | 66.021          | E[1]  |

# sp | Q8CGP5 | H2A1F\_MOUSE

[Acetyl]SGRGKQGGKARAKAKTRSSRAGLQFPVGRVHRLLRKGNYS

- ▶ fragmentation table for charge state 3+
- ▶ specType=etd
- ▶ score=50.30
- ▶ F113279.dat
- ▶ query=q46078.p1
- ▶ precursor=752.095930
- ▶ chargePrecursor=6
- ▶ itol=0.5

| AA | c  | y               | #s1             | #s2             | #s              | AA              |       |
|----|----|-----------------|-----------------|-----------------|-----------------|-----------------|-------|
| S  | 1  | 489.607         | <b>1503.178</b> | <b>1497.839</b> | 0.872           | <b>1497.563</b> | S[41] |
| G  | 2  | 86.704          | 1460.184        | 1454.275        | 0.672           | 1454.482        | G[49] |
| R  | 3  | 1307.188        | <b>1441.157</b> | <b>1435.817</b> | <b>1436.153</b> | <b>1435.482</b> | R[30] |
| G  | 4  | 139.745         | 1389.123        | 1383.784        | 1384.420        | 1383.448        | G[38] |
| K  | 5  | 182.443         | 1370.110        | 1364.777        | 1365.113        | 1364.441        | K[37] |
| G  | 6  | 225.130         | <b>1327.418</b> | <b>1322.078</b> | <b>1322.414</b> | <b>1321.742</b> | G[36] |
| G  | 7  | 284.117         | 1294.785        | 1289.382        | 1289.728        | 1288.956        | G[35] |
| G  | 8  | 283.144         | 1285.725        | <b>1260.385</b> | <b>1260.721</b> | 1260.040        | G[34] |
| K  | 9  | 305.842         | 1246.717        | 1241.378        | 1241.714        | 1241.042        | K[33] |
| A  | 10 | 328.521         | 1204.010        | 1198.679        | <b>1199.015</b> | 1198.344        | A[32] |
| R  | 11 | 381.555         | 1180.240        | <b>1175.000</b> | <b>1175.336</b> | 1174.664        | R[31] |
| A  | 12 | 489.294         | <b>1128.306</b> | 1122.907        | <b>1123.303</b> | 1122.831        | A[30] |
| K  | 13 | 447.932         | 1104.627        | 1099.288        | 1099.624        | 1098.952        | K[29] |
| A  | 14 | 471.611         | 1061.929        | 1056.589        | <b>1056.925</b> | 1056.251        | A[28] |
| K  | 15 | 514.310         | <b>1038.250</b> | <b>1032.910</b> | <b>1033.246</b> | 1032.574        | K[27] |
| T  | 16 | 547.602         | 995.552         | <b>990.212</b>  | <b>990.548</b>  | <b>989.876</b>  | T[26] |
| R  | 17 | 608.626         | 961.869         | <b>956.529</b>  | <b>956.865</b>  | 956.191         | R[25] |
| S  | 18 | 629.919         | 909.835         | 904.436         | 904.837         | 904.166         | S[24] |
| S  | 19 | 658.047         | 880.825         | <b>875.485</b>  | <b>875.821</b>  | 875.149         | S[23] |
| R  | 20 | <b>710.081</b>  | 851.014         | 846.474         | 846.810         | 846.138         | R[22] |
| A  | 21 | 723.160         | 799.780         | 794.441         | 794.777         | 794.105         | A[21] |
| G  | 22 | 752.767         | 776.101         | <b>770.762</b>  | <b>771.098</b>  | 770.426         | G[20] |
| L  | 23 | 789.663         | 759.094         | 753.754         | 754.090         | 753.418         | L[19] |
| Q  | 24 | <b>833.148</b>  | 719.306         | 714.000         | 714.396         | 713.724         | Q[18] |
| F  | 25 | <b>882.171</b>  | 676.713         | <b>671.374</b>  | <b>671.710</b>  | 671.038         | F[17] |
| F  | 26 | 914.552         | 627.600         | 622.351         | 622.687         | 622.015         | F[16] |
| V  | 27 | 947.545         | 595.139         | 590.000         | 590.336         | 589.664         | V[15] |
| G  | 28 | <b>966.552</b>  | 562.317         | 556.977         | 557.313         | 556.641         | G[14] |
| R  | 29 | 1003.886        | 543.309         | 537.970         | 538.306         | 537.634         | R[13] |
| V  | 30 | <b>1051.608</b> | 490.276         | 485.038         | 486.272         | 485.600         | V[12] |
| H  | 31 | <b>1097.294</b> | 458.253         | 452.913         | 453.249         | 452.577         | H[11] |
| R  | 32 | 1149.328        | 412.967         | 407.227         | 407.563         | 406.891         | R[10] |
| L  | 33 | 1187.023        | <b>360.533</b>  | 355.193         | 355.529         | 354.857         | L[9]  |
| L  | 34 | <b>1224.718</b> | 322.384         | 317.044         | 317.380         | 316.708         | L[8]  |
| R  | 35 | 1225.173        | 285.144         | 279.804         | 280.140         | 279.468         | R[7]  |
| K  | 36 | 1319.450        | 233.110         | 227.770         | 228.106         | 227.434         | K[6]  |
| G  | 37 | 1338.457        | 190.412         | 185.072         | 185.408         | 184.736         | G[5]  |
| N  | 38 | 1376.471        | 171.404         | 166.065         | 166.401         | 165.729         | N[4]  |
| V  | 39 | 1436.826        | 133.390         | 128.051         | 128.386         | 127.715         | V[3]  |
| S  | 40 | 1459.836        | 99.136          | 93.796          | 94.132          | 93.460          | S[2]  |
| E  | 41 | 1502.850        | 50.025          | 44.685          | 45.021          | 44.349          | E[1]  |

# sp | Q8CGP5 | H2A1F\_MOUSE

[Acetyl]SGRGKQGGKARAKAKTRSSRAGLQFPVGRVHRLLRKGNYS

- ▶ fragmentation table for charge state 4+
- ▶ specType=etd
- ▶ score=50.30
- ▶ F113279.dat
- ▶ query=q46078.p1
- ▶ precursor=752.095930
- ▶ chargePrecursor=6
- ▶ itol=0.5

| AA |    | c               | m               | p               | #s=1            | #s=2            | #s    | AA  |
|----|----|-----------------|-----------------|-----------------|-----------------|-----------------|-------|-----|
| S  | 1  | 37.505          | <b>1127.636</b> | <b>1123.631</b> | 0.705           | <b>1123.370</b> | 0.541 | G40 |
| G  | 2  | 51.780          | 1035.375        | <b>1091.370</b> | 0.795           | 1002.115        | 0.469 | R30 |
| R  | 3  | 90.805          | 1081.120        | 1077.115        | <b>1077.367</b> | 1076.861        | R30   |     |
| G  | 4  | 109.001         | 1042.094        | 1038.090        | <b>1038.342</b> | 1037.835        | G38   |     |
| K  | 5  | 137.064         | 1027.839        | 1023.834        | 1024.086        | 1023.582        | K37   |     |
| G  | 6  | 169.099         | 995.915         | 991.911         | 992.062         | 991.559         | G36   |     |
| G  | 7  | 193.354         | 963.801         | 959.796         | 960.048         | 959.544         | G35   |     |
| G  | 8  | 197.610         | 949.545         | 945.541         | <b>945.792</b>  | 945.289         | G34   |     |
| K  | 9  | 239.633         | 935.290         | 931.285         | 931.537         | 931.033         | K33   |     |
| A  | 10 | 247.303         | <b>903.266</b>  | <b>899.261</b>  | <b>899.513</b>  | <b>899.009</b>  | A32   |     |
| R  | 11 | 286.418         | 895.507         | 891.502         | <b>891.754</b>  | 891.250         | R31   |     |
| A  | 12 | 304.197         | 868.482         | 864.477         | 864.729         | 864.225         | A30   |     |
| K  | 13 | 336.201         | 828.722         | 824.718         | 824.970         | 824.466         | K29   |     |
| A  | 14 | 353.960         | 796.699         | 792.694         | 792.946         | 792.442         | A28   |     |
| K  | 15 | 385.964         | 778.939         | 774.935         | 775.187         | 774.683         | K27   |     |
| T  | 16 | 411.246         | 746.915         | 742.911         | 743.163         | 742.659         | T26   |     |
| R  | 17 | 459.274         | 721.954         | 717.949         | 718.201         | 717.697         | R25   |     |
| S  | 18 | 472.609         | 692.629         | 688.624         | 688.876         | 688.372         | S24   |     |
| S  | 19 | 493.787         | 660.970         | 656.966         | 657.218         | 656.714         | S23   |     |
| R  | 20 | 532.613         | 639.112         | 635.108         | 635.360         | 634.856         | R22   |     |
| A  | 21 | 539.572         | 600.087         | 596.082         | 596.334         | 595.830         | A21   |     |
| G  | 22 | 564.827         | 582.329         | 578.323         | 578.575         | 578.071         | G20   |     |
| L  | 23 | 593.098         | 568.072         | 564.068         | 564.320         | 563.816         | L19   |     |
| Q  | 24 | 625.113         | 539.803         | 535.797         | 536.049         | 535.545         | Q18   |     |
| F  | 25 | 661.880         | 507.797         | 503.792         | 504.044         | 503.540         | F17   |     |
| F  | 26 | 698.143         | 471.020         | 467.015         | 467.267         | 466.763         | F16   |     |
| V  | 27 | <b>710.910</b>  | 446.756         | 442.752         | 443.004         | 442.500         | V15   |     |
| G  | 28 | 752.588         | 421.989         | 417.985         | 418.237         | <b>417.733</b>  | G14   |     |
| K  | 29 | <b>764.191</b>  | 389.734         | 385.729         | 385.981         | 385.477         | K13   |     |
| V  | 30 | 788.958         | 368.709         | 364.704         | 364.956         | 364.452         | V12   |     |
| H  | 31 | 823.223         | 343.942         | 339.937         | 340.189         | 339.685         | H11   |     |
| R  | 32 | <b>862.248</b>  | 309.677         | 305.672         | 305.924         | 305.420         | R10   |     |
| L  | 33 | 890.519         | 270.652         | 266.647         | 266.899         | 266.395         | L9    |     |
| L  | 34 | 918.969         | 242.361         | 238.356         | 238.608         | 238.104         | L8    |     |
| R  | 35 | 957.815         | 214.110         | 210.105         | 210.357         | 209.853         | R7    |     |
| K  | 36 | <b>989.839</b>  | 175.084         | 171.080         | 171.332         | 170.828         | K6    |     |
| G  | 37 | 1064.094        | 143.061         | 139.056         | 139.308         | 138.804         | G5    |     |
| N  | 38 | 1032.605        | 128.805         | 124.800         | 125.052         | 124.548         | N4    |     |
| V  | 39 | <b>1073.371</b> | 100.294         | 96.289          | 96.541          | 96.037          | V3    |     |
| S  | 40 | 1069.439        | 99.529          | 95.524          | 95.776          | 95.272          | S2    |     |
| E  | 41 | 1127.590        | 97.771          | 93.766          | 94.018          | 93.514          | E1    |     |

# sp | Q8CGP5 | H2A1F\_MOUSE

[Acetyl]SGRGKQGGKARAKAKTRSSRAGLQFPVGRVHLLRKGNYSE

- ▶ fragmentation table for charge state 5+
- ▶ specType=etd
- ▶ score=50.30
- ▶ F113279.dat
- ▶ query=q46078\_p1
- ▶ precursor=752.095930
- ▶ chargePrecursor=6
- ▶ itol=0.5

| AA    | c              | y              | z+1            | z+2            | z       | AA    |
|-------|----------------|----------------|----------------|----------------|---------|-------|
| S[1]  | 30.221         | 902.310        | <b>899.106</b> | 0.806          | 898.905 | S[41] |
| G[2]  | 41.625         | <b>876.501</b> | 873.290        | 0.806          | 873.096 | G[40] |
| R[3]  | 72.846         | 865.097        | 861.893        | <b>862.095</b> | 861.692 | R[39] |
| G[4]  | 84.250         | 833.877        | 830.673        | 830.875        | 830.472 | G[38] |
| K[5]  | 109.869        | <b>822.473</b> | 819.269        | 819.470        | 819.067 | K[37] |
| Q[6]  | 135.481        | 796.854        | 793.650        | 793.851        | 793.448 | Q[36] |
| G[7]  | 146.885        | <b>771.242</b> | 768.038        | 768.240        | 767.837 | G[35] |
| G[8]  | 158.289        | 759.635        | 756.434        | 756.635        | 756.232 | G[34] |
| K[9]  | 183.908        | 748.431        | 745.230        | 745.431        | 745.028 | K[33] |
| A[10] | 198.116        | 722.814        | 719.611        | 719.812        | 719.409 | A[32] |
| R[11] | 229.136        | 708.607        | 705.403        | 705.605        | 705.202 | R[31] |
| A[12] | 243.543        | 677.387        | 674.183        | 674.385        | 673.981 | A[30] |
| K[13] | 269.162        | 663.179        | 659.976        | 660.177        | 659.774 | K[29] |
| A[14] | 283.370        | 637.560        | 634.357        | 634.558        | 634.155 | A[28] |
| K[15] | 308.989        | 623.353        | 620.149        | 620.351        | 619.948 | K[27] |
| T[16] | 329.198        | 597.734        | 594.530        | 594.732        | 594.329 | T[26] |
| R[17] | <b>360.418</b> | 577.524        | 574.321        | 574.522        | 574.119 | R[25] |
| S[18] | 377.825        | <b>546.304</b> | 543.100        | 543.302        | 542.899 | S[24] |
| S[19] | 399.231        | 528.696        | 525.694        | 525.896        | 525.492 | S[23] |
| R[20] | 426.451        | 511.491        | 508.288        | 508.489        | 508.086 | R[22] |
| A[21] | 440.659        | 480.271        | 477.067        | 477.269        | 476.866 | A[21] |
| G[22] | 452.063        | 466.064        | 462.860        | 463.061        | 462.658 | G[20] |
| L[23] | 474.680        | 454.659        | 451.456        | 451.657        | 451.254 | L[19] |
| Q[24] | 500.292        | 432.043        | 428.839        | 429.040        | 428.637 | Q[18] |
| F[25] | 529.705        | 406.431        | 403.227        | 403.429        | 403.026 | F[17] |
| P[26] | 549.116        | 377.017        | 373.813        | 374.015        | 373.612 | P[16] |
| V[27] | 568.930        | 357.607        | 354.403        | 354.604        | 354.201 | V[15] |
| G[28] | 589.334        | 337.793        | 334.589        | 334.791        | 334.388 | G[14] |
| K[29] | 611.354        | 326.389        | 323.185        | 323.386        | 322.983 | K[13] |
| V[30] | 631.368        | 295.155        | 291.965        | 292.166        | 291.763 | V[12] |
| H[31] | 658.780        | 275.355        | 272.151        | 272.353        | 271.949 | H[11] |
| R[32] | 690.000        | 247.943        | 244.739        | 244.941        | 244.538 | R[10] |
| L[33] | 712.617        | 216.723        | 213.519        | 213.721        | 213.317 | L[9]  |
| L[34] | 735.233        | 194.106        | 190.902        | 191.104        | 190.701 | L[8]  |
| R[35] | 766.454        | 171.489        | 168.285        | 168.487        | 168.084 | R[7]  |
| K[36] | 792.073        | 140.269        | 137.065        | 137.267        | 136.864 | K[6]  |
| G[37] | 803.477        | 114.650        | 111.446        | 111.648        | 111.245 | G[5]  |
| H[38] | 829.296        | 103.245        | 100.042        | 100.243        | 99.840  | H[4]  |
| V[39] | <b>858.898</b> | 80.431         | 77.233         | 77.435         | 77.032  | V[3]  |
| S[40] | 876.305        | 47.824         | 44.621         | 44.822         | 44.419  | S[2]  |
| E[41] | 902.113        | 30.418         | 27.214         | 27.416         | 27.013  | E[1]  |





# sp | P27661 | H2AX\_MOUSE

[Acetyl]SGRGG<sup>Acetyl</sup><sub>42.01</sub> TGGKARAKAKSRSSRAGLQFPVGRVHRLLRKGHYAE

- ▶ fragmentation table for charge state 1+
- ▶ specType=etd
- ▶ score=52.26
- ▶ F113279.dat
- ▶ query=q46117.p1
- ▶ precursor=753.428840
- ▶ chargePrecursor=6
- ▶ itol=0.5

| AA | c  | y               | z+1      | z+2             | z               | AA              |       |
|----|----|-----------------|----------|-----------------|-----------------|-----------------|-------|
| S  | 1  | 147.076         | 4515.526 | 4499.507        | 0.000           | 4498.490        | S[41] |
| G  | 2  | 204.098         | 4386.483 | 4370.464        | 0.000           | 4369.457        | G[40] |
| R  | 3  | <b>360.199</b>  | 4329.462 | 4313.443        | 4314.451        | 4312.435        | R[39] |
| G  | 4  | <b>417.220</b>  | 4173.361 | 4157.342        | 4158.350        | 4156.334        | G[38] |
| K  | 5  | <b>587.326</b>  | 4116.139 | 4100.120        | 4101.128        | 4099.113        | K[37] |
| T  | 6  | <b>688.374</b>  | 3946.234 | 3930.215        | 3931.223        | 3929.207        | T[36] |
| G  | 7  | <b>745.395</b>  | 3845.085 | 3829.066        | 3830.075        | 3828.059        | G[35] |
| G  | 8  | 802.417         | 3788.164 | 3772.145        | 3773.153        | 3771.138        | G[34] |
| K  | 9  | 830.512         | 3731.143 | 3715.124        | 3716.132        | 3714.116        | K[33] |
| A  | 10 | <b>1001.549</b> | 3603.048 | 3587.029        | 3588.037        | 3586.021        | A[32] |
| R  | 11 | 1167.650        | 3532.011 | 3515.992        | 3517.000        | 3514.984        | R[31] |
| A  | 12 | <b>1228.687</b> | 3375.906 | 3359.887        | 3360.895        | 3358.880        | A[30] |
| R  | 13 | 1356.782        | 3304.873 | 3288.854        | 3289.862        | 3287.846        | R[29] |
| A  | 14 | 1427.819        | 3176.778 | 3160.759        | 3161.767        | 3159.751        | A[28] |
| K  | 15 | <b>1555.914</b> | 3105.741 | 3089.722        | 3090.730        | 3088.714        | K[27] |
| S  | 16 | 1642.946        | 2977.646 | 2961.627        | 2962.635        | 2960.619        | S[26] |
| R  | 17 | 1709.047        | 2890.614 | 2874.595        | 2875.603        | 2873.587        | R[25] |
| S  | 18 | 1889.079        | 2734.519 | 2718.500        | 2719.508        | 2717.492        | S[24] |
| S  | 19 | 1973.111        | 2647.480 | 2631.461        | 2632.470        | 2630.454        | S[23] |
| R  | 20 | 2129.212        | 2560.443 | 2544.424        | 2545.432        | 2543.416        | R[22] |
| A  | 21 | 2209.249        | 2404.347 | 2388.328        | 2389.336        | 2387.321        | A[21] |
| G  | 22 | 2257.271        | 2313.310 | 2317.291        | 2318.299        | 2316.284        | G[20] |
| L  | 23 | 2310.285        | 2276.289 | 2260.270        | 2261.278        | 2259.263        | L[19] |
| Q  | 24 | 2408.413        | 2163.205 | 2147.186        | 2148.194        | 2146.179        | Q[18] |
| F  | 25 | 2643.482        | 2085.149 | 2018.121        | 2020.136        | 2018.120        | F[17] |
| F  | 26 | 2742.535        | 1888.078 | 1872.059        | 1873.067        | 1871.051        | F[16] |
| V  | 27 | 2841.603        | 1791.025 | 1775.006        | 1776.014        | 1773.998        | V[15] |
| G  | 28 | 2898.625        | 1691.956 | 1675.938        | 1676.946        | 1674.930        | G[14] |
| R  | 29 | 3054.726        | 1634.930 | <b>1618.916</b> | 1619.924        | 1617.908        | R[13] |
| V  | 30 | 3153.784        | 1478.834 | 1462.815        | 1463.823        | 1461.807        | V[12] |
| H  | 31 | 3290.853        | 1370.765 | 1363.747        | 1364.755        | 1362.739        | H[11] |
| R  | 32 | 3446.954        | 1242.707 | 1226.688        | 1227.696        | <b>1225.680</b> | R[10] |
| L  | 33 | 3560.038        | 1096.605 | 1070.587        | <b>1071.595</b> | 1069.579        | L[9]  |
| L  | 34 | 3673.122        | 873.521  | <b>957.503</b>  | <b>958.510</b>  | 956.495         | L[8]  |
| R  | 35 | 3829.273        | 696.437  | 443             | 697.445         | 695.430         | R[7]  |
| K  | 36 | 3957.318        | 704.330  | <b>688.317</b>  | 689.325         | 687.310         | K[6]  |
| G  | 37 | 4014.340        | 576.241  | 560.221         | 561.230         | 559.215         | G[5]  |
| H  | 38 | 4151.399        | 519.220  | 503.201         | 504.209         | 502.193         | H[4]  |
| V  | 39 | 4314.462        | 382.161  | 366.143         | 367.150         | 365.134         | V[3]  |
| A  | 40 | 4485.499        | 219.098  | 203.079         | 204.087         | 202.071         | A[2]  |
| E  | 41 | 4514.542        | 148.060  | 132.043         | 133.050         | 131.034         | E[1]  |

# sp | P27661 | H2AX\_MOUSE

[Acetyl]SGRGRK<sup>Acetyl</sup><sub>42.01</sub> TGGKARAKAKSRSSRAGLQFPVGRVHRLLRKGHYAE

- ▶ fragmentation table for charge state 2+
- ▶ specType=etd
- ▶ score=52.26
- ▶ F113279.dat
- ▶ query=q46117.p1
- ▶ precursor=753.428840
- ▶ chargePrecursor=6
- ▶ itol=0.5

| AA | c  | y               | z+1            | z+2             | z               | AA              |       |
|----|----|-----------------|----------------|-----------------|-----------------|-----------------|-------|
| S  | 1  | 74.042          | 2758.266       | 2750.257        | 0.504           | 2340.753        | S[41] |
| G  | 2  | 102.563         | 2191.745       | 2185.736        | 0.504           | 2185.232        | G[40] |
| R  | 3  | 180.603         | 2195.734       | 2157.225        | 2157.730        | 2156.721        | R[39] |
| G  | 4  | 209.114         | 2087.184       | 2079.175        | 2079.678        | 2078.671        | G[38] |
| K  | 5  | 204.167         | 2058.673       | 2050.664        | 2051.168        | 2050.160        | K[37] |
| T  | 6  | 384.690         | 1873.628       | 1865.611        | 1866.115        | 1865.107        | T[36] |
| G  | 7  | 373.201         | 1823.067       | 1815.058        | <b>1915.591</b> | 1914.582        | G[35] |
| G  | 8  | 401.712         | 1894.585       | <b>1886.576</b> | <b>1887.080</b> | 1886.073        | G[34] |
| K  | 9  | 465.759         | 1866.075       | 1858.066        | 1858.570        | 1857.562        | K[33] |
| A  | 10 | 501.278         | 1802.028       | 1794.018        | 1794.522        | 1793.514        | A[32] |
| R  | 11 | 579.259         | 1756.509       | 1748.500        | 1749.004        | 1747.996        | R[31] |
| A  | 12 | <b>614.847</b>  | 1698.459       | 1690.449        | <b>1688.953</b> | 1687.945        | A[30] |
| R  | 13 | <b>678.895</b>  | 1652.940       | <b>1644.931</b> | <b>1645.435</b> | 1644.427        | R[29] |
| A  | 14 | <b>714.413</b>  | 1588.892       | <b>1580.883</b> | <b>1581.387</b> | 1580.379        | A[28] |
| K  | 15 | <b>778.461</b>  | 1503.374       | 1545.365        | 1546.868        | 1544.861        | K[27] |
| S  | 16 | <b>821.977</b>  | 1489.326       | <b>1481.317</b> | 1481.821        | <b>1480.813</b> | S[26] |
| R  | 17 | <b>900.627</b>  | 1445.810       | <b>1437.801</b> | <b>1438.305</b> | 1437.297        | R[25] |
| S  | 18 | 943.923         | 1309.760       | <b>1355.750</b> | <b>1308.254</b> | 1309.246        | S[24] |
| S  | 19 | 987.059         | 1324.244       | <b>1316.234</b> | <b>1316.738</b> | 1315.731        | S[23] |
| R  | 20 | <b>1065.110</b> | 1280.728       | <b>1272.718</b> | <b>1273.222</b> | 1272.215        | R[22] |
| A  | 21 | 1109.626        | 1202.677       | <b>1194.668</b> | <b>1195.172</b> | 1194.164        | A[21] |
| G  | 22 | 1129.139        | 1167.159       | <b>1159.149</b> | 1159.653        | <b>1158.645</b> | G[20] |
| L  | 23 | 1185.801        | 1138.640       | <b>1130.630</b> | 1131.134        | <b>1130.135</b> | L[19] |
| Q  | 24 | <b>1249.710</b> | 1082.106       | 1074.096        | 1074.601        | 1073.593        | Q[18] |
| F  | 25 | 1213.248        | 1018.077       | <b>1010.067</b> | <b>1010.571</b> | 1009.563        | F[17] |
| P  | 26 | 1371.771        | <b>944.542</b> | 936.533         | 937.037         | 936.029         | P[16] |
| V  | 27 | 1421.305        | 896.016        | 888.007         | 888.511         | 887.503         | V[15] |
| G  | 28 | <b>1449.816</b> | 846.482        | <b>838.473</b>  | <b>838.976</b>  | 837.969         | G[14] |
| D  | 29 | 1572.866        | 817.971        | <b>809.962</b>  | <b>810.466</b>  | 809.458         | D[13] |
| K  | 30 | 1577.401        | 739.921        | 731.911         | 732.415         | 731.407         | K[12] |
| H  | 31 | 1645.930        | 690.385        | 682.377         | <b>682.881</b>  | 681.873         | H[11] |
| R  | 32 | 1723.981        | 611.857        | <b>613.848</b>  | <b>614.351</b>  | 613.344         | R[10] |
| L  | 33 | 1780.523        | 543.806        | 535.797         | 536.301         | 535.293         | L[9]  |
| L  | 34 | 1837.065        | 487.264        | 479.255         | 479.759         | 478.751         | L[8]  |
| R  | 35 | 1813.315        | 438.722        | 430.713         | 431.217         | 429.209         | R[7]  |
| K  | 36 | 1979.163        | 352.672        | 344.662         | 345.166         | 344.158         | K[6]  |
| G  | 37 | 2007.674        | 288.624        | 280.615         | 281.119         | 280.111         | G[5]  |
| H  | 38 | 2076.203        | 260.114        | 252.104         | 252.608         | 251.600         | H[4]  |
| V  | 39 | 2157.735        | 191.984        | 183.975         | 184.479         | 183.071         | V[3]  |
| A  | 40 | 2193.251        | 110.052        | 102.043         | 102.547         | 101.539         | A[2]  |
| E  | 41 | 2257.774        | 74.534         | 66.525          | 67.028          | 66.021          | E[1]  |

# sp | P27661 | H2AX\_MOUSE

[Acetyl]SGRGRK<sup>Acetyl</sup><sub>42.01</sub> TGGKARAKAKSRSSRAGLQFPVGRVHLLLRKGHYAE

- ▶ fragmentation table for charge state 3+
- ▶ specType=etd
- ▶ score=52.26
- ▶ F113279.dat
- ▶ query=q46117.p1
- ▶ precursor=753.428840
- ▶ chargePrecursor=6
- ▶ itol=0.5

| AA | c  | y               | #±1             | #±2             | z               | AA              |       |
|----|----|-----------------|-----------------|-----------------|-----------------|-----------------|-------|
| S  | 1  | 48.697          | 1508.347        | <b>1500.507</b> | 4.872           | 1500.177        | S[41] |
| G  | 2  | 86.704          | 1462.833        | 1457.453        | 0.672           | 1457.157        | G[49] |
| R  | 3  | 150.718         | 1443.825        | <b>1438.486</b> | <b>1438.822</b> | <b>1438.150</b> | R[30] |
| G  | 4  | 159.745         | 1391.792        | 1386.452        | <b>1386.788</b> | 1386.110        | G[38] |
| K  | 5  | 196.447         | 1372.785        | 1367.445        | 1367.781        | 1367.109        | K[37] |
| T  | 6  | 230.229         | 1316.081        | <b>1310.743</b> | <b>1311.079</b> | 1310.401        | T[36] |
| G  | 7  | 269.137         | 1262.850        | <b>1277.061</b> | <b>1277.397</b> | 1276.720        | G[35] |
| G  | 8  | 268.144         | 1263.903        | 1258.053        | 1258.389        | 1257.717        | G[34] |
| K  | 9  | 310.842         | 1244.388        | <b>1239.046</b> | <b>1239.382</b> | 1238.710        | K[33] |
| A  | 10 | 334.521         | 1201.688        | 1196.348        | <b>1196.684</b> | 1196.012        | A[32] |
| R  | 11 | 366.555         | 1178.008        | <b>1172.669</b> | <b>1173.005</b> | 1172.333        | R[31] |
| A  | 12 | 410.234         | <b>1125.975</b> | 1120.635        | 1120.971        | 1120.299        | A[30] |
| R  | 13 | 452.932         | 1102.256        | 1096.958        | <b>1097.292</b> | 1096.620        | R[29] |
| A  | 14 | 496.611         | 1059.597        | 1054.258        | <b>1054.594</b> | 1053.922        | A[28] |
| K  | 15 | 519.309         | 1035.918        | <b>1030.579</b> | <b>1030.915</b> | <b>1030.243</b> | K[27] |
| S  | 16 | 548.320         | 993.220         | <b>987.880</b>  | <b>988.216</b>  | <b>987.545</b>  | S[26] |
| R  | 17 | 606.254         | 984.200         | <b>958.870</b>  | <b>959.206</b>  | <b>958.534</b>  | R[25] |
| S  | 18 | 628.366         | 912.176         | 906.836         | 907.172         | 906.500         | S[24] |
| S  | 19 | 658.375         | <b>883.165</b>  | <b>877.825</b>  | <b>878.161</b>  | 877.489         | S[23] |
| R  | 20 | 710.400         | 854.154         | <b>848.815</b>  | <b>849.151</b>  | <b>848.479</b>  | R[22] |
| A  | 21 | 734.088         | 802.121         | 796.781         | 797.117         | 796.445         | A[21] |
| G  | 22 | 753.095         | <b>778.442</b>  | 773.102         | 773.438         | 772.766         | G[20] |
| L  | 23 | 795.798         | 756.134         | 750.793         | 751.129         | 750.457         | L[19] |
| G  | 24 | <b>833.476</b>  | 721.740         | 716.400         | 716.736         | 716.064         | G[18] |
| F  | 25 | 882.409         | <b>679.054</b>  | 673.714         | 674.050         | 673.378         | F[17] |
| F  | 26 | 914.850         | 630.031         | 624.691         | 625.027         | 624.355         | F[16] |
| V  | 27 | 947.873         | 597.680         | 592.340         | 592.676         | 592.004         | V[15] |
| G  | 28 | <b>966.880</b>  | 564.657         | 559.317         | 559.653         | 558.981         | G[14] |
| R  | 29 | 1015.813        | 545.656         | 540.316         | 540.652         | 539.980         | R[13] |
| V  | 30 | <b>1051.936</b> | 493.616         | 488.277         | 488.613         | 487.941         | V[12] |
| H  | 31 | <b>1097.823</b> | 460.593         | 455.254         | 455.590         | 454.918         | H[11] |
| R  | 32 | 1149.656        | 414.907         | 409.567         | 409.903         | 409.232         | R[10] |
| L  | 33 | 1187.353        | 362.873         | 357.534         | 357.870         | 357.198         | L[9]  |
| L  | 34 | <b>1225.046</b> | 328.179         | 318.839         | 319.175         | 318.503         | L[8]  |
| R  | 35 | <b>1277.079</b> | 287.484         | 282.144         | 282.480         | 281.808         | R[7]  |
| K  | 36 | 1319.778        | 235.450         | 230.111         | 230.447         | 229.775         | K[6]  |
| G  | 37 | 1338.785        | 192.752         | 187.412         | 187.748         | 187.076         | G[5]  |
| H  | 38 | 1394.471        | 173.745         | 168.405         | 168.741         | 168.069         | H[4]  |
| V  | 39 | <b>1438.826</b> | 128.098         | 122.758         | 123.094         | 122.422         | V[3]  |
| A  | 40 | 1448.265        | 73.304          | 68.384          | 68.720          | 68.048          | A[2]  |
| E  | 41 | 1505.519        | 50.025          | 44.685          | 45.021          | 44.349          | E[1]  |

# sp | P27661 | H2AX\_MOUSE

[Acetyl]SGRGRK<sup>Acetyl</sup><sub>42.01</sub> TGGKARAKAKSRSSRAGLQFPVGRVHLLLRKGHYAE

- ▶ fragmentation table for charge state 4+
- ▶ specType=etd
- ▶ score=52.26
- ▶ F113279.dat
- ▶ query=q46117.p1
- ▶ precursor=753.428840
- ▶ chargePrecursor=6
- ▶ itol=0.5

| AA    | c               | y               | z+1             | z+2             | z              | AA    |
|-------|-----------------|-----------------|-----------------|-----------------|----------------|-------|
| S[1]  | 37.525          | 1129.637        | <b>1125.632</b> | 0.755           | 1125.360       | S[41] |
| G[2]  | 51.780          | <b>1097.376</b> | 1093.372        | 0.755           | 1093.120       | G[40] |
| R[3]  | 90.805          | 1083.121        | 1079.116        | <b>1079.368</b> | 1078.864       | R[30] |
| G[4]  | 105.061         | 1044.090        | 1040.091        | 1040.343        | 1039.839       | G[38] |
| K[5]  | 147.507         | 1029.940        | 1025.936        | 1026.087        | 1025.584       | K[37] |
| T[6]  | 172.889         | <b>987.314</b>  | 983.309         | 983.561         | 983.057        | T[36] |
| G[7]  | 187.104         | 952.056         | <b>958.047</b>  | <b>958.299</b>  | <b>957.795</b> | G[35] |
| G[8]  | 201.360         | 947.797         | <b>943.792</b>  | <b>944.044</b>  | 943.540        | G[34] |
| K[9]  | 233.383         | 933.541         | 929.537         | 929.789         | 929.285        | K[33] |
| A[10] | 251.143         | 901.517         | 897.513         | 897.765         | 897.261        | A[32] |
| R[11] | 290.168         | 881.758         | 879.753         | <b>880.005</b>  | 879.502        | R[31] |
| A[12] | 307.827         | 844.733         | 840.728         | 840.980         | 840.476        | A[30] |
| R[13] | 339.951         | 825.974         | 822.969         | 823.221         | <b>822.717</b> | R[29] |
| A[14] | 357.710         | 794.950         | 790.945         | 791.197         | 790.693        | A[28] |
| K[15] | 389.734         | 777.191         | 773.186         | 773.438         | 772.934        | K[27] |
| S[16] | 411.492         | <b>745.167</b>  | 741.162         | 741.414         | 740.910        | S[26] |
| R[17] | 450.517         | 721.400         | 719.406         | 719.658         | 719.154        | R[25] |
| S[18] | 472.276         | 684.384         | 680.379         | 680.631         | 680.127        | S[24] |
| S[19] | 494.033         | 662.626         | 658.621         | 658.873         | 658.369        | S[23] |
| R[20] | 533.059         | 640.868         | 636.863         | 637.115         | 636.611        | R[22] |
| A[21] | 550.818         | 601.842         | 597.837         | 598.090         | 597.586        | A[21] |
| G[22] | 565.073         | 584.083         | <b>580.078</b>  | <b>580.330</b>  | 579.826        | G[20] |
| L[23] | 603.334         | 569.826         | 565.821         | 566.073         | 565.571        | L[19] |
| Q[24] | 625.359         | 541.557         | 537.552         | 537.804         | 537.300        | Q[19] |
| F[25] | 662.126         | 509.542         | 505.537         | 505.789         | 505.285        | F[17] |
| P[26] | 686.389         | 472.775         | 468.770         | 469.022         | 468.518        | P[16] |
| V[27] | 711.156         | 448.512         | 444.507         | 444.759         | 444.255        | V[15] |
| G[28] | 725.412         | 423.745         | 419.740         | 419.992         | 419.488        | G[14] |
| D[29] | 764.437         | 400.488         | 405.483         | 405.735         | 405.231        | D[13] |
| V[30] | 789.204         | 370.469         | 366.464         | 366.717         | 366.213        | V[12] |
| H[31] | 823.469         | 345.097         | 341.092         | 341.344         | 341.440        | H[11] |
| R[32] | 862.494         | 311.432         | 307.427         | 307.679         | 307.175        | R[10] |
| L[33] | 890.705         | 272.407         | 268.402         | 268.654         | 268.150        | L[9]  |
| L[34] | 919.036         | 244.136         | 240.131         | 240.383         | 239.879        | L[8]  |
| H[35] | <b>938.061</b>  | 215.865         | 211.860         | 212.112         | 211.608        | H[7]  |
| K[36] | 990.085         | 178.940         | 172.935         | 173.087         | 172.583        | K[6]  |
| G[37] | 1004.340        | 144.816         | 140.811         | 141.063         | 140.559        | G[5]  |
| H[38] | 1038.605        | 130.560         | 126.556         | 126.808         | 126.304        | H[4]  |
| V[39] | <b>1079.371</b> | 96.290          | 92.291          | 92.543          | 92.039         | V[3]  |
| A[40] | <b>1097.130</b> | 55.530          | 51.525          | 51.777          | 51.273         | A[2]  |
| E[41] | 1129.391        | 37.771          | 33.766          | 34.018          | 33.514         | E[1]  |

# sp | P27661 | H2AX\_MOUSE

[Acetyl]SGRGRK<sup>Acetyl</sup><sub>42.01</sub> TGGKARAKAKSRSSRAGLQFPVGRVHLLLRKGHYAE

- ▶ fragmentation table for charge state 5+
- ▶ specType=etd
- ▶ score=52.26
- ▶ F113279.dat
- ▶ query=q46117\_p1
- ▶ precursor=753.428840
- ▶ chargePrecursor=6
- ▶ itol=0.5

| AA    | c              | y              | z+1            | z#2            | z              | AA    |
|-------|----------------|----------------|----------------|----------------|----------------|-------|
| S[1]  | 30.221         | <b>903.911</b> | <b>900.707</b> | 0.806          | <b>900.506</b> | S[41] |
| G[2]  | 41.625         | <b>878.102</b> | 874.899        | 0.806          | 874.697        | G[40] |
| R[3]  | 72.846         | 866.698        | <b>863.494</b> | <b>863.696</b> | 863.293        | R[39] |
| G[4]  | 84.250         | 835.478        | 832.274        | 832.476        | 832.073        | G[38] |
| K[5]  | 118.271        | 804.074        | 803.870        | 803.071        | 800.668        | K[37] |
| T[6]  | 138.481        | 790.053        | 786.849        | 787.050        | 786.647        | T[36] |
| G[7]  | 149.685        | 769.843        | 766.639        | 766.841        | 766.438        | G[35] |
| G[8]  | 161.289        | 758.439        | 755.235        | 755.437        | 755.033        | G[34] |
| K[9]  | 188.908        | 747.034        | 743.831        | 744.032        | 743.629        | K[33] |
| A[10] | 201.118        | 721.415        | 718.212        | 718.413        | 718.010        | A[32] |
| R[11] | 232.336        | 707.205        | <b>704.004</b> | 704.206        | <b>703.803</b> | R[31] |
| A[12] | 246.543        | 675.988        | 672.784        | 672.986        | 672.582        | A[30] |
| K[13] | 272.162        | 661.780        | 658.577        | 658.778        | 658.375        | K[29] |
| A[14] | 286.370        | 636.161        | 632.958        | 633.159        | 632.756        | A[28] |
| K[15] | 311.989        | 621.954        | 618.750        | 618.952        | 618.549        | K[27] |
| S[16] | 329.395        | 596.335        | 593.131        | 593.333        | 592.930        | S[26] |
| R[17] | <b>360.615</b> | 578.929        | 575.725        | 575.926        | 575.523        | R[25] |
| S[18] | 378.022        | 547.708        | 544.503        | 544.706        | 544.303        | S[24] |
| S[19] | 399.428        | 530.302        | 527.099        | 527.300        | 526.897        | S[23] |
| R[20] | 426.648        | 512.895        | 509.692        | 509.893        | 509.490        | R[22] |
| A[21] | 440.856        | 481.675        | 478.472        | 478.673        | 478.270        | A[21] |
| G[22] | 452.260        | 467.468        | 464.264        | 464.466        | 464.063        | G[20] |
| L[23] | 474.877        | 456.064        | 452.860        | 453.061        | 452.658        | L[19] |
| Q[24] | 500.489        | 433.447        | 430.243        | 430.445        | 430.041        | Q[18] |
| F[25] | 529.902        | 407.835        | 404.631        | 404.833        | 404.430        | F[17] |
| P[26] | 549.313        | 378.421        | 375.218        | 375.419        | 375.016        | P[16] |
| V[27] | 559.126        | 359.011        | 355.807        | 356.009        | 355.605        | V[15] |
| G[28] | <b>580.531</b> | 339.191        | 335.987        | 336.189        | 335.782        | G[14] |
| R[29] | 611.751        | 327.793        | 324.589        | 324.791        | 324.388        | R[13] |
| V[30] | 631.565        | 296.573        | 293.369        | 293.570        | 293.167        | V[12] |
| H[31] | 658.976        | 276.759        | 273.555        | 273.757        | 273.354        | H[11] |
| R[32] | 690.197        | 249.347        | 246.143        | 246.345        | 245.942        | R[10] |
| L[33] | 712.813        | 218.127        | 214.923        | 215.125        | 214.722        | L[9]  |
| L[34] | 735.430        | 195.510        | 192.306        | 192.508        | 192.105        | L[8]  |
| R[35] | 766.650        | 172.893        | 169.689        | 169.891        | 169.488        | R[7]  |
| K[36] | 782.269        | 141.673        | 138.469        | 138.671        | 138.268        | K[6]  |
| G[37] | 803.074        | 116.054        | 112.850        | 113.052        | 112.649        | G[5]  |
| H[38] | 831.088        | 104.650        | 101.446        | 101.648        | 101.244        | H[4]  |
| V[39] | <b>863.698</b> | 77.238         | 74.034         | 74.236         | 73.833         | V[3]  |
| A[40] | <b>877.906</b> | 44.625         | 41.422         | 41.623         | 41.220         | A[2]  |
| E[41] | 903.714        | 30.418         | 27.214         | 27.416         | 27.013         | E[1]  |



# sp | P27661 | H2AX\_MOUSE

[Acetyl]SGRGG<sup>Acetyl</sup><sub>42.01</sub> TGGKARAKAKSRSSRAGLQFPVGRVHRLLRKGYAE

- ▶ fragmentation table for charge state 1+
- ▶ specType=etd
- ▶ score=42.15
- ▶ F113279.dat
- ▶ query=q46118.p1
- ▶ precursor=753.429120
- ▶ chargePrecursor=6
- ▶ itol=0.5

| AA | c  | w               | #s1             | #s2             | z               | AA              |       |
|----|----|-----------------|-----------------|-----------------|-----------------|-----------------|-------|
| S  | 1  | 147.076         | 4315.320        | 4489.307        | 4.800           | 4489.407        | S[41] |
| G  | 2  | 204.098         | 4386.483        | 4370.464        | 0.000           | 4369.457        | G[40] |
| R  | 3  | <b>360.199</b>  | 4329.463        | 4311.443        | 4314.451        | 4311.435        | R[39] |
| G  | 4  | <b>417.220</b>  | 4173.361        | 4157.342        | 4156.350        | 4156.334        | G[38] |
| K  | 5  | <b>587.326</b>  | 4116.339        | 4100.320        | 4101.328        | 4099.313        | K[37] |
| T  | 6  | <b>688.374</b>  | 3946.234        | 3930.215        | 3931.223        | 3929.207        | T[36] |
| G  | 7  | <b>745.395</b>  | 3845.198        | 3829.187        | 3830.178        | 3829.165        | G[35] |
| G  | 8  | 802.417         | 3788.164        | 3772.146        | 3773.153        | 3771.138        | G[34] |
| K  | 9  | <b>930.512</b>  | 3731.143        | 3715.124        | 3716.132        | 3714.116        | K[33] |
| A  | 10 | 1001.549        | 3603.048        | 3587.029        | 3588.037        | 3586.021        | A[32] |
| R  | 11 | <b>1167.659</b> | 3532.011        | 3515.992        | 3517.000        | 3514.984        | R[31] |
| A  | 12 | <b>1228.687</b> | 3378.916        | 3362.897        | 3363.899        | 3361.883        | A[30] |
| K  | 13 | 1306.752        | 3304.873        | 3288.854        | 3289.862        | 3287.846        | K[29] |
| A  | 14 | 1427.819        | 3176.776        | 3160.756        | 3161.767        | 3159.751        | A[28] |
| K  | 15 | <b>1555.914</b> | 3105.741        | 3089.722        | 3090.730        | 3088.714        | K[27] |
| S  | 16 | 1642.946        | 2977.646        | 2961.627        | 2962.635        | 2960.619        | S[26] |
| R  | 17 | 1769.047        | 2890.614        | 2874.595        | 2875.603        | 2873.587        | R[25] |
| S  | 18 | 1888.078        | 2794.572        | 2778.553        | 2779.562        | 2777.546        | S[24] |
| S  | 19 | 1973.111        | 2647.488        | 2631.469        | 2632.476        | 2630.461        | S[23] |
| R  | 20 | 2126.212        | 2560.448        | 2544.430        | 2545.437        | 2543.421        | R[22] |
| A  | 21 | 2200.249        | 2404.347        | 2388.329        | 2389.336        | 2387.321        | A[21] |
| G  | 22 | 2257.271        | 2333.310        | 2317.291        | 2318.299        | 2316.284        | G[20] |
| L  | 23 | 2376.368        | 2278.289        | 2262.270        | 2263.278        | 2261.263        | L[19] |
| G  | 24 | 2488.413        | 2163.255        | 2147.236        | 2148.244        | 2146.229        | G[18] |
| F  | 25 | 2645.482        | 2035.148        | 2019.129        | 2020.136        | 2018.120        | F[17] |
| F  | 26 | 2742.535        | <b>1888.078</b> | 1872.059        | 1873.067        | 1871.051        | F[16] |
| V  | 27 | 2841.603        | 1791.025        | 1775.006        | 1776.014        | 1773.998        | V[15] |
| G  | 28 | 2886.625        | 1691.995        | 1675.976        | 1676.984        | 1674.969        | G[14] |
| R  | 29 | 3054.726        | 1634.925        | 1618.910        | <b>1619.924</b> | 1617.905        | R[13] |
| V  | 30 | 3153.794        | 1476.834        | <b>1462.815</b> | 1463.823        | 1461.807        | V[12] |
| H  | 31 | 3296.853        | 1379.765        | 1363.747        | 1364.755        | 1362.739        | H[11] |
| R  | 32 | 3446.954        | <b>1242.707</b> | 1226.688        | 1227.696        | <b>1225.680</b> | R[10] |
| L  | 33 | 3560.038        | 1086.605        | 1070.587        | 1071.595        | 1069.579        | L[9]  |
| L  | 34 | 3673.122        | 873.521         | <b>857.503</b>  | 858.510         | 856.494         | L[8]  |
| R  | 35 | 3826.212        | 669.437         | <b>644.419</b>  | 645.426         | 643.411         | R[7]  |
| K  | 36 | 3957.318        | 704.336         | <b>688.317</b>  | 689.325         | 687.310         | K[6]  |
| G  | 37 | 4014.340        | 676.241         | 660.223         | 661.230         | 659.215         | G[5]  |
| H  | 38 | 4151.399        | 619.220         | 603.201         | 604.209         | 602.193         | H[4]  |
| V  | 39 | 4314.462        | 582.161         | 566.142         | 567.150         | 565.134         | V[3]  |
| A  | 40 | 4385.499        | 419.096         | 403.079         | 404.087         | 402.071         | A[2]  |
| E  | 41 | 4514.542        | 148.060         | 132.042         | 133.050         | 131.034         | E[1]  |

# sp | P27661 | H2AX\_MOUSE

[Acetyl]SGRGRK<sup>Acetyl</sup><sub>42.01</sub> TGGKARAKAKSRSSRAGLQFPVGRVHLLLRKGHYAE

- ▶ fragmentation table for charge state 2+
- ▶ specType=etd
- ▶ score=42.15
- ▶ F113279.dat
- ▶ query=q46118.p1
- ▶ precursor=753.429120
- ▶ chargePrecursor=6
- ▶ itol=0.5

| AA | c  | w               | s+1             | s+2             | z               | AA              |       |
|----|----|-----------------|-----------------|-----------------|-----------------|-----------------|-------|
| S  | 1  | 74.062          | 2528.206        | 2269.287        | 8.804           | 2249.781        | S(1)  |
| G  | 2  | 102.553         | 2193.745        | 2185.736        | 0.504           | 2185.232        | G(2)  |
| R  | 3  | 180.603         | 2165.234        | 2157.225        | 2157.720        | 2156.721        | R(3)  |
| G  | 4  | 209.114         | 2087.184        | 2079.175        | 2079.670        | 2078.671        | G(4)  |
| K  | 5  | 294.167         | 2038.673        | 2030.664        | 2031.168        | 2030.169        | K(5)  |
| T  | 6  | 344.650         | 1972.620        | 1964.611        | <b>1964.115</b> | 1965.111        | T(6)  |
| G  | 7  | 373.203         | 1923.091        | <b>1915.087</b> | <b>1915.591</b> | 1914.588        | G(7)  |
| G  | 8  | 401.712         | 1894.588        | 1886.579        | 1887.080        | 1886.073        | G(8)  |
| K  | 9  | 465.750         | 1866.075        | 1858.066        | <b>1858.570</b> | 1857.562        | K(9)  |
| A  | 10 | 501.278         | 1802.028        | 1794.018        | 1794.522        | 1793.514        | A(10) |
| R  | 11 | 577.329         | 1766.509        | 1758.500        | 1759.004        | 1757.996        | R(11) |
| A  | 12 | <b>614.897</b>  | 1688.858        | <b>1680.849</b> | <b>1680.953</b> | 1679.946        | A(12) |
| K  | 13 | <b>678.895</b>  | 1652.940        | 1644.931        | <b>1645.435</b> | 1644.427        | K(13) |
| A  | 14 | <b>714.413</b>  | 1588.893        | 1580.883        | <b>1581.387</b> | 1580.379        | A(14) |
| K  | 15 | <b>778.461</b>  | 1553.374        | <b>1545.365</b> | 1545.868        | <b>1544.861</b> | K(15) |
| S  | 16 | <b>821.977</b>  | 1489.320        | <b>1481.317</b> | <b>1481.821</b> | 1480.813        | S(16) |
| R  | 17 | <b>900.827</b>  | 1425.270        | <b>1437.801</b> | <b>1438.305</b> | 1437.297        | R(17) |
| S  | 18 | 953.818         | <b>1367.760</b> | 1369.750        | 1369.254        | 1369.246        | S(18) |
| S  | 19 | <b>987.959</b>  | 1324.244        | 1316.234        | 1316.738        | 1315.731        | S(19) |
| R  | 20 | <b>1065.110</b> | 1280.728        | <b>1272.718</b> | 1273.222        | <b>1272.215</b> | R(20) |
| A  | 21 | <b>1100.628</b> | 1202.671        | 1194.660        | 1195.172        | 1194.164        | A(21) |
| G  | 22 | <b>1129.139</b> | 1167.159        | 1159.149        | 1159.653        | 1158.645        | G(22) |
| L  | 23 | 1165.861        | 1138.848        | <b>1130.839</b> | 1131.343        | <b>1130.335</b> | L(23) |
| G  | 24 | 1249.710        | 1082.156        | <b>1074.097</b> | <b>1074.601</b> | 1073.593        | G(24) |
| F  | 25 | 1323.245        | 1018.077        | <b>1010.067</b> | <b>1010.571</b> | 1009.563        | F(25) |
| F  | 26 | 1374.771        | <b>944.542</b>  | 936.533         | 937.037         | 936.029         | F(26) |
| V  | 27 | 1421.305        | <b>896.016</b>  | <b>888.007</b>  | 888.511         | <b>887.503</b>  | V(27) |
| G  | 28 | <b>1449.816</b> | 848.462         | 840.452         | <b>838.876</b>  | 837.869         | G(28) |
| R  | 29 | 1507.859        | 819.911         | <b>809.962</b>  | <b>810.466</b>  | 809.458         | R(29) |
| V  | 30 | 1577.401        | 789.921         | 781.911         | 782.415         | <b>781.407</b>  | V(30) |
| H  | 31 | <b>1645.930</b> | 690.388         | 682.377         | 682.881         | 681.873         | H(31) |
| R  | 32 | 1723.981        | 621.851         | <b>613.848</b>  | <b>614.351</b>  | 613.344         | R(32) |
| L  | 33 | 1780.523        | 643.808         | 635.797         | 636.301         | 635.293         | L(33) |
| L  | 34 | 1837.065        | 489.264         | 479.253         | 479.756         | 478.748         | L(34) |
| R  | 35 | <b>1915.115</b> | 439.722         | 429.713         | 429.217         | 428.209         | R(35) |
| K  | 36 | 1979.153        | 352.672         | 344.662         | 345.166         | 344.158         | K(36) |
| G  | 37 | 2067.674        | 288.624         | 280.615         | 281.119         | 280.111         | G(37) |
| H  | 38 | 2076.203        | 260.114         | 252.104         | 252.608         | 251.600         | H(38) |
| V  | 39 | 2157.735        | 191.564         | 183.575         | 184.079         | 183.071         | V(39) |
| A  | 40 | 2193.253        | 110.026         | 102.043         | 102.547         | 101.539         | A(40) |
| E  | 41 | 2257.774        | 74.534          | 66.524          | 67.028          | 66.021          | E(41) |



# sp | P27661 | H2AX\_MOUSE

[Acetyl]SGRGRK<sup>Acetyl</sup><sub>42.01</sub> TGGKARAKAKSRSSRAGLQFPVGRVHRLLRKGHYAE

- ▶ fragmentation table for charge state 3+
- ▶ specType=etd
- ▶ score=42.15
- ▶ F113279.dat
- ▶ query=q46118.p1
- ▶ precursor=753.429120
- ▶ chargePrecursor=6
- ▶ itol=0.5

| AA | c  | y               | #=1             | #=2             | #=3             | AA              |       |
|----|----|-----------------|-----------------|-----------------|-----------------|-----------------|-------|
| S  | 1  | 489.697         | 1508.347        | <b>1500.507</b> | 0.872           | <b>1500.171</b> | S[41] |
| G  | 2  | 66.704          | <b>1462.833</b> | <b>1457.493</b> | 0.672           | 1457.157        | G[40] |
| R  | 3  | 1507.718        | 1443.625        | <b>1438.486</b> | 1438.622        | <b>1438.150</b> | R[39] |
| G  | 4  | 159.745         | 1391.792        | 1386.452        | <b>1386.788</b> | 1386.110        | G[38] |
| K  | 5  | 196.447         | 1372.785        | <b>1367.445</b> | <b>1367.781</b> | <b>1367.109</b> | K[37] |
| T  | 6  | 230.229         | 1316.082        | 1310.743        | <b>1311.079</b> | 1310.401        | T[36] |
| G  | 7  | 269.137         | 1252.400        | 1247.061        | <b>1247.397</b> | 1246.720        | G[35] |
| G  | 8  | 268.144         | 1263.903        | <b>1258.053</b> | <b>1258.389</b> | 1257.711        | G[34] |
| K  | 9  | 310.642         | 1244.388        | 1239.048        | <b>1239.382</b> | 1238.710        | K[33] |
| A  | 10 | 334.521         | 1201.688        | <b>1196.348</b> | 1196.684        | <b>1196.012</b> | A[32] |
| R  | 11 | 366.555         | 1178.080        | 1172.680        | 1173.005        | 1172.331        | R[31] |
| A  | 12 | 410.234         | <b>1125.395</b> | 1120.035        | 1120.361        | 1119.689        | A[30] |
| R  | 13 | 452.932         | 1102.256        | <b>1096.956</b> | <b>1097.292</b> | 1096.620        | R[29] |
| A  | 14 | 496.611         | 1059.597        | 1054.258        | 1054.584        | 1053.907        | A[28] |
| K  | 15 | 519.309         | 1035.918        | <b>1030.579</b> | <b>1030.915</b> | <b>1030.243</b> | K[27] |
| S  | 16 | 548.320         | 993.220         | 987.880         | 988.216         | 987.543         | S[26] |
| R  | 17 | 606.254         | 984.200         | <b>958.870</b>  | <b>958.206</b>  | 958.534         | R[25] |
| S  | 18 | 628.366         | 912.176         | 906.837         | 907.173         | 906.500         | S[24] |
| S  | 19 | 658.375         | 883.165         | 877.825         | <b>878.161</b>  | 877.489         | S[23] |
| R  | 20 | 710.400         | 854.154         | <b>848.815</b>  | <b>849.151</b>  | 848.479         | R[22] |
| A  | 21 | 734.088         | 802.121         | 796.781         | 797.117         | 796.445         | A[21] |
| G  | 22 | <b>753.095</b>  | <b>778.442</b>  | 773.102         | 773.438         | 772.766         | G[20] |
| L  | 23 | 788.134         | 758.434         | 753.094         | 753.430         | 752.758         | L[19] |
| G  | 24 | <b>833.476</b>  | 721.740         | 716.400         | 716.736         | 716.064         | G[18] |
| F  | 25 | 882.409         | <b>679.054</b>  | 673.714         | 674.050         | 673.378         | F[17] |
| F  | 26 | 914.850         | 630.031         | 624.691         | 625.027         | 624.355         | F[16] |
| V  | 27 | <b>947.873</b>  | 597.680         | 592.340         | 592.676         | 592.004         | V[15] |
| G  | 28 | <b>966.880</b>  | 564.657         | 559.317         | 559.653         | 558.981         | G[14] |
| R  | 29 | 1018.813        | 545.650         | 540.310         | 540.646         | 539.974         | R[13] |
| V  | 30 | 1051.936        | 493.616         | 488.277         | 488.613         | 487.941         | V[12] |
| H  | 31 | <b>1097.623</b> | 460.593         | 455.254         | 455.590         | 454.918         | H[11] |
| R  | 32 | 1149.656        | 414.907         | 409.567         | 409.903         | 409.232         | R[10] |
| L  | 33 | 1187.351        | 362.872         | 357.534         | 357.870         | 357.198         | L[9]  |
| L  | 34 | <b>1225.046</b> | 328.178         | 318.839         | 319.175         | 318.503         | L[8]  |
| R  | 35 | 1277.089        | 287.484         | 282.144         | 282.480         | 281.808         | R[7]  |
| K  | 36 | 1319.778        | 235.450         | 230.111         | 230.447         | 229.775         | K[6]  |
| G  | 37 | <b>1338.785</b> | 192.753         | 187.413         | 187.748         | 187.076         | G[5]  |
| H  | 38 | 1384.471        | 173.745         | 168.405         | 168.741         | 168.069         | H[4]  |
| V  | 39 | 1438.826        | 128.098         | 122.758         | 123.094         | 122.422         | V[3]  |
| A  | 40 | 1482.805        | 83.304          | 78.004          | 78.340          | 77.668          | A[2]  |
| E  | 41 | 1505.519        | 50.025          | 44.685          | 45.021          | 44.349          | E[1]  |

# sp | P27661 | H2AX\_MOUSE

[Acetyl]SGR<sup>Acetyl</sup>RGK<sub>42.01</sub> TGGKARAKAKSRSSRAGLQFPVGRVHLLLRKGHYAE

- ▶ fragmentation table for charge state 4+
- ▶ specType=etd
- ▶ score=42.15
- ▶ F113279.dat
- ▶ query=q46118.p1
- ▶ precursor=753.429120
- ▶ chargePrecursor=6
- ▶ itol=0.5

| AA | c  | y               | #s1             | #s2             | z               | AA              |       |
|----|----|-----------------|-----------------|-----------------|-----------------|-----------------|-------|
| S  | 1  | 37.505          | 1129.937        | <b>1125.632</b> | 0.705           | <b>1125.380</b> | S[41] |
| G  | 2  | 51.780          | <b>1097.376</b> | 1053.172        | 0.795           | 1003.120        | G[40] |
| R  | 3  | 90.805          | <b>1083.121</b> | 1079.110        | <b>1079.368</b> | 1079.864        | R[39] |
| G  | 4  | 105.001         | 1044.096        | 1040.091        | 1040.343        | 1039.839        | G[38] |
| K  | 5  | 147.587         | 1029.840        | 1025.836        | <b>1026.087</b> | 1025.584        | K[37] |
| T  | 6  | 172.849         | <b>987.314</b>  | 983.309         | <b>983.561</b>  | 983.061         | T[36] |
| G  | 7  | 187.104         | 959.055         | 955.047         | 956.079         | 955.075         | G[35] |
| G  | 8  | 201.360         | <b>947.707</b>  | <b>943.702</b>  | <b>944.044</b>  | 943.540         | G[34] |
| K  | 9  | 233.983         | 933.541         | 929.537         | 929.788         | 929.285         | K[33] |
| A  | 10 | 251.143         | 901.511         | 897.513         | 897.765         | 897.261         | A[32] |
| R  | 11 | 290.168         | 853.728         | 849.733         | 850.005         | 849.502         | R[31] |
| A  | 12 | 307.897         | <b>844.733</b>  | 840.738         | 840.990         | 840.487         | A[30] |
| K  | 13 | 339.951         | 826.974         | 822.969         | 823.221         | 822.717         | K[29] |
| A  | 14 | 357.710         | <b>794.950</b>  | <b>790.945</b>  | <b>791.197</b>  | 790.693         | A[28] |
| K  | 15 | 389.734         | 777.191         | 773.186         | 773.438         | 772.934         | K[27] |
| S  | 16 | 411.492         | <b>745.167</b>  | 741.162         | 741.414         | 740.910         | S[26] |
| R  | 17 | 458.517         | 721.409         | 717.404         | 717.656         | 717.152         | R[25] |
| S  | 18 | 472.976         | 694.384         | 690.379         | 690.631         | 690.127         | S[24] |
| S  | 19 | 494.033         | 662.626         | 658.621         | 658.873         | 658.369         | S[23] |
| R  | 20 | 533.059         | 640.868         | 636.863         | 637.115         | 636.611         | R[22] |
| A  | 21 | 550.818         | 601.842         | 597.838         | 598.090         | 597.586         | A[21] |
| C  | 22 | 565.073         | 584.083         | 580.078         | 580.330         | 579.826         | C[20] |
| L  | 23 | 593.344         | 669.826         | 665.823         | 666.075         | 665.571         | L[19] |
| Q  | 24 | 625.359         | 541.557         | 537.552         | 537.804         | 537.300         | Q[18] |
| F  | 25 | 662.126         | 509.542         | 505.537         | 505.789         | 505.285         | F[17] |
| P  | 26 | 698.389         | 472.775         | 468.770         | 469.022         | 468.518         | P[16] |
| V  | 27 | 711.156         | 448.512         | 444.507         | 444.759         | 444.255         | V[15] |
| C  | 28 | 725.412         | 423.745         | 419.740         | 419.992         | 419.488         | C[14] |
| R  | 29 | 764.433         | 409.809         | 405.804         | 406.056         | 405.552         | R[13] |
| V  | 30 | 799.204         | 370.464         | 366.459         | 366.711         | 366.207         | V[12] |
| H  | 31 | 823.469         | 345.697         | 341.692         | 341.944         | 341.440         | H[11] |
| R  | 32 | <b>862.494</b>  | 311.432         | 307.427         | 307.679         | 307.175         | R[10] |
| L  | 33 | 890.765         | 272.407         | 268.402         | 268.654         | 268.150         | L[9]  |
| L  | 34 | 918.036         | 244.178         | 240.173         | 240.425         | 239.921         | L[8]  |
| R  | 35 | 958.063         | 213.885         | 211.880         | 212.132         | 211.628         | R[7]  |
| K  | 36 | 990.085         | 178.848         | 172.835         | 173.087         | 172.583         | K[6]  |
| G  | 37 | 1004.340        | 144.816         | 140.811         | 141.063         | 140.559         | G[5]  |
| H  | 38 | <b>1038.605</b> | 130.560         | 126.556         | 126.808         | 126.304         | H[4]  |
| V  | 39 | <b>1079.371</b> | 96.296          | 92.291          | 92.543          | 92.039          | V[3]  |
| A  | 40 | <b>1097.130</b> | 58.530          | 53.525          | 53.777          | 53.273          | A[2]  |
| E  | 41 | <b>1129.391</b> | 37.771          | 33.766          | 34.018          | 33.514          | E[1]  |

# sp | P27661 | H2AX\_MOUSE

[Acetyl]SGRGRK<sup>Acetyl</sup><sub>42.01</sub> TGGKARAKAKSRSSRAGLQFPVGRVHRLLRKGHYAE

- ▶ fragmentation table for charge state 5+
- ▶ specType=etd
- ▶ score=42.15
- ▶ F113279.dat
- ▶ query=q46118.p1
- ▶ precursor=753.429120
- ▶ chargePrecursor=6
- ▶ itol=0.5

| AA    | c              | y       | z+1            | z+2            | z              | AA    |
|-------|----------------|---------|----------------|----------------|----------------|-------|
| S[1]  | 30.221         | 903.911 | <b>900.707</b> | 0.806          | <b>900.506</b> | S[41] |
| G[2]  | 41.625         | 878.102 | <b>874.899</b> | 0.806          | <b>874.697</b> | G[40] |
| R[3]  | 72.846         | 866.698 | <b>863.494</b> | <b>861.696</b> | <b>863.293</b> | R[39] |
| G[4]  | 84.250         | 835.478 | 832.274        | 832.476        | 832.073        | G[38] |
| K[5]  | 118.271        | 824.074 | 820.870        | 821.071        | 820.668        | K[37] |
| T[6]  | 138.481        | 790.053 | 786.849        | 787.050        | 786.647        | T[36] |
| G[7]  | 149.885        | 769.843 | 766.639        | 766.841        | 766.438        | G[35] |
| G[8]  | 163.289        | 758.439 | 755.235        | 755.437        | 755.033        | G[34] |
| K[9]  | 186.908        | 737.034 | 743.831        | 744.032        | 743.629        | K[13] |
| A[10] | 201.116        | 721.415 | 718.212        | 718.413        | 718.010        | A[12] |
| R[11] | 232.136        | 707.208 | 704.004        | 704.206        | <b>703.803</b> | R[11] |
| A[12] | 246.543        | 675.988 | 672.784        | 672.986        | 672.582        | A[30] |
| K[13] | 272.162        | 661.780 | 658.577        | 658.778        | 658.375        | K[29] |
| A[14] | 286.370        | 636.161 | 632.958        | 633.159        | 632.756        | A[28] |
| K[15] | 311.989        | 621.954 | 618.750        | 618.952        | 618.549        | K[27] |
| S[16] | 329.395        | 596.335 | 593.131        | 593.333        | 592.930        | S[26] |
| R[17] | <b>360.615</b> | 578.929 | 575.725        | 575.926        | 575.523        | R[25] |
| S[18] | 378.022        | 547.708 | 544.505        | 544.706        | 544.303        | S[24] |
| S[19] | 399.428        | 530.302 | 527.099        | 527.300        | 526.897        | S[23] |
| R[20] | 426.648        | 512.895 | 509.692        | 509.893        | 509.490        | R[22] |
| A[21] | 440.856        | 481.675 | 478.472        | 478.673        | 478.270        | A[21] |
| G[22] | 452.260        | 467.468 | 464.264        | 464.466        | 464.063        | G[20] |
| L[23] | 474.877        | 456.064 | 452.860        | 453.061        | 452.658        | L[19] |
| Q[24] | 500.489        | 433.447 | 430.243        | 430.445        | 430.041        | Q[18] |
| F[25] | 529.902        | 407.835 | 404.631        | 404.833        | 404.430        | F[17] |
| P[26] | 549.313        | 378.421 | 375.218        | 375.419        | 375.016        | P[16] |
| V[27] | 569.126        | 359.011 | 355.807        | 356.009        | 355.605        | V[15] |
| G[28] | 580.531        | 339.187 | 335.983        | 336.185        | 335.782        | G[14] |
| R[29] | 611.751        | 327.784 | 324.580        | 324.781        | 324.378        | R[13] |
| V[30] | 631.565        | 296.573 | 293.369        | 293.570        | 293.167        | V[12] |
| H[31] | 658.976        | 276.759 | 273.555        | 273.757        | 273.354        | H[11] |
| R[32] | 690.197        | 249.347 | 246.143        | 246.345        | 245.942        | R[10] |
| L[33] | 712.813        | 218.127 | 214.923        | 215.125        | 214.722        | L[9]  |
| L[34] | 736.430        | 195.510 | 192.306        | 192.508        | 192.105        | L[8]  |
| R[35] | 766.650        | 172.893 | 169.689        | 169.891        | 169.488        | R[7]  |
| K[36] | 792.269        | 141.673 | 138.469        | 138.671        | 138.268        | K[6]  |
| G[37] | 803.674        | 116.054 | 112.850        | 113.052        | 112.649        | G[5]  |
| H[38] | 813.089        | 104.850 | 101.646        | 101.848        | 101.444        | H[6]  |
| T[39] | <b>863.698</b> | 77.236  | 74.034         | 74.236         | 73.833         | T[5]  |
| A[40] | 877.905        | 44.625  | 41.422         | 41.623         | 41.220         | A[2]  |
| E[41] | 903.714        | 30.418  | 27.214         | 27.416         | 27.013         | E[1]  |

# sp | Q6GSS7 | H2A2A\_MOUSE

[Acetyl]SGRGK<sup>Acetyl</sup> QGGKARAKAKSRSSRAGLQFPVGRVHLLLRKGN<sup>42.01</sup>YAE

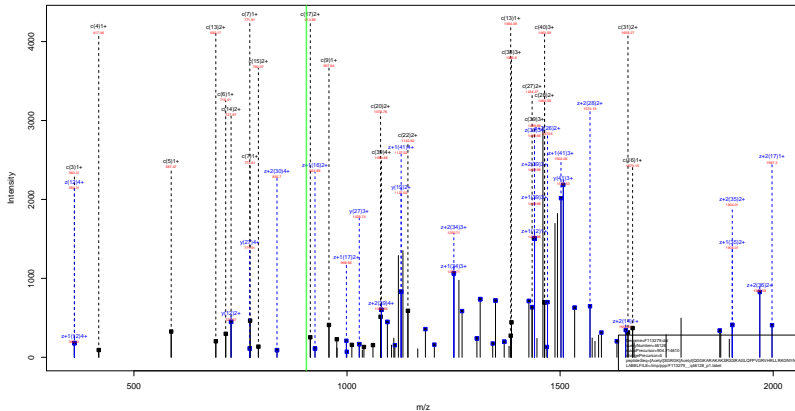

# sp | Q6GSS7 | H2A2A\_MOUSE

[Acetyl]SGRGRK<sup>Acetyl</sup><sub>42.01</sub> QGGKARAKAKSRSSRAGLQFPVGRVHRLLRKGN<sup>YAE</sup>

- ▶ fragmentation table for charge state 1+
- ▶ specType=etd
- ▶ score=56.32
- ▶ F113279.dat
- ▶ query=q46128.p1
- ▶ precursor=904.714610
- ▶ chargePrecursor=5
- ▶ itol=0.5

| AA   | c               | y        | z+1             | z+2             | z        | AA   |
|------|-----------------|----------|-----------------|-----------------|----------|------|
| S 1  | 147.076         | 4519.521 | 4501.502        | 0.000           | 4502.494 | S 41 |
| G 2  | 304.098         | 4390.478 | 4374.459        | 0.000           | 4373.451 | G 40 |
| R 3  | <b>360.199</b>  | 4333.457 | 4317.438        | 4316.440        | 4316.430 | R 39 |
| G 4  | <b>417.220</b>  | 4177.355 | 4161.337        | 4162.345        | 4160.329 | G 38 |
| K 5  | <b>587.326</b>  | 4120.334 | 4104.315        | 4106.323        | 4103.307 | K 37 |
| Q 6  | <b>715.385</b>  | 3950.298 | 3934.279        | 3935.278        | 3933.262 | Q 36 |
| G 7  | <b>772.406</b>  | 3822.170 | 3806.151        | 3807.159        | 3805.143 | G 35 |
| G 8  | 829.427         | 3765.148 | 3749.130        | 3750.138        | 3748.122 | G 34 |
| K 9  | <b>957.522</b>  | 3708.127 | 3692.108        | 3693.116        | 3691.100 | K 33 |
| A 10 | <b>1028.560</b> | 3580.032 | 3564.013        | 3565.021        | 3563.005 | A 32 |
| R 11 | 1154.051        | 3528.995 | 3492.975        | 3493.984        | 3491.968 | R 31 |
| A 12 | 1254.098        | 3352.984 | 3336.975        | 3337.983        | 3335.967 | A 30 |
| R 13 | <b>1383.793</b> | 3281.957 | 3265.938        | 3266.946        | 3264.930 | R 29 |
| A 14 | 1454.830        | 3153.762 | 3137.743        | 3138.751        | 3136.735 | A 28 |
| K 15 | 1562.925        | 3082.725 | 3066.706        | 3067.714        | 3065.698 | K 27 |
| S 16 | <b>1669.957</b> | 2954.630 | 2938.611        | 2939.619        | 2937.603 | S 26 |
| R 17 | 1826.058        | 2887.598 | 2851.579        | 2852.587        | 2850.571 | R 25 |
| S 18 | 1813.080        | 2711.496 | 2695.477        | 2696.486        | 2694.470 | S 24 |
| S 19 | 2000.122        | 2624.464 | 2608.446        | 2609.454        | 2607.438 | S 23 |
| R 20 | 2156.223        | 2537.432 | 2521.414        | 2522.422        | 2520.406 | R 22 |
| A 21 | 2227.260        | 2381.331 | 2365.313        | 2366.320        | 2364.305 | A 21 |
| G 22 | 2284.282        | 2310.294 | 2294.275        | 2295.283        | 2293.268 | G 20 |
| L 23 | 2387.366        | 2253.273 | 2237.254        | 2238.262        | 2236.246 | L 19 |
| Q 24 | 2575.424        | 2140.189 | 2124.170        | 2125.178        | 2123.162 | Q 18 |
| F 25 | 2672.493        | 2012.130 | 1996.111        | <b>1997.119</b> | 1995.104 | F 17 |
| F 26 | 2769.548        | 1895.062 | 1849.043        | 1850.051        | 1848.035 | F 16 |
| V 27 | 2868.614        | 1768.009 | 1752.990        | 1752.998        | 1750.982 | V 15 |
| G 28 | 2925.635        | 1698.940 | 1652.922        | <b>1653.930</b> | 1651.914 | G 14 |
| R 29 | 3081.737        | 1611.919 | 1595.900        | <b>1596.908</b> | 1594.882 | R 13 |
| V 30 | 3189.806        | 1495.818 | <b>1439.799</b> | 1440.807        | 1438.791 | V 12 |
| H 31 | 3317.864        | 1358.749 | 1342.731        | <b>1341.739</b> | 1339.723 | H 11 |
| R 32 | 3473.965        | 1219.691 | 1203.672        | <b>1204.680</b> | 1202.664 | R 10 |
| L 33 | 3587.049        | 1063.589 | 1047.571        | 1048.579        | 1046.563 | L 9  |
| L 34 | 3700.133        | 950.505  | 934.487         | 935.495         | 933.479  | L 8  |
| R 35 | 3856.234        | 837.421  | 821.403         | 822.410         | 820.395  | R 7  |
| K 36 | 3954.279        | 681.320  | 665.302         | 666.309         | 664.294  | K 6  |
| G 37 | 4041.351        | 553.225  | 537.207         | 538.214         | 536.199  | G 5  |
| N 38 | 4155.394        | 496.204  | 480.185         | 481.193         | 479.177  | N 4  |
| Y 39 | 4318.457        | 382.161  | 366.142         | 367.150         | 365.134  | Y 3  |
| A 40 | 4389.494        | 219.098  | 203.079         | 204.087         | 202.071  | A 2  |
| E 41 | 4518.537        | 148.060  | 132.042         | 133.050         | 131.034  | E 1  |

# sp | Q6GSS7 | H2A2A\_MOUSE

[Acetyl]SGR<sup>Acetyl</sup>GRK<sub>42.01</sub> QGGKARAKAKSRSSRAGLQFPVGRVHRLLRKGN<sup>YAE</sup>

- ▶ fragmentation table for charge state 2+
- ▶ specType=etd
- ▶ score=56.32
- ▶ F113279.dat
- ▶ query=q46128.p1
- ▶ precursor=904.714610
- ▶ chargePrecursor=5
- ▶ itol=0.5

| AA | c  | y               | #=1             | #=2             | z               | AA              |       |
|----|----|-----------------|-----------------|-----------------|-----------------|-----------------|-------|
| S  | 1  | 74.062          | 2502.294        | 2282.255        | 8.804           | 2251.781        | S[41] |
| G  | 2  | 102.553         | 2195.743        | 2187.733        | 0.504           | 2187.220        | G[40] |
| R  | 3  | 180.603         | 2167.232        | 2159.223        | 2159.726        | 2158.710        | R[39] |
| G  | 4  | 209.114         | 2089.181        | 2081.172        | 2081.676        | 2080.660        | G[38] |
| K  | 5  | 294.167         | 2050.671        | 2052.681        | 2053.105        | 2052.157        | K[37] |
| G  | 6  | 358.196         | 1975.618        | 1967.602        | <b>1968.112</b> | 1967.105        | G[36] |
| G  | 7  | 388.337         | 1711.589        | <b>1903.579</b> | <b>1904.083</b> | 1903.075        | G[35] |
| G  | 8  | 435.217         | 1883.078        | <b>1875.068</b> | 1875.572        | <b>1874.565</b> | G[34] |
| K  | 9  | 479.205         | 1854.567        | 1846.558        | 1847.062        | 1846.054        | K[33] |
| A  | 10 | 514.763         | 1790.520        | 1782.510        | 1783.014        | 1782.000        | A[32] |
| R  | 11 | 592.834         | 1735.001        | 1746.992        | 1747.496        | 1746.488        | R[31] |
| A  | 12 | 638.393         | 1688.943        | 1680.931        | 1680.436        | 1680.429        | A[30] |
| K  | 13 | <b>692.400</b>  | 1643.432        | <b>1633.423</b> | 1633.927        | <b>1632.919</b> | K[29] |
| A  | 14 | <b>727.919</b>  | 1577.384        | 1569.375        | <b>1569.879</b> | 1568.871        | A[28] |
| K  | 15 | <b>791.966</b>  | 1541.866        | <b>1533.857</b> | <b>1534.360</b> | 1533.351        | K[27] |
| S  | 16 | <b>835.482</b>  | 1477.818        | 1469.809        | <b>1470.313</b> | <b>1469.305</b> | S[26] |
| R  | 17 | <b>913.533</b>  | <b>1434.302</b> | <b>1426.293</b> | <b>1426.797</b> | 1425.789        | R[25] |
| S  | 18 | 957.609         | 1359.255        | <b>1348.243</b> | <b>1348.746</b> | 1347.739        | S[24] |
| S  | 19 | 1000.595        | <b>1312.736</b> | <b>1304.726</b> | <b>1305.230</b> | 1304.223        | S[23] |
| R  | 20 | <b>1078.615</b> | 1269.220        | 1261.210        | 1261.714        | 1260.707        | R[22] |
| A  | 21 | 1114.134        | 1191.169        | 1183.160        | <b>1183.664</b> | 1182.656        | A[21] |
| G  | 22 | <b>1142.644</b> | 1135.051        | 1147.041        | 1148.545        | 1147.537        | G[20] |
| L  | 23 | 1199.272        | <b>1127.140</b> | 1119.131        | 1119.635        | 1118.627        | L[19] |
| G  | 24 | 1253.216        | 1071.586        | 1082.580        | 1083.083        | 1082.082        | G[18] |
| F  | 25 | 1336.750        | 1006.599        | <b>998.559</b>  | <b>999.063</b>  | 998.055         | F[17] |
| F  | 26 | 1388.276        | 933.034         | <b>925.025</b>  | 925.529         | <b>924.521</b>  | F[16] |
| V  | 27 | <b>1434.811</b> | 884.506         | 876.499         | 877.003         | 876.992         | V[15] |
| G  | 28 | <b>1463.321</b> | 834.974         | 826.965         | 827.468         | 826.461         | G[14] |
| R  | 29 | 1541.873        | 808.483         | 800.474         | 800.978         | 799.970         | R[13] |
| V  | 30 | 1590.906        | <b>728.413</b>  | 720.403         | 720.907         | 719.899         | V[12] |
| H  | 31 | <b>1659.436</b> | 678.878         | 670.869         | 671.373         | 670.365         | H[11] |
| R  | 32 | 1737.486        | 610.349         | 602.340         | 602.843         | 601.836         | R[10] |
| L  | 33 | 1794.028        | 532.209         | 524.200         | 524.703         | 523.705         | L[9]  |
| L  | 34 | 1889.970        | 478.756         | 469.747         | 469.251         | 468.243         | L[8]  |
| R  | 35 | 1928.612        | 419.214         | 411.205         | 411.709         | 410.701         | R[7]  |
| K  | 36 | 1992.668        | 341.164         | 333.154         | 333.658         | 332.650         | K[6]  |
| G  | 37 | 2021.179        | 277.116         | 269.107         | 269.611         | 268.603         | G[5]  |
| N  | 38 | 2078.200        | 248.606         | 240.596         | 241.100         | 240.092         | N[4]  |
| V  | 39 | 2159.732        | 181.564         | 183.575         | 184.079         | 183.071         | V[3]  |
| A  | 40 | 2195.261        | 110.026         | 102.043         | 102.547         | 101.539         | A[2]  |
| E  | 41 | 2259.772        | 74.534          | 66.524          | 67.028          | 66.021          | E[1]  |

# sp | Q6GSS7 | H2A2A\_MOUSE

[Acetyl]SGR<sup>Acetyl</sup>GRGK<sub>42.01</sub> QGGKARAKAKSRSSRAGLQFPVGRVHRLLRKGN<sup>YAE</sup>

- ▶ fragmentation table for charge state 3+
- ▶ specType=etd
- ▶ score=56.32
- ▶ F113279.dat
- ▶ query=q46128.p1
- ▶ precursor=904.714610
- ▶ chargePrecursor=5
- ▶ itol=0.5

| AA | c  | y               | s+1             | s+2             | z               | AA              |       |
|----|----|-----------------|-----------------|-----------------|-----------------|-----------------|-------|
| S  | 1  | 489.697         | <b>1507.176</b> | <b>1501.839</b> | 0.872           | 1501.561        | S[41] |
| G  | 2  | 66.704          | 1464.184        | 1458.275        | 0.672           | 1455.480        | G[40] |
| R  | 3  | 1307.718        | 1445.157        | <b>1439.817</b> | <b>1440.153</b> | <b>1439.482</b> | R[39] |
| G  | 4  | 139.745         | 1393.123        | 1387.784        | 1386.120        | 1387.448        | G[38] |
| K  | 5  | 196.447         | 1374.116        | <b>1368.777</b> | <b>1369.113</b> | <b>1368.441</b> | K[37] |
| G  | 6  | 239.133         | 1317.414        | <b>1312.075</b> | <b>1312.411</b> | 1311.739        | G[36] |
| G  | 7  | 288.140         | 1274.726        | 1269.387        | <b>1269.725</b> | 1269.053        | G[35] |
| G  | 8  | 277.147         | 1235.921        | <b>1250.381</b> | <b>1250.717</b> | 1250.045        | G[34] |
| K  | 9  | 319.646         | 1236.714        | 1231.374        | 1231.710        | 1231.038        | K[33] |
| A  | 10 | 383.525         | 1194.016        | 1189.076        | 1189.012        | 1189.340        | A[32] |
| R  | 11 | 395.558         | 1170.336        | 1164.907        | 1165.331        | 1164.861        | R[31] |
| A  | 12 | 419.237         | 1118.301        | 1113.360        | 1113.309        | <b>1112.627</b> | A[30] |
| K  | 13 | 461.936         | <b>1094.624</b> | 1089.284        | 1089.620        | 1089.942        | K[29] |
| A  | 14 | 485.615         | 1051.925        | 1046.586        | 1046.922        | 1046.250        | A[28] |
| K  | 15 | 528.313         | <b>1028.246</b> | 1022.907        | 1023.243        | 1022.571        | K[27] |
| S  | 16 | 557.324         | 985.548         | 980.208         | 980.544         | 979.873         | S[26] |
| R  | 17 | 609.258         | 956.517         | 951.178         | 951.514         | 950.842         | R[25] |
| S  | 18 | 638.368         | 904.504         | 899.164         | 899.500         | 898.829         | S[24] |
| S  | 19 | 667.379         | 875.493         | 870.153         | 870.489         | 869.817         | S[23] |
| R  | 20 | 719.413         | 846.482         | 841.143         | 841.479         | 840.807         | R[22] |
| A  | 21 | 743.002         | 794.449         | 789.109         | 789.445         | 788.773         | A[21] |
| G  | 22 | 762.009         | 770.770         | 765.430         | 765.766         | 765.094         | G[20] |
| L  | 23 | 799.273         | 724.762         | 746.423         | 746.759         | 746.087         | L[19] |
| G  | 24 | 842.480         | 714.085         | 708.745         | 709.084         | 708.362         | G[18] |
| F  | 25 | 891.502         | 671.381         | 666.042         | 666.378         | 665.706         | F[17] |
| F  | 26 | 923.853         | 622.359         | 617.019         | 617.355         | 616.683         | F[16] |
| V  | 27 | 956.876         | 590.008         | 584.668         | 585.004         | 584.332         | V[15] |
| G  | 28 | <b>975.863</b>  | 556.985         | 551.645         | 551.981         | 551.309         | G[14] |
| R  | 29 | 1027.618        | 519.976         | 514.636         | 514.974         | 514.302         | R[13] |
| V  | 30 | <b>1060.940</b> | 485.944         | 480.604         | 480.941         | 480.269         | V[12] |
| H  | 31 | 1106.626        | 452.921         | 447.581         | 447.918         | 447.246         | H[11] |
| R  | 32 | 1158.660        | 407.235         | 401.895         | 402.231         | 401.560         | R[10] |
| L  | 33 | 1196.355        | 355.201         | 349.862         | 350.198         | 349.526         | L[9]  |
| L  | 34 | 1234.049        | 319.509         | 314.169         | 314.505         | 313.833         | L[8]  |
| R  | 35 | 1286.683        | 279.812         | 274.472         | 274.808         | 274.136         | R[7]  |
| K  | 36 | 1328.781        | 227.778         | 222.438         | 222.775         | 222.103         | K[6]  |
| G  | 37 | 1347.788        | 185.880         | 179.540         | 180.876         | 179.404         | G[5]  |
| N  | 38 | <b>1385.803</b> | 166.873         | 160.733         | 161.069         | 160.397         | N[4]  |
| V  | 39 | <b>1440.157</b> | 128.968         | 122.719         | 123.055         | 122.383         | V[3]  |
| A  | 40 | <b>1473.336</b> | 87.304          | 81.364          | 81.700          | 81.028          | A[2]  |
| E  | 41 | 1508.850        | 50.025          | 44.685          | 45.021          | 44.349          | E[1]  |

# sp | Q6GSS7 | H2A2A\_MOUSE

[Acetyl]SGRGRK<sup>Acetyl</sup><sub>42.01</sub> QGGKARAKAKSRSSRAGLQFPVGRVHLLLRKGN<sup>YAE</sup>

- ▶ fragmentation table for charge state 4+
- ▶ specType=etd
- ▶ score=56.32
- ▶ F113279.dat
- ▶ query=q46128.p1
- ▶ precursor=904.714610
- ▶ chargePrecursor=5
- ▶ itol=0.5

| AA   | c               | y              | z+1             | z+2             | z              | AA   |
|------|-----------------|----------------|-----------------|-----------------|----------------|------|
| S 1  | 17.526          | 1130.636       | <b>1126.631</b> | 0.755           | 1126.376       | S 41 |
| G 2  | 51.780          | 1098.375       | <b>1094.370</b> | 0.755           | 1094.118       | G 40 |
| R 3  | 90.805          | 1084.120       | 1080.115        | <b>1080.367</b> | 1079.863       | R 39 |
| G 4  | 105.061         | 1045.094       | 1041.090        | 1041.342        | 1040.839       | G 38 |
| K 5  | 147.587         | 1030.839       | 1026.834        | 1027.086        | 1026.582       | K 37 |
| Q 6  | 179.802         | 988.313        | 984.308         | 984.560         | 984.055        | Q 36 |
| G 7  | 193.897         | 996.288        | 992.293         | 992.545         | 992.041        | G 35 |
| G 8  | 208.112         | 942.043        | 938.038         | 938.290         | 937.786        | G 34 |
| K 9  | 240.136         | 927.787        | 923.783         | 924.034         | 923.531        | K 33 |
| A 10 | 257.895         | 895.763        | 891.758         | 892.011         | 891.507        | A 32 |
| R 11 | 296.821         | 878.804        | 874.800         | 875.052         | 874.548        | R 31 |
| A 12 | 314.680         | 838.978        | 834.974         | <b>835.226</b>  | 834.723        | A 30 |
| K 13 | 348.704         | 821.220        | 817.215         | 817.467         | 816.963        | K 29 |
| A 14 | 364.463         | 789.190        | 785.185         | 785.443         | 784.939        | A 28 |
| K 15 | 396.487         | <b>771.437</b> | 767.432         | 767.684         | 767.180        | K 27 |
| S 16 | 418.245         | 739.413        | 735.408         | 735.660         | 735.156        | S 26 |
| R 17 | 457.270         | 717.895        | 713.890         | 714.142         | 713.638        | R 25 |
| S 18 | 479.028         | 678.630        | 674.625         | 674.877         | 674.373        | S 24 |
| S 19 | 500.786         | 656.872        | 652.867         | 653.119         | 652.615        | S 23 |
| R 20 | 539.811         | 635.114        | 631.109         | 631.361         | 630.857        | R 22 |
| A 21 | 557.571         | 606.089        | 602.084         | 602.336         | 601.833        | A 21 |
| G 22 | 571.826         | 578.329        | 574.324         | 574.576         | 574.072        | G 20 |
| L 23 | 600.097         | 564.074        | 560.069         | 560.321         | 559.817        | L 19 |
| Q 24 | 632.112         | 635.803        | 631.798         | 632.050         | 631.546        | Q 18 |
| F 25 | 668.879         | 593.788        | 499.783         | 500.035         | 499.531        | F 17 |
| P 26 | 693.142         | 487.021        | 483.016         | 483.268         | 482.764        | P 16 |
| V 27 | 717.809         | 442.758        | 438.753         | 439.005         | 438.501        | V 15 |
| G 28 | 732.164         | 417.991        | 413.986         | 414.238         | 413.734        | G 14 |
| R 29 | 771.190         | 401.735        | 397.731         | 397.982         | 397.478        | R 13 |
| V 30 | 805.937         | 384.710        | <b>367.705</b>  | 368.957         | <b>360.453</b> | V 12 |
| H 31 | 830.221         | 339.943        | 335.938         | 336.190         | 335.686        | H 11 |
| R 32 | 869.247         | 305.676        | 301.673         | 301.925         | 301.421        | R 10 |
| L 33 | 897.518         | 266.651        | 262.646         | 262.900         | 262.396        | L 9  |
| L 34 | 925.789         | 238.382        | 234.377         | 234.629         | 234.125        | L 8  |
| R 35 | 964.814         | 210.111        | 206.106         | 206.358         | 205.854        | R 7  |
| K 36 | 999.038         | 171.886        | 167.881         | 168.133         | 167.629        | K 6  |
| G 37 | <b>1011.093</b> | 139.062        | 135.057         | 135.309         | 134.805        | G 5  |
| N 38 | <b>1039.604</b> | 124.808        | 120.802         | 121.054         | 120.550        | N 4  |
| Y 39 | <b>1080.370</b> | 96.296         | 92.291          | 92.543          | 92.039         | Y 3  |
| A 40 | 1098.139        | 55.530         | 51.525          | 51.777          | 51.273         | A 2  |
| E 41 | 1130.300        | 37.771         | 33.766          | 34.018          | 33.514         | E 1  |



# sp | Q6GSS7 | H2A2A\_MOUSE

[Acetyl]SGR GK<sup>Acetyl</sup> QGGKARAKAKSRSSRAGLQFPVGRVHLLLRKGN<sup>42.01</sup>YAE

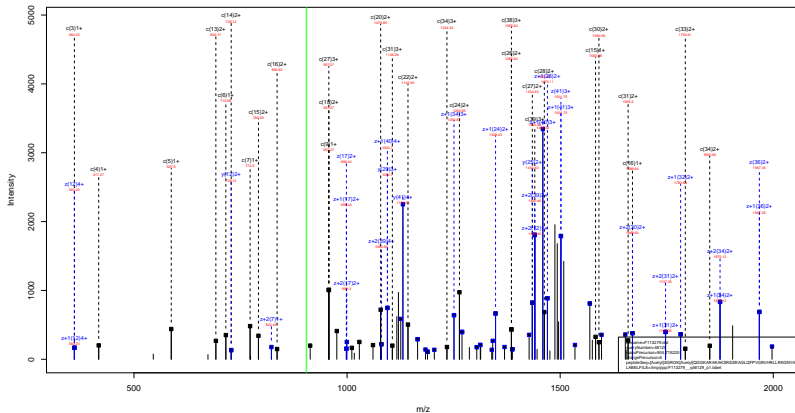

# sp | Q6GSS7 | H2A2A\_MOUSE

[Acetyl]SGRGK<sup>Acetyl</sup><sub>42.01</sub> QGGKARAKAKSRSSRAGLQFPVGRVHRLLRKGN<sup>YAE</sup>

- ▶ fragmentation table for charge state 1+
- ▶ specType=etd
- ▶ score=82.81
- ▶ F113279.dat
- ▶ query=q46129.p1
- ▶ precursor=904.715220
- ▶ chargePrecursor=5
- ▶ itol=0.5

| AA | c  | y               | z+1      | z+2             | z               | AA              |       |
|----|----|-----------------|----------|-----------------|-----------------|-----------------|-------|
| S  | 1  | 147.076         | 4519.521 | 4503.507        | 0.000           | 4502.494        | S[41] |
| G  | 2  | 204.098         | 4390.478 | 4374.459        | 0.000           | 4373.451        | G[40] |
| R  | 3  | <b>360.199</b>  | 4333.457 | 4317.438        | 4318.446        | 4116.438        | R[30] |
| G  | 4  | <b>417.220</b>  | 4177.355 | 4161.337        | 4162.345        | 4140.329        | G[38] |
| K  | 5  | <b>587.326</b>  | 4120.334 | 4104.315        | 4105.323        | 4103.307        | K[37] |
| Q  | 6  | <b>715.345</b>  | 3955.298 | 3939.279        | 3935.278        | 3933.262        | Q[36] |
| G  | 7  | <b>772.406</b>  | 3822.173 | 3806.155        | 3807.159        | 3885.142        | G[35] |
| G  | 8  | 829.427         | 3705.148 | 3749.130        | 3750.138        | 3748.122        | G[34] |
| K  | 9  | <b>957.522</b>  | 3706.127 | 3690.108        | 3693.116        | 3691.100        | K[33] |
| A  | 10 | <b>1028.560</b> | 3530.032 | 3564.013        | 3505.021        | 3563.009        | A[32] |
| R  | 11 | 1184.661        | 3538.995 | 3492.976        | 3493.984        | 3491.968        | R[31] |
| A  | 12 | 1255.698        | 3352.894 | 3336.875        | 3337.883        | 3335.867        | A[30] |
| R  | 13 | 1383.793        | 3281.857 | 3265.838        | 3266.846        | 3264.830        | R[29] |
| A  | 14 | 1454.830        | 3153.762 | 3137.743        | 3138.751        | 3136.735        | A[28] |
| K  | 15 | <b>1562.925</b> | 3082.725 | 3066.706        | 3067.714        | 3065.698        | K[27] |
| S  | 16 | <b>1669.957</b> | 2954.630 | 2938.611        | 2939.619        | 2937.603        | S[26] |
| R  | 17 | 1826.058        | 2867.588 | 2881.570        | 2852.567        | 2890.571        | R[25] |
| S  | 18 | 1913.090        | 2713.495 | 2709.477        | 2696.468        | 2694.452        | S[24] |
| S  | 19 | 2000.122        | 2624.464 | 2608.446        | 2609.454        | 2607.438        | S[23] |
| R  | 20 | 2186.223        | 2537.432 | 2521.414        | 2522.422        | 2520.406        | R[22] |
| A  | 21 | 2227.260        | 2401.331 | 2385.313        | 2396.320        | 2384.305        | A[21] |
| G  | 22 | 2284.282        | 2310.294 | 2294.275        | 2295.283        | 2293.267        | G[20] |
| L  | 23 | 2307.306        | 2253.272 | 2237.254        | 2238.262        | 2236.246        | L[19] |
| Q  | 24 | 2525.424        | 2140.189 | 2124.170        | 2125.178        | 2123.162        | Q[18] |
| F  | 25 | 2672.493        | 2012.130 | 1996.111        | <b>1997.119</b> | 1995.104        | F[17] |
| F  | 26 | 2769.546        | 1895.062 | 1849.043        | 1850.051        | 1848.035        | F[16] |
| V  | 27 | 2868.614        | 1768.009 | 1753.990        | 1752.998        | 1750.982        | V[15] |
| G  | 28 | 2925.635        | 1668.940 | <b>1652.922</b> | 1653.930        | 1651.914        | G[14] |
| R  | 29 | 3021.717        | 1611.919 | 1595.900        | <b>1596.908</b> | 1594.892        | R[13] |
| V  | 30 | 3180.805        | 1455.818 | 1439.799        | <b>1440.807</b> | 1438.792        | V[12] |
| H  | 31 | 3317.864        | 1356.749 | 1340.731        | <b>1341.739</b> | <b>1339.723</b> | H[11] |
| R  | 32 | 3473.965        | 1219.691 | 1203.672        | <b>1204.680</b> | 1202.664        | R[10] |
| L  | 33 | 3587.049        | 1063.589 | 1047.571        | 1048.579        | 1046.563        | L[9]  |
| L  | 34 | 3700.133        | 950.500  | 934.482         | 935.490         | 933.474         | L[8]  |
| R  | 35 | 3856.234        | 837.421  | 821.403         | <b>822.410</b>  | 820.394         | R[7]  |
| K  | 36 | 3984.329        | 681.320  | 665.302         | 666.309         | 664.293         | K[6]  |
| G  | 37 | 4041.351        | 553.225  | 537.207         | 538.214         | 536.199         | G[5]  |
| N  | 38 | 4155.394        | 496.204  | 480.185         | 481.193         | 479.177         | N[4]  |
| V  | 39 | 4318.457        | 382.161  | 366.143         | 367.150         | 365.134         | V[3]  |
| A  | 40 | 4389.494        | 219.098  | 203.079         | 204.087         | 202.071         | A[2]  |
| E  | 41 | 4518.537        | 148.060  | 132.042         | 133.050         | 131.034         | E[1]  |

# sp | Q6GSS7 | H2A2A\_MOUSE

[Acetyl]SGR<sup>Acetyl</sup>RGK<sub>42.01</sub> QGGKARAKAKSRSSRAGLQFPVGRVHRLLRKGN<sup>YAE</sup>

- ▶ fragmentation table for charge state 2+
- ▶ specType=etd
- ▶ score=82.81
- ▶ F113279.dat
- ▶ query=q46129.p1
- ▶ precursor=904.715220
- ▶ chargePrecursor=5
- ▶ itol=0.5

| AA | c  | y               | #s1             | #s2             | z               | AA              |       |
|----|----|-----------------|-----------------|-----------------|-----------------|-----------------|-------|
| S  | 1  | 74.062          | 2502.294        | 2282.255        | 8.804           | 2251.781        | S[41] |
| G  | 2  | 102.553         | 2195.743        | 2187.733        | 0.504           | 2187.220        | G[49] |
| R  | 3  | 180.603         | 2167.232        | 2159.233        | 2159.726        | 2158.710        | R[39] |
| G  | 4  | 209.114         | 2089.181        | 2081.172        | 2081.676        | 2080.660        | G[38] |
| K  | 5  | 294.187         | 2050.671        | 2052.681        | 2053.105        | 2052.157        | K[37] |
| G  | 6  | 358.196         | 1975.618        | <b>1967.608</b> | 1968.112        | <b>1967.105</b> | G[36] |
| G  | 7  | 388.377         | 1913.589        | 1914.579        | 1914.983        | 1913.973        | G[35] |
| G  | 8  | 435.217         | 1883.078        | <b>1875.068</b> | <b>1875.572</b> | 1874.565        | G[34] |
| K  | 9  | 479.205         | 1854.567        | 1846.558        | 1847.062        | 1846.054        | K[33] |
| A  | 10 | 514.203         | 1790.520        | <b>1782.510</b> | <b>1783.014</b> | 1782.000        | A[32] |
| R  | 11 | 562.834         | 1735.001        | <b>1746.992</b> | <b>1747.496</b> | 1746.488        | R[31] |
| A  | 12 | 608.953         | 1688.943        | 1689.943        | <b>1689.945</b> | 1688.939        | A[30] |
| K  | 13 | <b>692.400</b>  | 1643.433        | 1633.423        | 1633.927        | 1632.910        | K[29] |
| A  | 14 | <b>727.919</b>  | 1577.984        | <b>1569.375</b> | <b>1569.879</b> | 1568.871        | A[28] |
| K  | 15 | <b>791.966</b>  | 1541.966        | 1533.957        | <b>1534.360</b> | 1533.351        | K[27] |
| S  | 16 | <b>835.482</b>  | 1477.818        | <b>1469.809</b> | <b>1470.313</b> | 1469.303        | S[26] |
| R  | 17 | <b>913.533</b>  | <b>1434.302</b> | 1424.292        | <b>1426.797</b> | 1425.780        | R[25] |
| S  | 18 | <b>927.609</b>  | 1379.796        | <b>1348.243</b> | <b>1348.746</b> | 1347.730        | S[24] |
| S  | 19 | 1000.555        | <b>1312.736</b> | <b>1304.726</b> | 1305.230        | <b>1304.223</b> | S[23] |
| R  | 20 | <b>1078.615</b> | <b>1269.220</b> | 1261.210        | 1261.714        | 1260.707        | R[22] |
| A  | 21 | 1114.134        | 1191.169        | 1183.160        | <b>1183.664</b> | 1182.656        | A[21] |
| G  | 22 | <b>1142.644</b> | 1135.051        | 1147.041        | 1148.045        | 1147.037        | G[20] |
| L  | 23 | 1159.973        | 1127.140        | 1119.133        | 1119.858        | 1118.851        | L[19] |
| G  | 24 | <b>1263.216</b> | 1063.588        | 1062.589        | 1063.093        | 1062.085        | G[18] |
| F  | 25 | 1336.750        | 1008.599        | <b>998.559</b>  | <b>999.063</b>  | <b>998.055</b>  | F[17] |
| F  | 26 | <b>1385.276</b> | 933.034         | 925.025         | 925.529         | 924.521         | F[16] |
| V  | 27 | <b>1434.811</b> | 884.508         | 876.499         | 877.003         | 876.993         | V[15] |
| G  | 28 | <b>1463.321</b> | 834.974         | 826.965         | 827.468         | 826.461         | G[14] |
| R  | 29 | 1543.874        | 808.483         | 800.474         | 800.978         | 799.970         | R[13] |
| V  | 30 | <b>1590.906</b> | <b>728.413</b>  | 720.403         | 720.907         | 719.899         | V[12] |
| H  | 31 | <b>1659.436</b> | 678.878         | 670.869         | 671.373         | 670.365         | H[11] |
| R  | 32 | 1737.486        | 610.349         | 602.340         | 602.843         | 601.835         | R[10] |
| L  | 33 | <b>1794.028</b> | 532.209         | 524.200         | 524.703         | 523.695         | L[9]  |
| L  | 34 | <b>1850.570</b> | 478.756         | 469.747         | 469.251         | 468.243         | L[8]  |
| R  | 35 | 1928.621        | 419.214         | 411.205         | 411.709         | 410.701         | R[7]  |
| K  | 36 | 1992.668        | 341.164         | 333.154         | 333.658         | 332.650         | K[6]  |
| G  | 37 | 2021.179        | 277.116         | 269.107         | 269.611         | 268.603         | G[5]  |
| N  | 38 | 2078.200        | 248.606         | 240.596         | 241.100         | 240.092         | N[4]  |
| V  | 39 | 2159.232        | 181.564         | 183.575         | 184.079         | 183.071         | V[3]  |
| A  | 40 | 2195.261        | 110.054         | 109.043         | 109.547         | 108.539         | A[2]  |
| E  | 41 | 2259.772        | 74.534          | 66.524          | 67.028          | 66.021          | E[1]  |

# sp | Q6GSS7 | H2A2A\_MOUSE

[Acetyl]SGRGRK<sup>Acetyl</sup><sub>42.01</sub> QGGKARAKAKSRSSRAGLQFPVGRVHRLLRKGN<sup>YAE</sup>

- ▶ fragmentation table for charge state 3+
- ▶ specType=etd
- ▶ score=82.81
- ▶ F113279.dat
- ▶ query=q46129.p1
- ▶ precursor=904.715220
- ▶ chargePrecursor=5
- ▶ itol=0.5

| AA | c  | y               | #=1             | #=2             | #=3             | AA                    |
|----|----|-----------------|-----------------|-----------------|-----------------|-----------------------|
| S  | 1  | 489.697         | 1501.839        | 0.872           | <b>1501.563</b> | S(41)                 |
| G  | 2  | 66.704          | 1464.184        | <b>1458.825</b> | 0.672           | 1458.482 G(49)        |
| R  | 3  | 1307.718        | 1445.157        | 1439.817        | <b>1440.153</b> | 1439.482 R(39)        |
| G  | 4  | 139.745         | 1393.123        | <b>1387.764</b> | <b>1388.120</b> | <b>1387.448</b> G(38) |
| K  | 5  | 196.447         | 1374.116        | 1368.777        | <b>1369.113</b> | 1368.441 K(37)        |
| G  | 6  | 239.133         | 1347.444        | <b>1342.012</b> | <b>1342.411</b> | 1341.730 G(36)        |
| G  | 7  | 288.140         | 1314.726        | <b>1269.389</b> | <b>1269.725</b> | 1269.055 G(35)        |
| G  | 8  | 277.147         | 1295.721        | <b>1250.381</b> | <b>1250.717</b> | 1250.045 G(34)        |
| K  | 9  | 319.646         | 1236.714        | 1231.374        | 1231.710        | 1231.038 K(33)        |
| A  | 10 | 383.525         | 1194.016        | <b>1188.676</b> | <b>1189.012</b> | <b>1188.340</b> A(32) |
| R  | 11 | 395.558         | 1170.338        | <b>1164.997</b> | <b>1165.333</b> | 1164.661 R(31)        |
| A  | 12 | 419.237         | 1138.303        | 1133.963        | 1133.299        | 1132.627 A(30)        |
| K  | 13 | 461.936         | <b>1094.624</b> | 1089.284        | 1089.620        | 1088.944 K(29)        |
| A  | 14 | 485.615         | 1051.925        | 1046.585        | 1046.922        | 1046.250 A(28)        |
| K  | 15 | 528.313         | 1029.246        | 1022.907        | 1023.243        | 1022.571 K(27)        |
| S  | 16 | 557.324         | 985.548         | 980.208         | 980.544         | 979.873 S(26)         |
| R  | 17 | 609.258         | 956.517         | 951.178         | 951.514         | 950.842 R(25)         |
| S  | 18 | 638.268         | 904.504         | 900.164         | 900.500         | 899.829 S(24)         |
| S  | 19 | 687.379         | 875.493         | 870.153         | 870.489         | 869.817 S(23)         |
| R  | 20 | 719.413         | 846.482         | 841.143         | 841.479         | 840.807 R(22)         |
| A  | 21 | 743.092         | 794.449         | 789.109         | 789.445         | 788.773 A(21)         |
| G  | 22 | 762.099         | 770.770         | 765.430         | 765.766         | 765.094 G(20)         |
| L  | 23 | 799.273         | 724.762         | 746.423         | 746.759         | 746.087 L(19)         |
| G  | 24 | 842.480         | 714.085         | 708.735         | 709.064         | 708.392 G(18)         |
| F  | 25 | 891.592         | 671.382         | 666.042         | 666.378         | 665.707 F(17)         |
| F  | 26 | 923.853         | 622.359         | 617.019         | 617.355         | 616.683 F(16)         |
| V  | 27 | <b>956.876</b>  | 590.006         | 584.666         | 585.004         | 584.332 V(15)         |
| G  | 28 | <b>975.863</b>  | 558.985         | 553.645         | 553.981         | 553.309 G(14)         |
| R  | 29 | 1022.618        | 519.976         | 514.636         | 514.974         | 514.302 R(13)         |
| V  | 30 | <b>1060.940</b> | 485.944         | 480.604         | 480.941         | 480.269 V(12)         |
| H  | 31 | <b>1106.626</b> | 452.921         | 447.581         | 447.918         | 447.246 H(11)         |
| R  | 32 | 1158.660        | 407.235         | 401.895         | 402.231         | 401.560 R(10)         |
| L  | 33 | 1196.355        | 355.201         | 349.862         | 350.198         | 349.526 L(9)          |
| L  | 34 | <b>1234.049</b> | 319.509         | 314.169         | 314.505         | 313.833 L(8)          |
| R  | 35 | 1258.948        | 279.812         | 274.472         | 274.808         | 274.136 R(7)          |
| K  | 36 | 1328.781        | 227.778         | 222.438         | 222.775         | 222.103 K(6)          |
| G  | 37 | 1347.788        | 185.880         | 179.740         | 180.076         | 179.404 G(5)          |
| N  | 38 | <b>1385.803</b> | 166.873         | 160.733         | 161.069         | 160.397 N(4)          |
| V  | 39 | <b>1440.157</b> | 138.068         | 132.728         | 133.065         | 132.393 V(3)          |
| A  | 40 | 1463.876        | 83.348          | 80.384          | 80.720          | 80.048 A(2)           |
| E  | 41 | 1506.850        | 50.025          | 44.685          | 45.021          | 44.349 E(1)           |

# sp | Q6GSS7 | H2A2A\_MOUSE

[Acetyl]SGR<sup>Acetyl</sup>RGK<sub>42.01</sub> QGGKARAKAKSRSSRAGLQFPVGRVHRLLRKGN<sup>YAE</sup>

- ▶ fragmentation table for charge state 4+
- ▶ specType=etd
- ▶ score=82.81
- ▶ F113279.dat
- ▶ query=q46129\_p1
- ▶ precursor=904.715220
- ▶ chargePrecursor=5
- ▶ itol=0.5

| AA    | c               | p               | #±1             | #±2             | #               | AA    |
|-------|-----------------|-----------------|-----------------|-----------------|-----------------|-------|
| S[1]  | 37.505          | <b>1130.636</b> | 1128.631        | 0.705           | <b>1126.370</b> | S[41] |
| G[2]  | 51.780          | 1028.375        | <b>1094.370</b> | 0.795           | 1024.115        | G[40] |
| R[3]  | 90.805          | 1084.120        | 1080.115        | <b>1080.367</b> | 1079.861        | R[39] |
| G[4]  | 109.001         | 1045.094        | 1041.090        | 1041.342        | 1040.839        | G[38] |
| K[5]  | 147.587         | 1030.839        | 1026.834        | 1027.086        | 1026.582        | K[37] |
| G[6]  | 179.602         | 988.312         | 984.308         | 984.560         | 984.056         | G[36] |
| G[7]  | 193.857         | 956.296         | 952.291         | 952.543         | 952.040         | G[35] |
| G[8]  | 208.112         | 942.043         | 938.038         | 938.290         | 937.787         | G[34] |
| K[9]  | 240.136         | 927.787         | 923.783         | 924.034         | 923.531         | K[33] |
| A[10] | 257.895         | 895.761         | 891.756         | 892.011         | 891.507         | A[32] |
| R[11] | 296.921         | 878.004         | 873.999         | 874.251         | 873.748         | R[31] |
| A[12] | 314.680         | 838.978         | 834.974         | 835.226         | 834.723         | A[30] |
| K[13] | 346.704         | 821.220         | 817.215         | 817.467         | 816.964         | K[29] |
| A[14] | 384.443         | 789.199         | 785.195         | 785.447         | 784.944         | A[28] |
| K[15] | 396.497         | 771.431         | 767.427         | 767.679         | 767.176         | K[27] |
| S[16] | 418.245         | 739.413         | 735.408         | 735.660         | 735.157         | S[26] |
| R[17] | 457.270         | 717.655         | 713.651         | 713.902         | 713.400         | R[25] |
| S[18] | 479.028         | 678.590         | 674.585         | 674.837         | 674.334         | S[24] |
| S[19] | 500.786         | 656.872         | 652.867         | 653.119         | 652.616         | S[23] |
| R[20] | 539.811         | 635.114         | 631.109         | 631.361         | 630.857         | R[22] |
| A[21] | 557.571         | 596.089         | 592.084         | 592.336         | 591.832         | A[21] |
| G[22] | 571.826         | 578.329         | 574.324         | 574.576         | 574.072         | G[20] |
| L[23] | 603.087         | 648.074         | 644.069         | 644.321         | 643.818         | L[19] |
| Q[24] | 632.112         | 635.803         | 631.798         | 632.050         | 631.546         | Q[18] |
| F[25] | 668.879         | 593.788         | 499.783         | 500.035         | 499.531         | F[17] |
| F[26] | 693.142         | 667.021         | 463.016         | 463.268         | 462.764         | F[16] |
| V[27] | 717.909         | 442.758         | 438.753         | 439.005         | 438.501         | V[15] |
| G[28] | 752.104         | 417.991         | 413.986         | 414.238         | 413.734         | G[14] |
| R[29] | 771.190         | 403.735         | 399.731         | 399.982         | 399.478         | R[13] |
| V[30] | 795.957         | 364.710         | <b>360.705</b>  | 360.957         | <b>360.453</b>  | V[12] |
| H[31] | 830.221         | 339.943         | 335.938         | 336.190         | 335.686         | H[11] |
| R[32] | 869.247         | 305.678         | 301.673         | 301.925         | 301.421         | R[10] |
| L[33] | 897.518         | 266.657         | 262.648         | 262.900         | 262.396         | L[9]  |
| L[34] | 925.989         | 238.362         | 234.357         | 234.608         | 234.104         | L[8]  |
| R[35] | 954.814         | 210.111         | 206.106         | 206.358         | 205.854         | R[7]  |
| K[36] | 996.838         | 171.088         | 167.081         | 167.333         | 166.829         | K[6]  |
| G[37] | <b>1011.093</b> | 139.062         | 135.057         | 135.309         | 134.805         | G[5]  |
| N[38] | 1039.604        | 124.806         | 120.802         | 121.054         | 120.550         | N[4]  |
| Y[39] | <b>1080.370</b> | 96.296          | 92.291          | 92.543          | 92.039          | Y[3]  |
| A[40] | 1098.419        | 58.530          | 54.525          | 54.777          | 54.272          | A[2]  |
| E[41] | 1130.590        | 37.771          | 33.766          | 34.018          | 33.514          | E[1]  |

# sp | Q8CGP5 | H2A1F\_MOUSE

SHHK Acetyl PKGK  
42.01

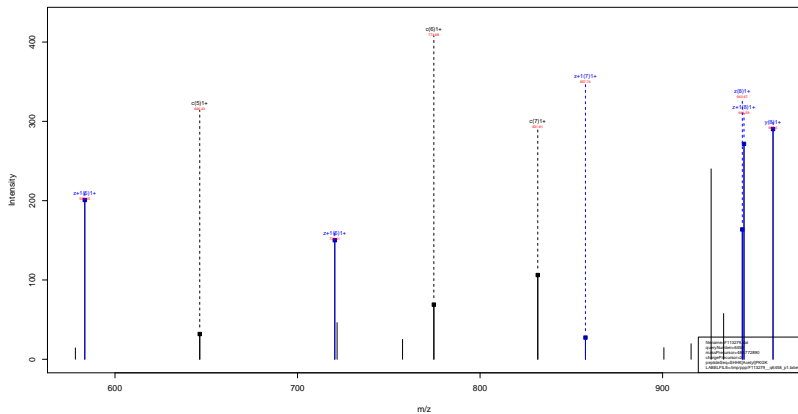

# sp | Q8CGP5 | H2A1F\_MOUSE

SHHK<sup>Acetyl</sup> PKGK  
42.01

- ▶ fragmentation table for charge state 1+
- ▶ specType=etd
- ▶ score=38.34
- ▶ F113279.dat
- ▶ query=q6458\_p1
- ▶ precursor=480.772890
- ▶ chargePrecursor=2
- ▶ itol=0.5

| AA   | c              | y              | z+1            | z+2     | z              | AA   |
|------|----------------|----------------|----------------|---------|----------------|------|
| S[1] | 108.066        | <b>960.537</b> | <b>944.519</b> | 0.000   | <b>943.511</b> | S[8] |
| H[2] | 242.125        | 873.505        | <b>857.487</b> | 0.000   | 856.479        | H[7] |
| H[3] | 379.184        | 736.446        | <b>720.428</b> | 0.000   | 719.420        | H[6] |
| K[4] | 549.289        | 599.388        | <b>583.369</b> | 584.377 | 582.361        | K[5] |
| P[5] | <b>646.342</b> | 429.282        | 413.263        | 414.271 | 412.255        | P[4] |
| K[6] | <b>774.437</b> | 332.229        | 316.211        | 317.218 | 315.203        | K[3] |
| G[7] | <b>831.458</b> | 204.134        | 188.116        | 189.123 | 187.108        | G[2] |
| K[8] | 959.553        | 147.113        | 131.094        | 132.102 | 130.086        | K[1] |





# sp | P15864 | H12\_MOUSE

LITK<sup>Acetyl</sup> AVAASKE  
42.01

- ▶ fragmentation table for charge state 1+
- ▶ specType=cid
- ▶ score=46.27
- ▶ F113280.dat
- ▶ query=q17648\_p1
- ▶ precursor=586.847440
- ▶ chargePrecursor=2
- ▶ itol=0.5

| AA    | a              | y*             | a $\beta$      | b               | b*             | b $\beta$      | y              | y*             | y $\beta$      | AA    |
|-------|----------------|----------------|----------------|-----------------|----------------|----------------|----------------|----------------|----------------|-------|
| L[1]  | 88.998         | 0.000          | 0.000          | 114.093         | 0.000          | 0.000          | 117.280        | 119.093        | 119.093        | L[11] |
| T[2]  | <b>159.180</b> | 0.000          | 0.000          | 229.439         | 0.000          | 0.000          | 109.894        | 104.729        | 204.364        | T[9]  |
| T[3]  | 200.528        | 0.000          | 282.211        | <b>328.221</b>  | 0.000          | 310.211        | <b>846.520</b> | 929.484        | 1028.510       | T[9]  |
| K[4]  |                | <b>451.207</b> | <b>521.360</b> | <b>498.520</b>  | <b>761.302</b> |                | <b>845.473</b> | 528.444        | 767.302        | K[8]  |
| R[5]  | <b>341.371</b> | 624.982        | <b>521.360</b> | <b>565.366</b>  | <b>552.339</b> | <b>351.358</b> | <b>475.367</b> | 589.354        | <b>657.357</b> | A[7]  |
| V[6]  | 240.578        | 523.433        | 625.425        | <b>668.434</b>  | 663.488        | <b>850.424</b> | <b>664.338</b> | 589.354        | 768.338        | V[6]  |
| A[7]  | 211.476        | 684.489        | 683.488        | <b>758.471</b>  | 722.445        | <b>721.461</b> | <b>505.282</b> | 688.238        | 867.261        | A[6]  |
| A[8]  | 192.513        | 785.489        | 784.503        | <b>810.500</b>  | 793.462        | <b>792.498</b> | <b>434.225</b> | 417.090        | <b>416.214</b> | A[4]  |
| S[9]  | 380.848        | 823.519        | 823.529        | <b>891.540</b>  | 886.514        | <b>879.530</b> | <b>361.187</b> | 369.051        | <b>345.177</b> | S[9]  |
| R[10] | 397.840        | 880.514        | 979.433        | <b>1025.635</b> | 1008.609       | 1007.625       | <b>276.155</b> | <b>258.128</b> | <b>258.145</b> | K[6]  |
| E[11] | 1128.683       | 1109.889       | 1108.871       | 1154.870        | 1137.851       | 1136.867       | 148.888        | 0.000          | 138.888        | E[1]  |

# sp | P15864 | H12\_MOUSE

LITKAVAASK<sup>Acetyl</sup>E  
42.01

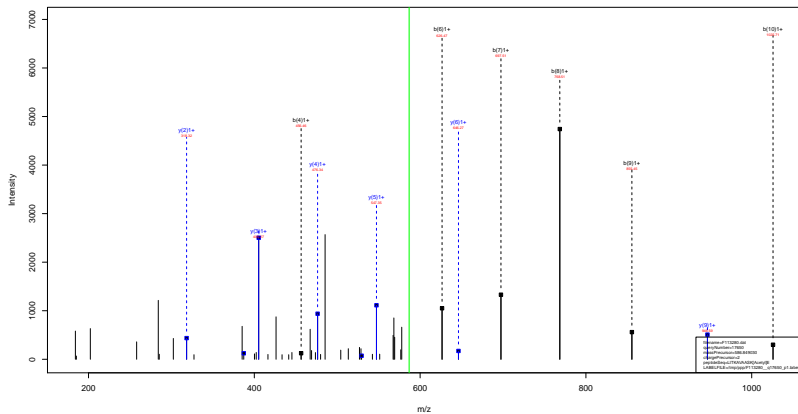

# sp | P15864 | H12\_MOUSE

LITKAVAASK<sup>Acetyl</sup>E  
42.01

- ▶ fragmentation table for charge state 1+
- ▶ specType=cid
- ▶ score=49.73
- ▶ F113280.dat
- ▶ query=q17650\_p1
- ▶ precursor=586.849030
- ▶ chargePrecursor=2
- ▶ itol=0.5

| AA  | a        | y <sup>n</sup> | a <sub>0</sub> | b               | b <sup>m</sup> | b <sub>0</sub> | y              | y <sup>m</sup> | y <sub>0</sub> | AA   |
|-----|----------|----------------|----------------|-----------------|----------------|----------------|----------------|----------------|----------------|------|
| L1  | 86.096   | 0.000          | 0.000          | 114.092         | 0.000          | 0.000          | 117.280        | 1150.952       | 1154.078       | L111 |
| T2  | 109.330  | 0.000          | 0.000          | 129.326         | 0.000          | 0.000          | 1309.664       | 1342.722       | 1344.304       | T00  |
| T3  | 300.728  | 0.000          | 282.211        | 326.221         | 0.000          | 310.211        | <b>946.520</b> | 979.484        | 985.510        | T00  |
| K4  | 412.512  | 411.289        | 430.151        | <b>456.318</b>  | 416.201        | 416.201        | 381.411        | 528.444        | 527.402        | K06  |
| A5  | 489.404  | 482.174        | 481.366        | 507             | 528.529        | 528.514        | 117.111        | 786.381        | 789.281        | A07  |
| V6  | 598.429  | 591.432        | 589.418        | <b>626.424</b>  | 608.397        | 608.413        | <b>646.341</b> | 679.324        | 628.330        | V06  |
| A7  | 600.404  | 602.439        | 601.431        | <b>607.461</b>  | 601.434        | 676.430        | <b>547.272</b> | 130.240        | <b>529.262</b> | A03  |
| A8  | 740.503  | 723.438        | 722.492        | <b>768.688</b>  | 751.411        | 750.469        | <b>476.235</b> | 490.200        | 452.215        | A04  |
| S9  | 877.578  | 870.563        | 869.529        | <b>855.539</b>  | 876.501        | 877.570        | <b>405.189</b> | 389.271        | <b>387.187</b> | S01  |
| R10 | 997.640  | 980.514        | 979.631        | <b>1025.615</b> | 1008.609       | 1007.625       | <b>318.166</b> | 305.110        | 300.031        | R02  |
| E11 | 1124.683 | 1109.869       | 1108.971       | 1154.676        | 1137.651       | 1136.669       | 148.660        | 0.000          | 130.000        | E01  |

# sp | Q8R1M2 | H2AJ\_MOUSE

SQKVKSK Acetyl  
42.01

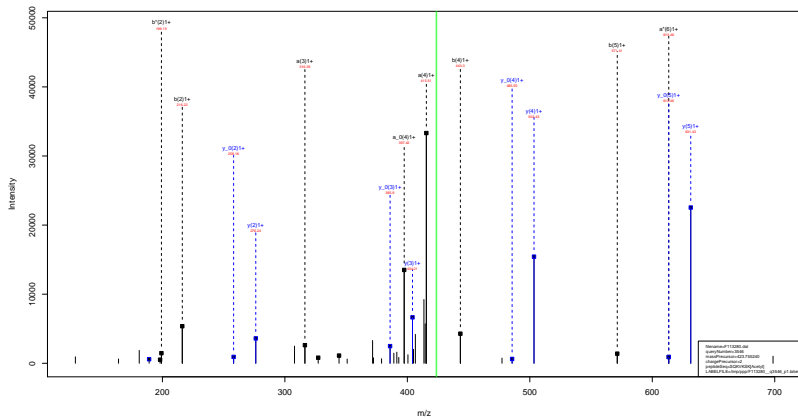

# sp | Q8R1M2 | H2AJ\_MOUSE

SQKVKSK <sup>Acetyl</sup>  
42.01

- ▶ fragmentation table for charge state 1+
- ▶ specType=cid
- ▶ score=38.67
- ▶ F113280.dat
- ▶ query=q3546.p1
- ▶ precursor=423.755240
- ▶ chargePrecursor=2
- ▶ itol=0.5

| AA   | a              | a*             | a $\beta$      | b              | b*             | b $\beta$      | y              | y*      | y $\beta$      | AA   |
|------|----------------|----------------|----------------|----------------|----------------|----------------|----------------|---------|----------------|------|
| S(1) | 60.044         | 0.000          | 40.034         | 68.030         | 0.000          | 70.000         | 686.004        | 829.476 | 828.494        | S(2) |
| Q(2) | 108.103        | 171.076        | 170.080        | <b>216.090</b> | <b>199.071</b> | <b>198.067</b> | 708.472        | 742.440 | 741.460        | Q(3) |
| R(3) | <b>316.146</b> | 409.111        | 408.103        | <b>344.121</b> | <b>327.106</b> | 326.102        | <b>631.414</b> | 614.389 | <b>613.403</b> | R(4) |
| V(4) | <b>415.266</b> | 508.240        | <b>397.256</b> | <b>443.261</b> | 425.230        | 425.251        | <b>593.319</b> | 485.270 | <b>485.308</b> | V(5) |
| K(5) | 943.061        | 108.330        | 105.351        | <b>571.356</b> | 554.330        | 553.346        | <b>404.250</b> | 387.224 | <b>386.240</b> | K(6) |
| S(6) | 0.00.003       | <b>613.367</b> | 612.361        | 650.360        | 641.362        | 640.370        | <b>276.155</b> | 250.120 | <b>258.145</b> | S(7) |
| R(7) | 888.409        | 103.472        | 102.468        | 828.460        | 811.461        | 810.463        | <b>189.123</b> | 212.080 | 0.000          | R(8) |



# sp | P84244 | H33\_MOUSE

IAQDFKTDLR <sup>Dimethyl</sup> 28.03 FQSAAIGALQE

- ▶ fragmentation table for charge state 1+
- ▶ specType=cid
- ▶ score=55.96
- ▶ F113280.dat
- ▶ query=q45999\_p1
- ▶ precursor=784.085800
- ▶ chargePrecursor=3
- ▶ itol=0.5

| AA | a        | a'       | a,b      | b        | b'       | b,b'     | y              | y'             | y,b            | AA          |
|----|----------|----------|----------|----------|----------|----------|----------------|----------------|----------------|-------------|
| I  | 98.698   | 0.000    | 0.000    | 114.091  | 0.000    | 0.000    | 2050.246       | 2153.214       | 2352.232       | I <b>21</b> |
| A  | 117.134  | 0.000    | 0.000    | 105.129  | 0.000    | 0.000    | 2227.150       | 2225.130       | 2219.148       | A <b>20</b> |
| Q  | 126.012  | 282.000  | 0.000    | 113.181  | 286.000  | 0.000    | 2180.110       | 2174.090       | 2146.108       | Q <b>19</b> |
| D  | 400.219  | 363.193  | 382.208  | 426.214  | 411.187  | 410.203  | 2678.090       | 2661.074       | 2630.100       | D <b>18</b> |
| F  | 247.207  | 520.201  | 520.217  | 375.203  | 356.206  | 357.212  | 1624.031       | 1608.001       | 1605.017       | F <b>17</b> |
| K  | 625.582  | 658.208  | 687.212  | 304.372  | 688.211  | 695.207  | 3725.065       | 3750.019       | 3757.054       | K <b>16</b> |
| T  | 479.436  | 390.404  | 704.420  | 304.426  | 397.388  | 398.414  | 1843.000       | 1830.044       | 1825.078       | T <b>15</b> |
| D  | 391.457  | 314.411  | 373.440  | 309.463  | 360.425  | 361.441  | 1546.022       | 1529.048       | 1528.011       | D <b>14</b> |
| L  | 104.541  | 687.533  | 688.531  | 102.532  | 683.530  | 681.528  | 1421.000       | 1414.000       | 1411.000       | L <b>13</b> |
| R  | 1188.74  | 1171.947 | 1171.961 | 1178.966 | 1169.954 | 1169.952 | 2189.010       | 2181.000       | 2168.010       | R <b>12</b> |
| F  | 1326.742 | 1318.735 | 1317.731 | 1263.737 | 1248.739 | 1246.726 | 1134.979       | 1117.963       | 1116.968       | F <b>11</b> |
| Q  | 163.801  | 1449.714 | 1445.700 | 1461.705 | 1474.709 | 1471.691 | 387.511        | 391.504        | 389.500        | Q <b>10</b> |
| S  | 1502.833 | 1523.826 | 1532.822 | 1478.827 | 1501.831 | 1500.817 | 387.492        | 382.426        | 381.441        | S <b>9</b>  |
| A  | 1011.818 | 1004.813 | 1003.809 | 1046.806 | 1052.810 | 1051.804 | <b>772.420</b> | 795.393        | 794.400        | A <b>8</b>  |
| A  | 1061.807 | 1075.800 | 1074.802 | 1125.803 | 1103.815 | 1102.801 | <b>701.381</b> | <b>684.358</b> | <b>683.372</b> | A <b>7</b>  |
| I  | 1035.892 | 1100.884 | 1107.880 | 1153.886 | 1116.899 | 1115.893 | <b>630.346</b> | 613.319        | 612.310        | I <b>6</b>  |
| C  | 1011.812 | 1002.808 | 1001.804 | 1001.801 | 1011.804 | 1012.807 | <b>517.262</b> | 500.235        | 499.241        | C <b>5</b>  |
| A  | 1004.848 | 1017.823 | 1018.820 | 1065.844 | 1048.818 | 1044.814 | <b>463.262</b> | 445.214        | 444.230        | A <b>4</b>  |
| L  | 1001.831 | 1000.817 | 1000.812 | 1000.810 | 1006.812 | 1007.811 | <b>389.203</b> | 374.171        | 371.191        | L <b>3</b>  |
| Q  | 1015.892 | 1038.888 | 1037.882 | 1063.891 | 1036.880 | 1035.876 | <b>276.119</b> | <b>259.092</b> | <b>258.108</b> | Q <b>2</b>  |
| E  | 1004.816 | 1007.808 | 1006.803 | 1032.809 | 1015.803 | 1014.810 | 148.980        | 0.000          | 138.990        | E <b>1</b>  |

# sp | P84244 | H33\_MOUSE

IAQDFKTDLR <sup>Dimethyl</sup> 28.03 FQSA AIGALQE

- ▶ fragmentation table for charge state 2+
- ▶ specType=cid
- ▶ score=55.96
- ▶ F113280.dat
- ▶ query=q45999\_p1
- ▶ precursor=784.085800
- ▶ chargePrecursor=3
- ▶ itol=0.5

| AA    | a              | a'      | a <sub>0</sub> | b               | b'     | b <sub>0</sub> | y        | y'       | y <sub>0</sub> | AA    |
|-------|----------------|---------|----------------|-----------------|--------|----------------|----------|----------|----------------|-------|
| I(3)  | 411.052        | 0.539   | 0.504          | 87.943          | 0.504  | 0.509          | 1119.222 | 1107.110 | 1106.832       | I(2)  |
| A(3)  | 78.072         | 0.539   | 0.504          | 87.959          | 0.504  | 0.504          | 1119.287 | 1118.599 | 1118.078       | A(2)  |
| Q(3)  | 143.100        | 1.04300 | 1.0204         | 172.087         | 1.0204 | 1.024          | 1025.571 | 1019.026 | 1014.502       | Q(2)  |
| D(4)  | 208.212        | 1.0212  | 1.0049         | 124.911         | 1.0049 | 1.009          | 1019.214 | 1018.021 | 1017.522       | D(3)  |
| F(5)  | 274.247        | 1.0163  | 1.0014         | 108.141         | 1.0014 | 1.003          | 878.146  | 881.201  | 881.011        | F(4)  |
| K(6)  | 338.295        | 1.01662 | 1.0018         | 104.182         | 1.0018 | 1.003          | 881.187  | 880.483  | 879.973        | K(5)  |
| T(7)  | 402.319        | 1.0078  | 1.0011         | 100.114         | 1.0011 | 1.003          | 881.111  | 884.499  | 884.023        | T(6)  |
| D(8)  | 466.332        | 1.01713 | 1.0021         | 100.215         | 1.0021 | 1.003          | 881.224  | 873.572  | <b>765.402</b> | D(7)  |
| L(9)  | 530.332        | 1.01713 | 1.0021         | 100.215         | 1.0021 | 1.003          | 881.224  | 873.572  | 873.572        | L(8)  |
| M(10) | <b>594.340</b> | 1.01713 | 1.0021         | <b>608.138</b>  | 1.0021 | 1.003          | 881.224  | 888.818  | 888.818        | M(9)  |
| P(11) | <b>658.375</b> | 1.01713 | 1.0021         | <b>658.375</b>  | 1.0021 | 1.003          | 881.224  | 888.818  | <b>658.854</b> | P(10) |
| Q(12) | 722.404        | 1.01713 | 1.0021         | <b>746.401</b>  | 1.0021 | 1.003          | 881.224  | 888.818  | 888.818        | Q(11) |
| S(13) | 786.404        | 1.01713 | 1.0021         | 786.404         | 1.0021 | 1.003          | 881.224  | 888.818  | 888.818        | S(12) |
| A(14) | 850.404        | 1.01713 | 1.0021         | <b>825.436</b>  | 1.0021 | 1.003          | 881.224  | 888.818  | 888.818        | A(13) |
| A(15) | 914.404        | 1.01713 | 1.0021         | <b>889.441</b>  | 1.0021 | 1.003          | 881.224  | 888.818  | 888.818        | A(14) |
| I(16) | 978.404        | 1.01713 | 1.0021         | <b>917.497</b>  | 1.0021 | 1.003          | 881.224  | 888.818  | 888.818        | I(15) |
| G(17) | 1042.404       | 1.01713 | 1.0021         | <b>945.501</b>  | 1.0021 | 1.003          | 881.224  | 888.818  | 888.818        | G(16) |
| A(18) | 1106.404       | 1.01713 | 1.0021         | <b>981.526</b>  | 1.0021 | 1.003          | 881.224  | 888.818  | 888.818        | A(17) |
| L(19) | 1170.404       | 1.01713 | 1.0021         | <b>1038.068</b> | 1.0021 | 1.003          | 881.224  | 888.818  | 888.818        | L(18) |
| Q(20) | 1234.404       | 1.01713 | 1.0021         | <b>1102.097</b> | 1.0021 | 1.003          | 881.224  | 888.818  | 888.818        | Q(19) |
| D(21) | 1298.404       | 1.01713 | 1.0021         | 1166.101        | 1.0021 | 1.003          | 881.224  | 888.818  | 888.818        | D(20) |



# sp | P84244 | H33\_MOUSE

IAQDFK<sup>Dimethyl</sup> TDLRFQSAAGALQE  
28.03

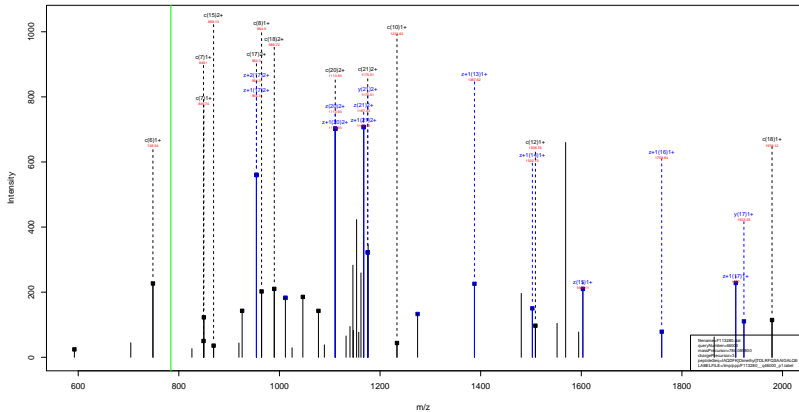

# sp | P84244 | H33\_MOUSE

IAQDFK<sup>Dimethyl</sup> TDLRFQSAIGALQE  
28.03

- ▶ fragmentation table for charge state 1+
- ▶ specType=etd
- ▶ score=50.94
- ▶ F113280.dat
- ▶ query=q46000\_p1
- ▶ precursor=784.085800
- ▶ chargePrecursor=3
- ▶ itol=0.5

| AA   | c               | y               | z+1             | z+2      | z               | AA   |
|------|-----------------|-----------------|-----------------|----------|-----------------|------|
| F 1  | 131.118         | 2350.240        | 2334.221        | 0.000    | 2333.214        | F 21 |
| A 2  | 202.155         | 2237.156        | 2221.137        | 0.000    | 2220.130        | A 20 |
| Q 3  | 330.214         | 2166.119        | 2150.100        | 2151.108 | 2149.092        | Q 19 |
| D 4  | 438.291         | 2038.060        | 2022.043        | 2023.050 | 2021.036        | D 18 |
| F 5  | <b>502.309</b>  | <b>1923.033</b> | <b>1907.015</b> | 1908.023 | 1906.007        | F 17 |
| K 6  | <b>748.435</b>  | 1775.965        | <b>1759.946</b> | 1760.954 | 1758.938        | K 16 |
| T 7  | <b>849.483</b>  | 1619.839        | 1603.820        | 1604.828 | <b>1602.812</b> | T 15 |
| D 8  | <b>964.510</b>  | 1518.791        | <b>1502.772</b> | 1503.780 | 1501.765        | D 14 |
| L 9  | <b>1077.594</b> | 1401.704        | <b>1387.745</b> | 1388.753 | 1386.736        | L 13 |
| R 10 | <b>1233.695</b> | 1290.689        | <b>1274.661</b> | 1275.669 | 1273.654        | R 12 |
| F 11 | 1380.763        | 1134.579        | 1118.560        | 1119.568 | 1117.552        | F 11 |
| Q 12 | <b>1508.822</b> | 987.511         | 971.492         | 972.500  | 970.484         | Q 10 |
| S 13 | 1595.854        | 859.452         | 843.433         | 844.441  | 842.425         | S 0  |
| A 14 | 1666.891        | 722.420         | 706.401         | 707.409  | 705.393         | A 8  |
| A 15 | 1737.928        | 701.383         | 685.364         | 686.372  | 684.356         | A 7  |
| I 16 | 1811.012        | 630.346         | 614.327         | 615.335  | 613.319         | I 6  |
| G 17 | 1908.034        | 517.262         | 501.243         | 502.251  | 500.235         | G 5  |
| A 18 | <b>1979.071</b> | 460.240         | 444.221         | 445.229  | 443.214         | A 4  |
| L 19 | 2092.155        | 389.203         | 373.184         | 374.192  | 372.177         | L 3  |
| Q 20 | 2220.214        | 276.119         | 260.100         | 261.108  | 259.092         | Q 2  |
| E 21 | 2349.256        | 148.060         | 132.042         | 133.050  | 131.034         | E 1  |

# sp | P84244 | H33\_MOUSE

IAQDFK<sup>Dimethyl</sup> TDLRFQSAIGALQE  
28.03

- ▶ fragmentation table for charge state 2+
- ▶ specType=etd
- ▶ score=50.94
- ▶ F113280.dat
- ▶ query=q46000\_p1
- ▶ precursor=784.085800
- ▶ chargePrecursor=3
- ▶ itol=0.5

| AA     | c               | y               | z+1             | z+2             | z               | AA    |
|--------|-----------------|-----------------|-----------------|-----------------|-----------------|-------|
| I [1]  | 66.093          | <b>1175.624</b> | <b>1167.614</b> | 0.504           | <b>1167.110</b> | [21]  |
| A [2]  | 101.561         | 1119.062        | <b>1111.072</b> | 0.504           | <b>1110.568</b> | A[20] |
| Q [3]  | 165.610         | 1083.563        | 1075.554        | 1076.058        | 1075.050        | Q[19] |
| D [4]  | 223.224         | 1049.539        | <b>1011.534</b> | <b>1012.028</b> | 1011.021        | D[18] |
| F [5]  | 290.658         | 989.020         | <b>954.011</b>  | <b>954.515</b>  | 953.507         | F[17] |
| K [6]  | 374.721         | 888.486         | 880.477         | 880.981         | 879.973         | K[16] |
| T [7]  | 425.245         | 810.423         | 802.414         | 802.918         | 801.910         | T[15] |
| D [8]  | 482.759         | 759.899         | 751.890         | 752.394         | 751.386         | D[14] |
| L [9]  | 539.301         | 702.386         | 694.376         | 694.880         | 693.872         | L[13] |
| R [10] | 617.363         | 646.844         | 637.834         | 638.338         | 637.330         | R[12] |
| F [11] | 690.595         | 597.792         | 559.784         | 560.288         | 559.280         | F[11] |
| Q [12] | 754.915         | 494.259         | 486.250         | 486.753         | 485.745         | Q[10] |
| S [13] | 798.431         | 430.230         | 422.220         | 422.724         | 421.716         | S[9]  |
| A [14] | 833.949         | 396.714         | 378.704         | 379.208         | 378.200         | A[8]  |
| A [15] | <b>869.468</b>  | 351.195         | 343.186         | 343.690         | 342.682         | A[7]  |
| I [16] | <b>926.010</b>  | 315.676         | 307.667         | 308.171         | 307.163         | I[6]  |
| G [17] | <b>954.521</b>  | 269.154         | 251.145         | 251.649         | 250.641         | G[5]  |
| A [18] | <b>990.039</b>  | 230.634         | 222.624         | 223.128         | 222.120         | A[4]  |
| L [19] | <b>1046.581</b> | 195.105         | 187.096         | 187.600         | 186.592         | L[3]  |
| Q [20] | <b>1110.610</b> | 138.563         | 130.554         | 131.058         | 130.050         | Q[2]  |
| E [21] | <b>1175.132</b> | 74.534          | 66.524          | 67.028          | 66.021          | E[1]  |



# sp | P62806 | H4\_MOUSE

SGRGKGGKGLGKGGAKRHRK<sup>Dimethyl</sup> VLRD  
28.03

- ▶ fragmentation table for charge state 1+
- ▶ specType=etd
- ▶ score=89.92
- ▶ F113280.dat
- ▶ query=q47290.p1
- ▶ precursor=501.503530
- ▶ chargePrecursor=5
- ▶ itol=0.5

| AA    | c               | y        | z+1            | z+2             | z              | AA    |
|-------|-----------------|----------|----------------|-----------------|----------------|-------|
| S[1]  | 105.066         | 2903.492 | 2487.473       | 0.000           | 2486.465       | S[24] |
| G[2]  | 162.207         | 2416.460 | 2400.441       | 0.000           | 2399.433       | G[23] |
| T[3]  | <b>318.188</b>  | 2359.438 | 2343.419       | 2344.437        | 2342.412       | T[22] |
| G[4]  | <b>375.210</b>  | 2203.337 | 2187.318       | 2188.326        | 2186.310       | G[21] |
| K[5]  | <b>503.305</b>  | 2146.316 | 2130.297       | 2131.305        | 2129.289       | K[20] |
| G[6]  | <b>560.326</b>  | 2018.221 | 2002.202       | 2003.210        | 2001.194       | G[19] |
| G[7]  | <b>617.348</b>  | 1961.199 | 1945.180       | 1946.188        | 1944.173       | G[18] |
| K[8]  | <b>745.443</b>  | 1904.179 | 1888.159       | 1889.167        | 1887.151       | K[17] |
| G[9]  | 802.464         | 1776.083 | 1760.064       | <b>1761.072</b> | 1759.056       | G[16] |
| L[10] | <b>915.548</b>  | 1719.061 | 1703.043       | 1704.050        | 1702.035       | L[15] |
| G[11] | 972.570         | 1665.977 | 1589.958       | 1590.966        | 1588.951       | G[14] |
| K[12] | 1100.695        | 1548.956 | 1532.937       | <b>1533.945</b> | 1531.929       | K[13] |
| G[13] | <b>1157.686</b> | 1420.861 | 1404.842       | <b>1405.850</b> | 1403.834       | G[12] |
| G[14] | <b>1214.708</b> | 1363.839 | 1347.821       | <b>1348.828</b> | 1346.813       | G[11] |
| A[15] | <b>1285.745</b> | 1306.818 | 1290.799       | <b>1291.807</b> | 1289.791       | A[10] |
| K[16] | 1413.860        | 1249.781 | 1233.762       | <b>1234.770</b> | 1232.754       | K[9]  |
| R[17] | 1569.941        | 1107.686 | 1091.667       | 1092.675        | 1090.659       | R[8]  |
| H[18] | <b>1707.000</b> | 951.585  | <b>935.566</b> | <b>936.574</b>  | 934.558        | H[7]  |
| R[19] | 1863.101        | 814.526  | <b>798.507</b> | 799.515         | <b>797.499</b> | R[6]  |
| K[20] | 2019.227        | 658.425  | <b>642.406</b> | <b>643.414</b>  | 641.398        | K[5]  |
| V[21] | 2118.296        | 502.298  | <b>486.280</b> | <b>487.287</b>  | 485.272        | V[4]  |
| L[22] | 2231.380        | 403.236  | <b>397.211</b> | 398.219         | 396.203        | L[3]  |
| T[23] | 2387.483        | 290.140  | <b>274.127</b> | <b>275.135</b>  | 273.119        | T[2]  |
| D[24] | 2502.568        | 134.045  | 118.026        | 119.034         | 117.018        | D[1]  |

# sp | P62806 | H4\_MOUSE

SGRGKGGKGLGKGGAKRHRK<sup>Dimethyl</sup> VLRD  
28.03

- ▶ fragmentation table for charge state 2+
- ▶ specType=etd
- ▶ score=89.92
- ▶ F113280.dat
- ▶ query=q47290\_p1
- ▶ precursor=501.503530
- ▶ chargePrecursor=5
- ▶ itol=0.5

| AA    | c               | y              | z+1             | z+2             | z              | AA    |
|-------|-----------------|----------------|-----------------|-----------------|----------------|-------|
| S[1]  | 53.037          | 1292.249       | 1244.240        | 0.904           | 1243.736       | S[24] |
| G[2]  | 81.547          | 1208.733       | 1200.724        | 0.904           | 1200.220       | G[23] |
| R[3]  | 150.598         | 1180.223       | 1172.213        | <b>1172.717</b> | 1171.709       | R[22] |
| G[4]  | 188.309         | 1102.172       | <b>1094.163</b> | <b>1094.667</b> | 1093.659       | G[21] |
| K[5]  | 252.156         | 1073.661       | 1065.652        | <b>1066.156</b> | 1065.148       | K[20] |
| G[6]  | 380.667         | 1008.614       | 1001.605        | <b>1002.108</b> | 1001.101       | G[19] |
| G[7]  | 509.176         | <b>981.103</b> | <b>973.094</b>  | <b>973.598</b>  | 972.590        | G[18] |
| K[8]  | <b>373.225</b>  | 952.592        | 944.583         | <b>945.087</b>  | 944.079        | K[17] |
| G[9]  | <b>461.736</b>  | 888.545        | 880.537         | <b>881.040</b>  | 880.032        | G[16] |
| L[10] | <b>458.276</b>  | 880.034        | <b>852.025</b>  | <b>852.529</b>  | 851.521        | L[15] |
| G[11] | <b>456.789</b>  | 803.492        | <b>795.483</b>  | <b>795.987</b>  | 794.979        | G[14] |
| K[12] | <b>550.836</b>  | 774.982        | <b>766.972</b>  | <b>767.476</b>  | 766.468        | K[13] |
| G[13] | <b>579.347</b>  | <b>710.934</b> | <b>702.925</b>  | <b>703.429</b>  | 702.421        | G[12] |
| G[14] | <b>607.857</b>  | 682.423        | <b>674.414</b>  | 674.918         | <b>673.910</b> | G[11] |
| A[15] | <b>643.376</b>  | <b>653.913</b> | <b>645.903</b>  | <b>646.407</b>  | 645.399        | A[10] |
| R[16] | <b>707.423</b>  | 618.394        | <b>610.385</b>  | <b>610.889</b>  | 609.881        | R[9]  |
| R[17] | <b>785.474</b>  | 554.347        | <b>546.337</b>  | <b>546.841</b>  | 545.833        | R[8]  |
| H[18] | <b>854.004</b>  | 476.290        | <b>468.287</b>  | <b>468.791</b>  | 467.783        | H[7]  |
| R[19] | <b>932.054</b>  | 407.707        | <b>399.757</b>  | <b>400.261</b>  | 399.253        | R[6]  |
| K[20] | <b>1010.117</b> | 329.716        | 321.707         | 322.211         | 321.203        | K[5]  |
| V[21] | <b>1059.651</b> | 251.653        | 243.643         | 244.147         | 243.140        | V[4]  |
| L[22] | <b>1118.193</b> | 202.119        | 194.109         | 194.613         | 193.605        | L[3]  |
| R[23] | 1194.244        | 145.577        | 137.567         | 138.071         | 137.063        | R[2]  |
| D[24] | 1251.757        | 67.526         | 59.517          | 60.021          | 59.013         | D[1]  |

# sp | P62806 | H4\_MOUSE

SGRGKGGKGLGKGGAKRHRK<sup>Dimethyl</sup>VLRD<sub>28.03</sub>

- ▶ fragmentation table for charge state 3+
- ▶ specType=etd
- ▶ score=89.92
- ▶ F113280.dat
- ▶ query=q47290.p1
- ▶ precursor=501.503530
- ▶ chargePrecursor=5
- ▶ itol=0.5

| AA    | c              | y              | z+1            | z+2            | z              | AA    |
|-------|----------------|----------------|----------------|----------------|----------------|-------|
| S[1]  | 35.693         | 335.169        | <b>829.829</b> | 0.672          | 829.893        | S[24] |
| G[2]  | 54.701         | <b>806.158</b> | <b>800.818</b> | 0.672          | 800.483        | G[23] |
| R[3]  | 106.734        | 787.151        | 781.811        | <b>782.147</b> | 781.475        | R[22] |
| G[4]  | 125.741        | 735.117        | <b>725.778</b> | <b>730.114</b> | <b>729.442</b> | G[21] |
| K[5]  | 168.440        | 716.110        | <b>710.770</b> | <b>711.106</b> | 710.435        | K[20] |
| G[6]  | 187.447        | 673.412        | <b>668.072</b> | <b>668.408</b> | <b>667.736</b> | G[19] |
| G[7]  | 206.454        | <b>654.405</b> | <b>649.065</b> | <b>649.401</b> | 648.729        | G[18] |
| K[8]  | 249.152        | 635.397        | <b>630.058</b> | <b>630.394</b> | 629.722        | K[17] |
| C[9]  | 288.100        | <b>592.699</b> | <b>587.360</b> | <b>587.695</b> | <b>587.024</b> | C[16] |
| L[10] | 335.254        | 573.692        | <b>568.352</b> | <b>568.688</b> | 568.016        | L[15] |
| G[11] | 374.361        | 535.997        | <b>530.658</b> | <b>530.994</b> | <b>530.322</b> | G[14] |
| K[12] | 397.560        | <b>516.990</b> | 511.651        | 511.988        | 511.315        | K[13] |
| G[13] | <b>386.567</b> | 474.292        | <b>468.952</b> | 469.288        | <b>468.616</b> | G[12] |
| G[14] | 405.574        | 455.285        | 449.945        | 450.281        | 449.609        | G[11] |
| A[15] | 429.253        | 436.277        | 430.938        | 431.274        | 430.602        | A[10] |
| K[16] | 471.351        | 412.598        | 407.259        | 407.595        | 406.923        | K[9]  |
| R[17] | <b>523.985</b> | 369.900        | 364.561        | 364.896        | 364.225        | R[8]  |
| H[18] | <b>569.671</b> | <b>317.866</b> | 312.527        | 312.863        | 312.191        | H[7]  |
| R[19] | <b>621.705</b> | 272.180        | 266.841        | 267.176        | 266.505        | R[6]  |
| K[20] | <b>673.747</b> | 220.140        | 214.807        | 215.143        | 214.471        | K[5]  |
| V[21] | <b>706.770</b> | 168.104        | 162.765        | 163.101        | 162.429        | V[4]  |
| L[22] | <b>744.465</b> | 135.082        | 129.742        | 130.078        | 129.406        | L[3]  |
| R[23] | 796.498        | 97.387         | 92.047         | 92.383         | 91.711         | R[2]  |
| D[24] | 854.841        | 45.353         | 40.014         | 40.349         | 39.678         | D[1]  |

# sp | P62806 | H4\_MOUSE

SGRGKGGKGLGKGGAKRHRK<sup>Dimethyl</sup> VLRD  
28.03

- ▶ fragmentation table for charge state 4+
- ▶ specType=etd
- ▶ score=89.92
- ▶ F113280.dat
- ▶ query=q47290.p1
- ▶ precursor=501.503530
- ▶ chargePrecursor=5
- ▶ itol=0.5

| AA    | c              | y              | z+1            | z+2            | z              | AA    |
|-------|----------------|----------------|----------------|----------------|----------------|-------|
| S[1]  | 27.022         | <b>626.626</b> | <b>622.624</b> | 0.755          | <b>622.172</b> | S[24] |
| G[2]  | 41.277         | 504.870        | 600.866        | 0.755          | 600.614        | G[23] |
| R[3]  | 60.303         | 590.615        | <b>586.610</b> | <b>586.862</b> | <b>586.358</b> | R[22] |
| G[4]  | 94.558         | <b>551.590</b> | <b>547.585</b> | 547.837        | <b>547.333</b> | G[21] |
| K[5]  | 126.582        | 537.334        | 533.330        | 533.582        | 533.078        | K[20] |
| G[6]  | 140.837        | 505.311        | 501.306        | 501.558        | 501.054        | G[19] |
| G[7]  | 155.092        | 491.055        | <b>487.051</b> | <b>487.303</b> | <b>486.799</b> | G[18] |
| K[8]  | 187.116        | 476.800        | 472.795        | 473.047        | 472.543        | K[17] |
| G[9]  | 203.372        | 444.776        | 440.771        | 443.023        | 440.520        | G[16] |
| L[10] | 229.643        | 430.521        | 426.516        | 426.768        | 426.264        | L[15] |
| G[11] | 243.998        | <b>402.250</b> | 398.245        | 398.497        | 397.993        | G[14] |
| K[12] | 275.022        | 387.994        | 383.989        | 384.242        | 383.738        | K[13] |
| G[13] | 290.177        | 355.971        | 351.966        | 352.218        | 351.714        | G[12] |
| G[14] | 304.432        | 341.715        | 337.711        | 337.963        | 337.459        | G[11] |
| A[15] | 322.192        | 327.460        | 323.455        | 323.707        | 323.203        | A[10] |
| K[16] | 354.215        | 309.701        | 305.696        | 305.948        | 305.444        | K[9]  |
| R[17] | 393.241        | 277.677        | 273.672        | <b>273.924</b> | 273.420        | R[8]  |
| H[18] | 427.505        | 238.652        | 234.647        | 234.899        | 234.395        | H[7]  |
| R[19] | 469.531        | 204.397        | 200.392        | 200.644        | 200.140        | R[6]  |
| K[20] | 505.562        | 165.362        | 161.357        | 161.609        | 161.105        | K[5]  |
| V[21] | <b>530.329</b> | 126.330        | 122.325        | 122.577        | 122.073        | V[4]  |
| L[22] | 558.600        | 101.563        | 97.558         | 97.810         | 97.306         | L[3]  |
| R[23] | 597.626        | 73.292         | 69.287         | 69.539         | 69.035         | R[2]  |
| D[24] | 626.382        | 34.267         | 30.262         | 30.514         | 30.010         | D[1]  |



# sp | P62806 | H4\_MOUSE

SGRGKGGKGLGKGGAKRHRK <sup>Dimethyl</sup> VLRD  
28.03

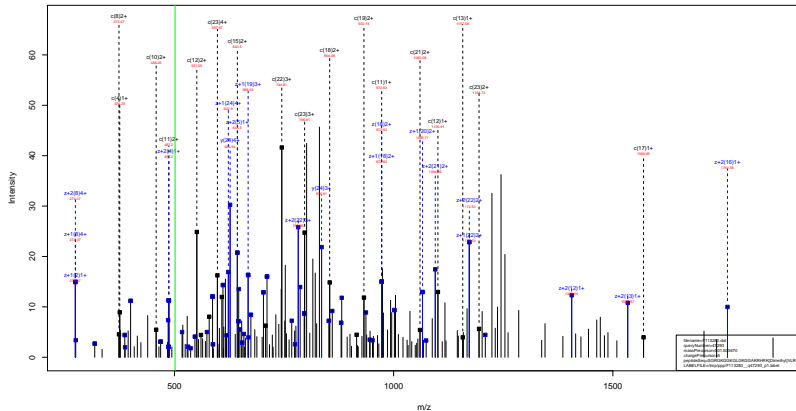

# sp | P62806 | H4\_MOUSE

SGRGKGGKGLGKGGAKRHRK<sup>Dimethyl</sup> VLRD  
28.03

- ▶ fragmentation table for charge state 1+
- ▶ specType=etd
- ▶ score=34.48
- ▶ F113280.dat
- ▶ query=q47293.p1
- ▶ precursor=501.503670
- ▶ chargePrecursor=5
- ▶ itol=0.5

| AA    | c               | y              | z+1            | z+2             | z              | AA    |
|-------|-----------------|----------------|----------------|-----------------|----------------|-------|
| S[1]  | 105.066         | 2903.492       | 2487.473       | 0.000           | 2486.465       | S[24] |
| G[2]  | 162.207         | 2416.460       | 2403.441       | 0.000           | 2399.433       | G[23] |
| T[3]  | <b>318.188</b>  | 2359.438       | 2343.419       | 2344.437        | 2342.412       | T[22] |
| G[4]  | <b>375.210</b>  | 2203.337       | 2187.318       | 2188.326        | 2186.310       | G[21] |
| K[5]  | 503.095         | 2146.316       | 2130.297       | 2131.305        | 2129.289       | K[20] |
| G[6]  | <b>560.326</b>  | 2018.221       | 2002.202       | 2003.210        | 2001.194       | G[19] |
| G[7]  | 617.348         | 1961.199       | 1945.180       | 1946.188        | 1944.173       | G[18] |
| K[8]  | 745.443         | 1904.179       | 1888.159       | 1889.167        | 1887.151       | K[17] |
| G[9]  | 802.465         | 1776.063       | 1760.044       | <b>1761.072</b> | 1759.056       | G[16] |
| L[10] | <b>915.548</b>  | 1719.061       | 1703.043       | 1704.059        | 1702.035       | L[15] |
| G[11] | <b>972.570</b>  | 1665.977       | 1589.958       | 1590.966        | 1588.951       | G[14] |
| K[12] | <b>1100.665</b> | 1548.956       | 1532.937       | <b>1533.945</b> | 1531.929       | K[13] |
| G[13] | <b>1157.686</b> | 1420.861       | 1404.842       | <b>1405.850</b> | 1403.834       | G[12] |
| G[14] | 1214.708        | 1363.839       | 1347.821       | 1348.828        | 1346.813       | G[11] |
| A[15] | 1285.745        | 1306.818       | 1290.799       | 1291.807        | 1289.791       | A[10] |
| K[16] | 1413.840        | 1249.781       | 1233.762       | 1234.770        | 1232.754       | K[9]  |
| R[17] | <b>1569.941</b> | 1107.686       | 1091.667       | 1092.675        | 1090.659       | R[8]  |
| H[18] | 1707.000        | <b>951.585</b> | 935.566        | <b>936.574</b>  | 934.558        | H[7]  |
| R[19] | 1863.101        | 814.526        | 798.507        | 799.515         | 797.499        | R[6]  |
| K[20] | 2019.227        | <b>658.425</b> | 642.406        | <b>643.414</b>  | 641.398        | K[5]  |
| V[21] | 2118.296        | 602.296        | <b>486.280</b> | <b>487.287</b>  | <b>485.272</b> | V[4]  |
| L[22] | 2231.380        | 460.236        | <b>397.211</b> | 398.219         | 396.203        | L[3]  |
| I[23] | 2387.481        | 390.140        | <b>274.127</b> | <b>275.135</b>  | 273.119        | I[2]  |
| D[24] | 2502.568        | 194.045        | 118.026        | 119.034         | 117.018        | D[1]  |

# sp | P62806 | H4\_MOUSE

SGRGKGGKGLGKGGAKRHRK<sup>Dimethyl</sup> VLRD  
28.03

- ▶ fragmentation table for charge state 2+
- ▶ specType=etd
- ▶ score=34.48
- ▶ F113280.dat
- ▶ query=q47293\_p1
- ▶ precursor=501.503670
- ▶ chargePrecursor=5
- ▶ itol=0.5

| AA    | c               | y               | z+1             | z+2             | z              | AA    |
|-------|-----------------|-----------------|-----------------|-----------------|----------------|-------|
| S[1]  | 53.037          | 1252.249        | 1244.260        | 0.504           | 1243.756       | S[24] |
| G[2]  | 81.547          | <b>1208.733</b> | 1200.724        | 0.504           | 1200.220       | G[23] |
| R[3]  | 159.598         | 1180.222        | <b>1172.213</b> | <b>1172.717</b> | 1171.709       | R[22] |
| G[4]  | 188.309         | 1122.172        | 1094.153        | <b>1094.667</b> | 1093.659       | G[21] |
| K[5]  | 252.159         | <b>1073.661</b> | <b>1065.652</b> | <b>1066.156</b> | 1065.148       | K[20] |
| G[6]  | 280.667         | 1009.614        | <b>1001.605</b> | <b>1002.108</b> | 1001.101       | G[19] |
| G[7]  | 309.176         | 961.101         | <b>973.094</b>  | 973.598         | <b>972.590</b> | G[18] |
| K[8]  | <b>373.225</b>  | 952.592         | 944.583         | <b>945.087</b>  | 944.079        | K[17] |
| G[9]  | 401.726         | 898.245         | <b>890.536</b>  | <b>891.040</b>  | <b>890.032</b> | G[16] |
| L[10] | <b>458.278</b>  | <b>860.034</b>  | <b>852.025</b>  | <b>852.529</b>  | 851.521        | L[15] |
| Q[11] | <b>486.789</b>  | 803.492         | <b>795.483</b>  | <b>795.987</b>  | 794.979        | Q[14] |
| K[12] | <b>550.836</b>  | <b>774.982</b>  | 766.972         | <b>767.476</b>  | 766.468        | K[13] |
| G[13] | <b>579.347</b>  | <b>710.934</b>  | <b>702.925</b>  | <b>703.429</b>  | 702.421        | G[12] |
| G[14] | <b>607.857</b>  | 689.421         | <b>674.414</b>  | 674.918         | <b>673.910</b> | G[11] |
| A[15] | <b>643.376</b>  | <b>653.913</b>  | <b>645.903</b>  | <b>646.407</b>  | 645.399        | A[10] |
| R[16] | <b>707.423</b>  | <b>618.394</b>  | <b>610.385</b>  | <b>610.889</b>  | 609.881        | R[9]  |
| R[17] | 765.474         | 554.341         | <b>546.337</b>  | <b>546.841</b>  | 545.833        | R[8]  |
| H[18] | <b>854.004</b>  | 476.208         | <b>468.207</b>  | <b>468.791</b>  | 467.783        | H[7]  |
| R[19] | <b>932.054</b>  | 407.767         | <b>399.757</b>  | <b>400.261</b>  | 399.253        | R[6]  |
| K[20] | 1010.117        | 329.716         | 321.707         | 322.211         | 321.203        | K[5]  |
| V[21] | <b>1059.651</b> | 251.663         | 243.653         | 244.147         | 243.140        | V[4]  |
| L[22] | 1119.913        | 202.119         | 194.108         | 194.613         | 193.605        | L[3]  |
| R[23] | <b>1194.244</b> | 145.577         | 137.567         | 138.071         | 137.063        | R[2]  |
| D[24] | 1251.757        | 67.528          | 59.517          | 60.021          | 59.013         | D[1]  |

# sp | P62806 | H4\_MOUSE

SGRGKGGKGLGKGGAKRHRK<sup>Dimethyl</sup>VLRD  
28.03

- ▶ fragmentation table for charge state 3+
- ▶ specType=etd
- ▶ score=34.48
- ▶ F113280.dat
- ▶ query=q47293.p1
- ▶ precursor=501.503670
- ▶ chargePrecursor=5
- ▶ itol=0.5

| AA    | c              | y              | z+1            | z+2            | z              | AA    |
|-------|----------------|----------------|----------------|----------------|----------------|-------|
| S[1]  | 35.693         | <b>835.169</b> | 829.827        | 0.672          | 829.893        | S[24] |
| G[2]  | 54.701         | 806.158        | 800.810        | 0.672          | 800.483        | G[23] |
| R[3]  | 106.734        | <b>787.151</b> | 781.811        | <b>782.147</b> | 781.475        | R[22] |
| G[4]  | 125.741        | 735.117        | 729.778        | 730.114        | 729.442        | G[21] |
| K[5]  | 168.440        | 716.110        | <b>710.770</b> | <b>711.106</b> | 710.435        | K[20] |
| G[6]  | 187.447        | 673.412        | <b>668.072</b> | <b>668.408</b> | <b>667.736</b> | G[19] |
| G[7]  | 206.454        | <b>654.405</b> | <b>649.065</b> | <b>649.401</b> | 648.729        | G[18] |
| K[8]  | 249.152        | 635.397        | 630.058        | 630.394        | 629.722        | K[17] |
| G[9]  | 268.160        | 592.099        | <b>587.360</b> | <b>587.695</b> | <b>587.024</b> | G[16] |
| L[10] | 305.854        | <b>573.692</b> | 568.35         | 568.688        | 568.016        | L[15] |
| G[11] | 324.861        | 535.097        | <b>530.658</b> | <b>530.994</b> | 530.322        | G[14] |
| K[12] | 367.560        | <b>516.990</b> | 511.651        | 511.988        | 511.315        | K[13] |
| G[13] | <b>386.567</b> | 474.292        | <b>468.952</b> | 469.288        | <b>468.616</b> | G[12] |
| G[14] | 405.574        | 455.285        | 449.945        | 450.281        | 449.609        | G[11] |
| A[15] | 429.253        | 436.277        | 430.938        | 431.274        | 430.602        | A[10] |
| K[16] | 471.951        | 412.598        | 407.259        | 407.595        | 406.923        | K[9]  |
| R[17] | 523.985        | 369.900        | 364.561        | 364.896        | 364.225        | R[8]  |
| H[18] | 569.671        | <b>317.866</b> | 312.527        | 312.863        | 312.191        | H[7]  |
| R[19] | 621.705        | 272.180        | 266.841        | 267.176        | 266.505        | R[6]  |
| K[20] | 673.747        | 220.140        | 214.807        | 215.143        | 214.471        | K[5]  |
| V[21] | 706.770        | 168.104        | 162.765        | 163.101        | 162.429        | V[4]  |
| L[22] | <b>744.465</b> | 135.082        | 129.742        | 130.078        | 129.406        | L[3]  |
| R[23] | <b>796.498</b> | 97.387         | 92.047         | 92.383         | 91.711         | R[2]  |
| D[24] | 854.841        | 45.353         | 40.014         | 40.349         | 39.678         | D[1]  |

# sp | P62806 | H4\_MOUSE

SGRGKGGKGLGKGGAKRHRK<sup>Dimethyl</sup> VLRD  
28.03

- ▶ fragmentation table for charge state 4+
- ▶ specType=etd
- ▶ score=34.48
- ▶ F113280.dat
- ▶ query=q47293.p1
- ▶ precursor=501.503670
- ▶ chargePrecursor=5
- ▶ itol=0.5

| AA    | c              | y              | z+1            | z+2            | z     | AA             |       |
|-------|----------------|----------------|----------------|----------------|-------|----------------|-------|
| S[1]  | 27.022         | <b>626.626</b> | <b>622.624</b> |                | 0.755 | 622.372        | S[24] |
| G[2]  | 41.277         | 604.870        | 600.868        |                | 0.755 | 600.614        | G[23] |
| R[3]  | 80.303         | 590.615        | <b>586.610</b> | <b>586.862</b> |       | 586.358        | R[22] |
| G[4]  | 94.558         | 551.590        | 547.585        | 547.837        |       | 547.333        | G[21] |
| K[5]  | 126.582        | <b>537.334</b> | 533.330        | 533.582        |       | 533.078        | K[20] |
| G[6]  | 140.837        | 505.311        | 501.306        | 501.558        |       | 501.054        | G[19] |
| G[7]  | 155.092        | 491.055        | <b>487.051</b> | <b>487.303</b> |       | <b>486.799</b> | G[18] |
| K[8]  | 187.116        | 476.800        | 472.795        | 473.047        |       | 472.543        | K[17] |
| G[9]  | 201.372        | 444.776        | 440.771        | 441.023        |       | 440.520        | G[16] |
| L[10] | 229.043        | 430.521        | 426.516        | 426.768        |       | 426.264        | L[15] |
| G[11] | 243.598        | 407.250        | 398.243        | 398.497        |       | 397.993        | G[14] |
| K[12] | 275.022        | 387.994        | 383.989        | 384.242        |       | 383.738        | K[13] |
| G[13] | 290.177        | 355.971        | 351.966        | 352.218        |       | 351.714        | G[12] |
| G[14] | 304.432        | 341.715        | 337.711        | 337.963        |       | 337.459        | G[11] |
| A[15] | 322.192        | 327.460        | 323.455        | 323.707        |       | 323.203        | A[10] |
| K[16] | 354.215        | 309.701        | 305.696        | 305.948        |       | 305.444        | K[9]  |
| R[17] | 393.241        | 277.877        | <b>273.672</b> | <b>273.924</b> |       | 273.420        | R[8]  |
| H[18] | 427.505        | 238.652        | 234.647        | 234.899        |       | 234.395        | H[7]  |
| R[19] | 469.531        | 204.397        | 200.392        | 200.644        |       | 200.140        | R[6]  |
| K[20] | 505.562        | 165.362        | 161.357        | 161.609        |       | 161.105        | K[5]  |
| V[21] | 530.329        | 126.330        | 122.325        | 122.577        |       | 122.073        | V[4]  |
| L[22] | 558.600        | 101.563        | 97.558         | 97.810         |       | 97.306         | L[3]  |
| R[23] | <b>597.626</b> | 73.292         | 69.287         | 69.539         |       | 69.035         | R[2]  |
| D[24] | 626.382        | 34.267         | 30.262         | 30.514         |       | 30.010         | D[1]  |

sp | P62806 | H4\_MOUSE

SGRGKGGKGLGKGGAKRHRK<sup>Dimethyl</sup> VLRD  
28.03

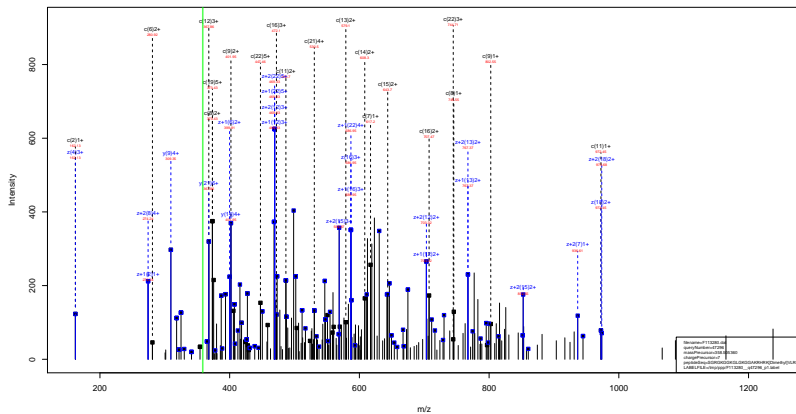

# sp | P62806 | H4\_MOUSE

SGRGKGGKGLGKGGAKRHRK<sup>Dimethyl</sup>VLRD  
28.03

- ▶ fragmentation table for charge state 1+
- ▶ specType=etd
- ▶ score=53.05
- ▶ F113280.dat
- ▶ query=q47296.p1
- ▶ precursor=358.505360
- ▶ chargePrecursor=7
- ▶ itol=0.5

| AA |    | c              | y              | z+1            | z+2            | z        | AA    |
|----|----|----------------|----------------|----------------|----------------|----------|-------|
| S  | 1  | 105.060        | 2503.492       | 2487.473       | 0.000          | 2486.465 | S[24] |
| G  | 2  | <b>162.087</b> | 2516.460       | 2400.441       | 0.000          | 2399.433 | G[23] |
| R  | 3  | <b>318.188</b> | 2359.438       | 2341.419       | 2344.437       | 2342.412 | R[22] |
| G  | 4  | <b>375.210</b> | 2203.437       | 2187.418       | 2188.426       | 2186.410 | G[21] |
| K  | 5  | <b>503.305</b> | 2146.416       | 2130.297       | 2131.305       | 2129.289 | K[20] |
| G  | 6  | <b>560.326</b> | 2018.221       | 2002.202       | 2003.210       | 2001.194 | G[19] |
| G  | 7  | <b>617.348</b> | 1961.199       | 1945.180       | 1946.188       | 1944.173 | G[18] |
| K  | 8  | <b>745.443</b> | 1904.178       | 1888.159       | 1889.167       | 1887.151 | K[17] |
| G  | 9  | <b>802.464</b> | 1776.083       | 1760.064       | 1761.072       | 1759.056 | G[16] |
| L  | 10 | 813.568        | 1719.061       | 1703.043       | 1704.050       | 1702.035 | L[15] |
| G  | 11 | <b>972.570</b> | 1606.977       | 1589.958       | 1590.966       | 1588.951 | G[14] |
| K  | 12 | 1100.665       | 1548.956       | 1532.937       | 1533.945       | 1531.929 | K[13] |
| G  | 13 | 1157.686       | 1420.861       | 1404.842       | 1405.850       | 1403.834 | G[12] |
| G  | 14 | 1214.708       | 1363.839       | 1347.821       | 1348.828       | 1346.813 | G[11] |
| A  | 15 | 1285.745       | 1306.818       | 1290.799       | 1291.807       | 1289.791 | A[10] |
| K  | 16 | 1413.840       | 1238.781       | 1219.763       | 1220.770       | 1218.754 | K[9]  |
| R  | 17 | 1589.981       | 1137.666       | 1097.647       | 1097.675       | 1095.660 | R[8]  |
| H  | 18 | 1707.000       | 951.585        | 915.500        | <b>936.574</b> | 934.558  | H[7]  |
| R  | 19 | 1853.101       | <b>814.526</b> | <b>798.507</b> | <b>799.515</b> | 797.499  | R[6]  |
| K  | 20 | 2019.227       | <b>658.425</b> | <b>642.406</b> | <b>643.414</b> | 641.398  | K[5]  |
| V  | 21 | 2118.295       | <b>502.298</b> | <b>486.280</b> | <b>487.287</b> | 485.272  | V[4]  |
| L  | 22 | 2231.380       | 403.230        | <b>387.211</b> | <b>388.219</b> | 386.203  | L[3]  |
| R  | 23 | 2387.481       | 290.146        | <b>274.127</b> | 275.135        | 273.119  | R[2]  |
| D  | 24 | 2602.568       | 134.045        | 118.026        | 119.034        | 117.018  | D[1]  |

# sp | P62806 | H4\_MOUSE

SGRGKGGKGLGKGGAKRHRK<sup>Dimethyl</sup> VLRD  
28.03

- ▶ fragmentation table for charge state 2+
- ▶ specType=etd
- ▶ score=53.05
- ▶ F113280.dat
- ▶ query=q47296.p1
- ▶ precursor=358.505360
- ▶ chargePrecursor=7
- ▶ itol=0.5

| AA |    | c              | y              | z+1            | z+2            | z              | AA    |
|----|----|----------------|----------------|----------------|----------------|----------------|-------|
| S  | 1  | 83.037         | 1252.249       | 1244.240       | 0.504          | 1243.736       | S[24] |
| G  | 2  | 83.547         | 1208.733       | 1209.728       | 0.504          | 1209.229       | G[23] |
| R  | 3  | 159.598        | 1180.223       | 1172.213       | 1172.717       | 1171.705       | R[22] |
| G  | 4  | 188.109        | 1102.172       | 1094.163       | 1094.667       | 1093.656       | G[21] |
| K  | 5  | 252.156        | 1073.661       | 1065.652       | 1066.156       | 1065.148       | K[20] |
| G  | 6  | <b>280.667</b> | 1009.614       | 1001.605       | 1002.108       | 1001.101       | G[19] |
| G  | 7  | <b>309.178</b> | 981.103        | 973.094        | <b>973.598</b> | <b>972.590</b> | G[18] |
| K  | 8  | <b>373.225</b> | 952.592        | <b>944.583</b> | <b>945.087</b> | 944.079        | K[17] |
| G  | 9  | <b>403.736</b> | 898.545        | 890.536        | 891.040        | 890.033        | G[16] |
| L  | 10 | <b>458.278</b> | <b>860.034</b> | <b>852.025</b> | <b>852.529</b> | <b>851.521</b> | L[15] |
| G  | 11 | <b>486.789</b> | 803.492        | <b>795.483</b> | <b>795.987</b> | 794.979        | G[14] |
| K  | 12 | <b>550.836</b> | <b>774.982</b> | <b>766.972</b> | <b>767.476</b> | 766.468        | K[13] |
| G  | 13 | <b>579.347</b> | 710.936        | <b>702.925</b> | <b>703.429</b> | 702.421        | G[12] |
| G  | 14 | <b>607.857</b> | 682.423        | <b>674.414</b> | <b>674.918</b> | 673.910        | G[11] |
| A  | 15 | <b>643.376</b> | <b>653.913</b> | <b>645.903</b> | <b>646.407</b> | 645.399        | A[10] |
| K  | 16 | <b>707.423</b> | 618.398        | 610.389        | <b>610.889</b> | 609.881        | K[9]  |
| R  | 17 | 765.874        | <b>584.347</b> | <b>546.337</b> | <b>548.841</b> | 545.833        | R[8]  |
| H  | 18 | 854.004        | 476.296        | <b>468.287</b> | <b>468.791</b> | 467.783        | H[7]  |
| R  | 19 | 932.054        | <b>407.767</b> | <b>399.757</b> | <b>400.261</b> | 399.253        | R[6]  |
| K  | 20 | 1010.117       | <b>329.716</b> | <b>321.707</b> | <b>322.211</b> | 321.203        | K[5]  |
| V  | 21 | 1059.601       | 251.653        | 243.643        | 244.147        | 243.140        | V[4]  |
| L  | 22 | 1116.193       | 202.119        | 194.109        | 194.613        | 193.605        | L[3]  |
| R  | 23 | 1194.244       | 145.577        | 137.567        | 138.071        | 137.063        | R[2]  |
| D  | 24 | 1251.757       | 87.526         | 89.517         | 89.021         | 89.013         | D[1]  |



# sp | P62806 | H4\_MOUSE

SGRGKGGKGLGKGGAKRHRK<sup>Dimethyl</sup>VLRD<sub>28.03</sub>

- ▶ fragmentation table for charge state 3+
- ▶ specType=etd
- ▶ score=53.05
- ▶ F113280.dat
- ▶ query=q47296.p1
- ▶ precursor=358.505360
- ▶ chargePrecursor=7
- ▶ itol=0.5

| AA    | c              | y              | z+1            | z+2            | z              | AA    |
|-------|----------------|----------------|----------------|----------------|----------------|-------|
| S[1]  | 35.693         | 335.169        | 829.827        | 0.672          | 829.493        | S[24] |
| G[2]  | 54.701         | 306.158        | 800.833        | 0.672          | 800.483        | G[23] |
| R[3]  | 106.734        | <b>787.151</b> | 781.811        | 782.147        | 781.475        | R[22] |
| G[4]  | 125.741        | 735.117        | 729.778        | <b>730.114</b> | <b>729.442</b> | G[21] |
| K[5]  | 168.440        | <b>716.110</b> | 710.770        | <b>711.106</b> | 710.435        | K[20] |
| G[6]  | 187.447        | 673.412        | <b>668.072</b> | <b>668.408</b> | <b>667.736</b> | G[19] |
| G[7]  | 206.454        | 654.405        | <b>649.065</b> | <b>649.401</b> | 648.729        | G[18] |
| K[8]  | 249.152        | 635.397        | 630.058        | <b>630.394</b> | 629.722        | K[17] |
| G[9]  | 268.160        | <b>592.699</b> | <b>587.360</b> | <b>587.695</b> | <b>587.024</b> | G[16] |
| L[10] | 309.254        | 573.692        | <b>568.352</b> | <b>568.688</b> | <b>568.016</b> | L[15] |
| G[11] | <b>324.861</b> | 535.997        | <b>530.658</b> | <b>530.994</b> | <b>530.322</b> | G[14] |
| K[12] | <b>367.560</b> | <b>516.990</b> | <b>511.651</b> | <b>511.986</b> | <b>511.315</b> | K[13] |
| G[13] | <b>386.567</b> | 474.292        | <b>468.952</b> | <b>469.288</b> | <b>468.616</b> | G[12] |
| G[14] | <b>405.574</b> | 455.285        | <b>449.945</b> | <b>450.281</b> | 449.609        | G[11] |
| A[15] | <b>429.253</b> | 436.277        | <b>430.938</b> | <b>431.274</b> | 430.602        | A[10] |
| R[16] | <b>471.951</b> | <b>412.598</b> | <b>407.259</b> | <b>407.595</b> | <b>406.923</b> | R[9]  |
| R[17] | <b>523.985</b> | 369.900        | 364.561        | <b>364.896</b> | 364.225        | R[8]  |
| H[18] | <b>569.671</b> | <b>317.866</b> | 312.527        | 312.863        | 312.191        | H[7]  |
| R[19] | 611.705        | 272.180        | 266.841        | 267.176        | 266.505        | R[6]  |
| K[20] | 673.747        | 220.140        | 214.807        | 215.143        | 214.471        | K[5]  |
| V[21] | 706.770        | 168.104        | 162.765        | 163.101        | <b>162.429</b> | V[4]  |
| L[22] | <b>744.465</b> | 135.082        | 129.742        | 130.078        | 129.406        | L[3]  |
| R[23] | <b>796.498</b> | 97.387         | 92.047         | 92.383         | 91.711         | R[2]  |
| D[24] | 854.841        | 45.353         | 40.014         | 40.349         | 39.678         | D[1]  |

# sp | P62806 | H4\_MOUSE

SGRGKGGKGLGKGGAKRHRK<sup>Dimethyl</sup>VLRD  
28.03

- ▶ fragmentation table for charge state 4+
- ▶ specType=etd
- ▶ score=53.05
- ▶ F113280.dat
- ▶ query=q47296.p1
- ▶ precursor=358.505360
- ▶ chargePrecursor=7
- ▶ itol=0.5

| AA    | c              | y              | z+1            | z+2            | z              | AA    |
|-------|----------------|----------------|----------------|----------------|----------------|-------|
| S[1]  | 27.022         | 826.626        | 622.624        | 0.755          | 622.372        | S[24] |
| G[2]  | 41.277         | 504.870        | 600.868        | 0.755          | 600.614        | G[23] |
| R[3]  | 80.303         | 590.615        | <b>586.610</b> | <b>586.862</b> | 586.358        | R[22] |
| G[4]  | 94.558         | <b>551.590</b> | <b>547.585</b> | <b>547.837</b> | <b>547.333</b> | G[21] |
| K[5]  | 126.582        | <b>537.334</b> | 533.330        | <b>533.582</b> | 533.078        | K[20] |
| G[6]  | 140.837        | 505.311        | 501.306        | <b>501.558</b> | 501.054        | G[19] |
| G[7]  | 155.092        | 491.055        | <b>487.051</b> | <b>487.303</b> | <b>486.799</b> | G[18] |
| K[8]  | 187.116        | 476.800        | <b>472.795</b> | <b>473.047</b> | <b>472.543</b> | K[17] |
| G[9]  | 203.372        | <b>444.776</b> | 440.771        | 440.267        | 440.260        | G[16] |
| L[10] | 229.643        | 430.521        | <b>426.516</b> | <b>426.768</b> | <b>426.264</b> | L[15] |
| G[11] | 253.898        | <b>402.250</b> | 398.245        | 397.741        | 397.993        | G[14] |
| K[12] | 275.922        | 387.994        | 383.989        | 384.242        | 383.738        | K[13] |
| G[13] | 290.177        | 355.971        | 351.966        | 352.218        | 351.714        | G[12] |
| G[14] | 304.432        | 341.715        | 337.711        | 337.963        | 337.459        | G[11] |
| A[15] | <b>322.192</b> | 327.460        | 323.455        | 323.707        | 323.203        | A[10] |
| R[16] | <b>354.215</b> | <b>309.701</b> | 305.696        | 305.948        | 305.444        | R[9]  |
| R[17] | <b>393.241</b> | 277.877        | 273.872        | <b>273.924</b> | 273.420        | R[8]  |
| H[18] | <b>427.505</b> | 238.652        | 234.647        | 234.899        | 234.395        | H[7]  |
| R[19] | 469.531        | 204.397        | 200.392        | 200.644        | 200.140        | R[6]  |
| K[20] | 505.562        | 165.362        | 161.357        | 161.609        | 161.105        | K[5]  |
| V[21] | <b>530.329</b> | 126.330        | 122.325        | 122.577        | 122.073        | V[4]  |
| L[22] | <b>558.600</b> | 101.563        | 97.558         | 97.810         | 97.306         | L[3]  |
| R[23] | 597.626        | 73.292         | 69.287         | 69.539         | 69.035         | R[2]  |
| D[24] | 636.382        | 34.267         | 30.262         | 30.514         | 30.010         | D[1]  |

# sp | P62806 | H4\_MOUSE

SGRGKGGKGLGKGGAKRHRK<sup>Dimethyl</sup> VLRD  
28.03

- ▶ fragmentation table for charge state 5+
- ▶ specType=etd
- ▶ score=53.05
- ▶ F113280.dat
- ▶ query=q47296.p1
- ▶ precursor=358.505360
- ▶ chargePrecursor=7
- ▶ itol=0.5

| AA    | c              | y              | z+1            | z+2            | z              | AA    |
|-------|----------------|----------------|----------------|----------------|----------------|-------|
| S[1]  | 21.819         | <b>501.504</b> | <b>498.300</b> | 0.806          | 498.099        | S[24] |
| G[2]  | 33.223         | 484.988        | 480.884        | 0.806          | 480.692        | G[23] |
| R[3]  | 64.444         | 472.691        | <b>469.490</b> | <b>469.691</b> | <b>469.288</b> | R[22] |
| G[4]  | 75.848         | 441.473        | <b>438.269</b> | <b>438.471</b> | 438.068        | G[21] |
| K[5]  | 101.467        | 430.069        | <b>426.865</b> | <b>427.067</b> | <b>426.664</b> | K[20] |
| G[6]  | 112.871        | 404.450        | 401.246        | 401.448        | 401.045        | G[19] |
| G[7]  | 124.275        | 393.046        | 389.842        | 390.043        | 389.640        | G[18] |
| K[8]  | 149.894        | 381.641        | 378.438        | 378.639        | <b>378.236</b> | K[17] |
| G[9]  | 181.299        | 356.022        | 352.819        | 353.020        | 352.617        | G[16] |
| L[10] | 193.918        | 344.618        | <b>341.414</b> | <b>341.616</b> | <b>341.213</b> | L[15] |
| G[11] | 195.320        | <b>322.001</b> | 318.798        | 318.999        | <b>318.596</b> | G[14] |
| K[12] | 220.939        | 310.597        | 307.393        | 307.595        | 307.192        | K[13] |
| G[13] | 232.343        | 284.978        | 281.774        | 281.976        | 281.573        | G[12] |
| G[14] | 243.747        | 273.574        | 270.370        | 270.572        | 270.168        | G[11] |
| A[15] | 257.955        | 262.169        | 258.966        | 259.167        | 258.764        | A[10] |
| K[16] | 283.574        | 247.962        | 244.758        | 244.960        | 244.557        | K[9]  |
| R[17] | 314.794        | 222.343        | 219.139        | 219.341        | 218.938        | R[8]  |
| H[18] | 342.206        | 191.123        | 187.919        | 188.121        | 187.717        | H[7]  |
| R[19] | <b>373.426</b> | 163.711        | 160.507        | 160.709        | 160.306        | R[6]  |
| K[20] | 404.251        | 132.491        | 129.287        | 129.489        | 129.085        | K[5]  |
| V[21] | <b>424.465</b> | 101.265        | 98.062         | 98.263         | 97.860         | V[4]  |
| L[22] | <b>447.082</b> | 81.452         | 78.248         | 78.450         | 78.047         | L[3]  |
| R[23] | 478.302        | 58.835         | 55.631         | 55.833         | 55.430         | R[2]  |
| D[24] | 501.307        | 27.615         | 24.411         | 24.613         | 24.209         | D[1]  |

# sp | P62806 | H4\_MOUSE

SGRGKGGKGLGKGGAKRHRK<sup>Dimethyl</sup> VLRD  
28.03

- ▶ fragmentation table for charge state 6+
- ▶ specType=etd
- ▶ score=53.05
- ▶ F113280.dat
- ▶ query=q47296.p1
- ▶ precursor=358.505360
- ▶ chargePrecursor=7
- ▶ itol=0.5

| AA    | c              | y              | z+1            | z+2            | z              | AA    |
|-------|----------------|----------------|----------------|----------------|----------------|-------|
| S[1]  | 18.950         | <b>418.088</b> | <b>415.418</b> | 0.839          | 615.290        | S[24] |
| G[2]  | 27.854         | 401.583        | 400.911        | 0.839          | 600.745        | G[23] |
| R[3]  | 53.871         | <b>394.079</b> | 391.409        | 391.577        | 391.241        | R[22] |
| G[4]  | 63.374         | <b>368.062</b> | <b>365.392</b> | <b>365.560</b> | <b>365.224</b> | G[21] |
| K[5]  | 84.724         | 358.559        | 355.889        | 356.057        | 355.721        | K[20] |
| G[6]  | 94.227         | 337.210        | 334.540        | 334.708        | 334.372        | G[19] |
| G[7]  | 103.731        | 327.706        | <b>325.036</b> | <b>325.204</b> | <b>324.868</b> | G[18] |
| K[8]  | 125.080        | <b>318.202</b> | 315.531        | 315.701        | 315.365        | K[17] |
| G[9]  | 134.583        | 296.851        | 294.181        | 297.354        | 294.015        | G[16] |
| L[10] | 153.431        | 287.346        | 284.666        | 284.848        | 284.512        | L[15] |
| G[11] | 162.934        | 268.502        | 265.832        | 266.000        | 265.665        | G[14] |
| K[12] | 184.284        | 258.999        | 256.329        | 256.497        | 256.161        | K[13] |
| G[13] | 193.787        | 237.650        | 234.980        | 235.148        | 234.812        | G[12] |
| G[14] | 203.291        | 228.146        | 225.476        | 225.644        | 225.308        | G[11] |
| A[15] | 215.130        | 218.642        | 215.973        | 216.141        | 215.805        | A[10] |
| K[16] | 236.479        | 206.803        | 204.133        | 204.301        | 203.965        | K[9]  |
| R[17] | 262.496        | 185.454        | 182.784        | 182.952        | 182.616        | R[8]  |
| H[18] | 285.139        | 159.437        | 156.767        | 156.935        | 156.599        | H[7]  |
| R[19] | 311.356        | 136.594        | 133.924        | 134.092        | 133.756        | R[6]  |
| K[20] | 337.377        | 110.577        | 107.907        | 108.075        | 107.739        | K[5]  |
| V[21] | <b>353.889</b> | 84.556         | 81.886         | 82.054         | 81.718         | V[4]  |
| L[22] | 372.736        | 68.044         | 65.374         | 65.543         | 65.207         | L[3]  |
| R[23] | 398.753        | 49.197         | 46.527         | 46.695         | 46.359         | R[2]  |
| D[24] | <b>417.924</b> | 23.180         | 20.510         | 20.678         | 20.342         | D[1]  |

sp | P62806 | H4\_MOUSE

SGRGKGGKGLGKGGAKRHRK<sup>Dimethyl</sup> VLRD  
28.03

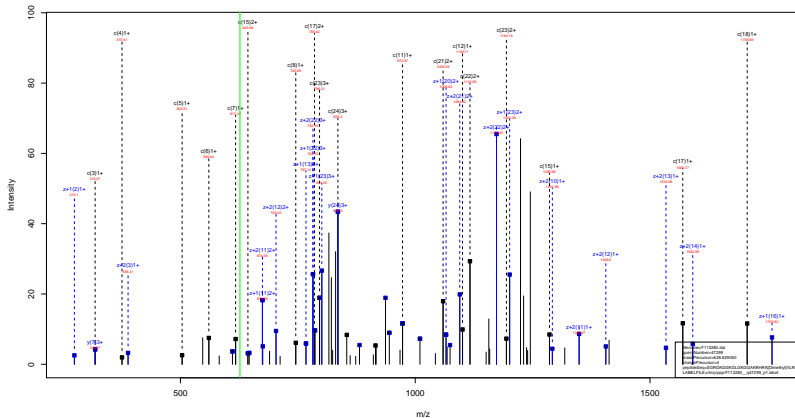

# sp | P62806 | H4\_MOUSE

SGRGKGGKGLGKGGAKRHRK<sup>Dimethyl</sup>VLRD  
28.03

- ▶ fragmentation table for charge state 1+
- ▶ specType=etd
- ▶ score=80.24
- ▶ F113280.dat
- ▶ query=q47299\_p1
- ▶ precursor=626.629050
- ▶ chargePrecursor=4
- ▶ itol=0.5

| AA | c  | y               | z+1      | z+2             | z               | AA       |       |
|----|----|-----------------|----------|-----------------|-----------------|----------|-------|
| S  | 1  | 105.056         | 2503.492 | 2487.473        | 0.000           | 2486.465 | S[24] |
| G  | 2  | 162.087         | 2416.460 | 2400.441        | 0.000           | 2399.433 | G[23] |
| R  | 3  | <b>318.180</b>  | 2359.438 | 2343.419        | 2344.427        | 2342.412 | R[22] |
| G  | 4  | <b>375.210</b>  | 2303.437 | 2187.418        | 2188.426        | 2186.410 | G[21] |
| K  | 5  | <b>503.305</b>  | 2146.416 | 2130.397        | 2131.405        | 2129.389 | K[20] |
| G  | 6  | <b>560.326</b>  | 2018.221 | 2002.200        | 2003.210        | 2001.194 | G[19] |
| G  | 7  | <b>617.348</b>  | 1961.199 | 1945.180        | 1946.188        | 1944.173 | G[18] |
| K  | 8  | <b>745.443</b>  | 1904.178 | 1888.159        | 1889.167        | 1887.151 | K[17] |
| G  | 9  | 802.464         | 1776.083 | <b>1760.064</b> | 1761.072        | 1759.056 | G[16] |
| L  | 10 | <b>915.548</b>  | 1719.061 | 1703.043        | 1704.050        | 1702.035 | L[15] |
| G  | 11 | <b>972.570</b>  | 1605.977 | 1589.958        | <b>1590.966</b> | 1588.951 | G[14] |
| K  | 12 | <b>1100.665</b> | 1548.956 | 1532.937        | <b>1533.945</b> | 1531.929 | K[13] |
| G  | 13 | 1157.686        | 1430.861 | 1404.842        | <b>1405.850</b> | 1403.834 | G[12] |
| G  | 14 | 1214.708        | 1363.839 | 1347.821        | <b>1348.828</b> | 1346.813 | G[11] |
| A  | 15 | <b>1285.745</b> | 1306.818 | 1290.799        | <b>1291.807</b> | 1289.791 | A[10] |
| R  | 16 | 1413.840        | 1238.781 | 1219.762        | 1220.770        | 1218.754 | R[9]  |
| R  | 17 | <b>1569.941</b> | 1107.686 | 1091.667        | 1092.675        | 1090.659 | R[8]  |
| H  | 18 | <b>1707.000</b> | 951.585  | 935.566         | <b>936.574</b>  | 934.558  | H[7]  |
| R  | 19 | 1863.101        | 814.526  | 798.507         | 799.515         | 797.499  | R[6]  |
| K  | 20 | 2019.227        | 658.425  | 642.406         | <b>643.414</b>  | 641.398  | K[5]  |
| V  | 21 | 2118.296        | 502.298  | 486.280         | 487.287         | 485.272  | V[4]  |
| L  | 22 | 2213.380        | 403.230  | 387.211         | <b>388.219</b>  | 386.203  | L[3]  |
| R  | 23 | 2307.461        | 298.146  | <b>274.127</b>  | -75.135         | 273.110  | R[2]  |
| D  | 24 | 2502.508        | 134.045  | 118.026         | 119.034         | 117.018  | D[1]  |

# sp | P62806 | H4\_MOUSE

SGRGKGGKGLGKGGAKRHRK<sup>Dimethyl</sup> VLRD  
28.03

- ▶ fragmentation table for charge state 2+
- ▶ specType=etd
- ▶ score=80.24
- ▶ F113280.dat
- ▶ query=q47299\_p1
- ▶ precursor=626.629050
- ▶ chargePrecursor=4
- ▶ itol=0.5

| AA    | c               | y               | z+1             | z+2             | z               | AA    |
|-------|-----------------|-----------------|-----------------|-----------------|-----------------|-------|
| S[1]  | 83.017          | 1282.249        | 1244.260        | 0.504           | 1243.756        | S[24] |
| G[2]  | 81.547          | 1238.733        | <b>1200.724</b> | 0.504           | 1200.220        | G[23] |
| K[3]  | 158.558         | 1180.223        | 1172.213        | <b>1172.717</b> | 1171.709        | K[22] |
| G[4]  | 188.399         | 1102.712        | 1094.193        | <b>1094.687</b> | 1093.659        | G[21] |
| K[5]  | 252.158         | <b>1073.661</b> | <b>1065.652</b> | 1066.156        | <b>1065.148</b> | K[20] |
| G[6]  | 280.667         | <b>1009.614</b> | 1001.605        | 1002.108        | 1001.101        | G[19] |
| G[7]  | 309.178         | 981.103         | <b>973.094</b>  | 973.598         | <b>972.590</b>  | G[18] |
| K[8]  | 373.225         | 952.592         | <b>944.583</b>  | <b>945.087</b>  | 944.070         | K[17] |
| G[9]  | 401.736         | 898.545         | 890.536         | <b>881.040</b>  | 880.032         | G[16] |
| L[10] | 430.248         | 860.036         | 852.027         | 852.529         | 851.521         | L[15] |
| G[11] | 486.789         | 803.482         | 795.473         | <b>795.987</b>  | 794.979         | G[14] |
| K[12] | 550.836         | 774.982         | <b>766.972</b>  | <b>767.476</b>  | 766.468         | K[13] |
| G[13] | 579.347         | 710.934         | 702.925         | <b>703.429</b>  | 702.421         | G[12] |
| G[14] | 607.857         | 682.423         | <b>674.414</b>  | <b>674.918</b>  | 673.910         | G[11] |
| A[15] | <b>643.376</b>  | 653.913         | <b>645.903</b>  | <b>646.407</b>  | 645.399         | A[10] |
| R[16] | 707.423         | 618.394         | <b>610.385</b>  | <b>610.889</b>  | 609.881         | R[9]  |
| R[17] | <b>785.474</b>  | 554.347         | 546.337         | 546.841         | 545.833         | R[8]  |
| H[18] | <b>854.004</b>  | 476.290         | 468.281         | 468.781         | 467.783         | H[7]  |
| R[19] | 932.054         | 407.767         | 399.757         | 400.261         | 399.253         | R[6]  |
| K[20] | <b>1010.117</b> | 329.716         | 321.707         | 322.211         | 321.203         | K[5]  |
| V[21] | <b>1059.661</b> | 251.663         | 243.653         | 244.157         | 243.149         | V[4]  |
| L[22] | <b>1116.193</b> | 202.119         | 194.109         | 194.613         | 193.605         | L[3]  |
| R[23] | <b>1194.244</b> | 145.577         | 137.567         | 138.071         | 137.063         | R[2]  |
| D[24] | 1251.757        | 87.526          | 79.517          | 80.021          | 79.013          | D[1]  |

# sp | P62806 | H4\_MOUSE

SGRGKGGKGLGKGGAKRHRK<sup>Dimethyl</sup> VLRD<sub>28.03</sub>

- ▶ fragmentation table for charge state 3+
- ▶ specType=etd
- ▶ score=80.24
- ▶ F113280.dat
- ▶ query=q47299\_p1
- ▶ precursor=626.629050
- ▶ chargePrecursor=4
- ▶ itol=0.5

| AA    | c              | y              | z+1            | z+2            | z       | AA    |
|-------|----------------|----------------|----------------|----------------|---------|-------|
| S[1]  | 35.693         | <b>835.169</b> | 829.820        | 0.672          | 829.493 | S[24] |
| G[2]  | 54.701         | 806.158        | <b>800.818</b> | 0.672          | 800.481 | G[23] |
| R[3]  | 106.734        | <b>787.151</b> | <b>781.811</b> | <b>782.147</b> | 781.475 | R[22] |
| G[4]  | 125.741        | 735.117        | 729.778        | 730.114        | 729.442 | G[21] |
| K[5]  | 168.440        | 716.110        | 710.770        | 711.106        | 710.435 | K[20] |
| G[6]  | 187.447        | 673.412        | 668.072        | 668.408        | 667.736 | G[19] |
| G[7]  | 206.454        | 654.405        | 649.065        | 649.401        | 648.729 | G[18] |
| K[8]  | 249.152        | 635.397        | 630.058        | 630.394        | 629.722 | K[17] |
| G[9]  | 268.160        | 592.699        | 587.360        | 587.696        | 587.024 | G[16] |
| L[10] | 309.254        | 573.692        | 568.352        | 568.688        | 568.016 | L[15] |
| G[11] | 324.261        | 535.997        | 530.658        | 530.994        | 530.322 | G[14] |
| K[12] | 367.560        | 516.990        | 511.651        | 511.986        | 511.315 | K[13] |
| G[13] | 386.567        | 474.292        | 468.952        | 469.288        | 468.616 | G[12] |
| G[14] | 405.574        | 455.285        | 449.945        | 450.281        | 449.609 | G[11] |
| A[15] | 429.253        | 436.277        | 430.938        | 431.274        | 430.602 | A[10] |
| K[16] | 471.951        | 412.598        | 407.259        | 407.595        | 406.923 | K[9]  |
| R[17] | 523.985        | 369.900        | 364.561        | 364.896        | 364.225 | R[8]  |
| H[18] | 569.671        | <b>317.866</b> | 312.527        | 312.863        | 312.191 | H[7]  |
| R[19] | 621.705        | 272.180        | 266.841        | 267.176        | 266.505 | R[6]  |
| K[20] | 673.147        | 220.140        | 214.801        | 215.143        | 214.471 | K[5]  |
| V[21] | 706.770        | 188.104        | 182.765        | 183.101        | 182.429 | V[4]  |
| L[22] | 744.465        | 135.082        | 129.742        | 130.078        | 129.406 | L[3]  |
| R[23] | <b>796.498</b> | 97.387         | 92.047         | 92.383         | 91.711  | R[2]  |
| D[24] | <b>834.841</b> | 45.353         | 40.014         | 40.349         | 39.678  | D[1]  |



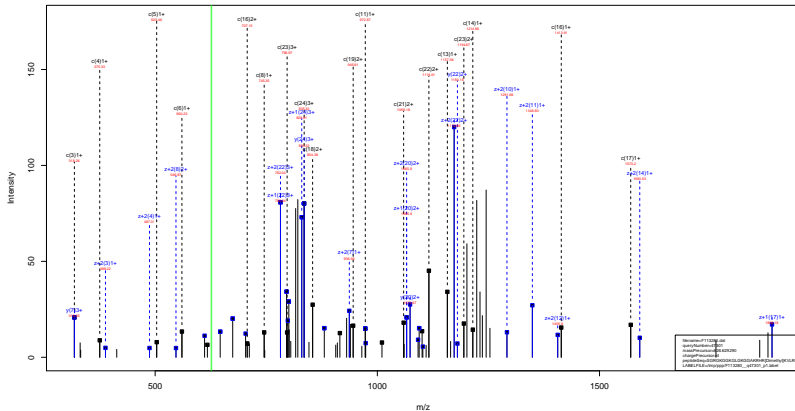

# sp | P62806 | H4\_MOUSE

SGRGKGGKGLGKGGAKRHR<sup>Dimethyl</sup> KVLRD  
28.03

- ▶ fragmentation table for charge state 1+
- ▶ specType=etd
- ▶ score=94.95
- ▶ F113280.dat
- ▶ query=q47301\_p1
- ▶ precursor=626.629290
- ▶ chargePrecursor=4
- ▶ itol=0.5

| AA    | c               | y        | z+1             | z+2             | z        | AA    |
|-------|-----------------|----------|-----------------|-----------------|----------|-------|
| S[1]  | 105.056         | 2503.492 | 2487.473        | 0.000           | 2486.465 | S[24] |
| G[2]  | 162.087         | 2416.460 | 2400.441        | 0.000           | 2399.433 | G[23] |
| R[3]  | <b>318.188</b>  | 2359.438 | 2343.419        | 2344.427        | 2342.412 | R[22] |
| G[4]  | <b>375.210</b>  | 2303.337 | 2187.318        | 2188.326        | 2186.310 | G[21] |
| K[5]  | <b>503.305</b>  | 2146.316 | 2130.297        | 2131.305        | 2129.289 | K[20] |
| G[6]  | <b>560.326</b>  | 2018.221 | 2002.200        | 2003.210        | 2001.194 | G[19] |
| G[7]  | <b>617.348</b>  | 1961.199 | 1945.180        | 1946.188        | 1944.173 | G[18] |
| K[8]  | <b>745.443</b>  | 1904.178 | <b>1888.159</b> | 1889.167        | 1887.151 | K[17] |
| G[9]  | 802.464         | 1776.082 | 1760.064        | 1761.072        | 1759.056 | G[16] |
| L[10] | <b>915.548</b>  | 1719.061 | 1703.043        | 1704.050        | 1702.035 | L[15] |
| G[11] | <b>972.570</b>  | 1605.977 | 1589.958        | <b>1590.966</b> | 1588.951 | G[14] |
| K[12] | <b>1100.665</b> | 1548.956 | 1532.937        | 1533.945        | 1531.929 | K[13] |
| G[13] | <b>1157.686</b> | 1430.861 | 1404.842        | <b>1405.850</b> | 1403.834 | G[12] |
| G[14] | <b>1214.708</b> | 1363.839 | 1347.821        | <b>1348.828</b> | 1346.813 | G[11] |
| A[15] | 1289.745        | 1306.818 | 1290.799        | <b>1291.807</b> | 1289.791 | A[10] |
| R[16] | <b>1413.840</b> | 1239.781 | 1219.762        | 1220.770        | 1218.754 | R[9]  |
| R[17] | <b>1569.941</b> | 1107.686 | <b>1091.667</b> | 1092.675        | 1090.659 | R[8]  |
| H[18] | 1707.000        | 951.585  | 935.566         | <b>936.574</b>  | 934.558  | H[7]  |
| R[19] | 1891.132        | 814.526  | <b>798.507</b>  | 799.515         | 797.499  | R[6]  |
| K[20] | 2019.227        | 630.393  | 614.375         | 615.382         | 613.367  | K[5]  |
| V[21] | 2118.296        | 502.298  | 486.280         | <b>487.287</b>  | 485.272  | V[4]  |
| L[22] | 2211.380        | 403.230  | 387.213         | <b>388.219</b>  | 386.203  | L[3]  |
| R[23] | 2387.481        | 280.146  | 274.127         | -75.135         | 273.110  | R[2]  |
| D[24] | 2502.508        | 134.045  | 118.026         | 119.034         | 117.018  | D[1]  |

# sp | P62806 | H4\_MOUSE

SGRGKGGKGLGKGGAKRHR<sup>Dimethyl</sup> KVLRD  
28.03

- ▶ fragmentation table for charge state 2+
- ▶ specType=etd
- ▶ score=94.95
- ▶ F113280.dat
- ▶ query=q47301\_p1
- ▶ precursor=626.629290
- ▶ chargePrecursor=4
- ▶ itol=0.5

| AA    | c               | y               | z+1             | z+2             | z               | AA    |
|-------|-----------------|-----------------|-----------------|-----------------|-----------------|-------|
| S[1]  | 63.017          | 1262.249        | 1244.260        | 0.504           | 1243.756        | S[24] |
| G[2]  | 61.547          | 1238.733        | 1200.724        | 0.504           | 1200.220        | G[23] |
| R[3]  | 158.558         | <b>1188.223</b> | 1172.731        | <b>1172.717</b> | 1171.709        | R[22] |
| G[4]  | 188.399         | <b>1102.172</b> | <b>1094.163</b> | 1093.657        | <b>1093.659</b> | G[21] |
| K[5]  | 252.158         | <b>1073.661</b> | <b>1065.652</b> | <b>1066.156</b> | 1065.148        | K[20] |
| G[6]  | 280.667         | 1009.614        | 1001.605        | 1002.608        | 1001.101        | G[19] |
| G[7]  | 309.178         | 981.103         | <b>973.094</b>  | <b>973.598</b>  | <b>972.590</b>  | G[18] |
| K[8]  | 373.225         | 952.592         | 944.583         | 945.587         | 944.070         | K[17] |
| G[9]  | 401.736         | 898.545         | <b>880.536</b>  | <b>881.040</b>  | 880.032         | G[16] |
| L[10] | 438.278         | 860.036         | 852.027         | 853.029         | 851.521         | L[15] |
| G[11] | 486.789         | 803.492         | <b>795.483</b>  | <b>795.987</b>  | 794.979         | G[14] |
| K[12] | 550.836         | 774.982         | 766.972         | 767.476         | 766.468         | K[13] |
| G[13] | 579.347         | 710.934         | 702.925         | <b>703.429</b>  | 702.421         | G[12] |
| G[14] | 607.857         | 682.423         | <b>674.414</b>  | <b>674.918</b>  | 673.910         | G[11] |
| A[15] | 693.396         | 653.913         | <b>645.903</b>  | <b>646.307</b>  | 645.300         | A[10] |
| R[16] | <b>707.423</b>  | 618.394         | 610.385         | <b>610.889</b>  | 609.881         | R[9]  |
| R[17] | 785.474         | 554.347         | 546.337         | <b>546.841</b>  | 545.833         | R[8]  |
| H[18] | <b>854.004</b>  | 476.290         | 468.281         | 468.781         | 467.783         | H[7]  |
| R[19] | <b>946.070</b>  | 407.767         | 399.757         | 400.261         | 399.253         | R[6]  |
| K[20] | <b>1010.117</b> | 315.700         | 307.691         | 308.195         | 307.187         | K[5]  |
| V[21] | <b>1059.661</b> | 253.653         | 245.643         | 246.147         | 245.140         | V[4]  |
| L[22] | <b>1116.193</b> | 202.119         | 194.109         | 194.613         | 193.605         | L[3]  |
| R[23] | <b>1194.244</b> | 145.577         | 137.567         | 138.071         | 137.063         | R[2]  |
| D[24] | 1251.757        | 67.526          | 59.517          | 60.021          | 59.013          | D[1]  |

# sp | P62806 | H4\_MOUSE

SGRGKGGKGLGKGGAKRHR <sup>Dimethyl</sup> 28.03 KVLRD

- ▶ fragmentation table for charge state 3+
- ▶ specType=etd
- ▶ score=94.95
- ▶ F113280.dat
- ▶ query=q47301\_p1
- ▶ precursor=626.629290
- ▶ chargePrecursor=4
- ▶ itol=0.5

| AA    | c              | y              | z+1            | z+2            | z              | AA    |
|-------|----------------|----------------|----------------|----------------|----------------|-------|
| S[1]  | 35.693         | <b>835.169</b> | <b>629.829</b> | 0.672          | <b>829.493</b> | S[24] |
| G[2]  | 54.701         | 306.150        | <b>800.818</b> | 0.672          | <b>800.483</b> | G[23] |
| R[3]  | 106.734        | 787.151        | <b>781.811</b> | <b>782.147</b> | 781.475        | R[22] |
| G[4]  | 125.741        | 735.117        | 729.778        | 730.114        | 729.442        | G[21] |
| K[5]  | 168.440        | 716.110        | 710.770        | 711.106        | 710.435        | K[20] |
| G[6]  | 187.447        | 673.412        | 668.072        | 668.408        | 667.736        | G[19] |
| G[7]  | 206.454        | 654.405        | 649.065        | 649.401        | 648.729        | G[18] |
| K[8]  | 249.152        | 635.397        | 630.058        | 630.394        | 629.722        | K[17] |
| G[9]  | 268.160        | 592.699        | 587.360        | 587.696        | 587.024        | G[16] |
| L[10] | 305.954        | 671.692        | 568.357        | 568.693        | 568.016        | L[15] |
| G[11] | 324.961        | 535.997        | 530.658        | 530.994        | 530.322        | G[14] |
| K[12] | 367.560        | 516.990        | 511.651        | 511.988        | 511.315        | K[13] |
| G[13] | 386.567        | 474.292        | 468.952        | 469.288        | 468.616        | G[12] |
| G[14] | 405.574        | 455.285        | 449.945        | 450.281        | 449.609        | G[11] |
| A[15] | 429.253        | 436.277        | 430.938        | 431.274        | 430.602        | A[10] |
| K[16] | 471.951        | 412.598        | 407.259        | 407.595        | 406.923        | K[9]  |
| R[17] | 523.985        | 369.900        | 364.561        | 364.896        | 364.225        | R[8]  |
| H[18] | 569.671        | <b>317.866</b> | 312.527        | 312.863        | 312.191        | H[7]  |
| R[19] | 631.049        | 272.180        | 266.841        | 267.176        | 266.505        | R[6]  |
| K[20] | 673.747        | 210.803        | 205.463        | 205.799        | 205.127        | K[5]  |
| V[21] | <b>706.770</b> | 168.104        | 162.765        | 163.101        | 162.429        | V[4]  |
| L[22] | 744.465        | 135.082        | 129.742        | 130.078        | 129.406        | L[3]  |
| R[23] | <b>796.498</b> | 97.387         | 92.047         | 92.383         | 91.711         | R[2]  |
| D[24] | <b>834.841</b> | 45.353         | 40.014         | 40.349         | 39.678         | D[1]  |

# sp | P62806 | H4\_MOUSE

[Acetyl]SGRGKGGKGLGKGGAKRHR (Dimethyl) KVLRD (28.03)

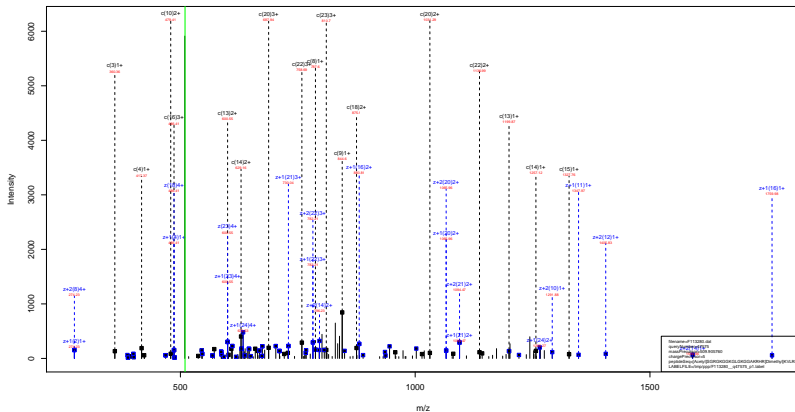

# sp | P62806 | H4\_MOUSE

[Acetyl]SGRGKGGKGLGKGGAKRHR (Dimethyl)  
(28.03) KVLRD

- ▶ fragmentation table for charge state 1+
- ▶ specType=etd
- ▶ score=74.54
- ▶ F113280.dat
- ▶ query=q47575\_p1
- ▶ precursor=509.905760
- ▶ chargePrecursor=5
- ▶ itol=0.5

| AA |    | c               | y              | z+1             | z+2             | z        | AA    |
|----|----|-----------------|----------------|-----------------|-----------------|----------|-------|
| S  | 1  | 147.076         | 2545.502       | 2529.483        | 0.000           | 2528.478 | S[24] |
| G  | 2  | 204.098         | 2416.460       | 2400.441        | 0.000           | 2399.433 | G[23] |
| R  | 3  | <b>360.199</b>  | 2359.439       | 2343.419        | 2344.427        | 2342.412 | R[22] |
| G  | 4  | <b>417.220</b>  | 2303.397       | 2187.378        | 2186.368        | 2186.310 | G[21] |
| K  | 5  | <b>545.315</b>  | 2146.316       | 2130.297        | 2131.305        | 2129.280 | K[20] |
| G  | 6  | <b>602.337</b>  | 2018.221       | 2002.202        | 2003.210        | 2001.194 | G[19] |
| G  | 7  | <b>659.358</b>  | 1961.199       | 1945.180        | 1946.188        | 1944.173 | G[18] |
| K  | 8  | <b>787.453</b>  | 1904.178       | 1888.159        | 1889.167        | 1887.151 | K[17] |
| G  | 9  | <b>844.475</b>  | 1776.083       | <b>1760.064</b> | 1761.072        | 1759.056 | G[16] |
| L  | 10 | <b>937.559</b>  | 1719.061       | 1703.043        | 1704.050        | 1702.035 | L[15] |
| K  | 11 | <b>1014.580</b> | 1605.977       | 1589.958        | <b>1590.966</b> | 1588.951 | K[14] |
| R  | 12 | <b>1142.675</b> | 1548.956       | 1532.937        | 1533.945        | 1531.929 | R[13] |
| G  | 13 | <b>1199.697</b> | 1420.861       | 1404.842        | <b>1405.850</b> | 1403.834 | G[12] |
| G  | 14 | <b>1256.718</b> | 1393.839       | <b>1347.821</b> | 1348.828        | 1346.813 | G[11] |
| A  | 15 | <b>1327.755</b> | 1306.818       | 1290.799        | <b>1291.807</b> | 1289.791 | A[10] |
| R  | 16 | 1405.850        | 1289.781       | 1273.762        | <b>1220.770</b> | 1218.755 | R[9]  |
| R  | 17 | 1611.951        | 1107.686       | 1091.667        | 1092.675        | 1090.659 | R[8]  |
| H  | 18 | 1749.010        | 951.585        | <b>935.566</b>  | <b>936.574</b>  | 934.558  | H[7]  |
| R  | 19 | 1933.143        | 814.526        | 798.507         | 799.515         | 797.499  | R[6]  |
| R  | 20 | 2061.238        | <b>630.393</b> | 614.375         | 615.382         | 613.367  | R[5]  |
| V  | 21 | 2180.306        | 502.298        | <b>486.280</b>  | <b>487.287</b>  | 485.272  | V[4]  |
| L  | 22 | 2273.390        | 403.230        | <b>387.211</b>  | <b>388.219</b>  | 386.203  | L[3]  |
| D  | 23 | 2429.491        | 298.146        | <b>274.127</b>  | 275.136         | 273.121  | D[2]  |
| D  | 24 | 2544.518        | 194.045        | 118.026         | 119.034         | 117.018  | D[1]  |

# sp | P62806 | H4\_MOUSE

[Acetyl]SGRGKGGKGLGKGGAKRHR (Dimethyl) KVLRD  
(28.03)

- ▶ fragmentation table for charge state 2+
- ▶ specType=etd
- ▶ score=74.54
- ▶ F113280.dat
- ▶ query=q47575.p1
- ▶ precursor=509.905760
- ▶ chargePrecursor=5
- ▶ itol=0.5

| AA    | c               | y              | z+1             | z+2             | z               | AA    |
|-------|-----------------|----------------|-----------------|-----------------|-----------------|-------|
| S[1]  | 74.042          | 1272.295       | <b>1265.245</b> | 0.504           | 1264.741        | S[24] |
| G[2]  | 102.553         | 1208.733       | 1200.724        | 0.504           | <b>1200.220</b> | G[23] |
| R[3]  | 180.603         | 1180.223       | 1172.213        | 1172.717        | 1171.709        | R[22] |
| G[4]  | 268.114         | 1102.122       | <b>1094.163</b> | <b>1094.567</b> | 1093.659        | G[21] |
| K[5]  | 273.103         | 1073.661       | <b>1065.652</b> | <b>1066.156</b> | 1065.149        | K[20] |
| G[6]  | 301.672         | 1009.614       | 1001.605        | <b>1002.108</b> | 1001.101        | G[19] |
| G[7]  | 330.183         | 961.103        | 973.094         | 973.598         | 972.590         | G[18] |
| K[8]  | <b>394.230</b>  | 952.592        | 944.583         | <b>945.087</b>  | 944.079         | K[17] |
| G[9]  | <b>422.741</b>  | <b>888.545</b> | <b>880.536</b>  | <b>881.040</b>  | 880.032         | G[16] |
| L[10] | <b>479.283</b>  | 850.234        | 862.225         | 862.729         | 861.721         | L[15] |
| G[11] | 507.794         | 803.682        | <b>795.683</b>  | <b>795.987</b>  | 794.979         | G[14] |
| K[12] | <b>571.841</b>  | 774.662        | <b>766.672</b>  | <b>767.476</b>  | 766.468         | K[13] |
| G[13] | <b>600.352</b>  | <b>710.934</b> | <b>702.925</b>  | <b>703.429</b>  | 702.421         | G[12] |
| G[14] | <b>628.863</b>  | 682.423        | <b>674.414</b>  | <b>674.918</b>  | <b>673.910</b>  | G[11] |
| A[15] | <b>664.361</b>  | 653.913        | <b>645.903</b>  | <b>646.407</b>  | <b>645.399</b>  | A[10] |
| R[16] | <b>728.429</b>  | <b>618.394</b> | <b>610.385</b>  | <b>610.889</b>  | 609.881         | R[9]  |
| R[17] | <b>806.479</b>  | 558.367        | <b>546.337</b>  | <b>546.841</b>  | <b>545.833</b>  | R[8]  |
| H[18] | <b>875.009</b>  | 476.295        | <b>468.287</b>  | <b>468.791</b>  | 467.783         | H[7]  |
| R[19] | 967.075         | 407.767        | <b>399.757</b>  | <b>400.261</b>  | 399.253         | R[6]  |
| K[20] | <b>1031.122</b> | 315.700        | 307.691         | 308.195         | 307.187         | K[5]  |
| V[21] | <b>1080.657</b> | 251.653        | 243.643         | 244.147         | 243.140         | V[4]  |
| L[22] | <b>1137.199</b> | 202.118        | 194.109         | 194.613         | 193.605         | L[3]  |
| R[23] | 1215.269        | 145.577        | 137.567         | 138.071         | 137.063         | R[2]  |
| D[24] | 1272.763        | 67.526         | 59.517          | 60.021          | 59.013          | D[1]  |

# sp | P62806 | H4\_MOUSE

[Acetyl]SGRGKGGKGLGKGGAKRHR (Dimethyl)  
(28.03) KVLRD

- ▶ fragmentation table for charge state 3+
- ▶ specType=etd
- ▶ score=74.54
- ▶ F113280.dat
- ▶ query=q47575\_p1
- ▶ precursor=509.905760
- ▶ chargePrecursor=5
- ▶ itol=0.5

| AA    | c              | y              | z+1            | z+2            | z              | AA    |
|-------|----------------|----------------|----------------|----------------|----------------|-------|
| S[1]  | 49.697         | <b>849.172</b> | 843.833        | 0.672          | 843.497        | S[24] |
| G[2]  | 68.704         | <b>806.156</b> | 800.817        | 0.672          | 800.481        | G[23] |
| R[3]  | 120.738        | <b>787.151</b> | <b>781.811</b> | <b>782.147</b> | 781.475        | R[22] |
| G[4]  | 139.745        | 735.117        | <b>729.778</b> | <b>730.114</b> | 729.442        | G[21] |
| K[5]  | 182.443        | 718.110        | <b>710.770</b> | <b>711.106</b> | 710.435        | K[20] |
| G[6]  | 201.450        | <b>673.412</b> | <b>668.072</b> | <b>668.408</b> | 667.736        | G[19] |
| G[7]  | 220.458        | 654.405        | 649.065        | <b>649.401</b> | 648.729        | G[18] |
| K[8]  | 263.156        | 635.397        | <b>630.058</b> | <b>630.394</b> | 629.722        | K[17] |
| G[9]  | 282.163        | <b>592.699</b> | <b>587.360</b> | <b>587.695</b> | <b>587.024</b> | G[16] |
| L[10] | 319.858        | 571.692        | <b>568.352</b> | <b>568.688</b> | <b>568.016</b> | L[15] |
| G[11] | 338.865        | 535.991        | 530.651        | 530.994        | 530.322        | G[14] |
| K[12] | 381.563        | 516.980        | 511.651        | 511.988        | 511.315        | K[13] |
| G[13] | <b>400.570</b> | 474.292        | <b>468.952</b> | 469.288        | <b>468.616</b> | G[12] |
| G[14] | 419.578        | 455.285        | 449.945        | 450.281        | 449.609        | G[11] |
| A[15] | 443.297        | 436.277        | 430.938        | 431.274        | 430.602        | A[10] |
| K[16] | <b>485.955</b> | 412.598        | 407.259        | 407.595        | 406.923        | K[9]  |
| R[17] | <b>537.989</b> | 369.900        | 364.561        | 364.896        | 364.225        | R[8]  |
| H[18] | 583.675        | 317.866        | 312.527        | 312.863        | 312.191        | H[7]  |
| R[19] | 645.092        | 272.180        | 266.841        | 267.176        | 266.505        | R[6]  |
| K[20] | <b>687.751</b> | 210.803        | 205.463        | 205.799        | 205.127        | K[5]  |
| V[21] | <b>720.774</b> | 108.104        | 102.765        | 103.101        | 102.429        | V[4]  |
| L[22] | <b>758.468</b> | 135.082        | 129.742        | 130.078        | 129.406        | L[3]  |
| R[23] | <b>810.502</b> | 97.387         | 92.047         | 92.383         | 91.711         | R[2]  |
| D[24] | 848.844        | 45.353         | 40.014         | 40.349         | 39.678         | D[1]  |



# sp | P62806 | H4\_MOUSE

[Acetyl]SGRGKGGKGLGKGGAKRHR (Dimethyl) KVLRD  
(28.03)

- ▶ fragmentation table for charge state 4+
- ▶ specType=etd
- ▶ score=74.54
- ▶ F113280.dat
- ▶ query=q47575\_p1
- ▶ precursor=509.905760
- ▶ chargePrecursor=5
- ▶ itol=0.5

| AA |    | c              | y              | z+1            | z+2            | z              | AA |
|----|----|----------------|----------------|----------------|----------------|----------------|----|
| S  | 1  | 37.925         | <b>637.131</b> | <b>633.126</b> | 0.755          | 632.076        | S  |
| G  | 2  | 51.780         | 604.970        | <b>600.866</b> | 0.755          | <b>600.614</b> | G  |
| R  | 3  | 90.905         | 590.615        | <b>586.610</b> | <b>586.862</b> | <b>586.358</b> | R  |
| G  | 4  | 105.061        | 591.590        | 547.585        | 547.837        | 547.133        | G  |
| K  | 5  | 137.084        | 537.334        | 533.330        | 533.582        | 533.078        | K  |
| G  | 6  | 151.340        | 505.311        | 501.306        | 501.558        | 501.054        | G  |
| G  | 7  | 165.595        | 491.055        | <b>487.051</b> | <b>487.303</b> | <b>486.799</b> | G  |
| K  | 8  | 197.619        | 476.800        | 472.795        | 473.047        | 472.543        | K  |
| G  | 9  | 211.874        | 444.776        | 440.771        | 441.023        | 440.520        | G  |
| L  | 10 | 240.145        | 430.521        | 426.516        | 426.768        | 426.264        | L  |
| G  | 11 | 254.401        | 402.260        | 398.245        | 398.497        | 397.993        | G  |
| K  | 12 | 286.424        | <b>387.994</b> | 383.990        | 384.242        | 383.738        | K  |
| G  | 13 | 300.680        | 355.971        | 351.966        | 352.218        | 351.714        | G  |
| G  | 14 | 314.935        | 341.715        | 337.711        | 337.963        | 337.459        | G  |
| A  | 15 | 332.694        | 327.460        | 323.455        | 323.707        | 323.203        | A  |
| K  | 16 | 364.718        | 309.701        | 305.696        | 305.948        | 305.444        | K  |
| R  | 17 | 403.743        | 277.677        | 273.672        | <b>273.924</b> | 273.420        | R  |
| H  | 18 | 438.008        | 238.652        | 234.647        | 234.899        | 234.395        | H  |
| R  | 19 | 484.041        | 204.387        | 200.382        | 200.634        | 200.130        | R  |
| K  | 20 | 518.065        | 136.354        | 134.349        | 134.601        | 134.097        | K  |
| V  | 21 | 540.332        | 126.130        | 122.125        | 122.377        | 122.073        | V  |
| L  | 22 | 569.103        | 101.563        | 97.558         | 97.810         | 97.306         | L  |
| R  | 23 | <b>608.128</b> | 73.292         | 69.287         | 69.539         | 69.035         | R  |
| D  | 24 | <b>636.885</b> | 34.267         | 30.262         | 30.514         | 30.010         | D  |



# sp | P62806 | H4\_MOUSE

[Acetyl]SGRGKGGKGLGKGGAKRHRK<sup>Dimethyl</sup>VLRD<sub>28.03</sub>

- ▶ fragmentation table for charge state 1+
- ▶ specType=etd
- ▶ score=88.63
- ▶ F113280.dat
- ▶ query=q47577\_p1
- ▶ precursor=509.906050
- ▶ chargePrecursor=5
- ▶ itol=0.5

| AA    | c               | y               | z+1             | z+2             | z              | AA    |
|-------|-----------------|-----------------|-----------------|-----------------|----------------|-------|
| S[1]  | 147.076         | 2545.507        | 2529.483        | 0.000           | 2528.476       | S[24] |
| G[2]  | 204.098         | 2416.460        | 2400.441        | 0.000           | 2399.433       | G[23] |
| R[3]  | <b>360.199</b>  | 2399.438        | 2343.419        | 2344.427        | 2342.412       | R[22] |
| G[4]  | <b>417.220</b>  | 2203.337        | 2187.318        | 2188.326        | 2186.310       | G[21] |
| K[5]  | <b>545.315</b>  | 2146.318        | 2130.297        | 2131.305        | 2129.289       | K[20] |
| G[6]  | <b>602.337</b>  | 2018.221        | 2002.202        | 2003.210        | 2001.194       | G[19] |
| G[7]  | <b>659.358</b>  | 1961.199        | 1945.180        | 1946.188        | 1944.172       | G[18] |
| K[8]  | <b>787.453</b>  | 1904.178        | 1888.159        | 1889.167        | 1887.151       | K[17] |
| G[9]  | <b>844.475</b>  | 1776.083        | 1760.064        | 1761.072        | 1759.056       | G[16] |
| L[10] | <b>927.559</b>  | 1729.061        | <b>1703.043</b> | 1704.050        | 1702.035       | L[15] |
| Q[11] | <b>1014.580</b> | 1605.977        | <b>1589.958</b> | 1590.966        | 1588.951       | Q[14] |
| K[12] | <b>1142.675</b> | 1548.956        | 1532.937        | <b>1533.945</b> | 1531.929       | K[13] |
| G[13] | 1199.697        | 1420.861        | 1404.842        | 1405.850        | 1403.834       | G[12] |
| G[14] | <b>1296.718</b> | 1363.839        | 1347.821        | <b>1348.828</b> | 1346.813       | G[11] |
| A[15] | <b>1327.755</b> | 1306.817        | 1290.798        | <b>1291.807</b> | 1289.791       | A[10] |
| R[16] | <b>1455.850</b> | <b>1235.781</b> | 1219.762        | <b>1220.770</b> | 1218.755       | R[9]  |
| R[17] | 1611.951        | 1107.686        | 1091.667        | 1092.675        | 1090.659       | R[8]  |
| H[18] | 1740.010        | <b>951.585</b>  | <b>935.566</b>  | <b>936.574</b>  | 934.558        | H[7]  |
| R[19] | 1905.111        | 814.528         | <b>798.507</b>  | 799.515         | 797.499        | R[6]  |
| K[20] | 2061.238        | 658.425         | <b>642.406</b>  | 643.414         | <b>641.398</b> | K[5]  |
| V[21] | 2160.306        | 502.368         | <b>485.380</b>  | 487.387         | 485.372        | V[4]  |
| L[22] | 2273.399        | 463.310         | <b>387.211</b>  | 388.219         | 386.203        | L[3]  |
| R[23] | 2429.491        | 290.148         | <b>274.127</b>  | 275.135         | 273.119        | R[2]  |
| D[24] | 2544.518        | 134.045         | 138.026         | 139.034         | 137.018        | D[1]  |

# sp | P62806 | H4\_MOUSE

[Acetyl]SGRGKGGKGLGKGGAKRHRK<sup>Dimethyl</sup>VLRD<sub>28.03</sub>

- ▶ fragmentation table for charge state 2+
- ▶ specType=etd
- ▶ score=88.63
- ▶ F113280.dat
- ▶ query=q47577\_p1
- ▶ precursor=509.906050
- ▶ chargePrecursor=5
- ▶ itol=0.5

| AA    | c               | y               | z+1             | z+2             | z               | AA    |
|-------|-----------------|-----------------|-----------------|-----------------|-----------------|-------|
| S[1]  | 74.042          | 1273.259        | 1266.265        | 0.504           | 1264.741        | S[24] |
| G[2]  | 102.551         | 1238.733        | 1200.724        | 0.504           | 1200.220        | G[23] |
| K[3]  | 180.603         | 1180.223        | <b>1172.213</b> | <b>1172.717</b> | 1171.709        | K[22] |
| G[4]  | 259.114         | 1102.172        | <b>1094.163</b> | <b>1094.567</b> | <b>1093.559</b> | G[21] |
| K[5]  | 273.163         | 1073.661        | 1055.592        | <b>1056.156</b> | 1055.148        | K[20] |
| G[6]  | 301.672         | <b>1009.614</b> | <b>1001.605</b> | <b>1002.108</b> | 1001.101        | G[19] |
| G[7]  | 330.183         | 981.103         | <b>973.094</b>  | <b>973.598</b>  | <b>972.590</b>  | G[18] |
| K[8]  | <b>394.230</b>  | 952.592         | 944.583         | <b>945.087</b>  | 944.070         | K[17] |
| G[9]  | <b>422.741</b>  | <b>888.545</b>  | <b>880.536</b>  | <b>881.040</b>  | 880.032         | G[16] |
| L[10] | <b>479.263</b>  | 860.036         | 852.027         | 853.529         | 852.521         | L[15] |
| G[11] | 507.794         | 803.492         | <b>795.483</b>  | <b>795.987</b>  | 794.979         | G[14] |
| K[12] | <b>571.841</b>  | 774.982         | <b>766.972</b>  | <b>767.476</b>  | 766.468         | K[13] |
| G[13] | <b>600.352</b>  | <b>710.934</b>  | <b>702.925</b>  | <b>703.429</b>  | 702.421         | G[12] |
| G[14] | <b>628.863</b>  | 682.423         | <b>674.414</b>  | <b>674.918</b>  | 673.910         | G[11] |
| A[15] | <b>664.381</b>  | 653.913         | <b>645.903</b>  | <b>646.407</b>  | 645.399         | A[10] |
| K[16] | 728.420         | 618.394         | <b>610.385</b>  | <b>610.889</b>  | 609.881         | K[9]  |
| R[17] | <b>806.479</b>  | <b>554.347</b>  | <b>546.337</b>  | 546.841         | <b>545.833</b>  | R[8]  |
| H[18] | <b>875.009</b>  | 476.296         | <b>468.287</b>  | <b>468.791</b>  | <b>467.783</b>  | H[7]  |
| R[19] | <b>953.059</b>  | 407.767         | <b>399.757</b>  | <b>400.261</b>  | 399.253         | R[6]  |
| K[20] | <b>1031.122</b> | 259.746         | 241.737         | 242.241         | 241.233         | K[5]  |
| V[21] | <b>1080.667</b> | 293.693         | 283.683         | 284.187         | 283.180         | V[4]  |
| L[22] | <b>1137.199</b> | 202.119         | 194.109         | 194.613         | 193.605         | L[3]  |
| R[23] | 1215.249        | 145.577         | 137.567         | 138.071         | 137.063         | R[2]  |
| D[24] | 1272.763        | 67.526          | 59.517          | 60.021          | 59.013          | D[1]  |

# sp | P62806 | H4\_MOUSE

[Acetyl]SGRGKGGKGLGKGGAKRHRK<sup>Dimethyl</sup>VLRD<sub>28.03</sub>

- ▶ fragmentation table for charge state 3+
- ▶ specType=etd
- ▶ score=88.63
- ▶ F113280.dat
- ▶ query=q47577.p1
- ▶ precursor=509.906050
- ▶ chargePrecursor=5
- ▶ itol=0.5

| AA    | c              | y              | z+1            | z+2            | z              | AA    |
|-------|----------------|----------------|----------------|----------------|----------------|-------|
| S[1]  | 49.697         | <b>849.172</b> | <b>843.833</b> | 0.672          | 843.497        | S[24] |
| G[2]  | 58.704         | <b>806.158</b> | <b>800.818</b> | 0.672          | 800.483        | G[23] |
| R[3]  | 150.738        | <b>787.151</b> | 781.811        | <b>782.147</b> | 781.475        | R[22] |
| G[4]  | 139.745        | 735.117        | <b>725.778</b> | <b>730.114</b> | 729.442        | G[21] |
| K[5]  | 182.443        | 716.110        | <b>710.770</b> | <b>711.106</b> | 710.435        | K[20] |
| G[6]  | 201.450        | 673.412        | <b>668.072</b> | <b>668.408</b> | <b>667.736</b> | G[19] |
| G[7]  | 220.458        | <b>654.405</b> | 649.065        | <b>649.401</b> | 648.729        | G[18] |
| K[8]  | 263.156        | 635.397        | <b>630.058</b> | <b>630.394</b> | 629.722        | K[17] |
| G[9]  | 282.163        | 592.699        | <b>587.360</b> | 587.695        | <b>587.024</b> | G[16] |
| L[10] | 319.658        | 573.692        | 568.352        | <b>568.688</b> | 568.016        | L[15] |
| G[11] | 338.665        | 535.997        | 530.658        | <b>530.994</b> | 530.322        | G[14] |
| K[12] | 381.563        | 516.990        | 511.651        | 511.986        | 511.315        | K[13] |
| G[13] | 400.570        | 474.292        | <b>468.952</b> | <b>469.288</b> | <b>468.616</b> | G[12] |
| G[14] | 419.578        | 455.285        | 449.945        | 450.281        | 449.609        | G[11] |
| A[15] | 443.257        | 436.277        | 430.938        | 431.274        | 430.602        | A[10] |
| K[16] | <b>485.955</b> | 412.598        | 407.259        | 407.595        | 406.923        | K[9]  |
| R[17] | 537.689        | 369.900        | 364.561        | 364.896        | 364.225        | R[8]  |
| H[18] | <b>583.675</b> | 317.866        | 312.527        | 312.863        | 312.191        | H[7]  |
| R[19] | <b>633.709</b> | 272.180        | 266.841        | 267.176        | 266.505        | R[6]  |
| K[20] | <b>687.751</b> | 220.140        | 214.801        | 215.143        | 214.471        | K[5]  |
| V[21] | <b>720.774</b> | 168.104        | 162.765        | 163.101        | 162.429        | V[4]  |
| L[22] | <b>758.468</b> | 135.082        | 129.742        | 130.078        | 129.406        | L[3]  |
| R[23] | <b>810.502</b> | 97.387         | 92.047         | 92.383         | 91.711         | R[2]  |
| D[24] | <b>848.844</b> | 45.353         | 40.014         | 40.349         | 39.678         | D[1]  |

# sp | P62806 | H4\_MOUSE

[Acetyl]SGRGKGGKGLGKGGAKRHRK<sup>Dimethyl</sup>VLRD<sub>28.03</sub>

- ▶ fragmentation table for charge state 4+
- ▶ specType=etd
- ▶ score=88.63
- ▶ F113280.dat
- ▶ query=q47577.p1
- ▶ precursor=509.906050
- ▶ chargePrecursor=5
- ▶ itol=0.5

| AA    | c              | y              | z+1            | z+2            | z              | AA    |
|-------|----------------|----------------|----------------|----------------|----------------|-------|
| S[1]  | 37.525         | <b>637.131</b> | <b>633.126</b> | 0.755          | 632.874        | S[24] |
| G[2]  | 51.780         | 604.870        | <b>600.866</b> | 0.755          | <b>600.614</b> | G[23] |
| R[3]  | 90.805         | 590.615        | <b>586.610</b> | <b>586.862</b> | 586.358        | R[22] |
| G[4]  | 105.061        | 551.590        | 547.585        | 547.837        | 547.333        | G[21] |
| K[5]  | 137.084        | 537.334        | 533.330        | 533.582        | 533.078        | K[20] |
| G[6]  | 151.340        | 505.311        | 501.306        | 501.558        | 501.054        | G[19] |
| G[7]  | 165.595        | 491.055        | 487.051        | 487.303        | 486.799        | G[18] |
| K[8]  | 197.619        | 476.800        | 472.793        | 473.047        | 472.543        | K[17] |
| G[9]  | 211.874        | 444.776        | 440.771        | 441.023        | 440.520        | G[16] |
| L[10] | 280.148        | 430.521        | 426.516        | 426.768        | 426.264        | L[15] |
| G[11] | 254.401        | 407.250        | 398.243        | 398.497        | 397.993        | G[14] |
| K[12] | 286.424        | 387.994        | 383.989        | 384.242        | 383.738        | K[13] |
| G[13] | 300.680        | 355.971        | 351.966        | 352.218        | 351.714        | G[12] |
| G[14] | 314.935        | 341.715        | 337.711        | 337.963        | 337.459        | G[11] |
| A[15] | 332.694        | 327.460        | 323.455        | 323.707        | 323.203        | A[10] |
| K[16] | 364.718        | 309.701        | 305.696        | 305.948        | 305.444        | K[9]  |
| R[17] | 403.743        | 277.677        | 273.672        | <b>273.924</b> | 273.420        | R[8]  |
| H[18] | 438.008        | 238.652        | 234.647        | 234.899        | 234.395        | H[7]  |
| R[19] | 477.033        | 204.397        | 200.392        | 200.644        | 200.140        | R[6]  |
| K[20] | 516.058        | 165.362        | 161.357        | 161.609        | 161.105        | K[5]  |
| V[21] | 540.832        | 126.330        | 122.325        | 122.577        | 122.073        | V[4]  |
| L[22] | <b>569.103</b> | 101.563        | 97.558         | 97.810         | 97.306         | L[3]  |
| R[23] | 608.128        | 73.292         | 69.287         | 69.539         | 69.035         | R[2]  |
| D[24] | 636.885        | 34.267         | 30.262         | 30.514         | 30.010         | D[1]  |



# sp | P62806 | H4\_MOUSE

[Acetyl]SGRGKGGKGLGKGGAKRHRK<sup>Dimethyl</sup>VLRD<sub>28.03</sub>

- ▶ fragmentation table for charge state 1+
- ▶ specType=etd
- ▶ score=47.25
- ▶ F113280.dat
- ▶ query=q47580\_p1
- ▶ precursor=509.906220
- ▶ chargePrecursor=5
- ▶ itol=0.5

| AA    | c               | y              | z+1             | z+2             | z               | AA    |
|-------|-----------------|----------------|-----------------|-----------------|-----------------|-------|
| S[1]  | 147.076         | 2545.502       | 2529.463        | 0.000           | 2528.416        | S[24] |
| G[2]  | 204.008         | 2416.460       | 2400.441        | 0.000           | 2399.433        | G[23] |
| R[3]  | <b>360.199</b>  | 2359.438       | 2343.410        | 2344.427        | 2342.412        | R[22] |
| G[4]  | <b>417.220</b>  | 2303.397       | 2187.318        | 2188.326        | 2186.310        | G[21] |
| K[5]  | <b>545.315</b>  | 2144.316       | 2130.297        | 2131.305        | 2129.289        | K[20] |
| G[6]  | 602.337         | 2018.221       | 2002.202        | 2003.210        | 2001.194        | G[19] |
| G[7]  | <b>659.358</b>  | 1961.199       | 1945.180        | 1946.188        | 1944.172        | G[18] |
| K[8]  | <b>787.453</b>  | 1804.178       | <b>1888.159</b> | 1889.167        | 1887.151        | K[17] |
| Q[9]  | <b>844.475</b>  | 1776.083       | 1760.064        | <b>1761.072</b> | 1759.056        | Q[16] |
| L[10] | <b>957.559</b>  | 1719.061       | 1703.043        | <b>1704.050</b> | 1702.034        | L[15] |
| Q[11] | <b>1014.580</b> | 1605.977       | 1589.958        | 1590.966        | 1588.951        | Q[14] |
| K[12] | <b>1142.675</b> | 1548.956       | 1532.937        | 1533.945        | 1531.929        | K[13] |
| G[13] | 1199.607        | 1420.861       | 1404.842        | <b>1405.850</b> | 1403.834        | G[12] |
| G[14] | <b>1256.718</b> | 1363.839       | 1347.821        | <b>1348.828</b> | <b>1346.813</b> | G[11] |
| A[15] | 1327.735        | 1306.818       | 1290.799        | <b>1291.807</b> | 1289.791        | A[10] |
| R[16] | 1405.802        | 1249.794       | 1233.775        | 1234.783        | 1232.767        | R[9]  |
| R[17] | 1611.951        | 1107.686       | 1091.667        | 1092.675        | 1090.659        | R[8]  |
| H[18] | 1740.010        | 951.585        | <b>935.566</b>  | <b>936.574</b>  | 934.558         | H[7]  |
| R[19] | 1905.111        | <b>814.526</b> | <b>798.507</b>  | 799.515         | 797.499         | R[6]  |
| K[20] | 2061.238        | 658.425        | <b>642.406</b>  | 643.414         | <b>641.398</b>  | K[5]  |
| V[21] | 2160.306        | 502.298        | <b>496.280</b>  | 497.287         | 495.272         | V[4]  |
| L[22] | 2273.369        | 403.130        | <b>387.211</b>  | 388.219         | 386.203         | L[3]  |
| R[23] | 2429.491        | 300.148        | <b>274.127</b>  | <b>275.135</b>  | 273.119         | R[2]  |
| D[24] | 2544.518        | 134.045        | 118.026         | 119.034         | 117.018         | D[1]  |



# sp | P62806 | H4\_MOUSE

[Acetyl]SGRGKGGKGLGKGGAKRHRK<sup>Dimethyl</sup>VLRD<sub>28.03</sub>

- ▶ fragmentation table for charge state 2+
- ▶ specType=etd
- ▶ score=47.25
- ▶ F113280.dat
- ▶ query=q47580\_p1
- ▶ precursor=509.906220
- ▶ chargePrecursor=5
- ▶ itol=0.5

| AA    | c               | y               | z+1             | z+2             | z               | AA    |
|-------|-----------------|-----------------|-----------------|-----------------|-----------------|-------|
| S[1]  | 74.042          | 1273.255        | 1265.265        | 0.504           | 1264.741        | S[24] |
| G[2]  | 102.553         | 1208.733        | 1200.724        | 0.504           | 1200.220        | G[23] |
| R[3]  | 180.603         | 1180.223        | 1172.213        | 1172.717        | 1171.700        | R[22] |
| G[4]  | 359.114         | 1102.172        | 1094.163        | <b>1094.667</b> | 1093.659        | G[21] |
| K[5]  | 273.103         | 1073.061        | <b>1065.052</b> | <b>1066.156</b> | <b>1065.148</b> | K[20] |
| G[6]  | 303.672         | <b>1009.614</b> | <b>1001.605</b> | <b>1002.108</b> | 1001.101        | G[19] |
| G[7]  | 330.183         | 981.103         | <b>973.094</b>  | 973.598         | <b>972.590</b>  | G[18] |
| K[8]  | <b>394.230</b>  | <b>952.592</b>  | 944.583         | <b>945.087</b>  | 944.070         | K[17] |
| G[9]  | <b>422.741</b>  | 898.545         | 890.536         | <b>891.040</b>  | 890.032         | G[16] |
| L[10] | <b>479.283</b>  | 860.036         | 852.028         | 852.532         | 851.524         | L[15] |
| G[11] | 507.794         | 803.492         | <b>795.483</b>  | <b>795.987</b>  | 794.979         | G[14] |
| K[12] | <b>571.841</b>  | <b>774.982</b>  | <b>766.972</b>  | <b>767.476</b>  | 766.468         | K[13] |
| G[13] | 600.352         | <b>710.934</b>  | <b>702.925</b>  | <b>703.429</b>  | 702.421         | G[12] |
| G[14] | <b>628.863</b>  | <b>682.423</b>  | <b>674.414</b>  | <b>674.918</b>  | 673.910         | G[11] |
| A[15] | <b>664.381</b>  | <b>653.913</b>  | <b>645.903</b>  | <b>646.407</b>  | <b>645.399</b>  | A[10] |
| R[16] | 738.429         | 618.394         | <b>610.385</b>  | <b>610.889</b>  | 609.881         | R[9]  |
| R[17] | <b>806.479</b>  | <b>554.347</b>  | <b>546.337</b>  | <b>546.841</b>  | <b>545.833</b>  | R[8]  |
| H[18] | <b>875.009</b>  | 476.206         | <b>468.207</b>  | <b>468.791</b>  | 467.783         | H[7]  |
| R[19] | <b>953.059</b>  | 407.767         | <b>399.757</b>  | <b>400.261</b>  | 399.253         | R[6]  |
| K[20] | 1031.127        | 329.716         | 321.707         | 322.211         | 321.203         | K[5]  |
| V[21] | <b>1080.657</b> | 251.093         | 243.083         | 244.587         | 243.140         | V[4]  |
| L[22] | <b>1137.199</b> | 202.119         | 194.109         | 194.613         | 193.605         | L[3]  |
| R[23] | 1215.249        | 145.577         | 137.567         | 138.071         | 137.063         | R[2]  |
| D[24] | 1272.763        | 67.526          | 59.517          | 60.021          | 59.013          | D[1]  |

# sp | P62806 | H4\_MOUSE

[Acetyl]SGRGKGGKGLGKGGAKRHRK<sup>Dimethyl</sup>VLRD<sub>28.03</sub>

- ▶ fragmentation table for charge state 3+
- ▶ specType=etd
- ▶ score=47.25
- ▶ F113280.dat
- ▶ query=q47580.p1
- ▶ precursor=509.906220
- ▶ chargePrecursor=5
- ▶ itol=0.5

| AA    | c              | y              | z+1            | z+2            | z              | AA    |
|-------|----------------|----------------|----------------|----------------|----------------|-------|
| S[1]  | 49.697         | <b>849.172</b> | 843.833        | 0.672          | 843.497        | S[24] |
| G[2]  | 56.704         | 806.158        | 800.810        | 0.672          | 800.483        | G[23] |
| R[3]  | 150.738        | <b>787.151</b> | <b>781.811</b> | <b>782.147</b> | 781.475        | R[22] |
| G[4]  | 139.745        | <b>735.117</b> | 729.778        | <b>730.114</b> | 729.442        | G[21] |
| K[5]  | 182.443        | 716.110        | <b>710.770</b> | <b>711.106</b> | <b>710.435</b> | K[20] |
| G[6]  | 201.450        | 673.412        | <b>668.072</b> | <b>668.408</b> | <b>667.736</b> | G[19] |
| G[7]  | 220.458        | 654.405        | 649.065        | <b>649.401</b> | 648.729        | G[18] |
| K[8]  | 263.156        | 635.397        | <b>630.058</b> | <b>630.394</b> | 629.722        | K[17] |
| C[9]  | 282.163        | 592.099        | <b>587.360</b> | <b>587.695</b> | <b>587.024</b> | C[16] |
| L[10] | 319.058        | 574.092        | 568.352        | <b>568.688</b> | 568.016        | L[15] |
| G[11] | 338.065        | <b>535.997</b> | <b>530.658</b> | <b>530.994</b> | <b>530.322</b> | G[14] |
| K[12] | 381.563        | 516.990        | 511.651        | 511.988        | 511.315        | K[13] |
| G[13] | 400.570        | 474.292        | 468.952        | 469.288        | <b>468.616</b> | G[12] |
| G[14] | 419.578        | 455.285        | 449.945        | 450.281        | 449.609        | G[11] |
| A[15] | 443.257        | 436.277        | 430.938        | <b>431.274</b> | 430.602        | A[10] |
| K[16] | <b>485.955</b> | 412.598        | 407.259        | 407.595        | 406.923        | K[9]  |
| R[17] | 537.089        | 369.900        | 364.561        | 364.896        | 364.225        | R[8]  |
| H[18] | <b>583.675</b> | 317.866        | 312.527        | 312.863        | 312.191        | H[7]  |
| R[19] | <b>635.709</b> | 272.180        | 266.841        | 267.176        | 266.505        | R[6]  |
| K[20] | 667.751        | 250.140        | 244.801        | 245.143        | 244.471        | K[5]  |
| V[21] | 720.774        | 168.104        | 162.765        | 163.101        | 162.429        | V[4]  |
| L[22] | <b>758.468</b> | 135.082        | 129.742        | 130.078        | 129.406        | L[3]  |
| R[23] | 810.502        | 97.387         | 92.047         | 92.383         | 91.711         | R[2]  |
| D[24] | 848.844        | 45.353         | 40.014         | 40.349         | 39.678         | D[1]  |

# sp | P62806 | H4\_MOUSE

[Acetyl]SGRGKGGKGLGKGGAKRHRK<sup>Dimethyl</sup>VLRD<sub>28.03</sub>

- ▶ fragmentation table for charge state 4+
- ▶ specType=etd
- ▶ score=47.25
- ▶ F113280.dat
- ▶ query=q47580.p1
- ▶ precursor=509.906220
- ▶ chargePrecursor=5
- ▶ itol=0.5

| AA    | c              | y              | z+1            | z+2            | z              | AA    |
|-------|----------------|----------------|----------------|----------------|----------------|-------|
| S[1]  | 37.525         | 537.131        | <b>633.126</b> | 0.755          | 632.874        | S[24] |
| G[2]  | 51.780         | 504.870        | <b>600.866</b> | 0.755          | <b>600.614</b> | G[23] |
| R[3]  | 90.805         | 590.615        | 586.610        | <b>586.862</b> | 586.353        | R[22] |
| G[4]  | 105.061        | 551.590        | 547.585        | 547.837        | 547.333        | G[21] |
| K[5]  | 137.084        | 537.334        | 533.330        | 533.582        | 533.078        | K[20] |
| G[6]  | 151.340        | 505.311        | 501.306        | 501.558        | 501.054        | G[19] |
| G[7]  | 165.595        | 491.055        | 487.051        | 487.303        | <b>486.799</b> | G[18] |
| K[8]  | 197.619        | <b>476.800</b> | 472.793        | 473.047        | 472.543        | K[17] |
| G[9]  | 211.874        | 444.776        | 440.771        | 441.023        | 440.520        | G[16] |
| L[10] | 280.148        | 430.521        | 426.516        | 426.768        | 426.264        | L[15] |
| G[11] | 254.401        | 407.250        | 398.243        | 398.497        | 397.993        | G[14] |
| K[12] | 286.424        | 387.994        | 383.990        | 384.242        | 383.738        | K[13] |
| G[13] | 300.680        | 355.971        | 351.966        | 352.218        | 351.714        | G[12] |
| G[14] | 314.935        | 341.715        | 337.711        | 337.963        | 337.459        | G[11] |
| A[15] | 332.694        | 327.460        | 323.455        | 323.707        | 323.203        | A[10] |
| K[16] | 364.718        | 309.701        | 305.696        | 305.948        | 305.444        | K[9]  |
| R[17] | 403.743        | 277.877        | <b>273.672</b> | <b>273.924</b> | 273.420        | R[8]  |
| H[18] | 438.008        | 238.652        | 234.647        | 234.899        | 234.395        | H[7]  |
| R[19] | <b>477.033</b> | 204.397        | 200.392        | 200.644        | 200.140        | R[6]  |
| K[20] | 515.055        | 165.362        | 161.357        | 161.609        | 161.105        | K[5]  |
| V[21] | 540.832        | 126.330        | 122.325        | 122.577        | 122.073        | V[4]  |
| L[22] | <b>569.103</b> | 101.563        | 97.558         | 97.810         | 97.306         | L[3]  |
| R[23] | <b>608.128</b> | 73.292         | 69.287         | 69.539         | 69.035         | R[2]  |
| D[24] | 636.885        | 34.267         | 30.262         | 30.514         | 30.010         | D[1]  |



# sp | P62806 | H4\_MOUSE

[Acetyl]SGRGKGGKGLGKGGAKRHR (Dimethyl)  
(28.03) KVLRD

- ▶ fragmentation table for charge state 1+
- ▶ specType=etd
- ▶ score=36.49
- ▶ F113280.dat
- ▶ query=q47582\_p1
- ▶ precursor=509.906400
- ▶ chargePrecursor=5
- ▶ itol=0.5

| AA    | c               | y               | z+1             | z+2             | z               | AA    |
|-------|-----------------|-----------------|-----------------|-----------------|-----------------|-------|
| S[1]  | 147.076         | 2545.505        | 2529.483        | 0.000           | 2528.470        | S[24] |
| G[2]  | 204.059         | 2416.460        | 2400.441        | 0.000           | 2399.431        | G[23] |
| R[3]  | <b>360.199</b>  | 2359.430        | 2343.410        | 2344.427        | 2342.412        | R[22] |
| G[4]  | <b>417.220</b>  | 2293.391        | 2187.378        | 2188.326        | 2186.310        | G[21] |
| R[5]  | <b>545.315</b>  | 2146.316        | 2130.297        | 2131.308        | 2129.280        | R[20] |
| G[6]  | <b>602.337</b>  | 2018.221        | 2002.200        | 2003.210        | 2001.184        | G[19] |
| G[7]  | <b>659.358</b>  | 1961.199        | 1945.180        | 1946.188        | 1944.173        | G[18] |
| K[8]  | <b>787.453</b>  | 1904.179        | 1888.159        | 1889.167        | 1887.151        | K[17] |
| G[9]  | <b>844.475</b>  | 1776.083        | 1760.064        | 1761.072        | 1759.056        | G[16] |
| L[10] | <b>957.559</b>  | 1719.061        | <b>1703.043</b> | 1704.050        | 1702.035        | L[15] |
| C[11] | <b>1014.580</b> | 1662.039        | 1556.028        | 1590.006        | 1588.951        | C[14] |
| K[12] | 1142.675        | 1548.956        | 1532.937        | 1533.945        | 1531.920        | K[13] |
| G[13] | 1199.697        | 1420.861        | 1404.842        | 1405.850        | 1403.834        | G[12] |
| G[14] | 1256.719        | <b>1363.839</b> | 1347.821        | <b>1348.828</b> | 1346.813        | G[11] |
| A[15] | 1313.759        | 1306.818        | <b>1290.799</b> | 1291.807        | 1289.791        | A[10] |
| R[16] | <b>1455.850</b> | 1238.781        | 1219.763        | 1220.770        | <b>1218.754</b> | R[9]  |
| R[17] | 1611.951        | 1107.688        | 1091.667        | 1092.675        | 1090.650        | R[6]  |
| H[18] | 1740.010        | 951.585         | 935.566         | <b>936.574</b>  | 934.558         | H[7]  |
| R[19] | 1933.143        | 814.526         | 798.507         | 799.515         | <b>797.499</b>  | R[6]  |
| K[20] | 2061.218        | <b>630.393</b>  | 614.375         | 615.382         | 613.367         | K[5]  |
| V[21] | 2189.308        | 592.296         | <b>488.280</b>  | 489.287         | 487.271         | V[4]  |
| L[22] | 2273.390        | 463.230         | <b>387.211</b>  | 388.219         | 386.203         | L[3]  |
| R[23] | 2429.441        | 290.146         | <b>274.127</b>  | <b>275.135</b>  | 273.119         | R[2]  |
| D[24] | 2544.519        | 134.045         | 118.028         | 119.034         | 117.018         | D[1]  |

# sp | P62806 | H4\_MOUSE

[Acetyl]SGRGKGGKGLGKGGAKRHR (Dimethyl) KVLRD  
(28.03)

- ▶ fragmentation table for charge state 2+
- ▶ specType=etd
- ▶ score=36.49
- ▶ F113280.dat
- ▶ query=q47582\_p1
- ▶ precursor=509.906400
- ▶ chargePrecursor=5
- ▶ itol=0.5

| AA   | c               | y               | z+1             | z+2             | z               | AA   |
|------|-----------------|-----------------|-----------------|-----------------|-----------------|------|
| S 1  | 74.092          | 1273.255        | 1265.245        | 0.504           | 1264.741        | G 24 |
| G 2  | 102.553         | 1208.733        | <b>1200.724</b> | 0.504           | 1200.220        | G 23 |
| R 3  | 180.603         | <b>1180.223</b> | <b>1172.213</b> | 1172.717        | <b>1171.709</b> | R 22 |
| G 4  | 209.114         | 1102.172        | 1094.162        | 1094.567        | 1093.857        | G 21 |
| K 5  | 273.163         | <b>1073.661</b> | <b>1065.652</b> | <b>1066.156</b> | 1065.141        | K 20 |
| G 6  | 301.672         | <b>1009.614</b> | <b>1001.605</b> | <b>1002.108</b> | 1001.101        | G 19 |
| G 7  | 330.183         | 981.103         | 973.094         | <b>973.598</b>  | 972.590         | G 18 |
| K 8  | 394.230         | 922.592         | 944.583         | <b>945.087</b>  | 944.079         | K 17 |
| G 9  | <b>422.741</b>  | <b>888.545</b>  | 880.536         | 881.040         | 880.032         | G 16 |
| L 10 | <b>473.283</b>  | <b>850.034</b>  | 850.035         | 851.529         | 851.521         | L 15 |
| G 11 | 507.794         | 833.492         | <b>795.483</b>  | <b>795.987</b>  | 794.979         | G 14 |
| K 12 | <b>571.841</b>  | 774.083         | 766.072         | <b>767.476</b>  | 766.468         | K 13 |
| G 13 | 600.352         | <b>710.934</b>  | <b>702.925</b>  | <b>703.429</b>  | 702.421         | G 12 |
| G 14 | <b>628.863</b>  | <b>682.423</b>  | <b>674.414</b>  | <b>674.918</b>  | 673.910         | G 11 |
| A 15 | 668.261         | <b>653.913</b>  | 653.913         | <b>646.407</b>  | 645.399         | A 10 |
| T 16 | <b>728.429</b>  | 618.396         | <b>610.385</b>  | <b>610.889</b>  | <b>609.881</b>  | T 9  |
| R 17 | <b>806.479</b>  | 554.347         | <b>546.337</b>  | 546.841         | <b>545.833</b>  | R 8  |
| H 18 | 875.009         | 476.296         | <b>468.287</b>  | <b>468.791</b>  | 467.783         | H 7  |
| R 19 | 967.075         | 407.767         | <b>399.757</b>  | <b>400.261</b>  | 399.253         | R 6  |
| K 20 | 1031.122        | 315.700         | 307.691         | 308.195         | 307.187         | K 5  |
| V 21 | 1080.587        | 251.053         | 243.043         | 244.547         | 243.540         | V 4  |
| L 22 | 1137.199        | 202.119         | 194.109         | 194.613         | 193.605         | L 3  |
| R 23 | <b>1215.249</b> | 145.577         | 137.567         | 138.071         | 137.063         | R 2  |
| D 24 | 1272.763        | 87.526          | 59.537          | 60.021          | 59.013          | D 1  |

# sp | P62806 | H4\_MOUSE

[Acetyl]SGRGKGGKGLGKGGAKRHR (Dimethyl) KVLRD  
(28.03)

- ▶ fragmentation table for charge state 3+
- ▶ specType=etd
- ▶ score=36.49
- ▶ F113280.dat
- ▶ query=q47582.p1
- ▶ precursor=509.906400
- ▶ chargePrecursor=5
- ▶ itol=0.5

| AA    | c              | y              | z+1            | z+2            | z              | AA    |
|-------|----------------|----------------|----------------|----------------|----------------|-------|
| S[1]  | 49.697         | <b>849.172</b> | 843.833        | 0.672          | 843.491        | S[24] |
| G[2]  | 68.704         | <b>806.158</b> | <b>800.818</b> | 0.672          | 800.483        | G[23] |
| R[3]  | 120.738        | <b>787.151</b> | 783.811        | <b>782.147</b> | 781.475        | R[22] |
| G[4]  | 139.745        | 735.117        | <b>729.778</b> | <b>730.114</b> | 729.442        | G[21] |
| K[5]  | 182.443        | 718.110        | <b>710.770</b> | <b>711.106</b> | 710.435        | K[20] |
| G[6]  | 201.450        | 673.412        | <b>668.072</b> | <b>668.408</b> | <b>667.736</b> | G[19] |
| G[7]  | 220.458        | <b>654.405</b> | 649.065        | <b>649.401</b> | 648.729        | G[18] |
| K[8]  | 263.156        | 635.397        | <b>630.058</b> | <b>630.394</b> | <b>629.722</b> | K[17] |
| G[9]  | 282.163        | 592.699        | <b>587.360</b> | 587.695        | <b>587.024</b> | G[16] |
| L[10] | 319.858        | <b>573.692</b> | 568.352        | 568.688        | 568.016        | L[15] |
| G[11] | 338.865        | 535.397        | <b>530.058</b> | <b>530.394</b> | 530.322        | G[14] |
| K[12] | 381.563        | 516.990        | 511.651        | 511.986        | 511.315        | K[13] |
| G[13] | 400.570        | 474.292        | 468.952        | 469.288        | <b>468.616</b> | G[12] |
| G[14] | 419.578        | 455.285        | 449.945        | 450.281        | 449.609        | G[11] |
| A[15] | 443.297        | 436.277        | 430.938        | 431.274        | 430.602        | A[10] |
| K[16] | <b>485.955</b> | 412.588        | 407.250        | 407.585        | 406.923        | K[9]  |
| R[17] | 537.989        | 369.900        | 364.561        | 364.896        | 364.225        | R[8]  |
| H[18] | <b>583.675</b> | 317.866        | 312.527        | 312.863        | 312.191        | H[7]  |
| R[19] | 645.052        | 272.180        | 266.841        | 267.176        | 266.505        | R[6]  |
| K[20] | 687.751        | 210.883        | 205.463        | 205.799        | 205.127        | K[5]  |
| V[21] | 720.774        | 188.104        | 182.705        | 183.101        | 182.429        | V[4]  |
| L[22] | <b>758.468</b> | 135.082        | 129.742        | 130.078        | 129.406        | L[3]  |
| R[23] | 810.502        | 97.387         | 92.047         | 92.383         | 91.711         | R[2]  |
| D[24] | <b>848.844</b> | 45.353         | 40.014         | 40.340         | 39.678         | D[1]  |

# sp | P62806 | H4\_MOUSE

[Acetyl]SGRGKGGKGLGKGGAKRHR (Dimethyl)  
(28.03) KVLRD

- ▶ fragmentation table for charge state 4+
- ▶ specType=etd
- ▶ score=36.49
- ▶ F113280.dat
- ▶ query=q47582.p1
- ▶ precursor=509.906400
- ▶ chargePrecursor=5
- ▶ itol=0.5

| AA    | c              | y              | z+1            | z+2            | z              | AA    |
|-------|----------------|----------------|----------------|----------------|----------------|-------|
| S[1]  | 37.925         | 637.131        | 633.128        | 0.756          | 633.074        | S[24] |
| G[2]  | 51.780         | 604.870        | <b>600.866</b> | 0.756          | <b>600.614</b> | G[23] |
| R[3]  | 90.305         | 590.615        | <b>586.610</b> | <b>586.862</b> | 586.358        | R[22] |
| G[4]  | 105.061        | 551.590        | <b>547.585</b> | <b>547.837</b> | <b>547.333</b> | G[21] |
| K[5]  | 137.084        | <b>537.334</b> | 533.330        | 533.582        | 533.078        | K[20] |
| G[6]  | 151.340        | 505.311        | 501.306        | 501.558        | 501.054        | G[19] |
| G[7]  | 165.595        | 491.055        | 487.051        | 487.303        | <b>486.799</b> | G[18] |
| K[8]  | 197.619        | 476.800        | 472.795        | 473.047        | 472.543        | K[17] |
| G[9]  | 211.874        | 444.776        | 440.771        | 441.023        | 440.520        | G[16] |
| L[10] | 240.145        | 430.521        | 426.516        | 426.768        | 426.264        | L[15] |
| G[11] | 254.401        | 402.250        | 398.245        | 398.497        | 397.993        | G[14] |
| K[12] | 286.424        | 387.994        | 383.989        | 384.242        | 383.738        | K[13] |
| G[13] | 300.680        | 355.971        | 351.966        | 352.218        | 351.714        | G[12] |
| G[14] | 314.935        | 341.715        | 337.711        | 337.963        | 337.459        | G[11] |
| A[15] | 332.694        | 327.460        | 323.455        | 323.707        | 323.203        | A[10] |
| K[16] | 364.718        | 309.701        | 305.696        | 305.948        | 305.444        | K[9]  |
| R[17] | 403.743        | 277.677        | <b>273.672</b> | <b>273.924</b> | 273.420        | R[8]  |
| H[18] | 438.008        | 238.652        | 234.647        | 234.899        | 234.395        | H[7]  |
| R[19] | 484.041        | 204.387        | 200.382        | 200.634        | 200.130        | R[6]  |
| K[20] | 518.065        | 136.354        | 134.349        | 134.601        | 134.097        | K[5]  |
| V[21] | 540.332        | 126.130        | 122.125        | 122.377        | 122.073        | V[4]  |
| L[22] | 569.103        | 101.563        | 97.558         | 97.810         | 97.306         | L[3]  |
| R[23] | <b>608.128</b> | 73.292         | 69.287         | 69.539         | 69.035         | R[2]  |
| D[24] | 636.885        | 34.267         | 30.262         | 30.514         | 30.010         | D[1]  |



# sp | P62806 | H4\_MOUSE

[Acetyl]SGRGKGGKGLGKGGAKRHRK <sup>Dimethyl</sup> VLRD  
28.03

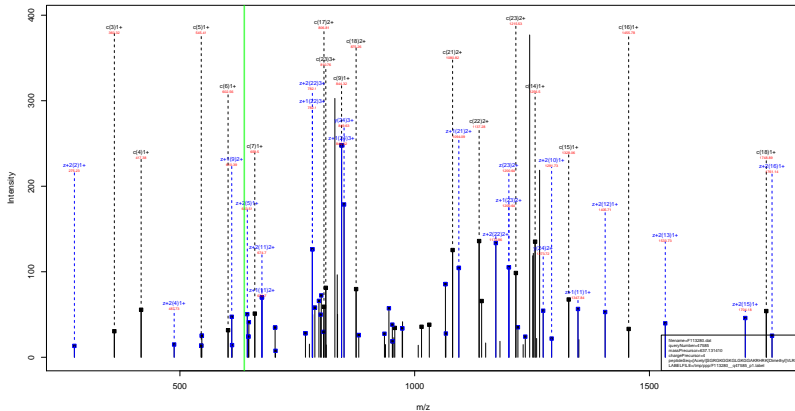

# sp | P62806 | H4\_MOUSE

[Acetyl]SGRGKGGKGLGKGGAKRHRK<sup>Dimethyl</sup>VLRD<sub>28.03</sub>

- ▶ fragmentation table for charge state 1+
- ▶ specType=etd
- ▶ score=110.05
- ▶ F113280.dat
- ▶ query=q47585\_p1
- ▶ precursor=637.131410
- ▶ chargePrecursor=4
- ▶ itol=0.5

| AA    | c               | y               | z+1             | z+2             | z        | AA    |
|-------|-----------------|-----------------|-----------------|-----------------|----------|-------|
| S[1]  | 147.076         | 2545.507        | 2529.483        | 0.000           | 2528.476 | S[24] |
| G[2]  | 204.098         | 2416.460        | 2400.441        | 0.000           | 2399.433 | G[23] |
| R[3]  | <b>360.199</b>  | 2399.436        | 2383.419        | 2344.427        | 2342.412 | R[22] |
| G[4]  | <b>417.220</b>  | 2203.337        | 2187.318        | 2188.326        | 2186.310 | G[21] |
| K[5]  | <b>545.315</b>  | 2146.316        | 2130.297        | 2131.305        | 2129.289 | K[20] |
| G[6]  | <b>602.337</b>  | 2018.221        | 2002.202        | 2003.210        | 2001.194 | G[19] |
| G[7]  | <b>659.358</b>  | 1961.199        | 1945.180        | 1946.188        | 1944.172 | G[18] |
| K[8]  | <b>787.453</b>  | 1904.178        | 1888.159        | 1889.167        | 1887.151 | K[17] |
| G[9]  | <b>844.475</b>  | 1776.083        | 1760.064        | <b>1761.072</b> | 1759.056 | G[16] |
| L[10] | <b>927.559</b>  | 1729.061        | 1713.043        | <b>1714.050</b> | 1712.035 | L[15] |
| Q[11] | <b>1014.580</b> | 1605.977        | 1589.958        | 1590.966        | 1588.951 | Q[14] |
| K[12] | <b>1142.675</b> | 1548.956        | 1532.937        | <b>1533.945</b> | 1531.929 | K[13] |
| G[13] | 1199.697        | 1420.861        | 1404.842        | <b>1405.850</b> | 1403.834 | G[12] |
| G[14] | <b>1296.718</b> | 1363.839        | <b>1347.821</b> | 1348.828        | 1346.813 | G[11] |
| A[15] | <b>1327.755</b> | 1296.813        | 1280.794        | <b>1281.807</b> | 1280.791 | A[10] |
| R[16] | <b>1425.850</b> | <b>1235.781</b> | <b>1219.762</b> | 1220.769        | 1218.754 | R[9]  |
| R[17] | 1611.951        | 1107.686        | 1091.667        | 1092.675        | 1090.659 | R[8]  |
| H[18] | <b>1749.010</b> | 951.585         | <b>935.566</b>  | 936.574         | 934.558  | H[7]  |
| R[19] | 1905.111        | 814.526         | 798.507         | <b>799.515</b>  | 797.499  | R[6]  |
| K[20] | 2061.238        | 658.425         | 642.406         | <b>643.414</b>  | 641.398  | K[5]  |
| V[21] | 2190.306        | 502.266         | 486.246         | <b>487.257</b>  | 485.242  | V[4]  |
| L[22] | 2273.369        | 463.139         | 447.121         |                 | 445.105  | L[3]  |
| R[23] | 2429.491        | 290.146         | 274.127         | <b>275.135</b>  | 273.119  | R[2]  |
| D[24] | 2544.518        | 134.045         | 118.026         | 119.034         | 117.018  | D[1]  |

# sp | P62806 | H4\_MOUSE

[Acetyl]SGRGKGGKGLGKGGAKRHRK <sup>Dimethyl</sup>VLRD  
28.03

- ▶ fragmentation table for charge state 2+
- ▶ specType=etd
- ▶ score=110.05
- ▶ F113280.dat
- ▶ query=q47585\_p1
- ▶ precursor=637.131410
- ▶ chargePrecursor=4
- ▶ itol=0.5

| AA    | c               | y               | z+1             | z+2             | z               | AA    |
|-------|-----------------|-----------------|-----------------|-----------------|-----------------|-------|
| S[1]  | 74.042          | <b>1273.255</b> | 1266.245        | 0.504           | 1264.741        | S[24] |
| G[2]  | 102.553         | 1238.733        | <b>1200.724</b> | 0.504           | <b>1200.220</b> | G[23] |
| K[3]  | 180.603         | 1180.223        | 1172.713        | <b>1172.717</b> | 1171.709        | K[22] |
| G[4]  | 259.114         | 1102.172        | <b>1094.163</b> | 1093.657        | <b>1093.659</b> | G[21] |
| K[5]  | 273.153         | 1073.661        | <b>1065.652</b> | <b>1066.156</b> | <b>1065.148</b> | K[20] |
| G[6]  | 301.672         | 1009.614        | 1001.605        | 1002.109        | 1001.101        | G[19] |
| G[7]  | 330.183         | 981.103         | <b>973.094</b>  | <b>973.598</b>  | 972.590         | G[18] |
| K[8]  | 394.230         | <b>952.592</b>  | 944.583         | <b>945.087</b>  | 944.079         | K[17] |
| G[9]  | 422.741         | 898.545         | <b>880.536</b>  | <b>881.040</b>  | 880.032         | G[16] |
| L[10] | 479.293         | 860.036         | 852.027         | 852.529         | 851.521         | L[15] |
| G[11] | 507.794         | 803.482         | 795.473         | <b>795.987</b>  | 794.979         | G[14] |
| K[12] | 571.841         | 774.982         | <b>766.972</b>  | <b>767.476</b>  | 766.468         | K[13] |
| G[13] | 600.352         | 710.934         | <b>702.925</b>  | <b>703.429</b>  | <b>702.421</b>  | G[12] |
| G[14] | 638.863         | 682.423         | <b>674.414</b>  | <b>674.918</b>  | 673.910         | G[11] |
| A[15] | 684.381         | 653.913         | <b>645.903</b>  | <b>646.407</b>  | <b>645.399</b>  | A[10] |
| R[16] | 739.439         | 618.394         | <b>610.385</b>  | <b>610.889</b>  | 609.881         | R[9]  |
| R[17] | <b>806.479</b>  | 554.347         | <b>546.337</b>  | <b>546.841</b>  | <b>545.833</b>  | R[8]  |
| H[18] | <b>875.009</b>  | 476.290         | 468.281         | 468.781         | 467.783         | H[7]  |
| R[19] | <b>953.059</b>  | 407.767         | 399.757         | 400.261         | 399.253         | R[6]  |
| K[20] | <b>1031.122</b> | 339.716         | 331.707         | 332.211         | 331.203         | K[5]  |
| V[21] | <b>1080.667</b> | 293.693         | 285.683         | 286.187         | 285.180         | V[4]  |
| L[22] | <b>1137.199</b> | 202.119         | 194.109         | 194.613         | 193.605         | L[3]  |
| R[23] | <b>1215.249</b> | 145.577         | 137.567         | 138.071         | 137.063         | R[2]  |
| D[24] | 1272.703        | 67.526          | 59.517          | 60.021          | 59.013          | D[1]  |

# sp | P62806 | H4\_MOUSE

[Acetyl]SGRGKGGKGLGKGGAKRHRK<sup>Dimethyl</sup>VLRD<sub>28.03</sub>

- ▶ fragmentation table for charge state 3+
- ▶ specType=etd
- ▶ score=110.05
- ▶ F113280.dat
- ▶ query=q47585.p1
- ▶ precursor=637.131410
- ▶ chargePrecursor=4
- ▶ itol=0.5

| AA    | c              | y              | z+1            | z+2            | z       | AA    |
|-------|----------------|----------------|----------------|----------------|---------|-------|
| S[1]  | 49.597         | <b>849.172</b> | <b>843.833</b> | 0.572          | 843.497 | S[24] |
| G[2]  | 58.704         | <b>806.150</b> | <b>800.818</b> | 0.572          | 800.483 | G[23] |
| R[3]  | 120.738        | <b>787.151</b> | <b>781.811</b> | <b>782.147</b> | 781.475 | R[22] |
| G[4]  | 139.745        | 735.117        | 729.778        | 730.114        | 729.442 | G[21] |
| K[5]  | 182.443        | 716.110        | 710.770        | 711.106        | 710.435 | K[20] |
| G[6]  | 201.450        | 673.412        | 668.072        | 668.408        | 667.736 | G[19] |
| G[7]  | 220.458        | 654.405        | 649.065        | 649.401        | 648.729 | G[18] |
| K[8]  | 263.156        | 635.397        | 630.058        | 630.394        | 629.722 | K[17] |
| G[9]  | 282.163        | 592.899        | 587.559        | 587.895        | 587.224 | G[16] |
| L[10] | 319.258        | 573.892        | 568.552        | 568.888        | 568.216 | L[15] |
| G[11] | 338.265        | 535.997        | 530.658        | 530.994        | 530.322 | G[14] |
| K[12] | 381.563        | 516.990        | 511.651        | 511.986        | 511.315 | K[13] |
| G[13] | 400.570        | 474.292        | 468.952        | 469.288        | 468.616 | G[12] |
| G[14] | 419.578        | 455.285        | 449.945        | 450.281        | 449.609 | G[11] |
| A[15] | 443.297        | 436.277        | 430.938        | 431.274        | 430.602 | A[10] |
| K[16] | 485.955        | 412.598        | 407.259        | 407.595        | 406.923 | K[9]  |
| R[17] | 537.989        | 369.900        | 364.561        | 364.896        | 364.225 | R[8]  |
| H[18] | 583.675        | 317.866        | 312.527        | 312.863        | 312.191 | H[7]  |
| R[19] | 635.709        | 272.180        | 266.841        | 267.176        | 266.505 | R[6]  |
| K[20] | 687.751        | 220.140        | 214.801        | 215.137        | 214.471 | K[5]  |
| V[21] | 720.774        | 188.104        | 182.765        | 183.101        | 182.429 | V[4]  |
| L[22] | 758.468        | 135.082        | 129.742        | 130.078        | 129.406 | L[3]  |
| R[23] | <b>810.502</b> | 97.387         | 92.047         | 92.383         | 91.711  | R[2]  |
| D[24] | 848.844        | 45.353         | 40.014         | 40.349         | 39.678  | D[1]  |



# sp | P62806 | H4\_MOUSE

[Acetyl]SGRGKGGKGLGKGGAKRHRK<sup>Dimethyl</sup>VLRD<sub>28.03</sub>

- ▶ fragmentation table for charge state 1+
- ▶ specType=etd
- ▶ score=57.81
- ▶ F113280.dat
- ▶ query=q47587\_p1
- ▶ precursor=849.173190
- ▶ chargePrecursor=3
- ▶ itol=0.5

| AA | c  | y               | z+1             | z+2             | z               | AA              |       |
|----|----|-----------------|-----------------|-----------------|-----------------|-----------------|-------|
| S  | 1  | 147.070         | 2545.900        | 2529.483        | 0.000           | 2529.476        | S[24] |
| G  | 2  | 204.008         | 2416.460        | 2400.443        | 0.000           | 2399.433        | G[23] |
| R  | 3  | <b>360.199</b>  | 2359.438        | 2343.419        | 2344.427        | 2342.412        | R[22] |
| G  | 4  | <b>417.230</b>  | 2003.337        | 2187.333        | 2188.336        | 2189.311        | G[21] |
| K  | 5  | <b>545.315</b>  | 2146.316        | 2130.297        | 2131.305        | 2129.289        | K[20] |
| G  | 6  | <b>602.337</b>  | 2018.221        | 2002.202        | 2003.210        | 2001.194        | G[19] |
| G  | 7  | <b>659.358</b>  | 1961.199        | <b>1945.180</b> | 1946.188        | 1944.173        | G[18] |
| K  | 8  | <b>787.453</b>  | <b>1904.178</b> | <b>1888.159</b> | 1889.167        | 1887.151        | K[17] |
| G  | 9  | 884.475         | 1776.081        | <b>1760.064</b> | 1761.072        | 1759.056        | G[16] |
| L  | 10 | 957.559         | 1719.061        | <b>1703.043</b> | 1704.050        | 1702.035        | L[15] |
| G  | 11 | <b>1014.580</b> | 1605.077        | 1589.058        | <b>1590.966</b> | 1588.951        | G[14] |
| K  | 12 | <b>1142.675</b> | 1548.056        | <b>1532.937</b> | 1533.945        | 1531.929        | K[13] |
| G  | 13 | 1199.607        | 1420.061        | <b>1404.842</b> | 1405.850        | 1403.834        | G[12] |
| G  | 14 | <b>1256.718</b> | 1303.839        | <b>1347.821</b> | <b>1348.828</b> | 1346.813        | G[11] |
| A  | 15 | 1287.859        | 1368.818        | 1360.797        | 1361.807        | 1359.791        | A[10] |
| R  | 16 | 1436.850        | 1235.781        | 1218.752        | <b>1220.770</b> | <b>1218.754</b> | R[9]  |
| R  | 17 | 1611.951        | 1107.688        | 1091.667        | 1092.675        | 1090.659        | R[8]  |
| H  | 18 | 1749.010        | 951.585         | 935.566         | <b>936.574</b>  | 934.558         | H[7]  |
| R  | 19 | 1905.111        | 814.520         | 798.507         | <b>799.515</b>  | 797.499         | R[6]  |
| K  | 20 | 2061.236        | 658.425         | 642.405         | 643.414         | 641.398         | K[5]  |
| V  | 21 | 2180.306        | 502.269         | 486.260         | 487.267         | 485.251         | V[4]  |
| L  | 22 | 2273.390        | 403.230         | 387.211         | 388.219         | 386.203         | L[3]  |
| R  | 23 | 2420.491        | 290.146         | 274.127         | 275.135         | 273.119         | R[2]  |
| D  | 24 | 2544.518        | 134.045         | 118.028         | 119.034         | 117.018         | D[1]  |

# sp | P62806 | H4\_MOUSE

[Acetyl]SGRGKGGKGLGKGGAKRHRK<sup>Dimethyl</sup>VLRD<sub>28.03</sub>

- ▶ fragmentation table for charge state 2+
- ▶ specType=etd
- ▶ score=57.81
- ▶ F113280.dat
- ▶ query=q47587\_p1
- ▶ precursor=849.173190
- ▶ chargePrecursor=3
- ▶ itol=0.5

| AA | c  | y               | z+1             | z+2             | z               | AA              |       |
|----|----|-----------------|-----------------|-----------------|-----------------|-----------------|-------|
| S  | 1  | 74.042          | <b>1273.255</b> | <b>1265.245</b> | 0.504           | <b>1264.741</b> | S[24] |
| G  | 2  | 102.553         | 1208.733        | <b>1200.724</b> | 0.504           | 1200.220        | G[23] |
| R  | 3  | 130.603         | 1180.223        | <b>1172.213</b> | <b>1172.717</b> | 1171.709        | R[22] |
| G  | 4  | 209.114         | 1102.172        | 1094.163        | 1094.667        | 1093.659        | G[21] |
| K  | 5  | 273.163         | 1073.661        | 1065.652        | 1066.156        | 1065.148        | K[20] |
| G  | 6  | 301.672         | 1009.614        | 1001.605        | 1002.109        | 1001.101        | G[19] |
| G  | 7  | 330.183         | 981.103         | 973.094         | 973.598         | 972.590         | G[18] |
| K  | 8  | 394.230         | 952.592         | 944.583         | 945.087         | 944.079         | K[17] |
| G  | 9  | 422.741         | 898.545         | 890.536         | 891.040         | 890.032         | G[16] |
| L  | 10 | 479.293         | 860.036         | 852.027         | 852.529         | 851.521         | L[15] |
| G  | 11 | 507.794         | 803.492         | 795.483         | 795.987         | 794.979         | G[14] |
| K  | 12 | 571.841         | 774.982         | 766.972         | 767.476         | 766.468         | K[13] |
| G  | 13 | 600.352         | 710.934         | 702.925         | 703.429         | 702.421         | G[12] |
| G  | 14 | 628.863         | 682.423         | 674.414         | 674.918         | 673.910         | G[11] |
| A  | 15 | 684.381         | 653.913         | 645.903         | 646.407         | 645.399         | A[10] |
| R  | 16 | 728.432         | 618.394         | 610.385         | 610.889         | 609.881         | R[9]  |
| R  | 17 | 806.470         | 554.347         | 546.337         | 546.841         | <b>545.833</b>  | R[8]  |
| H  | 18 | 875.009         | 476.290         | 468.280         | 468.784         | 467.776         | H[7]  |
| R  | 19 | 953.059         | 407.767         | 399.757         | 400.261         | 399.253         | R[6]  |
| K  | 20 | 1031.122        | 329.716         | 321.707         | 322.211         | 321.203         | K[5]  |
| V  | 21 | <b>1080.657</b> | 251.663         | 243.653         | 244.157         | 243.149         | V[4]  |
| L  | 22 | <b>1137.199</b> | 202.119         | 194.109         | 194.613         | 193.605         | L[3]  |
| R  | 23 | <b>1215.249</b> | 145.577         | 137.567         | 138.071         | 137.063         | R[2]  |
| D  | 24 | <b>1272.763</b> | 67.526          | 59.517          | 60.021          | 59.013          | D[1]  |





# sp | P62806 | H4\_MOUSE

[Acetyl]SGRGKGGKGLGKGGAKRHRK<sup>Dimethyl</sup>VLRD<sub>28.03</sub>

- ▶ fragmentation table for charge state 1+
- ▶ specType=etd
- ▶ score=123.91
- ▶ F113280.dat
- ▶ query=q47589\_p1
- ▶ precursor=637.131770
- ▶ chargePrecursor=4
- ▶ itol=0.5

| AA    | c               | y        | z+1             | z+2             | z        | AA    |
|-------|-----------------|----------|-----------------|-----------------|----------|-------|
| S[1]  | 147.076         | 2545.502 | 2529.483        | 0.000           | 2528.478 | S[24] |
| G[2]  | 204.098         | 2416.460 | 2400.441        | 0.000           | 2399.433 | G[23] |
| R[3]  | <b>368.199</b>  | 2289.438 | 2243.419        | 2244.427        | 2242.412 | R[22] |
| G[4]  | <b>417.220</b>  | 2203.337 | 2187.318        | 2188.326        | 2186.310 | G[21] |
| K[5]  | <b>545.315</b>  | 2146.316 | 2130.297        | 2131.305        | 2129.289 | K[20] |
| G[6]  | <b>602.337</b>  | 2018.221 | 2002.202        | 2003.210        | 2001.194 | G[19] |
| G[7]  | <b>659.358</b>  | 1961.199 | 1945.180        | <b>1946.188</b> | 1944.173 | G[18] |
| K[8]  | <b>787.453</b>  | 1904.178 | <b>1888.159</b> | 1889.167        | 1887.151 | K[17] |
| G[9]  | <b>844.475</b>  | 1776.063 | <b>1760.064</b> | 1761.072        | 1759.056 | G[16] |
| L[10] | <b>927.559</b>  | 1719.061 | 1703.063        | 1704.069        | 1702.035 | L[15] |
| G[11] | <b>1014.580</b> | 1605.977 | 1589.958        | <b>1590.966</b> | 1588.951 | G[14] |
| K[12] | <b>1142.675</b> | 1548.956 | <b>1532.937</b> | 1533.945        | 1531.929 | K[13] |
| G[13] | <b>1199.697</b> | 1420.861 | 1404.842        | <b>1405.850</b> | 1403.834 | G[12] |
| G[14] | <b>1256.718</b> | 1363.839 | 1347.821        | <b>1348.828</b> | 1346.813 | G[11] |
| A[15] | <b>1327.795</b> | 1306.818 | 1290.799        | <b>1291.807</b> | 1289.791 | A[10] |
| R[16] | <b>1435.850</b> | 1238.781 | 1219.782        | <b>1220.770</b> | 1218.764 | R[9]  |
| R[17] | <b>1611.951</b> | 1107.685 | 1091.687        | 1092.675        | 1090.659 | R[8]  |
| H[18] | 1749.010        | 951.585  | <b>935.566</b>  | <b>936.574</b>  | 934.558  | H[7]  |
| R[19] | <b>1905.111</b> | 814.526  | <b>798.507</b>  | 799.515         | 797.499  | R[6]  |
| K[20] | 2061.238        | 658.425  | 642.406         | <b>643.414</b>  | 641.398  | K[5]  |
| V[21] | 2180.306        | 502.298  | 486.280         | <b>487.287</b>  | 485.272  | V[4]  |
| L[22] | 2273.390        | 403.230  | 387.211         | <b>388.219</b>  | 386.203  | L[3]  |
| R[23] | 2429.491        | 290.146  | 274.127         | <b>275.135</b>  | 273.119  | R[2]  |
| D[24] | 2544.518        | 134.045  | 118.026         | 119.034         | 117.018  | D[1]  |

# sp | P62806 | H4\_MOUSE

[Acetyl]SGRGKGGKGLGKGGAKRHRK <sup>Dimethyl</sup> VLRD  
28.03

- ▶ fragmentation table for charge state 2+
- ▶ specType=etd
- ▶ score=123.91
- ▶ F113280.dat
- ▶ query=q47589\_p1
- ▶ precursor=637.131770
- ▶ chargePrecursor=4
- ▶ itol=0.5

| AA | c  | y               | z+1             | z+2             | z               | AA              |       |
|----|----|-----------------|-----------------|-----------------|-----------------|-----------------|-------|
| S  | 1  | 74.042          | <b>1273.255</b> | 1266.265        | 0.504           | 1264.741        | S[24] |
| G  | 2  | 102.553         | 1208.733        | 1200.724        | 0.504           | 1200.220        | G[23] |
| R  | 3  | 180.603         | 1180.223        | <b>1172.213</b> | <b>1172.717</b> | 1171.709        | R[22] |
| G  | 4  | 259.114         | 1102.172        | <b>1094.163</b> | <b>1094.667</b> | <b>1093.659</b> | G[21] |
| R  | 5  | 293.163         | 1073.661        | <b>1065.652</b> | <b>1066.156</b> | 1065.148        | R[20] |
| G  | 6  | 301.672         | 1009.614        | <b>1001.605</b> | <b>1002.108</b> | 1001.101        | G[19] |
| G  | 7  | 330.183         | 981.103         | <b>973.094</b>  | <b>973.598</b>  | 972.590         | G[18] |
| R  | 8  | 394.230         | <b>952.592</b>  | <b>944.583</b>  | <b>945.087</b>  | 944.079         | R[17] |
| G  | 9  | 422.741         | 898.545         | <b>890.536</b>  | <b>891.040</b>  | <b>890.032</b>  | G[16] |
| L  | 10 | 479.293         | 860.036         | 852.027         | 853.529         | 851.521         | L[15] |
| G  | 11 | 507.794         | 803.492         | <b>795.483</b>  | <b>795.987</b>  | 794.979         | G[14] |
| R  | 12 | 571.841         | 774.982         | <b>766.972</b>  | <b>767.476</b>  | 766.468         | R[13] |
| G  | 13 | 600.352         | 710.934         | <b>702.925</b>  | <b>703.429</b>  | 702.421         | G[12] |
| G  | 14 | 638.863         | 682.423         | <b>674.414</b>  | <b>674.918</b>  | <b>673.910</b>  | G[11] |
| A  | 15 | 684.381         | 653.913         | <b>645.903</b>  | <b>646.407</b>  | 645.399         | A[10] |
| R  | 16 | 728.430         | 618.394         | <b>610.385</b>  | <b>610.889</b>  | 609.881         | R[9]  |
| R  | 17 | <b>806.479</b>  | 554.347         | <b>546.337</b>  | <b>546.841</b>  | <b>545.833</b>  | R[8]  |
| H  | 18 | <b>875.009</b>  | 476.290         | 468.287         | 468.791         | 467.783         | H[7]  |
| R  | 19 | <b>953.059</b>  | 407.767         | 399.757         | 400.261         | 399.253         | R[6]  |
| R  | 20 | 1011.127        | 329.716         | 321.707         | 322.211         | 321.203         | R[5]  |
| V  | 21 | <b>1080.657</b> | 251.663         | 243.653         | 244.157         | 243.149         | V[4]  |
| L  | 22 | <b>1137.199</b> | 202.119         | 194.109         | 194.613         | 193.605         | L[3]  |
| R  | 23 | <b>1215.249</b> | 145.577         | 137.567         | 138.071         | 137.063         | R[2]  |
| D  | 24 | 1272.763        | 87.526          | 89.517          | 90.021          | 89.013          | D[1]  |

# sp | P62806 | H4\_MOUSE

[Acetyl]SGRGKGGKGLGKGGAKRHRK<sup>Dimethyl</sup>VLRD<sub>28.03</sub>

- ▶ fragmentation table for charge state 3+
- ▶ specType=etd
- ▶ score=123.91
- ▶ F113280.dat
- ▶ query=q47589\_p1
- ▶ precursor=637.131770
- ▶ chargePrecursor=4
- ▶ itol=0.5

| AA    | c              | y              | z+1            | z+2            | z       | AA    |
|-------|----------------|----------------|----------------|----------------|---------|-------|
| S[1]  | 49.597         | <b>849.172</b> | <b>843.833</b> | 0.572          | 843.497 | S[24] |
| G[2]  | 58.704         | <b>806.158</b> | <b>800.818</b> | 0.572          | 800.483 | G[23] |
| R[3]  | 120.738        | <b>787.151</b> | <b>781.811</b> | <b>782.147</b> | 781.475 | R[22] |
| G[4]  | 139.745        | 735.117        | 729.778        | 730.114        | 729.442 | G[21] |
| K[5]  | 182.443        | 716.110        | 710.770        | 711.106        | 710.435 | K[20] |
| G[6]  | 201.450        | 673.412        | 668.072        | 668.408        | 667.736 | G[19] |
| G[7]  | 220.458        | 654.405        | 649.065        | 649.401        | 648.729 | G[18] |
| K[8]  | 263.156        | 635.397        | 630.058        | 630.394        | 629.722 | K[17] |
| G[9]  | 282.163        | 592.899        | 587.559        | 587.895        | 587.224 | G[16] |
| L[10] | 319.258        | 573.892        | 568.552        | 568.888        | 568.216 | L[15] |
| G[11] | 338.265        | 535.997        | 530.658        | 530.994        | 530.322 | G[14] |
| K[12] | 381.563        | 516.990        | 511.651        | 511.986        | 511.315 | K[13] |
| G[13] | 400.570        | 474.292        | 468.952        | 469.288        | 468.616 | G[12] |
| G[14] | 419.578        | 455.285        | 449.945        | 450.281        | 449.609 | G[11] |
| A[15] | 443.297        | 436.277        | 430.938        | 431.274        | 430.602 | A[10] |
| K[16] | 485.955        | 412.598        | 407.259        | 407.595        | 406.923 | K[9]  |
| R[17] | 537.989        | 369.900        | 364.561        | 364.896        | 364.225 | R[8]  |
| H[18] | 583.675        | 317.866        | 312.527        | 312.863        | 312.191 | H[7]  |
| R[19] | 635.709        | 272.180        | 266.841        | 267.176        | 266.505 | R[6]  |
| K[20] | 687.751        | 220.140        | 214.801        | 215.137        | 214.471 | K[5]  |
| V[21] | 720.774        | 188.104        | 182.765        | 183.101        | 182.429 | V[4]  |
| L[22] | 758.468        | 135.082        | 129.742        | 130.078        | 129.406 | L[3]  |
| R[23] | <b>810.502</b> | 97.387         | 92.047         | 92.383         | 91.711  | R[2]  |
| D[24] | 848.844        | 45.353         | 40.014         | 40.349         | 39.678  | D[1]  |



# sp | P62806 | H4\_MOUSE

[Acetyl]SGRGKGGKGLGKGGAKRHRK<sup>Dimethyl</sup>VLRD<sub>28.03</sub>

- ▶ fragmentation table for charge state 1+
- ▶ specType=etd
- ▶ score=103.68
- ▶ F113280.dat
- ▶ query=q47590\_p1
- ▶ precursor=637.131770
- ▶ chargePrecursor=4
- ▶ itol=0.5

| AA    | c               | y               | z+1             | z+2             | z        | AA    |
|-------|-----------------|-----------------|-----------------|-----------------|----------|-------|
| S[1]  | 147.076         | 2545.507        | 2529.483        | 0.000           | 2528.418 | S[24] |
| G[2]  | 204.098         | 2416.460        | 2400.441        | 0.000           | 2399.433 | G[23] |
| R[3]  | <b>360.199</b>  | 2399.438        | 2383.419        | 2344.427        | 2342.412 | R[22] |
| G[4]  | <b>417.220</b>  | 2203.337        | 2187.318        | 2188.326        | 2186.310 | G[21] |
| K[5]  | <b>545.315</b>  | 2146.318        | 2130.297        | 2131.305        | 2129.289 | K[20] |
| G[6]  | <b>602.337</b>  | 2018.221        | 2002.202        | 2003.210        | 2001.194 | G[19] |
| G[7]  | <b>659.358</b>  | 1961.199        | 1945.180        | 1946.188        | 1944.172 | G[18] |
| K[8]  | <b>787.453</b>  | 1904.179        | 1888.159        | <b>1889.167</b> | 1887.151 | K[17] |
| G[9]  | <b>844.475</b>  | 1776.083        | 1760.064        | <b>1761.072</b> | 1759.056 | G[16] |
| L[10] | <b>927.559</b>  | 1729.061        | <b>1703.043</b> | 1704.051        | 1702.035 | L[15] |
| Q[11] | <b>1014.580</b> | 1605.977        | 1589.958        | 1590.966        | 1588.951 | Q[14] |
| K[12] | <b>1142.675</b> | 1548.956        | 1532.937        | <b>1533.945</b> | 1531.929 | K[13] |
| G[13] | 1199.697        | 1420.861        | 1404.842        | <b>1405.850</b> | 1403.834 | G[12] |
| G[14] | <b>1296.718</b> | 1363.839        | 1347.821        | <b>1348.828</b> | 1346.813 | G[11] |
| A[15] | <b>1327.755</b> | 1306.818        | 1290.799        | <b>1291.807</b> | 1289.791 | A[10] |
| R[16] | <b>1455.850</b> | <b>1235.781</b> | 1219.762        | <b>1220.770</b> | 1217.754 | R[9]  |
| R[17] | 1611.951        | 1107.686        | 1091.667        | 1092.675        | 1090.659 | R[8]  |
| H[18] | <b>1749.010</b> | 951.585         | <b>935.566</b>  | 936.574         | 934.558  | H[7]  |
| R[19] | 1905.111        | 814.526         | 798.507         | <b>799.515</b>  | 797.499  | R[6]  |
| K[20] | 2061.238        | 658.425         | 642.406         | <b>643.414</b>  | 641.398  | K[5]  |
| V[21] | 2160.306        | 502.366         | 486.346         | <b>487.354</b>  | 485.327  | V[4]  |
| L[22] | 2273.369        | 463.339         | 447.319         | <b>448.328</b>  | 446.301  | L[3]  |
| R[23] | 2429.491        | 290.146         | 274.127         | <b>275.135</b>  | 273.110  | R[2]  |
| D[24] | 2544.518        | 134.045         | 118.026         | 119.034         | 117.018  | D[1]  |

# sp | P62806 | H4\_MOUSE

[Acetyl]SGRGKGGKGLGKGGAKRHRK<sup>Dimethyl</sup>VLRD<sub>28.03</sub>

- ▶ fragmentation table for charge state 2+
- ▶ specType=etd
- ▶ score=103.68
- ▶ F113280.dat
- ▶ query=q47590\_p1
- ▶ precursor=637.131770
- ▶ chargePrecursor=4
- ▶ itol=0.5

| AA    | c               | y               | z+1             | z+2             | z               | AA    |
|-------|-----------------|-----------------|-----------------|-----------------|-----------------|-------|
| S[1]  | 74.042          | <b>1273.255</b> | 1266.265        | 0.504           | 1264.741        | S[24] |
| G[2]  | 102.553         | 1208.733        | <b>1200.724</b> | 0.504           | <b>1200.220</b> | G[23] |
| R[3]  | 180.603         | 1180.223        | 1172.713        | <b>1172.717</b> | 1171.709        | R[22] |
| G[4]  | 259.114         | 1102.172        | <b>1094.163</b> | <b>1094.667</b> | <b>1093.659</b> | G[21] |
| K[5]  | 273.153         | 1073.661        | <b>1065.652</b> | <b>1066.156</b> | <b>1065.148</b> | K[20] |
| G[6]  | 301.672         | 1009.614        | <b>1001.605</b> | <b>1002.108</b> | 1001.101        | G[19] |
| G[7]  | 330.183         | 981.103         | <b>973.094</b>  | <b>973.598</b>  | 972.590         | G[18] |
| K[8]  | 394.230         | <b>952.592</b>  | 944.583         | <b>945.087</b>  | 944.070         | K[17] |
| G[9]  | 422.741         | 898.545         | <b>890.536</b>  | <b>891.040</b>  | 890.032         | G[16] |
| L[10] | 479.293         | 860.036         | 852.027         | 853.029         | 852.021         | L[15] |
| G[11] | 507.794         | 803.492         | <b>795.483</b>  | <b>795.987</b>  | <b>794.979</b>  | G[14] |
| K[12] | 571.841         | 774.982         | <b>766.972</b>  | <b>767.476</b>  | 766.468         | K[13] |
| G[13] | 600.352         | 710.934         | <b>702.925</b>  | <b>703.429</b>  | 702.421         | G[12] |
| G[14] | 628.863         | 682.423         | <b>674.414</b>  | <b>674.918</b>  | 673.910         | G[11] |
| A[15] | 694.381         | 653.913         | <b>645.903</b>  | <b>646.407</b>  | <b>645.399</b>  | A[10] |
| R[16] | <b>728.429</b>  | 618.394         | <b>610.385</b>  | <b>610.889</b>  | 609.881         | R[9]  |
| R[17] | <b>806.479</b>  | 554.347         | <b>546.337</b>  | <b>546.841</b>  | <b>545.833</b>  | R[8]  |
| H[18] | <b>875.009</b>  | 476.290         | 468.281         | 469.281         | 467.783         | H[7]  |
| R[19] | <b>953.059</b>  | 407.767         | 399.757         | 400.261         | 399.253         | R[6]  |
| K[20] | <b>1031.122</b> | 329.716         | 321.707         | 322.211         | 321.203         | K[5]  |
| V[21] | <b>1080.667</b> | 251.663         | 243.653         | 244.157         | 243.149         | V[4]  |
| L[22] | <b>1137.199</b> | 202.119         | 194.109         | 194.613         | 193.605         | L[3]  |
| R[23] | <b>1215.249</b> | 145.577         | 137.567         | 138.071         | 137.063         | R[2]  |
| D[24] | <b>1272.763</b> | 67.526          | 59.517          | 60.021          | 59.013          | D[1]  |

# sp | P62806 | H4\_MOUSE

[Acetyl]SGRGKGGKGLGKGGAKRHRK<sup>Dimethyl</sup>VLRD<sub>28.03</sub>

- ▶ fragmentation table for charge state 3+
- ▶ specType=etd
- ▶ score=103.68
- ▶ F113280.dat
- ▶ query=q47590.p1
- ▶ precursor=637.131770
- ▶ chargePrecursor=4
- ▶ itol=0.5

| AA    | c              | y              | z+1            | z+2            | z              | AA    |
|-------|----------------|----------------|----------------|----------------|----------------|-------|
| S[1]  | 49.697         | <b>849.172</b> | <b>843.833</b> | 0.672          | <b>843.497</b> | S[24] |
| G[2]  | 58.704         | <b>806.158</b> | <b>800.818</b> | 0.672          | <b>800.483</b> | G[23] |
| R[3]  | 150.738        | <b>787.151</b> | <b>781.811</b> | <b>782.147</b> | 781.475        | R[22] |
| G[4]  | 139.745        | 735.117        | 729.778        | 730.114        | 729.442        | G[21] |
| K[5]  | 182.443        | 716.110        | 710.770        | 711.106        | 710.435        | K[20] |
| G[6]  | 201.450        | 673.412        | 668.072        | 668.408        | 667.736        | G[19] |
| G[7]  | 220.458        | 654.405        | 649.065        | 649.401        | 648.729        | G[18] |
| K[8]  | 263.156        | 635.397        | 630.058        | 630.394        | 629.722        | K[17] |
| G[9]  | 282.163        | 592.699        | 587.359        | 587.695        | 587.024        | G[16] |
| L[10] | 319.858        | 573.692        | 568.352        | 568.688        | 568.016        | L[15] |
| G[11] | 338.865        | 535.997        | 530.658        | 530.994        | 530.322        | G[14] |
| K[12] | 381.563        | 516.990        | 511.651        | 511.986        | 511.315        | K[13] |
| G[13] | 400.570        | 474.292        | 468.952        | 469.288        | 468.616        | G[12] |
| G[14] | 419.578        | 455.285        | 449.945        | 450.281        | 449.609        | G[11] |
| A[15] | 443.257        | 436.277        | 430.938        | 431.274        | 430.602        | A[10] |
| K[16] | 485.955        | 412.598        | 407.259        | 407.595        | 406.923        | K[9]  |
| R[17] | 537.989        | 369.900        | 364.561        | 364.896        | 364.225        | R[8]  |
| H[18] | 583.675        | 317.866        | 312.527        | 312.863        | 312.191        | H[7]  |
| R[19] | 635.709        | 272.180        | 266.841        | 267.176        | 266.505        | R[6]  |
| K[20] | 687.751        | 220.140        | 214.801        | 215.143        | 214.471        | K[5]  |
| V[21] | 720.774        | 168.104        | 162.765        | 163.101        | 162.429        | V[4]  |
| L[22] | 758.468        | 135.082        | 129.742        | 130.078        | 129.406        | L[3]  |
| R[23] | <b>810.502</b> | 97.387         | 92.047         | 92.383         | 91.711         | R[2]  |
| D[24] | 848.844        | 45.353         | 40.014         | 40.349         | 39.678         | D[1]  |

# sp | P62806 | H4\_MOUSE

[Acetyl]SGRGKGGKGLGKGGAKRHRK <sup>Dimethyl</sup> VLRD  
28.03

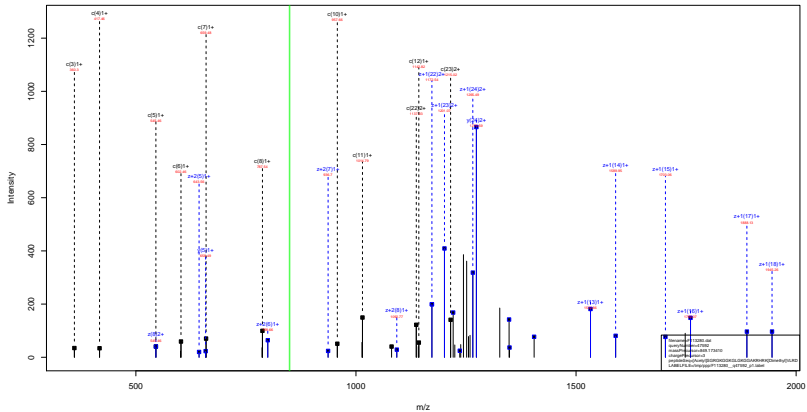



# sp | P62806 | H4\_MOUSE

[Acetyl]SGRGKGGKGLGKGGAKRHRK<sup>Dimethyl</sup>VLRD<sub>28.03</sub>

- ▶ fragmentation table for charge state 1+
- ▶ specType=etd
- ▶ score=73.13
- ▶ F113280.dat
- ▶ query=q47592\_p1
- ▶ precursor=849.173410
- ▶ chargePrecursor=3
- ▶ itol=0.5

| AA    | c               | y               | z+1             | z+2             | z        | AA    |
|-------|-----------------|-----------------|-----------------|-----------------|----------|-------|
| S[1]  | 147.076         | 2545.507        | 2529.483        | 0.000           | 2528.478 | S[24] |
| G[2]  | 204.098         | 2416.460        | 2400.441        | 0.000           | 2399.433 | G[23] |
| R[3]  | <b>360.199</b>  | 2399.438        | 2383.419        | 2344.427        | 2342.412 | R[22] |
| G[4]  | <b>417.220</b>  | 2203.377        | 2187.358        | 2188.326        | 2186.310 | G[21] |
| K[5]  | <b>945.315</b>  | 2146.318        | 2130.297        | 2131.305        | 2129.289 | K[20] |
| G[6]  | <b>602.337</b>  | 2018.221        | 2002.202        | 2003.210        | 2001.194 | G[19] |
| G[7]  | <b>659.358</b>  | 1961.159        | <b>1945.180</b> | 1946.188        | 1944.172 | G[18] |
| K[8]  | <b>787.453</b>  | 1904.179        | <b>1888.159</b> | 1889.167        | 1887.151 | K[17] |
| G[9]  | <b>844.475</b>  | 1776.083        | <b>1760.064</b> | 1761.072        | 1759.056 | G[16] |
| L[10] | <b>957.559</b>  | 1729.061        | <b>1703.043</b> | 1704.050        | 1702.035 | L[15] |
| Q[11] | <b>1014.580</b> | 1605.977        | <b>1589.958</b> | 1590.966        | 1588.951 | Q[14] |
| K[12] | <b>1142.675</b> | 1548.956        | <b>1532.937</b> | 1533.945        | 1531.929 | K[13] |
| G[13] | 1199.697        | 1420.861        | <b>1404.842</b> | 1405.850        | 1403.834 | G[12] |
| G[14] | 1256.718        | 1363.839        | <b>1347.821</b> | <b>1348.828</b> | 1346.813 | G[11] |
| A[15] | 1327.735        | 1306.813        | 1290.798        | 1291.807        | 1289.791 | A[10] |
| R[16] | 1405.890        | <b>1235.781</b> | 1219.768        | <b>1220.776</b> | 1218.760 | R[9]  |
| R[17] | 1611.951        | 1107.688        | 1091.667        | <b>1092.675</b> | 1090.659 | R[8]  |
| H[18] | 1740.010        | 951.585         | 935.566         | <b>936.574</b>  | 934.558  | H[7]  |
| R[19] | 1905.111        | 814.526         | 798.507         | <b>799.515</b>  | 797.499  | R[6]  |
| K[20] | 2061.238        | <b>658.425</b>  | 642.406         | <b>643.414</b>  | 641.398  | K[5]  |
| V[21] | 2160.306        | 502.360         | 486.340         | 487.347         | 485.322  | V[4]  |
| L[22] | 2273.369        | 463.292         | 447.271         | 448.279         | 446.263  | L[3]  |
| R[23] | 2429.491        | 290.146         | 274.127         | 275.135         | 273.119  | R[2]  |
| D[24] | 2544.518        | 134.045         | 118.026         | 119.034         | 117.018  | D[1]  |

# sp | P62806 | H4\_MOUSE

[Acetyl]SGRGKGGKGLGKGGAKRHRK<sup>Dimethyl</sup>VLRD<sub>28.03</sub>

- ▶ fragmentation table for charge state 2+
- ▶ specType=etd
- ▶ score=73.13
- ▶ F113280.dat
- ▶ query=q47592\_p1
- ▶ precursor=849.173410
- ▶ chargePrecursor=3
- ▶ itol=0.5

| AA |    | c               | y               | z+1             | z+2             | z              | AA    |
|----|----|-----------------|-----------------|-----------------|-----------------|----------------|-------|
| S  | 1  | 74.042          | <b>1273.255</b> | <b>1265.245</b> | 0.504           | 1264.741       | S[24] |
| G  | 2  | 102.553         | 1238.733        | <b>1200.724</b> | 0.504           | 1200.220       | G[23] |
| R  | 3  | 180.603         | 1180.222        | <b>1172.213</b> | <b>1172.717</b> | 1171.709       | R[22] |
| G  | 4  | 269.114         | 1102.172        | 1064.153        | 1054.661        | 1093.659       | G[21] |
| K  | 5  | 273.161         | 1073.062        | 1055.052        | 1006.155        | 1065.148       | K[20] |
| G  | 6  | 301.672         | 1009.614        | 1001.605        | 1002.108        | 1001.101       | G[19] |
| G  | 7  | 330.183         | 961.103         | 973.094         | 973.596         | 972.590        | G[18] |
| K  | 8  | 394.230         | 952.592         | 944.583         | 945.087         | 944.079        | K[17] |
| G  | 9  | 422.741         | 888.545         | 880.536         | 881.040         | 880.032        | G[16] |
| L  | 10 | 479.293         | 860.036         | 852.027         | 852.529         | 851.521        | L[15] |
| G  | 11 | 507.794         | 803.492         | 795.483         | 795.987         | 794.979        | G[14] |
| K  | 12 | 571.841         | 774.982         | 766.972         | 767.476         | 766.468        | K[13] |
| G  | 13 | 600.352         | 710.934         | 702.925         | 703.429         | 702.421        | G[12] |
| G  | 14 | 628.863         | 682.423         | 674.414         | 674.918         | 673.910        | G[11] |
| A  | 15 | 664.361         | 653.913         | 645.903         | 646.407         | 645.399        | A[10] |
| R  | 16 | 702.409         | 618.369         | 610.360         | 610.864         | 609.856        | R[9]  |
| R  | 17 | 806.479         | 554.341         | 546.331         | 546.841         | <b>545.833</b> | R[8]  |
| H  | 18 | 875.009         | 476.200         | 468.191         | 468.701         | 467.783        | H[7]  |
| R  | 19 | 953.059         | 407.767         | 399.757         | 400.261         | 399.253        | R[6]  |
| K  | 20 | 1031.122        | 329.716         | 321.707         | 322.211         | 321.203        | K[5]  |
| V  | 21 | <b>1080.657</b> | 251.663         | 243.653         | 244.147         | 243.140        | V[4]  |
| L  | 22 | <b>1117.199</b> | 202.119         | 194.109         | 194.613         | 193.605        | L[3]  |
| R  | 23 | <b>1215.249</b> | 145.577         | 137.567         | 138.071         | 137.063        | R[2]  |
| D  | 24 | 1272.763        | 67.526          | 59.517          | 60.021          | 59.013         | D[1]  |

# sp | P62806 | H4\_MOUSE

[Acetyl]SGRGKGGKGLGKGGAKRHRK <sup>Dimethyl</sup>VLRD  
28.03

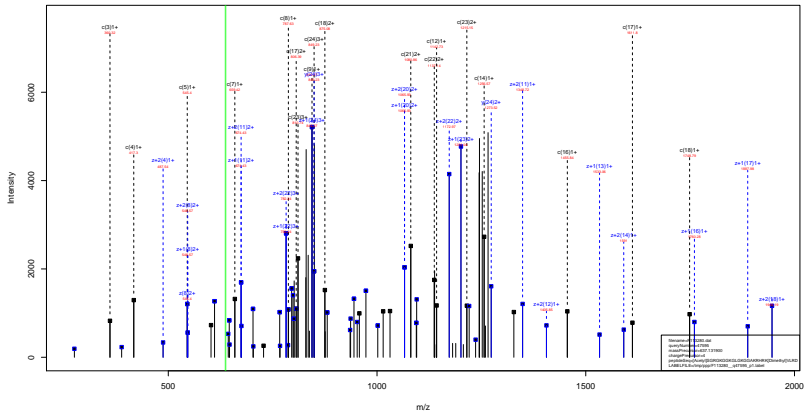

# sp | P62806 | H4\_MOUSE

[Acetyl]SGRGKGGKGLGKGGAKRHRK<sup>Dimethyl</sup>VLRD<sub>28.03</sub>

- ▶ fragmentation table for charge state 1+
- ▶ specType=etd
- ▶ score=131.28
- ▶ F113280.dat
- ▶ query=q47595\_p1
- ▶ precursor=637.131900
- ▶ chargePrecursor=4
- ▶ itol=0.5

| AA    | c               | y               | z+1             | z+2             | z        | AA    |
|-------|-----------------|-----------------|-----------------|-----------------|----------|-------|
| S[1]  | 147.076         | 2545.502        | 2529.483        | 0.000           | 2528.476 | S[24] |
| G[2]  | 204.098         | 2416.460        | 2400.441        | 0.000           | 2399.433 | G[23] |
| R[3]  | <b>360.199</b>  | 2399.438        | 2383.419        | 2344.427        | 2342.412 | R[22] |
| G[4]  | <b>417.220</b>  | 2203.377        | 2187.358        | 2188.326        | 2186.310 | G[21] |
| K[5]  | <b>945.315</b>  | 2146.316        | 2130.297        | 2131.305        | 2129.289 | K[20] |
| G[6]  | <b>602.337</b>  | 2018.221        | 2002.202        | 2003.210        | 2001.194 | G[19] |
| G[7]  | <b>659.358</b>  | 1961.159        | 1945.140        | <b>1946.188</b> | 1944.172 | G[18] |
| K[8]  | <b>787.453</b>  | 1904.179        | <b>1888.159</b> | 1889.167        | 1887.151 | K[17] |
| G[9]  | <b>844.475</b>  | 1776.083        | <b>1760.064</b> | 1761.072        | 1759.056 | G[16] |
| L[10] | <b>927.559</b>  | 1729.061        | 1713.043        | 1714.050        | 1712.035 | L[15] |
| Q[11] | <b>1014.580</b> | 1605.977        | 1589.958        | <b>1590.966</b> | 1588.951 | Q[14] |
| K[12] | <b>1142.675</b> | 1548.956        | <b>1532.937</b> | 1533.945        | 1531.929 | K[13] |
| G[13] | 1199.697        | 1420.861        | 1404.842        | <b>1405.850</b> | 1403.834 | G[12] |
| G[14] | <b>1296.718</b> | 1363.839        | 1347.821        | <b>1348.828</b> | 1346.813 | G[11] |
| A[15] | <b>1327.755</b> | 1306.818        | 1290.799        | 1291.807        | 1289.791 | A[10] |
| R[16] | <b>1456.850</b> | <b>1235.781</b> | 1219.762        | <b>1220.770</b> | 1218.755 | R[9]  |
| R[17] | <b>1611.951</b> | 1107.686        | 1091.667        | 1092.675        | 1090.659 | R[8]  |
| H[18] | <b>1749.010</b> | 951.585         | <b>935.566</b>  | <b>936.574</b>  | 934.558  | H[7]  |
| R[19] | 1905.111        | 814.526         | <b>798.507</b>  | 799.515         | 797.499  | R[6]  |
| K[20] | 2061.238        | 658.425         | 642.406         | <b>643.414</b>  | 641.398  | K[5]  |
| V[21] | 2160.306        | 502.366         | 486.346         | <b>487.357</b>  | 485.342  | V[4]  |
| L[22] | 2273.369        | 463.299         | 447.279         | <b>448.288</b>  | 446.271  | L[3]  |
| R[23] | 2429.491        | 290.146         | 274.127         | <b>275.135</b>  | 273.119  | R[2]  |
| D[24] | 2544.518        | 134.045         | 118.026         | 119.034         | 117.018  | D[1]  |

# sp | P62806 | H4\_MOUSE

[Acetyl]SGRGKGGKGLGKGGAKRHRK<sup>Dimethyl</sup>VLRD<sub>28.03</sub>

- ▶ fragmentation table for charge state 2+
- ▶ specType=etd
- ▶ score=131.28
- ▶ F113280.dat
- ▶ query=q47595\_p1
- ▶ precursor=637.131900
- ▶ chargePrecursor=4
- ▶ itol=0.5

| AA | c  | y               | z+1             | z+2             | z               | AA              |       |
|----|----|-----------------|-----------------|-----------------|-----------------|-----------------|-------|
| S  | 1  | 74.042          | <b>1273.255</b> | 1266.245        | 0.504           | 1264.741        | S[24] |
| G  | 2  | 102.553         | 1208.733        | <b>1200.724</b> | 0.504           | 1200.220        | G[23] |
| R  | 3  | 180.603         | 1180.223        | 1172.713        | <b>1172.717</b> | 1171.709        | R[22] |
| G  | 4  | 259.114         | 1102.172        | <b>1094.163</b> | <b>1094.667</b> | <b>1093.659</b> | G[21] |
| K  | 5  | 273.153         | 1073.661        | <b>1065.652</b> | <b>1066.156</b> | 1065.148        | K[20] |
| G  | 6  | 301.672         | 1009.614        | <b>1001.605</b> | <b>1002.108</b> | 1001.101        | G[19] |
| G  | 7  | 330.183         | 981.103         | <b>973.094</b>  | <b>973.598</b>  | 972.590         | G[18] |
| K  | 8  | 394.230         | <b>952.592</b>  | <b>944.583</b>  | <b>945.087</b>  | 944.079         | K[17] |
| G  | 9  | 422.741         | 898.545         | <b>890.536</b>  | <b>891.040</b>  | 890.032         | G[16] |
| L  | 10 | 479.293         | 860.036         | 852.026         | 852.529         | 851.521         | L[15] |
| G  | 11 | 507.794         | 803.482         | <b>795.483</b>  | <b>795.987</b>  | 794.979         | G[14] |
| K  | 12 | 571.841         | 774.982         | <b>766.972</b>  | <b>767.476</b>  | <b>766.468</b>  | K[13] |
| G  | 13 | 600.352         | 710.934         | <b>702.925</b>  | <b>703.429</b>  | 702.421         | G[12] |
| G  | 14 | 628.863         | 682.423         | <b>674.414</b>  | <b>674.918</b>  | 673.910         | G[11] |
| A  | 15 | 694.381         | 653.913         | <b>645.903</b>  | <b>646.407</b>  | 645.399         | A[10] |
| R  | 16 | <b>728.429</b>  | 618.394         | <b>610.385</b>  | <b>610.889</b>  | 609.881         | R[9]  |
| R  | 17 | <b>806.479</b>  | 554.347         | <b>546.337</b>  | <b>546.841</b>  | <b>545.833</b>  | R[8]  |
| H  | 18 | <b>875.009</b>  | 476.290         | 468.280         | 468.781         | 467.783         | H[7]  |
| R  | 19 | 953.059         | 407.767         | 399.757         | 400.261         | 399.253         | R[6]  |
| K  | 20 | <b>1031.122</b> | 329.716         | 321.707         | 322.211         | 321.203         | K[5]  |
| V  | 21 | <b>1080.657</b> | 251.663         | 243.653         | 244.157         | 243.149         | V[4]  |
| L  | 22 | <b>1137.199</b> | 202.119         | 194.109         | 194.613         | 193.605         | L[3]  |
| R  | 23 | <b>1215.249</b> | 145.577         | 137.567         | 138.071         | 137.063         | R[2]  |
| D  | 24 | 1272.763        | 67.526          | 59.517          | 60.021          | 59.013          | D[1]  |

# sp | P62806 | H4\_MOUSE

[Acetyl]SGRGKGGKGLGKGGAKRHRK<sup>Dimethyl</sup>VLRD<sub>28.03</sub>

- ▶ fragmentation table for charge state 3+
- ▶ specType=etd
- ▶ score=131.28
- ▶ F113280.dat
- ▶ query=q47595.p1
- ▶ precursor=637.131900
- ▶ chargePrecursor=4
- ▶ itol=0.5

| AA    | c              | y              | z+1            | z+2            | z              | AA    |
|-------|----------------|----------------|----------------|----------------|----------------|-------|
| S[1]  | 49.697         | <b>849.172</b> | <b>843.833</b> | 0.672          | 843.897        | S[24] |
| G[2]  | 58.704         | <b>806.158</b> | <b>800.818</b> | 0.672          | <b>800.483</b> | G[23] |
| R[3]  | 150.738        | <b>787.151</b> | <b>781.811</b> | <b>782.147</b> | 781.475        | R[22] |
| G[4]  | 139.745        | 735.117        | 729.778        | 730.114        | 729.442        | G[21] |
| K[5]  | 182.443        | 716.110        | 710.770        | 711.106        | 710.435        | K[20] |
| G[6]  | 201.450        | 673.412        | 668.072        | 668.408        | 667.736        | G[19] |
| G[7]  | 220.458        | 654.405        | 649.065        | 649.401        | 648.729        | G[18] |
| K[8]  | 263.156        | 635.397        | 630.058        | 630.394        | 629.722        | K[17] |
| Q[9]  | 282.163        | 592.699        | 587.360        | 587.696        | 587.024        | Q[16] |
| L[10] | 319.658        | 573.692        | 568.352        | 568.688        | 568.016        | L[15] |
| G[11] | 338.665        | 535.997        | 530.658        | 530.994        | 530.322        | G[14] |
| K[12] | 381.563        | 516.990        | 511.651        | 511.986        | 511.315        | K[13] |
| G[13] | 400.570        | 474.292        | 468.952        | 469.288        | 468.616        | G[12] |
| G[14] | 419.578        | 455.285        | 449.945        | 450.281        | 449.609        | G[11] |
| A[15] | 443.257        | 436.277        | 430.938        | 431.274        | 430.602        | A[10] |
| K[16] | 485.955        | 412.598        | 407.259        | 407.595        | 406.923        | K[9]  |
| R[17] | 537.989        | 369.900        | 364.561        | 364.896        | 364.225        | R[8]  |
| H[18] | 583.675        | 317.866        | 312.527        | 312.863        | 312.191        | H[7]  |
| R[19] | 635.709        | 272.180        | 266.841        | 267.176        | 266.505        | R[6]  |
| K[20] | 687.751        | 220.146        | 214.807        | 215.143        | 214.471        | K[5]  |
| V[21] | 720.774        | 168.104        | 162.765        | 163.101        | 162.429        | V[4]  |
| L[22] | 758.468        | 135.082        | 129.742        | 130.078        | 129.406        | L[3]  |
| R[23] | <b>810.502</b> | 97.387         | 92.047         | 92.383         | 91.711         | R[2]  |
| D[24] | <b>848.844</b> | 45.353         | 40.014         | 40.349         | 39.678         | D[1]  |



# sp | P62806 | H4\_MOUSE

[Acetyl]SGRGKGGKGLGKGGAK<sup>Acetyl</sup> RHRK<sup>Dimethyl</sup> VLRD<sup>28.03</sup>

- ▶ fragmentation table for charge state 1+
- ▶ specType=etd
- ▶ score=47.67
- ▶ F113280.dat
- ▶ query=q48145.p1
- ▶ precursor=370.507640
- ▶ chargePrecursor=7
- ▶ itol=0.5

| AA |    | c              | y              | z+1            | z+2            | z              | AA    |
|----|----|----------------|----------------|----------------|----------------|----------------|-------|
| S  | 1  | 147.076        | 2587.512       | 2571.494       | 0.000          | 2570.498       | S[24] |
| G  | 2  | <b>204.098</b> | 2338.470       | 2342.451       | 0.000          | 2341.444       | G[23] |
| R  | 3  | <b>350.199</b> | 2301.440       | 2305.430       | 2300.438       | 2304.422       | R[22] |
| G  | 4  | <b>417.220</b> | 2245.948       | 2229.329       | 2230.337       | 2226.321       | G[21] |
| K  | 5  | <b>545.315</b> | 2188.526       | 2172.307       | 2173.315       | 2171.300       | K[20] |
| G  | 6  | 602.337        | 2060.231       | 2044.212       | 2045.220       | 2043.205       | G[19] |
| G  | 7  | <b>659.358</b> | 2003.210       | 1987.191       | 1988.199       | 1986.183       | G[18] |
| K  | 8  | 707.453        | 1946.188       | 1930.170       | 1931.177       | 1929.162       | K[17] |
| G  | 9  | <b>844.475</b> | 1818.093       | 1802.075       | 1803.082       | 1801.067       | G[16] |
| L  | 10 | <b>957.559</b> | 1763.072       | 1747.053       | 1748.061       | 1746.045       | L[15] |
| G  | 11 | 1014.580       | 1647.985       | 1631.960       | 1632.977       | 1630.961       | G[14] |
| K  | 12 | 1142.675       | 1590.966       | 1574.948       | 1575.955       | 1573.940       | K[13] |
| G  | 13 | 1199.697       | 1462.871       | 1446.853       | 1447.860       | 1445.845       | G[12] |
| G  | 14 | 1256.718       | 1405.850       | 1389.831       | 1390.839       | 1388.823       | G[11] |
| A  | 15 | 1327.735       | 1348.828       | 1332.810       | 1333.818       | 1331.802       | A[10] |
| K  | 16 | 1487.861       | 1277.791       | 1261.773       | 1262.780       | 1260.765       | K[9]  |
| R  | 17 | 1653.984       | 1197.666       | 1191.667       | 1192.675       | 1190.659       | R[8]  |
| H  | 18 | 1791.021       | 951.585        | <b>935.566</b> | <b>936.574</b> | <b>934.558</b> | H[7]  |
| R  | 19 | 1947.122       | <b>814.526</b> | <b>798.507</b> | 799.515        | 797.499        | R[6]  |
| K  | 20 | 2103.248       | 658.425        | <b>642.406</b> | <b>643.414</b> | 641.398        | K[5]  |
| V  | 21 | 2202.317       | 502.298        | <b>486.280</b> | <b>487.287</b> | 485.272        | V[4]  |
| L  | 22 | 2315.401       | 403.230        | <b>387.211</b> | 388.219        | <b>386.203</b> | L[3]  |
| R  | 23 | 2471.502       | 290.146        | <b>274.127</b> | 275.135        | <b>273.119</b> | R[2]  |
| D  | 24 | 2586.529       | 134.045        | 118.026        | 119.034        | 117.018        | D[1]  |



# sp | P62806 | H4\_MOUSE

[Acetyl]SGRGKGGKGLGKGGAK<sup>Acetyl</sup> RHRK<sup>Dimethyl</sup> VLRD<sup>28.03</sup>

- ▶ fragmentation table for charge state 2+
- ▶ specType=etd
- ▶ score=47.67
- ▶ F113280.dat
- ▶ query=q48145\_p1
- ▶ precursor=370.507640
- ▶ chargePrecursor=7
- ▶ itol=0.5

| AA    | c               | y              | z+1             | z+2             | z              | AA    |
|-------|-----------------|----------------|-----------------|-----------------|----------------|-------|
| S[1]  | 74.642          | 1204.260       | 1286.251        | 0.904           | 1285.747       | S[24] |
| G[2]  | 102.553         | 1220.739       | 1221.729        | 0.904           | 1221.225       | G[23] |
| R[3]  | 180.603         | 1280.238       | <b>1193.219</b> | <b>1193.723</b> | 1242.715       | R[22] |
| G[4]  | 209.114         | 1323.177       | 1115.168        | 1115.672        | 1114.664       | G[21] |
| K[5]  | <b>273.161</b>  | 1094.667       | 1086.657        | 1087.161        | 1086.153       | K[20] |
| G[6]  | <b>301.672</b>  | 1030.619       | 1022.610        | 1023.114        | 1022.108       | G[19] |
| G[7]  | <b>330.183</b>  | 1002.108       | <b>994.099</b>  | <b>994.603</b>  | 993.595        | G[18] |
| K[8]  | <b>394.230</b>  | 973.598        | 965.588         | 966.092         | 965.084        | K[17] |
| G[9]  | <b>422.741</b>  | 958.550        | 961.541         | <b>962.045</b>  | 961.037        | G[16] |
| L[10] | <b>479.283</b>  | 893.040        | 873.030         | <b>873.534</b>  | 872.526        | L[15] |
| G[11] | <b>507.794</b>  | 824.495        | <b>816.488</b>  | <b>816.992</b>  | 815.984        | G[14] |
| K[12] | <b>571.841</b>  | <b>795.987</b> | 787.977         | <b>788.481</b>  | 787.474        | K[13] |
| G[13] | <b>600.352</b>  | 731.939        | 723.930         | <b>724.434</b>  | 723.426        | G[12] |
| G[14] | <b>628.863</b>  | 703.429        | <b>695.419</b>  | <b>695.923</b>  | 694.915        | G[11] |
| A[15] | 657.381         | 674.918        | <b>666.908</b>  | <b>667.412</b>  | 666.405        | A[10] |
| R[16] | <b>749.434</b>  | <b>639.399</b> | 631.393         | 631.894         | 630.886        | R[9]  |
| R[17] | <b>827.485</b>  | 594.347        | <b>546.337</b>  | <b>546.841</b>  | 545.833        | R[8]  |
| H[18] | <b>896.014</b>  | <b>476.296</b> | <b>468.287</b>  | <b>468.791</b>  | <b>467.783</b> | H[7]  |
| R[19] | 974.065         | <b>407.767</b> | <b>399.757</b>  | <b>400.261</b>  | 399.253        | R[6]  |
| K[20] | 1052.128        | 329.716        | <b>321.707</b>  | <b>322.211</b>  | 321.203        | K[5]  |
| V[21] | 1101.662        | 251.653        | 243.643         | 244.147         | 243.140        | V[4]  |
| L[22] | <b>1158.204</b> | 202.119        | 194.109         | 194.613         | 193.605        | L[3]  |
| R[23] | 1236.255        | 145.577        | 137.567         | 138.071         | 137.063        | R[2]  |
| D[24] | 1291.768        | 67.526         | 59.517          | 60.021          | 59.013         | D[1]  |

# sp | P62806 | H4\_MOUSE

[Acetyl]SGRGKGGKGLGKGGAK<sup>Acetyl</sup> RHRK<sup>Dimethyl</sup> VLRD<sup>28.03</sup>

- ▶ fragmentation table for charge state 3+
- ▶ specType=etd
- ▶ score=47.67
- ▶ F113280.dat
- ▶ query=q48145.p1
- ▶ precursor=370.507640
- ▶ chargePrecursor=7
- ▶ itol=0.5

| AA    | c              | y              | z+1            | z+2            | z              | AA    |
|-------|----------------|----------------|----------------|----------------|----------------|-------|
| S[1]  | 49.697         | 883.176        | 857.830        | 0.672          | 857.900        | S[24] |
| G[2]  | 58.704         | 820.162        | <b>814.822</b> | 0.672          | <b>814.486</b> | G[23] |
| R[3]  | 120.738        | 801.154        | <b>795.815</b> | <b>796.151</b> | 795.479        | R[22] |
| G[4]  | 139.745        | 749.121        | 743.781        | 744.117        | 743.445        | G[21] |
| K[5]  | 182.443        | 730.114        | <b>724.774</b> | 725.110        | <b>724.438</b> | K[20] |
| G[6]  | 201.450        | 687.415        | <b>682.076</b> | <b>682.412</b> | 681.740        | G[19] |
| G[7]  | 220.458        | 668.408        | 663.069        | <b>663.404</b> | 662.733        | G[18] |
| K[8]  | 263.156        | 649.401        | <b>644.061</b> | <b>644.397</b> | <b>643.725</b> | K[17] |
| G[9]  | 282.163        | 630.393        | <b>601.363</b> | <b>601.699</b> | 601.027        | G[16] |
| L[10] | <b>319.858</b> | <b>587.695</b> | <b>582.356</b> | <b>582.692</b> | 582.020        | L[15] |
| G[11] | <b>338.865</b> | <b>550.001</b> | 544.661        | <b>544.997</b> | 544.325        | G[14] |
| K[12] | <b>381.563</b> | <b>530.994</b> | <b>525.654</b> | <b>525.990</b> | 525.318        | K[13] |
| G[13] | <b>400.570</b> | <b>488.295</b> | <b>482.956</b> | <b>483.292</b> | 482.620        | G[12] |
| G[14] | <b>419.578</b> | <b>469.288</b> | <b>463.949</b> | <b>464.285</b> | 463.613        | G[11] |
| A[15] | <b>443.257</b> | 450.281        | 444.941        | 445.277        | 444.605        | A[10] |
| K[16] | <b>499.958</b> | 426.002        | 421.262        | <b>421.598</b> | 420.926        | K[9]  |
| R[17] | 551.992        | 369.900        | <b>364.561</b> | <b>364.896</b> | 364.225        | R[8]  |
| H[18] | <b>597.678</b> | 317.866        | 312.527        | 312.863        | 312.191        | H[7]  |
| R[19] | <b>649.712</b> | 272.180        | 266.941        | 267.276        | 266.605        | R[6]  |
| K[20] | 701.754        | 220.140        | 214.807        | 215.143        | 214.471        | K[5]  |
| V[21] | <b>734.777</b> | 168.104        | 162.765        | 163.101        | 162.429        | V[4]  |
| L[22] | 772.472        | 135.082        | 129.742        | 130.078        | 129.406        | L[3]  |
| R[23] | 824.505        | 97.387         | 92.047         | 92.383         | 91.711         | R[2]  |
| D[24] | 862.848        | 45.353         | 40.014         | 40.349         | 39.678         | D[1]  |

# sp | P62806 | H4\_MOUSE

[Acetyl]SGRGKGGKGLGKGGAK<sup>Acetyl</sup> RHRK<sup>Dimethyl</sup> VLRD<sup>28.03</sup>

- ▶ fragmentation table for charge state 4+
- ▶ specType=etd
- ▶ score=47.67
- ▶ F113280.dat
- ▶ query=q48145.p1
- ▶ precursor=370.507640
- ▶ chargePrecursor=7
- ▶ itol=0.5

| AA    | c              | y              | z+1            | z+2            | z              | AA    |
|-------|----------------|----------------|----------------|----------------|----------------|-------|
| S[1]  | 37.525         | 647.634        | <b>643.629</b> | 0.755          | <b>643.177</b> | S[24] |
| G[2]  | 51.780         | <b>615.373</b> | <b>611.368</b> | 0.755          | 611.116        | G[23] |
| R[3]  | 60.805         | 601.110        | <b>597.113</b> | <b>597.365</b> | <b>596.861</b> | R[22] |
| G[4]  | 105.061        | <b>562.092</b> | 558.088        | 558.340        | 557.836        | G[21] |
| K[5]  | 137.084        | <b>547.837</b> | <b>543.832</b> | 544.084        | <b>543.580</b> | K[20] |
| G[6]  | 151.340        | <b>515.813</b> | 511.809        | <b>512.061</b> | 511.557        | G[19] |
| G[7]  | 165.595        | 501.558        | <b>497.553</b> | <b>497.805</b> | <b>497.301</b> | G[18] |
| K[8]  | 197.619        | <b>487.303</b> | <b>483.298</b> | <b>483.550</b> | <b>483.046</b> | K[17] |
| G[9]  | 211.874        | 459.270        | <b>451.274</b> | <b>451.526</b> | 451.022        | G[16] |
| L[10] | 280.148        | <b>441.023</b> | <b>437.019</b> | <b>437.271</b> | 436.767        | L[15] |
| G[11] | 254.403        | 413.752        | 408.748        | <b>409.000</b> | 408.496        | G[14] |
| K[12] | 286.424        | 398.497        | <b>394.492</b> | <b>394.744</b> | <b>394.240</b> | K[13] |
| G[13] | 300.680        | 366.473        | 362.469        | 362.721        | 362.217        | G[12] |
| G[14] | 314.935        | 352.218        | 348.213        | 348.465        | 347.961        | G[11] |
| A[15] | 332.694        | <b>337.363</b> | 333.359        | 334.210        | 333.706        | A[10] |
| K[16] | <b>375.221</b> | <b>320.203</b> | 316.199        | 316.451        | 315.947        | K[9]  |
| R[17] | <b>414.246</b> | 277.877        | <b>273.672</b> | <b>273.924</b> | <b>273.420</b> | R[8]  |
| H[18] | <b>448.511</b> | 238.652        | 234.647        | 234.899        | 234.395        | H[7]  |
| R[19] | <b>487.536</b> | <b>204.387</b> | 200.382        | 200.634        | 200.130        | R[6]  |
| K[20] | 426.568        | 169.362        | 165.357        | 165.609        | 165.105        | K[5]  |
| V[21] | <b>551.335</b> | 126.330        | 122.325        | 122.577        | 122.073        | V[4]  |
| L[22] | <b>579.606</b> | 101.563        | 97.558         | 97.810         | 97.306         | L[3]  |
| R[23] | 618.631        | 73.292         | 69.287         | 69.539         | 69.035         | R[2]  |
| D[24] | 647.388        | 34.267         | 30.262         | 30.514         | 30.010         | D[1]  |

# sp | P62806 | H4\_MOUSE

[Acetyl]SGRGKGGKGLGKGGAK<sup>Acetyl</sup> RHRK<sup>Dimethyl</sup> VLRD<sup>28.03</sup>

- ▶ fragmentation table for charge state 5+
- ▶ specType=etd
- ▶ score=47.67
- ▶ F113280.dat
- ▶ query=q48145.p1
- ▶ precursor=370.507640
- ▶ chargePrecursor=7
- ▶ itol=0.5

| AA    | c              | y              | z+1            | z+2            | z              | AA    |
|-------|----------------|----------------|----------------|----------------|----------------|-------|
| S[1]  | 30.221         | 518.506        | <b>515.105</b> | 0.806          | 514.903        | S[24] |
| G[2]  | 41.625         | <b>492.500</b> | <b>489.296</b> | 0.806          | <b>489.095</b> | G[23] |
| R[3]  | 72.846         | 491.090        | <b>477.892</b> | <b>478.093</b> | 477.690        | R[22] |
| G[4]  | 84.250         | <b>449.875</b> | 446.672        | 446.873        | 446.470        | G[21] |
| K[5]  | 109.869        | 438.471        | <b>435.267</b> | <b>435.469</b> | 435.066        | K[20] |
| G[6]  | 121.273        | 412.852        | <b>409.648</b> | 409.850        | <b>409.447</b> | G[19] |
| G[7]  | 132.677        | 401.448        | 398.244        | 398.446        | 398.042        | G[18] |
| K[8]  | 158.296        | <b>390.043</b> | <b>386.840</b> | <b>387.041</b> | <b>386.638</b> | K[17] |
| G[9]  | 169.701        | 384.526        | 381.223        | 381.422        | 381.019        | G[16] |
| L[10] | 192.318        | 383.020        | 349.816        | 350.018        | 349.615        | L[15] |
| G[11] | <b>203.722</b> | <b>330.403</b> | 327.200        | 327.401        | 326.998        | G[14] |
| K[12] | 229.341        | 318.999        | 315.796        | 315.997        | 315.594        | K[13] |
| G[13] | 240.745        | <b>293.380</b> | 290.176        | 290.378        | 289.975        | G[12] |
| G[14] | 252.149        | 281.976        | 278.772        | 278.974        | 278.570        | G[11] |
| A[15] | 266.357        | 270.572        | 267.368        | 267.569        | 267.166        | A[10] |
| K[16] | 300.378        | 256.364        | 253.160        | 253.362        | 252.959        | K[9]  |
| R[17] | 331.598        | 222.343        | 219.139        | 219.341        | 218.938        | R[8]  |
| H[18] | <b>359.010</b> | 191.123        | 187.919        | 188.121        | 187.717        | H[7]  |
| R[19] | <b>380.230</b> | 163.711        | 160.507        | 160.709        | 160.306        | R[6]  |
| K[20] | <b>421.455</b> | 132.491        | 129.287        | 129.489        | 129.085        | K[5]  |
| V[21] | <b>441.269</b> | 101.265        | 98.062         | 98.263         | 97.860         | V[4]  |
| L[22] | <b>463.886</b> | 81.452         | 78.248         | 78.450         | 78.047         | L[3]  |
| R[23] | <b>495.106</b> | 58.835         | 55.631         | 55.833         | 55.430         | R[2]  |
| D[24] | 518.112        | 27.615         | 24.411         | 24.613         | 24.209         | D[1]  |

# sp | P62806 | H4\_MOUSE

[Acetyl]SGRGKGGKGLGKGGAK<sup>Acetyl</sup> RHRK<sup>Dimethyl</sup> VLRD<sup>28.03</sup>

- ▶ fragmentation table for charge state 6+
- ▶ specType=etd
- ▶ score=47.67
- ▶ F113280.dat
- ▶ query=q48145.p1
- ▶ precursor=370.507640
- ▶ chargePrecursor=7
- ▶ itol=0.5

| AA    | c              | y              | z+1            | z+2            | z              | AA    |
|-------|----------------|----------------|----------------|----------------|----------------|-------|
| S[1]  | 25.352         | 432.092        | <b>429.422</b> | 0.839          | 429.254        | S[24] |
| G[2]  | 34.856         | <b>401.584</b> | <b>407.915</b> | 0.839          | <b>407.747</b> | G[23] |
| R[3]  | 60.873         | <b>401.081</b> | 398.411        | 398.579        | 398.243        | R[22] |
| G[4]  | 70.376         | <b>375.064</b> | 372.394        | 372.562        | 372.226        | G[21] |
| K[5]  | 91.725         | 365.560        | 362.891        | 363.059        | 362.723        | K[20] |
| G[6]  | 101.229        | 344.211        | 341.541        | 341.709        | 341.374        | G[19] |
| G[7]  | 110.732        | 334.708        | 332.038        | 332.206        | 331.870        | G[18] |
| K[8]  | 132.082        | 325.204        | 322.534        | 322.702        | <b>322.366</b> | K[17] |
| G[9]  | 141.585        | 303.895        | 301.225        | 301.393        | 301.047        | G[16] |
| L[10] | 150.433        | 294.351        | 291.681        | 291.850        | 291.514        | L[15] |
| G[11] | 169.936        | 275.504        | 272.834        | <b>273.002</b> | 272.666        | G[14] |
| K[12] | 191.285        | 266.000        | 263.331        | 263.499        | 263.163        | K[13] |
| G[13] | 200.789        | 244.651        | 241.981        | 242.149        | 241.814        | G[12] |
| G[14] | 210.292        | 235.148        | 232.478        | 232.646        | 232.310        | G[11] |
| A[15] | 222.132        | 225.644        | 222.974        | 223.142        | 222.806        | A[10] |
| K[16] | 250.483        | 213.805        | 211.135        | 211.303        | 210.967        | K[9]  |
| R[17] | 276.500        | 185.454        | 182.784        | 182.952        | 182.616        | R[8]  |
| H[18] | 299.343        | 159.437        | 156.767        | 156.935        | 156.599        | H[7]  |
| R[19] | 325.360        | 136.594        | 133.924        | 134.092        | 133.756        | R[6]  |
| K[20] | 351.381        | 110.577        | 107.907        | 108.075        | 107.739        | K[5]  |
| V[21] | 367.892        | 84.556         | 81.886         | 82.054         | 81.718         | V[4]  |
| L[22] | <b>386.740</b> | 68.044         | 65.374         | 65.543         | 65.207         | L[3]  |
| R[23] | 412.756        | 49.197         | 46.527         | 46.695         | 46.359         | R[2]  |
| D[24] | 431.928        | 23.180         | 20.510         | 20.678         | 20.342         | D[1]  |

# sp | P62806 | H4\_MOUSE

[Acetyl]SGRGKGGKGLGKGGAK Acetyl 42.01 RHRK Dimethyl 28.03 VLRD

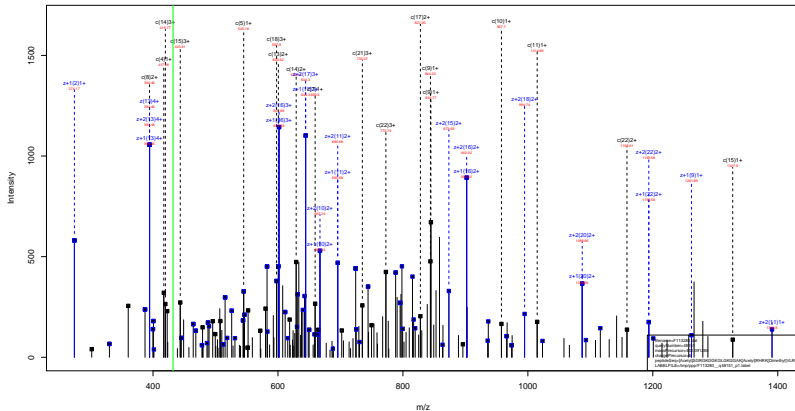

# sp | P62806 | H4\_MOUSE

[Acetyl]SGRGKGGKGLGKGGAK<sup>Acetyl</sup> RHRK<sup>Dimethyl</sup> VLRD<sup>28.03</sup>

- ▶ fragmentation table for charge state 1+
- ▶ specType=etd
- ▶ score=76.33
- ▶ F113280.dat
- ▶ query=q48151\_p1
- ▶ precursor=432.091280
- ▶ chargePrecursor=6
- ▶ itol=0.5

| AA | c  | y               | z+1            | z+2             | z               | AA       |   |    |
|----|----|-----------------|----------------|-----------------|-----------------|----------|---|----|
| S  | 1  | 147.076         | 2507.513       | 2571.494        | 0.000           | 2570.486 | S | 24 |
| G  | 2  | 204.098         | 2458.470       | 2442.451        | 0.000           | 2441.444 | G | 23 |
| R  | 3  | <b>360.199</b>  | 2401.449       | 2385.430        | 2380.430        | 2384.422 | R | 22 |
| G  | 4  | <b>417.230</b>  | 2345.340       | 2229.320        | 2230.337        | 2228.321 | G | 21 |
| K  | 5  | <b>545.315</b>  | 2188.326       | 2172.307        | 2173.315        | 2171.300 | K | 20 |
| G  | 6  | 602.357         | 2060.231       | 2044.210        | 2045.220        | 2043.205 | G | 19 |
| G  | 7  | <b>659.358</b>  | 2003.210       | 1987.191        | 1988.199        | 1986.183 | G | 18 |
| K  | 8  | 787.453         | 1946.189       | 1930.170        | 1931.177        | 1929.162 | K | 17 |
| G  | 9  | <b>844.475</b>  | 1818.093       | 1802.075        | 1801.082        | 1801.080 | G | 16 |
| L  | 10 | <b>957.559</b>  | 1763.072       | 1746.053        | 1746.061        | 1744.045 | L | 15 |
| G  | 11 | <b>1014.580</b> | 1547.985       | 1531.966        | 1532.977        | 1530.961 | G | 14 |
| K  | 12 | 1142.675        | 1590.969       | 1574.948        | 1575.955        | 1573.940 | K | 13 |
| G  | 13 | 1199.697        | 1462.871       | 1446.853        | 1447.860        | 1445.845 | G | 12 |
| G  | 14 | 1256.718        | 1405.850       | 1389.831        | <b>1390.839</b> | 1388.823 | G | 11 |
| A  | 15 | <b>1327.755</b> | 1348.828       | 1332.810        | 1331.818        | 1331.802 | A | 10 |
| R  | 16 | 1407.883        | 1277.791       | <b>1261.773</b> | 1262.780        | 1260.765 | R | 9  |
| R  | 17 | 1653.962        | 1107.680       | 1051.667        | <b>1002.675</b> | 1090.659 | R | 8  |
| H  | 18 | 1791.021        | 951.585        | <b>935.566</b>  | <b>936.574</b>  | 934.558  | H | 7  |
| R  | 19 | 1947.122        | 814.526        | <b>798.507</b>  | <b>799.515</b>  | 797.499  | R | 6  |
| K  | 20 | 2103.248        | <b>658.425</b> | <b>642.406</b>  | 643.414         | 641.398  | K | 5  |
| V  | 21 | 2202.317        | 502.290        | <b>486.280</b>  | 487.287         | 485.272  | V | 4  |
| L  | 22 | 2315.401        | 403.230        | <b>387.211</b>  | 388.219         | 386.203  | L | 3  |
| R  | 23 | 2471.502        | 280.140        | <b>274.127</b>  | 275.135         | 273.119  | R | 2  |
| D  | 24 | 2586.529        | 134.045        | 118.020         | 119.034         | 117.018  | D | 1  |

# sp | P62806 | H4\_MOUSE

[Acetyl]SGRGKGGKGLGKGGAK<sup>Acetyl</sup> RHRK<sup>Dimethyl</sup> VLRD<sup>28.03</sup>

- ▶ fragmentation table for charge state 2+
- ▶ specType=etd
- ▶ score=76.33
- ▶ F113280.dat
- ▶ query=q48151\_p1
- ▶ precursor=432.091280
- ▶ chargePrecursor=6
- ▶ itol=0.5

| AA    | c               | y               | z+1             | z+2             | z              | AA    |
|-------|-----------------|-----------------|-----------------|-----------------|----------------|-------|
| S[1]  | 74.042          | 1294.260        | 1236.251        | 0.504           | 1285.747       | S[24] |
| G[2]  | 102.553         | 1229.739        | 1231.729        | 0.504           | 1221.229       | G[23] |
| K[3]  | 180.603         | <b>1201.228</b> | <b>1193.219</b> | <b>1193.723</b> | 1192.715       | K[22] |
| G[4]  | 269.114         | 1123.177        | 1115.168        | <b>1115.672</b> | 1114.664       | G[21] |
| K[5]  | 273.161         | 1094.067        | <b>1086.657</b> | <b>1087.161</b> | 1085.153       | K[20] |
| G[6]  | <b>301.672</b>  | 1030.619        | 1022.610        | <b>1023.114</b> | 1022.106       | G[19] |
| G[7]  | <b>330.183</b>  | 1002.108        | 994.099         | <b>994.603</b>  | 993.595        | G[18] |
| K[8]  | <b>394.230</b>  | <b>973.598</b>  | <b>965.588</b>  | <b>966.092</b>  | 965.084        | K[17] |
| G[9]  | <b>422.741</b>  | 909.550         | <b>901.541</b>  | <b>902.045</b>  | 901.037        | G[16] |
| L[10] | <b>479.283</b>  | 861.040         | 853.031         | <b>853.534</b>  | 852.526        | L[15] |
| G[11] | <b>507.794</b>  | 824.498         | 816.488         | <b>816.992</b>  | 815.984        | G[14] |
| K[12] | <b>571.841</b>  | <b>795.987</b>  | <b>787.977</b>  | <b>788.481</b>  | 787.474        | K[13] |
| G[13] | <b>600.352</b>  | 731.939         | <b>723.930</b>  | <b>724.434</b>  | 723.426        | G[12] |
| G[14] | <b>628.863</b>  | 703.429         | <b>695.419</b>  | <b>695.923</b>  | 694.915        | G[11] |
| A[15] | <b>664.381</b>  | 674.919         | <b>666.908</b>  | <b>667.412</b>  | 666.404        | A[10] |
| K[16] | <b>749.434</b>  | <b>639.399</b>  | <b>631.390</b>  | <b>631.894</b>  | <b>630.886</b> | K[9]  |
| R[17] | <b>827.485</b>  | 554.347         | <b>546.337</b>  | <b>546.841</b>  | 545.833        | R[8]  |
| H[18] | <b>896.014</b>  | 476.200         | <b>468.287</b>  | <b>468.791</b>  | 467.783        | H[7]  |
| R[19] | <b>974.065</b>  | 407.767         | <b>399.757</b>  | <b>400.261</b>  | 399.253        | R[6]  |
| K[20] | 1052.126        | 329.716         | 321.707         | 322.211         | 321.203        | K[5]  |
| V[21] | 1107.660        | 251.663         | 243.653         | 244.147         | 243.140        | V[4]  |
| L[22] | <b>1158.204</b> | 202.132         | 194.123         | 194.617         | 193.609        | L[3]  |
| R[23] | 1236.255        | 145.577         | 137.567         | 138.071         | 137.063        | R[2]  |
| D[24] | 1293.768        | 67.526          | 59.517          | 60.021          | 59.013         | D[1]  |



# sp | P62806 | H4\_MOUSE

[Acetyl]SGRGKGGKGLGKGGAK<sup>Acetyl</sup> RHRK<sup>Dimethyl</sup> VLRD<sup>28.03</sup>

- ▶ fragmentation table for charge state 3+
- ▶ specType=etd
- ▶ score=76.33
- ▶ F113280.dat
- ▶ query=q48151.p1
- ▶ precursor=432.091280
- ▶ chargePrecursor=6
- ▶ itol=0.5

| AA    | c              | y              | z+1            | z+2            | z              | AA    |
|-------|----------------|----------------|----------------|----------------|----------------|-------|
| S[1]  | 49.697         | <b>863.176</b> | 857.830        | 0.672          | 857.920        | S[24] |
| G[2]  | 58.704         | <b>820.162</b> | <b>814.822</b> | 0.672          | 814.486        | G[23] |
| R[3]  | 120.738        | 801.154        | <b>795.815</b> | 796.151        | <b>795.479</b> | R[22] |
| G[4]  | 139.745        | 749.121        | <b>743.781</b> | <b>744.111</b> | 743.445        | G[21] |
| K[5]  | 182.443        | <b>730.114</b> | <b>724.774</b> | <b>725.110</b> | <b>724.438</b> | K[20] |
| G[6]  | 201.450        | <b>687.415</b> | 682.070        | 682.412        | 681.740        | G[19] |
| G[7]  | 220.458        | 668.408        | <b>663.069</b> | <b>663.404</b> | 662.733        | G[18] |
| K[8]  | 263.156        | <b>649.401</b> | <b>644.061</b> | <b>644.397</b> | 643.729        | K[17] |
| G[9]  | 282.163        | 629.793        | <b>601.363</b> | <b>601.699</b> | <b>601.027</b> | G[16] |
| L[10] | 319.858        | 587.695        | <b>582.356</b> | <b>582.692</b> | <b>582.020</b> | L[15] |
| G[11] | 338.865        | 550.001        | 544.651        | <b>544.997</b> | <b>544.325</b> | G[14] |
| K[12] | 381.563        | <b>530.994</b> | <b>525.654</b> | <b>525.990</b> | 525.318        | K[13] |
| G[13] | <b>400.570</b> | <b>488.295</b> | 482.956        | 483.292        | 482.620        | G[12] |
| G[14] | <b>419.578</b> | 469.288        | <b>463.949</b> | <b>464.285</b> | 463.613        | G[11] |
| A[15] | <b>443.257</b> | 450.281        | <b>444.941</b> | <b>445.277</b> | 444.605        | A[10] |
| K[16] | <b>499.958</b> | 426.602        | 421.262        | 421.598        | 420.926        | K[9]  |
| R[17] | <b>551.992</b> | 369.900        | 364.561        | 364.896        | 364.225        | R[8]  |
| H[18] | <b>597.678</b> | 317.866        | 312.527        | 312.863        | 312.191        | H[7]  |
| R[19] | <b>649.712</b> | 272.180        | 266.841        | 267.176        | 266.505        | R[6]  |
| K[20] | <b>701.754</b> | 220.140        | 214.807        | 215.143        | 214.471        | K[5]  |
| V[21] | <b>734.777</b> | 168.104        | 162.765        | 163.101        | 162.429        | V[4]  |
| L[22] | <b>772.472</b> | 135.082        | 129.742        | 130.078        | 129.406        | L[3]  |
| R[23] | 824.505        | 97.387         | 92.047         | 92.383         | 91.711         | R[2]  |
| D[24] | 862.848        | 45.353         | 40.014         | 40.349         | 39.678         | D[1]  |

# sp | P62806 | H4\_MOUSE

[Acetyl]SGRGKGGKGLGKGGAK<sup>Acetyl</sup> RHRK<sup>Dimethyl</sup> VLRD<sup>28.03</sup>

- ▶ fragmentation table for charge state 4+
- ▶ specType=etd
- ▶ score=76.33
- ▶ F113280.dat
- ▶ query=q48151\_p1
- ▶ precursor=432.091280
- ▶ chargePrecursor=6
- ▶ itol=0.5

| AA    | c              | y              | z+1            | z+2            | z              | AA    |
|-------|----------------|----------------|----------------|----------------|----------------|-------|
| S[1]  | 37.525         | 647.634        | 643.620        | 0.755          | 643.377        | S[24] |
| G[2]  | 51.780         | <b>615.373</b> | <b>611.360</b> | 0.755          | <b>611.116</b> | G[23] |
| R[3]  | 90.805         | <b>601.118</b> | 597.111        | <b>597.365</b> | 596.861        | R[22] |
| G[4]  | 105.061        | 562.092        | 558.088        | 558.340        | 557.836        | G[21] |
| K[5]  | 137.084        | 547.837        | <b>543.832</b> | <b>544.084</b> | 543.580        | K[20] |
| G[6]  | 151.340        | <b>515.813</b> | <b>511.809</b> | <b>512.061</b> | 511.557        | G[19] |
| G[7]  | 165.595        | 501.558        | 497.553        | 497.805        | 497.301        | G[18] |
| K[8]  | 197.619        | 487.303        | 483.298        | 483.550        | 483.046        | K[17] |
| G[9]  | 211.874        | 473.048        | 469.043        | 469.295        | 468.791        | G[16] |
| L[10] | 280.148        | 441.023        | 437.019        | 437.271        | 436.767        | L[15] |
| G[11] | 254.403        | 417.752        | 408.748        | 409.000        | 408.496        | G[14] |
| K[12] | 286.424        | 398.497        | <b>394.492</b> | <b>394.744</b> | <b>394.240</b> | K[13] |
| G[13] | 300.680        | 366.473        | 362.469        | 362.721        | 362.217        | G[12] |
| G[14] | 314.935        | 352.218        | 348.213        | 348.465        | 347.961        | G[11] |
| A[15] | 332.694        | 337.963        | 333.958        | 334.210        | 333.706        | A[10] |
| K[16] | 375.221        | 320.203        | 316.199        | 316.451        | 315.947        | K[9]  |
| R[17] | 414.246        | 277.877        | <b>273.872</b> | <b>273.924</b> | 273.420        | R[8]  |
| H[18] | 468.511        | 238.652        | 234.647        | 234.899        | 234.395        | H[7]  |
| R[19] | <b>487.536</b> | 204.397        | 200.392        | 200.644        | 200.140        | R[6]  |
| K[20] | 525.558        | 165.362        | 161.357        | 161.609        | 161.105        | K[5]  |
| V[21] | <b>551.335</b> | 126.330        | 122.325        | 122.577        | 122.073        | V[4]  |
| L[22] | <b>579.606</b> | 101.563        | 97.558         | 97.810         | 97.306         | L[3]  |
| R[23] | <b>618.631</b> | 73.292         | 69.287         | 69.539         | 69.035         | R[2]  |
| D[24] | 647.388        | 34.267         | 30.262         | 30.514         | 30.010         | D[1]  |

# sp | P62806 | H4\_MOUSE

[Acetyl]SGRGKGGKGLGKGGAK<sup>Acetyl</sup> RHRK<sup>Dimethyl</sup> VLRD<sup>28.03</sup>

- ▶ fragmentation table for charge state 5+
- ▶ specType=etd
- ▶ score=76.33
- ▶ F113280.dat
- ▶ query=q48151.p1
- ▶ precursor=432.091280
- ▶ chargePrecursor=6
- ▶ itol=0.5

| AA    | c              | y              | z+1            | z+2            | z     | AA                   |
|-------|----------------|----------------|----------------|----------------|-------|----------------------|
| S[1]  | 30.221         | <b>518.306</b> | <b>515.105</b> |                | 0.806 | <b>514.903</b> S[24] |
| G[2]  | 41.625         | 492.930        | <b>489.296</b> |                | 0.806 | 489.095 G[23]        |
| R[3]  | 72.846         | 481.096        | <b>477.892</b> | <b>478.093</b> |       | 477.690 R[22]        |
| G[4]  | 84.250         | 449.875        | 446.672        | 446.873        |       | 446.470 G[21]        |
| K[5]  | 109.869        | 438.471        | 435.267        | 435.469        |       | 435.066 K[20]        |
| G[6]  | 121.273        | 412.852        | 409.648        | 409.850        |       | 409.447 G[19]        |
| G[7]  | 132.677        | <b>401.448</b> | <b>398.244</b> | <b>398.446</b> |       | <b>398.042</b> G[18] |
| K[8]  | 158.296        | 390.043        | <b>386.840</b> | <b>387.041</b> |       | 386.638 K[17]        |
| G[9]  | 169.701        | 384.528        | 381.324        | 381.522        |       | 381.319 G[16]        |
| L[10] | 192.318        | 353.020        | 349.816        | 350.018        |       | 349.615 L[15]        |
| G[11] | 203.722        | <b>330.403</b> | 327.200        | 327.401        |       | 326.998 G[14]        |
| K[12] | 229.341        | 318.999        | 315.796        | 315.997        |       | 315.594 K[13]        |
| G[13] | 240.745        | 293.380        | 290.176        | 290.378        |       | 289.975 G[12]        |
| G[14] | 252.149        | 281.976        | 278.772        | 278.974        |       | 278.570 G[11]        |
| A[15] | 266.357        | 270.572        | 267.368        | 267.569        |       | 267.166 A[10]        |
| K[16] | 300.378        | 256.364        | 253.160        | 253.362        |       | 252.959 K[9]         |
| R[17] | 331.598        | 222.343        | 219.139        | 219.341        |       | 218.938 R[8]         |
| H[18] | 359.010        | 191.123        | 187.919        | 188.121        |       | 187.717 H[7]         |
| R[19] | 390.230        | 163.711        | 160.507        | 160.709        |       | 160.306 R[6]         |
| K[20] | 421.455        | 132.491        | 129.287        | 129.489        |       | 129.085 K[5]         |
| V[21] | 441.269        | 101.265        | 98.062         | 98.263         |       | 97.860 V[4]          |
| L[22] | <b>463.886</b> | 81.452         | 78.248         | 78.450         |       | 78.047 L[3]          |
| R[23] | <b>495.106</b> | 58.835         | 55.631         | 55.833         |       | 55.430 R[2]          |
| D[24] | 518.112        | 27.615         | 24.411         | 24.613         |       | 24.209 D[1]          |



# sp | P62806 | H4\_MOUSE

[Acetyl]SGRGKGGKGLGKGGAK<sup>Acetyl</sup> RHRKVL<sup>Dimethyl</sup> D<sub>28.03</sub>

- ▶ fragmentation table for charge state 1+
- ▶ specType=etd
- ▶ score=54.05
- ▶ F113280.dat
- ▶ query=q48155.p1
- ▶ precursor=432.091510
- ▶ chargePrecursor=6
- ▶ itol=0.5

| AA    | c               | y              | z+1            | z+2             | z        | AA    |
|-------|-----------------|----------------|----------------|-----------------|----------|-------|
| S[1]  | 167.076         | 2587.513       | 2571.494       | 0.000           | 2570.480 | S[24] |
| G[2]  | 224.298         | 2438.470       | 2442.451       | 0.000           | 2441.444 | G[23] |
| T[3]  | <b>306.199</b>  | 2302.449       | 2308.430       | 2389.438        | 2384.422 | T[22] |
| G[4]  | <b>417.220</b>  | 2245.345       | 2229.329       | 2230.337        | 2228.321 | G[21] |
| K[5]  | <b>545.315</b>  | 2188.328       | 2172.307       | 2173.315        | 2171.300 | K[20] |
| G[6]  | <b>602.337</b>  | 2060.231       | 2044.212       | 2045.220        | 2043.205 | G[19] |
| G[7]  | <b>659.358</b>  | 2003.210       | 1987.191       | 1988.199        | 1986.183 | G[18] |
| K[8]  | <b>787.453</b>  | 1946.189       | 1930.170       | 1931.177        | 1929.162 | K[17] |
| G[9]  | <b>844.475</b>  | 1838.093       | 1802.075       | 1803.082        | 1801.067 | G[16] |
| L[10] | <b>957.559</b>  | 1763.072       | 1745.053       | 1746.061        | 1744.045 | L[15] |
| G[11] | <b>1014.580</b> | 1647.985       | 1631.969       | 1632.977        | 1630.961 | G[14] |
| K[12] | <b>1142.675</b> | 1590.908       | 1574.948       | 1575.955        | 1573.940 | K[13] |
| G[13] | <b>1199.697</b> | 1462.871       | 1446.853       | 1447.860        | 1445.845 | G[12] |
| G[14] | <b>1256.718</b> | 1405.850       | 1389.831       | <b>1390.839</b> | 1388.823 | G[11] |
| A[15] | <b>1327.755</b> | 1348.829       | 1332.810       | <b>1333.818</b> | 1331.802 | A[10] |
| K[16] | 1407.881        | 1277.791       | 1261.772       | <b>1262.780</b> | 1260.765 | K[9]  |
| R[17] | 1653.952        | 1197.686       | 1091.667       | 1092.675        | 1090.659 | R[8]  |
| H[18] | 1791.021        | 991.585        | <b>935.566</b> | <b>936.574</b>  | 934.558  | H[7]  |
| R[19] | 1947.122        | 814.526        | <b>798.507</b> | <b>799.515</b>  | 797.499  | R[6]  |
| K[20] | 2075.217        | <b>658.425</b> | <b>642.406</b> | 643.414         | 641.398  | K[5]  |
| V[21] | 2174.285        | <b>530.330</b> | 514.311        | <b>515.319</b>  | 513.303  | V[4]  |
| L[22] | 2287.369        | <b>431.261</b> | 415.243        | 416.250         | 414.235  | L[3]  |
| L[23] | 2473.862        | 316.177        | 302.158        | 303.166         | 301.151  | L[2]  |
| D[24] | 2586.529        | 134.045        | 118.026        | 119.034         | 117.018  | D[1]  |

# sp | P62806 | H4\_MOUSE

[Acetyl]SGRGKGGKGLGKGGAK<sup>Acetyl</sup>RHRKVL<sup>Dimethyl</sup>D<sub>42.01</sub> 28.03

- ▶ fragmentation table for charge state 2+
- ▶ specType=etd
- ▶ score=54.05
- ▶ F113280.dat
- ▶ query=q48155\_p1
- ▶ precursor=432.091510
- ▶ chargePrecursor=6
- ▶ itol=0.5

| AA | c  | y              | z+1             | z+2             | z               | AA              |       |
|----|----|----------------|-----------------|-----------------|-----------------|-----------------|-------|
| S  | 1  | 74.042         | 1294.260        | 1288.251        | 0.504           | 1285.747        | S[24] |
| G  | 2  | 102.553        | 1229.739        | 1221.729        | 0.504           | 1221.229        | G[23] |
| R  | 3  | 180.063        | 1201.238        | 1193.228        | 1193.728        | 1192.715        | R[22] |
| G  | 4  | 269.113        | 1173.737        | <b>1115.168</b> | <b>1115.672</b> | 1114.664        | G[21] |
| K  | 5  | 273.151        | <b>1094.667</b> | <b>1086.657</b> | 1087.151        | <b>1086.153</b> | K[20] |
| G  | 6  | 301.819        | 1030.619        | 1022.619        | 1023.114        | 1022.108        | G[19] |
| G  | 7  | <b>330.183</b> | 1002.108        | <b>994.099</b>  | <b>994.603</b>  | 993.599         | G[18] |
| K  | 8  | <b>394.230</b> | <b>973.598</b>  | 965.588         | <b>966.092</b>  | 965.084         | K[17] |
| G  | 9  | <b>422.741</b> | 909.550         | 901.540         | <b>902.045</b>  | 901.037         | G[16] |
| L  | 10 | <b>475.233</b> | 893.040         | <b>873.030</b>  | <b>873.534</b>  | 872.526         | L[15] |
| G  | 11 | <b>507.794</b> | <b>824.498</b>  | <b>816.488</b>  | <b>816.992</b>  | <b>815.984</b>  | G[14] |
| K  | 12 | <b>571.841</b> | <b>795.987</b>  | <b>787.977</b>  | <b>788.481</b>  | <b>787.474</b>  | K[13] |
| G  | 13 | <b>600.352</b> | 731.939         | <b>723.930</b>  | <b>724.434</b>  | 723.426         | G[12] |
| G  | 14 | <b>628.863</b> | 703.429         | <b>695.419</b>  | <b>695.923</b>  | 694.915         | G[11] |
| A  | 15 | <b>664.381</b> | <b>674.918</b>  | <b>666.908</b>  | <b>667.412</b>  | 666.404         | A[10] |
| R  | 16 | <b>748.434</b> | 619.399         | <b>631.390</b>  | <b>631.894</b>  | 630.886         | R[9]  |
| R  | 17 | <b>827.485</b> | 554.347         | <b>546.337</b>  | <b>546.841</b>  | <b>545.833</b>  | R[8]  |
| H  | 18 | <b>896.014</b> | 476.295         | <b>468.287</b>  | <b>468.791</b>  | 467.783         | H[7]  |
| R  | 19 | <b>974.065</b> | 407.767         | <b>399.757</b>  | <b>400.261</b>  | 399.253         | R[6]  |
| K  | 20 | 1038.112       | <b>329.716</b>  | 321.707         | 322.211         | 321.203         | K[5]  |
| V  | 21 | 1087.665       | 265.666         | 267.660         | 268.163         | 267.155         | V[4]  |
| L  | 22 | 1144.193       | 216.134         | 208.124         | 209.629         | 207.621         | L[3]  |
| R  | 23 | 1236.255       | 159.592         | 151.581         | 152.087         | 151.079         | R[2]  |
| D  | 24 | 1293.788       | 67.526          | 59.517          | 60.021          | 59.013          | D[1]  |

# sp | P62806 | H4\_MOUSE

[Acetyl]SGRGKGGKGLGKGGAK<sup>Acetyl</sup>RHRKVL<sup>Dimethyl</sup>D<sup>28.03</sup>

- ▶ fragmentation table for charge state 3+
- ▶ specType=etd
- ▶ score=54.05
- ▶ F113280.dat
- ▶ query=q48155.p1
- ▶ precursor=432.091510
- ▶ chargePrecursor=6
- ▶ itol=0.5

| AA    | c              | y              | z+1            | z+2            | z              | AA    |
|-------|----------------|----------------|----------------|----------------|----------------|-------|
| S[1]  | 49.697         | 303.176        | 857.830        | 0.672          | 857.500        | S[24] |
| G[2]  | 58.704         | <b>820.162</b> | 814.822        | 0.672          | 814.486        | G[23] |
| R[3]  | 150.738        | <b>801.154</b> | <b>795.815</b> | <b>796.151</b> | <b>795.479</b> | R[22] |
| G[4]  | 139.745        | 749.121        | 743.781        | <b>744.117</b> | 743.445        | G[21] |
| K[5]  | 182.443        | <b>730.114</b> | <b>724.774</b> | <b>725.110</b> | <b>724.438</b> | K[20] |
| G[6]  | 201.450        | <b>687.415</b> | <b>682.076</b> | <b>682.412</b> | <b>681.740</b> | G[19] |
| G[7]  | 220.458        | <b>668.408</b> | <b>663.069</b> | <b>663.404</b> | <b>662.733</b> | G[18] |
| K[8]  | 263.156        | 649.401        | <b>644.061</b> | <b>644.397</b> | <b>643.725</b> | K[17] |
| G[9]  | 282.163        | 606.703        | <b>601.363</b> | <b>601.699</b> | <b>601.027</b> | G[16] |
| L[10] | 319.958        | 597.695        | <b>582.356</b> | <b>582.692</b> | 582.020        | L[15] |
| G[11] | 338.965        | <b>550.001</b> | <b>544.661</b> | <b>544.997</b> | <b>544.325</b> | G[14] |
| K[12] | 381.563        | 530.994        | <b>525.654</b> | <b>525.990</b> | <b>525.318</b> | K[13] |
| G[13] | <b>400.570</b> | 488.295        | 482.956        | 483.292        | 482.620        | G[12] |
| G[14] | <b>419.578</b> | <b>469.288</b> | <b>463.949</b> | <b>464.285</b> | 463.613        | G[11] |
| A[15] | <b>443.257</b> | 450.281        | 444.941        | 445.277        | 444.605        | A[10] |
| K[16] | <b>499.958</b> | 426.602        | 421.262        | 421.598        | 420.926        | K[9]  |
| R[17] | <b>551.992</b> | 369.900        | 364.561        | 364.896        | 364.225        | R[8]  |
| H[18] | <b>597.678</b> | 317.866        | 312.527        | 312.863        | 312.191        | H[7]  |
| R[19] | <b>649.712</b> | 272.180        | 266.841        | 267.176        | 266.505        | R[6]  |
| K[20] | 692.410        | 220.140        | 214.807        | 215.143        | 214.471        | K[5]  |
| V[21] | <b>725.433</b> | 177.448        | 172.109        | 172.444        | 171.773        | V[4]  |
| L[22] | 763.128        | 144.425        | 139.086        | 139.422        | 138.750        | L[3]  |
| R[23] | <b>824.505</b> | 106.731        | 101.391        | 101.727        | 101.055        | R[2]  |
| D[24] | 862.848        | 45.353         | 40.014         | 40.349         | 39.678         | D[1]  |

# sp | P62806 | H4\_MOUSE

[Acetyl]SGRGKGGKGLGKGGAK<sup>Acetyl</sup>RHRKVL<sup>Dimethyl</sup>D<sup>28.03</sup><sub>42.01</sub>

- ▶ fragmentation table for charge state 4+
- ▶ specType=etd
- ▶ score=54.05
- ▶ F113280.dat
- ▶ query=q48155.p1
- ▶ precursor=432.091510
- ▶ chargePrecursor=6
- ▶ itol=0.5

| AA    | c              | y              | z+1            | z+2            | z              | AA    |
|-------|----------------|----------------|----------------|----------------|----------------|-------|
| S[1]  | 37.525         | <b>647.634</b> | <b>643.629</b> | 0.755          | 0.433          | S[24] |
| G[2]  | 51.780         | <b>615.373</b> | <b>611.368</b> | 0.755          | 0.116          | G[23] |
| R[3]  | 90.805         | <b>601.118</b> | <b>597.113</b> | <b>597.365</b> | <b>596.061</b> | R[22] |
| G[4]  | 105.061        | 562.092        | <b>558.088</b> | <b>550.340</b> | <b>557.836</b> | G[21] |
| K[5]  | 137.084        | <b>547.837</b> | <b>543.832</b> | <b>544.084</b> | <b>543.580</b> | K[20] |
| G[6]  | 151.340        | <b>515.813</b> | 511.809        | 512.061        | 511.557        | G[19] |
| G[7]  | 165.595        | 501.558        | 497.553        | 497.805        | 497.301        | G[18] |
| K[8]  | 197.619        | <b>487.303</b> | 483.298        | 483.550        | 483.046        | K[17] |
| G[9]  | 211.874        | 459.279        | 451.274        | 451.526        | 451.022        | G[16] |
| L[10] | 280.148        | 441.023        | 437.019        | 437.271        | 436.767        | L[15] |
| G[11] | 294.403        | 417.752        | 408.748        | 409.000        | 408.496        | G[14] |
| K[12] | 298.424        | 398.497        | <b>394.492</b> | <b>394.744</b> | <b>394.240</b> | K[13] |
| G[13] | 300.680        | 366.473        | 362.469        | 362.721        | 362.217        | G[12] |
| G[14] | 314.935        | 352.218        | 348.213        | 348.465        | 347.961        | G[11] |
| A[15] | 332.694        | 337.963        | 333.958        | 334.210        | 333.706        | A[10] |
| K[16] | 375.221        | 320.203        | 316.199        | 316.451        | 315.947        | K[9]  |
| R[17] | 418.246        | 277.877        | <b>273.872</b> | <b>273.924</b> | 273.420        | R[8]  |
| H[18] | <b>448.511</b> | 238.652        | 234.647        | 234.899        | 234.395        | H[7]  |
| R[19] | <b>487.536</b> | 204.397        | 200.382        | 200.634        | 200.130        | R[6]  |
| K[20] | 419.569        | 185.362        | 181.357        | 181.609        | 181.105        | K[5]  |
| V[21] | <b>544.327</b> | 133.138        | 129.133        | 129.385        | 129.081        | V[4]  |
| L[22] | <b>572.598</b> | 108.571        | 104.566        | 104.818        | 104.314        | L[3]  |
| R[23] | 618.631        | 80.300         | 76.295         | 76.547         | 76.043         | R[2]  |
| D[24] | 647.388        | 34.267         | 30.262         | 30.514         | 30.010         | D[1]  |



# sp | P62806 | H4\_MOUSE

[Acetyl]SGRGKGGKGLGKGGAK<sup>Acetyl</sup>RHRKVL<sup>Dimethyl</sup>D<sub>42.01</sub><sub>28.03</sub>

- ▶ fragmentation table for charge state 5+
- ▶ specType=etd
- ▶ score=54.05
- ▶ F113280.dat
- ▶ query=q48155.p1
- ▶ precursor=432.091510
- ▶ chargePrecursor=6
- ▶ itol=0.5

| AA    | c              | y              | z+1            | z+2            | z              | AA    |
|-------|----------------|----------------|----------------|----------------|----------------|-------|
| S[1]  | 30.221         | 318.306        | <b>515.105</b> | 0.806          | <b>514.903</b> | S[24] |
| G[2]  | 41.625         | 492.500        | 489.298        | 0.806          | 489.095        | G[23] |
| R[3]  | 72.846         | 481.096        | <b>477.892</b> | <b>478.093</b> | 477.690        | R[22] |
| G[4]  | 84.250         | 449.875        | 446.672        | 446.873        | 446.470        | G[21] |
| K[5]  | 109.869        | 438.471        | 435.267        | 435.469        | 435.066        | K[20] |
| G[6]  | 121.273        | 412.852        | 409.649        | 409.850        | 409.447        | G[19] |
| G[7]  | 132.677        | <b>401.448</b> | 398.244        | 398.446        | 398.042        | G[18] |
| K[8]  | 158.296        | 390.043        | <b>386.840</b> | <b>387.041</b> | 386.638        | K[17] |
| G[9]  | 169.701        | 384.528        | 381.323        | 381.522        | 381.119        | G[16] |
| L[10] | 192.318        | 353.020        | 349.816        | 350.018        | 349.615        | L[15] |
| G[11] | 203.722        | <b>330.403</b> | 327.200        | 327.401        | 326.998        | G[14] |
| K[12] | 229.341        | 318.999        | 315.795        | 315.997        | 315.594        | K[13] |
| G[13] | 240.745        | 293.380        | 290.176        | 290.378        | 289.975        | G[12] |
| G[14] | 252.149        | 281.976        | 278.772        | 278.974        | 278.570        | G[11] |
| A[15] | 266.357        | 270.572        | 267.368        | 267.569        | 267.166        | A[10] |
| K[16] | 300.378        | 256.364        | 253.160        | 253.362        | 252.959        | K[9]  |
| R[17] | 331.598        | 222.343        | 219.139        | 219.341        | 218.938        | R[8]  |
| H[18] | 359.010        | 191.123        | 187.919        | 188.121        | 187.717        | H[7]  |
| R[19] | 390.230        | 163.711        | 160.507        | 160.709        | 160.306        | R[6]  |
| K[20] | 415.849        | 132.491        | 129.287        | 129.489        | 129.085        | K[5]  |
| V[21] | 435.663        | 106.872        | 103.668        | 103.870        | 103.466        | V[4]  |
| L[22] | 458.280        | 87.058         | 83.854         | 84.056         | 83.653         | L[3]  |
| R[23] | <b>495.106</b> | 64.441         | 61.238         | 61.439         | 61.036         | R[2]  |
| D[24] | 518.112        | 27.615         | 24.411         | 24.613         | 24.209         | D[1]  |

# sp | P62806 | H4\_MOUSE

[Acetyl]SGRGKGGKGLGKGGAK <sup>Acetyl</sup>RHRK <sup>Dimethyl</sup>VLRD  
42.01 28.03

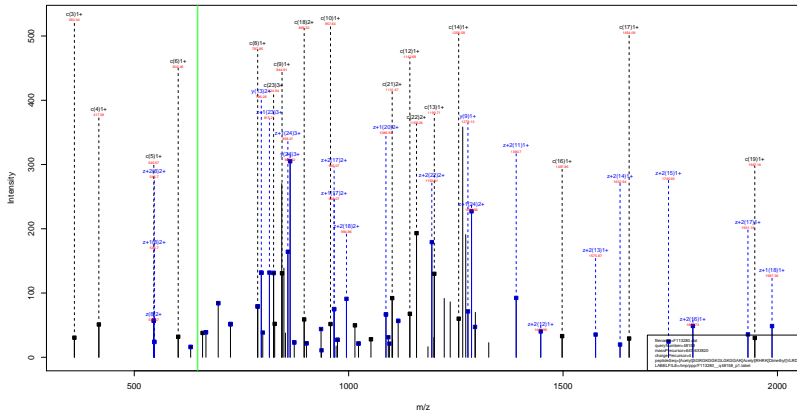

# sp | P62806 | H4\_MOUSE

[Acetyl]SGRGKGGKGLGKGGAK<sup>Acetyl</sup> RHRK<sup>Dimethyl</sup> VLRD<sup>28.03</sup>

- ▶ fragmentation table for charge state 1+
- ▶ specType=etd
- ▶ score=110.01
- ▶ F113280.dat
- ▶ query=q48158\_p1
- ▶ precursor=647.633820
- ▶ chargePrecursor=4
- ▶ itol=0.5

| AA | c  | y               | z+1             | z+2             | z               | AA       |       |
|----|----|-----------------|-----------------|-----------------|-----------------|----------|-------|
| S  | 1  | 147.076         | 2587.513        | 2571.494        | 0.000           | 2570.486 | S[24] |
| G  | 2  | 204.098         | 2458.470        | 2442.451        | 0.000           | 2441.444 | G[23] |
| R  | 3  | <b>360.199</b>  | 2401.440        | 2385.430        | 2388.438        | 2384.422 | R[22] |
| G  | 4  | <b>417.220</b>  | 2345.340        | 2229.330        | 2230.337        | 2228.321 | G[21] |
| K  | 5  | <b>545.315</b>  | 2185.320        | 2172.307        | 2173.315        | 2171.300 | K[20] |
| G  | 6  | <b>602.337</b>  | 2060.231        | 2044.212        | 2045.220        | 2043.205 | G[19] |
| G  | 7  | <b>659.358</b>  | 2003.210        | <b>1987.191</b> | 1988.199        | 1986.181 | G[18] |
| K  | 8  | <b>787.453</b>  | 1946.189        | 1930.170        | <b>1931.177</b> | 1929.162 | K[17] |
| G  | 9  | <b>844.475</b>  | 1818.093        | 1802.075        | <b>1803.082</b> | 1801.067 | G[16] |
| L  | 10 | <b>927.559</b>  | 1761.072        | 1745.053        | <b>1746.061</b> | 1744.045 | L[15] |
| Q  | 11 | <b>1014.580</b> | 1647.985        | 1631.969        | <b>1632.977</b> | 1630.961 | Q[14] |
| K  | 12 | <b>1142.675</b> | 1590.966        | 1574.948        | <b>1575.955</b> | 1573.940 | K[13] |
| G  | 13 | <b>1199.697</b> | 1462.871        | 1446.853        | <b>1447.860</b> | 1445.845 | G[12] |
| G  | 14 | <b>1256.718</b> | 1405.850        | 1389.831        | <b>1390.839</b> | 1388.821 | G[11] |
| A  | 15 | <b>1427.737</b> | 1348.829        | 1332.810        | <b>1333.818</b> | 1331.802 | A[10] |
| R  | 16 | <b>1497.861</b> | <b>1277.791</b> | 1261.773        | 1262.780        | 1260.765 | R[9]  |
| R  | 17 | <b>1653.962</b> | 1107.688        | 1091.667        | <b>1092.675</b> | 1090.659 | R[8]  |
| H  | 18 | 1791.021        | 951.585         | <b>935.566</b>  | <b>936.574</b>  | 934.558  | H[7]  |
| R  | 19 | <b>1947.122</b> | 814.526         | 798.507         | <b>799.515</b>  | 797.499  | R[6]  |
| K  | 20 | 2103.248        | 658.425         | 642.406         | 643.414         | 641.398  | K[5]  |
| V  | 21 | 2202.217        | 502.366         | 486.348         | 487.357         | 485.342  | V[4]  |
| L  | 22 | 2315.403        | 463.330         | 447.311         | 448.319         | 446.303  | L[3]  |
| R  | 23 | 2471.502        | 290.146         | 274.127         | 275.135         | 273.119  | R[2]  |
| D  | 24 | 2586.529        | 134.045         | 118.026         | 119.034         | 117.018  | D[1]  |

# sp | P62806 | H4\_MOUSE

[Acetyl]SGRGKGGKGLGKGGAK<sup>Acetyl</sup> RHRK<sup>Dimethyl</sup> VLRD<sup>28.03</sup>

- ▶ fragmentation table for charge state 2+
- ▶ specType=etd
- ▶ score=110.01
- ▶ F113280.dat
- ▶ query=q48158\_p1
- ▶ precursor=647.633820
- ▶ chargePrecursor=4
- ▶ itol=0.5

| AA |    | c               | y               | z+1             | z+2             | z              | AA    |
|----|----|-----------------|-----------------|-----------------|-----------------|----------------|-------|
| S  | 1  | 74.642          | <b>1294.260</b> | <b>1286.251</b> | 0.504           | 1285.747       | S[24] |
| G  | 2  | 102.553         | 1229.730        | 1221.720        | 0.504           | 1221.225       | G[23] |
| R  | 3  | 180.603         | 1201.226        | 1193.217        | <b>1193.723</b> | 1192.715       | R[22] |
| G  | 4  | 269.114         | 1123.177        | <b>1115.168</b> | <b>1115.672</b> | 1114.664       | G[21] |
| K  | 5  | 273.101         | <b>1094.667</b> | <b>1086.657</b> | <b>1087.161</b> | 1086.153       | K[20] |
| G  | 6  | 301.672         | 1030.619        | <b>1022.610</b> | <b>1023.114</b> | 1022.106       | G[19] |
| G  | 7  | 330.183         | 1002.106        | 994.099         | <b>994.603</b>  | 993.595        | G[18] |
| K  | 8  | 394.230         | <b>973.598</b>  | <b>965.588</b>  | <b>966.092</b>  | 965.084        | K[17] |
| G  | 9  | 422.741         | 909.550         | <b>901.541</b>  | <b>902.045</b>  | 901.037        | G[16] |
| L  | 10 | 479.203         | 861.040         | <b>873.030</b>  | <b>873.534</b>  | 872.526        | L[15] |
| Q  | 11 | 507.794         | <b>824.498</b>  | 816.488         | 816.992         | 815.984        | Q[14] |
| K  | 12 | 571.841         | <b>795.987</b>  | <b>787.977</b>  | 788.481         | <b>787.474</b> | K[13] |
| G  | 13 | 600.352         | 731.939         | <b>723.930</b>  | <b>724.434</b>  | 723.426        | G[12] |
| G  | 14 | 628.863         | 703.429         | <b>695.419</b>  | <b>695.923</b>  | 694.915        | G[11] |
| A  | 15 | 664.301         | 674.918         | <b>666.908</b>  | <b>667.412</b>  | 666.404        | A[10] |
| R  | 16 | 708.234         | 636.399         | <b>631.390</b>  | <b>631.894</b>  | 630.886        | R[9]  |
| R  | 17 | <b>827.485</b>  | 554.341         | <b>546.337</b>  | <b>546.841</b>  | <b>545.833</b> | R[8]  |
| H  | 18 | <b>896.014</b>  | 476.200         | 468.187         | 468.701         | 467.783        | H[7]  |
| R  | 19 | <b>974.065</b>  | 407.767         | 399.757         | 400.261         | 399.253        | R[6]  |
| K  | 20 | <b>1052.128</b> | 329.716         | 321.707         | 322.211         | 321.203        | K[5]  |
| V  | 21 | <b>1101.662</b> | 251.663         | 243.653         | 244.147         | 243.140        | V[4]  |
| L  | 22 | <b>1158.204</b> | 202.119         | 194.108         | 194.613         | 193.605        | L[3]  |
| R  | 23 | 1236.255        | 145.577         | 137.567         | 138.071         | 137.063        | R[2]  |
| D  | 24 | 1293.768        | 67.526          | 59.517          | 60.021          | 59.013         | D[1]  |

# sp | P62806 | H4\_MOUSE

[Acetyl]SGRGKGGKGLGKGGAK<sup>Acetyl</sup> RHRK<sup>Dimethyl</sup> VLRD<sup>28.03</sup>

- ▶ fragmentation table for charge state 3+
- ▶ specType=etd
- ▶ score=110.01
- ▶ F113280.dat
- ▶ query=q48158.p1
- ▶ precursor=647.633820
- ▶ chargePrecursor=4
- ▶ itol=0.5

| AA    | c              | y              | z+1            | z+2            | z              | AA    |
|-------|----------------|----------------|----------------|----------------|----------------|-------|
| S[1]  | 49.697         | <b>863.176</b> | <b>857.836</b> | 0.672          | 857.900        | S[24] |
| G[2]  | 58.704         | 820.162        | <b>814.822</b> | 0.672          | 814.486        | G[23] |
| R[3]  | 120.738        | 801.154        | <b>795.815</b> | <b>796.151</b> | 795.479        | R[22] |
| G[4]  | 139.745        | 749.121        | 743.781        | 744.117        | 743.445        | G[21] |
| K[5]  | 182.443        | 730.114        | <b>724.774</b> | 725.110        | <b>724.438</b> | K[20] |
| G[6]  | 201.450        | 687.415        | 682.076        | 682.412        | 681.740        | G[19] |
| G[7]  | 220.458        | 668.408        | 663.069        | 663.404        | 662.733        | G[18] |
| K[8]  | 263.156        | 649.401        | 644.061        | 644.397        | 643.725        | K[17] |
| G[9]  | 282.163        | 606.703        | 601.363        | 601.699        | 601.027        | G[16] |
| L[10] | 319.958        | 587.695        | 582.355        | 582.692        | 582.020        | L[15] |
| G[11] | 338.965        | 550.001        | 544.661        | 544.997        | 544.325        | G[14] |
| K[12] | 381.563        | 530.994        | 525.654        | 525.990        | 525.318        | K[13] |
| G[13] | 400.570        | 488.295        | 482.956        | 483.292        | 482.620        | G[12] |
| G[14] | 419.578        | 469.288        | 463.949        | 464.285        | 463.613        | G[11] |
| A[15] | 443.257        | 450.281        | 444.941        | 445.277        | 444.605        | A[10] |
| K[16] | 499.958        | 426.602        | 421.262        | 421.598        | 420.926        | K[9]  |
| R[17] | 551.992        | 369.900        | 364.561        | 364.896        | 364.225        | R[8]  |
| H[18] | 597.678        | 317.896        | 312.527        | 312.863        | 312.191        | H[7]  |
| R[19] | 649.712        | 272.180        | 266.941        | 267.176        | 266.505        | R[6]  |
| K[20] | 701.754        | 220.140        | 214.807        | 215.143        | 214.471        | K[5]  |
| V[21] | 734.777        | 168.104        | 162.768        | 163.101        | 162.429        | V[4]  |
| L[22] | 772.472        | 135.082        | 129.742        | 130.078        | 129.406        | L[3]  |
| R[23] | <b>824.505</b> | 97.387         | 92.047         | 92.383         | 91.711         | R[2]  |
| D[24] | 862.848        | 45.353         | 40.014         | 40.349         | 39.678         | D[1]  |

# sp | P62806 | H4\_MOUSE

[Acetyl]SGRGKGGKGLGKGGAK <sup>Acetyl</sup> RHRK <sup>Dimethyl</sup> VLRD  
 42.01 28.03

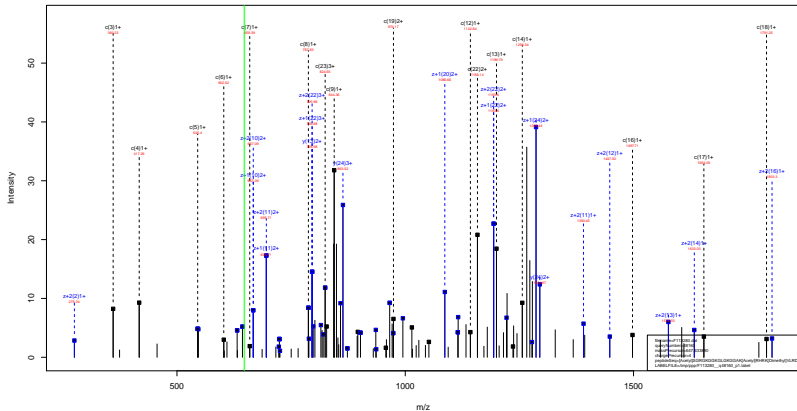

# sp | P62806 | H4\_MOUSE

[Acetyl]SGRGKGGKGLGKGGAK<sup>Acetyl</sup> RHRK<sup>Dimethyl</sup> VLRD<sup>28.03</sup>

- ▶ fragmentation table for charge state 1+
- ▶ specType=etd
- ▶ score=78.76
- ▶ F113280.dat
- ▶ query=q48160\_p1
- ▶ precursor=647.633890
- ▶ chargePrecursor=4
- ▶ itol=0.5

| AA    | c               | y               | z+1            | z+2             | z        | AA    |
|-------|-----------------|-----------------|----------------|-----------------|----------|-------|
| S[1]  | 347.676         | 2587.513        | 2571.494       | 0.000           | 2570.486 | S[24] |
| G[2]  | 204.008         | 2458.470        | 2442.451       | 0.000           | 2441.444 | G[23] |
| R[3]  | <b>368.199</b>  | 2401.440        | 2385.430       | 2386.438        | 2384.422 | R[22] |
| G[4]  | <b>417.230</b>  | 2245.346        | 2229.330       | 2230.337        | 2228.321 | G[21] |
| K[5]  | <b>545.315</b>  | 2188.326        | 2172.307       | 2173.315        | 2171.300 | K[20] |
| G[6]  | <b>602.337</b>  | 2060.231        | 2044.210       | 2045.220        | 2043.205 | G[19] |
| G[7]  | <b>659.358</b>  | 2003.210        | 1987.191       | 1988.199        | 1986.183 | G[18] |
| K[8]  | <b>787.453</b>  | 1946.180        | 1930.170       | 1931.177        | 1929.162 | K[17] |
| G[9]  | <b>844.475</b>  | 1818.093        | 1802.075       | <b>1803.082</b> | 1801.067 | G[16] |
| L[10] | <b>937.559</b>  | 1761.072        | 1745.053       | 1746.061        | 1744.045 | L[15] |
| G[11] | <b>1014.580</b> | 1647.958        | 1631.939       | <b>1632.977</b> | 1630.961 | G[14] |
| K[12] | <b>1142.675</b> | 1590.956        | 1574.948       | <b>1575.955</b> | 1573.940 | K[13] |
| G[13] | <b>1199.697</b> | 1462.871        | 1446.853       | <b>1447.860</b> | 1445.845 | G[12] |
| G[14] | <b>1256.718</b> | 1405.850        | 1389.831       | <b>1390.839</b> | 1388.823 | G[11] |
| A[15] | 1527.738        | 1348.828        | 1332.810       | 1333.818        | 1331.802 | A[10] |
| R[16] | <b>1497.861</b> | <b>1277.791</b> | 1261.773       | 1262.780        | 1260.765 | R[9]  |
| R[17] | <b>1653.962</b> | 1107.688        | 1091.667       | 1092.675        | 1090.659 | R[8]  |
| H[18] | <b>1791.021</b> | 951.585         | <b>935.566</b> | <b>936.574</b>  | 934.558  | H[7]  |
| R[19] | 1947.122        | 814.526         | <b>798.507</b> | 799.515         | 797.499  | R[6]  |
| K[20] | 2103.248        | 658.425         | 642.405        | <b>643.414</b>  | 641.398  | K[5]  |
| V[21] | 2202.317        | 502.368         | 486.350        | 487.357         | 485.272  | V[4]  |
| L[22] | 2315.401        | 403.239         | 387.211        | 388.219         | 386.203  | L[3]  |
| R[23] | 2471.502        | 290.146         | 274.127        | <b>275.135</b>  | 273.119  | R[2]  |
| D[24] | 2586.529        | 134.045         | 118.026        | 119.034         | 117.018  | D[1]  |

# sp | P62806 | H4\_MOUSE

[Acetyl]SGRGKGGKGLGKGGAK<sup>Acetyl</sup> RHRK<sup>Dimethyl</sup> VLRD<sup>28.03</sup>

- ▶ fragmentation table for charge state 2+
- ▶ specType=etd
- ▶ score=78.76
- ▶ F113280.dat
- ▶ query=q48160\_p1
- ▶ precursor=647.633890
- ▶ chargePrecursor=4
- ▶ itol=0.5

| AA    | c               | y               | z+1             | z+2             | z               | AA    |
|-------|-----------------|-----------------|-----------------|-----------------|-----------------|-------|
| S[1]  | 74.042          | <b>1294.260</b> | <b>1286.251</b> | 0.504           | 1289.747        | S[24] |
| G[2]  | 102.553         | 1229.739        | <b>1221.729</b> | 0.504           | 1221.225        | G[23] |
| K[3]  | 180.603         | 1201.229        | <b>1193.219</b> | <b>1193.723</b> | 1192.715        | K[22] |
| G[4]  | 259.114         | 1123.177        | <b>1115.168</b> | <b>1115.672</b> | <b>1114.664</b> | G[21] |
| K[5]  | 273.153         | 1094.667        | <b>1086.657</b> | 1087.161        | 1085.151        | K[20] |
| G[6]  | 301.672         | 1030.619        | 1022.610        | 1023.114        | 1022.106        | G[19] |
| G[7]  | 330.183         | 1002.108        | 994.099         | <b>994.603</b>  | 993.595         | G[18] |
| K[8]  | 394.230         | <b>973.598</b>  | <b>965.588</b>  | <b>966.092</b>  | 965.084         | K[17] |
| G[9]  | 422.741         | 909.550         | <b>901.541</b>  | <b>902.045</b>  | 901.037         | G[16] |
| L[10] | 479.293         | 869.040         | <b>873.030</b>  | <b>873.534</b>  | 872.526         | L[15] |
| G[11] | 507.794         | <b>824.498</b>  | 816.488         | 816.992         | 815.984         | G[14] |
| K[12] | 571.841         | <b>795.987</b>  | <b>787.977</b>  | <b>788.481</b>  | <b>787.474</b>  | K[13] |
| G[13] | 600.352         | 731.939         | <b>723.930</b>  | <b>724.434</b>  | <b>723.426</b>  | G[12] |
| G[14] | 628.863         | 703.429         | <b>695.419</b>  | <b>695.923</b>  | 694.915         | G[11] |
| A[15] | 664.381         | 674.919         | <b>666.908</b>  | <b>667.412</b>  | 666.404         | A[10] |
| R[16] | 749.434         | 639.399         | <b>631.390</b>  | <b>631.894</b>  | 630.886         | R[9]  |
| R[17] | <b>827.485</b>  | 554.347         | 546.337         | <b>546.841</b>  | <b>545.833</b>  | R[8]  |
| H[18] | <b>896.014</b>  | 476.290         | 468.280         | 468.784         | 467.776         | H[7]  |
| R[19] | <b>974.065</b>  | 407.767         | 399.757         | 400.261         | 399.253         | R[6]  |
| K[20] | <b>1052.128</b> | 329.716         | 321.707         | 322.211         | 321.203         | K[5]  |
| V[21] | 1101.655        | 251.663         | 243.653         | 244.157         | 243.149         | V[4]  |
| L[22] | <b>1158.204</b> | 202.119         | 194.109         | 194.613         | 193.605         | L[3]  |
| R[23] | <b>1236.255</b> | 145.577         | 137.567         | 138.071         | 137.063         | R[2]  |
| D[24] | 1293.768        | 67.526          | 59.517          | 60.021          | 59.013          | D[1]  |



# sp | P62806 | H4\_MOUSE

[Acetyl]SGRGKGGKGLGKGGAK<sup>Acetyl</sup>42.01 RHRK<sup>Dimethyl</sup>28.03 VLRD

- ▶ fragmentation table for charge state 3+
- ▶ specType=etd
- ▶ score=78.76
- ▶ F113280.dat
- ▶ query=q48160.p1
- ▶ precursor=647.633890
- ▶ chargePrecursor=4
- ▶ itol=0.5

| AA    | c              | y              | z+1            | z+2            | z              | AA    |
|-------|----------------|----------------|----------------|----------------|----------------|-------|
| S[1]  | 49.697         | <b>863.176</b> | <b>857.836</b> | 0.672          | 857.500        | S[24] |
| G[2]  | 58.704         | <b>820.162</b> | <b>814.822</b> | 0.672          | 814.486        | G[23] |
| R[3]  | 120.738        | 801.154        | <b>795.815</b> | <b>796.151</b> | 795.479        | R[22] |
| G[4]  | 139.745        | 749.121        | 743.781        | 744.117        | 743.445        | G[21] |
| K[5]  | 182.443        | 730.114        | <b>724.774</b> | <b>725.110</b> | <b>724.438</b> | K[20] |
| G[6]  | 201.450        | 687.415        | 682.076        | 682.412        | 681.740        | G[19] |
| G[7]  | 220.458        | 668.408        | 663.069        | 663.404        | 662.733        | G[18] |
| K[8]  | 263.156        | 649.401        | 644.061        | 644.397        | <b>643.725</b> | K[17] |
| G[9]  | 282.163        | 606.703        | 601.363        | 601.699        | 601.027        | G[16] |
| L[10] | 319.858        | 587.695        | 582.355        | 582.691        | 582.020        | L[15] |
| G[11] | 338.865        | 550.001        | 544.661        | <b>544.997</b> | 544.325        | G[14] |
| K[12] | 381.563        | 530.994        | 525.654        | 525.990        | 525.318        | K[13] |
| G[13] | 400.570        | 488.295        | 482.956        | 483.292        | 482.620        | G[12] |
| G[14] | 419.578        | 469.288        | 463.949        | 464.285        | 463.613        | G[11] |
| A[15] | 443.257        | 450.281        | 444.941        | 445.277        | 444.605        | A[10] |
| K[16] | 469.958        | 426.602        | 421.262        | 421.598        | 420.926        | K[9]  |
| R[17] | 551.992        | 369.900        | 364.561        | 364.896        | 364.225        | R[8]  |
| H[18] | 597.678        | 317.866        | 312.527        | 312.863        | 312.191        | H[7]  |
| R[19] | 649.712        | 272.180        | 266.841        | 267.176        | 266.505        | R[6]  |
| K[20] | 701.754        | 220.146        | 214.807        | 215.143        | 214.471        | K[5]  |
| V[21] | 734.777        | 168.104        | 162.765        | 163.101        | 162.429        | V[4]  |
| L[22] | 772.472        | 135.082        | 129.742        | 130.078        | 129.406        | L[3]  |
| R[23] | <b>824.505</b> | 97.387         | 92.047         | 92.383         | 91.711         | R[2]  |
| D[24] | 862.848        | 45.353         | 40.014         | 40.349         | 39.678         | D[1]  |



# sp | P62806 | H4\_MOUSE

[Acetyl]SGRGKGGKGLGKGGAK<sup>Acetyl</sup>RHRK<sup>Dimethyl</sup>VLRD<sup>28.03</sup>

- ▶ fragmentation table for charge state 1+
- ▶ specType=etd
- ▶ score=136.22
- ▶ F113280.dat
- ▶ query=q48162\_p1
- ▶ precursor=647.633950
- ▶ chargePrecursor=4
- ▶ itol=0.5

| AA    | c               | y        | z+1             | z+2             | z               | AA    |
|-------|-----------------|----------|-----------------|-----------------|-----------------|-------|
| S[1]  | 147.076         | 2597.513 | 2971.464        | 0.000           | 2570.486        | S[24] |
| G[2]  | 204.098         | 2458.470 | 2442.451        | 0.000           | 2441.444        | G[23] |
| R[3]  | <b>360.199</b>  | 2401.449 | 2385.430        | 2386.438        | 2384.422        | R[22] |
| G[4]  | <b>417.220</b>  | 2345.348 | 2229.320        | 2230.317        | 2228.311        | G[21] |
| K[5]  | <b>545.315</b>  | 2188.320 | 2172.301        | 2173.315        | 2171.305        | K[20] |
| G[6]  | <b>602.337</b>  | 2060.291 | 2044.272        | 2045.290        | 2043.205        | G[19] |
| G[7]  | <b>659.358</b>  | 2003.210 | 1987.190        | <b>1988.199</b> | 1986.181        | G[18] |
| K[8]  | <b>787.453</b>  | 1946.188 | <b>1930.170</b> | 1931.177        | 1929.162        | K[17] |
| G[9]  | <b>844.475</b>  | 1818.091 | 1802.075        | <b>1803.082</b> | 1801.067        | G[16] |
| L[10] | <b>957.559</b>  | 1793.072 | 1745.053        | <b>1746.061</b> | 1744.045        | L[15] |
| Q[11] | <b>1014.580</b> | 1647.988 | 1631.969        | <b>1632.977</b> | 1630.961        | Q[14] |
| K[12] | <b>1142.675</b> | 1590.966 | 1574.948        | <b>1575.955</b> | 1573.940        | K[13] |
| G[13] | <b>1199.697</b> | 1462.871 | 1446.853        | <b>1447.860</b> | 1445.845        | G[12] |
| G[14] | <b>1256.718</b> | 1405.850 | 1389.831        | <b>1390.839</b> | <b>1388.823</b> | G[11] |
| A[15] | <b>1327.755</b> | 1348.828 | 1332.810        | <b>1333.818</b> | 1331.802        | A[10] |
| R[16] | <b>1407.861</b> | 1277.793 | 1261.774        | 1262.782        | 1260.765        | R[9]  |
| R[17] | <b>1653.962</b> | 1107.686 | 1091.667        | <b>1092.675</b> | 1090.659        | R[8]  |
| H[18] | 1791.021        | 951.585  | <b>935.566</b>  | <b>936.574</b>  | 934.558         | H[7]  |
| R[19] | <b>1947.122</b> | 814.526  | <b>798.507</b>  | <b>799.515</b>  | 797.499         | R[6]  |
| K[20] | 2103.248        | 658.425  | <b>642.406</b>  | <b>643.414</b>  | 641.398         | K[5]  |
| V[21] | 2202.217        | 602.366  | 486.388         | <b>487.397</b>  | 485.272         | V[4]  |
| L[22] | 2315.403        | 493.320  | 387.211         | <b>388.219</b>  | 386.203         | L[3]  |
| R[23] | 2471.502        | 390.148  | 274.127         | <b>275.135</b>  | 273.119         | R[2]  |
| D[24] | 2586.529        | 134.045  | 118.028         | 119.034         | 117.018         | D[1]  |

# sp | P62806 | H4\_MOUSE

[Acetyl]SGRGKGGKGLGKGGAK<sup>Acetyl</sup> RHRK<sup>Dimethyl</sup> VLRD<sup>28.03</sup>

- ▶ fragmentation table for charge state 2+
- ▶ specType=etd
- ▶ score=136.22
- ▶ F113280.dat
- ▶ query=q48162.p1
- ▶ precursor=647.633950
- ▶ chargePrecursor=4
- ▶ itol=0.5

| AA    | c               | y               | z+1             | z+2             | z               | AA    |
|-------|-----------------|-----------------|-----------------|-----------------|-----------------|-------|
| S[1]  | 74.042          | <b>1294.260</b> | <b>1286.251</b> | 0.504           | 1289.747        | S[24] |
| G[2]  | 102.553         | 1229.739        | 1221.729        | 0.504           | 1221.225        | G[23] |
| K[3]  | 180.603         | <b>1261.228</b> | 1191.719        | <b>1193.723</b> | 1192.715        | K[22] |
| G[4]  | 259.114         | 1123.777        | <b>1115.108</b> | <b>1115.672</b> | 1119.666        | G[21] |
| K[5]  | 273.153         | 1094.667        | <b>1085.657</b> | 1097.151        | <b>1086.153</b> | K[20] |
| G[6]  | 303.672         | 1030.619        | <b>1022.610</b> | <b>1023.114</b> | 1022.106        | G[19] |
| G[7]  | 330.183         | 1002.108        | <b>994.099</b>  | <b>994.603</b>  | 993.595         | G[18] |
| K[8]  | 394.230         | 973.599         | <b>965.588</b>  | <b>966.092</b>  | 965.084         | K[17] |
| G[9]  | 422.741         | 959.560         | <b>901.541</b>  | <b>902.045</b>  | 901.037         | G[16] |
| L[10] | 479.293         | 893.040         | <b>873.030</b>  | <b>873.534</b>  | 872.526         | L[15] |
| G[11] | 507.794         | 824.468         | <b>816.468</b>  | <b>816.992</b>  | 815.984         | G[14] |
| K[12] | 571.841         | <b>795.987</b>  | <b>787.977</b>  | <b>788.481</b>  | <b>787.474</b>  | K[13] |
| G[13] | 600.352         | 731.939         | <b>723.930</b>  | <b>724.434</b>  | 723.426         | G[12] |
| G[14] | 628.863         | 703.429         | <b>695.419</b>  | <b>695.923</b>  | 694.915         | G[11] |
| A[15] | 664.381         | 674.919         | <b>666.908</b>  | <b>667.412</b>  | 666.404         | A[10] |
| R[16] | 749.434         | 639.399         | <b>631.390</b>  | <b>631.894</b>  | 630.886         | R[9]  |
| R[17] | <b>827.485</b>  | 554.347         | <b>546.337</b>  | <b>546.841</b>  | <b>545.833</b>  | R[8]  |
| H[18] | <b>896.014</b>  | 476.296         | 468.287         | 468.791         | 467.783         | H[7]  |
| R[19] | <b>974.065</b>  | 407.767         | 399.757         | 400.261         | 399.253         | R[6]  |
| K[20] | <b>1052.128</b> | 329.716         | 321.707         | 322.211         | 321.203         | K[5]  |
| V[21] | <b>1101.662</b> | 251.653         | 243.643         | 244.147         | 243.140         | V[4]  |
| L[22] | <b>1158.204</b> | 202.119         | 194.109         | 194.613         | 193.605         | L[3]  |
| R[23] | <b>1236.255</b> | 145.577         | 137.567         | 138.071         | 137.063         | R[2]  |
| D[24] | 1293.768        | 67.526          | 59.517          | 60.021          | 59.013          | D[1]  |

# sp | P62806 | H4\_MOUSE

[Acetyl]SGRGKGGKGLGKGGAK<sup>Acetyl</sup> RHRK<sup>Dimethyl</sup> VLRD<sup>28.03</sup>

- ▶ fragmentation table for charge state 3+
- ▶ specType=etd
- ▶ score=136.22
- ▶ F113280.dat
- ▶ query=q48162.p1
- ▶ precursor=647.633950
- ▶ chargePrecursor=4
- ▶ itol=0.5

| AA    | c       | y              | z+1            | z+2            | z              | AA    |
|-------|---------|----------------|----------------|----------------|----------------|-------|
| S[1]  | 49.697  | <b>863.176</b> | <b>857.836</b> | 0.672          | 857.503        | S[24] |
| G[2]  | 68.704  | 820.162        | 814.822        | 0.672          | 814.486        | G[23] |
| R[3]  | 120.738 | 801.154        | <b>795.815</b> | <b>796.151</b> | 795.479        | R[22] |
| G[4]  | 139.745 | 749.121        | 743.781        | 744.117        | 743.445        | G[21] |
| K[5]  | 182.443 | 730.114        | <b>724.774</b> | 725.110        | <b>724.438</b> | K[20] |
| G[6]  | 201.450 | 687.415        | 682.076        | 682.412        | 681.740        | G[19] |
| G[7]  | 220.458 | <b>668.408</b> | 663.069        | 663.404        | 662.733        | G[18] |
| K[8]  | 263.156 | 649.401        | 644.061        | 644.397        | <b>643.725</b> | K[17] |
| G[9]  | 282.163 | 606.793        | 601.453        | 601.789        | 601.127        | G[16] |
| L[10] | 319.838 | 587.895        | 582.556        | 582.892        | 582.220        | L[15] |
| G[11] | 338.865 | 550.001        | 544.661        | <b>544.997</b> | 544.325        | G[14] |
| K[12] | 381.563 | 530.994        | 525.654        | 525.990        | 525.318        | K[13] |
| G[13] | 400.570 | 488.295        | 482.956        | 483.292        | 482.620        | G[12] |
| G[14] | 419.578 | 469.288        | 463.949        | 464.285        | 463.613        | G[11] |
| A[15] | 443.257 | 450.281        | 444.941        | 445.277        | 444.605        | A[10] |
| K[16] | 499.958 | 426.602        | 421.262        | 421.598        | 420.926        | K[9]  |
| R[17] | 551.992 | 399.900        | 394.561        | 394.896        | 394.225        | R[8]  |
| H[18] | 597.678 | 317.866        | 312.527        | 312.863        | 312.191        | H[7]  |
| R[19] | 649.712 | 272.180        | 266.841        | 267.176        | 266.505        | R[6]  |
| K[20] | 701.754 | 223.346        | 218.007        | 218.343        | 217.671        | K[5]  |
| V[21] | 754.777 | 198.104        | 192.765        | 193.101        | 192.429        | V[4]  |
| L[22] | 772.472 | 135.982        | 129.742        | 130.078        | 129.406        | L[3]  |
| R[23] | 824.505 | 97.387         | 92.047         | 92.383         | 91.711         | R[2]  |
| D[24] | 862.848 | 45.353         | 40.014         | 40.349         | 39.678         | D[1]  |



# sp | P62806 | H4\_MOUSE

[Acetyl]SGRGKGGKGLGKGGAK<sup>Acetyl</sup> RHRK<sup>Dimethyl</sup> VLRD<sup>28.03</sup>

- ▶ fragmentation table for charge state 1+
- ▶ specType=etd
- ▶ score=70.52
- ▶ F113280.dat
- ▶ query=q48165\_p1
- ▶ precursor=518.308810
- ▶ chargePrecursor=5
- ▶ itol=0.5

| AA    | c               | y        | z+1             | z+2             | z               | AA    |
|-------|-----------------|----------|-----------------|-----------------|-----------------|-------|
| S[1]  | 147.076         | 2597.513 | 2971.464        | 0.000           | 2570.486        | S[24] |
| G[2]  | 204.098         | 2458.470 | 2442.451        | 0.000           | 2441.444        | G[23] |
| R[3]  | <b>360.199</b>  | 2401.449 | 2385.430        | 2386.438        | 2384.422        | R[22] |
| G[4]  | <b>417.220</b>  | 2345.448 | 2229.329        | 2230.337        | 2228.321        | G[21] |
| K[5]  | <b>545.315</b>  | 2188.326 | 2172.307        | 2173.315        | 2171.300        | K[20] |
| G[6]  | <b>602.337</b>  | 2060.231 | 2044.212        | 2045.220        | 2043.205        | G[19] |
| G[7]  | <b>659.358</b>  | 2003.210 | 1987.191        | 1988.199        | 1986.183        | G[18] |
| K[8]  | <b>787.453</b>  | 1946.188 | 1930.170        | 1931.177        | 1929.162        | K[17] |
| G[9]  | <b>844.475</b>  | 1818.091 | 1802.073        | 1803.082        | 1801.067        | G[16] |
| L[10] | <b>927.559</b>  | 1793.072 | 1743.053        | <b>1746.061</b> | 1744.046        | L[15] |
| Q[11] | <b>1014.580</b> | 1647.985 | <b>1631.969</b> | 1632.977        | 1630.961        | Q[14] |
| K[12] | <b>1142.675</b> | 1590.966 | 1574.948        | 1575.955        | 1573.940        | K[13] |
| G[13] | <b>1199.697</b> | 1462.871 | 1446.853        | 1447.860        | <b>1445.845</b> | G[12] |
| G[14] | <b>1256.718</b> | 1405.850 | 1389.831        | 1390.839        | 1388.823        | G[11] |
| A[15] | <b>1327.755</b> | 1348.828 | <b>1332.810</b> | 1333.818        | 1331.802        | A[10] |
| K[16] | 1407.851        | 1277.741 | 1261.723        | 1262.730        | 1260.715        | K[9]  |
| R[17] | 1653.962        | 1107.686 | 1091.667        | <b>1092.675</b> | 1090.659        | R[8]  |
| H[18] | <b>1791.021</b> | 951.585  | <b>935.566</b>  | <b>936.574</b>  | <b>934.558</b>  | H[7]  |
| R[19] | 1967.122        | 814.526  | <b>798.507</b>  | <b>799.515</b>  | 797.499         | R[6]  |
| K[20] | 2103.248        | 658.425  | 642.406         | <b>643.414</b>  | 641.399         | K[5]  |
| V[21] | 2202.217        | 602.368  | <b>486.280</b>  | 487.287         | 485.272         | V[4]  |
| L[22] | 2315.403        | 493.320  | <b>387.211</b>  | 388.219         | <b>386.203</b>  | L[3]  |
| R[23] | 2471.502        | 390.148  | <b>274.127</b>  | <b>275.135</b>  | <b>273.119</b>  | R[2]  |
| D[24] | 2586.529        | 134.045  | 118.026         | 119.034         | 117.018         | D[1]  |

# sp | P62806 | H4\_MOUSE

[Acetyl]SGRGKGGKGLGKGGAK<sup>Acetyl</sup> RHRK<sup>Dimethyl</sup> VLRD<sup>28.03</sup>

- ▶ fragmentation table for charge state 2+
- ▶ specType=etd
- ▶ score=70.52
- ▶ F113280.dat
- ▶ query=q48165.p1
- ▶ precursor=518.308810
- ▶ chargePrecursor=5
- ▶ itol=0.5

| AA | c  | y               | z+1             | z+2             | z               | AA              |       |
|----|----|-----------------|-----------------|-----------------|-----------------|-----------------|-------|
| S  | 1  | 74.042          | <b>1294.260</b> | <b>1286.251</b> | 0.504           | 1285.747        | S[24] |
| G  | 2  | 102.553         | 1229.739        | 1221.729        | 0.504           | 1221.225        | G[23] |
| R  | 3  | 180.603         | 1201.229        | 1193.219        | <b>1193.723</b> | 1192.715        | R[22] |
| G  | 4  | 259.114         | 1123.177        | <b>1115.168</b> | <b>1115.972</b> | 1114.666        | G[21] |
| K  | 5  | <b>273.161</b>  | 1094.667        | <b>1086.657</b> | <b>1087.161</b> | 1086.151        | K[20] |
| G  | 6  | 303.672         | 1030.619        | <b>1022.610</b> | <b>1023.114</b> | <b>1022.106</b> | G[19] |
| G  | 7  | 330.183         | 1002.108        | <b>994.099</b>  | <b>994.603</b>  | <b>993.595</b>  | G[18] |
| K  | 8  | 394.230         | 973.599         | 965.588         | <b>966.092</b>  | <b>965.084</b>  | K[17] |
| G  | 9  | <b>422.741</b>  | 959.550         | <b>901.541</b>  | <b>902.045</b>  | 901.037         | G[16] |
| L  | 10 | <b>479.293</b>  | 899.040         | <b>873.030</b>  | <b>873.534</b>  | 872.526         | L[15] |
| G  | 11 | <b>507.794</b>  | <b>824.498</b>  | 816.488         | <b>816.992</b>  | <b>815.984</b>  | G[14] |
| K  | 12 | <b>571.841</b>  | <b>795.987</b>  | <b>787.977</b>  | <b>788.481</b>  | <b>787.474</b>  | K[13] |
| G  | 13 | 600.352         | 731.939         | <b>723.930</b>  | <b>724.434</b>  | 723.426         | G[12] |
| G  | 14 | <b>628.863</b>  | <b>703.429</b>  | <b>695.419</b>  | 695.923         | <b>694.915</b>  | G[11] |
| A  | 15 | <b>664.381</b>  | <b>674.918</b>  | <b>666.908</b>  | 667.412         | <b>666.405</b>  | A[10] |
| R  | 16 | <b>749.434</b>  | 639.399         | <b>631.390</b>  | <b>631.894</b>  | 630.886         | R[9]  |
| R  | 17 | <b>827.485</b>  | <b>554.347</b>  | 546.337         | 546.841         | <b>545.833</b>  | R[8]  |
| H  | 18 | <b>896.014</b>  | 476.290         | <b>468.287</b>  | 468.791         | <b>467.783</b>  | H[7]  |
| R  | 19 | <b>974.065</b>  | 407.767         | <b>399.757</b>  | <b>400.261</b>  | 399.253         | R[6]  |
| K  | 20 | <b>1052.128</b> | 329.716         | 321.707         | 322.211         | 321.203         | K[5]  |
| V  | 21 | <b>1101.662</b> | 251.663         | 243.653         | 244.157         | 243.149         | V[4]  |
| L  | 22 | 1158.204        | 202.119         | 194.109         | 194.613         | 193.605         | L[3]  |
| R  | 23 | 1236.255        | 145.577         | 137.567         | 138.071         | 137.063         | R[2]  |
| D  | 24 | 1293.708        | 67.526          | 59.517          | 60.021          | 59.013          | D[1]  |



# sp | P62806 | H4\_MOUSE

[Acetyl]SGRGKGGKGLGKGGAK<sup>Acetyl</sup> RHRK<sup>Dimethyl</sup> VLRD<sup>28.03</sup>

- ▶ fragmentation table for charge state 3+
- ▶ specType=etd
- ▶ score=70.52
- ▶ F113280.dat
- ▶ query=q48165.p1
- ▶ precursor=518.308810
- ▶ chargePrecursor=5
- ▶ itol=0.5

| AA    | c              | y              | z+1            | z+2            | z              | AA    |
|-------|----------------|----------------|----------------|----------------|----------------|-------|
| S[1]  | 49.697         | <b>863.176</b> | <b>857.836</b> | 0.672          | <b>857.500</b> | S[24] |
| G[2]  | 58.704         | 320.162        | 814.822        | 0.672          | 814.486        | G[23] |
| R[3]  | 120.738        | 801.154        | <b>795.815</b> | <b>796.151</b> | <b>795.479</b> | R[22] |
| G[4]  | 139.745        | 749.121        | <b>743.781</b> | <b>744.117</b> | <b>743.445</b> | G[21] |
| K[5]  | 182.443        | <b>730.114</b> | <b>724.774</b> | <b>725.110</b> | <b>724.438</b> | K[20] |
| G[6]  | 201.450        | <b>687.415</b> | <b>682.076</b> | <b>682.412</b> | <b>681.740</b> | G[19] |
| G[7]  | 220.458        | 668.408        | 663.069        | <b>663.404</b> | 662.733        | G[18] |
| K[8]  | 263.156        | 649.401        | <b>644.061</b> | <b>644.397</b> | <b>643.725</b> | K[17] |
| C[9]  | 282.163        | <b>606.703</b> | <b>601.363</b> | <b>601.699</b> | <b>601.027</b> | C[16] |
| L[10] | 319.858        | <b>587.695</b> | 582.356        | <b>582.692</b> | 582.020        | L[15] |
| G[11] | 338.865        | 550.001        | <b>544.661</b> | <b>544.997</b> | <b>544.325</b> | G[14] |
| K[12] | 381.563        | <b>530.994</b> | 525.654        | 525.990        | 525.318        | K[13] |
| G[13] | 400.570        | 488.295        | 482.956        | 483.292        | 482.620        | G[12] |
| G[14] | 419.578        | 469.288        | 463.949        | 464.285        | 463.613        | G[11] |
| A[15] | 443.257        | 450.281        | 444.941        | 445.277        | 444.605        | A[10] |
| K[16] | 469.958        | 426.002        | 421.262        | 421.598        | 420.926        | K[9]  |
| R[17] | <b>551.992</b> | 369.900        | 364.561        | 364.896        | 364.225        | R[8]  |
| H[18] | <b>597.678</b> | 317.866        | 312.527        | 312.863        | 312.191        | H[7]  |
| R[19] | <b>649.712</b> | 272.180        | 266.841        | 267.176        | 266.505        | R[6]  |
| K[20] | 701.754        | 220.140        | 214.807        | 215.143        | 214.471        | K[5]  |
| V[21] | <b>734.777</b> | 168.104        | 162.765        | 163.101        | 162.429        | V[4]  |
| L[22] | <b>772.472</b> | 135.082        | 129.742        | 130.078        | 129.406        | L[3]  |
| R[23] | <b>824.505</b> | 97.387         | 92.047         | 92.383         | 91.711         | R[2]  |
| D[24] | 862.848        | 45.353         | 40.014         | 40.349         | 39.678         | D[1]  |

# sp | P62806 | H4\_MOUSE

[Acetyl]SGRGKGGKGLGKGGAK<sup>Acetyl</sup> RHRK<sup>Dimethyl</sup> VLRD<sup>28.03</sup>

- ▶ fragmentation table for charge state 4+
- ▶ specType=etd
- ▶ score=70.52
- ▶ F113280.dat
- ▶ query=q48165.p1
- ▶ precursor=518.308810
- ▶ chargePrecursor=5
- ▶ itol=0.5

| AA    | c              | y              | z+1            | z+2            | z              | AA    |
|-------|----------------|----------------|----------------|----------------|----------------|-------|
| S[1]  | 37.525         | <b>647.634</b> | <b>643.629</b> | 0.755          | <b>643.177</b> | S[24] |
| G[2]  | 51.780         | <b>615.373</b> | <b>611.368</b> | 0.755          | <b>611.116</b> | G[23] |
| R[3]  | 60.805         | <b>601.118</b> | <b>597.113</b> | <b>597.365</b> | 596.861        | R[22] |
| G[4]  | 105.061        | 562.092        | 558.088        | 558.340        | 557.836        | G[21] |
| K[5]  | 137.084        | <b>547.837</b> | 543.832        | 544.084        | 543.580        | K[20] |
| G[6]  | 151.340        | 515.813        | 511.809        | 512.061        | 511.557        | G[19] |
| G[7]  | 165.595        | 501.558        | 497.553        | 497.805        | 497.301        | G[18] |
| K[8]  | 197.619        | 487.303        | 483.298        | 483.550        | 483.046        | K[17] |
| G[9]  | 211.874        | 459.279        | 455.274        | 455.526        | 455.022        | G[16] |
| L[10] | 280.148        | 441.023        | 437.019        | 437.271        | 436.767        | L[15] |
| G[11] | 254.403        | 417.752        | 408.748        | 409.000        | 408.496        | G[14] |
| K[12] | 286.424        | 398.497        | 394.492        | 394.744        | 394.240        | K[13] |
| G[13] | 300.680        | 366.473        | 362.469        | 362.721        | 362.217        | G[12] |
| G[14] | 314.935        | 352.218        | 348.213        | 348.465        | 347.961        | G[11] |
| A[15] | 332.694        | 337.963        | 333.958        | 334.210        | 333.706        | A[10] |
| K[16] | 375.221        | 320.203        | 316.199        | 316.451        | 315.947        | K[9]  |
| R[17] | 414.246        | 277.877        | <b>273.672</b> | <b>273.924</b> | <b>273.420</b> | R[8]  |
| H[18] | 448.511        | 238.652        | 234.647        | 234.899        | 234.395        | H[7]  |
| R[19] | 487.536        | 204.387        | 200.382        | 200.634        | 200.130        | R[6]  |
| K[20] | 526.568        | 165.362        | 161.357        | 161.609        | 161.105        | K[5]  |
| V[21] | 551.335        | 126.330        | 122.325        | 122.577        | 122.073        | V[4]  |
| L[22] | 579.606        | 101.563        | 97.558         | 97.810         | 97.306         | L[3]  |
| R[23] | <b>618.631</b> | 73.292         | 69.287         | 69.539         | 69.035         | R[2]  |
| D[24] | <b>647.388</b> | 34.267         | 30.262         | 30.514         | 30.010         | D[1]  |

# sp | P62806 | H4\_MOUSE

[Acetyl]SGRGKGGKGLGKGGAK Acetyl 42.01 RHRK Dimethyl 28.03 VLRD

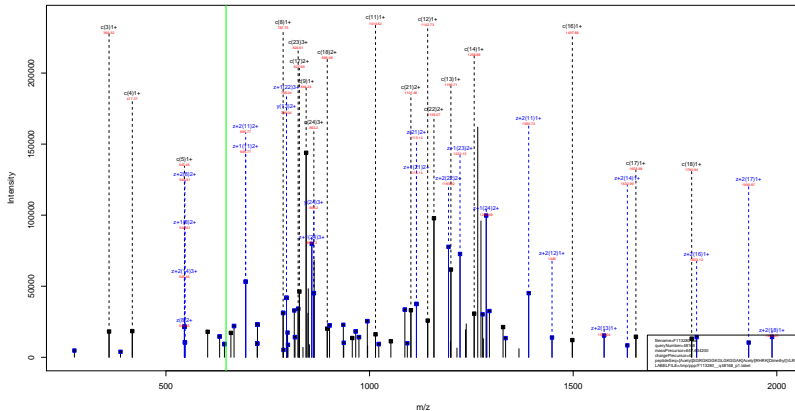

# sp | P62806 | H4\_MOUSE

[Acetyl]SGRGKGGKGLGKGGAK<sup>Acetyl</sup> RHRK<sup>Dimethyl</sup> VLRD<sup>28.03</sup>

- ▶ fragmentation table for charge state 1+
- ▶ specType=etd
- ▶ score=134.56
- ▶ F113280.dat
- ▶ query=q48168\_p1
- ▶ precursor=647.634200
- ▶ chargePrecursor=4
- ▶ itol=0.5

| AA    | c               | y               | z+1            | z+2             | z        | AA    |
|-------|-----------------|-----------------|----------------|-----------------|----------|-------|
| S[1]  | 347.676         | 2587.513        | 2571.494       | 0.000           | 2570.486 | S[24] |
| G[2]  | 204.008         | 2458.470        | 2442.451       | 0.000           | 2441.444 | G[23] |
| R[3]  | <b>368.199</b>  | 2401.440        | 2385.430       | 2386.438        | 2384.422 | R[22] |
| G[4]  | <b>417.230</b>  | 2245.346        | 2229.330       | 2230.337        | 2228.321 | G[21] |
| K[5]  | <b>545.315</b>  | 2188.326        | 2172.307       | 2173.315        | 2171.300 | K[20] |
| G[6]  | <b>602.337</b>  | 2080.231        | 2044.210       | 2045.220        | 2043.205 | G[19] |
| G[7]  | <b>659.358</b>  | 2003.210        | 1987.191       | <b>1988.199</b> | 1986.183 | G[18] |
| K[8]  | <b>787.453</b>  | 1946.180        | 1930.170       | <b>1931.177</b> | 1929.162 | K[17] |
| G[9]  | <b>844.475</b>  | 1818.093        | 1802.075       | <b>1803.082</b> | 1801.067 | G[16] |
| L[10] | <b>927.559</b>  | 1763.072        | 1746.053       | 1748.061        | 1744.045 | L[15] |
| G[11] | <b>1014.580</b> | 1647.958        | 1631.900       | <b>1632.977</b> | 1630.961 | G[14] |
| K[12] | <b>1142.675</b> | 1590.959        | 1574.948       | <b>1575.955</b> | 1573.940 | K[13] |
| G[13] | <b>1199.697</b> | 1462.871        | 1446.853       | <b>1447.860</b> | 1445.845 | G[12] |
| G[14] | <b>1256.718</b> | 1405.850        | 1389.831       | <b>1390.839</b> | 1388.823 | G[11] |
| A[15] | <b>1327.756</b> | 1348.828        | 1332.810       | <b>1333.818</b> | 1331.802 | A[10] |
| R[16] | <b>1407.881</b> | <b>1277.791</b> | 1261.773       | 1263.780        | 1260.765 | R[9]  |
| R[17] | <b>1653.962</b> | 1137.688        | 1091.667       | <b>1092.675</b> | 1090.659 | R[8]  |
| H[18] | <b>1791.021</b> | 951.589         | <b>935.566</b> | <b>936.574</b>  | 934.558  | H[7]  |
| R[19] | 1947.122        | 814.538         | <b>798.507</b> | <b>799.515</b>  | 797.499  | R[6]  |
| K[20] | 2103.248        | 658.425         | 642.406        | <b>643.414</b>  | 641.398  | K[5]  |
| V[21] | 2202.317        | 502.368         | 486.350        | 487.357         | 485.272  | V[4]  |
| L[22] | 2319.401        | 403.239         | 387.211        | <b>388.219</b>  | 386.203  | L[3]  |
| R[23] | 2471.502        | 290.140         | 274.127        | <b>275.135</b>  | 273.119  | R[2]  |
| D[24] | 2586.529        | 134.045         | 118.026        | 119.034         | 117.018  | D[1]  |

# sp | P62806 | H4\_MOUSE

[Acetyl]SGRGKGGKGLGKGGAK<sup>Acetyl</sup><sub>42.01</sub> RHRK<sup>Dimethyl</sup><sub>28.03</sub> VLRD

- ▶ fragmentation table for charge state 2+
- ▶ specType=etd
- ▶ score=134.56
- ▶ F113280.dat
- ▶ query=q48168.p1
- ▶ precursor=647.634200
- ▶ chargePrecursor=4
- ▶ itol=0.5

| AA    | c               | y               | z+1             | z+2             | z               | AA    |
|-------|-----------------|-----------------|-----------------|-----------------|-----------------|-------|
| S[1]  | 74.642          | <b>1294.260</b> | <b>1286.251</b> | 0.504           | 1289.747        | S[24] |
| G[2]  | 102.553         | 1229.739        | <b>1221.729</b> | 0.504           | 1221.225        | G[23] |
| K[3]  | 180.603         | 1201.229        | 1191.719        | <b>1193.723</b> | 1192.715        | K[22] |
| G[4]  | 259.114         | 1123.177        | <b>1115.168</b> | 1115.977        | <b>1114.564</b> | G[21] |
| K[5]  | 273.153         | 1094.567        | <b>1086.557</b> | <b>1087.161</b> | 1085.151        | K[20] |
| G[6]  | 301.672         | 1030.619        | <b>1022.610</b> | <b>1023.114</b> | 1022.100        | G[19] |
| G[7]  | 330.183         | 1002.108        | <b>994.099</b>  | <b>994.603</b>  | 993.595         | G[18] |
| K[8]  | 394.230         | <b>973.598</b>  | <b>965.588</b>  | <b>966.092</b>  | 965.083         | K[17] |
| G[9]  | 422.741         | 909.550         | <b>901.541</b>  | <b>902.045</b>  | 901.037         | G[16] |
| L[10] | 479.293         | 869.040         | 871.033         | 873.024         | 872.520         | L[15] |
| G[11] | 507.794         | <b>824.498</b>  | <b>816.488</b>  | <b>816.992</b>  | 815.983         | G[14] |
| K[12] | 571.841         | <b>795.987</b>  | <b>787.977</b>  | <b>788.481</b>  | <b>787.474</b>  | K[13] |
| G[13] | 600.352         | 731.939         | <b>723.930</b>  | <b>724.434</b>  | 723.426         | G[12] |
| G[14] | 628.863         | 703.429         | <b>695.419</b>  | <b>695.923</b>  | 694.915         | G[11] |
| A[15] | 664.381         | 674.919         | <b>666.908</b>  | <b>667.412</b>  | 666.405         | A[10] |
| R[16] | 749.434         | 639.399         | <b>631.390</b>  | <b>631.894</b>  | 630.886         | R[9]  |
| R[17] | <b>827.485</b>  | 554.347         | <b>546.337</b>  | <b>546.841</b>  | <b>545.833</b>  | R[8]  |
| H[18] | <b>896.014</b>  | 476.296         | 468.287         | 468.791         | 467.783         | H[7]  |
| R[19] | <b>974.065</b>  | 407.767         | 399.757         | 400.261         | 399.253         | R[6]  |
| K[20] | <b>1052.128</b> | 329.716         | 321.707         | 322.211         | 321.203         | K[5]  |
| V[21] | <b>1101.662</b> | 251.653         | 243.643         | 244.147         | 243.140         | V[4]  |
| L[22] | <b>1158.204</b> | 202.119         | 194.109         | 194.613         | 193.605         | L[3]  |
| R[23] | 1236.255        | 145.577         | 137.567         | 138.071         | 137.063         | R[2]  |
| D[24] | 1293.768        | 67.526          | 59.517          | 60.021          | 59.013          | D[1]  |

# sp | P62806 | H4\_MOUSE

[Acetyl]SGRGKGGKGLGKGGAK<sup>Acetyl</sup> RHRK<sup>Dimethyl</sup> VLRD<sup>28.03</sup>

- ▶ fragmentation table for charge state 3+
- ▶ specType=etd
- ▶ score=134.56
- ▶ F113280.dat
- ▶ query=q48168.p1
- ▶ precursor=647.634200
- ▶ chargePrecursor=4
- ▶ itol=0.5

| AA    | c              | y              | z+1            | z+2            | z              | AA            |
|-------|----------------|----------------|----------------|----------------|----------------|---------------|
| S[1]  | 49.697         | <b>863.176</b> | <b>857.836</b> |                | 0.672          | 857.900 S[24] |
| G[2]  | 58.704         | 820.162        | <b>814.822</b> |                | 0.672          | 814.486 G[23] |
| R[3]  | 120.738        | 801.154        | <b>795.815</b> | <b>796.151</b> | 795.479        | R[22]         |
| G[4]  | 139.745        | 749.121        | 743.781        | 744.117        | 743.445        | G[21]         |
| K[5]  | 182.443        | 730.114        | <b>724.774</b> | <b>725.110</b> | <b>724.438</b> | K[20]         |
| G[6]  | 201.450        | 687.415        | 682.076        | 682.412        | 681.740        | G[19]         |
| G[7]  | 220.458        | 668.408        | 663.069        | 663.404        | 662.733        | G[18]         |
| K[8]  | 263.156        | 649.401        | <b>644.061</b> | 644.397        | <b>643.725</b> | K[17]         |
| G[9]  | 282.163        | 606.703        | 601.363        | 601.699        | 601.027        | G[16]         |
| L[10] | 319.858        | 587.695        | 582.356        | 582.692        | 582.020        | L[15]         |
| G[11] | 338.865        | 550.001        | 544.661        | <b>544.997</b> | 544.325        | G[14]         |
| K[12] | 381.563        | 530.994        | 525.654        | 525.990        | 525.318        | K[13]         |
| G[13] | 400.570        | 488.295        | 482.956        | 483.292        | 482.620        | G[12]         |
| G[14] | 419.578        | 469.288        | 463.949        | 464.285        | 463.613        | G[11]         |
| A[15] | 443.257        | 450.281        | 444.941        | 445.277        | 444.605        | A[10]         |
| K[16] | 469.958        | 426.602        | 421.262        | 421.598        | 420.926        | K[9]          |
| R[17] | 551.992        | 369.900        | 364.561        | 364.896        | 364.225        | R[8]          |
| H[18] | 597.678        | 317.866        | 312.527        | 312.863        | 312.191        | H[7]          |
| R[19] | 649.712        | 272.180        | 266.841        | 267.176        | 266.505        | R[6]          |
| K[20] | 701.754        | 220.146        | 214.807        | 215.143        | 214.471        | K[5]          |
| V[21] | 734.777        | 168.104        | 162.765        | 163.101        | 162.429        | V[4]          |
| L[22] | 772.472        | 135.082        | 129.742        | 130.078        | 129.406        | L[3]          |
| R[23] | <b>824.505</b> | 97.387         | 92.047         | 92.383         | 91.711         | R[2]          |
| D[24] | <b>862.848</b> | 45.353         | 40.014         | 40.349         | 39.678         | D[1]          |

# sp | P62806 | H4\_MOUSE

[Acetyl]SGRGKGGKGLGKGGAK Acetyl 42.01 RHRK Dimethyl 28.03 VLRD

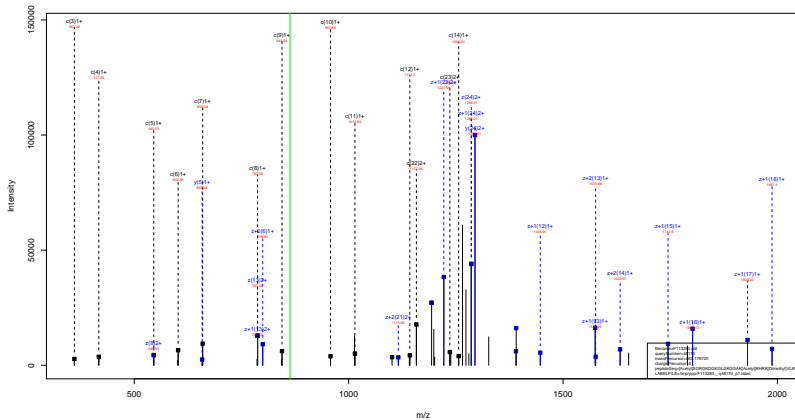

# sp | P62806 | H4\_MOUSE

[Acetyl]SGRGKGGKGLGKGGAK<sup>Acetyl</sup> RHRK<sup>Dimethyl</sup> VLRD<sup>28.03</sup>

- ▶ fragmentation table for charge state 1+
- ▶ specType=etd
- ▶ score=71.25
- ▶ F113280.dat
- ▶ query=q48170\_p1
- ▶ precursor=863.176720
- ▶ chargePrecursor=3
- ▶ itol=0.5

| AA    | c               | y              | z+1             | z+2             | z        | AA    |
|-------|-----------------|----------------|-----------------|-----------------|----------|-------|
| S[1]  | 347.076         | 2507.513       | 2571.494        | 0.000           | 2570.486 | S[24] |
| G[2]  | 204.008         | 2458.470       | 2442.451        | 0.000           | 2441.444 | G[23] |
| R[3]  | <b>360.190</b>  | 2401.440       | 2385.430        | 2386.438        | 2384.422 | R[22] |
| G[4]  | <b>417.230</b>  | 2345.340       | 2229.320        | 2230.337        | 2228.321 | G[21] |
| K[5]  | <b>545.315</b>  | 2188.326       | 2172.307        | 2173.315        | 2171.300 | K[20] |
| G[6]  | <b>602.337</b>  | 2060.231       | 2044.210        | 2045.220        | 2043.205 | G[19] |
| G[7]  | <b>659.358</b>  | 2003.210       | <b>1987.191</b> | 1988.199        | 1986.183 | G[18] |
| K[8]  | <b>787.453</b>  | 1946.188       | <b>1930.170</b> | 1931.177        | 1929.162 | K[17] |
| G[9]  | <b>844.475</b>  | 1818.093       | <b>1802.075</b> | 1803.082        | 1801.067 | G[16] |
| L[10] | <b>927.559</b>  | 1763.072       | <b>1745.053</b> | 1746.061        | 1744.045 | L[15] |
| G[11] | <b>1014.580</b> | 1647.985       | 1631.960        | <b>1632.977</b> | 1630.961 | G[14] |
| K[12] | <b>1142.675</b> | 1590.900       | <b>1574.948</b> | <b>1575.955</b> | 1573.940 | K[13] |
| G[13] | 1109.697        | 1462.871       | <b>1446.853</b> | 1447.860        | 1445.845 | G[12] |
| G[14] | <b>1256.718</b> | 1405.850       | <b>1389.831</b> | <b>1390.839</b> | 1388.823 | G[11] |
| A[15] | 1127.735        | 1348.828       | 1332.810        | 1333.818        | 1331.802 | A[10] |
| R[16] | 1409.883        | 1277.791       | 1261.773        | 1262.780        | 1260.765 | R[9]  |
| R[17] | 1653.962        | 1107.680       | 1091.667        | 1092.675        | 1090.659 | R[8]  |
| H[18] | 1791.021        | 951.585        | 935.566         | 936.574         | 934.558  | H[7]  |
| R[19] | 1947.122        | 814.526        | 798.507         | <b>799.515</b>  | 797.499  | R[6]  |
| K[20] | 2103.248        | <b>658.425</b> | 642.405         | 643.414         | 641.398  | K[5]  |
| V[21] | 2202.317        | 502.290        | 486.280         | 487.287         | 485.272  | V[4]  |
| L[22] | 2315.401        | 403.230        | 387.211         | 388.219         | 386.203  | L[3]  |
| R[23] | 2471.502        | 290.140        | 274.127         | 275.135         | 273.119  | R[2]  |
| D[24] | 2586.520        | 134.045        | 118.026         | 119.034         | 117.018  | D[1]  |



# sp | P62806 | H4\_MOUSE

[Acetyl]SGRGKGGKGLGKGGAK<sup>Acetyl</sup>RHRK<sup>Dimethyl</sup>VLRD<sup>28.03</sup>

- ▶ fragmentation table for charge state 2+
- ▶ specType=etd
- ▶ score=71.25
- ▶ F113280.dat
- ▶ query=q48170\_p1
- ▶ precursor=863.176720
- ▶ chargePrecursor=3
- ▶ itol=0.5

| AA    | c               | y               | z+1             | z+2             | z               | AA    |
|-------|-----------------|-----------------|-----------------|-----------------|-----------------|-------|
| S[1]  | 74.042          | <b>1294.260</b> | <b>1286.251</b> | 0.504           | <b>1285.747</b> | S[24] |
| G[2]  | 102.553         | 1229.739        | <b>1221.729</b> | 0.504           | 1221.225        | G[23] |
| R[3]  | 180.603         | 1201.229        | <b>1193.219</b> | <b>1193.723</b> | 1192.715        | R[22] |
| G[4]  | 259.114         | 1123.177        | 1115.168        | <b>1115.672</b> | 1114.664        | G[21] |
| K[5]  | 273.151         | 1094.667        | 1086.657        | 1087.161        | 1086.151        | K[20] |
| G[6]  | 301.672         | 1030.619        | 1022.610        | 1023.114        | 1022.106        | G[19] |
| G[7]  | 330.183         | 1002.108        | 994.099         | 994.603         | 993.595         | G[18] |
| K[8]  | 394.230         | 973.599         | 965.588         | 966.092         | 965.084         | K[17] |
| G[9]  | 422.741         | 959.550         | 961.541         | 962.045         | 961.037         | G[16] |
| L[10] | 479.289         | 893.040         | 873.030         | 873.534         | 872.526         | L[15] |
| G[11] | 507.794         | 824.495         | 816.488         | 816.992         | 815.984         | G[14] |
| K[12] | 571.841         | 795.987         | <b>787.977</b>  | 788.481         | <b>787.474</b>  | K[13] |
| G[13] | 600.352         | 731.939         | 723.930         | 724.434         | 723.426         | G[12] |
| G[14] | 628.863         | 703.429         | 695.419         | 695.923         | 694.915         | G[11] |
| A[15] | 684.381         | 674.919         | 666.908         | 667.412         | 666.404         | A[10] |
| R[16] | 749.434         | 639.399         | 631.390         | 631.894         | 630.886         | R[9]  |
| R[17] | 827.485         | 554.347         | 546.337         | 546.841         | <b>545.833</b>  | R[6]  |
| H[18] | 866.014         | 476.290         | 468.280         | 468.784         | 467.776         | H[7]  |
| R[19] | 974.065         | 407.767         | 399.757         | 400.261         | 399.253         | R[6]  |
| K[20] | 1052.128        | 329.716         | 321.707         | 322.211         | 321.203         | K[5]  |
| V[21] | <b>1101.662</b> | 251.653         | 243.643         | 244.147         | 243.140         | V[4]  |
| L[22] | <b>1158.204</b> | 202.119         | 194.109         | 194.613         | 193.605         | L[3]  |
| R[23] | <b>1236.255</b> | 145.577         | 137.567         | 138.071         | 137.063         | R[2]  |
| D[24] | 1293.708        | 67.526          | 59.517          | 60.021          | 59.013          | D[1]  |



# sp | P62806 | H4\_MOUSE

[Acetyl]SGRGKGGK<sup>Acetyl</sup><sub>42.01</sub> GLGKGGAKRHRK<sup>(butyryl)</sup><sub>(70.04)</sub> VLRD

- ▶ fragmentation table for charge state 1+
- ▶ specType=etd
- ▶ score=48.40
- ▶ F113280.dat
- ▶ query=q48573.p1
- ▶ precursor=439.092350
- ▶ chargePrecursor=6
- ▶ itol=0.5

| AA | c  | y               | z+1      | z+2            | z               | AA             |       |
|----|----|-----------------|----------|----------------|-----------------|----------------|-------|
| S  | 1  | 147.076         | 2029.523 | 2613.505       | 0.000           | 2612.497       | S[24] |
| G  | 2  | 204.098         | 2500.481 | 3084.463       | 0.000           | 2483.454       | G[23] |
| R  | 3  | <b>360.199</b>  | 2843.499 | 3427.441       | 2428.448        | 2426.433       | R[22] |
| G  | 4  | <b>417.230</b>  | 2287.358 | 2271.339       | 2272.347        | 2270.332       | G[21] |
| K  | 5  | <b>545.315</b>  | 2230.337 | 2214.318       | 2215.326        | 2213.310       | K[20] |
| G  | 6  | <b>602.337</b>  | 2102.242 | 2086.223       | 2087.231        | 2085.215       | G[19] |
| G  | 7  | <b>659.358</b>  | 2045.220 | 2029.202       | 2030.209        | 2028.194       | G[18] |
| K  | 8  | <b>829.464</b>  | 1988.199 | 1972.180       | 1973.188        | 1971.172       | K[17] |
| G  | 9  | <b>896.485</b>  | 1818.093 | 1802.075       | <b>1803.082</b> | 1801.067       | G[16] |
| L  | 10 | <b>939.569</b>  | 1761.072 | 1745.053       | 1746.061        | 1744.045       | L[15] |
| G  | 11 | <b>1056.591</b> | 1647.985 | 1631.966       | 1632.977        | 1630.961       | G[14] |
| K  | 12 | <b>1184.686</b> | 1590.965 | 1574.948       | 1575.955        | 1573.940       | K[13] |
| G  | 13 | <b>1241.707</b> | 1462.871 | 1446.853       | 1447.860        | 1445.845       | G[12] |
| G  | 14 | 1298.729        | 1405.850 | 1389.831       | 1390.839        | 1388.823       | G[11] |
| A  | 15 | 1369.766        | 1348.829 | 1332.810       | <b>1333.818</b> | 1331.802       | A[10] |
| K  | 16 | 1497.861        | 1277.791 | 1261.773       | <b>1262.780</b> | 1260.765       | K[9]  |
| R  | 17 | 1633.862        | 1149.696 | 1133.678       | 1134.685        | 1132.670       | R[8]  |
| H  | 18 | 1791.021        | 993.595  | 977.577        | 978.584         | 976.569        | H[7]  |
| R  | 19 | 1947.122        | 856.538  | 840.519        | 841.525         | 839.510        | R[6]  |
| K  | 20 | 2145.259        | 700.435  | 684.416        | <b>685.424</b>  | 683.409        | K[5]  |
| V  | 21 | 2244.327        | 502.298  | <b>486.280</b> | <b>487.287</b>  | 485.272        | V[4]  |
| L  | 22 | 2357.411        | 403.230  | <b>387.211</b> | 388.219         | 386.203        | L[3]  |
| R  | 23 | 2413.512        | 290.146  | <b>274.127</b> | <b>275.135</b>  | <b>273.119</b> | R[2]  |
| D  | 24 | 2626.539        | 134.045  | 135.050        | 136.054         | 137.058        | D[1]  |

# sp | P62806 | H4\_MOUSE

[Acetyl]SGRGKGGK<sup>Acetyl</sup><sub>42.01</sub> GLGKGGAKRHRK<sup>(butyryl)</sup><sub>(70.04)</sub> VLRD

- ▶ fragmentation table for charge state 2+
- ▶ specType=etd
- ▶ score=48.40
- ▶ F113280.dat
- ▶ query=q48573.p1
- ▶ precursor=439.092350
- ▶ chargePrecursor=6
- ▶ itol=0.5

| AA    | c               | y               | z+1             | z+2             | z               | AA    |
|-------|-----------------|-----------------|-----------------|-----------------|-----------------|-------|
| S[1]  | 74.682          | 1315.265        | 1307.256        | 0.504           | 1308.752        | S[24] |
| G[2]  | 102.553         | 1250.744        | 1242.735        | 0.504           | <b>1242.231</b> | G[23] |
| R[3]  | 180.603         | 1222.233        | 1214.224        | 1214.728        | 1217.720        | R[22] |
| G[4]  | 259.114         | 1144.183        | 1136.173        | 1136.677        | 1135.669        | G[21] |
| K[5]  | <b>273.161</b>  | <b>1115.673</b> | <b>1107.663</b> | <b>1108.167</b> | 1099.160        | K[20] |
| G[6]  | 361.672         | <b>1051.625</b> | 1043.615        | 1044.119        | 1043.111        | G[19] |
| G[7]  | 330.183         | 1023.114        | <b>1015.104</b> | <b>1015.608</b> | <b>1014.601</b> | G[18] |
| K[8]  | <b>415.236</b>  | <b>994.603</b>  | 986.594         | 987.098         | 986.590         | K[17] |
| G[9]  | <b>443.746</b>  | <b>909.550</b>  | 901.541         | <b>902.045</b>  | 901.037         | G[16] |
| L[10] | <b>503.288</b>  | 815.040         | <b>871.030</b>  | <b>871.534</b>  | <b>872.526</b>  | L[15] |
| G[11] | <b>528.799</b>  | <b>824.498</b>  | <b>816.488</b>  | <b>816.992</b>  | <b>815.984</b>  | G[14] |
| K[12] | <b>592.847</b>  | <b>795.987</b>  | 787.977         | <b>788.481</b>  | 787.474         | K[13] |
| G[13] | <b>621.357</b>  | <b>731.939</b>  | <b>723.930</b>  | <b>724.434</b>  | 723.426         | G[12] |
| G[14] | <b>649.868</b>  | 703.429         | <b>695.419</b>  | <b>695.923</b>  | 694.915         | G[11] |
| A[15] | <b>685.387</b>  | 674.918         | <b>666.908</b>  | <b>667.412</b>  | 666.404         | A[10] |
| T[16] | <b>749.434</b>  | 639.399         | <b>631.390</b>  | <b>631.894</b>  | 630.886         | T[9]  |
| R[17] | 827.485         | 575.352         | 567.342         | 567.846         | 566.839         | R[8]  |
| H[18] | 896.014         | 497.301         | 489.292         | 489.796         | 488.789         | H[7]  |
| R[19] | <b>974.065</b>  | 426.772         | 420.762         | 421.266         | 420.259         | R[6]  |
| K[20] | <b>1073.133</b> | 350.721         | 342.712         | 343.216         | 342.209         | K[5]  |
| V[21] | 1127.587        | 251.053         | 245.043         | 244.547         | 243.540         | V[4]  |
| L[22] | <b>1179.209</b> | 202.119         | 194.109         | 194.613         | 193.606         | L[3]  |
| R[23] | 1287.260        | 145.577         | 137.567         | 138.071         | 137.064         | R[2]  |
| D[24] | 1314.773        | 87.526          | 59.537          | 60.021          | 59.013          | D[1]  |

# sp | P62806 | H4\_MOUSE

[Acetyl]SGRGKGGK<sup>Acetyl</sup><sub>42.01</sub> GLGKGGAKRHRK<sup>(butyryl)</sup><sub>(70.04)</sub> VLRD

- ▶ fragmentation table for charge state 3+
- ▶ specType=etd
- ▶ score=48.40
- ▶ F113280.dat
- ▶ query=q48573.p1
- ▶ precursor=439.092350
- ▶ chargePrecursor=6
- ▶ itol=0.5

| AA    | c              | y              | z+1            | z+2            | z              | AA    |
|-------|----------------|----------------|----------------|----------------|----------------|-------|
| S[1]  | 69.697         | 877.170        | 871.843        | 0.672          | 871.504        | S[24] |
| G[2]  | 68.704         | <b>834.165</b> | 829.839        | 0.672          | 829.460        | G[23] |
| R[3]  | 120.738        | 815.150        | <b>809.818</b> | <b>810.154</b> | 809.482        | R[22] |
| G[4]  | 159.745        | 763.124        | <b>757.785</b> | <b>759.121</b> | 757.449        | G[21] |
| K[5]  | 182.443        | <b>744.117</b> | <b>738.778</b> | <b>739.113</b> | <b>738.442</b> | K[20] |
| G[6]  | 201.450        | <b>701.419</b> | <b>696.079</b> | 696.415        | <b>695.743</b> | G[19] |
| G[7]  | 220.458        | <b>682.412</b> | <b>677.072</b> | <b>677.408</b> | 676.736        | G[18] |
| K[8]  | 277.159        | 663.804        | <b>658.065</b> | <b>658.401</b> | 657.729        | K[17] |
| G[9]  | 296.167        | <b>606.703</b> | <b>601.363</b> | <b>601.699</b> | <b>601.027</b> | G[16] |
| L[10] | 313.861        | <b>587.695</b> | <b>582.356</b> | <b>582.692</b> | 582.020        | L[15] |
| G[11] | 352.868        | 530.901        | <b>544.561</b> | <b>544.907</b> | 544.325        | G[14] |
| K[12] | 395.567        | <b>530.994</b> | 525.654        | 525.990        | 525.318        | K[13] |
| G[13] | 414.574        | 488.295        | 482.956        | 483.292        | 482.620        | G[12] |
| G[14] | <b>433.581</b> | 469.289        | <b>463.949</b> | <b>464.285</b> | 463.613        | G[11] |
| A[15] | <b>457.260</b> | 450.281        | 444.941        | 445.277        | 444.605        | A[10] |
| K[16] | 499.958        | 426.602        | 421.262        | 421.598        | 420.926        | K[9]  |
| R[17] | 551.992        | 383.904        | 378.564        | 378.900        | 378.228        | R[8]  |
| H[18] | 597.678        | 331.870        | 326.530        | 326.866        | 326.194        | H[7]  |
| R[19] | 649.712        | 286.184        | 280.844        | 281.180        | 280.508        | R[6]  |
| K[20] | 715.758        | 234.150        | 228.810        | 229.146        | 228.474        | K[5]  |
| V[21] | 748.781        | 198.104        | 192.764        | 193.101        | 192.429        | V[4]  |
| L[22] | <b>786.475</b> | 135.082        | 129.742        | 130.078        | 129.406        | L[3]  |
| R[23] | 838.509        | 97.387         | 92.047         | 92.383         | 91.711         | R[2]  |
| D[24] | 876.851        | 45.353         | 40.014         | 40.349         | 39.678         | D[1]  |

# sp | P62806 | H4\_MOUSE

[Acetyl]SGRGKGGK<sup>Acetyl</sup><sub>42.01</sub> GLGKGGAKRHRK<sup>(butyryl)</sup><sub>(70.04)</sub> VLRD

- ▶ fragmentation table for charge state 4+
- ▶ specType=etd
- ▶ score=48.40
- ▶ F113280.dat
- ▶ query=q48573.p1
- ▶ precursor=439.092350
- ▶ chargePrecursor=6
- ▶ itol=0.5

| AA    | c              | y              | z+1            | z+2            | z              | AA    |
|-------|----------------|----------------|----------------|----------------|----------------|-------|
| S[1]  | 87.925         | <b>658.136</b> | 954.132        | 0.755          | 653.880        | S[24] |
| G[2]  | 51.780         | <b>625.876</b> | <b>621.871</b> | 0.755          | <b>621.619</b> | G[23] |
| R[3]  | 50.305         | <b>611.620</b> | <b>607.616</b> | <b>607.868</b> | 607.354        | R[22] |
| G[4]  | 105.061        | 572.595        | 568.590        | 568.842        | 568.131        | G[21] |
| K[5]  | 137.084        | 558.340        | <b>554.335</b> | <b>554.587</b> | 554.083        | K[20] |
| G[6]  | 151.340        | 526.316        | 522.311        | 522.563        | 522.059        | G[19] |
| G[7]  | 165.595        | <b>512.061</b> | 508.056        | 508.308        | 507.804        | G[18] |
| K[8]  | 208.121        | <b>497.805</b> | 493.800        | 494.052        | <b>493.549</b> | K[17] |
| G[9]  | 222.377        | 455.279        | 451.274        | 451.526        | 451.022        | G[16] |
| L[10] | 250.640        | 431.023        | 437.019        | 437.271        | 436.767        | L[15] |
| G[11] | 284.903        | 412.752        | 408.748        | 409.000        | 408.496        | G[14] |
| K[12] | 296.927        | 398.497        | <b>394.492</b> | <b>394.744</b> | <b>394.240</b> | K[13] |
| G[13] | 311.182        | 366.473        | 362.469        | 362.721        | 362.217        | G[12] |
| G[14] | 325.438        | 352.218        | 348.213        | 348.465        | 347.961        | G[11] |
| A[15] | 343.197        | 337.963        | 333.958        | 334.210        | 333.706        | A[10] |
| K[16] | 375.221        | 320.203        | 316.199        | 316.451        | 315.947        | K[9]  |
| R[17] | 414.246        | 288.180        | 284.175        | 284.427        | 283.923        | R[8]  |
| H[18] | 448.511        | 249.154        | 245.150        | 245.402        | 244.898        | H[7]  |
| R[19] | <b>487.536</b> | 214.890        | 210.885        | 211.137        | 210.633        | R[6]  |
| K[20] | 337.070        | 175.864        | 171.860        | 172.112        | 171.608        | K[5]  |
| V[21] | 961.837        | 126.130        | 122.125        | 122.377        | 122.073        | V[4]  |
| L[22] | <b>590.108</b> | 101.563        | 97.558         | 97.810         | 97.306         | L[3]  |
| R[23] | 629.134        | 73.292         | 69.287         | 69.539         | 69.035         | R[2]  |
| D[24] | 657.890        | 34.267         | 30.262         | 30.514         | 30.010         | D[1]  |

# sp | P62806 | H4\_MOUSE

[Acetyl]SGRGKGGK<sup>Acetyl</sup><sub>42.01</sub> GLGKGGAKRHRK<sup>(butyryl)</sup><sub>(70.04)</sub> VLRD

- ▶ fragmentation table for charge state 5+
- ▶ specType=etd
- ▶ score=48.40
- ▶ F113280.dat
- ▶ query=q48573.p1
- ▶ precursor=439.092350
- ▶ chargePrecursor=6
- ▶ itol=0.5

| AA    | c       | y              | z+1            | z+2            | z              | AA    |
|-------|---------|----------------|----------------|----------------|----------------|-------|
| S[1]  | 30.221  | 526.710        | <b>523.507</b> | 0.806          | 523.305        | S[24] |
| G[2]  | 41.625  | <b>500.902</b> | <b>497.698</b> | 0.306          | <b>497.497</b> | G[23] |
| R[3]  | 72.846  | 489.498        | <b>486.294</b> | <b>486.495</b> | <b>486.092</b> | R[22] |
| G[4]  | 84.250  | 458.277        | 455.074        | 455.275        | 454.072        | G[21] |
| K[5]  | 109.869 | 446.873        | <b>443.669</b> | <b>443.871</b> | 443.468        | K[20] |
| G[6]  | 121.273 | 421.254        | 418.050        | 418.252        | 417.849        | G[19] |
| G[7]  | 132.677 | 409.850        | 406.646        | 406.848        | 406.445        | G[18] |
| K[8]  | 168.099 | 398.446        | 395.242        | 395.443        | <b>395.040</b> | K[17] |
| G[9]  | 178.103 | 384.424        | 381.221        | 381.422        | 381.019        | G[16] |
| L[10] | 200.720 | 353.020        | 349.816        | 350.018        | 349.615        | L[15] |
| G[11] | 212.124 | 339.403        | 327.200        | 327.401        | 326.996        | G[14] |
| K[12] | 237.743 | 318.999        | 315.795        | 315.997        | 315.594        | K[13] |
| G[13] | 249.147 | 293.380        | 290.176        | 290.378        | 289.975        | G[12] |
| G[14] | 260.552 | 281.976        | 278.772        | 278.974        | 278.570        | G[11] |
| A[15] | 274.759 | 270.572        | 267.368        | 267.569        | 267.166        | A[10] |
| K[16] | 300.378 | 256.364        | 253.160        | 253.362        | 252.959        | K[9]  |
| R[17] | 331.998 | 230.745        | 227.541        | 227.743        | 227.340        | R[8]  |
| H[18] | 359.010 | 199.525        | 196.321        | 196.523        | 196.120        | H[7]  |
| R[19] | 390.230 | 172.113        | 168.909        | 169.111        | 168.708        | R[6]  |
| K[20] | 429.858 | 140.893        | 137.689        | 137.891        | 137.488        | K[5]  |
| V[21] | 449.671 | 103.256        | 98.962         | 99.263         | 97.860         | V[4]  |
| L[22] | 472.268 | 81.452         | 78.248         | 78.450         | 78.047         | L[3]  |
| R[23] | 503.508 | 58.835         | 55.631         | 55.833         | 55.430         | R[2]  |
| D[24] | 526.514 | 27.615         | 24.411         | 24.613         | 24.209         | D[1]  |

# sp | P62806 | H4\_MOUSE

[Acetyl]SGRGKGGKGLGK <sup>Acetyl</sup>GGAK <sup>Acetyl</sup>RHRK <sup>Dimethyl</sup>VLRD  
 42.01 42.01 28.03

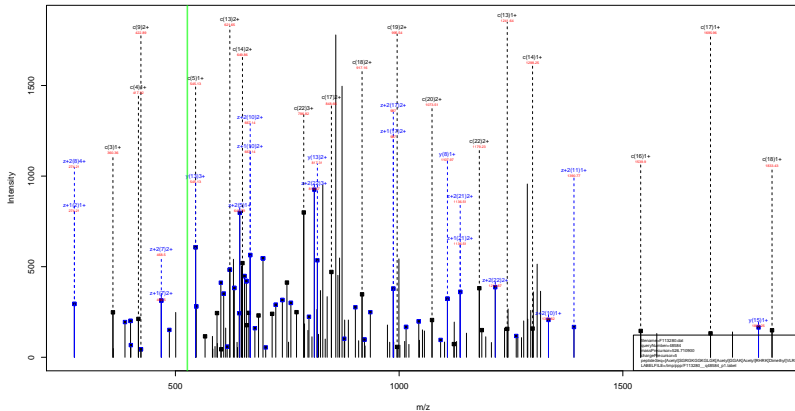



# sp | P62806 | H4\_MOUSE

[Acetyl]SGRGKGGKGLGK<sup>Acetyl</sup><sub>42.01</sub> GGAK<sup>Acetyl</sup><sub>42.01</sub> RHRK<sup>Dimethyl</sup><sub>28.03</sub> VLRD

- ▶ fragmentation table for charge state 1+
- ▶ specType=etd
- ▶ score=69.91
- ▶ F113280.dat
- ▶ query=q48584\_p1
- ▶ precursor=526.710900
- ▶ chargePrecursor=5
- ▶ itol=0.5

| AA | c  | y               | z+1             | z+2             | z               | AA       |       |
|----|----|-----------------|-----------------|-----------------|-----------------|----------|-------|
| S  | 1  | 147.076         | 2629.523        | 2613.505        | 0.000           | 2612.497 | S[24] |
| G  | 2  | 204.098         | 2500.481        | 2484.462        | 0.000           | 2483.454 | G[23] |
| R  | 3  | <b>360.199</b>  | 2641.450        | 2427.431        | 2426.448        | 2626.433 | R[22] |
| G  | 4  | <b>417.220</b>  | 2297.564        | 2271.538        | 2272.547        | 2270.535 | G[21] |
| K  | 5  | <b>945.315</b>  | 2230.337        | 2214.318        | 2215.326        | 2213.310 | K[20] |
| G  | 6  | <b>602.337</b>  | 2102.342        | 2086.323        | 2087.331        | 2085.315 | G[19] |
| G  | 7  | <b>659.358</b>  | 2045.220        | 2029.200        | 2030.209        | 2028.194 | G[18] |
| K  | 8  | 787.453         | 1988.199        | 1972.180        | 1973.189        | 1971.172 | K[17] |
| G  | 9  | 884.475         | 1899.124        | 1884.085        | 1885.093        | 1884.077 | G[16] |
| L  | 10 | 957.559         | <b>1803.082</b> | 1787.064        | 1788.071        | 1786.056 | L[15] |
| Q  | 11 | 1014.580        | 1689.998        | 1673.980        | 1674.987        | 1672.972 | Q[14] |
| K  | 12 | <b>1184.686</b> | 1632.977        | 1616.958        | 1617.966        | 1615.950 | K[13] |
| G  | 13 | <b>1241.707</b> | 1462.977        | 1446.953        | 1447.960        | 1445.945 | G[12] |
| G  | 14 | <b>1298.729</b> | 1405.950        | 1389.931        | <b>1390.939</b> | 1388.923 | G[11] |
| A  | 15 | 1409.106        | 1348.926        | 1332.911        | <b>1333.918</b> | 1331.902 | A[10] |
| R  | 16 | <b>1539.871</b> | 1277.903        | <b>1261.773</b> | 1262.781        | 1260.765 | R[9]  |
| R  | 17 | <b>1695.973</b> | <b>1107.686</b> | 1091.667        | <b>1092.675</b> | 1090.659 | R[8]  |
| H  | 18 | <b>1833.031</b> | 951.585         | <b>935.566</b>  | 936.574         | 934.558  | H[7]  |
| R  | 19 | 1969.133        | 814.526         | <b>798.507</b>  | 799.515         | 797.499  | R[6]  |
| K  | 20 | 2145.250        | <b>658.425</b>  | <b>642.406</b>  | <b>643.414</b>  | 641.398  | K[5]  |
| V  | 21 | 2284.327        | 502.360         | <b>486.360</b>  | 487.367         | 485.352  | V[4]  |
| L  | 22 | 2367.413        | 463.339         | <b>387.311</b>  | 388.319         | 386.303  | L[3]  |
| R  | 23 | 2513.512        | 290.146         | <b>274.127</b>  | 275.135         | 273.119  | R[2]  |
| D  | 24 | 2628.539        | 134.045         | 136.026         | 137.034         | 137.018  | D[1]  |

# sp | P62806 | H4\_MOUSE

[Acetyl]SGRGKGGKGLGK <sup>Acetyl</sup>42.01 GGAK <sup>Acetyl</sup>42.01 RHRK <sup>Dimethyl</sup>28.03 VLRD

- ▶ fragmentation table for charge state 2+
- ▶ specType=etd
- ▶ score=69.91
- ▶ F113280.dat
- ▶ query=q48584\_p1
- ▶ precursor=526.710900
- ▶ chargePrecursor=5
- ▶ itol=0.5

| AA | c  | y               | z+1            | z+2             | z               | AA             |       |
|----|----|-----------------|----------------|-----------------|-----------------|----------------|-------|
| S  | 1  | 74.642          | 1315.265       | 1307.256        | 0.504           | 1306.752       | S[24] |
| G  | 2  | 102.563         | 1250.744       | 1242.735        | 0.504           | 1242.231       | G[23] |
| R  | 3  | 180.603         | 1222.233       | 1219.222        | <b>1214.728</b> | 1213.720       | R[22] |
| G  | 4  | 259.114         | 1144.183       | <b>1136.173</b> | <b>1136.677</b> | 1135.669       | G[21] |
| K  | 5  | 273.101         | 1115.672       | <b>1107.663</b> | <b>1108.167</b> | 1107.159       | K[20] |
| G  | 6  | 301.672         | 1051.625       | <b>1043.615</b> | <b>1044.119</b> | 1043.111       | G[19] |
| G  | 7  | 330.183         | 1023.114       | <b>1015.104</b> | <b>1015.608</b> | 1014.601       | G[18] |
| K  | 8  | 394.230         | 994.603        | <b>986.594</b>  | <b>987.098</b>  | 986.090        | K[17] |
| G  | 9  | <b>422.741</b>  | 936.595        | <b>922.546</b>  | 921.050         | <b>922.042</b> | G[16] |
| L  | 10 | 419.283         | <b>902.045</b> | 894.035         | 894.539         | 893.532        | L[15] |
| G  | 11 | 507.794         | 845.503        | 837.493         | 837.997         | 836.990        | G[14] |
| K  | 12 | <b>592.847</b>  | <b>816.992</b> | 808.983         | 809.487         | 808.479        | K[13] |
| G  | 13 | <b>621.357</b>  | 731.939        | <b>723.930</b>  | <b>724.434</b>  | 723.426        | G[12] |
| G  | 14 | <b>649.868</b>  | 703.429        | <b>695.419</b>  | <b>695.923</b>  | 694.915        | G[11] |
| A  | 15 | <b>685.387</b>  | 674.918        | <b>666.908</b>  | <b>667.412</b>  | 666.405        | A[10] |
| R  | 16 | <b>778.439</b>  | 639.399        | <b>631.390</b>  | <b>631.894</b>  | 630.886        | R[9]  |
| R  | 17 | <b>848.490</b>  | 554.347        | <b>546.337</b>  | <b>546.841</b>  | 545.833        | R[8]  |
| H  | 18 | <b>917.019</b>  | 478.290        | <b>468.287</b>  | <b>468.791</b>  | 467.783        | H[7]  |
| R  | 19 | <b>995.070</b>  | 407.707        | <b>399.757</b>  | <b>400.261</b>  | <b>399.253</b> | R[6]  |
| K  | 20 | <b>1073.133</b> | 329.716        | 321.707         | 322.211         | 321.203        | K[5]  |
| V  | 21 | <b>1122.667</b> | 251.653        | 243.643         | 244.147         | 243.140        | V[4]  |
| L  | 22 | <b>1179.209</b> | 202.119        | 194.109         | 194.613         | 193.605        | L[3]  |
| R  | 23 | 1257.260        | 145.577        | 137.567         | 138.071         | 137.063        | R[2]  |
| D  | 24 | 1314.773        | 67.526         | 59.517          | 60.021          | 59.013         | D[1]  |

# sp | P62806 | H4\_MOUSE

[Acetyl]SGRGKGGKGLGK<sup>Acetyl</sup>42.01 GGAK<sup>Acetyl</sup>42.01 RHRK<sup>Dimethyl</sup>28.03 VLRD

- ▶ fragmentation table for charge state 3+
- ▶ specType=etd
- ▶ score=69.91
- ▶ F113280.dat
- ▶ query=q48584.p1
- ▶ precursor=526.710900
- ▶ chargePrecursor=5
- ▶ itol=0.5

| AA    | c              | y              | z+1            | z+2            | z              | AA    |
|-------|----------------|----------------|----------------|----------------|----------------|-------|
| S[1]  | 49.697         | <b>877.179</b> | 871.840        | 0.672          | 871.904        | S[24] |
| G[2]  | 58.704         | 134.165        | 828.826        | 0.672          | 828.490        | G[23] |
| R[3]  | 120.738        | 815.158        | 809.819        | <b>810.154</b> | 809.482        | R[22] |
| G[4]  | 139.745        | 763.124        | <b>757.785</b> | <b>750.121</b> | 757.449        | G[21] |
| K[5]  | 182.443        | 744.117        | <b>738.778</b> | <b>739.113</b> | 738.442        | K[20] |
| G[6]  | 201.450        | <b>701.419</b> | <b>696.079</b> | 696.415        | <b>695.743</b> | G[19] |
| G[7]  | 220.458        | 682.412        | 677.072        | <b>677.408</b> | 676.736        | G[18] |
| K[8]  | 263.156        | 663.404        | <b>658.065</b> | <b>658.401</b> | 657.729        | K[17] |
| G[9]  | 282.163        | 620.709        | <b>615.367</b> | <b>615.703</b> | 615.031        | G[16] |
| L[10] | 319.958        | <b>601.699</b> | 596.357        | 596.695        | 596.023        | L[15] |
| G[11] | 338.965        | 504.024        | 558.665        | 559.001        | 558.329        | G[14] |
| K[12] | 395.567        | <b>544.997</b> | 539.658        | 539.994        | 539.322        | K[13] |
| G[13] | 414.574        | 488.295        | 482.956        | 483.292        | 482.620        | G[12] |
| G[14] | 433.581        | 469.288        | 463.949        | 464.285        | 463.613        | G[11] |
| A[15] | 457.260        | 450.281        | 444.941        | 445.277        | 444.605        | A[10] |
| K[16] | 513.962        | 426.602        | 421.262        | 421.598        | 420.926        | K[9]  |
| R[17] | <b>565.996</b> | 369.900        | 364.561        | 364.896        | 364.225        | R[8]  |
| H[18] | 611.662        | 317.866        | 312.527        | 312.863        | 312.191        | H[7]  |
| R[19] | <b>663.716</b> | 272.180        | 266.841        | 267.176        | 266.505        | R[6]  |
| K[20] | <b>715.758</b> | 220.140        | 214.807        | 215.143        | 214.471        | K[5]  |
| V[21] | <b>748.781</b> | 168.104        | 162.765        | 163.101        | 162.429        | V[4]  |
| L[22] | <b>786.475</b> | 135.082        | 129.742        | 130.078        | 129.406        | L[3]  |
| R[23] | 838.509        | 97.387         | 92.047         | 92.383         | 91.711         | R[2]  |
| D[24] | 876.851        | 45.353         | 40.014         | 40.349         | 39.678         | D[1]  |

# sp | P62806 | H4\_MOUSE

[Acetyl]SGRGKGGKGLGK <sup>Acetyl</sup><sub>42.01</sub> GGAK <sup>Acetyl</sup><sub>42.01</sub> RHRK <sup>Dimethyl</sup><sub>28.03</sub> VLRD

- ▶ fragmentation table for charge state 4+
- ▶ specType=etd
- ▶ score=69.91
- ▶ F113280.dat
- ▶ query=q48584\_p1
- ▶ precursor=526.710900
- ▶ chargePrecursor=5
- ▶ itol=0.5

| AA    | c       | y              | z+1            | z+2            | z              | AA    |
|-------|---------|----------------|----------------|----------------|----------------|-------|
| S[1]  | 37.525  | <b>658.136</b> | <b>654.132</b> | 0.755          | <b>653.880</b> | S[24] |
| G[2]  | 51.780  | 625.976        | <b>621.871</b> | 0.755          | <b>621.619</b> | G[23] |
| R[3]  | 90.805  | 611.620        | <b>607.616</b> | <b>607.868</b> | 607.364        | R[22] |
| G[4]  | 105.061 | 572.595        | 568.590        | 568.842        | 568.338        | G[21] |
| K[5]  | 137.084 | 558.340        | 554.335        | 554.587        | 554.083        | K[20] |
| G[6]  | 151.340 | 526.316        | 522.311        | 522.563        | 522.059        | G[19] |
| G[7]  | 165.595 | 512.061        | 508.056        | 508.308        | 507.804        | G[18] |
| K[8]  | 197.619 | 497.805        | 493.800        | 494.052        | 493.549        | K[17] |
| G[9]  | 211.874 | 483.550        | 479.545        | 479.797        | 479.293        | G[16] |
| L[10] | 240.145 | 463.326        | 447.321        | 447.773        | 447.269        | L[15] |
| G[11] | 254.401 | <b>423.255</b> | 419.250        | 419.502        | 418.998        | G[14] |
| K[12] | 296.927 | 409.000        | 404.995        | 405.247        | 404.743        | K[13] |
| G[13] | 311.182 | 366.473        | 362.469        | 362.721        | 362.217        | G[12] |
| G[14] | 325.438 | 352.218        | 348.213        | 348.465        | 347.961        | G[11] |
| A[15] | 343.197 | 337.963        | 333.958        | 334.210        | 333.706        | A[10] |
| K[16] | 385.723 | 320.203        | 316.199        | 316.451        | 315.947        | K[9]  |
| R[17] | 424.749 | <b>277.677</b> | 273.672        | <b>273.924</b> | 273.420        | R[8]  |
| H[18] | 459.013 | 238.652        | 234.647        | 234.899        | 234.395        | H[7]  |
| R[19] | 498.039 | 204.387        | 200.382        | 200.634        | 200.130        | R[6]  |
| K[20] | 537.070 | 169.362        | 165.357        | 165.609        | 165.105        | K[5]  |
| V[21] | 561.817 | 126.130        | 122.125        | 122.377        | 122.073        | V[4]  |
| L[22] | 580.108 | 101.563        | 97.558         | 97.810         | 97.306         | L[3]  |
| R[23] | 629.134 | 73.292         | 69.287         | 69.539         | 69.035         | R[2]  |
| D[24] | 657.890 | 34.267         | 30.262         | 30.514         | 30.010         | D[1]  |



# sp | P62806 | H4\_MOUSE

[Acetyl]SGRGKGGKGLGK<sup>Acetyl</sup><sub>42.01</sub> GGAK<sup>Acetyl</sup><sub>42.01</sub> RHRK<sup>Dimethyl</sup><sub>28.03</sub> VLRD

- ▶ fragmentation table for charge state 1+
- ▶ specType=etd
- ▶ score=82.66
- ▶ F113280.dat
- ▶ query=q48588\_p1
- ▶ precursor=658.137210
- ▶ chargePrecursor=4
- ▶ itol=0.5

| AA | c  | y               | z+1             | z+2             | z               | AA       |       |
|----|----|-----------------|-----------------|-----------------|-----------------|----------|-------|
| S  | 1  | 147.076         | 2629.523        | 2613.505        | 0.000           | 2612.497 | S[24] |
| G  | 2  | 204.008         | 2500.481        | 2484.462        | 0.000           | 2483.454 | G[23] |
| R  | 3  | <b>360.199</b>  | 2641.450        | 2427.431        | 2426.448        | 2626.433 | R[22] |
| G  | 4  | <b>417.220</b>  | 2287.358        | 2271.339        | 2272.347        | 2270.331 | G[21] |
| K  | 5  | <b>945.115</b>  | 2230.337        | 2214.318        | 2215.326        | 2213.310 | K[20] |
| G  | 6  | <b>602.337</b>  | 2102.343        | 2086.323        | 2087.331        | 2085.315 | G[19] |
| G  | 7  | 659.358         | 2045.220        | 2029.200        | 2030.209        | 2028.194 | G[18] |
| K  | 8  | <b>787.453</b>  | 1988.199        | 1972.180        | 1973.188        | 1971.172 | K[17] |
| G  | 9  | <b>844.475</b>  | 1860.104        | 1844.085        | <b>1845.093</b> | 1843.077 | G[16] |
| L  | 10 | 907.519         | 1803.082        | 1787.064        | 1788.071        | 1786.056 | L[15] |
| Q  | 11 | <b>1014.580</b> | 1685.998        | 1673.980        | 1674.987        | 1672.972 | Q[14] |
| K  | 12 | <b>1184.686</b> | 1632.977        | 1616.958        | <b>1617.966</b> | 1615.950 | K[13] |
| G  | 13 | <b>1241.707</b> | 1462.871        | <b>1446.853</b> | 1447.860        | 1445.845 | G[12] |
| G  | 14 | <b>1298.729</b> | 1405.850        | 1389.831        | <b>1390.839</b> | 1388.823 | G[11] |
| A  | 15 | <b>1369.766</b> | 1348.828        | 1332.809        | 1333.817        | 1331.802 | A[10] |
| R  | 16 | <b>1539.874</b> | 1277.791        | 1261.773        | <b>1262.780</b> | 1260.765 | R[9]  |
| R  | 17 | 1695.973        | <b>1107.686</b> | 1091.667        | <b>1092.675</b> | 1090.659 | R[8]  |
| H  | 18 | <b>1833.031</b> | 951.585         | <b>935.566</b>  | <b>936.574</b>  | 934.558  | H[7]  |
| R  | 19 | 1989.133        | <b>814.526</b>  | <b>798.507</b>  | <b>799.515</b>  | 797.499  | R[6]  |
| K  | 20 | 2145.250        | 658.425         | <b>642.406</b>  | 643.414         | 641.398  | K[5]  |
| V  | 21 | 2244.227        | 502.300         | 486.280         | 487.287         | 485.272  | V[4]  |
| L  | 22 | 2367.413        | 463.139         | 447.119         | <b>388.215</b>  | 389.203  | L[3]  |
| R  | 23 | 2513.512        | 290.146         | 274.127         | <b>275.135</b>  | 273.119  | R[2]  |
| D  | 24 | 2628.539        | 134.045         | 118.026         | 119.034         | 117.018  | D[1]  |

# sp | P62806 | H4\_MOUSE

[Acetyl]SGRGKGGKGLGK<sup>Acetyl</sup><sub>42.01</sub> GGAK<sup>Acetyl</sup><sub>42.01</sub> RHRK<sup>Dimethyl</sup><sub>28.03</sub> VLRD

- ▶ fragmentation table for charge state 2+
- ▶ specType=etd
- ▶ score=82.66
- ▶ F113280.dat
- ▶ query=q48588\_p1
- ▶ precursor=658.137210
- ▶ chargePrecursor=4
- ▶ itol=0.5

| AA    | c               | y               | z+1             | z+2             | z               | AA    |
|-------|-----------------|-----------------|-----------------|-----------------|-----------------|-------|
| S[1]  | 74.642          | <b>1315.265</b> | <b>1307.256</b> | 0.504           | 1306.752        | S[24] |
| G[2]  | 102.553         | <b>1250.744</b> | <b>1242.735</b> | 0.504           | 1242.231        | G[23] |
| R[3]  | 180.603         | 1222.233        | 1214.224        | 1914.728        | 1213.720        | R[22] |
| G[4]  | 259.114         | 1144.183        | <b>1138.173</b> | <b>1130.077</b> | 1129.569        | G[21] |
| K[5]  | 273.163         | 1115.672        | <b>1107.663</b> | <b>1108.167</b> | 1107.159        | K[20] |
| G[6]  | 303.672         | 1051.625        | <b>1043.615</b> | 1044.119        | <b>1043.111</b> | G[19] |
| G[7]  | 330.183         | 1023.114        | <b>1015.104</b> | 1015.608        | <b>1014.601</b> | G[18] |
| K[8]  | 394.230         | 994.603         | <b>986.594</b>  | <b>987.098</b>  | <b>986.090</b>  | K[17] |
| G[9]  | 422.741         | 930.595         | <b>922.546</b>  | <b>923.050</b>  | 922.042         | G[16] |
| L[10] | 479.293         | 902.045         | 884.035         | 884.539         | 883.531         | L[15] |
| G[11] | 507.794         | 845.503         | 837.493         | <b>837.997</b>  | 836.990         | G[14] |
| K[12] | 502.847         | 816.992         | 808.983         | <b>809.487</b>  | 808.479         | K[13] |
| G[13] | 621.357         | 731.939         | 723.930         | <b>724.434</b>  | 723.426         | G[12] |
| G[14] | 648.868         | 703.429         | <b>695.419</b>  | <b>695.923</b>  | 694.915         | G[11] |
| A[15] | 685.389         | 674.919         | <b>666.908</b>  | <b>667.412</b>  | <b>666.405</b>  | A[10] |
| R[16] | 770.439         | 639.399         | <b>631.390</b>  | 631.894         | <b>630.886</b>  | R[9]  |
| R[17] | <b>848.490</b>  | 554.347         | <b>546.337</b>  | <b>546.841</b>  | <b>545.833</b>  | R[8]  |
| H[18] | <b>917.019</b>  | 476.296         | 468.287         | 468.791         | 467.783         | H[7]  |
| R[19] | <b>995.070</b>  | 407.767         | 399.757         | 400.261         | 399.253         | R[6]  |
| K[20] | 1071.133        | 329.746         | 321.737         | 322.241         | 321.233         | K[5]  |
| V[21] | <b>1122.667</b> | 251.693         | 243.683         | 244.187         | 243.180         | V[4]  |
| L[22] | <b>1179.209</b> | 202.139         | 194.129         | 194.633         | 193.625         | L[3]  |
| R[23] | <b>1257.260</b> | 145.577         | 137.567         | 138.071         | 137.063         | R[2]  |
| D[24] | 1314.773        | 67.526          | 59.517          | 60.021          | 59.013          | D[1]  |

# sp | P62806 | H4\_MOUSE

[Acetyl]SGRGKGGKGLGK <sup>Acetyl</sup><sub>42.01</sub> GGAK <sup>Acetyl</sup><sub>42.01</sub> RHRK <sup>Dimethyl</sup><sub>28.03</sub> VLRD

- ▶ fragmentation table for charge state 3+
- ▶ specType=etd
- ▶ score=82.66
- ▶ F113280.dat
- ▶ query=q48588.p1
- ▶ precursor=658.137210
- ▶ chargePrecursor=4
- ▶ itol=0.5

| AA    | c              | y              | z+1            | z+2            | z              | AA    |
|-------|----------------|----------------|----------------|----------------|----------------|-------|
| S[1]  | 49.697         | <b>877.179</b> | <b>671.840</b> | 0.672          | 871.904        | S[24] |
| G[2]  | 58.704         | 134.165        | <b>828.826</b> | 0.672          | 828.490        | G[23] |
| R[3]  | 150.738        | 815.158        | <b>809.818</b> | <b>810.154</b> | <b>809.482</b> | R[22] |
| G[4]  | 139.745        | 763.124        | 757.785        | 758.121        | 757.449        | G[21] |
| K[5]  | 182.443        | 744.117        | 738.778        | 739.113        | 738.442        | K[20] |
| G[6]  | 201.450        | 701.419        | <b>696.079</b> | 696.415        | <b>695.743</b> | G[19] |
| G[7]  | 220.458        | 682.412        | 677.072        | 677.408        | 676.736        | G[18] |
| K[8]  | 263.156        | 663.404        | 658.063        | 658.401        | 657.729        | K[17] |
| G[9]  | 282.163        | 630.705        | 615.367        | 615.703        | 615.031        | G[16] |
| L[10] | 319.958        | <b>601.699</b> | 596.359        | 596.698        | 596.023        | L[15] |
| G[11] | 338.965        | 504.024        | 558.665        | 559.001        | 558.329        | G[14] |
| K[12] | 395.567        | <b>544.997</b> | 539.658        | 539.994        | 539.322        | K[13] |
| G[13] | 414.574        | 488.295        | 482.956        | 483.292        | 482.620        | G[12] |
| G[14] | 433.581        | 469.288        | 463.949        | 464.285        | 463.613        | G[11] |
| A[15] | 457.260        | 450.281        | 444.941        | 445.277        | 444.605        | A[10] |
| K[16] | 513.962        | 426.602        | 421.262        | 421.598        | 420.926        | K[9]  |
| R[17] | 565.996        | 369.900        | 364.561        | 364.896        | 364.225        | R[8]  |
| H[18] | 611.682        | 317.896        | 312.527        | 312.863        | 312.191        | H[7]  |
| R[19] | 663.716        | 272.180        | 266.941        | 267.176        | 266.505        | R[6]  |
| K[20] | 715.758        | 220.146        | 214.807        | 215.143        | 214.471        | K[5]  |
| V[21] | 748.781        | 168.104        | 162.765        | 163.101        | 162.429        | V[4]  |
| L[22] | 786.475        | 135.082        | 129.742        | 130.078        | 129.406        | L[3]  |
| R[23] | <b>838.509</b> | 97.387         | 92.047         | 92.383         | 91.711         | R[2]  |
| D[24] | 876.851        | 45.353         | 40.014         | 40.349         | 39.678         | D[1]  |





# sp | P62806 | H4\_MOUSE

[Acetyl]SGRGKGGK <sup>Acetyl</sup><sub>42.01</sub> GLGK <sup>Acetyl</sup><sub>42.01</sub> GGAK <sup>Acetyl</sup><sub>42.01</sub> RHRK <sup>Dimethyl</sup><sub>28.03</sub> VLRD

- ▶ fragmentation table for charge state 1+
- ▶ specType=etd
- ▶ score=102.81
- ▶ F113280.dat
- ▶ query=q49042.p1
- ▶ precursor=668.639290
- ▶ chargePrecursor=4
- ▶ itol=0.5

| AA    | c               | y        | z+1            | z+2             | z        | AA    |
|-------|-----------------|----------|----------------|-----------------|----------|-------|
| S[1]  | 147.076         | 2071.534 | 2055.515       | 0.000           | 2054.507 | S[24] |
| G[2]  | 224.598         | 2542.491 | 2526.473       | 0.000           | 2525.465 | G[23] |
| T[3]  | <b>300.199</b>  | 2328.470 | 2309.451       | 2070.459        | 2308.443 | T[22] |
| G[4]  | <b>417.220</b>  | 2239.369 | 2313.350       | 2314.358        | 2312.342 | G[21] |
| K[5]  | <b>545.115</b>  | 2272.347 | 2256.329       | 2257.336        | 2255.321 | K[20] |
| G[6]  | <b>602.337</b>  | 2144.253 | 2138.234       | 2129.241        | 2127.226 | G[19] |
| G[7]  | <b>659.358</b>  | 2087.231 | 2071.212       | 2072.220        | 2070.204 | G[18] |
| K[8]  | <b>829.464</b>  | 2030.209 | 2014.191       | 2015.198        | 2013.183 | K[17] |
| G[9]  | <b>886.485</b>  | 1890.104 | 1884.085       | <b>1845.093</b> | 1843.077 | G[16] |
| L[10] | <b>939.549</b>  | 1803.082 | 1787.064       | 1788.071        | 1786.056 | L[15] |
| G[11] | <b>1056.591</b> | 1689.998 | 1673.980       | <b>1674.987</b> | 1672.972 | G[14] |
| K[12] | <b>1226.696</b> | 1632.977 | 1616.958       | <b>1617.966</b> | 1615.950 | K[13] |
| G[13] | <b>1283.718</b> | 1462.871 | 1446.853       | 1447.860        | 1445.845 | G[12] |
| G[14] | <b>1340.739</b> | 1405.850 | 1389.831       | <b>1390.839</b> | 1388.823 | G[11] |
| A[15] | 1511.776        | 1348.829 | 1332.810       | 1333.818        | 1331.802 | A[10] |
| K[16] | <b>1581.882</b> | 1277.791 | 1261.773       | 1262.780        | 1260.765 | K[9]  |
| R[17] | <b>1737.983</b> | 1197.686 | 1091.667       | <b>1092.675</b> | 1090.659 | R[8]  |
| H[18] | 1876.942        | 951.585  | <b>935.566</b> | 936.574         | 934.558  | H[7]  |
| R[19] | 2031.143        | 814.526  | <b>798.507</b> | <b>799.515</b>  | 797.499  | R[6]  |
| K[20] | 2187.209        | 658.425  | 642.406        | 643.414         | 641.398  | K[5]  |
| V[21] | 2286.338        | 602.298  | 486.280        | 487.287         | 485.272  | V[4]  |
| L[22] | 2399.422        | 460.236  | 387.211        | 388.219         | 386.203  | L[3]  |
| D[23] | 2529.523        | 290.140  | 274.121        | <b>275.135</b>  | 273.115  | D[2]  |
| D[24] | 2670.550        | 134.045  | 118.026        | 119.034         | 117.015  | D[1]  |

# sp | P62806 | H4\_MOUSE

[Acetyl]SGRGKGGK<sup>Acetyl</sup><sub>42.01</sub> GLGK<sup>Acetyl</sup><sub>42.01</sub> GGAK<sup>Acetyl</sup><sub>42.01</sub> RHRK<sup>Dimethyl</sup><sub>28.03</sub> VLRD

- ▶ fragmentation table for charge state 2+
- ▶ specType=etd
- ▶ score=102.81
- ▶ F113280.dat
- ▶ query=q49042.p1
- ▶ precursor=668.639290
- ▶ chargePrecursor=4
- ▶ itol=0.5

| AA    | c               | y               | z+1             | z+2             | z               | AA    |
|-------|-----------------|-----------------|-----------------|-----------------|-----------------|-------|
| S[1]  | 74.042          | 1138.271        | 1126.261        | 0.504           | 1327.757        | S[24] |
| G[2]  | 102.551         | 1271.746        | <b>1263.740</b> | 0.504           | 1263.236        | G[23] |
| R[3]  | 180.603         | 1243.239        | 1231.229        | <b>1235.733</b> | 1234.723        | R[22] |
| G[4]  | 209.114         | 1165.189        | <b>1157.179</b> | <b>1157.683</b> | <b>1156.675</b> | G[21] |
| K[5]  | 273.161         | 1136.677        | <b>1128.668</b> | <b>1129.172</b> | 1128.162        | K[20] |
| G[6]  | 301.672         | 1072.630        | <b>1064.620</b> | <b>1065.124</b> | 1064.117        | G[19] |
| G[7]  | 330.183         | 1044.119        | <b>1036.110</b> | <b>1036.614</b> | 1035.606        | G[18] |
| K[8]  | 415.216         | <b>1015.608</b> | <b>1007.599</b> | <b>1008.103</b> | 1007.095        | K[17] |
| G[9]  | 443.746         | 0.30556         | <b>922.546</b>  | <b>923.050</b>  | 922.042         | G[16] |
| L[10] | 509.288         | 992.045         | 980.035         | 984.539         | 983.531         | L[15] |
| G[11] | 528.799         | 945.501         | <b>837.493</b>  | <b>837.997</b>  | 836.990         | G[14] |
| K[12] | 613.852         | 816.992         | <b>808.983</b>  | <b>809.487</b>  | 808.479         | K[13] |
| G[13] | 642.363         | 731.939         | 723.930         | 724.434         | 723.426         | G[12] |
| G[14] | 670.873         | 703.429         | <b>695.419</b>  | <b>695.923</b>  | 694.915         | G[11] |
| A[15] | 698.384         | 674.918         | 666.908         | 667.412         | 666.404         | A[10] |
| R[16] | <b>791.445</b>  | 639.399         | 631.390         | <b>631.894</b>  | 630.886         | R[9]  |
| R[17] | 869.495         | 554.347         | <b>546.337</b>  | <b>546.841</b>  | <b>545.833</b>  | R[8]  |
| H[18] | <b>938.025</b>  | 476.296         | 468.287         | 468.791         | 467.783         | H[7]  |
| R[19] | <b>1016.075</b> | 407.767         | 399.757         | 400.261         | 399.253         | R[6]  |
| K[20] | 1094.128        | 329.716         | 321.707         | 322.211         | 321.203         | K[5]  |
| V[21] | <b>1143.673</b> | 251.663         | 243.653         | 244.157         | 243.149         | V[4]  |
| L[22] | <b>1200.215</b> | 202.119         | 194.109         | 194.613         | 193.605         | L[3]  |
| R[23] | <b>1278.265</b> | 145.577         | 137.567         | 138.071         | 137.063         | R[2]  |
| D[24] | 1335.779        | 67.526          | 59.517          | 60.021          | 59.013          | D[1]  |

# sp | P62806 | H4\_MOUSE

[Acetyl]SGRGKGGK <sup>Acetyl</sup><sub>42.01</sub> GLGK <sup>Acetyl</sup><sub>42.01</sub> GGAK <sup>Acetyl</sup><sub>42.01</sub> RHRK <sup>Dimethyl</sup><sub>28.03</sub> VLRD

- ▶ fragmentation table for charge state 3+
- ▶ specType=etd
- ▶ score=102.81
- ▶ F113280.dat
- ▶ query=q49042.p1
- ▶ precursor=668.639290
- ▶ chargePrecursor=4
- ▶ itol=0.5

| AA    | c              | y              | z+1            | z+2            | z       | AA    |
|-------|----------------|----------------|----------------|----------------|---------|-------|
| S[1]  | 49.597         | <b>891.183</b> | <b>885.843</b> | 0.572          | 885.507 | S[24] |
| G[2]  | 58.704         | 846.159        | <b>842.829</b> | 0.572          | 842.493 | G[23] |
| R[3]  | 130.738        | <b>829.161</b> | 823.822        | <b>824.158</b> | 823.486 | R[22] |
| G[4]  | 139.745        | 777.128        | 771.788        | 772.124        | 771.452 | G[21] |
| K[5]  | 182.443        | 758.121        | 752.781        | 753.117        | 752.445 | K[20] |
| G[6]  | 201.450        | 715.422        | 710.083        | 710.419        | 709.747 | G[19] |
| G[7]  | 220.458        | 696.415        | 691.075        | 691.412        | 690.740 | G[18] |
| K[8]  | 277.159        | 677.408        | 672.068        | 672.404        | 671.732 | K[17] |
| G[9]  | 296.167        | 658.705        | 653.367        | 653.703        | 653.031 | G[16] |
| L[10] | 313.891        | 601.699        | 596.359        | 596.695        | 596.023 | L[15] |
| G[11] | 352.888        | 564.054        | 558.695        | 559.031        | 558.359 | G[14] |
| K[12] | 409.570        | <b>544.997</b> | 539.658        | 539.994        | 539.322 | K[13] |
| G[13] | 428.577        | 488.295        | 482.956        | 483.292        | 482.620 | G[12] |
| G[14] | 447.585        | 469.288        | 463.949        | 464.285        | 463.613 | G[11] |
| A[15] | 471.264        | 450.281        | 444.941        | 445.277        | 444.605 | A[10] |
| K[16] | 527.966        | 426.602        | 421.262        | 421.598        | 420.926 | K[9]  |
| R[17] | 579.999        | 369.900        | 364.561        | 364.896        | 364.225 | R[8]  |
| H[18] | 625.686        | 317.866        | 312.527        | 312.863        | 312.191 | H[7]  |
| R[19] | 677.719        | 272.180        | 266.841        | 267.176        | 266.505 | R[6]  |
| K[20] | 729.761        | 220.140        | 214.801        | 215.143        | 214.471 | K[5]  |
| V[21] | 762.784        | 168.104        | 162.765        | 163.101        | 162.429 | V[4]  |
| L[22] | 830.479        | 135.082        | 129.742        | 130.078        | 129.406 | L[3]  |
| R[23] | <b>852.513</b> | 97.387         | 92.047         | 92.383         | 91.711  | R[2]  |
| D[24] | 890.855        | 45.353         | 40.014         | 40.349         | 39.678  | D[1]  |

# sp | P62806 | H4\_MOUSE

[Acetyl]SGRGKGGK Acetyl  
42.01 GLGK Acetyl  
42.01 GGAK Acetyl  
42.01 RHRK Dimethyl  
28.03 VLRD

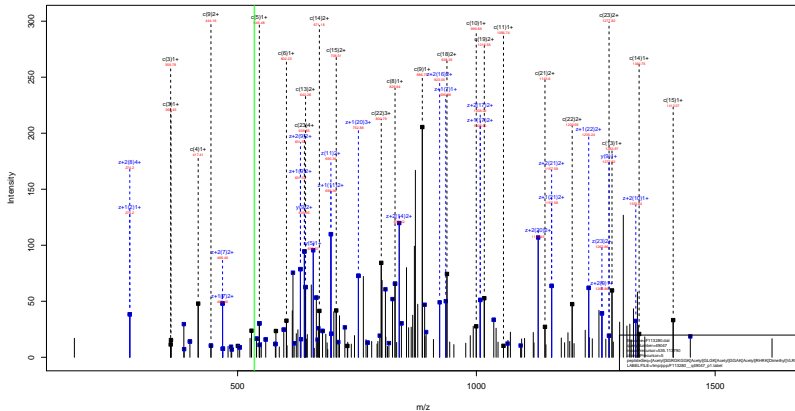

# sp | P62806 | H4\_MOUSE

[Acetyl]SGRGKGGK <sup>Acetyl</sup><sub>42.01</sub> GLGK <sup>Acetyl</sup><sub>42.01</sub> GGAK <sup>Acetyl</sup><sub>42.01</sub> RHRK <sup>Dimethyl</sup><sub>28.03</sub> VLRD

- ▶ fragmentation table for charge state 1+
- ▶ specType=etd
- ▶ score=54.55
- ▶ F113280.dat
- ▶ query=q49047\_p1
- ▶ precursor=535.113790
- ▶ chargePrecursor=5
- ▶ itol=0.5

| AA | c  | y               | z+1             | z+2            | z               | AA             |       |
|----|----|-----------------|-----------------|----------------|-----------------|----------------|-------|
| S  | 1  | 147.076         | 2073.534        | 2055.515       | 0.000           | 2054.507       | S[24] |
| G  | 2  | 204.008         | 2542.491        | 2526.473       | 0.000           | 2525.465       | G[23] |
| R  | 3  | <b>350.190</b>  | 2405.470        | 2469.451       | 2470.439        | 2468.443       | R[22] |
| G  | 4  | <b>417.230</b>  | 2329.369        | 2313.350       | 2314.338        | 2312.341       | G[21] |
| K  | 5  | <b>545.315</b>  | 2272.347        | 2256.329       | 2257.320        | 2255.321       | K[20] |
| G  | 6  | <b>602.337</b>  | 2144.252        | 2128.234       | 2129.241        | 2127.238       | G[19] |
| G  | 7  | 659.358         | 2087.231        | 2071.215       | 2072.220        | 2070.204       | G[18] |
| K  | 8  | <b>829.464</b>  | 2030.209        | 2014.191       | 2015.198        | 2013.183       | K[17] |
| G  | 9  | <b>886.485</b>  | 1985.184        | 1844.085       | 1845.093        | 1843.077       | G[16] |
| L  | 10 | <b>929.549</b>  | 1903.082        | 1787.084       | 1788.071        | 1786.056       | L[15] |
| G  | 11 | <b>1056.591</b> | 1689.968        | 1673.980       | 1674.987        | 1672.972       | G[14] |
| K  | 12 | 1226.696        | 1632.977        | 1616.958       | 1617.966        | 1615.950       | K[13] |
| G  | 13 | <b>1283.718</b> | 1462.871        | 1446.853       | <b>1447.860</b> | 1445.845       | G[12] |
| G  | 14 | <b>1340.739</b> | 1405.850        | 1389.831       | 1390.839        | 1388.823       | G[11] |
| A  | 15 | <b>1411.776</b> | 1348.828        | 1332.810       | <b>1333.818</b> | 1331.802       | A[10] |
| R  | 16 | 1581.885        | <b>1277.791</b> | 1261.773       | <b>1262.780</b> | 1260.765       | R[9]  |
| R  | 17 | 1737.983        | 1107.688        | 1091.667       | <b>1092.675</b> | 1090.659       | R[8]  |
| H  | 18 | 1875.042        | 951.585         | <b>935.566</b> | 936.574         | 934.558        | H[7]  |
| R  | 19 | 2031.143        | 814.520         | 798.507        | 799.515         | <b>797.499</b> | R[6]  |
| K  | 20 | 2187.209        | <b>658.425</b>  | <b>642.406</b> | 643.414         | 641.398        | K[5]  |
| V  | 21 | 2286.338        | 502.298         | <b>486.280</b> | <b>487.287</b>  | 485.272        | V[4]  |
| L  | 22 | 2399.422        | 403.239         | <b>387.211</b> | <b>388.219</b>  | 386.203        | L[3]  |
| R  | 23 | 2555.523        | 290.140         | <b>274.127</b> | 275.135         | 273.119        | R[2]  |
| D  | 24 | 2670.550        | 134.045         | 118.028        | 119.034         | 117.018        | D[1]  |

# sp | P62806 | H4\_MOUSE

[Acetyl]SGRGKGGK<sup>Acetyl</sup><sub>42.01</sub> GLGK<sup>Acetyl</sup><sub>42.01</sub> GGAK<sup>Acetyl</sup><sub>42.01</sub> RHRK<sup>Dimethyl</sup><sub>28.03</sub> VLRD

- ▶ fragmentation table for charge state 2+
- ▶ specType=etd
- ▶ score=54.55
- ▶ F113280.dat
- ▶ query=q49047\_p1
- ▶ precursor=535.113790
- ▶ chargePrecursor=5
- ▶ itol=0.5

| AA    | c               | y              | z+1             | z+2             | z               | AA    |
|-------|-----------------|----------------|-----------------|-----------------|-----------------|-------|
| S[1]  | 74.042          | 1336.271       | 1338.261        | 0.504           | 1327.757        | S[24] |
| G[2]  | 102.553         | 1271.749       | 1263.740        | 0.504           | <b>1263.236</b> | G[23] |
| R[3]  | 180.603         | 1243.239       | <b>1235.229</b> | <b>1235.733</b> | 1234.725        | R[22] |
| G[4]  | 269.114         | 1185.188       | <b>1157.179</b> | <b>1157.683</b> | 1156.675        | G[21] |
| K[5]  | 273.161         | 1138.677       | 1128.668        | <b>1129.172</b> | 1125.164        | K[20] |
| G[6]  | 361.672         | 1072.630       | 1064.620        | <b>1065.124</b> | 1064.117        | G[19] |
| G[7]  | 350.163         | 1044.119       | <b>1036.110</b> | <b>1036.614</b> | 1035.606        | G[18] |
| K[8]  | 415.236         | 1015.608       | <b>1007.599</b> | <b>1008.103</b> | 1007.095        | K[17] |
| G[9]  | <b>443.746</b>  | 930.556        | 922.546         | <b>923.050</b>  | 922.042         | G[16] |
| L[10] | <b>509.288</b>  | 902.045        | 894.035         | <b>894.539</b>  | 893.532         | L[15] |
| G[11] | <b>528.799</b>  | 845.503        | 837.493         | <b>837.997</b>  | 836.990         | G[14] |
| K[12] | 613.852         | <b>816.992</b> | 808.983         | <b>809.487</b>  | 808.479         | K[13] |
| G[13] | <b>642.363</b>  | 731.939        | 723.930         | <b>724.434</b>  | 723.426         | G[12] |
| G[14] | <b>670.873</b>  | 703.429        | <b>695.419</b>  | <b>695.923</b>  | <b>694.915</b>  | G[11] |
| A[15] | <b>706.392</b>  | 614.918        | 606.908         | <b>607.412</b>  | 606.405         | A[10] |
| R[16] | 703.458         | <b>639.399</b> | <b>631.390</b>  | <b>631.894</b>  | 630.886         | R[9]  |
| R[17] | 869.495         | 554.347        | <b>546.337</b>  | 548.341         | <b>545.833</b>  | R[8]  |
| R[18] | <b>938.025</b>  | 476.295        | <b>468.287</b>  | <b>468.791</b>  | 467.783         | R[7]  |
| R[19] | <b>1016.075</b> | 407.767        | <b>399.757</b>  | <b>400.261</b>  | 399.253         | R[6]  |
| K[20] | 1094.138        | 329.716        | 321.707         | 322.711         | 321.203         | K[5]  |
| V[21] | <b>1143.673</b> | 251.652        | 243.643         | 244.647         | 243.140         | V[4]  |
| L[22] | <b>1200.215</b> | 202.119        | 194.110         | 194.613         | 193.605         | L[3]  |
| R[23] | <b>1278.265</b> | 145.577        | 137.567         | 138.071         | 137.063         | R[2]  |
| D[24] | 1335.779        | 67.526         | 59.517          | 60.021          | 59.013          | D[1]  |

# sp | P62806 | H4\_MOUSE

[Acetyl]SGRGKGGK <sup>Acetyl</sup><sub>42.01</sub> GLGK <sup>Acetyl</sup><sub>42.01</sub> GGAK <sup>Acetyl</sup><sub>42.01</sub> RHRK <sup>Dimethyl</sup><sub>28.03</sub> VLRD

- ▶ fragmentation table for charge state 3+
- ▶ specType=etd
- ▶ score=54.55
- ▶ F113280.dat
- ▶ query=q49047.p1
- ▶ precursor=535.113790
- ▶ chargePrecursor=5
- ▶ itol=0.5

| AA    | c              | y              | z+1            | z+2            | z              | AA    |
|-------|----------------|----------------|----------------|----------------|----------------|-------|
| S[1]  | 49.697         | <b>891.183</b> | 885.843        | 0.672          | 885.507        | S[24] |
| G[2]  | 58.704         | 848.195        | <b>842.829</b> | 0.672          | <b>842.493</b> | G[23] |
| R[3]  | 150.738        | <b>829.161</b> | 823.822        | <b>824.158</b> | 823.486        | R[22] |
| G[4]  | 139.745        | 777.128        | <b>771.788</b> | <b>772.124</b> | 771.452        | G[21] |
| K[5]  | 182.443        | 798.121        | <b>752.781</b> | <b>753.117</b> | <b>752.445</b> | K[20] |
| G[6]  | 201.450        | 715.422        | <b>710.083</b> | <b>710.419</b> | 709.747        | G[19] |
| G[7]  | 220.458        | <b>696.415</b> | 691.076        | 691.412        | 690.740        | G[18] |
| K[8]  | 277.159        | <b>677.408</b> | 672.068        | 672.404        | 671.732        | K[17] |
| G[9]  | 296.167        | 630.798        | 613.397        | <b>615.703</b> | 615.031        | G[16] |
| L[10] | 313.881        | 601.699        | <b>596.359</b> | <b>596.695</b> | 596.023        | L[15] |
| G[11] | 352.888        | 564.004        | <b>558.665</b> | <b>559.001</b> | 558.329        | G[14] |
| K[12] | 409.570        | <b>544.997</b> | <b>539.658</b> | <b>539.994</b> | <b>539.322</b> | K[13] |
| G[13] | 428.577        | 488.295        | 482.956        | 483.292        | 482.620        | G[12] |
| G[14] | 447.585        | <b>469.288</b> | 463.949        | 464.285        | 463.613        | G[11] |
| A[15] | 471.264        | 450.281        | 444.941        | 445.277        | <b>444.605</b> | A[10] |
| K[16] | 527.966        | 426.602        | 421.262        | 421.598        | 420.926        | K[9]  |
| R[17] | <b>579.999</b> | 369.900        | 364.561        | 364.896        | 364.225        | R[8]  |
| H[18] | 605.686        | 317.866        | 312.527        | 312.863        | 312.191        | H[7]  |
| R[19] | <b>677.719</b> | 272.180        | 266.841        | 267.176        | 266.505        | R[6]  |
| K[20] | <b>729.761</b> | 220.140        | 214.807        | 215.143        | 214.471        | K[5]  |
| V[21] | 762.784        | 168.104        | 162.765        | 163.101        | 162.429        | V[4]  |
| L[22] | <b>800.479</b> | 135.082        | 129.742        | 130.078        | 129.406        | L[3]  |
| R[23] | 852.513        | 97.387         | 92.047         | 92.383         | 91.711         | R[2]  |
| D[24] | 890.855        | 45.353         | 40.014         | 40.349         | 39.678         | D[1]  |



# sp | P62806 | H4\_MOUSE

[Acetyl]SGRGKGGK <sup>Acetyl</sup><sub>42.01</sub> GLGK <sup>Acetyl</sup><sub>42.01</sub> GGAK <sup>Acetyl</sup><sub>42.01</sub> RHRK <sup>Dimethyl</sup><sub>28.03</sub> VLRD

- ▶ fragmentation table for charge state 4+
- ▶ specType=etd
- ▶ score=54.55
- ▶ F113280.dat
- ▶ query=q49047.p1
- ▶ precursor=535.113790
- ▶ chargePrecursor=5
- ▶ itol=0.5

| AA    | c              | y              | z+1            | z+2            | z              | AA    |
|-------|----------------|----------------|----------------|----------------|----------------|-------|
| S[1]  | 37.525         | <b>668.639</b> | <b>664.634</b> | 0.755          | <b>664.382</b> | S[24] |
| G[2]  | 51.780         | 536.378        | <b>632.374</b> | 0.755          | 632.122        | G[23] |
| R[3]  | 90.805         | 622.123        | <b>618.118</b> | <b>618.370</b> | 617.866        | R[22] |
| G[4]  | 105.061        | 583.098        | <b>579.093</b> | <b>579.345</b> | <b>578.841</b> | G[21] |
| K[5]  | 137.084        | 568.842        | 564.838        | 565.090        | 564.586        | K[20] |
| G[6]  | 151.340        | 536.819        | 532.814        | 533.066        | 532.562        | G[19] |
| G[7]  | 165.595        | 522.563        | 518.558        | 518.810        | 518.307        | G[18] |
| K[8]  | 208.121        | 508.308        | <b>504.303</b> | <b>504.555</b> | <b>504.051</b> | K[17] |
| G[9]  | 222.377        | 495.781        | 491.777        | 492.029        | 491.525        | G[16] |
| L[10] | 250.048        | 451.526        | 447.521        | 447.773        | 447.269        | L[15] |
| G[11] | 264.303        | 423.255        | 419.250        | 419.502        | 418.998        | G[14] |
| K[12] | 307.430        | 400.000        | 404.995        | 405.247        | 404.743        | K[13] |
| G[13] | 321.685        | 366.473        | 362.469        | 362.721        | 362.217        | G[12] |
| G[14] | 335.940        | 352.218        | 348.213        | 348.465        | 347.961        | G[11] |
| A[15] | 353.700        | 337.963        | 333.958        | 334.210        | 333.706        | A[10] |
| K[16] | 398.226        | 320.203        | 316.199        | 316.451        | 315.947        | K[9]  |
| R[17] | 435.251        | 277.677        | 273.672        | <b>273.924</b> | 273.420        | R[8]  |
| H[18] | <b>469.516</b> | 238.652        | 234.647        | 234.899        | 234.395        | H[7]  |
| R[19] | 458.541        | 254.397        | 250.392        | 250.644        | 250.140        | R[6]  |
| K[20] | 547.573        | 165.362        | 161.357        | 161.609        | 161.105        | K[5]  |
| V[21] | 572.340        | 126.330        | 122.325        | 122.577        | 122.073        | V[4]  |
| L[22] | 600.611        | 101.563        | 97.558         | 97.810         | 97.306         | L[3]  |
| R[23] | <b>639.636</b> | 73.292         | 69.287         | 69.539         | 69.035         | R[2]  |
| D[24] | 668.393        | 34.267         | 30.262         | 30.514         | 30.010         | D[1]  |

# sp | P62806 | H4\_MOUSE

[Acetyl]SGRGK Acetyl 42.01 GGK Acetyl 42.01 GLGK Acetyl 42.01 GGAK Acetyl 42.01 RHRK Dimethyl 28.03 VLRD

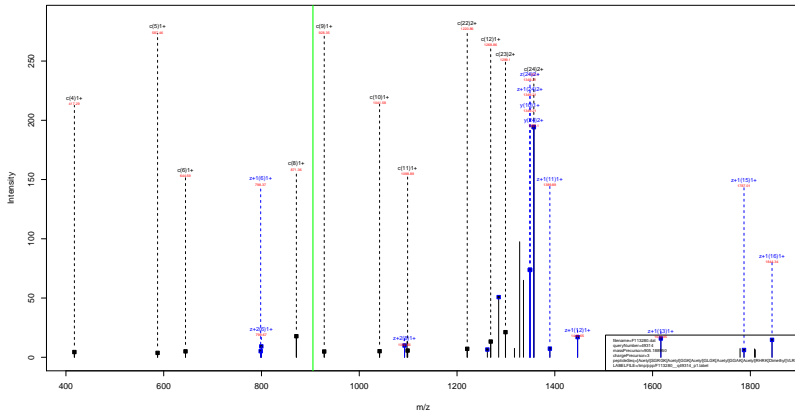

# sp | P62806 | H4\_MOUSE

[Acetyl]SGRGK<sub>42.01</sub> Acetyl GGK<sub>42.01</sub> Acetyl GLGK<sub>42.01</sub> Acetyl GGAK<sub>42.01</sub> Acetyl RHRK<sub>28.03</sub> Dimethyl VLRD

- ▶ fragmentation table for charge state 1+
- ▶ specType=etd
- ▶ score=54.86
- ▶ F113280.dat
- ▶ query=q49314\_p1
- ▶ precursor=905.188950
- ▶ chargePrecursor=3
- ▶ itol=0.5

| AA | c               | y               | z+1             | z+2             | z        | AA    |
|----|-----------------|-----------------|-----------------|-----------------|----------|-------|
| S  | 147.076         | 2713.544        | 2697.536        | 0.000           | 2696.519 | S[24] |
| G  | 204.098         | 2584.502        | 2568.483        | 0.000           | 2567.473 | G[23] |
| R  | 301.199         | 2527.480        | 2511.462        | 2512.470        | 2510.454 | R[22] |
| G  | <b>417.220</b>  | 2371.379        | 2355.361        | 2356.369        | 2354.351 | G[21] |
| K  | <b>587.326</b>  | 2314.358        | 2298.339        | 2299.347        | 2297.331 | K[20] |
| G  | <b>644.347</b>  | 2144.252        | 2128.234        | 2129.241        | 2127.226 | G[19] |
| G  | 761.369         | 2087.231        | 2071.213        | 2072.220        | 2070.204 | G[18] |
| K  | <b>871.474</b>  | 2030.209        | 2014.191        | 2015.199        | 2013.183 | K[17] |
| G  | <b>928.496</b>  | 1866.104        | <b>1844.085</b> | 1845.093        | 1843.077 | G[16] |
| L  | <b>1041.580</b> | 1863.082        | <b>1787.064</b> | 1788.071        | 1786.056 | L[15] |
| Q  | <b>1098.601</b> | 1689.998        | 1673.980        | 1674.987        | 1672.972 | Q[14] |
| K  | <b>1268.707</b> | 1632.977        | <b>1616.958</b> | 1617.966        | 1615.950 | K[13] |
| G  | 1325.728        | 1462.871        | <b>1446.853</b> | 1447.860        | 1445.845 | G[12] |
| G  | 1382.750        | 1405.850        | <b>1389.831</b> | 1390.839        | 1388.823 | G[11] |
| A  | 1439.767        | <b>1348.828</b> | 1332.810        | 1333.818        | 1331.802 | A[10] |
| R  | 1623.293        | 2399.799        | <b>1261.773</b> | 1262.780        | 1260.765 | R[9]  |
| R  | 1779.894        | 1107.688        | 1091.667        | <b>1092.675</b> | 1090.659 | R[8]  |
| H  | 1817.663        | 951.585         | 935.566         | 936.574         | 934.558  | H[7]  |
| R  | 2073.154        | 614.526         | <b>796.507</b>  | <b>799.515</b>  | 797.499  | R[6]  |
| K  | 2229.280        | 658.425         | 642.406         | 643.414         | 641.398  | K[5]  |
| V  | 2428.348        | 502.366         | 486.346         | 487.354         | 485.337  | V[4]  |
| L  | 2441.432        | 463.339         | 447.319         | 448.327         | 446.311  | L[3]  |
| R  | 2597.534        | 290.146         | 274.127         | 275.135         | 273.119  | R[2]  |
| D  | 2712.560        | 134.045         | 118.026         | 119.034         | 117.018  | D[1]  |

# sp | P62806 | H4\_MOUSE

[Acetyl]SGR**GK**<sup>Acetyl</sup><sub>42.01</sub> **G**G**K**<sup>Acetyl</sup><sub>42.01</sub> **G**L**G****K**<sup>Acetyl</sup><sub>42.01</sub> **G**G**A****K**<sup>Acetyl</sup><sub>42.01</sub> **R**H**R****K**<sup>Dimethyl</sup><sub>28.03</sub> **V**L**R****D**

- ▶ fragmentation table for charge state 2+
- ▶ specType=etd
- ▶ score=54.86
- ▶ F113280.dat
- ▶ query=q49314.p1
- ▶ precursor=905.188950
- ▶ chargePrecursor=3
- ▶ itol=0.5

| AA |    | c               | y               | z+1             | z+2      | z               | AA    |
|----|----|-----------------|-----------------|-----------------|----------|-----------------|-------|
| S  | 1  | 74.042          | <b>1357.276</b> | <b>1349.267</b> | 0.504    | <b>1348.763</b> | S[24] |
| G  | 2  | 102.553         | 1292.755        | <b>1284.745</b> | 0.504    | 1284.241        | G[23] |
| R  | 3  | 180.603         | 1264.244        | 1256.234        | 1256.738 | 1255.731        | R[22] |
| G  | 4  | 259.114         | 1199.193        | 1178.184        | 1179.688 | 1177.680        | G[21] |
| K  | 5  | 294.167         | 1157.682        | 1149.673        | 1150.177 | 1149.169        | K[20] |
| G  | 6  | 352.677         | 1072.630        | 1064.620        | 1065.124 | 1064.117        | G[19] |
| G  | 7  | 351.188         | 1044.119        | 1036.110        | 1036.614 | 1035.606        | G[18] |
| K  | 8  | 436.241         | 1015.608        | 1007.599        | 1008.103 | 1007.095        | K[17] |
| G  | 9  | 464.752         | 930.556         | 922.546         | 923.050  | 922.042         | G[16] |
| L  | 10 | 511.294         | 902.045         | 894.035         | 894.539  | 893.532         | L[15] |
| Q  | 11 | 549.804         | 845.503         | 837.493         | 837.997  | 836.990         | Q[14] |
| K  | 12 | 634.857         | 816.992         | 808.983         | 809.487  | 808.479         | K[13] |
| G  | 13 | 663.368         | 731.939         | 723.930         | 724.434  | 723.426         | G[12] |
| G  | 14 | 691.879         | 703.429         | 695.419         | 695.923  | 694.915         | G[11] |
| A  | 15 | 727.391         | 614.915         | 606.906         | 607.410  | 606.402         | A[10] |
| R  | 16 | 812.450         | 639.399         | 631.390         | 631.894  | 630.886         | R[9]  |
| R  | 17 | 890.500         | 554.347         | 546.337         | 546.841  | 545.833         | R[8]  |
| H  | 18 | 959.030         | 476.290         | 468.281         | 468.785  | 467.777         | H[7]  |
| R  | 19 | 1037.080        | 407.767         | 399.757         | 400.261  | 399.253         | R[6]  |
| K  | 20 | 1115.144        | 329.716         | 321.707         | 322.211  | 321.203         | K[5]  |
| V  | 21 | 1184.678        | 251.663         | 243.653         | 244.157  | 243.149         | V[4]  |
| L  | 22 | <b>1221.220</b> | 392.133         | 384.123         | 384.627  | 383.620         | L[3]  |
| R  | 23 | <b>1299.270</b> | 145.577         | 137.567         | 138.071  | 137.063         | R[2]  |
| D  | 24 | <b>1356.784</b> | 67.526          | 59.517          | 60.021   | 59.013          | D[1]  |

# sp | P43274 | H14\_MOUSE

[Acetyl]SETAPAAPAAPAPAEKTPVKKKARKAAGGAKRKTSGPPVSE

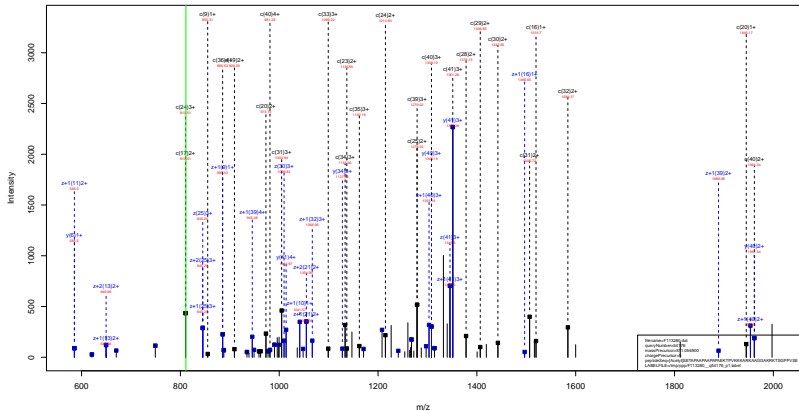

# sp | P43274 | H14\_MOUSE

[Acetyl]SETAPAAPAAPAPAEKTPVKKKARKAAGGAKRKTSGPPVSE

- ▶ fragmentation table for charge state 1+
- ▶ specType=etd
- ▶ score=43.99
- ▶ F113280.dat
- ▶ query=q54176.p1
- ▶ precursor=811.056900
- ▶ chargePrecursor=5
- ▶ itol=0.5

| AA  | c               | y               | z+1             | z+2             | z        | AA  |
|-----|-----------------|-----------------|-----------------|-----------------|----------|-----|
| S1  | 147.076         | 4051.243        | 4635.222        | 0.000           | 4034.215 | S41 |
| E2  | 276.119         | 3922.198        | 9906.180        | 0.000           | 3905.172 | E40 |
| T3  | 377.167         | 3793.156        | 3777.137        | 0.000           | 3776.129 | T39 |
| A4  | 448.204         | 3692.108        | 3679.090        | 0.000           | 3675.082 | A38 |
| F5  | 545.257         | 3621.071        | 3605.052        | 0.000           | 3604.045 | F37 |
| A6  | 619.294         | 3524.018        | 3508.000        | 0.000           | 3506.990 | A26 |
| A7  | 667.331         | 3452.982        | 3436.963        | 0.000           | 3435.955 | A35 |
| P8  | 784.384         | 3381.944        | 3365.925        | 0.000           | 3364.918 | P34 |
| A9  | <b>855.421</b>  | 3294.891        | 3268.873        | 0.000           | 3267.865 | A33 |
| A10 | 926.458         | 3213.854        | 3197.836        | 0.000           | 3196.828 | A32 |
| F11 | 1023.511        | 3142.817        | 3126.798        | 0.000           | 3125.791 | F31 |
| A12 | 1094.568        | 3049.764        | 3029.746        | 0.000           | 3028.738 | A30 |
| F13 | 1191.620        | 2974.727        | 2958.709        | 0.000           | 2957.701 | F29 |
| A14 | 1262.638        | 2877.674        | 2861.656        | 0.000           | 2860.648 | A28 |
| E15 | 1361.680        | 2806.637        | 2790.619        | 0.000           | 2789.611 | E27 |
| K16 | <b>1519.775</b> | 2677.595        | 2661.576        | 2662.584        | 2660.568 | K26 |
| T17 | 1620.623        | 2549.560        | 2533.541        | 2534.499        | 2532.473 | T25 |
| F18 | 1717.676        | 2448.452        | 2432.433        | 2433.441        | 2431.426 | F24 |
| V19 | 1816.944        | 2351.399        | 2335.381        | 2336.388        | 2334.373 | V23 |
| K20 | <b>1945.839</b> | 2252.331        | 2236.312        | 2237.320        | 2235.304 | K22 |
| K21 | 2073.134        | 2124.236        | 2108.217        | 2109.225        | 2107.209 | K21 |
| K22 | 2201.229        | 1996.141        | 1980.122        | 1981.130        | 1979.114 | K20 |
| A23 | 2272.266        | 1898.045        | 1882.027        | 1883.035        | 1881.020 | A19 |
| R24 | 2428.367        | 1797.009        | 1780.990        | 1781.998        | 1779.982 | R18 |
| K25 | 2556.462        | 1640.908        | 1624.889        | 1625.897        | 1623.881 | K17 |
| A26 | 2627.499        | 1512.813        | <b>1496.794</b> | 1497.802        | 1495.786 | A16 |
| A27 | 2698.536        | 1441.776        | 1425.757        | 1426.765        | 1424.749 | A15 |
| G28 | 2755.558        | 1370.739        | 1354.720        | 1355.728        | 1353.712 | G14 |
| G29 | 2812.579        | <b>1313.717</b> | <b>1297.698</b> | 1298.706        | 1296.690 | G13 |
| A30 | 2883.616        | 1256.696        | <b>1240.677</b> | 1241.685        | 1239.669 | A12 |
| K31 | 3011.711        | 1185.659        | 1169.640        | <b>1170.648</b> | 1168.632 | K11 |
| R32 | 3167.812        | 1057.564        | <b>1041.545</b> | 1042.553        | 1040.537 | R10 |
| K33 | 3295.907        | 901.463         | <b>885.444</b>  | 886.452         | 884.436  | K9  |
| F34 | 3396.955        | 773.368         | 757.349         | 758.357         | 756.341  | F8  |
| S35 | 3483.987        | 792.329         | 658.303         | 659.309         | 657.293  | S31 |
| G36 | 3541.009        | <b>585.288</b>  | 569.269         | 570.277         | 568.261  | G6  |
| F37 | 3638.061        | 528.256         | 512.248         | 513.256         | 511.240  | F6  |
| F38 | 3736.114        | 431.214         | 415.195         | 416.203         | 414.187  | F4  |
| V39 | 3834.182        | 334.161         | 318.142         | 319.150         | 317.134  | V3  |
| S40 | 3921.214        | 235.082         | 219.074         | 220.082         | 218.066  | S3  |
| E41 | 4050.257        | 148.986         | 132.942         | 133.950         | 131.934  | E1  |

# sp | P43274 | H14\_MOUSE

[Acetyl]SETAPAAPAAPAPAEKTPVKKKARKAAGGAKRKTSGPPVSE

- ▶ fragmentation table for charge state 2+
- ▶ specType=etd
- ▶ score=43.99
- ▶ F113280.dat
- ▶ query=q54176.p1
- ▶ precursor=811.056900
- ▶ chargePrecursor=5
- ▶ itol=0.5

| AA | c  | y               | z+1             | z+2             | z               | AA             |       |
|----|----|-----------------|-----------------|-----------------|-----------------|----------------|-------|
| S  | 1  | 74.042          | 2025.126        | 2018.115        | 0.504           | 2017.611       | S[41] |
| E  | 2  | 138.563         | <b>1961.603</b> | <b>1953.594</b> | 0.504           | 1953.090       | E[40] |
| T  | 3  | 189.097         | 1897.062        | <b>1889.072</b> | 0.504           | 1888.566       | T[39] |
| A  | 4  | 224.606         | 1846.558        | 1838.548        | 0.504           | 1838.044       | A[38] |
| F  | 5  | 273.132         | 1811.030        | 1803.030        | 0.504           | 1802.526       | F[37] |
| A  | 6  | 308.650         | 1782.511        | 1774.503        | 0.504           | 1774.000       | A[36] |
| A  | 7  | 344.169         | 1726.984        | 1718.985        | 0.504           | 1718.481       | A[35] |
| P  | 8  | 392.695         | 1691.476        | 1683.466        | 0.504           | 1682.962       | P[34] |
| A  | 9  | 428.214         | 1642.949        | 1634.940        | 0.504           | 1634.436       | A[33] |
| A  | 10 | 463.733         | 1607.431        | 1599.421        | 0.504           | 1598.917       | A[32] |
| F  | 11 | 512.259         | 1571.912        | 1563.903        | 0.504           | 1563.399       | F[31] |
| A  | 12 | 547.777         | 1523.396        | 1515.376        | 0.504           | 1514.871       | A[30] |
| F  | 13 | 596.304         | 1487.887        | 1479.858        | 0.504           | 1479.354       | F[29] |
| A  | 14 | 631.822         | 1439.341        | 1431.332        | 0.504           | 1430.828       | A[28] |
| E  | 15 | 696.344         | 1403.822        | 1395.813        | 0.504           | 1395.309       | E[27] |
| K  | 16 | 766.391         | 1339.301        | 1331.292        | 1311.790        | 1330.780       | K[26] |
| T  | 17 | <b>810.915</b>  | 1275.284        | <b>1267.244</b> | <b>1267.748</b> | 1266.740       | T[25] |
| F  | 18 | 896.441         | 1224.739        | 1215.709        | 1211.224        | 1210.719       | F[24] |
| V  | 19 | <b>968.976</b>  | 1176.203        | 1168.194        | 1168.698        | 1167.690       | V[23] |
| K  | 20 | <b>973.023</b>  | 1126.669        | 1118.660        | 1119.164        | 1118.156       | K[22] |
| K  | 21 | 1037.671        | 1062.622        | <b>1054.612</b> | <b>1055.116</b> | 1054.106       | K[21] |
| K  | 22 | 1101.118        | <b>998.574</b>  | <b>990.565</b>  | 991.069         | <b>990.061</b> | K[20] |
| A  | 23 | <b>1136.637</b> | <b>934.527</b>  | 925.517         | 927.021         | 926.011        | A[19] |
| R  | 24 | <b>1214.687</b> | 899.004         | 890.999         | 891.503         | 890.495        | R[18] |
| K  | 25 | <b>1278.735</b> | 820.958         | 812.948         | 813.452         | 812.444        | K[17] |
| A  | 26 | <b>1314.253</b> | 756.910         | <b>748.901</b>  | <b>749.405</b>  | 748.397        | A[16] |
| A  | 27 | 1369.772        | 721.392         | 713.382         | 713.886         | 712.878        | A[15] |
| G  | 28 | <b>1376.283</b> | 685.873         | 677.863         | 678.367         | 677.360        | G[14] |
| G  | 29 | <b>1406.793</b> | 657.362         | <b>649.353</b>  | <b>649.857</b>  | 648.849        | G[13] |
| A  | 30 | <b>1442.312</b> | 626.852         | <b>620.842</b>  | <b>621.346</b>  | 620.338        | A[12] |
| K  | 31 | <b>1506.359</b> | 593.333         | <b>585.324</b>  | <b>585.827</b>  | 584.820        | K[11] |
| R  | 32 | <b>1584.410</b> | 529.285         | 521.276         | 521.780         | 520.772        | R[10] |
| K  | 33 | 1648.457        | 451.235         | 443.226         | 443.729         | 442.722        | K[9]  |
| F  | 34 | 1698.961        | 387.187         | 379.178         | 379.682         | 378.674        | F[8]  |
| S  | 35 | 1742.497        | 336.664         | 328.654         | 329.158         | 328.150        | S[7]  |
| G  | 36 | 1771.008        | 293.140         | 285.138         | 285.642         | 284.634        | G[6]  |
| P  | 37 | 1819.534        | 264.637         | 256.627         | 257.131         | 256.124        | P[5]  |
| F  | 38 | 1868.061        | 216.110         | 208.101         | 208.605         | 207.597        | F[4]  |
| V  | 39 | 1917.595        | 167.584         | 159.575         | 160.079         | 159.071        | V[3]  |
| S  | 40 | <b>1961.111</b> | 118.050         | 110.041         | 110.544         | 109.537        | S[2]  |
| E  | 41 | 2025.632        | 74.534          | 66.524          | 67.028          | 66.021         | E[1]  |

# sp | P43274 | H14\_MOUSE

[Acetyl]SETAPAAPAAPAPAEKTPVKKKARKAAGGAKRKTSGPPVSE

- ▶ fragmentation table for charge state 3+
- ▶ specType=etd
- ▶ score=43.99
- ▶ F113280.dat
- ▶ query=q54176.p1
- ▶ precursor=811.056900
- ▶ chargePrecursor=5
- ▶ itol=0.5

| AA | c  | y               | z+1             | z+2             | z              | AA              |       |
|----|----|-----------------|-----------------|-----------------|----------------|-----------------|-------|
| S  | 1  | 49.697          | <b>1351.085</b> | <b>1345.746</b> | 0.672          | <b>1345.410</b> | S[41] |
| E  | 2  | 92.711          | <b>1308.071</b> | <b>1302.731</b> | 0.672          | 1302.398        | E[40] |
| T  | 3  | 126.394         | 1265.057        | 1259.717        | 0.672          | 1259.381        | T[39] |
| A  | 4  | 150.073         | 1231.374        | 1226.035        | 0.672          | 1225.699        | A[38] |
| P  | 5  | 182.424         | <b>1207.695</b> | 1202.356        | 0.672          | 1202.020        | P[37] |
| A  | 6  | 206.193         | 1173.544        | 1170.005        | 0.672          | 1169.669        | A[36] |
| A  | 7  | 229.782         | 1151.065        | 1146.326        | 0.672          | 1145.990        | A[35] |
| P  | 8  | 262.133         | <b>1127.986</b> | 1122.647        | 0.672          | 1122.311        | P[34] |
| A  | 9  | 285.812         | 1095.835        | 1090.296        | 0.672          | 1089.960        | A[33] |
| A  | 10 | 309.491         | 1071.950        | <b>1066.617</b> | 0.672          | 1066.281        | A[32] |
| P  | 11 | 341.242         | <b>1048.277</b> | 1042.938        | 0.672          | 1042.602        | P[31] |
| A  | 12 | 365.921         | 1019.926        | 1010.587        | 0.672          | <b>1010.251</b> | A[30] |
| P  | 13 | 397.672         | 992.241         | 986.902         | 0.672          | 986.572         | P[29] |
| A  | 14 | 421.551         | 959.890         | 954.551         | 0.672          | 954.221         | A[28] |
| E  | 15 | 464.565         | 936.217         | 930.878         | 0.672          | 930.542         | E[27] |
| K  | 16 | 507.263         | 893.201         | <b>887.864</b>  | <b>888.199</b> | <b>887.528</b>  | K[26] |
| T  | 17 | 540.946         | 890.565         | <b>845.165</b>  | <b>845.501</b> | <b>844.829</b>  | T[25] |
| P  | 18 | 574.297         | 835.829         | 831.489         | 831.819        | 831.147         | P[24] |
| V  | 19 | 606.320         | 784.471         | 779.132         | 779.468        | 778.796         | V[23] |
| K  | 20 | 649.018         | 751.449         | 746.109         | 746.445        | 745.773         | K[22] |
| K  | 21 | 691.716         | 708.750         | 703.411         | 703.747        | 703.075         | K[21] |
| K  | 22 | 734.414         | 666.052         | 660.712         | 661.048        | 660.376         | K[20] |
| A  | 23 | 752.094         | 621.354         | 616.014         | 616.350        | 615.678         | A[19] |
| R  | 24 | <b>810.127</b>  | 590.875         | 584.335         | 584.671        | 583.999         | R[18] |
| K  | 25 | 852.526         | 547.641         | 542.301         | 542.637        | 541.965         | K[17] |
| A  | 26 | 876.505         | 504.942         | 499.603         | 499.939        | 499.267         | A[16] |
| A  | 27 | 900.184         | 461.263         | 475.924         | 476.260        | 475.588         | A[15] |
| G  | 28 | 919.191         | 457.584         | 452.245         | 452.581        | 451.909         | G[14] |
| G  | 29 | 952.698         | 438.577         | 433.238         | 433.574        | 432.902         | G[13] |
| A  | 30 | <b>961.872</b>  | 419.570         | 414.231         | 414.566        | 413.894         | A[12] |
| K  | 31 | <b>1004.575</b> | 395.891         | 390.551         | 390.887        | 390.216         | K[11] |
| R  | 32 | 1056.609        | 353.193         | 347.853         | 348.189        | 347.517         | R[10] |
| K  | 33 | <b>1099.307</b> | 301.159         | 295.819         | 296.155        | 295.484         | K[9]  |
| T  | 34 | <b>1132.990</b> | 258.461         | 253.121         | 253.457        | 252.785         | T[8]  |
| S  | 35 | <b>1162.801</b> | 224.778         | 219.438         | 219.775        | 219.103         | S[7]  |
| G  | 36 | 1183.068        | 199.761         | 194.421         | 194.756        | 194.084         | G[6]  |
| P  | 37 | 1213.359        | 175.760         | 171.421         | 171.757        | 171.085         | P[5]  |
| P  | 38 | 1245.710        | 144.400         | 139.070         | 139.406        | 138.734         | P[4]  |
| V  | 39 | <b>1278.732</b> | 112.050         | 106.710         | 107.045        | 106.373         | V[3]  |
| S  | 40 | <b>1307.743</b> | 79.030          | 73.696          | 74.032         | 73.360          | S[2]  |
| E  | 41 | <b>1350.757</b> | 50.025          | 44.685          | 45.021         | 44.349          | E[1]  |



# sp | P43274 | H14\_MOUSE

[Acetyl]SETAPAAPAAPAPAEKTPVKKKARKAAGGAKRKTSGPPVSE

- ▶ fragmentation table for charge state 4+
- ▶ specType=etd
- ▶ score=43.99
- ▶ F113280.dat
- ▶ query=q54176\_p1
- ▶ precursor=811.056900
- ▶ chargePrecursor=5
- ▶ itol=0.5

| AA | c  | y              | z+1             | z+2             | z     | AA             |       |
|----|----|----------------|-----------------|-----------------|-------|----------------|-------|
| S  | 1  | 37.525         | <b>1013.566</b> | <b>1009.561</b> | 0.795 | 1009.309       | S[41] |
| E  | 2  | 69.795         | <b>981.305</b>  | <b>977.300</b>  | 0.795 | <b>977.048</b> | E[40] |
| F  | 3  | 85.047         | <b>949.044</b>  | <b>945.040</b>  | 0.795 | 944.789        | F[39] |
| A  | 4  | 112.806        | 923.733         | 919.778         | 0.795 | 919.520        | A[38] |
| P  | 5  | 137.070        | 906.023         | 902.019         | 0.795 | 901.767        | P[37] |
| A  | 6  | 154.829        | 881.760         | 877.755         | 0.795 | 877.503        | A[36] |
| A  | 7  | 172.588        | 864.001         | 859.996         | 0.795 | 859.744        | A[35] |
| P  | 8  | 190.351        | 846.241         | 842.237         | 0.795 | 841.985        | P[34] |
| A  | 9  | 214.611        | 821.978         | 817.974         | 0.795 | 817.722        | A[33] |
| A  | 10 | 232.370        | 804.219         | 800.214         | 0.795 | 799.962        | A[32] |
| P  | 11 | 256.633        | 789.460         | 785.455         | 0.795 | 785.203        | P[31] |
| A  | 12 | 274.392        | 782.197         | 778.192         | 0.795 | 777.940        | A[30] |
| P  | 13 | 298.656        | 744.437         | 740.433         | 0.795 | 740.181        | P[29] |
| A  | 14 | 316.415        | 720.174         | 716.169         | 0.795 | 715.917        | A[28] |
| E  | 15 | 348.675        | 702.415         | 698.410         | 0.795 | 698.158        | E[27] |
| K  | 16 | 380.699        | <b>670.154</b>  | 666.149         | 0.665 | 665.896        | K[26] |
| T  | 17 | 405.961        | 638.130         | 634.126         | 0.634 | 633.874        | T[25] |
| P  | 18 | 430.224        | 612.868         | 608.864         | 0.609 | 608.612        | P[24] |
| V  | 19 | 454.991        | 588.605         | 584.601         | 0.584 | 584.349        | V[23] |
| K  | 20 | 487.015        | 563.838         | 559.834         | 0.560 | 559.582        | K[22] |
| K  | 21 | 519.039        | 531.814         | 527.810         | 0.528 | 527.558        | K[21] |
| K  | 22 | 551.063        | 499.791         | 495.786         | 0.496 | 495.534        | K[20] |
| A  | 23 | 568.822        | 467.767         | 463.762         | 0.464 | 463.510        | A[19] |
| K  | 24 | 607.847        | 450.008         | 446.003         | 0.446 | 445.751        | K[18] |
| K  | 25 | 639.871        | 410.982         | 406.978         | 0.407 | 406.726        | K[17] |
| A  | 26 | 657.630        | 379.959         | 374.954         | 0.375 | 374.702        | A[16] |
| A  | 27 | 675.390        | 361.199         | 357.195         | 0.357 | 356.943        | A[15] |
| G  | 28 | 689.645        | 343.440         | 339.435         | 0.339 | 339.183        | G[14] |
| G  | 29 | 703.900        | 329.185         | 325.180         | 0.325 | 324.928        | G[13] |
| A  | 30 | 721.960        | 314.929         | 310.925         | 0.311 | 310.673        | A[12] |
| K  | 31 | 753.683        | 297.170         | 293.165         | 0.293 | 292.913        | K[11] |
| K  | 32 | 782.709        | 285.140         | 281.132         | 0.281 | 280.880        | K[10] |
| K  | 33 | 824.712        | 229.171         | 222.116         | 0.222 | 221.864        | K[9]  |
| T  | 34 | 849.994        | 194.097         | 190.093         | 0.190 | 189.841        | T[8]  |
| S  | 35 | 871.752        | 168.835         | 164.831         | 0.165 | 164.579        | S[7]  |
| G  | 36 | <b>886.008</b> | 147.077         | 143.073         | 0.143 | 142.821        | G[6]  |
| P  | 37 | 910.271        | 132.822         | 128.817         | 0.129 | 128.565        | P[5]  |
| P  | 38 | <b>934.534</b> | 108.559         | 104.554         | 0.104 | 104.302        | P[4]  |
| V  | 39 | <b>959.301</b> | 84.296          | 80.291          | 0.80  | 80.039         | V[3]  |
| S  | 40 | <b>981.059</b> | 59.537          | 55.534          | 0.55  | 55.272         | S[2]  |
| E  | 41 | 1013.520       | 37.771          | 33.766          | 0.34  | 33.514         | E[1]  |

sp | P43277 | H13\_MOUSE

[Acetyl]SETAPAAPAAPAPVEKTPVKKKAKKTGAAAGKRKASGPPVSE

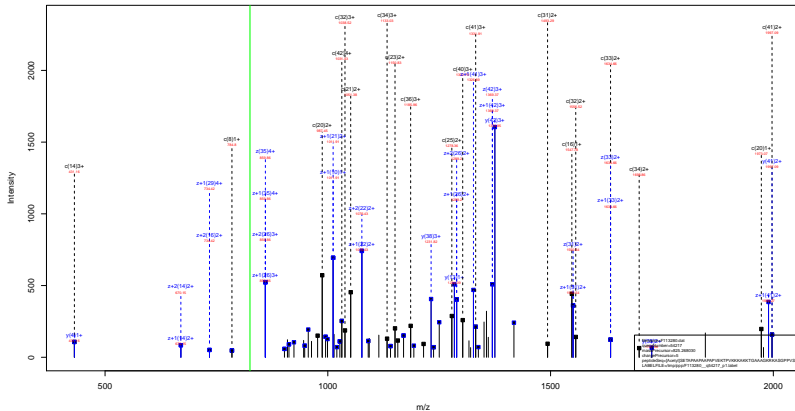

# sp | P43277 | H13\_MOUSE

[Acetyl]SETAPAAPAAPAPVEKTPVKKKAKKTGAAAGKRKASGPPVSE

- ▶ fragmentation table for charge state 1+
- ▶ specType=etd
- ▶ score=50.66
- ▶ F113280.dat
- ▶ query=q54217\_p1
- ▶ precursor=825.268030
- ▶ chargePrecursor=5
- ▶ itol=0.5

| AA | c  | y               | z+1             | z+2             | z               | AA              |       |
|----|----|-----------------|-----------------|-----------------|-----------------|-----------------|-------|
| S  | 1  | 147.076         | 4122.303        | 4106.285        | 0.000           | 4105.277        | S[42] |
| E  | 2  | 276.119         | 8993.261        | 9077.242        | 0.000           | 9076.234        | E[41] |
| T  | 3  | 377.167         | 13064.218       | 13048.199       | 0.000           | 13047.192       | T[40] |
| A  | 4  | 448.204         | 17583.170       | 17477.152       | 0.000           | 17467.144       | A[39] |
| F  | 5  | 585.257         | 23092.133       | 23076.115       | 0.000           | 23075.107       | F[38] |
| A  | 6  | 616.294         | 29595.081       | 2979.062        | 0.000           | 3578.054        | A[37] |
| A  | 7  | 687.331         | 35244.044       | 3506.025        | 0.000           | 3507.017        | A[36] |
| F  | 8  | <b>784.384</b>  | 43453.006       | 4336.988        | 0.000           | 4335.980        | F[35] |
| A  | 9  | 855.421         | 49356.954       | 4939.935        | 0.000           | 4938.927        | A[34] |
| A  | 10 | 926.458         | 55484.917       | 5546.898        | 0.000           | 5547.890        | A[33] |
| P  | 11 | 1023.511        | 61313.879       | 6197.861        | 0.000           | 6196.853        | P[32] |
| A  | 12 | 1094.548        | 67168.827       | 6700.808        | 0.000           | 6699.800        | A[31] |
| F  | 13 | 1181.600        | 73045.790       | 7320.771        | 0.000           | 7320.763        | F[30] |
| V  | 14 | 1290.659        | 79487.737       | 7932.718        | 0.000           | 7931.710        | V[29] |
| E  | 15 | 1419.711        | 86499.689       | 8633.670        | 0.000           | 8632.662        | E[28] |
| N  | 16 | <b>1547.806</b> | 93790.636       | 9394.617        | 2709.618        | 7793.599        | N[27] |
| T  | 17 | 1648.854        | 10092.531       | 2678.512        | 2577.520        | 2575.504        | T[26] |
| F  | 18 | 1745.907        | 2491.483        | 2475.464        | 2476.472        | 2474.457        | F[25] |
| V  | 19 | 1844.975        | 3394.430        | 2376.412        | 2379.419        | 2377.406        | V[24] |
| K  | 20 | <b>1973.070</b> | 2295.362        | 2279.343        | 2280.351        | 2279.335        | K[23] |
| K  | 21 | 2101.123        | 3167.287        | 2151.268        | 2152.256        | 2150.240        | K[22] |
| R  | 22 | 2229.260        | 3038.172        | 3023.153        | 3024.161        | 3022.145        | R[21] |
| A  | 23 | 2300.297        | 1911.077        | 1895.058        | 1896.066        | 1894.050        | A[20] |
| K  | 24 | 2438.392        | 1840.040        | 1824.021        | 1825.029        | 1823.013        | K[19] |
| K  | 25 | 2556.487        | 1711.945        | 1695.926        | 1696.934        | 1694.918        | K[18] |
| T  | 26 | 2687.535        | 1583.890        | 1567.871        | 1568.879        | 1566.863        | T[17] |
| C  | 27 | 2714.569        | 1492.802        | 1466.783        | 1467.791        | 1465.775        | C[16] |
| A  | 28 | 2785.593        | 1425.781        | 1409.762        | 1410.770        | 1408.754        | A[15] |
| A  | 29 | 2856.611        | 1354.744        | 1338.725        | 1339.733        | <b>1337.717</b> | A[14] |
| A  | 30 | 2927.668        | <b>1283.707</b> | 1267.688        | 1268.696        | 1266.680        | A[13] |
| G  | 31 | 2984.689        | 1212.670        | 1196.651        | 1197.659        | 1195.643        | G[12] |
| K  | 32 | 3123.754        | 1136.649        | 1120.630        | <b>1140.637</b> | 1138.621        | K[11] |
| R  | 33 | 3269.895        | <b>1027.553</b> | <b>1011.534</b> | 1012.542        | 1010.527        | R[10] |
| K  | 34 | 3396.980        | 871.462         | 855.443         | 856.441         | 854.425         | K[9]  |
| A  | 35 | 3468.017        | 743.357         | 727.338         | 728.346         | 726.330         | A[8]  |
| S  | 36 | 3535.049        | 672.320         | 656.301         | 657.309         | 655.293         | S[7]  |
| G  | 37 | 3612.071        | 585.288         | 569.269         | 570.277         | 568.261         | G[6]  |
| F  | 38 | 3709.124        | 478.246         | 462.227         | 463.235         | 461.219         | F[5]  |
| F  | 39 | 3806.178        | <b>431.214</b>  | 415.195         | 416.203         | 414.187         | F[4]  |
| V  | 40 | 3905.245        | 334.161         | 318.142         | 319.150         | 317.134         | V[3]  |
| S  | 41 | 3992.277        | 235.092         | 219.074         | 220.082         | 218.066         | S[2]  |
| E  | 42 | 4121.319        | 148.060         | 132.042         | 133.050         | 131.034         | E[1]  |

# sp | P43277 | H13\_MOUSE

[Acetyl]SETAPAAPAAPAPVEKTPVKKKAKKTGAAAGKRKASGPPVSE

- ▶ fragmentation table for charge state 2+
- ▶ specType=etd
- ▶ score=50.66
- ▶ F113280.dat
- ▶ query=q54217\_p1
- ▶ precursor=825.268030
- ▶ chargePrecursor=5
- ▶ itol=0.5

| AA    | c               | y               | z+1             | z+2             | z               | AA    |
|-------|-----------------|-----------------|-----------------|-----------------|-----------------|-------|
| S[1]  | 74.042          | 2061.655        | 2053.646        | 0.504           | 2053.142        | S[42] |
| E[2]  | 138.563         | <b>1997.134</b> | <b>1989.125</b> | 0.504           | 1988.621        | E[41] |
| T[3]  | 189.087         | 1932.613        | 1924.603        | 0.504           | 1924.090        | T[40] |
| A[4]  | 224.206         | 1862.080        | 1854.080        | 0.504           | 1853.576        | A[39] |
| P[5]  | 293.135         | 1646.509        | 1638.501        | 0.504           | 1638.026        | P[38] |
| A[6]  | 358.650         | 1790.044        | 1782.035        | 0.504           | 1781.531        | A[37] |
| A[7]  | 344.169         | 1763.525        | 1754.516        | 0.504           | 1754.012        | A[36] |
| F[8]  | 392.695         | <b>1727.007</b> | 1718.997        | 0.504           | 1718.494        | F[35] |
| A[9]  | 428.214         | 1678.480        | 1670.471        | 0.504           | 1669.967        | A[34] |
| A[10] | 463.733         | 1642.962        | <b>1634.953</b> | 0.504           | <b>1634.449</b> | A[33] |
| P[11] | 532.259         | 1607.443        | 1599.434        | 0.504           | 1598.931        | P[32] |
| A[12] | 547.777         | 1558.017        | <b>1550.008</b> | 0.504           | <b>1550.404</b> | A[31] |
| F[13] | 596.304         | 1523.308        | 1515.300        | 0.504           | 1514.805        | F[30] |
| V[14] | 645.830         | 1474.872        | 1466.863        | 0.504           | 1466.359        | V[29] |
| E[15] | 710.359         | 1425.338        | <b>1417.328</b> | 0.504           | 1416.825        | E[28] |
| R[16] | 774.887         | 1369.817        | 1361.807        | 138.311         | 1361.304        | R[27] |
| T[17] | 824.911         | 1290.769        | <b>1288.760</b> | <b>1289.264</b> | 1288.256        | T[26] |
| F[18] | 873.457         | 1246.245        | 1238.236        | 1238.740        | <b>1237.732</b> | F[25] |
| V[19] | 922.991         | 1197.719        | 1189.709        | 1190.213        | 1189.206        | V[24] |
| K[20] | <b>987.039</b>  | 1148.195        | 1140.185        | <b>1140.679</b> | 1139.671        | K[23] |
| R[21] | <b>1051.886</b> | 1098.737        | <b>1076.128</b> | <b>1076.332</b> | 1075.325        | R[22] |
| K[22] | 1115.114        | <b>1020.090</b> | <b>1012.080</b> | 1012.584        | <b>1011.576</b> | K[21] |
| A[23] | <b>1150.652</b> | <b>956.042</b>  | <b>948.033</b>  | <b>948.537</b>  | 947.529         | A[20] |
| K[24] | <b>1214.700</b> | 920.524         | <b>912.514</b>  | <b>913.018</b>  | 912.010         | K[19] |
| K[25] | <b>1278.747</b> | 856.476         | 848.467         | 848.971         | 847.963         | K[18] |
| T[26] | 1329.271        | 792.429         | <b>784.419</b>  | <b>784.923</b>  | 783.915         | T[17] |
| G[27] | 1397.892        | 741.905         | 733.895         | <b>734.399</b>  | 733.390         | G[16] |
| A[28] | 1393.300        | 713.394         | 705.385         | 705.889         | 704.881         | A[15] |
| A[29] | 1438.819        | 677.876         | <b>669.866</b>  | <b>670.370</b>  | 669.362         | A[14] |
| A[30] | 1464.337        | 642.357         | 634.348         | 634.852         | 633.844         | A[13] |
| G[31] | <b>1492.848</b> | 606.839         | 598.830         | 599.333         | 598.325         | G[12] |
| K[32] | <b>1556.896</b> | 576.326         | 570.318         | 570.822         | 569.814         | K[11] |
| R[33] | <b>1634.946</b> | 514.380         | 506.371         | 506.875         | 505.867         | R[10] |
| R[34] | <b>1698.994</b> | 436.293         | 428.283         | 428.784         | 427.776         | R[9]  |
| A[35] | 1734.512        | 372.182         | 364.173         | 364.677         | 363.669         | A[8]  |
| S[36] | 1778.028        | 336.664         | 328.654         | 329.158         | 328.150         | S[7]  |
| G[37] | 1806.539        | 291.140         | 285.130         | 285.642         | 284.634         | G[6]  |
| F[38] | 1855.068        | 264.617         | 256.607         | 257.111         | 256.103         | F[5]  |
| F[39] | 1903.592        | 238.110         | 230.101         | 230.605         | 229.597         | F[4]  |
| V[40] | 1953.126        | 167.584         | 159.575         | 160.079         | 159.071         | V[3]  |
| S[41] | <b>1996.642</b> | 118.050         | 110.041         | 110.544         | 109.537         | S[2]  |
| E[42] | 2061.161        | 74.534          | 66.524          | 67.028          | 66.021          | E[1]  |

# sp | P43277 | H13\_MOUSE

[Acetyl]SETAPAAPAAPAPVEKTPVKKKAKKTGAAAGKRKASGPPVSE

- ▶ fragmentation table for charge state 3+
- ▶ specType=etd
- ▶ score=50.66
- ▶ F113280.dat
- ▶ query=q54217\_p1
- ▶ precursor=825.268030
- ▶ chargePrecursor=5
- ▶ itol=0.5

| AA   | c               | y               | z+1             | z+2            | z               | AA   |
|------|-----------------|-----------------|-----------------|----------------|-----------------|------|
| S 1  | 49.697          | <b>1374.773</b> | <b>1369.433</b> | 0.672          | <b>1369.097</b> | S 42 |
| E 2  | 92.711          | <b>1331.758</b> | <b>1326.419</b> | 0.672          | 1326.081        | E 41 |
| T 3  | 126.394         | <b>1288.744</b> | <b>1283.405</b> | 0.672          | 1283.069        | T 40 |
| N 4  | 150.073         | <b>1245.730</b> | <b>1249.722</b> | 0.672          | 1249.385        | N 39 |
| P 5  | 182.424         | <b>1231.383</b> | 1228.043        | 0.672          | 1225.707        | P 38 |
| A 6  | 206.103         | 1199.032        | 1193.692        | 0.672          | <b>1193.356</b> | A 37 |
| A 7  | 229.782         | 1175.351        | <b>1170.013</b> | 0.672          | <b>1169.677</b> | A 36 |
| P 8  | 262.133         | 1151.674        | 1146.334        | 0.672          | 1145.990        | P 35 |
| A 9  | 285.812         | 1119.323        | 1113.983        | 0.672          | 1113.647        | A 34 |
| A 10 | 309.491         | 1095.644        | <b>1090.304</b> | 0.672          | 1089.959        | A 33 |
| P 11 | 341.842         | 1071.965        | 1066.625        | 0.672          | 1066.289        | P 32 |
| A 12 | 365.521         | 1039.614        | 1034.274        | 0.672          | 1033.938        | A 31 |
| P 13 | 397.872         | 1015.935        | 1010.595        | 0.672          | 1010.259        | P 30 |
| V 14 | <b>430.894</b>  | 983.584         | 978.244         | 0.672          | 977.908         | V 29 |
| E 15 | 473.909         | 959.563         | 953.223         | 0.672          | 944.885         | E 28 |
| R 16 | 516.697         | 937.547         | <b>902.207</b>  | <b>902.543</b> | 901.871         | R 27 |
| T 17 | 550.290         | 884.848         | <b>859.509</b>  | <b>859.845</b> | 859.173         | T 26 |
| P 18 | 582.640         | 831.166         | 825.826         | 826.162        | 825.490         | P 25 |
| V 19 | 615.663         | 798.815         | 793.475         | 793.811        | 793.139         | V 24 |
| K 20 | 658.362         | 765.792         | 760.453         | 760.789        | 760.117         | K 23 |
| K 21 | 701.060         | 723.094         | 717.754         | 718.090        | 717.418         | K 22 |
| K 22 | 743.758         | 689.399         | 678.959         | 679.302        | 674.739         | K 21 |
| A 23 | 787.437         | 637.987         | 632.358         | 632.694        | 632.022         | A 20 |
| K 24 | 810.136         | 614.018         | 608.679         | 609.015        | 608.343         | K 19 |
| K 25 | 852.834         | 571.320         | 565.980         | 566.316        | 565.644         | K 18 |
| T 26 | 895.516         | 529.627         | 523.282         | 523.618        | 522.946         | T 17 |
| G 27 | 905.524         | 494.830         | 489.509         | 489.835        | 489.203         | G 16 |
| A 28 | 929.203         | 475.937         | 470.592         | 470.928        | 470.256         | A 15 |
| A 29 | 952.882         | 452.253         | 446.913         | 447.249        | 446.577         | A 14 |
| A 30 | 976.561         | 428.574         | 423.234         | 423.570        | 422.898         | A 13 |
| G 31 | 995.556         | 404.895         | 399.555         | 399.891        | 399.219         | G 12 |
| K 32 | <b>1038.266</b> | 385.888         | 380.548         | 380.884        | 380.212         | K 11 |
| R 33 | <b>1090.300</b> | 342.180         | 337.850         | 338.186        | 337.514         | R 10 |
| T 34 | <b>1112.596</b> | 291.159         | 285.818         | 286.152        | 285.480         | T 9  |
| A 35 | <b>1156.677</b> | 245.457         | 243.118         | 243.454        | 242.782         | A 8  |
| S 36 | <b>1185.688</b> | 224.778         | 219.439         | 219.775        | 219.103         | S 7  |
| G 37 | 1204.695        | 195.767         | 190.428         | 190.764        | 190.092         | G 6  |
| P 38 | <b>1237.046</b> | 176.760         | 171.421         | 171.757        | 171.085         | P 5  |
| P 39 | 1257.397        | 144.409         | 139.070         | 139.406        | 138.734         | P 4  |
| V 40 | <b>1302.420</b> | 112.954         | 108.719         | 109.055        | 108.383         | V 3  |
| S 41 | <b>1331.430</b> | 75.025          | 73.686          | 74.022         | 73.350          | S 2  |
| E 42 | 1374.445        | 50.025          | 44.685          | 45.021         | 44.349          | E 1  |

# sp | P43277 | H13\_MOUSE

[Acetyl]SETAPAAPAAPAPVEKTPVKKKAKKTGAAAGKRKASGPPVSE

- ▶ fragmentation table for charge state 4+
- ▶ specType=etd
- ▶ score=50.66
- ▶ F113280.dat
- ▶ query=q54217\_p1
- ▶ precursor=825.268030
- ▶ chargePrecursor=5
- ▶ itol=0.5

| AA | c  | y               | a+1             | a+2             | z       | AA              |       |
|----|----|-----------------|-----------------|-----------------|---------|-----------------|-------|
| S  | 1  | 37.525          | <b>1031.331</b> | <b>1027.027</b> | 0.755   | <b>1027.075</b> | S[42] |
| E  | 2  | 69.785          | <b>999.071</b>  | <b>995.066</b>  | 0.755   | <b>994.814</b>  | E[41] |
| F  | 3  | 95.047          | 999.813         | 992.808         | 0.755   | 994.538         | F[40] |
| A  | 4  | 112.806         | 945.540         | 937.543         | 0.755   | 937.291         | A[39] |
| P  | 5  | 137.070         | <b>923.789</b>  | 919.784         | 0.755   | 919.532         | P[38] |
| A  | 6  | 154.829         | 899.520         | 895.521         | 0.755   | 895.269         | A[37] |
| A  | 7  | 172.588         | 883.760         | 877.762         | 0.755   | 877.510         | A[36] |
| P  | 8  | 190.351         | 864.007         | <b>860.002</b>  | 0.755   | <b>859.750</b>  | P[35] |
| A  | 9  | 214.611         | 839.744         | 835.739         | 0.755   | 835.487         | A[34] |
| A  | 10 | 232.370         | 824.985         | 817.980         | 0.755   | 817.728         | A[33] |
| P  | 11 | 256.633         | 804.225         | 800.221         | 0.755   | 799.969         | P[32] |
| A  | 12 | 274.392         | 779.962         | 775.957         | 0.755   | 775.705         | A[31] |
| P  | 13 | 298.656         | 762.203         | 758.198         | 0.755   | 757.946         | P[30] |
| V  | 14 | 323.423         | 737.940         | <b>733.935</b>  | 0.755   | 733.683         | V[29] |
| E  | 15 | 355.683         | 713.173         | 709.168         | 0.755   | 708.916         | E[28] |
| K  | 16 | 387.707         | 689.913         | 676.907         | 677.159 | 676.955         | K[27] |
| T  | 17 | 412.969         | 648.888         | 644.883         | 645.135 | 644.833         | T[26] |
| P  | 18 | 437.232         | 623.620         | 619.622         | 619.874 | 619.370         | P[25] |
| V  | 19 | 461.999         | 599.353         | 595.358         | 595.610 | 595.105         | V[24] |
| K  | 20 | 494.023         | 574.590         | 570.591         | 570.843 | 570.339         | K[23] |
| K  | 21 | 526.047         | 542.372         | 538.368         | 538.619 | 538.316         | K[22] |
| K  | 22 | 558.070         | 510.948         | 506.944         | 507.196 | 506.292         | K[21] |
| A  | 23 | 575.830         | 478.525         | 474.520         | 474.772 | 474.268         | A[20] |
| K  | 24 | 607.854         | 460.705         | 456.701         | 457.013 | 456.509         | K[19] |
| K  | 25 | 639.877         | 428.742         | 424.737         | 424.989 | 424.485         | K[18] |
| T  | 26 | 665.139         | 396.718         | 392.713         | 392.965 | 392.461         | T[17] |
| G  | 27 | 679.395         | 371.458         | 367.451         | 367.703 | 367.199         | G[16] |
| A  | 28 | 697.154         | 367.201         | 363.196         | 363.448 | 362.944         | A[15] |
| A  | 29 | 714.913         | 339.441         | 335.437         | 335.689 | 335.185         | A[14] |
| A  | 30 | 732.672         | 321.682         | 317.677         | 317.929 | 317.425         | A[13] |
| G  | 31 | 746.928         | 303.923         | 299.918         | 300.170 | 299.666         | G[12] |
| K  | 32 | 778.951         | 289.667         | 285.663         | 285.915 | 285.411         | K[11] |
| R  | 33 | 817.977         | 257.644         | 253.639         | 253.891 | 253.387         | R[10] |
| K  | 34 | 850.001         | 218.618         | 214.614         | 214.866 | 214.362         | K[9]  |
| A  | 35 | 867.760         | 189.561         | 185.556         | 185.808 | 185.304         | A[9]  |
| S  | 36 | 889.518         | 168.835         | 164.831         | 165.083 | 164.579         | S[7]  |
| G  | 37 | 903.773         | 147.077         | 143.073         | 143.325 | 142.821         | G[6]  |
| P  | 38 | 928.036         | 132.822         | 128.817         | 129.069 | 128.565         | P[5]  |
| P  | 39 | 952.300         | 108.559         | 104.554         | 104.806 | 104.302         | P[4]  |
| V  | 40 | <b>977.067</b>  | 84.290          | 80.291          | 80.543  | 80.039          | V[3]  |
| S  | 41 | 699.276         | 69.529          | 65.534          | 65.778  | 65.273          | S[2]  |
| E  | 42 | <b>1031.085</b> | 37.771          | 33.766          | 34.018  | 33.514          | E[1]  |



# sp | P43277 | H13\_MOUSE

[Acetyl]SETAPAAPAAPAPVEKTPVKKKAKKTGAAAGKRKASGPPVSE

- ▶ fragmentation table for charge state 1+
- ▶ specType=etd
- ▶ score=58.02
- ▶ F113280.dat
- ▶ query=q54219\_p1
- ▶ precursor=825.268080
- ▶ chargePrecursor=5
- ▶ itol=0.5

| AA | c               | y               | z+1             | z+2             | z        | AA    |
|----|-----------------|-----------------|-----------------|-----------------|----------|-------|
| S  | 147.079         | 4122.303        | 4106.285        | 0.000           | 4105.277 | S[42] |
| E  | 276.119         | 3993.261        | 3977.242        | 0.000           | 3976.234 | E[41] |
| L  | 377.167         | 3684.218        | 3668.199        | 0.000           | 3667.192 | L[40] |
| A  | 448.204         | 3763.175        | 3747.155        | 0.000           | 3746.144 | A[39] |
| P  | 545.257         | 3692.133        | 3676.115        | 0.000           | 3675.107 | P[38] |
| A  | 616.294         | 3595.081        | 3579.062        | 0.000           | 3578.054 | A[37] |
| A  | 667.331         | 3524.044        | 3508.025        | 0.000           | 3507.017 | A[36] |
| P  | <b>764.384</b>  | 3453.000        | 3436.980        | 0.000           | 3435.980 | P[35] |
| A  | 855.421         | 3385.954        | 3369.935        | 0.000           | 3368.927 | A[34] |
| A  | 926.458         | 3284.917        | 3268.898        | 0.000           | 3267.890 | A[33] |
| P  | 1023.511        | 3213.879        | 3197.861        | 0.000           | 3196.853 | P[32] |
| A  | 1094.548        | 3116.827        | 3100.808        | 0.000           | 3099.800 | A[31] |
| P  | 1181.600        | 3045.790        | 3029.771        | 0.000           | 3028.763 | P[30] |
| V  | 1290.669        | 2948.737        | 2932.718        | 0.000           | 2931.710 | V[29] |
| E  | 1437.711        | 2849.686        | 2833.666        | 0.000           | 2832.642 | E[28] |
| R  | <b>1547.806</b> | 2720.626        | 2704.607        | 2705.615        | 2703.599 | R[27] |
| I  | 1648.854        | 2592.533        | 2576.512        | 2577.520        | 2575.504 | I[26] |
| P  | 1745.907        | 2491.483        | 2475.464        | 2476.472        | 2474.457 | P[25] |
| V  | 1844.975        | 2394.430        | 2378.412        | 2379.419        | 2377.404 | V[24] |
| K  | 1973.070        | 2295.362        | 2279.343        | 2280.351        | 2278.335 | K[23] |
| K  | 2101.105        | 2187.287        | 2171.268        | 2152.256        | 2150.240 | K[22] |
| K  | 2229.209        | 2079.174        | 2063.153        | 2034.161        | 2032.145 | K[21] |
| A  | 2300.297        | <b>1911.077</b> | <b>1895.058</b> | 1896.066        | 1894.050 | A[20] |
| K  | 2438.392        | 1840.040        | 1824.021        | 1825.029        | 1823.013 | K[19] |
| K  | 2556.497        | 1711.945        | 1695.926        | 1696.934        | 1694.918 | K[18] |
| T  | 2657.535        | 1583.850        | 1567.831        | 1568.839        | 1566.823 | T[17] |
| G  | 2714.559        | 1482.802        | 1466.784        | <b>1467.791</b> | 1465.775 | G[16] |
| A  | 2785.593        | 1425.781        | 1409.762        | 1410.770        | 1408.754 | A[15] |
| A  | 2856.631        | 1384.744        | 1368.725        | 1369.733        | 1367.717 | A[14] |
| A  | 2927.668        | 1283.707        | 1267.688        | 1268.696        | 1266.680 | A[13] |
| G  | 2984.689        | 1212.670        | 1196.651        | <b>1197.659</b> | 1195.643 | G[12] |
| K  | 3112.784        | 1155.648        | 1139.629        | 1140.637        | 1138.621 | K[11] |
| R  | 3268.888        | 1027.553        | 1011.534        | <b>1012.542</b> | 1010.527 | R[10] |
| R  | 3396.989        | 871.452         | 855.433         | <b>856.441</b>  | 854.425  | R[9]  |
| A  | 3468.017        | 743.357         | 727.338         | 728.346         | 726.330  | A[8]  |
| S  | 3535.049        | 672.320         | 656.301         | 657.309         | 655.293  | S[7]  |
| G  | 3612.071        | 585.288         | 569.269         | <b>570.277</b>  | 568.261  | G[6]  |
| P  | 3706.124        | 508.266         | 512.248         | 513.256         | 511.240  | P[5]  |
| P  | 3888.176        | <b>431.214</b>  | 435.195         | 436.203         | 434.187  | P[4]  |
| V  | 3905.245        | 336.161         | 338.142         | 339.150         | 337.134  | V[3]  |
| S  | 3992.277        | 235.092         | 239.074         | 240.082         | 238.066  | S[2]  |
| E  | 4121.319        | 148.050         | 152.032         | 153.050         | 151.034  | E[1]  |



# sp | P43277 | H13\_MOUSE

[Acetyl]SETAPAAPAAPAPVEKTPVKKKAKKTGAAAGKRKASGPPVSE

- ▶ fragmentation table for charge state 2+
- ▶ specType=etd
- ▶ score=58.02
- ▶ F113280.dat
- ▶ query=q54219\_p1
- ▶ precursor=825.268080
- ▶ chargePrecursor=5
- ▶ itol=0.5

| AA | c  | y               | z+1             | z+2             | z               | AA              |       |
|----|----|-----------------|-----------------|-----------------|-----------------|-----------------|-------|
| S  | 1  | 74.042          | 2061.655        | 2053.646        | 0.504           | 2053.142        | S(42) |
| E  | 2  | 138.563         | <b>1997.134</b> | <b>1989.125</b> | 0.504           | 1988.621        | E(41) |
| T  | 3  | 189.087         | 1932.613        | 1924.603        | 0.504           | 1924.090        | T(40) |
| A  | 4  | 224.606         | 1862.089        | 1854.080        | 0.504           | 1853.570        | A(39) |
| P  | 5  | 293.132         | 1646.570        | 1638.561        | 0.504           | 1638.050        | P(38) |
| A  | 6  | 358.650         | 1790.044        | 1782.035        | 0.504           | 1781.523        | A(37) |
| A  | 7  | 344.169         | 1763.525        | <b>1754.516</b> | 0.504           | 1754.012        | A(36) |
| F  | 8  | 392.695         | 1727.007        | 1719.997        | 0.504           | 1718.486        | F(35) |
| A  | 9  | 428.214         | 1678.480        | 1670.471        | 0.504           | 1669.960        | A(34) |
| A  | 10 | 463.733         | 1642.962        | <b>1634.953</b> | 0.504           | <b>1634.449</b> | A(33) |
| P  | 11 | 532.259         | 1607.443        | 1599.434        | 0.504           | 1598.923        | P(32) |
| A  | 12 | 547.777         | 1558.917        | 1550.908        | 0.504           | 1550.404        | A(31) |
| P  | 13 | 596.304         | 1523.398        | 1515.389        | 0.504           | 1514.888        | P(30) |
| V  | 14 | 645.830         | 1474.872        | 1466.863        | 0.504           | 1466.350        | V(29) |
| E  | 15 | 710.359         | 1439.352        | <b>1417.328</b> | 0.504           | 1416.825        | E(28) |
| R  | 16 | 774.887         | <b>1360.817</b> | 1352.807        | 1343.313        | 1352.300        | R(27) |
| T  | 17 | 824.411         | 1296.789        | <b>1288.760</b> | <b>1289.264</b> | 1288.250        | T(26) |
| F  | 18 | 873.457         | 1246.245        | <b>1238.236</b> | 1238.740        | <b>1237.732</b> | F(25) |
| V  | 19 | 922.991         | <b>1197.719</b> | 1189.709        | 1190.213        | 1189.206        | V(24) |
| K  | 20 | <b>987.039</b>  | 1148.185        | 1140.175        | 1140.679        | 1139.671        | K(23) |
| K  | 21 | <b>1051.866</b> | 1098.737        | <b>1076.128</b> | <b>1076.632</b> | 1075.625        | K(22) |
| R  | 22 | <b>1115.134</b> | <b>1020.090</b> | <b>1012.080</b> | <b>1012.584</b> | 1011.576        | R(21) |
| A  | 23 | <b>1150.652</b> | 996.042         | <b>948.033</b>  | <b>948.537</b>  | 947.529         | A(20) |
| K  | 24 | <b>1214.700</b> | 920.524         | <b>912.514</b>  | <b>913.018</b>  | 912.010         | K(19) |
| K  | 25 | <b>1278.747</b> | <b>856.476</b>  | 848.467         | 848.971         | 847.963         | K(18) |
| T  | 26 | 1329.271        | <b>792.429</b>  | <b>784.419</b>  | <b>784.923</b>  | <b>783.915</b>  | T(17) |
| G  | 27 | 1397.802        | 714.905         | 713.898         | 714.399         | 713.390         | G(16) |
| A  | 28 | 1393.300        | 713.394         | <b>705.385</b>  | <b>705.889</b>  | 704.881         | A(15) |
| A  | 29 | <b>1428.819</b> | 677.876         | <b>669.866</b>  | <b>670.370</b>  | <b>669.362</b>  | A(14) |
| A  | 30 | 1464.337        | 642.357         | 634.348         | 634.852         | 633.844         | A(13) |
| G  | 31 | 1492.848        | 606.839         | 598.830         | 599.333         | 598.325         | G(12) |
| K  | 32 | <b>1556.896</b> | 678.328         | <b>570.318</b>  | <b>570.822</b>  | 569.814         | K(11) |
| R  | 33 | <b>1634.946</b> | 614.809         | 606.801         | 607.304         | 606.296         | R(10) |
| K  | 34 | 1698.994        | 436.290         | 428.280         | 428.784         | 427.776         | K(9)  |
| A  | 35 | 1734.512        | 372.182         | 364.173         | 364.677         | 363.669         | A(8)  |
| S  | 36 | 1778.028        | 336.664         | 328.654         | 329.158         | 328.150         | S(7)  |
| G  | 37 | 1806.539        | 291.140         | 283.130         | 283.642         | 282.634         | G(6)  |
| P  | 38 | 1855.068        | 264.617         | 256.607         | 257.111         | 256.103         | P(5)  |
| P  | 39 | 1903.592        | 238.110         | 230.101         | 230.605         | 229.597         | P(4)  |
| V  | 40 | 1953.126        | 167.584         | 159.575         | 160.079         | 159.071         | V(3)  |
| S  | 41 | 1996.642        | 118.050         | 110.041         | 110.544         | 109.537         | S(2)  |
| E  | 42 | 2061.161        | 74.534          | 66.524          | 67.028          | 66.021          | E(1)  |

# sp | P43277 | H13\_MOUSE

[Acetyl]SETAPAAPAAPAPVEKTPVKKKAKKTGAAAGKRKASGPPVSE

- ▶ fragmentation table for charge state 3+
- ▶ specType=etd
- ▶ score=58.02
- ▶ F113280.dat
- ▶ query=q54219\_p1
- ▶ precursor=825.268080
- ▶ chargePrecursor=5
- ▶ itol=0.5

| AA   | c               | y               | z+1             | z+2            | z               | AA   |
|------|-----------------|-----------------|-----------------|----------------|-----------------|------|
| S 1  | 49.697          | 1374.773        | 1369.433        | 0.672          | <b>1369.097</b> | S 42 |
| E 2  | 92.711          | <b>1331.750</b> | 1326.419        | 0.672          | 1326.083        | E 41 |
| T 3  | 126.394         | <b>1288.744</b> | <b>1283.405</b> | 0.672          | <b>1283.069</b> | T 40 |
| A 4  | 150.073         | 1255.799        | <b>1249.722</b> | 0.672          | 1249.360        | A 39 |
| P 5  | 182.424         | <b>1231.383</b> | 1226.043        | 0.672          | 1225.707        | P 38 |
| A 6  | 206.103         | 1199.032        | <b>1193.692</b> | 0.672          | <b>1193.356</b> | A 37 |
| A 7  | 229.782         | 1175.353        | 1170.013        | 0.672          | 1169.677        | A 36 |
| P 8  | 262.133         | <b>1151.674</b> | 1146.334        | 0.672          | 1145.990        | P 35 |
| A 9  | 285.812         | 1119.323        | 1113.983        | 0.672          | 1113.647        | A 34 |
| A 10 | 309.491         | 1095.644        | <b>1090.304</b> | 0.672          | 1089.960        | A 33 |
| P 11 | 341.842         | 1071.965        | 1066.625        | 0.672          | 1066.289        | P 32 |
| A 12 | 365.521         | 1039.614        | 1034.274        | 0.672          | 1033.938        | A 31 |
| P 13 | 397.872         | 1015.935        | 1010.595        | 0.672          | 1010.259        | P 30 |
| V 14 | <b>430.894</b>  | 983.584         | <b>978.244</b>  | 0.672          | <b>977.908</b>  | V 29 |
| E 15 | 473.909         | 959.563         | 945.221         | 0.672          | 944.885         | E 28 |
| R 16 | 516.607         | 937.547         | 927.209         | 0.672          | 924.871         | R 27 |
| T 17 | 550.290         | 914.948         | <b>859.509</b>  | <b>859.845</b> | 859.173         | T 26 |
| P 18 | 582.640         | 831.166         | 825.826         | 826.162        | 825.490         | P 25 |
| V 19 | 615.663         | 799.815         | 793.475         | 793.811        | <b>793.139</b>  | V 24 |
| K 20 | 658.362         | 765.792         | 760.453         | 760.789        | 760.117         | K 23 |
| K 21 | 701.060         | 723.094         | 717.754         | 718.090        | 717.418         | K 22 |
| K 22 | 743.758         | 689.396         | 675.056         | 675.392        | 674.720         | K 21 |
| A 23 | 787.437         | 637.697         | 632.358         | 632.694        | 632.022         | A 20 |
| K 24 | 810.136         | 614.018         | 608.679         | 609.015        | 608.343         | K 19 |
| K 25 | 852.834         | 571.320         | 565.980         | 566.316        | 565.644         | K 18 |
| T 26 | 895.516         | 529.622         | 523.282         | 523.618        | 522.946         | T 17 |
| G 27 | 905.524         | 494.830         | 489.509         | 489.835        | 489.203         | G 16 |
| A 28 | 929.203         | 475.932         | 470.592         | 470.928        | 470.256         | A 15 |
| A 29 | 952.882         | 452.253         | 446.913         | 447.249        | 446.577         | A 14 |
| A 30 | 976.561         | 428.574         | 423.234         | 423.570        | 422.898         | A 13 |
| G 31 | <b>995.568</b>  | 404.895         | 399.555         | 399.891        | 399.219         | G 12 |
| K 32 | <b>1038.266</b> | 385.888         | 380.548         | 380.884        | 380.212         | K 11 |
| R 33 | <b>1090.300</b> | 342.180         | 337.850         | 338.186        | 337.514         | R 10 |
| T 34 | <b>1112.598</b> | 291.159         | 285.818         | 286.152        | 285.480         | T 9  |
| A 35 | <b>1156.677</b> | 245.457         | 243.118         | 243.454        | 242.782         | A 8  |
| S 36 | <b>1185.688</b> | 224.778         | 219.439         | 219.775        | 219.103         | S 7  |
| G 37 | 1204.695        | 195.767         | 190.428         | 190.764        | 190.092         | G 6  |
| P 38 | <b>1237.046</b> | 176.760         | 171.421         | 171.757        | 171.085         | P 5  |
| P 39 | 1267.397        | 144.409         | 139.070         | 139.406        | 138.734         | P 4  |
| V 40 | <b>1302.420</b> | 112.951         | 108.719         | 109.055        | 108.383         | V 3  |
| S 41 | <b>1331.430</b> | 75.025          | 73.686          | 74.022         | 73.350          | S 2  |
| E 42 | 1374.445        | 50.025          | 44.685          | 45.021         | 44.349          | E 1  |

# sp | P43277 | H13\_MOUSE

[Acetyl]SETAPAAPAAPAPVEKTPVKKKAKKTGAAAGKRKASGPPVSE

- ▶ fragmentation table for charge state 4+
- ▶ specType=etd
- ▶ score=58.02
- ▶ F113280.dat
- ▶ query=q54219\_p1
- ▶ precursor=825.268080
- ▶ chargePrecursor=5
- ▶ itol=0.5

| AA | c  | y              | z+1            | z+2             | z              | AA              |       |
|----|----|----------------|----------------|-----------------|----------------|-----------------|-------|
| S  | 1  | 87.525         | 1031.231       | <b>1027.327</b> | 0.755          | <b>1027.075</b> | S[42] |
| E  | 3  | 69.785         | <b>999.071</b> | <b>995.066</b>  | 0.755          | 994.814         | E[41] |
| Y  | 3  | 95.047         | 966.610        | <b>962.805</b>  | 0.755          | 962.553         | Y[40] |
| A  | 4  | 112.806        | 941.548        | <b>937.543</b>  | 0.755          | <b>937.291</b>  | A[39] |
| F  | 5  | 137.070        | 923.789        | 919.784         | 0.755          | 919.532         | F[38] |
| A  | 6  | 154.230        | 899.526        | 895.521         | 0.755          | 895.269         | A[37] |
| A  | 7  | 172.588        | 881.766        | 877.762         | 0.755          | 877.510         | A[36] |
| F  | 8  | 196.851        | 864.007        | <b>860.002</b>  | 0.755          | <b>859.750</b>  | F[35] |
| A  | 9  | 218.611        | 839.744        | 835.739         | 0.755          | 835.487         | A[34] |
| A  | 10 | 232.370        | 821.985        | 817.980         | 0.755          | 817.728         | A[33] |
| P  | 11 | 256.633        | 804.225        | 800.221         | 0.755          | 799.969         | P[32] |
| A  | 12 | 274.302        | 779.962        | 775.957         | 0.755          | 775.705         | A[31] |
| P  | 13 | 298.656        | 762.203        | 758.198         | 0.755          | 757.946         | P[30] |
| V  | 14 | 323.423        | 737.940        | 733.935         | 0.755          | 733.683         | V[29] |
| E  | 15 | 353.663        | 713.173        | 709.168         | 0.755          | 708.916         | E[28] |
| K  | 16 | 387.707        | 688.912        | 684.907         | 0.77189        | 684.655         | K[27] |
| T  | 17 | 412.969        | 648.888        | 644.883         | 0.45135        | 644.632         | T[26] |
| P  | 18 | 437.232        | 623.626        | 619.622         | 0.619874       | 619.370         | P[25] |
| V  | 19 | 461.999        | 599.363        | 595.358         | 0.595610       | 595.106         | V[24] |
| K  | 20 | 494.023        | 574.595        | <b>570.591</b>  | <b>570.843</b> | <b>570.339</b>  | K[23] |
| K  | 21 | 526.047        | 542.572        | 538.568         | 538.819        | 538.316         | K[22] |
| K  | 22 | 560.870        | 510.548        | 506.543         | 506.796        | 506.292         | K[21] |
| A  | 23 | 578.831        | 518.525        | 474.520         | 474.772        | 474.269         | A[20] |
| K  | 24 | 607.854        | 466.765        | 462.761         | 457.013        | 456.509         | K[19] |
| K  | 25 | 639.877        | 428.742        | 424.737         | 424.989        | 424.485         | K[18] |
| T  | 26 | 665.139        | 396.718        | 392.713         | 392.965        | 392.461         | T[17] |
| G  | 27 | 679.395        | 371.456        | 367.451         | 367.703        | 367.199         | G[16] |
| A  | 28 | 687.154        | 367.201        | 353.196         | 353.448        | 352.944         | A[15] |
| A  | 29 | 714.813        | 339.441        | 335.437         | 335.689        | 335.185         | A[14] |
| A  | 30 | 732.672        | 321.662        | 317.677         | 317.929        | 317.425         | A[13] |
| G  | 31 | 746.928        | 303.923        | 299.918         | 300.170        | 299.666         | G[12] |
| K  | 32 | 778.951        | 289.667        | 285.663         | 285.915        | 285.411         | K[11] |
| R  | 33 | 817.977        | 257.644        | 253.639         | 253.891        | 253.387         | R[10] |
| K  | 34 | 850.001        | 218.618        | 214.614         | 214.866        | 214.362         | K[9]  |
| A  | 35 | 887.760        | 186.595        | 182.590         | 182.842        | 182.338         | A[8]  |
| S  | 36 | 889.818        | 186.838        | 164.831         | 165.083        | 164.579         | S[7]  |
| G  | 37 | 903.773        | 147.077        | 143.073         | 143.325        | 142.821         | G[6]  |
| F  | 38 | 928.036        | 132.622        | 128.617         | 129.069        | 128.565         | F[5]  |
| P  | 39 | 952.300        | 108.559        | 104.554         | 104.806        | 104.302         | P[4]  |
| V  | 40 | <b>977.067</b> | 84.296         | 80.291          | 80.543         | 80.039          | V[3]  |
| S  | 41 | <b>998.825</b> | 59.529         | 55.524          | 55.776         | 55.272          | S[2]  |
| E  | 42 | 1031.065       | 37.771         | 33.766          | 34.018         | 33.514          | E[1]  |



# sp | P27661 | H2AX\_MOUSE

[Acetyl]SGRGKTGGKARAKAKSRSSRAGLQFPVGRVHRLLRKGHYAE

- ▶ fragmentation table for charge state 1+
- ▶ specType=etd
- ▶ score=40.77
- ▶ F113280.dat
- ▶ query=q54407\_p1
- ▶ precursor=746.425950
- ▶ chargePrecursor=6
- ▶ itol=0.5

| AA   | c               | y              | z+1      | z+2             | z               | AA   |
|------|-----------------|----------------|----------|-----------------|-----------------|------|
| S 1  | 147.076         | 4473.515       | 4467.496 | 0.000           | 4456.480        | S 41 |
| G 2  | 304.098         | 4344.473       | 4328.454 | 0.000           | 4327.448        | G 40 |
| R 3  | <b>360.199</b>  | 4207.451       | 4271.432 | 4272.440        | 4270.423        | R 39 |
| G 4  | <b>417.220</b>  | 4131.350       | 4115.331 | 4116.339        | 4114.323        | G 38 |
| K 5  | <b>543.315</b>  | 4074.329       | 4058.310 | 4059.318        | 4057.302        | K 37 |
| T 6  | <b>646.363</b>  | 3946.234       | 3930.215 | 3931.223        | 3929.207        | T 36 |
| G 7  | <b>703.385</b>  | 3845.186       | 3829.167 | 3830.175        | 3828.159        | G 35 |
| G 8  | <b>760.406</b>  | 3788.164       | 3772.146 | 3773.153        | 3771.138        | G 34 |
| K 9  | 888.501         | 3731.143       | 3715.124 | 3716.132        | 3714.116        | K 33 |
| A 10 | 959.538         | 3603.048       | 3587.029 | 3588.037        | 3586.021        | A 32 |
| R 11 | <b>1115.639</b> | 3532.011       | 3515.992 | 3517.000        | 3514.984        | R 31 |
| A 12 | <b>1186.676</b> | 3376.930       | 3359.911 | 3360.909        | 3358.893        | A 30 |
| R 13 | 1314.673        | 3304.873       | 3288.854 | 3289.862        | 3287.846        | R 29 |
| A 14 | 1385.808        | 3176.778       | 3160.759 | 3161.767        | 3159.751        | A 28 |
| K 15 | 1511.903        | 3105.741       | 3089.722 | 3090.730        | 3088.714        | K 27 |
| S 16 | 1600.935        | 2977.646       | 2961.627 | 2962.635        | 2960.619        | S 26 |
| R 17 | 1757.037        | 2890.614       | 2874.595 | 2875.603        | 2873.587        | R 25 |
| S 18 | 1844.089        | 2734.512       | 2718.494 | 2719.502        | 2717.486        | S 24 |
| S 19 | 1931.101        | 2647.480       | 2631.462 | 2632.470        | 2630.454        | S 23 |
| R 20 | 2087.202        | 2560.448       | 2544.430 | 2545.437        | 2543.421        | R 22 |
| A 21 | 2158.239        | 2404.347       | 2388.329 | 2389.336        | 2387.321        | A 21 |
| G 22 | 2215.260        | 2333.310       | 2317.291 | 2318.299        | 2316.284        | G 20 |
| L 23 | 2328.344        | 2276.289       | 2260.270 | 2261.278        | 2259.262        | L 19 |
| G 24 | 2459.403        | 2183.255       | 2167.236 | 2168.244        | 2166.229        | G 18 |
| F 25 | 2603.471        | 2036.146       | 2019.127 | 2020.135        | 2018.120        | F 17 |
| P 26 | 2700.524        | 1888.078       | 1872.059 | 1873.067        | 1871.051        | P 16 |
| V 27 | 2799.592        | 1791.025       | 1775.006 | 1776.014        | 1774.998        | V 15 |
| G 28 | 2856.614        | 1691.956       | 1675.938 | 1676.946        | 1674.930        | G 14 |
| R 29 | 3012.715        | 1634.935       | 1618.916 | <b>1619.924</b> | 1617.908        | R 13 |
| V 30 | 3113.783        | 1476.844       | 1460.825 | 1461.833        | 1460.809        | V 12 |
| H 31 | 3248.842        | 1379.785       | 1363.767 | 1364.775        | 1362.759        | H 11 |
| R 32 | 3404.943        | 1242.707       | 1226.688 | 1227.696        | 1225.680        | R 10 |
| L 33 | 3518.026        | 1086.605       | 1070.587 | 1071.595        | <b>1069.579</b> | L 9  |
| L 34 | 3611.112        | 973.521        | 957.503  | <b>958.510</b>  | 956.495         | L 8  |
| R 35 | 3787.213        | 860.437        | 844.419  | 845.426         | 843.411         | R 7  |
| K 36 | 3919.268        | <b>704.316</b> | 688.297  | 689.305         | 687.291         | K 6  |
| G 37 | 3972.329        | 676.241        | 660.223  | 661.230         | 659.215         | G 5  |
| H 38 | 4109.388        | 519.220        | 503.201  | 504.209         | 502.193         | H 4  |
| V 39 | 4272.451        | 382.161        | 366.142  | 367.150         | 365.134         | V 3  |
| A 40 | 4341.489        | 219.098        | 203.079  | 204.087         | 202.071         | A 2  |
| E 41 | 4472.531        | 148.060        | 132.042  | 133.050         | 131.034         | E 1  |

# sp | P27661 | H2AX\_MOUSE

[Acetyl]SGRGKTGGKARAKAKSRSSRAGLQFPVGRVHRLLRKGHYAE

- ▶ fragmentation table for charge state 2+
- ▶ specType=etd
- ▶ score=40.77
- ▶ F113280.dat
- ▶ query=q54407\_p1
- ▶ precursor=746.425950
- ▶ chargePrecursor=6
- ▶ itol=0.5

| AA | c  | y               | z+1             | z+2             | z               | AA             |       |
|----|----|-----------------|-----------------|-----------------|-----------------|----------------|-------|
| S  | 1  | 74.042          | 2237.261        | 2239.262        | 0.504           | 2238.740       | S[41] |
| G  | 2  | 102.563         | 2172.740        | 2164.731        | 0.504           | 2164.227       | G[40] |
| R  | 3  | 180.603         | 2144.229        | 2136.220        | 2136.724        | 2135.718       | R[39] |
| G  | 4  | 209.114         | 2096.179        | 2058.189        | 2058.673        | 2057.665       | G[38] |
| K  | 5  | 273.161         | 2037.668        | 2029.659        | 2029.659        | 2029.155       | K[37] |
| T  | 6  | 313.689         | 1979.621        | <b>1965.611</b> | <b>1966.115</b> | 1966.107       | T[36] |
| G  | 7  | 352.198         | 1921.097        | <b>1905.587</b> | <b>1915.591</b> | 1914.582       | G[35] |
| G  | 8  | 380.707         | 1864.588        | 1886.576        | <b>1887.080</b> | 1886.073       | G[34] |
| K  | 9  | 444.754         | 1806.075        | 1858.066        | 1858.570        | 1857.562       | K[33] |
| A  | 10 | 480.273         | 1802.028        | 1794.018        | 1794.522        | 1793.514       | A[32] |
| R  | 11 | 520.823         | 1756.500        | 1758.500        | 1759.004        | 1757.996       | R[31] |
| A  | 12 | <b>591.842</b>  | 1688.452        | 1680.440        | 1680.943        | 1679.943       | A[30] |
| R  | 13 | <b>657.889</b>  | 1652.940        | 1644.931        | <b>1645.435</b> | 1644.427       | R[29] |
| A  | 14 | <b>693.408</b>  | 1588.892        | 1580.883        | 1581.387        | 1580.379       | A[28] |
| K  | 15 | <b>757.455</b>  | 1553.374        | 1545.365        | 1545.868        | 1544.861       | K[27] |
| S  | 16 | <b>800.971</b>  | 1489.320        | <b>1481.317</b> | <b>1481.821</b> | 1480.813       | S[26] |
| R  | 17 | 879.822         | 1445.810        | <b>1437.801</b> | <b>1438.305</b> | 1437.297       | R[25] |
| S  | 18 | <b>922.538</b>  | 1387.760        | 1389.760        | 1389.254        | 1389.244       | S[24] |
| S  | 19 | <b>966.054</b>  | 1324.244        | <b>1316.234</b> | <b>1316.738</b> | 1315.731       | S[23] |
| R  | 20 | 1044.104        | 1280.728        | 1272.719        | 1273.222        | 1272.215       | R[22] |
| A  | 21 | 1079.623        | <b>1202.677</b> | 1194.668        | <b>1195.172</b> | 1194.164       | A[21] |
| G  | 22 | 1108.134        | 1167.159        | 1159.149        | 1159.653        | 1158.645       | G[20] |
| L  | 23 | <b>1164.676</b> | 1130.640        | <b>1130.639</b> | <b>1131.143</b> | 1130.135       | L[19] |
| G  | 24 | <b>1228.705</b> | 1082.120        | 1074.109        | <b>1074.601</b> | 1073.593       | G[18] |
| F  | 25 | 1302.239        | 1018.077        | <b>1010.067</b> | <b>1010.571</b> | 1009.563       | F[17] |
| P  | 26 | 1350.766        | <b>944.542</b>  | 936.533         | 937.037         | 936.029        | P[16] |
| V  | 27 | 1400.300        | <b>896.016</b>  | 888.007         | 888.511         | <b>887.503</b> | V[15] |
| G  | 28 | <b>1428.811</b> | 846.482         | 838.473         | 838.976         | 837.969        | G[14] |
| D  | 29 | 1506.861        | 812.971         | <b>809.962</b>  | <b>810.466</b>  | 809.458        | D[13] |
| V  | 30 | 1556.395        | 739.921         | 731.911         | 732.415         | 731.407        | V[12] |
| H  | 31 | <b>1624.925</b> | 690.388         | <b>682.377</b>  | <b>682.881</b>  | 681.873        | H[11] |
| R  | 32 | 1702.975        | 601.857         | <b>613.848</b>  | <b>614.351</b>  | 613.344        | R[10] |
| L  | 33 | 1759.517        | 543.800         | 535.797         | 536.301         | 535.293        | L[9]  |
| L  | 34 | 1816.059        | 487.264         | 479.255         | 479.759         | 478.751        | L[8]  |
| R  | 35 | 1884.110        | 430.722         | 422.713         | 423.217         | 422.209        | R[7]  |
| K  | 36 | 1958.157        | 382.672         | 384.662         | 385.166         | 384.158        | K[6]  |
| G  | 37 | 1986.668        | 288.624         | 280.615         | 281.119         | 280.111        | G[5]  |
| H  | 38 | 2065.198        | 200.114         | 252.104         | 252.608         | 251.600        | H[4]  |
| V  | 39 | 2136.729        | 191.584         | 183.575         | 184.079         | 183.071        | V[3]  |
| A  | 40 | 2172.248        | 110.052         | 102.043         | 102.547         | 101.539        | A[2]  |
| E  | 41 | 2236.789        | 74.532          | 66.524          | 67.028          | 66.021         | E[1]  |

# sp | P27661 | H2AX\_MOUSE

[Acetyl]SGRGKTGGKARAKAKSRSSRAGLQFPVGRVHRLLRKGHYAE

- ▶ fragmentation table for charge state 3+
- ▶ specType=etd
- ▶ score=40.77
- ▶ F113280.dat
- ▶ query=q54407\_p1
- ▶ precursor=746.425950
- ▶ chargePrecursor=6
- ▶ itol=0.5

| AA |    | c               | y               | #±1             | #±2             | z               | AA    |
|----|----|-----------------|-----------------|-----------------|-----------------|-----------------|-------|
| S  | 1  | 49.697          | <b>1491.843</b> | 1488.565        | 0.672           | 1489.187        | S[41] |
| G  | 2  | 66.704          | 1448.820        | 1443.480        | 0.672           | 1443.154        | G[40] |
| R  | 3  | 130.738         | 1420.823        | 1424.482        | 1424.818        | 1424.146        | R[39] |
| G  | 4  | 139.745         | 1377.788        | 1372.449        | <b>1372.785</b> | 1372.111        | G[38] |
| K  | 5  | 182.443         | 1358.781        | 1353.441        | <b>1353.777</b> | 1353.105        | K[37] |
| T  | 6  | 238.226         | 1338.083        | <b>1310.743</b> | <b>1311.079</b> | 1310.401        | T[36] |
| G  | 7  | 255.133         | 1302.830        | <b>1277.061</b> | <b>1277.397</b> | 1276.720        | G[35] |
| G  | 8  | 254.140         | 1263.963        | 1258.623        | <b>1258.389</b> | 1257.711        | G[34] |
| K  | 9  | 296.839         | 1244.388        | 1239.048        | <b>1239.382</b> | 1238.710        | K[33] |
| A  | 10 | 320.518         | 1201.688        | 1196.348        | 1196.684        | 1196.017        | A[32] |
| R  | 11 | 372.551         | 1178.088        | 1172.688        | 1173.005        | 1172.383        | R[31] |
| A  | 12 | 389.230         | 1128.919        | 1123.619        | 1123.916        | <b>1120.299</b> | A[30] |
| K  | 13 | 438.929         | 1102.296        | <b>1096.956</b> | <b>1097.292</b> | 1096.625        | K[29] |
| A  | 14 | 482.688         | 1059.597        | 1054.258        | <b>1054.594</b> | 1053.927        | A[28] |
| K  | 15 | 509.306         | 1035.918        | <b>1030.579</b> | <b>1030.915</b> | <b>1030.243</b> | K[27] |
| S  | 16 | 534.317         | 993.220         | <b>987.880</b>  | <b>988.216</b>  | 987.545         | S[26] |
| R  | 17 | 586.250         | 984.200         | <b>958.870</b>  | 959.206         | <b>958.534</b>  | R[25] |
| S  | 18 | 615.983         | 932.176         | 926.837         | 927.172         | 926.505         | S[24] |
| S  | 19 | 644.372         | 883.165         | <b>877.825</b>  | <b>878.161</b>  | 877.489         | S[23] |
| R  | 20 | 696.405         | 854.154         | <b>848.815</b>  | <b>849.151</b>  | 848.479         | R[22] |
| A  | 21 | 720.084         | <b>802.121</b>  | 796.781         | 797.117         | 796.445         | A[21] |
| G  | 22 | 759.062         | 778.442         | 773.102         | 773.438         | 772.766         | G[20] |
| L  | 23 | 778.788         | 759.434         | 754.094         | 754.430         | 753.759         | L[19] |
| Q  | 24 | <b>819.472</b>  | 721.740         | 716.400         | <b>716.736</b>  | 716.064         | Q[18] |
| F  | 25 | 868.495         | 679.054         | 673.714         | 674.050         | 673.378         | F[17] |
| F  | 26 | 900.946         | 630.031         | 624.691         | 625.027         | 624.355         | F[16] |
| V  | 27 | 933.889         | 597.680         | 592.340         | 592.676         | 592.004         | V[15] |
| G  | 28 | <b>952.876</b>  | 558.051         | 552.711         | 553.047         | 552.375         | G[14] |
| R  | 29 | 1004.919        | <b>545.650</b>  | 540.310         | 540.646         | 539.974         | R[13] |
| V  | 30 | <b>1037.933</b> | 491.616         | 486.276         | 486.612         | 485.941         | V[12] |
| H  | 31 | <b>1083.619</b> | 460.593         | 455.253         | 455.589         | 454.918         | H[11] |
| R  | 32 | 1135.653        | 414.907         | 409.567         | 409.903         | 409.232         | R[10] |
| L  | 33 | <b>1173.347</b> | 362.873         | 357.533         | 357.870         | 357.198         | L[9]  |
| L  | 34 | <b>1211.042</b> | 328.178         | 322.838         | 323.174         | 322.502         | L[8]  |
| R  | 35 | 1253.328        | 287.484         | 282.144         | 282.480         | 281.808         | R[7]  |
| K  | 36 | 1305.774        | 235.460         | 230.120         | 230.457         | 229.785         | K[6]  |
| G  | 37 | 1354.781        | 192.752         | 187.412         | 187.748         | 187.076         | G[5]  |
| H  | 38 | 1370.468        | 173.745         | 168.405         | 168.741         | 168.069         | H[4]  |
| V  | 39 | 1424.822        | 128.098         | 122.758         | 123.094         | 122.422         | V[3]  |
| A  | 40 | 1468.903        | 83.304          | 77.964          | 78.300          | 77.628          | A[2]  |
| E  | 41 | 1491.515        | 50.025          | 44.685          | 45.021          | 44.349          | E[1]  |

# sp | P27661 | H2AX\_MOUSE

[Acetyl]SGRGKTGGKARAKAKSRSSRAGLQFPVGRVHRLLRKGHYAE

- ▶ fragmentation table for charge state 4+
- ▶ specType=etd
- ▶ score=40.77
- ▶ F113280.dat
- ▶ query=q54407.p1
- ▶ precursor=746.425950
- ▶ chargePrecursor=6
- ▶ itol=0.5

| AA   | c               | y               | z+1            | z+2             | z              | AA   |
|------|-----------------|-----------------|----------------|-----------------|----------------|------|
| S 1  | 17.526          | <b>1119.134</b> | 1116.190       | 0.755           | 1114.878       | S 41 |
| G 2  | 51.780          | 1086.874        | 1082.889       | 0.755           | 1082.617       | G 40 |
| R 3  | 90.805          | <b>1072.618</b> | 1068.614       | <b>1068.866</b> | 1068.367       | R 39 |
| G 4  | 105.061         | 1033.593        | 1029.588       | 1029.940        | 1029.339       | G 38 |
| K 5  | 137.084         | 1019.338        | 1015.333       | <b>1015.585</b> | 1015.081       | K 37 |
| T 6  | 162.346         | 997.314         | <b>983.309</b> | <b>983.561</b>  | <b>983.057</b> | T 36 |
| G 7  | 178.602         | 962.052         | <b>958.047</b> | <b>958.299</b>  | 957.795        | G 35 |
| G 8  | 190.857         | 947.797         | <b>943.792</b> | <b>944.044</b>  | 943.540        | G 34 |
| K 9  | 222.891         | 933.541         | 929.537        | 929.788         | 929.285        | K 33 |
| A 10 | 240.640         | 903.517         | 897.513        | 897.765         | 897.261        | A 32 |
| R 11 | 279.695         | 883.750         | <b>879.753</b> | <b>880.005</b>  | 879.502        | R 31 |
| A 12 | 297.425         | 844.733         | 840.728        | 840.980         | 840.476        | A 30 |
| K 13 | 329.448         | 828.974         | 822.969        | <b>823.221</b>  | 822.717        | K 29 |
| A 14 | 347.208         | 794.950         | 790.945        | 791.197         | 790.693        | A 28 |
| K 15 | 379.231         | 777.191         | 773.186        | 773.438         | 772.934        | K 27 |
| S 16 | <b>400.989</b>  | 745.167         | 741.162        | 741.414         | 740.910        | S 26 |
| R 17 | 440.035         | 723.400         | 719.404        | 719.696         | 719.152        | R 25 |
| S 18 | 483.773         | 694.384         | 690.379        | 690.631         | 690.127        | S 24 |
| S 19 | 483.531         | 662.626         | 658.621        | 658.873         | <b>658.369</b> | S 23 |
| R 20 | 522.556         | 640.869         | 636.863        | 637.115         | 636.611        | R 22 |
| A 21 | 540.315         | 601.847         | 597.838        | 598.090         | 597.586        | A 21 |
| G 22 | 584.571         | 584.083         | 580.078        | 580.330         | 579.826        | G 20 |
| L 23 | 582.842         | 569.828         | 565.823        | 566.075         | 565.571        | L 19 |
| G 24 | 614.856         | 543.557         | 537.553        | 537.804         | 537.300        | G 18 |
| F 25 | 651.823         | 509.542         | 505.537        | 505.789         | 505.285        | F 17 |
| P 26 | 675.888         | 472.775         | 468.770        | 469.022         | 468.518        | P 16 |
| V 27 | 700.694         | 448.512         | 444.507        | 444.759         | 444.255        | V 15 |
| G 28 | 714.909         | 423.745         | 419.740        | 419.992         | 419.488        | G 14 |
| R 29 | 753.034         | 409.480         | 405.485        | 405.736         | 405.233        | R 13 |
| Y 30 | 719.901         | 379.464         | 369.459        | 369.711         | 369.207        | Y 12 |
| H 31 | 812.968         | 345.697         | 341.692        | 341.944         | 341.440        | H 11 |
| R 32 | 851.991         | 311.432         | 307.427        | 307.679         | 307.175        | R 10 |
| L 33 | <b>880.262</b>  | 273.407         | 268.402        | 268.654         | 268.150        | L 9  |
| L 34 | 908.533         | 244.130         | 240.131        | 240.383         | 239.879        | L 8  |
| R 35 | 947.559         | 215.865         | 211.860        | 212.112         | 211.608        | R 7  |
| L 36 | <b>979.582</b>  | 178.849         | 172.835        | 173.087         | 172.583        | L 6  |
| G 37 | 893.538         | 144.810         | 140.811        | 141.063         | 140.559        | G 5  |
| H 38 | 1028.102        | 130.560         | 126.556        | 126.808         | 126.304        | H 4  |
| Y 39 | <b>1068.868</b> | 96.296          | 92.291         | 92.543          | 92.039         | Y 3  |
| A 40 | 1098.628        | 55.530          | 51.525         | 51.777          | 51.273         | A 2  |
| E 41 | <b>1118.888</b> | 37.771          | 33.766         | 34.018          | 33.514         | E 1  |



# sp | P27661 | H2AX\_MOUSE

[Acetyl]SGRGKTGGKARAKAKSRSSRAGLQFPVGRVHLLLRKGHYAE

- ▶ fragmentation table for charge state 5+
- ▶ specType=etd
- ▶ score=40.77
- ▶ F113280.dat
- ▶ query=q54407\_p1
- ▶ precursor=746.425950
- ▶ chargePrecursor=6
- ▶ itol=0.5

| AA    | c              | y              | z+1            | z#2            | z              | AA    |
|-------|----------------|----------------|----------------|----------------|----------------|-------|
| S[1]  | 30.221         | <b>895.509</b> | <b>892.305</b> | 0.806          | <b>892.104</b> | S[41] |
| G[2]  | 41.625         | 890.700        | 886.497        | 0.806          | 886.295        | G[40] |
| R[3]  | 72.846         | 888.296        | <b>855.092</b> | <b>855.294</b> | <b>854.891</b> | R[39] |
| G[4]  | 84.250         | 827.076        | <b>823.872</b> | <b>824.074</b> | <b>823.671</b> | G[38] |
| K[5]  | 109.869        | 815.672        | 812.468        | 812.669        | 812.266        | K[37] |
| T[6]  | 130.078        | 790.053        | 786.849        | 787.050        | 786.647        | T[36] |
| G[7]  | 141.483        | 769.843        | 766.639        | 766.841        | 766.438        | G[35] |
| G[8]  | 152.887        | 758.439        | 755.235        | 755.437        | 755.033        | G[34] |
| K[9]  | 178.506        | 747.034        | 743.831        | 744.032        | 743.629        | K[33] |
| A[10] | 192.713        | 721.415        | 718.212        | 718.413        | 718.010        | A[32] |
| R[11] | 223.934        | 707.208        | 704.004        | <b>704.206</b> | <b>703.803</b> | R[31] |
| A[12] | 238.141        | 675.988        | 672.784        | 672.986        | 672.582        | A[30] |
| K[13] | 263.760        | 661.780        | 658.577        | 658.778        | <b>658.375</b> | K[29] |
| A[14] | 277.968        | 636.161        | 632.958        | 633.159        | 632.756        | A[28] |
| K[15] | 303.586        | 621.954        | 618.750        | 618.952        | 618.549        | K[27] |
| S[16] | 320.993        | 596.335        | 593.131        | 593.333        | 592.930        | S[26] |
| R[17] | 352.213        | 578.929        | 575.725        | 575.926        | 575.523        | R[25] |
| S[18] | 389.620        | 527.708        | 544.503        | 544.706        | 544.303        | S[24] |
| S[19] | 397.028        | 530.302        | 527.098        | 527.300        | 526.897        | S[23] |
| R[20] | 418.246        | 512.895        | 509.692        | 509.893        | 509.490        | R[22] |
| A[21] | 432.454        | 481.675        | 478.472        | 478.673        | 478.270        | A[21] |
| G[22] | 443.858        | 467.468        | 464.264        | 464.466        | 464.063        | G[20] |
| L[23] | 466.475        | 456.064        | 452.860        | 453.061        | 452.658        | L[19] |
| Q[24] | 492.089        | 433.447        | 430.243        | 430.445        | 430.041        | Q[18] |
| F[25] | 521.500        | 407.835        | 404.631        | 404.833        | 404.430        | F[17] |
| P[26] | 540.911        | 378.421        | 375.218        | 375.419        | 375.016        | P[16] |
| V[27] | 560.724        | 359.011        | 355.807        | 356.009        | 355.605        | V[15] |
| G[28] | 572.129        | 339.191        | 335.987        | 336.189        | 335.782        | G[14] |
| R[29] | 603.349        | 327.793        | 324.589        | 324.791        | 324.388        | R[13] |
| V[30] | 623.163        | 296.573        | 293.369        | 293.570        | 293.167        | V[12] |
| H[31] | 650.574        | 276.759        | 273.555        | 273.757        | 273.354        | H[11] |
| R[32] | 681.795        | 249.347        | 246.143        | 246.345        | 245.942        | R[10] |
| L[33] | <b>704.411</b> | 218.127        | 214.923        | 215.125        | 214.722        | L[9]  |
| L[34] | 727.628        | 195.510        | 192.306        | 192.508        | 192.105        | L[8]  |
| R[35] | <b>758.248</b> | 172.893        | 169.689        | 169.891        | 169.488        | R[7]  |
| K[36] | 783.867        | 141.673        | 138.469        | 138.671        | 138.268        | K[6]  |
| G[37] | 799.272        | 116.054        | 112.850        | 113.052        | 112.649        | G[5]  |
| H[38] | 822.683        | 104.650        | 101.446        | 101.648        | 101.244        | H[4]  |
| V[39] | <b>855.296</b> | 77.238         | 74.034         | 74.236         | 73.833         | V[3]  |
| A[40] | 869.504        | 44.625         | 41.422         | 41.623         | 41.220         | A[2]  |
| E[41] | 895.312        | 30.418         | 27.214         | 27.416         | 27.013         | E[1]  |

# sp | Q6GSS7 | H2A2A\_MOUSE

[Acetyl]SGRGKQGQGGKARAKAKSRSSRAGLQFPVGRVHLLLRKGN<sup>YAE</sup>

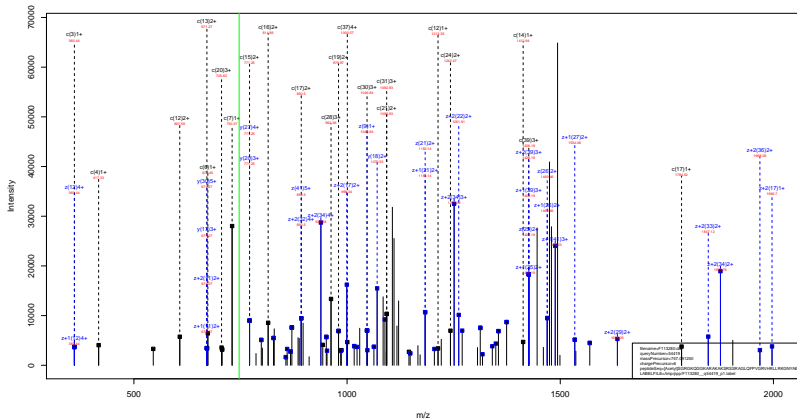

# sp | Q6GSS7 | H2A2A\_MOUSE

[Acetyl]SGRGKQGGKARAKAKSRSSRAGLQFPVGRVHRLLRKGNAYE

- ▶ fragmentation table for charge state 1+
- ▶ specType=etd
- ▶ score=39.44
- ▶ F113280.dat
- ▶ query=q54419.p1
- ▶ precursor=747.091250
- ▶ chargePrecursor=6
- ▶ itol=0.5

| AA | c  | y               | z+1      | z+2             | z               | AA              |       |
|----|----|-----------------|----------|-----------------|-----------------|-----------------|-------|
| S  | 1  | 147.076         | 4477.530 | 4461.481        | 0.000           | 4460.483        | S[41] |
| G  | 2  | 204.098         | 4348.467 | 4332.440        | 0.000           | 4331.441        | G[40] |
| R  | 3  | <b>360.199</b>  | 4291.448 | 4275.429        | 4276.435        | 4274.419        | R[39] |
| G  | 4  | <b>417.220</b>  | 4135.345 | 4119.320        | 4120.334        | 4118.310        | G[38] |
| K  | 5  | <b>545.315</b>  | 4078.323 | 4062.305        | 4063.313        | 4061.297        | K[37] |
| Q  | 6  | <b>673.374</b>  | 3985.208 | 3974.210        | 3975.218        | 3973.202        | Q[36] |
| G  | 7  | <b>730.395</b>  | 3922.193 | 3899.151        | 3907.159        | 3895.142        | G[35] |
| G  | 8  | 787.417         | 3765.148 | 3749.130        | 3750.138        | 3748.122        | G[34] |
| K  | 9  | 915.512         | 3708.127 | 3692.108        | 3693.116        | 3691.100        | K[33] |
| A  | 10 | <b>986.549</b>  | 3530.032 | 3504.013        | 3505.021        | 3503.005        | A[32] |
| R  | 11 | 1142.650        | 3538.995 | 3492.970        | 3493.984        | 3491.966        | R[31] |
| A  | 12 | <b>1213.687</b> | 3352.894 | 3338.875        | 3337.883        | 3335.867        | A[30] |
| R  | 13 | 1381.782        | 3281.857 | 3265.838        | 3266.846        | 3264.830        | R[29] |
| A  | 14 | <b>1412.819</b> | 3153.762 | 3137.743        | 3138.751        | 3136.735        | A[28] |
| K  | 15 | 1540.914        | 3082.725 | 3066.706        | 3067.714        | 3065.698        | K[27] |
| S  | 16 | 1827.946        | 2954.630 | 2938.611        | 2939.619        | 2937.603        | S[26] |
| R  | 17 | <b>1784.047</b> | 2867.598 | 2851.579        | 2852.587        | 2850.571        | R[25] |
| S  | 18 | 1871.979        | 2713.495 | 2699.471        | 2698.488        | 2696.470        | S[24] |
| S  | 19 | 1958.111        | 2624.464 | 2608.448        | 2609.454        | 2607.438        | S[23] |
| R  | 20 | 2114.213        | 2537.432 | 2521.414        | 2522.422        | 2520.406        | R[22] |
| A  | 21 | 2185.250        | 2491.431 | 2485.413        | 2486.420        | 2484.405        | A[21] |
| G  | 22 | 2242.271        | 2310.294 | 2294.275        | 2295.283        | 2293.268        | G[20] |
| L  | 23 | 2485.388        | 2253.273 | 2237.258        | 2238.262        | 2236.246        | L[19] |
| Q  | 24 | 2483.414        | 2149.189 | 2134.170        | 2135.178        | 2133.162        | Q[18] |
| F  | 25 | 2630.482        | 2012.130 | 1996.111        | <b>1997.119</b> | 1995.104        | F[17] |
| F  | 26 | 2727.535        | 1895.062 | 1849.043        | 1850.051        | 1848.035        | F[16] |
| V  | 27 | 2826.603        | 1768.009 | 1753.990        | 1752.998        | 1750.982        | V[15] |
| G  | 28 | 2883.625        | 1668.940 | 1652.922        | 1653.930        | 1651.914        | G[14] |
| D  | 29 | 2939.720        | 1611.919 | 1595.900        | 1596.908        | 1594.892        | D[13] |
| V  | 30 | 3138.794        | 1495.818 | 1479.799        | 1480.807        | 1478.791        | V[12] |
| H  | 31 | 3275.853        | 1356.749 | <b>1340.731</b> | 1341.739        | 1339.723        | H[11] |
| R  | 32 | 3431.964        | 1219.691 | 1203.672        | <b>1204.680</b> | 1202.664        | R[10] |
| L  | 33 | 3545.038        | 1063.589 | <b>1047.571</b> | 1048.579        | <b>1046.563</b> | L[9]  |
| L  | 34 | 3658.123        | 950.505  | 934.487         | 935.495         | 933.479         | L[8]  |
| R  | 35 | 3814.224        | 837.421  | 821.403         | 822.410         | 820.395         | R[7]  |
| K  | 36 | 3942.319        | 681.320  | 665.302         | 666.309         | 664.293         | K[6]  |
| G  | 37 | 3999.340        | 553.225  | 537.207         | 538.214         | 536.199         | G[5]  |
| N  | 38 | 4113.383        | 496.204  | 480.185         | 481.193         | 479.177         | N[4]  |
| V  | 39 | 4276.446        | 382.101  | 366.143         | 367.150         | 365.134         | V[3]  |
| A  | 40 | 4347.463        | 219.098  | 203.079         | 204.087         | 202.071         | A[2]  |
| E  | 41 | 4476.528        | 148.060  | 132.042         | 133.050         | 131.034         | E[1]  |

# sp | Q6GSS7 | H2A2A\_MOUSE

[Acetyl]SGRGKQGGKARAKAKSRSSRAGLQFPVGRVHRLLRKGN<sup>YAE</sup>

- ▶ fragmentation table for charge state 2+
- ▶ specType=etd
- ▶ score=39.44
- ▶ F113280.dat
- ▶ query=q54419\_p1
- ▶ precursor=747.091250
- ▶ chargePrecursor=6
- ▶ itol=0.5

| AA | c  | w               | #s1             | #s2             | z               | AA              |       |
|----|----|-----------------|-----------------|-----------------|-----------------|-----------------|-------|
| S  | 1  | 74.062          | 2239.259        | 2231.260        | 8.804           | 2230.147        | S(41) |
| G  | 2  | 102.553         | 2174.737        | 2166.738        | 0.504           | 2166.254        | G(40) |
| R  | 3  | 180.603         | 2146.227        | 2138.217        | 2138.921        | 2137.713        | R(39) |
| G  | 4  | 209.114         | 2068.176        | 2060.167        | 2060.671        | 2059.663        | G(38) |
| K  | 5  | 273.161         | 2039.665        | 2031.656        | 2032.160        | 2031.152        | K(37) |
| G  | 6  | 327.194         | 1975.616        | 1967.606        | <b>1968.112</b> | 1967.105        | G(36) |
| G  | 7  | 365.703         | 1911.569        | 1903.579        | 1904.083        | 1903.075        | G(35) |
| G  | 8  | 394.212         | 1883.078        | 1875.088        | <b>1875.572</b> | 1874.565        | G(34) |
| K  | 9  | 458.260         | 1854.567        | 1846.558        | <b>1847.062</b> | 1846.054        | K(33) |
| A  | 10 | 493.778         | 1790.520        | 1782.510        | 1783.014        | 1782.006        | A(32) |
| R  | 11 | 577.829         | 1735.001        | 1726.992        | 1727.496        | 1726.488        | R(31) |
| A  | 12 | <b>607.347</b>  | 1678.954        | 1668.943        | 1669.446        | 1668.439        | A(30) |
| K  | 13 | <b>671.395</b>  | 1643.433        | 1633.423        | <b>1633.927</b> | 1632.919        | K(29) |
| A  | 14 | <b>706.913</b>  | 1577.384        | <b>1569.375</b> | 1569.879        | <b>1568.871</b> | A(28) |
| K  | 15 | <b>770.961</b>  | 1541.866        | <b>1533.857</b> | <b>1534.360</b> | 1533.351        | K(27) |
| S  | 16 | <b>814.477</b>  | 1477.818        | <b>1469.809</b> | 1470.313        | <b>1469.305</b> | S(26) |
| R  | 17 | <b>892.527</b>  | 1434.302        | <b>1426.293</b> | <b>1426.797</b> | <b>1425.789</b> | R(25) |
| S  | 18 | 928.613         | 1369.263        | 1360.253        | <b>1348.746</b> | 1347.739        | S(24) |
| S  | 19 | <b>979.559</b>  | <b>1312.736</b> | 1304.726        | 1305.230        | 1304.223        | S(23) |
| R  | 20 | 1057.610        | 1269.220        | 1261.210        | <b>1261.714</b> | 1260.707        | R(22) |
| A  | 21 | <b>1093.128</b> | 1191.169        | <b>1183.160</b> | 1183.664        | <b>1182.656</b> | A(21) |
| G  | 22 | 1121.639        | 1135.051        | <b>1147.641</b> | <b>1148.145</b> | 1147.137        | G(20) |
| L  | 23 | 1179.383        | 1119.140        | 1110.130        | 1110.634        | 1109.626        | L(19) |
| Q  | 24 | <b>1242.211</b> | <b>1070.598</b> | <b>1062.589</b> | <b>1063.093</b> | 1062.085        | Q(18) |
| F  | 25 | 1315.745        | 1006.509        | 998.509         | <b>999.063</b>  | 998.055         | F(17) |
| F  | 26 | 1364.271        | 933.034         | 925.035         | 925.539         | 924.531         | F(16) |
| V  | 27 | 1413.805        | 884.506         | 876.496         | 877.003         | 876.005         | V(15) |
| G  | 28 | 1462.316        | 834.074         | 826.064         | <b>827.468</b>  | 826.461         | G(14) |
| R  | 29 | 1520.369        | 806.483         | <b>798.454</b>  | <b>798.958</b>  | 797.950         | R(13) |
| V  | 30 | 1569.901        | 729.413         | 720.403         | 720.907         | 719.899         | V(12) |
| H  | 31 | 1638.430        | 678.878         | <b>670.869</b>  | <b>671.373</b>  | 670.365         | H(11) |
| R  | 32 | 1716.481        | 610.349         | 602.340         | 602.843         | 601.835         | R(10) |
| L  | 33 | 1773.023        | 532.269         | 524.269         | 524.793         | 523.785         | L(9)  |
| L  | 34 | 1829.566        | 478.756         | 469.747         | 469.251         | 468.243         | L(8)  |
| R  | 35 | 1907.615        | 419.214         | 411.205         | 411.709         | 410.701         | R(7)  |
| K  | 36 | 1971.663        | 341.164         | 333.154         | 333.658         | 332.650         | K(6)  |
| G  | 37 | 2000.174        | 277.116         | 269.107         | 269.611         | 268.603         | G(5)  |
| N  | 38 | 2057.195        | 248.606         | 240.596         | 241.100         | 240.092         | N(4)  |
| V  | 39 | 2136.727        | 181.564         | 183.575         | 184.079         | 183.071         | V(3)  |
| A  | 40 | 2114.265        | 110.026         | 102.043         | 102.547         | 101.539         | A(2)  |
| E  | 41 | 2238.767        | 74.534          | 66.524          | 67.028          | 66.021          | E(1)  |

# sp | Q6GSS7 | H2A2A\_MOUSE

[Acetyl]SGRGKQGGKARAKAKSRSSRAGLQFPVGRVHRLLRKGN~~YAE~~

- ▶ fragmentation table for charge state 3+
- ▶ specType=etd
- ▶ score=39.44
- ▶ F113280.dat
- ▶ query=q54419\_p1
- ▶ precursor=747.091250
- ▶ chargePrecursor=6
- ▶ itol=0.5

| AA | c  | y               | #s1             | #s2             | z               | AA              |       |
|----|----|-----------------|-----------------|-----------------|-----------------|-----------------|-------|
| S  | 1  | 489.607         | 1392.178        | <b>1487.835</b> | 8.872           | 2487.407        | S[41] |
| G  | 2  | 66.704          | 1450.181        | 1444.531        | 0.672           | 1444.485        | G[40] |
| R  | 3  | 1307.718        | 1431.154        | <b>1425.814</b> | <b>1426.150</b> | 1425.478        | R[39] |
| G  | 4  | 139.745         | 1379.120        | <b>1373.780</b> | <b>1374.116</b> | 1373.444        | G[38] |
| K  | 5  | 182.443         | 1350.113        | <b>1354.773</b> | <b>1355.109</b> | 1354.437        | K[37] |
| G  | 6  | 225.130         | <b>1317.414</b> | <b>1312.075</b> | <b>1312.411</b> | 1311.730        | G[36] |
| G  | 7  | 244.137         | 1274.325        | 1268.969        | <b>1269.725</b> | 1269.045        | G[35] |
| G  | 8  | 263.144         | 1255.721        | 1250.381        | <b>1250.717</b> | 1250.045        | G[34] |
| K  | 9  | 305.642         | 1236.714        | 1231.374        | 1231.710        | 1231.038        | K[33] |
| A  | 10 | 329.521         | 1194.016        | 1188.676        | 1189.012        | 1188.340        | A[32] |
| R  | 11 | 381.555         | 1170.336        | 1164.997        | 1165.333        | 1164.661        | R[31] |
| A  | 12 | 405.234         | 1138.303        | 1132.963        | 1133.300        | 1132.624        | A[30] |
| K  | 13 | 447.932         | 1094.624        | <b>1089.284</b> | 1089.620        | <b>1088.948</b> | K[29] |
| A  | 14 | 491.611         | 1051.925        | <b>1046.586</b> | <b>1046.922</b> | 1046.250        | A[28] |
| K  | 15 | 514.310         | 1028.246        | 1022.907        | <b>1023.243</b> | 1022.571        | K[27] |
| S  | 16 | 543.320         | <b>985.548</b>  | <b>980.208</b>  | 980.544         | <b>979.873</b>  | S[26] |
| R  | 17 | 585.254         | 956.537         | <b>951.198</b>  | <b>951.534</b>  | <b>950.862</b>  | R[25] |
| S  | 18 | 624.365         | 904.504         | 898.164         | 898.500         | 897.825         | S[24] |
| S  | 19 | 653.375         | 875.493         | <b>870.153</b>  | <b>870.489</b>  | 869.817         | S[23] |
| R  | 20 | <b>705.409</b>  | 846.482         | 841.143         | 841.479         | 840.807         | R[22] |
| A  | 21 | 729.088         | 794.449         | 789.109         | 789.445         | 788.773         | A[21] |
| G  | 22 | 748.095         | <b>770.770</b>  | 765.430         | 765.766         | 765.094         | G[20] |
| L  | 23 | 785.990         | 740.762         | 735.423         | 735.759         | 735.087         | L[19] |
| G  | 24 | 828.476         | 714.085         | 708.745         | 709.084         | 708.412         | G[18] |
| F  | 25 | 877.409         | <b>671.382</b>  | 666.042         | 666.378         | 665.707         | F[17] |
| F  | 26 | 909.950         | 622.359         | 617.019         | 617.355         | 616.683         | F[16] |
| V  | 27 | <b>942.873</b>  | 590.006         | 584.666         | 585.004         | 584.332         | V[15] |
| G  | 28 | <b>961.880</b>  | 558.985         | 553.645         | 553.981         | 553.309         | G[14] |
| R  | 29 | 1013.914        | 537.978         | 532.638         | 532.974         | 532.302         | R[13] |
| V  | 30 | <b>1046.936</b> | 485.944         | 480.604         | 480.941         | 480.269         | V[12] |
| H  | 31 | <b>1092.623</b> | 452.921         | 447.582         | 447.918         | 447.246         | H[11] |
| R  | 32 | <b>1144.656</b> | 407.235         | 401.895         | 402.231         | 401.560         | R[10] |
| L  | 33 | 1182.351        | 355.201         | 349.862         | 350.198         | 349.526         | L[9]  |
| L  | 34 | 1230.046        | 319.509         | 314.169         | 314.505         | 313.833         | L[8]  |
| R  | 35 | 1272.079        | 279.812         | 274.472         | 274.808         | 274.136         | R[7]  |
| K  | 36 | 1314.778        | 227.778         | 222.438         | 222.775         | 222.103         | K[6]  |
| G  | 37 | 1333.785        | 185.080         | 179.740         | 180.076         | 179.404         | G[5]  |
| N  | 38 | 1371.799        | 146.073         | 140.733         | 141.069         | 140.397         | N[4]  |
| V  | 39 | <b>1426.154</b> | 108.098         | 102.758         | 103.095         | 102.423         | V[3]  |
| A  | 40 | 1449.813        | 73.348          | 68.008          | 68.344          | 67.672          | A[2]  |
| E  | 41 | 1492.847        | 30.025          | 44.685          | 45.021          | 44.349          | E[1]  |

# sp | Q6GSS7 | H2A2A\_MOUSE

[Acetyl]SGRGKQGGKARAKAKSRSSRAGLQFPVGRVHRLLRKGN~~YAE~~

- ▶ fragmentation table for charge state 4+
- ▶ specType=etd
- ▶ score=39.44
- ▶ F113280.dat
- ▶ query=q54419\_p1
- ▶ precursor=747.091250
- ▶ chargePrecursor=6
- ▶ itol=0.5

| AA   | c               | y              | z+1             | z+2             | z              | AA   |
|------|-----------------|----------------|-----------------|-----------------|----------------|------|
| S 1  | 17.526          | 1120.193       | 1116.138        | 0.755           | 1115.878       | S 41 |
| G 2  | 51.780          | 1087.872       | 1083.808        | 0.755           | 1083.618       | G 40 |
| R 3  | 90.805          | 1073.617       | 1069.612        | 1069.864        | 1069.360       | R 39 |
| G 4  | 105.061         | 1034.592       | 1030.587        | 1030.839        | 1030.335       | G 38 |
| K 5  | 137.084         | 1020.336       | <b>1016.332</b> | <b>1016.384</b> | 1016.080       | K 37 |
| G 6  | 169.099         | 988.313        | 984.308         | 984.560         | 984.056        | G 36 |
| G 7  | 183.394         | 996.288        | 992.293         | <b>992.545</b>  | 992.041        | G 35 |
| G 8  | 197.610         | 942.043        | 938.038         | <b>938.290</b>  | 937.786        | G 34 |
| K 9  | 229.633         | 927.787        | 923.783         | 924.034         | 923.531        | K 33 |
| A 10 | 247.303         | 895.763        | 891.758         | <b>892.011</b>  | 891.507        | A 32 |
| R 11 | 286.418         | 878.004        | 873.999         | 874.251         | 873.748        | R 31 |
| A 12 | 304.177         | 838.978        | 834.974         | 835.226         | 834.723        | A 30 |
| K 13 | 338.201         | 821.220        | 817.215         | 817.467         | 816.964        | K 29 |
| A 14 | 353.960         | 789.198        | 785.193         | 785.443         | 784.939        | A 28 |
| K 15 | 385.984         | <b>771.437</b> | 767.432         | 767.684         | 767.180        | K 27 |
| S 16 | 407.742         | 739.413        | 735.408         | 735.660         | 735.156        | S 26 |
| R 17 | 446.767         | 717.895        | 713.890         | 714.142         | 713.638        | R 25 |
| S 18 | 468.526         | 678.639        | 674.635         | 674.887         | 674.373        | S 24 |
| S 19 | 490.283         | 656.872        | 652.867         | 653.119         | 652.615        | S 23 |
| R 20 | 529.309         | 635.114        | 631.109         | 631.361         | 630.857        | R 22 |
| A 21 | 547.068         | 606.089        | 602.084         | 602.336         | 601.833        | A 21 |
| G 22 | 561.323         | 578.329        | 574.324         | 574.576         | 574.072        | G 20 |
| L 23 | 589.594         | 564.074        | 560.069         | 560.321         | 559.817        | L 19 |
| G 24 | 623.609         | 535.803        | 531.798         | 532.050         | 531.546        | G 18 |
| F 25 | 658.376         | 503.788        | 499.783         | 500.035         | 499.531        | F 17 |
| P 26 | 682.639         | 487.021        | 483.016         | 483.268         | 482.764        | P 16 |
| V 27 | <b>707.406</b>  | 442.759        | 438.753         | 439.005         | 438.501        | V 15 |
| G 28 | 721.662         | 417.991        | 413.986         | 414.238         | 413.734        | G 14 |
| R 29 | 760.687         | 401.735        | 397.731         | 399.982         | 399.478        | R 13 |
| V 30 | 785.454         | 384.710        | <b>380.705</b>  | 380.957         | <b>380.453</b> | V 12 |
| H 31 | 819.719         | 359.943        | 355.938         | 356.190         | 355.686        | H 11 |
| R 32 | 858.744         | 305.676        | 301.673         | 301.925         | 301.421        | R 10 |
| L 33 | 887.015         | 266.651        | 262.648         | 262.900         | 262.396        | L 9  |
| L 34 | 915.286         | 238.382        | 234.377         | 234.629         | 234.125        | L 8  |
| R 35 | 954.511         | 210.111        | 206.106         | 206.358         | 205.854        | R 7  |
| K 36 | <b>986.135</b>  | 171.086        | 167.083         | 167.335         | 166.829        | K 6  |
| G 37 | <b>1000.590</b> | 139.062        | 135.057         | 135.309         | 134.805        | G 5  |
| N 38 | 1029.101        | 124.808        | 120.802         | 121.054         | 120.550        | N 4  |
| V 39 | 1069.867        | 96.296         | 92.291          | 92.543          | 92.039         | V 3  |
| A 40 | 1087.626        | 55.530         | 51.525          | 51.777          | 51.273         | A 2  |
| E 41 | 1119.887        | 37.771         | 33.766          | 34.018          | 33.514         | E 1  |

# sp | Q6GSS7 | H2A2A\_MOUSE

[Acetyl]SGRGGKQGGKARAKAKSRSSRAGLQFPVGRVHLLRKGNYAE

- ▶ fragmentation table for charge state 5+
- ▶ specType=etd
- ▶ score=39.44
- ▶ F113280.dat
- ▶ query=q54419\_p1
- ▶ precursor=747.091250
- ▶ chargePrecursor=6
- ▶ itol=0.5

| AA | c  | y              | z+1            | z#2            | z              | AA                   |
|----|----|----------------|----------------|----------------|----------------|----------------------|
| S  | 1  | 30.221         | 306.308        | 893.104        | 0.806          | <b>892.903</b> S[41] |
| G  | 2  | 41.625         | <b>870.499</b> | <b>867.296</b> | 0.806          | <b>867.094</b> G[40] |
| R  | 3  | 72.846         | <b>859.095</b> | 855.891        | <b>856.093</b> | 855.690 R[39]        |
| G  | 4  | 84.250         | <b>827.875</b> | 824.671        | 824.873        | 824.469 G[38]        |
| K  | 5  | 109.869        | 816.471        | 813.267        | 813.468        | 813.065 K[37]        |
| Q  | 6  | 135.481        | 790.852        | 787.648        | 787.849        | 787.446 Q[36]        |
| G  | 7  | 146.885        | 765.240        | 762.036        | 762.238        | 761.834 G[35]        |
| G  | 8  | 158.289        | 751.836        | 750.632        | 750.833        | 750.430 G[34]        |
| K  | 9  | 183.908        | 742.431        | 739.227        | 739.429        | 739.026 K[33]        |
| A  | 10 | 198.116        | 716.812        | 713.608        | 713.810        | 713.407 A[32]        |
| R  | 11 | 229.336        | 702.605        | 699.401        | 699.603        | 699.199 R[31]        |
| A  | 12 | 243.543        | <b>671.385</b> | 668.181        | 668.382        | 667.979 A[30]        |
| K  | 13 | 269.162        | 657.177        | 653.973        | 654.175        | 653.772 K[29]        |
| A  | 14 | 283.370        | 631.558        | 628.354        | 628.556        | 628.153 A[28]        |
| K  | 15 | 308.989        | 617.351        | 614.147        | 614.349        | 613.945 K[27]        |
| S  | 16 | 326.395        | 591.732        | 588.528        | 588.730        | 588.326 S[26]        |
| R  | 17 | 357.615        | 574.325        | 571.122        | 571.323        | 570.920 R[25]        |
| S  | 18 | 375.022        | 548.705        | 545.501        | 545.703        | 545.300 S[24]        |
| S  | 19 | 392.428        | 523.089        | 522.485        | 522.687        | 522.283 S[23]        |
| R  | 20 | 423.648        | 508.292        | 505.089        | 505.290        | 504.887 R[22]        |
| A  | 21 | 437.856        | 477.072        | 473.868        | 474.070        | 473.667 A[21]        |
| G  | 22 | 449.260        | 462.865        | 459.661        | 459.862        | 459.459 G[20]        |
| L  | 23 | 471.877        | 451.460        | 448.257        | 448.458        | 448.055 L[19]        |
| Q  | 24 | 497.489        | 428.844        | 425.640        | 425.841        | 425.438 Q[18]        |
| F  | 25 | 528.902        | 403.232        | 400.028        | 400.230        | 399.827 F[17]        |
| P  | 26 | 546.313        | 373.816        | 370.614        | 370.816        | 370.413 P[16]        |
| V  | 27 | 565.126        | 354.408        | 351.203        | 351.405        | 351.002 V[15]        |
| G  | 28 | 577.531        | 334.994        | 331.790        | 331.992        | 331.589 G[14]        |
| R  | 29 | 608.751        | 323.190        | 319.986        | 320.187        | 319.784 R[13]        |
| V  | 30 | 628.565        | 291.969        | 288.766        | 288.967        | 288.564 V[12]        |
| H  | 31 | 658.976        | 272.156        | 268.952        | 269.154        | 268.750 H[11]        |
| K  | 32 | 687.197        | 244.744        | 241.540        | 241.742        | 241.339 K[10]        |
| L  | 33 | 709.814        | 213.524        | 210.320        | 210.522        | 210.118 L[9]         |
| L  | 34 | 732.430        | 190.907        | 187.703        | 187.905        | 187.502 L[8]         |
| R  | 35 | 763.651        | 168.290        | 165.086        | 165.288        | 164.885 R[7]         |
| K  | 36 | 789.270        | 137.070        | 133.866        | 134.068        | 133.665 K[6]         |
| G  | 37 | 830.074        | 111.451        | 108.247        | 108.449        | 108.046 G[5]         |
| N  | 38 | 823.482        | 100.047        | 96.843         | 97.044         | 96.641 N[4]          |
| V  | 39 | <b>856.095</b> | 77.238         | 74.034         | 74.236         | 73.833 V[3]          |
| A  | 40 | <b>870.303</b> | 44.625         | 41.422         | 41.623         | 41.220 A[2]          |
| E  | 41 | 896.111        | 30.418         | 27.214         | 27.416         | 27.013 E[1]          |

# sp | Q8BFU2 | H2A3\_MOUSE

[Acetyl]SGRGKQGGKARAKAKSRSSRAGLQFPVGRVHLLRKGNYS

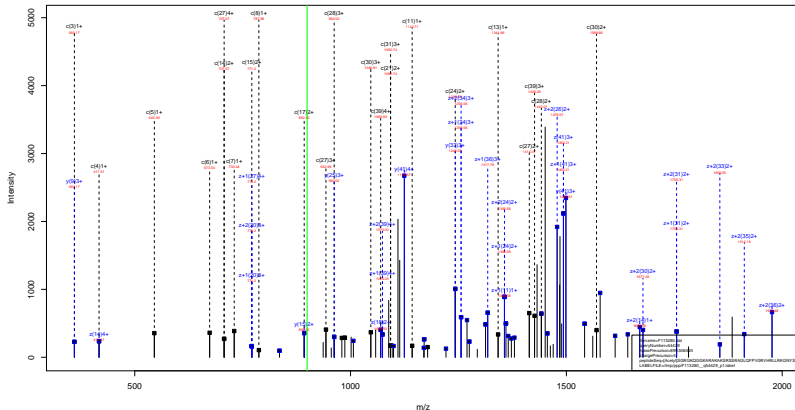



# sp | Q8BFU2 | H2A3\_MOUSE

[Acetyl]SGRGKQGGKARAKAKSRSSRAGLQFPVGRVHRLLRKGNYS

- ▶ fragmentation table for charge state 1+
- ▶ specType=etd
- ▶ score=51.02
- ▶ F113280.dat
- ▶ query=q54429\_p1
- ▶ precursor=899.506520
- ▶ chargePrecursor=5
- ▶ itol=0.5

| AA | c  | y               | z+1             | z+2             | z               | AA       |       |
|----|----|-----------------|-----------------|-----------------|-----------------|----------|-------|
| S  | 1  | 147.076         | 4463.595        | 4477.486        | 0.000           | 4476.476 | S[41] |
| G  | 2  | 204.098         | 4384.462        | 4348.444        | 0.000           | 4347.436 | G[40] |
| R  | 3  | <b>360.199</b>  | 4307.441        | 4291.422        | 4392.430        | 4290.414 | R[39] |
| G  | 4  | <b>417.220</b>  | 4151.340        | 4135.321        | 4136.329        | 4134.313 | G[38] |
| K  | 5  | <b>545.315</b>  | 4094.318        | 4078.300        | 4079.307        | 4077.292 | K[37] |
| Q  | 6  | <b>673.374</b>  | 3999.273        | 3959.255        | 3951.272        | 3949.197 | Q[36] |
| G  | 7  | <b>730.395</b>  | 3838.165        | 3822.146        | 3823.154        | 3821.138 | G[35] |
| G  | 8  | <b>787.417</b>  | 3781.143        | 3765.125        | 3766.132        | 3764.117 | G[34] |
| K  | 9  | 915.512         | 3724.122        | 3708.103        | 3709.111        | 3707.095 | K[33] |
| A  | 10 | <b>986.549</b>  | 3596.027        | 3580.008        | 3581.016        | 3579.000 | A[32] |
| R  | 11 | <b>1142.650</b> | 3524.990        | 3508.971        | 3509.979        | 3507.963 | R[31] |
| A  | 12 | 1211.667        | 3388.889        | 3372.870        | 3373.878        | 3371.862 | A[30] |
| R  | 13 | <b>1341.782</b> | 3297.852        | 3281.833        | 3282.841        | 3280.825 | R[29] |
| A  | 14 | 1412.819        | 3169.757        | 3153.738        | 3154.746        | 3152.730 | A[28] |
| K  | 15 | 1540.914        | 3098.719        | 3082.701        | 3083.709        | 3081.693 | K[27] |
| S  | 16 | 1627.946        | 2976.625        | 2954.606        | 2955.614        | 2953.598 | S[26] |
| R  | 17 | 1784.047        | 2883.582        | 2867.574        | 2868.582        | 2866.566 | R[25] |
| S  | 18 | 1871.079        | 2727.491        | 2711.473        | 2712.480        | 2710.465 | S[24] |
| S  | 19 | 1958.111        | 2640.459        | 2624.441        | 2625.448        | 2623.433 | S[23] |
| R  | 20 | 2114.213        | 2553.427        | 2537.409        | 2538.416        | 2536.401 | R[22] |
| A  | 21 | 2185.250        | 2397.335        | 2381.307        | 2382.315        | 2380.300 | A[21] |
| G  | 22 | 2242.271        | 2336.289        | 2310.270        | 2311.278        | 2309.263 | G[20] |
| L  | 23 | 2385.388        | 2209.208        | 2203.249        | 2204.267        | 2202.241 | L[19] |
| Q  | 24 | 2483.414        | 2156.184        | 2140.165        | 2141.173        | 2139.157 | Q[18] |
| F  | 25 | 2630.482        | 2028.125        | 2012.106        | 2013.114        | 2011.099 | F[17] |
| P  | 26 | 2727.535        | 1881.057        | 1865.038        | 1866.046        | 1864.030 | P[16] |
| V  | 27 | 2826.603        | 1784.004        | 1767.985        | 1768.993        | 1766.977 | V[15] |
| G  | 28 | 2883.625        | 1684.935        | 1668.917        | <b>1669.924</b> | 1667.909 | G[14] |
| D  | 29 | 2930.226        | 1627.914        | 1611.895        | <b>1612.903</b> | 1610.888 | D[13] |
| V  | 30 | 3138.794        | 1477.811        | <b>1455.794</b> | 1456.802        | 1454.786 | V[12] |
| H  | 31 | 3275.853        | <b>1372.744</b> | <b>1356.726</b> | 1357.734        | 1355.718 | H[11] |
| R  | 32 | 3431.964        | 1235.685        | 1219.667        | <b>1220.675</b> | 1218.659 | R[10] |
| L  | 33 | 3545.038        | 1079.584        | 1063.566        | 1064.573        | 1062.558 | L[9]  |
| L  | 34 | 3658.121        | 966.500         | 950.482         | 951.489         | 949.474  | L[8]  |
| T  | 35 | 3814.224        | 853.418         | 837.399         | 838.406         | 836.390  | T[7]  |
| K  | 36 | 3942.319        | 697.315         | 681.296         | 682.304         | 680.289  | K[6]  |
| G  | 37 | 3999.340        | 569.220         | 553.201         | 554.209         | 552.194  | G[5]  |
| N  | 38 | 4113.383        | 512.109         | 496.180         | 497.188         | 495.172  | N[4]  |
| V  | 39 | 4276.446        | 398.159         | 382.137         | 383.145         | 381.129  | V[3]  |
| S  | 40 | 4363.478        | 235.062         | 219.074         | 220.082         | 218.066  | S[2]  |
| E  | 41 | 4492.521        | 148.060         | 132.042         | 133.050         | 131.034  | E[1]  |

# sp | Q8BFU2 | H2A3\_MOUSE

[Acetyl]SGRGKQGGKARAKAKSRSSRAGLQFPVGRVHRLLRKGNYS

- ▶ fragmentation table for charge state 2+
- ▶ specType=etd
- ▶ score=51.02
- ▶ F113280.dat
- ▶ query=q54429.p1
- ▶ precursor=899.506520
- ▶ chargePrecursor=5
- ▶ itol=0.5

| AA | c  | y               | #s1             | #s2             | z               | AA              |       |
|----|----|-----------------|-----------------|-----------------|-----------------|-----------------|-------|
| S  | 1  | 74.062          | 2247.256        | 2229.267        | 8.804           | 2238.74         | S[41] |
| G  | 2  | 102.553         | 2182.735        | 2174.725        | 0.504           | 2174.222        | G[40] |
| R  | 3  | 180.603         | 2154.224        | 2146.215        | 2146.719        | 2145.711        | R[39] |
| G  | 4  | 209.114         | 2076.174        | 2068.164        | 2068.666        | 2067.660        | G[38] |
| K  | 5  | 273.161         | 2047.663        | 2039.653        | 2040.157        | 2039.150        | K[37] |
| G  | 6  | 327.194         | 1988.615        | 1975.605        | <b>1976.110</b> | 1975.102        | G[36] |
| G  | 7  | 385.704         | 1919.566        | 1911.577        | <b>1912.081</b> | 1911.077        | G[35] |
| G  | 8  | 394.212         | 1891.075        | 1883.086        | 1883.570        | 1882.562        | G[34] |
| K  | 9  | 458.260         | 1862.565        | 1854.555        | <b>1855.059</b> | 1854.051        | K[33] |
| A  | 10 | 493.778         | 1798.517        | 1790.508        | 1791.012        | 1790.004        | A[32] |
| R  | 11 | 571.820         | 1762.999        | <b>1754.989</b> | <b>1755.493</b> | 1754.485        | R[31] |
| A  | 12 | 607.337         | 1684.948        | 1676.938        | <b>1677.443</b> | 1676.435        | A[30] |
| R  | 13 | 671.395         | 1649.420        | 1641.430        | <b>1641.924</b> | 1640.915        | R[29] |
| A  | 14 | <b>706.913</b>  | 1585.383        | 1577.373        | <b>1577.876</b> | 1576.869        | A[28] |
| K  | 15 | <b>770.961</b>  | 1549.861        | <b>1541.854</b> | <b>1542.358</b> | 1541.350        | K[27] |
| S  | 16 | 814.477         | 1485.816        | 1477.807        | <b>1478.310</b> | 1477.303        | S[26] |
| R  | 17 | <b>892.527</b>  | <b>1442.300</b> | 1434.291        | 1434.794        | 1433.786        | R[25] |
| S  | 18 | 936.913         | 1384.249        | <b>1376.240</b> | <b>1376.744</b> | 1375.736        | S[24] |
| S  | 19 | <b>979.559</b>  | 1320.731        | <b>1312.724</b> | <b>1313.228</b> | 1312.220        | S[23] |
| R  | 20 | 1057.610        | 1277.217        | 1269.208        | <b>1269.712</b> | 1268.704        | R[22] |
| A  | 21 | <b>1093.128</b> | 1219.167        | 1211.157        | 1211.661        | 1210.653        | A[21] |
| G  | 22 | 1171.639        | 1163.648        | 1155.639        | 1156.143        | 1155.135        | G[20] |
| L  | 23 | <b>1178.181</b> | 1138.137        | 1130.127        | 1130.631        | 1129.623        | L[19] |
| Q  | 24 | <b>1242.211</b> | 1078.595        | 1070.585        | 1071.089        | <b>1070.082</b> | Q[18] |
| F  | 25 | 1315.745        | 1014.566        | <b>1006.557</b> | 1007.061        | 1006.053        | F[17] |
| F  | 26 | 1364.271        | 941.033         | 933.023         | 933.526         | 932.519         | F[16] |
| V  | 27 | <b>1413.805</b> | <b>892.506</b>  | 884.496         | 885.000         | 883.992         | V[15] |
| G  | 28 | <b>1442.316</b> | 842.971         | <b>834.962</b>  | <b>835.466</b>  | 834.458         | G[14] |
| R  | 29 | 1520.827        | 814.461         | 806.451         | <b>806.955</b>  | 805.947         | R[13] |
| V  | 30 | <b>1569.901</b> | 736.410         | 728.401         | 728.905         | 727.897         | V[12] |
| H  | 31 | 1638.430        | 688.876         | 678.866         | 679.370         | 678.363         | H[11] |
| L  | 32 | 1716.461        | 618.346         | 610.337         | 610.841         | 609.833         | L[10] |
| R  | 33 | 1773.023        | 540.296         | 532.286         | 532.790         | 531.783         | R[9]  |
| L  | 34 | 1829.568        | 469.754         | 459.744         | 459.248         | 458.241         | L[8]  |
| R  | 35 | 1907.615        | 427.212         | 419.202         | 419.706         | 418.699         | R[7]  |
| K  | 36 | 1971.663        | 349.161         | 341.152         | 341.656         | 340.648         | K[6]  |
| G  | 37 | 2000.174        | 285.114         | 277.104         | 277.608         | 276.600         | G[5]  |
| N  | 38 | 2057.195        | 256.603         | 248.594         | 249.098         | 248.090         | N[4]  |
| V  | 39 | 2138.227        | 199.562         | 191.572         | 192.076         | 191.068         | V[3]  |
| S  | 40 | 2192.243        | 118.056         | 110.047         | 110.551         | 109.543         | S[2]  |
| E  | 41 | 2246.764        | 74.534          | 66.524          | 67.028          | 66.021          | E[1]  |

# sp | Q8BFU2 | H2A3\_MOUSE

[Acetyl]SGRGKQGGKARAKAKSRSSRAGLQFPVGRVHRLLRKGNYS

- ▶ fragmentation table for charge state 3+
- ▶ specType=etd
- ▶ score=51.02
- ▶ F113280.dat
- ▶ query=q54429.p1
- ▶ precursor=899.506520
- ▶ chargePrecursor=5
- ▶ itol=0.5

| AA | c  | y               | #s1             | #s2             | #s3             | AA              |       |
|----|----|-----------------|-----------------|-----------------|-----------------|-----------------|-------|
| S  | 1  | 489.697         | <b>1498.507</b> | <b>1493.167</b> | 0.872           | <b>1492.831</b> | S[41] |
| G  | 2  | 66.704          | <b>1455.492</b> | 1450.153        | 0.672           | 1449.817        | G[49] |
| R  | 3  | 1307.738        | 1439.485        | 1431.140        | 1431.482        | 1430.810        | R[39] |
| G  | 4  | 139.745         | 1384.451        | 1379.112        | <b>1379.448</b> | 1378.770        | G[38] |
| K  | 5  | 182.443         | <b>1365.444</b> | <b>1360.105</b> | <b>1360.441</b> | <b>1359.769</b> | K[37] |
| G  | 6  | 225.130         | 1322.746        | <b>1317.406</b> | <b>1317.742</b> | 1317.070        | G[36] |
| G  | 7  | 244.137         | 1306.060        | <b>1274.729</b> | <b>1275.056</b> | 1274.384        | G[35] |
| G  | 8  | 263.144         | <b>1261.051</b> | <b>1255.713</b> | <b>1256.049</b> | 1255.377        | G[34] |
| K  | 9  | 305.642         | <b>1242.045</b> | 1236.706        | 1237.042        | 1236.370        | K[33] |
| A  | 10 | 329.521         | 1199.341        | 1194.000        | 1194.344        | 1193.672        | A[32] |
| R  | 11 | 381.555         | 1175.668        | <b>1170.329</b> | <b>1170.664</b> | <b>1169.993</b> | R[31] |
| A  | 12 | 405.234         | 1129.835        | 1124.495        | 1124.838        | 1124.166        | A[30] |
| R  | 13 | 447.932         | <b>1099.955</b> | 1094.615        | 1094.952        | 1094.280        | R[29] |
| A  | 14 | 491.611         | 1057.257        | 1051.917        | 1052.253        | 1051.580        | A[28] |
| K  | 15 | 514.310         | 1033.578        | 1028.238        | 1028.574        | 1027.902        | K[27] |
| S  | 16 | 543.320         | 990.887         | 985.546         | 985.876         | 985.204         | S[26] |
| R  | 17 | 595.254         | <b>961.869</b>  | 956.529         | 956.865         | 956.193         | R[25] |
| S  | 18 | 624.265         | 959.575         | 954.235         | 954.572         | 953.900         | S[24] |
| S  | 19 | 653.275         | 980.825         | 875.485         | 875.821         | 875.149         | S[23] |
| R  | 20 | 705.409         | 851.614         | 846.274         | 846.610         | 845.938         | R[22] |
| A  | 21 | 729.088         | 799.789         | 794.441         | 794.777         | 794.105         | A[21] |
| G  | 22 | 748.095         | 776.101         | <b>770.762</b>  | <b>771.098</b>  | 770.426         | G[20] |
| L  | 23 | 785.790         | 752.094         | 746.754         | 747.090         | 746.418         | L[19] |
| Q  | 24 | 828.419         | 719.366         | 714.026         | 714.366         | 713.694         | Q[18] |
| F  | 25 | 897.409         | 676.713         | 671.374         | 671.710         | 671.038         | F[17] |
| F  | 26 | 909.950         | 627.600         | 622.261         | 622.597         | 621.925         | F[16] |
| V  | 27 | <b>942.873</b>  | 595.139         | 590.000         | 590.336         | 589.664         | V[15] |
| G  | 28 | <b>961.860</b>  | 562.317         | 556.977         | 557.313         | 556.641         | G[14] |
| R  | 29 | 1013.914        | 443.309         | 437.970         | 438.306         | 437.634         | R[13] |
| V  | 30 | <b>1046.936</b> | 401.275         | 405.936         | 406.272         | 405.600         | V[12] |
| H  | 31 | <b>1092.623</b> | 458.253         | 452.913         | 453.249         | 452.577         | H[11] |
| R  | 32 | 1144.656        | 412.567         | 407.227         | 407.563         | 406.891         | R[10] |
| L  | 33 | 1182.351        | <b>360.533</b>  | 355.193         | 355.529         | 354.857         | L[9]  |
| L  | 34 | 1230.046        | 322.574         | 317.234         | 317.570         | 316.898         | L[8]  |
| R  | 35 | 1272.079        | 285.144         | 279.804         | 280.140         | 279.468         | R[7]  |
| K  | 36 | 1314.778        | 233.110         | 227.770         | 228.106         | 227.434         | K[6]  |
| G  | 37 | 1333.785        | 190.412         | 185.072         | 185.408         | 184.736         | G[5]  |
| N  | 38 | 1371.799        | 171.404         | 166.064         | 166.400         | 165.728         | N[4]  |
| V  | 39 | <b>1426.154</b> | 133.390         | 128.051         | 128.386         | 127.714         | V[3]  |
| S  | 40 | 1455.164        | 99.136          | 93.796          | 94.132          | 93.460          | S[2]  |
| E  | 41 | 1498.178        | 50.025          | 44.685          | 45.021          | 44.349          | E[1]  |

# sp | Q8BFU2 | H2A3\_MOUSE

[Acetyl]SGRGKQGGKARAKAKSRSSRAGLQFPVGRVHRLLRKGNYS

- ▶ fragmentation table for charge state 4+
- ▶ specType=etd
- ▶ score=51.02
- ▶ F113280.dat
- ▶ query=q54429.p1
- ▶ precursor=899.506520
- ▶ chargePrecursor=5
- ▶ itol=0.5

| AA   | c               | y               | z+1             | z+2             | z              | AA   |
|------|-----------------|-----------------|-----------------|-----------------|----------------|------|
| S 1  | 37.525          | <b>1124.132</b> | 1130.137        | 0.755           | 1119.895       | S 41 |
| G 2  | 51.780          | 1091.971        | 1097.966        | 0.755           | 1087.614       | G 40 |
| R 3  | 90.805          | 1077.616        | <b>1073.611</b> | <b>1073.663</b> | 1073.359       | R 39 |
| G 4  | 105.061         | 1038.590        | 1034.586        | 1034.838        | 1034.334       | G 38 |
| K 5  | 137.084         | 1024.335        | 1020.330        | 1020.582        | 1020.078       | K 37 |
| Q 6  | 169.099         | 992.311         | 988.307         | 988.559         | 988.055        | Q 36 |
| G 7  | 203.354         | 950.290         | 946.282         | 946.544         | 946.040        | G 35 |
| G 8  | 197.810         | 946.041         | 942.037         | 942.289         | 941.785        | G 34 |
| K 9  | 229.633         | 931.788         | 927.781         | 928.033         | 927.529        | K 33 |
| A 10 | 247.393         | 899.762         | 895.757         | 896.009         | 895.506        | A 32 |
| R 11 | 286.418         | 882.003         | 877.998         | 878.250         | 877.746        | R 31 |
| A 12 | 304.177         | 842.978         | 838.973         | 839.225         | 838.721        | A 30 |
| R 13 | 336.201         | 825.218         | 821.214         | 821.466         | 820.962        | R 29 |
| A 14 | 353.960         | 793.195         | 789.190         | 789.442         | 788.938        | A 28 |
| K 15 | 385.984         | 775.435         | <b>771.431</b>  | <b>771.683</b>  | <b>771.179</b> | K 27 |
| S 16 | 407.742         | 743.412         | 739.407         | 739.659         | 739.155        | S 26 |
| R 17 | 446.267         | 721.854         | 717.849         | 718.101         | 717.597        | R 25 |
| S 18 | 468.526         | 682.629         | 678.624         | 678.876         | 678.372        | S 24 |
| S 19 | 490.283         | 660.870         | 656.866         | 657.118         | 656.614        | S 23 |
| R 20 | 529.309         | 639.112         | 635.108         | 635.360         | 634.856        | R 22 |
| A 21 | 547.068         | 600.089         | 596.082         | 596.334         | 595.830        | A 21 |
| Q 22 | 561.323         | 582.320         | 578.313         | 578.575         | 578.071        | Q 20 |
| L 23 | 589.334         | 568.072         | 564.068         | 564.320         | 563.816        | L 19 |
| Q 24 | 621.869         | 539.801         | 535.797         | 536.049         | 535.545        | Q 19 |
| F 25 | 658.376         | 507.781         | 503.782         | 504.034         | 503.530        | F 17 |
| P 26 | 682.639         | 471.020         | 467.015         | 467.267         | 466.763        | P 16 |
| V 27 | <b>707.406</b>  | 446.750         | 442.752         | 443.004         | 442.500        | V 15 |
| G 28 | 721.662         | 421.989         | 417.985         | 418.237         | <b>417.733</b> | G 14 |
| R 29 | 760.887         | 407.734         | 403.729         | 403.981         | 403.477        | R 13 |
| H 30 | 785.454         | 388.759         | 384.754         | 384.996         | 384.452        | H 12 |
| H 31 | 819.719         | 343.942         | 339.937         | 340.189         | 339.685        | H 11 |
| R 32 | 858.744         | 309.677         | 305.672         | 305.924         | 305.420        | R 10 |
| L 33 | 887.015         | 270.652         | 266.647         | 266.899         | 266.395        | L 9  |
| L 34 | 915.286         | 242.381         | 238.376         | 238.628         | 238.124        | L 8  |
| R 35 | 954.313         | 214.113         | 210.108         | 210.360         | 209.856        | R 7  |
| R 36 | <b>986.335</b>  | 175.084         | 171.080         | 171.332         | 170.828        | R 6  |
| G 37 | 1000.590        | 143.061         | 139.056         | 139.308         | 138.804        | G 5  |
| N 38 | 1029.101        | 128.805         | 124.800         | 125.052         | 124.548        | N 4  |
| V 39 | <b>1069.867</b> | 100.294         | 96.290          | 96.542          | 96.038         | V 3  |
| S 40 | 1091.625        | 99.529          | 95.524          | 95.776          | 95.272         | S 2  |
| E 41 | 1123.888        | 97.771          | 93.766          | 94.018          | 93.514         | E 1  |



# sp | Q8CGP5 | H2A1F\_MOUSE

[Acetyl]SGRGKQGGKARAKAKTRSSRAGLQFPVGRVHLLRKGNYSE

- ▶ fragmentation table for charge state 1+
- ▶ specType=etd
- ▶ score=42.52
- ▶ F113280.dat
- ▶ query=q54453\_p1
- ▶ precursor=752.093360
- ▶ chargePrecursor=6
- ▶ itol=0.5

| AA | c  | y              | z+1            | z+2             | z               | AA       |       |
|----|----|----------------|----------------|-----------------|-----------------|----------|-------|
| S  | 1  | 147.076        | 4507.521       | 4491.502        | 0.000           | 4490.494 | S[41] |
| G  | 2  | 204.098        | 4378.478       | 4362.459        | 0.000           | 4361.451 | G[46] |
| R  | 3  | <b>360.199</b> | 4321.457       | 4305.438        | 4306.446        | 4304.430 | R[39] |
| K  | 4  | <b>417.220</b> | 4185.355       | 4149.337        | 4150.345        | 4148.329 | K[38] |
| K  | 5  | <b>545.315</b> | 4108.334       | 4092.315        | 4093.323        | 4091.307 | K[37] |
| Q  | 6  | <b>673.374</b> | 3989.239       | 3954.220        | 3955.228        | 3953.212 | Q[36] |
| G  | 7  | <b>730.395</b> | 3852.180       | 3836.162        | 3837.170        | 3835.154 | G[35] |
| G  | 8  | <b>787.417</b> | 3795.159       | 3779.140        | 3780.148        | 3778.132 | G[34] |
| K  | 9  | <b>915.512</b> | 3738.138       | 3722.119        | 3723.127        | 3721.111 | K[33] |
| A  | 10 | <b>986.549</b> | 3610.043       | 3594.024        | 3595.032        | 3593.016 | A[32] |
| R  | 11 | 1142.650       | 3539.955       | 3523.936        | 3524.944        | 3522.928 | R[31] |
| A  | 12 | 1213.667       | 3382.904       | 3366.885        | 3367.893        | 3365.877 | A[30] |
| K  | 13 | 1341.782       | 3311.867       | 3295.848        | 3296.856        | 3294.841 | K[29] |
| A  | 14 | 1412.819       | 3183.772       | 3167.754        | 3168.761        | 3166.746 | A[28] |
| K  | 15 | 1540.914       | 3112.735       | 3096.716        | 3097.724        | 3095.709 | K[27] |
| T  | 16 | 1641.962       | 2984.640       | 2968.621        | 2969.629        | 2967.614 | T[26] |
| K  | 17 | 1798.063       | 2883.592       | 2867.574        | 2868.582        | 2866.566 | K[25] |
| S  | 18 | 1885.095       | 2727.493       | 2711.474        | 2712.482        | 2710.466 | S[24] |
| S  | 19 | 1972.127       | 2648.459       | 2632.441        | 2633.448        | 2631.433 | S[23] |
| R  | 20 | 2128.228       | 2563.427       | 2547.409        | 2548.416        | 2546.401 | R[22] |
| A  | 21 | 2199.265       | 2397.326       | 2381.307        | 2382.315        | 2380.300 | A[21] |
| G  | 22 | 2256.287       | 2326.289       | 2310.270        | 2311.278        | 2309.263 | G[20] |
| L  | 23 | 2369.371       | 2269.268       | 2253.249        | 2254.257        | 2252.241 | L[19] |
| Q  | 24 | 2497.459       | 2126.184       | 2110.165        | 2111.173        | 2109.157 | Q[18] |
| F  | 25 | 2644.498       | 2028.125       | 2012.106        | 2013.114        | 2011.098 | F[17] |
| P  | 26 | 2741.551       | 1981.057       | 1965.038        | 1966.046        | 1964.030 | P[16] |
| V  | 27 | 2840.619       | 1784.004       | 1767.985        | 1768.993        | 1766.977 | V[15] |
| G  | 28 | 2897.641       | 1684.935       | 1668.917        | 1669.924        | 1667.909 | G[14] |
| R  | 29 | 3053.742       | 1627.914       | 1611.895        | <b>1612.903</b> | 1610.887 | R[13] |
| V  | 30 | 3152.810       | 1471.813       | <b>1455.794</b> | 1456.802        | 1454.786 | V[12] |
| I  | 31 | 3269.869       | 1372.744       | 1356.725        | <b>1357.734</b> | 1355.718 | I[11] |
| R  | 32 | 3445.970       | 1235.685       | <b>1219.667</b> | 1220.675        | 1218.659 | R[10] |
| L  | 33 | 3559.054       | 1079.584       | 1063.566        | 1064.573        | 1062.558 | L[9]  |
| L  | 34 | 3672.138       | <b>966.500</b> | 950.482         | 951.489         | 949.474  | L[8]  |
| R  | 35 | 3828.239       | 853.416        | 837.398         | <b>838.405</b>  | 836.390  | R[7]  |
| K  | 36 | 3956.334       | 697.315        | 681.296         | 682.304         | 680.289  | K[6]  |
| G  | 37 | 4013.358       | 569.220        | 553.201         | 554.209         | 552.194  | G[5]  |
| N  | 38 | 4127.399       | 512.199        | 496.180         | 497.188         | 495.172  | N[4]  |
| V  | 39 | 4290.482       | 398.156        | 382.137         | 383.145         | 381.129  | V[3]  |
| S  | 40 | 4377.494       | 235.062        | 219.074         | 220.082         | 218.066  | S[2]  |
| E  | 41 | 4506.537       | 148.060        | 132.042         | 133.050         | 131.034  | E[1]  |

# sp | Q8CGP5 | H2A1F\_MOUSE

[Acetyl]SGRGKQGGKARAKAKTRSSRAGLQFPVGRVHRLLRKGNYS

- ▶ fragmentation table for charge state 2+
- ▶ specType=etd
- ▶ score=42.52
- ▶ F113280.dat
- ▶ query=q54453.p1
- ▶ precursor=752.093360
- ▶ chargePrecursor=6
- ▶ itol=0.5

| AA | c  | y               | #s1             | #s2             | z               | AA              |       |
|----|----|-----------------|-----------------|-----------------|-----------------|-----------------|-------|
| S  | 1  | 74.062          | 2054.264        | 2266.255        | 0.804           | 2245.781        | S[41] |
| G  | 2  | 102.553         | 2189.743        | 2381.733        | 0.504           | 2181.220        | G[40] |
| R  | 3  | 180.603         | 2641.232        | 2153.233        | 2153.236        | 2152.710        | R[39] |
| G  | 4  | 209.114         | 2083.181        | 2075.172        | 2075.676        | 2074.660        | G[38] |
| K  | 5  | 273.181         | 2054.671        | 2046.661        | 2047.165        | 2046.157        | K[37] |
| G  | 6  | 337.194         | 1690.622        | 1862.614        | 1863.118        | 1862.110        | G[36] |
| G  | 7  | 385.703         | 3306.594        | 1619.584        | <b>1919.088</b> | 1919.080        | G[35] |
| G  | 8  | 394.212         | 1898.083        | 1890.074        | <b>1890.578</b> | 1889.570        | G[34] |
| K  | 9  | 458.260         | 1869.572        | 1861.563        | <b>1862.067</b> | 1861.059        | K[33] |
| A  | 10 | 493.773         | 1895.525        | 1797.516        | 1798.019        | 1797.012        | A[32] |
| R  | 11 | <b>571.829</b>  | 1770.008        | 1761.997        | 1762.501        | 1761.493        | R[31] |
| A  | 12 | <b>607.347</b>  | 1692.969        | 1684.960        | 1684.960        | 1683.953        | A[30] |
| R  | 13 | <b>671.395</b>  | 1656.437        | <b>1648.428</b> | 1648.932        | <b>1647.924</b> | R[29] |
| A  | 14 | <b>706.913</b>  | 1592.900        | <b>1584.380</b> | 1584.884        | 1583.876        | A[28] |
| K  | 15 | <b>770.961</b>  | 1556.871        | 1548.862        | 1549.366        | 1548.358        | K[27] |
| T  | 16 | <b>821.485</b>  | 1492.824        | 1484.814        | 1485.318        | <b>1484.310</b> | T[26] |
| R  | 17 | <b>899.535</b>  | <b>1442.300</b> | 1434.291        | 1434.794        | 1433.787        | R[25] |
| S  | 18 | 933.651         | 1384.249        | 1376.240        | 1376.744        | 1375.736        | S[24] |
| S  | 19 | <b>986.567</b>  | 1330.733        | 1322.724        | <b>1313.228</b> | 1312.220        | S[23] |
| R  | 20 | 1064.618        | 1277.217        | 1269.208        | <b>1269.712</b> | 1268.704        | R[22] |
| A  | 21 | 1100.136        | <b>1199.167</b> | 1191.157        | 1191.661        | 1190.653        | A[21] |
| G  | 22 | <b>1128.647</b> | 1153.648        | 1145.639        | 1146.143        | 1145.135        | G[20] |
| L  | 23 | 1155.673        | 1138.137        | 1129.128        | <b>1127.632</b> | 1126.624        | L[19] |
| Q  | 24 | <b>1249.218</b> | 1073.595        | 1070.586        | 1071.090        | 1070.082        | Q[18] |
| F  | 25 | <b>1322.753</b> | 1014.569        | <b>1006.557</b> | <b>1007.061</b> | 1006.053        | F[17] |
| F  | 26 | 1371.279        | 941.053         | 933.043         | 933.546         | 932.538         | F[16] |
| V  | 27 | 1420.811        | 892.506         | 884.496         | 885.000         | 883.992         | V[15] |
| G  | 28 | <b>1449.324</b> | 842.971         | 834.961         | 835.465         | 834.457         | G[14] |
| R  | 29 | 1507.874        | 814.461         | <b>806.451</b>  | <b>806.955</b>  | 805.947         | R[13] |
| V  | 30 | 1576.909        | 736.410         | 728.401         | 728.905         | 727.897         | V[12] |
| H  | 31 | 1645.438        | 688.876         | 678.866         | 679.370         | 678.363         | H[11] |
| R  | 32 | 1723.489        | 618.346         | 610.337         | 610.841         | 609.833         | R[10] |
| L  | 33 | 1780.031        | 540.296         | 532.286         | 532.790         | 531.783         | L[9]  |
| L  | 34 | 1838.573        | 469.754         | 459.743         | 459.246         | 458.240         | L[8]  |
| R  | 35 | 1914.623        | 427.212         | 419.202         | 419.706         | 418.698         | R[7]  |
| K  | 36 | 1978.671        | 349.161         | 341.152         | 341.656         | 340.648         | K[6]  |
| G  | 37 | 2067.181        | 285.114         | 277.104         | 277.608         | 276.600         | G[5]  |
| N  | 38 | 2094.203        | 256.603         | 248.594         | 249.098         | 248.090         | N[4]  |
| V  | 39 | 2145.736        | 189.562         | 181.552         | 182.056         | 181.048         | V[3]  |
| S  | 40 | 2189.281        | 118.056         | 110.046         | 110.549         | 109.541         | S[2]  |
| E  | 41 | 2253.772        | 74.534          | 66.524          | 67.028          | 66.021          | E[1]  |

# sp | Q8CGP5 | H2A1F\_MOUSE

[Acetyl]SGRGKQGGKARAKAKTRSSRAGLQFPVGRVHRLLRKGNYS

- ▶ fragmentation table for charge state 3+
- ▶ specType=etd
- ▶ score=42.52
- ▶ F113280.dat
- ▶ query=q54453.p1
- ▶ precursor=752.093360
- ▶ chargePrecursor=6
- ▶ itol=0.5

| AA | c  | y               | #s1             | #s2             | z               | AA              |       |
|----|----|-----------------|-----------------|-----------------|-----------------|-----------------|-------|
| S  | 1  | 489.607         | 1502.178        | 1487.830        | 0.872           | 1487.561        | S[41] |
| G  | 2  | 66.704          | 1460.184        | 1454.935        | 0.672           | 1454.480        | G[60] |
| R  | 3  | 1307.718        | 1441.157        | <b>1435.817</b> | <b>1436.153</b> | 1435.482        | R[30] |
| G  | 4  | 139.745         | 1389.123        | 1383.784        | <b>1384.120</b> | 1383.448        | G[38] |
| K  | 5  | 182.443         | 1370.118        | 1364.777        | <b>1365.113</b> | 1364.441        | K[37] |
| G  | 6  | 225.130         | 1327.418        | 1322.078        | <b>1322.414</b> | 1321.742        | G[36] |
| G  | 7  | 244.137         | 1284.732        | 1279.392        | <b>1279.728</b> | 1279.056        | G[55] |
| G  | 8  | 263.144         | 1245.725        | 1240.385        | <b>1240.721</b> | 1240.049        | G[34] |
| K  | 9  | 305.642         | 1246.717        | <b>1241.378</b> | <b>1241.714</b> | 1241.042        | K[33] |
| A  | 10 | 329.521         | 1204.019        | 1198.679        | <b>1199.015</b> | 1198.344        | A[32] |
| R  | 11 | 381.555         | 1180.340        | 1175.000        | <b>1175.336</b> | 1174.664        | R[31] |
| A  | 12 | 405.234         | <b>1128.306</b> | 1122.966        | 1123.302        | 1122.630        | A[30] |
| R  | 13 | 447.932         | 1104.627        | <b>1099.288</b> | <b>1099.624</b> | <b>1098.952</b> | R[29] |
| A  | 14 | 491.611         | 1081.929        | <b>1056.589</b> | <b>1056.925</b> | 1056.253        | A[28] |
| K  | 15 | 514.310         | <b>1038.250</b> | <b>1032.910</b> | <b>1033.246</b> | 1032.574        | K[27] |
| T  | 16 | 547.002         | 995.552         | <b>990.212</b>  | <b>990.548</b>  | 989.870         | T[26] |
| R  | 17 | 600.626         | 981.869         | <b>956.529</b>  | <b>956.865</b>  | 956.193         | R[25] |
| S  | 18 | 629.017         | 959.835         | 954.485         | 954.831         | 954.160         | S[24] |
| S  | 19 | 658.047         | 938.025         | 893.485         | <b>875.821</b>  | 893.149         | S[23] |
| R  | 20 | 710.081         | 911.614         | 846.474         | 846.810         | 846.138         | R[22] |
| A  | 21 | 733.760         | 799.780         | 794.441         | 794.777         | 794.105         | A[21] |
| G  | 22 | 752.767         | 778.101         | <b>770.762</b>  | <b>771.098</b>  | 770.426         | G[20] |
| L  | 23 | 780.482         | 759.094         | 753.754         | 754.090         | 753.418         | L[19] |
| Q  | 24 | 833.148         | 739.366         | 734.026         | 734.366         | 733.722         | Q[18] |
| F  | 25 | <b>882.171</b>  | 676.713         | <b>671.374</b>  | <b>671.710</b>  | <b>671.038</b>  | F[17] |
| F  | 26 | 914.522         | 627.600         | 622.261         | 622.607         | 622.015         | F[16] |
| V  | 27 | 947.545         | 595.139         | 590.000         | 590.336         | 589.664         | V[15] |
| G  | 28 | <b>966.552</b>  | 562.317         | 556.977         | 557.313         | 556.641         | G[14] |
| R  | 29 | 1018.665        | 543.309         | 537.970         | 538.306         | 537.634         | R[13] |
| V  | 30 | 1051.608        | 490.276         | 485.038         | 486.272         | 485.600         | V[12] |
| H  | 31 | 1097.204        | 458.253         | 452.913         | 453.249         | 452.577         | H[11] |
| R  | 32 | 1149.328        | 412.967         | 407.227         | 407.563         | 406.891         | R[10] |
| L  | 33 | <b>1187.023</b> | <b>360.533</b>  | 355.193         | 355.529         | 354.857         | L[9]  |
| L  | 34 | 1234.718        | 322.876         | 317.489         | 317.826         | 317.154         | L[8]  |
| R  | 35 | 1276.751        | 285.144         | 279.804         | 280.140         | 279.468         | R[7]  |
| K  | 36 | 1319.450        | 233.110         | 227.770         | 228.106         | 227.434         | K[6]  |
| G  | 37 | 1338.457        | 190.412         | 185.072         | 185.408         | 184.736         | G[5]  |
| N  | 38 | 1376.471        | 171.404         | 166.065         | 166.401         | 165.729         | N[4]  |
| V  | 39 | 1430.826        | 133.390         | 128.051         | 128.386         | 127.715         | V[3]  |
| S  | 40 | 1459.836        | 99.136          | 93.796          | 94.132          | 93.460          | S[2]  |
| E  | 41 | 1502.850        | 50.025          | 44.685          | 45.021          | 44.349          | E[1]  |



# sp | Q8CGP5 | H2A1F\_MOUSE

[Acetyl]SGRGKQGGKARAKAKTRSSRAGLQFPVGRVHRLLRKGNYS

- ▶ fragmentation table for charge state 4+
- ▶ specType=etd
- ▶ score=42.52
- ▶ F113280.dat
- ▶ query=q54453.p1
- ▶ precursor=752.093360
- ▶ chargePrecursor=6
- ▶ itol=0.5

| AA | c  | p               | s+1             | s+2             | e               | AA              |       |
|----|----|-----------------|-----------------|-----------------|-----------------|-----------------|-------|
| S  | 1  | 37.505          | <b>1127.636</b> | <b>1123.631</b> | 0.708           | 1123.377        | S[41] |
| G  | 2  | 51.780          | 1035.375        | 1051.370        | 0.795           | 1051.110        | G[40] |
| R  | 3  | 90.805          | 1081.120        | 1077.115        | <b>1077.367</b> | 1076.863        | R[39] |
| G  | 4  | 109.001         | 1042.094        | <b>1038.090</b> | <b>1038.342</b> | <b>1037.838</b> | G[38] |
| K  | 5  | 137.064         | 1027.839        | <b>1023.834</b> | <b>1024.086</b> | 1023.582        | K[37] |
| G  | 6  | 169.059         | 995.815         | 991.811         | 992.267         | 991.559         | G[36] |
| G  | 7  | 193.254         | 963.803         | <b>959.796</b>  | <b>960.048</b>  | 959.544         | G[35] |
| G  | 8  | 197.610         | 949.545         | <b>945.541</b>  | <b>945.792</b>  | 945.289         | G[34] |
| K  | 9  | 229.633         | <b>935.290</b>  | 931.285         | <b>931.537</b>  | 931.033         | K[33] |
| A  | 10 | 247.303         | <b>903.266</b>  | <b>899.261</b>  | <b>899.513</b>  | 899.009         | A[32] |
| R  | 11 | 266.418         | 895.507         | 891.502         | 891.754         | 891.250         | R[31] |
| A  | 12 | 304.177         | 868.482         | 864.477         | 864.729         | 864.225         | A[30] |
| K  | 13 | 336.201         | 828.722         | 824.718         | 824.970         | 824.466         | K[29] |
| A  | 14 | 353.960         | 796.699         | 792.694         | 792.946         | 792.442         | A[28] |
| K  | 15 | 385.984         | 778.939         | 774.935         | 775.187         | 774.683         | K[27] |
| T  | 16 | 411.246         | 746.915         | 742.911         | 743.163         | 742.659         | T[26] |
| R  | 17 | 458.271         | 721.954         | 717.949         | 718.201         | 717.697         | R[25] |
| S  | 18 | 472.629         | 692.626         | 688.621         | 688.873         | 688.369         | S[24] |
| S  | 19 | 493.787         | 660.970         | 656.966         | 657.218         | 656.714         | S[23] |
| R  | 20 | 532.613         | 639.112         | 635.108         | 635.360         | 634.856         | R[22] |
| A  | 21 | 550.572         | 600.087         | 596.082         | 596.334         | 595.830         | A[21] |
| G  | 22 | 564.827         | 582.328         | 578.323         | 578.575         | 578.071         | G[20] |
| L  | 23 | 593.998         | 568.072         | 564.068         | 564.320         | 563.816         | L[19] |
| G  | 24 | 625.113         | 539.801         | 535.797         | 536.049         | 535.545         | G[18] |
| F  | 25 | 661.880         | 507.787         | 503.782         | 504.034         | 503.530         | F[17] |
| F  | 26 | 698.143         | 471.020         | 467.015         | 467.267         | 466.763         | F[16] |
| V  | 27 | <b>710.910</b>  | 446.756         | 442.752         | 443.004         | 442.500         | V[15] |
| G  | 28 | 725.269         | 421.989         | 417.985         | 418.237         | <b>417.733</b>  | G[14] |
| R  | 29 | 764.181         | 389.734         | 385.729         | 385.981         | 385.477         | R[13] |
| V  | 30 | <b>788.958</b>  | 368.705         | 364.704         | 364.956         | 364.452         | V[12] |
| H  | 31 | <b>823.223</b>  | 343.942         | 339.937         | 340.189         | 339.685         | H[11] |
| R  | 32 | <b>862.248</b>  | 309.677         | 305.672         | 305.924         | 305.420         | R[10] |
| L  | 33 | <b>890.519</b>  | 270.652         | 266.647         | 266.899         | 266.395         | L[9]  |
| L  | 34 | 918.770         | 242.361         | 238.356         | 238.608         | 238.104         | L[8]  |
| R  | 35 | 957.615         | 214.110         | 210.105         | 210.357         | 209.853         | R[7]  |
| K  | 36 | 989.839         | 175.084         | 171.079         | 171.331         | 170.827         | K[6]  |
| G  | 37 | 1064.094        | 143.061         | 139.056         | 139.308         | 138.804         | G[5]  |
| N  | 38 | 1032.605        | 128.805         | 124.800         | 125.052         | 124.548         | N[4]  |
| V  | 39 | <b>1073.371</b> | 100.294         | 96.289          | 96.541          | 96.037          | V[3]  |
| S  | 40 | 1068.139        | 98.529          | 94.524          | 94.776          | 94.272          | S[2]  |
| E  | 41 | 1127.590        | 97.771          | 93.766          | 94.018          | 93.514          | E[1]  |

# sp | Q8CGP5 | H2A1F\_MOUSE

[Acetyl]SGRGKQGGKARAKAKTRSSRAGLQFPVGRVHRLLRKGNYS

- ▶ fragmentation table for charge state 5+
- ▶ specType=etd
- ▶ score=42.52
- ▶ F113280.dat
- ▶ query=q54453\_p1
- ▶ precursor=752.093360
- ▶ chargePrecursor=6
- ▶ itol=0.5

| AA    | c              | y              | z+1     | z+2     | z              | AA    |
|-------|----------------|----------------|---------|---------|----------------|-------|
| S[1]  | 30.221         | 902.310        | 899.106 | 0.806   | 898.905        | S[41] |
| G[2]  | 41.625         | <b>876.501</b> | 873.298 | 0.806   | 873.096        | G[40] |
| R[3]  | 72.846         | 865.097        | 861.893 | 862.095 | 861.892        | R[39] |
| G[4]  | 84.250         | <b>833.877</b> | 830.673 | 830.675 | 830.472        | G[38] |
| K[5]  | 109.869        | 822.473        | 819.269 | 819.470 | 819.067        | K[37] |
| Q[6]  | 135.481        | 796.854        | 793.650 | 793.851 | 793.448        | Q[36] |
| G[7]  | 146.885        | <b>771.242</b> | 768.038 | 768.240 | 767.837        | G[35] |
| G[8]  | 158.289        | 759.238        | 756.034 | 756.235 | 755.832        | G[34] |
| K[9]  | 183.908        | 748.433        | 745.230 | 745.431 | 745.028        | K[33] |
| A[10] | 198.116        | 722.814        | 719.611 | 719.812 | 719.409        | A[32] |
| R[11] | 229.336        | <b>708.607</b> | 705.403 | 705.605 | 705.202        | R[31] |
| A[12] | 243.543        | 677.387        | 674.183 | 674.385 | <b>673.981</b> | A[30] |
| K[13] | 269.162        | 663.178        | 659.976 | 660.177 | 659.774        | K[29] |
| A[14] | 283.370        | 637.560        | 634.357 | 634.558 | 634.155        | A[28] |
| K[15] | 308.989        | 623.353        | 620.149 | 620.351 | 619.948        | K[27] |
| T[16] | 329.198        | 597.734        | 594.530 | 594.732 | 594.329        | T[26] |
| R[17] | <b>360.418</b> | 577.524        | 574.321 | 574.522 | 574.119        | R[25] |
| S[18] | 377.625        | 546.304        | 543.100 | 543.302 | 542.899        | S[24] |
| S[19] | 399.231        | 528.898        | 525.694 | 525.896 | 525.492        | S[23] |
| R[20] | 426.451        | 511.491        | 508.288 | 508.489 | 508.086        | R[22] |
| A[21] | 440.659        | 488.271        | 477.067 | 477.269 | 476.866        | A[21] |
| G[22] | 452.063        | 468.064        | 462.860 | 463.061 | 462.658        | G[20] |
| L[23] | 474.680        | 454.659        | 451.456 | 451.657 | 451.254        | L[19] |
| Q[24] | 500.292        | 432.043        | 428.839 | 429.040 | 428.637        | Q[18] |
| F[25] | 529.705        | 408.431        | 403.227 | 403.429 | 403.026        | F[17] |
| P[26] | 549.116        | 377.017        | 373.813 | 374.015 | 373.612        | P[16] |
| V[27] | 568.930        | 357.607        | 354.403 | 354.604 | 354.201        | V[15] |
| G[28] | 580.334        | 337.793        | 334.589 | 334.791 | 334.388        | G[14] |
| R[29] | 611.554        | 326.389        | 323.185 | 323.386 | 322.983        | R[13] |
| V[30] | 633.368        | 295.168        | 291.963 | 292.165 | 291.763        | V[12] |
| H[31] | 658.780        | 275.955        | 272.751 | 272.953 | 271.949        | H[11] |
| R[32] | 690.000        | 247.943        | 244.739 | 244.941 | 244.538        | R[10] |
| L[33] | 712.617        | 216.721        | 213.519 | 213.721 | 213.317        | L[0]  |
| L[34] | 735.233        | 194.106        | 190.902 | 191.104 | 190.701        | L[8]  |
| R[35] | 766.454        | 171.489        | 168.285 | 168.487 | 168.084        | R[7]  |
| K[36] | 792.073        | 140.269        | 137.065 | 137.267 | 136.864        | K[6]  |
| G[37] | 803.477        | 114.650        | 111.446 | 111.648 | 111.245        | G[5]  |
| N[38] | <b>826.286</b> | 103.246        | 100.042 | 100.243 | 99.840         | N[4]  |
| V[39] | 858.898        | 80.437         | 77.233  | 77.435  | 77.032         | V[3]  |
| S[40] | <b>876.305</b> | 47.824         | 44.621  | 44.822  | 44.419         | S[2]  |
| E[41] | 902.113        | 30.418         | 27.214  | 27.416  | 27.013         | E[1]  |



# sp | Q8CGP5 | H2A1F\_MOUSE

[Acetyl]SGRGKQGGKARAKAKTRSSRAGLQFPVGRVHRLLRKGNYS

- ▶ fragmentation table for charge state 1+
- ▶ specType=etd
- ▶ score=43.83
- ▶ F113280.dat
- ▶ query=q54459.p1
- ▶ precursor=752.093800
- ▶ chargePrecursor=6
- ▶ itol=0.5

| AA | c  | y               | z+1            | z+2             | z               | AA              |       |
|----|----|-----------------|----------------|-----------------|-----------------|-----------------|-------|
| S  | 1  | 147.076         | 4507.521       | 4491.503        | 0.000           | 4490.486        | S[41] |
| G  | 2  | 204.068         | 4378.478       | 4362.459        | 0.000           | 4361.451        | G[40] |
| R  | 3  | <b>360.199</b>  | 4321.457       | 4305.438        | 4308.446        | 4304.439        | R[39] |
| G  | 4  | <b>417.220</b>  | 4165.355       | 4149.337        | 4150.345        | 4148.329        | G[38] |
| K  | 5  | <b>545.315</b>  | 4108.334       | 4092.315        | 4093.323        | 4091.307        | K[37] |
| Q  | 6  | <b>673.374</b>  | 3985.238       | 3969.220        | 3965.228        | 3963.211        | Q[36] |
| G  | 7  | <b>730.395</b>  | 3852.080       | 3836.100        | 3837.110        | 3835.104        | G[35] |
| G  | 8  | <b>787.417</b>  | 3795.159       | 3779.140        | 3780.148        | 3778.132        | G[34] |
| K  | 9  | <b>915.512</b>  | 3738.138       | 3722.119        | 3723.127        | 3721.111        | K[33] |
| A  | 10 | <b>966.549</b>  | 3610.043       | 3594.024        | 3595.032        | 3593.016        | A[32] |
| R  | 11 | 1142.050        | 3539.005       | 3522.987        | 3523.995        | 3521.979        | R[31] |
| A  | 12 | <b>1213.687</b> | 3382.904       | 3366.885        | 3367.893        | 3365.877        | A[30] |
| R  | 13 | 1381.782        | 3311.867       | 3295.848        | 3296.856        | 3294.841        | R[29] |
| A  | 14 | 1412.819        | 3183.772       | 3167.754        | 3168.761        | 3166.746        | A[28] |
| K  | 15 | 1540.914        | 3112.735       | 3096.716        | 3097.724        | 3095.709        | K[27] |
| T  | 16 | 1841.962        | 2984.640       | 2968.621        | 2969.629        | 2967.614        | T[26] |
| R  | 17 | 1708.063        | 2853.592       | 2837.573        | 2838.582        | 2836.566        | R[25] |
| S  | 18 | 1885.095        | 2729.494       | 2713.475        | 2714.483        | 2712.467        | S[24] |
| S  | 19 | 1972.127        | 2640.459       | 2624.441        | 2625.448        | 2623.433        | S[23] |
| R  | 20 | 2138.228        | 2553.421       | 2537.402        | 2538.410        | 2536.394        | R[22] |
| A  | 21 | 2199.265        | 2497.326       | 2481.307        | 2482.315        | 2480.300        | A[21] |
| G  | 22 | 2256.287        | 2326.289       | 2310.270        | 2311.278        | 2309.263        | G[20] |
| L  | 23 | 2309.371        | 2209.260       | 2193.240        | 2194.249        | 2192.241        | L[19] |
| Q  | 24 | 3007.429        | 2158.184       | 2142.165        | 2143.173        | 2141.157        | Q[18] |
| F  | 25 | 3644.498        | 2028.125       | 2012.106        | 2013.114        | 2011.099        | F[17] |
| P  | 26 | 2741.551        | 1881.057       | 1865.038        | 1866.046        | 1864.030        | P[16] |
| V  | 27 | 2840.619        | 1784.004       | 1767.985        | 1768.993        | 1766.977        | V[15] |
| G  | 28 | 2897.641        | 1684.935       | 1668.917        | 1669.924        | 1667.909        | G[14] |
| R  | 29 | 3633.742        | 1627.824       | 1611.805        | <b>1612.803</b> | 1610.787        | R[13] |
| V  | 30 | 3152.810        | 1471.813       | 1455.794        | 4456.802        | <b>1454.786</b> | V[12] |
| H  | 31 | 3289.869        | 1372.744       | <b>1356.726</b> | 1357.734        | 1355.718        | H[11] |
| R  | 32 | 3445.970        | 1235.685       | <b>1219.667</b> | 1220.675        | 1218.659        | R[10] |
| L  | 33 | 3559.054        | 1079.584       | 1063.565        | 1064.573        | <b>1062.558</b> | L[9]  |
| L  | 34 | 3672.138        | <b>966.500</b> | 950.482         | <b>951.489</b>  | 949.474         | L[8]  |
| R  | 35 | 3838.239        | 833.418        | 817.399         | <b>818.405</b>  | 816.390         | R[7]  |
| K  | 36 | 3956.334        | 697.315        | 681.296         | 682.304         | 680.289         | K[6]  |
| G  | 37 | 4013.356        | 569.220        | 553.201         | 554.209         | 552.194         | G[5]  |
| N  | 38 | 4127.399        | 512.109        | 496.180         | 497.188         | 495.172         | N[4]  |
| V  | 39 | 4290.462        | 398.156        | 382.137         | 383.145         | 381.129         | V[3]  |
| S  | 40 | 4377.494        | 235.082        | 219.074         | 220.082         | 218.066         | S[2]  |
| E  | 41 | 4408.537        | 148.060        | 132.043         | 133.050         | 131.034         | E[1]  |

# sp | Q8CGP5 | H2A1F\_MOUSE

[Acetyl]SGRGKQGGKARAKAKTRSSRAGLQFPVGRVHRLLRKGNYS

- ▶ fragmentation table for charge state 2+
- ▶ specType=etd
- ▶ score=43.83
- ▶ F113280.dat
- ▶ query=q54459.p1
- ▶ precursor=752.093800
- ▶ chargePrecursor=6
- ▶ itol=0.5

| AA   | c               | y        | z+1             | z+2             | z               | AA   |
|------|-----------------|----------|-----------------|-----------------|-----------------|------|
| S 1  | 74.042          | 2754.364 | 2246.255        | 0.504           | 2245.751        | S 41 |
| G 2  | 102.563         | 2189.743 | 2181.731        | 0.504           | 2181.229        | G 40 |
| R 3  | 180.603         | 2161.732 | 2153.229        | 2153.726        | 2152.719        | R 39 |
| G 4  | 209.114         | 2083.181 | 2075.172        | 2075.676        | 2074.669        | G 38 |
| K 5  | 273.161         | 2054.671 | 2046.661        | 2047.165        | 2046.157        | K 37 |
| Q 6  | 337.193         | 1999.623 | 1992.611        | 1993.116        | 1992.111        | Q 36 |
| G 7  | 365.701         | 1926.564 | 1918.554        | <b>1919.088</b> | 1918.081        | G 35 |
| G 8  | 394.212         | 1898.083 | 1890.074        | <b>1890.578</b> | 1889.570        | G 34 |
| K 9  | 458.260         | 1869.672 | <b>1861.563</b> | <b>1862.067</b> | 1861.059        | K 33 |
| A 10 | 493.778         | 1805.625 | 1797.510        | 1798.019        | 1797.012        | A 32 |
| R 11 | 571.659         | 1770.096 | 1761.997        | 1762.501        | 1761.494        | R 31 |
| A 12 | <b>607.347</b>  | 1693.956 | 1685.949        | 1686.453        | 1685.443        | A 30 |
| R 13 | <b>671.395</b>  | 1656.437 | <b>1648.428</b> | <b>1648.932</b> | 1647.925        | R 29 |
| A 14 | <b>706.913</b>  | 1592.390 | 1584.380        | <b>1584.884</b> | 1583.876        | A 28 |
| K 15 | <b>770.961</b>  | 1556.671 | <b>1548.662</b> | <b>1549.166</b> | 1548.159        | K 27 |
| T 16 | <b>821.485</b>  | 1492.824 | 1484.814        | 1485.318        | <b>1484.310</b> | T 26 |
| R 17 | <b>899.535</b>  | 1454.300 | 1446.289        | 1446.794        | 1445.787        | R 25 |
| S 18 | 933.051         | 1394.249 | <b>1386.240</b> | <b>1386.744</b> | 1385.736        | S 24 |
| S 19 | <b>986.567</b>  | 1320.731 | <b>1312.724</b> | 1313.228        | <b>1312.220</b> | S 23 |
| R 20 | 1064.618        | 1277.217 | <b>1269.208</b> | <b>1269.712</b> | 1268.704        | R 22 |
| A 21 | 1100.136        | 1199.667 | <b>1191.157</b> | <b>1191.661</b> | 1190.657        | A 21 |
| G 22 | <b>1128.647</b> | 1163.648 | 1155.630        | 1156.143        | 1155.135        | G 20 |
| L 23 | 1158.709        | 1136.137 | 1127.129        | 1127.632        | 1126.625        | L 19 |
| Q 24 | <b>1249.218</b> | 1078.585 | <b>1070.586</b> | <b>1071.090</b> | 1070.082        | Q 19 |
| F 25 | <b>1322.753</b> | 1014.569 | <b>1006.557</b> | <b>1007.061</b> | <b>1006.053</b> | F 17 |
| P 26 | 1371.279        | 941.032  | 933.023         | 933.526         | 932.519         | P 16 |
| V 27 | <b>1420.813</b> | 892.506  | 884.490         | 885.000         | 883.992         | V 15 |
| G 28 | <b>1449.324</b> | 842.671  | 834.662         | 835.166         | 834.159         | G 14 |
| R 29 | 1527.274        | 814.461  | <b>806.451</b>  | <b>806.955</b>  | <b>805.947</b>  | R 13 |
| V 30 | 1576.809        | 738.410  | 729.401         | 730.405         | 729.397         | V 12 |
| H 31 | 1645.438        | 688.878  | 679.869         | 679.370         | 678.363         | H 11 |
| R 32 | 1723.489        | 618.346  | 610.337         | 610.841         | 609.833         | R 10 |
| L 33 | 1780.031        | 540.290  | 532.280         | 532.790         | 531.783         | L 9  |
| L 34 | 1836.573        | 483.754  | 475.744         | 476.248         | 475.241         | L 8  |
| I 35 | 1814.623        | 427.212  | 419.202         | 419.706         | 418.699         | I 7  |
| K 36 | 1978.671        | 349.161  | 341.152         | 341.656         | 340.648         | K 6  |
| G 37 | 2007.181        | 285.114  | 277.104         | 277.608         | 276.600         | G 5  |
| N 38 | 2064.203        | 256.603  | 248.594         | 249.098         | 248.090         | N 4  |
| V 39 | 2145.735        | 199.582  | 191.573         | 192.076         | 191.069         | V 3  |
| S 40 | 2189.251        | 118.050  | 110.041         | 110.544         | 109.537         | S 2  |
| E 41 | 2253.772        | 74.534   | 66.524          | 67.028          | 66.021          | E 1  |

# sp | Q8CGP5 | H2A1F\_MOUSE

[Acetyl]SGRGKQGGKARAKAKTRSSRAGLQFPVGRVHRLLRKGNYS

- ▶ fragmentation table for charge state 3+
- ▶ specType=etd
- ▶ score=43.83
- ▶ F113280.dat
- ▶ query=q54459.p1
- ▶ precursor=752.093800
- ▶ chargePrecursor=6
- ▶ itol=0.5

| AA | c  | y               | #s1             | #s2             | z               | AA              |       |
|----|----|-----------------|-----------------|-----------------|-----------------|-----------------|-------|
| S  | 1  | 489.697         | 1502.178        | <b>1497.829</b> | 0.872           | 2497.567        | S[41] |
| G  | 2  | 86.704          | 1460.184        | <b>1454.825</b> | 0.672           | 1454.480        | G[40] |
| R  | 3  | 1307.718        | 1441.157        | <b>1435.817</b> | <b>1430.153</b> | <b>1435.482</b> | R[30] |
| G  | 4  | 139.745         | 1389.123        | <b>1383.784</b> | <b>1384.120</b> | 1383.448        | G[38] |
| K  | 5  | 182.443         | 1370.116        | <b>1364.777</b> | <b>1365.113</b> | <b>1364.441</b> | K[37] |
| G  | 6  | 225.130         | 1327.418        | 1322.078        | <b>1322.414</b> | 1321.742        | G[36] |
| G  | 7  | 244.137         | 1284.732        | 1279.392        | 1279.728        | 1279.056        | G[35] |
| G  | 8  | 263.144         | 1265.725        | <b>1260.385</b> | <b>1260.721</b> | 1260.049        | G[34] |
| K  | 9  | 305.642         | 1246.717        | <b>1241.378</b> | <b>1241.714</b> | 1241.042        | K[33] |
| A  | 10 | 329.521         | 1204.019        | 1199.079        | 1199.015        | 1198.344        | A[32] |
| R  | 11 | 381.555         | 1180.390        | <b>1175.000</b> | <b>1175.336</b> | 1174.664        | R[31] |
| A  | 12 | 405.234         | <b>1128.206</b> | 1123.907        | 1123.803        | 1123.803        | A[30] |
| R  | 13 | 447.932         | 1104.627        | <b>1099.288</b> | 1099.624        | <b>1098.952</b> | R[29] |
| A  | 14 | 471.611         | 1061.929        | <b>1056.589</b> | 1056.925        | <b>1056.253</b> | A[28] |
| K  | 15 | 514.310         | <b>1038.250</b> | <b>1032.910</b> | <b>1033.246</b> | <b>1032.574</b> | K[27] |
| T  | 16 | 547.002         | 995.552         | 990.212         | <b>990.548</b>  | 989.870         | T[26] |
| R  | 17 | 600.626         | 961.869         | <b>956.529</b>  | <b>956.865</b>  | 956.187         | R[25] |
| S  | 18 | 629.017         | 909.835         | 904.495         | 904.831         | 904.160         | S[24] |
| S  | 19 | 658.047         | 880.825         | <b>875.485</b>  | <b>875.821</b>  | 875.149         | S[23] |
| R  | 20 | 710.081         | 851.814         | <b>846.474</b>  | <b>846.810</b>  | 846.138         | R[22] |
| A  | 21 | 733.760         | 799.789         | <b>794.441</b>  | <b>794.777</b>  | 794.105         | A[21] |
| G  | 22 | 752.767         | 776.101         | <b>770.762</b>  | <b>771.098</b>  | 770.426         | G[20] |
| L  | 23 | 789.682         | 759.094         | 753.754         | 753.690         | 753.419         | L[19] |
| Q  | 24 | <b>833.148</b>  | 733.305         | 724.900         | 724.996         | 723.221         | Q[18] |
| F  | 25 | 882.171         | 676.713         | <b>671.374</b>  | <b>671.710</b>  | <b>671.038</b>  | F[17] |
| F  | 26 | 914.552         | 627.600         | 622.261         | 622.687         | 622.015         | F[16] |
| V  | 27 | 947.545         | 595.139         | 590.000         | 590.336         | 589.664         | V[15] |
| G  | 28 | <b>966.552</b>  | 562.317         | 556.977         | 557.313         | 556.641         | G[14] |
| R  | 29 | 1013.658        | 543.309         | 537.970         | 538.306         | 537.634         | R[13] |
| V  | 30 | 1051.608        | 491.275         | 485.936         | 486.272         | 485.600         | V[12] |
| H  | 31 | <b>1097.294</b> | 458.253         | 452.913         | 453.249         | 452.577         | H[11] |
| R  | 32 | 1149.328        | 412.567         | 407.227         | 407.563         | 406.891         | R[10] |
| L  | 33 | <b>1187.023</b> | <b>360.533</b>  | 355.193         | 355.529         | 354.857         | L[9]  |
| L  | 34 | <b>1224.718</b> | 322.576         | 317.236         | 317.572         | 316.900         | L[8]  |
| R  | 35 | 1275.753        | 285.144         | 279.804         | 280.140         | 279.468         | R[7]  |
| K  | 36 | 1319.450        | 233.110         | 227.770         | 228.106         | 227.434         | K[6]  |
| G  | 37 | 1338.457        | 190.412         | 185.072         | 185.408         | 184.736         | G[5]  |
| N  | 38 | 1376.471        | 171.404         | 166.065         | 166.401         | 165.729         | N[4]  |
| V  | 39 | 1430.826        | 133.390         | 128.051         | 128.386         | 127.715         | V[3]  |
| S  | 40 | 1459.836        | 99.136          | 93.796          | 94.132          | 93.460          | S[2]  |
| E  | 41 | 1502.850        | 50.025          | 44.685          | 45.021          | 44.349          | E[1]  |

# sp | Q8CGP5 | H2A1F\_MOUSE

[Acetyl]SGRGKQGGKARAKAKTRSSRAGLQFPVGRVHRLLRKGNYS

- ▶ fragmentation table for charge state 4+
- ▶ specType=etd
- ▶ score=43.83
- ▶ F113280.dat
- ▶ query=q54459.p1
- ▶ precursor=752.093800
- ▶ chargePrecursor=6
- ▶ itol=0.5

| AA   | c               | y              | z+1             | z+2             | z               | AA   |
|------|-----------------|----------------|-----------------|-----------------|-----------------|------|
| S 1  | 57.525          | 1127.636       | <b>1123.631</b> | 0.755           | 1125.370        | S 41 |
| G 2  | 51.780          | 1095.375       | <b>1091.370</b> | 0.755           | <b>1091.118</b> | G 40 |
| R 3  | 90.805          | 1081.120       | <b>1077.115</b> | <b>1077.367</b> | 1076.861        | R 30 |
| G 4  | 105.061         | 1042.094       | 1038.090        | <b>1038.342</b> | 1037.839        | G 38 |
| K 5  | 137.084         | 1027.839       | <b>1023.834</b> | <b>1024.086</b> | 1023.582        | K 37 |
| Q 6  | 189.089         | 926.815        | 922.811         | 922.807         | 921.555         | Q 30 |
| G 7  | 253.354         | 953.803        | <b>955.796</b>  | <b>960.048</b>  | 955.542         | G 32 |
| G 8  | 197.810         | 949.545        | <b>945.541</b>  | <b>945.792</b>  | <b>945.289</b>  | G 34 |
| K 9  | 229.633         | 935.290        | 931.285         | 931.537         | 931.033         | K 33 |
| A 10 | 247.303         | <b>903.266</b> | <b>899.261</b>  | <b>899.513</b>  | <b>899.009</b>  | A 32 |
| R 11 | 286.418         | 899.007        | 895.002         | 895.254         | 894.750         | R 31 |
| A 12 | 304.177         | <b>846.462</b> | 842.457         | 842.709         | 842.205         | A 30 |
| R 13 | 336.201         | 828.722        | 824.716         | 824.970         | 824.465         | R 29 |
| A 14 | 353.960         | 796.699        | 792.694         | 792.946         | 792.442         | A 28 |
| K 15 | 385.984         | 778.939        | 774.933         | 775.187         | 774.681         | K 27 |
| T 16 | 411.246         | 746.915        | 742.911         | 743.163         | 742.659         | T 26 |
| R 17 | 450.271         | <b>721.654</b> | 717.649         | 717.901         | 717.397         | R 25 |
| S 18 | 472.829         | 682.828        | 678.824         | 679.076         | 678.572         | S 24 |
| S 19 | 493.787         | 660.870        | 656.865         | 657.118         | 656.614         | S 23 |
| R 20 | 532.813         | 639.112        | 635.107         | 635.360         | 634.856         | R 22 |
| A 21 | 550.572         | 600.087        | 596.082         | 596.334         | 595.830         | A 21 |
| G 22 | 564.827         | 582.128        | 578.123         | 578.375         | 577.871         | G 20 |
| L 23 | 603.006         | 566.072        | 562.067         | 562.320         | 561.815         | L 19 |
| Q 24 | 625.113         | 539.803        | 535.797         | 536.049         | 535.545         | Q 19 |
| F 25 | 661.880         | 507.787        | 503.782         | 504.034         | 503.530         | F 17 |
| F 26 | 686.143         | 471.020        | 467.015         | 467.267         | 466.763         | F 16 |
| V 27 | <b>710.910</b>  | 446.750        | 442.745         | 443.004         | 442.500         | V 15 |
| G 28 | 725.166         | 421.989        | 417.983         | 418.237         | <b>417.733</b>  | G 14 |
| R 29 | 764.191         | 407.734        | 403.729         | 403.981         | 403.477         | R 13 |
| V 30 | 788.058         | 386.709        | 384.704         | 384.956         | 384.452         | V 12 |
| H 31 | 823.223         | 343.942        | 339.937         | 340.189         | 339.685         | H 11 |
| R 32 | 862.248         | 309.677        | 305.672         | 305.924         | 305.420         | R 10 |
| L 33 | 890.519         | 270.652        | 266.647         | 266.899         | 266.395         | L 9  |
| L 34 | 918.790         | 242.381        | 238.376         | 238.628         | 238.124         | L 8  |
| R 35 | 957.815         | 214.110        | 210.105         | 210.357         | 209.853         | R 7  |
| R 36 | 989.839         | 175.084        | 171.079         | 171.332         | 170.828         | R 6  |
| G 37 | <b>1004.094</b> | 143.061        | 139.056         | 139.308         | 138.804         | G 5  |
| N 38 | <b>1032.605</b> | 126.805        | 124.800         | 125.052         | 124.548         | N 4  |
| V 39 | <b>1073.371</b> | 100.294        | 96.290          | 96.542          | 96.038          | V 3  |
| S 40 | 1095.120        | 59.529         | 55.524          | 55.776          | 55.272          | S 2  |
| E 41 | 1127.390        | 37.771         | 33.766          | 34.018          | 33.514          | E 1  |

# sp | Q8CGP5 | H2A1F\_MOUSE

[Acetyl]SGRGKQGGKARAKAKTRSSRAGLQFPVGRVHRLLRKGNYS

- ▶ fragmentation table for charge state 5+
- ▶ specType=etd
- ▶ score=43.83
- ▶ F113280.dat
- ▶ query=q54459\_p1
- ▶ precursor=752.093800
- ▶ chargePrecursor=6
- ▶ itol=0.5

| AA    | c              | y              | z+1            | z+2     | z              | AA    |
|-------|----------------|----------------|----------------|---------|----------------|-------|
| S[1]  | 30.221         | <b>902.310</b> | <b>899.106</b> | 0.806   | 898.905        | S[41] |
| G[2]  | 41.625         | 876.501        | <b>873.298</b> | 0.806   | <b>873.096</b> | G[40] |
| R[3]  | 72.846         | 865.097        | 861.893        | 862.095 | 861.692        | R[39] |
| G[4]  | 84.250         | <b>833.877</b> | 830.673        | 830.875 | 830.472        | G[38] |
| K[5]  | 109.859        | 822.473        | 819.269        | 819.470 | 819.067        | K[37] |
| Q[6]  | 135.481        | 796.854        | 793.650        | 793.851 | 793.448        | Q[36] |
| G[7]  | 146.885        | <b>771.242</b> | 768.038        | 768.240 | 767.837        | G[35] |
| G[8]  | 158.289        | 759.835        | 756.634        | 756.835 | 756.432        | G[34] |
| K[9]  | 183.908        | 748.431        | 745.230        | 745.431 | 745.028        | K[33] |
| A[10] | 198.116        | 722.814        | 719.611        | 719.812 | 719.409        | A[32] |
| R[11] | 229.136        | 708.007        | 705.403        | 705.605 | 705.202        | R[31] |
| A[12] | 243.543        | 677.387        | 674.183        | 674.385 | 673.981        | A[30] |
| K[13] | 269.162        | 663.179        | 659.976        | 660.177 | 659.774        | K[29] |
| A[14] | 283.370        | 637.560        | 634.357        | 634.558 | 634.155        | A[28] |
| K[15] | 308.989        | 623.353        | 620.149        | 620.351 | 619.948        | K[27] |
| T[16] | 329.198        | 597.734        | 594.530        | 594.732 | 594.329        | T[26] |
| R[17] | <b>360.418</b> | 577.524        | 574.321        | 574.522 | 574.119        | R[25] |
| S[18] | 377.825        | 546.305        | 543.100        | 543.302 | 542.899        | S[24] |
| S[19] | 399.231        | 528.899        | 525.694        | 525.896 | 525.492        | S[23] |
| R[20] | 426.451        | 511.491        | 508.288        | 508.489 | 508.086        | R[22] |
| A[21] | 440.659        | 480.271        | 477.067        | 477.269 | 476.866        | A[21] |
| G[22] | 452.063        | 466.064        | 462.860        | 463.061 | 462.658        | G[20] |
| L[23] | 474.680        | 454.659        | 451.456        | 451.657 | 451.254        | L[19] |
| Q[24] | 500.292        | 432.043        | 428.839        | 429.040 | 428.637        | Q[18] |
| F[25] | 529.705        | 406.431        | 403.227        | 403.429 | 403.026        | F[17] |
| P[26] | 549.116        | 377.017        | 373.813        | 374.015 | 373.612        | P[16] |
| V[27] | 568.930        | 357.607        | 354.403        | 354.604 | 354.201        | V[15] |
| G[28] | 589.334        | 337.793        | 334.589        | 334.791 | 334.388        | G[14] |
| K[29] | 611.354        | 326.389        | 323.185        | 323.386 | 322.983        | K[13] |
| V[30] | 631.368        | 295.165        | 291.965        | 292.166 | 291.763        | V[12] |
| H[31] | 658.780        | 275.355        | 272.151        | 272.353 | 271.949        | H[11] |
| R[32] | 690.000        | 247.943        | 244.739        | 244.941 | 244.538        | R[10] |
| L[33] | 712.617        | 216.723        | 213.519        | 213.721 | 213.317        | L[9]  |
| L[34] | 735.233        | 194.106        | 190.902        | 191.104 | 190.701        | L[8]  |
| R[35] | 766.454        | 171.489        | 168.285        | 168.487 | 168.084        | R[7]  |
| K[36] | 792.073        | 140.269        | 137.065        | 137.267 | 136.864        | K[6]  |
| G[37] | 803.477        | 114.650        | 111.446        | 111.648 | 111.245        | G[5]  |
| N[38] | 829.296        | 103.245        | 100.042        | 100.243 | 99.840         | N[4]  |
| V[39] | <b>858.898</b> | 80.431         | 77.233         | 77.435  | 77.032         | V[3]  |
| S[40] | 876.305        | 47.824         | 44.621         | 44.822  | 44.419         | S[2]  |
| E[41] | 902.113        | 30.418         | 27.214         | 27.416  | 27.013         | E[1]  |





# sp | Q6GSS7 | H2A2A\_MOUSE

[Acetyl]SGRGK<sup>Acetyl</sup><sub>42.01</sub> QGGKARAKAKSRSSRAGLQFPVGRVHRLLRKGN<sup>YAE</sup>

- ▶ fragmentation table for charge state 1+
- ▶ specType=etd
- ▶ score=40.66
- ▶ F113280.dat
- ▶ query=q54467.p1
- ▶ precursor=646.508890
- ▶ chargePrecursor=7
- ▶ itol=0.5

| AA   | c               | y               | z+1             | z+2             | z              | AA   |
|------|-----------------|-----------------|-----------------|-----------------|----------------|------|
| S 1  | 147.076         | 4519.521        | 4503.502        | 0.000           | 4502.484       | S 41 |
| G 2  | 204.068         | 4390.478        | 4374.459        | 0.000           | 4373.451       | G 40 |
| R 3  | <b>360.199</b>  | 4331.457        | 4317.438        | 4318.448        | 4316.439       | R 39 |
| G 4  | <b>417.220</b>  | 4177.355        | 4161.337        | 4162.345        | 4160.329       | G 38 |
| K 5  | <b>587.326</b>  | 4120.334        | 4104.315        | 4105.323        | 4103.307       | K 37 |
| Q 6  | <b>715.345</b>  | 3959.276        | 3943.257        | 3935.218        | 3933.202       | Q 36 |
| G 7  | <b>772.406</b>  | 3822.170        | 3806.151        | 3807.159        | 3805.143       | G 35 |
| G 8  | <b>829.427</b>  | 3705.148        | 3749.130        | 3750.138        | 3748.122       | G 34 |
| K 9  | <b>957.522</b>  | 3708.127        | 3662.108        | 3661.116        | 3661.100       | K 33 |
| A 10 | <b>1028.560</b> | 3580.032        | 3564.013        | 3565.021        | 3563.005       | A 32 |
| R 11 | 1158.661        | 3508.995        | 3482.976        | 3493.984        | 3491.968       | R 31 |
| A 12 | <b>1255.698</b> | 3352.984        | 3336.975        | 3337.983        | 3335.967       | A 30 |
| R 13 | 1383.793        | 3281.957        | 3265.938        | 3266.946        | 3264.930       | R 29 |
| A 14 | <b>1454.830</b> | 3153.962        | 3137.943        | 3138.951        | 3136.935       | A 28 |
| K 15 | 1582.925        | 3082.925        | 3066.906        | 3067.914        | 3065.898       | K 27 |
| S 16 | 1609.957        | 2954.930        | 2938.911        | 2939.919        | 2937.903       | S 26 |
| R 17 | 1826.058        | 2887.906        | 2871.887        | 2852.887        | 2890.571       | R 25 |
| S 18 | 1913.090        | 2711.939        | 2695.920        | 2696.928        | 2694.912       | S 24 |
| S 19 | 2000.122        | 2624.944        | 2608.924        | 2609.932        | 2607.916       | S 23 |
| R 20 | 2186.223        | 2537.932        | 2521.913        | 2522.921        | 2520.905       | R 22 |
| A 21 | 2227.260        | 2381.931        | 2365.912        | 2366.920        | 2364.904       | A 21 |
| G 22 | 2284.282        | 2310.294        | 2294.275        | 2295.283        | 2293.267       | G 20 |
| L 23 | 2307.306        | 2253.273        | 2237.254        | 2238.262        | 2236.246       | L 19 |
| Q 24 | 2525.424        | 2140.189        | 2124.170        | 2125.178        | 2123.162       | Q 19 |
| F 25 | 2672.493        | 2012.135        | 1996.111        | <b>1997.119</b> | 1995.104       | F 17 |
| P 26 | 2769.546        | 1805.062        | 1849.043        | 1850.051        | 1848.035       | P 16 |
| V 27 | 2868.614        | 1768.009        | 1751.990        | 1752.998        | 1750.982       | V 15 |
| G 28 | 2925.635        | <b>1668.940</b> | 1652.922        | <b>1653.930</b> | 1651.914       | G 14 |
| D 29 | 3031.237        | 1611.910        | 1595.892        | 1596.900        | 1594.884       | D 13 |
| V 30 | 3180.808        | 1495.815        | 1479.796        | <b>1440.807</b> | 1438.791       | V 12 |
| H 31 | 3317.864        | 1358.748        | <b>1340.731</b> | 1341.739        | 1339.723       | H 11 |
| R 32 | 3473.965        | 1219.691        | <b>1203.672</b> | 1204.680        | 1202.664       | R 10 |
| L 33 | 3587.049        | 1063.589        | <b>1047.571</b> | 1048.579        | 1046.563       | L 9  |
| L 34 | 3700.133        | 950.505         | 934.487         | 935.495         | 933.479        | L 8  |
| T 35 | 3859.214        | <b>837.421</b>  | 821.403         | 822.410         | 820.394        | T 7  |
| K 36 | 3984.329        | 681.320         | 665.302         | <b>666.309</b>  | 664.293        | K 6  |
| G 37 | 4041.351        | 553.225         | 537.207         | 538.214         | 536.199        | G 5  |
| N 38 | 4155.394        | 406.204         | 480.185         | 481.193         | <b>479.177</b> | N 4  |
| V 39 | 4318.457        | 382.161         | 366.142         | 367.150         | 365.134        | V 3  |
| A 40 | 4389.494        | 219.086         | 203.079         | 204.087         | 202.071        | A 2  |
| E 41 | 4518.537        | 148.060         | 132.042         | 133.050         | 131.034        | E 1  |

# sp | Q6GSS7 | H2A2A\_MOUSE

[Acetyl]SGR<sup>Acetyl</sup>RGK<sub>42.01</sub> QGGKARAKAKSRSSRAGLQFPVGRVHRLLRKGN<sup>YAE</sup>

- ▶ fragmentation table for charge state 2+
- ▶ specType=etd
- ▶ score=40.66
- ▶ F113280.dat
- ▶ query=q54467\_p1
- ▶ precursor=646.508890
- ▶ chargePrecursor=7
- ▶ itol=0.5

| AA | c  | w               | #s1             | #s2             | z               | AA              |       |
|----|----|-----------------|-----------------|-----------------|-----------------|-----------------|-------|
| S  | 1  | 74.062          | 2502.294        | 2282.255        | 0.804           | 2251.781        | S[41] |
| G  | 2  | 102.553         | 2195.743        | 2187.733        | 0.504           | 2187.220        | G[40] |
| R  | 3  | 180.603         | 2167.232        | 2159.233        | 2159.726        | 2158.710        | R[39] |
| G  | 4  | 209.114         | 2089.181        | 2081.172        | 2081.676        | 2080.660        | G[38] |
| K  | 5  | 294.167         | 2050.671        | 2052.681        | 2053.105        | 2052.157        | K[37] |
| Q  | 6  | 358.196         | 1975.618        | 1967.608        | 1968.112        | 1967.105        | Q[36] |
| G  | 7  | 388.377         | 1711.589        | 1603.579        | 1604.083        | 1603.075        | G[35] |
| G  | 8  | 415.217         | 1883.078        | 1875.068        | 1875.572        | 1874.565        | G[34] |
| K  | 9  | <b>479.265</b>  | 1854.567        | 1846.558        | 1847.062        | 1846.054        | K[33] |
| A  | 10 | 514.783         | 1790.520        | 1782.510        | 1783.014        | 1782.000        | A[32] |
| R  | 11 | <b>592.834</b>  | 1735.001        | 1727.002        | 1727.506        | 1726.488        | R[31] |
| A  | 12 | <b>628.353</b>  | 1678.983        | <b>1668.941</b> | <b>1669.945</b> | 1668.937        | A[30] |
| R  | 13 | <b>662.400</b>  | 1643.433        | <b>1633.423</b> | <b>1633.927</b> | 1632.910        | R[29] |
| A  | 14 | <b>727.919</b>  | 1577.384        | 1569.375        | <b>1569.879</b> | 1568.871        | A[28] |
| K  | 15 | <b>791.966</b>  | 1541.866        | 1533.857        | 1534.360        | 1533.353        | K[27] |
| S  | 16 | <b>835.482</b>  | 1477.818        | <b>1469.809</b> | <b>1470.313</b> | 1469.305        | S[26] |
| R  | 17 | <b>913.533</b>  | 1434.302        | 1426.293        | 1426.797        | 1425.789        | R[25] |
| S  | 18 | <b>957.049</b>  | 1369.765        | <b>1348.243</b> | 1348.746        | <b>1347.739</b> | S[24] |
| S  | 19 | 1000.595        | <b>1312.736</b> | 1304.726        | 1305.230        | 1304.223        | S[23] |
| R  | 20 | 1078.615        | 1269.220        | 1261.210        | <b>1261.714</b> | 1260.707        | R[22] |
| A  | 21 | 1114.134        | <b>1191.169</b> | <b>1183.160</b> | <b>1183.664</b> | 1182.656        | A[21] |
| G  | 22 | 1142.644        | 1135.651        | 1127.641        | 1128.145        | 1127.137        | G[20] |
| L  | 23 | <b>1199.187</b> | <b>1127.140</b> | 1119.130        | <b>1119.635</b> | 1118.627        | L[19] |
| Q  | 24 | 1253.116        | <b>1070.598</b> | <b>1062.589</b> | <b>1063.093</b> | 1062.085        | Q[18] |
| F  | 25 | 1336.750        | 1008.599        | <b>998.559</b>  | <b>999.063</b>  | 998.055         | F[17] |
| F  | 26 | 1388.276        | 933.034         | 925.025         | 925.529         | 924.521         | F[16] |
| V  | 27 | 1434.811        | 884.506         | <b>876.499</b>  | 877.003         | <b>875.995</b>  | V[15] |
| G  | 28 | 1483.321        | 834.974         | <b>825.965</b>  | <b>827.468</b>  | <b>826.461</b>  | G[14] |
| R  | 29 | 1541.374        | 808.483         | <b>798.454</b>  | <b>798.958</b>  | 797.950         | R[13] |
| V  | 30 | 1590.906        | <b>728.413</b>  | 720.403         | 720.907         | <b>719.899</b>  | V[12] |
| H  | 31 | 1659.436        | 678.878         | <b>670.869</b>  | <b>671.373</b>  | <b>670.365</b>  | H[11] |
| R  | 32 | 1737.488        | 610.349         | <b>602.340</b>  | <b>602.843</b>  | 601.836         | R[10] |
| L  | 33 | 1794.028        | 532.289         | 524.280         | 524.783         | 523.785         | L[9]  |
| L  | 34 | 1850.570        | 478.756         | 469.747         | 469.250         | 468.242         | L[8]  |
| R  | 35 | 1928.612        | 419.214         | 411.205         | 411.709         | 410.701         | R[7]  |
| K  | 36 | 1992.668        | 341.164         | 333.154         | 333.658         | 332.650         | K[6]  |
| G  | 37 | 2021.179        | 277.116         | 269.107         | 269.611         | 268.603         | G[5]  |
| N  | 38 | 2078.200        | 248.606         | 240.596         | 241.100         | 240.092         | N[4]  |
| V  | 39 | 2159.732        | 181.564         | 183.575         | 184.079         | 183.071         | V[3]  |
| A  | 40 | 2195.261        | 110.026         | 109.043         | 109.547         | 108.539         | A[2]  |
| E  | 41 | 2259.772        | 74.534          | 66.524          | 67.028          | 66.021          | E[1]  |

# sp | Q6GSS7 | H2A2A\_MOUSE

[Acetyl]SGRGRK<sup>Acetyl</sup><sub>42.01</sub> QGGKARAKAKSRSSRAGLQFPVGRVHRLLRKGN<sup>YAE</sup>

- ▶ fragmentation table for charge state 3+
- ▶ specType=etd
- ▶ score=40.66
- ▶ F113280.dat
- ▶ query=q54467.p1
- ▶ precursor=646.508890
- ▶ chargePrecursor=7
- ▶ itol=0.5

| AA | c  | y               | #±1             | #±2             | z               | AA              |       |
|----|----|-----------------|-----------------|-----------------|-----------------|-----------------|-------|
| S  | 1  | 48.697          | 1507.118        | 1361.839        | 0.872           | 1501.561        | S[41] |
| G  | 2  | 66.704          | <b>1464.164</b> | 1458.825        | 0.872           | 1455.480        | G[40] |
| R  | 3  | 150.718         | 1445.157        | 1439.817        | 1440.151        | 1439.482        | R[39] |
| G  | 4  | 159.745         | 1393.123        | 1387.784        | <b>1388.120</b> | 1387.448        | G[38] |
| K  | 5  | 196.447         | 1374.116        | <b>1368.777</b> | <b>1369.113</b> | <b>1368.441</b> | K[37] |
| G  | 6  | 239.133         | 1317.414        | 1312.075        | <b>1312.411</b> | 1311.739        | G[36] |
| G  | 7  | 288.140         | 1214.725        | 1209.387        | 1209.728        | 1209.055        | G[35] |
| G  | 8  | 297.147         | <b>1255.721</b> | 1250.381        | <b>1250.717</b> | 1250.045        | G[34] |
| K  | 9  | 319.646         | 1236.714        | <b>1231.374</b> | <b>1231.710</b> | <b>1231.038</b> | K[33] |
| A  | 10 | 383.525         | 1194.016        | 1188.676        | 1189.012        | 1188.340        | A[32] |
| R  | 11 | 395.558         | 1170.336        | 1164.997        | 1165.331        | 1164.661        | R[31] |
| A  | 12 | 439.239         | 1133.301        | 1127.963        | 1128.300        | 1127.623        | A[30] |
| K  | 13 | 461.936         | <b>1094.624</b> | 1089.284        | 1089.620        | 1088.945        | K[29] |
| A  | 14 | 485.615         | 1051.925        | 1046.586        | <b>1046.922</b> | 1046.250        | A[28] |
| K  | 15 | 508.313         | <b>1028.246</b> | <b>1022.907</b> | <b>1023.243</b> | 1022.571        | K[27] |
| S  | 16 | 557.324         | 985.548         | <b>980.208</b>  | <b>980.544</b>  | <b>979.873</b>  | S[26] |
| R  | 17 | 609.258         | <b>956.537</b>  | 951.198         | <b>951.534</b>  | 950.862         | R[25] |
| S  | 18 | 638.368         | 904.594         | 899.154         | 899.500         | 898.823         | S[24] |
| S  | 19 | <b>667.379</b>  | 875.493         | <b>870.153</b>  | 870.489         | <b>869.817</b>  | S[23] |
| R  | 20 | <b>719.413</b>  | 846.482         | 841.143         | <b>841.479</b>  | 840.807         | R[22] |
| A  | 21 | <b>743.092</b>  | 794.449         | <b>789.109</b>  | <b>789.445</b>  | 788.771         | A[21] |
| G  | 22 | 762.069         | 770.710         | 765.370         | 765.706         | 765.034         | G[20] |
| L  | 23 | 799.078         | 753.762         | <b>746.423</b>  | <b>746.759</b>  | 746.081         | L[19] |
| Q  | 24 | <b>842.480</b>  | 714.065         | 708.726         | 709.064         | 708.382         | Q[18] |
| F  | 25 | 891.502         | <b>671.382</b>  | <b>666.042</b>  | <b>666.378</b>  | 665.700         | F[17] |
| F  | 26 | 923.853         | 622.359         | 617.019         | 617.355         | 616.683         | F[16] |
| V  | 27 | <b>956.876</b>  | 590.006         | 584.668         | 585.004         | 584.332         | V[15] |
| G  | 28 | 956.985         | 581.645         | 576.305         | 576.641         | 575.969         | G[14] |
| K  | 29 | <b>1027.917</b> | 539.918         | 534.578         | 534.914         | 534.240         | K[13] |
| V  | 30 | <b>1060.940</b> | 485.944         | 480.605         | 480.941         | 480.269         | V[12] |
| H  | 31 | <b>1106.626</b> | 452.921         | 447.582         | 447.918         | 447.246         | H[11] |
| R  | 32 | 1138.660        | 407.235         | 401.895         | 402.231         | 401.560         | R[10] |
| L  | 33 | <b>1196.355</b> | 355.201         | 349.862         | 350.198         | 349.526         | L[9]  |
| L  | 34 | 1234.049        | 312.509         | 307.169         | 307.505         | 306.831         | L[8]  |
| R  | 35 | 1298.683        | 279.812         | 274.472         | 274.808         | 274.135         | R[7]  |
| K  | 36 | 1328.781        | 227.778         | 222.439         | 222.775         | 222.103         | K[6]  |
| G  | 37 | <b>1347.788</b> | 185.080         | 179.740         | 180.076         | 179.404         | G[5]  |
| N  | 38 | 1385.803        | 166.073         | 160.733         | 161.069         | 160.397         | N[4]  |
| V  | 39 | 1450.157        | 128.098         | 122.758         | 123.094         | 122.421         | V[3]  |
| A  | 40 | <b>1463.836</b> | 83.304          | 77.964          | 78.300          | 77.628          | A[2]  |
| E  | 41 | 1508.850        | 50.025          | 44.685          | 45.021          | 44.349          | E[1]  |

# sp | Q6GSS7 | H2A2A\_MOUSE

[Acetyl]SGRGRK<sup>Acetyl</sup><sub>42.01</sub> QGGKARAKAKSRSSRAGLQFPVGRVHLLLRKGN<sup>YAE</sup>

- ▶ fragmentation table for charge state 4+
- ▶ specType=etd
- ▶ score=40.66
- ▶ F113280.dat
- ▶ query=q54467\_p1
- ▶ precursor=646.508890
- ▶ chargePrecursor=7
- ▶ itol=0.5

| AA | c  | y              | z+1             | z+2            | z               | AA             |       |
|----|----|----------------|-----------------|----------------|-----------------|----------------|-------|
| S  | 1  | 37.525         | 1130.639        | 4126.631       | 0.795           | 1126.379       | S[41] |
| G  | 2  | 51.780         | 1098.375        | 1094.370       | 0.795           | 1094.118       | G[40] |
| R  | 3  | 90.805         | <b>1084.120</b> | 1080.115       | 1080.367        | 1079.861       | R[39] |
| C  | 4  | 105.061        | 1045.094        | 1041.090       | <b>1041.342</b> | 1040.838       | C[38] |
| K  | 5  | 147.567        | 1030.839        | 1026.834       | <b>1027.086</b> | 1026.562       | K[37] |
| Q  | 6  | 179.502        | 988.313         | 984.308        | <b>984.560</b>  | 984.059        | Q[36] |
| G  | 7  | 193.857        | <b>956.298</b>  | <b>952.293</b> | 952.545         | <b>952.041</b> | G[35] |
| G  | 8  | 208.112        | 942.043         | <b>938.038</b> | <b>938.290</b>  | 937.788        | G[34] |
| K  | 9  | 240.136        | 927.787         | 923.781        | 924.034         | 923.531        | K[33] |
| A  | 10 | 257.895        | 895.763         | 891.758        | 892.011         | 891.507        | A[32] |
| R  | 11 | 298.921        | 878.504         | 874.500        | <b>874.251</b>  | 873.748        | R[31] |
| A  | 12 | 314.608        | 838.979         | 834.974        | 835.226         | 834.722        | A[30] |
| K  | 13 | 346.704        | 821.220         | 817.215        | 817.467         | 816.963        | K[29] |
| A  | 14 | 364.463        | <b>789.196</b>  | 785.191        | <b>785.443</b>  | 784.939        | A[28] |
| K  | 15 | 396.467        | <b>771.437</b>  | 767.432        | 767.684         | 767.180        | K[27] |
| S  | 16 | <b>418.245</b> | 739.413         | <b>735.408</b> | <b>735.660</b>  | 735.156        | S[26] |
| R  | 17 | 467.278        | <b>717.655</b>  | 713.650        | 713.902         | 713.398        | R[25] |
| S  | 18 | <b>478.028</b> | 678.539         | 674.535        | 674.787         | 674.273        | S[24] |
| S  | 19 | 497.598        | 656.972         | 652.967        | 653.219         | 652.715        | S[23] |
| R  | 20 | 539.811        | 635.114         | 631.109        | 631.361         | 630.857        | R[22] |
| A  | 21 | 557.571        | 596.088         | 592.084        | 592.336         | 591.833        | A[21] |
| G  | 22 | 571.826        | 578.329         | 574.324        | 574.576         | 574.072        | G[20] |
| L  | 23 | <b>600.097</b> | 564.074         | 560.069        | 560.321         | 559.817        | L[19] |
| G  | 24 | 632.122        | 538.863         | 534.858        | 535.110         | 534.606        | G[18] |
| F  | 25 | 668.876        | 503.788         | 499.783        | 500.035         | 499.531        | F[17] |
| P  | 26 | <b>693.142</b> | 467.021         | 463.016        | 463.268         | 462.764        | P[16] |
| V  | 27 | <b>717.909</b> | 442.758         | 438.753        | 439.005         | 438.501        | V[15] |
| G  | 28 | <b>732.164</b> | <b>417.991</b>  | 413.986        | 414.238         | 413.734        | G[14] |
| R  | 29 | <b>771.190</b> | 403.735         | 399.731        | 399.982         | 399.479        | R[13] |
| V  | 30 | 795.957        | 384.716         | <b>380.705</b> | 380.957         | <b>380.453</b> | V[12] |
| I  | 31 | 830.212        | 358.943         | 354.938        | 355.190         | 354.686        | I[11] |
| R  | 32 | <b>869.247</b> | 305.678         | 301.673        | 301.925         | 301.421        | R[10] |
| L  | 33 | 897.518        | 266.653         | 262.648        | 262.900         | 262.396        | L[9]  |
| L  | 34 | 925.789        | 238.387         | 234.377        | 234.629         | 234.125        | L[8]  |
| R  | 35 | 964.814        | 210.111         | 206.106        | 206.358         | 205.854        | R[7]  |
| K  | 36 | 996.838        | 171.086         | 167.081        | 167.333         | 166.829        | K[6]  |
| C  | 37 | 1011.863       | 138.962         | 134.957        | 135.209         | 134.705        | C[5]  |
| N  | 38 | 1039.604       | 124.806         | 120.801        | 121.054         | 120.550        | N[4]  |
| V  | 39 | 1080.370       | 96.296          | 92.291         | 92.543          | 92.039         | V[3]  |
| A  | 40 | 1098.129       | 55.530          | 51.525         | 51.777          | 51.273         | A[2]  |
| E  | 41 | 1130.990       | 37.771          | 33.766         | 34.018          | 33.514         | E[1]  |

# sp | Q6GSS7 | H2A2A\_MOUSE

[Acetyl]SGR<sup>Acetyl</sup>RGK<sub>42.01</sub> QGGKARAKAKSRSSRAGLQFPVGRVHRLLRKGN<sup>YAE</sup>

- ▶ fragmentation table for charge state 5+
- ▶ specType=etd
- ▶ score=40.66
- ▶ F113280.dat
- ▶ query=q54467\_p1
- ▶ precursor=646.508890
- ▶ chargePrecursor=7
- ▶ itol=0.5

| AA | c  | y              | z+1            | z#2            | z              | AA             |   |    |
|----|----|----------------|----------------|----------------|----------------|----------------|---|----|
| S  | 1  | 30.221         | 304.710        | <b>901.506</b> | 0.806          | <b>901.305</b> | S | 41 |
| G  | 2  | 41.625         | 878.901        | <b>875.698</b> | 0.806          | 875.496        | G | 40 |
| R  | 3  | 72.846         | 867.497        | <b>864.293</b> | <b>864.495</b> | <b>864.092</b> | R | 39 |
| G  | 4  | 84.250         | <b>836.277</b> | 833.073        | 833.275        | 832.872        | G | 38 |
| K  | 5  | 118.271        | 804.873        | 801.669        | 801.870        | 801.467        | K | 37 |
| Q  | 6  | 143.883        | 790.852        | 787.648        | 787.849        | 787.446        | Q | 36 |
| G  | 7  | 195.287        | 765.240        | 762.036        | 762.238        | 761.834        | G | 35 |
| G  | 8  | 166.691        | 751.836        | <b>750.632</b> | <b>750.833</b> | 750.430        | G | 34 |
| K  | 9  | 192.310        | 742.831        | 739.227        | 739.429        | 739.026        | K | 33 |
| A  | 10 | 206.518        | 716.812        | 713.608        | 713.810        | 713.407        | A | 32 |
| R  | 11 | 237.738        | 702.605        | 699.401        | 699.603        | 699.199        | R | 31 |
| A  | 12 | 251.945        | <b>671.385</b> | <b>668.181</b> | 668.382        | <b>667.979</b> | A | 30 |
| K  | 13 | 277.564        | 657.177        | 653.973        | 654.175        | 653.772        | K | 29 |
| A  | 14 | 291.772        | 631.558        | <b>628.354</b> | <b>628.556</b> | <b>628.153</b> | A | 28 |
| K  | 15 | 317.391        | 617.351        | 614.147        | 614.349        | 613.945        | K | 27 |
| S  | 16 | 334.797        | 591.732        | 588.528        | 588.730        | 588.326        | S | 26 |
| R  | 17 | 366.017        | 574.325        | 571.122        | 571.323        | 570.920        | R | 25 |
| S  | 18 | 383.424        | 548.105        | 539.901        | 540.103        | 539.700        | S | 24 |
| S  | 19 | 400.830        | 525.689        | 522.485        | 522.687        | 522.283        | S | 23 |
| R  | 20 | 432.050        | 508.282        | 505.080        | 505.280        | 504.877        | R | 22 |
| A  | 21 | 446.258        | 477.072        | 473.868        | 474.070        | 473.667        | A | 21 |
| G  | 22 | 457.662        | 462.865        | 458.661        | 459.862        | 459.459        | G | 20 |
| L  | 23 | 480.279        | 451.460        | 448.257        | 448.458        | 448.055        | L | 19 |
| Q  | 24 | 505.891        | 428.844        | 425.640        | 425.841        | 425.438        | Q | 18 |
| F  | 25 | 535.304        | 403.232        | 400.028        | 400.230        | 399.827        | F | 17 |
| P  | 26 | 554.715        | 373.816        | 370.614        | 370.816        | 370.413        | P | 16 |
| V  | 27 | 574.520        | 354.408        | 351.203        | 351.405        | 351.002        | V | 15 |
| G  | 28 | 585.933        | 334.594        | 331.390        | 331.592        | 331.189        | G | 14 |
| R  | 29 | 617.153        | 323.190        | 319.986        | 320.187        | 319.784        | R | 13 |
| V  | 30 | 636.967        | 291.969        | 288.766        | 288.967        | 288.564        | V | 12 |
| H  | 31 | 664.379        | 272.156        | 268.952        | 269.154        | 268.750        | H | 11 |
| K  | 32 | 695.599        | 244.744        | 241.540        | 241.742        | 241.339        | K | 10 |
| L  | 33 | <b>718.216</b> | 213.524        | 210.320        | 210.522        | 210.118        | L | 9  |
| L  | 34 | 740.832        | 190.907        | 187.703        | 187.905        | 187.502        | L | 8  |
| R  | 35 | <b>772.053</b> | 168.290        | 165.086        | 165.288        | 164.885        | R | 7  |
| K  | 36 | 787.872        | 137.070        | 133.866        | 134.068        | 133.665        | K | 6  |
| G  | 37 | 839.078        | 111.451        | 108.247        | 108.449        | 108.046        | G | 5  |
| N  | 38 | 831.885        | 100.047        | 96.843         | 97.044         | 96.641         | N | 4  |
| V  | 39 | <b>864.497</b> | 77.238         | 74.034         | 74.236         | 73.833         | V | 3  |
| A  | 40 | 878.705        | 44.625         | 41.422         | 41.623         | 41.220         | A | 2  |
| E  | 41 | 904.513        | 30.418         | 27.214         | 27.416         | 27.013         | E | 1  |

# sp | Q6GSS7 | H2A2A\_MOUSE

[Acetyl]SGR<sup>Acetyl</sup>RGK<sup>42.01</sup> QGGKARAKAKSRSSRAGLQFPVGRVHLLRKGN<sup>YAE</sup>

- ▶ fragmentation table for charge state 6+
- ▶ specType=etd
- ▶ score=40.66
- ▶ F113280.dat
- ▶ query=q54467\_p1
- ▶ precursor=646.508890
- ▶ chargePrecursor=7
- ▶ itol=0.5

| AA    | c              | y              | z+1            | z+2     | z              | AA    |
|-------|----------------|----------------|----------------|---------|----------------|-------|
| S[1]  | 25.352         | <b>754.093</b> | <b>751.423</b> | 0.839   | <b>751.255</b> | S[41] |
| G[2]  | 34.856         | <b>732.586</b> | 729.916        | 0.839   | 729.748        | G[40] |
| R[3]  | 60.873         | 723.082        | 720.412        | 720.580 | <b>720.244</b> | R[39] |
| G[4]  | 70.376         | 697.065        | 694.396        | 694.563 | 694.226        | G[38] |
| K[5]  | 98.727         | 687.562        | 684.892        | 685.060 | 684.724        | K[37] |
| Q[6]  | 120.070        | 659.211        | 656.541        | 656.709 | 656.373        | Q[36] |
| G[7]  | 129.574        | 637.866        | 635.196        | 635.366 | 635.030        | G[35] |
| G[8]  | 139.077        | <b>628.364</b> | 625.694        | 625.862 | 625.526        | G[34] |
| K[9]  | 169.426        | 618.861        | 616.191        | 616.359 | 616.023        | K[33] |
| A[10] | 172.266        | 597.511        | 594.842        | 595.010 | 594.674        | A[32] |
| R[11] | 198.283        | 585.072        | 583.002        | 583.170 | 582.834        | R[31] |
| A[12] | 210.122        | 559.655        | 556.985        | 557.153 | 556.817        | A[30] |
| K[13] | 231.472        | 547.816        | 545.146        | 545.314 | 544.978        | K[29] |
| A[14] | 243.311        | 526.466        | 523.797        | 523.965 | 523.629        | A[28] |
| K[15] | 264.660        | 514.627        | 511.957        | 512.125 | 511.789        | K[27] |
| S[16] | 279.166        | 493.278        | 490.608        | 490.776 | 490.440        | S[26] |
| R[17] | 305.182        | 478.772        | 476.103        | 476.271 | 475.935        | R[25] |
| S[18] | 319.688        | 452.795        | 450.080        | 450.254 | 449.918        | S[24] |
| S[19] | 334.193        | 438.290        | 435.580        | 435.748 | 435.412        | S[23] |
| R[20] | <b>360.210</b> | 423.745        | 421.075        | 421.243 | 420.907        | R[22] |
| A[21] | 372.049        | 397.728        | 395.058        | 395.226 | 394.890        | A[21] |
| G[22] | 381.553        | 385.888        | 383.219        | 383.387 | 383.051        | G[20] |
| L[23] | 400.400        | 376.385        | 373.715        | 373.883 | 373.547        | L[19] |
| Q[24] | 421.743        | 357.538        | 354.868        | 355.036 | 354.700        | Q[18] |
| F[25] | 446.255        | 336.194        | 333.525        | 333.693 | 333.357        | F[17] |
| P[26] | 462.430        | 311.683        | 309.013        | 309.181 | 308.845        | P[16] |
| V[27] | 478.942        | 295.508        | 292.838        | 293.006 | 292.670        | V[15] |
| L[28] | 488.445        | 278.995        | 276.325        | 276.494 | 276.158        | L[14] |
| K[29] | 514.862        | 259.491        | 256.821        | 256.991 | 256.655        | K[13] |
| V[30] | 530.974        | 243.476        | 240.806        | 240.974 | 240.638        | V[12] |
| H[31] | 553.817        | 226.964        | 224.295        | 224.462 | 224.127        | H[11] |
| R[32] | 579.834        | 204.121        | 201.451        | 201.619 | 201.283        | R[10] |
| L[33] | 598.681        | 178.104        | 175.435        | 175.602 | 175.267        | L[9]  |
| L[34] | 617.528        | 159.257        | 156.587        | 156.755 | 156.419        | L[8]  |
| R[35] | 643.545        | 140.410        | 137.740        | 137.908 | 137.572        | R[7]  |
| K[36] | 664.894        | 114.393        | 111.723        | 111.891 | 111.555        | K[6]  |
| G[37] | 674.398        | 93.044         | 90.374         | 90.542  | 90.206         | G[5]  |
| V[38] | <b>693.405</b> | 83.540         | 80.870         | 81.038  | 80.702         | V[4]  |
| V[39] | 720.959        | 84.531         | 81.861         | 82.031  | 81.695         | V[3]  |
| A[40] | <b>732.422</b> | 37.396         | 34.686         | 34.854  | 34.518         | A[2]  |
| E[41] | <b>753.929</b> | 25.510         | 22.846         | 23.014  | 22.678         | E[1]  |





# sp | Q3THW5 | H2AV\_MOUSE

AGGKAGK <sup>Acetyl D</sup>  
42.01

- ▶ fragmentation table for charge state 1+
- ▶ specType=cid
- ▶ score=39.97
- ▶ F113280.dat
- ▶ query=q728\_p1
- ▶ precursor=373.195660
- ▶ chargePrecursor=2
- ▶ itol=0.5

| AA | a              | a*      | a.Δ     | b              | b*             | b.Δ     | y              | y*      | y.Δ            | AA  |
|----|----------------|---------|---------|----------------|----------------|---------|----------------|---------|----------------|-----|
| A1 | 44.089         | 0.000   | 0.000   | 72.241         | 0.000          | 0.000   | 146.381        | 146.381 | 72.241         | A10 |
| C1 | 101.102        | 0.000   | 0.000   | <b>129.066</b> | 0.000          | 0.000   | <b>674.347</b> | 674.347 | 129.066        | C17 |
| G1 | 158.092        | 0.000   | 0.000   | <b>186.087</b> | 0.000          | 0.000   | <b>617.325</b> | 617.325 | 186.087        | G16 |
| K1 | 209.127        | 209.121 | 0.000   | <b>314.182</b> | <b>297.156</b> | 0.000   | <b>560.304</b> | 543.277 | 542.293        | K15 |
| A1 | <b>357.224</b> | 340.198 | 0.000   | <b>385.219</b> | 398.192        | 0.000   | <b>432.200</b> | 415.182 | 414.190        | A14 |
| G1 | 414.296        | 397.271 | 0.000   | <b>442.241</b> | 425.214        | 0.000   | <b>501.172</b> | 484.145 | <b>443.161</b> | G13 |
| K1 | 584.351        | 587.325 | 0.000   | <b>612.346</b> | 605.320        | 0.000   | <b>304.150</b> | 287.124 | 286.140        | K12 |
| D1 | 699.416        | 682.391 | 661.366 | 727.372        | 710.347        | 699.321 | <b>134.045</b> | 0.000   | 116.034        | L11 |



# sp | P68433 | H31\_MOUSE

IAQDFK<sup>Dimethyl</sup>TD  
28.03

- ▶ fragmentation table for charge state 1+
- ▶ specType=cid
- ▶ score=56.97
- ▶ F113280.dat
- ▶ query=q8093\_p1
- ▶ precursor=483.249240
- ▶ chargePrecursor=2
- ▶ itol=0.5

| AA         | a              | a*             | a:0            | b              | b*      | b:0     | y              | y*             | y:0            | AA         |
|------------|----------------|----------------|----------------|----------------|---------|---------|----------------|----------------|----------------|------------|
| <b>T</b> 1 | 46.298         | 0.000          | 0.000          | 114.195        | 0.000   | 0.000   | 952.414        | 952.414        | 244.663        | <b>T</b> 1 |
| <b>A</b> 2 | <b>157.134</b> | 0.000          | 0.000          | <b>185.128</b> | 0.000   | 0.000   | <b>852.410</b> | 852.410        | 834.999        | <b>A</b> 2 |
| <b>Q</b> 3 | 286.192        | 286.192        | 0.000          | <b>313.187</b> | 286.160 | 0.000   | <b>781.373</b> | <b>764.346</b> | <b>763.362</b> | <b>Q</b> 3 |
| <b>D</b> 4 | 400.219        | 401.391        | <b>382.208</b> | <b>428.214</b> | 411.187 | 440.203 | <b>653.314</b> | 659.289        | 635.344        | <b>D</b> 4 |
| <b>F</b> 5 | 547.287        | <b>536.261</b> | 545.277        | 515.282        | 536.256 | 557.272 | <b>538.287</b> | 542.281        | 520.277        | <b>F</b> 5 |
| <b>R</b> 6 | 713.414        | 695.417        | 695.413        | <b>731.409</b> | 714.392 | 713.398 | <b>391.219</b> | <b>374.192</b> | <b>373.208</b> | <b>R</b> 6 |
| <b>T</b> 7 | 804.461        | 797.435        | 796.451        | 822.459        | 815.430 | 814.446 | <b>235.092</b> | 0.000          | 237.082        | <b>T</b> 7 |
| <b>G</b> 8 | 916.488        | 902.492        | 901.478        | 947.483        | 930.457 | 929.473 | 134.040        | 0.000          | 116.034        | <b>G</b> 8 |

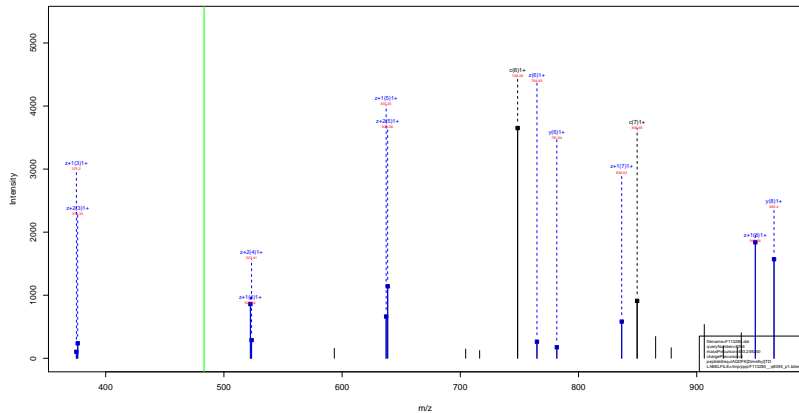

# sp | P68433 | H31\_MOUSE

IAQDFK<sup>Dimethyl</sup>TD  
28.03

- ▶ fragmentation table for charge state 1+
- ▶ specType=etd
- ▶ score=33.70
- ▶ F113280.dat
- ▶ query=q8094.p1
- ▶ precursor=483.249240
- ▶ chargePrecursor=2
- ▶ itol=0.5

| AA  | c              | y              | z+1            | z+2            | z              | AA  |
|-----|----------------|----------------|----------------|----------------|----------------|-----|
| I 1 | 131.118        | <b>965.494</b> | <b>949.475</b> | 0.000          | 948.467        | I 8 |
| A 2 | 202.155        | 852.410        | <b>836.391</b> | 0.000          | 835.383        | A 7 |
| Q 3 | 330.214        | <b>781.373</b> | 765.354        | 766.362        | <b>764.346</b> | Q 6 |
| D 4 | 445.241        | 653.314        | <b>637.295</b> | <b>638.303</b> | 636.288        | D 5 |
| F 5 | 592.309        | 538.287        | <b>522.268</b> | <b>523.276</b> | 521.261        | F 4 |
| R 6 | <b>748.435</b> | 901.219        | <b>375.200</b> | <b>376.208</b> | 374.192        | R 3 |
| T 7 | <b>849.483</b> | 235.092        | 219.074        | 220.082        | 218.066        | T 2 |
| D 8 | 964.510        | 134.045        | 118.026        | 119.034        | 117.018        | D 1 |



# sp | P68433 | H31\_MOUSE

IAQDFK<sup>Dimethyl</sup>TD  
28.03

- ▶ fragmentation table for charge state 1+
- ▶ specType=cid
- ▶ score=40.19
- ▶ F113280.dat
- ▶ query=q8095\_p1
- ▶ precursor=483.249630
- ▶ chargePrecursor=2
- ▶ itol=0.5

| AA  | a               | y*             | aΔ             | b              | b*             | bΔ             | y              | y*             | yΔ             | AA       |     |
|-----|-----------------|----------------|----------------|----------------|----------------|----------------|----------------|----------------|----------------|----------|-----|
| T 1 | 483.2496        | 0.0000         | 0.0000         | 114.0071       | 0.0000         | 0.0000         | 852.4100       | 0.0000         | 0.0000         | 944.4637 | T18 |
| A 2 | <b>157.1194</b> | 0.0000         | 0.0000         | <b>185.128</b> | 0.0000         | 0.0000         | <b>852.410</b> | 0.0000         | 0.0000         | 829.3811 | A17 |
| Q 3 | 295.192         | 298.1195       | 0.0000         | <b>313.187</b> | 296.160        | 0.0000         | <b>781.373</b> | <b>764.346</b> | <b>763.362</b> | Q16      |     |
| D 4 | 400.2719        | 383.1171       | <b>382.208</b> | <b>428.214</b> | 411.187        | 410.201        | <b>853.314</b> | 836.289        | 835.314        | D15      |     |
| F 5 | 547.287         | <b>530.261</b> | 529.271        | <b>515.282</b> | 504.256        | 503.272        | <b>538.287</b> | 521.261        | 520.277        | F14      |     |
| R 6 | 703.414         | <b>686.397</b> | <b>685.403</b> | <b>711.409</b> | 694.382        | 693.396        | <b>301.219</b> | <b>374.192</b> | <b>373.208</b> | R13      |     |
| T 7 | 804.461         | 787.435        | 786.451        | 823.458        | <b>815.430</b> | <b>814.446</b> | <b>235.092</b> | 0.0000         | 217.087        | T12      |     |
| D 8 | 915.498         | 892.469        | 891.478        | 943.483        | 926.457        | 925.471        | 138.1943       | 0.0000         | 118.014        | D11      |     |

# sp | P68433 | H31\_MOUSE

DTNLCAIHAH Acetyl RVTIMPK  
42.01

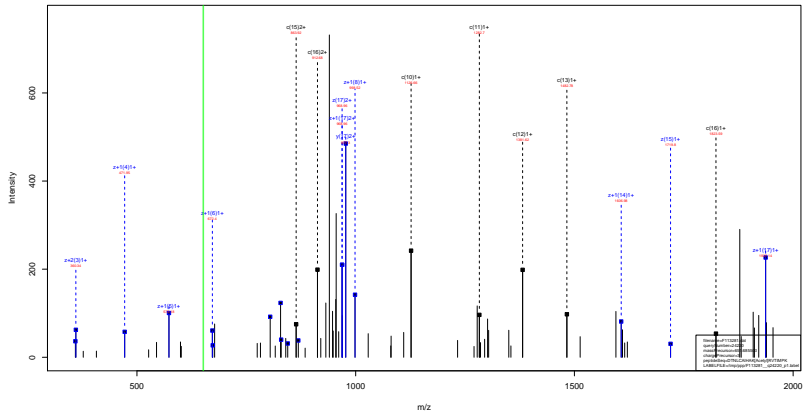



# sp | P68433 | H31\_MOUSE

DTNLCAIHAK <sup>Acetyl</sup> 42.01 RVTIMPK

- ▶ fragmentation table for charge state 1+
- ▶ specType=etd
- ▶ score=28.34
- ▶ F113281.dat
- ▶ query=q24220.p1
- ▶ precursor=651.685500
- ▶ chargePrecursor=3
- ▶ itol=0.5

| AA    | c               | y              | z=1             | z=2            | z               | AA    |
|-------|-----------------|----------------|-----------------|----------------|-----------------|-------|
| D[1]  | 133.051         | 1953.041       | <b>1937.022</b> | 0.000          | 1936.014        | D[7]  |
| T[2]  | 234.108         | 1936.014       | 1821.965        | 0.000          | 1920.957        | T[6]  |
| N[3]  | 348.151         | 1730.965       | 1720.948        | 1721.955       | <b>1719.940</b> | N[15] |
| L[4]  | 461.235         | 1622.923       | <b>1606.905</b> | 1607.912       | 1605.887        | L[14] |
| C[5]  | 564.245         | 1509.839       | 1493.821        | 1494.828       | 1492.813        | C[13] |
| A[6]  | 635.282         | 1406.830       | 1390.811        | 1391.819       | 1389.804        | A[12] |
| H[7]  | 748.366         | 1335.793       | 1319.774        | 1320.782       | 1318.766        | H[11] |
| W[8]  | 889.428         | 1222.709       | 1206.680        | 1207.688       | 1205.662        | W[10] |
| A[9]  | 956.462         | 1085.650       | 1059.631        | 1070.639       | 1068.623        | A[9]  |
| K[10] | <b>1126.567</b> | 1034.613       | <b>998.594</b>  | 999.602        | 997.588         | K[8]  |
| R[11] | <b>1282.668</b> | <b>844.507</b> | <b>828.489</b>  | <b>829.496</b> | 827.481         | R[7]  |
| V[12] | <b>1381.737</b> | 688.400        | <b>672.387</b>  | <b>673.395</b> | 671.380         | V[6]  |
| I[13] | <b>1482.785</b> | 589.338        | <b>573.319</b>  | 574.327        | 572.311         | I[5]  |
| I[14] | 1597.869        | 488.290        | <b>472.271</b>  | 473.279        | 471.264         | I[4]  |
| M[15] | 1726.909        | 375.205        | <b>359.187</b>  | <b>360.195</b> | 358.180         | M[3]  |
| P[16] | <b>1823.962</b> | 244.166        | 228.149         | 229.155        | 227.139         | P[2]  |
| K[17] | 1952.097        | 147.113        | 131.094         | 132.102        | 130.088         | K[1]  |

# sp | P68433 | H31\_MOUSE

DTNLCAIHAK<sup>Acetyl</sup>RVTIMPK  
42.01

- ▶ fragmentation table for charge state 2+
- ▶ specType=etd
- ▶ score=28.34
- ▶ F113281.dat
- ▶ query=q24220.p1
- ▶ precursor=651.685500
- ▶ chargePrecursor=3
- ▶ itol=0.5

| AA    | c              | y              | z+1            | z+2            | z              | AA    |
|-------|----------------|----------------|----------------|----------------|----------------|-------|
| D[1]  | 67.034         | <b>977.024</b> | <b>969.015</b> | 0.504          | <b>968.511</b> | D[17] |
| Y[2]  | 117.558        | 919.511        | 911.501        | 0.504          | 910.997        | Y[16] |
| N[3]  | 174.579        | <b>868.987</b> | 860.977        | 861.481        | 860.473        | N[15] |
| L[4]  | 231.121        | 811.965        | 803.950        | <b>804.460</b> | 803.452        | L[14] |
| C[5]  | 282.626        | 755.423        | 747.414        | 747.918        | 746.910        | C[13] |
| A[6]  | 318.145        | 703.919        | 695.909        | 696.413        | 695.405        | A[12] |
| V[7]  | 374.687        | 650.405        | 650.391        | 650.895        | 650.887        | V[11] |
| H[8]  | 443.216        | 611.898        | 603.889        | 604.393        | 603.385        | H[10] |
| A[9]  | 478.735        | 543.320        | 535.310        | 535.823        | 534.815        | A[9]  |
| K[10] | 563.787        | 507.810        | 499.801        | 500.305        | 499.297        | K[8]  |
| R[11] | 641.838        | 422.757        | 414.748        | 415.252        | 414.244        | R[7]  |
| V[12] | 691.372        | 344.707        | 336.697        | 337.201        | 336.193        | V[6]  |
| Y[13] | 741.896        | 295.173        | 287.163        | 287.667        | 286.659        | Y[5]  |
| V[14] | 798.438        | 244.649        | 236.639        | 237.143        | 236.135        | V[4]  |
| M[15] | <b>863.958</b> | 188.107        | 180.097        | 180.601        | 179.593        | M[3]  |
| P[16] | <b>912.485</b> | 122.585        | 114.577        | 115.081        | 114.073        | P[2]  |
| K[17] | 976.512        | 74.060         | 66.051         | 66.555         | 65.547         | K[1]  |

# sp | P62806 | H4\_MOUSE

DAVYTEHAKRK Acetyl 42.01 TVTAM

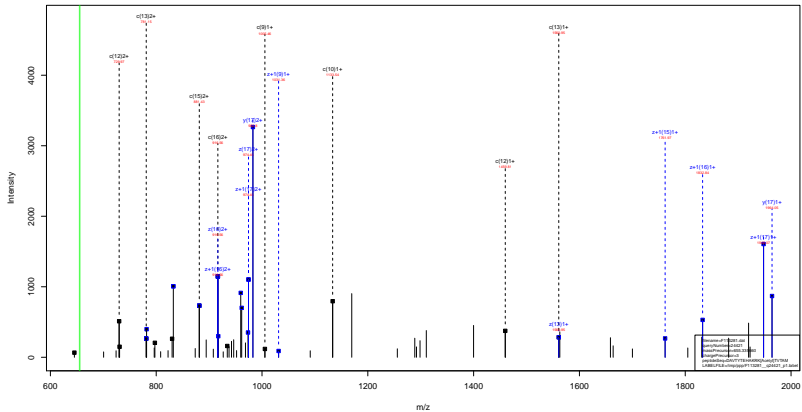

# sp | P62806 | H4\_MOUSE

DAVYTEHAKRK Acetyl  
42.01 TVTAM

- ▶ fragmentation table for charge state 1+
- ▶ specType=etd
- ▶ score=47.87
- ▶ F113281.dat
- ▶ query=q24421\_p1
- ▶ precursor=655.335660
- ▶ chargePrecursor=3
- ▶ itol=0.5

| AA   | c               | y               | z+1             | z+2            | z               | AA   |
|------|-----------------|-----------------|-----------------|----------------|-----------------|------|
| D 1  | 133.061         | <b>1961.991</b> | <b>1947.972</b> | 0.000          | 1946.964        | D 17 |
| A 2  | 204.208         | 1548.961        | <b>1812.945</b> | 0.000          | 1811.937        | A 16 |
| V 3  | 303.166         | 1777.927        | <b>1761.908</b> | 0.000          | 1760.900        | V 15 |
| T 4  | 404.214         | 1678.858        | 1562.839        | 0.000          | 1661.832        | T 14 |
| Y 5  | 507.277         | 1577.810        | 1561.792        | 0.000          | <b>1560.784</b> | Y 13 |
| T 6  | 608.325         | 1414.747        | 1398.728        | 0.000          | 1397.721        | T 12 |
| E 7  | <b>797.368</b>  | 1311.699        | 1287.681        | 0.000          | 1296.673        | E 11 |
| H 8  | <b>934.426</b>  | 1194.657        | 1188.638        | 0.000          | 1187.630        | H 10 |
| A 9  | <b>1005.464</b> | 1047.598        | <b>1031.579</b> | 0.000          | 1030.571        | A 9  |
| K 10 | <b>1133.559</b> | 976.561         | 960.542         | <b>961.550</b> | <b>959.534</b>  | K 8  |
| R 11 | 1289.660        | 848.466         | <b>832.447</b>  | 831.435        | 831.439         | R 7  |
| K 12 | <b>1459.765</b> | 692.355         | 676.346         | 677.354        | 675.350         | K 6  |
| T 13 | <b>1560.813</b> | 522.250         | 506.240         | 507.248        | 505.243         | T 5  |
| V 14 | 1659.881        | 423.212         | 405.193         | 406.201        | 404.195         | V 4  |
| T 15 | 1760.929        | 322.143         | 306.124         | 307.132        | 305.117         | T 3  |
| A 16 | 1831.968        | 221.095         | 205.077         | 206.085        | 204.080         | A 2  |
| M 17 | 1963.007        | 150.058         | 134.040         | 135.047        | 133.032         | M 1  |

# sp | P62806 | H4\_MOUSE

DAVYTEHAKRK <sup>Acetyl</sup> 42.01 TVTAM

- ▶ fragmentation table for charge state 2+
- ▶ specType=etd
- ▶ score=47.87
- ▶ F113281.dat
- ▶ query=q24421\_p1
- ▶ precursor=655.335660
- ▶ chargePrecursor=3
- ▶ itol=0.5

| AA    | c              | y              | z+1            | z+2     | z              | AA    |
|-------|----------------|----------------|----------------|---------|----------------|-------|
| D[1]  | 67.034         | <b>982.499</b> | <b>974.490</b> | 0.504   | <b>973.986</b> | D[17] |
| A[2]  | 102.953        | 924.985        | <b>916.976</b> | 0.504   | <b>916.472</b> | A[16] |
| V[3]  | 152.087        | 889.467        | <b>881.458</b> | 0.504   | <b>880.954</b> | V[15] |
| T[4]  | 202.611        | 839.933        | <b>831.923</b> | 0.504   | 831.419        | T[14] |
| Y[5]  | 284.142        | 789.409        | <b>781.399</b> | 0.504   | <b>780.896</b> | Y[13] |
| T[6]  | 334.666        | 707.877        | 699.868        | 0.504   | 699.364        | T[12] |
| E[7]  | 399.189        | 657.351        | 649.344        | 0.504   | 648.840        | E[11] |
| H[8]  | 467.717        | 602.822        | 584.823        | 0.504   | 584.319        | H[10] |
| A[9]  | 503.235        | 524.303        | 516.293        | 0.504   | 515.789        | A[9]  |
| K[10] | 567.283        | 488.784        | 480.775        | 481.279 | 480.271        | K[8]  |
| R[11] | <b>645.333</b> | 424.737        | 416.727        | 417.231 | 416.223        | R[7]  |
| K[12] | <b>730.386</b> | 346.686        | 338.677        | 339.181 | 338.173        | K[6]  |
| T[13] | <b>780.910</b> | 261.637        | 253.624        | 254.128 | 253.120        | T[5]  |
| V[14] | <b>830.444</b> | 211.109        | 203.100        | 203.604 | 202.596        | V[4]  |
| T[15] | <b>880.968</b> | 161.575        | 153.566        | 154.070 | 153.062        | T[3]  |
| A[16] | <b>916.487</b> | 111.051        | 103.042        | 103.546 | 102.538        | A[2]  |
| M[17] | 982.507        | 75.533         | 67.523         | 68.027  | 67.020         | M[1]  |

# sp | P62806 | H4\_MOUSE

DAVYTEHAK <sup>Acetyl</sup>RKTVTAM  
42.01

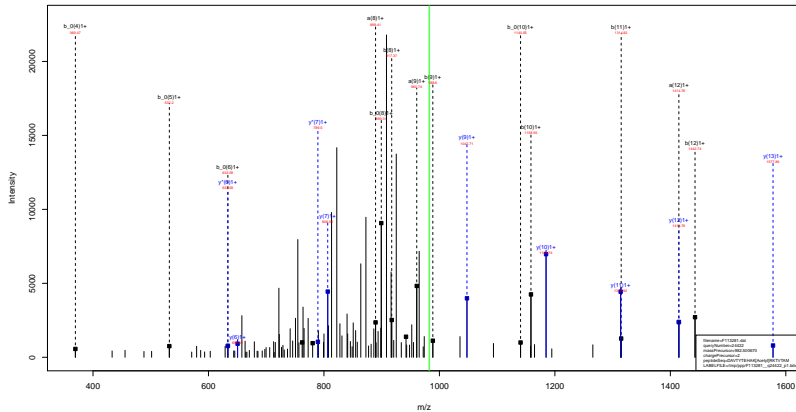

# sp | P62806 | H4\_MOUSE

DAVITYTEHAK Acetyl RKTVTAM  
42.01

- ▶ fragmentation table for charge state 1+
- ▶ specType=cid
- ▶ score=55.43
- ▶ F113281.dat
- ▶ query=q24422\_p1
- ▶ precursor=982.500670
- ▶ chargePrecursor=2
- ▶ itol=0.5

| AA  | a               | a*       | a+p            | b               | b*       | b-p             | y               | y*             | y-p      | AA  |
|-----|-----------------|----------|----------------|-----------------|----------|-----------------|-----------------|----------------|----------|-----|
| D1  | 80.209          | 0.000    | 100.020        | 116.034         | 0.000    | 90.024          | 106.051         | 1040.961       | 1041.980 | D17 |
| A12 | 136.076         | 0.000    | 143.960        | 187.024         | 0.000    | 139.061         | 106.054         | 1033.933       | 1033.933 | A16 |
| V13 | 208.145         | 0.000    | 260.131        | 286.143         | 0.000    | 208.130         | 177.037         | 1750.903       | 1750.903 | V15 |
| T14 | 339.193         | 0.000    | 341.187        | 387.187         | 0.000    | <b>369.177</b>  | 107.010         | 1061.832       | 1060.849 | T14 |
| V15 | 423.268         | 0.000    | 506.240        | 588.231         | 0.000    | <b>532.240</b>  | <b>1377.817</b> | 1030.788       | 1030.788 | V15 |
| T16 | 643.304         | 0.000    | 656.293        | 803.288         | 0.000    | <b>633.288</b>  | <b>1414.747</b> | 1397.721       | 1396.737 | T12 |
| E17 | 699.330         | 0.000    | 728.320        | <b>780.341</b>  | 0.000    | <b>762.330</b>  | <b>1213.699</b> | 1200.671       | 1200.670 | E11 |
| R18 | <b>809.408</b>  | 0.000    | 811.399        | <b>873.408</b>  | 0.000    | <b>809.389</b>  | <b>1164.857</b> | 1161.830       | 1161.829 | R18 |
| A19 | <b>960.442</b>  | 0.000    | <b>942.432</b> | <b>968.437</b>  | 0.000    | 939.420         | <b>1047.530</b> | 1030.572       | 1029.587 | A15 |
| K10 | 11.01848        | 1111.021 | 1112.137       | <b>1158.343</b> | 1041.016 | <b>1148.532</b> | 679.981         | 680.130        | 658.920  | K18 |
| R11 | 1200.440        | 1200.442 | 1200.633       | <b>1216.644</b> | 1207.637 | 1200.633        | <b>806.265</b>  | <b>785.420</b> | 108.444  | R17 |
| K12 | <b>1414.744</b> | 1397.714 | 1397.873       | <b>1442.739</b> | 1425.712 | 1414.738        | <b>630.354</b>  | <b>633.359</b> | 132.344  | K16 |
| T13 | 1510.761        | 1496.735 | 1497.781       | 1543.766        | 1526.760 | 1510.750        | 122.289         | 0.000          | 504.248  | T13 |
| V14 | 1614.880        | 1597.833 | 1598.840       | 1642.859        | 1626.838 | 1614.844        | 421.213         | 0.000          | 461.201  | V14 |
| T14 | 1718.900        | 1706.861 | 1706.860       | 1743.866        | 1726.856 | 1718.860        | 304.843         | 0.000          | 304.833  | T14 |
| A18 | 1730.945        | 1709.914 | 1709.914       | 1814.945        | 1797.911 | 1730.930        | 221.000         | 0.000          | 0.000    | A18 |
| M17 | 1817.985        | 1800.959 | 1800.979       | 1849.980        | 1832.951 | 1817.969        | 150.000         | 0.000          | 0.000    | M17 |





# sp | P62806 | H4\_MOUSE

DAVYTEHAKRK Acetyl  
42.01 TVTAM

- ▶ fragmentation table for charge state 1+
- ▶ specType=cid
- ▶ score=36.76
- ▶ F113281.dat
- ▶ query=q24424\_p1
- ▶ precursor=982.50700
- ▶ chargePrecursor=2
- ▶ itol=0.5

| AA  | a               | a*       | a+p            | b               | b*       | b-p             | y               | y*             | y-p            | AA  |
|-----|-----------------|----------|----------------|-----------------|----------|-----------------|-----------------|----------------|----------------|-----|
| D1  | 38.239          | 0.000    | 180.620        | 116.054         | 0.000    | 38.234          | 186.101         | 144.961        | 144.980        | D17 |
| A12 | 178.076         | 0.000    | 143.960        | 187.024         | 0.000    | 178.081         | 188.904         | 183.903        | 183.913        | A16 |
| V13 | 208.145         | 0.000    | 240.131        | 288.143         | 0.000    | 208.130         | 177.037         | 178.930        | 178.915        | V15 |
| T14 | 329.181         | 0.000    | 341.181        | <b>387.187</b>  | 0.000    | 329.177         | 1078.050        | 1041.832       | 1040.849       | T14 |
| V15 | 323.268         | 0.000    | 308.260        | 388.271         | 0.000    | <b>332.240</b>  | 1377.011        | 1008.788       | 1008.809       | V15 |
| T16 | 643.584         | 0.000    | 606.291        | 605.268         | 0.000    | <b>633.288</b>  | <b>1414.747</b> | 1397.221       | 1396.737       | T12 |
| E17 | 699.150         | 0.000    | 158.151        | <b>780.341</b>  | 0.000    | <b>762.230</b>  | <b>1213.699</b> | 1200.971       | 1200.989       | E11 |
| T18 | <b>809.408</b>  | 0.000    | 811.380        | <b>817.408</b>  | 0.000    | <b>809.389</b>  | <b>1164.857</b> | 1161.898       | 1161.898       | T18 |
| A19 | <b>901.442</b>  | 0.000    | <b>942.432</b> | <b>908.437</b>  | 0.000    | 879.250         | <b>1047.530</b> | 1030.571       | 1029.587       | A15 |
| K10 | 1088.517        | 1071.511 | 1100.137       | <b>1116.332</b> | 1099.926 | 1094.511        | 678.361         | 680.130        | 680.200        | K18 |
| R11 | 1244.038        | 1227.413 | 1226.624       | <b>1272.633</b> | 1260.987 | <b>1254.623</b> | <b>846.266</b>  | <b>831.439</b> | <b>830.455</b> | R17 |
| K12 | <b>1414.744</b> | 1379.114 | 1369.871       | <b>1440.739</b> | 1425.112 | 1414.728        | <b>652.351</b>  | 652.351        | 652.351        | K16 |
| T13 | 1515.761        | 1498.785 | 1487.781       | 1543.788        | 1528.780 | 1525.776        | 422.289         | 0.000          | 504.249        | T13 |
| V14 | 1614.880        | 1597.833 | 1586.840       | 1642.859        | 1626.838 | 1624.844        | 421.213         | 0.000          | 461.201        | V14 |
| T14 | 1718.900        | 1706.861 | 1699.869       | 1743.866        | 1726.876 | 1724.882        | 324.818         | 0.000          | 364.813        | T14 |
| A18 | 1720.945        | 1709.919 | 1700.925       | 1741.945        | 1727.911 | 1726.920        | 221.000         | 0.000          | 0.000          | A18 |
| M17 | 1817.955        | 1800.959 | 1808.979       | 1849.980        | 1832.961 | 1827.969        | 150.000         | 0.000          | 0.000          | M17 |

# sp | P62806 | H4\_MOUSE

DAVYTEHAK <sup>Acetyl</sup>RKTVTAM  
42.01

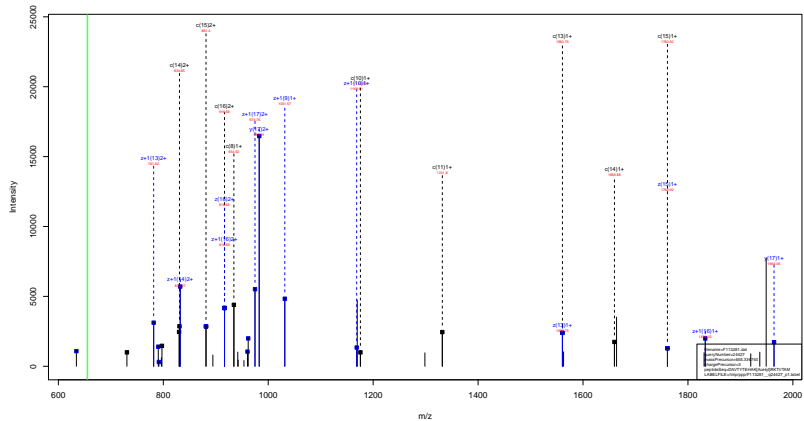

# sp | P62806 | H4\_MOUSE

DAVITYTEHAK <sup>Acetyl</sup> 42.01 RKTVTAM

- ▶ fragmentation table for charge state 1+
- ▶ specType=etd
- ▶ score=65.21
- ▶ F113281.dat
- ▶ query=q24427\_p1
- ▶ precursor=655.336740
- ▶ chargePrecursor=3
- ▶ itol=0.5

| AA   | c               | y               | a+1             | a+2            | z               | AA   |
|------|-----------------|-----------------|-----------------|----------------|-----------------|------|
| D 1  | 133.061         | <b>1961.991</b> | 1947.072        | 0.000          | 1946.064        | D 17 |
| A 2  | 204.098         | 1948.964        | <b>1832.945</b> | 0.000          | 1831.937        | A 16 |
| V 3  | 303.166         | 1777.927        | 1761.958        | 0.000          | <b>1760.900</b> | V 15 |
| T 4  | 404.214         | 1678.850        | 1662.839        | 0.000          | 1661.832        | T 14 |
| Y 5  | 507.277         | 1577.810        | 1561.792        | 0.000          | <b>1560.784</b> | Y 13 |
| T 6  | 608.325         | 1414.747        | 1398.728        | 0.000          | 1397.721        | T 12 |
| E 7  | <b>797.368</b>  | 1313.699        | 1297.681        | 0.000          | 1296.673        | E 11 |
| H 8  | <b>934.426</b>  | 1194.657        | <b>1168.638</b> | 0.000          | 1167.630        | H 10 |
| A 9  | 1026.604        | 1047.598        | <b>1031.579</b> | 0.000          | 1030.571        | A 9  |
| K 10 | <b>1175.569</b> | 978.561         | <b>960.542</b>  | <b>961.550</b> | 959.534         | K 8  |
| R 11 | <b>1331.670</b> | 806.455         | <b>790.437</b>  | <b>791.444</b> | 789.429         | R 7  |
| K 12 | 1459.765        | 650.351         | <b>634.335</b>  | 635.343        | 633.329         | K 6  |
| T 13 | <b>1568.813</b> | 522.250         | 506.240         | 507.248        | 505.233         | T 5  |
| V 14 | <b>1659.981</b> | 423.212         | 405.193         | 406.201        | 404.185         | V 4  |
| T 15 | <b>1760.929</b> | 322.143         | 306.124         | 307.132        | 305.117         | T 3  |
| A 16 | 1831.966        | 221.095         | 205.077         | 206.085        | 204.069         | A 2  |
| M 17 | 1963.007        | 150.058         | 134.040         | 135.047        | 133.032         | M 1  |

# sp | P62806 | H4\_MOUSE

DAVYTEHAK <sup>Acetyl</sup> 42.01 RKTVTAM

- ▶ fragmentation table for charge state 2+
- ▶ specType=etd
- ▶ score=65.21
- ▶ F113281.dat
- ▶ query=q24427\_p1
- ▶ precursor=655.336740
- ▶ chargePrecursor=3
- ▶ itol=0.5

| AA    | c              | y              | z+1            | z+2     | z              | AA    |
|-------|----------------|----------------|----------------|---------|----------------|-------|
| D[1]  | 67.034         | <b>982.499</b> | <b>974.490</b> | 0.504   | 973.985        | D[17] |
| A[2]  | 102.553        | 924.985        | <b>916.976</b> | 0.504   | <b>916.472</b> | A[16] |
| V[3]  | 152.087        | 889.467        | <b>881.458</b> | 0.504   | <b>880.954</b> | V[15] |
| T[4]  | 202.611        | 839.933        | <b>831.923</b> | 0.504   | 831.419        | T[14] |
| V[5]  | 284.142        | 789.409        | <b>781.399</b> | 0.504   | 780.895        | V[13] |
| T[6]  | 334.666        | 707.877        | 699.868        | 0.504   | 699.364        | T[12] |
| E[7]  | 399.189        | 657.351        | 649.344        | 0.504   | 648.840        | E[11] |
| H[8]  | 467.717        | 602.822        | 584.823        | 0.504   | 584.319        | H[10] |
| A[9]  | 503.235        | 524.303        | 516.293        | 0.504   | 515.789        | A[9]  |
| K[10] | 588.288        | 488.784        | 480.775        | 481.279 | 480.271        | K[8]  |
| R[11] | 666.339        | 403.731        | 395.722        | 396.226 | 395.218        | R[7]  |
| K[12] | <b>730.386</b> | 325.681        | 317.671        | 318.175 | 317.167        | K[6]  |
| T[13] | 780.910        | 261.633        | 253.624        | 254.128 | 253.120        | T[5]  |
| V[14] | <b>830.444</b> | 211.109        | 203.100        | 203.604 | 202.596        | V[4]  |
| T[15] | <b>880.968</b> | 161.575        | 153.566        | 154.070 | 153.062        | T[3]  |
| A[16] | <b>916.487</b> | 111.051        | 103.042        | 103.546 | 102.538        | A[2]  |
| M[17] | 982.507        | 75.533         | 67.523         | 68.027  | 67.020         | M[1]  |



# sp | P68433 | H31\_MOUSE

DTNLCAIHAK Crotonaldehyde  
70.04 RVTIMPK

- ▶ fragmentation table for charge state 1+
- ▶ specType=etd
- ▶ score=40.31
- ▶ F113281.dat
- ▶ query=q24714.p1
- ▶ precursor=661.029180
- ▶ chargePrecursor=3
- ▶ itol=0.5

| AA    | c               | y        | z=1             | z=2             | z        | AA    |
|-------|-----------------|----------|-----------------|-----------------|----------|-------|
| D[1]  | 133.051         | 1081.072 | <b>1965.053</b> | 0.000           | 1966.046 | D[7]  |
| T[2]  | 234.108         | 1866.045 | 1650.035        | 0.000           | 1849.031 | T[6]  |
| N[3]  | 348.151         | 1764.985 | 1748.979        | <b>1749.987</b> | 1747.971 | N[15] |
| L[4]  | 461.235         | 1650.955 | 1634.930        | <b>1635.944</b> | 1633.928 | L[14] |
| C[5]  | 564.245         | 1537.871 | 1521.850        | 1522.860        | 1520.844 | C[13] |
| A[6]  | 635.282         | 1434.861 | 1418.843        | 1419.850        | 1417.835 | A[12] |
| H[7]  | 748.366         | 1383.824 | <b>1347.806</b> | 1348.813        | 1346.798 | H[11] |
| W[8]  | 859.439         | 1250.740 | 1234.723        | 1235.729        | 1233.714 | W[10] |
| A[9]  | <b>956.462</b>  | 1113.681 | 1097.663        | 1098.670        | 1096.655 | A[9]  |
| K[10] | <b>1154.599</b> | 1042.644 | <b>1026.625</b> | <b>1027.633</b> | 1025.618 | K[8]  |
| R[11] | <b>1310.700</b> | 844.507  | <b>828.489</b>  | <b>829.496</b>  | 827.481  | R[7]  |
| V[12] | <b>1409.766</b> | 688.400  | <b>672.387</b>  | 673.395         | 671.380  | V[6]  |
| I[13] | 1510.816        | 589.338  | <b>573.319</b>  | <b>574.327</b>  | 572.311  | I[5]  |
| I[14] | <b>1623.900</b> | 488.290  | <b>472.271</b>  | 473.279         | 471.264  | I[4]  |
| M[15] | 1754.040        | 375.250  | <b>359.187</b>  | 360.195         | 358.180  | M[3]  |
| P[16] | <b>1851.993</b> | 244.166  | 228.147         | 229.155         | 227.139  | P[2]  |
| K[17] | 1980.888        | 147.113  | 131.094         | 132.102         | 130.088  | K[1]  |

# sp | P68433 | H31\_MOUSE

DTNLCAIHAK <sup>Crotonaldehyde</sup> <sub>70.04</sub> RVTIMPK

- ▶ fragmentation table for charge state 2+
- ▶ specType=etd
- ▶ score=40.31
- ▶ F113281.dat
- ▶ query=q24714\_p1
- ▶ precursor=661.029180
- ▶ chargePrecursor=3
- ▶ itol=0.5

| AA    | c              | y              | z+1            | z+2            | z       | AA    |
|-------|----------------|----------------|----------------|----------------|---------|-------|
| D[1]  | 67.034         | <b>991.040</b> | <b>983.030</b> | 0.504          | 982.526 | D[17] |
| T[2]  | 117.558        | 933.526        | <b>925.517</b> | 0.504          | 925.013 | T[16] |
| N[3]  | 174.579        | 883.002        | <b>874.993</b> | <b>875.497</b> | 874.489 | N[15] |
| L[4]  | 231.121        | 825.981        | <b>817.972</b> | <b>818.475</b> | 817.468 | L[14] |
| C[5]  | 282.626        | 769.439        | 761.430        | 761.933        | 760.926 | C[13] |
| A[6]  | 318.145        | 717.934        | 709.925        | 710.429        | 709.421 | A[12] |
| T[7]  | 374.857        | 662.415        | 674.408        | 674.910        | 673.902 | T[11] |
| H[8]  | 443.216        | 625.874        | 617.864        | 618.368        | 617.360 | H[10] |
| A[9]  | 478.735        | 557.344        | 549.335        | 549.839        | 548.831 | A[9]  |
| K[10] | 577.803        | 521.826        | 513.816        | 514.320        | 513.312 | K[8]  |
| R[11] | 655.854        | 422.757        | 414.748        | 415.252        | 414.244 | R[7]  |
| V[12] | <b>705.388</b> | 344.707        | 336.697        | 337.201        | 336.193 | V[6]  |
| T[13] | 755.912        | 295.173        | 287.163        | 287.667        | 286.659 | T[5]  |
| I[14] | 812.454        | 244.649        | 236.639        | 237.143        | 236.135 | I[4]  |
| M[15] | 877.974        | 188.107        | 180.097        | 180.601        | 179.593 | M[3]  |
| P[16] | <b>926.506</b> | 122.586        | 114.577        | 115.081        | 114.073 | P[2]  |
| K[17] | 990.348        | 74.060         | 66.051         | 66.555         | 65.547  | K[1]  |

# sp | P68433 | H31\_MOUSE

DTNLCAIHAK Crotonaldehyde RVTIMPK  
70.04

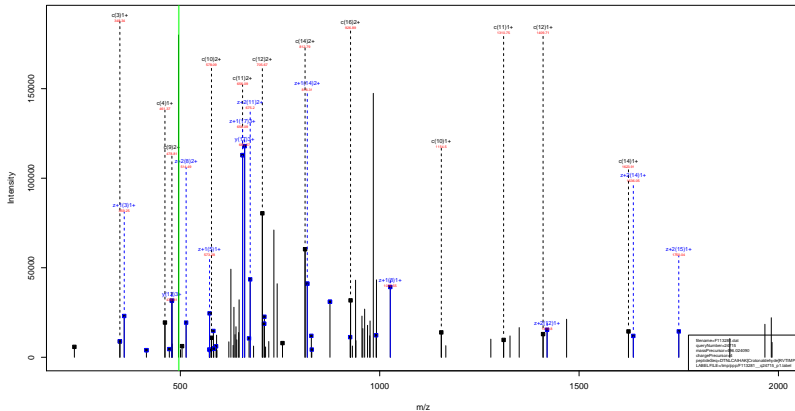



# sp | P68433 | H31\_MOUSE

DTNLCAIHAK Crotonaldehyde  
70.04 RVTIMPK

- ▶ fragmentation table for charge state 1+
- ▶ specType=etd
- ▶ score=41.76
- ▶ F113281.dat
- ▶ query=q24715.p1
- ▶ precursor=496.024090
- ▶ chargePrecursor=4
- ▶ itol=0.5

| AA    | c               | y              | z=1             | z=2             | z              | AA    |
|-------|-----------------|----------------|-----------------|-----------------|----------------|-------|
| D[1]  | 133.952         | 1081.072       | 1965.053        | 0.000           | 1964.046       | D[17] |
| T[2]  | <b>234.108</b>  | 1066.045       | 1620.026        | 0.000           | 1649.019       | T[16] |
| N[3]  | <b>348.151</b>  | 1764.985       | 1748.979        | <b>1749.987</b> | 1747.971       | N[15] |
| L[4]  | <b>461.235</b>  | 1050.955       | 1634.930        | <b>1635.944</b> | 1633.928       | L[14] |
| C[5]  | 564.245         | 1537.871       | 1521.850        | 1522.860        | 1520.844       | C[13] |
| A[6]  | 635.262         | 1434.861       | 1418.843        | <b>1419.850</b> | 1417.835       | A[12] |
| H[7]  | 748.268         | 1383.824       | 1347.805        | 1348.813        | 1346.798       | H[11] |
| W[8]  | 889.425         | 1250.740       | 1234.721        | 1235.729        | 1233.714       | W[10] |
| A[9]  | 956.462         | 1113.681       | 1097.663        | 1098.670        | 1096.655       | A[9]  |
| K[10] | <b>1154.599</b> | 1042.644       | <b>1026.625</b> | 1027.633        | 1025.618       | K[8]  |
| R[11] | <b>1310.700</b> | 844.507        | <b>828.489</b>  | <b>829.496</b>  | 827.481        | R[7]  |
| V[12] | <b>1409.768</b> | 688.400        | <b>672.387</b>  | 673.395         | 671.380        | V[6]  |
| I[13] | 1510.818        | <b>589.338</b> | <b>573.319</b>  | <b>574.327</b>  | <b>572.311</b> | I[5]  |
| I[14] | <b>1623.908</b> | 488.290        | <b>472.271</b>  | 473.279         | 471.264        | I[4]  |
| M[15] | 1754.040        | 375.205        | <b>359.187</b>  | 360.195         | 358.180        | M[3]  |
| P[16] | 1851.993        | 244.166        | 228.147         | 229.155         | 227.139        | P[2]  |
| K[17] | 1980.888        | 147.113        | 131.094         | 132.102         | 130.088        | K[1]  |

# sp | P68433 | H31\_MOUSE

DTNLCAIHAK Crotonaldehyde  
70.04 RVTIMPK

- ▶ fragmentation table for charge state 2+
- ▶ specType=etd
- ▶ score=41.76
- ▶ F113281.dat
- ▶ query=q24715.p1
- ▶ precursor=496.024090
- ▶ chargePrecursor=4
- ▶ itol=0.5

| AA    | c              | y              | z+1            | z+2            | z       | AA    |
|-------|----------------|----------------|----------------|----------------|---------|-------|
| D[1]  | 67.034         | <b>991.040</b> | 983.030        | 0.504          | 982.526 | D[17] |
| T[2]  | 117.558        | 933.526        | <b>925.517</b> | 0.504          | 925.013 | T[16] |
| N[3]  | 174.579        | 883.002        | <b>874.993</b> | <b>875.497</b> | 874.489 | N[15] |
| L[4]  | 231.121        | 825.981        | <b>817.972</b> | <b>818.475</b> | 817.468 | L[14] |
| C[5]  | 282.626        | 769.439        | 761.430        | 761.933        | 760.926 | C[13] |
| A[6]  | 318.148        | 717.934        | <b>709.925</b> | <b>710.429</b> | 709.421 | A[12] |
| T[7]  | 374.887        | 662.410        | 674.403        | <b>674.910</b> | 673.902 | T[11] |
| H[8]  | 443.216        | 626.874        | 617.864        | 618.368        | 617.360 | H[10] |
| A[9]  | <b>478.735</b> | 557.344        | 549.336        | 549.839        | 548.831 | A[9]  |
| K[10] | <b>577.803</b> | 521.826        | 513.816        | <b>514.320</b> | 513.312 | K[8]  |
| R[11] | <b>655.854</b> | 422.757        | <b>414.748</b> | <b>415.252</b> | 414.244 | R[7]  |
| V[12] | <b>705.388</b> | 344.707        | 336.697        | 337.201        | 336.193 | V[6]  |
| T[13] | <b>755.912</b> | 295.173        | 287.163        | 287.667        | 286.659 | T[5]  |
| I[14] | <b>812.454</b> | 244.649        | 236.639        | 237.143        | 236.135 | I[4]  |
| M[15] | 877.974        | 188.107        | 180.097        | 180.601        | 179.593 | M[3]  |
| P[16] | <b>926.506</b> | 122.586        | 114.577        | 115.081        | 114.073 | P[2]  |
| K[17] | 990.348        | 74.060         | 66.051         | 66.555         | 65.547  | K[1]  |

# sp | P68433 | H31\_MOUSE

DTNLCAIHAK Crotonaldehyde  
70.04 RVTIMPK

- ▶ fragmentation table for charge state 3+
- ▶ specType=etd
- ▶ score=41.76
- ▶ F113281.dat
- ▶ query=q24715.p1
- ▶ precursor=496.024090
- ▶ chargePrecursor=4
- ▶ itol=0.5

| AA    | c              | y              | z+1            | z+2            | z              | AA    |
|-------|----------------|----------------|----------------|----------------|----------------|-------|
| D[1]  | 45.025         | <b>661.029</b> | <b>655.689</b> | 0.672          | 666.351        | D[17] |
| T[2]  | 78.708         | 622.687        | 617.347        | 0.672          | 617.011        | T[16] |
| N[3]  | 116.722        | 589.004        | <b>583.664</b> | <b>584.000</b> | <b>583.329</b> | N[15] |
| L[4]  | 154.417        | 550.990        | 545.050        | 545.969        | 545.314        | L[14] |
| C[5]  | 188.753        | 513.299        | 507.953        | 508.291        | 507.620        | C[13] |
| A[6]  | 212.432        | <b>478.959</b> | 473.619        | 473.955        | 473.283        | A[12] |
| V[7]  | 250.127        | 456.280        | 449.940        | 450.276        | 449.604        | V[11] |
| H[8]  | 289.813        | 417.585        | 412.245        | 412.581        | 411.909        | H[10] |
| A[9]  | 319.492        | 371.899        | 366.559        | 366.895        | 366.223        | A[9]  |
| K[10] | 385.538        | <b>348.220</b> | 342.880        | 343.216        | 342.544        | K[8]  |
| R[11] | 437.571        | 282.174        | 276.834        | 277.170        | 276.498        | R[7]  |
| V[12] | 470.594        | 230.140        | 224.801        | 225.137        | 224.465        | V[6]  |
| T[13] | <b>504.277</b> | 197.117        | 191.778        | 192.114        | 191.442        | T[5]  |
| T[14] | 541.971        | 163.435        | 158.095        | 158.431        | 157.759        | T[4]  |
| M[15] | 585.652        | 125.740        | 120.401        | 120.737        | 120.065        | M[3]  |
| P[16] | 618.603        | 82.060         | 76.720         | 77.056         | 76.385         | P[2]  |
| K[17] | 660.701        | 49.709         | 44.370         | 44.705         | 44.034         | K[1]  |

# sp | P62806 | H4\_MOUSE

DVVYALK<sup>Acetyl</sup>RQGRTLYGFGG  
42.01

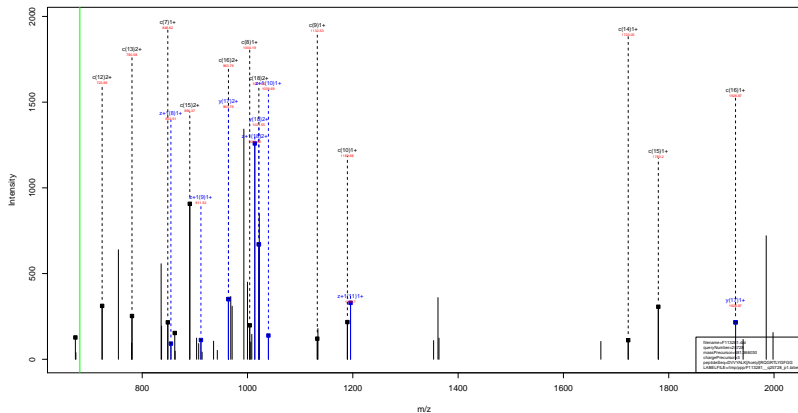

# sp | P62806 | H4\_MOUSE

DVVYALK<sup>Acetyl</sup> RQGRTLYGFGG  
42.01

- ▶ fragmentation table for charge state 1+
- ▶ specType=etd
- ▶ score=32.74
- ▶ F113281.dat
- ▶ query=q25728.p1
- ▶ precursor=681.366030
- ▶ chargePrecursor=3
- ▶ itol=0.5

| AA    | c               | y               | z+1             | z+2      | z        | AA    |
|-------|-----------------|-----------------|-----------------|----------|----------|-------|
| D[1]  | 111.061         | 2042.982        | 2028.663        | 0.000    | 2029.055 | D[18] |
| V[2]  | 232.129         | <b>1927.055</b> | 1911.636        | 0.000    | 1910.638 | V[17] |
| V[3]  | 331.198         | 1827.986        | 1811.968        | 0.000    | 1810.960 | V[16] |
| Y[4]  | 404.261         | 1728.918        | 1712.899        | 0.000    | 1711.891 | Y[15] |
| A[5]  | 505.298         | 1529.850        | 1519.836        | 0.000    | 1548.828 | A[14] |
| L[6]  | 678.382         | 1498.810        | 1478.799        | 0.000    | 1477.791 | L[13] |
| R[7]  | <b>848.488</b>  | 1381.734        | 1365.715        | 1366.723 | 1364.707 | R[12] |
| R[8]  | <b>1004.589</b> | 1211.638        | <b>1195.609</b> | 1196.617 | 1194.601 | R[11] |
| Q[9]  | <b>1132.647</b> | 1055.527        | <b>1039.508</b> | 1040.516 | 1038.500 | Q[10] |
| G[10] | <b>1189.669</b> | 927.466         | <b>911.450</b>  | 912.457  | 910.442  | G[9]  |
| R[11] | 1285.770        | 870.447         | <b>854.428</b>  | 855.436  | 853.420  | R[8]  |
| T[12] | 1466.818        | 718.340         | 693.827         | 699.835  | 697.819  | T[7]  |
| L[13] | 1559.902        | 613.298         | 597.279         | 598.287  | 596.271  | L[6]  |
| Y[14] | <b>1722.965</b> | 500.214         | 484.195         | 485.203  | 483.187  | Y[5]  |
| G[15] | <b>1779.986</b> | 337.151         | 321.132         | 322.140  | 320.124  | G[4]  |
| F[16] | <b>1927.055</b> | 280.129         | 264.110         | 265.118  | 263.103  | F[3]  |
| G[17] | 1984.076        | 133.063         | 117.042         | 118.050  | 116.034  | G[2]  |
| G[18] | 2041.098        | 79.030          | 60.021          | 61.028   | 59.011   | G[1]  |

# sp | P62806 | H4\_MOUSE

DVVYALK<sup>Acetyl</sup>42.01 RQGRTLYGFGG

- ▶ fragmentation table for charge state 2+
- ▶ specType=etd
- ▶ score=32.74
- ▶ F113281.dat
- ▶ query=q25728\_p1
- ▶ precursor=681.366030
- ▶ chargePrecursor=3
- ▶ itol=0.5

| AA   | c               | y               | z+1             | z+2   | z        | AA   |
|------|-----------------|-----------------|-----------------|-------|----------|------|
| D 1  | 67.034          | <b>1021.545</b> | <b>1013.535</b> | 0.504 | 1013.031 | D 18 |
| V 2  | 116.568         | <b>964.031</b>  | 956.022         | 0.504 | 955.518  | V 17 |
| V 3  | 166.102         | 914.497         | 906.487         | 0.504 | 905.984  | V 16 |
| V 4  | 217.634         | 864.963         | 856.953         | 0.504 | 856.449  | V 15 |
| A 5  | 268.163         | 814.431         | 806.422         | 0.504 | 805.918  | A 14 |
| L 6  | 319.695         | 764.912         | 756.903         | 0.504 | 756.399  | L 13 |
| K 7  | 424.747         | 691.370         | 683.361         | 0.504 | 682.857  | K 12 |
| R 8  | 502.798         | 608.318         | 598.308         | 0.504 | 597.804  | R 11 |
| Q 9  | 566.827         | 528.267         | 520.258         | 0.504 | 519.754  | Q 10 |
| G 10 | 595.338         | 464.238         | 456.228         | 0.504 | 455.725  | G 9  |
| R 11 | <b>673.389</b>  | 435.727         | 427.718         | 0.504 | 427.214  | R 8  |
| T 12 | <b>721.912</b>  | 387.670         | 379.661         | 0.504 | 379.157  | T 7  |
| L 13 | <b>780.454</b>  | 307.153         | 299.143         | 0.504 | 298.639  | L 6  |
| V 14 | <b>861.986</b>  | 250.611         | 242.601         | 0.504 | 242.097  | V 5  |
| G 15 | <b>890.497</b>  | 169.079         | 161.070         | 0.504 | 160.566  | G 4  |
| F 16 | <b>964.031</b>  | 140.568         | 132.559         | 0.504 | 132.055  | F 3  |
| G 17 | 992.542         | 67.034          | 59.025          | 0.504 | 58.521   | G 2  |
| G 18 | <b>1021.053</b> | 38.523          | 30.514          | 0.504 | 30.010   | G 1  |

# sp | P62806 | H4\_MOUSE

DVVYALK<sup>Acetyl</sup>RQGRTLYGFGG  
42.01

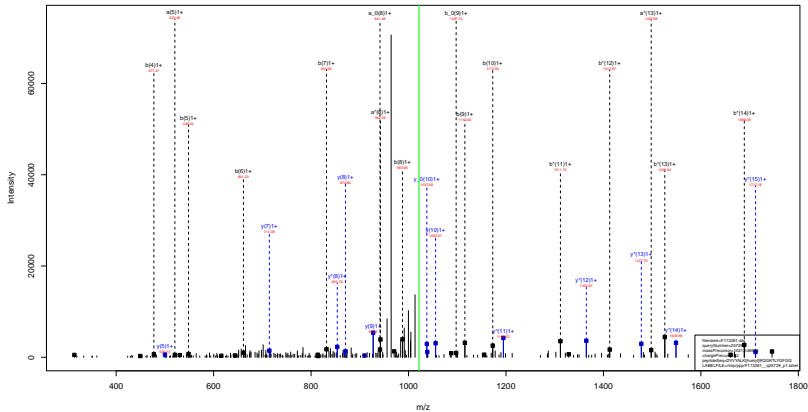

# sp | P62806 | H4\_MOUSE

DVVYALK<sup>Acetyl</sup> RQGRTLYGFGG  
42.01

- ▶ fragmentation table for charge state 1+
- ▶ specType=cid
- ▶ score=29.61
- ▶ F113281.dat
- ▶ query=q25729\_p1
- ▶ precursor=1021.546900
- ▶ chargePrecursor=2
- ▶ itol=0.5

| AA   | a               | a'    | a+b             | b               | b'    | b+b'            | y        | y'       | y+b      | AA   |
|------|-----------------|-------|-----------------|-----------------|-------|-----------------|----------|----------|----------|------|
| V1   | 187.078         | 0.000 | 187.078         | 116.078         | 0.000 | 187.078         | 203.078  | 203.078  | 319.156  | Q101 |
| V12  | 187.078         | 0.000 | 187.078         | 116.078         | 0.000 | 187.078         | 203.078  | 203.078  | 319.156  | V127 |
| V15  | 187.078         | 0.000 | 187.078         | 116.171         | 0.000 | 187.171         | 203.171  | 203.171  | 319.342  | V126 |
| V16  | <b>448.219</b>  | 0.000 | 448.219         | <b>177.248</b>  | 0.000 | 448.219         | 525.467  | 525.467  | 702.715  | V125 |
| A16  | <b>528.277</b>  | 0.000 | 528.277         | <b>548.271</b>  | 0.000 | <b>530.281</b>  | 1068.558 | 1068.558 | 1598.844 | A124 |
| L16  | 615.361         | 0.000 | <b>615.350</b>  | <b>661.356</b>  | 0.000 | <b>643.345</b>  | 1278.691 | 1278.691 | 1892.036 | L113 |
| R17  | 615.361         | 0.000 | 615.361         | 661.361         | 0.000 | 643.355         | 1278.711 | 1278.711 | 1892.126 | R120 |
| R18  | 615.361         | 0.000 | 615.361         | 661.361         | 0.000 | 643.365         | 1278.731 | 1278.731 | 1892.216 | R119 |
| R19  | 615.361         | 0.000 | 615.361         | 661.361         | 0.000 | 643.375         | 1278.751 | 1278.751 | 1892.306 | R118 |
| Q10  | <b>1007.626</b> | 0.000 | <b>1007.615</b> | <b>1115.621</b> | 0.000 | <b>1007.610</b> | 2123.235 | 2123.235 | 3238.850 | Q105 |
| Q108 | 1144.817        | 0.000 | 1144.817        | 1172.845        | 0.000 | 1155.816        | 2317.632 | 2317.632 | 3470.468 | Q108 |
| R111 | 1266.748        | 0.000 | 1266.748        | 1328.733        | 0.000 | 1348.713        | 2595.461 | 2595.461 | 3844.174 | R111 |
| R112 | 1266.748        | 0.000 | 1266.748        | 1328.733        | 0.000 | 1348.723        | 2595.481 | 2595.481 | 3844.264 | R112 |
| L113 | 1266.748        | 0.000 | 1266.748        | 1328.733        | 0.000 | 1348.733        | 2595.501 | 2595.501 | 3844.354 | L113 |
| V14  | 1266.748        | 0.000 | 1266.748        | 1328.733        | 0.000 | 1348.743        | 2595.521 | 2595.521 | 3844.444 | V14  |
| Q115 | 1714.903        | 0.000 | 1714.903        | 1763.903        | 0.000 | 1764.903        | 3478.806 | 3478.806 | 5242.709 | Q115 |
| F14  | 1882.011        | 0.000 | 1884.024        | 1933.020        | 0.000 | 1882.010        | 3866.030 | 3866.030 | 5748.060 | F14  |
| Q117 | 1978.026        | 0.000 | 1978.026        | 2027.026        | 0.000 | 1978.026        | 4355.052 | 4355.052 | 6333.104 | Q117 |
| Q118 | 1978.026        | 0.000 | 1978.026        | 2027.026        | 0.000 | 1978.026        | 4355.142 | 4355.142 | 6333.194 | Q118 |



# sp | P62806 | H4\_MOUSE

DVVYALK<sup>Acetyl</sup>RQGRTLYGFGG  
42.01

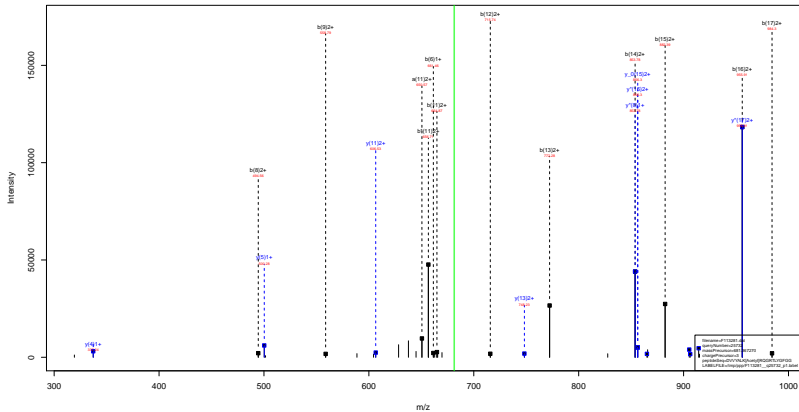

# sp | P62806 | H4\_MOUSE

DVVYALK<sup>Acetyl</sup>RQGRTLYGFGG  
42.01

- ▶ fragmentation table for charge state 1+
- ▶ specType=cid
- ▶ score=54.68
- ▶ F113281.dat
- ▶ query=q25732\_p1
- ▶ precursor=681.367270
- ▶ chargePrecursor=3
- ▶ itol=0.5

| AA | a  | a'       | a <sup>o</sup> | b        | b'       | b <sup>o</sup> | y        | y'       | y <sup>o</sup> | AA  |
|----|----|----------|----------------|----------|----------|----------------|----------|----------|----------------|-----|
| D  | 1  | 88.839   | 0.000          | 78.050   | 118.094  | 0.000          | 88.839   | 2042.050 | 2054.891       | D10 |
| V  | 2  | 187.108  | 0.000          | 189.087  | 215.103  | 0.000          | 187.108  | 1927.050 | 1910.029       | V10 |
| V  | 3  | 285.176  | 0.000          | 288.180  | 314.171  | 0.000          | 285.176  | 1822.050 | 1810.989       | V10 |
| V  | 4  | 384.259  | 0.000          | 431.259  | 417.254  | 0.000          | 430.254  | 1720.910 | 1711.891       | V10 |
| A  | 5  | 430.277  | 0.000          | 502.260  | 548.271  | 0.000          | 530.261  | 1565.850 | 1548.828       | A10 |
| L  | 6  | 513.361  | 0.000          | 613.350  | 661.356  | 0.000          | 643.350  | 1494.811 | 1477.791       | L10 |
| R  | 7  | 603.466  | 0.000          | 703.460  | 758.465  | 0.000          | 714.459  | 1313.843 | 1304.791       | R10 |
| R  | 8  | 699.567  | 0.000          | 841.561  | 987.562  | 0.000          | 870.536  | 1099.752 | 1011.820       | R10 |
| Q  | 9  | 787.626  | 0.000          | 1087.611 | 1119.613 | 0.000          | 1098.598 | 1007.610 | 1000.530       | Q10 |
| C  | 10 | 874.674  | 0.000          | 1124.661 | 1172.642 | 0.000          | 1170.616 | 878.614  | 847.460        | C10 |
| R  | 11 | 1300.748 | 0.000          | 1302.730 | 1320.743 | 0.000          | 1311.717 | 810.713  | 800.447        | R10 |
| T  | 12 | 1401.796 | 0.000          | 1383.780 | 1420.791 | 0.000          | 1411.784 | 641.780  | 614.540        | T10 |
| L  | 13 | 1514.880 | 0.000          | 1486.870 | 1542.875 | 0.000          | 1524.855 | 513.780  | 500.000        | L10 |
| V  | 14 | 1617.884 | 0.000          | 1590.861 | 1709.868 | 0.000          | 1698.812 | 389.860  | 380.214        | V10 |
| C  | 15 | 1714.905 | 0.000          | 1715.854 | 1762.860 | 0.000          | 1744.830 | 267.850  | 260.151        | C10 |
| F  | 16 | 1812.913 | 0.000          | 1814.851 | 1819.859 | 0.000          | 1802.830 | 180.120  | 180.000        | F10 |
| C  | 17 | 1810.950 | 0.000          | 1841.844 | 1880.850 | 0.000          | 1840.838 | 133.061  | 133.000        | C10 |
| C  | 18 | 1906.910 | 0.000          | 1870.850 | 1924.811 | 0.000          | 1904.794 | 80.000   | 80.000         | C10 |

# sp | P62806 | H4\_MOUSE

DVVYALK<sup>Acetyl</sup><sub>42.01</sub> RQGRTLYGFGG

- ▶ fragmentation table for charge state 2+
- ▶ specType=cid
- ▶ score=54.68
- ▶ F113281.dat
- ▶ query=q25732.p1
- ▶ precursor=681.367270
- ▶ chargePrecursor=3
- ▶ itol=0.5

| AA    | a              | a*      | a,Δ     | b              | b*             | b,Δ      | y              | y*             | y,Δ            | AA    |
|-------|----------------|---------|---------|----------------|----------------|----------|----------------|----------------|----------------|-------|
| D[1]  | 44.923         | 0.504   | 85.618  | 58.921         | 0.504          | 40.515   | 4103.949       | 2013.031       | 1012.530       | D[18] |
| V[2]  | 94.657         | 0.504   | 85.952  | 118.055        | 0.504          | 80.050   | 474.171        | <b>955.518</b> | 455.227        | V[17] |
| V[3]  | 143.391        | 0.504   | 134.386 | 137.589        | 0.504          | 143.581  | <b>114.491</b> | <b>305.304</b> | <b>856.912</b> | V[16] |
| Y[4]  | 225.123        | 0.504   | 216.118 | 230.121        | 0.504          | 230.115  | <b>864.963</b> | <b>856.449</b> | <b>855.957</b> | Y[15] |
| A[5]  | 286.642        | 0.504   | 251.637 | 274.639        | 0.504          | 285.634  | 763.431        | 774.918        | 774.426        | A[14] |
| L[6]  | 317.184        | 0.504   | 308.179 | 331.181        | 0.504          | 322.175  | <b>747.912</b> | 739.399        | 738.907        | L[13] |
| R[7]  | 402.719        | 0.504   | 389.714 | 416.716        | 0.504          | 401.710  | 481.220        | 494.170        | 492.887        | R[12] |
| R[8]  | 488.257        | 471.774 | 471.282 | <b>494.285</b> | 485.711        | 485.270  | <b>606.318</b> | 597.804        | 597.312        | R[11] |
| Q[9]  | 574.371        | 130.801 | 535.111 | <b>558.314</b> | 149.887        | 149.389  | 528.261        | 519.754        | 519.262        | Q[10] |
| G[10] | 672.229        | 364.314 | 261.222 | 320.125        | 371.111        | 371.813  | 464.230        | 455.725        | 455.233        | G[11] |
| R[11] | <b>650.878</b> | 565.360 | 341.113 | <b>664.875</b> | <b>656.362</b> | 655.810  | 435.122        | 426.614        | 426.122        | R[10] |
| T[12] | 709.402        | 560.388 | 362.104 | <b>715.399</b> | 570.388        | 570.388  | 387.616        | 384.104        | 384.612        | T[11] |
| L[13] | 817.944        | 740.430 | 748.930 | <b>771.941</b> | 763.428        | 762.926  | 307.151        | 0.504          | 0.504          | L[10] |
| Y[14] | 829.414        | 880.780 | 828.424 | <b>853.423</b> | 884.780        | 884.488  | 282.611        | 0.504          | 0.504          | Y[10] |
| G[15] | 857.908        | 859.471 | 858.961 | <b>881.904</b> | 873.470        | 872.970  | 189.613        | 0.504          | 0.504          | G[10] |
| F[16] | 941.820        | 833.001 | 832.515 | <b>955.518</b> | 847.000        | 846.515  | 148.568        | 0.504          | 0.504          | F[11] |
| G[17] | 970.931        | 981.533 | 981.026 | <b>984.829</b> | 975.533        | 975.023  | 87.034         | 0.504          | 0.504          | G[11] |
| G[18] | 998.442        | 990.020 | 989.512 | 1002.518       | 1004.020       | 1003.510 | 38.521         | 0.504          | 0.504          | G[11] |



# sp | Q8CGP5 | H2A1F\_MOUSE

DNK<sup>Acetyl</sup>KTRIIPRHLQLAIRN  
42.01

- ▶ fragmentation table for charge state 1+
- ▶ specType=etd
- ▶ score=57.98
- ▶ F113281.dat
- ▶ query=q28110\_p1
- ▶ precursor=557.834380
- ▶ chargePrecursor=4
- ▶ itol=0.5

| AA    | c               | y              | z+1            | z+2             | z        | AA    |
|-------|-----------------|----------------|----------------|-----------------|----------|-------|
| D[1]  | 133.061         | 2228.310       | 2212.291       | 0.000           | 2211.283 | D[18] |
| N[2]  | <b>247.104</b>  | 2113.283       | 2097.264       | 2096.272        | 2096.256 | N[17] |
| K[3]  | 417.209         | 1999.240       | 1983.221       | <b>1984.229</b> | 1982.213 | K[16] |
| K[4]  | <b>545.304</b>  | 1829.134       | 1813.116       | 1814.124        | 1812.108 | K[15] |
| T[5]  | <b>646.352</b>  | 1701.039       | 1685.021       | 1686.229        | 1684.013 | T[14] |
| R[6]  | <b>802.453</b>  | 1599.992       | 1583.973       | <b>1584.981</b> | 1582.965 | R[13] |
| I[7]  | <b>915.537</b>  | 1443.891       | 1427.872       | 1428.880        | 1426.864 | I[12] |
| I[8]  | <b>1028.621</b> | 1330.807       | 1314.788       | 1315.796        | 1313.780 | I[11] |
| F[9]  | <b>1125.674</b> | 1217.723       | 1201.704       | 1202.712        | 1200.696 | F[10] |
| R[10] | <b>1281.775</b> | 1120.670       | 1104.651       | 1105.659        | 1103.643 | R[9]  |
| H[11] | <b>1418.834</b> | <b>864.569</b> | <b>848.550</b> | 849.558         | 847.542  | H[8]  |
| L[12] | 1533.939        | <b>827.570</b> | <b>811.491</b> | 812.499         | 810.483  | L[7]  |
| Q[13] | <b>1659.977</b> | 714.420        | <b>698.407</b> | 699.415         | 697.399  | Q[6]  |
| L[14] | 1773.061        | 586.367        | <b>570.348</b> | <b>571.356</b>  | 569.341  | L[5]  |
| A[15] | 1844.898        | 473.283        | <b>457.264</b> | 458.272         | 456.257  | A[4]  |
| I[16] | 1957.182        | 402.240        | 386.227        | 387.235         | 385.219  | I[3]  |
| K[17] | 2113.283        | 289.162        | 273.143        | 274.151         | 272.135  | K[2]  |
| N[18] | 2227.326        | 133.061        | 117.042        | 118.050         | 116.034  | N[1]  |

# sp | Q8CGP5 | H2A1F\_MOUSE

DNK<sup>Acetyl</sup>KTRIIPRHLQLAIRN  
42.01

- ▶ fragmentation table for charge state 2+
- ▶ specType=etd
- ▶ score=57.98
- ▶ F113281.dat
- ▶ query=q28110.p1
- ▶ precursor=557.834380
- ▶ chargePrecursor=4
- ▶ itol=0.5

| AA    | c               | y               | z+1             | z+2             | z        | AA    |
|-------|-----------------|-----------------|-----------------|-----------------|----------|-------|
| D[1]  | 67.034          | <b>1114.659</b> | <b>1106.649</b> | 0.004           | 1105.145 | D[18] |
| N[2]  | 124.055         | <b>1057.145</b> | 1049.136        | <b>1049.640</b> | 1048.632 | N[17] |
| K[3]  | 209.108         | 1000.124        | <b>992.114</b>  | <b>992.618</b>  | 991.610  | K[16] |
| K[4]  | 273.156         | <b>915.071</b>  | <b>907.061</b>  | <b>907.565</b>  | 906.558  | K[15] |
| T[5]  | 352.680         | 851.023         | <b>843.014</b>  | <b>843.518</b>  | 842.510  | T[14] |
| R[6]  | 401.730         | 800.500         | <b>792.490</b>  | <b>792.994</b>  | 791.986  | R[13] |
| H[7]  | 458.272         | 722.449         | 714.440         | 714.944         | 713.936  | H[12] |
| H[8]  | 514.814         | 665.907         | 657.898         | <b>658.401</b>  | 657.394  | H[11] |
| P[9]  | 563.341         | 609.385         | 601.376         | 601.879         | 600.872  | P[10] |
| R[10] | <b>641.391</b>  | 560.839         | <b>552.829</b>  | <b>553.333</b>  | 552.325  | R[9]  |
| H[11] | <b>709.921</b>  | 522.788         | 514.779         | 515.283         | 514.275  | H[8]  |
| L[12] | 766.463         | 474.250         | 466.240         | 466.743         | 465.735  | L[7]  |
| Q[13] | <b>830.492</b>  | 357.718         | 349.707         | 350.211         | 349.203  | Q[6]  |
| L[14] | 887.034         | 293.687         | 285.678         | 286.182         | 285.174  | L[5]  |
| A[15] | <b>922.552</b>  | 237.145         | 229.136         | 229.640         | 228.632  | A[4]  |
| H[16] | 979.095         | 201.627         | 193.617         | 194.121         | 193.113  | H[3]  |
| H[17] | <b>1057.145</b> | 149.085         | 137.075         | 137.579         | 136.571  | H[2]  |
| N[18] | 1114.197        | 67.034          | 59.025          | 59.529          | 58.521   | N[1]  |

# sp | Q8CGP5 | H2A1F\_MOUSE

DNK<sup>Acetyl</sup> KTRIIPRHLQLAIRN  
42.01

- ▶ fragmentation table for charge state 3+
- ▶ specType=etd
- ▶ score=57.98
- ▶ F113281.dat
- ▶ query=q28110.p1
- ▶ precursor=557.834380
- ▶ chargePrecursor=4
- ▶ itol=0.5

| AA |    | c              | y              | z+1            | z+2            | z              | AA              |
|----|----|----------------|----------------|----------------|----------------|----------------|-----------------|
| D  | 1  | 45.025         | <b>743.441</b> | <b>738.102</b> | 0.672          | <b>737.766</b> | D <sup>16</sup> |
| N  | 2  | 83.039         | <b>705.099</b> | <b>699.760</b> | <b>700.096</b> | 0.99424        | N <sup>17</sup> |
| K  | 3  | 139.741        | 607.065        | <b>661.745</b> | <b>662.081</b> | 0.61409        | K <sup>16</sup> |
| K  | 4  | 182.540        | 610.363        | 605.043        | 605.379        | 0.64707        | K <sup>15</sup> |
| T  | 5  | 216.122        | 567.685        | 562.345        | 562.681        | 0.62109        | T <sup>14</sup> |
| R  | 6  | 268.156        | 534.002        | 528.663        | 528.998        | 0.58127        | R <sup>13</sup> |
| I  | 7  | 305.851        | 481.968        | 476.629        | 476.965        | 0.76293        | I <sup>12</sup> |
| I  | 8  | 343.545        | 444.274        | 438.934        | 439.270        | 0.58598        | I <sup>11</sup> |
| P  | 9  | 375.896        | 406.579        | 401.230        | 401.575        | 0.60904        | P <sup>10</sup> |
| R  | 10 | 427.930        | 374.228        | 368.889        | 369.224        | 0.68553        | R <sup>9</sup>  |
| H  | 11 | 473.616        | 322.194        | 316.855        | 317.191        | 0.51519        | H <sup>8</sup>  |
| L  | 12 | 513.311        | 276.508        | 271.169        | 271.504        | 0.70333        | L <sup>7</sup>  |
| Q  | 13 | 553.997        | 238.813        | 233.474        | 233.810        | 0.53136        | Q <sup>6</sup>  |
| L  | 14 | 591.692        | 196.127        | 190.788        | 191.124        | 0.60452        | L <sup>5</sup>  |
| A  | 15 | 615.371        | 158.433        | 153.093        | 153.429        | 0.52757        | A <sup>4</sup>  |
| I  | 16 | 653.065        | 134.753        | 129.414        | 129.750        | 0.29078        | I <sup>3</sup>  |
| R  | 17 | <b>705.099</b> | 97.050         | 91.719         | 92.065         | 0.1383         | R <sup>2</sup>  |
| N  | 18 | 743.113        | 45.025         | 39.680         | 40.021         | 0.39350        | N <sup>1</sup>  |

# sp | Q8CGP5 | H2A1F\_MOUSE

DNK<sup>Acetyl</sup> KTRIIPRHLQLAIRN  
42.01

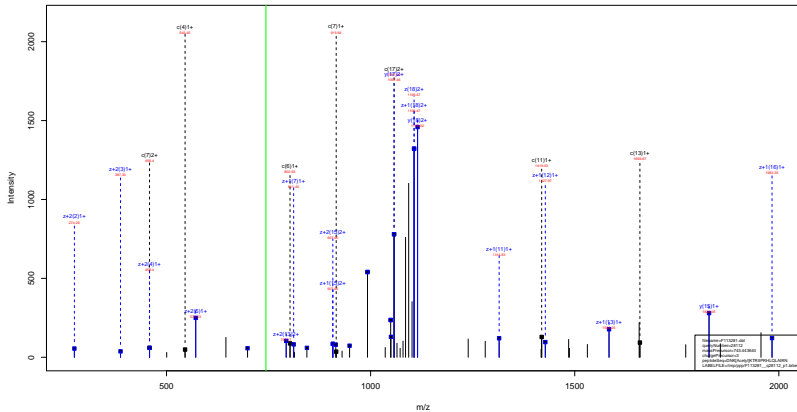



# sp | Q8CGP5 | H2A1F\_MOUSE

DNK<sup>Acetyl</sup>KTRIIPRHLQLAIRN  
42.01

- ▶ fragmentation table for charge state 1+
- ▶ specType=etd
- ▶ score=38.58
- ▶ F113281.dat
- ▶ query=q28112.p1
- ▶ precursor=743.443640
- ▶ chargePrecursor=3
- ▶ itol=0.5

| AA    | c               | y               | z+1             | z+2            | z        | AA    |
|-------|-----------------|-----------------|-----------------|----------------|----------|-------|
| D[1]  | 113.061         | 2228.310        | 2212.291        | 0.000          | 2211.283 | D[16] |
| N[2]  | 247.104         | 2113.283        | 2097.264        | 2086.272       | 2096.258 | N[17] |
| K[3]  | 417.209         | 1999.240        | <b>1983.221</b> | 1994.229       | 1982.213 | K[16] |
| K[4]  | <b>545.304</b>  | <b>1829.134</b> | 1813.116        | 1814.124       | 1812.108 | K[15] |
| T[5]  | 618.352         | 1701.030        | 1685.021        | 1686.029       | 1684.011 | T[14] |
| R[6]  | <b>802.453</b>  | 1599.952        | <b>1583.973</b> | 1594.981       | 1582.965 | R[13] |
| I[7]  | <b>915.537</b>  | 1443.891        | <b>1427.872</b> | 1428.880       | 1426.864 | I[12] |
| I[8]  | 1028.621        | 1330.807        | <b>1314.788</b> | 1315.796       | 1313.780 | I[11] |
| P[9]  | 1125.674        | 1217.723        | 1201.704        | 1202.712       | 1200.696 | P[10] |
| R[10] | 1281.775        | 1120.670        | 1104.651        | 1105.659       | 1103.643 | R[9]  |
| H[11] | <b>1418.834</b> | 964.560         | <b>948.550</b>  | 949.558        | 947.542  | H[8]  |
| L[12] | 1513.919        | 827.510         | <b>811.491</b>  | 812.499        | 810.483  | L[7]  |
| Q[13] | <b>1659.977</b> | 714.426         | <b>698.407</b>  | 699.415        | 697.399  | Q[6]  |
| L[14] | 1773.061        | 588.307         | 570.348         | <b>571.356</b> | 569.341  | L[5]  |
| A[15] | 1844.098        | 473.283         | 457.264         | <b>458.272</b> | 456.257  | A[4]  |
| I[16] | 1957.182        | 402.240         | 386.227         | <b>387.235</b> | 385.219  | I[3]  |
| R[17] | 2113.283        | 286.162         | 273.143         | <b>274.151</b> | 272.135  | R[2]  |
| N[18] | 2227.326        | 133.061         | 117.042         | 118.050        | 116.034  | N[1]  |

# sp | Q8CGP5 | H2A1F\_MOUSE

DNK <sup>Acetyl</sup> KTRIIPRHLQLAIRN  
42.01

- ▶ fragmentation table for charge state 2+
- ▶ specType=etd
- ▶ score=38.58
- ▶ F113281.dat
- ▶ query=q28112\_p1
- ▶ precursor=743.443640
- ▶ chargePrecursor=3
- ▶ itol=0.5

| AA    | c               | w               | z+1             | z+2             | z               | AA    |
|-------|-----------------|-----------------|-----------------|-----------------|-----------------|-------|
| D[3]  | 57.034          | <b>1114.659</b> | <b>1106.649</b> | 8.504           | <b>1106.145</b> | D[18] |
| N[2]  | 124.055         | <b>1057.145</b> | <b>1049.136</b> | <b>1049.640</b> | <b>1048.832</b> | N[17] |
| K[3]  | 209.108         | 1030.124        | <b>992.114</b>  | <b>992.618</b>  | 901.610         | K[16] |
| K[4]  | 273.156         | <b>915.071</b>  | <b>907.061</b>  | <b>907.565</b>  | 806.558         | K[15] |
| T[5]  | 323.680         | 851.023         | 843.014         | <b>843.518</b>  | 842.510         | T[14] |
| R[6]  | 401.730         | 808.550         | 792.483         | <b>792.984</b>  | 791.986         | R[13] |
| I[7]  | <b>458.272</b>  | 722.445         | 714.440         | 714.944         | 713.936         | I[12] |
| I[8]  | 514.814         | 665.907         | 657.898         | 658.401         | 657.394         | I[11] |
| P[9]  | 563.341         | 609.365         | 601.356         | 601.859         | 600.852         | P[10] |
| R[10] | 641.391         | 560.839         | 552.830         | 553.333         | 552.325         | R[9]  |
| H[11] | 699.921         | 482.788         | 474.779         | 475.283         | 474.275         | H[8]  |
| L[12] | 756.463         | 414.259         | 406.249         | 406.753         | 405.745         | L[7]  |
| G[13] | 830.492         | 357.716         | 349.707         | 350.211         | 349.203         | G[6]  |
| L[14] | 867.034         | 293.667         | 285.678         | 286.182         | 285.174         | L[6]  |
| A[15] | 922.552         | 237.145         | 229.136         | 229.640         | 228.632         | A[4]  |
| V[16] | 979.095         | 201.627         | 193.617         | 194.121         | 193.113         | V[3]  |
| R[17] | <b>1057.145</b> | 146.085         | 137.075         | 137.579         | 136.571         | R[2]  |
| N[18] | 1114.137        | 67.034          | 59.025          | 59.529          | 58.521          | N[1]  |

# sp | P62806 | H4\_MOUSE

[Acetyl]SGRGKGGKGLGKGGAKRHRK <sup>Dimethyl</sup> VLR  
28.03

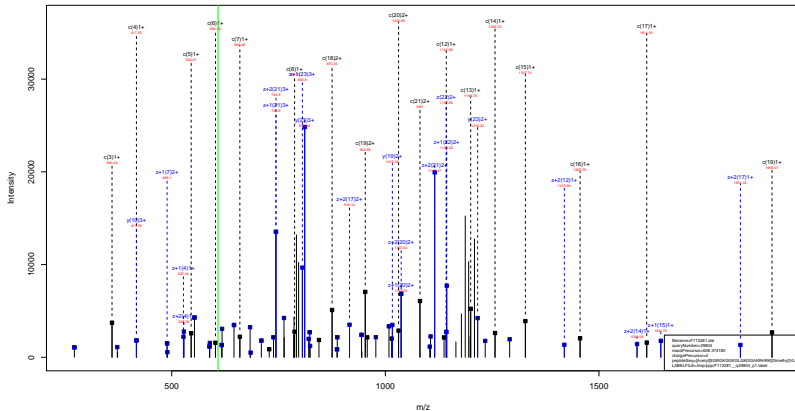

# sp | P62806 | H4\_MOUSE

[Acetyl]SGRGKGGKGLGKGGAKRHRK <sup>Dimethyl</sup> 28.03 VLR

- ▶ fragmentation table for charge state 1+
- ▶ specType=etd
- ▶ score=123.29
- ▶ F113281.dat
- ▶ query=q29804\_p1
- ▶ precursor=608.374180
- ▶ chargePrecursor=4
- ▶ itol=0.5

| AA    | c               | y        | z+1             | z+2             | z               | AA    |
|-------|-----------------|----------|-----------------|-----------------|-----------------|-------|
| S[1]  | 147.076         | 2430.475 | 2414.457        | 0.000           | 2413.449        | S[2]  |
| G[2]  | 204.098         | 2301.433 | 2285.414        | 0.000           | 2284.406        | G[22] |
| R[3]  | <b>360.199</b>  | 2344.411 | 2328.392        | 2229.400        | 2227.389        | R[21] |
| G[4]  | <b>417.220</b>  | 2088.310 | 2072.291        | 2073.299        | 2071.284        | G[20] |
| K[5]  | <b>545.315</b>  | 2031.289 | 2015.270        | 2016.278        | 2014.262        | K[19] |
| G[6]  | <b>602.337</b>  | 1973.194 | 1957.175        | 1959.183        | 1958.167        | G[18] |
| G[7]  | <b>659.358</b>  | 1846.172 | 1830.153        | <b>1831.161</b> | 1829.146        | G[17] |
| K[8]  | <b>787.453</b>  | 1789.151 | 1773.132        | 1774.140        | 1772.124        | K[16] |
| G[9]  | <b>844.475</b>  | 1661.056 | <b>1645.037</b> | 1646.045        | 1644.029        | G[15] |
| L[10] | <b>957.559</b>  | 1604.034 | 1588.015        | <b>1589.023</b> | 1587.008        | L[14] |
| G[11] | <b>1014.580</b> | 1490.950 | 1474.932        | 1475.939        | 1473.924        | G[13] |
| R[12] | <b>1142.675</b> | 1433.829 | 1417.810        | <b>1418.818</b> | 1416.803        | R[12] |
| G[13] | <b>1199.697</b> | 1305.834 | 1289.815        | <b>1290.823</b> | 1288.807        | G[11] |
| G[14] | <b>1256.718</b> | 1248.812 | 1232.794        | <b>1233.801</b> | 1231.785        | G[10] |
| A[15] | <b>1327.755</b> | 1191.791 | 1175.772        | 1176.780        | 1174.764        | A[9]  |
| K[16] | <b>1455.850</b> | 1120.754 | 1104.735        | <b>1105.743</b> | <b>1103.727</b> | K[8]  |
| R[17] | <b>1611.951</b> | 660.699  | 676.680         | <b>677.646</b>  | 675.632         | R[7]  |
| R[18] | 1749.010        | 638.658  | <b>620.539</b>  | 621.547         | 619.533         | R[6]  |
| R[19] | <b>1905.111</b> | 609.609  | <b>681.480</b>  | <b>684.488</b>  | 682.472         | R[5]  |
| K[20] | 2061.238        | 543.568  | <b>527.379</b>  | <b>528.387</b>  | 526.371         | K[4]  |
| V[21] | 2169.306        | 497.271  | 471.253         | <b>372.261</b>  | 370.245         | V[3]  |
| L[22] | 2273.390        | 388.203  | <b>272.184</b>  | 273.192         | 271.176         | L[2]  |
| R[23] | 2429.491        | 175.119  | 159.100         | 160.108         | 158.092         | R[1]  |

# sp | P62806 | H4\_MOUSE

[Acetyl]SGRGKGGKGLGKGGAKRHRK <sup>Dimethyl</sup> VLR  
28.03

- ▶ fragmentation table for charge state 2+
- ▶ specType=etd
- ▶ score=123.29
- ▶ F113281.dat
- ▶ query=q29804\_p1
- ▶ precursor=608.374180
- ▶ chargePrecursor=4
- ▶ itol=0.5

| AA    | c               | y               | z+1             | z+2             | z               | AA    |
|-------|-----------------|-----------------|-----------------|-----------------|-----------------|-------|
| S[1]  | 74.042          | <b>1215.741</b> | 1207.737        | 0.904           | 1207.220        | S[2]  |
| G[2]  | 102.553         | 1151.220        | <b>1143.211</b> | 0.904           | <b>1142.707</b> | G[3]  |
| R[3]  | 180.603         | 1122.709        | 1114.700        | <b>1115.204</b> | 1114.196        | R[2]  |
| G[4]  | 209.114         | 1044.659        | <b>1036.649</b> | <b>1037.153</b> | 1036.143        | G[2]  |
| K[5]  | 273.161         | <b>1016.148</b> | <b>1008.139</b> | <b>1008.643</b> | 1007.835        | K[19] |
| G[6]  | 301.672         | 952.199         | <b>944.091</b>  | <b>944.595</b>  | 943.589         | G[18] |
| G[7]  | 330.183         | 923.590         | 915.580         | <b>916.084</b>  | 915.075         | G[17] |
| K[8]  | 394.230         | 895.079         | <b>887.070</b>  | <b>887.574</b>  | <b>886.566</b>  | K[10] |
| G[9]  | 422.741         | 831.053         | <b>823.022</b>  | <b>823.526</b>  | 822.518         | G[15] |
| L[10] | 479.283         | 802.521         | 794.511         | 795.015         | 794.008         | L[14] |
| G[11] | 507.794         | 748.079         | <b>737.969</b>  | <b>738.473</b>  | 737.465         | G[13] |
| K[12] | 571.844         | 717.850         | <b>709.459</b>  | <b>709.963</b>  | 709.955         | K[12] |
| G[13] | 600.352         | 651.421         | <b>645.411</b>  | <b>645.915</b>  | 644.907         | G[11] |
| G[14] | 638.863         | 624.910         | <b>616.900</b>  | <b>617.404</b>  | 616.397         | G[10] |
| A[15] | 664.301         | 590.399         | <b>588.390</b>  | <b>588.894</b>  | 587.886         | A[9]  |
| K[16] | <b>728.429</b>  | 560.881         | <b>552.871</b>  | <b>553.375</b>  | 552.367         | K[8]  |
| R[17] | 692.477         | 498.833         | <b>488.824</b>  | <b>489.328</b>  | 488.320         | R[7]  |
| H[18] | <b>875.009</b>  | 418.782         | 410.773         | 411.277         | 410.269         | H[6]  |
| R[19] | <b>953.059</b>  | 350.253         | 342.244         | 342.748         | 341.740         | R[5]  |
| K[20] | <b>1031.122</b> | <b>272.202</b>  | 264.193         | 264.697         | 263.689         | K[4]  |
| V[21] | <b>1080.657</b> | 194.139         | 186.130         | 186.634         | 185.626         | V[9]  |
| L[22] | <b>1137.199</b> | 144.605         | 136.595         | 137.100         | 136.092         | L[3]  |
| R[23] | 1215.249        | 98.051          | 89.042          | 89.556          | 79.550          | R[1]  |

# sp | P62806 | H4\_MOUSE

[Acetyl]SGRGKGGKGLGKGGAKRHRK<sup>Dimethyl</sup>VLR<sub>28.03</sub>

- ▶ fragmentation table for charge state 3+
- ▶ specType=etd
- ▶ score=123.29
- ▶ F113281.dat
- ▶ query=q29804\_p1
- ▶ precursor=608.374180
- ▶ chargePrecursor=4
- ▶ itol=0.5

| AA    | c       | y              | z+1            | z+2            | z       | AA    |
|-------|---------|----------------|----------------|----------------|---------|-------|
| S[1]  | 49.697  | <b>810.830</b> | <b>805.490</b> | 0.672          | 805.154 | S[2]  |
| G[2]  | 68.704  | 787.816        | <b>782.476</b> | 0.772          | 782.140 | G[22] |
| R[3]  | 120.738 | 148.909        | <b>743.469</b> | <b>743.805</b> | 743.133 | R[21] |
| G[4]  | 139.745 | 696.775        | 691.435        | 691.771        | 691.099 | G[20] |
| K[5]  | 182.443 | 0.77768        | 672.428        | 672.764        | 672.092 | K[19] |
| G[6]  | 201.450 | 635.069        | 629.730        | 630.066        | 629.394 | G[18] |
| G[7]  | 220.458 | 616.062        | 610.723        | 611.059        | 610.387 | G[17] |
| K[8]  | 263.156 | 597.055        | 591.716        | 592.051        | 591.380 | K[16] |
| G[9]  | 282.163 | 554.357        | 549.017        | 549.353        | 548.681 | G[15] |
| L[10] | 319.858 | 535.350        | 530.010        | 530.346        | 529.674 | L[14] |
| G[11] | 338.865 | 497.655        | 492.315        | 492.651        | 491.979 | G[13] |
| K[12] | 381.563 | 478.648        | 473.308        | 473.644        | 472.972 | K[12] |
| G[13] | 400.570 | 435.949        | 430.610        | 430.946        | 430.274 | G[11] |
| G[14] | 439.878 | <b>416.942</b> | 411.603        | 411.939        | 411.267 | G[10] |
| A[15] | 443.257 | 397.935        | 392.596        | 392.932        | 392.260 | A[9]  |
| K[16] | 485.955 | 374.256        | 368.917        | 369.252        | 368.581 | K[8]  |
| R[17] | 537.989 | 331.358        | 326.018        | 326.354        | 325.682 | R[7]  |
| H[18] | 583.675 | 279.524        | 274.185        | 274.520        | 273.849 | H[6]  |
| R[19] | 635.709 | 233.838        | 228.498        | 228.834        | 228.162 | R[5]  |
| K[20] | 687.751 | 181.804        | 176.465        | 176.800        | 176.129 | K[4]  |
| V[21] | 720.774 | 129.762        | 124.422        | 124.758        | 124.086 | V[3]  |
| L[22] | 758.468 | 96.739         | 91.400         | 91.736         | 91.064  | L[2]  |
| R[23] | 810.502 | 59.045         | 53.705         | 54.041         | 53.369  | R[1]  |

# sp | P62806 | H4\_MOUSE

[Acetyl]SGRGKGGKGLGKGGAKRHRK <sup>Dimethyl</sup> VLR  
28.03

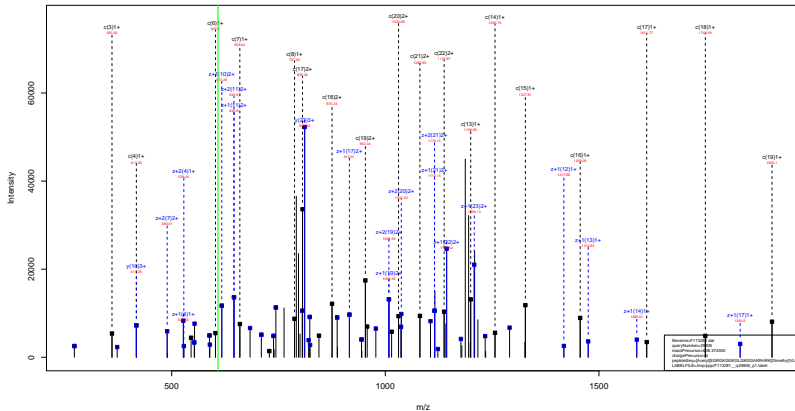

# sp | P62806 | H4\_MOUSE

[Acetyl]SGRGKGGKGLGKGGAKRHRK <sup>Dimethyl</sup> 28.03 VLR

- ▶ fragmentation table for charge state 1+
- ▶ specType=etd
- ▶ score=130.01
- ▶ F113281.dat
- ▶ query=q29806\_p1
- ▶ precursor=608.374350
- ▶ chargePrecursor=4
- ▶ itol=0.5

| AA    | c               | y        | z+1             | z+2             | z        | AA    |
|-------|-----------------|----------|-----------------|-----------------|----------|-------|
| S[1]  | 147.076         | 2430.475 | 2474.457        | 0.000           | 2413.440 | S[23] |
| G[2]  | 304.098         | 2301.433 | 2285.414        | 0.000           | 2284.406 | G[22] |
| R[3]  | <b>360.199</b>  | 2244.411 | 2228.392        | 2229.400        | 2227.385 | R[21] |
| G[4]  | <b>417.220</b>  | 2088.310 | 2072.291        | 2073.299        | 2071.284 | G[20] |
| K[5]  | <b>543.315</b>  | 2031.289 | 2015.270        | 2016.278        | 2014.263 | K[19] |
| G[6]  | <b>602.137</b>  | 1903.194 | 1887.175        | 1888.183        | 1886.167 | G[18] |
| G[7]  | <b>659.358</b>  | 1846.172 | <b>1830.153</b> | 1831.161        | 1829.146 | G[17] |
| K[8]  | <b>787.453</b>  | 1789.151 | 1773.132        | 1774.140        | 1772.124 | K[16] |
| G[9]  | <b>844.475</b>  | 1661.056 | 1645.037        | 1646.045        | 1644.029 | G[15] |
| L[10] | <b>957.559</b>  | 1604.034 | <b>1588.016</b> | 1589.023        | 1587.008 | L[14] |
| G[11] | <b>1014.580</b> | 1486.950 | <b>1474.932</b> | 1475.939        | 1473.924 | G[13] |
| R[12] | 1142.676        | 1433.929 | <b>1417.910</b> | 1418.918        | 1416.902 | R[12] |
| G[13] | <b>1199.697</b> | 1305.834 | 1289.815        | <b>1290.823</b> | 1288.807 | G[11] |
| G[14] | <b>1256.718</b> | 1248.812 | 1232.794        | <b>1233.801</b> | 1231.786 | G[10] |
| A[15] | <b>1327.755</b> | 1191.791 | 1175.772        | <b>1176.780</b> | 1174.764 | A[0]  |
| K[16] | <b>1455.850</b> | 1120.754 | 1104.735        | <b>1105.743</b> | 1103.727 | K[8]  |
| R[17] | <b>1611.951</b> | 992.659  | 976.640         | <b>977.648</b>  | 975.632  | R[7]  |
| T[18] | <b>1749.010</b> | 836.568  | <b>820.539</b>  | 821.547         | 819.531  | T[6]  |
| R[19] | <b>1905.111</b> | 699.490  | <b>683.460</b>  | 684.468         | 682.452  | R[5]  |
| K[20] | 2061.238        | 543.398  | <b>527.379</b>  | <b>528.387</b>  | 526.371  | K[4]  |
| V[21] | 2160.306        | 387.271  | 371.253         | <b>372.261</b>  | 370.245  | V[3]  |
| L[22] | 2273.390        | 288.203  | <b>272.184</b>  | 273.192         | 271.176  | L[2]  |
| R[23] | 2429.491        | 175.119  | 159.100         | 160.108         | 158.092  | R[1]  |



# sp | P62806 | H4\_MOUSE

[Acetyl]SGRGKGGKGLGKGGAKRHRK <sup>Dimethyl</sup> VLR  
28.03

- ▶ fragmentation table for charge state 2+
- ▶ specType=etd
- ▶ score=130.01
- ▶ F113281.dat
- ▶ query=q29806.p1
- ▶ precursor=608.374350
- ▶ chargePrecursor=4
- ▶ itol=0.5

| AA   | c               | y               | z+1             | z+2             | z               | AA   |
|------|-----------------|-----------------|-----------------|-----------------|-----------------|------|
| S 1  | 74.042          | 1215.741        | <b>1207.732</b> | 0.904           | 1207.220        | S 21 |
| G 2  | 102.553         | 1151.220        | <b>1143.211</b> | 0.904           | 1142.707        | G 22 |
| R 3  | 180.603         | <b>1122.709</b> | <b>1114.700</b> | <b>1115.204</b> | 1114.190        | R 21 |
| G 4  | 209.114         | 1044.659        | <b>1036.649</b> | <b>1037.153</b> | <b>1036.145</b> | G 20 |
| K 5  | 273.161         | 1016.148        | <b>1008.139</b> | <b>1008.643</b> | 1007.835        | K 19 |
| G 6  | 301.672         | 892.300         | <b>884.091</b>  | <b>884.595</b>  | 883.589         | G 18 |
| G 7  | 330.183         | 823.590         | <b>815.580</b>  | <b>816.084</b>  | 815.078         | G 17 |
| K 8  | 394.230         | 895.079         | <b>887.070</b>  | <b>887.574</b>  | 886.568         | K 16 |
| G 9  | 422.741         | 831.053         | <b>823.022</b>  | <b>823.526</b>  | 822.518         | G 15 |
| L 10 | 478.283         | 802.521         | 794.511         | 795.015         | 794.050         | L 14 |
| G 11 | 507.794         | 745.079         | <b>737.969</b>  | <b>738.473</b>  | 737.465         | G 13 |
| K 12 | 571.844         | 717.466         | <b>709.459</b>  | <b>709.963</b>  | 708.955         | K 12 |
| G 13 | 600.352         | 651.421         | <b>645.411</b>  | <b>645.915</b>  | 644.907         | G 11 |
| G 14 | 638.863         | 624.910         | <b>616.900</b>  | <b>617.404</b>  | 616.397         | G 10 |
| A 15 | 664.301         | 596.399         | <b>588.390</b>  | <b>588.894</b>  | 587.888         | A 9  |
| K 16 | <b>728.429</b>  | 560.881         | <b>552.871</b>  | <b>553.375</b>  | <b>552.367</b>  | K 8  |
| R 17 | <b>805.479</b>  | 498.833         | 488.823         | <b>489.328</b>  | 488.321         | R 7  |
| H 18 | <b>875.009</b>  | 418.782         | 410.773         | 411.277         | 410.269         | H 6  |
| R 19 | <b>953.059</b>  | 350.253         | 342.244         | 342.748         | 341.740         | R 5  |
| K 20 | <b>1031.122</b> | <b>272.202</b>  | 264.193         | 264.697         | 263.689         | K 4  |
| V 21 | <b>1080.657</b> | 194.139         | 186.130         | 186.634         | 185.626         | V 3  |
| L 22 | <b>1137.199</b> | 144.605         | 136.596         | 137.100         | 136.092         | L 1  |
| R 23 | 1233.242        | 98.053          | 89.044          | 89.558          | 79.550          | R 1  |

# sp | P62806 | H4\_MOUSE

[Acetyl]SGRGKGGKGLGKGGAKRHRK<sup>Dimethyl</sup>VLR<sub>28.03</sub>

- ▶ fragmentation table for charge state 3+
- ▶ specType=etd
- ▶ score=130.01
- ▶ F113281.dat
- ▶ query=q29806.p1
- ▶ precursor=608.374350
- ▶ chargePrecursor=4
- ▶ itol=0.5

| AA    | c       | y              | z+1            | z+2            | z              | AA    |
|-------|---------|----------------|----------------|----------------|----------------|-------|
| S[1]  | 49.697  | <b>810.830</b> | <b>805.490</b> | 0.672          | <b>805.154</b> | S[2]  |
| G[2]  | 68.704  | 767.816        | 762.476        | 0.677          | 762.140        | G[22] |
| K[3]  | 120.738 | 748.809        | <b>743.469</b> | <b>743.805</b> | 743.133        | K[21] |
| G[4]  | 139.745 | 696.775        | 691.435        | 691.771        | 691.099        | G[20] |
| K[5]  | 182.443 | 677.768        | 672.428        | 672.764        | 672.092        | K[19] |
| G[6]  | 201.450 | 635.069        | 629.730        | 630.066        | 629.394        | G[18] |
| G[7]  | 220.458 | 616.062        | 610.723        | 611.059        | 610.387        | G[17] |
| K[8]  | 263.156 | 597.055        | 591.716        | 592.051        | 591.380        | K[16] |
| G[9]  | 282.163 | 554.357        | 549.017        | 549.353        | 548.681        | G[15] |
| L[10] | 319.858 | 535.350        | 530.010        | 530.346        | 529.674        | L[14] |
| G[11] | 338.865 | 497.655        | 492.315        | 492.651        | 491.979        | G[13] |
| K[12] | 381.563 | 478.648        | 473.308        | 473.644        | 472.972        | K[12] |
| G[13] | 400.570 | 435.949        | 430.610        | 430.946        | 430.274        | G[11] |
| G[14] | 419.578 | <b>416.942</b> | 411.603        | 411.939        | 411.267        | G[10] |
| A[15] | 443.257 | 397.935        | 392.596        | 392.932        | 392.260        | A[9]  |
| K[16] | 485.955 | 374.256        | 368.917        | 369.252        | 368.581        | K[8]  |
| R[17] | 537.989 | 331.558        | 326.219        | 326.554        | 325.882        | R[7]  |
| H[18] | 583.675 | 279.524        | 274.185        | 274.520        | 273.849        | H[6]  |
| R[19] | 635.709 | 233.838        | 228.499        | 228.834        | 228.162        | R[5]  |
| K[20] | 687.751 | 181.804        | 176.465        | 176.800        | 176.129        | K[4]  |
| V[21] | 720.774 | 129.762        | 124.422        | 124.758        | 124.086        | V[3]  |
| L[22] | 758.468 | 96.739         | 91.400         | 91.736         | 91.064         | L[2]  |
| R[23] | 810.502 | 59.045         | 53.705         | 54.041         | 53.369         | R[1]  |

sp | P62806 | H4\_MOUSE

[Acetyl]SGRGKGGKGLGKGGAKRHRK Dimethyl VLR  
28.03

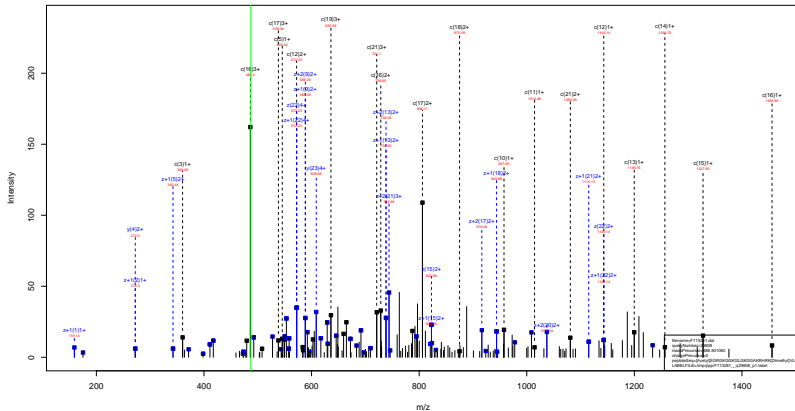

# sp | P62806 | H4\_MOUSE

[Acetyl]SGRGKGGKGLGKGGAKRHRK<sup>Dimethyl</sup> VLR<sub>28.03</sub>

- ▶ fragmentation table for charge state 1+
- ▶ specType=etd
- ▶ score=58.74
- ▶ F113281.dat
- ▶ query=q29808\_p1
- ▶ precursor=486.901060
- ▶ chargePrecursor=5
- ▶ itol=0.5

| AA    | c               | y              | z+1            | z+2             | z        | AA    |
|-------|-----------------|----------------|----------------|-----------------|----------|-------|
| S[1]  | 147.076         | 2430.475       | 2414.457       | 0.000           | 2413.440 | S[23] |
| G[2]  | 204.098         | 2301.433       | 2285.414       | 0.000           | 2284.405 | G[22] |
| R[3]  | <b>360.199</b>  | 2244.411       | 2228.392       | 2229.400        | 2227.385 | R[21] |
| G[4]  | <b>417.220</b>  | 2088.310       | 2072.291       | 2073.299        | 2071.284 | G[20] |
| K[5]  | <b>545.315</b>  | 2031.289       | 2015.270       | 2016.278        | 2014.262 | K[19] |
| G[6]  | <b>602.337</b>  | 1903.194       | 1887.175       | 1888.183        | 1886.167 | G[18] |
| G[7]  | <b>659.358</b>  | 1846.172       | 1830.153       | 1831.161        | 1829.145 | G[17] |
| K[8]  | <b>787.453</b>  | 1789.151       | 1773.132       | 1774.140        | 1772.124 | K[16] |
| G[9]  | 844.475         | 1661.056       | 1645.037       | 1646.045        | 1644.029 | G[15] |
| L[10] | <b>957.559</b>  | 1604.034       | 1588.016       | 1589.023        | 1587.008 | L[14] |
| G[11] | <b>1014.580</b> | 1490.950       | 1474.932       | 1475.939        | 1473.924 | G[13] |
| R[12] | <b>1142.675</b> | 1433.929       | 1417.910       | 1418.918        | 1416.902 | R[12] |
| G[13] | <b>1198.697</b> | 1305.834       | 1289.815       | 1290.823        | 1288.807 | G[11] |
| G[14] | <b>1256.718</b> | 1248.812       | 1232.794       | <b>1233.801</b> | 1231.786 | G[10] |
| A[15] | <b>1327.735</b> | 1191.791       | 1175.772       | 1176.780        | 1174.764 | A[9]  |
| K[16] | <b>1455.850</b> | 1120.754       | 1104.735       | 1105.743        | 1103.727 | K[8]  |
| R[17] | 1611.951        | 992.659        | 976.640        | <b>977.648</b>  | 975.632  | R[7]  |
| R[18] | 1740.010        | 836.555        | <b>820.539</b> | 821.547         | 819.531  | R[6]  |
| R[19] | 1809.111        | 699.490        | <b>683.480</b> | 684.488         | 682.472  | R[5]  |
| K[20] | 2061.236        | <b>543.398</b> | <b>527.379</b> | 528.387         | 526.371  | K[4]  |
| V[21] | 2160.306        | 387.271        | <b>371.253</b> | 372.261         | 370.245  | V[3]  |
| L[22] | 2273.390        | 288.203        | <b>272.184</b> | 273.192         | 271.176  | L[2]  |
| R[23] | 2429.491        | <b>175.119</b> | <b>159.100</b> | 160.108         | 158.092  | R[1]  |

# sp | P62806 | H4\_MOUSE

[Acetyl]SGRGKGGKGLGKGGAKRHRK <sup>Dimethyl</sup> 28.03 VLR

- ▶ fragmentation table for charge state 2+
- ▶ specType=etd
- ▶ score=58.74
- ▶ F113281.dat
- ▶ query=q29808.p1
- ▶ precursor=486.901060
- ▶ chargePrecursor=5
- ▶ itol=0.5

| AA    | c               | y              | z+1             | z+2             | z               | AA    |
|-------|-----------------|----------------|-----------------|-----------------|-----------------|-------|
| S[1]  | 74.062          | 1215.741       | 1207.732        | 0.504           | 1207.228        | S[2]  |
| G[2]  | 102.563         | 1151.220       | <b>1143.211</b> | 0.504           | <b>1142.707</b> | G[2]  |
| R[3]  | 180.603         | 1122.709       | <b>1114.700</b> | <b>1115.204</b> | 1114.196        | R[2]  |
| G[4]  | 209.114         | 1044.059       | 1036.049        | <b>1037.153</b> | 1036.143        | G[20] |
| K[5]  | 273.161         | 1016.148       | 1008.139        | <b>1008.643</b> | 1007.635        | K[19] |
| G[6]  | 301.672         | 952.100        | <b>944.091</b>  | <b>944.595</b>  | <b>943.587</b>  | G[18] |
| G[7]  | 330.183         | <b>923.590</b> | 915.580         | <b>916.084</b>  | 915.076         | G[17] |
| K[8]  | 394.230         | 895.079        | 887.070         | 887.574         | 886.566         | K[16] |
| G[9]  | 422.741         | <b>831.032</b> | <b>823.022</b>  | <b>823.526</b>  | <b>822.518</b>  | G[15] |
| L[10] | <b>479.283</b>  | 802.521        | <b>794.511</b>  | <b>795.015</b>  | 794.008         | L[14] |
| G[11] | <b>507.794</b>  | <b>745.079</b> | <b>737.069</b>  | <b>738.473</b>  | 737.465         | G[13] |
| R[12] | <b>571.841</b>  | 717.468        | <b>709.459</b>  | <b>709.963</b>  | 708.955         | R[12] |
| G[13] | 600.352         | 653.421        | <b>645.411</b>  | <b>645.915</b>  | 644.907         | G[11] |
| G[14] | <b>628.863</b>  | 624.910        | <b>616.900</b>  | <b>617.404</b>  | 616.397         | G[10] |
| A[15] | <b>664.381</b>  | <b>596.399</b> | <b>588.390</b>  | <b>588.894</b>  | 587.886         | A[9]  |
| K[16] | <b>728.429</b>  | 560.881        | <b>552.871</b>  | <b>553.375</b>  | 552.367         | K[8]  |
| R[17] | <b>806.479</b>  | 496.833        | 488.823         | 489.327         | 488.320         | R[7]  |
| R[18] | <b>875.009</b>  | 418.782        | <b>410.773</b>  | <b>411.277</b>  | 410.269         | R[6]  |
| R[19] | 953.059         | 350.253        | <b>342.244</b>  | <b>342.748</b>  | 341.740         | R[5]  |
| K[20] | 1031.122        | <b>272.202</b> | 264.193         | 264.697         | 263.689         | K[4]  |
| V[21] | <b>1080.657</b> | 194.139        | 186.130         | 186.634         | 185.626         | V[3]  |
| L[22] | 1137.199        | 144.605        | 136.596         | 137.100         | 136.092         | L[2]  |
| R[23] | 1215.249        | 88.083         | 80.074          | 80.578          | 79.570          | R[1]  |

# sp | P62806 | H4\_MOUSE

[Acetyl]SGRGKGGKGLGKGGAKRHRK<sup>Dimethyl</sup>VLR<sub>28.03</sub>

- ▶ fragmentation table for charge state 3+
- ▶ specType=etd
- ▶ score=58.74
- ▶ F113281.dat
- ▶ query=q29808.p1
- ▶ precursor=486.901060
- ▶ chargePrecursor=5
- ▶ itol=0.5

| AA    | c              | y              | z+1            | z+2            | z              | AA    |
|-------|----------------|----------------|----------------|----------------|----------------|-------|
| S[1]  | 49.697         | 810.830        | 805.490        | 0.672          | 805.154        | S[23] |
| G[2]  | 68.704         | 767.816        | 762.476        | 0.672          | 762.140        | G[22] |
| E[3]  | 120.738        | 748.809        | 743.469        | <b>743.805</b> | 743.133        | R[21] |
| G[4]  | 139.743        | <b>696.775</b> | <b>691.435</b> | <b>691.771</b> | 691.099        | G[20] |
| K[5]  | 182.443        | 677.768        | <b>672.428</b> | 672.764        | <b>672.092</b> | K[19] |
| G[6]  | 201.450        | 635.069        | <b>629.730</b> | <b>630.066</b> | <b>629.394</b> | G[18] |
| G[7]  | 220.458        | 616.062        | 610.723        | 611.059        | 610.387        | G[17] |
| K[8]  | 263.156        | 597.055        | <b>591.716</b> | <b>592.051</b> | 591.380        | K[16] |
| G[9]  | 282.163        | 554.367        | <b>549.017</b> | <b>549.353</b> | <b>548.681</b> | G[15] |
| L[10] | 319.658        | 535.350        | 530.010        | 530.346        | 529.674        | L[14] |
| G[11] | 338.665        | 497.655        | <b>492.315</b> | <b>492.651</b> | 491.979        | G[13] |
| K[12] | 381.363        | 478.648        | <b>473.308</b> | <b>473.644</b> | <b>472.972</b> | K[12] |
| G[13] | 400.370        | 435.949        | 430.610        | 430.946        | 430.274        | G[11] |
| G[14] | 419.378        | <b>416.942</b> | 411.603        | 411.939        | <b>411.267</b> | G[10] |
| A[15] | 443.257        | <b>397.935</b> | 392.596        | 392.932        | 392.260        | A[9]  |
| K[16] | <b>485.955</b> | 374.256        | 368.917        | 369.252        | 368.581        | K[8]  |
| R[17] | <b>537.989</b> | 351.558        | 326.218        | 326.554        | 325.882        | R[7]  |
| H[18] | <b>583.675</b> | 279.524        | 274.185        | 274.520        | 273.849        | H[6]  |
| R[19] | <b>635.709</b> | 233.838        | 228.498        | 228.834        | 228.162        | R[5]  |
| K[20] | 687.751        | 181.804        | 176.465        | 176.800        | 176.129        | K[4]  |
| V[21] | <b>720.774</b> | 129.762        | 124.422        | 124.758        | 124.086        | V[9]  |
| L[22] | 758.868        | 96.739         | 91.400         | 91.736         | 91.064         | L[2]  |
| R[23] | 810.502        | 59.043         | 53.703         | 54.041         | 53.369         | R[1]  |

# sp | P62806 | H4\_MOUSE

[Acetyl]SGRGKGGKGLGKGGAKRHRK<sup>Dimethyl</sup>VLR<sub>28.03</sub>

- ▶ fragmentation table for charge state 4+
- ▶ specType=etd
- ▶ score=58.74
- ▶ F113281.dat
- ▶ query=q29808.p1
- ▶ precursor=486.901060
- ▶ chargePrecursor=5
- ▶ itol=0.5

| AA |    | c       | y              | z+1            | z+2            | z              | AA |
|----|----|---------|----------------|----------------|----------------|----------------|----|
| S  | 1  | 37.525  | <b>608.374</b> | 604.370        | 0.755          | 604.118        | S  |
| G  | 2  | 51.750  | 576.114        | <b>572.109</b> | 0.755          | <b>571.857</b> | G  |
| K  | 3  | 60.833  | 561.358        | <b>557.854</b> | <b>558.106</b> | <b>557.602</b> | K  |
| G  | 4  | 105.061 | 522.833        | 518.830        | 519.080        | 518.576        | G  |
| K  | 5  | 137.084 | 508.578        | 504.573        | 504.825        | 504.321        | K  |
| G  | 6  | 151.340 | 476.554        | <b>472.549</b> | <b>472.801</b> | <b>472.297</b> | G  |
| G  | 7  | 165.595 | 462.299        | 458.294        | 458.546        | 458.042        | G  |
| K  | 8  | 197.619 | 448.043        | 444.038        | 444.290        | 443.787        | K  |
| G  | 9  | 211.874 | 416.019        | 412.015        | 412.267        | 411.763        | G  |
| L  | 10 | 240.145 | 401.764        | 397.759        | <b>398.011</b> | 397.507        | L  |
| G  | 11 | 254.401 | 373.493        | 369.488        | 369.740        | 369.236        | G  |
| K  | 12 | 286.424 | 359.238        | 355.233        | 355.485        | 354.981        | K  |
| G  | 13 | 300.680 | 327.214        | 323.209        | 323.461        | 322.957        | G  |
| G  | 14 | 314.935 | 312.959        | 308.954        | 309.206        | 308.702        | G  |
| A  | 15 | 332.594 | 298.703        | 294.698        | 294.950        | 294.447        | A  |
| K  | 16 | 364.718 | 280.944        | 276.939        | 277.191        | 276.687        | K  |
| R  | 17 | 403.743 | 248.920        | 244.915        | 245.167        | 244.664        | R  |
| H  | 18 | 438.008 | 209.895        | 205.890        | 206.142        | 205.638        | H  |
| R  | 19 | 477.033 | 175.830        | 171.825        | 171.877        | 171.374        | R  |
| K  | 20 | 516.065 | 136.605        | 132.600        | 132.852        | 132.348        | K  |
| V  | 21 | 540.812 | 97.573         | 93.569         | 93.821         | 93.317         | V  |
| L  | 22 | 569.103 | 72.806         | 68.802         | 69.053         | 68.550         | L  |
| R  | 23 | 608.128 | 44.535         | 40.531         | 40.782         | 40.279         | R  |





# sp | P62806 | H4\_MOUSE

[Acetyl]SGRGKGGKGLGKGGAKRHRK <sup>Dimethyl</sup> 28.03 VLR

- ▶ fragmentation table for charge state 1+
- ▶ specType=etd
- ▶ score=94.64
- ▶ F113281.dat
- ▶ query=q29809\_p1
- ▶ precursor=486.901100
- ▶ chargePrecursor=5
- ▶ itol=0.5

| AA    | c               | y              | z+1             | z+2             | z        | AA    |
|-------|-----------------|----------------|-----------------|-----------------|----------|-------|
| S[1]  | 147.076         | 2430.475       | 2474.457        | 0.000           | 2413.440 | S[23] |
| G[2]  | 304.098         | 2301.433       | 2285.414        | 0.000           | 2284.406 | G[22] |
| R[3]  | <b>360.199</b>  | 2244.411       | 2228.392        | 2229.400        | 2227.385 | R[21] |
| G[4]  | <b>417.220</b>  | 2088.310       | 2072.291        | 2073.299        | 2071.284 | G[20] |
| K[5]  | <b>545.315</b>  | 2031.289       | 2015.270        | 2016.278        | 2014.263 | K[19] |
| G[6]  | 602.337         | 1903.184       | 1887.175        | 1888.183        | 1886.167 | G[18] |
| G[7]  | <b>659.358</b>  | 1846.172       | 1830.153        | 1831.161        | 1829.146 | G[17] |
| K[8]  | <b>787.453</b>  | 1789.151       | 1773.132        | 1774.140        | 1772.124 | K[16] |
| G[9]  | <b>844.475</b>  | 1661.056       | 1645.037        | <b>1646.045</b> | 1644.029 | G[15] |
| L[10] | <b>957.559</b>  | 1604.034       | 1588.015        | 1589.023        | 1587.008 | L[14] |
| G[11] | <b>1014.580</b> | 1486.950       | 1474.932        | 1475.939        | 1471.924 | G[13] |
| R[12] | <b>1142.675</b> | 1433.929       | 1417.910        | 1418.918        | 1416.902 | R[12] |
| G[13] | <b>1199.697</b> | 1305.834       | 1289.815        | <b>1290.823</b> | 1288.807 | G[11] |
| G[14] | <b>1256.718</b> | 1248.812       | <b>1232.794</b> | 1233.801        | 1231.786 | G[10] |
| A[15] | <b>1327.755</b> | 1191.791       | 1175.772        | <b>1176.780</b> | 1174.764 | A[0]  |
| K[16] | <b>1455.850</b> | 1120.754       | 1104.735        | <b>1105.743</b> | 1103.727 | K[8]  |
| R[17] | <b>1611.951</b> | 992.659        | 976.640         | <b>977.648</b>  | 975.632  | R[7]  |
| T[18] | 1749.010        | 836.568        | <b>820.539</b>  | <b>821.547</b>  | 819.531  | T[6]  |
| R[19] | 1905.111        | 699.499        | <b>683.480</b>  | <b>684.488</b>  | 682.472  | R[5]  |
| K[20] | 2061.238        | 543.398        | <b>527.379</b>  | <b>528.387</b>  | 526.371  | K[4]  |
| V[21] | 2160.306        | 387.271        | <b>371.253</b>  | <b>372.261</b>  | 370.245  | V[3]  |
| L[22] | 2273.390        | 288.203        | <b>272.184</b>  | 273.192         | 271.176  | L[2]  |
| R[23] | 2429.491        | <b>175.119</b> | <b>159.100</b>  | 160.108         | 158.092  | R[1]  |

# sp | P62806 | H4\_MOUSE

[Acetyl]SGRGKGGKGLGKGGAKRHRK <sup>Dimethyl</sup> 28.03 VLR

- ▶ fragmentation table for charge state 2+
- ▶ specType=etd
- ▶ score=94.64
- ▶ F113281.dat
- ▶ query=q29809\_p1
- ▶ precursor=486.901100
- ▶ chargePrecursor=5
- ▶ itol=0.5

| AA    | c               | y               | z+1            | z+2             | z               | AA    |
|-------|-----------------|-----------------|----------------|-----------------|-----------------|-------|
| S[1]  | 74.042          | <b>1215.741</b> | 1207.732       | 0.504           | 1207.228        | S[23] |
| G[2]  | 102.553         | 1151.220        | 1143.211       | 0.504           | <b>1142.707</b> | G[22] |
| R[3]  | 180.603         | 1122.709        | 1114.700       | 1115.204        | 1114.196        | R[21] |
| G[4]  | 209.114         | 1044.659        | 1036.649       | <b>1037.153</b> | 1036.145        | G[20] |
| K[5]  | 273.161         | 1016.148        | 1008.139       | <b>1008.643</b> | 1007.635        | K[19] |
| G[6]  | 301.672         | 955.100         | <b>944.091</b> | <b>944.595</b>  | 943.587         | G[18] |
| G[7]  | 330.183         | <b>923.590</b>  | <b>915.580</b> | <b>916.084</b>  | 915.076         | G[17] |
| K[8]  | <b>394.230</b>  | 895.070         | 887.070        | <b>887.574</b>  | 886.566         | K[16] |
| G[9]  | <b>422.741</b>  | <b>831.032</b>  | <b>823.022</b> | <b>823.526</b>  | 822.518         | G[15] |
| L[10] | <b>479.283</b>  | 802.521         | <b>794.511</b> | <b>795.015</b>  | 794.008         | L[14] |
| G[11] | <b>507.794</b>  | 745.970         | <b>737.969</b> | <b>738.473</b>  | 737.465         | G[13] |
| R[12] | <b>571.841</b>  | 717.466         | <b>709.459</b> | <b>709.963</b>  | <b>708.955</b>  | R[12] |
| G[13] | <b>600.352</b>  | 653.423         | <b>645.411</b> | <b>645.915</b>  | <b>644.907</b>  | G[11] |
| G[14] | 628.863         | 624.910         | <b>616.900</b> | <b>617.404</b>  | 616.397         | G[10] |
| A[15] | <b>664.381</b>  | 596.399         | <b>588.390</b> | <b>588.894</b>  | 587.886         | A[9]  |
| R[16] | <b>728.429</b>  | 560.881         | <b>552.871</b> | <b>553.375</b>  | 552.367         | R[8]  |
| R[17] | <b>806.479</b>  | 496.813         | <b>488.824</b> | <b>489.328</b>  | 488.320         | R[7]  |
| R[18] | <b>875.009</b>  | 438.763         | <b>430.773</b> | <b>431.277</b>  | 430.269         | R[6]  |
| R[19] | <b>953.059</b>  | 350.253         | <b>342.244</b> | <b>342.748</b>  | 341.740         | R[5]  |
| R[20] | <b>1031.122</b> | <b>272.202</b>  | 264.193        | 264.697         | 263.689         | R[4]  |
| V[21] | <b>1080.657</b> | 194.139         | 186.130        | 186.634         | 185.626         | V[3]  |
| L[22] | <b>1137.199</b> | 144.605         | 136.596        | 137.100         | 136.092         | L[2]  |
| R[23] | 1215.249        | 88.063          | 80.054         | 80.558          | 79.550          | R[1]  |

# sp | P62806 | H4\_MOUSE

[Acetyl]SGRGKGGKGLGKGGAKRHRK <sup>Dimethyl</sup> VLR  
28.03

- ▶ fragmentation table for charge state 3+
- ▶ specType=etd
- ▶ score=94.64
- ▶ F113281.dat
- ▶ query=q29809\_p1
- ▶ precursor=486.901100
- ▶ chargePrecursor=5
- ▶ itol=0.5

| AA    | c              | y              | z+1            | z+2            | z              | AA    |
|-------|----------------|----------------|----------------|----------------|----------------|-------|
| S[1]  | 49.697         | 810.830        | <b>805.490</b> | 0.672          | 805.154        | S[23] |
| G[2]  | 68.704         | 767.816        | 762.476        | 0.672          | 762.140        | G[22] |
| E[3]  | 120.738        | 748.909        | 743.469        | <b>743.805</b> | 743.133        | R[21] |
| G[4]  | 139.743        | 696.775        | <b>691.435</b> | <b>691.771</b> | 691.099        | G[25] |
| K[5]  | 182.443        | 577.768        | <b>672.428</b> | <b>672.764</b> | 672.092        | K[19] |
| G[6]  | 201.450        | 635.069        | <b>629.730</b> | 630.066        | <b>629.394</b> | G[18] |
| G[7]  | 220.458        | 616.062        | 610.723        | 611.059        | 610.387        | G[17] |
| K[8]  | 263.156        | 597.055        | <b>591.716</b> | <b>592.051</b> | 591.380        | K[16] |
| G[9]  | 282.163        | 554.357        | <b>549.017</b> | <b>549.353</b> | 548.681        | G[15] |
| L[10] | 319.658        | 535.350        | <b>530.010</b> | <b>530.346</b> | <b>529.674</b> | L[14] |
| G[11] | 338.665        | <b>497.655</b> | <b>492.315</b> | <b>492.651</b> | 491.979        | G[13] |
| K[12] | 381.563        | 478.648        | 473.308        | 473.644        | 472.972        | K[12] |
| G[13] | 400.570        | 435.949        | 430.610        | 430.946        | 430.274        | G[11] |
| G[14] | 419.578        | <b>416.942</b> | 411.603        | 411.939        | <b>411.267</b> | G[10] |
| A[15] | 443.257        | 397.935        | 392.596        | 392.932        | 392.260        | A[9]  |
| K[16] | 485.955        | 374.256        | 368.917        | 369.252        | 368.581        | K[8]  |
| R[17] | <b>537.989</b> | 351.558        | 326.218        | 326.554        | 325.882        | R[7]  |
| H[18] | <b>583.675</b> | 279.524        | 274.185        | 274.520        | 273.849        | H[6]  |
| R[19] | <b>635.709</b> | 233.838        | 228.498        | 228.834        | 228.162        | R[5]  |
| K[20] | <b>687.751</b> | 181.804        | 176.465        | 176.800        | 176.129        | K[4]  |
| V[21] | <b>720.774</b> | 129.762        | 124.422        | 124.758        | 124.086        | V[9]  |
| L[22] | <b>758.468</b> | 96.739         | 91.400         | 91.736         | 91.064         | L[2]  |
| R[23] | 810.502        | 59.043         | 53.703         | 54.041         | 53.369         | R[1]  |

# sp | P62806 | H4\_MOUSE

[Acetyl]SGRGKGGKGLGKGGAKRHRK<sup>Dimethyl</sup> VLR<sub>28.03</sub>

- ▶ fragmentation table for charge state 4+
- ▶ specType=etd
- ▶ score=94.64
- ▶ F113281.dat
- ▶ query=q29809\_p1
- ▶ precursor=486.901100
- ▶ chargePrecursor=5
- ▶ itol=0.5

| AA |    | c       | y              | z+1            | z+2            | z              | AA |
|----|----|---------|----------------|----------------|----------------|----------------|----|
| S  | 1  | 37.525  | <b>608.374</b> | <b>604.370</b> | 0.755          | 604.118        | S  |
| G  | 2  | 51.750  | 576.114        | <b>572.109</b> | 0.755          | <b>571.857</b> | G  |
| K  | 3  | 60.833  | 561.358        | <b>557.854</b> | <b>553.106</b> | <b>557.602</b> | K  |
| G  | 4  | 105.061 | 522.833        | 518.827        | 519.080        | 518.576        | G  |
| K  | 5  | 137.084 | <b>508.578</b> | 504.573        | 504.825        | 504.321        | K  |
| G  | 6  | 151.340 | 476.554        | 472.549        | 472.801        | 472.297        | G  |
| G  | 7  | 165.595 | 462.299        | 458.294        | 458.546        | 458.042        | G  |
| K  | 8  | 197.619 | 448.043        | 444.038        | 444.290        | 443.787        | K  |
| G  | 9  | 211.874 | 416.019        | 412.015        | 412.267        | 411.763        | G  |
| L  | 10 | 240.145 | 401.764        | 397.759        | 398.011        | 397.507        | L  |
| G  | 11 | 254.401 | 373.493        | 369.488        | 369.740        | 369.236        | G  |
| K  | 12 | 286.424 | 359.238        | 355.233        | 355.485        | 354.981        | K  |
| G  | 13 | 300.680 | 327.214        | 323.209        | 323.461        | 322.957        | G  |
| G  | 14 | 314.935 | 312.959        | 308.954        | 309.206        | 308.702        | G  |
| A  | 15 | 332.594 | 298.703        | 294.698        | 294.950        | 294.447        | A  |
| K  | 16 | 364.718 | 280.944        | 276.939        | 277.191        | 276.687        | K  |
| R  | 17 | 403.743 | 248.920        | 244.915        | 245.167        | 244.664        | R  |
| H  | 18 | 438.008 | 209.895        | 205.890        | 206.142        | 205.638        | H  |
| R  | 19 | 477.033 | <b>175.630</b> | 171.625        | 171.877        | 171.374        | R  |
| K  | 20 | 516.065 | 136.605        | 132.600        | 132.852        | 132.348        | K  |
| V  | 21 | 540.812 | 97.573         | 93.568         | 93.821         | 93.317         | V  |
| L  | 22 | 569.103 | 72.806         | 68.802         | 69.053         | 68.550         | L  |
| R  | 23 | 608.128 | 44.535         | 40.531         | 40.782         | 40.279         | R  |



# sp | P62806 | H4\_MOUSE

[Acetyl]SGRGKGGKGLGKGGAKRHRK<sup>Dimethyl</sup>VLR<sub>28.03</sub>

- ▶ fragmentation table for charge state 1+
- ▶ specType=etd
- ▶ score=87.07
- ▶ F113281.dat
- ▶ query=q29812.p1
- ▶ precursor=810.830530
- ▶ chargePrecursor=3
- ▶ itol=0.5

| AA    | c               | y        | z+1             | z+2             | z        | AA    |
|-------|-----------------|----------|-----------------|-----------------|----------|-------|
| S[1]  | 147.076         | 2430.475 | 2414.457        | 0.000           | 2413.440 | S[23] |
| G[2]  | 304.098         | 2301.433 | 2285.414        | 0.000           | 2284.400 | G[22] |
| R[3]  | <b>360.199</b>  | 2244.411 | 2228.392        | 2229.400        | 2227.385 | R[21] |
| G[4]  | <b>417.220</b>  | 2088.310 | 2072.291        | 2073.299        | 2071.284 | G[20] |
| K[5]  | <b>543.315</b>  | 2031.289 | 2015.270        | 2016.278        | 2014.263 | K[19] |
| G[6]  | <b>602.137</b>  | 1903.194 | <b>1887.175</b> | 1888.183        | 1886.167 | G[18] |
| G[7]  | <b>659.358</b>  | 1846.172 | <b>1830.153</b> | 1831.161        | 1829.146 | G[17] |
| K[8]  | <b>787.453</b>  | 1789.151 | <b>1773.132</b> | 1774.140        | 1772.124 | K[16] |
| G[9]  | <b>844.475</b>  | 1661.056 | <b>1645.037</b> | 1646.045        | 1644.029 | G[15] |
| L[10] | <b>957.559</b>  | 1604.034 | <b>1588.016</b> | 1589.023        | 1587.008 | L[14] |
| G[11] | <b>1014.580</b> | 1486.950 | 1471.932        | <b>1475.939</b> | 1473.924 | G[13] |
| R[12] | <b>1142.675</b> | 1433.929 | <b>1417.910</b> | <b>1418.918</b> | 1416.902 | R[12] |
| G[13] | 1169.697        | 1305.834 | <b>1289.815</b> | 1290.823        | 1288.807 | G[11] |
| G[14] | 1256.718        | 1248.812 | 1232.794        | <b>1233.801</b> | 1231.786 | G[10] |
| A[15] | 1327.795        | 1191.791 | 1175.772        | <b>1176.780</b> | 1174.764 | A[0]  |
| K[16] | 1435.850        | 1120.754 | 1104.735        | <b>1105.743</b> | 1103.727 | K[8]  |
| R[17] | 1611.951        | 992.659  | 976.640         | <b>977.648</b>  | 975.632  | R[7]  |
| T[18] | 1749.010        | 836.568  | 820.539         | <b>821.547</b>  | 819.531  | T[6]  |
| R[19] | 1905.111        | 699.490  | 683.480         | <b>684.488</b>  | 682.472  | R[5]  |
| K[20] | 2061.236        | 543.398  | 527.379         | <b>528.387</b>  | 526.371  | K[4]  |
| V[23] | 2160.306        | 387.271  | 371.253         | 372.261         | 370.245  | V[3]  |
| L[22] | 2273.390        | 288.203  | 272.184         | 273.192         | 271.176  | L[2]  |
| R[23] | 2429.491        | 175.119  | 159.100         | 160.108         | 158.082  | R[1]  |

# sp | P62806 | H4\_MOUSE

[Acetyl]SGRGKGGKGLGKGGAKRHRK <sup>Dimethyl</sup> VLR  
28.03

- ▶ fragmentation table for charge state 2+
- ▶ specType=etd
- ▶ score=87.07
- ▶ F113281.dat
- ▶ query=q29812.p1
- ▶ precursor=810.830530
- ▶ chargePrecursor=3
- ▶ itol=0.5

| AA   | c               | y               | z+1             | z+2             | z               | AA   |
|------|-----------------|-----------------|-----------------|-----------------|-----------------|------|
| S 1  | 74.042          | <b>1215.741</b> | <b>1207.732</b> | 0.904           | 1207.220        | S 21 |
| G 2  | 102.553         | 1151.220        | <b>1143.211</b> | 0.904           | <b>1142.707</b> | G 20 |
| R 3  | 180.603         | 1122.709        | <b>1114.700</b> | <b>1115.204</b> | 1114.196        | R 21 |
| G 4  | 209.114         | 1044.659        | <b>1036.649</b> | <b>1037.153</b> | 1036.143        | G 20 |
| K 5  | 273.161         | 1016.148        | 1008.139        | 1008.643        | 1007.835        | K 19 |
| G 6  | 301.672         | 952.200         | 944.001         | 944.505         | 943.589         | G 18 |
| G 7  | 330.183         | 923.590         | 915.590         | 916.094         | 915.075         | G 17 |
| K 8  | 394.230         | 895.079         | 887.070         | 887.574         | 886.560         | K 18 |
| G 9  | 422.741         | 831.053         | 823.025         | 823.526         | 822.510         | G 15 |
| L 10 | 478.283         | 802.521         | 794.511         | 795.015         | 794.050         | L 14 |
| G 11 | 507.794         | 748.079         | 740.069         | 740.573         | 739.465         | G 13 |
| K 12 | 571.841         | 717.465         | 709.459         | 709.963         | 708.955         | K 12 |
| G 13 | 600.352         | 653.421         | 645.411         | 645.915         | 644.907         | G 11 |
| G 14 | 638.863         | 624.910         | 616.900         | 617.404         | 616.397         | G 10 |
| A 15 | 664.371         | 596.399         | 588.390         | 588.894         | 587.880         | A 9  |
| K 16 | 728.420         | 560.881         | 552.871         | 553.375         | 552.367         | K 8  |
| R 17 | 808.479         | 498.833         | 488.823         | 489.328         | 488.321         | R 7  |
| H 18 | 875.520         | 418.782         | 410.773         | 411.277         | 410.250         | H 6  |
| R 19 | 953.059         | 350.253         | 342.244         | 342.748         | 341.740         | R 5  |
| K 20 | <b>1031.122</b> | 272.202         | 264.193         | 264.697         | 263.680         | K 4  |
| V 21 | <b>1080.657</b> | 194.139         | 186.130         | 186.634         | 185.620         | V 9  |
| L 22 | <b>1137.199</b> | 144.065         | 136.065         | 137.060         | 136.060         | L 3  |
| R 23 | 1215.249        | 98.053          | 89.034          | 89.558          | 79.550          | R 1  |





# sp | P62806 | H4\_MOUSE

[Acetyl]SGRGKGGKGLGKGGAKRHRK <sup>Dimethyl</sup> 28.03 VLR

- ▶ fragmentation table for charge state 1+
- ▶ specType=cid
- ▶ score=44.12
- ▶ F113281.dat
- ▶ query=q29817\_p1
- ▶ precursor=1215.742700
- ▶ chargePrecursor=2
- ▶ itol=0.5

| AA  | a              | a*              | a <sub>0</sub> | b               | b*              | b <sub>0</sub>  | y               | y*              | y <sub>0</sub> | AA  |
|-----|----------------|-----------------|----------------|-----------------|-----------------|-----------------|-----------------|-----------------|----------------|-----|
| S1  | 1247.026       | 0.000           | 346.044        | 130.260         | 0.000           | 137.239         | 2423.420        | 2413.420        | 2412.760       | S19 |
| G2  | 1191.010       | 0.000           | 143.056        | 107.014         | 0.000           | 109.001         | 2301.413        | 2298.400        | 0.000          | G20 |
| R3  | 1115.110       | 106.111         | 267.071        | 343.172         | 126.146         | 126.150         | 2204.411        | 2227.390        | 1160.000       | R21 |
| G4  | 872.109        | 209.112         | 354.189        | 420.189         | 383.187         | 382.183         | 2089.410        | 2072.390        | 0.000          | G20 |
| K15 | 800.095        | <b>483.281</b>  | 466.269        | <b>236.200</b>  | 0.000           | 0.000           | 1919.410        | 1919.410        | 0.000          | K16 |
| G6  | 557.104        | 150.105         | 516.310        | <b>585.310</b>  | 558.304         | <b>567.300</b>  | <b>1903.194</b> | 1899.190        | 0.000          | G10 |
| G7  | 514.101        | 107.102         | 586.320        | 662.320         | 626.300         | 624.301         | <b>1846.172</b> | 1839.140        | 0.000          | G17 |
| R8  | 482.092        | 123.093         | 726.423        | <b>776.427</b>  | 753.409         | 752.410         | 1709.171        | 1722.310        | 0.000          | R14 |
| G9  | 309.093        | 152.091         | 781.441        | <b>827.448</b>  | 810.422         | 809.438         | 1591.159        | 1644.020        | 0.000          | G10 |
| L10 | <b>912.517</b> | 895.511         | 894.520        | <b>940.532</b>  | <b>923.506</b>  | 922.510         | 1529.150        | 1527.000        | 0.000          | L14 |
| G11 | 667.101        | <b>932.532</b>  | 1017.540       | <b>997.554</b>  | <b>980.527</b>  | 979.530         | <b>1490.987</b> | 1491.000        | 0.000          | G11 |
| K12 | 1297.024       | 1299.018        | 1219.043       | 1129.064        | 1100.029        | <b>1107.010</b> | <b>1433.920</b> | 1418.900        | 0.000          | K12 |
| G13 | 1104.019       | <b>1137.040</b> | 1138.049       | 1132.070        | <b>1185.044</b> | 1184.040        | <b>1395.834</b> | 1389.800        | 0.000          | G13 |
| G14 | 1211.017       | <b>1194.070</b> | 1124.088       | <b>1226.092</b> | 1222.065        | 1221.061        | <b>1246.812</b> | <b>1231.786</b> | 0.000          | G10 |
| R15 | 1268.114       | 1269.110        | 1269.122       | <b>1310.129</b> | 1308.102        | <b>1292.118</b> | 1197.111        | 1214.900        | 0.000          | R16 |
| K16 | 1419.089       | 1401.081        | 1362.081       | <b>1436.024</b> | 1432.007        | 1430.011        | <b>1120.754</b> | 1118.720        | 0.000          | K18 |
| R17 | 1269.028       | 1249.020        | 1248.013       | <b>1294.025</b> | <b>1277.008</b> | 1276.014        | <b>902.650</b>  | 904.110         | 0.000          | R17 |
| L18 | 1111.068       | 1099.062        | 1060.062       | <b>1131.064</b> | 1124.057        | <b>1113.073</b> | <b>836.555</b>  | <b>810.511</b>  | 0.000          | L18 |
| R19 | 1069.089       | 1041.081        | 1043.071       | 1037.071        | 1071.058        | 1070.074        | <b>690.490</b>  | 692.470         | 0.000          | R19 |
| R20 | 2019.210       | 1999.192        | 1998.188       | 2044.211        | 2037.195        | 2036.201        | <b>543.396</b>  | 546.371         | 0.000          | R14 |
| V21 | 1019.105       | 1009.100        | 1000.104       | 1043.104        | 1036.103        | 1035.109        | <b>387.211</b>  | 390.200         | 0.000          | V18 |
| L22 | 1019.105       | 1011.100        | 1010.104       | 1043.104        | 1036.103        | 1035.109        | 0.000           | 0.000           | 0.000          | L12 |
| R23 | 2014.400       | 2007.400        | 1996.400       | 2012.400        | 2004.400        | 2004.400        | 175.110         | 158.000         | 0.000          | R11 |

# sp | P62806 | H4\_MOUSE

[Acetyl]SGRGKGGKGLGKGGAKRHRK Dimethyl VLR  
28.03

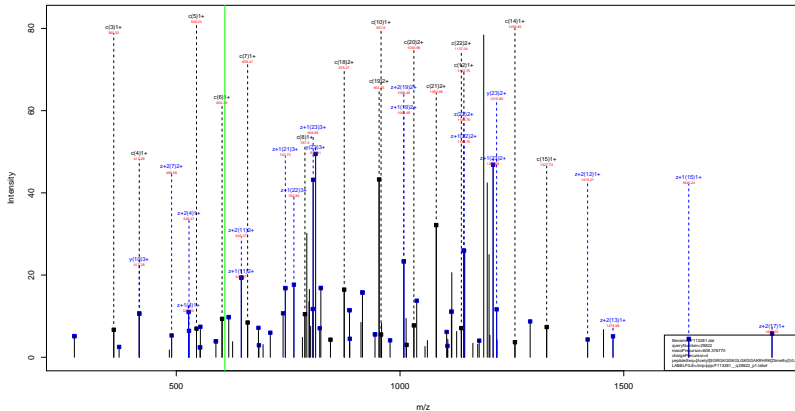

# sp | P62806 | H4\_MOUSE

[Acetyl]SGRGKGGKGLGKGGAKRHRK <sup>Dimethyl</sup> VLR  
28.03

- ▶ fragmentation table for charge state 1+
- ▶ specType=etd
- ▶ score=90.73
- ▶ F113281.dat
- ▶ query=q29822.p1
- ▶ precursor=608.376770
- ▶ chargePrecursor=4
- ▶ itol=0.5

| AA    | c               | y        | z+1             | z+2             | z               | AA    |
|-------|-----------------|----------|-----------------|-----------------|-----------------|-------|
| S[1]  | 147.076         | 2430.475 | 2414.457        | 0.000           | 2413.449        | S[23] |
| G[2]  | 204.098         | 2301.433 | 2285.414        | 0.000           | 2284.406        | G[22] |
| R[3]  | <b>360.199</b>  | 2244.411 | 2228.392        | 2229.400        | 2227.385        | R[21] |
| G[4]  | <b>417.220</b>  | 2088.310 | 2072.291        | 2073.299        | 2071.284        | G[20] |
| K[5]  | <b>545.315</b>  | 2031.289 | 2015.270        | 2016.278        | 2014.262        | K[19] |
| G[6]  | <b>602.337</b>  | 1973.194 | 1957.175        | 1958.183        | 1956.167        | G[18] |
| G[7]  | <b>659.358</b>  | 1846.172 | 1830.153        | <b>1831.161</b> | 1829.146        | G[17] |
| K[8]  | <b>787.453</b>  | 1789.151 | 1773.132        | 1774.140        | 1772.124        | K[16] |
| G[9]  | <b>844.475</b>  | 1661.056 | <b>1645.037</b> | 1646.045        | 1644.029        | G[15] |
| L[10] | <b>957.559</b>  | 1604.034 | 1588.015        | 1589.023        | 1587.008        | L[14] |
| G[11] | <b>1014.580</b> | 1490.950 | 1474.932        | <b>1475.939</b> | 1473.924        | G[13] |
| R[12] | <b>1142.675</b> | 1433.829 | 1417.810        | <b>1418.818</b> | 1416.803        | R[12] |
| G[13] | 1199.697        | 1305.834 | 1289.815        | <b>1290.823</b> | 1288.807        | G[11] |
| G[14] | <b>1256.718</b> | 1248.812 | 1232.794        | 1233.801        | 1231.785        | G[10] |
| A[15] | <b>1327.755</b> | 1191.791 | 1175.772        | <b>1176.780</b> | 1174.764        | A[9]  |
| K[16] | 1455.850        | 1120.754 | 1104.735        | <b>1105.743</b> | <b>1103.727</b> | K[8]  |
| R[17] | 1611.051        | 660.699  | 676.680         | <b>677.646</b>  | 675.632         | R[7]  |
| R[18] | 1769.019        | 638.658  | <b>620.539</b>  | 621.547         | 619.533         | R[6]  |
| R[19] | 1905.111        | 609.609  | <b>681.480</b>  | <b>684.488</b>  | 682.472         | R[5]  |
| K[20] | 2061.238        | 543.568  | <b>527.379</b>  | <b>528.387</b>  | 526.371         | K[4]  |
| V[21] | 2169.306        | 497.271  | 471.253         | <b>372.261</b>  | 370.245         | V[3]  |
| L[22] | 2273.390        | 388.203  | <b>272.184</b>  | 273.192         | 271.176         | L[2]  |
| R[23] | 2429.491        | 175.119  | 159.100         | 160.108         | 158.092         | R[1]  |

# sp | P62806 | H4\_MOUSE

[Acetyl]SGRGKGGKGLGKGGAKRHRK<sup>Dimethyl</sup>VLR<sub>28.03</sub>

- ▶ fragmentation table for charge state 2+
- ▶ specType=etd
- ▶ score=90.73
- ▶ F113281.dat
- ▶ query=q29822.p1
- ▶ precursor=608.376770
- ▶ chargePrecursor=4
- ▶ itol=0.5

| AA   | c               | y               | z+1             | z+2             | z               | AA   |
|------|-----------------|-----------------|-----------------|-----------------|-----------------|------|
| S 1  | 74.042          | <b>1215.741</b> | <b>1207.732</b> | 0.504           | 1207.226        | S 21 |
| G 2  | 102.553         | 1151.220        | <b>1143.211</b> | 0.504           | <b>1142.707</b> | G 22 |
| R 3  | 180.603         | 1122.709        | <b>1114.700</b> | <b>1115.204</b> | 1114.196        | R 21 |
| G 4  | 209.114         | 1044.659        | <b>1037.153</b> | 1036.649        | 1036.143        | G 20 |
| K 5  | 273.161         | 1016.148        | <b>1008.139</b> | <b>1008.643</b> | 1007.635        | K 19 |
| G 6  | 301.672         | 952.100         | <b>944.091</b>  | <b>944.595</b>  | 943.589         | G 18 |
| G 7  | 330.183         | 923.590         | <b>915.580</b>  | <b>916.084</b>  | 915.075         | G 17 |
| K 8  | 394.230         | 895.079         | <b>887.070</b>  | <b>887.574</b>  | 886.566         | K 16 |
| G 9  | 422.741         | 831.033         | <b>823.022</b>  | <b>823.526</b>  | 822.518         | G 15 |
| L 10 | 479.283         | 802.521         | 794.511         | 795.015         | 794.008         | L 14 |
| G 11 | 507.794         | 748.979         | 740.969         | <b>738.473</b>  | 737.465         | G 13 |
| K 12 | 571.844         | 717.466         | 709.459         | <b>708.963</b>  | 708.955         | K 12 |
| G 13 | 600.352         | 651.421         | <b>645.411</b>  | <b>645.915</b>  | 644.907         | G 11 |
| G 14 | 638.863         | 624.910         | <b>616.900</b>  | <b>617.404</b>  | 616.397         | G 10 |
| A 15 | 664.361         | 596.399         | <b>588.390</b>  | <b>588.894</b>  | 587.886         | A 9  |
| K 16 | 728.420         | 560.881         | <b>552.871</b>  | <b>553.375</b>  | 552.367         | K 8  |
| R 17 | 698.478         | 498.833         | 488.823         | <b>489.328</b>  | 488.321         | R 7  |
| H 18 | <b>875.009</b>  | 418.782         | 410.773         | 411.277         | 410.269         | H 6  |
| R 19 | <b>953.059</b>  | 350.253         | 342.244         | 342.748         | 341.740         | R 5  |
| K 20 | <b>1031.122</b> | <b>272.202</b>  | 264.193         | 264.697         | 263.689         | K 4  |
| V 21 | <b>1080.657</b> | 194.139         | 186.130         | 186.634         | 185.626         | V 3  |
| L 22 | <b>1137.199</b> | 144.605         | 136.595         | 137.100         | 136.092         | L 1  |
| R 23 | 1213.247        | 98.051          | 89.044          | 89.558          | 79.550          | R 1  |

# sp | P62806 | H4\_MOUSE

[Acetyl]SGRGKGGKGLGKGGAKRHRK<sup>Dimethyl</sup>VLR<sub>28.03</sub>

- ▶ fragmentation table for charge state 3+
- ▶ specType=etd
- ▶ score=90.73
- ▶ F113281.dat
- ▶ query=q29822\_p1
- ▶ precursor=608.376770
- ▶ chargePrecursor=4
- ▶ itol=0.5

| AA    | c       | y              | z+1            | z+2            | z              | AA    |
|-------|---------|----------------|----------------|----------------|----------------|-------|
| S[1]  | 49.697  | <b>810.830</b> | <b>805.490</b> | 0.672          | <b>805.154</b> | S[23] |
| G[2]  | 68.704  | 767.816        | <b>762.476</b> | 0.677          | 762.140        | G[22] |
| R[3]  | 120.738 | 748.809        | <b>743.469</b> | <b>743.805</b> | 743.133        | R[21] |
| G[4]  | 139.745 | 696.775        | 691.435        | 691.771        | 691.099        | G[20] |
| K[5]  | 182.443 | 677.768        | 672.428        | 672.764        | 672.092        | K[19] |
| G[6]  | 201.450 | 635.069        | 629.730        | 630.066        | 629.394        | G[18] |
| G[7]  | 220.458 | 616.062        | 610.723        | 611.059        | 610.387        | G[17] |
| K[8]  | 263.156 | 597.055        | 591.716        | 592.051        | 591.380        | K[16] |
| G[9]  | 282.163 | 554.357        | 549.017        | 549.353        | 548.681        | G[15] |
| L[10] | 319.858 | 535.350        | 530.010        | 530.346        | 529.674        | L[14] |
| G[11] | 338.865 | 497.655        | 492.315        | 492.651        | 491.979        | G[13] |
| K[12] | 381.563 | 478.648        | 473.308        | 473.644        | 472.972        | K[12] |
| G[13] | 400.570 | 435.949        | 430.610        | 430.946        | 430.274        | G[11] |
| G[14] | 419.578 | <b>416.942</b> | 411.603        | 411.939        | 411.267        | G[10] |
| A[15] | 443.257 | 397.935        | 392.596        | 392.932        | 392.260        | A[9]  |
| K[16] | 485.955 | 374.256        | 368.917        | 369.252        | 368.581        | K[8]  |
| R[17] | 537.989 | 331.558        | 326.219        | 326.554        | 325.882        | R[7]  |
| H[18] | 583.675 | 279.824        | 274.485        | 274.820        | 274.149        | H[6]  |
| R[19] | 635.709 | 233.838        | 228.499        | 228.834        | 228.162        | R[5]  |
| K[20] | 687.751 | 181.804        | 176.465        | 176.800        | 176.129        | K[4]  |
| V[21] | 720.774 | 129.762        | 124.422        | 124.758        | 124.086        | V[3]  |
| L[22] | 758.468 | 96.739         | 91.400         | 91.736         | 91.064         | L[2]  |
| R[23] | 810.502 | 59.045         | 53.705         | 54.041         | 53.369         | R[1]  |

# sp | P62806 | H4\_MOUSE

[Acetyl]SGRGKGGKGLGKGGAK Acetyl 42.01 RHRK Dimethyl 28.03 VLR

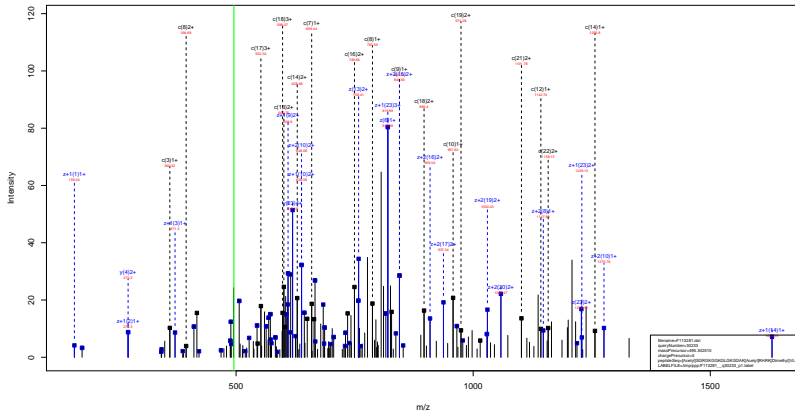

# sp | P62806 | H4\_MOUSE

[Acetyl]SGRGKGGKGLGKGGAK<sup>Acetyl</sup> RHRK<sup>Dimethyl</sup> VLR<sup>28.03</sup>

- ▶ fragmentation table for charge state 1+
- ▶ specType=etd
- ▶ score=74.10
- ▶ F113281.dat
- ▶ query=q30233\_p1
- ▶ precursor=495.302510
- ▶ chargePrecursor=5
- ▶ itol=0.5

| AA    | c               | y              | z+1             | z+2             | z              | AA    |
|-------|-----------------|----------------|-----------------|-----------------|----------------|-------|
| S[1]  | 147.076         | 2472.488       | 2456.469        | 0.000           | 2455.450       | S[23] |
| G[2]  | 304.098         | 2343.443       | 2327.425        | 0.000           | 2326.411       | G[22] |
| R[3]  | <b>360.199</b>  | 2206.422       | 2270.403        | 2271.411        | 2269.395       | R[21] |
| G[4]  | <b>417.220</b>  | 2130.321       | 2114.302        | 2115.310        | 2113.294       | G[20] |
| K[5]  | <b>543.315</b>  | 2073.299       | 2057.280        | 2058.288        | 2056.273       | K[19] |
| G[6]  | <b>602.137</b>  | 1945.204       | 1929.185        | 1930.193        | 1928.178       | G[18] |
| G[7]  | <b>659.358</b>  | 1888.183       | 1872.164        | 1873.172        | 1871.156       | G[17] |
| K[8]  | <b>787.453</b>  | 1831.161       | 1815.143        | 1816.150        | 1814.135       | K[16] |
| G[9]  | <b>844.475</b>  | 1703.066       | 1687.048        | 1688.055        | 1686.040       | G[15] |
| L[10] | <b>957.559</b>  | 1646.045       | <b>1630.026</b> | 1631.034        | 1629.018       | L[14] |
| G[11] | <b>1014.580</b> | 1532.961       | 1516.942        | 1517.950        | 1515.934       | G[13] |
| R[12] | <b>1142.675</b> | 1475.939       | 1459.921        | 1460.928        | 1458.913       | R[12] |
| G[13] | 1199.697        | 1347.844       | 1331.826        | 1332.833        | 1330.818       | G[11] |
| G[14] | <b>1256.718</b> | 1290.823       | 1274.804        | <b>1275.812</b> | 1273.796       | G[10] |
| A[15] | 1327.795        | 1233.801       | 1217.783        | <b>1218.791</b> | 1216.775       | A[0]  |
| K[16] | 1497.881        | 1162.764       | 1146.745        | <b>1147.753</b> | 1145.738       | K[8]  |
| R[17] | 1653.962        | 992.699        | 976.680         | <b>977.688</b>  | 975.673        | R[7]  |
| T[18] | 1793.024        | <b>836.558</b> | 820.539         | 821.547         | <b>819.531</b> | T[6]  |
| R[19] | 1947.122        | <b>699.499</b> | <b>683.480</b>  | 684.488         | 682.472        | R[5]  |
| K[20] | 2103.248        | 543.399        | <b>527.379</b>  | 528.387         | 526.371        | K[4]  |
| V[21] | 2202.317        | <b>387.271</b> | <b>371.253</b>  | 372.261         | 370.245        | V[3]  |
| L[22] | 2315.401        | 288.203        | <b>272.184</b>  | 273.192         | 271.176        | L[2]  |
| R[23] | 2471.502        | <b>175.119</b> | <b>159.100</b>  | 160.108         | 158.092        | R[1]  |

# sp | P62806 | H4\_MOUSE

[Acetyl]SGRGKGGKGLGKGGAK<sup>Acetyl</sup> RHRK<sup>Dimethyl</sup> VLR<sup>28.03</sup>

- ▶ fragmentation table for charge state 2+
- ▶ specType=etd
- ▶ score=74.10
- ▶ F113281.dat
- ▶ query=q30233.p1
- ▶ precursor=495.302510
- ▶ chargePrecursor=5
- ▶ itol=0.5

| AA    | c               | y              | z+1             | z+2             | z               | AA    |
|-------|-----------------|----------------|-----------------|-----------------|-----------------|-------|
| S[1]  | 74.062          | 1236.747       | <b>1228.737</b> | 0.504           | <b>1228.233</b> | S[23] |
| G[2]  | 102.553         | 1172.225       | 1164.210        | 0.504           | 1163.712        | G[22] |
| R[3]  | 180.603         | 1143.715       | 1135.700        | 1136.209        | 1135.201        | R[21] |
| G[4]  | 209.114         | 1085.664       | 1057.655        | <b>1058.159</b> | 1057.151        | G[20] |
| K[5]  | 273.161         | 1037.151       | <b>1029.144</b> | <b>1029.648</b> | <b>1028.640</b> | K[19] |
| G[6]  | 301.672         | 973.106        | <b>965.096</b>  | <b>965.600</b>  | 964.592         | G[18] |
| G[7]  | 330.183         | 944.595        | 936.580         | <b>937.090</b>  | 936.082         | G[17] |
| K[8]  | <b>394.230</b>  | 916.084        | 908.075         | <b>908.579</b>  | 907.571         | K[16] |
| G[9]  | 422.741         | <b>852.037</b> | 844.027         | <b>844.531</b>  | 843.524         | G[15] |
| L[10] | 479.283         | 823.526        | <b>815.517</b>  | <b>816.021</b>  | 815.013         | L[14] |
| G[11] | 507.794         | 766.068        | 758.058         | 759.479         | <b>758.471</b>  | G[13] |
| R[12] | <b>571.841</b>  | <b>738.473</b> | <b>730.464</b>  | <b>730.968</b>  | <b>729.960</b>  | R[12] |
| G[13] | <b>600.352</b>  | 674.626        | <b>666.416</b>  | <b>666.920</b>  | 665.913         | G[11] |
| G[14] | <b>628.863</b>  | 645.915        | <b>637.906</b>  | <b>638.410</b>  | 637.402         | G[10] |
| A[15] | <b>664.381</b>  | 617.404        | <b>609.395</b>  | <b>609.899</b>  | <b>608.891</b>  | A[9]  |
| R[16] | <b>748.434</b>  | 581.886        | 573.876         | <b>574.380</b>  | <b>573.373</b>  | R[8]  |
| R[17] | <b>827.485</b>  | 499.833        | <b>498.824</b>  | <b>499.328</b>  | 498.320         | R[7]  |
| R[18] | <b>896.014</b>  | 418.782        | <b>416.773</b>  | <b>417.277</b>  | 416.269         | R[6]  |
| R[19] | <b>974.065</b>  | 350.253        | <b>342.244</b>  | <b>342.748</b>  | <b>341.740</b>  | R[5]  |
| R[20] | 1052.128        | <b>272.202</b> | 264.193         | 264.697         | 263.689         | R[4]  |
| V[21] | <b>1101.662</b> | 194.139        | 186.130         | 186.634         | 185.626         | V[3]  |
| L[22] | <b>1158.204</b> | 144.605        | 136.596         | 137.100         | 136.092         | L[2]  |
| R[23] | 1236.255        | 88.083         | 80.074          | 80.578          | 79.570          | R[1]  |



# sp | P62806 | H4\_MOUSE

[Acetyl]SGRGKGGKGLGKGGAK<sup>Acetyl</sup> RHRK<sup>Dimethyl</sup> VLR<sup>28.03</sup>

- ▶ fragmentation table for charge state 3+
- ▶ specType=etd
- ▶ score=74.10
- ▶ F113281.dat
- ▶ query=q30233.p1
- ▶ precursor=495.302510
- ▶ chargePrecursor=5
- ▶ itol=0.5

| AA |      | c              | y              | z+1            | z+2            | z              | AA    |
|----|------|----------------|----------------|----------------|----------------|----------------|-------|
| S  | [1]  | 49.697         | 824.813        | <b>819.494</b> | 0.672          | 019.158        | S[23] |
| G  | [2]  | 68.704         | 781.819        | 779.480        | 0.672          | 776.144        | G[22] |
| R  | [3]  | 120.738        | <b>762.812</b> | <b>757.473</b> | <b>757.808</b> | 757.137        | R[21] |
| G  | [4]  | 139.743        | 710.778        | <b>705.439</b> | <b>705.775</b> | 708.103        | G[20] |
| K  | [5]  | 182.443        | 691.771        | <b>686.432</b> | <b>686.768</b> | <b>686.096</b> | K[19] |
| G  | [6]  | 201.450        | 649.073        | <b>643.733</b> | <b>644.069</b> | 643.397        | G[18] |
| G  | [7]  | 220.458        | 630.066        | 624.726        | <b>625.062</b> | 624.390        | G[17] |
| K  | [8]  | 263.156        | 611.059        | <b>605.719</b> | <b>606.055</b> | 605.383        | K[16] |
| G  | [9]  | 282.163        | <b>568.360</b> | <b>563.021</b> | <b>563.357</b> | 562.685        | G[15] |
| L  | [10] | 319.658        | 549.353        | <b>544.014</b> | <b>544.350</b> | 543.678        | L[14] |
| G  | [11] | 338.665        | 511.658        | <b>506.319</b> | <b>506.655</b> | 505.983        | G[13] |
| K  | [12] | 381.563        | 492.651        | <b>487.312</b> | <b>487.648</b> | 486.976        | K[12] |
| G  | [13] | 400.570        | 449.953        | 444.913        | 444.949        | 444.277        | G[11] |
| G  | [14] | 419.578        | 430.946        | 425.606        | 425.942        | 425.270        | G[10] |
| A  | [15] | 443.257        | 411.939        | 406.599        | 406.935        | 406.263        | A[9]  |
| K  | [16] | 499.958        | 388.260        | 382.920        | 383.256        | 382.584        | K[8]  |
| R  | [17] | <b>551.992</b> | 351.558        | 326.218        | 326.554        | 325.882        | R[7]  |
| H  | [18] | <b>597.678</b> | 279.524        | 274.185        | 274.520        | 273.849        | H[6]  |
| R  | [19] | <b>649.712</b> | 233.838        | 228.498        | 228.834        | 228.162        | R[5]  |
| K  | [20] | 701.754        | 181.804        | 176.465        | 176.800        | 176.129        | K[4]  |
| V  | [21] | <b>734.777</b> | 129.767        | 124.427        | 124.758        | 124.086        | V[3]  |
| L  | [22] | 772.472        | 96.739         | 91.400         | 91.736         | 91.064         | L[2]  |
| R  | [23] | 824.505        | 59.045         | 53.705         | 54.041         | 53.369         | R[1]  |

# sp | P62806 | H4\_MOUSE

[Acetyl]SGRGKGGKGLGKGGAK<sup>Acetyl</sup> RHRK<sup>Dimethyl</sup> VLR<sup>28.03</sup>

- ▶ fragmentation table for charge state 4+
- ▶ specType=etd
- ▶ score=74.10
- ▶ F113281.dat
- ▶ query=q30233.p1
- ▶ precursor=495.302510
- ▶ chargePrecursor=5
- ▶ itol=0.5

| AA |      | c              | y              | z+1            | z+2            | z              | AA    |
|----|------|----------------|----------------|----------------|----------------|----------------|-------|
| S  | [1]  | 37.525         | <b>618.877</b> | <b>614.872</b> | 0.755          | <b>614.620</b> | S[23] |
| G  | [2]  | 51.780         | <b>586.616</b> | <b>582.612</b> | 0.755          | <b>582.360</b> | G[22] |
| R  | [3]  | 60.805         | <b>572.361</b> | <b>568.356</b> | <b>568.608</b> | 568.104        | R[21] |
| G  | [4]  | 105.091        | 513.316        | 529.333        | 529.583        | 529.079        | G[20] |
| K  | [5]  | 137.084        | <b>519.080</b> | 515.076        | 515.328        | 514.824        | K[19] |
| G  | [6]  | 151.340        | 487.057        | 483.052        | 483.304        | 482.800        | G[18] |
| G  | [7]  | 165.595        | 472.801        | <b>468.796</b> | 469.048        | <b>468.545</b> | G[17] |
| K  | [8]  | 197.619        | 458.546        | 454.541        | 454.793        | 454.289        | K[16] |
| G  | [9]  | 211.874        | 426.522        | 422.517        | 422.769        | <b>422.265</b> | G[15] |
| L  | [10] | 240.145        | 412.267        | 408.262        | 408.514        | 408.010        | L[14] |
| G  | [11] | 254.401        | 383.996        | 379.991        | 380.243        | 379.739        | G[13] |
| K  | [12] | 286.424        | 369.740        | 365.735        | 365.988        | 365.484        | K[12] |
| G  | [13] | 300.680        | 337.717        | 333.712        | 333.964        | 333.460        | G[11] |
| G  | [14] | 314.935        | 323.461        | 319.457        | 319.708        | 319.205        | G[10] |
| A  | [15] | 332.694        | 309.206        | 305.201        | 305.453        | 304.949        | A[9]  |
| R  | [16] | 375.221        | 291.447        | 287.442        | 287.694        | 287.190        | R[8]  |
| R  | [17] | 414.246        | 248.920        | 244.915        | 245.167        | 244.664        | R[7]  |
| H  | [18] | 448.511        | 209.895        | 205.890        | 206.142        | 205.638        | H[6]  |
| R  | [19] | <b>487.536</b> | <b>175.630</b> | 171.625        | 171.877        | 171.374        | R[5]  |
| K  | [20] | 526.568        | 136.605        | 132.600        | 132.852        | 132.348        | K[4]  |
| V  | [21] | 551.335        | 97.573         | 93.568         | 93.821         | 93.317         | V[3]  |
| L  | [22] | 579.606        | 72.306         | 68.302         | 68.553         | 68.050         | L[2]  |
| R  | [23] | 618.631        | 44.535         | 40.531         | 40.782         | 40.279         | R[1]  |



# sp | P62806 | H4\_MOUSE

[Acetyl]SGRGKGGKGLGKGGAK<sup>Acetyl</sup> RHRK<sup>Dimethyl</sup> VLR<sup>28.03</sup>

- ▶ fragmentation table for charge state 1+
- ▶ specType=etd
- ▶ score=85.54
- ▶ F113281.dat
- ▶ query=q30235\_p1
- ▶ precursor=495.302940
- ▶ chargePrecursor=5
- ▶ itol=0.5

| AA    | c               | y              | z+1            | z+2             | z               | AA    |
|-------|-----------------|----------------|----------------|-----------------|-----------------|-------|
| S[1]  | 147.076         | 2472.488       | 2456.467       | 0.000           | 2455.450        | S[23] |
| G[2]  | 304.098         | 2343.443       | 2327.435       | 0.000           | 2326.417        | G[22] |
| R[3]  | <b>360.199</b>  | 2208.422       | 2270.403       | 2271.411        | 2269.395        | R[21] |
| G[4]  | <b>417.220</b>  | 2130.321       | 2114.302       | 2115.310        | 2113.294        | G[20] |
| K[5]  | <b>543.315</b>  | 2073.299       | 2057.280       | 2058.288        | 2056.272        | K[19] |
| G[6]  | <b>602.137</b>  | 1945.204       | 1929.186       | 1930.193        | 1928.176        | G[18] |
| G[7]  | <b>659.358</b>  | 1888.183       | 1872.164       | 1873.172        | 1871.156        | G[17] |
| K[8]  | <b>787.453</b>  | 1831.161       | 1815.143       | <b>1816.150</b> | 1814.135        | K[16] |
| G[9]  | <b>844.475</b>  | 1703.066       | 1687.048       | 1688.055        | 1686.040        | G[15] |
| L[10] | <b>957.559</b>  | 1646.045       | 1630.026       | 1631.034        | 1629.018        | L[14] |
| G[11] | <b>1014.580</b> | 1532.961       | 1516.942       | <b>1517.950</b> | 1515.934        | G[13] |
| K[12] | <b>1142.675</b> | 1475.939       | 1459.921       | 1460.928        | 1458.912        | K[12] |
| G[13] | <b>1199.697</b> | 1347.844       | 1331.825       | <b>1332.833</b> | 1330.818        | G[11] |
| G[14] | <b>1256.718</b> | 1290.823       | 1274.804       | <b>1275.812</b> | 1273.796        | G[10] |
| A[15] | 1327.795        | 1233.801       | 1217.783       | <b>1218.791</b> | <b>1216.775</b> | A[0]  |
| K[16] | 1497.881        | 1182.784       | 1146.740       | <b>1147.753</b> | 1145.738        | K[8]  |
| R[17] | 1653.962        | 992.699        | 976.640        | <b>977.648</b>  | 975.632         | R[7]  |
| T[18] | 1793.024        | 836.596        | <b>820.539</b> | 821.547         | <b>819.531</b>  | T[6]  |
| R[19] | 1947.122        | 699.499        | <b>683.480</b> | 684.488         | 682.472         | R[5]  |
| K[20] | 2103.248        | 543.398        | <b>527.379</b> | <b>528.387</b>  | 526.371         | K[4]  |
| V[21] | 2202.317        | 387.271        | <b>371.253</b> | 372.261         | 370.245         | V[3]  |
| L[22] | 2315.401        | 288.203        | <b>272.184</b> | 273.192         | 271.176         | L[2]  |
| R[23] | 2471.502        | <b>175.119</b> | <b>159.100</b> | 160.108         | 158.092         | R[1]  |

# sp | P62806 | H4\_MOUSE

[Acetyl]SGRGKGGKGLGKGGAK<sup>Acetyl</sup> RHRK<sup>Dimethyl</sup> VLR<sup>28.03</sup>

- ▶ fragmentation table for charge state 2+
- ▶ specType=etd
- ▶ score=85.54
- ▶ F113281.dat
- ▶ query=q30235.p1
- ▶ precursor=495.302940
- ▶ chargePrecursor=5
- ▶ itol=0.5

| AA    | c               | y              | z+1             | z+2             | z               | AA    |
|-------|-----------------|----------------|-----------------|-----------------|-----------------|-------|
| S[1]  | 74.062          | 1236.747       | 1228.737        | 0.504           | 1228.233        | S[23] |
| G[2]  | 102.553         | 1172.225       | <b>1164.216</b> | 0.504           | 1163.712        | G[22] |
| R[3]  | 180.603         | 1143.715       | <b>1135.705</b> | 1136.209        | <b>1135.201</b> | R[21] |
| G[4]  | 209.114         | 1085.664       | 1057.653        | <b>1058.159</b> | 1057.151        | G[20] |
| K[5]  | 273.161         | 1037.153       | <b>1029.144</b> | <b>1029.648</b> | 1028.640        | K[19] |
| G[6]  | 301.672         | 973.106        | <b>965.096</b>  | <b>965.600</b>  | 964.592         | G[18] |
| G[7]  | 330.183         | 944.595        | <b>936.586</b>  | <b>937.090</b>  | 936.082         | G[17] |
| K[8]  | <b>394.230</b>  | 916.084        | 908.075         | <b>908.579</b>  | 907.571         | K[16] |
| G[9]  | <b>422.741</b>  | 852.037        | <b>844.027</b>  | <b>844.531</b>  | 843.524         | G[15] |
| L[10] | <b>479.283</b>  | 823.526        | 815.517         | 816.021         | <b>815.013</b>  | L[14] |
| G[11] | 507.794         | 766.068        | <b>758.075</b>  | <b>758.579</b>  | <b>758.471</b>  | G[13] |
| R[12] | <b>571.841</b>  | <b>738.473</b> | <b>730.464</b>  | <b>730.968</b>  | 729.960         | R[12] |
| G[13] | <b>600.352</b>  | 674.626        | <b>666.416</b>  | <b>666.920</b>  | 665.913         | G[11] |
| G[14] | <b>628.863</b>  | 645.915        | <b>637.906</b>  | <b>638.410</b>  | 637.402         | G[10] |
| A[15] | <b>664.381</b>  | 617.404        | <b>609.395</b>  | <b>609.899</b>  | <b>608.091</b>  | A[9]  |
| K[16] | <b>748.434</b>  | 581.886        | <b>573.876</b>  | <b>574.380</b>  | 573.373         | K[8]  |
| R[17] | <b>827.485</b>  | 696.833        | <b>688.824</b>  | <b>689.328</b>  | <b>688.320</b>  | R[7]  |
| R[18] | <b>896.014</b>  | 618.782        | <b>610.773</b>  | <b>611.277</b>  | 610.269         | R[6]  |
| R[19] | <b>974.065</b>  | 350.253        | <b>342.244</b>  | <b>342.748</b>  | 341.740         | R[5]  |
| K[20] | <b>1052.128</b> | <b>272.202</b> | 264.193         | 264.697         | 263.689         | K[4]  |
| V[21] | 1101.662        | 194.139        | 186.130         | 186.634         | 185.626         | V[3]  |
| L[22] | <b>1158.204</b> | 144.605        | 136.596         | 137.100         | 136.092         | L[2]  |
| R[23] | 1238.255        | 88.083         | 80.074          | 80.578          | 79.570          | R[1]  |

# sp | P62806 | H4\_MOUSE

[Acetyl]SGRGKGGKGLGKGGAK<sup>Acetyl</sup> RHRK<sup>Dimethyl</sup> VLR<sup>28.03</sup>

- ▶ fragmentation table for charge state 3+
- ▶ specType=etd
- ▶ score=85.54
- ▶ F113281.dat
- ▶ query=q30235.p1
- ▶ precursor=495.302940
- ▶ chargePrecursor=5
- ▶ itol=0.5

| AA |      | c              | y              | z+1            | z+2            | z              | AA    |
|----|------|----------------|----------------|----------------|----------------|----------------|-------|
| S  | [1]  | 49.697         | <b>824.833</b> | <b>819.494</b> | 0.672          | 019.158        | S[2]  |
| G  | [2]  | 68.704         | 781.819        | 776.480        | 0.672          | 776.144        | G[22] |
| R  | [3]  | 120.738        | 762.812        | 737.472        | <b>757.868</b> | 737.137        | R[21] |
| G  | [4]  | 139.743        | 710.778        | <b>705.439</b> | <b>705.775</b> | 705.103        | G[25] |
| K  | [5]  | 182.443        | 691.771        | <b>686.432</b> | <b>686.768</b> | 686.095        | K[19] |
| G  | [6]  | 201.450        | 649.073        | <b>643.733</b> | <b>644.069</b> | <b>643.397</b> | G[18] |
| G  | [7]  | 220.458        | 630.066        | 624.726        | <b>625.062</b> | 624.390        | G[17] |
| K  | [8]  | 263.156        | 611.059        | <b>605.719</b> | <b>606.055</b> | <b>605.383</b> | K[16] |
| G  | [9]  | 282.163        | <b>568.360</b> | <b>563.021</b> | <b>563.357</b> | 562.685        | G[15] |
| L  | [10] | 319.658        | 549.353        | <b>544.014</b> | <b>544.350</b> | 543.678        | L[14] |
| G  | [11] | 338.665        | 511.658        | <b>506.319</b> | <b>506.655</b> | 505.983        | G[13] |
| K  | [12] | 381.563        | <b>492.651</b> | 487.312        | <b>487.648</b> | 486.976        | K[12] |
| G  | [13] | 400.570        | 449.353        | 444.013        | 443.349        | 444.277        | G[11] |
| G  | [14] | 419.578        | 430.346        | 425.006        | 425.342        | 425.270        | G[10] |
| A  | [15] | 443.257        | <b>411.939</b> | 406.599        | 406.935        | 406.263        | A[9]  |
| K  | [16] | 499.958        | 388.260        | 382.920        | 383.256        | 382.584        | K[8]  |
| R  | [17] | <b>551.992</b> | 351.558        | 326.218        | 326.554        | 325.882        | R[7]  |
| H  | [18] | <b>597.678</b> | 279.524        | 274.185        | 274.520        | 273.849        | H[6]  |
| R  | [19] | <b>649.712</b> | 233.838        | 228.498        | 228.834        | 228.162        | R[5]  |
| K  | [20] | <b>701.754</b> | 181.804        | 176.463        | 176.800        | 176.129        | K[4]  |
| V  | [21] | <b>734.777</b> | 129.762        | 124.422        | 124.758        | 124.086        | V[3]  |
| L  | [22] | <b>772.472</b> | 96.739         | 91.400         | 91.736         | 91.064         | L[2]  |
| R  | [23] | 624.365        | 59.045         | 53.705         | 54.041         | 53.369         | R[1]  |

# sp | P62806 | H4\_MOUSE

[Acetyl]SGRGKGGKGLGKGGAK<sup>Acetyl</sup>RHRK<sup>Dimethyl</sup>VLR<sup>28.03</sup>

- ▶ fragmentation table for charge state 4+
- ▶ specType=etd
- ▶ score=85.54
- ▶ F113281.dat
- ▶ query=q30235.p1
- ▶ precursor=495.302940
- ▶ chargePrecursor=5
- ▶ itol=0.5

| AA |      | c              | y              | z+1            | z+2            | z              | AA    |
|----|------|----------------|----------------|----------------|----------------|----------------|-------|
| S  | [1]  | 37.525         | <b>618.877</b> | <b>614.872</b> | 0.755          | <b>614.620</b> | S[23] |
| G  | [2]  | 51.780         | 586.616        | <b>582.612</b> | 0.755          | 582.360        | G[22] |
| R  | [3]  | 60.805         | <b>572.361</b> | <b>568.356</b> | <b>568.608</b> | 568.104        | R[21] |
| G  | [4]  | 105.061        | 933.336        | 929.332        | 929.583        | 929.079        | G[20] |
| K  | [5]  | 137.084        | 519.080        | 515.076        | 515.328        | 514.824        | K[19] |
| G  | [6]  | 151.340        | 487.057        | 483.052        | 483.304        | 482.800        | G[18] |
| G  | [7]  | 165.595        | 472.801        | 468.796        | 469.048        | 468.545        | G[17] |
| K  | [8]  | 197.619        | 458.546        | 454.541        | 454.793        | 454.289        | K[16] |
| G  | [9]  | 211.874        | 426.522        | 422.517        | <b>422.769</b> | 422.265        | G[15] |
| L  | [10] | 240.145        | 412.267        | 408.262        | 408.514        | 408.010        | L[14] |
| G  | [11] | 254.401        | 383.996        | 379.991        | 380.243        | 379.739        | G[13] |
| K  | [12] | 286.424        | 369.740        | 365.735        | 365.988        | 365.484        | K[12] |
| G  | [13] | 300.680        | 337.717        | 333.712        | 333.964        | 333.460        | G[11] |
| G  | [14] | 314.935        | 323.461        | 319.457        | 319.708        | 319.205        | G[10] |
| A  | [15] | 332.694        | 309.206        | 305.201        | 305.453        | 304.949        | A[9]  |
| R  | [16] | 375.221        | 291.447        | 287.442        | 287.694        | 287.190        | R[8]  |
| R  | [17] | 414.246        | 248.920        | 244.915        | 245.167        | 244.664        | R[7]  |
| H  | [18] | 448.511        | 209.895        | 205.890        | 206.142        | 205.638        | H[6]  |
| R  | [19] | <b>487.536</b> | <b>175.630</b> | 171.625        | 171.877        | 171.374        | R[5]  |
| K  | [20] | 526.568        | 136.605        | 132.600        | 132.852        | 132.348        | K[4]  |
| V  | [21] | 551.335        | 97.573         | 93.569         | 93.821         | 93.317         | V[9]  |
| L  | [22] | 579.606        | 72.306         | 68.302         | 68.553         | 68.050         | L[8]  |
| R  | [23] | 618.631        | 44.535         | 40.531         | 40.782         | 40.279         | R[1]  |





# sp | P62806 | H4\_MOUSE

[Acetyl]SGRGKGGKGLGKGGAK<sup>Acetyl</sup> RHRK<sup>Dimethyl</sup> VLR<sup>28.03</sup>

- ▶ fragmentation table for charge state 1+
- ▶ specType=etd
- ▶ score=118.13
- ▶ F113281.dat
- ▶ query=q30237\_p1
- ▶ precursor=618.877070
- ▶ chargePrecursor=4
- ▶ itol=0.5

| AA    | c               | y        | z+1             | z+2             | z              | AA    |
|-------|-----------------|----------|-----------------|-----------------|----------------|-------|
| S[1]  | 147.076         | 2472.488 | 2456.469        | 0.000           | 2455.450       | S[23] |
| G[2]  | 304.098         | 2343.443 | 2327.425        | 0.000           | 2326.411       | G[22] |
| R[3]  | <b>360.199</b>  | 2208.422 | 2270.403        | 2271.411        | 2269.395       | R[21] |
| G[4]  | <b>417.220</b>  | 2130.321 | 2114.302        | 2115.310        | 2113.294       | G[20] |
| K[5]  | <b>543.315</b>  | 2073.299 | 2057.280        | 2058.288        | 2056.273       | K[19] |
| G[6]  | <b>602.137</b>  | 1945.204 | 1929.185        | 1930.193        | 1928.178       | G[18] |
| G[7]  | <b>659.358</b>  | 1888.183 | 1872.164        | 1873.172        | 1871.156       | G[17] |
| K[8]  | <b>787.453</b>  | 1831.161 | 1815.143        | 1816.150        | 1814.135       | K[16] |
| G[9]  | <b>844.475</b>  | 1703.066 | 1687.048        | <b>1688.055</b> | 1686.040       | G[15] |
| L[10] | <b>957.559</b>  | 1646.045 | 1630.026        | 1631.034        | 1629.018       | L[14] |
| G[11] | <b>1014.580</b> | 1530.961 | 1515.942        | <b>1517.950</b> | 1515.934       | G[13] |
| R[12] | <b>1142.675</b> | 1475.939 | <b>1459.921</b> | 1460.928        | 1458.913       | R[12] |
| G[13] | <b>1199.697</b> | 1347.844 | 1331.826        | <b>1332.833</b> | 1330.818       | G[11] |
| G[14] | <b>1256.718</b> | 1290.823 | 1274.804        | <b>1275.812</b> | 1273.796       | G[10] |
| A[15] | <b>1327.755</b> | 1233.801 | 1217.783        | 1218.791        | 1216.775       | A[0]  |
| K[16] | <b>1497.861</b> | 1182.784 | 1166.765        | <b>1147.753</b> | 1145.738       | K[8]  |
| R[17] | <b>1653.962</b> | 992.699  | 976.680         | <b>977.648</b>  | 976.633        | R[7]  |
| F[18] | 1793.924        | 836.588  | 820.569         | 821.547         | <b>819.531</b> | F[6]  |
| R[19] | <b>1947.122</b> | 699.499  | <b>683.480</b>  | 684.488         | 682.472        | R[5]  |
| K[20] | 2103.248        | 543.398  | <b>527.379</b>  | <b>528.387</b>  | 526.371        | K[4]  |
| V[21] | 2202.317        | 387.271  | 371.253         | <b>372.261</b>  | 370.245        | V[3]  |
| L[22] | 2315.401        | 288.203  | <b>272.184</b>  | 273.192         | 271.176        | L[2]  |
| R[23] | 2471.502        | 178.119  | 159.100         | 160.108         | 158.082        | R[1]  |

# sp | P62806 | H4\_MOUSE

[Acetyl]SGRGKGGKGLGKGGAK<sup>Acetyl</sup> RHRK<sup>Dimethyl</sup> VLR<sup>28.03</sup>

- ▶ fragmentation table for charge state 2+
- ▶ specType=etd
- ▶ score=118.13
- ▶ F113281.dat
- ▶ query=q30237\_p1
- ▶ precursor=618.877070
- ▶ chargePrecursor=4
- ▶ itol=0.5

| AA    | c               | y               | z+1             | z+2             | z              | AA    |
|-------|-----------------|-----------------|-----------------|-----------------|----------------|-------|
| S[1]  | 74.042          | <b>1236.747</b> | <b>1228.737</b> | 0.904           | 1228.233       | S[2]  |
| G[2]  | 102.563         | 1172.225        | <b>1164.216</b> | 0.904           | 1163.712       | G[2]  |
| R[3]  | 180.603         | 1143.715        | <b>1135.705</b> | <b>1136.209</b> | 1135.201       | R[2]  |
| G[4]  | 209.114         | 1095.664        | <b>1057.655</b> | <b>1058.159</b> | 1057.151       | G[20] |
| K[5]  | 273.161         | <b>1037.153</b> | <b>1029.144</b> | <b>1029.648</b> | 1028.640       | K[19] |
| G[6]  | 301.672         | 978.100         | <b>965.096</b>  | <b>965.600</b>  | 964.592        | G[18] |
| G[7]  | 330.183         | 944.592         | <b>936.586</b>  | <b>937.090</b>  | 936.082        | G[17] |
| K[8]  | 394.230         | 916.084         | 908.075         | <b>908.579</b>  | 907.571        | K[16] |
| G[9]  | 422.741         | 882.037         | <b>844.027</b>  | <b>844.531</b>  | 843.524        | G[15] |
| L[10] | 479.283         | 823.520         | 815.517         | 816.021         | 815.013        | L[14] |
| G[11] | 507.794         | 766.968         | <b>758.975</b>  | <b>759.479</b>  | <b>758.471</b> | G[13] |
| R[12] | 571.841         | 738.477         | <b>730.464</b>  | <b>730.968</b>  | 729.960        | R[12] |
| G[13] | 600.352         | 674.426         | <b>666.416</b>  | <b>666.920</b>  | 665.913        | G[11] |
| G[14] | 628.863         | <b>645.915</b>  | <b>637.906</b>  | <b>638.410</b>  | 637.402        | G[10] |
| A[15] | 664.301         | 617.404         | <b>609.395</b>  | <b>609.899</b>  | 608.891        | A[9]  |
| R[16] | <b>748.434</b>  | 581.899         | <b>573.876</b>  | <b>574.380</b>  | 573.373        | R[8]  |
| R[17] | <b>827.485</b>  | 496.810         | 488.826         | <b>489.328</b>  | 488.320        | R[7]  |
| R[18] | <b>896.014</b>  | 418.762         | 410.773         | 411.277         | 410.269        | R[6]  |
| R[19] | <b>974.065</b>  | 350.253         | 342.264         | 342.768         | 341.760        | R[5]  |
| R[20] | <b>1052.128</b> | <b>272.202</b>  | 264.193         | 264.697         | 263.689        | R[4]  |
| V[21] | <b>1101.662</b> | 194.139         | 186.130         | 186.634         | 185.626        | V[3]  |
| L[22] | <b>1158.204</b> | 144.605         | 136.596         | 137.100         | 136.092        | L[2]  |
| R[23] | <b>1236.255</b> | 88.063          | 80.054          | 80.558          | 79.550         | R[1]  |

# sp | P62806 | H4\_MOUSE

[Acetyl]SGRGKGGKGLGKGGAK<sup>Acetyl</sup> RHRK<sup>Dimethyl</sup> VLR<sup>28.03</sup>  
42.01 28.03

- ▶ fragmentation table for charge state 3+
- ▶ specType=etd
- ▶ score=118.13
- ▶ F113281.dat
- ▶ query=q30237.p1
- ▶ precursor=618.877070
- ▶ chargePrecursor=4
- ▶ itol=0.5

| AA    | c              | y              | z+1            | z+2            | z       | AA    |
|-------|----------------|----------------|----------------|----------------|---------|-------|
| S[1]  | 49.697         | <b>824.833</b> | <b>819.494</b> | 0.672          | 819.158 | S[2]  |
| G[2]  | 68.704         | 781.819        | <b>776.480</b> | 0.672          | 776.144 | G[22] |
| K[3]  | 120.738        | 782.812        | <b>791.473</b> | <b>797.808</b> | 797.137 | K[21] |
| G[4]  | 139.745        | 710.775        | 705.438        | 705.775        | 705.103 | G[20] |
| K[5]  | 182.443        | 591.771        | 686.432        | 686.768        | 686.096 | K[19] |
| G[6]  | 201.450        | 549.073        | 643.733        | 644.069        | 643.397 | G[18] |
| G[7]  | 220.458        | 630.066        | 624.726        | 625.062        | 624.390 | G[17] |
| K[8]  | 263.156        | 611.059        | 605.719        | 606.055        | 605.383 | K[16] |
| G[9]  | 282.163        | 568.360        | 563.021        | 563.357        | 562.685 | G[15] |
| L[10] | 319.858        | 549.353        | 544.014        | 544.350        | 543.678 | L[14] |
| G[11] | 338.865        | 611.858        | 506.319        | 506.655        | 505.983 | G[13] |
| K[12] | 381.563        | 492.851        | 487.312        | 487.648        | 486.976 | K[12] |
| G[13] | 400.570        | 549.853        | 444.013        | 444.349        | 443.677 | G[11] |
| G[14] | 419.578        | 630.846        | 425.606        | 425.942        | 425.270 | G[10] |
| A[15] | 443.257        | 411.939        | 406.599        | 406.935        | 406.263 | A[9]  |
| K[16] | 499.958        | 388.260        | 382.920        | 383.256        | 382.584 | K[8]  |
| R[17] | 551.992        | 331.558        | 326.218        | 326.554        | 325.882 | R[7]  |
| H[18] | 597.678        | 279.524        | 274.185        | 274.520        | 273.849 | H[6]  |
| R[19] | 649.712        | 233.838        | 228.498        | 228.834        | 228.162 | R[5]  |
| K[20] | 701.754        | 181.804        | 176.465        | 176.800        | 176.129 | K[4]  |
| V[21] | 734.777        | 129.762        | 124.422        | 124.758        | 124.086 | V[3]  |
| L[22] | 772.472        | 96.739         | 91.400         | 91.736         | 91.064  | L[2]  |
| R[23] | <b>824.505</b> | 59.045         | 53.705         | 54.041         | 53.369  | R[1]  |



# sp | P62806 | H4\_MOUSE

[Acetyl]SGRGKGGKGLGKGGAK<sup>Acetyl</sup> RHRK<sup>Dimethyl</sup> VLR<sup>28.03</sup>

- ▶ fragmentation table for charge state 1+
- ▶ specType=etd
- ▶ score=75.88
- ▶ F113281.dat
- ▶ query=q30239\_p1
- ▶ precursor=618.877400
- ▶ chargePrecursor=4
- ▶ itol=0.5

| AA    | c               | y        | z+1             | z+2             | z              | AA    |
|-------|-----------------|----------|-----------------|-----------------|----------------|-------|
| S[1]  | 147.076         | 2472.488 | 2456.489        | 0.0000          | 2455.490       | S[23] |
| G[2]  | 304.098         | 2343.443 | 2327.435        | 0.0000          | 2326.417       | G[22] |
| R[3]  | <b>360.199</b>  | 2208.422 | 2270.403        | 2271.411        | 2269.395       | R[21] |
| G[4]  | <b>417.220</b>  | 2130.321 | 2114.302        | 2115.310        | 2113.294       | G[20] |
| K[5]  | <b>543.315</b>  | 2073.299 | 2057.280        | 2058.288        | 2056.273       | K[19] |
| G[6]  | <b>602.137</b>  | 1945.204 | 1929.186        | 1930.193        | 1928.175       | G[18] |
| G[7]  | <b>659.358</b>  | 1888.183 | <b>1872.164</b> | 1873.172        | 1871.156       | G[17] |
| K[8]  | <b>787.453</b>  | 1831.161 | 1815.143        | 1816.150        | 1814.135       | K[16] |
| G[9]  | <b>844.475</b>  | 1763.066 | 1687.048        | <b>1688.055</b> | 1686.040       | G[15] |
| L[10] | <b>957.559</b>  | 1646.045 | 1630.026        | 1631.034        | 1629.018       | L[14] |
| G[11] | <b>1014.580</b> | 1532.961 | 1516.942        | 1517.950        | 1515.934       | G[13] |
| R[12] | <b>1142.675</b> | 1475.939 | 1459.921        | 1460.928        | 1458.913       | R[12] |
| G[13] | 1199.697        | 1347.844 | 1331.826        | <b>1332.833</b> | 1330.818       | G[11] |
| G[14] | 1256.718        | 1290.823 | 1274.804        | <b>1275.812</b> | 1273.796       | G[10] |
| A[15] | 1327.795        | 1233.801 | 1217.783        | 1218.791        | 1216.775       | A[0]  |
| K[16] | <b>1497.861</b> | 1182.784 | <b>1146.746</b> | 1147.753        | 1145.738       | K[8]  |
| R[17] | <b>1653.962</b> | 992.699  | 976.680         | <b>977.648</b>  | 976.632        | R[7]  |
| T[18] | 1793.024        | 836.588  | 820.569         | 821.547         | <b>819.533</b> | T[6]  |
| R[19] | 1947.122        | 699.499  | <b>683.480</b>  | <b>684.488</b>  | 682.472        | R[5]  |
| K[20] | 2103.248        | 543.398  | <b>527.379</b>  | <b>528.387</b>  | 526.371        | K[4]  |
| V[21] | 2202.317        | 387.271  | 371.253         | <b>372.261</b>  | 370.245        | V[3]  |
| L[22] | 2315.401        | 288.203  | <b>272.184</b>  | 273.192         | 271.176        | L[2]  |
| R[23] | 2471.502        | 178.119  | 159.100         | 160.108         | 158.082        | R[1]  |

# sp | P62806 | H4\_MOUSE

[Acetyl]SGRGKGGKGLGKGGAK<sup>Acetyl</sup> RHRK<sup>Dimethyl</sup> VLR<sup>28.03</sup>

- ▶ fragmentation table for charge state 2+
- ▶ specType=etd
- ▶ score=75.88
- ▶ F113281.dat
- ▶ query=q30239\_p1
- ▶ precursor=618.877400
- ▶ chargePrecursor=4
- ▶ itol=0.5

| AA    | c               | y               | z+1             | z+2             | z              | AA    |
|-------|-----------------|-----------------|-----------------|-----------------|----------------|-------|
| S[1]  | 74.042          | <b>1236.747</b> | <b>1228.737</b> | 0.904           | 1228.233       | S[2]  |
| G[2]  | 102.563         | 1172.225        | <b>1164.216</b> | 0.904           | 1163.712       | G[2]  |
| R[3]  | 180.603         | 1143.715        | <b>1135.705</b> | <b>1136.209</b> | 1135.201       | R[2]  |
| G[4]  | 209.114         | 1095.664        | <b>1057.655</b> | <b>1058.159</b> | 1057.151       | G[20] |
| K[5]  | 273.161         | <b>1037.153</b> | <b>1029.144</b> | <b>1029.648</b> | 1028.643       | K[10] |
| G[6]  | 301.672         | 973.193         | <b>965.096</b>  | 965.590         | <b>964.592</b> | G[18] |
| G[7]  | 330.183         | 944.595         | <b>936.586</b>  | 937.080         | <b>936.082</b> | G[17] |
| K[8]  | 394.230         | <b>916.084</b>  | <b>908.075</b>  | <b>908.579</b>  | 907.571        | K[16] |
| G[9]  | 422.741         | 852.037         | <b>844.027</b>  | <b>844.531</b>  | <b>843.524</b> | G[15] |
| L[10] | 479.283         | 823.520         | 815.517         | 816.021         | 815.013        | L[14] |
| G[11] | 507.794         | 766.964         | 758.975         | 759.479         | 758.471        | G[13] |
| R[12] | 573.841         | 738.473         | <b>730.464</b>  | <b>730.968</b>  | 729.960        | R[12] |
| G[13] | 600.352         | 674.426         | <b>666.416</b>  | <b>666.920</b>  | 665.913        | G[11] |
| G[14] | <b>628.863</b>  | 645.915         | <b>637.906</b>  | <b>638.410</b>  | <b>637.402</b> | G[10] |
| A[15] | 664.361         | 617.404         | <b>609.395</b>  | <b>609.899</b>  | 608.891        | A[9]  |
| K[16] | <b>748.434</b>  | 581.896         | <b>573.876</b>  | <b>574.380</b>  | 573.373        | K[8]  |
| R[17] | <b>827.485</b>  | 496.812         | <b>488.824</b>  | <b>489.328</b>  | 488.320        | R[7]  |
| R[18] | <b>894.014</b>  | 418.762         | 410.773         | 411.277         | 410.269        | R[6]  |
| R[19] | <b>974.065</b>  | 350.253         | 342.264         | 342.768         | 341.760        | R[5]  |
| K[20] | <b>1052.128</b> | <b>272.202</b>  | 264.193         | 264.697         | 263.689        | K[4]  |
| V[21] | <b>1101.662</b> | 194.139         | 186.130         | 186.634         | 185.626        | V[3]  |
| L[22] | <b>1158.204</b> | 144.605         | 136.596         | 137.100         | 136.092        | L[2]  |
| R[23] | <b>1236.255</b> | 88.063          | 80.054          | 80.558          | 79.550         | R[1]  |

# sp | P62806 | H4\_MOUSE

[Acetyl]SGRGKGGKGLGKGGAK<sup>Acetyl</sup> RHRK<sup>Dimethyl</sup> VLR<sup>28.03</sup>

- ▶ fragmentation table for charge state 3+
- ▶ specType=etd
- ▶ score=75.88
- ▶ F113281.dat
- ▶ query=q30239\_p1
- ▶ precursor=618.877400
- ▶ chargePrecursor=4
- ▶ itol=0.5

| AA    | c       | y              | z+1            | z+2            | z              | AA    |
|-------|---------|----------------|----------------|----------------|----------------|-------|
| S[1]  | 49.697  | <b>824.833</b> | <b>819.494</b> | 0.672          | <b>819.158</b> | S[2]  |
| G[2]  | 68.704  | 781.819        | <b>776.480</b> | 0.677          | <b>776.144</b> | G[2]  |
| R[3]  | 120.738 | 702.312        | <b>757.473</b> | <b>757.808</b> | 757.137        | R[2]  |
| G[4]  | 139.745 | 710.778        | 705.439        | 705.775        | 705.103        | G[20] |
| K[5]  | 182.443 | 691.771        | 686.432        | 686.768        | 686.096        | K[19] |
| G[6]  | 201.450 | 649.073        | 643.731        | 644.069        | 643.397        | G[18] |
| G[7]  | 220.458 | 630.066        | <b>624.726</b> | 625.062        | <b>624.390</b> | G[17] |
| K[8]  | 263.156 | 611.059        | 605.719        | 606.055        | 605.383        | K[16] |
| G[9]  | 282.163 | 568.360        | 563.021        | 563.357        | 562.685        | G[15] |
| L[10] | 319.858 | 549.353        | 544.014        | 544.350        | 543.678        | L[14] |
| G[11] | 338.865 | 511.658        | 506.319        | 506.655        | 505.983        | G[13] |
| K[12] | 381.563 | 492.651        | 487.312        | 487.648        | 486.976        | K[12] |
| G[13] | 400.570 | 449.953        | 444.613        | 444.949        | 444.277        | G[11] |
| G[14] | 419.578 | 430.946        | 425.606        | 425.942        | 425.270        | G[10] |
| A[15] | 443.257 | 411.939        | 406.599        | 406.935        | 406.263        | A[9]  |
| K[16] | 499.958 | 388.260        | 382.920        | 383.256        | 382.584        | K[8]  |
| R[17] | 551.992 | 331.558        | 326.218        | 326.554        | 325.882        | R[7]  |
| H[18] | 597.678 | 279.524        | 274.185        | 274.520        | 273.849        | H[6]  |
| R[19] | 649.712 | 233.838        | 228.498        | 228.834        | 228.162        | R[5]  |
| K[20] | 701.754 | 181.804        | 176.465        | 176.800        | 176.129        | K[4]  |
| V[21] | 734.777 | 129.762        | 124.422        | 124.758        | 124.086        | V[3]  |
| L[22] | 772.472 | 96.739         | 91.400         | 91.736         | 91.064         | L[2]  |
| R[23] | 824.505 | 59.645         | 53.705         | 54.041         | 53.369         | R[1]  |

# sp | P62806 | H4\_MOUSE

[Acetyl]SGRGKGGKGLGKGGAK Acetyl RHRK Dimethyl VLR  
42.01 28.03

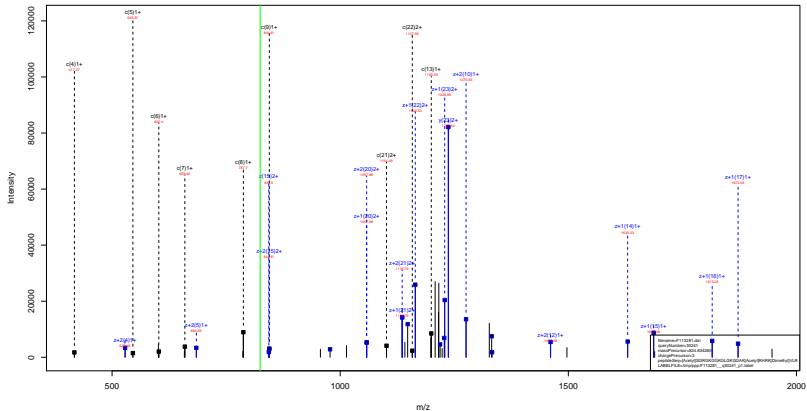



# sp | P62806 | H4\_MOUSE

[Acetyl]SGRGKGGKGLGKGGAK<sup>Acetyl</sup> RHRK<sup>Dimethyl</sup> VLR<sup>28.03</sup>

- ▶ fragmentation table for charge state 1+
- ▶ specType=etd
- ▶ score=53.57
- ▶ F113281.dat
- ▶ query=q30241\_p1
- ▶ precursor=824.834260
- ▶ chargePrecursor=3
- ▶ itol=0.5

| AA    | c               | y        | z+1             | z+2             | z        | AA    |
|-------|-----------------|----------|-----------------|-----------------|----------|-------|
| S[1]  | 147.076         | 2472.488 | 2456.469        | 0.000           | 2455.450 | S[23] |
| G[2]  | 304.068         | 2343.443 | 2327.425        | 0.000           | 2326.411 | G[22] |
| R[3]  | 360.199         | 2208.422 | 2270.403        | 2271.411        | 2269.395 | R[21] |
| G[4]  | <b>417.220</b>  | 2130.321 | 2114.302        | 2115.310        | 2113.294 | G[20] |
| K[5]  | <b>543.315</b>  | 2073.299 | 2057.280        | 2058.288        | 2056.273 | K[19] |
| G[6]  | <b>602.137</b>  | 1945.204 | 1929.186        | 1930.193        | 1928.176 | G[18] |
| G[7]  | <b>659.358</b>  | 1888.183 | <b>1872.164</b> | 1873.172        | 1871.156 | G[17] |
| K[8]  | <b>787.453</b>  | 1831.161 | <b>1815.143</b> | 1816.150        | 1814.135 | K[16] |
| G[9]  | <b>844.475</b>  | 1774.066 | <b>1687.048</b> | 1688.055        | 1686.040 | G[15] |
| L[10] | 987.559         | 1646.045 | <b>1630.026</b> | 1631.034        | 1629.018 | L[14] |
| G[11] | 1074.580        | 1532.961 | 1516.942        | 1517.950        | 1515.934 | G[13] |
| R[12] | 1142.078        | 1475.939 | 1459.921        | <b>1460.928</b> | 1458.913 | R[12] |
| G[13] | <b>1199.697</b> | 1347.844 | <b>1331.826</b> | <b>1332.833</b> | 1330.818 | G[11] |
| G[14] | 1256.718        | 1290.823 | 1274.804        | <b>1275.812</b> | 1273.796 | G[10] |
| A[15] | 1327.795        | 1233.801 | 1217.783        | <b>1218.791</b> | 1216.775 | A[0]  |
| K[16] | 1497.881        | 1182.764 | 1166.746        | <b>1147.753</b> | 1145.738 | K[8]  |
| R[17] | 1653.962        | 992.699  | 976.680         | <b>977.648</b>  | 976.632  | R[7]  |
| T[18] | 1793.024        | 836.588  | 820.569         | 821.547         | 819.531  | T[6]  |
| R[19] | 1947.122        | 699.499  | 683.480         | <b>684.488</b>  | 682.472  | R[5]  |
| K[20] | 2103.248        | 543.398  | 527.379         | <b>528.387</b>  | 526.371  | K[4]  |
| V[21] | 2202.317        | 387.271  | 371.253         | 372.261         | 370.245  | V[3]  |
| L[22] | 2315.401        | 288.203  | 272.184         | 273.192         | 271.176  | L[2]  |
| R[23] | 2471.502        | 178.119  | 159.100         | 160.108         | 158.082  | R[1]  |

# sp | P62806 | H4\_MOUSE

[Acetyl]SGRGKGGKGLGKGGAK<sup>Acetyl</sup> RHRK<sup>Dimethyl</sup> VLR<sup>28.03</sup>

- ▶ fragmentation table for charge state 2+
- ▶ specType=etd
- ▶ score=53.57
- ▶ F113281.dat
- ▶ query=q30241\_p1
- ▶ precursor=824.834260
- ▶ chargePrecursor=3
- ▶ itol=0.5

| AA   | c               | y               | z+1             | z+2             | z               | AA   |
|------|-----------------|-----------------|-----------------|-----------------|-----------------|------|
| S 1  | 74.042          | <b>1236.747</b> | <b>1228.737</b> | 0.504           | <b>1228.233</b> | S 21 |
| G 2  | 102.553         | 1172.225        | <b>1164.216</b> | 0.504           | 1163.712        | G 22 |
| R 3  | 180.603         | 1143.715        | <b>1135.705</b> | <b>1136.209</b> | 1135.201        | R 21 |
| G 4  | 209.114         | 1065.664        | <b>1057.655</b> | <b>1058.159</b> | 1057.151        | G 20 |
| K 5  | 273.161         | 1037.153        | 1029.144        | 1029.648        | 1028.640        | K 19 |
| G 6  | 301.672         | 978.100         | 965.090         | 965.593         | 964.585         | G 18 |
| G 7  | 330.183         | 944.595         | 936.586         | 937.090         | 936.082         | G 17 |
| K 8  | 394.230         | 916.084         | 908.075         | 908.579         | 907.571         | K 16 |
| G 9  | 422.741         | 852.031         | 844.022         | <b>844.531</b>  | <b>843.524</b>  | G 15 |
| L 10 | 479.283         | 823.520         | 815.511         | 816.011         | 815.013         | L 14 |
| G 11 | 507.794         | 768.067         | 758.075         | 759.479         | 758.471         | G 13 |
| K 12 | 571.841         | 738.873         | 730.864         | 731.868         | 729.860         | K 12 |
| G 13 | 600.352         | 674.426         | 666.418         | 666.920         | 665.913         | G 11 |
| G 14 | 638.863         | 645.915         | 637.906         | 638.410         | 637.402         | G 10 |
| A 15 | 664.371         | 617.404         | 609.395         | 609.899         | 608.891         | A 9  |
| K 16 | 749.414         | 581.896         | 573.876         | 574.380         | 573.373         | K 8  |
| R 17 | 817.465         | 498.833         | 488.823         | 489.328         | 488.321         | R 7  |
| H 18 | 896.014         | 418.782         | 410.773         | 411.277         | 410.269         | H 6  |
| R 19 | 974.065         | 350.253         | 342.244         | 342.748         | 341.740         | R 5  |
| K 20 | 1052.116        | 272.202         | 264.193         | 264.697         | 263.689         | K 4  |
| V 21 | <b>1101.662</b> | 194.139         | 186.130         | 186.634         | 185.626         | V 3  |
| L 22 | <b>1158.204</b> | 144.605         | 136.596         | 137.100         | 136.092         | L 1  |
| R 23 | 1236.255        | 88.051          | 80.044          | 80.558          | 79.550          | R 1  |

# sp | P62806 | H4\_MOUSE

[Acetyl]SGRGKGGKGLGKGGAK <sup>Acetyl</sup> RHRK <sup>Dimethyl</sup> VLR  
 42.01 28.03

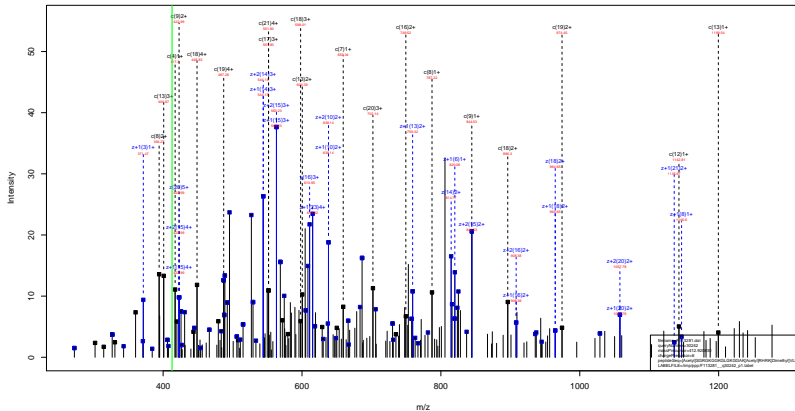

# sp | P62806 | H4\_MOUSE

[Acetyl]SGRGKGGKGLGKGGAK<sup>Acetyl</sup> RHRK<sup>Dimethyl</sup> VLR<sup>28.03</sup>  
42.01 28.03

- ▶ fragmentation table for charge state 1+
- ▶ specType=etd
- ▶ score=37.79
- ▶ F113281.dat
- ▶ query=q30242.p1
- ▶ precursor=412.920830
- ▶ chargePrecursor=6
- ▶ itol=0.5

| AA    | c               | y              | z+1             | z+2      | z              | AA    |
|-------|-----------------|----------------|-----------------|----------|----------------|-------|
| S[1]  | 147.076         | 2472.488       | 2456.407        | 0.000    | 2455.459       | S[23] |
| G[2]  | 204.098         | 2343.443       | 2327.425        | 0.000    | 2326.417       | G[22] |
| R[3]  | <b>360.199</b>  | 2239.422       | 2270.403        | 2271.411 | 2269.395       | R[21] |
| G[4]  | <b>417.220</b>  | 2130.321       | 2114.302        | 2115.310 | 2113.294       | G[20] |
| K[5]  | 542.319         | 2072.290       | 2057.280        | 2058.288 | 2056.273       | K[19] |
| G[6]  | 602.337         | 1946.204       | 1929.186        | 1930.193 | 1928.178       | G[18] |
| G[7]  | <b>659.358</b>  | 1888.183       | 1872.164        | 1873.172 | 1871.156       | G[17] |
| K[8]  | <b>787.453</b>  | 1831.161       | 1815.143        | 1816.150 | 1814.135       | K[16] |
| G[9]  | <b>844.475</b>  | 1773.066       | 1687.048        | 1688.055 | 1686.040       | G[15] |
| L[10] | 957.559         | 1646.045       | 1630.026        | 1631.034 | 1629.019       | L[14] |
| G[11] | 1014.580        | 1532.961       | 1516.942        | 1517.950 | 1515.934       | G[13] |
| R[12] | <b>1142.675</b> | 1475.935       | 1459.917        | 1460.926 | 1458.911       | R[12] |
| G[13] | <b>1198.697</b> | 1347.844       | 1331.826        | 1332.833 | 1330.818       | G[11] |
| G[14] | 1256.718        | 1290.823       | 1274.804        | 1275.812 | 1273.796       | G[10] |
| A[15] | 1327.735        | 1233.801       | 1217.783        | 1218.791 | 1216.775       | A[9]  |
| K[16] | 1497.801        | 1162.764       | <b>1146.746</b> | 1147.753 | 1145.738       | K[8]  |
| R[17] | 1653.962        | 992.659        | 976.640         | 977.648  | 975.633        | R[7]  |
| H[18] | 1791.021        | <b>836.558</b> | <b>820.539</b>  | 821.547  | <b>819.531</b> | H[6]  |
| R[19] | 1847.122        | 599.499        | <b>683.480</b>  | 684.488  | 682.473        | R[5]  |
| K[20] | 2103.246        | 543.395        | <b>527.379</b>  | 528.387  | 526.371        | K[4]  |
| V[21] | 2202.317        | 387.271        | <b>371.253</b>  | 372.261  | 370.245        | V[3]  |
| L[22] | 2315.401        | 288.203        | <b>272.184</b>  | 273.192  | 271.176        | L[2]  |
| R[23] | 2471.502        | 175.119        | 159.100         | 160.108  | 158.092        | R[1]  |

# sp | P62806 | H4\_MOUSE

[Acetyl]SGRGKGGKGLGKGGAK<sup>Acetyl</sup> RHRK<sup>Dimethyl</sup> VLR<sup>28.03</sup>

- ▶ fragmentation table for charge state 2+
- ▶ specType=etd
- ▶ score=37.79
- ▶ F113281.dat
- ▶ query=q30242.p1
- ▶ precursor=412.920830
- ▶ chargePrecursor=6
- ▶ itol=0.5

| AA    | c              | y              | z+1             | z+2             | z               | AA    |
|-------|----------------|----------------|-----------------|-----------------|-----------------|-------|
| S[1]  | 74.042         | 1236.747       | 1226.737        | 0.504           | 1226.231        | S[2]  |
| G[2]  | 102.553        | 1172.225       | 1164.210        | 0.504           | 1163.712        | G[2]  |
| R[3]  | 180.603        | 1143.715       | <b>1135.705</b> | <b>1136.209</b> | 1135.201        | R[2]  |
| G[4]  | 259.114        | 1065.664       | <b>1057.655</b> | <b>1058.159</b> | 1057.151        | G[2]  |
| K[5]  | 277.183        | 1037.153       | <b>1029.144</b> | 1029.640        | <b>1028.640</b> | K[10] |
| G[6]  | <b>301.672</b> | 973.196        | <b>965.096</b>  | 965.600         | <b>964.592</b>  | G[16] |
| G[7]  | <b>330.183</b> | <b>944.595</b> | 938.589         | <b>937.090</b>  | <b>936.082</b>  | G[17] |
| K[8]  | <b>394.230</b> | 916.084        | <b>908.075</b>  | <b>908.579</b>  | 907.571         | K[10] |
| G[9]  | <b>422.741</b> | 862.637        | 844.627         | <b>844.531</b>  | 843.524         | G[15] |
| L[10] | <b>479.283</b> | <b>823.526</b> | 815.517         | <b>816.021</b>  | <b>815.013</b>  | L[14] |
| G[11] | <b>507.794</b> | <b>765.984</b> | <b>758.975</b>  | <b>759.479</b>  | 758.471         | G[15] |
| R[12] | <b>571.841</b> | 738.473        | <b>730.464</b>  | <b>730.968</b>  | <b>729.960</b>  | R[12] |
| G[13] | <b>600.352</b> | 674.426        | <b>666.416</b>  | <b>666.920</b>  | 665.913         | G[11] |
| G[14] | <b>628.863</b> | 645.915        | <b>637.906</b>  | <b>638.410</b>  | <b>637.402</b>  | G[10] |
| A[15] | 664.381        | 617.404        | 609.395         | 609.899         | <b>608.891</b>  | A[0]  |
| K[16] | <b>749.434</b> | 581.896        | 573.870         | <b>574.380</b>  | 573.373         | K[8]  |
| R[17] | 807.885        | 496.831        | <b>488.824</b>  | <b>489.328</b>  | <b>488.320</b>  | R[7]  |
| T[18] | <b>896.034</b> | 418.382        | 410.373         | 411.877         | 410.369         | T[6]  |
| R[19] | <b>974.065</b> | 350.253        | 342.244         | <b>342.748</b>  | 341.740         | R[5]  |
| K[20] | 1052.139       | <b>272.202</b> | 264.193         | 264.697         | 263.689         | K[4]  |
| V[21] | 1101.662       | 194.139        | 186.130         | 186.634         | 185.626         | V[3]  |
| L[22] | 1158.204       | 144.605        | 136.596         | 137.100         | 136.092         | L[3]  |
| R[23] | 1236.255       | 88.063         | 80.054          | 80.558          | 79.550          | R[1]  |

# sp | P62806 | H4\_MOUSE

[Acetyl]SGRGKGGKGLGKGGAK<sup>Acetyl</sup> RHRK<sup>Dimethyl</sup> VLR<sup>28.03</sup>

- ▶ fragmentation table for charge state 3+
- ▶ specType=etd
- ▶ score=37.79
- ▶ F113281.dat
- ▶ query=q30242.p1
- ▶ precursor=412.920830
- ▶ chargePrecursor=6
- ▶ itol=0.5

| AA |      | c              | y              | z+1            | z+2            | z              | AA    |
|----|------|----------------|----------------|----------------|----------------|----------------|-------|
| S  | [1]  | 49.697         | <b>824.833</b> | <b>819.494</b> | 0.672          | 819.158        | S[23] |
| G  | [2]  | 68.704         | <b>781.819</b> | 775.480        | 0.672          | 776.144        | G[22] |
| R  | [3]  | 120.738        | <b>762.812</b> | <b>757.473</b> | <b>757.868</b> | 757.137        | R[21] |
| G  | [4]  | 139.743        | 710.776        | 705.439        | <b>705.775</b> | 705.103        | G[20] |
| K  | [5]  | 182.443        | 691.771        | <b>686.432</b> | <b>686.768</b> | <b>686.096</b> | K[19] |
| G  | [6]  | 201.450        | <b>649.073</b> | 643.733        | 644.069        | 643.397        | G[18] |
| G  | [7]  | 220.458        | <b>630.066</b> | 624.726        | 625.062        | 624.390        | G[17] |
| K  | [8]  | 263.156        | <b>611.059</b> | <b>605.719</b> | 606.055        | <b>605.383</b> | K[16] |
| G  | [9]  | 282.163        | <b>568.360</b> | <b>563.021</b> | <b>563.357</b> | 562.685        | G[15] |
| L  | [10] | 319.658        | 549.353        | <b>544.014</b> | <b>544.350</b> | <b>543.678</b> | L[14] |
| G  | [11] | 338.665        | <b>511.658</b> | <b>506.319</b> | <b>506.655</b> | <b>505.983</b> | G[13] |
| K  | [12] | 381.563        | <b>492.651</b> | <b>487.312</b> | <b>487.648</b> | <b>486.976</b> | K[12] |
| G  | [13] | <b>400.570</b> | 419.563        | <b>444.613</b> | <b>444.949</b> | 444.277        | G[11] |
| G  | [14] | <b>419.578</b> | <b>430.946</b> | <b>425.606</b> | <b>425.942</b> | 425.270        | G[10] |
| A  | [15] | <b>443.257</b> | 411.939        | <b>406.599</b> | 406.935        | <b>406.263</b> | A[9]  |
| K  | [16] | 499.958        | 388.260        | 382.920        | 383.256        | 382.584        | K[8]  |
| R  | [17] | <b>551.992</b> | 351.558        | <b>326.218</b> | <b>326.554</b> | 325.882        | R[7]  |
| H  | [18] | <b>597.678</b> | 279.524        | 274.185        | 274.520        | 273.849        | H[6]  |
| R  | [19] | <b>649.712</b> | 233.838        | 228.498        | 228.834        | 228.162        | R[5]  |
| K  | [20] | <b>701.754</b> | 181.804        | 176.465        | 176.800        | 176.129        | K[4]  |
| V  | [21] | <b>734.777</b> | 129.762        | 124.422        | 124.758        | 124.086        | V[3]  |
| L  | [22] | 772.472        | 96.739         | 91.400         | 91.736         | 91.064         | L[2]  |
| K  | [23] | 824.505        | 59.043         | 53.703         | 54.041         | 53.369         | K[1]  |

# sp | P62806 | H4\_MOUSE

[Acetyl]SGRGKGGKGLGKGGAK<sup>Acetyl</sup> RHRK<sup>Dimethyl</sup> VLR<sup>28.03</sup>

- ▶ fragmentation table for charge state 4+
- ▶ specType=etd
- ▶ score=37.79
- ▶ F113281.dat
- ▶ query=q30242.p1
- ▶ precursor=412.920830
- ▶ chargePrecursor=6
- ▶ itol=0.5

| AA |      | c              | y              | z+1            | z+2            | z              | AA    |
|----|------|----------------|----------------|----------------|----------------|----------------|-------|
| S  | [1]  | 37.525         | <b>618.877</b> | <b>614.872</b> | 0.755          | 614.620        | S[23] |
| G  | [2]  | 51.780         | 586.616        | 582.612        | 0.755          | 582.360        | G[22] |
| R  | [3]  | 60.806         | 732.361        | <b>568.356</b> | <b>564.608</b> | 538.104        | R[21] |
| G  | [4]  | 105.091        | <b>533.336</b> | <b>529.331</b> | <b>529.593</b> | <b>529.079</b> | G[20] |
| K  | [5]  | 137.084        | 519.080        | <b>515.076</b> | <b>515.328</b> | <b>514.824</b> | K[19] |
| G  | [6]  | 151.340        | <b>487.057</b> | 483.052        | <b>483.304</b> | 482.800        | G[18] |
| G  | [7]  | 165.595        | 472.801        | 468.796        | 469.048        | 468.545        | G[17] |
| K  | [8]  | 197.619        | 458.546        | <b>454.541</b> | 454.793        | <b>454.289</b> | K[16] |
| G  | [9]  | 211.874        | <b>426.522</b> | <b>422.517</b> | <b>422.769</b> | 422.265        | G[15] |
| L  | [10] | 240.145        | 412.267        | 408.262        | 408.514        | <b>408.010</b> | L[14] |
| G  | [11] | 254.401        | <b>383.996</b> | 379.991        | 380.243        | 379.739        | G[13] |
| K  | [12] | 286.424        | 369.740        | 365.736        | 365.988        | 365.484        | K[12] |
| G  | [13] | 307.680        | 337.717        | 333.712        | 333.964        | 333.460        | G[11] |
| G  | [14] | <b>314.935</b> | 323.461        | 319.457        | 319.708        | 319.205        | G[10] |
| A  | [15] | 332.694        | 309.206        | 305.201        | 305.453        | 304.949        | A[9]  |
| K  | [16] | 375.221        | 291.447        | 287.442        | 287.694        | 287.190        | K[8]  |
| R  | [17] | 414.246        | 248.920        | 244.915        | 245.167        | 244.664        | R[7]  |
| H  | [18] | <b>448.511</b> | 209.895        | 205.890        | 206.142        | 205.638        | H[6]  |
| R  | [19] | <b>487.536</b> | 175.630        | 171.625        | 171.877        | 171.374        | R[5]  |
| K  | [20] | 526.568        | 136.605        | 132.600        | 132.852        | 132.348        | K[4]  |
| V  | [21] | <b>551.335</b> | 97.573         | 93.569         | 93.821         | 93.317         | V[3]  |
| L  | [22] | <b>579.606</b> | 72.306         | 68.302         | 68.553         | 68.050         | L[2]  |
| R  | [23] | <b>618.631</b> | 44.535         | 40.531         | 40.782         | 40.279         | R[1]  |

# sp | P62806 | H4\_MOUSE

[Acetyl]SGRGKGGKGLGKGGAK<sup>Acetyl</sup> RHRK<sup>Dimethyl</sup> VLR<sup>28.03</sup>

- ▶ fragmentation table for charge state 5+
- ▶ specType=etd
- ▶ score=37.79
- ▶ F113281.dat
- ▶ query=q30242\_p1
- ▶ precursor=412.920830
- ▶ chargePrecursor=6
- ▶ itol=0.5

| AA    | c       | y              | z+1            | z+2            | z              | AA    |
|-------|---------|----------------|----------------|----------------|----------------|-------|
| S[1]  | 30.221  | <b>495.303</b> | <b>492.099</b> | 0.806          | 491.898        | S[2]  |
| G[2]  | 41.625  | 469.494        | <b>466.291</b> | 0.806          | <b>466.089</b> | G[22] |
| R[3]  | 72.866  | 438.993        | 434.388        | 433.088        | 431.385        | R[21] |
| G[4]  | 84.250  | <b>426.870</b> | 423.666        | 423.868        | <b>423.465</b> | G[20] |
| K[5]  | 109.869 | 415.466        | 412.262        | 412.463        | 412.060        | K[19] |
| G[6]  | 121.273 | 389.647        | 386.641        | 386.844        | 386.441        | G[18] |
| G[7]  | 132.677 | 378.442        | 375.239        | 375.440        | 375.037        | G[17] |
| K[8]  | 158.296 | 367.038        | 363.834        | 364.036        | 363.633        | K[16] |
| G[9]  | 169.701 | 341.419        | 338.215        | 338.417        | 338.014        | G[15] |
| L[10] | 192.318 | 330.015        | <b>326.811</b> | <b>327.013</b> | <b>326.609</b> | L[14] |
| G[11] | 203.722 | 307.398        | 304.194        | 304.396        | 303.993        | G[13] |
| K[12] | 229.341 | 295.994        | 292.790        | 292.992        | 292.589        | K[12] |
| G[13] | 240.745 | 270.375        | 267.171        | 267.373        | 266.969        | G[11] |
| G[14] | 252.149 | 258.970        | 255.767        | 255.968        | 255.565        | G[10] |
| A[15] | 266.357 | 247.566        | 244.362        | 244.564        | 244.161        | A[9]  |
| K[16] | 300.378 | 233.359        | 230.155        | 230.357        | 229.953        | K[8]  |
| R[17] | 331.598 | 199.338        | 196.134        | 196.335        | 195.932        | R[7]  |
| H[18] | 359.010 | 168.117        | 164.914        | 165.115        | 164.712        | H[6]  |
| R[19] | 390.230 | 140.706        | 137.502        | 137.703        | 137.300        | R[5]  |
| K[20] | 421.435 | 109.485        | 106.282        | 106.483        | 106.080        | K[4]  |
| V[21] | 441.269 | 78.260         | 75.056         | 75.258         | 74.855         | V[3]  |
| L[22] | 463.886 | 58.446         | 55.243         | 55.444         | 55.041         | L[2]  |
| R[23] | 495.106 | 35.830         | 32.626         | 32.827         | 32.424         | R[1]  |



# sp | Q6ZWY9 | H2B1C\_MOUSE

PEPAKSAPAPKKGSK <sup>Acetyl</sup> 42.01 KAVTKAQKK

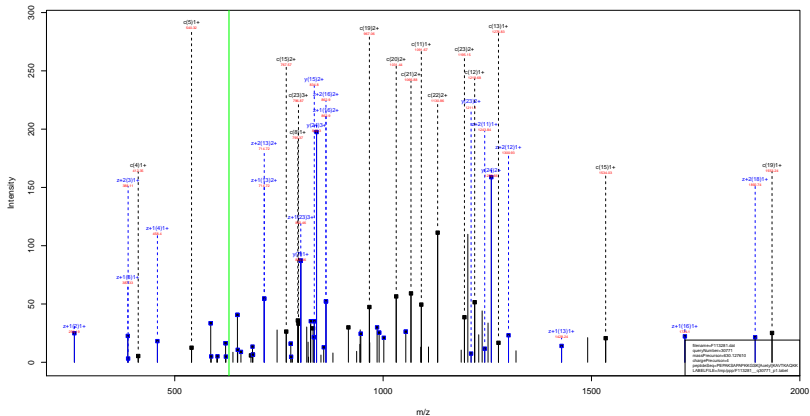

# sp | Q6ZWY9 | H2B1C\_MOUSE

PEPAKSAPAPKKGSK<sup>Acetyl</sup> KAVTKAQKK  
42.01

- ▶ fragmentation table for charge state 1+
- ▶ specType=etd
- ▶ score=72.68
- ▶ F113281.dat
- ▶ query=q30771\_p1
- ▶ precursor=630.127610
- ▶ chargePrecursor=4
- ▶ itol=0.5

| AA | c  | y               | z+1             | z+2             | z               | AA             |       |
|----|----|-----------------|-----------------|-----------------|-----------------|----------------|-------|
| P  | 1  | 115.087         | 2517.488        | 2501.469        | 0.000           | 2500.461       | P[24] |
| E  | 2  | 284.129         | 2420.435        | 2408.416        | 0.000           | 2403.408       | E[23] |
| F  | 3  | 287.162         | 2291.362        | 2275.273        | 0.000           | 2274.366       | F[22] |
| A  | 4  | <b>412.210</b>  | 2194.330        | 2178.301        | 0.000           | 2177.311       | A[21] |
| K  | 5  | <b>540.314</b>  | 2123.302        | 2107.284        | 2108.291        | 2105.276       | K[20] |
| S  | 6  | 627.346         | 1995.207        | 1979.189        | 1980.196        | 1978.181       | S[19] |
| A  | 7  | 698.383         | 1908.175        | 1892.157        | <b>1893.164</b> | 1891.149       | A[18] |
| P  | 8  | <b>795.436</b>  | 1837.139        | 1821.119        | 1822.127        | 1820.112       | P[17] |
| A  | 9  | 866.473         | 1740.085        | <b>1724.067</b> | 1725.075        | 1723.059       | A[16] |
| T  | 10 | 983.526         | 1669.042        | 1653.023        | 1654.031        | 1652.022       | T[15] |
| K  | 11 | <b>1091.621</b> | 1571.998        | 1555.977        | 1556.985        | 1554.969       | K[14] |
| K  | 12 | <b>1219.716</b> | 1443.901        | <b>1427.882</b> | 1428.890        | 1426.874       | K[13] |
| G  | 13 | <b>1276.737</b> | 1315.808        | 1299.787        | <b>1300.795</b> | 1298.779       | G[12] |
| S  | 14 | 1363.769        | 1258.784        | 1242.765        | <b>1243.773</b> | 1241.758       | S[11] |
| K  | 15 | <b>1533.875</b> | 1127.752        | 1112.733        | 1116.741        | 1114.726       | K[10] |
| K  | 16 | 1663.919        | <b>1001.647</b> | <b>985.628</b>  | 986.636         | 984.620        | K[9]  |
| A  | 17 | 1733.007        | 873.552         | <b>857.533</b>  | 858.541         | 856.525        | A[8]  |
| V  | 18 | 1832.075        | <b>802.515</b>  | 786.496         | 787.504         | 785.488        | V[7]  |
| T  | 19 | <b>1933.123</b> | 703.446         | <b>687.427</b>  | 688.435         | <b>686.420</b> | T[6]  |
| K  | 20 | 2061.216        | <b>602.398</b>  | <b>586.380</b>  | <b>587.388</b>  | 585.372        | K[5]  |
| A  | 21 | 2132.285        | 474.303         | <b>458.285</b>  | 459.293         | 457.277        | A[4]  |
| Q  | 22 | 2290.314        | 403.256         | <b>387.248</b>  | <b>388.255</b>  | 386.240        | Q[3]  |
| K  | 23 | 2388.409        | 275.208         | <b>259.189</b>  | 260.197         | 258.181        | K[2]  |
| K  | 24 | 2516.504        | 147.113         | 131.094         | 132.102         | 130.086        | K[1]  |

# sp | Q6ZWY9 | H2B1C\_MOUSE

PEPAKSAPAPKKGSK<sup>Acetyl</sup> KAVTKAQKK  
42.01

- ▶ fragmentation table for charge state 2+
- ▶ specType=etd
- ▶ score=72.68
- ▶ F113281.dat
- ▶ query=q30771\_p1
- ▶ precursor=630.127610
- ▶ chargePrecursor=4
- ▶ itol=0.5

| AA    | c               | y               | z+1             | z+2             | z              | AA    |
|-------|-----------------|-----------------|-----------------|-----------------|----------------|-------|
| P[1]  | 58.047          | <b>1250.247</b> | 1251.238        | 0.504           | 1250.734       | P[24] |
| E[2]  | 122.568         | <b>1210.721</b> | 1202.712        | 0.504           | 1202.208       | E[23] |
| F[3]  | 171.095         | 1146.200        | 1138.190        | 0.504           | 1137.686       | F[22] |
| A[4]  | 208.613         | 1097.673        | 1089.664        | 0.504           | 1089.160       | A[21] |
| K[5]  | 270.561         | 1082.155        | <b>1054.145</b> | <b>1054.645</b> | 1053.642       | K[20] |
| S[6]  | 314.177         | 998.107         | <b>990.098</b>  | <b>990.602</b>  | 989.594        | S[19] |
| A[7]  | 349.695         | 954.591         | <b>946.582</b>  | 947.086         | <b>946.078</b> | A[18] |
| P[8]  | 398.222         | 919.073         | 911.063         | 911.567         | 910.559        | P[17] |
| A[9]  | 433.740         | 878.545         | <b>862.537</b>  | <b>863.041</b>  | 862.033        | A[16] |
| T[10] | 482.267         | <b>835.028</b>  | 827.018         | 827.522         | <b>826.515</b> | T[15] |
| K[11] | 546.314         | 788.501         | <b>778.492</b>  | <b>778.996</b>  | <b>777.988</b> | K[14] |
| K[12] | 610.362         | 722.454         | <b>714.445</b>  | <b>714.948</b>  | 713.941        | K[13] |
| G[13] | 638.872         | <b>658.406</b>  | <b>650.397</b>  | <b>650.901</b>  | 649.893        | G[12] |
| S[14] | <b>682.388</b>  | 620.690         | <b>621.886</b>  | <b>622.390</b>  | 621.382        | S[11] |
| K[15] | <b>747.441</b>  | <b>586.380</b>  | 578.370         | 578.874         | 577.866        | K[10] |
| K[16] | <b>831.488</b>  | 501.327         | 493.318         | 493.821         | 492.814        | K[9]  |
| A[17] | 887.007         | 437.270         | 429.270         | 429.774         | 428.766        | A[8]  |
| V[18] | <b>916.541</b>  | 401.761         | 393.752         | 394.255         | 393.248        | V[7]  |
| T[19] | <b>967.065</b>  | 352.227         | 344.217         | 344.721         | 343.713        | T[6]  |
| K[20] | <b>1031.113</b> | 301.703         | 293.693         | 294.197         | 293.190        | K[5]  |
| A[21] | <b>1066.631</b> | 237.655         | 229.646         | 230.150         | 229.143        | A[4]  |
| Q[22] | <b>1130.660</b> | 202.137         | 194.127         | 194.631         | 193.624        | Q[3]  |
| K[23] | <b>1194.708</b> | 138.108         | 130.098         | 130.602         | 129.594        | K[2]  |
| K[24] | 1258.755        | 74.060          | 66.051          | 66.555          | 65.547         | K[1]  |

# sp | Q6ZWY9 | H2B1C\_MOUSE

PEPAKSAPAPKKGSK<sup>Acetyl</sup> KAVTKAQKK  
42.01

- ▶ fragmentation table for charge state 3+
- ▶ specType=etd
- ▶ score=72.68
- ▶ F113281.dat
- ▶ query=q30771\_p1
- ▶ precursor=630.127610
- ▶ chargePrecursor=4
- ▶ itol=0.5

| AA    | c              | y              | z+1            | z+2     | z              | AA    |
|-------|----------------|----------------|----------------|---------|----------------|-------|
| P[1]  | 99.034         | <b>839.834</b> | <b>834.494</b> | 0.672   | <b>834.159</b> | P[24] |
| E[2]  | 82.048         | 807.483        | <b>802.144</b> | 0.672   | 801.808        | E[23] |
| P[3]  | 114.999        | 764.469        | 759.129        | 0.672   | 758.793        | P[22] |
| A[4]  | 138.078        | 732.118        | 726.778        | 0.672   | 726.442        | A[21] |
| K[5]  | 180.776        | 708.439        | 703.099        | 703.435 | 702.763        | K[20] |
| S[6]  | 209.787        | 665.741        | 660.401        | 660.727 | 660.005        | S[19] |
| A[7]  | 233.466        | 636.730        | 631.390        | 631.726 | 631.054        | A[18] |
| P[8]  | 265.817        | 613.051        | 607.711        | 608.047 | 607.375        | P[17] |
| A[9]  | 289.496        | 588.700        | 583.360        | 583.696 | 583.024        | A[16] |
| P[10] | 321.847        | 557.021        | 551.681        | 552.017 | 551.345        | P[15] |
| K[11] | 364.545        | 524.670        | 519.330        | 519.666 | 518.995        | K[14] |
| K[12] | 407.243        | 481.972        | 476.632        | 476.968 | 476.296        | K[13] |
| G[13] | 426.251        | 439.273        | 433.934        | 434.270 | 433.598        | G[12] |
| S[14] | 455.261        | 420.266        | 414.927        | 415.263 | 414.591        | S[11] |
| K[15] | 511.963        | 391.256        | 385.916        | 386.252 | 385.580        | K[10] |
| K[16] | 554.661        | 334.554        | 329.214        | 329.550 | 328.878        | K[9]  |
| A[17] | 578.340        | 291.855        | 286.515        | 286.852 | 286.180        | A[8]  |
| V[18] | 611.363        | 268.176        | 262.837        | 263.173 | 262.501        | V[7]  |
| T[19] | 645.045        | 235.154        | 229.814        | 230.150 | 229.478        | T[6]  |
| K[20] | <b>687.744</b> | 201.471        | 196.131        | 196.467 | 195.795        | K[5]  |
| A[21] | 711.423        | 158.771        | 153.431        | 153.767 | 153.097        | A[4]  |
| Q[22] | 754.109        | 135.094        | 129.754        | 130.090 | 129.418        | Q[3]  |
| K[23] | <b>796.808</b> | 92.407         | 87.068         | 87.404  | 86.732         | K[2]  |
| K[24] | 839.506        | 49.700         | 44.370         | 44.705  | 44.034         | K[1]  |



# sp | P62806 | H4\_MOUSE

[Acetyl]SGRGKGGK <sup>Acetyl</sup><sub>42.01</sub> GLGK <sup>Acetyl</sup><sub>42.01</sub> GGAK <sup>Acetyl</sup><sub>42.01</sub> RHRK <sup>Dimethyl</sup><sub>28.03</sub> VLR

- ▶ fragmentation table for charge state 1+
- ▶ specType=etd
- ▶ score=89.21
- ▶ F113281.dat
- ▶ query=q31171\_p1
- ▶ precursor=512.105650
- ▶ chargePrecursor=5
- ▶ itol=0.5

| AA    | c               | y              | z+1             | z+2             | z              | AA    |
|-------|-----------------|----------------|-----------------|-----------------|----------------|-------|
| S[1]  | 147.076         | 2566.507       | 2540.488        | 0.000           | 2539.488       | S[23] |
| G[2]  | 304.098         | 2427.464       | 2411.446        | 0.000           | 2410.438       | G[22] |
| R[3]  | <b>360.199</b>  | 2370.443       | 2354.424        | 2355.432        | 2353.416       | R[21] |
| G[4]  | <b>417.220</b>  | 2214.342       | 2198.323        | 2199.331        | 2197.315       | G[20] |
| K[5]  | <b>543.315</b>  | 2137.320       | 2141.302        | 2142.309        | 2140.293       | K[19] |
| G[6]  | <b>602.137</b>  | 2039.225       | 2013.207        | 2014.214        | 2012.199       | G[18] |
| G[7]  | <b>659.358</b>  | 1972.204       | 1956.185        | 1957.193        | 1955.177       | G[17] |
| K[8]  | 829.464         | 1915.182       | 1899.164        | <b>1900.172</b> | 1898.156       | K[16] |
| G[9]  | <b>886.485</b>  | 1745.077       | <b>1729.058</b> | 1730.066        | 1728.050       | G[15] |
| L[10] | <b>999.569</b>  | 1688.055       | 1672.037        | 1673.045        | 1671.029       | L[14] |
| G[11] | <b>1056.591</b> | 1574.071       | 1558.053        | 1559.060        | 1557.045       | G[13] |
| R[12] | <b>1228.696</b> | 1317.956       | 1301.938        | <b>1302.936</b> | 1300.921       | R[12] |
| G[13] | <b>1283.718</b> | 1347.844       | 1331.826        | <b>1332.833</b> | 1330.818       | G[11] |
| G[14] | <b>1340.739</b> | 1290.823       | <b>1274.804</b> | 1275.812        | 1273.796       | G[10] |
| A[15] | <b>1411.776</b> | 1233.801       | 1217.783        | <b>1218.791</b> | 1216.775       | A[9]  |
| K[16] | <b>1581.882</b> | 1162.764       | 1146.746        | <b>1147.753</b> | 1145.738       | K[8]  |
| R[17] | 1737.983        | 892.699        | 876.680         | 877.688         | 876.673        | R[7]  |
| T[18] | 1879.082        | <b>636.558</b> | <b>620.539</b>  | 621.547         | <b>619.531</b> | T[6]  |
| R[19] | 2031.143        | 609.439        | <b>603.400</b>  | 604.408         | <b>602.472</b> | R[5]  |
| K[20] | 2187.209        | 543.398        | <b>527.379</b>  | <b>528.387</b>  | 526.371        | K[4]  |
| V[21] | 2286.338        | 387.271        | <b>371.253</b>  | 372.261         | 370.245        | V[3]  |
| L[22] | 2399.422        | 288.203        | <b>272.184</b>  | 273.192         | 271.176        | L[2]  |
| R[23] | 2555.523        | 178.119        | <b>159.100</b>  | 160.108         | 158.092        | R[1]  |

# sp | P62806 | H4\_MOUSE

[Acetyl]SGRGKGGK <sup>Acetyl</sup><sub>42.01</sub> GLGK <sup>Acetyl</sup><sub>42.01</sub> GGAK <sup>Acetyl</sup><sub>42.01</sub> RHRK <sup>Dimethyl</sup><sub>28.03</sub> VLR

- ▶ fragmentation table for charge state 2+
- ▶ specType=etd
- ▶ score=89.21
- ▶ F113281.dat
- ▶ query=q31171\_p1
- ▶ precursor=512.105650
- ▶ chargePrecursor=5
- ▶ itol=0.5

| AA    | c               | y              | z+1             | z+2             | z               | AA    |
|-------|-----------------|----------------|-----------------|-----------------|-----------------|-------|
| S[1]  | 74.062          | 1276.757       | <b>1270.748</b> | 0.504           | 1270.244        | S[2]  |
| G[2]  | 102.563         | 1214.236       | <b>1206.226</b> | 0.504           | 1205.723        | G[2]  |
| R[3]  | 180.603         | 1195.725       | 1177.710        | 1178.220        | <b>1177.212</b> | R[2]  |
| G[4]  | 209.114         | 1107.675       | 1099.665        | <b>1100.169</b> | 1099.161        | G[20] |
| K[5]  | 273.161         | 1079.164       | 1071.154        | <b>1071.658</b> | 1070.651        | K[19] |
| G[6]  | 301.672         | 975.116        | <b>1007.107</b> | <b>1007.611</b> | 1006.603        | G[18] |
| G[7]  | 330.183         | <b>986.606</b> | <b>978.596</b>  | <b>979.100</b>  | 978.092         | G[17] |
| K[8]  | <b>415.236</b>  | 958.095        | <b>950.085</b>  | <b>950.589</b>  | 949.582         | K[16] |
| G[9]  | <b>443.746</b>  | 873.042        | 865.033         | <b>865.537</b>  | 864.529         | G[15] |
| L[10] | <b>500.288</b>  | 844.531        | <b>836.522</b>  | <b>837.026</b>  | 836.018         | L[14] |
| G[11] | <b>538.799</b>  | 727.009        | <b>779.980</b>  | <b>780.484</b>  | 779.476         | G[13] |
| R[12] | <b>613.652</b>  | <b>759.479</b> | <b>751.469</b>  | <b>751.973</b>  | 750.965         | R[12] |
| G[13] | <b>642.363</b>  | 574.526        | <b>666.416</b>  | <b>666.920</b>  | 665.913         | G[11] |
| G[14] | <b>670.873</b>  | <b>645.915</b> | <b>637.906</b>  | <b>638.410</b>  | 637.402         | G[10] |
| A[15] | <b>706.392</b>  | 617.404        | <b>609.395</b>  | <b>609.899</b>  | <b>606.891</b>  | A[9]  |
| K[16] | <b>791.445</b>  | 581.888        | <b>573.876</b>  | 574.380         | <b>573.373</b>  | K[8]  |
| R[17] | <b>869.495</b>  | 496.833        | <b>488.824</b>  | <b>489.328</b>  | 488.320         | R[7]  |
| R[18] | <b>938.025</b>  | 418.782        | <b>410.773</b>  | <b>411.277</b>  | 410.269         | R[6]  |
| R[19] | <b>1016.075</b> | 350.253        | <b>342.244</b>  | <b>342.748</b>  | 341.740         | R[5]  |
| K[20] | <b>1094.138</b> | <b>272.202</b> | 264.193         | 264.697         | 263.689         | K[4]  |
| V[21] | 1143.673        | 194.139        | 186.130         | 186.634         | 185.626         | V[3]  |
| L[22] | 1200.215        | 144.605        | 136.596         | 137.100         | 136.092         | L[2]  |
| R[23] | 1278.265        | 88.083         | 80.074          | 80.578          | 79.570          | R[1]  |

# sp | P62806 | H4\_MOUSE

[Acetyl]SGRGKGGK<sup>Acetyl</sup><sub>42.01</sub> GLGK<sup>Acetyl</sup><sub>42.01</sub> GGAK<sup>Acetyl</sup><sub>42.01</sub> RHRK<sup>Dimethyl</sup><sub>28.03</sub> VLR

- ▶ fragmentation table for charge state 3+
- ▶ specType=etd
- ▶ score=89.21
- ▶ F113281.dat
- ▶ query=q31171\_p1
- ▶ precursor=512.105650
- ▶ chargePrecursor=5
- ▶ itol=0.5

| AA   | c              | y       | z+1            | z+2            | z              | AA   |
|------|----------------|---------|----------------|----------------|----------------|------|
| S 1  | 49.697         | 852.841 | <b>847.501</b> | 0.672          | 847.165        | S 23 |
| G 2  | 68.704         | 809.826 | 804.487        | 0.672          | 804.151        | G 22 |
| K 3  | 120.738        | 700.819 | 705.489        | <b>785.816</b> | 785.144        | K 21 |
| G 4  | 139.745        | 138.785 | <b>733.446</b> | <b>733.782</b> | 733.110        | G 20 |
| K 5  | 182.443        | 719.778 | 714.439        | <b>714.775</b> | 714.103        | K 19 |
| G 6  | 201.450        | 677.080 | <b>671.740</b> | <b>672.076</b> | <b>671.404</b> | G 18 |
| G 7  | 220.458        | 658.073 | <b>652.733</b> | <b>653.069</b> | 652.397        | G 17 |
| K 8  | 277.159        | 639.066 | <b>633.726</b> | <b>634.062</b> | <b>633.390</b> | K 16 |
| G 9  | 296.167        | 582.364 | 577.024        | <b>577.360</b> | 576.688        | G 15 |
| L 10 | 333.861        | 563.357 | <b>558.017</b> | <b>558.353</b> | 557.681        | L 14 |
| G 11 | 352.868        | 525.662 | 520.322        | <b>520.658</b> | 519.986        | G 13 |
| K 12 | 409.570        | 506.655 | 501.315        | 501.651        | <b>500.979</b> | K 12 |
| G 13 | 428.577        | 449.953 | 444.613        | 444.949        | <b>444.277</b> | G 11 |
| G 14 | 447.585        | 430.946 | 425.606        | 425.942        | 425.270        | G 10 |
| A 15 | 471.264        | 411.939 | 406.599        | 406.935        | 406.263        | A 9  |
| K 16 | <b>527.966</b> | 388.260 | 382.920        | 381.256        | 382.584        | K 8  |
| R 17 | <b>579.999</b> | 331.558 | 326.218        | 326.554        | 325.882        | R 7  |
| H 18 | <b>625.686</b> | 279.524 | 274.185        | 274.520        | 273.849        | H 6  |
| R 19 | <b>677.719</b> | 233.838 | 228.498        | 228.834        | 228.162        | R 5  |
| K 20 | <b>729.761</b> | 181.804 | 176.465        | 176.800        | 176.129        | K 4  |
| V 21 | <b>762.784</b> | 129.762 | 124.422        | 124.758        | 124.086        | V 3  |
| L 22 | 800.479        | 96.739  | 91.400         | 91.736         | 91.064         | L 2  |
| R 23 | 852.513        | 59.045  | 53.705         | 54.041         | 53.369         | R 1  |



# sp | P62806 | H4\_MOUSE

[Acetyl]SGRGKGGK <sup>Acetyl</sup><sub>42.01</sub> GLGK <sup>Acetyl</sup><sub>42.01</sub> GGAK <sup>Acetyl</sup><sub>42.01</sub> RHRK <sup>Dimethyl</sup><sub>28.03</sub> VLR

- ▶ fragmentation table for charge state 4+
- ▶ specType=etd
- ▶ score=89.21
- ▶ F113281.dat
- ▶ query=q31171\_p1
- ▶ precursor=512.105650
- ▶ chargePrecursor=5
- ▶ itol=0.5

| AA    | c       | y              | z+1            | z+2            | z              | AA    |
|-------|---------|----------------|----------------|----------------|----------------|-------|
| S[1]  | 37.525  | <b>639.882</b> | <b>635.878</b> | 0.755          | 635.626        | S[23] |
| G[2]  | 51.780  | 607.622        | 603.617        | 0.755          | 603.365        | G[22] |
| R[3]  | 60.855  | 593.366        | <b>589.362</b> | <b>585.613</b> | 589.110        | R[21] |
| G[4]  | 105.061 | 554.341        | 550.336        | 550.588        | 550.084        | G[20] |
| K[5]  | 137.084 | 540.086        | 536.081        | 536.333        | 535.829        | K[19] |
| G[6]  | 151.340 | 508.062        | 504.057        | 504.309        | 503.805        | G[18] |
| G[7]  | 165.595 | 493.806        | <b>489.802</b> | <b>490.054</b> | <b>489.550</b> | G[17] |
| K[8]  | 208.121 | 479.551        | 475.546        | 475.798        | 475.294        | K[16] |
| G[9]  | 222.377 | 437.025        | 433.020        | 433.272        | 432.768        | G[15] |
| L[10] | 250.648 | 422.769        | 418.765        | 419.017        | 418.513        | L[14] |
| G[11] | 264.903 | 394.488        | 390.484        | 390.746        | 390.242        | G[13] |
| K[12] | 307.430 | 380.243        | 376.238        | 376.490        | 375.986        | K[12] |
| G[13] | 321.685 | 339.737        | 335.732        | 335.984        | 335.480        | G[11] |
| G[14] | 335.940 | 323.461        | 319.457        | 319.708        | 319.205        | G[10] |
| A[15] | 353.700 | 309.206        | 305.201        | 305.453        | 304.949        | A[9]  |
| K[16] | 396.226 | 291.447        | 287.442        | 287.694        | 287.190        | K[8]  |
| R[17] | 435.251 | 248.920        | 244.915        | 245.167        | 244.664        | R[7]  |
| H[18] | 469.516 | 209.895        | 205.890        | 206.142        | 205.638        | H[6]  |
| R[19] | 508.541 | 175.630        | 171.625        | 171.877        | 171.374        | R[5]  |
| K[20] | 547.573 | 136.605        | 132.600        | 132.852        | 132.348        | K[4]  |
| V[21] | 572.340 | 97.573         | 93.569         | 93.821         | 93.317         | V[3]  |
| L[22] | 600.611 | 72.806         | 68.802         | 69.053         | 68.550         | L[2]  |
| R[23] | 639.636 | 44.535         | 40.531         | 40.782         | 40.279         | R[1]  |

# sp | Q6ZWY9 | H2B1C\_MOUSE

PEPAKSAPAPK Acetyl 42.01 K Acetyl 42.01 GSKKAVTKAQKK

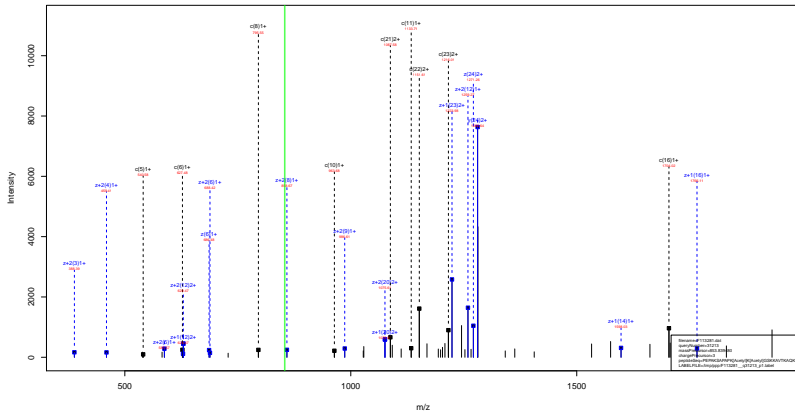

# sp | Q6ZWY9 | H2B1C\_MOUSE

PEPAKSAPAPK <sup>Acetyl</sup>42.01 K <sup>Acetyl</sup>42.01 GSKKAVTKAQKK

- ▶ fragmentation table for charge state 1+
- ▶ specType=etd
- ▶ score=39.06
- ▶ F113281.dat
- ▶ query=q31213.p1
- ▶ precursor=853.839480
- ▶ chargePrecursor=3
- ▶ itol=0.5

| AA | c  | y               | z+1      | z+2             | z               | AA             |       |
|----|----|-----------------|----------|-----------------|-----------------|----------------|-------|
| P  | 1  | 115.007         | 2509.498 | 2543.479        | 0.000           | 2542.473       | P[24] |
| E  | 2  | 244.129         | 2462.445 | 2446.427        | 0.000           | 2445.419       | E[23] |
| P  | 3  | 341.182         | 2333.403 | 2317.384        | 0.000           | 2316.376       | P[22] |
| A  | 4  | 413.319         | 2298.350 | 2229.331        | 0.000           | 2219.323       | A[21] |
| K  | 5  | <b>540.314</b>  | 2165.313 | 2149.294        | 2150.302        | 2148.288       | K[20] |
| S  | 6  | <b>627.346</b>  | 2037.218 | 2021.199        | 2022.207        | 2020.191       | S[19] |
| A  | 7  | 698.393         | 1950.186 | 1934.167        | 1935.175        | 1933.159       | A[18] |
| P  | 8  | <b>795.436</b>  | 1879.149 | 1863.130        | 1864.138        | 1862.122       | P[17] |
| A  | 9  | 859.471         | 1782.096 | <b>1766.077</b> | 1767.085        | 1765.069       | A[16] |
| P  | 10 | <b>961.526</b>  | 1711.059 | 1695.040        | 1696.048        | 1694.032       | P[15] |
| K  | 11 | <b>1133.631</b> | 1614.006 | <b>1597.987</b> | 1598.995        | 1596.980       | K[14] |
| K  | 12 | 1303.757        | 1443.901 | 1427.882        | 1428.890        | 1426.874       | K[13] |
| G  | 13 | 1360.758        | 1273.795 | 1257.776        | <b>1258.784</b> | 1256.768       | G[12] |
| S  | 14 | 1447.790        | 1216.774 | 1200.755        | 1201.763        | 1199.747       | S[11] |
| K  | 15 | 1679.888        | 1120.742 | 1113.723        | 1114.731        | 1112.715       | K[10] |
| K  | 16 | <b>1703.980</b> | 1003.647 | 986.628         | <b>986.636</b>  | 984.620        | K[9]  |
| A  | 17 | 1775.017        | 873.552  | 857.533         | <b>858.541</b>  | 856.525        | A[8]  |
| V  | 18 | 1874.086        | 802.515  | 786.496         | 787.504         | 785.488        | V[7]  |
| T  | 19 | 1975.131        | 703.446  | 687.427         | <b>688.435</b>  | <b>686.420</b> | T[6]  |
| K  | 20 | 2103.228        | 602.389  | 586.380         | <b>587.388</b>  | 585.372        | K[5]  |
| A  | 21 | 2174.266        | 474.303  | 458.285         | <b>459.293</b>  | 457.277        | A[4]  |
| Q  | 22 | 2302.324        | 403.266  | 387.248         | <b>388.255</b>  | 386.240        | Q[3]  |
| K  | 23 | 2430.419        | 275.208  | 259.190         | 260.197         | 258.181        | K[2]  |
| K  | 24 | 2558.514        | 147.113  | 131.094         | 132.102         | 130.086        | K[1]  |

# sp | Q6ZWY9 | H2B1C\_MOUSE

PEPAKSAPAPK <sup>Acetyl</sup>42.01 K <sup>Acetyl</sup>42.01 GSKKAVTKAQKK

- ▶ fragmentation table for charge state 2+
- ▶ specType=etd
- ▶ score=39.06
- ▶ F113281.dat
- ▶ query=q31213.p1
- ▶ precursor=853.839480
- ▶ chargePrecursor=3
- ▶ itol=0.5

| AA    | c               | y               | z+1             | z+2             | z               | AA    |
|-------|-----------------|-----------------|-----------------|-----------------|-----------------|-------|
| F[1]  | 58.047          | <b>1280.253</b> | 1270.249        | 0.504           | <b>1271.739</b> | P[20] |
| E[2]  | 122.508         | 1231.726        | <b>1223.717</b> | 0.504           | 1223.211        | E[23] |
| F[3]  | 171.095         | 1167.205        | 1159.196        | 0.504           | 1159.692        | F[22] |
| A[4]  | 258.013         | 1118.879        | 1110.889        | 0.504           | 1110.385        | A[21] |
| R[5]  | 270.693         | 1083.150        | <b>1075.151</b> | <b>1075.655</b> | 1074.647        | R[20] |
| S[6]  | 314.177         | 1019.113        | 1011.103        | 1011.607        | 1010.599        | S[19] |
| A[7]  | 349.695         | 975.597         | 967.587         | 968.091         | 967.083         | A[18] |
| F[8]  | 398.222         | 940.079         | 932.069         | 932.573         | 931.565         | F[17] |
| A[9]  | 433.740         | 891.552         | 883.542         | 884.046         | 883.038         | A[16] |
| T[10] | 482.287         | 856.033         | 848.024         | 848.528         | 847.520         | T[15] |
| K[11] | 507.319         | 807.507         | 799.497         | 800.001         | 798.993         | K[14] |
| K[12] | 652.372         | 722.454         | 714.445         | 714.949         | 713.941         | K[13] |
| G[13] | 680.603         | 637.401         | <b>629.392</b>  | <b>629.896</b>  | <b>628.888</b>  | G[12] |
| S[14] | 724.399         | 608.890         | 600.881         | 601.385         | 600.377         | S[11] |
| K[15] | 768.446         | 568.374         | 560.365         | 560.869         | 559.861         | K[10] |
| K[16] | 852.498         | 501.327         | 493.318         | 493.821         | 492.813         | K[9]  |
| A[17] | 888.012         | 437.279         | 429.270         | 429.774         | 428.766         | A[8]  |
| V[18] | 937.547         | 401.761         | 393.752         | 394.255         | 393.247         | V[7]  |
| T[19] | 988.070         | 352.227         | 344.217         | 344.721         | 343.713         | T[6]  |
| K[20] | 1027.118        | 301.703         | 293.693         | 294.197         | 293.189         | K[5]  |
| A[21] | <b>1087.636</b> | 237.655         | 229.646         | 230.150         | 229.142         | A[4]  |
| Q[22] | <b>1151.666</b> | 202.137         | 194.127         | 194.631         | 193.623         | Q[3]  |
| K[23] | <b>1215.713</b> | 138.108         | 130.098         | 130.602         | 129.594         | K[2]  |
| K[24] | 1279.701        | 74.060          | 66.051          | 66.555          | 65.547          | K[1]  |



# sp | P62806 | H4\_MOUSE

[Acetyl]SGR**GGK**<sup>Acetyl</sup><sub>42.01</sub> **GGK**<sup>Acetyl</sup><sub>42.01</sub> **GLGK**<sup>Acetyl</sup><sub>42.01</sub> **GGAK**<sup>Acetyl</sup><sub>42.01</sub> **RHRK**<sup>Dimethyl</sup><sub>28.03</sub> **VLR**

- ▶ fragmentation table for charge state 1+
- ▶ specType=etd
- ▶ score=61.19
- ▶ F113281.dat
- ▶ query=q31511\_p1
- ▶ precursor=520.509050
- ▶ chargePrecursor=5
- ▶ itol=0.5

| AA    | c               | y              | z+1             | z+2            | z              | AA    |
|-------|-----------------|----------------|-----------------|----------------|----------------|-------|
| S[1]  | 147.076         | 2585.518       | 2582.409        | 0.000          | 2581.401       | S[23] |
| G[2]  | 204.098         | 2469.475       | 2453.456        | 0.000          | 2452.448       | G[22] |
| R[3]  | <b>360.199</b>  | 2412.453       | 2396.435        | 2397.443       | 2395.427       | R[21] |
| G[4]  | <b>417.220</b>  | 2256.352       | 2240.334        | 2241.341       | 2239.326       | G[20] |
| K[5]  | <b>587.326</b>  | 2169.331       | 2153.312        | 2154.320       | 2152.304       | K[19] |
| G[6]  | <b>644.347</b>  | 2029.225       | 2013.207        | 2014.214       | 2012.199       | G[18] |
| G[7]  | <b>701.369</b>  | 1972.204       | 1956.185        | 1957.193       | 1955.177       | G[17] |
| K[8]  | <b>871.474</b>  | 1915.182       | 1899.164        | 1900.172       | 1898.156       | K[16] |
| G[9]  | <b>928.496</b>  | 1745.077       | 1729.058        | 1730.066       | 1728.050       | G[15] |
| L[10] | <b>1041.580</b> | 1688.055       | 1672.037        | 1673.045       | 1671.029       | L[14] |
| G[11] | <b>1098.601</b> | 1574.971       | <b>1558.953</b> | 1559.960       | 1557.945       | G[13] |
| K[12] | 1228.707        | 1317.956       | 1301.937        | 1302.945       | 1300.929       | K[12] |
| G[13] | <b>1325.728</b> | 1247.844       | 1231.826        | 1232.833       | 1230.818       | G[11] |
| G[14] | <b>1382.750</b> | 1290.823       | 1274.804        | 1275.812       | 1273.796       | G[10] |
| A[15] | <b>1453.787</b> | 1233.801       | 1217.783        | 1218.791       | 1216.775       | A[9]  |
| K[16] | 1623.893        | 1162.764       | <b>1146.746</b> | 1147.753       | 1145.738       | K[8]  |
| R[17] | <b>1779.994</b> | 992.659        | 976.640         | 977.648        | 975.632        | R[7]  |
| R[18] | 1817.053        | <b>836.558</b> | 820.539         | <b>821.547</b> | <b>819.531</b> | R[6]  |
| R[19] | 2073.154        | 699.499        | <b>683.480</b>  | <b>684.488</b> | 682.472        | R[5]  |
| K[20] | 2226.280        | 543.395        | <b>527.379</b>  | <b>528.387</b> | 526.371        | K[4]  |
| V[21] | 2328.348        | 387.271        | 371.253         | 372.261        | 370.245        | V[3]  |
| L[22] | 2441.432        | 288.203        | <b>272.184</b>  | 273.192        | 271.176        | L[2]  |
| R[23] | 2597.534        | <b>175.119</b> | <b>159.100</b>  | 160.108        | 158.092        | R[1]  |

# sp | P62806 | H4\_MOUSE

[Acetyl]SGRGK Acetyl  
42.01 **GGK** Acetyl  
42.01 **GLGK** Acetyl  
42.01 **GGAK** Acetyl  
42.01 **RHRK** Dimethyl  
28.03 **VLR**

- ▶ fragmentation table for charge state 2+
- ▶ specType=etd
- ▶ score=61.19
- ▶ F113281.dat
- ▶ query=q31511.p1
- ▶ precursor=520.509050
- ▶ chargePrecursor=5
- ▶ itol=0.5

| AA    | c               | y               | z+1             | z+2             | z              | AA    |
|-------|-----------------|-----------------|-----------------|-----------------|----------------|-------|
| S[1]  | 74.062          | 1299.762        | 1291.753        | 0.904           | 1291.249       | S[23] |
| G[2]  | 102.563         | 1235.241        | 1227.232        | 0.904           | 1226.728       | G[22] |
| R[3]  | 180.603         | <b>1206.730</b> | <b>1198.721</b> | <b>1199.225</b> | 1198.217       | R[21] |
| G[4]  | 209.114         | 1128.680        | 1120.670        | <b>1121.174</b> | 1120.167       | G[20] |
| K[5]  | 294.167         | 1100.160        | 1092.150        | 1092.654        | 1091.656       | K[19] |
| G[6]  | 322.677         | 1025.139        | 1020.130        | <b>1007.611</b> | 1006.603       | G[18] |
| G[7]  | 351.188         | 986.606         | <b>978.596</b>  | <b>979.100</b>  | <b>978.092</b> | G[17] |
| K[8]  | 436.241         | 958.095         | 950.085         | <b>950.589</b>  | 949.582        | K[16] |
| G[9]  | 464.752         | 873.047         | 865.033         | 865.537         | 864.529        | G[15] |
| L[10] | 521.294         | 844.531         | 836.522         | <b>837.026</b>  | 836.018        | L[14] |
| G[11] | 569.804         | 787.989         | <b>779.980</b>  | 780.484         | <b>779.476</b> | G[13] |
| R[12] | 634.857         | 759.470         | <b>751.460</b>  | 751.973         | <b>750.965</b> | R[12] |
| G[13] | 663.368         | 674.426         | 666.416         | <b>666.920</b>  | 665.913        | G[11] |
| G[14] | <b>691.879</b>  | 645.915         | 637.905         | <b>638.410</b>  | 637.402        | G[10] |
| A[15] | 727.397         | 617.404         | <b>609.395</b>  | <b>609.899</b>  | 608.891        | A[9]  |
| K[16] | 812.450         | 581.889         | <b>573.876</b>  | <b>574.380</b>  | <b>573.373</b> | K[8]  |
| R[17] | <b>890.500</b>  | 496.833         | <b>488.824</b>  | <b>489.328</b>  | 488.320        | R[7]  |
| R[18] | <b>959.030</b>  | 418.763         | <b>410.773</b>  | <b>411.277</b>  | 410.269        | R[6]  |
| R[19] | <b>1037.080</b> | 350.253         | <b>342.244</b>  | <b>342.748</b>  | 341.740        | R[5]  |
| R[20] | 1115.144        | <b>272.202</b>  | 264.193         | 264.697         | 263.689        | R[4]  |
| V[21] | <b>1164.678</b> | 194.139         | 186.130         | 186.634         | 185.626        | V[3]  |
| L[22] | <b>1221.220</b> | 144.605         | 136.596         | 137.100         | 136.092        | L[2]  |
| R[23] | 1299.270        | 88.063          | 80.054          | 80.558          | 79.550         | R[1]  |

# sp | P62806 | H4\_MOUSE

[Acetyl]SGR**GK**<sup>Acetyl</sup><sub>42.01</sub> **GGK**<sup>Acetyl</sup><sub>42.01</sub> **GLGK**<sup>Acetyl</sup><sub>42.01</sub> **GGAK**<sup>Acetyl</sup><sub>42.01</sub> **RHRK**<sup>Dimethyl</sup><sub>28.03</sub> **VLR**

- ▶ fragmentation table for charge state 3+
- ▶ specType=etd
- ▶ score=61.19
- ▶ F113281.dat
- ▶ query=q31511.p1
- ▶ precursor=520.509050
- ▶ chargePrecursor=5
- ▶ itol=0.5

| AA    | c              | y              | z+1            | z+2            | z              | AA    |
|-------|----------------|----------------|----------------|----------------|----------------|-------|
| S[1]  | 49.697         | 896.844        | 861.504        | 0.672          | 861.169        | S[23] |
| G[2]  | 68.704         | 823.830        | 818.490        | 0.672          | 818.154        | G[22] |
| E[3]  | 120.738        | 804.821        | 799.483        | <b>799.819</b> | 799.147        | R[21] |
| G[4]  | 139.743        | 732.789        | <b>747.449</b> | <b>747.705</b> | 747.113        | G[20] |
| K[5]  | 196.447        | 733.782        | <b>726.442</b> | <b>726.778</b> | 726.106        | K[19] |
| G[6]  | 215.454        | 677.080        | <b>671.740</b> | <b>672.076</b> | 671.404        | G[18] |
| G[7]  | 234.461        | 658.073        | 652.733        | 653.069        | 652.397        | G[17] |
| K[8]  | 291.163        | <b>639.066</b> | <b>633.726</b> | <b>634.062</b> | 633.390        | K[16] |
| G[9]  | 310.170        | 582.364        | <b>577.024</b> | <b>577.360</b> | <b>576.688</b> | G[15] |
| L[10] | 347.885        | 563.357        | 558.017        | 558.353        | 557.681        | L[14] |
| G[11] | 366.872        | 525.662        | 520.322        | 520.658        | 519.986        | G[13] |
| K[12] | 423.574        | 506.655        | <b>501.315</b> | <b>501.651</b> | 500.979        | K[12] |
| G[13] | 442.581        | 449.953        | <b>444.613</b> | <b>444.949</b> | <b>444.277</b> | G[11] |
| G[14] | 461.588        | 430.946        | 425.607        | <b>425.942</b> | 425.270        | G[10] |
| A[15] | 485.267        | <b>411.939</b> | 406.599        | 406.935        | 406.263        | A[9]  |
| K[16] | 541.969        | 388.260        | 382.920        | 383.256        | 382.584        | K[8]  |
| R[17] | 594.063        | 331.558        | 326.218        | 326.554        | 325.882        | R[7]  |
| H[18] | 639.689        | 279.524        | 274.185        | 274.520        | 273.849        | H[6]  |
| R[19] | <b>691.723</b> | 233.838        | 228.498        | 228.834        | 228.162        | R[5]  |
| K[20] | <b>743.765</b> | 181.804        | 176.465        | 176.800        | 176.129        | K[4]  |
| V[21] | 776.788        | 129.762        | 124.422        | 124.758        | 124.086        | V[9]  |
| L[22] | <b>814.482</b> | 96.739         | 91.400         | 91.736         | 91.064         | L[8]  |
| R[23] | 868.316        | 39.043         | 33.703         | 34.041         | 33.369         | R[1]  |



# sp | P62806 | H4\_MOUSE

[Acetyl]SGRGK<sup>Acetyl</sup><sub>42.01</sub> GGK<sup>Acetyl</sup><sub>42.01</sub> GLGK<sup>Acetyl</sup><sub>42.01</sub> GGAK<sup>Acetyl</sup><sub>42.01</sub> RHRK<sup>Dimethyl</sup><sub>28.03</sub> VLR

- ▶ fragmentation table for charge state 4+
- ▶ specType=etd
- ▶ score=61.19
- ▶ F113281.dat
- ▶ query=q31511.p1
- ▶ precursor=520.509050
- ▶ chargePrecursor=5
- ▶ itol=0.5

| AA    | c       | y              | z+1            | z+2            | z              | AA    |
|-------|---------|----------------|----------------|----------------|----------------|-------|
| S[1]  | 37.525  | <b>650.385</b> | <b>646.380</b> | 0.755          | 646.128        | S[23] |
| G[2]  | 51.750  | 618.124        | <b>614.120</b> | 0.755          | 613.868        | G[22] |
| R[3]  | 60.835  | 603.859        | <b>599.864</b> | <b>600.116</b> | 599.612        | R[21] |
| G[4]  | 105.061 | 564.844        | 560.839        | 561.091        | 560.587        | G[20] |
| K[5]  | 147.587 | 519.588        | 546.584        | 546.835        | 546.132        | K[19] |
| G[6]  | 161.842 | 508.062        | 504.057        | 504.309        | 503.805        | G[18] |
| G[7]  | 176.098 | 493.806        | <b>489.802</b> | <b>490.054</b> | <b>489.550</b> | G[17] |
| K[8]  | 218.634 | 479.551        | 475.546        | 475.798        | 475.294        | K[16] |
| G[9]  | 232.879 | 437.025        | 433.020        | 433.272        | 432.768        | G[15] |
| L[10] | 261.150 | 422.769        | 418.765        | 419.017        | 418.513        | L[14] |
| G[11] | 275.406 | 394.488        | 390.484        | 390.746        | 390.242        | G[13] |
| K[12] | 317.932 | 380.243        | 376.238        | 376.490        | 375.986        | K[12] |
| G[13] | 322.188 | 339.737        | 335.732        | 335.984        | 335.480        | G[11] |
| G[14] | 346.443 | 323.461        | 319.457        | 319.708        | 319.205        | G[10] |
| A[15] | 354.202 | 309.206        | 305.201        | 305.453        | 304.949        | A[9]  |
| K[16] | 406.729 | 291.447        | 287.442        | 287.694        | 287.190        | K[8]  |
| R[17] | 445.754 | 248.920        | 244.915        | 245.167        | 244.664        | R[7]  |
| H[18] | 480.019 | 209.895        | 205.890        | 206.142        | 205.638        | H[6]  |
| R[19] | 519.044 | <b>175.630</b> | 171.625        | 171.877        | 171.374        | R[5]  |
| K[20] | 558.075 | 136.605        | 132.600        | 132.852        | 132.348        | K[4]  |
| V[21] | 582.843 | 97.573         | 93.569         | 93.821         | 93.317         | V[3]  |
| L[22] | 611.114 | 72.806         | 68.802         | 69.053         | 68.550         | L[2]  |
| R[23] | 650.139 | 44.535         | 40.531         | 40.782         | 40.279         | R[1]  |



# sp | P62806 | H4\_MOUSE

[Acetyl]SGRGK<sub>42.01</sub> Acetyl GGK<sub>42.01</sub> Acetyl GLGK<sub>42.01</sub> Acetyl GGAK<sub>42.01</sub> Acetyl RHRK<sub>28.03</sub> Dimethyl VLR

- ▶ fragmentation table for charge state 1+
- ▶ specType=etd
- ▶ score=113.53
- ▶ F113281.dat
- ▶ query=q31516.p1
- ▶ precursor=650.385470
- ▶ chargePrecursor=4
- ▶ itol=0.5

| AA    | c               | y              | z+1            | z+2             | z        | AA    |
|-------|-----------------|----------------|----------------|-----------------|----------|-------|
| S[1]  | 147.076         | 2585.518       | 2582.499       | 0.000           | 2581.491 | S[23] |
| G[2]  | 204.098         | 2469.475       | 2451.450       | 0.000           | 2452.448 | G[22] |
| R[3]  | <b>360.199</b>  | 2412.453       | 2396.435       | 2397.443        | 2395.427 | R[21] |
| G[4]  | <b>417.220</b>  | 2256.352       | 2240.334       | 2241.341        | 2239.326 | G[20] |
| K[5]  | <b>587.326</b>  | 2169.331       | 2153.312       | 2154.320        | 2152.304 | K[19] |
| G[6]  | <b>644.347</b>  | 2029.225       | 2013.207       | 2014.214        | 2012.199 | G[18] |
| G[7]  | <b>701.369</b>  | 1972.204       | 1956.185       | <b>1957.193</b> | 1955.177 | G[17] |
| K[8]  | <b>871.474</b>  | 1915.182       | 1899.164       | <b>1900.172</b> | 1898.158 | K[16] |
| G[9]  | <b>928.496</b>  | 1745.077       | 1729.059       | <b>1730.066</b> | 1728.050 | G[15] |
| L[10] | <b>1041.580</b> | 1688.059       | 1672.037       | 1673.045        | 1671.029 | L[14] |
| G[11] | <b>1098.601</b> | 1574.971       | 1558.953       | <b>1559.960</b> | 1557.945 | G[13] |
| K[12] | 1228.707        | 1517.956       | 1501.933       | <b>1502.939</b> | 1500.923 | K[12] |
| G[13] | <b>1325.728</b> | 1347.844       | 1331.820       | <b>1332.833</b> | 1330.818 | G[11] |
| G[14] | <b>1382.750</b> | 1290.823       | 1274.804       | 1275.812        | 1273.796 | G[10] |
| A[15] | 1453.787        | 1233.801       | 1217.781       | <b>1218.791</b> | 1216.775 | A[9]  |
| K[16] | <b>1623.893</b> | 1162.764       | 1146.740       | <b>1147.753</b> | 1145.738 | K[8]  |
| R[17] | <b>1779.994</b> | 992.659        | 976.640        | <b>977.648</b>  | 975.632  | R[7]  |
| R[18] | 1817.053        | <b>836.558</b> | <b>820.539</b> | <b>821.547</b>  | 819.531  | R[6]  |
| R[19] | 2073.154        | 699.499        | <b>683.480</b> | <b>684.488</b>  | 682.472  | R[5]  |
| K[20] | 2226.280        | 543.398        | 527.379        | <b>528.387</b>  | 526.371  | K[4]  |
| V[21] | 2328.348        | 387.271        | 371.253        | <b>372.261</b>  | 370.245  | V[3]  |
| L[22] | 2441.432        | 288.203        | 272.184        | <b>273.192</b>  | 271.178  | L[2]  |
| R[23] | 2597.534        | 175.119        | 159.100        | 160.108         | 158.092  | R[1]  |

# sp | P62806 | H4\_MOUSE

[Acetyl]SGR**GK** Acetyl 42.01 GGK Acetyl 42.01 GLGK Acetyl 42.01 GGAK Acetyl 42.01 RHRK Dimethyl 28.03 VLR

- ▶ fragmentation table for charge state 2+
- ▶ specType=etd
- ▶ score=113.53
- ▶ F113281.dat
- ▶ query=q31516\_p1
- ▶ precursor=650.385470
- ▶ chargePrecursor=4
- ▶ itol=0.5

| AA | c  | y               | z+1             | z+2             | z               | AA              |      |
|----|----|-----------------|-----------------|-----------------|-----------------|-----------------|------|
| S  | 1  | 74.042          | <b>1299.762</b> | 1291.753        | 0.504           | 1291.240        | S(2) |
| G  | 2  | 102.553         | 1235.241        | 1227.232        | 0.504           | 1226.720        | G(2) |
| R  | 3  | 180.603         | 1206.730        | 1198.721        | <b>1199.225</b> | 1198.211        | R(2) |
| G  | 4  | 209.114         | 1128.680        | <b>1120.670</b> | <b>1121.174</b> | 1120.167        | G(2) |
| K  | 5  | 264.167         | 1100.169        | <b>1092.160</b> | <b>1092.664</b> | 1091.655        | K(2) |
| G  | 6  | 292.677         | 1035.125        | <b>1007.107</b> | 1007.611        | <b>1006.603</b> | G(2) |
| G  | 7  | 351.138         | 988.605         | <b>978.596</b>  | <b>979.100</b>  | <b>978.092</b>  | G(2) |
| K  | 8  | 436.241         | 958.095         | <b>950.085</b>  | <b>950.589</b>  | 949.582         | K(2) |
| G  | 9  | 464.752         | 873.042         | 865.033         | 865.537         | 864.529         | G(2) |
| L  | 10 | 521.204         | 844.531         | <b>836.522</b>  | <b>837.026</b>  | 836.018         | L(2) |
| G  | 11 | 569.264         | 787.989         | <b>775.980</b>  | <b>780.484</b>  | 779.476         | G(2) |
| K  | 12 | 634.257         | 759.879         | <b>751.869</b>  | <b>751.973</b>  | 750.965         | K(2) |
| G  | 13 | 663.368         | 674.426         | <b>666.416</b>  | <b>666.920</b>  | 665.913         | G(2) |
| G  | 14 | 691.879         | 645.915         | <b>637.906</b>  | <b>638.410</b>  | 637.402         | G(2) |
| A  | 15 | 727.397         | 617.404         | <b>609.395</b>  | <b>609.899</b>  | 608.891         | A(2) |
| K  | 16 | 812.450         | 581.896         | <b>573.876</b>  | <b>574.380</b>  | 573.373         | K(2) |
| R  | 17 | <b>898.500</b>  | 498.833         | <b>488.824</b>  | <b>489.328</b>  | 488.321         | R(2) |
| H  | 18 | <b>959.030</b>  | 418.782         | 410.773         | 411.277         | 410.269         | H(2) |
| R  | 19 | <b>1037.080</b> | 350.253         | 342.244         | 342.748         | 341.740         | R(2) |
| K  | 20 | <b>1115.144</b> | 272.202         | 264.193         | 264.697         | 263.689         | K(2) |
| V  | 21 | <b>1164.678</b> | 194.139         | 186.130         | 186.634         | 185.626         | V(2) |
| L  | 22 | <b>1221.220</b> | 144.605         | 136.596         | 137.100         | 136.092         | L(2) |
| R  | 23 | <b>1299.270</b> | 98.051          | 89.042          | 89.546          | 79.538          | R(2) |

# sp | P62806 | H4\_MOUSE

[Acetyl]SGR**GGK** Acetyl 42.01 **GGK** Acetyl 42.01 **GLGK** Acetyl 42.01 **GGAK** Acetyl 42.01 **RHRK** Dimethyl 28.03 **VLR**

- ▶ fragmentation table for charge state 3+
- ▶ specType=etd
- ▶ score=113.53
- ▶ F113281.dat
- ▶ query=q31516.p1
- ▶ precursor=650.385470
- ▶ chargePrecursor=4
- ▶ itol=0.5

| AA    | c       | y              | z+1            | z+2            | z              | AA    |
|-------|---------|----------------|----------------|----------------|----------------|-------|
| S[1]  | 49.697  | <b>866.844</b> | 861.503        | 0.672          | 861.169        | S[2]  |
| G[2]  | 68.704  | 823.830        | <b>818.490</b> | 0.672          | 818.154        | G[2]  |
| K[3]  | 120.738 | 804.823        | <b>799.483</b> | <b>799.819</b> | 799.147        | K[2]  |
| G[4]  | 139.745 | 752.789        | 747.440        | 747.785        | 747.113        | G[20] |
| K[5]  | 196.447 | 733.782        | 728.442        | 728.778        | 728.106        | K[19] |
| G[6]  | 215.454 | 677.080        | 671.740        | 672.076        | 671.404        | G[18] |
| G[7]  | 234.461 | 658.073        | 652.733        | 653.069        | 652.397        | G[17] |
| K[8]  | 291.163 | <b>639.066</b> | 633.726        | 634.062        | 633.390        | K[16] |
| G[9]  | 310.170 | 582.364        | 577.024        | 577.360        | 576.688        | G[15] |
| L[10] | 347.885 | 563.357        | 558.017        | 558.353        | 557.681        | L[14] |
| G[11] | 366.872 | 525.662        | 520.322        | 520.658        | 519.986        | G[13] |
| K[12] | 423.574 | 506.655        | 501.315        | 501.651        | 500.979        | K[12] |
| G[13] | 442.581 | 449.953        | 444.613        | 444.949        | 444.277        | G[11] |
| G[14] | 461.588 | 430.946        | 425.606        | 425.942        | 425.270        | G[10] |
| A[15] | 485.267 | 411.939        | 406.599        | 406.935        | 406.263        | A[9]  |
| K[16] | 541.969 | 388.260        | 382.920        | 383.256        | 382.584        | K[8]  |
| R[17] | 594.003 | 331.558        | 326.218        | 326.554        | 325.882        | R[7]  |
| H[18] | 639.689 | 279.524        | 274.185        | 274.520        | <b>273.849</b> | H[6]  |
| R[19] | 691.723 | 233.838        | 228.498        | 228.834        | 228.162        | R[5]  |
| K[20] | 743.785 | 181.804        | 176.465        | 176.800        | 176.129        | K[4]  |
| V[21] | 776.788 | 129.762        | 124.422        | 124.758        | 124.086        | V[3]  |
| L[22] | 814.482 | 96.739         | 91.400         | 91.736         | 91.064         | L[2]  |
| R[23] | 866.516 | 59.045         | 53.705         | 54.041         | 53.369         | R[1]  |

# sp | P62806 | H4\_MOUSE

[Acetyl]SGRGK Acetyl 42.01 GGK Acetyl 42.01 GLGK Acetyl 42.01 GGAK Acetyl 42.01 RHRK Dimethyl 28.03 VLR

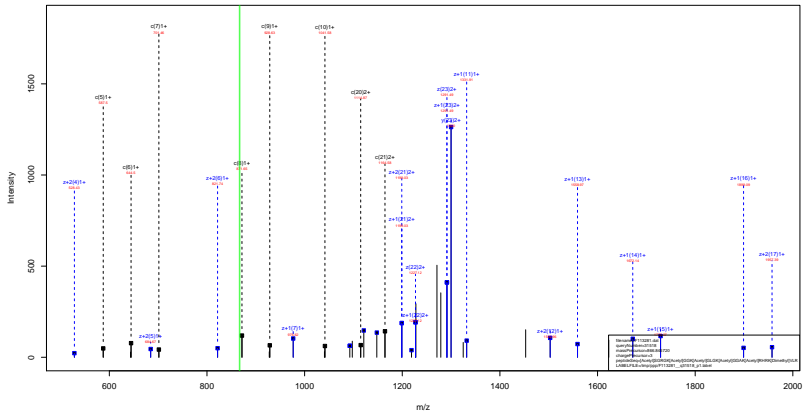

# sp | P62806 | H4\_MOUSE

[Acetyl]SGR**GK** <sup>Acetyl</sup><sub>42.01</sub> **GGK** <sup>Acetyl</sup><sub>42.01</sub> **GLGK** <sup>Acetyl</sup><sub>42.01</sub> **GGAK** <sup>Acetyl</sup><sub>42.01</sub> **RHRK** <sup>Dimethyl</sup><sub>28.03</sub> **VLR**

- ▶ fragmentation table for charge state 1+
- ▶ specType=etd
- ▶ score=54.21
- ▶ F113281.dat
- ▶ query=q31518\_p1
- ▶ precursor=866.845720
- ▶ chargePrecursor=3
- ▶ itol=0.5

| AA    | c               | y        | z+1             | z+2             | z        | AA    |
|-------|-----------------|----------|-----------------|-----------------|----------|-------|
| S[1]  | 147.076         | 2598.518 | 2582.499        | 0.000           | 2581.491 | S[23] |
| G[2]  | 304.098         | 2469.475 | 2453.456        | 0.000           | 2452.448 | G[22] |
| R[3]  | 360.199         | 2412.453 | 2396.435        | 2397.443        | 2395.427 | R[21] |
| G[4]  | 417.200         | 2256.352 | 2240.334        | 2241.341        | 2239.326 | G[20] |
| K[5]  | <b>587.326</b>  | 2190.331 | 2183.312        | 2184.320        | 2182.305 | K[19] |
| G[6]  | <b>644.347</b>  | 2029.225 | 2013.207        | 2014.214        | 2012.199 | G[18] |
| G[7]  | <b>701.369</b>  | 1972.204 | 1956.185        | <b>1957.193</b> | 1955.177 | G[17] |
| K[8]  | <b>871.474</b>  | 1915.182 | <b>1899.164</b> | 1900.172        | 1898.156 | K[16] |
| G[9]  | <b>928.496</b>  | 1745.077 | <b>1729.058</b> | 1730.066        | 1728.050 | G[15] |
| L[10] | <b>1041.580</b> | 1688.055 | <b>1672.037</b> | 1673.045        | 1671.029 | L[14] |
| G[11] | 1098.601        | 1574.071 | <b>1558.053</b> | 1559.060        | 1557.045 | G[13] |
| R[12] | 1268.707        | 1317.050 | 1301.031        | <b>1502.039</b> | 1500.023 | R[12] |
| G[13] | 1325.728        | 1247.044 | <b>1331.026</b> | 1332.033        | 1330.018 | G[11] |
| G[14] | 1382.750        | 1200.023 | 1274.804        | 1275.812        | 1273.796 | G[10] |
| A[15] | 1453.787        | 1233.001 | 1217.983        | <b>1218.791</b> | 1216.775 | A[0]  |
| K[16] | 1523.893        | 1162.764 | 1146.746        | <b>1147.753</b> | 1145.738 | K[8]  |
| R[17] | 1779.994        | 992.659  | <b>976.640</b>  | 977.648         | 976.632  | R[7]  |
| T[18] | 1817.053        | 836.598  | 820.579         | <b>821.547</b>  | 819.531  | T[6]  |
| R[19] | 2073.154        | 699.499  | 683.480         | <b>684.488</b>  | 682.472  | R[5]  |
| K[20] | 2229.260        | 543.398  | 527.379         | <b>528.387</b>  | 526.371  | K[4]  |
| V[21] | 2328.346        | 387.271  | 371.253         | 372.261         | 370.245  | V[3]  |
| L[22] | 2441.432        | 288.203  | 272.184         | 273.192         | 271.176  | L[2]  |
| R[23] | 2597.534        | 175.119  | 159.100         | 160.108         | 158.082  | R[1]  |

# sp | P62806 | H4\_MOUSE

[Acetyl]SGR**GGK**<sup>Acetyl</sup><sub>42.01</sub> **GGK**<sup>Acetyl</sup><sub>42.01</sub> **GLGK**<sup>Acetyl</sup><sub>42.01</sub> **GGAK**<sup>Acetyl</sup><sub>42.01</sub> **RHRK**<sup>Dimethyl</sup><sub>28.03</sub> **VLR**

- ▶ fragmentation table for charge state 2+
- ▶ specType=etd
- ▶ score=54.21
- ▶ F113281.dat
- ▶ query=q31518\_p1
- ▶ precursor=866.845720
- ▶ chargePrecursor=3
- ▶ itol=0.5

| AA   | c               | y               | z+1             | z+2             | z               | AA   |
|------|-----------------|-----------------|-----------------|-----------------|-----------------|------|
| S 1  | 74.042          | <b>1299.762</b> | <b>1291.753</b> | 0.504           | <b>1291.249</b> | S 21 |
| G 2  | 102.553         | 1235.241        | <b>1227.232</b> | 0.504           | <b>1226.728</b> | G 22 |
| R 3  | 180.603         | 1206.730        | <b>1198.721</b> | <b>1199.225</b> | 1198.217        | R 21 |
| G 4  | 209.114         | 1128.680        | 1120.670        | <b>1121.174</b> | 1120.167        | G 20 |
| K 5  | 298.167         | 1100.169        | <b>1092.160</b> | <b>1092.664</b> | 1091.656        | K 19 |
| G 6  | 322.677         | 1035.135        | 1027.127        | 1027.631        | 1026.623        | G 18 |
| G 7  | 351.188         | 988.605         | 978.595         | 979.100         | 978.092         | G 17 |
| K 8  | 436.241         | 958.095         | 950.085         | 950.589         | 949.582         | K 16 |
| G 9  | 464.752         | 873.042         | 865.033         | 865.537         | 864.529         | G 15 |
| L 10 | 521.294         | 844.531         | 836.522         | 837.026         | 836.018         | L 14 |
| G 11 | 569.804         | 787.999         | 779.989         | 780.494         | 779.487         | G 13 |
| K 12 | 634.857         | 759.479         | 751.469         | 751.973         | 750.965         | K 12 |
| G 13 | 663.368         | 674.425         | 666.416         | 666.920         | 665.913         | G 11 |
| G 14 | 691.879         | 645.915         | 637.906         | 638.410         | 637.402         | G 10 |
| A 15 | 727.397         | 617.404         | 609.395         | 609.899         | 608.891         | A 9  |
| K 16 | 812.450         | 581.886         | 573.876         | 574.380         | 573.373         | K 8  |
| R 17 | 880.500         | 496.833         | 488.823         | 489.328         | 488.321         | R 7  |
| H 18 | 959.030         | 418.782         | 410.773         | 411.277         | 410.269         | H 6  |
| R 19 | 1037.080        | 350.253         | 342.244         | 342.748         | 341.740         | R 5  |
| K 20 | <b>1115.144</b> | 272.202         | 264.193         | 264.697         | 263.689         | K 4  |
| V 21 | <b>1164.678</b> | 194.139         | 186.130         | 186.634         | 185.626         | V 3  |
| L 22 | 1221.220        | 144.605         | 136.595         | 137.100         | 136.092         | L 1  |
| R 23 | 1299.270        | 88.051          | 80.044          | 80.558          | 79.550          | R 1  |



# sp | Q6ZWY9 | H2B1C\_MOUSE

PEPAKSAPAPKK Acetyl 42.01 GSK Acetyl 42.01 K Acetyl 42.01 AVTKAQKK

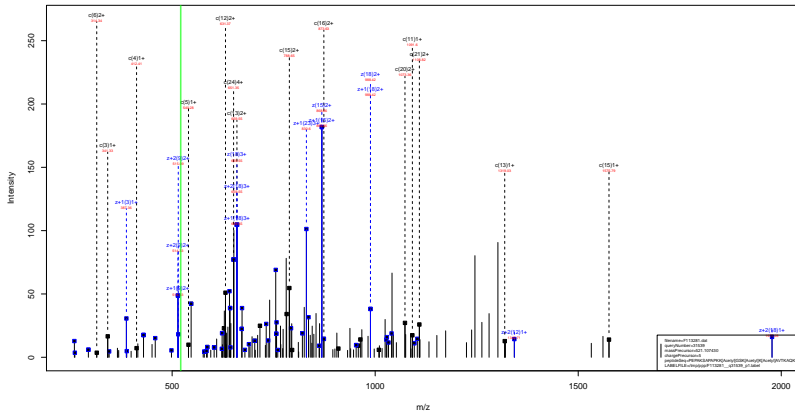

# sp | Q6ZWY9 | H2B1C\_MOUSE

PEPAKSAPAPKK <sup>Acetyl</sup>42.01 GSK <sup>Acetyl</sup>42.01 K <sup>Acetyl</sup>42.01 AVTKAQKK

- ▶ fragmentation table for charge state 1+
- ▶ specType=etd
- ▶ score=45.78
- ▶ F113281.dat
- ▶ query=q31539\_p1
- ▶ precursor=521.107430
- ▶ chargePrecursor=5
- ▶ itol=0.5

| AA  | c               | y              | z+1             | z+2             | z        | AA  |
|-----|-----------------|----------------|-----------------|-----------------|----------|-----|
| P1  | 115.097         | 2601.509       | 2585.490        | 0.000           | 2584.482 | P24 |
| E2  | 244.129         | 2504.456       | 2488.437        | 0.000           | 2487.429 | E23 |
| P3  | <b>341.182</b>  | 2376.411       | 2359.395        | 0.000           | 2358.387 | P22 |
| A4  | <b>412.219</b>  | 2278.361       | 2262.342        | 0.000           | 2261.334 | A21 |
| K5  | <b>540.314</b>  | 2207.323       | 2191.305        | 2192.313        | 2190.297 | K20 |
| S6  | <b>627.346</b>  | 2078.228       | 2063.210        | 2064.218        | 2062.202 | S19 |
| A7  | 698.393         | 1992.196       | 1976.178        | <b>1977.186</b> | 1975.170 | A18 |
| P8  | <b>795.436</b>  | 1921.159       | 1905.141        | 1906.148        | 1904.133 | P17 |
| A9  | 866.471         | 1824.107       | 1808.088        | 1809.096        | 1807.080 | A16 |
| P10 | <b>963.526</b>  | 1753.066       | 1737.051        | 1738.059        | 1736.041 | P15 |
| K11 | <b>1091.621</b> | 1656.017       | 1639.998        | 1641.006        | 1638.990 | K14 |
| K12 | 1261.728        | 1527.922       | 1511.903        | 1512.911        | 1510.895 | K13 |
| G13 | <b>1318.748</b> | 1357.616       | 1341.797        | <b>1342.805</b> | 1340.790 | G12 |
| S14 | 1405.780        | 1300.795       | 1284.775        | 1285.784        | 1283.768 | S11 |
| K15 | <b>1575.885</b> | 1213.763       | 1197.744        | 1198.752        | 1196.736 | K10 |
| K16 | 1749.974        | 1043.697       | <b>1027.638</b> | <b>1028.646</b> | 1026.631 | K9  |
| A17 | 1817.028        | <b>873.552</b> | 857.533         | 858.541         | 856.525  | A8  |
| V18 | 1916.096        | 802.515        | 786.496         | 787.504         | 785.488  | V7  |
| T19 | 2017.144        | <b>703.446</b> | 687.427         | 688.435         | 686.420  | T6  |
| K20 | 2145.239        | 602.398        | <b>586.380</b>  | 587.388         | 585.372  | K5  |
| A21 | 2216.278        | 474.303        | <b>455.285</b>  | 456.293         | 454.277  | A4  |
| Q22 | 2344.316        | 403.266        | <b>387.248</b>  | <b>388.255</b>  | 386.240  | Q3  |
| K23 | 2472.430        | 275.208        | <b>259.189</b>  | <b>260.197</b>  | 258.181  | K2  |
| K24 | 3000.525        | 147.113        | 131.094         | 132.102         | 130.088  | K1  |

# sp | Q6ZWY9 | H2B1C\_MOUSE

PEPAKSAPAPKK <sup>Acetyl</sup><sub>42.01</sub> GSK <sup>Acetyl</sup><sub>42.01</sub> K <sup>Acetyl</sup><sub>42.01</sub> AVTKAQKK

- ▶ fragmentation table for charge state 2+
- ▶ specType=etd
- ▶ score=45.78
- ▶ F113281.dat
- ▶ query=q31539\_p1
- ▶ precursor=521.107430
- ▶ chargePrecursor=5
- ▶ itol=0.5

| AA    | c               | y               | z+1             | z+2             | z              | AA    |
|-------|-----------------|-----------------|-----------------|-----------------|----------------|-------|
| P[1]  | 58.047          | 1301.256        | 1293.269        | 0.504           | 1292.765       | P[24] |
| E[2]  | 122.568         | 1252.732        | 1244.722        | 0.504           | 1244.218       | E[23] |
| F[3]  | 171.095         | 1188.210        | 1180.201        | 0.504           | 1179.697       | F[22] |
| A[4]  | 268.613         | 1129.684        | 1121.675        | 0.504           | 1121.171       | A[21] |
| K[5]  | 270.561         | <b>1104.165</b> | <b>1096.156</b> | <b>1096.660</b> | 1095.652       | K[20] |
| S[6]  | <b>314.177</b>  | <b>1040.118</b> | 1032.109        | <b>1032.612</b> | 1031.605       | S[19] |
| A[7]  | 349.605         | 996.602         | <b>988.592</b>  | 989.096         | <b>988.089</b> | A[18] |
| P[8]  | 398.222         | 961.083         | <b>953.074</b>  | <b>953.578</b>  | 952.570        | P[17] |
| A[9]  | 433.740         | 912.567         | <b>904.557</b>  | 905.061         | 904.054        | A[16] |
| P[10] | 492.297         | 877.038         | <b>869.029</b>  | 869.533         | <b>868.525</b> | P[15] |
| K[11] | <b>546.314</b>  | 828.512         | <b>820.503</b>  | <b>821.007</b>  | 819.999        | K[14] |
| K[12] | <b>631.367</b>  | 764.484         | <b>756.455</b>  | <b>756.959</b>  | 755.951        | K[13] |
| G[13] | <b>659.878</b>  | <b>679.412</b>  | <b>671.402</b>  | <b>671.906</b>  | <b>670.898</b> | G[12] |
| S[14] | <b>703.394</b>  | <b>650.901</b>  | <b>642.892</b>  | <b>643.396</b>  | <b>642.388</b> | S[11] |
| K[15] | <b>788.440</b>  | 607.385         | 607.374         | 607.878         | 606.872        | K[10] |
| K[16] | <b>873.499</b>  | 562.332         | <b>514.323</b>  | <b>514.827</b>  | 513.821        | K[9]  |
| A[17] | <b>909.018</b>  | 457.276         | <b>429.270</b>  | <b>429.774</b>  | 428.766        | A[8]  |
| V[18] | <b>958.552</b>  | 401.761         | 393.752         | 394.255         | 393.248        | V[7]  |
| T[19] | <b>1009.076</b> | 352.227         | 344.217         | <b>344.721</b>  | 343.713        | T[6]  |
| K[20] | <b>1073.123</b> | 301.703         | <b>293.693</b>  | <b>294.197</b>  | 293.190        | K[5]  |
| A[21] | <b>1108.642</b> | 297.655         | 297.646         | 297.149         | 296.142        | A[4]  |
| Q[22] | 1172.674        | 302.137         | 194.127         | 194.631         | 193.624        | Q[3]  |
| K[23] | 1236.718        | 138.108         | 130.098         | 130.602         | 129.594        | K[2]  |
| K[24] | 1300.766        | 74.060          | 66.051          | 66.555          | 65.547         | K[1]  |

# sp | Q6ZWY9 | H2B1C\_MOUSE

PEPAKSAPAPKK <sup>Acetyl</sup>42.01 GSK <sup>Acetyl</sup>42.01 K <sup>Acetyl</sup>42.01 AVTKAQKK

- ▶ fragmentation table for charge state 3+
- ▶ specType=etd
- ▶ score=45.78
- ▶ F113281.dat
- ▶ query=q31539\_p1
- ▶ precursor=521.107430
- ▶ chargePrecursor=5
- ▶ itol=0.5

| AA    | c              | y              | z+1            | z+2            | z              | AA    |
|-------|----------------|----------------|----------------|----------------|----------------|-------|
| P[1]  | 39.034         | 397.841        | 893.501        | 0.672          | <b>862.166</b> | P[24] |
| E[2]  | 82.048         | <b>835.490</b> | <b>830.151</b> | 0.672          | 829.915        | E[23] |
| P[3]  | 114.399        | <b>792.476</b> | 787.139        | 0.672          | 786.800        | P[22] |
| A[4]  | 138.078        | <b>760.125</b> | <b>754.785</b> | 0.672          | 754.450        | A[21] |
| K[5]  | 180.776        | <b>736.446</b> | 731.109        | <b>731.442</b> | 730.770        | K[20] |
| S[6]  | 209.767        | 693.748        | 688.408        | <b>688.744</b> | 688.072        | S[19] |
| A[7]  | 233.466        | 654.737        | <b>659.397</b> | <b>659.733</b> | <b>659.061</b> | A[18] |
| F[8]  | 265.817        | <b>641.058</b> | 635.718        | 630.054        | 630.385        | F[17] |
| A[9]  | 289.896        | 608.707        | <b>603.367</b> | <b>603.703</b> | <b>603.032</b> | A[16] |
| P[10] | 321.947        | <b>585.028</b> | <b>579.688</b> | 580.024        | <b>579.352</b> | P[15] |
| K[11] | 364.545        | 552.677        | 547.337        | 547.673        | <b>547.002</b> | K[14] |
| K[12] | 421.247        | 509.979        | 504.639        | 504.975        | 504.303        | K[13] |
| G[13] | 440.254        | 453.277        | 447.937        | 448.273        | 447.601        | G[12] |
| S[14] | 469.265        | 434.270        | 428.930        | <b>429.266</b> | 428.594        | S[11] |
| K[15] | 529.967        | 405.259        | 399.920        | 400.255        | 399.584        | K[10] |
| K[16] | 582.668        | 348.557        | 343.218        | 343.554        | 342.882        | K[9]  |
| A[17] | 606.348        | 291.855        | 286.518        | 286.852        | 286.180        | A[8]  |
| V[18] | 699.370        | 268.176        | 262.837        | 263.173        | 262.501        | V[7]  |
| T[19] | 813.053        | 235.156        | 229.814        | 230.150        | 229.478        | T[6]  |
| K[20] | <b>715.751</b> | 201.471        | 196.131        | 196.467        | 195.795        | K[5]  |
| A[21] | 739.430        | 158.773        | 153.433        | 153.769        | 153.097        | A[4]  |
| Q[22] | <b>782.116</b> | 135.094        | 129.754        | 130.090        | 129.418        | Q[3]  |
| K[23] | 824.815        | 92.407         | 87.068         | 87.404         | 86.732         | K[2]  |
| K[24] | 867.513        | 49.709         | 44.370         | 44.705         | 44.034         | K[1]  |

# sp | Q6ZWY9 | H2B1C\_MOUSE

PEPAKSAPAPKK <sup>Acetyl</sup>42.01 GSK <sup>Acetyl</sup>42.01 K <sup>Acetyl</sup>42.01 AVTKAQKK

- ▶ fragmentation table for charge state 4+
- ▶ specType=etd
- ▶ score=45.78
- ▶ F113281.dat
- ▶ query=q31539\_p1
- ▶ precursor=521.107430
- ▶ chargePrecursor=5
- ▶ itol=0.5

| AA    | c              | y              | z+1            | z+2     | z              | AA    |
|-------|----------------|----------------|----------------|---------|----------------|-------|
| P[1]  | 29.527         | <b>651.133</b> | 647.128        | 0.755   | 646.376        | P[24] |
| E[2]  | 61.788         | 626.859        | <b>622.865</b> | 0.755   | <b>622.613</b> | E[23] |
| P[3]  | 96.051         | 594.609        | 590.604        | 0.755   | 590.352        | P[22] |
| A[4]  | 103.810        | 570.346        | 566.341        | 0.755   | 566.089        | A[21] |
| K[5]  | 135.834        | 552.586        | 548.582        | 548.834 | 548.330        | K[20] |
| S[6]  | 157.592        | 620.563        | 516.558        | 516.810 | 516.306        | S[19] |
| A[7]  | 175.351        | <b>498.805</b> | 494.800        | 495.052 | 494.548        | A[18] |
| P[8]  | 199.614        | 481.045        | 477.041        | 477.293 | 476.789        | P[17] |
| A[9]  | 217.274        | 456.782        | 452.777        | 453.029 | 452.525        | A[16] |
| P[10] | 241.037        | 439.021        | 435.019        | 435.270 | 434.766        | P[15] |
| K[11] | 273.561        | 414.760        | 410.755        | 411.007 | 410.503        | K[14] |
| K[12] | 316.187        | 382.735        | 378.731        | 378.983 | 378.479        | K[13] |
| G[13] | 330.442        | 340.210        | 336.205        | 336.457 | 335.953        | G[12] |
| S[14] | 352.200        | 325.954        | 321.949        | 322.201 | 321.697        | S[11] |
| K[15] | 394.727        | 304.196        | 300.191        | 300.443 | 299.939        | K[10] |
| K[16] | 437.253        | 281.670        | 257.665        | 257.917 | 257.413        | K[9]  |
| A[17] | 495.012        | 219.143        | 215.139        | 215.391 | 214.887        | A[8]  |
| V[18] | 479.780        | 201.384        | 197.379        | 197.631 | 197.127        | V[7]  |
| T[19] | 505.041        | 176.617        | 172.612        | 172.864 | 172.360        | T[6]  |
| K[20] | 537.065        | 151.355        | 147.350        | 147.602 | 147.098        | K[5]  |
| A[21] | 554.824        | 119.331        | 115.327        | 115.579 | 115.075        | A[4]  |
| Q[22] | <b>586.839</b> | 101.572        | 97.567         | 97.819  | 97.315         | Q[3]  |
| K[23] | 618.983        | 69.957         | 65.953         | 66.205  | 65.701         | K[2]  |
| K[24] | <b>650.887</b> | 37.534         | 33.529         | 33.781  | 33.277         | K[1]  |



# sp | Q9D2U9 | H2B3A\_MOUSE

PEPSRSTPAPKK <sup>Acetyl</sup>42.01 GSK <sup>Acetyl</sup>42.01 KAITKAQKK

- ▶ fragmentation table for charge state 1+
- ▶ specType=etd
- ▶ score=45.99
- ▶ F113281.dat
- ▶ query=q31911\_p1
- ▶ precursor=530.311290
- ▶ chargePrecursor=5
- ▶ itol=0.5

| AA | c  | y               | z+1             | z+2            | z               | AA              |       |
|----|----|-----------------|-----------------|----------------|-----------------|-----------------|-------|
| P  | 1  | 115.097         | 2047.525        | 2031.507       | 0.000           | 2030.499        | P[24] |
| E  | 2  | 264.129         | 2550.473        | 2534.454       | 0.000           | 2533.446        | E[23] |
| F  | 3  | <b>341.182</b>  | 2621.430        | 2405.411       | 0.000           | 2404.403        | F[22] |
| S  | 4  | <b>428.214</b>  | 3224.377        | 3208.359       | 0.000           | 3207.351        | S[21] |
| R  | 5  | <b>504.315</b>  | 3237.345        | 3221.326       | 2222.334        | 3220.319        | R[20] |
| S  | 6  | <b>671.347</b>  | 2081.344        | 2065.325       | 2066.233        | 2064.215        | S[19] |
| T  | 7  | 772.305         | 1994.212        | 1978.193       | 1979.201        | 1977.186        | T[18] |
| P  | 8  | <b>869.448</b>  | 1893.154        | 1877.140       | 1878.153        | 1876.138        | P[17] |
| A  | 9  | 869.448         | 1796.112        | 1780.093       | 1781.101        | <b>1779.085</b> | A[16] |
| T  | 10 | <b>1037.537</b> | 1725.070        | 1709.050       | 1710.064        | 1708.049        | T[15] |
| K  | 11 | <b>1105.632</b> | 1628.022        | 1612.003       | 1613.011        | 1610.995        | K[14] |
| K  | 12 | <b>1325.738</b> | 1499.927        | 1483.908       | <b>1484.916</b> | 1482.900        | K[13] |
| G  | 13 | <b>1392.759</b> | 1329.821        | 1313.803       | <b>1314.810</b> | 1312.795        | G[12] |
| S  | 14 | 1479.791        | 1272.800        | 1256.781       | <b>1257.789</b> | 1255.773        | S[11] |
| K  | 15 | <b>1649.897</b> | 1145.765        | 1129.746       | 1130.757        | 1128.741        | K[10] |
| K  | 16 | 1777.932        | <b>1015.662</b> | <b>995.644</b> | <b>1000.651</b> | 998.635         | K[9]  |
| A  | 17 | 1849.029        | 887.561         | <b>871.549</b> | 872.556         | 870.541         | A[8]  |
| I  | 18 | 1962.113        | 816.530         | 800.511        | 801.519         | 799.504         | I[7]  |
| T  | 19 | 2063.101        | 703.446         | <b>687.427</b> | <b>688.435</b>  | 686.420         | T[6]  |
| K  | 20 | 2191.256        | <b>602.398</b>  | <b>586.380</b> | <b>587.388</b>  | <b>585.372</b>  | K[5]  |
| A  | 21 | 2302.299        | 474.303         | <b>458.285</b> | 459.293         | 457.277         | A[4]  |
| Q  | 22 | 2390.351        | 403.266         | <b>387.248</b> | 388.255         | 386.240         | Q[3]  |
| K  | 23 | 2518.446        | <b>275.208</b>  | <b>258.189</b> | <b>260.197</b>  | 258.181         | K[2]  |
| K  | 24 | 2646.541        | 147.113         | 131.094        | 132.102         | 130.086         | K[1]  |

# sp | Q9D2U9 | H2B3A\_MOUSE

PEPSRSTPAPKK <sup>Acetyl</sup>42.01 GSK <sup>Acetyl</sup>42.01 KAITKAQKK

- ▶ fragmentation table for charge state 2+
- ▶ specType=etd
- ▶ score=45.99
- ▶ F113281.dat
- ▶ query=q31911\_p1
- ▶ precursor=530.311290
- ▶ chargePrecursor=5
- ▶ itol=0.5

| AA    | c               | y              | z+1             | z+2             | z               | AA    |
|-------|-----------------|----------------|-----------------|-----------------|-----------------|-------|
| P[1]  | 58.047          | 1324.066       | 1316.257        | 0.504           | 1315.753        | P[24] |
| E[2]  | 122.568         | 1275.740       | <b>1267.731</b> | 0.504           | 1267.227        | E[23] |
| F[3]  | 171.095         | 1211.219       | 1203.200        | 0.504           | 1202.705        | F[22] |
| S[4]  | 214.611         | 1152.692       | 1144.683        | 0.504           | 1144.179        | S[21] |
| R[5]  | 262.591         | 1119.170       | <b>1111.167</b> | <b>1111.671</b> | 1110.663        | R[20] |
| S[6]  | 336.177         | 1041.126       | <b>1033.116</b> | <b>1033.620</b> | <b>1032.612</b> | S[19] |
| T[7]  | 386.701         | 997.610        | 989.600         | <b>990.104</b>  | 989.096         | T[18] |
| F[8]  | 435.227         | 947.085        | 939.076         | 939.580         | 938.573         | F[17] |
| A[9]  | 470.746         | 898.559        | 890.550         | <b>891.054</b>  | 890.046         | A[16] |
| T[10] | 519.272         | 853.041        | <b>855.032</b>  | <b>855.535</b>  | 854.528         | T[15] |
| K[11] | <b>583.320</b>  | 814.515        | 806.505         | 807.009         | 806.001         | K[14] |
| K[12] | <b>668.373</b>  | 750.467        | <b>742.458</b>  | <b>742.962</b>  | <b>741.954</b>  | K[13] |
| G[13] | <b>696.883</b>  | 695.414        | <b>657.405</b>  | <b>657.909</b>  | 656.901         | G[12] |
| S[14] | 780.399         | 636.904        | <b>628.894</b>  | <b>629.398</b>  | 628.390         | S[11] |
| K[15] | <b>825.452</b>  | <b>593.368</b> | <b>585.378</b>  | <b>585.882</b>  | <b>584.874</b>  | K[10] |
| K[16] | 889.969         | <b>508.335</b> | <b>500.325</b>  | <b>500.829</b>  | 499.821         | K[9]  |
| A[17] | 925.018         | 444.287        | <b>436.278</b>  | <b>436.782</b>  | 435.774         | A[8]  |
| I[18] | <b>981.560</b>  | 408.769        | 400.759         | 401.263         | 400.255         | I[7]  |
| T[19] | <b>1032.084</b> | 352.227        | 344.217         | 344.721         | 343.713         | T[6]  |
| K[20] | <b>1096.132</b> | 301.703        | 293.693         | 294.197         | 293.190         | K[5]  |
| A[21] | <b>1131.650</b> | 237.655        | 229.645         | 230.150         | 229.142         | A[4]  |
| Q[22] | 1185.619        | 202.137        | 194.127         | 194.631         | 193.623         | Q[3]  |
| K[23] | 1259.727        | 136.108        | 130.098         | 130.602         | 129.594         | K[2]  |
| K[24] | 1323.774        | 74.060         | 66.051          | 66.555          | 65.547          | K[1]  |



# sp | Q9D2U9 | H2B3A\_MOUSE

PEPSRSTPAPKK <sup>Acetyl</sup>42.01 GSK <sup>Acetyl</sup>42.01 KAITKAQKK

- ▶ fragmentation table for charge state 3+
- ▶ specType=etd
- ▶ score=45.99
- ▶ F113281.dat
- ▶ query=q31911.p1
- ▶ precursor=530.311290
- ▶ chargePrecursor=5
- ▶ itol=0.5

| AA    | c              | y              | z+1            | z+2            | z              | AA    |
|-------|----------------|----------------|----------------|----------------|----------------|-------|
| P[1]  | 39.034         | 803.190        | 877.840        | 0.672          | 877.504        | P[24] |
| E[2]  | 82.048         | <b>850.829</b> | <b>845.489</b> | 0.672          | 845.154        | E[23] |
| P[3]  | 114.399        | 807.615        | 882.475        | 0.672          | 882.139        | P[22] |
| S[4]  | 143.410        | 775.464        | <b>770.124</b> | 0.672          | 769.788        | S[21] |
| R[5]  | 195.443        | 746.453        | 743.114        | <b>741.450</b> | 740.778        | R[20] |
| S[6]  | 224.454        | 694.420        | <b>689.080</b> | <b>689.416</b> | <b>688.744</b> | S[19] |
| T[7]  | 258.136        | 665.409        | <b>660.069</b> | <b>660.405</b> | <b>659.733</b> | T[18] |
| F[8]  | 290.487        | 631.726        | 628.387        | 626.723        | 626.051        | F[17] |
| A[9]  | 314.106        | 599.375        | <b>594.036</b> | <b>594.372</b> | <b>593.700</b> | A[16] |
| P[10] | 348.517        | 575.696        | 570.357        | 570.693        | 570.021        | P[15] |
| K[11] | 389.216        | 543.345        | 538.006        | 538.342        | 537.670        | K[14] |
| K[12] | 445.917        | <b>500.647</b> | 495.308        | 495.643        | 494.972        | K[13] |
| G[13] | 464.925        | 443.945        | 438.606        | 438.942        | 438.270        | G[12] |
| S[14] | 493.935        | 424.938        | 419.599        | 419.934        | 419.263        | S[11] |
| K[15] | 550.637        | 395.927        | 390.588        | 390.924        | 390.252        | K[10] |
| K[16] | <b>593.335</b> | 339.226        | 333.886        | 334.222        | 333.550        | K[9]  |
| A[17] | 617.015        | 296.527        | 291.188        | 291.524        | 290.852        | A[8]  |
| I[18] | <b>654.709</b> | 272.848        | 267.509        | 267.845        | 267.173        | I[7]  |
| T[19] | <b>688.392</b> | 235.156        | 229.817        | 230.153        | 229.481        | T[6]  |
| K[20] | <b>731.090</b> | 201.471        | 196.131        | 196.467        | 195.795        | K[5]  |
| A[21] | <b>754.760</b> | 158.773        | 153.433        | 153.769        | 153.097        | A[4]  |
| Q[22] | <b>797.455</b> | 135.094        | 129.754        | 130.090        | 129.418        | Q[3]  |
| K[23] | <b>840.154</b> | 92.407         | 87.068         | 87.404         | 86.732         | K[2]  |
| K[24] | 882.852        | 49.709         | 44.370         | 44.705         | 44.034         | K[1]  |

# sp | Q9D2U9 | H2B3A\_MOUSE

PEPSRSTPAPKK <sup>Acetyl</sup>42.01 GSK <sup>Acetyl</sup>42.01 KAITKAQKK

- ▶ fragmentation table for charge state 4+
- ▶ specType=etd
- ▶ score=45.99
- ▶ F113281.dat
- ▶ query=q31911.p1
- ▶ precursor=530.311290
- ▶ chargePrecursor=5
- ▶ itol=0.5

| AA    | c              | y              | z+1            | z+2            | z       | AA    |
|-------|----------------|----------------|----------------|----------------|---------|-------|
| P[1]  | 29.527         | <b>662.637</b> | 668.632        | 0.755          | 668.883 | P[24] |
| E[2]  | 51.788         | 536.374        | <b>634.369</b> | 0.755          | 634.117 | E[23] |
| P[3]  | 96.051         | 606.113        | <b>602.108</b> | 0.755          | 601.856 | P[22] |
| S[4]  | 107.809        | 581.850        | 577.845        | 0.755          | 577.593 | S[21] |
| R[5]  | 146.834        | 560.092        | 556.087        | 556.339        | 555.835 | R[20] |
| S[6]  | 168.592        | 521.066        | 517.062        | 517.314        | 516.810 | S[19] |
| T[7]  | 193.854        | 499.308        | 495.304        | 495.556        | 495.052 | T[18] |
| F[8]  | 218.117        | 474.047        | 470.042        | 470.294        | 469.790 | F[17] |
| A[9]  | 235.277        | 449.783        | 445.779        | 446.031        | 445.527 | A[16] |
| P[10] | <b>360.140</b> | 432.024        | <b>428.019</b> | <b>428.271</b> | 427.767 | P[15] |
| K[11] | 292.154        | 407.761        | 403.756        | 404.008        | 403.504 | K[14] |
| K[12] | 334.690        | 375.737        | 371.732        | 371.984        | 371.481 | K[13] |
| G[13] | 348.945        | 333.211        | 329.206        | 329.458        | 328.954 | G[12] |
| S[14] | 370.703        | 318.955        | 314.951        | 315.203        | 314.699 | S[11] |
| K[15] | 413.230        | 297.197        | 293.193        | 293.445        | 292.941 | K[10] |
| K[16] | 445.253        | 254.671        | 250.666        | 250.918        | 250.414 | K[9]  |
| A[17] | 463.013        | 222.647        | 218.643        | 218.895        | 218.391 | A[8]  |
| I[18] | 491.284        | 204.888        | 200.883        | 201.135        | 200.631 | I[7]  |
| T[19] | 516.546        | 176.617        | 172.612        | 172.864        | 172.360 | T[6]  |
| K[20] | 543.569        | 151.355        | 147.350        | 147.602        | 147.098 | K[5]  |
| A[21] | 566.129        | 119.331        | 115.327        | 115.579        | 115.075 | A[4]  |
| Q[22] | 598.343        | 101.572        | 97.567         | 97.819         | 97.315  | Q[3]  |
| K[23] | 630.367        | 69.957         | 65.953         | 66.205         | 65.701  | K[2]  |
| K[24] | 662.391        | 37.534         | 33.529         | 33.781         | 33.277  | K[1]  |



# sp | Q9D2U9 | H2B3A\_MOUSE

PEPSRSTPAPKK Acetyl 42.01 GSK Acetyl 42.01 K Acetyl 42.01 AITK Acetyl 42.01 AQKK

- ▶ fragmentation table for charge state 1+
- ▶ specType=cid
- ▶ score=33.99
- ▶ F113281.dat
- ▶ query=q32440.p1
- ▶ precursor=683.642500
- ▶ chargePrecursor=4
- ▶ itol=0.5

| AA  | a              | a'             | a <sup>o</sup> | b              | b'             | b <sup>o</sup> | y               | y'              | y <sup>o</sup> | AA       |      |
|-----|----------------|----------------|----------------|----------------|----------------|----------------|-----------------|-----------------|----------------|----------|------|
| E1  | 90             | 90             | 0.000          | 98             | 98             | 0.000          | 0.000           | 2713.546        | 2714.550       | 2713.536 | P124 |
| E2  | <b>199.108</b> | 0.000          | 183.000        | <b>237.163</b> | 0.000          | 203.000        | 2524.490        | 2617.489        | 2618.483       | E121     |      |
| E3  | 199.107        | 0.000          | 278.134        | 324.000        | 0.000          | 301.140        | 2900.490        | 3000.144        | 3001.144       | P222     |      |
| S4  | 199.103        | 0.000          | 355.130        | 441.107        | 0.000          | 393.177        | 3240.530        | 3351.373        | 3350.368       | S221     |      |
| H5  | <b>339.294</b> | 107.287        | 323.000        | 397.000        | <b>558.262</b> | 149.171        | 3121.166        | 3234.146        | 3233.306       | R220     |      |
| S6  | 339.291        | 107.287        | 400.000        | <b>608.315</b> | <b>654.321</b> | 137.254        | 3131.151        | 3248.230        | 3247.265       | S104     |      |
| T7  | <b>737.373</b> | 170.367        | <b>705.363</b> | <b>735.368</b> | 736.362        | <b>737.358</b> | 3163.200        | 3164.210        | 3165.210       | T100     |      |
| F8  | <b>824.426</b> | <b>807.400</b> | 806.413        | <b>923.458</b> | 926.394        | 824.413        | 3197.130        | 3198.130        | 3199.131       | P107     |      |
| A9  | <b>895.463</b> | 898.457        | 877.453        | <b>923.458</b> | 926.453        | <b>905.448</b> | 3180.133        | 3181.130        | 3182.127       | A100     |      |
| T10 | 1130.515       | 1075.500       | 1065.500       | 1130.515       | 1076.500       | 1065.500       | 3189.500        | 3190.500        | 3191.500       | P110     |      |
| R11 | 1130.511       | 1103.500       | 1102.500       | 1140.500       | 1131.510       | 1130.500       | 3172.043        | 3169.028        | 3168.032       | K124     |      |
| K12 | 1130.511       | 1107.000       | 1127.000       | 1130.511       | 1101.000       | 1100.100       | 3183.940        | 3168.928        | 3168.937       | K113     |      |
| G13 | 1131.730       | 1107.711       | 1106.710       | 1130.711       | 1101.000       | 1100.100       | 3227.222        | 3243.042        | 3242.042       | K122     |      |
| G14 | 1131.730       | 1117.711       | 1116.710       | 1130.711       | 1101.000       | 1100.100       | 3449.774        | 3320.821        | 3319.820       | G111     |      |
| K15 | 1134.870       | 1107.000       | 1108.000       | 1132.000       | 1113.884       | 1114.886       | 3208.748        | 3263.748        | 3263.748       | K110     |      |
| K16 | 1174.501       | 1167.000       | 1156.000       | 1162.000       | 1135.500       | 1164.000       | <b>1089.883</b> | <b>1082.857</b> | 1081.878       | K100     |      |
| A17 | 1188.910       | 1168.000       | 1153.000       | 1161.011       | 1160.000       | 1160.000       | <b>925.531</b>  | 924.555         | 923.569        | A100     |      |
| T18 | 1199.100       | 1182.000       | 1141.000       | 1187.000       | 1170.014       | 1169.000       | <b>858.541</b>  | <b>845.514</b>  | <b>846.530</b> | I101     |      |
| L19 | 1199.100       | 1181.100       | 1162.100       | 1188.100       | 1171.110       | 1170.110       | <b>745.457</b>  | <b>744.457</b>  | <b>727.446</b> | I100     |      |
| R20 | 1199.100       | 1171.200       | 1162.200       | 1188.200       | 1172.210       | 1171.210       | <b>644.409</b>  | <b>627.382</b>  | 626.386        | K100     |      |
| A21 | 1204.200       | 1164.200       | 1163.200       | 1200.200       | 1211.201       | 1211.211       | <b>475.303</b>  | <b>473.303</b>  | 472.311        | A100     |      |
| Q22 | 1202.101       | 1161.100       | 1161.100       | 1200.100       | 1201.101       | 1201.101       | 493.200         | 493.200         | 493.200        | Q110     |      |
| K23 | 1207.440       | 1200.433       | 1210.430       | 1208.441       | 1208.434       | 1207.430       | <b>275.308</b>  | 268.183         | 268.000        | K100     |      |
| K24 | 1208.214       | 1200.210       | 1201.210       | 1214.210       | 1206.210       | 1205.210       | 444.411         | 439.000         | 438.000        | K110     |      |

# sp | Q9D2U9 | H2B3A\_MOUSE

PEPSRSTPAPKK Acetyl 42.01 GSK Acetyl 42.01 K Acetyl 42.01 AITK Acetyl 42.01 AQKK

- ▶ fragmentation table for charge state 2+
- ▶ specType=cid
- ▶ score=33.99
- ▶ F113281.dat
- ▶ query=q32440.p1
- ▶ precursor=683.642500
- ▶ chargePrecursor=4
- ▶ itol=0.5

| AA | a        | a'    | a <sup>o</sup> | b        | b'      | b <sup>o</sup> | y        | y'       | y <sup>o</sup> | AA   |
|----|----------|-------|----------------|----------|---------|----------------|----------|----------|----------------|------|
| P1 | 38.938   | 0.938 | 0.94           | 49.934   | 0.934   | 0.936          | 138.930  | 139.929  | 139.927        | P124 |
| E1 | 130.927  | 0.928 | 0.928          | 139.925  | 139.925 | 0.924          | 330.920  | 331.919  | 331.918        | E123 |
| P2 | 148.916  | 0.916 | 139.916        | 209.910  | 0.914   | 0.914          | 432.913  | 433.912  | 433.911        | P222 |
| S1 | 192.905  | 0.904 | 193.900        | 269.900  | 0.904   | 0.904          | 534.900  | 535.900  | 535.900        | S221 |
| H1 | 270.894  | 0.897 | 269.894        | 329.894  | 0.894   | 0.894          | 636.894  | 637.894  | 637.894        | H220 |
| S1 | 314.883  | 0.885 | 314.883        | 389.883  | 0.885   | 0.885          | 738.883  | 739.883  | 739.883        | S119 |
| T1 | 364.190  | 0.883 | 363.189        | 439.188  | 0.884   | 0.884          | 840.188  | 841.188  | 841.188        | T118 |
| P1 | 412.177  | 0.881 | 411.177        | 489.177  | 0.881   | 0.881          | 942.177  | 943.177  | 943.177        | P117 |
| A1 | 448.235  | 0.880 | 448.235        | 539.235  | 0.881   | 0.881          | 1044.235 | 1045.235 | 1045.235       | A116 |
| T1 | 496.222  | 0.880 | 495.222        | 589.222  | 0.881   | 0.881          | 1146.222 | 1147.222 | 1147.222       | T115 |
| R1 | 544.209  | 0.880 | 543.209        | 639.209  | 0.881   | 0.881          | 1248.209 | 1249.209 | 1249.209       | R114 |
| K1 | 592.196  | 0.880 | 591.196        | 689.196  | 0.881   | 0.881          | 1350.196 | 1351.196 | 1351.196       | K113 |
| K1 | 640.183  | 0.880 | 639.183        | 739.183  | 0.881   | 0.881          | 1452.183 | 1453.183 | 1453.183       | K112 |
| S1 | 688.170  | 0.880 | 687.170        | 789.170  | 0.881   | 0.881          | 1554.170 | 1555.170 | 1555.170       | S111 |
| K1 | 736.157  | 0.880 | 735.157        | 839.157  | 0.881   | 0.881          | 1656.157 | 1657.157 | 1657.157       | K110 |
| K1 | 784.144  | 0.880 | 783.144        | 889.144  | 0.881   | 0.881          | 1758.144 | 1759.144 | 1759.144       | K109 |
| A1 | 832.131  | 0.880 | 831.131        | 939.131  | 0.881   | 0.881          | 1860.131 | 1861.131 | 1861.131       | A108 |
| T1 | 880.118  | 0.880 | 879.118        | 989.118  | 0.881   | 0.881          | 1962.118 | 1963.118 | 1963.118       | T107 |
| T1 | 928.105  | 0.880 | 927.105        | 1039.105 | 0.881   | 0.881          | 2064.105 | 2065.105 | 2065.105       | T106 |
| A1 | 976.092  | 0.880 | 975.092        | 1089.092 | 0.881   | 0.881          | 2166.092 | 2167.092 | 2167.092       | A105 |
| A1 | 1024.079 | 0.880 | 1023.079       | 1139.079 | 0.881   | 0.881          | 2268.079 | 2269.079 | 2269.079       | A104 |
| A1 | 1072.066 | 0.880 | 1071.066       | 1189.066 | 0.881   | 0.881          | 2370.066 | 2371.066 | 2371.066       | A103 |
| A1 | 1120.053 | 0.880 | 1119.053       | 1239.053 | 0.881   | 0.881          | 2472.053 | 2473.053 | 2473.053       | A102 |
| A1 | 1168.040 | 0.880 | 1167.040       | 1289.040 | 0.881   | 0.881          | 2574.040 | 2575.040 | 2575.040       | A101 |
| A1 | 1216.027 | 0.880 | 1215.027       | 1339.027 | 0.881   | 0.881          | 2676.027 | 2677.027 | 2677.027       | A100 |
| A1 | 1264.014 | 0.880 | 1263.014       | 1389.014 | 0.881   | 0.881          | 2778.014 | 2779.014 | 2779.014       | A100 |

# sp | Q9D2U9 | H2B3A\_MOUSE

PEPSRSTPAPKK <sup>Acetyl</sup>42.01 GSK <sup>Acetyl</sup>42.01 K <sup>Acetyl</sup>42.01 AITK <sup>Acetyl</sup>42.01 AQKK

- ▶ fragmentation table for charge state 3+
- ▶ specType=cid
- ▶ score=33.99
- ▶ F113281.dat
- ▶ query=q32440\_p1
- ▶ precursor=683.642500
- ▶ chargePrecursor=4
- ▶ itol=0.5

| AA  | a              | a*             | a·b            | b              | b*             | b·b            | y              | y*             | y·b            | AA  |
|-----|----------------|----------------|----------------|----------------|----------------|----------------|----------------|----------------|----------------|-----|
| P1  | 24.027         | 0.672          | 16.172         | 33.358         | 0.672          | 0.672          | 981.159        | <b>905.511</b> | <b>905.183</b> | P24 |
| T1  | 87.894         | 0.683          | 61.053         | 76.372         | 0.672          | 0.683          | <b>871.836</b> | <b>873.161</b> | <b>872.333</b> | L23 |
| P3  | 90.392         | 0.672          | 61.358         | 108.723        | 0.672          | 102.720        | <b>835.822</b> | <b>830.146</b> | <b>829.818</b> | P22 |
| S4  | 120.802        | 0.669          | 122.999        | 137.734        | 0.672          | 131.739        | <b>803.471</b> | <b>797.795</b> | <b>797.467</b> | S12 |
| R5  | 130.436        | 174.703        | 174.433        | 189.769        | 184.052        | 183.764        | 776.481        | 735.205        | <b>768.457</b> | R20 |
| S6  | 209.849        | 209.811        | 209.843        | 239.778        | 213.309        | 212.976        | 722.421        | <b>716.751</b> | <b>716.423</b> | S19 |
| T7  | 243.129        | 237.454        | 237.126        | 262.461        | 246.785        | 246.431        | 693.431        | 687.142        | 687.412        | T18 |
| P8  | <b>275.480</b> | 269.809        | 269.477        | 284.812        | 279.136        | 278.809        | <b>659.733</b> | <b>654.058</b> | <b>653.730</b> | P17 |
| A9  | 299.126        | 295.854        | 295.152        | 308.491        | 292.615        | 292.487        | <b>627.382</b> | <b>621.707</b> | <b>621.379</b> | A16 |
| P10 | 331.810        | 328.406        | 328.269        | 346.842        | 338.366        | 338.438        | <b>602.703</b> | <b>598.028</b> | <b>599.700</b> | P15 |
| R11 | 374.208        | <b>368.533</b> | <b>368.205</b> | 383.540        | 377.865        | 377.537        | 571.352        | <b>565.677</b> | 565.349        | R14 |
| K12 | 430.919        | 425.235        | 424.907        | 440.242        | 434.566        | 434.238        | 538.654        | 522.919        | 522.951        | K13 |
| G13 | 449.917        | 444.232        | 443.914        | 451.249        | <b>453.574</b> | <b>453.246</b> | 471.952        | 466.277        | 465.949        | G12 |
| S14 | 478.928        | 473.243        | 472.925        | 480.265        | 474.589        | 474.261        | 452.456        | 447.270        | 446.952        | S11 |
| R15 | 535.630        | 529.944        | <b>529.626</b> | 544.963        | <b>539.286</b> | 538.958        | 423.933        | 418.259        | 417.931        | R10 |
| K16 | <b>592.332</b> | 586.658        | 586.330        | 593.473        | <b>595.988</b> | <b>595.660</b> | 397.233        | 381.553        | 381.225        | K11 |
| A17 | 616.111        | 610.426        | 610.100        | <b>625.243</b> | <b>619.667</b> | <b>619.339</b> | 380.231        | 364.551        | 364.223        | A11 |
| T18 | <b>653.706</b> | 648.021        | 647.722        | <b>663.037</b> | <b>657.461</b> | <b>657.134</b> | 289.252        | 281.175        | 280.848        | T11 |
| T19 | 697.588        | 691.913        | 691.305        | 699.725        | 693.944        | 693.119        | 249.121        | 243.482        | 243.154        | T11 |
| K20 | 748.990        | 743.304        | 742.977        | <b>753.422</b> | 747.640        | 747.418        | 215.475        | 209.799        | 209.472        | K15 |
| R21 | <b>787.760</b> | <b>782.084</b> | <b>781.765</b> | 787.901        | <b>771.825</b> | 771.603        | 189.773        | 183.289        | 182.962        | R11 |
| Q22 | 816.958        | 811.272        | 810.945        | <b>819.787</b> | <b>814.111</b> | <b>813.783</b> | 129.559        | 129.415        | 129.270        | Q18 |
| K23 | 851.154        | 845.469        | 845.142        | <b>862.485</b> | <b>856.810</b> | 856.482        | 92.401         | 86.732         | 86.402         | K12 |
| K24 | <b>895.852</b> | 890.166        | 889.840        | <b>905.183</b> | 899.508        | 899.180        | 49.759         | 44.034         | 43.702         | K11 |



# sp | Q9D2U9 | H2B3A\_MOUSE

PEPSRSTPAPKK <sup>Acetyl</sup>42.01 GSK <sup>Acetyl</sup>42.01 K <sup>Acetyl</sup>42.01 AITK <sup>Acetyl</sup>42.01 AQKK

- ▶ fragmentation table for charge state 1+
- ▶ specType=etd
- ▶ score=76.00
- ▶ F113281.dat
- ▶ query=q32441\_p1
- ▶ precursor=683.642500
- ▶ chargePrecursor=4
- ▶ itol=0.5

| AA | c  | y               | z+1      | z+2             | z               | AA             |       |
|----|----|-----------------|----------|-----------------|-----------------|----------------|-------|
| P  | 1  | 115.097         | 2731.546 | 2715.528        | 0.000           | 2714.520       | P[24] |
| E  | 2  | 244.129         | 2634.494 | 2618.475        | 0.000           | 2617.467       | E[23] |
| P  | 3  | 341.182         | 2596.451 | 2489.432        | 0.000           | 2488.425       | P[22] |
| S  | 4  | 438.214         | 2608.398 | 2395.380        | 0.000           | 2394.371       | S[21] |
| R  | 5  | <b>584.315</b>  | 2321.365 | 2305.348        | 2306.355        | 2304.340       | R[20] |
| S  | 6  | <b>671.347</b>  | 2165.265 | 2149.247        | 2150.254        | 2148.239       | S[19] |
| T  | 7  | 772.395         | 2078.233 | 2062.214        | 2063.222        | 2061.207       | T[18] |
| P  | 8  | 869.448         | 1977.189 | 1961.167        | 1962.175        | 1960.159       | P[17] |
| A  | 9  | 967.500         | 1880.133 | 1864.114        | 1865.122        | 1863.106       | A[16] |
| P  | 10 | <b>1037.537</b> | 1809.096 | 1793.077        | 1794.085        | 1792.069       | P[15] |
| K  | 11 | <b>1165.632</b> | 1712.043 | <b>1696.024</b> | 1697.032        | 1695.016       | K[14] |
| K  | 12 | 1335.738        | 1583.948 | 1567.929        | <b>1568.937</b> | 1566.921       | K[13] |
| G  | 13 | 1502.759        | 1413.842 | 1397.824        | 1398.831        | 1396.816       | G[12] |
| S  | 14 | <b>1479.791</b> | 1356.821 | 1340.802        | 1341.810        | 1339.794       | S[11] |
| K  | 15 | 1649.897        | 1288.789 | <b>1253.770</b> | 1254.778        | 1252.762       | K[10] |
| K  | 16 | 1839.002        | 1209.683 | <b>1183.665</b> | <b>1184.672</b> | 1182.657       | K[9]  |
| A  | 17 | 1891.040        | 929.575  | 913.558         | 914.567         | 912.551        | A[8]  |
| I  | 18 | 2004.124        | 858.541  | 842.520         | 843.530         | 841.514        | I[7]  |
| T  | 19 | 2105.171        | 745.457  | <b>729.438</b>  | 730.446         | <b>728.430</b> | T[6]  |
| K  | 20 | 2275.277        | 644.409  | <b>628.390</b>  | 629.398         | <b>627.382</b> | K[5]  |
| A  | 21 | 2346.314        | 474.303  | <b>458.285</b>  | 459.293         | 457.277        | A[4]  |
| Q  | 22 | 2474.373        | 403.266  | <b>387.248</b>  | 388.256         | 386.240        | Q[3]  |
| K  | 23 | 2602.468        | 275.208  | <b>259.189</b>  | 260.197         | 258.181        | K[2]  |
| K  | 24 | 2730.562        | 147.113  | 131.094         | 132.102         | 130.086        | K[1]  |



# sp | Q9D2U9 | H2B3A\_MOUSE

PEPSRSTPAPKK <sup>Acetyl</sup>42.01 GSK <sup>Acetyl</sup>42.01 K <sup>Acetyl</sup>42.01 AITK <sup>Acetyl</sup>42.01 AQKK

- ▶ fragmentation table for charge state 2+
- ▶ specType=etd
- ▶ score=76.00
- ▶ F113281.dat
- ▶ query=q32441\_p1
- ▶ precursor=683.642500
- ▶ chargePrecursor=4
- ▶ itol=0.5

| AA    | c               | y               | z+1             | z+2             | z              | AA    |
|-------|-----------------|-----------------|-----------------|-----------------|----------------|-------|
| P[1]  | 58.047          | 1306.277        | 1358.208        | 0.504           | 1357.704       | P[24] |
| E[2]  | 122.568         | 1317.751        | 1309.741        | 0.504           | 1309.237       | E[23] |
| F[3]  | 171.095         | <b>1253.229</b> | 1245.220        | 0.504           | 1244.716       | F[22] |
| S[4]  | 214.611         | 1204.781        | 1196.869        | 0.504           | 1196.365       | S[21] |
| R[5]  | 292.591         | 1181.187        | 1153.177        | <b>1153.681</b> | 1152.676       | R[20] |
| S[6]  | 336.177         | 1081.138        | <b>1075.127</b> | <b>1075.631</b> | 1074.623       | S[19] |
| T[7]  | 386.701         | 1039.620        | <b>1031.611</b> | <b>1032.115</b> | 1031.107       | T[18] |
| P[8]  | 435.227         | 989.090         | 981.087         | 981.591         | 980.583        | P[17] |
| A[9]  | 470.746         | 946.570         | <b>932.561</b>  | <b>933.065</b>  | <b>932.057</b> | A[16] |
| T[10] | 519.272         | 905.051         | <b>897.042</b>  | <b>897.546</b>  | 896.538        | T[15] |
| K[11] | 581.320         | 855.525         | <b>848.516</b>  | <b>849.020</b>  | 848.012        | K[14] |
| K[12] | 608.373         | <b>792.478</b>  | <b>784.468</b>  | <b>784.972</b>  | 783.964        | K[13] |
| G[13] | 606.883         | 707.425         | <b>699.415</b>  | <b>699.919</b>  | 698.912        | G[12] |
| S[14] | <b>740.399</b>  | 678.014         | <b>670.905</b>  | <b>671.409</b>  | 670.401        | S[11] |
| K[15] | <b>825.452</b>  | 635.365         | <b>627.359</b>  | <b>627.863</b>  | 626.855        | K[10] |
| K[16] | 910.905         | 590.350         | 582.349         | 582.853         | 581.845        | K[9]  |
| A[17] | 946.023         | 465.293         | 457.283         | 457.787         | 456.779        | A[8]  |
| I[18] | <b>1002.565</b> | 429.774         | 421.765         | 422.269         | 421.261        | I[7]  |
| T[19] | <b>1053.089</b> | 373.232         | 365.223         | 365.727         | 364.719        | T[6]  |
| K[20] | <b>1138.142</b> | 322.705         | 314.696         | 315.203         | 314.195        | K[5]  |
| A[21] | <b>1173.561</b> | 277.655         | 269.646         | 270.150         | 269.142        | A[4]  |
| Q[22] | <b>1237.690</b> | 202.137         | 194.127         | 194.631         | 193.623        | Q[3]  |
| K[23] | <b>1301.737</b> | 138.108         | 130.098         | 130.602         | 129.594        | K[2]  |
| K[24] | 1305.785        | 74.060          | 66.051          | 66.555          | 65.547         | K[1]  |

# sp | Q9D2U9 | H2B3A\_MOUSE

PEPSRSTPAPKK <sup>Acetyl</sup>42.01 GSK <sup>Acetyl</sup>42.01 K <sup>Acetyl</sup>42.01 AITK <sup>Acetyl</sup>42.01 AQKK

- ▶ fragmentation table for charge state 3+
- ▶ specType=etd
- ▶ score=76.00
- ▶ F113281.dat
- ▶ query=q32441\_p1
- ▶ precursor=683.642500
- ▶ chargePrecursor=4
- ▶ itol=0.5

| AA    | c              | y              | z+1            | z+2     | z       | AA    |
|-------|----------------|----------------|----------------|---------|---------|-------|
| P[1]  | 89.034         | 911.187        | <b>905.847</b> | 0.672   | 905.511 | P[24] |
| E[2]  | 82.048         | 878.836        | <b>873.497</b> | 0.672   | 873.161 | E[23] |
| P[3]  | 114.999        | 935.822        | 830.482        | 0.672   | 830.146 | P[22] |
| S[4]  | 143.410        | 803.471        | 799.131        | 0.672   | 797.795 | S[21] |
| R[5]  | 195.443        | 774.460        | 769.121        | 769.457 | 768.785 | R[20] |
| S[6]  | 224.454        | 722.427        | 717.067        | 717.423 | 716.751 | S[19] |
| T[7]  | 258.136        | 693.416        | 688.076        | 688.412 | 687.740 | T[18] |
| F[8]  | 290.487        | 659.733        | 654.394        | 654.730 | 654.058 | F[17] |
| A[9]  | 314.566        | <b>627.382</b> | 622.043        | 622.379 | 621.707 | A[16] |
| P[10] | 346.517        | 603.701        | 598.364        | 598.700 | 598.028 | P[15] |
| K[11] | 389.216        | 571.352        | 566.013        | 566.349 | 565.677 | K[14] |
| K[12] | 445.917        | 528.054        | 523.315        | 523.651 | 522.979 | K[13] |
| G[13] | 464.925        | 471.952        | 466.613        | 466.949 | 466.277 | G[12] |
| S[14] | 493.935        | 452.940        | 447.606        | 447.942 | 447.270 | S[11] |
| K[15] | 550.637        | 423.934        | 418.595        | 418.931 | 418.259 | K[10] |
| K[16] | 607.339        | 367.233        | 361.893        | 362.229 | 361.557 | K[9]  |
| A[17] | 631.018        | 310.531        | 305.191        | 305.527 | 304.855 | A[8]  |
| T[18] | 668.713        | 286.852        | 281.512        | 281.848 | 281.176 | T[7]  |
| T[19] | 702.395        | 249.157        | 243.817        | 244.153 | 243.482 | T[6]  |
| K[20] | 759.097        | 215.475        | 210.135        | 210.471 | 209.799 | K[5]  |
| A[21] | 782.776        | 158.773        | 153.433        | 153.769 | 153.097 | A[4]  |
| Q[22] | <b>825.462</b> | 135.096        | 129.754        | 130.090 | 129.418 | Q[3]  |
| K[23] | <b>868.161</b> | 92.407         | 87.068         | 87.404  | 86.732  | K[2]  |
| K[24] | 910.859        | 48.700         | 44.370         | 44.705  | 44.034  | K[1]  |



# sp | Q3THW5 | H2AV\_MOUSE

DSLKATIAGGGVIPHIHK <sup>Dimethyl</sup> <sub>28.03</sub> SLIGKKGQQKTA

- ▶ fragmentation table for charge state 1+
- ▶ specType=cid
- ▶ score=34.50
- ▶ F113281.dat
- ▶ query=q34426.p1
- ▶ precursor=799.473050
- ▶ chargePrecursor=4
- ▶ itol=0.5

| AA | a   | a*   | a.D   | b   | b*   | b.D   | y   | y*  | y.D   | AA    |
|----|-----|------|-------|-----|------|-------|-----|-----|-------|-------|
| D1 | 115 | 1071 | 0.000 | 157 | 1491 | 0.000 | 38  | 302 | 0.000 | D121  |
| S1 | 116 | 1072 | 0.000 | 158 | 1492 | 0.000 | 39  | 303 | 0.000 | S130  |
| L1 | 117 | 1073 | 0.000 | 159 | 1493 | 0.000 | 40  | 304 | 0.000 | L139  |
| F1 | 118 | 1074 | 0.000 | 160 | 1494 | 0.000 | 41  | 305 | 0.000 | F148  |
| K1 | 119 | 1075 | 0.000 | 161 | 1495 | 0.000 | 42  | 306 | 0.000 | K157  |
| A1 | 120 | 1076 | 0.000 | 162 | 1496 | 0.000 | 43  | 307 | 0.000 | A166  |
| T1 | 121 | 1077 | 0.000 | 163 | 1497 | 0.000 | 44  | 308 | 0.000 | T175  |
| I1 | 122 | 1078 | 0.000 | 164 | 1498 | 0.000 | 45  | 309 | 0.000 | I184  |
| V1 | 123 | 1079 | 0.000 | 165 | 1499 | 0.000 | 46  | 310 | 0.000 | V193  |
| M1 | 124 | 1080 | 0.000 | 166 | 1500 | 0.000 | 47  | 311 | 0.000 | M202  |
| C1 | 125 | 1081 | 0.000 | 167 | 1501 | 0.000 | 48  | 312 | 0.000 | C211  |
| G1 | 126 | 1082 | 0.000 | 168 | 1502 | 0.000 | 49  | 313 | 0.000 | G220  |
| E1 | 127 | 1083 | 0.000 | 169 | 1503 | 0.000 | 50  | 314 | 0.000 | E229  |
| Q1 | 128 | 1084 | 0.000 | 170 | 1504 | 0.000 | 51  | 315 | 0.000 | Q238  |
| N1 | 129 | 1085 | 0.000 | 171 | 1505 | 0.000 | 52  | 316 | 0.000 | N247  |
| D2 | 130 | 1086 | 0.000 | 172 | 1506 | 0.000 | 53  | 317 | 0.000 | D256  |
| S2 | 131 | 1087 | 0.000 | 173 | 1507 | 0.000 | 54  | 318 | 0.000 | S265  |
| L2 | 132 | 1088 | 0.000 | 174 | 1508 | 0.000 | 55  | 319 | 0.000 | L274  |
| F2 | 133 | 1089 | 0.000 | 175 | 1509 | 0.000 | 56  | 320 | 0.000 | F283  |
| K2 | 134 | 1090 | 0.000 | 176 | 1510 | 0.000 | 57  | 321 | 0.000 | K292  |
| A2 | 135 | 1091 | 0.000 | 177 | 1511 | 0.000 | 58  | 322 | 0.000 | A301  |
| T2 | 136 | 1092 | 0.000 | 178 | 1512 | 0.000 | 59  | 323 | 0.000 | T310  |
| I2 | 137 | 1093 | 0.000 | 179 | 1513 | 0.000 | 60  | 324 | 0.000 | I319  |
| V2 | 138 | 1094 | 0.000 | 180 | 1514 | 0.000 | 61  | 325 | 0.000 | V328  |
| M2 | 139 | 1095 | 0.000 | 181 | 1515 | 0.000 | 62  | 326 | 0.000 | M337  |
| C2 | 140 | 1096 | 0.000 | 182 | 1516 | 0.000 | 63  | 327 | 0.000 | C346  |
| G2 | 141 | 1097 | 0.000 | 183 | 1517 | 0.000 | 64  | 328 | 0.000 | G355  |
| E2 | 142 | 1098 | 0.000 | 184 | 1518 | 0.000 | 65  | 329 | 0.000 | E364  |
| Q2 | 143 | 1099 | 0.000 | 185 | 1519 | 0.000 | 66  | 330 | 0.000 | Q373  |
| N2 | 144 | 1100 | 0.000 | 186 | 1520 | 0.000 | 67  | 331 | 0.000 | N382  |
| D3 | 145 | 1101 | 0.000 | 187 | 1521 | 0.000 | 68  | 332 | 0.000 | D391  |
| S3 | 146 | 1102 | 0.000 | 188 | 1522 | 0.000 | 69  | 333 | 0.000 | S400  |
| L3 | 147 | 1103 | 0.000 | 189 | 1523 | 0.000 | 70  | 334 | 0.000 | L409  |
| F3 | 148 | 1104 | 0.000 | 190 | 1524 | 0.000 | 71  | 335 | 0.000 | F418  |
| K3 | 149 | 1105 | 0.000 | 191 | 1525 | 0.000 | 72  | 336 | 0.000 | K427  |
| A3 | 150 | 1106 | 0.000 | 192 | 1526 | 0.000 | 73  | 337 | 0.000 | A436  |
| T3 | 151 | 1107 | 0.000 | 193 | 1527 | 0.000 | 74  | 338 | 0.000 | T445  |
| I3 | 152 | 1108 | 0.000 | 194 | 1528 | 0.000 | 75  | 339 | 0.000 | I454  |
| V3 | 153 | 1109 | 0.000 | 195 | 1529 | 0.000 | 76  | 340 | 0.000 | V463  |
| M3 | 154 | 1110 | 0.000 | 196 | 1530 | 0.000 | 77  | 341 | 0.000 | M472  |
| C3 | 155 | 1111 | 0.000 | 197 | 1531 | 0.000 | 78  | 342 | 0.000 | C481  |
| G3 | 156 | 1112 | 0.000 | 198 | 1532 | 0.000 | 79  | 343 | 0.000 | G490  |
| E3 | 157 | 1113 | 0.000 | 199 | 1533 | 0.000 | 80  | 344 | 0.000 | E500  |
| Q3 | 158 | 1114 | 0.000 | 200 | 1534 | 0.000 | 81  | 345 | 0.000 | Q509  |
| N3 | 159 | 1115 | 0.000 | 201 | 1535 | 0.000 | 82  | 346 | 0.000 | N518  |
| D4 | 160 | 1116 | 0.000 | 202 | 1536 | 0.000 | 83  | 347 | 0.000 | D527  |
| S4 | 161 | 1117 | 0.000 | 203 | 1537 | 0.000 | 84  | 348 | 0.000 | S536  |
| L4 | 162 | 1118 | 0.000 | 204 | 1538 | 0.000 | 85  | 349 | 0.000 | L545  |
| F4 | 163 | 1119 | 0.000 | 205 | 1539 | 0.000 | 86  | 350 | 0.000 | F554  |
| K4 | 164 | 1120 | 0.000 | 206 | 1540 | 0.000 | 87  | 351 | 0.000 | K563  |
| A4 | 165 | 1121 | 0.000 | 207 | 1541 | 0.000 | 88  | 352 | 0.000 | A572  |
| T4 | 166 | 1122 | 0.000 | 208 | 1542 | 0.000 | 89  | 353 | 0.000 | T581  |
| I4 | 167 | 1123 | 0.000 | 209 | 1543 | 0.000 | 90  | 354 | 0.000 | I590  |
| V4 | 168 | 1124 | 0.000 | 210 | 1544 | 0.000 | 91  | 355 | 0.000 | V600  |
| M4 | 169 | 1125 | 0.000 | 211 | 1545 | 0.000 | 92  | 356 | 0.000 | M609  |
| C4 | 170 | 1126 | 0.000 | 212 | 1546 | 0.000 | 93  | 357 | 0.000 | C618  |
| G4 | 171 | 1127 | 0.000 | 213 | 1547 | 0.000 | 94  | 358 | 0.000 | G627  |
| E4 | 172 | 1128 | 0.000 | 214 | 1548 | 0.000 | 95  | 359 | 0.000 | E636  |
| Q4 | 173 | 1129 | 0.000 | 215 | 1549 | 0.000 | 96  | 360 | 0.000 | Q645  |
| N4 | 174 | 1130 | 0.000 | 216 | 1550 | 0.000 | 97  | 361 | 0.000 | N654  |
| D5 | 175 | 1131 | 0.000 | 217 | 1551 | 0.000 | 98  | 362 | 0.000 | D663  |
| S5 | 176 | 1132 | 0.000 | 218 | 1552 | 0.000 | 99  | 363 | 0.000 | S672  |
| L5 | 177 | 1133 | 0.000 | 219 | 1553 | 0.000 | 100 | 364 | 0.000 | L681  |
| F5 | 178 | 1134 | 0.000 | 220 | 1554 | 0.000 | 101 | 365 | 0.000 | F690  |
| K5 | 179 | 1135 | 0.000 | 221 | 1555 | 0.000 | 102 | 366 | 0.000 | K700  |
| A5 | 180 | 1136 | 0.000 | 222 | 1556 | 0.000 | 103 | 367 | 0.000 | A709  |
| T5 | 181 | 1137 | 0.000 | 223 | 1557 | 0.000 | 104 | 368 | 0.000 | T718  |
| I5 | 182 | 1138 | 0.000 | 224 | 1558 | 0.000 | 105 | 369 | 0.000 | I727  |
| V5 | 183 | 1139 | 0.000 | 225 | 1559 | 0.000 | 106 | 370 | 0.000 | V736  |
| M5 | 184 | 1140 | 0.000 | 226 | 1560 | 0.000 | 107 | 371 | 0.000 | M745  |
| C5 | 185 | 1141 | 0.000 | 227 | 1561 | 0.000 | 108 | 372 | 0.000 | C754  |
| G5 | 186 | 1142 | 0.000 | 228 | 1562 | 0.000 | 109 | 373 | 0.000 | G763  |
| E5 | 187 | 1143 | 0.000 | 229 | 1563 | 0.000 | 110 | 374 | 0.000 | E772  |
| Q5 | 188 | 1144 | 0.000 | 230 | 1564 | 0.000 | 111 | 375 | 0.000 | Q781  |
| N5 | 189 | 1145 | 0.000 | 231 | 1565 | 0.000 | 112 | 376 | 0.000 | N790  |
| D6 | 190 | 1146 | 0.000 | 232 | 1566 | 0.000 | 113 | 377 | 0.000 | D800  |
| S6 | 191 | 1147 | 0.000 | 233 | 1567 | 0.000 | 114 | 378 | 0.000 | S809  |
| L6 | 192 | 1148 | 0.000 | 234 | 1568 | 0.000 | 115 | 379 | 0.000 | L818  |
| F6 | 193 | 1149 | 0.000 | 235 | 1569 | 0.000 | 116 | 380 | 0.000 | F827  |
| K6 | 194 | 1150 | 0.000 | 236 | 1570 | 0.000 | 117 | 381 | 0.000 | K836  |
| A6 | 195 | 1151 | 0.000 | 237 | 1571 | 0.000 | 118 | 382 | 0.000 | A845  |
| T6 | 196 | 1152 | 0.000 | 238 | 1572 | 0.000 | 119 | 383 | 0.000 | T854  |
| I6 | 197 | 1153 | 0.000 | 239 | 1573 | 0.000 | 120 | 384 | 0.000 | I863  |
| V6 | 198 | 1154 | 0.000 | 240 | 1574 | 0.000 | 121 | 385 | 0.000 | V872  |
| M6 | 199 | 1155 | 0.000 | 241 | 1575 | 0.000 | 122 | 386 | 0.000 | M881  |
| C6 | 200 | 1156 | 0.000 | 242 | 1576 | 0.000 | 123 | 387 | 0.000 | C890  |
| G6 | 201 | 1157 | 0.000 | 243 | 1577 | 0.000 | 124 | 388 | 0.000 | G899  |
| E6 | 202 | 1158 | 0.000 | 244 | 1578 | 0.000 | 125 | 389 | 0.000 | E908  |
| Q6 | 203 | 1159 | 0.000 | 245 | 1579 | 0.000 | 126 | 390 | 0.000 | Q917  |
| N6 | 204 | 1160 | 0.000 | 246 | 1580 | 0.000 | 127 | 391 | 0.000 | N926  |
| D7 | 205 | 1161 | 0.000 | 247 | 1581 | 0.000 | 128 | 392 | 0.000 | D935  |
| S7 | 206 | 1162 | 0.000 | 248 | 1582 | 0.000 | 129 | 393 | 0.000 | S944  |
| L7 | 207 | 1163 | 0.000 | 249 | 1583 | 0.000 | 130 | 394 | 0.000 | L953  |
| F7 | 208 | 1164 | 0.000 | 250 | 1584 | 0.000 | 131 | 395 | 0.000 | F962  |
| K7 | 209 | 1165 | 0.000 | 251 | 1585 | 0.000 | 132 | 396 | 0.000 | K971  |
| A7 | 210 | 1166 | 0.000 | 252 | 1586 | 0.000 | 133 | 397 | 0.000 | A980  |
| T7 | 211 | 1167 | 0.000 | 253 | 1587 | 0.000 | 134 | 398 | 0.000 | T989  |
| I7 | 212 | 1168 | 0.000 | 254 | 1588 | 0.000 | 135 | 399 | 0.000 | I998  |
| V7 | 213 | 1169 | 0.000 | 255 | 1589 | 0.000 | 136 | 400 | 0.000 | V1007 |
| M7 | 214 | 1170 | 0.000 | 256 | 1590 | 0.000 | 137 | 401 | 0.000 | M1016 |
| C7 | 215 | 1171 | 0.000 | 257 | 1591 | 0.000 | 138 | 402 | 0.000 | C1025 |
| G7 | 216 | 1172 | 0.000 | 258 | 1592 | 0.000 | 139 | 403 | 0.000 | G1034 |
| E7 | 217 | 1173 | 0.000 | 259 | 1593 | 0.000 | 140 | 404 | 0.000 | E1043 |
| Q7 | 218 | 1174 | 0.000 | 260 | 1594 | 0.000 | 141 | 405 | 0.000 | Q1052 |
| N7 | 219 | 1175 | 0.000 | 261 | 1595 | 0.000 | 142 | 406 | 0.000 | N1061 |
| D8 | 220 | 1176 | 0.000 | 262 | 1596 | 0.000 | 143 | 407 | 0.000 | D1070 |
| S8 | 221 | 1177 | 0.000 | 263 | 1597 | 0.000 | 144 | 408 | 0.000 | S1079 |
| L8 | 222 | 1178 | 0.000 | 264 | 1598 | 0.000 | 145 | 409 | 0.000 | L1088 |
| F8 | 223 | 1179 | 0.000 | 265 | 1599 | 0.000 | 146 | 410 | 0.000 | F1097 |
| K8 | 224 | 1180 | 0.000 | 266 | 1600 | 0.000 | 147 | 411 | 0.000 | K1106 |
| A8 | 225 | 1181 | 0.000 | 267 | 1601 | 0.000 | 148 | 412 | 0.000 | A1115 |
| T8 | 226 | 1182 | 0.000 | 268 | 1602 | 0.000 | 149 | 413 | 0.000 | T1124 |
| I8 | 227 | 1183 | 0.000 | 269 | 1603 | 0.000 | 150 | 414 | 0.000 | I1133 |
| V8 | 228 | 1184 | 0.000 | 270 | 1604 | 0.000 | 151 | 415 | 0.000 | V1142 |
| M8 | 229 | 1185 | 0.000 | 271 | 1605 | 0.000 | 152 | 416 | 0.000 | M1151 |
| C8 | 230 | 1186 | 0.000 | 272 | 1606 | 0.000 | 153 | 417 | 0.000 | C1160 |
| G8 | 231 | 1187 | 0.000 | 273 | 1607 | 0.000 | 154 | 418 | 0.000 | G1169 |
| E8 | 232 | 1188 | 0.000 | 274 | 1608 | 0.000 | 155 | 419 | 0.000 | E1178 |
| Q8 | 233 | 1189 | 0.000 | 275 | 1609 | 0.000 | 156 | 420 | 0.000 | Q1187 |
| N8 | 234 | 1190 | 0.000 | 276 | 1610 | 0.000 | 157 | 421 | 0.000 | N1196 |
| D9 | 235 | 1191 | 0.000 | 277 | 1611 | 0.000 | 158 | 422 | 0.000 | D1205 |
| S9 | 236 | 1192 |       |     |      |       |     |     |       |       |

# sp | Q3THW5 | H2AV\_MOUSE

DSLKATIAGGGVIPHIHK<sup>Dimethyl</sup><sub>28.03</sub> SLIGKKGQQKTA

- ▶ fragmentation table for charge state 2+
- ▶ specType=cid
- ▶ score=34.50
- ▶ F113281.dat
- ▶ query=q34426.p1
- ▶ precursor=799.473050
- ▶ chargePrecursor=4
- ▶ itol=0.5

| AA | a    | a'   | a+b  | b    | b'   | b+c  | c    | c'   | c+d  | AA   |     |
|----|------|------|------|------|------|------|------|------|------|------|-----|
| D1 | 44   | 523  | 569  | 55   | 521  | 558  | 52   | 558  | 49   | 519  | D10 |
| S1 | 88   | 103  | 191  | 102  | 103  | 191  | 104  | 103  | 191  | 104  | S10 |
| L1 | 132  | 148  | 280  | 147  | 148  | 280  | 149  | 148  | 280  | 149  | L10 |
| K1 | 176  | 193  | 369  | 192  | 193  | 369  | 194  | 193  | 369  | 194  | K10 |
| A1 | 220  | 237  | 456  | 236  | 237  | 456  | 238  | 237  | 456  | 238  | A10 |
| T1 | 264  | 281  | 545  | 280  | 281  | 545  | 282  | 281  | 545  | 282  | T10 |
| M1 | 308  | 325  | 633  | 324  | 325  | 633  | 326  | 325  | 633  | 326  | M10 |
| I1 | 352  | 369  | 721  | 368  | 369  | 721  | 370  | 369  | 721  | 370  | I10 |
| V1 | 396  | 413  | 809  | 412  | 413  | 809  | 414  | 413  | 809  | 414  | V10 |
| Q1 | 440  | 457  | 897  | 456  | 457  | 897  | 458  | 457  | 897  | 458  | Q10 |
| N1 | 484  | 501  | 985  | 500  | 501  | 985  | 502  | 501  | 985  | 502  | N10 |
| C1 | 528  | 545  | 1073 | 544  | 545  | 1073 | 546  | 545  | 1073 | 546  | C10 |
| G1 | 572  | 589  | 1161 | 588  | 589  | 1161 | 590  | 589  | 1161 | 590  | G10 |
| E1 | 616  | 633  | 1249 | 632  | 633  | 1249 | 634  | 633  | 1249 | 634  | E10 |
| D1 | 660  | 677  | 1337 | 676  | 677  | 1337 | 678  | 677  | 1337 | 678  | D10 |
| S1 | 704  | 721  | 1425 | 720  | 721  | 1425 | 722  | 721  | 1425 | 722  | S10 |
| L1 | 748  | 765  | 1513 | 764  | 765  | 1513 | 766  | 765  | 1513 | 766  | L10 |
| K1 | 792  | 809  | 1601 | 808  | 809  | 1601 | 810  | 809  | 1601 | 810  | K10 |
| A1 | 836  | 853  | 1689 | 852  | 853  | 1689 | 854  | 853  | 1689 | 854  | A10 |
| T1 | 880  | 897  | 1777 | 896  | 897  | 1777 | 898  | 897  | 1777 | 898  | T10 |
| M1 | 924  | 941  | 1865 | 940  | 941  | 1865 | 942  | 941  | 1865 | 942  | M10 |
| I1 | 968  | 985  | 1953 | 984  | 985  | 1953 | 986  | 985  | 1953 | 986  | I10 |
| V1 | 1012 | 1029 | 2041 | 1030 | 1029 | 2041 | 1032 | 1029 | 2041 | 1032 | V10 |
| Q1 | 1056 | 1073 | 2129 | 1072 | 1073 | 2129 | 1074 | 1073 | 2129 | 1074 | Q10 |
| N1 | 1100 | 1117 | 2217 | 1116 | 1117 | 2217 | 1118 | 1117 | 2217 | 1118 | N10 |
| C1 | 1144 | 1161 | 2305 | 1160 | 1161 | 2305 | 1162 | 1161 | 2305 | 1162 | C10 |
| G1 | 1188 | 1205 | 2393 | 1204 | 1205 | 2393 | 1206 | 1205 | 2393 | 1206 | G10 |
| E1 | 1232 | 1249 | 2481 | 1248 | 1249 | 2481 | 1250 | 1249 | 2481 | 1250 | E10 |
| D1 | 1276 | 1293 | 2569 | 1292 | 1293 | 2569 | 1294 | 1293 | 2569 | 1294 | D10 |
| S1 | 1320 | 1337 | 2657 | 1336 | 1337 | 2657 | 1338 | 1337 | 2657 | 1338 | S10 |
| L1 | 1364 | 1381 | 2745 | 1380 | 1381 | 2745 | 1382 | 1381 | 2745 | 1382 | L10 |
| K1 | 1408 | 1425 | 2833 | 1424 | 1425 | 2833 | 1426 | 1425 | 2833 | 1426 | K10 |
| A1 | 1452 | 1469 | 2921 | 1468 | 1469 | 2921 | 1470 | 1469 | 2921 | 1470 | A10 |
| T1 | 1496 | 1513 | 3009 | 1512 | 1513 | 3009 | 1514 | 1513 | 3009 | 1514 | T10 |
| M1 | 1540 | 1557 | 3097 | 1556 | 1557 | 3097 | 1558 | 1557 | 3097 | 1558 | M10 |
| I1 | 1584 | 1601 | 3185 | 1600 | 1601 | 3185 | 1602 | 1601 | 3185 | 1602 | I10 |
| V1 | 1628 | 1645 | 3273 | 1644 | 1645 | 3273 | 1646 | 1645 | 3273 | 1646 | V10 |
| Q1 | 1672 | 1689 | 3361 | 1688 | 1689 | 3361 | 1690 | 1689 | 3361 | 1690 | Q10 |
| N1 | 1716 | 1733 | 3449 | 1732 | 1733 | 3449 | 1734 | 1733 | 3449 | 1734 | N10 |
| C1 | 1760 | 1777 | 3537 | 1776 | 1777 | 3537 | 1778 | 1777 | 3537 | 1778 | C10 |
| G1 | 1804 | 1821 | 3625 | 1820 | 1821 | 3625 | 1822 | 1821 | 3625 | 1822 | G10 |
| E1 | 1848 | 1865 | 3713 | 1864 | 1865 | 3713 | 1866 | 1865 | 3713 | 1866 | E10 |
| D1 | 1892 | 1909 | 3801 | 1908 | 1909 | 3801 | 1910 | 1909 | 3801 | 1910 | D10 |
| S1 | 1936 | 1953 | 3889 | 1952 | 1953 | 3889 | 1954 | 1953 | 3889 | 1954 | S10 |
| L1 | 1980 | 1997 | 3977 | 1996 | 1997 | 3977 | 1998 | 1997 | 3977 | 1998 | L10 |
| K1 | 2024 | 2041 | 4065 | 2040 | 2041 | 4065 | 2042 | 2041 | 4065 | 2042 | K10 |
| A1 | 2068 | 2085 | 4153 | 2084 | 2085 | 4153 | 2086 | 2085 | 4153 | 2086 | A10 |
| T1 | 2112 | 2129 | 4241 | 2128 | 2129 | 4241 | 2130 | 2129 | 4241 | 2130 | T10 |
| M1 | 2156 | 2173 | 4329 | 2172 | 2173 | 4329 | 2174 | 2173 | 4329 | 2174 | M10 |
| I1 | 2200 | 2217 | 4417 | 2216 | 2217 | 4417 | 2218 | 2217 | 4417 | 2218 | I10 |
| V1 | 2244 | 2261 | 4505 | 2260 | 2261 | 4505 | 2262 | 2261 | 4505 | 2262 | V10 |
| Q1 | 2288 | 2305 | 4593 | 2304 | 2305 | 4593 | 2306 | 2305 | 4593 | 2306 | Q10 |
| N1 | 2332 | 2349 | 4681 | 2348 | 2349 | 4681 | 2350 | 2349 | 4681 | 2350 | N10 |
| C1 | 2376 | 2393 | 4769 | 2392 | 2393 | 4769 | 2394 | 2393 | 4769 | 2394 | C10 |
| G1 | 2420 | 2437 | 4857 | 2436 | 2437 | 4857 | 2438 | 2437 | 4857 | 2438 | G10 |
| E1 | 2464 | 2481 | 4945 | 2480 | 2481 | 4945 | 2482 | 2481 | 4945 | 2482 | E10 |
| D1 | 2508 | 2525 | 5033 | 2524 | 2525 | 5033 | 2526 | 2525 | 5033 | 2526 | D10 |
| S1 | 2552 | 2569 | 5121 | 2568 | 2569 | 5121 | 2570 | 2569 | 5121 | 2570 | S10 |
| L1 | 2596 | 2613 | 5209 | 2612 | 2613 | 5209 | 2614 | 2613 | 5209 | 2614 | L10 |
| K1 | 2640 | 2657 | 5297 | 2656 | 2657 | 5297 | 2658 | 2657 | 5297 | 2658 | K10 |
| A1 | 2684 | 2701 | 5385 | 2700 | 2701 | 5385 | 2702 | 2701 | 5385 | 2702 | A10 |
| T1 | 2728 | 2739 | 5473 | 2738 | 2739 | 5473 | 2740 | 2739 | 5473 | 2740 | T10 |
| M1 | 2772 | 2783 | 5561 | 2782 | 2783 | 5561 | 2784 | 2783 | 5561 | 2784 | M10 |
| I1 | 2816 | 2827 | 5649 | 2826 | 2827 | 5649 | 2828 | 2827 | 5649 | 2828 | I10 |
| V1 | 2860 | 2871 | 5737 | 2870 | 2871 | 5737 | 2872 | 2871 | 5737 | 2872 | V10 |
| Q1 | 2904 | 2915 | 5825 | 2914 | 2915 | 5825 | 2916 | 2915 | 5825 | 2916 | Q10 |
| N1 | 2948 | 2959 | 5913 | 2958 | 2959 | 5913 | 2960 | 2959 | 5913 | 2960 | N10 |
| C1 | 2992 | 3003 | 6001 | 3002 | 3003 | 6001 | 3004 | 3003 | 6001 | 3004 | C10 |
| G1 | 3036 | 3047 | 6089 | 3046 | 3047 | 6089 | 3048 | 3047 | 6089 | 3048 | G10 |
| E1 | 3080 | 3091 | 6177 | 3090 | 3091 | 6177 | 3092 | 3091 | 6177 | 3092 | E10 |
| D1 | 3124 | 3135 | 6265 | 3134 | 3135 | 6265 | 3136 | 3135 | 6265 | 3136 | D10 |
| S1 | 3168 | 3179 | 6353 | 3178 | 3179 | 6353 | 3180 | 3179 | 6353 | 3180 | S10 |
| L1 | 3212 | 3223 | 6441 | 3222 | 3223 | 6441 | 3224 | 3223 | 6441 | 3224 | L10 |
| K1 | 3256 | 3267 | 6529 | 3266 | 3267 | 6529 | 3268 | 3267 | 6529 | 3268 | K10 |
| A1 | 3300 | 3311 | 6617 | 3310 | 3311 | 6617 | 3312 | 3311 | 6617 | 3312 | A10 |
| T1 | 3344 | 3355 | 6705 | 3354 | 3355 | 6705 | 3356 | 3355 | 6705 | 3356 | T10 |
| M1 | 3388 | 3399 | 6793 | 3398 | 3399 | 6793 | 3400 | 3399 | 6793 | 3400 | M10 |
| I1 | 3432 | 3443 | 6881 | 3442 | 3443 | 6881 | 3444 | 3443 | 6881 | 3444 | I10 |
| V1 | 3476 | 3487 | 6969 | 3486 | 3487 | 6969 | 3488 | 3487 | 6969 | 3488 | V10 |
| Q1 | 3520 | 3531 | 7057 | 3530 | 3531 | 7057 | 3532 | 3531 | 7057 | 3532 | Q10 |
| N1 | 3564 | 3575 | 7145 | 3574 | 3575 | 7145 | 3576 | 3575 | 7145 | 3576 | N10 |
| C1 | 3608 | 3619 | 7233 | 3618 | 3619 | 7233 | 3620 | 3619 | 7233 | 3620 | C10 |
| G1 | 3652 | 3663 | 7321 | 3662 | 3663 | 7321 | 3664 | 3663 | 7321 | 3664 | G10 |
| E1 | 3696 | 3707 | 7409 | 3706 | 3707 | 7409 | 3708 | 3707 | 7409 | 3708 | E10 |
| D1 | 3740 | 3751 | 7497 | 3750 | 3751 | 7497 | 3752 | 3751 | 7497 | 3752 | D10 |
| S1 | 3784 | 3795 | 7585 | 3794 | 3795 | 7585 | 3796 | 3795 | 7585 | 3796 | S10 |
| L1 | 3828 | 3839 | 7673 | 3838 | 3839 | 7673 | 3840 | 3839 | 7673 | 3840 | L10 |
| K1 | 3872 | 3883 | 7761 | 3882 | 3883 | 7761 | 3884 | 3883 | 7761 | 3884 | K10 |
| A1 | 3916 | 3927 | 7849 | 3926 | 3927 | 7849 | 3928 | 3927 | 7849 | 3928 | A10 |
| T1 | 3960 | 3971 | 7937 | 3970 | 3971 | 7937 | 3972 | 3971 | 7937 | 3972 | T10 |
| M1 | 4004 | 4015 | 8025 | 4014 | 4015 | 8025 | 4016 | 4015 | 8025 | 4016 | M10 |
| I1 | 4048 | 4059 | 8113 | 4058 | 4059 | 8113 | 4060 | 4059 | 8113 | 4060 | I10 |
| V1 | 4092 | 4103 | 8201 | 4102 | 4103 | 8201 | 4104 | 4103 | 8201 | 4104 | V10 |
| Q1 | 4136 | 4147 | 8289 | 4146 | 4147 | 8289 | 4148 | 4147 | 8289 | 4148 | Q10 |
| N1 | 4180 | 4191 | 8377 | 4190 | 4191 | 8377 | 4192 | 4191 | 8377 | 4192 | N10 |
| C1 | 4224 | 4235 | 8465 | 4234 | 4235 | 8465 | 4236 | 4235 | 8465 | 4236 | C10 |
| G1 | 4268 | 4279 | 8553 | 4278 | 4279 | 8553 | 4280 | 4279 | 8553 | 4280 | G10 |
| E1 | 4312 | 4323 | 8641 | 4322 | 4323 | 8641 | 4324 | 4323 | 8641 | 4324 | E10 |
| D1 | 4356 | 4367 | 8729 | 4366 | 4367 | 8729 | 4368 | 4367 | 8729 | 4368 | D10 |
| S1 | 4400 | 4411 | 8817 | 4410 | 4411 | 8817 | 4412 | 4411 | 8817 | 4412 | S10 |
| L1 | 4444 | 4455 | 8905 | 4454 | 4455 | 8905 | 4456 | 4455 | 8905 | 4456 | L10 |
| K1 | 4488 | 4499 | 8993 | 4498 | 4499 | 8993 | 4500 | 4499 | 8993 | 4500 | K10 |
| A1 | 4532 | 4543 | 9081 | 4542 | 4543 | 9081 | 4544 | 4543 | 9081 | 4544 | A10 |
| T1 | 4576 | 4587 | 9169 | 4586 | 4587 | 9169 | 4588 | 4587 | 9169 | 4588 | T10 |
| M1 | 4620 | 4631 | 9257 | 4630 | 4631 | 9257 | 4632 | 4631 | 9257 | 4632 | M10 |
| I1 | 4664 | 4675 | 9345 | 4674 | 4675 | 9345 | 4676 | 4675 | 9345 | 4676 | I10 |
| V1 | 4708 | 4719 | 9433 | 4718 | 4719 | 9433 | 4720 | 4719 | 9433 | 4720 | V10 |
| Q1 | 4752 | 4763 | 9521 | 4762 | 4763 | 9521 | 4764 | 4763 | 9521 | 4764 | Q10 |
| N1 | 4796 | 4807 | 9609 | 4806 | 4807 | 9609 | 4808 | 4807 | 9609 | 4808 | N10 |
| C1 | 4840 | 4851 | 9697 | 4850 | 4851 | 9697 | 4852 | 4851 | 9697 | 4852 | C10 |
| G1 | 4884 | 4895 | 9785 | 4894 | 4895 | 9785 | 4896 | 4895 | 9785 | 4896 | G10 |
| E1 | 4928 | 4939 | 9873 | 4938 | 4939 | 9873 | 4940 | 4939 | 9873 | 4940 | E10 |
| D1 | 4972 | 4983 | 9961 | 4982 | 4983 | 9961 |      |      |      |      |     |

# sp | Q3THW5 | H2AV\_MOUSE

DSLKATIAGGGVIPHIHK<sup>Dimethyl</sup> SLIGKKGQQKTA<sup>28.03</sup>

- ▶ fragmentation table for charge state 3+
- ▶ specType=cid
- ▶ score=34.50
- ▶ F113281.dat
- ▶ query=q34426.p1
- ▶ precursor=799.473050
- ▶ chargePrecursor=4
- ▶ itol=0.5

| AA    | a              | a*             | aΔ             | b              | b*             | bΔ             | y              | y*             | yΔ             | AA             |          |        |
|-------|----------------|----------------|----------------|----------------|----------------|----------------|----------------|----------------|----------------|----------------|----------|--------|
| D(1)  | 31             | 0.010          | 0.012          | 128.014        | 108.010        | 0.012          | 111.050        | 1.000          | 1.000          | 1059.026       | D(31)    |        |
| S(2)  | 50             | 0.049          | 0.052          | 143.025        | 148.060        | 0.012          | 164.107        | 1.021          | 1.021          | 1011.012       | S(50)    |        |
| L(3)  | 98             | 0.244          | 0.012          | 169.229        | 169.025        | 0.014          | 133.018        | <b>978.276</b> | 1.002          | 1.001          | 1066.018 | L(98)  |
| I(4)  | 134            | 0.418          | 0.012          | 138.414        | 143.050        | 0.012          | 157.786        | 980.000        | 1.004          | 1.004          | 1054.016 | I(134) |
| K(5)  | 177            | 1.110          | 171.481        | 171.111        | 136.460        | 180.772        | 130.484        | <b>922.887</b> | <b>917.211</b> | <b>916.983</b> | K(177)   |        |
| A(6)  | 200            | 0.019          | 184.128        | 184.782        | 228.227        | 184.010        | 184.118        | <b>881.189</b> | <b>874.513</b> | <b>874.165</b> | A(200)   |        |
| T(7)  | 234            | 0.019          | 229.032        | 228.474        | 143.010        | 238.134        | 237.036        | <b>856.510</b> | <b>850.834</b> | <b>850.506</b> | T(234)   |        |
| I(8)  | 272            | 0.171          | 268.467        | 268.160        | 181.504        | 276.020        | 275.011        | <b>822.827</b> | 817.124        | 816.874        | I(272)   |        |
| A(9)  | 290            | 0.052          | 289.118        | 289.063        | 305.113        | 290.048        | 290.108        | <b>785.132</b> | <b>779.457</b> | <b>779.129</b> | A(290)   |        |
| G(10) | 314            | 0.008          | 309.013        | 308.003        | 324.102        | 314.015        | 313.017        | <b>761.453</b> | <b>755.778</b> | <b>755.450</b> | G(314)   |        |
| G(11) | 331            | 0.066          | 330.109        | 327.082        | 343.108        | 337.022        | 337.104        | <b>742.446</b> | <b>736.771</b> | 736.041        | G(331)   |        |
| G(12) | 352            | 0.173          | 347.138        | 346.071        | 362.205        | 356.029        | 356.211        | <b>723.439</b> | 717.764        | 717.436        | G(352)   |        |
| V(13) | 388            | 0.068          | 380.215        | 379.001        | 398.218        | 389.012        | 389.214        | <b>704.431</b> | <b>698.756</b> | 698.028        | V(388)   |        |
| I(14) | 423            | 0.041          | 411.015        | 411.507        | 433.023        | 427.047        | 426.019        | <b>671.409</b> | 665.735        | 665.008        | I(423)   |        |
| P(15) | 450            | 0.042          | 450.201        | 449.034        | 469.071        | 460.008        | 459.201        | <b>611.714</b> | <b>618.039</b> | <b>627.711</b> | P(450)   |        |
| R(16) | 501            | 0.240          | 495.052        | 495.024        | 511.054        | 505.047        | 504.019        | <b>601.363</b> | 595.689        | 595.360        | R(501)   |        |
| H(17) | 538            | 0.113          | 533.047        | 533.010        | 549.044        | <b>542.979</b> | <b>542.851</b> | 537.001        | <b>550.002</b> | 544.014        | H(538)   |        |
| R(18) | 585            | 0.039          | 579.013        | <b>579.005</b> | 595.040        | 589.006        | 589.017        | 577.000        | 572.007        | 571.018        | R(585)   |        |
| K(19) | 617            | 0.121          | 611.078        | 611.067        | 646.111        | <b>640.767</b> | <b>640.379</b> | 632.206        | 626.622        | 626.213        | K(617)   |        |
| S(20) | <b>646.062</b> | <b>646.386</b> | 646.000        | 646.000        | 681.118        | 675.010        | 675.010        | 621.204        | 614.518        | 614.263        | S(646)   |        |
| L(21) | <b>703.756</b> | 699.011        | 697.251        | <b>713.088</b> | 707.412        | 717.014        | 717.014        | 591.243        | 585.568        | 585.244        | L(703)   |        |
| I(22) | 741.401        | 735.171        | 736.444        | 750.101        | <b>745.167</b> | <b>744.779</b> | 733.548        | 747.011        | 741.045        | 740.100        | I(741)   |        |
| G(23) | 780.458        | 774.163        | 774.455        | 788.700        | 784.114        | 803.108        | <b>815.854</b> | 810.119        | 803.011        | 802.011        | G(780)   |        |
| K(24) | 803.176        | 797.461        | 797.501        | 813.466        | 808.013        | 828.005        | 823.009        | 793.114        | 786.018        | 785.018        | K(803)   |        |
| R(25) | <b>845.855</b> | 840.119        | 839.051        | 855.108        | 849.011        | 869.013        | 854.107        | 848.471        | 842.145        | 841.017        | R(845)   |        |
| G(26) | <b>864.862</b> | 859.000        | 859.000        | <b>874.194</b> | <b>868.518</b> | <b>868.190</b> | 861.000        | 855.115        | 849.047        | 848.010        | G(864)   |        |
| G(27) | <b>917.548</b> | <b>911.873</b> | <b>911.545</b> | <b>916.880</b> | 911.204        | 931.010        | 927.010        | 918.763        | 912.000        | 911.000        | G(917)   |        |
| G(28) | <b>950.214</b> | 944.518        | 944.518        | 959.000        | 953.000        | 963.002        | 149.711        | 144.001        | 144.153        | 143.011        | G(950)   |        |
| K(29) | <b>992.813</b> | <b>987.257</b> | <b>988.929</b> | 1002.204       | 996.000        | 996.201        | 1017.011       | 1011.000       | 1011.000       | K(992)         |          |        |
| L(30) | 1026.615       | 1020.000       | 1020.012       | 1035.047       | 1030.071       | 1039.011       | 1044.072       | 1037.012       | 1036.300       | 1035.011       | L(1026)  |        |
| A(31) | 1059.264       | 1054.013       | 1054.261       | 1069.000       | 1063.000       | 1073.010       | 1078.000       | 1073.011       | 1072.011       | 1071.011       | A(1059)  |        |



# sp | Q3THW5 | H2AV\_MOUSE

DSLKATIAGGGVIPHIHKSLIGKKGQQK <sup>Dimethyl</sup>TA  
28.03

- ▶ fragmentation table for charge state 1+
- ▶ specType=etd
- ▶ score=41.98
- ▶ F113281.dat
- ▶ query=q34438\_p1
- ▶ precursor=639.781470
- ▶ chargePrecursor=5
- ▶ itol=0.5

| AA | c  | y               | a+1            | a+2             | z               | AA              |       |
|----|----|-----------------|----------------|-----------------|-----------------|-----------------|-------|
| D  | 1  | 133.061         | 1194.874       | 3176.855        | 0.000           | 3177.847        | K(31) |
| S  | 3  | 333.093         | 3179.849       | 3943.829        | 0.000           | 3943.829        | S(30) |
| L  | 3  | 333.177         | 2992.835       | 2976.790        | 0.000           | 2975.782        | L(29) |
| I  | 4  | <b>446.261</b>  | 2879.731       | 2863.712        | 0.000           | 2862.704        | I(28) |
| K  | 5  | <b>574.356</b>  | 2766.646       | 2750.620        | 2751.636        | 2749.620        | K(27) |
| A  | 6  | <b>645.393</b>  | 2638.552       | 2622.533        | 2623.541        | 2621.525        | A(26) |
| T  | 7  | 786.441         | 2567.534       | 2551.490        | 2552.504        | 2550.486        | T(25) |
| I  | 8  | 899.576         | 2486.467       | 2450.443        | 2451.456        | 2449.441        | I(24) |
| A  | 9  | <b>930.562</b>  | 2353.383       | 2337.354        | 2338.372        | 2336.356        | A(23) |
| G  | 10 | <b>987.583</b>  | 2282.346       | 2266.327        | 2267.335        | 2265.310        | G(22) |
| G  | 11 | 1064.605        | 2225.224       | 2209.205        | 2210.213        | 2208.206        | G(21) |
| G  | 12 | 1101.626        | 2168.203       | 2152.204        | 2153.202        | 2151.276        | G(20) |
| V  | 13 | 1200.696        | 2111.281       | 2095.262        | 2096.270        | 2094.253        | V(19) |
| L  | 14 | 1313.719        | 2032.213       | 1996.194        | 1997.202        | 1995.185        | L(18) |
| P  | 15 | <b>1410.831</b> | 1899.129       | 1883.110        | 1884.118        | 1882.102        | P(17) |
| H  | 16 | 1547.890        | 1802.076       | 1786.057        | 1787.065        | 1785.049        | H(16) |
| I  | 17 | 1660.974        | 1695.017       | 1648.999        | <b>1650.006</b> | 1647.990        | I(15) |
| H  | 18 | 1798.033        | 1551.933       | <b>1535.914</b> | 1536.922        | 1534.906        | H(14) |
| K  | 19 | 1826.128        | 1414.874       | 1398.855        | 1399.863        | 1397.847        | K(13) |
| S  | 20 | 2013.160        | 1298.779       | 1270.760        | <b>1271.768</b> | 1269.751        | S(12) |
| L  | 21 | 2126.244        | 1199.747       | 1183.728        | 1184.736        | <b>1182.720</b> | L(11) |
| I  | 22 | 2239.328        | 1086.663       | 1070.644        | 1071.652        | 1069.636        | I(10) |
| G  | 23 | 2296.350        | 973.579        | 957.560         | <b>958.568</b>  | <b>956.552</b>  | G(9)  |
| K  | 24 | 2424.445        | 816.557        | 800.539         | 801.547         | 800.531         | K(8)  |
| K  | 25 | 2437.540        | <b>788.462</b> | <b>772.444</b>  | 773.452         | 772.436         | K(7)  |
| G  | 26 | 2626.561        | 656.561        | <b>644.349</b>  | <b>645.357</b>  | <b>643.341</b>  | G(6)  |
| Q  | 27 | 2737.620        | <b>603.346</b> | <b>587.327</b>  | 588.335         | 588.320         | Q(5)  |
| Q  | 28 | 2865.679        | 475.287        | <b>459.269</b>  | <b>460.277</b>  | 458.261         | Q(4)  |
| K  | 29 | 3021.805        | <b>347.229</b> | <b>331.210</b>  | 332.218         | 330.202         | K(3)  |
| T  | 30 | 3122.852        | 191.103        | 175.084         | 176.092         | 174.076         | T(2)  |
| A  | 31 | 3183.890        | 90.059         | 74.030          | 75.044          | 73.020          | A(1)  |



# sp | Q3THW5 | H2AV\_MOUSE

DSLKATIAGGGVIPHIHKSLIGKKGQQK <sup>Dimethyl</sup> TA  
28.03

- ▶ fragmentation table for charge state 2+
- ▶ specType=etd
- ▶ score=41.98
- ▶ F113281.dat
- ▶ query=q34438.p1
- ▶ precursor=639.781470
- ▶ chargePrecursor=5
- ▶ itol=0.5

| AA |    | c               | y               | z+1             | z+2             | z              | AA |    |
|----|----|-----------------|-----------------|-----------------|-----------------|----------------|----|----|
| D  | 1  | 67.634          | 1597.040        | 1599.615        | 0.504           | 1599.427       | D  | 31 |
| G  | 3  | 110.850         | 1540.427        | <b>1532.418</b> | 0.504           | 1533.014       | G  | 30 |
| L  | 3  | 107.092         | 1495.912        | 1498.577        | 0.504           | 1488.355       | L  | 29 |
| I  | 4  | 223.634         | 1440.309        | 1432.300        | 0.504           | 1431.056       | I  | 28 |
| K  | 5  | 267.662         | 1363.627        | 1375.618        | <b>1376.321</b> | 1375.314       | K  | 27 |
| A  | 6  | 323.200         | 1319.770        | 1311.770        | 1312.274        | 1311.250       | A  | 26 |
| T  | 7  | 373.724         | 1284.261        | 1276.251        | <b>1276.755</b> | 1275.746       | T  | 25 |
| I  | 8  | 430.266         | 1233.737        | 1225.738        | 1226.735        | 1225.720       | I  | 24 |
| A  | 9  | 465.785         | 1177.195        | 1169.186        | <b>1169.690</b> | 1168.682       | A  | 23 |
| G  | 10 | 494.295         | <b>1141.676</b> | 1133.667        | <b>1134.171</b> | 1133.163       | G  | 22 |
| G  | 11 | 522.806         | 1113.166        | 1105.156        | 1105.660        | 1104.652       | G  | 21 |
| G  | 12 | 551.317         | 1084.655        | 1076.646        | 1077.149        | 1076.142       | G  | 20 |
| V  | 13 | 600.851         | <b>1056.144</b> | 1048.135        | 1048.639        | 1047.631       | V  | 19 |
| I  | 14 | 657.393         | 1006.619        | <b>998.601</b>  | <b>999.105</b>  | 998.097        | I  | 18 |
| P  | 15 | 705.919         | 950.068         | 942.059         | 942.563         | 941.555        | P  | 17 |
| H  | 16 | <b>774.449</b>  | 901.542         | 893.532         | <b>894.036</b>  | 893.028        | H  | 16 |
| I  | 17 | <b>830.991</b>  | <b>833.012</b>  | 825.003         | <b>825.507</b>  | 824.499        | I  | 15 |
| H  | 18 | 899.520         | 778.470         | 768.461         | <b>768.965</b>  | 767.957        | H  | 14 |
| K  | 19 | <b>963.568</b>  | <b>767.941</b>  | <b>699.931</b>  | 700.935         | <b>698.427</b> | K  | 13 |
| S  | 20 | 1007.694        | <b>643.893</b>  | <b>635.884</b>  | <b>636.388</b>  | 635.380        | S  | 12 |
| L  | 21 | 1063.626        | 600.372         | <b>592.368</b>  | <b>592.872</b>  | 591.864        | L  | 11 |
| I  | 22 | <b>1120.168</b> | 543.835         | <b>535.826</b>  | <b>536.330</b>  | 535.322        | I  | 10 |
| G  | 23 | 1168.679        | 487.297         | <b>479.284</b>  | <b>479.788</b>  | 478.780        | G  | 9  |
| K  | 24 | <b>1212.726</b> | <b>458.782</b>  | 450.773         | 451.277         | 450.269        | K  | 8  |
| K  | 25 | <b>1276.774</b> | 394.735         | 386.726         | 387.229         | 386.222        | K  | 7  |
| G  | 26 | 1325.294        | 330.687         | 322.678         | 323.182         | 322.174        | G  | 6  |
| Q  | 27 | <b>1369.314</b> | 302.177         | 294.167         | 294.671         | 293.663        | Q  | 5  |
| Q  | 28 | 1433.343        | 238.147         | 230.138         | 230.642         | 229.634        | Q  | 4  |
| K  | 29 | 1511.406        | 174.118         | 166.109         | 166.613         | 165.605        | K  | 3  |
| T  | 30 | 1561.930        | 96.055          | 88.046          | 88.550          | 87.542         | T  | 2  |
| A  | 31 | 1597.448        | 49.531          | 37.522          | 38.026          | 37.018         | A  | 1  |

# sp | Q3THW5 | H2AV\_MOUSE

DSLKATIAGGGVIPHIHKSLIGKKGQQK <sup>Dimethyl</sup>TA  
28.03

- ▶ fragmentation table for charge state 3+
- ▶ specType=etd
- ▶ score=41.98
- ▶ F113281.dat
- ▶ query=q34438.p1
- ▶ precursor=639.781470
- ▶ chargePrecursor=5
- ▶ itol=0.5

| AA    | c               | y              | z+1            | z+2            | z              | AA    |
|-------|-----------------|----------------|----------------|----------------|----------------|-------|
| D[1]  | 45.025          | 1065.629       | 1060.290       | 0.672          | 1059.954       | D[31] |
| S[2]  | 74.036          | 1027.287       | 1021.947       | 0.672          | 1021.612       | S[30] |
| L[3]  | 111.730         | 998.276        | 992.937        | 0.672          | 992.601        | L[29] |
| I[4]  | 149.425         | 969.262        | 955.242        | 0.672          | 954.906        | I[28] |
| K[5]  | 192.123         | <b>922.087</b> | <b>917.547</b> | <b>917.883</b> | 917.211        | K[27] |
| A[6]  | 215.803         | 899.185        | <b>874.849</b> | <b>875.185</b> | 874.511        | A[26] |
| T[7]  | 249.485         | <b>856.510</b> | 751.179        | 831.506        | 850.834        | T[25] |
| I[8]  | 287.180         | <b>822.827</b> | <b>817.488</b> | <b>817.823</b> | 817.152        | I[24] |
| A[9]  | 310.859         | <b>785.132</b> | <b>779.793</b> | <b>780.129</b> | <b>779.457</b> | A[23] |
| G[10] | 329.866         | 761.453        | <b>756.114</b> | <b>756.450</b> | 755.778        | G[22] |
| G[11] | 348.873         | <b>742.446</b> | 737.107        | 737.443        | 736.771        | G[21] |
| G[12] | 367.880         | 723.430        | 718.099        | 718.435        | 717.764        | G[20] |
| V[13] | 400.903         | 704.432        | 699.082        | <b>699.428</b> | 698.756        | V[19] |
| I[14] | 438.598         | 671.409        | 666.070        | 666.405        | 665.734        | I[18] |
| P[15] | 479.940         | 633.714        | 628.375        | 628.711        | 628.039        | P[17] |
| H[16] | 516.635         | 601.363        | 596.024        | 596.360        | 595.688        | H[16] |
| I[17] | 564.330         | 555.677        | 550.338        | 550.674        | 550.002        | I[15] |
| H[18] | 600.016         | 517.982        | 512.643        | 512.979        | 512.307        | H[14] |
| K[19] | 642.714         | 472.290        | 466.957        | 467.293        | 466.621        | K[13] |
| S[20] | 671.725         | 429.598        | 424.258        | 424.594        | 423.922        | S[12] |
| L[21] | 709.420         | 400.387        | 395.048        | 395.384        | 394.712        | L[11] |
| I[22] | 747.114         | 362.891        | 357.553        | 357.889        | 357.217        | I[10] |
| G[23] | <b>766.122</b>  | 325.198        | 319.858        | 320.194        | 319.522        | G[9]  |
| K[24] | <b>808.820</b>  | 306.191        | 300.851        | 301.187        | 300.515        | K[8]  |
| K[25] | 851.518         | 263.460        | 258.123        | 258.469        | 257.797        | K[7]  |
| G[26] | <b>870.525</b>  | 220.794        | 215.454        | 215.790        | 215.119        | G[6]  |
| Q[27] | <b>913.211</b>  | 201.787        | 196.447        | 196.783        | 196.111        | Q[5]  |
| Q[28] | 959.908         | 159.103        | 153.761        | 154.097        | 153.425        | Q[4]  |
| K[29] | <b>1007.940</b> | 110.416        | 111.075        | 111.411        | 110.739        | K[3]  |
| L[30] | 1041.622        | 64.372         | 59.033         | 59.369         | 58.697         | L[2]  |
| A[31] | 1065.301        | 30.690         | 25.350         | 25.686         | 25.014         | A[1]  |

# sp | Q3THW5 | H2AV\_MOUSE

DSLKATIAGGGVIPHIHKSLIGKKGQQK <sup>Dimethyl</sup>TA  
28.03

- ▶ fragmentation table for charge state 4+
- ▶ specType=etd
- ▶ score=41.98
- ▶ F113281.dat
- ▶ query=q34438.p1
- ▶ precursor=639.781470
- ▶ chargePrecursor=5
- ▶ itol=0.5

| AA    | c              | y              | z+1            | z+2     | z              | AA    |
|-------|----------------|----------------|----------------|---------|----------------|-------|
| D[1]  | 34.021         | 799.474        | 795.469        | 0.755   | 795.217        | D[31] |
| S[2]  | 35.779         | 770.717        | <b>766.712</b> | 0.755   | <b>766.460</b> | S[30] |
| L[3]  | 84.050         | 748.959        | <b>744.954</b> | 0.755   | 744.702        | L[29] |
| T[4]  | 112.221        | 720.685        | 716.683        | 0.755   | 716.431        | T[28] |
| K[5]  | 144.344        | 692.417        | 688.412        | 688.664 | 688.160        | K[27] |
| A[6]  | 182.104        | 660.393        | 656.389        | 656.641 | 656.137        | A[26] |
| Y[7]  | 197.366        | 642.634        | 638.629        | 638.881 | 638.377        | Y[25] |
| I[8]  | 215.637        | 617.372        | 613.367        | 613.619 | 613.116        | I[24] |
| A[9]  | 233.396        | 589.101        | 585.096        | 585.348 | 584.844        | A[23] |
| G[10] | 247.651        | 571.342        | 567.337        | 567.589 | 567.085        | G[22] |
| G[11] | 261.907        | 557.086        | 553.082        | 553.334 | 552.830        | G[21] |
| G[12] | 276.162        | 942.831        | 538.826        | 539.078 | 538.574        | G[20] |
| V[13] | 300.529        | 528.576        | 524.571        | 524.823 | 524.319        | V[19] |
| T[14] | 329.200        | 503.309        | 499.302        | 500.056 | 499.352        | T[18] |
| P[15] | 353.463        | <b>475.538</b> | 471.533        | 471.785 | 471.281        | P[17] |
| H[16] | 387.728        | 451.274        | 447.270        | 447.522 | 447.018        | H[16] |
| I[17] | 415.999        | 417.010        | 413.005        | 413.257 | 412.753        | I[15] |
| H[18] | 450.264        | 388.739        | 384.734        | 384.986 | 384.482        | H[14] |
| K[19] | 482.288        | 354.474        | 350.469        | 350.721 | 350.217        | K[13] |
| S[20] | 504.046        | 622.450        | 318.446        | 318.697 | 318.194        | S[12] |
| L[21] | 532.317        | 300.692        | 296.688        | 296.939 | 296.436        | L[11] |
| T[22] | 560.588        | 272.421        | 268.417        | 268.668 | 268.165        | T[10] |
| Q[23] | <b>574.843</b> | 244.150        | 240.146        | 240.397 | 239.894        | Q[10] |
| K[24] | 606.367        | 220.895        | 225.889        | 226.142 | 225.638        | K[9]  |
| K[25] | 638.890        | 197.371        | 193.366        | 194.118 | 193.614        | K[8]  |
| G[26] | 653.146        | 165.847        | 161.843        | 162.095 | 161.591        | G[6]  |
| Q[27] | 685.160        | 151.592        | 147.587        | 147.839 | 147.335        | Q[5]  |
| Q[28] | 717.175        | 119.577        | 115.573        | 115.825 | 115.321        | Q[4]  |
| K[29] | <b>756.207</b> | 87.563         | 83.558         | 83.810  | 83.306         | K[3]  |
| T[30] | 761.469        | 48.531         | 44.526         | 44.778  | 44.274         | T[2]  |
| A[31] | 799.228        | 23.269         | 19.265         | 19.516  | 19.013         | A[1]  |



# sp | Q3THW5 | H2AV\_MOUSE

DSLKATIAGGGVIPHIHKSLLIGKKGQQK <sup>Dimethyl</sup> TA  
28.03

- ▶ fragmentation table for charge state 1+
- ▶ specType=cid
- ▶ score=58.73
- ▶ F113281.dat
- ▶ query=q34445.p1
- ▶ precursor=1065.632300
- ▶ chargePrecursor=3
- ▶ itol=0.5

| AA  | a               | a'             | a $\rho$       | b               | b'    | b $\rho$ | y        | y'       | y $\rho$ | AA  |
|-----|-----------------|----------------|----------------|-----------------|-------|----------|----------|----------|----------|-----|
| D1  | 468.036         | 0.000          | 189.000        | 112.004         | 0.000 | 98.000   | 1149.017 | 1171.044 | 1076.067 | D10 |
| S1  | 170.011         | 0.000          | 197.000        | 210.000         | 1.000 | 188.000  | 1097.007 | 1054.000 | 1011.018 | S10 |
| L1  | 200.010         | 0.000          | 240.000        | 110.000         | 0.000 | 208.000  | 1040.010 | 1049.000 | 1014.004 | L10 |
| E1  | 442.018         | 0.000          | 363.000        | <b>429.234</b>  | 0.000 | 411.000  | 1079.011 | 1082.000 | 1061.000 | E10 |
| K1  | 629.034         | 0.000          | 513.000        | 513.000         | 0.000 | 609.000  | 1139.000 | 1149.000 | 1148.000 | K10 |
| A1  | 584.012         | 0.000          | 580.000        | <b>638.505</b>  | 0.000 | 611.000  | 1073.000 | 1074.000 | 1070.000 | A10 |
| T1  | 1100.010        | 0.000          | 983.000        | <b>120.015</b>  | 0.000 | 1110.000 | 1000.000 | 1000.000 | 1000.000 | T10 |
| M1  | 114.002         | 0.000          | 106.000        | <b>842.480</b>  | 0.000 | 836.000  | 1046.000 | 1046.000 | 1046.000 | M10 |
| G1  | 695.040         | <b>868.514</b> | 687.000        | <b>913.315</b>  | 0.000 | 906.000  | 1163.000 | 1159.000 | 1159.000 | G10 |
| C1  | 462.000         | 0.000          | 462.000        | 0.000           | 0.000 | 462.000  | 1022.000 | 1022.000 | 1022.000 | C10 |
| Q1  | <b>999.583</b>  | 0.000          | <b>981.573</b> | <b>1027.578</b> | 0.000 | 1009.000 | 1220.000 | 1220.000 | 1220.000 | Q10 |
| G12 | 1109.000        | 1109.000       | 1109.000       | <b>1084.600</b> | 0.000 | 1099.000 | 1200.000 | 1213.000 | 1210.000 | G12 |
| V12 | 1109.000        | 1109.000       | 1109.000       | <b>1183.000</b> | 0.000 | 1109.000 | 1200.000 | 1200.000 | 1200.000 | V12 |
| L14 | <b>1268.757</b> | 1268.757       | 1268.757       | <b>1296.752</b> | 0.000 | 1278.752 | 1400.000 | 1395.000 | 1394.000 | L14 |
| F15 | 1065.000        | 1065.000       | 1065.000       | 1065.000        | 0.000 | 1065.000 | 1200.000 | 1200.000 | 1200.000 | F15 |
| H16 | 1112.000        | 1112.000       | 1112.000       | 1112.000        | 0.000 | 1112.000 | 1200.000 | 1200.000 | 1200.000 | H16 |
| I17 | 1112.000        | 1112.000       | 1112.000       | 1112.000        | 0.000 | 1112.000 | 1200.000 | 1200.000 | 1200.000 | I17 |
| H18 | 1173.012        | 1173.000       | 1173.000       | 1173.000        | 0.000 | 1173.000 | 1300.000 | 1300.000 | 1300.000 | H18 |
| K19 | 1083.107        | 1084.000       | 1084.000       | 1084.000        | 0.000 | 1084.000 | 1200.000 | 1200.000 | 1200.000 | K19 |
| S20 | 1066.100        | 1066.100       | 1066.100       | 1066.100        | 0.000 | 1066.100 | 1200.000 | 1200.000 | 1200.000 | S20 |
| L21 | 1061.102        | 1064.000       | 1064.000       | 1064.000        | 0.000 | 1064.000 | 1200.000 | 1200.000 | 1200.000 | L21 |
| E22 | 1194.107        | 1197.000       | 1198.000       | 1198.000        | 0.000 | 1198.000 | 1300.000 | 1300.000 | 1300.000 | E22 |
| G23 | 1065.100        | 1066.000       | 1066.000       | 1066.000        | 0.000 | 1066.000 | 1200.000 | 1200.000 | 1200.000 | G23 |
| K24 | 1192.123        | 1192.000       | 1192.000       | 1192.000        | 0.000 | 1192.000 | 1300.000 | 1300.000 | 1300.000 | K24 |
| K25 | 1097.110        | 1098.000       | 1098.000       | 1098.000        | 0.000 | 1098.000 | 1200.000 | 1200.000 | 1200.000 | K25 |
| G26 | 1066.100        | 1066.100       | 1066.100       | 1066.100        | 0.000 | 1066.100 | 1200.000 | 1200.000 | 1200.000 | G26 |
| Q27 | 1062.100        | 1063.000       | 1063.000       | 1063.000        | 0.000 | 1063.000 | 1200.000 | 1200.000 | 1200.000 | Q27 |
| Q28 | 1063.100        | 1063.000       | 1063.000       | 1063.000        | 0.000 | 1063.000 | 1200.000 | 1200.000 | 1200.000 | Q28 |
| K29 | 1069.100        | 1069.000       | 1069.000       | 1069.000        | 0.000 | 1069.000 | 1200.000 | 1200.000 | 1200.000 | K29 |
| L30 | 1077.100        | 1078.000       | 1078.000       | 1078.000        | 0.000 | 1078.000 | 1200.000 | 1200.000 | 1200.000 | L30 |
| T31 | 1077.100        | 1078.000       | 1078.000       | 1078.000        | 0.000 | 1078.000 | 1200.000 | 1200.000 | 1200.000 | T31 |
| A31 | 1048.000        | 1051.000       | 1051.000       | 1051.000        | 0.000 | 1051.000 | 1200.000 | 1200.000 | 1200.000 | A31 |

# sp | Q3THW5 | H2AV\_MOUSE

DSLKATIAGGGVIPHIHKSLIGKKGQQK <sup>Dimethyl</sup> TA  
28.03

- ▶ fragmentation table for charge state 2+
- ▶ specType=cid
- ▶ score=58.73
- ▶ F113281.dat
- ▶ query=q34445.p1
- ▶ precursor=1065.632300
- ▶ chargePrecursor=3
- ▶ itol=0.5

| AA  | a        | a'    | a:2      | b        | b'    | b:2      | a'       | a:2      | AA       |
|-----|----------|-------|----------|----------|-------|----------|----------|----------|----------|
| W1  | 44.553   | 0.559 | 39339    | 58.803   | 0.504 | 46.553   | 1391.951 | 1391.951 | 1391.951 |
| W2  | 58.659   | 0.504 | 19034    | 102.007  | 0.504 | 61.611   | 1548.421 | 1548.421 | 1548.421 |
| L13 | 144.521  | 0.522 | 139.576  | 158.576  | 0.504 | 149.574  | 1449.811 | 1449.811 | 1449.811 |
| E4  | 231.222  | 0.509 | 192.119  | 232.119  | 0.504 | 236.122  | 1450.303 | 1450.303 | 1450.303 |
| W5  | 268.174  | 1.004 | 268.174  | 268.174  | 0.504 | 268.174  | 1391.951 | 1391.951 | 1391.951 |
| A16 | 309.659  | 2.021 | 211.268  | 314.687  | 0.504 | 314.687  | 1391.951 | 1391.951 | 1391.951 |
| T17 | 391.423  | 1.021 | 142.700  | 396.111  | 0.504 | 396.111  | 1391.951 | 1391.951 | 1391.951 |
| E8  | 407.229  | 1.021 | 348.762  | 411.751  | 0.512 | 411.751  | 1233.737 | 1233.737 | 1233.737 |
| A9  | 423.274  | 4.247 | 434.309  | 434.309  | 0.504 | 434.309  | 1177.195 | 1177.195 | 1177.195 |
| G10 | 431.765  | 0.511 | 461.919  | 461.919  | 0.504 | 461.919  | 1341.833 | 1341.833 | 1341.833 |
| G12 | 438.269  | 1.021 | 319.803  | 442.803  | 0.504 | 442.803  | 1084.655 | 1084.655 | 1084.655 |
| W13 | 478.742  | 0.509 | 508.709  | 508.709  | 0.504 | 508.709  | 1391.951 | 1391.951 | 1391.951 |
| E14 | 474.832  | 0.504 | 525.877  | 525.877  | 0.504 | 525.877  | 1006.610 | 1006.610 | 1006.610 |
| P15 | 481.405  | 0.504 | 474.405  | 474.405  | 0.504 | 474.405  | 950.068  | 950.068  | 950.068  |
| T16 | 483.408  | 1.021 | 442.811  | 483.408  | 0.504 | 483.408  | 961.542  | 961.542  | 961.542  |
| K17 | 486.409  | 0.504 | 709.425  | 802.425  | 0.512 | 802.425  | 831.012  | 831.012  | 831.012  |
| T18 | 477.409  | 0.504 | 503.024  | 491.024  | 0.504 | 491.024  | 776.470  | 776.470  | 776.470  |
| K19 | 941.057  | 0.504 | 941.057  | 941.057  | 0.504 | 941.057  | 1006.610 | 1006.610 | 1006.610 |
| S20 | 941.057  | 0.504 | 941.057  | 941.057  | 0.504 | 941.057  | 1006.610 | 1006.610 | 1006.610 |
| L21 | 1061.119 | 1.021 | 1061.119 | 1061.119 | 1.048 | 1061.119 | 1061.119 | 1061.119 | 1061.119 |
| G22 | 1067.659 | 1.021 | 1067.659 | 1067.659 | 1.048 | 1067.659 | 1067.659 | 1067.659 | 1067.659 |
| G23 | 1136.219 | 1.111 | 1136.219 | 1136.219 | 1.111 | 1136.219 | 1136.219 | 1136.219 | 1136.219 |
| K24 | 1198.219 | 1.111 | 1198.219 | 1198.219 | 1.111 | 1198.219 | 1198.219 | 1198.219 | 1198.219 |
| K25 | 1254.263 | 1.249 | 1254.263 | 1254.263 | 1.249 | 1254.263 | 1254.263 | 1254.263 | 1254.263 |
| K26 | 1261.274 | 1.274 | 1261.274 | 1261.274 | 1.274 | 1261.274 | 1261.274 | 1261.274 | 1261.274 |
| G27 | 1346.319 | 1.319 | 1346.319 | 1346.319 | 1.319 | 1346.319 | 1346.319 | 1346.319 | 1346.319 |
| K28 | 1431.319 | 1.431 | 1431.319 | 1431.319 | 1.431 | 1431.319 | 1431.319 | 1431.319 | 1431.319 |
| K29 | 1438.330 | 1.438 | 1438.330 | 1438.330 | 1.438 | 1438.330 | 1438.330 | 1438.330 | 1438.330 |
| T30 | 1539.419 | 1.539 | 1539.419 | 1539.419 | 1.539 | 1539.419 | 1539.419 | 1539.419 | 1539.419 |
| A31 | 1574.519 | 1.574 | 1574.519 | 1574.519 | 1.574 | 1574.519 | 1574.519 | 1574.519 | 1574.519 |



# sp | Q3THW5 | H2AV\_MOUSE

DSLKATIAGGGVIPHIHK<sup>Acetyl</sup>SLIGKKGQQK<sup>Dimethyl</sup>TA  
42.01 28.03

- ▶ fragmentation table for charge state 1+
- ▶ specType=etd
- ▶ score=62.51
- ▶ F113281.dat
- ▶ query=q34590\_p1
- ▶ precursor=809.978650
- ▶ chargePrecursor=4
- ▶ itol=0.5

| AA | c       | y               | z+1      | z+2             | z               | AA             |     |    |
|----|---------|-----------------|----------|-----------------|-----------------|----------------|-----|----|
| D  | 133.081 | 32.36.804       | 3220.885 | 0.000           | 2219.895        | D              | 131 |    |
| S  | 220.093 | 3171.857        | 3105.838 | 0.000           | 3104.831        | S              | 20  |    |
| L  | 333.177 | 3034.825        | 3018.806 | 0.000           | 3017.799        | L              | 29  |    |
| I  | 446.261 | 2921.741        | 2905.722 | 0.000           | 2904.715        | I              | 28  |    |
| K  | 5       | <b>574.356</b>  | 2808.657 | 2792.638        | 2793.646        | 2791.630       | K   | 27 |
| A  | 6       | <b>645.393</b>  | 2680.562 | 2664.543        | 2665.551        | 2663.530       | A   | 26 |
| T  | 7       | 716.441         | 2606.525 | 2593.505        | 2594.514        | 2592.496       | T   | 25 |
| I  | 8       | <b>858.525</b>  | 2308.477 | 2292.459        | 2293.466        | 2291.451       | I   | 24 |
| A  | 9       | <b>930.562</b>  | 2395.363 | 2379.345        | 2380.352        | 2378.341       | A   | 23 |
| G  | 10      | <b>987.583</b>  | 2324.356 | 2308.337        | 2309.345        | 2307.330       | G   | 22 |
| G  | 11      | <b>1044.605</b> | 2267.335 | 2251.316        | 2252.324        | 2250.308       | G   | 21 |
| G  | 12      | 1101.626        | 2210.313 | 2194.294        | 2195.302        | 2193.287       | G   | 20 |
| V  | 13      | <b>1200.695</b> | 2153.292 | 2137.273        | 2138.281        | 2136.265       | V   | 19 |
| I  | 14      | 1313.779        | 2054.223 | 2038.205        | 2039.212        | 2037.197       | I   | 18 |
| P  | 15      | <b>1410.831</b> | 1941.139 | 1925.121        | 1926.128        | 1924.113       | P   | 17 |
| H  | 16      | 1547.890        | 1944.088 | 1828.068        | <b>1829.076</b> | 1827.060       | H   | 16 |
| H  | 17      | 1660.974        | 1707.028 | <b>1691.009</b> | 1692.017        | 1690.001       | H   | 15 |
| H  | 18      | 1798.033        | 1593.944 | 1577.925        | <b>1578.933</b> | 1576.917       | H   | 14 |
| K  | 19      | 1968.139        | 1456.885 | 1440.865        | <b>1441.874</b> | 1439.858       | K   | 13 |
| S  | 20      | 2055.171        | 1308.779 | 1278.760        | 1271.748        | 1269.743       | S   | 12 |
| L  | 21      | 2168.255        | 1190.747 | 1153.728        | <b>1184.736</b> | 1182.720       | L   | 11 |
| I  | 22      | 2281.339        | 1086.663 | 1070.644        | 1071.652        | 1069.636       | I   | 10 |
| G  | 23      | 2338.361        | 973.579  | 957.560         | <b>958.568</b>  | 956.552        | G   | 9  |
| K  | 24      | 2466.455        | 916.557  | 900.539         | <b>901.547</b>  | <b>899.531</b> | K   | 8  |
| K  | 25      | 2594.550        | 788.462  | <b>772.444</b>  | <b>773.452</b>  | 771.436        | K   | 7  |
| G  | 26      | 2613.572        | 660.368  | 644.350         | <b>645.357</b>  | 643.341        | G   | 6  |
| Q  | 27      | 2779.636        | 603.346  | <b>587.327</b>  | 588.335         | 586.320        | Q   | 5  |
| Q  | 28      | 2907.689        | 475.267  | <b>459.269</b>  | 460.277         | 458.261        | Q   | 4  |
| K  | 29      | 3063.815        | 347.239  | 331.210         | 332.218         | 330.202        | K   | 3  |
| T  | 30      | 3164.863        | 191.103  | 175.084         | 176.092         | 174.076        | T   | 2  |
| A  | 31      | 3235.900        | 90.055   | 74.036          | 75.044          | 73.028         | A   | 1  |



# sp | Q3THW5 | H2AV\_MOUSE

DSLKATIAGGGVIPHIHK <sup>Acetyl</sup> 42.01 SLIGKKGQQK <sup>Dimethyl</sup> 28.03 TA

- ▶ fragmentation table for charge state 2+
- ▶ specType=etd
- ▶ score=62.51
- ▶ F113281.dat
- ▶ query=q34590.p1
- ▶ precursor=809.978650
- ▶ chargePrecursor=4
- ▶ itol=0.5

| AA | c  | y               | z+1             | z+2             | z               | AA              |       |
|----|----|-----------------|-----------------|-----------------|-----------------|-----------------|-------|
| D  | 1  | 67.034          | <b>1618.946</b> | 1618.938        | 0.504           | 1618.432        | D[31] |
| S  | 2  | 108.550         | 1301.432        | <b>1563.423</b> | 0.504           | <b>1552.919</b> | S[30] |
| L  | 3  | 187.092         | <b>1517.916</b> | <b>1509.907</b> | 0.504           | 1509.401        | L[29] |
| I  | 4  | 223.614         | 1481.974        | 1451.935        | 0.504           | 1462.861        | I[28] |
| K  | 5  | 287.682         | 1404.833        | <b>1396.823</b> | <b>1397.327</b> | 1396.310        | K[27] |
| A  | 6  | 323.200         | <b>1340.785</b> | <b>1332.775</b> | <b>1333.279</b> | 1332.273        | A[26] |
| T  | 7  | 373.724         | 1305.266        | <b>1297.257</b> | 1297.761        | <b>1296.753</b> | T[25] |
| I  | 8  | 400.266         | 1254.742        | 1240.733        | 1237.237        | 1240.231        | I[24] |
| A  | 9  | 465.785         | 1198.200        | <b>1190.191</b> | <b>1190.695</b> | 1189.687        | A[23] |
| G  | 10 | 484.295         | 1162.682        | 1154.672        | <b>1155.176</b> | 1154.168        | G[22] |
| G  | 11 | 522.806         | 1134.171        | <b>1126.162</b> | 1126.666        | <b>1125.658</b> | G[21] |
| G  | 12 | 551.317         | 1105.660        | 1097.651        | 1098.155        | 1097.147        | G[20] |
| V  | 13 | 606.851         | 1077.149        | 1069.140        | 1069.644        | <b>1068.636</b> | V[19] |
| I  | 14 | 657.383         | 1029.632        | 1019.608        | 1020.110        | 1019.100        | I[18] |
| F  | 15 | 705.910         | 971.073         | 963.054         | <b>963.568</b>  | 962.560         | F[17] |
| H  | 16 | 774.440         | 922.547         | <b>914.538</b>  | <b>915.041</b>  | 914.034         | H[16] |
| I  | 17 | 838.961         | 874.017         | <b>846.008</b>  | <b>846.512</b>  | 845.504         | I[15] |
| R  | 18 | <b>899.520</b>  | 797.475         | 789.465         | 789.970         | 788.962         | R[14] |
| K  | 19 | <b>984.573</b>  | <b>728.946</b>  | 720.937         | 721.440         | 720.431         | K[13] |
| S  | 20 | 1025.089        | 643.893         | 635.884         | 636.388         | 635.380         | S[12] |
| L  | 21 | 1084.611        | 600.377         | 592.368         | 592.872         | 591.864         | L[11] |
| I  | 22 | 1143.173        | 543.835         | 535.826         | 536.330         | 535.322         | I[10] |
| G  | 23 | <b>1169.684</b> | 487.293         | 479.284         | 479.788         | 478.780         | G[9]  |
| K  | 24 | <b>1233.731</b> | <b>458.782</b>  | 450.773         | 451.277         | 450.269         | K[8]  |
| K  | 25 | 1282.718        | 394.736         | 386.728         | 387.232         | 386.224         | K[7]  |
| G  | 26 | <b>1326.290</b> | 330.687         | 322.678         | 323.182         | 322.174         | G[6]  |
| Q  | 27 | <b>1360.319</b> | 302.177         | 294.167         | 294.671         | 293.663         | Q[5]  |
| Q  | 28 | <b>1454.348</b> | 238.147         | 230.138         | 230.642         | 229.634         | Q[4]  |
| K  | 29 | 1532.411        | 174.119         | 166.109         | 166.613         | 165.605         | K[3]  |
| T  | 30 | 1602.938        | 98.095          | 88.088          | 88.592          | 87.584          | T[2]  |
| A  | 31 | 1618.434        | 48.531          | 37.522          | 38.026          | 37.018          | A[1]  |

# sp | Q3THW5 | H2AV\_MOUSE

DSLKATIAGGGVIPHIHK<sup>Acetyl</sup> SLIGKKGQQK<sup>Dimethyl</sup> TA  
42.01 28.03

- ▶ fragmentation table for charge state 3+
- ▶ specType=etd
- ▶ score=62.51
- ▶ F113281.dat
- ▶ query=q34590\_p1
- ▶ precursor=809.978650
- ▶ chargePrecursor=4
- ▶ itol=0.5

| AA    | c        | y               | z+1             | z+2            | z               | AA    |
|-------|----------|-----------------|-----------------|----------------|-----------------|-------|
| D[1]  | 45.021   | <b>1079.633</b> | <b>1074.291</b> | 0.672          | <b>1071.957</b> | D[2]  |
| S[2]  | 74.036   | 1041.291        | <b>1035.951</b> | 0.672          | <b>1035.615</b> | S[3]  |
| L[3]  | 111.730  | <b>1012.280</b> | <b>1006.940</b> | 0.672          | <b>1006.604</b> | L[29] |
| H[4]  | 149.425  | 974.585         | <b>969.246</b>  | 0.672          | <b>968.910</b>  | H[28] |
| K[5]  | 192.123  | <b>936.891</b>  | <b>931.551</b>  | <b>931.887</b> | 931.215         | K[27] |
| A[6]  | 215.803  | 894.192         | 888.853         | 889.189        | 888.517         | A[26] |
| T[7]  | 249.485  | 870.513         | 863.174         | 865.510        | 864.835         | T[25] |
| I[8]  | 287.180  | 836.831         | 831.491         | 831.827        | 831.155         | I[24] |
| A[9]  | 310.859  | 799.136         | 793.796         | 794.132        | 793.460         | A[23] |
| G[10] | 329.886  | 775.457         | 770.117         | 770.453        | 769.781         | G[22] |
| G[11] | 348.873  | 756.450         | 751.110         | 751.446        | 750.774         | G[21] |
| G[12] | 367.880  | 737.443         | 732.103         | 732.439        | 731.767         | G[20] |
| V[13] | 400.963  | 718.435         | 713.096         | 713.432        | 712.760         | V[19] |
| I[14] | 438.588  | 685.423         | 680.073         | 680.409        | 679.737         | I[18] |
| P[15] | 470.949  | 647.715         | 642.376         | 642.714        | 642.042         | P[17] |
| H[16] | 516.635  | 615.367         | 610.027         | 610.363        | 609.691         | H[16] |
| H[17] | 554.330  | 569.061         | 564.341         | 564.677        | 564.005         | H[15] |
| H[18] | 600.016  | 531.860         | 526.646         | 526.982        | 526.311         | H[14] |
| K[19] | 656.718  | 486.300         | 480.950         | 481.296        | 480.624         | K[13] |
| S[20] | 685.735  | 459.588         | 454.258         | 454.594        | 453.922         | S[12] |
| L[21] | 723.423  | 400.587         | 395.248         | 395.584        | 394.912         | L[11] |
| I[22] | 761.118  | 362.093         | 357.893         | 357.889        | 357.217         | I[10] |
| G[23] | 780.125  | 325.198         | 319.858         | 320.194        | 319.522         | G[9]  |
| K[24] | 822.823  | 306.191         | 300.851         | 301.187        | 300.515         | K[8]  |
| K[25] | 865.522  | 263.492         | 258.153         | 258.489        | 257.817         | K[7]  |
| G[26] | 884.539  | 220.794         | 215.454         | 215.790        | 215.118         | G[6]  |
| Q[27] | 927.215  | 201.787         | 196.447         | 196.783        | 196.111         | Q[5]  |
| Q[28] | 969.901  | 159.101         | 153.761         | 154.097        | 153.425         | Q[4]  |
| K[29] | 1021.943 | 116.414         | 111.075         | 111.411        | 110.739         | K[3]  |
| T[30] | 1055.629 | 64.372          | 59.033          | 59.369         | 58.697          | T[2]  |
| A[31] | 1079.305 | 30.690          | 25.350          | 25.686         | 25.014          | A[1]  |



# sp | Q6GSS7 | H2A2A\_MOUSE

DEELNKLLGK<sup>Dimethyl</sup>VTIAQGGVLPNIQAVLLPKKTESHKAKGK<sup>28.03</sup>

- ▶ fragmentation table for charge state 1+
- ▶ specType=cid
- ▶ score=46.43
- ▶ F113281.dat
- ▶ query=q36869\_p1
- ▶ precursor=866.900240
- ▶ chargePrecursor=5
- ▶ itol=0.5

| AA   | a        | a'       | a <sub>Δ</sub> | b        | b'       | b <sub>Δ</sub> | y <sup>+</sup> | y <sub>Δ</sub> | AA   |
|------|----------|----------|----------------|----------|----------|----------------|----------------|----------------|------|
| E1   | 881.521  | 0.000    | 109.701        | 148.024  | 0.000    | 148.024        | 4315.471       | 4315.471       | E138 |
| E1   | 217.002  | 0.000    | 109.071        | 245.071  | 0.000    | 227.000        | 4215.471       | 4198.444       | E139 |
| E1   | 346.434  | 0.000    | 108.111        | 374.119  | 0.000    | 308.109        | 4086.424       | 4069.401       | E138 |
| E1   | 469.259  | 0.000    | 143.100        | 487.303  | 0.000    | 368.103        | 3687.385       | 3640.359       | E139 |
| E1   | 519.251  | 0.000    | 100.241        | 601.249  | 0.000    | 508.250        | 3548.251       | 3521.225       | E138 |
| E1   | 601.346  | 464.320  | 663.313        | 728.341  | 174.315  | 511.314        | 3730.251       | 3513.214       | K130 |
| E1   | 687.424  | 687.424  | 756.424        | 842.425  | 826.399  | 634.415        | 3687.181       | 3585.131       | L134 |
| E1   | 817.515  | 817.515  | 886.515        | 955.519  | 939.481  | 719.497        | 3488.019       | 3471.000       | K131 |
| E1   | 894.576  | 894.576  | 963.576        | 1011.531 | 995.504  | 794.510        | 3175.960       | 3158.960       | G125 |
| K130 | 1431.601 | 1431.601 | 1507.601       | 1586.601 | 1571.611 | 1391.641       | 1318.611       | 1301.641       | K131 |
| V11  | 1259.711 | 1221.720 | 1221.720       | 1221.720 | 1221.720 | 1221.720       | 1162.644       | 1144.644       | V106 |
| V12  | 1491.711 | 1421.711 | 1421.711       | 1421.711 | 1421.711 | 1421.711       | 1059.711       | 1049.711       | V106 |
| H13  | 1451.801 | 1448.811 | 1448.811       | 1481.811 | 1481.811 | 1481.811       | 1048.711       | 1048.711       | E131 |
| A14  | 1524.931 | 1507.871 | 1506.880       | 1552.890 | 1535.868 | 1534.854       | 1040.841       | 1032.822       | A127 |
| G126 | 1582.966 | 1538.961 | 1538.961       | 1586.961 | 1569.961 | 1568.961       | 1046.961       | 1038.961       | G126 |
| G16  | 1559.969 | 1550.951 | 1551.961       | 1572.971 | 1570.948 | 1570.954       | 1050.951       | 1051.951       | G125 |
| G13  | 1587.911 | 1549.911 | 1549.911       | 1594.911 | 1577.969 | 1576.959       | 1051.911       | 1051.911       | G124 |
| V11  | 1689.999 | 1639.971 | 1639.971       | 1686.971 | 1669.999 | 1668.978       | 1059.911       | 1059.911       | V105 |
| L139 | 1719.154 | 1692.132 | 1691.141       | 1801.141 | 1780.122 | 1780.110       | 1057.441       | 1057.414       | L122 |
| P120 | 1676.954 | 1659.109 | 1658.109       | 1708.109 | 1687.175 | 1686.161       | 1054.109       | 1057.109       | P123 |
| K121 | 1580.940 | 1573.221 | 1572.209       | 1618.244 | 1601.218 | 1600.214       | 1052.801       | 1052.801       | N120 |
| L121 | 1611.111 | 1605.961 | 1605.961       | 1631.961 | 1614.924 | 1613.911       | 1051.911       | 1050.924       | L118 |
| Q125 | 1611.369 | 1614.369 | 1614.369       | 1618.369 | 1624.369 | 1624.369       | 1066.111       | 1066.111       | K118 |
| A14  | 1607.429 | 1601.421 | 1601.411       | 1630.424 | 1613.387 | 1612.413       | 1067.111       | 1065.801       | A117 |
| V124 | 1601.669 | 1604.661 | 1604.661       | 1608.661 | 1614.661 | 1614.661       | 1066.661       | 1066.661       | V116 |
| L124 | 1614.561 | 1607.511 | 1606.511       | 1626.520 | 1604.504 | 1604.501       | 1067.011       | 1064.501       | L118 |
| L127 | 1617.569 | 1610.511 | 1610.511       | 1630.524 | 1608.514 | 1607.509       | 1068.801       | 1071.801       | L114 |
| L121 | 1618.111 | 1611.061 | 1611.061       | 1641.061 | 1624.061 | 1624.061       | 1074.061       | 1074.061       | F113 |
| K120 | 1652.511 | 1645.511 | 1644.811       | 1660.524 | 1643.162 | 1642.156       | 1074.911       | 1074.911       | K112 |
| K120 | 1681.961 | 1681.961 | 1681.961       | 1681.961 | 1681.961 | 1681.961       | 1074.961       | 1074.961       | K111 |
| L121 | 1611.669 | 1604.621 | 1603.641       | 1630.641 | 1613.624 | 1612.610       | 1072.661       | 1074.641       | L118 |
| L121 | 1611.669 | 1604.621 | 1603.641       | 1630.641 | 1613.624 | 1612.610       | 1072.661       | 1074.641       | L118 |
| S13  | 1668.011 | 1661.011 | 1661.011       | 1668.011 | 1674.011 | 1674.011       | 1081.011       | 1081.011       | S11  |
| K14  | 1631.019 | 1624.081 | 1623.071       | 1661.080 | 1644.045 | 1643.034       | 1081.471       | 1081.471       | H17  |
| K124 | 1712.148 | 1705.211 | 1704.211       | 1735.211 | 1718.144 | 1717.131       | 1085.111       | 1085.111       | K125 |
| K124 | 1699.251 | 1691.211 | 1690.211       | 1720.211 | 1701.212 | 1700.210       | 1084.211       | 1084.211       | K125 |
| A117 | 1671.269 | 1664.211 | 1663.211       | 1694.211 | 1676.211 | 1675.211       | 1083.211       | 1083.211       | A10  |
| K126 | 1699.111 | 1691.141 | 1690.141       | 1721.141 | 1704.141 | 1703.141       | 1082.141       | 1082.141       | K120 |
| G12  | 1750.301 | 1743.310 | 1743.300       | 1764.300 | 1747.300 | 1746.301       | 1094.111       | 1093.010       | G12  |
| K140 | 1684.401 | 1677.401 | 1676.401       | 1712.401 | 1695.401 | 1694.401       | 1087.111       | 1086.001       | K11  |

# sp | Q6GSS7 | H2A2A\_MOUSE

DEELNKLKLG<sup>Dimethyl</sup><sub>28.03</sub>VTIAQGGVLPNIQAVLLPKKTESHKAKGK

- ▶ fragmentation table for charge state 2+
- ▶ specType=cid
- ▶ score=46.43
- ▶ F113281.dat
- ▶ query=q36869\_p1
- ▶ precursor=866.900240
- ▶ chargePrecursor=5
- ▶ itol=0.5

| AA  | a        | a'    | a,Δ      | b        | b'    | b,Δ      | y        | y'       | y,Δ      | AA  |
|-----|----------|-------|----------|----------|-------|----------|----------|----------|----------|-----|
| D1  | 44.523   | 0.504 | 35.518   | 58.521   | 0.504 | 46.533   | 2165.752 | 2157.208 | 2556.747 | D40 |
| E2  | 59.965   | 0.504 | 50.976   | 73.974   | 0.504 | 61.979   | 2170.232 | 2166.728 | 2609.234 | E30 |
| E3  | 773.599  | 0.504 | 684.561  | 187.563  | 0.504 | 176.559  | 2043.710 | 2035.204 | 2404.712 | E38 |
| L4  | 330.388  | 0.507 | 221.103  | 244.303  | 0.504 | 236.303  | 1979.180 | 1970.683 | 2376.181 | L37 |
| R5  | 389.958  | 0.507 | 280.924  | 309.929  | 0.507 | 301.934  | 2007.657 | 1999.154 | 2412.659 | R36 |
| R6  | 351.177  | 0.507 | 242.024  | 242.177  | 0.506 | 236.174  | 1895.631 | 1887.118 | 2292.627 | R35 |
| L7  | 389.958  | 0.507 | 280.924  | 309.929  | 0.507 | 301.934  | 1881.589 | 1873.079 | 2292.588 | L34 |
| L8  | 484.227  | 0.507 | 375.232  | 421.718  | 0.507 | 413.203  | 1842.561 | 1834.051 | 2243.559 | L33 |
| L9  | 492.712  | 0.507 | 383.717  | 431.203  | 0.507 | 423.188  | 1850.521 | 1842.011 | 2251.519 | L32 |
| R10 | 370.889  | 0.507 | 261.852  | 284.832  | 0.507 | 276.819  | 1876.497 | 1867.988 | 2277.493 | R32 |
| V11 | 520.887  | 0.507 | 415.864  | 463.362  | 0.507 | 453.353  | 1847.469 | 1838.959 | 2242.464 | V34 |
| I12 | 710.913  | 0.627 | 602.300  | 661.808  | 0.627 | 594.781  | 1826.437 | 1817.926 | 2223.438 | I30 |
| E13 | 397.438  | 0.627 | 288.819  | 318.439  | 0.627 | 310.422  | 1737.427 | 1728.916 | 2137.424 | E31 |
| A14 | 750.953  | 0.754 | 640.751  | 753.948  | 0.754 | 746.439  | 1707.400 | 1698.890 | 2107.402 | A27 |
| G15 | 826.983  | 0.816 | 700.469  | 814.968  | 0.816 | 807.457  | 1637.373 | 1628.862 | 2037.374 | G25 |
| G16 | 855.489  | 0.816 | 749.485  | 864.984  | 0.816 | 851.473  | 1623.346 | 1614.835 | 2023.347 | G24 |
| G17 | 854.984  | 0.816 | 748.980  | 863.979  | 0.816 | 850.968  | 1627.359 | 1618.848 | 2027.360 | G24 |
| V18 | 633.933  | 0.816 | 524.933  | 547.936  | 0.816 | 543.931  | 1586.322 | 1577.811 | 1986.324 | V30 |
| L19 | 696.958  | 0.816 | 587.959  | 604.976  | 0.816 | 605.973  | 1210.224 | 1210.710 | 1502.228 | L22 |
| P20 | 619.958  | 0.816 | 510.959  | 527.974  | 0.816 | 529.971  | 1162.622 | 1154.108 | 1453.676 | P21 |
| R21 | 627.419  | 0.816 | 518.420  | 535.437  | 0.816 | 537.434  | 1141.554 | 1133.040 | 1432.594 | R22 |
| G22 | 2152.526 | 1.043 | 1843.180 | 1104.108 | 1.043 | 1157.125 | 1057.134 | 1049.621 | 1294.132 | G24 |
| G23 | 2112.209 | 1.043 | 1802.864 | 1072.144 | 1.043 | 1125.188 | 1066.699 | 1059.187 | 1282.191 | G23 |
| A24 | 1281.714 | 1.043 | 1092.249 | 1205.716 | 1.043 | 1207.709 | 936.584  | 929.070  | 1027.587 | A17 |
| V25 | 1210.242 | 1.043 | 1020.791 | 1134.249 | 1.043 | 1136.242 | 905.044  | 897.531  | 1002.038 | V18 |
| L26 | 927.494  | 1.043 | 748.498  | 771.497  | 1.043 | 781.496  | 851.510  | 842.996  | 942.504  | L23 |
| L27 | 1414.126 | 1.043 | 1245.131 | 1405.131 | 1.043 | 1419.131 | 744.120  | 736.606  | 796.454  | L24 |
| R28 | 1262.413 | 1.043 | 1093.416 | 1116.416 | 1.043 | 1120.416 | 718.426  | 710.912  | 798.426  | R25 |
| R29 | 1236.709 | 1.043 | 1067.709 | 1090.709 | 1.043 | 1114.709 | 718.426  | 710.912  | 798.426  | R25 |
| K30 | 1380.588 | 1.284 | 1201.582 | 1304.585 | 1.284 | 1306.582 | 625.852  | 617.339  | 616.847  | K13 |
| V31 | 1328.518 | 1.284 | 1143.518 | 1246.521 | 1.284 | 1252.518 | 625.852  | 617.339  | 616.847  | V10 |
| E32 | 1156.534 | 1.284 | 987.538  | 1090.541 | 1.284 | 1101.538 | 511.261  | 502.747  | 592.259  | E24 |
| S33 | 1142.530 | 1.284 | 973.534  | 1076.534 | 1.284 | 1081.534 | 446.750  | 438.240  | 437.754  | S30 |
| E34 | 1104.534 | 1.284 | 935.534  | 1038.534 | 1.284 | 1043.534 | 446.750  | 438.240  | 437.754  | E31 |
| H35 | 1086.576 | 1.284 | 917.576  | 1020.576 | 1.284 | 1025.576 | 324.774  | 316.264  | 315.768  | H32 |
| K36 | 1080.603 | 1.284 | 911.603  | 1014.603 | 1.284 | 1019.603 | 324.774  | 316.264  | 315.768  | K33 |
| A37 | 1250.514 | 1.524 | 1065.518 | 1168.521 | 1.524 | 1173.518 | 258.124  | 250.614  | 249.118  | A34 |
| K38 | 1246.518 | 1.524 | 1061.522 | 1164.525 | 1.524 | 1170.522 | 258.124  | 250.614  | 249.118  | K35 |
| G39 | 1216.518 | 1.524 | 1031.522 | 1134.525 | 1.524 | 1140.522 | 258.124  | 250.614  | 249.118  | G36 |
| K40 | 1242.520 | 1.524 | 1057.524 | 1160.527 | 1.524 | 1165.524 | 214.742  | 207.232  | 206.726  | K37 |

# sp | Q6GSS7 | H2A2A\_MOUSE

DEELNKLLGK<sup>Dimethyl</sup><sub>28.03</sub>VTIAQGGVLPNIQAVLLPKKTESHKAKGK

- ▶ fragmentation table for charge state 3+
- ▶ specType=cid
- ▶ score=46.43
- ▶ F113281.dat
- ▶ query=q36869\_p1
- ▶ precursor=866.900240
- ▶ chargePrecursor=5
- ▶ itol=0.5

| AA  | a               | a*              | a,Δ             | b               | b*              | b,Δ             | r       | y*      | y,Δ    | AA   |
|-----|-----------------|-----------------|-----------------|-----------------|-----------------|-----------------|---------|---------|--------|------|
| G1  | 28.018          | 0.072           | 28.090          | 39.202          | 0.072           | 39.274          | 144.171 | 143.409 | 44.301 | L54G |
| E2  | 73.019          | 0.072           | 73.091          | 39.202          | 0.072           | 39.274          | 144.171 | 143.409 | 44.301 | L54G |
| E3  | 118.046         | 0.072           | 118.118         | 125.376         | 0.072           | 125.448         | 133.814 | 133.052 | 43.981 | E10H |
| L4  | 163.071         | 0.072           | 163.143         | 163.877         | 0.072           | 163.949         | 119.650 | 118.888 | 43.124 | L127 |
| N5  | 208.095         | 1.000           | 208.167         | 209.087         | 1.000           | 209.159         | 109.083 | 108.321 | 42.708 | N30  |
| K6  | 253.096         | 2.000           | 253.168         | 254.088         | 2.000           | 254.160         | 107.812 | 107.050 | 42.292 | K131 |
| L7  | 298.120         | 3.000           | 298.192         | 299.112         | 3.000           | 299.184         | 106.541 | 105.779 | 41.876 | L134 |
| L8  | 343.145         | 3.000           | 343.217         | 344.137         | 3.000           | 344.209         | 113.173 | 112.411 | 41.460 | L113 |
| G9  | 388.169         | 3.000           | 388.241         | 389.161         | 3.000           | 389.233         | 111.902 | 111.140 | 41.044 | G42  |
| K10 | 433.193         | 3.000           | 433.265         | 434.185         | 3.000           | 434.257         | 106.631 | 105.869 | 40.628 | K131 |
| V11 | 478.217         | 4.000           | 478.289         | 479.209         | 4.000           | 479.281         | 117.263 | 116.501 | 40.212 | V30  |
| L12 | 523.241         | 4.000           | 523.313         | 524.233         | 4.000           | 524.305         | 102.992 | 102.230 | 39.796 | L128 |
| L13 | 568.265         | 4.000           | 568.337         | 569.257         | 4.000           | 569.329         | 101.721 | 100.959 | 39.380 | L131 |
| A14 | 613.289         | 4.000           | 613.361         | 614.281         | 4.000           | 614.353         | 102.450 | 101.688 | 38.964 | A27  |
| Q15 | 658.313         | 4.000           | 658.385         | 659.305         | 4.000           | 659.377         | 104.181 | 103.419 | 38.548 | Q20  |
| G16 | 703.337         | 4.000           | 703.409         | 704.329         | 4.000           | 704.401         | 102.910 | 102.148 | 38.132 | G25  |
| G17 | 748.361         | 4.000           | 748.433         | 749.353         | 4.000           | 749.425         | 101.640 | 100.878 | 37.716 | G24  |
| V18 | 793.385         | <b>817.818</b>  | <b>818.681</b>  | <b>819.601</b>  | <b>819.551</b>  | <b>820.414</b>  | 100.370 | 99.608  | 37.300 | V29  |
| L19 | 838.409         | 4.000           | 838.481         | 839.401         | 4.000           | 839.473         | 101.100 | 100.338 | 36.884 | L22  |
| P20 | 883.433         | <b>687.065</b>  | <b>884.325</b>  | <b>885.245</b>  | <b>885.195</b>  | <b>886.058</b>  | 102.830 | 102.068 | 36.468 | P21  |
| N21 | 928.457         | 4.000           | 928.529         | 929.449         | 4.000           | 929.521         | 101.560 | 100.798 | 36.052 | N20  |
| G22 | 973.481         | <b>782.774</b>  | <b>783.446</b>  | <b>784.366</b>  | <b>784.316</b>  | <b>785.179</b>  | 103.290 | 102.528 | 35.636 | G23  |
| Q23 | 1018.505        | 4.000           | 1018.577        | 1019.497        | 4.000           | 1019.569        | 102.020 | 101.258 | 35.220 | Q18  |
| A24 | 1063.529        | <b>828.119</b>  | <b>828.891</b>  | <b>829.811</b>  | <b>829.761</b>  | <b>830.624</b>  | 103.750 | 102.988 | 34.804 | A17  |
| V25 | 1108.553        | 4.000           | 1108.625        | 1109.545        | 4.000           | 1109.617        | 102.480 | 101.718 | 34.388 | V14  |
| K26 | 1153.577        | 4.000           | 1153.649        | 1154.569        | 4.000           | 1154.641        | 101.210 | 100.448 | 33.972 | K12  |
| L27 | 1198.601        | 4.000           | 1198.673        | 1199.593        | 4.000           | 1199.665        | 100.940 | 100.178 | 33.556 | L133 |
| P28 | 1243.625        | 4.000           | 1243.697        | 1244.617        | 4.000           | 1244.689        | 101.670 | 100.908 | 33.140 | P22  |
| K29 | 1288.649        | <b>1012.600</b> | <b>1013.272</b> | <b>1014.192</b> | <b>1014.142</b> | <b>1015.005</b> | 102.400 | 101.638 | 32.724 | K12  |
| K30 | 1333.673        | 4.000           | 1333.745        | 1334.665        | 4.000           | 1334.737        | 101.130 | 100.368 | 32.308 | K11  |
| L31 | 1378.697        | 4.000           | 1378.769        | 1379.689        | 4.000           | 1379.761        | 100.860 | 100.098 | 31.892 | L132 |
| E32 | 1423.721        | 11.000          | 1423.793        | 1424.713        | 11.000          | 1424.785        | 101.590 | 100.828 | 31.476 | E31  |
| S33 | <b>1166.662</b> | 11.000          | <b>1166.734</b> | <b>1167.654</b> | <b>1167.604</b> | <b>1168.467</b> | 103.320 | 102.558 | 31.060 | S31  |
| L34 | 1468.745        | 4.000           | 1468.817        | 1469.737        | 4.000           | 1469.809        | 100.590 | 99.828  | 30.644 | L131 |
| H35 | 1513.769        | 2.000           | 1513.841        | 1514.761        | 2.000           | 1514.833        | 101.320 | 100.558 | 30.228 | H30  |
| K36 | 1558.793        | 2.000           | 1558.865        | 1559.785        | 2.000           | 1559.857        | 102.050 | 101.288 | 29.812 | K35  |
| A37 | 1603.817        | 4.000           | 1603.889        | 1604.809        | 4.000           | 1604.881        | 102.780 | 102.018 | 29.396 | A34  |
| K38 | 1648.841        | 4.000           | 1648.913        | 1649.833        | 4.000           | 1649.905        | 101.510 | 100.748 | 28.980 | K33  |
| G39 | 1693.865        | 1.000           | 1693.937        | 1694.857        | 1.000           | 1694.929        | 102.240 | 101.478 | 28.564 | G42  |
| K40 | 1738.889        | 1.000           | 1738.961        | 1739.881        | 1.000           | 1739.953        | 102.970 | 102.208 | 28.148 | K31  |

# sp | Q6GSS7 | H2A2A\_MOUSE

DEELNKLLGK<sup>Dimethyl</sup><sub>28.03</sub>VTIAQGGVLPNIQAVLLPKKTESHKAKGK

- ▶ fragmentation table for charge state 4+
- ▶ specType=cid
- ▶ score=46.43
- ▶ F113281.dat
- ▶ query=q36869\_p1
- ▶ precursor=866.900240
- ▶ chargePrecursor=5
- ▶ itol=0.5

| AA  | a        | a*       | a,Δ      | b        | b*       | b,Δ      | y       | y*      | y,Δ     | AA   |
|-----|----------|----------|----------|----------|----------|----------|---------|---------|---------|------|
| E1  | 227.050  | 0.750    | 18.260   | 26.764   | 0.750    | 26.260   | 100.000 | 110.012 | 100.000 | D140 |
| E2  | 352.050  | 0.750    | 30.514   | 42.024   | 0.750    | 37.514   | 104.000 | 107.000 | 102.000 | E130 |
| E3  | 477.050  | 0.750    | 42.768   | 57.534   | 0.750    | 50.034   | 102.000 | 105.000 | 101.000 | E120 |
| L4  | 115.506  | 0.750    | 111.009  | 122.008  | 0.750    | 118.004  | 980.833 | 985.845 | 985.989 | L137 |
| T5  | 144.000  | 1.000    | 139.000  | 150.000  | 1.000    | 146.000  | 981.833 | 987.845 | 987.989 | K30  |
| R6  | 176.500  | 1.11830  | 171.000  | 183.000  | 1.11830  | 178.500  | 981.833 | 987.845 | 987.989 | K30  |
| L7  | 304.200  | 1.000    | 199.000  | 211.362  | 1.000    | 200.362  | 981.296 | 987.308 | 987.354 | L134 |
| L8  | 432.210  | 1.000    | 227.113  | 239.534  | 1.000    | 238.534  | 981.296 | 987.308 | 987.354 | L134 |
| G9  | 246.000  | 240.513  | 245.567  | 257.000  | 240.513  | 246.500  | 844.734 | 849.746 | 849.792 | C125 |
| K10 | 388.011  | 181.854  | 393.419  | 242.000  | 388.011  | 393.417  | 849.697 | 854.709 | 854.755 | K111 |
| V11 | 150.000  | 150.453  | 150.906  | 162.000  | 150.453  | 150.906  | 851.244 | 856.256 | 856.302 | V136 |
| V12 | 220.000  | 220.902  | 221.447  | 232.000  | 220.902  | 232.447  | 851.244 | 856.256 | 856.302 | V136 |
| H13 | 354.201  | 354.654  | 355.110  | 367.110  | 354.654  | 367.111  | 741.418 | 746.430 | 746.430 | H124 |
| A14 | 381.000  | 377.724  | 377.478  | 388.000  | 384.722  | 384.476  | 713.247 | 718.259 | 718.259 | A127 |
| Q15 | 413.000  | 409.749  | 409.493  | 420.000  | 416.747  | 416.491  | 685.403 | 690.415 | 690.415 | Q126 |
| G16 | 420.200  | 423.000  | 423.740  | 435.240  | 423.000  | 432.740  | 683.339 | 688.351 | 688.351 | C125 |
| G17 | 342.500  | 438.240  | 438.003  | 449.504  | 445.240  | 445.002  | 649.130 | 654.142 | 654.142 | C124 |
| V18 | 480.000  | 481.913  | 481.719  | 494.000  | 489.913  | 489.719  | 618.000 | 623.012 | 623.012 | V135 |
| L19 | 466.544  | 468.200  | 468.041  | 502.543  | 468.200  | 468.040  | 616.110 | 621.122 | 621.122 | L122 |
| P20 | 319.000  | 315.500  | 315.304  | 326.000  | 322.500  | 322.303  | 581.884 | 586.896 | 586.896 | P121 |
| T21 | 448.110  | 444.610  | 444.315  | 455.110  | 451.610  | 451.314  | 577.977 | 582.989 | 582.989 | T120 |
| T22 | 379.000  | 374.500  | 374.205  | 385.000  | 381.500  | 381.204  | 524.014 | 529.026 | 529.026 | T114 |
| Q23 | 368.000  | 364.500  | 364.205  | 375.000  | 371.500  | 371.204  | 480.000 | 485.012 | 485.012 | Q119 |
| A24 | 856.263  | 852.100  | 851.860  | 853.361  | 852.100  | 852.860  | 408.000 | 413.012 | 413.012 | A117 |
| V25 | 851.130  | 846.910  | 846.611  | 848.130  | 846.910  | 847.611  | 411.000 | 416.012 | 416.012 | V116 |
| L26 | 879.410  | 875.140  | 874.890  | 886.410  | 882.140  | 881.891  | 426.200 | 431.212 | 431.212 | L115 |
| L27 | 797.672  | 793.410  | 793.160  | 794.672  | 793.410  | 793.160  | 397.000 | 402.012 | 402.012 | L114 |
| P28 | 779.000  | 774.750  | 774.500  | 780.000  | 776.750  | 776.500  | 386.000 | 391.012 | 391.012 | P113 |
| K29 | 783.959  | 779.702  | 779.455  | 785.961  | 781.701  | 781.455  | 385.000 | 390.012 | 390.012 | K112 |
| K30 | 795.983  | 791.726  | 791.479  | 793.985  | 789.725  | 789.479  | 314.400 | 319.412 | 319.412 | K111 |
| T31 | 819.117  | 814.860  | 814.613  | 820.117  | 815.860  | 815.613  | 317.400 | 322.412 | 322.412 | T110 |
| E32 | 853.500  | 849.250  | 849.003  | 860.500  | 856.250  | 856.003  | 256.144 | 261.156 | 261.156 | E111 |
| S33 | 876.201  | 871.950  | 871.703  | 882.202  | 877.950  | 877.703  | 221.600 | 226.612 | 226.612 | S110 |
| K34 | 889.100  | 884.850  | 884.603  | 890.100  | 885.850  | 885.603  | 204.200 | 209.212 | 209.212 | K111 |
| H35 | 816.710  | 812.460  | 812.213  | 817.710  | 813.460  | 813.213  | 160.000 | 165.012 | 165.012 | H110 |
| K36 | 876.210  | 871.960  | 871.713  | 882.210  | 877.960  | 877.713  | 153.000 | 158.012 | 158.012 | K110 |
| A17 | 893.576  | 889.310  | 889.071  | 894.576  | 890.310  | 890.071  | 101.572 | 106.584 | 106.584 | A106 |
| K18 | 876.510  | 872.260  | 872.013  | 877.510  | 873.260  | 873.013  | 101.572 | 106.584 | 106.584 | K105 |
| G19 | 1009.000 | 1004.750 | 1004.503 | 1014.000 | 1009.750 | 1009.503 | 104.200 | 109.212 | 109.212 | G104 |
| K40 | 1017.000 | 1012.750 | 1012.503 | 1017.000 | 1012.750 | 1012.503 | 104.200 | 109.212 | 109.212 | K111 |





# sp | Q6GSS7 | H2A2A\_MOUSE

DEELNKLLGK <sup>Dimethyl</sup> <sub>28.03</sub> VTIAQGGVLPNIQAVLLPKKTESHKAKGK

- ▶ fragmentation table for charge state 1+
- ▶ specType=etd
- ▶ score=77.02
- ▶ F113281.dat
- ▶ query=q36870.p1
- ▶ precursor=866.900240
- ▶ chargePrecursor=5
- ▶ itol=0.5

| AA   | c               | y        | z+1             | z+2             | z               | AA    |
|------|-----------------|----------|-----------------|-----------------|-----------------|-------|
| D 1  | 133.061         | 4330.497 | 4314.479        | 0.000           | 4313.477        | D[40] |
| E 2  | 362.103         | 4215.476 | 4199.452        | 0.000           | 4198.444        | E[39] |
| E 3  | 391.146         | 4088.428 | 4070.420        | 0.000           | 4059.401        | E[38] |
| L 4  | 504.230         | 3957.385 | 3941.366        | 0.000           | 3940.359        | L[37] |
| N 5  | <b>618.273</b>  | 3844.301 | 3828.282        | 3820.290        | 3817.275        | N[36] |
| K 6  | <b>746.368</b>  | 3730.258 | 3714.239        | 3715.247        | 3713.232        | K[35] |
| L 7  | <b>859.452</b>  | 3602.183 | 3586.144        | 3587.152        | 3585.137        | L[34] |
| L 8  | <b>972.536</b>  | 3489.079 | 3473.060        | 3474.068        | 3472.051        | L[33] |
| G 9  | <b>1029.558</b> | 3375.095 | 3359.076        | 3360.084        | 3358.069        | G[32] |
| K 10 | 1185.684        | 3318.974 | 3302.955        | 3303.963        | 3301.947        | K[31] |
| V 11 | <b>1284.752</b> | 3102.847 | 3146.829        | 3147.836        | 3145.821        | V[30] |
| T 12 | <b>1385.800</b> | 3063.779 | 3047.760        | 3048.768        | 3046.752        | T[29] |
| L 13 | <b>1498.884</b> | 2962.731 | 2946.713        | 2947.720        | 2945.705        | L[28] |
| A 14 | <b>1569.921</b> | 2849.647 | 2833.628        | 2834.636        | 2832.621        | A[27] |
| Q 15 | <b>1697.980</b> | 2778.610 | 2762.591        | 2763.599        | 2761.584        | Q[26] |
| G 16 | 1755.001        | 2656.552 | 2634.533        | 2635.541        | 2633.525        | G[25] |
| G 17 | 1812.023        | 2593.530 | 2577.511        | 2578.519        | 2576.504        | G[24] |
| V 18 | 1911.091        | 2536.509 | 2520.490        | 2521.498        | 2519.482        | V[23] |
| L 19 | 2024.175        | 2431.440 | 2421.421        | 2422.429        | 2420.413        | L[22] |
| P 20 | 2111.228        | 2324.366 | 2308.347        | 2309.345        | 2307.330        | P[21] |
| N 21 | 2235.271        | 2227.303 | 2211.284        | 2212.292        | 2210.277        | N[20] |
| I 22 | 2348.355        | 2113.260 | 2097.242        | 2098.250        | 2096.234        | I[19] |
| Q 23 | 2476.413        | 2000.176 | 1984.158        | 1985.165        | 1983.150        | Q[18] |
| A 24 | 2547.450        | 1872.118 | 1856.099        | 1857.107        | 1855.091        | A[17] |
| V 25 | 2656.519        | 1801.081 | 1785.062        | 1786.070        | 1784.054        | V[16] |
| L 26 | 2759.603        | 1702.012 | 1685.994        | 1687.001        | 1684.985        | L[15] |
| L 27 | 2872.687        | 1588.928 | 1572.909        | <b>1573.917</b> | 1571.902        | L[14] |
| P 28 | 2069.740        | 1475.844 | 1459.825        | 1460.833        | 1458.818        | P[13] |
| K 29 | 3097.835        | 1378.791 | <b>1362.773</b> | 1363.780        | 1361.765        | K[12] |
| K 30 | 3225.930        | 1250.696 | <b>1234.678</b> | 1235.685        | 1233.670        | K[11] |
| I 31 | 3358.977        | 1122.601 | <b>1106.583</b> | 1107.591        | 1105.575        | I[10] |
| E 32 | 3456.020        | 1021.554 | <b>1005.535</b> | 1006.543        | <b>1004.527</b> | E[9]  |
| S 33 | 3543.052        | 892.511  | <b>876.492</b>  | 877.500         | 875.485         | S[8]  |
| H 34 | 3680.111        | 805.479  | <b>789.460</b>  | 790.468         | 788.453         | H[7]  |
| H 35 | 3817.170        | 698.420  | <b>652.401</b>  | 653.409         | 651.394         | H[6]  |
| K 36 | 3945.265        | 531.361  | <b>515.343</b>  | <b>516.350</b>  | 514.335         | K[5]  |
| A 37 | 4019.302        | 403.306  | 387.249         | 388.257         | 386.241         | A[4]  |
| K 38 | 4144.397        | 332.229  | <b>316.211</b>  | 317.218         | 315.202         | K[3]  |
| G 39 | 4201.418        | 204.134  | 188.116         | 189.123         | 187.108         | G[2]  |
| K 40 | 4329.513        | 147.113  | 133.094         | 132.102         | 130.089         | K[1]  |

# sp | Q6GSS7 | H2A2A\_MOUSE

DEELNKLLGK <sup>Dimethyl</sup> <sub>28.03</sub> VTIAQGGVLPNIQAVLLPKKTESHKAKGK

- ▶ fragmentation table for charge state 2+
- ▶ specType=etd
- ▶ score=77.02
- ▶ F113281.dat
- ▶ query=q36870.p1
- ▶ precursor=866.900240
- ▶ chargePrecursor=5
- ▶ itol=0.5

| AA    | c        | y        | z+1      | z+2      | z        | AA    |
|-------|----------|----------|----------|----------|----------|-------|
| D[1]  | 67.034   | 2165.752 | 2157.743 | 0.504    | 2157.239 | D[40] |
| E[2]  | 111.955  | 2158.238 | 2150.229 | 0.504    | 2099.728 | E[39] |
| E[3]  | 196.077  | 2043.718 | 2035.709 | 0.504    | 2035.205 | E[38] |
| L[4]  | 252.619  | 1976.199 | 1971.187 | 0.504    | 1970.683 | L[37] |
| N[5]  | 309.640  | 1922.654 | 1914.645 | 1915.149 | 1914.141 | N[36] |
| K[6]  | 373.688  | 1895.633 | 1887.623 | 1888.127 | 1887.119 | K[35] |
| L[7]  | 430.230  | 1861.585 | 1793.576 | 1794.080 | 1793.072 | L[34] |
| L[8]  | 489.772  | 1745.043 | 1737.034 | 1737.538 | 1736.530 | L[33] |
| G[9]  | 515.282  | 1688.561 | 1680.552 | 1680.996 | 1679.988 | G[32] |
| K[10] | 591.346  | 1659.990 | 1651.981 | 1652.485 | 1651.477 | K[31] |
| V[11] | 642.880  | 1581.627 | 1573.618 | 1574.422 | 1573.414 | V[30] |
| T[12] | 693.404  | 1512.393 | 1524.384 | 1524.888 | 1523.880 | T[29] |
| L[13] | 769.546  | 1451.899 | 1473.860 | 1474.364 | 1473.356 | L[28] |
| A[14] | 785.464  | 1425.327 | 1417.318 | 1417.822 | 1416.814 | A[27] |
| Q[15] | 849.493  | 1389.809 | 1381.800 | 1382.303 | 1381.295 | Q[26] |
| G[16] | 878.004  | 1325.779 | 1317.770 | 1318.274 | 1317.266 | G[25] |
| G[17] | 906.515  | 1297.269 | 1289.259 | 1289.763 | 1288.755 | G[24] |
| V[18] | 956.049  | 1268.758 | 1260.749 | 1261.252 | 1260.245 | V[23] |
| L[19] | 1027.597 | 1210.244 | 1211.214 | 1211.718 | 1210.710 | L[22] |
| P[20] | 1061.118 | 1162.662 | 1154.653 | 1155.156 | 1154.160 | P[21] |
| N[21] | 1118.139 | 1114.155 | 1106.146 | 1106.650 | 1105.642 | N[20] |
| I[22] | 1174.681 | 1067.134 | 1049.124 | 1049.628 | 1048.621 | I[19] |
| Q[23] | 1238.710 | 1000.592 | 992.582  | 993.086  | 992.079  | Q[18] |
| A[24] | 1274.229 | 936.563  | 928.553  | 929.057  | 928.049  | A[17] |
| V[25] | 1323.763 | 891.044  | 883.035  | 883.539  | 882.531  | V[16] |
| L[26] | 1369.305 | 851.510  | 843.500  | 844.004  | 843.000  | L[15] |
| L[27] | 1436.847 | 794.968  | 786.958  | 787.462  | 786.454  | L[14] |
| P[28] | 1485.374 | 738.426  | 730.416  | 730.920  | 729.912  | P[13] |
| K[29] | 1549.421 | 699.899  | 681.890  | 682.394  | 681.388  | K[12] |
| K[30] | 1613.468 | 635.852  | 617.842  | 618.346  | 617.339  | K[11] |
| I[31] | 1663.992 | 581.804  | 563.795  | 564.299  | 563.291  | I[10] |
| E[32] | 1728.514 | 511.281  | 503.271  | 503.775  | 502.767  | E[9]  |
| S[33] | 1772.030 | 446.759  | 438.750  | 439.254  | 438.246  | S[8]  |
| H[34] | 1840.559 | 401.243  | 393.234  | 393.738  | 392.730  | H[7]  |
| H[35] | 1909.089 | 334.714  | 326.704  | 327.208  | 326.200  | H[6]  |
| K[36] | 1973.136 | 266.184  | 258.175  | 258.679  | 257.671  | K[5]  |
| A[37] | 2008.655 | 202.139  | 194.129  | 194.633  | 193.625  | A[4]  |
| K[38] | 2072.702 | 168.618  | 158.609  | 159.113  | 158.105  | K[3]  |
| G[39] | 2101.213 | 102.571  | 94.561   | 95.065   | 94.057   | G[2]  |
| K[40] | 2165.260 | 74.060   | 66.051   | 66.555   | 65.547   | K[1]  |

# sp | Q6GSS7 | H2A2A\_MOUSE

DEELNKLLGK<sup>Dimethyl</sup>VTIAQGGVLPNIQAVLLPKKTESHHKAKGK<sup>28.03</sup>

- ▶ fragmentation table for charge state 3+
- ▶ specType=etd
- ▶ score=77.02
- ▶ F113281.dat
- ▶ query=q36870.p1
- ▶ precursor=866.900240
- ▶ chargePrecursor=5
- ▶ itol=0.5

| AA   | c               | y               | z=1             | z=2             | z               | AA   |
|------|-----------------|-----------------|-----------------|-----------------|-----------------|------|
| D 1  | 45.025          | <b>1444.171</b> | 1438.831        | 0.672           | 1438.495        | D 40 |
| E 2  | 68.039          | 1495.775        | 1490.489        | 0.672           | 1490.153        | E 39 |
| E 3  | 113.654         | <b>1362.814</b> | 1357.478        | 0.672           | 1357.139        | E 38 |
| L 4  | 158.748         | 1319.805        | 1314.469        | 0.672           | 1314.124        | L 37 |
| N 5  | 206.762         | 1282.105        | 1276.769        | <b>1277.102</b> | 1276.430        | N 36 |
| K 6  | 249.401         | 1244.091        | <b>1238.751</b> | <b>1239.087</b> | <b>1238.415</b> | K 35 |
| L 7  | 287.156         | 1201.393        | 1196.053        | <b>1196.389</b> | 1195.717        | L 34 |
| L 8  | 324.869         | 1163.699        | 1158.363        | 1158.004        | 1158.022        | L 33 |
| G 9  | 343.357         | 1126.003        | 1120.664        | 1121.000        | 1120.329        | G 32 |
| K 10 | 395.899         | <b>1106.996</b> | 1101.656        | 1101.992        | 1101.321        | K 31 |
| V 11 | 438.402         | <b>1054.954</b> | <b>1049.614</b> | 1049.950        | <b>1049.278</b> | V 30 |
| T 12 | 482.605         | 1021.931        | 1016.592        | 1016.928        | 1016.259        | T 29 |
| L 13 | 500.299         | 988.249         | 982.909         | <b>983.245</b>  | 982.573         | L 28 |
| A 14 | 523.979         | 956.554         | <b>945.214</b>  | <b>945.550</b>  | 944.879         | A 27 |
| Q 15 | 566.605         | 926.875         | 921.535         | <b>921.871</b>  | 921.199         | Q 26 |
| G 16 | 585.672         | 884.189         | <b>878.849</b>  | <b>879.185</b>  | <b>878.513</b>  | G 25 |
| G 17 | 604.679         | 865.182         | <b>859.842</b>  | 860.178         | <b>859.506</b>  | G 24 |
| V 18 | 637.702         | 846.174         | 840.835         | 841.171         | 840.499         | V 23 |
| L 19 | 678.307         | 813.152         | <b>807.812</b>  | <b>808.148</b>  | <b>807.476</b>  | L 22 |
| F 20 | 707.747         | 775.821         | 770.481         | 770.817         | 770.145         | F 21 |
| N 21 | 748.762         | 743.106         | 737.766         | 738.102         | 737.430         | N 20 |
| I 22 | 781.456         | 705.002         | 699.662         | 700.000         | 699.414         | I 19 |
| Q 23 | 826.143         | 667.397         | 662.057         | 662.393         | 661.721         | Q 18 |
| A 24 | 849.827         | 634.711         | 629.371         | 629.707         | 629.035         | A 17 |
| V 25 | 882.844         | 603.035         | 598.692         | 599.028         | 598.356         | V 16 |
| L 26 | 920.539         | 568.009         | 562.669         | 563.005         | 562.333         | L 15 |
| L 27 | 958.234         | 530.314         | 524.975         | 525.311         | 524.639         | L 14 |
| F 28 | 990.505         | 492.620         | 487.280         | 487.616         | 486.944         | F 13 |
| K 29 | 1033.283        | 460.269         | 454.929         | 455.265         | 454.593         | K 12 |
| K 30 | <b>1075.981</b> | 427.570         | 422.230         | 422.567         | 421.895         | K 11 |
| T 31 | <b>1109.664</b> | 374.872         | 369.532         | 369.868         | 369.196         | T 10 |
| E 32 | 1152.678        | 341.180         | 335.840         | 336.180         | 335.514         | E 9  |
| S 33 | <b>1181.689</b> | 298.175         | 292.835         | 293.172         | 292.500         | S 8  |
| H 34 | <b>1227.375</b> | 269.185         | 263.845         | 264.181         | 263.489         | H 7  |
| H 35 | <b>1273.061</b> | 223.478         | 218.138         | 218.475         | 217.803         | H 6  |
| K 36 | <b>1315.768</b> | 177.762         | 172.422         | 172.762         | 172.110         | K 5  |
| A 37 | <b>1339.439</b> | 135.094         | 129.754         | 130.090         | 129.414         | A 4  |
| K 38 | 1382.137        | 111.415         | 106.075         | 106.411         | 105.739         | K 3  |
| G 39 | <b>1461.144</b> | 68.716          | 63.377          | 63.713          | 63.041          | G 2  |
| K 40 | 1443.843        | 49.709          | 44.370          | 44.705          | 44.034          | K 1  |

# sp | Q6GSS7 | H2A2A\_MOUSE

DEELNKLLGK <sup>Dimethyl</sup> 28.03 VTIAQGGVLPNIQAVLLPKKTESHKAKGK

- ▶ fragmentation table for charge state 4+
- ▶ specType=etd
- ▶ score=77.02
- ▶ F113281.dat
- ▶ query=q36870.p1
- ▶ precursor=866.900240
- ▶ chargePrecursor=5
- ▶ itol=0.5

| AA    | c               | y               | z+1             | z+2            | z              | AA    |
|-------|-----------------|-----------------|-----------------|----------------|----------------|-------|
| D[1]  | 34.021          | 1083.367        | 1079.375        | 0.755          | 1079.121       | D[40] |
| E[2]  | 66.281          | <b>1054.623</b> | 1050.618        | 0.755          | 1050.366       | E[39] |
| E[3]  | 98.542          | 1022.362        | <b>1018.358</b> | 0.755          | 1018.108       | E[38] |
| L[4]  | 126.813         | 990.102         | 986.097         | 0.755          | 985.845        | L[37] |
| N[5]  | 155.324         | 961.831         | 957.826         | 958.078        | 957.574        | N[36] |
| K[6]  | 187.347         | 933.320         | <b>929.315</b>  | 929.567        | <b>929.063</b> | K[35] |
| L[7]  | 215.818         | 903.292         | 897.292         | 897.544        | 897.544        | L[34] |
| L[8]  | 243.889         | 873.022         | 869.021         | 869.273        | 868.769        | L[33] |
| G[9]  | 258.145         | 844.754         | 840.750         | 841.002        | 840.498        | G[32] |
| K[10] | 297.176         | 839.499         | 826.494         | 826.746        | 826.242        | K[31] |
| V[11] | 321.944         | 791.467         | <b>787.463</b>  | <b>787.715</b> | <b>787.211</b> | V[30] |
| T[12] | 347.205         | 766.700         | 762.696         | 762.947        | 762.444        | T[29] |
| I[13] | 375.476         | 741.438         | 737.434         | 737.686        | 737.182        | I[28] |
| A[14] | 393.236         | 713.167         | 709.163         | 709.415        | 708.911        | A[27] |
| Q[15] | 425.250         | 695.408         | 691.403         | 691.655        | 691.151        | Q[26] |
| G[16] | 439.508         | 663.391         | 659.389         | 659.641        | 659.137        | G[25] |
| G[17] | 453.761         | 648.138         | 645.133         | 645.385        | 644.881        | G[24] |
| V[18] | 478.528         | 634.883         | 630.878         | 631.130        | 630.626        | V[23] |
| L[19] | 506.799         | 610.110         | 606.111         | 606.363        | 605.859        | L[22] |
| P[20] | 533.862         | 583.844         | 577.840         | 578.092        | 577.588        | P[21] |
| N[21] | 559.573         | 557.582         | 553.577         | 553.829        | 553.325        | N[20] |
| I[22] | 587.844         | 529.671         | 525.666         | 525.918        | 524.814        | I[19] |
| Q[23] | 619.859         | 500.800         | 496.795         | 497.047        | 496.543        | Q[18] |
| A[24] | 637.618         | 468.788         | 464.780         | 465.032        | 464.528        | A[17] |
| V[25] | 662.385         | 451.028         | 447.021         | 447.273        | 446.769        | V[16] |
| L[26] | 690.856         | 428.259         | 423.254         | 423.506        | 422.002        | L[15] |
| L[27] | 718.927         | 397.895         | 393.883         | 394.235        | 393.731        | L[14] |
| P[28] | 743.190         | 368.710         | 365.712         | 365.964        | 365.460        | P[13] |
| K[29] | 775.214         | 345.453         | 341.440         | 341.701        | 341.197        | K[12] |
| K[30] | 807.238         | 313.430         | 309.425         | 309.677        | 309.173        | K[11] |
| T[31] | 832.500         | 281.408         | 277.401         | 277.653        | 277.149        | T[10] |
| E[32] | 864.780         | 256.144         | 252.139         | 252.391        | 251.887        | E[9]  |
| S[33] | 898.518         | 223.881         | 219.879         | 220.131        | 219.627        | S[8]  |
| H[34] | 920.783         | 202.125         | 198.121         | 198.373        | 197.869        | H[7]  |
| H[35] | 955.048         | 167.861         | 163.856         | 164.108        | 163.604        | H[6]  |
| K[36] | 987.672         | 133.596         | 129.591         | 129.843        | 129.339        | K[5]  |
| A[37] | <b>1004.831</b> | 101.572         | 97.567          | 97.819         | 97.315         | A[4]  |
| K[38] | <b>1036.855</b> | 83.813          | 79.808          | 80.060         | 79.556         | K[3]  |
| G[39] | <b>1051.110</b> | 53.789          | 47.784          | 48.036         | 47.532         | G[2]  |
| K[40] | 1083.134        | 37.534          | 33.529          | 33.781         | 33.277         | K[1]  |



# sp | Q6GSS7 | H2A2A\_MOUSE

DEELNKLLGK <sup>Dimethyl</sup>VTIAQGGVLPNIQAVLLPKKTESHKAKGK <sub>28.03</sub>

- ▶ fragmentation table for charge state 1+
- ▶ specType=etd
- ▶ score=66.97
- ▶ F113281.dat
- ▶ query=q36876.p1
- ▶ precursor=866.900490
- ▶ chargePrecursor=5
- ▶ itol=0.5

| AA | c       | y               | z=1             | z=2             | z               | AA              |       |
|----|---------|-----------------|-----------------|-----------------|-----------------|-----------------|-------|
| D  | 133.061 | 4330.497        | 4314.479        | 0.000           | 4313.471        | D(40)           |       |
| E  | 262.103 | 4215.470        | 4199.452        | 0.000           | 4198.444        | E(36)           |       |
| E  | 391.146 | 4099.425        | 4079.409        | 0.000           | 4079.401        | E(38)           |       |
| L  | 504.230 | 3957.385        | 3941.368        | 0.000           | 3940.359        | L(37)           |       |
| N  | 5       | <b>618.273</b>  | 3844.301        | 3826.282        | 3829.290        | 3827.275        | N(36) |
| K  | 6       | <b>746.368</b>  | 3730.258        | 3714.239        | 3715.247        | 3713.233        | K(35) |
| L  | 7       | <b>859.452</b>  | 3602.163        | 3586.144        | 3587.152        | 3585.137        | L(34) |
| L  | 8       | <b>972.536</b>  | 3469.076        | 3451.058        | 3474.066        | 3472.052        | L(33) |
| G  | 9       | <b>1029.558</b> | 3375.955        | 3359.937        | 3360.984        | 3358.950        | G(32) |
| K  | 10      | 1185.684        | 3318.074        | 3302.055        | 3303.963        | 3301.947        | K(31) |
| V  | 11      | 1284.752        | 3162.847        | 3146.830        | 3147.836        | 3145.821        | V(30) |
| T  | 12      | 1385.800        | 3063.779        | 3047.760        | 3048.768        | 3046.752        | T(29) |
| L  | 13      | 1486.864        | 2962.731        | 2946.713        | 2947.720        | 2945.705        | L(28) |
| A  | 14      | <b>1569.921</b> | 2849.647        | 2833.628        | 2834.636        | 2832.621        | A(27) |
| Q  | 15      | 1667.980        | 2778.610        | 2762.591        | 2763.599        | 2761.583        | Q(26) |
| G  | 16      | 1755.001        | 2650.552        | 2634.533        | 2635.541        | 2633.525        | G(25) |
| G  | 17      | 1812.023        | 2593.530        | 2577.511        | 2578.519        | 2576.504        | G(24) |
| V  | 18      | 1911.091        | 2536.509        | 2520.490        | 2521.498        | 2519.482        | V(23) |
| L  | 19      | 2024.175        | 2437.440        | 2421.421        | 2422.429        | 2420.414        | L(22) |
| P  | 20      | 2121.208        | 2324.355        | 2308.337        | 2309.345        | 2307.330        | P(21) |
| N  | 21      | 2235.271        | 2227.303        | 2211.285        | 2212.292        | 2210.277        | N(20) |
| I  | 22      | 2346.355        | 2111.260        | 2095.242        | 2096.250        | 2094.234        | I(19) |
| Q  | 23      | 2476.413        | 2000.176        | 1984.158        | 1985.165        | 1983.150        | Q(18) |
| A  | 24      | 2547.450        | 1872.118        | 1856.099        | 1857.107        | 1855.091        | A(17) |
| V  | 25      | 2648.519        | 1804.081        | 1788.062        | 1789.070        | 1787.054        | V(16) |
| L  | 26      | 2759.603        | 1702.012        | 1685.994        | 1687.001        | 1684.985        | L(15) |
| L  | 27      | 2872.687        | 1608.928        | 1592.909        | <b>1573.917</b> | 1571.901        | L(14) |
| P  | 28      | 2969.740        | 1475.844        | 1459.825        | 1460.833        | <b>1458.818</b> | P(13) |
| K  | 29      | 3097.815        | 1378.791        | 1362.773        | 1363.780        | 1361.765        | K(12) |
| K  | 30      | 3225.930        | <b>1250.696</b> | <b>1234.678</b> | 1235.686        | 1233.670        | K(11) |
| T  | 31      | 3328.977        | 1122.601        | <b>1106.583</b> | 1107.591        | 1105.575        | T(10) |
| E  | 32      | 3456.020        | 1021.554        | <b>1005.535</b> | 1006.543        | <b>1004.527</b> | E(9)  |
| S  | 33      | 3543.052        | <b>892.511</b>  | <b>876.492</b>  | <b>877.500</b>  | 875.485         | S(8)  |
| H  | 34      | 3680.111        | 805.479         | <b>789.460</b>  | 790.468         | 788.453         | H(7)  |
| H  | 35      | 3817.170        | 698.420         | <b>682.401</b>  | 683.409         | 681.394         | H(6)  |
| K  | 36      | 3945.266        | 633.361         | <b>615.343</b>  | <b>616.350</b>  | 614.335         | K(5)  |
| A  | 37      | 4016.302        | 483.265         | <b>387.248</b>  | 388.255         | 386.240         | A(4)  |
| K  | 38      | 4144.397        | 332.229         | <b>316.211</b>  | <b>317.218</b>  | 315.203         | K(3)  |
| G  | 39      | 4261.416        | 204.134         | 186.116         | 189.123         | 187.106         | G(2)  |
| K  | 40      | 4320.513        | 147.113         | 131.094         | 132.102         | 130.086         | K(1)  |

# sp | Q6GSS7 | H2A2A\_MOUSE

DEELNKLLGK <sup>Dimethyl</sup> <sub>28.03</sub> VTIAQGGVLPNIQAVLLPKKTESHKAKGK

- ▶ fragmentation table for charge state 2+
- ▶ specType=etd
- ▶ score=66.97
- ▶ F113281.dat
- ▶ query=q36876.p1
- ▶ precursor=866.900490
- ▶ chargePrecursor=5
- ▶ itol=0.5

| AA  | c               | y        | z+1             | z+2             | z               | AA  |
|-----|-----------------|----------|-----------------|-----------------|-----------------|-----|
| D 1 | 67.034          | 2165.752 | 2157.743        | 0.504           | 2157.239        | Q40 |
| E 2 | 133.955         | 2158.238 | 2158.229        | 0.504           | 2099.728        | E39 |
| E 3 | 196.077         | 2043.718 | 2035.709        | 0.504           | 2035.205        | E38 |
| L 4 | 252.619         | 1976.199 | 1971.187        | 0.504           | 1970.683        | L37 |
| N 5 | 309.640         | 1922.654 | 1914.645        | 1915.149        | 1914.141        | N36 |
| K 6 | 373.688         | 1895.633 | 1887.623        | 1888.127        | 1887.119        | K35 |
| L 7 | 430.230         | 1861.585 | <b>1793.576</b> | 1794.080        | <b>1793.072</b> | L34 |
| L 8 | 489.772         | 1745.043 | 1737.034        | 1737.538        | 1736.531        | L33 |
| G 9 | <b>515.282</b>  | 1688.501 | 1680.492        | <b>1680.996</b> | 1679.989        | G32 |
| K10 | 591.346         | 1659.990 | 1651.981        | <b>1652.485</b> | 1651.477        | K31 |
| V11 | 642.880         | 1581.627 | <b>1573.918</b> | <b>1574.422</b> | 1573.414        | V30 |
| T12 | 693.404         | 1512.303 | <b>1524.384</b> | 1524.888        | <b>1523.880</b> | T29 |
| L13 | 749.646         | 1451.899 | 1473.890        | <b>1474.384</b> | 1473.386        | L28 |
| A14 | 785.464         | 1425.327 | 1417.318        | 1417.822        | 1416.814        | A27 |
| Q15 | 849.493         | 1389.809 | <b>1381.799</b> | <b>1382.303</b> | 1381.295        | Q26 |
| G16 | <b>878.004</b>  | 1325.779 | <b>1317.770</b> | <b>1318.274</b> | 1317.266        | G25 |
| G17 | 906.515         | 1297.269 | 1289.259        | 1289.763        | 1288.755        | G24 |
| V18 | <b>956.049</b>  | 1268.758 | 1260.749        | 1261.252        | 1260.245        | V23 |
| L19 | 1027.597        | 1219.244 | 1211.235        | <b>1211.738</b> | 1210.730        | L22 |
| P20 | <b>1061.118</b> | 1162.662 | 1154.653        | 1155.156        | 1154.149        | P21 |
| N21 | 1118.139        | 1114.155 | 1106.146        | <b>1106.650</b> | 1105.642        | N20 |
| I22 | 1174.681        | 1057.134 | 1049.124        | 1049.628        | 1048.621        | I19 |
| Q23 | <b>1238.710</b> | 1000.592 | 992.582         | 993.086         | 992.079         | Q18 |
| A24 | <b>1274.229</b> | 936.563  | <b>928.553</b>  | <b>929.057</b>  | 928.049         | A17 |
| V25 | <b>1323.763</b> | 891.044  | <b>893.035</b>  | <b>894.000</b>  | <b>892.531</b>  | V16 |
| L26 | <b>1380.305</b> | 851.510  | <b>843.500</b>  | <b>844.004</b>  | 843.000         | L15 |
| L27 | 1438.847        | 794.968  | <b>786.958</b>  | 787.462         | <b>786.454</b>  | L14 |
| P28 | <b>1485.374</b> | 738.426  | 730.416         | 730.920         | 729.912         | P13 |
| K29 | <b>1549.421</b> | 699.899  | <b>681.890</b>  | <b>682.394</b>  | 681.386         | K12 |
| K30 | <b>1613.468</b> | 635.852  | <b>617.842</b>  | <b>618.346</b>  | 617.339         | K11 |
| I31 | <b>1663.992</b> | 581.804  | 583.795         | 584.299         | 583.291         | I10 |
| E32 | <b>1728.514</b> | 511.281  | 503.271         | 503.775         | 502.767         | E9  |
| S33 | <b>1772.030</b> | 446.759  | 438.750         | 439.254         | 438.246         | S8  |
| H34 | 1840.559        | 401.243  | 393.234         | 393.738         | 392.730         | H7  |
| H35 | <b>1909.089</b> | 334.714  | 326.704         | 327.208         | 326.200         | H6  |
| K36 | 1973.136        | 286.184  | 288.175         | 288.679         | 287.671         | K5  |
| A37 | 2008.655        | 202.139  | 194.129         | 194.633         | 193.625         | A4  |
| K38 | 2072.702        | 168.618  | 158.609         | 159.113         | 158.105         | K3  |
| G39 | 2101.213        | 102.571  | 94.561          | 95.065          | 94.057          | G2  |
| K40 | 2165.260        | 74.060   | 66.051          | 66.555          | 65.547          | K1  |

# sp | Q6GSS7 | H2A2A\_MOUSE

DEELNKLLGK <sup>Dimethyl</sup> <sub>28.03</sub> VTIAQGGVLPNIQAVLLPKKTESHKAKGK

- ▶ fragmentation table for charge state 3+
- ▶ specType=etd
- ▶ score=66.97
- ▶ F113281.dat
- ▶ query=q36876.p1
- ▶ precursor=866.900490
- ▶ chargePrecursor=5
- ▶ itol=0.5

| AA | c  | y               | z+1             | z+2             | z               | AA              |       |
|----|----|-----------------|-----------------|-----------------|-----------------|-----------------|-------|
| D  | 1  | 45.025          | 1444.171        | <b>1438.831</b> | 0.672           | <b>1438.495</b> | D[40] |
| E  | 2  | 68.039          | 1405.628        | <b>1400.489</b> | 0.672           | <b>1400.153</b> | E[39] |
| E  | 3  | 113.054         | 1362.874        | <b>1357.475</b> | 0.672           | <b>1357.139</b> | E[38] |
| L  | 4  | 158.748         | 1319.800        | 1314.400        | 0.672           | 1314.123        | L[37] |
| N  | 5  | 206.762         | 1282.105        | 1276.706        | 1277.102        | 1276.430        | N[36] |
| K  | 6  | 249.401         | 1244.091        | <b>1238.751</b> | <b>1239.087</b> | <b>1238.415</b> | K[35] |
| L  | 7  | 287.156         | 1201.393        | <b>1196.053</b> | <b>1196.389</b> | 1195.717        | L[34] |
| L  | 8  | 324.869         | 1163.099        | <b>1158.358</b> | <b>1158.694</b> | 1158.022        | L[33] |
| G  | 9  | 343.357         | 1126.001        | 1120.600        | <b>1121.000</b> | 1120.329        | G[32] |
| K  | 10 | 395.899         | <b>1106.996</b> | 1101.596        | 1101.992        | 1101.321        | K[31] |
| V  | 11 | 438.622         | 1054.954        | 1049.614        | 1049.950        | 1049.277        | V[30] |
| T  | 12 | 482.605         | 1021.931        | 1018.592        | 1018.938        | 1018.250        | T[29] |
| L  | 13 | 500.259         | 988.249         | <b>982.909</b>  | <b>983.245</b>  | 982.573         | L[28] |
| A  | 14 | 523.979         | 956.554         | 952.214         | 952.550         | 951.878         | A[27] |
| Q  | 15 | 566.695         | 926.875         | <b>921.535</b>  | <b>921.871</b>  | 921.192         | Q[26] |
| G  | 16 | 585.672         | 884.189         | 878.849         | 879.185         | 878.513         | G[25] |
| G  | 17 | 604.679         | 845.182         | <b>859.842</b>  | 860.178         | <b>859.506</b>  | G[24] |
| V  | 18 | 637.702         | 846.174         | 840.835         | 841.171         | 840.497         | V[23] |
| L  | 19 | 678.397         | 813.152         | 807.812         | <b>808.148</b>  | 807.471         | L[22] |
| P  | 20 | 707.747         | 775.821         | 770.117         | 770.853         | 769.761         | P[21] |
| N  | 21 | <b>745.762</b>  | 743.106         | 737.766         | 738.102         | 737.430         | N[20] |
| I  | 22 | 781.456         | 705.002         | 699.152         | 700.488         | 699.411         | I[19] |
| Q  | 23 | 826.143         | 667.397         | 662.057         | 662.393         | 661.721         | Q[18] |
| A  | 24 | 849.827         | 634.711         | 619.371         | 619.707         | 619.035         | A[17] |
| V  | 25 | 882.844         | 603.035         | 596.692         | 596.928         | 596.256         | V[16] |
| L  | 26 | 920.539         | 568.009         | 562.669         | 563.005         | 562.333         | L[15] |
| L  | 27 | 958.234         | 530.314         | 524.975         | 525.311         | 524.639         | L[14] |
| P  | 28 | 990.505         | 492.620         | 487.280         | 487.616         | 486.944         | P[13] |
| K  | 29 | <b>1033.283</b> | 460.269         | 454.929         | 455.265         | 454.593         | K[12] |
| K  | 30 | 1075.981        | 427.570         | 412.231         | 412.567         | 411.895         | K[11] |
| T  | 31 | <b>1109.664</b> | 374.872         | 369.532         | 369.868         | 369.196         | T[10] |
| E  | 32 | <b>1152.678</b> | 341.180         | 335.840         | 336.186         | 335.514         | E[9]  |
| S  | 33 | <b>1181.689</b> | 298.175         | 292.835         | 293.172         | 292.500         | S[8]  |
| H  | 34 | <b>1227.375</b> | 269.165         | 263.825         | 264.161         | 263.489         | H[7]  |
| H  | 35 | 1273.061        | 223.478         | 218.139         | 218.475         | 217.803         | H[6]  |
| K  | 36 | 1318.760        | 177.762         | 172.423         | 172.768         | 172.110         | K[5]  |
| A  | 37 | <b>1339.439</b> | 135.094         | 129.754         | 130.090         | 129.411         | A[4]  |
| K  | 38 | <b>1382.137</b> | 111.415         | 106.075         | 106.411         | 105.739         | K[3]  |
| G  | 39 | <b>1461.144</b> | 68.716          | 63.377          | 63.713          | 63.041          | G[2]  |
| K  | 40 | 1443.843        | 49.709          | 44.370          | 44.705          | 44.034          | K[1]  |



# sp | Q6GSS7 | H2A2A\_MOUSE

DEELNKLLGK <sup>Dimethyl</sup>VTIAQGGVLPNIQAVLLPKKTESHKAKGK <sub>28.03</sub>

- ▶ fragmentation table for charge state 4+
- ▶ specType=etd
- ▶ score=66.97
- ▶ F113281.dat
- ▶ query=q36876\_p1
- ▶ precursor=866.900490
- ▶ chargePrecursor=5
- ▶ itol=0.5

| AA    | c               | y        | z+1             | z+2     | z               | AA    |
|-------|-----------------|----------|-----------------|---------|-----------------|-------|
| D[1]  | 34.021          | 1053.980 | <b>1079.375</b> | 0.755   | <b>1079.123</b> | D[40] |
| E[2]  | 66.281          | 1054.025 | <b>1050.618</b> | 0.755   | <b>1050.366</b> | E[39] |
| E[3]  | 98.942          | 1022.362 | <b>1018.358</b> | 0.755   | 1018.106        | E[38] |
| L[4]  | 126.613         | 090.102  | 999.097         | 0.755   | 995.945         | L[37] |
| N[5]  | 155.324         | 961.831  | 957.826         | 958.078 | 957.574         | N[36] |
| K[6]  | 187.247         | 933.320  | <b>929.315</b>  | 929.567 | <b>929.063</b>  | K[35] |
| L[7]  | 215.618         | 901.296  | 887.292         | 897.544 | 897.540         | L[34] |
| L[8]  | 243.889         | 873.025  | 859.021         | 859.273 | 858.769         | L[33] |
| G[9]  | 258.145         | 844.754  | 840.750         | 841.002 | 840.498         | G[32] |
| K[10] | 297.176         | 830.499  | 826.494         | 826.746 | 826.242         | K[31] |
| V[11] | 321.944         | 791.467  | 787.463         | 787.715 | <b>787.211</b>  | V[30] |
| V[12] | 347.205         | 766.700  | 762.696         | 762.947 | 762.444         | V[29] |
| L[13] | 375.476         | 741.438  | 737.434         | 737.686 | 737.182         | L[28] |
| A[14] | 393.236         | 713.187  | 709.183         | 709.435 | 708.931         | A[27] |
| Q[15] | 425.250         | 695.408  | 691.403         | 691.655 | 691.151         | Q[26] |
| G[16] | 439.506         | 663.393  | 659.389         | 659.641 | 659.137         | G[25] |
| G[17] | 453.761         | 649.138  | 645.133         | 645.385 | 644.881         | G[24] |
| V[18] | 478.529         | 634.883  | 630.878         | 631.130 | 630.626         | V[23] |
| L[19] | 506.799         | 610.116  | 606.111         | 606.363 | 605.859         | L[22] |
| F[20] | 531.862         | 581.844  | 577.840         | 578.092 | 577.588         | F[21] |
| N[21] | 559.573         | 557.587  | 553.577         | 553.829 | 553.325         | N[20] |
| I[22] | 587.844         | 529.071  | 525.066         | 525.318 | 524.814         | I[19] |
| Q[23] | 619.859         | 500.800  | 496.795         | 497.047 | 496.543         | Q[18] |
| A[24] | 637.618         | 468.785  | 464.780         | 465.032 | 464.528         | A[17] |
| V[25] | 662.385         | 451.020  | 447.021         | 447.273 | 446.769         | V[16] |
| L[26] | 690.656         | 426.250  | 422.254         | 422.506 | 422.002         | L[15] |
| L[27] | 718.927         | 397.980  | 393.983         | 394.235 | 393.731         | L[14] |
| P[28] | 743.190         | 369.710  | 365.712         | 365.964 | 365.460         | P[13] |
| K[29] | 775.214         | 345.453  | 341.449         | 341.701 | 341.197         | K[12] |
| K[30] | 807.238         | 313.430  | 309.425         | 309.677 | 309.173         | K[11] |
| T[31] | 832.500         | 281.406  | 277.401         | 277.653 | 277.149         | T[10] |
| E[32] | 864.760         | 256.144  | 252.139         | 252.391 | 251.887         | E[9]  |
| S[33] | 896.518         | 223.883  | 219.879         | 220.131 | 219.627         | S[8]  |
| H[34] | 920.783         | 202.125  | 198.121         | 198.373 | 197.869         | H[7]  |
| H[35] | 955.048         | 167.863  | 163.856         | 164.108 | 163.604         | H[6]  |
| K[36] | <b>987.072</b>  | 133.596  | 129.591         | 129.843 | 129.339         | K[5]  |
| A[37] | 1004.831        | 101.572  | 97.567          | 97.819  | 97.315          | A[4]  |
| K[38] | 1036.855        | 83.813   | 79.808          | 80.060  | 79.556          | K[3]  |
| G[39] | <b>1051.110</b> | 51.789   | 47.784          | 48.036  | 47.532          | G[2]  |
| K[40] | 1083.134        | 37.534   | 33.529          | 33.781  | 33.277          | K[1]  |



# sp | Q6GSS7 | H2A2A\_MOUSE

DEELNK <sup>Dimethyl</sup> 28.03 LLGKVITIAQGGVLPNIQAVLLPKKTESHKAKGK

- ▶ fragmentation table for charge state 1+
- ▶ specType=etd
- ▶ score=34.67
- ▶ F113281.dat
- ▶ query=q36877\_p1
- ▶ precursor=619.502510
- ▶ chargePrecursor=7
- ▶ itol=0.5

| AA | c  | y               | z+1            | z+2             | z               | AA              |       |
|----|----|-----------------|----------------|-----------------|-----------------|-----------------|-------|
| D  | 1  | 1317661         | 4330.497       | 4314.479        | 0.000           | 4313.477        | D[40] |
| E  | 2  | <b>262.103</b>  | 4215.476       | 4199.452        | 0.000           | 4198.444        | E[39] |
| E  | 3  | 391.146         | 4088.428       | 4070.420        | 0.000           | 4059.401        | E[38] |
| L  | 4  | 504.230         | 3957.385       | 3941.366        | 0.000           | 3940.359        | L[37] |
| N  | 5  | <b>618.273</b>  | 3844.301       | 3828.282        | 3820.290        | 3817.275        | N[36] |
| K  | 6  | 774.399         | 3730.258       | 3714.239        | 3715.247        | 3713.232        | K[35] |
| L  | 7  | 887.483         | 3574.132       | 3558.113        | 3559.121        | 3557.105        | L[34] |
| L  | 8  | 1030.597        | 3493.058       | 3445.029        | 3446.037        | 3444.021        | L[33] |
| G  | 9  | 1057.589        | 3347.964       | 3331.945        | 3332.953        | 3330.937        | G[32] |
| K  | 10 | 1185.684        | 3200.942       | 3274.924        | 3275.931        | 3273.916        | K[31] |
| V  | 11 | <b>1284.752</b> | 3102.847       | 3146.829        | 3147.836        | 3145.821        | V[30] |
| T  | 12 | 1385.800        | 3063.779       | 3047.760        | 3048.768        | 3046.752        | T[29] |
| L  | 13 | 1498.884        | 2962.731       | 2946.713        | 2947.720        | 2945.705        | L[28] |
| A  | 14 | 1589.921        | 2849.647       | 2833.628        | 2834.636        | 2832.621        | A[27] |
| Q  | 15 | 1697.980        | 2778.610       | 2762.591        | 2763.599        | 2761.584        | Q[26] |
| G  | 16 | 1755.001        | 2650.552       | 2634.533        | 2635.541        | 2633.525        | G[25] |
| G  | 17 | 1812.023        | 2503.530       | 2577.511        | 2578.519        | 2576.504        | G[24] |
| V  | 18 | 1911.091        | 2536.509       | 2520.490        | 2521.498        | 2519.483        | V[23] |
| L  | 19 | 2024.175        | 2431.440       | 2421.421        | 2422.429        | 2420.413        | L[22] |
| P  | 20 | 2111.228        | 2324.356       | 2308.337        | 2309.345        | 2307.330        | P[21] |
| N  | 21 | 2235.271        | 2227.303       | 2211.284        | 2212.292        | 2210.277        | N[20] |
| I  | 22 | 2348.355        | 2113.260       | 2097.242        | 2098.250        | 2096.234        | I[19] |
| Q  | 23 | 2476.413        | 2000.176       | 1984.158        | 1985.165        | 1983.150        | Q[18] |
| A  | 24 | 2547.450        | 1872.118       | 1856.099        | 1857.107        | 1855.091        | A[17] |
| V  | 25 | 2646.519        | 1803.081       | 1785.062        | 1786.070        | 1784.054        | V[16] |
| L  | 26 | 2759.603        | 1702.012       | 1685.994        | 1687.001        | 1684.985        | L[15] |
| L  | 27 | 2872.687        | 1588.928       | 1572.909        | <b>1573.917</b> | 1571.902        | L[14] |
| F  | 28 | 2069.740        | 1475.844       | 1459.825        | 1460.833        | 1458.818        | F[13] |
| K  | 29 | 3097.835        | 1378.791       | 1362.773        | 1363.780        | 1361.765        | K[12] |
| K  | 30 | 3225.930        | 1250.696       | <b>1234.678</b> | 1235.685        | 1233.670        | K[11] |
| I  | 31 | 3358.977        | 1122.601       | <b>1106.583</b> | 1107.591        | 1105.575        | I[10] |
| E  | 32 | 3456.020        | 1071.554       | <b>1005.535</b> | 1006.543        | <b>1004.527</b> | E[9]  |
| S  | 33 | 3543.052        | <b>892.511</b> | <b>876.492</b>  | 877.500         | 875.485         | S[8]  |
| H  | 34 | 3680.111        | 805.479        | <b>789.460</b>  | <b>790.468</b>  | 788.453         | H[7]  |
| H  | 35 | 3817.170        | 698.420        | <b>652.401</b>  | 653.409         | 651.394         | H[6]  |
| K  | 36 | 3945.205        | 531.361        | <b>515.343</b>  | 516.350         | 514.335         | K[5]  |
| A  | 37 | 4019.202        | 413.306        | <b>387.248</b>  | 388.256         | 386.240         | A[4]  |
| K  | 38 | 4144.397        | 332.229        | <b>316.211</b>  | <b>317.218</b>  | 315.203         | K[3]  |
| G  | 39 | 4201.418        | 204.134        | <b>188.116</b>  | 189.123         | 187.108         | G[2]  |
| K  | 40 | 4329.513        | 147.113        | 133.094         | 132.102         | 130.089         | K[1]  |

# sp | Q6GSS7 | H2A2A\_MOUSE

DEELNK<sup>Dimethyl</sup><sub>28.03</sub> LLGKVITIAQGGVLPNIQAVLLPKKTESHKAKGK

- ▶ fragmentation table for charge state 2+
- ▶ specType=etd
- ▶ score=34.67
- ▶ F113281.dat
- ▶ query=q36877\_p1
- ▶ precursor=619.502510
- ▶ chargePrecursor=7
- ▶ itol=0.5

| AA | c  | y               | z=1             | z=2             | z               | AA                    |
|----|----|-----------------|-----------------|-----------------|-----------------|-----------------------|
| D  | 1  | 87.034          | 2165.752        | 2157.743        | 0.504           | 2157.239 [D40]        |
| E  | 2  | 131.555         | 2108.239        | 2100.229        | 0.504           | 2099.726 [E39]        |
| E  | 3  | 188.077         | 2043.718        | 2035.708        | 0.504           | 2035.201 [E38]        |
| L  | 4  | 252.619         | 1979.196        | 1971.187        | 0.504           | 1970.683 [L37]        |
| N  | 5  | 309.640         | 1922.654        | 1914.645        | 1915.140        | 1914.141 [N36]        |
| K  | 6  | <b>387.703</b>  | 1895.633        | 1887.623        | 1858.127        | 1867.119 [K35]        |
| L  | 7  | 444.245         | 1787.570        | 1779.560        | 1780.064        | 1779.050 [L34]        |
| L  | 8  | 500.767         | 1731.028        | 1723.018        | 1723.522        | 1722.514 [L33]        |
| G  | 9  | 558.288         | 1674.486        | 1666.476        | 1666.980        | 1665.972 [G32]        |
| K  | 10 | <b>593.346</b>  | 1645.975        | 1637.965        | 1638.469        | 1637.462 [K31]        |
| V  | 11 | <b>642.880</b>  | 1581.927        | <b>1573.918</b> | <b>1574.422</b> | 1573.414 [V30]        |
| T  | 12 | <b>693.404</b>  | 1532.393        | 1524.384        | <b>1524.888</b> | 1523.880 [T29]        |
| L  | 13 | <b>749.946</b>  | 1481.899        | 1473.889        | 1474.394        | 1473.386 [L28]        |
| A  | 14 | <b>785.464</b>  | 1428.327        | 1420.317        | 1417.822        | 1416.814 [A27]        |
| Q  | 15 | <b>849.493</b>  | 1389.805        | 1381.795        | 1382.303        | <b>1381.295</b> [Q26] |
| G  | 16 | 878.004         | <b>1325.779</b> | 1317.770        | 1318.274        | 1317.266 [G25]        |
| G  | 17 | <b>906.515</b>  | 1297.266        | 1289.256        | 1289.763        | 1288.755 [G24]        |
| V  | 18 | <b>956.049</b>  | <b>1268.758</b> | 1260.749        | 1261.252        | 1260.245 [V23]        |
| L  | 19 | 1012.594        | 1217.224        | <b>1211.214</b> | <b>1211.718</b> | 1210.710 [L22]        |
| F  | 20 | 1081.118        | <b>1162.682</b> | 1154.672        | 1155.176        | <b>1154.168</b> [F21] |
| N  | 21 | 1118.139        | 1114.155        | 1106.146        | <b>1106.650</b> | 1105.642 [N20]        |
| I  | 22 | 1174.681        | 1057.134        | 1049.124        | 1049.628        | 1048.621 [I20]        |
| Q  | 23 | <b>1238.710</b> | 1000.592        | 992.582         | <b>993.086</b>  | 992.079 [Q18]         |
| A  | 24 | <b>1274.229</b> | 936.563         | 928.553         | 929.057         | 928.049 [A17]         |
| V  | 25 | 1313.743        | 893.044         | <b>893.035</b>  | <b>893.539</b>  | <b>892.531</b> [V16]  |
| L  | 26 | 1380.305        | 851.510         | 843.500         | <b>844.004</b>  | 843.000 [L15]         |
| L  | 27 | 1438.847        | 794.968         | 786.958         | <b>787.462</b>  | 786.454 [L14]         |
| F  | 28 | <b>1465.374</b> | <b>738.426</b>  | 730.416         | 730.920         | 729.912 [F13]         |
| K  | 29 | <b>1549.421</b> | 689.899         | <b>681.890</b>  | <b>682.394</b>  | 681.386 [K12]         |
| K  | 30 | 1613.959        | <b>625.852</b>  | <b>617.842</b>  | <b>618.346</b>  | <b>617.338</b> [K11]  |
| T  | 31 | <b>1663.992</b> | 561.834         | <b>553.795</b>  | <b>554.299</b>  | 553.291 [T10]         |
| E  | 32 | <b>1728.514</b> | 511.261         | <b>503.271</b>  | <b>503.775</b>  | 502.767 [E9]          |
| S  | 33 | 1772.030        | 446.739         | <b>438.750</b>  | <b>439.254</b>  | 438.246 [S8]          |
| H  | 34 | 1840.559        | 403.243         | <b>395.234</b>  | <b>395.738</b>  | 394.730 [H7]          |
| H  | 35 | 1899.089        | 334.714         | 326.704         | 327.208         | 326.200 [H6]          |
| K  | 36 | 1973.136        | 266.184         | 258.173         | 258.678         | 257.671 [K5]          |
| A  | 37 | 2058.655        | 202.137         | 194.127         | 194.631         | 193.624 [A4]          |
| K  | 38 | 2072.702        | 166.618         | 158.609         | 159.113         | 158.105 [K3]          |
| G  | 39 | 2101.211        | 102.571         | 94.561          | 95.065          | 94.057 [G2]           |
| K  | 40 | 2165.260        | 74.060          | 66.051          | 66.555          | 65.547 [K1]           |

# sp | Q6GSS7 | H2A2A\_MOUSE

DEELNK<sup>Dimethyl</sup><sub>28.03</sub> LLGKVIAQGGVLPNIQAVLLPKKTESHKAKGK

- ▶ fragmentation table for charge state 3+
- ▶ specType=etd
- ▶ score=34.67
- ▶ F113281.dat
- ▶ query=q36877\_p1
- ▶ precursor=619.502510
- ▶ chargePrecursor=7
- ▶ itol=0.5

| AA    | c               | y              | z+1             | z+2             | z               | AA    |
|-------|-----------------|----------------|-----------------|-----------------|-----------------|-------|
| D[1]  | 85.025          | 1444.171       | 1438.831        | 0.672           | 1438.466        | D[40] |
| E[2]  | 88.038          | 1425.238       | 1440.480        | 0.672           | 1440.151        | E[39] |
| E[3]  | 131.054         | 1302.014       | 1307.470        | 0.672           | 1307.139        | E[38] |
| L[4]  | 168.748         | 1319.800       | 1314.460        | 0.672           | 1314.124        | L[37] |
| N[5]  | 206.762         | 1282.105       | 1278.760        | 1.277           | 1276.430        | N[36] |
| K[6]  | 258.805         | 1244.091       | <b>1238.751</b> | <b>1239.087</b> | 1238.415        | K[35] |
| L[7]  | 296.499         | 1192.049       | 1188.700        | 1187.045        | 1186.373        | L[34] |
| L[8]  | 334.194         | 1154.354       | 1149.015        | 1149.381        | 1148.693        | L[33] |
| G[9]  | 353.201         | 1118.059       | 1111.520        | 1111.056        | <b>1110.984</b> | G[32] |
| K[10] | <b>395.899</b>  | 1097.052       | 1092.311        | 1092.649        | <b>1091.977</b> | K[31] |
| V[11] | 428.922         | 1054.954       | 1049.614        | 1049.950        | 1049.270        | V[30] |
| T[12] | 462.605         | 1021.931       | 1016.592        | 1016.928        | 1016.250        | T[29] |
| L[13] | 500.299         | 988.249        | 982.909         | 983.245         | 982.573         | L[28] |
| A[14] | 523.979         | 950.554        | <b>945.214</b>  | <b>945.550</b>  | <b>944.878</b>  | A[27] |
| Q[15] | 566.565         | 926.975        | <b>921.535</b>  | <b>921.871</b>  | <b>921.199</b>  | Q[26] |
| G[16] | 585.672         | 884.189        | <b>878.849</b>  | <b>879.185</b>  | <b>878.513</b>  | G[25] |
| G[17] | 604.679         | 805.182        | 800.842         | 801.178         | 800.500         | G[24] |
| V[18] | 637.702         | 846.174        | <b>840.835</b>  | <b>841.171</b>  | 840.499         | V[23] |
| L[19] | 675.297         | 813.157        | <b>807.812</b>  | <b>808.148</b>  | <b>807.476</b>  | L[22] |
| P[20] | 707.147         | <b>775.457</b> | <b>770.117</b>  | <b>770.453</b>  | 769.781         | P[21] |
| N[21] | 745.762         | 743.105        | <b>737.766</b>  | <b>738.102</b>  | <b>737.430</b>  | N[20] |
| I[22] | 783.456         | 705.902        | 699.752         | 700.088         | 699.414         | I[19] |
| Q[23] | <b>826.143</b>  | 697.397        | <b>662.057</b>  | <b>662.393</b>  | 661.721         | Q[18] |
| A[24] | <b>849.822</b>  | 624.711        | 619.371         | 619.707         | 619.035         | A[17] |
| V[25] | <b>882.844</b>  | 601.032        | <b>595.692</b>  | <b>596.028</b>  | 595.356         | V[16] |
| L[26] | 925.539         | 568.009        | 562.669         | <b>561.005</b>  | 562.331         | L[15] |
| L[27] | 958.234         | 530.314        | 524.975         | 525.311         | 524.639         | L[14] |
| P[28] | 990.585         | 492.620        | 487.280         | 487.616         | 486.944         | P[13] |
| K[29] | <b>1033.283</b> | 460.209        | 454.929         | 455.205         | 454.503         | K[12] |
| K[30] | <b>1075.981</b> | 417.570        | 412.231         | 412.567         | 411.895         | K[11] |
| I[31] | 1109.664        | 474.872        | 369.532         | 369.868         | 369.196         | I[10] |
| E[32] | <b>1152.678</b> | 341.180        | 335.850         | 336.186         | 335.514         | E[9]  |
| S[33] | <b>1181.689</b> | 298.175        | 292.836         | 293.172         | 292.500         | S[8]  |
| H[34] | 1227.375        | 269.165        | 263.825         | 264.161         | 263.489         | H[7]  |
| H[35] | 1273.061        | 223.478        | <b>218.139</b>  | <b>218.475</b>  | <b>217.803</b>  | H[6]  |
| K[36] | <b>1315.760</b> | 177.792        | 172.452         | 172.788         | 172.116         | K[5]  |
| A[37] | <b>1333.439</b> | 135.084        | 129.794         | 130.090         | 129.418         | A[4]  |
| K[38] | 1382.137        | 111.435        | 106.075         | 106.411         | 105.739         | K[3]  |
| G[39] | <b>1401.144</b> | 68.716         | 63.377          | 63.713          | 63.041          | G[2]  |
| K[40] | 1443.843        | 49.709         | 44.370          | 44.705          | 44.034          | K[1]  |

# sp | Q6GSS7 | H2A2A\_MOUSE

DEELNK <sup>Dimethyl</sup><sub>28.03</sub> LLGKVTIAQGGVLPNIQAVLLPKKTESHKAKGK

- ▶ fragmentation table for charge state 4+
- ▶ specType=etd
- ▶ score=34.67
- ▶ F113281.dat
- ▶ query=q36877.p1
- ▶ precursor=619.502510
- ▶ chargePrecursor=7
- ▶ itol=0.5

| AA    | c               | y              | z+1             | z+2            | z               | AA    |
|-------|-----------------|----------------|-----------------|----------------|-----------------|-------|
| D[1]  | 34.021          | 1083.560       | 1079.375        | 0.755          | 1079.171        | D[60] |
| E[2]  | 66.281          | 1054.623       | <b>1050.618</b> | 0.755          | <b>1050.366</b> | E[39] |
| E[3]  | 98.542          | 1022.362       | <b>1018.358</b> | 0.755          | <b>1018.106</b> | E[38] |
| L[4]  | 126.813         | <b>990.102</b> | 986.097         | 0.755          | 985.845         | L[37] |
| R[5]  | 155.324         | 961.831        | 957.826         | 958.078        | 957.574         | R[36] |
| K[6]  | 184.355         | 933.320        | 929.315         | 929.567        | 929.063         | K[35] |
| L[7]  | 222.236         | 894.268        | 890.264         | 890.526        | 890.121         | L[34] |
| L[8]  | 250.897         | 866.017        | 862.011         | 862.265        | 861.761         | L[33] |
| G[9]  | 265.153         | 837.746        | <b>833.742</b>  | 833.994        | <b>833.490</b>  | G[32] |
| K[10] | 297.476         | 823.491        | 819.486         | 819.738        | 819.234         | K[31] |
| V[11] | 321.944         | 791.667        | <b>787.463</b>  | <b>787.715</b> | 787.211         | V[30] |
| T[12] | 347.205         | 766.700        | 762.696         | <b>762.947</b> | 762.444         | T[29] |
| I[13] | 375.476         | <b>741.438</b> | <b>737.434</b>  | <b>737.686</b> | <b>737.182</b>  | I[28] |
| A[14] | 393.738         | 713.169        | <b>709.163</b>  | <b>709.415</b> | <b>708.911</b>  | A[27] |
| Q[15] | 425.250         | 695.408        | <b>691.403</b>  | <b>691.655</b> | <b>691.151</b>  | Q[26] |
| Q[16] | <b>439.506</b>  | <b>663.393</b> | <b>659.389</b>  | <b>659.641</b> | 659.137         | Q[25] |
| G[17] | 453.761         | 640.139        | 645.133         | 645.385        | 644.881         | G[24] |
| V[18] | 478.528         | 614.893        | <b>630.878</b>  | <b>631.130</b> | 630.626         | V[23] |
| L[19] | 506.799         | <b>610.116</b> | <b>606.111</b>  | <b>606.363</b> | 605.859         | L[22] |
| P[20] | 533.662         | <b>581.844</b> | 577.840         | 578.092        | 577.588         | P[21] |
| N[21] | 559.573         | 557.584        | 553.577         | <b>553.829</b> | 553.325         | N[20] |
| I[22] | 587.944         | 529.071        | 525.066         | 525.318        | 524.814         | I[19] |
| Q[23] | 619.859         | 500.800        | 496.795         | 497.047        | 496.543         | Q[18] |
| A[24] | 637.618         | 468.785        | 464.780         | 465.032        | 464.528         | A[17] |
| V[25] | <b>662.385</b>  | 451.026        | 447.021         | 447.273        | 446.769         | V[16] |
| L[26] | 690.856         | 428.259        | 424.254         | 424.506        | 424.002         | L[15] |
| L[27] | 718.927         | 397.685        | 393.683         | 394.235        | 393.731         | L[14] |
| P[28] | 743.190         | 369.716        | 365.712         | 365.964        | 365.460         | P[13] |
| K[29] | 775.214         | 345.453        | 341.449         | 341.701        | 341.197         | K[12] |
| K[30] | 807.238         | 313.430        | 309.425         | 309.677        | 309.173         | K[11] |
| T[31] | 832.500         | 281.406        | 277.401         | 277.653        | 277.149         | T[10] |
| E[32] | 854.769         | 250.144        | 246.139         | 246.391        | 245.887         | E[9]  |
| S[13] | <b>886.518</b>  | 223.883        | 219.879         | 220.131        | 219.627         | S[8]  |
| H[34] | 920.783         | 202.125        | 198.121         | 198.373        | 197.869         | H[7]  |
| H[35] | 955.048         | 167.861        | 163.856         | 164.108        | 163.604         | H[6]  |
| K[36] | 987.872         | 133.596        | 129.591         | 129.843        | 129.339         | K[5]  |
| A[37] | <b>1004.831</b> | 101.572        | 97.567          | 97.819         | 97.315          | A[4]  |
| K[38] | <b>1036.855</b> | 83.813         | 79.808          | 80.060         | 79.556          | K[3]  |
| G[39] | <b>1051.110</b> | 51.789         | 47.784          | 48.036         | 47.532          | G[2]  |
| K[40] | 1083.134        | 37.534         | 33.529          | 33.781         | 33.277          | K[1]  |

# sp | Q6GSS7 | H2A2A\_MOUSE

DEELNK <sup>Dimethyl</sup><sub>28.03</sub> LLGKVTIAQGGVLPNIQAVLLPKKTESHKAKGK

- ▶ fragmentation table for charge state 5+
- ▶ specType=etd
- ▶ score=34.67
- ▶ F113281.dat
- ▶ query=q36877\_p1
- ▶ precursor=619.502510
- ▶ chargePrecursor=7
- ▶ itol=0.5

| AA    | c              | y              | z+1            | z+2            | z              | AA    |
|-------|----------------|----------------|----------------|----------------|----------------|-------|
| D[1]  | 27.418         | 866.905        | <b>863.702</b> | 0.806          | <b>863.500</b> | D[40] |
| E[2]  | 53.226         | <b>843.900</b> | <b>840.696</b> | 0.806          | 840.495        | E[39] |
| E[3]  | 79.035         | 818.093        | <b>814.888</b> | 0.806          | 814.686        | E[38] |
| L[4]  | 101.052        | 792.281        | <b>789.079</b> | 0.806          | 788.878        | L[37] |
| N[5]  | 124.460        | 769.666        | 766.462        | 766.664        | 766.261        | N[36] |
| K[6]  | 156.680        | <b>746.857</b> | 743.654        | 743.855        | 743.452        | K[35] |
| L[7]  | 178.302        | <b>715.632</b> | 712.428        | 712.630        | 712.227        | L[34] |
| L[8]  | 200.919        | 691.015        | 688.812        | 689.013        | 689.610        | L[33] |
| G[9]  | 212.324        | <b>670.399</b> | 667.195        | 667.396        | 666.993        | G[32] |
| K[10] | 237.943        | 658.994        | 655.791        | 655.992        | 655.589        | K[31] |
| V[11] | 257.756        | 633.375        | 630.172        | 630.373        | 629.970        | V[30] |
| V[12] | 277.966        | 613.562        | <b>610.358</b> | <b>610.559</b> | <b>610.156</b> | V[29] |
| I[13] | 300.583        | <b>593.352</b> | 590.148        | 590.350        | 589.947        | I[28] |
| A[14] | 314.790        | 570.735        | 567.532        | 567.733        | 567.330        | A[27] |
| Q[15] | 340.402        | 556.528        | 553.324        | 553.526        | 553.123        | Q[26] |
| G[16] | 351.806        | 530.916        | 527.712        | 527.914        | 527.511        | G[25] |
| G[17] | 363.210        | 519.512        | 516.308        | 516.510        | 516.107        | G[24] |
| V[18] | 383.024        | 508.108        | 504.904        | 505.105        | 504.702        | V[23] |
| L[19] | 405.641        | 488.294        | 485.090        | 485.292        | 484.889        | L[22] |
| P[20] | 425.051        | 465.677        | 462.473        | 462.675        | 462.272        | P[21] |
| N[21] | 447.860        | 446.266        | 443.063        | 443.264        | 442.861        | N[20] |
| L[22] | 470.477        | 423.458        | 420.254        | 420.456        | 420.053        | L[19] |
| Q[23] | 496.088        | 400.841        | 397.637        | 397.839        | 397.436        | Q[18] |
| A[24] | 510.296        | 375.226        | 372.022        | 372.223        | 371.824        | A[17] |
| V[25] | 530.110        | 361.022        | 357.818        | 358.020        | 357.617        | V[16] |
| L[26] | 552.726        | 341.208        | 338.005        | 338.206        | 337.803        | L[15] |
| L[27] | 575.343        | 318.591        | 315.388        | 315.589        | 315.186        | L[14] |
| P[28] | 594.754        | 295.975        | 292.771        | 292.972        | 292.569        | P[13] |
| K[29] | 630.373        | 276.564        | 273.360        | 273.562        | 273.159        | K[12] |
| K[30] | 645.992        | 250.945        | 247.741        | 247.943        | 247.540        | K[11] |
| V[31] | 669.201        | 229.326        | 226.122        | 226.324        | 225.921        | V[10] |
| E[32] | 692.010        | 205.117        | 201.913        | 202.114        | 201.711        | E[9]  |
| S[33] | <b>709.416</b> | 179.308        | 176.104        | 176.306        | 175.903        | S[8]  |
| H[34] | <b>736.828</b> | 161.902        | 158.698        | 158.899        | 158.496        | H[7]  |
| H[35] | 764.240        | 134.490        | 131.286        | 131.488        | 131.085        | H[6]  |
| K[36] | <b>789.859</b> | 107.078        | 103.874        | 104.076        | 103.673        | K[5]  |
| A[37] | 804.066        | 81.459         | 78.255         | 78.457         | 78.054         | A[4]  |
| K[38] | 829.685        | 67.252         | 64.048         | 64.249         | 63.846         | K[3]  |
| G[39] | <b>841.089</b> | 41.633         | 38.429         | 38.630         | 38.227         | G[2]  |
| K[40] | 869.708        | 30.228         | 27.023         | 27.226         | 26.823         | K[1]  |

# sp | Q6GSS7 | H2A2A\_MOUSE

DEELNK <sup>Dimethyl</sup><sub>28.03</sub> LLGKVTIAQGGVLPNIQAVLLPKKTESHKAKGK

- ▶ fragmentation table for charge state 6+
- ▶ specType=etd
- ▶ score=34.67
- ▶ F113281.dat
- ▶ query=q36877\_p1
- ▶ precursor=619.502510
- ▶ chargePrecursor=7
- ▶ itol=0.5

| AA | c  | y              | z+1            | z+2            | z              | AA             |   |    |
|----|----|----------------|----------------|----------------|----------------|----------------|---|----|
| D  | 1  | 23.016         | 722.589        | <b>719.919</b> | 0.839          | 719.751        | D | 40 |
| E  | 2  | 44.523         | 593.418        | 700.740        | 0.839          | 700.580        | E | 39 |
| E  | 3  | 68.030         | <b>681.911</b> | 679.247        | 0.839          | 679.073        | E | 38 |
| L  | 4  | 94.378         | <b>660.404</b> | 657.734        | 0.839          | 657.566        | L | 37 |
| N  | 5  | 103.885        | 641.550        | 638.886        | 0.839          | 638.718        | N | 36 |
| K  | 6  | 129.906        | 622.949        | 619.879        | 0.839          | 619.711        | K | 35 |
| L  | 7  | 148.753        | 596.528        | <b>593.858</b> | <b>594.026</b> | <b>593.690</b> | L | 34 |
| L  | 8  | 167.601        | 577.681        | 575.011        | 575.179        | 574.843        | L | 33 |
| G  | 9  | 177.104        | 558.833        | 556.164        | 556.332        | 555.996        | G | 32 |
| K  | 10 | 198.453        | 549.130        | 546.660        | 546.828        | 546.492        | K | 31 |
| V  | 11 | 214.965        | 527.981        | 525.311        | 525.479        | 525.143        | V | 30 |
| I  | 12 | 233.806        | 511.469        | 508.799        | 508.967        | 508.631        | I | 29 |
| I  | 13 | 250.053        | 494.620        | 491.950        | 492.126        | 491.790        | I | 28 |
| A  | 14 | <b>262.493</b> | 475.781        | 473.111        | 473.279        | 472.943        | A | 27 |
| Q  | 15 | 283.836        | 463.941        | 461.271        | 461.439        | 461.103        | Q | 26 |
| G  | 16 | 293.340        | 442.598        | <b>439.928</b> | <b>440.096</b> | <b>439.760</b> | G | 25 |
| G  | 17 | 302.843        | 433.094        | 430.425        | 430.593        | 430.257        | G | 24 |
| V  | 18 | 319.355        | 423.591        | 420.921        | 421.089        | 420.753        | V | 23 |
| L  | 19 | 338.202        | 407.079        | 404.410        | 404.578        | 404.242        | L | 22 |
| P  | 20 | 354.377        | 388.232        | 385.562        | 385.730        | 385.394        | P | 21 |
| N  | 21 | 373.385        | 372.091        | 369.387        | 369.555        | 369.219        | N | 20 |
| L  | 22 | 392.232        | 353.049        | 350.360        | 350.548        | 350.212        | L | 19 |
| Q  | 23 | 413.575        | 334.202        | 331.532        | 331.700        | 331.364        | Q | 18 |
| A  | 24 | 435.414        | 312.858        | 310.189        | 310.357        | 310.021        | A | 17 |
| V  | 25 | 441.926        | 301.020        | 298.350        | 298.518        | 298.182        | V | 16 |
| L  | 26 | 460.773        | 284.508        | 281.838        | 282.006        | 281.670        | L | 15 |
| L  | 27 | 479.621        | 265.661        | 262.991        | 263.159        | 262.823        | L | 14 |
| P  | 28 | 495.796        | 246.813        | 244.144        | 244.312        | 243.976        | P | 13 |
| K  | 29 | 517.145        | 230.638        | 227.968        | 228.136        | 227.800        | K | 12 |
| K  | 30 | 538.494        | 209.289        | 206.619        | 206.787        | 206.451        | K | 11 |
| I  | 31 | 555.236        | <b>187.940</b> | 185.270        | 185.438        | 185.102        | I | 10 |
| L  | 32 | 576.843        | 171.059        | 168.429        | 168.597        | 168.261        | E | 9  |
| S  | 33 | 591.348        | 149.591        | 146.921        | 147.089        | 146.753        | S | 8  |
| H  | 34 | 614.191        | 135.086        | 132.416        | 132.584        | 132.248        | H | 7  |
| H  | 35 | 637.034        | 112.243        | 109.573        | 109.741        | 109.405        | H | 6  |
| K  | 36 | 658.384        | 89.400         | 86.730         | 86.898         | 86.562         | K | 5  |
| A  | 37 | <b>670.223</b> | 68.050         | 65.381         | 65.549         | 65.213         | A | 4  |
| K  | 38 | <b>691.572</b> | 56.211         | 53.541         | 53.709         | 53.373         | K | 3  |
| G  | 39 | 701.076        | 34.862         | 32.192         | 32.360         | 32.024         | G | 2  |
| K  | 40 | 722.425        | 25.358         | 22.688         | 22.856         | 22.520         | K | 1  |





# sp | Q6GSS7 | H2A2A\_MOUSE

DEELNKLLGK <sup>Dimethyl</sup> <sub>28.03</sub> VTIAQGGVLPNIQAVLLPKKTESHKAKGK

- ▶ fragmentation table for charge state 1+
- ▶ specType=etd
- ▶ score=49.62
- ▶ F113281.dat
- ▶ query=q36882.p1
- ▶ precursor=866.900870
- ▶ chargePrecursor=5
- ▶ itol=0.5

| AA | c       | y               | z+1            | z+2             | z              | AA              |       |
|----|---------|-----------------|----------------|-----------------|----------------|-----------------|-------|
| D  | 133.084 | 4330.497        | 4314.479       | 0.000           | 4313.471       | D[40]           |       |
| E  | 282.103 | 4215.470        | 4199.452       | 0.000           | 4198.444       | E[30]           |       |
| E  | 391.146 | 4086.428        | 4070.409       | 0.000           | 4069.401       | E[38]           |       |
| L  | 504.230 | 3957.385        | 3941.366       | 0.000           | 3940.359       | L[37]           |       |
| N  | 5       | <b>618.273</b>  | 3844.301       | 3828.282        | 3829.290       | 3827.275        | N[30] |
| K  | 6       | <b>746.368</b>  | 3730.259       | 3714.239        | 3715.247       | 3713.231        | K[35] |
| L  | 7       | 854.357         | 3602.163       | 3586.144        | 3587.152       | 3585.131        | L[34] |
| L  | 8       | <b>972.536</b>  | 3489.079       | 3473.060        | 3474.068       | 3472.051        | L[33] |
| G  | 9       | <b>1029.558</b> | 3375.995       | 3359.976        | 3360.984       | 3358.969        | G[32] |
| K  | 10      | 1185.684        | 3318.974       | 3302.955        | 3303.963       | 3301.947        | K[31] |
| V  | 11      | 1284.752        | 3162.847       | 3146.829        | 3147.836       | 3145.821        | V[30] |
| T  | 12      | <b>1385.800</b> | 3063.779       | 3047.760        | 3048.768       | 3046.752        | T[29] |
| I  | 13      | 1498.884        | 2982.731       | 2966.713        | 2967.720       | 2965.705        | I[28] |
| A  | 14      | 1569.921        | 2894.641       | 2878.623        | 2879.630       | 2877.614        | A[27] |
| Q  | 15      | 1697.980        | 2778.610       | 2762.591        | 2763.599       | 2761.584        | Q[26] |
| G  | 16      | <b>1755.001</b> | 2650.562       | 2634.543        | 2635.541       | 2633.525        | G[25] |
| G  | 17      | 1812.023        | 2593.530       | 2577.511        | 2578.519       | 2576.504        | G[24] |
| V  | 18      | 1911.091        | 2536.509       | 2520.490        | 2521.498       | 2519.482        | V[23] |
| L  | 19      | 2024.175        | 2437.440       | 2421.421        | 2422.429       | 2420.414        | L[22] |
| T  | 20      | 2112.228        | 2324.356       | 2308.337        | 2309.345       | 2307.330        | T[21] |
| N  | 21      | 2235.271        | 2227.303       | 2211.285        | 2212.292       | 2210.277        | N[20] |
| I  | 22      | 2348.355        | 2113.260       | 2097.242        | 2098.250       | 2096.234        | I[19] |
| Q  | 23      | 2476.413        | 2000.176       | 1984.158        | 1985.165       | 1983.150        | Q[18] |
| A  | 24      | 2547.450        | 1872.118       | 1856.099        | 1857.107       | 1855.091        | A[17] |
| V  | 25      | 2646.519        | 1801.081       | 1785.062        | 1786.070       | 1784.054        | V[16] |
| L  | 26      | 2759.603        | 1702.012       | 1686.004        | 1687.001       | 1684.989        | L[15] |
| L  | 27      | 2872.687        | 1598.935       | <b>1572.909</b> | 1573.917       | 1571.902        | L[14] |
| P  | 28      | 2969.740        | 1475.844       | 1459.825        | 1460.833       | <b>1458.818</b> | P[13] |
| K  | 29      | 3097.835        | 1378.791       | 1362.773        | 1363.780       | 1361.765        | K[12] |
| K  | 30      | 3225.930        | 1250.695       | <b>1234.678</b> | 1235.685       | 1233.670        | K[11] |
| T  | 31      | 3326.977        | 1122.601       | <b>1106.583</b> | 1107.591       | 1105.575        | T[10] |
| E  | 32      | 3459.030        | 1011.554       | 1005.535        | 1006.543       | 1004.527        | E[9]  |
| S  | 33      | 3543.052        | <b>892.511</b> | <b>876.492</b>  | 877.500        | 875.485         | S[8]  |
| H  | 34      | 3680.111        | 805.479        | <b>789.460</b>  | 790.468        | 788.451         | H[7]  |
| H  | 35      | 3817.170        | 668.420        | <b>652.401</b>  | <b>653.409</b> | 651.394         | H[6]  |
| K  | 36      | 3945.205        | 531.301        | 515.283         | <b>516.350</b> | 514.335         | K[5]  |
| A  | 37      | 4016.302        | 403.266        | 387.248         | 388.255        | 386.240         | A[4]  |
| K  | 38      | 4144.397        | 332.229        | <b>316.211</b>  | 317.219        | 315.203         | K[3]  |
| G  | 39      | 4201.418        | 204.134        | 188.116         | 189.123        | 187.107         | G[2]  |
| K  | 40      | 4329.513        | 147.113        | 131.094         | 132.102        | 130.086         | K[1]  |

# sp | Q6GSS7 | H2A2A\_MOUSE

DEELNKLLGK <sup>Dimethyl</sup> <sub>28.03</sub> VTIAQGGVLPNIQAVLLPKKTESHKAKGK

- ▶ fragmentation table for charge state 2+
- ▶ specType=etd
- ▶ score=49.62
- ▶ F113281.dat
- ▶ query=q36882.p1
- ▶ precursor=866.900870
- ▶ chargePrecursor=5
- ▶ itol=0.5

| AA  | c               | y        | z+1             | z+2             | z               | AA  |
|-----|-----------------|----------|-----------------|-----------------|-----------------|-----|
| L1  | 67.034          | 2165.752 | 2157.743        | 0.504           | 2157.239        | Q40 |
| E12 | 111.935         | 2158.238 | 2150.229        | 0.504           | 2099.728        | E39 |
| E13 | 196.077         | 2043.718 | 2035.709        | 0.504           | 2035.205        | E38 |
| L14 | 252.619         | 1976.190 | 1971.187        | 0.504           | 1970.683        | L37 |
| N15 | 309.640         | 1922.654 | 1914.645        | 1915.149        | 1914.141        | N36 |
| K16 | 373.688         | 1895.633 | <b>1857.623</b> | <b>1858.127</b> | 1857.119        | K35 |
| L17 | 430.230         | 1861.585 | 1795.576        | <b>1794.080</b> | 1793.072        | L34 |
| L18 | 486.772         | 1745.043 | 1737.034        | 1737.536        | 1736.533        | L33 |
| G19 | 515.262         | 1688.561 | 1680.552        | 1680.996        | 1679.989        | G32 |
| K10 | 593.346         | 1659.990 | <b>1651.981</b> | <b>1652.485</b> | 1651.477        | K31 |
| V11 | 642.880         | 1581.627 | 1573.618        | 1574.422        | <b>1573.414</b> | V30 |
| T12 | 693.404         | 1532.303 | <b>1524.384</b> | <b>1524.888</b> | 1523.880        | T29 |
| L13 | 749.946         | 1451.889 | 1473.880        | 1474.384        | 1473.386        | L28 |
| A14 | 788.464         | 1425.327 | 1417.318        | 1417.822        | 1416.814        | A27 |
| Q15 | <b>849.493</b>  | 1389.809 | 1381.799        | <b>1382.303</b> | 1381.295        | Q26 |
| G16 | 878.004         | 1325.779 | <b>1317.770</b> | <b>1318.274</b> | 1317.266        | G25 |
| G17 | 906.515         | 1267.269 | 1269.259        | <b>1269.763</b> | 1268.755        | G24 |
| V18 | <b>956.049</b>  | 1268.758 | 1260.749        | 1261.252        | 1260.245        | V23 |
| L19 | 1023.291        | 1219.224 | <b>1211.214</b> | <b>1211.718</b> | 1210.710        | L22 |
| P20 | 1061.118        | 1162.662 | 1154.653        | 1155.156        | 1154.160        | P21 |
| N21 | 1118.139        | 1114.155 | <b>1106.146</b> | <b>1106.650</b> | 1105.642        | N20 |
| I22 | 1174.681        | 1057.134 | <b>1049.124</b> | 1049.628        | <b>1048.621</b> | I19 |
| Q23 | <b>1238.710</b> | 1000.592 | 992.582         | 993.086         | 992.079         | Q18 |
| A24 | <b>1274.229</b> | 936.563  | 928.553         | 929.057         | 928.049         | A17 |
| V25 | <b>1323.763</b> | 893.044  | <b>893.035</b>  | 893.539         | <b>892.531</b>  | V16 |
| L26 | 1369.305        | 851.510  | <b>843.500</b>  | <b>844.004</b>  | 843.000         | L15 |
| L27 | 1436.847        | 794.968  | <b>786.958</b>  | <b>787.462</b>  | 786.454         | L14 |
| P28 | <b>1485.374</b> | 738.426  | 730.416         | 730.920         | 729.912         | P13 |
| K29 | <b>1549.421</b> | 699.899  | <b>681.890</b>  | <b>682.394</b>  | 681.386         | K12 |
| K30 | <b>1613.468</b> | 635.852  | <b>617.842</b>  | <b>618.346</b>  | 617.339         | K11 |
| I31 | <b>1663.992</b> | 581.804  | 573.795         | 574.299         | 573.291         | I10 |
| E32 | <b>1728.514</b> | 511.281  | 503.271         | 503.775         | 502.767         | E9  |
| S33 | <b>1772.030</b> | 446.759  | 438.750         | 439.254         | 438.246         | S18 |
| H34 | 1840.559        | 403.243  | 395.234         | 395.738         | 394.730         | H17 |
| H35 | 1909.089        | 334.714  | 326.704         | 327.208         | 326.200         | H16 |
| K36 | <b>1973.136</b> | 266.184  | 258.175         | 258.679         | 257.671         | K5  |
| A37 | 2048.655        | 202.139  | 194.129         | 194.633         | 193.625         | A4  |
| K38 | 2072.702        | 168.618  | 158.609         | 159.113         | 158.105         | K3  |
| G39 | 2101.213        | 102.571  | 94.561          | 95.065          | 94.057          | G2  |
| K40 | 2165.260        | 74.060   | 66.051          | 66.555          | 65.547          | K1  |

# sp | Q6GSS7 | H2A2A\_MOUSE

DEELNKLLGK <sup>Dimethyl</sup> <sub>28.03</sub> VTIAQGGVLPNIQAVLLPKKTESHKAKGK

- ▶ fragmentation table for charge state 3+
- ▶ specType=etd
- ▶ score=49.62
- ▶ F113281.dat
- ▶ query=q36882.p1
- ▶ precursor=866.900870
- ▶ chargePrecursor=5
- ▶ itol=0.5

| AA | c  | y               | z+1             | z+2             | z               | AA              |       |
|----|----|-----------------|-----------------|-----------------|-----------------|-----------------|-------|
| D  | 1  | 45.025          | 1444.171        | 1438.831        | 0.672           | 1438.495        | D[40] |
| E  | 2  | 88.039          | 1405.628        | <b>1400.489</b> | 0.672           | 1400.153        | E[39] |
| E  | 3  | 131.054         | 1362.814        | 1357.475        | 0.672           | 1357.139        | E[38] |
| L  | 4  | 188.748         | 1319.800        | 1314.460        | 0.672           | 1314.124        | L[37] |
| N  | 5  | 206.762         | 1282.105        | 1276.766        | 1277.102        | 1276.430        | N[36] |
| K  | 6  | 249.401         | 1244.091        | <b>1238.751</b> | <b>1239.087</b> | <b>1238.415</b> | K[35] |
| L  | 7  | 287.156         | 1201.393        | 1196.053        | 1196.389        | <b>1195.717</b> | L[34] |
| L  | 8  | 324.860         | 1163.099        | 1158.388        | 1158.694        | 1158.022        | L[33] |
| G  | 9  | 343.357         | 1128.003        | 1123.664        | <b>1121.000</b> | 1120.329        | G[32] |
| K  | 10 | 395.899         | <b>1106.996</b> | <b>1101.656</b> | <b>1101.992</b> | 1101.321        | K[31] |
| V  | 11 | 438.922         | 1054.954        | 1049.614        | 1049.950        | <b>1049.278</b> | V[30] |
| T  | 12 | 482.605         | 1021.931        | 1018.592        | <b>1016.928</b> | 1016.250        | T[29] |
| L  | 13 | 500.299         | 988.249         | <b>982.909</b>  | <b>983.245</b>  | 982.573         | L[28] |
| A  | 14 | 523.979         | <b>950.554</b>  | <b>945.214</b>  | <b>945.550</b>  | <b>944.878</b>  | A[27] |
| Q  | 15 | 566.695         | 920.975         | <b>921.535</b>  | <b>921.871</b>  | 921.192         | Q[26] |
| G  | 16 | 585.672         | 884.189         | <b>878.849</b>  | <b>879.185</b>  | <b>878.513</b>  | G[25] |
| G  | 17 | 604.679         | 865.182         | 859.842         | 860.178         | 859.500         | G[24] |
| V  | 18 | 637.702         | 846.174         | 840.835         | 841.171         | 840.499         | V[23] |
| L  | 19 | 678.397         | 813.152         | 807.812         | 808.148         | 807.476         | L[22] |
| P  | 20 | 707.747         | 775.821         | 770.481         | 770.817         | 769.761         | P[21] |
| N  | 21 | 748.762         | 743.106         | 737.766         | 738.102         | 737.430         | N[20] |
| I  | 22 | 781.496         | 705.002         | 699.662         | 700.000         | 699.411         | I[19] |
| Q  | 23 | 826.143         | 667.397         | 662.057         | 662.393         | 661.721         | Q[18] |
| A  | 24 | <b>848.822</b>  | 634.711         | 629.371         | 629.707         | 629.035         | A[17] |
| V  | 25 | 882.844         | 603.035         | 598.695         | 599.030         | 598.359         | V[16] |
| L  | 26 | 920.539         | 568.009         | 562.669         | 563.005         | 562.333         | L[15] |
| L  | 27 | 958.234         | 530.314         | 524.975         | 525.311         | 524.639         | L[14] |
| P  | 28 | 990.505         | 492.620         | 487.280         | 487.616         | 486.944         | P[13] |
| K  | 29 | 1033.283        | 460.289         | 454.929         | 455.265         | 454.593         | K[12] |
| K  | 30 | 1078.908        | 427.570         | 422.231         | 422.567         | 421.895         | K[11] |
| T  | 31 | <b>1109.664</b> | 374.872         | 369.532         | 369.868         | 369.190         | T[10] |
| E  | 32 | <b>1152.678</b> | 341.180         | 335.840         | 336.186         | 335.514         | E[9]  |
| S  | 33 | 1181.689        | 298.175         | 292.835         | 293.172         | 292.500         | S[8]  |
| H  | 34 | 1227.375        | 269.185         | 263.825         | 264.161         | 263.489         | H[7]  |
| H  | 35 | <b>1273.061</b> | 223.478         | 218.139         | 218.475         | 217.803         | H[6]  |
| K  | 36 | 1313.980        | 177.762         | 172.423         | 172.768         | 172.110         | K[5]  |
| A  | 37 | 1339.439        | 135.094         | 129.754         | 130.090         | 129.411         | A[4]  |
| K  | 38 | <b>1382.137</b> | 111.415         | 106.075         | 106.411         | 105.739         | K[3]  |
| G  | 39 | <b>1461.144</b> | 68.716          | 63.377          | 63.713          | 63.041          | G[2]  |
| K  | 40 | 1443.643        | 49.709          | 44.370          | 44.705          | 44.034          | K[1]  |

# sp | Q6GSS7 | H2A2A\_MOUSE

DEELNKLKLGK <sup>Dimethyl</sup> <sub>28.03</sub> VTIAQGGVLPNIQAVLLPKKTESHKAKGK

- ▶ fragmentation table for charge state 4+
- ▶ specType=etd
- ▶ score=49.62
- ▶ F113281.dat
- ▶ query=q36882.p1
- ▶ precursor=866.900870
- ▶ chargePrecursor=5
- ▶ itol=0.5

| AA    | c               | y        | z+1             | z+2     | z               | AA    |
|-------|-----------------|----------|-----------------|---------|-----------------|-------|
| D[1]  | 34.021          | 1053.980 | <b>1079.375</b> | 0.755   | <b>1079.123</b> | D[40] |
| E[2]  | 66.281          | 1054.025 | <b>1050.618</b> | 0.755   | 1050.956        | E[39] |
| E[3]  | 98.942          | 1022.362 | <b>1018.358</b> | 0.755   | 1018.106        | E[38] |
| L[4]  | 126.613         | 090.102  | 969.097         | 0.755   | 965.945         | L[37] |
| N[5]  | 155.324         | 961.831  | 957.826         | 958.078 | 957.574         | N[36] |
| K[6]  | 187.247         | 933.320  | 929.215         | 929.567 | 929.063         | K[35] |
| L[7]  | 215.618         | 901.296  | 897.292         | 897.544 | 897.040         | L[34] |
| L[8]  | 243.889         | 873.025  | 859.021         | 859.273 | 858.769         | L[33] |
| G[9]  | 258.145         | 844.754  | 840.750         | 841.002 | 840.498         | G[32] |
| K[10] | 297.176         | 830.499  | 826.494         | 826.746 | 826.242         | K[31] |
| V[11] | 321.944         | 791.467  | <b>787.463</b>  | 787.715 | <b>787.211</b>  | V[30] |
| V[12] | 347.205         | 766.700  | 762.696         | 762.947 | 762.444         | V[29] |
| I[13] | 375.476         | 741.438  | 737.434         | 737.686 | 737.182         | I[28] |
| A[14] | 393.236         | 713.187  | 709.183         | 709.435 | 708.931         | A[27] |
| Q[15] | 425.250         | 695.408  | 691.403         | 691.655 | 691.151         | Q[26] |
| G[16] | 439.506         | 663.393  | 659.389         | 659.641 | 659.137         | G[25] |
| G[17] | 453.761         | 649.138  | 645.133         | 645.385 | 644.881         | G[24] |
| V[18] | 478.529         | 634.883  | 630.878         | 631.130 | 630.626         | V[23] |
| L[19] | 506.799         | 610.116  | 606.111         | 606.363 | 605.859         | L[22] |
| F[20] | 531.862         | 581.844  | 577.840         | 578.092 | 577.588         | F[21] |
| N[21] | 559.573         | 557.587  | 553.577         | 553.829 | 553.325         | N[20] |
| I[22] | 587.844         | 529.071  | 525.066         | 525.318 | 524.814         | I[19] |
| Q[23] | 619.859         | 500.800  | 496.795         | 497.047 | 496.543         | Q[18] |
| A[24] | 637.618         | 468.785  | 464.780         | 465.032 | 464.528         | A[17] |
| V[25] | 662.385         | 451.020  | 447.021         | 447.273 | 446.769         | V[16] |
| L[26] | 690.656         | 426.250  | 422.254         | 422.506 | 422.002         | L[15] |
| L[27] | 718.927         | 397.980  | 393.983         | 394.235 | 393.731         | L[14] |
| P[28] | 743.190         | 369.710  | 365.712         | 365.964 | 365.460         | P[13] |
| K[29] | 775.214         | 345.453  | 341.449         | 341.701 | 341.197         | K[12] |
| K[30] | 807.238         | 313.430  | 309.425         | 309.677 | 309.173         | K[11] |
| T[31] | 832.500         | 281.406  | 277.401         | 277.653 | 277.149         | T[10] |
| E[32] | 864.760         | 256.144  | 252.139         | 252.391 | 251.887         | E[9]  |
| S[33] | 896.518         | 223.883  | 219.879         | 220.131 | 219.627         | S[8]  |
| H[34] | 920.783         | 202.125  | 198.121         | 198.373 | 197.869         | H[7]  |
| H[35] | 955.048         | 167.863  | 163.856         | 164.108 | 163.604         | H[6]  |
| K[36] | 987.072         | 133.596  | 129.591         | 129.843 | 129.339         | K[5]  |
| A[37] | 1004.831        | 101.572  | 97.567          | 97.819  | 97.315          | A[4]  |
| K[38] | 1036.855        | 83.813   | 79.808          | 80.060  | 79.556          | K[3]  |
| G[39] | <b>1051.110</b> | 51.789   | 47.784          | 48.036  | 47.532          | G[2]  |
| K[40] | 1083.134        | 37.534   | 33.529          | 33.781  | 33.277          | K[1]  |

# sp | Q6GSS7 | H2A2A\_MOUSE

DEELNKLLGK <sup>Dimethyl</sup> VTIAQGGVLPNIQAVLLPKKTESHKAKGK  
28.03

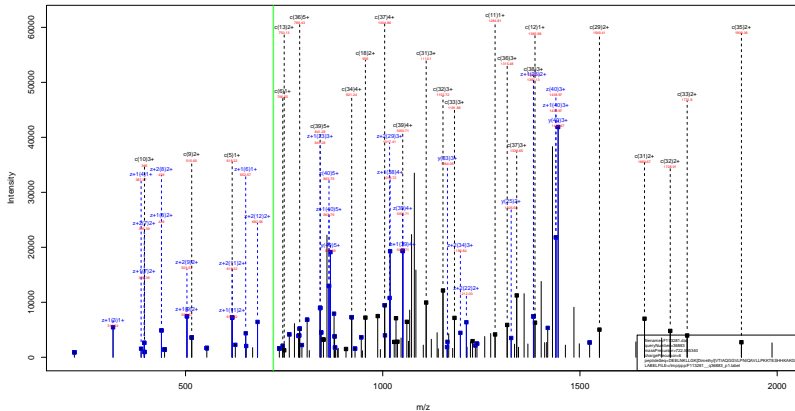

# sp | Q6GSS7 | H2A2A\_MOUSE

DEELNKLLGK <sup>Dimethyl</sup> <sub>28.03</sub> VTIAQGGVLPNIQAVLLPKKTESHKAKGK

- ▶ fragmentation table for charge state 1+
- ▶ specType=etd
- ▶ score=36.65
- ▶ F113281.dat
- ▶ query=q36883.p1
- ▶ precursor=722.585340
- ▶ chargePrecursor=6
- ▶ itol=0.5

| AA | c       | y               | z+1      | z+2             | z              | AA              |       |
|----|---------|-----------------|----------|-----------------|----------------|-----------------|-------|
| D  | 133.084 | 4330.497        | 4314.479 | 0.000           | 4313.471       | D[40]           |       |
| E  | 282.103 | 4215.470        | 4199.452 | 0.000           | 4198.444       | E[30]           |       |
| E  | 391.146 | 4086.428        | 4070.409 | 0.000           | 4069.401       | E[38]           |       |
| L  | 504.230 | 3957.385        | 3941.366 | 0.000           | 3940.359       | L[37]           |       |
| N  | 5       | <b>618.273</b>  | 3844.301 | 3828.282        | 3829.290       | 3827.275        | N[30] |
| K  | 6       | <b>746.368</b>  | 3730.259 | 3714.239        | 3715.247       | 3713.231        | K[35] |
| L  | 7       | 859.452         | 3602.163 | 3586.144        | 3587.152       | 3585.131        | L[34] |
| L  | 8       | 974.536         | 3469.079 | 3453.060        | 3454.068       | 3452.051        | L[33] |
| G  | 9       | <b>1029.558</b> | 3375.095 | 3359.076        | 3360.084       | 3358.069        | G[32] |
| K  | 10      | 1185.684        | 3318.974 | 3302.955        | 3303.963       | 3301.947        | K[31] |
| V  | 11      | <b>1284.752</b> | 3102.847 | 3146.829        | 3147.836       | 3145.821        | V[30] |
| V  | 12      | <b>1385.800</b> | 3063.779 | 3047.760        | 3048.768       | 3046.752        | V[29] |
| I  | 13      | 1498.884        | 2982.731 | 2946.713        | 2947.720       | 2945.705        | I[28] |
| A  | 14      | 1569.921        | 2949.641 | 2933.623        | 2934.630       | 2932.614        | A[27] |
| Q  | 15      | 1697.980        | 2778.610 | 2762.591        | 2763.599       | 2761.584        | Q[26] |
| G  | 16      | 1755.001        | 2650.562 | 2634.543        | 2635.541       | 2633.525        | G[25] |
| G  | 17      | 1812.023        | 2593.530 | 2577.511        | 2578.519       | 2576.504        | G[24] |
| V  | 18      | 1911.091        | 2536.509 | 2520.490        | 2521.498       | 2519.482        | V[23] |
| L  | 19      | 2024.175        | 2437.440 | 2421.421        | 2422.429       | 2420.414        | L[22] |
| F  | 20      | 2117.238        | 2324.395 | 2308.377        | 2309.385       | 2307.370        | F[21] |
| N  | 21      | 2235.271        | 2227.363 | 2211.345        | 2212.352       | 2210.337        | N[20] |
| I  | 22      | 2348.355        | 2113.300 | 2097.282        | 2098.290       | 2096.274        | I[19] |
| Q  | 23      | 2476.413        | 2000.176 | 1984.158        | 1985.165       | 1983.150        | Q[18] |
| A  | 24      | 2547.450        | 1872.118 | 1856.099        | 1857.107       | 1855.091        | A[17] |
| V  | 25      | 2646.519        | 1801.081 | 1785.062        | 1786.070       | 1784.054        | V[16] |
| L  | 26      | 2759.603        | 1702.012 | 1686.994        | 1687.991       | 1686.975        | L[15] |
| L  | 27      | 2872.687        | 1598.935 | 1572.900        | 1573.917       | 1571.902        | L[14] |
| P  | 28      | 2969.740        | 1475.844 | 1459.825        | 1460.833       | 1458.818        | P[13] |
| K  | 29      | 3097.835        | 1378.791 | 1362.773        | 1363.780       | 1361.765        | K[12] |
| K  | 30      | 3225.930        | 1250.695 | <b>1234.678</b> | 1235.685       | 1233.670        | K[11] |
| T  | 31      | 3326.977        | 1122.601 | 1106.583        | 1107.591       | 1105.575        | T[10] |
| E  | 32      | 3459.030        | 1011.554 | <b>1005.535</b> | 1006.543       | <b>1004.527</b> | E[9]  |
| S  | 33      | 3543.052        | 892.511  | <b>876.492</b>  | <b>877.500</b> | 875.485         | S[8]  |
| H  | 34      | 3680.111        | 805.479  | <b>789.460</b>  | 790.468        | 788.453         | H[7]  |
| H  | 35      | 3817.170        | 668.420  | <b>652.401</b>  | <b>653.409</b> | 651.394         | H[6]  |
| K  | 36      | 3945.205        | 531.301  | <b>515.343</b>  | 516.350        | 514.335         | K[5]  |
| A  | 37      | 4016.302        | 403.266  | <b>387.248</b>  | 388.255        | 386.240         | A[4]  |
| K  | 38      | 4144.397        | 332.229  | <b>316.211</b>  | 317.218        | 315.203         | K[3]  |
| G  | 39      | 4201.418        | 204.134  | 189.110         | 189.123        | 187.105         | G[2]  |
| K  | 40      | 4329.513        | 147.113  | 131.094         | 132.102        | 130.086         | K[1]  |

# sp | Q6GSS7 | H2A2A\_MOUSE

DEELNKLLGK <sup>Dimethyl</sup> <sub>28.03</sub> VTIAQGGVLPNIQAVLLPKKTESHKAKGK

- ▶ fragmentation table for charge state 2+
- ▶ specType=etd
- ▶ score=36.65
- ▶ F113281.dat
- ▶ query=q36883.p1
- ▶ precursor=722.585340
- ▶ chargePrecursor=6
- ▶ itol=0.5

| AA  | c               | y               | z+1             | z+2             | z              | AA  |
|-----|-----------------|-----------------|-----------------|-----------------|----------------|-----|
| D1  | 67.034          | 2165.752        | 2157.743        | 0.504           | 2157.239       | D40 |
| E2  | 113.955         | 2158.239        | 2150.230        | 0.504           | 2099.725       | E30 |
| E3  | 136.077         | 2043.715        | 2035.708        | 0.504           | 2035.200       | E18 |
| L4  | 252.619         | 1979.196        | 1971.187        | 0.504           | 1970.681       | L17 |
| N5  | 309.640         | 1922.654        | 1914.645        | 1915.149        | 1914.141       | N36 |
| K6  | 373.688         | 1895.633        | 1857.623        | 1858.127        | 1857.119       | K35 |
| L7  | 430.230         | 1801.585        | 1793.576        | 1794.080        | 1793.072       | L34 |
| L8  | 489.772         | 1745.043        | 1737.034        | 1737.538        | 1736.530       | L13 |
| G9  | <b>515.282</b>  | 1688.503        | 1680.492        | 1680.996        | 1679.989       | G32 |
| K10 | 593.548         | 1659.990        | 1651.981        | 1652.485        | 1651.477       | K31 |
| V11 | 642.880         | 1581.927        | 1573.918        | 1574.422        | 1573.414       | V30 |
| T12 | 693.404         | 1532.393        | <b>1524.384</b> | <b>1524.888</b> | 1523.880       | T29 |
| L13 | <b>749.946</b>  | 1481.860        | 1473.850        | 1474.354        | 1473.346       | L28 |
| A14 | 785.464         | 1426.327        | 1417.318        | <b>1417.822</b> | 1416.814       | A27 |
| Q15 | <b>849.493</b>  | 1389.800        | <b>1381.799</b> | <b>1382.303</b> | 1381.295       | Q20 |
| G16 | <b>878.004</b>  | <b>1325.779</b> | 1317.770        | 1318.274        | 1317.266       | G25 |
| G17 | <b>906.515</b>  | 1297.266        | 1289.259        | 1289.763        | 1288.755       | G24 |
| V18 | <b>956.049</b>  | 1258.750        | 1250.740        | 1251.242        | 1250.245       | V23 |
| L19 | 1027.597        | 1219.233        | 1211.224        | <b>1211.718</b> | 1210.710       | L22 |
| P20 | <b>1061.118</b> | <b>1162.682</b> | 1154.673        | 1155.176        | 1154.169       | P21 |
| N21 | 1118.139        | 1114.155        | 1106.146        | 1106.650        | 1105.642       | N20 |
| I22 | 1174.681        | 1057.134        | 1049.124        | 1049.628        | 1048.621       | I19 |
| Q23 | <b>1238.710</b> | 1000.592        | 992.582         | 993.086         | 992.079        | Q18 |
| A24 | 1274.220        | 936.053         | 928.043         | 928.057         | 928.049        | A17 |
| V25 | 1323.763        | 901.545         | 893.535         | 893.539         | 892.531        | V10 |
| L26 | 1380.305        | 851.510         | 843.500         | <b>844.004</b>  | 842.996        | L15 |
| L27 | 1436.847        | <b>794.968</b>  | <b>786.958</b>  | <b>787.462</b>  | <b>786.454</b> | L14 |
| P28 | 1485.374        | 738.426         | 730.416         | 730.920         | 729.912        | P13 |
| K29 | <b>1549.421</b> | 689.899         | 681.890         | <b>682.394</b>  | 681.386        | K12 |
| K30 | 1613.688        | <b>625.852</b>  | <b>617.842</b>  | <b>618.346</b>  | 617.339        | K11 |
| I31 | <b>1663.992</b> | 583.804         | <b>553.795</b>  | <b>554.299</b>  | 553.291        | I10 |
| E32 | <b>1728.514</b> | 511.281         | <b>503.271</b>  | <b>503.775</b>  | 502.767        | E8  |
| S33 | <b>1772.030</b> | <b>446.759</b>  | <b>438.750</b>  | <b>439.254</b>  | 438.246        | S8  |
| H34 | 1840.959        | 403.243         | <b>395.234</b>  | <b>395.738</b>  | 394.730        | H7  |
| H35 | <b>1909.089</b> | 334.714         | 326.704         | 327.208         | 326.200        | H6  |
| K36 | 1973.136        | 266.184         | 258.175         | 258.679         | 257.671        | K5  |
| A37 | 2008.655        | 200.139         | 192.130         | 192.634         | 191.626        | A4  |
| K38 | 2072.702        | 186.610         | 158.600         | 159.113         | 158.105        | K3  |
| G39 | 2101.213        | 102.571         | 94.561          | 95.065          | 94.057         | G2  |
| K40 | 2165.260        | 74.060          | 66.051          | 66.555          | 65.547         | K1  |



# sp | Q6GSS7 | H2A2A\_MOUSE

DEELNKLLGK <sup>Dimethyl</sup> <sub>28.03</sub> VTIAQGGVLPNIQAVLLPKKTESHHKAKGK

- ▶ fragmentation table for charge state 3+
- ▶ specType=etd
- ▶ score=36.65
- ▶ F113281.dat
- ▶ query=q36883.p1
- ▶ precursor=722.585340
- ▶ chargePrecursor=6
- ▶ itol=0.5

| AA | c  | y               | z+1             | z+2             | z               | AA              |       |
|----|----|-----------------|-----------------|-----------------|-----------------|-----------------|-------|
| D  | 1  | 45.025          | <b>1444.171</b> | <b>1438.831</b> | 0.672           | <b>1438.495</b> | D[40] |
| E  | 2  | 68.039          | 1405.628        | 1400.489        | 0.672           | 1400.153        | E[39] |
| E  | 3  | 131.054         | 1362.874        | 1357.473        | 0.672           | 1357.139        | E[38] |
| L  | 4  | 198.748         | 1319.800        | 1314.400        | 0.672           | 1314.124        | L[37] |
| N  | 5  | 266.762         | 1282.105        | 1276.706        | 1.277           | 1276.430        | N[36] |
| K  | 6  | 349.401         | 1244.091        | <b>1238.751</b> | <b>1239.087</b> | <b>1238.415</b> | K[35] |
| L  | 7  | 287.156         | 1201.393        | 1196.053        | <b>1196.389</b> | 1195.717        | L[34] |
| L  | 8  | 224.850         | <b>1163.698</b> | 1158.788        | 1158.894        | 1158.622        | L[33] |
| G  | 9  | 343.357         | 1128.939        | 1123.694        | 1121.000        | 1120.526        | G[32] |
| K  | 10 | <b>395.899</b>  | 1108.996        | 1101.656        | 1101.992        | 1101.321        | K[31] |
| V  | 11 | 438.922         | 1054.954        | 1049.614        | 1049.950        | 1049.277        | V[30] |
| T  | 12 | 482.605         | 1021.931        | 1016.592        | <b>1016.928</b> | 1016.256        | T[29] |
| L  | 13 | 500.259         | 988.249         | 982.909         | 981.298         | 982.573         | L[28] |
| A  | 14 | 523.979         | 958.554         | <b>945.214</b>  | <b>945.550</b>  | 944.879         | A[27] |
| G  | 15 | 566.695         | 926.875         | <b>921.535</b>  | 921.871         | <b>921.199</b>  | G[26] |
| G  | 16 | 585.672         | 884.189         | <b>878.849</b>  | <b>879.185</b>  | 878.513         | G[25] |
| G  | 17 | 604.679         | 865.182         | 859.842         | 860.178         | 859.506         | G[24] |
| V  | 18 | 637.702         | 846.174         | <b>840.835</b>  | <b>841.171</b>  | 840.499         | V[23] |
| L  | 19 | 678.397         | 813.152         | <b>807.812</b>  | <b>808.148</b>  | 807.476         | L[22] |
| F  | 20 | 707.747         | 775.821         | 771.117         | 770.853         | 769.781         | F[21] |
| N  | 21 | 748.762         | 743.108         | <b>737.766</b>  | <b>738.102</b>  | <b>737.430</b>  | N[20] |
| I  | 22 | 781.456         | 705.002         | 699.752         | 700.488         | 699.416         | I[19] |
| Q  | 23 | 826.143         | 667.397         | 662.057         | 662.393         | 661.721         | Q[18] |
| A  | 24 | <b>848.822</b>  | 634.711         | 619.371         | 619.707         | 619.035         | A[17] |
| V  | 25 | 882.844         | 603.032         | 598.692         | 598.928         | 598.356         | V[16] |
| L  | 26 | 920.539         | 568.009         | 562.669         | 563.005         | 562.333         | L[15] |
| L  | 27 | 958.234         | 530.314         | 524.975         | 525.311         | 524.639         | L[14] |
| F  | 28 | 990.505         | 492.620         | 487.280         | 487.616         | 486.944         | F[13] |
| K  | 29 | <b>1033.283</b> | 460.269         | 454.929         | 455.265         | 454.593         | K[12] |
| K  | 30 | 1075.980        | 427.576         | 412.236         | 412.572         | 411.900         | K[11] |
| T  | 31 | <b>1109.664</b> | 374.872         | 369.532         | 369.868         | 369.196         | T[10] |
| E  | 32 | <b>1152.678</b> | 341.180         | 335.840         | 336.186         | 335.514         | E[9]  |
| S  | 33 | <b>1181.689</b> | 298.175         | 292.836         | 293.172         | 292.500         | S[8]  |
| H  | 34 | <b>1227.375</b> | 269.185         | 263.845         | 264.181         | 263.489         | H[7]  |
| H  | 35 | 1272.063        | 223.478         | <b>218.139</b>  | <b>218.475</b>  | <b>217.803</b>  | H[6]  |
| K  | 36 | <b>1315.760</b> | 177.762         | 172.463         | 172.768         | 172.110         | K[5]  |
| A  | 37 | <b>1339.439</b> | 135.094         | 129.754         | 130.090         | 129.414         | A[4]  |
| K  | 38 | <b>1382.137</b> | 111.415         | 106.075         | 106.411         | 105.739         | K[3]  |
| G  | 39 | 1461.144        | 68.716          | 63.377          | 63.713          | 63.041          | G[2]  |
| K  | 40 | 1443.843        | 49.709          | 44.370          | 44.705          | 44.034          | K[1]  |

# sp | Q6GSS7 | H2A2A\_MOUSE

DEELNKLLGK <sup>Dimethyl</sup>VTIAQGGVLPNIQAVLLPKKTESHKAKGK <sub>28.03</sub>

- ▶ fragmentation table for charge state 4+
- ▶ specType=etd
- ▶ score=36.65
- ▶ F113281.dat
- ▶ query=q36883.p1
- ▶ precursor=722.585340
- ▶ chargePrecursor=6
- ▶ itol=0.5

| AA    | c               | y        | z+1             | z+2            | z               | AA    |
|-------|-----------------|----------|-----------------|----------------|-----------------|-------|
| D[1]  | 34.021          | 1083.560 | 1079.375        | 0.755          | 1079.121        | D[60] |
| E[2]  | 66.281          | 1054.623 | <b>1050.618</b> | 0.755          | <b>1050.366</b> | E[39] |
| E[3]  | 98.542          | 1022.362 | <b>1018.358</b> | 0.755          | 1018.106        | E[38] |
| L[4]  | 126.813         | 990.102  | 986.097         | 0.755          | 985.845         | L[37] |
| N[5]  | 155.324         | 961.831  | 957.826         | 958.078        | 957.574         | N[36] |
| K[6]  | 187.347         | 933.320  | <b>929.315</b>  | <b>929.567</b> | 929.063         | K[35] |
| L[7]  | 215.838         | 901.296  | 897.232         | 897.544        | 897.040         | L[34] |
| L[8]  | 243.889         | 873.025  | 869.071         | 869.273        | 868.769         | L[33] |
| G[9]  | 258.145         | 844.754  | 840.750         | <b>841.002</b> | 840.498         | G[32] |
| K[10] | 297.176         | 830.499  | 826.494         | 826.746        | 826.242         | K[31] |
| V[11] | 321.944         | 791.667  | <b>787.663</b>  | <b>787.715</b> | 787.211         | V[30] |
| T[12] | 347.205         | 766.700  | <b>762.696</b>  | <b>762.947</b> | 762.444         | T[29] |
| I[13] | 375.476         | 741.438  | <b>737.434</b>  | <b>737.686</b> | 737.182         | I[28] |
| A[14] | 393.236         | 713.167  | 709.153         | 709.415        | 708.911         | A[27] |
| Q[15] | 425.250         | 695.408  | 691.403         | 691.655        | 691.151         | Q[26] |
| Q[16] | 439.508         | 663.393  | 659.389         | 659.641        | 659.137         | Q[25] |
| G[17] | 453.761         | 649.139  | 645.133         | 645.385        | 644.881         | G[24] |
| V[18] | 478.528         | 634.883  | 630.878         | 631.130        | 630.626         | V[23] |
| L[19] | 506.799         | 610.116  | 606.111         | 606.363        | 605.859         | L[22] |
| P[20] | 533.662         | 583.844  | 577.869         | 578.092        | 577.588         | P[21] |
| N[21] | 559.573         | 557.581  | <b>553.577</b>  | <b>553.829</b> | 553.325         | N[20] |
| I[22] | 587.944         | 529.071  | 525.066         | 525.318        | 524.814         | I[19] |
| Q[23] | 619.859         | 500.800  | 496.795         | 497.047        | 496.543         | Q[18] |
| A[24] | 637.618         | 468.785  | 464.780         | 465.032        | 464.528         | A[17] |
| V[25] | 662.385         | 451.026  | <b>447.021</b>  | <b>447.273</b> | <b>446.769</b>  | V[16] |
| L[26] | 690.856         | 428.299  | 424.244         | 424.568        | 424.064         | L[15] |
| L[27] | 718.927         | 397.685  | 393.963         | 394.235        | 393.731         | L[14] |
| P[28] | 743.190         | 369.716  | 365.712         | 365.964        | 365.460         | P[13] |
| K[29] | 775.214         | 345.453  | 341.449         | 341.701        | 341.197         | K[12] |
| K[30] | 807.238         | 313.430  | 309.425         | 309.677        | 309.173         | K[11] |
| T[31] | 832.500         | 281.406  | 277.401         | 277.653        | 277.149         | T[10] |
| E[32] | 864.760         | 256.144  | 252.139         | 252.391        | 251.887         | E[9]  |
| S[33] | 898.518         | 223.683  | 219.679         | 220.113        | 219.627         | S[8]  |
| H[34] | <b>920.783</b>  | 202.125  | 198.121         | 198.373        | 197.869         | H[7]  |
| H[35] | 955.048         | 167.861  | 163.856         | 164.108        | 163.604         | H[0]  |
| K[36] | <b>987.072</b>  | 133.596  | 129.591         | 129.843        | 129.339         | K[5]  |
| A[37] | <b>1004.831</b> | 101.572  | 97.567          | 97.819         | 97.315          | A[4]  |
| K[38] | <b>1036.855</b> | 83.813   | 79.808          | 80.060         | 79.556          | K[3]  |
| G[39] | <b>1051.110</b> | 51.789   | 47.784          | 48.036         | 47.532          | G[2]  |
| K[40] | 1083.134        | 37.534   | 33.529          | 33.781         | 33.277          | K[1]  |

# sp | Q6GSS7 | H2A2A\_MOUSE

DEELNKLLGK <sup>Dimethyl</sup> 28.03 VTIAQGGVLPNIQAVLLPKKTESHKAKGK

- ▶ fragmentation table for charge state 5+
- ▶ specType=etd
- ▶ score=36.65
- ▶ F113281.dat
- ▶ query=q36883.p1
- ▶ precursor=722.585340
- ▶ chargePrecursor=6
- ▶ itol=0.5

| AA |    | c              | y              | z+1            | z+2            | z              | AA |    |
|----|----|----------------|----------------|----------------|----------------|----------------|----|----|
| D  | 1  | 27.418         | <b>866.905</b> | <b>863.702</b> | 0.806          | <b>863.500</b> | D  | 40 |
| E  | 2  | 83.226         | <b>843.900</b> | 840.696        | 0.806          | 840.495        | E  | 39 |
| E  | 3  | 79.035         | 818.591        | 815.388        | 0.806          | 814.586        | E  | 38 |
| L  | 4  | 101.052        | 792.261        | <b>789.079</b> | 0.806          | 788.878        | L  | 37 |
| N  | 5  | 124.460        | 769.666        | 766.462        | 766.664        | 766.261        | N  | 36 |
| K  | 6  | 150.079        | <b>746.857</b> | 743.654        | 743.855        | 743.452        | K  | 35 |
| L  | 7  | 172.686        | 721.238        | 718.035        | 718.236        | 717.833        | L  | 34 |
| L  | 8  | 198.313        | 698.622        | 695.419        | 695.619        | 695.216        | L  | 33 |
| G  | 9  | 206.717        | 676.005        | 672.801        | 673.003        | 672.600        | G  | 32 |
| K  | 10 | 237.943        | 664.601        | 661.397        | 661.598        | 661.195        | K  | 31 |
| V  | 11 | 257.756        | 633.375        | 630.172        | 630.373        | 629.970        | V  | 30 |
| V  | 12 | 277.966        | 613.562        | 610.358        | 610.559        | 610.156        | V  | 29 |
| I  | 13 | 300.593        | 593.352        | 590.148        | 590.350        | 589.947        | I  | 28 |
| A  | 14 | 314.790        | 570.735        | 567.532        | 567.733        | 567.330        | A  | 27 |
| Q  | 15 | 340.402        | 556.528        | 553.324        | <b>553.526</b> | 553.123        | Q  | 26 |
| G  | 16 | 351.806        | 530.916        | 527.712        | 527.914        | 527.511        | G  | 25 |
| G  | 17 | 363.210        | 519.512        | 516.308        | 516.510        | <b>516.107</b> | G  | 24 |
| V  | 18 | 383.024        | 508.108        | 504.904        | 505.105        | 504.702        | V  | 23 |
| L  | 19 | 405.641        | 488.294        | 485.090        | 485.292        | 484.889        | L  | 22 |
| P  | 20 | 425.051        | 468.677        | 465.473        | 465.675        | 465.272        | P  | 21 |
| N  | 21 | 447.880        | 448.266        | 445.063        | 445.264        | 444.861        | N  | 20 |
| L  | 22 | 470.477        | 423.458        | 420.254        | 420.456        | 420.053        | L  | 19 |
| Q  | 23 | 496.088        | 400.841        | 397.637        | 397.839        | 397.436        | Q  | 18 |
| A  | 24 | 510.296        | 375.228        | 372.026        | 372.227        | 371.824        | A  | 17 |
| V  | 25 | 530.110        | 361.022        | 357.818        | 358.020        | 357.617        | V  | 16 |
| L  | 26 | 552.726        | 341.208        | 338.005        | 338.206        | 337.803        | L  | 15 |
| L  | 27 | 575.343        | 318.591        | 315.388        | 315.589        | 315.186        | L  | 14 |
| P  | 28 | 594.754        | 295.975        | 292.771        | 292.972        | 292.569        | P  | 13 |
| K  | 29 | 630.373        | 276.564        | 273.360        | 273.562        | 273.159        | K  | 12 |
| K  | 30 | 645.992        | 250.945        | 247.741        | 247.943        | 247.540        | K  | 11 |
| V  | 31 | 668.201        | 229.326        | 226.122        | 226.324        | 225.921        | V  | 10 |
| E  | 32 | 692.010        | 205.117        | 201.913        | 202.114        | 201.711        | E  | 9  |
| S  | 33 | 709.416        | 179.308        | 176.104        | 176.306        | 175.903        | S  | 8  |
| H  | 34 | 736.828        | 161.902        | 158.698        | 158.899        | 158.496        | H  | 7  |
| H  | 35 | 764.240        | 134.490        | 131.286        | 131.488        | 131.085        | H  | 6  |
| K  | 36 | <b>789.859</b> | 107.078        | 103.874        | 104.076        | 103.673        | K  | 5  |
| A  | 37 | 804.066        | 81.459         | 78.255         | 78.457         | 78.054         | A  | 4  |
| K  | 38 | 829.685        | 67.252         | 64.048         | 64.249         | 63.846         | K  | 3  |
| G  | 39 | <b>841.089</b> | 41.633         | 38.429         | 38.630         | 38.227         | G  | 2  |
| K  | 40 | 866.708        | 30.228         | 27.025         | 27.226         | 26.823         | K  | 1  |

# sp | Q6GSS7 | H2A2A\_MOUSE

DEELNKLLGK <sup>Dimethyl</sup>VTIAQGGVLPNIQAVLLPKKTESHHKAKGK  
28.03

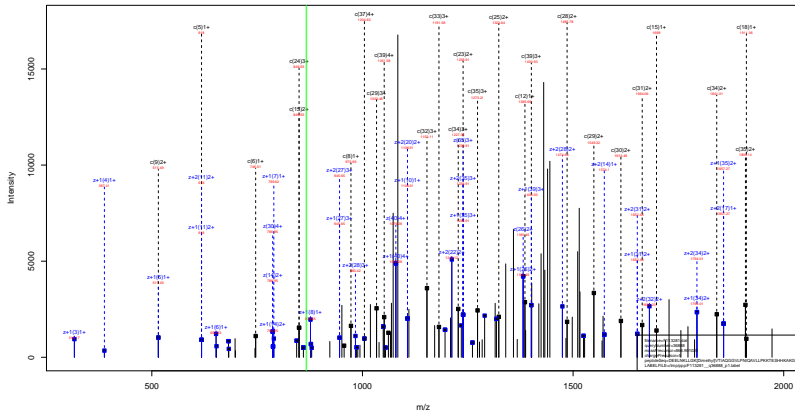

# sp | Q6GSS7 | H2A2A\_MOUSE

DEELNKLLGK <sup>Dimethyl</sup> <sub>28.03</sub> VTIAQGGVLPNIQAVLLPKKTESHKAKGK

- ▶ fragmentation table for charge state 1+
- ▶ specType=etd
- ▶ score=54.78
- ▶ F113281.dat
- ▶ query=q36888.p1
- ▶ precursor=866.901020
- ▶ chargePrecursor=5
- ▶ itol=0.5

| AA  | c               | y        | z+1             | z+2             | z               | AA    |
|-----|-----------------|----------|-----------------|-----------------|-----------------|-------|
| D1  | 133.061         | 4330.497 | 4314.479        | 0.000           | 4313.477        | [Q40] |
| E1  | 262.103         | 4315.476 | 4199.452        | 0.000           | 4198.444        | E397  |
| E1  | 301.148         | 4308.428 | 4079.420        | 0.000           | 4059.401        | E138  |
| L1  | 504.230         | 3957.385 | 3941.366        | 0.000           | 3940.359        | L137  |
| N1  | <b>618.273</b>  | 3844.301 | 3828.282        | 3820.290        | 3817.275        | N136  |
| K1  | <b>746.368</b>  | 3730.258 | 3714.239        | 3715.247        | 3713.232        | K135  |
| L1  | <b>859.452</b>  | 3602.183 | 3586.144        | 3587.152        | 3585.137        | L134  |
| L1  | <b>972.536</b>  | 3489.078 | 3473.060        | 3474.068        | 3472.051        | L133  |
| G1  | 1020.555        | 3375.095 | 3359.076        | 3360.084        | 3358.069        | G132  |
| K10 | 1185.684        | 3318.074 | 3302.055        | 3303.063        | 3301.047        | K131  |
| V11 | 1284.752        | 3162.847 | 3146.829        | 3147.836        | 3145.821        | V130  |
| T12 | <b>1385.800</b> | 3061.779 | 3047.760        | 3048.768        | 3046.752        | T129  |
| L13 | 1498.884        | 2962.731 | 2946.713        | 2947.720        | 2945.705        | L128  |
| A14 | 1589.021        | 2849.647 | 2833.629        | 2834.636        | 2832.621        | A127  |
| Q15 | <b>1697.580</b> | 2778.030 | 2762.001        | 2763.009        | 2761.588        | Q126  |
| G16 | 1755.001        | 2650.552 | 2634.533        | 2635.541        | 2633.525        | G125  |
| G17 | 1812.023        | 2501.530 | 2477.511        | 2478.519        | 2476.504        | G124  |
| V18 | <b>1911.091</b> | 2536.509 | 2520.490        | 2521.498        | 2519.482        | V123  |
| L19 | 2024.175        | 2431.440 | 2421.421        | 2422.429        | 2420.413        | L122  |
| P20 | 2111.228        | 2324.356 | 2308.337        | 2309.345        | 2307.330        | P121  |
| N21 | 2235.271        | 2227.303 | 2211.284        | 2212.292        | 2210.277        | N120  |
| I22 | 2348.355        | 2113.260 | 2097.242        | 2098.250        | 2096.234        | I119  |
| Q23 | 2476.413        | 2000.176 | 1984.158        | 1985.165        | 1983.150        | Q118  |
| A24 | 2547.450        | 1872.118 | 1856.099        | <b>1857.107</b> | 1855.091        | A117  |
| V25 | 2656.519        | 1801.081 | 1785.062        | 1786.070        | 1784.054        | V116  |
| L26 | 2759.603        | 1702.012 | 1685.994        | 1687.001        | 1684.985        | L115  |
| L27 | 2872.687        | 1588.928 | 1572.909        | <b>1573.917</b> | 1571.902        | L114  |
| F28 | 2069.740        | 1475.844 | 1459.825        | 1460.833        | 1458.818        | F113  |
| K29 | 3097.835        | 1378.791 | 1362.773        | 1363.780        | 1361.765        | K112  |
| K30 | 3225.930        | 1250.696 | <b>1234.678</b> | 1235.685        | 1233.670        | K111  |
| I31 | 3358.977        | 1122.601 | <b>1106.583</b> | 1107.591        | 1105.575        | I110  |
| E32 | 3456.020        | 1021.554 | 1005.535        | 1006.543        | <b>1004.527</b> | E109  |
| S33 | 3543.052        | 892.511  | <b>876.492</b>  | <b>877.500</b>  | 875.485         | S108  |
| H34 | 3680.111        | 805.479  | <b>789.460</b>  | 790.468         | 788.453         | H107  |
| H35 | 3817.170        | 698.420  | <b>652.401</b>  | <b>653.409</b>  | 651.394         | H106  |
| K36 | 3945.205        | 531.361  | <b>515.343</b>  | 516.350         | 514.335         | K105  |
| A37 | 4019.202        | 413.306  | <b>381.248</b>  |                 | 380.240         | A104  |
| K38 | 4144.397        | 322.229  | <b>316.211</b>  | 317.218         | 315.202         | K103  |
| G39 | 4201.418        | 204.134  | 188.116         | 189.123         | 187.108         | G102  |
| K40 | 4329.513        | 147.113  | 131.094         | 132.102         | 130.089         | K101  |

# sp | Q6GSS7 | H2A2A\_MOUSE

DEELNKLLGK <sup>Dimethyl</sup> <sub>28.03</sub> VTIAQGGVLPNIQAVLLPKKTESHKAKGK

- ▶ fragmentation table for charge state 2+
- ▶ specType=etd
- ▶ score=54.78
- ▶ F113281.dat
- ▶ query=q36888.p1
- ▶ precursor=866.901020
- ▶ chargePrecursor=5
- ▶ itol=0.5

| AA  | c               | y        | z+1             | z+2             | z               | AA  |
|-----|-----------------|----------|-----------------|-----------------|-----------------|-----|
| D 1 | 67.034          | 2165.752 | 2157.743        | 0.504           | 2157.239        | Q40 |
| E 2 | 111.955         | 2158.238 | 2150.229        | 0.504           | 2099.720        | E30 |
| E 3 | 196.077         | 2043.718 | 2035.709        | 0.504           | 2035.205        | E38 |
| L 4 | 252.619         | 1976.190 | 1971.187        | 0.504           | 1970.683        | L37 |
| N 5 | 309.640         | 1922.654 | 1914.645        | 1915.149        | 1914.141        | N36 |
| K 6 | 373.688         | 1805.633 | <b>1857.623</b> | <b>1858.127</b> | <b>1857.119</b> | K35 |
| L 7 | 430.230         | 1801.585 | <b>1793.576</b> | <b>1794.080</b> | 1793.072        | L34 |
| L 8 | 489.772         | 1745.043 | 1737.034        | 1737.538        | 1736.530        | L33 |
| G 9 | <b>515.282</b>  | 1688.501 | 1680.492        | <b>1680.996</b> | 1679.989        | G32 |
| K10 | 591.346         | 1659.990 | <b>1651.981</b> | <b>1652.485</b> | 1651.477        | K31 |
| V11 | 642.880         | 1581.627 | <b>1573.618</b> | <b>1574.122</b> | 1573.414        | V30 |
| T12 | 693.404         | 1512.303 | <b>1524.384</b> | <b>1524.888</b> | 1523.880        | T29 |
| L13 | 769.646         | 1451.689 | 1473.680        | <b>1474.364</b> | 1473.356        | L28 |
| A14 | 785.464         | 1425.327 | 1417.318        | 1417.822        | 1416.814        | A27 |
| Q15 | <b>849.493</b>  | 1389.809 | <b>1381.799</b> | 1382.303        | <b>1381.295</b> | Q26 |
| G16 | <b>878.004</b>  | 1325.779 | <b>1317.770</b> | <b>1318.274</b> | 1317.266        | G25 |
| G17 | 906.515         | 1297.269 | 1289.259        | <b>1289.763</b> | 1288.755        | G24 |
| V18 | <b>956.049</b>  | 1268.758 | <b>1260.749</b> | <b>1261.252</b> | 1260.245        | V23 |
| L19 | 1027.591        | 1219.244 | 1211.235        | <b>1211.718</b> | 1210.710        | L22 |
| P20 | <b>1061.118</b> | 1162.662 | 1154.653        | 1155.156        | 1154.160        | P21 |
| N21 | 1118.139        | 1114.155 | 1106.146        | <b>1106.650</b> | 1105.642        | N20 |
| I22 | 1174.681        | 1057.134 | <b>1049.124</b> | <b>1049.628</b> | 1048.621        | I19 |
| Q23 | <b>1238.710</b> | 1000.592 | 992.582         | 993.086         | 992.079         | Q18 |
| A24 | 1274.229        | 936.563  | 928.553         | 929.057         | 928.049         | A17 |
| V25 | <b>1323.763</b> | 891.044  | 883.034         | 883.538         | 882.531         | V16 |
| L26 | 1369.305        | 853.510  | <b>843.500</b>  | <b>844.004</b>  | 843.996         | L15 |
| L27 | 1436.847        | 794.968  | <b>786.958</b>  | <b>787.462</b>  | <b>786.454</b>  | L14 |
| P28 | <b>1485.374</b> | 738.426  | 730.416         | 730.920         | 729.912         | P13 |
| K29 | <b>1549.421</b> | 699.899  | <b>681.890</b>  | <b>682.394</b>  | 681.386         | K12 |
| K30 | <b>1613.468</b> | 635.852  | <b>617.842</b>  | <b>618.346</b>  | 617.339         | K11 |
| I31 | <b>1663.992</b> | 581.804  | 583.795         | 584.299         | 583.291         | I10 |
| E32 | 1728.514        | 511.281  | 503.271         | 503.775         | 502.767         | E9  |
| S33 | 1772.030        | 446.759  | 438.750         | 439.254         | 438.246         | S8  |
| H34 | <b>1840.559</b> | 403.243  | 395.234         | 395.738         | 394.730         | H7  |
| H35 | <b>1909.089</b> | 334.714  | 326.704         | 327.208         | 326.200         | H6  |
| K36 | 1973.136        | 266.184  | 258.175         | 258.679         | 257.671         | K5  |
| A37 | 2008.655        | 202.139  | 194.129         | 194.633         | 193.625         | A4  |
| K38 | 2072.702        | 168.618  | 158.609         | 159.113         | 158.105         | K3  |
| G39 | 2101.213        | 102.571  | 94.561          | 95.065          | 94.057          | G2  |
| K40 | 2165.260        | 74.060   | 66.051          | 66.555          | 65.547          | K1  |

# sp | Q6GSS7 | H2A2A\_MOUSE

DEELNKLLGK <sup>Dimethyl</sup> <sub>28.03</sub> VTIAQGGVLPNIQAVLLPKKTESHKAKGK

- ▶ fragmentation table for charge state 3+
- ▶ specType=etd
- ▶ score=54.78
- ▶ F113281.dat
- ▶ query=q36888.p1
- ▶ precursor=866.901020
- ▶ chargePrecursor=5
- ▶ itol=0.5

| AA | c  | y               | z=1             | z=2             | z               | AA              |       |
|----|----|-----------------|-----------------|-----------------|-----------------|-----------------|-------|
| D  | 1  | 45.025          | 1444.171        | 1438.931        | 0.672           | 1438.495        | D[40] |
| E  | 2  | 88.039          | 1405.628        | <b>1400.489</b> | 0.672           | 1400.153        | E[39] |
| E  | 3  | 131.054         | 1362.874        | 1357.473        | 0.672           | 1357.139        | E[38] |
| L  | 4  | 188.748         | 1319.800        | 1314.400        | 0.672           | 1314.124        | L[37] |
| N  | 5  | 206.762         | 1282.105        | 1276.706        | 1.277           | 1276.430        | N[36] |
| K  | 6  | 249.401         | 1244.091        | <b>1238.751</b> | <b>1239.087</b> | <b>1238.415</b> | K[35] |
| L  | 7  | 287.156         | 1201.393        | <b>1196.053</b> | <b>1196.389</b> | <b>1195.717</b> | L[34] |
| L  | 8  | 324.860         | 1163.098        | 1156.752        | 1156.994        | 1156.622        | L[33] |
| G  | 9  | 343.357         | 1126.003        | 1120.604        | 1121.000        | 1120.520        | G[32] |
| K  | 10 | 395.899         | <b>1106.996</b> | 1101.636        | 1101.992        | 1101.321        | K[31] |
| V  | 11 | 438.602         | <b>1054.954</b> | <b>1049.614</b> | 1049.950        | <b>1049.278</b> | V[30] |
| T  | 12 | 482.605         | 1021.931        | 1016.592        | 1016.938        | 1016.250        | T[29] |
| L  | 13 | 500.259         | 988.249         | 982.959         | <b>983.245</b>  | 982.573         | L[28] |
| A  | 14 | 523.979         | 956.554         | <b>945.214</b>  | <b>945.550</b>  | 944.879         | A[27] |
| G  | 15 | 566.606         | 926.875         | 921.535         | 921.871         | 921.192         | G[26] |
| G  | 16 | 585.672         | 884.189         | 878.849         | <b>879.185</b>  | 878.513         | G[25] |
| G  | 17 | 604.679         | 865.182         | <b>859.842</b>  | <b>860.178</b>  | <b>859.506</b>  | G[24] |
| V  | 18 | 637.702         | 846.174         | 840.835         | 841.171         | 840.497         | V[23] |
| L  | 19 | 678.307         | 813.152         | 807.812         | 808.148         | 807.471         | L[22] |
| P  | 20 | 707.747         | 775.821         | 770.117         | 770.453         | 769.781         | P[21] |
| N  | 21 | 748.762         | 743.106         | 737.766         | 738.102         | 737.430         | N[20] |
| I  | 22 | 781.456         | 705.002         | 699.152         | 700.488         | 699.814         | I[19] |
| Q  | 23 | 826.143         | 667.397         | 662.057         | 662.393         | 661.721         | Q[18] |
| A  | 24 | <b>849.822</b>  | 634.711         | 619.371         | 619.707         | 619.035         | A[17] |
| V  | 25 | 882.844         | 603.016         | 598.662         | 598.998         | 598.326         | V[16] |
| L  | 26 | 920.539         | 568.009         | 562.669         | 563.005         | 562.333         | L[15] |
| L  | 27 | 958.234         | 530.314         | 524.975         | 525.311         | 524.639         | L[14] |
| P  | 28 | 990.505         | 492.620         | 487.280         | 487.616         | 486.944         | P[13] |
| K  | 29 | <b>1033.283</b> | 460.289         | 454.929         | 455.265         | 454.593         | K[12] |
| K  | 30 | 1075.981        | 427.570         | 412.231         | 412.567         | 411.895         | K[11] |
| T  | 31 | 1109.664        | 374.872         | 369.532         | 369.868         | 369.190         | T[10] |
| E  | 32 | <b>1152.678</b> | 341.180         | 335.850         | 336.186         | 335.514         | E[9]  |
| S  | 33 | <b>1181.689</b> | 298.175         | 292.836         | 293.172         | 292.500         | S[8]  |
| H  | 34 | <b>1227.375</b> | 269.185         | 263.825         | 264.161         | 263.489         | H[7]  |
| K  | 35 | <b>1273.061</b> | 223.478         | 218.139         | 218.475         | 217.803         | K[6]  |
| K  | 36 | 1313.760        | 177.762         | 172.483         | 172.768         | 172.110         | K[5]  |
| A  | 37 | 1339.439        | 135.094         | 129.754         | 130.090         | 129.414         | A[4]  |
| K  | 38 | 1382.137        | 111.415         | 106.075         | 106.411         | 105.739         | K[3]  |
| G  | 39 | <b>1461.144</b> | 68.716          | 63.377          | 63.713          | 63.041          | G[2]  |
| K  | 40 | 1443.843        | 49.709          | 44.370          | 44.705          | 44.034          | K[1]  |

# sp | Q6GSS7 | H2A2A\_MOUSE

DEELNKLLGK <sup>Dimethyl</sup> <sub>28.03</sub> VTIAQGGVLPNIQAVLLPKKTESHKAKGK

- ▶ fragmentation table for charge state 4+
- ▶ specType=etd
- ▶ score=54.78
- ▶ F113281.dat
- ▶ query=q36888.p1
- ▶ precursor=866.901020
- ▶ chargePrecursor=5
- ▶ itol=0.5

| AA  | c               | y               | z=1             | z=2            | z               | AA  |
|-----|-----------------|-----------------|-----------------|----------------|-----------------|-----|
| D1  | 34.621          | 1081.385        | <b>1079.375</b> | 0.755          | <b>1079.123</b> | D40 |
| E12 | 66.281          | <b>1054.623</b> | 1050.618        | 0.755          | 1050.366        | E39 |
| E13 | 98.542          | 1022.362        | 1018.358        | 0.755          | 1018.106        | E38 |
| L14 | 126.813         | 990.102         | <b>986.097</b>  | 0.755          | <b>985.845</b>  | L37 |
| N15 | 155.324         | 961.831         | 957.826         | 958.078        | 957.574         | N36 |
| K16 | 187.347         | 933.320         | 929.315         | 929.567        | 929.063         | K35 |
| L17 | 215.818         | 901.296         | 897.292         | 897.544        | 897.040         | L34 |
| L18 | 243.889         | 873.025         | 869.021         | 869.273        | 868.769         | L33 |
| G19 | 258.145         | 844.754         | 840.750         | 841.002        | 840.498         | G32 |
| K10 | 297.176         | 830.490         | 826.484         | 826.746        | 826.242         | K31 |
| V11 | 321.944         | 791.467         | <b>787.463</b>  | <b>787.715</b> | <b>787.211</b>  | V30 |
| T12 | 347.205         | 766.700         | 762.696         | 762.947        | 762.444         | T29 |
| L13 | 375.476         | 741.438         | 737.434         | 737.686        | 737.182         | L28 |
| A14 | 392.236         | 713.167         | 709.163         | 709.415        | 708.911         | A27 |
| Q15 | 425.250         | 695.408         | 691.403         | 691.655        | 691.151         | Q26 |
| G16 | 439.506         | 663.381         | 659.379         | 659.641        | 659.137         | G25 |
| G17 | 453.761         | 649.138         | 645.133         | 645.385        | 644.881         | G24 |
| V18 | 478.528         | 634.883         | 630.878         | 631.130        | 630.626         | V23 |
| L19 | 506.790         | 610.116         | 606.111         | 606.363        | 605.859         | L22 |
| P20 | 531.062         | 581.844         | 577.840         | 578.092        | 577.588         | P21 |
| N21 | 559.573         | 557.581         | 553.577         | 553.829        | 553.325         | N20 |
| I22 | 587.844         | 529.071         | 525.066         | 525.318        | 524.814         | I19 |
| Q23 | 619.859         | 500.800         | 496.795         | 497.047        | 496.543         | Q18 |
| A24 | 637.618         | 468.785         | 464.780         | 465.032        | 464.528         | A17 |
| V25 | 662.385         | 451.020         | 447.021         | 447.273        | 446.769         | V16 |
| L26 | 689.656         | 426.751         | 422.754         | 422.999        | 422.495         | L15 |
| L27 | 718.927         | 397.985         | 393.983         | 394.235        | 393.731         | L14 |
| P28 | 743.190         | 369.716         | 365.712         | 365.964        | 365.460         | P13 |
| K29 | 775.214         | 345.453         | 341.449         | 341.701        | 341.197         | K12 |
| K30 | 807.238         | 313.430         | 309.425         | 309.677        | 309.173         | K11 |
| T31 | 832.500         | 281.406         | 277.401         | 277.653        | 277.149         | T10 |
| E32 | 854.768         | 256.144         | 252.139         | 252.391        | 251.887         | E9  |
| S33 | 886.518         | 223.883         | 219.879         | 220.131        | 219.627         | S8  |
| H34 | 920.783         | 202.125         | 198.121         | 198.373        | 197.869         | H7  |
| H35 | 955.046         | 167.861         | 163.856         | 164.108        | 163.604         | H6  |
| K36 | 987.072         | 133.590         | 129.591         | 129.843        | 129.339         | K5  |
| A37 | <b>1054.831</b> | 101.373         | 97.369          | 97.621         | 97.117          | A4  |
| K38 | 1016.855        | 83.811          | 79.808          | 80.060         | 79.556          | K3  |
| G39 | <b>1051.110</b> | 51.789          | 47.784          | 48.036         | 47.532          | G2  |
| K40 | 1083.134        | 37.534          | 33.529          | 33.781         | 33.277          | K1  |



# sp | Q6GSS7 | H2A2A\_MOUSE

DEELNKLLGK <sup>Dimethyl</sup>VTIAQGGVLPNIQAVLLPKKTESHHKAKGK <sub>28.03</sub>

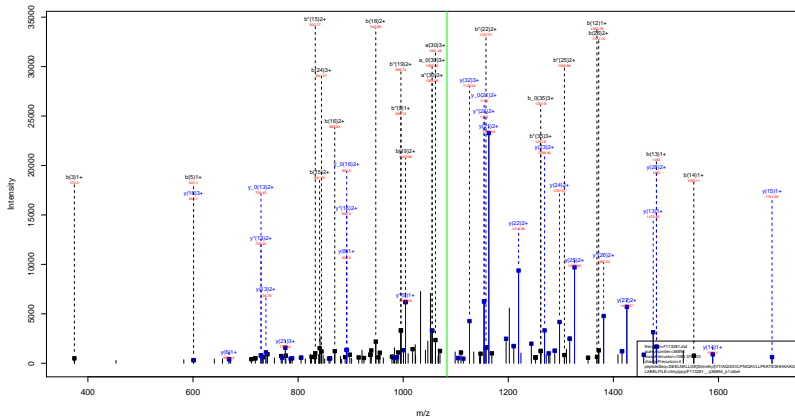

# sp | Q6GSS7 | H2A2A\_MOUSE

DEELNKLLGK<sup>Dimethyl</sup>VTIAQGGVLPNIQAVLLPKKTESHKAKGK<sup>28.03</sup>

- ▶ fragmentation table for charge state 1+
- ▶ specType=cid
- ▶ score=38.04
- ▶ F113281.dat
- ▶ query=q36894\_p1
- ▶ precursor=1083.374700
- ▶ chargePrecursor=4
- ▶ itol=0.5

| AA  | a   | a*  | a,Δ | b   | b*  | b,Δ | y   | y*  | y,Δ | AA  |     |      |      |      |      |      |      |      |      |     |
|-----|-----|-----|-----|-----|-----|-----|-----|-----|-----|-----|-----|------|------|------|------|------|------|------|------|-----|
| D1  | 38  | 039 | 0   | 000 | 78  | 039 | 116 | 034 | 0   | 000 | 86  | 024  | 4330 | 467  | 4311 | 471  | 4312 | 467  | D140 |     |
| E1  | 317 | 003 | 0   | 000 | 106 | 071 | 146 | 071 | 0   | 000 | 127 | 069  | 4215 | 471  | 4138 | 444  | 4207 | 466  | E138 |     |
| E1  | 346 | 174 | 0   | 000 | 105 | 114 | 174 | 119 | 0   | 000 | 106 | 110  | 4088 | 420  | 4089 | 461  | 4088 | 417  | E138 |     |
| L1  | 4   | 330 | 330 | 0   | 000 | 441 | 109 | 0   | 000 | 440 | 103 | 1097 | 385  | 3849 | 389  | 3819 | 3819 | 375  | L137 |     |
| R1  | 1   | 319 | 011 | 000 | 291 | 000 | 041 | 001 | 040 | 000 | 301 | 011  | 3048 | 381  | 3049 | 381  | 3049 | 381  | R136 |     |
| R1  | 1   | 301 | 186 | 084 | 532 | 083 | 530 | 083 | 531 | 083 | 515 | 083  | 3783 | 385  | 3715 | 342  | 3782 | 342  | R135 |     |
| L1  | 1   | 314 | 411 | 187 | 401 | 186 | 410 | 187 | 412 | 187 | 400 | 187  | 3681 | 381  | 3682 | 381  | 3681 | 381  | L134 |     |
| L1  | 1   | 317 | 411 | 187 | 401 | 186 | 410 | 187 | 412 | 187 | 400 | 187  | 3681 | 381  | 3682 | 381  | 3681 | 381  | L134 |     |
| L1  | 1   | 304 | 530 | 397 | 509 | 396 | 529 | 397 | 510 | 397 | 502 | 397  | 3575 | 385  | 3576 | 385  | 3575 | 385  | L133 |     |
| K10 | 114 | 040 | 0   | 000 | 113 | 031 | 012 | 032 | 011 | 031 | 110 | 047  | 3118 | 047  | 3101 | 047  | 3100 | 041  | K132 |     |
| V11 | 12  | 387 | 011 | 000 | 104 | 000 | 011 | 000 | 000 | 000 | 110 | 011  | 3100 | 047  | 3101 | 047  | 3100 | 041  | V134 |     |
| L12 | 1   | 340 | 718 | 133 | 703 | 132 | 702 | 133 | 703 | 133 | 702 | 133  | 3055 | 371  | 3056 | 371  | 3055 | 371  | L130 |     |
| L13 | 1   | 453 | 001 | 048 | 838 | 047 | 835 | 048 | 836 | 048 | 834 | 048  | 2987 | 311  | 2988 | 311  | 2987 | 311  | L129 |     |
| A14 | 1   | 324 | 000 | 107 | 071 | 106 | 069 | 107 | 070 | 107 | 068 | 107  | 2884 | 047  | 2885 | 047  | 2884 | 041  | A127 |     |
| G15 | 1   | 352 | 000 | 07  | 000 | 015 | 043 | 015 | 042 | 015 | 041 | 015  | 2774 | 014  | 2775 | 014  | 2774 | 014  | G126 |     |
| G16 | 1   | 306 | 000 | 000 | 000 | 000 | 000 | 000 | 000 | 000 | 000 | 000  | 2650 | 000  | 2651 | 000  | 2650 | 000  | G125 |     |
| G17 | 1   | 337 | 000 | 148 | 075 | 146 | 061 | 147 | 060 | 147 | 059 | 146  | 2576 | 004  | 2577 | 004  | 2576 | 004  | G124 |     |
| V18 | 1   | 338 | 000 | 000 | 000 | 000 | 000 | 000 | 000 | 000 | 000 | 000  | 2459 | 000  | 2460 | 000  | 2459 | 000  | V128 |     |
| L19 | 1   | 339 | 154 | 082 | 143 | 081 | 143 | 080 | 142 | 080 | 141 | 080  | 2437 | 044  | 2438 | 044  | 2437 | 042  | L122 |     |
| P20 | 1   | 319 | 000 | 000 | 000 | 000 | 000 | 000 | 000 | 000 | 000 | 000  | 2328 | 000  | 2329 | 000  | 2328 | 000  | P121 |     |
| N21 | 1   | 389 | 014 | 011 | 012 | 012 | 014 | 011 | 014 | 011 | 013 | 014  | 2247 | 011  | 2248 | 011  | 2247 | 011  | N120 |     |
| G22 | 1   | 230 | 013 | 020 | 023 | 020 | 023 | 021 | 022 | 021 | 023 | 021  | 2113 | 020  | 2114 | 020  | 2113 | 020  | G114 |     |
| G23 | 1   | 211 | 001 | 014 | 016 | 014 | 018 | 014 | 017 | 014 | 016 | 017  | 2028 | 010  | 2029 | 010  | 2028 | 010  | G113 |     |
| A14 | 1   | 302 | 429 | 240 | 401 | 239 | 400 | 240 | 401 | 239 | 400 | 240  | 1812 | 411  | 1813 | 411  | 1812 | 411  | A117 |     |
| V15 | 1   | 201 | 010 | 004 | 011 | 003 | 010 | 003 | 010 | 003 | 010 | 003  | 1675 | 004  | 1676 | 004  | 1675 | 004  | V116 |     |
| L16 | 1   | 201 | 010 | 004 | 011 | 003 | 010 | 003 | 010 | 003 | 010 | 003  | 1675 | 004  | 1676 | 004  | 1675 | 004  | L115 |     |
| L17 | 1   | 217 | 000 | 210 | 030 | 209 | 029 | 210 | 030 | 210 | 029 | 210  | 1588 | 026  | 1589 | 026  | 1588 | 026  | L114 |     |
| R18 | 1   | 218 | 018 | 011 | 019 | 018 | 020 | 018 | 019 | 018 | 020 | 019  | 1475 | 018  | 1476 | 018  | 1475 | 018  | R113 |     |
| K19 | 1   | 202 | 013 | 010 | 013 | 010 | 016 | 010 | 015 | 010 | 016 | 015  | 1361 | 010  | 1362 | 010  | 1361 | 010  | K112 |     |
| K15 | 1   | 180 | 000 | 101 | 000 | 100 | 000 | 101 | 000 | 101 | 000 | 100  | 1250 | 000  | 1251 | 000  | 1250 | 000  | K111 |     |
| L11 | 1   | 169 | 000 | 000 | 000 | 000 | 000 | 000 | 000 | 000 | 000 | 000  | 1089 | 000  | 1090 | 000  | 1089 | 000  | L110 |     |
| E14 | 1   | 150 | 000 | 103 | 001 | 102 | 000 | 103 | 001 | 103 | 000 | 102  | 001  | 1064 | 000  | 1065 | 000  | 1064 | 000  | E11 |
| S13 | 1   | 108 | 001 | 101 | 000 | 100 | 000 | 101 | 000 | 101 | 000 | 100  | 001  | 892  | 011  | 893  | 011  | 892  | 011  | S11 |
| H12 | 1   | 101 | 000 | 000 | 000 | 000 | 000 | 000 | 000 | 000 | 000 | 000  | 805  | 000  | 806  | 000  | 805  | 000  | H11  |     |
| H10 | 1   | 372 | 048 | 070 | 022 | 074 | 138 | 069 | 043 | 073 | 013 | 070  | 013  | 685  | 420  | 686  | 420  | 685  | 420  | H10 |
| K16 | 1   | 300 | 011 | 083 | 017 | 082 | 018 | 083 | 017 | 083 | 016 | 083  | 538  | 016  | 539  | 016  | 538  | 016  | K11  |     |
| A11 | 1   | 317 | 010 | 000 | 000 | 000 | 000 | 000 | 000 | 000 | 000 | 000  | 490  | 000  | 491  | 000  | 490  | 000  | A11  |     |
| K11 | 1   | 249 | 001 | 000 | 001 | 000 | 000 | 001 | 000 | 001 | 000 | 000  | 352  | 001  | 353  | 001  | 352  | 001  | K11  |     |
| G19 | 1   | 415 | 001 | 418 | 106 | 418 | 088 | 418 | 087 | 418 | 086 | 418  | 308  | 116  | 309  | 116  | 308  | 116  | G12  |     |
| K10 | 1   | 439 | 400 | 437 | 400 | 436 | 401 | 437 | 401 | 437 | 400 | 436  | 400  | 147  | 111  | 148  | 111  | 147  | 111  | K11 |

# sp | Q6GSS7 | H2A2A\_MOUSE

DEELNKLLGK<sup>Dimethyl</sup>VTIAQGGVLPNIQAVLLPKKTESHKAKGK<sup>28.03</sup>

- ▶ fragmentation table for charge state 2+
- ▶ specType=cid
- ▶ score=38.04
- ▶ F113281.dat
- ▶ query=q36894\_p1
- ▶ precursor=1083.374700
- ▶ chargePrecursor=4
- ▶ itol=0.5

| AA  | a               | a*             | a.z0           | b               | b*              | b.z0            | y               | y*              | y.z0            | AA       |      |
|-----|-----------------|----------------|----------------|-----------------|-----------------|-----------------|-----------------|-----------------|-----------------|----------|------|
| G1  | 44.223          | 0.524          | 35.512         | 35.512          | 0.504           | 49.523          | 230.125         | 2137.250        | 2210.747        | L540     |      |
| E2  | 339.044         | 0.504          | 339.039        | 339.044         | 0.504           | 174.017         | 230.125         | 2099.750        | 2099.750        | L539     |      |
| E3  | 173.556         | 0.524          | 145.561        | 147.563         | 0.504           | 173.556         | 2043.713        | 2075.204        | 2034.712        | L538     |      |
| L4  | 173.556         | 0.524          | 223.113        | 244.615         | 0.504           | 135.000         | 1359.150        | 1370.641        | 1370.641        | L537     |      |
| N5  | 339.044         | 0.504          | 339.039        | 339.044         | 0.504           | 202.012         | 202.012         | 2022.654        | 1814.141        | N530     |      |
| K6  | 135.914         | 0.524          | 145.561        | 147.563         | 0.504           | 135.914         | 200.000         | 1999.511        | 1999.511        | K531     |      |
| L7  | 407.712         | 0.504          | 369.208        | 381.714         | 0.513           | 413.711         | 381.711         | 381.711         | 373.710         | L534     |      |
| L8  | 404.541         | 0.524          | 493.742        | 493.742         | 0.504           | 404.541         | 1745.041        | 1745.041        | 1745.041        | L533     |      |
| G9  | 492.712         | 0.524          | 493.742        | 493.742         | 0.504           | 492.712         | 1659.500        | 1671.000        | 1671.000        | G532     |      |
| K10 | 470.630         | 0.524          | 361.800        | 361.800         | 0.504           | 470.630         | 1659.500        | 1671.000        | 1671.000        | K531     |      |
| V11 | 420.589         | 0.513          | 411.364        | 424.584         | 0.525           | 420.589         | 1659.500        | 1671.000        | 1671.000        | V530     |      |
| T12 | 409.800         | 0.524          | 361.800        | 361.800         | 0.504           | 409.800         | 1659.500        | 1671.000        | 1671.000        | T529     |      |
| R13 | 747.430         | <b>718.922</b> | <b>718.930</b> | <b>741.432</b>  | <b>732.919</b>  | <b>732.427</b>  | <b>1481.800</b> | 1471.300        | 1471.300        | R528     |      |
| A14 | 176.551         | 0.542          | 176.548        | <b>176.551</b>  | 0.504           | <b>167.546</b>  | <b>1425.327</b> | <b>1418.814</b> | <b>1416.322</b> | A527     |      |
| Q15 | 405.400         | 0.513          | 405.400        | <b>405.400</b>  | <b>405.400</b>  | <b>405.400</b>  | <b>1385.250</b> | <b>1385.250</b> | <b>1385.250</b> | Q526     |      |
| G16 | 335.400         | 0.504          | 335.400        | <b>335.400</b>  | <b>335.400</b>  | <b>335.400</b>  | <b>1325.770</b> | <b>1317.260</b> | <b>1316.774</b> | G525     |      |
| G17 | 334.044         | 0.504          | 334.044        | <b>334.044</b>  | <b>334.044</b>  | <b>334.044</b>  | <b>1297.700</b> | <b>1288.755</b> | <b>1288.263</b> | G524     |      |
| V18 | 333.000         | <b>324.028</b> | <b>324.033</b> | <b>333.000</b>  | <b>333.000</b>  | <b>333.000</b>  | <b>1268.750</b> | <b>1268.750</b> | <b>1268.750</b> | V523     |      |
| L19 | <b>900.080</b>  | <b>881.587</b> | <b>881.591</b> | <b>900.078</b>  | <b>895.565</b>  | <b>895.565</b>  | <b>1219.224</b> | <b>1210.710</b> | <b>1210.218</b> | L522     |      |
| P20 | 318.000         | 0.504          | 318.000        | 318.000         | 0.504           | 318.000         | 1203.500        | 1182.862        | 1154.148        | 1153.876 | P521 |
| N21 | 339.044         | 0.504          | 339.039        | <b>339.044</b>  | <b>339.044</b>  | <b>339.044</b>  | <b>1189.826</b> | <b>1189.826</b> | <b>1189.826</b> | N520     |      |
| G22 | 153.170         | 0.513          | 153.165        | 153.165         | 0.504           | <b>153.165</b>  | <b>1157.162</b> | 1048.621        | 1048.621        | G519     |      |
| Q23 | 121.000         | 0.504          | 121.000        | 121.000         | 0.504           | 121.000         | 1000.500        | 992.070         | 983.537         | Q518     |      |
| A24 | 100.000         | 0.504          | 100.000        | 100.000         | 0.504           | 100.000         | 992.070         | 983.537         | 983.537         | A517     |      |
| V25 | <b>1251.718</b> | 0.513          | 1251.713       | <b>1251.718</b> | <b>1251.718</b> | <b>1251.718</b> | <b>982.070</b>  | <b>982.070</b>  | <b>982.070</b>  | V516     |      |
| K26 | 100.000         | 0.504          | 100.000        | 100.000         | 0.504           | 100.000         | 982.070         | 982.070         | 982.070         | K515     |      |
| L27 | 100.000         | 0.504          | 100.000        | 100.000         | 0.504           | 100.000         | 982.070         | 982.070         | 982.070         | L514     |      |
| K28 | 100.000         | 0.504          | 100.000        | 100.000         | 0.504           | 100.000         | 982.070         | 982.070         | 982.070         | K513     |      |
| K29 | 100.000         | 0.504          | 100.000        | 100.000         | 0.504           | 100.000         | 982.070         | 982.070         | 982.070         | K512     |      |
| K30 | 100.000         | 0.504          | 100.000        | 100.000         | 0.504           | 100.000         | 982.070         | 982.070         | 982.070         | K511     |      |
| L31 | 100.000         | 0.504          | 100.000        | 100.000         | 0.504           | 100.000         | 982.070         | 982.070         | 982.070         | L510     |      |
| E32 | 100.000         | 0.504          | 100.000        | 100.000         | 0.504           | 100.000         | 982.070         | 982.070         | 982.070         | E509     |      |
| S33 | 100.000         | 0.504          | 100.000        | 100.000         | 0.504           | 100.000         | 982.070         | 982.070         | 982.070         | S508     |      |
| L34 | 100.000         | 0.504          | 100.000        | 100.000         | 0.504           | 100.000         | 982.070         | 982.070         | 982.070         | L507     |      |
| L35 | 100.000         | 0.504          | 100.000        | 100.000         | 0.504           | 100.000         | 982.070         | 982.070         | 982.070         | L506     |      |
| K36 | 100.000         | 0.504          | 100.000        | 100.000         | 0.504           | 100.000         | 982.070         | 982.070         | 982.070         | K505     |      |
| A37 | 100.000         | 0.504          | 100.000        | 100.000         | 0.504           | 100.000         | 982.070         | 982.070         | 982.070         | A504     |      |
| K38 | 100.000         | 0.504          | 100.000        | 100.000         | 0.504           | 100.000         | 982.070         | 982.070         | 982.070         | K503     |      |
| G39 | 100.000         | 0.504          | 100.000        | 100.000         | 0.504           | 100.000         | 982.070         | 982.070         | 982.070         | G502     |      |
| K40 | 100.000         | 0.504          | 100.000        | 100.000         | 0.504           | 100.000         | 982.070         | 982.070         | 982.070         | K501     |      |

# sp | Q6GSS7 | H2A2A\_MOUSE

DEELNKLLGK<sup>Dimethyl</sup>VTIAQGGVLPNIQAVLLPKKTESHKAKGK<sup>28.03</sup>

- ▶ fragmentation table for charge state 3+
- ▶ specType=cid
- ▶ score=38.04
- ▶ F113281.dat
- ▶ query=q36894\_p1
- ▶ precursor=1083.374700
- ▶ chargePrecursor=4
- ▶ itol=0.5

| AA  | x        | y                | x <sub>0</sub>   | b                | b <sub>0</sub>   | y                | y <sub>0</sub>  | x <sub>0</sub>  | AA              |      |
|-----|----------|------------------|------------------|------------------|------------------|------------------|-----------------|-----------------|-----------------|------|
| E1  | 30103    | 0.000            | 42.011           | 38.000           | 0.000            | 31.500           | 1464.111        | 1432.499        | E140            |      |
| E2  | 71.012   | 0.000            | 42.020           | 38.004           | 0.000            | 31.500           | 1463.823        | 1430.151        | E139            |      |
| E3  | 112.020  | 0.000            | 119.004          | 119.000          | 0.000            | 119.000          | 1500.914        | 1497.439        | E138            |      |
| E4  | 153.028  | 0.000            | 154.798          | 154.800          | 0.000            | 154.800          | 1516.800        | 1514.139        | E137            |      |
| E5  | 194.035  | 0.000            | 190.792          | 191.000          | 0.000            | 191.000          | 1532.100        | 1529.100        | E136            |      |
| E6  | 235.043  | 0.000            | 236.740          | 237.000          | 0.000            | 237.000          | <b>1544.001</b> | 1544.000        | E135            |      |
| E7  | 276.050  | 0.000            | 277.141          | 277.400          | 0.000            | 277.400          | 1561.331        | <b>1558.717</b> | E134            |      |
| E8  | 317.058  | 0.000            | 318.040          | 318.170          | 0.11499          | 313.171          | <b>1553.003</b> | <b>1558.022</b> | <b>1557.694</b> | E133 |
| E9  | 358.065  | 0.000            | 359.000          | 359.134          | 0.000            | 359.134          | <b>1565.001</b> | 1565.000        | E132            |      |
| E10 | 400.072  | 0.000            | 399.241          | 399.244          | 0.000            | 399.244          | 1584.244        | 1584.244        | E131            |      |
| V11 | 441.079  | 0.000            | 442.000          | 442.247          | 0.000            | 442.247          | <b>1614.001</b> | 1614.000        | V10             |      |
| V12 | 482.086  | 0.000            | 483.000          | 483.244          | 0.000            | 483.244          | 1633.244        | 1633.244        | V9              |      |
| V13 | 523.093  | 0.000            | 524.000          | 524.241          | 0.000            | 524.241          | <b>1652.240</b> | 1652.241        | V8              |      |
| A14 | 564.100  | 0.000            | 565.000          | 565.238          | 0.000            | 565.238          | 1671.238        | 1671.238        | A13             |      |
| G15 | 605.107  | 0.000            | 606.000          | 606.234          | 0.000            | 606.234          | 1690.234        | 1690.234        | G14             |      |
| G16 | 646.114  | 0.000            | 647.000          | 647.231          | 0.000            | 647.231          | 1709.231        | 1709.231        | G13             |      |
| G17 | 687.121  | 0.000            | 688.000          | 688.228          | 0.000            | 688.228          | 1728.228        | 1728.228        | G12             |      |
| V18 | 728.128  | 0.000            | 729.000          | 729.224          | 0.000            | 729.224          | 1747.224        | 1747.224        | V17             |      |
| L19 | 769.135  | 0.000            | 770.000          | 770.221          | 0.000            | 770.221          | 1766.221        | 1766.221        | L18             |      |
| V20 | 810.142  | 0.000            | 811.000          | 811.217          | 0.000            | 811.217          | <b>1785.217</b> | <b>1785.217</b> | V19             |      |
| V21 | 851.149  | 0.000            | 852.000          | 852.214          | 0.000            | 852.214          | 1804.214        | 1804.214        | V18             |      |
| G22 | 892.156  | 0.000            | 893.000          | 893.211          | 0.000            | 893.211          | 1823.211        | 1823.211        | G21             |      |
| G23 | 933.163  | <b>0.05.400</b>  | 934.000          | 934.207          | 0.000            | 934.207          | 1842.207        | 1842.207        | G20             |      |
| V24 | 974.170  | 0.000            | 975.000          | 975.204          | 0.000            | 975.204          | 1861.204        | 1861.204        | V23             |      |
| V25 | 1015.177 | 0.000            | 1016.000         | 1016.201         | 0.000            | 1016.201         | <b>1880.201</b> | <b>1880.201</b> | V22             |      |
| V26 | 1056.184 | 0.000            | 1057.000         | 1057.197         | 0.000            | 1057.197         | <b>1900.197</b> | <b>1900.197</b> | V21             |      |
| L27 | 1097.191 | 0.000            | 1098.000         | 1098.194         | 0.000            | 1098.194         | 1919.194        | 1919.194        | L26             |      |
| L28 | 1138.198 | 0.000            | 1139.000         | 1139.191         | 0.000            | 1139.191         | 1938.191        | 1938.191        | L25             |      |
| L29 | 1179.205 | <b>0.07.031</b>  | <b>0.07.223</b>  | <b>0.07.558</b>  | 0.000            | 1179.205         | 1957.191        | 1957.191        | L24             |      |
| P30 | 1220.212 | 0.000            | 1221.000         | 1221.187         | 0.000            | 1221.187         | <b>0.01.030</b> | 1976.187        | P29             |      |
| K31 | 1261.219 | 0.000            | 1262.000         | 1262.184         | 0.000            | 1262.184         | 1995.184        | 1995.184        | K30             |      |
| K32 | 1302.226 | 0.000            | 1303.000         | 1303.181         | 0.000            | 1303.181         | 2014.181        | 2014.181        | K31             |      |
| T33 | 1343.233 | 0.000            | 1344.000         | 1344.178         | 0.000            | 1344.178         | 2033.178        | 2033.178        | T32             |      |
| E34 | 1384.240 | 0.000            | 1385.000         | 1385.175         | 0.000            | 1385.175         | 2052.175        | 2052.175        | E33             |      |
| E35 | 1425.247 | 0.000            | 1426.000         | 1426.172         | 0.000            | 1426.172         | 2071.172        | 2071.172        | E32             |      |
| E36 | 1466.254 | 0.000            | 1467.000         | 1467.169         | 0.000            | 1467.169         | 2090.169        | 2090.169        | E31             |      |
| E37 | 1507.261 | 0.000            | 1508.000         | 1508.166         | 0.000            | 1508.166         | 2109.166        | 2109.166        | E30             |      |
| E38 | 1548.268 | 0.000            | 1549.000         | 1549.163         | 0.000            | 1549.163         | 2128.163        | 2128.163        | E29             |      |
| E39 | 1589.275 | 0.000            | 1590.000         | 1590.160         | 0.000            | 1590.160         | 2147.160        | 2147.160        | E28             |      |
| E40 | 1630.282 | 0.000            | 1631.000         | 1631.157         | 0.000            | 1631.157         | 2166.157        | 2166.157        | E27             |      |
| E41 | 1671.289 | 0.000            | 1672.000         | 1672.154         | 0.000            | 1672.154         | 2185.154        | 2185.154        | E26             |      |
| E42 | 1712.296 | 0.000            | 1713.000         | 1713.151         | 0.000            | 1713.151         | 2204.151        | 2204.151        | E25             |      |
| E43 | 1753.303 | 0.000            | 1754.000         | 1754.148         | 0.000            | 1754.148         | 2223.148        | 2223.148        | E24             |      |
| E44 | 1794.310 | 0.000            | 1795.000         | 1795.145         | 0.000            | 1795.145         | 2242.145        | 2242.145        | E23             |      |
| E45 | 1835.317 | <b>1.252.379</b> | <b>1.252.451</b> | <b>1.252.700</b> | <b>1.261.730</b> | <b>1.261.382</b> | 2261.142        | 2261.142        | E22             |      |
| E46 | 1876.324 | 0.000            | 1877.000         | 1877.142         | 0.000            | 1877.142         | 2280.142        | 2280.142        | E21             |      |
| A47 | 1917.331 | 0.000            | 1918.000         | 1918.139         | 0.000            | 1918.139         | 2299.139        | 2299.139        | A46             |      |
| K48 | 1958.338 | 0.000            | 1959.000         | 1959.136         | 0.000            | 1959.136         | 2318.136        | 2318.136        | K47             |      |
| G49 | 1999.345 | 0.000            | 2000.000         | 2000.133         | 0.000            | 2000.133         | 2337.133        | 2337.133        | G48             |      |
| K50 | 2040.352 | 0.000            | 2041.000         | 2041.130         | 0.000            | 2041.130         | 2356.130        | 2356.130        | K49             |      |
| K51 | 2081.359 | 0.000            | 2082.000         | 2082.127         | 0.000            | 2082.127         | 2375.127        | 2375.127        | K50             |      |
| K52 | 2122.366 | 0.000            | 2123.000         | 2123.124         | 0.000            | 2123.124         | 2394.124        | 2394.124        | K51             |      |
| K53 | 2163.373 | 0.000            | 2164.000         | 2164.121         | 0.000            | 2164.121         | 2413.121        | 2413.121        | K52             |      |
| K54 | 2204.380 | 0.000            | 2205.000         | 2205.118         | 0.000            | 2205.118         | 2432.118        | 2432.118        | K53             |      |
| K55 | 2245.387 | 0.000            | 2246.000         | 2246.115         | 0.000            | 2246.115         | 2451.115        | 2451.115        | K54             |      |
| K56 | 2286.394 | 0.000            | 2287.000         | 2287.112         | 0.000            | 2287.112         | 2470.112        | 2470.112        | K55             |      |
| K57 | 2327.401 | 0.000            | 2328.000         | 2328.109         | 0.000            | 2328.109         | 2489.109        | 2489.109        | K56             |      |
| K58 | 2368.408 | 0.000            | 2369.000         | 2369.106         | 0.000            | 2369.106         | 2508.106        | 2508.106        | K57             |      |
| K59 | 2409.415 | 0.000            | 2410.000         | 2410.103         | 0.000            | 2410.103         | 2527.103        | 2527.103        | K58             |      |
| K60 | 2450.422 | 0.000            | 2451.000         | 2451.100         | 0.000            | 2451.100         | 2546.100        | 2546.100        | K59             |      |

# sp | Q6GSS7 | H2A2A\_MOUSE

DEELNKLLGK <sup>Dimethyl</sup> 28.03 VTIAQGGVLPNIQAVLLPKKTESHHKAKGK

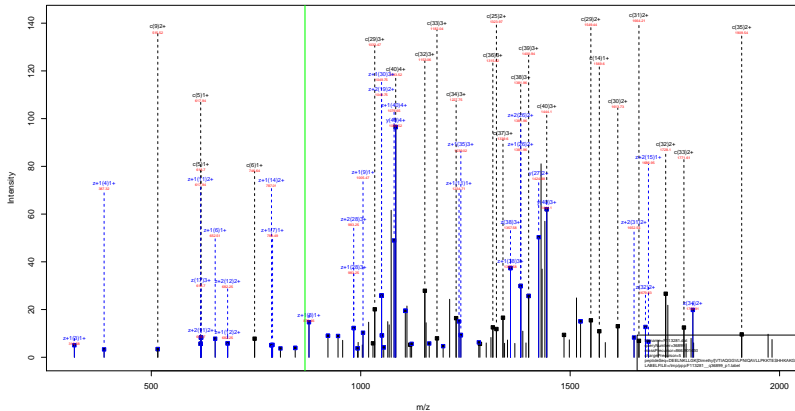

# sp | Q6GSS7 | H2A2A\_MOUSE

DEELNKLLGK <sup>Dimethyl</sup> <sub>28.03</sub> VTIAQGGVLPNIQAVLLPKKTESHKAKGK

- ▶ fragmentation table for charge state 1+
- ▶ specType=etd
- ▶ score=34.94
- ▶ F113281.dat
- ▶ query=q36899\_p1
- ▶ precursor=866.901430
- ▶ chargePrecursor=5
- ▶ itol=0.5

| AA   | c               | y        | z=1             | z=2             | z        | AA   |
|------|-----------------|----------|-----------------|-----------------|----------|------|
| D1   | 133.085         | 4330.997 | 4314.479        | 0.000           | 4313.471 | D140 |
| E12  | 282.103         | 4215.470 | 4199.452        | 0.000           | 4198.444 | E130 |
| E13  | 391.146         | 4086.425 | 4070.409        | 0.000           | 4069.401 | E138 |
| L14  | 594.230         | 3957.385 | 3941.366        | 0.000           | 3940.359 | L137 |
| N15  | <b>618.273</b>  | 3844.301 | 3828.282        | 3829.290        | 3827.275 | N136 |
| K16  | <b>746.368</b>  | 3730.259 | 3714.239        | 3715.247        | 3713.231 | K135 |
| L17  | 859.452         | 3602.163 | 3586.144        | 3587.152        | 3585.131 | L134 |
| L18  | 917.538         | 3489.079 | 3473.060        | 3474.068        | 3472.051 | L133 |
| G19  | <b>1029.558</b> | 3375.095 | 3359.076        | 3360.084        | 3358.069 | G132 |
| K10  | 1185.684        | 3318.974 | 3302.955        | 3303.963        | 3301.947 | K131 |
| V111 | <b>1284.752</b> | 3102.847 | 3146.629        | 3147.636        | 3145.621 | V130 |
| V112 | 1385.900        | 3063.779 | 3047.760        | 3048.768        | 3046.752 | V129 |
| I113 | 1469.894        | 2982.731 | 2946.713        | 2947.720        | 2945.705 | I128 |
| A114 | <b>1569.921</b> | 2949.641 | 2933.623        | 2934.630        | 2932.614 | A127 |
| Q115 | 1697.980        | 2778.610 | 2762.591        | 2763.599        | 2761.584 | Q126 |
| G116 | 1755.001        | 2650.562 | 2634.533        | 2635.541        | 2633.525 | G125 |
| G117 | 1812.023        | 2593.530 | 2577.511        | 2578.519        | 2576.504 | G124 |
| V118 | 1911.091        | 2536.509 | 2520.490        | 2521.498        | 2519.482 | V123 |
| L119 | 2024.175        | 2437.440 | 2421.421        | 2422.429        | 2420.414 | L122 |
| F120 | 2117.238        | 2324.395 | 2308.377        | 2309.385        | 2307.370 | F121 |
| N121 | 2235.271        | 2227.363 | 2211.345        | 2212.352        | 2210.337 | N120 |
| I122 | 2348.355        | 2113.260 | 2097.242        | 2098.250        | 2096.234 | I119 |
| Q123 | 2476.411        | 2000.176 | 1984.158        | 1985.165        | 1983.150 | Q118 |
| A124 | 2547.450        | 1872.118 | 1856.099        | 1857.107        | 1855.091 | A117 |
| V125 | 2646.519        | 1801.081 | 1785.062        | 1786.070        | 1784.054 | V116 |
| L126 | 2759.603        | 1702.012 | 1686.004        | <b>1687.001</b> | 1684.989 | L115 |
| L127 | 2872.687        | 1598.935 | 1572.900        | 1573.917        | 1571.902 | L114 |
| F128 | 2969.740        | 1475.844 | 1459.825        | 1460.833        | 1458.818 | F113 |
| K129 | 3097.835        | 1378.791 | 1362.773        | 1363.780        | 1361.765 | K112 |
| K130 | 3225.930        | 1250.696 | <b>1234.678</b> | 1235.685        | 1233.670 | K111 |
| T131 | 3326.977        | 1122.601 | <b>1106.583</b> | 1107.591        | 1105.575 | T110 |
| E132 | 3459.030        | 1011.554 | <b>1005.535</b> | 1006.543        | 1004.527 | E109 |
| S133 | 3543.052        | 892.511  | <b>876.492</b>  | 877.500         | 875.485  | S108 |
| H134 | 3680.111        | 805.479  | <b>789.460</b>  | 790.468         | 788.453  | H107 |
| H135 | 3817.170        | 668.420  | <b>652.401</b>  | 653.409         | 651.394  | H106 |
| K136 | 3945.205        | 531.301  | <b>515.343</b>  | 516.350         | 514.335  | K105 |
| A137 | 4016.302        | 403.266  | <b>387.248</b>  | 388.255         | 386.240  | A104 |
| K138 | 4144.397        | 332.229  | <b>316.211</b>  | 317.218         | 315.203  | K103 |
| G139 | 4201.418        | 204.134  | 189.110         | 189.123         | 187.105  | G102 |
| K140 | 4329.513        | 147.113  | 131.094         | 132.102         | 130.080  | K101 |

# sp | Q6GSS7 | H2A2A\_MOUSE

DEELNKLLGK <sup>Dimethyl</sup> <sub>28.03</sub> VTIAQGGVLPNIQAVLLPKKTESHKAKGK

- ▶ fragmentation table for charge state 2+
- ▶ specType=etd
- ▶ score=34.94
- ▶ F113281.dat
- ▶ query=q36899\_p1
- ▶ precursor=866.901430
- ▶ chargePrecursor=5
- ▶ itol=0.5

| AA | c  | y               | z=1             | z=2             | z               | AA              |       |
|----|----|-----------------|-----------------|-----------------|-----------------|-----------------|-------|
| D  | 1  | 87.034          | 2165.752        | 2157.743        | 0.504           | 2157.239        | D[40] |
| E  | 2  | 131.555         | 2108.239        | 2100.229        | 0.504           | 2099.726        | E[39] |
| E  | 3  | 188.077         | 2043.715        | 2035.705        | 0.504           | 2035.201        | E[38] |
| L  | 4  | 252.519         | 1979.190        | 1971.187        | 0.504           | 1970.683        | L[37] |
| N  | 5  | 309.640         | 1922.654        | 1914.645        | 1915.140        | 1914.141        | N[36] |
| K  | 6  | 374.668         | 1858.613        | 1857.623        | 1858.127        | 1857.119        | K[35] |
| L  | 7  | 430.230         | 1801.585        | 1793.576        | 1794.080        | 1793.072        | L[34] |
| L  | 8  | 498.772         | 1748.043        | 1742.034        | 1737.538        | 1736.530        | L[33] |
| G  | 9  | <b>515.282</b>  | 1708.521        | 1698.492        | 1698.998        | <b>1679.988</b> | G[32] |
| K  | 10 | 593.346         | 1659.990        | 1651.981        | <b>1652.485</b> | 1651.477        | K[31] |
| V  | 11 | 642.880         | 1581.927        | 1573.918        | 1574.422        | 1573.414        | V[30] |
| T  | 12 | 693.404         | 1532.393        | <b>1524.384</b> | <b>1524.888</b> | 1523.880        | T[29] |
| L  | 13 | 748.946         | 1484.869        | 1473.860        | 1474.364        | 1473.356        | L[28] |
| A  | 14 | 785.464         | <b>1425.327</b> | 1417.318        | 1417.822        | 1416.814        | A[27] |
| G  | 15 | 849.493         | 1359.805        | <b>1381.799</b> | <b>1382.303</b> | 1381.295        | G[26] |
| G  | 16 | 878.004         | 1325.779        | 1317.770        | 1318.274        | 1317.266        | G[25] |
| G  | 17 | 906.515         | 1297.269        | 1289.259        | 1289.763        | 1288.755        | G[24] |
| V  | 18 | 956.049         | 1268.758        | 1260.749        | 1261.252        | 1260.245        | V[23] |
| L  | 19 | 1012.597        | 1219.224        | 1211.214        | 1211.718        | 1210.710        | L[22] |
| P  | 20 | 1081.118        | 1162.682        | 1154.672        | 1155.176        | 1154.168        | P[21] |
| N  | 21 | <b>1118.139</b> | 1114.155        | <b>1106.146</b> | <b>1106.650</b> | 1105.642        | N[20] |
| I  | 22 | 1174.681        | 1057.134        | 1049.124        | <b>1049.628</b> | 1048.621        | I[19] |
| Q  | 23 | <b>1238.710</b> | 1000.592        | <b>992.582</b>  | 993.086         | <b>992.079</b>  | Q[18] |
| A  | 24 | 1274.229        | 936.563         | 928.553         | 929.057         | 928.049         | A[17] |
| V  | 25 | <b>1323.763</b> | 893.044         | 885.035         | 885.539         | 884.531         | V[16] |
| L  | 26 | 1388.309        | 851.510         | <b>843.500</b>  | <b>844.004</b>  | 843.000         | L[15] |
| L  | 27 | 1438.847        | 794.968         | <b>786.958</b>  | <b>787.462</b>  | 786.454         | L[14] |
| P  | 28 | <b>1465.374</b> | 738.426         | 730.416         | 730.920         | 729.912         | P[13] |
| K  | 29 | <b>1549.421</b> | 699.899         | <b>681.890</b>  | <b>682.394</b>  | 681.386         | K[12] |
| K  | 30 | <b>1613.468</b> | 626.382         | <b>617.842</b>  | <b>618.346</b>  | 617.338         | K[11] |
| T  | 31 | <b>1663.992</b> | 563.894         | 555.738         | 556.242         | 555.234         | T[10] |
| E  | 32 | <b>1728.514</b> | 511.281         | 503.271         | 503.775         | 502.767         | E[9]  |
| S  | 33 | <b>1772.030</b> | 446.759         | 438.750         | 439.254         | 438.246         | S[8]  |
| H  | 34 | 1840.559        | 403.243         | 395.234         | 395.738         | 394.730         | H[7]  |
| H  | 35 | <b>1909.089</b> | 334.714         | 326.704         | 327.208         | 326.200         | H[6]  |
| K  | 36 | 1973.128        | 268.184         | 260.175         | 260.679         | 259.671         | K[5]  |
| A  | 37 | 2058.655        | 202.137         | 194.127         | 194.631         | 193.624         | A[4]  |
| K  | 38 | 2072.702        | 166.618         | 158.609         | 159.113         | 158.105         | K[3]  |
| G  | 39 | 2161.211        | 102.571         | 94.561          | 95.065          | 94.057          | G[2]  |
| K  | 40 | 2185.260        | 74.060          | 66.051          | 66.555          | 65.547          | K[1]  |

# sp | Q6GSS7 | H2A2A\_MOUSE

DEELNKLLGK <sup>Dimethyl</sup> <sub>28.03</sub> VTIAQGGVLPNIQAVLLPKKTESHKAKGK

- ▶ fragmentation table for charge state 3+
- ▶ specType=etd
- ▶ score=34.94
- ▶ F113281.dat
- ▶ query=q36899\_p1
- ▶ precursor=866.901430
- ▶ chargePrecursor=5
- ▶ itol=0.5

| AA   | c               | y               | z=1             | z=2             | z               | AA   |
|------|-----------------|-----------------|-----------------|-----------------|-----------------|------|
| D 1  | 45.025          | <b>1444.171</b> | 1438.931        | 0.672           | 1438.495        | D 40 |
| E 2  | 68.039          | 1405.028        | <b>1408.489</b> | 0.672           | 1407.163        | E 39 |
| E 3  | 113.654         | 1362.874        | <b>1357.475</b> | 0.672           | <b>1357.139</b> | E 38 |
| L 4  | 158.748         | 1319.800        | 1314.500        | 0.672           | 1314.223        | L 37 |
| N 5  | 206.762         | <b>1282.105</b> | 1276.706        | 1277.102        | 1276.430        | N 36 |
| K 6  | 249.401         | 1244.091        | <b>1238.751</b> | <b>1239.087</b> | 1238.415        | K 35 |
| L 7  | 287.156         | 1201.393        | 1196.053        | <b>1196.389</b> | 1195.717        | L 34 |
| L 8  | 324.850         | <b>1163.698</b> | 1158.388        | 1159.094        | 1158.602        | L 33 |
| G 9  | 361.357         | 1128.003        | 1120.604        | <b>1121.000</b> | 1120.250        | G 32 |
| K 10 | 395.899         | 1108.996        | 1101.656        | 1101.992        | 1101.321        | K 31 |
| V 11 | 438.402         | <b>1054.954</b> | <b>1049.614</b> | <b>1049.950</b> | <b>1049.278</b> | V 30 |
| T 12 | 482.605         | 1021.931        | 1018.592        | 1018.938        | 1018.250        | T 29 |
| L 13 | 500.299         | 988.249         | <b>982.909</b>  | <b>983.245</b>  | 982.573         | L 28 |
| A 14 | 523.979         | 956.554         | 949.214         | <b>945.550</b>  | 944.879         | A 27 |
| Q 15 | 566.605         | 926.875         | <b>921.535</b>  | <b>921.871</b>  | 921.192         | Q 26 |
| G 16 | 585.672         | 884.189         | 878.849         | 879.185         | 878.513         | G 25 |
| G 17 | 604.679         | 865.182         | 859.842         | 860.178         | 859.500         | G 24 |
| V 18 | 637.702         | 846.174         | 840.835         | 841.171         | 840.499         | V 23 |
| L 19 | 678.397         | 813.152         | 807.812         | <b>808.148</b>  | 807.470         | L 22 |
| F 20 | 707.747         | 775.481         | 770.141         | 770.533         | 769.781         | F 21 |
| N 21 | 745.762         | 743.106         | 737.766         | 738.102         | 737.430         | N 20 |
| I 22 | 781.456         | 705.002         | 699.752         | 700.088         | 699.410         | I 19 |
| Q 23 | 826.143         | 667.397         | 662.057         | 662.393         | 661.721         | Q 18 |
| A 24 | 849.827         | 634.711         | 619.371         | 619.707         | <b>619.035</b>  | A 17 |
| V 25 | 882.844         | 603.035         | 598.692         | 599.028         | 598.356         | V 16 |
| L 26 | 920.539         | 568.009         | 562.669         | 563.005         | 562.333         | L 15 |
| L 27 | 958.234         | 530.314         | 524.975         | 525.311         | 524.639         | L 14 |
| F 28 | 990.505         | 492.620         | 487.280         | 487.616         | 486.944         | F 13 |
| K 29 | <b>1033.283</b> | 460.289         | 454.929         | 455.265         | 454.591         | K 12 |
| K 30 | 1075.981        | 427.570         | 412.230         | 412.567         | 411.895         | K 11 |
| T 31 | 1109.664        | 374.872         | 369.532         | 369.868         | 369.190         | T 10 |
| E 32 | <b>1152.678</b> | 341.180         | 335.850         | 336.186         | 335.514         | E 9  |
| S 33 | <b>1181.689</b> | 298.175         | 292.836         | 293.172         | 292.500         | S 8  |
| H 34 | <b>1227.375</b> | 269.185         | 263.825         | 264.161         | 263.489         | H 7  |
| H 35 | 1277.063        | 223.478         | 218.139         | 218.475         | 217.803         | H 6  |
| K 36 | <b>1315.760</b> | 177.762         | 172.483         | 172.768         | 172.110         | K 5  |
| A 37 | <b>1339.439</b> | 135.094         | 129.754         | 130.090         | 129.414         | A 4  |
| K 38 | <b>1382.137</b> | 111.415         | 106.075         | 106.411         | 105.739         | K 3  |
| G 39 | <b>1461.144</b> | 68.716          | 63.377          | 63.713          | 63.041          | G 2  |
| K 40 | <b>1443.843</b> | 49.709          | 44.370          | 44.705          | 44.034          | K 1  |



# sp | Q6GSS7 | H2A2A\_MOUSE

DEELNKLLGK <sup>Dimethyl</sup> 28.03 VTIAQGGVLPNIQAVLLPKKTESHKAKGK

- ▶ fragmentation table for charge state 4+
- ▶ specType=etd
- ▶ score=34.94
- ▶ F113281.dat
- ▶ query=q36899\_p1
- ▶ precursor=866.901430
- ▶ chargePrecursor=5
- ▶ itol=0.5

| AA    | c               | y               | z+1             | z+2     | z               | AA    |
|-------|-----------------|-----------------|-----------------|---------|-----------------|-------|
| D[1]  | 34.021          | <b>1081.380</b> | <b>1079.375</b> | 0.755   | 1079.121        | D[40] |
| E[2]  | 66.281          | <b>1054.623</b> | <b>1050.618</b> | 0.755   | <b>1050.360</b> | E[39] |
| E[3]  | 98.542          | 1022.802        | 1018.358        | 0.755   | 1018.100        | E[38] |
| L[4]  | 126.813         | 990.102         | 986.097         | 0.755   | 985.845         | L[37] |
| R[5]  | 155.324         | 961.831         | 957.826         | 958.078 | 957.574         | R[36] |
| K[6]  | 187.347         | 933.320         | 929.315         | 929.567 | 929.063         | K[35] |
| L[7]  | 215.618         | 901.290         | 897.282         | 897.544 | 897.040         | L[34] |
| L[8]  | 243.899         | 873.020         | 869.021         | 869.273 | 868.769         | L[33] |
| G[9]  | 258.145         | 844.754         | 840.750         | 841.002 | 840.498         | G[32] |
| K[10] | 297.176         | 830.499         | 826.494         | 826.746 | 826.242         | K[31] |
| V[11] | 321.644         | 791.467         | <b>787.463</b>  | 787.715 | <b>787.211</b>  | V[30] |
| V[12] | 347.205         | 766.700         | 762.696         | 762.947 | 762.444         | V[29] |
| I[13] | 375.476         | 741.438         | 737.434         | 737.686 | 737.182         | I[28] |
| A[14] | 393.236         | 713.167         | 709.163         | 709.415 | 708.911         | A[27] |
| Q[15] | 425.250         | 695.400         | 691.403         | 691.655 | 691.151         | Q[26] |
| Q[16] | 439.508         | 663.393         | 659.389         | 659.641 | 659.137         | Q[25] |
| G[17] | 453.761         | 648.130         | 645.133         | 645.385 | 644.881         | G[24] |
| V[18] | 478.528         | 634.883         | 630.878         | 631.130 | 630.626         | V[23] |
| L[19] | 506.799         | 610.110         | 606.111         | 606.363 | 605.859         | L[22] |
| F[20] | 533.662         | 593.944         | 591.840         | 591.092 | 589.389         | F[21] |
| N[21] | 559.573         | 587.561         | 583.577         | 583.829 | 583.325         | N[20] |
| I[22] | 587.844         | 529.071         | 525.066         | 525.318 | 524.814         | I[19] |
| Q[23] | 619.859         | 500.800         | 496.795         | 497.047 | 496.543         | Q[18] |
| A[24] | 627.618         | 468.788         | 464.780         | 465.032 | 464.528         | A[17] |
| V[25] | 662.385         | 451.026         | 447.021         | 447.273 | 446.769         | V[16] |
| L[26] | 690.856         | 428.260         | 423.254         | 423.506 | 422.002         | L[15] |
| L[27] | 718.927         | 397.860         | 393.863         | 394.235 | 393.731         | L[14] |
| F[28] | 743.190         | 369.710         | 365.712         | 365.964 | 365.460         | F[13] |
| K[29] | 775.214         | 345.453         | 341.449         | 341.701 | 341.197         | K[12] |
| K[30] | 807.238         | 313.430         | 309.425         | 309.677 | 309.173         | K[11] |
| V[31] | 832.500         | 281.400         | 277.401         | 277.653 | 277.149         | V[10] |
| L[32] | 864.760         | 256.144         | 252.139         | 252.391 | 251.887         | L[9]  |
| S[33] | 896.518         | 223.881         | 219.879         | 220.131 | 219.627         | S[8]  |
| H[34] | 920.783         | 202.120         | 198.121         | 198.373 | 197.869         | H[7]  |
| R[35] | 955.048         | 167.801         | 163.806         | 164.108 | 163.604         | R[0]  |
| K[36] | 987.072         | 133.590         | 129.591         | 129.843 | 129.339         | K[5]  |
| A[37] | 1004.831        | 101.572         | 97.567          | 97.819  | 97.315          | A[4]  |
| K[38] | 1036.855        | 83.813          | 79.808          | 80.060  | 79.556          | K[3]  |
| G[39] | 1053.110        | 53.780          | 47.784          | 48.036  | 47.532          | G[2]  |
| R[40] | <b>1083.134</b> | 37.533          | 33.529          | 33.781  | 33.277          | R[1]  |

# sp | Q6GSS7 | H2A2A\_MOUSE

DEELNKLLGK <sup>Dimethyl</sup>VTIAQGGVLPNIQAVLLPKKTESHHKAKGK  
28.03

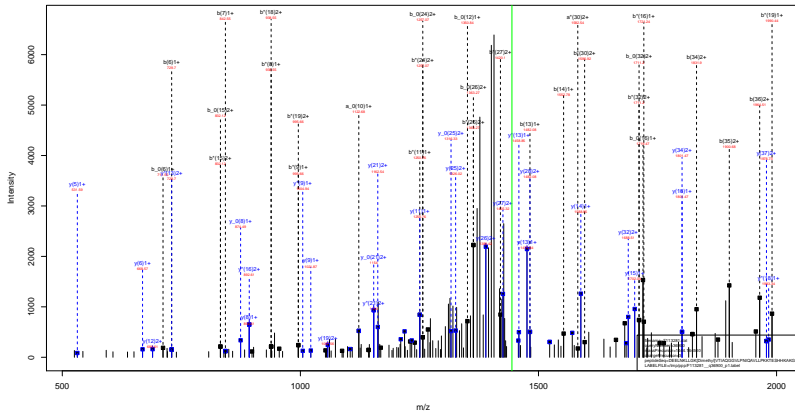

# sp | Q6GSS7 | H2A2A\_MOUSE

DEELNKLLGK<sup>Dimethyl</sup>VTIAQGGVLPNIQAVLLPKKTESHKAKGK<sup>28.03</sup>

- ▶ fragmentation table for charge state 1+
- ▶ specType=cid
- ▶ score=48.63
- ▶ F113281.dat
- ▶ query=q36900.p1
- ▶ precursor=1444.164500
- ▶ chargePrecursor=3
- ▶ itol=0.5

| AA  | a    | a'  | y <sub>0</sub> | b        | b'       | b <sub>0</sub> | y        | y'       | y <sub>0</sub> | AA   |
|-----|------|-----|----------------|----------|----------|----------------|----------|----------|----------------|------|
| E1  | 38   | 38  | 0.000          | 189.020  | 119.019  | 0.000          | 98.004   | 430.497  | 431.497        | 1342 |
| E2  | 22   | 17  | 0.000          | 180.011  | 120.017  | 0.000          | 22.020   | 423.471  | 418.444        | 1340 |
| E3  | 7    | 6   | 0.000          | 209.121  | 174.120  | 0.000          | 210.109  | 409.451  | 409.451        | 1338 |
| E4  | 4    | 3   | 0.000          | 441.100  | 367.093  | 0.000          | 488.103  | 397.389  | 394.376        | 1334 |
| N5  | 10   | 10  | 0.000          | 552.141  | 367.140  | 0.000          | 367.140  | 367.140  | 367.140        | 1330 |
| F16 | 114  | 70  | 0.000          | 661.120  | 729.141  | 114.113        | 711.131  | 17.012   | 17.012         | 1328 |
| L7  | 14   | 4   | 0.000          | 706.433  | 842.425  | 826.380        | 824.415  | 360.181  | 358.171        | 1324 |
| L8  | 10   | 4   | 0.000          | 600.500  | 805.500  | 818.461        | 807.500  | 340.000  | 342.000        | 1320 |
| G9  | 10   | 10  | 0.000          | 600.500  | 818.461  | 818.461        | 818.461  | 310.000  | 310.000        | 1318 |
| K10 | 114  | 60  | 0.000          | 1172.653 | 1168.657 | 1111.610       | 1150.607 | 1110.614 | 1109.611       | 1312 |
| V11 | 1239 | 731 | 1242.700       | 1242.700 | 1267.736 | 1250.699       | 1250.717 | 1142.684 | 1140.671       | 1310 |
| I12 | 7    | 7   | 0.000          | 1330.762 | 1330.762 | 1330.762       | 1330.762 | 1040.761 | 1040.761       | 1308 |
| E13 | 10   | 10  | 0.000          | 1430.814 | 1461.857 | 1464.814       | 1464.814 | 1000.731 | 1000.731       | 1306 |
| L14 | 124  | 60  | 0.000          | 1500.881 | 1552.894 | 1535.884       | 1535.884 | 1000.647 | 1000.647       | 1302 |
| Q15 | 10   | 10  | 0.000          | 1610.943 | 1610.943 | 1610.943       | 1610.943 | 1000.561 | 1000.561       | 1300 |
| G16 | 10   | 10  | 0.000          | 1691.969 | 1700.968 | 1720.948       | 1719.964 | 1000.510 | 1001.501       | 1298 |
| L17 | 117  | 101 | 1148.910       | 1148.910 | 1174.938 | 1174.938       | 1174.938 | 1000.530 | 1000.519       | 1294 |
| V18 | 10   | 10  | 0.000          | 1800.974 | 1800.974 | 1800.974       | 1800.974 | 1000.460 | 1001.451       | 1292 |
| L19 | 1979 | 154 | 1979.154       | 1979.154 | 1999.140 | 1990.122       | 1999.140 | 1000.441 | 1001.431       | 1288 |
| P20 | 10   | 10  | 0.000          | 2000.100 | 2000.100 | 2000.100       | 2000.100 | 1000.380 | 1000.380       | 1284 |
| L21 | 110  | 110 | 0.000          | 2110.110 | 2110.110 | 2110.110       | 2110.110 | 1000.360 | 1000.360       | 1280 |
| Q22 | 10   | 10  | 0.000          | 2200.120 | 2200.120 | 2200.120       | 2200.120 | 1000.340 | 1000.340       | 1278 |
| Q23 | 10   | 10  | 0.000          | 2410.100 | 2410.100 | 2410.100       | 2410.100 | 1000.310 | 1001.300       | 1274 |
| L24 | 10   | 10  | 0.000          | 2500.110 | 2500.110 | 2500.110       | 2500.110 | 1000.290 | 1001.280       | 1270 |
| V25 | 10   | 10  | 0.000          | 2600.120 | 2600.120 | 2600.120       | 2600.120 | 1000.270 | 1001.260       | 1268 |
| L26 | 117  | 101 | 1174.910       | 1174.910 | 1174.910 | 1174.910       | 1174.910 | 1000.250 | 1001.240       | 1264 |
| L27 | 10   | 10  | 0.000          | 2800.120 | 2800.120 | 2800.120       | 2800.120 | 1000.230 | 1001.220       | 1260 |
| P28 | 24   | 12  | 0.000          | 3000.120 | 3000.120 | 3000.120       | 3000.120 | 1000.210 | 1001.200       | 1256 |
| K29 | 10   | 10  | 0.000          | 3100.130 | 3100.130 | 3100.130       | 3100.130 | 1000.190 | 1001.180       | 1252 |
| L30 | 10   | 10  | 0.000          | 3200.140 | 3200.140 | 3200.140       | 3200.140 | 1000.170 | 1001.160       | 1248 |
| L31 | 10   | 10  | 0.000          | 3300.150 | 3300.150 | 3300.150       | 3300.150 | 1000.150 | 1001.140       | 1244 |
| E32 | 10   | 10  | 0.000          | 3400.160 | 3400.160 | 3400.160       | 3400.160 | 1000.130 | 1001.120       | 1240 |
| L33 | 10   | 10  | 0.000          | 3500.170 | 3500.170 | 3500.170       | 3500.170 | 1000.110 | 1001.100       | 1236 |
| L34 | 10   | 10  | 0.000          | 3600.180 | 3600.180 | 3600.180       | 3600.180 | 1000.090 | 1001.080       | 1232 |
| H35 | 10   | 10  | 0.000          | 3700.190 | 3700.190 | 3700.190       | 3700.190 | 1000.070 | 1001.060       | 1228 |
| K36 | 10   | 10  | 0.000          | 3800.200 | 3800.200 | 3800.200       | 3800.200 | 1000.050 | 1001.040       | 1224 |
| L37 | 10   | 10  | 0.000          | 3900.210 | 3900.210 | 3900.210       | 3900.210 | 1000.030 | 1001.020       | 1220 |
| K38 | 10   | 10  | 0.000          | 4000.220 | 4000.220 | 4000.220       | 4000.220 | 1000.010 | 1001.010       | 1216 |
| G39 | 10   | 10  | 0.000          | 4100.230 | 4100.230 | 4100.230       | 4100.230 | 1000.000 | 1001.000       | 1212 |
| K40 | 10   | 10  | 0.000          | 4200.240 | 4200.240 | 4200.240       | 4200.240 | 1000.000 | 1001.000       | 1208 |

# sp | Q6GSS7 | H2A2A\_MOUSE

DEELNKLLGK<sup>Dimethyl</sup><sub>28.03</sub>VTIAQGGVLPNIQAVLLPKKTESHHKAKGK

- ▶ fragmentation table for charge state 2+
- ▶ specType=cid
- ▶ score=48.63
- ▶ F113281.dat
- ▶ query=q36900.p1
- ▶ precursor=1444.164500
- ▶ chargePrecursor=3
- ▶ itol=0.5

| AA  | a    | a'   | y <sub>20</sub> | b    | b'   | b <sub>20</sub> | y    | y'   | y <sub>20</sub> | AA   |      |     |      |     |      |
|-----|------|------|-----------------|------|------|-----------------|------|------|-----------------|------|------|-----|------|-----|------|
| E1  | 64   | 593  | 0.500           | 28   | 511  | 0.504           | 64   | 593  | 2180            | 1952 | 2187 | 220 | 2189 | 747 | L340 |
| E2  | 129  | 658  | 0.504           | 100  | 626  | 0.504           | 114  | 642  | 2180            | 1952 | 2187 | 220 | 2189 | 747 | L340 |
| E3  | 194  | 723  | 0.508           | 150  | 691  | 0.508           | 178  | 710  | 2180            | 1952 | 2187 | 220 | 2189 | 747 | L340 |
| E4  | 259  | 788  | 0.512           | 200  | 756  | 0.512           | 238  | 774  | 2180            | 1952 | 2187 | 220 | 2189 | 747 | L340 |
| E5  | 324  | 853  | 0.516           | 250  | 821  | 0.516           | 298  | 838  | 2180            | 1952 | 2187 | 220 | 2189 | 747 | L340 |
| E6  | 389  | 918  | 0.520           | 300  | 886  | 0.520           | 358  | 904  | 2180            | 1952 | 2187 | 220 | 2189 | 747 | L340 |
| E7  | 454  | 983  | 0.524           | 350  | 951  | 0.524           | 418  | 970  | 2180            | 1952 | 2187 | 220 | 2189 | 747 | L340 |
| E8  | 519  | 1048 | 0.528           | 400  | 1016 | 0.528           | 478  | 1036 | 2180            | 1952 | 2187 | 220 | 2189 | 747 | L340 |
| E9  | 584  | 1113 | 0.532           | 450  | 1081 | 0.532           | 538  | 1102 | 2180            | 1952 | 2187 | 220 | 2189 | 747 | L340 |
| E10 | 649  | 1178 | 0.536           | 500  | 1146 | 0.536           | 598  | 1168 | 2180            | 1952 | 2187 | 220 | 2189 | 747 | L340 |
| E11 | 714  | 1243 | 0.540           | 550  | 1211 | 0.540           | 658  | 1234 | 2180            | 1952 | 2187 | 220 | 2189 | 747 | L340 |
| E12 | 779  | 1308 | 0.544           | 600  | 1276 | 0.544           | 718  | 1290 | 2180            | 1952 | 2187 | 220 | 2189 | 747 | L340 |
| E13 | 844  | 1373 | 0.548           | 650  | 1341 | 0.548           | 778  | 1356 | 2180            | 1952 | 2187 | 220 | 2189 | 747 | L340 |
| E14 | 909  | 1438 | 0.552           | 700  | 1406 | 0.552           | 838  | 1412 | 2180            | 1952 | 2187 | 220 | 2189 | 747 | L340 |
| E15 | 974  | 1503 | 0.556           | 750  | 1471 | 0.556           | 898  | 1478 | 2180            | 1952 | 2187 | 220 | 2189 | 747 | L340 |
| E16 | 1039 | 1568 | 0.560           | 800  | 1536 | 0.560           | 958  | 1534 | 2180            | 1952 | 2187 | 220 | 2189 | 747 | L340 |
| E17 | 1104 | 1633 | 0.564           | 850  | 1601 | 0.564           | 1018 | 1600 | 2180            | 1952 | 2187 | 220 | 2189 | 747 | L340 |
| E18 | 1169 | 1698 | 0.568           | 900  | 1666 | 0.568           | 1078 | 1656 | 2180            | 1952 | 2187 | 220 | 2189 | 747 | L340 |
| E19 | 1234 | 1763 | 0.572           | 950  | 1731 | 0.572           | 1138 | 1712 | 2180            | 1952 | 2187 | 220 | 2189 | 747 | L340 |
| E20 | 1299 | 1828 | 0.576           | 1000 | 1796 | 0.576           | 1198 | 1768 | 2180            | 1952 | 2187 | 220 | 2189 | 747 | L340 |
| E21 | 1364 | 1893 | 0.580           | 1050 | 1861 | 0.580           | 1258 | 1824 | 2180            | 1952 | 2187 | 220 | 2189 | 747 | L340 |
| E22 | 1429 | 1958 | 0.584           | 1100 | 1926 | 0.584           | 1318 | 1880 | 2180            | 1952 | 2187 | 220 | 2189 | 747 | L340 |
| E23 | 1494 | 2023 | 0.588           | 1150 | 1991 | 0.588           | 1378 | 1936 | 2180            | 1952 | 2187 | 220 | 2189 | 747 | L340 |
| E24 | 1559 | 2088 | 0.592           | 1200 | 2056 | 0.592           | 1438 | 1992 | 2180            | 1952 | 2187 | 220 | 2189 | 747 | L340 |
| E25 | 1624 | 2153 | 0.596           | 1250 | 2121 | 0.596           | 1498 | 2048 | 2180            | 1952 | 2187 | 220 | 2189 | 747 | L340 |
| E26 | 1689 | 2218 | 0.600           | 1300 | 2186 | 0.600           | 1558 | 2104 | 2180            | 1952 | 2187 | 220 | 2189 | 747 | L340 |
| E27 | 1754 | 2283 | 0.604           | 1350 | 2251 | 0.604           | 1618 | 2160 | 2180            | 1952 | 2187 | 220 | 2189 | 747 | L340 |
| E28 | 1819 | 2348 | 0.608           | 1400 | 2316 | 0.608           | 1678 | 2216 | 2180            | 1952 | 2187 | 220 | 2189 | 747 | L340 |
| E29 | 1884 | 2413 | 0.612           | 1450 | 2381 | 0.612           | 1738 | 2272 | 2180            | 1952 | 2187 | 220 | 2189 | 747 | L340 |
| E30 | 1949 | 2478 | 0.616           | 1500 | 2446 | 0.616           | 1798 | 2328 | 2180            | 1952 | 2187 | 220 | 2189 | 747 | L340 |
| E31 | 2014 | 2543 | 0.620           | 1550 | 2511 | 0.620           | 1858 | 2384 | 2180            | 1952 | 2187 | 220 | 2189 | 747 | L340 |
| E32 | 2079 | 2608 | 0.624           | 1600 | 2576 | 0.624           | 1918 | 2440 | 2180            | 1952 | 2187 | 220 | 2189 | 747 | L340 |
| E33 | 2144 | 2673 | 0.628           | 1650 | 2641 | 0.628           | 1978 | 2496 | 2180            | 1952 | 2187 | 220 | 2189 | 747 | L340 |
| E34 | 2209 | 2738 | 0.632           | 1700 | 2706 | 0.632           | 2038 | 2552 | 2180            | 1952 | 2187 | 220 | 2189 | 747 | L340 |
| E35 | 2274 | 2803 | 0.636           | 1750 | 2771 | 0.636           | 2098 | 2608 | 2180            | 1952 | 2187 | 220 | 2189 | 747 | L340 |
| E36 | 2339 | 2868 | 0.640           | 1800 | 2836 | 0.640           | 2158 | 2664 | 2180            | 1952 | 2187 | 220 | 2189 | 747 | L340 |
| E37 | 2404 | 2933 | 0.644           | 1850 | 2901 | 0.644           | 2218 | 2720 | 2180            | 1952 | 2187 | 220 | 2189 | 747 | L340 |
| E38 | 2469 | 2998 | 0.648           | 1900 | 2966 | 0.648           | 2278 | 2776 | 2180            | 1952 | 2187 | 220 | 2189 | 747 | L340 |
| E39 | 2534 | 3063 | 0.652           | 1950 | 3031 | 0.652           | 2338 | 2832 | 2180            | 1952 | 2187 | 220 | 2189 | 747 | L340 |
| E40 | 2599 | 3128 | 0.656           | 2000 | 3096 | 0.656           | 2398 | 2888 | 2180            | 1952 | 2187 | 220 | 2189 | 747 | L340 |
| E41 | 2664 | 3193 | 0.660           | 2050 | 3161 | 0.660           | 2458 | 2944 | 2180            | 1952 | 2187 | 220 | 2189 | 747 | L340 |
| E42 | 2729 | 3258 | 0.664           | 2100 | 3226 | 0.664           | 2518 | 3000 | 2180            | 1952 | 2187 | 220 | 2189 | 747 | L340 |
| E43 | 2794 | 3323 | 0.668           | 2150 | 3291 | 0.668           | 2578 | 3056 | 2180            | 1952 | 2187 | 220 | 2189 | 747 | L340 |
| E44 | 2859 | 3388 | 0.672           | 2200 | 3356 | 0.672           | 2638 | 3112 | 2180            | 1952 | 2187 | 220 | 2189 | 747 | L340 |
| E45 | 2924 | 3453 | 0.676           | 2250 | 3421 | 0.676           | 2698 | 3168 | 2180            | 1952 | 2187 | 220 | 2189 | 747 | L340 |
| E46 | 2989 | 3518 | 0.680           | 2300 | 3486 | 0.680           | 2758 | 3224 | 2180            | 1952 | 2187 | 220 | 2189 | 747 | L340 |
| E47 | 3054 | 3583 | 0.684           | 2350 | 3551 | 0.684           | 2818 | 3280 | 2180            | 1952 | 2187 | 220 | 2189 | 747 | L340 |
| E48 | 3119 | 3648 | 0.688           | 2400 | 3616 | 0.688           | 2878 | 3336 | 2180            | 1952 | 2187 | 220 | 2189 | 747 | L340 |
| E49 | 3184 | 3713 | 0.692           | 2450 | 3681 | 0.692           | 2938 | 3392 | 2180            | 1952 | 2187 | 220 | 2189 | 747 | L340 |
| E50 | 3249 | 3778 | 0.696           | 2500 | 3746 | 0.696           | 2998 | 3448 | 2180            | 1952 | 2187 | 220 | 2189 | 747 | L340 |

# sp | Q6GSS7 | H2A2A\_MOUSE

DEELNKLLGK <sup>Dimethyl</sup>VTIAQGGVLPNIQAVLLPKKTESHKAKGK  
28.03

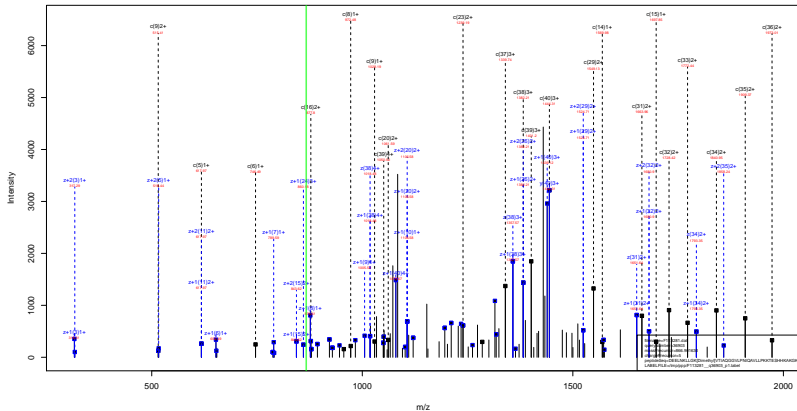

# sp | Q6GSS7 | H2A2A\_MOUSE

DEELNKLLGK <sup>Dimethyl</sup> <sub>28.03</sub> VTIAQGGVLPNIQAVLLPKKTESHHKAKGK

- ▶ fragmentation table for charge state 1+
- ▶ specType=etd
- ▶ score=61.79
- ▶ F113281.dat
- ▶ query=q36903.p1
- ▶ precursor=866.901630
- ▶ chargePrecursor=5
- ▶ itol=0.5

| AA   | c               | y        | z=1             | z=2             | z        | AA   |
|------|-----------------|----------|-----------------|-----------------|----------|------|
| D1   | 133.085         | 4330.497 | 4314.479        | 0.000           | 4313.471 | D140 |
| E12  | 282.103         | 4215.470 | 4199.452        | 0.000           | 4198.444 | E130 |
| E13  | 391.146         | 4086.428 | 4070.409        | 0.000           | 4069.401 | E138 |
| L14  | 594.230         | 3957.385 | 3941.366        | 0.000           | 3940.359 | L137 |
| N15  | <b>618.273</b>  | 3844.301 | 3828.282        | 3829.290        | 3827.273 | N136 |
| K16  | <b>746.368</b>  | 3730.259 | 3714.239        | 3715.247        | 3713.231 | K135 |
| L17  | 854.357         | 3602.163 | 3586.144        | 3587.152        | 3585.134 | L134 |
| L18  | <b>972.536</b>  | 3489.079 | 3473.060        | 3474.068        | 3472.051 | L133 |
| G19  | <b>1029.558</b> | 3375.995 | 3359.976        | 3360.984        | 3358.969 | G132 |
| K10  | 1185.084        | 3318.974 | 3302.955        | 3303.963        | 3301.947 | K131 |
| V111 | <b>1284.752</b> | 3102.847 | 3146.629        | 3147.636        | 3145.621 | V130 |
| T112 | 1385.900        | 3063.779 | 3047.760        | 3048.768        | 3046.752 | T129 |
| I113 | 1498.984        | 2982.731 | 2946.713        | 2947.720        | 2945.705 | I128 |
| A114 | <b>1569.921</b> | 2849.641 | 2833.623        | 2834.630        | 2832.614 | A127 |
| Q115 | <b>1697.980</b> | 2778.610 | 2762.591        | 2763.599        | 2761.584 | Q126 |
| G116 | 1755.001        | 2650.562 | 2634.543        | 2635.541        | 2633.525 | G125 |
| G117 | 1812.023        | 2593.530 | 2577.511        | 2578.519        | 2576.504 | G124 |
| V118 | 1911.091        | 2536.509 | 2520.490        | 2521.498        | 2519.482 | V123 |
| L119 | 2024.175        | 2437.440 | 2421.421        | 2422.429        | 2420.414 | L122 |
| T120 | 2117.238        | 2324.395 | 2308.377        | 2309.385        | 2307.370 | T121 |
| N121 | 2235.271        | 2227.363 | 2211.345        | 2212.352        | 2210.337 | N120 |
| I122 | 2348.355        | 2113.300 | 2097.282        | 2098.290        | 2096.274 | I119 |
| Q123 | 2476.413        | 2000.176 | 1984.158        | 1985.165        | 1983.150 | Q118 |
| A124 | 2547.450        | 1872.118 | 1856.099        | 1857.107        | 1855.091 | A117 |
| V125 | 2646.519        | 1801.081 | 1785.062        | 1786.070        | 1784.054 | V116 |
| L126 | 2759.603        | 1702.012 | 1686.004        | 1687.011        | 1684.988 | L115 |
| L127 | 2872.687        | 1598.935 | <b>1572.909</b> | 1573.917        | 1571.902 | L114 |
| P128 | 2969.740        | 1475.844 | 1459.825        | 1460.833        | 1458.818 | P113 |
| K129 | 3097.835        | 1378.791 | 1362.773        | <b>1363.780</b> | 1361.765 | K112 |
| K130 | 3225.930        | 1250.696 | <b>1234.678</b> | 1235.685        | 1233.670 | K111 |
| T131 | 3326.977        | 1122.601 | <b>1106.583</b> | 1107.591        | 1105.575 | T110 |
| E132 | 3459.030        | 1011.554 | <b>1005.535</b> | 1006.543        | 1004.527 | E109 |
| S133 | 3543.052        | 892.511  | <b>876.492</b>  | <b>877.500</b>  | 875.485  | S108 |
| H134 | 3680.111        | 805.479  | <b>789.460</b>  | <b>790.468</b>  | 788.453  | H107 |
| H135 | 3817.170        | 668.420  | <b>652.401</b>  | <b>653.409</b>  | 651.394  | H106 |
| K136 | 3945.205        | 531.301  | <b>515.343</b>  | <b>516.350</b>  | 514.335  | K105 |
| A137 | 4016.302        | 403.266  | 387.248         | 388.255         | 386.240  | A104 |
| K138 | 4144.397        | 332.229  | <b>316.211</b>  | <b>317.218</b>  | 315.203  | K103 |
| G139 | 4201.418        | 204.134  | 188.116         | 188.123         | 187.109  | G102 |
| K140 | 4329.513        | 147.113  | 131.094         | 132.102         | 130.088  | K101 |

# sp | Q6GSS7 | H2A2A\_MOUSE

DEELNKLLGK <sup>Dimethyl</sup> <sub>28.03</sub> VTIAQGGVLPNIQAVLLPKKTESHKAKGK

- ▶ fragmentation table for charge state 2+
- ▶ specType=etd
- ▶ score=61.79
- ▶ F113281.dat
- ▶ query=q36903.p1
- ▶ precursor=866.901630
- ▶ chargePrecursor=5
- ▶ itol=0.5

| AA   | c               | y        | z+1             | z+2             | z               | AA  |
|------|-----------------|----------|-----------------|-----------------|-----------------|-----|
| D 1  | 67.034          | 2165.752 | 2157.743        | 0.504           | 2157.239        | Q40 |
| E 2  | 111.955         | 2138.238 | 2130.229        | 0.504           | 2099.720        | E30 |
| E 3  | 196.077         | 2043.718 | 2035.709        | 0.504           | 2035.205        | E18 |
| L 4  | 252.619         | 1976.190 | 1971.187        | 0.504           | 1970.683        | L17 |
| N 5  | 309.640         | 1922.654 | 1914.645        | 1915.149        | 1914.141        | N36 |
| K 6  | 373.688         | 1895.633 | 1887.623        | <b>1858.127</b> | 1857.119        | K35 |
| L 7  | 430.230         | 1801.585 | <b>1793.576</b> | 1794.080        | <b>1793.072</b> | L34 |
| L 8  | 489.772         | 1745.043 | 1737.034        | 1737.538        | 1736.530        | L13 |
| G 9  | <b>515.282</b>  | 1688.501 | <b>1680.492</b> | <b>1680.996</b> | 1679.989        | G32 |
| K 10 | 571.346         | 1659.990 | <b>1651.981</b> | 1652.485        | <b>1651.477</b> | K31 |
| V 11 | 642.880         | 1581.627 | 1573.618        | <b>1574.422</b> | <b>1573.414</b> | V30 |
| T 12 | 693.404         | 1532.303 | <b>1524.384</b> | <b>1524.888</b> | 1523.880        | T29 |
| L 13 | 769.646         | 1451.889 | 1473.880        | 1474.384        | 1473.386        | L28 |
| A 14 | 785.464         | 1425.327 | 1417.318        | 1417.822        | 1416.814        | A27 |
| Q 15 | 849.493         | 1389.809 | <b>1381.799</b> | <b>1382.303</b> | 1381.295        | Q26 |
| G 16 | <b>878.004</b>  | 1325.779 | <b>1317.770</b> | <b>1318.274</b> | 1317.266        | G25 |
| G 17 | 906.515         | 1297.269 | 1289.259        | 1289.763        | 1288.755        | G24 |
| V 18 | <b>956.049</b>  | 1268.758 | 1260.749        | <b>1261.252</b> | 1260.245        | V23 |
| L 19 | 1027.597        | 1219.244 | <b>1211.214</b> | 1211.718        | <b>1210.710</b> | L22 |
| P 20 | <b>1061.118</b> | 1162.662 | 1154.653        | 1155.156        | 1154.160        | P21 |
| N 21 | 1118.139        | 1114.155 | <b>1106.146</b> | <b>1106.650</b> | 1105.642        | N20 |
| I 22 | 1174.681        | 1057.134 | 1049.124        | <b>1049.628</b> | 1048.621        | I19 |
| Q 23 | <b>1238.710</b> | 1000.592 | 992.582         | 993.086         | 992.079         | Q18 |
| A 24 | 1274.229        | 936.563  | <b>928.553</b>  | <b>929.057</b>  | 928.049         | A17 |
| V 25 | 1323.763        | 891.044  | <b>893.035</b>  | <b>893.539</b>  | 892.531         | V16 |
| L 26 | 1389.305        | 853.510  | <b>843.500</b>  | <b>844.004</b>  | 843.996         | L15 |
| L 27 | 1436.847        | 794.968  | 786.958         | <b>787.462</b>  | 786.454         | L14 |
| P 28 | 1485.374        | 738.426  | 730.416         | 730.920         | 729.912         | P13 |
| K 29 | <b>1549.421</b> | 699.899  | 691.890         | 692.394         | 691.386         | K12 |
| K 30 | 1613.468        | 635.852  | <b>617.842</b>  | <b>618.346</b>  | 617.339         | K11 |
| I 31 | <b>1663.992</b> | 581.804  | 573.795         | 574.299         | 573.291         | I10 |
| E 32 | <b>1728.514</b> | 511.281  | 503.271         | 503.775         | 502.767         | E9  |
| S 33 | <b>1772.030</b> | 446.759  | 438.750         | 439.254         | 438.246         | S8  |
| H 34 | <b>1840.559</b> | 403.243  | 395.234         | 395.738         | 394.730         | H7  |
| H 35 | <b>1909.089</b> | 334.714  | 326.704         | 327.208         | 326.200         | H6  |
| K 36 | <b>1973.136</b> | 266.184  | 258.175         | 258.679         | 257.671         | K5  |
| A 37 | 2008.655        | 202.139  | 194.129         | 194.633         | 193.625         | A4  |
| K 38 | 2072.702        | 168.618  | 158.609         | 159.113         | 158.105         | K3  |
| G 39 | 2101.213        | 102.571  | 94.561          | 95.065          | 94.057          | G2  |
| K 40 | 2165.260        | 74.060   | 66.051          | 66.555          | 65.547          | K1  |

# sp | Q6GSS7 | H2A2A\_MOUSE

DEELNKLLGK<sup>Dimethyl</sup>VTIAQGGVLPNIQAVLLPKKTESHKAKGK<sup>28.03</sup>

- ▶ fragmentation table for charge state 3+
- ▶ specType=etd
- ▶ score=61.79
- ▶ F113281.dat
- ▶ query=q36903.p1
- ▶ precursor=866.901630
- ▶ chargePrecursor=5
- ▶ itol=0.5

| AA    | c               | y               | z=1             | z=2             | z               | AA    |
|-------|-----------------|-----------------|-----------------|-----------------|-----------------|-------|
| D[1]  | 45.025          | <b>1444.171</b> | <b>1438.831</b> | 0.672           | 1438.495        | D[40] |
| E[2]  | 68.039          | 1405.628        | 1401.657        | 0.672           | 1400.745        | E[39] |
| E[3]  | 113.654         | 1362.874        | <b>1357.475</b> | 0.672           | <b>1357.139</b> | E[38] |
| L[4]  | 158.748         | 1319.800        | <b>1314.460</b> | 0.672           | 1314.123        | L[37] |
| N[5]  | 206.762         | 1282.105        | 1276.766        | 1.277           | 1276.430        | N[36] |
| K[6]  | 249.401         | 1244.091        | <b>1238.751</b> | <b>1239.087</b> | 1238.415        | K[35] |
| L[7]  | 287.156         | 1201.393        | <b>1196.053</b> | <b>1196.389</b> | <b>1195.717</b> | L[34] |
| L[8]  | 324.869         | 1163.698        | 1157.757        | 1157.094        | 1156.022        | L[33] |
| G[9]  | 353.252         | 1126.001        | <b>1120.664</b> | <b>1121.000</b> | <b>1120.328</b> | G[32] |
| K[10] | 395.899         | <b>1106.996</b> | <b>1101.656</b> | <b>1101.992</b> | <b>1101.321</b> | K[31] |
| V[11] | 438.602         | 1054.954        | <b>1049.614</b> | <b>1049.950</b> | <b>1049.278</b> | V[30] |
| T[12] | 482.605         | 1021.931        | 1016.592        | 1016.938        | 1016.250        | T[29] |
| L[13] | 500.299         | 988.249         | 982.959         | <b>983.245</b>  | 982.573         | L[28] |
| A[14] | 523.979         | 956.554         | 948.212         | <b>945.550</b>  | 944.870         | A[27] |
| Q[15] | 566.605         | 926.875         | <b>921.535</b>  | <b>921.871</b>  | 921.192         | Q[26] |
| G[16] | 585.672         | 884.189         | <b>878.849</b>  | <b>879.185</b>  | <b>878.513</b>  | G[25] |
| G[17] | 604.679         | 865.182         | <b>859.842</b>  | <b>860.178</b>  | 859.500         | G[24] |
| V[18] | 637.702         | 846.174         | 840.835         | 841.171         | 840.499         | V[23] |
| L[19] | 678.397         | 813.152         | 807.812         | 808.148         | 807.470         | L[22] |
| P[20] | 707.747         | 775.821         | 770.117         | 770.453         | 769.781         | P[21] |
| N[21] | 748.762         | 743.106         | 737.766         | 738.102         | 737.430         | N[20] |
| I[22] | 781.456         | 705.002         | 699.752         | 700.088         | 699.410         | I[19] |
| Q[23] | 826.143         | 667.397         | 662.057         | 662.393         | 661.721         | Q[18] |
| A[24] | 849.827         | 634.711         | 619.371         | 619.707         | 619.035         | A[17] |
| V[25] | 882.844         | 603.015         | 595.692         | 596.028         | 595.356         | V[16] |
| L[26] | 920.539         | 568.009         | 562.669         | 563.005         | 562.333         | L[15] |
| L[27] | 958.234         | 530.314         | 524.975         | 525.311         | 524.639         | L[14] |
| P[28] | 990.505         | 492.620         | 487.280         | 487.616         | 486.944         | P[13] |
| K[29] | 1033.283        | 460.289         | 454.929         | 455.265         | 454.593         | K[12] |
| K[30] | 1075.981        | 427.570         | 412.231         | 412.567         | 411.895         | K[11] |
| T[31] | 1109.664        | 374.872         | 369.532         | 369.868         | 369.190         | T[10] |
| E[32] | 1152.678        | 341.180         | 335.850         | 336.186         | 335.514         | E[9]  |
| S[33] | 1181.689        | 298.175         | 292.836         | 293.172         | 292.500         | S[8]  |
| H[34] | 1227.375        | 269.185         | 263.825         | 264.161         | 263.489         | H[7]  |
| H[35] | 1273.061        | 223.478         | 218.139         | 218.475         | 217.803         | H[6]  |
| K[36] | 1318.769        | 177.762         | 172.483         | 172.768         | 172.110         | K[5]  |
| A[37] | <b>1339.439</b> | 135.094         | 129.754         | 130.090         | 129.411         | A[4]  |
| K[38] | <b>1382.137</b> | 111.415         | 106.075         | 106.411         | 105.739         | K[3]  |
| G[39] | <b>1461.144</b> | 68.716          | 63.377          | 63.713          | 63.041          | G[2]  |
| K[40] | <b>1443.843</b> | 49.709          | 44.370          | 44.705          | 44.031          | K[1]  |



# sp | Q6GSS7 | H2A2A\_MOUSE

DEELNKLLGK <sup>Dimethyl</sup> <sub>28.03</sub> VTIAQGGVLPNIQAVLLPKKTESHKAKGK

- ▶ fragmentation table for charge state 4+
- ▶ specType=etd
- ▶ score=61.79
- ▶ F113281.dat
- ▶ query=q36903.p1
- ▶ precursor=866.901630
- ▶ chargePrecursor=5
- ▶ itol=0.5

| AA    | c               | y        | z+1             | z+2            | z               | AA    |
|-------|-----------------|----------|-----------------|----------------|-----------------|-------|
| D[1]  | 34.021          | 1083.360 | <b>1078.375</b> | 0.755          | 1078.121        | D[60] |
| E[2]  | 66.281          | 1054.623 | <b>1050.618</b> | 0.755          | 1050.366        | E[39] |
| E[3]  | 98.542          | 1022.362 | <b>1018.358</b> | 0.755          | <b>1018.106</b> | E[38] |
| L[4]  | 126.813         | 990.102  | 986.097         | 0.755          | 985.845         | L[37] |
| R[5]  | 155.324         | 961.831  | 957.826         | 958.078        | 957.574         | R[36] |
| K[6]  | 187.347         | 933.320  | <b>929.315</b>  | 929.567        | <b>929.063</b>  | K[35] |
| L[7]  | 215.838         | 901.296  | 897.292         | 897.544        | 897.292         | L[34] |
| L[8]  | 243.889         | 873.025  | 869.021         | 869.273        | 868.769         | L[33] |
| G[9]  | 258.145         | 844.754  | 840.750         | 841.002        | 840.498         | G[32] |
| K[10] | 297.176         | 830.499  | 826.494         | 826.746        | 826.242         | K[31] |
| V[11] | 321.944         | 791.667  | <b>787.463</b>  | <b>787.715</b> | <b>787.211</b>  | V[30] |
| T[12] | 347.205         | 766.700  | 762.696         | 762.947        | 762.444         | T[29] |
| I[13] | 375.476         | 741.438  | 737.434         | 737.686        | 737.182         | I[28] |
| A[14] | 393.236         | 713.167  | 709.163         | 709.415        | 708.911         | A[27] |
| Q[15] | 425.250         | 695.408  | 691.403         | 691.655        | 691.151         | Q[26] |
| G[16] | 439.508         | 663.393  | 659.389         | 659.641        | 659.137         | G[25] |
| G[17] | 453.761         | 640.138  | 645.133         | 645.385        | 644.881         | G[24] |
| V[18] | 478.528         | 634.883  | 630.878         | 631.130        | 630.626         | V[23] |
| L[19] | 506.799         | 610.116  | 606.111         | 606.363        | 605.859         | L[22] |
| P[20] | 533.662         | 581.844  | 577.840         | 578.092        | 577.588         | P[21] |
| N[21] | 559.573         | 557.581  | 553.577         | 553.829        | 553.325         | N[20] |
| I[22] | 587.944         | 529.071  | 525.066         | 525.318        | 524.814         | I[19] |
| Q[23] | 619.859         | 500.800  | 496.795         | 497.047        | 496.543         | Q[18] |
| A[24] | 637.618         | 468.785  | 464.780         | 465.032        | 464.528         | A[17] |
| V[25] | 662.385         | 451.026  | 447.021         | 447.273        | 446.769         | V[16] |
| L[26] | 690.856         | 428.269  | 424.264         | 424.516        | 424.012         | L[15] |
| L[27] | 718.927         | 397.005  | 393.001         | 394.253        | 393.731         | L[14] |
| P[28] | 743.190         | 369.716  | 365.712         | 365.964        | 365.460         | P[13] |
| K[29] | 775.214         | 345.453  | 341.449         | 341.701        | 341.197         | K[12] |
| K[30] | 807.238         | 313.430  | 309.425         | 309.677        | 309.173         | K[11] |
| T[31] | 832.500         | 281.406  | 277.401         | 277.653        | 277.149         | T[10] |
| E[32] | 864.780         | 256.144  | 252.139         | 252.391        | 251.887         | E[9]  |
| S[33] | 898.518         | 223.081  | 219.076         | 219.313        | 218.827         | S[8]  |
| H[34] | 920.783         | 202.125  | 198.121         | 198.373        | 197.869         | H[7]  |
| H[35] | 955.048         | 167.861  | 163.856         | 164.108        | 163.604         | H[6]  |
| K[36] | 987.872         | 133.596  | 129.591         | 129.843        | 129.339         | K[5]  |
| A[37] | 1004.831        | 101.572  | 97.567          | 97.819         | 97.315          | A[4]  |
| K[38] | 1028.855        | 83.813   | 79.808          | 80.060         | 79.556          | K[3]  |
| G[39] | <b>1051.110</b> | 51.789   | 47.784          | 48.036         | 47.532          | G[2]  |
| R[40] | 1083.134        | 37.534   | 33.529          | 33.781         | 33.277          | R[1]  |



# sp | Q6GSS7 | H2A2A\_MOUSE

DEELNKLLGK<sup>Dimethyl</sup>VTIAQGGVLPNIQAVLLPKKTESHKAKGK<sup>28.03</sup>

- ▶ fragmentation table for charge state 1+
- ▶ specType=cid
- ▶ score=40.95
- ▶ F113281.dat
- ▶ query=q36904.p1
- ▶ precursor=1083.375300
- ▶ chargePrecursor=4
- ▶ itol=0.5

| AA  | a    | a*   | a.z0  | b    | b*   | b.z0  | y    | y*   | y.z0 | AA   |
|-----|------|------|-------|------|------|-------|------|------|------|------|
| G1  | 88   | 89   | 0.000 | 79   | 80   | 0.000 | 88   | 89   | 4131 | 4131 |
| E2  | 117  | 118  | 0.000 | 108  | 109  | 0.000 | 117  | 118  | 4212 | 4212 |
| E3  | 146  | 147  | 0.000 | 137  | 138  | 0.000 | 146  | 147  | 4293 | 4293 |
| L4  | 175  | 176  | 0.000 | 166  | 167  | 0.000 | 175  | 176  | 4374 | 4374 |
| N5  | 204  | 205  | 0.000 | 195  | 196  | 0.000 | 204  | 205  | 4455 | 4455 |
| K6  | 233  | 234  | 0.000 | 224  | 225  | 0.000 | 233  | 234  | 4536 | 4536 |
| L7  | 262  | 263  | 0.000 | 253  | 254  | 0.000 | 262  | 263  | 4617 | 4617 |
| L8  | 291  | 292  | 0.000 | 280  | 281  | 0.000 | 291  | 292  | 4698 | 4698 |
| G9  | 320  | 321  | 0.000 | 309  | 310  | 0.000 | 320  | 321  | 4779 | 4779 |
| K10 | 349  | 350  | 0.000 | 338  | 339  | 0.000 | 349  | 350  | 4860 | 4860 |
| V11 | 378  | 379  | 0.000 | 367  | 368  | 0.000 | 378  | 379  | 4941 | 4941 |
| T12 | 407  | 408  | 0.000 | 396  | 397  | 0.000 | 407  | 408  | 5022 | 5022 |
| A13 | 436  | 437  | 0.000 | 425  | 426  | 0.000 | 436  | 437  | 5103 | 5103 |
| G14 | 465  | 466  | 0.000 | 454  | 455  | 0.000 | 465  | 466  | 5184 | 5184 |
| G15 | 494  | 495  | 0.000 | 483  | 484  | 0.000 | 494  | 495  | 5265 | 5265 |
| G16 | 523  | 524  | 0.000 | 512  | 513  | 0.000 | 523  | 524  | 5346 | 5346 |
| G17 | 552  | 553  | 0.000 | 541  | 542  | 0.000 | 552  | 553  | 5427 | 5427 |
| V18 | 581  | 582  | 0.000 | 570  | 571  | 0.000 | 581  | 582  | 5508 | 5508 |
| L19 | 610  | 611  | 0.000 | 600  | 601  | 0.000 | 610  | 611  | 5589 | 5589 |
| P20 | 639  | 640  | 0.000 | 629  | 630  | 0.000 | 639  | 640  | 5670 | 5670 |
| A21 | 668  | 669  | 0.000 | 658  | 659  | 0.000 | 668  | 669  | 5751 | 5751 |
| G22 | 697  | 698  | 0.000 | 687  | 688  | 0.000 | 697  | 698  | 5832 | 5832 |
| G23 | 726  | 727  | 0.000 | 716  | 717  | 0.000 | 726  | 727  | 5913 | 5913 |
| V24 | 755  | 756  | 0.000 | 745  | 746  | 0.000 | 755  | 756  | 5994 | 5994 |
| V25 | 784  | 785  | 0.000 | 774  | 775  | 0.000 | 784  | 785  | 6075 | 6075 |
| L26 | 813  | 814  | 0.000 | 803  | 804  | 0.000 | 813  | 814  | 6156 | 6156 |
| L27 | 842  | 843  | 0.000 | 832  | 833  | 0.000 | 842  | 843  | 6237 | 6237 |
| L28 | 871  | 872  | 0.000 | 861  | 862  | 0.000 | 871  | 872  | 6318 | 6318 |
| P29 | 900  | 901  | 0.000 | 890  | 891  | 0.000 | 900  | 901  | 6399 | 6399 |
| K30 | 929  | 930  | 0.000 | 919  | 920  | 0.000 | 929  | 930  | 6480 | 6480 |
| E31 | 958  | 959  | 0.000 | 948  | 949  | 0.000 | 958  | 959  | 6561 | 6561 |
| E32 | 987  | 988  | 0.000 | 977  | 978  | 0.000 | 987  | 988  | 6642 | 6642 |
| E33 | 1016 | 1017 | 0.000 | 1006 | 1007 | 0.000 | 1016 | 1017 | 6723 | 6723 |
| L34 | 1045 | 1046 | 0.000 | 1035 | 1036 | 0.000 | 1045 | 1046 | 6804 | 6804 |
| H35 | 1074 | 1075 | 0.000 | 1064 | 1065 | 0.000 | 1074 | 1075 | 6885 | 6885 |
| K36 | 1103 | 1104 | 0.000 | 1093 | 1094 | 0.000 | 1103 | 1104 | 6966 | 6966 |
| A37 | 1132 | 1133 | 0.000 | 1122 | 1123 | 0.000 | 1132 | 1133 | 7047 | 7047 |
| K38 | 1161 | 1162 | 0.000 | 1151 | 1152 | 0.000 | 1161 | 1162 | 7128 | 7128 |
| G39 | 1190 | 1191 | 0.000 | 1180 | 1181 | 0.000 | 1190 | 1191 | 7209 | 7209 |
| K40 | 1219 | 1220 | 0.000 | 1209 | 1210 | 0.000 | 1219 | 1220 | 7290 | 7290 |

# sp | Q6GSS7 | H2A2A\_MOUSE

DEELNKLLGK<sup>Dimethyl</sup>VTIAQGGVLPNIQAVLLPKKTESHKAKGK<sup>28.03</sup>

- ▶ fragmentation table for charge state 2+
- ▶ specType=cid
- ▶ score=40.95
- ▶ F113281.dat
- ▶ query=q36904\_p1
- ▶ precursor=1083.375300
- ▶ chargePrecursor=4
- ▶ itol=0.5

| AA  | a    | a*  | a,Δ   | b    | b*  | b,Δ   | y    | y*  | y,Δ  | AA |      |     |     |
|-----|------|-----|-------|------|-----|-------|------|-----|------|----|------|-----|-----|
| E1  | 44   | 522 | 0.526 | 38   | 522 | 0.504 | 46   | 522 | 2160 | 72 | 2136 | 147 | E40 |
| E2  | 100  | 504 | 0.509 | 100  | 504 | 0.504 | 100  | 504 | 2160 | 72 | 2136 | 147 | E39 |
| E3  | 156  | 504 | 0.509 | 156  | 504 | 0.504 | 156  | 504 | 2160 | 72 | 2136 | 147 | E38 |
| E4  | 212  | 504 | 0.509 | 212  | 504 | 0.504 | 212  | 504 | 2160 | 72 | 2136 | 147 | E37 |
| E5  | 268  | 504 | 0.509 | 268  | 504 | 0.504 | 268  | 504 | 2160 | 72 | 2136 | 147 | E36 |
| E6  | 324  | 504 | 0.509 | 324  | 504 | 0.504 | 324  | 504 | 2160 | 72 | 2136 | 147 | E35 |
| E7  | 380  | 504 | 0.509 | 380  | 504 | 0.504 | 380  | 504 | 2160 | 72 | 2136 | 147 | E34 |
| E8  | 436  | 504 | 0.509 | 436  | 504 | 0.504 | 436  | 504 | 2160 | 72 | 2136 | 147 | E33 |
| E9  | 492  | 504 | 0.509 | 492  | 504 | 0.504 | 492  | 504 | 2160 | 72 | 2136 | 147 | E32 |
| E10 | 548  | 504 | 0.509 | 548  | 504 | 0.504 | 548  | 504 | 2160 | 72 | 2136 | 147 | E31 |
| E11 | 604  | 504 | 0.509 | 604  | 504 | 0.504 | 604  | 504 | 2160 | 72 | 2136 | 147 | E30 |
| E12 | 660  | 504 | 0.509 | 660  | 504 | 0.504 | 660  | 504 | 2160 | 72 | 2136 | 147 | E29 |
| E13 | 716  | 504 | 0.509 | 716  | 504 | 0.504 | 716  | 504 | 2160 | 72 | 2136 | 147 | E28 |
| E14 | 772  | 504 | 0.509 | 772  | 504 | 0.504 | 772  | 504 | 2160 | 72 | 2136 | 147 | E27 |
| E15 | 828  | 504 | 0.509 | 828  | 504 | 0.504 | 828  | 504 | 2160 | 72 | 2136 | 147 | E26 |
| E16 | 884  | 504 | 0.509 | 884  | 504 | 0.504 | 884  | 504 | 2160 | 72 | 2136 | 147 | E25 |
| E17 | 940  | 504 | 0.509 | 940  | 504 | 0.504 | 940  | 504 | 2160 | 72 | 2136 | 147 | E24 |
| E18 | 996  | 504 | 0.509 | 996  | 504 | 0.504 | 996  | 504 | 2160 | 72 | 2136 | 147 | E23 |
| E19 | 1052 | 504 | 0.509 | 1052 | 504 | 0.504 | 1052 | 504 | 2160 | 72 | 2136 | 147 | E22 |
| E20 | 1108 | 504 | 0.509 | 1108 | 504 | 0.504 | 1108 | 504 | 2160 | 72 | 2136 | 147 | E21 |
| E21 | 1164 | 504 | 0.509 | 1164 | 504 | 0.504 | 1164 | 504 | 2160 | 72 | 2136 | 147 | E20 |
| E22 | 1220 | 504 | 0.509 | 1220 | 504 | 0.504 | 1220 | 504 | 2160 | 72 | 2136 | 147 | E19 |
| E23 | 1276 | 504 | 0.509 | 1276 | 504 | 0.504 | 1276 | 504 | 2160 | 72 | 2136 | 147 | E18 |
| E24 | 1332 | 504 | 0.509 | 1332 | 504 | 0.504 | 1332 | 504 | 2160 | 72 | 2136 | 147 | E17 |
| E25 | 1388 | 504 | 0.509 | 1388 | 504 | 0.504 | 1388 | 504 | 2160 | 72 | 2136 | 147 | E16 |
| E26 | 1444 | 504 | 0.509 | 1444 | 504 | 0.504 | 1444 | 504 | 2160 | 72 | 2136 | 147 | E15 |
| E27 | 1500 | 504 | 0.509 | 1500 | 504 | 0.504 | 1500 | 504 | 2160 | 72 | 2136 | 147 | E14 |
| E28 | 1556 | 504 | 0.509 | 1556 | 504 | 0.504 | 1556 | 504 | 2160 | 72 | 2136 | 147 | E13 |
| E29 | 1612 | 504 | 0.509 | 1612 | 504 | 0.504 | 1612 | 504 | 2160 | 72 | 2136 | 147 | E12 |
| E30 | 1668 | 504 | 0.509 | 1668 | 504 | 0.504 | 1668 | 504 | 2160 | 72 | 2136 | 147 | E11 |
| E31 | 1724 | 504 | 0.509 | 1724 | 504 | 0.504 | 1724 | 504 | 2160 | 72 | 2136 | 147 | E10 |
| E32 | 1780 | 504 | 0.509 | 1780 | 504 | 0.504 | 1780 | 504 | 2160 | 72 | 2136 | 147 | E9  |
| E33 | 1836 | 504 | 0.509 | 1836 | 504 | 0.504 | 1836 | 504 | 2160 | 72 | 2136 | 147 | E8  |
| E34 | 1892 | 504 | 0.509 | 1892 | 504 | 0.504 | 1892 | 504 | 2160 | 72 | 2136 | 147 | E7  |
| E35 | 1948 | 504 | 0.509 | 1948 | 504 | 0.504 | 1948 | 504 | 2160 | 72 | 2136 | 147 | E6  |
| E36 | 2004 | 504 | 0.509 | 2004 | 504 | 0.504 | 2004 | 504 | 2160 | 72 | 2136 | 147 | E5  |
| E37 | 2060 | 504 | 0.509 | 2060 | 504 | 0.504 | 2060 | 504 | 2160 | 72 | 2136 | 147 | E4  |
| E38 | 2116 | 504 | 0.509 | 2116 | 504 | 0.504 | 2116 | 504 | 2160 | 72 | 2136 | 147 | E3  |
| E39 | 2172 | 504 | 0.509 | 2172 | 504 | 0.504 | 2172 | 504 | 2160 | 72 | 2136 | 147 | E2  |
| E40 | 2228 | 504 | 0.509 | 2228 | 504 | 0.504 | 2228 | 504 | 2160 | 72 | 2136 | 147 | E1  |

# sp | Q6GSS7 | H2A2A\_MOUSE

DEELNKLLGK<sup>Dimethyl</sup><sub>28.03</sub>VTIAQGGVLPNIQAVLLPKKTESHKAKGK

- ▶ fragmentation table for charge state 3+
- ▶ specType=cid
- ▶ score=40.95
- ▶ F113281.dat
- ▶ query=q36904\_p1
- ▶ precursor=1083.375300
- ▶ chargePrecursor=4
- ▶ itol=0.5

| AA  | x    | y    | x <sub>0</sub> | y <sub>0</sub> | b    | b <sup>+</sup> | b <sub>0</sub> | y    | y <sup>+</sup> | y <sub>0</sub> | AA   |
|-----|------|------|----------------|----------------|------|----------------|----------------|------|----------------|----------------|------|
| E1  | 30   | 1010 | 0              | 0              | 1010 | 0              | 0              | 1010 | 0              | 0              | E140 |
| E2  | 73   | 1017 | 0              | 0              | 1017 | 0              | 0              | 1017 | 0              | 0              | E136 |
| E3  | 116  | 1024 | 0              | 0              | 1024 | 0              | 0              | 1024 | 0              | 0              | E132 |
| L4  | 159  | 1031 | 0              | 0              | 1031 | 0              | 0              | 1031 | 0              | 0              | L127 |
| N5  | 191  | 1038 | 0              | 0              | 1038 | 0              | 0              | 1038 | 0              | 0              | N10  |
| K6  | 234  | 1045 | 0              | 0              | 1045 | 0              | 0              | 1045 | 0              | 0              | K10  |
| L7  | 277  | 1052 | 0              | 0              | 1052 | 0              | 0              | 1052 | 0              | 0              | L124 |
| L8  | 320  | 1059 | 0              | 0              | 1059 | 0              | 0              | 1059 | 0              | 0              | L121 |
| L9  | 363  | 1066 | 0              | 0              | 1066 | 0              | 0              | 1066 | 0              | 0              | L117 |
| K10 | 406  | 1073 | 0              | 0              | 1073 | 0              | 0              | 1073 | 0              | 0              | K112 |
| V11 | 449  | 1080 | 0              | 0              | 1080 | 0              | 0              | 1080 | 0              | 0              | V100 |
| V12 | 492  | 1087 | 0              | 0              | 1087 | 0              | 0              | 1087 | 0              | 0              | V106 |
| E13 | 535  | 1094 | 0              | 0              | 1094 | 0              | 0              | 1094 | 0              | 0              | E132 |
| A14 | 578  | 1101 | 0              | 0              | 1101 | 0              | 0              | 1101 | 0              | 0              | A127 |
| Q15 | 621  | 1108 | 0              | 0              | 1108 | 0              | 0              | 1108 | 0              | 0              | Q120 |
| G16 | 664  | 1115 | 0              | 0              | 1115 | 0              | 0              | 1115 | 0              | 0              | G125 |
| G17 | 707  | 1122 | 0              | 0              | 1122 | 0              | 0              | 1122 | 0              | 0              | G124 |
| V18 | 750  | 1129 | 0              | 0              | 1129 | 0              | 0              | 1129 | 0              | 0              | V123 |
| L19 | 793  | 1136 | 0              | 0              | 1136 | 0              | 0              | 1136 | 0              | 0              | L122 |
| K20 | 836  | 1143 | 0              | 0              | 1143 | 0              | 0              | 1143 | 0              | 0              | K124 |
| E21 | 879  | 1150 | 0              | 0              | 1150 | 0              | 0              | 1150 | 0              | 0              | E121 |
| Q22 | 922  | 1157 | 0              | 0              | 1157 | 0              | 0              | 1157 | 0              | 0              | Q126 |
| Q23 | 965  | 1164 | 0              | 0              | 1164 | 0              | 0              | 1164 | 0              | 0              | Q118 |
| V24 | 1008 | 1171 | 0              | 0              | 1171 | 0              | 0              | 1171 | 0              | 0              | V128 |
| V25 | 1051 | 1178 | 0              | 0              | 1178 | 0              | 0              | 1178 | 0              | 0              | V124 |
| L26 | 1094 | 1185 | 0              | 0              | 1185 | 0              | 0              | 1185 | 0              | 0              | L124 |
| L27 | 1137 | 1192 | 0              | 0              | 1192 | 0              | 0              | 1192 | 0              | 0              | L114 |
| P28 | 1180 | 1199 | 0              | 0              | 1199 | 0              | 0              | 1199 | 0              | 0              | P113 |
| K29 | 1223 | 1206 | 0              | 0              | 1206 | 0              | 0              | 1206 | 0              | 0              | K112 |
| K30 | 1266 | 1213 | 0              | 0              | 1213 | 0              | 0              | 1213 | 0              | 0              | K110 |
| F31 | 1309 | 1220 | 0              | 0              | 1220 | 0              | 0              | 1220 | 0              | 0              | F108 |
| E32 | 1352 | 1227 | 0              | 0              | 1227 | 0              | 0              | 1227 | 0              | 0              | E106 |
| E33 | 1395 | 1234 | 0              | 0              | 1234 | 0              | 0              | 1234 | 0              | 0              | E104 |
| H34 | 1438 | 1241 | 0              | 0              | 1241 | 0              | 0              | 1241 | 0              | 0              | H102 |
| H35 | 1481 | 1248 | 0              | 0              | 1248 | 0              | 0              | 1248 | 0              | 0              | H100 |
| H36 | 1524 | 1255 | 0              | 0              | 1255 | 0              | 0              | 1255 | 0              | 0              | H104 |
| A37 | 1567 | 1262 | 0              | 0              | 1262 | 0              | 0              | 1262 | 0              | 0              | A104 |
| K38 | 1610 | 1269 | 0              | 0              | 1269 | 0              | 0              | 1269 | 0              | 0              | K103 |
| G39 | 1653 | 1276 | 0              | 0              | 1276 | 0              | 0              | 1276 | 0              | 0              | G102 |
| K40 | 1696 | 1283 | 0              | 0              | 1283 | 0              | 0              | 1283 | 0              | 0              | K101 |

# sp | Q6GSS7 | H2A2A\_MOUSE

DEELNKLLGK <sup>Dimethyl</sup> V<sub>28.03</sub>TIAQGGVLPNIQAVLLPKKTESHHKAKGK

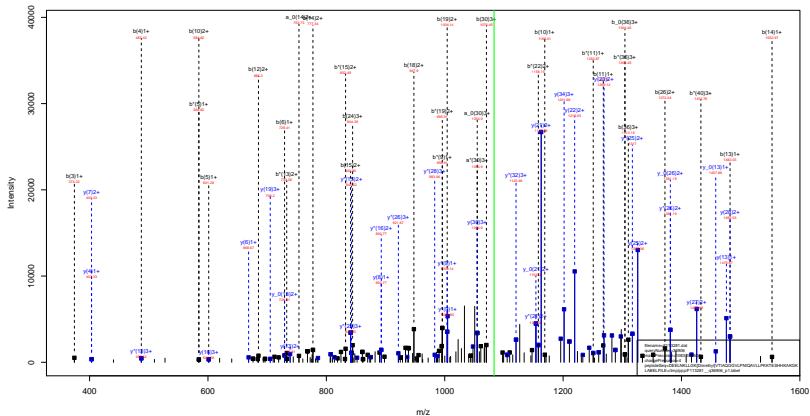

# sp | Q6GSS7 | H2A2A\_MOUSE

DEELNKLLGK<sup>Dimethyl</sup><sub>28.03</sub>VTIAQGGVLPNIQAVLLPKKTESHKAKGK

- ▶ fragmentation table for charge state 1+
- ▶ specType=cid
- ▶ score=52.36
- ▶ F113281.dat
- ▶ query=q36906.p1
- ▶ precursor=1083.375500
- ▶ chargePrecursor=4
- ▶ itol=0.5

| AA  | a    | a*  | a,Δ            | b   | b*   | b,Δ            | y               | y*              | y,Δ  | AA       |                 |                 |       |     |      |     |     |
|-----|------|-----|----------------|-----|------|----------------|-----------------|-----------------|------|----------|-----------------|-----------------|-------|-----|------|-----|-----|
| D1  | 38   | 039 | 0.000          | 70  | 039  | 116.034        | 0.000           | 86              | 024  | 4330.467 | 4311.471        | 0.940           |       |     |      |     |     |
| E1  | 37   | 000 | 0.000          | 70  | 071  | 146.071        | 0.000           | 127             | 069  | 4213.470 | 4138.444        | 0.710           |       |     |      |     |     |
| E2  | 346  | 134 | 0.000          | 508 | 114  | <b>174.118</b> | 0.000           | 160             | 130  | 4080.430 | 4006.417        | 0.740           |       |     |      |     |     |
| L1  | 4    | 350 | 300            | 441 | 109  | <b>487.203</b> | 480             | 353             | 107  | 300      | 300             | 3039.375        | 1.137 |     |      |     |     |
| R1  | 178  | 011 | 100            | 201 | 100  | <b>301.240</b> | 184             | 220             | 100  | 100      | 100             | 100             | 100   |     |      |     |     |
| R1  | 101  | 100 | <b>684.320</b> | 081 | 100  | <b>728.341</b> | 712.315         | 111             | 101  | 100      | 100             | 100             | 100   |     |      |     |     |
| L1  | 114  | 411 | 107            | 401 | 70   | <b>424.425</b> | <b>824.415</b>  | 100             | 107  | 100      | 100             | 100             | 100   |     |      |     |     |
| L1  | 127  | 111 | 100            | 100 | 100  | <b>655.500</b> | <b>618.483</b>  | 104             | 523  | 1375.950 | 1320.960        | 0.357           | 0.000 |     |      |     |     |
| K10 | 1140 | 000 | 1133           | 030 | 1122 | 012            | <b>1168.857</b> | 1151.833        | 1130 | 047      | 1118            | 047             | 1100  | 041 | K131 |     |     |
| V11 | 1287 | 010 | 1272           | 004 | 1261 | 010            | <b>1267.736</b> | <b>1250.706</b> | 1250 | 010      | 1232            | 044             | 1214  | 041 | V134 |     |     |
| I12 | 1140 | 010 | 1133           | 010 | 1122 | 010            | <b>1168.857</b> | 1151.833        | 1130 | 047      | 1118            | 047             | 1100  | 041 | I120 |     |     |
| E13 | 443  | 000 | 443            | 000 | 443  | 000            | <b>1481.857</b> | 1464.833        | 1461 | 000      | 1461            | 000             | 1461  | 000 | E121 |     |     |
| A14 | 124  | 000 | 1207           | 011 | 1208 | 009            | <b>1532.894</b> | 1515.869        | 1514 | 004      | 1496            | 041             | 1481  | 011 | A127 |     |     |
| G15 | 100  | 000 | 100            | 000 | 100  | 000            | 100             | 000             | 100  | 000      | 100             | 000             | 100   | 000 | G120 |     |     |
| G16 | 100  | 000 | 100            | 000 | 100  | 000            | 100             | 000             | 100  | 000      | 100             | 000             | 100   | 000 | G120 |     |     |
| G17 | 1187 | 010 | 1180           | 010 | 1174 | 001            | 1174            | 000             | 1177 | 000      | 1176            | 000             | 1169  | 000 | G124 |     |     |
| V18 | 1180 | 000 | 1180           | 000 | 1180 | 000            | 1180            | 000             | 1180 | 000      | 1180            | 000             | 1180  | 000 | V120 |     |     |
| L19 | 1036 | 104 | 1032           | 112 | 1031 | 143            | 1030            | 110             | 1030 | 110      | 1027            | 441             | 1020  | 414 | L122 |     |     |
| P20 | 1036 | 104 | 1032           | 110 | 1031 | 101            | 1031            | 101             | 1031 | 101      | 1028            | 101             | 1021  | 101 | P121 |     |     |
| N21 | 1036 | 104 | 1032           | 112 | 1031 | 104            | 1031            | 111             | 1031 | 111      | 1028            | 111             | 1021  | 111 | N120 |     |     |
| G22 | 2203 | 113 | 2200           | 123 | 2199 | 128            | 2194            | 102             | 2193 | 110      | 2113            | 200             | 2099  | 124 | G124 |     |     |
| Q23 | 2411 | 101 | 2414           | 101 | 2411 | 101            | 2410            | 101             | 2411 | 101      | 2400            | 110             | 2388  | 110 | Q120 |     |     |
| R14 | 1002 | 412 | 1000           | 401 | 1000 | 401            | 1000            | 401             | 1000 | 401      | 1000            | 401             | 1000  | 401 | R117 |     |     |
| V15 | 2021 | 010 | 2014           | 011 | 2011 | 010            | 2010            | 010             | 2011 | 010      | 1997            | 011             | 1989  | 000 | V110 |     |     |
| L16 | 1114 | 001 | 1087           | 000 | 1088 | 011            | 1074            | 010             | 1074 | 000      | 1068            | 000             | 1064  | 000 | L113 |     |     |
| L17 | 107  | 000 | 1040           | 030 | 1039 | 010            | 1035            | 000             | 1038 | 034      | 1027            | 000             | 1017  | 000 | L114 |     |     |
| R18 | 100  | 000 | 100            | 000 | 100  | 000            | 100             | 000             | 100  | 000      | <b>1475.844</b> | <b>1457.834</b> | 100   | 000 | R114 |     |     |
| K19 | 102  | 011 | 1010           | 001 | 1004 | 001            | 1004            | 001             | 1005 | 001      | 1000            | 010             | 1000  | 001 | K112 |     |     |
| K10 | 1180 | 000 | 1180           | 000 | 1180 | 000            | 1180            | 000             | 1180 | 000      | <b>1250.696</b> | <b>1233.670</b> | 1170  | 001 | K113 |     |     |
| I11 | 1180 | 000 | 1180           | 000 | 1180 | 000            | 1180            | 000             | 1180 | 000      | <b>1300.375</b> | <b>1283.350</b> | 1170  | 001 | I110 |     |     |
| E24 | 1150 | 000 | 1151           | 001 | 1150 | 000            | 1150            | 000             | 1150 | 000      | <b>1064.527</b> | <b>1049.541</b> | 1050  | 001 | E110 |     |     |
| S13 | 1180 | 000 | 1180           | 000 | 1180 | 000            | 1180            | 000             | 1180 | 000      | <b>892.511</b>  | <b>874.501</b>  | 870   | 000 | S110 |     |     |
| H14 | 1180 | 000 | 1180           | 000 | 1180 | 000            | 1180            | 000             | 1180 | 000      | 1180            | 000             | 1180  | 000 | H110 |     |     |
| H15 | 1072 | 040 | 1070           | 122 | 1064 | 130            | 1060            | 114             | 1052 | 111      | <b>664.420</b>  | 661.394         | 660   | 000 | H10  |     |     |
| K16 | 1000 | 011 | 1001           | 111 | 1002 | 110            | 1001            | 111             | 1000 | 100      | 100             | 000             | 100   | 000 | K10  |     |     |
| R17 | 1171 | 010 | 1164           | 010 | 1158 | 010            | 1158            | 010             | 1158 | 010      | <b>401.246</b>  | 400             | 240   | 000 | R10  |     |     |
| R18 | 1180 | 000 | 1180           | 000 | 1180 | 000            | 1180            | 000             | 1180 | 000      | 1180            | 000             | 1180  | 000 | R10  |     |     |
| K19 | 4156 | 010 | 4156           | 010 | 4156 | 010            | 4156            | 010             | 4156 | 010      | 4156            | 010             | 4156  | 010 | K10  |     |     |
| K10 | 4394 | 400 | 4387           | 400 | 4389 | 401            | 4311            | 407             | 4309 | 400      | 4306            | 400             | 427   | 111 | 130  | 000 | K11 |

# sp | Q6GSS7 | H2A2A\_MOUSE

DEELNKLKLG<sup>Dimethyl</sup><sub>28.03</sub>VTIAQGGVLPNIQAVLLPKKTESHKAKGK

- ▶ fragmentation table for charge state 2+
- ▶ specType=cid
- ▶ score=52.36
- ▶ F113281.dat
- ▶ query=q36906.p1
- ▶ precursor=1083.375500
- ▶ chargePrecursor=4
- ▶ itol=0.5

| AA   | a    | a*  | a,Δ      | b    | b*  | b,Δ      | y        | y*       | y,Δ      | AA       |          |          |      |
|------|------|-----|----------|------|-----|----------|----------|----------|----------|----------|----------|----------|------|
| E1   | 64   | 522 | 0.504    | 35   | 518 | 58.521   | 0.504    | 46       | 515      | 2160.75  | 2157.239 | 2156.747 | E140 |
| E2   | 100  | 505 | 0.504    | 100  | 505 | 123.974  | 0.504    | 114      | 517      | 2200.239 | 2196.733 | 2196.244 | E139 |
| E3   | 173  | 505 | 0.504    | 174  | 505 | 189.503  | 0.504    | 176      | 515      | 2643.719 | 2638.204 | 2638.712 | E138 |
| L14  | 180  | 505 | 0.504    | 181  | 505 | 194.505  | 0.504    | 182      | 505      | 2694.200 | 2689.685 | 2689.191 | L137 |
| N15  | 187  | 512 | 0.504    | 188  | 514 | 200.517  | 0.504    | 192      | 514      | 2744.691 | 2740.176 | 2739.682 | N136 |
| K16  | 251  | 512 | 0.504    | 252  | 512 | 350.514  | 0.504    | 252      | 515      | 3395.631 | 3389.115 | 3388.627 | K135 |
| L17  | 307  | 519 | 0.504    | 308  | 519 | 421.519  | 0.504    | 312      | 519      | 4127.711 | 4121.195 | 4120.701 | L134 |
| L18  | 354  | 519 | 0.504    | 355  | 519 | 476.519  | 0.504    | 358      | 519      | 4578.191 | 4571.675 | 4571.181 | L133 |
| L19  | 402  | 519 | 0.504    | 403  | 519 | 536.519  | 0.504    | 402      | 519      | 5029.675 | 5023.159 | 5022.665 | L132 |
| K10  | 500  | 505 | 0.504    | 501  | 505 | 604.512  | 0.504    | 501      | 505      | 5979.685 | 5973.169 | 5972.675 | K131 |
| V11  | 620  | 505 | 0.504    | 621  | 504 | 636.504  | 0.504    | 621      | 507      | 6374.644 | 6368.128 | 6367.634 | V130 |
| I12  | 670  | 505 | 0.504    | 671  | 505 | 684.500  | 0.504    | 676      | 507      | 675.683  | 675.167  | 674.675  | I129 |
| I13  | 747  | 489 | 718.922  | 748  | 489 | 742.489  | 732.919  | 747.489  | 1481.809 | 1474.809 | 1474.809 | I128     |      |
| A14  | 781  | 485 | 782.485  | 781  | 485 | 776.951  | 768.438  | 787.486  | 1425.327 | 1418.814 | 1418.300 | A127     |      |
| Q15  | 808  | 489 | 818.489  | 808  | 489 | 806.989  | 812.487  | 831.975  | 1381.295 | 1374.781 | 1374.267 | Q126     |      |
| G16  | 855  | 489 | 856.489  | 855  | 489 | 850.491  | 856.978  | 880.485  | 1325.775 | 1319.262 | 1318.748 | G125     |      |
| G17  | 889  | 489 | 890.489  | 889  | 489 | 884.997  | 888.488  | 888.488  | 1297.269 | 1290.755 | 1290.241 | G124     |      |
| V18  | 885  | 516 | 825.516  | 824  | 533 | 847.536  | 818.519  | 838.531  | 1268.758 | 1260.243 | 1259.729 | V123     |      |
| L19  | 990  | 480 | 981.478  | 980  | 482 | 1004.078 | 995.565  | 995.075  | 1218.224 | 1210.718 | 1210.212 | L122     |      |
| P20  | 1018 | 480 | 1019.480 | 1018 | 480 | 1014.091 | 1041.599 | 1162.682 | 1154.168 | 1153.676 | P121     |          |      |
| N11  | 1019 | 480 | 1020.480 | 1019 | 480 | 1108.626 | 1110.626 | 1110.626 | 1109.642 | 1109.156 | 1108.670 | N120     |      |
| G21  | 1164 | 510 | 1144.510 | 1143 | 503 | 1143.510 | 1157.634 | 1157.634 | 1048.129 | 1047.641 | 1047.153 | G119     |      |
| Q23  | 1185 | 480 | 1187.480 | 1186 | 484 | 1181.954 | 1221.984 | 1221.984 | 1000.789 | 999.301  | 998.813  | Q118     |      |
| A14  | 1210 | 480 | 1211.480 | 1210 | 480 | 1205.743 | 1209.743 | 1209.743 | 936.563  | 935.075  | 934.587  | A117     |      |
| V25  | 1210 | 480 | 1210.743 | 1210 | 482 | 1210.743 | 1206.743 | 1206.743 | 901.994  | 892.531  | 892.043  | V116     |      |
| L17  | 1217 | 508 | 1218.508 | 1218 | 508 | 1213.219 | 1217.219 | 1217.219 | 851.518  | 842.998  | 842.504  | L115     |      |
| L17  | 1243 | 508 | 1244.508 | 1243 | 514 | 1243.154 | 1243.154 | 1243.154 | 796.045  | 785.565  | 785.071  | L114     |      |
| P26  | 1243 | 510 | 1244.510 | 1243 | 510 | 1243.154 | 1243.154 | 1243.154 | 738.426  | 737.940  | 737.454  | P113     |      |
| K20  | 1310 | 480 | 1311.480 | 1310 | 480 | 1305.284 | 1309.284 | 1309.284 | 684.984  | 683.496  | 683.001  | K112     |      |
| K130 | 1309 | 480 | 1310.484 | 1308 | 482 | 1304.975 | 1308.975 | 1308.975 | 625.975  | 617.455  | 616.967  | K111     |      |
| L11  | 1341 | 480 | 1342.480 | 1340 | 478 | 1340.978 | 1340.978 | 1340.978 | 568.978  | 567.490  | 566.994  | L110     |      |
| E12  | 1358 | 480 | 1359.480 | 1358 | 480 | 1353.978 | 1353.978 | 1353.978 | 511.978  | 509.490  | 508.994  | E109     |      |
| S11  | 1349 | 510 | 1341.510 | 1340 | 514 | 1335.510 | 1335.510 | 1335.510 | 441.510  | 438.022  | 437.534  | S10      |      |
| L14  | 1388 | 510 | 1389.510 | 1387 | 514 | 1383.510 | 1383.510 | 1383.510 | 401.241  | 398.753  | 398.265  | L108     |      |
| H15  | 1388 | 510 | 1388.000 | 1387 | 512 | 1383.510 | 1383.510 | 1383.510 | 355.714  | 353.226  | 352.738  | H107     |      |
| K130 | 1392 | 480 | 1393.480 | 1391 | 478 | 1388.978 | 1388.978 | 1388.978 | 308.978  | 297.472  | 296.974  | K105     |      |
| K117 | 1389 | 480 | 1390.480 | 1388 | 478 | 1384.510 | 1384.510 | 1384.510 | 262.978  | 251.472  | 250.974  | K104     |      |
| K130 | 2050 | 501 | 2041.501 | 2041 | 500 | 2054.500 | 2055.514 | 2055.514 | 180.514  | 178.026  | 177.538  | K103     |      |
| G139 | 2071 | 480 | 2072.480 | 2069 | 478 | 2065.978 | 2065.978 | 2065.978 | 137.978  | 135.490  | 134.994  | G102     |      |
| K140 | 2142 | 480 | 2143.480 | 2141 | 478 | 2138.214 | 2142.214 | 2142.214 | 84.980   | 82.492   | 81.994   | K101     |      |



# sp | Q6GSS7 | H2A2A\_MOUSE

DEELNKLLGK<sup>Dimethyl</sup><sub>28.03</sub>VTIAQGGVLPNIQAVLLPKKTESHKAKGK

- ▶ fragmentation table for charge state 3+
- ▶ specType=cid
- ▶ score=52.36
- ▶ F113281.dat
- ▶ query=q36906.p1
- ▶ precursor=1083.375500
- ▶ chargePrecursor=4
- ▶ itol=0.5

| AA  | a               | a'              | a <sub>0</sub>  | b               | b'              | b <sub>0</sub> | y        | y'              | y <sub>0</sub>  | AA              |          |      |
|-----|-----------------|-----------------|-----------------|-----------------|-----------------|----------------|----------|-----------------|-----------------|-----------------|----------|------|
| E1  | 30103           | 0.000           | 0.000           | 0.000           | 0.000           | 0.000          | 1464.111 | 1432.494        | 1416.077        | E140            |          |      |
| E2  | 71.012          | 0.002           | 0.000           | 0.004           | 0.002           | 0.000          | 1402.823 | 1400.152        | 1398.005        | E136            |          |      |
| E3  | 110.006         | 0.002           | 1.00001         | 0.000           | 0.004           | 0.000          | 1309.914 | 1307.439        | 1305.811        | E130            |          |      |
| L4  | 153.942         | 0.002           | 147.978         | 0.002           | 0.002           | 0.000          | 1191.809 | 1184.134        | 1181.768        | L127            |          |      |
| N5  | 181.791         | 0.000           | 180.792         | 0.001           | 0.001           | 0.000          | 1095.003 | 1070.430        | 1070.102        | N130            |          |      |
| K6  | 228.945         | 0.000           | 228.945         | 0.000           | 0.000           | 0.000          | 939.966  | 924.913         | 924.908         | K135            |          |      |
| L7  | 272.848         | 0.001           | 268.140         | 0.001           | 0.004           | 0.000          | 876.476  | <b>1261.383</b> | <b>1198.717</b> | L134            |          |      |
| L8  | 309.043         | 0.004           | 303.040         | 0.000           | 0.000           | 0.000          | 813.173  | 1103.662        | <b>1158.022</b> | <b>1197.694</b> | L133     |      |
| L9  | 308.930         | 0.004           | 302.929         | 0.000           | 0.004           | 0.000          | 812.916  | 1103.093        | <b>1158.208</b> | <b>1198.000</b> | L133     |      |
| K10 | 360.800         | 0.012           | 354.800         | 0.004           | 0.004           | 0.000          | 694.294  | 1044.548        | 1044.299        | K132            |          |      |
| V11 | 411.933         | 0.008           | 407.932         | 0.000           | 0.001           | 0.000          | 617.531  | <b>1034.954</b> | 1040.770        | 1040.990        | V130     |      |
| V12 | 449.000         | 0.010           | 443.999         | 0.000           | 0.004           | 0.000          | 550.000  | 970.000         | 969.999         | V129            |          |      |
| L13 | 488.971         | 0.016           | 482.968         | 0.000           | 0.000           | 0.000          | 482.968  | <b>988.240</b>  | <b>982.573</b>  | L128            |          |      |
| A14 | 528.971         | 0.016           | 522.968         | 0.000           | 0.000           | 0.000          | 422.269  | 905.951         | 905.951         | 904.950         | A127     |      |
| Q15 | 581.838         | 0.016           | 575.835         | 0.000           | 0.004           | 0.000          | 354.364  | 825.819         | <b>921.189</b>  | 920.817         | Q126     |      |
| G16 | 570.000         | 0.014           | 564.000         | 0.000           | 0.004           | 0.000          | 354.364  | 804.134         | 803.511         | 803.506         | G125     |      |
| G17 | 588.972         | 0.016           | 582.969         | 0.000           | 0.004           | 0.000          | 354.364  | 805.951         | 805.328         | 805.319         | G124     |      |
| V18 | 639.800         | 0.018           | 633.797         | 0.000           | 0.004           | 0.000          | 288.800  | 740.000         | <b>841.499</b>  | 840.999         | V123     |      |
| L19 | 688.900         | 0.014           | 682.897         | 0.000           | 0.004           | 0.000          | 228.900  | <b>813.152</b>  | <b>807.476</b>  | <b>807.148</b>  | L122     |      |
| K20 | 690.940         | 0.010           | 684.937         | 0.000           | 0.004           | 0.000          | 228.940  | <b>806.868</b>  | 806.867         | 806.865         | K124     |      |
| K21 | 738.880         | 0.014           | 732.877         | 0.000           | 0.004           | 0.000          | 168.880  | <b>734.483</b>  | 734.482         | 734.481         | K123     |      |
| Q22 | <b>788.440</b>  | 0.014           | 782.437         | 0.000           | <b>777.781</b>  | 0.000          | 108.440  | <b>705.090</b>  | 699.418         | 699.988         | Q126     |      |
| Q23 | 811.730         | 0.010           | 805.727         | 0.000           | 0.004           | 0.000          | 104.730  | 614.456         | 607.391         | 601.771         | 801.301  | Q118 |
| A24 | 834.813         | 0.010           | 828.810         | 0.000           | 0.004           | 0.000          | 104.813  | 636.417         | 629.450         | 623.829         | 829.317  | A117 |
| V25 | 889.819         | <b>882.182</b>  | <b>881.834</b>  | <b>844.148</b>  | 0.000           | 0.000          | 89.819   | 591.493         | 591.199         | <b>601.030</b>  | 590.995  | V116 |
| L26 | 900.932         | 0.010           | 894.929         | 0.000           | 0.004           | 0.000          | 89.932   | 593.000         | 592.705         | 592.700         | 892.100  | L115 |
| L27 | 902.900         | 0.010           | 896.897         | 0.000           | 0.004           | 0.000          | 89.900   | 593.000         | 592.705         | 592.700         | 891.800  | L114 |
| P28 | 915.938         | 0.010           | 909.935         | 0.000           | 0.004           | 0.000          | 89.938   | 593.000         | 592.705         | 592.700         | 914.938  | P113 |
| K29 | 928.944         | <b>1085.288</b> | <b>1084.911</b> | <b>1076.308</b> | 0.000           | 0.000          | 89.944   | 593.000         | 592.705         | 592.700         | 927.944  | K112 |
| K30 | <b>1082.974</b> | <b>1085.288</b> | <b>1084.911</b> | <b>1076.308</b> | 0.000           | 0.000          | 89.974   | 593.000         | 592.705         | 592.700         | 1081.974 | K111 |
| T31 | 1094.007        | 0.008           | 1088.004        | 0.000           | 1.01003         | 0.000          | 108.007  | 594.007         | 593.919         | 593.914         | 1093.007 | T110 |
| E32 | 1117.012        | 0.010           | 1111.009        | 0.000           | <b>1147.003</b> | 0.000          | 108.012  | 594.009         | 593.920         | 593.914         | 1116.012 | E109 |
| L33 | 1168.910        | 0.010           | 1162.907        | 0.000           | 0.004           | 0.000          | 108.910  | 594.009         | 593.920         | 593.914         | 1167.910 | L108 |
| H34 | 1213.908        | 0.008           | 1207.905        | 0.000           | 1.01003         | 0.000          | 108.908  | 594.009         | 593.920         | 593.914         | 1212.908 | H107 |
| H35 | 1268.914        | 0.008           | 1262.911        | 0.000           | 1.01003         | 0.000          | 108.914  | 594.009         | 593.920         | 593.914         | 1267.914 | H106 |
| V36 | 1324.912        | 0.010           | 1318.909        | 0.000           | <b>1333.763</b> | 0.000          | 108.912  | 594.009         | 593.920         | 593.914         | 1323.912 | V105 |
| A37 | 1389.910        | 0.010           | 1383.907        | 0.000           | 1.01003         | 0.000          | 108.910  | 594.009         | 593.920         | 593.914         | 1388.910 | A104 |
| K38 | 1449.910        | 0.010           | 1443.907        | 0.000           | 1.01003         | 0.000          | 108.910  | 594.009         | 593.920         | 593.914         | 1448.910 | K103 |
| G39 | 1488.910        | 0.010           | 1482.907        | 0.000           | 1.01003         | 0.000          | 108.910  | 594.009         | 593.920         | 593.914         | 1487.910 | G102 |
| K40 | 1498.910        | 0.010           | 1492.907        | 0.000           | 1.01003         | 0.000          | 108.910  | 594.009         | 593.920         | 593.914         | 1497.910 | K101 |



# sp | Q6GSS7 | H2A2A\_MOUSE

DEELNKLKLGKVTIAQGGVLPNIQAVLLPKKTESHHKAKGK (Acetyl)  
(42.01)

- ▶ fragmentation table for charge state 1+
- ▶ specType=cid
- ▶ score=43.20
- ▶ F113281.dat
- ▶ query=q36929\_p1
- ▶ precursor=869.702430
- ▶ chargePrecursor=5
- ▶ itol=0.5

| AA    | a    | a*   | a,Δ | b    | b*   | b,Δ | y    | y*   | y,Δ | AA    |
|-------|------|------|-----|------|------|-----|------|------|-----|-------|
| E[1]  | 88   | 89   | 0   | 89   | 90   | 0   | 89   | 90   | 0   | E[2]  |
| E[2]  | 213  | 214  | 0   | 214  | 215  | 0   | 214  | 215  | 0   | E[3]  |
| E[3]  | 346  | 347  | 0   | 347  | 348  | 0   | 346  | 347  | 0   | E[4]  |
| L[4]  | 374  | 375  | 0   | 374  | 375  | 0   | 374  | 375  | 0   | L[5]  |
| K[5]  | 515  | 516  | 0   | 515  | 516  | 0   | 515  | 516  | 0   | K[6]  |
| R[6]  | 701  | 702  | 0   | 701  | 702  | 0   | 701  | 702  | 0   | R[7]  |
| L[7]  | 842  | 843  | 0   | 842  | 843  | 0   | 842  | 843  | 0   | L[8]  |
| L[8]  | 906  | 907  | 0   | 906  | 907  | 0   | 906  | 907  | 0   | L[9]  |
| L[9]  | 1005 | 1006 | 0   | 1005 | 1006 | 0   | 1005 | 1006 | 0   | L[10] |
| V[11] | 1097 | 1098 | 0   | 1097 | 1098 | 0   | 1097 | 1098 | 0   | V[12] |
| V[12] | 1197 | 1198 | 0   | 1197 | 1198 | 0   | 1197 | 1198 | 0   | V[13] |
| A[14] | 1390 | 1391 | 0   | 1390 | 1391 | 0   | 1390 | 1391 | 0   | A[15] |
| Q[16] | 1581 | 1582 | 0   | 1581 | 1582 | 0   | 1581 | 1582 | 0   | Q[17] |
| Q[17] | 1778 | 1779 | 0   | 1778 | 1779 | 0   | 1778 | 1779 | 0   | Q[18] |
| V[18] | 1830 | 1831 | 0   | 1830 | 1831 | 0   | 1830 | 1831 | 0   | V[19] |
| L[19] | 1924 | 1925 | 0   | 1924 | 1925 | 0   | 1924 | 1925 | 0   | L[20] |
| P[20] | 2046 | 2047 | 0   | 2046 | 2047 | 0   | 2046 | 2047 | 0   | P[21] |
| N[21] | 2162 | 2163 | 0   | 2162 | 2163 | 0   | 2162 | 2163 | 0   | N[22] |
| R[22] | 2276 | 2277 | 0   | 2276 | 2277 | 0   | 2276 | 2277 | 0   | R[23] |
| Q[25] | 2403 | 2404 | 0   | 2403 | 2404 | 0   | 2403 | 2404 | 0   | Q[26] |
| A[24] | 2474 | 2475 | 0   | 2474 | 2475 | 0   | 2474 | 2475 | 0   | A[25] |
| V[25] | 2577 | 2578 | 0   | 2577 | 2578 | 0   | 2577 | 2578 | 0   | V[26] |
| L[26] | 2688 | 2689 | 0   | 2688 | 2689 | 0   | 2688 | 2689 | 0   | L[27] |
| L[27] | 2799 | 2800 | 0   | 2799 | 2800 | 0   | 2799 | 2800 | 0   | L[28] |
| P[28] | 2904 | 2905 | 0   | 2904 | 2905 | 0   | 2904 | 2905 | 0   | P[29] |
| R[29] | 3004 | 3005 | 0   | 3004 | 3005 | 0   | 3004 | 3005 | 0   | R[30] |
| R[30] | 3102 | 3103 | 0   | 3102 | 3103 | 0   | 3102 | 3103 | 0   | R[31] |
| L[31] | 3203 | 3204 | 0   | 3203 | 3204 | 0   | 3203 | 3204 | 0   | L[32] |
| L[32] | 3304 | 3305 | 0   | 3304 | 3305 | 0   | 3304 | 3305 | 0   | L[33] |
| S[33] | 3409 | 3410 | 0   | 3409 | 3410 | 0   | 3409 | 3410 | 0   | S[34] |
| R[34] | 3507 | 3508 | 0   | 3507 | 3508 | 0   | 3507 | 3508 | 0   | R[35] |
| R[35] | 3614 | 3615 | 0   | 3614 | 3615 | 0   | 3614 | 3615 | 0   | R[36] |
| R[36] | 3712 | 3713 | 0   | 3712 | 3713 | 0   | 3712 | 3713 | 0   | R[37] |
| A[37] | 3811 | 3812 | 0   | 3811 | 3812 | 0   | 3811 | 3812 | 0   | A[38] |
| R[38] | 3911 | 3912 | 0   | 3911 | 3912 | 0   | 3911 | 3912 | 0   | R[39] |
| Q[39] | 4018 | 4019 | 0   | 4018 | 4019 | 0   | 4018 | 4019 | 0   | Q[40] |
| R[40] | 4100 | 4101 | 0   | 4100 | 4101 | 0   | 4100 | 4101 | 0   | R[41] |

# sp | Q6GSS7 | H2A2A\_MOUSE

DEELNKLLGKVTIAQGGVLPNIQAVLLPKKTESHHKAKGK (Acetyl)  
(42.01)

- ▶ fragmentation table for charge state 2+
- ▶ specType=cid
- ▶ score=43.20
- ▶ F113281.dat
- ▶ query=q36929\_p1
- ▶ precursor=869.702430
- ▶ chargePrecursor=5
- ▶ itol=0.5

| AA   | a               | a*             | a.p            | b               | b*              | b.p             | y               | y*              | y.p             | AA   |
|------|-----------------|----------------|----------------|-----------------|-----------------|-----------------|-----------------|-----------------|-----------------|------|
| E1   | 44.8021         | 0.500          | 393.518        | 388.021         | 0.504           | 488.459         | 2137.141        | 2168.228        | 2167.161        | D140 |
| E2   | 108.640         | 0.504          | 108.639        | 123.642         | 0.504           | 114.637         | 2135.223        | 2166.719        | 2168.203        | E138 |
| E3   | 172.478         | 0.504          | 169.561        | 189.635         | 0.504           | 176.532         | 2099.191        | 2074.195        | 2094.768        | E136 |
| L4   | 236.316         | 0.504          | 224.181        | 244.176         | 0.504           | 243.126         | 1986.186        | 1977.181        | 1977.181        | L137 |
| N5   | 299.154         | 228.633        | 278.124        | 301.127         | 292.614         | 292.614         | 202.122         | 1929.644        | 1924.131        | N136 |
| K16  | 363.014         | 302.694        | 284.114        | 366.114         | 356.608         | 356.608         | 198.009         | 1874.604        | 1869.104        | K135 |
| L17  | 426.852         | 366.530        | 348.114        | 421.112         | 411.109         | 411.111         | 1888.574        | 1888.003        | 1879.530        | L134 |
| L18  | 490.691         | 430.367        | 409.208        | 478.208         | 469.203         | 469.203         | 1792.031        | 1743.528        | 1743.038        | L133 |
| G19  | 554.529         | 494.203        | 473.206        | 548.206         | 539.202         | 539.202         | 1697.584        | 1659.451        | 1658.951        | G132 |
| R100 | 618.367         | 558.038        | 541.014        | 612.017         | 602.989         | 602.989         | 1603.134        | 1565.447        | 1564.947        | R131 |
| V111 | <b>682.205</b>  | 621.803        | 601.308        | <b>620.301</b>  | 611.298         | 611.300         | 1508.681        | 1504.431        | 1503.931        | V130 |
| I123 | 746.043         | 685.877        | 664.372        | 740.375         | 731.369         | 731.371         | 1414.231        | 1414.114        | 1414.114        | I129 |
| A14  | 810.881         | <b>704.906</b> | <b>704.614</b> | <b>676.615</b>  | <b>718.903</b>  | <b>718.411</b>  | 1320.873        | 1294.361        | 1294.361        | A128 |
| G125 | 874.719         | <b>748.424</b> | <b>748.130</b> | <b>762.935</b>  | <b>754.422</b>  | <b>753.930</b>  | 1226.915        | 1201.801        | 1201.801        | G124 |
| G116 | 938.557         | 808.261        | 787.765        | <b>816.967</b>  | <b>818.461</b>  | <b>817.969</b>  | 1132.957        | 1132.841        | 1132.841        | G123 |
| G118 | 1002.395        | 962.101        | 933.471        | <b>955.475</b>  | <b>946.962</b>  | <b>946.470</b>  | 1039.001        | 1038.884        | 1038.884        | G122 |
| G117 | 1066.233        | 1026.045       | <b>860.983</b> | 1017.988        | 978.473         | 977.981         | 945.043         | 944.926         | 944.926         | G121 |
| V118 | <b>818.933</b>  | 818.899        | 818.827        | 818.827         | 818.827         | <b>824.931</b>  | 1248.916        | 1248.246        | 1248.246        | V117 |
| L119 | <b>976.065</b>  | 975.552        | 975.055        | <b>990.062</b>  | 991.549         | <b>924.931</b>  | <b>1240.229</b> | 1235.175        | 1235.174        | L118 |
| P120 | 1040.903        | 1040.388       | 1040.316       | 1040.316        | 1040.316        | 1040.316        | <b>1183.467</b> | <b>1175.174</b> | <b>1174.682</b> | P121 |
| N121 | 1104.741        | 1104.128       | 1104.057       | <b>1095.630</b> | <b>1087.097</b> | <b>1086.605</b> | <b>1135.161</b> | 1129.047        | 1129.155        | N120 |
| S122 | <b>1138.155</b> | 1137.542       | 1137.470       | <b>1152.152</b> | 1153.639        | <b>1104.939</b> | <b>1039.139</b> | 1039.026        | 1039.134        | S123 |
| Q123 | 1202.094        | 1201.481       | 1201.410       | 1201.410        | 1201.410        | 1201.410        | 946.999         | 946.999         | 946.999         | Q118 |
| A124 | 1265.932        | 1265.320       | 1265.249       | 1265.249        | 1265.249        | 1265.249        | <b>957.548</b>  | <b>948.055</b>  | 948.163         | A117 |
| V125 | 1329.770        | 1329.158       | 1329.087       | 1329.087        | 1329.087        | 1329.087        | <b>922.569</b>  | 922.569         | 922.569         | V124 |
| L126 | 1393.608        | 1392.996       | 1392.925       | 1392.925        | 1392.925        | 1392.925        | 848.611         | 848.611         | 848.611         | L125 |
| L127 | 1457.446        | 1456.834       | 1456.763       | 1456.763        | 1456.763        | 1456.763        | <b>815.973</b>  | <b>807.480</b>  | <b>806.988</b>  | L124 |
| R128 | 1521.284        | 1520.672       | 1520.601       | 1520.601        | 1520.601        | 1520.601        | <b>793.431</b>  | <b>790.911</b>  | 790.911         | R123 |
| K129 | 1585.122        | 1584.510       | 1584.439       | 1584.439        | 1584.439        | 1584.439        | <b>710.905</b>  | <b>706.381</b>  | <b>701.899</b>  | K122 |
| K130 | 1648.960        | 1648.348       | 1648.277       | 1648.277        | 1648.277        | 1648.277        | 628.436         | 628.349         | 628.357         | K111 |
| L131 | 1712.798        | 1712.186       | 1712.115       | 1712.115        | 1712.115        | 1712.115        | 545.893         | 545.806         | 545.814         | L130 |
| E132 | 1776.636        | 1776.024       | 1775.953       | 1775.953        | 1775.953        | 1775.953        | 463.347         | 463.260         | 463.268         | E131 |
| L133 | 1840.474        | 1839.862       | 1839.791       | 1839.791        | 1839.791        | 1839.791        | 380.801         | 380.714         | 380.722         | L132 |
| L134 | 1904.312        | 1903.700       | 1903.629       | 1903.629        | 1903.629        | 1903.629        | 300.255         | 300.168         | 300.176         | L133 |
| L135 | 1968.150        | 1967.538       | 1967.467       | 1967.467        | 1967.467        | 1967.467        | 219.709         | 219.622         | 219.630         | L134 |
| K136 | 2031.988        | 2031.376       | 2031.305       | 2031.305        | 2031.305        | 2031.305        | 139.163         | 139.076         | 139.084         | K135 |
| K137 | 2095.826        | 2095.214       | 2095.143       | 2095.143        | 2095.143        | 2095.143        | 58.617          | 58.530          | 58.538          | K136 |
| K138 | 2159.664        | 2159.052       | 2158.981       | 2158.981        | 2158.981        | 2158.981        | 17.071          | 16.984          | 16.992          | K137 |
| G139 | 2223.502        | 2222.890       | 2222.819       | 2222.819        | 2222.819        | 2222.819        | 6.525           | 6.438           | 6.446           | G138 |
| K140 | 2287.340        | 2286.728       | 2286.657       | 2286.657        | 2286.657        | 2286.657        | 0.000           | 0.000           | 0.000           | K138 |

# sp | Q6GSS7 | H2A2A\_MOUSE

DEELNKLLGKVTIAQGGVLPNIQAVLLPKKTESHHKAKGK (Acetyl)  
(42.01)

- ▶ fragmentation table for charge state 3+
- ▶ specType=cid
- ▶ score=43.20
- ▶ F113281.dat
- ▶ query=q36929\_p1
- ▶ precursor=869.702430
- ▶ chargePrecursor=5
- ▶ itol=0.5

| AA  | a              | a*             | aΔ              | b               | b*              | bΔ              | y              | y*             | yΔ             | AA   |
|-----|----------------|----------------|-----------------|-----------------|-----------------|-----------------|----------------|----------------|----------------|------|
| D1  | 30103          | 0.672          | 24.054          | 38.385          | 0.672           | 35.546          | 1448.833       | 1443.150       | 1442.507       | Q140 |
| E12 | 113353         | 0.674          | 69.059          | 69.924          | 0.674           | 70.300          | 1411.493       | 1404.813       | 1404.065       | T119 |
| E13 | 116150         | 0.672          | 110.041         | 125.378         | 0.672           | 133.554         | 1387.474       | 1381.798       | 1381.403       | E118 |
| L14 | 133191         | 0.672          | 147.726         | 152.003         | 0.672           | 157.069         | 1374.401       | 1367.726       | 1367.331       | L117 |
| N15 | 137173         | 0.672          | 181.702         | 181.081         | 0.672           | 181.411         | 1369.389       | 1362.714       | 1362.319       | N116 |
| K16 | 234404         | 230.731        | 230.450         | 245.793         | 238.135         | 237.762         | 1246.751       | 1243.076       | 1242.747       | K115 |
| L17 | 272140         | 186.413        | 186.141         | 201.463         | 215.804         | 215.476         | 1206.691       | 1203.177       | 1202.849       | L114 |
| L18 | 309204         | 264.108        | 263.849         | 310.179         | 311.499         | 311.171         | 1168.568       | 1162.620       | 1162.354       | L113 |
| G19 | 328208         | 323.171        | 322.947         | 339.161         | 335.506         | 332.116         | 1131.613       | 1125.665       | 1125.399       | G112 |
| K10 | 371188         | 386.814        | 386.541         | 389.881         | 379.269         | 384.697         | 1111.689       | 1105.966       | 1105.661       | K111 |
| V11 | 404174         | 388.882        | 388.583         | 411.917         | 408.277         | 407.698         | 1098.957       | 1093.185       | 1092.954       | V110 |
| L12 | 438208         | 433.913        | 433.269         | 444.516         | 441.916         | 441.662         | 1076.945       | 1071.269       | 1070.911       | L109 |
| L13 | 478188         | 430.213        | 429.544         | 445.264         | 479.058         | 475.277         | 1052.267       | 1046.288       | 1045.811       | L108 |
| A14 | <b>499.678</b> | 481.951        | 481.524         | 509.305         | 503.284         | 502.908         | <b>964.537</b> | <b>958.882</b> | <b>958.554</b> | A107 |
| G15 | 528214         | 530.813        | 530.381         | 541.449         | 544.916         | 544.462         | <b>946.876</b> | <b>941.261</b> | <b>940.811</b> | G106 |
| G16 | 561151         | 525.046        | 525.111         | <b>576.463</b>  | 564.977         | 564.849         | <b>916.192</b> | <b>910.182</b> | <b>909.182</b> | G105 |
| G17 | 585133         | 534.651        | 534.129         | 569.660         | <b>581.964</b>  | 581.696         | <b>878.185</b> | <b>873.119</b> | <b>872.132</b> | G104 |
| V18 | 611161         | 607.615        | 607.147         | 622.683         | 617.697         | 617.619         | <b>866.116</b> | <b>861.040</b> | <b>860.174</b> | V103 |
| L19 | 651249         | 605.211        | 605.253         | 609.371         | 604.162         | 604.174         | <b>827.135</b> | <b>821.401</b> | <b>821.152</b> | L102 |
| P20 | <b>681.397</b> | <b>677.721</b> | <b>677.303</b>  | 694.724         | 689.051         | 688.745         | <b>789.488</b> | <b>783.785</b> | <b>783.457</b> | P101 |
| N21 | 721411         | 715.726        | 715.402         | 729.743         | 725.087         | 724.769         | <b>757.169</b> | <b>751.434</b> | <b>751.186</b> | N100 |
| N22 | 769108         | 714.843        | 714.702         | <b>706.437</b>  | <b>762.762</b>  | <b>762.434</b>  | <b>713.895</b> | <b>711.430</b> | <b>711.027</b> | N111 |
| G23 | 801189         | 786.110        | 786.106         | 811.121         | 806.448         | 806.121         | 681.449        | 676.743        | 676.387        | G108 |
| A24 | 834191         | 818.793        | 818.481         | <b>834.802</b>  | 828.127         | 828.709         | <b>636.714</b> | 633.019        | 632.711        | A111 |
| V25 | <b>856.454</b> | 819.811        | 819.746         | 849.449         | 844.916         | 844.699         | 601.419        | 600.511        | 600.156        | V106 |
| L26 | 890151         | 860.511        | 860.528         | <b>905.528</b>  | 899.044         | <b>899.316</b>  | 582.019        | 578.519        | 578.019        | L115 |
| L27 | 911163         | 868.269        | 867.879         | 943.213         | 932.019         | 937.211         | 564.519        | 560.619        | 560.119        | L114 |
| L28 | 931174         | 868.269        | 867.879         | 943.213         | 932.019         | 937.211         | 564.519        | 560.619        | 560.119        | L113 |
| P29 | 1008152        | 1003.251       | 1002.929        | 1019.264        | <b>1012.588</b> | <b>1012.260</b> | <b>506.823</b> | 503.219        | 502.819        | P112 |
| K30 | 1061488        | 1046.070       | <b>1045.627</b> | <b>1066.962</b> | 1055.267        | 1054.959        | 431.019        | 428.619        | 428.319        | K111 |
| L31 | 1088153        | 1059.029       | 1058.111        | 1071.019        | 1069.219        | 1068.619        | 408.019        | 406.519        | 406.019        | L111 |
| L32 | 1112162        | 1112.019       | 1112.019        | <b>1137.058</b> | 1131.981        | 1131.508        | 399.519        | 398.019        | 397.519        | L110 |
| S33 | 1157138        | 1131.688       | 1131.141        | 1168.671        | 1160.964        | 1160.666        | 314.119        | 306.519        | 306.119        | S111 |
| H34 | 1201124        | 1187.589       | 1187.021        | 1214.268        | 1208.688        | 1208.362        | 263.119        | 257.489        | 257.019        | H111 |
| N35 | 1268111        | 1219.019       | 1218.711        | 1244.844        | 1238.806        | 1238.406        | 197.419        | 193.419        | 193.019        | N110 |
| K36 | 1300456        | 1260.711       | 1260.443        | 1300.744        | 1292.688        | 1294.737        | 161.719        | 160.119        | 159.719        | K110 |
| A37 | 1311108        | 1269.412       | 1269.288        | 1274.429        | 1312.744        | 1312.418        | 149.019        | 147.419        | 147.019        | A110 |
| L38 | 1328113        | 1313.119       | 1312.811        | 1329.219        | 1328.449        | 1328.151        | 125.419        | 124.819        | 124.319        | L109 |
| G39 | 1376763        | 1371.119       | 1370.793        | 1395.125        | 1390.449        | 1390.123        | 92.709         | 92.049         | 91.679         | G109 |
| K40 | 1413149        | 1437.629       | 1437.489        | 1443.821        | 1437.151        | 1436.823        | 63.719         | 63.019         | 62.679         | K110 |

# sp | Q6GSS7 | H2A2A\_MOUSE

DEELNKLKLVIAQGGVLPNIQAVLLPKKTESHHKAKGK (Acetyl)  
(42.01)

- ▶ fragmentation table for charge state 4+
- ▶ specType=cid
- ▶ score=43.20
- ▶ F113281.dat
- ▶ query=q36929\_p1
- ▶ precursor=869.702430
- ▶ chargePrecursor=5
- ▶ itol=0.5

| AA  | a              | a*           | a,Δ             | b               | b*           | b,Δ             | y               | y*             | y,Δ            | AA   |
|-----|----------------|--------------|-----------------|-----------------|--------------|-----------------|-----------------|----------------|----------------|------|
| D1  | 32.000         | 0.750        | 18.281          | 28.044          | 0.750        | 35.282          | <b>1086.875</b> | 1087.831       | 1087.172       | D140 |
| E2  | 33.000         | 0.750        | 18.221          | 28.029          | 0.750        | 35.212          |                 | 1087.866       | 1087.166       | L139 |
| E3  | 37.000         | 0.750        | 18.194          | 28.065          | 0.750        | 36.703          | <b>1025.857</b> | 1025.953       | 1025.303       | E138 |
| L4  | 113.000        | 0.750        | 114.059         | 112.566         | 0.750        | 118.074         | 951.507         | 950.146        | 949.044        | L137 |
| N5  | 144.000        | 1.000        | 149.046         | 141.067         | 1.000        | 148.011         | 949.004         | <b>965.126</b> | 965.060        | N136 |
| K12 | 170.000        | 1.000        | 171.059         | 169.064         | 1.000        | 170.029         | 916.006         | 916.000        | 915.550        | K135 |
| L17 | 204.000        | 1.000        | 209.066         | 211.362         | 1.000        | 208.030         | 904.193         | 904.131        | 903.369        | L134 |
| L18 | 230.000        | 2.000        | 236.112         | 238.613         | 2.000        | 236.376         | 875.192         | 872.365        | 871.017        | L133 |
| D19 | 246.000        | 2.000        | 254.161         | 253.166         | 2.000        | 252.624         | 848.249         | 845.900        | 844.796        | G132 |
| K10 | 276.000        | 2.000        | 278.411         | 280.912         | 2.000        | 281.406         | 841.406         | 833.004        | 830.711        | K131 |
| V11 | 303.000        | 2.000        | 309.113         | 310.819         | 2.000        | 308.422         | 806.176         | 803.820        | 802.713        | V130 |
| L11 | 330.000        | 3.000        | 339.444         | 339.944         | 3.000        | 338.944         | 811.410         | 809.803        | 807.606        | L129 |
| E13 | 357.000        | 3.000        | 362.211         | 364.212         | 3.000        | 363.006         | 794.704         | 794.044        | 792.448        | E128 |
| A14 | 374.000        | 3.000        | 380.479         | 381.971         | 3.000        | 377.715         | 777.468         | 773.000        | 769.441        | A127 |
| G12 | 408.000        | 4.000        | 407.446         | 413.946         | 4.000        | 409.413         | 770.113         | <b>701.854</b> | <b>701.408</b> | G126 |
| G10 | 421.000        | 4.000        | 425.743         | 426.243         | 4.000        | 423.580         | 725.720         | 713.506        | 710.000        | G125 |
| G17 | 435.000        | 4.000        | 439.999         | 442.497         | 4.000        | 437.994         | 693.641         | 693.100        | 691.118        | G124 |
| V18 | 460.000        | 4.000        | 465.766         | 467.264         | 4.000        | 463.007         | 669.711         | <b>641.129</b> | 640.003        | V123 |
| L19 | 480.000        | 4.000        | 485.023         | 486.520         | 4.000        | 483.019         | 661.612         | <b>630.818</b> | 630.000        | L122 |
| P20 | 517.000        | 5.000        | 518.291         | 519.789         | 5.000        | 516.941         | 615.406         | 607.327        | 606.000        | P121 |
| N21 | 541.000        | 5.000        | 546.003         | 548.504         | 5.000        | 544.002         | 643.006         | 636.004        | 633.002        | N120 |
| G22 | 568.000        | 6.000        | 569.474         | 570.974         | 6.000        | 568.024         | 614.074         | 608.118        | 605.111        | G119 |
| G23 | <b>601.596</b> | 7.000        | 603.093         | 604.596         | 7.000        | 604.102         | 611.100         | <b>507.846</b> | <b>506.800</b> | G118 |
| A24 | 619.000        | 6.000        | 624.852         | 626.354         | 6.000        | 622.007         | 621.011         | 619.208        | 615.003        | A117 |
| V24 | 644.000        | 6.000        | 649.611         | 651.111         | 6.000        | 649.604         | 648.110         | 646.906        | 643.900        | V116 |
| L26 | 672.000        | 6.000        | 677.366         | 678.866         | 6.000        | 676.110         | 624.006         | 626.103        | 623.000        | L115 |
| L27 | 700.000        | 6.000        | 705.121         | 706.621         | 6.000        | 704.110         | 602.400         | 604.201        | 601.000        | L114 |
| L28 | 724.000        | 6.000        | <b>726.423</b>  | 727.923         | 6.000        | <b>727.660</b>  | 581.110         | 582.110        | 579.113        | L113 |
| A29 | 756.000        | 6.000        | 761.443         | 762.943         | 6.000        | <b>759.093</b>  | <b>750.447</b>  | 655.006        | 651.000        | K112 |
| K30 | 788.000        | 7.000        | 794.477         | 795.977         | 7.000        | 793.471         | 623.010         | 624.010        | 619.410        | K111 |
| L31 | 814.000        | 7.000        | 820.740         | <b>821.240</b>  | 7.000        | 818.014         | <b>816.733</b>  | 784.010        | 787.000        | L110 |
| L32 | 840.000        | 7.000        | 846.241         | 847.741         | 7.000        | 845.240         | <b>846.903</b>  | 816.010        | 815.010        | E109 |
| S33 | 866.000        | 8.000        | 869.000         | 869.750         | 8.000        | 869.997         | 870.011         | 874.000        | 870.000        | S108 |
| L34 | 891.000        | <b>8.000</b> | <b>896.017</b>  | <b>896.517</b>  | <b>8.000</b> | <b>895.267</b>  | <b>805.016</b>  | 747.006        | 746.010        | L107 |
| L35 | 916.000        | 8.000        | 921.266         | 922.766         | 8.000        | 920.266         | 814.010         | 814.010        | 811.010        | L106 |
| K36 | 946.000        | <b>8.000</b> | <b>944.552</b>  | <b>944.308</b>  | 8.000        | 943.007         | 871.051         | <b>871.305</b> | 844.000        | K105 |
| A17 | 969.000        | <b>8.000</b> | <b>962.311</b>  | 963.300         | 8.000        | 969.110         | 869.004         | 812.015        | 807.000        | A104 |
| K38 | 1019.000       | 9.000        | <b>1014.089</b> | <b>1014.590</b> | 9.000        | <b>1014.948</b> | 804.000         | 806.010        | 804.000        | K103 |
| G39 | 1037.000       | 9.000        | 1042.500        | 1043.000        | 9.000        | <b>1038.580</b> | <b>1038.343</b> | 807.000        | 803.000        | G102 |
| K40 | 1075.000       | 10.000       | 1081.111        | 1080.612        | 10.000       | <b>1078.115</b> | <b>1077.869</b> | 801.000        | 801.000        | K101 |



# sp | Q6GSS7 | H2A2A\_MOUSE

DEELNKLLGKVTIAQGGLVLPNIQAVLLPKKTESHHKAKGK (Acetyl)  
(42.01)

- ▶ fragmentation table for charge state 1+
- ▶ specType=etd
- ▶ score=79.67
- ▶ F113281.dat
- ▶ query=q36930.p1
- ▶ precursor=869.702430
- ▶ chargePrecursor=5
- ▶ itol=0.5

| AA | c  | y               | z=1             | z=2             | z               | AA              |       |
|----|----|-----------------|-----------------|-----------------|-----------------|-----------------|-------|
| D  | 1  | 131.061         | 4344.477        | 4328.458        | 0.000           | 4327.450        | D(40) |
| E  | 2  | 262.103         | 4329.450        | 4213.431        | 0.000           | 4212.423        | E(39) |
| E  | 3  | 393.146         | 4304.407        | 4084.388        | 0.000           | 4083.380        | E(38) |
| L  | 4  | 524.170         | 3971.364        | 3955.345        | 0.000           | 3954.337        | L(17) |
| N  | 5  | 618.273         | 3858.260        | 3842.262        | 3843.269        | 3841.254        | N(36) |
| K  | 6  | <b>746.368</b>  | 3744.237        | 3728.219        | 3729.227        | 3727.211        | K(35) |
| L  | 7  | <b>859.452</b>  | 3618.143        | 3600.124        | 3601.132        | 3599.116        | L(34) |
| L  | 8  | <b>972.536</b>  | 3503.058        | 3487.040        | 3488.048        | 3486.032        | L(33) |
| G  | 9  | <b>1029.558</b> | 3389.974        | 3373.955        | 3374.963        | 3372.946        | G(25) |
| K  | 10 | <b>1157.652</b> | 3332.953        | 3318.934        | 3317.942        | 3315.926        | K(31) |
| V  | 11 | <b>1256.721</b> | 3204.858        | 3188.839        | 3189.847        | 3187.831        | V(30) |
| T  | 12 | <b>1357.769</b> | 3105.790        | 3089.771        | 3090.779        | 3088.763        | T(29) |
| I  | 13 | <b>1470.853</b> | 3004.742        | 2988.723        | 2989.731        | 2987.715        | I(28) |
| A  | 14 | <b>1587.897</b> | 2894.695        | 2878.676        | 2879.684        | 2877.668        | A(27) |
| G  | 15 | <b>1669.948</b> | 2820.621        | 2804.602        | 2805.610        | 2803.594        | G(26) |
| G  | 16 | 1728.970        | 2692.562        | 2676.543        | 2677.551        | 2675.535        | G(25) |
| G  | 17 | 1783.991        | 2635.541        | 2619.522        | 2620.530        | 2618.514        | G(24) |
| V  | 18 | <b>1883.060</b> | 2578.519        | 2562.500        | 2563.508        | 2561.493        | V(23) |
| L  | 19 | 1996.144        | 2479.451        | 2463.432        | 2464.440        | 2462.424        | L(22) |
| F  | 20 | 2033.168        | 2368.397        | 2352.378        | 2353.386        | 2351.370        | F(21) |
| N  | 21 | 2207.239        | 2289.314        | 2273.295        | 2274.303        | 2272.287        | N(20) |
| I  | 22 | 2330.323        | 2155.271        | 2139.252        | 2140.260        | 2138.244        | I(19) |
| Q  | 23 | 2448.392        | 2042.181        | 2026.168        | 2027.176        | 2025.160        | Q(18) |
| A  | 24 | 2518.419        | 1914.129        | 1898.110        | 1899.117        | 1897.102        | A(17) |
| V  | 25 | 2618.458        | 1747.091        | 1827.073        | 1828.080        | <b>1826.065</b> | V(16) |
| L  | 26 | 2731.572        | <b>1744.023</b> | 1728.004        | 1729.012        | 1727.000        | L(15) |
| L  | 27 | 2844.656        | 1630.938        | 1614.920        | <b>1615.928</b> | 1613.912        | L(14) |
| F  | 28 | 2941.708        | 1517.855        | 1501.836        | 1502.844        | 1500.828        | F(13) |
| K  | 29 | 3059.803        | <b>1420.802</b> | 1404.783        | <b>1405.791</b> | 1403.775        | K(12) |
| K  | 30 | 3197.898        | <b>1292.707</b> | <b>1276.688</b> | 1277.696        | 1275.680        | K(11) |
| I  | 31 | 3289.948        | 1154.612        | 1138.593        | 1139.601        | 1137.585        | I(10) |
| E  | 32 | 3427.989        | 1053.564        | <b>1047.546</b> | <b>1048.553</b> | 1046.537        | E(9)  |
| S  | 33 | 3515.021        | 934.522         | <b>918.503</b>  | 919.511         | 917.495         | S(8)  |
| H  | 34 | 3652.080        | 847.490         | <b>831.471</b>  | 832.479         | 830.463         | H(7)  |
| H  | 35 | 3789.119        | <b>710.431</b>  | <b>694.412</b>  | <b>695.420</b>  | 693.404         | H(6)  |
| K  | 36 | 3817.233        | 572.372         | 567.353         | 568.361         | 566.345         | K(5)  |
| A  | 37 | 3958.274        | 448.271         | 429.252         | 430.260         | 428.254         | A(4)  |
| K  | 38 | 4118.366        | 374.240         | <b>358.221</b>  | 359.229         | 357.213         | K(3)  |
| G  | 39 | 4173.397        | 246.145         | 230.126         | 231.134         | 229.118         | G(2)  |
| K  | 40 | 4343.493        | 189.123         | 173.105         | 174.112         | 172.097         | K(1)  |



# sp | Q6GSS7 | H2A2A\_MOUSE

DEELNKLLGKVTIAQGGVLPNIQAVLLPKKTESHHKAKGK (Acetyl)  
(42.01)

- ▶ fragmentation table for charge state 2+
- ▶ specType=etd
- ▶ score=79.67
- ▶ F113281.dat
- ▶ query=q36930.p1
- ▶ precursor=869.702430
- ▶ chargePrecursor=5
- ▶ itol=0.5

| AA | c  | y               | z+1            | z+2             | z               | AA              |       |
|----|----|-----------------|----------------|-----------------|-----------------|-----------------|-------|
| D  | 1  | 67.634          | 2172.742       | 2164.733        | 0.504           | 2164.229        | D[40] |
| E  | 2  | 131.555         | 2135.228       | 2107.210        | 0.504           | 2106.715        | E[39] |
| E  | 3  | 195.077         | 2097.709       | 2042.569        | 0.504           | 2042.190        | E[38] |
| L  | 4  | 252.519         | 1986.186       | 1978.176        | 0.504           | 1977.673        | L[37] |
| N  | 5  | 309.040         | 1929.644       | 1921.634        | 1922.138        | 1921.131        | N[36] |
| K  | 6  | 373.658         | 1872.622       | 1864.613        | 1865.117        | 1864.109        | K[35] |
| L  | 7  | 430.230         | 1808.575       | 1800.560        | <b>1801.069</b> | 1800.057        | L[34] |
| L  | 8  | 486.772         | 1752.033       | <b>1744.023</b> | <b>1744.527</b> | 1743.520        | L[33] |
| G  | 9  | 515.282         | 1695.493       | 1687.484        | 1687.989        | 1686.979        | G[32] |
| K  | 10 | 579.130         | 1606.980       | 1608.971        | <b>1609.475</b> | 1608.467        | K[31] |
| V  | 11 | 638.884         | 1602.933       | <b>1594.923</b> | <b>1595.427</b> | 1594.419        | V[30] |
| T  | 12 | 679.388         | 1551.398       | <b>1545.389</b> | <b>1545.893</b> | 1544.885        | T[29] |
| I  | 13 | 735.930         | 1502.875       | <b>1494.865</b> | <b>1495.369</b> | 1494.361        | I[28] |
| A  | 14 | <b>771.449</b>  | 1446.333       | <b>1438.323</b> | <b>1438.827</b> | 1437.819        | A[27] |
| Q  | 15 | 835.476         | 1410.814       | 1402.804        | 1403.309        | 1402.301        | Q[26] |
| G  | 16 | <b>863.989</b>  | 1346.785       | <b>1338.775</b> | <b>1339.279</b> | 1338.271        | G[25] |
| G  | 17 | <b>892.499</b>  | 1318.274       | <b>1310.265</b> | <b>1310.768</b> | <b>1309.761</b> | G[24] |
| V  | 18 | 942.033         | 1289.763       | <b>1281.754</b> | <b>1282.258</b> | 1281.250        | V[23] |
| L  | 19 | <b>998.575</b>  | 1240.229       | <b>1232.220</b> | <b>1232.724</b> | 1231.716        | L[22] |
| T  | 20 | <b>1047.102</b> | 1183.687       | 1175.678        | 1176.182        | 1175.174        | T[21] |
| N  | 21 | 1104.123        | 1138.161       | 1127.151        | 1127.655        | <b>1126.647</b> | N[20] |
| I  | 22 | 1160.665        | 1078.139       | 1070.130        | 1070.634        | <b>1069.626</b> | I[19] |
| Q  | 23 | 1224.695        | 1021.597       | 1013.588        | 1014.092        | 1013.084        | Q[18] |
| A  | 24 | 1289.213        | 957.568        | <b>949.558</b>  | <b>950.062</b>  | 949.055         | A[17] |
| V  | 25 | <b>1309.747</b> | 822.049        | 814.040         | 814.544         | 813.536         | V[16] |
| L  | 26 | <b>1368.289</b> | 872.515        | 864.506         | 865.010         | <b>864.002</b>  | L[15] |
| L  | 27 | <b>1422.831</b> | 815.973        | <b>807.964</b>  | <b>808.468</b>  | 807.460         | L[14] |
| P  | 28 | <b>1471.358</b> | 759.431        | 751.422         | 751.926         | 750.918         | P[13] |
| K  | 29 | 1535.405        | <b>710.905</b> | <b>702.895</b>  | <b>703.399</b>  | 702.391         | K[12] |
| K  | 30 | <b>1599.453</b> | 646.857        | <b>638.848</b>  | <b>639.352</b>  | 638.344         | K[11] |
| I  | 31 | 1657.077        | 582.810        | 574.800         | 575.304         | 574.296         | I[10] |
| E  | 32 | <b>1714.498</b> | 512.288        | 504.279         | 504.783         | 503.775         | E[9]  |
| S  | 33 | <b>1758.014</b> | 497.765        | 489.755         | 490.259         | 489.251         | S[8]  |
| H  | 34 | <b>1826.543</b> | 424.248        | 416.239         | 416.743         | 415.735         | H[7]  |
| H  | 35 | <b>1895.073</b> | 395.719        | 387.710         | 388.214         | 387.206         | H[6]  |
| K  | 36 | 1959.120        | 387.190        | 279.180         | 279.684         | 278.676         | K[5]  |
| A  | 37 | <b>1994.639</b> | 223.142        | 215.133         | 215.637         | 214.629         | A[4]  |
| K  | 38 | 2053.658        | 157.624        | 149.614         | 150.118         | 149.110         | K[3]  |
| G  | 39 | 2087.197        | 123.579        | 115.569         | 116.073         | 115.065         | G[2]  |
| K  | 40 | 2172.250        | 95.065         | 87.050          | 87.560          | 86.553          | K[1]  |

# sp | Q6GSS7 | H2A2A\_MOUSE

DEELNKLLGKVTIAQGGVLPNIQAVLLPKKTESHHKAKGK (Acetyl)  
(42.01)

- ▶ fragmentation table for charge state 3+
- ▶ specType=etd
- ▶ score=79.67
- ▶ F113281.dat
- ▶ query=q36930.p1
- ▶ precursor=869.702430
- ▶ chargePrecursor=5
- ▶ itol=0.5

| AA    | c               | y              | z+1             | z+2             | z               | AA    |
|-------|-----------------|----------------|-----------------|-----------------|-----------------|-------|
| D[1]  | 45.025          | 1448.830       | <b>1443.491</b> | 0.672           | <b>1443.155</b> | D[40] |
| E[2]  | 88.039          | 1410.488       | 1405.14         | 0.672           | 1408.811        | E[39] |
| E[3]  | 131.054         | 1389.474       | <b>1362.134</b> | 0.672           | <b>1361.798</b> | E[38] |
| L[4]  | 168.748         | 1324.460       | 1319.120        | 0.672           | 1315.764        | L[37] |
| N[5]  | 206.762         | 1286.765       | 1281.425        | <b>1281.761</b> | 1281.089        | N[36] |
| K[6]  | 269.461         | 1246.751       | 1243.411        | 1243.747        | 1243.075        | K[35] |
| L[7]  | 287.156         | 1206.052       | <b>1200.713</b> | <b>1201.049</b> | 1200.377        | L[34] |
| L[8]  | 324.850         | 1166.758       | 1163.018        | 1163.354        | 1162.682        | L[33] |
| G[9]  | 343.257         | 1130.063       | <b>1125.323</b> | <b>1125.659</b> | 1124.986        | G[32] |
| K[10] | 386.556         | 1111.050       | <b>1106.310</b> | <b>1106.652</b> | 1105.980        | K[31] |
| V[11] | 419.578         | 1068.957       | 1063.618        | 1063.954        | 1063.282        | V[30] |
| T[12] | 453.201         | 1035.935       | <b>1030.595</b> | 1030.931        | <b>1030.259</b> | T[29] |
| I[13] | 490.956         | 1002.252       | 996.913         | 997.248         | 996.577         | I[28] |
| A[14] | 514.435         | 964.597        | 959.232         | 959.564         | 958.886         | A[27] |
| Q[15] | 557.221         | 940.878        | <b>935.539</b>  | <b>935.875</b>  | 935.203         | Q[26] |
| G[16] | 576.328         | 898.192        | <b>892.853</b>  | <b>893.189</b>  | <b>892.517</b>  | G[25] |
| G[17] | 595.335         | 879.185        | 873.845         | 874.181         | 873.510         | G[24] |
| V[18] | 628.358         | 860.178        | 854.838         | 855.174         | 854.502         | V[23] |
| L[19] | 666.051         | 827.155        | <b>821.816</b>  | <b>822.151</b>  | 821.480         | L[22] |
| T[20] | 698.404         | 789.460        | 784.121         | 784.457         | 783.785         | T[21] |
| N[21] | 738.418         | 757.109        | 753.770         | 752.106         | 751.434         | N[20] |
| I[22] | 774.113         | 719.095        | 713.756         | 714.092         | 713.420         | I[19] |
| Q[23] | 816.799         | 681.400        | 676.061         | 676.397         | 675.725         | Q[18] |
| A[24] | 860.478         | <b>638.714</b> | 633.375         | 633.711         | 633.039         | A[17] |
| V[25] | 873.501         | 615.035        | 609.696         | 610.032         | 609.360         | V[16] |
| L[26] | 911.228         | 532.032        | 526.693         | 527.029         | 526.357         | L[15] |
| L[27] | 948.890         | 544.318        | 538.979         | 539.314         | 538.642         | L[14] |
| F[28] | <b>981.241</b>  | 506.623        | 501.284         | 501.619         | 500.948         | F[13] |
| K[29] | 1021.939        | 474.272        | 468.933         | 469.269         | 468.597         | K[12] |
| K[30] | 1066.638        | 431.574        | 426.234         | 426.570         | 425.898         | K[11] |
| T[31] | 1100.220        | 388.876        | 383.536         | 383.872         | 383.200         | T[10] |
| E[32] | 1143.224        | 358.193        | 349.853         | 349.189         | 348.517         | E[9]  |
| S[33] | <b>1172.345</b> | 312.179        | 306.839         | 307.175         | 306.503         | S[8]  |
| H[34] | 1218.031        | 283.168        | 277.829         | 278.164         | 277.493         | H[7]  |
| H[35] | 1263.718        | 237.462        | 232.122         | 232.476         | 231.806         | H[6]  |
| K[36] | 1308.416        | 191.795        | 186.456         | 186.792         | 186.120         | K[5]  |
| A[37] | <b>1330.095</b> | 149.097        | 143.758         | 144.094         | 143.422         | A[4]  |
| K[38] | <b>1372.783</b> | 128.416        | 123.076         | 123.414         | 122.743         | K[3]  |
| G[39] | <b>1391.801</b> | 82.720         | 77.381          | 77.716          | 77.044          | G[2]  |
| K[40] | 1448.502        | 63.713         | 58.373          | 58.709          | 58.037          | K[1]  |

# sp | Q6GSS7 | H2A2A\_MOUSE

DEELNKLLGKVTIAQGGVLPNIQAVLLPKKTESHHKAKGK (Acetyl)  
(42.01)

- ▶ fragmentation table for charge state 4+
- ▶ specType=etd
- ▶ score=79.67
- ▶ F113281.dat
- ▶ query=q36930.p1
- ▶ precursor=869.702430
- ▶ chargePrecursor=5
- ▶ itol=0.5

| AA | c  | y               | z+1             | z+2             | z       | AA              |       |
|----|----|-----------------|-----------------|-----------------|---------|-----------------|-------|
| D  | 1  | 34.621          | <b>1086.875</b> | <b>1082.870</b> | 0.755   | <b>1082.618</b> | L(40) |
| E  | 2  | 66.281          | 1058.113        | <b>1054.113</b> | 0.755   | <b>1053.861</b> | L(38) |
| E  | 3  | 98.542          | 1025.857        | 1021.853        | 0.755   | 1021.601        | E(38) |
| L  | 4  | 126.813         | 993.599         | 989.592         | 0.755   | 989.340         | L(37) |
| N  | 5  | 155.324         | 965.326         | 961.321         | 961.573 | 961.069         | N(36) |
| K  | 6  | 187.347         | 936.815         | 932.810         | 933.062 | 932.559         | K(35) |
| L  | 7  | 215.618         | 904.791         | 900.786         | 901.038 | 900.534         | L(34) |
| L  | 8  | 243.889         | 876.520         | 872.515         | 872.767 | 872.263         | L(33) |
| G  | 9  | 258.145         | 848.240         | 844.244         | 844.496 | 843.992         | G(32) |
| K  | 10 | 290.169         | 833.994         | 829.989         | 830.241 | 829.737         | K(31) |
| V  | 11 | 314.936         | 801.970         | 797.965         | 798.217 | 797.713         | V(30) |
| T  | 12 | 340.198         | 777.203         | 773.198         | 773.450 | 772.946         | T(29) |
| I  | 13 | 368.469         | 751.941         | 747.936         | 748.188 | 747.684         | I(28) |
| A  | 14 | 398.226         | 723.670         | 719.665         | 719.917 | 719.413         | A(27) |
| Q  | 15 | 418.243         | 705.911         | 701.906         | 702.158 | 701.654         | Q(26) |
| G  | 16 | 432.498         | 673.899         | 669.891         | 670.143 | 669.639         | G(25) |
| G  | 17 | 446.753         | 659.641         | 655.636         | 655.888 | 655.384         | G(24) |
| V  | 18 | 471.520         | 645.385         | 641.381         | 641.633 | 641.129         | V(23) |
| L  | 19 | 499.791         | 620.618         | 616.613         | 616.865 | 616.362         | L(22) |
| P  | 20 | 524.056         | 592.347         | 588.342         | 588.594 | 588.090         | P(21) |
| N  | 21 | 552.305         | 568.084         | 564.079         | 564.331 | 563.827         | N(20) |
| I  | 22 | 580.536         | 539.573         | 535.569         | 535.820 | 535.317         | I(19) |
| Q  | 23 | 612.851         | 511.302         | 507.298         | 507.549 | 507.046         | Q(18) |
| A  | 24 | 630.610         | 479.288         | 475.283         | 475.535 | 475.031         | A(17) |
| V  | 25 | 655.377         | 461.528         | 457.524         | 457.776 | 457.272         | V(16) |
| L  | 26 | 683.648         | 436.761         | 432.756         | 433.008 | 432.505         | L(15) |
| L  | 27 | 711.919         | 409.490         | 404.485         | 404.737 | 404.234         | L(14) |
| P  | 28 | 736.183         | 380.210         | 376.214         | 376.466 | 375.962         | P(13) |
| K  | 29 | 768.206         | 355.959         | 351.951         | 352.203 | 351.699         | K(12) |
| K  | 30 | 800.430         | 323.932         | 319.928         | 320.179 | 319.676         | K(11) |
| T  | 31 | 825.492         | 291.908         | 287.904         | 288.156 | 287.652         | T(10) |
| E  | 32 | 857.753         | 266.647         | 262.642         | 262.894 | 262.390         | E(9)  |
| S  | 33 | 879.511         | 234.389         | 230.383         | 230.635 | 230.132         | S(8)  |
| H  | 34 | 913.775         | 212.622         | 208.623         | 208.875 | 208.371         | H(7)  |
| H  | 35 | 948.040         | 178.361         | 174.358         | 174.610 | 174.107         | H(6)  |
| K  | 36 | 980.064         | 144.094         | 140.094         | 140.346 | 139.842         | K(5)  |
| A  | 37 | <b>997.823</b>  | 112.075         | 108.070         | 108.322 | 107.818         | A(4)  |
| K  | 38 | <b>1029.847</b> | 94.315          | 90.311          | 90.563  | 90.059          | K(3)  |
| C  | 39 | <b>1044.102</b> | 62.292          | 58.287          | 58.539  | 58.035          | C(2)  |
| K  | 40 | 1088.629        | 48.036          | 44.032          | 44.284  | 43.780          | K(1)  |



# sp | Q6GSS7 | H2A2A\_MOUSE

DEELNKLLGKVTIAQGGVLPNIQAVLLPKKTESHHKAKGK (Acetyl)  
(42.01)

- ▶ fragmentation table for charge state 1+
- ▶ specType=cid
- ▶ score=53.87
- ▶ F113281.dat
- ▶ query=q36932.p1
- ▶ precursor=1086.876600
- ▶ chargePrecursor=4
- ▶ itol=0.5

| AA  | a               | a*             | aΔ              | b               | b*       | bΔ              | y        | y*       | yΔ       | AA   |
|-----|-----------------|----------------|-----------------|-----------------|----------|-----------------|----------|----------|----------|------|
| E1  | 38              | 39             | 0               | 40              | 41       | 0               | 42       | 43       | 44       | D140 |
| E2  | 2217.062        | 0.000          | 180.074         | 265.077         | 0.000    | 38.029          | 4344.471 | 4327.495 | 4320.466 | E140 |
| E3  | 746.124         | 0.000          | 309.117         | <b>374.119</b>  | 0.000    | 227.000         | 4220.480 | 4212.424 | 4204.439 | E139 |
| L4  | 433.000         | 0.000          | 441.100         | <b>487.203</b>  | 0.000    | <b>465.193</b>  | 3971.300 | 3954.310 | 3947.304 | L137 |
| N5  | 173.251         | 100.225        | 150.241         | 160.240         | 100.225  | <b>583.236</b>  | 3892.300 | 3884.254 | 3876.210 | N136 |
| K16 | 760.000         | 100.000        | 300.000         | <b>720.241</b>  | 100.000  | <b>713.231</b>  | 3749.200 | 3741.211 | 3733.269 | K135 |
| L7  | 114.431         | 187.424        | 390.420         | <b>842.425</b>  | 187.420  | <b>824.415</b>  | 3636.140 | 3628.114 | 3620.114 | L134 |
| L8  | 127.515         | 160.480        | 160.500         | <b>955.509</b>  | 160.483  | 107.400         | 3513.000 | 3498.033 | 3483.048 | L133 |
| G9  | 160.000         | <b>987.509</b> | 160.000         | <b>1112.535</b> | 160.000  | <b>994.520</b>  | 3339.000 | 3331.044 | 3323.064 | G132 |
| R10 | <b>1112.531</b> | 160.000        | <b>1140.526</b> | 160.000         | 1112.536 | 1112.536        | 3112.000 | 3104.026 | 3096.044 | R131 |
| V11 | <b>1211.699</b> | 1104.671       | 1104.699        | 1104.699        | 1104.699 | <b>1221.684</b> | 1104.699 | 1104.699 | 1104.699 | V130 |
| L12 | 1420.531        | 1420.531       | <b>1294.737</b> | 1420.531        | 1420.531 | 1420.531        | 3004.740 | 2997.710 | 2990.710 | L129 |
| A14 | 1490.000        | 1490.000       | 1490.000        | 1490.000        | 1490.000 | 1490.000        | 2881.000 | 2874.031 | 2867.044 | A127 |
| Q13 | 1554.000        | 1554.000       | 1554.000        | 1554.000        | 1554.000 | 1554.000        | 2667.000 | 2660.000 | 2653.000 | Q126 |
| G16 | 1681.000        | 1681.000       | 1681.000        | 1681.000        | 1681.000 | 1681.000        | 2453.000 | 2446.000 | 2439.000 | G125 |
| G17 | 1738.000        | 1738.000       | 1738.000        | 1738.000        | 1738.000 | 1738.000        | 2241.000 | 2234.000 | 2227.000 | G124 |
| V18 | 1810.000        | 1810.000       | 1810.000        | 1810.000        | 1810.000 | 1810.000        | 2029.000 | 2022.000 | 2015.000 | V123 |
| L19 | 1924.122        | 1924.122       | 1924.122        | 1924.122        | 1924.122 | 1924.122        | 1817.000 | 1810.000 | 1803.000 | L122 |
| P20 | 1948.170        | 1948.170       | 1948.170        | 1948.170        | 1948.170 | 1948.170        | 1605.000 | 1605.000 | 1605.000 | P121 |
| N21 | 2032.010        | 2032.010       | 2032.010        | 2032.010        | 2032.010 | 2032.010        | 1393.000 | 1393.000 | 1393.000 | N120 |
| S22 | 2056.300        | 2056.300       | 2056.300        | 2056.300        | 2056.300 | 2056.300        | 1181.000 | 1181.000 | 1181.000 | S119 |
| Q23 | 2081.000        | 2081.000       | 2081.000        | 2081.000        | 2081.000 | 2081.000        | 969.000  | 969.000  | 969.000  | Q118 |
| A24 | 2174.000        | 2174.000       | 2174.000        | 2174.000        | 2174.000 | 2174.000        | 757.000  | 757.000  | 757.000  | A117 |
| V25 | 2214.000        | 2214.000       | 2214.000        | 2214.000        | 2214.000 | 2214.000        | 545.000  | 545.000  | 545.000  | V116 |
| L26 | 2260.000        | 2260.000       | 2260.000        | 2260.000        | 2260.000 | 2260.000        | 333.000  | 333.000  | 333.000  | L115 |
| L27 | 2316.000        | 2316.000       | 2316.000        | 2316.000        | 2316.000 | 2316.000        | 121.000  | 121.000  | 121.000  | L114 |
| R28 | 2366.000        | 2366.000       | 2366.000        | 2366.000        | 2366.000 | 2366.000        | 1.000    | 1.000    | 1.000    | R113 |
| K29 | 2444.162        | 2444.162       | 2444.162        | 2444.162        | 2444.162 | 2444.162        | 0.000    | 0.000    | 0.000    | K112 |
| K30 | 1532.077        | 1532.080       | 1532.080        | 1532.080        | 1532.080 | 1532.080        | 1292.700 | 1292.700 | 1292.700 | K111 |
| L31 | 1532.080        | 1532.080       | 1532.080        | 1532.080        | 1532.080 | 1532.080        | 1080.700 | 1080.700 | 1080.700 | L110 |
| E32 | 1381.000        | 1380.941       | 1380.941        | 1380.941        | 1380.941 | 1380.941        | 869.500  | 869.500  | 869.500  | E109 |
| S33 | 1089.000        | 1089.000       | 1089.000        | 1089.000        | 1089.000 | 1089.000        | 657.500  | 657.500  | 657.500  | S108 |
| T34 | 1074.111        | 1074.111       | 1074.111        | 1074.111        | 1074.111 | 1074.111        | 445.500  | 445.500  | 445.500  | T107 |
| H35 | 1044.111        | 1044.111       | 1044.111        | 1044.111        | 1044.111 | 1044.111        | 233.500  | 233.500  | 233.500  | H106 |
| K36 | 1072.012        | 1072.012       | 1072.012        | 1072.012        | 1072.012 | 1072.012        | 21.000   | 21.000   | 21.000   | K105 |
| A37 | 1049.000        | 1049.000       | 1049.000        | 1049.000        | 1049.000 | 1049.000        | 0.000    | 0.000    | 0.000    | A104 |
| K38 | 4072.344        | 4072.334       | 4072.334        | 4072.334        | 4072.334 | 4072.334        | 374.200  | 374.200  | 374.200  | K103 |
| G39 | 4120.000        | 4121.100       | 4121.100        | 4121.100        | 4121.100 | 4121.100        | 158.000  | 158.000  | 158.000  | G102 |
| K40 | 4206.011        | 4206.011       | 4206.011        | 4206.011        | 4206.011 | 4206.011        | 100.000  | 100.000  | 100.000  | K101 |

# sp | Q6GSS7 | H2A2A\_MOUSE

DEELNKLLGKVTIAQGGVLPNIQAVLLPKKTESHHKAKGK (Acetyl)  
(42.01)

- ▶ fragmentation table for charge state 2+
- ▶ specType=cid
- ▶ score=53.87
- ▶ F113281.dat
- ▶ query=q36932.p1
- ▶ precursor=1086.876600
- ▶ chargePrecursor=4
- ▶ itol=0.5

| AA   | x    | y     | x <sup>2</sup> | y <sup>2</sup> | x+y  | x <sup>2</sup> +y <sup>2</sup> | x-y  | x <sup>2</sup> -y <sup>2</sup> | AA     |
|------|------|-------|----------------|----------------|------|--------------------------------|------|--------------------------------|--------|
| E1   | 44   | 100   | 1936           | 10000          | 144  | 11936                          | -60  | -2400                          | E100   |
| E2   | 110  | 245   | 12100          | 60025          | 155  | 72125                          | -135 | -18225                         | E245   |
| E3   | 175  | 390   | 30625          | 152100         | 215  | 182725                         | -115 | -13225                         | E390   |
| E4   | 240  | 535   | 57600          | 286225         | 275  | 758825                         | -95  | -9025                          | E535   |
| E5   | 305  | 680   | 93025          | 462400         | 335  | 1127025                        | -75  | -5625                          | E680   |
| E6   | 370  | 825   | 136900         | 680625         | 395  | 1564525                        | -55  | -3025                          | E825   |
| E7   | 435  | 970   | 189225         | 940900         | 455  | 2070125                        | -35  | -1225                          | E970   |
| E8   | 500  | 1115  | 250000         | 1243225        | 515  | 2663225                        | -15  | -225                           | E1115  |
| E9   | 565  | 1260  | 319225         | 1587600        | 585  | 3406825                        | 5    | 25                             | E1260  |
| E10  | 630  | 1405  | 396900         | 1974025        | 655  | 4273925                        | 25   | 625                            | E1405  |
| E11  | 695  | 1550  | 484025         | 2400500        | 725  | 5260525                        | 55   | 3025                           | E1550  |
| E12  | 760  | 1695  | 577600         | 2870025        | 795  | 6369025                        | 135  | 18225                          | E1695  |
| E13  | 825  | 1840  | 678225         | 3372400        | 865  | 7504625                        | 215  | 46225                          | E1840  |
| E14  | 890  | 1985  | 785100         | 3947025        | 935  | 8767625                        | 295  | 87025                          | E1985  |
| E15  | 955  | 2130  | 908025         | 4543500        | 1005 | 10158025                       | 375  | 140625                         | E2130  |
| E16  | 1020 | 2275  | 1036800        | 5161500        | 1075 | 11685025                       | 455  | 207025                         | E2275  |
| E17  | 1085 | 2420  | 1171225        | 5801500        | 1145 | 13350025                       | 535  | 286225                         | E2420  |
| E18  | 1150 | 2565  | 1311000        | 6463025        | 1215 | 15153025                       | 615  | 378225                         | E2565  |
| E19  | 1215 | 2710  | 1456225        | 7146500        | 1285 | 17094025                       | 695  | 482025                         | E2710  |
| E20  | 1280 | 2855  | 1607000        | 7851500        | 1355 | 19173025                       | 775  | 596025                         | E2855  |
| E21  | 1345 | 3000  | 1763225        | 8578500        | 1425 | 21390025                       | 855  | 726025                         | E3000  |
| E22  | 1410 | 3145  | 1925000        | 9326500        | 1495 | 23745025                       | 935  | 872025                         | E3145  |
| E23  | 1475 | 3290  | 2092225        | 10096500       | 1565 | 26238025                       | 1015 | 1034025                        | E3290  |
| E24  | 1540 | 3435  | 2265000        | 10887500       | 1635 | 28869025                       | 1095 | 1204025                        | E3435  |
| E25  | 1605 | 3580  | 2443225        | 11699500       | 1705 | 31643025                       | 1175 | 1386025                        | E3580  |
| E26  | 1670 | 3725  | 2627000        | 12532000       | 1775 | 34560025                       | 1255 | 1580025                        | E3725  |
| E27  | 1735 | 3870  | 2816225        | 13385500       | 1845 | 37620025                       | 1335 | 1786025                        | E3870  |
| E28  | 1800 | 4015  | 3011000        | 14259500       | 1915 | 40823025                       | 1415 | 2004025                        | E4015  |
| E29  | 1865 | 4160  | 3211225        | 15153500       | 1985 | 44170025                       | 1495 | 2234025                        | E4160  |
| E30  | 1930 | 4305  | 3417000        | 16067000       | 2055 | 47661025                       | 1575 | 2476025                        | E4305  |
| E31  | 1995 | 4450  | 3628225        | 17000500       | 2125 | 51297025                       | 1655 | 2730025                        | E4450  |
| E32  | 2060 | 4595  | 3845000        | 17953500       | 2195 | 55079025                       | 1735 | 3000025                        | E4595  |
| E33  | 2125 | 4740  | 4067225        | 18936500       | 2265 | 59008025                       | 1815 | 3286025                        | E4740  |
| E34  | 2190 | 4885  | 4295000        | 19949000       | 2335 | 63084025                       | 1895 | 3588025                        | E4885  |
| E35  | 2255 | 5030  | 4528225        | 21000500       | 2405 | 67308025                       | 1975 | 3906025                        | E5030  |
| E36  | 2320 | 5175  | 4767000        | 22091000       | 2475 | 71690025                       | 2055 | 4240025                        | E5175  |
| E37  | 2385 | 5320  | 5011225        | 23220500       | 2545 | 76231025                       | 2135 | 4590025                        | E5320  |
| E38  | 2450 | 5465  | 5261000        | 24389500       | 2615 | 80932025                       | 2215 | 4956025                        | E5465  |
| E39  | 2515 | 5610  | 5516225        | 25597000       | 2685 | 85794025                       | 2295 | 5338025                        | E5610  |
| E40  | 2580 | 5755  | 5777000        | 26843500       | 2755 | 90818025                       | 2375 | 5736025                        | E5755  |
| E41  | 2645 | 5900  | 6043225        | 28128500       | 2825 | 96004025                       | 2455 | 6150025                        | E5900  |
| E42  | 2710 | 6045  | 6315000        | 29451500       | 2895 | 101353025                      | 2535 | 6580025                        | E6045  |
| E43  | 2775 | 6190  | 6592225        | 30812000       | 2965 | 106865025                      | 2615 | 7026025                        | E6190  |
| E44  | 2840 | 6335  | 6875000        | 32209500       | 3035 | 112539025                      | 2695 | 7488025                        | E6335  |
| E45  | 2905 | 6480  | 7163225        | 33643500       | 3105 | 118374025                      | 2775 | 7966025                        | E6480  |
| E46  | 2970 | 6625  | 7457000        | 35113500       | 3175 | 124370025                      | 2855 | 8460025                        | E6625  |
| E47  | 3035 | 6770  | 7756225        | 36619000       | 3245 | 130527025                      | 2935 | 8970025                        | E6770  |
| E48  | 3100 | 6915  | 8061000        | 38160500       | 3315 | 136845025                      | 3015 | 9496025                        | E6915  |
| E49  | 3165 | 7060  | 8371225        | 39737500       | 3385 | 143325025                      | 3095 | 10038025                       | E7060  |
| E50  | 3230 | 7205  | 8687000        | 41350500       | 3455 | 150067025                      | 3175 | 10596025                       | E7205  |
| E51  | 3295 | 7350  | 9008225        | 42999000       | 3525 | 156972025                      | 3255 | 11170025                       | E7350  |
| E52  | 3360 | 7495  | 9335000        | 44682500       | 3595 | 164042025                      | 3335 | 11760025                       | E7495  |
| E53  | 3425 | 7640  | 9667225        | 46401500       | 3665 | 171277025                      | 3415 | 12370025                       | E7640  |
| E54  | 3490 | 7785  | 10005000       | 48155500       | 3735 | 178677025                      | 3495 | 13000025                       | E7785  |
| E55  | 3555 | 7930  | 10348225       | 49944000       | 3805 | 186242025                      | 3575 | 12650025                       | E7930  |
| E56  | 3620 | 8075  | 10697000       | 51767500       | 3875 | 193972025                      | 3655 | 13320025                       | E8075  |
| E57  | 3685 | 8220  | 11051225       | 53625500       | 3945 | 201867025                      | 3735 | 14010025                       | E8220  |
| E58  | 3750 | 8365  | 11411000       | 55518500       | 4015 | 209917025                      | 3815 | 14720025                       | E8365  |
| E59  | 3815 | 8510  | 11776225       | 57446000       | 4085 | 218122025                      | 3895 | 15450025                       | E8510  |
| E60  | 3880 | 8655  | 12147000       | 59408500       | 4155 | 226482025                      | 3975 | 16200025                       | E8655  |
| E61  | 3945 | 8800  | 12523225       | 61406500       | 4225 | 235097025                      | 4055 | 16970025                       | E8800  |
| E62  | 4010 | 8945  | 12905000       | 63439500       | 4295 | 243867025                      | 4135 | 17760025                       | E8945  |
| E63  | 4075 | 9090  | 13292225       | 65507000       | 4365 | 252792025                      | 4215 | 18570025                       | E9090  |
| E64  | 4140 | 9235  | 13685000       | 67609500       | 4435 | 261872025                      | 4295 | 19400025                       | E9235  |
| E65  | 4205 | 9380  | 14083225       | 69746500       | 4505 | 271107025                      | 4375 | 20250025                       | E9380  |
| E66  | 4270 | 9525  | 14487000       | 71918500       | 4575 | 280497025                      | 4455 | 21120025                       | E9525  |
| E67  | 4335 | 9670  | 14896225       | 74125000       | 4645 | 290042025                      | 4535 | 22010025                       | E9670  |
| E68  | 4400 | 9815  | 15311000       | 76366500       | 4715 | 299742025                      | 4615 | 22920025                       | E9815  |
| E69  | 4465 | 9960  | 15731225       | 78642500       | 4785 | 309597025                      | 4695 | 23850025                       | E9960  |
| E70  | 4530 | 10105 | 16157000       | 80953500       | 4855 | 319607025                      | 4775 | 24800025                       | E10105 |
| E71  | 4595 | 10250 | 16588225       | 83299000       | 4925 | 329772025                      | 4855 | 25770025                       | E10250 |
| E72  | 4660 | 10395 | 17025000       | 85679500       | 4995 | 340092025                      | 4935 | 26760025                       | E10395 |
| E73  | 4725 | 10540 | 17467225       | 88094500       | 5065 | 350567025                      | 5015 | 27770025                       | E10540 |
| E74  | 4790 | 10685 | 17915000       | 90544500       | 5135 | 361197025                      | 5095 | 28800025                       | E10685 |
| E75  | 4855 | 10830 | 18368225       | 93029000       | 5205 | 371982025                      | 5175 | 29850025                       | E10830 |
| E76  | 4920 | 10975 | 18827000       | 95548500       | 5275 | 382922025                      | 5255 | 30920025                       | E10975 |
| E77  | 4985 | 11120 | 19291225       | 98102500       | 5345 | 394017025                      | 5335 | 32010025                       | E11120 |
| E78  | 5050 | 11265 | 19761000       | 100691000      | 5415 | 405267025                      | 5415 | 33120025                       | E11265 |
| E79  | 5115 | 11410 | 20236225       | 103314500      | 5485 | 416672025                      | 5495 | 34250025                       | E11410 |
| E80  | 5180 | 11555 | 20717000       | 105977000      | 5555 | 428232025                      | 5575 | 35400025                       | E11555 |
| E81  | 5245 | 11700 | 21203225       | 108678500      | 5625 | 439947025                      | 5655 | 36570025                       | E11700 |
| E82  | 5310 | 11845 | 21695000       | 111418500      | 5695 | 451817025                      | 5735 | 37760025                       | E11845 |
| E83  | 5375 | 11990 | 22192225       | 114197500      | 5765 | 463842025                      | 5815 | 38970025                       | E11990 |
| E84  | 5440 | 12135 | 22695000       | 117025000      | 5835 | 476022025                      | 5895 | 40200025                       | E12135 |
| E85  | 5505 | 12280 | 23203225       | 119891500      | 5905 | 488357025                      | 5975 | 41450025                       | E12280 |
| E86  | 5570 | 12425 | 23717000       | 122804500      | 5975 | 500847025                      | 6055 | 42720025                       | E12425 |
| E87  | 5635 | 12570 | 24236225       | 125764500      | 6045 | 513492025                      | 6135 | 44010025                       | E12570 |
| E88  | 5700 | 12715 | 24761000       | 128771000      | 6115 | 526292025                      | 6215 | 45320025                       | E12715 |
| E89  | 5765 | 12860 | 25291225       | 131824500      | 6185 | 539247025                      | 6295 | 46650025                       | E12860 |
| E90  | 5830 | 13005 | 25827000       | 134925000      | 6255 | 552357025                      | 6375 | 48000025                       | E13005 |
| E91  | 5895 | 13150 | 26368225       | 138073000      | 6325 | 565622025                      | 6455 | 49370025                       | E13150 |
| E92  | 5960 | 13295 | 26915000       | 141268000      | 6395 | 579042025                      | 6535 | 50760025                       | E13295 |
| E93  | 6025 | 13440 | 27467225       | 144510500      | 6465 | 592617025                      | 6615 | 52170025                       | E13440 |
| E94  | 6090 | 13585 | 28025000       | 147800000      | 6535 | 606347025                      | 6695 | 53600025                       | E13585 |
| E95  | 6155 | 13730 | 28588225       | 151146000      | 6605 | 620232025                      | 6775 | 55050025                       | E13730 |
| E96  | 6220 | 13875 | 29157000       | 154558500      | 6675 | 634272025                      | 6855 | 56520025                       | E13875 |
| E97  | 6285 | 14020 | 29731225       | 158038000      | 6745 | 648467025                      | 6935 | 58010025                       | E14020 |
| E98  | 6350 | 14165 | 30311000       | 161584000      | 6815 | 662817025                      | 7015 | 59520025                       | E14165 |
| E99  | 6415 | 14310 | 30896225       | 165196000      | 6885 | 677322025                      | 7095 | 61050025                       | E14310 |
| E100 | 6480 | 14455 | 31487000       | 168874500      | 6955 | 691982025                      | 7175 | 62600025                       | E14455 |

# sp | Q6GSS7 | H2A2A\_MOUSE

DEELNKLLGKVTIAQGGVLPNIQAVLLPKKTESHHKAKGK (Acetyl)  
(42.01)

- ▶ fragmentation table for charge state 3+
- ▶ specType=cid
- ▶ score=53.87
- ▶ F113281.dat
- ▶ query=q36932.p1
- ▶ precursor=1086.876600
- ▶ chargePrecursor=4
- ▶ itol=0.5

| AA   | a   | a'  | aΔ    | b        | b'       | bΔ      | y       | y'              | yΔ              | AA              |
|------|-----|-----|-------|----------|----------|---------|---------|-----------------|-----------------|-----------------|
| E1   | 30  | 803 | 0.622 | 98.014   | 99.309   | 0.827   | 53.890  | 1440.830        | 1443.015        | D340            |
| E2   | 31  | 713 | 0.622 | 89.029   | 90.364   | 0.827   | 56.309  | <b>1410.488</b> | 1414.311        | D340            |
| E3   | 32  | 623 | 0.622 | 80.044   | 81.379   | 0.827   | 58.728  | 1379.479        | 1384.708        | D340            |
| L4   | 33  | 534 | 0.622 | 71.059   | 72.073   | 0.827   | 61.147  | 1350.464        | <b>1318.784</b> | <b>1318.456</b> |
| N5   | 34  | 444 | 0.622 | 62.074   | 63.088   | 0.827   | 63.566  | 1321.450        | 1327.679        | N6              |
| K6   | 35  | 354 | 0.622 | 53.089   | 54.103   | 0.827   | 65.985  | 1292.435        | 1299.664        | K7              |
| L7   | 36  | 264 | 0.622 | 44.104   | 45.118   | 0.827   | 68.404  | 1263.420        | 1271.649        | L8              |
| L8   | 37  | 174 | 0.622 | 35.119   | 36.133   | 0.827   | 70.823  | 1234.405        | 1243.634        | L9              |
| K9   | 38  | 84  | 0.622 | 26.134   | 27.148   | 0.827   | 73.242  | 1205.390        | 1215.623        | K10             |
| K10  | 39  | 14  | 0.622 | 17.149   | 18.163   | 0.827   | 75.661  | 1176.375        | <b>1130.653</b> | <b>1124.967</b> |
| V11  | 40  | 24  | 0.622 | 8.164    | 9.178    | 0.827   | 78.080  | 1147.360        | 1158.595        | V12             |
| V12  | 41  | 34  | 0.622 | 19.179   | 20.193   | 0.827   | 80.500  | 1118.345        | 1130.584        | V13             |
| V13  | 42  | 44  | 0.622 | 30.194   | 31.208   | 0.827   | 82.919  | 1089.330        | 1102.573        | V14             |
| E14  | 43  | 54  | 0.622 | 41.209   | 42.223   | 0.827   | 85.338  | 1060.315        | 1073.562        | E15             |
| K14  | 44  | 64  | 0.622 | 52.224   | 53.238   | 0.827   | 87.757  | 1031.300        | <b>954.802</b>  | <b>934.875</b>  |
| Q15  | 45  | 74  | 0.622 | 63.239   | 64.253   | 0.827   | 90.176  | 1002.285        | 1017.520        | Q16             |
| Q16  | 46  | 84  | 0.622 | 74.254   | 75.268   | 0.827   | 92.595  | 973.270         | 989.505         | Q17             |
| Q17  | 47  | 94  | 0.622 | 85.269   | 86.283   | 0.827   | 95.014  | 944.255         | 961.490         | Q18             |
| V18  | 48  | 104 | 0.622 | 96.284   | 97.298   | 0.827   | 97.433  | 915.240         | 933.475         | V19             |
| V19  | 49  | 114 | 0.622 | 107.299  | 108.313  | 0.827   | 99.852  | 886.225         | 905.460         | V20             |
| E20  | 50  | 124 | 0.622 | 118.314  | 119.328  | 0.827   | 102.271 | 857.210         | 877.445         | E21             |
| E21  | 51  | 134 | 0.622 | 129.329  | 130.343  | 0.827   | 104.690 | 828.195         | 849.430         | E22             |
| E22  | 52  | 144 | 0.622 | 140.344  | 141.358  | 0.827   | 107.109 | 799.180         | 820.415         | E23             |
| E23  | 53  | 154 | 0.622 | 151.359  | 152.373  | 0.827   | 109.528 | 770.165         | 791.400         | E24             |
| E24  | 54  | 164 | 0.622 | 162.374  | 163.388  | 0.827   | 111.947 | 741.150         | 762.385         | E25             |
| E25  | 55  | 174 | 0.622 | 173.389  | 174.403  | 0.827   | 114.366 | 712.135         | 733.370         | E26             |
| E26  | 56  | 184 | 0.622 | 184.404  | 185.418  | 0.827   | 116.785 | 683.120         | 704.355         | E27             |
| E27  | 57  | 194 | 0.622 | 195.419  | 196.433  | 0.827   | 119.204 | 654.105         | 675.340         | E28             |
| E28  | 58  | 204 | 0.622 | 206.434  | 207.448  | 0.827   | 121.623 | 625.090         | 646.325         | E29             |
| E29  | 59  | 214 | 0.622 | 217.449  | 218.463  | 0.827   | 124.042 | 596.075         | 617.310         | E30             |
| E30  | 60  | 224 | 0.622 | 228.464  | 229.478  | 0.827   | 126.461 | 567.060         | 588.295         | E31             |
| E31  | 61  | 234 | 0.622 | 239.479  | 240.493  | 0.827   | 128.880 | 538.045         | 559.280         | E32             |
| E32  | 62  | 244 | 0.622 | 250.494  | 251.508  | 0.827   | 131.299 | 509.030         | 530.265         | E33             |
| E33  | 63  | 254 | 0.622 | 261.509  | 262.523  | 0.827   | 133.718 | 480.015         | 501.250         | E34             |
| E34  | 64  | 264 | 0.622 | 272.524  | 273.538  | 0.827   | 136.137 | 451.000         | 472.235         | E35             |
| E35  | 65  | 274 | 0.622 | 283.539  | 284.553  | 0.827   | 138.556 | 422.015         | 443.220         | E36             |
| E36  | 66  | 284 | 0.622 | 294.554  | 295.568  | 0.827   | 140.975 | 393.000         | 414.205         | E37             |
| E37  | 67  | 294 | 0.622 | 305.569  | 306.583  | 0.827   | 143.394 | 364.015         | 385.190         | E38             |
| E38  | 68  | 304 | 0.622 | 316.584  | 317.598  | 0.827   | 145.813 | 335.000         | 356.175         | E39             |
| E39  | 69  | 314 | 0.622 | 327.599  | 328.613  | 0.827   | 148.232 | 306.015         | 327.160         | E40             |
| E40  | 70  | 324 | 0.622 | 338.614  | 339.628  | 0.827   | 150.651 | 277.000         | 298.145         | E41             |
| E41  | 71  | 334 | 0.622 | 349.629  | 350.643  | 0.827   | 153.070 | 248.015         | 269.130         | E42             |
| E42  | 72  | 344 | 0.622 | 360.644  | 361.658  | 0.827   | 155.489 | 219.000         | 240.115         | E43             |
| E43  | 73  | 354 | 0.622 | 371.659  | 372.673  | 0.827   | 157.908 | 190.015         | 211.100         | E44             |
| E44  | 74  | 364 | 0.622 | 382.674  | 383.688  | 0.827   | 160.327 | 161.000         | 182.085         | E45             |
| E45  | 75  | 374 | 0.622 | 393.689  | 394.703  | 0.827   | 162.746 | 132.015         | 153.070         | E46             |
| E46  | 76  | 384 | 0.622 | 404.704  | 405.718  | 0.827   | 165.165 | 103.000         | 124.055         | E47             |
| E47  | 77  | 394 | 0.622 | 415.719  | 416.733  | 0.827   | 167.584 | 74.015          | 95.040          | E48             |
| E48  | 78  | 404 | 0.622 | 426.734  | 427.748  | 0.827   | 170.003 | 45.000          | 66.025          | E49             |
| E49  | 79  | 414 | 0.622 | 437.749  | 438.763  | 0.827   | 172.422 | 16.015          | 37.010          | E50             |
| E50  | 80  | 424 | 0.622 | 448.764  | 449.778  | 0.827   | 174.841 | 7.000           | 8.000           | E51             |
| E51  | 81  | 434 | 0.622 | 459.779  | 460.792  | 0.827   | 177.260 | 8.000           | 8.000           | E52             |
| E52  | 82  | 444 | 0.622 | 470.794  | 471.808  | 0.827   | 179.679 | 9.000           | 9.000           | E53             |
| E53  | 83  | 454 | 0.622 | 481.809  | 482.823  | 0.827   | 182.098 | 10.000          | 10.000          | E54             |
| E54  | 84  | 464 | 0.622 | 492.824  | 493.838  | 0.827   | 184.517 | 11.000          | 11.000          | E55             |
| E55  | 85  | 474 | 0.622 | 503.839  | 504.853  | 0.827   | 186.936 | 12.000          | 12.000          | E56             |
| E56  | 86  | 484 | 0.622 | 514.854  | 515.868  | 0.827   | 189.355 | 13.000          | 13.000          | E57             |
| E57  | 87  | 494 | 0.622 | 525.869  | 526.883  | 0.827   | 191.774 | 14.000          | 14.000          | E58             |
| E58  | 88  | 504 | 0.622 | 536.884  | 537.898  | 0.827   | 194.193 | 15.000          | 15.000          | E59             |
| E59  | 89  | 514 | 0.622 | 547.899  | 548.913  | 0.827   | 196.612 | 16.000          | 16.000          | E60             |
| E60  | 90  | 524 | 0.622 | 558.914  | 559.928  | 0.827   | 199.031 | 17.000          | 17.000          | E61             |
| E61  | 91  | 534 | 0.622 | 569.929  | 570.942  | 0.827   | 201.450 | 18.000          | 18.000          | E62             |
| E62  | 92  | 544 | 0.622 | 580.944  | 581.958  | 0.827   | 203.869 | 19.000          | 19.000          | E63             |
| E63  | 93  | 554 | 0.622 | 591.959  | 592.973  | 0.827   | 206.288 | 20.000          | 20.000          | E64             |
| E64  | 94  | 564 | 0.622 | 602.974  | 603.988  | 0.827   | 208.707 | 21.000          | 21.000          | E65             |
| E65  | 95  | 574 | 0.622 | 613.989  | 615.002  | 0.827   | 211.126 | 22.000          | 22.000          | E66             |
| E66  | 96  | 584 | 0.622 | 625.004  | 626.018  | 0.827   | 213.545 | 23.000          | 23.000          | E67             |
| E67  | 97  | 594 | 0.622 | 636.019  | 637.033  | 0.827   | 215.964 | 24.000          | 24.000          | E68             |
| E68  | 98  | 604 | 0.622 | 647.034  | 648.048  | 0.827   | 218.383 | 25.000          | 25.000          | E69             |
| E69  | 99  | 614 | 0.622 | 658.049  | 659.063  | 0.827   | 220.802 | 26.000          | 26.000          | E70             |
| E70  | 100 | 624 | 0.622 | 669.064  | 670.077  | 0.827   | 223.221 | 27.000          | 27.000          | E71             |
| E71  | 101 | 634 | 0.622 | 680.079  | 681.093  | 0.827   | 225.640 | 28.000          | 28.000          | E72             |
| E72  | 102 | 644 | 0.622 | 691.094  | 692.108  | 0.827   | 228.059 | 29.000          | 29.000          | E73             |
| E73  | 103 | 654 | 0.622 | 702.109  | 703.123  | 0.827   | 230.478 | 30.000          | 30.000          | E74             |
| E74  | 104 | 664 | 0.622 | 713.124  | 714.138  | 0.827   | 232.897 | 31.000          | 31.000          | E75             |
| E75  | 105 | 674 | 0.622 | 724.139  | 725.153  | 0.827   | 235.316 | 32.000          | 32.000          | E76             |
| E76  | 106 | 684 | 0.622 | 735.154  | 736.168  | 0.827   | 237.735 | 33.000          | 33.000          | E77             |
| E77  | 107 | 694 | 0.622 | 746.169  | 747.183  | 0.827   | 240.154 | 34.000          | 34.000          | E78             |
| E78  | 108 | 704 | 0.622 | 757.184  | 758.198  | 0.827   | 242.573 | 35.000          | 35.000          | E79             |
| E79  | 109 | 714 | 0.622 | 768.199  | 769.213  | 0.827   | 244.992 | 36.000          | 36.000          | E80             |
| E80  | 110 | 724 | 0.622 | 779.214  | 780.228  | 0.827   | 247.411 | 37.000          | 37.000          | E81             |
| E81  | 111 | 734 | 0.622 | 790.229  | 791.243  | 0.827   | 249.830 | 38.000          | 38.000          | E82             |
| E82  | 112 | 744 | 0.622 | 801.244  | 802.258  | 0.827   | 252.249 | 39.000          | 39.000          | E83             |
| E83  | 113 | 754 | 0.622 | 812.259  | 813.273  | 0.827   | 254.668 | 40.000          | 40.000          | E84             |
| E84  | 114 | 764 | 0.622 | 823.274  | 824.288  | 0.827   | 257.087 | 41.000          | 41.000          | E85             |
| E85  | 115 | 774 | 0.622 | 834.289  | 835.302  | 0.827   | 259.506 | 42.000          | 42.000          | E86             |
| E86  | 116 | 784 | 0.622 | 845.304  | 846.318  | 0.827   | 261.925 | 43.000          | 43.000          | E87             |
| E87  | 117 | 794 | 0.622 | 856.319  | 857.333  | 0.827   | 264.344 | 44.000          | 44.000          | E88             |
| E88  | 118 | 804 | 0.622 | 867.334  | 868.348  | 0.827   | 266.763 | 45.000          | 45.000          | E89             |
| E89  | 119 | 814 | 0.622 | 878.349  | 879.363  | 0.827   | 269.182 | 46.000          | 46.000          | E90             |
| E90  | 120 | 824 | 0.622 | 889.364  | 890.378  | 0.827   | 271.601 | 47.000          | 47.000          | E91             |
| E91  | 121 | 834 | 0.622 | 900.379  | 901.393  | 0.827   | 274.020 | 48.000          | 48.000          | E92             |
| E92  | 122 | 844 | 0.622 | 911.394  | 912.407  | 0.827   | 276.439 | 49.000          | 49.000          | E93             |
| E93  | 123 | 854 | 0.622 | 922.409  | 923.421  | 0.827   | 278.858 | 50.000          | 50.000          | E94             |
| E94  | 124 | 864 | 0.622 | 933.424  | 934.438  | 0.827   | 281.277 | 51.000          | 51.000          | E95             |
| E95  | 125 | 874 | 0.622 | 944.439  | 945.453  | 0.827   | 283.696 | 52.000          | 52.000          | E96             |
| E96  | 126 | 884 | 0.622 | 955.454  | 956.468  | 0.827   | 286.115 | 53.000          | 53.000          | E97             |
| E97  | 127 | 894 | 0.622 | 966.469  | 967.482  | 0.827   | 288.534 | 54.000          | 54.000          | E98             |
| E98  | 128 | 904 | 0.622 | 977.484  | 978.498  | 0.827   | 290.953 | 55.000          | 55.000          | E99             |
| E99  | 129 | 914 | 0.622 | 988.499  | 989.513  | 0.827   | 293.372 | 56.000          | 56.000          | E100            |
| E100 | 130 | 924 | 0.622 | 999.514  | 1000.527 | 0.827   | 295.791 | 57.000          | 57.000          | E101            |
| E101 | 131 | 934 | 0.622 | 1010.529 | 1011.543 | 0.827   | 298.210 | 58.000          | 58.000          | E102            |
| E102 | 132 | 944 | 0.622 | 1021.544 | 1022.557 | 0.827   | 300.629 | 59.000          | 59.000          | E103            |
| E103 | 133 | 954 | 0.622 | 1032.559 | 1033.571 | 0.827   | 303.048 | 60.000          | 60.000          | E104            |
| E104 | 134 | 964 | 0.622 | 1043.574 | 1044.585 | 0.827   | 305.467 | 61.000          | 61.000          | E105            |
| E105 | 135 | 974 | 0.622 | 1054.589 | 1055.600 | 0.827</ |         |                 |                 |                 |





# sp | Q6GSS7 | H2A2A\_MOUSE

DEELNKLLGKVTIAQGGVLPNIQAVLLPKKTESHHKAKGK (Acetyl)  
(42.01)

- ▶ fragmentation table for charge state 1+
- ▶ specType=cid
- ▶ score=57.49
- ▶ F113281.dat
- ▶ query=q36934.p1
- ▶ precursor=869.702830
- ▶ chargePrecursor=5
- ▶ itol=0.5

| AA   | a              | y*              | a,y            | b               | b*             | b,y            | y              | y*             | a,y      | AA   |
|------|----------------|-----------------|----------------|-----------------|----------------|----------------|----------------|----------------|----------|------|
| D1   | 381-389        | 0.000           | 381-389        | 116.054         | 0.000          | 381-389        | 4344.417       | 4344.450       | 4338-406 | L140 |
| E12  | 317-325        | 0.000           | 317-325        | 105.074         | 0.000          | 317-325        | 4200.450       | 4214.450       | 4211-830 | L139 |
| E13  | 346-354        | 0.000           | 346-354        | 374.118         | 0.000          | 356-189        | 4100.450       | 4083.100       | 4082-366 | E138 |
| L14  |                |                 |                | 487.203         |                | 468-193        | 3911.100       | 3924.100       | 3923-304 | L137 |
| N15  | <b>373-281</b> | <b>558-225</b>  | 381-241        | <b>461-244</b>  | <b>384-220</b> |                |                |                |          | N159 |
| K16  | 320-328        | 309-328         | 303-328        | 229-304         | 172-310        | <b>F11-331</b> | 3744-231       | 3727-211       | 3726-227 | K130 |
| L17  | 314-331        | 307-309         | <b>796-420</b> | <b>842-425</b>  | 825-399        | 824-431        | 3613.142       | 3599.110       | 3598-132 | L134 |
| L18  | 327-335        | 320-328         | <b>809-504</b> | <b>955-509</b>  | 938-483        | 937-485        | 3523.000       | 3486.010       | 3485-040 | L133 |
| G19  | 308-328        | 307-309         | 309-328        | <b>811-531</b>  | 809-398        |                | 3339.814       | 3327.840       | 3324-064 | G132 |
| K10  | 113-138        | <b>1085-804</b> | 3089-816       | 1449-816        | 1421-899       | 1419-816       | 3134.964       | 3116-916       | 3114-942 | K131 |
| V11  | 1011-1039      | 1104-874        | 1107-880       | 1120-880        | 1022-868       | 1021-868       | 3084.800       | 3107-810       | 3106-047 | V130 |
| L12  | 1329-141       | 1326-141        | 1329-141       | 1450-144        | 1409-119       | 1409-119       | 3009.700       | 3008.700       | 3008-700 | L128 |
| L13  | 1329-141       |                 |                | <b>1461-876</b> | 1438-800       | 1438-800       | 3009-110       | 3007-110       | 3007-111 | L129 |
| A14  | 1396-1398      | 1478-814        | 1478-814       | 1524-810        | 1507-817       | 1506-815       | 2881.800       | 2878-810       | 2878-810 | A127 |
| G15  | 1329-141       | 1329-141        | 1329-141       | 1450-144        | 1409-119       | 1409-119       | 2829.814       | 2828.814       | 2828-700 | G129 |
| G16  | 1393-1404      | 1884-822        | 1883-830       | 1709-943        | 2092-917       | 1891-933       | 2692.500       | 2676.530       | 2674-502 | G126 |
| G17  | 1718-180       | 1721-941        | 1720-939       | 1708-940        | 1748-810       | 1748-804       | 2633.541       | 2618.110       | 2617-630 | G125 |
| V18  | 1358-1370      | 1821-822        | 1820-820       | 1886-813        | 1890-807       | 1889-805       | 2521.810       | 2505.400       | 2504-500 | V122 |
| L19  | 1751-182       | 1834-808        | 1833-811       | 1879-811        | 2092-914       | 1981-931       | 2479.470       | 2465-420       | 2461-440 | L121 |
| F120 | 1348-139       | 1811-138        | 1808-168       | 1896-116        | 2099-143       | 1998-139       | 2388.300       | 2348-140       | 2346-300 | F121 |
| N21  | 1392-138       | 2149-113        | 2148-107       | 2198-113        | 2171-106       | 2170-107       | 2488-114       | 2482-100       | 2481-103 | N20  |
| N22  | 1392-138       | 2149-113        | 2148-107       | 2198-113        | 2171-106       | 2170-107       | 2489-114       | 2483-100       | 2482-100 | N20  |
| G23  | 1392-138       | 2149-113        | 2148-107       | 2198-113        | 2171-106       | 2170-107       | 2490-114       | 2484-100       | 2483-100 | G18  |
| A14  | 1374-136       | 2487-101        | 2486-101       | 2500-100        | 2485-100       | 2484-100       | 1814.120       | 1807-110       | 1806-110 | A117 |
| V121 | 1374-136       | 2487-101        | 2486-101       | 2500-100        | 2485-100       | 2484-100       | 1815-110       | 1808-100       | 1807-100 | V116 |
| L126 | 1368-136       | 2689-524        | 2688-544       | 2714-545        | 2699-518       | 2698-510       | 1744-021       | 1728-990       | 1728-021 | L125 |
| L127 | 1368-136       | 2689-524        | 2688-544       | 2714-545        | 2699-518       | 2698-510       | 1744-021       | 1729-990       | 1729-021 | L124 |
| K128 | 1368-136       | 2689-524        | 2688-544       | 2714-545        | 2699-518       | 2698-510       | 1745-021       | 1730-990       | 1730-021 | K123 |
| K129 | 1364-132       | 3067-613        | 3056-773       | 3074-770        | 3056-750       | 3054-750       | 1430-800       | 1403-770       | 1402-781 | K122 |
| K130 | 1352-137       | 1139-639        | 1138-640       | 1103-817        | 1103-849       | 1102-814       | 1200-810       | 1178-600       | 1174-666 | K113 |
| L131 | 1353-144       | 1238-639        | 1237-644       | 1249-620        | 1242-643       | 1241-643       | 1101-811       | 1079-610       | 1078-644 | L118 |
| L132 | 1353-144       | 1238-639        | 1237-644       | 1249-620        | 1242-643       | 1241-643       | 1102-811       | 1081-610       | 1080-620 | L119 |
| K133 | 1369-139       | 3461-917        | 3461-908       | 3487-904        | 3482-888       | 3478-890       | 814-510        | 811-490        | 810-511  | K111 |
| K134 | 1367-139       | 3580-914        | 3580-940       | 3636-916        | 3618-927       | 3617-924       | 817-491        | 810-481        | 810-491  | K117 |
| K135 | 144-111        | 177-101         | 177-101        | 177-111         | 175-100        | 174-100        | 710-431        |                |          | K110 |
| K136 | 127-124        | 3651-111        | 3651-210       | 3660-210        | 3683-180       | 3682-110       | <b>871-372</b> | <b>558-345</b> | 0.000    | K10  |
| A137 | 143-130        | 3626-211        | 3626-210       | 3671-214        | 3654-210       | 3653-210       | <b>445-277</b> | 438-250        | 0.000    | A16  |
| K138 | 1171-114       | 4074-111        | 4074-111       | 4099-110        | 4099-110       | 4098-111       | 311-111        | 311-111        | 311-111  | K109 |
| G139 | 4120-360       | 4111-330        | 4110-350       | 4126-360        | 4130-334       | 4130-330       | 250-110        | 250-110        | 0.000    | G12  |
| K140 | 4388-491       | 4381-491        | 4380-481       | 4326-480        | 4308-491       | 4308-491       | 188-110        | 172-090        | 0.000    | K11  |

# sp | Q6GSS7 | H2A2A\_MOUSE

DEELNKLLGKVTIAQGGVLPNIQAVLLPKKTESHHKAKGK (Acetyl)  
(42.01)

- ▶ fragmentation table for charge state 2+
- ▶ specType=cid
- ▶ score=57.49
- ▶ F113281.dat
- ▶ query=q36934\_p1
- ▶ precursor=869.702830
- ▶ chargePrecursor=5
- ▶ itol=0.5

| AA  | a    | a*   | a.p      | b        | b*      | b.p      | y        | y*      | y.p     | AA      |      |
|-----|------|------|----------|----------|---------|----------|----------|---------|---------|---------|------|
| E1  | 44   | 8021 | 0.509    | 285151   | 38521   | 0.504    | 481257   | 2137174 | 2168225 | 2163177 | D140 |
| E2  | 108  | 640  | 0.504    | 1080339  | 123242  | 0.504    | 1141617  | 2115225 | 2166719 | 2160823 | E138 |
| E3  | 172  | 508  | 0.504    | 1659561  | 187053  | 0.504    | 1712507  | 2099170 | 2164215 | 2164215 | F138 |
| L4  | 236  | 376  | 0.504    | 2241183  | 244150  | 0.504    | 2313497  | 2086118 | 2157181 | 2157181 | L137 |
| N5  | 299  | 120  | 228.623  | 2781124  | 301127  | 202.614  | 2864382  | 2079444 | 2162111 | 2162039 | N136 |
| K16 | 363  | 816  | 202.614  | 3421146  | 385174  | 202.614  | 3505360  | 2074800 | 2160104 | 2160104 | K135 |
| L17 | 427  | 712  | 388.336  | 4081144  | 461172  | 412.338  | 4187111  | 2068571 | 2158023 | 2158023 | L134 |
| L18 | 491  | 581  | 455.742  | 4851268  | 478228  | 469.745  | 4782351  | 2152351 | 2143529 | 2143529 | L133 |
| G19 | 555  | 449  | 429.229  | 5351266  | 588159  | 537.248  | 5453354  | 2150431 | 2150431 | 2150431 | G132 |
| R10 | 619  | 356  | 319      | 6081244  | 660187  | 610.251  | 6174318  | 2148588 | 2150243 | 2150243 | R131 |
| V11 | 683  | 300  | 287.820  | 6711242  | 722181  | 671.250  | 6805301  | 2146741 | 2150157 | 2150157 | V130 |
| T12 | 747  | 207  | 628.341  | 7361240  | 787175  | 736.249  | 7456300  | 2144894 | 2149311 | 2149311 | T129 |
| G13 | 811  | 149  | 700.861  | 8001238  | 851169  | 800.248  | 8092299  | 2143047 | 2148426 | 2148426 | G128 |
| A14 | 875  | 99   | 764.382  | 8641236  | 916163  | 864.247  | 8733298  | 2141200 | 2147585 | 2147585 | A127 |
| G15 | 939  | 47   | 828.903  | 9281234  | 971157  | 928.246  | 9374297  | 2139353 | 2146764 | 2146764 | G126 |
| G16 | 1003 | 1    | 893.424  | 9921232  | 1026151 | 992.245  | 10014286 | 2137506 | 2146175 | 2146175 | G125 |
| G17 | 1067 | 309  | 857.945  | 10561230 | 1081145 | 956.244  | 10654285 | 2135659 | 2145586 | 2145586 | G124 |
| V18 | 1131 | 209  | 822.466  | 11201228 | 1172139 | 822.243  | 11294284 | 2133812 | 2145000 | 2145000 | V123 |
| L19 | 1195 | 100  | 987.587  | 11841226 | 1223133 | 987.242  | 11934283 | 2131965 | 2144411 | 2144411 | L122 |
| P20 | 1259 | 1024 | 951      | 12481224 | 1278127 | 1024.241 | 12574282 | 2130118 | 2143814 | 2143814 | P21  |
| N21 | 1323 | 511  | 1016.108 | 13121222 | 1363121 | 1016.240 | 13214281 | 2128271 | 2143225 | 2143225 | N20  |
| G22 | 1387 | 1138 | 980.629  | 13761220 | 1427115 | 980.239  | 13854280 | 2126424 | 2142638 | 2142638 | G19  |
| Q23 | 1451 | 646  | 1041.150 | 14401218 | 1481109 | 1041.238 | 14504279 | 2124577 | 2142051 | 2142051 | Q18  |
| A24 | 1515 | 102  | 1106.271 | 14941216 | 1536103 | 1106.237 | 15034278 | 2122730 | 2141464 | 2141464 | A17  |
| V25 | 1579 | 218  | 1170.792 | 15581214 | 1591197 | 1170.236 | 15674277 | 2120883 | 2140877 | 2140877 | V16  |
| L26 | 1643 | 170  | 1235.313 | 16221212 | 1646191 | 1235.235 | 16314276 | 2119036 | 2140290 | 2140290 | L15  |
| L27 | 1707 | 40   | 1300.834 | 16861210 | 1701185 | 1300.234 | 17094275 | 2117189 | 2139703 | 2139703 | L14  |
| R28 | 1771 | 44   | 1365.355 | 17501208 | 1765179 | 1365.233 | 17594274 | 2115342 | 2139116 | 2139116 | R13  |
| K29 | 1835 | 206  | 1430.876 | 18141206 | 1820173 | 1430.232 | 18234273 | 2113495 | 2138529 | 2138529 | K12  |
| K30 | 1899 | 104  | 1495.397 | 18781204 | 1883167 | 1495.231 | 18874272 | 2111648 | 2137942 | 2137942 | K11  |
| L31 | 1963 | 44   | 1560.917 | 19421202 | 1947161 | 1560.230 | 19514271 | 2109801 | 2137355 | 2137355 | L11  |
| E32 | 2027 | 100  | 1625.438 | 20061200 | 2011155 | 1625.229 | 20154270 | 2107954 | 2136768 | 2136768 | E10  |
| S33 | 2091 | 50   | 1690.959 | 20701198 | 2075149 | 1690.228 | 20794269 | 2106107 | 2136181 | 2136181 | S10  |
| T34 | 2155 | 10   | 1755.480 | 21341196 | 2139143 | 1755.227 | 21434268 | 2104260 | 2135594 | 2135594 | T9   |
| T35 | 2219 | 10   | 1820.001 | 21981194 | 2193137 | 1820.226 | 22024267 | 2102413 | 2135007 | 2135007 | T8   |
| K36 | 2283 | 60   | 1885.522 | 22621192 | 2267131 | 1885.225 | 22714266 | 2100566 | 2134420 | 2134420 | K7   |
| A37 | 2347 | 10   | 1950.043 | 23261190 | 2331125 | 1950.224 | 23354265 | 2098719 | 2133833 | 2133833 | A6   |
| K38 | 2411 | 10   | 2015.564 | 23901188 | 2395119 | 2015.223 | 24044264 | 2096872 | 2133246 | 2133246 | K5   |
| G39 | 2475 | 60   | 2080.085 | 24541186 | 2459113 | 2080.222 | 24634263 | 2095025 | 2132659 | 2132659 | G4   |
| K40 | 2539 | 10   | 2145.606 | 25181184 | 2523111 | 2145.221 | 25274262 | 2093178 | 2132072 | 2132072 | K4   |

# sp | Q6GSS7 | H2A2A\_MOUSE

DEELNKLLGKVTIAQGGVLPNIQAVLLPKKTESHHKAKGK (Acetyl)  
(42.01)

- ▶ fragmentation table for charge state 3+
- ▶ specType=cid
- ▶ score=57.49
- ▶ F113281.dat
- ▶ query=q36934.p1
- ▶ precursor=869.702830
- ▶ chargePrecursor=5
- ▶ itol=0.5

| AA   | a       | a*      | a.p     | b       | b*      | b.p     | y       | y*      | y.p     | AA   |
|------|---------|---------|---------|---------|---------|---------|---------|---------|---------|------|
| G1   | 30.000  | 0.000   | 28.014  | 30.000  | 0.000   | 31.000  | 34.000  | 31.000  | 34.000  | D140 |
| E2   | 17.000  | 0.000   | 17.000  | 18.004  | 0.000   | 19.000  | 14.000  | 14.004  | 14.000  | E130 |
| E3   | 110.000 | 0.000   | 110.000 | 110.000 | 0.000   | 110.000 | 110.000 | 110.000 | 110.000 | E130 |
| L4   | 153.191 | 0.000   | 147.708 | 153.191 | 0.000   | 157.000 | 134.400 | 131.000 | 131.000 | L137 |
| N5   | 101.220 | 100.000 | 101.220 | 101.220 | 100.000 | 101.220 | 120.792 | 120.792 | 120.792 | N130 |
| K16  | 224.944 | 220.000 | 220.000 | 224.944 | 220.000 | 224.944 | 220.000 | 220.000 | 220.000 | K130 |
| L17  | 177.130 | 166.431 | 166.431 | 181.430 | 176.204 | 176.204 | 156.431 | 156.431 | 156.431 | L134 |
| L18  | 109.243 | 104.100 | 104.100 | 110.170 | 111.400 | 111.400 | 111.400 | 111.400 | 111.400 | L133 |
| G19  | 120.000 | 120.000 | 120.000 | 120.000 | 120.000 | 120.000 | 120.000 | 120.000 | 120.000 | G130 |
| R100 | 171.500 | 165.545 | 165.545 | 180.000 | 176.500 | 176.500 | 171.500 | 171.500 | 171.500 | R130 |
| V111 | 100.000 | 300.000 | 300.000 | 111.000 | 100.000 | 100.000 | 100.000 | 100.000 | 100.000 | V130 |
| I123 | 430.234 | 430.234 | 460.000 | 430.234 | 430.234 | 430.234 | 430.234 | 430.234 | 430.234 | I130 |
| K14  | 490.000 | 480.000 | 480.000 | 500.000 | 490.000 | 490.000 | 480.000 | 480.000 | 480.000 | K130 |
| G15  | 100.000 | 100.000 | 100.000 | 100.000 | 100.000 | 100.000 | 100.000 | 100.000 | 100.000 | G130 |
| G16  | 100.000 | 100.000 | 100.000 | 100.000 | 100.000 | 100.000 | 100.000 | 100.000 | 100.000 | G130 |
| G17  | 100.000 | 100.000 | 100.000 | 100.000 | 100.000 | 100.000 | 100.000 | 100.000 | 100.000 | G130 |
| V18  | 100.000 | 100.000 | 100.000 | 100.000 | 100.000 | 100.000 | 100.000 | 100.000 | 100.000 | V130 |
| L109 | 100.000 | 100.000 | 100.000 | 100.000 | 100.000 | 100.000 | 100.000 | 100.000 | 100.000 | L130 |
| P120 | 100.000 | 100.000 | 100.000 | 100.000 | 100.000 | 100.000 | 100.000 | 100.000 | 100.000 | P130 |
| N121 | 100.000 | 100.000 | 100.000 | 100.000 | 100.000 | 100.000 | 100.000 | 100.000 | 100.000 | N130 |
| D122 | 100.000 | 100.000 | 100.000 | 100.000 | 100.000 | 100.000 | 100.000 | 100.000 | 100.000 | D130 |
| Q123 | 100.000 | 100.000 | 100.000 | 100.000 | 100.000 | 100.000 | 100.000 | 100.000 | 100.000 | Q130 |
| A124 | 100.000 | 100.000 | 100.000 | 100.000 | 100.000 | 100.000 | 100.000 | 100.000 | 100.000 | A130 |
| V125 | 100.000 | 100.000 | 100.000 | 100.000 | 100.000 | 100.000 | 100.000 | 100.000 | 100.000 | V130 |
| L126 | 100.000 | 100.000 | 100.000 | 100.000 | 100.000 | 100.000 | 100.000 | 100.000 | 100.000 | L130 |
| L127 | 100.000 | 100.000 | 100.000 | 100.000 | 100.000 | 100.000 | 100.000 | 100.000 | 100.000 | L130 |
| R128 | 100.000 | 100.000 | 100.000 | 100.000 | 100.000 | 100.000 | 100.000 | 100.000 | 100.000 | R130 |
| K129 | 100.000 | 100.000 | 100.000 | 100.000 | 100.000 | 100.000 | 100.000 | 100.000 | 100.000 | K130 |
| K130 | 100.000 | 100.000 | 100.000 | 100.000 | 100.000 | 100.000 | 100.000 | 100.000 | 100.000 | K130 |
| K131 | 100.000 | 100.000 | 100.000 | 100.000 | 100.000 | 100.000 | 100.000 | 100.000 | 100.000 | K130 |
| E132 | 100.000 | 100.000 | 100.000 | 100.000 | 100.000 | 100.000 | 100.000 | 100.000 | 100.000 | E130 |
| E133 | 100.000 | 100.000 | 100.000 | 100.000 | 100.000 | 100.000 | 100.000 | 100.000 | 100.000 | E130 |
| E134 | 100.000 | 100.000 | 100.000 | 100.000 | 100.000 | 100.000 | 100.000 | 100.000 | 100.000 | E130 |
| E135 | 100.000 | 100.000 | 100.000 | 100.000 | 100.000 | 100.000 | 100.000 | 100.000 | 100.000 | E130 |
| K136 | 100.000 | 100.000 | 100.000 | 100.000 | 100.000 | 100.000 | 100.000 | 100.000 | 100.000 | K130 |
| K137 | 100.000 | 100.000 | 100.000 | 100.000 | 100.000 | 100.000 | 100.000 | 100.000 | 100.000 | K130 |
| K138 | 100.000 | 100.000 | 100.000 | 100.000 | 100.000 | 100.000 | 100.000 | 100.000 | 100.000 | K130 |
| G139 | 100.000 | 100.000 | 100.000 | 100.000 | 100.000 | 100.000 | 100.000 | 100.000 | 100.000 | G130 |
| K140 | 100.000 | 100.000 | 100.000 | 100.000 | 100.000 | 100.000 | 100.000 | 100.000 | 100.000 | K130 |

# sp | Q6GSS7 | H2A2A\_MOUSE

DEELNKLLGKVTIAQGGVLPNIQAVLLPKKTESHHKAKGK (Acetyl)  
(42.01)

- ▶ fragmentation table for charge state 4+
- ▶ specType=cid
- ▶ score=57.49
- ▶ F113281.dat
- ▶ query=q36934.p1
- ▶ precursor=869.702830
- ▶ chargePrecursor=5
- ▶ itol=0.5

| AA   | a              | a*             | a,0            | b               | b*              | b,0            | y              | y*              | y,0             | AA   |
|------|----------------|----------------|----------------|-----------------|-----------------|----------------|----------------|-----------------|-----------------|------|
| D1   | 207.265        | 0.750          | 18.263         | 26.764          | 0.750           | 26.261         | 11689.819      | <b>1082.618</b> | <b>1082.372</b> | D340 |
| E12  | 302.505        | 0.750          | 268.505        | 428.265         | 0.750           | 427.509        | 10088.918      | 10088.918       | 10088.918       | E119 |
| E13  | 307.260        | 0.750          | 302.760        | 442.260         | 0.750           | 441.761        | 10078.915      | <b>1021.601</b> | 1021.300        | E130 |
| L14  | 112.508        | 0.750          | 112.508        | 122.508         | 0.750           | 121.504        | 10078.915      | 10078.915       | 10078.915       | L137 |
| N15  | 114.262        | 0.750          | 129.262        | 123.262         | 0.750           | 122.261        | 10078.915      | <b>965.376</b>  | 965.376         | N159 |
| R16  | 176.262        | 1.71825        | 171.262        | 183.262         | 1.71825         | 179.264        | 176.262        | 929.013         | 929.013         | R120 |
| L17  | 204.261        | 0.750          | 199.261        | 211.261         | 0.750           | 210.261        | 10078.915      | <b>964.791</b>  | 964.791         | L134 |
| L18  | 232.264        | 0.750          | 228.264        | 238.264         | 0.750           | 237.264        | 10078.915      | 10078.915       | 10078.915       | L131 |
| G19  | 290.262        | 0.750          | 285.262        | 293.262         | 0.750           | 292.262        | 10078.915      | 10078.915       | 10078.915       | G125 |
| V111 | 303.260        | 0.750          | 298.260        | 308.260         | 0.750           | 307.260        | 10078.915      | <b>841.921</b>  | <b>841.746</b>  | V108 |
| V112 | 308.262        | 0.750          | 303.262        | 313.262         | 0.750           | 312.262        | 10078.915      | 10078.915       | 10078.915       | V105 |
| I113 | 307.261        | 0.750          | 302.261        | 312.261         | 0.750           | 311.261        | 10078.915      | <b>751.941</b>  | <b>747.684</b>  | I110 |
| A114 | 314.263        | 0.750          | 309.263        | 319.263         | 0.750           | 318.263        | 10078.915      | <b>718.413</b>  | <b>718.167</b>  | A122 |
| G115 | 308.260        | 0.750          | 303.260        | 313.260         | 0.750           | 312.260        | 10078.915      | <b>705.911</b>  | <b>701.406</b>  | G124 |
| G116 | 321.263        | 4.15350        | 316.263        | 326.263         | 4.15350         | 325.263        | 321.263        | 699.303         | 699.303         | G126 |
| G117 | 431.260        | 4.31261        | 426.260        | 436.260         | 4.31261         | 435.260        | 431.260        | 655.184         | 655.178         | G128 |
| V118 | 460.261        | 4.31261        | 455.261        | 465.261         | 4.31261         | 464.261        | 460.261        | 642.179         | 642.179         | V122 |
| L119 | 468.262        | 4.31261        | 463.262        | 473.262         | 4.31261         | 472.262        | 468.262        | 629.013         | 629.013         | L121 |
| P120 | 517.260        | 1.68244        | 502.260        | 512.260         | 1.68244         | 511.260        | 507.260        | 589.000         | 589.000         | P121 |
| N121 | 541.261        | 1.68244        | 536.261        | 546.261         | 1.68244         | 545.261        | 541.261        | 583.929         | 583.929         | N120 |
| N122 | 559.261        | 1.68244        | 554.261        | 564.261         | 1.68244         | 563.261        | 559.261        | 578.919         | 578.919         | N118 |
| G123 | <b>601.596</b> | 1.68244        | 596.596        | 606.596         | 1.68244         | 605.596        | 601.596        | <b>507.046</b>  | <b>506.800</b>  | G119 |
| A124 | 619.595        | <b>614.852</b> | 614.852        | 624.852         | 614.852         | 623.852        | 619.595        | 475.013         | 475.013         | A117 |
| V125 | 644.593        | 4.31261        | 639.593        | 649.593         | 4.31261         | 648.593        | 644.593        | 469.303         | 469.303         | V116 |
| L126 | 672.595        | 6.88113        | 667.595        | 677.595         | 6.88113         | 676.595        | 672.595        | <b>438.761</b>  | 432.209         | L124 |
| L127 | 680.594        | 6.88113        | 675.594        | 685.594         | 6.88113         | 684.594        | 680.594        | 424.129         | 424.129         | L123 |
| P128 | 700.594        | 6.88113        | 695.594        | 705.594         | 6.88113         | 704.594        | 700.594        | <b>377.669</b>  | 377.669         | P124 |
| R129 | 756.592        | 17.0254        | 751.592        | 761.592         | 17.0254         | <b>750.593</b> | <b>750.447</b> | <b>355.956</b>  | 351.699         | R122 |
| K130 | 768.593        | 17.0254        | 763.593        | 773.593         | 17.0254         | 772.593        | 768.593        | 323.013         | 323.013         | K123 |
| K131 | 769.592        | 17.0254        | 764.592        | 774.592         | 17.0254         | 773.592        | 769.592        | 287.929         | 287.929         | K121 |
| E132 | <b>846.497</b> | <b>842.241</b> | 841.241        | <b>851.498</b>  | <b>849.239</b>  | <b>848.193</b> | 846.497        | 262.169         | 262.169         | E111 |
| S133 | 858.260        | 6.88113        | 853.260        | 863.260         | 6.88113         | 862.260        | 858.260        | 226.129         | 226.129         | S131 |
| H134 | 867.591        | 6.88113        | 862.591        | 872.591         | 6.88113         | 871.591        | 867.591        | 212.029         | 212.029         | H117 |
| V135 | 876.592        | 6.88113        | 871.592        | 881.592         | 6.88113         | 880.592        | 876.592        | 176.303         | 176.303         | V115 |
| R136 | <b>908.810</b> | <b>904.552</b> | <b>904.500</b> | 914.552         | 904.552         | 913.551        | 911.260        | 148.000         | 148.000         | R130 |
| A137 | 908.590        | 6.88113        | 903.590        | 913.590         | 6.88113         | 912.590        | 908.590        | 112.013         | 112.013         | A130 |
| R138 | 918.591        | 6.88113        | 913.591        | 923.591         | 6.88113         | 922.591        | 918.591        | 88.129          | 88.129          | R132 |
| G139 | 1032.641       | 1025.544       | 1025.544       | 1035.640        | 1025.544        | 1030.543       | 1032.641       | 82.262          | 82.262          | G129 |
| K140 | 1035.591       | 1031.111       | 1031.011       | <b>1062.372</b> | <b>1078.115</b> | 1077.609       | 1035.591       | 43.800          | 43.800          | K131 |



# sp | Q6GSS7 | H2A2A\_MOUSE

DEELNKLLGKVTIAQGGVLPNIQAVLLPKKTESHHKAKGK (Acetyl)  
(42.01)

- ▶ fragmentation table for charge state 1+
- ▶ specType=etd
- ▶ score=67.09
- ▶ F113281.dat
- ▶ query=q36935.p1
- ▶ precursor=869.702830
- ▶ chargePrecursor=5
- ▶ itol=0.5

| AA | c  | y               | z+1            | z+2             | z               | AA              |       |
|----|----|-----------------|----------------|-----------------|-----------------|-----------------|-------|
| D  | 1  | 133.061         | 4344.477       | 4328.458        | 0.000           | 4327.450        | D[40] |
| E  | 2  | 262.103         | 4220.490       | 4213.431        | 0.000           | 4212.422        | E[39] |
| E  | 3  | 391.146         | 4106.497       | 4098.389        | 0.000           | 4098.386        | E[38] |
| L  | 4  | 504.230         | 3971.364       | 3955.346        | 0.000           | 3954.338        | L[37] |
| N  | 5  | 618.273         | 3858.280       | 3843.262        | 3943.269        | 3841.254        | N[36] |
| K  | 6  | <b>746.366</b>  | 3744.237       | 3728.210        | 3726.227        | 3727.211        | K[35] |
| L  | 7  | 859.452         | 3616.142       | 3600.124        | 3601.132        | 3599.116        | L[34] |
| L  | 8  | <b>972.536</b>  | 3503.058       | 3487.040        | 3488.056        | 3489.032        | L[33] |
| G  | 9  | <b>1029.558</b> | 3389.014       | 3373.996        | 3374.013        | 3372.984        | G[32] |
| K  | 10 | <b>1157.652</b> | 3332.953       | 3316.934        | 3317.942        | 3315.926        | K[31] |
| V  | 11 | <b>1256.721</b> | 3204.858       | 3188.839        | 3189.847        | 3187.831        | V[30] |
| T  | 12 | <b>1357.769</b> | 3105.790       | 3089.771        | 3090.779        | 3088.762        | T[29] |
| I  | 13 | <b>1470.853</b> | 3004.742       | 2988.723        | 2989.731        | 2987.715        | I[28] |
| A  | 14 | <b>1541.890</b> | 2891.698       | 2875.630        | 2876.647        | 2874.631        | A[27] |
| Q  | 15 | <b>1609.948</b> | 2820.621       | 2804.602        | 2805.610        | 2803.594        | Q[26] |
| G  | 16 | <b>1726.970</b> | 2692.562       | 2676.543        | 2677.551        | 2675.536        | G[25] |
| G  | 17 | <b>1783.991</b> | 2618.541       | 2619.522        | 2620.530        | 2618.514        | G[24] |
| V  | 18 | 1883.060        | 2578.519       | 2562.500        | 2563.508        | 2561.493        | V[23] |
| L  | 19 | 1996.144        | 2479.451       | 2463.432        | 2464.440        | 2462.424        | L[22] |
| P  | 20 | 2093.196        | 2366.367       | 2350.348        | 2351.356        | 2349.340        | P[21] |
| N  | 21 | 2207.239        | 2209.314       | 2203.295        | 2204.303        | 2202.287        | N[20] |
| I  | 22 | 2320.323        | 2155.271       | 2139.252        | 2140.260        | 2138.244        | I[19] |
| Q  | 23 | 2448.382        | 2042.187       | 2026.168        | 2027.176        | 2025.160        | Q[18] |
| A  | 24 | 2519.419        | 1914.128       | 1898.110        | 1899.117        | 1897.102        | A[17] |
| V  | 25 | 2618.488        | 1843.091       | <b>1827.073</b> | 1828.080        | 1826.065        | V[16] |
| L  | 26 | 2713.572        | 1714.023       | 1708.004        | <b>1718.012</b> | <b>1726.995</b> | L[15] |
| L  | 27 | 2844.656        | 1630.938       | 1614.920        | 1615.928        | 1613.912        | L[14] |
| P  | 28 | 2941.708        | 1517.855       | 1501.836        | 1502.844        | 1500.828        | P[13] |
| K  | 29 | 3069.803        | 1420.802       | 1404.783        | 1405.791        | 1403.775        | K[12] |
| K  | 30 | 3197.898        | 1292.707       | 1276.688        | <b>1277.696</b> | 1275.680        | K[11] |
| E  | 31 | 3298.946        | 1104.612       | <b>1148.593</b> | <b>1149.601</b> | 1147.585        | E[10] |
| E  | 32 | 3417.089        | 1013.564       | <b>1047.546</b> | 1048.554        | 1046.538        | E[9]  |
| S  | 33 | 3515.021        | <b>934.522</b> | <b>918.503</b>  | <b>919.511</b>  | 917.495         | S[8]  |
| H  | 34 | 3652.080        | 847.490        | <b>831.471</b>  | 832.479         | 830.463         | H[7]  |
| H  | 35 | 3769.139        | 710.431        | <b>694.412</b>  | <b>695.420</b>  | 693.404         | H[6]  |
| K  | 36 | 3917.213        | 573.372        | <b>557.353</b>  | <b>558.361</b>  | 556.345         | K[5]  |
| A  | 37 | 3988.271        | 445.277        | <b>429.258</b>  | 430.266         | 428.250         | A[4]  |
| K  | 38 | 4118.268        | 374.240        | <b>358.221</b>  | 359.229         | 357.213         | K[3]  |
| G  | 39 | 4173.387        | 246.145        | 230.126         | 231.134         | 229.118         | G[2]  |
| K  | 40 | 4343.403        | 189.123        | 173.105         | 174.112         | 172.097         | K[1]  |

# sp | Q6GSS7 | H2A2A\_MOUSE

DEELNKLLGKVTIAQGGVLPNIQAVLLPKKTESHHKAKGK (Acetyl)  
(42.01)

- ▶ fragmentation table for charge state 2+
- ▶ specType=etd
- ▶ score=67.09
- ▶ F113281.dat
- ▶ query=q36935.p1
- ▶ precursor=869.702830
- ▶ chargePrecursor=5
- ▶ itol=0.5

| AA | c  | y               | z=1             | z=2             | z               | AA              |       |
|----|----|-----------------|-----------------|-----------------|-----------------|-----------------|-------|
| D  | 1  | 87.634          | 2172.742        | 2164.733        | 0.504           | 2164.250        | D(40) |
| E  | 2  | 131.555         | 2115.229        | 2107.219        | 0.504           | 2108.715        | E(39) |
| E  | 3  | 168.277         | 2050.707        | 2042.698        | 0.504           | 2042.194        | E(38) |
| L  | 4  | 252.619         | 1398.186        | 1379.176        | 0.504           | 1377.671        | L(17) |
| N  | 5  | 309.640         | 1029.644        | 1021.634        | 1922.138        | 1021.131        | N(36) |
| K  | 6  | 373.688         | 1872.622        | 1864.613        | 1865.117        | 1864.109        | K(35) |
| L  | 7  | 430.230         | 1838.575        | <b>1800.566</b> | <b>1801.069</b> | 1800.067        | L(34) |
| L  | 8  | 486.772         | 1752.033        | 1744.023        | 1744.527        | 1743.520        | L(33) |
| G  | 9  | 515.282         | 1695.491        | 1687.481        | <b>1687.985</b> | 1686.979        | G(25) |
| K  | 10 | 579.330         | 1666.980        | 1658.971        | <b>1659.475</b> | 1659.467        | K(31) |
| V  | 11 | 638.884         | 1602.933        | 1594.923        | 1595.427        | 1594.419        | V(30) |
| T  | 12 | 679.388         | 1553.398        | 1545.389        | <b>1545.893</b> | 1544.885        | T(29) |
| L  | 13 | 735.930         | 1502.875        | <b>1494.865</b> | <b>1495.369</b> | 1494.361        | L(28) |
| A  | 14 | 774.440         | 1448.333        | 1438.323        | 1438.827        | 1437.819        | A(27) |
| G  | 15 | 834.478         | <b>1410.814</b> | 1402.804        | 1403.308        | 1402.301        | G(26) |
| G  | 16 | <b>863.989</b>  | <b>1346.785</b> | 1338.775        | <b>1339.279</b> | 1338.271        | G(25) |
| G  | 17 | 892.499         | <b>1318.274</b> | <b>1310.265</b> | 1310.768        | <b>1309.761</b> | G(24) |
| V  | 18 | 942.033         | 1289.763        | 1281.754        | <b>1282.258</b> | 1281.250        | V(23) |
| L  | 19 | 992.575         | 1240.229        | <b>1232.220</b> | <b>1232.724</b> | 1231.716        | L(22) |
| F  | 20 | <b>1047.102</b> | 1183.687        | 1175.677        | 1176.181        | 1175.174        | F(21) |
| N  | 21 | <b>1104.123</b> | 1135.161        | <b>1127.151</b> | <b>1127.655</b> | 1126.647        | N(20) |
| I  | 22 | 1160.695        | 1078.139        | <b>1070.130</b> | <b>1070.634</b> | 1069.626        | I(19) |
| Q  | 23 | 1234.695        | <b>1021.597</b> | 1013.588        | 1014.092        | 1013.084        | Q(18) |
| A  | 24 | 1290.213        | 957.568         | 949.558         | <b>950.062</b>  | 949.055         | A(17) |
| V  | 25 | <b>1309.747</b> | 922.049         | <b>914.040</b>  | 914.544         | <b>913.536</b>  | V(16) |
| L  | 26 | <b>1364.289</b> | 874.515         | <b>864.506</b>  | 865.010         | <b>864.002</b>  | L(15) |
| L  | 27 | 1422.811        | 815.973         | <b>807.964</b>  | <b>808.468</b>  | 807.460         | L(14) |
| F  | 28 | 1471.358        | 759.431         | 751.422         | 751.926         | 750.918         | F(13) |
| K  | 29 | 1535.405        | 710.905         | <b>702.895</b>  | <b>703.399</b>  | 702.391         | K(12) |
| K  | 30 | <b>1590.453</b> | 648.957         | <b>638.848</b>  | <b>639.352</b>  | 638.344         | K(11) |
| T  | 31 | <b>1649.977</b> | 589.816         | 581.806         | 582.310         | 581.302         | T(10) |
| E  | 32 | <b>1714.498</b> | 532.289         | 524.279         | 524.783         | 523.775         | E(9)  |
| S  | 33 | <b>1758.014</b> | 467.765         | 459.755         | 460.259         | 459.251         | S(8)  |
| H  | 34 | <b>1826.543</b> | 424.248         | 416.239         | 416.743         | 415.735         | H(7)  |
| H  | 35 | <b>1895.073</b> | 395.719         | 387.710         | 388.214         | 387.206         | H(6)  |
| K  | 36 | 1953.120        | 381.180         | 373.170         | 373.674         | 372.666         | K(5)  |
| A  | 37 | <b>1994.639</b> | 223.142         | 215.133         | 215.637         | 214.629         | A(4)  |
| K  | 38 | 2058.688        | 187.624         | 179.614         | 180.118         | 179.110         | K(3)  |
| G  | 39 | 2087.197        | 123.576         | 115.567         | 116.071         | 115.063         | G(2)  |
| K  | 40 | 2172.250        | 95.065          | 87.056          | 87.560          | 86.552          | K(1)  |

# sp | Q6GSS7 | H2A2A\_MOUSE

DEELNKLLGKVTIAQGGVLPNIQAVLLPKKTESHHKAKGK (Acetyl)  
(42.01)

- ▶ fragmentation table for charge state 3+
- ▶ specType=etd
- ▶ score=67.09
- ▶ F113281.dat
- ▶ query=q36935.p1
- ▶ precursor=869.702830
- ▶ chargePrecursor=5
- ▶ itol=0.5

| AA   | c               | y               | z=1             | z=2             | z               | AA   |
|------|-----------------|-----------------|-----------------|-----------------|-----------------|------|
| D 1  | 43.625          | <b>1448.830</b> | 1443.493        | 0.672           | 1443.155        | D 40 |
| E 2  | 38.039          | <b>1410.488</b> | 1405.148        | 0.672           | 1404.811        | E 39 |
| E 3  | 131.054         | 1387.974        | 1382.134        | 0.672           | 1381.799        | E 38 |
| L 4  | 189.746         | 1374.460        | 1370.120        | 0.672           | <b>1318.784</b> | L 17 |
| N 5  | 206.762         | 1286.705        | 1281.425        | 1.281.761       | 1281.089        | N 36 |
| K 6  | 249.461         | 1248.751        | <b>1243.411</b> | <b>1243.747</b> | <b>1243.075</b> | K 35 |
| L 7  | 287.156         | 1230.053        | <b>1200.713</b> | 1201.049        | <b>1200.377</b> | L 34 |
| L 8  | 324.850         | 1188.358        | <b>1163.018</b> | <b>1163.354</b> | 1162.882        | L 33 |
| G 9  | 343.877         | 1130.563        | <b>1125.323</b> | <b>1125.659</b> | 1124.999        | G 25 |
| K 10 | 386.556         | 1111.650        | <b>1106.316</b> | <b>1106.652</b> | <b>1105.980</b> | K 31 |
| V 11 | 419.578         | 1068.957        | 1063.618        | 1063.954        | 1063.282        | V 30 |
| T 12 | 453.261         | 1035.935        | 1030.595        | 1030.931        | 1030.259        | T 29 |
| I 13 | 490.956         | <b>1002.252</b> | <b>996.913</b>  | <b>997.248</b>  | 996.577         | I 28 |
| A 14 | 514.675         | <b>964.557</b>  | <b>959.218</b>  | <b>959.554</b>  | 958.882         | A 27 |
| Q 15 | <b>557.321</b>  | 1040.976        | <b>935.539</b>  | <b>935.875</b>  | 935.201         | Q 26 |
| G 16 | 576.328         | 898.192         | <b>892.853</b>  | <b>893.189</b>  | 892.517         | G 25 |
| G 17 | 595.335         | 879.185         | 873.845         | 874.181         | 873.510         | G 24 |
| V 18 | 628.358         | 860.178         | 854.838         | 855.174         | 854.502         | V 23 |
| L 19 | 666.053         | <b>827.155</b>  | <b>821.816</b>  | <b>822.151</b>  | 821.480         | L 22 |
| F 20 | 688.804         | 809.460         | 784.121         | 784.457         | 783.785         | F 21 |
| N 21 | 736.418         | 757.120         | 751.779         | 752.106         | 751.434         | N 20 |
| I 22 | 774.113         | 719.095         | 713.756         | 714.092         | 713.420         | I 20 |
| Q 23 | 816.799         | 681.400         | 676.061         | 676.397         | 675.725         | Q 18 |
| A 24 | 846.478         | <b>638.714</b>  | 633.375         | 633.711         | 633.039         | A 17 |
| V 25 | 873.501         | 635.035         | 600.695         | 601.032         | 600.360         | V 18 |
| L 26 | 911.195         | 582.012         | 576.673         | 577.009         | 576.337         | L 15 |
| L 27 | 948.890         | 544.315         | 538.976         | 539.314         | 538.642         | L 14 |
| F 28 | 981.241         | 506.623         | 501.284         | 501.620         | 500.948         | F 13 |
| K 29 | <b>1023.939</b> | 474.272         | 468.933         | 469.269         | 468.597         | K 12 |
| K 30 | <b>1066.638</b> | 431.574         | 426.234         | 426.570         | 425.908         | K 11 |
| T 31 | <b>1109.338</b> | 388.876         | 383.537         | 383.873         | 383.200         | T 10 |
| E 32 | <b>1143.334</b> | 355.192         | 349.853         | 350.189         | 349.517         | E 9  |
| S 33 | <b>1172.345</b> | 312.179         | 306.839         | 307.175         | 306.503         | S 8  |
| H 34 | <b>1218.031</b> | 283.166         | 277.827         | 278.164         | 277.491         | H 7  |
| H 35 | 1263.716        | 237.482         | 232.142         | 232.478         | 231.806         | H 6  |
| K 36 | 1308.410        | 194.799         | 189.459         | 189.796         | 189.124         | K 5  |
| A 37 | 1330.095        | 149.101         | 143.758         | 144.094         | 143.422         | A 4  |
| K 38 | <b>1372.793</b> | 125.418         | 120.079         | 120.414         | 119.743         | K 3  |
| G 39 | <b>1391.801</b> | 81.720          | 77.380          | 77.716          | 77.044          | G 2  |
| K 40 | 1448.502        | 63.713          | 58.373          | 58.709          | 58.037          | K 1  |



# sp | Q6GSS7 | H2A2A\_MOUSE

DEELNKLLGKVTIAQGGVLPNIQAVLLPKKTESHHKAKGK (Acetyl)  
(42.01)

- ▶ fragmentation table for charge state 4+
- ▶ specType=etd
- ▶ score=67.09
- ▶ F113281.dat
- ▶ query=q36935.p1
- ▶ precursor=869.702830
- ▶ chargePrecursor=5
- ▶ itol=0.5

| AA    | c               | y              | z+1             | z+2     | z               | AA    |
|-------|-----------------|----------------|-----------------|---------|-----------------|-------|
| D[1]  | 34.021          | 1086.875       | <b>1082.870</b> | 0.755   | <b>1082.618</b> | D[60] |
| E[2]  | 66.281          | 1058.118       | <b>1054.113</b> | 0.755   | 1053.865        | E[39] |
| E[3]  | 98.542          | 1029.857       | <b>1021.853</b> | 0.755   | <b>1021.601</b> | E[38] |
| L[4]  | 126.813         | 993.597        | 989.592         | 0.755   | 989.340         | L[37] |
| N[5]  | 155.324         | <b>965.326</b> | 961.321         | 961.573 | 961.069         | N[36] |
| K[6]  | 187.347         | 936.815        | 932.810         | 933.062 | 932.558         | K[35] |
| L[7]  | 215.638         | 904.791        | 900.786         | 901.038 | 900.534         | L[34] |
| L[8]  | 243.889         | 876.530        | 872.515         | 872.767 | 872.263         | L[33] |
| G[9]  | 258.145         | 848.249        | 844.244         | 844.496 | 843.992         | G[32] |
| K[10] | 290.169         | 833.994        | 829.989         | 830.241 | 829.737         | K[31] |
| V[11] | 314.936         | 801.970        | 797.965         | 798.217 | 797.713         | V[30] |
| T[12] | 340.189         | 777.203        | 773.198         | 773.450 | 772.946         | T[29] |
| I[13] | 368.469         | 751.941        | 747.936         | 748.188 | 747.684         | I[28] |
| A[14] | 386.228         | 723.876        | 719.865         | 719.917 | 719.413         | A[27] |
| Q[15] | 418.243         | 705.911        | 701.906         | 702.158 | 701.654         | Q[26] |
| Q[16] | 432.498         | 673.896        | 669.891         | 670.143 | 669.639         | Q[25] |
| G[17] | 446.753         | 659.641        | 655.636         | 655.888 | 655.384         | G[24] |
| V[18] | 471.520         | 645.385        | 641.381         | 641.633 | 641.129         | V[23] |
| L[19] | 499.791         | 620.618        | 616.613         | 616.865 | 616.362         | L[22] |
| F[20] | 524.055         | 592.347        | 588.342         | 588.594 | 588.090         | F[21] |
| N[21] | 552.065         | 568.084        | 564.079         | 564.331 | 563.827         | N[20] |
| I[22] | 580.836         | 539.573        | 535.569         | 535.820 | 535.317         | I[19] |
| Q[23] | 612.851         | 511.302        | 507.298         | 507.549 | 507.046         | Q[18] |
| A[24] | 630.610         | 479.288        | 475.283         | 475.535 | 475.031         | A[17] |
| V[25] | 655.377         | 461.528        | 457.524         | 457.776 | 457.272         | V[16] |
| L[26] | 683.648         | 436.761        | 432.756         | 433.008 | 432.505         | L[15] |
| L[27] | 711.939         | 408.490        | 404.485         | 404.737 | 404.234         | L[14] |
| N[28] | 736.183         | 380.219        | 376.214         | 376.466 | 375.963         | N[13] |
| K[29] | 768.206         | 355.956        | 351.951         | 352.203 | 351.699         | K[12] |
| K[30] | 800.230         | 323.932        | 319.928         | 320.179 | 319.676         | K[11] |
| T[31] | 825.492         | 291.908        | 287.904         | 288.156 | 287.652         | T[10] |
| E[32] | 857.753         | 266.647        | 262.642         | 262.894 | 262.390         | E[9]  |
| S[33] | 879.511         | 234.386        | 230.381         | 230.633 | 230.129         | S[6]  |
| H[34] | <b>913.715</b>  | 212.828        | 208.823         | 209.075 | 208.571         | H[7]  |
| H[35] | 948.040         | 178.363        | 174.358         | 174.610 | 174.107         | H[0]  |
| K[36] | 980.064         | 144.098        | 140.094         | 140.346 | 139.842         | K[5]  |
| A[37] | 997.823         | 112.075        | 108.070         | 108.322 | 107.818         | A[4]  |
| K[38] | <b>1029.847</b> | 94.315         | 90.311          | 90.563  | 90.059          | K[3]  |
| G[39] | 1044.102        | 62.292         | 58.287          | 58.539  | 58.035          | G[2]  |
| K[40] | 1086.629        | 48.036         | 44.032          | 44.284  | 43.780          | K[1]  |



# sp | Q6GSS7 | H2A2A\_MOUSE

DEELNKLLGKVTIAQGGVLPNIQAVLLPKKTESHHKAKGK (Acetyl)  
(42.01)

- ▶ fragmentation table for charge state 1+
- ▶ specType=etd
- ▶ score=63.48
- ▶ F113281.dat
- ▶ query=q36936.p1
- ▶ precursor=724.920490
- ▶ chargePrecursor=6
- ▶ itol=0.5

| AA | c  | y               | z=1             | z=2             | z               | AA              |       |
|----|----|-----------------|-----------------|-----------------|-----------------|-----------------|-------|
| D  | 1  | 131.061         | 4344.477        | 4328.458        | 0.000           | 4327.450        | D(40) |
| E  | 2  | <b>262.103</b>  | 4229.450        | 4213.431        | 0.000           | 4212.423        | E(39) |
| E  | 3  | 301.150         | 4104.407        | 4088.388        | 0.000           | 4087.380        | E(38) |
| L  | 4  | 394.230         | 3971.364        | 3955.345        | 0.000           | 3954.337        | L(17) |
| N  | 5  | 618.273         | 3858.260        | 3842.242        | 3843.269        | 3841.254        | N(36) |
| K  | 6  | <b>746.368</b>  | 3744.237        | 3728.219        | 3729.237        | 3727.211        | K(35) |
| L  | 7  | 899.452         | 3618.142        | 3602.124        | 3601.132        | 3599.110        | L(34) |
| L  | 8  | <b>972.536</b>  | 3503.098        | 3487.040        | 3488.048        | 3486.032        | L(33) |
| G  | 9  | <b>1029.556</b> | 3389.974        | 3373.955        | 3374.963        | 3372.946        | G(25) |
| K  | 10 | <b>1157.652</b> | 3332.953        | 3316.934        | 3317.942        | 3315.926        | K(31) |
| V  | 11 | <b>1256.721</b> | 3204.858        | 3188.839        | 3189.847        | 3187.831        | V(30) |
| T  | 12 | 1357.769        | 3105.790        | 3089.771        | 3090.779        | 3088.763        | T(29) |
| I  | 13 | <b>1470.853</b> | 3004.742        | 2988.723        | 2989.731        | 2987.715        | I(28) |
| A  | 14 | 1541.890        | 2891.658        | 2875.639        | 2876.647        | 2874.631        | A(27) |
| Q  | 15 | 1609.948        | 2820.621        | 2804.602        | 2805.610        | 2803.594        | Q(26) |
| G  | 16 | 1726.970        | 2692.562        | 2676.543        | 2677.551        | 2675.535        | G(25) |
| G  | 17 | 1783.991        | 2635.541        | 2619.522        | 2620.530        | 2618.514        | G(24) |
| V  | 18 | 1883.080        | 2578.519        | 2562.500        | 2563.508        | 2561.493        | V(23) |
| L  | 19 | 1996.144        | 2479.451        | 2463.432        | 2464.440        | 2462.424        | L(22) |
| F  | 20 | 2033.198        | 2368.397        | 2352.378        | 2353.386        | 2351.369        | F(21) |
| N  | 21 | 2207.239        | 2289.314        | 2273.295        | 2274.303        | 2272.287        | N(20) |
| I  | 22 | 2330.273        | 2155.271        | 2139.252        | 2140.260        | 2138.244        | I(19) |
| Q  | 23 | 2448.302        | 2042.181        | 2026.168        | 2027.176        | 2025.160        | Q(18) |
| A  | 24 | 2518.419        | 1914.129        | 1898.110        | 1899.117        | 1897.102        | A(17) |
| V  | 25 | 2618.468        | 1845.091        | 1829.072        | 1830.080        | <b>1828.065</b> | V(16) |
| L  | 26 | 2731.572        | 1744.023        | <b>1728.004</b> | 1729.012        | 1727.996        | L(15) |
| L  | 27 | 2844.656        | 1630.936        | 1614.920        | 1615.928        | 1613.912        | L(14) |
| F  | 28 | 2941.708        | <b>1517.855</b> | 1501.838        | <b>1502.844</b> | 1500.828        | F(13) |
| K  | 29 | 3099.803        | 1420.803        | 1404.783        | <b>1405.791</b> | 1403.775        | K(12) |
| K  | 30 | 3197.898        | <b>1292.707</b> | <b>1276.688</b> | 1277.696        | 1275.680        | K(11) |
| T  | 31 | 3288.948        | 1194.812        | 1178.793        | <b>1149.801</b> | 1147.785        | T(10) |
| E  | 32 | 3427.989        | 1083.984        | <b>1047.946</b> | 1048.953        | 1046.937        | E(9)  |
| S  | 33 | 3515.021        | 934.922         | <b>918.903</b>  | 919.911         | 917.895         | S(8)  |
| H  | 34 | 3652.080        | 847.900         | 831.871         | <b>832.479</b>  | 830.463         | H(7)  |
| H  | 35 | 3789.139        | <b>710.431</b>  | <b>694.412</b>  | 695.420         | 693.404         | H(6)  |
| K  | 36 | 3817.233        | <b>573.372</b>  | <b>557.353</b>  | <b>558.361</b>  | 556.345         | K(5)  |
| A  | 37 | 3958.274        | 442.377         | <b>429.298</b>  | 429.298         | 428.282         | A(4)  |
| K  | 38 | 4118.366        | 374.240         | <b>358.221</b>  | 359.229         | 357.213         | K(3)  |
| G  | 39 | 4173.397        | 246.145         | 230.126         | 231.134         | 229.118         | G(2)  |
| K  | 40 | 4343.493        | <b>189.123</b>  | 173.105         | 174.112         | 172.097         | K(1)  |

# sp | Q6GSS7 | H2A2A\_MOUSE

DEELNKLLGKVTIAQGGVLPNIQAVLLPKKTESHHKAKGK (Acetyl)  
(42.01)

- ▶ fragmentation table for charge state 2+
- ▶ specType=etd
- ▶ score=63.48
- ▶ F113281.dat
- ▶ query=q36936.p1
- ▶ precursor=724.920490
- ▶ chargePrecursor=6
- ▶ itol=0.5

| AA | c  | y               | z=1             | z=2             | z               | AA              |       |
|----|----|-----------------|-----------------|-----------------|-----------------|-----------------|-------|
| D  | 1  | 87.634          | 2172.742        | 2164.733        | 0.504           | 2164.250        | D(40) |
| E  | 2  | 131.555         | 2115.229        | 2107.219        | 0.504           | 2108.715        | E(39) |
| E  | 3  | 188.277         | 2050.707        | 2042.698        | 0.504           | 2042.194        | E(38) |
| L  | 4  | 252.619         | 1986.186        | 1978.176        | 0.504           | 1977.671        | L(17) |
| N  | 5  | 309.640         | 1929.644        | 1921.634        | 1922.138        | 1921.131        | N(36) |
| K  | 6  | 373.688         | 1872.622        | 1864.613        | 1865.117        | 1864.109        | K(35) |
| L  | 7  | 430.230         | 1808.575        | 1800.566        | 1801.069        | 1800.062        | L(34) |
| L  | 8  | 486.772         | 1752.031        | 1744.022        | 1744.527        | 1743.520        | L(33) |
| G  | 9  | 515.282         | 1695.491        | <b>1687.481</b> | <b>1687.985</b> | 1688.979        | G(25) |
| K  | 10 | 578.330         | 1636.980        | 1628.971        | <b>1629.475</b> | 1629.467        | K(31) |
| V  | 11 | <b>628.864</b>  | 1602.933        | <b>1594.923</b> | <b>1595.427</b> | 1594.419        | V(30) |
| T  | 12 | 679.358         | 1553.398        | 1545.389        | <b>1545.893</b> | 1544.885        | T(29) |
| L  | 13 | 735.910         | <b>1502.875</b> | 1494.865        | 1495.369        | 1494.361        | L(28) |
| A  | 14 | 777.449         | 1448.331        | 1438.323        | 1438.827        | 1437.819        | A(27) |
| L  | 15 | <b>835.478</b>  | 1410.814        | 1402.805        | 1403.309        | 1402.301        | L(26) |
| G  | 16 | 883.989         | 1346.785        | 1338.776        | 1339.279        | 1338.271        | G(25) |
| G  | 17 | 892.499         | 1318.274        | <b>1310.265</b> | 1310.768        | <b>1309.761</b> | G(24) |
| V  | 18 | <b>942.033</b>  | 1289.763        | <b>1281.754</b> | <b>1282.258</b> | 1281.250        | V(23) |
| L  | 19 | <b>998.575</b>  | 1240.229        | <b>1232.220</b> | <b>1232.724</b> | 1231.716        | L(22) |
| F  | 20 | 1047.102        | 1183.697        | 1175.688        | 1176.192        | 1175.184        | F(21) |
| N  | 21 | 1104.123        | 1135.181        | 1127.171        | 1127.675        | 1126.667        | N(20) |
| I  | 22 | 1160.605        | 1078.139        | 1070.130        | 1070.634        | 1069.626        | I(19) |
| Q  | 23 | <b>1224.695</b> | 1021.597        | 1013.588        | 1014.092        | 1013.084        | Q(18) |
| A  | 24 | 1280.213        | 957.549         | 949.540         | 950.042         | <b>949.055</b>  | A(17) |
| V  | 25 | <b>1309.747</b> | 922.049         | <b>914.040</b>  | <b>914.544</b>  | 913.536         | V(16) |
| L  | 26 | <b>1364.972</b> | 882.516         | <b>874.506</b>  | <b>885.010</b>  | 884.002         | L(15) |
| L  | 27 | 1422.511        | 815.973         | <b>807.964</b>  | <b>808.468</b>  | 807.460         | L(14) |
| F  | 28 | <b>1471.358</b> | 759.431         | 751.422         | 751.926         | 750.918         | F(13) |
| K  | 29 | <b>1535.405</b> | <b>710.905</b>  | <b>702.895</b>  | <b>703.399</b>  | 702.391         | K(12) |
| K  | 30 | 1597.953        | <b>646.857</b>  | <b>638.848</b>  | <b>639.352</b>  | 638.344         | K(11) |
| L  | 31 | <b>1649.972</b> | 589.316         | <b>574.800</b>  | <b>575.304</b>  | 574.296         | L(10) |
| E  | 32 | <b>1714.498</b> | 532.285         | <b>524.276</b>  | <b>524.780</b>  | 523.772         | E(9)  |
| S  | 33 | <b>1758.014</b> | 467.795         | <b>459.755</b>  | <b>460.259</b>  | 459.251         | S(8)  |
| H  | 34 | <b>1826.543</b> | 424.248         | <b>416.239</b>  | <b>416.743</b>  | 415.735         | H(7)  |
| H  | 35 | <b>1895.073</b> | 395.719         | 387.710         | 388.214         | 387.206         | H(6)  |
| K  | 36 | <b>1959.120</b> | 287.180         | 279.180         | 279.684         | 278.676         | K(5)  |
| A  | 37 | <b>1994.139</b> | 223.142         | 215.133         | 215.637         | 214.629         | A(4)  |
| K  | 38 | 2058.688        | 187.624         | 179.614         | 180.118         | 179.110         | K(3)  |
| G  | 39 | 2087.197        | 123.576         | 115.567         | 116.071         | 115.063         | G(2)  |
| K  | 40 | 2172.250        | 95.065          | 87.056          | 87.560          | 86.552          | K(1)  |

# sp | Q6GSS7 | H2A2A\_MOUSE

DEELNKLLGKVTIAQGGVLPNIQAVLLPKKTESHHKAKGK (Acetyl)  
(42.01)

- ▶ fragmentation table for charge state 3+
- ▶ specType=etd
- ▶ score=63.48
- ▶ F113281.dat
- ▶ query=q36936.p1
- ▶ precursor=724.920490
- ▶ chargePrecursor=6
- ▶ itol=0.5

| AA     | c               | y               | z+1             | z+2             | z              | AA    |
|--------|-----------------|-----------------|-----------------|-----------------|----------------|-------|
| D [1]  | 45.025          | 1448.830        | <b>1443.491</b> | 0.672           | 1443.155       | D[40] |
| E [2]  | 88.039          | 1410.488        | <b>1405.148</b> | 0.672           | 1404.813       | E[39] |
| E [3]  | 131.054         | 1307.474        | <b>1300.134</b> | 0.662           | 1301.768       | E[38] |
| L [4]  | 168.748         | 1324.460        | <b>1319.120</b> | 0.672           | 1318.784       | L[37] |
| N [5]  | 206.762         | 1298.785        | <b>1281.425</b> | <b>1281.761</b> | 1281.089       | N[36] |
| K [6]  | 269.461         | 1248.751        | 1243.411        | 1243.747        | 1243.075       | K[35] |
| L [7]  | 287.156         | <b>1206.052</b> | 1200.713        | 1201.049        | 1200.377       | L[34] |
| L [8]  | 324.850         | 1189.755        | 1183.009        | 1183.355        | 1182.682       | L[33] |
| G [9]  | 243.057         | <b>1130.663</b> | 1125.323        | <b>1125.659</b> | 1124.987       | G[32] |
| K [10] | 386.556         | 1111.050        | <b>1106.316</b> | <b>1106.652</b> | 1105.980       | K[31] |
| V [11] | 419.578         | 1058.957        | 1053.618        | 1053.954        | 1053.282       | V[30] |
| T [12] | 453.201         | 1035.935        | 1030.595        | 1030.931        | 1030.259       | T[29] |
| I [13] | 490.956         | 1000.257        | 996.913         | <b>997.248</b>  | 996.577        | I[28] |
| A [14] | 514.036         | <b>964.557</b>  | <b>959.218</b>  | <b>959.554</b>  | 958.882        | A[27] |
| Q [15] | <b>557.321</b>  | 960.674         | 955.334         | 955.670         | 954.998        | Q[26] |
| G [16] | 576.328         | 898.192         | 892.853         | <b>893.189</b>  | 892.517        | G[25] |
| G [17] | 595.335         | 879.185         | 873.846         | 874.181         | 873.513        | G[24] |
| V [18] | 628.358         | 860.178         | 854.838         | 855.174         | 854.502        | V[23] |
| L [19] | 666.051         | <b>827.155</b>  | <b>821.816</b>  | <b>822.151</b>  | 821.480        | L[22] |
| T [20] | 698.404         | <b>789.460</b>  | 784.121         | 784.457         | 783.785        | T[21] |
| N [21] | 738.418         | 727.109         | 721.770         | 722.106         | 721.434        | N[20] |
| I [22] | 774.113         | 719.095         | 713.756         | 714.092         | 713.420        | I[19] |
| Q [23] | 816.799         | 661.400         | 656.061         | 656.397         | 655.725        | Q[18] |
| A [24] | 840.478         | <b>638.714</b>  | 633.375         | 633.711         | 633.039        | A[17] |
| V [25] | 873.501         | 615.035         | 609.696         | 610.032         | 609.360        | V[16] |
| L [26] | 911.036         | 569.013         | 563.674         | 564.009         | 563.337        | L[15] |
| L [27] | <b>948.890</b>  | <b>544.318</b>  | <b>538.978</b>  | <b>539.314</b>  | <b>538.642</b> | L[14] |
| P [28] | <b>981.241</b>  | 506.623         | 501.284         | 501.619         | 500.948        | P[13] |
| K [29] | <b>1023.939</b> | 474.277         | 468.938         | 469.269         | 468.599        | K[12] |
| K [30] | <b>1066.638</b> | 431.574         | 426.234         | 426.570         | 425.898        | K[11] |
| I [31] | <b>1100.320</b> | 388.876         | 383.536         | 383.872         | 383.200        | I[10] |
| E [32] | 1143.814        | 356.191         | 350.851         | 351.186         | 350.514        | E[9]  |
| S [33] | 1172.345        | 312.178         | 306.839         | 307.175         | 306.503        | S[8]  |
| H [34] | <b>1218.031</b> | 283.188         | 277.829         | 278.164         | 277.493        | H[7]  |
| H [35] | 1263.716        | 237.462         | 232.122         | 232.478         | 231.806        | H[6]  |
| K [36] | <b>1306.416</b> | 191.795         | 186.455         | 186.792         | 186.120        | K[5]  |
| A [37] | <b>1330.095</b> | 149.007         | 143.758         | 144.094         | 143.422        | A[4]  |
| K [38] | <b>1372.793</b> | 126.411         | 120.619         | 120.912         | 119.741        | K[3]  |
| G [39] | 1391.801        | 83.220          | 77.380          | 77.716          | 77.044         | G[2]  |
| K [40] | 1448.502        | 63.713          | 58.373          | 58.709          | 58.033         | K[1]  |

# sp | Q6GSS7 | H2A2A\_MOUSE

DEELNKLLGKVTIAQGGVLPNIQAVLLPKKTESHHKAKGK (Acetyl)  
(42.01)

- ▶ fragmentation table for charge state 4+
- ▶ specType=etd
- ▶ score=63.48
- ▶ F113281.dat
- ▶ query=q36936.p1
- ▶ precursor=724.920490
- ▶ chargePrecursor=6
- ▶ itol=0.5

| AA    | c               | y              | z+1             | z+2            | z              | AA    |
|-------|-----------------|----------------|-----------------|----------------|----------------|-------|
| D[1]  | 34.021          | 1086.875       | <b>1082.870</b> | 0.755          | 1082.813       | D[40] |
| E[2]  | 66.261          | 1058.118       | <b>1054.113</b> | 0.755          | 1053.861       | E[39] |
| E[3]  | 98.542          | 1025.857       | <b>1021.853</b> | 0.755          | 1021.601       | E[38] |
| L[4]  | 126.813         | 993.597        | 989.592         | 0.755          | 989.340        | L[37] |
| N[5]  | 155.324         | <b>965.326</b> | 961.321         | 961.573        | 961.069        | N[36] |
| K[6]  | 187.347         | <b>936.815</b> | 932.810         | 933.062        | 932.558        | K[35] |
| L[7]  | 215.618         | 904.793        | 900.788         | 901.038        | 899.534        | L[34] |
| L[8]  | 243.889         | 876.533        | 872.515         | 872.767        | 872.263        | L[33] |
| G[9]  | 258.145         | 848.249        | <b>844.244</b>  | <b>844.496</b> | <b>843.992</b> | G[32] |
| K[10] | 290.169         | 833.994        | 829.989         | 830.241        | 829.737        | K[31] |
| V[11] | 314.936         | 801.970        | 797.965         | 798.217        | 797.713        | V[30] |
| T[12] | 340.198         | 777.203        | <b>773.198</b>  | <b>773.450</b> | <b>772.946</b> | T[29] |
| I[13] | 368.469         | 751.941        | 747.936         | 748.188        | 747.684        | I[28] |
| A[14] | 398.228         | 723.873        | 719.868         | 719.917        | 719.413        | A[27] |
| Q[15] | 418.343         | 705.911        | 701.906         | 702.158        | 701.654        | Q[26] |
| G[16] | 432.498         | 673.896        | 669.891         | 670.143        | 669.639        | G[25] |
| G[17] | 446.753         | 659.641        | 655.636         | 655.888        | 655.384        | G[24] |
| V[18] | 471.520         | 645.385        | 641.381         | 641.633        | 641.129        | V[23] |
| L[19] | 499.791         | 630.618        | 626.613         | 626.865        | 626.362        | L[22] |
| P[20] | 524.055         | 592.347        | 588.342         | 588.594        | 588.090        | P[21] |
| T[21] | 552.965         | 568.094        | 564.079         | 564.331        | 563.827        | T[20] |
| I[22] | 580.830         | <b>539.573</b> | 535.569         | 535.820        | 535.317        | I[19] |
| Q[23] | 612.851         | 511.302        | 507.298         | 507.549        | 507.046        | Q[18] |
| A[24] | 630.610         | 479.288        | 475.283         | 475.535        | 475.031        | A[17] |
| V[25] | 655.377         | 461.528        | 457.524         | 457.776        | 457.272        | V[16] |
| L[26] | 683.648         | 436.761        | 432.756         | 433.008        | 432.505        | L[15] |
| L[27] | 711.939         | 408.490        | 404.485         | 404.737        | 404.234        | L[14] |
| P[28] | 736.183         | 380.219        | 376.214         | 376.466        | 375.963        | P[13] |
| K[29] | 768.206         | 355.956        | 351.951         | 352.203        | 351.699        | K[12] |
| K[30] | 800.230         | 323.932        | 319.928         | 320.179        | 319.676        | K[11] |
| T[31] | 825.492         | 291.908        | 287.904         | 288.156        | 287.652        | T[10] |
| E[32] | <b>857.753</b>  | 260.647        | <b>262.642</b>  | 262.894        | <b>262.390</b> | E[0]  |
| S[33] | 879.511         | 234.386        | 230.381         | 230.633        | 230.129        | S[8]  |
| H[34] | 913.775         | 212.932        | 208.927         | 209.179        | 208.675        | H[7]  |
| H[35] | 948.040         | 178.361        | 174.358         | 174.610        | 174.107        | H[6]  |
| K[36] | <b>980.064</b>  | 144.098        | 140.094         | 140.346        | 139.842        | K[5]  |
| A[37] | <b>997.823</b>  | 112.075        | 108.070         | 108.322        | 107.818        | A[4]  |
| K[38] | <b>1029.847</b> | 94.315         | 90.311          | 90.563         | 90.059         | K[3]  |
| G[39] | 1044.102        | 62.292         | 58.287          | 58.539         | 58.035         | G[2]  |
| K[40] | 1086.629        | 48.036         | 44.032          | 44.284         | 43.780         | K[1]  |

# sp | Q6GSS7 | H2A2A\_MOUSE

DEELNKLLGKVTIAQGGVLPNIQAVLLPKKTESHHKAKGK (Acetyl)  
(42.01)

- ▶ fragmentation table for charge state 5+
- ▶ specType=etd
- ▶ score=63.48
- ▶ F113281.dat
- ▶ query=q36936\_p1
- ▶ precursor=724.920490
- ▶ chargePrecursor=6
- ▶ itol=0.5

| AA |    | c              | y              | z+1            | z+2            | z              | AA |    |
|----|----|----------------|----------------|----------------|----------------|----------------|----|----|
| D  | 1  | 27.418         | <b>869.701</b> | 866.497        | 0.806          | 866.290        | D  | 40 |
| E  | 2  | 93.226         | 846.696        | 843.492        | 0.806          | 843.290        | E  | 39 |
| E  | 3  | 79.035         | 820.887        | 817.683        | 0.806          | 817.482        | E  | 38 |
| L  | 4  | 131.852        | 795.079        | 791.875        | 0.806          | 791.673        | L  | 37 |
| N  | 5  | 134.660        | <b>772.462</b> | 769.258        | 769.050        | 769.057        | N  | 36 |
| K  | 6  | 150.079        | 748.653        | <b>746.450</b> | <b>746.651</b> | <b>746.248</b> | K  | 35 |
| L  | 7  | 172.696        | 724.034        | 720.831        | 721.032        | 720.629        | L  | 34 |
| L  | 8  | 195.313        | 701.418        | 698.214        | 698.415        | 698.012        | L  | 33 |
| G  | 9  | 206.717        | 678.801        | 675.597        | 675.799        | 675.395        | G  | 32 |
| K  | 10 | 232.336        | 657.396        | 654.193        | 654.394        | 653.991        | K  | 31 |
| V  | 11 | 262.150        | 641.777        | <b>638.574</b> | <b>638.775</b> | 0.38372        | V  | 30 |
| Y  | 12 | 272.360        | 621.964        | 618.760        | 618.962        | 618.558        | Y  | 29 |
| I  | 13 | 284.976        | 601.754        | 598.550        | 598.752        | 598.349        | I  | 28 |
| A  | 14 | 309.184        | 579.137        | 575.934        | 576.135        | 575.732        | A  | 27 |
| Q  | 15 | 334.795        | 564.930        | 561.726        | 561.928        | 561.525        | Q  | 26 |
| G  | 16 | 346.200        | <b>539.318</b> | 536.114        | 536.316        | 535.913        | G  | 25 |
| G  | 17 | 357.604        | 527.914        | <b>524.710</b> | <b>524.912</b> | <b>524.509</b> | G  | 24 |
| V  | 18 | 377.418        | 516.510        | 513.306        | 513.507        | 513.104        | V  | 23 |
| L  | 19 | 400.035        | 496.696        | 493.492        | 493.694        | 493.291        | L  | 22 |
| P  | 20 | 419.445        | 474.079        | 470.875        | 471.077        | 470.674        | P  | 21 |
| N  | 21 | 442.254        | 454.669        | 451.465        | 451.666        | 451.263        | N  | 20 |
| I  | 22 | 464.871        | 431.860        | 428.656        | 428.858        | 428.455        | I  | 19 |
| Q  | 23 | 490.482        | 409.243        | 406.039        | 406.241        | 405.838        | Q  | 18 |
| A  | 24 | 504.690        | 387.631        | 384.427        | 384.629        | 384.226        | A  | 17 |
| V  | 25 | <b>524.503</b> | 369.424        | 366.220        | 366.422        | 366.019        | V  | 16 |
| L  | 26 | 547.120        | 349.610        | 346.407        | 346.608        | 346.205        | L  | 15 |
| L  | 27 | 569.737        | 326.994        | 323.790        | 323.991        | 323.588        | L  | 14 |
| P  | 28 | 589.148        | 304.377        | 301.173        | 301.375        | 300.971        | P  | 13 |
| K  | 29 | 614.767        | 284.956        | 281.762        | 281.964        | 281.561        | K  | 12 |
| K  | 30 | 640.388        | 259.347        | 256.143        | 256.345        | 255.942        | K  | 11 |
| I  | 31 | <b>660.595</b> | 233.728        | 230.524        | 230.726        | 230.323        | I  | 10 |
| L  | 32 | 684.809        | 213.519        | 210.315        | 210.517        | 210.114        | L  | 9  |
| S  | 33 | <b>703.810</b> | 187.710        | 184.506        | 184.708        | 184.305        | S  | 8  |
| H  | 34 | 731.222        | 170.304        | 167.100        | 167.302        | 166.898        | H  | 7  |
| H  | 35 | 758.634        | 142.892        | 139.688        | 139.890        | 139.487        | H  | 6  |
| K  | 36 | 784.253        | 115.480        | 112.276        | 112.478        | 112.075        | K  | 5  |
| A  | 37 | 798.460        | 89.861         | 86.657         | 86.859         | 86.456         | A  | 4  |
| K  | 38 | 824.079        | 75.054         | 72.450         | 72.652         | 72.248         | K  | 3  |
| G  | 39 | <b>835.483</b> | 50.035         | 46.831         | 47.033         | 46.629         | G  | 2  |
| K  | 40 | 869.304        | 38.830         | 35.427         | 35.628         | 35.225         | K  | 1  |





# sp | Q6GSS7 | H2A2A\_MOUSE

DEELNKLLGKVTIAQGGVLPNIQAVLLPKKTESHHKAKGK (Acetyl)  
(42.01)

- ▶ fragmentation table for charge state 1+
- ▶ specType=etd
- ▶ score=69.13
- ▶ F113281.dat
- ▶ query=q36937\_p1
- ▶ precursor=869.703220
- ▶ chargePrecursor=5
- ▶ itol=0.5

| AA | c  | y               | z+1             | z+2             | z               | AA       |       |
|----|----|-----------------|-----------------|-----------------|-----------------|----------|-------|
| D  | 1  | 133.061         | 4344.477        | 4328.458        | 0.000           | 4337.450 | D[40] |
| E  | 2  | 262.103         | 4229.450        | 4213.431        | 0.000           | 4212.423 | E[30] |
| E  | 3  | 391.146         | 4109.420        | 4094.400        | 0.000           | 4093.392 | E[18] |
| L  | 4  | 504.230         | 3971.364        | 3955.346        | 0.000           | 3954.338 | L[37] |
| N  | 5  | 618.273         | 3858.280        | 3842.262        | 3843.269        | 3841.254 | N[30] |
| K  | 6  | <b>746.368</b>  | 3744.237        | 3728.219        | 3729.227        | 3727.211 | K[35] |
| L  | 7  | <b>859.452</b>  | 3616.142        | 3600.124        | 3601.132        | 3599.116 | L[34] |
| L  | 8  | <b>972.536</b>  | 3503.058        | 3487.040        | 3488.048        | 3486.032 | L[33] |
| G  | 9  | <b>1029.558</b> | 3399.974        | 3373.956        | 3374.963        | 3372.946 | G[15] |
| K  | 10 | <b>1157.652</b> | 3352.953        | 3316.934        | 3317.942        | 3315.926 | K[31] |
| V  | 11 | <b>1256.721</b> | 3204.858        | 3188.839        | 3189.847        | 3187.831 | V[30] |
| T  | 12 | 1357.769        | 3105.796        | 3089.771        | 3090.779        | 3088.762 | T[29] |
| I  | 13 | 1470.853        | 3004.742        | 2988.723        | 2989.731        | 2987.715 | I[28] |
| A  | 14 | <b>1541.890</b> | 2891.695        | 2875.676        | 2876.684        | 2874.667 | A[27] |
| Q  | 15 | <b>1609.948</b> | 2820.621        | 2804.602        | 2805.610        | 2803.594 | Q[26] |
| G  | 16 | 1726.970        | 2692.562        | 2676.543        | 2677.551        | 2675.536 | G[25] |
| G  | 17 | 1783.991        | 2635.541        | 2619.522        | 2620.530        | 2618.514 | G[24] |
| V  | 18 | 1883.060        | 2578.519        | 2562.500        | 2563.508        | 2561.493 | V[23] |
| L  | 19 | 1996.144        | 2479.451        | 2463.432        | 2464.440        | 2462.424 | L[22] |
| T  | 20 | 2093.196        | 2366.361        | 2350.342        | 2351.350        | 2349.344 | T[21] |
| N  | 21 | 2207.239        | 2269.314        | 2253.295        | 2254.303        | 2252.287 | N[20] |
| I  | 22 | 2320.323        | 2155.271        | 2139.252        | 2140.260        | 2138.244 | I[19] |
| Q  | 23 | 2448.382        | 2042.187        | 2026.168        | 2027.176        | 2025.160 | Q[18] |
| A  | 24 | 2519.419        | 1914.128        | 1898.110        | 1899.117        | 1897.102 | A[17] |
| V  | 25 | 2618.488        | 1843.081        | <b>1827.073</b> | 1828.080        | 1826.065 | V[16] |
| L  | 26 | 2713.572        | 1744.023        | <b>1728.004</b> | 1729.012        | 1727.000 | L[15] |
| L  | 27 | 2844.656        | 1630.930        | 1614.920        | 1615.928        | 1613.912 | L[14] |
| P  | 28 | 2941.708        | 1517.855        | 1501.836        | <b>1502.844</b> | 1500.828 | P[13] |
| K  | 29 | 3099.803        | 1420.807        | 1404.783        | <b>1405.791</b> | 1403.775 | K[12] |
| K  | 30 | 3197.898        | 1292.707        | <b>1276.688</b> | 1277.696        | 1275.680 | K[11] |
| I  | 31 | 3298.946        | 1104.612        | <b>1148.593</b> | 1149.601        | 1147.585 | I[10] |
| E  | 32 | 3417.889        | <b>1063.564</b> | <b>1047.546</b> | 1048.553        | 1046.538 | E[9]  |
| S  | 33 | 3515.021        | 934.522         | <b>918.503</b>  | 919.511         | 917.495  | S[8]  |
| H  | 34 | 3652.080        | 847.400         | <b>831.471</b>  | 832.479         | 830.463  | H[7]  |
| H  | 35 | 3789.139        | 710.431         | <b>694.412</b>  | 695.420         | 693.404  | H[6]  |
| K  | 36 | 3917.213        | 573.372         | <b>557.353</b>  | <b>558.361</b>  | 556.345  | K[5]  |
| A  | 37 | 3988.271        | 445.277         | <b>429.258</b>  | 430.266         | 428.250  | A[4]  |
| K  | 38 | 4118.268        | 374.242         | <b>353.221</b>  | 354.229         | 352.213  | K[3]  |
| G  | 39 | 4173.387        | 246.145         | 230.130         | 231.134         | 229.118  | G[2]  |
| K  | 40 | 4343.493        | 189.123         | 173.105         | 174.112         | 172.097  | K[1]  |

# sp | Q6GSS7 | H2A2A\_MOUSE

DEELNKLLGKVTIAQGGVLPNIQAVLLPKKTESHHKAKGK (Acetyl)  
(42.01)

- ▶ fragmentation table for charge state 2+
- ▶ specType=etd
- ▶ score=69.13
- ▶ F113281.dat
- ▶ query=q36937\_p1
- ▶ precursor=869.703220
- ▶ chargePrecursor=5
- ▶ itol=0.5

| AA | c  | y               | z=1             | z=2             | z               | AA              |       |
|----|----|-----------------|-----------------|-----------------|-----------------|-----------------|-------|
| D  | 1  | 87.634          | 2172.742        | 2164.733        | 0.504           | 2164.250        | D(40) |
| E  | 2  | 131.555         | 2115.229        | 2107.219        | 0.504           | 2108.715        | E(39) |
| E  | 3  | 186.277         | 2050.707        | 2042.698        | 0.504           | 2042.194        | E(38) |
| L  | 4  | 252.619         | 1986.186        | 1978.176        | 0.504           | 1977.671        | L(17) |
| N  | 5  | 309.640         | 1929.644        | 1921.634        | 1922.136        | 1921.131        | N(36) |
| K  | 6  | 373.688         | 1872.622        | 1864.613        | 1865.117        | 1864.109        | K(35) |
| L  | 7  | 430.230         | 1818.575        | <b>1800.566</b> | <b>1801.069</b> | 1800.067        | L(34) |
| L  | 8  | 486.772         | 1752.031        | 1744.021        | 1744.527        | 1743.520        | L(33) |
| G  | 9  | 515.282         | 1695.491        | <b>1687.481</b> | 1687.985        | <b>1686.978</b> | G(25) |
| K  | 10 | 579.330         | 1640.960        | <b>1658.971</b> | <b>1659.475</b> | 1658.467        | K(31) |
| V  | 11 | 638.884         | 1602.933        | 1594.923        | 1595.427        | 1594.419        | V(30) |
| T  | 12 | 679.388         | 1553.398        | 1545.389        | <b>1545.893</b> | 1544.885        | T(29) |
| L  | 13 | 735.930         | <b>1502.875</b> | 1494.865        | <b>1495.369</b> | 1494.361        | L(28) |
| A  | 14 | 777.449         | 1446.331        | 1438.323        | 1438.827        | <b>1437.819</b> | A(27) |
| Q  | 15 | <b>835.478</b>  | <b>1410.814</b> | 1402.803        | 1403.309        | 1402.301        | Q(26) |
| G  | 16 | 863.989         | 1354.785        | <b>1338.775</b> | 1339.279        | <b>1338.271</b> | G(25) |
| G  | 17 | <b>892.499</b>  | 1318.274        | <b>1310.265</b> | 1310.768        | <b>1309.761</b> | G(24) |
| V  | 18 | <b>942.033</b>  | 1289.763        | <b>1281.754</b> | <b>1282.258</b> | 1281.250        | V(23) |
| L  | 19 | 988.575         | 1240.229        | <b>1232.220</b> | <b>1232.724</b> | 1231.716        | L(22) |
| P  | 20 | 1047.102        | 1183.697        | 1175.687        | 1176.192        | 1175.184        | P(21) |
| N  | 21 | 1104.123        | 1135.181        | <b>1127.151</b> | <b>1127.655</b> | 1126.647        | N(20) |
| I  | 22 | 1160.605        | 1078.139        | <b>1070.130</b> | 1070.634        | <b>1069.626</b> | I(19) |
| Q  | 23 | 1234.605        | 1021.597        | <b>1013.588</b> | <b>1014.092</b> | 1013.084        | Q(18) |
| A  | 24 | 1290.213        | 957.569         | <b>949.558</b>  | <b>950.062</b>  | 949.055         | A(17) |
| V  | 25 | <b>1309.747</b> | 922.049         | 914.039         | 914.544         | 913.536         | V(16) |
| L  | 26 | 1355.289        | 874.515         | <b>865.506</b>  | <b>865.010</b>  | 864.002         | L(15) |
| L  | 27 | 1422.831        | 815.973         | <b>807.964</b>  | <b>808.468</b>  | 807.460         | L(14) |
| F  | 28 | 1471.358        | 759.431         | 751.422         | 751.926         | 750.918         | F(13) |
| K  | 29 | <b>1535.405</b> | 710.909         | <b>702.895</b>  | <b>703.399</b>  | 702.391         | K(12) |
| K  | 30 | <b>1559.453</b> | <b>646.857</b>  | <b>638.848</b>  | <b>639.352</b>  | 638.344         | K(11) |
| T  | 31 | 1649.977        | 588.816         | 580.806         | 581.310         | 580.302         | T(10) |
| E  | 32 | 1714.498        | 532.280         | 524.270         | 524.774         | 523.767         | E(9)  |
| S  | 33 | <b>1758.014</b> | 467.705         | 459.695         | 460.200         | 459.192         | S(8)  |
| H  | 34 | <b>1826.543</b> | 424.248         | 416.239         | 416.743         | 415.735         | H(7)  |
| H  | 35 | 1895.073        | 355.719         | 347.710         | 348.214         | 347.206         | H(6)  |
| K  | 36 | <b>1959.120</b> | 289.180         | 281.170         | 279.684         | 278.676         | K(5)  |
| A  | 37 | <b>1994.139</b> | 223.142         | 215.133         | 213.647         | 212.639         | A(4)  |
| K  | 38 | 2058.686        | 187.624         | 179.614         | 180.118         | 179.110         | K(3)  |
| G  | 39 | 2087.197        | 123.576         | 115.567         | 116.071         | 115.063         | G(2)  |
| K  | 40 | 2172.250        | 95.065          | 87.056          | 87.560          | 86.552          | K(1)  |

# sp | Q6GSS7 | H2A2A\_MOUSE

DEELNKLLGKVTIAQGGVLPNIQAVLLPKKTESHHKAKGK (Acetyl)  
(42.01)

- ▶ fragmentation table for charge state 3+
- ▶ specType=etd
- ▶ score=69.13
- ▶ F113281.dat
- ▶ query=q36937.p1
- ▶ precursor=869.703220
- ▶ chargePrecursor=5
- ▶ itol=0.5

| AA | c  | y               | z=1             | z=2             | z               | AA              |       |
|----|----|-----------------|-----------------|-----------------|-----------------|-----------------|-------|
| D  | 1  | 43.025          | <b>1448.830</b> | 1443.493        | 0.672           | 1443.155        | D[40] |
| E  | 2  | 38.039          | <b>1410.488</b> | <b>1405.148</b> | 0.672           | 1404.813        | E[39] |
| E  | 3  | 131.054         | 1387.974        | 1382.737        | 0.672           | 1381.940        | E[38] |
| L  | 4  | 189.746         | 1374.460        | <b>1319.120</b> | 0.672           | 1319.780        | L[17] |
| N  | 5  | 206.762         | 1286.705        | 1281.425        | <b>1281.761</b> | 1281.089        | N[36] |
| K  | 6  | 249.461         | 1248.751        | 1243.411        | 1243.747        | 1243.075        | K[35] |
| L  | 7  | 287.156         | 1230.053        | <b>1200.713</b> | <b>1201.049</b> | <b>1200.377</b> | L[34] |
| L  | 8  | 324.850         | 1188.358        | <b>1163.018</b> | <b>1163.354</b> | 1162.882        | L[33] |
| G  | 9  | 343.897         | 1130.563        | 1125.243        | <b>1125.059</b> | 1124.989        | G[25] |
| K  | 10 | 386.556         | 1111.656        | 1106.311        | <b>1106.652</b> | 1105.980        | K[31] |
| V  | 11 | 419.578         | 1068.957        | <b>1063.618</b> | <b>1063.954</b> | <b>1063.282</b> | V[30] |
| T  | 12 | 453.261         | 1035.935        | <b>1030.595</b> | <b>1030.931</b> | 1030.259        | T[29] |
| L  | 13 | 490.956         | 1002.252        | <b>996.913</b>  | <b>997.248</b>  | 996.577         | L[28] |
| A  | 14 | 514.675         | 994.597         | 989.238         | <b>989.554</b>  | 988.862         | A[27] |
| G  | 15 | <b>557.321</b>  | 940.876         | 935.570         | <b>935.875</b>  | 935.201         | G[26] |
| G  | 16 | 576.328         | 898.192         | <b>892.853</b>  | <b>893.189</b>  | <b>892.517</b>  | G[25] |
| G  | 17 | 595.335         | 879.185         | <b>873.845</b>  | <b>874.181</b>  | 873.510         | G[24] |
| V  | 18 | 628.358         | 860.178         | 854.838         | 855.174         | 854.502         | V[23] |
| L  | 19 | 666.053         | 827.155         | <b>821.816</b>  | <b>822.151</b>  | 821.480         | L[22] |
| F  | 20 | 688.404         | 789.460         | 784.121         | 784.457         | 783.781         | F[21] |
| N  | 21 | 736.418         | 757.120         | 751.770         | 752.106         | 751.434         | N[20] |
| I  | 22 | 774.113         | 719.095         | 713.756         | <b>714.092</b>  | 713.420         | I[19] |
| Q  | 23 | 816.799         | 681.400         | 676.061         | 676.397         | 675.725         | Q[18] |
| A  | 24 | 846.478         | <b>638.714</b>  | 633.375         | 633.711         | 633.039         | A[17] |
| V  | 25 | 873.501         | 635.035         | 630.088         | 630.032         | 630.360         | V[16] |
| L  | 26 | 911.195         | 582.012         | 576.673         | 577.009         | 576.337         | L[15] |
| L  | 27 | 948.890         | 544.318         | 538.978         | 539.314         | 538.642         | L[14] |
| F  | 28 | 981.241         | 506.623         | 501.284         | 501.620         | 500.948         | F[13] |
| K  | 29 | 1023.939        | 474.272         | 468.933         | 469.269         | 468.597         | K[12] |
| K  | 30 | <b>1066.638</b> | 431.574         | 426.234         | 426.570         | 425.898         | K[11] |
| T  | 31 | 1160.950        | 388.876         | 383.536         | 383.872         | 383.200         | T[10] |
| E  | 32 | 1143.334        | 355.192         | 349.853         | 350.189         | 349.517         | E[9]  |
| S  | 33 | <b>1172.345</b> | 312.179         | 306.839         | 307.175         | 306.503         | S[8]  |
| H  | 34 | <b>1218.031</b> | 263.166         | 257.827         | 258.164         | 257.493         | H[7]  |
| H  | 35 | 1263.716        | 237.482         | 232.142         | 232.478         | 231.806         | H[6]  |
| K  | 36 | 1306.416        | 191.799         | 186.459         | 186.792         | 186.120         | K[5]  |
| A  | 37 | 1330.095        | 149.101         | 143.758         | 144.094         | 143.422         | A[4]  |
| K  | 38 | 1372.793        | 125.418         | 120.079         | 120.414         | 119.743         | K[3]  |
| G  | 39 | <b>1391.801</b> | 83.720          | 77.380          | 77.716          | 77.044          | G[2]  |
| K  | 40 | <b>1448.502</b> | 63.713          | 58.373          | 58.709          | 58.037          | K[1]  |

# sp | Q6GSS7 | H2A2A\_MOUSE

DEELNKLLGKVTIAQGGVLPNIQAVLLPKKTESHHKAKGK (Acetyl)  
(42.01)

- ▶ fragmentation table for charge state 4+
- ▶ specType=etd
- ▶ score=69.13
- ▶ F113281.dat
- ▶ query=q36937\_p1
- ▶ precursor=869.703220
- ▶ chargePrecursor=5
- ▶ itol=0.5

| AA  | c               | y               | z+1             | z+2     | z               | AA  |
|-----|-----------------|-----------------|-----------------|---------|-----------------|-----|
| D1  | 34.621          | <b>1086.875</b> | <b>1082.870</b> | 0.755   | <b>1082.618</b> | L40 |
| E12 | 66.281          | <b>1054.118</b> | 1054.113        | 0.755   | 1054.361        | L38 |
| E13 | 98.542          | 1025.857        | 1021.853        | 0.755   | 1021.601        | E38 |
| L14 | 126.813         | 993.597         | 989.592         | 0.755   | 989.340         | L37 |
| N15 | 155.324         | <b>965.326</b>  | 961.321         | 961.573 | 961.069         | N30 |
| K16 | 187.347         | 936.815         | 932.810         | 933.062 | 932.559         | K35 |
| L17 | 215.618         | 904.791         | 900.786         | 901.038 | 900.534         | L34 |
| L18 | 243.889         | 876.520         | 872.515         | 872.767 | 872.263         | L33 |
| G19 | 278.145         | 848.240         | 844.244         | 844.496 | 843.992         | G32 |
| K10 | 290.169         | 833.994         | 829.989         | 830.241 | 829.737         | K31 |
| V11 | 314.936         | 801.970         | 797.965         | 798.217 | 797.713         | V30 |
| T12 | 340.198         | 777.203         | 773.198         | 773.450 | 772.946         | T29 |
| I13 | 368.469         | 751.941         | 747.936         | 748.188 | 747.684         | I28 |
| A14 | 398.226         | 723.670         | 719.665         | 719.917 | 719.413         | A27 |
| Q15 | 418.243         | 705.911         | 701.906         | 702.158 | 701.654         | Q26 |
| G16 | 432.498         | 673.899         | 669.891         | 670.143 | 669.639         | G25 |
| G17 | 446.753         | 659.641         | 655.636         | 655.888 | 655.384         | G24 |
| V18 | 471.520         | 645.385         | 641.381         | 641.633 | 641.129         | V23 |
| L19 | 499.791         | 620.618         | 616.613         | 616.865 | 616.362         | L22 |
| P20 | 524.056         | 592.347         | 588.342         | 588.594 | 588.090         | P21 |
| N21 | 552.305         | 568.084         | 564.079         | 564.331 | 563.827         | N20 |
| I22 | 580.836         | 539.573         | 535.569         | 535.820 | 535.317         | I19 |
| Q23 | 612.851         | 511.302         | 507.298         | 507.549 | 507.046         | Q18 |
| A24 | 630.610         | 479.288         | 475.283         | 475.535 | 475.031         | A17 |
| V25 | 655.377         | 461.528         | 457.524         | 457.776 | 457.272         | V16 |
| L26 | 683.648         | 436.761         | 432.756         | 433.008 | 432.505         | L15 |
| L27 | 713.919         | 409.490         | 404.485         | 404.737 | 404.234         | L14 |
| P18 | 736.183         | 380.210         | 376.214         | 376.466 | 375.962         | P13 |
| K19 | 768.208         | 355.959         | 351.951         | 352.203 | 351.699         | K12 |
| K30 | 800.430         | 323.932         | 319.928         | 320.179 | 319.676         | K11 |
| T31 | 825.492         | 291.908         | 287.904         | 288.156 | 287.652         | T10 |
| E32 | 857.753         | 266.647         | 262.642         | 262.894 | 262.390         | E9  |
| S33 | 879.511         | 234.389         | 230.383         | 230.635 | 230.130         | S9  |
| H34 | 913.775         | 212.622         | 208.623         | 208.875 | 208.371         | H7  |
| H35 | 948.040         | 178.361         | 174.358         | 174.610 | 174.107         | H0  |
| K36 | 980.064         | 144.098         | 140.094         | 140.346 | 139.842         | K5  |
| A37 | 997.823         | 112.075         | 108.070         | 108.322 | 107.818         | A4  |
| K38 | <b>1029.847</b> | 94.315          | 90.311          | 90.563  | 90.059          | K3  |
| C39 | 1044.102        | 62.292          | 58.287          | 58.539  | 58.035          | C2  |
| K40 | 1086.629        | 48.030          | 44.032          | 44.284  | 43.780          | K1  |



# sp | Q6GSS7 | H2A2A\_MOUSE

DEELNKLLGKVTIAQGGVLPNIQAVLLPKKTESHHKAKGK (Acetyl)  
(42.01)

- ▶ fragmentation table for charge state 1+
- ▶ specType=etd
- ▶ score=40.80
- ▶ F113281.dat
- ▶ query=q36938.p1
- ▶ precursor=724.920610
- ▶ chargePrecursor=6
- ▶ itol=0.5

| AA | c  | y               | z=1             | z=2             | z               | AA              |       |
|----|----|-----------------|-----------------|-----------------|-----------------|-----------------|-------|
| D  | 1  | 131.061         | 4344.477        | 4328.458        | 0.000           | 4327.450        | D(40) |
| E  | 2  | 262.103         | 4329.450        | 4213.431        | 0.000           | 4212.423        | E(39) |
| E  | 3  | 393.146         | 4304.407        | 4084.388        | 0.000           | 4083.380        | E(38) |
| L  | 4  | 524.170         | 3973.364        | 3955.345        | 0.000           | 3954.337        | L(17) |
| N  | 5  | 618.273         | 3858.260        | 3842.262        | 3843.269        | 3841.254        | N(36) |
| K  | 6  | <b>746.368</b>  | 3744.237        | 3728.219        | 3729.227        | 3727.211        | K(35) |
| L  | 7  | 859.452         | 3618.142        | 3600.124        | 3601.132        | 3599.116        | L(34) |
| L  | 8  | <b>972.536</b>  | 3503.058        | 3487.040        | 3488.048        | 3486.032        | L(33) |
| G  | 9  | <b>1029.556</b> | 3389.974        | 3373.955        | 3374.963        | 3372.946        | G(25) |
| K  | 10 | 1157.652        | 3332.953        | 3318.934        | 3317.942        | 3315.926        | K(31) |
| V  | 11 | <b>1256.721</b> | 3204.858        | 3188.839        | 3189.847        | 3187.831        | V(30) |
| T  | 12 | 1357.709        | 3105.790        | 3089.771        | 3090.779        | 3088.763        | T(29) |
| I  | 13 | <b>1470.853</b> | 3004.742        | 2988.723        | 2989.731        | 2987.715        | I(28) |
| A  | 14 | 1571.831        | 2894.658        | 2878.639        | 2879.647        | 2877.631        | A(27) |
| G  | 15 | <b>1669.948</b> | 2820.561        | 2804.542        | 2805.550        | 2803.534        | G(26) |
| G  | 16 | 1768.970        | 2692.562        | 2676.543        | 2677.551        | 2675.535        | G(25) |
| G  | 17 | 1783.991        | 2635.541        | 2619.522        | 2620.530        | 2618.514        | G(24) |
| V  | 18 | 1883.080        | 2578.519        | 2562.500        | 2563.508        | 2561.493        | V(23) |
| L  | 19 | 1996.144        | 2479.451        | 2463.432        | 2464.440        | 2462.424        | L(22) |
| F  | 20 | 2093.198        | 2368.397        | 2352.378        | 2353.386        | 2351.370        | F(21) |
| N  | 21 | 2207.239        | 2269.314        | 2253.295        | 2254.303        | 2252.287        | N(20) |
| I  | 22 | 2330.323        | 2155.271        | 2139.252        | 2140.260        | 2138.244        | I(19) |
| Q  | 23 | 2448.392        | 2042.181        | 2026.168        | 2027.176        | 2025.160        | Q(18) |
| A  | 24 | 2518.419        | 1914.129        | 1898.110        | 1899.117        | 1897.102        | A(17) |
| V  | 25 | 2618.488        | 1845.091        | 1827.073        | 1828.080        | <b>1826.065</b> | V(16) |
| L  | 26 | 2731.572        | 1744.023        | 1728.004        | 1729.012        | 1727.000        | L(15) |
| L  | 27 | 2844.656        | 1630.938        | 1614.920        | 1615.928        | 1613.912        | L(14) |
| F  | 28 | 2941.708        | <b>1517.855</b> | 1501.836        | <b>1502.844</b> | 1500.828        | F(13) |
| K  | 29 | 3099.803        | 1420.802        | 1404.783        | <b>1405.791</b> | 1403.775        | K(12) |
| K  | 30 | 3197.898        | 1292.707        | 1276.688        | <b>1277.696</b> | 1275.680        | K(11) |
| T  | 31 | 3298.948        | 1184.612        | <b>1148.593</b> | 1149.600        | 1147.584        | T(10) |
| E  | 32 | 3427.989        | 1083.584        | <b>1047.546</b> | 1048.553        | 1046.537        | E(9)  |
| S  | 33 | 3515.021        | 934.522         | <b>918.503</b>  | 919.511         | 917.495         | S(8)  |
| H  | 34 | 3652.080        | 847.490         | 831.471         | 832.479         | <b>830.463</b>  | H(7)  |
| H  | 35 | 3789.119        | <b>710.431</b>  | <b>694.412</b>  | 695.420         | 693.404         | H(6)  |
| K  | 36 | 3817.233        | 673.372         | <b>557.353</b>  | 558.361         | 556.345         | K(5)  |
| A  | 37 | 3958.274        | 546.271         | <b>429.258</b>  | 430.266         | 428.250         | A(4)  |
| K  | 38 | 4118.366        | 374.240         | <b>358.221</b>  | 359.229         | 357.213         | K(3)  |
| G  | 39 | 4173.397        | 246.145         | 230.126         | 231.134         | 229.118         | G(2)  |
| K  | 40 | 4343.493        | 189.123         | 173.105         | 174.112         | 172.097         | K(1)  |

# sp | Q6GSS7 | H2A2A\_MOUSE

DEELNKLLGKVTIAQGGVLPNIQAVLLPKKTESHHKAKGK (Acetyl)  
(42.01)

- ▶ fragmentation table for charge state 2+
- ▶ specType=etd
- ▶ score=40.80
- ▶ F113281.dat
- ▶ query=q36938.p1
- ▶ precursor=724.920610
- ▶ chargePrecursor=6
- ▶ itol=0.5

| AA | c  | y               | z=1             | z=2             | z               | AA              |       |
|----|----|-----------------|-----------------|-----------------|-----------------|-----------------|-------|
| D  | 1  | 87.634          | 2172.742        | 2164.733        | 0.504           | 2164.250        | D(40) |
| E  | 2  | 131.555         | 2115.229        | 2107.219        | 0.504           | 2108.715        | E(39) |
| E  | 3  | 168.277         | 2050.707        | 2042.698        | 0.504           | 2042.194        | E(38) |
| L  | 4  | 252.619         | 1396.156        | 1379.170        | 0.504           | 1377.671        | L(17) |
| N  | 5  | 309.640         | 1029.644        | 1021.634        | 1922.136        | 1021.131        | N(36) |
| K  | 6  | 373.688         | 1872.622        | 1864.613        | 1865.117        | 1864.109        | K(35) |
| L  | 7  | 430.230         | 1838.575        | <b>1800.566</b> | <b>1801.069</b> | 1800.067        | L(34) |
| L  | 8  | 486.772         | 1752.033        | 1744.023        | 1744.527        | 1743.520        | L(33) |
| Q  | 9  | 515.282         | 1665.491        | 1657.481        | 1657.985        | 1656.979        | Q(25) |
| K  | 10 | 578.336         | 1666.980        | 1658.971        | 1659.475        | 1658.467        | K(31) |
| V  | 11 | 638.884         | 1602.933        | 1594.923        | 1595.427        | 1594.419        | V(30) |
| T  | 12 | 679.358         | 1553.398        | <b>1545.389</b> | <b>1545.893</b> | 1544.885        | T(29) |
| L  | 13 | 735.910         | <b>1502.875</b> | 1494.865        | 1495.369        | 1494.361        | L(28) |
| A  | 14 | 777.469         | 1446.317        | 1438.307        | 1438.811        | 1437.803        | A(27) |
| Q  | 15 | <b>835.478</b>  | 1410.814        | 1402.804        | 1403.308        | 1402.301        | Q(26) |
| G  | 16 | <b>863.989</b>  | 1346.785        | <b>1338.775</b> | 1339.279        | <b>1338.271</b> | G(25) |
| G  | 17 | 892.499         | 1318.274        | <b>1310.265</b> | <b>1310.768</b> | 1309.761        | G(24) |
| V  | 18 | <b>942.033</b>  | 1289.763        | 1281.754        | 1282.258        | 1281.250        | V(23) |
| L  | 19 | <b>990.575</b>  | 1240.229        | <b>1232.220</b> | <b>1232.724</b> | <b>1231.716</b> | L(22) |
| F  | 20 | <b>1047.102</b> | <b>1183.687</b> | 1175.678        | 1176.182        | 1175.174        | F(21) |
| N  | 21 | 1104.152        | 1135.161        | 1127.151        | 1127.655        | 1126.647        | N(20) |
| I  | 22 | <b>1160.605</b> | 1078.139        | 1070.130        | 1070.634        | 1069.626        | I(19) |
| Q  | 23 | 1234.605        | 1021.597        | 1013.588        | 1014.092        | 1013.084        | Q(18) |
| A  | 24 | 1280.213        | 957.568         | <b>949.558</b>  | <b>950.062</b>  | <b>949.055</b>  | A(17) |
| V  | 25 | 1309.747        | 922.049         | <b>914.040</b>  | <b>914.544</b>  | 913.536         | V(16) |
| L  | 26 | 1366.298        | 912.515         | <b>884.506</b>  | 885.010         | <b>884.002</b>  | L(15) |
| L  | 27 | 1422.811        | <b>815.973</b>  | 807.964         | <b>808.468</b>  | 807.460         | L(14) |
| F  | 28 | <b>1471.358</b> | 759.431         | 751.422         | <b>751.926</b>  | 750.918         | F(13) |
| K  | 29 | <b>1535.405</b> | <b>710.905</b>  | <b>702.895</b>  | <b>703.399</b>  | 702.391         | K(12) |
| K  | 30 | <b>1599.453</b> | <b>646.857</b>  | <b>638.848</b>  | <b>639.352</b>  | 638.344         | K(11) |
| T  | 31 | <b>1649.977</b> | 589.816         | <b>574.800</b>  | <b>575.304</b>  | 574.296         | T(10) |
| E  | 32 | <b>1714.408</b> | 532.285         | <b>524.276</b>  | <b>524.780</b>  | 523.772         | E(9)  |
| S  | 33 | 1758.014        | 467.795         | <b>459.755</b>  | <b>460.259</b>  | 459.251         | S(8)  |
| H  | 34 | <b>1826.543</b> | 424.248         | 416.239         | 416.743         | 415.735         | H(7)  |
| H  | 35 | <b>1895.073</b> | 355.719         | 347.710         | 348.214         | 347.206         | H(6)  |
| K  | 36 | 1959.220        | 287.180         | 279.180         | 279.684         | 278.676         | K(5)  |
| A  | 37 | 1994.219        | 223.142         | 215.133         | 215.637         | 214.629         | A(4)  |
| K  | 38 | 2058.686        | 167.624         | 179.614         | 180.118         | 179.110         | K(3)  |
| G  | 39 | 2087.197        | 123.576         | 115.567         | 116.071         | 115.063         | G(2)  |
| K  | 40 | 2172.250        | 95.065          | 87.056          | 87.560          | 86.552          | K(1)  |

# sp | Q6GSS7 | H2A2A\_MOUSE

DEELNKLLGKVTIAQGGVLPNIQAVLLPKKTESHHKAKGK (Acetyl)  
(42.01)

- ▶ fragmentation table for charge state 3+
- ▶ specType=etd
- ▶ score=40.80
- ▶ F113281.dat
- ▶ query=q36938.p1
- ▶ precursor=724.920610
- ▶ chargePrecursor=6
- ▶ itol=0.5

| AA   | c               | y               | z=1             | z=2             | z               | AA   |
|------|-----------------|-----------------|-----------------|-----------------|-----------------|------|
| D 1  | 43.025          | <b>1448.830</b> | <b>1443.491</b> | 0.672           | <b>1443.155</b> | D 40 |
| E 2  | 38.039          | 1410.488        | <b>1405.148</b> | 0.672           | 1404.813        | E 39 |
| E 3  | 131.054         | 1387.974        | 792.737         | 0.672           | 1381.960        | E 38 |
| L 4  | 189.746         | 3154.466        | <b>1319.120</b> | 0.672           | 1315.769        | L 17 |
| N 5  | 206.762         | 1286.705        | 1281.425        | 1281.761        | 1281.089        | N 30 |
| K 6  | 249.461         | 1248.751        | <b>1243.411</b> | <b>1243.747</b> | 1243.075        | K 35 |
| L 7  | 287.156         | 1209.052        | 1206.713        | 1201.949        | 1200.377        | L 34 |
| L 8  | 324.850         | 1168.358        | 1161.012        | <b>1163.354</b> | 1162.882        | L 33 |
| G 9  | 343.877         | 1130.663        | <b>1125.323</b> | <b>1125.059</b> | 1124.999        | G 25 |
| K 10 | 386.556         | 1111.656        | <b>1106.316</b> | <b>1106.652</b> | <b>1105.980</b> | K 31 |
| V 11 | 419.578         | 1068.957        | 1063.619        | 1063.954        | 1063.282        | V 30 |
| T 12 | 453.261         | 1035.935        | 1030.595        | 1030.931        | 1030.259        | T 29 |
| L 13 | 490.956         | 1002.252        | 996.913         | 997.248         | 996.577         | L 28 |
| A 14 | 514.635         | 994.597         | <b>959.218</b>  | <b>959.554</b>  | 958.882         | A 27 |
| Q 15 | <b>557.321</b>  | 942.976         | 935.639         | 935.974         | 935.302         | Q 24 |
| G 16 | 576.328         | 898.192         | <b>892.853</b>  | <b>893.189</b>  | 892.517         | G 23 |
| G 17 | 595.335         | 879.185         | 873.845         | 874.181         | 873.510         | G 24 |
| V 18 | 628.358         | 860.178         | 854.838         | <b>855.174</b>  | 854.502         | V 23 |
| L 19 | 666.053         | 827.155         | 821.815         | <b>822.151</b>  | 821.480         | L 22 |
| F 20 | 698.404         | 789.460         | 784.121         | 784.457         | 783.781         | F 21 |
| N 21 | <b>736.418</b>  | 757.105         | 751.770         | <b>752.106</b>  | 751.434         | N 20 |
| I 22 | 774.113         | 719.095         | 713.756         | <b>714.092</b>  | 713.420         | I 20 |
| Q 23 | <b>816.799</b>  | 681.400         | 676.061         | <b>676.397</b>  | 675.725         | Q 18 |
| A 24 | 840.476         | <b>638.714</b>  | <b>633.375</b>  | <b>633.711</b>  | <b>633.039</b>  | A 17 |
| V 25 | 873.564         | 635.035         | 630.095         | 630.432         | 630.360         | V 18 |
| L 26 | 911.376         | 582.042         | 576.703         | 577.039         | 576.371         | L 15 |
| L 27 | <b>948.890</b>  | 544.318         | 538.978         | 539.314         | 538.642         | L 14 |
| F 28 | 981.241         | 506.623         | 501.284         | 501.620         | 500.948         | F 13 |
| K 29 | 1023.939        | 474.272         | 468.933         | 469.269         | 468.597         | K 12 |
| K 30 | 1066.638        | 431.574         | 426.234         | 426.570         | 425.898         | K 11 |
| T 31 | 1109.330        | 388.876         | 383.537         | 383.873         | 383.200         | T 10 |
| E 32 | <b>1143.334</b> | 355.192         | 349.853         | 350.189         | 349.517         | E 9  |
| S 33 | 1172.345        | 312.179         | 306.839         | 307.175         | 306.503         | S 8  |
| H 34 | 1218.031        | 283.168         | 277.829         | 278.164         | 277.493         | H 7  |
| H 35 | 1263.716        | 237.482         | 232.142         | 232.478         | 231.806         | H 6  |
| K 36 | 1305.411        | 194.795         | 189.456         | 189.792         | 189.120         | K 5  |
| A 37 | <b>1330.095</b> | 149.101         | 143.758         | 144.094         | 143.422         | A 4  |
| K 38 | 1372.793        | 125.418         | 120.079         | 120.414         | 119.743         | K 3  |
| G 39 | 1391.801        | 82.720          | 77.380          | 77.716          | 77.044          | G 2  |
| K 40 | 1448.502        | 63.713          | 58.373          | 58.709          | 58.037          | K 1  |



# sp | Q6GSS7 | H2A2A\_MOUSE

DEELNKLLGKVTIAQGGLVLPNIQAVLLPKKTESHHKAKGK (Acetyl)  
(42.01)

- ▶ fragmentation table for charge state 4+
- ▶ specType=etd
- ▶ score=40.80
- ▶ F113281.dat
- ▶ query=q36938.p1
- ▶ precursor=724.920610
- ▶ chargePrecursor=6
- ▶ itol=0.5

| AA   | c               | y               | z+1             | z+2            | z              | AA   |
|------|-----------------|-----------------|-----------------|----------------|----------------|------|
| L1   | 34.021          | <b>1006.875</b> | 1067.870        | 0.755          | 1062.618       | L140 |
| E12  | 66.281          |                 | <b>1054.113</b> | 0.755          | 1053.861       | L139 |
| E13  | 98.542          | 1025.857        | 1021.853        | 0.755          | 1021.001       | E138 |
| L14  | 126.813         | 993.597         | 989.592         | 0.755          | 989.340        | L137 |
| N15  | 155.234         | <b>965.326</b>  | 961.321         | 961.573        | 961.099        | N136 |
| K16  | 187.347         | <b>936.815</b>  | 932.810         | 933.062        | 932.559        | K135 |
| L17  | 215.618         | 904.791         | 900.786         | <b>901.038</b> | 900.534        | L134 |
| L18  | 243.889         | 876.529         | 872.535         | 872.787        | 872.261        | L133 |
| G19  | 258.145         | 848.240         | <b>844.244</b>  | <b>844.496</b> | <b>843.992</b> | G132 |
| K10  | 290.169         | <b>833.954</b>  | 829.969         | <b>830.241</b> | 829.731        | K131 |
| V11  | 314.936         | 803.970         | 797.965         | 798.217        | 797.713        | V130 |
| L12  | 340.198         | 777.203         | <b>773.198</b>  | <b>773.450</b> | <b>772.946</b> | L129 |
| L13  | 368.469         | <b>751.941</b>  | 747.936         | 748.188        | 747.684        | L128 |
| A14  | 398.228         | 723.970         | 719.965         | 719.917        | 719.413        | A127 |
| Q15  | 418.243         | 705.911         | 701.906         | 702.158        | 701.654        | Q126 |
| G16  | 432.498         | 673.899         | 669.891         | 670.143        | 669.639        | G125 |
| G17  | 446.753         | 659.641         | 655.636         | 655.888        | 655.384        | G124 |
| V18  | 471.520         | 645.385         | 641.381         | 641.633        | 641.129        | V123 |
| L19  | 499.791         | 620.618         | 616.613         | 616.865        | 616.362        | L122 |
| P120 |                 | <b>524.055</b>  | 520.047         | 520.342        | 520.094        | P121 |
| N21  | 523.599         | 569.094         | 564.079         | 564.331        | 563.827        | N120 |
| I22  | 580.836         | 539.573         | 535.569         | 535.820        | 535.317        | I119 |
| Q23  | 612.851         | 511.300         | 507.298         | 507.549        | 507.048        | Q118 |
| A24  | 630.610         | 479.288         | 475.283         | 475.535        | 475.031        | A117 |
| V25  | 695.377         | 461.528         | 457.524         | 457.776        | 457.272        | V116 |
| L26  | 683.648         | 436.761         | 432.756         | 433.008        | 432.505        | L115 |
| L27  | 713.919         | 408.490         | 404.485         | 404.737        | 404.234        | L114 |
| P128 | 736.183         | 380.230         | 376.214         | 376.466        | 375.962        | P113 |
| K129 | 768.206         | 355.959         | 351.951         | 352.203        | 351.699        | K112 |
| K30  | 800.230         | 323.932         | 319.928         | 320.179        | 319.676        | K111 |
| T31  | 825.492         | 291.908         | 287.904         | 288.156        | 287.652        | T110 |
| E32  | 857.753         | 266.647         | 262.642         | 262.894        | 262.390        | E109 |
| S33  | <b>879.511</b>  | 236.389         | 230.383         | 230.635        | 230.129        | S108 |
| H14  | <b>913.775</b>  | 212.620         | 208.623         | 208.875        | 208.371        | H17  |
| H35  | 948.040         | 178.361         | 174.358         | 174.610        | 174.107        | H16  |
| K36  | <b>980.064</b>  | 144.099         | 140.094         | 140.346        | 139.842        | K15  |
| A37  | 997.823         | 112.075         | 108.070         | 108.322        | 107.818        | A14  |
| K38  | <b>1029.847</b> | 94.315          | 90.311          | 90.563         | 90.059         | K13  |
| G39  | <b>1044.102</b> | 62.292          | 58.287          | 58.539         | 58.035         | G12  |
| K40  | <b>1086.629</b> | 48.036          | 44.032          | 44.284         | 43.780         | K11  |

# sp | Q6GSS7 | H2A2A\_MOUSE

DEELNKLLGKVTIAQGGVLPNIQAVLLPKKTESHHKAKGK (Acetyl)  
(42.01)

- ▶ fragmentation table for charge state 5+
- ▶ specType=etd
- ▶ score=40.80
- ▶ F113281.dat
- ▶ query=q36938\_p1
- ▶ precursor=724.920610
- ▶ chargePrecursor=6
- ▶ itol=0.5

| AA |    | c              | y              | z+1            | z+2            | z              | AA |    |
|----|----|----------------|----------------|----------------|----------------|----------------|----|----|
| D  | 1  | 27.418         | <b>869.701</b> | 866.497        | 0.806          | 866.290        | D  | 40 |
| E  | 2  | 93.226         | 846.696        | 843.492        | 0.806          | 843.290        | E  | 39 |
| E  | 3  | 79.035         | 820.887        | 817.683        | 0.806          | 817.482        | E  | 38 |
| L  | 4  | 131.852        | 795.079        | 791.875        | 0.806          | 791.673        | L  | 37 |
| N  | 5  | 134.660        | 772.462        | 769.258        | 769.450        | 769.057        | N  | 36 |
| K  | 6  | 150.079        | 749.653        | <b>746.450</b> | <b>746.651</b> | <b>746.248</b> | K  | 35 |
| L  | 7  | 172.696        | 724.034        | 720.831        | 721.032        | 720.629        | L  | 34 |
| L  | 8  | 195.313        | 701.418        | 698.214        | 698.415        | 698.012        | L  | 33 |
| G  | 9  | 206.717        | 678.801        | 675.597        | 675.799        | 675.395        | G  | 32 |
| K  | 10 | 232.336        | 657.396        | 654.193        | 654.394        | 653.991        | K  | 31 |
| V  | 11 | 252.150        | 641.777        | 638.574        | <b>638.775</b> | 638.372        | V  | 30 |
| I  | 12 | 272.360        | 621.964        | 618.760        | 618.962        | 618.558        | I  | 29 |
| I  | 13 | 284.976        | 601.754        | 598.550        | 598.752        | 598.349        | I  | 28 |
| A  | 14 | 309.184        | 579.137        | 575.934        | 576.135        | 575.732        | A  | 27 |
| Q  | 15 | 334.795        | 564.930        | 561.726        | 561.928        | 561.525        | Q  | 26 |
| G  | 16 | 346.200        | 539.118        | 536.114        | 536.316        | 535.913        | G  | 25 |
| G  | 17 | 357.604        | 527.914        | <b>524.710</b> | <b>524.912</b> | <b>524.509</b> | G  | 24 |
| V  | 18 | 377.418        | 516.510        | 513.306        | 513.507        | 513.104        | V  | 23 |
| L  | 19 | 400.035        | 496.696        | 493.492        | 493.694        | 493.291        | L  | 22 |
| P  | 20 | 419.445        | 474.079        | 470.875        | 471.077        | 470.674        | P  | 21 |
| N  | 21 | 442.254        | 454.669        | 451.465        | 451.666        | 451.263        | N  | 20 |
| I  | 22 | 457.871        | 431.860        | 428.656        | 428.858        | 428.455        | I  | 19 |
| Q  | 23 | 490.982        | 409.243        | 406.039        | 406.241        | 405.838        | Q  | 18 |
| A  | 24 | 504.690        | 387.631        | 384.427        | 384.629        | 384.226        | A  | 17 |
| V  | 25 | <b>524.503</b> | 369.424        | 366.220        | 366.422        | 366.019        | V  | 16 |
| L  | 26 | 547.120        | 349.610        | 346.407        | 346.608        | 346.205        | L  | 15 |
| L  | 27 | 569.737        | 326.994        | 323.790        | 323.991        | 323.588        | L  | 14 |
| P  | 28 | 589.148        | 304.377        | 301.173        | 301.375        | 300.971        | P  | 13 |
| K  | 29 | 614.767        | 284.956        | 281.762        | 281.964        | 281.561        | K  | 12 |
| K  | 30 | 640.386        | 259.347        | 256.143        | 256.345        | 255.942        | K  | 11 |
| I  | 31 | 660.395        | 233.728        | 230.524        | 230.726        | 230.323        | I  | 10 |
| L  | 32 | 688.404        | 213.519        | 210.315        | 210.517        | 210.114        | L  | 9  |
| S  | 33 | 703.810        | 187.710        | 184.506        | 184.708        | 184.305        | S  | 8  |
| H  | 34 | 731.222        | 170.304        | 167.100        | 167.302        | 166.898        | H  | 7  |
| H  | 35 | 758.634        | 142.892        | 139.688        | 139.890        | 139.487        | H  | 6  |
| K  | 36 | 784.253        | 115.480        | 112.276        | 112.478        | 112.075        | K  | 5  |
| A  | 37 | 798.460        | 89.861         | 86.657         | 86.859         | 86.456         | A  | 4  |
| K  | 38 | 824.079        | 75.054         | 72.450         | 72.652         | 72.248         | K  | 3  |
| G  | 39 | <b>835.483</b> | 50.035         | 46.831         | 47.033         | 46.629         | G  | 2  |
| K  | 40 | 869.304        | 38.830         | 35.427         | 35.628         | 35.225         | K  | 1  |



# sp | Q6GSS7 | H2A2A\_MOUSE

DEELNKLLGK <sup>Dimethyl</sup> 28.03 VTIAQGGVLPNIQAVLLPKKTESHKAKGK <sup>Acetyl</sup> 42.01

- ▶ fragmentation table for charge state 1+
- ▶ specType=cid
- ▶ score=42.67
- ▶ F113281.dat
- ▶ query=q36977\_p1
- ▶ precursor=875.302790
- ▶ chargePrecursor=5
- ▶ itol=0.5

| AA   | a               | a*       | aΔ              | b               | b*       | bΔ             | r              | y*       | yΔ       | AA   |
|------|-----------------|----------|-----------------|-----------------|----------|----------------|----------------|----------|----------|------|
| D1   | 383029          | 0.000    | 169.020         | 110.030         | 0.000    | 388.050        | 4117.920       | 4339.480 | 4534.487 | E140 |
| E2   | 377740          | 0.000    | 169.020         | 109.040         | 0.000    | 377.060        | 4201.480       | 4424.050 | 4624.057 | E139 |
| E3   | 348124          | 0.000    | 120.110         | <b>374.110</b>  | 0.000    | <b>356.100</b> | 4430.430       | 4415.410 | 4610.420 | E138 |
| L4   | 470220          | 0.000    | 440.100         | <b>487.203</b>  | 0.000    | 489.493        | 3980.390       | 3980.390 | 4081.383 | L137 |
| N5   | <b>143.251</b>  | 0.000    | 100.040         | <b>601.240</b>  | 0.000    | 704.220        | 3990.310       | 3990.310 | 4090.303 | N136 |
| K10  | <b>701.346</b>  | 0.000    | 600.330         | 600.340         | 0.000    | 712.310        | 3772.250       | 3772.250 | 4294.260 | K135 |
| L7   | 634.631         | 0.000    | <b>796.420</b>  | 643.420         | 0.000    | 826.380        | <b>824.415</b> | 844.114  | 862.144  | L134 |
| L8   | 657.615         | 0.000    | <b>809.504</b>  | 665.500         | 0.000    | <b>838.463</b> | <b>837.499</b> | 851.000  | 864.000  | L133 |
| G9   | 764.708         | 0.000    | 650.690         | 650.700         | 0.000    | 650.700        | 814.000        | 826.000  | 838.000  | G132 |
| K10  | <b>1140.862</b> | 1140.810 | 1140.810        | 1140.810        | 0.000    | <b>952.504</b> | 1108.000       | 1108.000 | 1244.000 | K131 |
| V11  | <b>1239.731</b> | 1239.730 | <b>1221.720</b> | <b>1267.720</b> | 1267.720 | 1267.720       | 1244.000       | 1244.000 | 1380.000 | V130 |
| T12  | 1266.718        | 1266.710 | 1266.710        | 1266.710        | 0.000    | 1266.710       | 1300.700       | 1300.700 | 1436.700 | T129 |
| E13  | 1261.660        | 1261.660 | 1261.660        | 1261.660        | 0.000    | 1261.660       | 1300.700       | 1300.700 | 1436.700 | E128 |
| A14  | 1254.600        | 1254.610 | 1254.610        | 1254.610        | 0.000    | 1254.610       | 1281.600       | 1281.600 | 1367.600 | A127 |
| Q15  | 1085.500        | 1085.510 | 1085.510        | 1085.510        | 0.000    | 1085.510       | 1240.400       | 1240.400 | 1326.400 | Q126 |
| G16  | 1100.500        | 1100.510 | 1100.510        | 1100.510        | 0.000    | 1100.510       | 1260.500       | 1260.500 | 1346.500 | G125 |
| G17  | 1107.510        | 1107.520 | 1107.520        | 1107.520        | 0.000    | 1107.520       | 1276.500       | 1276.500 | 1362.500 | G124 |
| V18  | 1090.500        | 1090.510 | 1090.510        | 1090.510        | 0.000    | 1090.510       | 1256.500       | 1256.500 | 1342.500 | V123 |
| L19  | 1114.510        | 1114.520 | 1114.520        | 1114.520        | 0.000    | 1114.520       | 1276.500       | 1276.500 | 1362.500 | L122 |
| P20  | 1078.500        | 1078.510 | 1078.510        | 1078.510        | 0.000    | 1078.510       | 1236.500       | 1236.500 | 1322.500 | P121 |
| K21  | 1099.500        | 1099.510 | 1099.510        | 1099.510        | 0.000    | 1099.510       | 1256.500       | 1256.500 | 1342.500 | K120 |
| G22  | 1093.510        | 1093.520 | 1093.520        | 1093.520        | 0.000    | 1093.520       | 1246.500       | 1246.500 | 1332.500 | G119 |
| Q23  | 1043.500        | 1043.510 | 1043.510        | 1043.510        | 0.000    | 1043.510       | 1206.500       | 1206.500 | 1292.500 | Q118 |
| A14  | 1026.420        | 1026.430 | 1026.430        | 1026.430        | 0.000    | 1026.430       | 1186.400       | 1186.400 | 1272.400 | A117 |
| V24  | 1000.500        | 1000.510 | 1000.510        | 1000.510        | 0.000    | 1000.510       | 1166.400       | 1166.400 | 1252.400 | V116 |
| L26  | 1174.610        | 1174.620 | 1174.620        | 1174.620        | 0.000    | 1174.620       | 1194.600       | 1194.600 | 1280.600 | L115 |
| L27  | 1017.600        | 1017.610 | 1017.610        | 1017.610        | 0.000    | 1017.610       | 1154.600       | 1154.600 | 1240.600 | L114 |
| P28  | 1154.710        | 1154.720 | 1154.720        | 1154.720        | 0.000    | 1154.720       | 1182.600       | 1182.600 | 1268.600 | P113 |
| K29  | 1002.610        | 1002.620 | 1002.620        | 1002.620        | 0.000    | 1002.620       | 1130.600       | 1130.600 | 1216.600 | K112 |
| K130 | 1000.600        | 1000.610 | 1000.610        | 1000.610        | 0.000    | 1000.610       | 1120.600       | 1120.600 | 1206.600 | K111 |
| L131 | 1010.600        | 1010.610 | 1010.610        | 1010.610        | 0.000    | 1010.610       | 1130.600       | 1130.600 | 1216.600 | L110 |
| E132 | 1010.600        | 1010.610 | 1010.610        | 1010.610        | 0.000    | 1010.610       | 1130.600       | 1130.600 | 1216.600 | E109 |
| E133 | 1010.610        | 1010.620 | 1010.620        | 1010.620        | 0.000    | 1010.620       | 1130.600       | 1130.600 | 1216.600 | E108 |
| L134 | 1010.610        | 1010.620 | 1010.620        | 1010.620        | 0.000    | 1010.620       | 1130.600       | 1130.600 | 1216.600 | L107 |
| K135 | 1010.610        | 1010.620 | 1010.620        | 1010.620        | 0.000    | 1010.620       | 1130.600       | 1130.600 | 1216.600 | K106 |
| K136 | 1010.610        | 1010.620 | 1010.620        | 1010.620        | 0.000    | 1010.620       | 1130.600       | 1130.600 | 1216.600 | K105 |
| A137 | 1010.610        | 1010.620 | 1010.620        | 1010.620        | 0.000    | 1010.620       | 1130.600       | 1130.600 | 1216.600 | A104 |
| K138 | 1010.610        | 1010.620 | 1010.620        | 1010.620        | 0.000    | 1010.620       | 1130.600       | 1130.600 | 1216.600 | K103 |
| G139 | 1010.610        | 1010.620 | 1010.620        | 1010.620        | 0.000    | 1010.620       | 1130.600       | 1130.600 | 1216.600 | G102 |
| K140 | 1010.610        | 1010.620 | 1010.620        | 1010.620        | 0.000    | 1010.620       | 1130.600       | 1130.600 | 1216.600 | K101 |

# sp | Q6GSS7 | H2A2A\_MOUSE

DEELNKLLGK <sup>Dimethyl</sup> 28.03 VTIAQGGVLPNIQAVLLPKKTESHKAKGK <sup>Acetyl</sup> 42.01

- ▶ fragmentation table for charge state 2+
- ▶ specType=cid
- ▶ score=42.67
- ▶ F113281.dat
- ▶ query=q36977\_p1
- ▶ precursor=875.302790
- ▶ chargePrecursor=5
- ▶ itol=0.5

| AA  | a              | a*             | a.z            | b               | b*              | b.z             | y               | y*              | y.z            | AA             |      |
|-----|----------------|----------------|----------------|-----------------|-----------------|-----------------|-----------------|-----------------|----------------|----------------|------|
| G1  | 44             | 523            | 0.504          | 35              | 513             | 0.504           | 49              | 503             | 238            | 201            | L134 |
| E2  | 109            | 611            | 0.504          | 109             | 611             | 0.504           | 114             | 616             | 238            | 201            | L134 |
| E3  | 174            | 536            | 0.504          | 184             | 561             | 0.504           | 179             | 539             | 204            | 221            | E126 |
| L4  | 231            | 109            | 0.504          | 221             | 113             | 0.504           | 236             | 109             | 204            | 221            | L134 |
| N5  | 287            | 230            | 0.504          | 278             | 225             | 0.504           | 292             | 234             | 204            | 221            | N130 |
| K6  | 312            | 319            | <b>342.164</b> | <b>342.172</b>  | <b>305.919</b>  | <b>306.923</b>  | <b>356.169</b>  | <b>357.173</b>  | <b>189.623</b> | <b>189.625</b> | K132 |
| L7  | 367            | 319            | 0.504          | 358             | 314             | 0.504           | 372             | 316             | 204            | 221            | L134 |
| L8  | 424            | 261            | 0.504          | 415             | 256             | 0.504           | 429             | 260             | 204            | 221            | L134 |
| G9  | 480            | 274            | 0.504          | 471             | 269             | 0.504           | 485             | 273             | 204            | 221            | G128 |
| K10 | 536            | 369            | 0.504          | 527             | 364             | 0.504           | 541             | 368             | 204            | 221            | K132 |
| V11 | <b>620.369</b> | <b>511.106</b> | <b>611.365</b> | <b>612.369</b>  | <b>503.106</b>  | <b>504.110</b>  | <b>675.365</b>  | <b>676.369</b>  | <b>154.865</b> | <b>154.867</b> | V130 |
| L12 | 676            | 369            | 0.504          | 667             | 364             | 0.504           | 681             | 368             | 204            | 221            | L134 |
| L13 | <b>737.435</b> | <b>718.922</b> | <b>718.430</b> | <b>741.432</b>  | <b>732.919</b>  | <b>732.427</b>  | <b>804.432</b>  | <b>805.436</b>  | <b>144.932</b> | <b>144.934</b> | L132 |
| L14 | 805            | 369            | 0.504          | 796             | 364             | 0.504           | 810             | 368             | 204            | 221            | L134 |
| G15 | 861            | 443            | 0.504          | 852             | 438             | 0.504           | 866             | 442             | 204            | 221            | G128 |
| G16 | <b>915.493</b> | <b>848.980</b> | <b>848.488</b> | <b>918.490</b>  | <b>889.491</b>  | <b>889.978</b>  | <b>986.490</b>  | <b>987.494</b>  | <b>134.990</b> | <b>134.992</b> | G124 |
| G17 | 986            | 443            | 0.504          | 977             | 438             | 0.504           | 991             | 442             | 204            | 221            | G128 |
| V18 | 1042           | 536            | 0.504          | <b>1034.533</b> | <b>1035.537</b> | <b>1036.541</b> | <b>1133.533</b> | <b>1134.537</b> | <b>154.533</b> | <b>154.535</b> | V130 |
| L19 | 1108           | 536            | 0.504          | <b>1099.587</b> | <b>1099.589</b> | <b>1099.591</b> | <b>1196.587</b> | <b>1197.591</b> | <b>144.587</b> | <b>144.589</b> | L132 |
| P20 | 1164           | 536            | 0.504          | <b>1155.621</b> | <b>1155.623</b> | <b>1155.625</b> | <b>1252.621</b> | <b>1253.625</b> | <b>134.621</b> | <b>134.623</b> | P128 |
| G21 | 1220           | 536            | 0.504          | <b>1211.655</b> | <b>1211.657</b> | <b>1211.659</b> | <b>1308.655</b> | <b>1309.659</b> | <b>124.655</b> | <b>124.657</b> | G128 |
| G22 | 1276           | 536            | 0.504          | <b>1262.689</b> | <b>1262.691</b> | <b>1262.693</b> | <b>1359.689</b> | <b>1360.693</b> | <b>114.689</b> | <b>114.691</b> | G128 |
| G23 | 1332           | 536            | 0.504          | <b>1318.723</b> | <b>1318.725</b> | <b>1318.727</b> | <b>1415.723</b> | <b>1416.727</b> | <b>104.723</b> | <b>104.725</b> | G128 |
| V24 | 1388           | 536            | 0.504          | <b>1374.757</b> | <b>1374.759</b> | <b>1374.761</b> | <b>1471.757</b> | <b>1472.761</b> | <b>94.757</b>  | <b>94.759</b>  | V130 |
| L25 | 1444           | 536            | 0.504          | <b>1430.791</b> | <b>1430.793</b> | <b>1430.795</b> | <b>1527.791</b> | <b>1528.795</b> | <b>84.791</b>  | <b>84.793</b>  | L132 |
| L26 | 1500           | 536            | 0.504          | <b>1476.825</b> | <b>1476.827</b> | <b>1476.829</b> | <b>1573.825</b> | <b>1574.829</b> | <b>74.825</b>  | <b>74.827</b>  | L132 |
| L27 | 1556           | 536            | 0.504          | <b>1532.859</b> | <b>1532.861</b> | <b>1532.863</b> | <b>1629.859</b> | <b>1630.863</b> | <b>64.859</b>  | <b>64.861</b>  | L132 |
| P28 | 1612           | 536            | 0.504          | <b>1588.893</b> | <b>1588.895</b> | <b>1588.897</b> | <b>1685.893</b> | <b>1686.897</b> | <b>54.893</b>  | <b>54.895</b>  | P128 |
| K29 | 1668           | 536            | 0.504          | <b>1644.927</b> | <b>1644.929</b> | <b>1644.931</b> | <b>1741.927</b> | <b>1742.931</b> | <b>44.927</b>  | <b>44.929</b>  | K132 |
| K30 | 1724           | 536            | 0.504          | <b>1700.961</b> | <b>1700.963</b> | <b>1700.965</b> | <b>1797.961</b> | <b>1798.965</b> | <b>34.961</b>  | <b>34.963</b>  | K132 |
| L31 | 1780           | 536            | 0.504          | <b>1756.995</b> | <b>1756.997</b> | <b>1756.999</b> | <b>1853.995</b> | <b>1854.999</b> | <b>24.995</b>  | <b>24.997</b>  | L132 |
| E32 | 1836           | 536            | 0.504          | <b>1812.103</b> | <b>1812.105</b> | <b>1812.107</b> | <b>1909.103</b> | <b>1910.107</b> | <b>14.103</b>  | <b>14.105</b>  | E126 |
| S33 | 1892           | 536            | 0.504          | <b>1868.137</b> | <b>1868.139</b> | <b>1868.141</b> | <b>1965.137</b> | <b>1966.141</b> | <b>4.137</b>   | <b>4.139</b>   | S130 |
| H34 | 1948           | 536            | 0.504          | <b>1924.171</b> | <b>1924.173</b> | <b>1924.175</b> | <b>2021.171</b> | <b>2022.175</b> | <b>-4.171</b>  | <b>-4.173</b>  | H130 |
| H35 | 2004           | 536            | 0.504          | <b>1980.205</b> | <b>1980.207</b> | <b>1980.209</b> | <b>2077.205</b> | <b>2078.209</b> | <b>-14.205</b> | <b>-14.207</b> | H130 |
| K36 | 2060           | 536            | 0.504          | <b>2036.239</b> | <b>2036.241</b> | <b>2036.243</b> | <b>2133.239</b> | <b>2134.243</b> | <b>-24.239</b> | <b>-24.241</b> | K130 |
| A37 | 2116           | 536            | 0.504          | <b>2092.273</b> | <b>2092.275</b> | <b>2092.277</b> | <b>2189.273</b> | <b>2190.277</b> | <b>-34.273</b> | <b>-34.275</b> | A130 |
| K38 | 2172           | 536            | 0.504          | <b>2148.307</b> | <b>2148.309</b> | <b>2148.311</b> | <b>2245.307</b> | <b>2246.311</b> | <b>-44.307</b> | <b>-44.309</b> | K130 |
| G39 | 2228           | 536            | 0.504          | <b>2204.341</b> | <b>2204.343</b> | <b>2204.345</b> | <b>2301.341</b> | <b>2302.345</b> | <b>-54.341</b> | <b>-54.343</b> | G128 |
| G40 | 2284           | 536            | 0.504          | <b>2260.375</b> | <b>2260.377</b> | <b>2260.379</b> | <b>2357.375</b> | <b>2358.379</b> | <b>-64.375</b> | <b>-64.377</b> | G128 |
| K41 | 2340           | 536            | 0.504          | <b>2316.409</b> | <b>2316.411</b> | <b>2316.413</b> | <b>2413.409</b> | <b>2414.413</b> | <b>-74.409</b> | <b>-74.411</b> | K130 |

# sp | Q6GSS7 | H2A2A\_MOUSE

DEELNKLLGK <sup>Dimethyl</sup> 28.03 VTIAQGGVLPNIQAVLLPKKTESHKAKGK <sup>Acetyl</sup> 42.01

- ▶ fragmentation table for charge state 3+
- ▶ specType=cid
- ▶ score=42.67
- ▶ F113281.dat
- ▶ query=q36977\_p1
- ▶ precursor=875.302790
- ▶ chargePrecursor=5
- ▶ itol=0.5

| AA   | a               | a <sup>+</sup> | a,0   | b        | b <sup>+</sup>  | b,0   | y        | y <sup>+</sup>  | y,0             | AA              |      |
|------|-----------------|----------------|-------|----------|-----------------|-------|----------|-----------------|-----------------|-----------------|------|
| D1   | 30              | 30.02          | 0.022 | 24.024   | 36.302          | 0.027 | 33.346   | 1492.116        | 1492.486        | 1492.171        | D140 |
| E2   | 32              | 32.02          | 0.017 | 32.007   | 32.301          | 0.027 | 36.369   | 1512.112        | 1512.150        | 1512.030        | E130 |
| E3   | 116             | 116.040        | 0.024 | 116.030  | 116.370         | 0.024 | 116.374  | 1336.618        | 1337.142        | 1336.854        | E100 |
| L4   | 115             | 115.741        | 0.024 | 115.730  | 116.013         | 0.024 | 115.980  | 1311.500        | 1312.120        | 1312.000        | L137 |
| N5   | 110             | 110.724        | 0.017 | 110.712  | 111.001         | 0.017 | 110.987  | 1296.119        | 1296.414        | 1296.200        | N130 |
| K10  | 226             | 226.404        | 0.226 | 226.400  | 231.700         | 0.226 | 226.370  | 1258.004        | 1259.412        | 1259.093        | K126 |
| L17  | 222             | 222.448        | 0.017 | 222.440  | 223.480         | 0.017 | 223.479  | 1213.300        | 1213.720        | 1213.603        | L134 |
| L18  | 106             | 106.044        | 0.044 | 106.040  | 106.110         | 0.044 | 106.117  | 1177.611        | 1177.650        | 1177.600        | L133 |
| Q19  | 102             | 102.700        | 0.102 | 102.697  | 103.102         | 0.102 | 102.970  | 1154.000        | 1154.311        | 1154.003        | Q125 |
| K100 | 100             | 100.002        | 0.017 | 100.000  | 100.124         | 0.017 | 100.124  | 1041.000        | 1041.000        | 1041.000        | K132 |
| V111 | 413             | 413.015        | 0.015 | 413.002  | 413.242         | 0.015 | 413.241  | 1038.007        | 1038.250        | 1038.054        | V108 |
| L124 | 402             | 402.700        | 0.102 | 402.700  | 403.242         | 0.102 | 402.704  | 1029.300        | 1029.300        | 1029.300        | L128 |
| L116 | 386             | 386.782        | 0.186 | 386.780  | 388.244         | 0.186 | 386.780  | 1002.200        | 1002.200        | 1002.200        | L120 |
| K114 | <b>308.871</b>  | 308.256        | 0.026 | 308.260  | 312.803         | 0.027 | 312.299  | <b>864.557</b>  | <b>864.557</b>  | <b>864.554</b>  | K127 |
| Q121 | 301             | 301.000        | 0.000 | 301.000  | 301.000         | 0.000 | 301.000  | <b>816.201</b>  | <b>816.201</b>  | <b>816.201</b>  | Q121 |
| G108 | 171             | 171.000        | 0.000 | 171.000  | 171.000         | 0.000 | 171.000  | <b>808.112</b>  | <b>808.112</b>  | <b>808.105</b>  | G120 |
| Q117 | 169             | 169.000        | 0.000 | 169.000  | 169.000         | 0.000 | 169.000  | <b>593.328</b>  | <b>593.328</b>  | <b>593.328</b>  | Q117 |
| V116 | <b>837.835</b>  | 837.810        | 0.010 | 837.810  | 838.000         | 0.010 | 837.810  | <b>808.700</b>  | <b>808.700</b>  | <b>808.700</b>  | V120 |
| L119 | 800             | 800.100        | 0.104 | 800.104  | <b>808.721</b>  | 0.084 | 808.094  | <b>805.717</b>  | <b>827.155</b>  | 801.400         | L122 |
| P125 | 798             | 798.200        | 0.200 | 798.200  | <b>807.872</b>  | 0.080 | 798.200  | <b>789.460</b>  | <b>783.785</b>  | <b>783.457</b>  | P121 |
| N121 | <b>736.755</b>  | 736.710        | 0.010 | 736.710  | 736.710         | 0.010 | 736.710  | <b>736.000</b>  | <b>736.000</b>  | <b>736.000</b>  | N120 |
| G120 | <b>708.440</b>  | 708.374        | 0.040 | 708.374  | <b>717.781</b>  | 0.072 | 717.105  | <b>715.777</b>  | <b>719.095</b>  | 714.920         | G118 |
| Q123 | <b>811.135</b>  | 811.000        | 0.010 | 811.000  | 811.400         | 0.010 | 811.400  | <b>814.767</b>  | <b>814.884</b>  | <b>811.400</b>  | Q118 |
| V121 | <b>834.815</b>  | 834.710        | 0.010 | 834.710  | <b>844.148</b>  | 0.010 | 844.148  | <b>838.471</b>  | <b>838.471</b>  | <b>838.471</b>  | V117 |
| V120 | 807             | 807.010        | 0.010 | 807.010  | 807.010         | 0.010 | 807.010  | <b>812.000</b>  | <b>812.000</b>  | <b>812.000</b>  | V116 |
| Q122 | <b>811.135</b>  | 811.000        | 0.010 | 811.000  | 811.400         | 0.010 | 811.400  | <b>809.188</b>  | <b>808.860</b>  | 801.012         | Q118 |
| L127 | <b>843.227</b>  | 843.150        | 0.010 | 843.150  | <b>857.558</b>  | 0.010 | 857.558  | <b>848.883</b>  | <b>848.883</b>  | <b>848.883</b>  | L123 |
| K126 | 808             | 808.010        | 0.010 | 808.010  | 808.010         | 0.010 | 808.010  | <b>808.000</b>  | <b>808.000</b>  | <b>808.000</b>  | K126 |
| K120 | 806             | 806.010        | 0.010 | 806.010  | 806.010         | 0.010 | 806.010  | <b>806.000</b>  | <b>806.000</b>  | <b>806.000</b>  | K120 |
| K115 | <b>1066.974</b> | 1066.750       | 0.024 | 1066.750 | <b>1104.872</b> | 0.024 | 1104.870 | <b>1064.302</b> | <b>1064.302</b> | <b>1064.302</b> | K111 |
| L111 | 1066            | 1066.000       | 0.000 | 1066.000 | 1066.000        | 0.000 | 1066.000 | <b>1066.000</b> | <b>1066.000</b> | <b>1066.000</b> | L110 |
| E102 | <b>1137.871</b> | 1137.780       | 0.010 | 1137.780 | <b>1147.805</b> | 0.010 | 1147.805 | <b>1141.327</b> | <b>1140.909</b> | 1091.901        | E100 |
| S111 | 1108            | 1108.000       | 0.000 | 1108.000 | <b>1116.813</b> | 0.010 | 1116.810 | <b>1116.000</b> | <b>1116.000</b> | <b>1116.000</b> | S110 |
| L114 | 1100            | 1100.000       | 0.000 | 1100.000 | <b>1100.000</b> | 0.000 | 1100.000 | <b>1100.000</b> | <b>1100.000</b> | <b>1100.000</b> | L114 |
| R115 | 1100            | 1100.000       | 0.000 | 1100.000 | <b>1100.000</b> | 0.000 | 1100.000 | <b>1100.000</b> | <b>1100.000</b> | <b>1100.000</b> | R115 |
| K116 | 1100            | 1100.000       | 0.000 | 1100.000 | <b>1100.000</b> | 0.000 | 1100.000 | <b>1100.000</b> | <b>1100.000</b> | <b>1100.000</b> | K116 |
| K117 | 1100            | 1100.000       | 0.000 | 1100.000 | <b>1100.000</b> | 0.000 | 1100.000 | <b>1100.000</b> | <b>1100.000</b> | <b>1100.000</b> | K117 |
| K118 | 1100            | 1100.000       | 0.000 | 1100.000 | <b>1100.000</b> | 0.000 | 1100.000 | <b>1100.000</b> | <b>1100.000</b> | <b>1100.000</b> | K118 |
| K119 | 1100            | 1100.000       | 0.000 | 1100.000 | <b>1100.000</b> | 0.000 | 1100.000 | <b>1100.000</b> | <b>1100.000</b> | <b>1100.000</b> | K119 |
| G119 | 1100            | 1100.000       | 0.000 | 1100.000 | <b>1100.000</b> | 0.000 | 1100.000 | <b>1100.000</b> | <b>1100.000</b> | <b>1100.000</b> | G119 |
| K140 | 1442            | 1442.000       | 0.000 | 1442.000 | 1442.000        | 0.000 | 1442.000 | <b>1442.000</b> | <b>1442.000</b> | <b>1442.000</b> | K140 |

# sp | Q6GSS7 | H2A2A\_MOUSE

DEELNKLLGK <sup>Dimethyl</sup> 28.03 VTIAQGGVLPNIQAVLLPKKTESHKAKGK <sup>Acetyl</sup> 42.01

- ▶ fragmentation table for charge state 4+
- ▶ specType=cid
- ▶ score=42.67
- ▶ F113281.dat
- ▶ query=q36977\_p1
- ▶ precursor=875.302790
- ▶ chargePrecursor=5
- ▶ itol=0.5

| AA  | a              | a*            | a,Δ            | b              | b*            | b,Δ            | r              | r*             | r,Δ            | AA            |      |
|-----|----------------|---------------|----------------|----------------|---------------|----------------|----------------|----------------|----------------|---------------|------|
| Q1  | 22.793         | 0.300         | 18.293         | 29.794         | 0.700         | 29.294         | 100.000        | 100.000        | 0.000          | L540          |      |
| E2  | 30.000         | 0.000         | 30.000         | 30.000         | 0.000         | 30.000         | 100.000        | <b>100.000</b> | 0.000          | L539          |      |
| E3  | 37.207         | 0.700         | 32.507         | 34.207         | 0.700         | 33.707         | <b>103.820</b> | <b>103.820</b> | <b>103.820</b> | L538          |      |
| L4  | 44.414         | 1.000         | 43.414         | 42.414         | 0.700         | 41.714         | 100.000        | <b>96.348</b>  | <b>96.182</b>  | L537          |      |
| N5  | 51.621         | 1.300         | 50.321         | 49.021         | 1.000         | 48.021         | <b>97.333</b>  | 100.000        | 0.000          | N50           |      |
| K6  | 58.828         | 1.600         | 57.228         | 55.628         | 1.300         | 54.328         | 100.000        | <b>93.506</b>  | <b>93.320</b>  | K53           |      |
| L7  | 66.035         | 1.900         | 64.135         | 62.235         | 1.600         | 60.635         | 100.000        | <b>87.342</b>  | <b>87.206</b>  | L534          |      |
| L8  | 73.242         | 2.200         | 71.042         | 68.842         | 1.900         | 66.942         | 100.000        | 0.000          | 0.000          | L533          |      |
| Q9  | 80.449         | 2.500         | 77.949         | 75.549         | 2.200         | 73.349         | <b>85.257</b>  | 100.000        | 0.000          | Q525          |      |
| K10 | 87.656         | 2.800         | 84.856         | 82.456         | 2.500         | 79.956         | 100.000        | 0.000          | 0.000          | K513          |      |
| V11 | 94.863         | 3.100         | 91.763         | 89.363         | 2.800         | 86.563         | 100.000        | <b>80.190</b>  | 100.000        | V530          |      |
| T12 | 102.070        | 3.400         | 98.670         | 96.270         | 3.100         | 93.170         | 100.000        | <b>77.200</b>  | <b>77.020</b>  | T528          |      |
| R13 | 109.277        | 3.700         | 105.577        | 103.177        | 3.400         | 100.777        | <b>77.200</b>  | 100.000        | 0.000          | R526          |      |
| A14 | 116.484        | 4.000         | 112.484        | 109.484        | 3.700         | 105.784        | 100.000        | <b>71.813</b>  | <b>71.617</b>  | A527          |      |
| Q15 | 123.691        | 4.300         | 119.391        | 116.091        | 4.000         | 112.091        | <b>70.911</b>  | <b>70.585</b>  | <b>70.408</b>  | Q526          |      |
| G16 | 130.898        | 4.600         | 126.298        | 122.898        | 4.300         | 118.598        | 100.000        | <b>66.030</b>  | 0.000          | G225          |      |
| Q17 | 138.105        | <b>4.900</b>  | <b>133.205</b> | <b>129.805</b> | <b>4.600</b>  | <b>125.205</b> | <b>64.802</b>  | 100.000        | 0.000          | Q234          |      |
| V18 | 145.312        | 5.200         | 140.112        | 136.712        | 4.900         | 132.812        | 100.000        | <b>62.018</b>  | 0.000          | V529          |      |
| P20 | 152.519        | 5.500         | 147.019        | 143.519        | 5.200         | 139.319        | 100.000        | 0.000          | 0.000          | P521          |      |
| N21 | 159.726        | 5.800         | 153.926        | 150.426        | 5.500         | 145.926        | 100.000        | <b>58.877</b>  | <b>58.587</b>  | N520          |      |
| Q22 | 166.933        | 6.100         | 160.833        | 157.333        | 5.800         | 152.533        | 100.000        | <b>55.973</b>  | <b>55.591</b>  | Q526          |      |
| Q23 | 174.140        | 6.400         | 167.740        | <b>163.840</b> | <b>6.100</b>  | <b>159.140</b> | 100.000        | <b>53.100</b>  | <b>52.644</b>  | <b>52.600</b> | Q518 |
| A24 | 181.347        | 6.700         | 174.647        | 171.147        | 6.400         | 165.747        | 100.000        | 0.000          | 0.000          | A517          |      |
| Q25 | 188.554        | <b>6.900</b>  | <b>181.654</b> | <b>178.154</b> | <b>6.600</b>  | <b>172.554</b> | <b>64.827</b>  | 100.000        | 0.000          | Q516          |      |
| L26 | 195.761        | <b>7.100</b>  | <b>188.661</b> | <b>185.161</b> | <b>6.800</b>  | <b>179.361</b> | <b>62.143</b>  | <b>60.897</b>  | <b>60.761</b>  | L535          |      |
| L27 | 202.968        | 7.400         | 195.568        | 191.068        | 7.100         | 186.168        | 100.000        | <b>58.200</b>  | <b>57.888</b>  | L534          |      |
| P28 | 210.175        | <b>7.700</b>  | <b>202.475</b> | <b>198.975</b> | <b>7.400</b>  | <b>192.975</b> | <b>58.200</b>  | 100.000        | 0.000          | P515          |      |
| K29 | 217.382        | <b>7.900</b>  | <b>209.482</b> | <b>205.982</b> | <b>7.600</b>  | <b>199.782</b> | <b>55.556</b>  | <b>54.300</b>  | <b>54.164</b>  | K512          |      |
| K30 | 224.589        | 8.200         | 216.389        | 212.889        | 7.900         | 206.589        | 100.000        | <b>52.932</b>  | <b>52.632</b>  | K511          |      |
| L31 | 231.796        | 8.500         | 223.296        | 219.796        | 8.200         | 213.396        | 100.000        | <b>50.500</b>  | <b>50.200</b>  | L532          |      |
| E32 | <b>239.003</b> | <b>8.800</b>  | <b>230.203</b> | <b>226.703</b> | <b>8.500</b>  | <b>220.203</b> | <b>50.500</b>  | 100.000        | 0.000          | E511          |      |
| S33 | 246.210        | 9.100         | 237.110        | 233.610        | 8.800         | 227.010        | 100.000        | <b>48.068</b>  | <b>47.768</b>  | S511          |      |
| H34 | 253.417        | <b>9.300</b>  | <b>244.117</b> | <b>240.617</b> | <b>9.000</b>  | <b>233.817</b> | <b>48.068</b>  | 100.000        | 0.000          | H511          |      |
| H35 | 260.624        | <b>9.500</b>  | <b>251.124</b> | <b>247.624</b> | <b>9.200</b>  | <b>240.624</b> | 100.000        | <b>45.636</b>  | <b>45.336</b>  | H510          |      |
| K36 | 267.831        | 9.800         | <b>258.131</b> | <b>254.631</b> | <b>9.500</b>  | <b>247.431</b> | 100.000        | <b>43.204</b>  | <b>42.904</b>  | K510          |      |
| A37 | 275.038        | 10.100        | 265.038        | 261.538        | <b>9.800</b>  | <b>254.238</b> | 100.000        | <b>40.772</b>  | <b>40.472</b>  | A510          |      |
| K38 | 282.245        | <b>10.300</b> | <b>272.045</b> | <b>268.545</b> | <b>10.000</b> | <b>261.045</b> | 100.000        | <b>38.340</b>  | <b>38.040</b>  | K510          |      |
| G39 | 289.452        | 10.600        | 279.052        | 275.552        | <b>10.200</b> | <b>267.852</b> | 100.000        | <b>35.908</b>  | <b>35.608</b>  | G510          |      |
| K40 | <b>296.659</b> | <b>10.800</b> | <b>286.059</b> | <b>282.559</b> | <b>10.400</b> | <b>274.659</b> | 100.000        | <b>33.476</b>  | <b>33.176</b>  | K510          |      |

# sp | Q6GSS7 | H2A2A\_MOUSE

DEELNKLLGK <sup>Dimethyl</sup> 28.03 VTIAQGGVLPNIQAVLLPKKTESHHKAKGK <sup>Acetyl</sup> 42.01

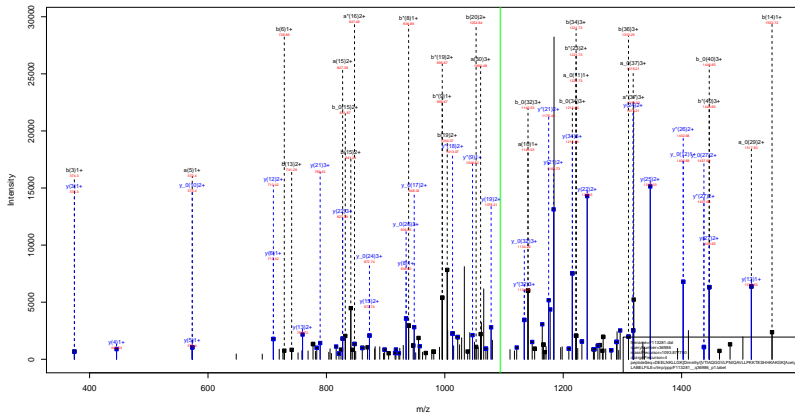



# sp | Q6GSS7 | H2A2A\_MOUSE

DEELNKLLGK <sup>Dimethyl</sup> 28.03 VTIAQGGVLPNIQAVLLPKKTESHHKAKGK <sup>Acetyl</sup> 42.01

- ▶ fragmentation table for charge state 1+
- ▶ specType=cid
- ▶ score=59.70
- ▶ F113281.dat
- ▶ query=q36986.p1
- ▶ precursor=1093.877700
- ▶ chargePrecursor=4
- ▶ itol=0.5

| AA   | a    | a'  | a <sub>0</sub> | b        | b'       | b <sub>0</sub> | y        | y'      | y <sub>0</sub> | AA      |      |
|------|------|-----|----------------|----------|----------|----------------|----------|---------|----------------|---------|------|
| E1   | 88   | 93  | 0.000          | 189.026  | 1.09149  | 0.000          | 98.094   | 4.92730 | 4.92730        | 4.92730 | L142 |
| E2   | 221  | 152 | 0.000          | 180.014  | 2.02177  | 0.000          | 227.000  | 2.91740 | 2.91740        | 2.91740 | L136 |
| E3   | 798  | 174 | 0.000          | 229.114  | 3.04119  | 0.000          | 236.010  | 4.21841 | 4.21841        | 4.21841 | L138 |
| L14  | 892  | 89  | 0.000          | 441.110  | 4.07103  | 0.000          | 488.104  | 3.66930 | 3.66930        | 3.66930 | L131 |
| N15  | 375  | 251 | 0.000          | 330.224  | 5.09149  | 0.000          | 384.230  | 3.61720 | 3.61720        | 3.61720 | N146 |
| L16  | 124  | 124 | 0.000          | 469.326  | 6.11194  | 0.000          | 474.330  | 3.17420 | 3.17420        | 3.17420 | K120 |
| L17  | 814  | 431 | 0.000          | 798.430  | 8.42251  | 0.000          | 824.415  | 3.04414 | 3.04414        | 3.04414 | L134 |
| L18  | 107  | 431 | 0.000          | 608.534  | 9.53300  | 0.000          | 634.500  | 2.81400 | 2.81400        | 2.81400 | L131 |
| L19  | 798  | 738 | 967.500        | 969.524  | 1.09149  | 912.500        | 904.520  | 4.11010 | 4.11010        | 4.11010 | L125 |
| K109 | 1148 | 682 | 1131.639       | 1122.813 | 1.16865  | 1151.631       | 1150.697 | 3.54190 | 3.54190        | 3.54190 | K131 |
| V111 | 4276 | 731 | 3242.780       | 3231.738 | 1.267736 | 3250.699       | 3249.715 | 3.26083 | 3.26083        | 3.26083 | V130 |
| V112 | 106  | 718 | 1431.780       | 1424.780 | 1.36681  | 1444.718       | 1439.430 | 3.00170 | 3.00170        | 3.00170 | V128 |
| K113 | 1041 | 857 | 1430.813       | 1420.813 | 1.461857 | 1444.718       | 1439.742 | 2.98711 | 2.98711        | 2.98711 | K126 |
| K114 | 1024 | 850 | 1427.813       | 1420.813 | 1.562894 | 1435.688       | 1434.654 | 2.98183 | 2.98183        | 2.98183 | K127 |
| Q123 | 1082 | 808 | 1418.843       | 1408.843 | 1.663931 | 1426.657       | 1425.623 | 2.97655 | 2.97655        | 2.97655 | Q120 |
| Q108 | 1100 | 800 | 1409.843       | 1403.843 | 1.764968 | 1417.626       | 1416.592 | 2.97127 | 2.97127        | 2.97127 | Q120 |
| Q117 | 1187 | 811 | 1400.873       | 1394.873 | 1.866005 | 1408.595       | 1407.561 | 2.96599 | 2.96599        | 2.96599 | Q124 |
| V116 | 1000 | 800 | 1391.903       | 1385.903 | 1.967042 | 1399.564       | 1398.530 | 2.96071 | 2.96071        | 2.96071 | V123 |
| L109 | 1070 | 554 | 1382.933       | 1376.933 | 2.068079 | 1390.533       | 1389.500 | 2.95543 | 2.95543        | 2.95543 | L122 |
| P120 | 1016 | 560 | 1373.963       | 1367.963 | 2.169116 | 1381.502       | 1380.468 | 2.95015 | 2.95015        | 2.95015 | P121 |
| K111 | 1189 | 414 | 1364.993       | 1358.993 | 2.270153 | 1372.471       | 1371.437 | 2.94487 | 2.94487        | 2.94487 | K120 |
| Q121 | 1053 | 513 | 1356.023       | 1350.023 | 2.371190 | 1363.440       | 1362.406 | 2.93959 | 2.93959        | 2.93959 | Q120 |
| Q125 | 1011 | 500 | 1347.053       | 1341.053 | 2.472227 | 1354.410       | 1353.375 | 2.93431 | 2.93431        | 2.93431 | Q118 |
| K112 | 1099 | 414 | 1338.083       | 1332.083 | 2.573264 | 1345.379       | 1344.345 | 2.92903 | 2.92903        | 2.92903 | K120 |
| V126 | 1001 | 500 | 1329.113       | 1323.113 | 2.674301 | 1336.348       | 1335.314 | 2.92375 | 2.92375        | 2.92375 | V126 |
| L128 | 1174 | 411 | 1320.143       | 1314.143 | 2.775338 | 1327.317       | 1326.283 | 2.91847 | 2.91847        | 2.91847 | L111 |
| P126 | 1014 | 510 | 1311.173       | 1305.173 | 2.876375 | 1318.286       | 1317.252 | 2.91319 | 2.91319        | 2.91319 | P124 |
| P128 | 1014 | 510 | 1302.203       | 1296.203 | 2.977412 | 1309.255       | 1308.221 | 2.90791 | 2.90791        | 2.90791 | P124 |
| K129 | 1052 | 411 | 1293.233       | 1287.233 | 3.078449 | 1300.224       | 1299.190 | 2.90263 | 2.90263        | 2.90263 | K122 |
| K131 | 1052 | 411 | 1284.263       | 1278.263 | 3.179486 | 1291.193       | 1290.159 | 2.89735 | 2.89735        | 2.89735 | K122 |
| L131 | 1010 | 500 | 1275.293       | 1269.293 | 3.280523 | 1282.162       | 1281.128 | 2.89207 | 2.89207        | 2.89207 | L120 |
| E121 | 1010 | 500 | 1266.323       | 1260.323 | 3.381560 | 1273.131       | 1272.097 | 2.88679 | 2.88679        | 2.88679 | E10  |
| K130 | 1010 | 511 | 1257.353       | 1251.353 | 3.482597 | 1264.100       | 1263.066 | 2.88151 | 2.88151        | 2.88151 | K120 |
| H134 | 1010 | 511 | 1248.383       | 1242.383 | 3.583634 | 1255.069       | 1254.035 | 2.87623 | 2.87623        | 2.87623 | H131 |
| H135 | 1072 | 445 | 1239.413       | 1233.413 | 3.684671 | 1246.038       | 1245.004 | 2.87095 | 2.87095        | 2.87095 | H10  |
| K136 | 1040 | 443 | 1230.443       | 1224.443 | 3.785708 | 1237.007       | 1235.973 | 2.86567 | 2.86567        | 2.86567 | K120 |
| A137 | 1114 | 338 | 1221.473       | 1215.473 | 3.886745 | 1227.976       | 1226.942 | 2.86039 | 2.86039        | 2.86039 | A124 |
| K138 | 1000 | 431 | 1212.503       | 1206.503 | 3.987782 | 1218.945       | 1217.911 | 2.85511 | 2.85511        | 2.85511 | K120 |
| Q136 | 1136 | 387 | 1203.533       | 1197.533 | 4.088819 | 1209.914       | 1208.880 | 2.84983 | 2.84983        | 2.84983 | Q120 |
| K140 | 1000 | 430 | 1194.563       | 1188.563 | 4.189856 | 1200.883       | 1199.849 | 2.84455 | 2.84455        | 2.84455 | K120 |

# sp | Q6GSS7 | H2A2A\_MOUSE

DEELNKLLGK <sup>Dimethyl</sup> 28.03 VTIAQGGVLPNIQAVLLPKKTESHKAKGK <sup>Acetyl</sup> 42.01

- ▶ fragmentation table for charge state 2+
- ▶ specType=cid
- ▶ score=59.70
- ▶ F113281.dat
- ▶ query=q36986.p1
- ▶ precursor=1093.877700
- ▶ chargePrecursor=4
- ▶ itol=0.5

| AA  | a    | a*  | a,b   | b       | b*     | b,b   | y      | y*      | y,b     | AA       |      |
|-----|------|-----|-------|---------|--------|-------|--------|---------|---------|----------|------|
| Q1  | 44   | 523 | 0.524 | 100.513 | 59.523 | 0.504 | 49.523 | 238.120 | 417.294 | 2117.532 | E140 |
| E2  | 100  | 524 | 0.524 | 101.037 | 59.524 | 0.504 | 49.524 | 238.244 | 417.418 | 2117.656 | E140 |
| E3  | 156  | 524 | 0.524 | 101.561 | 59.524 | 0.504 | 49.524 | 238.368 | 417.542 | 2117.780 | E140 |
| E4  | 212  | 524 | 0.524 | 102.085 | 59.524 | 0.504 | 49.524 | 238.492 | 417.666 | 2117.904 | E140 |
| E5  | 268  | 524 | 0.524 | 102.609 | 59.524 | 0.504 | 49.524 | 238.616 | 417.790 | 2118.028 | E140 |
| E6  | 324  | 524 | 0.524 | 103.133 | 59.524 | 0.504 | 49.524 | 238.740 | 417.914 | 2118.152 | E140 |
| E7  | 380  | 524 | 0.524 | 103.657 | 59.524 | 0.504 | 49.524 | 238.864 | 418.038 | 2118.276 | E140 |
| E8  | 436  | 524 | 0.524 | 104.181 | 59.524 | 0.504 | 49.524 | 238.988 | 418.162 | 2118.400 | E140 |
| E9  | 492  | 524 | 0.524 | 104.705 | 59.524 | 0.504 | 49.524 | 239.112 | 418.286 | 2118.524 | E140 |
| E10 | 548  | 524 | 0.524 | 105.229 | 59.524 | 0.504 | 49.524 | 239.236 | 418.410 | 2118.648 | E140 |
| E11 | 604  | 524 | 0.524 | 105.753 | 59.524 | 0.504 | 49.524 | 239.360 | 418.534 | 2118.772 | E140 |
| E12 | 660  | 524 | 0.524 | 106.277 | 59.524 | 0.504 | 49.524 | 239.484 | 418.658 | 2118.896 | E140 |
| E13 | 716  | 524 | 0.524 | 106.801 | 59.524 | 0.504 | 49.524 | 239.608 | 418.782 | 2119.020 | E140 |
| E14 | 772  | 524 | 0.524 | 107.325 | 59.524 | 0.504 | 49.524 | 239.732 | 418.906 | 2119.144 | E140 |
| E15 | 828  | 524 | 0.524 | 107.849 | 59.524 | 0.504 | 49.524 | 239.856 | 419.030 | 2119.268 | E140 |
| E16 | 884  | 524 | 0.524 | 108.373 | 59.524 | 0.504 | 49.524 | 239.980 | 419.154 | 2119.392 | E140 |
| E17 | 940  | 524 | 0.524 | 108.897 | 59.524 | 0.504 | 49.524 | 240.104 | 419.278 | 2119.516 | E140 |
| E18 | 996  | 524 | 0.524 | 109.421 | 59.524 | 0.504 | 49.524 | 240.228 | 419.402 | 2119.640 | E140 |
| E19 | 1052 | 524 | 0.524 | 109.945 | 59.524 | 0.504 | 49.524 | 240.352 | 419.526 | 2119.764 | E140 |
| E20 | 1108 | 524 | 0.524 | 110.469 | 59.524 | 0.504 | 49.524 | 240.476 | 419.650 | 2119.888 | E140 |
| E21 | 1164 | 524 | 0.524 | 110.993 | 59.524 | 0.504 | 49.524 | 240.600 | 419.774 | 2120.012 | E140 |
| E22 | 1220 | 524 | 0.524 | 111.517 | 59.524 | 0.504 | 49.524 | 240.724 | 419.898 | 2120.136 | E140 |
| E23 | 1276 | 524 | 0.524 | 112.041 | 59.524 | 0.504 | 49.524 | 240.848 | 420.022 | 2120.260 | E140 |
| E24 | 1332 | 524 | 0.524 | 112.565 | 59.524 | 0.504 | 49.524 | 240.972 | 420.146 | 2120.384 | E140 |
| E25 | 1388 | 524 | 0.524 | 113.089 | 59.524 | 0.504 | 49.524 | 241.096 | 420.270 | 2120.508 | E140 |
| E26 | 1444 | 524 | 0.524 | 113.613 | 59.524 | 0.504 | 49.524 | 241.220 | 420.394 | 2120.632 | E140 |
| E27 | 1500 | 524 | 0.524 | 114.137 | 59.524 | 0.504 | 49.524 | 241.344 | 420.518 | 2120.756 | E140 |
| E28 | 1556 | 524 | 0.524 | 114.661 | 59.524 | 0.504 | 49.524 | 241.468 | 420.642 | 2120.880 | E140 |
| E29 | 1612 | 524 | 0.524 | 115.185 | 59.524 | 0.504 | 49.524 | 241.592 | 420.766 | 2121.004 | E140 |
| E30 | 1668 | 524 | 0.524 | 115.709 | 59.524 | 0.504 | 49.524 | 241.716 | 420.890 | 2121.128 | E140 |
| E31 | 1724 | 524 | 0.524 | 116.233 | 59.524 | 0.504 | 49.524 | 241.840 | 421.014 | 2121.252 | E140 |
| E32 | 1780 | 524 | 0.524 | 116.757 | 59.524 | 0.504 | 49.524 | 241.964 | 421.138 | 2121.376 | E140 |
| E33 | 1836 | 524 | 0.524 | 117.281 | 59.524 | 0.504 | 49.524 | 242.088 | 421.262 | 2121.500 | E140 |
| E34 | 1892 | 524 | 0.524 | 117.805 | 59.524 | 0.504 | 49.524 | 242.212 | 421.386 | 2121.624 | E140 |
| E35 | 1948 | 524 | 0.524 | 118.329 | 59.524 | 0.504 | 49.524 | 242.336 | 421.510 | 2121.748 | E140 |
| E36 | 2004 | 524 | 0.524 | 118.853 | 59.524 | 0.504 | 49.524 | 242.460 | 421.634 | 2121.872 | E140 |
| E37 | 2060 | 524 | 0.524 | 119.377 | 59.524 | 0.504 | 49.524 | 242.584 | 421.758 | 2121.996 | E140 |
| E38 | 2116 | 524 | 0.524 | 119.901 | 59.524 | 0.504 | 49.524 | 242.708 | 421.882 | 2122.120 | E140 |
| E39 | 2172 | 524 | 0.524 | 120.425 | 59.524 | 0.504 | 49.524 | 242.832 | 422.006 | 2122.244 | E140 |
| E40 | 2228 | 524 | 0.524 | 120.949 | 59.524 | 0.504 | 49.524 | 242.956 | 422.130 | 2122.368 | E140 |
| E41 | 2284 | 524 | 0.524 | 121.473 | 59.524 | 0.504 | 49.524 | 243.080 | 422.254 | 2122.492 | E140 |
| E42 | 2340 | 524 | 0.524 | 121.997 | 59.524 | 0.504 | 49.524 | 243.204 | 422.378 | 2122.616 | E140 |
| E43 | 2396 | 524 | 0.524 | 122.521 | 59.524 | 0.504 | 49.524 | 243.328 | 422.502 | 2122.740 | E140 |
| E44 | 2452 | 524 | 0.524 | 123.045 | 59.524 | 0.504 | 49.524 | 243.452 | 422.626 | 2122.864 | E140 |
| E45 | 2508 | 524 | 0.524 | 123.569 | 59.524 | 0.504 | 49.524 | 243.576 | 422.750 | 2122.988 | E140 |
| E46 | 2564 | 524 | 0.524 | 124.093 | 59.524 | 0.504 | 49.524 | 243.700 | 422.874 | 2123.112 | E140 |
| E47 | 2620 | 524 | 0.524 | 124.617 | 59.524 | 0.504 | 49.524 | 243.824 | 422.998 | 2123.236 | E140 |
| E48 | 2676 | 524 | 0.524 | 125.141 | 59.524 | 0.504 | 49.524 | 243.948 | 423.122 | 2123.360 | E140 |
| E49 | 2732 | 524 | 0.524 | 125.665 | 59.524 | 0.504 | 49.524 | 244.072 | 423.246 | 2123.484 | E140 |
| E50 | 2788 | 524 | 0.524 | 126.189 | 59.524 | 0.504 | 49.524 | 244.196 | 423.370 | 2123.608 | E140 |
| E51 | 2844 | 524 | 0.524 | 126.713 | 59.524 | 0.504 | 49.524 | 244.320 | 423.494 | 2123.732 | E140 |
| E52 | 2900 | 524 | 0.524 | 127.237 | 59.524 | 0.504 | 49.524 | 244.444 | 423.618 | 2123.856 | E140 |
| E53 | 2956 | 524 | 0.524 | 127.761 | 59.524 | 0.504 | 49.524 | 244.568 | 423.742 | 2123.980 | E140 |
| E54 | 3012 | 524 | 0.524 | 128.285 | 59.524 | 0.504 | 49.524 | 244.692 | 423.866 | 2124.104 | E140 |
| E55 | 3068 | 524 | 0.524 | 128.809 | 59.524 | 0.504 | 49.524 | 244.816 | 423.990 | 2124.228 | E140 |
| E56 | 3124 | 524 | 0.524 | 129.333 | 59.524 | 0.504 | 49.524 | 244.940 | 424.114 | 2124.352 | E140 |
| E57 | 3180 | 524 | 0.524 | 129.857 | 59.524 | 0.504 | 49.524 | 245.064 | 424.238 | 2124.476 | E140 |
| E58 | 3236 | 524 | 0.524 | 130.381 | 59.524 | 0.504 | 49.524 | 245.188 | 424.362 | 2124.600 | E140 |
| E59 | 3292 | 524 | 0.524 | 130.905 | 59.524 | 0.504 | 49.524 | 245.312 | 424.486 | 2124.724 | E140 |
| E60 | 3348 | 524 | 0.524 | 131.429 | 59.524 | 0.504 | 49.524 | 245.436 | 424.610 | 2124.848 | E140 |
| E61 | 3404 | 524 | 0.524 | 131.953 | 59.524 | 0.504 | 49.524 | 245.560 | 424.734 | 2124.972 | E140 |
| E62 | 3460 | 524 | 0.524 | 132.477 | 59.524 | 0.504 | 49.524 | 245.684 | 424.858 | 2125.096 | E140 |
| E63 | 3516 | 524 | 0.524 | 133.001 | 59.524 | 0.504 | 49.524 | 245.808 | 424.982 | 2125.220 | E140 |
| E64 | 3572 | 524 | 0.524 | 133.525 | 59.524 | 0.504 | 49.524 | 245.932 | 425.106 | 2125.344 | E140 |
| E65 | 3628 | 524 | 0.524 | 134.049 | 59.524 | 0.504 | 49.524 | 246.056 | 425.230 | 2125.468 | E140 |
| E66 | 3684 | 524 | 0.524 | 134.573 | 59.524 | 0.504 | 49.524 | 246.180 | 425.354 | 2125.592 | E140 |
| E67 | 3740 | 524 | 0.524 | 135.097 | 59.524 | 0.504 | 49.524 | 246.304 | 425.478 | 2125.716 | E140 |
| E68 | 3796 | 524 | 0.524 | 135.621 | 59.524 | 0.504 | 49.524 | 246.428 | 425.602 | 2125.840 | E140 |
| E69 | 3852 | 524 | 0.524 | 136.145 | 59.524 | 0.504 | 49.524 | 246.552 | 425.726 | 2125.964 | E140 |
| E70 | 3908 | 524 | 0.524 | 136.669 | 59.524 | 0.504 | 49.524 | 246.676 | 425.850 | 2126.088 | E140 |
| E71 | 3964 | 524 | 0.524 | 137.193 | 59.524 | 0.504 | 49.524 | 246.800 | 425.974 | 2126.212 | E140 |
| E72 | 4020 | 524 | 0.524 | 137.717 | 59.524 | 0.504 | 49.524 | 246.924 | 426.098 | 2126.336 | E140 |
| E73 | 4076 | 524 | 0.524 | 138.241 | 59.524 | 0.504 | 49.524 | 247.048 | 426.222 | 2126.460 | E140 |
| E74 | 4132 | 524 | 0.524 | 138.765 | 59.524 | 0.504 | 49.524 | 247.172 | 426.346 | 2126.584 | E140 |
| E75 | 4188 | 524 | 0.524 | 139.289 | 59.524 | 0.504 | 49.524 | 247.296 | 426.470 | 2126.708 | E140 |
| E76 | 4244 | 524 | 0.524 | 139.813 | 59.524 | 0.504 | 49.524 | 247.420 | 426.594 | 2126.832 | E140 |
| E77 | 4300 | 524 | 0.524 | 140.337 | 59.524 | 0.504 | 49.524 | 247.544 | 426.718 | 2126.956 | E140 |
| E78 | 4356 | 524 | 0.524 | 140.861 | 59.524 | 0.504 | 49.524 | 247.668 | 426.842 | 2127.080 | E140 |
| E79 | 4412 | 524 | 0.524 | 141.385 | 59.524 | 0.504 | 49.524 | 247.792 | 426.966 | 2127.204 | E140 |
| E80 | 4468 | 524 | 0.524 | 141.909 | 59.524 | 0.504 | 49.524 | 247.916 | 427.090 | 2127.328 | E140 |
| E81 | 4524 | 524 | 0.524 | 142.433 | 59.524 | 0.504 | 49.524 | 248.040 | 427.214 | 2127.452 | E140 |
| E82 | 4580 | 524 | 0.524 | 142.957 | 59.524 | 0.504 | 49.524 | 248.164 | 427.338 | 2127.576 | E140 |
| E83 | 4636 | 524 | 0.524 | 143.481 | 59.524 | 0.504 | 49.524 | 248.288 | 427.462 | 2127.700 | E140 |
| E84 | 4692 | 524 | 0.524 | 144.005 | 59.524 | 0.504 | 49.524 | 248.412 | 427.586 | 2127.824 | E140 |
| E85 | 4748 | 524 | 0.524 | 144.529 | 59.524 | 0.504 | 49.524 | 248.536 | 427.710 | 2127.948 | E140 |
| E86 | 4804 | 524 | 0.524 | 145.053 | 59.524 | 0.504 | 49.524 | 248.660 | 427.834 | 2128.072 | E140 |
| E87 | 4860 | 524 | 0.524 | 145.577 | 59.524 | 0.504 | 49.524 | 248.784 | 427.958 | 2128.196 | E140 |
| E88 | 4916 | 524 | 0.524 | 146.101 | 59.524 | 0.504 | 49.524 | 248.908 | 428.082 | 2128.320 | E140 |
| E89 | 4972 | 524 | 0.524 | 146.625 | 59.524 | 0.504 | 49.524 | 249.032 | 428.206 | 2128.444 | E140 |
| E90 | 5028 | 524 | 0.524 | 147.149 | 59.524 | 0.504 | 49.524 | 249.156 | 428.330 | 2128.568 | E140 |
| E91 | 5084 | 524 | 0.524 | 147.673 | 59.524 | 0.504 | 49.524 | 249.280 | 428.454 | 2128.692 | E140 |
| E92 | 5140 | 524 | 0.524 | 148.197 | 59.524 | 0.504 | 49.524 | 249.404 | 428.578 | 2128.816 | E140 |
| E93 | 5196 | 524 | 0.524 | 148.721 | 59.524 | 0.504 | 49.524 | 249.528 | 428.702 | 2128.940 | E140 |
| E94 | 5252 | 524 | 0.524 | 149.245 | 59.524 | 0.504 | 49.524 | 2       |         |          |      |





# sp | Q6GSS7 | H2A2A\_MOUSE

DEELNKLLGK <sup>Dimethyl</sup> 28.03 VTIAQGGVLPNIQAVLLPKKTESHKAKGK <sup>Acetyl</sup> 42.01

- ▶ fragmentation table for charge state 1+
- ▶ specType=cid
- ▶ score=40.10
- ▶ F113281.dat
- ▶ query=q36989.p1
- ▶ precursor=875.304810
- ▶ chargePrecursor=5
- ▶ itol=0.5

| AA  | a               | a*             | aΔ             | b               | b*             | bΔ       | r        | y*       | yΔ       | AA   |
|-----|-----------------|----------------|----------------|-----------------|----------------|----------|----------|----------|----------|------|
| E1  | 363.059         | 0.000          | 363.059        | 116.034         | 0.000          | 363.059  | 417.726  | 4.950    | 462.676  | D140 |
| E2  | 217.006         | 0.000          | 217.006        | 42.010          | 0.000          | 217.006  | 427.441  | 4.950    | 452.491  | E139 |
| E3  | 346.124         | 0.000          | 346.124        | 374.118         | 0.000          | 346.124  | 4126.431 | 4.111    | 4131.426 | E138 |
| L4  | 493.200         | 0.000          | <b>441.190</b> | <b>487.203</b>  | 0.000          | 493.200  | 3993.101 | 3992.390 | 3991.301 | L137 |
| T5  | <b>375.251</b>  | 0.000          | 375.251        | <b>601.240</b>  | 0.000          | 375.251  | 3998.101 | 3998.200 | 3998.101 | K136 |
| R6  | 404.300         | 0.000          | 404.300        | <b>712.315</b>  | 0.000          | 404.300  | 3772.250 | 3770.250 | 3770.250 | K135 |
| L7  | 014.411         | <b>797.404</b> | 797.404        | 342.421         | 0.000          | 797.404  | 354.174  | 352.174  | 352.103  | L134 |
| L8  | 107.529         | 0.000          | 107.529        | 308.529         | 0.000          | 107.529  | 317.489  | 311.100  | 311.000  | L133 |
| Q9  | 364.530         | 0.000          | 364.530        | 303.531         | <b>895.504</b> | 364.530  | 3418.000 | 3418.000 | 3418.000 | C132 |
| R10 | <b>1140.657</b> | 1127.639       | 1127.639       | <b>1168.657</b> | 1131.631       | 1140.657 | 1390.664 | 1349.954 | 1342.674 | K131 |
| V11 | <b>1236.731</b> | 1222.724       | 1222.724       | 1237.730        | 1232.694       | 1236.731 | 1247.691 | 1247.691 | 1247.691 | V130 |
| V12 | 1246.730        | 1232.726       | 1232.726       | 1257.729        | 1252.704       | 1246.730 | 1257.729 | 1257.729 | 1257.729 | V129 |
| H13 | 391.190         | 1436.618       | 1436.618       | 1481.611        | 1481.611       | 391.190  | 3084.744 | 3087.718 | 3088.711 | H128 |
| A14 | 1524.930        | 1507.913       | 1507.913       | 1512.914        | 1512.914       | 1524.930 | 1581.931 | 1574.913 | 1574.913 | A127 |
| C15 | 360.366         | 1636.443       | 1636.443       | 1646.445        | 1646.445       | 360.366  | 1636.443 | 1636.443 | 1636.443 | C126 |
| G16 | 1109.960        | 1092.933       | 1092.933       | 1117.919        | 1117.919       | 1109.960 | 1092.933 | 1092.933 | 1092.933 | C125 |
| G17 | 1167.101        | 1149.053       | 1149.053       | 1164.060        | 1164.060       | 1167.101 | 1176.100 | 1163.541 | 1163.511 | C124 |
| V18 | 1088.930        | 1079.913       | 1079.913       | 1084.914        | 1084.914       | 1088.930 | 1079.913 | 1079.913 | 1079.913 | V123 |
| L19 | 1099.154        | 1082.127       | 1082.127       | 1097.144        | 1097.144       | 1099.154 | 1079.913 | 1079.913 | 1079.913 | V122 |
| P20 | 1019.100        | 1009.100       | 1009.100       | 1014.101        | 1014.101       | 1019.100 | 1009.100 | 1009.100 | 1009.100 | P121 |
| R21 | 1039.100        | 1029.100       | 1029.100       | 1034.101        | 1034.101       | 1039.100 | 1029.100 | 1029.100 | 1029.100 | P120 |
| D22 | 2263.133        | 2247.123       | 2247.123       | 2257.125        | 2257.125       | 2263.133 | 2257.123 | 2257.123 | 2257.123 | H119 |
| Q23 | 2811.362        | 2794.349       | 2794.349       | 2804.351        | 2804.351       | 2811.362 | 2794.349 | 2794.349 | 2794.349 | Q118 |
| A24 | 2592.420        | 2575.402       | 2575.402       | 2585.424        | 2585.424       | 2592.420 | 2575.402 | 2575.402 | 2575.402 | A117 |
| V25 | 2811.400        | 2794.411       | 2794.411       | 2804.412        | 2804.412       | 2811.400 | 2794.411 | 2794.411 | 2794.411 | V116 |
| L26 | 2114.561        | 2097.550       | 2097.551       | 2124.570        | 2124.569       | 2114.561 | 2097.550 | 2097.550 | 2097.550 | L115 |
| L27 | 2027.000        | 2010.013       | 2010.013       | 2020.015        | 2020.015       | 2027.000 | 2010.013 | 2010.013 | 2010.013 | L114 |
| V28 | 1234.700        | 1217.687       | 1217.687       | 1227.689        | 1227.689       | 1234.700 | 1217.687 | 1217.687 | 1217.687 | F113 |
| R29 | 1552.813        | 1535.797       | 1535.797       | 1545.800        | 1545.800       | 1552.813 | 1535.797 | 1535.797 | 1535.797 | K112 |
| K30 | 1189.930        | 1171.913       | 1171.913       | 1181.915        | 1181.915       | 1189.930 | 1171.913 | 1171.913 | 1171.913 | K111 |
| V31 | 1234.700        | 1217.687       | 1217.687       | 1227.689        | 1227.689       | 1234.700 | 1217.687 | 1217.687 | 1217.687 | V110 |
| E32 | 3412.960        | 3391.972       | 3391.969       | 3401.969        | 3401.969       | 3412.960 | 3391.972 | 3391.969 | 3391.969 | E101 |
| S33 | 1669.010        | 1651.009       | 1651.009       | 1661.011        | 1661.011       | 1669.010 | 1651.009 | 1651.009 | 1651.009 | S100 |
| H34 | 1615.000        | 1601.000       | 1601.000       | 1611.000        | 1611.000       | 1615.000 | 1601.000 | 1601.000 | 1601.000 | H107 |
| V35 | 1114.140        | 1101.141       | 1101.141       | 1111.142        | 1111.142       | 1114.140 | 1101.141 | 1101.141 | 1101.141 | V106 |
| K36 | 3600.343        | 3581.217       | 3581.213       | 3591.218        | 3591.212       | 3600.343 | 3581.217 | 3581.217 | 3581.217 | K105 |
| A17 | 3971.260        | 3954.254       | 3954.250       | 3964.249        | 3964.249       | 3971.260 | 3954.254 | 3954.250 | 3954.250 | A104 |
| R18 | 2309.870        | 2292.868       | 2292.869       | 2302.868        | 2302.868       | 2309.870 | 2292.868 | 2292.868 | 2292.868 | C103 |
| G39 | 2155.597        | 2139.590       | 2139.588       | 2149.589        | 2149.588       | 2155.597 | 2139.590 | 2139.588 | 2139.588 | C102 |
| K40 | 3335.500        | 3320.498       | 3320.496       | 3330.497        | 3330.497       | 3335.500 | 3320.498 | 3320.498 | 3320.498 | K101 |

# sp | Q6GSS7 | H2A2A\_MOUSE

DEELNKLLGK <sup>Dimethyl</sup> 28.03 VTIAQGGVLPNIQAVLLPKKTESHKAKGK <sup>Acetyl</sup> 42.01

- ▶ fragmentation table for charge state 2+
- ▶ specType=cid
- ▶ score=40.10
- ▶ F113281.dat
- ▶ query=q36989\_p1
- ▶ precursor=875.304810
- ▶ chargePrecursor=5
- ▶ itol=0.5

| AA  | a    | a*  | a,0   | b        | b*      | b,0   | y        | y*       | y,0      | AA       |      |
|-----|------|-----|-------|----------|---------|-------|----------|----------|----------|----------|------|
| Q1  | 44   | 523 | 0.524 | 160.510  | 59.521  | 0.504 | 49.503   | 238.100  | 419.294  | 2117.532 | L540 |
| E2  | 100  | 544 | 0.545 | 160.510  | 59.521  | 0.504 | 174.501  | 238.100  | 419.294  | 2117.532 | L540 |
| E3  | 173  | 566 | 0.524 | 164.563  | 107.563 | 0.504 | 178.526  | 2094.223 | 2095.210 | 2095.138 | E281 |
| L4  | 273  | 610 | 0.524 | 170.110  | 104.110 | 0.504 | 201.100  | 2095.138 | 2193.088 | 1991.138 | L177 |
| N5  | 307  | 620 | 0.620 | 210.120  | 103.120 | 0.620 | 202.120  | 2094.800 | 1019.148 | 1094.804 | N30  |
| K6  | 310  | 614 | 0.614 | 204.614  | 109.614 | 0.614 | 205.610  | 1099.610 | 1099.610 | 1099.610 | K13  |
| L7  | 407  | 610 | 0.610 | 166.610  | 111.610 | 0.610 | 111.610  | 1017.610 | 1018.070 | 1011.100 | L134 |
| L8  | 404  | 581 | 0.570 | 143.580  | 119.580 | 0.580 | 109.580  | 1193.040 | 1193.040 | 1193.040 | L133 |
| Q9  | 492  | 714 | 0.714 | 163.710  | 129.710 | 0.710 | 109.710  | 1193.040 | 1193.040 | 1193.040 | G23  |
| K10 | 530  | 630 | 0.630 | 166.630  | 134.630 | 0.630 | 108.630  | 1017.630 | 1017.630 | 1011.100 | K13  |
| V11 | 620  | 580 | 0.580 | 141.580  | 131.580 | 0.580 | 108.580  | 1194.410 | 1091.501 | 1011.100 | V10  |
| T12 | 610  | 580 | 0.580 | 141.580  | 131.580 | 0.580 | 108.580  | 1194.410 | 1091.501 | 1011.100 | T10  |
| H13 | 727  | 635 | 0.635 | 170.630  | 141.630 | 0.630 | 137.630  | 1099.630 | 1099.630 | 1099.630 | G26  |
| A14 | 760  | 635 | 0.635 | 170.630  | 141.630 | 0.630 | 137.630  | 1099.630 | 1099.630 | 1099.630 | A27  |
| Q15 | 826  | 683 | 0.683 | 180.680  | 146.680 | 0.680 | 142.680  | 1143.110 | 1143.110 | 1143.110 | G20  |
| G16 | 855  | 693 | 0.693 | 180.690  | 146.690 | 0.690 | 142.690  | 1143.110 | 1143.110 | 1143.110 | G20  |
| Q17 | 884  | 684 | 0.684 | 184.680  | 146.680 | 0.680 | 142.680  | 1143.110 | 1143.110 | 1143.110 | G24  |
| V18 | 933  | 626 | 0.626 | 166.620  | 147.620 | 0.620 | 147.620  | 1193.040 | 1193.040 | 1193.040 | V20  |
| L19 | 990  | 680 | 0.680 | 184.680  | 146.680 | 0.680 | 142.680  | 1143.110 | 1143.110 | 1143.110 | L22  |
| P20 | 1000 | 680 | 0.680 | 184.680  | 146.680 | 0.680 | 142.680  | 1143.110 | 1143.110 | 1143.110 | P21  |
| N21 | 1095 | 628 | 0.628 | 166.620  | 147.620 | 0.620 | 147.620  | 1193.040 | 1193.040 | 1193.040 | N20  |
| Q22 | 1130 | 610 | 0.610 | 143.610  | 143.610 | 0.610 | 143.610  | 1017.610 | 1017.610 | 1017.610 | Q18  |
| Q23 | 1216 | 200 | 0.200 | 1207.190 | 121.000 | 0.200 | 1021.190 | 1011.000 | 1011.000 | 1011.000 | Q18  |
| V24 | 1260 | 620 | 0.620 | 166.620  | 147.620 | 0.620 | 147.620  | 1193.040 | 1193.040 | 1193.040 | V20  |
| L25 | 1267 | 610 | 0.610 | 143.610  | 143.610 | 0.610 | 143.610  | 1017.610 | 1017.610 | 1017.610 | L13  |
| L27 | 1414 | 610 | 0.610 | 143.610  | 143.610 | 0.610 | 143.610  | 1017.610 | 1017.610 | 1017.610 | L13  |
| P28 | 1462 | 610 | 0.610 | 143.610  | 143.610 | 0.610 | 143.610  | 1017.610 | 1017.610 | 1017.610 | P15  |
| K29 | 1520 | 610 | 0.610 | 143.610  | 143.610 | 0.610 | 143.610  | 1017.610 | 1017.610 | 1017.610 | K12  |
| K30 | 1560 | 600 | 0.600 | 143.600  | 143.600 | 0.600 | 143.600  | 1017.600 | 1017.600 | 1017.600 | K11  |
| L31 | 1744 | 610 | 0.610 | 143.610  | 143.610 | 0.610 | 143.610  | 1017.610 | 1017.610 | 1017.610 | L13  |
| E32 | 1760 | 600 | 0.600 | 143.600  | 143.600 | 0.600 | 143.600  | 1017.600 | 1017.600 | 1017.600 | E11  |
| S33 | 1740 | 610 | 0.610 | 143.610  | 143.610 | 0.610 | 143.610  | 1017.610 | 1017.610 | 1017.610 | S11  |
| L34 | 1814 | 610 | 0.610 | 143.610  | 143.610 | 0.610 | 143.610  | 1017.610 | 1017.610 | 1017.610 | L13  |
| K35 | 1830 | 610 | 0.610 | 143.610  | 143.610 | 0.610 | 143.610  | 1017.610 | 1017.610 | 1017.610 | K10  |
| K36 | 1930 | 620 | 0.620 | 166.620  | 147.620 | 0.620 | 147.620  | 1193.040 | 1193.040 | 1193.040 | K10  |
| A37 | 1930 | 620 | 0.620 | 166.620  | 147.620 | 0.620 | 147.620  | 1193.040 | 1193.040 | 1193.040 | A14  |
| K38 | 2000 | 610 | 0.610 | 143.610  | 143.610 | 0.610 | 143.610  | 1017.610 | 1017.610 | 1017.610 | K13  |
| G39 | 2010 | 610 | 0.610 | 143.610  | 143.610 | 0.610 | 143.610  | 1017.610 | 1017.610 | 1017.610 | G12  |
| K40 | 2060 | 610 | 0.610 | 143.610  | 143.610 | 0.610 | 143.610  | 1017.610 | 1017.610 | 1017.610 | K13  |

# sp | Q6GSS7 | H2A2A\_MOUSE

DEELNKLLGK <sup>Dimethyl</sup> 28.03 VTIAQGGVLPNIQAVLLPKKTESHKAKGK <sup>Acetyl</sup> 42.01

- ▶ fragmentation table for charge state 3+
- ▶ specType=cid
- ▶ score=40.10
- ▶ F113281.dat
- ▶ query=q36989\_p1
- ▶ precursor=875.304810
- ▶ chargePrecursor=5
- ▶ itol=0.5

| AA  | a       | a*       | a,Δ      | b        | b*       | b,Δ      | y        | y*       | y,Δ      | AA   |
|-----|---------|----------|----------|----------|----------|----------|----------|----------|----------|------|
| D1  | 301058  | 0.072    | 34.014   | 36.930   | 0.072    | 33.346   | 1463.171 | 1463.466 | 1462.171 | D140 |
| E2  | 311333  | 0.072    | 34.026   | 42.864   | 0.072    | 36.468   | 1439.831 | 1444.376 | 1441.831 | E130 |
| E3  | 138590  | 0.072    | 103.043  | 125.376  | 0.072    | 119.374  | 1370.810 | 1371.143 | 1370.044 | E130 |
| L4  | 153741  | 0.072    | 147.738  | 163.071  | 0.072    | 157.089  | 1331.803 | 1329.120 | 1327.803 | L137 |
| K5  | 1307495 | 0.080    | 109.765  | 109.869  | 0.080    | 109.913  | 1306.951 | 1308.101 | 1309.433 | K530 |
| K10 | 254454  | 236.773  | 238.602  | 243.195  | 238.110  | 237.789  | 1288.084 | 1267.416 | 1262.801 | K130 |
| L11 | 272248  | 266.471  | 268.143  | 281.460  | 275.304  | 275.409  | 1215.396 | 1209.721 | 1208.391 | L134 |
| L18 | 109411  | 306.180  | 313.846  | 318.178  | 311.669  | 312.114  | 1147.763 | 1172.020 | 1171.688 | L133 |
| G19 | 226702  | 323.373  | 322.947  | 338.152  | 332.500  | 332.162  | 1150.101 | 1154.101 | 1154.101 | G125 |
| K10 | 308302  | 336.117  | 374.689  | 380.274  | 384.540  | 384.230  | 1111.030 | 1113.324 | 1114.909 | K133 |
| V11 | 214703  | 401.266  | 407.922  | 424.247  | 417.711  | 417.263  | 1088.991 | 1083.260 | 1082.954 | V134 |
| L12 | 241700  | 431.921  | 441.504  | 436.719  | 431.254  | 430.362  | 1035.931 | 1030.266 | 1029.354 | L120 |
| E13 | 351260  | 476.011  | 476.898  | 484.874  | 480.646  | 480.688  | 1001.267 | 998.971  | 998.101  | E121 |
| A14 | 308371  | 503.294  | 502.998  | 516.913  | 512.637  | 512.259  | 964.957  | 963.965  | 964.194  | A127 |
| G15 | 331306  | 530.460  | 545.054  | 546.603  | 535.314  | 534.448  | 933.878  | 935.263  | 934.875  | G126 |
| G16 | 330305  | 554.468  | 564.661  | 571.946  | 574.312  | 573.933  | 898.192  | 898.511  | 897.875  | G126 |
| G17 | 330372  | 583.966  | 583.668  | 598.014  | 593.326  | 593.033  | 873.510  | 873.182  | 872.624  | G126 |
| V18 | 330365  | 613.990  | 618.605  | 619.669  | 606.363  | 606.163  | 860.178  | 859.900  | 859.704  | V126 |
| L19 | 350389  | 634.724  | 634.580  | 650.721  | 644.045  | 643.711  | 827.155  | 801.460  | 801.162  | L122 |
| P20 | 332340  | 667.690  | 667.717  | 672.872  | 665.269  | 665.068  | 789.460  | 785.745  | 781.457  | P121 |
| K21 | 331333  | 720.091  | 724.711  | 716.466  | 714.111  | 714.163  | 751.434  | 751.434  | 751.434  | K121 |
| G22 | 330440  | 752.374  | 762.440  | 777.781  | 772.510  | 771.713  | 719.095  | 719.095  | 719.092  | G124 |
| G23 | 311133  | 801.466  | 805.122  | 826.467  | 814.492  | 814.494  | 681.492  | 675.725  | 675.367  | G128 |
| K24 | 334713  | 829.173  | 830.014  | 844.242  | 838.471  | 838.174  | 636.174  | 635.699  | 635.199  | K117 |
| V25 | 332337  | 862.182  | 861.834  | 874.719  | 874.719  | 874.719  | 571.195  | 615.035  | 609.360  | V116 |
| L26 | 350319  | 896.695  | 896.528  | 914.864  | 909.138  | 908.860  | 562.012  | 576.311  | 576.009  | L118 |
| L27 | 343237  | 937.951  | 937.232  | 952.532  | 946.803  | 946.626  | 544.113  | 538.042  | 538.134  | L114 |
| K28 | 371316  | 960.560  | 960.514  | 964.404  | 959.238  | 959.418  | 478.418  | 469.613  | 469.613  | K118 |
| K29 | 318376  | 1012.460 | 1012.272 | 1017.606 | 1021.932 | 1021.604 | 434.272  | 468.597  | 468.769  | K112 |
| K10 | 330318  | 1026.260 | 1024.971 | 1070.306 | 1064.630 | 1064.303 | 431.574  | 425.888  | 425.570  | K113 |
| L31 | 338393  | 1080.861 | 1080.633 | 1085.669 | 1080.819 | 1080.619 | 368.819  | 368.819  | 369.819  | L110 |
| E32 | 1137373 | 1131.960 | 1131.667 | 1147.803 | 1141.370 | 1141.939 | 355.153  | 348.911  | 348.988  | E110 |
| S33 | 1131360 | 1161.890 | 1161.616 | 1176.111 | 1171.102 | 1171.102 | 312.110  | 306.263  | 306.119  | S110 |
| K34 | 330300  | 1201.890 | 1201.616 | 1216.111 | 1211.102 | 1211.102 | 277.491  | 277.491  | 277.491  | K111 |
| H35 | 2758014 | 1252.379 | 1252.093 | 1267.388 | 1261.710 | 1261.710 | 237.461  | 233.909  | 233.972  | H101 |
| K16 | 3303123 | 1276.077 | 1274.749 | 1310.084 | 1304.406 | 1304.081 | 181.769  | 184.120  | 182.772  | K101 |
| K17 | 3303123 | 1301.459 | 1300.131 | 1330.519 | 1324.841 | 1324.516 | 140.719  | 142.422  | 140.719  | K101 |
| K31 | 1337134 | 1331.474 | 1331.120 | 1336.762 | 1331.100 | 1331.100 | 135.433  | 135.743  | 135.743  | K101 |
| G40 | 1336131 | 1386.466 | 1386.134 | 1391.460 | 1386.100 | 1386.460 | 81.720   | 77.064   | 80.772   | G42  |
| K40 | 1442328 | 1437.181 | 1436.835 | 1452.171 | 1446.405 | 1446.167 | 63.713   | 64.037   | 63.877   | K11  |

# sp | Q6GSS7 | H2A2A\_MOUSE

DEELNKLLGK <sup>Dimethyl</sup> 28.03 VTIAQGGVLPNIQAVLLPKKTESHKAKGK <sup>Acetyl</sup> 42.01

- ▶ fragmentation table for charge state 4+
- ▶ specType=cid
- ▶ score=40.10
- ▶ F113281.dat
- ▶ query=q36989\_p1
- ▶ precursor=875.304810
- ▶ chargePrecursor=5
- ▶ itol=0.5

| AA   | a              | a*              | a.b             | b               | b*             | b.b            | v              | a*             | v.b            | AA             |      |
|------|----------------|-----------------|-----------------|-----------------|----------------|----------------|----------------|----------------|----------------|----------------|------|
| E1   | 22             | 209             | 0.793           | 124.053         | 20.761         | 0.793          | 29.287         | 1001.881       | 1000.028       | 1000.028       | C140 |
| E2   | 95             | 5295            | 0.793           | 505.523         | 82.0225        | 0.793          | 57.5222        | 1005.126       | 1003.899       | 1003.899       | E139 |
| E3   | 87             | 287             | 0.793           | 87.284          | 94.205         | 0.793          | 88.9783        | 1012.883       | 1028.638       | 1028.362       | E138 |
| L4   | 115            | 558             | 0.793           | 114.028         | 122.555        | 0.793          | 113.054        | 1016.054       | 1006.345       | 1006.345       | L137 |
| R5   | 144            | 680             | 1.59123         | 139.505         | 150.051        | 1.49353        | 149.954        | <b>972.333</b> | 968.077        | 982.813        | R630 |
| K6   | 176            | 862             | 1.71235         | 171.589         | 183.061        | 1.71834        | 178.588        | 943.823        | 939.596        | <b>939.320</b> | K125 |
| L7   | 204            | 981             | 2.00135         | 199.200         | 211.262        | 2.02710        | 205.839        | 931.792        | 907.542        | 907.246        | L124 |
| L16  | 213            | 934             | 2.08317         | 208.813         | 218.833        | 2.10339        | 212.319        | <b>853.553</b> | 870.272        | 899.805        | L123 |
| G9   | 246            | 1089            | 2.62133         | 242.327         | 253.888        | 2.64937        | 249.336        | <b>855.257</b> | 851.003        | 860.734        | G122 |
| K19  | 285            | 1211            | 2.81164         | 281.433         | 292.521        | 2.83833        | 288.471        | <b>841.602</b> | <b>836.745</b> | <b>836.499</b> | K121 |
| V11  | 319            | 1589            | 3.08431         | 308.325         | 317.688        | 3.12430        | 313.436        | 811.211        | 811.211        | <b>797.467</b> | V120 |
| L125 | 335            | 1590            | 3.11083         | 331.447         | 342.944        | 3.15062        | 338.446        | 777.253        | <b>772.945</b> | <b>772.705</b> | L119 |
| L13  | 384            | 1731            | 3.69484         | 384.138         | 391.225        | 3.68863        | 386.473        | 741.941        | <b>747.684</b> | <b>747.438</b> | L118 |
| A14  | 391            | 1869            | 3.77124         | 377.476         | 386.974        | 3.84722        | 384.476        | 723.823        | <b>719.413</b> | <b>719.167</b> | A117 |
| Q129 | 413            | 1995            | 4.09138         | 409.482         | 420.969        | 4.08873        | 416.981        | 678.801        | 678.801        | 678.801        | Q128 |
| G16  | 436            | 2091            | 4.21394         | 421.748         | 435.243        | 4.20362        | 430.746        | 673.259        | 669.039        | 668.783        | G127 |
| G13  | 442            | 2091            | <b>4.18249</b>  | <b>438.803</b>  | 449.521        | <b>445.248</b> | <b>445.002</b> | 653.841        | 650.261        | 650.138        | G124 |
| Q128 | 459            | 2119            | 4.61139         | 461.217         | 474.219        | 4.61337        | 467.219        | 607.789        | 607.789        | 607.789        | Q127 |
| L119 | 495            | 2444            | 4.91292         | 491.041         | 502.543        | 4.90328        | 496.040        | 630.813        | 616.262        | 616.119        | L122 |
| P120 | 513            | 2637            | 5.11330         | 511.304         | 526.656        | 5.12349        | 512.633        | 602.347        | 598.168        | 597.844        | P121 |
| N21  | 548            | 2518            | 5.64165         | 548.215         | 555.313        | 5.63360        | 550.814        | 568.264        | 563.627        | 563.381        | N20  |
| L123 | 576            | 2809            | 5.74132         | 574.088         | 583.581        | 5.74811        | 578.381        | 574.808        | 570.911        | 570.811        | L114 |
| Q123 | 608            | 3002            | 6.04347         | 604.131         | <b>615.602</b> | 6.01346        | 611.140        | 511.302        | 507.646        | 508.803        | Q118 |
| A124 | 626            | 3061            | 6.23135         | 621.200         | 633.191        | 6.20139        | 626.693        | 479.283        | 475.031        | 474.705        | A113 |
| V126 | 651            | 3139            | 6.66813         | 666.809         | <b>658.128</b> | 6.63818        | 653.809        | 469.131        | 465.272        | 465.909        | V116 |
| L106 | 676            | 3401            | 6.75144         | 674.088         | 685.482        | 6.82143        | 681.599        | <b>436.761</b> | 432.552        | 432.229        | L115 |
| L127 | <b>707.872</b> | <b>3178.078</b> | <b>7.07132</b>  | <b>707.142</b>  | 714.671        | <b>710.414</b> | <b>710.168</b> | 403.490        | 400.238        | 401.888        | L116 |
| P124 | 711            | 3201            | <b>7.07476</b>  | <b>711.432</b>  | 719.877        | 714.431        | 710.219        | 388.219        | 374.866        | 374.618        | P113 |
| P125 | 715            | 3202            | <b>7.10792</b>  | <b>715.436</b>  | 726.365        | 716.912        | 716.670        | 385.699        | 380.442        | 380.432        | K112 |
| K100 | 745            | 3611            | 7.41128         | 741.436         | 752.985        | 746.125        | 746.479        | 341.617        | 338.819        | 338.436        | K111 |
| L131 | 813            | 4014            | <b>8.16368</b>  | <b>813.437</b>  | <b>820.287</b> | <b>823.987</b> | <b>823.741</b> | 286.880        | 287.950        | 287.649        | L118 |
| L124 | <b>833.365</b> | 4111.768        | <b>8.60302</b>  | <b>860.501</b>  | 869.264        | <b>866.481</b> | 334.161        | 330.123        | 329.811        | S10            |      |
| R104 | 860            | 4318            | 8.60278         | <b>859.290</b>  | <b>816.527</b> | <b>812.270</b> | <b>812.024</b> | 211.828        | 208.371        | 207.701        | R107 |
| K106 | 875            | 4324            | 8.71260         | <b>870.290</b>  | 879.528        | 874.512        | 874.028        | 194.028        | 190.442        | 190.765        | K105 |
| A137 | 893            | 4576            | 8.91319         | 893.071         | 900.174        | 896.119        | 896.672        | 182.071        | 180.818        | 180.740        | A14  |
| K108 | 1025           | 5667            | <b>10.21343</b> | 1021.297        | 1032.592       | 1028.341       | 1028.095       | 84.123         | 84.009         | 83.901         | K103 |
| K109 | 1119           | 6173            | 11.19171        | 1119.311        | 1130.801       | 1124.397       | 1124.719       | 62.619         | 62.619         | 62.619         | K102 |
| R403 | 1162           | 5811            | <b>10.78124</b> | <b>1077.878</b> | 1088.380       | 1080.121       | 1084.877       | 48.839         | 48.792         | 48.741         | R11  |



# sp | P62806 | H4\_MOUSE

[Acetyl]SGRGKGGKGLGKGGAKRHRK Dimethyl VL  
28.03

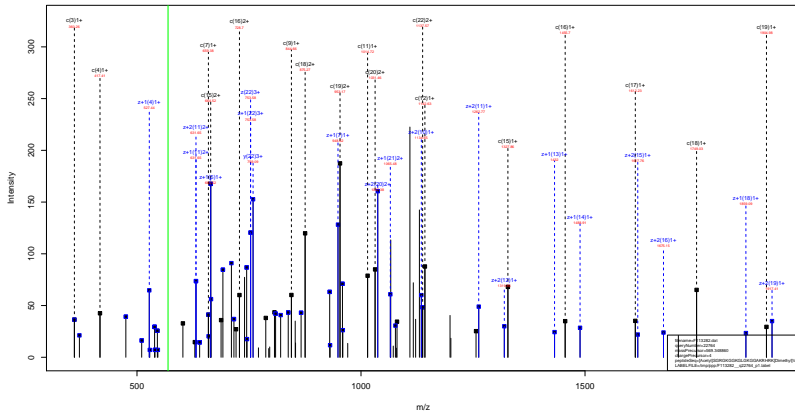

# sp | P62806 | H4\_MOUSE

[Acetyl]SGRGKGGKGLGKGGAKRHRK<sup>Dimethyl</sup> VL  
28.03

- ▶ fragmentation table for charge state 1+
- ▶ specType=etd
- ▶ score=127.94
- ▶ F113282.dat
- ▶ query=q22764\_p1
- ▶ precursor=569.348860
- ▶ chargePrecursor=4
- ▶ itol=0.5

| AA | c               | y        | z+1             | z+2             | z        | AA |
|----|-----------------|----------|-----------------|-----------------|----------|----|
| S  | 147.076         | 2274.374 | 2298.385        | 0.000           | 2297.340 | S  |
| G  | 204.088         | 2145.332 | 2129.313        | 9.000           | 2129.309 | G  |
| R  | <b>360.199</b>  | 2088.110 | 2072.291        | 2073.299        | 2071.284 | R  |
| G  | <b>417.220</b>  | 1932.209 | 1916.190        | <b>1917.198</b> | 1915.182 | G  |
| K  | <b>545.315</b>  | 1875.188 | <b>1859.169</b> | 1860.177        | 1858.161 | K  |
| G  | <b>602.337</b>  | 1747.093 | 1731.074        | 1732.082        | 1730.066 | G  |
| G  | <b>659.358</b>  | 1690.071 | 1674.052        | <b>1675.060</b> | 1673.045 | G  |
| R  | <b>737.453</b>  | 1633.050 | 1617.031        | <b>1618.039</b> | 1616.023 | R  |
| G  | <b>844.475</b>  | 1504.955 | <b>1488.936</b> | 1489.944        | 1487.928 | G  |
| L  | 957.559         | 1447.933 | <b>1431.914</b> | 1432.922        | 1430.907 | L  |
| G  | <b>1014.580</b> | 1334.849 | 1318.830        | <b>1319.838</b> | 1317.823 | G  |
| K  | <b>1142.675</b> | 1277.828 | 1261.809        | <b>1262.817</b> | 1260.801 | K  |
| G  | 1159.697        | 1149.733 | 1133.714        | <b>1134.722</b> | 1132.706 | G  |
| G  | <b>1258.718</b> | 1092.711 | <b>1076.693</b> | 1077.700        | 1075.685 | G  |
| A  | <b>1327.755</b> | 1035.690 | 1019.671        | 1020.679        | 1018.663 | A  |
| R  | <b>1455.850</b> | 964.653  | <b>948.634</b>  | 949.642         | 947.626  | R  |
| R  | <b>1611.951</b> | 836.558  | <b>820.539</b>  | 821.547         | 819.531  | R  |
| H  | <b>1749.010</b> | 680.457  | <b>664.438</b>  | <b>665.446</b>  | 663.430  | H  |
| K  | <b>1905.111</b> | 543.368  | <b>527.349</b>  | <b>528.357</b>  | 526.341  | K  |
| R  | 2061.238        | 407.267  | <b>371.248</b>  | 372.256         | 370.240  | R  |
| V  | 2180.308        | 231.170  | 215.152         | 216.159         | 214.144  | V  |
| L  | 2273.390        | 132.102  | 116.083         | 117.091         | 115.075  | L  |

# sp | P62806 | H4\_MOUSE

[Acetyl]SGRGKGGKGLGKGGAKRHRK <sup>Dimethyl</sup>VL  
28.03

- ▶ fragmentation table for charge state 2+
- ▶ specType=etd
- ▶ score=127.94
- ▶ F113282.dat
- ▶ query=q22764\_p1
- ▶ precursor=569.348860
- ▶ chargePrecursor=4
- ▶ itol=0.5

| AA | c  | y               | z+1             | z+2             | z               | AA             |      |
|----|----|-----------------|-----------------|-----------------|-----------------|----------------|------|
| S  | 1  | 74.642          | <b>1137.691</b> | 1129.853        | 0.304           | 1129.177       | S(2) |
| G  | 2  | 180.953         | 1079.169        | <b>1065.160</b> | 0.304           | 1064.056       | G(2) |
| R  | 3  | 180.903         | 1044.050        | 1036.040        | <b>1037.153</b> | 1035.145       | R(2) |
| G  | 4  | 209.114         | 966.908         | <b>958.599</b>  | <b>959.103</b>  | 958.095        | G(1) |
| K  | 5  | 273.161         | 938.097         | <b>930.088</b>  | <b>930.592</b>  | 929.584        | K(1) |
| G  | 6  | 301.672         | 874.050         | <b>866.041</b>  | <b>866.544</b>  | 865.537        | G(1) |
| G  | 7  | 330.183         | 845.539         | <b>837.530</b>  | <b>838.034</b>  | 837.026        | G(1) |
| R  | 8  | 384.239         | 817.028         | <b>809.019</b>  | <b>809.523</b>  | 808.515        | R(1) |
| G  | 9  | 422.741         | 752.981         | <b>744.972</b>  | <b>745.476</b>  | <b>744.468</b> | G(1) |
| L  | 10 | 479.283         | 724.470         | <b>716.461</b>  | 716.965         | <b>715.957</b> | L(1) |
| G  | 11 | 507.794         | 667.920         | <b>659.919</b>  | <b>660.423</b>  | <b>659.415</b> | G(1) |
| R  | 12 | 571.841         | <b>639.417</b>  | <b>631.408</b>  | <b>631.912</b>  | 630.904        | R(1) |
| G  | 13 | 607.824         | 579.210         | <b>567.201</b>  | 567.705         | 566.697        | G(1) |
| G  | 14 | <b>628.863</b>  | <b>546.859</b>  | <b>538.850</b>  | <b>539.354</b>  | 538.346        | G(1) |
| A  | 15 | <b>664.381</b>  | 518.349         | <b>510.339</b>  | <b>510.843</b>  | 509.835        | A(1) |
| R  | 16 | <b>728.429</b>  | 480.838         | <b>474.821</b>  | <b>475.325</b>  | 474.317        | R(1) |
| R  | 17 | <b>806.479</b>  | 448.782         | 440.773         | 441.277         | 440.269        | R(1) |
| H  | 18 | <b>875.009</b>  | 340.732         | 332.723         | 333.226         | 332.219        | H(1) |
| R  | 19 | <b>953.059</b>  | 272.202         | 264.193         | 264.697         | 263.689        | R(1) |
| R  | 20 | <b>1011.122</b> | 194.152         | 186.143         | 186.646         | 185.639        | R(1) |
| V  | 21 | <b>1080.657</b> | 116.080         | 108.070         | 108.583         | 107.576        | V(1) |
| L  | 22 | <b>1137.199</b> | 66.935          | 58.945          | 59.049          | 58.041         | L(1) |

# sp | P62806 | H4\_MOUSE

[Acetyl]SGRGKGGKGLGKGGAKRHRK<sup>Dimethyl</sup> VL  
28.03

- ▶ fragmentation table for charge state 3+
- ▶ specType=etd
- ▶ score=127.94
- ▶ F113282.dat
- ▶ query=q22764\_p1
- ▶ precursor=569.348860
- ▶ chargePrecursor=4
- ▶ itol=0.5

| AA   | c              | y              | z+1            | z+2            | z              | AA   |
|------|----------------|----------------|----------------|----------------|----------------|------|
| S 1  | 49.697         | <b>758.796</b> | <b>753.457</b> | 0.672          | <b>753.121</b> | S 22 |
| G 2  | 68.704         | 715.782        | <b>710.442</b> | 0.672          | 710.107        | G 21 |
| R 3  | 120.738        | 696.775        | <b>691.435</b> | <b>691.771</b> | 691.099        | R 20 |
| G 4  | 139.745        | 644.741        | <b>639.402</b> | <b>639.738</b> | 639.066        | G 19 |
| K 5  | 182.443        | 625.734        | 620.394        | 620.730        | 620.059        | K 18 |
| G 6  | 201.450        | 583.036        | 577.696        | 578.032        | 577.366        | G 17 |
| G 7  | 239.456        | 564.029        | 558.689        | 559.025        | 558.353        | G 16 |
| K 8  | 253.156        | <b>545.021</b> | <b>539.682</b> | <b>540.018</b> | <b>539.346</b> | K 15 |
| G 9  | 282.163        | 502.323        | 496.984        | 497.319        | 496.648        | G 14 |
| L 10 | 319.858        | 483.316        | 477.976        | 478.312        | 477.640        | L 13 |
| G 11 | 338.865        | 445.621        | 440.282        | 440.618        | 439.946        | G 12 |
| K 12 | 381.563        | 426.614        | 421.275        | 421.610        | 420.939        | K 11 |
| G 13 | 400.570        | 383.916        | 378.576        | 378.912        | 378.240        | G 10 |
| G 14 | 419.578        | 364.909        | 359.569        | <b>359.905</b> | 359.233        | G 9  |
| A 15 | 443.257        | 345.901        | 340.562        | 340.898        | 340.226        | A 8  |
| K 16 | 485.995        | 322.222        | 316.883        | 317.219        | 316.547        | K 7  |
| R 17 | 537.989        | 279.524        | 274.185        | 274.520        | 273.849        | R 6  |
| H 18 | 553.675        | 227.490        | 222.151        | 222.487        | 221.815        | H 5  |
| R 19 | 635.709        | 181.804        | 176.465        | 176.800        | 176.129        | R 4  |
| K 20 | <b>687.751</b> | 129.770        | 124.431        | 124.767        | 124.095        | K 3  |
| V 21 | <b>720.774</b> | 77.728         | 72.389         | 72.725         | 72.053         | V 2  |
| L 22 | 758.468        | 44.705         | 39.366         | 39.702         | 39.030         | L 1  |



# sp | P68433 | H31\_MOUSE

PK<sup>Acetyl</sup><sub>42.01</sub> DIQLARRIGERA

- ▶ fragmentation table for charge state 1+
- ▶ specType=etd
- ▶ score=41.55
- ▶ F113283.dat
- ▶ query=q39503.p1
- ▶ precursor=365.016590
- ▶ chargePrecursor=5
- ▶ itol=0.5

| AA    | c               | y              | z+1            | z+2      | z        | AA    |
|-------|-----------------|----------------|----------------|----------|----------|-------|
| P[1]  | <b>115.087</b>  | 1821.057       | 1825.038       | 0.000    | 1804.039 | P[15] |
| K[2]  | <b>285.192</b>  | 1724.004       | 1707.985       | 1708.993 | 1706.973 | K[14] |
| D[3]  | <b>400.219</b>  | 1553.898       | 1537.880       | 1538.887 | 1536.872 | D[13] |
| I[4]  | <b>513.303</b>  | 1438.871       | 1422.853       | 1423.860 | 1421.845 | I[12] |
| Q[5]  | <b>641.362</b>  | 1325.787       | 1309.769       | 1310.776 | 1308.761 | Q[11] |
| L[6]  | <b>754.446</b>  | 1197.720       | 1181.710       | 1182.718 | 1180.702 | L[10] |
| A[7]  | <b>825.483</b>  | 1084.645       | 1068.628       | 1069.634 | 1067.618 | A[9]  |
| R[8]  | <b>981.584</b>  | 1013.000       | 997.580        | 998.597  | 996.581  | R[8]  |
| R[9]  | 1137.685        | 857.506        | <b>841.488</b> | 842.496  | 840.480  | R[7]  |
| I[10] | <b>1250.769</b> | 701.405        | <b>685.387</b> | 686.394  | 684.379  | I[6]  |
| R[11] | 1406.870        | <b>588.321</b> | <b>572.303</b> | 573.310  | 571.295  | R[6]  |
| G[12] | 1463.992        | <b>432.220</b> | <b>416.201</b> | 417.209  | 415.194  | G[4]  |
| E[13] | 1592.934        | 375.109        | <b>359.189</b> | 360.188  | 358.172  | E[3]  |
| R[14] | 1749.035        | 246.156        | <b>230.137</b> | 231.145  | 229.130  | R[2]  |
| A[15] | 1820.073        | 90.055         | 74.036         | 75.044   | 73.028   | A[1]  |

# sp | P68433 | H31\_MOUSE

PK<sup>Acetyl</sup> 42.01 DIQLARRIGERA

- ▶ fragmentation table for charge state 2+
- ▶ specType=etd
- ▶ score=41.55
- ▶ F113283.dat
- ▶ query=q39503\_p1
- ▶ precursor=365.016590
- ▶ chargePrecursor=5
- ▶ itol=0.5

| AA    | c              | y       | z+1            | z+2            | z              | AA    |
|-------|----------------|---------|----------------|----------------|----------------|-------|
| P[1]  | 58.047         | 911.032 | <b>903.023</b> | 0.504          | 602.510        | P[15] |
| K[2]  | 143.100        | 862.506 | 854.496        | <b>855.000</b> | 853.992        | K[14] |
| D[3]  | 200.613        | 777.453 | 769.443        | <b>769.947</b> | 768.940        | D[13] |
| T[4]  | 257.155        | 719.939 | 711.930        | <b>712.434</b> | 711.425        | T[12] |
| Q[5]  | 321.184        | 663.397 | 655.388        | <b>655.892</b> | 654.384        | Q[11] |
| L[6]  | 377.227        | 599.368 | 591.359        | <b>591.863</b> | 590.355        | L[10] |
| A[7]  | 413.265        | 542.828 | 534.817        | <b>535.321</b> | 534.313        | A[9]  |
| R[8]  | <b>491.296</b> | 507.307 | 499.298        | <b>499.802</b> | 498.794        | R[8]  |
| R[9]  | <b>569.346</b> | 429.257 | <b>421.247</b> | <b>421.751</b> | 420.744        | R[7]  |
| I[10] | <b>625.888</b> | 351.206 | 343.197        | 343.701        | 342.693        | I[6]  |
| R[11] | <b>703.939</b> | 294.664 | <b>286.655</b> | 287.159        | <b>286.151</b> | R[5]  |
| G[12] | <b>732.450</b> | 216.614 | 208.604        | 209.108        | 208.100        | G[4]  |
| E[13] | 796.971        | 188.103 | 180.094        | 180.598        | 179.590        | E[3]  |
| R[14] | <b>875.021</b> | 123.582 | 115.572        | 116.075        | <b>115.068</b> | R[2]  |
| A[15] | 910.540        | 45.531  | 37.522         | 38.026         | 37.018         | A[1]  |

# sp | P68433 | H31\_MOUSE

PK<sup>Acetyl</sup> 42.01 DIQLARRIGERA

- ▶ fragmentation table for charge state 3+
- ▶ specType=etd
- ▶ score=41.55
- ▶ F113283.dat
- ▶ query=q39503.p1
- ▶ precursor=365.016590
- ▶ chargePrecursor=5
- ▶ itol=0.5

| AA    | c              | y              | z+1            | z+2            | z              | AA    |
|-------|----------------|----------------|----------------|----------------|----------------|-------|
| P[1]  | 39.034         | <b>607.690</b> | 602.351        | 0.672          | 602.015        | P[15] |
| K[2]  | 95.736         | 575.339        | <b>570.000</b> | <b>570.336</b> | <b>569.664</b> | K[14] |
| D[3]  | 134.078        | 518.638        | <b>513.298</b> | <b>513.634</b> | <b>512.962</b> | D[13] |
| T[4]  | 171.773        | 480.295        | <b>474.956</b> | <b>475.292</b> | 474.620        | T[12] |
| Q[5]  | 214.459        | 442.091        | <b>437.261</b> | <b>437.597</b> | 436.925        | Q[11] |
| L[6]  | 252.153        | <b>399.914</b> | <b>394.575</b> | <b>394.911</b> | <b>394.239</b> | L[10] |
| A[7]  | 275.032        | 362.220        | <b>356.880</b> | <b>357.216</b> | 356.544        | A[9]  |
| R[8]  | 327.866        | 338.941        | <b>333.201</b> | <b>333.537</b> | 332.965        | R[8]  |
| R[9]  | 379.900        | <b>286.507</b> | 281.167        | 281.503        | 280.831        | R[7]  |
| I[10] | <b>417.595</b> | 234.473        | 229.134        | 229.470        | 228.798        | I[6]  |
| R[11] | <b>469.628</b> | 196.779        | 191.439        | 191.775        | 191.103        | R[5]  |
| G[12] | <b>488.635</b> | 144.745        | 139.405        | 139.741        | 139.069        | G[4]  |
| E[13] | <b>531.650</b> | 125.738        | 120.398        | 120.734        | 120.062        | E[3]  |
| R[14] | <b>583.683</b> | 82.724         | 77.384         | 77.720         | 77.048         | R[2]  |
| A[15] | <b>607.362</b> | 30.690         | 25.350         | 25.686         | 25.014         | A[1]  |



# sp | P68433 | H31\_MOUSE

PK<sup>Acetyl</sup><sub>42.01</sub> DIQLARRIGERA

- ▶ fragmentation table for charge state 4+
- ▶ specType=etd
- ▶ score=41.55
- ▶ F113283.dat
- ▶ query=q39503\_p1
- ▶ precursor=365.016590
- ▶ chargePrecursor=5
- ▶ itol=0.5

| AA    | c              | y              | z+1            | z+2            | z              | AA    |
|-------|----------------|----------------|----------------|----------------|----------------|-------|
| P[1]  | 29.527         | <b>456.020</b> | <b>452.015</b> | 0.755          | <b>451.763</b> | P[15] |
| K[2]  | 72.053         | <b>431.756</b> | <b>427.752</b> | <b>428.004</b> | 427.500        | K[14] |
| D[3]  | 100.810        | 309.230        | 385.225        | 385.477        | 384.973        | D[13] |
| T[4]  | 129.081        | 350.473        | 356.469        | <b>356.721</b> | 356.217        | T[12] |
| Q[5]  | 161.096        | 332.202        | 328.198        | 328.450        | 327.946        | Q[11] |
| L[6]  | 189.367        | 330.188        | 295.183        | 295.435        | 295.211        | L[10] |
| A[7]  | 207.128        | 271.917        | 267.912        | 268.164        | 267.660        | A[9]  |
| R[8]  | 246.151        | 254.157        | 250.151        | 250.405        | 249.901        | R[8]  |
| R[9]  | <b>285.177</b> | 215.152        | 211.127        | 211.379        | 210.875        | R[7]  |
| I[10] | 313.448        | 176.107        | 172.102        | 172.354        | 171.850        | I[6]  |
| R[11] | 352.473        | 147.836        | 143.831        | 144.083        | 143.579        | R[5]  |
| G[12] | 366.728        | 108.810        | 104.806        | 105.058        | 104.554        | G[4]  |
| E[13] | 398.989        | 94.955         | 90.950         | 90.802         | 90.298         | E[3]  |
| R[14] | <b>438.014</b> | 62.294         | 58.290         | 58.542         | 58.038         | R[2]  |
| A[15] | <b>455.774</b> | 23.289         | 19.285         | 19.516         | 19.013         | A[1]  |

# sp | P68433 | H31\_MOUSE

PK<sup>Acetyl</sup> DIQLARRIGERA  
42.01

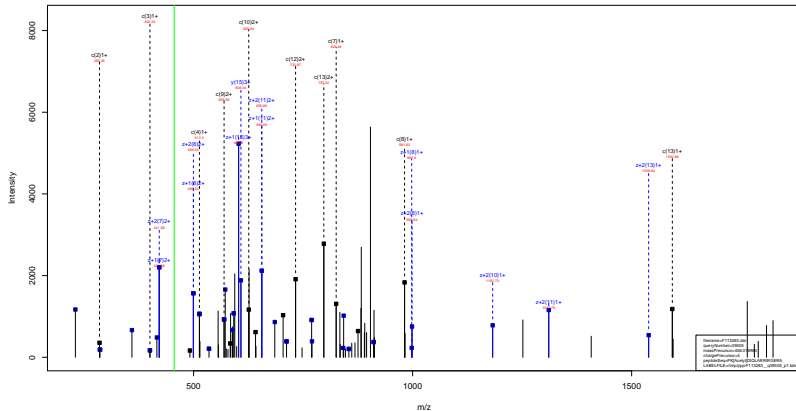

# sp | P68433 | H31\_MOUSE

PK<sup>Acetyl</sup><sub>42.01</sub> DIQLARRIGERA

- ▶ fragmentation table for charge state 1+
- ▶ specType=etd
- ▶ score=49.37
- ▶ F113283.dat
- ▶ query=q39505.p1
- ▶ precursor=456.018960
- ▶ chargePrecursor=4
- ▶ itol=0.5

| AA    | c               | y              | z+1            | z+2             | z        | AA    |
|-------|-----------------|----------------|----------------|-----------------|----------|-------|
| P[1]  | 115.087         | 1821.057       | 1805.030       | 0.000           | 1804.030 | P[15] |
| K[2]  | <b>285.192</b>  | 1724.004       | 1707.985       | 1708.993        | 1706.977 | K[14] |
| D[3]  | <b>400.219</b>  | 1551.898       | 1537.880       | <b>1538.887</b> | 1536.872 | D[13] |
| I[4]  | <b>513.303</b>  | 1438.872       | 1422.853       | 1423.860        | 1421.845 | I[12] |
| Q[5]  | <b>641.362</b>  | 1325.787       | 1309.769       | <b>1310.776</b> | 1308.761 | Q[11] |
| L[6]  | 754.490         | 1197.720       | 1181.702       | <b>1182.718</b> | 1180.702 | L[10] |
| A[7]  | <b>825.483</b>  | 1084.645       | 1068.626       | 1069.634        | 1067.618 | A[9]  |
| R[8]  | <b>981.584</b>  | 1013.005       | <b>997.580</b> | <b>998.597</b>  | 996.581  | R[8]  |
| R[9]  | 1137.685        | 857.506        | <b>841.490</b> | <b>842.496</b>  | 840.480  | R[7]  |
| I[10] | 1250.769        | 701.405        | <b>685.387</b> | 686.394         | 684.379  | I[6]  |
| R[11] | 1406.870        | <b>588.321</b> | <b>572.303</b> | 573.310         | 571.295  | R[5]  |
| G[12] | 1463.992        | 432.220        | <b>416.201</b> | 417.209         | 415.194  | G[4]  |
| E[13] | <b>1592.334</b> | 278.100        | <b>305.180</b> | 306.188         | 304.172  | E[3]  |
| R[14] | 1748.035        | 246.150        | <b>230.137</b> | 231.145         | 229.130  | R[2]  |
| A[15] | 1820.073        | 90.055         | 78.030         | 79.044          | 77.028   | A[1]  |

# sp | P68433 | H31\_MOUSE

PK<sup>Acetyl</sup> DIQLARRIGERA  
42.01

- ▶ fragmentation table for charge state 2+
- ▶ specType=etd
- ▶ score=49.37
- ▶ F113283.dat
- ▶ query=q39505.p1
- ▶ precursor=456.018960
- ▶ chargePrecursor=4
- ▶ itol=0.5

| AA    | c              | y              | z+1            | z+2            | z              | AA    |
|-------|----------------|----------------|----------------|----------------|----------------|-------|
| P[1]  | 58.047         | <b>911.032</b> | 903.023        | 0.504          | 902.519        | P[15] |
| K[2]  | 143.100        | 862.506        | <b>854.496</b> | 855.000        | <b>853.992</b> | K[14] |
| D[3]  | 200.613        | 777.453        | <b>769.443</b> | <b>769.947</b> | 768.940        | D[13] |
| T[4]  | 257.155        | 719.939        | <b>711.930</b> | <b>712.434</b> | 711.426        | T[12] |
| Q[5]  | 321.184        | 663.397        | <b>655.388</b> | <b>655.892</b> | 654.884        | Q[11] |
| L[6]  | 377.227        | 599.366        | <b>591.359</b> | <b>591.863</b> | 590.855        | L[10] |
| A[7]  | 413.265        | 542.826        | <b>534.817</b> | <b>535.321</b> | 534.313        | A[9]  |
| R[8]  | <b>491.296</b> | 507.307        | <b>499.298</b> | <b>499.802</b> | 498.794        | R[8]  |
| R[9]  | <b>569.346</b> | 420.257        | <b>421.247</b> | <b>421.751</b> | 420.744        | R[7]  |
| I[10] | <b>625.888</b> | 351.206        | 343.197        | 343.701        | 342.693        | I[6]  |
| R[11] | <b>703.939</b> | 294.664        | <b>286.655</b> | 287.159        | <b>286.151</b> | R[5]  |
| G[12] | <b>732.450</b> | 216.614        | 208.604        | 209.108        | 208.100        | G[4]  |
| E[13] | <b>796.971</b> | 188.103        | 180.094        | 180.598        | 179.990        | E[3]  |
| R[14] | <b>875.021</b> | 123.582        | 115.572        | 116.076        | 115.068        | R[2]  |
| A[15] | <b>910.540</b> | 45.531         | 37.522         | 38.026         | 37.018         | A[1]  |

# sp | P68433 | H31\_MOUSE

PK<sup>Acetyl</sup> 42.01 DIQLARRIGERA

- ▶ fragmentation table for charge state 3+
- ▶ specType=etd
- ▶ score=49.37
- ▶ F113283.dat
- ▶ query=q39505.p1
- ▶ precursor=456.018960
- ▶ chargePrecursor=4
- ▶ itol=0.5

| AA    | c              | y              | z+1            | z+2            | z              | AA    |
|-------|----------------|----------------|----------------|----------------|----------------|-------|
| P[1]  | 39.034         | <b>607.690</b> | <b>602.351</b> | 0.672          | 602.015        | P[15] |
| K[2]  | 95.736         | 575.339        | <b>570.000</b> | 570.336        | <b>569.664</b> | K[14] |
| D[3]  | 134.078        | 518.638        | <b>513.298</b> | <b>513.634</b> | <b>512.962</b> | D[13] |
| T[4]  | 171.773        | 480.295        | 474.956        | 475.292        | 474.620        | T[12] |
| Q[5]  | 214.459        | 442.601        | 437.261        | 437.597        | 436.925        | Q[11] |
| L[6]  | 252.153        | <b>399.914</b> | 395.573        | 395.911        | 394.239        | L[10] |
| A[7]  | 275.832        | 362.220        | 356.880        | 357.216        | 356.544        | A[9]  |
| R[8]  | 327.866        | 338.941        | 333.201        | 333.537        | 332.865        | R[8]  |
| R[9]  | 379.900        | <b>286.507</b> | 281.167        | 281.503        | 280.831        | R[7]  |
| I[10] | 417.595        | 234.473        | 229.134        | 229.470        | 228.798        | I[6]  |
| R[11] | 469.628        | 196.779        | 191.439        | 191.775        | 191.103        | R[5]  |
| G[12] | 488.635        | 144.745        | 139.405        | 139.741        | 139.069        | G[4]  |
| E[13] | 531.690        | 125.738        | 120.398        | 120.734        | 120.062        | E[3]  |
| R[14] | <b>583.683</b> | 82.724         | 77.384         | 77.720         | 77.048         | R[2]  |
| A[15] | 607.362        | 30.690         | 25.350         | 25.686         | 25.014         | A[1]  |



# sp | P68433 | H31\_MOUSE

PK<sup>Acetyl</sup><sub>42.01</sub> DIQLARRIGERA

- ▶ fragmentation table for charge state 1+
- ▶ specType=etd
- ▶ score=30.96
- ▶ F113283.dat
- ▶ query=q39507.p1
- ▶ precursor=365.016720
- ▶ chargePrecursor=5
- ▶ itol=0.5

| AA    | c               | y              | z+1            | z+2            | z        | AA    |
|-------|-----------------|----------------|----------------|----------------|----------|-------|
| P[1]  | 115.087         | 1821.057       | 1805.036       | 0.000          | 1804.036 | P[15] |
| K[2]  | <b>205.192</b>  | 1724.004       | 1707.985       | 1708.993       | 1706.973 | K[14] |
| D[3]  | <b>400.219</b>  | 1553.898       | 1537.880       | 1538.887       | 1536.872 | D[13] |
| I[4]  | <b>513.303</b>  | 1438.871       | 1422.853       | 1423.860       | 1421.845 | I[12] |
| Q[5]  | <b>641.362</b>  | 1325.787       | 1309.769       | 1310.776       | 1308.761 | Q[11] |
| L[6]  | <b>754.446</b>  | 1197.720       | 1181.710       | 1182.718       | 1180.702 | L[10] |
| A[7]  | <b>825.483</b>  | 1084.645       | 1068.628       | 1069.634       | 1067.618 | A[9]  |
| R[8]  | <b>981.584</b>  | 1013.000       | 997.580        | 998.597        | 996.581  | R[8]  |
| R[9]  | 1137.685        | 857.506        | <b>841.488</b> | <b>842.496</b> | 840.480  | R[7]  |
| I[10] | <b>1250.769</b> | 701.405        | <b>685.387</b> | 686.394        | 684.379  | I[6]  |
| R[11] | 1406.870        | <b>588.321</b> | <b>572.303</b> | 573.310        | 571.295  | R[6]  |
| G[12] | 1463.992        | 432.220        | <b>416.201</b> | <b>417.209</b> | 415.194  | G[4]  |
| E[13] | 1592.934        | 275.109        | <b>359.189</b> | 360.188        | 358.172  | E[3]  |
| R[14] | 1749.035        | 246.156        | <b>230.137</b> | 231.145        | 229.130  | R[2]  |
| A[15] | 1820.073        | 90.055         | 74.036         | 75.044         | 73.028   | A[1]  |

# sp | P68433 | H31\_MOUSE

PK<sup>Acetyl</sup> 42.01 DIQLARRIGERA

- ▶ fragmentation table for charge state 2+
- ▶ specType=etd
- ▶ score=30.96
- ▶ F113283.dat
- ▶ query=q39507\_p1
- ▶ precursor=365.016720
- ▶ chargePrecursor=5
- ▶ itol=0.5

| AA    | c              | y       | z+1            | z+2            | z              | AA    |
|-------|----------------|---------|----------------|----------------|----------------|-------|
| P[1]  | 58.047         | 911.032 | 903.023        | 0.504          | 902.519        | P[15] |
| K[2]  | 143.100        | 862.506 | 854.496        | 855.000        | 853.992        | K[14] |
| D[3]  | 200.613        | 777.453 | 769.443        | <b>769.947</b> | 768.940        | D[13] |
| T[4]  | 257.155        | 719.939 | <b>711.930</b> | <b>712.434</b> | <b>711.426</b> | T[12] |
| Q[5]  | 321.184        | 663.397 | <b>655.388</b> | <b>655.892</b> | 654.884        | Q[11] |
| L[6]  | 377.227        | 599.368 | <b>591.359</b> | <b>591.863</b> | 590.856        | L[10] |
| A[7]  | 413.285        | 542.828 | 534.817        | <b>535.321</b> | 534.313        | A[9]  |
| R[8]  | <b>491.296</b> | 507.307 | <b>499.298</b> | <b>499.802</b> | <b>498.794</b> | R[8]  |
| R[9]  | <b>569.346</b> | 429.257 | <b>421.247</b> | <b>421.751</b> | 420.744        | R[7]  |
| I[10] | <b>625.888</b> | 351.206 | 343.197        | 343.701        | 342.693        | I[6]  |
| R[11] | <b>703.939</b> | 294.664 | <b>286.655</b> | <b>287.159</b> | <b>286.151</b> | R[5]  |
| G[12] | <b>732.450</b> | 216.614 | 208.604        | 209.108        | 208.100        | G[4]  |
| E[13] | <b>796.971</b> | 188.103 | 180.094        | 180.598        | 179.590        | E[3]  |
| R[14] | 875.021        | 123.582 | 115.572        | 116.076        | 115.068        | R[2]  |
| A[15] | 910.540        | 45.531  | 37.522         | 38.026         | 37.018         | A[1]  |



# sp | P68433 | H31\_MOUSE

PK<sup>Acetyl</sup> 42.01 DIQLARRIGERA

- ▶ fragmentation table for charge state 3+
- ▶ specType=etd
- ▶ score=30.96
- ▶ F113283.dat
- ▶ query=q39507\_p1
- ▶ precursor=365.016720
- ▶ chargePrecursor=5
- ▶ itol=0.5

| AA    | c              | y              | z+1            | z+2            | z              | AA    |
|-------|----------------|----------------|----------------|----------------|----------------|-------|
| P[1]  | 39.034         | 607.690        | 602.351        | 0.672          | 602.015        | P[15] |
| K[2]  | 95.736         | 575.339        | <b>570.000</b> | 570.336        | <b>569.664</b> | K[14] |
| D[3]  | 134.078        | 518.638        | <b>513.298</b> | <b>513.634</b> | 512.962        | D[13] |
| T[4]  | 171.773        | 480.295        | <b>474.956</b> | <b>475.292</b> | <b>474.620</b> | T[12] |
| Q[5]  | 214.459        | 442.091        | <b>437.261</b> | <b>437.597</b> | 436.925        | Q[11] |
| L[6]  | 252.153        | <b>399.914</b> | <b>394.575</b> | <b>394.911</b> | 394.239        | L[10] |
| A[7]  | 275.832        | 362.220        | <b>356.880</b> | <b>357.216</b> | 356.544        | A[9]  |
| R[8]  | 327.866        | 338.941        | <b>333.201</b> | <b>333.537</b> | 332.865        | R[8]  |
| R[9]  | 379.900        | <b>286.507</b> | 281.167        | 281.503        | 280.831        | R[7]  |
| I[10] | <b>417.595</b> | 234.473        | 229.134        | 229.470        | 228.798        | I[6]  |
| R[11] | <b>469.628</b> | 196.779        | 191.439        | 191.775        | 191.103        | R[5]  |
| G[12] | <b>488.635</b> | 144.745        | 139.405        | 139.741        | 139.069        | G[4]  |
| E[13] | <b>531.650</b> | 125.738        | 120.398        | 120.734        | 120.062        | E[3]  |
| R[14] | <b>583.683</b> | 82.724         | 77.384         | 77.720         | 77.048         | R[2]  |
| A[15] | 607.362        | 30.690         | 25.350         | 25.686         | 25.014         | A[1]  |

# sp | P68433 | H31\_MOUSE

PK<sup>Acetyl</sup> 42.01 DIQLARRIGERA

- ▶ fragmentation table for charge state 4+
- ▶ specType=etd
- ▶ score=30.96
- ▶ F113283.dat
- ▶ query=q39507\_p1
- ▶ precursor=365.016720
- ▶ chargePrecursor=5
- ▶ itol=0.5

| AA    | c              | y              | z+1            | z+2            | z       | AA    |
|-------|----------------|----------------|----------------|----------------|---------|-------|
| P[1]  | 29.527         | <b>456.020</b> | <b>452.015</b> | 0.795          | 461.763 | P[15] |
| K[2]  | 72.053         | 431.756        | 427.750        | 428.004        | 427.500 | K[14] |
| D[3]  | 100.610        | 389.230        | 385.225        | 385.477        | 384.973 | D[13] |
| T[4]  | 129.081        | 360.473        | 356.468        | <b>356.721</b> | 356.217 | T[12] |
| Q[5]  | 161.096        | 332.202        | 328.198        | 328.450        | 327.946 | Q[11] |
| L[6]  | 189.387        | 300.126        | 296.121        | 296.435        | 296.331 | L[10] |
| A[7]  | 207.126        | 271.911        | 267.911        | 268.164        | 267.660 | A[9]  |
| R[8]  | 246.151        | 254.157        | 250.153        | 250.405        | 249.901 | R[8]  |
| R[9]  | <b>285.177</b> | 235.132        | 231.127        | 231.379        | 230.875 | R[7]  |
| I[10] | 313.448        | 176.107        | 172.102        | 172.354        | 171.850 | I[6]  |
| R[11] | 352.473        | 147.836        | 143.831        | 144.083        | 143.579 | R[5]  |
| G[12] | 366.728        | 108.610        | 104.606        | 105.058        | 104.554 | G[4]  |
| E[13] | 398.969        | 94.555         | 90.550         | 90.802         | 90.298  | E[3]  |
| R[14] | 438.014        | 62.294         | 58.290         | 58.542         | 58.038  | R[2]  |
| A[15] | <b>455.774</b> | 23.269         | 19.265         | 19.516         | 19.013  | A[1]  |



# sp | P68433 | H31\_MOUSE

PK<sup>Acetyl</sup> 42.01 DIQLARRIGERA

- ▶ fragmentation table for charge state 1+
- ▶ specType=etd
- ▶ score=64.01
- ▶ F113283.dat
- ▶ query=q39510.p1
- ▶ precursor=607.689790
- ▶ chargePrecursor=3
- ▶ itol=0.5

| AA    | c               | y               | z+1             | z+2             | z        | AA    |
|-------|-----------------|-----------------|-----------------|-----------------|----------|-------|
| P[1]  | 115.087         | <b>1821.857</b> | <b>1805.038</b> | 0.000           | 1804.038 | P[15] |
| K[2]  | <b>285.192</b>  | 1124.058        | 1107.595        | <b>1708.993</b> | 1106.977 | K[14] |
| D[3]  | 490.219         | 1553.988        | 1537.580        | <b>1538.887</b> | 1536.872 | D[13] |
| I[4]  | 513.303         | 1438.871        | 1422.853        | <b>1423.860</b> | 1421.845 | I[12] |
| Q[5]  | 641.362         | 1325.787        | 1309.769        | <b>1310.776</b> | 1308.761 | Q[11] |
| L[6]  | 754.446         | 1197.726        | 1181.710        | <b>1182.718</b> | 1180.702 | L[10] |
| A[7]  | 827.493         | 1084.641        | 1068.625        | <b>1069.634</b> | 1067.618 | A[9]  |
| R[8]  | <b>981.584</b>  | 1013.005        | 997.520         | <b>998.597</b>  | 996.581  | R[8]  |
| R[9]  | <b>1137.685</b> | 857.506         | <b>841.488</b>  | 842.495         | 840.480  | R[7]  |
| H[10] | <b>1250.769</b> | 701.405         | 685.367         | 686.394         | 684.379  | H[6]  |
| R[11] | <b>1406.870</b> | 588.321         | <b>572.303</b>  | <b>573.310</b>  | 571.295  | R[5]  |
| G[12] | <b>1463.892</b> | 432.220         | 416.201         | <b>417.209</b>  | 415.194  | G[4]  |
| E[13] | <b>1592.934</b> | 375.199         | 359.180         | <b>360.188</b>  | 358.172  | E[3]  |
| R[14] | 1749.035        | 246.150         | 230.137         | 231.145         | 229.130  | R[2]  |
| A[15] | 1820.073        | 90.085          | 74.036          | 75.044          | 73.028   | A[1]  |

# sp | P68433 | H31\_MOUSE

PK<sup>Acetyl</sup><sub>42.01</sub> DIQLARRIGERA

- ▶ fragmentation table for charge state 2+
- ▶ specType=etd
- ▶ score=64.01
- ▶ F113283.dat
- ▶ query=q39510.p1
- ▶ precursor=607.689790
- ▶ chargePrecursor=3
- ▶ itol=0.5

| AA    | c              | y              | z+1            | z+2            | z       | AA    |
|-------|----------------|----------------|----------------|----------------|---------|-------|
| P[1]  | 58.047         | <b>911.032</b> | <b>903.023</b> | 0.504          | 902.519 | P[15] |
| K[2]  | 143.100        | 862.505        | <b>854.496</b> | <b>855.000</b> | 853.992 | R[14] |
| D[3]  | 200.613        | 777.453        | 769.443        | <b>769.947</b> | 768.940 | D[13] |
| T[4]  | 257.155        | 719.939        | 711.930        | <b>712.434</b> | 711.426 | I[12] |
| Q[5]  | 321.184        | 663.397        | <b>655.388</b> | <b>655.892</b> | 654.884 | Q[11] |
| L[6]  | 377.227        | 599.365        | 591.359        | 591.863        | 590.856 | L[10] |
| A[7]  | 413.243        | 542.826        | 534.817        | 535.321        | 534.313 | A[9]  |
| R[8]  | 451.296        | 507.307        | 499.298        | 499.802        | 498.794 | R[8]  |
| R[9]  | 569.346        | 429.257        | 421.247        | 421.751        | 420.744 | R[7]  |
| I[10] | 625.888        | 351.206        | 343.197        | 343.701        | 342.693 | I[6]  |
| R[11] | 703.939        | 294.664        | 286.655        | 287.159        | 286.151 | R[5]  |
| G[12] | 732.450        | 216.614        | 208.604        | 209.108        | 208.100 | G[4]  |
| E[13] | 796.971        | 138.103        | 130.094        | 130.598        | 129.590 | E[3]  |
| R[14] | <b>875.021</b> | 123.582        | 115.572        | 116.076        | 115.068 | R[2]  |
| A[15] | 910.540        | 45.531         | 37.522         | 38.026         | 37.018  | A[1]  |



# sp | P68433 | H31\_MOUSE

PK<sup>Acetyl</sup><sub>42.01</sub> DIQLARRIGERA

- ▶ fragmentation table for charge state 1+
- ▶ specType=etd
- ▶ score=55.33
- ▶ F113283.dat
- ▶ query=q39512.p1
- ▶ precursor=456.019340
- ▶ chargePrecursor=4
- ▶ itol=0.5

| AA    | c               | y              | z+1            | z+2             | z              | AA    |
|-------|-----------------|----------------|----------------|-----------------|----------------|-------|
| P[1]  | 115.087         | 1821.057       | 1805.030       | 0.000           | 1804.030       | P[15] |
| K[2]  | <b>285.192</b>  | 1724.004       | 1707.985       | 1708.993        | 1706.977       | K[14] |
| D[3]  | <b>400.219</b>  | 1551.898       | 1537.880       | 1538.887        | 1536.872       | D[13] |
| I[4]  | <b>513.303</b>  | 1438.873       | 1422.853       | 1423.860        | 1421.845       | I[12] |
| Q[5]  | <b>641.362</b>  | 1325.787       | 1309.769       | <b>1310.776</b> | 1308.761       | Q[11] |
| L[6]  | 754.480         | 1197.729       | 1181.710       | <b>1182.718</b> | 1180.702       | L[10] |
| A[7]  | <b>825.483</b>  | 1084.645       | 1068.626       | 1069.634        | 1067.618       | A[9]  |
| R[8]  | <b>981.584</b>  | 1013.005       | 997.550        | <b>998.597</b>  | 996.581        | R[8]  |
| R[9]  | <b>1137.685</b> | 857.508        | <b>841.498</b> | <b>842.496</b>  | 840.480        | R[7]  |
| I[10] | 1250.769        | 701.405        | <b>685.387</b> | 686.394         | <b>684.379</b> | I[6]  |
| R[11] | 1406.870        | <b>588.321</b> | <b>572.303</b> | 573.310         | 571.295        | R[5]  |
| G[12] | <b>1463.892</b> | 432.220        | <b>416.201</b> | 417.209         | 415.194        | G[4]  |
| E[13] | 1592.934        | 278.100        | <b>305.180</b> | 306.188         | 304.172        | E[3]  |
| R[14] | 1749.035        | 246.150        | <b>230.137</b> | 231.145         | 229.130        | R[2]  |
| A[15] | 1820.073        | 90.055         | 78.036         | 79.044          | 77.028         | A[1]  |

# sp | P68433 | H31\_MOUSE

PK<sup>Acetyl</sup><sub>42.01</sub> DIQLARRIGERA

- ▶ fragmentation table for charge state 2+
- ▶ specType=etd
- ▶ score=55.33
- ▶ F113283.dat
- ▶ query=q39512.p1
- ▶ precursor=456.019340
- ▶ chargePrecursor=4
- ▶ itol=0.5

| AA    | c              | y              | z+1            | z+2            | z              | AA    |
|-------|----------------|----------------|----------------|----------------|----------------|-------|
| P[1]  | 58.047         | <b>911.032</b> | 903.023        | 0.504          | 902.519        | P[15] |
| K[2]  | 143.100        | <b>862.506</b> | 854.490        | <b>855.000</b> | <b>853.992</b> | K[14] |
| D[3]  | 200.613        | 777.453        | <b>769.443</b> | <b>769.947</b> | 768.940        | D[13] |
| T[4]  | 257.155        | 719.939        | <b>711.930</b> | <b>712.434</b> | 711.426        | T[12] |
| Q[5]  | 321.184        | 663.397        | <b>655.388</b> | <b>655.892</b> | 654.884        | Q[11] |
| L[6]  | 377.227        | 599.366        | <b>591.359</b> | <b>591.863</b> | 590.855        | L[10] |
| A[7]  | 413.265        | 542.826        | <b>534.817</b> | 533.811        | <b>534.313</b> | A[9]  |
| R[8]  | <b>491.296</b> | 507.307        | <b>499.298</b> | <b>499.802</b> | 498.794        | R[8]  |
| R[9]  | <b>569.346</b> | 420.257        | <b>421.247</b> | <b>421.751</b> | 420.744        | R[7]  |
| I[10] | <b>625.888</b> | 351.206        | 343.197        | 343.701        | 342.693        | I[6]  |
| R[11] | <b>703.939</b> | 294.664        | 286.655        | 287.159        | 286.151        | R[5]  |
| G[12] | <b>732.450</b> | 216.614        | 208.604        | 209.108        | 208.100        | G[4]  |
| E[13] | <b>796.971</b> | 188.103        | 180.094        | 180.598        | 179.590        | E[3]  |
| R[14] | <b>875.021</b> | 123.582        | 115.573        | 116.076        | 115.068        | R[2]  |
| A[15] | 910.540        | 45.531         | 37.522         | 38.026         | 37.018         | A[1]  |



# sp | P68433 | H31\_MOUSE

PK<sup>Acetyl</sup> 42.01 DIQLARRIGERA

- ▶ fragmentation table for charge state 3+
- ▶ specType=etd
- ▶ score=55.33
- ▶ F113283.dat
- ▶ query=q39512.p1
- ▶ precursor=456.019340
- ▶ chargePrecursor=4
- ▶ itol=0.5

| AA    | c              | y              | z+1            | z+2            | z              | AA    |
|-------|----------------|----------------|----------------|----------------|----------------|-------|
| P[1]  | 39.034         | <b>607.690</b> | <b>602.351</b> | 0.672          | 602.015        | P[15] |
| K[2]  | 95.736         | 575.339        | <b>570.000</b> | <b>570.336</b> | <b>569.664</b> | K[14] |
| D[3]  | 134.078        | 518.638        | <b>513.298</b> | <b>513.634</b> | <b>512.962</b> | D[13] |
| T[4]  | 171.773        | 480.295        | 474.956        | 475.292        | 474.620        | T[12] |
| Q[5]  | 214.459        | 442.601        | 437.261        | 437.597        | 436.925        | Q[11] |
| L[6]  | 252.153        | <b>399.914</b> | 394.573        | 394.911        | 394.239        | L[10] |
| A[7]  | 275.832        | 362.220        | 356.880        | 357.216        | 356.544        | A[9]  |
| R[8]  | 327.866        | 328.941        | 323.201        | 323.537        | 322.865        | R[8]  |
| R[9]  | 379.900        | 286.507        | 281.167        | 281.503        | 280.831        | R[7]  |
| I[10] | 417.595        | 234.473        | 229.134        | 229.470        | 228.798        | I[6]  |
| R[11] | 469.628        | 196.779        | 191.439        | 191.775        | 191.103        | R[5]  |
| G[12] | 488.635        | 144.745        | 139.405        | 139.741        | 139.069        | G[4]  |
| E[13] | 531.690        | 125.738        | 120.398        | 120.734        | 120.062        | E[3]  |
| R[14] | <b>583.683</b> | 82.724         | 77.384         | 77.720         | 77.048         | R[2]  |
| A[15] | <b>607.362</b> | 30.690         | 25.350         | 25.686         | 25.014         | A[1]  |



# sp | P68433 | H31\_MOUSE

PK<sup>Acetyl</sup> DIQLARRIGERA  
42.01

- ▶ fragmentation table for charge state 1+
- ▶ specType=etd
- ▶ score=54.18
- ▶ F113283.dat
- ▶ query=q39514.p1
- ▶ precursor=607.690310
- ▶ chargePrecursor=3
- ▶ itol=0.5

| AA    | c               | y        | z+1             | z+2             | z               | AA    |
|-------|-----------------|----------|-----------------|-----------------|-----------------|-------|
| P[1]  | 115.087         | 1821.057 | 1806.036        | 0.000           | 1804.036        | P[15] |
| K[2]  | 285.192         | 1724.004 | 1707.955        | 1538.087        | 1536.872        | K[14] |
| D[3]  | 400.219         | 1553.898 | <b>1537.880</b> | 1422.853        | <b>1423.860</b> | D[13] |
| H[4]  | 511.303         | 1438.871 |                 |                 | 1421.845        | H[12] |
| Q[5]  | <b>641.362</b>  | 1325.787 | <b>1309.769</b> | <b>1310.776</b> | 1308.761        | Q[11] |
| L[6]  | <b>754.446</b>  | 1197.729 | 1184.710        | <b>1162.718</b> | 1180.702        | L[10] |
| A[7]  | 823.473         | 1084.645 | <b>1068.626</b> | 1069.634        | 1067.618        | A[9]  |
| R[8]  | <b>981.584</b>  | 1013.505 | <b>997.589</b>  | <b>998.597</b>  | 995.583         | R[8]  |
| R[9]  | <b>1137.685</b> | 957.508  | <b>841.488</b>  | <b>842.496</b>  | 840.480         | R[7]  |
| H[10] | <b>1250.769</b> | 701.405  | <b>685.387</b>  | 686.394         | 684.379         | H[6]  |
| R[11] | <b>1406.870</b> | 588.321  | <b>572.303</b>  | <b>573.310</b>  | 571.295         | R[5]  |
| G[12] | 1463.892        | 432.220  | 416.201         | <b>417.209</b>  | 415.194         | G[4]  |
| E[13] | 1592.934        | 378.199  | 359.180         | <b>360.188</b>  | 358.172         | E[3]  |
| R[14] | 1749.035        | 246.150  | 230.137         | 231.145         | 229.130         | R[2]  |
| A[15] | 1820.073        | 90.055   | 74.036          | 75.044          | 73.028          | A[1]  |

# sp | P68433 | H31\_MOUSE

PK<sup>Acetyl</sup><sub>42.01</sub> DIQLARRIGERA

- ▶ fragmentation table for charge state 2+
- ▶ specType=etd
- ▶ score=54.18
- ▶ F113283.dat
- ▶ query=q39514\_p1
- ▶ precursor=607.690310
- ▶ chargePrecursor=3
- ▶ itol=0.5

| AA    | c       | y              | z+1            | z+2            | z              | AA    |
|-------|---------|----------------|----------------|----------------|----------------|-------|
| P[1]  | 58.047  | <b>911.032</b> | <b>903.023</b> | 0.504          | 602.510        | P[15] |
| K[2]  | 143.100 | <b>862.506</b> | <b>854.496</b> | 055.000        | <b>853.992</b> | R[14] |
| D[3]  | 200.613 | 777.453        | <b>769.443</b> | <b>769.947</b> | 768.940        | D[13] |
| T[4]  | 257.155 | 719.939        | <b>711.930</b> | <b>712.434</b> | 711.426        | I[12] |
| Q[5]  | 321.184 | 663.397        | <b>655.388</b> | <b>655.892</b> | 654.884        | Q[11] |
| L[6]  | 377.727 | 599.368        | 591.359        | 591.863        | 590.856        | L[10] |
| A[7]  | 413.245 | 542.826        | 534.817        | 535.321        | 534.313        | A[9]  |
| R[8]  | 481.296 | 507.307        | 499.298        | 499.802        | 498.794        | R[8]  |
| R[9]  | 569.348 | 426.257        | 421.247        | 421.751        | 420.744        | R[7]  |
| I[10] | 625.888 | 351.206        | 343.197        | 343.701        | 342.693        | I[6]  |
| R[11] | 703.939 | 294.664        | 286.655        | 287.159        | 286.151        | R[5]  |
| G[12] | 732.430 | 216.614        | 208.604        | 209.108        | 208.100        | G[4]  |
| E[13] | 796.971 | 188.103        | 180.094        | 180.598        | 179.590        | E[3]  |
| R[14] | 875.021 | 123.582        | 115.572        | 116.076        | 115.068        | R[2]  |
| A[15] | 910.540 | 45.531         | 37.522         | 38.026         | 37.018         | A[1]  |



# sp | P68433 | H31\_MOUSE

PK<sup>Acetyl</sup> 42.01 DIQLARRIGERA

- ▶ fragmentation table for charge state 1+
- ▶ specType=etd
- ▶ score=28.74
- ▶ F113283.dat
- ▶ query=q39516.p1
- ▶ precursor=607.690370
- ▶ chargePrecursor=3
- ▶ itol=0.5

| AA    | c               | y        | #+1             | #+2             | z               | AA    |
|-------|-----------------|----------|-----------------|-----------------|-----------------|-------|
| P[1]  | 115.087         | 1821.059 | <b>1805.038</b> | 0.000           | 1304.030        | P[15] |
| K[2]  | 285.192         | 1724.004 | 1707.953        | 1708.993        | 1706.972        | K[14] |
| D[3]  | 400.219         | 1553.898 | 1537.880        | <b>1538.887</b> | <b>1536.872</b> | D[13] |
| H[4]  | 513.303         | 1438.871 | 1423.853        | 1423.860        | 1421.845        | H[12] |
| Q[5]  | 641.362         | 1325.787 | 1309.769        | <b>1310.776</b> | 1308.761        | Q[11] |
| L[6]  | 764.446         | 1197.729 | 1181.710        | <b>1182.718</b> | 1180.702        | L[10] |
| A[7]  | 878.493         | 1084.645 | 1068.626        | 1069.634        | 1067.618        | A[9]  |
| R[8]  | <b>981.584</b>  | 1013.608 | 997.590         | 998.597         | 996.581         | R[8]  |
| R[9]  | <b>1137.685</b> | 857.500  | <b>841.488</b>  | <b>842.496</b>  | 840.480         | R[7]  |
| H[10] | 1250.769        | 701.405  | 685.387         | 686.394         | 684.379         | H[6]  |
| R[11] | <b>1406.870</b> | 588.321  | 572.303         | <b>573.310</b>  | 571.295         | R[5]  |
| G[12] | <b>1463.892</b> | 430.230  | 416.201         | <b>417.209</b>  | 415.194         | G[4]  |
| E[13] | 1592.934        | 378.199  | 363.180         | <b>364.188</b>  | 362.172         | E[3]  |
| R[14] | 1749.035        | 246.156  | 230.137         | 231.145         | 229.130         | R[2]  |
| A[15] | 1820.073        | 90.055   | 74.036          | 75.044          | 73.028          | A[1]  |

# sp | P68433 | H31\_MOUSE

PK<sup>Acetyl</sup> 42.01 DIQLARRIGERA

- ▶ fragmentation table for charge state 2+
- ▶ specType=etd
- ▶ score=28.74
- ▶ F113283.dat
- ▶ query=q39516.p1
- ▶ precursor=607.690370
- ▶ chargePrecursor=3
- ▶ itol=0.5

| AA    | c              | y              | z+1            | z+2            | z              | AA    |
|-------|----------------|----------------|----------------|----------------|----------------|-------|
| P[1]  | 58.047         | <b>911.032</b> | <b>903.023</b> | 0.504          | <b>902.519</b> | P[15] |
| K[2]  | 143.100        | 862.506        | <b>854.496</b> | <b>855.000</b> | <b>853.992</b> | K[14] |
| D[3]  | 200.613        | 777.453        | <b>769.443</b> | <b>769.947</b> | <b>768.940</b> | D[13] |
| T[4]  | 257.155        | 719.939        | 711.930        | <b>712.434</b> | 711.426        | T[12] |
| Q[5]  | 321.184        | 663.397        | 655.388        | <b>655.892</b> | 654.884        | Q[11] |
| L[6]  | 377.227        | 599.366        | <b>591.359</b> | <b>591.863</b> | 590.855        | L[10] |
| A[7]  | 413.248        | 542.826        | 534.817        | 533.811        | 534.313        | A[9]  |
| R[8]  | 491.296        | 507.307        | 499.298        | 499.802        | 498.794        | R[8]  |
| R[9]  | 569.346        | 429.257        | 421.247        | 421.751        | 420.744        | R[7]  |
| I[10] | 625.888        | 351.206        | 343.197        | 343.701        | 342.693        | I[6]  |
| R[11] | 703.939        | 294.664        | 286.655        | 287.159        | 286.151        | R[5]  |
| G[12] | 732.450        | 216.614        | 208.604        | 209.108        | 208.100        | G[4]  |
| E[13] | 796.971        | 188.103        | 180.094        | 180.598        | 179.590        | E[3]  |
| R[14] | 875.021        | 123.582        | 115.572        | 116.076        | 115.068        | R[2]  |
| A[15] | <b>910.540</b> | 45.531         | 37.522         | 38.026         | 37.018         | A[1]  |





# sp | P68433 | H31\_MOUSE

PK<sup>Acetyl</sup> 42.01 DIQLARRIGERA

- ▶ fragmentation table for charge state 1+
- ▶ specType=etd
- ▶ score=34.28
- ▶ F113283.dat
- ▶ query=q39518\_p1
- ▶ precursor=607.690790
- ▶ chargePrecursor=3
- ▶ itol=0.5

| AA    | c               | y        | z+1             | z+2             | z        | AA    |
|-------|-----------------|----------|-----------------|-----------------|----------|-------|
| P[1]  | 115.087         | 1821.057 | <b>1805.038</b> | 0.000           | 1804.036 | P[18] |
| K[2]  | 285.192         | 1724.004 | 1707.985        | 1708.993        | 1705.977 | K[14] |
| D[3]  | 400.219         | 1553.898 | 1537.880        | <b>1538.087</b> | 1536.872 | D[13] |
| H[4]  | 511.303         | 1438.871 | 1422.853        | 1423.860        | 1421.845 | H[12] |
| Q[5]  | 641.362         | 1325.787 | 1309.769        | <b>1310.776</b> | 1308.761 | Q[11] |
| L[6]  | 754.446         | 1197.729 | 1181.710        | <b>1182.718</b> | 1180.702 | L[10] |
| A[7]  | 875.493         | 1084.645 | 1068.628        | 1069.634        | 1067.618 | A[9]  |
| R[8]  | <b>981.584</b>  | 1013.505 | 997.500         | <b>998.597</b>  | 995.582  | R[8]  |
| R[9]  | 1137.685        | 957.500  | <b>841.488</b>  | <b>842.496</b>  | 840.480  | R[7]  |
| H[10] | <b>1250.769</b> | 701.405  | 685.387         | <b>686.394</b>  | 684.379  | H[6]  |
| R[11] | <b>1406.870</b> | 588.321  | <b>572.303</b>  | <b>573.310</b>  | 571.295  | R[5]  |
| G[12] | <b>1463.892</b> | 432.230  | 416.201         | <b>417.209</b>  | 415.194  | G[4]  |
| E[13] | <b>1592.934</b> | 378.199  | 359.180         | 360.188         | 358.172  | E[3]  |
| R[14] | 1748.035        | 246.150  | <b>230.137</b>  | 231.145         | 229.130  | R[2]  |
| A[15] | 1820.073        | 90.055   | 74.036          | 75.044          | 73.028   | A[1]  |

# sp | P68433 | H31\_MOUSE

PK<sup>Acetyl</sup><sub>42.01</sub> DIQLARRIGERA

- ▶ fragmentation table for charge state 2+
- ▶ specType=etd
- ▶ score=34.28
- ▶ F113283.dat
- ▶ query=q39518\_p1
- ▶ precursor=607.690790
- ▶ chargePrecursor=3
- ▶ itol=0.5

| AA    | c              | y              | z+1            | z+2            | z              | AA    |
|-------|----------------|----------------|----------------|----------------|----------------|-------|
| P[1]  | 58.047         | <b>911.032</b> | <b>903.023</b> | 0.504          | <b>902.519</b> | P[15] |
| K[2]  | 143.100        | 862.506        | 854.496        | 855.000        | <b>853.992</b> | K[14] |
| D[3]  | 200.613        | 777.453        | 769.443        | 769.947        | 768.940        | D[13] |
| T[4]  | 257.155        | 719.939        | 711.930        | <b>712.434</b> | 711.426        | T[12] |
| Q[5]  | 321.184        | 663.397        | <b>655.388</b> | <b>655.892</b> | 654.884        | Q[11] |
| L[6]  | 377.227        | 599.366        | 591.359        | 591.863        | 590.855        | L[10] |
| A[7]  | 413.243        | 542.826        | 534.817        | 535.321        | 534.313        | A[9]  |
| R[8]  | 491.296        | 507.307        | 499.298        | 499.802        | 498.794        | R[8]  |
| R[9]  | 569.346        | 429.257        | 421.247        | 421.751        | 420.744        | R[7]  |
| I[10] | 625.888        | 351.206        | 343.197        | 343.701        | 342.693        | I[6]  |
| K[11] | 703.939        | 294.664        | 286.655        | 287.159        | 286.151        | K[5]  |
| G[12] | 732.450        | 216.614        | 208.604        | 209.108        | 208.100        | G[4]  |
| E[13] | 796.971        | 188.103        | 180.094        | 180.598        | 179.590        | E[3]  |
| R[14] | <b>875.021</b> | 123.582        | 115.572        | 116.076        | 115.068        | R[2]  |
| A[15] | <b>910.540</b> | 45.531         | 37.522         | 38.026         | 37.018         | A[1]  |

# sp | P62806 | H4\_MOUSE

DVVYALK<sup>Acetyl</sup> RQGRTLYGFGG  
42.01

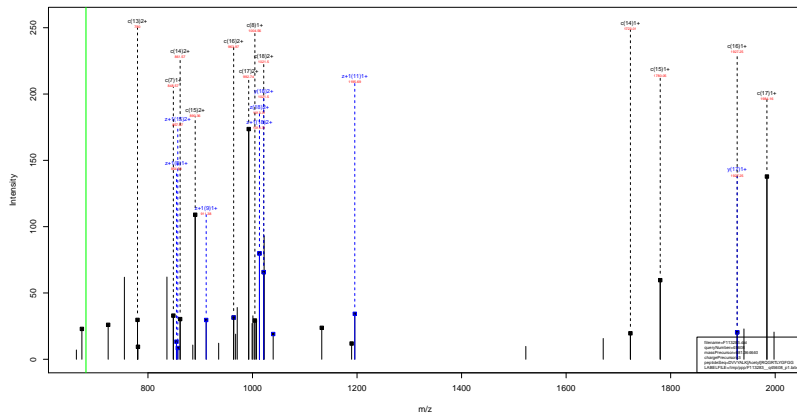

# sp | P62806 | H4\_MOUSE

DVVYALK<sup>Acetyl</sup> RQGRTLYGFGG  
42.01

- ▶ fragmentation table for charge state 1+
- ▶ specType=etd
- ▶ score=50.60
- ▶ F113283.dat
- ▶ query=q45608\_p1
- ▶ precursor=681.364640
- ▶ chargePrecursor=3
- ▶ itol=0.5

| AA    | c               | y               | z+1             | z+2      | z        | AA    |
|-------|-----------------|-----------------|-----------------|----------|----------|-------|
| D[1]  | 111.061         | 2042.982        | 2028.663        | 0.000    | 2029.055 | D[18] |
| V[2]  | 232.129         | <b>1927.055</b> | 1911.636        | 0.000    | 1910.638 | V[17] |
| V[3]  | 331.198         | 1827.986        | 1811.968        | 0.000    | 1810.960 | V[16] |
| Y[4]  | 404.261         | 1728.918        | 1712.899        | 0.000    | 1711.891 | Y[15] |
| A[5]  | 505.298         | 1595.851        | 1589.836        | 0.000    | 1548.828 | A[14] |
| L[6]  | 678.382         | 1498.810        | 1478.799        | 0.000    | 1477.791 | L[13] |
| R[7]  | <b>848.488</b>  | 1381.734        | 1365.715        | 1366.723 | 1364.707 | R[12] |
| R[8]  | <b>1004.589</b> | 1211.638        | <b>1195.609</b> | 1196.617 | 1194.601 | R[11] |
| Q[9]  | <b>1132.647</b> | 1055.527        | <b>1039.508</b> | 1040.516 | 1038.500 | Q[10] |
| G[10] | <b>1189.669</b> | 927.468         | <b>911.450</b>  | 912.457  | 910.442  | G[9]  |
| R[11] | 1285.770        | 870.447         | <b>854.428</b>  | 855.436  | 853.420  | R[8]  |
| T[12] | 1466.818        | 718.340         | 693.327         | 699.335  | 697.319  | T[7]  |
| L[13] | 1559.902        | 613.268         | 597.279         | 598.287  | 596.271  | L[6]  |
| Y[14] | <b>1722.965</b> | 500.214         | 484.195         | 485.203  | 483.187  | Y[5]  |
| G[15] | <b>1779.986</b> | 337.151         | 321.132         | 322.140  | 320.124  | G[4]  |
| F[16] | <b>1927.055</b> | 280.129         | 264.110         | 265.118  | 263.103  | F[3]  |
| G[17] | <b>1984.076</b> | 133.063         | 117.042         | 118.050  | 116.034  | G[2]  |
| G[18] | 2041.098        | 70.030          | 60.021          | 61.028   | 59.011   | G[1]  |

# sp | P62806 | H4\_MOUSE

DVYALK<sup>Acetyl</sup> RQGRTLYGFGG  
42.01

- ▶ fragmentation table for charge state 2+
- ▶ specType=etd
- ▶ score=50.60
- ▶ F113283.dat
- ▶ query=q45608\_p1
- ▶ precursor=681.364640
- ▶ chargePrecursor=3
- ▶ itol=0.5

| AA    | c               | y               | z+1             | z+2     | z               | AA    |
|-------|-----------------|-----------------|-----------------|---------|-----------------|-------|
| D[1]  | 67.034          | <b>1021.545</b> | <b>1013.535</b> | 0.504   | <b>1013.031</b> | D[10] |
| V[2]  | 116.566         | <b>964.031</b>  | 956.022         | 0.504   | 955.518         | V[17] |
| V[3]  | 166.102         | 914.497         | 906.487         | 0.504   | 905.984         | V[16] |
| Y[4]  | 247.634         | 864.963         | <b>856.953</b>  | 0.504   | 856.449         | Y[15] |
| A[5]  | 283.153         | 783.431         | 775.422         | 0.504   | 774.918         | A[14] |
| L[6]  | 339.695         | 747.917         | 739.903         | 0.504   | 739.399         | L[13] |
| R[7]  | 424.747         | 691.370         | 683.361         | 683.805 | 682.851         | R[12] |
| R[8]  | 502.798         | 606.310         | 598.308         | 598.812 | 597.804         | R[11] |
| Q[9]  | 566.827         | 526.267         | 520.258         | 520.762 | 519.754         | Q[10] |
| G[10] | 595.338         | 464.238         | 456.228         | 456.732 | 455.725         | G[9]  |
| R[11] | <b>673.389</b>  | 435.227         | 427.218         | 428.222 | 427.214         | R[8]  |
| T[12] | <b>721.912</b>  | 357.670         | 349.667         | 350.171 | 349.163         | T[7]  |
| L[13] | <b>780.454</b>  | 307.153         | 299.143         | 299.647 | 298.639         | L[6]  |
| V[14] | <b>861.986</b>  | 250.611         | 242.601         | 243.105 | 242.097         | V[5]  |
| G[15] | <b>890.497</b>  | 169.070         | 161.070         | 161.574 | 160.566         | G[4]  |
| F[16] | <b>964.031</b>  | 140.568         | 132.559         | 133.063 | 132.059         | F[3]  |
| G[17] | <b>992.542</b>  | 67.034          | 59.025          | 59.529  | 58.521          | G[2]  |
| G[18] | <b>1021.053</b> | 38.523          | 30.514          | 31.018  | 30.013          | G[1]  |

# sp | P43274 | H14\_MOUSE

[Acetyl]SETAPAAPAAPAPAEKTPVKKKARKAAGGAKRKTSGPPVSEL

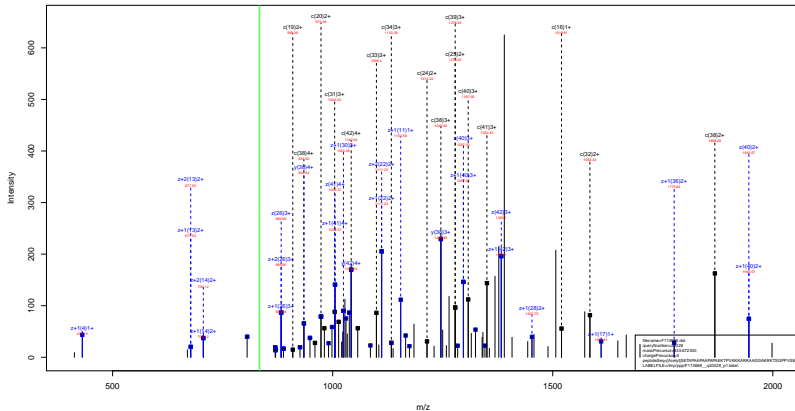

# sp | P43274 | H14\_MOUSE

[Acetyl]SETAPAAPAAPAPAEKTPVKKKARKAAGGAKRKTSGPPVSEL

- ▶ fragmentation table for charge state 1+
- ▶ specType=etd
- ▶ score=31.80
- ▶ F113669.dat
- ▶ query=q20028\_p1
- ▶ precursor=833.672300
- ▶ chargePrecursor=5
- ▶ itol=0.5

| AA | c  | y               | z+1      | z+2             | z               | AA             |       |
|----|----|-----------------|----------|-----------------|-----------------|----------------|-------|
| S  | 1  | 147.076         | 4164.325 | 4148.306        | 0.000           | 4147.299       | S[42] |
| E  | 2  | 276.119         | 4035.283 | 4019.264        | 0.000           | 4018.256       | E[41] |
| T  | 3  | 377.187         | 3906.240 | 3890.221        | 0.000           | 3889.213       | T[40] |
| A  | 4  | 448.204         | 3805.192 | 3789.174        | 0.000           | 3788.166       | A[39] |
| P  | 5  | 545.297         | 3734.155 | 3718.136        | 0.000           | 3717.128       | P[38] |
| A  | 6  | 616.294         | 3637.102 | 3621.084        | 0.000           | 3620.076       | A[37] |
| A  | 7  | 687.331         | 3566.065 | 3550.047        | 0.000           | 3549.039       | A[36] |
| F  | 8  | 784.384         | 3495.028 | 3479.010        | 0.000           | 3478.002       | F[35] |
| A  | 9  | 855.421         | 3397.975 | 3381.957        | 0.000           | 3380.949       | A[34] |
| A  | 10 | 926.458         | 3326.938 | 3310.920        | 0.000           | 3309.912       | A[33] |
| P  | 11 | 1023.511        | 3255.901 | 3239.882        | 0.000           | 3238.875       | P[32] |
| A  | 12 | 1094.548        | 3158.848 | 3142.830        | 0.000           | 3141.822       | A[31] |
| F  | 13 | 1191.600        | 3087.811 | 3071.793        | 0.000           | 3070.785       | F[30] |
| A  | 14 | 1262.638        | 2990.759 | 2974.740        | 0.000           | 2973.732       | A[29] |
| E  | 15 | 1397.689        | 2919.721 | 2903.703        | 0.000           | 2902.695       | E[28] |
| K  | 16 | <b>1518.775</b> | 2790.678 | 2774.660        | 2773.648        | 2773.652       | K[27] |
| V  | 17 | 1620.823        | 2692.584 | 2686.565        | 2647.573        | 2645.557       | V[26] |
| P  | 18 | 1717.876        | 2591.536 | 2545.517        | 2546.525        | 2544.510       | P[25] |
| V  | 19 | 1816.944        | 2494.483 | 2448.465        | 2449.473        | 2447.457       | V[24] |
| K  | 20 | 1945.039        | 2395.415 | 2349.396        | 2350.404        | 2348.389       | K[23] |
| K  | 21 | 2073.134        | 2237.320 | 2221.303        | 2222.309        | 2220.294       | K[22] |
| K  | 22 | 2201.229        | 2109.275 | 2093.258        | 2094.274        | 2092.199       | K[21] |
| A  | 23 | 2272.266        | 1981.130 | 1955.111        | 1956.119        | 1954.105       | A[20] |
| R  | 24 | 2428.307        | 1910.093 | 1894.074        | 1895.082        | 1893.066       | R[19] |
| K  | 25 | 2506.402        | 1783.062 | 1737.079        | 1738.081        | 1736.055       | K[18] |
| A  | 26 | 2627.499        | 1625.897 | <b>1609.878</b> | 1610.886        | 1608.870       | A[17] |
| A  | 27 | 2698.536        | 1554.860 | 1538.841        | 1539.849        | 1537.833       | A[16] |
| E  | 28 | 2759.578        | 1483.823 | 1467.804        | 1468.812        | 1466.796       | E[15] |
| G  | 29 | 2812.579        | 1426.801 | 1410.783        | 1411.790        | 1409.775       | G[14] |
| A  | 30 | 2863.616        | 1369.780 | 1353.761        | 1354.769        | 1352.753       | A[13] |
| K  | 31 | 3011.711        | 1298.743 | 1282.724        | <b>1283.732</b> | 1281.716       | K[12] |
| R  | 32 | 3187.812        | 1170.648 | <b>1154.629</b> | 1155.637        | 1153.621       | R[11] |
| K  | 33 | 3295.907        | 1014.547 | <b>998.528</b>  | 999.536         | 997.520        | K[10] |
| T  | 34 | 3306.935        | 898.425  | <b>870.433</b>  | 871.441         | <b>869.425</b> | T[9]  |
| S  | 35 | 3483.987        | 778.304  | 769.308         | 770.303         | 768.307        | S[8]  |
| G  | 36 | 3541.009        | 698.172  | 682.353         | 683.361         | 681.345        | G[7]  |
| P  | 37 | 3638.061        | 641.350  | 625.332         | 626.340         | 624.324        | P[6]  |
| F  | 38 | 3735.114        | 544.298  | 528.279         | 529.287         | 527.271        | F[5]  |
| V  | 39 | 3834.182        | 447.245  | <b>431.226</b>  | 432.234         | 430.218        | V[4]  |
| S  | 40 | 3921.214        | 348.177  | 342.158         | 343.166         | 341.150        | S[3]  |
| L  | 41 | 4009.257        | 281.144  | 265.125         | 266.134         | 264.118        | L[2]  |
| L  | 42 | 4103.341        | 132.102  | 116.083         | 117.091         | 115.075        | L[1]  |

# sp | P43274 | H14\_MOUSE

[Acetyl]SETAPAAPAAPAPAEKTPVKKKARKAAGGAKRKTSGPPVSEL

- ▶ fragmentation table for charge state 2+
- ▶ specType=etd
- ▶ score=31.80
- ▶ F113669.dat
- ▶ query=q20028.p1
- ▶ precursor=833.672300
- ▶ chargePrecursor=5
- ▶ itol=0.5

| AA | c  | y               | z+1            | z+2             | z               | AA              |       |
|----|----|-----------------|----------------|-----------------|-----------------|-----------------|-------|
| S  | 1  | 74.042          | 2082.666       | 2074.657        | 0.504           | 2074.153        | S[42] |
| E  | 2  | 138.563         | 2018.145       | 2010.136        | 0.504           | 2009.632        | E[41] |
| L  | 3  | 189.087         | 1951.624       | <b>1945.614</b> | 0.504           | <b>1945.110</b> | L[40] |
| A  | 4  | 234.608         | 1893.108       | 1893.996        | 0.504           | 1894.387        | A[39] |
| P  | 5  | 273.132         | 1857.581       | 1859.572        | 0.504           | 1859.055        | P[38] |
| A  | 6  | 308.650         | 1819.055       | 1811.045        | 0.504           | 1810.542        | A[37] |
| A  | 7  | 344.169         | 1793.536       | <b>1775.527</b> | 0.504           | 1775.027        | A[36] |
| P  | 8  | 392.695         | 1748.018       | 1740.008        | 0.504           | 1739.504        | P[35] |
| A  | 9  | 428.214         | 1699.491       | 1691.482        | 0.504           | 1690.978        | A[34] |
| A  | 10 | 463.733         | 1653.973       | 1653.963        | 0.504           | 1655.466        | A[33] |
| P  | 11 | 512.259         | 1628.454       | 1620.444        | 0.504           | 1619.941        | P[32] |
| A  | 12 | 547.777         | 1579.928       | 1571.918        | 0.504           | 1571.415        | A[31] |
| P  | 13 | 596.304         | 1544.409       | 1536.400        | 0.504           | 1535.896        | P[30] |
| A  | 14 | 631.822         | 1495.883       | 1487.874        | 0.504           | 1487.370        | A[29] |
| E  | 15 | 666.344         | 1450.364       | <b>1452.355</b> | 0.504           | 1451.851        | E[28] |
| R  | 16 | 700.291         | 1399.843       | <b>1387.834</b> | 1389.336        | 1387.336        | R[27] |
| L  | 17 | 810.915         | 1331.790       | 1323.780        | <b>1324.290</b> | 1323.282        | L[26] |
| P  | 18 | 859.441         | 1281.272       | 1273.262        | 1273.766        | 1272.758        | P[25] |
| V  | 19 | <b>908.976</b>  | 1232.745       | 1224.736        | 1225.240        | 1224.232        | V[24] |
| K  | 20 | <b>973.023</b>  | 1183.211       | 1175.202        | 1175.706        | <b>1174.698</b> | K[23] |
| K  | 21 | 1037.671        | 1139.684       | <b>1111.154</b> | <b>1111.658</b> | 1110.650        | K[22] |
| K  | 22 | 1101.118        | 1095.116       | 1094.706        | 1094.713        | 1096.607        | K[21] |
| A  | 23 | 1136.637        | <b>991.069</b> | 983.059         | 983.563         | 982.555         | A[20] |
| R  | 24 | <b>1214.687</b> | 955.550        | 947.541         | <b>948.045</b>  | 947.037         | R[19] |
| K  | 25 | <b>1278.735</b> | 877.500        | <b>869.490</b>  | <b>869.994</b>  | <b>868.986</b>  | K[18] |
| A  | 26 | 1314.253        | 813.452        | <b>805.443</b>  | <b>805.947</b>  | 804.939         | A[17] |
| A  | 27 | 1350.772        | 777.624        | 769.615         | 770.426         | 769.420         | A[16] |
| G  | 28 | 1378.283        | 742.615        | 734.606         | 734.910         | 733.902         | G[15] |
| G  | 29 | 1406.793        | 713.604        | <b>705.895</b>  | <b>706.399</b>  | 705.391         | G[14] |
| A  | 30 | 1442.312        | 685.394        | <b>677.384</b>  | <b>677.888</b>  | 676.880         | A[13] |
| K  | 31 | 1509.359        | 649.875        | 641.866         | 642.370         | 641.362         | K[12] |
| R  | 32 | <b>1584.410</b> | 585.627        | 577.618         | 578.322         | 577.314         | R[11] |
| R  | 33 | 1668.457        | 507.702        | 499.700         | 500.271         | 499.264         | R[10] |
| L  | 34 | 1698.984        | 443.729        | 435.720         | 436.224         | 435.217         | L[9]  |
| S  | 35 | 1742.497        | 393.206        | 385.196         | 385.700         | 384.692         | S[8]  |
| G  | 36 | 1771.008        | 349.690        | 341.680         | 342.184         | 341.176         | G[7]  |
| P  | 37 | 1819.534        | 321.179        | 313.170         | 313.673         | 312.666         | P[6]  |
| P  | 38 | <b>1868.061</b> | 272.652        | 264.643         | 265.147         | 264.139         | P[5]  |
| V  | 39 | 1917.595        | 224.136        | 216.117         | 216.621         | 215.613         | V[4]  |
| S  | 40 | 1961.111        | 174.582        | 166.583         | 167.086         | 166.079         | S[3]  |
| E  | 41 | 2025.632        | 131.070        | 123.062         | 123.570         | 122.563         | E[2]  |
| L  | 42 | 2082.174        | 66.555         | 58.546          | 59.049          | 58.041          | L[1]  |



# sp | P43274 | H14\_MOUSE

[Acetyl]SETAPAAPAAPAPAEKTPVKKKARKAAGGAKRKTSGPPVSEL

- ▶ fragmentation table for charge state 3+
- ▶ specType=etd
- ▶ score=31.80
- ▶ F113669.dat
- ▶ query=q20028.p1
- ▶ precursor=833.672300
- ▶ chargePrecursor=5
- ▶ itol=0.5

| AA   | c               | y               | z+1             | z+2            | z               | AA   |
|------|-----------------|-----------------|-----------------|----------------|-----------------|------|
| S 1  | 49.697          | 1388.780        | <b>1383.440</b> | 0.672          | <b>1383.104</b> | S 42 |
| E 2  | 92.711          | <b>1345.766</b> | 1340.426        | 0.672          | 1340.090        | E 41 |
| T 3  | 128.394         | 1302.792        | <b>1297.412</b> | 0.672          | <b>1297.076</b> | T 40 |
| A 4  | 150.073         | 1260.560        | 1255.229        | 0.672          | 1255.391        | A 39 |
| P 5  | 182.424         | <b>1245.390</b> | 1240.050        | 0.672          | 1239.714        | P 38 |
| A 6  | 206.103         | 1213.030        | 1207.699        | 0.672          | 1207.363        | A 37 |
| A 7  | 229.782         | 1189.360        | 1184.020        | 0.672          | 1183.684        | A 36 |
| P 8  | 262.133         | <b>1165.681</b> | 1160.341        | 0.672          | 1160.005        | P 35 |
| A 9  | 285.812         | <b>1133.330</b> | 1127.990        | 0.672          | 1127.654        | A 34 |
| A 10 | 309.491         | 1109.661        | 1104.321        | 0.672          | 1103.975        | A 33 |
| P 11 | 341.842         | <b>1085.972</b> | 1080.632        | 0.672          | 1080.296        | P 32 |
| A 12 | 365.521         | 1053.621        | 1048.281        | 0.672          | 1047.945        | A 31 |
| P 13 | 397.872         | <b>1029.942</b> | <b>1024.602</b> | 0.672          | <b>1024.266</b> | P 30 |
| A 14 | 421.551         | 997.591         | 992.251         | 0.672          | 991.916         | A 29 |
| E 15 | 464.205         | <b>973.912</b>  | 968.572         | 0.672          | 968.236         | E 28 |
| R 16 | 497.283         | 939.993         | <b>925.558</b>  | <b>925.894</b> | 925.222         | R 27 |
| T 17 | 540.946         | <b>888.199</b>  | <b>882.860</b>  | <b>883.196</b> | <b>882.524</b>  | T 26 |
| P 18 | 573.297         | 854.517         | 849.177         | 849.513        | 848.841         | P 25 |
| V 19 | 606.320         | 822.160         | 816.820         | 817.162        | 816.490         | V 24 |
| K 20 | 649.018         | 789.143         | 783.804         | 784.140        | 783.468         | K 23 |
| K 21 | 691.126         | 746.445         | 741.105         | 741.441        | 740.769         | K 22 |
| K 22 | 734.414         | 703.747         | 698.407         | 698.743        | 698.071         | K 21 |
| A 23 | 758.094         | 661.048         | 655.709         | 656.045        | 655.373         | A 20 |
| R 24 | 810.127         | 637.309         | 632.030         | 632.366        | 631.694         | R 19 |
| K 25 | 852.826         | 595.139         | 579.666         | 580.332        | 579.666         | K 18 |
| A 26 | 876.505         | 542.637         | 537.298         | 537.634        | 536.962         | A 17 |
| A 27 | 900.184         | 510.958         | 513.619         | 513.954        | 513.282         | A 16 |
| Q 28 | 919.191         | 469.379         | 429.660         | 429.718        | 429.504         | Q 15 |
| Q 29 | 938.198         | 475.272         | 470.932         | 471.268        | 470.596         | Q 14 |
| A 30 | 961.877         | 457.205         | 451.925         | 452.261        | 451.589         | A 13 |
| K 31 | <b>1004.575</b> | 413.586         | 428.246         | 428.582        | 427.910         | K 12 |
| R 32 | <b>1056.609</b> | 390.887         | 385.548         | 385.884        | 385.212         | R 11 |
| K 33 | <b>1099.307</b> | 338.854         | 333.514         | 333.850        | 333.178         | K 10 |
| T 34 | <b>1112.590</b> | 296.151         | 290.811         | 291.152        | 290.480         | T 9  |
| S 35 | 1162.001        | 262.473         | 257.133         | 257.469        | 256.797         | S 8  |
| G 36 | 1181.008        | 213.462         | 208.123         | 208.459        | 207.787         | G 7  |
| P 37 | 1213.359        | 214.455         | 209.115         | 209.451        | 208.779         | P 6  |
| P 38 | <b>1245.710</b> | 182.104         | 176.765         | 177.100        | 176.429         | P 5  |
| V 39 | <b>1278.732</b> | 149.753         | 144.414         | 144.750        | 144.078         | V 4  |
| S 40 | <b>1307.743</b> | 116.780         | 111.441         | 111.777        | 111.105         | S 3  |
| E 41 | <b>1350.757</b> | 87.220          | 82.380          | 82.716         | 82.044          | E 2  |
| L 42 | 1388.452        | 44.705          | 39.366          | 39.702         | 39.030          | L 1  |

# sp | P43274 | H14\_MOUSE

[Acetyl]SETAPAAPAAPAPAEKTPVKKKARKAAGGAKRKTSGPPVSEL

- ▶ fragmentation table for charge state 4+
- ▶ specType=etd
- ▶ score=31.80
- ▶ F113669.dat
- ▶ query=q20028.p1
- ▶ precursor=833.672300
- ▶ chargePrecursor=5
- ▶ itol=0.5

| AA | c  | y               | a+1             | a+2             | z       | AA              |       |
|----|----|-----------------|-----------------|-----------------|---------|-----------------|-------|
| S  | 1  | 37.525          | <b>1041.837</b> | <b>1037.832</b> | 0.755   | <b>1037.580</b> | S[42] |
| E  | 2  | 69.785          | 1005.576        | <b>1005.571</b> | 0.755   | <b>1005.319</b> | E[41] |
| T  | 3  | 95.047          | 977.315         | <b>973.311</b>  | 0.755   | <b>971.059</b>  | T[40] |
| A  | 4  | 112.506         | 952.054         | <b>948.049</b>  | 0.755   | 947.797         | A[39] |
| P  | 5  | 137.070         | <b>934.294</b>  | 930.290         | 0.755   | 930.038         | P[38] |
| A  | 6  | 154.829         | 910.031         | 906.026         | 0.755   | 905.774         | A[37] |
| A  | 7  | 172.588         | 892.272         | <b>888.267</b>  | 0.755   | <b>888.015</b>  | A[36] |
| P  | 8  | 190.351         | 874.513         | <b>870.508</b>  | 0.755   | <b>870.256</b>  | P[35] |
| A  | 9  | 214.811         | 859.249         | 855.245         | 0.755   | 849.993         | A[34] |
| A  | 10 | 232.570         | 832.490         | 828.485         | 0.755   | 828.233         | A[33] |
| P  | 11 | 256.633         | 814.731         | 810.726         | 0.755   | 810.474         | P[32] |
| A  | 12 | 274.392         | 790.468         | 786.463         | 0.755   | 786.211         | A[31] |
| P  | 13 | 298.656         | 772.709         | 768.704         | 0.755   | 768.452         | P[30] |
| A  | 14 | 316.415         | 748.445         | 744.440         | 0.755   | 744.188         | A[29] |
| E  | 15 | 348.675         | 730.686         | 726.681         | 0.755   | 726.429         | E[28] |
| K  | 16 | 380.699         | 699.423         | 694.420         | 684.672 | 694.169         | K[27] |
| T  | 17 | 405.961         | 666.403         | 662.397         | 662.649 | 662.145         | T[26] |
| P  | 18 | 430.224         | 641.140         | 637.135         | 637.387 | 636.883         | P[25] |
| V  | 19 | 454.991         | 616.876         | 612.872         | 613.124 | 612.620         | V[24] |
| K  | 20 | 487.015         | 592.100         | 588.105         | 588.356 | 587.853         | K[23] |
| K  | 21 | 519.039         | 566.085         | 562.081         | 566.333 | 565.829         | K[22] |
| K  | 22 | 551.063         | 539.060         | 534.057         | 534.309 | 533.805         | K[21] |
| A  | 23 | 568.522         | 496.030         | 492.033         | 492.285 | 491.781         | A[20] |
| R  | 24 | 607.847         | 478.279         | 474.274         | 474.526 | 474.022         | R[19] |
| K  | 25 | 639.871         | 439.253         | 435.249         | 435.501 | 434.997         | K[18] |
| A  | 26 | 657.630         | 407.230         | 403.225         | 403.477 | 402.973         | A[17] |
| A  | 27 | 675.390         | 389.470         | 385.466         | 385.718 | 385.214         | A[16] |
| E  | 28 | 699.845         | 371.711         | 367.706         | 367.958 | 367.454         | E[15] |
| G  | 29 | 703.900         | 357.450         | 353.451         | 353.703 | 353.199         | G[14] |
| A  | 30 | 721.660         | 343.200         | 339.196         | 339.448 | 338.944         | A[13] |
| K  | 31 | 753.683         | 325.441         | 321.436         | 321.688 | 321.184         | K[12] |
| R  | 32 | 792.709         | 293.417         | 289.413         | 289.665 | 289.161         | R[11] |
| K  | 33 | 824.732         | 254.392         | 250.387         | 250.639 | 250.135         | K[10] |
| T  | 34 | 849.094         | 222.368         | 218.364         | 218.616 | 218.112         | T[9]  |
| S  | 35 | 871.752         | 191.100         | 189.102         | 193.354 | 192.850         | S[8]  |
| G  | 36 | 886.008         | 175.348         | 171.344         | 171.596 | 171.092         | G[7]  |
| P  | 37 | 910.271         | 161.093         | 157.088         | 157.340 | 156.836         | P[6]  |
| P  | 38 | <b>934.534</b>  | 136.830         | 132.825         | 133.077 | 132.573         | P[5]  |
| V  | 39 | <b>959.301</b>  | 112.507         | 108.502         | 108.814 | 108.310         | V[4]  |
| S  | 40 | <b>981.059</b>  | 87.800          | 83.795          | 84.047  | 83.543          | S[3]  |
| E  | 41 | <b>1013.320</b> | 66.943          | 62.937          | 63.289  | 61.785          | E[2]  |
| L  | 42 | <b>1041.591</b> | 33.781          | 29.776          | 30.028  | 28.524          | L[1]  |



# sp | P43277 | H13\_MOUSE

[Acetyl]SETAPAAPAAPAPVEKTPVKKKAKKTGAAAGKRKASGPPVSEL

- ▶ fragmentation table for charge state 1+
- ▶ specType=etd
- ▶ score=47.35
- ▶ F113669.dat
- ▶ query=q20046\_p1
- ▶ precursor=847.884540
- ▶ chargePrecursor=5
- ▶ itol=0.5

| AA |    | c               | y              | a+1             | a+2             | z               | AA    |
|----|----|-----------------|----------------|-----------------|-----------------|-----------------|-------|
| S  | 1  | 147.076         | 4235.397       | 4219.360        | 0.000           | 4218.361        | S[43] |
| E  | 2  | 278.119         | 4138.345       | 4099.329        | 0.000           | 4099.311        | E[42] |
| T  | 3  | 377.167         | 3977.302       | 3961.264        | 0.000           | 3960.270        | T[41] |
| A  | 4  | 448.204         | 3876.255       | 3860.236        | 0.000           | 3859.238        | A[40] |
| F  | 5  | 545.257         | 3805.217       | 3789.199        | 0.000           | 3788.191        | F[39] |
| A  | 6  | 616.294         | 3708.165       | 3692.146        | 0.000           | 3691.138        | A[38] |
| A  | 7  | 667.331         | 3637.128       | 3621.109        | 0.000           | 3620.101        | A[37] |
| P  | 8  | 704.384         | 3566.090       | 3550.072        | 0.000           | 3549.064        | P[36] |
| A  | 9  | <b>855.421</b>  | 3499.038       | 3483.019        | 0.000           | 3482.011        | A[35] |
| A  | 10 | 926.458         | 3398.001       | 3381.982        | 0.000           | 3380.974        | A[34] |
| P  | 11 | <b>1023.511</b> | 3326.963       | 3310.945        | 0.000           | 3309.937        | P[33] |
| A  | 12 | 1094.548        | 3229.911       | 3213.892        | 0.000           | 3212.884        | A[32] |
| P  | 13 | 1161.600        | 3158.874       | 3142.855        | 0.000           | 3141.847        | P[31] |
| V  | 14 | 1209.669        | 3091.823       | 3075.802        | 0.000           | 3074.794        | V[30] |
| E  | 15 | 1419.711        | 2962.752       | 2946.734        | 0.000           | 2945.726        | E[29] |
| K  | 16 | <b>1547.806</b> | 2833.710       | 2817.691        | 2818.699        | 2816.683        | K[28] |
| T  | 17 | 1648.854        | 2705.615       | 2689.596        | 2690.604        | 2688.588        | T[27] |
| P  | 18 | 1745.907        | 2604.567       | 2588.548        | 2589.556        | 2587.541        | P[26] |
| V  | 19 | 1844.975        | 2507.514       | 2491.496        | 2492.504        | 2490.488        | V[25] |
| R  | 20 | 1913.079        | 2408.466       | 2392.427        | 2393.435        | 2391.418        | R[24] |
| K  | 21 | 2101.105        | 2288.351       | 2274.332        | 2285.340        | 2283.324        | K[23] |
| R  | 22 | 2229.200        | 2152.256       | 2138.237        | 2137.245        | 2135.230        | R[22] |
| A  | 23 | 2300.297        | 2024.161       | 2008.142        | 2009.150        | 2007.135        | A[21] |
| K  | 24 | 2428.392        | 1953.124       | 1937.105        | 1938.113        | 1936.097        | K[20] |
| K  | 25 | 2526.460        | 1825.029       | 1809.010        | 1810.018        | 1808.002        | K[19] |
| T  | 26 | 2657.538        | 1696.934       | 1680.915        | 1681.923        | 1679.906        | T[18] |
| G  | 27 | 2714.556        | 1595.886       | 1579.868        | 1580.875        | 1578.860        | G[17] |
| A  | 28 | 2785.593        | 1538.865       | 1522.846        | 1523.854        | 1521.838        | A[16] |
| A  | 29 | 2856.631        | 1467.828       | 1451.809        | 1452.817        | <b>1450.801</b> | A[15] |
| A  | 30 | 2927.668        | 1396.791       | 1380.772        | 1381.780        | 1379.764        | A[14] |
| C  | 31 | 2984.689        | 1325.754       | 1309.735        | 1310.743        | 1308.727        | C[13] |
| K  | 32 | 3112.784        | 1268.732       | 1252.713        | <b>1253.721</b> | 1251.706        | K[12] |
| R  | 33 | 3268.888        | 1140.637       | <b>1124.618</b> | 1125.626        | 1123.611        | R[11] |
| K  | 34 | 3398.980        | 984.536        | <b>968.517</b>  | 969.525         | 967.509         | K[10] |
| A  | 35 | 3488.017        | 856.441        | <b>840.422</b>  | 841.430         | 839.413         | A[9]  |
| S  | 36 | 3555.049        | 795.404        | 789.385         | 770.363         | 768.377         | S[8]  |
| G  | 37 | 3632.071        | <b>668.372</b> | 662.353         | 663.361         | 661.345         | G[7]  |
| P  | 38 | 3709.124        | 611.359        | 605.340         | 606.348         | 604.332         | P[6]  |
| P  | 39 | 3806.176        | 544.298        | 538.279         | 529.287         | 527.271         | P[5]  |
| V  | 40 | 3905.245        | 447.245        | <b>431.226</b>  | 432.234         | 430.218         | V[4]  |
| S  | 41 | 3992.277        | 348.177        | 332.158         | 333.166         | 331.150         | S[3]  |
| E  | 42 | 4121.319        | 261.144        | 245.126         | 246.134         | 244.118         | E[2]  |
| L  | 43 | 4234.403        | 132.102        | 116.083         | 117.091         | 115.075         | L[1]  |

# sp | P43277 | H13\_MOUSE

[Acetyl]SETAPAAPAAPAVEKTPVKKKAKKTGAAAGKRKASGPPVSEL

- ▶ fragmentation table for charge state 2+
- ▶ specType=etd
- ▶ score=47.35
- ▶ F113669.dat
- ▶ query=q20046\_p1
- ▶ precursor=847.884540
- ▶ chargePrecursor=5
- ▶ itol=0.5

| AA | c  | y               | z+1             | z+2             | z               | AA              |       |
|----|----|-----------------|-----------------|-----------------|-----------------|-----------------|-------|
| S  | 1  | 74.042          | 2118.197        | 2110.188        | 0.504           | 2109.684        | E[43] |
| E  | 2  | 138.563         | 2051.676        | 2045.667        | 0.504           | 2045.163        | E[42] |
| T  | 3  | 189.087         | 1988.355        | 1981.345        | 0.504           | 1980.841        | F[41] |
| A  | 4  | 224.606         | 1928.631        | 1920.622        | 0.504           | 1920.118        | A[40] |
| F  | 5  | 273.132         | 1903.112        | 1895.103        | 0.504           | 1894.599        | F[39] |
| A  | 6  | 308.650         | 1854.586        | 1846.577        | 0.504           | 1846.073        | A[38] |
| A  | 7  | 344.169         | 1819.067        | 1811.058        | 0.504           | 1810.554        | A[37] |
| F  | 8  | 382.695         | 1783.549        | 1775.540        | 0.504           | 1775.036        | F[36] |
| A  | 9  | 428.214         | 1752.022        | 1744.013        | 0.504           | 1743.509        | A[35] |
| A  | 10 | 463.733         | <b>1699.504</b> | <b>1691.495</b> | 0.504           | 1690.991        | A[34] |
| F  | 11 | 512.259         | 1663.965        | 1655.956        | 0.504           | 1655.452        | F[33] |
| A  | 12 | 547.777         | 1615.439        | <b>1607.450</b> | 0.504           | <b>1606.946</b> | A[32] |
| F  | 13 | 586.304         | 1579.940        | 1571.931        | 0.504           | 1571.427        | F[31] |
| V  | 14 | 645.838         | 1538.424        | 1530.415        | 0.504           | 1529.911        | V[30] |
| E  | 15 | 710.359         | 1489.880        | <b>1473.870</b> | 0.504           | 1473.367        | E[29] |
| K  | 16 | 774.407         | 1447.359        | 1439.349        | 1409.853        | 1408.845        | K[28] |
| T  | 17 | 824.911         | 1383.311        | 1345.302        | <b>1345.806</b> | 1344.798        | T[27] |
| F  | 18 | 873.457         | <b>1302.787</b> | 1294.778        | 1295.282        | 1294.274        | F[26] |
| V  | 19 | 922.974         | 1254.261        | <b>1246.251</b> | 1246.755        | <b>1245.748</b> | V[25] |
| K  | 20 | <b>957.039</b>  | 1204.727        | 1195.717        | 1197.221        | 1196.213        | K[24] |
| K  | 21 | <b>1051.086</b> | 1140.679        | <b>1132.670</b> | <b>1133.174</b> | 1132.166        | K[23] |
| K  | 22 | 1115.134        | <b>1076.632</b> | <b>1068.622</b> | <b>1069.126</b> | 1068.118        | K[22] |
| A  | 23 | <b>1150.652</b> | 1012.584        | <b>1004.575</b> | <b>1005.079</b> | 1004.071        | A[21] |
| K  | 24 | 1214.709        | <b>977.066</b>  | <b>969.056</b>  | 969.560         | <b>968.552</b>  | K[20] |
| K  | 25 | <b>1278.747</b> | <b>913.018</b>  | <b>905.009</b>  | <b>905.513</b>  | 904.505         | K[19] |
| T  | 26 | 1328.271        | 848.911         | <b>840.901</b>  | 841.405         | <b>840.457</b>  | T[18] |
| G  | 27 | 1357.782        | 798.447         | <b>790.437</b>  | <b>790.941</b>  | 789.934         | G[17] |
| A  | 28 | 1383.300        | 769.936         | <b>761.927</b>  | <b>762.431</b>  | 761.423         | A[16] |
| A  | 29 | 1428.819        | 734.419         | <b>726.408</b>  | <b>726.912</b>  | 725.904         | A[15] |
| A  | 30 | <b>1464.337</b> | <b>690.099</b>  | 690.603         | 691.107         | 690.100         | A[14] |
| C  | 31 | <b>1492.848</b> | <b>663.380</b>  | 663.884         | 664.388         | 663.380         | C[13] |
| K  | 32 | <b>1556.896</b> | 634.970         | 624.960         | 625.464         | 624.456         | K[12] |
| R  | 33 | 1634.946        | 670.822         | 562.813         | 563.317         | 562.309         | R[11] |
| K  | 34 | <b>1698.994</b> | 692.772         | 484.762         | 485.266         | 484.258         | K[10] |
| A  | 35 | 1734.512        | 428.724         | 428.715         | 421.219         | 420.211         | A[9]  |
| S  | 36 | 1778.028        | 383.206         | 383.197         | 385.700         | 384.692         | S[8]  |
| G  | 37 | 1808.539        | 349.689         | 341.680         | 342.184         | 341.176         | G[7]  |
| F  | 38 | 1855.065        | 321.179         | 313.170         | 313.673         | 312.666         | F[6]  |
| F  | 39 | <b>1903.592</b> | 272.652         | 264.643         | 265.147         | 264.139         | F[5]  |
| V  | 40 | 1953.126        | 254.129         | 218.117         | 218.621         | 215.613         | V[4]  |
| S  | 41 | 1986.642        | 174.592         | 166.583         | 167.086         | 166.078         | S[3]  |
| E  | 42 | 2001.613        | 134.076         | 123.987         | 124.490         | 123.482         | E[2]  |
| L  | 43 | 2117.705        | 66.555          | 58.545          | 59.049          | 58.041          | L[1]  |

# sp | P43277 | H13\_MOUSE

[Acetyl]SETAPAAPAAPAVEKTPVKKKAKKTGAAAGKRKASGPPVSEL

- ▶ fragmentation table for charge state 3+
- ▶ specType=etd
- ▶ score=47.35
- ▶ F113669.dat
- ▶ query=q20046\_p1
- ▶ precursor=847.884540
- ▶ chargePrecursor=5
- ▶ itol=0.5

| AA    | c               | y               | z+1             | z+2            | z               | AA    |
|-------|-----------------|-----------------|-----------------|----------------|-----------------|-------|
| S[1]  | 60.697          | 1412.461        | <b>1407.128</b> | 0.672          | <b>1406.702</b> | S[42] |
| S[2]  | 62.711          | 1309.451        | <b>1364.714</b> | 0.672          | <b>1363.776</b> | S[43] |
| T[3]  | 126.594         | 1326.430        | <b>1321.099</b> | 0.672          | <b>1320.763</b> | T[41] |
| A[4]  | 150.073         | 1292.756        | <b>1287.417</b> | 0.672          | 1287.081        | A[40] |
| F[5]  | 162.424         | <b>1269.077</b> | 1263.736        | 0.672          | 1263.400        | F[39] |
| A[6]  | 206.103         | 1236.720        | 1231.367        | 0.672          | 1231.051        | A[38] |
| A[7]  | 229.762         | 1231.041        | <b>1207.706</b> | 0.672          | 1207.372        | A[37] |
| P[8]  | 262.133         | <b>1189.368</b> | 1184.029        | 0.672          | 1183.693        | P[36] |
| A[9]  | 285.812         | 1157.017        | 1151.676        | 0.672          | <b>1151.342</b> | A[35] |
| A[10] | 309.491         | <b>1133.338</b> | <b>1127.999</b> | 0.672          | <b>1127.663</b> | A[34] |
| P[11] | 341.842         | 1109.659        | 1104.320        | 0.672          | 1103.984        | P[33] |
| A[12] | 365.521         | <b>1077.308</b> | 1071.969        | 0.672          | 1071.633        | A[32] |
| P[13] | 397.872         | 1051.620        | 1046.290        | 0.672          | 1047.954        | P[31] |
| V[14] | <b>430.694</b>  | 1021.276        | 1015.639        | 0.672          | 1015.660        | V[30] |
| E[15] | 473.909         | 988.250         | <b>982.916</b>  | 0.672          | <b>982.500</b>  | E[29] |
| K[16] | 516.607         | 945.241         | <b>939.902</b>  | <b>940.238</b> | 939.566         | K[28] |
| T[17] | 550.290         | 902.547         | <b>897.204</b>  | <b>897.539</b> | <b>896.868</b>  | T[27] |
| P[18] | 582.640         | 868.861         | 863.521         | 863.857        | 863.185         | P[26] |
| V[19] | 615.663         | 836.510         | 831.170         | 831.506        | 830.834         | V[25] |
| K[20] | 658.302         | 803.467         | 798.147         | 798.483        | 797.811         | K[24] |
| K[21] | 701.000         | 760.769         | 755.449         | 755.785        | 755.113         | K[23] |
| K[22] | 743.758         | 718.000         | 712.751         | 713.087        | 712.415         | K[22] |
| A[23] | 767.437         | 675.392         | <b>670.052</b>  | <b>670.388</b> | 669.716         | A[21] |
| K[24] | 810.136         | 651.713         | 646.373         | 646.709        | 646.037         | K[20] |
| K[25] | 852.834         | 609.015         | 603.675         | 604.011        | 603.339         | K[19] |
| T[26] | 896.616         | 566.316         | 560.977         | 561.313        | 560.641         | T[18] |
| G[27] | <b>905.524</b>  | 533.634         | 527.294         | 527.630        | 526.958         | G[17] |
| A[28] | 929.203         | 513.626         | 508.287         | 508.623        | 507.951         | A[16] |
| A[29] | <b>952.882</b>  | 469.947         | 464.608         | 464.944        | 464.272         | A[15] |
| A[30] | 976.561         | 466.260         | 460.920         | 461.255        | 460.591         | A[14] |
| G[31] | 995.568         | 442.580         | 437.250         | 437.586        | 436.914         | G[13] |
| K[32] | <b>1038.266</b> | 423.567         | 418.243         | 418.579        | 417.907         | K[12] |
| R[33] | 1050.300        | 380.884         | 375.544         | 375.880        | 375.208         | R[11] |
| K[34] | <b>1132.998</b> | 328.850         | 323.511         | 323.847        | 323.175         | K[10] |
| A[35] | <b>1156.677</b> | 286.157         | 280.812         | 281.148        | 280.476         | A[0]  |
| S[36] | 1185.688        | 262.473         | 257.133         | 257.469        | 256.797         | S[8]  |
| G[37] | 1204.695        | 231.462         | 226.123         | 226.459        | 225.787         | G[7]  |
| P[38] | 1237.046        | 214.451         | 209.115         | 209.451        | 208.779         | P[6]  |
| P[39] | <b>1269.397</b> | 182.104         | 176.765         | 177.100        | 176.425         | P[5]  |
| V[40] | <b>1302.420</b> | 149.753         | 144.414         | 144.750        | 144.078         | V[4]  |
| S[41] | <b>1331.430</b> | 116.730         | 111.391         | 111.727        | 111.055         | S[3]  |
| E[42] | <b>1374.445</b> | 87.720          | 82.380          | 82.716         | 82.044          | E[2]  |
| L[43] | 1412.139        | 44.705          | 39.366          | 39.702         | 39.030          | L[1]  |

# sp | P43277 | H13\_MOUSE

[Acetyl]SETAPAAPAAPAVEKTPVKKKAKKTGAAAGKRKASGPPVSEL

- ▶ fragmentation table for charge state 4+
- ▶ specType=etd
- ▶ score=47.35
- ▶ F113669.dat
- ▶ query=q20046.p1
- ▶ precursor=847.884540
- ▶ chargePrecursor=5
- ▶ itol=0.5

| AA   | c               | y               | z+1             | z+2     | z               | AA   |
|------|-----------------|-----------------|-----------------|---------|-----------------|------|
| S 1  | 37.525          | <b>1059.602</b> | <b>1055.598</b> | 0.755   | <b>1055.346</b> | S 42 |
| E 2  | 69.785          | 1027.342        | <b>1023.337</b> | 0.755   | <b>1023.085</b> | E 42 |
| T 3  | 95.047          | 995.081         | <b>991.076</b>  | 0.755   | <b>990.824</b>  | T 41 |
| A 4  | 112.806         | 969.819         | 965.814         | 0.755   | <b>965.562</b>  | A 40 |
| P 5  | 127.070         | 952.000         | 948.055         | 0.755   | 947.803         | P 39 |
| A 6  | 154.820         | 927.797         | 923.792         | 0.755   | 923.540         | A 38 |
| A 7  | 172.588         | 910.037         | 906.033         | 0.755   | <b>905.781</b>  | A 37 |
| P 8  | 190.351         | 892.276         | 888.273         | 0.755   | 888.021         | P 36 |
| A 9  | 214.611         | 868.015         | 864.010         | 0.755   | 863.758         | A 35 |
| A 10 | 232.370         | 850.256         | 846.251         | 0.755   | 845.999         | A 34 |
| P 11 | 256.633         | 826.000         | 822.002         | 0.755   | 821.749         | P 33 |
| A 12 | 274.392         | 808.233         | 804.238         | 0.755   | 803.976         | A 32 |
| P 13 | 290.656         | <b>790.474</b>  | 786.469         | 0.755   | 786.217         | P 31 |
| V 14 | 323.423         | 766.211         | <b>762.206</b>  | 0.755   | <b>761.954</b>  | V 30 |
| E 15 | 355.683         | 741.444         | 737.439         | 0.755   | 737.187         | E 29 |
| K 16 | 387.707         | 709.183         | 705.178         | 705.430 | 704.926         | K 28 |
| T 17 | 412.969         | 677.159         | 673.154         | 673.406 | 672.903         | T 27 |
| P 18 | 437.232         | 651.897         | 647.893         | 648.145 | 647.641         | P 26 |
| V 19 | 461.999         | 627.634         | 623.629         | 623.881 | 623.377         | V 25 |
| K 20 | 494.023         | 602.967         | 598.962         | 599.114 | 598.611         | K 24 |
| K 21 | 526.047         | 579.843         | 566.839         | 567.090 | 566.587         | K 23 |
| K 22 | 558.070         | 558.819         | 534.815         | 535.067 | 534.563         | K 22 |
| A 23 | 578.830         | 506.796         | 502.791         | 503.043 | 502.539         | A 21 |
| K 24 | 607.854         | 489.030         | 485.032         | 485.284 | 484.780         | K 20 |
| K 25 | 639.877         | 457.013         | 453.008         | 453.260 | 452.756         | K 19 |
| T 26 | 665.139         | 434.989         | 430.984         | 431.236 | 430.732         | T 18 |
| T 27 | 679.395         | 395.727         | 395.727         | 395.974 | 395.470         | T 17 |
| A 28 | 697.154         | 385.472         | 381.467         | 381.719 | 381.215         | A 16 |
| A 29 | 714.913         | 367.712         | 363.708         | 363.960 | 363.456         | A 15 |
| A 30 | 732.672         | 349.953         | 345.948         | 346.200 | 345.696         | A 14 |
| G 31 | 746.928         | 332.194         | 328.189         | 328.441 | 327.937         | G 13 |
| K 32 | 778.951         | 317.608         | 313.604         | 313.856 | 313.352         | K 12 |
| K 33 | 817.974         | 289.915         | 281.910         | 282.162 | 281.658         | K 11 |
| K 34 | 850.001         | 246.889         | 242.885         | 243.137 | 242.633         | K 10 |
| A 35 | 867.760         | 214.899         | 210.891         | 211.113 | 210.609         | A 9  |
| S 36 | 889.518         | 197.100         | 193.102         | 193.354 | 192.850         | S 8  |
| G 37 | 903.773         | 175.348         | 171.344         | 171.596 | 171.092         | G 7  |
| P 38 | 924.026         | 161.093         | 157.088         | 157.340 | 156.836         | P 6  |
| P 39 | <b>952.300</b>  | 139.839         | 132.826         | 133.077 | 132.573         | P 5  |
| V 40 | <b>977.067</b>  | 112.507         | 108.502         | 108.814 | 108.310         | V 4  |
| S 41 | 998.825         | 87.800          | 83.795          | 84.047  | 83.543          | S 3  |
| E 42 | <b>1031.085</b> | 66.042          | 62.037          | 62.289  | 61.785          | E 2  |
| L 43 | 1059.356        | 33.781          | 29.776          | 30.028  | 29.524          | L 1  |





# sp | P43277 | H13\_MOUSE

[Acetyl]S<sup>(Phospho)</sup><sub>(79.97)</sub> ETAPAAPAAPAPVEKTPVKKKAKKTGAAAGKRKASGPPVSEL

- ▶ fragmentation table for charge state 1+
- ▶ specType=etd
- ▶ score=30.07
- ▶ F113669.dat
- ▶ query=q20079\_p1
- ▶ precursor=720.065550
- ▶ chargePrecursor=6
- ▶ itol=0.5

| AA |    | c               | y        | z+1             | z+2             | z        | AA    |
|----|----|-----------------|----------|-----------------|-----------------|----------|-------|
| S  | 1  | 227.043         | 4315.394 | 4299.135        | 0.000           | 4299.327 | S[43] |
| E  | 3  | 366.085         | 4156.345 | 4098.335        | 0.000           | 4099.311 | E[42] |
| F  | 3  | 457.133         | 3977.302 | 3961.294        | 0.000           | 3960.276 | F[41] |
| A  | 4  | 528.170         | 3876.255 | 3860.236        | 0.000           | 3859.228 | A[40] |
| F  | 5  | 605.223         | 3805.217 | 3789.199        | 0.000           | 3788.191 | F[39] |
| A  | 6  | 696.260         | 3708.165 | 3692.146        | 0.000           | 3691.138 | A[38] |
| A  | 7  | 757.297         | 3637.128 | 3621.109        | 0.000           | 3620.101 | A[37] |
| F  | 8  | <b>884.350</b>  | 3566.090 | 3550.072        | 0.000           | 3549.064 | F[36] |
| A  | 9  | 935.397         | 3499.035 | 3483.019        | 0.000           | 3482.011 | A[35] |
| A  | 10 | 1006.424        | 3398.001 | 3381.982        | 0.000           | 3380.974 | A[34] |
| P  | 11 | 1103.477        | 3326.963 | 3310.945        | 0.000           | 3309.937 | P[33] |
| A  | 12 | 1174.514        | 3229.911 | 3213.892        | 0.000           | 3212.884 | A[32] |
| P  | 13 | 1271.567        | 3158.874 | 3142.855        | 0.000           | 3141.847 | P[31] |
| V  | 14 | 1370.635        | 3081.821 | 3065.802        | 0.000           | 3064.794 | V[30] |
| E  | 15 | 1489.678        | 2992.782 | 2946.734        | 0.000           | 2945.726 | E[29] |
| K  | 16 | <b>1627.773</b> | 2933.710 | 2817.691        | 2816.699        | 2810.661 | K[28] |
| T  | 17 | 1728.820        | 2705.615 | 2689.596        | 2690.604        | 2688.588 | T[27] |
| F  | 18 | 1825.873        | 2604.567 | 2588.548        | 2589.556        | 2587.541 | F[26] |
| V  | 19 | 1924.942        | 2507.514 | 2491.495        | 2492.504        | 2490.488 | V[25] |
| K  | 20 | 2023.037        | 2406.448 | 2390.429        | 2391.436        | 2391.410 | K[24] |
| K  | 21 | 2181.132        | 2380.351 | 2264.332        | 2265.340        | 2263.324 | K[23] |
| K  | 22 | 2309.226        | 2152.256 | 2136.237        | 2137.245        | 2135.230 | K[22] |
| A  | 23 | 2380.264        | 2024.161 | 2008.142        | 2009.150        | 2007.135 | A[21] |
| K  | 24 | 2508.359        | 1993.124 | 1937.105        | 1938.113        | 1936.097 | K[20] |
| K  | 25 | 2636.454        | 1825.029 | 1809.010        | 1810.018        | 1808.002 | K[19] |
| T  | 26 | 2737.501        | 1696.934 | 1680.915        | 1681.923        | 1679.908 | T[18] |
| G  | 27 | 2794.573        | 1595.886 | 1579.868        | <b>1580.875</b> | 1578.860 | G[17] |
| A  | 28 | 2865.590        | 1538.865 | 1522.846        | <b>1523.854</b> | 1521.838 | A[16] |
| A  | 29 | 2936.597        | 1467.828 | 1451.809        | 1452.817        | 1450.801 | A[15] |
| A  | 30 | 3007.634        | 1396.791 | 1380.772        | 1381.780        | 1379.764 | A[14] |
| G  | 31 | 3064.655        | 1325.754 | 1309.735        | 1310.743        | 1308.727 | G[13] |
| K  | 32 | 3162.750        | 1268.732 | 1252.713        | 1253.721        | 1251.706 | K[12] |
| P  | 33 | 3348.852        | 1140.697 | <b>1124.618</b> | 1125.626        | 1123.611 | P[11] |
| K  | 34 | 3476.947        | 994.535  | <b>968.517</b>  | 969.525         | 967.509  | K[10] |
| A  | 35 | 3547.984        | 856.441  | 840.422         | <b>841.430</b>  | 839.415  | A[9]  |
| S  | 36 | 3635.016        | 785.404  | 769.385         | 770.393         | 768.377  | S[8]  |
| G  | 37 | 3692.037        | 698.372  | 682.353         | 683.361         | 681.345  | G[7]  |
| P  | 38 | 3789.090        | 641.350  | 625.332         | 626.340         | 624.324  | P[6]  |
| F  | 39 | 3888.143        | 644.296  | 628.279         | 629.287         | 627.271  | F[5]  |
| V  | 40 | 3985.211        | 647.245  | 631.226         | 632.234         | 630.218  | V[4]  |
| S  | 41 | 4072.243        | 648.177  | 632.158         | 633.166         | 631.150  | S[3]  |
| E  | 42 | 4301.286        | 261.144  | 245.126         | 246.134         | 244.118  | E[2]  |
| L  | 43 | 4314.370        | 132.102  | 116.083         | 117.091         | 115.075  | L[1]  |

# sp | P43277 | H13\_MOUSE

[Acetyl]S<sup>(Phospho)</sup><sub>(79.97)</sub> ETAPAAPAAPAPVEKTPVKKKAKKTGAAAGKRKASGPPVSEL

- ▶ fragmentation table for charge state 2+
- ▶ specType=etd
- ▶ score=30.07
- ▶ F113669.dat
- ▶ query=q20079\_p1
- ▶ precursor=720.065550
- ▶ chargePrecursor=6
- ▶ itol=0.5

| AA | c  | y               | z+1             | z+2             | z               | AA             |       |
|----|----|-----------------|-----------------|-----------------|-----------------|----------------|-------|
| S  | 1  | 114.025         | 2158.181        | 2150.171        | 0.504           | 2149.667       | S[43] |
| E  | 2  | 118.540         | 2053.076        | 2045.067        | 0.504           | 2045.561       | E[42] |
| T  | 3  | 229.078         | 1989.153        | 1981.145        | 0.504           | 1980.641       | T[41] |
| A  | 4  | 294.589         | 1938.031        | 1930.022        | 0.504           | 1930.518       | A[40] |
| P  | 5  | 313.115         | 1903.112        | 1895.103        | 0.504           | 1894.599       | P[39] |
| A  | 6  | 368.634         | 1854.588        | 1846.577        | 0.504           | 1846.073       | A[38] |
| A  | 7  | 384.152         | 1819.067        | 1811.058        | 0.504           | 1810.554       | A[37] |
| P  | 8  | 432.679         | 1783.546        | 1775.536        | 0.504           | 1775.030       | P[36] |
| A  | 9  | 488.197         | 1735.022        | 1727.013        | 0.504           | 1726.509       | A[35] |
| A  | 10 | 503.716         | 1699.504        | 1691.495        | 0.504           | 1690.991       | A[34] |
| P  | 11 | 552.242         | <b>1663.985</b> | 1655.976        | 0.504           | 1655.472       | P[33] |
| A  | 12 | 567.761         | 1615.459        | 1607.450        | 0.504           | 1606.946       | A[32] |
| P  | 13 | 636.287         | 1570.940        | 1571.931        | 0.504           | 1571.427       | P[31] |
| V  | 14 | 685.821         | 1531.414        | <b>1523.405</b> | 0.504           | 1522.901       | V[30] |
| E  | 15 | 750.343         | 1481.888        | 1473.879        | 0.504           | 1473.367       | E[29] |
| K  | 16 | 814.866         | 1447.358        | 1439.349        | 1409.853        | 1408.845       | K[28] |
| T  | 17 | 864.014         | 1383.311        | 1345.302        | 1345.806        | 1344.798       | T[27] |
| P  | 18 | <b>913.440</b>  | 1302.787        | 1294.778        | 1295.282        | 1294.274       | P[26] |
| V  | 19 | 952.974         | 1254.261        | 1246.251        | 1246.755        | 1245.748       | V[25] |
| K  | 20 | <b>1027.822</b> | 1204.727        | 1196.717        | 1197.211        | 1196.211       | K[24] |
| K  | 21 | 1091.899        | 1140.679        | 1132.670        | <b>1133.174</b> | 1132.166       | K[23] |
| K  | 22 | <b>1155.117</b> | <b>1076.632</b> | <b>1068.622</b> | <b>1069.126</b> | 1068.118       | K[22] |
| A  | 23 | <b>1190.635</b> | <b>1012.584</b> | <b>1004.575</b> | <b>1005.079</b> | 1004.071       | A[21] |
| K  | 24 | <b>1254.683</b> | 977.056         | 969.050         | 969.549         | <b>968.552</b> | K[20] |
| K  | 25 | 1318.730        | 913.018         | <b>905.009</b>  | <b>905.513</b>  | 904.505        | K[19] |
| T  | 26 | <b>1369.254</b> | <b>848.971</b>  | <b>840.961</b>  | <b>841.465</b>  | 840.457        | T[18] |
| G  | 27 | <b>1397.765</b> | <b>798.447</b>  | <b>790.437</b>  | <b>790.941</b>  | <b>789.934</b> | G[17] |
| A  | 28 | 1433.284        | 769.938         | <b>761.927</b>  | <b>762.431</b>  | 761.423        | A[16] |
| A  | 29 | <b>1468.802</b> | 734.418         | <b>726.408</b>  | <b>726.912</b>  | 725.904        | A[15] |
| A  | 30 | 1504.321        | 698.899         | <b>690.890</b>  | <b>691.394</b>  | 690.386        | A[14] |
| G  | 31 | <b>1532.831</b> | <b>663.380</b>  | <b>655.371</b>  | <b>655.875</b>  | 654.867        | G[13] |
| R  | 32 | <b>1596.879</b> | <b>634.870</b>  | <b>626.860</b>  | <b>627.364</b>  | <b>626.356</b> | R[12] |
| R  | 33 | 1674.352        | 578.824         | <b>562.813</b>  | <b>563.317</b>  | 562.309        | R[11] |
| K  | 34 | 1738.977        | 492.772         | 484.762         | 485.266         | 484.258        | K[10] |
| A  | 35 | 1774.495        | 428.724         | 420.715         | 421.219         | 420.211        | A[9]  |
| S  | 36 | 1818.011        | 393.206         | 385.196         | 385.700         | 384.692        | S[8]  |
| G  | 37 | 1886.522        | 349.680         | 341.670         | 342.174         | 341.176        | G[7]  |
| P  | 38 | 1895.048        | 321.179         | 313.170         | 313.674         | 312.666        | P[6]  |
| P  | 39 | 1943.575        | 272.652         | 264.643         | 265.147         | 264.139        | P[5]  |
| V  | 40 | 1993.109        | 224.126         | 216.117         | 216.621         | 215.613        | V[4]  |
| S  | 41 | 2056.625        | 174.592         | 166.583         | 167.086         | 166.079        | S[3]  |
| E  | 42 | 2101.146        | 131.070         | 123.067         | 123.570         | 122.563        | E[2]  |
| L  | 43 | 2157.689        | 66.555          | 58.545          | 59.049          | 58.041         | L[1]  |

# sp | P43277 | H13\_MOUSE

[Acetyl]S<sup>(Phospho)</sup><sub>(79.97)</sub> ETAPAAPAAPAPVEKTPVKKKAKKTGAAAGKRKASGPPVSEL

- ▶ fragmentation table for charge state 3+
- ▶ specType=etd
- ▶ score=30.07
- ▶ F113669.dat
- ▶ query=q20079\_p1
- ▶ precursor=720.065550
- ▶ chargePrecursor=6
- ▶ itol=0.5

| AA | c  | y               | a+1             | a+2             | z              | AA              |       |
|----|----|-----------------|-----------------|-----------------|----------------|-----------------|-------|
| S  | 1  | 76.352          | 1439.123        | <b>1433.783</b> | 0.672          | <b>1433.447</b> | S[43] |
| E  | 3  | 119.387         | <b>1369.453</b> | 1364.214        | 0.672          | 1360.770        | E[42] |
| I  | 3  | 151.049         | 1326.432        | 1321.099        | 0.612          | 1320.761        | I[41] |
| A  | 4  | 178.728         | 1292.756        | 1287.417        | 0.672          | 1287.081        | A[40] |
| P  | 5  | 209.079         | 1269.077        | 1263.738        | 0.672          | 1263.400        | P[39] |
| A  | 6  | 232.758         | 1236.758        | 1231.397        | 0.672          | 1231.051        | A[38] |
| A  | 7  | 256.437         | 1213.047        | <b>1207.708</b> | 0.672          | 1207.372        | A[37] |
| P  | 8  | 288.788         | 1199.369        | <b>1184.029</b> | 0.672          | <b>1183.693</b> | P[36] |
| A  | 9  | 312.467         | 1157.017        | 1151.678        | 0.672          | 1151.342        | A[35] |
| A  | 10 | 336.146         | <b>1133.338</b> | 1127.999        | 0.672          | 1127.663        | A[34] |
| P  | 11 | 368.497         | 1109.659        | 1104.320        | 0.672          | 1103.984        | P[33] |
| A  | 12 | 392.176         | 1077.308        | 1071.969        | 0.672          | <b>1071.633</b> | A[32] |
| P  | 13 | 424.527         | 1053.629        | 1048.290        | 0.672          | 1047.954        | P[31] |
| V  | 14 | 457.550         | 1021.278        | 1015.939        | 0.672          | <b>1015.603</b> | V[30] |
| E  | 15 | 500.554         | 989.256         | 983.916         | 0.672          | 982.580         | E[29] |
| K  | 16 | 543.262         | 948.241         | 939.902         | 940.236        | 019.596         | K[28] |
| T  | 17 | 576.945         | 902.543         | <b>897.204</b>  | <b>897.539</b> | 896.868         | T[27] |
| P  | 18 | 609.296         | 869.861         | 863.521         | <b>863.857</b> | 863.189         | P[26] |
| V  | 19 | 642.219         | 836.510         | 831.170         | 831.506        | 830.834         | V[25] |
| K  | 20 | 685.017         | 803.461         | <b>798.147</b>  | <b>798.483</b> | <b>797.811</b>  | K[24] |
| K  | 21 | 727.715         | 760.160         | <b>755.449</b>  | <b>755.785</b> | 755.111         | K[23] |
| K  | 22 | 770.414         | 718.090         | <b>712.751</b>  | <b>713.087</b> | <b>712.415</b>  | K[22] |
| A  | 23 | 794.093         | <b>675.392</b>  | <b>670.052</b>  | <b>670.388</b> | 669.718         | A[21] |
| K  | 24 | 836.791         | 651.713         | <b>646.373</b>  | <b>646.709</b> | <b>646.037</b>  | K[20] |
| K  | 25 | <b>879.489</b>  | 609.015         | <b>603.675</b>  | <b>604.011</b> | <b>603.339</b>  | K[19] |
| T  | 26 | 923.172         | 566.310         | 560.971         | 561.313        | 560.641         | T[18] |
| G  | 27 | 932.179         | 532.834         | 527.494         | 527.836        | 526.956         | G[17] |
| A  | 28 | 955.858         | 513.626         | 508.287         | 508.623        | 507.951         | A[16] |
| A  | 29 | <b>979.537</b>  | 489.947         | 484.608         | 484.944        | 484.272         | A[15] |
| A  | 30 | 1003.216        | 466.268         | 460.929         | 461.265        | 460.593         | A[14] |
| G  | 31 | 1027.233        | 442.589         | 437.250         | 437.586        | 436.914         | G[13] |
| K  | 32 | <b>1064.922</b> | 423.583         | 418.243         | 418.579        | 417.907         | K[12] |
| R  | 33 | <b>1116.955</b> | 380.884         | 375.544         | 375.880        | 375.208         | R[11] |
| K  | 34 | <b>1159.654</b> | 328.850         | 323.511         | 323.847        | 323.175         | K[10] |
| A  | 35 | <b>1183.333</b> | 286.152         | 280.812         | 281.148        | 280.476         | A[9]  |
| S  | 36 | <b>1212.343</b> | 262.473         | 257.133         | 257.469        | 256.797         | S[8]  |
| G  | 37 | 1231.351        | 233.462         | 228.123         | 228.459        | 227.787         | G[7]  |
| P  | 38 | 1263.701        | 214.455         | 209.115         | 209.451        | 208.779         | P[6]  |
| P  | 39 | 1296.052        | 182.194         | 176.765         | 177.101        | 176.429         | P[5]  |
| V  | 40 | 1329.076        | 149.753         | 144.414         | 144.750        | 144.078         | V[4]  |
| S  | 41 | 1358.086        | 116.730         | 111.391         | 111.727        | 111.055         | S[3]  |
| E  | 42 | 1401.100        | 87.720          | 82.380          | 82.716         | 82.044          | E[2]  |
| L  | 43 | 1438.795        | 44.705          | 39.366          | 39.702         | 39.030          | L[1]  |

# sp | P43277 | H13\_MOUSE

[Acetyl]S<sup>(Phospho)</sup><sub>(79.97)</sub> ETAPAAPAAPAPVEKTPVKKKAKKTGAAAGKRKASGPPVSEL

- ▶ fragmentation table for charge state 4+
- ▶ specType=etd
- ▶ score=30.07
- ▶ F113669.dat
- ▶ query=q20079\_p1
- ▶ precursor=720.065550
- ▶ chargePrecursor=6
- ▶ itol=0.5

| AA | c  | y              | z+1             | z+2            | z       | AA             |       |
|----|----|----------------|-----------------|----------------|---------|----------------|-------|
| S  | 1  | 97.616         | 1079.594        | 1078.589       | 0.755   | 1078.337       | S[43] |
| E  | 2  | 89.777         | <b>1027.342</b> | 1023.337       | 0.755   | 1023.085       | E[42] |
| T  | 3  | 115.039        | 995.081         | 991.076        | 0.755   | 990.824        | T[41] |
| A  | 4  | 132.798        | <b>969.819</b>  | 965.814        | 0.755   | 965.562        | A[40] |
| P  | 5  | 157.081        | 927.062         | 923.055        | 0.755   | 922.803        | P[39] |
| A  | 6  | 174.820        | 927.797         | 923.792        | 0.755   | 923.540        | A[38] |
| A  | 7  | 192.580        | 910.037         | <b>906.033</b> | 0.755   | <b>905.781</b> | A[37] |
| P  | 8  | 216.843        | <b>892.278</b>  | <b>888.273</b> | 0.755   | <b>888.021</b> | P[36] |
| A  | 9  | 234.602        | 868.015         | <b>864.010</b> | 0.755   | <b>863.758</b> | A[35] |
| A  | 10 | 252.361        | 850.250         | 846.251        | 0.755   | 845.999        | A[34] |
| P  | 11 | 276.625        | <b>832.496</b>  | 828.492        | 0.755   | 828.240        | P[33] |
| A  | 12 | 294.384        | 808.233         | 804.228        | 0.755   | 803.976        | A[32] |
| T  | 13 | 318.687        | <b>790.474</b>  | 786.469        | 0.755   | 786.217        | T[31] |
| V  | 14 | 343.414        | 766.211         | <b>762.206</b> | 0.755   | <b>761.954</b> | V[30] |
| E  | 15 | 375.675        | 741.444         | 737.439        | 0.755   | 737.187        | E[29] |
| K  | 16 | 407.699        | 709.183         | 705.178        | 705.430 | 704.928        | K[28] |
| T  | 17 | 432.061        | 677.159         | 673.154        | 673.406 | 672.903        | T[27] |
| P  | 18 | 457.224        | 651.897         | 647.893        | 648.145 | 647.641        | P[26] |
| V  | 19 | 481.991        | <b>627.634</b>  | 623.629        | 623.881 | 623.377        | V[25] |
| K  | 20 | 514.015        | 602.867         | 598.862        | 599.114 | 598.610        | K[24] |
| K  | 21 | 548.038        | 570.843         | 566.839        | 567.090 | 566.587        | K[23] |
| K  | 22 | 578.062        | 538.810         | 534.815        | 535.067 | 534.563        | K[22] |
| A  | 23 | 595.821        | 506.796         | 502.791        | 503.043 | 502.539        | A[21] |
| K  | 24 | <b>627.845</b> | 489.038         | 485.032        | 485.284 | 484.780        | K[20] |
| K  | 25 | 659.869        | 457.013         | 453.008        | 453.260 | 452.756        | K[19] |
| T  | 26 | 685.131        | 424.989         | 420.984        | 421.236 | 420.732        | T[18] |
| G  | 27 | 699.386        | 399.727         | 395.722        | 395.974 | 395.470        | G[17] |
| A  | 28 | 717.145        | 385.472         | 381.467        | 381.719 | 381.215        | A[16] |
| A  | 29 | 734.905        | 367.712         | 363.706        | 363.958 | 363.454        | A[15] |
| A  | 30 | 752.664        | 349.951         | 345.946        | 346.200 | 345.695        | A[14] |
| G  | 31 | 766.919        | 332.194         | 328.188        | 328.441 | 327.937        | G[13] |
| K  | 32 | <b>798.943</b> | 317.938         | 313.934        | 314.186 | 313.682        | K[12] |
| K  | 33 | <b>837.968</b> | 285.915         | 281.910        | 282.162 | 281.658        | K[11] |
| K  | 34 | 869.992        | 246.889         | 242.885        | 243.137 | 242.633        | K[10] |
| A  | 35 | 887.751        | 214.868         | 210.861        | 211.113 | 210.609        | A[9]  |
| S  | 36 | 909.509        | 197.106         | 193.102        | 193.354 | 192.850        | S[8]  |
| G  | 37 | 923.765        | 175.348         | 171.344        | 171.596 | 171.092        | G[7]  |
| P  | 38 | 948.028        | 187.091         | 183.088        | 183.340 | 182.836        | P[6]  |
| P  | 39 | 972.291        | 158.830         | 154.825        | 155.077 | 154.573        | P[5]  |
| V  | 40 | 997.058        | 112.567         | 108.562        | 108.814 | 108.310        | V[4]  |
| S  | 41 | 1018.816       | 87.800          | 83.795         | 84.047  | 83.543         | S[3]  |
| E  | 42 | 1051.077       | 66.042          | 62.037         | 62.289  | 61.785         | E[2]  |
| L  | 43 | 1079.348       | 33.781          | 29.776         | 30.028  | 29.524         | L[1]  |

# sp | P43277 | H13\_MOUSE

[Acetyl]S<sup>(Phospho)</sup><sub>(79.97)</sub> ETAPAAPAAPAPVEKTPVKKKAKKTGAAAGKRKASGPPVSEL

- ▶ fragmentation table for charge state 5+
- ▶ specType=etd
- ▶ score=30.07
- ▶ F113669.dat
- ▶ query=q20079\_p1
- ▶ precursor=720.065550
- ▶ chargePrecursor=6
- ▶ itol=0.5

| AA | c  | y              | z+1            | z+2            | z     | AA             |   |    |
|----|----|----------------|----------------|----------------|-------|----------------|---|----|
| S  | 1  | 46.214         | <b>863.877</b> | <b>860.673</b> | 0.806 | 860.471        | S | 43 |
| E  | 2  | 72.023         | 822.075        | 818.871        | 0.806 | 818.669        | E | 42 |
| T  | 3  | 92.232         | 795.266        | <b>793.063</b> | 0.806 | 792.861        | T | 41 |
| A  | 4  | 106.440        | 776.057        | 772.853        | 0.806 | 772.651        | A | 40 |
| P  | 5  | 125.890        | <b>761.849</b> | 758.646        | 0.806 | 758.444        | P | 39 |
| A  | 6  | 140.058        | 742.439        | 739.235        | 0.806 | 739.033        | A | 38 |
| A  | 7  | 154.265        | 728.231        | 725.028        | 0.806 | 724.826        | A | 37 |
| P  | 8  | 173.676        | 714.024        | 710.820        | 0.806 | 710.619        | P | 36 |
| A  | 9  | 187.883        | 694.613        | <b>691.410</b> | 0.806 | <b>691.208</b> | A | 35 |
| A  | 10 | 202.091        | 680.406        | 677.202        | 0.806 | 677.001        | A | 34 |
| P  | 11 | 221.501        | 666.199        | 662.995        | 0.806 | 662.793        | P | 33 |
| A  | 12 | 235.709        | <b>646.788</b> | 643.584        | 0.806 | 643.383        | A | 32 |
| P  | 13 | 255.119        | 632.581        | 629.377        | 0.806 | 629.175        | P | 31 |
| V  | 14 | 274.933        | 613.170        | 609.966        | 0.806 | 609.765        | V | 30 |
| E  | 15 | 300.741        | 593.356        | 590.153        | 0.806 | 589.951        | E | 29 |
| K  | 16 | 326.360        | 567.548        | 564.344        | 0.806 | 564.142        | K | 28 |
| T  | 17 | 346.570        | 541.929        | 538.725        | 0.806 | 538.523        | T | 27 |
| P  | 18 | 365.980        | 521.719        | 518.516        | 0.806 | 518.314        | P | 26 |
| V  | 19 | 385.794        | 502.309        | 499.105        | 0.806 | 498.903        | V | 25 |
| K  | 20 | 411.413        | 482.495        | 479.291        | 0.806 | 479.090        | K | 24 |
| K  | 21 | 437.032        | 456.876        | 453.672        | 0.806 | 453.471        | K | 23 |
| K  | 22 | 462.651        | 431.257        | 428.053        | 0.806 | 427.852        | K | 22 |
| K  | 23 | 478.859        | 405.638        | 402.434        | 0.806 | 402.233        | K | 21 |
| K  | 24 | 502.478        | 391.431        | 388.227        | 0.806 | 388.026        | K | 20 |
| K  | 25 | 528.097        | 365.812        | 362.608        | 0.806 | 362.406        | K | 19 |
| T  | 26 | 548.306        | 340.193        | 336.989        | 0.806 | 336.787        | T | 18 |
| G  | 27 | 559.710        | 319.983        | 316.779        | 0.806 | 316.578        | G | 17 |
| A  | 28 | 573.918        | 308.579        | 305.375        | 0.806 | 305.173        | A | 16 |
| A  | 29 | 588.125        | 294.371        | 291.168        | 0.806 | 290.966        | A | 15 |
| A  | 30 | 602.333        | 280.164        | 276.960        | 0.806 | 276.759        | A | 14 |
| G  | 31 | 613.737        | 265.957        | 262.753        | 0.806 | 262.551        | G | 13 |
| K  | 32 | 639.356        | 234.302        | 231.098        | 0.806 | 230.896        | K | 12 |
| K  | 33 | <b>670.576</b> | 228.931        | 225.727        | 0.806 | 225.525        | K | 11 |
| K  | 34 | 695.195        | 197.713        | 194.509        | 0.806 | 194.308        | K | 10 |
| A  | 35 | 710.403        | 172.094        | 168.890        | 0.806 | 168.689        | A | 9  |
| S  | 36 | 727.809        | 157.887        | 154.683        | 0.806 | 154.481        | S | 8  |
| G  | 37 | 739.213        | 140.480        | 137.276        | 0.806 | 137.075        | G | 7  |
| P  | 38 | 758.624        | 129.076        | 125.872        | 0.806 | 125.671        | P | 6  |
| P  | 39 | 778.034        | 109.665        | 106.462        | 0.806 | 106.260        | P | 5  |
| V  | 40 | <b>797.848</b> | 90.255         | 87.051         | 0.806 | 86.849         | V | 4  |
| S  | 41 | 815.254        | 70.441         | 67.237         | 0.806 | 67.036         | S | 3  |
| E  | 42 | <b>841.063</b> | 53.035         | 49.831         | 0.806 | 49.629         | E | 2  |
| L  | 43 | <b>863.680</b> | 37.226         | 34.022         | 0.806 | 33.821         | L | 1  |



# sp | P62806 | H4\_MOUSE

[Acetyl]S<sup>Phospho</sup><sub>79.97</sub> GRGKGGKGL

- ▶ fragmentation table for charge state 1+
- ▶ specType=etd
- ▶ score=31.56
- ▶ F113669.dat
- ▶ query=q5831.p1
- ▶ precursor=519.758830
- ▶ chargePrecursor=2
- ▶ itol=0.5

| AA    | c              | y               | z+1             | z+2            | z        | AA    |
|-------|----------------|-----------------|-----------------|----------------|----------|-------|
| S[1]  | 227.041        | <b>1038.509</b> | <b>1022.490</b> | 0.000          | 1021.481 | S[10] |
| G[2]  | 284.084        | 629.500         | <b>813.482</b>  | 0.000          | 812.474  | G[9]  |
| R[3]  | 440.105        | 772.470         | <b>756.460</b>  | <b>757.468</b> | 755.452  | R[8]  |
| G[4]  | 497.187        | 616.378         | <b>600.359</b>  | 601.367        | 599.351  | G[7]  |
| K[5]  | <b>625.282</b> | 509.356         | 543.337         | <b>544.345</b> | 542.330  | K[6]  |
| G[6]  | 682.303        | 431.261         | 415.243         | 416.250        | 414.235  | G[5]  |
| G[7]  | 739.335        | 374.240         | 358.221         | 359.229        | 357.213  | G[4]  |
| K[8]  | <b>867.428</b> | 317.218         | 301.200         | 302.207        | 300.182  | K[3]  |
| G[9]  | <b>924.441</b> | 189.123         | 173.105         | 174.112        | 172.087  | G[2]  |
| L[10] | 1037.525       | 132.102         | 116.083         | 117.091        | 115.075  | L[1]  |

# sp | P15864 | H12\_MOUSE

LITK <sup>Acetyl</sup>AVAASKE  
42.01

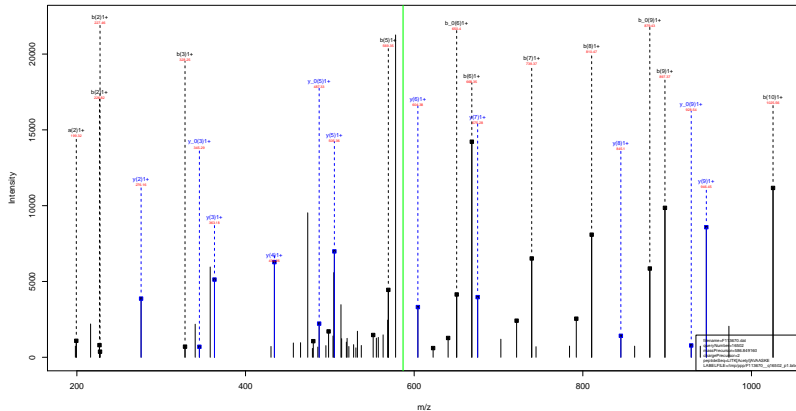



# sp | P15864 | H12\_MOUSE

LITK<sup>Acetyl</sup> AVAASKE  
42.01

- ▶ fragmentation table for charge state 1+
- ▶ specType=cid
- ▶ score=71.45
- ▶ F113670.dat
- ▶ query=q16502\_p1
- ▶ precursor=586.849160
- ▶ chargePrecursor=2
- ▶ itol=0.5

| AA  | a              | y <sup>a</sup> | a <sub>0</sub> | b               | b <sup>a</sup> | b <sub>0</sub> | y              | y <sup>a</sup> | y <sub>0</sub> | AA   |
|-----|----------------|----------------|----------------|-----------------|----------------|----------------|----------------|----------------|----------------|------|
| L11 | 88.298         | 0.025          | 0.000          | 132.295         | 0.000          | 0.000          | 117.280        | 1120.852       | 1154.878       | L111 |
| T12 | <b>159.180</b> | 0.043          | 0.000          | <b>227.175</b>  | 0.000          | 0.000          | 1208.894       | 1042.729       | 2044.964       | T02  |
| T13 | 300.578        | 0.059          | 282.211        | <b>328.231</b>  | 0.000          | 310.211        | <b>846.530</b> | 929.484        | <b>928.510</b> | T03  |
| K14 | 470.534        | 0.113          | 452.121        | <b>498.529</b>  | 481.302        | <b>480.318</b> | <b>845.473</b> | 828.444        | 827.462        | K16  |
| A15 | 643.314        | 0.164          | 625.166        | <b>563.366</b>  | 546.139        | <b>531.355</b> | <b>875.367</b> | 858.341        | 857.359        | A17  |
| V16 | <b>840.439</b> | 0.214          | <b>822.429</b> | <b>868.434</b>  | 851.408        | <b>850.424</b> | <b>864.338</b> | 849.304        | 848.321        | V18  |
| A17 | 1114.716       | 0.264          | 1097.469       | <b>738.471</b>  | 722.445        | <b>721.461</b> | <b>505.282</b> | 488.255        | <b>487.251</b> | A19  |
| A18 | 1382.513       | 0.314          | 1365.467       | 134.503         | <b>810.508</b> | 793.482        | <b>792.498</b> | <b>434.225</b> | 417.198        | A14  |
| S19 | 1669.948       | 0.373          | 1652.933       | <b>891.548</b>  | 874.524        | <b>873.530</b> | <b>361.187</b> | 344.161        | <b>345.177</b> | S11  |
| R10 | 1897.840       | 0.403          | 1879.834       | <b>1025.635</b> | 1008.609       | 1007.625       | <b>276.155</b> | 259.129        | 258.145        | R12  |
| E11 | 1124.683       | 1.028          | 1108.671       | 1154.676        | 1137.651       | 1136.667       | 148.600        | 0.000          | 130.600        | E11  |

# sp | P15864 | H12\_MOUSE

LITK <sup>Acetyl</sup> 42.01 AVAASKE

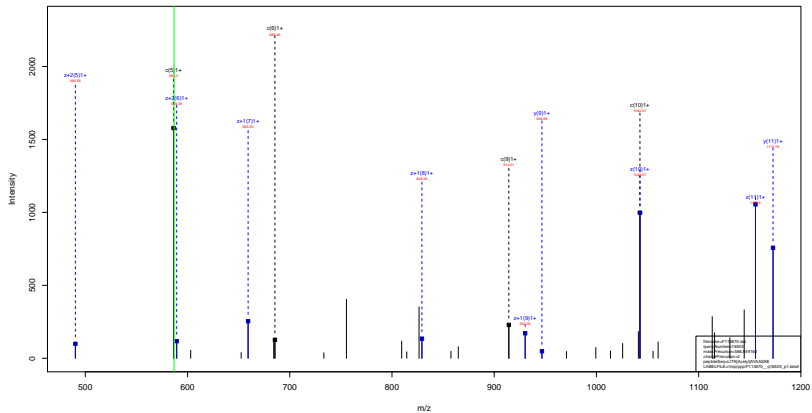

# sp | P15864 | H12\_MOUSE

LITK<sup>Acetyl</sup> AVAASKE  
42.01

- ▶ fragmentation table for charge state 1+
- ▶ specType=etd
- ▶ score=28.06
- ▶ F113670.dat
- ▶ query=q16503\_p1
- ▶ precursor=586.849160
- ▶ chargePrecursor=2
- ▶ itol=0.5

| AA    | c               | y               | z+1            | z+2            | z               | AA    |
|-------|-----------------|-----------------|----------------|----------------|-----------------|-------|
| L[1]  | 131.118         | <b>1172.689</b> | 1156.670       | 0.000          | <b>1155.662</b> | L[11] |
| I[2]  | 244.202         | 1059.604        | 1043.586       | 0.000          | <b>1042.578</b> | I[10] |
| T[3]  | 345.250         | <b>946.520</b>  | <b>930.502</b> | 0.000          | 929.494         | T[9]  |
| K[4]  | 513.209         | 845.473         | <b>829.454</b> | 830.462        | 828.446         | K[8]  |
| A[5]  | <b>536.392</b>  | 675.367         | <b>659.348</b> | 660.356        | 658.341         | A[7]  |
| V[6]  | <b>655.461</b>  | 606.330         | 595.311        | <b>589.319</b> | 587.305         | V[6]  |
| A[7]  | 756.498         | 505.262         | 489.243        | <b>490.251</b> | 488.235         | A[5]  |
| A[8]  | 827.535         | 434.225         | 418.206        | 419.214        | 417.195         | A[4]  |
| S[9]  | <b>914.567</b>  | 363.187         | 347.169        | 348.177        | 346.161         | S[3]  |
| K[10] | <b>1042.662</b> | 276.153         | 260.137        | 261.144        | 259.129         | K[2]  |
| E[11] | 1171.795        | 148.080         | 132.062        | 133.070        | 131.054         | E[1]  |

# sp | Q8R1M2 | H2AJ\_MOUSE

SQKVKSK Acetyl  
42.01

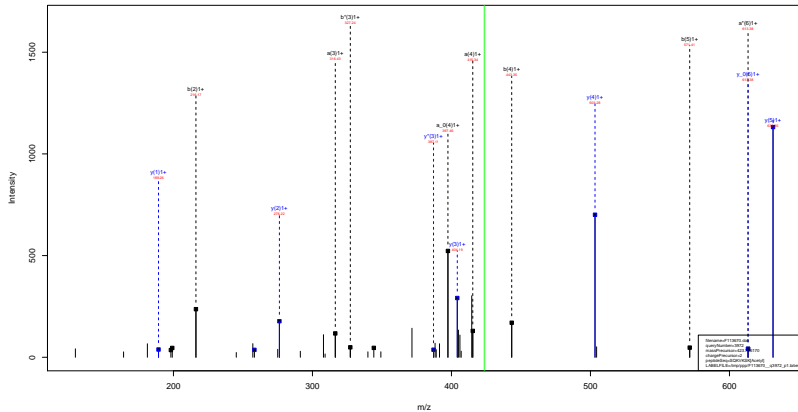

# sp | Q8R1M2 | H2AJ\_MOUSE

SQKVKSK <sup>Acetyl</sup>  
42.01

- ▶ fragmentation table for charge state 1+
- ▶ specType=cid
- ▶ score=38.75
- ▶ F113670.dat
- ▶ query=q3972.p1
- ▶ precursor=423.756170
- ▶ chargePrecursor=2
- ▶ itol=0.5

| AA   | a              | a*             | a $\beta$      | b              | b*             | b $\beta$      | y              | y*             | y $\beta$      | AA   |
|------|----------------|----------------|----------------|----------------|----------------|----------------|----------------|----------------|----------------|------|
| S(1) | 60.944         | 0.000          | 42.039         | 89.070         | 0.000          | 10.029         | 486.509        | 629.476        | 628.494        | S(1) |
| Q(2) | 158.103        | 171.076        | 170.082        | <b>216.090</b> | <b>199.071</b> | <b>198.067</b> | 750.472        | 742.440        | 741.462        | Q(2) |
| R(3) | <b>316.190</b> | 309.171        | 289.189        | <b>344.193</b> | <b>327.166</b> | 328.170        | <b>631.414</b> | 644.389        | <b>613.403</b> | R(3) |
| V(4) | <b>415.266</b> | 399.260        | <b>397.256</b> | <b>443.263</b> | 426.258        | 425.252        | <b>503.319</b> | 486.292        | 485.288        | V(4) |
| K(5) | 543.361        | 536.339        | 526.351        | <b>571.356</b> | 554.330        | 553.346        | <b>404.290</b> | <b>387.224</b> | 386.240        | K(5) |
| S(6) | 630.393        | <b>613.367</b> | 612.383        | 658.389        | 641.362        | 640.378        | <b>276.155</b> | 259.120        | <b>258.145</b> | S(2) |
| R(7) | 809.409        | 783.412        | 782.400        | 828.404        | 811.401        | 810.403        | <b>189.123</b> | 172.080        | 0.000          | R(1) |

# sp | Q8R1M2 | H2AJ\_MOUSE

SQKVKSK Acetyl  
42.01

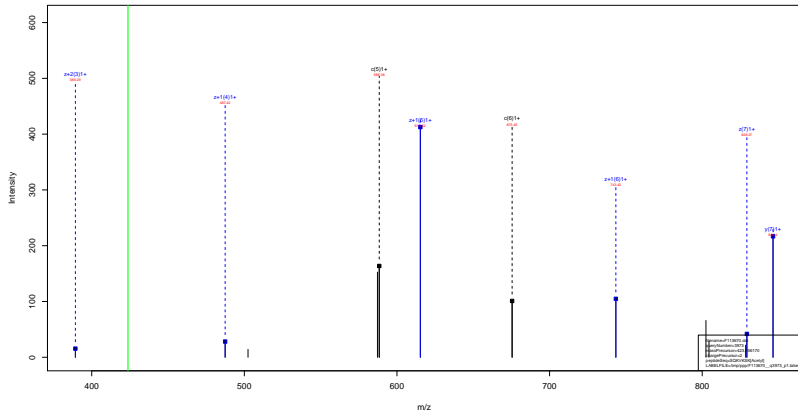

# sp | Q8R1M2 | H2AJ\_MOUSE

SQKVKSK <sup>Acetyl</sup>  
42.01

- ▶ fragmentation table for charge state 1+
- ▶ specType=etd
- ▶ score=24.34
- ▶ F113670.dat
- ▶ query=q3973.p1
- ▶ precursor=423.756170
- ▶ chargePrecursor=2
- ▶ itol=0.5

| AA   | c              | y              | z+1            | z+2            | z              | AA   |
|------|----------------|----------------|----------------|----------------|----------------|------|
| S[1] | 105.066        | <b>846.504</b> | 630.486        | 0.000          | <b>829.478</b> | S[7] |
| Q[2] | 233.124        | 759.572        | <b>743.454</b> | 744.851        | 742.445        | Q[6] |
| K[3] | 351.219        | 631.414        | <b>615.395</b> | 616.403        | 614.387        | K[5] |
| V[4] | 450.288        | 503.319        | <b>487.300</b> | 488.308        | 486.292        | V[4] |
| K[5] | <b>588.383</b> | 404.250        | 388.232        | <b>389.239</b> | 387.224        | K[3] |
| S[6] | <b>675.415</b> | 276.155        | 260.137        | 261.144        | 259.129        | S[2] |
| K[7] | 845.520        | 189.123        | 173.105        | 174.112        | 172.097        | K[1] |





# sp | Q8CGP1 | H2B1K\_MOUSE

LAKHAVSEGTK <sup>Acetyl</sup>42.01 AVTK <sup>Acetyl</sup>42.01 YTSAK

- ▶ fragmentation table for charge state 1+
- ▶ specType=etd
- ▶ score=25.51
- ▶ F113670.dat
- ▶ query=q41619\_p1
- ▶ precursor=544.301350
- ▶ chargePrecursor=4
- ▶ itol=0.5

| AA    | c               | y               | z+1             | z+2             | z        | AA    |
|-------|-----------------|-----------------|-----------------|-----------------|----------|-------|
| L[1]  | 131.119         | 2174.182        | 2158.163        | 0.000           | 2157.155 | L[20] |
| A[2]  | 202.155         | 2061.097        | 2045.079        | 0.000           | 2044.071 | A[19] |
| K[3]  | <b>330.250</b>  | <b>1990.060</b> | 1974.042        | 1975.049        | 1973.034 | K[18] |
| H[4]  | <b>467.309</b>  | 1861.965        | <b>1845.947</b> | 1846.955        | 1844.939 | H[17] |
| A[5]  | 538.346         | 1724.907        | 1708.889        | <b>1709.896</b> | 1707.880 | A[16] |
| V[6]  | <b>637.414</b>  | 1652.860        | 1637.851        | 1638.858        | 1636.843 | V[15] |
| S[7]  | <b>724.446</b>  | 1554.803        | <b>1538.782</b> | 1539.790        | 1537.774 | S[14] |
| E[8]  | 853.489         | 1467.750        | 1451.750        | <b>1452.758</b> | 1450.742 | E[13] |
| G[9]  | 910.510         | 1338.728        | 1322.708        | 1323.715        | 1321.700 | G[12] |
| Y[10] | 1011.558        | 1281.705        | 1265.689        | 1266.694        | 1264.678 | Y[11] |
| K[11] | 1181.664        | 1180.657        | 1164.638        | 1165.646        | 1163.631 | K[10] |
| A[12] | 1252.701        | 1010.552        | 994.533         | 995.541         | 993.525  | A[9]  |
| V[13] | 1351.709        | 939.515         | <b>923.496</b>  | 924.504         | 922.488  | V[8]  |
| T[14] | <b>1452.817</b> | 840.446         | 824.427         | 825.435         | 823.420  | T[7]  |
| K[15] | 1622.922        | <b>739.398</b>  | 723.380         | <b>724.388</b>  | 722.372  | K[6]  |
| Y[16] | 1785.986        | <b>569.293</b>  | 553.274         | 554.282         | 552.266  | Y[5]  |
| T[17] | 1867.033        | <b>406.230</b>  | 390.211         | 391.219         | 389.203  | T[4]  |
| S[18] | 1974.085        | <b>305.182</b>  | 289.163         | 290.171         | 288.155  | S[3]  |
| A[19] | 2045.103        | <b>218.150</b>  | 202.131         | 203.139         | 201.123  | A[2]  |
| K[20] | 2173.198        | 147.111         | 131.094         | 132.102         | 130.086  | K[1]  |

# sp | Q8CGP1 | H2B1K\_MOUSE

LAKHAVSEGTK <sup>Acetyl</sup>42.01 AVTK <sup>Acetyl</sup>42.01 YTSAK

- ▶ fragmentation table for charge state 2+
- ▶ specType=etd
- ▶ score=25.51
- ▶ F113670.dat
- ▶ query=q41619\_p1
- ▶ precursor=544.301350
- ▶ chargePrecursor=4
- ▶ itol=0.5

| AA    | c               | y               | z+1             | z+2            | z              | AA    |
|-------|-----------------|-----------------|-----------------|----------------|----------------|-------|
| L[1]  | 66.063          | <b>1087.594</b> | <b>1079.585</b> | 0.504          | 1079.081       | L[20] |
| A[2]  | 101.581         | 1031.052        | <b>1023.043</b> | 0.504          | 1022.539       | A[19] |
| K[3]  | 165.609         | 995.534         | <b>987.524</b>  | <b>988.028</b> | 987.021        | K[18] |
| H[4]  | 234.158         | 931.480         | <b>923.477</b>  | <b>923.981</b> | 922.973        | H[17] |
| A[5]  | 269.677         | 882.957         | <b>854.948</b>  | <b>855.451</b> | 854.444        | A[16] |
| V[6]  | 319.211         | 827.438         | 819.429         | 819.933        | 818.925        | V[15] |
| S[7]  | 362.727         | 777.904         | <b>769.895</b>  | <b>770.399</b> | 769.391        | S[14] |
| E[8]  | 427.248         | <b>734.389</b>  | 726.379         | 726.883        | <b>725.875</b> | E[13] |
| G[9]  | 455.759         | 669.867         | 661.857         | 662.361        | 661.354        | G[12] |
| T[10] | 506.283         | 641.350         | 613.347         | 613.851        | 612.843        | T[11] |
| K[11] | 591.335         | 590.832         | <b>582.823</b>  | <b>583.327</b> | 582.319        | K[10] |
| A[12] | 626.854         | 505.770         | 497.760         | 498.264        | 497.256        | A[9]  |
| V[13] | 676.388         | 470.261         | 462.252         | 462.756        | 461.748        | V[9]  |
| T[14] | 726.912         | 426.727         | 412.717         | 413.221        | 412.213        | T[7]  |
| R[15] | <b>811.965</b>  | 370.203         | 362.194         | 362.697        | 361.690        | R[6]  |
| V[16] | 893.497         | 285.150         | 277.141         | 277.645        | 276.637        | V[5]  |
| T[17] | 944.020         | 203.618         | 195.609         | 196.113        | 195.105        | T[4]  |
| S[18] | <b>987.536</b>  | 153.095         | 145.085         | 145.589        | 144.581        | S[3]  |
| A[19] | <b>1023.055</b> | 109.579         | 101.569         | 102.073        | 101.065        | A[2]  |
| R[20] | <b>1087.102</b> | 74.060          | 66.051          | 66.555         | 65.547         | R[1]  |

# sp | Q8CGP1 | H2B1K\_MOUSE

LAKHAVSEGTK <sup>Acetyl</sup>42.01 AVTK <sup>Acetyl</sup>42.01 YTSAK

- ▶ fragmentation table for charge state 3+
- ▶ specType=etd
- ▶ score=25.51
- ▶ F113670.dat
- ▶ query=q41619\_p1
- ▶ precursor=544.301350
- ▶ chargePrecursor=4
- ▶ itol=0.5

| AA    | c              | y              | z+1            | z+2     | z              | AA    |
|-------|----------------|----------------|----------------|---------|----------------|-------|
| L[1]  | 44.377         | <b>725.399</b> | <b>720.059</b> | 0.672   | <b>719.723</b> | L[20] |
| A[2]  | 68.057         | 687.704        | <b>682.364</b> | 0.672   | 682.029        | A[19] |
| K[3]  | 110.730        | 694.025        | 696.085        | 699.021 | 696.349        | K[18] |
| H[4]  | 158.441        | 621.327        | 615.987        | 616.323 | 615.251        | H[17] |
| A[5]  | 180.120        | 575.640        | 570.301        | 570.637 | 569.985        | A[16] |
| V[6]  | 213.143        | 551.961        | 546.622        | 546.958 | 546.286        | V[15] |
| S[7]  | 242.154        | 518.939        | 513.599        | 513.935 | 513.263        | S[14] |
| E[8]  | 285.168        | 489.928        | 484.588        | 484.924 | 484.252        | E[13] |
| G[9]  | 304.175        | 446.914        | 441.574        | 441.910 | 441.238        | G[12] |
| T[10] | 337.858        | 427.906        | <b>422.567</b> | 422.903 | <b>422.231</b> | T[11] |
| K[11] | 394.559        | 394.224        | 388.884        | 389.220 | 388.548        | K[10] |
| A[12] | 418.238        | 337.522        | 332.183        | 332.518 | 331.847        | A[9]  |
| V[13] | 451.261        | 313.843        | 308.503        | 308.839 | 308.168        | V[8]  |
| T[14] | 484.944        | 289.525        | 275.483        | 275.817 | 275.145        | T[7]  |
| K[15] | 541.646        | 247.139        | 241.798        | 242.134 | 241.462        | K[6]  |
| V[16] | 596.000        | 190.436        | 185.096        | 185.432 | 184.760        | V[5]  |
| T[17] | 629.683        | 136.081        | 130.742        | 131.078 | 130.406        | T[4]  |
| S[18] | 658.693        | 102.399        | 97.059         | 97.395  | 96.723         | S[3]  |
| A[19] | <b>682.372</b> | 73.388         | 68.049         | 68.385  | 67.713         | A[2]  |
| K[20] | <b>725.071</b> | 49.709         | 44.370         | 44.705  | 44.034         | K[1]  |



# sp | Q6ZWY9 | H2B1C\_MOUSE

PEPAKSAPAPKK <sup>Acetyl</sup><sub>42.01</sub> GSKKAVTKAQKKD

- ▶ fragmentation table for charge state 1+
- ▶ specType=etd
- ▶ score=67.38
- ▶ F113670.dat
- ▶ query=q46975.p1
- ▶ precursor=527.308570
- ▶ chargePrecursor=5
- ▶ itol=0.5

| AA | c               | y              | z+1             | z+2             | z        | AA    |
|----|-----------------|----------------|-----------------|-----------------|----------|-------|
| P  | 115.087         | 2032.518       | 2018.495        | 0.000           | 2018.485 | P[25] |
| E  | 244.129         | 2535.462       | 2519.443        | 0.000           | 2519.431 | E[24] |
| P  | <b>341.182</b>  | 2906.415       | 2390.400        | 0.000           | 2389.393 | P[23] |
| A  | 412.219         | 2309.366       | 2293.348        | 0.000           | 2292.340 | A[22] |
| K  | <b>540.314</b>  | 2238.329       | 2222.311        | 2223.318        | 2221.303 | K[21] |
| S  | <b>627.346</b>  | 2110.234       | 2094.216        | 2095.223        | 2093.208 | S[20] |
| A  | <b>698.383</b>  | 2023.202       | 2007.184        | 2008.191        | 2006.176 | A[19] |
| P  | <b>795.436</b>  | 1952.166       | 1936.148        | 1937.154        | 1935.139 | P[18] |
| A  | <b>866.473</b>  | 1855.112       | 1839.094        | 1840.101        | 1838.086 | A[17] |
| P  | 903.526         | 1784.075       | 1768.057        | 1769.064        | 1767.049 | P[16] |
| K  | <b>1091.621</b> | 1687.022       | 1671.004        | 1672.012        | 1669.996 | K[15] |
| K  | 1261.726        | 1558.928       | <b>1542.909</b> | 1543.917        | 1541.901 | K[14] |
| G  | 1318.748        | 1388.822       | 1372.803        | <b>1373.811</b> | 1371.795 | G[13] |
| S  | 1409.780        | 1331.801       | 1315.782        | <b>1316.790</b> | 1314.774 | S[12] |
| K  | 1533.875        | 1244.768       | 1228.750        | 1229.758        | 1227.742 | K[11] |
| K  | 1601.970        | 1118.674       | <b>1100.655</b> | <b>1101.663</b> | 1099.647 | K[10] |
| A  | 1733.007        | 988.579        | <b>972.560</b>  | <b>973.568</b>  | 971.552  | A[9]  |
| V  | 1832.075        | <b>917.541</b> | 901.523         | 902.531         | 900.515  | V[8]  |
| T  | 1933.123        | <b>818.473</b> | <b>802.454</b>  | 803.462         | 801.446  | T[7]  |
| I  | 2093.218        | <b>717.425</b> | <b>701.407</b>  | 702.414         | 700.399  | I[6]  |
| A  | 2132.255        | 595.330        | <b>573.312</b>  | <b>574.320</b>  | 572.304  | A[5]  |
| Q  | 2260.314        | 518.293        | <b>502.275</b>  | 503.282         | 501.267  | Q[4]  |
| K  | 2388.409        | 400.235        | <b>374.216</b>  | <b>375.224</b>  | 373.208  | K[3]  |
| K  | 2516.504        | 282.140        | <b>246.121</b>  | 247.129         | 245.113  | K[2]  |
| D  | 2631.530        | 134.045        | 118.028         | 119.034         | 117.018  | D[1]  |

# sp | Q6ZWY9 | H2B1C\_MOUSE

PEPAKSAPAPKK <sup>Acetyl</sup><sub>42.01</sub> GSKKAVTKAQKKD

- ▶ fragmentation table for charge state 2+
- ▶ specType=etd
- ▶ score=67.38
- ▶ F113670.dat
- ▶ query=q46975.p1
- ▶ precursor=527.308570
- ▶ chargePrecursor=5
- ▶ itol=0.5

| AA   | c               | y               | z+1             | z+2             | z              | AA   |
|------|-----------------|-----------------|-----------------|-----------------|----------------|------|
| P 1  | 58.047          | <b>1316.761</b> | 1388.752        | 0.504           | 1308.248       | P 25 |
| E 2  | 132.588         | 1388.234        | 1288.235        | 0.504           | 1299.721       | E 24 |
| P 3  | 171.095         | 1201.713        | 1195.704        | 0.504           | 1195.200       | P 23 |
| A 4  | 206.613         | 1155.187        | 1147.177        | 0.504           | 1146.674       | A 22 |
| K 5  | 270.661         | <b>1119.668</b> | <b>1111.659</b> | <b>1112.163</b> | 1111.155       | K 21 |
| S 6  | 314.177         | <b>1055.621</b> | <b>1047.611</b> | <b>1048.115</b> | 1047.107       | S 20 |
| A 7  | 349.695         | 1012.105        | 1004.095        | <b>1004.599</b> | 1003.591       | A 19 |
| F 8  | 389.222         | 976.588         | 968.574         | 969.041         | 968.041        | F 18 |
| A 9  | 433.740         | 928.060         | <b>920.050</b>  | <b>920.554</b>  | <b>919.547</b> | A 17 |
| P 10 | 482.267         | 892.541         | 884.532         | 885.036         | 884.038        | P 16 |
| K 11 | <b>546.314</b>  | 844.015         | <b>836.006</b>  | <b>836.509</b>  | 835.500        | K 15 |
| K 12 | <b>631.367</b>  | <b>779.967</b>  | <b>771.958</b>  | <b>772.462</b>  | <b>771.454</b> | K 14 |
| Q 13 | 677.727         | <b>694.915</b>  | <b>686.905</b>  | <b>687.409</b>  | 686.401        | Q 13 |
| S 14 | <b>703.194</b>  | 656.404         | 648.395         | <b>658.898</b>  | 657.891        | S 12 |
| K 15 | <b>767.441</b>  | 622.888         | <b>614.879</b>  | <b>615.382</b>  | 614.375        | K 11 |
| K 16 | <b>831.488</b>  | <b>558.840</b>  | <b>550.831</b>  | <b>551.335</b>  | 550.327        | K 10 |
| A 17 | <b>867.007</b>  | 604.797         | <b>486.784</b>  | <b>487.287</b>  | 486.280        | A 9  |
| V 18 | 910.541         | <b>459.274</b>  | 451.265         | 451.769         | 450.761        | V 8  |
| T 19 | <b>967.065</b>  | 389.743         | 401.733         | 402.235         | 401.227        | T 7  |
| K 20 | <b>1031.113</b> | 359.218         | 351.207         | 351.711         | 350.703        | K 6  |
| A 21 | <b>1066.631</b> | 295.169         | 287.159         | 287.663         | 286.656        | A 5  |
| Q 22 | <b>1130.660</b> | 259.650         | 251.641         | 252.145         | 251.137        | Q 4  |
| K 23 | <b>1194.708</b> | 195.621         | 187.612         | 188.116         | 187.108        | K 3  |
| K 24 | <b>1258.755</b> | 131.574         | 123.564         | 124.068         | 123.060        | K 2  |
| D 25 | 1338.289        | 87.528          | 89.517          | 88.021          | 89.013         | D 1  |

# sp | Q6ZWY9 | H2B1C\_MOUSE

PEPAKSAPAPKK <sup>Acetyl</sup><sub>42.01</sub> GSKKAVTKAQKKD

- ▶ fragmentation table for charge state 3+
- ▶ specType=etd
- ▶ score=67.38
- ▶ F113670.dat
- ▶ query=q46975.p1
- ▶ precursor=527.308570
- ▶ chargePrecursor=5
- ▶ itol=0.5

| AA    | c              | y              | z+1            | z+2            | z              | AA    |
|-------|----------------|----------------|----------------|----------------|----------------|-------|
| P[1]  | 38.034         | <b>878.176</b> | <b>872.837</b> | 0.672          | <b>872.501</b> | P[25] |
| E[2]  | 82.048         | 845.825        | <b>840.486</b> | 0.672          | <b>840.150</b> | E[24] |
| P[3]  | 114.399        | <b>802.811</b> | <b>797.472</b> | 0.672          | <b>797.136</b> | P[23] |
| A[4]  | 138.078        | 770.460        | <b>765.121</b> | 0.672          | 764.785        | A[22] |
| K[5]  | 180.776        | <b>746.781</b> | <b>741.442</b> | <b>741.778</b> | 741.106        | K[21] |
| S[6]  | 209.187        | <b>704.083</b> | <b>698.743</b> | <b>699.019</b> | 698.407        | S[20] |
| A[7]  | 211.668        | 675.072        | <b>669.733</b> | <b>670.069</b> | <b>669.397</b> | A[19] |
| P[8]  | 265.817        | 651.393        | 645.054        | 646.390        | 645.718        | P[18] |
| A[9]  | 289.496        | <b>619.042</b> | <b>613.703</b> | <b>614.039</b> | <b>613.367</b> | A[17] |
| P[10] | 321.847        | 595.363        | 590.024        | 590.360        | 589.688        | P[16] |
| K[11] | 364.545        | 563.012        | <b>557.673</b> | <b>558.009</b> | 557.337        | K[15] |
| K[12] | 421.247        | 520.314        | 514.974        | 515.310        | 514.639        | K[14] |
| G[13] | 440.254        | 463.612        | 458.273        | 458.609        | 457.937        | G[13] |
| S[14] | 469.265        | 444.605        | 439.263        | 439.601        | 438.930        | S[12] |
| K[15] | 513.963        | 415.394        | 410.253        | 410.591        | 409.919        | K[11] |
| K[16] | 554.051        | 372.896        | 367.555        | <b>367.892</b> | 367.221        | K[10] |
| A[17] | 578.540        | 330.198        | 324.858        | 325.194        | 324.522        | A[9]  |
| V[18] | <b>611.363</b> | 306.519        | 301.179        | 301.515        | 300.843        | V[8]  |
| T[19] | <b>645.046</b> | 273.496        | 268.156        | 268.492        | 267.820        | T[7]  |
| K[20] | <b>687.744</b> | 239.813        | 234.474        | 234.810        | 234.138        | K[6]  |
| A[21] | <b>711.423</b> | 197.115        | 191.775        | 192.111        | 191.439        | A[5]  |
| Q[22] | <b>754.109</b> | 173.436        | 168.096        | 168.432        | 167.760        | Q[4]  |
| K[23] | <b>796.808</b> | 130.750        | 125.410        | 125.746        | 125.074        | K[3]  |
| K[24] | <b>839.506</b> | 88.051         | 82.712         | 83.048         | 82.376         | K[2]  |
| D[25] | 877.946        | 45.353         | 40.014         | 40.349         | 39.678         | D[1]  |

# sp | Q6ZWY9 | H2B1C\_MOUSE

PEPAKSAPAPKK <sup>Acetyl</sup><sub>42.01</sub> GSKKAVTKAQKKD

- ▶ fragmentation table for charge state 4+
- ▶ specType=etd
- ▶ score=67.38
- ▶ F113670.dat
- ▶ query=q46975.p1
- ▶ precursor=527.308570
- ▶ chargePrecursor=5
- ▶ itol=0.5

| AA |    | c              | y              | z+1            | z+2     | z              | AA   |
|----|----|----------------|----------------|----------------|---------|----------------|------|
| P  | 1  | 29.527         | <b>658.884</b> | <b>654.879</b> | 0.755   | <b>654.627</b> | P 25 |
| E  | 2  | 61.788         | 634.621        | <b>630.616</b> | 0.755   | <b>630.364</b> | E 24 |
| P  | 3  | 86.051         | 602.360        | 598.356        | 0.755   | 598.104        | P 23 |
| A  | 4  | 103.810        | 578.097        | <b>574.092</b> | 0.755   | <b>573.840</b> | A 22 |
| K  | 5  | 135.834        | 460.338        | 396.333        | 396.585 | 396.081        | K 21 |
| S  | 6  | 157.592        | 328.314        | 324.309        | 324.561 | 324.287        | S 20 |
| A  | 7  | 175.351        | 308.556        | <b>502.551</b> | 502.803 | <b>502.299</b> | A 19 |
| P  | 8  | 199.614        | 488.797        | 484.792        | 485.044 | 484.540        | P 18 |
| A  | 9  | 217.374        | 464.534        | 460.529        | 460.781 | 460.277        | A 17 |
| P  | 10 | 241.637        | 446.774        | 442.770        | 443.022 | 442.518        | P 16 |
| K  | 11 | 273.661        | 422.511        | 418.506        | 418.758 | 418.254        | K 15 |
| K  | 12 | 316.187        | 390.487        | 386.483        | 386.735 | 386.231        | K 14 |
| G  | 13 | 330.442        | 347.961        | 343.956        | 344.208 | 343.704        | G 13 |
| S  | 14 | 352.200        | 333.706        | 329.701        | 329.953 | 329.449        | S 12 |
| K  | 15 | 384.224        | 311.948        | 307.943        | 308.195 | 307.691        | K 11 |
| K  | 16 | 416.248        | 279.923        | 275.919        | 276.171 | 275.667        | K 10 |
| A  | 17 | 434.007        | 247.900        | 243.895        | 244.147 | 243.643        | A 9  |
| V  | 18 | 458.774        | 230.141        | 226.136        | 226.388 | 225.884        | V 8  |
| T  | 19 | 484.036        | 205.974        | 201.969        | 201.621 | 201.117        | T 7  |
| K  | 20 | 516.060        | 180.112        | 176.107        | 176.359 | 175.855        | K 6  |
| A  | 21 | 533.819        | 148.088        | 144.083        | 144.335 | 143.831        | A 5  |
| Q  | 22 | 565.834        | 130.329        | 126.324        | 126.576 | 126.072        | Q 4  |
| K  | 23 | 597.858        | 98.314         | 94.309         | 94.561  | 94.057         | K 3  |
| K  | 24 | <b>629.881</b> | 66.290         | 62.286         | 62.538  | 62.034         | K 2  |
| D  | 25 | 658.638        | 34.267         | 30.262         | 30.514  | 30.010         | D 1  |



# sp | Q64525 | H2B2B\_MOUSE

PDKASAPAPKK Acetyl GSK Acetyl K Acetyl AVTKVQKKD  
 42.01 42.01 42.01

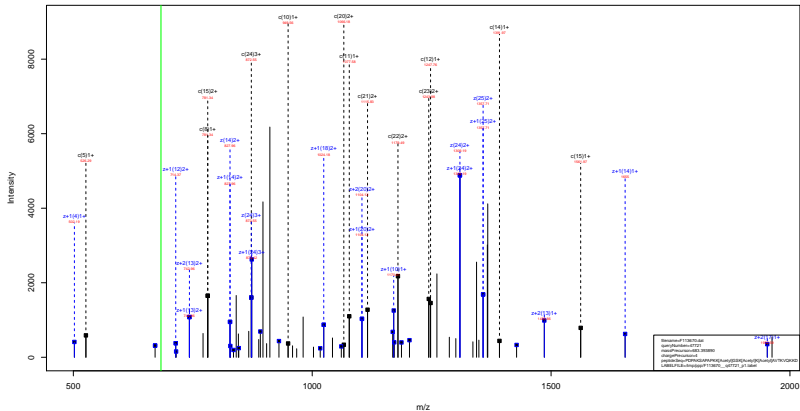

Sequence: P112620\_006  
 Gene: H2B2B\_MOUSE  
 UniProt: P112620\_006  
 RefSeq: NM\_010550.4  
 UniProt: P112620\_006  
 UniProt: P112620\_006

# sp | Q64525 | H2B2B\_MOUSE

PDKAKSAPAPKK <sup>Acetyl</sup>42.01 GSK <sup>Acetyl</sup>42.01 K <sup>Acetyl</sup>42.01 AVTKVQKKD

- ▶ fragmentation table for charge state 1+
- ▶ specType=etd
- ▶ score=44.66
- ▶ F113670.dat
- ▶ query=q47721\_p1
- ▶ precursor=683.393890
- ▶ chargePrecursor=4
- ▶ itol=0.5

| AA | c  | y               | z+1             | z+2             | z               | AA       |       |
|----|----|-----------------|-----------------|-----------------|-----------------|----------|-------|
| P  | 1  | 115.087         | 2730.551        | 2714.533        | 0.000           | 2711.525 | P[25] |
| D  | 3  | 230.114         | 2833.498        | 2817.480        | 0.000           | 2810.472 | D[24] |
| P  | 3  | 327.168         | 2519.472        | 2502.453        | 0.000           | 2501.445 | P[23] |
| A  | 4  | 398.203         | 2421.410        | 2405.400        | 0.000           | 2404.392 | A[22] |
| K  | 5  | <b>526.298</b>  | 2350.382        | 2334.363        | 2335.371        | 2333.355 | K[21] |
| S  | 6  | 613.330         | 2222.397        | 2206.288        | 2207.276        | 2205.360 | S[20] |
| A  | 7  | 684.369         | 2135.295        | 2119.236        | 2120.244        | 2118.228 | A[19] |
| P  | 8  | <b>781.420</b>  | 2084.219        | 2068.199        | 2069.207        | 2067.191 | P[18] |
| A  | 9  | 852.457         | 1997.162        | 1981.146        | <b>1952.154</b> | 1950.138 | A[17] |
| P  | 10 | <b>949.510</b>  | 1896.128        | 1880.109        | 1881.117        | 1879.101 | P[16] |
| K  | 11 | <b>1077.605</b> | 1799.075        | 1783.056        | 1784.064        | 1782.048 | K[15] |
| K  | 12 | <b>1247.711</b> | 1670.980        | <b>1654.961</b> | 1655.969        | 1653.953 | K[14] |
| G  | 13 | 1307.732        | 1590.873        | 1584.857        | <b>1485.864</b> | 1483.848 | G[13] |
| S  | 14 | <b>1391.764</b> | 1443.851        | <b>1427.834</b> | 1428.842        | 1426.826 | S[12] |
| K  | 15 | <b>1561.870</b> | 1358.821        | 1340.802        | 1341.810        | 1339.794 | K[11] |
| K  | 16 | 1731.975        | <b>1186.715</b> | <b>1170.697</b> | <b>1171.705</b> | 1169.689 | K[10] |
| A  | 17 | 1803.012        | <b>1016.610</b> | 1000.591        | 1001.599        | 999.583  | A[9]  |
| V  | 18 | 1902.081        | 945.573         | 929.554         | <b>930.562</b>  | 928.546  | V[8]  |
| T  | 19 | 2003.128        | <b>846.504</b>  | 830.488         | 831.493         | 829.477  | T[7]  |
| K  | 20 | 2111.223        | 782.457         | 729.438         | 730.446         | 728.430  | K[6]  |
| V  | 21 | 2230.292        | 617.362         | 601.343         | 602.351         | 600.335  | V[5]  |
| Q  | 22 | 2358.360        | 518.291         | <b>502.275</b>  | 503.282         | 501.267  | Q[4]  |
| K  | 23 | 2489.445        | 390.235         | 374.216         | 375.224         | 373.208  | K[3]  |
| K  | 24 | 2614.540        | 302.140         | 246.121         | 247.129         | 245.113  | K[2]  |
| D  | 25 | 2729.587        | 134.045         | 118.026         | 119.034         | 117.018  | D[1]  |

# sp | Q64525 | H2B2B\_MOUSE

PDKAKSAPAPKK Acetyl 42.01 GSK Acetyl 42.01 K Acetyl 42.01 AVTKVQKKD

- ▶ fragmentation table for charge state 2+
- ▶ specType=etd
- ▶ score=44.66
- ▶ F113670.dat
- ▶ query=q47721\_p1
- ▶ precursor=683.393890
- ▶ chargePrecursor=4
- ▶ itol=0.5

| AA | c  | y               | a+1      | a+2             | z               | AA              |       |
|----|----|-----------------|----------|-----------------|-----------------|-----------------|-------|
| P  | 1  | 58.647          | 1365.779 | <b>1397.770</b> | 0.504           | <b>1357.266</b> | P[25] |
| D  | 3  | 115.560         | 1317.263 | <b>1309.244</b> | 0.504           | <b>1308.740</b> | D[24] |
| P  | 3  | 164.087         | 1259.739 | 1251.730        | 0.504           | 1251.226        | P[23] |
| A  | 4  | 199.605         | 1311.213 | <b>1203.204</b> | 0.504           | 1202.700        | A[22] |
| K  | 5  | 263.653         | 1175.694 | 1167.685        | <b>1168.189</b> | 1167.181        | K[21] |
| S  | 6  | 307.169         | 1111.647 | <b>1103.638</b> | <b>1104.142</b> | 1103.134        | S[20] |
| A  | 7  | 362.697         | 1058.131 | 1050.122        | <b>1060.626</b> | 1059.618        | A[19] |
| P  | 8  | 391.214         | 932.612  | <b>1024.603</b> | 1025.107        | <b>1024.099</b> | P[18] |
| A  | 9  | 426.732         | 984.086  | 976.077         | 976.581         | 975.572         | A[17] |
| P  | 10 | 475.259         | 948.567  | 940.558         | 941.062         | 940.054         | P[16] |
| K  | 11 | 539.306         | 900.041  | 892.032         | 892.536         | <b>891.528</b>  | K[15] |
| K  | 12 | 624.359         | 835.994  | <b>827.984</b>  | <b>828.488</b>  | <b>827.480</b>  | K[14] |
| G  | 13 | 652.870         | 750.941  | <b>742.931</b>  | <b>743.435</b>  | 742.927         | G[13] |
| S  | 14 | 696.388         | 722.430  | <b>714.421</b>  | <b>714.925</b>  | <b>713.917</b>  | S[12] |
| K  | 15 | <b>781.438</b>  | 678.914  | <b>670.905</b>  | <b>671.409</b>  | 670.401         | K[11] |
| K  | 16 | 866.491         | 593.861  | 585.852         | 586.356         | 585.348         | K[10] |
| A  | 17 | 902.010         | 508.809  | 500.799         | 501.303         | 500.295         | A[9]  |
| V  | 18 | 951.544         | 473.290  | 465.281         | 465.785         | 464.777         | V[8]  |
| T  | 19 | 1022.088        | 423.750  | 415.740         | 416.250         | 415.241         | T[7]  |
| K  | 20 | <b>1066.115</b> | 373.232  | 365.221         | 365.727         | 364.719         | K[6]  |
| V  | 21 | <b>1115.650</b> | 309.184  | 301.175         | 301.679         | 300.671         | V[5]  |
| Q  | 22 | <b>1179.679</b> | 259.650  | 251.641         | 252.145         | 251.137         | Q[4]  |
| K  | 23 | <b>1243.726</b> | 195.621  | 187.612         | 188.116         | 187.108         | K[3]  |
| K  | 24 | 1307.774        | 131.574  | 123.564         | 124.068         | 123.060         | K[2]  |
| D  | 25 | 1385.287        | 87.528   | 79.517          | 80.021          | 79.013          | D[1]  |

# sp | Q64525 | H2B2B\_MOUSE

PDKAKSAPAPKK Acetyl 42.01 GSK Acetyl 42.01 K Acetyl 42.01 AVTKVQKKD

- ▶ fragmentation table for charge state 3+
- ▶ specType=etd
- ▶ score=44.66
- ▶ F113670.dat
- ▶ query=q47721\_p1
- ▶ precursor=683.393890
- ▶ chargePrecursor=4
- ▶ itol=0.5

| AA    | c              | y       | z+1            | z+2     | z              | AA    |
|-------|----------------|---------|----------------|---------|----------------|-------|
| P[1]  | 39.034         | 910.855 | 905.510        | 0.672   | 905.180        | P[25] |
| D[2]  | 77.376         | 878.504 | <b>873.165</b> | 0.672   | <b>872.829</b> | D[24] |
| P[3]  | 109.727        | 840.162 | <b>834.822</b> | 0.672   | 834.487        | P[23] |
| A[4]  | 133.406        | 807.811 | 802.472        | 0.672   | 802.136        | A[22] |
| K[5]  | 176.104        | 784.132 | 778.792        | 779.128 | 778.457        | K[21] |
| S[6]  | 209.118        | 741.434 | 735.094        | 736.430 | 735.794        | S[20] |
| A[7]  | 228.794        | 712.423 | 707.063        | 707.419 | 706.748        | A[19] |
| P[8]  | 261.145        | 688.744 | 683.404        | 683.740 | 683.069        | P[18] |
| A[9]  | 284.824        | 656.393 | 651.054        | 651.389 | 650.718        | A[17] |
| P[10] | 317.175        | 632.714 | 627.375        | 627.710 | 627.039        | P[16] |
| K[11] | 359.873        | 600.363 | 595.024        | 595.360 | 594.688        | K[15] |
| K[12] | 416.575        | 557.665 | 552.325        | 552.661 | 551.989        | K[14] |
| G[13] | 435.582        | 500.963 | 495.623        | 495.959 | 495.287        | G[13] |
| S[14] | 464.593        | 481.956 | 476.616        | 476.952 | 476.280        | S[12] |
| K[15] | 521.295        | 432.945 | 447.606        | 447.942 | 447.270        | K[11] |
| K[16] | 577.997        | 396.243 | 390.904        | 391.240 | 390.568        | K[10] |
| A[17] | 601.076        | 339.541 | 334.202        | 334.538 | 333.866        | A[9]  |
| V[18] | 634.698        | 315.862 | 310.523        | 310.859 | 310.187        | V[8]  |
| T[19] | 668.381        | 282.840 | 277.500        | 277.836 | 277.164        | T[7]  |
| K[20] | 711.079        | 249.157 | 243.817        | 244.153 | 243.482        | K[6]  |
| V[21] | 744.102        | 206.459 | 201.119        | 201.455 | 200.783        | V[5]  |
| Q[22] | 786.788        | 173.436 | 168.096        | 168.432 | 167.760        | Q[4]  |
| K[23] | 829.487        | 130.750 | 125.410        | 125.746 | 125.074        | K[3]  |
| K[24] | <b>872.185</b> | 88.051  | 82.712         | 83.048  | 82.376         | K[2]  |
| D[25] | 910.527        | 45.353  | 40.014         | 40.349  | 39.678         | D[1]  |

# sp | Q6ZWY9 | H2B1C\_MOUSE

PEPAKSAPAPKK Acetyl 42.01 GSK Acetyl 42.01 K Acetyl 42.01 AVTK Acetyl 42.01 AQKKD

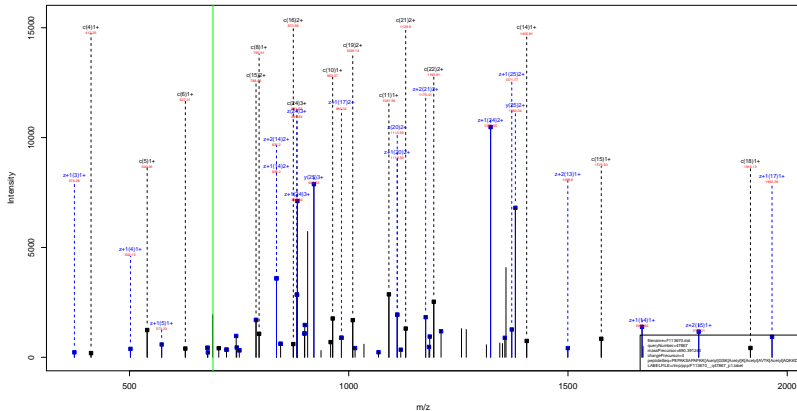

# sp | Q6ZWY9 | H2B1C\_MOUSE

PEPAKSAPAPKK <sup>Acetyl</sup>42.01 GSK <sup>Acetyl</sup>42.01 K <sup>Acetyl</sup>42.01 AVTK <sup>Acetyl</sup>42.01 AQKKD

- ▶ fragmentation table for charge state 1+
- ▶ specType=etd
- ▶ score=79.14
- ▶ F113670.dat
- ▶ query=q47867\_p1
- ▶ precursor=690.391240
- ▶ chargePrecursor=4
- ▶ itol=0.5

| AA | c               | y        | z+1             | z+2             | z        | AA    |
|----|-----------------|----------|-----------------|-----------------|----------|-------|
| P  | 115.087         | 2758.549 | 2742.527        | 0.000           | 2741.520 | P[25] |
| E  | 244.129         | 2981.493 | 2945.475        | 0.000           | 2944.467 | E[24] |
| P  | 341.182         | 2532.451 | 2516.432        | 0.000           | 2515.424 | P[23] |
| A  | <b>412.219</b>  | 2435.398 | 2419.379        | 0.000           | 2418.371 | A[22] |
| K  | <b>540.314</b>  | 2304.361 | 2346.342        | 2349.350        | 2347.334 | K[21] |
| S  | <b>627.346</b>  | 2236.266 | 2220.247        | 2221.255        | 2219.239 | S[20] |
| A  | <b>696.383</b>  | 2149.234 | 2133.215        | 2134.223        | 2132.207 | A[19] |
| P  | <b>795.436</b>  | 2078.191 | 2062.172        | 2063.180        | 2061.174 | P[18] |
| A  | 866.473         | 1981.144 | <b>1965.125</b> | 1966.133        | 1964.118 | A[17] |
| P  | <b>963.526</b>  | 1910.107 | 1894.088        | 1895.096        | 1893.080 | P[16] |
| K  | <b>1091.621</b> | 1813.054 | 1797.035        | <b>1798.043</b> | 1796.028 | K[15] |
| K  | 1261.726        | 1684.959 | <b>1668.940</b> | 1669.948        | 1667.933 | K[14] |
| G  | 1318.748        | 1514.854 | 1498.835        | <b>1499.843</b> | 1497.827 | G[13] |
| S  | <b>1405.780</b> | 1457.812 | 1441.793        | 1442.801        | 1440.785 | S[12] |
| K  | <b>1575.885</b> | 1370.800 | 1354.781        | <b>1355.789</b> | 1353.774 | K[11] |
| K  | 1745.991        | 1200.695 | <b>1184.676</b> | 1185.684        | 1183.668 | K[10] |
| A  | 1817.026        | 1030.589 | <b>1014.570</b> | 1015.578        | 1013.563 | A[9]  |
| V  | <b>1916.096</b> | 950.552  | 943.533         | 944.541         | 942.525  | V[8]  |
| T  | 2017.144        | 860.484  | <b>844.465</b>  | 845.473         | 843.457  | T[7]  |
| R  | 2187.250        | 759.436  | <b>743.417</b>  | <b>744.425</b>  | 742.409  | R[6]  |
| A  | 2258.287        | 689.330  | <b>673.312</b>  | 674.320         | 672.304  | A[5]  |
| Q  | 2296.345        | 618.293  | <b>602.275</b>  | 603.283         | 601.267  | Q[4]  |
| K  | 2514.440        | 460.235  | <b>374.216</b>  | 375.224         | 373.208  | K[3]  |
| K  | 2842.535        | 282.140  | 246.121         | 247.129         | 245.113  | K[2]  |
| D  | 2757.562        | 134.045  | 118.028         | 119.034         | 117.018  | D[1]  |

# sp | Q6ZWY9 | H2B1C\_MOUSE

PEPAKSAPAPKK <sup>Acetyl</sup>42.01 GSK <sup>Acetyl</sup>42.01 K <sup>Acetyl</sup>42.01 AVTK <sup>Acetyl</sup>42.01 AQKKD

- ▶ fragmentation table for charge state 2+
- ▶ specType=etd
- ▶ score=79.14
- ▶ F113670.dat
- ▶ query=q47867.p1
- ▶ precursor=690.391240
- ▶ chargePrecursor=4
- ▶ itol=0.5

| AA |    | c               | y               | z+1             | z+2             | z               | AA    |
|----|----|-----------------|-----------------|-----------------|-----------------|-----------------|-------|
| P  | 1  | 58.047          | <b>1379.777</b> | <b>1371.767</b> | 0.504           | 1371.261        | P[25] |
| E  | 2  | 127.588         | 1331.295        | <b>1323.281</b> | 0.504           | 1322.775        | E[24] |
| P  | 3  | 171.095         | 1306.725        | 1295.703        | 0.504           | 1295.210        | P[23] |
| A  | 4  | 206.613         | 1218.201        | <b>1210.193</b> | 0.504           | 1209.689        | A[22] |
| K  | 5  | 270.601         | <b>1182.684</b> | 1174.675        | <b>1175.179</b> | 1174.171        | K[21] |
| S  | 6  | 314.177         | <b>1118.637</b> | <b>1110.627</b> | 1111.131        | <b>1110.123</b> | S[20] |
| A  | 7  | 349.695         | 1075.121        | 1067.113        | <b>1067.615</b> | 1066.607        | A[19] |
| P  | 8  | 388.222         | 1039.602        | 1031.593        | 1032.097        | 1031.089        | P[18] |
| A  | 9  | 433.740         | 991.075         | <b>983.066</b>  | <b>983.570</b>  | 982.562         | A[17] |
| P  | 10 | 482.267         | 955.557         | 947.548         | 948.052         | 947.044         | P[16] |
| K  | 11 | 546.314         | 907.031         | <b>899.021</b>  | <b>899.525</b>  | <b>898.517</b>  | K[15] |
| K  | 12 | 631.367         | 842.983         | <b>834.974</b>  | <b>835.478</b>  | 834.470         | K[14] |
| C  | 13 | 659.878         | 757.935         | <b>749.921</b>  | <b>750.425</b>  | 749.417         | C[13] |
| S  | 14 | <b>703.394</b>  | 729.820         | <b>721.810</b>  | 721.314         | <b>720.306</b>  | S[12] |
| K  | 15 | <b>788.446</b>  | 685.904         | <b>677.894</b>  | <b>678.398</b>  | <b>677.390</b>  | K[11] |
| K  | 16 | <b>873.499</b>  | 600.851         | 592.842         | 593.346         | 592.338         | K[10] |
| A  | 17 | 909.018         | 515.798         | 507.789         | 508.293         | 507.285         | A[9]  |
| V  | 18 | <b>958.552</b>  | 480.280         | 472.270         | 472.774         | 471.766         | V[8]  |
| T  | 19 | <b>1009.676</b> | 438.745         | 429.738         | 429.240         | 428.232         | T[7]  |
| K  | 20 | 1064.128        | 380.222         | 372.212         | 372.716         | 371.708         | K[6]  |
| A  | 21 | <b>1129.647</b> | 295.169         | 287.159         | 287.663         | 286.655         | A[5]  |
| Q  | 22 | <b>1193.676</b> | 259.656         | 251.641         | 252.145         | 251.137         | Q[4]  |
| K  | 23 | 1257.724        | 195.621         | 187.612         | 188.116         | 187.108         | K[3]  |
| K  | 24 | 1321.771        | 131.574         | 123.564         | 124.068         | 123.060         | K[2]  |
| D  | 25 | 1379.285        | 67.526          | 59.517          | 60.021          | 59.013          | D[1]  |

# sp | Q6ZWY9 | H2B1C\_MOUSE

PEPAKSAPAPKK <sup>Acetyl</sup>42.01 GSK <sup>Acetyl</sup>42.01 K <sup>Acetyl</sup>42.01 AVTK <sup>Acetyl</sup>42.01 AQKKD

- ▶ fragmentation table for charge state 3+
- ▶ specType=etd
- ▶ score=79.14
- ▶ F113670.dat
- ▶ query=q47867\_p1
- ▶ precursor=690.391240
- ▶ chargePrecursor=4
- ▶ itol=0.5

| AA    | c              | y              | z+1            | z+2     | z              | AA    |
|-------|----------------|----------------|----------------|---------|----------------|-------|
| P[3]  | 39.034         | <b>920.187</b> | 914.847        | 0.672   | 914.511        | P[25] |
| E[2]  | 82.048         | 887.836        | <b>882.496</b> | 0.672   | <b>882.160</b> | E[24] |
| P[3]  | 114.399        | <b>844.822</b> | 839.482        | 0.672   | 839.145        | P[23] |
| A[4]  | 138.078        | 812.473        | 807.131        | 0.672   | 806.795        | A[22] |
| K[5]  | 180.776        | <b>788.792</b> | 783.452        | 783.768 | 783.216        | K[21] |
| S[6]  | 209.787        | 746.094        | 740.754        | 741.090 | 740.418        | S[20] |
| A[7]  | 233.466        | 717.083        | 711.743        | 712.079 | 711.407        | A[19] |
| P[8]  | 265.817        | 681.404        | 688.054        | 688.400 | 687.728        | P[18] |
| A[9]  | 289.496        | 661.053        | 655.713        | 656.049 | 655.377        | A[17] |
| P[10] | 321.847        | 637.374        | 632.034        | 632.370 | 631.698        | P[16] |
| K[11] | 364.545        | 605.023        | 599.683        | 600.019 | 599.347        | K[15] |
| K[12] | 421.247        | 562.325        | 556.985        | 557.321 | 556.649        | K[14] |
| G[13] | 440.254        | 505.023        | 500.283        | 500.619 | 499.947        | G[13] |
| S[14] | 469.265        | 486.616        | 481.276        | 481.612 | 480.940        | S[12] |
| K[15] | 525.967        | 457.605        | 452.265        | 452.601 | 451.929        | K[11] |
| K[16] | 582.068        | 400.903        | 395.563        | 395.899 | 395.228        | K[10] |
| A[17] | 606.348        | 344.201        | 338.862        | 339.198 | 338.526        | A[9]  |
| V[18] | 639.370        | 320.522        | 315.183        | 315.519 | 314.847        | V[8]  |
| T[19] | 673.083        | 287.499        | 282.159        | 282.496 | 281.824        | T[7]  |
| K[20] | 729.755        | 253.817        | 248.477        | 248.813 | 248.141        | K[6]  |
| A[21] | 753.434        | 197.115        | 191.775        | 192.111 | 191.439        | A[5]  |
| Q[22] | 796.120        | 173.436        | 168.096        | 168.432 | 167.760        | Q[4]  |
| K[23] | 838.818        | 130.750        | 125.410        | 125.746 | 125.074        | K[3]  |
| K[24] | <b>881.517</b> | 88.051         | 82.712         | 83.048  | 82.376         | K[2]  |
| D[25] | 919.859        | 45.353         | 40.014         | 40.349  | 39.678         | D[1]  |





# sp | Q8CGP5 | H2A1F\_MOUSE

LNKLLGRVTIAQGGVLPNIQAVLLPKK<sup>Acetyl</sup> TE  
42.01

- ▶ fragmentation table for charge state 1+
- ▶ specType=cid
- ▶ score=26.56
- ▶ F113670.dat
- ▶ query=q50020\_p1
- ▶ precursor=782.226050
- ▶ chargePrecursor=4
- ▶ itol=0.5

| AA  | a    | a <sup>h</sup> | a <sup>o</sup> | b       | b <sup>h</sup> | b <sup>o</sup> | y         | y <sup>h</sup> | y <sup>o</sup> | AA        |           |     |
|-----|------|----------------|----------------|---------|----------------|----------------|-----------|----------------|----------------|-----------|-----------|-----|
| L1  | 88   | 0.00           | 0.00           | 114.091 | 0.00           | 0.00           | 31.25.877 | 31.09.851      | 30.97.807      | L129      |           |     |
| K1  | 338  | 1.34           | 1.11           | 0.00    | 2.08.134       | 0.11.300       | 0.00      | 30.91.761      | 29.89.705      | K30       |           |     |
| R1  | 338  | 1.34           | 1.11           | 2.08    | 0.00           | 3.02.245       | 3.04.203  | 0.00           | 30.90.150      | 30.88.142 | K27       |     |
| L4  | 141  | 1.08           | 0.74           | 2.02    | 0.00           | 1.82.287       | 0.00      | 27.70.203      | 27.61.520      | L126      |           |     |
| L5  | 174  | 0.42           | 0.17           | 0.11    | 0.00           | 1.82.397       | 0.00.011  | 0.00           | 26.01.111      | 25.99.549 | L125      |     |
| G6  | 111  | 4.74           | 3.94           | 3.89    | 0.00           | 1.02.911       | 0.22.362  | 0.00           | 25.44.481      | 25.27.461 | G24       |     |
| R7  | 187  | 0.23           | 0.00           | 0.69    | 0.00           | 1.95.520       | 0.77.403  | 0.00           | 24.87.490      | 24.74.430 | R23       |     |
| V8  | 188  | 0.41           | 0.08           | 0.58    | 0.00           | 1.84.508       | 0.77.562  | 0.00           | 24.81.988      | 24.64.928 | V22       |     |
| L9  | 187  | 0.41           | 0.08           | 0.11    | 0.00           | 1.96.520       | 0.12.509  | 0.00           | 22.32.203      | 22.19.210 | L21       |     |
| L10 | 188  | 1.09           | 1.063          | 0.99    | 1.06           | 1.118          | 1.026     | 1.060          | 21.31.369      | 21.14.323 | L20       |     |
| A11 | 115  | 1.52           | 1.124          | 1.25    | 1.122          | 1.75           | 1.176     | 1.75           | 1.02           | 1.11      | 20.00.154 | A16 |
| G12 | 178  | 0.43           | 0.20           | 0.49    | 0.26           | 0.41           | 0.120     | 0.116          | 1.00           | 1.00      | 19.00.465 | G17 |
| G13 | 136  | 0.42           | 0.19           | 0.19    | 1.11           | 0.11           | 1.04      | 0.11           | 1.04           | 1.07      | 18.00.500 | G17 |
| G14 | 133  | 0.58           | 1.06           | 0.37    | 1.05           | 0.53           | 1.421     | 0.53           | 1.403          | 0.60      | 17.02.047 | G16 |
| V15 | 130  | 0.18           | 1.45           | 0.46    | 1.44           | 0.46           | 1.03      | 0.39           | 1.00           | 0.41      | 16.00.000 | V16 |
| L16 | 206  | 1.04           | 1.08           | 0.90    | 1.08           | 0.90           | 1.03      | 0.91           | 1.01           | 1.01      | 15.00.357 | L14 |
| L17 | 193  | 0.90           | 1.00           | 0.92    | 1.00           | 0.92           | 0.71      | 0.64           | 0.71           | 0.64      | 14.00.181 | L13 |
| K18 | 117  | 1.11           | 0.80           | 0.80    | 1.00           | 0.11           | 0.10      | 0.10           | 0.07           | 0.07      | 13.00.181 | K13 |
| L19 | 230  | 1.00           | 1.013          | 1.00    | 1.013          | 1.00           | 1.013     | 1.00           | 1.013          | 1.00      | 12.00.171 | L11 |
| G20 | 202  | 0.23           | 0.41           | 0.20    | 0.40           | 0.40           | 0.09      | 0.23           | 0.09           | 0.23      | 11.00.094 | G15 |
| A21 | 128  | 0.47           | 0.17           | 0.17    | 0.17           | 0.17           | 0.17      | 0.17           | 0.17           | 0.17      | 10.00.000 | A15 |
| V22 | 227  | 0.20           | 0.11           | 0.14    | 0.05           | 0.10           | 0.05      | 0.10           | 0.05           | 0.10      | 9.00.508  | V18 |
| L23 | 141  | 0.41           | 0.04           | 0.41    | 0.04           | 0.41           | 0.04      | 0.41           | 0.04           | 0.41      | 8.00.529  | L17 |
| L24 | 1454 | 1.06           | 1.037          | 1.032   | 1.036          | 1.032          | 1.065     | 1.067          | 1.064          | 1.013     | 7.00.445  | L16 |
| R25 | 231  | 0.16           | 0.14           | 0.14    | 0.14           | 0.14           | 0.14      | 0.14           | 0.14           | 0.14      | 6.00.445  | R15 |
| K26 | 179  | 0.16           | 0.16           | 0.16    | 0.16           | 0.16           | 0.16      | 0.16           | 0.16           | 0.16      | 5.00.267  | K14 |
| K27 | 144  | 0.12           | 0.12           | 0.12    | 0.12           | 0.12           | 0.12      | 0.12           | 0.12           | 0.12      | 4.00.187  | K13 |
| L28 | 130  | 0.12           | 0.12           | 0.12    | 0.12           | 0.12           | 0.12      | 0.12           | 0.12           | 0.12      | 3.00.114  | L15 |
| E29 | 179  | 0.12           | 0.12           | 0.12    | 0.12           | 0.12           | 0.12      | 0.12           | 0.12           | 0.12      | 2.00.100  | E11 |

# sp | Q8CGP5 | H2A1F\_MOUSE

LNKLLGRVTIAQGGVLPNIQAVLLPKK<sup>Acetyl</sup> TE  
42.01

- ▶ fragmentation table for charge state 2+
- ▶ specType=cid
- ▶ score=26.56
- ▶ F113670.dat
- ▶ query=q50020\_p1
- ▶ precursor=782.226050
- ▶ chargePrecursor=4
- ▶ itol=0.5

| AA  | a    | a*  | a+D   | b     | b*       | b+D     | y      | y*       | y+D      | AA       |      |
|-----|------|-----|-------|-------|----------|---------|--------|----------|----------|----------|------|
| L1  | 43   | 302 | 0.504 | 0.504 | 57.545   | 0.504   | 0.501  | 1561.442 | 1554.929 | 1554.437 | L29  |
| R1  | 108  | 975 | 0.504 | 0.504 | 114.877  | 0.504   | 0.501  | 1558.900 | 1458.357 | 1467.865 | R20  |
| R1  | 104  | 921 | 1.508 | 1.508 | 0.504    | 378.613 | 11.711 | 0.501    | 1449.070 | 1441.560 | K127 |
| L4  | 221  | 163 | 0.12  | 0.504 | 233.161  | 17.26   | 0.447  | 1393.031 | 1237.112 | 1316.226 | L26  |
| L5  | 227  | 169 | 0.504 | 0.504 | 241.705  | 20.018  | 0.501  | 1326.289 | 1324.778 | 1323.269 | L29  |
| G1  | 308  | 235 | 0.504 | 0.504 | 320.213  | 23.111  | 0.501  | 1292.741 | 1284.234 | 1283.742 | G24  |
| R7  | 364  | 306 | 0.504 | 0.504 | 389.764  | 38.874  | 0.501  | 1244.231 | 1235.723 | 1235.231 | R23  |
| V1  | 413  | 344 | 0.504 | 0.504 | 442.791  | 44.284  | 0.501  | 1189.710 | 1183.202 | 1182.710 | V22  |
| L9  | 464  | 324 | 0.504 | 0.504 | 493.272  | 49.322  | 0.501  | 1133.052 | 1124.544 | 1124.052 | L21  |
| I10 | 540  | 386 | 0.504 | 0.504 | 574.804  | 57.480  | 0.501  | 1066.110 | 1057.615 | 1057.123 | I21  |
| A11 | 576  | 380 | 0.504 | 0.504 | 605.327  | 60.527  | 0.501  | 1009.589 | 1001.073 | 1000.581 | A16  |
| Q12 | 766  | 614 | 0.504 | 0.504 | 797.112  | 79.711  | 0.501  | 924.462  | 915.954  | 915.462  | Q19  |
| G13 | 668  | 525 | 0.504 | 0.504 | 699.423  | 69.942  | 0.501  | 874.469  | 865.961  | 865.469  | G17  |
| G14 | 667  | 436 | 0.504 | 0.504 | 698.430  | 69.843  | 0.501  | 762.920  | 754.412  | 753.920  | G16  |
| V13 | 764  | 609 | 0.504 | 0.504 | 795.264  | 79.526  | 0.501  | 772.454  | 763.946  | 763.454  | V15  |
| L10 | 801  | 532 | 0.504 | 0.504 | 832.505  | 83.250  | 0.501  | 708.996  | 700.488  | 700.000  | L14  |
| P12 | 862  | 588 | 0.504 | 0.504 | 893.011  | 89.301  | 0.501  | 651.963  | 643.455  | 642.963  | P13  |
| R11 | 824  | 608 | 0.504 | 0.504 | 855.011  | 85.501  | 0.501  | 574.244  | 565.736  | 565.244  | R12  |
| I16 | 965  | 627 | 0.504 | 0.504 | 996.505  | 99.650  | 0.501  | 509.594  | 501.086  | 500.594  | I11  |
| Q20 | 1029 | 631 | 0.504 | 0.504 | 1060.011 | 106.001 | 0.501  | 444.621  | 436.113  | 435.621  | Q19  |
| A21 | 1071 | 498 | 0.504 | 0.504 | 1102.514 | 110.251 | 0.501  | 379.624  | 371.116  | 370.624  | A16  |
| V22 | 1114 | 664 | 0.504 | 0.504 | 1145.011 | 114.501 | 0.501  | 314.610  | 306.102  | 305.610  | V16  |
| L23 | 1171 | 526 | 0.504 | 0.504 | 1202.223 | 120.223 | 0.501  | 249.710  | 241.202  | 240.710  | L17  |
| L24 | 1227 | 768 | 1.208 | 2.214 | 1241.765 | 124.176 | 1.207  | 179.220  | 170.712  | 170.220  | L16  |
| R25 | 1276 | 804 | 0.504 | 0.504 | 1304.269 | 130.427 | 0.501  | 121.269  | 112.761  | 112.269  | R16  |
| R26 | 1340 | 542 | 0.504 | 0.504 | 1371.765 | 137.176 | 0.501  | 64.269   | 55.761   | 55.269   | R16  |
| K27 | 1428 | 584 | 1.008 | 1.008 | 1439.269 | 143.927 | 1.007  | 14.269   | 5.761    | 5.269    | K16  |
| L28 | 1491 | 688 | 0.504 | 0.504 | 1524.765 | 152.476 | 0.501  | 14.765   | 5.269    | 5.269    | L16  |
| E29 | 1540 | 440 | 0.504 | 0.504 | 1571.269 | 157.127 | 0.501  | 4.269    | 4.269    | 4.269    | E11  |

# sp | Q8CGP5 | H2A1F\_MOUSE

LNKLLGRVTIAQGGVLPNIQAVLLPKK<sup>Acetyl</sup> TE<sub>42.01</sub>

- ▶ fragmentation table for charge state 3+
- ▶ specType=cid
- ▶ score=26.56
- ▶ F113670.dat
- ▶ query=q50020.p1
- ▶ precursor=782.226050
- ▶ chargePrecursor=4
- ▶ itol=0.5

| AA   | a               | a*             | aΔ1            | b              | b*             | bΔ1            | y               | y*             | yΔ1            | AA   |
|------|-----------------|----------------|----------------|----------------|----------------|----------------|-----------------|----------------|----------------|------|
| L1   | 26.910          | 0.672          | 0.672          | 18.702         | 0.672          | 0.672          | <b>1042.631</b> | 1036.959       | 1036.957       | L126 |
| R12  | 97.983          | 0.708          | 0.672          | 79.124         | 14.944         | 0.672          | 1050.813        | 999.260        | 999.912        | R120 |
| R13  | 110.061         | 104.469        | 0.672          | 118.413        | 11.578         | 0.672          | 986.327         | 981.246        | 981.912        | R122 |
| L14  | 147.719         | 142.120        | 0.672          | 137.109        | 15.134         | 0.672          | 934.251         | 919.546        | 919.210        | L126 |
| L15  | 186.422         | 179.360        | 0.672          | 156.804        | 19.918         | 0.672          | 688.559         | 688.969        | 688.975        | L126 |
| Q16  | 204.679         | 198.904        | 0.672          | 213.811        | 208.136        | 0.672          | 940.214         | 943.159        | <b>842.830</b> | Q124 |
| R17  | 216.511         | 202.838        | 0.672          | 209.349        | 280.169        | 0.672          | 829.327         | 826.151        | 821.812        | R123 |
| V18  | 230.589         | 217.913        | 0.672          | 240.489        | 254.164        | 0.672          | 777.781         | 777.210        | 779.740        | V122 |
| L19  | 253.219         | 217.943        | 351.210        | 333.980        | 328.979        | 326.541        | 744.717         | <b>738.095</b> | <b>738.767</b> | L121 |
| L19  | 366.911         | 351.210        | 384.910        | 319.241        | 384.890        | 384.191        | 741.689         | 738.411        | 735.084        | L121 |
| A111 | 384.562         | 378.917        | 383.980        | 383.924        | 380.240        | 387.828        | 673.282         | 672.811        | <b>667.389</b> | A119 |
| Q123 | 422.708         | 421.960        | 421.970        | 438.824        | 430.908        | 430.900        | 669.214         | <b>644.938</b> |                | Q118 |
| Q123 | 446.589         | 446.600        | 446.210        | 449.811        | 444.942        | 449.814        | 666.211         | 665.315        | <b>501.024</b> | Q117 |
| Q14  | <b>465.793</b>  | 479.217        | 489.209        | 474.824        | 480.949        | 480.811        | <b>588.021</b>  | <b>582.345</b> | 782.717        | G116 |
| L121 | 486.589         | 493.943        | 483.121        | 509.841        | 493.972        | 493.964        | 535.281         | 530.513        | 529.669        | L121 |
| L126 | 530.000         | 526.176        | 530.000        | 545.343        | 530.000        | 539.136        | 535.281         | 530.513        | 529.669        | L124 |
| R127 | 548.381         | 567.840        | 568.240        | 577.889        | 572.811        | 577.889        | 488.290         | 482.020        | 482.210        | R113 |
| R148 | 588.710         | <b>600.740</b> | <b>606.372</b> | 615.200        | 610.012        | 609.104        | 485.981         | 480.710        | 480.042        | R114 |
| R18  | <b>644.070</b>  | <b>638.100</b> | <b>638.000</b> | <b>653.402</b> | 647.126        | 647.126        | 432.011         | 422.260        | 421.707        | R111 |
| Q120 | 688.709         | 681.000        | 680.711        | <b>696.088</b> | 680.413        | 680.689        | 386.211         | 388.561        | 384.711        | Q119 |
| A121 | <b>718.435</b>  | 724.750        | 724.432        | <b>719.767</b> | <b>714.082</b> | <b>713.764</b> | 347.050         | 341.809        | 341.546        | A116 |
| V122 | <b>743.458</b>  | 737.883        | 737.450        | <b>752.736</b> | 747.114        | 746.738        | 319.811         | 318.109        | 315.969        | V118 |
| L128 | 781.584         | 775.417        | 775.110        | <b>790.485</b> | 784.800        | 784.410        | 260.511         | 265.172        | 264.844        | L112 |
| L124 | 810.000         | <b>813.172</b> | <b>812.844</b> | <b>828.179</b> | <b>822.504</b> | <b>822.176</b> | 263.121         | 247.470        | 247.120        | L116 |
| P121 | <b>851.199</b>  | <b>845.523</b> | <b>846.198</b> | 859.520        | 854.000        | 854.100        | 215.491         | 208.781        | 208.600        | P111 |
| R126 | 850.381         | 850.381        | <b>857.893</b> | 869.220        | 869.220        | 867.220        | 183.210         | 177.450        | 177.104        | R124 |
| R227 | 900.389         | 884.611        | 884.100        | <b>939.838</b> | 934.200        | 931.671        | 140.489         | 138.719        | 134.416        | R118 |
| L126 | 900.389         | 878.056        | 880.210        | 901.911        | 897.637        | 897.638        | 83.789          | 81.627         | 77.704         | L112 |
| R224 | <b>1027.285</b> | 1011.818       | 1011.260       | 1030.811       | 1026.024       | 1026.024       | 80.000          | 81.874         | 44.201         | R111 |



# sp | Q8CGP5 | H2A1F\_MOUSE

LNKLLGRVTIAQGGVLPNIQAVLLPKK <sup>Acetyl</sup> 42.01 TE

- ▶ fragmentation table for charge state 1+
- ▶ specType=etd
- ▶ score=37.74
- ▶ F113670.dat
- ▶ query=q50021.p1
- ▶ precursor=782.226050
- ▶ chargePrecursor=4
- ▶ itol=0.5

| AA    | c               | y              | z+1             | z+2             | z               | AA    |
|-------|-----------------|----------------|-----------------|-----------------|-----------------|-------|
| L[1]  | 131.118         | 3125.877       | 3109.850        | 0.000           | 3108.881        | L[28] |
| N[2]  | 245.161         | 3012.793       | 2996.774        | 2997.782        | 2995.763        | N[28] |
| K[3]  | <b>373.256</b>  | 2896.750       | 2883.732        | 2883.739        | 2881.724        | K[27] |
| L[4]  | 486.340         | 2770.655       | 2754.637        | 2755.644        | 2753.629        | L[26] |
| L[5]  | 597.424         | 2657.571       | 2641.553        | 2642.560        | 2640.545        | L[25] |
| G[6]  | <b>656.445</b>  | 2544.487       | 2528.469        | 2529.476        | 2527.461        | G[24] |
| R[7]  | <b>812.546</b>  | 2437.406       | 2421.447        | 2422.455        | 2420.439        | R[23] |
| V[8]  | <b>911.615</b>  | 2331.365       | 2315.346        | 2316.354        | 2314.338        | V[22] |
| T[9]  | <b>1012.663</b> | 2232.296       | 2216.277        | 2217.285        | 2215.270        | T[21] |
| I[10] | <b>1125.747</b> | 2131.249       | 2115.230        | 2116.238        | 2114.222        | I[20] |
| A[11] | <b>1196.784</b> | 2038.184       | 2022.165        | 2023.174        | 2021.156        | A[19] |
| Q[12] | 1314.552        | 1947.127       | <b>1931.109</b> | 1932.116        | 1930.101        | Q[18] |
| G[13] | 1381.384        | 1859.069       | 1843.050        | 1844.058        | 1842.042        | G[17] |
| G[14] | 1438.885        | 1762.947       | 1746.929        | 1747.936        | 1745.921        | G[16] |
| V[15] | 1537.954        | 1705.826       | 1689.807        | 1690.815        | 1687.999        | V[15] |
| L[16] | 1651.038        | 1605.957       | <b>1589.939</b> | 1590.947        | 1588.931        | L[14] |
| T[17] | 1748.091        | 1492.872       | 1476.853        | <b>1477.862</b> | 1475.847        | T[13] |
| N[18] | 1882.133        | 1395.804       | <b>1379.802</b> | 1380.810        | 1378.795        | N[12] |
| I[19] | 1975.217        | 1281.728       | 1265.710        | 1266.717        | 1264.751        | I[11] |
| Q[20] | 2103.276        | 1168.664       | 1152.675        | 1153.683        | 1151.667        | Q[10] |
| A[21] | 2174.313        | 1040.635       | 1024.616        | 1025.624        | <b>1023.608</b> | A[9]  |
| V[22] | 2273.382        | 969.598        | 953.579         | 954.587         | 952.571         | V[8]  |
| L[23] | 2369.466        | 870.529        | <b>854.511</b>  | 855.519         | 853.503         | L[7]  |
| L[24] | 2499.550        | 757.445        | <b>741.427</b>  | <b>742.435</b>  | 740.419         | L[6]  |
| P[25] | 2596.602        | <b>644.361</b> | 628.341         | 629.350         | 627.335         | P[5]  |
| K[26] | 2724.697        | 547.309        | <b>531.290</b>  | 532.298         | 530.282         | K[4]  |
| K[27] | 2894.803        | 419.214        | 403.195         | 404.203         | 402.187         | K[3]  |
| T[28] | 2995.851        | 249.108        | 233.089         | 234.097         | 232.082         | T[2]  |
| E[29] | 3134.893        | 148.050        | 132.042         | 133.050         | 131.034         | E[1]  |

# sp | Q8CGP5 | H2A1F\_MOUSE

LNKLLGRVTIAQGGVLPNIQAVLLPKK <sup>Acetyl</sup>42.01 TE

- ▶ fragmentation table for charge state 2+
- ▶ specType=etd
- ▶ score=37.74
- ▶ F113670.dat
- ▶ query=q50021.p1
- ▶ precursor=782.226050
- ▶ chargePrecursor=4
- ▶ itol=0.5

| AA  | c               | y               | z+1             | z+2             | z               | AA   |
|-----|-----------------|-----------------|-----------------|-----------------|-----------------|------|
| L1  | 66.053          | <b>1563.442</b> | <b>1555.433</b> | 0.504           | <b>1554.929</b> | L126 |
| N1  | 123.054         | 1506.905        | <b>1498.891</b> | <b>1499.395</b> | 1498.367        | N20  |
| K1  | 187.132         | 1449.879        | <b>1441.869</b> | <b>1442.373</b> | 1441.366        | K27  |
| L1  | 243.674         | 1385.811        | <b>1377.822</b> | 1378.326        | <b>1377.318</b> | L26  |
| L1  | 300.216         | 1329.289        | 1321.285        | 1321.784        | 1320.776        | L25  |
| G1  | 358.758         | 1272.747        | 1264.739        | 1265.242        | 1264.235        | G24  |
| R1  | 406.777         | 1214.230        | <b>1206.227</b> | 1206.731        | <b>1205.723</b> | R23  |
| V1  | 456.311         | 1166.188        | <b>1158.177</b> | 1158.680        | <b>1157.673</b> | V22  |
| T1  | 506.835         | 1116.652        | 1108.642        | <b>1109.146</b> | 1108.139        | T21  |
| T10 | 563.377         | 1056.129        | 1058.119        | 1058.622        | 1057.613        | T20  |
| A11 | 608.856         | 1000.595        | 1002.587        | 1002.080        | 1001.073        | A19  |
| G12 | 667.826         | 974.061         | <b>966.058</b>  | 966.562         | <b>965.554</b>  | G18  |
| G13 | <b>691.436</b>  | <b>910.038</b>  | 902.029         | 902.533         | 901.525         | G17  |
| G14 | 719.946         | 861.527         | 873.518         | <b>874.022</b>  | 873.014         | G16  |
| V15 | <b>769.480</b>  | 813.017         | 865.007         | 845.511         | 844.503         | V15  |
| L16 | 826.023         | 803.482         | 795.473         | 795.977         | 794.969         | L14  |
| T17 | <b>874.549</b>  | 746.940         | 738.931         | 739.435         | 738.427         | T13  |
| N18 | 911.570         | 698.414         | 690.405         | 690.908         | 689.901         | N12  |
| I19 | 968.112         | 641.392         | 633.383         | 633.887         | 632.879         | I11  |
| Q20 | <b>1052.142</b> | 584.850         | 576.841         | 577.345         | 576.337         | Q10  |
| A21 | 1087.660        | 530.821         | 512.812         | 513.316         | 512.308         | A0   |
| V22 | <b>1137.194</b> | 486.302         | 477.293         | 477.797         | 476.790         | V8   |
| L23 | <b>1193.736</b> | 438.765         | 429.756         | 429.260         | 428.252         | L1   |
| L24 | 1250.279        | 379.226         | 371.217         | 371.721         | 370.713         | L6   |
| P25 | <b>1298.805</b> | 322.684         | 314.675         | 315.179         | 314.171         | P5   |
| K26 | <b>1367.852</b> | 274.158         | 266.149         | 266.652         | 265.645         | K4   |
| K27 | <b>1447.905</b> | 210.110         | 202.101         | 202.605         | 201.597         | K3   |
| T28 | 1488.429        | 125.058         | 117.048         | 117.552         | 116.544         | T2   |
| E29 | 1562.950        | 74.534          | 66.524          | 67.028          | 66.021          | E1   |

# sp | Q8CGP5 | H2A1F\_MOUSE

LNKLLGRVTIAQGGVLPNIQAVLLPKK <sup>Acetyl</sup>42.01 TE

- ▶ fragmentation table for charge state 3+
- ▶ specType=etd
- ▶ score=37.74
- ▶ F113670.dat
- ▶ query=q50021.p1
- ▶ precursor=782.226050
- ▶ chargePrecursor=4
- ▶ itol=0.5

| AA    | c               | y               | z+1             | z+2            | z               | AA    |
|-------|-----------------|-----------------|-----------------|----------------|-----------------|-------|
| L[1]  | 44.577          | <b>1042.631</b> | <b>1037.291</b> | 0.672          | <b>1036.955</b> | L[28] |
| N[2]  | 82.392          | 1004.930        | <b>999.596</b>  | <b>999.932</b> | <b>999.260</b>  | N[28] |
| K[3]  | 125.090         | 966.927         | <b>961.582</b>  | 961.918        | <b>961.246</b>  | K[27] |
| L[4]  | 162.785         | 924.223         | 918.884         | 919.220        | 918.548         | L[26] |
| L[5]  | 200.479         | 886.520         | 881.189         | 881.525        | 880.883         | L[25] |
| Q[6]  | 239.887         | 843.839         | 838.494         | 838.830        | 838.185         | Q[24] |
| R[7]  | 271.520         | 829.827         | 824.487         | 824.823        | 824.151         | R[23] |
| V[8]  | 304.543         | 777.983         | 772.453         | 772.789        | 772.118         | V[22] |
| T[9]  | 338.226         | 744.770         | 739.431         | 739.767        | 739.095         | T[21] |
| I[10] | 375.920         | 711.080         | 705.748         | 706.084        | 705.412         | I[20] |
| A[11] | 399.599         | 673.303         | 668.053         | 668.389        | 667.711         | A[19] |
| Q[12] | 442.286         | 649.741         | <b>644.374</b>  | <b>644.710</b> | <b>644.038</b>  | Q[19] |
| G[13] | 461.293         | 607.028         | 601.688         | 602.024        | 601.352         | G[17] |
| G[14] | 480.300         | 589.021         | 583.681         | 583.017        | 582.345         | G[16] |
| V[15] | 513.323         | 569.019         | 563.674         | 564.010        | 563.339         | V[15] |
| L[16] | 551.017         | 535.991         | 530.651         | <b>530.987</b> | 530.315         | L[14] |
| F[17] | 583.358         | 498.290         | 492.950         | 493.282        | 492.620         | F[13] |
| T[18] | 621.383         | 465.941         | 460.605         | 460.941        | 460.270         | T[12] |
| I[19] | 659.077         | 427.931         | 422.591         | 422.927        | 422.255         | I[11] |
| Q[20] | 701.764         | 390.230         | 384.896         | 385.232        | 384.561         | Q[10] |
| A[21] | 725.443         | 347.550         | 342.210         | 342.546        | 341.874         | A[9]  |
| V[22] | 758.465         | 323.871         | 318.531         | 318.867        | 318.195         | V[8]  |
| L[23] | 796.190         | 290.845         | 285.508         | 285.844        | 285.172         | L[7]  |
| L[24] | 833.855         | 263.151         | 257.814         | 258.150        | 257.478         | L[6]  |
| P[25] | 866.206         | 215.450         | 210.119         | 210.455        | 209.783         | P[5]  |
| K[26] | 908.904         | 183.108         | 177.768         | 178.104        | 177.433         | K[4]  |
| K[27] | <b>945.606</b>  | 140.400         | 135.070         | 135.406        | 134.734         | K[3]  |
| T[28] | <b>999.288</b>  | 83.700          | 78.366          | 78.704         | 78.032          | T[2]  |
| E[29] | <b>1042.303</b> | 50.025          | 44.685          | 45.021         | 44.340          | E[1]  |





# sp | P22752 | H2A1\_MOUSE

SHHKAKGK<sup>Acetyl</sup>  
42.01

- ▶ fragmentation table for charge state 1+
- ▶ specType=etd
- ▶ score=25.31
- ▶ F113670.dat
- ▶ query=q7155\_p1
- ▶ precursor=312.179560
- ▶ chargePrecursor=3
- ▶ itol=0.5

| AA   | c              | y              | z+1            | z+2     | z              | AA   |
|------|----------------|----------------|----------------|---------|----------------|------|
| S[1] | 109.066        | <b>934.522</b> | <b>916.503</b> | 0.000   | 917.495        | S[8] |
| H[2] | <b>242.125</b> | 847.490        | 831.471        | 0.000   | 830.463        | H[7] |
| H[3] | <b>379.184</b> | <b>710.431</b> | <b>694.412</b> | 0.000   | 693.404        | H[6] |
| K[4] | <b>507.279</b> | 573.372        | <b>557.353</b> | 558.361 | 556.345        | K[5] |
| A[5] | <b>578.316</b> | 445.277        | <b>429.258</b> | 430.266 | <b>428.250</b> | A[4] |
| K[6] | 706.411        | 374.240        | <b>358.221</b> | 359.229 | 357.213        | K[3] |
| G[7] | <b>763.432</b> | 246.145        | 230.126        | 231.134 | 229.118        | G[2] |
| K[8] | 933.538        | 189.123        | 173.105        | 174.112 | 172.097        | K[1] |

# sp | P22752 | H2A1\_MOUSE

SHHKAKGK<sup>Acetyl</sup>  
42.01

- ▶ fragmentation table for charge state 2+
- ▶ specType=etd
- ▶ score=25.31
- ▶ F113670.dat
- ▶ query=q7155.p1
- ▶ precursor=312.179560
- ▶ chargePrecursor=3
- ▶ itol=0.5

| AA   | c              | y              | z+1            | z+2     | z       | AA   |
|------|----------------|----------------|----------------|---------|---------|------|
| S[1] | 53.037         | <b>467.765</b> | <b>459.755</b> | 0.504   | 459.251 | S[8] |
| H[2] | 121.566        | 424.248        | <b>416.239</b> | 0.504   | 415.735 | H[7] |
| H[3] | 190.095        | 355.719        | 347.710        | 0.504   | 347.206 | H[6] |
| K[4] | 254.143        | 287.190        | 279.180        | 279.684 | 278.676 | K[5] |
| A[5] | 289.662        | 223.142        | 215.133        | 215.637 | 214.629 | A[4] |
| K[6] | <b>353.709</b> | 187.624        | 179.614        | 180.118 | 179.110 | K[3] |
| G[7] | <b>382.220</b> | 123.576        | 115.567        | 116.071 | 115.063 | G[2] |
| K[8] | 467.272        | 95.063         | 87.056         | 87.560  | 86.552  | K[1] |



# sp | Q8CGP5 | H2A1F\_MOUSE

LAGNAAR<sup>Methyl D</sup>  
14.02

- ▶ fragmentation table for charge state 1+
- ▶ specType=cid
- ▶ score=43.01
- ▶ F113671.dat
- ▶ query=q2456\_p1
- ▶ precursor=401.214940
- ▶ chargePrecursor=2
- ▶ itol=0.5

| AA | a              | a*             | a $\beta$ | b              | b*             | b $\beta$ | y              | y*             | y $\beta$ | AA  |
|----|----------------|----------------|-----------|----------------|----------------|-----------|----------------|----------------|-----------|-----|
| L1 | 86.998         | 0.000          | 0.000     | 114.073        | 0.000          | 0.000     | 431.423        | 168.399        | 163.441   | L10 |
| A1 | <b>157.134</b> | 0.000          | 0.000     | <b>185.129</b> | 0.000          | 0.000     | <b>608.337</b> | 671.311        | 670.327   | A17 |
| G1 | 214.155        | 0.000          | 0.000     | <b>242.150</b> | 0.000          | 0.000     | <b>617.300</b> | <b>600.274</b> | 589.260   | G69 |
| N1 | <b>328.198</b> | 311.171        | 0.000     | <b>356.193</b> | <b>339.166</b> | 0.000     | <b>560.279</b> | 543.252        | 542.268   | N15 |
| A1 | 259.230        | <b>382.208</b> | 0.000     | <b>437.230</b> | <b>410.203</b> | 0.000     | <b>446.236</b> | 430.200        | 430.205   | A14 |
| A1 | <b>470.272</b> | 453.245        | 0.000     | 466.267        | <b>481.241</b> | 0.000     | <b>375.199</b> | 359.173        | 357.186   | A13 |
| R1 | 640.389        | 623.362        | 0.000     | 668.384        | 651.357        | 0.000     | <b>304.182</b> | 287.155        | 286.151   | R12 |
| G1 | 735.416        | 718.389        | 737.400   | 763.411        | 746.384        | 705.400   | 134.069        | 0.000          | 116.034   | G11 |



# sp | Q6GSS7 | H2A2A\_MOUSE

GK<sup>Methyl</sup> 14.02 VTIAQGGVLPNIQAVL

- ▶ fragmentation table for charge state 1+
- ▶ specType=etd
- ▶ score=89.00
- ▶ F113673.dat
- ▶ query=q15097\_p1
- ▶ precursor=598.028190
- ▶ chargePrecursor=3
- ▶ itol=0.5

| AA    | c               | y               | z+1             | z+2             | z               | AA    |
|-------|-----------------|-----------------|-----------------|-----------------|-----------------|-------|
| G[1]  | 75.055          | 1762.009        | <b>1776.050</b> | 8.900           | 1775.042        | G[18] |
| R[2]  | 217.106         | 1735.048        | 1719.029        | 1720.037        | 1718.021        | R[17] |
| V[3]  | <b>316.234</b>  | 1562.937        | 1576.918        | 1577.926        | 1576.910        | V[16] |
| T[4]  | <b>417.282</b>  | 1493.869        | <b>1477.850</b> | 1478.858        | 1476.842        | T[15] |
| I[5]  | <b>530.366</b>  | <b>1392.921</b> | <b>1376.902</b> | 1377.910        | 1375.894        | I[14] |
| A[6]  | <b>601.403</b>  | <b>1279.737</b> | <b>1263.718</b> | <b>1264.726</b> | 1262.710        | A[13] |
| G[7]  | <b>729.462</b>  | 1206.705        | 1192.681        | 1193.689        | <b>1191.673</b> | G[12] |
| G[8]  | <b>786.483</b>  | <b>1080.641</b> | 1064.622        | 1065.630        | 1063.615        | G[11] |
| G[9]  | <b>843.505</b>  | <b>1023.620</b> | <b>1007.601</b> | 1008.609        | 1006.593        | G[10] |
| V[10] | <b>942.573</b>  | 956.598         | <b>950.580</b>  | 951.587         | 949.572         | V[9]  |
| L[11] | 1053.667        | <b>807.530</b>  | <b>851.511</b>  | <b>852.519</b>  | 850.503         | L[8]  |
| P[12] | <b>1152.710</b> | <b>754.446</b>  | 759.437         | 759.435         | 737.410         | P[7]  |
| N[13] | 1266.753        | 657.393         | 641.374         | <b>642.382</b>  | 640.366         | N[6]  |
| I[14] | <b>1379.837</b> | 643.356         | <b>527.331</b>  | 528.339         | 526.324         | I[5]  |
| Q[15] | <b>1507.895</b> | 430.260         | 414.247         | 415.255         | 413.239         | Q[4]  |
| A[16] | 1519.933        | 302.207         | 286.189         | 287.197         | 285.181         | A[3]  |
| V[17] | <b>1678.001</b> | 218.170         | 215.152         | 216.159         | 214.144         | V[2]  |
| L[18] | 1791.005        | 132.102         | 118.083         | 117.091         | 115.075         | L[1]  |

# sp | Q6GSS7 | H2A2A\_MOUSE

GK<sup>Methyl</sup> 14.02 VTIAQGGVLPNIQAVL

- ▶ fragmentation table for charge state 2+
- ▶ specType=etd
- ▶ score=89.00
- ▶ F113673.dat
- ▶ query=q15097\_p1
- ▶ precursor=598.028190
- ▶ chargePrecursor=3
- ▶ itol=0.5

| AA |      | c              | y              | z+1            | z+2     | z              | AA    |
|----|------|----------------|----------------|----------------|---------|----------------|-------|
| G  | [1]  | 38.031         | <b>896.530</b> | <b>888.529</b> | 0.504   | <b>888.025</b> | G[18] |
| K  | [2]  | 109.087        | <b>868.027</b> | 860.018        | 860.522 | 859.514        | K[11] |
| V  | [3]  | 158.024        | 796.972        | 788.963        | 789.467 | 788.459        | V[16] |
| T  | [4]  | 209.145        | 747.436        | 739.429        | 739.932 | 738.925        | T[15] |
| I  | [5]  | 265.087        | 696.914        | 688.905        | 689.409 | 688.401        | I[14] |
| A  | [6]  | 301.205        | 640.372        | 632.363        | 632.867 | 631.859        | A[13] |
| Q  | [7]  | 365.235        | 604.854        | 596.844        | 597.348 | 596.340        | Q[12] |
| G  | [8]  | 393.745        | 640.824        | 632.815        | 633.319 | 632.311        | G[11] |
| G  | [9]  | 422.256        | 612.313        | 604.304        | 604.808 | 603.800        | G[10] |
| V  | [10] | 471.790        | 483.803        | 475.793        | 476.297 | 475.289        | V[9]  |
| L  | [11] | 538.332        | 434.269        | 426.259        | 426.763 | 425.755        | L[8]  |
| F  | [12] | 676.859        | 377.727        | 369.717        | 370.221 | 369.213        | F[7]  |
| N  | [13] | 633.889        | 359.206        | 351.191        | 351.695 | 350.687        | N[6]  |
| I  | [14] | <b>690.422</b> | 272.179        | 264.169        | 264.673 | 263.665        | I[5]  |
| Q  | [15] | <b>754.451</b> | 215.637        | 207.627        | 208.131 | 207.123        | Q[4]  |
| A  | [16] | 789.970        | 151.607        | 143.598        | 144.102 | 143.094        | A[3]  |
| V  | [17] | <b>839.504</b> | 116.089        | 108.079        | 108.583 | 107.576        | V[2]  |
| L  | [18] | <b>896.046</b> | 66.555         | 58.545         | 59.049  | 58.041         | L[1]  |





# sp | Q6GSS7 | H2A2A\_MOUSE

GK<sup>Methyl</sup> 14.02 VTIAQGGVLPNIQAVL

- ▶ fragmentation table for charge state 1+
- ▶ specType=cid
- ▶ score=55.96
- ▶ F113673.dat
- ▶ query=q15099\_p1
- ▶ precursor=896.538950
- ▶ chargePrecursor=2
- ▶ itol=0.5

| AA  | a              | a'             | a <sub>0</sub>  | b               | b'       | b <sub>0</sub>  | y               | y'             | y <sub>0</sub> | AA  |
|-----|----------------|----------------|-----------------|-----------------|----------|-----------------|-----------------|----------------|----------------|-----|
| Q1  | 30.004         | 0.000          | 0.000           | 58.004          | 0.000    | 0.000           | 172.208         | 172.000        | 172.000        | Q16 |
| K12 | 172.208        | 180.130        | 0.000           | 209.130         | 180.130  | 0.000           | 173.000         | 173.000        | 173.000        | K17 |
| V13 | 173.000        | 284.130        | 0.000           | 299.130         | 284.130  | 0.000           | 132.137         | 132.000        | 132.000        | V16 |
| T14 | 132.137        | 130.411        | 130.411         | 130.411         | 130.411  | 130.411         | <b>302.245</b>  | <b>143.209</b> | 143.209        | T15 |
| I15 | 143.209        | 488.131        | 488.131         | <b>511.340</b>  | 488.131  | <b>485.329</b>  | 132.000         | 132.000        | 132.000        | I14 |
| A16 | 485.329        | 538.351        | 538.351         | <b>584.377</b>  | 538.351  | <b>556.356</b>  | <b>1279.737</b> | 1282.750       | 1282.750       | A13 |
| Q17 | <b>884.440</b> | 609.431        | 609.431         | <b>712.435</b>  | 609.431  | 609.431         | <b>1208.700</b> | 1210.000       | 1210.000       | Q12 |
| Q18 | 712.435        | 724.431        | <b>723.451</b>  | <b>769.457</b>  | 724.431  | 724.431         | <b>1080.541</b> | 1083.613       | 1083.613       | Q11 |
| Q19 | 1083.613       | <b>781.457</b> | 781.457         | 819.470         | 819.470  | <b>808.460</b>  | <b>1023.620</b> | 1026.700       | 1026.700       | Q10 |
| V10 | 819.470        | 881.520        | <b>878.541</b>  | <b>925.547</b>  | 881.520  | <b>907.526</b>  | <b>949.572</b>  | 949.572        | 949.572        | V09 |
| L11 | 949.572        | 959.560        | <b>1008.631</b> | <b>1012.654</b> | 959.560  | <b>1020.620</b> | <b>867.330</b>  | 867.330        | 867.330        | L10 |
| P12 | 1012.654       | 1081.660       | 1081.660        | <b>1135.661</b> | 1081.660 | <b>1117.673</b> | <b>754.446</b>  | <b>737.418</b> | 737.418        | P11 |
| N13 | 1117.673       | 1204.720       | 1204.720        | <b>1249.726</b> | 1204.720 | 1204.720        | 1235.716        | 1235.716       | 1235.716       | N08 |
| T14 | 1249.726       | 1319.780       | 1319.780        | <b>1362.816</b> | 1319.780 | 1319.780        | 1344.800        | 1344.800       | 1344.800       | T09 |
| Q15 | 1344.800       | 1445.850       | 1445.850        | 1490.860        | 1445.850 | 1472.810        | <b>430.356</b>  | 431.210        | 431.210        | Q04 |
| A16 | 1472.810       | 1518.880       | 1518.880        | 1563.880        | 1518.880 | 1543.890        | 382.200         | 382.200        | 382.200        | A05 |
| V17 | 1543.890       | 1613.950       | 1613.950        | 1660.970        | 1613.950 | 1642.960        | 331.210         | 331.210        | 331.210        | V02 |
| L18 | 1642.960       | 1729.030       | 1729.030        | 1774.050        | 1729.030 | 1756.040        | 132.100         | 132.100        | 132.100        | L01 |



# sp | P15864 | H12\_MOUSE

LITKAVAASK <sup>Methyl</sup> E  
14.02

- ▶ fragmentation table for charge state 1+
- ▶ specType=cid
- ▶ score=53.95
- ▶ F113676.dat
- ▶ query=q15415\_p1
- ▶ precursor=572.851810
- ▶ chargePrecursor=2
- ▶ itol=0.5

| AA   | a              | y*       | a $\beta$ | b              | b*       | b $\beta$      | y              | y*       | y $\beta$ | AA   |
|------|----------------|----------|-----------|----------------|----------|----------------|----------------|----------|-----------|------|
| L11  | 86.798         | 0.000    | 0.000     | 114.907        | 0.000    | 0.000          | 114.908        | 1147.897 | 1148.903  | L111 |
| T12  | <b>199.180</b> | 0.000    | 0.000     | <b>227.175</b> | 0.000    | 0.000          | 1151.831       | 1014.924 | 2101.769  | T121 |
| T13  | 300.720        | 0.000    | 200.210   | <b>320.223</b> | 0.000    | 310.213        | <b>818.525</b> | 905.490  | 600.515   | T131 |
| K14  | <b>302.622</b> | 811.207  | 410.311   | <b>436.318</b> | 810.201  | <b>438.307</b> | <b>817.478</b> | 500.451  | 700.467   | K141 |
| A15  | <b>409.340</b> | 802.214  | 401.300   | <b>527.325</b> | 800.204  | <b>509.315</b> | <b>400.303</b> | 272.500  | 107.512   | A151 |
| V16  | 408.429        | 501.402  | 500.400   | <b>626.424</b> | 500.397  | <b>608.413</b> | <b>610.350</b> | 505.370  | 500.355   | V161 |
| A17  | 400.400        | 602.400  | 601.400   | <b>697.461</b> | 600.404  | <b>679.450</b> | <b>519.277</b> | 500.251  | 601.267   | A171 |
| A18  | 740.503        | 723.476  | 722.482   | <b>748.498</b> | 731.471  | <b>750.467</b> | <b>448.340</b> | 430.214  | 430.230   | A181 |
| S19  | 877.876        | 810.848  | 809.850   | <b>855.835</b> | 810.840  | <b>837.819</b> | <b>377.203</b> | 360.177  | 800.003   | S191 |
| R100 | 890.846        | 852.819  | 851.830   | 907.845        | 880.814  | 879.830        | <b>290.171</b> | 278.144  | 272.060   | R100 |
| E11  | 1000.000       | 1001.000 | 1000.000  | 1120.000       | 1100.000 | 1000.000       | 140.000        | 0.000    | 130.000   | E111 |



# sp | P15864 | H12\_MOUSE

LITKAVAASK <sup>Methyl</sup> E  
14.02

- ▶ fragmentation table for charge state 1+
- ▶ specType=etd
- ▶ score=61.27
- ▶ F113676.dat
- ▶ query=q15418\_p1
- ▶ precursor=382.237220
- ▶ chargePrecursor=3
- ▶ itol=0.5

| AA     | c              | y               | z+1            | z+2     | z        | AA     |
|--------|----------------|-----------------|----------------|---------|----------|--------|
| L [3]  | 131.118        | <b>1144.694</b> | 1128.675       | 0.000   | 1127.067 | L [11] |
| T [2]  | <b>244.202</b> | 1031.610        | 1015.501       | 0.000   | 1014.583 | T [10] |
| T [3]  | <b>345.250</b> | 918.525         | <b>902.507</b> | 0.000   | 901.490  | T [9]  |
| K [4]  | <b>473.345</b> | 817.473         | <b>801.459</b> | 802.467 | 800.451  | K [8]  |
| A [5]  | <b>544.392</b> | 689.393         | <b>673.364</b> | 674.372 | 672.366  | A [7]  |
| V [6]  | <b>644.450</b> | 619.340         | <b>602.327</b> | 603.335 | 601.319  | V [6]  |
| A [7]  | <b>714.487</b> | <b>519.277</b>  | <b>503.259</b> | 504.266 | 502.251  | A [5]  |
| A [8]  | <b>785.524</b> | 448.240         | <b>432.221</b> | 433.229 | 431.214  | A [4]  |
| S [9]  | <b>872.556</b> | 377.203         | <b>361.184</b> | 362.192 | 360.177  | S [3]  |
| R [10] | 1014.667       | 290.171         | <b>274.152</b> | 275.160 | 273.144  | R [2]  |
| E [11] | 1143.710       | 148.060         | 132.042        | 133.050 | 131.034  | E [1]  |

# sp | P15864 | H12\_MOUSE

LITKAVAASK <sup>Methyl</sup> E  
14.02

- ▶ fragmentation table for charge state 2+
- ▶ specType=etd
- ▶ score=61.27
- ▶ F113676.dat
- ▶ query=q15418\_p1
- ▶ precursor=382.237220
- ▶ chargePrecursor=3
- ▶ itol=0.5

| AA     | c              | y              | z+1            | z+2     | z              | AA     |
|--------|----------------|----------------|----------------|---------|----------------|--------|
| L [1]  | 66.093         | <b>572.850</b> | <b>564.841</b> | 0.504   | <b>564.337</b> | L [11] |
| I [2]  | 122.605        | 516.308        | <b>508.299</b> | 0.504   | <b>507.795</b> | I [10] |
| T [3]  | 173.128        | 459.766        | 451.757        | 0.504   | 451.253        | T [9]  |
| K [4]  | 227.176        | 409.243        | 401.233        | 403.737 | 400.729        | K [8]  |
| A [5]  | 272.694        | <b>345.195</b> | 337.186        | 337.690 | 336.682        | A [7]  |
| V [6]  | 322.229        | 309.676        | 301.667        | 302.171 | 301.163        | V [6]  |
| A [7]  | 357.747        | 280.142        | 252.133        | 252.637 | 251.629        | A [5]  |
| A [8]  | 393.266        | 224.624        | 216.614        | 217.118 | 216.110        | A [4]  |
| S [9]  | 436.782        | 189.105        | 181.096        | 181.600 | 180.592        | S [3]  |
| K [10] | <b>507.837</b> | 145.589        | 137.580        | 138.084 | 137.076        | K [2]  |
| E [11] | <b>572.358</b> | 74.534         | 66.524         | 67.028  | 66.021         | E [1]  |





# sp | P84244 | H33\_MOUSE

FK<sup>Methyl</sup> TDLRFQSAAGALQE  
14.02

- ▶ fragmentation table for charge state 1+
- ▶ specType=etd
- ▶ score=53.19
- ▶ F113676.dat
- ▶ query=q36830.p1
- ▶ precursor=637.012920
- ▶ chargePrecursor=3
- ▶ itol=0.5

| AA     | c               | y               | z=1             | z=2             | z               | AA     |
|--------|-----------------|-----------------|-----------------|-----------------|-----------------|--------|
| F [1]  | 165.102         | <b>1909.018</b> | <b>1892.999</b> | 0.000           | 1891.961        | F [17] |
| K [2]  | 307.213         | 1181.349        | 745.133         | 1140.338        | 1744.923        | K [6]  |
| T [3]  | <b>408.261</b>  | 1019.839        | <b>1603.820</b> | 1004.826        | 1502.812        | T [18] |
| D [4]  | <b>523.287</b>  | 1518.791        | <b>1502.772</b> | 1503.780        | 1501.765        | D [14] |
| L [5]  | <b>636.372</b>  | 1801.764        | 1387.745        | <b>1388.753</b> | 1389.738        | L [13] |
| R [6]  | <b>792.473</b>  | 1290.680        | 1274.661        | 1275.669        | <b>1273.654</b> | R [12] |
| F [7]  | <b>939.541</b>  | 1134.579        | <b>1118.560</b> | 1119.568        | 1117.552        | F [11] |
| Q [8]  | 1087.698        | 889.511         | <b>971.492</b>  | 972.500         | 970.484         | Q [10] |
| S [9]  | <b>1154.632</b> | 859.452         | 843.433         | 844.441         | 842.425         | S [9]  |
| A [10] | <b>1225.669</b> | 772.420         | <b>756.401</b>  | 757.409         | 755.393         | A [8]  |
| A [11] | 1286.706        | 701.383         | 685.364         | 686.372         | 684.356         | A [7]  |
| I [12] | <b>1409.790</b> | 630.346         | 614.327         | 615.335         | 613.319         | I [9]  |
| G [13] | 1469.811        | 517.262         | 501.243         | 502.251         | 500.235         | G [5]  |
| A [14] | <b>1537.849</b> | 460.240         | 444.221         | 445.229         | 443.214         | A [4]  |
| L [15] | <b>1650.933</b> | 389.203         | 373.184         | 374.192         | 372.177         | L [3]  |
| Q [16] | <b>1778.991</b> | 276.110         | 260.100         | 261.108         | 259.092         | Q [2]  |
| E [17] | 1908.014        | 148.060         | 132.042         | 133.050         | 131.034         | E [1]  |

# sp | P84244 | H33\_MOUSE

FK<sup>Methyl</sup> TDLRFQSAAGALQE  
14.02

- ▶ fragmentation table for charge state 2+
- ▶ specType=etd
- ▶ score=53.19
- ▶ F113676.dat
- ▶ query=q36830\_p1
- ▶ precursor=637.012920
- ▶ chargePrecursor=3
- ▶ itol=0.5

| AA    | c              | y              | z+1            | z+2            | z       | AA    |
|-------|----------------|----------------|----------------|----------------|---------|-------|
| F[1]  | 83.095         | <b>955.013</b> | <b>947.003</b> | 0.504          | 946.499 | F[17] |
| K[2]  | 154.110        | 881.478        | <b>873.469</b> | <b>873.973</b> | 872.965 | K[16] |
| T[3]  | 294.634        | 810.423        | 802.414        | 802.918        | 801.910 | T[15] |
| D[4]  | 262.147        | 759.899        | 751.890        | 752.394        | 751.386 | D[14] |
| L[5]  | 318.689        | 702.386        | 694.376        | 694.880        | 693.872 | L[13] |
| R[6]  | 386.740        | 645.844        | 637.834        | 638.338        | 637.330 | R[12] |
| T[7]  | <b>470.274</b> | 587.793        | 579.784        | 580.288        | 579.280 | T[11] |
| Q[8]  | 434.303        | 494.250        | 486.240        | 486.744        | 485.746 | Q[10] |
| S[9]  | 577.819        | 430.230        | 422.220        | 422.724        | 421.716 | S[9]  |
| A[10] | 613.138        | 386.714        | 378.704        | 379.208        | 378.200 | A[8]  |
| A[11] | 648.857        | 351.195        | 343.186        | 343.690        | 342.682 | A[7]  |
| I[12] | 705.399        | 315.676        | 307.667        | 308.171        | 307.163 | I[6]  |
| G[13] | <b>733.909</b> | 269.134        | 261.125        | 261.629        | 260.621 | G[5]  |
| A[14] | <b>769.428</b> | 230.624        | 222.614        | 223.118        | 222.110 | A[4]  |
| L[15] | <b>825.970</b> | 195.105        | 187.096        | 187.600        | 186.592 | L[3]  |
| Q[16] | <b>869.999</b> | 138.563        | 130.554        | 131.058        | 130.050 | Q[2]  |
| E[17] | <b>954.521</b> | 74.534         | 66.524         | 67.028         | 66.021  | E[1]  |



# sp | Q64522 | H2A2B\_MOUSE

LNK<sup>Propionyl</sup><sub>56.03</sub> LLGGVTIAQGGVLPNIQAVLLPKKTE

- ▶ fragmentation table for charge state 1+
- ▶ specType=etd
- ▶ score=50.28
- ▶ F113676.dat
- ▶ query=q49493.p1
- ▶ precursor=760.960020
- ▶ chargePrecursor=4
- ▶ itol=0.5

| AA    | c               | y              | z+1             | z+2             | z               | AA    |
|-------|-----------------|----------------|-----------------|-----------------|-----------------|-------|
| L[1]  | 131.118         | 3040.813       | 3024.795        | 0.000           | 3023.787        | L[28] |
| N[2]  | 245.161         | 2927.729       | 2911.710        | 2912.718        | 2910.703        | N[28] |
| K[3]  | 429.282         | 2813.686       | 2797.668        | 2798.675        | 2796.660        | K[27] |
| L[4]  | 542.366         | 2629.565       | 2613.546        | 2614.554        | 2612.539        | L[26] |
| L[5]  | 655.450         | 2516.481       | 2500.462        | 2501.470        | 2499.454        | L[25] |
| G[6]  | 712.472         | 2403.397       | 2387.379        | 2388.386        | 2386.370        | G[24] |
| G[7]  | <b>769.493</b>  | 2246.370       | 2230.351        | 2231.359        | 2229.343        | G[23] |
| V[8]  | <b>868.561</b>  | 2289.354       | 2273.335        | 2274.343        | 2272.327        | V[22] |
| T[9]  | 969.609         | 2190.286       | 2174.267        | 2175.275        | 2173.259        | T[21] |
| T[10] | <b>1082.693</b> | 2089.238       | 2073.219        | 2074.227        | 2072.211        | T[20] |
| A[11] | <b>1153.730</b> | 1976.154       | <b>1960.135</b> | 1961.143        | 1959.127        | A[19] |
| Q[12] | <b>1261.769</b> | 1929.131       | 1913.112        | <b>1896.106</b> | 1898.090        | Q[18] |
| G[13] | <b>1338.810</b> | 1777.058       | 1761.039        | 1762.047        | 1760.032        | G[17] |
| G[14] | <b>1395.832</b> | 1720.037       | <b>1704.018</b> | 1705.026        | 1703.010        | G[16] |
| V[15] | 1494.900        | 1663.015       | 1646.997        | 1648.004        | 1646.989        | V[15] |
| L[16] | 1607.984        | 1561.947       | <b>1547.928</b> | 1548.936        | 1546.920        | L[14] |
| T[17] | 1705.037        | 1450.863       | 1434.844        | 1435.852        | 1433.836        | T[13] |
| N[18] | 1819.080        | 1353.810       | 1337.791        | <b>1338.799</b> | 1336.783        | N[12] |
| I[19] | 1932.164        | 1239.767       | 1223.748        | 1224.756        | <b>1222.741</b> | I[11] |
| Q[20] | 2060.223        | 1126.683       | 1110.664        | 1111.672        | 1109.656        | Q[10] |
| A[21] | 2131.260        | 908.624        | 902.605         | 903.614         | 901.598         | A[9]  |
| V[22] | 2230.338        | <b>927.587</b> | 911.568         | 912.576         | <b>910.561</b>  | V[8]  |
| L[23] | 2333.412        | 826.519        | 810.500         | <b>813.508</b>  | 811.483         | L[7]  |
| L[24] | 2456.496        | 715.435        | <b>695.416</b>  | <b>700.424</b>  | 698.408         | L[6]  |
| P[25] | 2563.540        | 602.351        | 586.332         | 587.340         | 585.324         | P[5]  |
| K[26] | 2681.644        | 505.268        | <b>489.279</b>  | 490.287         | 488.271         | K[4]  |
| K[27] | 2809.739        | 377.203        | <b>361.184</b>  | 362.192         | 360.177         | K[3]  |
| T[28] | 2910.787        | 249.108        | 243.089         | 244.097         | 242.082         | T[2]  |
| E[29] | 3039.829        | 148.060        | 132.040         | 133.050         | 131.034         | E[1]  |

# sp | Q64522 | H2A2B\_MOUSE

LNK<sup>Propionyl</sup><sub>56.03</sub> LLGGVTIAQGGVLPNIQAVLLPKKTE

- ▶ fragmentation table for charge state 2+
- ▶ specType=etd
- ▶ score=50.28
- ▶ F113676.dat
- ▶ query=q49493.p1
- ▶ precursor=760.960020
- ▶ chargePrecursor=4
- ▶ itol=0.5

| AA   | c               | y              | z+1             | z+2             | z               | AA   |
|------|-----------------|----------------|-----------------|-----------------|-----------------|------|
| L 1  | 66.063          | 1520.935       | 1512.951        | 0.504           | <b>1512.397</b> | L 28 |
| N 2  | 123.084         | 1464.368       | <b>1456.359</b> | 1456.803        | <b>1455.855</b> | N 28 |
| K 3  | 215.145         | 1407.947       | 1399.337        | 1399.841        | 1398.834        | K 27 |
| L 4  | 271.687         | 1315.289       | 1307.277        | 1307.781        | 1306.773        | L 26 |
| L 5  | 328.229         | 1258.744       | 1250.735        | 1251.239        | 1250.231        | L 25 |
| G 6  | 385.779         | 1202.202       | 1194.193        | 1194.697        | 1193.689        | G 24 |
| G 7  | 385.250         | 1173.691       | 1165.682        | 1166.186        | 1165.178        | G 23 |
| V 8  | 434.784         | 1145.181       | <b>1137.171</b> | 1137.675        | <b>1136.667</b> | V 22 |
| T 9  | 483.309         | 1095.646       | <b>1087.637</b> | <b>1088.141</b> | 1087.133        | T 21 |
| I 10 | 541.850         | 1045.123       | <b>1037.113</b> | <b>1037.617</b> | 1036.609        | I 20 |
| A 11 | 577.369         | 998.581        | <b>990.571</b>  | <b>981.075</b>  | 980.067         | A 19 |
| Q 12 | 643.398         | 953.062        | <b>945.053</b>  | <b>945.557</b>  | 944.549         | Q 18 |
| G 13 | 689.909         | 899.033        | <b>881.023</b>  | 881.527         | <b>880.519</b>  | G 17 |
| G 14 | 698.420         | <b>860.522</b> | <b>852.513</b>  | <b>853.017</b>  | 852.009         | G 16 |
| V 15 | 747.954         | 832.011        | <b>824.002</b>  | <b>824.506</b>  | 823.498         | V 15 |
| L 16 | 804.496         | 782.477        | <b>774.468</b>  | 774.972         | 773.964         | L 14 |
| T 17 | <b>853.022</b>  | <b>725.935</b> | 717.926         | 718.430         | 717.422         | T 13 |
| N 18 | 919.944         | 677.409        | 669.399         | 669.903         | 668.895         | N 12 |
| I 19 | 966.586         | 626.867        | 612.878         | 612.882         | 611.874         | I 11 |
| Q 20 | <b>1030.615</b> | 563.845        | 555.839         | 556.340         | 555.332         | Q 10 |
| A 21 | 1066.134        | 499.616        | 491.607         | 492.110         | 491.303         | A 9  |
| V 22 | <b>1115.668</b> | 464.297        | 456.288         | 456.792         | 455.784         | V 8  |
| L 23 | <b>1172.210</b> | 414.763        | 406.754         | 407.256         | 406.250         | L 7  |
| L 24 | 1228.752        | 358.221        | 350.211         | 350.716         | 349.709         | L 6  |
| P 25 | <b>1277.278</b> | 301.679        | 293.670         | 294.174         | 293.166         | P 5  |
| K 26 | <b>1341.326</b> | 253.153        | 245.143         | 245.647         | 244.639         | K 4  |
| K 27 | <b>1405.373</b> | 189.105        | 181.096         | 181.600         | 180.592         | K 3  |
| T 28 | <b>1455.897</b> | 125.058        | 117.049         | 117.552         | 116.544         | T 2  |
| E 29 | 1530.418        | 74.834         | 66.826          | 67.328          | 66.821          | E 1  |

# sp | Q64522 | H2A2B\_MOUSE

LNK<sup>Propionyl</sup><sub>56.03</sub> LLGGVTIAQGGVLPNIQAVLLPKKTE

- ▶ fragmentation table for charge state 3+
- ▶ specType=etd
- ▶ score=50.28
- ▶ F113676.dat
- ▶ query=q49493.p1
- ▶ precursor=760.960020
- ▶ chargePrecursor=4
- ▶ itol=0.5

| AA    | c              | y               | z+1             | z+2            | z               | AA    |
|-------|----------------|-----------------|-----------------|----------------|-----------------|-------|
| L  1  | 44.377         | <b>1014.276</b> | <b>1008.936</b> | 0.672          | <b>1008.600</b> | L 20  |
| N  2  | 62.392         | 976.581         | <b>971.242</b>  | <b>971.578</b> | <b>970.906</b>  | N 28  |
| K  3  | 143.766        | 938.567         | 933.227         | 933.563        | 932.891         | K 27  |
| L  4  | 181.460        | 877.193         | 871.854         | 872.190        | 871.518         | L 26  |
| L  5  | 219.155        | 839.499         | 834.159         | 834.495        | 833.823         | L 25  |
| G  6  | 238.103        | 801.804         | 796.464         | 796.800        | <b>796.128</b>  | G 24  |
| G  7  | 257.109        | 782.767         | 777.427         | 777.763        | 777.121         | G 23  |
| V  8  | 290.192        | 763.790         | 758.450         | 758.786        | 758.114         | V 22  |
| T  9  | 323.875        | 730.767         | 725.427         | 725.763        | 725.091         | T 21  |
| I 10  | <b>361.569</b> | 697.084         | 691.745         | 692.081        | 691.409         | I 20  |
| A 11  | 385.268        | 658.389         | 654.050         | 654.386        | 653.714         | A 19  |
| Q 12  | 427.934        | 636.720         | 630.371         | 630.707        | 630.035         | Q 18  |
| G 13  | 446.942        | 593.024         | 587.685         | 588.021        | 587.349         | G 17  |
| G 14  | 465.949        | 574.017         | 568.678         | 569.013        | 568.342         | G 16  |
| V 15  | 466.972        | 555.010         | 549.670         | 550.006        | 549.334         | V 15  |
| L 16  | 536.666        | 521.987         | 516.648         | 516.984        | 516.312         | L 14  |
| F 17  | 569.017        | 484.292         | 478.953         | 479.289        | 478.617         | F 13  |
| Tu 18 | 607.693        | 451.942         | 446.603         | 446.939        | 446.266         | Tu 12 |
| I 19  | 644.726        | 413.927         | 408.588         | 408.924        | 408.252         | I 11  |
| Q 20  | 687.412        | 376.213         | 370.893         | 371.229        | 370.557         | Q 10  |
| A 21  | 711.091        | 333.546         | 328.207         | 328.543        | 327.871         | A 9   |
| V 22  | 744.114        | 309.867         | 304.528         | 304.864        | 304.192         | V 8   |
| L 23  | 781.899        | 276.844         | 271.505         | 271.841        | 271.169         | L 7   |
| L 24  | 819.954        | 260.150         | 253.810         | 254.146        | 253.474         | L 6   |
| P 25  | 851.855        | 201.655         | 195.316         | 195.651        | 195.000         | P 5   |
| K 26  | 894.553        | 169.104         | 163.765         | 164.101        | 163.429         | K 4   |
| K 27  | <b>937.251</b> | 126.406         | 121.066         | 121.402        | 120.730         | K 3   |
| T 28  | <b>970.934</b> | 83.708          | 78.368          | 78.704         | 78.032          | T 2   |
| E 29  | 1013.948       | 50.025          | 44.685          | 45.021         | 44.349          | E 1   |

# sp | Q6GSS7 | H2A2A\_MOUSE

LNKLLGK <sup>Dimethyl</sup> VTIAQGGVLPNIQAVLLPKKTE  
28.03

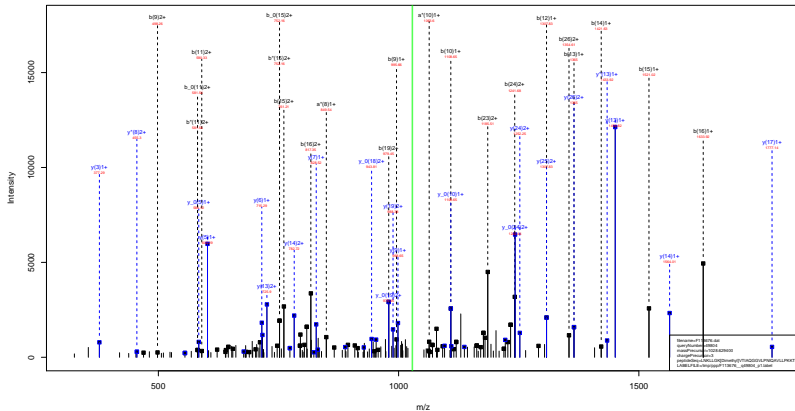

# sp | Q6GSS7 | H2A2A\_MOUSE

LNKLLGK <sup>Dimethyl</sup> <sub>28.03</sub> VTIAQGGVLPNIQAVLLPKKTE

- ▶ fragmentation table for charge state 1+
- ▶ specType=cid
- ▶ score=75.62
- ▶ F113676.dat
- ▶ query=q49804.p1
- ▶ precursor=1028.629400
- ▶ chargePrecursor=3
- ▶ itol=0.5

| AA   | a              | a'             | a,β            | b              | b'             | b,β     | y              | y'             | y,β            | AA   |
|------|----------------|----------------|----------------|----------------|----------------|---------|----------------|----------------|----------------|------|
| L1   | 86302          | 8399           | 0.000          | 114709         | 9340           | 0.000   | 993189         | 3498399        | 893881         | L129 |
| N1   | 230139         | 331111         | 0.000          | 230139         | 211188         | 0.000   | 2491181        | 2841181        | 2942179        | N20  |
| K1   | 708174         | 311208         | 0.000          | 308129         | 130103         | 0.000   | 8591194        | 9291194        | 9391194        | K27  |
| L14  | 441111         | 404100         | 0.000          | <b>408131</b>  | 403087         | 0.000   | 4748109        | 4713104        | 4713089        | L104 |
| L15  | 304100         | 337108         | 0.000          | 304100         | 308111         | 0.000   | 3015100        | 2946100        | 2949101        | L124 |
| G16  | 311111         | 314107         | 0.000          | 311111         | 308111         | 0.000   | 3005102        | 2993102        | 2993101        | G24  |
| K17  | 187100         | 180104         | 0.000          | <b>195140</b>  | 199109         | 0.000   | 3481400        | 3438104        | 3438100        | K23  |
| V18  | 309101         | <b>349102</b>  | 0.000          | <b>304113</b>  | 307107         | 0.000   | 3081101        | 2912101        | 2912101        | V22  |
| T19  | 397108         | 397108         | <b>349102</b>  | <b>393101</b>  | 393101         | 0.000   | 397108         | 393101         | 393101         | T21  |
| I10  | <b>1088178</b> | <b>1083174</b> | <b>1862140</b> | <b>1108178</b> | <b>1081179</b> | 0.000   | 1088178        | 1080178        | 1081177        | I26  |
| A111 | 1111107        | 1134101        | 1143177        | <b>1178178</b> | <b>1162176</b> | 1181172 | 1810111        | 1849111        | 1849111        | A109 |
| G123 | 1178108        | 1182109        | 1201110        | <b>1301101</b> | <b>1190114</b> | 1198108 | 1820111        | 1820111        | 1820111        | G10  |
| G15  | 1138109        | 118104         | 118109         | <b>1384101</b> | 1371101        | 1386109 | <b>1777108</b> | 1769101        | 1769108        | G17  |
| G14  | 1081089        | 1076101        | 1101101        | <b>1421104</b> | 1414101        | 1401101 | 1142101        | 1142101        | 1142101        | G16  |
| V15  | 309101         | 319101         | 319101         | <b>1520102</b> | 1510102        | 1500101 | 1820101        | 1820101        | 1820101        | V10  |
| L104 | 309101         | 309101         | 309101         | <b>1634103</b> | 1634103        | 1634103 | <b>1563101</b> | 1564101        | 1564101        | L114 |
| P117 | 1113104        | 1080108        | 1080108        | 1114108        | 1114108        | 1113101 | <b>1450101</b> | <b>1433101</b> | 1419101        | P115 |
| N108 | 1811111        | 1800111        | 1800111        | 1800111        | 1800111        | 1800111 | 1811111        | 1811111        | 1811111        | N10  |
| E19  | 3101101        | 3111101        | 3121101        | 3091101        | 3091101        | 3091101 | 1701101        | 1702111        | <b>1721101</b> | E11  |
| Q20  | 3081101        | 3041101        | 3041101        | 3081101        | 3081101        | 3081101 | 1701101        | <b>1108101</b> | <b>1108101</b> | Q10  |
| A21  | 3081101        | 3081101        | 3081101        | 3081101        | 3081101        | 3081101 | <b>108101</b>  | 108101         | 108101         | A8   |
| V22  | 3081101        | 3081101        | 3081101        | 3081101        | 3081101        | 3081101 | <b>107101</b>  | 107101         | 107101         | V10  |
| L124 | 3041101        | 3041101        | 3041101        | 3041101        | 3041101        | 3041101 | <b>108101</b>  | 108101         | 108101         | L11  |
| L124 | 3041101        | 3041101        | 3041101        | 3041101        | 3041101        | 3041101 | <b>111101</b>  | 111101         | 111101         | L11  |
| P25  | 3011101        | 3011101        | 3011101        | 3011101        | 3011101        | 3011101 | <b>103101</b>  | 103101         | 103101         | P16  |
| K26  | 3011101        | 3011101        | 3011101        | 3011101        | 3011101        | 3011101 | 103101         | 103101         | 103101         | K14  |
| L127 | 3011101        | 3011101        | 3011101        | 3011101        | 3011101        | 3011101 | <b>107101</b>  | 107101         | 107101         | L12  |
| L106 | 3008104        | 3008101        | 3008101        | 3008101        | 3008101        | 3008101 | 100101         | 100101         | 100101         | L12  |
| E29  | 3001101        | 3001101        | 3001101        | 3001101        | 3001101        | 3001101 | 100101         | 100101         | 100101         | E11  |



# sp | Q6GSS7 | H2A2A\_MOUSE

LNKLLGK <sup>Dimethyl</sup>VTIAQGGVLPNIQAVLLPKKTE  
28.03

- ▶ fragmentation table for charge state 2+
- ▶ specType=cid
- ▶ score=75.62
- ▶ F113676.dat
- ▶ query=q49804\_p1
- ▶ precursor=1028.629400
- ▶ chargePrecursor=3
- ▶ itol=0.5

| AA  | a               | a'              | a,Δ   | b               | b'              | b,Δ   | y               | y'              | y,Δ             | AA   |
|-----|-----------------|-----------------|-------|-----------------|-----------------|-------|-----------------|-----------------|-----------------|------|
| L1  | 45              | 501             | 0.500 | 0.500           | 07949           | 0.500 | 1562.490        | 1119.030        | 0113.444        | L129 |
| N1  | 102             | 117             | 0.500 | 0.500           | 114371          | 0.500 | 1480.587        | 1447.084        | 1479.502        | N24  |
| K1  | 119             | 122             | 0.500 | 0.500           | 119103          | 0.500 | 1529.503        | 1429.274        | 1471.001        | K27  |
| L14 | 221             | 483             | 0.500 | 0.500           | 239140          | 0.500 | <b>1384.630</b> | 1388.325        | 1310.611        | L128 |
| L15 | 227             | 150             | 0.500 | 0.500           | 247120          | 0.500 | <b>1386.390</b> | 1349.180        | 1309.201        | L124 |
| G16 | 236             | 102             | 0.500 | 0.500           | 252141          | 0.500 | <b>1251.750</b> | 1451.743        | <b>1342.740</b> | G24  |
| K17 | 384             | 478             | 0.500 | 0.500           | 388120          | 0.500 | 1221.484        | 1214.731        | 1144.239        | K122 |
| V18 | 431             | 613             | 0.500 | 0.500           | 437120          | 0.500 | 1210.180        | <b>1136.047</b> | 1138.170        | V22  |
| T19 | 458             | 110             | 0.500 | 0.500           | <b>476.335</b>  | 0.500 | <b>1075.540</b> | 1318.210        | 1200.941        | T12  |
| R14 | 480             | 879             | 0.500 | 0.500           | <b>554.876</b>  | 0.500 | 1400.141        | 1036.406        | 1036.111        | R26  |
| A11 | 477             | 577             | 0.500 | 0.500           | <b>590.395</b>  | 0.500 | <b>988.081</b>  | 980.081         | <b>978.575</b>  | A19  |
| G13 | <b>646.427</b>  | 133.813         | 0.500 | <b>654.426</b>  | <b>646.911</b>  | 0.500 | <b>953.082</b>  | 968.549         | <b>964.527</b>  | G10  |
| G18 | 668             | 679             | 0.500 | 0.500           | <b>682.938</b>  | 0.500 | <b>889.033</b>  | 886.814         | 869.217         | G17  |
| G14 | 697             | 443             | 0.500 | 0.500           | <b>711.446</b>  | 0.500 | <b>702.440</b>  | 691.212         | 681.317         | G16  |
| V15 | <b>746.982</b>  | 129.449         | 0.500 | <b>746.980</b>  | <b>752.482</b>  | 0.500 | <b>832.011</b>  | <b>821.498</b>  | 822.006         | V10  |
| L16 | <b>883.524</b>  | <b>716.011</b>  | 0.500 | <b>817.520</b>  | <b>808.008</b>  | 0.500 | <b>782.477</b>  | <b>771.064</b>  | <b>773.472</b>  | L14  |
| P17 | 887             | 693             | 0.500 | 0.500           | <b>888.048</b>  | 0.500 | <b>725.935</b>  | 717.422         | <b>716.930</b>  | P15  |
| N18 | <b>908.472</b>  | 368.969         | 0.500 | 0.500           | <b>914.936</b>  | 0.500 | <b>917.408</b>  | 888.288         | 868.367         | N13  |
| R19 | 967             | 614             | 0.500 | 0.500           | <b>976.612</b>  | 0.500 | 958.197         | 951.274         | 911.367         | R11  |
| G20 | 1021            | 110             | 0.500 | 0.500           | 1026.944        | 0.500 | 1011.641        | <b>555.312</b>  | <b>554.840</b>  | G18  |
| A21 | <b>1085.182</b> | 306.649         | 0.500 | 0.500           | <b>1076.180</b> | 0.500 | <b>1076.154</b> | 1069.819        | 1068.514        | A20  |
| V22 | <b>1114.696</b> | 1108.110        | 0.500 | 0.500           | <b>1120.180</b> | 0.500 | 104.210         | <b>455.784</b>  | <b>455.292</b>  | V18  |
| L23 | <b>1173.238</b> | <b>1162.725</b> | 0.500 | <b>1162.233</b> | <b>1185.236</b> | 0.500 | <b>1176.727</b> | <b>1176.230</b> | 1174.761        | L17  |
| L24 | <b>1227.780</b> | <b>1218.267</b> | 0.500 | 0.500           | <b>1234.776</b> | 0.500 | <b>1232.773</b> | 1228.266        | 1227.771        | L16  |
| P25 | 1290            | 1254            | 0.500 | 0.500           | <b>1354.352</b> | 0.500 | 1244.100        | 1241.610        | 1244.147        | P24  |
| K26 | 1302            | 1214            | 0.500 | 0.500           | 1314.100        | 0.500 | 1251.153        | 1244.610        | 1244.147        | K24  |
| K27 | 1444            | 1414            | 0.500 | 0.500           | 1444.100        | 0.500 | 1444.100        | 1444.100        | 1444.100        | K23  |
| L28 | 1454            | 1404            | 0.500 | 0.500           | 1454.100        | 0.500 | 1454.100        | 1454.100        | 1454.100        | L22  |
| L29 | 1510            | 1474            | 0.500 | 0.500           | 1510.100        | 0.500 | 1510.100        | 1510.100        | 1510.100        | L21  |



# sp | Q6GSS7 | H2A2A\_MOUSE

LNKLLGK <sup>Dimethyl</sup> <sub>28.03</sub> VTIAQGGVLPNIQAVLLPKKTE

- ▶ fragmentation table for charge state 1+
- ▶ specType=etd
- ▶ score=40.13
- ▶ F113676.dat
- ▶ query=q49805.p1
- ▶ precursor=1028.629400
- ▶ chargePrecursor=3
- ▶ itol=0.5

| AA  | c               | y               | z+1             | z+2             | z        | AA  |
|-----|-----------------|-----------------|-----------------|-----------------|----------|-----|
| L1  | 131.118         | 3083.892        | 3067.873        | 0.000           | 3066.865 | L26 |
| N2  | 245.161         | 2970.808        | 2954.789        | 2938.797        | 2953.781 | N28 |
| K3  | 373.256         | 2856.765        | 2840.746        | 2841.754        | 2839.738 | K27 |
| L4  | 486.340         | 2728.670        | 2712.651        | 2713.659        | 2711.643 | L26 |
| L5  | 599.424         | 2615.585        | 2599.567        | 2600.575        | 2598.559 | L25 |
| G6  | <b>636.445</b>  | 2502.500        | 2486.483        | 2487.491        | 2485.475 | G24 |
| K7  | 812.572         | 2445.480        | 2429.462        | 2430.469        | 2428.454 | K23 |
| V8  | 911.640         | 2289.354        | 2273.335        | 2274.343        | 2272.327 | V22 |
| T9  | <b>1012.688</b> | 2190.286        | 2174.267        | 2175.275        | 2173.259 | T21 |
| I10 | 1125.772        | 2089.230        | 2073.210        | 2074.227        | 2072.211 | I20 |
| A11 | <b>1196.809</b> | <b>1976.154</b> | <b>1960.135</b> | 1961.143        | 1959.127 | A19 |
| Q12 | 1314.857        | 1925.111        | <b>1889.098</b> | 1890.106        | 1888.090 | Q18 |
| G13 | <b>1381.889</b> | 1777.058        | 1761.039        | 1762.047        | 1760.032 | G17 |
| G14 | 1438.910        | 1720.037        | <b>1704.018</b> | 1705.026        | 1703.010 | G16 |
| V15 | 1537.979        | 1663.015        | 1646.997        | 1648.004        | 1646.989 | V15 |
| L16 | 1651.063        | 1563.947        | 1547.928        | 1548.936        | 1546.920 | L14 |
| F17 | 1768.116        | 1490.863        | 1474.844        | 1475.852        | 1473.836 | F13 |
| N18 | 1892.159        | 1353.810        | <b>1337.791</b> | 1338.799        | 1336.783 | N12 |
| I19 | <b>1975.243</b> | 1239.767        | 1223.748        | 1224.756        | 1222.741 | I11 |
| Q20 | 2103.301        | 1126.683        | 1110.664        | <b>1111.672</b> | 1109.656 | Q10 |
| A21 | 2174.338        | 998.624         | <b>982.606</b>  | <b>983.614</b>  | 981.598  | A9  |
| V22 | 2273.407        | 927.587         | 911.569         | 912.576         | 910.561  | V8  |
| L23 | 2389.491        | 808.513         | 832.500         | <b>813.508</b>  | 811.492  | L7  |
| L24 | 2499.575        | 715.435         | <b>699.416</b>  | <b>700.424</b>  | 698.408  | L6  |
| P25 | 2596.628        | 602.351         | 586.332         | 587.340         | 585.324  | P5  |
| K26 | 2724.723        | 505.268         | 489.249         | 490.257         | 488.271  | K4  |
| K27 | 2852.818        | 377.203         | 361.184         | 362.192         | 360.177  | K3  |
| T28 | 2953.865        | 249.106         | 233.089         | 234.097         | 232.082  | T2  |
| E29 | 3082.908        | 148.060         | 132.042         | 133.050         | 131.034  | E1  |

# sp | Q6GSS7 | H2A2A\_MOUSE

LNKLLGK <sup>Dimethyl</sup> <sub>28.03</sub> VTIAQGGVLPNIQAVLLPKKTE

- ▶ fragmentation table for charge state 2+
- ▶ specType=etd
- ▶ score=40.13
- ▶ F113676.dat
- ▶ query=q49805.p1
- ▶ precursor=1028.629400
- ▶ chargePrecursor=3
- ▶ itol=0.5

| AA   | c               | y               | z+1             | z+2             | z               | AA   |
|------|-----------------|-----------------|-----------------|-----------------|-----------------|------|
| L1   | 66.053          | <b>1542.450</b> | 1524.440        | 9.504           | 1533.930        | L120 |
| N12  | 123.054         | 1485.905        | <b>1477.898</b> | 1478.402        | <b>1477.394</b> | N020 |
| K13  | 187.132         | 1428.889        | <b>1420.877</b> | <b>1421.381</b> | 1420.373        | K027 |
| L14  | 243.674         | 1364.839        | <b>1356.829</b> | 1357.333        | <b>1356.325</b> | L126 |
| L15  | 300.216         | 1308.297        | 1300.287        | 1300.791        | 1299.783        | L125 |
| G16  | 358.759         | 1251.755        | 1243.745        | 1244.249        | 1243.241        | G024 |
| K17  | 406.799         | 1223.244        | 1215.234        | 1215.738        | 1214.731        | K023 |
| V18  | 456.324         | 1145.181        | 1137.171        | 1137.675        | 1136.667        | V022 |
| T19  | 506.849         | 1095.646        | 1087.637        | 1088.141        | 1087.133        | T121 |
| T10  | 563.390         | 1045.123        | 1037.113        | 1037.617        | 1036.609        | T020 |
| A111 | 588.938         | 988.581         | 980.571         | 981.075         | 980.067         | A119 |
| G112 | 602.937         | 953.065         | 945.055         | 945.559         | 944.551         | G118 |
| G113 | 691.448         | 889.033         | 881.023         | 881.527         | 880.519         | G117 |
| G14  | 719.959         | 860.522         | 852.513         | 853.017         | 852.009         | G116 |
| V15  | 769.493         | 832.011         | 824.002         | 824.506         | 823.498         | V115 |
| L16  | 826.035         | 782.477         | 774.468         | 774.972         | 773.964         | L114 |
| T17  | 874.581         | 728.935         | 720.925         | 721.429         | 720.421         | T113 |
| N118 | 931.583         | 677.400         | 669.390         | 669.893         | 668.885         | N112 |
| I19  | 988.125         | 620.867         | 612.857         | 613.361         | 612.353         | I111 |
| Q120 | 1052.154        | 563.845         | 555.836         | 556.340         | 555.332         | Q110 |
| A121 | 1087.673        | 499.816         | 491.807         | 492.310         | 491.303         | A10  |
| V122 | 1127.207        | 484.297         | 476.288         | 476.792         | 475.784         | V10  |
| L123 | 1193.769        | 414.763         | 406.754         | <b>407.258</b>  | 406.250         | L10  |
| L124 | 1250.291        | 358.221         | 350.212         | 350.716         | 349.708         | L10  |
| P125 | <b>1298.817</b> | 301.679         | 293.670         | 294.174         | 293.166         | P10  |
| K126 | <b>1362.865</b> | 253.153         | 245.143         | 245.647         | 244.639         | K10  |
| K127 | <b>1426.912</b> | 189.105         | 181.096         | 181.600         | 180.592         | K10  |
| T128 | <b>1477.436</b> | 125.058         | 117.048         | 117.552         | 116.544         | T10  |
| E129 | <b>1541.958</b> | 74.534          | 66.524          | 67.028          | 66.021          | E10  |



# sp | Q6GSS7 | H2A2A\_MOUSE

ELNKLKLGK<sup>Dimethyl</sup>VTIAQGGVLPNIQAVLLPKKTE  
28.03

- ▶ fragmentation table for charge state 1+
- ▶ specType=cid
- ▶ score=50.46
- ▶ F113676.dat
- ▶ query=q50390.p1
- ▶ precursor=803.984670
- ▶ chargePrecursor=4
- ▶ itol=0.5

| AA  | a        | a*       | a <sub>0</sub> | b        | b*       | b <sub>0</sub> | v        | s <sup>a</sup> | s <sup>b</sup> | AA  |
|-----|----------|----------|----------------|----------|----------|----------------|----------|----------------|----------------|-----|
| E 1 | 225.139  | 0.000    | 86.944         | 136.889  | 0.000    | 112.456        | 131.914  | 1359.985       | 1359.985       | L20 |
| L 2 | 225.139  | 0.000    | 107.125        | 124.134  | 0.000    | 125.123        | 135.970  | 1009.985       | 1009.985       | L20 |
| N 3 | 329.032  | 803.109  | 111.113        | 109.877  | 340.430  | 179.389        | 100.000  | 1245.183       | 1052.727       | N20 |
| N 4 | 329.032  | 803.109  | 128.269        | 105.222  | 348.243  | 187.261        | 100.000  | 1249.183       | 1058.744       | N20 |
| L 5 | 370.301  | 351.314  | 100.301        | 100.100  | 101.319  | 100.100        | 1750.810 | 1211.941       | 1212.000       | L20 |
| L 6 | 381.445  | 660.418  | 100.414        | 111.440  | 104.413  | 103.420        | 101.100  | 1266.510       | 1057.514       | L20 |
| G 7 | 140.467  | 723.640  | 122.458        | 102.461  | 171.430  | 170.451        | 100.000  | 1486.470       | 1484.481       | G24 |
| N 8 | 100.100  | 879.989  | 879.989        | 102.580  | 102.581  | 100.100        | 100.000  | 1262.454       | 1262.450       | N20 |
| V 9 | 105.461  | 876.635  | 107.631        | 102.636  | 106.630  | 106.630        | 100.000  | 1277.631       | 1091.543       | V22 |
| T10 | 1096.709 | 1079.682 | 1096.688       | 1124.704 | 1107.677 | 1106.695       | 1100.200 | 1214.200       | 1122.216       | T21 |
| L11 | 1100.100 | 1100.100 | 1100.100       | 1100.100 | 1100.100 | 1100.100       | 100.000  | 100.000        | 100.000        | L21 |
| A12 | 1201.610 | 1201.610 | 1201.610       | 1201.610 | 1201.610 | 1201.610       | 100.000  | 100.000        | 100.000        | A19 |
| G13 | 1300.800 | 1300.800 | 1300.800       | 1300.800 | 1300.800 | 1300.800       | 100.000  | 100.000        | 100.000        | G19 |
| G14 | 1400.000 | 1400.000 | 1400.000       | 1400.000 | 1400.000 | 1400.000       | 100.000  | 100.000        | 100.000        | G19 |
| G15 | 1500.000 | 1500.000 | 1500.000       | 1500.000 | 1500.000 | 1500.000       | 100.000  | 100.000        | 100.000        | G19 |
| V16 | 1600.000 | 1600.000 | 1600.000       | 1600.000 | 1600.000 | 1600.000       | 100.000  | 100.000        | 100.000        | V15 |
| L17 | 1700.000 | 1700.000 | 1700.000       | 1700.000 | 1700.000 | 1700.000       | 100.000  | 100.000        | 100.000        | L14 |
| P18 | 1800.134 | 1800.134 | 1800.134       | 1800.134 | 1800.134 | 1800.134       | 1450.855 | 1450.855       | 1450.855       | P15 |
| N19 | 1900.000 | 1900.000 | 1900.000       | 1900.000 | 1900.000 | 1900.000       | 100.000  | 1100.183       | 1100.183       | N12 |
| E20 | 2000.000 | 2000.000 | 2000.000       | 2000.000 | 2000.000 | 2000.000       | 100.000  | 1222.741       | 1222.741       | E18 |
| G21 | 2100.100 | 2100.100 | 2100.100       | 2100.100 | 2100.100 | 2100.100       | 1126.683 | 1108.677       | 1108.677       | G18 |
| A22 | 2200.800 | 2200.800 | 2200.800       | 2200.800 | 2200.800 | 2200.800       | 986.624  | 986.624        | 986.614        | A16 |
| V23 | 2300.400 | 2300.400 | 2300.400       | 2300.400 | 2300.400 | 2300.400       | 927.587  | 918.561        | 908.517        | V16 |
| L24 | 2400.100 | 2400.100 | 2400.100       | 2400.100 | 2400.100 | 2400.100       | 824.519  | 824.519        | 811.500        | L17 |
| L25 | 2500.000 | 2500.000 | 2500.000       | 2500.000 | 2500.000 | 2500.000       | 715.435  | 686.416        | 661.424        | L16 |
| P26 | 2600.040 | 2600.040 | 2600.040       | 2600.040 | 2600.040 | 2600.040       | 602.351  | 569.324        | 544.340        | P16 |
| L27 | 2700.000 | 2700.000 | 2700.000       | 2700.000 | 2700.000 | 2700.000       | 505.290  | 469.274        | 444.280        | L14 |
| R28 | 2800.000 | 2800.000 | 2800.000       | 2800.000 | 2800.000 | 2800.000       | 377.203  | 365.173        | 350.181        | R16 |
| T29 | 2900.000 | 2900.000 | 2900.000       | 2900.000 | 2900.000 | 2900.000       | 246.106  | 230.000        | 211.000        | T15 |
| K30 | 3000.000 | 3000.000 | 3000.000       | 3000.000 | 3000.000 | 3000.000       | 100.000  | 100.000        | 100.000        | K16 |

# sp | Q6GSS7 | H2A2A\_MOUSE

ELNKLKLGK<sup>Dimethyl</sup><sub>28.03</sub>VTIAQGGVLPNIQAVLLPKKTE

- ▶ fragmentation table for charge state 2+
- ▶ specType=cid
- ▶ score=50.46
- ▶ F113676.dat
- ▶ query=q50390.p1
- ▶ precursor=803.984670
- ▶ chargePrecursor=4
- ▶ itol=0.5

| AA | a  | a'       | a <sub>0</sub>  | b               | b'              | b <sub>0</sub>  | y               | y'              | y <sub>0</sub>  | AA |
|----|----|----------|-----------------|-----------------|-----------------|-----------------|-----------------|-----------------|-----------------|----|
| E  | 1  | 1030.073 | 0.000           | 99.045          | 122.071         | 0.000           | 103.073         | 103.073         | 103.073         | E  |
| L  | 2  | 1080.073 | 0.000           | 99.045          | 122.071         | 0.000           | 103.073         | 103.073         | 103.073         | L  |
| N  | 3  | 1130.073 | 0.000           | 99.045          | 122.071         | 0.000           | 103.073         | 103.073         | 103.073         | N  |
| R  | 4  | 1180.073 | 0.000           | 99.045          | 122.071         | 0.000           | 103.073         | 103.073         | 103.073         | R  |
| L  | 5  | 1230.073 | 0.000           | 99.045          | 122.071         | 0.000           | 103.073         | 103.073         | 103.073         | L  |
| L  | 6  | 1280.073 | 0.000           | 99.045          | 122.071         | 0.000           | 103.073         | 103.073         | 103.073         | L  |
| G  | 7  | 1330.073 | 0.000           | 99.045          | 122.071         | 0.000           | 103.073         | 103.073         | 103.073         | G  |
| N  | 8  | 1380.073 | 0.000           | 99.045          | 122.071         | 0.000           | 103.073         | 103.073         | 103.073         | N  |
| V  | 9  | 1430.073 | 0.000           | 99.045          | 122.071         | 0.000           | 103.073         | 103.073         | 103.073         | V  |
| T  | 10 | 1480.073 | <b>540.345</b>  | <b>539.853</b>  | <b>562.856</b>  | <b>354.342</b>  | <b>551.850</b>  | <b>700.345</b>  | <b>1087.133</b> | T  |
| L  | 11 | 1530.073 | <b>590.347</b>  | <b>589.855</b>  | <b>612.858</b>  | <b>404.344</b>  | <b>601.852</b>  | <b>750.347</b>  | <b>1137.135</b> | L  |
| A  | 12 | 1580.073 | <b>640.349</b>  | <b>639.857</b>  | <b>662.860</b>  | <b>454.346</b>  | <b>651.854</b>  | <b>800.349</b>  | <b>1187.137</b> | A  |
| Q  | 13 | 1630.073 | <b>690.351</b>  | <b>689.859</b>  | <b>712.862</b>  | <b>504.348</b>  | <b>701.856</b>  | <b>850.351</b>  | <b>1237.139</b> | Q  |
| G  | 14 | 1680.073 | <b>740.353</b>  | <b>739.861</b>  | <b>762.864</b>  | <b>554.350</b>  | <b>751.858</b>  | <b>900.353</b>  | <b>1287.141</b> | G  |
| G  | 15 | 1730.073 | <b>790.355</b>  | <b>789.863</b>  | <b>812.866</b>  | <b>604.352</b>  | <b>801.860</b>  | <b>950.355</b>  | <b>1337.143</b> | G  |
| V  | 16 | 1780.073 | <b>840.357</b>  | <b>839.865</b>  | <b>862.868</b>  | <b>654.354</b>  | <b>851.862</b>  | <b>1000.357</b> | <b>1387.145</b> | V  |
| L  | 17 | 1830.073 | <b>890.359</b>  | <b>889.867</b>  | <b>912.870</b>  | <b>704.356</b>  | <b>901.864</b>  | <b>1050.359</b> | <b>1437.147</b> | L  |
| P  | 18 | 1880.073 | <b>940.361</b>  | <b>939.869</b>  | <b>962.872</b>  | <b>754.358</b>  | <b>951.866</b>  | <b>1100.361</b> | <b>1487.149</b> | P  |
| L  | 19 | 1930.073 | <b>990.363</b>  | <b>989.871</b>  | <b>1012.874</b> | <b>804.360</b>  | <b>1001.868</b> | <b>1150.363</b> | <b>1537.151</b> | L  |
| E  | 20 | 1980.073 | <b>1040.365</b> | <b>1039.873</b> | <b>1062.876</b> | <b>854.362</b>  | <b>1051.870</b> | <b>1200.365</b> | <b>1587.153</b> | E  |
| A  | 21 | 2030.073 | <b>1090.367</b> | <b>1089.875</b> | <b>1112.878</b> | <b>904.364</b>  | <b>1101.872</b> | <b>1250.367</b> | <b>1637.155</b> | A  |
| V  | 22 | 2080.073 | <b>1140.369</b> | <b>1139.877</b> | <b>1162.880</b> | <b>954.366</b>  | <b>1151.874</b> | <b>1300.369</b> | <b>1687.157</b> | V  |
| L  | 23 | 2130.073 | <b>1190.371</b> | <b>1189.879</b> | <b>1212.882</b> | <b>1004.368</b> | <b>1201.876</b> | <b>1350.371</b> | <b>1737.159</b> | L  |
| L  | 24 | 2180.073 | <b>1240.373</b> | <b>1239.881</b> | <b>1262.884</b> | <b>1054.370</b> | <b>1251.878</b> | <b>1400.373</b> | <b>1787.161</b> | L  |
| L  | 25 | 2230.073 | <b>1290.375</b> | <b>1289.883</b> | <b>1312.886</b> | <b>1104.372</b> | <b>1301.880</b> | <b>1450.375</b> | <b>1837.163</b> | L  |
| P  | 26 | 2280.073 | <b>1340.377</b> | <b>1339.885</b> | <b>1362.888</b> | <b>1154.374</b> | <b>1351.882</b> | <b>1500.377</b> | <b>1887.165</b> | P  |
| L  | 27 | 2330.073 | <b>1390.379</b> | <b>1389.887</b> | <b>1412.890</b> | <b>1204.376</b> | <b>1401.884</b> | <b>1550.379</b> | <b>1937.167</b> | L  |
| R  | 28 | 2380.073 | <b>1440.381</b> | <b>1439.889</b> | <b>1462.892</b> | <b>1254.378</b> | <b>1451.886</b> | <b>1600.381</b> | <b>1987.169</b> | R  |
| T  | 29 | 2430.073 | <b>1490.383</b> | <b>1489.891</b> | <b>1512.894</b> | <b>1304.380</b> | <b>1501.888</b> | <b>1650.383</b> | <b>2037.171</b> | T  |
| E  | 30 | 2480.073 | <b>1540.385</b> | <b>1539.893</b> | <b>1562.896</b> | <b>1354.382</b> | <b>1551.890</b> | <b>1700.385</b> | <b>2087.173</b> | E  |

# sp | Q6GSS7 | H2A2A\_MOUSE

ELNKLKLGK<sup>Dimethyl</sup><sub>28.03</sub>VTIAQGGVLPNIQAVLLPKKTE

- ▶ fragmentation table for charge state 3+
- ▶ specType=cid
- ▶ score=50.46
- ▶ F113676.dat
- ▶ query=q50390\_p1
- ▶ precursor=803.984670
- ▶ chargePrecursor=4
- ▶ itol=0.5

| AA | a   | a'         | a <sub>0</sub> | b          | b'         | b <sub>0</sub> | y          | y'         | y <sub>0</sub> | AA          |            |             |            |            |            |            |            |            |            |      |      |
|----|-----|------------|----------------|------------|------------|----------------|------------|------------|----------------|-------------|------------|-------------|------------|------------|------------|------------|------------|------------|------------|------|------|
| E1 | 34  | 690        | 0.672          | 28         | 601        | 0.672          | 38         | 611        | 1071           | 503         | 1065.646   | E1S1        |            |            |            |            |            |            |            |      |      |
| L1 | 72  | 580        | 0.672          | 66         | 581        | 0.672          | 76         | 613        | 1028           | 635         | 1022.632   | L1S0        |            |            |            |            |            |            |            |      |      |
| K  | 110 | 599        | 104.721        | 104        | 395        | 110            | 730        | 114        | 655            | 113         | 727        | 660         | 261        | 688        | 205        | 104        | 637        | K2S0       |            |      |      |
| K  | 113 | 589        | 107.447        | 107        | 594        | 108            | 629        | 116        | 613            | 116         | 629        | <b>952</b>  | 255        | 104        | 255        | 104        | 619        | K2S1       |            |      |      |
| L  | 136 | 702        | 105.110        | 104        | 703        | 100            | 123        | 104        | 646            | 104         | 120        | <b>812</b>  | <b>228</b> | <b>044</b> | <b>553</b> | <b>804</b> | <b>225</b> | L1S2       |            |      |      |
| L  | 6   | 278        | 407            | 227        | 311        | 227            | 481        | 217        | 618            | 232         | 143        | 211         | 613        | <b>872</b> | <b>533</b> | <b>046</b> | <b>858</b> | <b>866</b> | <b>530</b> | L1S3 |      |
| G  | 7   | 247        | 404            | 241        | 310        | 241            | 480        | 226        | 624            | 231         | 150        | 226         | 627        | <b>834</b> | <b>839</b> | 230        | 161        | <b>828</b> | <b>530</b> | G1S0 |      |
| K  | 9   | 239        | 520            | 233        | 521        | 233            | 507        | 303        | 102            | 302         | 94         | <b>973</b>  | 817        | 819        | 125        | 819        | 125        | K1S2       |            |      |      |
| V  | 9   | 132        | 608            | 136        | 603        | 136            | 533        | 141        | 600            | 136         | 515        | 135         | 607        | 783        | 709        | 738        | 114        | 757        | 786        | V1S2 |      |
| T  | 110 | 598        | 241            | 592        | 595        | 592            | 232        | 376        | 572            | 384         | 697        | 269         | 599        | <b>730</b> | <b>787</b> | 726        | 593        | 724        | 743        | T1S1 |      |
| I  | 113 | 603        | 608            | 609        | 609        | 610            | 611        | 609        | 602            | 607         | 204        | <b>937</b>  | <b>884</b> | <b>937</b> | <b>884</b> | <b>937</b> | <b>884</b> | <b>937</b> | <b>884</b> | I1S0 |      |
| A  | 123 | 637        | 635            | 631        | 630        | 635            | 631        | 636        | 647            | 631         | 621        | 630         | 643        | <b>659</b> | <b>714</b> | <b>653</b> | <b>714</b> | <b>653</b> | <b>714</b> | A1S0 |      |
| Q  | 123 | 632        | 632            | <b>664</b> | <b>626</b> | <b>664</b>     | <b>738</b> | 636        | 633            | 637         | 637        | 632         | 630        | <b>631</b> | <b>635</b> | 628        | 707        | 628        | 707        | Q1S1 |      |
| Q  | 14  | 619        | 708            | <b>61</b>  | <b>708</b> | <b>61</b>      | <b>708</b> | 619        | 708            | 619         | 708        | 619         | 708        | 619        | 708        | 619        | 708        | 619        | 708        | 619  | Q1S2 |
| Q  | 15  | 598        | 595            | 592        | 590        | 592            | 592        | 597        | 607            | 593         | 593        | 591         | 603        | <b>574</b> | <b>617</b> | 566        | 542        | 566        | 542        | Q1S3 |      |
| V  | 16  | 641        | 633            | 633        | 640        | 633            | 633        | 644        | 639            | 644         | 639        | <b>555</b>  | <b>610</b> | 549        | 120        | 549        | 610        | V1S3       |            |      |      |
| L  | 17  | 735        | 717            | 729        | 720        | 729            | 720        | 736        | 724            | <b>582</b>  | <b>689</b> | <b>582</b>  | <b>661</b> | 525        | 707        | 516        | 512        | 525        | 704        | L1S4 |      |
| P  | 18  | <b>611</b> | <b>384</b>     | 629        | 612        | 629            | 384        | 612        | 613            | 614         | 619        | 629         | 612        | 613        | 614        | 619        | 629        | 612        | 613        | 614  | P1S3 |
| N  | 18  | 649        | 588            | 643        | 721        | 643            | 588        | <b>654</b> | <b>730</b>     | 653         | 654        | 652         | 730        | 653        | 647        | 446        | 260        | 446        | 260        | N1S2 |      |
| I  | 20  | 597        | 593            | 591        | 611        | 591            | 599        | <b>696</b> | <b>424</b>     | <b>690</b>  | <b>420</b> | 611         | 611        | 611        | 611        | 611        | 611        | 611        | 611        | 611  | I1S1 |
| Q  | 21  | <b>728</b> | <b>779</b>     | 728        | 779        | 728            | 779        | <b>736</b> | <b>116</b>     | <b>733</b>  | <b>115</b> | <b>733</b>  | <b>115</b> | <b>733</b> | <b>115</b> | 733        | 115        | 733        | 115        | Q1S0 |      |
| A  | 22  | 753        | 608            | <b>747</b> | <b>742</b> | <b>747</b>     | <b>454</b> | <b>762</b> | <b>790</b>     | <b>757</b>  | <b>114</b> | <b>756</b>  | <b>786</b> | 753        | 545        | 527        | 671        | 527        | 643        | A1S1 |      |
| V  | 23  | <b>786</b> | <b>481</b>     | 786        | 481        | 786            | 477        | 785        | 612            | <b>790</b>  | <b>137</b> | 785         | 612        | 785        | 612        | 785        | 612        | 785        | 612        | V1S1 |      |
| L  | 24  | 714        | 717            | <b>818</b> | <b>500</b> | <b>818</b>     | <b>172</b> | 713        | 603            | 717         | 602        | 716         | 603        | 717        | 602        | 716        | 603        | 717        | 602        | L1S1 |      |
| L  | 25  | 714        | 612            | 714        | 612        | 714            | 612        | 716        | 608            | 716         | 608        | 716         | 608        | 716        | 608        | 716        | 608        | 716        | 608        | L1S2 |      |
| P  | 26  | <b>884</b> | <b>221</b>     | 884        | 221        | 884            | 211        | <b>903</b> | <b>553</b>     | <b>897</b>  | <b>877</b> | <b>897</b>  | <b>546</b> | 891        | 451        | 106        | 106        | 106        | 451        | P1S1 |      |
| K  | 27  | 676        | 659            | 681        | 264        | 680            | 654        | 696        | 251            | 695         | 276        | 694         | 276        | 694        | 276        | 694        | 276        | 694        | 276        | 694  | K1S0 |
| K  | 28  | 673        | 613            | 673        | 613        | 673            | 613        | 675        | 614            | <b>982</b>  | <b>546</b> | 675         | 614        | 675        | 614        | 675        | 614        | 675        | 614        | K1S1 |      |
| T  | 29  | 1011       | 500            | 1007       | 493        | 1007           | 493        | 1012       | 492            | <b>1016</b> | <b>506</b> | <b>1016</b> | <b>628</b> | 1015       | 492        | 1015       | 492        | 1015       | 492        | T1S2 |      |
| E  | 30  | 1006       | 511            | 1003       | 504        | 1003           | 504        | 1009       | 511            | 1009        | 504        | 1009        | 504        | 1009       | 504        | 1009       | 504        | 1009       | 504        | E1S1 |      |





# sp | Q6GSS7 | H2A2A\_MOUSE

ELNKLKLGK<sup>Dimethyl</sup>VTIAQGGVLPNIQAVLLPKKTE  
28.03

- ▶ fragmentation table for charge state 1+
- ▶ specType=etd
- ▶ score=93.50
- ▶ F113676.dat
- ▶ query=q50391.p1
- ▶ precursor=803.984670
- ▶ chargePrecursor=4
- ▶ itol=0.5

| AA | c  | y               | z+1      | z+2             | z              | AA              |   |    |
|----|----|-----------------|----------|-----------------|----------------|-----------------|---|----|
| E  | 1  | 147.676         | 3212.934 | 3196.916        | 0.000          | 3195.908        | E | 30 |
| L  | 2  | 260.160         | 3063.892 | 3067.873        | 0.000          | 3066.865        | L | 29 |
| R  | 3  | 374.373         | 2910.869 | 2954.789        | 2955.797       | 2953.781        | R | 28 |
| K  | 4  | <b>502.798</b>  | 2856.765 | 2860.746        | 2861.754       | 2859.738        | K | 27 |
| L  | 5  | <b>615.382</b>  | 2728.670 | 2712.651        | 2713.659       | 2711.643        | L | 26 |
| L  | 6  | <b>728.466</b>  | 2615.586 | 2599.569        | 2600.575       | 2598.559        | L | 25 |
| G  | 7  | <b>785.488</b>  | 2502.502 | 2486.483        | 2487.491       | 2485.475        | G | 24 |
| K  | 8  | 941.614         | 2445.480 | 2429.462        | 2430.469       | 2428.454        | K | 23 |
| V  | 9  | <b>1048.683</b> | 2389.364 | 2373.355        | 2374.363       | 2372.347        | V | 22 |
| I  | 10 | <b>1141.730</b> | 2190.286 | 2174.267        | 2175.276       | 2173.259        | I | 21 |
| I  | 11 | <b>1254.814</b> | 2089.238 | 2073.219        | 2074.227       | 2072.211        | I | 20 |
| A  | 12 | <b>1325.851</b> | 1978.154 | 1962.135        | 1963.143       | 1961.127        | A | 19 |
| Q  | 13 | <b>1453.910</b> | 1905.117 | <b>1889.098</b> | 1890.106       | 1888.090        | Q | 18 |
| G  | 14 | 1510.932        | 1777.058 | <b>1761.039</b> | 1762.047       | 1760.032        | G | 17 |
| G  | 15 | 1627.853        | 1730.031 | <b>1704.018</b> | 1705.026       | 1703.010        | G | 16 |
| V  | 16 | <b>1667.021</b> | 1583.015 | <b>1548.997</b> | 1549.004       | 1547.989        | V | 15 |
| L  | 17 | 1780.105        | 1563.947 | <b>1547.928</b> | 1548.936       | 1546.920        | L | 14 |
| P  | 18 | <b>1877.158</b> | 1450.863 | 1434.844        | 1435.852       | 1433.836        | P | 13 |
| N  | 19 | 1991.201        | 1353.810 | <b>1337.791</b> | 1338.799       | 1336.783        | N | 12 |
| I  | 20 | 2104.285        | 1239.767 | 1223.748        | 1224.756       | <b>1222.741</b> | I | 11 |
| Q  | 21 | 2232.344        | 1136.682 | <b>1118.664</b> | 1119.672       | 1109.656        | Q | 10 |
| A  | 22 | 2303.391        | 998.624  | <b>982.606</b>  | 983.614        | <b>981.598</b>  | A | 9  |
| V  | 23 | 2402.449        | 927.587  | 911.569         | 912.576        | 910.560         | V | 8  |
| L  | 24 | 2515.533        | 828.519  | <b>812.500</b>  | 813.508        | 811.492         | L | 7  |
| L  | 25 | 3028.617        | 715.435  | <b>699.416</b>  | <b>700.424</b> | 698.408         | L | 6  |
| P  | 26 | 2725.670        | 602.351  | 586.332         | 587.340        | 585.324         | P | 5  |
| K  | 27 | 2853.765        | 505.299  | <b>489.279</b>  | 490.287        | 488.271         | K | 4  |
| R  | 28 | 2883.886        | 377.262  | <b>361.184</b>  | 362.192        | 360.176         | R | 3  |
| T  | 29 | 3082.908        | 249.188  | 233.099         | 234.097        | 232.082         | T | 2  |
| E  | 30 | 3211.950        | 148.060  | 132.042         | 133.050        | 131.034         | E | 1  |

# sp | Q6GSS7 | H2A2A\_MOUSE

ELNKLKLGK<sup>Dimethyl</sup>VTIAQGGVLPNIQAVLLPKKTE  
28.03

- ▶ fragmentation table for charge state 2+
- ▶ specType=etd
- ▶ score=93.50
- ▶ F113676.dat
- ▶ query=q50391.p1
- ▶ precursor=803.984670
- ▶ chargePrecursor=4
- ▶ itol=0.5

| AA   | c               | y               | z+1             | z+2             | z               | AA   |
|------|-----------------|-----------------|-----------------|-----------------|-----------------|------|
| E 1  | 74.042          | <b>1606.971</b> | <b>1598.962</b> | 0.504           | 459.456         | E 30 |
| L 2  | 130.504         | 1542.456        | <b>1534.440</b> | 0.504           | 453.930         | L 29 |
| N 3  | 187.605         | 1485.908        | 1477.898        | 1478.402        | 1477.394        | N 28 |
| K 4  | 251.653         | 1428.869        | <b>1420.877</b> | <b>1421.381</b> | <b>1420.373</b> | K 27 |
| L 5  | 308.195         | 1364.835        | <b>1356.829</b> | <b>1357.333</b> | 1356.329        | L 26 |
| L 6  | 364.737         | 1308.287        | 1300.287        | 1300.791        | 1299.783        | L 25 |
| G 7  | 391.240         | 1251.735        | <b>1243.745</b> | <b>1244.249</b> | 1243.241        | G 24 |
| K 8  | 471.311         | <b>1223.244</b> | <b>1215.234</b> | 1215.738        | <b>1214.731</b> | K 23 |
| V 9  | 520.845         | 1145.181        | 1147.183        | 1137.679        | 1138.667        | V 22 |
| T 10 | 573.369         | 1095.646        | <b>1087.637</b> | <b>1088.141</b> | <b>1087.133</b> | T 21 |
| I 11 | 627.911         | <b>1045.123</b> | <b>1037.113</b> | <b>1037.617</b> | 1036.602        | I 20 |
| A 12 | 683.429         | 988.581         | 980.571         | <b>981.075</b>  | 980.067         | A 19 |
| Q 13 | 727.459         | 933.063         | <b>945.053</b>  | <b>945.557</b>  | 944.540         | Q 18 |
| G 14 | 755.969         | 889.633         | 881.623         | <b>881.527</b>  | 880.519         | G 17 |
| C 15 | <b>784.460</b>  | <b>860.522</b>  | <b>852.513</b>  | <b>853.017</b>  | 852.009         | C 16 |
| V 16 | <b>834.014</b>  | 812.014         | <b>824.002</b>  | <b>824.506</b>  | 823.497         | V 15 |
| L 17 | 890.556         | 782.477         | 774.468         | 774.972         | 773.964         | L 14 |
| F 18 | <b>939.083</b>  | 725.935         | 717.926         | 718.430         | 717.422         | F 13 |
| N 19 | 996.104         | 677.409         | 669.399         | 669.903         | 668.895         | N 12 |
| I 20 | <b>1052.646</b> | 620.387         | 612.378         | 612.882         | 611.874         | I 11 |
| Q 21 | <b>1116.676</b> | 563.848         | 565.838         | 556.348         | 555.339         | Q 10 |
| A 22 | <b>1152.194</b> | 499.810         | 491.801         | 492.310         | 491.301         | A 9  |
| V 23 | <b>1201.728</b> | 464.297         | 456.288         | 456.792         | 455.784         | V 8  |
| L 24 | <b>1258.270</b> | 414.763         | 406.754         | 407.258         | 406.250         | L 7  |
| L 25 | 1314.812        | 358.221         | 350.212         | 350.716         | 349.708         | L 6  |
| T 26 | <b>1363.339</b> | 301.679         | 293.670         | 294.174         | 293.166         | T 5  |
| K 27 | <b>1427.386</b> | 253.153         | 245.143         | 245.647         | 244.639         | K 4  |
| K 28 | 1491.434        | 189.105         | 181.096         | 181.600         | 180.592         | K 3  |
| T 29 | <b>1541.958</b> | 125.058         | 117.048         | 117.552         | 116.544         | T 2  |
| E 30 | <b>1606.479</b> | 74.534          | 66.524          | 67.028          | 66.021          | E 1  |

# sp | Q6GSS7 | H2A2A\_MOUSE

ELNKLKLGK<sup>Dimethyl</sup>VTIAQGGVLPNIQAVLLPKKTE  
28.03

- ▶ fragmentation table for charge state 3+
- ▶ specType=etd
- ▶ score=93.50
- ▶ F113676.dat
- ▶ query=q50391.p1
- ▶ precursor=803.984670
- ▶ chargePrecursor=4
- ▶ itol=0.5

| AA | c  | y               | z+1             | z+2             | z              | AA             |          |    |    |
|----|----|-----------------|-----------------|-----------------|----------------|----------------|----------|----|----|
| E  | 1  | 49.697          | <b>1071.650</b> | <b>1066.310</b> | 0.672          | 1065.974       | E        | 30 |    |
| L  | 2  | 87.302          | <b>1028.635</b> |                 | 1023.296       | 0.672          | 1022.960 | L  | 29 |
| TW | 3  | 125.806         | 999.941         | 993.001         | 988.937        |                | 989.265  | TW | 28 |
| K  | 4  | 168.104         | 952.926         | <b>947.587</b>  | <b>947.923</b> | <b>947.251</b> |          | K  | 27 |
| L  | 5  | 205.799         | 910.228         | 904.889         | 905.225        | 904.551        |          | L  | 26 |
| L  | 6  | 243.494         | 872.531         | 867.194         | 867.530        | 866.858        |          | L  | 25 |
| G  | 7  | 282.501         | 834.839         | 829.499         | 829.835        | 829.161        |          | G  | 24 |
| K  | 8  | 314.543         | 815.832         | 810.492         | 810.828        | 810.150        |          | K  | 23 |
| V  | 9  | 347.566         | 783.780         | 778.450         | 778.786        | 778.114        |          | V  | 22 |
| T  | 10 | 381.248         | 730.767         | 725.427         | 725.763        | 725.091        |          | T  | 21 |
| I  | 11 | 418.943         | 697.054         | 691.745         | 692.081        | 691.409        |          | I  | 20 |
| A  | 12 | 442.622         | 658.389         | 654.050         | 654.386        | 653.714        |          | A  | 19 |
| Q  | 13 | 485.308         | 635.710         | 630.371         | 630.707        | 630.035        |          | Q  | 18 |
| G  | 14 | 504.315         | 593.024         | 587.685         | 588.021        | 587.349        |          | G  | 17 |
| G  | 15 | 523.223         | 574.017         | 568.678         | 569.013        | 568.342        |          | G  | 16 |
| V  | 16 | 559.345         | 535.010         | 549.670         | 550.006        | 549.334        |          | V  | 15 |
| L  | 17 | 594.040         | 523.957         | 518.648         | 518.984        | 518.312        |          | L  | 14 |
| P  | 18 | 626.391         | 484.292         | 478.953         | 479.289        | 478.617        |          | P  | 13 |
| N  | 19 | 664.405         | 451.942         | 446.602         | 446.938        | 446.266        |          | N  | 12 |
| I  | 20 | 702.100         | 413.927         | 408.588         | 408.924        | 408.252        |          | I  | 11 |
| Q  | 21 | 744.786         | 376.233         | 370.893         | 371.229        | 370.557        |          | Q  | 10 |
| A  | 22 | 788.465         | 333.548         | 328.207         | 328.543        | 327.871        |          | A  | 9  |
| V  | 23 | 801.488         | 309.897         | 304.526         | 304.864        | 304.192        |          | V  | 8  |
| L  | 24 | 838.183         | 276.844         | 271.505         | 271.841        | 271.169        |          | L  | 7  |
| L  | 25 | 876.877         | 239.150         | 233.810         | 234.146        | 233.474        |          | L  | 6  |
| P  | 26 | 909.228         | 201.455         | 196.116         | 196.451        | 195.780        |          | P  | 5  |
| K  | 27 | 951.927         | 169.104         | 163.765         | 164.101        | 163.429        |          | K  | 4  |
| K  | 28 | <b>994.625</b>  | 128.408         | 121.096         | 121.462        | 120.750        |          | K  | 3  |
| T  | 29 | <b>1028.307</b> | 83.709          | 78.368          | 78.704         | 78.032         |          | T  | 2  |
| E  | 30 | <b>1071.322</b> | 50.625          | 44.685          | 45.021         | 44.349         |          | E  | 1  |



# sp | P68433 | H31\_MOUSE

IAQDFK<sup>Methyl</sup>TD  
14.02

- ▶ fragmentation table for charge state 1+
- ▶ specType=cid
- ▶ score=31.47
- ▶ F113676.dat
- ▶ query=q7823\_p1
- ▶ precursor=476.241650
- ▶ chargePrecursor=2
- ▶ itol=0.5

| AA  | a              | a*      | a:Δ     | b              | b*             | b:Δ            | y              | y*             | y:Δ            | AA  |
|-----|----------------|---------|---------|----------------|----------------|----------------|----------------|----------------|----------------|-----|
| T 1 | 46.998         | 0.000   | 0.000   | 114.098        | 0.000          | 0.000          | 951.416        | 109.456        | 113.968        | T 1 |
| A 2 | <b>157.134</b> | 0.000   | 0.000   | <b>185.128</b> | 0.000          | 0.000          | <b>838.354</b> | 821.356        | 820.384        | A 2 |
| Q 3 | 285.192        | 285.188 | 0.000   | <b>313.187</b> | 296.169        | 0.000          | <b>767.357</b> | <b>750.330</b> | 749.348        | Q 3 |
| G 4 | 400.219        | 393.193 | 362.208 | <b>478.214</b> | <b>411.187</b> | <b>410.203</b> | <b>636.298</b> | 622.272        | 621.288        | G 4 |
| F 5 | 547.287        | 540.261 | 529.277 | <b>575.282</b> | 558.256        | 557.272        | <b>524.271</b> | 507.245        | <b>506.261</b> | F 5 |
| R 6 | 689.356        | 672.332 | 671.368 | <b>717.363</b> | 700.366        | 699.382        | <b>377.263</b> | 360.177        | 359.193        | R 6 |
| T 7 | 790.446        | 775.419 | 772.435 | 818.441        | <b>801.414</b> | 800.430        | <b>235.092</b> | 0.000          | 237.082        | T 7 |
| G 8 | 905.473        | 888.449 | 887.462 | 933.468        | 916.441        | 915.457        | 134.040        | 0.000          | 136.034        | G 8 |

# sp | P68433 | H31\_MOUSE

IAQDFK <sup>Methyl</sup>TD  
14.02

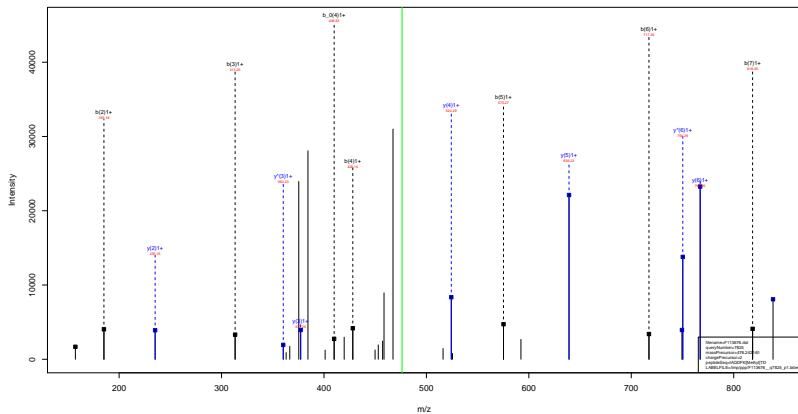

# sp | P68433 | H31\_MOUSE

IAQDFK<sup>Methyl</sup> TD  
14.02

- ▶ fragmentation table for charge state 1+
- ▶ specType=cid
- ▶ score=63.01
- ▶ F113676.dat
- ▶ query=q7825\_p1
- ▶ precursor=476.242140
- ▶ chargePrecursor=2
- ▶ itol=0.5

| AA         | a              | a*      | a,β     | b              | b*      | b,β            | γ              | γ*             | γ,β            | AA         |
|------------|----------------|---------|---------|----------------|---------|----------------|----------------|----------------|----------------|------------|
| <b>T</b> 1 | 88.098         | 0.000   | 0.000   | 114.191        | 0.000   | 0.000          | 95.419         | 0.000          | 0.000          | <b>T</b> 1 |
| <b>A</b> 2 | <b>157.134</b> | 0.000   | 0.000   | <b>185.128</b> | 0.000   | 0.000          | <b>838.304</b> | 0.000          | 0.000          | <b>A</b> 2 |
| <b>Q</b> 3 | 285.192        | 286.186 | 0.000   | <b>313.187</b> | 286.186 | 0.000          | <b>767.357</b> | <b>750.330</b> | <b>749.346</b> | <b>Q</b> 3 |
| <b>D</b> 4 | 400.219        | 383.193 | 382.200 | <b>438.214</b> | 411.187 | <b>410.203</b> | <b>639.298</b> | 622.272        | 621.288        | <b>D</b> 4 |
| <b>F</b> 5 | 547.287        | 530.261 | 529.271 | <b>575.282</b> | 558.256 | 557.272        | <b>524.271</b> | 507.245        | 506.261        | <b>F</b> 5 |
| <b>H</b> 6 | 689.356        | 672.332 | 671.342 | <b>717.363</b> | 700.366 | 699.332        | <b>377.303</b> | <b>360.177</b> | 359.193        | <b>H</b> 6 |
| <b>I</b> 7 | 790.446        | 773.419 | 772.435 | <b>818.441</b> | 801.414 | 800.430        | <b>235.092</b> | 0.000          | 217.082        | <b>I</b> 7 |
| <b>G</b> 8 | 905.473        | 888.448 | 887.462 | 913.468        | 916.441 | 915.457        | 138.040        | 0.000          | 116.034        | <b>G</b> 8 |





# sp | P68433 | H31\_MOUSE

IAQDFK<sup>Methyl</sup>TD  
14.02

- ▶ fragmentation table for charge state 1+
- ▶ specType=etd
- ▶ score=42.30
- ▶ F113676.dat
- ▶ query=q7826\_p1
- ▶ precursor=476.242140
- ▶ chargePrecursor=2
- ▶ itol=0.5

| AA  | c              | y              | z+1            | z+2            | z       | AA  |
|-----|----------------|----------------|----------------|----------------|---------|-----|
| I 1 | 131.118        | <b>951.478</b> | <b>935.459</b> | 0.000          | 934.452 | I 8 |
| A 2 | 202.155        | 838.394        | <b>822.375</b> | 0.000          | 821.368 | A 7 |
| Q 3 | 330.214        | 767.357        | <b>751.338</b> | 752.346        | 750.330 | Q 6 |
| D 4 | 445.241        | 639.298        | <b>623.280</b> | <b>624.288</b> | 622.272 | D 5 |
| F 5 | 592.309        | 524.271        | <b>508.253</b> | <b>509.261</b> | 507.245 | F 4 |
| K 6 | <b>734.420</b> | 377.203        | 361.184        | <b>362.192</b> | 360.177 | K 3 |
| T 7 | <b>835.467</b> | 235.092        | 219.074        | 220.082        | 218.066 | T 2 |
| D 8 | 950.494        | 134.045        | 118.026        | 119.034        | 117.018 | D 1 |

# sp | P68433 | H31\_MOUSE

IAQDFK Methyl TD  
14.02

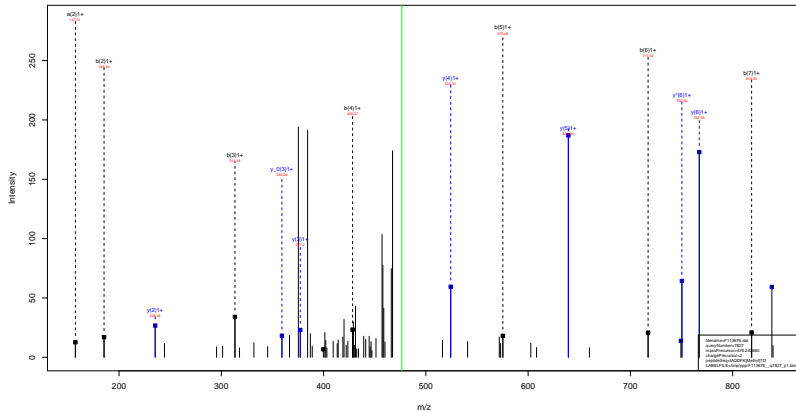

# sp | P68433 | H31\_MOUSE

IAQDFK<sup>Methyl</sup> TD  
14.02

- ▶ fragmentation table for charge state 1+
- ▶ specType=cid
- ▶ score=38.86
- ▶ F113676.dat
- ▶ query=q7827\_p1
- ▶ precursor=476.242660
- ▶ chargePrecursor=2
- ▶ itol=0.5

| AA  | a              | a*      | aΔ     | b              | b*      | bΔ     | y              | y*             | yΔ            | AA  |
|-----|----------------|---------|--------|----------------|---------|--------|----------------|----------------|---------------|-----|
| T 1 | 86.098         | 0.000   | 0.000  | 116.203        | 0.000   | 0.000  | 361.417        | 339.456        | 22.960        | T 1 |
| A 2 | <b>157.134</b> | 0.000   | 0.000  | <b>185.128</b> | 0.000   | 0.000  | <b>838.304</b> | 821.398        | 16.906        | A 2 |
| Q 3 | 298.197        | 268.139 | -0.000 | <b>313.187</b> | 298.169 | -0.000 | <b>767.357</b> | <b>750.330</b> | <b>17.026</b> | Q 3 |
| D 4 | <b>400.219</b> | 383.103 | 18.000 | <b>428.214</b> | 411.107 | 17.000 | <b>639.298</b> | 622.272        | 17.026        | D 4 |
| F 5 | 547.287        | 530.261 | 17.000 | <b>575.282</b> | 558.256 | 17.000 | <b>534.274</b> | 507.248        | 27.026        | F 5 |
| R 6 | 695.356        | 677.330 | 18.000 | <b>717.351</b> | 700.325 | 17.000 | <b>377.203</b> | 360.177        | <b>17.026</b> | R 6 |
| T 7 | 790.440        | 773.414 | 17.000 | <b>818.441</b> | 801.414 | 17.000 | <b>235.092</b> | 0.000          | 217.092       | T 7 |
| D 8 | 905.472        | 888.446 | 17.000 | 933.468        | 916.441 | 17.000 | 138.040        | 0.000          | 116.034       | D 8 |

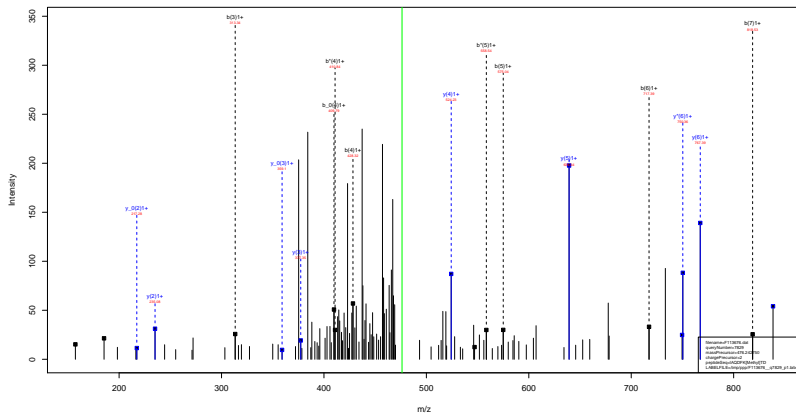

# sp | P68433 | H31\_MOUSE

IAQDFK<sup>Methyl</sup> TD  
14.02

- ▶ fragmentation table for charge state 1+
- ▶ specType=cid
- ▶ score=36.91
- ▶ F113676.dat
- ▶ query=q7829\_p1
- ▶ precursor=476.242750
- ▶ chargePrecursor=2
- ▶ itol=0.5

| AA  | a              | a*      | a,d     | b              | b*             | b,d            | y              | y*             | y,d            | AA  |
|-----|----------------|---------|---------|----------------|----------------|----------------|----------------|----------------|----------------|-----|
| T 1 | 46.098         | 0.000   | 0.000   | 114.098        | 0.000          | 0.000          | 901.416        | 109.404        | 114.098        | T 1 |
| A 2 | <b>157.134</b> | 0.000   | 0.000   | <b>185.128</b> | 0.000          | 0.000          | <b>838.384</b> | 821.360        | 820.384        | A 2 |
| Q 3 | 286.192        | 286.186 | 0.000   | <b>313.187</b> | 296.160        | 0.000          | <b>767.357</b> | <b>750.330</b> | <b>749.346</b> | Q 3 |
| G 4 | 400.219        | 393.193 | 362.209 | <b>428.214</b> | <b>411.187</b> | <b>410.203</b> | <b>636.298</b> | 622.272        | 621.288        | G 4 |
| F 5 | <b>547.287</b> | 540.261 | 529.277 | <b>575.282</b> | <b>558.256</b> | 557.272        | <b>524.271</b> | 507.245        | 506.261        | F 5 |
| R 6 | 659.269        | 652.243 | 641.259 | <b>677.263</b> | 660.237        | 659.253        | <b>377.263</b> | 360.237        | <b>359.193</b> | R 6 |
| T 7 | 790.446        | 773.419 | 772.435 | <b>818.441</b> | 801.414        | 800.430        | <b>235.092</b> | 0.000          | <b>217.082</b> | T 7 |
| G 8 | 905.473        | 888.446 | 887.462 | 933.468        | 916.441        | 915.457        | 134.040        | 0.000          | 116.034        | G 8 |



# sp | P68433 | H31\_MOUSE

IAQDFK<sup>Methyl</sup> TD  
14.02

- ▶ fragmentation table for charge state 1+
- ▶ specType=cid
- ▶ score=48.56
- ▶ F113676.dat
- ▶ query=q7831\_p1
- ▶ precursor=476.243020
- ▶ chargePrecursor=2
- ▶ itol=0.5

| AA         | a              | a*      | a:Δ     | b              | b*             | b:Δ            | y              | y*             | y:Δ            | AA         |
|------------|----------------|---------|---------|----------------|----------------|----------------|----------------|----------------|----------------|------------|
| <b>T</b> 1 | 46398          | 0.000   | 0.000   | 114.090        | 0.000          | 0.000          | 901.414        | 109.450        | 113.969        | <b>T</b> 1 |
| <b>A</b> 2 | <b>157.134</b> | 0.000   | 0.000   | <b>185.128</b> | 0.000          | 0.000          | <b>838.354</b> | 821.390        | 630.384        | <b>A</b> 2 |
| <b>Q</b> 3 | 286.192        | 286.189 | 0.000   | <b>313.187</b> | 296.160        | 0.000          | <b>767.357</b> | <b>750.330</b> | <b>749.346</b> | <b>Q</b> 3 |
| <b>G</b> 4 | 400.219        | 393.193 | 362.209 | <b>428.214</b> | <b>411.187</b> | <b>410.203</b> | <b>636.298</b> | 622.272        | 621.288        | <b>G</b> 4 |
| <b>F</b> 5 | 547.287        | 540.261 | 529.277 | <b>575.282</b> | 558.256        | <b>557.272</b> | <b>524.271</b> | 500.245        | 498.251        | <b>F</b> 5 |
| <b>R</b> 6 | 689.356        | 672.332 | 671.366 | <b>717.363</b> | 700.369        | 697.362        | <b>377.263</b> | <b>360.177</b> | <b>359.193</b> | <b>R</b> 6 |
| <b>T</b> 7 | 790.446        | 775.419 | 772.435 | <b>818.441</b> | 801.414        | 800.430        | <b>235.092</b> | 0.000          | 227.082        | <b>T</b> 7 |
| <b>G</b> 8 | 905.473        | 888.449 | 887.462 | 933.468        | 916.441        | 915.457        | 134.040        | 0.000          | 116.034        | <b>G</b> 8 |





# sp | P68433 | H31\_MOUSE

IAQDFK<sup>Methyl</sup> TD  
14.02

- ▶ fragmentation table for charge state 1+
- ▶ specType=cid
- ▶ score=62.94
- ▶ F113676.dat
- ▶ query=q7833\_p1
- ▶ precursor=476.243150
- ▶ chargePrecursor=2
- ▶ itol=0.5

| AA  | a              | a <sup>*</sup> | a,β     | b              | b <sup>*</sup> | b,β     | γ              | γ <sup>*</sup> | γ,β            | AA  |
|-----|----------------|----------------|---------|----------------|----------------|---------|----------------|----------------|----------------|-----|
| T 1 | 88.098         | 0.000          | 0.000   | 114.191        | 0.000          | 0.000   | 361.419        | 319.464        | 223.468        | T 1 |
| A 2 | <b>157.134</b> | 0.000          | 0.000   | <b>185.128</b> | 0.000          | 0.000   | <b>838.304</b> | 821.362        | 462.584        | A 2 |
| Q 3 | 285.192        | 286.186        | 0.000   | <b>313.187</b> | 296.180        | 0.000   | <b>767.357</b> | <b>750.330</b> | <b>749.346</b> | Q 3 |
| D 4 | 400.219        | 393.193        | 382.209 | <b>428.214</b> | 411.197        | 0.000   | <b>410.203</b> | <b>639.298</b> | 622.272        | D 4 |
| F 5 | 547.287        | 540.261        | 529.271 | <b>575.282</b> | 558.256        | 557.272 | <b>524.271</b> | 507.245        | 506.261        | F 5 |
| R 6 | 689.356        | 672.372        | 673.368 | <b>717.363</b> | 700.366        | 699.362 | <b>377.303</b> | 360.377        | 359.193        | R 6 |
| T 7 | 790.446        | 773.439        | 772.435 | <b>818.441</b> | 801.414        | 800.430 | <b>235.092</b> | 0.000          | 217.082        | T 7 |
| G 8 | 905.473        | 888.449        | 887.462 | 913.468        | 916.441        | 915.437 | 138.040        | 0.000          | 116.034        | G 8 |

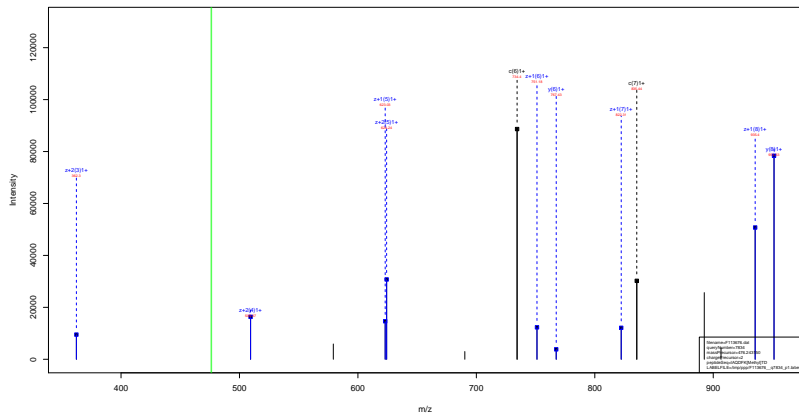

# sp | P68433 | H31\_MOUSE

IAQDFK<sup>Methyl</sup>TD  
14.02

- ▶ fragmentation table for charge state 1+
- ▶ specType=etd
- ▶ score=39.28
- ▶ F113676.dat
- ▶ query=q7834.p1
- ▶ precursor=476.243150
- ▶ chargePrecursor=2
- ▶ itol=0.5

| AA    | c              | y              | z+1            | z+2            | z       | AA  |
|-------|----------------|----------------|----------------|----------------|---------|-----|
| I   1 | 131.118        | <b>951.478</b> | <b>935.459</b> | 0.000          | 934.452 | I 8 |
| A   2 | 202.155        | 838.394        | <b>822.375</b> | 0.000          | 821.368 | A 7 |
| Q   3 | 330.214        | <b>767.357</b> | <b>751.338</b> | 752.346        | 750.330 | Q 6 |
| D   4 | 445.241        | 639.298        | <b>623.280</b> | <b>624.288</b> | 622.272 | D 5 |
| F   5 | 592.309        | 524.271        | 508.253        | <b>509.261</b> | 507.245 | F 4 |
| K   6 | <b>734.420</b> | 377.203        | 361.184        | <b>362.192</b> | 360.177 | K 3 |
| T   7 | <b>835.467</b> | 235.092        | 219.074        | 220.082        | 218.066 | T 2 |
| D   8 | 950.494        | 134.045        | 118.026        | 119.034        | 117.018 | D 1 |

# sp | P68433 | H31\_MOUSE

IAQDFK Dimethyl TD  
28.03

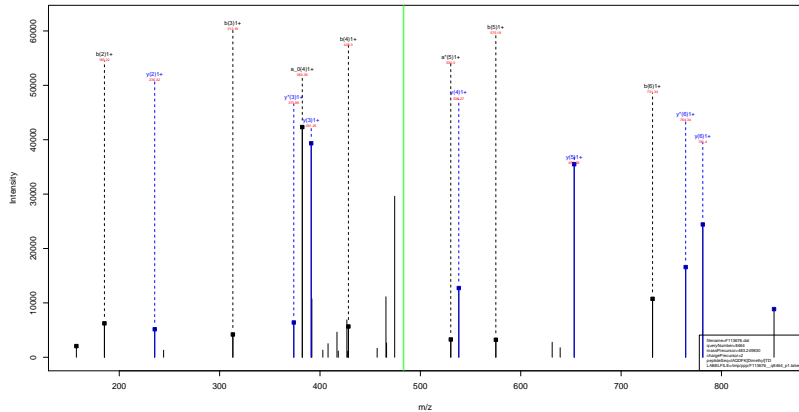

# sp | P68433 | H31\_MOUSE

IAQDFK<sup>Dimethyl</sup>TD  
28.03

- ▶ fragmentation table for charge state 1+
- ▶ specType=cid
- ▶ score=55.82
- ▶ F113676.dat
- ▶ query=q8464\_p1
- ▶ precursor=483.249830
- ▶ chargePrecursor=2
- ▶ itol=0.5

| AA  | a              | a*             | a.0            | b              | b*      | b.0     | y              | y*             | y.0     | AA  |
|-----|----------------|----------------|----------------|----------------|---------|---------|----------------|----------------|---------|-----|
| T 1 | 86.998         | 0.000          | 0.000          | 124.000        | 0.000   | 0.000   | 483.249        | 483.249        | 483.249 | T 1 |
| A 2 | <b>157.134</b> | 0.000          | 0.000          | <b>185.128</b> | 0.000   | 0.000   | <b>852.410</b> | 852.410        | 852.410 | A 2 |
| Q 3 | 285.192        | 268.566        | 0.000          | <b>313.187</b> | 296.560 | 0.000   | <b>781.373</b> | <b>764.346</b> | 763.962 | Q 3 |
| D 4 | 400.219        | 383.393        | <b>382.208</b> | <b>428.214</b> | 411.187 | 410.203 | <b>653.314</b> | 650.280        | 635.304 | D 4 |
| F 5 | 547.287        | <b>538.261</b> | 529.277        | <b>575.282</b> | 558.256 | 557.272 | <b>538.287</b> | 540.293        | 520.277 | F 5 |
| R 6 | 703.434        | 686.397        | 676.403        | <b>731.469</b> | 714.362 | 713.368 | <b>301.219</b> | <b>374.192</b> | 373.206 | R 6 |
| T 7 | 804.461        | 787.435        | 786.451        | 850.456        | 833.430 | 834.446 | <b>235.092</b> | 0.000          | 217.082 | T 7 |
| D 8 | 919.488        | 902.462        | 891.478        | 947.483        | 930.457 | 929.473 | 134.060        | 0.000          | 116.034 | D 8 |



# sp | P68433 | H31\_MOUSE

IAQDFK<sup>Dimethyl</sup> TD  
28.03

- ▶ fragmentation table for charge state 1+
- ▶ specType=etd
- ▶ score=42.20
- ▶ F113676.dat
- ▶ query=q8465\_p1
- ▶ precursor=483.249830
- ▶ chargePrecursor=2
- ▶ itol=0.5

| AA  | c              | y              | z+1            | z+2            | z       | AA  |
|-----|----------------|----------------|----------------|----------------|---------|-----|
| I 1 | 131.118        | <b>965.494</b> | <b>949.475</b> | 0.000          | 948.467 | I 8 |
| A 2 | 202.155        | 852.410        | <b>836.391</b> | 0.000          | 835.383 | A 7 |
| Q 3 | 330.214        | 781.373        | <b>765.354</b> | 766.362        | 764.346 | Q 6 |
| D 4 | 445.241        | 653.314        | <b>637.295</b> | <b>638.303</b> | 636.288 | D 5 |
| F 5 | 592.309        | 538.287        | <b>522.268</b> | <b>523.276</b> | 521.261 | F 4 |
| K 6 | <b>748.435</b> | 391.219        | 375.200        | <b>376.208</b> | 374.192 | K 3 |
| T 7 | <b>849.483</b> | 235.092        | 219.074        | 220.082        | 218.066 | T 2 |
| D 8 | 964.510        | 134.045        | 118.026        | 119.034        | 117.018 | D 1 |





# sp | P68433 | H31\_MOUSE

IAQDFK<sup>Dimethyl</sup> TD  
28.03

- ▶ fragmentation table for charge state 1+
- ▶ specType=cid
- ▶ score=49.79
- ▶ F113676.dat
- ▶ query=q8466\_p1
- ▶ precursor=483.250420
- ▶ chargePrecursor=2
- ▶ itol=0.5

| AA  | a              | a*             | a:0            | b              | b*             | b:0     | y              | y*             | y:0            | AA  |
|-----|----------------|----------------|----------------|----------------|----------------|---------|----------------|----------------|----------------|-----|
| T 1 | 483.250        | 0.000          | 0.000          | 114.181        | 0.000          | 0.000   | 483.250        | 444.462        | 247.481        | T0  |
| A 2 | <b>157.134</b> | 0.000          | 0.000          | <b>185.128</b> | 0.000          | 0.000   | <b>652.410</b> | 635.261        | 634.391        | A 7 |
| Q 3 | 285.192        | 288.166        | 0.000          | <b>313.187</b> | <b>296.160</b> | 0.000   | <b>781.373</b> | <b>764.346</b> | <b>763.362</b> | Q 6 |
| D 4 | 400.219        | 383.193        | <b>387.208</b> | <b>428.214</b> | <b>411.187</b> | 431.203 | <b>653.314</b> | 636.288        | 635.314        | D 5 |
| F 5 | 547.287        | <b>536.261</b> | 530.237        | <b>575.262</b> | 558.236        | 557.232 | <b>538.287</b> | 521.261        | 520.237        | F 4 |
| R 6 | 703.414        | 686.388        | 679.363        | <b>731.400</b> | 714.374        | 713.366 | <b>301.219</b> | <b>374.192</b> | <b>373.208</b> | R 3 |
| T 7 | 854.461        | 787.435        | 786.451        | 832.458        | 815.432        | 814.446 | <b>235.092</b> | 0.000          | 237.062        | T 2 |
| D 8 | 919.488        | 902.462        | 895.436        | 947.463        | 930.437        | 929.473 | 134.640        | 0.000          | 136.634        | D 9 |

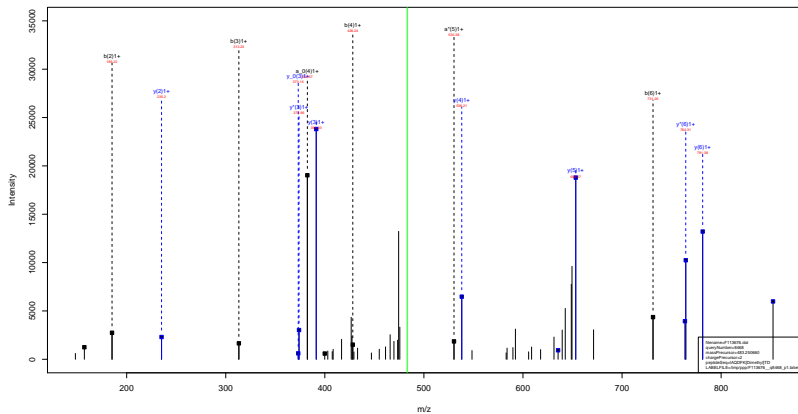

# sp | P68433 | H31\_MOUSE

IAQDFK<sup>Dimethyl</sup>TD  
28.03

- ▶ fragmentation table for charge state 1+
- ▶ specType=cid
- ▶ score=53.87
- ▶ F113676.dat
- ▶ query=q8468\_p1
- ▶ precursor=483.250660
- ▶ chargePrecursor=2
- ▶ itol=0.5

| AA         | a              | a*             | a:Δ            | b              | b*      | b:Δ     | y              | y*             | y:Δ            | AA         |
|------------|----------------|----------------|----------------|----------------|---------|---------|----------------|----------------|----------------|------------|
| <b>T</b> 1 | 46.998         | 0.000          | 0.000          | 124.998        | 0.000   | 0.000   | 483.251        | 0.000          | 0.000          | <b>T</b> 1 |
| <b>A</b> 2 | <b>157.134</b> | 0.000          | 0.000          | <b>185.128</b> | 0.000   | 0.000   | <b>852.410</b> | 0.000          | 0.000          | <b>A</b> 2 |
| <b>Q</b> 3 | 286.192        | 286.192        | 0.000          | <b>313.187</b> | 286.192 | 0.000   | <b>781.373</b> | <b>764.346</b> | <b>763.362</b> | <b>Q</b> 3 |
| <b>G</b> 4 | <b>400.219</b> | 400.219        | <b>382.208</b> | <b>428.214</b> | 411.187 | 430.203 | <b>653.314</b> | 659.289        | <b>635.304</b> | <b>G</b> 4 |
| <b>F</b> 5 | 547.287        | <b>536.261</b> | 545.277        | 515.282        | 536.256 | 557.272 | <b>538.287</b> | 532.261        | 538.277        | <b>F</b> 5 |
| <b>R</b> 6 | 713.414        | 699.403        | 699.403        | <b>731.409</b> | 714.382 | 713.388 | <b>391.219</b> | <b>374.192</b> | <b>373.208</b> | <b>R</b> 6 |
| <b>T</b> 7 | 804.461        | 797.435        | 796.451        | 852.459        | 815.430 | 814.446 | <b>235.092</b> | 0.000          | 237.082        | <b>T</b> 7 |
| <b>G</b> 8 | 916.488        | 902.482        | 901.478        | 947.483        | 930.457 | 929.473 | 134.040        | 0.000          | 136.034        | <b>G</b> 8 |



# sp | P68433 | H31\_MOUSE

IAQDFK<sup>Dimethyl</sup>TD  
28.03

- ▶ fragmentation table for charge state 1+
- ▶ specType=etd
- ▶ score=38.71
- ▶ F113676.dat
- ▶ query=q8469\_p1
- ▶ precursor=483.250660
- ▶ chargePrecursor=2
- ▶ itol=0.5

| AA  | c              | y              | z+1            | z+2            | z              | AA  |
|-----|----------------|----------------|----------------|----------------|----------------|-----|
| I 1 | 131.118        | <b>965.494</b> | <b>949.475</b> | 0.000          | 948.467        | I 8 |
| A 2 | 202.155        | 852.410        | <b>836.391</b> | 0.000          | <b>835.383</b> | A 7 |
| Q 3 | 330.214        | 781.373        | <b>765.354</b> | 766.362        | 764.346        | Q 6 |
| D 4 | 445.241        | 653.314        | <b>637.295</b> | <b>638.303</b> | 636.288        | D 5 |
| F 5 | <b>592.309</b> | <b>538.287</b> | <b>522.268</b> | <b>523.276</b> | 521.261        | F 4 |
| R 6 | <b>748.435</b> | 901.219        | <b>375.200</b> | <b>376.208</b> | 374.192        | R 3 |
| T 7 | <b>849.483</b> | 235.092        | 219.074        | 220.082        | 218.066        | T 2 |
| D 8 | 964.510        | 134.045        | 118.026        | 119.034        | 117.018        | D 1 |

# sp | P68433 | H31\_MOUSE

VREIAQDFKT Phospho DLRF  
79.97

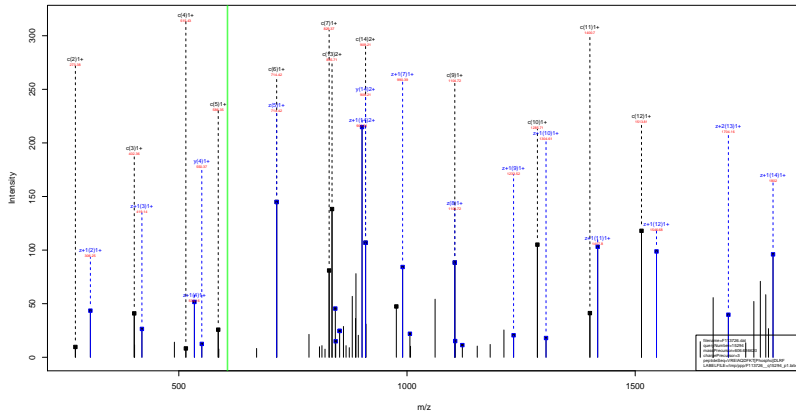

# sp | P68433 | H31\_MOUSE

VREIAQDFKT<sup>Phospho</sup>DLRF  
79.97

- ▶ fragmentation table for charge state 1+
- ▶ specType=etd
- ▶ score=72.59
- ▶ F113726.dat
- ▶ query=q15294\_p1
- ▶ precursor=606.636620
- ▶ chargePrecursor=3
- ▶ itol=0.5

| AA    | c               | y               | z+1             | z+2             | z               | AA    |
|-------|-----------------|-----------------|-----------------|-----------------|-----------------|-------|
| V[1]  | 117.100         | 1817.995        | <b>1801.876</b> | 0.000           | 1900.860        | V[14] |
| R[2]  | <b>273.203</b>  | 1718.826        | 1702.807        | <b>1703.815</b> | 1701.800        | R[13] |
| E[3]  | <b>402.246</b>  | 1562.725        | <b>1548.706</b> | 1547.714        | 1545.690        | E[12] |
| T[4]  | <b>515.330</b>  | 1433.662        | <b>1417.664</b> | 1418.672        | 1416.660        | T[11] |
| A[5]  | <b>586.367</b>  | 1320.598        | <b>1304.580</b> | 1305.587        | 1303.572        | A[10] |
| Q[6]  | <b>714.426</b>  | 1249.561        | <b>1233.543</b> | 1234.550        | 1232.535        | Q[0]  |
| D[7]  | <b>829.453</b>  | <b>1121.503</b> | <b>1105.484</b> | 1106.492        | <b>1104.476</b> | D[8]  |
| F[8]  | <b>976.521</b>  | <b>1006.476</b> | <b>990.457</b>  | 991.465         | 989.449         | F[7]  |
| K[9]  | <b>1104.616</b> | 859.407         | <b>843.389</b>  | 844.396         | 842.381         | K[6]  |
| Y[10] | <b>1285.630</b> | 731.312         | 715.294         | 716.301         | <b>714.286</b>  | Y[5]  |
| D[11] | <b>1400.657</b> | <b>550.298</b>  | <b>534.280</b>  | 535.287         | 533.272         | D[4]  |
| L[12] | <b>1513.741</b> | 435.271         | <b>419.253</b>  | 420.261         | 418.245         | L[3]  |
| R[13] | 1699.842        | 322.187         | <b>306.169</b>  | 307.176         | 305.161         | R[2]  |
| F[14] | 1818.911        | 186.086         | 180.068         | 181.075         | 180.060         | F[1]  |



# sp | P68433 | H31\_MOUSE

VREIAQDFKT <sup>Phospho</sup> DLRF  
79.97

- ▶ fragmentation table for charge state 2+
- ▶ specType=etd
- ▶ score=72.59
- ▶ F113726.dat
- ▶ query=q15294.p1
- ▶ precursor=606.636620
- ▶ chargePrecursor=3
- ▶ itol=0.5

| AA     | c              | y              | z+1            | z+2            | z       | AA     |
|--------|----------------|----------------|----------------|----------------|---------|--------|
| V [1]  | 59.055         | <b>909.451</b> | <b>901.442</b> | 0.904          | 900.938 | V [14] |
| R [2]  | 137.105        | 859.917        | <b>851.907</b> | <b>852.411</b> | 851.403 | R [13] |
| E [3]  | 201.627        | 781.866        | 773.857        | 774.361        | 773.353 | E [12] |
| I [4]  | 258.169        | 717.345        | 709.336        | 709.839        | 708.832 | I [11] |
| A [5]  | 293.687        | 660.803        | 652.793        | 653.297        | 652.290 | A [10] |
| Q [6]  | 357.716        | 625.284        | 617.275        | 617.779        | 616.771 | Q [9]  |
| D [7]  | 415.230        | 561.255        | 553.246        | 553.750        | 552.742 | D [8]  |
| F [8]  | 488.764        | 503.742        | 495.732        | 495.236        | 495.238 | F [7]  |
| K [9]  | 552.812        | 430.207        | 422.198        | 422.702        | 421.694 | K [6]  |
| T [10] | 643.319        | 366.166        | 358.156        | 358.654        | 357.647 | T [5]  |
| D [11] | 700.832        | 275.653        | 267.643        | 268.147        | 267.140 | D [4]  |
| L [12] | 757.374        | 218.130        | 210.130        | 210.634        | 209.626 | L [3]  |
| R [13] | <b>835.425</b> | 161.597        | 153.588        | 154.092        | 153.084 | R [2]  |
| F [14] | <b>908.959</b> | 83.547         | 75.537         | 76.041         | 75.033  | F [1]  |



# sp | P68433 | H31\_MOUSE

DT<sup>Phospho</sup> 79.97 NLCAIHAKRVTIMPKDIQLARRIRGE

- ▶ fragmentation table for charge state 1+
- ▶ specType=etd
- ▶ score=35.57
- ▶ F113851.dat
- ▶ query=q50741\_p1
- ▶ precursor=660.550520
- ▶ chargePrecursor=5
- ▶ itol=0.5

| AA |    | c               | y              | z+1             | z+2             | z               | AA              |
|----|----|-----------------|----------------|-----------------|-----------------|-----------------|-----------------|
| D  | 11 | 133.061         | 3798.739       | 3282.720        | 0.000           | 3281.712        | D <sup>28</sup> |
| T  | 3  | 314.075         | 3183.712       | 3167.693        | 0.000           | 3166.685        | T <sup>27</sup> |
| N  | 3  | 438.118         | 3302.698       | 3286.679        | 2997.667        | 3285.671        | N <sup>26</sup> |
| L  | 4  | 541.202         | 2898.655       | 2872.636        | 2873.644        | 2871.628        | L <sup>25</sup> |
| C  | 5  | 644.211         | 2775.571       | 2759.552        | 2760.560        | 2758.544        | C <sup>24</sup> |
| A  | 6  | 715.248         | 2672.562       | 2656.543        | 2657.551        | 2655.535        | A <sup>23</sup> |
| I  | 7  | 828.132         | 2601.525       | 2585.506        | 2586.514        | 2584.488        | I <sup>22</sup> |
| H  | 8  | 955.201         | 2488.441       | 2472.422        | 2473.430        | 2471.414        | H <sup>21</sup> |
| A  | 9  | 1036.628        | 2351.382       | 2335.363        | 2336.371        | 2334.355        | A <sup>20</sup> |
| K  | 10 | <b>1164.523</b> | 2280.345       | 2264.326        | 2265.334        | 2263.318        | K <sup>19</sup> |
| R  | 11 | 1320.624        | 2152.250       | 2136.231        | 2137.239        | 2135.223        | R <sup>18</sup> |
| V  | 12 | 1419.663        | 1996.148       | 1980.130        | 1981.138        | 1979.122        | V <sup>17</sup> |
| T  | 13 | <b>1538.740</b> | 1897.080       | 1881.061        | 1882.069        | 1880.053        | T <sup>16</sup> |
| L  | 14 | <b>1633.824</b> | 1796.032       | 1780.013        | 1781.021        | 1779.005        | L <sup>15</sup> |
| M  | 15 | 1764.895        | 1682.048       | <b>1666.930</b> | 1667.937        | 1665.922        | M <sup>14</sup> |
| F  | 16 | 1861.918        | 1551.968       | 1535.889        | 1536.897        | <b>1534.881</b> | F <sup>13</sup> |
| K  | 17 | 1990.013        | 1454.855       | 1438.836        | <b>1439.844</b> | 1437.828        | K <sup>12</sup> |
| D  | 18 | 2105.040        | 1326.760       | 1310.741        | <b>1311.749</b> | 1309.734        | D <sup>11</sup> |
| I  | 19 | 2218.234        | 1211.733       | 1195.714        | 1196.722        | 1194.707        | I <sup>10</sup> |
| Q  | 20 | 2346.182        | 1098.649       | 1082.630        | 1083.638        | <b>1081.623</b> | Q <sup>9</sup>  |
| L  | 21 | 2459.266        | 970.590        | 954.572         | <b>955.580</b>  | 953.564         | L <sup>8</sup>  |
| A  | 22 | 2530.303        | 857.506        | 841.488         | <b>842.496</b>  | 840.480         | A <sup>7</sup>  |
| R  | 23 | 2686.404        | <b>786.469</b> | 770.451         | 771.458         | 769.443         | R <sup>6</sup>  |
| K  | 24 | 2872.506        | 630.368        | <b>614.360</b>  | 615.367         | 613.342         | K <sup>5</sup>  |
| L  | 25 | 2955.599        | 474.267        | <b>458.248</b>  | 459.256         | 457.241         | L <sup>4</sup>  |
| R  | 26 | 3111.691        | 361.183        | <b>345.164</b>  | 346.172         | 344.156         | R <sup>3</sup>  |
| G  | 27 | 3168.712        | 205.082        | 189.063         | 190.071         | 188.055         | G <sup>2</sup>  |
| E  | 28 | 3297.725        | 148.060        | 132.042         | 133.050         | 131.034         | E <sup>1</sup>  |

# sp | P68433 | H31\_MOUSE

DT<sup>Phospho</sup> 79.97 NLCAIHAKRVTIMPKDIQLARRIRGE

- ▶ fragmentation table for charge state 2+
- ▶ specType=etd
- ▶ score=35.57
- ▶ F113851.dat
- ▶ query=q50741\_p1
- ▶ precursor=660.550520
- ▶ chargePrecursor=5
- ▶ itol=0.5

| AA    | c               | y              | z=1             | z=2             | z              | AA    |
|-------|-----------------|----------------|-----------------|-----------------|----------------|-------|
| D[1]  | 67.634          | 1640.672       | 1041.884        | 0.504           | 1641.360       | D[26] |
| T[2]  | 157.541         | 1302.360       | <b>1584.350</b> | 0.504           | 1303.846       | T[27] |
| N[3]  | -214.562        | 1501.853       | 1493.643        | 1494.347        | 1493.330       | N[20] |
| L[4]  | 271.105         | 1444.831       | 1436.823        | 1437.326        | 1436.318       | L[25] |
| C[5]  | 322.609         | 1388.269       | 1380.260        | 1380.764        | 1379.776       | C[24] |
| A[6]  | 358.120         | 1330.784       | 1328.775        | 1329.279        | 1328.271       | A[23] |
| I[7]  | 414.670         | 1301.266       | 1293.257        | 1293.760        | 1292.751       | I[22] |
| R[8]  | 483.109         | 1284.724       | 1278.715        | 1279.218        | 1278.211       | R[21] |
| A[9]  | 518.718         | 1176.194       | 1168.185        | 1168.689        | 1167.681       | A[20] |
| K[10] | 582.765         | 1140.676       | 1132.667        | <b>1133.170</b> | 1132.163       | K[19] |
| R[11] | 660.816         | 1076.628       | 1068.619        | <b>1069.123</b> | 1068.115       | R[18] |
| V[12] | <b>710.350</b>  | 908.576        | <b>990.568</b>  | <b>991.072</b>  | <b>990.065</b> | V[17] |
| T[13] | <b>768.874</b>  | <b>849.044</b> | 841.037         | 841.539         | <b>840.530</b> | T[16] |
| L[14] | <b>817.416</b>  | <b>890.520</b> | <b>890.510</b>  | <b>891.014</b>  | 890.005        | L[15] |
| M[15] | 882.936         | 841.975        | <b>833.968</b>  | <b>834.472</b>  | 833.464        | M[14] |
| F[16] | <b>931.462</b>  | <b>776.458</b> | <b>768.448</b>  | 768.952         | <b>767.944</b> | F[13] |
| K[17] | <b>995.510</b>  | 727.931        | <b>719.922</b>  | 720.426         | 719.418        | K[12] |
| D[18] | 1051.923        | 663.884        | <b>655.874</b>  | <b>656.378</b>  | 655.370        | D[11] |
| I[19] | <b>1109.565</b> | 608.242        | <b>598.361</b>  | <b>598.865</b>  | 597.857        | I[10] |
| Q[20] | <b>1173.595</b> | 549.626        | <b>541.819</b>  | <b>542.323</b>  | <b>541.315</b> | Q[9]  |
| L[21] | 1230.137        | 485.799        | <b>477.790</b>  | <b>478.293</b>  | 477.285        | L[8]  |
| A[22] | <b>1265.655</b> | 428.257        | 421.247         | 421.751         | 420.744        | A[7]  |
| R[23] | <b>1343.706</b> | <b>393.738</b> | <b>385.729</b>  | <b>386.233</b>  | 385.225        | R[6]  |
| R[24] | <b>1421.756</b> | 315.688        | 307.678         | 308.182         | 307.174        | R[5]  |
| T[25] | <b>1478.296</b> | 237.037        | 229.028         | 229.532         | 228.524        | T[4]  |
| R[26] | <b>1556.349</b> | 181.095        | 173.086         | 173.590         | 172.582        | R[3]  |
| G[27] | <b>1584.860</b> | 103.045        | 95.035          | 95.539          | 94.531         | G[2]  |
| E[28] | 1649.381        | 74.534         | 66.524          | 67.028          | 66.021         | E[1]  |

# sp | P68433 | H31\_MOUSE

DT<sup>Phospho</sup> 79.97 NLCAIHAKRVTIMPKDIQLARRIRGE

- ▶ fragmentation table for charge state 3+
- ▶ specType=etd
- ▶ score=35.57
- ▶ F113851.dat
- ▶ query=q50741.p1
- ▶ precursor=660.550520
- ▶ chargePrecursor=5
- ▶ itol=0.5

| AA    | c               | y              | z+1            | z+2            | z              | AA    |
|-------|-----------------|----------------|----------------|----------------|----------------|-------|
| D[2]  | 45.025          | 1100.251       | 1094.911       | 0.672          | 1094.576       | D[28] |
| T[2]  | 105.163         | 1061.909       | 1056.569       | 0.672          | 1056.233       | T[27] |
| N[3]  | 143.377         | 1001.571       | <b>996.231</b> | 0.96567        | <b>995.895</b> | N[26] |
| L[4]  | 181.072         | <b>963.557</b> | 956.217        | 0.95853        | 957.881        | L[25] |
| C[5]  | 215.409         | 925.802        | 920.522        | 0.920858       | 920.186        | C[24] |
| A[6]  | 239.088         | 891.525        | 886.196        | 0.896222       | 885.850        | A[23] |
| T[7]  | 278.782         | 867.848        | 862.527        | <b>0.62843</b> | 862.171        | T[22] |
| H[8]  | 322.469         | 830.152        | <b>824.812</b> | <b>825.148</b> | <b>824.476</b> | H[21] |
| A[9]  | 346.148         | 784.465        | <b>778.126</b> | 779.462        | <b>778.790</b> | A[20] |
| K[10] | 388.846         | <b>760.786</b> | 755.447        | 755.783        | 755.111        | K[19] |
| R[11] | 440.680         | 718.080        | <b>712.748</b> | <b>713.084</b> | <b>712.413</b> | R[18] |
| V[12] | 473.902         | 666.054        | 660.715        | 661.051        | 660.379        | V[17] |
| T[13] | 507.585         | 613.032        | 627.692        | 628.028        | 627.356        | T[16] |
| I[14] | 545.280         | 599.349        | 594.009        | 594.346        | 593.673        | I[15] |
| M[15] | 588.965         | <b>561.054</b> | 556.315        | 556.651        | 555.979        | M[14] |
| P[16] | 621.111         | 517.974        | 512.635        | 512.970        | 512.299        | P[13] |
| K[17] | 664.009         | 485.623        | 480.284        | 480.620        | 479.948        | K[12] |
| D[18] | 702.151         | 442.925        | 437.585        | 437.921        | 437.249        | D[11] |
| I[19] | 740.040         | 404.583        | 399.243        | 399.579        | 398.907        | I[10] |
| Q[20] | 782.732         | 366.888        | 361.548        | 361.884        | 361.212        | Q[0]  |
| L[21] | 830.427         | 324.202        | 318.862        | 319.198        | 318.526        | L[0]  |
| A[22] | 844.106         | 286.507        | 281.167        | 281.503        | 280.831        | A[7]  |
| R[23] | <b>896.140</b>  | 262.820        | 257.480        | 257.824        | 257.152        | R[0]  |
| R[24] | <b>948.173</b>  | 210.794        | 205.455        | 205.791        | 205.119        | R[5]  |
| I[25] | <b>985.868</b>  | 158.761        | 153.421        | 153.757        | 153.085        | I[4]  |
| R[26] | <b>1037.902</b> | 121.060        | 115.720        | 116.062        | 115.390        | R[3]  |
| Q[27] | 1056.909        | 69.812         | 63.063         | 64.020         | 63.357         | Q[2]  |
| E[28] | 1099.923        | 30.020         | 44.683         | 45.021         | 44.349         | E[1]  |

# sp | P68433 | H31\_MOUSE

DT<sup>Phospho</sup> 79.97 NLCAIHAKRVTIMPKDIQLARRIRGE

- ▶ fragmentation table for charge state 4+
- ▶ specType=etd
- ▶ score=35.57
- ▶ F113851.dat
- ▶ query=q50741.p1
- ▶ precursor=660.550520
- ▶ chargePrecursor=5
- ▶ itol=0.5

| AA    | c              | y              | z+1            | z+2     | z              | AA    |
|-------|----------------|----------------|----------------|---------|----------------|-------|
| D[1]  | 34.021         | <b>825.440</b> | <b>821.435</b> | 0.755   | 821.184        | D[28] |
| T[2]  | 79.274         | 796.685        | <b>792.679</b> | 0.755   | <b>792.427</b> | T[27] |
| N[3]  | 107.785        | 751.430        | 747.425        | 747.677 | 747.173        | N[26] |
| L[4]  | 136.056        | 722.919        | 718.915        | 719.166 | 718.663        | L[25] |
| C[5]  | 161.208        | 694.643        | 690.643        | 690.895 | 690.392        | C[24] |
| A[6]  | 179.567        | 666.996        | 664.891        | 665.143 | 664.639        | A[23] |
| I[7]  | 207.238        | 651.137        | 647.132        | 647.384 | 646.880        | I[22] |
| H[8]  | 242.103        | 622.866        | 618.861        | 619.113 | 618.609        | H[21] |
| A[9]  | 259.802        | 588.601        | 584.596        | 584.848 | 584.344        | A[20] |
| K[10] | 291.886        | 570.847        | 566.839        | 567.090 | 566.585        | K[19] |
| R[11] | 330.912        | 538.818        | 534.813        | 535.065 | 534.561        | R[18] |
| V[12] | 355.679        | 499.793        | 495.788        | 496.040 | 495.536        | V[17] |
| T[13] | 380.941        | 475.025        | 471.021        | 471.273 | 470.769        | T[16] |
| I[14] | 409.212        | 449.764        | 445.759        | 446.011 | 445.507        | I[15] |
| M[15] | 441.972        | 421.493        | 417.488        | 417.740 | 417.236        | M[14] |
| P[16] | 466.235        | 388.752        | 384.728        | 384.980 | 384.476        | P[13] |
| K[17] | 498.250        | 364.469        | 360.465        | 360.716 | 360.213        | K[12] |
| D[18] | 527.015        | 332.445        | 328.441        | 328.693 | 328.189        | D[11] |
| I[19] | 555.286        | 303.689        | 299.684        | 299.936 | 299.432        | I[10] |
| Q[20] | 587.301        | 275.418        | 271.413        | 271.665 | 271.161        | Q[9]  |
| L[21] | 615.572        | 243.403        | 239.398        | 239.650 | 239.146        | L[8]  |
| A[22] | 633.331        | 215.132        | 211.127        | 211.379 | 210.875        | A[7]  |
| K[23] | 672.357        | 197.373        | 193.368        | 193.620 | 193.116        | K[6]  |
| R[24] | 711.382        | 158.349        | 154.343        | 154.595 | 154.091        | R[5]  |
| L[25] | 739.653        | 119.322        | 115.318        | 115.570 | 115.066        | L[4]  |
| R[26] | <b>778.678</b> | 91.051         | 87.047         | 87.298  | 86.795         | R[3]  |
| G[27] | <b>792.934</b> | 52.026         | 48.021         | 48.273  | 47.769         | G[2]  |
| E[28] | <b>825.194</b> | 37.771         | 33.766         | 34.018  | 33.514         | E[1]  |



# sp | P84244 | H33\_MOUSE

IAQDFK<sup>Methyl</sup> TDLRFQSAAGALQE  
14.02

- ▶ fragmentation table for charge state 1+
- ▶ specType=cid
- ▶ score=50.81
- ▶ F113873.dat
- ▶ query=q43865\_p1
- ▶ precursor=779.413030
- ▶ chargePrecursor=3
- ▶ itol=0.5

| AA    | a              | a'       | a,b      | b               | b'       | b,b'           | y              | y'             | y,b            | AA    |
|-------|----------------|----------|----------|-----------------|----------|----------------|----------------|----------------|----------------|-------|
| I(3)  | 86.808         | 0.000    | 0.000    | 114.080         | 0.000    | 0.000          | 2136.220       | 2113.108       | 2118.924       | I(2)  |
| A(2)  | 637.134        | 0.000    | 0.000    | 189.120         | 0.000    | 0.000          | 2223.140       | 2206.114       | 2209.130       | A(20) |
| Q(3)  | 326.162        | 388.384  | 0.000    | 131.180         | 298.180  | 0.000          | 2132.204       | 2130.074       | 2134.004       | Q(16) |
| D(4)  | 400.219        | 383.383  | 302.200  | 420.204         | 411.187  | 410.203        | 2024.050       | 2020.016       | 2026.014       | D(10) |
| F(5)  | 847.087        | 836.201  | 526.272  | 579.261         | 508.268  | 457.272        | 1886.038       | 1884.994       | 1884.007       | F(17) |
| K(6)  | 868.087        | 872.212  | 671.380  | 717.393         | 700.398  | 609.390        | 1741.040       | 1744.923       | 1743.039       | K(16) |
| L(7)  | <b>706.446</b> | 713.419  | 722.420  | <b>915.441</b>  | 881.444  | 804.440        | 1638.870       | 1660.812       | 1661.808       | L(15) |
| D(8)  | 905.471        | 888.449  | 887.440  | <b>915.448</b>  | 916.441  | <b>915.457</b> | 1516.751       | 1516.749       | 1509.741       | D(14) |
| L(9)  | 1013.509       | 1001.520 | 1020.540 | <b>1046.552</b> | 1028.532 | 1019.544       | 1431.580       | 1436.580       | 1438.574       | L(14) |
| R(10) | 1174.608       | 1187.601 | 1186.604 | 1246.601        | 1188.606 | 1184.610       | 1280.604       | 1272.604       | 1272.600       | R(12) |
| F(11) | 1321.708       | 1304.700 | 1301.700 | 1340.720        | 1332.680 | 1331.711       | 1134.579       | 1117.550       | 1118.568       | F(11) |
| Q(12) | 1440.800       | 1432.800 | 1431.797 | 1477.800        | 1460.793 | 1459.800       | <b>887.511</b> | 878.504        | 880.500        | Q(10) |
| S(13) | 1536.817       | 1529.780 | 1518.800 | 1564.812        | 1547.785 | 1546.801       | <b>859.452</b> | <b>842.425</b> | 841.441        | S(9)  |
| A(14) | 1697.854       | 1690.817 | 1689.841 | 1630.849        | 1618.844 | 1617.836       | 714.840        | 709.836        | 714.836        | A(8)  |
| A(15) | 1816.861       | 1804.869 | 1800.861 | 1708.868        | 1688.869 | 1688.876       | <b>701.383</b> | 684.358        | 681.372        | A(7)  |
| I(16) | 1791.876       | 1774.880 | 1771.880 | 1610.870        | 1602.844 | 1601.860       | <b>630.346</b> | <b>613.319</b> | 612.330        | I(6)  |
| G(17) | 1848.887       | 1831.889 | 1828.888 | 1616.886        | 1608.889 | 1608.881       | <b>517.263</b> | <b>500.235</b> | <b>489.251</b> | G(5)  |
| A(18) | 1900.904       | 1883.903 | 1882.923 | 1640.920        | 1631.902 | 1630.918       | 480.250        | 443.254        | 442.250        | A(4)  |
| L(19) | 2033.916       | 1998.919 | 1995.916 | 1606.916        | 1604.908 | 1604.910       | <b>389.203</b> | <b>372.177</b> | <b>371.183</b> | L(3)  |
| Q(20) | 2081.930       | 2044.928 | 2043.940 | 1600.934        | 1612.945 | 1611.931       | <b>376.110</b> | <b>259.092</b> | <b>258.108</b> | Q(2)  |
| D(21) | 2096.939       | 2071.930 | 2070.930 | 1610.934        | 1603.937 | 1603.938       | 146.930        |                | 146.930        | D(1)  |



# sp | P84244 | H33\_MOUSE

IAQDFK <sup>Methyl</sup> 14.02 TDLRFQSAAILGALQE

- ▶ fragmentation table for charge state 2+
- ▶ specType=cid
- ▶ score=50.81
- ▶ F113873.dat
- ▶ query=q43865\_p1
- ▶ precursor=779.413030
- ▶ chargePrecursor=3
- ▶ itol=0.5

| AA  | a        | a'       | a_D      | b        | b'       | b_D      | y        | y'       | y_D      | AA  |
|-----|----------|----------|----------|----------|----------|----------|----------|----------|----------|-----|
| R1  | 41.057   | 0.504    | 0.504    | 57.549   | 0.504    | 0.504    | 1168.818 | 1169.321 | 1169.811 | R21 |
| A1  | 79.070   | 0.504    | 0.504    | 93.060   | 0.504    | 0.504    | 1114.074 | 1114.578 | 1115.069 | A20 |
| G1  | 141.200  | 1.547    | 0.504    | 147.087  | 1.485    | 0.504    | 1079.503 | 1080.044 | 1080.530 | G19 |
| L1  | 206.513  | 2.061    | 1.020    | 214.811  | 2.059    | 0.504    | 1012.502 | 1013.011 | 1013.511 | L18 |
| F1  | 374.147  | 3.061    | 1.531    | 388.141  | 3.078    | 0.504    | 955.115  | 955.615  | 956.107  | F17 |
| K1  | 542.277  | 3.561    | 1.531    | 556.265  | 3.567    | 0.504    | 881.478  | 881.975  | 882.471  | K16 |
| T1  | 705.727  | 4.561    | 2.281    | 720.129  | 4.559    | 0.504    | 824.119  | 824.619  | 825.111  | T15 |
| D1  | 861.240  | 4.561    | 2.281    | 875.213  | 4.558    | 0.504    | 759.899  | 760.399  | 760.894  | D14 |
| L1  | 1027.782 | 5.561    | 2.777    | 1043.177 | 5.559    | 0.504    | 714.774  | 715.274  | 715.769  | L13 |
| M1  | 1187.318 | 6.561    | 3.016    | 1204.364 | 6.559    | 0.504    | 669.824  | 670.324  | 670.819  | M12 |
| P11 | 661.367  | 652.854  | 652.362  | 661.830  | 662.317  | 661.829  | 597.793  | 598.293  | 598.788  | P11 |
| Q12 | 725.396  | 716.489  | 716.391  | 726.394  | 726.880  | 726.386  | 541.267  | 541.767  | 542.264  | Q10 |
| S13 | 769.547  | 760.640  | 760.542  | 770.538  | 771.025  | 770.536  | 498.232  | 498.732  | 499.224  | S10 |
| A14 | 804.611  | 795.617  | 795.613  | 814.620  | 815.115  | 814.623  | 451.111  | 451.611  | 452.107  | A9  |
| A15 | 839.649  | 831.659  | 830.644  | 851.647  | 852.141  | 851.641  | 404.041  | 404.541  | 405.035  | A8  |
| I16 | 896.491  | 887.515  | 887.490  | 916.489  | 917.075  | 916.493  | 353.816  | 354.316  | 354.811  | I6  |
| G17 | 955.966  | 946.989  | 946.991  | 975.997  | 976.593  | 976.005  | 303.134  | 303.634  | 304.129  | G6  |
| A18 | 990.521  | 982.529  | 982.511  | 1014.518 | 1015.005 | 1014.513 | 253.224  | 253.724  | 254.219  | A4  |
| L19 | 1017.063 | 1009.049 | 1009.050 | 1047.050 | 1047.537 | 1047.054 | 203.105  | 203.605  | 204.100  | L3  |
| G20 | 1084.084 | 1076.070 | 1076.070 | 1095.069 | 1095.578 | 1095.084 | 153.041  | 153.541  | 154.036  | G3  |
| Q21 | 1145.613 | 1137.603 | 1137.603 | 1156.601 | 1157.091 | 1156.605 | 103.004  | 103.504  | 104.000  | Q1  |

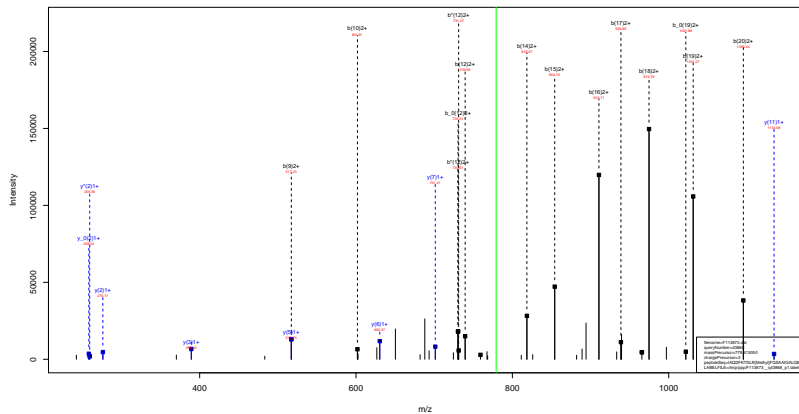

# sp | P84244 | H33\_MOUSE

IAQDFKTDLR<sup>Methyl</sup> FQSAAIGALQE  
14.02

- ▶ fragmentation table for charge state 1+
- ▶ specType=cid
- ▶ score=56.15
- ▶ F113873.dat
- ▶ query=q43868\_p1
- ▶ precursor=779.413050
- ▶ chargePrecursor=3
- ▶ itol=0.5

| AA    | a        | a'             | a,β      | b        | b'       | b,β      | y               | y'             | y,β            | AA    |
|-------|----------|----------------|----------|----------|----------|----------|-----------------|----------------|----------------|-------|
| I(3)  | 86.898   | 0.000          | 0.000    | 114.091  | 0.000    | 0.000    | 218.220         | 218.220        | 218.224        | I(2)  |
| A(2)  | 137.134  | 0.000          | 0.000    | 185.129  | 0.000    | 0.000    | 223.140         | 223.144        | 223.130        | A(26) |
| Q(3)  | 226.162  | 388.384        | 0.000    | 213.287  | 398.150  | 0.000    | 242.231         | 242.207        | 242.168        | Q(18) |
| D(4)  | 400.219  | 383.383        | 382.200  | 428.924  | 411.187  | 410.200  | 454.953         | 454.933        | 454.919        | D(16) |
| F(5)  | 647.287  | 536.261        | 528.272  | 578.262  | 558.258  | 557.277  | 589.038         | 589.038        | 589.037        | F(17) |
| K(6)  | 875.382  | 670.264        | 667.272  | 703.277  | 686.261  | 685.280  | 718.043         | 718.023        | 718.039        | K(16) |
| T(7)  | 119.438  | <b>718.404</b> | 704.420  | 804.429  | 787.368  | 786.413  | 828.894         | 828.828        | 828.844        | T(15) |
| D(8)  | 391.457  | 374.433        | 373.448  | 409.462  | 392.426  | 391.441  | 412.852         | 412.785        | 412.736        | D(14) |
| L(9)  | 184.541  | 467.533        | 466.532  | 502.536  | 481.528  | 481.528  | 512.528         | 512.528        | 512.528        | L(13) |
| R(10) | 1174.618 | 1187.617       | 1186.641 | 1202.619 | 1188.618 | 1187.641 | 1208.618        | 1208.618       | 1208.618       | R(2)  |
| F(11) | 1321.708 | 1324.708       | 1323.720 | 1348.721 | 1332.695 | 1331.721 | <b>1134.579</b> | 1117.555       | 1118.568       | F(11) |
| Q(12) | 1443.692 | 1442.691       | 1441.720 | 1477.693 | 1460.653 | 1459.691 | 1487.651        | 1487.651       | 1487.650       | Q(12) |
| S(13) | 1536.617 | 1529.609       | 1518.600 | 1564.612 | 1547.595 | 1546.610 | 1563.602        | 1562.626       | 1561.641       | S(9)  |
| A(14) | 1099.694 | 1099.694       | 1099.694 | 1102.694 | 1101.692 | 1101.692 | 1104.692        | 1104.692       | 1104.692       | A(14) |
| A(15) | 1812.691 | 1804.689       | 1800.681 | 1806.686 | 1789.659 | 1788.679 | <b>701.383</b>  | 684.358        | 684.372        | A(1)  |
| I(16) | 1791.678 | 1774.669       | 1771.660 | 1810.670 | 1802.644 | 1801.660 | <b>630.346</b>  | 613.319        | 612.335        | I(6)  |
| G(17) | 1848.667 | 1831.658       | 1828.660 | 1878.662 | 1870.635 | 1869.651 | <b>517.292</b>  | 500.259        | 499.275        | G(8)  |
| A(18) | 1300.694 | 1293.693       | 1292.621 | 1348.629 | 1331.602 | 1330.618 | 1450.613        | 1443.254       | 1442.270       | A(4)  |
| L(19) | 2033.618 | 2028.691       | 2025.691 | 2061.611 | 2044.686 | 2043.610 | <b>389.293</b>  | 372.273        | 371.180        | L(8)  |
| Q(20) | 2081.616 | 2144.628       | 2143.650 | 2189.631 | 2172.645 | 2171.661 | <b>276.119</b>  | <b>259.892</b> | <b>258.108</b> | Q(2)  |
| D(21) | 2296.619 | 2271.623       | 2270.200 | 2318.624 | 2301.618 | 2300.200 | 2320.618        | 2320.618       | 2320.618       | D(1)  |

# sp | P84244 | H33\_MOUSE

IAQDFKTDLR<sup>Methyl</sup> FQSAAIGALQE  
14.02

- ▶ fragmentation table for charge state 2+
- ▶ specType=cid
- ▶ score=56.15
- ▶ F113873.dat
- ▶ query=q43868.p1
- ▶ precursor=779.413050
- ▶ chargePrecursor=3
- ▶ itol=0.5

| AA | a  | a'   | a <sub>0</sub> | b     | b'       | b <sub>0</sub>  | y               | y'       | y <sub>0</sub> | AA       |      |
|----|----|------|----------------|-------|----------|-----------------|-----------------|----------|----------------|----------|------|
| H  | 41 | 552  | 0.559          | 0.504 | 57.945   | 0.504           | 0.504           | 1148.010 | 1160.010       | 1160.011 | H23  |
| A  | 2  | 75   | 0.509          | 0.504 | 69.059   | 0.504           | 0.504           | 1142.204 | 1150.504       | 1150.509 | A25  |
| Q  | 3  | 143  | 0.509          | 0.504 | 132.064  | 0.504           | 0.504           | 1075.500 | 1088.004       | 1088.004 | Q10  |
| E  | 4  | 208  | 0.512          | 0.509 | 195.069  | 0.509           | 0.509           | 1012.200 | 1026.012       | 1026.012 | E10  |
| F  | 5  | 274  | 0.447          | 0.511 | 268.144  | 0.511           | 0.511           | 978.440  | 993.011        | 993.011  | F117 |
| K  | 6  | 338  | 0.595          | 0.508 | 338.180  | 0.512           | 0.512           | 943.180  | 959.412        | 959.412  | K106 |
| T  | 7  | 402  | 0.479          | 0.509 | 402.174  | 0.509           | 0.509           | 878.174  | 894.411        | 894.411  | T135 |
| D  | 8  | 466  | 0.522          | 0.511 | 466.211  | 0.511           | 0.511           | 843.211  | 859.504        | 859.504  | D134 |
| L  | 9  | 530  | 0.474          | 0.511 | 530.205  | <b>516.772</b>  | 0.511           | 807.716  | 824.204        | 824.204  | L113 |
| M  | 10 | 594  | 0.473          | 0.511 | 594.201  | <b>601.830</b>  | 0.511           | 772.810  | 789.204        | 789.204  | M12  |
| P  | 11 | 658  | 0.524          | 0.509 | 658.195  | 0.509           | 0.509           | 737.195  | 754.200        | 754.200  | P121 |
| Q  | 12 | 722  | 0.509          | 0.508 | 722.189  | <b>730.304</b>  | <b>730.308</b>  | 697.200  | 714.200        | 714.204  | Q118 |
| S  | 13 | 786  | 0.512          | 0.509 | 786.183  | 0.509           | 0.509           | 662.183  | 679.200        | 679.200  | S10  |
| A  | 14 | 850  | 0.470          | 0.511 | 850.177  | <b>816.428</b>  | 0.511           | 627.177  | 644.200        | 644.200  | A10  |
| A  | 15 | 914  | 0.509          | 0.511 | 914.171  | <b>853.047</b>  | 0.511           | 592.171  | 609.200        | 609.200  | A10  |
| I  | 16 | 978  | 0.493          | 0.511 | 978.165  | 0.511           | 0.511           | 557.165  | 574.200        | 574.200  | I10  |
| A  | 17 | 1042 | 0.470          | 0.511 | 1042.159 | <b>910.489</b>  | 0.511           | 522.159  | 539.200        | 539.200  | A10  |
| A  | 18 | 1106 | 0.511          | 0.509 | 1106.153 | <b>938.009</b>  | 0.509           | 487.153  | <b>510.134</b> | 510.134  | A10  |
| A  | 19 | 1170 | 0.511          | 0.509 | 1170.147 | <b>974.518</b>  | <b>966.005</b>  | 452.147  | 469.200        | 469.200  | A10  |
| Q  | 20 | 1234 | 0.511          | 0.509 | 1234.141 | <b>1031.060</b> | <b>1022.035</b> | 417.141  | 434.200        | 434.200  | Q10  |
| G  | 21 | 1298 | 0.511          | 0.509 | 1298.135 | <b>1095.009</b> | 0.509           | 382.135  | 399.200        | 399.200  | G10  |
| G  | 22 | 1362 | 0.511          | 0.509 | 1362.129 | 0.509           | 0.509           | 347.129  | 364.200        | 364.200  | G10  |

# sp | P84244 | H33\_MOUSE

IAQDFKTDLR <sup>Methyl</sup> FQSAAIGALQE  
14.02

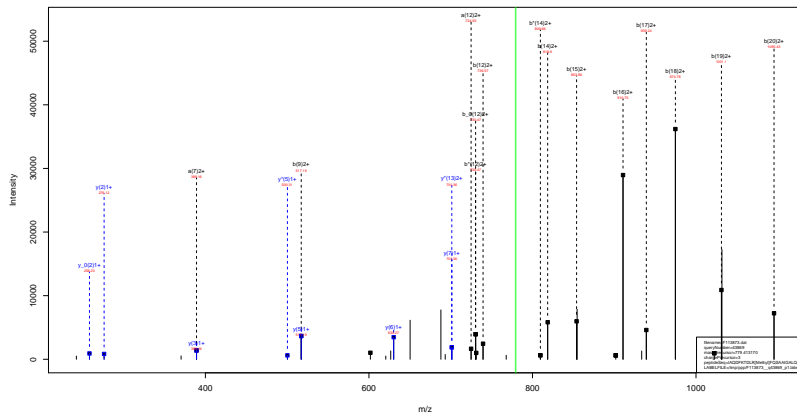

# sp | P84244 | H33\_MOUSE

IAQDFKTDLR<sup>Methyl</sup> FQSAAIGALQE  
14.02

- ▶ fragmentation table for charge state 1+
- ▶ specType=cid
- ▶ score=61.81
- ▶ F113873.dat
- ▶ query=q43869\_p1
- ▶ precursor=779.413170
- ▶ chargePrecursor=3
- ▶ itol=0.5

| AA | a       | a'      | a,b     | b       | b'      | b,b'           | r        | r'       | r,b      | AA          |
|----|---------|---------|---------|---------|---------|----------------|----------|----------|----------|-------------|
| I  | 98.698  | 0.000   | 0.000   | 114.091 | 0.000   | 0.000          | 2356.225 | 2319.088 | 2318.214 | I <b>25</b> |
| A  | 137.134 | 0.000   | 0.000   | 105.129 | 0.000   | 0.000          | 2221.140 | 2206.114 | 2205.130 | A <b>26</b> |
| Q  | 138.012 | 282.987 | 0.000   | 113.187 | 286.166 | 0.000          | 2351.101 | 2336.077 | 2335.093 | Q <b>19</b> |
| D  | 140.219 | 303.193 | 382.208 | 126.214 | 311.187 | 410.203        | 2624.076 | 2607.018 | 2606.034 | D <b>28</b> |
| F  | 147.207 | 320.201 | 420.217 | 137.263 | 326.206 | 457.212        | 3069.031 | 3051.993 | 3051.007 | F <b>11</b> |
| K  | 147.582 | 328.208 | 427.212 | 137.372 | 328.211 | 458.217        | 3075.057 | 3058.023 | 3057.039 | K <b>16</b> |
| L  | 179.436 | 358.414 | 458.420 | 158.426 | 370.268 | 509.414        | 3333.004 | 3316.028 | 3315.044 | L <b>15</b> |
| D  | 181.437 | 374.413 | 474.420 | 169.463 | 382.425 | <b>501.441</b> | 3532.031 | 3515.055 | 3514.070 | D <b>14</b> |
| I  | 183.434 | 387.413 | 487.420 | 172.463 | 385.425 | 511.426        | 3417.026 | 3400.051 | 3399.067 | I <b>13</b> |
| R  | 187.438 | 417.413 | 517.420 | 182.463 | 403.426 | 519.426        | 3479.042 | 3462.066 | 3461.082 | R <b>12</b> |
| F  | 191.438 | 434.413 | 534.420 | 194.463 | 415.426 | 531.431        | 3534.079 | 3517.103 | 3516.118 | F <b>11</b> |
| Q  | 194.438 | 442.413 | 542.420 | 197.463 | 418.426 | 534.431        | 3549.069 | 3532.093 | 3531.108 | Q <b>10</b> |
| S  | 197.438 | 450.413 | 550.420 | 200.463 | 421.426 | 537.431        | 3564.064 | 3547.088 | 3546.103 | S <b>11</b> |
| A  | 197.554 | 450.413 | 550.420 | 200.463 | 421.426 | 537.431        | 3564.064 | 3547.088 | 3546.103 | A <b>10</b> |
| A  | 197.691 | 451.413 | 551.420 | 201.463 | 422.426 | 538.431        | 3579.059 | 3562.083 | 3561.098 | A <b>11</b> |
| I  | 197.879 | 453.413 | 553.420 | 203.463 | 424.426 | 540.431        | 3594.054 | 3577.078 | 3576.093 | I <b>10</b> |
| C  | 198.007 | 453.413 | 553.420 | 203.463 | 424.426 | 540.431        | 3594.054 | 3577.078 | 3576.093 | C <b>10</b> |
| A  | 198.034 | 453.413 | 553.420 | 203.463 | 424.426 | 540.431        | 3594.054 | 3577.078 | 3576.093 | A <b>10</b> |
| L  | 198.110 | 453.413 | 553.420 | 203.463 | 424.426 | 540.431        | 3594.054 | 3577.078 | 3576.093 | L <b>10</b> |
| Q  | 198.176 | 453.413 | 553.420 | 203.463 | 424.426 | 540.431        | 3594.054 | 3577.078 | 3576.093 | Q <b>10</b> |
| E  | 198.219 | 453.413 | 553.420 | 203.463 | 424.426 | 540.431        | 3594.054 | 3577.078 | 3576.093 | E <b>10</b> |

# sp | P84244 | H33\_MOUSE

IAQDFKTDLR<sup>Methyl</sup> FQSAAIGALQE  
14.02

- ▶ fragmentation table for charge state 2+
- ▶ specType=cid
- ▶ score=61.81
- ▶ F113873.dat
- ▶ query=q43869\_p1
- ▶ precursor=779.413170
- ▶ chargePrecursor=3
- ▶ itol=0.5

| AA | a              | a'     | a <sub>0</sub> | b               | b'              | b <sub>0</sub>  | y        | y'       | y <sub>0</sub> | AA     |    |
|----|----------------|--------|----------------|-----------------|-----------------|-----------------|----------|----------|----------------|--------|----|
| R1 | 45.592         | 0.504  | -0.504         | 57.946          | 0.504           | 0.504           | 1168.618 | 1169.521 | 1169.611       | R21    |    |
| A1 | 79.107         | 0.504  | 0.504          | 81.069          | 0.504           | 0.504           | 1117.074 | 1118.581 | 1119.089       | A20    |    |
| G1 | 143.131        | 1.008  | 0.504          | 149.589         | 1.008           | 0.504           | 1019.505 | 1020.974 | 1021.939       | G19    |    |
| D1 | 209.513        | 1.512  | 1.008          | 214.511         | 1.512           | 1.008           | 891.502  | 892.916  | 893.511        | D18    |    |
| F1 | 274.249        | 2.016  | 1.512          | 280.141         | 2.016           | 1.512           | 779.140  | 780.115  | 780.495        | F17    |    |
| K1 | 338.125        | 2.520  | 2.016          | 342.192         | 2.520           | 2.016           | 641.418  | 642.965  | 643.473        | K16    |    |
| L1 | <b>380.719</b> | 3.024  | 2.520          | 382.715         | 3.024           | 2.520           | 500.711  | 501.411  | 501.912        | L15    |    |
| E1 | 446.557        | 3.528  | 3.024          | 450.210         | 3.528           | 3.024           | 431.224  | 432.009  | 432.504        | E14    |    |
| L1 | 502.174        | 4.032  | 3.528          | <b>516.772</b>  | 4.032           | 3.528           | 389.762  | 390.584  | <b>700.880</b> | L13    |    |
| M1 | 567.813        | 4.536  | 4.032          | <b>601.830</b>  | 4.536           | 4.032           | 342.802  | 343.188  | 343.689        | M12    |    |
| P1 | 601.924        | 5.040  | 4.536          | 605.364         | 5.040           | 4.536           | 299.359  | 299.793  | 299.789        | P11    |    |
| Q1 | <b>725.396</b> | 5.544  | 5.040          | <b>739.384</b>  | <b>730.880</b>  | <b>730.384</b>  | 261.201  | 261.740  | 261.254        | Q10    |    |
| S1 | 789.617        | 6.048  | 5.544          | 790.903         | 6.048           | 5.544           | 229.222  | 229.710  | 229.224        | S10    |    |
| A1 | 859.413        | 6.552  | 6.048          | 859.421         | <b>818.428</b>  | <b>809.915</b>  | 199.414  | 199.260  | 199.116        | A9     |    |
| A1 | 929.989        | 7.056  | 6.552          | <b>931.947</b>  | 945.511         | 944.941         | 161.135  | 161.083  | 161.180        | A9     |    |
| I1 | 995.493        | 7.560  | 7.056          | 997.488         | <b>910.489</b>  | <b>901.975</b>  | 131.610  | 131.383  | 131.611        | I8     |    |
| G1 | 1059.889       | 8.064  | 7.560          | 1059.889        | <b>938.995</b>  | 938.409         | 109.794  | 109.549  | 109.520        | G8     |    |
| A1 | 1090.521       | 8.568  | 8.064          | 1095.515        | <b>974.518</b>  | 969.005         | 995.513  | 230.824  | 222.110        | A7     |    |
| L1 | 1117.263       | 9.072  | 8.568          | 1120.071        | <b>1031.060</b> | <b>1022.547</b> | 1022.955 | 195.195  | 186.110        | L7     |    |
| G1 | 1181.494       | 9.576  | 9.072          | <b>1095.089</b> | 1096.578        | 1096.024        | 119.787  | 119.689  | 119.688        | G7     |    |
| R1 | 1249.513       | 10.080 | 9.576          | 1250.625        | 1250.611        | 1251.097        | 1192.969 | 74.534   | 0.504          | 65.529 | R1 |

sp | P84244 | H33\_MOUSE

IAQDFKTDLR<sup>Methyl</sup> FQSAAIGALQE  
14.02

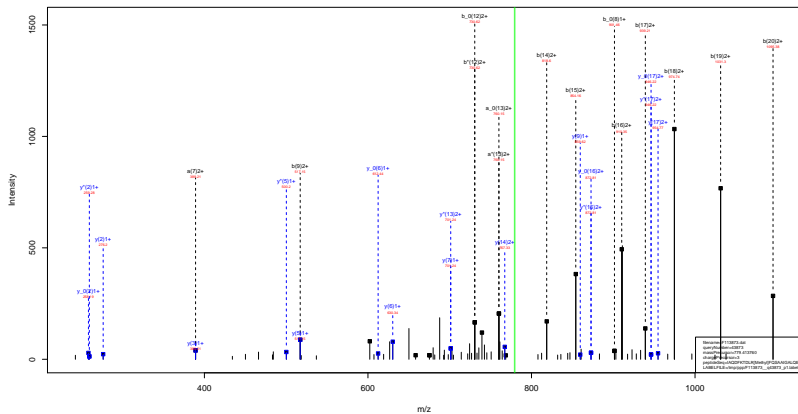



# sp | P84244 | H33\_MOUSE

IAQDFKTDLR<sup>Methyl</sup> FQSAAIGALQE  
14.02

- ▶ fragmentation table for charge state 1+
- ▶ specType=cid
- ▶ score=59.94
- ▶ F113873.dat
- ▶ query=q43873\_p1
- ▶ precursor=779.413760
- ▶ chargePrecursor=3
- ▶ itol=0.5

| AA | a              | a'             | a,b      | b        | b'       | b,b'           | r              | r'             | r,b            | AA  |
|----|----------------|----------------|----------|----------|----------|----------------|----------------|----------------|----------------|-----|
| I  | 98.698         | 0.000          | 0.000    | 114.091  | 0.000    | 0.000          | 2356.225       | 2310.088       | 2310.088       | I23 |
| A  | 137.134        | 0.000          | 0.000    | 105.129  | 0.000    | 0.000          | 2221.140       | 2206.114       | 2206.114       | A20 |
| Q  | 109.012        | 282.987        | 0.000    | 113.187  | 289.069  | 0.000          | 2351.101       | 2326.075       | 2326.075       | Q19 |
| D  | 700.219        | 363.193        | 382.209  | 426.214  | 341.197  | 410.203        | 2624.052       | 2607.018       | 2606.034       | D28 |
| F  | 247.207        | 529.201        | 529.277  | 375.202  | 326.206  | 357.272        | 1669.011       | 1661.993       | 1661.007       | F17 |
| K  | <b>475.382</b> | <b>658.356</b> | 487.372  | 303.377  | 488.351  | 405.357        | 1761.945       | 1744.923       | 1743.939       | K16 |
| V  | 174.783        | 305.448        | 704.420  | 304.426  | 187.368  | 309.414        | 1833.904       | 1816.828       | 1815.844       | V15 |
| D  | 391.457        | 374.413        | 373.440  | 303.463  | 360.425  | <b>301.441</b> | 1552.831       | 1515.783       | 1514.798       | D14 |
| L  | 1034.241       | 607.533        | 606.531  | 1032.530 | 1013.502 | 1014.526       | 1417.702       | 1400.712       | 1399.702       | L13 |
| R  | 1174.818       | 1177.811       | 1176.810 | 1162.811 | 1163.808 | 1164.812       | 1394.812       | 1386.809       | 1387.809       | R12 |
| F  | 1321.728       | 1324.730       | 1323.731 | 1348.723 | 1332.699 | 1331.711       | 1134.979       | 1117.963       | 1116.968       | F11 |
| Q  | 1640.702       | 1642.701       | 1641.704 | 1677.693 | 1660.701 | 1659.697       | 687.511        | 670.504        | 669.502        | Q10 |
| S  | 1030.617       | 1032.609       | 1031.602 | 1064.612 | 1047.603 | 1046.601       | <b>839.452</b> | 842.426        | 841.441        | S10 |
| A  | 1007.254       | 1009.252       | 1008.251 | 1020.254 | 1011.252 | 1011.250       | 771.250        | 755.251        | 754.250        | A10 |
| A  | 1076.891       | 1081.889       | 1080.881 | 1102.890 | 1089.893 | 1088.879       | <b>701.383</b> | 684.368        | 683.372        | A10 |
| I  | 1191.978       | 1194.988       | 1193.981 | 1210.979 | 1202.944 | 1201.930       | <b>630.346</b> | 613.335        | 612.335        | I10 |
| C  | 1048.907       | 1051.913       | 1050.901 | 1070.904 | 1059.894 | 1058.879       | <b>517.262</b> | <b>508.235</b> | 507.241        | C10 |
| A  | 1000.044       | 1003.051       | 1002.021 | 1048.029 | 1034.032 | 1033.018       | 463.242        | 443.243        | 442.242        | A10 |
| L  | 1051.116       | 1054.109       | 1053.111 | 1074.111 | 1064.100 | 1063.111       | <b>389.203</b> | 374.171        | 373.191        | L10 |
| Q  | 1051.170       | 1054.159       | 1053.160 | 1070.171 | 1057.145 | 1056.161       | <b>276.119</b> | <b>259.092</b> | <b>258.108</b> | Q10 |
| E  | 1000.219       | 1003.201       | 1002.204 | 1010.214 | 1001.187 | 1000.201       | 148.180        | 0.000          | 148.180        | E10 |

# sp | P84244 | H33\_MOUSE

IAQDFKTDLR<sup>Methyl</sup> FQSAAIGALQE  
14.02

- ▶ fragmentation table for charge state 2+
- ▶ specType=cid
- ▶ score=59.94
- ▶ F113873.dat
- ▶ query=q43873\_p1
- ▶ precursor=779.413760
- ▶ chargePrecursor=3
- ▶ itol=0.5

| AA | a              | a'             | a <sup>o</sup> | b               | b'             | b <sup>o</sup> | y              | y'             | y <sup>o</sup> | AA   |
|----|----------------|----------------|----------------|-----------------|----------------|----------------|----------------|----------------|----------------|------|
| I  | 43.002         | 0.500          | 0.504          | 59.940          | 0.504          | 0.500          | 1186.830       | 1186.330       | 1186.831       | [R2] |
| A  | 70.070         | 0.504          | 0.500          | 59.920          | 0.504          | 0.504          | 1112.034       | 1110.543       | 1110.039       | A205 |
| Q  | 143.100        | 1.004          | 1.004          | 139.080         | 1.004          | 1.004          | 1036.193       | 1036.142       | 1036.193       | Q10  |
| D  | 200.513        | 150.330        | 151.650        | 214.911         | 206.097        | 205.600        | 1012.520       | 1004.915       | 1003.521       | Q10  |
| F  | 274.147        | 265.634        | 265.141        | 288.141         | 279.632        | 279.140        | <b>955.013</b> | <b>946.498</b> | <b>946.007</b> | F117 |
| K  | 338.290        | 329.662        | 329.165        | 352.162         | 343.639        | 343.147        | 881.431        | <b>872.965</b> | <b>872.473</b> | K10  |
| L  | <b>388.719</b> | 380.093        | 379.593        | 402.122         | 393.600        | 393.103        | 803.511        | 817.431        | 806.512        | L10  |
| D  | 446.552        | 437.929        | 437.429        | 460.210         | 451.735        | 451.234        | <b>766.907</b> | 758.344        | 757.850        | L14  |
| L  | 502.274        | 494.261        | 494.160        | <b>516.772</b>  | 508.758        | 507.756        | 700.361        | <b>700.880</b> | 700.380        | L13  |
| M  | 567.613        | 559.101        | 558.601        | <b>601.830</b>  | 593.817        | 592.815        | 601.801        | 644.748        | 644.254        | M12  |
| F  | 594.267        | 585.354        | 585.352        | <b>675.364</b>  | 666.851        | 666.350        | 583.251        | 575.240        | 575.740        | F111 |
| Q  | 672.396        | 663.483        | 663.180        | <b>739.364</b>  | <b>730.880</b> | <b>730.380</b> | 498.250        | 489.740        | 489.254        | Q10  |
| S  | <b>766.912</b> | <b>760.389</b> | <b>759.907</b> | 761.911         | 774.396        | 773.904        | 430.250        | 424.710        | 424.214        | S10  |
| A  | 806.719        | 800.197        | 800.493        | <b>818.428</b>  | 809.815        | 809.313        | 359.244        | 350.730        | 350.234        | A10  |
| A  | 830.949        | 821.430        | 820.941        | <b>851.947</b>  | 843.431        | 842.941        | 351.180        | 342.665        | 342.170        | A11  |
| I  | 886.401        | 877.880        | 877.480        | <b>910.469</b>  | 901.975        | <b>901.483</b> | 313.630        | 307.101        | 306.611        | I10  |
| G  | 928.600        | 919.469        | 918.969        | <b>938.509</b>  | 929.469        | 928.970        | <b>250.134</b> | 246.611        | 246.119        | G10  |
| A  | 960.521        | 952.000        | 951.501        | <b>974.518</b>  | 966.000        | 965.511        | 230.624        | 223.110        | 222.619        | A14  |
| L  | 1017.681       | 1008.549       | 1008.051       | <b>1031.660</b> | 1022.547       | 1022.050       | 186.110        | 180.500        | 180.010        | L10  |
| Q  | 1081.692       | 1072.210       | 1071.692       | <b>1095.869</b> | 1086.576       | 1086.054       | 130.563        | 130.050        | 129.550        | Q10  |
| D  | 1148.513       | 1139.030       | 1138.500       | 1150.521        | 1141.000       | 1140.476       | 76.503         | 76.000         | 75.500         | D10  |

# sp | P84244 | H33\_MOUSE

IAQDFKTDLR <sup>Methyl</sup> FQSAAIGALQE  
14.02

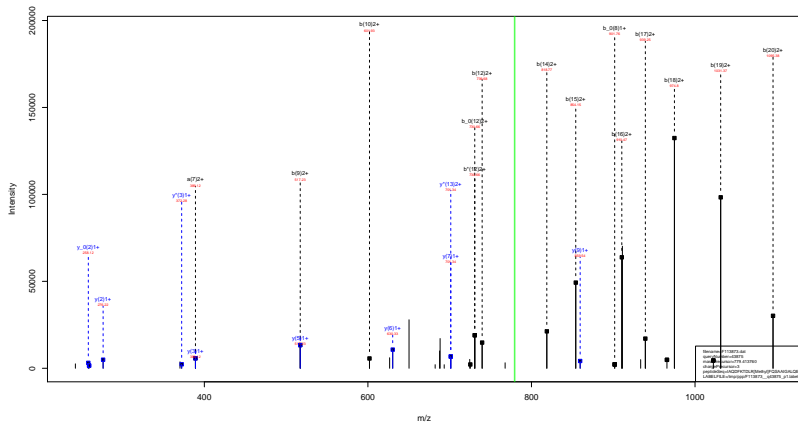

# sp | P84244 | H33\_MOUSE

IAQDFKTDLR<sup>Methyl</sup> FQSAAIGALQE  
14.02

- ▶ fragmentation table for charge state 1+
- ▶ specType=cid
- ▶ score=65.34
- ▶ F113873.dat
- ▶ query=q43875.p1
- ▶ precursor=779.413760
- ▶ chargePrecursor=3
- ▶ itol=0.5

| AA | a        | a*       | a,b      | b        | b*       | b,b            | r              | r*       | r,b      | AA          |
|----|----------|----------|----------|----------|----------|----------------|----------------|----------|----------|-------------|
| I  | 98.698   | 0.000    | 0.000    | 114.091  | 0.000    | 0.000          | 2356.225       | 2310.088 | 2318.214 | I <b>21</b> |
| A  | 137.134  | 0.000    | 0.000    | 105.129  | 0.000    | 0.000          | 2221.140       | 2256.114 | 2205.130 | A <b>20</b> |
| Q  | 109.012  | 282.987  | 0.000    | 113.187  | 289.166  | 0.000          | 2351.101       | 2326.077 | 2374.091 | Q <b>19</b> |
| D  | 400.219  | 363.193  | 382.208  | 426.214  | 411.197  | 410.203        | 2624.076       | 2607.051 | 2606.034 | D <b>18</b> |
| F  | 247.207  | 230.201  | 230.207  | 375.203  | 356.206  | 357.212        | 1669.011       | 1661.993 | 1691.007 | F <b>17</b> |
| K  | 625.082  | 608.208  | 687.212  | 703.217  | 688.211  | 685.207        | 1761.945       | 1744.923 | 1743.939 | K <b>16</b> |
| T  | 479.436  | 458.434  | 458.420  | 604.426  | 587.428  | 589.414        | 1633.994       | 1616.928 | 1615.944 | T <b>15</b> |
| D  | 391.457  | 374.411  | 373.480  | 503.463  | 480.425  | <b>501.441</b> | 1532.831       | 1515.765 | 1514.798 | D <b>14</b> |
| I  | 103.424  | 107.533  | 100.521  | 110.529  | 101.530  | 101.426        | 1417.702       | 1400.713 | 1399.700 | I <b>13</b> |
| R  | 1174.818 | 1177.811 | 1186.809 | 1202.811 | 1193.808 | 1194.812       | 1384.999       | 1387.999 | 1388.000 | R <b>12</b> |
| F  | 1201.728 | 1204.730 | 1203.710 | 1248.721 | 1232.699 | 1231.711       | 1134.979       | 1117.903 | 1116.908 | F <b>11</b> |
| Q  | 1640.780 | 1642.781 | 1631.774 | 1677.780 | 1660.781 | 1659.789       | 107.511        | 107.504  | 106.500  | Q <b>10</b> |
| S  | 1038.817 | 1039.799 | 1032.800 | 1064.812 | 1047.785 | 1046.801       | <b>839.452</b> | 842.426  | 841.441  | S <b>9</b>  |
| A  | 1007.854 | 1008.812 | 1000.841 | 1020.846 | 1011.822 | 1011.808       | 771.900        | 770.391  | 774.808  | A <b>8</b>  |
| A  | 1076.891 | 1081.895 | 1080.881 | 1120.888 | 1089.893 | 1088.879       | <b>701.383</b> | 684.308  | 683.372  | A <b>7</b>  |
| I  | 1191.978 | 1194.988 | 1191.960 | 1210.970 | 1202.944 | 1201.958       | <b>638.346</b> | 613.319  | 612.310  | I <b>6</b>  |
| C  | 1468.907 | 1471.913 | 1461.880 | 1479.899 | 1470.864 | 1469.870       | <b>517.262</b> | 501.239  | 499.241  | C <b>5</b>  |
| A  | 1000.934 | 1003.937 | 1002.921 | 1048.929 | 1031.932 | 1030.918       | 463.262        | 449.214  | 448.230  | A <b>4</b>  |
| L  | 1051.910 | 1053.911 | 1051.901 | 1081.911 | 1064.900 | 1063.911       | <b>389.263</b> | 372.177  | 371.191  | L <b>3</b>  |
| Q  | 1051.910 | 1054.910 | 1043.900 | 1088.910 | 1072.905 | 1071.910       | <b>276.119</b> | 259.092  | 258.108  | Q <b>2</b>  |
| E  | 2050.219 | 2053.200 | 2049.200 | 2010.214 | 2001.187 | 2000.200       | 148.980        | 0.000    | 148.980  | E <b>1</b>  |

# sp | P84244 | H33\_MOUSE

IAQDFKTDLR<sup>Methyl</sup> FQSAAIGALQE  
14.02

- ▶ fragmentation table for charge state 2+
- ▶ specType=cid
- ▶ score=65.34
- ▶ F113873.dat
- ▶ query=q43875.p1
- ▶ precursor=779.413760
- ▶ chargePrecursor=3
- ▶ itol=0.5

| AA | a              | a'     | a-D    | b              | b'             | b-D            | y        | y'             | y-D      | AA   |
|----|----------------|--------|--------|----------------|----------------|----------------|----------|----------------|----------|------|
| R1 | 45.592         | 0.504  | 0.504  | 57.946         | 0.504          | 0.504          | 1168.818 | 1193.521       | 1193.811 | R21  |
| A1 | 79.107         | 0.504  | 0.504  | 81.069         | 0.504          | 0.504          | 1117.074 | 1143.581       | 1143.889 | A20  |
| G1 | 143.131        | 1.008  | 0.504  | 149.589        | 1.008          | 0.504          | 1117.074 | 1143.581       | 1143.889 | G19  |
| D1 | 207.613        | 1.512  | 1.008  | 214.511        | 1.512          | 1.008          | 1074.202 | 1099.911       | 1099.511 | D18  |
| F1 | 274.249        | 2.016  | 1.512  | 280.141        | 2.016          | 1.512          | 1074.202 | 1099.911       | 1099.511 | F17  |
| K1 | 338.125        | 2.520  | 2.016  | 344.192        | 2.520          | 2.016          | 1041.418 | 1072.965       | 1072.474 | K16  |
| L1 | <b>380.119</b> | 3.024  | 2.520  | 387.715        | 3.024          | 2.520          | 1007.111 | 1037.411       | 1036.426 | L15  |
| E1 | 446.557        | 3.528  | 3.024  | 450.235        | 3.528          | 3.024          | 971.224  | 1000.939       | 999.954  | E14  |
| L1 | 502.174        | 4.032  | 3.528  | <b>516.772</b> | 4.032          | 3.528          | 939.768  | <b>969.880</b> | 968.895  | L13  |
| M1 | 567.613        | 4.536  | 4.032  | <b>601.830</b> | 4.536          | 4.032          | 902.312  | 932.361        | 931.376  | M12  |
| P1 | 604.304        | 4.944  | 4.536  | 605.354        | 4.944          | 4.536          | 869.856  | 901.905        | 900.920  | P11  |
| Q1 | <b>775.394</b> | 6.048  | 5.544  | <b>739.384</b> | <b>730.880</b> | <b>730.386</b> | 804.200  | 836.749        | 835.254  | Q10  |
| S1 | 100.617        | 1.008  | 0.504  | 106.569        | 1.008          | 0.504          | 774.386  | 773.884        | 773.222  | S10  |
| A1 | 166.613        | 1.512  | 1.008  | 172.421        | 1.512          | 1.008          | 742.430  | 741.928        | 741.266  | A9   |
| A1 | 232.613        | 2.016  | 1.512  | 238.273        | 2.016          | 1.512          | 709.474  | 708.972        | 708.310  | A8   |
| A1 | 298.613        | 2.520  | 2.016  | 304.125        | 2.520          | 2.016          | 676.518  | 676.016        | 675.354  | A7   |
| L1 | 364.613        | 3.024  | 2.520  | 370.029        | 3.024          | 2.520          | 643.562  | 643.060        | 642.398  | L6   |
| L1 | 430.613        | 3.528  | 3.024  | 435.933        | 3.528          | 3.024          | 610.606  | 610.104        | 609.442  | L5   |
| L1 | 496.613        | 4.032  | 3.528  | 501.837        | 4.032          | 3.528          | 577.650  | 577.148        | 576.486  | L4   |
| L1 | 562.613        | 4.536  | 4.032  | 567.741        | 4.536          | 4.032          | 544.694  | 544.192        | 543.530  | L3   |
| L1 | 628.613        | 5.040  | 4.536  | 633.645        | 5.040          | 4.536          | 511.738  | 511.236        | 510.574  | L2   |
| L1 | 694.613        | 5.544  | 5.040  | 700.549        | 5.544          | 5.040          | 478.782  | 478.280        | 477.618  | L1   |
| L1 | 760.613        | 6.048  | 5.544  | 766.453        | 6.048          | 5.544          | 445.826  | 445.324        | 444.662  | L0   |
| L1 | 826.613        | 6.552  | 6.048  | 832.357        | 6.552          | 6.048          | 412.870  | 412.368        | 411.706  | L-1  |
| L1 | 892.613        | 7.056  | 6.552  | 898.261        | 7.056          | 6.552          | 379.914  | 379.412        | 378.750  | L-2  |
| L1 | 958.613        | 7.560  | 7.056  | 964.165        | 7.560          | 7.056          | 346.958  | 346.456        | 345.794  | L-3  |
| L1 | 1024.613       | 8.064  | 7.560  | 1030.069       | 8.064          | 7.560          | 314.002  | 313.500        | 312.838  | L-4  |
| L1 | 1090.613       | 8.568  | 8.064  | 1095.973       | 8.568          | 8.064          | 281.046  | 280.544        | 279.882  | L-5  |
| L1 | 1156.613       | 9.072  | 8.568  | 1161.877       | 9.072          | 8.568          | 248.090  | 247.588        | 246.926  | L-6  |
| L1 | 1222.613       | 9.576  | 9.072  | 1227.781       | 9.576          | 9.072          | 215.134  | 214.632        | 213.970  | L-7  |
| L1 | 1288.613       | 10.080 | 9.576  | 1293.685       | 10.080         | 9.576          | 182.178  | 181.676        | 181.014  | L-8  |
| L1 | 1354.613       | 10.584 | 10.080 | 1359.589       | 10.584         | 10.080         | 149.222  | 148.720        | 148.058  | L-9  |
| L1 | 1420.613       | 11.088 | 10.584 | 1425.493       | 11.088         | 10.584         | 116.266  | 115.764        | 115.102  | L-10 |
| L1 | 1486.613       | 11.592 | 11.088 | 1491.397       | 11.592         | 11.088         | 83.310   | 82.808         | 82.146   | L-11 |

# sp | P84244 | H33\_MOUSE

IAQDFK <sup>Methyl</sup> TDLRFQSAAILGALQE  
14.02

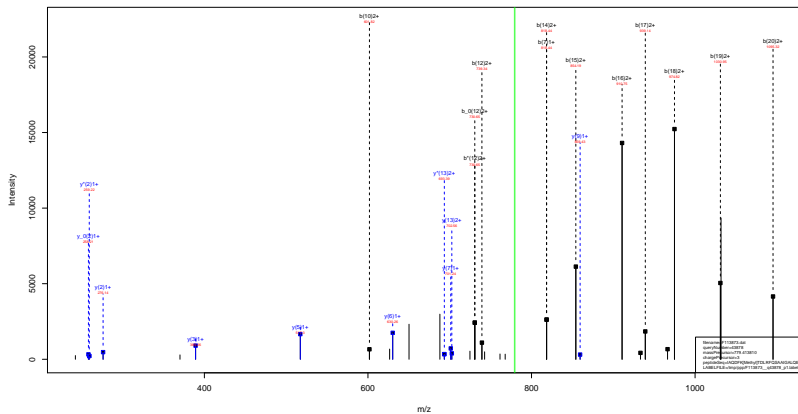

# sp | P84244 | H33\_MOUSE

IAQDFK <sup>Methyl</sup> 14.02 TDLRFQSA AIGALQE

- ▶ fragmentation table for charge state 1+
- ▶ specType=cid
- ▶ score=59.33
- ▶ F113873.dat
- ▶ query=q43878\_p1
- ▶ precursor=779.413810
- ▶ chargePrecursor=3
- ▶ itol=0.5

| AA | a        | a'       | a,b      | b              | b'       | b,b'     | r              | r'             | r,b            | AA          |
|----|----------|----------|----------|----------------|----------|----------|----------------|----------------|----------------|-------------|
| I  | 98.698   | 0.000    | 0.000    | 114.091        | 0.000    | 0.000    | 2356.225       | 2316.088       | 2316.214       | I <b>21</b> |
| A  | 137.134  | 0.000    | 0.000    | 105.129        | 0.000    | 0.000    | 2221.140       | 2206.114       | 2206.130       | A <b>20</b> |
| Q  | 139.072  | 282.985  | 0.000    | 113.187        | 289.166  | 0.000    | 2351.101       | 2336.077       | 2336.093       | Q <b>19</b> |
| D  | 160.219  | 363.193  | 382.209  | 1426.214       | 1411.197 | 410.203  | 2624.050       | 2607.018       | 2606.034       | D <b>18</b> |
| F  | 167.207  | 520.201  | 520.217  | 1679.263       | 1656.256 | 167.217  | 3069.011       | 3061.993       | 3061.017       | F <b>17</b> |
| K  | 168.098  | 572.212  | 431.203  | 1713.267       | 1701.266 | 168.262  | 3161.945       | 3144.923       | 3143.939       | K <b>16</b> |
| V  | 170.446  | 674.213  | 722.431  | <b>813.441</b> | 801.434  | 801.438  | 3438.933       | 3400.911       | 3401.928       | V <b>15</b> |
| D  | 165.473  | 358.446  | 357.452  | <b>813.448</b> | 801.441  | 813.457  | 3518.921       | 3501.903       | 3500.911       | D <b>14</b> |
| L  | 181.629  | 101.529  | 101.540  | 1046.524       | 1032.521 | 101.524  | 1461.924       | 1456.909       | 1456.914       | L <b>13</b> |
| R  | 117.438  | 117.441  | 118.441  | 1202.523       | 1188.526 | 117.442  | 1261.902       | 1272.894       | 1272.910       | R <b>12</b> |
| F  | 133.728  | 1334.700 | 1333.710 | 1348.721       | 1332.699 | 1331.711 | 1334.979       | 1317.962       | 1316.968       | F <b>11</b> |
| Q  | 1640.782 | 1442.789 | 1431.774 | 1447.789       | 1440.781 | 1440.789 | 167.511        | 167.504        | 166.500        | Q <b>10</b> |
| S  | 1526.817 | 1526.799 | 1512.802 | 1504.812       | 1507.785 | 1506.801 | <b>859.452</b> | 842.425        | 841.441        | S <b>9</b>  |
| A  | 1007.254 | 1000.251 | 1000.243 | 1000.264       | 1018.272 | 1017.268 | 771.260        | 755.261        | 754.266        | A <b>8</b>  |
| A  | 1016.891 | 1061.885 | 1060.881 | 1058.890       | 1068.893 | 1068.875 | <b>701.383</b> | 684.368        | 683.372        | A <b>7</b>  |
| I  | 1791.978 | 1774.988 | 1771.983 | 1819.979       | 1802.944 | 1801.969 | <b>630.346</b> | 613.319        | 612.319        | I <b>6</b>  |
| C  | 1468.907 | 1451.910 | 1441.900 | 1479.901       | 1459.864 | 1458.879 | <b>517.262</b> | 501.239        | 499.241        | C <b>5</b>  |
| A  | 1000.034 | 1001.031 | 1002.023 | 1048.025       | 1031.002 | 1030.018 | 463.262        | 445.254        | 444.258        | A <b>4</b>  |
| L  | 1051.116 | 1051.101 | 1051.101 | 1051.111       | 1054.100 | 1054.111 | <b>389.203</b> | 374.171        | 371.191        | L <b>3</b>  |
| Q  | 1051.170 | 1044.159 | 1043.150 | 1038.171       | 1012.145 | 1011.161 | <b>276.119</b> | <b>259.092</b> | <b>258.108</b> | Q <b>2</b>  |
| E  | 2050.219 | 2049.200 | 2049.200 | 2019.214       | 2018.187 | 2019.201 | 148.980        | 0.000          | 138.959        | E <b>1</b>  |

# sp | P84244 | H33\_MOUSE

IAQDFK <sup>Methyl</sup> 14.02 TDLRFQSA AIGALQE

- ▶ fragmentation table for charge state 2+
- ▶ specType=cid
- ▶ score=59.33
- ▶ F113873.dat
- ▶ query=q43878.p1
- ▶ precursor=779.413810
- ▶ chargePrecursor=3
- ▶ itol=0.5

| AA    | a        | a'       | a <sub>0</sub> | b        | b'       | b <sub>0</sub> | y        | y'       | y <sub>0</sub> | AA    |
|-------|----------|----------|----------------|----------|----------|----------------|----------|----------|----------------|-------|
| I(3)  | 43.602   | 0.500    | 0.500          | 59.541   | 0.504    | 0.500          | 1180.830 | 1180.330 | 1180.831       | I(2)  |
| A(2)  | 70.070   | 0.504    | 0.500          | 93.080   | 0.504    | 0.500          | 1112.034 | 1110.534 | 1110.030       | A(20) |
| Q(3)  | 143.100  | 1.514    | 0.504          | 137.080  | 1.483    | 0.504          | 1038.583 | 1038.083 | 1038.580       | Q(18) |
| D(4)  | 200.013  | 192.300  | 191.600        | 214.461  | 209.097  | 209.400        | 1012.520 | 1004.013 | 1012.521       | D(16) |
| F(5)  | 274.147  | 265.634  | 265.147        | 288.141  | 279.632  | 279.140        | 935.033  | 944.496  | 944.007        | F(17) |
| K(6)  | 345.201  | 338.069  | 336.197        | 350.200  | 350.067  | 350.195        | 881.431  | 872.869  | 872.473        | K(16) |
| L(7)  | 408.777  | 401.213  | 400.121        | 408.724  | 401.213  | 400.121        | 810.421  | 806.910  | 806.418        | L(15) |
| D(8)  | 451.240  | 444.127  | 443.215        | 462.211  | 450.724  | 450.212        | 750.000  | 741.340  | 740.894        | D(14) |
| L(9)  | 500.782  | 491.200  | 490.777        | 510.780  | 511.710  | 511.710        | 707.306  | 693.872  | 693.360        | L(13) |
| R(10) | 557.813  | 547.101  | 546.041        | 561.830  | 558.117  | 558.117        | 660.891  | 649.146  | 648.638        | R(12) |
| F(11) | 594.397  | 582.324  | 582.324        | 597.395  | 589.851  | 589.851        | 597.391  | 579.295  | 578.780        | F(11) |
| Q(12) | 672.396  | 658.487  | 658.191        | 739.394  | 730.880  | 730.388        | 498.290  | 489.740  | 489.234        | Q(10) |
| S(13) | 688.012  | 680.389  | 680.389        | 701.011  | 704.396  | 704.396        | 430.230  | 424.710  | 424.204        | S(9)  |
| A(14) | 804.918  | 800.317  | 800.317        | 818.428  | 808.825  | 808.825        | 359.714  | 359.200  | 358.686        | A(8)  |
| A(15) | 830.949  | 816.430  | 816.941        | 851.947  | 845.431  | 844.941        | 351.100  | 347.580  | 347.190        | A(7)  |
| I(16) | 888.401  | 887.810  | 887.480        | 910.489  | 901.975  | 901.483        | 313.030  | 307.181  | 306.671        | I(6)  |
| G(17) | 978.000  | 975.480  | 975.991        | 938.009  | 933.480  | 933.991        | 259.134  | 250.021  | 249.509        | G(5)  |
| A(18) | 990.521  | 992.000  | 991.513        | 974.518  | 976.005  | 975.513        | 230.024  | 223.110  | 222.619        | A(4)  |
| L(19) | 1017.081 | 1008.549 | 1008.011       | 1031.060 | 1022.547 | 1022.010       | 190.100  | 188.700  | 188.300        | L(3)  |
| Q(20) | 1081.092 | 1072.219 | 1072.080       | 1095.089 | 1086.576 | 1086.084       | 130.063  | 130.000  | 129.938        | Q(2)  |
| D(21) | 1148.013 | 1137.000 | 1136.600       | 1156.011 | 1151.000 | 1150.600       | 78.900   | 78.900   | 78.900         | D(1)  |





# sp | P84244 | H33\_MOUSE

IAQDFKTDLR<sup>Methyl</sup> FQSAAIGALQE  
14.02

- ▶ fragmentation table for charge state 1+
- ▶ specType=cid
- ▶ score=63.68
- ▶ F113873.dat
- ▶ query=q43880\_p1
- ▶ precursor=779.414210
- ▶ chargePrecursor=3
- ▶ itol=0.5

| AA | a        | a'       | a,b      | b        | b'       | b,b'     | r              | r'             | r,b            | AA  |
|----|----------|----------|----------|----------|----------|----------|----------------|----------------|----------------|-----|
| I  | 98.698   | 0.000    | 0.000    | 114.091  | 0.000    | 0.000    | 2356.225       | 2319.088       | 2319.088       | I23 |
| A  | 137.134  | 0.000    | 0.000    | 105.129  | 0.000    | 0.000    | 2221.140       | 2206.114       | 2206.114       | A20 |
| Q  | 139.012  | 282.987  | 0.000    | 113.187  | 289.169  | 0.000    | 2351.101       | 2336.075       | 2336.075       | Q19 |
| D  | 400.219  | 363.193  | 382.239  | 426.214  | 411.197  | 410.203  | 2624.076       | 2607.018       | 2606.034       | D28 |
| F  | 347.207  | 520.201  | 520.277  | 375.202  | 356.206  | 357.272  | 1669.011       | 1661.993       | 1661.007       | F11 |
| K  | 625.582  | 658.208  | 687.212  | 703.217  | 688.211  | 685.207  | 1781.945       | 1744.923       | 1743.939       | K16 |
| V  | 479.436  | 500.434  | 704.420  | 504.426  | 479.408  | 498.414  | 1633.994       | 1618.928       | 1617.944       | V15 |
| D  | 391.457  | 314.413  | 373.440  | 309.463  | 360.425  | 361.441  | 1552.851       | 1515.785       | 1514.798       | D14 |
| L  | 1034.241 | 887.233  | 888.232  | 1032.239 | 1013.202 | 1014.228 | 1417.792       | 1402.753       | 1399.769       | L13 |
| R  | 1174.838 | 1117.813 | 1136.801 | 1222.813 | 1159.808 | 1158.812 | 1384.912       | 1369.899       | 1367.899       | R12 |
| F  | 1321.728 | 1304.705 | 1303.710 | 1348.721 | 1332.699 | 1331.711 | 1334.979       | 1311.963       | 1310.968       | F11 |
| Q  | 1640.785 | 1442.761 | 1431.774 | 1477.769 | 1460.751 | 1459.769 | 167.511        | 167.504        | 166.500        | Q10 |
| S  | 1638.617 | 1619.709 | 1618.800 | 1664.612 | 1647.705 | 1646.801 | 160.402        | 160.402        | 161.441        | S10 |
| A  | 1007.254 | 920.222  | 939.241  | 935.246  | 916.222  | 917.238  | 112.420        | 112.420        | 114.409        | A10 |
| A  | 1616.891 | 1561.865 | 1600.861 | 1628.868 | 1589.859 | 1588.875 | <b>701.383</b> | 684.369        | 683.372        | A10 |
| I  | 1791.978 | 1774.969 | 1773.963 | 1819.970 | 1802.944 | 1801.960 | <b>638.346</b> | 623.330        | 612.319        | I10 |
| C  | 1668.907 | 1613.878 | 1632.880 | 1678.891 | 1659.864 | 1658.879 | <b>517.262</b> | <b>508.235</b> | 499.221        | C10 |
| A  | 1000.044 | 1001.000 | 1002.021 | 1048.026 | 1031.002 | 1030.018 | 463.262        | 443.243        | 442.239        | A10 |
| L  | 1051.116 | 1018.091 | 1016.100 | 1061.111 | 1044.086 | 1043.101 | <b>389.263</b> | 374.271        | 371.191        | L10 |
| Q  | 1051.170 | 1044.150 | 1043.160 | 1089.171 | 1072.145 | 1071.161 | <b>276.119</b> | <b>259.092</b> | <b>258.108</b> | Q10 |
| E  | 2050.219 | 2019.193 | 2018.200 | 2019.214 | 2001.187 | 2000.200 | 148.990        | 0.000          | 148.990        | E10 |

# sp | P84244 | H33\_MOUSE

IAQDFKTDLR<sup>Methyl</sup> FQSAAIGALQE  
14.02

- ▶ fragmentation table for charge state 2+
- ▶ specType=cid
- ▶ score=63.68
- ▶ F113873.dat
- ▶ query=q43880\_p1
- ▶ precursor=779.414210
- ▶ chargePrecursor=3
- ▶ itol=0.5

| AA    | a              | a'       | a <sup>o</sup> | b               | b'             | b <sup>o</sup> | y              | y'             | y <sup>o</sup> | AA    |
|-------|----------------|----------|----------------|-----------------|----------------|----------------|----------------|----------------|----------------|-------|
| I(3)  | 43.602         | 0.505    | 0.505          | 57.945          | 0.504          | 0.504          | 1186.835       | 1186.835       | 1186.835       | I(2)  |
| A(2)  | 78.070         | 0.504    | 0.504          | 93.082          | 0.504          | 0.504          | 1112.024       | 1112.024       | 1112.024       | A(25) |
| Q(3)  | 143.100        | 1.514    | 1.514          | 137.085         | 1.481          | 1.481          | 1038.583       | 1038.583       | 1038.583       | Q(18) |
| D(4)  | 200.613        | 192.380  | 191.600        | 214.911         | 206.097        | 205.600        | 933.520        | 1004.913       | 1004.913       | D(16) |
| F(5)  | 274.147        | 265.834  | 265.147        | 288.141         | 279.632        | 279.140        | 895.033        | 948.496        | 948.496        | F(17) |
| K(6)  | 338.190        | 329.662  | 329.190        | 352.182         | 343.670        | 343.187        | 881.433        | 872.869        | 872.473        | K(16) |
| T(7)  | 388.719        | 380.200  | 379.719        | 402.712         | 394.200        | 393.711        | 871.431        | 868.911        | 868.426        | T(15) |
| D(8)  | 446.552        | 437.719  | 437.222        | 460.215         | 451.726        | 451.224        | <b>764.907</b> | 758.344        | 757.900        | D(14) |
| L(9)  | 502.274        | 494.263  | 493.766        | <b>516.772</b>  | 508.758        | 507.766        | 760.261        | <b>700.880</b> | 700.380        | L(13) |
| R(10) | 557.813        | 549.802  | 549.305        | <b>561.836</b>  | 553.817        | 552.825        | 801.800        | 844.738        | 844.240        | R(12) |
| F(11) | 594.397        | 585.384  | 584.887        | 597.384         | 588.353        | 587.359        | 593.753        | 595.295        | 594.798        | F(11) |
| Q(12) | <b>725.394</b> | 716.381  | 715.884        | <b>730.384</b>  | <b>730.880</b> | <b>730.388</b> | 694.290        | 695.746        | 695.254        | Q(10) |
| S(13) | 768.012        | 760.000  | 759.503        | 773.011         | 764.996        | 763.994        | 430.233        | 424.718        | 424.224        | S(9)  |
| A(14) | 804.816        | 795.812  | 795.315        | <b>810.428</b>  | 802.425        | 801.423        | 399.744        | 399.260        | 398.768        | A(8)  |
| A(15) | 839.949        | 831.439  | 830.941        | <b>851.947</b>  | 843.433        | 842.941        | 381.180        | 347.883        | 347.390        | A(7)  |
| I(16) | 886.461        | 877.950  | 877.453        | <b>910.469</b>  | 901.975        | 901.483        | 313.676        | 307.183        | 306.671        | I(6)  |
| G(17) | 929.800        | 921.469  | 920.999        | <b>938.999</b>  | 930.488        | 929.994        | <b>259.134</b> | 286.523        | 286.026        | G(5)  |
| A(18) | 960.521        | 952.000  | 951.523        | <b>974.518</b>  | 966.000        | 965.513        | 230.624        | 223.133        | 222.618        | A(4)  |
| L(16) | 1017.685       | 1009.549 | 1009.071       | <b>1031.869</b> | 1022.947       | 1022.020       | 196.180        | 189.760        | 189.310        | L(8)  |
| Q(20) | 1081.692       | 1072.219 | 1071.692       | <b>1095.869</b> | 1086.576       | 1086.054       | 138.983        | 136.800        | 136.530        | Q(2)  |
| D(21) | 1148.613       | 1137.000 | 1136.600       | 1150.611        | 1141.000       | 1140.600       | 78.924         | 0.760          | 0.520          | D(1)  |

# sp | P84244 | H33\_MOUSE

IAQDFK <sup>Methyl</sup> TDLRFQSA AIGALQE  
14.02

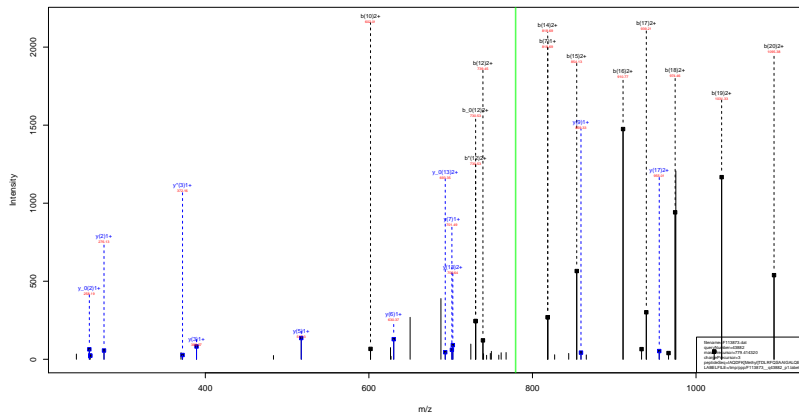

# sp | P84244 | H33\_MOUSE

IAQDFK <sup>Methyl</sup> 14.02 TDLRFQSAAGALQE

- ▶ fragmentation table for charge state 1+
- ▶ specType=cid
- ▶ score=54.93
- ▶ F113873.dat
- ▶ query=q43882.p1
- ▶ precursor=779.414320
- ▶ chargePrecursor=3
- ▶ itol=0.5

| AA | a       | a'      | a,b     | b              | b'      | b,b'     | r              | r'       | r,b         | AA          |
|----|---------|---------|---------|----------------|---------|----------|----------------|----------|-------------|-------------|
| I  | 98.698  | 0.000   | 0.000   | 114.091        | 0.000   | 0.000    | 2356.225       | 2316.088 | 2316.214    | I <b>21</b> |
| A  | 137.134 | 0.000   | 0.000   | 105.129        | 0.000   | 0.000    | 2221.140       | 2206.114 | 2206.130    | A <b>20</b> |
| Q  | 139.012 | 282.985 | 0.000   | 113.181        | 289.166 | 0.000    | 2191.101       | 2176.077 | 2176.093    | Q <b>19</b> |
| D  | 160.219 | 363.193 | 382.239 | 126.214        | 311.197 | 410.263  | 2024.076       | 2007.018 | 2006.034    | D <b>18</b> |
| F  | 147.207 | 109.201 | 159.277 | 109.201        | 109.201 | 107.272  | 1669.011       | 1661.993 | 1661.007    | F <b>17</b> |
| K  | 168.098 | 172.172 | 431.303 | 171.207        | 170.266 | 169.262  | 1761.945       | 1744.923 | 1743.939    | K <b>16</b> |
| V  | 100.446 | 174.419 | 172.431 | <b>813.463</b> | 161.414 | 160.438  | 1618.933       | 1600.911 | 1601.928    | V <b>15</b> |
| D  | 165.473 | 168.456 | 167.462 | 161.441        | 115.457 | 1518.751 | 1501.765       | 1500.781 | D <b>14</b> |             |
| L  | 101.829 | 101.829 | 100.840 | 104.824        | 102.821 | 102.824  | 1461.761       | 1456.739 | 1456.754    | L <b>13</b> |
| R  | 117.438 | 117.431 | 116.441 | 120.433        | 118.436 | 119.442  | 1291.661       | 1274.644 | 1273.659    | R <b>12</b> |
| P  | 120.728 | 120.728 | 120.728 | 120.728        | 120.728 | 120.728  | 1114.979       | 1111.962 | 1111.968    | P <b>11</b> |
| Q  | 140.782 | 140.782 | 141.774 | 147.789        | 146.781 | 145.789  | 1071.511       | 1070.504 | 1070.500    | Q <b>10</b> |
| S  | 103.617 | 103.617 | 103.617 | 104.612        | 104.612 | 104.612  | <b>859.452</b> | 842.426  | 841.441     | S <b>9</b>  |
| A  | 107.254 | 106.252 | 105.251 | 105.254        | 105.252 | 105.252  | 791.926        | 790.919  | 790.916     | A <b>8</b>  |
| A  | 116.891 | 116.891 | 116.891 | 117.883        | 116.891 | 116.891  | <b>701.383</b> | 684.366  | 683.372     | A <b>7</b>  |
| I  | 171.978 | 171.978 | 171.978 | 171.978        | 171.978 | 171.978  | <b>630.346</b> | 613.319  | 612.333     | I <b>6</b>  |
| C  | 148.907 | 148.907 | 148.907 | 148.907        | 148.907 | 148.907  | <b>517.262</b> | 501.235  | 499.251     | C <b>5</b>  |
| A  | 100.034 | 100.034 | 100.034 | 100.034        | 100.034 | 100.034  | 449.242        | 448.234  | 448.230     | A <b>4</b>  |
| L  | 103.116 | 103.116 | 103.116 | 103.116        | 103.116 | 103.116  | <b>389.203</b> | 372.177  | 371.191     | L <b>3</b>  |
| Q  | 101.170 | 101.170 | 101.170 | 101.170        | 101.170 | 101.170  | <b>276.119</b> | 259.092  | 258.108     | Q <b>2</b>  |
| E  | 200.219 | 200.219 | 200.219 | 200.219        | 200.219 | 200.219  | 148.980        | 0.000    | 148.980     | E <b>1</b>  |

# sp | P84244 | H33\_MOUSE

IAQDFK <sup>Methyl</sup> 14.02 TDLRFQSAAILGALQE

- ▶ fragmentation table for charge state 2+
- ▶ specType=cid
- ▶ score=54.93
- ▶ F113873.dat
- ▶ query=q43882.p1
- ▶ precursor=779.414320
- ▶ chargePrecursor=3
- ▶ itol=0.5

| AA    | a        | a'     | a-D    | b        | b'     | b-D    | y        | y'       | y-D      | AA   |
|-------|----------|--------|--------|----------|--------|--------|----------|----------|----------|------|
| R1    | 45.592   | 0.504  | 0.504  | 57.949   | 0.504  | 0.504  | 1168.818 | 1169.323 | 1169.831 | R21  |
| A1-2  | 79.100   | 0.504  | 0.504  | 81.069   | 0.504  | 0.504  | 1147.014 | 1147.519 | 1148.027 | A20  |
| Q1-3  | 143.131  | 1.008  | 0.504  | 149.589  | 1.008  | 0.504  | 1017.903 | 1018.408 | 1018.913 | Q19  |
| D1-4  | 209.613  | 1.512  | 1.008  | 214.811  | 1.512  | 1.008  | 897.202  | 897.707  | 898.212  | D18  |
| F1-5  | 274.247  | 2.016  | 1.512  | 280.143  | 2.016  | 1.512  | 779.140  | 779.645  | 780.150  | F17  |
| K1-6  | 345.233  | 2.520  | 2.016  | 351.209  | 2.520  | 2.016  | 660.195  | 660.700  | 661.205  | K16  |
| T1-7  | 405.217  | 3.024  | 2.520  | 412.194  | 3.024  | 2.520  | 549.199  | 549.704  | 550.209  | T15  |
| D1-8  | 453.260  | 3.528  | 3.024  | 461.217  | 3.528  | 3.024  | 438.232  | 438.737  | 439.242  | D14  |
| L1-9  | 509.282  | 4.032  | 3.528  | 519.271  | 4.032  | 3.528  | 327.274  | 327.779  | 328.284  | L13  |
| M1-10 | 567.313  | 4.536  | 4.032  | 577.325  | 4.536  | 4.032  | 216.317  | 216.822  | 217.327  | M12  |
| P111  | 594.324  | 4.920  | 4.536  | 601.334  | 4.920  | 4.536  | 105.359  | 105.864  | 106.369  | P111 |
| Q112  | 672.339  | 5.304  | 4.920  | 739.384  | 5.304  | 4.920  | 94.284   | 94.789   | 95.294   | Q112 |
| S113  | 709.352  | 5.688  | 5.304  | 759.393  | 5.688  | 5.304  | 74.366   | 74.871   | 75.376   | S113 |
| A114  | 809.416  | 6.312  | 5.688  | 818.428  | 6.312  | 5.688  | 69.414   | 69.919   | 70.424   | A114 |
| A115  | 839.949  | 6.696  | 6.312  | 853.944  | 6.696  | 6.312  | 64.461   | 64.966   | 65.471   | A115 |
| I116  | 895.993  | 7.224  | 6.696  | 910.989  | 7.224  | 6.696  | 60.503   | 61.008   | 61.513   | I116 |
| C117  | 979.993  | 7.920  | 7.224  | 1036.995 | 7.920  | 7.224  | 56.545   | 57.050   | 57.555   | C117 |
| A118  | 990.521  | 8.028  | 7.920  | 1045.533 | 8.028  | 7.920  | 55.533   | 56.038   | 56.543   | A118 |
| L119  | 1017.063 | 8.280  | 8.028  | 1058.075 | 8.280  | 8.028  | 54.521   | 55.026   | 55.531   | L119 |
| Q120  | 1084.044 | 8.976  | 8.280  | 1095.089 | 8.976  | 8.280  | 53.509   | 54.014   | 54.519   | Q120 |
| R21   | 1149.613 | 11.976 | 11.976 | 1159.613 | 11.976 | 11.976 | 74.534   | 75.039   | 75.544   | R21  |

# sp | P84244 | H33\_MOUSE

IAQDFKTDLR <sup>Methyl</sup> FQSAAIGALQE  
14.02

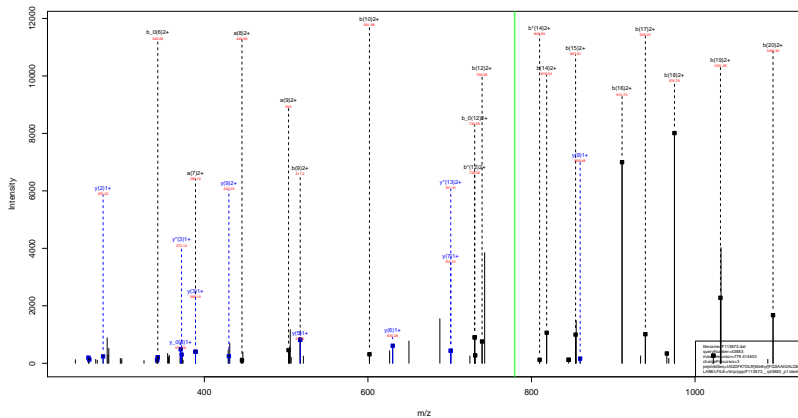

# sp | P84244 | H33\_MOUSE

IAQDFKTDLR <sup>Methyl</sup> 14.02 FQSAAIGALQE

- ▶ fragmentation table for charge state 1+
- ▶ specType=cid
- ▶ score=49.19
- ▶ F113873.dat
- ▶ query=q43883.p1
- ▶ precursor=779.414400
- ▶ chargePrecursor=3
- ▶ itol=0.5

| AA | a        | a*       | a,b      | b        | b*       | b,b      | r              | r*       | r,b      | AA          |
|----|----------|----------|----------|----------|----------|----------|----------------|----------|----------|-------------|
| I  | 98.698   | 0.000    | 0.000    | 114.091  | 0.000    | 0.000    | 2356.225       | 2310.088 | 2318.214 | I <b>23</b> |
| A  | 137.134  | 0.000    | 0.000    | 105.129  | 0.000    | 0.000    | 2221.140       | 2256.114 | 2205.130 | A <b>20</b> |
| Q  | 109.012  | 282.989  | 0.000    | 113.181  | 289.166  | 0.000    | 2351.101       | 2326.077 | 2374.031 | Q <b>19</b> |
| D  | 400.219  | 363.193  | 382.208  | 426.214  | 411.197  | 410.203  | 2624.050       | 2607.018 | 2606.034 | D <b>18</b> |
| F  | 347.207  | 320.201  | 320.217  | 375.203  | 356.206  | 357.212  | 1669.011       | 1661.993 | 1691.007 | F <b>17</b> |
| K  | 626.582  | 658.208  | 687.212  | 703.217  | 688.211  | 695.207  | 1761.945       | 1744.923 | 1743.939 | K <b>16</b> |
| V  | 479.436  | 498.434  | 504.420  | 504.429  | 497.388  | 498.414  | 1633.994       | 1616.928 | 1615.944 | V <b>15</b> |
| D  | 391.457  | 374.413  | 373.440  | 369.463  | 360.425  | 361.441  | 1552.851       | 1515.785 | 1514.798 | D <b>14</b> |
| L  | 1034.241 | 897.533  | 888.531  | 1032.539 | 1013.500 | 1014.526 | 1417.700       | 1400.713 | 1389.700 | L <b>13</b> |
| R  | 1174.838 | 1117.813 | 1126.801 | 1222.813 | 1183.808 | 1184.812 | 1386.699       | 1287.699 | 1286.699 | R <b>12</b> |
| F  | 1321.728 | 1294.700 | 1303.710 | 1348.721 | 1332.699 | 1331.711 | 1134.979       | 1117.903 | 1116.908 | F <b>11</b> |
| Q  | 1640.700 | 1422.701 | 1431.714 | 1477.700 | 1460.701 | 1459.709 | 887.511        | 919.504  | 889.500  | Q <b>10</b> |
| S  | 1638.617 | 1619.700 | 1610.800 | 1564.612 | 1547.185 | 1546.201 | <b>859.452</b> | 862.426  | 861.441  | S <b>9</b>  |
| A  | 1007.254 | 920.212  | 930.241  | 935.246  | 916.212  | 917.208  | 771.200        | 755.201  | 754.206  | A <b>8</b>  |
| A  | 1076.891 | 1061.895 | 1060.881 | 1026.889 | 1009.893 | 1008.879 | <b>701.383</b> | 684.368  | 683.372  | A <b>7</b>  |
| I  | 1791.978 | 1774.988 | 1771.963 | 1819.970 | 1802.944 | 1801.958 | <b>638.346</b> | 613.319  | 612.310  | I <b>6</b>  |
| C  | 1668.907 | 1613.910 | 1611.860 | 1619.909 | 1602.864 | 1602.867 | <b>517.262</b> | 501.239  | 499.241  | C <b>5</b>  |
| A  | 1000.034 | 1001.031 | 1002.021 | 1048.029 | 1031.032 | 1030.018 | 463.262        | 449.254  | 448.258  | A <b>4</b>  |
| L  | 1051.116 | 1016.101 | 1015.100 | 1061.111 | 1044.100 | 1043.101 | <b>389.263</b> | 372.177  | 371.183  | L <b>3</b>  |
| Q  | 1051.170 | 1044.150 | 1043.150 | 1038.171 | 1012.145 | 1011.161 | <b>276.119</b> | 259.092  | 258.108  | Q <b>2</b>  |
| E  | 2050.219 | 2019.100 | 2018.201 | 2019.214 | 2018.187 | 2019.201 | 148.980        | 0.000    | 148.980  | E <b>1</b>  |



# sp | P84244 | H33\_MOUSE

IAQDFKTDLR<sup>Methyl</sup> FQSAAIGALQE  
14.02

- ▶ fragmentation table for charge state 2+
- ▶ specType=cid
- ▶ score=49.19
- ▶ F113873.dat
- ▶ query=q43883\_p1
- ▶ precursor=779.414400
- ▶ chargePrecursor=3
- ▶ itol=0.5

| AA    | a              | a'     | a-D    | b               | b'              | b-D             | y              | y'             | y-D            | AA     |     |
|-------|----------------|--------|--------|-----------------|-----------------|-----------------|----------------|----------------|----------------|--------|-----|
| R1    | 45.552         | 0.504  | 0.504  | 57.945          | 0.504           | 0.504           | 1168.818       | 1169.322       | 1169.811       | R21    |     |
| A1-2  | 79.100         | 0.504  | 0.504  | 81.069          | 0.504           | 0.504           | 1117.074       | 1117.578       | 1118.069       | A20    |     |
| Q1-3  | 143.131        | 1.008  | 0.504  | 149.589         | 1.008           | 0.504           | 1019.502       | 1020.004       | 1020.501       | Q19    |     |
| D1-4  | 209.613        | 1.512  | 1.008  | 214.511         | 1.512           | 1.008           | 929.252        | 929.751        | 930.241        | D18    |     |
| F1-5  | 274.147        | 2.016  | 1.512  | 280.141         | 2.016           | 1.512           | 839.140        | 839.635        | 840.129        | F17    |     |
| K1-6  | 338.127        | 2.520  | 2.016  | 344.129         | 2.520           | 2.016           | 743.187        | 743.675        | 744.161        | K16    |     |
| T1-7  | <b>398.219</b> | 3.024  | 2.520  | 402.113         | 3.024           | 2.520           | 651.111        | 651.591        | 652.075        | T15    |     |
| D1-8  | <b>446.232</b> | 3.528  | 3.024  | 450.210         | 3.528           | 3.024           | 559.224        | 559.697        | 560.168        | D14    |     |
| L1-9  | <b>502.774</b> | 4.032  | 3.528  | 516.772         | 4.032           | 3.528           | 467.166        | 467.631        | 468.090        | L13    |     |
| M1-10 | 567.813        | 4.536  | 4.032  | 581.830         | 4.536           | 4.032           | 375.129        | 375.587        | 376.041        | M12    |     |
| P1-11 | 631.292        | 5.040  | 4.536  | 645.354         | 5.040           | 4.536           | 283.193        | 283.641        | 284.089        | P11    |     |
| Q1-12 | 692.309        | 5.544  | 5.040  | 709.344         | 5.544           | 5.040           | 191.269        | 191.711        | 192.154        | Q10    |     |
| S1-13 | 750.812        | 6.048  | 5.544  | 770.900         | 6.048           | 5.544           | 100.254        | 100.691        | 101.124        | S10    |     |
| A1-14 | 808.813        | 6.552  | 6.048  | 818.428         | 6.552           | 6.048           | 9.213          | 9.641          | 9.978          | A9     |     |
| A1-15 | 830.949        | 6.816  | 6.552  | <b>851.947</b>  | <b>6.816</b>    | <b>6.552</b>    | 0.110          | <b>342.682</b> | <b>342.190</b> | A17    |     |
| I1-16 | 895.493        | 7.320  | 6.816  | 897.488         | <b>910.489</b>  | 901.978         | 901.481        | 3.810          | 387.181        | I16    |     |
| G1-17 | 929.883        | 7.824  | 7.320  | <b>938.999</b>  | 930.988         | 921.974         | <b>238.134</b> | 238.621        | 239.109        | G16    |     |
| A1-18 | 990.521        | 8.328  | 7.824  | <b>974.518</b>  | 966.005         | <b>965.513</b>  | 230.224        | 221.110        | 221.818        | A14    |     |
| L1-19 | 1011.263       | 8.832  | 8.328  | <b>1031.060</b> | <b>1022.547</b> | <b>1022.055</b> | 181.105        | 180.392        | 180.110        | L16    |     |
| Q1-20 | 1081.814       | 9.336  | 8.832  | <b>1095.089</b> | 1086.576        | 1078.054        | 130.394        | 129.881        | 129.368        | Q15    |     |
| R21   | 1149.813       | 11.376 | 11.376 | 1158.825        | 1158.811        | 1151.997        | 1152.928       | 74.534         | 0.504          | 85.529 | R11 |

# sp | P84244 | H33\_MOUSE

IAQDFK<sup>Methyl</sup> TDLRFQSAAILGALQE  
14.02

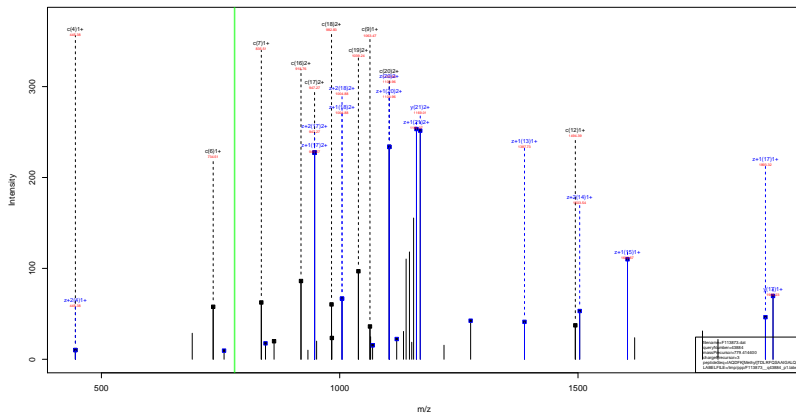

# sp | P84244 | H33\_MOUSE

IAQDFK <sup>Methyl</sup> 14.02 TDLRFQSA AIGALQE

- ▶ fragmentation table for charge state 1+
- ▶ specType=etd
- ▶ score=43.68
- ▶ F113873.dat
- ▶ query=q43884\_p1
- ▶ precursor=779.414400
- ▶ chargePrecursor=3
- ▶ itol=0.5

| AA     | c               | y               | z+1             | z+2             | z        | AA    |
|--------|-----------------|-----------------|-----------------|-----------------|----------|-------|
| F [1]  | 151.118         | 2336.254        | 2336.266        | 0.000           | 2319.166 | F[21] |
| A [2]  | 202.195         | 2223.140        | 2207.172        | 0.000           | 2206.114 | A[20] |
| Q [3]  | 159.214         | 2152.103        | 2136.085        | 2137.092        | 2135.077 | Q[19] |
| D [4]  | <b>445.241</b>  | 2024.945        | 2008.936        | 2009.934        | 2007.918 | D[18] |
| F [5]  | 502.309         | <b>1909.018</b> | <b>1892.999</b> | 1894.007        | 1891.991 | F[17] |
| K [6]  | <b>734.420</b>  | 1761.949        | 1745.931        | 1746.938        | 1744.923 | K[16] |
| T [7]  | <b>835.467</b>  | 1619.839        | <b>1603.820</b> | 1604.828        | 1602.812 | T[15] |
| D [8]  | 950.494         | 1518.791        | 1502.772        | <b>1503.780</b> | 1501.765 | D[14] |
| L [9]  | <b>1063.578</b> | 1401.704        | <b>1387.745</b> | 1388.753        | 1386.738 | L[13] |
| R [10] | 1219.679        | 1290.680        | <b>1274.661</b> | 1275.669        | 1273.654 | R[12] |
| F [11] | 1306.748        | 1134.579        | 1118.560        | <b>1119.568</b> | 1117.552 | F[11] |
| Q [12] | <b>1494.806</b> | 987.511         | 971.492         | 972.500         | 970.484  | Q[10] |
| S [13] | 1581.838        | 859.452         | 843.433         | <b>844.441</b>  | 842.425  | S[9]  |
| A [14] | 1652.875        | 722.420         | 706.401         | <b>707.409</b>  | 705.393  | A[8]  |
| A [15] | 1723.913        | 701.383         | 685.364         | 686.372         | 684.356  | A[7]  |
| I [16] | 1839.997        | 630.340         | 614.321         | 615.329         | 613.313  | I[6]  |
| G [17] | 1894.018        | 517.262         | 501.243         | 502.251         | 500.235  | G[5]  |
| A [18] | 1965.055        | 460.240         | 444.221         | <b>445.229</b>  | 443.214  | A[4]  |
| L [19] | 2078.139        | 389.207         | 373.188         | 374.192         | 372.177  | L[3]  |
| Q [20] | 2206.198        | 276.119         | 260.100         | 261.108         | 259.092  | Q[2]  |
| E [21] | 2335.240        | 148.060         | 132.042         | 133.050         | 131.034  | E[1]  |

# sp | P84244 | H33\_MOUSE

IAQDFK <sup>Methyl</sup> 14.02 TDLRFQSA AIGALQE

- ▶ fragmentation table for charge state 2+
- ▶ specType=etd
- ▶ score=43.68
- ▶ F113873.dat
- ▶ query=q43884.p1
- ▶ precursor=779.414400
- ▶ chargePrecursor=3
- ▶ itol=0.5

| AA     | c               | y               | z+1             | z+2             | z               | AA    |
|--------|-----------------|-----------------|-----------------|-----------------|-----------------|-------|
| I [1]  | 66.093          | <b>1168.616</b> | <b>1160.607</b> | 0.504           | 1169.103        | Q[1]  |
| A [2]  | 101.561         | 1112.074        | <b>1104.064</b> | 0.504           | <b>1103.561</b> | A[20] |
| Q [3]  | 165.610         | 1076.555        | <b>1066.546</b> | <b>1060.050</b> | 1069.042        | Q[19] |
| D [4]  | 223.224         | 1032.526        | <b>1004.517</b> | <b>1005.021</b> | 1004.011        | Q[18] |
| F [5]  | 296.658         | 955.013         | <b>947.003</b>  | <b>947.507</b>  | 950.497         | F[17] |
| K [6]  | 367.713         | 881.478         | 871.469         | 873.973         | 872.965         | K[16] |
| T [7]  | 418.237         | 810.423         | 802.414         | 802.918         | 801.910         | T[15] |
| D [8]  | 475.751         | 759.899         | 751.890         | 752.394         | 751.386         | D[14] |
| L [9]  | 532.293         | 702.366         | 694.376         | 694.880         | 693.872         | L[13] |
| R[10]  | 610.343         | 646.844         | 637.833         | 638.338         | 637.330         | R[12] |
| F [11] | 663.578         | 597.793         | 559.784         | 560.288         | 559.280         | F[11] |
| Q [12] | 747.907         | 494.259         | 486.250         | 486.753         | 485.745         | Q[10] |
| S [13] | 791.423         | 430.230         | 422.220         | 422.724         | 421.716         | S[9]  |
| A [14] | 826.941         | 396.714         | 378.704         | 379.208         | 378.200         | A[8]  |
| A [15] | <b>802.460</b>  | 351.195         | 343.186         | 343.690         | 342.682         | A[7]  |
| I [16] | <b>919.002</b>  | 315.676         | 307.667         | 308.171         | 307.163         | I[6]  |
| G [17] | <b>947.513</b>  | 259.134         | 251.125         | 251.629         | 250.621         | G[5]  |
| A [18] | <b>983.031</b>  | 230.624         | 222.614         | 223.118         | 222.110         | A[4]  |
| L [19] | <b>1039.573</b> | 195.105         | 187.096         | 187.600         | 186.592         | L[3]  |
| Q [20] | <b>1103.603</b> | 138.563         | 130.554         | 131.058         | 130.050         | Q[2]  |
| E [21] | 1188.124        | 74.834          | 68.824          | 67.828          | 68.832          | E[1]  |



# sp | P84244 | H33\_MOUSE

IAQDFK <sup>Methyl</sup> 14.02 TDLRFQSA AIGALQE

- ▶ fragmentation table for charge state 1+
- ▶ specType=cid
- ▶ score=41.57
- ▶ F113873.dat
- ▶ query=q43885\_p1
- ▶ precursor=779.414440
- ▶ chargePrecursor=3
- ▶ itol=0.5

| AA | a        | a'       | a,b      | b              | b'       | b,b'     | r              | r'             | r,b            | AA  |
|----|----------|----------|----------|----------------|----------|----------|----------------|----------------|----------------|-----|
| I  | 98.698   | 0.000    | 0.000    | 114.001        | 0.000    | 0.000    | 2356.225       | 2310.088       | 2310.088       | I23 |
| A  | 137.134  | 0.000    | 0.000    | 105.120        | 0.000    | 0.000    | 2221.140       | 2206.114       | 2206.114       | A20 |
| Q  | 139.012  | 282.985  | 0.000    | 113.181        | 289.166  | 0.000    | 2191.101       | 2176.075       | 2176.075       | Q19 |
| D  | 160.219  | 303.193  | 382.200  | 142.214        | 311.197  | 410.203  | 2024.052       | 2007.018       | 2006.034       | D18 |
| F  | 147.207  | 102.201  | 102.201  | 129.277        | 129.262  | 104.256  | 197.272        | 199.010        | 199.003        | F17 |
| K  | 160.208  | 172.212  | 431.203  | 171.207        | 170.204  | 169.202  | 171.945        | 1744.923       | 1743.919       | K16 |
| V  | 100.446  | 174.413  | 172.413  | <b>813.441</b> | 161.414  | 160.410  | 1618.408       | 1600.411       | 1601.409       | V15 |
| D  | 160.473  | 168.466  | 167.462  | <b>813.468</b> | 161.441  | 115.417  | 1518.751       | 1501.765       | 1500.781       | D14 |
| L  | 101.827  | 101.820  | 101.840  | 104.824        | 102.821  | 102.814  | 1431.793       | 1389.799       | 1388.784       | L13 |
| R  | 117.438  | 117.431  | 118.441  | 120.433        | 118.426  | 119.442  | 1281.402       | 1272.404       | 1272.401       | R12 |
| P  | 1321.728 | 1304.700 | 1303.710 | 1348.723       | 1332.699 | 1331.711 | 1134.979       | 1117.962       | 1116.968       | P11 |
| Q  | 1440.702 | 1422.701 | 1431.711 | 1477.704       | 1460.701 | 1459.699 | 107.511        | 107.504        | 106.900        | Q10 |
| S  | 1030.617 | 1018.700 | 1012.800 | 1048.612       | 1047.100 | 1046.601 | <b>859.452</b> | 842.426        | 841.441        | S10 |
| A  | 1007.254 | 1000.251 | 1000.241 | 1005.244       | 1011.232 | 1011.230 | 771.230        | 755.203        | 754.408        | A10 |
| A  | 1016.891 | 1011.889 | 1010.881 | 1026.886       | 1019.879 | 1018.875 | <b>701.383</b> | 684.368        | 683.372        | A10 |
| I  | 1191.978 | 1174.960 | 1171.961 | 1219.970       | 1212.944 | 1211.960 | <b>630.346</b> | <b>613.315</b> | <b>613.315</b> | I10 |
| C  | 1048.907 | 1031.891 | 1031.881 | 1037.884       | 1036.864 | 1035.861 | <b>517.262</b> | <b>500.235</b> | <b>500.231</b> | C10 |
| A  | 1000.044 | 1001.031 | 1002.021 | 1048.026       | 1041.002 | 1040.018 | 463.242        | 443.214        | 442.200        | A10 |
| L  | 1003.110 | 1001.091 | 1001.111 | 1004.090       | 1001.111 | 1004.090 | <b>389.203</b> | <b>372.177</b> | 371.191        | L10 |
| Q  | 1011.170 | 1044.150 | 1043.150 | 1038.171       | 1017.145 | 1017.143 | <b>276.119</b> | 269.092        | <b>258.108</b> | Q10 |
| E  | 1000.219 | 1001.201 | 1001.201 | 1010.214       | 1010.187 | 1009.200 | 148.190        | 0.000          | 138.190        | E10 |

# sp | P84244 | H33\_MOUSE

IAQDFK <sup>Methyl</sup> 14.02 TDLRFQSAAGALQE

- ▶ fragmentation table for charge state 2+
- ▶ specType=cid
- ▶ score=41.57
- ▶ F113873.dat
- ▶ query=q43885\_p1
- ▶ precursor=779.414440
- ▶ chargePrecursor=3
- ▶ itol=0.5

| AA | a        | a'       | a <sub>0</sub> | b               | b'              | b <sub>0</sub>  | y              | y'             | y <sub>0</sub> | AA |
|----|----------|----------|----------------|-----------------|-----------------|-----------------|----------------|----------------|----------------|----|
| R  | 41.552   | 0.559    | 0.564          | 57.945          | 0.564           | 0.569           | 1138.810       | 1139.371       | 1139.931       | R  |
| A  | 75.070   | 0.559    | 0.564          | 89.569          | 0.564           | 0.564           | 1132.291       | 1132.851       | 1133.411       | A  |
| Q  | 143.150  | 155.500  | 157.044        | 157.044         | 158.588         | 0.564           | 1075.501       | 1076.061       | 1076.621       | Q  |
| D  | 208.212  | 209.761  | 210.305        | 224.912         | 226.456         | 0.569           | 1052.520       | 1053.080       | 1053.640       | D  |
| F  | 274.247  | 285.635  | 286.144        | 338.144         | 339.632         | 0.564           | 885.131        | 885.691        | 886.251        | F  |
| K  | 345.293  | 356.680  | 358.201        | 358.201         | 359.697         | 0.569           | 855.135        | 855.695        | 856.255        | K  |
| T  | 385.277  | 387.273  | 388.221        | 408.224         | 409.211         | 0.569           | 810.423        | 810.983        | 811.543        | T  |
| E  | 451.290  | 454.227  | 445.215        | 467.215         | 468.224         | 0.564           | 755.388        | 755.948        | 756.508        | E  |
| L  | 500.282  | 501.220  | <b>500.777</b> | <b>500.777</b>  | 511.260         | 0.564           | <b>702.386</b> | <b>693.872</b> | <b>693.380</b> | L  |
| M  | 557.313  | 558.271  | 559.221        | <b>601.830</b>  | 602.817         | 0.569           | 650.391        | 650.951        | 651.511        | M  |
| P  | 594.324  | 595.284  | 595.282        | 607.305         | 608.304         | 0.564           | 599.359        | 599.919        | 600.479        | P  |
| I  | 672.338  | 673.300  | 673.300        | <b>739.394</b>  | <b>739.394</b>  | <b>739.388</b>  | 604.287        | 604.847        | 605.407        | I  |
| S  | 698.352  | 699.300  | 699.300        | 707.305         | 708.304         | 0.564           | 430.230        | 430.790        | 431.350        | S  |
| A  | 698.410  | 699.411  | 699.421        | <b>816.428</b>  | <b>809.915</b>  | 0.569           | 309.412        | 309.972        | 310.532        | A  |
| V  | 730.369  | 731.430  | 730.944        | <b>853.947</b>  | 865.431         | 0.564           | 244.941        | 245.501        | 246.061        | V  |
| N  | 805.401  | 807.070  | 807.069        | <b>910.489</b>  | <b>901.975</b>  | 0.561           | 181.481        | 182.041        | 182.601        | N  |
| G  | 870.410  | 871.469  | 869.989        | <b>938.995</b>  | 949.480         | 0.564           | 129.484        | 129.524        | 129.564        | G  |
| R  | 886.524  | 887.580  | 885.515        | <b>974.518</b>  | <b>966.005</b>  | <b>965.513</b>  | 120.524        | 122.111        | 123.698        | R  |
| Q  | 1017.083 | 1018.589 | 1018.070       | <b>1031.060</b> | <b>1022.547</b> | <b>1022.035</b> | 100.500        | 100.500        | 100.500        | Q  |
| D  | 1144.014 | 1145.217 | 1144.200       | 1155.200        | 1156.216        | 0.564           | 140.504        | 140.504        | 140.504        | D  |
| E  | 1144.014 | 1145.217 | 1145.200       | 1155.200        | 1155.200        | 0.559           | 140.504        | 140.504        | 140.504        | E  |

sp | P84244 | H33\_MOUSE

IAQDFK<sup>Methyl</sup> TDLRFQSAAGALQE  
14.02

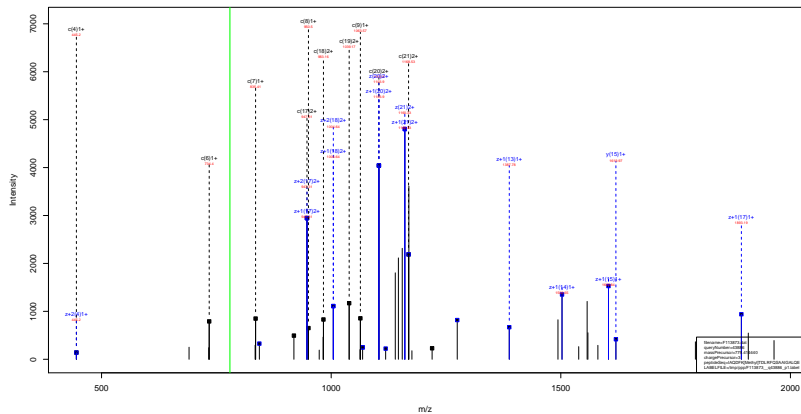



# sp | P84244 | H33\_MOUSE

IAQDFK <sup>Methyl</sup> 14.02 TDLRFQSAAILGALQE

- ▶ fragmentation table for charge state 1+
- ▶ specType=etd
- ▶ score=38.83
- ▶ F113873.dat
- ▶ query=q43886.p1
- ▶ precursor=779.414440
- ▶ chargePrecursor=3
- ▶ itol=0.5

| AA     | c               | y               | z+1             | z+2            | z        | AA     |
|--------|-----------------|-----------------|-----------------|----------------|----------|--------|
| I [1]  | 131.118         | 2338.224        | 2320.206        | 0.000          | 2319.198 | I [21] |
| A [2]  | 202.155         | 2223.140        | 2207.122        | 0.000          | 2206.114 | A [20] |
| Q [3]  | 330.214         | 2152.103        | 2136.085        | 2137.092       | 2135.077 | Q [19] |
| D [4]  | <b>445.241</b>  | 2024.040        | 2008.026        | 2009.034       | 2007.018 | D [18] |
| F [5]  | 502.309         | 1909.018        | <b>1892.999</b> | 1894.007       | 1891.991 | F [17] |
| K [6]  | <b>734.420</b>  | 1761.949        | 1745.931        | 1746.938       | 1744.923 | K [16] |
| T [7]  | <b>835.467</b>  | <b>1619.839</b> | <b>1603.820</b> | 1604.828       | 1602.812 | T [15] |
| D [8]  | <b>950.494</b>  | 1518.791        | <b>1502.772</b> | 1503.780       | 1501.765 | D [14] |
| L [9]  | <b>1063.578</b> | 1403.764        | <b>1387.745</b> | 1388.753       | 1386.738 | L [13] |
| R [10] | <b>1219.679</b> | 1290.680        | <b>1274.661</b> | 1275.669       | 1273.654 | R [12] |
| F [11] | 1356.748        | 1134.570        | <b>1118.560</b> | 1119.568       | 1117.552 | F [11] |
| Q [12] | 1494.806        | 987.511         | 971.492         | 972.500        | 970.484  | Q [10] |
| S [13] | 1581.838        | 859.452         | <b>843.433</b>  | 844.441        | 842.425  | S [9]  |
| A [14] | 1652.875        | 772.420         | 756.401         | 757.409        | 755.393  | A [8]  |
| A [15] | 1723.913        | 701.383         | 685.364         | 686.372        | 684.356  | A [7]  |
| I [6]  | 1839.997        | 630.346         | 614.327         | 615.335        | 613.319  | I [6]  |
| Q [17] | 1894.018        | 517.302         | 501.283         | 502.291        | 500.275  | Q [5]  |
| A [18] | 1965.055        | 460.240         | 444.221         | <b>445.229</b> | 443.214  | A [4]  |
| L [19] | 2078.139        | 389.203         | 373.184         | 374.192        | 372.177  | L [3]  |
| Q [20] | 2206.198        | 276.119         | 260.100         | 261.108        | 259.092  | Q [2]  |
| E [21] | 2335.240        | 148.060         | 132.042         | 133.050        | 131.034  | E [1]  |

# sp | P84244 | H33\_MOUSE

IAQDFK <sup>Methyl</sup> 14.02 TDLRFQSA AIGALQE

- ▶ fragmentation table for charge state 2+
- ▶ specType=etd
- ▶ score=38.83
- ▶ F113873.dat
- ▶ query=q43886\_p1
- ▶ precursor=779.414440
- ▶ chargePrecursor=3
- ▶ itol=0.5

| AA     | c               | y               | z+1             | z+2             | z               | AA    |
|--------|-----------------|-----------------|-----------------|-----------------|-----------------|-------|
| I [1]  | 66.093          | <b>1168.616</b> | <b>1160.607</b> | 0.504           | <b>1160.103</b> | [21]  |
| A [2]  | 101.561         | 1112.074        | <b>1104.064</b> | 0.504           | <b>1103.561</b> | A[20] |
| Q [3]  | 165.610         | 1076.555        | <b>1068.546</b> | 1069.050        | <b>1068.042</b> | Q[19] |
| D [4]  | 223.224         | 1042.526        | <b>1005.517</b> | <b>1005.021</b> | 1004.513        | D[18] |
| F [5]  | 296.658         | 955.013         | <b>947.003</b>  | <b>947.507</b>  | 950.499         | F[17] |
| K [6]  | 367.713         | 881.478         | 873.469         | 873.973         | 872.965         | K[16] |
| T [7]  | 418.237         | 810.423         | 802.414         | 802.918         | 801.910         | T[15] |
| D [8]  | 475.751         | 759.899         | 751.890         | 752.394         | 751.386         | D[14] |
| L [9]  | 532.293         | 702.366         | 694.376         | 694.880         | 693.872         | L[13] |
| R [10] | 610.343         | 646.844         | 637.833         | 638.338         | 637.330         | R[12] |
| F [11] | 683.578         | 597.793         | 559.784         | 560.288         | 559.280         | F[11] |
| Q [12] | 747.907         | 494.259         | 486.250         | 486.753         | 485.745         | Q[10] |
| S [13] | 791.423         | 430.230         | 422.220         | 422.724         | 421.716         | S[9]  |
| A [14] | 826.941         | 396.714         | 378.704         | 379.208         | 378.200         | A[8]  |
| A [15] | 892.460         | 351.195         | 343.188         | 343.690         | 342.682         | A[7]  |
| I [16] | <b>919.002</b>  | 315.676         | 307.667         | 308.171         | 307.163         | I[6]  |
| G [17] | <b>947.513</b>  | 259.134         | 251.125         | 251.629         | 250.621         | G[5]  |
| A [18] | <b>983.031</b>  | 230.624         | 222.614         | 223.118         | 222.110         | A[4]  |
| L [19] | <b>1039.573</b> | 195.105         | 187.096         | 187.600         | 186.592         | L[3]  |
| Q [20] | <b>1103.603</b> | 138.563         | 130.554         | 131.058         | 130.050         | Q[2]  |
| E [21] | <b>1168.124</b> | 74.534          | 66.524          | 67.028          | 66.021          | E[1]  |

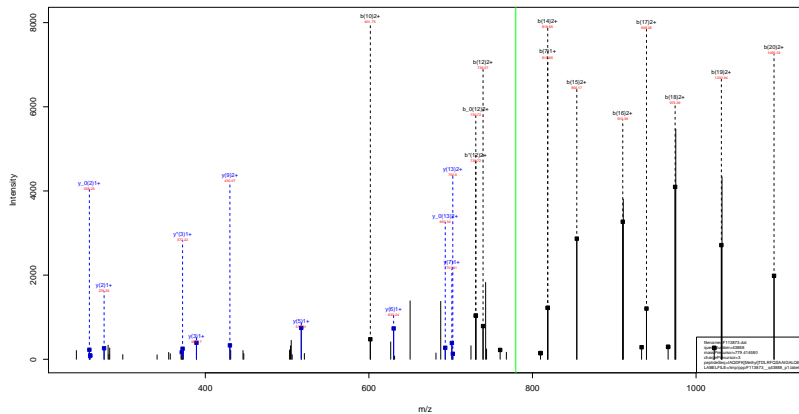

# sp | P84244 | H33\_MOUSE

IAQDFK <sup>Methyl</sup> 14.02 TDLRFQSA AIGALQE

- ▶ fragmentation table for charge state 1+
- ▶ specType=cid
- ▶ score=41.68
- ▶ F113873.dat
- ▶ query=q43888.p1
- ▶ precursor=779.414580
- ▶ chargePrecursor=3
- ▶ itol=0.5

| AA | a        | a*       | a,b      | b               | b*       | b,b      | r               | r*             | r,b            | AA          |
|----|----------|----------|----------|-----------------|----------|----------|-----------------|----------------|----------------|-------------|
| I  | 98.898   | 0.000    | 0.000    | 114.091         | 0.000    | 0.000    | 2356.225        | 2316.088       | 2316.214       | I <b>21</b> |
| A  | 137.134  | 0.000    | 0.000    | 105.129         | 0.000    | 0.000    | 2221.140        | 2256.114       | 2205.130       | A <b>20</b> |
| Q  | 139.012  | 282.985  | 0.000    | 113.181         | 286.166  | 0.000    | 2191.101        | 2126.071       | 2154.041       | Q <b>19</b> |
| D  | 160.219  | 363.193  | 382.209  | 426.214         | 341.197  | 410.203  | 2624.074        | 2607.018       | 2606.034       | D <b>18</b> |
| F  | 247.207  | 520.201  | 520.217  | 379.203         | 356.206  | 357.212  | 3469.010        | 3361.003       | 3391.037       | F <b>17</b> |
| K  | 480.268  | 672.212  | 671.205  | 271.207         | 270.266  | 269.252  | 3761.045        | 3744.023       | 3743.039       | K <b>16</b> |
| V  | 700.446  | 874.213  | 772.431  | <b>818.441</b>  | 661.414  | 660.430  | 3518.030        | 3500.012       | 3501.028       | V <b>15</b> |
| D  | 1605.473 | 1688.436 | 1687.462 | <b>1313.468</b> | 1016.441 | 1015.457 | 3518.751        | 3501.703       | 3500.701       | D <b>14</b> |
| L  | 1013.529 | 1011.529 | 1001.540 | 1046.524        | 1032.522 | 1031.524 | 3461.704        | 3386.700       | 3385.704       | L <b>13</b> |
| R  | 1174.638 | 1171.631 | 1166.641 | 1202.633        | 1188.626 | 1187.642 | 3280.662        | 3272.644       | 3272.618       | R <b>12</b> |
| F  | 1321.726 | 1324.700 | 1321.710 | 1348.721        | 1332.699 | 1331.711 | 3134.979        | 3117.903       | 3116.908       | F <b>11</b> |
| Q  | 1640.780 | 1642.761 | 1641.774 | 1677.769        | 1660.751 | 1659.769 | 3067.511        | 3019.484       | 3019.500       | Q <b>10</b> |
| S  | 1826.817 | 1828.799 | 1812.800 | 1864.812        | 1847.785 | 1846.801 | 3002.402        | 3002.402       | 3041.441       | S <b>9</b>  |
| A  | 1987.854 | 1989.827 | 1988.841 | 1929.846        | 1918.822 | 1917.838 | 2922.420        | 2925.393       | 2924.408       | A <b>8</b>  |
| A  | 2176.891 | 2181.865 | 2180.881 | 2126.886        | 2109.859 | 2108.875 | <b>2701.383</b> | 2684.366       | 2683.372       | A <b>7</b>  |
| I  | 1791.978 | 1797.958 | 1791.960 | 1819.970        | 1802.944 | 1801.960 | <b>630.346</b>  | 613.319        | 612.319        | I <b>6</b>  |
| C  | 1848.007 | 1851.983 | 1845.985 | 1879.986        | 1862.964 | 1861.980 | <b>517.262</b>  | 500.239        | 499.241        | C <b>5</b>  |
| A  | 1920.034 | 1921.007 | 1920.021 | 1948.026        | 1931.002 | 1930.018 | 463.262         | 449.254        | 448.258        | A <b>4</b>  |
| L  | 1003.110 | 1003.101 | 1003.111 | 1004.100        | 1004.111 | 1004.100 | <b>389.203</b>  | <b>372.177</b> | <b>371.183</b> | L <b>3</b>  |
| Q  | 1011.170 | 1014.150 | 1013.150 | 1018.171        | 1017.145 | 1017.161 | <b>276.119</b>  | <b>259.092</b> | <b>258.108</b> | Q <b>2</b>  |
| E  | 2000.219 | 2001.200 | 2000.200 | 2010.214        | 2001.187 | 2000.200 | 148.190         | 0.000          | 148.190        | E <b>1</b>  |

# sp | P84244 | H33\_MOUSE

IAQDFK <sup>Methyl</sup> 14.02 TDLRFQSA AIGALQE

- ▶ fragmentation table for charge state 2+
- ▶ specType=cid
- ▶ score=41.68
- ▶ F113873.dat
- ▶ query=q43888.p1
- ▶ precursor=779.414580
- ▶ chargePrecursor=3
- ▶ itol=0.5

| AA | a    | a'    | a-D    | b     | b'   | b-D   | y      | y'    | y-D  | AA    |      |       |     |
|----|------|-------|--------|-------|------|-------|--------|-------|------|-------|------|-------|-----|
| R1 | 45   | 592   | 0.504  | 0.504 | 57   | 949   | 0.504  | 0.504 | 1168 | 818   | 1169 | 811   | R21 |
| A1 | 79   | 1070  | 0.504  | 0.504 | 81   | 959   | 0.504  | 0.504 | 1117 | 1074  | 1118 | 1061  | A20 |
| Q1 | 143  | 1747  | 1.008  | 0.504 | 149  | 1987  | 1.008  | 0.504 | 1076 | 1703  | 1077 | 1647  | Q19 |
| D1 | 209  | 2513  | 1.512  | 0.504 | 214  | 2611  | 1.512  | 0.504 | 1024 | 2459  | 1025 | 2329  | D18 |
| F1 | 274  | 3247  | 2.016  | 0.504 | 280  | 3341  | 2.016  | 0.504 | 972  | 3187  | 973  | 3057  | F17 |
| K1 | 340  | 3913  | 2.520  | 0.504 | 346  | 3997  | 2.520  | 0.504 | 920  | 3843  | 921  | 3713  | K16 |
| T1 | 405  | 4519  | 3.024  | 0.504 | 411  | 4603  | 3.024  | 0.504 | 868  | 4459  | 869  | 4329  | T15 |
| E1 | 471  | 5225  | 3.528  | 0.504 | 477  | 5309  | 3.528  | 0.504 | 816  | 5155  | 817  | 5025  | E14 |
| L1 | 536  | 5781  | 4.032  | 0.504 | 542  | 5853  | 4.032  | 0.504 | 764  | 5691  | 765  | 5561  | L13 |
| M1 | 602  | 6287  | 4.536  | 0.504 | 608  | 6361  | 4.536  | 0.504 | 712  | 6207  | 713  | 6077  | M12 |
| I1 | 667  | 6873  | 5.040  | 0.504 | 673  | 6937  | 5.040  | 0.504 | 660  | 6843  | 661  | 6713  | I11 |
| V1 | 733  | 7529  | 5.544  | 0.504 | 739  | 7581  | 5.544  | 0.504 | 608  | 7529  | 609  | 7399  | V10 |
| G1 | 798  | 8175  | 6.048  | 0.504 | 804  | 8229  | 6.048  | 0.504 | 556  | 8175  | 557  | 8045  | G9  |
| S1 | 864  | 8841  | 6.552  | 0.504 | 870  | 8895  | 6.552  | 0.504 | 504  | 8841  | 505  | 8711  | S8  |
| P1 | 929  | 9487  | 7.056  | 0.504 | 935  | 9541  | 7.056  | 0.504 | 452  | 9487  | 453  | 9357  | P7  |
| N1 | 995  | 10143 | 7.560  | 0.504 | 1001 | 10207 | 7.560  | 0.504 | 400  | 10143 | 401  | 10013 | N6  |
| Y1 | 1060 | 10839 | 8.064  | 0.504 | 1066 | 10983 | 8.064  | 0.504 | 348  | 10839 | 349  | 10709 | Y5  |
| H1 | 1126 | 11465 | 8.568  | 0.504 | 1132 | 11561 | 8.568  | 0.504 | 296  | 11465 | 297  | 11335 | H4  |
| C1 | 1191 | 12161 | 9.072  | 0.504 | 1197 | 12305 | 9.072  | 0.504 | 244  | 12161 | 245  | 12031 | C3  |
| R1 | 1257 | 12757 | 9.576  | 0.504 | 1263 | 12901 | 9.576  | 0.504 | 192  | 12757 | 193  | 12627 | R2  |
| A1 | 1322 | 13453 | 10.080 | 0.504 | 1328 | 13597 | 10.080 | 0.504 | 140  | 13453 | 141  | 13323 | A1  |
| D1 | 1388 | 14079 | 10.584 | 0.504 | 1394 | 14241 | 10.584 | 0.504 | 88   | 14079 | 89   | 13949 | D0  |
| F1 | 1453 | 14775 | 11.088 | 0.504 | 1459 | 14919 | 11.088 | 0.504 | 36   | 14775 | 37   | 14645 | F0  |
| K1 | 1519 | 15371 | 11.592 | 0.504 | 1525 | 15515 | 11.592 | 0.504 | 0    | 15371 | 0    | 15241 | K0  |
| T1 | 1584 | 16067 | 12.096 | 0.504 | 1590 | 16261 | 12.096 | 0.504 | 0    | 16067 | 0    | 15937 | T0  |
| E1 | 1650 | 16863 | 12.600 | 0.504 | 1656 | 17055 | 12.600 | 0.504 | 0    | 16863 | 0    | 16733 | E0  |
| L1 | 1715 | 17459 | 13.104 | 0.504 | 1721 | 17647 | 13.104 | 0.504 | 0    | 17459 | 0    | 17329 | L0  |
| M1 | 1781 | 18155 | 13.608 | 0.504 | 1787 | 18339 | 13.608 | 0.504 | 0    | 18155 | 0    | 18025 | M0  |
| I1 | 1846 | 18861 | 14.112 | 0.504 | 1852 | 19043 | 14.112 | 0.504 | 0    | 18861 | 0    | 18747 | I0  |
| V1 | 1912 | 19357 | 14.616 | 0.504 | 1918 | 19527 | 14.616 | 0.504 | 0    | 19357 | 0    | 19243 | V0  |
| G1 | 1977 | 19953 | 15.120 | 0.504 | 1983 | 19995 | 15.120 | 0.504 | 0    | 19953 | 0    | 19839 | G0  |
| S1 | 2043 | 20449 | 15.624 | 0.504 | 2049 | 20583 | 15.624 | 0.504 | 0    | 20449 | 0    | 20335 | S0  |
| P1 | 2108 | 20845 | 16.128 | 0.504 | 2114 | 20977 | 16.128 | 0.504 | 0    | 20845 | 0    | 20731 | P0  |
| N1 | 2174 | 21041 | 16.632 | 0.504 | 2180 | 21169 | 16.632 | 0.504 | 0    | 21041 | 0    | 20927 | N0  |
| Y1 | 2239 | 21237 | 17.136 | 0.504 | 2245 | 21301 | 17.136 | 0.504 | 0    | 21237 | 0    | 21123 | Y0  |
| H1 | 2305 | 21433 | 17.640 | 0.504 | 2311 | 21493 | 17.640 | 0.504 | 0    | 21433 | 0    | 21329 | H0  |
| C1 | 2370 | 21629 | 18.144 | 0.504 | 2376 | 21655 | 18.144 | 0.504 | 0    | 21629 | 0    | 21525 | C0  |
| R1 | 2436 | 21825 | 18.648 | 0.504 | 2442 | 21811 | 18.648 | 0.504 | 0    | 21825 | 0    | 21721 | R0  |
| A1 | 2501 | 22021 | 19.152 | 0.504 | 2507 | 22007 | 19.152 | 0.504 | 0    | 22021 | 0    | 21917 | A0  |
| D1 | 2567 | 22217 | 19.656 | 0.504 | 2573 | 22193 | 19.656 | 0.504 | 0    | 22217 | 0    | 22113 | D0  |
| F1 | 2632 | 22413 | 20.160 | 0.504 | 2638 | 22379 | 20.160 | 0.504 | 0    | 22413 | 0    | 22309 | F0  |
| K1 | 2698 | 22609 | 20.664 | 0.504 | 2704 | 22565 | 20.664 | 0.504 | 0    | 22609 | 0    | 22505 | K0  |
| T1 | 2763 | 22805 | 21.168 | 0.504 | 2769 | 22751 | 21.168 | 0.504 | 0    | 22805 | 0    | 22701 | T0  |
| E1 | 2829 | 23001 | 21.672 | 0.504 | 2835 | 22937 | 21.672 | 0.504 | 0    | 23001 | 0    | 22897 | E0  |
| L1 | 2894 | 23197 | 22.176 | 0.504 | 2900 | 23123 | 22.176 | 0.504 | 0    | 23197 | 0    | 23093 | L0  |
| M1 | 2960 | 23393 | 22.680 | 0.504 | 2966 | 23309 | 22.680 | 0.504 | 0    | 23393 | 0    | 23289 | M0  |
| I1 | 3025 | 23589 | 23.184 | 0.504 | 3031 | 23495 | 23.184 | 0.504 | 0    | 23589 | 0    | 23485 | I0  |
| V1 | 3091 | 23785 | 23.688 | 0.504 | 3097 | 23681 | 23.688 | 0.504 | 0    | 23785 | 0    | 23681 | V0  |
| G1 | 3156 | 23981 | 24.192 | 0.504 | 3162 | 23867 | 24.192 | 0.504 | 0    | 23981 | 0    | 23877 | G0  |
| S1 | 3222 | 24177 | 24.696 | 0.504 | 3228 | 24053 | 24.696 | 0.504 | 0    | 24177 | 0    | 24073 | S0  |
| P1 | 3287 | 24373 | 25.200 | 0.504 | 3293 | 24239 | 25.200 | 0.504 | 0    | 24373 | 0    | 24259 | P0  |
| N1 | 3353 | 24569 | 25.704 | 0.504 | 3359 | 24425 | 25.704 | 0.504 | 0    | 24569 | 0    | 24445 | N0  |
| Y1 | 3418 | 24765 | 26.208 | 0.504 | 3424 | 24611 | 26.208 | 0.504 | 0    | 24765 | 0    | 24641 | Y0  |
| H1 | 3484 | 24961 | 26.712 | 0.504 | 3490 | 24797 | 26.712 | 0.504 | 0    | 24961 | 0    | 24837 | H0  |
| C1 | 3549 | 25157 | 27.216 | 0.504 | 3555 | 24983 | 27.216 | 0.504 | 0    | 25157 | 0    | 25033 | C0  |
| R1 | 3615 | 25353 | 27.720 | 0.504 | 3621 | 25169 | 27.720 | 0.504 | 0    | 25353 | 0    | 25219 | R0  |
| A1 | 3680 | 25549 | 28.224 | 0.504 | 3686 | 25355 | 28.224 | 0.504 | 0    | 25549 | 0    | 25405 | A0  |
| D1 | 3746 | 25745 | 28.728 | 0.504 | 3752 | 25541 | 28.728 | 0.504 | 0    | 25745 | 0    | 25591 | D0  |
| F1 | 3811 | 25941 | 29.232 | 0.504 | 3817 | 25727 | 29.232 | 0.504 | 0    | 25941 | 0    | 25777 | F0  |
| K1 | 3877 | 26137 | 29.736 | 0.504 | 3883 | 25913 | 29.736 | 0.504 | 0    | 26137 | 0    | 25963 | K0  |
| T1 | 3942 | 26333 | 30.240 | 0.504 | 3948 | 26099 | 30.240 | 0.504 | 0    | 26333 | 0    | 26149 | T0  |
| E1 | 4008 | 26529 | 30.744 | 0.504 | 4014 | 26285 | 30.744 | 0.504 | 0    | 26529 | 0    | 26335 | E0  |
| L1 | 4073 | 26725 | 31.248 | 0.504 | 4079 | 26471 | 31.248 | 0.504 | 0    | 26725 | 0    | 26521 | L0  |
| M1 | 4139 | 26921 | 31.752 | 0.504 | 4145 | 26657 | 31.752 | 0.504 | 0    | 26921 | 0    | 26707 | M0  |
| I1 | 4204 | 27117 | 32.256 | 0.504 | 4210 | 26843 | 32.256 | 0.504 | 0    | 27117 | 0    | 26893 | I0  |
| V1 | 4270 | 27313 | 32.760 | 0.504 | 4276 | 27029 | 32.760 | 0.504 | 0    | 27313 | 0    | 27079 | V0  |
| G1 | 4335 | 27509 | 33.264 | 0.504 | 4341 | 27215 | 33.264 | 0.504 | 0    | 27509 | 0    | 27265 | G0  |
| S1 | 4401 | 27705 | 33.768 | 0.504 | 4407 | 27401 | 33.768 | 0.504 | 0    | 27705 | 0    | 27451 | S0  |
| P1 | 4466 | 27901 | 34.272 | 0.504 | 4472 | 27587 | 34.272 | 0.504 | 0    | 27901 | 0    | 27637 | P0  |
| N1 | 4532 | 28097 | 34.776 | 0.504 | 4538 | 27773 | 34.776 | 0.504 | 0    | 28097 | 0    | 27823 | N0  |
| Y1 | 4597 | 28293 | 35.280 | 0.504 | 4603 | 27959 | 35.280 | 0.504 | 0    | 28293 | 0    | 28009 | Y0  |
| H1 | 4663 | 28489 | 35.784 | 0.504 | 4669 | 28145 | 35.784 | 0.504 | 0    | 28489 | 0    | 28195 | H0  |
| C1 | 4728 | 28685 | 36.288 | 0.504 | 4734 | 28331 | 36.288 | 0.504 | 0    | 28685 | 0    | 28381 | C0  |
| R1 | 4794 | 28881 | 36.792 | 0.504 | 4800 | 28517 | 36.792 | 0.504 | 0    | 28881 | 0    | 28567 | R0  |
| A1 | 4859 | 29077 | 37.296 | 0.504 | 4865 | 28703 | 37.296 | 0.504 | 0    | 29077 | 0    | 28753 | A0  |
| D1 | 4925 | 29273 | 37.800 | 0.504 | 4931 | 28889 | 37.800 | 0.504 | 0    | 29273 | 0    | 28939 | D0  |
| F1 | 4990 | 29469 | 38.304 | 0.504 | 4996 | 29075 | 38.304 | 0.504 | 0    | 29469 | 0    | 29125 | F0  |
| K1 | 5056 | 29665 | 38.808 | 0.504 | 5062 | 29261 | 38.808 | 0.504 | 0    | 29665 | 0    | 29311 | K0  |
| T1 | 5121 | 29861 | 39.312 | 0.504 | 5127 | 29447 | 39.312 | 0.504 | 0    | 29861 | 0    | 29497 | T0  |
| E1 | 5187 | 30057 | 39.816 | 0.504 | 5193 | 29633 | 39.816 | 0.504 | 0    | 30057 | 0    | 29683 | E0  |
| L1 | 5252 | 30253 | 40.320 | 0.504 | 5258 | 29819 | 40.320 | 0.504 | 0    | 30253 | 0    | 29869 | L0  |
| M1 | 5318 | 30449 | 40.824 | 0.504 | 5324 | 30005 | 40.824 | 0.504 | 0    | 30449 | 0    | 30055 | M0  |
| I1 | 5383 | 30645 | 41.328 | 0.504 | 5389 | 30191 | 41.328 | 0.504 | 0    | 30645 | 0    | 30241 | I0  |
| V1 | 5449 | 30841 | 41.832 | 0.504 | 5455 | 30377 | 41.832 | 0.504 | 0    | 30841 | 0    | 30427 | V0  |
| G1 | 5514 | 31037 | 42.336 | 0.504 | 5521 | 30563 | 42.336 | 0.504 | 0    | 31037 | 0    | 30613 | G0  |
| S1 | 5580 | 31233 | 42.840 | 0.504 | 5587 | 30749 | 42.840 | 0.504 | 0    | 31233 | 0    | 30799 | S0  |
| P1 | 5645 | 31429 | 43.344 | 0.504 | 5651 | 30935 | 43.344 | 0.504 | 0    | 31429 | 0    | 30985 | P0  |
| N1 | 5711 | 31625 | 43.848 | 0.504 | 5717 | 31121 | 43.848 | 0.504 | 0    | 31625 | 0    | 31171 | N0  |
| Y1 | 5776 | 31821 | 44.352 | 0.504 | 5782 | 31307 | 44.352 | 0.504 | 0    | 31821 | 0    | 31357 | Y0  |
| H1 | 5842 | 32017 | 44.856 | 0.504 | 5848 | 31493 | 44.856 | 0.504 | 0    | 32017 | 0    | 31543 | H0  |
| C1 | 5907 | 32213 | 45.360 | 0.504 | 5913 | 31679 | 45.360 | 0.504 | 0    | 32213 | 0    | 31729 | C0  |
| R1 | 5973 | 32409 | 45.864 | 0.504 | 5979 | 31865 | 45.864 | 0.504 | 0    | 32409 | 0    | 31915 | R0  |
| A1 | 6038 | 32605 | 46.368 | 0.504 | 6044 | 32051 | 46.368 | 0.504 | 0    | 32605 | 0    | 32101 | A0  |
| D1 |      |       |        |       |      |       |        |       |      |       |      |       |     |

# sp | P84244 | H33\_MOUSE

IAQDFKTDLR <sup>Methyl</sup> FQSAAIGALQE  
14.02

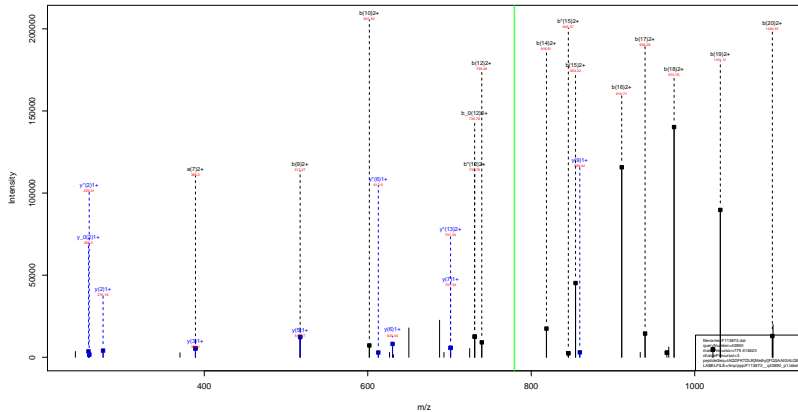

# sp | P84244 | H33\_MOUSE

IAQDFKTDLR<sup>Methyl</sup> FQSAAIGALQE  
14.02

- ▶ fragmentation table for charge state 1+
- ▶ specType=cid
- ▶ score=65.91
- ▶ F113873.dat
- ▶ query=q43890\_p1
- ▶ precursor=779.414620
- ▶ chargePrecursor=3
- ▶ itol=0.5

| AA | a        | a*       | a,b      | b        | b*       | b,b      | r              | r*             | r,b            | AA          |
|----|----------|----------|----------|----------|----------|----------|----------------|----------------|----------------|-------------|
| I  | 98.698   | 0.000    | 0.000    | 114.091  | 0.000    | 0.000    | 2356.225       | 2310.088       | 2318.214       | I <b>23</b> |
| A  | 137.134  | 0.000    | 0.000    | 105.129  | 0.000    | 0.000    | 2221.140       | 2206.114       | 2205.130       | A <b>20</b> |
| Q  | 139.012  | 382.989  | 0.000    | 113.181  | 289.166  | 0.000    | 2351.101       | 2326.077       | 2324.093       | Q <b>19</b> |
| D  | 400.219  | 363.193  | 382.208  | 426.214  | 311.187  | 410.203  | 2624.050       | 2607.018       | 2606.034       | D <b>18</b> |
| F  | 347.207  | 520.201  | 520.277  | 375.202  | 326.206  | 327.272  | 1669.011       | 1661.993       | 1661.007       | F <b>17</b> |
| K  | 625.082  | 658.208  | 687.212  | 303.207  | 688.211  | 625.207  | 1781.945       | 1744.923       | 1743.939       | K <b>16</b> |
| V  | 179.436  | 338.434  | 704.420  | 304.425  | 187.428  | 338.414  | 1833.994       | 1818.928       | 1817.944       | V <b>15</b> |
| D  | 391.437  | 314.413  | 373.440  | 303.463  | 360.425  | 301.481  | 1532.837       | 1515.785       | 1514.798       | D <b>14</b> |
| L  | 1034.241 | 697.533  | 688.531  | 1032.529 | 1013.502 | 1014.528 | 1417.700       | 1400.712       | 1399.700       | L <b>13</b> |
| R  | 1174.838 | 1171.813 | 1186.801 | 1202.813 | 1183.808 | 1184.812 | 1386.699       | 1387.698       | 1386.699       | R <b>12</b> |
| F  | 1321.728 | 1324.703 | 1321.710 | 1348.721 | 1332.699 | 1331.711 | 1134.979       | 1117.953       | 1116.968       | F <b>11</b> |
| Q  | 1640.702 | 1642.701 | 1641.714 | 1677.703 | 1660.701 | 1659.709 | 687.511        | 687.504        | 686.920        | Q <b>10</b> |
| S  | 1638.617 | 1639.709 | 1632.800 | 1664.812 | 1647.185 | 1646.201 | <b>839.452</b> | 842.425        | 841.441        | S <b>9</b>  |
| A  | 1007.254 | 1000.252 | 1000.243 | 1020.264 | 1018.272 | 1017.268 | 771.200        | 770.201        | 770.408        | A <b>8</b>  |
| A  | 1076.891 | 1061.885 | 1060.881 | 1108.898 | 1089.879 | 1088.875 | <b>701.383</b> | 684.368        | 683.372        | A <b>7</b>  |
| I  | 1791.978 | 1774.988 | 1771.983 | 1819.979 | 1802.944 | 1801.980 | <b>638.346</b> | <b>613.319</b> | 612.310        | I <b>6</b>  |
| C  | 1668.907 | 1651.910 | 1648.901 | 1679.910 | 1670.864 | 1669.870 | <b>517.262</b> | 508.229        | 507.241        | C <b>5</b>  |
| A  | 1000.034 | 1001.033 | 1002.021 | 1048.029 | 1031.032 | 1030.018 | 463.262        | 445.214        | 444.230        | A <b>4</b>  |
| L  | 1051.116 | 1051.091 | 1051.101 | 1061.111 | 1054.088 | 1054.111 | <b>389.203</b> | 374.171        | 371.191        | L <b>3</b>  |
| Q  | 1051.170 | 1044.159 | 1043.160 | 1088.171 | 1072.145 | 1071.161 | <b>276.119</b> | <b>259.092</b> | <b>258.108</b> | Q <b>2</b>  |
| E  | 2000.219 | 2001.203 | 2000.201 | 2010.214 | 2001.187 | 2000.201 | 148.980        | 0.000          | 148.980        | E <b>1</b>  |

# sp | P84244 | H33\_MOUSE

IAQDFKTDLR<sup>Methyl</sup> FQSAAIGALQE  
14.02

- ▶ fragmentation table for charge state 2+
- ▶ specType=cid
- ▶ score=65.91
- ▶ F113873.dat
- ▶ query=q43890\_p1
- ▶ precursor=779.414620
- ▶ chargePrecursor=3
- ▶ itol=0.5

| AA | a              | a'     | a-D   | b               | b'              | b-D             | y              | y'       | y-D            | AA  |
|----|----------------|--------|-------|-----------------|-----------------|-----------------|----------------|----------|----------------|-----|
| R1 | 45.952         | 0.504  | 0.504 | 57.945          | 0.504           | 0.504           | 1168.818       | 1169.323 | 1169.831       | R21 |
| A1 | 79.910         | 0.504  | 0.504 | 81.903          | 0.504           | 0.504           | 1114.014       | 1114.519 | 1115.021       | A20 |
| Q1 | 143.131        | 1.008  | 0.504 | 151.081         | 1.008           | 0.504           | 1017.903       | 1018.408 | 1018.911       | Q19 |
| D1 | 209.111        | 1.512  | 1.008 | 214.111         | 1.512           | 1.008           | 851.202        | 851.707  | 852.211        | D18 |
| F1 | 274.149        | 2.016  | 1.512 | 288.141         | 2.016           | 1.512           | 779.140        | 779.645  | 780.149        | F17 |
| K1 | 338.135        | 2.520  | 2.016 | 352.132         | 2.520           | 2.016           | 641.181        | 641.686  | 642.191        | K16 |
| T1 | <b>380.119</b> | 3.024  | 2.520 | 412.111         | 3.024           | 2.520           | 569.111        | 569.616  | 570.119        | T15 |
| D1 | 446.102        | 3.528  | 3.024 | 460.102         | 3.528           | 3.024           | 491.224        | 491.729  | 492.231        | D14 |
| L1 | 502.174        | 4.032  | 3.528 | <b>516.772</b>  | 4.032           | 3.528           | 419.261        | 419.766  | <b>700.880</b> | L13 |
| M1 | 559.113        | 4.536  | 4.032 | <b>661.830</b>  | 4.536           | 4.032           | 351.302        | 351.807  | 352.311        | M12 |
| P1 | 591.104        | 5.040  | 4.536 | 625.104         | 5.040           | 4.536           | 299.339        | 299.844  | 300.349        | P11 |
| Q1 | 673.104        | 5.544  | 5.040 | <b>739.384</b>  | <b>730.880</b>  | <b>730.386</b>  | 251.381        | 251.886  | 252.391        | Q10 |
| S1 | 709.111        | 6.048  | 5.544 | 719.111         | 6.048           | 5.544           | 214.386        | 214.891  | 215.396        | S10 |
| A1 | 779.111        | 6.552  | 6.048 | <b>818.428</b>  | 6.552           | 6.048           | 179.411        | 179.916  | 180.421        | A9  |
| A1 | 839.109        | 7.056  | 6.552 | <b>853.947</b>  | <b>845.433</b>  | <b>844.941</b>  | 151.105        | 151.610  | 152.110        | A7  |
| I1 | 895.101        | 7.560  | 7.056 | 887.101         | <b>910.489</b>  | 901.975         | 121.101        | 121.606  | 122.111        | I6  |
| G1 | 979.103        | 8.064  | 7.560 | <b>938.999</b>  | 930.486         | 921.974         | <b>239.134</b> | 239.639  | 240.144        | G5  |
| A1 | 999.101        | 8.568  | 8.064 | <b>974.518</b>  | <b>966.005</b>  | <b>965.513</b>  | 211.134        | 211.639  | 212.144        | A4  |
| L1 | 1011.101       | 9.072  | 8.568 | <b>1031.060</b> | <b>1022.547</b> | <b>1022.055</b> | 181.135        | 181.640  | 182.140        | L3  |
| Q1 | 1081.104       | 9.576  | 9.072 | <b>1095.089</b> | 1086.576        | 1078.064        | 151.134        | 151.639  | 152.144        | Q3  |
| R1 | 1149.111       | 10.080 | 9.576 | 1159.111        | 1150.601        | 1142.087        | 119.136        | 119.641  | 120.141        | R1  |





# sp | P84244 | H33\_MOUSE

IAQDFK <sup>Methyl</sup> 14.02 TDLRFQSA AIGALQE

- ▶ fragmentation table for charge state 1+
- ▶ specType=cid
- ▶ score=52.11
- ▶ F113873.dat
- ▶ query=q43891\_p1
- ▶ precursor=779.414640
- ▶ chargePrecursor=3
- ▶ itol=0.5

| AA    | a        | a'             | a,b      | b               | b'       | b,b'     | y              | y'             | y,b            | AA    |
|-------|----------|----------------|----------|-----------------|----------|----------|----------------|----------------|----------------|-------|
| I(3)  | 86.898   | 0.000          | 0.000    | 114.080         | 0.000    | 0.000    | 2136.220       | 2310.100       | 2418.224       | I(2)  |
| A(2)  | 637.134  | 0.000          | 0.000    | 189.120         | 0.000    | 0.000    | 2223.100       | 2206.114       | 2206.114       | A(20) |
| Q(3)  | 326.162  | 0.000          | 0.000    | 131.180         | 0.000    | 0.000    | 2132.200       | 2130.070       | 2130.070       | Q(16) |
| D(4)  | 400.219  | <b>383.193</b> | 382.200  | 420.214         | 411.187  | 410.203  | 2024.050       | 2020.010       | 2020.010       | D(10) |
| F(5)  | 847.287  | 536.261        | 526.277  | 578.265         | 558.258  | 557.272  | 1886.030       | 1884.990       | 1884.007       | F(17) |
| K(6)  | 688.398  | 672.212        | 671.380  | <b>717.393</b>  | 700.396  | 699.200  | 2141.040       | 2144.920       | 2143.010       | K(16) |
| T(7)  | 790.446  | 774.419        | 773.420  | <b>818.441</b>  | 801.444  | 800.430  | 1838.870       | 1836.810       | 1836.810       | T(15) |
| D(8)  | 905.473  | 888.446        | 887.445  | <b>933.468</b>  | 916.441  | 915.427  | 2130.750       | 2130.750       | 2130.750       | D(14) |
| L(9)  | 1013.500 | 1001.500       | 1000.500 | <b>1046.522</b> | 1029.525 | 1028.510 | 1430.700       | 1430.700       | 1430.700       | L(13) |
| R(10) | 1174.608 | 1157.601       | 1156.601 | 1199.600        | 1182.603 | 1181.602 | 2280.000       | 2277.990       | 2277.990       | R(12) |
| F(11) | 1321.728 | 1304.720       | 1303.720 | 1346.720        | 1329.723 | 1328.720 | 2131.710       | 2131.710       | 2131.710       | F(11) |
| Q(12) | 1440.780 | 1422.780       | 1421.770 | 1477.780        | 1460.773 | 1459.760 | 1807.530       | 1807.530       | 1807.530       | Q(10) |
| S(13) | 1536.817 | 1520.780       | 1519.800 | 1564.812        | 1547.785 | 1546.800 | 1807.480       | 1807.480       | 1807.480       | S(10) |
| A(14) | 1699.854 | 1680.807       | 1680.840 | 1725.840        | 1708.844 | 1707.840 | 1714.810       | 1714.810       | 1714.810       | A(10) |
| A(15) | 1872.891 | 1854.880       | 1850.880 | 1908.880        | 1890.880 | 1889.870 | <b>701.383</b> | 684.380        | 684.380        | A(17) |
| I(16) | 1791.978 | 1774.980       | 1771.980 | 1819.970        | 1802.944 | 1801.950 | <b>630.346</b> | 613.310        | 613.310        | I(16) |
| G(17) | 1848.987 | 1831.980       | 1828.980 | 1878.980        | 1860.980 | 1859.980 | <b>517.293</b> | <b>500.235</b> | 489.210        | G(16) |
| A(18) | 1920.004 | 1903.000       | 1902.020 | 1948.020        | 1931.002 | 1930.010 | 480.250        | 443.214        | 443.210        | A(14) |
| L(19) | 2033.118 | 1998.091       | 1995.100 | 2058.110        | 2040.088 | 2041.100 | <b>389.293</b> | <b>372.177</b> | 371.180        | L(10) |
| Q(20) | 2081.170 | 2044.158       | 2043.160 | 2088.170        | 2071.145 | 2071.150 | <b>276.118</b> | 260.082        | <b>258.108</b> | Q(10) |
| D(21) | 2296.219 | 2271.193       | 2270.200 | 2309.210        | 2291.187 | 2290.200 | 140.000        | 0.000          | 0.000          | D(10) |

# sp | P84244 | H33\_MOUSE

IAQDFK <sup>Methyl</sup> 14.02 TDLRFQSAAGALQE

- ▶ fragmentation table for charge state 2+
- ▶ specType=cid
- ▶ score=52.11
- ▶ F113873.dat
- ▶ query=q43891\_p1
- ▶ precursor=779.414640
- ▶ chargePrecursor=3
- ▶ itol=0.5

| AA  | a              | a'             | a <sub>0</sub> | b               | b'              | b <sub>0</sub> | y               | y'             | y <sub>0</sub> | AA  |
|-----|----------------|----------------|----------------|-----------------|-----------------|----------------|-----------------|----------------|----------------|-----|
| R1  | 45 592         | 0 504          | 0 504          | 57 940          | 0 504           | 0 504          | 1168 810        | 1169 314       | 1169 811       | R21 |
| A1  | 79 100         | 0 504          | 0 504          | 81 069          | 0 504           | 0 504          | 1117 074        | 1117 578       | 1117 089       | A20 |
| Q1  | 143 131        | 143 700        | 0 504          | 143 597         | 140 584         | 0 504          | <b>1076 555</b> | 1082 054       | 1087 551       | Q10 |
| D1  | 200 613        | 199 700        | 199 500        | 245 511         | 200 589         | 0 504          | 1002 508        | 1007 511       | 1012 511       | D10 |
| F1  | 274 247        | 265 634        | 265 141        | 308 141         | 278 632         | 278 140        | 951 013         | 956 493        | 961 971        | F11 |
| K1  | 345 231        | 336 680        | 336 189        | 389 200         | 350 687         | 350 195        | 881 473         | 887 953        | 894 431        | K10 |
| T1  | 400 217        | 391 213        | 389 141        | 438 141         | 401 211         | 400 210        | 810 441         | 816 921        | 823 401        | T10 |
| E1  | 451 260        | 444 737        | 444 235        | <b>467 237</b>  | 468 724         | 458 232        | <b>750 859</b>  | 751 358        | 750 864        | E14 |
| L1  | 509 182        | 501 220        | 500 771        | <b>501 870</b>  | 515 208         | 514 774        | 702 280         | <b>681 872</b> | <b>693 380</b> | L13 |
| M1  | 567 613        | 559 321        | 558 821        | <b>661 830</b>  | 588 317         | 587 821        | 602 281         | 607 781        | 612 681        | M12 |
| P1  | 604 304        | 602 304        | 602 303        | 602 304         | 600 303         | 600 303        | 507 793         | 509 293        | 510 793        | P11 |
| Q12 | <b>725 294</b> | <b>716 883</b> | 716 381        | <b>739 384</b>  | <b>730 880</b>  | <b>730 380</b> | 604 281         | 606 781        | 607 281        | Q10 |
| S13 | 780 613        | <b>760 309</b> | <b>759 307</b> | 760 311         | 774 306         | 774 304        | 438 232         | 441 731        | 441 234        | S10 |
| A14 | 839 613        | 830 442        | 829 442        | <b>818 428</b>  | 838 612         | 838 611        | 309 111         | 310 260        | 311 760        | A10 |
| A15 | 839 949        | 831 431        | 830 944        | <b>851 947</b>  | 865 431         | 864 931        | 351 135         | 352 631        | 353 131        | A11 |
| I16 | 895 493        | 887 031        | 887 488        | <b>910 489</b>  | 921 019         | 921 453        | 313 010         | 317 010        | 320 011        | I10 |
| G17 | 929 880        | 920 480        | 919 880        | <b>938 995</b>  | 953 480         | 952 984        | 239 024         | 240 524        | 241 024        | G10 |
| A18 | 980 521        | 982 220        | 981 521        | <b>974 518</b>  | <b>966 005</b>  | <b>965 513</b> | 230 024         | 232 511        | 231 010        | A14 |
| L19 | 1017 263       | 1020 549       | 1020 057       | <b>1031 060</b> | <b>1022 547</b> | 1022 055       | 185 135         | 186 382        | 186 130        | L10 |
| Q10 | 1081 474       | 1077 717       | 1077 480       | <b>1095 089</b> | 1088 579        | 1088 578       | 110 261         | 110 261        | 110 261        | Q10 |
| R21 | 1149 813       | 1137 200       | 1136 695       | 1136 811        | 1151 097        | 1150 595       | 74 534          | 0 504          | 65 529         | R10 |



# sp | P84244 | H33\_MOUSE

IAQDFK <sup>Methyl</sup> 14.02 TDLRFQSA AIGALQE

- ▶ fragmentation table for charge state 1+
- ▶ specType=cid
- ▶ score=58.29
- ▶ F113873.dat
- ▶ query=q43893\_p1
- ▶ precursor=1168.618400
- ▶ chargePrecursor=2
- ▶ itol=0.5

| AA  | a        | a'       | a+b      | b        | b'       | b+a'     | a        | a'       | a+b      | AA  |
|-----|----------|----------|----------|----------|----------|----------|----------|----------|----------|-----|
| A1  | 187.134  | 0.000    | 0.000    | 174.093  | 0.000    | 0.000    | 2132.223 | 2132.184 | 2132.174 | T21 |
| A2  | 187.134  | 0.000    | 0.000    | 188.134  | 0.000    | 0.000    | 2223.243 | 2223.174 | 2223.130 | A20 |
| Q3  | 205.192  | 208.155  | 0.000    | 353.187  | 236.140  | 0.000    | 2132.103 | 2130.073 | 2134.093 | Q19 |
| H4  | 205.192  | 208.155  | 208.200  | 248.191  | 411.189  | 0.000    | 2009.049 | 2009.049 | 2009.049 | L20 |
| F5  | 247.237  | 332.231  | 439.223  | 476.206  | 308.206  | 347.222  | 1989.031 | 1989.041 | 1989.087 | F17 |
| K6  | 308.280  | 372.232  | 479.223  | 717.393  | 700.360  | 386.282  | 2179.049 | 1744.923 | 1743.939 | K16 |
| L7  | 308.280  | 372.232  | 479.223  | 818.441  | 803.414  | 406.430  | 1818.839 | 1809.822 | 1807.828 | L15 |
| G8  | 308.280  | 388.440  | 487.462  | 933.468  | 916.441  | 915.457  | 1518.791 | 1503.765 | 1503.761 | G14 |
| L9  | 308.280  | 388.440  | 488.440  | 1048.522 | 1038.426 | 1048.521 | 1403.768 | 1388.738 | 1388.754 | L13 |
| M10 | 317.408  | 417.401  | 534.899  | 1202.523 | 1188.428 | 1188.491 | 1296.688 | 1277.694 | 1277.691 | M12 |
| F11 | 332.728  | 434.703  | 533.731  | 1348.723 | 1332.699 | 1332.713 | 1218.973 | 1117.953 | 1118.968 | F11 |
| Q12 | 1448.785 | 1447.781 | 1431.739 | 1477.780 | 1460.753 | 1460.789 | 987.511  | 978.484  | 969.511  | Q12 |
| S13 | 1532.617 | 1532.700 | 1518.806 | 1504.781 | 1547.885 | 1548.881 | 856.452  | 848.428  | 841.441  | S10 |
| A14 | 1587.614 | 1576.611 | 1569.661 | 1535.974 | 1518.922 | 1518.911 | 772.428  | 769.391  | 764.390  | A16 |
| A15 | 1670.681 | 1661.678 | 1661.688 | 1706.886 | 1689.859 | 1689.871 | 701.381  | 698.351  | 693.372  | A17 |
| L16 | 1791.075 | 1778.660 | 1772.660 | 1819.970 | 1802.644 | 1802.662 | 636.546  | 613.519  | 612.535  | L11 |
| Q17 | 1846.991 | 1831.979 | 1829.969 | 1849.969 | 1831.962 | 1831.969 | 629.961  | 609.233  | 606.251  | Q18 |
| A18 | 1900.934 | 1888.931 | 1888.929 | 1894.926 | 1871.902 | 1871.918 | 489.949  | 481.214  | 481.209  | A18 |
| L19 | 2039.118 | 2029.091 | 2015.101 | 2054.098 | 2044.086 | 2043.102 | 389.281  | 374.174  | 374.191  | L19 |
| Q20 | 2181.176 | 2164.153 | 2143.100 | 2179.114 | 2172.148 | 2171.161 | 309.111  | 294.084  | 294.108  | Q20 |
| E21 | 2286.218 | 2273.189 | 2272.201 | 2318.214 | 2301.187 | 2300.201 | 149.000  | 0.000    | 139.000  | E21 |

sp | P84244 | H33\_MOUSE

IAQDFKTDLR <sup>Methyl</sup> FQSAAIGALQE  
14.02

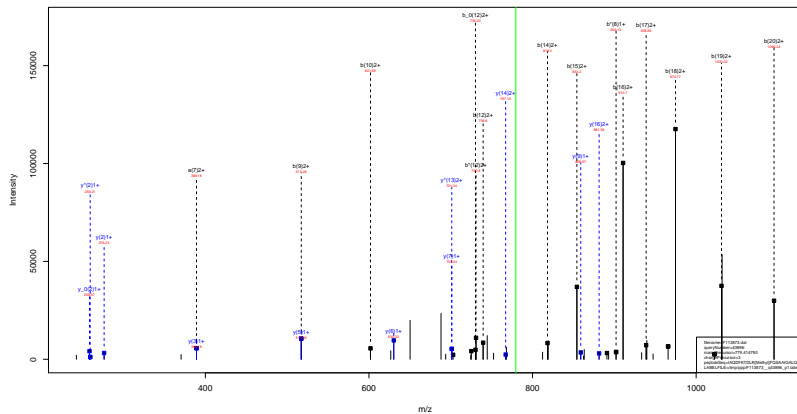

# sp | P84244 | H33\_MOUSE

IAQDFKTDLR<sup>Methyl</sup> FQSAAIGALQE  
14.02

- ▶ fragmentation table for charge state 1+
- ▶ specType=cid
- ▶ score=60.45
- ▶ F113873.dat
- ▶ query=q43896.p1
- ▶ precursor=779.414790
- ▶ chargePrecursor=3
- ▶ itol=0.5

| AA | a              | a*       | a,b      | b              | b*             | b,b      | r              | r*             | r,b            | AA          |
|----|----------------|----------|----------|----------------|----------------|----------|----------------|----------------|----------------|-------------|
| I  | 98.698         | 0.000    | 0.000    | 114.091        | 0.000          | 0.000    | 2356.225       | 2310.088       | 2318.214       | I <b>21</b> |
| A  | 137.134        | 0.000    | 0.000    | 105.120        | 0.000          | 0.000    | 2221.140       | 2206.114       | 2205.130       | A <b>20</b> |
| Q  | 138.012        | 282.987  | 0.000    | 113.187        | 286.166        | 0.000    | 2351.101       | 2326.077       | 2324.047       | Q <b>19</b> |
| D  | 400.219        | 363.193  | 382.200  | 426.214        | 411.187        | 410.203  | 2624.076       | 2607.018       | 2606.034       | D <b>18</b> |
| F  | 347.207        | 320.201  | 320.277  | 375.202        | 356.206        | 357.272  | 1669.011       | 1661.993       | 1661.007       | F <b>17</b> |
| K  | 425.082        | 408.208  | 487.372  | <b>703.377</b> | 686.251        | 685.267  | 1761.945       | 1744.923       | 1743.939       | K <b>16</b> |
| V  | 179.430        | 166.414  | 166.420  | 184.426        | 177.368        | 176.414  | 1633.994       | 1616.928       | 1615.944       | V <b>15</b> |
| D  | <b>891.457</b> | 874.431  | 873.448  | 919.463        | <b>902.425</b> | 901.441  | 1552.857       | 1515.789       | 1514.798       | D <b>14</b> |
| L  | 1104.241       | 1077.233 | 1081.232 | 1122.230       | 1013.202       | 1012.208 | 1417.826       | 1400.752       | 1399.760       | L <b>13</b> |
| R  | 1174.838       | 1157.821 | 1156.849 | 1202.831       | 1128.806       | 1127.812 | 1386.942       | 1369.899       | 1368.908       | R <b>12</b> |
| F  | 1321.728       | 1294.705 | 1293.710 | 1348.721       | 1232.689       | 1231.711 | 1134.979       | 1117.903       | 1116.908       | F <b>11</b> |
| Q  | 1640.702       | 1622.700 | 1631.714 | 1677.703       | 1600.701       | 1600.699 | 1067.911       | 1050.844       | 1050.800       | Q <b>10</b> |
| S  | 1638.617       | 1619.709 | 1618.800 | 1664.812       | 1547.785       | 1546.801 | <b>859.452</b> | 842.426        | 841.441        | S <b>9</b>  |
| A  | 1007.254       | 988.252  | 989.261  | 1035.264       | 918.232        | 917.238  | 793.900        | 775.874        | 774.888        | A <b>8</b>  |
| A  | 1076.891       | 1061.885 | 1060.881 | 1108.885       | 1000.859       | 1000.875 | <b>701.383</b> | 684.366        | 683.372        | A <b>7</b>  |
| I  | 1191.978       | 1174.968 | 1173.961 | 1219.970       | 1092.944       | 1091.950 | <b>638.346</b> | 613.319        | 612.313        | I <b>6</b>  |
| C  | 1048.907       | 1031.893 | 1030.886 | 1076.896       | 959.864        | 958.870  | <b>517.262</b> | 500.239        | 499.244        | C <b>5</b>  |
| A  | 1000.034       | 1001.001 | 1002.021 | 1048.025       | 1001.002       | 1001.018 | 463.262        | 445.244        | 444.238        | A <b>4</b>  |
| L  | 1051.110       | 1038.101 | 1035.111 | 1084.106       | 981.111        | 980.116  | <b>389.203</b> | 374.171        | 373.161        | L <b>3</b>  |
| Q  | 1051.170       | 1044.159 | 1043.160 | 1088.173       | 1017.145       | 1017.161 | <b>276.119</b> | <b>259.092</b> | <b>258.108</b> | Q <b>2</b>  |
| E  | 2000.219       | 2000.200 | 2000.200 | 2010.214       | 2001.187       | 2000.200 | 148.980        | 0.000          | 148.980        | E <b>1</b>  |

# sp | P84244 | H33\_MOUSE

IAQDFKTDLR<sup>Methyl</sup> FQSAAIGALQE  
14.02

- ▶ fragmentation table for charge state 2+
- ▶ specType=cid
- ▶ score=60.45
- ▶ F113873.dat
- ▶ query=q43896.p1
- ▶ precursor=779.414790
- ▶ chargePrecursor=3
- ▶ itol=0.5

| AA  | a              | a'     | a-D    | b               | b'              | b-D             | y        | y'             | y-D      | AA  |
|-----|----------------|--------|--------|-----------------|-----------------|-----------------|----------|----------------|----------|-----|
| R1  | 45.592         | 0.504  | 0.504  | 57.949          | 0.504           | 0.504           | 1168.818 | 1192.521       | 1193.811 | R21 |
| A1  | 79.107         | 0.504  | 0.504  | 81.069          | 0.504           | 0.504           | 1117.074 | 1193.581       | 1193.889 | A20 |
| Q1  | 143.131        | 1.008  | 0.504  | 149.589         | 1.008           | 0.504           | 1076.565 | 1088.074       | 1087.630 | Q19 |
| D1  | 209.513        | 1.512  | 1.008  | 214.511         | 1.512           | 0.508           | 1017.202 | 1095.811       | 1093.511 | D18 |
| F1  | 274.249        | 2.016  | 1.512  | 288.143         | 2.016           | 1.012           | 955.183  | 988.493        | 986.907  | F17 |
| K1  | 338.125        | 2.520  | 2.016  | 352.192         | 2.520           | 1.516           | 881.478  | 972.985        | 972.478  | K16 |
| T1  | <b>380.719</b> | 3.024  | 2.520  | 416.212         | 3.024           | 2.020           | 805.711  | 917.491        | 916.426  | T15 |
| D1  | 446.557        | 3.528  | 3.024  | 482.232         | 3.528           | 2.524           | 716.307  | 838.304        | 837.802  | D14 |
| L1  | 512.174        | 4.032  | 3.528  | <b>516.772</b>  | 4.032           | 3.028           | 678.584  | <b>700.880</b> | 700.180  | L13 |
| M1  | 577.813        | 4.536  | 4.032  | <b>601.830</b>  | 4.536           | 3.532           | 612.867  | 644.188        | 644.089  | M12 |
| P1  | 643.394        | 5.040  | 4.536  | 705.384         | 5.040           | 4.036           | 557.793  | 599.292        | 599.189  | P11 |
| Q1  | <b>725.396</b> | 5.544  | 5.040  | <b>739.384</b>  | <b>730.880</b>  | <b>730.386</b>  | 494.287  | 495.740        | 493.254  | Q10 |
| S1  | 790.812        | 6.048  | 5.544  | 858.936         | 6.048           | 5.548           | 438.222  | 441.710        | 441.254  | S10 |
| A1  | 856.813        | 6.552  | 6.048  | <b>818.428</b>  | 6.552           | 6.052           | 398.424  | 399.414        | 397.980  | A10 |
| A1  | 922.849        | 7.056  | 6.552  | 937.944         | <b>853.947</b>  | 848.941         | 351.185  | 343.483        | 342.180  | A10 |
| I1  | 988.493        | 7.560  | 7.056  | 1057.488        | <b>910.489</b>  | <b>901.975</b>  | 301.483  | 313.814        | 307.183  | I10 |
| C1  | 1054.089       | 8.064  | 7.560  | <b>938.995</b>  | 938.995         | 938.995         | 259.994  | 260.991        | 260.719  | C10 |
| A1  | 1090.521       | 8.568  | 8.064  | <b>974.518</b>  | <b>966.005</b>  | <b>965.513</b>  | 220.524  | 222.110        | 221.810  | A10 |
| L1  | 1117.063       | 9.072  | 8.568  | <b>1031.060</b> | <b>1022.547</b> | <b>1022.055</b> | 181.105  | 180.392        | 180.110  | L10 |
| Q1  | 1183.494       | 9.576  | 9.072  | <b>1095.089</b> | 1095.089        | 1095.089        | 139.584  | 139.881        | 139.580  | Q10 |
| R21 | 1149.513       | 11.136 | 11.064 | 1158.611        | 1151.097        | 1152.062        | 74.534   | 0.504          | 45.529   | R11 |





# sp | P84244 | H33\_MOUSE

IAQDFKTDLR<sup>Methyl</sup> FQSAAIGALQE  
14.02

- ▶ fragmentation table for charge state 1+
- ▶ specType=cid
- ▶ score=54.68
- ▶ F113873.dat
- ▶ query=q43897\_p1
- ▶ precursor=779.414920
- ▶ chargePrecursor=3
- ▶ itol=0.5

| AA    | a        | a'       | a,β      | b        | b'              | b,β      | y              | y'             | y,β            | AA    |
|-------|----------|----------|----------|----------|-----------------|----------|----------------|----------------|----------------|-------|
| I(3)  | 86.898   | 0.000    | 0.000    | 114.091  | 0.000           | 0.000    | 218.224        | 218.224        | 218.224        | I(2)  |
| A(2)  | 137.134  | 0.000    | 0.000    | 185.129  | 0.000           | 0.000    | 223.140        | 223.140        | 223.140        | A(26) |
| Q(3)  | 185.162  | 185.162  | 0.000    | 213.287  | 208.168         | 0.000    | 218.224        | 218.224        | 218.224        | Q(16) |
| D(4)  | 490.219  | 383.383  | 382.200  | 428.924  | 411.187         | 410.203  | 2594.953       | 2020.015       | 2008.919       | D(16) |
| F(5)  | 847.287  | 538.281  | 528.277  | 578.282  | 558.258         | 557.272  | 1886.038       | 1886.999       | 1886.007       | F(17) |
| K(6)  | 875.282  | 608.285  | 607.272  | 703.277  | 686.251         | 685.267  | 2181.043       | 1744.923       | 1743.939       | K(16) |
| T(7)  | 878.438  | 708.449  | 708.428  | 804.428  | 787.388         | 786.414  | 1838.859       | 1838.828       | 1838.844       | T(15) |
| D(8)  | 891.457  | 614.443  | 613.448  | 619.462  | <b>902.425</b>  | 901.441  | 2530.282       | 1515.789       | 1514.796       | D(14) |
| L(9)  | 1084.541 | 687.533  | 686.532  | 1032.536 | 1014.528        | 1013.528 | 1420.753       | 1389.760       | 1388.768       | L(13) |
| R(10) | 1174.618 | 1187.611 | 1186.644 | 1220.611 | <b>1185.626</b> | 1184.612 | 1398.988       | 1289.988       | 1288.988       | R(12) |
| F(11) | 1321.728 | 1324.708 | 1323.720 | 1348.721 | 1320.702        | 1319.711 | 1334.579       | 1117.555       | 1116.568       | F(11) |
| Q(12) | 1440.802 | 1442.781 | 1441.770 | 1477.789 | 1460.773        | 1459.789 | 1807.531       | 1769.504       | 1768.507       | Q(10) |
| S(13) | 1536.817 | 1529.789 | 1518.808 | 1564.812 | 1547.785        | 1546.801 | 1807.482       | 1842.428       | 1841.441       | S(10) |
| A(14) | 1599.894 | 1599.817 | 1598.843 | 1628.894 | 1618.884        | 1617.892 | 1714.501       | 1657.381       | 1656.388       | A(10) |
| A(15) | 1812.891 | 1804.889 | 1800.881 | 1808.886 | 1808.889        | 1808.879 | <b>701.383</b> | 684.358        | 683.372        | A(1)  |
| I(16) | 1791.878 | 1774.889 | 1771.881 | 1810.870 | 1802.844        | 1801.850 | <b>630.346</b> | 613.319        | <b>612.335</b> | I(6)  |
| Q(17) | 1848.867 | 1831.878 | 1828.888 | 1878.862 | 1869.869        | 1868.878 | <b>517.282</b> | <b>500.235</b> | <b>499.251</b> | Q(8)  |
| A(18) | 1920.924 | 1903.939 | 1902.923 | 1948.929 | 1931.922        | 1930.918 | <b>460.240</b> | 443.234        | 442.238        | A(4)  |
| L(19) | 2033.918 | 1918.891 | 1915.101 | 2061.111 | 2044.888        | 2043.100 | <b>389.293</b> | <b>372.177</b> | 371.183        | L(8)  |
| Q(20) | 2051.916 | 1944.128 | 1943.186 | 2189.911 | 2172.145        | 2171.151 | <b>376.118</b> | <b>259.892</b> | <b>258.108</b> | Q(2)  |
| D(21) | 2296.919 | 2271.103 | 2270.208 | 2318.914 | 2303.187        | 2302.203 | 146.988        | 146.988        | 146.988        | D(1)  |

# sp | P84244 | H33\_MOUSE

IAQDFKTDLR<sup>Methyl</sup> FQSAAIGALQE  
14.02

- ▶ fragmentation table for charge state 2+
- ▶ specType=cid
- ▶ score=54.68
- ▶ F113873.dat
- ▶ query=q43897\_p1
- ▶ precursor=779.414920
- ▶ chargePrecursor=3
- ▶ itol=0.5

| AA | a        | a'     | a-D    | b        | b'     | b-D    | y        | y'       | y-D      | AA  |
|----|----------|--------|--------|----------|--------|--------|----------|----------|----------|-----|
| R1 | 45.592   | 0.504  | 0.504  | 57.946   | 0.504  | 0.504  | 1168.818 | 1169.322 | 1169.811 | R21 |
| A1 | 79.107   | 0.504  | 0.504  | 81.069   | 0.504  | 0.504  | 1114.074 | 1114.578 | 1115.069 | A20 |
| Q1 | 143.131  | 1.008  | 0.504  | 149.589  | 1.008  | 0.504  | 1076.502 | 1077.014 | 1077.501 | Q19 |
| D1 | 209.113  | 1.512  | 1.008  | 214.811  | 1.512  | 1.008  | 1019.202 | 1019.714 | 1020.201 | D18 |
| F1 | 274.149  | 2.016  | 1.512  | 280.141  | 2.016  | 1.512  | 979.140  | 979.652  | 980.141  | F17 |
| K1 | 338.175  | 2.520  | 2.016  | 343.192  | 2.520  | 2.016  | 941.181  | 941.693  | 942.175  | K16 |
| T1 | 380.119  | 3.024  | 2.520  | 385.119  | 3.024  | 2.520  | 903.111  | 903.623  | 904.119  | T15 |
| D1 | 406.122  | 4.032  | 3.024  | 410.122  | 4.032  | 3.024  | 865.122  | 865.634  | 866.122  | D14 |
| L1 | 432.174  | 4.536  | 4.032  | 437.172  | 4.536  | 4.032  | 827.174  | 827.686  | 828.174  | L13 |
| M1 | 487.413  | 5.040  | 4.536  | 491.413  | 5.040  | 4.536  | 789.413  | 789.925  | 790.413  | M12 |
| P1 | 501.304  | 5.544  | 5.040  | 505.304  | 5.544  | 5.040  | 751.304  | 751.816  | 752.304  | P11 |
| Q1 | 575.304  | 7.104  | 6.048  | 579.304  | 7.104  | 6.048  | 713.304  | 713.816  | 714.304  | Q10 |
| S1 | 716.312  | 8.664  | 7.560  | 720.312  | 8.664  | 7.560  | 675.312  | 675.824  | 676.312  | S10 |
| A1 | 768.312  | 9.672  | 8.568  | 772.312  | 9.672  | 8.568  | 637.312  | 637.824  | 638.312  | A10 |
| A1 | 830.349  | 10.176 | 9.072  | 834.349  | 10.176 | 9.072  | 599.349  | 599.861  | 600.349  | A10 |
| L1 | 895.401  | 10.680 | 9.576  | 899.401  | 10.680 | 9.576  | 561.401  | 561.913  | 562.401  | L10 |
| C1 | 929.483  | 11.184 | 10.080 | 933.483  | 11.184 | 10.080 | 523.483  | 523.995  | 524.483  | C10 |
| A1 | 990.521  | 11.688 | 10.584 | 994.521  | 11.688 | 10.584 | 485.521  | 486.033  | 486.521  | A10 |
| L1 | 1017.063 | 12.192 | 11.088 | 1021.063 | 12.192 | 11.088 | 447.063  | 447.575  | 448.063  | L10 |
| Q1 | 1081.064 | 12.696 | 11.592 | 1085.064 | 12.696 | 11.592 | 409.064  | 409.576  | 410.064  | Q10 |
| R1 | 1149.513 | 13.200 | 12.096 | 1153.513 | 13.200 | 12.096 | 371.513  | 372.025  | 372.513  | R10 |

# sp | P84244 | H33\_MOUSE

IAQDFKTDLR<sup>Methyl</sup> FQSAAIGALQE  
14.02

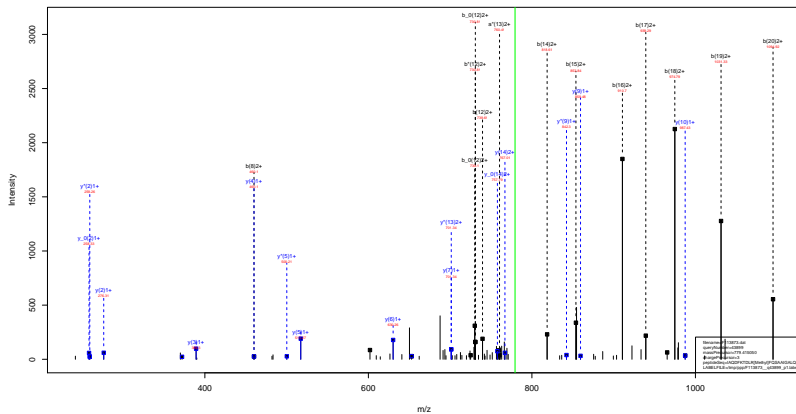

# sp | P84244 | H33\_MOUSE

IAQDFKTDLR <sup>Methyl</sup> 14.02 FQSAAIGALQE

- ▶ fragmentation table for charge state 1+
- ▶ specType=cid
- ▶ score=48.86
- ▶ F113873.dat
- ▶ query=q43899\_p1
- ▶ precursor=779.415050
- ▶ chargePrecursor=3
- ▶ itol=0.5

| AA | a        | a*             | a,b      | b        | b*       | b,b      | r              | r*             | r,b            | AA          |
|----|----------|----------------|----------|----------|----------|----------|----------------|----------------|----------------|-------------|
| I  | 98.698   | 0.000          | 0.000    | 114.091  | 0.000    | 0.000    | 2356.220       | 2310.088       | 2318.214       | I <b>23</b> |
| A  | 137.134  | 0.000          | 0.000    | 105.129  | 0.000    | 0.000    | 2221.140       | 2206.114       | 2205.130       | A <b>20</b> |
| Q  | 159.012  | 282.989        | 0.000    | 113.189  | 289.166  | 0.000    | 2350.100       | 2326.074       | 2324.049       | Q <b>19</b> |
| D  | 160.219  | 263.193        | 382.200  | 125.214  | 311.187  | 410.203  | 2624.050       | 2607.015       | 2606.034       | D <b>18</b> |
| F  | 167.207  | 531.201        | 150.277  | 129.263  | 326.256  | 357.272  | 3089.010       | 3061.993       | 3061.007       | F <b>17</b> |
| K  | 167.582  | 626.264        | 487.372  | 103.372  | 488.351  | 605.357  | 3761.945       | 3744.923       | 3743.939       | K <b>16</b> |
| V  | 179.430  | <b>759.404</b> | 704.420  | 104.426  | 479.368  | 506.414  | 3533.904       | 3516.878       | 3515.894       | V <b>15</b> |
| D  | 181.457  | 374.411        | 871.440  | 103.463  | 360.425  | 301.441  | 3532.852       | 3515.865       | 3514.798       | D <b>14</b> |
| L  | 183.541  | <b>887.515</b> | 880.531  | 110.529  | 301.500  | 301.458  | 3417.780       | 3400.751       | 3399.765       | L <b>13</b> |
| R  | 1174.838 | 21.7           | 1196.860 | 1202.873 | 1103.868 | 1194.862 | 3384.862       | 3367.899       | 3366.880       | R <b>12</b> |
| F  | 1321.728 | 1394.705       | 1301.710 | 1348.721 | 1332.699 | 1331.711 | 3134.979       | 3117.953       | 3116.968       | F <b>11</b> |
| Q  | 1440.702 | 1442.709       | 1431.714 | 1477.709 | 1460.711 | 1459.709 | <b>307.511</b> | 305.504        | 305.500        | Q <b>10</b> |
| S  | 1520.617 | 1519.709       | 1512.800 | 1564.612 | 1547.605 | 1546.601 | <b>859.452</b> | <b>842.425</b> | 841.441        | S <b>9</b>  |
| A  | 1607.554 | 1606.612       | 1599.641 | 1655.604 | 1638.612 | 1637.608 | 773.500        | 770.503        | 770.499        | A <b>8</b>  |
| A  | 1676.691 | 1661.695       | 1650.681 | 1705.690 | 1688.693 | 1688.679 | <b>701.383</b> | 684.369        | 683.372        | A <b>7</b>  |
| I  | 1791.978 | 1774.988       | 1771.963 | 1819.970 | 1802.944 | 1801.950 | <b>630.346</b> | 613.330        | 612.333        | I <b>6</b>  |
| C  | 1848.907 | 1831.913       | 1821.880 | 1876.904 | 1859.894 | 1858.901 | <b>511.263</b> | <b>500.235</b> | 499.241        | C <b>5</b>  |
| A  | 1909.934 | 1891.937       | 1880.921 | 1948.929 | 1931.932 | 1930.933 | <b>460.240</b> | 443.214        | 442.230        | A <b>4</b>  |
| L  | 2031.116 | 2018.109       | 2005.111 | 2064.111 | 2044.100 | 2043.109 | <b>389.203</b> | <b>372.177</b> | 371.191        | L <b>3</b>  |
| Q  | 2051.170 | 2044.159       | 2043.150 | 2098.171 | 2072.145 | 2071.161 | <b>276.119</b> | <b>259.092</b> | <b>258.108</b> | Q <b>2</b>  |
| E  | 2060.219 | 2049.193       | 2049.201 | 2019.214 | 2018.187 | 2019.201 | 148.990        | 0.000          | 148.990        | E <b>1</b>  |

# sp | P84244 | H33\_MOUSE

IAQDFKTDLR<sup>Methyl</sup> FQSAAIGALQE  
14.02

- ▶ fragmentation table for charge state 2+
- ▶ specType=cid
- ▶ score=48.86
- ▶ F113873.dat
- ▶ query=q43899\_p1
- ▶ precursor=779.415050
- ▶ chargePrecursor=3
- ▶ itol=0.5

| AA | a  | a'   | a <sub>0</sub> | b    | b'   | b <sub>0</sub> | y    | y'   | y <sub>0</sub> | AA   |     |
|----|----|------|----------------|------|------|----------------|------|------|----------------|------|-----|
| I  | 43 | 602  | 639            | 255  | 17   | 541            | 639  | 1166 | 639            | 1166 | I21 |
| A  | 2  | 76   | 77             | 639  | 639  | 639            | 639  | 1112 | 639            | 1113 | A25 |
| D  | 3  | 143  | 150            | 154  | 161  | 168            | 175  | 182  | 189            | 196  | D19 |
| D  | 4  | 200  | 213            | 232  | 251  | 270            | 289  | 308  | 327            | 346  | D16 |
| F  | 5  | 274  | 287            | 306  | 325  | 344            | 363  | 382  | 401            | 420  | F17 |
| K  | 6  | 338  | 351            | 370  | 389  | 408            | 427  | 446  | 465            | 484  | K16 |
| L  | 7  | 400  | 413            | 432  | 451  | 470            | 489  | 508  | 527            | 546  | L15 |
| D  | 8  | 446  | 459            | 478  | 497  | 516            | 535  | 554  | 573            | 592  | D14 |
| L  | 9  | 502  | 515            | 534  | 553  | 572            | 591  | 610  | 629            | 648  | L13 |
| R  | 10 | 557  | 570            | 589  | 608  | 627            | 646  | 665  | 684            | 703  | R12 |
| F  | 11 | 594  | 607            | 626  | 645  | 664            | 683  | 702  | 721            | 740  | F11 |
| Q  | 12 | 725  | 738            | 757  | 776  | 795            | 814  | 833  | 852            | 871  | Q10 |
| S  | 13 | 788  | 801            | 820  | 839  | 858            | 877  | 896  | 915            | 934  | S10 |
| A  | 14 | 848  | 861            | 880  | 899  | 918            | 937  | 956  | 975            | 994  | A10 |
| A  | 15 | 930  | 943            | 962  | 981  | 1000           | 1019 | 1038 | 1057           | 1076 | A11 |
| I  | 16 | 1005 | 1018           | 1037 | 1056 | 1075           | 1094 | 1113 | 1132           | 1151 | I10 |
| G  | 17 | 1078 | 1091           | 1110 | 1129 | 1148           | 1167 | 1186 | 1205           | 1224 | G10 |
| A  | 18 | 1060 | 1073           | 1092 | 1111 | 1130           | 1149 | 1168 | 1187           | 1206 | A14 |
| L  | 19 | 1017 | 1030           | 1049 | 1068 | 1087           | 1106 | 1125 | 1144           | 1163 | L10 |
| Q  | 20 | 1081 | 1094           | 1113 | 1132 | 1151           | 1170 | 1189 | 1208           | 1227 | Q10 |
| D  | 21 | 1148 | 1161           | 1180 | 1199 | 1218           | 1237 | 1256 | 1275           | 1294 | D10 |

# sp | P84244 | H33\_MOUSE

IAQDFKTDLR <sup>Methyl</sup> FQSAAIGALQE  
14.02

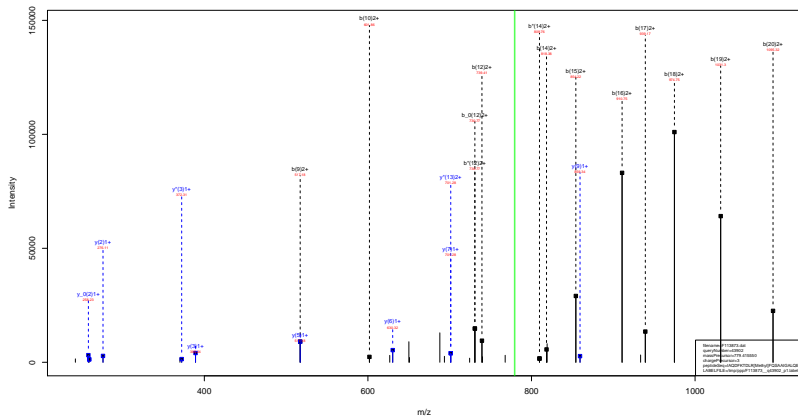

# sp | P84244 | H33\_MOUSE

IAQDFKTDLR<sup>Methyl</sup> FQSAAIGALQE  
14.02

- ▶ fragmentation table for charge state 1+
- ▶ specType=cid
- ▶ score=72.57
- ▶ F113873.dat
- ▶ query=q43902\_p1
- ▶ precursor=779.415550
- ▶ chargePrecursor=3
- ▶ itol=0.5

| AA | a        | a*       | a,b      | b        | b*       | b,b      | r              | r*             | r,b            | AA |
|----|----------|----------|----------|----------|----------|----------|----------------|----------------|----------------|----|
| I  | 98.098   | 0.000    | 0.000    | 114.091  | 0.000    | 0.000    | 2356.225       | 2310.088       | 2310.088       | I  |
| A  | 137.134  | 0.000    | 0.000    | 105.129  | 0.000    | 0.000    | 2221.140       | 2206.114       | 2206.114       | A  |
| Q  | 159.012  | 282.987  | 0.000    | 113.187  | 289.169  | 0.000    | 2351.101       | 2326.077       | 2326.077       | Q  |
| D  | 160.219  | 303.193  | 382.208  | 126.214  | 311.197  | 410.203  | 2624.050       | 2607.018       | 2606.034       | D  |
| F  | 167.207  | 320.201  | 420.217  | 129.202  | 326.206  | 437.212  | 3069.010       | 3061.001       | 3061.007       | F  |
| K  | 167.582  | 328.208  | 487.212  | 131.207  | 338.211  | 486.217  | 3261.945       | 3244.923       | 3243.939       | K  |
| V  | 179.436  | 338.414  | 704.420  | 134.425  | 347.428  | 717.438  | 338.414        | 3338.394       | 3310.328       | V  |
| D  | 181.437  | 314.413  | 871.430  | 109.463  | 360.425  | 361.441  | 3532.831       | 3515.783       | 3514.798       | D  |
| L  | 183.431  | 367.433  | 881.431  | 132.432  | 361.430  | 361.430  | 3614.528       | 3617.700       | 3609.700       | L  |
| R  | 1174.818 | 1171.811 | 1186.809 | 1162.811 | 1181.808 | 1184.812 | 1386.809       | 1287.809       | 1288.809       | R  |
| P  | 1321.728 | 1324.730 | 1331.710 | 1348.721 | 1332.699 | 1331.711 | 1334.679       | 1317.583       | 1316.568       | P  |
| Q  | 1640.780 | 1642.781 | 1641.774 | 1647.769 | 1640.781 | 1650.769 | 167.511        | 167.504        | 166.500        | Q  |
| S  | 1638.617 | 1639.769 | 1642.800 | 1648.812 | 1647.783 | 1646.801 | <b>859.452</b> | 862.426        | 861.441        | S  |
| A  | 1687.254 | 1688.251 | 1689.241 | 1690.246 | 1681.232 | 1671.230 | 771.230        | 770.231        | 764.808        | A  |
| A  | 1676.891 | 1681.889 | 1680.881 | 1708.888 | 1689.879 | 1688.879 | <b>701.383</b> | 684.368        | 683.372        | A  |
| I  | 1791.978 | 1794.988 | 1791.980 | 1819.979 | 1802.944 | 1801.980 | <b>638.346</b> | 613.319        | 612.310        | I  |
| C  | 1848.907 | 1841.910 | 1841.900 | 1870.909 | 1859.884 | 1858.907 | <b>517.262</b> | 501.239        | 499.241        | C  |
| A  | 1900.034 | 1901.031 | 1902.021 | 1948.029 | 1931.002 | 1930.010 | 463.262        | 449.254        | 444.238        | A  |
| L  | 2031.110 | 2031.101 | 2031.101 | 2061.111 | 2054.080 | 2061.111 | <b>389.203</b> | <b>372.177</b> | 371.191        | L  |
| Q  | 2051.170 | 2044.159 | 2043.150 | 2088.171 | 2072.145 | 2071.161 | <b>276.119</b> | <b>259.092</b> | <b>258.108</b> | Q  |
| E  | 2060.219 | 2059.199 | 2059.201 | 2010.214 | 2010.187 | 2010.201 | 148.190        | 0.000          | 148.190        | E  |



# sp | P84244 | H33\_MOUSE

IAQDFKTDLR<sup>Methyl</sup> FQSAAIGALQE  
14.02

- ▶ fragmentation table for charge state 2+
- ▶ specType=cid
- ▶ score=72.57
- ▶ F113873.dat
- ▶ query=q43902\_p1
- ▶ precursor=779.415550
- ▶ chargePrecursor=3
- ▶ itol=0.5

| AA    | a        | a'       | a <sup>o</sup> | b        | b'       | b <sup>o</sup> | y        | y'       | y <sup>o</sup> | AA   |
|-------|----------|----------|----------------|----------|----------|----------------|----------|----------|----------------|------|
| I(3)  | 43.602   | 0.500    | 0.500          | 37.040   | 0.504    | 0.500          | 1186.830 | 1186.330 | 1186.831       | I(2) |
| A(2)  | 78.070   | 0.504    | 0.500          | 33.080   | 0.504    | 0.504          | 1112.034 | 1110.543 | 1110.039       | A(2) |
| Q(3)  | 124.100  | 1.514    | 0.504          | 137.080  | 1.481    | 0.504          | 1076.583 | 1088.042 | 1089.539       | Q(1) |
| D(4)  | 200.013  | 192.330  | 191.600        | 214.911  | 206.097  | 205.400        | 1032.520 | 1004.913 | 1003.512       | D(1) |
| F(5)  | 274.147  | 265.814  | 265.147        | 288.147  | 279.632  | 279.140        | 995.033  | 948.490  | 946.007        | F(1) |
| K(6)  | 338.190  | 329.662  | 329.190        | 352.192  | 343.679  | 343.191        | 881.433  | 872.895  | 872.412        | K(1) |
| T(7)  | 400.219  | 389.295  | 389.219        | 400.219  | 394.203  | 393.711        | 817.431  | 808.911  | 808.426        | T(1) |
| D(8)  | 446.232  | 437.710  | 437.232        | 460.231  | 451.710  | 451.234        | 756.950  | 738.344  | 737.900        | D(1) |
| L(9)  | 502.274  | 494.261  | 494.261        | 516.772  | 508.758  | 507.766        | 700.261  | 700.880  | 700.380        | L(1) |
| R(10) | 557.313  | 547.301  | 547.301        | 571.830  | 563.817  | 562.825        | 630.291  | 644.738  | 644.199        | R(1) |
| F(11) | 594.357  | 582.354  | 582.352        | 607.354  | 599.351  | 598.359        | 563.251  | 555.250  | 554.760        | F(1) |
| Q(12) | 672.396  | 708.401  | 710.399        | 739.394  | 730.400  | 730.388        | 498.250  | 498.748  | 498.254        | Q(1) |
| S(13) | 698.412  | 700.399  | 700.399        | 707.400  | 707.399  | 707.399        | 430.250  | 424.718  | 424.234        | S(1) |
| A(14) | 804.414  | 810.417  | 810.420        | 815.420  | 809.415  | 809.423        | 359.414  | 359.000  | 359.416        | A(1) |
| A(15) | 830.469  | 831.430  | 830.941        | 851.947  | 845.431  | 844.941        | 351.100  | 347.980  | 347.190        | A(1) |
| I(16) | 886.461  | 887.430  | 887.430        | 910.469  | 901.430  | 901.423        | 313.030  | 307.181  | 306.671        | I(1) |
| G(17) | 978.500  | 978.469  | 978.500        | 978.500  | 978.469  | 978.500        | 259.134  | 260.021  | 260.021        | G(1) |
| A(18) | 990.521  | 992.503  | 991.513        | 974.518  | 966.500  | 965.513        | 230.024  | 223.110  | 223.018        | A(1) |
| L(19) | 1017.681 | 1008.549 | 1008.011       | 1031.660 | 1022.547 | 1022.020       | 190.100  | 189.700  | 189.100        | L(1) |
| Q(20) | 1081.692 | 1072.529 | 1072.000       | 1095.690 | 1086.526 | 1086.004       | 130.003  | 130.000  | 129.500        | Q(1) |
| D(21) | 1148.713 | 1137.560 | 1137.000       | 1150.710 | 1141.560 | 1141.000       | 78.500   | 78.500   | 78.000         | D(1) |



# sp | P84244 | H33\_MOUSE

IAQDFK<sup>Dimethyl</sup> TDLRFQSAAIGALQE  
28.03

- ▶ fragmentation table for charge state 1+
- ▶ specType=etd
- ▶ score=60.40
- ▶ F113873.dat
- ▶ query=q44083.p1
- ▶ precursor=784.085270
- ▶ chargePrecursor=3
- ▶ itol=0.5

| AA     | c               | y              | z+1             | z+2             | z        | AA     |
|--------|-----------------|----------------|-----------------|-----------------|----------|--------|
| I [1]  | 131.118         | 2350.240       | 2334.221        | 0.000           | 2333.214 | I [21] |
| A [2]  | 202.155         | 2237.156       | 2221.137        | 0.000           | 2220.130 | A [20] |
| Q [3]  | 330.214         | 2106.119       | 2150.100        | 2151.108        | 2149.092 | Q [19] |
| D [4]  | <b>445.241</b>  | 2038.060       | 2022.043        | 2073.040        | 2021.034 | D [18] |
| F [5]  | <b>592.309</b>  | 1923.033       | 1907.015        | <b>1908.023</b> | 1905.007 | F [17] |
| K [6]  | <b>748.435</b>  | 1775.965       | <b>1759.946</b> | 1760.954        | 1759.938 | K [16] |
| T [7]  | <b>849.483</b>  | 1619.839       | <b>1603.820</b> | 1604.828        | 1602.812 | T [15] |
| D [8]  | <b>964.510</b>  | 1518.791       | <b>1502.772</b> | 1503.780        | 1501.765 | D [14] |
| L [9]  | <b>1077.594</b> | 1403.764       | <b>1387.745</b> | 1388.753        | 1386.738 | L [13] |
| R [10] | <b>1213.695</b> | 1290.690       | <b>1274.661</b> | 1275.669        | 1273.654 | R [12] |
| F [11] | 1380.763        | 1134.579       | <b>1118.560</b> | 1119.568        | 1117.552 | F [11] |
| Q [12] | <b>1508.822</b> | 987.511        | 971.492         | <b>972.500</b>  | 970.484  | Q [10] |
| S [13] | 1595.854        | 859.452        | <b>843.433</b>  | <b>844.441</b>  | 842.425  | S [9]  |
| A [14] | 1666.891        | 772.420        | 756.401         | 757.409         | 755.393  | A [8]  |
| A [15] | 1737.928        | 701.383        | 685.364         | 686.372         | 684.356  | A [7]  |
| T [6]  | 1813.912        | 630.346        | 614.327         | 615.335         | 613.319  | T [6]  |
| G [17] | <b>1908.034</b> | <b>517.262</b> | 501.243         | 502.251         | 500.235  | G [5]  |
| A [18] | <b>1979.071</b> | 460.240        | 444.221         | <b>445.229</b>  | 443.214  | A [4]  |
| L [19] | 2092.155        | 389.203        | 373.184         | 374.192         | 372.177  | L [3]  |
| Q [20] | 2220.214        | 276.119        | 260.100         | 261.108         | 259.092  | Q [2]  |
| E [21] | 2349.256        | 148.060        | 132.042         | 133.050         | 131.034  | E [1]  |

# sp | P84244 | H33\_MOUSE

IAQDFK<sup>Dimethyl</sup> TDLRFQSA AIGALQE  
28.03

- ▶ fragmentation table for charge state 2+
- ▶ specType=etd
- ▶ score=60.40
- ▶ F113873.dat
- ▶ query=q44083.p1
- ▶ precursor=784.085270
- ▶ chargePrecursor=3
- ▶ itol=0.5

| AA     | c               | y               | z+1             | z+2             | z               | AA    |
|--------|-----------------|-----------------|-----------------|-----------------|-----------------|-------|
| I [1]  | 66.093          | <b>1175.624</b> | <b>1167.614</b> | 0.504           | <b>1167.110</b> | I[21] |
| A [2]  | 101.551         | 1119.062        | <b>1111.072</b> | 0.504           | <b>1110.568</b> | A[20] |
| Q [3]  | 165.610         | 1083.563        | <b>1075.554</b> | 1076.058        | <b>1075.050</b> | Q[19] |
| D [4]  | 223.124         | 1049.539        | <b>1011.534</b> | <b>1012.028</b> | 1011.621        | D[18] |
| F [5]  | 290.658         | 992.020         | <b>954.011</b>  | <b>954.515</b>  | 953.501         | F[17] |
| K [6]  | 374.721         | 888.486         | 886.477         | 886.981         | 879.971         | K[16] |
| T [7]  | 425.245         | 810.423         | 802.414         | 802.918         | 801.910         | T[15] |
| D [8]  | 482.759         | 759.899         | 751.890         | 752.394         | 751.389         | D[14] |
| L [9]  | 539.301         | 702.386         | 694.376         | 694.880         | 693.872         | L[13] |
| R [10] | 617.351         | 646.844         | 637.833         | 638.338         | 637.330         | R[12] |
| F [11] | 690.595         | 597.792         | 559.784         | 560.288         | 559.280         | F[11] |
| Q [12] | 754.915         | 494.259         | 486.250         | 486.753         | 485.745         | Q[10] |
| S [13] | 798.431         | 430.230         | 422.220         | 422.724         | 421.716         | S[9]  |
| A [14] | 833.949         | 396.714         | 378.704         | 379.208         | 378.200         | A[8]  |
| A [15] | 899.908         | 351.195         | 343.188         | 343.690         | 342.682         | A[7]  |
| I [16] | <b>926.010</b>  | 315.676         | 307.667         | 308.171         | 307.161         | I[6]  |
| G [17] | <b>954.521</b>  | 259.134         | 251.126         | 251.629         | 250.621         | G[5]  |
| A [18] | <b>990.039</b>  | 230.624         | 222.614         | 223.118         | 222.110         | A[4]  |
| L [19] | <b>1046.581</b> | 195.105         | 187.096         | 187.600         | 186.592         | L[3]  |
| Q [20] | <b>1110.610</b> | 138.563         | 130.554         | 131.058         | 130.050         | Q[2]  |
| E [21] | 1175.132        | 74.834          | 68.824          | 67.828          | 68.821          | E[1]  |

# sp | P84244 | H33\_MOUSE

IAQDFKTDLR <sup>Dimethyl</sup> 28.03 FQSA AIGALQE

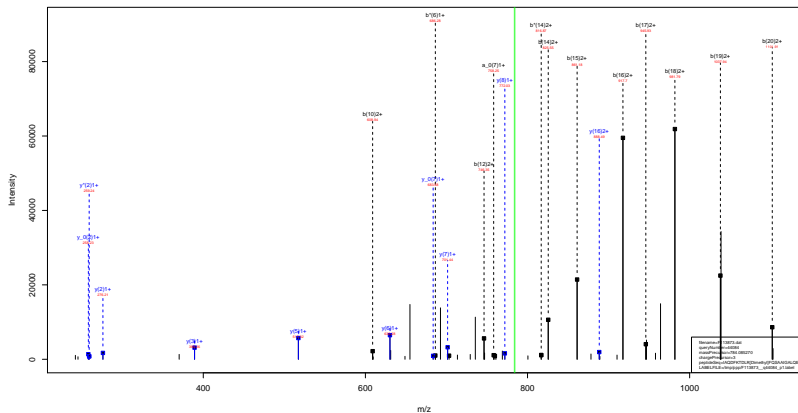

# sp | P84244 | H33\_MOUSE

IAQDFKTDLR <sup>Dimethyl</sup> 28.03 FQSA AIGALQE

- ▶ fragmentation table for charge state 1+
- ▶ specType=cid
- ▶ score=44.77
- ▶ F113873.dat
- ▶ query=q44084\_p1
- ▶ precursor=784.085270
- ▶ chargePrecursor=3
- ▶ itol=0.5

| AA | a        | a'             | a,b            | b        | b'       | b,b'     | y              | y'             | y,b            | AA          |
|----|----------|----------------|----------------|----------|----------|----------|----------------|----------------|----------------|-------------|
| I  | 98.698   | 0.000          | 0.000          | 114.091  | 0.000    | 0.000    | 2050.246       | 2153.214       | 2352.232       | I <b>21</b> |
| A  | 117.134  | 0.000          | 0.000          | 135.126  | 0.000    | 0.000    | 2257.150       | 2320.130       | 2519.148       | A <b>20</b> |
| Q  | 135.012  | 282.978        | 0.000          | 153.187  | 289.169  | 0.000    | 2380.133       | 2444.093       | 2646.108       | Q <b>19</b> |
| D  | 160.219  | 353.193        | 382.208        | 175.214  | 341.187  | 410.263  | 2438.093       | 2504.054       | 2610.069       | D <b>18</b> |
| F  | 187.207  | 531.201        | 529.277        | 197.203  | 526.256  | 557.272  | 2524.051       | 2590.011       | 2705.027       | F <b>17</b> |
| K  | 475.582  | 628.264        | 451.212        | 703.377  | 496.351  | 625.267  | 2725.065       | 2750.019       | 2757.054       | K <b>16</b> |
| T  | 478.438  | <b>758.484</b> | <b>758.420</b> | 508.426  | 737.458  | 638.414  | 2843.093       | 2830.044       | 2825.078       | T <b>15</b> |
| D  | 501.457  | 874.413        | 873.440        | 509.463  | 860.425  | 901.481  | 2946.022       | 2929.048       | 2928.011       | D <b>14</b> |
| L  | 518.541  | 887.535        | 886.531        | 512.539  | 881.530  | 911.528  | 3121.028       | 3124.069       | 3111.060       | L <b>13</b> |
| R  | 1188.814 | 1171.847       | 1170.861       | 1178.868 | 1169.854 | 1169.854 | 3189.013       | 3181.009       | 3180.011       | R <b>12</b> |
| P  | 1338.742 | 1338.735       | 1337.731       | 1345.737 | 1346.739 | 1345.726 | 3194.979       | 3117.963       | 3116.968       | P <b>11</b> |
| G  | 1483.801 | 1449.774       | 1448.768       | 1481.769 | 1474.769 | 1471.769 | 367.511        | 369.504        | 369.502        | G <b>10</b> |
| S  | 1502.833 | 1503.808       | 1502.822       | 1509.807 | 1501.801 | 1500.817 | 887.452        | 882.426        | 881.441        | S <b>9</b>  |
| A  | 1611.818 | 1608.813       | 1607.809       | 1614.806 | 1605.810 | 1601.814 | <b>772.420</b> | 775.391        | 774.406        | A <b>8</b>  |
| A  | 1895.507 | 1875.500       | 1874.892       | 1875.903 | 1875.875 | 1872.891 | <b>701.383</b> | 684.369        | <b>481.372</b> | A <b>7</b>  |
| I  | 1895.993 | 1886.984       | 1887.680       | 1883.988 | 1818.959 | 1813.957 | <b>638.346</b> | 613.319        | 612.319        | I <b>6</b>  |
| C  | 1895.812 | 1892.789       | 1893.001       | 1891.001 | 1818.004 | 1817.007 | <b>517.262</b> | 500.239        | 499.241        | C <b>5</b>  |
| A  | 2204.048 | 1871.023       | 1870.020       | 2185.044 | 2048.018 | 2044.014 | 463.242        | 449.214        | 448.230        | A <b>4</b>  |
| L  | 2691.431 | 2688.418       | 2688.124       | 2689.118 | 2686.102 | 2687.111 | <b>389.203</b> | 374.171        | 371.191        | L <b>3</b>  |
| Q  | 2875.192 | 2858.168       | 2857.182       | 2863.187 | 2836.160 | 2835.176 | <b>276.119</b> | <b>259.092</b> | <b>258.108</b> | Q <b>2</b>  |
| E  | 2884.216 | 2887.203       | 2886.201       | 2883.203 | 2815.203 | 2814.213 | 148.980        | 0.000          | 148.980        | E <b>1</b>  |

# sp | P84244 | H33\_MOUSE

IAQDFKTDLR <sup>Dimethyl</sup> 28.03 FQSAAIGALQE

- ▶ fragmentation table for charge state 2+
- ▶ specType=cid
- ▶ score=44.77
- ▶ F113873.dat
- ▶ query=q44084\_p1
- ▶ precursor=784.085270
- ▶ chargePrecursor=3
- ▶ itol=0.5

| AA    | a        | a'       | a <sub>0</sub> | b               | b'             | b <sub>0</sub> | y              | y'       | y <sub>0</sub> | AA    |
|-------|----------|----------|----------------|-----------------|----------------|----------------|----------------|----------|----------------|-------|
| I(3)  | 43.602   | 0.500    | 0.500          | 37.040          | 0.504          | 0.500          | 1176.620       | 1181.110 | 1186.620       | I(2)  |
| A(2)  | 78.070   | 0.504    | 0.500          | 33.020          | 0.504          | 0.500          | 1110.560       | 1115.070 | 1120.570       | A(20) |
| Q(3)  | 154.100  | 1.010    | 0.500          | 137.080         | 1.010          | 0.504          | 1025.580       | 1030.590 | 1035.600       | Q(18) |
| D(4)  | 200.010  | 130.200  | 191.600        | 214.010         | 200.007        | 200.000        | 1070.530       | 1075.020 | 1080.520       | D(16) |
| F(5)  | 274.147  | 185.610  | 265.147        | 288.140         | 270.632        | 270.140        | 980.000        | 985.500  | 991.010        | F(17) |
| K(6)  | 338.190  | 229.662  | 320.190        | 352.192         | 343.679        | 343.197        | <b>886.486</b> | 891.970  | 897.460        | K(16) |
| T(7)  | 380.070  | 260.200  | 330.710        | 400.710         | 384.200        | 383.710        | 824.470        | 829.960  | 835.470        | T(15) |
| D(8)  | 446.122  | 337.710  | 437.210        | 460.210         | 451.710        | 451.210        | 773.010        | 778.510  | 784.010        | D(14) |
| L(9)  | 502.174  | 404.260  | 484.260        | 516.260         | 507.260        | 507.260        | 718.010        | 723.510  | 729.010        | L(13) |
| R(10) | 558.226  | 460.310  | 480.310        | <b>606.310</b>  | 560.310        | 560.310        | 660.010        | 665.510  | 671.010        | R(12) |
| F(11) | 608.278  | 509.360  | 500.360        | 520.360         | 613.360        | 613.360        | 580.260        | 585.760  | 591.260        | F(11) |
| Q(12) | 672.304  | 573.400  | 573.190        | <b>746.401</b>  | 677.400        | 677.400        | 490.260        | 495.760  | 501.260        | Q(10) |
| S(13) | 770.300  | 667.400  | 666.910        | 700.300         | 780.300        | 780.300        | 430.260        | 435.760  | 441.260        | S(9)  |
| A(14) | 814.308  | 700.400  | 690.400        | <b>825.400</b>  | <b>816.401</b> | <b>816.401</b> | 380.260        | 385.760  | 391.260        | A(8)  |
| A(15) | 846.367  | 736.444  | 837.360        | <b>860.454</b>  | 850.441        | 851.360        | 340.260        | 345.760  | 351.260        | A(7)  |
| I(16) | 923.460  | 804.500  | 804.490        | <b>917.497</b>  | 908.500        | 908.490        | 310.260        | 315.760  | 321.260        | I(6)  |
| G(17) | 972.510  | 853.540  | 853.530        | <b>946.507</b>  | 937.540        | 937.530        | <b>258.134</b> | 263.630  | 269.130        | G(5)  |
| A(18) | 997.520  | 899.610  | 900.520        | <b>981.526</b>  | 972.610        | 972.610        | 230.260        | 235.760  | 241.260        | A(4)  |
| L(19) | 1024.670 | 935.700  | 935.690        | <b>1018.668</b> | 1009.700       | 1009.690       | 190.260        | 195.760  | 201.260        | L(3)  |
| Q(20) | 1080.500 | 1079.200 | 1079.090       | <b>1102.807</b> | 1090.200       | 1090.090       | 150.260        | 155.760  | 161.260        | Q(2)  |
| D(21) | 1176.010 | 1144.200 | 1143.610       | 1166.010        | 1156.200       | 1156.610       | 76.260         | 81.760   | 87.260         | D(1)  |





# sp | P84244 | H33\_MOUSE

IAQDFK<sup>Dimethyl</sup> TDLRFQSAALGALQE  
28.03

- ▶ fragmentation table for charge state 1+
- ▶ specType=etd
- ▶ score=48.93
- ▶ F113873.dat
- ▶ query=q44085\_p1
- ▶ precursor=784.085490
- ▶ chargePrecursor=3
- ▶ itol=0.5

| AA     | c               | y               | z+1             | z+2             | z               | AA          |
|--------|-----------------|-----------------|-----------------|-----------------|-----------------|-------------|
| I   1  | 151.118         | 2305.248        | 2194.231        | 0.000           | 2133.214        | <b>Q</b> 1  |
| A   2  | 202.155         | 2237.156        | 2201.137        | 0.000           | 2220.130        | <b>A</b> 20 |
| Q   3  | 330.214         | 2166.119        | 2150.100        | 2151.108        | 2149.092        | <b>Q</b> 19 |
| D   4  | <b>445.241</b>  | 2038.065        | 2022.042        | 2023.049        | 2021.034        | <b>Q</b> 18 |
| F   5  | <b>592.309</b>  | 1922.033        | 1907.015        | <b>1908.023</b> | 1905.007        | <b>F</b> 17 |
| K   6  | <b>748.435</b>  | 1775.065        | <b>1759.046</b> | 1760.994        | 1758.938        | <b>K</b> 16 |
| T   7  | <b>849.483</b>  | <b>1619.839</b> | <b>1603.820</b> | 1604.828        | 1602.811        | <b>T</b> 15 |
| D   8  | <b>964.510</b>  | 1518.791        | 1502.772        | 1503.780        | <b>1501.765</b> | <b>D</b> 14 |
| L   9  | <b>1077.594</b> | <b>1403.764</b> | <b>1387.745</b> | 1388.753        | 1386.735        | <b>L</b> 13 |
| R   10 | <b>1213.695</b> | 1290.695        | <b>1274.661</b> | 1275.669        | 1273.651        | <b>R</b> 12 |
| F   11 | <b>1380.763</b> | 1184.579        | 1178.560        | 1179.568        | 1177.552        | <b>F</b> 11 |
| Q   12 | <b>1508.822</b> | 987.511         | 971.490         | <b>972.500</b>  | 970.484         | <b>Q</b> 10 |
| S   13 | 1595.854        | 859.452         | <b>843.433</b>  | 844.441         | 842.425         | <b>S</b> 0  |
| A   14 | 1666.891        | 722.420         | 706.401         | 707.409         | 705.393         | <b>A</b> 0  |
| A   15 | 2737.928        | 704.363         | 688.344         | 689.352         | 687.336         | <b>A</b> 0  |
| L   16 | 1851.012        | 630.346         | 614.327         | 615.335         | 613.319         | <b>L</b> 0  |
| G   17 | <b>1908.034</b> | <b>517.262</b>  | 501.243         | 502.251         | 500.235         | <b>G</b> 5  |
| A   18 | 1978.071        | 460.240         | 444.221         | <b>445.229</b>  | 443.214         | <b>A</b> 4  |
| L   19 | 2092.155        | 389.203         | 373.184         | 374.192         | 372.177         | <b>L</b> 3  |
| Q   20 | 2220.214        | 276.119         | 260.100         | 261.108         | 259.092         | <b>Q</b> 2  |
| E   21 | 2349.256        | 148.060         | 132.042         | 133.050         | 131.034         | <b>E</b> 0  |

# sp | P84244 | H33\_MOUSE

IAQDFK<sup>Dimethyl</sup> TDLRFQSAAIGALQE  
28.03

- ▶ fragmentation table for charge state 2+
- ▶ specType=etd
- ▶ score=48.93
- ▶ F113873.dat
- ▶ query=q44085\_p1
- ▶ precursor=784.085490
- ▶ chargePrecursor=3
- ▶ itol=0.5

| AA     | c               | y               | z+1             | z+2             | z               | AA    |
|--------|-----------------|-----------------|-----------------|-----------------|-----------------|-------|
| I [1]  | 66.093          | <b>1175.624</b> | <b>1167.614</b> | 0.504           | <b>1167.110</b> | [21]  |
| A [2]  | 101.561         | 1119.062        | <b>1111.072</b> | 0.504           | 1116.560        | A[20] |
| Q [3]  | 165.610         | 1083.563        | 1075.554        | 1079.058        | 1075.050        | Q[19] |
| D [4]  | 223.124         | 1049.539        | <b>1011.534</b> | <b>1012.028</b> | 1011.021        | D[18] |
| F [5]  | 290.628         | 992.020         | <b>954.011</b>  | <b>954.515</b>  | 953.507         | F[17] |
| K [6]  | 374.721         | 888.486         | 880.477         | 880.981         | 879.973         | K[16] |
| T [7]  | 425.245         | 810.423         | 802.414         | 802.918         | 801.910         | T[15] |
| D [8]  | 482.759         | 759.899         | 751.890         | 752.394         | 751.386         | D[14] |
| L [9]  | 539.301         | <b>702.386</b>  | 694.376         | 694.880         | 693.872         | L[13] |
| R [10] | 617.363         | 648.844         | 637.834         | 638.338         | 637.330         | R[12] |
| F [11] | 690.595         | 597.793         | 559.784         | 560.288         | 559.280         | F[11] |
| Q [12] | 754.915         | 494.259         | 486.250         | 486.753         | 485.745         | Q[10] |
| S [13] | 798.431         | 430.230         | 422.220         | 422.724         | 421.716         | S[9]  |
| A [14] | 833.949         | 396.714         | 378.704         | 379.208         | 378.200         | A[8]  |
| A [15] | 899.908         | 351.195         | 343.186         | 343.690         | 342.682         | A[7]  |
| I [16] | <b>926.010</b>  | 315.676         | 307.667         | 308.171         | 307.163         | I[6]  |
| G [17] | <b>954.521</b>  | 259.134         | 251.125         | 251.629         | 250.621         | G[5]  |
| A [18] | <b>990.039</b>  | 230.624         | 222.614         | 223.118         | 222.110         | A[4]  |
| L [19] | <b>1046.581</b> | 195.105         | 187.096         | 187.600         | 186.592         | L[3]  |
| Q [20] | 1110.610        | 138.563         | 130.554         | 131.058         | 130.050         | Q[2]  |
| E [21] | 1175.132        | 74.834          | 68.824          | 67.828          | 68.021          | E[1]  |

# sp | P84244 | H33\_MOUSE

IAQDFKTDLR<sup>Dimethyl</sup>FQSAAIGALQE  
28.03

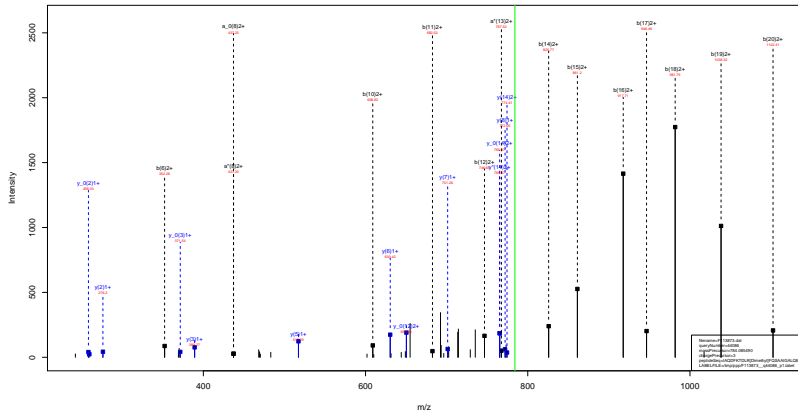

# sp | P84244 | H33\_MOUSE

IAQDFKTDLR <sup>Dimethyl</sup> 28.03 FQSAAIGALQE

- ▶ fragmentation table for charge state 1+
- ▶ specType=cid
- ▶ score=69.94
- ▶ F113873.dat
- ▶ query=q44086.p1
- ▶ precursor=784.085490
- ▶ chargePrecursor=3
- ▶ itol=0.5

| AA | a        | a'       | a,b      | b        | b'       | b,b'     | y              | y'             | y,b            | AA          |
|----|----------|----------|----------|----------|----------|----------|----------------|----------------|----------------|-------------|
| I  | 98.698   | 0.000    | 0.000    | 114.001  | 0.000    | 0.000    | 2000.246       | 2133.214       | 2332.232       | I <b>21</b> |
| A  | 117.134  | 0.000    | 0.000    | 105.120  | 0.000    | 0.000    | 2227.150       | 2220.130       | 2219.148       | A <b>20</b> |
| Q  | 128.012  | 282.000  | 0.000    | 113.181  | 286.000  | 0.000    | 2180.111       | 2174.000       | 2146.000       | Q <b>19</b> |
| D  | 400.219  | 363.193  | 382.200  | 426.214  | 411.187  | 410.203  | 2030.000       | 2021.000       | 2000.000       | D <b>18</b> |
| F  | 247.207  | 520.201  | 520.217  | 375.203  | 356.206  | 357.212  | 1614.031       | 1608.001       | 1605.011       | F <b>17</b> |
| K  | 626.582  | 658.208  | 687.212  | 314.572  | 688.211  | 685.207  | 1775.985       | 1759.993       | 1757.004       | K <b>16</b> |
| T  | 479.436  | 390.414  | 704.420  | 304.425  | 707.408  | 706.414  | 1644.000       | 1630.004       | 1625.000       | T <b>15</b> |
| D  | 391.457  | 314.411  | 373.440  | 309.463  | 360.425  | 361.441  | 1546.822       | 1529.748       | 1528.811       | D <b>14</b> |
| L  | 104.541  | 687.523  | 688.531  | 102.520  | 683.509  | 681.528  | 1421.700       | 1414.700       | 1411.700       | L <b>13</b> |
| R  | 1188.814 | 1171.847 | 1171.860 | 1178.868 | 1169.854 | 1169.863 | 1318.711       | 1311.889       | 1308.000       | R <b>12</b> |
| F  | 1320.742 | 1318.715 | 1317.731 | 1263.737 | 1248.719 | 1245.726 | 1134.979       | 1117.903       | 1116.908       | F <b>11</b> |
| Q  | 1403.801 | 1449.774 | 1445.790 | 1401.769 | 1474.769 | 1471.780 | 887.511        | 879.484        | 869.500        | Q <b>10</b> |
| S  | 1502.833 | 1523.806 | 1532.822 | 1478.807 | 1501.801 | 1500.817 | 859.452        | 842.426        | 841.441        | S <b>9</b>  |
| A  | 1611.816 | 1604.813 | 1603.800 | 1646.806 | 1652.798 | 1651.804 | <b>772.820</b> | 755.781        | 754.808        | A <b>8</b>  |
| A  | 1692.807 | 1675.800 | 1674.802 | 1720.803 | 1703.875 | 1702.891 | <b>701.883</b> | 684.808        | 683.772        | A <b>7</b>  |
| I  | 1825.892 | 1808.884 | 1807.880 | 1833.888 | 1816.899 | 1815.905 | <b>630.346</b> | 613.319        | 612.310        | I <b>6</b>  |
| C  | 1811.812 | 1802.800 | 1801.800 | 1807.801 | 1811.804 | 1812.807 | <b>517.262</b> | 500.239        | 499.241        | C <b>5</b>  |
| A  | 1934.848 | 1921.823 | 1920.820 | 1965.844 | 1948.818 | 1944.824 | <b>463.262</b> | 445.214        | 444.230        | A <b>4</b>  |
| L  | 1997.831 | 1988.810 | 1988.810 | 1996.810 | 1996.810 | 1997.810 | <b>389.203</b> | 374.171        | <b>371.193</b> | L <b>3</b>  |
| Q  | 2175.932 | 2158.908 | 2157.892 | 2203.910 | 2186.890 | 2185.878 | <b>276.119</b> | <b>259.092</b> | <b>258.108</b> | Q <b>2</b>  |
| E  | 2364.916 | 2347.893 | 2346.870 | 2352.890 | 2335.870 | 2334.858 | 148.980        | 0.000          | 138.950        | E <b>1</b>  |

# sp | P84244 | H33\_MOUSE

IAQDFKTDLR <sup>Dimethyl</sup> 28.03 FQSAAIGALQE

- ▶ fragmentation table for charge state 2+
- ▶ specType=cid
- ▶ score=69.94
- ▶ F113873.dat
- ▶ query=q44086.p1
- ▶ precursor=784.085490
- ▶ chargePrecursor=3
- ▶ itol=0.5

| AA    | a        | a'             | a <sup>o</sup> | b               | b'       | b <sup>o</sup> | y              | y'             | y <sup>o</sup> | AA    |
|-------|----------|----------------|----------------|-----------------|----------|----------------|----------------|----------------|----------------|-------|
| I(3)  | 43.602   | 0.500          | 0.500          | 37.040          | 0.504    | 0.500          | 1176.620       | 1181.110       | 1186.620       | I(2)  |
| A(2)  | 78.070   | 0.504          | 0.500          | 33.080          | 0.504    | 0.504          | 1119.080       | 1123.570       | 1128.070       | A(20) |
| Q(3)  | 154.100  | 1.010          | 0.500          | 137.080         | 1.004    | 0.504          | 1081.580       | 1077.090       | 1072.500       | Q(10) |
| D(4)  | 200.015  | 130.330        | 191.650        | 214.015         | 200.097  | 205.600        | 1019.530       | 1014.020       | 1009.520       | D(10) |
| F(5)  | 274.147  | 185.818        | 265.147        | 288.147         | 279.632  | 279.140        | 980.020        | 975.510        | 971.010        | F(17) |
| K(6)  | 338.195  | 229.662        | 320.195        | 352.192         | 343.079  | 343.197        | 880.480        | 875.970        | 871.480        | K(16) |
| T(7)  | 380.219  | 260.250        | 330.219        | 400.219         | 384.203  | 383.215        | 820.450        | 815.940        | 811.450        | T(15) |
| D(8)  | 440.232  | <b>437.719</b> | <b>437.227</b> | 460.232         | 451.716  | 451.224        | <b>773.915</b> | <b>765.403</b> | <b>764.910</b> | D(14) |
| L(9)  | 502.274  | 494.267        | 491.267        | 520.274         | 509.258  | 507.260        | 718.801        | 714.290        | 709.790        | L(13) |
| R(10) | 564.300  | 555.287        | 552.287        | <b>600.310</b>  | 589.289  | 587.290        | 630.801        | 626.290        | 621.790        | R(12) |
| F(11) | 608.379  | 609.363        | 609.360        | <b>682.372</b>  | 673.360  | 673.367        | 567.251        | 562.740        | <b>650.854</b> | F(11) |
| Q(12) | 712.404  | 703.387        | 703.380        | <b>746.401</b>  | 737.388  | 737.390        | 498.200        | 493.690        | 489.190        | Q(10) |
| S(13) | 774.507  | <b>747.407</b> | 765.515        | 785.515         | 781.494  | 780.512        | 430.230        | 425.720        | 421.230        | S(9)  |
| A(14) | 814.530  | 805.513        | 805.510        | <b>825.436</b>  | 816.524  | 816.530        | 350.214        | 345.700        | 341.210        | A(8)  |
| A(15) | 840.567  | 830.444        | 830.445        | <b>860.954</b>  | 852.441  | 851.949        | 311.180        | 306.670        | 302.180        | A(7)  |
| I(16) | 923.669  | 894.480        | 894.480        | <b>917.407</b>  | 908.463  | 908.463        | 213.070        | 208.560        | 204.070        | I(6)  |
| G(17) | 972.610  | 953.467        | 953.460        | <b>946.607</b>  | 937.466  | 937.466        | <b>250.134</b> | 245.620        | 241.130        | G(5)  |
| A(18) | 997.520  | 990.015        | 990.015        | <b>981.526</b>  | 973.013  | 972.521        | 210.024        | 205.510        | 201.020        | A(4)  |
| L(19) | 1024.670 | 1015.397       | 1015.390       | <b>1038.068</b> | 1029.335 | 1029.063       | 150.100        | 145.590        | 141.100        | L(3)  |
| Q(20) | 1080.507 | 1070.228       | 1070.224       | <b>1102.807</b> | 1093.584 | 1093.584       | 130.063        | 125.550        | 121.060        | Q(2)  |
| D(21) | 1176.011 | 1164.280       | 1164.610       | 1166.011        | 1156.100 | 1157.013       | 76.500         | 72.000         | 67.510         | D(1)  |

# sp | P84244 | H33\_MOUSE

IAQDFK<sup>Dimethyl</sup> TDLRFQSAALGALQE  
28.03

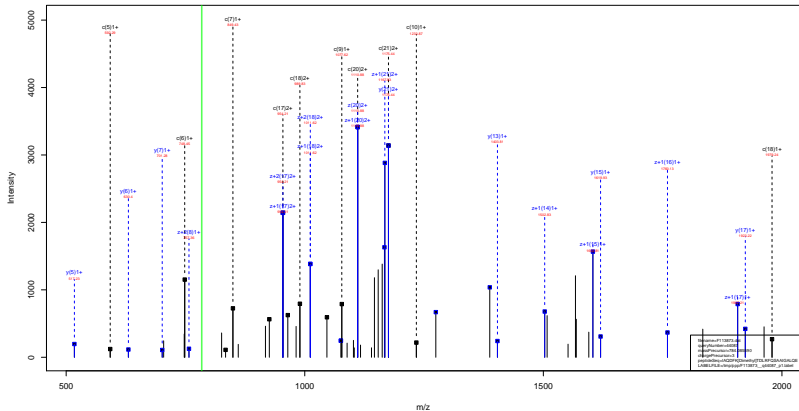

# sp | P84244 | H33\_MOUSE

IAQDFK<sup>Dimethyl</sup> TDLRFQSAAIGALQE  
28.03

- ▶ fragmentation table for charge state 1+
- ▶ specType=etd
- ▶ score=52.26
- ▶ F113873.dat
- ▶ query=q44087\_p1
- ▶ precursor=784.085590
- ▶ chargePrecursor=3
- ▶ itol=0.5

| AA     | c               | y               | z+1             | z+2            | z        | AA     |
|--------|-----------------|-----------------|-----------------|----------------|----------|--------|
| I [1]  | 131.118         | 2850.240        | 2334.221        | 0.000          | 2333.214 | I [21] |
| A [2]  | 202.155         | 3237.150        | 2221.137        | 0.000          | 2220.130 | A [20] |
| Q [3]  | 330.214         | 2166.110        | 2150.100        | 2151.108       | 2149.092 | Q [19] |
| D [4]  | 445.241         | 3339.060        | 3022.042        | 2073.040       | 2021.034 | D [18] |
| F [5]  | <b>592.309</b>  | <b>1923.033</b> | <b>1907.015</b> | 1908.023       | 1905.007 | F [17] |
| K [6]  | <b>748.435</b>  | 1775.965        | <b>1759.946</b> | 1760.954       | 1759.938 | K [16] |
| T [7]  | <b>849.483</b>  | <b>1619.839</b> | <b>1603.820</b> | 1604.828       | 1602.812 | T [15] |
| D [8]  | <b>964.510</b>  | 1518.791        | <b>1502.772</b> | 1503.780       | 1501.765 | D [14] |
| L [9]  | <b>1077.594</b> | <b>1403.764</b> | <b>1387.745</b> | 1388.753       | 1386.735 | L [13] |
| R [10] | <b>1213.695</b> | 1290.680        | <b>1274.661</b> | 1275.669       | 1273.654 | R [12] |
| F [11] | 1350.763        | 1134.570        | 1118.550        | 1119.558       | 1117.552 | F [11] |
| Q [12] | 1508.822        | 987.511         | 971.492         | 972.500        | 970.484  | Q [10] |
| S [13] | 1595.854        | 859.452         | 843.433         | 844.441        | 842.425  | S [9]  |
| A [14] | 1666.891        | 772.420         | 756.401         | <b>757.409</b> | 755.393  | A [8]  |
| A [15] | 1737.928        | <b>701.383</b>  | 685.364         | 686.372        | 684.356  | A [7]  |
| I [6]  | 1813.012        | <b>630.346</b>  | 614.327         | 615.335        | 613.319  | I [6]  |
| Q [17] | 1908.034        | <b>517.262</b>  | 501.243         | 502.251        | 500.235  | Q [5]  |
| A [18] | <b>1979.071</b> | 460.240         | 444.221         | 445.229        | 443.214  | A [4]  |
| L [19] | 2092.155        | 389.203         | 373.184         | 374.192        | 372.177  | L [3]  |
| Q [20] | 2220.214        | 276.110         | 260.100         | 261.108        | 259.092  | Q [2]  |
| E [21] | 2349.256        | 148.060         | 132.042         | 133.050        | 131.034  | E [1]  |

# sp | P84244 | H33\_MOUSE

IAQDFK<sup>Dimethyl</sup> TDLRFQSAAIGALQE  
28.03

- ▶ fragmentation table for charge state 2+
- ▶ specType=etd
- ▶ score=52.26
- ▶ F113873.dat
- ▶ query=q44087\_p1
- ▶ precursor=784.085590
- ▶ chargePrecursor=3
- ▶ itol=0.5

| AA     | c               | y               | z+1             | z+2             | z               | AA    |
|--------|-----------------|-----------------|-----------------|-----------------|-----------------|-------|
| I [1]  | 66.093          | <b>1175.624</b> | <b>1167.614</b> | 0.504           | <b>1167.110</b> | [21]  |
| A [2]  | 101.551         | 1119.062        | <b>1111.072</b> | 0.504           | <b>1110.568</b> | A[20] |
| Q [3]  | 165.610         | 1083.563        | <b>1075.554</b> | <b>1076.058</b> | 1075.050        | Q[19] |
| D [4]  | 223.224         | 1049.539        | <b>1011.524</b> | <b>1012.028</b> | 1011.021        | D[18] |
| F [5]  | 295.658         | 992.020         | <b>954.011</b>  | <b>954.515</b>  | 953.507         | F[17] |
| K [6]  | 374.721         | 888.486         | 886.477         | 886.981         | 879.973         | K[16] |
| T [7]  | 425.245         | 810.423         | 802.414         | 802.918         | 801.910         | T[15] |
| D [8]  | 482.759         | 759.899         | 751.890         | 752.394         | 751.386         | D[14] |
| L [9]  | 539.301         | 702.386         | 694.376         | 694.880         | 693.872         | L[13] |
| R [10] | 617.353         | 646.844         | 637.834         | 638.338         | 637.330         | R[12] |
| F [11] | 690.595         | 597.792         | 559.784         | 560.288         | 559.280         | F[11] |
| Q [12] | 754.915         | 494.259         | 486.250         | 486.753         | 485.745         | Q[10] |
| S [13] | 798.431         | 430.230         | 422.220         | 422.724         | 421.716         | S[9]  |
| A [14] | <b>833.949</b>  | 396.714         | 378.704         | 379.208         | 378.200         | A[8]  |
| A [15] | 859.798         | 351.195         | 343.186         | 343.690         | 342.682         | A[7]  |
| I [16] | <b>926.010</b>  | 315.676         | 307.667         | 308.171         | 307.163         | I[6]  |
| G [17] | <b>954.521</b>  | 269.134         | 251.125         | 251.629         | 250.621         | G[5]  |
| A [18] | <b>990.039</b>  | 230.624         | 222.614         | 223.118         | 222.110         | A[4]  |
| L [19] | <b>1046.581</b> | 195.105         | 187.096         | 187.600         | 186.592         | L[3]  |
| Q [20] | <b>1110.610</b> | 138.563         | 130.554         | 131.058         | 130.050         | Q[2]  |
| E [21] | <b>1175.132</b> | 74.534          | 66.524          | 67.028          | 66.021          | E[1]  |





# sp | P84244 | H33\_MOUSE

IAQDFKTDLR <sup>Dimethyl</sup> 28.03 FQSAAIGALQE

- ▶ fragmentation table for charge state 1+
- ▶ specType=cid
- ▶ score=72.63
- ▶ F113873.dat
- ▶ query=q44088\_p1
- ▶ precursor=784.085590
- ▶ chargePrecursor=3
- ▶ itol=0.5

| AA | a        | a*       | a,b      | b        | b*       | b,b      | r        | r*       | r,b      | AA          |
|----|----------|----------|----------|----------|----------|----------|----------|----------|----------|-------------|
| I  | 98.698   | 0.000    | 0.000    | 114.091  | 0.000    | 0.000    | 2350.246 | 2353.274 | 2352.252 | I <b>21</b> |
| A  | 137.134  | 0.000    | 0.000    | 185.126  | 0.000    | 0.000    | 2227.150 | 2225.130 | 2219.148 | A <b>20</b> |
| Q  | 159.012  | 282.979  | 0.000    | 313.181  | 289.169  | 0.000    | 2180.131 | 2174.093 | 2146.108 | Q <b>19</b> |
| D  | 400.219  | 363.193  | 382.208  | 426.214  | 411.187  | 410.203  | 2038.093 | 2021.034 | 2000.990 | D <b>18</b> |
| F  | 547.207  | 520.201  | 529.277  | 575.263  | 556.256  | 557.272  | 1924.031 | 1908.001 | 1905.017 | F <b>17</b> |
| K  | 676.582  | 658.258  | 687.372  | 704.372  | 688.351  | 685.357  | 1775.985 | 1759.939 | 1757.954 | K <b>16</b> |
| T  | 779.436  | 760.404  | 768.420  | 808.426  | 787.388  | 786.414  | 1643.930 | 1630.884 | 1625.879 | T <b>15</b> |
| D  | 891.457  | 874.411  | 873.488  | 909.483  | 892.425  | 891.481  | 1546.822 | 1529.768 | 1528.811 | D <b>14</b> |
| L  | 1034.541 | 997.533  | 988.531  | 1022.536 | 1013.509 | 1014.528 | 1421.760 | 1414.769 | 1411.780 | L <b>13</b> |
| R  | 1188.614 | 1171.587 | 1170.661 | 1216.666 | 1209.624 | 1208.618 | 1318.713 | 1301.689 | 1298.610 | R <b>12</b> |
| F  | 1339.742 | 1318.715 | 1317.731 | 1363.737 | 1348.719 | 1345.726 | 1134.579 | 1117.563 | 1116.568 | F <b>11</b> |
| Q  | 1483.801 | 1468.774 | 1448.760 | 1481.765 | 1474.769 | 1471.780 | 987.511  | 970.484  | 969.500  | Q <b>10</b> |
| S  | 1530.833 | 1513.806 | 1512.822 | 1578.807 | 1561.801 | 1560.817 | 897.452  | 882.426  | 881.441  | S <b>9</b>  |
| A  | 1671.878 | 1654.843 | 1653.859 | 1686.866 | 1669.858 | 1668.874 | 772.420  | 755.393  | 754.408  | A <b>8</b>  |
| A  | 1892.907 | 1875.880 | 1874.896 | 1920.903 | 1903.875 | 1902.891 | 701.383  | 684.366  | 683.372  | A <b>7</b>  |
| I  | 1893.993 | 1886.964 | 1887.880 | 1933.988 | 1916.959 | 1915.975 | 638.346  | 613.319  | 612.335  | I <b>6</b>  |
| C  | 1913.112 | 1892.988 | 1891.991 | 1937.100 | 1918.064 | 1917.080 | 517.282  | 500.255  | 499.261  | C <b>5</b>  |
| A  | 2004.048 | 1971.023 | 1970.039 | 2062.044 | 2043.018 | 2044.034 | 463.243  | 445.214  | 444.220  | A <b>4</b>  |
| L  | 2097.431 | 2080.401 | 2079.418 | 2096.418 | 2086.402 | 2087.419 | 389.203  | 374.171  | 371.181  | L <b>3</b>  |
| Q  | 2175.192 | 2158.166 | 2157.182 | 2203.187 | 2186.160 | 2185.176 | 276.119  | 259.092  | 258.108  | Q <b>2</b>  |
| E  | 2364.216 | 2347.189 | 2346.205 | 2352.209 | 2345.203 | 2344.219 | 148.980  | 0.000    | 138.999  | E <b>1</b>  |

# sp | P84244 | H33\_MOUSE

IAQDFKTDLR <sup>Dimethyl</sup> 28.03 FQSAAIGALQE

- ▶ fragmentation table for charge state 2+
- ▶ specType=cid
- ▶ score=72.63
- ▶ F113873.dat
- ▶ query=q44088.p1
- ▶ precursor=784.085590
- ▶ chargePrecursor=3
- ▶ itol=0.5

| AA    | a         | a'    | a <sub>0</sub> | b         | b'    | b <sub>0</sub> | y          | y'         | y <sub>0</sub> | AA    |
|-------|-----------|-------|----------------|-----------|-------|----------------|------------|------------|----------------|-------|
| I(2)  | 41.002    | 0.509 | 0.504          | 87.941    | 0.504 | 0.509          | 11.19.020  | 11.07.110  | 1.046.830      | I(2)  |
| A(2)  | 75.070    | 0.509 | 0.504          | 87.959    | 0.504 | 0.504          | 11.10.097  | 11.10.590  | 1.113.070      | A(2)  |
| Q(2)  | 143.030   | 1.018 | 1.008          | 175.904   | 1.008 | 1.014          | 22.37.000  | 22.17.000  | 2.194.500      | Q(2)  |
| D(4)  | 208.012   | 1.018 | 1.008          | 249.811   | 1.008 | 1.009          | 33.55.000  | 33.11.021  | 3.332.529      | D(4)  |
| F(5)  | 274.047   | 1.527 | 1.514          | 338.141   | 1.514 | 1.514          | 45.14.000  | 44.51.000  | 4.451.011      | F(5)  |
| K(6)  | 338.095   | 2.036 | 2.016          | 414.192   | 2.016 | 2.019          | 56.13.000  | 55.40.000  | 5.570.000      | K(6)  |
| T(7)  | 402.119   | 2.545 | 2.511          | 490.119   | 2.511 | 2.511          | 67.11.000  | 66.44.000  | 6.615.000      | T(7)  |
| D(8)  | 466.152   | 3.054 | 3.011          | 566.151   | 3.011 | 3.011          | 78.10.000  | 77.11.000  | 7.741.000      | D(8)  |
| L(9)  | 530.174   | 3.563 | 3.511          | 642.174   | 3.511 | 3.511          | 89.09.000  | 87.40.000  | 8.780.000      | L(9)  |
| M(10) | 594.210   | 4.072 | 4.011          | 718.210   | 4.011 | 4.011          | 100.08.000 | 97.40.000  | 9.740.000      | M(10) |
| P(11) | 658.246   | 4.581 | 4.511          | 794.246   | 4.511 | 4.511          | 111.07.000 | 107.40.000 | 10.740.000     | P(11) |
| Q(12) | 722.282   | 5.090 | 5.011          | 870.282   | 5.011 | 5.011          | 122.06.000 | 117.40.000 | 11.740.000     | Q(12) |
| S(13) | 786.318   | 5.599 | 5.511          | 946.318   | 5.511 | 5.511          | 133.05.000 | 127.40.000 | 12.740.000     | S(13) |
| A(14) | 850.354   | 6.108 | 6.011          | 1.022.354 | 6.011 | 6.011          | 144.04.000 | 137.40.000 | 13.740.000     | A(14) |
| A(15) | 914.390   | 6.617 | 6.511          | 1.098.390 | 6.511 | 6.511          | 155.03.000 | 147.40.000 | 14.740.000     | A(15) |
| I(16) | 978.426   | 7.126 | 7.011          | 1.174.426 | 7.011 | 7.011          | 166.02.000 | 157.40.000 | 15.740.000     | I(16) |
| G(17) | 1.042.462 | 7.635 | 7.511          | 1.250.462 | 7.511 | 7.511          | 177.01.000 | 167.40.000 | 16.740.000     | G(17) |
| A(18) | 1.106.498 | 8.144 | 8.011          | 1.326.498 | 8.011 | 8.011          | 188.00.000 | 177.40.000 | 17.740.000     | A(18) |
| L(19) | 1.170.534 | 8.653 | 8.511          | 1.402.534 | 8.511 | 8.511          | 199.00.000 | 187.40.000 | 18.740.000     | L(19) |
| Q(20) | 1.234.570 | 9.162 | 9.011          | 1.478.570 | 9.011 | 9.011          | 210.00.000 | 197.40.000 | 19.740.000     | Q(20) |
| D(21) | 1.298.606 | 9.671 | 9.511          | 1.554.606 | 9.511 | 9.511          | 221.00.000 | 207.40.000 | 20.740.000     | D(21) |

# sp | P84244 | H33\_MOUSE

IAQDFK <sup>Methyl</sup> 14.02 TDLR <sup>Methyl</sup> 14.02 FQSA AIGALQE

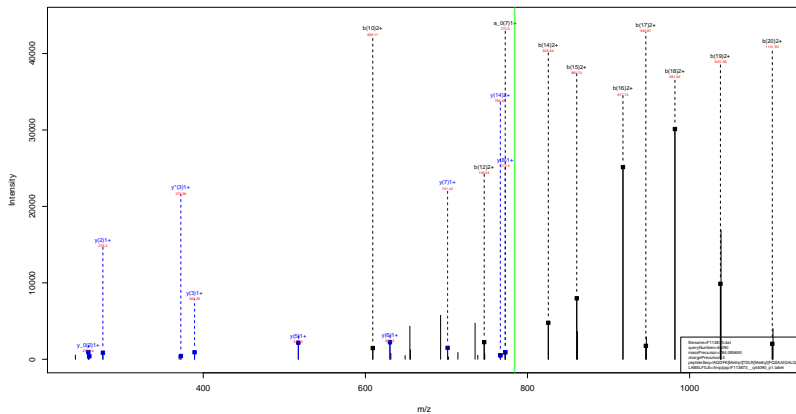

# sp | P84244 | H33\_MOUSE

IAQDFK <sup>Methyl</sup>14.02 TDLR <sup>Methyl</sup>14.02 FQSAAIGALQE

- ▶ fragmentation table for charge state 1+
- ▶ specType=cid
- ▶ score=53.11
- ▶ F113873.dat
- ▶ query=q44090\_p1
- ▶ precursor=784.085650
- ▶ chargePrecursor=3
- ▶ itol=0.5

| AA | a        | a*       | a.b            | b        | b*       | b.b      | y              | y*             | y.b            | AA |
|----|----------|----------|----------------|----------|----------|----------|----------------|----------------|----------------|----|
| I  | 98.898   | 0.000    | 0.000          | 114.001  | 0.000    | 0.000    | 2000.246       | 2153.214       | 2322.232       | I  |
| A  | 137.134  | 0.000    | 0.000          | 105.120  | 0.000    | 0.000    | 2227.150       | 2720.130       | 2219.148       | A  |
| Q  | 109.012  | 282.989  | 0.000          | 113.187  | 289.169  | 0.000    | 2180.131       | 1149.000       | 2146.000       | Q  |
| D  | 400.219  | 363.193  | 382.200        | 426.214  | 411.187  | 410.201  | 2670.000       | 2021.004       | 2000.000       | D  |
| F  | 247.207  | 520.201  | 120.277        | 379.202  | 326.206  | 327.272  | 1203.031       | 1006.007       | 1005.017       | F  |
| K  | 680.208  | 672.212  | 671.210        | 711.203  | 700.206  | 699.202  | 1775.005       | 1750.000       | 1757.004       | K  |
| V  | 700.246  | 674.212  | <b>772.415</b> | 618.241  | 601.244  | 600.238  | 1833.004       | 1818.000       | 1815.004       | V  |
| D  | 365.473  | 358.466  | 357.462        | 363.468  | 361.441  | 313.457  | 1532.037       | 1515.000       | 1514.006       | D  |
| L  | 101.527  | 101.520  | 100.540        | 104.522  | 102.521  | 102.521  | 1417.000       | 1400.000       | 1399.000       | L  |
| R  | 1188.714 | 1172.707 | 1171.691       | 1218.698 | 1199.674 | 1199.674 | 1306.000       | 1287.000       | 1286.000       | R  |
| P  | 1320.742 | 1310.735 | 1311.731       | 1363.737 | 1348.719 | 1348.726 | 1134.979       | 1117.000       | 1116.000       | P  |
| G  | 103.801  | 1440.774 | 1440.760       | 1461.769 | 1474.769 | 1474.769 | 887.511        | 870.004        | 869.000        | G  |
| S  | 1502.833 | 1503.826 | 1502.822       | 1570.827 | 1561.801 | 1560.817 | 897.452        | 882.426        | 881.441        | S  |
| A  | 1011.810 | 1008.803 | 1009.800       | 1040.806 | 1032.788 | 1031.804 | <b>772.420</b> | 755.393        | 754.408        | A  |
| A  | 1092.807 | 1075.800 | 1074.800       | 1120.803 | 1103.875 | 1102.891 | <b>701.383</b> | 684.366        | 683.372        | A  |
| I  | 1035.892 | 1030.884 | 1027.880       | 1033.886 | 1016.899 | 1015.905 | <b>630.346</b> | 613.319        | 612.333        | I  |
| C  | 1011.812 | 1002.805 | 1000.801       | 1017.807 | 1001.804 | 1002.807 | <b>517.262</b> | 500.235        | 499.249        | C  |
| A  | 1004.849 | 1017.823 | 1018.820       | 1060.844 | 1048.818 | 1044.814 | 463.262        | 445.214        | 444.230        | A  |
| L  | 1097.831 | 1090.810 | 1088.810       | 1099.816 | 1086.802 | 1087.810 | <b>389.203</b> | <b>372.177</b> | 371.191        | L  |
| Q  | 1075.892 | 1058.866 | 1057.862       | 1063.867 | 1046.860 | 1045.876 | <b>276.119</b> | <b>259.092</b> | <b>258.108</b> | Q  |
| E  | 1064.876 | 1067.858 | 1066.854       | 1052.859 | 1035.853 | 1034.870 | 148.000        | 0.000          | 148.000        | E  |

# sp | P84244 | H33\_MOUSE

IAQDFK<sup>Methyl</sup><sub>14.02</sub> TDLR<sup>Methyl</sup><sub>14.02</sub> FQSAAIGALQE

- ▶ fragmentation table for charge state 2+
- ▶ specType=cid
- ▶ score=53.11
- ▶ F113873.dat
- ▶ query=q44090\_p1
- ▶ precursor=784.085650
- ▶ chargePrecursor=3
- ▶ itol=0.5

| AA    | a        | a'       | a <sub>0</sub> | b               | b'       | b <sub>0</sub> | v              | v'       | v <sub>0</sub> | AA    |
|-------|----------|----------|----------------|-----------------|----------|----------------|----------------|----------|----------------|-------|
| I(3)  | 43.602   | 0.500    | 0.500          | 37.040          | 0.504    | 0.500          | 1176.620       | 1181.110 | 1186.620       | I(2)  |
| A(2)  | 78.070   | 0.504    | 0.500          | 33.080          | 0.504    | 0.500          | 1110.580       | 1115.070 | 1120.580       | A(20) |
| Q(3)  | 143.100  | 1.514    | 0.500          | 137.080         | 1.481    | 0.504          | 1081.580       | 1076.090 | 1071.590       | Q(18) |
| D(4)  | 200.013  | 192.380  | 191.600        | 214.911         | 206.097  | 205.400        | 1070.530       | 1014.020 | 1010.520       | D(16) |
| F(5)  | 274.147  | 268.634  | 266.147        | 288.141         | 279.632  | 279.140        | 980.020        | 953.500  | 951.010        | F(17) |
| K(6)  | 345.201  | 338.669  | 336.190        | 359.200         | 350.687  | 350.190        | 880.480        | 874.970  | 870.480        | K(16) |
| L(7)  | 408.777  | 401.251  | 398.770        | 408.724         | 400.251  | 400.130        | 817.610        | 808.100  | 803.610        | L(15) |
| D(8)  | 451.040  | 444.727  | 441.250        | 462.211         | 453.724  | 453.210        | <b>764.907</b> | 758.344  | 751.900        | D(14) |
| L(9)  | 500.182  | 491.260  | 488.770        | 500.129         | 491.260  | 491.170        | 700.260        | 690.260  | 685.260        | L(13) |
| R(10) | 550.450  | 540.120  | 537.120        | <b>600.834</b>  | 589.120  | 589.110        | 600.260        | 544.710  | 540.260        | R(12) |
| F(11) | 608.574  | 600.061  | 599.580        | 608.574         | 600.061  | 600.061        | 500.261        | 500.260  | 499.760        | F(11) |
| Q(12) | 670.604  | 661.091  | 659.590        | <b>746.401</b>  | 737.090  | 737.090        | 490.260        | 480.760  | 480.260        | Q(10) |
| S(13) | 770.500  | 760.400  | <b>766.915</b> | 760.111         | 761.404  | 760.910        | 430.260        | 424.710  | 424.260        | S(9)  |
| A(14) | 811.938  | 800.900  | 799.940        | <b>875.436</b>  | 868.940  | 868.940        | 350.910        | 350.260  | 349.760        | A(8)  |
| A(15) | 846.907  | 836.444  | 834.900        | <b>880.954</b>  | 880.441  | 881.940        | 351.100        | 347.880  | 344.190        | A(7)  |
| I(16) | 923.469  | 914.000  | 911.490        | <b>917.497</b>  | 908.000  | 908.000        | 310.000        | 307.100  | 306.010        | I(6)  |
| G(17) | 972.010  | 961.460  | 959.950        | <b>946.607</b>  | 937.460  | 937.460        | <b>250.134</b> | 249.010  | 248.010        | G(5)  |
| A(18) | 997.520  | 990.010  | 988.520        | <b>981.526</b>  | 973.010  | 972.510        | 230.020        | 225.110  | 223.010        | A(4)  |
| L(19) | 1024.070 | 1015.390 | 1013.090       | <b>1038.068</b> | 1029.390 | 1029.000       | 190.100        | 188.500  | 188.010        | L(3)  |
| Q(20) | 1080.500 | 1070.200 | 1069.000       | <b>1102.807</b> | 1091.500 | 1091.000       | 130.000        | 130.000  | 129.500        | Q(2)  |
| D(21) | 1176.010 | 1164.000 | 1161.610       | 1166.010        | 1158.000 | 1157.610       | 70.000         | 69.500   | 69.010         | D(1)  |

# sp | P84244 | H33\_MOUSE

IAQDFK<sup>Dimethyl</sup> TDLRFQSAAGALQE  
28.03

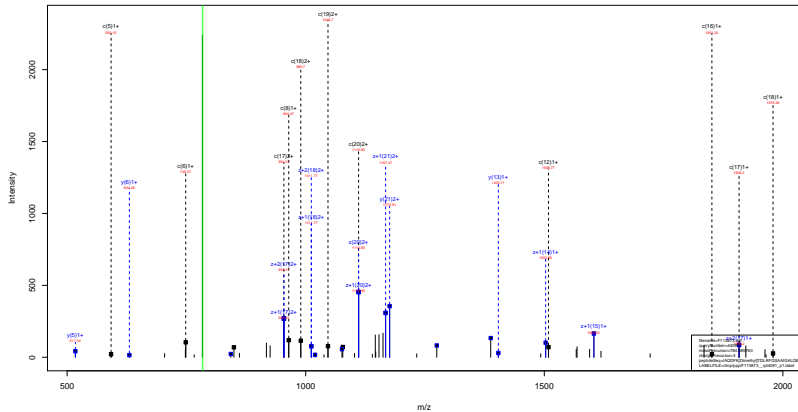

# sp | P84244 | H33\_MOUSE

IAQDFK<sup>Dimethyl</sup> TDLRFQSAAIGALQE  
28.03

- ▶ fragmentation table for charge state 1+
- ▶ specType=etd
- ▶ score=47.82
- ▶ F113873.dat
- ▶ query=q44091\_p1
- ▶ precursor=784.085760
- ▶ chargePrecursor=3
- ▶ itol=0.5

| AA    | c               | y               | z+1             | z+2             | z        | AA    |
|-------|-----------------|-----------------|-----------------|-----------------|----------|-------|
| F[1]  | 151.118         | 2950.240        | 2134.221        | 0.000           | 2333.214 | F[21] |
| A[2]  | 202.155         | 2237.156        | 2221.117        | 0.000           | 2220.130 | A[20] |
| Q[3]  | 330.214         | 2166.119        | 2150.100        | 2151.108        | 2149.092 | Q[19] |
| D[4]  | 438.291         | 2038.569        | 2022.893        | 2023.949        | 2021.036 | D[18] |
| F[5]  | <b>502.309</b>  | 1923.033        | 1907.215        | <b>1908.023</b> | 1906.007 | F[17] |
| K[6]  | <b>748.435</b>  | 1775.905        | 1759.946        | 1760.954        | 1758.938 | K[16] |
| T[7]  | <b>849.483</b>  | 1619.839        | <b>1603.820</b> | 1604.828        | 1602.812 | T[15] |
| D[8]  | <b>964.510</b>  | 1518.791        | <b>1502.772</b> | 1503.780        | 1501.765 | D[14] |
| L[9]  | <b>1077.594</b> | <b>1403.764</b> | <b>1387.745</b> | 1388.753        | 1386.736 | L[13] |
| R[10] | 1213.699        | 1296.680        | <b>1274.663</b> | 1275.669        | 1273.654 | R[12] |
| F[11] | 1380.763        | 1134.579        | 1118.500        | 1119.508        | 1117.552 | F[11] |
| Q[12] | <b>1508.822</b> | 987.511         | 971.492         | 972.500         | 970.484  | Q[10] |
| S[13] | 1595.854        | 859.452         | <b>843.433</b>  | 844.441         | 842.425  | S[9]  |
| A[14] | 1696.891        | 722.420         | 706.401         | 707.409         | 705.391  | A[8]  |
| A[15] | 1717.828        | 701.363         | 685.354         | 686.372         | 684.356  | A[7]  |
| L[16] | <b>1851.012</b> | <b>630.346</b>  | 614.337         | 615.335         | 613.319  | L[6]  |
| G[17] | <b>1908.034</b> | <b>517.262</b>  | 501.243         | 502.251         | 500.235  | G[5]  |
| A[18] | <b>1979.071</b> | 460.240         | 444.221         | 445.229         | 443.214  | A[4]  |
| L[19] | 2092.155        | 389.207         | 373.188         | 374.192         | 372.177  | L[3]  |
| Q[20] | 2220.214        | 276.119         | 260.100         | 261.108         | 259.092  | Q[2]  |
| E[21] | 2349.256        | 148.060         | 132.042         | 133.050         | 131.034  | E[1]  |



# sp | P84244 | H33\_MOUSE

IAQDFK<sup>Dimethyl</sup> TDLRFQSAIGALQE  
28.03

- ▶ fragmentation table for charge state 2+
- ▶ specType=etd
- ▶ score=47.82
- ▶ F113873.dat
- ▶ query=q44091\_p1
- ▶ precursor=784.085760
- ▶ chargePrecursor=3
- ▶ itol=0.5

| AA     | c               | y               | z+1             | z+2             | z               | AA    |
|--------|-----------------|-----------------|-----------------|-----------------|-----------------|-------|
| I [1]  | 66.093          | <b>1175.624</b> | <b>1167.614</b> | 0.504           | <b>1167.110</b> | [21]  |
| A [2]  | 101.561         | 1119.062        | <b>1111.072</b> | 0.504           | <b>1110.568</b> | A[20] |
| Q [3]  | 165.610         | 1083.563        | 1075.554        | <b>1076.058</b> | 1075.050        | Q[19] |
| D [4]  | 223.124         | <b>1019.534</b> | <b>1011.524</b> | <b>1012.028</b> | 1011.021        | D[18] |
| F [5]  | 290.658         | 992.025         | <b>954.011</b>  | <b>954.515</b>  | 953.507         | F[17] |
| K [6]  | 374.721         | 888.486         | 880.477         | 880.981         | 879.973         | K[16] |
| T [7]  | 425.245         | 810.423         | 802.414         | 802.918         | 801.910         | T[15] |
| D [8]  | 482.759         | 759.899         | 751.890         | 752.394         | 751.386         | D[14] |
| L [9]  | 539.301         | 702.366         | 694.376         | 694.880         | 693.872         | L[13] |
| R [10] | 617.363         | 646.844         | 637.833         | 638.338         | 637.330         | R[12] |
| F [11] | 690.595         | 597.793         | 559.784         | 560.288         | 559.280         | F[11] |
| Q [12] | 754.915         | 494.259         | 486.250         | 486.753         | 485.745         | Q[10] |
| S [13] | 798.431         | 430.230         | 422.220         | 422.724         | 421.716         | S[9]  |
| A [14] | 833.949         | 396.714         | 378.704         | 379.208         | 378.200         | A[8]  |
| A [15] | 869.468         | 351.195         | 343.188         | 343.690         | 342.682         | A[7]  |
| L [16] | 928.010         | 315.676         | 307.667         | 308.171         | 307.163         | L[6]  |
| G [17] | <b>954.521</b>  | 269.134         | 251.126         | 251.629         | 250.621         | G[5]  |
| A [18] | <b>990.039</b>  | 230.614         | 222.614         | 223.118         | 222.110         | A[4]  |
| L [19] | <b>1046.581</b> | 195.105         | 187.096         | 187.600         | 186.592         | L[3]  |
| Q [20] | <b>1110.610</b> | 138.563         | 130.554         | 131.058         | 130.050         | Q[2]  |
| E [21] | 1175.132        | 74.834          | 68.824          | 67.828          | 68.821          | E[1]  |

# sp | P84244 | H33\_MOUSE

IAQDFKTDLR <sup>Dimethyl</sup> FQSA AIGALQE  
28.03

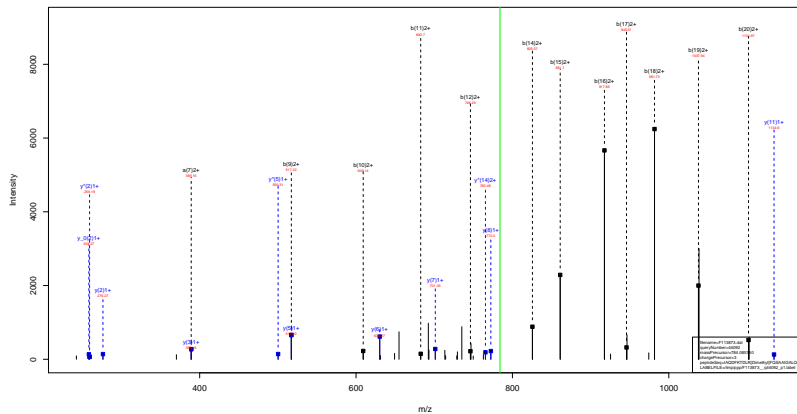

# sp | P84244 | H33\_MOUSE

IAQDFKTDLR <sup>Dimethyl</sup> 28.03 FQSA AIGALQE

- ▶ fragmentation table for charge state 1+
- ▶ specType=cid
- ▶ score=63.49
- ▶ F113873.dat
- ▶ query=q44092\_p1
- ▶ precursor=784.085760
- ▶ chargePrecursor=3
- ▶ itol=0.5

| AA     | a        | a'       | a <sub>0</sub> | b        | b'       | b <sub>0</sub> | y               | y'             | y <sub>0</sub> | AA    |
|--------|----------|----------|----------------|----------|----------|----------------|-----------------|----------------|----------------|-------|
| I [3]  | 86.698   | 0.000    | 0.000          | 114.091  | 0.000    | 0.000          | 2166.240        | 2311.214       | 2322.238       | [K2]  |
| A [2]  | 637.134  | 0.000    | 0.000          | 185.129  | 0.000    | 0.000          | 2237.150        | 2226.150       | 2219.149       | A[26] |
| Q [3]  | 226.162  | 268.265  | 0.000          | 513.287  | 268.265  | 0.000          | 2246.131        | 2149.000       | 2148.000       | Q[18] |
| D [4]  | 490.219  | 383.383  | 382.200        | 428.924  | 411.187  | 410.200        | 2030.000        | 2024.024       | 2003.000       | Q[16] |
| F [5]  | 847.287  | 536.261  | 526.277        | 678.261  | 556.256  | 557.277        | 1921.000        | 1908.000       | 1905.021       | F[17] |
| K [6]  | 675.262  | 608.266  | 687.270        | 703.277  | 686.261  | 685.260        | 1745.082        | 1758.038       | 1757.034       | K[16] |
| T [7]  | 776.430  | 708.424  | 706.420        | 804.429  | 787.408  | 786.411        | 1647.891        | 1635.844       | 1626.899       | T[15] |
| D [8]  | 891.457  | 814.431  | 813.448        | 919.462  | 902.426  | 901.441        | 1546.822        | 1535.748       | 1528.812       | D[14] |
| L [9]  | 1004.541 | 927.533  | 926.530        | 1032.536 | 1015.500 | 1014.520       | 1431.760        | 1424.760       | 1417.760       | L[13] |
| R [10] | 1118.614 | 1041.597 | 1040.593       | 1146.600 | 1129.542 | 1128.590       | 1318.711        | 1309.588       | 1302.600       | R[12] |
| P [11] | 1232.742 | 1155.715 | 1154.730       | 1261.737 | 1244.710 | 1243.730       | <b>1134.579</b> | 1117.552       | 1110.568       | P[11] |
| Q [12] | 1346.871 | 1269.797 | 1268.792       | 1381.799 | 1364.760 | 1363.780       | 987.531         | 979.494        | 969.500        | Q[10] |
| S [13] | 1460.933 | 1383.808 | 1382.822       | 1516.807 | 1499.761 | 1498.811       | 836.452         | 842.426        | 841.441        | S[9]  |
| A [14] | 1574.918 | 1504.812 | 1503.826       | 1549.803 | 1532.768 | 1531.820       | <b>772.420</b>  | 765.360        | 754.408        | A[8]  |
| A [15] | 1688.907 | 1619.800 | 1618.814       | 1652.801 | 1635.765 | 1634.820       | <b>701.383</b>  | 694.358        | 681.372        | A[7]  |
| I [16] | 1802.901 | 1733.804 | 1732.808       | 1831.808 | 1814.769 | 1813.820       | <b>630.346</b>  | 623.310        | 612.310        | I[6]  |
| G [17] | 1916.812 | 1847.800 | 1846.804       | 1916.807 | 1899.767 | 1898.820       | <b>517.263</b>  | <b>500.235</b> | 489.250        | G[5]  |
| A [18] | 1934.049 | 1917.033 | 1916.030       | 1962.044 | 1945.018 | 1944.030       | 450.253         | 443.254        | 442.250        | A[4]  |
| L [19] | 2047.133 | 2030.107 | 2029.103       | 2078.118 | 2061.100 | 2060.110       | <b>389.203</b>  | 372.171        | 371.180        | L[3]  |
| Q [20] | 2175.192 | 2158.168 | 2157.163       | 2203.187 | 2186.160 | 2185.170       | <b>276.119</b>  | <b>259.092</b> | <b>258.108</b> | Q[2]  |
| E [21] | 2304.276 | 2287.250 | 2286.246       | 2332.260 | 2315.231 | 2314.240       | 146.080         | 145.080        | 144.080        | E[1]  |

# sp | P84244 | H33\_MOUSE

IAQDFKTDLR <sup>Dimethyl</sup> <sub>28.03</sub> FQSAAIGALQE

- ▶ fragmentation table for charge state 2+
- ▶ specType=cid
- ▶ score=63.49
- ▶ F113873.dat
- ▶ query=q44092.p1
- ▶ precursor=784.085760
- ▶ chargePrecursor=3
- ▶ itol=0.5

| AA    | a        | a'       | a $\rho$ | b               | b'       | b $\rho$ | y              | y'             | y $\rho$ | AA    |
|-------|----------|----------|----------|-----------------|----------|----------|----------------|----------------|----------|-------|
| I(3)  | 43.602   | 0.500    | 0.500    | 37.040          | 0.504    | 0.500    | 1176.620       | 1181.110       | 1186.620 | I(2)  |
| A(2)  | 78.070   | 0.504    | 0.500    | 33.020          | 0.504    | 0.500    | 1110.560       | 1115.070       | 1120.560 | A(20) |
| Q(3)  | 154.100  | 1.010    | 0.500    | 137.080         | 1.004    | 0.504    | 1025.580       | 1030.090       | 1035.580 | Q(18) |
| D(4)  | 200.015  | 130.330  | 191.650  | 214.911         | 200.097  | 205.000  | 970.530        | 1014.020       | 1010.520 | D(16) |
| F(5)  | 274.147  | 185.818  | 265.147  | 288.141         | 270.632  | 270.140  | 980.000        | 983.500        | 985.100  | F(17) |
| K(6)  | 338.220  | 229.662  | 320.190  | 352.192         | 343.079  | 343.107  | 880.480        | 879.970        | 879.480  | K(16) |
| T(7)  | 388.719  | 280.200  | 320.710  | 400.710         | 386.200  | 383.111  | 820.430        | 819.920        | 819.430  | T(15) |
| D(8)  | 440.522  | 337.710  | 437.221  | 460.210         | 451.710  | 451.224  | 770.910        | <b>765.400</b> | 764.910  | D(14) |
| L(9)  | 502.274  | 404.201  | 491.701  | <b>516.772</b>  | 508.700  | 507.700  | 710.401        | 709.890        | 709.380  | L(13) |
| R(10) | 564.450  | 465.111  | 551.111  | <b>600.638</b>  | 588.120  | 589.111  | 630.890        | 631.380        | 630.890  | R(12) |
| F(11) | 608.570  | 609.961  | 609.590  | <b>682.372</b>  | 673.890  | 673.391  | 580.791        | 579.280        | 578.780  | F(11) |
| Q(12) | 732.604  | 723.601  | 723.190  | <b>746.401</b>  | 737.600  | 737.100  | 490.200        | 489.700        | 489.200  | Q(10) |
| S(13) | 770.500  | 767.400  | 766.910  | 780.911         | 781.400  | 780.910  | 430.200        | 429.710        | 429.200  | S(9)  |
| A(14) | 811.910  | 809.910  | 809.410  | <b>825.430</b>  | 816.910  | 816.410  | 350.710        | 349.200        | 348.710  | A(8)  |
| A(15) | 846.907  | 836.414  | 837.901  | <b>860.954</b>  | 852.441  | 851.940  | 301.100        | 299.600        | 299.100  | A(7)  |
| I(16) | 923.860  | 914.360  | 914.490  | <b>917.497</b>  | 908.981  | 908.491  | 213.070        | 212.570        | 212.070  | I(6)  |
| G(17) | 1023.010 | 1013.497 | 1013.990 | <b>946.011</b>  | 1007.490 | 1007.010 | <b>250.134</b> | 249.630        | 249.130  | G(5)  |
| A(18) | 997.520  | 999.010  | 998.521  | <b>981.520</b>  | 973.010  | 972.521  | 230.020        | 229.520        | 229.020  | A(4)  |
| L(19) | 1024.670 | 1023.397 | 1023.090 | <b>1038.060</b> | 1029.500 | 1029.001 | 190.100        | 189.600        | 189.100  | L(3)  |
| Q(20) | 1080.500 | 1079.200 | 1078.900 | <b>1102.807</b> | 1083.500 | 1083.000 | 130.500        | 129.000        | 128.500  | Q(2)  |
| D(21) | 1170.010 | 1164.200 | 1164.610 | 1160.011        | 1150.100 | 1150.610 | 70.500         | 69.000         | 68.500   | D(1)  |

# sp | P84244 | H33\_MOUSE

IAQDFKTDLR <sup>Dimethyl</sup> FQSAAILGALQE  
28.03

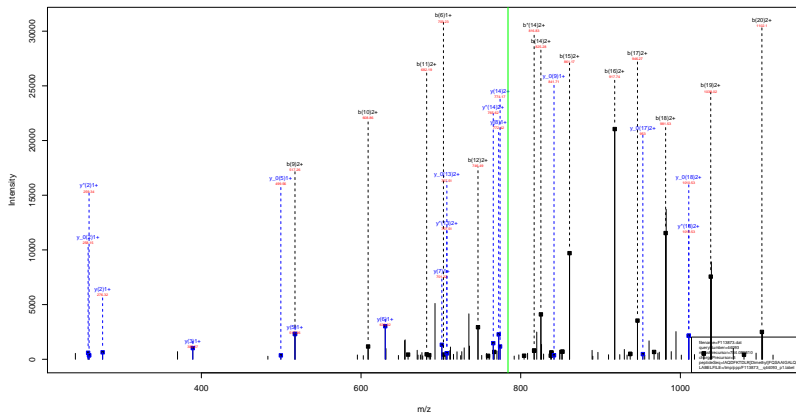

# sp | P84244 | H33\_MOUSE

IAQDFKTDLR <sup>Dimethyl</sup> 28.03 FQSA AIGALQE

- ▶ fragmentation table for charge state 1+
- ▶ specType=cid
- ▶ score=53.79
- ▶ F113873.dat
- ▶ query=q44093\_p1
- ▶ precursor=784.085810
- ▶ chargePrecursor=3
- ▶ itol=0.5

| AA | a       | a'             | a,b      | b              | b'       | b,b'           | y              | y'             | y,b            | AA          |
|----|---------|----------------|----------|----------------|----------|----------------|----------------|----------------|----------------|-------------|
| I  | 98.698  | 0.000          | 0.000    | 114.001        | 0.000    | 0.000          | 2000.246       | 2153.214       | 2332.230       | I <b>21</b> |
| A  | 117.134 | 0.000          | 0.000    | 105.120        | 0.000    | 0.000          | 2227.150       | 2220.130       | 2219.148       | A <b>20</b> |
| Q  | 126.012 | 262.000        | 0.000    | 113.181        | 266.000  | 0.000          | 2180.111       | 2174.000       | 2146.000       | Q <b>19</b> |
| D  | 140.219 | 263.193        | 382.200  | 426.214        | 311.187  | 410.203        | 2070.000       | 2061.000       | 2030.000       | D <b>18</b> |
| F  | 147.207 | 101.201        | 150.217  | 375.203        | 304.206  | 307.212        | 1614.031       | 1606.001       | 1605.011       | F <b>17</b> |
| K  | 167.082 | 678.262        | 487.312  | <b>781.377</b> | 688.311  | <b>685.367</b> | 1775.005       | 1759.000       | 1757.004       | K <b>16</b> |
| T  | 179.430 | <b>759.404</b> | 704.420  | <b>804.425</b> | 787.408  | 785.414        | 1643.000       | 1630.004       | 1625.000       | T <b>15</b> |
| D  | 181.457 | 374.411        | 371.440  | 661.425        | 661.425  | 301.441        | 1646.022       | 1629.000       | 1628.011       | D <b>14</b> |
| L  | 184.541 | 607.533        | 600.531  | 1032.530       | 1013.509 | 1014.520       | 1431.700       | 1414.700       | 1411.700       | L <b>13</b> |
| R  | 188.614 | 1171.647       | 1170.661 | 2128.660       | 1939.654 | 1939.653       | 1318.711       | 1301.660       | 1300.611       | R <b>12</b> |
| P  | 190.742 | 1318.715       | 1317.731 | 2363.737       | 2348.719 | 2349.726       | 1134.979       | 1117.900       | 1116.900       | P <b>11</b> |
| Q  | 193.801 | 1449.774       | 1448.790 | 2481.795       | 2474.769 | 2474.780       | 687.511        | 670.464        | 669.500        | Q <b>10</b> |
| S  | 193.833 | 1451.806       | 1450.822 | 2478.807       | 2461.801 | 2461.817       | 687.452        | 662.420        | <b>641.441</b> | S <b>9</b>  |
| A  | 197.870 | 1604.813       | 1603.830 | 2644.836       | 2632.818 | 2631.854       | <b>771.420</b> | 755.391        | 754.400        | A <b>8</b>  |
| A  | 199.907 | 1615.900       | 1614.892 | 2720.903       | 2703.875 | 2702.911       | <b>761.383</b> | 684.368        | 683.372        | A <b>7</b>  |
| I  | 199.993 | 1700.904       | 1707.880 | 2833.900       | 2816.869 | 2815.905       | <b>630.346</b> | 613.319        | 612.330        | I <b>6</b>  |
| C  | 199.912 | 1892.900       | 1890.881 | 3091.891       | 3074.864 | 3073.897       | <b>517.262</b> | 500.239        | <b>499.251</b> | C <b>5</b>  |
| A  | 199.949 | 1971.923       | 1970.920 | 3162.944       | 3144.918 | 3144.934       | 463.242        | 445.214        | 444.230        | A <b>4</b>  |
| L  | 199.911 | 2000.891       | 2000.120 | 3090.110       | 3066.102 | 3067.111       | <b>389.203</b> | 374.171        | 371.191        | L <b>3</b>  |
| Q  | 197.932 | 2358.900       | 2357.182 | 3263.187       | 3236.180 | 3235.176       | <b>276.119</b> | <b>259.092</b> | <b>258.108</b> | Q <b>2</b>  |
| E  | 198.470 | 2207.900       | 2206.201 | 3152.200       | 3131.003 | 3131.010       | 148.980        | 0.000          | 130.900        | E <b>1</b>  |

# sp | P84244 | H33\_MOUSE

IAQDFKTDLR <sup>Dimethyl</sup> 28.03 FQSA AIGALQE

- ▶ fragmentation table for charge state 2+
- ▶ specType=cid
- ▶ score=53.79
- ▶ F113873.dat
- ▶ query=q44093.p1
- ▶ precursor=784.085810
- ▶ chargePrecursor=3
- ▶ itol=0.5

| AA | a       | a'      | a+b     | b       | b'      | b+a'    | a       | a'      | a+b     | AA  |
|----|---------|---------|---------|---------|---------|---------|---------|---------|---------|-----|
| L1 | 417.00  | 0.50    | 0.50    | 57.50   | 0.50    | 0.50    | 1120.50 | 1120.50 | 1120.50 | L21 |
| A1 | 78.00   | 0.50    | 0.50    | 93.50   | 0.50    | 0.50    | 1120.50 | 1120.50 | 1120.50 | A20 |
| Q1 | 143.00  | 134.50  | 0.50    | 157.00  | 148.50  | 0.50    | 1083.50 | 1075.00 | 1074.50 | Q19 |
| H1 | 200.00  | 189.00  | 100.00  | 194.00  | 200.00  | 100.00  | 1039.50 | 1011.00 | 1010.50 | H18 |
| F1 | 274.50  | 265.50  | 308.14  | 288.14  | 279.62  | 309.14  | 992.00  | 965.50  | 965.00  | F17 |
| K1 | 330.00  | 328.00  | 328.00  | 352.00  | 343.67  | 343.67  | 888.00  | 879.00  | 878.00  | K16 |
| T1 | 388.00  | 387.00  | 378.71  | 402.71  | 394.00  | 394.00  | 829.00  | 824.00  | 823.00  | T15 |
| G1 | 446.00  | 437.71  | 437.71  | 462.00  | 451.71  | 451.71  | 773.00  | 765.00  | 764.00  | G14 |
| L1 | 504.00  | 494.00  | 494.00  | 518.00  | 508.00  | 507.00  | 718.00  | 707.00  | 706.00  | L13 |
| M1 | 562.00  | 551.00  | 551.00  | 576.00  | 565.00  | 564.00  | 659.00  | 648.00  | 647.00  | M12 |
| F1 | 620.00  | 609.00  | 609.00  | 634.00  | 623.00  | 622.00  | 599.00  | 588.00  | 587.00  | F11 |
| Q1 | 678.00  | 667.00  | 667.00  | 692.00  | 681.00  | 680.00  | 540.00  | 529.00  | 528.00  | Q10 |
| S1 | 736.00  | 725.00  | 725.00  | 750.00  | 739.00  | 738.00  | 481.00  | 470.00  | 469.00  | S09 |
| A1 | 794.00  | 783.00  | 783.00  | 808.00  | 797.00  | 796.00  | 422.00  | 411.00  | 410.00  | A08 |
| A1 | 852.00  | 841.00  | 841.00  | 866.00  | 855.00  | 854.00  | 363.00  | 352.00  | 351.00  | A07 |
| L1 | 910.00  | 899.00  | 899.00  | 924.00  | 913.00  | 912.00  | 304.00  | 293.00  | 292.00  | L06 |
| Q1 | 968.00  | 957.00  | 957.00  | 982.00  | 971.00  | 970.00  | 245.00  | 234.00  | 233.00  | Q05 |
| H1 | 1026.00 | 1015.00 | 1015.00 | 1040.00 | 1029.00 | 1028.00 | 186.00  | 175.00  | 174.00  | H04 |
| K1 | 1084.00 | 1073.00 | 1073.00 | 1098.00 | 1087.00 | 1086.00 | 127.00  | 116.00  | 115.00  | K03 |
| E1 | 1142.00 | 1131.00 | 1131.00 | 1156.00 | 1145.00 | 1144.00 | 68.00   | 57.00   | 56.00   | E02 |





# sp | P84244 | H33\_MOUSE

IAQDFK<sup>Dimethyl</sup> TDLRFQSAIGALQE  
28.03

- ▶ fragmentation table for charge state 1+
- ▶ specType=etd
- ▶ score=39.19
- ▶ F113873.dat
- ▶ query=q44097\_p1
- ▶ precursor=784.086150
- ▶ chargePrecursor=3
- ▶ itol=0.5

| AA     | c               | y               | z+1             | z+2             | z        | AA    |
|--------|-----------------|-----------------|-----------------|-----------------|----------|-------|
| F [1]  | 131.118         | 2355.240        | 2334.221        | 0.000           | 2333.214 | F[21] |
| A [2]  | 202.155         | 2237.156        | 2221.117        | 0.000           | 2220.130 | A[20] |
| Q [3]  | 330.214         | 2166.119        | 2150.100        | 2151.108        | 2149.092 | Q[19] |
| D [4]  | 435.291         | 2038.569        | 2022.893        | 2023.949        | 2021.936 | D[18] |
| F [5]  | <b>592.309</b>  | 1923.933        | <b>1907.815</b> | 1908.023        | 1906.007 | F[17] |
| K [6]  | <b>748.435</b>  | 1775.905        | <b>1759.946</b> | 1760.954        | 1758.938 | K[16] |
| T [7]  | <b>849.483</b>  | <b>1619.839</b> | <b>1603.820</b> | 1604.828        | 1602.812 | T[15] |
| D [8]  | <b>964.510</b>  | 1518.791        | <b>1502.772</b> | 1503.780        | 1501.765 | D[14] |
| L [9]  | <b>1077.594</b> | 1401.764        | <b>1387.745</b> | 1388.753        | 1386.736 | L[13] |
| R [10] | 1213.699        | 1290.680        | <b>1274.663</b> | 1275.669        | 1273.654 | R[12] |
| F [11] | 1380.763        | 1134.579        | 1118.500        | <b>1119.568</b> | 1117.552 | F[11] |
| Q [12] | 1508.822        | 987.511         | 971.492         | 972.500         | 970.484  | Q[10] |
| S [13] | 1595.854        | 859.452         | <b>843.433</b>  | 844.441         | 842.425  | S[9]  |
| A [14] | 1666.891        | 722.420         | 706.401         | 707.409         | 705.393  | A[8]  |
| A [15] | 1737.928        | 603.363         | 587.354         | 588.372         | 586.356  | A[7]  |
| I [16] | 1811.012        | <b>430.346</b>  | 414.327         | 415.335         | 413.319  | I[6]  |
| G [17] | 1908.034        | <b>517.262</b>  | 501.243         | 502.251         | 500.235  | G[5]  |
| A [18] | 1979.071        | 460.240         | 444.221         | 445.229         | 443.214  | A[4]  |
| L [19] | 2092.155        | 389.203         | 373.184         | 374.192         | 372.177  | L[3]  |
| Q [20] | 2220.214        | 276.119         | 260.100         | 261.108         | 259.092  | Q[2]  |
| E [21] | 2349.256        | 148.060         | 132.042         | 133.050         | 131.034  | E[1]  |

# sp | P84244 | H33\_MOUSE

IAQDFK<sup>Dimethyl</sup> TDLRFQSAAIGALQE  
28.03

- ▶ fragmentation table for charge state 2+
- ▶ specType=etd
- ▶ score=39.19
- ▶ F113873.dat
- ▶ query=q44097\_p1
- ▶ precursor=784.086150
- ▶ chargePrecursor=3
- ▶ itol=0.5

| AA     | c               | y               | z+1             | z+2             | z               | AA    |
|--------|-----------------|-----------------|-----------------|-----------------|-----------------|-------|
| I [1]  | 66.093          | <b>1175.624</b> | <b>1167.614</b> | 0.504           | <b>1167.110</b> | [21]  |
| A [2]  | 101.561         | 1119.062        | <b>1111.072</b> | 0.504           | 1116.560        | A[20] |
| Q [3]  | 165.610         | 1083.563        | <b>1075.554</b> | 1076.058        | <b>1075.050</b> | Q[19] |
| D [4]  | 223.224         | 1049.534        | <b>1011.534</b> | <b>1012.026</b> | <b>1011.021</b> | D[18] |
| F [5]  | 290.658         | 989.020         | <b>954.011</b>  | <b>954.515</b>  | 955.509         | F[17] |
| K [6]  | 374.721         | 888.486         | 886.477         | 886.981         | 879.973         | K[16] |
| T [7]  | 425.245         | 810.423         | 802.414         | 802.918         | 801.910         | T[15] |
| D [8]  | 482.759         | 759.899         | 751.890         | 752.394         | 751.389         | D[14] |
| L [9]  | 539.301         | 702.366         | 694.376         | 694.880         | 693.872         | L[13] |
| R [10] | 617.363         | 646.844         | 637.833         | 638.338         | 637.330         | R[12] |
| F [11] | 690.535         | 597.792         | 559.784         | 560.288         | 559.280         | F[11] |
| Q [12] | 754.915         | 494.259         | 486.250         | 486.753         | 485.745         | Q[10] |
| S [13] | 798.431         | 430.230         | 422.220         | 422.724         | 421.716         | S[9]  |
| A [14] | 833.949         | 396.714         | 378.704         | 379.208         | 378.200         | A[8]  |
| A [15] | <b>869.468</b>  | 351.195         | 343.188         | 343.690         | 342.682         | A[7]  |
| L [16] | 828.010         | 315.676         | 307.667         | 308.171         | 307.163         | L[6]  |
| G [17] | <b>954.521</b>  | 259.134         | 251.126         | 251.629         | 250.621         | G[5]  |
| A [18] | <b>990.039</b>  | 230.624         | 222.614         | 223.118         | 222.110         | A[4]  |
| L [19] | <b>1046.581</b> | 195.105         | 187.096         | 187.600         | 186.592         | L[3]  |
| Q [20] | 1110.610        | 138.563         | 130.554         | 131.058         | 130.050         | Q[2]  |
| E [21] | <b>1175.132</b> | 74.534          | 66.524          | 67.028          | 66.021          | E[1]  |



# sp | P84244 | H33\_MOUSE

IAQDFKTDLR <sup>Dimethyl</sup> 28.03 FQSAAIGALQE

- ▶ fragmentation table for charge state 1+
- ▶ specType=cid
- ▶ score=69.89
- ▶ F113873.dat
- ▶ query=q44098\_p1
- ▶ precursor=784.086150
- ▶ chargePrecursor=3
- ▶ itol=0.5

| AA | a        | a'       | a,b      | b        | b'             | b,b'     | y              | y'       | y,b            | AA          |
|----|----------|----------|----------|----------|----------------|----------|----------------|----------|----------------|-------------|
| I  | 98.698   | 0.000    | 0.000    | 114.001  | 0.000          | 0.000    | 2050.246       | 2153.214 | 2332.232       | I <b>21</b> |
| A  | 117.134  | 0.000    | 0.000    | 105.126  | 0.000          | 0.000    | 2227.150       | 2220.130 | 2219.148       | A <b>20</b> |
| Q  | 126.012  | 282.000  | 0.000    | 113.181  | 286.000        | 0.000    | 2180.111       | 2174.000 | 2146.000       | Q <b>19</b> |
| D  | 400.219  | 363.193  | 382.200  | 426.214  | 411.187        | 410.203  | 2678.000       | 2661.004 | 2630.000       | D <b>18</b> |
| F  | 547.207  | 520.201  | 520.217  | 575.203  | 558.206        | 557.212  | 3163.001       | 3166.001 | 3165.011       | F <b>17</b> |
| K  | 626.582  | 608.208  | 687.212  | 704.577  | <b>696.351</b> | 695.267  | 3775.005       | 3758.005 | 3757.004       | K <b>16</b> |
| T  | 679.436  | 660.404  | 704.420  | 704.426  | 717.431        | 706.414  | 3443.000       | 3430.004 | 3429.000       | T <b>15</b> |
| D  | 801.457  | 814.411  | 873.480  | 918.463  | 901.425        | 901.481  | 3546.022       | 3529.008 | 3528.011       | D <b>14</b> |
| L  | 1014.541 | 987.533  | 988.531  | 1032.530 | 1015.509       | 1014.528 | 4421.000       | 4414.000 | 4413.000       | L <b>13</b> |
| R  | 1188.614 | 1171.587 | 1219.661 | 1219.666 | 1269.654       | 1268.618 | 5133.011       | 5121.000 | 5120.011       | R <b>12</b> |
| F  | 1326.742 | 1318.715 | 1317.731 | 1365.737 | 1348.719       | 1348.726 | 5154.979       | 5117.963 | 5116.968       | F <b>11</b> |
| Q  | 1483.801 | 1466.774 | 1446.790 | 1481.765 | 1474.769       | 1473.780 | 587.511        | 587.504  | 586.500        | Q <b>10</b> |
| S  | 1550.833 | 1533.806 | 1532.822 | 1578.807 | 1561.801       | 1560.817 | 657.452        | 642.426  | 641.441        | S <b>9</b>  |
| A  | 1611.816 | 1594.813 | 1593.800 | 1640.806 | 1623.798       | 1621.804 | <b>773.420</b> | 755.391  | 754.406        | A <b>8</b>  |
| A  | 1660.807 | 1645.800 | 1674.800 | 1720.803 | 1703.875       | 1702.891 | <b>701.383</b> | 684.368  | 683.372        | A <b>7</b>  |
| I  | 1826.893 | 1808.884 | 1807.880 | 1853.886 | 1836.869       | 1835.895 | <b>638.346</b> | 613.319  | 612.316        | I <b>6</b>  |
| C  | 1875.812 | 1857.800 | 1856.800 | 1897.801 | 1881.804       | 1877.807 | <b>517.262</b> | 500.239  | 499.241        | C <b>5</b>  |
| A  | 1934.848 | 1917.823 | 1916.820 | 1962.844 | 1945.818       | 1944.834 | <b>463.263</b> | 445.214  | 444.230        | A <b>4</b>  |
| L  | 1991.831 | 1980.801 | 2008.810 | 2008.810 | 2056.802       | 2057.810 | <b>389.203</b> | 374.171  | 371.191        | L <b>3</b>  |
| Q  | 2175.932 | 2158.908 | 2157.932 | 2203.937 | 2186.930       | 2185.916 | <b>276.119</b> | 269.092  | <b>258.108</b> | Q <b>2</b>  |
| E  | 2364.916 | 2347.898 | 2346.916 | 2392.920 | 2375.903       | 2374.919 | 148.980        | 0.000    | 148.980        | E <b>1</b>  |

# sp | P84244 | H33\_MOUSE

IAQDFKTDLR <sup>Dimethyl</sup> 28.03 FQSAAIGALQE

- ▶ fragmentation table for charge state 2+
- ▶ specType=cid
- ▶ score=69.89
- ▶ F113873.dat
- ▶ query=q44098\_p1
- ▶ precursor=784.086150
- ▶ chargePrecursor=3
- ▶ itol=0.5

| AA    | a              | a'             | a <sup>o</sup> | b               | b'       | b <sup>o</sup> | y              | y'       | y <sup>o</sup> | AA    |
|-------|----------------|----------------|----------------|-----------------|----------|----------------|----------------|----------|----------------|-------|
| I(3)  | 43.602         | 0.500          | 0.500          | 37.040          | 0.504    | 0.500          | 1176.820       | 1181.310 | 1186.820       | I(2)  |
| A(2)  | 78.070         | 0.504          | 0.500          | 39.080          | 0.504    | 0.504          | 1110.100       | 1115.590 | 1121.070       | A(20) |
| Q(3)  | 154.100        | 1.010          | 0.500          | 137.080         | 1.010    | 0.504          | 1081.580       | 1079.590 | 1074.100       | Q(18) |
| D(4)  | 200.015        | 130.200        | 191.600        | 214.911         | 200.097  | 200.000        | 1019.534       | 1011.020 | 1010.010       | D(16) |
| F(5)  | 274.147        | 180.804        | 266.147        | 288.147         | 270.632  | 270.140        | <b>962.020</b> | 953.500  | 951.010        | F(17) |
| K(6)  | 338.220        | 229.602        | 320.190        | 352.192         | 343.679  | 343.197        | 880.480        | 879.970  | 879.480        | K(16) |
| T(7)  | <b>388.319</b> | 280.200        | 320.710        | 400.710         | 384.200  | 383.710        | 824.400        | 819.900  | 815.410        | T(15) |
| D(8)  | 440.552        | 337.130        | 437.221        | 460.221         | 451.705  | 451.224        | 775.050        | 769.400  | 764.910        | D(14) |
| L(9)  | 502.774        | 404.200        | 491.700        | <b>514.722</b>  | 506.200  | 507.200        | 718.600        | 709.800  | 707.700        | L(13) |
| R(10) | 564.450        | 460.100        | 550.200        | <b>568.834</b>  | 558.100  | 559.100        | 630.800        | 621.300  | 616.800        | R(12) |
| F(11) | 608.570        | 509.000        | 599.500        | 620.500         | 613.000  | 613.500        | 583.200        | 575.200  | 569.200        | F(11) |
| Q(12) | 672.604        | <b>723.891</b> | <b>723.399</b> | <b>746.401</b>  | 737.890  | 737.399        | 498.200        | 489.700  | 480.200        | Q(10) |
| S(13) | 770.500        | 667.400        | 656.010        | 780.010         | 771.494  | 770.910        | 430.200        | 424.710  | 420.200        | S(9)  |
| A(14) | 811.910        | 700.900        | 690.410        | <b>825.436</b>  | 816.900  | 816.410        | 350.410        | 346.900  | 343.410        | A(8)  |
| A(15) | 846.907        | 736.414        | 727.900        | <b>860.954</b>  | 852.441  | 851.949        | 301.100        | 297.600  | 294.100        | A(7)  |
| I(16) | 923.460        | 804.000        | 794.490        | <b>917.497</b>  | 908.980  | 908.490        | 211.000        | 207.500  | 204.000        | I(6)  |
| G(17) | 1023.010       | 913.490        | 903.990        | <b>946.007</b>  | 937.490  | 936.990        | 150.100        | 146.600  | 143.100        | G(5)  |
| A(18) | 997.520        | 900.010        | 890.520        | <b>981.526</b>  | 973.010  | 972.510        | 230.824        | 225.130  | 220.810        | A(4)  |
| L(19) | 1024.670       | 913.397        | 903.890        | <b>1038.669</b> | 1029.900 | 1029.400       | 136.100        | 132.500  | 129.000        | L(3)  |
| Q(20) | 1080.500       | 1019.200       | 1010.000       | <b>1102.807</b> | 1093.500 | 1093.000       | 130.000        | 126.500  | 123.000        | Q(2)  |
| D(21) | 1170.010       | 1144.000       | 1143.610       | 1166.610        | 1158.100 | 1157.610       | 76.500         | 75.000   | 73.500         | D(1)  |

# sp | P84244 | H33\_MOUSE

IAQDFK <sup>Methyl</sup> 14.02 TDLR <sup>Methyl</sup> 14.02 FQSAAGALQE

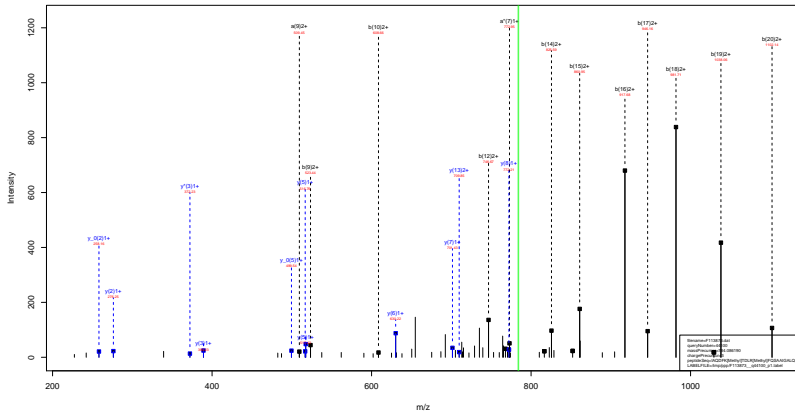

Mass: 1338.027  
 Gene: H33\_MOUSE  
 Mod: 14.02  
 ID: 1338.027  
 Name: H33\_MOUSE  
 Description: H33\_MOUSE

# sp | P84244 | H33\_MOUSE

IAQDFK <sup>Methyl</sup>14.02 TDLR <sup>Methyl</sup>14.02 FQSAAIGALQE

- ▶ fragmentation table for charge state 1+
- ▶ specType=cid
- ▶ score=69.40
- ▶ F113873.dat
- ▶ query=q44100\_p1
- ▶ precursor=784.086190
- ▶ chargePrecursor=3
- ▶ itol=0.5

| AA    | a        | a'             | a,β            | b        | b'              | b,β      | y              | y'             | y,β            | AA    |
|-------|----------|----------------|----------------|----------|-----------------|----------|----------------|----------------|----------------|-------|
| I(3)  | 86.606   | 0.000          | 0.000          | 114.001  | 0.000           | 0.000    | 2180.240       | 2111.214       | 2022.228       | [R2]  |
| A(2)  | 137.134  | 0.000          | 0.000          | 185.120  | 0.000           | 0.000    | 2237.150       | 2220.130       | 2213.140       | A(26) |
| Q(3)  | 126.102  | 388.385        | 0.000          | 213.187  | 298.180         | 0.000    | 2126.133       | 2149.000       | 2148.000       | Q(18) |
| D(4)  | 400.219  | 383.183        | 382.200        | 428.214  | 411.187         | 410.203  | 2030.100       | 2023.074       | 2003.092       | Q(16) |
| F(5)  | 847.287  | 538.261        | 526.277        | 578.261  | 558.258         | 557.272  | 1821.031       | 1808.001       | 1805.021       | F(17) |
| K(6)  | 808.398  | 517.272        | 501.285        | 511.291  | 500.388         | 499.392  | 1745.082       | 1758.938       | 1757.034       | K(16) |
| T(7)  | 700.466  | <b>713.419</b> | <b>772.435</b> | 618.441  | 601.424         | 600.434  | 1838.894       | 1849.828       | 1811.844       | T(15) |
| D(8)  | 305.473  | 616.519        | 617.450        | 603.468  | 616.441         | 615.457  | 2132.202       | 2115.788       | 2114.796       | D(14) |
| L(9)  | 181.587  | 280.530        | 120.540        | 104.552  | <b>1020.525</b> | 1020.514 | 1417.700       | 1402.711       | 1380.700       | L(13) |
| R(10) | 118.674  | 1171.967       | 1171.960       | 1218.968 | 1218.960        | 1218.968 | 1398.968       | 1397.988       | 1398.000       | R(12) |
| P(11) | 1330.742 | 1330.735       | 1317.732       | 1363.737 | 1349.732        | 1348.726 | 1134.579       | 1117.552       | 1118.568       | P(11) |
| Q(12) | 1633.811 | 1649.797       | 1440.792       | 1481.793 | 1478.789        | 1477.780 | 107.531        | 109.504        | 106.500        | Q(10) |
| S(13) | 1030.833 | 1033.828       | 1032.822       | 1038.827 | 1041.824        | 1040.817 | 131.822        | 1042.426       | 1041.441       | S(9)  |
| A(14) | 1014.918 | 1024.912       | 1001.910       | 1040.915 | 1024.910        | 1023.914 | <b>772.420</b> | 793.391        | 794.408        | A(8)  |
| A(15) | 1062.907 | 1076.900       | 1074.898       | 1120.902 | 1103.895        | 1102.891 | <b>701.383</b> | 688.358        | 688.172        | A(7)  |
| I(16) | 1035.961 | 1128.954       | 1127.950       | 1133.955 | 1126.949        | 1125.975 | <b>630.346</b> | 613.319        | 612.335        | I(6)  |
| G(17) | 1013.912 | 1025.905       | 1024.901       | 1028.907 | 1029.901        | 1029.907 | <b>517.292</b> | 509.276        | <b>499.251</b> | G(5)  |
| A(18) | 1394.049 | 1397.033       | 1393.030       | 1392.044 | 1394.038        | 1394.034 | 450.253        | 443.234        | 442.230        | A(4)  |
| L(19) | 2047.133 | 2038.127       | 2028.121       | 2038.128 | 2038.122        | 2037.118 | <b>389.203</b> | <b>372.177</b> | 371.183        | L(3)  |
| Q(20) | 2175.192 | 2158.185       | 2157.180       | 2163.187 | 2160.180        | 2159.176 | <b>376.118</b> | 269.102        | <b>258.108</b> | Q(2)  |
| D(21) | 2184.276 | 2207.269       | 2206.263       | 2212.270 | 2210.263        | 2210.218 | 146.263        | 140.260        | 138.260        | D(1)  |

# sp | P84244 | H33\_MOUSE

IAQDFK <sup>Methyl</sup>14.02 TDLR <sup>Methyl</sup>14.02 FQSAAIGALQE

- ▶ fragmentation table for charge state 2+
- ▶ specType=cid
- ▶ score=69.40
- ▶ F113873.dat
- ▶ query=q44100.p1
- ▶ precursor=784.086190
- ▶ chargePrecursor=3
- ▶ itol=0.5

| AA  | a              | a'              | a-D    | b               | b'              | b-D             | y        | y'             | y-D      | AA      |     |
|-----|----------------|-----------------|--------|-----------------|-----------------|-----------------|----------|----------------|----------|---------|-----|
| R1  | 45.592         | 0.504           | 0.504  | 57.949          | 0.504           | 0.504           | 1179.626 | 1197.110       | 1188.618 | R21     |     |
| A1  | 79.100         | 0.504           | 0.504  | 81.069          | 0.504           | 0.504           | 1119.082 | 1110.588       | 1110.090 | A20     |     |
| G1  | 143.131        | 1.008           | 0.504  | 149.589         | 1.008           | 0.504           | 1087.593 | 1017.089       | 1014.588 | G19     |     |
| D1  | 209.113        | 1.512           | 1.008  | 214.511         | 1.512           | 1.008           | 959.542  | 981.021        | 910.022  | D18     |     |
| F1  | 274.147        | 2.016           | 1.512  | 288.142         | 2.016           | 1.512           | 879.140  | 981.020        | 981.021  | F17     |     |
| K1  | 345.211        | 2.520           | 2.016  | 359.209         | 2.520           | 2.016           | 808.485  | 876.570        | 876.570  | K16     |     |
| T1  | 385.217        | 3.024           | 2.520  | 398.144         | 3.024           | 2.520           | 802.919  | 814.011        | 808.910  | T15     |     |
| E1  | 451.260        | 3.528           | 3.024  | 467.217         | 3.528           | 3.024           | 738.232  | 758.937        | 758.938  | E14     |     |
| L1  | <b>509.782</b> | 4.032           | 3.528  | <b>523.779</b>  | 4.032           | 3.528           | 614.774  | <b>109.394</b> | 100.889  | L13     |     |
| M1  | 579.878        | 4.536           | 4.032  | <b>608.838</b>  | 4.536           | 4.032           | 588.129  | 588.129        | 444.131  | M12     |     |
| P1  | 658.974        | 5.040           | 4.536  | <b>668.924</b>  | 5.040           | 4.536           | 573.569  | 573.567        | 597.793  | 599.289 | P11 |
| Q1  | 732.034        | 5.544           | 5.040  | <b>746.411</b>  | 5.544           | 5.040           | 477.056  | 494.287        | 486.746  | 480.254 | Q10 |
| S1  | 779.100        | <b>7.67.407</b> | 5.544  | 786.911         | 7.67.407        | 5.544           | 439.222  | 412.712        | 441.234  | S09     |     |
| A14 | 811.478        | 8.182           | 8.182  | <b>825.436</b>  | <b>816.923</b>  | <b>816.431</b>  | 399.114  | 399.114        | 399.114  | A08     |     |
| A15 | 846.957        | 8.686           | 8.686  | <b>860.954</b>  | <b>852.441</b>  | <b>851.949</b>  | 361.135  | 343.683        | 343.180  | A07     |     |
| I16 | 961.049        | 9.84            | 9.84   | <b>917.497</b>  | 908.981         | 908.491         | 313.613  | 307.183        | 306.671  | I06     |     |
| C17 | 1133.819       | 12.149          | 12.149 | <b>1146.997</b> | 1137.484        | 1136.994        | 239.347  | 269.921        | 269.419  | C05     |     |
| A18 | 1197.528       | 12.753          | 12.753 | <b>1211.540</b> | 1202.023        | 1201.533        | 230.824  | 222.110        | 221.618  | A04     |     |
| L19 | 1224.970       | 13.257          | 13.257 | <b>1238.089</b> | <b>1228.573</b> | <b>1228.083</b> | 181.185  | 188.792        | 188.110  | L03     |     |
| G20 | 1308.119       | 13.861          | 13.861 | <b>1302.634</b> | <b>1293.117</b> | <b>1292.627</b> | 132.787  | 140.394        | 139.882  | G02     |     |
| R21 | 1352.621       | 14.465          | 14.465 | 1358.616        | 1349.103        | 1348.613        | 74.534   | 82.929         | 82.929   | R01     |     |



# sp | P84244 | H33\_MOUSE

IAQDFK<sup>Dimethyl</sup> TDLRFQSA AIGALQE  
28.03

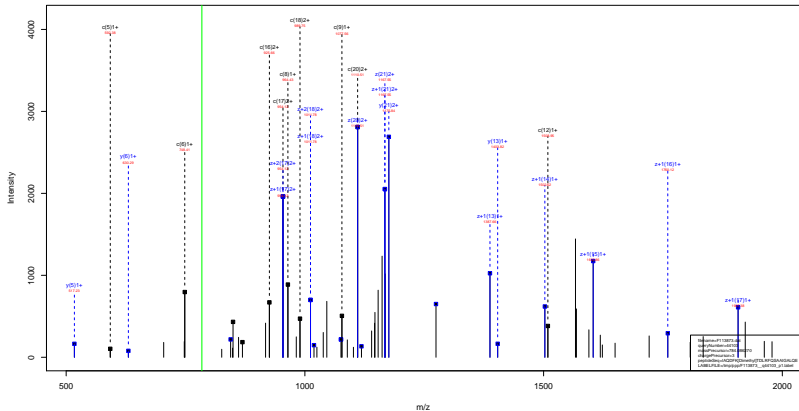

# sp | P84244 | H33\_MOUSE

IAQDFK<sup>Dimethyl</sup> TDLRFQSAAIGALQE  
28.03

- ▶ fragmentation table for charge state 1+
- ▶ specType=etd
- ▶ score=44.01
- ▶ F113873.dat
- ▶ query=q44103\_p1
- ▶ precursor=784.086270
- ▶ chargePrecursor=3
- ▶ itol=0.5

| AA     | c               | y               | z+1             | z+2            | z        | AA     |
|--------|-----------------|-----------------|-----------------|----------------|----------|--------|
| I [1]  | 131.118         | 2852.240        | 2334.221        | 0.000          | 2333.214 | I [21] |
| A [2]  | 202.155         | 3237.150        | 2221.137        | 0.000          | 2220.130 | A [20] |
| Q [3]  | 330.214         | 2166.110        | 2150.100        | 2151.108       | 2149.092 | Q [19] |
| D [4]  | 445.241         | 3338.060        | 3022.042        | 3023.040       | 3021.034 | D [18] |
| F [5]  | <b>592.309</b>  | 1923.033        | <b>1907.015</b> | 1908.023       | 1905.007 | F [17] |
| K [6]  | <b>748.435</b>  | 1775.965        | <b>1759.946</b> | 1760.954       | 1758.938 | K [16] |
| T [7]  | <b>849.483</b>  | 1619.839        | <b>1603.820</b> | 1604.828       | 1602.812 | T [15] |
| D [8]  | <b>964.510</b>  | 1518.791        | <b>1502.772</b> | 1503.780       | 1501.765 | D [14] |
| L [9]  | <b>1077.594</b> | <b>1403.764</b> | <b>1387.745</b> | 1388.753       | 1386.735 | L [13] |
| R [10] | 1213.695        | 1290.680        | <b>1274.661</b> | 1275.669       | 1273.654 | R [12] |
| F [11] | 1580.763        | 1134.579        | <b>1118.560</b> | 1119.568       | 1117.552 | F [11] |
| Q [12] | <b>1508.822</b> | 987.511         | 971.402         | 972.500        | 970.484  | Q [10] |
| S [13] | 1595.854        | 859.452         | 843.433         | <b>844.441</b> | 842.425  | S [9]  |
| A [14] | 1666.891        | 772.420         | 756.401         | 757.409        | 755.393  | A [8]  |
| A [15] | 1737.928        | 703.383         | 685.364         | 686.372        | 684.356  | A [7]  |
| I [6]  | 1813.012        | <b>630.346</b>  | 614.327         | 615.335        | 613.319  | I [6]  |
| Q [17] | 1908.034        | <b>517.262</b>  | 501.243         | 502.251        | 500.235  | Q [5]  |
| A [18] | 1979.071        | 460.240         | 444.221         | 445.229        | 443.214  | A [4]  |
| L [19] | 2092.155        | 389.203         | 373.184         | 374.192        | 372.177  | L [3]  |
| Q [20] | 2220.214        | 276.119         | 260.100         | 261.108        | 259.092  | Q [2]  |
| E [21] | 2349.256        | 148.060         | 132.042         | 133.050        | 131.034  | E [1]  |

# sp | P84244 | H33\_MOUSE

IAQDFK<sup>Dimethyl</sup> TDLRFQSAAIGALQE  
28.03

- ▶ fragmentation table for charge state 2+
- ▶ specType=etd
- ▶ score=44.01
- ▶ F113873.dat
- ▶ query=q44103.p1
- ▶ precursor=784.086270
- ▶ chargePrecursor=3
- ▶ itol=0.5

| AA     | c               | y               | z+1             | z+2             | z               | AA    |
|--------|-----------------|-----------------|-----------------|-----------------|-----------------|-------|
| I [1]  | 66.093          | <b>1175.624</b> | <b>1167.614</b> | 0.504           | <b>1167.110</b> | [21]  |
| A [2]  | 101.501         | 1119.062        | 1111.072        | 0.504           | <b>1110.568</b> | A[20] |
| Q [3]  | 165.610         | 1083.563        | <b>1075.554</b> | <b>1076.058</b> | 1075.050        | Q[19] |
| D [4]  | 223.124         | <b>1019.534</b> | <b>1011.524</b> | <b>1012.028</b> | 1011.021        | D[18] |
| F [5]  | 290.628         | 954.011         | <b>954.011</b>  | <b>954.515</b>  | 953.507         | F[17] |
| K [6]  | 374.721         | 888.486         | 880.477         | 880.981         | 879.973         | K[16] |
| T [7]  | 425.245         | 810.423         | 802.414         | 802.918         | 801.910         | T[15] |
| D [8]  | 482.759         | 759.899         | 751.890         | 752.394         | 751.386         | D[14] |
| L [9]  | 539.301         | 702.366         | 694.376         | 694.880         | 693.872         | L[13] |
| R [10] | 617.363         | 646.844         | 637.833         | 638.338         | 637.330         | R[12] |
| F [11] | 690.535         | 597.792         | 589.784         | 590.288         | 589.280         | F[11] |
| Q [12] | 754.915         | 494.259         | 486.250         | 486.753         | 485.745         | Q[10] |
| S [13] | 768.431         | 430.230         | 422.220         | 422.724         | 421.716         | S[9]  |
| A [14] | 833.049         | 396.714         | 378.704         | 379.208         | 378.200         | A[8]  |
| A [15] | <b>869.468</b>  | 351.195         | 343.188         | 343.690         | 342.682         | A[7]  |
| I [16] | <b>926.010</b>  | 315.676         | 307.667         | 308.171         | 307.163         | I[6]  |
| G [17] | <b>954.521</b>  | 259.134         | 251.126         | 251.629         | 250.621         | G[5]  |
| A [18] | <b>990.039</b>  | 230.624         | 222.614         | 223.118         | 222.110         | A[4]  |
| L [19] | 1048.501        | 195.105         | 187.096         | 187.600         | 186.592         | L[3]  |
| Q [20] | <b>1110.610</b> | 138.563         | 130.554         | 131.058         | 130.050         | Q[2]  |
| E [21] | 1175.132        | 74.534          | 66.524          | 67.028          | 66.021          | E[1]  |

# sp | P84244 | H33\_MOUSE

IAQDFKTDLR <sup>Dimethyl</sup> FQSA AIGALQE  
28.03

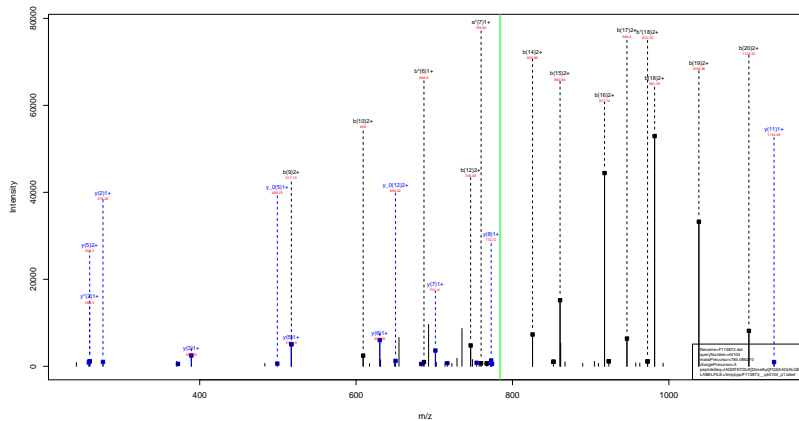

bioRxiv preprint doi: <https://doi.org/10.1101/2018.08.14.250000>; this version posted August 14, 2018. The copyright holder for this preprint (which was not certified by peer review) is the author/funder, who has granted bioRxiv a license to display the preprint in perpetuity. It is made available under aCC-BY-NC-ND 4.0 International license.

# sp | P84244 | H33\_MOUSE

IAQDFKTDLR <sup>Dimethyl</sup> 28.03 FQSAAIGALQE

- ▶ fragmentation table for charge state 1+
- ▶ specType=cid
- ▶ score=69.77
- ▶ F113873.dat
- ▶ query=q44104\_p1
- ▶ precursor=784.086270
- ▶ chargePrecursor=3
- ▶ itol=0.5

| AA | a        | a'             | a <sub>0</sub> | b        | b'       | b <sub>0</sub> | y               | y'             | y <sub>0</sub> | AA    |
|----|----------|----------------|----------------|----------|----------|----------------|-----------------|----------------|----------------|-------|
| I  | 88.008   | 0.000          | 0.000          | 114.001  | 0.000    | 0.000          | 2160.200        | 2311.214       | 2311.218       | [R2]  |
| A  | 137.134  | 0.000          | 0.000          | 185.133  | 0.000    | 0.000          | 2237.150        | 2220.150       | 2219.149       | A[26] |
| Q  | 226.162  | 288.285        | 0.000          | 213.287  | 298.150  | 0.000          | 2248.133        | 2149.000       | 2148.000       | Q[18] |
| D  | 400.219  | 383.383        | 382.200        | 428.214  | 411.387  | 410.200        | 2030.100        | 2021.024       | 2020.000       | Q[16] |
| F  | 847.287  | 830.281        | 828.272        | 878.281  | 858.258  | 857.277        | 1921.031        | 1808.000       | 1805.021       | F[17] |
| K  | 875.282  | 858.289        | 857.272        | 901.277  | 886.251  | 885.260        | 1745.083        | 1738.000       | 1737.004       | K[16] |
| T  | 879.438  | <b>759.484</b> | 760.420        | 884.425  | 757.480  | 756.410        | 1847.891        | 1835.844       | 1835.898       | T[15] |
| D  | 891.457  | 874.411        | 873.448        | 919.462  | 902.420  | 901.441        | 1546.822        | 1535.748       | 1535.811       | D[14] |
| L  | 1024.541 | 987.533        | 986.516        | 1010.538 | 1011.509 | 1014.520       | 1431.760        | 1434.760       | 1431.760       | L[13] |
| M  | 1188.674 | 1171.667       | 1170.660       | 1210.668 | 1189.642 | 1188.670       | 1318.711        | 1309.588       | 1308.700       | M[12] |
| P  | 1330.742 | 1318.715       | 1317.732       | 1363.737 | 1346.710 | 1345.730       | <b>1134.579</b> | 1117.552       | 1118.568       | P[11] |
| Q  | 1633.811 | 1620.797       | 1620.792       | 1661.795 | 1674.800 | 1673.810       | 987.531         | 978.104        | 980.500        | Q[10] |
| S  | 1650.833 | 1633.828       | 1632.822       | 1678.827 | 1691.801 | 1690.810       | 885.565         | 884.428        | 884.411        | S[9]  |
| A  | 1814.918 | 1804.912       | 1803.920       | 1846.903 | 1834.908 | 1833.920       | <b>772.820</b>  | 765.360        | <b>754.409</b> | A[8]  |
| A  | 1862.907 | 1856.889       | 1854.890       | 1920.902 | 1910.895 | 1910.890       | <b>701.383</b>  | 688.358        | <b>683.372</b> | A[7]  |
| I  | 1885.961 | 1878.954       | 1877.950       | 1933.960 | 1916.959 | 1915.970       | <b>630.346</b>  | 613.310        | 612.310        | I[6]  |
| G  | 1883.812 | 1885.809       | 1884.800       | 1908.807 | 1919.801 | 1917.800       | <b>517.262</b>  | 509.239        | <b>499.251</b> | G[5]  |
| A  | 1934.049 | 1917.033       | 1916.030       | 1962.044 | 1946.018 | 1944.030       | 450.252         | 443.234        | 442.230        | A[4]  |
| L  | 2047.133 | 2030.107       | 2029.120       | 2078.128 | 2058.102 | 2057.130       | <b>389.203</b>  | <b>372.177</b> | 371.180        | L[3]  |
| Q  | 2175.192 | 2158.168       | 2157.180       | 2203.187 | 2186.160 | 2185.170       | <b>276.119</b>  | <b>259.092</b> | <b>258.108</b> | Q[2]  |
| D  | 2304.276 | 2287.250       | 2286.250       | 2332.250 | 2315.251 | 2314.250       | 146.080         | 146.080        | 146.080        | D[1]  |

# sp | P84244 | H33\_MOUSE

IAQDFKTDLR <sup>Dimethyl</sup> FQSAAIGALQE  
28.03

- ▶ fragmentation table for charge state 2+
- ▶ specType=cid
- ▶ score=69.77
- ▶ F113873.dat
- ▶ query=q44104.p1
- ▶ precursor=784.086270
- ▶ chargePrecursor=3
- ▶ itol=0.5

| AA    | a        | a'             | a,β            | b               | b'             | b,β            | y              | y'       | y,β            | AA    |
|-------|----------|----------------|----------------|-----------------|----------------|----------------|----------------|----------|----------------|-------|
| I(3)  | 43.602   | 0.500          | 0.500          | 57.040          | 0.504          | 0.500          | 1176.620       | 1181.110 | 1186.610       | I(2)  |
| A(2)  | 70.070   | 0.504          | 0.500          | 93.080          | 0.504          | 0.504          | 1110.560       | 1115.070 | 1120.570       | A(20) |
| Q(3)  | 154.100  | 1.014          | 0.504          | 137.080         | 1.481          | 0.504          | 1081.581       | 1076.080 | 1081.580       | Q(10) |
| D(4)  | 200.013  | 102.330        | 101.600        | 214.461         | 206.097        | 205.400        | 1070.534       | 1014.021 | 1010.520       | D(10) |
| F(5)  | 274.447  | 105.610        | 105.141        | 288.141         | 270.632        | 270.140        | 980.020        | 953.501  | 953.010        | F(17) |
| K(6)  | 338.095  | 109.062        | 109.190        | 352.192         | 343.679        | 343.191        | 880.480        | 879.973  | 879.481        | K(16) |
| T(7)  | 400.079  | 100.300        | 100.711        | 400.710         | 394.203        | 393.711        | 820.430        | 815.920  | 815.431        | T(15) |
| D(8)  | 446.532  | 137.710        | 137.221        | 460.210         | 451.710        | 451.224        | <b>771.915</b> | 765.410  | 764.910        | D(14) |
| L(9)  | 502.274  | 104.201        | 104.170        | <b>516.772</b>  | 508.710        | 507.700        | <b>716.011</b> | 710.500  | 710.010        | L(13) |
| R(10) | 558.450  | 100.101        | 100.101        | <b>608.834</b>  | 599.710        | 599.611        | 600.000        | 591.500  | <b>650.854</b> | R(12) |
| F(11) | 608.570  | 105.001        | 105.000        | 605.001         | 613.000        | 613.001        | 551.501        | 550.200  | 550.700        | F(11) |
| Q(12) | 672.004  | 103.001        | 103.100        | <b>746.401</b>  | 737.000        | 737.000        | 490.200        | 489.700  | 489.204        | Q(10) |
| S(13) | 675.501  | <b>767.407</b> | <b>766.915</b> | 765.001         | 761.004        | 760.512        | 430.200        | 429.710  | 429.204        | S(9)  |
| A(14) | 691.910  | 100.910        | 100.910        | <b>825.430</b>  | 816.001        | 816.001        | 300.914        | 300.000  | 300.910        | A(8)  |
| A(15) | 846.907  | 100.404        | 100.901        | <b>880.954</b>  | <b>852.441</b> | <b>851.940</b> | 101.100        | 147.000  | 147.100        | A(7)  |
| I(16) | 923.000  | 104.000        | 104.000        | <b>917.407</b>  | 908.001        | 908.001        | 100.001        | 113.000  | 100.101        | I(6)  |
| G(17) | 973.010  | <b>923.407</b> | <b>923.000</b> | <b>946.007</b>  | 937.000        | 937.000        | <b>250.134</b> | 249.001  | 249.010        | G(5)  |
| A(18) | 997.520  | 103.520        | 103.520        | <b>1015.520</b> | <b>973.013</b> | <b>972.521</b> | 230.024        | 229.110  | 229.010        | A(4)  |
| L(19) | 1024.070 | 103.070        | 103.070        | <b>1038.068</b> | 1029.000       | 1029.000       | 100.100        | 100.500  | 100.100        | L(3)  |
| Q(20) | 1080.501 | 1070.200       | 1070.004       | <b>1102.007</b> | 1093.504       | 1093.500       | 130.503        | 130.000  | 129.500        | Q(2)  |
| D(21) | 1170.011 | 1144.100       | 1143.610       | 1130.011        | 1120.100       | 1120.610       | 70.501         | 0.500    | 0.510          | D(1)  |

# sp | P84244 | H33\_MOUSE

IAQDFKTDLR<sup>Dimethyl</sup>FQSA AIGALQE  
28.03

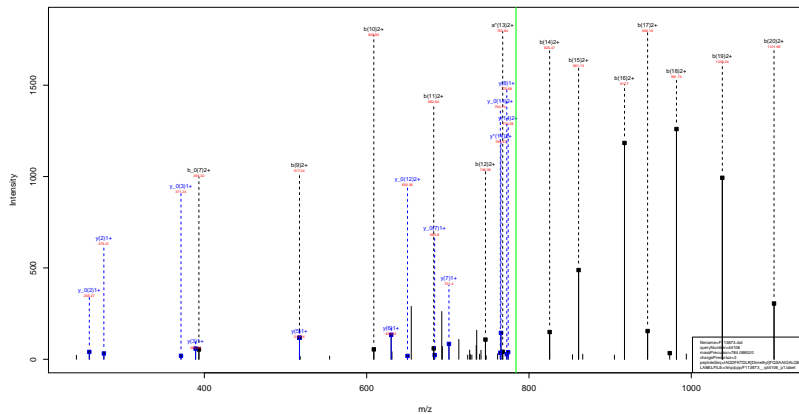

Mass: 13071.00  
Gene: Hm19b-01708  
Mod: P84244 (28.03)  
Charge: 2  
Protein: Hm19b-01708 (28.03)  
Label: P84244-01708 (28.03)

# sp | P84244 | H33\_MOUSE

IAQDFKTDLR <sup>Dimethyl</sup> 28.03 FQSAAIGALQE

- ▶ fragmentation table for charge state 1+
- ▶ specType=cid
- ▶ score=70.10
- ▶ F113873.dat
- ▶ query=q44106\_p1
- ▶ precursor=784.086520
- ▶ chargePrecursor=3
- ▶ itol=0.5

| AA | a        | a'       | a,b      | b        | b'       | b,b'     | y              | y'       | y,b            | AA          |
|----|----------|----------|----------|----------|----------|----------|----------------|----------|----------------|-------------|
| I  | 98.698   | 0.000    | 0.000    | 114.091  | 0.000    | 0.000    | 2050.246       | 2153.214 | 2352.232       | I <b>21</b> |
| A  | 117.134  | 0.000    | 0.000    | 105.126  | 0.000    | 0.000    | 2227.150       | 2220.130 | 2219.146       | A <b>20</b> |
| Q  | 126.012  | 262.009  | 0.000    | 113.181  | 266.006  | 0.000    | 2160.110       | 2149.090 | 2148.106       | Q <b>19</b> |
| D  | 400.219  | 363.193  | 362.208  | 426.214  | 411.197  | 410.201  | 2670.090       | 2661.074 | 2660.090       | D <b>18</b> |
| F  | 247.207  | 231.201  | 230.217  | 375.203  | 356.206  | 357.212  | 1924.031       | 1908.007 | 1905.012       | F <b>17</b> |
| K  | 625.082  | 608.208  | 607.212  | 704.207  | 686.211  | 685.207  | 3775.065       | 3759.065 | 3757.054       | K <b>16</b> |
| T  | 479.436  | 459.434  | 458.420  | 608.429  | 587.468  | 586.414  | 1843.000       | 1830.004 | 1829.019       | T <b>15</b> |
| D  | 391.457  | 374.411  | 373.400  | 509.403  | 490.425  | 491.411  | 1546.022       | 1529.988 | 1528.911       | D <b>14</b> |
| L  | 104.541  | 97.523   | 96.521   | 102.529  | 101.530  | 101.528  | 1421.700       | 1414.700 | 1413.700       | L <b>13</b> |
| R  | 1188.814 | 1171.807 | 1170.800 | 1278.806 | 1259.824 | 1258.810 | 3331.711       | 3316.809 | 3315.811       | R <b>12</b> |
| F  | 1320.742 | 1308.735 | 1307.731 | 1363.737 | 1346.719 | 1345.726 | 3134.979       | 3117.963 | 3116.968       | F <b>11</b> |
| Q  | 163.801  | 1469.774 | 1445.790 | 1461.795 | 1474.769 | 1473.780 | 867.511        | 870.504  | 869.500        | Q <b>10</b> |
| S  | 1530.833 | 1523.826 | 1522.822 | 1578.827 | 1561.801 | 1560.817 | 892.425        | 894.441  | 894.441        | S <b>9</b>  |
| A  | 101.810  | 2004.813 | 2003.800 | 2046.806 | 2032.788 | 2031.804 | <b>772.420</b> | 775.391  | 774.406        | A <b>8</b>  |
| A  | 100.807  | 1015.809 | 1014.800 | 1120.803 | 1103.875 | 1102.891 | <b>701.383</b> | 684.369  | <b>483.372</b> | A <b>7</b>  |
| I  | 103.804  | 1100.804 | 1100.800 | 1153.806 | 1136.809 | 1135.805 | <b>630.346</b> | 613.319  | 612.319        | I <b>6</b>  |
| C  | 101.812  | 1002.808 | 1001.801 | 1097.801 | 1078.804 | 1077.807 | <b>517.262</b> | 500.239  | 499.241        | C <b>5</b>  |
| A  | 100.809  | 1017.813 | 1016.810 | 1060.816 | 1043.819 | 1042.834 | 463.262        | 445.214  | 444.230        | A <b>4</b>  |
| L  | 101.811  | 1000.817 | 1000.810 | 1009.818 | 1006.810 | 1007.811 | <b>389.263</b> | 374.171  | <b>371.193</b> | L <b>3</b>  |
| Q  | 101.812  | 1008.820 | 1007.812 | 1003.819 | 1006.820 | 1005.816 | <b>276.119</b> | 269.092  | <b>258.108</b> | Q <b>2</b>  |
| E  | 104.816  | 2007.828 | 2006.821 | 2052.826 | 2035.803 | 2034.819 | 148.990        | 0.000    | 150.990        | E <b>1</b>  |



# sp | P84244 | H33\_MOUSE

IAQDFKTDLR <sup>Dimethyl</sup> <sub>28.03</sub> FQSAAIGALQE

- ▶ fragmentation table for charge state 2+
- ▶ specType=cid
- ▶ score=70.10
- ▶ F113873.dat
- ▶ query=q44106.p1
- ▶ precursor=784.086520
- ▶ chargePrecursor=3
- ▶ itol=0.5

| AA    | a        | a'             | a <sub>0</sub> | b               | b'             | b <sub>0</sub> | y              | y'             | y <sub>0</sub> | AA    |
|-------|----------|----------------|----------------|-----------------|----------------|----------------|----------------|----------------|----------------|-------|
| I(3)  | 43.602   | 0.500          | 0.500          | 37.040          | 0.504          | 0.500          | 1176.820       | 1181.310       | 1186.810       | I(2)  |
| A(2)  | 70.070   | 0.504          | 0.500          | 33.080          | 0.504          | 0.500          | 1110.500       | 1115.010       | 1120.510       | A(20) |
| Q(3)  | 154.100  | 1.010          | 0.500          | 137.080         | 1.004          | 0.504          | 1081.500       | 1077.000       | 1072.500       | Q(10) |
| D(4)  | 200.010  | 130.300        | 191.600        | 214.010         | 200.007        | 205.000        | 1070.530       | 1011.020       | 1010.520       | Q(10) |
| F(5)  | 274.147  | 180.810        | 266.147        | 288.140         | 270.632        | 279.140        | 980.000        | 953.500        | 953.010        | F(17) |
| K(6)  | 338.190  | 220.000        | 320.190        | 352.190         | 343.070        | 353.190        | 880.000        | 870.970        | 870.980        | K(16) |
| T(7)  | 400.210  | 280.200        | 370.210        | 400.210         | 380.200        | <b>393.211</b> | 820.000        | 810.200        | 810.210        | T(15) |
| D(8)  | 446.232  | 437.710        | 437.232        | 460.230         | 451.710        | 451.230        | <b>773.015</b> | <b>765.403</b> | <b>764.910</b> | L(14) |
| L(9)  | 502.274  | 494.260        | 494.270        | <b>516.272</b>  | 508.260        | 507.260        | 710.000        | 700.260        | 700.270        | L(13) |
| R(10) | 558.316  | 550.300        | 550.310        | <b>569.308</b>  | 560.300        | 560.310        | 630.000        | 621.300        | <b>620.854</b> | R(12) |
| F(11) | 608.370  | 600.360        | 600.370        | <b>622.372</b>  | 613.360        | 613.370        | 550.200        | 530.200        | 530.200        | F(11) |
| Q(12) | 672.404  | 663.390        | 663.400        | <b>746.401</b>  | 737.390        | 737.400        | 490.200        | 480.200        | 480.200        | Q(10) |
| S(13) | 772.500  | <b>747.487</b> | 746.500        | 780.500         | 761.484        | 760.500        | 430.200        | 421.200        | 421.200        | S(9)  |
| A(14) | 814.500  | 800.500        | 800.510        | <b>825.436</b>  | 816.500        | 816.510        | 350.200        | 340.200        | 340.200        | A(8)  |
| A(15) | 846.507  | 830.494        | 830.500        | <b>860.504</b>  | 851.490        | 851.500        | 340.000        | 340.000        | 340.000        | A(7)  |
| I(16) | 923.500  | 904.500        | 904.490        | <b>917.497</b>  | 908.500        | 908.490        | 310.000        | 300.000        | 300.000        | I(6)  |
| G(17) | 972.510  | 953.490        | 953.500        | <b>946.507</b>  | 937.490        | 937.500        | 290.200        | 280.200        | 280.200        | G(6)  |
| A(18) | 997.520  | 978.510        | 978.520        | <b>981.520</b>  | <b>973.013</b> | 972.510        | 270.000        | 250.000        | 250.000        | A(4)  |
| L(19) | 1024.510 | 1003.500       | 1003.500       | <b>1038.506</b> | 1029.500       | 1029.510       | 190.100        | 180.100        | 180.100        | L(8)  |
| Q(20) | 1080.500 | 1070.500       | 1070.500       | <b>1102.507</b> | 1093.500       | 1093.500       | 130.000        | 130.000        | 130.000        | Q(2)  |
| D(21) | 1170.510 | 1144.500       | 1144.510       | 1160.510        | 1150.500       | 1150.510       | 70.000         | 70.000         | 70.000         | D(1)  |

# sp | P84244 | H33\_MOUSE

IAQDFKTDLR <sup>Dimethyl</sup> FQSAAILGALQE  
28.03

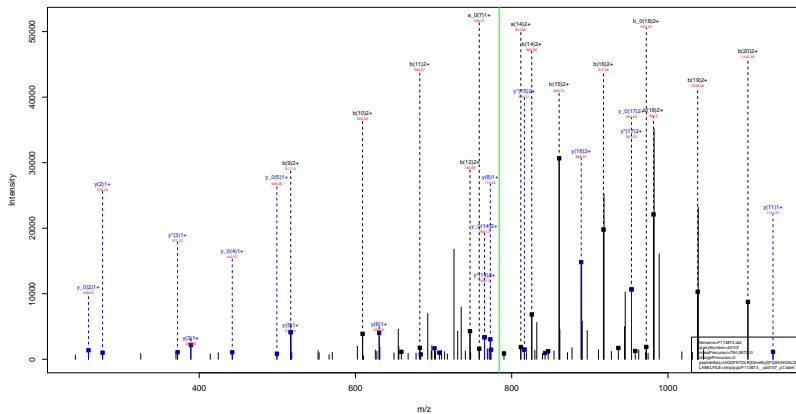

# sp | P84244 | H33\_MOUSE

IAQDFKTDLR <sup>Dimethyl</sup> FQSAAIGALQE  
28.03

- ▶ fragmentation table for charge state 1+
- ▶ specType=cid
- ▶ score=39.20
- ▶ F113873.dat
- ▶ query=q44107\_p1
- ▶ precursor=784.087310
- ▶ chargePrecursor=3
- ▶ itol=0.5

| AA    | a        | a'             | a <sub>0</sub> | b        | b'       | b <sub>0</sub> | y               | y'             | y <sub>0</sub> | AA    |
|-------|----------|----------------|----------------|----------|----------|----------------|-----------------|----------------|----------------|-------|
| I(3)  | 86.898   | 0.000          | 0.000          | 114.091  | 0.000    | 0.000          | 2160.240        | 2311.214       | 2311.214       | I(2)  |
| A(2)  | 637.134  | 0.000          | 0.000          | 185.129  | 0.000    | 0.000          | 2237.150        | 2220.150       | 2219.149       | A(20) |
| Q(3)  | 226.162  | 268.265        | 0.000          | 513.287  | 208.150  | 0.000          | 2160.131        | 2149.000       | 2148.000       | Q(18) |
| D(4)  | 490.219  | 383.393        | 382.200        | 428.924  | 411.187  | 410.200        | 2030.000        | 2024.924       | 2020.000       | Q(16) |
| F(5)  | 847.287  | 630.261        | 628.277        | 678.061  | 658.258  | 657.277        | 1921.001        | 1908.001       | 1905.011       | F(17) |
| K(6)  | 675.382  | <b>658.356</b> | <b>657.210</b> | 703.377  | 686.351  | 685.350        | 1775.082        | 1758.938       | 1757.934       | K(16) |
| T(7)  | 676.438  | 676.438        | <b>735.420</b> | 604.426  | 597.368  | 596.411        | 1847.891        | 1835.844       | 1835.895       | T(15) |
| D(8)  | 891.457  | 614.431        | 613.440        | 619.462  | 602.426  | 601.441        | 1546.822        | 1535.748       | 1535.811       | D(14) |
| L(9)  | 1034.541 | 687.533        | 686.530        | 1032.536 | 1012.509 | 1011.528       | 1424.520        | 1411.760       | 1414.760       | L(13) |
| R(10) | 1188.614 | 1171.567       | 1170.560       | 1216.588 | 1199.612 | 1198.610       | 1318.711        | 1299.588       | 1298.700       | R(12) |
| F(11) | 1339.742 | 1338.735       | 1337.730       | 1363.737 | 1346.719 | 1345.730       | <b>1134.579</b> | 1117.555       | 1118.568       | F(11) |
| Q(12) | 1683.811 | 1682.797       | 1681.790       | 1681.795 | 1674.801 | 1673.791       | 887.531         | 878.048        | 880.000        | Q(10) |
| S(13) | 1830.833 | 1829.828       | 1828.822       | 1828.827 | 1821.801 | 1820.811       | 835.452         | <b>842.425</b> | 841.441        | S(9)  |
| A(14) | 1984.898 | 1984.891       | 1983.886       | 1948.903 | 1934.898 | 1933.899       | <b>772.420</b>  | 766.399        | 764.898        | A(8)  |
| A(15) | 1982.907 | 1978.889       | 1974.890       | 1720.902 | 1700.895 | 1700.899       | <b>701.383</b>  | 688.395        | <b>683.372</b> | A(7)  |
| I(16) | 1835.961 | 1728.954       | 1727.950       | 1833.968 | 1815.959 | 1815.970       | <b>630.346</b>  | 613.319        | 612.319        | I(6)  |
| Q(17) | 1883.812 | 1881.805       | 1880.800       | 1881.807 | 1873.801 | 1872.801       | <b>517.262</b>  | 509.239        | <b>499.251</b> | Q(5)  |
| A(18) | 1394.049 | 1393.033       | 1392.030       | 1362.044 | 1346.018 | 1344.019       | 450.203         | 443.214        | <b>442.200</b> | A(4)  |
| L(19) | 2047.133 | 2036.107       | 2035.100       | 2035.108 | 2026.102 | 2027.101       | <b>389.203</b>  | <b>373.171</b> | 371.180        | L(3)  |
| Q(20) | 2175.192 | 2158.168       | 2157.160       | 2163.187 | 2156.159 | 2155.170       | <b>276.119</b>  | 269.092        | <b>258.108</b> | Q(2)  |
| D(21) | 2304.276 | 2287.250       | 2286.240       | 2332.270 | 2315.251 | 2314.271       | 146.000         | 140.000        | 138.000        | D(1)  |

# sp | P84244 | H33\_MOUSE

IAQDFKTDLR <sup>Dimethyl</sup> <sub>28.03</sub> FQSAAIGALQE

- ▶ fragmentation table for charge state 2+
- ▶ specType=cid
- ▶ score=39.20
- ▶ F113873.dat
- ▶ query=q44107\_p1
- ▶ precursor=784.087310
- ▶ chargePrecursor=3
- ▶ itol=0.5

| AA | a  | a'             | a <sub>0</sub> | b     | b'    | b <sub>0</sub> | y              | y'              | y <sub>0</sub> | AA             |                |          |          |                |                |                |                |      |     |     |
|----|----|----------------|----------------|-------|-------|----------------|----------------|-----------------|----------------|----------------|----------------|----------|----------|----------------|----------------|----------------|----------------|------|-----|-----|
| I  | 43 | 602            | 639            | 255   | 17    | 544            | 0.504          | 0.508           | 1176.826       | 1181.310       | 1188.828       | I21      |          |                |                |                |                |      |     |     |
| A  | 2  | 78             | 770            | 0.504 | 0.504 | 33             | 282            | 0.504           | 0.504          | 1113.182       | 1113.588       | 1113.078 | A26      |                |                |                |                |      |     |     |
| Q  | 3  | 153            | 150            | 154   | 365   | 157            | 287            | 148             | 584            | 0.504          | 1081.581       | 1079.580 | 1074.588 | Q18            |                |                |                |      |     |     |
| D  | 4  | 200            | 213            | 192   | 380   | 191            | 650            | 214             | 461            | 206            | 997            | 205      | 620      | 1019           | 534            | 1011           | 923            | 1010 | 579 | D16 |
| F  | 5  | 274            | 247            | 265   | 834   | 265            | 147            | 288             | 147            | 278            | 632            | 379      | 140      | 680            | 600            | <b>951.507</b> | <b>951.015</b> | F17  |     |     |
| K  | 6  | 338            | 335            | 329   | 662   | 320            | 190            | 352             | 182            | 343            | 079            | 343      | 137      | <b>888.486</b> | <b>879</b>     | 911            | 279            | 481  | K16 |     |
| T  | 7  | 388            | 373            | 388   | 385   | 379            | 711            | 408             | 719            | 384            | 385            | 383      | 711      | <b>918.579</b> | <b>915.925</b> | T15            |                |      |     |     |
| E  | 8  | 446            | 532            | 437   | 719   | 437            | 221            | 460             | 215            | 461            | 718            | 451      | 224      | <b>773.915</b> | <b>765.403</b> | <b>764.910</b> | E14            |      |     |     |
| L  | 9  | 502            | 274            | 494   | 281   | 491            | 781            | <b>516.772</b>  | 1108           | 718            | 107            | 708      | 718      | 631            | 601            | <b>767.396</b> | L13            |      |     |     |
| M  | 10 | 554            | 450            | 465   | 311   | 461            | 311            | <b>608.838</b>  | 1088           | 718            | 109            | 611      | 601      | 601            | 581            | 546            | <b>608.834</b> | M12  |     |     |
| P  | 11 | 608            | 579            | 609   | 381   | 609            | 380            | <b>682.372</b>  | 1073           | 839            | 103            | 831      | 581      | 581            | 581            | 581            | 581            | 581  | 581 | P11 |
| G  | 12 | 672            | 604            | 673   | 487   | 673            | 198            | <b>746.401</b>  | 737            | 888            | 107            | 888      | 681      | 289            | 681            | 746            | <b>681.274</b> | G10  |     |     |
| S  | 13 | 725            | 627            | 725   | 487   | 725            | 198            | <b>789.917</b>  | 781            | 484            | 107            | 484      | 430      | 230            | 424            | 718            | 624            | 234  | S9  |     |
| N  | 14 | <b>811.438</b> | 670            | 670   | 670   | 670            | 670            | <b>825.438</b>  | 818            | 824            | <b>816.431</b> | 818      | 814      | 818            | 818            | 818            | 818            | 818  | N8  |     |
| A  | 15 | <b>846.957</b> | 836            | 844   | 837   | 835            | <b>860.954</b> | 862             | 841            | 851            | 849            | 851      | 180      | 847            | 848            | <b>844.180</b> | A7             |      |     |     |
| H  | 16 | 903            | 869            | 904   | 888   | 884            | 888            | <b>917.497</b>  | 908            | 881            | 898            | 881      | 881      | 881            | 881            | 881            | 881            | 881  | 881 | H6  |
| C  | 17 | 973            | 919            | 974   | 967   | 963            | 966            | <b>987.888</b>  | 977            | 888            | <b>917.862</b> | 988      | 914      | 988            | 914            | 988            | 914            | 988  | 914 | C5  |
| R  | 18 | 1047           | 928            | 1048  | 935   | <b>958.523</b> | <b>961.528</b> | 973             | 913            | <b>972.521</b> | 230            | 824      | 223      | 113            | 223            | 113            | 223            | 113  | R4  |     |
| V  | 19 | 1074           | 970            | 1075  | 977   | 1078           | 978            | <b>1038.068</b> | 1029           | 935            | 1029           | 935      | 136      | 110            | 136            | 110            | 136            | 110  | V3  |     |
| Y  | 20 | 1088           | 1041           | 1079  | 1028  | 1079           | 1024           | <b>1102.807</b> | 1093           | 1084           | 1083           | 1084     | 136      | 1083           | 136            | 1083           | 136            | 1083 | 136 | Y2  |
| W  | 21 | 1176           | 1011           | 1144  | 1011  | 1143           | 610            | 1106            | 1011           | 1138           | 1010           | 1137     | 610      | 1138           | 610            | 1138           | 610            | 1138 | 610 | W1  |



# sp | P68433 | H31\_MOUSE

IAQDFKTDLR<sup>Methyl</sup> FQSSAVMALQE  
14.02

- ▶ fragmentation table for charge state 1+
- ▶ specType=cid
- ▶ score=56.65
- ▶ F113873.dat
- ▶ query=q44759\_p1
- ▶ precursor=804.741550
- ▶ chargePrecursor=3
- ▶ itol=0.5

| AA    | a               | a <sup>+</sup> | a <sup>0</sup> | b        | b <sup>+</sup> | b <sup>0</sup> | y              | y <sup>+</sup> | y <sup>0</sup> | AA    |
|-------|-----------------|----------------|----------------|----------|----------------|----------------|----------------|----------------|----------------|-------|
| I(3)  | 86.064          | 0.000          | 0.000          | 114.090  | 0.000          | 0.000          | 243.223        | 2395.194       | 2394.223       | I(2)  |
| A(2)  | 137.134         | 0.000          | 0.000          | 185.120  | 0.000          | 0.000          | 2500.130       | 2252.112       | 2251.128       | A(25) |
| Q(3)  | 289.392         | 268.166        | 0.000          | 343.381  | 284.160        | 88.221         | 2225.103       | 2211.074       | 2210.084       | Q(19) |
| D(4)  | 450.215         | 383.130        | 362.200        | 475.224  | 411.187        | 215.203        | 2150.163       | 2089.010       | 2082.032       | D(16) |
| F(5)  | 541.261         | 430.261        | 404.277        | 576.265  | 508.258        | 457.272        | 1885.038       | 1881.066       | 1880.057       | F(17) |
| K(6)  | 675.362         | 608.256        | 587.252        | 701.377  | 688.311        | 669.377        | 1817.040       | 1820.021       | 1819.031       | K(16) |
| T(7)  | 776.430         | 726.404        | 704.420        | 804.426  | <b>787.368</b> | <b>768.414</b> | 1728.091       | 1669.026       | 1666.042       | T(15) |
| D(8)  | 861.467         | 814.431        | 791.446        | 919.450  | 901.425        | 881.441        | 1650.050       | 1593.778       | 1590.794       | D(14) |
| L(9)  | <b>1004.541</b> | 987.512        | 968.520        | 1022.530 | 1013.500       | 1014.512       | 1481.730       | 1476.752       | 1475.768       | L(13) |
| R(10) | 1174.588        | 1137.610       | 1105.661       | 1240.681 | 1228.706       | 1219.712       | 1380.080       | 1381.081       | 1380.081       | R(12) |
| P(11) | 1321.720        | 1304.700       | 1293.706       | 1349.722 | 1332.680       | 1331.711       | 1270.571       | 1195.501       | 1192.567       | P(11) |
| Q(12) | 1449.769        | 1432.750       | 1421.771       | 1477.788 | 1460.733       | 1459.769       | 1083.700       | 1046.624       | 1043.697       | Q(10) |
| S(13) | 1638.817        | 1619.790       | 1608.805       | 1664.812 | 1647.785       | 1646.801       | 985.480        | 916.426        | 913.440        | S(9)  |
| S(14) | 1824.884        | 1806.874       | 1791.810       | 1851.846 | 1834.811       | 1833.813       | 924.410        | 833.364        | 830.408        | S(8)  |
| A(15) | 1994.980        | 1977.950       | 1966.870       | 1992.881 | 1975.854       | 1974.870       | <b>761.386</b> | 744.360        | 741.376        | A(1)  |
| V(16) | 2170.954        | 2155.920       | 2147.854       | 2184.929 | 2184.929       | 2183.930       | <b>690.349</b> | 679.320        | 672.310        | V(1)  |
| K(17) | 2324.989        | 2307.950       | 2295.969       | 2356.989 | 2339.953       | 2334.978       | <b>591.281</b> | 574.254        | 571.269        | K(1)  |
| A(18) | 1998.053        | 1979.006       | 1978.023       | 2024.021 | 2007.000       | 2006.016       | <b>460.240</b> | <b>443.214</b> | 442.210        | A(4)  |
| L(16) | 2109.118        | 2092.090       | 2091.108       | 2137.111 | 2120.084       | 2119.100       | <b>389.293</b> | <b>372.173</b> | 371.093        | L(6)  |
| Q(20) | 2237.170        | 2220.140       | 2219.154       | 2265.170 | 2248.143       | 2247.159       | <b>376.119</b> | <b>359.092</b> | <b>358.108</b> | Q(2)  |
| D(21) | 2390.211        | 2368.170       | 2363.180       | 2398.211 | 2387.180       | 2376.200       | 148.000        | 148.000        | 148.000        | D(3)  |

# sp | P68433 | H31\_MOUSE

IAQDFKTDLR <sup>Methyl</sup> 14.02 FQSSAVMALQE

- ▶ fragmentation table for charge state 2+
- ▶ specType=cid
- ▶ score=56.65
- ▶ F113873.dat
- ▶ query=q44759\_p1
- ▶ precursor=804.741550
- ▶ chargePrecursor=3
- ▶ itol=0.5

| AA  | a               | a'             | a-D            | b               | b'              | b-D            | y             | y'              | y-D            | AA  |
|-----|-----------------|----------------|----------------|-----------------|-----------------|----------------|---------------|-----------------|----------------|-----|
| R1  | 41.007          | 0.504          | 0.504          | 37.049          | 0.504           | 0.504          | 120.637       | 110.132         | 110.132        | Q21 |
| A2  | 76.001          | 0.509          | 0.509          | 69.006          | 0.504           | 0.504          | 110.039       | 114.566         | 114.566        | A26 |
| Q3  | 143.000         | 0.504          | 0.504          | 137.001         | 140.504         | 0.504          | 114.554       | 110.039         | 110.039        | Q19 |
| D4  | 208.012         | 0.503          | 100.009        | 194.011         | 206.009         | 0.509          | 100.037       | <b>104.7812</b> | 104.781        | L18 |
| F15 | 274.147         | 0.504          | 266.141        | 268.143         | 273.632         | 0.504          | 100.039       | 104.492         | 104.492        | F17 |
| K6  | 330.195         | 0.500          | 320.191        | 321.192         | 343.679         | 0.503          | 100.437       | 101.960         | 101.472        | K16 |
| T17 | 388.229         | 0.503          | 379.233        | 380.232         | 389.209         | 0.503          | <b>83.430</b> | 100.039         | 100.039        | L15 |
| D8  | 440.262         | 0.503          | 437.253        | <b>400.250</b>  | 401.251         | 0.504          | 100.039       | 100.301         | <b>105.901</b> | L14 |
| L16 | 502.274         | 0.503          | 494.269        | 491.267         | 500.271         | 0.503          | 100.039       | 100.039         | 100.039        | L13 |
| R19 | 567.289         | 0.503          | 559.281        | <b>601.280</b>  | 599.277         | 0.503          | 100.039       | 100.039         | 100.039        | K22 |
| F11 | 601.267         | <b>852.854</b> | <b>632.302</b> | 600.264         | 609.261         | 0.504          | 100.292       | 107.270         | 108.767        | F11 |
| Q12 | 720.266         | 0.503          | 710.260        | <b>730.264</b>  | <b>730.880</b>  | <b>730.308</b> | 100.292       | 103.740         | 103.251        | Q10 |
| S13 | 780.312         | <b>760.300</b> | <b>730.907</b> | <b>782.810</b>  | 774.305         | 773.304        | 100.292       | 100.710         | 100.221        | S10 |
| S14 | 832.326         | 0.503          | 824.320        | 826.321         | 831.324         | 0.503          | 100.292       | 103.100         | 103.100        | S16 |
| A15 | 847.347         | 0.503          | 839.341        | <b>861.344</b>  | <b>853.431</b>  | 0.503          | 100.130       | <b>372.683</b>  | <b>372.191</b> | A17 |
| V18 | 897.401         | 0.503          | 889.395        | <b>911.470</b>  | 902.395         | 902.473        | 100.292       | 107.100         | 106.613        | V16 |
| K17 | 900.404         | 0.504          | 892.399        | <b>916.390</b>  | 906.400         | 907.399        | 100.292       | 100.039         | 100.039        | K15 |
| A19 | 960.520         | 0.503          | 952.514        | <b>1012.517</b> | 1004.504        | 1005.512       | 100.292       | 102.111         | 101.618        | A16 |
| L11 | <b>1005.062</b> | 1000.500       | 1000.000       | <b>1009.059</b> | <b>1006.546</b> | 1000.004       | 100.130       | 100.500         | 100.100        | L11 |
| Q20 | 1110.066        | 1100.130       | 1100.000       | <b>1113.060</b> | 1104.066        | 1104.066       | 100.130       | 100.000         | 100.000        | Q18 |
| E21 | 1183.012        | 1175.000       | 1174.000       | 1183.010        | 1180.000        | 1180.004       | 10.534        | 0.500           | 0.500          | E11 |





# sp | P68433 | H31\_MOUSE

IAQDFKTDLR <sup>Methyl</sup> 14.02 FQSSAVMALQE

- ▶ fragmentation table for charge state 1+
- ▶ specType=cid
- ▶ score=68.80
- ▶ F113873.dat
- ▶ query=q44761\_p1
- ▶ precursor=804.743860
- ▶ chargePrecursor=3
- ▶ itol=0.5

| AA | a              | a*       | aΔ       | b        | b*       | bΔ       | y              | y*             | yΔ             | AA       |   |
|----|----------------|----------|----------|----------|----------|----------|----------------|----------------|----------------|----------|---|
| I  | 98.066         | 0.000    | 0.000    | 114.050  | 0.000    | 0.000    | 2412.231       | 2266.156       | 2684.211       | I        |   |
| A  | 137.134        | 0.000    | 0.000    | 135.120  | 0.000    | 0.000    | 2266.156       | 2120.112       | 2276.112       | A        |   |
| G  | 159.162        | 382.318  | 0.000    | 151.189  | 298.067  | 0.000    | 2276.112       | 2131.078       | 2010.078       | G        |   |
| D  | 440.219        | 353.593  | 382.318  | 426.234  | 243.187  | 410.203  | 2131.078       | 2100.041       | 2063.035       | 2092.032 | D |
| F  | 547.267        | 530.261  | 530.237  | 579.261  | 638.256  | 617.272  | 1865.035       | 1869.066       | 1867.036       | F        |   |
| K  | <b>675.382</b> | 658.256  | 657.122  | 703.372  | 668.051  | 665.267  | 1817.048       | 1820.011       | 1819.017       | K        |   |
| L  | 776.429        | 760.408  | 758.421  | 804.426  | 772.366  | 768.414  | 1730.011       | 1862.026       | 1860.042       | L        |   |
| D  | 101.407        | 374.411  | 373.440  | 918.413  | 1002.425 | 1011.441 | 1860.026       | 1501.715       | 2366.734       | D        |   |
| I  | 103.041        | 387.513  | 386.511  | 1012.509 | 1012.509 | 1014.526 | 1861.715       | 1476.752       | 2176.768       | I        |   |
| R  | 1174.608       | 1177.611 | 1176.640 | 1222.615 | 1188.628 | 1189.641 | 1380.699       | 1381.689       | 1382.699       | R        |   |
| P  | 1321.720       | 1324.703 | 1323.710 | 1346.725 | 1312.689 | 1311.711 | 1215.577       | 2193.551       | 2192.567       | P        |   |
| Q  | 1449.783       | 1452.781 | 1451.784 | 1477.788 | 1460.793 | 1462.801 | 1061.598       | 2046.824       | 2045.830       | Q        |   |
| S  | 1536.817       | 1539.793 | 1538.800 | 1564.812 | 1547.785 | 1546.804 | 935.450        | 2018.424       | 2017.440       | S        |   |
| N  | 1623.869       | 1626.833 | 1625.839 | 1655.844 | 1638.817 | 1637.815 | 868.413        | 931.765        | 470.408        | N        |   |
| A  | 1694.886       | 1707.859 | 1706.832 | 1723.863 | 1705.854 | 1704.819 | 761.336        | 744.360        | 1741.376       | A        |   |
| V  | 1763.954       | 1776.928 | 1775.944 | 1802.949 | 1804.923 | 1811.910 | <b>690.349</b> | 573.323        | 812.310        | V        |   |
| T  | 1824.969       | 1837.923 | 1836.894 | 1864.968 | 1838.969 | 1834.912 | <b>581.361</b> | 518.294        | 618.286        | T        |   |
| M  | 1908.002       | 1919.936 | 1918.921 | 1924.927 | 1920.900 | 1936.916 | <b>480.320</b> | 449.254        | 442.237        | M        |   |
| L  | 2007.110       | 2002.938 | 2001.101 | 2110.111 | 2103.984 | 2111.110 | <b>389.293</b> | <b>372.177</b> | 671.100        | L        |   |
| Q  | 2237.175       | 2230.158 | 2219.184 | 2265.170 | 2248.143 | 2267.176 | <b>276.119</b> | <b>259.092</b> | <b>258.108</b> | Q        |   |
| E  | 2362.212       | 2361.104 | 2349.201 | 2329.211 | 2317.105 | 2317.216 | 148.106        | 148.106        | 178.100        | E        |   |

# sp | P68433 | H31\_MOUSE

IAQDFKTDLR<sup>Methyl</sup> FQSSAVMALQE  
14.02

- ▶ fragmentation table for charge state 2+
- ▶ specType=cid
- ▶ score=68.80
- ▶ F113873.dat
- ▶ query=q44761\_p1
- ▶ precursor=804.743860
- ▶ chargePrecursor=3
- ▶ itol=0.5

| AA | a              | a'             | a <sub>0</sub> | b              | b'              | b <sub>0</sub> | y        | y'             | y <sub>0</sub> | AA  |
|----|----------------|----------------|----------------|----------------|-----------------|----------------|----------|----------------|----------------|-----|
| I  | 41.952         | 0.504          | 0.504          | 57.940         | 0.504           | 0.504          | 1206.610 | 1198.102       | 1197.602       | I21 |
| A  | 78.070         | 0.504          | 0.504          | 93.060         | 0.504           | 0.504          | 1150.103 | 1143.590       | 1143.090       | A20 |
| Q  | 143.100        | 0.504          | 0.504          | 157.090        | 0.504           | 0.504          | 1114.594 | 1108.081       | 1107.581       | Q19 |
| D  | 208.133        | 0.504          | 0.504          | 224.611        | 0.504           | 0.504          | 1079.095 | 1073.582       | 1073.082       | D18 |
| F  | 274.147        | 0.504          | 0.504          | 288.140        | 0.504           | 0.504          | 1043.597 | 1038.084       | 1037.584       | F17 |
| K  | 339.190        | 0.504          | 0.504          | 352.192        | 0.504           | 0.504          | 1008.099 | 1003.587       | 1003.087       | K16 |
| T  | <b>388.719</b> | 0.504          | 0.504          | 402.110        | 0.504           | 0.504          | 973.112  | <b>973.430</b> | 973.930        | T15 |
| D  | 454.733        | 0.512          | 0.512          | 457.221        | 0.512           | 0.512          | 938.124  | 938.363        | 938.361        | D14 |
| L  | 520.774        | 0.512          | 0.512          | 492.762        | 0.512           | 0.512          | 903.126  | 903.365        | 903.363        | L13 |
| M  | 587.819        | 0.512          | 0.512          | 557.803        | <b>601.830</b>  | 0.512          | 868.127  | 868.367        | 868.365        | M12 |
| P  | 654.867        | 0.520          | <b>651.382</b> | <b>675.354</b> | <b>666.851</b>  | <b>666.350</b> | 833.129  | 833.369        | 833.367        | P11 |
| Q  | 721.916        | 0.520          | 0.520          | 726.397        | <b>739.364</b>  | 0.520          | 803.131  | 803.371        | 803.369        | Q10 |
| S  | 788.952        | <b>766.399</b> | 0.520          | 793.401        | <b>782.910</b>  | 0.520          | 773.134  | <b>459.715</b> | 773.373        | S10 |
| S  | 854.978        | 0.520          | 0.520          | 859.443        | 0.520           | 0.520          | 738.136  | 738.375        | 738.373        | S9  |
| A  | 921.947        | 0.520          | 0.520          | 926.485        | <b>911.944</b>  | 0.520          | 703.138  | <b>372.683</b> | <b>372.191</b> | A10 |
| V  | 987.981        | 0.520          | 0.520          | 992.479        | <b>911.478</b>  | 0.520          | 668.140  | 668.379        | 668.377        | V10 |
| T  | 1053.999       | 0.520          | 0.520          | 1058.500       | <b>976.500</b>  | 0.520          | 633.142  | 633.381        | 633.379        | T10 |
| A  | 1098.320       | 0.520          | 0.520          | 1099.521       | <b>1012.517</b> | 0.520          | 603.144  | 603.383        | 603.381        | A10 |
| L  | 1075.082       | 0.540          | 0.540          | 1046.056       | <b>1069.059</b> | 0.540          | 568.146  | 568.385        | 568.383        | L10 |
| Q  | 1119.081       | 0.540          | 0.540          | 1120.080       | <b>1135.088</b> | 0.540          | 533.148  | 533.387        | 533.385        | Q10 |
| E  | 1183.012       | 0.540          | 0.540          | 1184.010       | 1189.010        | 0.540          | 503.150  | 503.389        | 503.387        | E10 |

# sp | P68433 | H31\_MOUSE

IAQDFKTDLR<sup>Methyl</sup> FQSSAVMALQE  
14.02

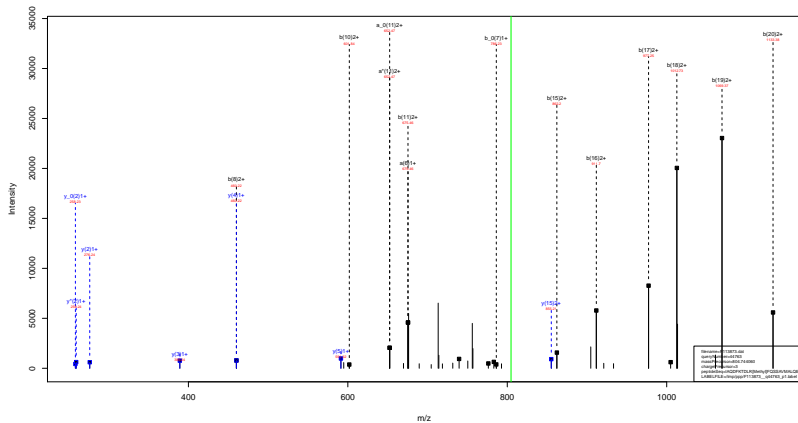

# sp | P68433 | H31\_MOUSE

IAQDFKTDLR<sup>Methyl</sup> FQSSAVMALQE  
14.02

- ▶ fragmentation table for charge state 1+
- ▶ specType=cid
- ▶ score=62.08
- ▶ F113873.dat
- ▶ query=q44763\_p1
- ▶ precursor=804.744060
- ▶ chargePrecursor=3
- ▶ itol=0.5

| AA    | a               | a'       | a <sub>0</sub> | b        | b'       | b <sub>0</sub> | y              | y'             | y <sub>0</sub> | AA    |
|-------|-----------------|----------|----------------|----------|----------|----------------|----------------|----------------|----------------|-------|
| I(3)  | 86.064          | 0.000    | 0.000          | 114.090  | 0.000    | 0.000          | 2412.233       | 2395.194       | 2384.233       | I(2)  |
| A(2)  | 137.134         | 0.000    | 0.000          | 185.120  | 0.000    | 0.000          | 2250.130       | 2232.112       | 2221.130       | A(25) |
| Q(3)  | 289.392         | 268.166  | 0.000          | 343.380  | 284.180  | 88.200         | 2228.130       | 2211.074       | 2200.084       | Q(19) |
| D(4)  | 450.215         | 383.130  | 362.200        | 470.224  | 411.187  | 219.200        | 2100.163       | 2083.010       | 2072.162       | D(16) |
| F(5)  | 641.267         | 530.261  | 524.277        | 576.266  | 528.246  | 367.272        | 1985.030       | 1969.966       | 1955.000       | F(17) |
| K(6)  | <b>875.382</b>  | 808.236  | 807.252        | 861.277  | 808.251  | 369.277        | 1837.040       | 1820.921       | 1809.937       | K(16) |
| T(7)  | <b>976.436</b>  | 790.404  | 784.420        | 804.426  | 807.406  | <b>706.414</b> | 1700.091       | 1689.926       | 1680.042       | T(15) |
| D(8)  | 1074.431        | 874.430  | 870.430        | 902.425  | 901.441  | 1600.000       | 1592.978       | 1588.984       | 1584.994       | D(14) |
| L(9)  | <b>1004.541</b> | 887.431  | 885.430        | 1022.430 | 1012.430 | 1014.520       | 1481.730       | 1476.724       | 1472.730       | L(13) |
| M(10) | 1174.580        | 1137.431 | 1135.430       | 1240.420 | 1238.420 | 1194.414       | 1380.080       | 1368.987       | 1360.000       | M(12) |
| F(11) | 1321.720        | 1304.700 | 1303.700       | 1349.720 | 1337.680 | 1331.711       | 1270.577       | 1265.501       | 1260.507       | F(11) |
| Q(12) | 1449.769        | 1432.730 | 1431.731       | 1477.760 | 1467.721 | 1401.760       | 1083.700       | 1078.624       | 1074.630       | Q(10) |
| S(13) | 1638.817        | 1619.760 | 1618.800       | 1664.812 | 1647.760 | 1644.801       | 982.400        | 978.424        | 974.440        | S(9)  |
| S(14) | 1824.864        | 1796.760 | 1795.810       | 1851.860 | 1834.811 | 1831.811       | 924.410        | 919.360        | 916.400        | S(8)  |
| A(15) | 1994.900        | 1977.800 | 1976.810       | 1992.801 | 1985.804 | 1984.810       | 861.380        | 854.360        | 851.370        | A(11) |
| V(16) | 2170.954        | 2170.920 | 2170.924       | 2041.900 | 2041.920 | 2041.920       | 819.300        | 812.310        | 812.310        | V(10) |
| K(17) | 2124.980        | 2107.800 | 2106.800       | 2080.980 | 2080.980 | 2080.980       | <b>501.201</b> | 500.204        | 499.200        | K(8)  |
| A(18) | 1998.053        | 1979.006 | 1978.021       | 2024.021 | 2007.000 | 2006.016       | <b>460.240</b> | 445.234        | 444.230        | A(4)  |
| L(16) | 2109.110        | 2092.000 | 2091.100       | 2137.111 | 2120.000 | 2119.100       | <b>389.293</b> | 372.177        | 371.093        | L(8)  |
| Q(20) | 2237.110        | 2220.040 | 2219.044       | 2265.110 | 2248.143 | 2247.150       | <b>376.119</b> | <b>258.092</b> | <b>258.108</b> | Q(2)  |
| D(21) | 2390.210        | 2368.110 | 2367.110       | 2398.210 | 2387.100 | 2376.200       | 148.000        | 148.000        | 148.000        | D(3)  |

# sp | P68433 | H31\_MOUSE

IAQDFKTDLR <sup>Methyl</sup> 14.02 FQSSAVMALQE

- ▶ fragmentation table for charge state 2+
- ▶ specType=cid
- ▶ score=62.08
- ▶ F113873.dat
- ▶ query=q44763\_p1
- ▶ precursor=804.744060
- ▶ chargePrecursor=3
- ▶ itol=0.5

| AA    | a        | a'              | a <sub>0</sub> <sup>0</sup> | b              | b'               | b <sub>0</sub> <sup>0</sup> | y        | y'             | y <sub>0</sub> <sup>0</sup> | AA   |
|-------|----------|-----------------|-----------------------------|----------------|------------------|-----------------------------|----------|----------------|-----------------------------|------|
| I(3)  | 41.952   | 0.504           | 0.504                       | 57.940         | 0.504            | 0.504                       | 1206.610 | 1168.102       | 1187.602                    | I(2) |
| A(2)  | 78.070   | 0.504           | 0.504                       | 93.060         | 0.504            | 0.504                       | 1150.103 | 1143.580       | 1143.080                    | A(2) |
| Q(3)  | 1143.100 | 1.504           | 0.504                       | 131.090        | 0.504            | 0.504                       | 1114.594 | 1108.041       | 1108.541                    | Q(1) |
| D(4)  | 1508.513 | 1.504           | 1.504                       | 174.611        | 1.504            | 1.504                       | 1055.525 | 1045.021       | 1044.521                    | D(1) |
| F(5)  | 1774.047 | 1.504           | 1.504                       | 208.140        | 1.504            | 1.504                       | 1011.037 | 1004.494       | 1004.034                    | F(1) |
| K(6)  | 1938.195 | 1.504           | 1.504                       | 252.162        | 1.504            | 1.504                       | 953.137  | 947.412        | 946.912                     | K(1) |
| T(7)  | 2002.719 | 1.504           | 1.504                       | 296.179        | 1.504            | 1.504                       | 913.112  | <b>874.430</b> | 868.911                     | T(1) |
| D(8)  | 2166.121 | 1.504           | 1.504                       | 340.192        | 1.504            | 1.504                       | 874.124  | 868.363        | 867.863                     | D(1) |
| L(9)  | 2329.774 | 1.504           | 1.504                       | 384.202        | 1.504            | 1.504                       | 837.126  | 831.201        | 830.701                     | L(1) |
| M(10) | 2493.318 | 1.504           | 1.504                       | 428.210        | 1.504            | 1.504                       | 802.127  | 800.181        | 799.681                     | M(1) |
| F(11) | 2656.927 | <b>0.52.854</b> | <b>0.52.302</b>             | <b>472.218</b> | <b>0.51.834</b>  | <b>0.50.814</b>             | 769.129  | 765.192        | 764.692                     | F(1) |
| Q(12) | 2820.596 | 1.504           | 1.504                       | 516.224        | 1.504            | 1.504                       | 734.130  | 732.193        | 731.693                     | Q(1) |
| S(13) | 2984.152 | 1.504           | 1.504                       | 560.230        | 1.504            | 1.504                       | 700.134  | 698.220        | 697.720                     | S(1) |
| S(14) | 3147.708 | 1.504           | 1.504                       | 604.233        | 1.504            | 1.504                       | 667.134  | 665.193        | 664.693                     | S(1) |
| A(15) | 3311.247 | 1.504           | 1.504                       | 648.241        | <b>0.51.844</b>  | <b>0.50.830</b>             | 634.137  | 632.181        | 631.681                     | A(1) |
| V(16) | 3474.801 | 1.504           | 1.504                       | 692.247        | <b>0.51.870</b>  | <b>0.50.855</b>             | 602.143  | 600.181        | 599.681                     | V(1) |
| T(17) | 3638.359 | 1.504           | 1.504                       | 736.250        | <b>0.51.900</b>  | <b>0.50.885</b>             | 570.144  | 568.181        | 567.681                     | T(1) |
| A(18) | 3801.920 | 1.504           | 1.504                       | 780.251        | <b>1.012.517</b> | 1.004.004                   | 538.151  | 536.824        | 535.511                     | A(1) |
| L(19) | 3965.482 | 1.504           | 1.504                       | 824.250        | <b>1.069.519</b> | 1.061.014                   | 506.159  | 504.502        | 503.011                     | L(1) |
| Q(20) | 4129.041 | 1.504           | 1.504                       | 868.250        | <b>1.133.088</b> | 1.124.575                   | 474.165  | 472.502        | 471.011                     | Q(1) |
| E(21) | 4292.612 | 1.504           | 1.504                       | 912.251        | 1.188.596        | 1.180.058                   | 442.165  | 440.502        | 439.011                     | E(1) |



# sp | P68433 | H31\_MOUSE

IAQDFKTDLR <sup>Methyl</sup> 14.02 FQSSAVMALQE

- ▶ fragmentation table for charge state 1+
- ▶ specType=cid
- ▶ score=41.21
- ▶ F113873.dat
- ▶ query=q44764\_p1
- ▶ precursor=804.744180
- ▶ chargePrecursor=3
- ▶ itol=0.5

| AA   | a              | a*       | aD    | b        | b*    | bD    | y        | y*       | yD       | AA  |
|------|----------------|----------|-------|----------|-------|-------|----------|----------|----------|-----|
| R1   | 869964         | 1430     | 0.000 | 1143000  | 0.000 | 0.000 | 2412.23  | 2365.194 | 2364.221 | R21 |
| A1   | 1171114        | 0.000    | 0.000 | 1091130  | 0.000 | 0.000 | 2269.119 | 2267.114 | 2261.119 | A20 |
| G1   | 1001342        | 1001.342 | 0.000 | 1014330  | 1.000 | 0.000 | 2420.131 | 2414.076 | 2210.064 | Q10 |
| D1   | 4001215        | 0.011    | 0.000 | 4291214  | 0.011 | 0.011 | 3001.010 | 3000.010 | 2902.010 | D10 |
| F1   | 1411011        | 0.011    | 0.011 | 1411.011 | 0.011 | 0.011 | 1881.010 | 1881.000 | 1801.011 | F11 |
| K1   | 0111011        | 0.011    | 0.011 | 1011.011 | 0.011 | 0.011 | 1801.010 | 1800.010 | 1810.011 | K10 |
| T1   | 1111011        | 0.011    | 0.011 | 1111.011 | 0.011 | 0.011 | 1801.010 | 1800.010 | 1800.011 | T10 |
| E1   | 0011011        | 0.011    | 0.011 | 0111.011 | 0.011 | 0.011 | 1801.010 | 1800.010 | 1901.011 | E10 |
| L1   | <b>1004341</b> | 1004.341 | 0.000 | 1012.340 | 0.012 | 0.000 | 1814.328 | 1813.741 | 1470.702 | L11 |
| M1   | 1111011        | 0.011    | 0.011 | 1111.011 | 0.011 | 0.011 | 1801.010 | 1800.010 | 1801.011 | M10 |
| P1   | 1111011        | 0.011    | 0.011 | 1111.011 | 0.011 | 0.011 | 1801.010 | 1800.010 | 1801.011 | P10 |
| Q1   | 1111011        | 0.011    | 0.011 | 1111.011 | 0.011 | 0.011 | 1801.010 | 1800.010 | 1801.011 | Q10 |
| S1   | 1111011        | 0.011    | 0.011 | 1111.011 | 0.011 | 0.011 | 1801.010 | 1800.010 | 1801.011 | S10 |
| N1   | 1111011        | 0.011    | 0.011 | 1111.011 | 0.011 | 0.011 | 1801.010 | 1800.010 | 1801.011 | N10 |
| A11  | 1004340        | 1004.340 | 0.000 | 1012.340 | 0.012 | 0.000 | 1814.328 | 1813.741 | 1470.702 | A11 |
| V11  | 1111011        | 0.011    | 0.011 | 1111.011 | 0.011 | 0.011 | 1801.010 | 1800.010 | 1801.011 | V10 |
| I11  | 1111011        | 0.011    | 0.011 | 1111.011 | 0.011 | 0.011 | 1801.010 | 1800.010 | 1801.011 | I10 |
| A111 | 1004340        | 1004.340 | 0.000 | 1012.340 | 0.012 | 0.000 | 1814.328 | 1813.741 | 1470.702 | A11 |
| L111 | 1111011        | 0.011    | 0.011 | 1111.011 | 0.011 | 0.011 | 1801.010 | 1800.010 | 1801.011 | L11 |
| G11  | 1111011        | 0.011    | 0.011 | 1111.011 | 0.011 | 0.011 | 1801.010 | 1800.010 | 1801.011 | G11 |
| D11  | 1111011        | 0.011    | 0.011 | 1111.011 | 0.011 | 0.011 | 1801.010 | 1800.010 | 1801.011 | D11 |

# sp | P68433 | H31\_MOUSE

IAQDFKTDLR <sup>Methyl</sup> 14.02 FQSSAVMALQE

- ▶ fragmentation table for charge state 2+
- ▶ specType=cid
- ▶ score=41.21
- ▶ F113873.dat
- ▶ query=q44764\_p1
- ▶ precursor=804.744180
- ▶ chargePrecursor=3
- ▶ itol=0.5

| AA  | a               | a'             | a-D            | b               | b'              | b-D             | y              | y'             | y-D            | AA  |
|-----|-----------------|----------------|----------------|-----------------|-----------------|-----------------|----------------|----------------|----------------|-----|
| R1  | 41.067          | 0.904          | 0.904          | 37.949          | 0.904           | 0.904           | 1206.010       | 1108.010       | 1107.010       | Q21 |
| A2  | 76.001          | 0.904          | 0.904          | 69.086          | 0.904           | 0.904           | 1100.071       | 1141.966       | 1141.066       | A26 |
| Q3  | 143.000         | 1.94506        | 0.934          | 137.091         | 1.48504         | 0.934           | 1114.054       | 1108.040       | 1105.040       | Q19 |
| D4  | 208.013         | 0.910          | 1.00000        | 194.111         | 0.90000         | 0.90000         | 1099.006       | 1095.000       | 1094.000       | L18 |
| F5  | 274.147         | 205.134        | 205.141        | 268.143         | 273.633         | 270.140         | <b>983.012</b> | <b>984.418</b> | <b>984.006</b> | F17 |
| K6  | 339.090         | 339.090        | 339.100        | 332.192         | 343.879         | 343.187         | 819.477        | 819.960        | 819.472        | K16 |
| T7  | <b>388.719</b>  | 389.013        | 389.713        | 400.110         | 388.009         | 389.711         | <b>835.410</b> | <b>846.917</b> | <b>846.425</b> | L15 |
| D8  | 446.044         | 437.119        | 437.221        | <b>400.230</b>  | 481.719         | 481.024         | 804.959        |                |                | D14 |
| L9  | 502.774         | 494.201        | 494.100        | 500.771         | <b>508.258</b>  | 507.760         | 787.388        | 788.070        | 788.367        | L11 |
| R10 | 569.018         | 579.111        | 581.011        | <b>601.830</b>  | 580.111         | 580.008         | 697.987        | 682.111        | 681.008        | R12 |
| F11 | 641.367         | 622.024        | <b>632.302</b> | 667.304         | <b>666.051</b>  | 666.309         | 605.792        | 597.270        | 598.787        | F11 |
| Q12 | 720.369         | 614.081        | 616.100        | <b>739.304</b>  | 739.881         | 740.380         | 632.280        | 633.146        | 633.251        | Q10 |
| S13 | 788.012         | 793.308        | 793.000        | <b>782.010</b>  | 774.308         | 774.004         | 588.225        | <b>490.715</b> | 490.212        | S10 |
| S14 | 832.438         | 811.011        | 813.411        | 820.411         | 811.011         | 812.430         | 624.111        | 613.989        | 613.707        | S16 |
| A15 | <b>847.847</b>  | 838.413        | 838.941        | <b>861.844</b>  | 853.411         | 853.939         | 611.187        | <b>372.683</b> | <b>372.181</b> | A17 |
| V16 | 897.461         | <b>888.968</b> | <b>888.476</b> | <b>911.470</b>  | 903.070         | 903.473         | 505.070        | 517.005        | 516.073        | V16 |
| K17 | 963.001         | 954.000        | 954.000        | <b>976.000</b>  | <b>966.485</b>  | 967.000         | 400.484        | 400.000        | 399.000        | K17 |
| A18 | 998.000         | 990.000        | 990.011        | <b>1012.511</b> | <b>1004.004</b> | 1005.011        | 300.004        | 292.111        | 291.011        | A18 |
| L19 | <b>1005.062</b> | 1006.008       | 1006.000       | <b>1009.009</b> | <b>1006.546</b> | <b>1006.054</b> | 100.100        | 100.000        | 100.100        | L19 |
| Q20 | 1116.000        | 1110.011       | 1110.000       | <b>1131.000</b> | 1124.011        | 1124.000        | 100.011        | 100.000        | 100.000        | Q20 |
| E21 | 1183.012        | 1175.000       | 1174.833       | 1183.012        | 1183.000        | 1183.004        | 74.534         | 0.500          | 85.529         | E11 |



# sp | P68433 | H31\_MOUSE

IAQDFK <sup>Methyl</sup> TDLRFQSSAVMALQE  
14.02

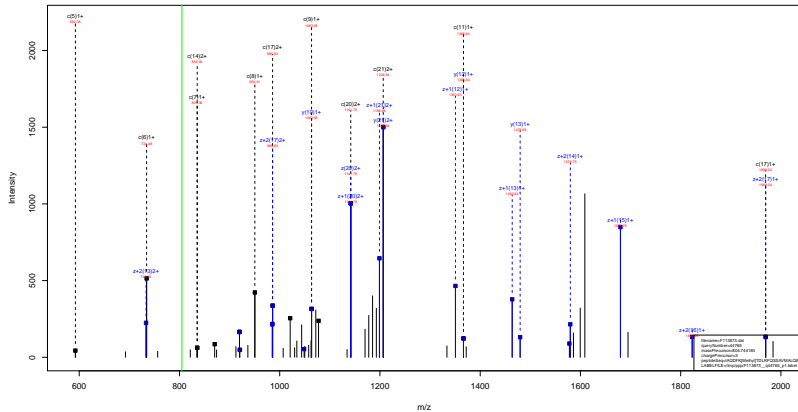

# sp | P68433 | H31\_MOUSE

IAQDFK <sup>Methyl</sup> 14.02 TDLRFQSSAVMALQE

- ▶ fragmentation table for charge state 1+
- ▶ specType=etd
- ▶ score=42.58
- ▶ F113873.dat
- ▶ query=q44765\_p1
- ▶ precursor=804.744180
- ▶ chargePrecursor=3
- ▶ itol=0.5

| AA     | c               | y               | z+1             | z+2             | z               | AA    |
|--------|-----------------|-----------------|-----------------|-----------------|-----------------|-------|
| I [1]  | 131.118         | 2412.225        | 2396.206        | 0.000           | 2395.190        | R[21] |
| A [2]  | 202.155         | 2299.130        | 2283.120        | 0.000           | 2282.112        | A[20] |
| Q [3]  | 330.214         | 2228.102        | 2212.083        | 2213.001        | 2211.075        | Q[19] |
| D [4]  | 445.241         | 2140.043        | 2084.024        | 2039.012        | 2037.010        | D[18] |
| F [5]  | <b>592.309</b>  | 1985.016        | 1969.997        | <b>1970.005</b> | 1967.990        | F[17] |
| K [6]  | <b>734.420</b>  | 1837.948        | 1821.929        | <b>1822.937</b> | 1820.921        | K[16] |
| T [7]  | <b>835.467</b>  | 1695.837        | <b>1679.818</b> | 1680.826        | 1678.810        | T[15] |
| D [8]  | <b>950.494</b>  | 1594.789        | 1578.771        | <b>1579.778</b> | <b>1577.763</b> | D[14] |
| L [9]  | <b>1063.578</b> | <b>1479.762</b> | <b>1463.744</b> | 1464.752        | 1462.736        | L[13] |
| R[10]  | 1219.679        | <b>1366.678</b> | <b>1350.660</b> | 1351.667        | 1349.651        | R[12] |
| F [11] | <b>1366.748</b> | 1210.577        | 1194.559        | 1195.566        | 1193.551        | F[11] |
| Q [12] | 1494.806        | <b>1063.509</b> | 1047.490        | <b>1048.498</b> | 1046.482        | Q[10] |
| S [13] | 1561.838        | 935.450         | <b>919.432</b>  | <b>920.439</b>  | 918.424         | S[9]  |
| S [14] | 1668.870        | 848.418         | 832.400         | 833.407         | 831.392         | S[8]  |
| A [15] | 1739.908        | 743.388         | 743.397         | 746.375         | 744.360         | A[7]  |
| V [16] | 1838.978        | 650.340         | 674.330         | 675.338         | 673.323         | V[6]  |
| M [17] | <b>1970.016</b> | 561.281         | 575.262         | 576.270         | 574.254         | M[5]  |
| A [18] | 2041.054        | 460.240         | 444.231         | 445.229         | 443.214         | A[4]  |
| L [19] | 2154.138        | 389.203         | 373.194         | 374.192         | 372.177         | L[3]  |
| Q [20] | 2282.196        | 276.170         | 260.160         | 261.158         | 259.142         | Q[2]  |
| E [21] | 2411.239        | 148.090         | 132.082         | 133.080         | 131.064         | E[1]  |

# sp | P68433 | H31\_MOUSE

IAQDFK <sup>Methyl</sup> 14.02 TDLRFQSSAVMALQE

- ▶ fragmentation table for charge state 2+
- ▶ specType=etd
- ▶ score=42.58
- ▶ F113873.dat
- ▶ query=q44765\_p1
- ▶ precursor=804.744180
- ▶ chargePrecursor=3
- ▶ itol=0.5

| AA     | c               | y               | z+1             | z+2            | z               | AA    |
|--------|-----------------|-----------------|-----------------|----------------|-----------------|-------|
| I [1]  | 66.063          | <b>1206.615</b> | <b>1198.606</b> | 0.504          | 1198.103        | I[21] |
| A [2]  | 101.501         | 1150.073        | <b>1142.064</b> | 0.504          | <b>1141.560</b> | A[20] |
| Q [3]  | 105.610         | 1114.554        | 1106.545        | 1107.040       | 1106.041        | Q[19] |
| D [4]  | 223.124         | 1050.525        | 1042.516        | 1043.020       | 1042.511        | D[18] |
| F [5]  | 296.658         | 993.012         | <b>965.002</b>  | <b>965.506</b> | 964.496         | F[17] |
| K [6]  | 307.713         | <b>919.477</b>  | 911.468         | 911.972        | 910.964         | K[16] |
| T [7]  | 418.237         | 848.422         | 840.413         | 840.917        | 839.909         | T[15] |
| D [8]  | 475.751         | 797.899         | 789.889         | 790.393        | 789.385         | D[14] |
| L [9]  | 532.291         | 740.385         | 732.375         | <b>732.879</b> | 731.872         | L[13] |
| R [10] | 610.343         | 683.841         | 675.833         | 676.337        | 675.329         | R[12] |
| F [11] | 683.878         | 605.792         | 597.783         | 598.287        | 597.279         | F[11] |
| Q [12] | 747.907         | 532.258         | 524.249         | 524.753        | 523.745         | Q[10] |
| S [13] | 791.423         | 468.220         | 460.210         | 460.723        | 459.715         | S[9]  |
| S [14] | <b>834.939</b>  | 424.713         | 416.703         | 417.207        | 416.199         | S[8]  |
| A [15] | <b>878.457</b>  | 381.187         | 373.187         | 373.691        | 372.683         | A[7]  |
| V [16] | <b>919.992</b>  | 345.670         | 337.669         | 338.173        | 337.165         | V[6]  |
| M [17] | <b>965.512</b>  | 296.144         | 288.135         | 288.639        | 287.631         | M[5]  |
| A [18] | <b>1021.030</b> | 230.624         | 222.614         | 223.118        | 222.110         | A[4]  |
| L [19] | <b>1077.572</b> | 195.105         | 187.096         | 187.600        | 186.592         | L[3]  |
| Q [20] | <b>1141.602</b> | 138.563         | 130.554         | 131.058        | 130.050         | Q[2]  |
| E [21] | <b>1206.123</b> | 74.534          | 66.524          | 67.028         | 66.021          | E[1]  |



# sp | P68433 | H31\_MOUSE

IAQDFKTDLR<sup>Methyl</sup> FQSSAVMALQE  
14.02

- ▶ fragmentation table for charge state 1+
- ▶ specType=cid
- ▶ score=63.64
- ▶ F113873.dat
- ▶ query=q44767\_p1
- ▶ precursor=804.745160
- ▶ chargePrecursor=3
- ▶ itol=0.5

| AA    | a               | a*       | a.p      | b              | b*             | b.p      | y              | y*             | y.p            | AA    |
|-------|-----------------|----------|----------|----------------|----------------|----------|----------------|----------------|----------------|-------|
| I(3)  | 88.0664         | 0.000    | 0.000    | 114.090        | 0.000          | 0.000    | 2412.220       | 2395.194       | 2384.222       | I(2)  |
| A(2)  | 137.114         | 0.000    | 0.000    | 185.120        | 0.000          | 0.000    | 2250.130       | 2232.112       | 2221.128       | A(25) |
| Q(3)  | 289.392         | 268.166  | 0.00     | 341.341        | 284.180        | 0.00     | 2228.100       | 2214.074       | 2203.084       | Q(19) |
| D(4)  | 450.215         | 383.195  | 352.200  | 470.224        | 411.187        | 411.203  | 2100.163       | 2089.016       | 2082.032       | D(10) |
| F(5)  | 641.267         | 630.261  | 624.277  | 676.266        | 658.268        | 657.272  | 1985.030       | 1981.996       | 1981.006       | F(17) |
| K(6)  | <b>675.382</b>  | 658.376  | 657.372  | <b>703.377</b> | 688.371        | 685.367  | 1817.040       | 1820.021       | 1818.031       | K(16) |
| T(7)  | 776.526         | 770.484  | 764.483  | 814.525        | <b>797.508</b> | 796.514  | 1708.091       | 1699.026       | 1698.042       | T(15) |
| D(8)  | 983.467         | 974.431  | 971.430  | 1014.452       | <b>997.436</b> | 991.441  | 1600.020       | 1593.778       | 1596.784       | D(14) |
| L(9)  | <b>1004.541</b> | 987.512  | 986.510  | 1027.530       | 1013.500       | 1014.512 | 1481.730       | 1476.752       | 1475.760       | L(13) |
| R(10) | 1174.690        | 1157.610 | 1155.601 | 1200.620       | 1189.590       | 1189.612 | 1380.080       | 1381.081       | 1380.081       | R(12) |
| F(11) | 1321.720        | 1304.700 | 1303.700 | 1349.720       | 1337.680       | 1331.711 | 1270.571       | 1195.501       | 1192.567       | F(11) |
| Q(12) | 1449.760        | 1432.730 | 1431.727 | 1477.760       | 1460.733       | 1461.760 | 1083.700       | 1046.600       | 1043.667       | Q(10) |
| S(13) | 1638.817        | 1619.780 | 1618.800 | 1664.812       | 1647.785       | 1646.805 | 985.400        | 916.424        | 917.440        | S(9)  |
| S(14) | 1824.884        | 1806.824 | 1805.810 | 1851.846       | 1834.811       | 1833.813 | 934.400        | 833.366        | 836.408        | S(8)  |
| A(15) | 1894.880        | 1877.850 | 1876.830 | 1922.881       | 1905.854       | 1904.870 | 881.380        | 744.380        | 741.376        | A(1)  |
| V(16) | 1920.954        | 1910.920 | 1910.904 | 1941.950       | 1924.923       | 1923.930 | <b>890.349</b> | 839.320        | 832.310        | V(1)  |
| K(17) | 1924.980        | 1907.950 | 1906.940 | 1956.980       | 1939.953       | 1934.970 | <b>891.381</b> | 834.354        | 827.340        | K(6)  |
| A(18) | 1996.053        | 1979.006 | 1978.023 | 2024.021       | 2007.000       | 2006.016 | <b>460.240</b> | 443.234        | 442.230        | A(4)  |
| L(16) | 2109.116        | 2092.090 | 2091.100 | 2137.111       | 2120.084       | 2119.100 | <b>389.293</b> | 372.177        | 371.093        | L(8)  |
| Q(20) | 2237.190        | 2220.140 | 2219.144 | 2265.170       | 2248.143       | 2247.150 | <b>376.119</b> | <b>258.092</b> | <b>258.108</b> | Q(2)  |
| E(21) | 2390.210        | 2374.190 | 2373.193 | 2409.210       | 2394.180       | 2393.180 | 376.200        | 148.000        | 148.000        | E(3)  |

# sp | P68433 | H31\_MOUSE

IAQDFKTDLR<sup>Methyl</sup> FQSSAVMALQE  
14.02

- ▶ fragmentation table for charge state 2+
- ▶ specType=cid
- ▶ score=63.64
- ▶ F113873.dat
- ▶ query=q44767\_p1
- ▶ precursor=804.745160
- ▶ chargePrecursor=3
- ▶ itol=0.5

| AA | a              | a'    | a <sub>0</sub> | b               | b'              | b <sub>0</sub>  | y        | y'             | y <sub>0</sub> | AA             |      |
|----|----------------|-------|----------------|-----------------|-----------------|-----------------|----------|----------------|----------------|----------------|------|
| H  | 41.052         | 0.509 | 0.509          | 17.546          | 0.504           | 0.509           | 1126.813 | 1100.152       | 1100.882       | H21            |      |
| A  | 70.070         | 0.509 | 0.509          | 19.050          | 0.504           | 0.504           | 1130.073 | 1143.590       | 1141.088       | A20            |      |
| G  | 104.000        | 1.040 | 1.040          | 12.000          | 1.020           | 1.040           | 0.504    | 1114.707       | 1100.044       | 1100.044       | Q10  |
| D  | 130.013        | 0.513 | 0.513          | 0.013           | 0.511           | 0.509           | 0.509    | 1050.262       | 1049.012       | 1044.702       | D10  |
| F  | 174.147        | 0.517 | 0.517          | 108.147         | 0.512           | 0.512           | 0.716    | 1001.097       | 1004.494       | 1004.004       | F117 |
| K  | 198.070        | 0.570 | 0.570          | 130.070         | 0.512           | 0.512           | 0.413    | 1011.107       | 1010.004       | 1010.412       | K106 |
| I  | <b>330.719</b> | 0.719 | 0.719          | 0.719           | 0.719           | 0.719           | 0.719    | <b>855.430</b> | 0.680          | 0.680          | I115 |
| E  | 336.144        | 0.574 | 0.574          | 432.144         | <b>460.230</b>  | 0.512           | 0.512    | 1011.234       | 1005.303       | 1005.003       | L114 |
| L  | 332.274        | 0.574 | 0.574          | 432.274         | 0.512           | 0.512           | 0.716    | 1011.200       | 1004.074       | 1004.074       | L113 |
| M  | 337.013        | 0.573 | 0.573          | 337.013         | <b>601.830</b>  | 0.512           | 0.512    | 1001.000       | 1001.000       | 1001.000       | M112 |
| P  | 334.307        | 0.573 | 0.573          | <b>632.302</b>  | <b>675.304</b>  | 0.509           | 0.509    | 1005.700       | 1007.270       | 1008.707       | P111 |
| Q  | 172.000        | 0.500 | 0.500          | <b>739.304</b>  | 100.000         | 0.500           | 0.500    | 1002.200       | 1001.700       | 1001.200       | Q103 |
| S  | 190.012        | 0.508 | 0.508          | 190.012         | <b>782.910</b>  | 0.512           | 0.512    | 1001.004       | 1001.200       | <b>450.715</b> | S100 |
| S  | 194.008        | 0.508 | 0.508          | 194.008         | 0.512           | 0.512           | 0.716    | 1001.008       | 1001.008       | 1001.008       | S100 |
| A  | 107.007        | 0.507 | 0.507          | <b>861.944</b>  | 100.007         | 0.512           | 0.512    | 1011.007       | 1011.007       | 1011.007       | A107 |
| V  | 107.001        | 0.508 | 0.508          | 100.001         | <b>911.470</b>  | 0.509           | 0.509    | 1011.471       | 1005.013       | 1011.013       | V106 |
| T  | 100.010        | 0.510 | 0.510          | <b>976.950</b>  | 100.010         | 0.510           | 0.510    | 1001.010       | 1001.010       | 1001.010       | T105 |
| A  | 100.020        | 0.508 | 0.508          | 100.020         | <b>1012.517</b> | <b>1004.004</b> | 1011.512 | 1001.020       | 1001.120       | 1001.020       | A104 |
| L  | 100.010        | 0.508 | 0.508          | 100.010         | <b>1009.050</b> | <b>1004.540</b> | 1001.010 | 1001.010       | 1001.010       | 1001.010       | L103 |
| G  | 111.004        | 1.110 | 1.110          | <b>1133.000</b> | 111.004         | 1.110           | 1.110    | 1001.004       | 1001.004       | 1001.004       | G102 |
| D  | 110.012        | 0.510 | 0.510          | 110.012         | 110.012         | 0.510           | 0.510    | 1001.012       | 1001.012       | 1001.012       | D101 |



# sp | P68433 | H31\_MOUSE

IAQDFKTDLR <sup>Methyl</sup> 14.02 FQSSAVMALQE

- ▶ fragmentation table for charge state 1+
- ▶ specType=cid
- ▶ score=52.06
- ▶ F113873.dat
- ▶ query=q44769\_p1
- ▶ precursor=804.745320
- ▶ chargePrecursor=3
- ▶ itol=0.5

| AA | a              | a*       | aΔ       | b              | b*             | bΔ       | y              | y*       | yΔ       | AA |
|----|----------------|----------|----------|----------------|----------------|----------|----------------|----------|----------|----|
| I  | 98.066         | 0.000    | 0.000    | 114.066        | 0.000          | 0.000    | 2412.231       | 2266.166 | 264.065  | I  |
| A  | 137.134        | 0.000    | 0.000    | 185.134        | 0.000          | 0.000    | 2266.131       | 2120.066 | 146.065  | A  |
| Q  | 180.162        | 0.000    | 0.000    | 231.162        | 0.000          | 0.000    | 2220.161       | 2074.100 | 146.065  | Q  |
| D  | 440.219        | 33.543   | 362.238  | 426.214        | 141.187        | 410.203  | 2180.041       | 2063.015 | 200.021  | D  |
| F  | 547.267        | 530.261  | 530.237  | 579.262        | 638.256        | 617.273  | 1865.016       | 1869.966 | 1869.006 | F  |
| K  | <b>675.382</b> | 658.356  | 657.332  | 703.373        | 668.351        | 665.357  | 1817.040       | 1820.911 | 1819.031 | K  |
| L  | 776.439        | 760.434  | 759.410  | 787.429        | <b>787.708</b> | 786.414  | 1730.011       | 1800.026 | 1800.042 | L  |
| D  | 801.407        | 874.411  | 873.440  | <b>919.452</b> | 901.425        | 901.441  | 1668.050       | 1591.715 | 1590.794 | D  |
| L  | 1004.541       | 987.515  | 986.510  | 1032.536       | 1015.509       | 1014.526 | 1461.720       | 1476.732 | 1476.700 | L  |
| R  | 1174.608       | 1157.611 | 1156.640 | 1202.605       | 1185.598       | 1184.611 | 1369.011       | 1384.007 | 1384.000 | R  |
| F  | 1321.720       | 1304.703 | 1303.710 | 1348.725       | 1332.689       | 1331.711 | 1215.577       | 1193.551 | 1192.567 | F  |
| Q  | 1449.783       | 1432.781 | 1431.784 | 1477.788       | 1460.783       | 1459.789 | 1061.500       | 1046.484 | 1045.490 | Q  |
| S  | 1536.817       | 1519.799 | 1518.800 | 1564.812       | 1547.785       | 1546.801 | 935.450        | 918.424  | 917.440  | S  |
| S  | 1621.866       | 1604.828 | 1603.819 | 1651.844       | 1634.817       | 1633.815 | 863.411        | 847.395  | 846.408  | S  |
| A  | 1894.886       | 1877.859 | 1876.835 | 1923.863       | 1906.854       | 1904.819 | 761.336        | 744.360  | 743.376  | A  |
| V  | 1973.954       | 1956.933 | 1955.944 | 1992.949       | 1974.923       | 1973.910 | <b>690.349</b> | 673.323  | 672.319  | V  |
| T  | 1984.969       | 1967.928 | 1966.909 | 1994.964       | 1976.928       | 1974.912 | <b>581.461</b> | 574.294  | 573.290  | T  |
| A  | 1998.002       | 1979.936 | 1978.921 | 2004.927       | 2000.900       | 2000.016 | <b>460.240</b> | 443.254  | 442.237  | A  |
| L  | 2009.116       | 1992.069 | 1991.101 | 2019.111       | 2001.084       | 2000.111 | <b>389.203</b> | 372.177  | 371.180  | L  |
| Q  | 2237.175       | 2220.156 | 2219.161 | 2265.170       | 2248.143       | 2247.159 | <b>276.119</b> | 259.092  | 258.108  | Q  |
| E  | 2362.212       | 2345.193 | 2344.201 | 2390.211       | 2373.185       | 2372.201 | 148.106        | 147.100  | 146.100  | E  |



# sp | P68433 | H31\_MOUSE

IAQDFKTDLR<sup>Methyl</sup> FQSSAVMALQE  
14.02

- ▶ fragmentation table for charge state 2+
- ▶ specType=cid
- ▶ score=52.06
- ▶ F113873.dat
- ▶ query=q44769\_p1
- ▶ precursor=804.745320
- ▶ chargePrecursor=3
- ▶ itol=0.5

| AA  | a        | a'             | a,b            | b               | b'              | b,b'            | y              | y'             | y,b            | AA  |
|-----|----------|----------------|----------------|-----------------|-----------------|-----------------|----------------|----------------|----------------|-----|
| R1  | 43.002   | 0.504          | 0.504          | 57.940          | 0.504           | 0.504           | 1306.630       | 1190.130       | 1197.630       | R21 |
| A2  | 70.070   | 0.504          | 0.504          | 83.066          | 0.504           | 0.504           | 1330.073       | 1141.566       | 1141.066       | A20 |
| C3  | 1143.100 | 134.500        | 0.504          | 137.007         | 148.504         | 0.504           | 1114.054       | 1100.040       | 1100.540       | Q10 |
| D4  | 200.013  | 102.013        | 102.013        | 244.011         | 200.007         | 200.000         | 1000.500       | 1040.010       | 1040.510       | D10 |
| F5  | 374.447  | 386.034        | 386.141        | 388.148         | 379.632         | 379.140         | <b>901.012</b> | 904.408        | 904.000        | F11 |
| K6  | 638.195  | 639.682        | 638.180        | 654.190         | 641.676         | 641.187         | <b>810.477</b> | 810.965        | 810.472        | K10 |
| L11 | 800.019  | 800.989        | 800.913        | 802.910         | 804.905         | 801.911         | <b>835.430</b> | 840.919        | 840.420        | L10 |
| D8  | 1446.032 | 1437.710       | 1437.210       | <b>461.230</b>  | 461.730         | 461.234         | 804.508        | 796.960        | 796.961        | L14 |
| L10 | 1002.714 | 1001.201       | 1002.700       | 1001.700        | 1001.700        | 1001.700        | <b>860.801</b> | 858.291        | 858.291        | L13 |
| M10 | 1007.018 | 1010.010       | 1010.010       | <b>601.810</b>  | 601.810         | 601.810         | <b>860.801</b> | 860.801        | 860.801        | M12 |
| P11 | 504.507  | <b>652.054</b> | <b>652.062</b> | <b>675.364</b>  | 668.851         | 668.350         | 800.300        | 797.270        | 798.707        | P11 |
| Q12 | 172.004  | 163.000        | 170.000        | <b>730.304</b>  | 710.000         | 710.000         | 812.000        | 720.100        | 721.200        | Q10 |
| S10 | 1000.012 | 1000.000       | 1000.000       | <b>782.010</b>  | 774.500         | 774.504         | 808.200        | <b>450.715</b> | 450.210        | S10 |
| S14 | 1014.008 | 1011.010       | 1010.421       | 800.420         | 811.012         | 811.006         | 814.010        | 815.007        | 815.007        | S10 |
| A15 | 847.847  | 830.431        | 830.941        | <b>861.944</b>  | 851.431         | 851.939         | 861.007        | <b>372.683</b> | <b>372.181</b> | A10 |
| V10 | 1007.001 | 1000.900       | 1000.470       | <b>911.478</b>  | 902.900         | 902.471         | 815.010        | 737.100        | 736.670        | V10 |
| T17 | 1003.010 | 1004.000       | 1003.000       | <b>976.995</b>  | 968.000         | 968.000         | 808.940        | 780.000        | 780.700        | L10 |
| A10 | 1000.000 | 1000.000       | 1000.514       | <b>1012.517</b> | <b>1004.004</b> | <b>1003.512</b> | 230.004        | 222.110        | 221.610        | A10 |
| L10 | 1003.000 | 1000.500       | 1000.000       | <b>1133.000</b> | 1090.500        | 1090.004        | 100.000        | 100.000        | 100.110        | L10 |
| Q10 | 1110.010 | 1110.700       | 1110.000       | <b>1133.000</b> | 1124.510        | 1124.004        | 110.000        | 100.000        | 100.000        | Q10 |
| E11 | 1100.010 | 1110.000       | 1110.000       | 1100.000        | 1100.000        | 1100.004        | 94.004         | 0.000          | 0.000          | E11 |

# sp | P68433 | H31\_MOUSE

IAQDFK <sup>Methyl</sup> TDLRFQSSAVMALQE  
14.02

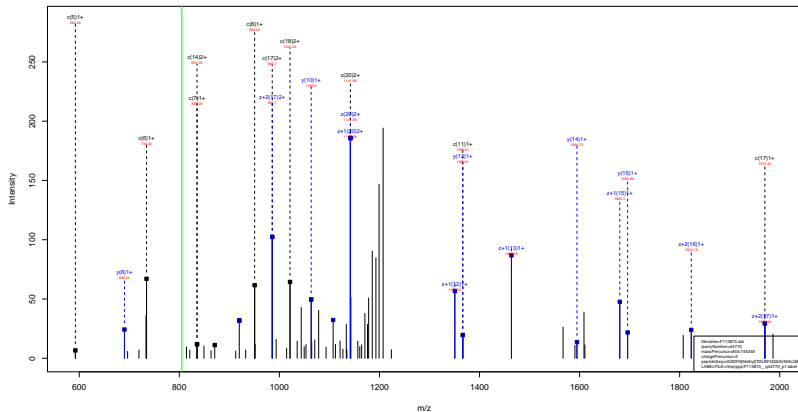

Download FT1875.D  
Scan 10 (6.00e6-6.0775)  
MS1:MS1:Scan=10;P1=10.000000  
Charge=1;Mass=144.0  
Protein:sp|P68433|H31\_MOUSE  
LAMBL:FLV:chp:sp|P11875\_1|\_68775\_p1\_36

# sp | P68433 | H31\_MOUSE

IAQDFK <sup>Methyl</sup> 14.02 TDLRFQSSAVMALQE

- ▶ fragmentation table for charge state 1+
- ▶ specType=etd
- ▶ score=41.54
- ▶ F113873.dat
- ▶ query=q44770\_p1
- ▶ precursor=804.745340
- ▶ chargePrecursor=3
- ▶ itol=0.5

| AA    | c               | y               | z+1             | z+2             | z        | AA    |
|-------|-----------------|-----------------|-----------------|-----------------|----------|-------|
| I[1]  | 131.118         | 2412.223        | 2396.204        | 0.000           | 2395.186 | I[21] |
| A[2]  | 202.195         | 2299.139        | 2283.120        | 0.000           | 2282.112 | A[20] |
| Q[3]  | 330.214         | 2228.102        | 2212.083        | 2213.091        | 2211.075 | Q[19] |
| D[4]  | 449.241         | 2100.043        | 2084.024        | 2085.032        | 2083.016 | D[18] |
| F[5]  | <b>592.309</b>  | 1985.016        | 1969.007        | <b>1970.005</b> | 1967.990 | F[17] |
| K[6]  | <b>734.420</b>  | 1837.948        | 1821.929        | <b>1822.937</b> | 1820.921 | K[16] |
| T[7]  | <b>835.467</b>  | <b>1695.837</b> | <b>1679.818</b> | 1680.826        | 1678.810 | T[15] |
| D[8]  | <b>950.494</b>  | <b>1594.789</b> | 1578.771        | 1579.778        | 1577.761 | D[14] |
| L[9]  | <b>1063.578</b> | 1479.762        | <b>1463.744</b> | 1464.752        | 1462.736 | L[13] |
| R[10] | 1219.777        | <b>1366.678</b> | <b>1350.660</b> | 1351.667        | 1349.651 | R[12] |
| F[11] | <b>1366.748</b> | 1210.571        | 1194.553        | 1195.561        | 1193.545 | F[11] |
| Q[12] | 1494.806        | <b>1063.509</b> | 1047.490        | 1048.498        | 1046.482 | Q[10] |
| S[13] | 1561.836        | 935.450         | <b>919.432</b>  | 920.439         | 918.424  | S[9]  |
| S[14] | 1668.870        | 848.418         | 832.400         | 833.407         | 831.392  | S[8]  |
| A[15] | 1730.908        | 761.386         | 745.367         | 746.375         | 744.360  | A[7]  |
| V[16] | 1838.938        | <b>690.349</b>  | 674.330         | 675.338         | 673.322  | V[6]  |
| M[17] | <b>1970.016</b> | 591.301         | 575.282         | 576.290         | 574.274  | M[5]  |
| A[18] | 2041.054        | 460.240         | 444.221         | 445.229         | 443.214  | A[4]  |
| L[19] | 2154.138        | 389.203         | 373.184         | 374.192         | 372.177  | L[3]  |
| Q[20] | 2282.196        | 276.119         | 260.100         | 261.108         | 259.092  | Q[2]  |
| E[21] | 2411.239        | 148.060         | 132.042         | 133.050         | 131.034  | E[1]  |

# sp | P68433 | H31\_MOUSE

IAQDFK <sup>Methyl</sup> 14.02 TDLRFQSSAVMALQE

- ▶ fragmentation table for charge state 2+
- ▶ specType=etd
- ▶ score=41.54
- ▶ F113873.dat
- ▶ query=q44770\_p1
- ▶ precursor=804.745340
- ▶ chargePrecursor=3
- ▶ itol=0.5

| AA    | c               | y              | z+1             | z+2             | z               | AA    |
|-------|-----------------|----------------|-----------------|-----------------|-----------------|-------|
| F[1]  | 66.063          | 1206.615       | 1186.606        | 0.504           | 1198.103        | F[21] |
| A[2]  | 101.581         | 1150.073       | <b>1142.064</b> | 0.504           | <b>1141.560</b> | A[20] |
| Q[3]  | 105.610         | 1114.554       | 1106.545        | <b>1107.049</b> | 1106.041        | Q[19] |
| D[4]  | 223.124         | 1050.526       | 1040.518        | 1041.022        | 1042.011        | D[18] |
| F[5]  | 296.658         | 993.012        | 985.502         | <b>985.506</b>  | 984.496         | F[17] |
| K[6]  | 307.713         | <b>919.477</b> | 911.468         | 911.972         | 910.964         | K[16] |
| T[7]  | 418.237         | 946.422        | 940.413         | 940.917         | 939.909         | T[15] |
| D[8]  | 475.751         | 797.898        | 789.889         | 790.393         | 789.385         | D[14] |
| L[9]  | 532.291         | 740.385        | 732.375         | 732.879         | 731.872         | L[13] |
| R[10] | 610.343         | 683.843        | 676.833         | 676.337         | 675.330         | R[12] |
| F[11] | 683.878         | 505.792        | 507.783         | 508.287         | 507.279         | F[11] |
| Q[12] | 747.907         | 532.258        | 524.249         | 524.753         | 523.745         | Q[10] |
| S[13] | 791.423         | 468.220        | 460.210         | 460.713         | 459.715         | S[0]  |
| S[14] | <b>834.939</b>  | 424.713        | 416.703         | 417.207         | 416.199         | S[0]  |
| A[15] | <b>878.457</b>  | 381.197        | 373.187         | 373.691         | 372.683         | A[7]  |
| V[16] | <b>919.992</b>  | 345.678        | 337.669         | 338.173         | 337.165         | V[0]  |
| M[17] | <b>985.512</b>  | 296.144        | 288.135         | 288.639         | 287.631         | M[0]  |
| A[18] | <b>1021.030</b> | 230.624        | 222.614         | 223.118         | 222.110         | A[0]  |
| L[19] | 1077.572        | 195.105        | 187.096         | 187.600         | 186.592         | L[9]  |
| Q[20] | <b>1141.602</b> | 138.563        | 130.554         | 131.058         | 130.050         | Q[2]  |
| E[21] | 1206.123        | 74.534         | 66.524          | 67.028          | 66.021          | E[1]  |

sp | P68433 | H31\_MOUSE  
IAQDFKTDLR<sup>Methyl</sup> FQSSAVMALQE  
14.02

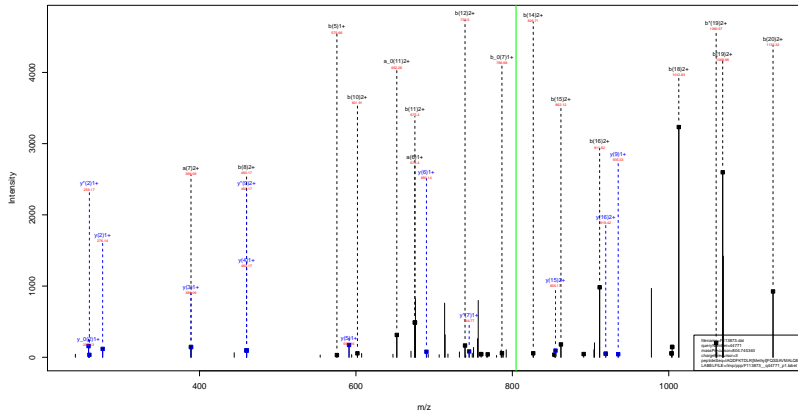

# sp | P68433 | H31\_MOUSE

IAQDFKTDLR<sup>Methyl</sup> FQSSAVMALQE  
14.02

- ▶ fragmentation table for charge state 1+
- ▶ specType=cid
- ▶ score=45.38
- ▶ F113873.dat
- ▶ query=q44771\_p1
- ▶ precursor=804.745340
- ▶ chargePrecursor=3
- ▶ itol=0.5

| AA    | a        | a*       | a.p      | b        | b*       | b.p     | y        | y*       | y.p      | AA    |
|-------|----------|----------|----------|----------|----------|---------|----------|----------|----------|-------|
| I(3)  | 88.064   | 0.000    | 0.000    | 114.090  | 0.000    | 0.000   | 2412.220 | 2395.194 | 2384.222 | I(2)  |
| A(2)  | 137.134  | 0.000    | 0.000    | 185.120  | 0.000    | 0.000   | 2250.130 | 2232.112 | 2221.128 | A(25) |
| Q(3)  | 289.392  | 268.166  | 0.00     | 343.148  | 284.180  | 88.00   | 2228.100 | 2214.074 | 2202.084 | Q(19) |
| D(4)  | 450.215  | 383.195  | 352.200  | 479.224  | 411.187  | 210.200 | 2100.163 | 2089.016 | 2072.032 | D(10) |
| F(5)  | 647.267  | 530.261  | 524.277  | 575.282  | 504.246  | 357.272 | 1985.038 | 1981.996 | 1967.006 | F(17) |
| K(6)  | 875.382  | 808.336  | 807.352  | 861.377  | 808.351  | 369.377 | 1837.040 | 1828.021 | 1818.031 | K(16) |
| T(7)  | 1088.424 | 1004.404 | 1004.420 | 1071.406 | 1004.414 | 378.414 | 1708.093 | 1699.026 | 1689.042 | T(15) |
| D(8)  | 1301.457 | 1214.431 | 1214.440 | 1315.452 | 1262.425 | 501.442 | 1600.082 | 1593.078 | 1586.084 | D(14) |
| L(9)  | 1504.541 | 1407.512 | 1407.520 | 1522.530 | 1471.500 | 511.510 | 1481.120 | 1474.124 | 1467.128 | L(13) |
| M(10) | 1714.588 | 1617.570 | 1617.580 | 1730.580 | 1679.560 | 519.570 | 1391.142 | 1383.087 | 1375.092 | M(12) |
| P(11) | 1931.726 | 1834.700 | 1834.705 | 1949.725 | 1897.695 | 531.715 | 1270.571 | 1265.501 | 1260.507 | P(11) |
| Q(12) | 2149.769 | 2052.750 | 2052.757 | 2167.769 | 2116.753 | 540.753 | 1163.700 | 1158.624 | 1154.630 | Q(10) |
| S(13) | 2376.817 | 2279.790 | 2279.800 | 2394.812 | 2347.785 | 554.805 | 1035.450 | 1030.424 | 1027.440 | S(9)  |
| S(14) | 2604.884 | 2506.874 | 2506.880 | 2624.884 | 2574.871 | 571.871 | 918.513  | 913.506  | 910.508  | S(8)  |
| A(15) | 2844.980 | 2747.850 | 2747.855 | 2864.980 | 2832.854 | 584.850 | 814.810  | 810.800  | 807.800  | A(10) |
| V(16) | 3100.054 | 2999.920 | 2999.924 | 3120.054 | 3084.922 | 601.922 | 704.920  | 701.920  | 699.920  | V(10) |
| K(17) | 3374.989 | 3269.850 | 3269.855 | 3394.989 | 3359.853 | 614.978 | 601.981  | 599.981  | 597.981  | K(10) |
| A(18) | 3669.053 | 3549.906 | 3549.910 | 3689.053 | 3654.907 | 629.907 | 504.016  | 502.016  | 500.016  | A(14) |
| L(19) | 3982.118 | 3849.961 | 3849.965 | 3999.118 | 3964.964 | 644.964 | 414.030  | 412.030  | 410.030  | L(13) |
| Q(20) | 4314.183 | 4169.040 | 4169.044 | 4334.183 | 4294.042 | 661.042 | 324.040  | 322.040  | 320.040  | Q(12) |
| E(21) | 4666.214 | 4499.110 | 4499.114 | 4686.214 | 4641.109 | 677.109 | 234.030  | 232.030  | 230.030  | E(10) |

# sp | P68433 | H31\_MOUSE

IAQDFKTDLR<sup>Methyl</sup> FQSSAVMALQE  
14.02

- ▶ fragmentation table for charge state 2+
- ▶ specType=cid
- ▶ score=45.38
- ▶ F113873.dat
- ▶ query=q44771\_p1
- ▶ precursor=804.745340
- ▶ chargePrecursor=3
- ▶ itol=0.5

| AA  | a              | a'             | a,b            | b               | b'              | b,b'            | y              | y'             | y,b      | AA  |
|-----|----------------|----------------|----------------|-----------------|-----------------|-----------------|----------------|----------------|----------|-----|
| R1  | 43.592         | 0.504          | 0.504          | 57.946          | 0.504           | 0.504           | 1398.635       | 1198.132       | 1197.632 | R21 |
| A1  | 76.670         | 0.504          | 0.504          | 93.666          | 0.504           | 0.504           | 1398.673       | 1143.566       | 1143.066 | A20 |
| C3  | 1143.100       | 138.505        | 0.504          | 137.597         | 148.584         | 0.504           | 1114.524       | 1160.040       | 1159.540 | Q19 |
| D4  | 200.613        | 183.189        | 183.693        | 244.811         | 206.097         | 206.096         | 1326.765       | 1643.021       | 1642.521 | D18 |
| F5  | 274.447        | 268.634        | 268.141        | 288.148         | 279.632         | 279.140         | 983.189        | 984.488        | 984.000  | F17 |
| K6  | 338.107        | 329.682        | 328.180        | 354.193         | 341.676         | 341.187         | <b>818.477</b> | 991.965        | 910.474  | K16 |
| L11 | <b>388.719</b> | 389.989        | 389.491        | 408.716         | 384.935         | 384.441         | <b>853.430</b> | 946.919        | 946.426  | L15 |
| D8  | 446.532        | 437.719        | 437.221        | <b>461.230</b>  | 451.719         | 451.224         | 654.568        | 746.363        | 746.001  | D14 |
| L10 | 502.274        | 493.261        | 492.762        | <b>601.810</b>  | 508.732         | 507.768         | 787.383        | 738.874        | 738.387  | L13 |
| M12 | 557.618        | 578.121        | 578.121        | <b>611.810</b>  | 589.127         | 588.628         | 891.911        | 882.381        | 881.888  | M12 |
| P11 | 594.597        | 592.924        | <b>632.362</b> | <b>675.364</b>  | 668.931         | 668.508         | 695.792        | 597.278        | 596.787  | P11 |
| Q12 | 672.994        | 661.681        | 661.181        | <b>739.344</b>  | 710.881         | 710.381         | 937.481        | 720.749        | 720.251  | Q12 |
| S13 | <b>766.912</b> | <b>761.399</b> | <b>759.907</b> | 757.911         | 774.396         | 773.894         | 888.225        | <b>459.715</b> | 460.222  | S10 |
| S14 | 774.726        | 801.613        | 801.613        | <b>876.426</b>  | 811.612         | 811.612         | 624.113        | 812.707        | 812.707  | S16 |
| A15 | 847.847        | 836.431        | 836.941        | <b>861.944</b>  | <b>853.431</b>  | 852.939         | 981.189        | 573.481        | 572.981  | A17 |
| V16 | 897.461        | 888.955        | 888.476        | <b>911.478</b>  | 902.955         | 902.471         | 945.618        | 537.189        | 536.678  | V16 |
| K17 | 935.811        | 924.488        | 923.999        | 938.999         | 928.488         | 927.999         | 938.944        | 587.631        | 587.139  | K15 |
| A18 | 998.520        | 986.020        | 985.514        | <b>1012.517</b> | <b>1004.004</b> | <b>1003.512</b> | 230.024        | 222.111        | 221.610  | A14 |
| L19 | 1075.162       | 1066.340       | 1065.020       | <b>1060.050</b> | <b>1060.548</b> | 1060.054        | 105.185        | 188.381        | 188.110  | L18 |
| Q20 | 1119.014       | 1110.761       | 1110.088       | <b>1133.088</b> | 1124.576        | 1124.081        | 1128.761       | 134.088        | 133.588  | Q14 |
| E21 | 1193.612       | 1176.089       | 1174.926       | 1174.916        | 1189.926        | 1189.004        | 94.534         | 0.926          | 0.926    | E11 |





# sp | P68433 | H31\_MOUSE

IAQDFKTDLR <sup>Methyl</sup> 14.02 FQSSAVMALQE

- ▶ fragmentation table for charge state 1+
- ▶ specType=cid
- ▶ score=55.48
- ▶ F113873.dat
- ▶ query=q44775\_p1
- ▶ precursor=804.746770
- ▶ chargePrecursor=3
- ▶ itol=0.5

| AA | a              | a*       | aΔ       | b              | b*       | bΔ             | y              | y*             | yΔ             | AA   |
|----|----------------|----------|----------|----------------|----------|----------------|----------------|----------------|----------------|------|
| I  | 98.066         | 0.000    | 0.000    | 114.066        | 0.000    | 0.000          | 2412.231       | 2266.166       | 2684.231       | I(2) |
| A  | 137.134        | 0.000    | 0.000    | 138.134        | 0.000    | 0.000          | 2268.134       | 2122.134       | 2538.134       | A(2) |
| Q  | 138.162        | 0.000    | 0.000    | 143.162        | 0.000    | 0.000          | 2270.162       | 2124.162       | 2542.162       | Q(2) |
| D  | 140.219        | 33.533   | 382.238  | 145.219        | 141.587  | 410.203        | 2180.214       | 2083.678       | 2502.212       | D(2) |
| F  | 147.287        | 33.533   | 530.237  | 152.287        | 148.655  | 458.272        | 1985.235       | 1869.700       | 2307.233       | F(1) |
| K  | <b>175.382</b> | 658.256  | 487.372  | 178.372        | 168.051  | 520.325        | 1817.348       | 1828.312       | 2219.317       | K(1) |
| L  | <b>178.410</b> | 700.408  | 708.420  | 180.420        | 172.788  | <b>716.414</b> | 1738.391       | 1708.426       | 2200.402       | L(1) |
| D  | 181.457        | 37.433   | 373.440  | <b>191.452</b> | 180.425  | 381.441        | 1858.380       | 1591.718       | 2386.734       | D(1) |
| L  | 182.441        | 387.513  | 388.513  | 182.513        | 182.500  | 181.458        | 1861.720       | 1476.722       | 2178.708       | L(1) |
| R  | 174.468        | 117.411  | 118.464  | 122.465        | 118.008  | 119.474        | 1389.462       | 1381.469       | 1382.468       | R(2) |
| F  | 131.728        | 1384.788 | 1383.738 | 1348.725       | 1332.888 | 1331.731       | 1215.777       | 1193.553       | 1190.567       | F(1) |
| Q  | 144.783        | 1432.788 | 1431.734 | 1417.788       | 1400.783 | 1401.788       | 1061.588       | 1048.624       | 1045.638       | Q(1) |
| S  | 1138.217       | 1128.788 | 1128.888 | 1104.812       | 1047.788 | 1048.281       | 915.452        | 918.424        | 917.440        | S(1) |
| S  | 1013.168       | 1008.425 | 1008.818 | 1005.444       | 1004.817 | 1003.318       | 883.419        | 871.788        | 870.408        | S(1) |
| A  | 1084.888       | 1072.859 | 1074.832 | 1123.883       | 1105.854 | 1104.819       | <b>761.886</b> | 744.865        | 743.176        | A(1) |
| V  | 1163.854       | 1176.838 | 1174.844 | 1162.848       | 1164.823 | 1161.810       | <b>690.349</b> | 674.322        | 672.139        | V(1) |
| T  | 1164.868       | 1167.823 | 1168.884 | 1164.848       | 1165.834 | 1164.819       | <b>581.481</b> | 574.284        | 573.008        | T(1) |
| A  | 1398.022       | 1378.028 | 1378.021 | 1324.027       | 1307.000 | 1306.016       | <b>480.248</b> | 483.254        | 442.237        | A(1) |
| L  | 1091.116       | 1082.088 | 1081.116 | 1110.116       | 1101.084 | 1110.116       | <b>389.203</b> | <b>372.177</b> | 371.180        | L(1) |
| Q  | 2237.175       | 2228.158 | 2219.141 | 2285.178       | 2248.143 | 2247.129       | <b>276.119</b> | <b>259.092</b> | <b>258.108</b> | Q(2) |
| T  | 2162.212       | 2153.195 | 2144.200 | 2209.212       | 2172.185 | 2171.200       | 148.186        | 147.188        | 146.188        | T(1) |

# sp | P68433 | H31\_MOUSE

IAQDFKTDLR<sup>Methyl</sup> FQSSAVMALQE  
14.02

- ▶ fragmentation table for charge state 2+
- ▶ specType=cid
- ▶ score=55.48
- ▶ F113873.dat
- ▶ query=q44775\_p1
- ▶ precursor=804.746770
- ▶ chargePrecursor=3
- ▶ itol=0.5

| AA  | a              | a'             | a,b            | b               | b'              | b,b'            | y              | y'       | y,b            | AA             |     |
|-----|----------------|----------------|----------------|-----------------|-----------------|-----------------|----------------|----------|----------------|----------------|-----|
| R1  | 43.002         | 0.504          | 0.504          | 57.940          | 0.504           | 0.504           | 1306.630       | 1190.130 | 1197.630       | R21            |     |
| A1  | 70.070         | 0.504          | 0.504          | 93.060          | 0.504           | 0.504           | 1330.073       | 1141.560 | 1141.060       | A20            |     |
| C3  | 1143.100       | 134.500        | 0.504          | 137.007         | 148.504         | 0.504           | 1114.024       | 1160.040 | 1160.540       | Q10            |     |
| D4  | 200.013        | 103.000        | 130.000        | 244.811         | 200.007         | 200.000         | 1020.700       | 940.010  | 940.510        | D10            |     |
| F5  | 374.447        | 380.004        | 380.141        | 388.140         | 379.024         | 379.140         | 903.000        | 904.400  | 904.000        | F11            |     |
| K6  | 503.007        | 500.000        | 500.000        | 504.100         | 510.100         | 511.007         | 810.477        | 810.964  | 810.474        | K10            |     |
| T11 | <b>804.719</b> | 800.000        | 800.000        | 802.100         | 804.000         | 804.119         | <b>655.430</b> | 655.919  | 655.430        | T10            |     |
| D8  | 1440.020       | 137.710        | 137.710        | 1407.210        | 1411.710        | 1411.224        | 654.400        | 656.300  | 656.800        | L14            |     |
| L10 | 2027.714       | 601.201        | 601.201        | 602.700         | 605.700         | 605.700         | 607.700        | 607.700  | 607.700        | L13            |     |
| M12 | 207.010        | 0.100          | 0.100          | 207.100         | 207.100         | 207.100         | 600.000        | 600.000  | 600.000        | M12            |     |
| P11 | 201.007        | <b>652.854</b> | <b>652.862</b> | <b>675.364</b>  | 668.851         | 668.850         | 605.700        | 607.270  | 608.707        | P11            |     |
| Q12 | 270.004        | 601.000        | 601.000        | 730.304         | 730.000         | 730.000         | 607.000        | 607.000  | 607.000        | Q10            |     |
| S13 | 1080.012       | 100.000        | 100.000        | 100.000         | <b>782.910</b>  | 774.000         | 773.004        | 608.200  | 600.710        | 600.210        | S10 |
| S14 | 1014.008       | 601.000        | 601.000        | 601.000         | 601.000         | 601.000         | 601.000        | 601.000  | 601.000        | S10            |     |
| A15 | 847.047        | 800.001        | 800.001        | <b>861.044</b>  | 851.451         | 851.000         | 601.000        | 601.000  | <b>372.683</b> | <b>372.181</b> | A10 |
| V16 | 807.061        | 800.000        | 800.000        | 808.470         | <b>811.478</b>  | 802.000         | 602.471        | 601.010  | 601.010        | 601.010        | V10 |
| T17 | 605.001        | 604.000        | 604.000        | <b>976.996</b>  | 968.000         | 968.000         | 600.000        | 600.000  | 600.000        | 600.000        | T10 |
| A18 | 998.020        | 980.000        | 980.000        | <b>1012.517</b> | 1004.000        | <b>1003.512</b> | 230.000        | 222.110  | 221.610        | A10            |     |
| L19 | 2075.002       | 2080.500       | 2080.000       | <b>1060.050</b> | <b>1060.548</b> | <b>1060.054</b> | 100.000        | 100.000  | 100.000        | L10            |     |
| Q20 | 1110.010       | 1110.000       | 1110.000       | <b>1133.080</b> | 1124.000        | 1124.000        | 110.000        | 100.000  | 100.000        | Q10            |     |
| E21 | 1100.010       | 1110.000       | 1110.000       | 1110.000        | 1100.000        | 1100.000        | 110.000        | 0.000    | 0.000          | E10            |     |

# sp | Q6GSS7 | H2A2A\_MOUSE

EELNK<sup>Dimethyl</sup><sub>28.03</sub> LLGK<sup>Methyl</sup><sub>14.02</sub> VTIAQGGVLPNIQAVLLPKKTE

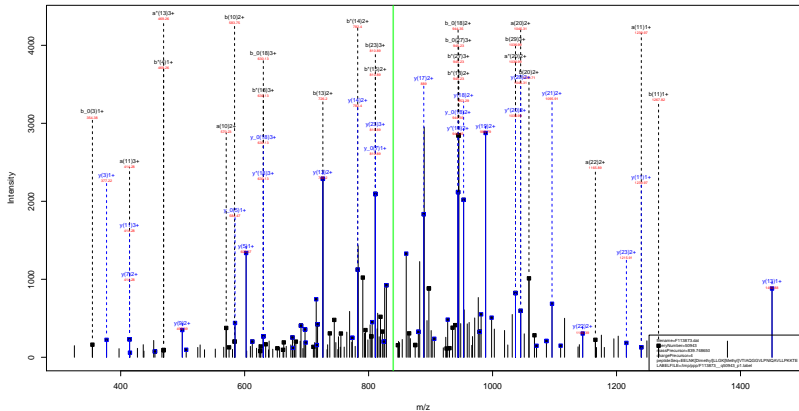

# sp | Q6GSS7 | H2A2A\_MOUSE

EELNK<sup>Dimethyl</sup><sub>28.03</sub> LLGK<sup>Methyl</sup><sub>14.02</sub> VTIAQGGVLPNIQAVLLPKKTE

- ▶ fragmentation table for charge state 1+
- ▶ specType=cid
- ▶ score=69.29
- ▶ F113873.dat
- ▶ query=q50943.p1
- ▶ precursor=839.748650
- ▶ chargePrecursor=4
- ▶ itol=0.5

| AA   | a               | a'             | aD             | b               | b'             | bD             | y               | y'              | yD             | AA    |     |
|------|-----------------|----------------|----------------|-----------------|----------------|----------------|-----------------|-----------------|----------------|-------|-----|
| E1   | 002380          | 0.000          | 38.041         | 130.050         | 0.000          | 112.030        | 335.093         | 0.000           | 0.000          | E11   |     |
| E2   | 211.038         | 0.000          | 151.057        | 259.092         | 0.000          | 201.092        | 322.070         | 3.200           | 0.000          | E10   |     |
| E3   | 344.026         | 0.000          | 282.111        | 377.212         | 0.000          | 334.181        | 309.099         | 3.000           | 0.000          | E9    |     |
| E4   | 468.220         | 441.136        | 440.211        | 489.215         | <b>469.193</b> | 450.200        | 2494.821        | 1.900           | 2.000          | E8    |     |
| E5   | 614.901         | 597.824        | 586.146        | 643.249         | <b>625.319</b> | 604.330        | 2030.181        | 2.000           | 2.000          | E7    |     |
| E6   | 747.430         | <b>718.408</b> | 705.475        | <b>755.430</b>  | 736.401        | <b>732.410</b> | 2214.002        | 2.000           | 2.000          | E6    |     |
| E7   | 896.018         |                | <b>822.500</b> | 874.514         | 851.497        | 832.500        | 2613.813        | 2.000           | 2.000          | E5    |     |
| G1   | <b>897.540</b>  | <b>880.514</b> | 890.510        | <b>925.510</b>  | 906.490        | 897.470        | 2488.480        | 2.000           | 2.000          | G4    |     |
| K1   | 1039.015        | 1022.024       | 1021.040       | <b>1067.040</b> | 1050.010       | 1040.000       | 2431.480        | 2.000           | 2.000          | K23   |     |
| V10  | 1139.010        | 1120.000       | 1120.000       | 1140.000        | 1140.000       | 1140.000       | 1140.000        | 2.000           | 2.000          | V22   |     |
| T11  | <b>1239.767</b> | 1222.741       | 1221.761       | <b>1267.762</b> | 1250.736       | 1240.710       | 2150.200        | 2.000           | 2.000          | T21   |     |
| T12  | 1337.011        | 1319.020       | 1318.041       | 1339.040        | 1339.020       | 1339.020       | 2008.230        | 2.000           | 2.000          | T20   |     |
| A13  | 1423.000        | 1406.000       | 1405.000       | 1426.000        | 1426.000       | 1426.000       | 1426.000        | 2.000           | 2.000          | A19   |     |
| G14  | 1501.947        | 1494.930       | 1493.930       | 1514.944        | 1514.915       | 1514.915       | 1495.117        | 1.800           | 0.000          | G10   |     |
| G15  | 1602.999        | 1591.974       | 1590.950       | 1611.970        | 1611.937       | 1611.937       | 1592.000        | 1.700           | 0.000          | G12   |     |
| G16  | 1684.944        | 1674.927       | 1673.910       | 1694.920        | 1694.886       | 1694.886       | 1675.000        | 1.700           | 0.000          | G14   |     |
| V17  | 1765.708        | 1749.612       | 1747.600       | 1769.612        | 1769.577       | 1769.577       | 1750.000        | 1.600           | 0.000          | V15   |     |
| L18  | 1878.142        | 1861.116       | 1860.110       | 1888.116        | 1888.111       | 1888.111       | 1869.000        | 1.500           | 0.000          | L14   |     |
| P19  | 1979.140        | 1958.120       | 1957.104       | 1989.120        | 1989.113       | 1989.113       | <b>1450.843</b> | 1.433           | 0.000          | P13   |     |
| K20  | 2068.936        | 2050.911       | 2049.890       | 2071.910        | 2071.880       | 2071.880       | 2052.000        | 1.500           | 0.000          | K15   |     |
| D21  | 2097.527        | 2085.200       | 2084.181       | 2105.211        | 2105.180       | 2105.180       | <b>1239.767</b> | 1.222           | 0.000          | D11   |     |
| G22  | 2130.911        | 2111.904       | 2112.770       | 2149.910        | 2149.740       | 2149.740       | 2130.000        | <b>1109.656</b> | 1.109          | 0.000 | G18 |
| A121 | 2201.010        | 2184.000       | 2183.000       | 2204.010        | 2204.000       | 2204.000       | 2184.000        | <b>980.631</b>  | <b>981.500</b> | A10   |     |
| V24  | 2260.980        | 2243.950       | 2242.910       | 2263.961        | 2263.910       | 2263.910       | <b>927.587</b>  | 0.928           | 0.000          | V16   |     |
| L25  | 2311.910        | 2296.914       | 2296.900       | 2324.910        | 2324.900       | 2324.900       | <b>820.519</b>  | 0.821           | 0.000          | L17   |     |
| L26  | 2370.708        | 2354.690       | 2353.660       | 2380.700        | 2380.670       | 2380.670       | <b>715.435</b>  | <b>696.400</b>  | <b>697.424</b> | L19   |     |
| P27  | 2423.107        | 2406.070       | 2405.040       | 2435.100        | 2435.070       | 2435.070       | <b>602.351</b>  | 0.603           | 0.000          | P19   |     |
| K28  | 2491.000        | 2474.000       | 2473.000       | 2496.000        | 2496.000       | 2496.000       | <b>505.298</b>  | 0.506           | 0.000          | K16   |     |
| K29  | 2579.987        | 2562.950       | 2561.920       | 2581.980        | 2581.950       | 2581.950       | <b>377.203</b>  | 0.378           | 0.000          | K18   |     |
| L34  | 2100.000        | 2100.000       | 2100.000       | 2100.000        | 2100.000       | 2100.000       | 2100.000        | 2.000           | 2.000          | L12   |     |
| E31  | 3309.987        | 3292.980       | 3291.970       | 3317.980        | 3317.950       | 3317.950       | 3300.000        | 0.000           | 1.000          | E1    |     |

# sp | Q6GSS7 | H2A2A\_MOUSE

EELNK<sup>Dimethyl</sup><sub>28.03</sub> LLGK<sup>Methyl</sup><sub>14.02</sub> VTIAQGGVLPNIQAVLLPKKTE

- ▶ fragmentation table for charge state 2+
- ▶ specType=cid
- ▶ score=69.29
- ▶ F113873.dat
- ▶ query=q50943\_p1
- ▶ precursor=839.748650
- ▶ chargePrecursor=4
- ▶ itol=0.5

| AA  | a        | a'    | a''      | b        | b'    | b''      | a        | a'       | a''      | AA   |
|-----|----------|-------|----------|----------|-------|----------|----------|----------|----------|------|
| E1  | 52.335   | 0.504 | 122.960  | 35.520   | 0.504 | 35.520   | 1678.520 | 1695.024 | 1689.020 | E121 |
| E2  | 116.052  | 0.504 | 187.467  | 139.026  | 0.504 | 131.045  | 1613.077 | 1629.481 | 1604.074 | E120 |
| E3  | 179.769  | 0.504 | 251.974  | 203.532  | 0.504 | 197.056  | 1548.130 | 1564.434 | 1540.131 | E119 |
| E4  | 243.486  | 0.504 | 316.481  | 268.038  | 0.504 | 261.070  | 1483.183 | 1499.487 | 1475.188 | E118 |
| E5  | 307.203  | 0.504 | 380.988  | 332.544  | 0.504 | 326.083  | 1418.236 | 1434.540 | 1410.237 | E117 |
| E6  | 370.920  | 0.504 | 445.495  | 397.050  | 0.504 | 391.096  | 1353.289 | 1369.593 | 1339.290 | E116 |
| E7  | 434.637  | 0.504 | 509.002  | 461.556  | 0.504 | 456.111  | 1288.342 | 1304.646 | 1278.343 | E115 |
| E8  | 498.354  | 0.504 | 573.509  | 526.062  | 0.504 | 521.126  | 1223.395 | 1239.700 | 1203.396 | E114 |
| E9  | 562.071  | 0.504 | 638.016  | 590.568  | 0.504 | 586.141  | 1158.448 | 1174.752 | 1132.449 | E113 |
| E10 | 625.788  | 0.504 | 702.523  | 655.074  | 0.504 | 651.156  | 1093.501 | 1109.805 | 1061.502 | E112 |
| E11 | 689.505  | 0.504 | 767.030  | 719.580  | 0.504 | 716.171  | 1028.554 | 1044.858 | 1000.555 | E111 |
| E12 | 753.222  | 0.504 | 831.537  | 784.086  | 0.504 | 781.186  | 963.607  | 979.911  | 933.608  | E110 |
| E13 | 816.939  | 0.504 | 896.044  | 848.592  | 0.504 | 846.201  | 898.660  | 914.964  | 870.661  | E109 |
| E14 | 880.656  | 0.504 | 960.551  | 913.098  | 0.504 | 911.216  | 833.713  | 849.917  | 801.714  | E108 |
| E15 | 944.373  | 0.504 | 1025.058 | 977.604  | 0.504 | 976.231  | 768.766  | 784.970  | 740.767  | E107 |
| E16 | 1008.090 | 0.504 | 1089.565 | 1042.110 | 0.504 | 1041.246 | 703.819  | 719.923  | 671.820  | E106 |
| E17 | 1071.807 | 0.504 | 1154.072 | 1106.616 | 0.504 | 1106.261 | 638.872  | 654.976  | 610.873  | E105 |
| E18 | 1135.524 | 0.504 | 1218.579 | 1171.122 | 0.504 | 1171.276 | 573.925  | 589.929  | 543.926  | E104 |
| E19 | 1199.241 | 0.504 | 1283.086 | 1235.628 | 0.504 | 1236.291 | 508.978  | 524.982  | 480.979  | E103 |
| E20 | 1262.958 | 0.504 | 1347.593 | 1300.134 | 0.504 | 1301.306 | 444.031  | 459.935  | 412.932  | E102 |
| E21 | 1326.675 | 0.504 | 1412.100 | 1364.640 | 0.504 | 1366.321 | 379.084  | 394.988  | 350.985  | E101 |
| E22 | 1390.392 | 0.504 | 1476.607 | 1429.146 | 0.504 | 1431.336 | 314.137  | 329.941  | 280.938  | E100 |
| E23 | 1454.109 | 0.504 | 1541.114 | 1493.652 | 0.504 | 1496.351 | 249.190  | 264.944  | 220.941  | E99  |
| E24 | 1517.826 | 0.504 | 1605.621 | 1558.158 | 0.504 | 1561.366 | 184.243  | 199.947  | 150.944  | E98  |
| E25 | 1581.543 | 0.504 | 1670.128 | 1622.664 | 0.504 | 1626.381 | 119.296  | 134.950  | 90.947   | E97  |
| E26 | 1645.260 | 0.504 | 1734.635 | 1687.170 | 0.504 | 1691.396 | 54.349   | 69.953   | 25.950   | E96  |
| E27 | 1708.977 | 0.504 | 1800.142 | 1751.676 | 0.504 | 1756.411 | -10.698  | -4.944   | -39.953  | E95  |
| E28 | 1772.694 | 0.504 | 1864.649 | 1816.182 | 0.504 | 1821.426 | -75.751  | -69.947  | -90.956  | E94  |
| E29 | 1836.411 | 0.504 | 1930.156 | 1880.688 | 0.504 | 1886.441 | -140.804 | -134.941 | -141.959 | E93  |
| E30 | 1900.128 | 0.504 | 1994.663 | 1945.194 | 0.504 | 1951.456 | -205.857 | -199.934 | -200.962 | E92  |
| E31 | 1963.845 | 0.504 | 2060.170 | 2009.700 | 0.504 | 2016.471 | -270.910 | -264.931 | -265.965 | E91  |

# sp | Q6GSS7 | H2A2A\_MOUSE

EELNK<sup>Dimethyl</sup><sub>28.03</sub> LLGK<sup>Methyl</sup><sub>14.02</sub> VTIAQGGVLPNIQAVLLPKKTE

- ▶ fragmentation table for charge state 3+
- ▶ specType=cid
- ▶ score=69.29
- ▶ F113873.dat
- ▶ query=q50943.p1
- ▶ precursor=839.748650
- ▶ chargePrecursor=4
- ▶ itol=0.5

| AA  | a              | a'             | a <sup>+</sup> | a <sup>0</sup>  | b              | b'             | b <sup>+</sup> | b <sup>0</sup>  | γ | γ' | γ <sup>+</sup> | γ <sup>0</sup> | AA   |
|-----|----------------|----------------|----------------|-----------------|----------------|----------------|----------------|-----------------|---|----|----------------|----------------|------|
| E1  | 34.600         | 0.672          | 36.088         | 44.021          | 0.672          | 38.600         | 1119.150       | 1114.000        |   |    |                |                | E111 |
| E2  | 77.704         | 0.672          | 79.701         | 87.088          | 0.672          | 81.432         | 1076.327       | <b>1070.646</b> |   |    |                |                | E130 |
| E3  | 115.300        | 0.671          | 116.971        | 124.716         | 0.717          | 123.997        | 933.501        | 1009.599        |   |    |                |                | L206 |
| R4  | 153.411        | 147.250        | 147.411        | 162.743         | 157.098        | 156.743        | 909.611        | 989.911         |   |    |                |                | N200 |
| R5  | 192.433        | 189.780        | 189.424        | 214.781         | 208.111        | 208.780        | 967.999        | 951.924         |   |    |                |                | N227 |
| L6  | 231.710        | 227.441        | 227.441        | 262.843         | 242.006        | 242.411        | <b>905.506</b> | 989.911         |   |    |                |                | L206 |
| L7  | 269.944        | 275.159        | 274.941        | 298.174         | 294.594        | 294.174        | 897.924        | 989.159         |   |    |                |                | L206 |
| G8  | 308.652        | 304.174        | 303.844        | 328.113         | 303.600        | 303.100        | 830.161        | <b>824.491</b>  |   |    |                |                | G24  |
| R9  | 347.272        | 341.540        | 341.210        | 358.553         | 350.670        | 350.553        | <b>811.160</b> | <b>805.484</b>  |   |    |                |                | K225 |
| Q10 | 386.000        | 374.400        | 374.241        | 388.574         | 383.801        | 383.474        | 818.574        | 892.110         |   |    |                |                | V222 |
| T11 | <b>413.827</b> | 408.250        | 407.924        | 423.263         | 417.585        | 417.250        | 730.761        | 725.091         |   |    |                |                | T221 |
| I12 | 451.222        | 443.250        | 443.011        | 460.354         | <b>455.278</b> | <b>454.950</b> | <b>697.084</b> | 691.407         |   |    |                |                | I221 |
| A13 | 476.702        | <b>468.825</b> | <b>468.291</b> | 484.811         | 478.927        | 478.927        | 666.291        | 664.714         |   |    |                |                | A219 |
| Q14 | 517.997        | <b>512.313</b> | 512.063        | 527.916         | 521.943        | 521.313        | 630.710        | <b>630.035</b>  |   |    |                |                | Q118 |
| G15 | 536.994        | 531.319        | 530.991        | 546.310         | 540.630        | 540.120        | 583.024        | 587.349         |   |    |                |                | G217 |
| G16 | 556.001        | 550.324        | 549.994        | 565.511         | 559.630        | 559.120        | 574.017        | 568.342         |   |    |                |                | G216 |
| V17 | 598.278        | <b>583.389</b> | 583.021        | 598.384         | 592.608        | 592.101        | 559.010        | 549.334         |   |    |                |                | V215 |
| L18 | 636.719        | 631.041        | 630.711        | 646.981         | <b>630.375</b> | <b>630.047</b> | 521.081        | 516.314         |   |    |                |                | L114 |
| P19 | 653.104        | <b>653.066</b> | 652.401        | <b>662.726</b>  | <b>662.398</b> | 662.398        | 484.292        | 478.011         |   |    |                |                | P113 |
| R20 | <b>687.884</b> | 681.401        | <b>681.081</b> | 696.411         | 690.407        | 690.407        | 491.081        | 484.292         |   |    |                |                | R212 |
| I21 | 724.178        | 720.110        | <b>714.141</b> | <b>744.110</b>  | 738.430        | 738.101        | <b>411.927</b> | 408.250         |   |    |                |                | I211 |
| Q22 | 777.461        | 771.101        | 770.462        | 789.791         | 783.411        | 783.081        | 370.231        | 370.231         |   |    |                |                | Q118 |
| A23 | 804.144        | 802.441        | <b>810.476</b> | 814.888         | <b>804.800</b> | <b>804.472</b> | 333.540        | 327.011         |   |    |                |                | A201 |
| V24 | 834.102        | <b>824.491</b> | 824.491        | 844.910         | 837.410        | 837.410        | 303.011        | 299.151         |   |    |                |                | V201 |
| L25 | 871.882        | 866.110        | <b>865.838</b> | 881.121         | <b>875.518</b> | <b>875.190</b> | 278.941        | 274.100         |   |    |                |                | L117 |
| L26 | 909.576        | 893.881        | 893.551        | 918.888         | 913.212        | 912.884        | 230.150        | 233.474         |   |    |                |                | L101 |
| P27 | 941.909        | 936.979        | <b>935.504</b> | 954.799         | <b>945.363</b> | <b>945.235</b> | 190.400        | 190.780         |   |    |                |                | P201 |
| R28 | 984.058        | <b>978.930</b> | 978.930        | 993.911         | 987.911        | 987.911        | 160.104        | 161.401         |   |    |                |                | K101 |
| K29 | 1027.304       | 1021.820       | 1021.304       | <b>1036.633</b> | 1030.960       | 1030.633       | 120.400        | 120.730         |   |    |                |                | N101 |
| L30 | 1069.888       | 1064.300       | 1064.300       | 1079.888        | 1074.300       | 1074.300       | 90.000         | 90.000          |   |    |                |                | L101 |
| E31 | 1104.000       | 1098.520       | 1097.997       | 1113.131        | 1107.650       | 1107.126       | 50.025         | 0.072           |   |    |                |                | E21  |



# sp | Q6GSS7 | H2A2A\_MOUSE

EELNK<sup>Acetyl</sup><sub>42.01</sub> LLGKVTIAQGGVLPNIQAVLLPKKTE

- ▶ fragmentation table for charge state 1+
- ▶ specType=etd
- ▶ score=76.23
- ▶ F113873.dat
- ▶ query=q50944.p1
- ▶ precursor=839.748650
- ▶ chargePrecursor=4
- ▶ itol=0.5

| AA | c  | y               | z+1            | z+2             | z               | AA       |   |    |
|----|----|-----------------|----------------|-----------------|-----------------|----------|---|----|
| E  | 1  | 147.076         | 1355.595       | 1339.458        | 0.000           | 1339.458 | E | 13 |
| E  | 2  | 274.119         | 1226.944       | 1210.895        | 0.000           | 1209.887 | E | 30 |
| L  | 3  | 389.203         | 1097.871       | 1081.852        | 0.000           | 1080.845 | L | 29 |
| N  | 4  | 503.246         | 2984.787       | 2968.768        | 2969.776        | 2967.761 | N | 28 |
| K  | 5  | <b>673.352</b>  | 2870.744       | 2854.725        | 2855.733        | 2853.718 | K | 27 |
| L  | 6  | <b>786.436</b>  | 2700.639       | 2684.620        | 2685.628        | 2683.612 | L | 26 |
| L  | 7  | <b>899.520</b>  | 2587.595       | 2571.536        | 2472.544        | 2570.526 | L | 25 |
| G  | 8  | <b>956.541</b>  | 2474.470       | 2458.453        | 2459.460        | 2457.444 | G | 24 |
| K  | 9  | <b>1084.636</b> | 2317.448       | 2403.430        | 2402.438        | 2400.423 | K | 23 |
| V  | 10 | <b>1183.704</b> | 2289.354       | 2273.335        | 2274.343        | 2272.327 | V | 22 |
| I  | 11 | <b>1284.752</b> | 2190.286       | 2174.267        | 2175.275        | 2173.259 | I | 21 |
| I  | 12 | <b>1397.836</b> | 2089.238       | 2073.219        | 2074.227        | 2072.211 | I | 20 |
| A  | 13 | <b>1468.873</b> | 1976.154       | 1960.135        | <b>1961.143</b> | 1959.127 | A | 19 |
| Q  | 14 | <b>1596.932</b> | 1895.117       | 1889.089        | <b>1890.106</b> | 1889.090 | Q | 18 |
| G  | 15 | 1653.953        | 1777.055       | 1761.030        | 1762.040        | 1760.032 | G | 17 |
| G  | 16 | 1710.975        | 1720.037       | <b>1704.018</b> | 1705.026        | 1703.010 | G | 16 |
| V  | 17 | <b>1810.043</b> | 1663.015       | 1646.997        | 1646.004        | 1645.989 | V | 15 |
| L  | 18 | 1923.127        | 1563.947       | 1547.928        | <b>1548.936</b> | 1546.920 | L | 14 |
| F  | 19 | 2020.180        | 1450.863       | 1434.854        | <b>1435.852</b> | 1433.836 | F | 13 |
| T  | 20 | 2134.223        | 1353.810       | <b>1337.791</b> | 1338.799        | 1336.783 | T | 12 |
| I  | 21 | 2247.307        | 1239.787       | <b>1223.748</b> | 1224.756        | 1222.741 | I | 11 |
| Q  | 22 | 2375.366        | 1128.683       | 1110.664        | 1111.672        | 1109.656 | Q | 10 |
| A  | 23 | 2446.403        | 996.624        | 982.606         | <b>983.614</b>  | 981.599  | A | 9  |
| V  | 24 | 2545.471        | 927.587        | 911.569         | 912.576         | 910.561  | V | 8  |
| L  | 25 | 2658.555        | 828.519        | 812.500         | <b>813.508</b>  | 811.482  | L | 7  |
| L  | 26 | 2711.639        | 718.435        | <b>699.416</b>  | <b>700.424</b>  | 698.409  | L | 6  |
| P  | 27 | 2868.692        | 602.351        | 586.332         | 587.340         | 585.324  | P | 5  |
| K  | 28 | 2996.787        | 505.268        | 489.249         | 490.257         | 488.241  | K | 4  |
| K  | 29 | 3124.882        | <b>377.203</b> | 361.184         | 362.192         | 360.177  | K | 3  |
| F  | 30 | 3225.930        | 249.108        | 233.089         | 234.097         | 232.082  | F | 2  |
| E  | 31 | 3354.972        | 148.060        | 132.042         | 133.050         | 131.034  | E | 1  |



# sp | Q6GSS7 | H2A2A\_MOUSE

EELNK<sup>Acetyl</sup><sub>42.01</sub> LLGKVTIAQGGVLPNIQAVLLPKKTE

- ▶ fragmentation table for charge state 2+
- ▶ specType=etd
- ▶ score=76.23
- ▶ F113873.dat
- ▶ query=q50944.p1
- ▶ precursor=839.748650
- ▶ chargePrecursor=4
- ▶ itol=0.5

| AA | c  | y               | z+1             | z+2             | z               | AA              |       |
|----|----|-----------------|-----------------|-----------------|-----------------|-----------------|-------|
| E  | 1  | 74.042          | 1078.482        | <b>1070.472</b> | 0.504           | 1069.959        | E[31] |
| E  | 2  | 138.563         | <b>1013.960</b> | 1005.951        | 0.504           | 1005.441        | E[30] |
| L  | 3  | 195.105         | 1349.439        | 1341.430        | 0.504           | 1340.920        | L[29] |
| N  | 4  | 252.127         | 1492.897        | 1484.888        | 1485.392        | 1484.884        | N[28] |
| K  | 5  | 337.179         | <b>1435.876</b> | 1427.866        | 1428.370        | 1427.362        | K[27] |
| L  | 6  | 393.721         | 1750.823        | <b>1342.814</b> | <b>1343.317</b> | 1342.310        | L[26] |
| L  | 7  | 450.263         | 1294.281        | 1286.272        | 1286.775        | 1285.768        | L[25] |
| G  | 8  | 492.744         | 1339.739        | 1329.730        | <b>1230.213</b> | 1229.205        | G[24] |
| K  | 9  | 542.832         | <b>1209.228</b> | <b>1201.219</b> | <b>1201.723</b> | 1200.715        | K[23] |
| V  | 10 | 592.356         | 1145.181        | 1137.171        | <b>1137.675</b> | 1136.667        | V[22] |
| T  | 11 | 642.880         | 1095.646        | <b>1087.637</b> | <b>1088.141</b> | <b>1087.133</b> | T[21] |
| T  | 12 | <b>699.422</b>  | 1045.123        | <b>1037.113</b> | 1037.617        | <b>1036.609</b> | T[20] |
| A  | 13 | 734.940         | 988.581         | <b>980.571</b>  | <b>981.075</b>  | 980.067         | A[19] |
| Q  | 14 | 792.970         | 933.062         | <b>945.053</b>  | <b>945.557</b>  | 944.549         | Q[18] |
| G  | 15 | 827.480         | 889.033         | <b>881.023</b>  | <b>881.527</b>  | 880.519         | G[17] |
| G  | 16 | <b>855.991</b>  | 860.522         | 852.513         | 853.017         | 852.009         | G[16] |
| V  | 17 | <b>905.525</b>  | 832.011         | 824.002         | 824.506         | 823.498         | V[15] |
| L  | 18 | 962.067         | 782.477         | 774.468         | 774.972         | 773.964         | L[14] |
| F  | 19 | 1010.594        | 729.935         | 721.926         | 722.430         | 721.422         | F[13] |
| N  | 20 | 1057.615        | 677.405         | 669.396         | 669.900         | 668.892         | N[12] |
| I  | 21 | 1104.157        | 620.867         | 612.858         | 613.362         | 612.354         | I[11] |
| Q  | 22 | <b>1188.186</b> | 563.845         | 555.836         | 556.340         | 555.332         | Q[10] |
| A  | 23 | <b>1223.705</b> | 499.816         | 491.807         | 492.310         | 491.303         | A[0]  |
| V  | 24 | <b>1273.239</b> | 484.297         | 476.288         | 476.792         | 475.784         | V[0]  |
| L  | 25 | <b>1329.761</b> | 414.763         | 406.754         | 407.258         | 406.250         | L[1]  |
| L  | 26 | 1386.323        | 358.221         | 350.212         | 350.716         | 349.708         | L[6]  |
| P  | 27 | 1434.850        | 301.679         | 293.670         | 294.174         | 293.166         | P[5]  |
| K  | 28 | <b>1496.897</b> | 253.153         | 245.143         | 245.647         | 244.639         | K[4]  |
| K  | 29 | <b>1562.945</b> | 189.105         | 181.096         | 181.600         | 180.592         | K[3]  |
| T  | 30 | <b>1613.468</b> | 126.056         | 117.048         | 117.552         | 116.544         | T[2]  |
| E  | 31 | 1677.892        | 74.534          | 66.524          | 67.028          | 66.021          | E[1]  |

# sp | Q6GSS7 | H2A2A\_MOUSE

EELNK<sup>Acetyl</sup><sub>42.01</sub> LLGKVTIAQGGVLPNIQAVLLPKKTE

- ▶ fragmentation table for charge state 3+
- ▶ specType=etd
- ▶ score=76.23
- ▶ F113873.dat
- ▶ query=q50944\_p1
- ▶ precursor=839.748650
- ▶ chargePrecursor=4
- ▶ itol=0.5

| AA |    | c               | y               | z+1      | z+2     | z              | AA |    |
|----|----|-----------------|-----------------|----------|---------|----------------|----|----|
| E  | 1  | 49.097          | 1119.324        | 1113.984 | 0.672   | 1113.048       | E  | 31 |
| E  | 2  | 62.711          | <b>1076.309</b> | 1070.970 | 0.672   | 1070.034       | E  | 30 |
| L  | 3  | 130.406         | 1033.295        | 1027.956 | 0.672   | 1027.020       | L  | 29 |
| R  | 4  | 108.420         | 995.601         | 990.261  | 990.597 | <b>989.925</b> | R  | 28 |
| K  | 5  | 225.122         | 957.586         | 952.247  | 952.583 | 951.911        | K  | 27 |
| L  | 6  | 262.617         | 900.884         | 895.545  | 895.881 | 895.205        | L  | 26 |
| L  | 7  | 509.511         | 863.130         | 857.850  | 858.186 | 857.514        | L  | 25 |
| G  | 8  | 319.519         | 825.495         | 820.155  | 820.491 | 819.819        | G  | 24 |
| K  | 9  | 362.217         | 806.488         | 801.148  | 801.484 | 800.812        | K  | 23 |
| V  | 10 | 395.240         | 763.790         | 758.450  | 758.786 | 758.114        | V  | 22 |
| T  | 11 | 428.922         | 730.787         | 725.427  | 725.763 | 725.091        | T  | 21 |
| I  | 12 | 466.617         | 697.084         | 691.745  | 692.081 | 691.409        | I  | 20 |
| A  | 13 | 490.296         | 659.359         | 654.020  | 654.356 | 653.684        | A  | 19 |
| Q  | 14 | 532.962         | 625.739         | 620.374  | 620.707 | 620.035        | Q  | 18 |
| G  | 15 | 551.989         | 583.024         | 587.685  | 588.021 | 587.349        | G  | 17 |
| G  | 16 | 570.990         | 574.017         | 568.678  | 569.013 | 568.342        | G  | 16 |
| V  | 17 | 604.019         | 555.010         | 549.670  | 550.006 | 549.334        | V  | 15 |
| L  | 18 | 641.714         | 521.967         | 516.648  | 516.984 | 516.312        | L  | 14 |
| P  | 19 | 674.005         | 484.292         | 478.953  | 479.289 | 478.617        | P  | 13 |
| N  | 20 | 717.079         | 451.942         | 446.602  | 446.938 | 446.266        | N  | 12 |
| T  | 21 | 749.774         | 413.927         | 408.588  | 408.924 | 408.252        | T  | 11 |
| Q  | 22 | 792.460         | 375.233         | 370.893  | 371.229 | 370.557        | Q  | 10 |
| A  | 23 | 816.139         | 333.546         | 328.207  | 328.543 | 327.871        | A  | 9  |
| V  | 24 | 849.162         | 309.887         | 304.528  | 304.864 | 304.192        | V  | 8  |
| L  | 25 | <b>886.857</b>  | 276.844         | 271.505  | 271.841 | 271.169        | L  | 7  |
| L  | 26 | 924.951         | 239.150         | 233.810  | 234.146 | 233.474        | L  | 6  |
| P  | 27 | <b>956.902</b>  | 201.455         | 196.116  | 196.451 | 195.780        | P  | 5  |
| K  | 28 | 979.719         | 166.104         | 160.765  | 161.101 | 160.429        | K  | 4  |
| K  | 29 | <b>1042.299</b> | 129.636         | 124.296  | 124.632 | 123.960        | K  | 3  |
| L  | 30 | 1075.981        | 83.708          | 78.368   | 78.704  | 78.032         | L  | 2  |
| E  | 31 | 1118.990        | 50.025          | 44.685   | 45.021  | 44.349         | E  | 1  |

# sp | Q6GSS7 | H2A2A\_MOUSE

EELNK <sup>Acetyl</sup> 42.01 LLGK <sup>Dimethyl</sup> 28.03 VTIAQGGVLPNIQAVLLPKKTE

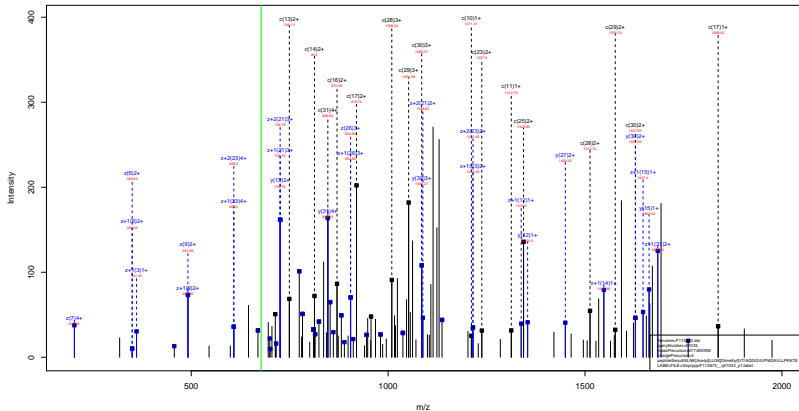

# sp | Q6GSS7 | H2A2A\_MOUSE

EELNK<sup>Acetyl</sup><sub>42.01</sub> LLGK<sup>Dimethyl</sup><sub>28.03</sub> VTIAQGGVLPNIQAVLLPKKTE

- ▶ fragmentation table for charge state 1+
- ▶ specType=etd
- ▶ score=44.20
- ▶ F113873.dat
- ▶ query=q51032.p1
- ▶ precursor=677.600590
- ▶ chargePrecursor=5
- ▶ itol=0.5

| AA | c  | y               | z+1             | z+2             | z               | AA       |   |    |
|----|----|-----------------|-----------------|-----------------|-----------------|----------|---|----|
| E  | 1  | 147.076         | 1381.068        | 1387.069        | 0.000           | 1366.061 | E | 31 |
| E  | 2  | 170.819         | 1254.945        | 1239.936        | 0.000           | 1237.911 | E | 30 |
| L  | 3  | 395.203         | 1125.982        | 1109.984        | 0.000           | 1105.976 | L | 29 |
| N  | 4  | 503.246         | 1012.818        | 2096.800        | 2997.807        | 2995.792 | N | 28 |
| K  | 5  | 673.352         | 898.775         | 2882.757        | 2883.765        | 2881.749 | K | 27 |
| L  | 6  | 786.436         | 2728.670        | 2712.651        | 2713.659        | 2711.643 | L | 26 |
| L  | 7  | 899.420         | 2615.586        | 2599.567        | 2600.575        | 2598.559 | L | 25 |
| G  | 8  | <b>926.541</b>  | 2502.502        | 2488.483        | 2487.491        | 2485.475 | G | 24 |
| K  | 9  | 1112.697        | 1845.480        | 2429.462        | 2430.469        | 2428.454 | K | 23 |
| V  | 10 | <b>1211.736</b> | 2289.354        | 2273.335        | 2274.343        | 2272.327 | V | 22 |
| T  | 11 | <b>1312.783</b> | 2190.266        | 2174.267        | 2175.275        | 2173.259 | T | 21 |
| L  | 12 | 1425.868        | 2089.138        | 2073.210        | 2074.227        | 2072.211 | L | 20 |
| A  | 13 | 1486.905        | 1976.154        | 1960.135        | 1961.143        | 1959.127 | A | 19 |
| Q  | 14 | 1624.903        | 1826.131        | 1809.688        | 1808.106        | 1806.590 | Q | 18 |
| G  | 15 | 1681.985        | 1777.058        | 1761.039        | <b>1762.047</b> | 1760.032 | G | 17 |
| G  | 16 | 1739.006        | 1728.037        | 1704.018        | 1705.026        | 1703.010 | G | 16 |
| V  | 17 | <b>1838.075</b> | <b>1663.015</b> | <b>1646.997</b> | 1648.004        | 1646.989 | V | 15 |
| L  | 18 | 1951.159        | 1563.047        | <b>1547.928</b> | 1548.936        | 1546.920 | L | 14 |
| P  | 19 | 2038.211        | 1459.061        | 1434.944        | 1435.952        | 1433.936 | P | 13 |
| N  | 20 | 2162.254        | <b>1353.810</b> | <b>1337.791</b> | 1338.799        | 1336.783 | N | 12 |
| D  | 21 | 2275.338        | 1239.767        | 1223.748        | 1224.756        | 1222.741 | D | 11 |
| Q  | 22 | 2403.397        | 1126.683        | 1110.664        | 1111.672        | 1109.656 | Q | 10 |
| A  | 23 | 2474.434        | 998.624         | 982.606         | 983.614         | 981.598  | A | 9  |
| V  | 24 | 2573.503        | 927.587         | <b>911.569</b>  | 912.576         | 910.561  | V | 8  |
| L  | 25 | 2685.589        | 808.513         | 812.495         | 813.503         | 811.487  | L | 7  |
| L  | 26 | 2799.671        | <b>715.435</b>  | <b>699.416</b>  | <b>700.424</b>  | 698.408  | L | 6  |
| P  | 27 | 2896.723        | 602.351         | 586.332         | 587.340         | 585.324  | P | 5  |
| K  | 28 | 3024.818        | 505.206         | 489.179         | 490.187         | 488.171  | K | 4  |
| K  | 29 | 3152.913        | 377.203         | <b>361.184</b>  | 362.192         | 360.177  | K | 3  |
| T  | 30 | 3251.961        | 246.106         | 233.089         | 234.097         | 232.082  | T | 2  |
| E  | 31 | 3383.004        | 148.066         | 132.042         | 133.050         | 131.034  | E | 1  |

# sp | Q6GSS7 | H2A2A\_MOUSE

EELNK<sup>Acetyl</sup><sub>42.01</sub> LLGK<sup>Dimethyl</sup><sub>28.03</sub> VTIAQGGVLPNIQAVLLPKKTE

- ▶ fragmentation table for charge state 2+
- ▶ specType=etd
- ▶ score=44.20
- ▶ F113873.dat
- ▶ query=q51032.p1
- ▶ precursor=677.600590
- ▶ chargePrecursor=5
- ▶ itol=0.5

| AA | c  | y               | z+1             | z+2             | z               | AA              |       |
|----|----|-----------------|-----------------|-----------------|-----------------|-----------------|-------|
| E  | 1  | 74.042          | 1092.407        | <b>1084.488</b> | 0.504           | 1083.984        | E[31] |
| E  | 2  | 138.563         | <b>1627.976</b> | 1619.067        | 0.504           | 1618.463        | E[30] |
| L  | 3  | 199.106         | 838.535         | 1555.445        | 0.504           | 1554.941        | L[29] |
| N  | 4  | 252.127         | 1550.015        | 1498.933        | 1499.407        | 1498.400        | N[28] |
| K  | 5  | 337.170         | <b>1449.891</b> | 1441.882        | 1442.386        | 1441.378        | K[27] |
| L  | 6  | 393.721         | 1364.839        | 1356.829        | 1357.333        | 1356.325        | L[26] |
| L  | 7  | 450.263         | 1308.297        | 1300.287        | 1300.791        | 1299.783        | L[25] |
| G  | 8  | 498.814         | 1252.755        | 1244.745        | 1245.249        | 1244.241        | G[24] |
| K  | 9  | 556.837         | 1223.244        | <b>1215.234</b> | <b>1215.738</b> | 1214.731        | K[23] |
| V  | 10 | 606.372         | 1145.181        | <b>1137.171</b> | 1137.675        | <b>1136.667</b> | V[22] |
| T  | 11 | 656.895         | 1095.646        | 1087.637        | <b>1088.141</b> | 1087.133        | T[21] |
| L  | 12 | <b>713.437</b>  | 1045.123        | <b>1037.113</b> | <b>1037.617</b> | 1036.609        | L[20] |
| A  | 13 | <b>748.956</b>  | 988.561         | <b>980.571</b>  | <b>981.075</b>  | 980.067         | A[19] |
| Q  | 14 | <b>812.985</b>  | 953.060         | <b>945.053</b>  | <b>945.557</b>  | 944.549         | Q[18] |
| G  | 15 | 861.498         | <b>889.033</b>  | <b>881.023</b>  | <b>881.527</b>  | 880.519         | G[17] |
| G  | 16 | <b>870.007</b>  | <b>860.522</b>  | <b>852.513</b>  | <b>853.017</b>  | 852.009         | G[16] |
| V  | 17 | <b>919.541</b>  | 832.011         | <b>824.002</b>  | <b>824.506</b>  | 823.498         | V[15] |
| L  | 18 | 978.063         | <b>782.477</b>  | <b>774.468</b>  | 774.972         | <b>773.964</b>  | L[14] |
| P  | 19 | 1024.809        | <b>725.935</b>  | 717.925         | 718.429         | 717.421         | P[13] |
| N  | 20 | 1081.631        | 677.456         | <b>669.399</b>  | <b>669.903</b>  | 668.895         | N[12] |
| I  | 21 | 1138.173        | 630.387         | 622.378         | 622.882         | 621.874         | I[11] |
| Q  | 22 | 1202.202        | 583.845         | 575.836         | 576.340         | 575.332         | Q[10] |
| A  | 23 | <b>1237.721</b> | 499.816         | <b>491.807</b>  | 492.310         | <b>491.303</b>  | A[0]  |
| V  | 24 | 1277.752        | 484.297         | 476.288         | <b>456.792</b>  | 455.784         | V[8]  |
| L  | 25 | <b>1343.797</b> | 414.763         | 406.754         | 407.258         | 406.250         | L[7]  |
| L  | 26 | 1400.339        | 358.221         | <b>350.212</b>  | 350.716         | <b>349.708</b>  | L[6]  |
| P  | 27 | 1448.895        | 301.679         | 293.670         | 294.174         | 293.166         | P[5]  |
| K  | 28 | <b>1512.913</b> | 253.153         | 245.143         | 245.647         | 244.639         | K[4]  |
| K  | 29 | <b>1576.960</b> | 189.105         | 181.096         | 181.600         | 180.592         | K[3]  |
| T  | 30 | <b>1627.484</b> | 126.056         | 117.048         | 117.552         | 116.544         | T[2]  |
| E  | 31 | 1692.225        | 74.534          | 66.524          | 67.028          | 66.021          | E[1]  |

# sp | Q6GSS7 | H2A2A\_MOUSE

EELNK <sup>Acetyl</sup>42.01 LLGK <sup>Dimethyl</sup>28.03 VTIAQGGVLPNIQAVLLPKKTE

- ▶ fragmentation table for charge state 3+
- ▶ specType=etd
- ▶ score=44.20
- ▶ F113873.dat
- ▶ query=q51032.p1
- ▶ precursor=677.600590
- ▶ chargePrecursor=5
- ▶ itol=0.5

| AA  | c               | y               | z+1             | z+2            | z              | AA  |
|-----|-----------------|-----------------|-----------------|----------------|----------------|-----|
| E 1 | 49.697          | 1170.607        | 1123.528        | 0.672          | 1122.962       | E11 |
| E 2 | 92.711          | <b>1085.653</b> | 1080.314        | 0.672          | 1079.978       | E10 |
| L 3 | 130.406         | 1042.639        | <b>1037.299</b> | 0.672          | 1036.963       | L29 |
| N 4 | 168.420         | 1004.944        | 999.605         | 999.941        | 999.269        | N28 |
| K 5 | 225.122         | 966.930         | 961.500         | 961.926        | 961.254        | K27 |
| L 6 | 262.817         | 910.228         | <b>904.889</b>  | 905.225        | <b>904.553</b> | L26 |
| L 7 | 300.511         | 872.533         | 867.194         | 867.530        | 866.955        | L25 |
| Q 8 | 319.519         | 834.830         | 829.699         | 829.935        | 829.163        | Q24 |
| K 9 | 371.561         | 815.832         | <b>810.492</b>  | <b>810.828</b> | <b>810.156</b> | K23 |
| V10 | 404.583         | 763.790         | 758.450         | 758.786        | 758.114        | V22 |
| T11 | 438.266         | 730.767         | <b>725.427</b>  | <b>725.763</b> | 725.091        | T21 |
| I12 | 475.961         | 697.584         | 691.745         | 692.081        | 691.409        | I20 |
| A13 | 499.640         | 659.389         | 654.050         | 654.386        | 653.714        | A19 |
| Q14 | 542.326         | 639.710         | 630.371         | 630.707        | 630.035        | Q18 |
| Q15 | 561.333         | 593.024         | 587.685         | 588.021        | 587.349        | Q17 |
| Q16 | 580.340         | 574.017         | 568.678         | 569.013        | 568.342        | Q16 |
| V17 | 613.363         | 555.010         | 549.670         | 550.006        | 549.334        | V15 |
| L18 | 651.058         | 521.987         | 516.648         | 516.984        | 516.312        | L14 |
| F19 | 683.409         | 484.292         | 478.953         | 479.289        | 478.617        | F13 |
| T20 | 727.823         | 451.943         | 446.602         | 446.938        | 446.266        | T13 |
| T21 | 759.118         | 413.927         | 408.588         | 408.924        | 408.252        | T11 |
| Q22 | 801.804         | 376.231         | 370.893         | 371.229        | 370.557        | Q10 |
| A23 | 825.483         | 333.546         | 328.207         | 328.543        | 327.871        | A9  |
| V24 | 858.506         | 309.867         | 304.528         | 304.864        | 304.192        | V8  |
| L25 | 896.200         | 276.844         | 271.505         | 271.841        | 271.169        | L7  |
| L26 | 933.895         | 239.150         | 233.810         | 234.146        | 233.474        | L6  |
| P27 | 966.346         | 201.455         | 196.116         | 196.451        | 195.780        | P5  |
| K28 | <b>1008.944</b> | 169.104         | 163.765         | 164.101        | 163.429        | K4  |
| K29 | <b>1051.643</b> | 128.409         | 121.066         | 121.402        | 120.730        | K3  |
| T30 | <b>1085.125</b> | 83.708          | 78.368          | 78.704         | 78.032         | T2  |
| E31 | 1128.339        | 50.025          | 44.685          | 45.021         | 44.349         | E1  |

# sp | Q6GSS7 | H2A2A\_MOUSE

EELNK<sup>Acetyl</sup><sub>42.01</sub> LLGK<sup>Dimethyl</sup><sub>28.03</sub> VTIAQGGVLPNIQAVLLPKKTE

- ▶ fragmentation table for charge state 4+
- ▶ specType=etd
- ▶ score=44.20
- ▶ F113873.dat
- ▶ query=q51032.p1
- ▶ precursor=677.600590
- ▶ chargePrecursor=5
- ▶ itol=0.5

| AA    |  | c              | y              | z+1            | z+2            | z              | AA    |
|-------|--|----------------|----------------|----------------|----------------|----------------|-------|
| E[1]  |  | 37.525         | <b>846.752</b> | 842.748        | 0.755          | 842.696        | E[31] |
| E[2]  |  | 69.795         | <b>814.492</b> | <b>810.487</b> | 0.755          | <b>810.235</b> | E[30] |
| L[3]  |  | 98.056         | <b>782.231</b> | 778.226        | 0.755          | 777.974        | L[29] |
| N[4]  |  | 126.567        | 753.966        | 749.953        | 750.207        | 749.703        | N[28] |
| K[5]  |  | 159.093        | <b>725.449</b> | 721.443        | 721.697        | 721.193        | K[27] |
| L[6]  |  | 197.364        | 692.923        | 678.918        | 679.170        | 678.666        | L[26] |
| L[7]  |  | 225.635        | 654.652        | 650.647        | 650.899        | 650.395        | L[25] |
| G[8]  |  | 239.891        | 626.381        | 622.376        | 622.628        | 622.124        | G[24] |
| K[9]  |  | 278.922        | 612.126        | <b>608.121</b> | <b>608.373</b> | <b>607.869</b> | K[23] |
| V[10] |  | 303.689        | 573.094        | 569.089        | 569.341        | 568.837        | V[22] |
| T[11] |  | 328.951        | 548.327        | 544.322        | 544.574        | 544.070        | T[21] |
| I[12] |  | 357.222        | 523.065        | 519.060        | 519.312        | 518.808        | I[20] |
| A[13] |  | 374.982        | 494.794        | 490.789        | 491.041        | 490.537        | A[19] |
| Q[14] |  | 408.296        | 477.035        | 473.030        | 473.282        | 472.778        | Q[18] |
| G[15] |  | 421.252        | 445.020        | 441.015        | 441.267        | 440.763        | G[17] |
| G[16] |  | 435.507        | 430.765        | 426.760        | 427.012        | 426.508        | G[16] |
| V[17] |  | 460.274        | 416.509        | 412.504        | 412.757        | 412.253        | V[15] |
| L[18] |  | 488.545        | 391.742        | 387.737        | 387.989        | 387.486        | L[14] |
| P[19] |  | 512.808        | 363.471        | 359.466        | 359.718        | 359.215        | P[13] |
| N[20] |  | 541.319        | 339.208        | 335.203        | 335.455        | 334.951        | N[12] |
| T[21] |  | 569.590        | 310.697        | 306.693        | 306.945        | 306.441        | T[11] |
| Q[22] |  | 601.605        | 282.426        | 278.421        | 278.673        | 278.170        | Q[16] |
| L[23] |  | 619.364        | 250.812        | 246.807        | 246.959        | 246.355        | L[9]  |
| V[24] |  | 644.131        | 232.662        | 228.648        | 228.900        | 228.396        | V[8]  |
| L[25] |  | 672.402        | 207.885        | 203.881        | 204.132        | <b>203.629</b> | L[7]  |
| L[26] |  | <b>700.673</b> | 179.614        | 175.609        | 175.861        | 175.358        | L[6]  |
| P[27] |  | 724.936        | 151.343        | 147.338        | 147.590        | 147.087        | P[5]  |
| K[28] |  | 756.960        | 127.080        | 123.075        | 123.327        | 122.823        | K[4]  |
| K[29] |  | 788.984        | 95.056         | 91.052         | 91.304         | 90.800         | K[3]  |
| T[30] |  | <b>814.246</b> | 63.032         | 59.028         | 59.280         | 58.776         | T[2]  |
| E[31] |  | <b>846.506</b> | 37.771         | 33.766         | 34.018         | 33.514         | E[1]  |





# sp | P68433 | H31\_MOUSE

IAQDFK<sup>Methyl</sup> TD  
14.02

- ▶ fragmentation table for charge state 1+
- ▶ specType=cid
- ▶ score=52.02
- ▶ F113873.dat
- ▶ query=q7835\_p1
- ▶ precursor=476.243890
- ▶ chargePrecursor=2
- ▶ itol=0.5

| AA  | a              | a*      | a,β     | b              | b*      | b,β            | γ              | γ*             | γ,β            | AA  |
|-----|----------------|---------|---------|----------------|---------|----------------|----------------|----------------|----------------|-----|
| T 1 | 46.096         | 0.000   | 0.000   | 114.191        | 0.000   | 0.000          | 361.416        | 316.464        | 223.468        | T 1 |
| A 2 | <b>157.134</b> | 0.000   | 0.000   | <b>185.126</b> | 0.000   | 0.000          | <b>838.304</b> | 821.366        | 602.584        | A 2 |
| Q 3 | 286.192        | 286.186 | 0.000   | <b>313.187</b> | 286.180 | 0.000          | <b>767.357</b> | <b>750.330</b> | <b>749.346</b> | Q 3 |
| D 4 | <b>400.219</b> | 383.193 | 382.200 | <b>426.214</b> | 411.187 | <b>410.203</b> | <b>639.296</b> | 622.272        | 621.288        | D 4 |
| F 5 | 547.287        | 530.261 | 529.271 | <b>575.282</b> | 558.256 | 557.272        | <b>524.271</b> | 507.245        | 506.261        | F 5 |
| R 6 | 689.356        | 672.332 | 671.360 | <b>717.363</b> | 700.366 | 699.382        | <b>377.303</b> | 360.377        | 359.393        | R 6 |
| T 7 | 790.446        | 773.419 | 772.435 | <b>818.441</b> | 801.414 | 800.430        | <b>235.092</b> | 0.000          | <b>217.082</b> | T 7 |
| G 8 | 905.473        | 888.448 | 887.464 | 913.468        | 916.441 | 915.457        | 138.040        | 0.000          | 116.034        | G 8 |



# sp | P68433 | H31\_MOUSE

IAQDFK<sup>Methyl</sup>TD  
14.02

- ▶ fragmentation table for charge state 1+
- ▶ specType=etd
- ▶ score=39.11
- ▶ F113873.dat
- ▶ query=q7836\_p1
- ▶ precursor=476.243890
- ▶ chargePrecursor=2
- ▶ itol=0.5

| AA  | c              | y              | z+1            | z+2            | z       | AA  |
|-----|----------------|----------------|----------------|----------------|---------|-----|
| I 1 | 131.118        | <b>951.478</b> | <b>935.459</b> | 0.000          | 934.452 | I 8 |
| A 2 | 202.155        | 838.394        | <b>822.375</b> | 0.000          | 821.368 | A 7 |
| Q 3 | 330.214        | 767.357        | <b>751.338</b> | 752.346        | 750.330 | Q 6 |
| D 4 | 445.241        | 639.298        | <b>623.280</b> | <b>624.288</b> | 622.272 | D 5 |
| F 5 | 592.309        | 524.271        | 568.253        | <b>509.261</b> | 507.245 | F 4 |
| K 6 | <b>734.420</b> | 377.203        | 361.184        | <b>362.192</b> | 360.177 | K 3 |
| T 7 | <b>835.467</b> | 235.092        | 219.074        | 220.082        | 218.066 | T 2 |
| D 8 | 950.494        | 134.045        | 118.026        | 119.034        | 117.018 | D 1 |

# sp | P68433 | H31\_MOUSE

IAQDFK Dimethyl TD  
28.03

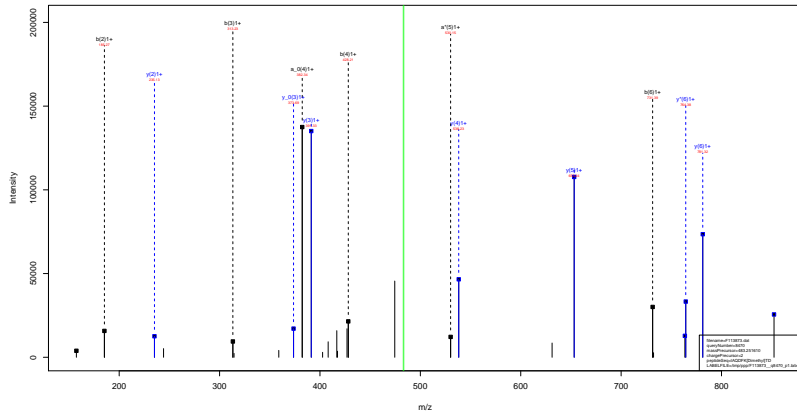

# sp | P68433 | H31\_MOUSE

IAQDFK<sup>Dimethyl</sup>TD  
28.03

- ▶ fragmentation table for charge state 1+
- ▶ specType=cid
- ▶ score=52.43
- ▶ F113873.dat
- ▶ query=q8470\_p1
- ▶ precursor=483.251610
- ▶ chargePrecursor=2
- ▶ itol=0.5

| AA  | a              | a*             | a:Δ            | b              | b*      | b:Δ     | y              | y*             | y:Δ            | AA  |
|-----|----------------|----------------|----------------|----------------|---------|---------|----------------|----------------|----------------|-----|
| T 1 | 46.298         | 0.000          | 0.000          | 124.195        | 0.000   | 0.000   | 452.434        | 242.461        | 244.463        | T 1 |
| A 2 | <b>157.134</b> | 0.000          | 0.000          | <b>185.128</b> | 0.000   | 0.000   | <b>852.410</b> | 875.361        | 874.399        | A 2 |
| Q 3 | 286.192        | 288.160        | 0.550          | <b>313.187</b> | 296.160 | 0.500   | <b>781.373</b> | <b>764.346</b> | <b>763.362</b> | Q 3 |
| G 4 | 400.219        | 383.393        | <b>387.308</b> | <b>428.214</b> | 411.187 | 440.203 | <b>653.314</b> | 659.289        | 635.334        | G 4 |
| F 5 | 547.287        | <b>536.261</b> | 325.277        | 315.192        | 536.256 | 357.272 | <b>538.287</b> | 542.261        | 620.277        | F 5 |
| R 6 | 713.414        | 695.407        | 620.403        | <b>731.409</b> | 714.382 | 713.388 | <b>391.219</b> | 374.192        | <b>373.208</b> | R 6 |
| T 7 | 804.461        | 787.435        | 786.451        | 852.450        | 815.430 | 814.446 | <b>235.092</b> | 0.000          | 237.082        | T 7 |
| G 8 | 916.488        | 902.482        | 861.478        | 947.483        | 930.457 | 929.473 | 134.040        | 0.000          | 116.034        | G 8 |



# sp | P68433 | H31\_MOUSE

IAQDFK<sup>Dimethyl</sup>TD  
28.03

- ▶ fragmentation table for charge state 1+
- ▶ specType=etd
- ▶ score=49.82
- ▶ F113873.dat
- ▶ query=q8471.p1
- ▶ precursor=483.251610
- ▶ chargePrecursor=2
- ▶ itol=0.5

| AA  | c              | y              | z+1            | z+2            | z       | AA  |
|-----|----------------|----------------|----------------|----------------|---------|-----|
| I 1 | 131.118        | <b>965.494</b> | <b>949.475</b> | 0.000          | 948.467 | I 8 |
| A 2 | 202.155        | 852.410        | <b>836.391</b> | 0.000          | 835.383 | A 7 |
| Q 3 | 330.214        | <b>781.373</b> | <b>765.354</b> | 766.362        | 764.346 | Q 6 |
| D 4 | 445.241        | 653.314        | <b>637.295</b> | <b>638.303</b> | 636.288 | D 5 |
| F 5 | 592.309        | 538.287        | <b>522.268</b> | <b>523.276</b> | 521.261 | F 4 |
| K 6 | <b>748.435</b> | 391.219        | <b>375.200</b> | <b>376.208</b> | 374.192 | K 3 |
| T 7 | <b>849.483</b> | 235.092        | 219.074        | 220.082        | 218.066 | T 2 |
| D 8 | 964.510        | 134.045        | 118.026        | 119.034        | 117.018 | D 1 |





# sp | P43274 | H14\_MOUSE

KAPKS <sup>Phospho</sup>PAK  
79.97

- ▶ fragmentation table for charge state 1+
- ▶ specType=cid
- ▶ score=48.00
- ▶ F115532.dat
- ▶ query=q1003\_p1
- ▶ precursor=453.744120
- ▶ chargePrecursor=2
- ▶ itol=0.5

| AA | a        | a*      | aΔ      | b              | b*      | bΔ      | y              | y*      | yΔ             | AA  |
|----|----------|---------|---------|----------------|---------|---------|----------------|---------|----------------|-----|
| K1 | 1101.227 | 88.183  | 0.000   | <b>129.102</b> | 112.076 | -0.083  | 260.40         | 189.818 | 111.419        | K10 |
| A1 | 112.144  | 155.133 | 0.000   | <b>200.135</b> | 163.113 | -0.000  | <b>778.388</b> | 761.950 | <b>760.375</b> | A17 |
| F1 | 269.197  | 250.111 | 0.000   | <b>297.192</b> | 280.166 | 0.000   | <b>707.349</b> | 690.322 | <b>689.338</b> | F16 |
| K1 | 107.292  | 880.259 | 0.000   | <b>425.287</b> | 408.261 | 0.000   | 610.290        | 593.269 | 592.285        | K15 |
| S1 | 354.291  | 347.258 | 548.288 | 390.285        | 375.259 | 374.215 | <b>482.301</b> | 465.174 | 464.190        | S14 |
| F1 | 693.313  | 648.317 | 643.331 | <b>649.338</b> | 592.312 | 611.328 | <b>215.203</b> | 208.176 | 0.000          | F13 |
| A1 | 732.980  | 715.358 | 714.370 | <b>760.375</b> | 743.949 | 742.935 | 218.150        | 201.123 | 0.000          | A12 |
| K1 | 880.470  | 843.449 | 842.465 | 888.470        | 871.444 | 870.480 | 147.113        | 130.086 | 0.000          | K11 |



# sp | P70696 | H2B1A\_MOUSE

HAVS <sup>Phospho</sup>EGTK  
79.97

- ▶ fragmentation table for charge state 1+
- ▶ specType=cid
- ▶ score=42.71
- ▶ F115532.dat
- ▶ query=q1027.p1
- ▶ precursor=454.697230
- ▶ chargePrecursor=2
- ▶ itol=0.5

| AA         | a              | a*      | a,β     | b              | b*      | b,β            | γ              | γ*             | γ,β            | AA          |
|------------|----------------|---------|---------|----------------|---------|----------------|----------------|----------------|----------------|-------------|
| <b>H</b> 1 | 1113.714       | 0.000   | 0.000   | 136.995        | 0.000   | 0.000          | 906.100        | 994.361        | 994.377        | <b>H</b> 10 |
| <b>A</b> 2 | <b>181.108</b> | 0.000   | 0.000   | <b>209.103</b> | 0.000   | 0.000          | <b>771.328</b> | 745.324        | 753.316        | <b>A</b> 7  |
| <b>V</b> 3 | 286.177        | 0.000   | 0.000   | <b>308.172</b> | 0.000   | 0.000          | <b>700.291</b> | 683.265        | <b>682.281</b> | <b>V</b> 6  |
| <b>S</b> 4 | 447.275        | 0.000   | 429.185 | 475.170        | 0.000   | 497.160        | <b>601.223</b> | <b>584.196</b> | 585.212        | <b>S</b> 5  |
| <b>E</b> 5 | 576.218        | 0.000   | 556.201 | 604.213        | 0.000   | 585.202        | <b>434.225</b> | 417.195        | <b>416.214</b> | <b>E</b> 4  |
| <b>G</b> 6 | 633.239        | 0.000   | 613.220 | 664.234        | 0.000   | 643.223        | <b>305.182</b> | <b>288.155</b> | <b>287.171</b> | <b>G</b> 3  |
| <b>T</b> 7 | 734.287        | 0.000   | 715.275 | <b>762.282</b> | 0.000   | <b>744.271</b> | 468.160        | 231.134        | 230.150        | <b>T</b> 2  |
| <b>K</b> 8 | 894.382        | 846.359 | 844.378 | 896.377        | 871.350 | 872.369        | <b>147.113</b> | 150.088        | 0.000          | <b>K</b> 9  |

# sp | P70696 | H2B1A\_MOUSE

HAVS Phospho EGTK  
79.97

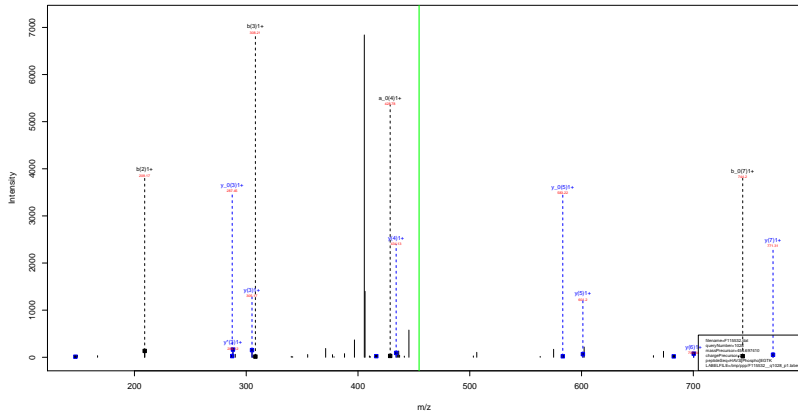

# sp | P70696 | H2B1A\_MOUSE

HAVS<sup>Phospho</sup> EGTK  
79.97

- ▶ fragmentation table for charge state 1+
- ▶ specType=cid
- ▶ score=45.80
- ▶ F115532.dat
- ▶ query=q1028\_p1
- ▶ precursor=454.697410
- ▶ chargePrecursor=2
- ▶ itol=0.5

| AA         | a       | a*      | a,β            | b              | b*      | b,β            | γ              | γ*             | γ,β            | AA          |
|------------|---------|---------|----------------|----------------|---------|----------------|----------------|----------------|----------------|-------------|
| <b>H</b> 1 | 110.074 | 0.000   | 0.000          | 136.995        | 0.000   | 0.000          | 908.100        | 904.361        | 994.377        | <b>H</b> 10 |
| <b>A</b> 2 | 181.108 | 0.000   | 0.000          | <b>209.103</b> | 0.000   | 0.000          | <b>771.328</b> | 745.324        | 753.319        | <b>A</b> 7  |
| <b>V</b> 3 | 280.177 | 0.000   | 0.000          | <b>308.172</b> | 0.000   | 0.000          | <b>700.291</b> | 683.265        | <b>682.281</b> | <b>V</b> 6  |
| <b>S</b> 4 | 447.175 | 0.000   | <b>429.165</b> | 475.170        | 0.000   | 457.160        | <b>601.223</b> | 584.198        | <b>583.212</b> | <b>S</b> 5  |
| <b>E</b> 5 | 576.210 | 0.000   | 558.201        | 604.211        | 0.000   | 585.202        | <b>434.225</b> | 417.205        | <b>416.214</b> | <b>E</b> 4  |
| <b>G</b> 6 | 633.239 | 0.000   | 615.229        | 654.234        | 0.000   | 633.224        | <b>305.182</b> | <b>288.155</b> | <b>287.171</b> | <b>G</b> 3  |
| <b>T</b> 7 | 734.269 | 0.000   | 715.278        | 742.282        | 0.000   | <b>744.271</b> | 748.160        | 731.134        | 726.150        | <b>T</b> 2  |
| <b>K</b> 8 | 852.302 | 845.295 | 844.278        | 896.377        | 871.350 | 872.359        | <b>147.113</b> | 130.084        | 0.000          | <b>K</b> 11 |

# sp | P68433 | H31\_MOUSE

ST<sup>(Phospho)</sup> ELLIR  
(79.97)

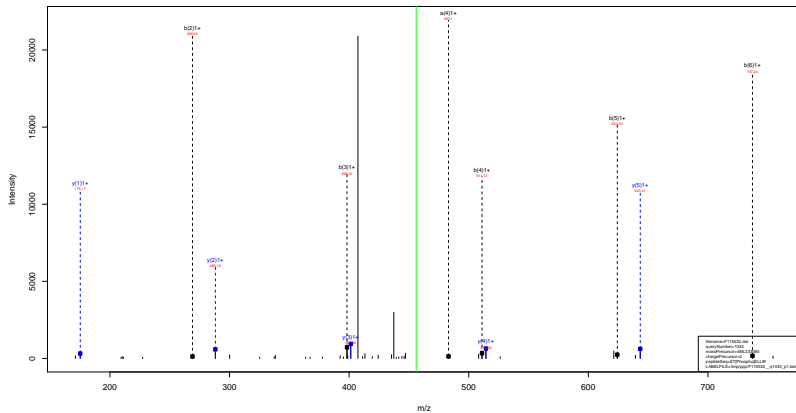

# sp | P68433 | H31\_MOUSE

ST<sup>(Phospho)</sup> ELLIR  
(79.97)

- ▶ fragmentation table for charge state 1+
- ▶ specType=cid
- ▶ score=40.85
- ▶ F115532.dat
- ▶ query=q1043\_p1
- ▶ precursor=456.233080
- ▶ chargePrecursor=2
- ▶ itol=0.5

| AA | a | a*             | a,0   | b       | b*             | b,0   | y       | y*             | y,0            | AA      |       |   |
|----|---|----------------|-------|---------|----------------|-------|---------|----------------|----------------|---------|-------|---|
| S  | 1 | 60.044         | 0.000 | 42.039  | 88.079         | 0.000 | 70.029  | 93.140         | 894.433        | 904.448 | S     |   |
| T  | 2 | 241.358        | 0.000 | 223.040 | <b>269.053</b> | 0.000 | 251.043 | 324.428        | 807.403        | 808.417 | T     |   |
| E  | 3 | 376.217        | 0.000 | 332.000 | <b>396.096</b> | 0.000 | 360.093 | <b>443.414</b> | 626.387        | 626.401 | E     |   |
| L  | 4 | <b>483.185</b> | 0.000 | 425.174 | <b>511.180</b> | 0.000 | 493.169 | <b>514.371</b> | 627.361        | 0.000   | L     |   |
| L  | 5 | 596.269        | 0.000 | 578.259 | <b>624.264</b> | 0.000 | 596.253 | <b>401.287</b> | 804.261        | 0.000   | L     |   |
| R  | 6 | 709.313        | 0.000 | 691.343 | <b>737.348</b> | 0.000 | 719.339 | <b>288.283</b> | 273.176        | 0.000   | R     |   |
| R  | 7 | 885.454        | 0.000 | 847.444 | 893.440        | 0.000 | 876.433 | 875.439        | <b>175.119</b> | 158.092 | 0.000 | R |

# sp | P27661 | H2AX\_MOUSE

KASQAS<sup>Phospho</sup> QEY  
79.97

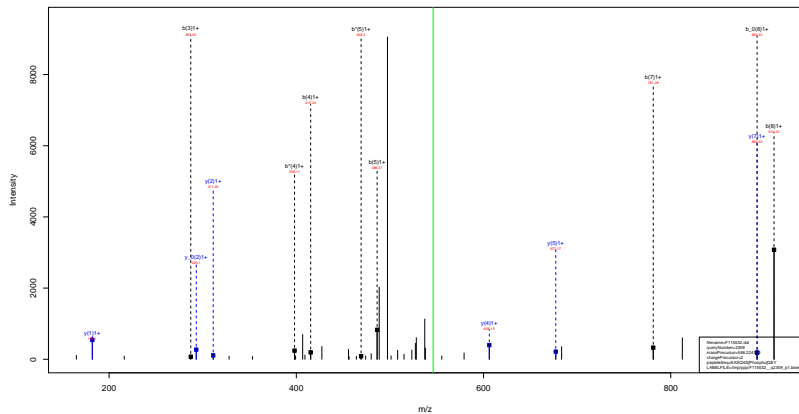



# sp | P27661 | H2AX\_MOUSE

KASQAS<sup>Phospho</sup> QEY  
79.97

- ▶ fragmentation table for charge state 1+
- ▶ specType=cid
- ▶ score=44.29
- ▶ F115532.dat
- ▶ query=q2309\_p1
- ▶ precursor=546.224130
- ▶ chargePrecursor=2
- ▶ itol=0.5

| AA | a        | a*       | aΔ       | b              | b*             | bΔ       | y              | y*             | yΔ       | AA |
|----|----------|----------|----------|----------------|----------------|----------|----------------|----------------|----------|----|
| R  | 101.07   | 144.01   | 0.000    | 126.102        | 112.076        | 0.000    | 100.440        | 1074.431       | 0.000    | R  |
| A  | 172.144  | 155.118  | 0.000    | 200.150        | 181.111        | 0.000    | 583.588        | 646.510        | 0.000    | A  |
| S  | 259.176  | 242.150  | 241.100  | <b>287.171</b> | 270.145        | 269.181  | <b>692.358</b> | 671.261        | 674.250  | S  |
| Q  | 387.208  | 370.182  | 369.231  | <b>415.230</b> | <b>398.204</b> | 397.218  | 652.271        | 682.261        | 681.269  | Q  |
| A  | 354.212  | 441.200  | 440.251  | <b>488.261</b> | <b>469.241</b> | 364.257  | <b>677.218</b> | 660.151        | 659.207  | A  |
| S  | 625.271  | 608.244  | 607.289  | 653.263        | 636.238        | 635.250  | <b>606.181</b> | 589.154        | 588.170  | S  |
| Q  | 751.290  | 736.263  | 735.310  | <b>781.324</b> | 764.297        | 763.313  | 439.102        | 422.150        | 421.172  | Q  |
| T  | 883.312  | 868.285  | 867.330  | <b>918.361</b> | 901.335        | 900.349  | <b>692.356</b> | <b>311.134</b> | 0.000    | T  |
| Y  | 1045.436 | 1028.408 | 1027.424 | 1073.426       | 1056.400       | 1055.415 | <b>182.081</b> | 0.000          | 1043.411 | Y  |



# sp | P43274 | H14\_MOUSE

KAPKS <sup>Phospho</sup> PAKAK  
79.97

- ▶ fragmentation table for charge state 1+
- ▶ specType=cid
- ▶ score=45.49
- ▶ F115532.dat
- ▶ query=q2424.p1
- ▶ precursor=553.310030
- ▶ chargePrecursor=2
- ▶ itol=0.5

| AA  | a        | a*       | a <sub>0</sub> | b              | b*             | b <sub>0</sub> | y              | y*       | y <sub>0</sub> | AA  |
|-----|----------|----------|----------------|----------------|----------------|----------------|----------------|----------|----------------|-----|
| R1  | 101.407  | 94.001   | 0.000          | 229.102        | 112.076        | 0.000          | 1109.613       | 1088.988 | 1097.602       | K10 |
| A2  | 172.144  | 155.218  | 0.000          | <b>206.139</b> | 115.113        | 0.000          | <b>977.518</b> | 969.491  | <b>959.507</b> | A9  |
| T3  | 209.019  | 202.313  | 0.000          | <b>297.192</b> | 209.166        | 0.000          | <b>906.481</b> | 899.454  | <b>888.470</b> | T8  |
| R4  | 397.292  | 390.296  | 0.000          | <b>425.267</b> | <b>408.261</b> | 0.000          | 859.422        | 792.402  | 779.418        | K7  |
| S5  | 414.211  | 387.205  | 146.190        | 352.219        | 375.219        | 1074.211       | <b>861.131</b> | 859.301  | <b>843.121</b> | S0  |
| T6  | 481.242  | 464.217  | 943.131        | 469.219        | 474.214        | 874.242        | <b>514.128</b> | 497.208  | 0.000          | T0  |
| A7  | 732.280  | 715.254  | 744.310        | <b>760.375</b> | 743.289        | 742.280        | <b>417.282</b> | 403.255  | 0.000          | A0  |
| R8  | 860.476  | 843.449  | 842.450        | <b>888.470</b> | 871.444        | 870.469        | 949.265        | 929.218  | 0.000          | R0  |
| A9  | 1011.512 | 1014.498 | 911.502        | <b>959.507</b> | 962.481        | 961.497        | <b>218.150</b> | 201.123  | 0.000          | A0  |
| K10 | 1059.607 | 1049.591 | 1044.590       | 1067.602       | 1070.576       | 1069.601       | 147.111        | 130.088  | 0.000          | K0  |

# sp | P43274 | H14\_MOUSE

KAPKS<sup>Phospho</sup> PAKAK  
79.97

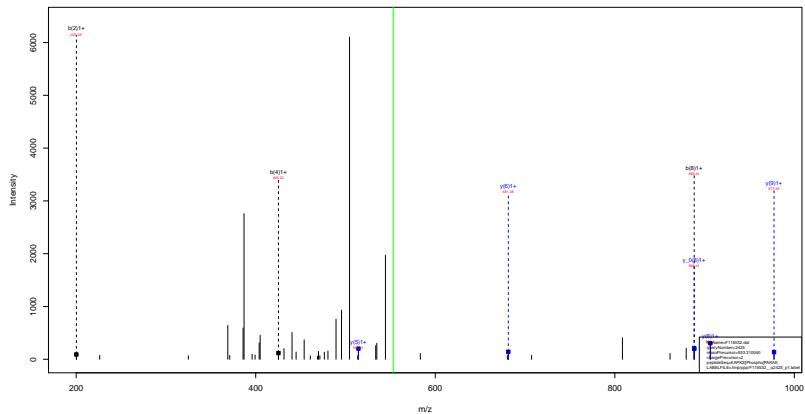

# sp | P43274 | H14\_MOUSE

KAPKS <sup>Phospho</sup> PAKAK  
79.97

- ▶ fragmentation table for charge state 1+
- ▶ specType=cid
- ▶ score=24.91
- ▶ F115532.dat
- ▶ query=q2425\_p1
- ▶ precursor=553.310040
- ▶ chargePrecursor=2
- ▶ itol=0.5

| AA  | a       | a*       | a,b      | b              | b*       | b,b      | y              | y*       | y,b            | AA  |
|-----|---------|----------|----------|----------------|----------|----------|----------------|----------|----------------|-----|
| R1  | 101-107 | 94-101   | 0.000    | 128-132        | 112-106  | 0.000    | 1159-813       | 1088-938 | 1057-802       | K10 |
| A2  | 172-144 | 135-118  | 0.000    | <b>206-139</b> | 183-113  | 0.000    | <b>977-518</b> | 968-491  | 959-507        | A9  |
| T3  | 109-107 | 202-111  | 0.000    | 191-119        | 200-106  | 0.000    | <b>905-481</b> | 899-454  | <b>888-470</b> | Y10 |
| R4  | 107-202 | 200-200  | 0.000    | <b>425-287</b> | 408-261  | 0.000    | 859-425        | 792-402  | 170-418        | K10 |
| S5  | 104-211 | 187-205  | 146-190  | 352-210        | 375-210  | 1074-211 | <b>861-131</b> | 168-101  | 103-111        | S10 |
| T6  | 101-212 | 184-117  | 143-111  | 359-110        | 374-114  | 1074-212 | <b>514-325</b> | 497-202  | 0.000          | Y10 |
| A7  | 132-200 | 115-204  | 174-310  | 750-370        | 743-349  | 762-303  | 417-200        | 403-200  | 0.000          | A10 |
| R8  | 160-470 | 143-449  | 142-450  | <b>888-470</b> | 871-444  | 870-400  | 948-200        | 929-210  | 0.000          | K10 |
| A9  | 111-512 | 114-408  | 111-507  | 959-507        | 942-461  | 941-407  | 218-150        | 201-123  | 0.000          | A10 |
| R10 | 109-607 | 1049-501 | 1044-500 | 1081-602       | 1070-576 | 1068-501 | 147-111        | 130-088  | 0.000          | K10 |



# sp | Q6ZWY9 | H2B1C\_MOUSE

PEPAKS<sup>Phospho</sup> APAPK  
79.97

- ▶ fragmentation table for charge state 1+
- ▶ specType=cid
- ▶ score=49.68
- ▶ F115532.dat
- ▶ query=q2847\_p1
- ▶ precursor=586.789490
- ▶ chargePrecursor=2
- ▶ itol=0.5

| AA  | a              | y <sup>m</sup> | a $\beta$ | b              | b <sup>m</sup> | b $\beta$ | y              | y <sup>m</sup> | y $\beta$      | AA  |
|-----|----------------|----------------|-----------|----------------|----------------|-----------|----------------|----------------|----------------|-----|
| P1  | 41.295         | 0.000          | 0.000     | 98.793         | 0.000          | 0.000     | 117.217        | 117.217        | 117.217        | P11 |
| P2  | <b>199.108</b> | 0.000          | 101.909   | <b>227.193</b> | 0.000          | 0.000     | 119.219        | 119.219        | 119.219        | P10 |
| P3  | 256.100        | 0.000          | 276.150   | 324.253        | 0.000          | 306.149   | <b>946.476</b> | <b>929.448</b> | 928.446        | P9  |
| A4  | 287.100        | 0.000          | 349.100   |                | 0.000          | 377.100   |                |                | <b>811.412</b> | A9  |
| P5  | 316.094        | 0.000          | 417.094   | <b>523.207</b> | 0.000          | 556.094   | <b>778.208</b> | 778.208        | 778.208        | K17 |
| S6  | 350.094        | 0.000          | 444.094   | 566.207        | 0.000          | 599.094   | <b>650.201</b> | 650.201        | 650.201        | S9  |
| A7  | 435.090        | 0.000          | 716.090   | 761.303        | 0.000          | 794.090   | <b>961.303</b> | <b>961.293</b> | 961.293        | A9  |
| P8  | 530.081        | 0.000          | 812.081   | 857.376        | 0.000          | 891.081   | 846.355        | <b>412.355</b> | 399.250        | P16 |
| A9  | 601.078        | 0.000          | 983.078   | <b>929.413</b> | 0.000          | 911.078   | 911.078        | 911.078        | 298.129        | A9  |
| P10 | 696.071        | 0.000          | 980.071   | 1025.065       | 0.000          | 1058.071  | <b>244.106</b> | <b>227.138</b> | 0.000          | P12 |
| K11 | 1120.566       | 1100.566       | 1100.566  | 1114.563       | 1113.564       | 1110.569  | 157.110        | 1.50000        | 0.000          | K11 |

# sp | Q9D2U9 | H2B3A\_MOUSE

PEPSRS Phospho TPAPK  
79.97

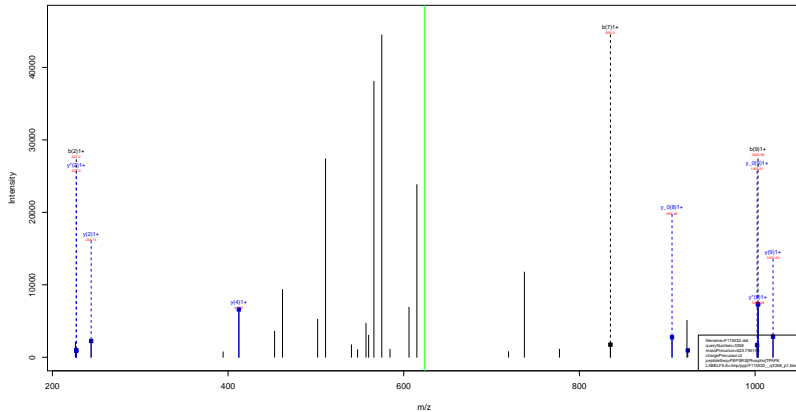



# sp | Q9D2U9 | H2B3A\_MOUSE

PEPSRS<sup>Phospho</sup> TPAPK  
79.97

- ▶ fragmentation table for charge state 1+
- ▶ specType=cid
- ▶ score=30.33
- ▶ F115532.dat
- ▶ query=q3358\_p1
- ▶ precursor=623.795170
- ▶ chargePrecursor=2
- ▶ itol=0.5

| AA   | a        | a*        | a:β       | b               | b*        | b:β       | y               | y*              | y:β             | AA   |
|------|----------|-----------|-----------|-----------------|-----------|-----------|-----------------|-----------------|-----------------|------|
| P11  | 301.055  | 0.000     | 0.000     | 96.287          | 0.000     | 0.000     | 1.445.387       | 2.229.559       | 3.238.512       | P111 |
| T12  | 309.100  | 0.000     | 1.81.989  | <b>227.103</b>  | 0.000     | 0.000     | 2.09.559        | 1.119.909       | 2.133.512       | T121 |
| P13  | 309.100  | 0.000     | 2.95.193  | 3.04.155        | 0.000     | 0.000     | <b>1020.487</b> | <b>1003.461</b> | <b>1007.477</b> | P131 |
| S14  | 313.110  | 0.000     | 305.182   | 4.11.187        | 0.000     | 0.000     | <b>921.435</b>  | 959.400         | <b>905.424</b>  | S141 |
| T15  | 319.414  | 327.261   | 3.21.289  | 1.09.489        | 329.242   | 349.214   | 348.466         | 319.379         | 348.466         | T151 |
| S16  | 326.262  | 959.255   | 1.00.261  | 7.94.287        | 317.202   | 3.10.270  | 959.255         | 1.05.270        | 9.05.291        | S161 |
| T17  | 327.430  | 1.00.110  | 1.09.329  | <b>835.335</b>  | 1.01.409  | 1.17.130  | 1.10.310        | 9.06.272        | 4.05.291        | T171 |
| P18  | 334.332  | 327.261   | 9.06.262  | 1.10.287        | 9.05.301  | 9.10.312  | <b>412.255</b>  | 9.05.255        | 0.000           | P181 |
| A19  | 371.410  | 926.410   | 97.410    | <b>1001.424</b> | 926.410   | 926.410   | 1.11.924        | 2.09.110        | 0.000           | A191 |
| P100 | 5372.482 | 3.005.459 | 1.004.472 | 11.001.477      | 1.001.451 | 3.002.460 | <b>244.168</b>  | <b>227.139</b>  | 0.000           | P100 |
| R111 | 1200.117 | 1.183.151 | 1.183.967 | 12.28.972       | 1.211.106 | 12.10.102 | 147.111         | 1.93.089        | 0.000           | R111 |

# sp | P15864 | H12\_MOUSE

GTGASGS<sup>Phospho</sup>FKLNK  
79.97

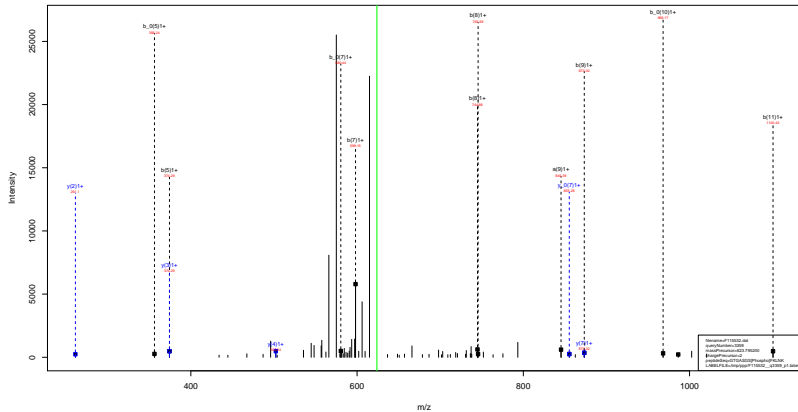

# sp | P15864 | H12\_MOUSE

GTGASGS<sup>Phospho</sup> FKLNK  
79.97

- ▶ fragmentation table for charge state 1+
- ▶ specType=cid
- ▶ score=38.57
- ▶ F115532.dat
- ▶ query=q3359\_p1
- ▶ precursor=623.795200
- ▶ chargePrecursor=2
- ▶ itol=0.5

| AA  | a        | a'       | a <sub>0</sub> | b        | b'       | b <sub>0</sub> | y        | y'       | y <sub>0</sub> | AA  |
|-----|----------|----------|----------------|----------|----------|----------------|----------|----------|----------------|-----|
| Q1  | 38.574   | 0.000    | 0.000          | 58.029   | 0.000    | 0.000          | 1346.553 | 1172.556 | 1172.557       | Q12 |
| T1  | 131.082  | 0.000    | 113.071        | 158.076  | 0.000    | 141.086        | 1180.561 | 1172.555 | 1171.561       | T13 |
| G5  | 188.151  | 0.000    | 170.092        | 210.095  | 0.000    | 158.087        | 1088.534 | 1071.487 | 1070.503       | G10 |
| A4  | 279.148  | 0.000    | 261.138        | 289.135  | 0.000    | 209.154        | 1021.483 | 1014.486 | 1013.492       | A9  |
| S5  | 346.172  | 0.000    | 328.162        | 374.167  | 0.000    | 256.156        | 960.435  | 943.428  | 942.444        | S8  |
| Q4  | 403.174  | 0.000    | 385.163        | 410.169  | 0.000    | 313.173        | 873.423  | 856.399  | 855.412        | Q7  |
| S7  | 470.192  | 0.000    | 452.181        | 480.183  | 0.000    | 368.176        | 811.402  | 794.378  | 793.384        | S6  |
| T6  | 517.208  | 0.000    | 499.200        | 508.203  | 0.000    | 419.209        | 750.413  | 733.371  | 732.378        | T5  |
| R6  | 646.255  | 888.888  | 617.246        | 673.250  | 888.834  | 655.240        | 507.316  | 488.308  | 0.000          | R4  |
| L10 | 709.470  | 841.413  | 680.420        | 686.434  | 869.438  | 668.424        | 374.240  | 357.213  | 0.000          | L3  |
| R11 | 1079.482 | 1079.482 | 1054.473       | 1100.477 | 1081.481 | 1056.471       | 261.136  | 244.129  | 0.000          | R3  |
| R12 | 1300.577 | 1183.581 | 1182.569       | 1228.573 | 1211.548 | 1210.562       | 147.113  | 130.088  | 0.000          | R1  |



# sp | Q9D2U9 | H2B3A\_MOUSE

PEPSRS<sup>Phospho</sup> TPAPK  
79.97

- ▶ fragmentation table for charge state 1+
- ▶ specType=cid
- ▶ score=33.43
- ▶ F115532.dat
- ▶ query=q3360.p1
- ▶ precursor=623.795200
- ▶ chargePrecursor=2
- ▶ itol=0.5

| AA   | a        | a*    | a <sub>0</sub> | b               | b*    | b <sub>0</sub> | y               | y*              | y <sub>0</sub> | AA    |      |
|------|----------|-------|----------------|-----------------|-------|----------------|-----------------|-----------------|----------------|-------|------|
| P11  | 70195    | 0.000 | 0.000          | 10.291          | 0.000 | 0.000          | 1246.983        | 1220.550        | 1238.572       | P111  |      |
| E12  | 399.100  | 0.000 | 1.63.000       | <b>277.103</b>  | 0.000 | 0.000          | 1249.330        | 1132.600        | 1133.300       | E120  |      |
| P13  | 399.100  | 0.000 | 278.100        | 324.100         | 0.000 | 356.100        | <b>1020.487</b> | <b>1001.461</b> | 1002.477       | P130  |      |
| S14  | 383.100  | 0.000 | 389.100        | 411.100         | 0.000 | 381.100        | 921.431         | 920.430         | <b>905.424</b> | S140  |      |
| T15  | 139.200  | 0.000 | 322.200        | 389.200         | 0.000 | 381.200        | 888.460         | 887.200         | 888.200        | T150  |      |
| S16  | 394.200  | 0.000 | 389.200        | 734.200         | 0.000 | 712.200        | 735.270         | 680.270         | 681.270        | S160  |      |
| T17  | 307.300  | 0.000 | 389.300        | <b>435.335</b>  | 0.000 | 637.300        | 113.300         | 660.270         | 660.270        | T170  |      |
| P18  | 354.300  | 0.000 | 389.300        | 435.300         | 0.000 | 637.300        | <b>412.355</b>  | 380.270         | 0.000          | P180  |      |
| A19  | 375.400  | 0.000 | 389.400        | <b>1001.424</b> | 0.000 | 920.400        | 920.410         | 115.200         | 920.110        | A190  |      |
| P100 | 1012.400 | 0.000 | 1004.471       | 1009.477        | 0.000 | 1001.451       | 1001.451        | <b>344.166</b>  | <b>327.139</b> | 0.000 | P100 |
| K111 | 1000.577 | 1.000 | 1.000          | 1.000           | 1.000 | 1.011.546      | 1.010.560       | 147.111         | 1.010.000      | 0.000 | K111 |

# sp | Q9D2U9 | H2B3A\_MOUSE

PEPSRST Phospho PAKP  
79.97

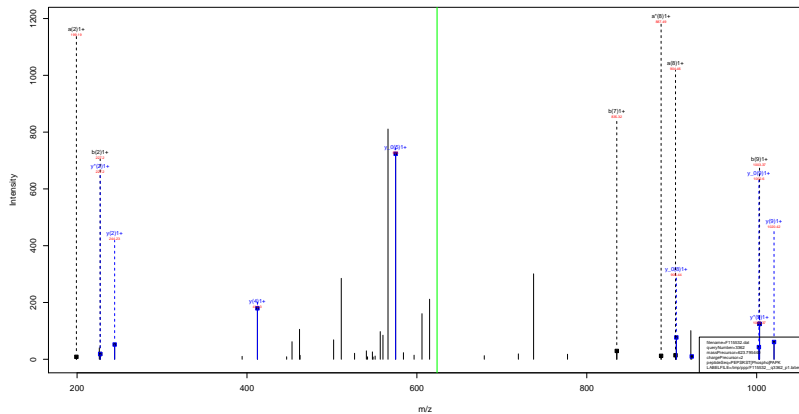

# sp | Q9D2U9 | H2B3A\_MOUSE

PEPSRST Phospho PAKK  
79.97

- ▶ fragmentation table for charge state 1+
- ▶ specType=cid
- ▶ score=26.70
- ▶ F115532.dat
- ▶ query=q3362\_p1
- ▶ precursor=623.795440
- ▶ chargePrecursor=2
- ▶ itol=0.5

| AA   | a              | a*             | a,b      | b               | b*       | b,c      | y              | y*              | y,c             | AA              |      |
|------|----------------|----------------|----------|-----------------|----------|----------|----------------|-----------------|-----------------|-----------------|------|
| P11  | 1152.07        | 0.000          | 0.000    | 96.297          | 0.000    | 0.000    | 1346.367       | 2.229           | 559             | 1238.572        | P111 |
| E12  | <b>138.138</b> | 0.000          | 131.969  | <b>227.103</b>  | 0.000    | 0.000    | 228.999        | 1349.333        | 1139.908        | 2193.938        | E120 |
| P13  | 256.156        | 0.000          | 250.120  | 324.155         | 0.000    | 0.000    | 330.145        | <b>1020.487</b> | <b>1003.461</b> | <b>1007.477</b> | P130 |
| S14  | 383.173        | 0.000          | 380.182  | 411.187         | 0.000    | 391.177  | <b>921.435</b> | 950.400         | <b>905.424</b>  | S140            |      |
| T15  | 510.190        | 0.000          | 512.209  | 589.208         | 0.000    | 569.214  | 588.214        | 619.219         | 638.266         | T150            |      |
| S16  | 626.208        | 800.250        | 628.215  | 694.223         | 637.204  | 636.210  | 680.211        | 683.215         | 687.219         | S160            |      |
| T17  | 767.224        | 680.231        | 769.233  | <b>835.235</b>  | 694.229  | 617.221  | 690.221        | 719.243         | <b>575.250</b>  | T170            |      |
| P18  | <b>904.262</b> | <b>887.266</b> | 888.262  | 916.267         | 935.261  | 916.271  | <b>412.255</b> | 940.259         | 0.000           | P180            |      |
| A19  | 1174.278       | 924.263        | 971.419  | <b>1003.424</b> | 996.414  | 990.414  | 1013.271       | 269.170         | 0.000           | A190            |      |
| P100 | 1312.480       | 1005.459       | 1094.472 | 1100.477        | 1081.461 | 1080.460 | <b>244.168</b> | <b>227.139</b>  | 0.000           | P100            |      |
| K111 | 1330.517       | 1183.551       | 1183.567 | 1228.572        | 1211.546 | 1210.542 | 147.111        | 130.089         | 0.000           | K110            |      |

# sp | Q9D2U9 | H2B3A\_MOUSE

PEPSRS Phospho TPAK  
79.97

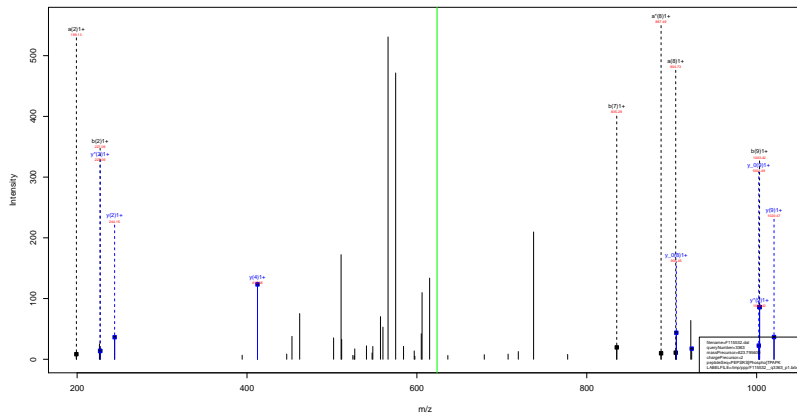



# sp | Q9D2U9 | H2B3A\_MOUSE

PEPSRS<sup>Phospho</sup> TPAPK  
79.97

- ▶ fragmentation table for charge state 1+
- ▶ specType=cid
- ▶ score=26.74
- ▶ F115532.dat
- ▶ query=q3363\_p1
- ▶ precursor=623.795600
- ▶ chargePrecursor=2
- ▶ itol=0.5

| AA          | a              | a*             | a:β      | b               | b*       | b:β      | y              | y*              | y:β             | AA              |             |
|-------------|----------------|----------------|----------|-----------------|----------|----------|----------------|-----------------|-----------------|-----------------|-------------|
| P11         | 115532         | 0.000          | 0.000    | 66.287          | 0.000    | 0.000    | 1346.583       | 2229.559        | 3238.532        | P111            |             |
| <b>E12</b>  | <b>139.138</b> | 0.000          | 131.989  | <b>227.103</b>  | 0.000    | 0.000    | 2289.559       | 3174.908        | 4183.935        | <b>E121</b>     |             |
| P13         | 256.159        | 0.000          | 250.193  | 324.155         | 0.000    | 0.000    | 300.145        | <b>1020.481</b> | <b>1003.461</b> | <b>1007.477</b> | P131        |
| <b>S14</b>  | <b>383.180</b> | 0.000          | 380.182  | 411.187         | 0.000    | 0.000    | 101.177        | <b>921.435</b>  | 900.400         | <b>905.424</b>  | <b>S141</b> |
| P15         | 139.219        | 0.000          | 131.289  | 189.289         | 0.000    | 0.000    | 260.219        | 388.266         | 519.276         | 648.286         | P151        |
| <b>S16</b>  | <b>176.252</b> | 0.000          | 169.261  | <b>194.267</b>  | 0.000    | 0.000    | 110.252        | 980.251         | 1063.255        | 1043.261        | <b>S161</b> |
| T17         | 307.263        | 0.000          | 300.269  | <b>335.235</b>  | 0.000    | 0.000    | 117.263        | 114.263         | 966.272         | 946.273         | T171        |
| <b>I18</b>  | <b>364.292</b> | <b>367.266</b> | 360.292  | 410.297         | 355.291  | 410.297  | <b>412.255</b> | 980.255         | 960.256         | 940.261         | <b>I181</b> |
| <b>A19</b>  | <b>474.319</b> | <b>464.303</b> | 467.319  | <b>1003.424</b> | 998.318  | 999.419  | 113.319        | 260.319         | 0.000           | 0.000           | <b>A191</b> |
| P20         | 1312.482       | 0.000          | 1304.472 | 1330.477        | 1303.493 | 1300.482 | <b>244.168</b> | <b>227.139</b>  | 0.000           | 0.000           | P201        |
| <b>K111</b> | 1200.517       | 1183.551       | 1184.567 | 1228.512        | 1211.516 | 1210.502 | 147.511        | 130.000         | 0.000           | 0.000           | <b>K111</b> |



# sp | Q9D2U9 | H2B3A\_MOUSE

PEPSRS<sup>Phospho</sup> TPAPK  
79.97

- ▶ fragmentation table for charge state 1+
- ▶ specType=cid
- ▶ score=30.10
- ▶ F115532.dat
- ▶ query=q3366\_p1
- ▶ precursor=623.795790
- ▶ chargePrecursor=2
- ▶ itol=0.5

| AA          | a               | a*              | a:β             | b               | b*              | b:β             | y              | y*              | y:β             | AA              |             |
|-------------|-----------------|-----------------|-----------------|-----------------|-----------------|-----------------|----------------|-----------------|-----------------|-----------------|-------------|
| P11         | 115532          | 0.000           | 0.000           | 66.287          | 0.000           | 0.000           | 1346.587       | 2229.588        | 3238.572        | P111            |             |
| <b>F12</b>  | <b>118.108</b>  | 0.000           | 131.989         | <b>227.103</b>  | 0.000           | 0.000           | 2289.590       | 3174.591        | 4183.582        | <b>F121</b>     |             |
| P13         | 256.159         | 0.000           | 295.193         | 324.155         | 0.000           | 0.000           | 330.145        | <b>1020.487</b> | <b>1003.461</b> | <b>1007.477</b> | P131        |
| S14         | 383.193         | 0.000           | 385.182         | 411.187         | 0.000           | 0.000           | 391.177        | <b>921.435</b>  | 950.430         | <b>905.424</b>  | S141        |
| P15         | 510.228         | 327.265         | 521.289         | 589.288         | 327.265         | 560.274         | 581.274        | 681.276         | 781.278         | 881.280         | P151        |
| S16         | 736.262         | 660.255         | 748.267         | 794.267         | 717.262         | 715.270         | 680.271        | 683.270         | 683.270         | 583.261         | S161        |
| T17         | 867.293         | 780.281         | 789.293         | <b>835.235</b>  | 781.281         | 817.281         | 774.279        | 666.277         | 446.271         | 716.273         | T171        |
| P18         | 1044.302        | 887.285         | 888.282         | 925.287         | 855.281         | 914.277         | <b>412.255</b> | 565.255         | 565.255         | 565.255         | P181        |
| <b>A19</b>  | <b>1214.332</b> | <b>924.421</b>  | <b>927.419</b>  | <b>1003.424</b> | <b>926.414</b>  | <b>920.414</b>  | <b>913.271</b> | <b>268.172</b>  | 0.000           | 0.000           | <b>A191</b> |
| P100        | 1312.482        | 1055.459        | 1054.472        | 1100.477        | 1081.454        | 1080.460        | <b>244.168</b> | <b>227.139</b>  | 0.000           | 0.000           | P101        |
| <b>R111</b> | <b>1310.517</b> | <b>1183.551</b> | <b>1182.567</b> | <b>1228.572</b> | <b>1211.546</b> | <b>1210.552</b> | <b>147.111</b> | <b>130.089</b>  | 0.000           | 0.000           | <b>R111</b> |

# sp | P70696 | H2B1A\_MOUSE

QVHPDTGISS Phospho K  
79.97

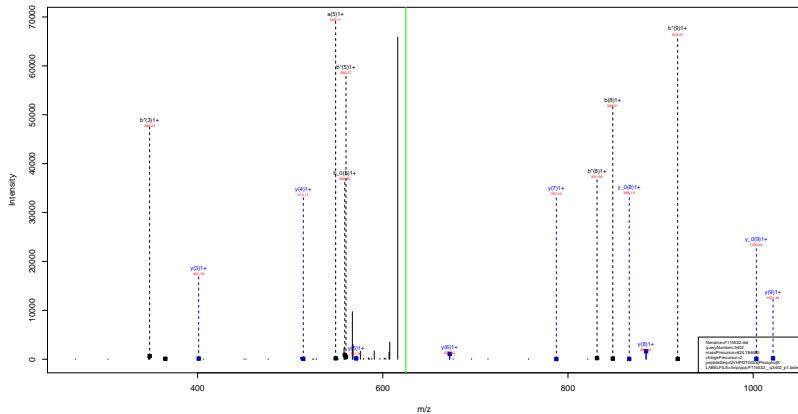

# sp | P70696 | H2B1A\_MOUSE

QVHPDTGISS Phospho K  
79.97

- ▶ fragmentation table for charge state 1+
- ▶ specType=cid
- ▶ score=27.38
- ▶ F115532.dat
- ▶ query=q3402.p1
- ▶ precursor=624.784880
- ▶ chargePrecursor=2
- ▶ itol=0.5

| AA | a   | a*  | aΔ    | b   | b*  | bΔ    | y   | y*  | yΔ    | AA |
|----|-----|-----|-------|-----|-----|-------|-----|-----|-------|----|
| Q  | 101 | 84  | 0.000 | 170 | 153 | 0.000 | 170 | 153 | 0.000 | Q  |
| V  | 102 | 85  | 0.000 | 171 | 154 | 0.000 | 171 | 154 | 0.000 | V  |
| R  | 103 | 86  | 0.000 | 172 | 155 | 0.000 | 172 | 155 | 0.000 | R  |
| P  | 104 | 87  | 0.000 | 173 | 156 | 0.000 | 173 | 156 | 0.000 | P  |
| L  | 105 | 88  | 0.000 | 174 | 157 | 0.000 | 174 | 157 | 0.000 | L  |
| I  | 106 | 89  | 0.000 | 175 | 158 | 0.000 | 175 | 158 | 0.000 | I  |
| V  | 107 | 90  | 0.000 | 176 | 159 | 0.000 | 176 | 159 | 0.000 | V  |
| M  | 108 | 91  | 0.000 | 177 | 160 | 0.000 | 177 | 160 | 0.000 | M  |
| K  | 109 | 92  | 0.000 | 178 | 161 | 0.000 | 178 | 161 | 0.000 | K  |
| K  | 110 | 93  | 0.000 | 179 | 162 | 0.000 | 179 | 162 | 0.000 | K  |
| K  | 111 | 94  | 0.000 | 180 | 163 | 0.000 | 180 | 163 | 0.000 | K  |
| K  | 112 | 95  | 0.000 | 181 | 164 | 0.000 | 181 | 164 | 0.000 | K  |
| K  | 113 | 96  | 0.000 | 182 | 165 | 0.000 | 182 | 165 | 0.000 | K  |
| K  | 114 | 97  | 0.000 | 183 | 166 | 0.000 | 183 | 166 | 0.000 | K  |
| K  | 115 | 98  | 0.000 | 184 | 167 | 0.000 | 184 | 167 | 0.000 | K  |
| K  | 116 | 99  | 0.000 | 185 | 168 | 0.000 | 185 | 168 | 0.000 | K  |
| K  | 117 | 100 | 0.000 | 186 | 169 | 0.000 | 186 | 169 | 0.000 | K  |
| K  | 118 | 101 | 0.000 | 187 | 170 | 0.000 | 187 | 170 | 0.000 | K  |
| K  | 119 | 102 | 0.000 | 188 | 171 | 0.000 | 188 | 171 | 0.000 | K  |
| K  | 120 | 103 | 0.000 | 189 | 172 | 0.000 | 189 | 172 | 0.000 | K  |
| K  | 121 | 104 | 0.000 | 190 | 173 | 0.000 | 190 | 173 | 0.000 | K  |
| K  | 122 | 105 | 0.000 | 191 | 174 | 0.000 | 191 | 174 | 0.000 | K  |
| K  | 123 | 106 | 0.000 | 192 | 175 | 0.000 | 192 | 175 | 0.000 | K  |
| K  | 124 | 107 | 0.000 | 193 | 176 | 0.000 | 193 | 176 | 0.000 | K  |
| K  | 125 | 108 | 0.000 | 194 | 177 | 0.000 | 194 | 177 | 0.000 | K  |
| K  | 126 | 109 | 0.000 | 195 | 178 | 0.000 | 195 | 178 | 0.000 | K  |
| K  | 127 | 110 | 0.000 | 196 | 179 | 0.000 | 196 | 179 | 0.000 | K  |
| K  | 128 | 111 | 0.000 | 197 | 180 | 0.000 | 197 | 180 | 0.000 | K  |
| K  | 129 | 112 | 0.000 | 198 | 181 | 0.000 | 198 | 181 | 0.000 | K  |
| K  | 130 | 113 | 0.000 | 199 | 182 | 0.000 | 199 | 182 | 0.000 | K  |
| K  | 131 | 114 | 0.000 | 200 | 183 | 0.000 | 200 | 183 | 0.000 | K  |
| K  | 132 | 115 | 0.000 | 201 | 184 | 0.000 | 201 | 184 | 0.000 | K  |
| K  | 133 | 116 | 0.000 | 202 | 185 | 0.000 | 202 | 185 | 0.000 | K  |
| K  | 134 | 117 | 0.000 | 203 | 186 | 0.000 | 203 | 186 | 0.000 | K  |
| K  | 135 | 118 | 0.000 | 204 | 187 | 0.000 | 204 | 187 | 0.000 | K  |
| K  | 136 | 119 | 0.000 | 205 | 188 | 0.000 | 205 | 188 | 0.000 | K  |
| K  | 137 | 120 | 0.000 | 206 | 189 | 0.000 | 206 | 189 | 0.000 | K  |
| K  | 138 | 121 | 0.000 | 207 | 190 | 0.000 | 207 | 190 | 0.000 | K  |
| K  | 139 | 122 | 0.000 | 208 | 191 | 0.000 | 208 | 191 | 0.000 | K  |
| K  | 140 | 123 | 0.000 | 209 | 192 | 0.000 | 209 | 192 | 0.000 | K  |
| K  | 141 | 124 | 0.000 | 210 | 193 | 0.000 | 210 | 193 | 0.000 | K  |
| K  | 142 | 125 | 0.000 | 211 | 194 | 0.000 | 211 | 194 | 0.000 | K  |
| K  | 143 | 126 | 0.000 | 212 | 195 | 0.000 | 212 | 195 | 0.000 | K  |
| K  | 144 | 127 | 0.000 | 213 | 196 | 0.000 | 213 | 196 | 0.000 | K  |
| K  | 145 | 128 | 0.000 | 214 | 197 | 0.000 | 214 | 197 | 0.000 | K  |
| K  | 146 | 129 | 0.000 | 215 | 198 | 0.000 | 215 | 198 | 0.000 | K  |
| K  | 147 | 130 | 0.000 | 216 | 199 | 0.000 | 216 | 199 | 0.000 | K  |
| K  | 148 | 131 | 0.000 | 217 | 200 | 0.000 | 217 | 200 | 0.000 | K  |
| K  | 149 | 132 | 0.000 | 218 | 201 | 0.000 | 218 | 201 | 0.000 | K  |
| K  | 150 | 133 | 0.000 | 219 | 202 | 0.000 | 219 | 202 | 0.000 | K  |
| K  | 151 | 134 | 0.000 | 220 | 203 | 0.000 | 220 | 203 | 0.000 | K  |
| K  | 152 | 135 | 0.000 | 221 | 204 | 0.000 | 221 | 204 | 0.000 | K  |
| K  | 153 | 136 | 0.000 | 222 | 205 | 0.000 | 222 | 205 | 0.000 | K  |
| K  | 154 | 137 | 0.000 | 223 | 206 | 0.000 | 223 | 206 | 0.000 | K  |
| K  | 155 | 138 | 0.000 | 224 | 207 | 0.000 | 224 | 207 | 0.000 | K  |
| K  | 156 | 139 | 0.000 | 225 | 208 | 0.000 | 225 | 208 | 0.000 | K  |
| K  | 157 | 140 | 0.000 | 226 | 209 | 0.000 | 226 | 209 | 0.000 | K  |
| K  | 158 | 141 | 0.000 | 227 | 210 | 0.000 | 227 | 210 | 0.000 | K  |
| K  | 159 | 142 | 0.000 | 228 | 211 | 0.000 | 228 | 211 | 0.000 | K  |
| K  | 160 | 143 | 0.000 | 229 | 212 | 0.000 | 229 | 212 | 0.000 | K  |
| K  | 161 | 144 | 0.000 | 230 | 213 | 0.000 | 230 | 213 | 0.000 | K  |
| K  | 162 | 145 | 0.000 | 231 | 214 | 0.000 | 231 | 214 | 0.000 | K  |
| K  | 163 | 146 | 0.000 | 232 | 215 | 0.000 | 232 | 215 | 0.000 | K  |
| K  | 164 | 147 | 0.000 | 233 | 216 | 0.000 | 233 | 216 | 0.000 | K  |
| K  | 165 | 148 | 0.000 | 234 | 217 | 0.000 | 234 | 217 | 0.000 | K  |
| K  | 166 | 149 | 0.000 | 235 | 218 | 0.000 | 235 | 218 | 0.000 | K  |
| K  | 167 | 150 | 0.000 | 236 | 219 | 0.000 | 236 | 219 | 0.000 | K  |
| K  | 168 | 151 | 0.000 | 237 | 220 | 0.000 | 237 | 220 | 0.000 | K  |
| K  | 169 | 152 | 0.000 | 238 | 221 | 0.000 | 238 | 221 | 0.000 | K  |
| K  | 170 | 153 | 0.000 | 239 | 222 | 0.000 | 239 | 222 | 0.000 | K  |
| K  | 171 | 154 | 0.000 | 240 | 223 | 0.000 | 240 | 223 | 0.000 | K  |
| K  | 172 | 155 | 0.000 | 241 | 224 | 0.000 | 241 | 224 | 0.000 | K  |
| K  | 173 | 156 | 0.000 | 242 | 225 | 0.000 | 242 | 225 | 0.000 | K  |
| K  | 174 | 157 | 0.000 | 243 | 226 | 0.000 | 243 | 226 | 0.000 | K  |
| K  | 175 | 158 | 0.000 | 244 | 227 | 0.000 | 244 | 227 | 0.000 | K  |
| K  | 176 | 159 | 0.000 | 245 | 228 | 0.000 | 245 | 228 | 0.000 | K  |
| K  | 177 | 160 | 0.000 | 246 | 229 | 0.000 | 246 | 229 | 0.000 | K  |
| K  | 178 | 161 | 0.000 | 247 | 230 | 0.000 | 247 | 230 | 0.000 | K  |
| K  | 179 | 162 | 0.000 | 248 | 231 | 0.000 | 248 | 231 | 0.000 | K  |
| K  | 180 | 163 | 0.000 | 249 | 232 | 0.000 | 249 | 232 | 0.000 | K  |
| K  | 181 | 164 | 0.000 | 250 | 233 | 0.000 | 250 | 233 | 0.000 | K  |
| K  | 182 | 165 | 0.000 | 251 | 234 | 0.000 | 251 | 234 | 0.000 | K  |
| K  | 183 | 166 | 0.000 | 252 | 235 | 0.000 | 252 | 235 | 0.000 | K  |
| K  | 184 | 167 | 0.000 | 253 | 236 | 0.000 | 253 | 236 | 0.000 | K  |
| K  | 185 | 168 | 0.000 | 254 | 237 | 0.000 | 254 | 237 | 0.000 | K  |
| K  | 186 | 169 | 0.000 | 255 | 238 | 0.000 | 255 | 238 | 0.000 | K  |
| K  | 187 | 170 | 0.000 | 256 | 239 | 0.000 | 256 | 239 | 0.000 | K  |
| K  | 188 | 171 | 0.000 | 257 | 240 | 0.000 | 257 | 240 | 0.000 | K  |
| K  | 189 | 172 | 0.000 | 258 | 241 | 0.000 | 258 | 241 | 0.000 | K  |
| K  | 190 | 173 | 0.000 | 259 | 242 | 0.000 | 259 | 242 | 0.000 | K  |
| K  | 191 | 174 | 0.000 | 260 | 243 | 0.000 | 260 | 243 | 0.000 | K  |
| K  | 192 | 175 | 0.000 | 261 | 244 | 0.000 | 261 | 244 | 0.000 | K  |
| K  | 193 | 176 | 0.000 | 262 | 245 | 0.000 | 262 | 245 | 0.000 | K  |
| K  | 194 | 177 | 0.000 | 263 | 246 | 0.000 | 263 | 246 | 0.000 | K  |
| K  | 195 | 178 | 0.000 | 264 | 247 | 0.000 | 264 | 247 | 0.000 | K  |
| K  | 196 | 179 | 0.000 | 265 | 248 | 0.000 | 265 | 248 | 0.000 | K  |
| K  | 197 | 180 | 0.000 | 266 | 249 | 0.000 | 266 | 249 | 0.000 | K  |
| K  | 198 | 181 | 0.000 | 267 | 250 | 0.000 | 267 | 250 | 0.000 | K  |
| K  | 199 | 182 | 0.000 | 268 | 251 | 0.000 | 268 | 251 | 0.000 | K  |
| K  | 200 | 183 | 0.000 | 269 | 252 | 0.000 | 269 | 252 | 0.000 | K  |
| K  | 201 | 184 | 0.000 | 270 | 253 | 0.000 | 270 | 253 | 0.000 | K  |
| K  | 202 | 185 | 0.000 | 271 | 254 | 0.000 | 271 | 254 | 0.000 | K  |
| K  | 203 | 186 | 0.000 | 272 | 255 | 0.000 | 272 | 255 | 0.000 | K  |
| K  | 204 | 187 | 0.000 | 273 | 256 | 0.000 | 273 | 256 | 0.000 | K  |
| K  | 205 | 188 | 0.000 | 274 | 257 | 0.000 | 274 | 257 | 0.000 | K  |
| K  | 206 | 189 | 0.000 | 275 | 258 | 0.000 | 275 | 258 | 0.000 | K  |
| K  | 207 | 190 | 0.000 | 276 | 259 | 0.000 | 276 | 259 | 0.000 | K  |
| K  | 208 | 191 | 0.000 | 277 | 260 | 0.000 | 277 | 260 | 0.000 | K  |
| K  | 209 | 192 | 0.000 | 278 | 261 | 0.000 | 278 | 261 | 0.000 | K  |
| K  | 210 | 193 | 0.000 | 279 | 262 | 0.000 | 279 | 262 | 0.000 | K  |
| K  | 211 | 194 | 0.000 | 280 | 263 | 0.000 | 280 | 263 | 0.000 | K  |
| K  | 212 | 195 | 0.000 | 281 | 264 | 0.000 | 281 | 264 | 0.000 | K  |
| K  | 213 | 196 | 0.000 | 282 | 265 | 0.000 | 282 | 265 | 0.000 | K  |
| K  | 214 | 197 | 0.    |     |     |       |     |     |       |    |



# sp | Q64475 | H2B1B\_MOUSE

KES<sup>Phospho</sup> YSVYVYK  
79.97

- ▶ fragmentation table for charge state 1+
- ▶ specType=cid
- ▶ score=61.08
- ▶ F115532.dat
- ▶ query=q4022.p1
- ▶ precursor=673.308090
- ▶ chargePrecursor=2
- ▶ itol=0.5

| AA | a  | a*             | a,0      | b              | b*              | b,0            | y               | y*              | y,0            | AA    |
|----|----|----------------|----------|----------------|-----------------|----------------|-----------------|-----------------|----------------|-------|
| K  | 1  | 308.202        | 48.000   | 0.000          | 126.082         | 112.000        | 0.000           | 1146.880        | 1126.000       | K(2)  |
| E  | 2  | 330.730        | 213.120  | 212.130        | <b>258.145</b>  | <b>281.118</b> | <b>240.134</b>  | <b>1217.513</b> | 1206.480       | E(2)  |
| S  | 3  | 330.730        | 369.240  | 378.130        | 329.050         | 308.000        | 307.120         | <b>1088.439</b> | 1079.440       | S(3)  |
| V  | 4  | <b>508.212</b> | 543.180  | <b>542.201</b> | <b>588.207</b>  | 571.130        | 570.130         | <b>821.472</b>  | 804.440        | V(4)  |
| S  | 5  | 547.224        | 530.120  | 539.130        | <b>674.207</b>  | <b>658.212</b> | 657.200         | <b>758.408</b>  | 743.120        | S(5)  |
| V  | 6  | 576.212        | 120.200  | 128.200        | <b>174.207</b>  | <b>157.200</b> | 156.200         | <b>671.378</b>  | <b>654.200</b> | V(6)  |
| V  | 7  | 576.212        | 802.240  | 801.200        | <b>857.378</b>  | 836.240        | 835.200         | <b>572.308</b>  | 566.200        | V(7)  |
| V  | 8  | 606.444        | 681.410  | <b>901.433</b> | <b>1036.439</b> | 1018.410       | <b>1018.428</b> | <b>408.245</b>  | 392.210        | V(8)  |
| V  | 9  | 1171.207       | 1154.480 | 1153.499       | <b>1199.502</b> | 1180.475       | <b>1181.481</b> | <b>316.176</b>  | 293.150        | V(9)  |
| K  | 10 | 1204.668       | 1200.750 | 1201.930       | 1187.960        | 1180.930       | 1180.960        | 141.110         | 130.000        | K(10) |





# sp | P15864 | H12\_MOUSE

GTGAS<sup>Phospho</sup> 79.97 GSFKLNKK

- ▶ fragmentation table for charge state 1+
- ▶ specType=cid
- ▶ score=39.18
- ▶ F115532.dat
- ▶ query=q4151\_p1
- ▶ precursor=687.842810
- ▶ chargePrecursor=2
- ▶ itol=0.5

| AA | a  | a*      | a <sup>Δ</sup>  | b        | b*              | b <sup>Δ</sup> | y               | y*              | y <sup>Δ</sup>  | AA              |      |
|----|----|---------|-----------------|----------|-----------------|----------------|-----------------|-----------------|-----------------|-----------------|------|
| Q  | 1  | 301034  | 0.000           | 0.000    | 590024          | 0.000          | 0.000           | 1174.63         | 1107.63         | 1066.60         | G(L) |
| T  | 2  | 1311092 | 0.000           | 1143.071 | 1391.071        | 0.000          | 1411.099        | 1317.630        | 1300.630        | 1209.646        | T(L) |
| G  | 3  | 1081313 | 0.000           | 1301000  | 1319100         | 0.000          | 1301.000        | 1219.699        | 1159.699        | 1106.666        | G(L) |
| A  | 4  | 2091540 | 0.000           | 1445.130 | <b>2071335</b>  | 0.000          | 1699.124        | 1359.130        | 1142.945        | 1141.577        | A(L) |
| S  | 5  | 1021130 | 0.000           | 1091120  | 1091130         | 0.000          | 1036.122        | 1036.122        | 1072.521        | 1031.520        | S(L) |
| G  | 6  | 1031100 | 0.000           | 1001100  | 1011100         | 0.000          | 1031.100        | <b>1071.302</b> | 1041.302        | <b>1011.541</b> | G(L) |
| S  | 7  | 1019100 | 0.000           | 1001100  | 1001100         | 0.000          | 1001.100        | 1001.100        | 1001.100        | 1001.100        | S(L) |
| F  | 8  | 1171000 | 0.000           | 1001000  | 1001000         | 0.000          | <b>1271.245</b> | <b>1177.498</b> | 1001.000        | 1001.000        | F(L) |
| K  | 9  | 1041000 | <b>1028.329</b> | 1047.943 | <b>1131.300</b> | 1006.124       | 1001.000        | <b>1001.000</b> | <b>1001.000</b> | 1001.000        | K(L) |
| L  | 10 | 1011000 | 1011000         | 1011000  | 1011000         | 1011000        | 1011000         | <b>1011.000</b> | 1011.000        | 1011.000        | L(L) |
| N  | 11 | 1107200 | 1006.400        | 1006.400 | <b>1100.477</b> | 1001.401       | <b>1002.467</b> | <b>1001.201</b> | 1001.201        | 1001.201        | N(L) |
| K  | 12 | 1100100 | 1100100         | 1100100  | <b>1228.572</b> | 1211.549       | <b>1210.562</b> | <b>1175.208</b> | 1001.100        | 1001.100        | K(L) |
| K  | 13 | 1100100 | 1100100         | 1100100  | 1100100         | 1100100        | 1100100         | 1100100         | 1100100         | 1100100         | K(L) |

# sp|P10922|H10\_MOUSE

TENS<sup>Phospho</sup>TSAPAAKPK  
79.97

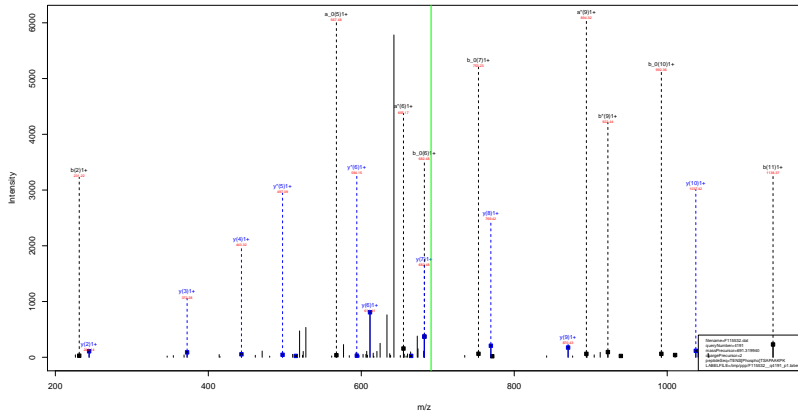

# sp | P10922 | H10\_MOUSE

TENS<sup>Phospho</sup> TSAPAAKPK  
79.97

- ▶ fragmentation table for charge state 1+
- ▶ specType=cid
- ▶ score=65.74
- ▶ F115532.dat
- ▶ query=q4191\_p1
- ▶ precursor=691.319940
- ▶ chargePrecursor=2
- ▶ itol=0.5

| AA    | a        | a*             | aΔ             | b               | b*             | bΔ             | y               | y*             | yΔ       | AA     |
|-------|----------|----------------|----------------|-----------------|----------------|----------------|-----------------|----------------|----------|--------|
| E[1]  | 74.000   | 0.000          | 74.000         | 0.000           | 0.000          | 0.000          | 1.000           | 1.000          | 0.000    | E[12]  |
| E[2]  | 203.103  | 0.000          | 180.000        | <b>231.098</b>  | 0.000          | 253.007        | 1.000           | 1.000          | 1.000    | E[12]  |
| TG[3] | 317.240  | 100.133        | 209.107        | 344.144         | 100.134        | 320.000        | 1.000           | 1.000          | 1.000    | TG[13] |
| S[4]  | 304.144  | 487.117        | 446.111        | 513.110         | 495.112        | 494.100        | <b>1037.503</b> | 1030.470       | 1030.460 | S[10]  |
| T[5]  | 300.102  |                | <b>567.181</b> | 613.180         | 600.160        |                | <b>870.504</b>  | 860.470        | 862.744  | T[10]  |
| S[6]  | 412.214  | <b>635.187</b> | 694.211        | 700.200         | 703.190        | <b>682.208</b> | <b>760.497</b>  | 750.480        | 750.480  | S[10]  |
| A[7]  | 743.201  | 170.204        | 170.200        | <b>771.206</b>  | 754.200        | <b>753.205</b> | <b>682.425</b>  | <b>645.398</b> | 0.000    | A[7]   |
| P[8]  | 690.114  | 637.207        | 122.101        | 369.104         | 361.090        | 630.200        | <b>611.388</b>  | <b>544.361</b> | 0.000    | P[8]   |
| A[9]  | 351.101  | <b>694.324</b> | 694.320        | <b>699.345</b>  | <b>627.319</b> | 621.310        | <b>514.335</b>  | <b>497.309</b> | 0.000    | A[9]   |
| A[10] | 690.200  | 690.201        | 690.197        | <b>1010.183</b> | 694.180        | <b>902.372</b> | <b>443.208</b>  | 443.200        | 0.000    | A[10]  |
| R[11] | 1110.403 | 1083.400       | 1082.472       | <b>1138.478</b> | 1112.451       | 1130.460       | <b>372.201</b>  | 368.204        | 0.000    | R[11]  |
| P[12] | 1307.535 | 1180.530       | 1180.529       | 1435.530        | 1435.530       | 1437.530       | <b>244.166</b>  | 240.160        | 0.000    | P[12]  |
| R[13] | 1376.532 | 1338.528       | 1337.620       | 1367.529        | 1346.519       | 1345.510       | 340.171         | 330.000        | 0.000    | R[13]  |

# sp|P10922|H10\_MOUSE

TENS<sup>Phospho</sup>TSAPAAKPK  
79.97

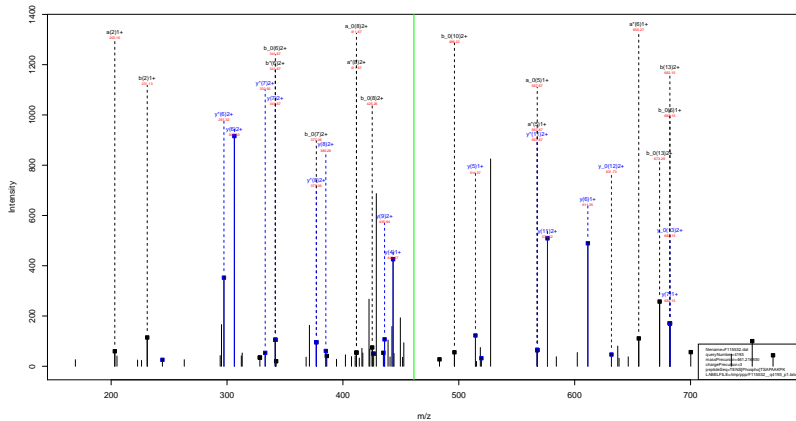

# sp | P10922 | H10\_MOUSE

TENS<sup>Phospho</sup> TSAPAAKPK  
79.97

- ▶ fragmentation table for charge state 1+
- ▶ specType=cid
- ▶ score=30.85
- ▶ F115532.dat
- ▶ query=q4193\_p1
- ▶ precursor=461.216930
- ▶ chargePrecursor=3
- ▶ itol=0.5

| AA    | a              | a*             | a,Δ            | b              | b*             | b,Δ            | y              | y*             | y,Δ       | AA     |
|-------|----------------|----------------|----------------|----------------|----------------|----------------|----------------|----------------|-----------|--------|
| E[1]  | 74.892         | 0.000          | 74.892         | 110.000        | 0.000          | 110.000        | 194.054        | 1.001.030      | 0.004.000 | T10[S] |
| E[2]  | <b>203.165</b> | 0.000          | 180.000        | <b>231.098</b> | 0.000          | 231.098        | 213.107        | 2.000.000      | 0.261.000 | E12[1] |
| T6[3] | 117.478        | 0.001.110      | 0.000.000      | 164.744        | <b>328.114</b> | 0.001.110      | 0.001.110      | 1.151.040      | 0.114.000 | T6[3]  |
| S[4]  | 404.144        | 407.117        | 400.131        | 512.133        | 405.112        | 404.130        | 1037.001       | 1005.478       | 0.010.482 | S[4D]  |
| T1[5] | 282.172        | <b>566.165</b> | <b>567.181</b> | 0.000.000      | 0.000.000      | 0.000.000      | 101.001        | 0.001.000      | 0.001.000 | T1[5]  |
| S[6]  | 172.214        | <b>653.197</b> | 654.213        | <b>700.219</b> | 693.194        | <b>692.208</b> | 101.001        | 100.490        | 0.001.498 | S[6]   |
| A[7]  | 743.201        | 1.000.201      | 1.000.201      | <b>771.230</b> | 754.229        | <b>753.245</b> | <b>682.425</b> | 1.000.000      | 0.000.000 | A[7]   |
| F[8]  | 840.014        | 837.007        | 838.008        | 868.008        | 871.002        | 869.000        | <b>611.388</b> | 1.004.001      | 0.000.000 | F[8]   |
| A[9]  | 621.051        | 604.034        | 603.040        | 630.040        | 622.019        | 621.035        | <b>514.335</b> | 497.000        | 0.000.000 | A[9]   |
| A[10] | 692.008        | 695.001        | 696.001        | 1010.000       | 693.004        | 692.002        | <b>441.298</b> | <b>426.271</b> | 0.000.000 | A[10]  |
| R[11] | 1110.483       | 1093.436       | 1092.472       | 1120.470       | 1121.451       | 1120.487       | 812.201        | 805.214        | 0.000.000 | R[11]  |
| P[12] | 1007.030       | 1100.030       | 1100.030       | 1120.030       | 1121.034       | 1121.034       | <b>244.166</b> | 227.130        | 0.000.000 | P[12]  |
| R[13] | 1035.030       | 1108.004       | 1117.020       | 1161.020       | 1146.009       | 1145.011       | 147.111        | 130.000        | 0.000.000 | R[13]  |

# sp | P10922 | H10\_MOUSE

TENS<sup>Phospho</sup> TSAPAAKPK  
79.97

- ▶ fragmentation table for charge state 2+
- ▶ specType=cid
- ▶ score=30.85
- ▶ F115532.dat
- ▶ query=q4193\_p1
- ▶ precursor=461.216930
- ▶ chargePrecursor=3
- ▶ itol=0.5

| AA | a       | a*             | a $\beta$      | b              | b*             | b $\beta$      | y              | y*             | y $\beta$      | AA  |
|----|---------|----------------|----------------|----------------|----------------|----------------|----------------|----------------|----------------|-----|
| T  | 137.034 | 0.504          | 28.528         | 51.531         | 0.504          | 41.526         | 691.527        | 682.028        | <b>682.316</b> | T13 |
| E  | 132.078 | 0.504          | 84.069         | 116.062        | 0.504          | 107.057        | 646.766        | 632.267        | <b>632.762</b> | E12 |
| N  | 130.076 | 150.553        | 150.071        | 113.074        | 164.561        | 164.059        | <b>576.276</b> | <b>567.763</b> | <b>567.271</b> | N11 |
| S  | 142.078 | 234.069        | 234.573        | 256.573        | 246.069        | 247.588        | <b>519.255</b> | 518.742        | 518.250        | S10 |
| T  | 203.059 | 284.528        | 284.054        | 307.057        | 306.554        | 307.052        | <b>435.756</b> | 432.249        | <b>426.751</b> | T10 |
| S  | 208.078 | <b>328.182</b> | 327.618        | 350.618        | 349.114        | <b>342.100</b> | <b>341.608</b> | <b>345.222</b> | <b>376.718</b> | S10 |
| A  | 272.134 | 353.513        | 353.139        | <b>398.131</b> | 397.619        | <b>377.619</b> | <b>377.126</b> | <b>341.710</b> | <b>333.203</b> | A10 |
| P  | 400.650 | <b>412.147</b> | <b>411.655</b> | <b>434.658</b> | <b>426.145</b> | <b>425.653</b> | <b>306.197</b> | <b>297.684</b> | 0.504          | P16 |
| A  | 456.179 | 447.690        | 447.174        | 470.176        | 461.663        | 461.171        | 257.671        | 249.150        | 0.504          | A16 |
| A  | 603.868 | <b>483.184</b> | 482.668        | 505.668        | 497.152        | <b>496.660</b> | 222.154        | 213.639        | 0.504          | A16 |
| R  | 255.742 | 427.212        | 446.746        | 368.742        | 361.229        | 360.737        | 198.631        | 118.121        | 0.504          | R11 |
| P  | 104.271 | 106.730        | 105.264        | 618.269        | 609.756        | 609.264        | 127.588        | 114.073        | 0.504          | P12 |
| K  | 168.319 | 658.800        | 658.314        | <b>682.316</b> | 673.803        | <b>673.311</b> | 74.060         | 65.547         | 0.504          | K11 |

# sp|P10922|H10\_MOUSE

TENS<sup>Phospho</sup>TSAPAAKPK  
79.97

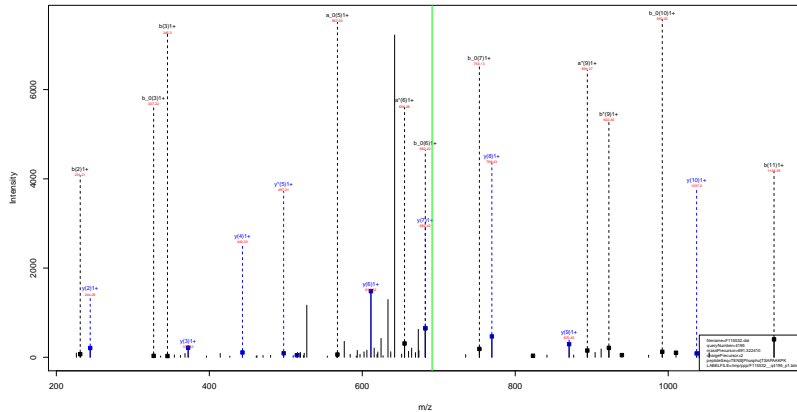

# sp|P10922|H10\_MOUSE

TENS<sup>Phospho</sup>TSAPAAKPK  
79.97

- ▶ fragmentation table for charge state 1+
- ▶ specType=cid
- ▶ score=76.44
- ▶ F115532.dat
- ▶ query=q4195\_p1
- ▶ precursor=691.322410
- ▶ chargePrecursor=2
- ▶ itol=0.5

| AA  | a        | a*             | aΔ             | b               | b*             | bΔ      | y              | y*             | yΔ             | AA   |
|-----|----------|----------------|----------------|-----------------|----------------|---------|----------------|----------------|----------------|------|
| T1  | 74.000   | 0.000          | 74.000         | 0.000           | 0.000          | 0.000   | 1.001          | 1.000          | 0.001          | T113 |
| E2  | 203.103  | 0.000          | 188.093        | <b>231.093</b>  | 0.000          | 231.093 | 1.000          | 1.000          | 0.000          | E121 |
| T3  | 317.246  | 203.103        | 114.143        | <b>305.140</b>  | 203.103        | 102.037 | <b>327.130</b> | 1.019          | 1.019          | T113 |
| S4  | 304.144  | 487.117        | 183.000        | 486.117         | 486.117        | 0.000   | 1.000          | 1.000          | 0.000          | S129 |
| T5  | 385.312  | 0.000          | <b>567.181</b> | 0.000           | 0.000          | 0.000   | <b>870.504</b> | 0.000          | 0.000          | T109 |
| S6  | 412.214  | <b>635.187</b> | 223.000        | 634.187         | 634.187        | 0.000   | <b>842.208</b> | <b>765.497</b> | 0.000          | S101 |
| A7  | 743.201  | 170.204        | 573.000        | 713.200         | 713.200        | 0.000   | <b>753.345</b> | <b>682.425</b> | 0.000          | A171 |
| P8  | 891.214  | <b>823.287</b> | 67.927         | 890.287         | 890.287        | 0.000   | 0.000          | <b>611.388</b> | 0.000          | P101 |
| A9  | 911.201  | <b>894.324</b> | 16.877         | <b>899.345</b>  | <b>927.319</b> | 27.974  | 0.000          | <b>514.335</b> | <b>497.309</b> | A101 |
| A10 | 959.208  | 907.281        | 52.000         | <b>1010.183</b> | 958.280        | 52.000  | <b>922.372</b> | <b>443.298</b> | 0.000          | A101 |
| R11 | 1110.203 | 1083.200       | 27.000         | <b>1138.478</b> | 1137.451       | 1.000   | 0.000          | <b>372.301</b> | 0.000          | R101 |
| P12 | 1207.235 | 1180.230       | 27.000         | 1180.230        | 1180.230       | 0.000   | 1.000          | <b>244.166</b> | 0.000          | P101 |
| R13 | 1208.232 | 1178.228       | 30.000         | 1177.228        | 1176.228       | 1.000   | 0.000          | 0.000          | 0.000          | R101 |



# sp|P10922|H10\_MOUSE

TENS<sup>Phospho</sup>TSAPAAKPK  
79.97

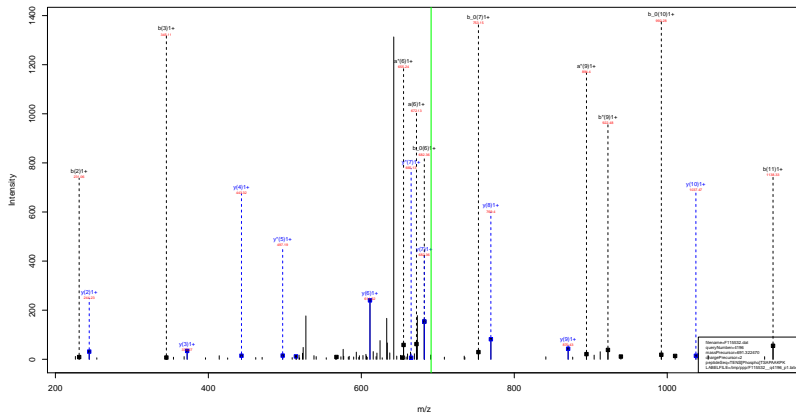

# sp | P10922 | H10\_MOUSE

TENS<sup>Phospho</sup> TSAPAAKPK  
79.97

- ▶ fragmentation table for charge state 1+
- ▶ specType=cid
- ▶ score=69.51
- ▶ F115532.dat
- ▶ query=q4196\_p1
- ▶ precursor=691.322470
- ▶ chargePrecursor=2
- ▶ itol=0.5

| AA    | a              | a'             | a <sup>+</sup> | a <sup>+</sup> Δ | b        | b <sup>+</sup> | b <sup>+</sup> Δ | y              | y <sup>+</sup> | y <sup>+</sup> Δ | AA     |
|-------|----------------|----------------|----------------|------------------|----------|----------------|------------------|----------------|----------------|------------------|--------|
| E[1]  | 74.000         | 0.000          | 98.000         | 0.000000         | 0.000    | 98.000         | 1.001816         | 1.004002       | 0.001184       | 0.000000         | E[12]  |
| E[2]  | 203.101        | 0.000          | 180.000        | <b>231.098</b>   | 0.000    | 203.000        | 1.280393         | 1.280393       | 0.000000       | 0.000000         | E[12]  |
| T6[3] | 217.246        | 203.101        | 209.125        | <b>305.140</b>   | 0.000    | 217.146        | 1.251980         | 1.251980       | 0.000000       | 0.000000         | T6[12] |
| S[4]  | 304.144        | 487.117        | 486.117        | <b>486.117</b>   | 0.000    | 304.139        | <b>1037.503</b>  | 1037.478       | 0.026262       | 0.000000         | S[12]  |
| T1[5] | <b>779.224</b> | <b>567.181</b> | <b>567.181</b> | 0.000000         | 0.000    | 779.224        | <b>870.504</b>   | 869.478        | 1.026262       | 0.000000         | T1[12] |
| S[6]  | <b>872.224</b> | <b>635.187</b> | <b>634.211</b> | 0.000000         | 0.000    | 872.224        | <b>861.208</b>   | <b>765.497</b> | 99.7113        | 0.000000         | S[12]  |
| A[7]  | 743.291        | 720.234        | 720.234        | 720.234          | 720.234  | 743.291        | <b>753.345</b>   | <b>682.425</b> | <b>645.398</b> | 0.000000         | A[12]  |
| P[8]  | 690.314        | 637.287        | 637.287        | 637.287          | 637.287  | 690.314        | <b>611.388</b>   | 596.314        | 0.000000       | 0.000000         | P[12]  |
| A[9]  | 611.301        | <b>634.324</b> | 634.324        | <b>634.324</b>   | 634.324  | 611.301        | <b>627.319</b>   | <b>514.325</b> | <b>497.309</b> | 0.000000         | A[12]  |
| A[10] | 600.308        | 600.308        | 600.308        | <b>1610.383</b>  | 0.000    | 600.308        | <b>922.372</b>   | <b>443.298</b> | 479.074        | 0.000000         | A[12]  |
| R[11] | 1110.403       | 1083.430       | 1083.472       | <b>1138.478</b>  | 0.000    | 1110.403       | <b>372.301</b>   | 358.234        | 0.000000       | 0.000000         | R[12]  |
| P[12] | 1207.535       | 1180.560       | 1180.520       | 1180.520         | 1207.535 | 1207.535       | <b>244.166</b>   | 229.130        | 0.000000       | 0.000000         | P[12]  |
| R[13] | 1208.532       | 1178.528       | 1177.620       | 1187.620         | 1208.532 | 1208.532       | 1345.301         | 997.171        | 0.000000       | 0.000000         | R[12]  |



# sp | P15864 | H12\_MOUSE

KAS <sup>Phospho</sup> GPPVSELITK  
79.97

- ▶ fragmentation table for charge state 1+
- ▶ specType=cid
- ▶ score=36.35
- ▶ F115532.dat
- ▶ query=q4299\_p1
- ▶ precursor=703.868560
- ▶ chargePrecursor=2
- ▶ itol=0.5

| AA | a              | a*             | a <sub>0</sub> | b      | b*             | b <sub>0</sub> | y               | y*       | y <sub>0</sub>  | AA   |
|----|----------------|----------------|----------------|--------|----------------|----------------|-----------------|----------|-----------------|------|
| K  | 101.07         | 84.08          | 0.00           | 120.09 | 112.09         | 0.00           | 146.12          | 138.09   | 108.71          | K(L) |
| A  | 172.14         | 155.13         | 0.00           | 202.12 | 193.12         | 0.00           | 227.15          | 220.08   | 170.04          | A(L) |
| S  | 332.83         | 321.83         | 310.15         | 424.10 | 408.11         | 349.12         | 1207.57         | 1192.59  | 1100.00         | S(L) |
| G  | <b>396.164</b> | <b>379.130</b> | 370.154        | 424.10 | <b>407.113</b> | <b>406.149</b> | <b>1040.570</b> | 1033.572 | <b>1022.580</b> | G(L) |
| F  | 398.16         | 381.130        | 372.129        | 424.10 | 407.113        | 406.149        | 1040.570        | 1033.572 | 1022.580        | F(L) |
| T  | 398.16         | 381.130        | 372.129        | 424.10 | 407.113        | 406.149        | 1040.570        | 1033.572 | 1022.580        | T(L) |
| N  | 398.16         | 381.130        | 372.129        | 424.10 | 407.113        | 406.149        | 1040.570        | 1033.572 | 1022.580        | N(L) |
| Y  | 398.16         | 381.130        | 372.129        | 424.10 | 407.113        | 406.149        | 1040.570        | 1033.572 | 1022.580        | Y(L) |
| W  | 398.16         | 381.130        | 372.129        | 424.10 | 407.113        | 406.149        | 1040.570        | 1033.572 | 1022.580        | W(L) |
| E  | 398.16         | 381.130        | 372.129        | 424.10 | 407.113        | 406.149        | 1040.570        | 1033.572 | 1022.580        | E(L) |
| D  | 398.16         | 381.130        | 372.129        | 424.10 | 407.113        | 406.149        | 1040.570        | 1033.572 | 1022.580        | D(L) |
| H  | 398.16         | 381.130        | 372.129        | 424.10 | 407.113        | 406.149        | 1040.570        | 1033.572 | 1022.580        | H(L) |
| I  | 398.16         | 381.130        | 372.129        | 424.10 | 407.113        | 406.149        | 1040.570        | 1033.572 | 1022.580        | I(L) |
| L  | 398.16         | 381.130        | 372.129        | 424.10 | 407.113        | 406.149        | 1040.570        | 1033.572 | 1022.580        | L(L) |
| M  | 398.16         | 381.130        | 372.129        | 424.10 | 407.113        | 406.149        | 1040.570        | 1033.572 | 1022.580        | M(L) |
| Q  | 398.16         | 381.130        | 372.129        | 424.10 | 407.113        | 406.149        | 1040.570        | 1033.572 | 1022.580        | Q(L) |
| R  | 398.16         | 381.130        | 372.129        | 424.10 | 407.113        | 406.149        | 1040.570        | 1033.572 | 1022.580        | R(L) |
| V  | 398.16         | 381.130        | 372.129        | 424.10 | 407.113        | 406.149        | 1040.570        | 1033.572 | 1022.580        | V(L) |
| P  | 398.16         | 381.130        | 372.129        | 424.10 | 407.113        | 406.149        | 1040.570        | 1033.572 | 1022.580        | P(L) |
| C  | 398.16         | 381.130        | 372.129        | 424.10 | 407.113        | 406.149        | 1040.570        | 1033.572 | 1022.580        | C(L) |



# sp | P15864 | H12\_MOUSE

KAS <sup>Phospho</sup> GPPVSELITK  
79.97

- ▶ fragmentation table for charge state 1+
- ▶ specType=cid
- ▶ score=75.58
- ▶ F115532.dat
- ▶ query=q4300\_p1
- ▶ precursor=703.868820
- ▶ chargePrecursor=2
- ▶ itol=0.5

| AA  | a          | a'         | a <sub>2</sub> | b          | b'          | b <sub>2</sub> | y           | y'         | y <sub>2</sub> | AA  |
|-----|------------|------------|----------------|------------|-------------|----------------|-------------|------------|----------------|-----|
| K1  | 101        | 100        | 98             | 99         | 0           | 0              | 0           | 0          | 0              | K1  |
| A2  | 172        | 174        | 150            | 151        | 0           | 0              | 0           | 0          | 0              | A2  |
| S3  | 330        | 333        | 300            | 311        | 313         | 315            | 317         | 319        | 321            | S3  |
| G4  | 396        | 394        | 370            | 354        | 324         | 326            | 328         | 330        | 332            | G4  |
| F5  | <b>493</b> | <b>217</b> | 430            | 120        | 420         | 320            | 321         | <b>903</b> | <b>577</b>     | F5  |
| T6  | 559        | 557        | 514            | 514        | 514         | 514            | 514         | 514        | 514            | T6  |
| V7  | 599        | 596        | <b>671</b>     | <b>312</b> | <b>671</b>  | <b>313</b>     | 700         | 599        | 597            | V7  |
| S8  | 674        | 671        | 650            | 644        | 654         | 651            | 658         | 665        | 672            | S8  |
| E9  | 805        | 813        | 800            | 785        | 807         | 802            | 816         | 825        | 834            | E9  |
| L10 | 1218       | 1218       | 1214           | 1214       | 1214        | 1214           | 1214        | 1214       | 1214           | L10 |
| D11 | 1331       | 1331       | 1314           | 1304       | <b>1350</b> | <b>576</b>     | 1342        | 1349       | 1341           | D11 |
| I12 | 1332       | 1332       | 1313           | 1302       | 1314        | 1313           | <b>1342</b> | <b>613</b> | <b>248</b>     | I12 |
| K13 | 1360       | 1364       | 1340           | 1313       | 1360        | 1359           | 1370        | 1381       | 1392           | K13 |

# sp | P15864 | H12\_MOUSE

KAS Phospho GPPVSELITK  
79.97

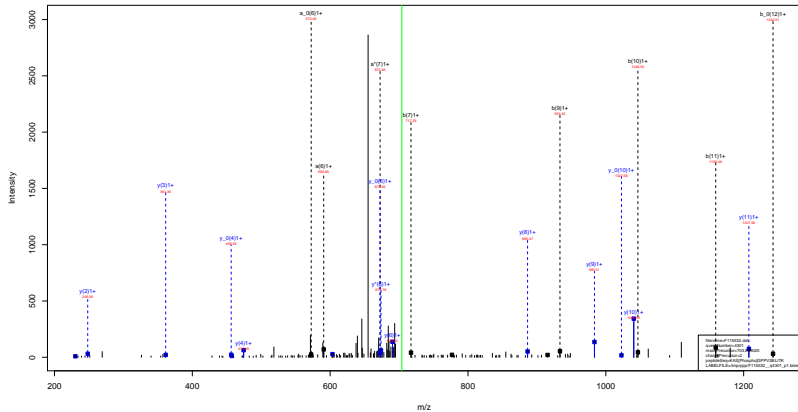

# sp | P15864 | H12\_MOUSE

KAS Phospho 79.97 GPPVSELITK

- ▶ fragmentation table for charge state 1+
- ▶ specType=cid
- ▶ score=50.52
- ▶ F115532.adt
- ▶ query=q4301.p1
- ▶ precursor=703.869020
- ▶ chargePrecursor=2
- ▶ itol=0.5

| AA | a   | a'             | a+2            | b              | b'              | b+2      | y               | y'              | y+2            | AA              |   |
|----|-----|----------------|----------------|----------------|-----------------|----------|-----------------|-----------------|----------------|-----------------|---|
| K  | 101 | 100            | 98             | 88             | 87              | 85       | 0.000           | 1446.720        | 1389.920       | 1388.720        | K |
| A  | 2   | 172.144        | 150.112        | 0.000          | 200.130         | 183.113  | 0.000           | 773.720         | 1267.808       | 1266.024        | A |
| S  | 3   | 170.143        | 150.112        | 141.935        | 200.130         | 180.113  | 200.200         | <b>1217.507</b> | 1160.540       | 1158.708        | S |
| G  | 4   | 166.144        | 130.130        | 130.134        | 424.150         | 409.133  | 406.150         | <b>1040.590</b> | 1003.572       | <b>1022.580</b> | G |
| P  | 5   | 162.144        | 130.130        | 126.134        | 321.132         | 304.130  | 301.131         | <b>983.577</b>  | 984.551        | 982.507         | P |
| T  | 6   | <b>396.210</b> | 181.240        | <b>372.230</b> | 110.000         | 102.000  | 102.000         | <b>886.524</b>  | 889.498        | 888.114         | T |
| V  | 7   | 160.140        | <b>671.312</b> | 1571.220       | <b>717.333</b>  | 700.300  | 599.323         | 109.412         | 772.445        | 771.463         | V |
| S  | 8   | <b>778.370</b> | 160.140        | 718.361        | 304.300         | 301.300  | 600.300         | <b>690.603</b>  | <b>673.377</b> | <b>672.361</b>  | S |
| E  | 9   | 100.413        | 100.000        | 100.000        | <b>923.408</b>  | 916.303  | <b>915.307</b>  | <b>602.371</b>  | 588.345        | 587.263         | E |
| L  | 10  | 118.410        | 101.470        | 100.000        | <b>1006.492</b> | 1004.465 | 1003.463        | <b>474.329</b>  | <b>457.302</b> | <b>456.318</b>  | L |
| D  | 11  | 113.380        | 114.500        | 111.570        | <b>1159.576</b> | 1142.549 | 1141.500        | <b>361.245</b>  | 344.218        | 343.234         | D |
| I  | 12  | 132.230        | 113.682        | 114.810        | 1260.624        | 1243.520 | <b>1242.613</b> | <b>248.160</b>  | 231.134        | <b>230.150</b>  | I |
| K  | 13  | 130.124        | 118.680        | 114.013        | 1308.720        | 1291.605 | 1290.700        | 140.710         | 130.000        | 130.000         | K |





# sp | P68433 | H31\_MOUSE

EIAQDFKT<sup>Phospho</sup> DLR  
79.97

- ▶ fragmentation table for charge state 1+
- ▶ specType=cid
- ▶ score=31.75
- ▶ F115532.dat
- ▶ query=q4326\_p1
- ▶ precursor=708.332020
- ▶ chargePrecursor=2
- ▶ itol=0.5

| AA  | a              | a*             | a,Δ      | b               | b*        | b,Δ             | y              | y*             | y,Δ       | AA      |     |
|-----|----------------|----------------|----------|-----------------|-----------|-----------------|----------------|----------------|-----------|---------|-----|
| E1  | 102.055        | 0.000          | 84.044   | 4.36382         | 0.000     | 4.12.030        | 1453.667       | 1.390.630      | 1.397.046 | E11     |     |
| H2  | 215.230        | 0.000          | 199.224  | 243.134         | 0.000     | 225.212         | 1208.843       | 1208.843       | 2264.603  | H2      |     |
| A3  | 269.176        | 0.000          | 248.345  | 314.173         | 0.000     | 296.156         | 1113.530       | 1116.500       | 1205.519  | A3      |     |
| Q4  | 314.200        | 387.200        | 390.224  | 442.200         | 0.000     | 424.210         | 1130.430       | 1120.450       | 1044.602  | Q4      |     |
| D5  | 429.018        | 412.200        | 511.261  | 537.257         | 0.000     | 528.246         | 874.424        | 881.488        | 1084.424  | D5      |     |
| F10 | <b>676.110</b> | <b>658.304</b> | 658.320  | 708.320         | 0.000     | <b>687.298</b>  | <b>686.314</b> | <b>659.487</b> | 642.393   | 641.397 | F10 |
| K17 | 684.420        | 687.380        | 708.414  | <b>812.428</b>  | 0.015.981 | 814.400         | 672.399        | 666.112        | 664.210   | K18     |     |
| T18 | 685.430        | 685.412        | 687.428  | 715.415         | 0.000.807 | <b>816.423</b>  | <b>834.264</b> | 687.212        | 666.211   | T14     |     |
| L19 | 1101.666       | 1074.430       | 1076.450 | <b>1126.461</b> | 0.111.414 | <b>1110.450</b> | <b>483.230</b> | 389.260        | 382.210   | L23     |     |
| L10 | 1313.260       | 1186.520       | 1188.510 | <b>1241.543</b> | 0.224.518 | 1223.534        | <b>288.203</b> | <b>271.176</b> | 0.000     | L12     |     |
| R11 | 1389.031       | 1362.620       | 1354.641 | 1339.646        | 0.000.620 | 1319.636        | 176.110        | 158.000        | 0.000     | R11     |     |

# sp | P68433 | H31\_MOUSE

EIAQDFKT <sup>Phospho</sup> DLR  
79.97

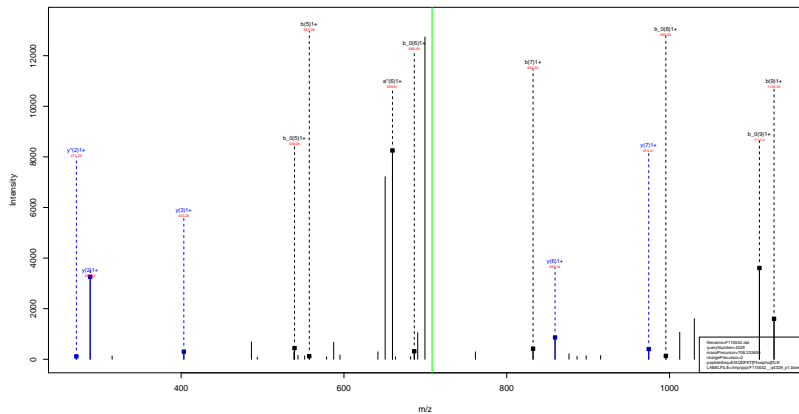

# sp | P68433 | H31\_MOUSE

EIAQDFKT<sup>Phospho</sup> DLR  
79.97

- ▶ fragmentation table for charge state 1+
- ▶ specType=cid
- ▶ score=33.30
- ▶ F115532.dat
- ▶ query=q4329\_p1
- ▶ precursor=708.332600
- ▶ chargePrecursor=2
- ▶ itol=0.5

| AA  | a        | a*             | a,Δ      | b               | b*        | b,Δ             | y              | y*             | y,Δ       | AA  |
|-----|----------|----------------|----------|-----------------|-----------|-----------------|----------------|----------------|-----------|-----|
| E11 | 102.095  | 0.000          | 84.044   | 4.36382         | 0.000     | 4.12.030        | 1453.667       | 1.390.630      | 1.397.046 | E11 |
| T12 | 173.130  | 0.000          | 139.123  | 343.134         | 0.000     | 205.113         | 1208.644       | 1209.620       | 1208.603  | T12 |
| A13 | 209.176  | 0.000          | 208.165  | 314.173         | 0.000     | 206.100         | 1173.520       | 1176.503       | 1165.519  | A13 |
| Q14 | 314.230  | 387.230        | 386.224  | 825.237         | 0.20.311  | 826.209         | 881.498        | 1020.460       | 1014.432  | Q14 |
| D15 | 429.282  | 812.282        | 811.281  | 537.291         | 1.68.202  | 538.216         | 874.424        | 981.488        | 989.424   | D15 |
| F16 | 574.334  | <b>659.304</b> | 658.320  | 739.323         | 2.07.268  | <b>686.314</b>  | <b>859.487</b> | 842.355        | 841.397   | F16 |
| K17 | 654.420  | 657.389        | 706.414  | <b>812.428</b>  | 0.15.381  | 814.402         | 814.359        | 866.112        | 864.120   | K17 |
| T18 | 685.459  | 685.412        | 687.428  | 1161.415        | 0.68.607  | <b>895.423</b>  | 824.254        | 987.112        | 986.211   | T18 |
| L19 | 1100.466 | 1073.439       | 1072.453 | <b>1128.461</b> | 1.11.414  | <b>1110.450</b> | <b>403.230</b> | 385.260        | 382.119   | L19 |
| L20 | 1313.500 | 1186.521       | 1186.518 | 1247.541        | 22.24.518 | 1223.534        | <b>288.203</b> | <b>271.176</b> | 0.000     | L20 |
| R11 | 1389.551 | 1387.620       | 1331.541 | 1339.648        | 1380.620  | 1319.636        | 176.110        | 158.000        | 0.000     | R11 |



# sp | P62806 | H4\_MOUSE

RIS Phospho  
79.97 GLIYEETR

- ▶ fragmentation table for charge state 1+
- ▶ specType=cid
- ▶ score=79.02
- ▶ F115532.dat
- ▶ query=q4332\_p1
- ▶ precursor=708.847160
- ▶ chargePrecursor=2
- ▶ itol=0.5

| AA    | a              | a*       | a <sup>2</sup> | b               | b*       | b <sup>2</sup> | y               | y*       | y <sup>2</sup> | AA    |
|-------|----------------|----------|----------------|-----------------|----------|----------------|-----------------|----------|----------------|-------|
| R(1)  | 120.113        | 112.087  | 0.000          | 277.192         | 440.887  | 0.000          | 1428.888        | 1399.662 | 1398.078       | R(11) |
| T(2)  | 282.302        | 229.171  | 0.000          | <b>276.192</b>  | 293.306  | 0.000          | 1398.987        | 1249.966 | 1244.977       | Y(8)  |
| S(3)  | 309.106        | 262.100  | 385.185        | 427.581         | 420.164  | 418.138        | <b>1147.503</b> | 1130.471 | 1129.661       | S(9)  |
| G(4)  | 339.301        | 288.120  | 440.288        | 487.581         | 477.186  | 476.288        | <b>980.505</b>  | 983.471  | 982.834        | G(9)  |
| L(5)  | <b>378.301</b> | 322.219  | 588.288        | <b>607.206</b>  | 589.471  | 588.288        | <b>823.463</b>  | 826.471  | 826.171        | L(10) |
| I(6)  | 392.302        | 375.233  | 674.287        | <b>720.389</b>  | 703.204  | 702.233        | <b>810.399</b>  | 793.233  | 792.589        | I(6)  |
| V(7)  | 393.430        | 338.427  | 317.430        | <b>881.444</b>  | 864.411  | 863.431        | <b>697.315</b>  | 699.288  | 698.288        | V(6)  |
| E(8)  | 384.401        | 387.400  | 388.401        | <b>1012.486</b> | 995.456  | 994.476        | <b>524.252</b>  | 517.226  | 516.241        | E(6)  |
| D(9)  | 1113.204       | 1099.262 | 1090.242       | <b>1141.529</b> | 1124.202 | 1123.212       | <b>405.209</b>  | 406.212  | <b>387.199</b> | D(5)  |
| T(10) | 1214.202       | 1187.233 | 1186.213       | 1242.207        | 1225.236 | 1224.206       | <b>276.187</b>  | 280.146  | 280.124        | T(2)  |
| R(11) | 1310.203       | 1283.266 | 1282.216       | 1308.219        | 1281.243 | 1280.229       | 176.118         | 180.202  | 0.000          | R(1)  |

# sp | P62806 | H4\_MOUSE

RIS Phospho GLIYEETR  
79.97

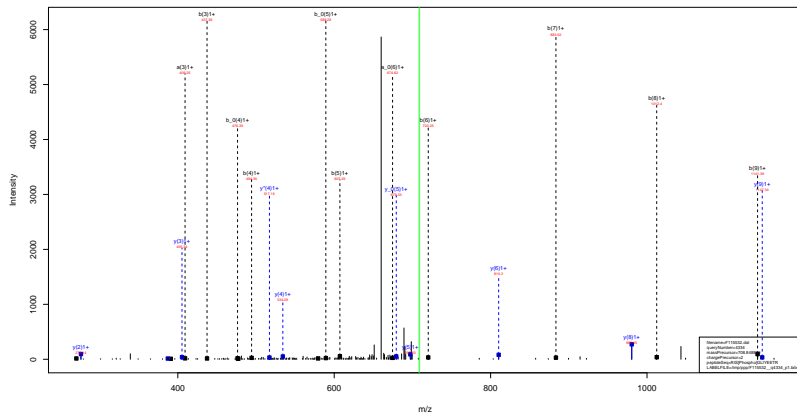

# sp | P62806 | H4\_MOUSE

RIS<sup>Phospho</sup> GLIYEETR  
79.97

- ▶ fragmentation table for charge state 1+
- ▶ specType=cid
- ▶ score=40.24
- ▶ F115532.dat
- ▶ query=q4334\_p1
- ▶ precursor=708.848820
- ▶ chargePrecursor=2
- ▶ itol=0.5

| AA    | a              | a*       | a,0            | b               | b*             | b,0            | y               | y*             | y,0            | AA    |
|-------|----------------|----------|----------------|-----------------|----------------|----------------|-----------------|----------------|----------------|-------|
| R[1]  | 130.111        | 112.087  | 0.000          | 112.088         | 140.092        | 0.000          | 140.090         | 1399.692       | 1398.678       | R[1]  |
| T[2]  | 282.108        | 229.111  | 0.000          | <b>270.192</b>  | 295.106        | 0.000          | 295.104         | 1243.586       | 1242.572       | Y[2]  |
| S[3]  | <b>408.106</b> | 350.100  | <b>301.185</b> | <b>437.191</b>  | 420.184        | 0.100          | <b>1147.503</b> | 1130.471       | 1129.461       | S[3]  |
| Q[4]  |                | 481.101  | 440.224        | <b>494.212</b>  | <b>677.186</b> | <b>476.202</b> | <b>660.505</b>  | 582.474        | 582.048        | Q[4]  |
| L[5]  | <b>578.101</b> | 682.201  | 640.281        | <b>667.296</b>  | 708.278        | <b>583.286</b> | 682.290         | 686.481        | 686.031        | L[5]  |
| V[6]  | 552.202        | 675.200  | <b>674.375</b> | <b>720.380</b>  | 703.204        | 655.200        | <b>818.399</b>  | 793.373        | 792.369        | V[6]  |
| V[7]  | 655.433        | 680.427  | 677.438        | <b>883.444</b>  | 896.417        | 865.431        | <b>697.315</b>  | 680.299        | <b>676.305</b> | V[7]  |
| E[8]  | 684.401        | 582.400  | 585.401        | <b>1012.466</b> | 1006.400       | 1004.418       | <b>534.232</b>  | <b>517.225</b> | 515.241        | E[8]  |
| E[9]  | 1113.204       | 870.200  | 1020.201       | <b>1141.529</b> | 1134.200       | 1123.201       | <b>405.209</b>  | 397.199        | 397.199        | E[9]  |
| T[10] | 1314.202       | 1187.200 | 1198.211       | 1247.211        | 1232.200       | 1224.200       | <b>276.187</b>  | 268.181        | 268.181        | T[10] |
| R[11] | 1310.201       | 1183.200 | 1204.211       | 1208.210        | 1201.201       | 1200.200       | 175.119         | 158.200        | 0.000          | R[11] |





# sp | P43274 | H14\_MOUSE

KTS Phospho 79.97 GPPVSELITK

- ▶ fragmentation table for charge state 1+
- ▶ specType=cid
- ▶ score=31.60
- ▶ F115532.dat
- ▶ query=q4457\_p1
- ▶ precursor=479.584690
- ▶ chargePrecursor=3
- ▶ itol=0.5

| AA  | a              | a*             | a,Δ            | b              | b*       | b,Δ      | y              | y*             | y,Δ            | AA  |
|-----|----------------|----------------|----------------|----------------|----------|----------|----------------|----------------|----------------|-----|
| R1  | 491.207        | 494.001        | 0.000          | 1299.101       | 1312.076 | 0.000    | 1430.140       | 1419.713       | 1418.729       | R13 |
| L2  | 292.727        | 295.238        | 180.742        | <b>230.150</b> | 233.123  | 217.139  | 330.040        | 320.810        | 320.034        | L12 |
| S3  | <b>369.153</b> | 371.127        | 351.141        | 377.144        | 380.122  | 373.139  | 327.050        | 318.876        | 318.088        | S13 |
| G4  | <b>426.175</b> | 430.130        | 406.104        | 404.175        | 437.141  | 436.139  | 300.050        | 302.972        | 302.088        | G10 |
| P5  | 211.210        | 210.217        | <b>551.223</b> | 234.100        | 233.212  | 263.127  | 306.033        | 306.033        | 306.033        | P10 |
| T6  | 320.000        | <b>601.234</b> | 600.234        | <b>148.273</b> | 151.299  | 152.273  | 300.041        | 300.041        | 300.041        | T10 |
| V7  | 719.249        | 720.252        | 700.250        | <b>747.345</b> | 750.317  | 729.315  | <b>700.472</b> | 712.445        | <b>771.461</b> | V11 |
| S8  | 306.301        | <b>789.354</b> | 788.351        | 824.370        | 817.349  | 818.309  | <b>690.403</b> | 673.371        | 672.391        | S10 |
| E9  | 625.421        | 618.207        | 617.413        | 963.418        | 946.392  | 845.408  | <b>603.371</b> | 589.345        | 585.361        | E15 |
| L10 | 1248.207       | 1251.461       | 1230.460       | 1276.503       | 1269.676 | 1258.492 | 454.363        | <b>497.302</b> | 496.316        | L16 |
| I11 | 1161.392       | 1144.509       | 1143.501       | 1109.580       | 1112.560 | 1111.576 | 361.265        | 344.238        | 343.234        | I18 |
| H12 | 102.839        | 100.613        | 1248.620       | 1250.134       | 1271.038 | 1272.024 | <b>248.160</b> | 231.134        | <b>230.150</b> | H16 |
| R13 | 1000.034       | 1013.108       | 1112.124       | 1418.729       | 1401.103 | 1400.718 | 147.111        | 130.088        | 0.000          | R10 |

# sp | P43274 | H14\_MOUSE

KTS Phospho 79.97 GPPVSELITK

- ▶ fragmentation table for charge state 2+
- ▶ specType=cid
- ▶ score=31.60
- ▶ F115532.dat
- ▶ query=q4457\_p1
- ▶ precursor=479.584690
- ▶ chargePrecursor=3
- ▶ itol=0.5

| AA | a              | a*      | a $\beta$      | b              | b*             | b $\beta$      | y              | y*              | y $\beta$       | AA |
|----|----------------|---------|----------------|----------------|----------------|----------------|----------------|-----------------|-----------------|----|
| K  | 51.057         | 62.541  | 0.504          | 65.025         | 76.541         | 0.504          | 718.873        | 719.297         | 720.898         | K  |
| T  | 101.044        | 111.068 | 0.519          | 113.549        | 127.058        | 0.519          | 1064.824       | <b>1064.313</b> | <b>1064.221</b> | T  |
| S  | 139.080        | 179.520 | 1.75.075       | 190.010        | 190.505        | 1.90.010       | 904.302        | 905.107         | <b>905.297</b>  | S  |
| G  | 211.961        | 246.019 | 204.588        | 227.589        | 218.019        | 218.581        | 520.811        | <b>512.200</b>  | <b>511.768</b>  | G  |
| P  | 262.117        | 253.604 | 253.117        | <b>276.115</b> | 267.602        | 267.111        | 462.207        | 463.719         | 463.207         | P  |
| F  | <b>310.644</b> | 302.131 | 301.648        | <b>315.641</b> | <b>316.120</b> | <b>315.636</b> | <b>443.766</b> | <b>435.253</b>  | <b>434.761</b>  | F  |
| V  | <b>368.178</b> | 351.655 | 351.173        | <b>374.175</b> | 366.652        | 366.170        | 395.214        | 388.129         | 388.214         | V  |
| S  | 401.664        | 385.141 | <b>384.689</b> | <b>417.681</b> | 408.170        | 408.680        | <b>345.705</b> | 337.102         | 336.400         | S  |
| E  | <b>468.215</b> | 459.702 | 459.210        | 462.213        | 473.700        | 473.208        | 302.180        | 293.676         | 293.184         | E  |
| L  | 504.719        | 516.247 | 515.750        | 518.768        | 519.242        | 520.762        | 237.660        | 228.159         | 228.653         | L  |
| I  | <b>581.299</b> | 572.786 | 572.294        | <b>595.297</b> | 586.784        | 586.292        | 181.126        | 172.613         | 172.121         | I  |
| T  | 631.823        | 623.310 | 622.811        | <b>645.821</b> | 637.307        | 636.815        | 124.560        | 116.071         | 115.579         | T  |
| K  | 685.871        | 687.353 | 686.855        | 709.868        | 701.355        | 700.863        | 74.000         | 65.547          | 0.504           | K  |

# sp | P43274 | H14\_MOUSE

KTS Phospho GPPVSELITK  
79.97

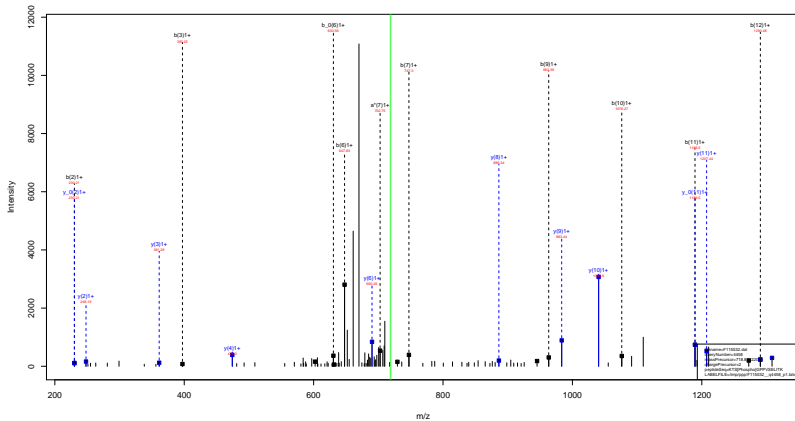

# sp | P43274 | H14\_MOUSE

KTS Phospho 79.97 GPPVSELITK

- ▶ fragmentation table for charge state 1+
- ▶ specType=cid
- ▶ score=72.79
- ▶ F115532.dat
- ▶ query=q4458\_p1
- ▶ precursor=718.874220
- ▶ chargePrecursor=2
- ▶ itol=0.5

| AA  | a   | a'  | a <sup>o</sup> | b   | b'   | b <sup>o</sup> | y   | y'          | y <sup>o</sup> | AA          |
|-----|-----|-----|----------------|-----|------|----------------|-----|-------------|----------------|-------------|
| K1  | 300 | 300 | 0.000          | 120 | 120  | 0.000          | 340 | 740         | 1410           | K123        |
| T1  | 300 | 300 | 180            | 120 | 180  | 213            | 120 | <b>1300</b> | 1200           | <b>1200</b> |
| S2  | 300 | 300 | 300            | 120 | 300  | 450            | 120 | <b>1200</b> | 1100           | <b>1100</b> |
| G4  | 300 | 300 | 420            | 120 | 420  | 570            | 120 | <b>1040</b> | 1000           | <b>1000</b> |
| T5  | 300 | 300 | 540            | 120 | 540  | 690            | 120 | <b>980</b>  | 940            | <b>940</b>  |
| T6  | 300 | 300 | 660            | 120 | 660  | 810            | 120 | <b>920</b>  | 880            | <b>880</b>  |
| V7  | 300 | 300 | 780            | 120 | 780  | 930            | 120 | <b>860</b>  | 820            | <b>820</b>  |
| S8  | 300 | 300 | 900            | 120 | 900  | 1050           | 120 | <b>800</b>  | 760            | <b>760</b>  |
| E9  | 300 | 300 | 1020           | 120 | 1020 | 1170           | 120 | <b>740</b>  | 700            | <b>700</b>  |
| L10 | 300 | 300 | 1140           | 120 | 1140 | 1290           | 120 | <b>680</b>  | 640            | <b>640</b>  |
| D11 | 300 | 300 | 1260           | 120 | 1260 | 1410           | 120 | <b>620</b>  | 580            | <b>580</b>  |
| T12 | 300 | 300 | 1380           | 120 | 1380 | 1530           | 120 | <b>560</b>  | 520            | <b>520</b>  |
| K13 | 300 | 300 | 1500           | 120 | 1500 | 1650           | 120 | <b>500</b>  | 460            | <b>460</b>  |

# sp | P70696 | H2B1A\_MOUSE

IAS Phospho EASR  
79.97

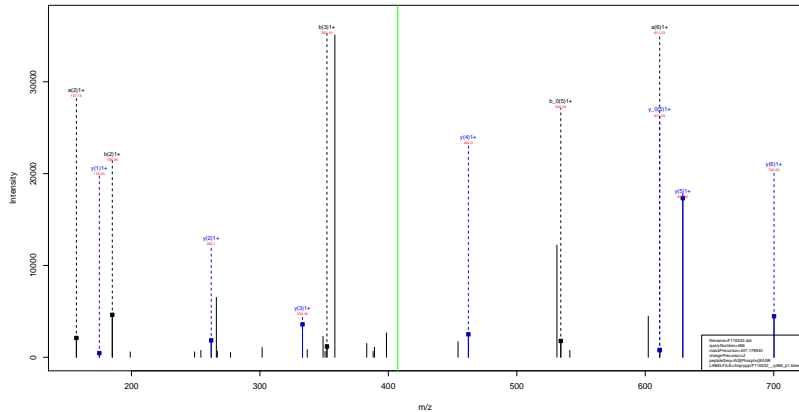

- ▶ fragmentation table for charge state 1+
- ▶ specType=cid
- ▶ score=57.09
- ▶ F115532.dat
- ▶ query=q466\_p1
- ▶ precursor=407.178940
- ▶ chargePrecursor=2
- ▶ itol=0.5

| AA | a              | a*      | a <sub>0</sub> | b              | b*      | b <sub>0</sub> | y              | y*      | y <sub>0</sub> | AA |
|----|----------------|---------|----------------|----------------|---------|----------------|----------------|---------|----------------|----|
| R  | 96.096         | 0.000   | 0.000          | 114.091        | 0.000   | 0.000          | 613.350        | 796.334 | 796.340        | H  |
| A  | <b>157.134</b> | 0.000   | 0.000          | <b>185.128</b> | 0.000   | 0.000          | <b>700.366</b> | 683.240 | 682.250        | A  |
| S  | 134.124        | 0.000   | 368.121        | <b>352.127</b> | 0.000   | 134.118        | <b>629.239</b> | 612.200 | <b>611.218</b> | S  |
| E  | 453.174        | 0.000   | 435.160        | 461.163        | 0.000   | 463.150        | <b>462.231</b> | 445.204 | 444.220        | E  |
| A  | 324.212        | 0.000   | 306.201        | 362.207        | 0.000   | <b>534.196</b> | <b>333.188</b> | 316.164 | 315.178        | A  |
| S  | <b>611.244</b> | 0.000   | 593.231        | 630.239        | 0.000   | 621.228        | <b>262.151</b> | 245.124 | 244.140        | S  |
| R  | 187.181        | 750.178 | 748.164        | 795.160        | 778.153 | 777.152        | <b>175.119</b> | 158.092 | 0.000          | R  |

# sp | P70696 | H2B1A\_MOUSE

IAS Phospho EASR  
79.97

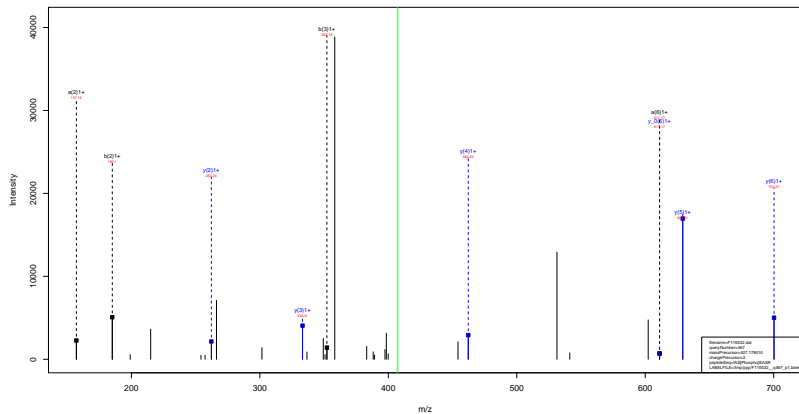



- ▶ fragmentation table for charge state 1+
- ▶ specType=cid
- ▶ score=43.68
- ▶ F115532.dat
- ▶ query=q467\_p1
- ▶ precursor=407.179010
- ▶ chargePrecursor=2
- ▶ itol=0.5

| AA | a              | a*      | a,0     | b              | b*      | b,0     | y              | y*      | y,0            | AA |
|----|----------------|---------|---------|----------------|---------|---------|----------------|---------|----------------|----|
| R  | 96.096         | 0.000   | 0.000   | 114.501        | 0.000   | 0.000   | 813.850        | 796.324 | 795.940        | H  |
| A  | <b>157.134</b> | 0.000   | 0.000   | <b>185.128</b> | 0.000   | 0.000   | <b>700.266</b> | 683.240 | 682.250        | A  |
| S  | 154.124        | 0.000   | 308.121 | <b>352.127</b> | 0.000   | 534.116 | <b>623.229</b> | 612.202 | <b>611.218</b> | S  |
| E  | 453.174        | 0.000   | 435.162 | 481.169        | 0.000   | 453.150 | <b>462.231</b> | 445.204 | 444.220        | E  |
| A  | 524.212        | 0.000   | 506.201 | 552.207        | 0.000   | 534.186 | <b>333.188</b> | 316.162 | 315.178        | A  |
| S  | <b>611.244</b> | 0.000   | 593.233 | 622.229        | 0.000   | 601.228 | <b>262.151</b> | 245.124 | 244.140        | S  |
| R  | 787.345        | 750.318 | 749.332 | 795.340        | 778.313 | 777.320 | 175.110        | 158.092 | 0.000          | R  |

# sp | P70696 | H2B1A\_MOUSE

STITS (Phospho)  
(79.97) REIQTAVR

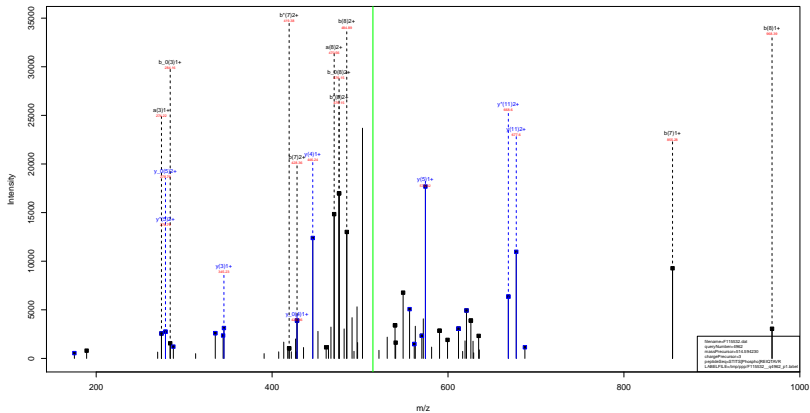

# sp | P70696 | H2B1A\_MOUSE

STITS (Phospho)  
(79.97) REIQTAVR

- ▶ fragmentation table for charge state 1+
- ▶ specType=cid
- ▶ score=45.35
- ▶ F115532.dat
- ▶ query=q4962\_p1
- ▶ precursor=514.594230
- ▶ chargePrecursor=3
- ▶ itol=0.5

| AA    | a              | a*    | a,Δ     | b              | b*    | b,Δ            | y              | y*             | y,Δ      | AA             |       |
|-------|----------------|-------|---------|----------------|-------|----------------|----------------|----------------|----------|----------------|-------|
| S(1)  | 80.664         | 0.000 | 42.030  | 88.039         | 0.000 | 10.009         | 1541.700       | 1524.742       | 1624.702 | S(1)           |       |
| T(2)  | 131.192        | 0.000 | 143.002 | <b>189.087</b> | 0.000 | 171.039        | 1454.720       | 1437.720       | 1436.720 | T(2)           |       |
| T(3)  | <b>214.176</b> | 0.000 | 258.100 | 308.171        | 0.000 | <b>264.160</b> | 1331.688       | 1338.660       | 1335.678 | T(3)           |       |
| T(4)  | 275.224        | 0.000 | 337.213 | 403.210        | 0.000 | 365.238        | 1240.600       | 1223.576       | 1222.584 | T(4)           |       |
| S(5)  | 342.222        | 0.000 | 349.212 | <b>376.217</b> | 0.000 | 392.207        | 1130.530       | 1122.530       | 1121.540 | S(5)           |       |
| R(6)  | 398.212        | 0.000 | 380.211 | 378.210        | 0.000 | 368.208        | 1028.508       | 1022.500       | 1020.512 | R(6)           |       |
| S(7)  | 457.208        | 0.000 | 409.202 | <b>455.201</b> | 0.000 | 437.200        | 919.474        | 909.474        | 908.447  | S(7)           |       |
| T(8)  | 540.450        | 0.000 | 522.439 | <b>568.445</b> | 0.000 | 550.434        | <b>687.415</b> | 678.388        | 668.404  | T(8)           |       |
| Q(9)  | 528.509        | 0.000 | 520.498 | 508.503        | 0.000 | 519.477        | 587.403        | <b>574.331</b> | 557.304  | <b>556.320</b> | Q(9)  |
| T(10) | 589.508        | 0.000 | 571.496 | 559.501        | 0.000 | 550.476        | 479.347        | <b>445.272</b> | 429.249  | <b>428.262</b> | T(10) |
| A(11) | 649.503        | 0.000 | 632.501 | 620.508        | 0.000 | 601.502        | 370.578        | <b>345.224</b> | 325.198  | 315.200        | A(11) |
| V(12) | 630.602        | 0.000 | 613.601 | 601.607        | 0.000 | 584.600        | 269.609        | <b>274.187</b> | 257.184  | 250.182        | V(12) |
| R(13) | 685.593        | 0.000 | 667.592 | 655.598        | 0.000 | 638.591        | 165.707        | <b>175.119</b> | 158.692  | 150.690        | R(13) |

# sp | P70696 | H2B1A\_MOUSE

STITS (Phospho)  
(79.97) REIQTAVR

- ▶ fragmentation table for charge state 2+
- ▶ specType=cid
- ▶ score=45.35
- ▶ F115532.dat
- ▶ query=q4962\_p1
- ▶ precursor=514.594230
- ▶ chargePrecursor=3
- ▶ itol=0.5

| AA    | a              | a*             | a,d            | b              | b*             | b,d            | y              | y*             | y,d            | AA             |      |
|-------|----------------|----------------|----------------|----------------|----------------|----------------|----------------|----------------|----------------|----------------|------|
| S[1]  | 30.926         | 0.504          | 22.521         | 44.523         | 0.504          | 35.519         | 171.880        | 162.875        | 162.883        | S[13]          |      |
| T[2]  | 31.420         | 0.504          | 22.044         | 45.047         | 0.504          | 36.042         | 172.872        | 173.212        | 173.898        | T[12]          |      |
| T[3]  | 31.912         | 0.504          | 22.569         | 45.570         | 0.504          | 36.564         | <b>571.348</b> | <b>168.835</b> | <b>168.343</b> | S[11]          |      |
| I[4]  | 32.404         | 0.504          | 179.131        | 202.113        | 0.504          | 193.139        | <b>620.806</b> | <b>612.203</b> | <b>611.801</b> | I[10]          |      |
| S[5]  | 32.896         | 0.504          | 202.630        | 225.612        | 0.504          | 216.637        | <b>570.282</b> | <b>561.769</b> | <b>561.277</b> | S[6]           |      |
| R[6]  | 33.388         | 0.504          | 240.660        | 263.645        | 0.504          | 254.661        | 466.783        | 470.210        | 471.718        | R[6]           |      |
| E[7]  | 33.880         | 0.504          | 405.151        | 428.184        | 0.504          | 410.179        | 409.732        | 400.219        | 409.727        | E[7]           |      |
| I[8]  | <b>470.729</b> | 0.519          | <b>461.723</b> | <b>484.726</b> | <b>476.213</b> | <b>475.721</b> | <b>344.211</b> | <b>335.698</b> | <b>335.206</b> | I[8]           |      |
| Q[9]  | 33.878         | 0.504          | 326.205        | 326.179        | 0.504          | <b>548.755</b> | <b>540.242</b> | <b>530.750</b> | <b>287.669</b> | <b>278.664</b> | Q[9] |
| T[10] | 34.370         | 0.504          | 326.729        | <b>509.279</b> | <b>500.766</b> | <b>500.274</b> | 261.643        | 275.120        | 274.624        | T[10]          |      |
| A[11] | <b>620.800</b> | <b>612.287</b> | <b>611.795</b> | <b>624.798</b> | <b>626.284</b> | <b>625.792</b> | 171.322        | 164.803        | 0.504          | A[11]          |      |
| V[12] | 33.334         | 0.504          | 461.329        | 604.332        | 0.519          | 615.327        | 137.599        | 129.084        | 0.504          | V[12]          |      |
| R[13] | 34.332         | 0.504          | 759.350        | 762.353        | 0.519          | 763.347        | 68.563         | 70.550         | 0.504          | R[13]          |      |

# sp | P70696 | H2B1A\_MOUSE

STITS (Phospho)  
(79.97) REIQTAVR

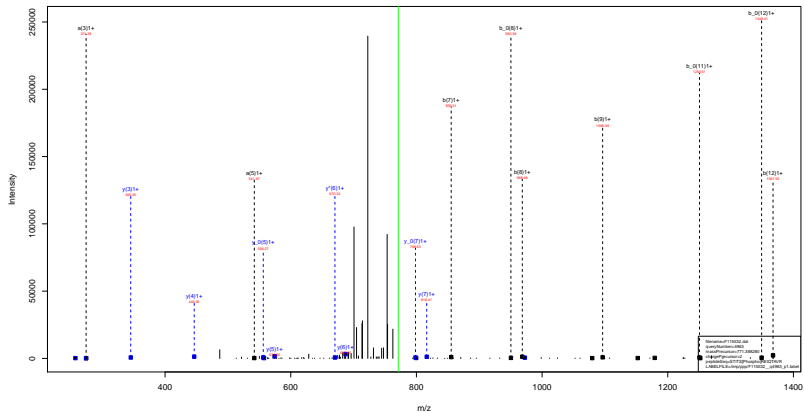

# sp | P70696 | H2B1A\_MOUSE

STITS (Phospho)  
(79.97) REIQTAVR

- ▶ fragmentation table for charge state 1+
- ▶ specType=cid
- ▶ score=43.57
- ▶ F115532.dat
- ▶ query=q4963\_p1
- ▶ precursor=771.388280
- ▶ chargePrecursor=2
- ▶ itol=0.5

| AA    | a              | a*              | a <sub>0</sub> | b               | b*              | b <sub>0</sub>  | y               | y*              | y <sub>0</sub>  | AA    |
|-------|----------------|-----------------|----------------|-----------------|-----------------|-----------------|-----------------|-----------------|-----------------|-------|
| S(1)  | 661944         | 0.000           | 42.016         | 89.000          | -0.000          | 70.000          | 1541.700        | 1524.742        | 1521.760        | S(1)  |
| T(2)  | 1011032        | 0.000           | 143.000        | 109.000         | 0.000           | 111.019         | 1604.730        | 1437.710        | 1436.720        | T(2)  |
| I(3)  | <b>274.176</b> | 0.000           | 298.000        | 282.771         | 0.000           | 284.000         | 1763.662        | 1739.660        | 1739.620        | I(3)  |
| H(4)  | 1161144        | 0.000           | 357.013        | 409.210         | -0.000          | 369.000         | 1790.000        | 1623.070        | 1622.004        | H(4)  |
| S(5)  | <b>542.222</b> | 0.000           | 524.717        | 519.213         | 0.000           | 502.000         | 1139.000        | 1122.530        | 1121.540        | S(5)  |
| R(6)  | 1081211        | 681.200         | 680.111        | 700.000         | 700.200         | 700.000         | <b>672.564</b>  | 665.550         | 664.540         | R(6)  |
| E(7)  | 819.700        | 819.700         | 809.200        | <b>855.361</b>  | 855.341         | 837.000         | <b>816.457</b>  | <b>790.431</b>  | <b>790.447</b>  | E(7)  |
| I(8)  | 1411400        | 1411.400        | 1401.410       | <b>1406.445</b> | 1401.410        | <b>150.434</b>  | <b>147.415</b>  | <b>147.380</b>  | 146.404         | I(8)  |
| Q(9)  | 1008700        | 1008.700        | 1000.490       | <b>1096.503</b> | <b>1079.477</b> | 1079.490        | <b>1074.311</b> | <b>1057.304</b> | <b>1056.300</b> | Q(9)  |
| T(10) | 1000000        | <b>1152.530</b> | 1151.940       | 1151.940        | 1151.940        | <b>1179.541</b> | <b>448.272</b>  | 448.270         | 448.270         | T(10) |
| A(11) | 1040100        | 1040.100        | 1022.500       | 1040.500        | <b>1251.562</b> | <b>1250.570</b> | <b>145.224</b>  | 145.190         | 145.190         | A(11) |
| V(12) | 1101000        | 1101.000        | 1100.000       | <b>1307.657</b> | 1307.010        | <b>1349.046</b> | <b>274.187</b>  | <b>257.161</b>  | 257.160         | V(12) |
| R(13) | 1400100        | 1400.100        | 1400.200       | 1400.200        | 1400.210        | 1400.210        | 175.100         | 175.000         | 175.000         | R(13) |

# sp | P43274 | H14\_MOUSE

S<sup>Phospho</sup> ETAPAAPAAPAPAEK  
79.97

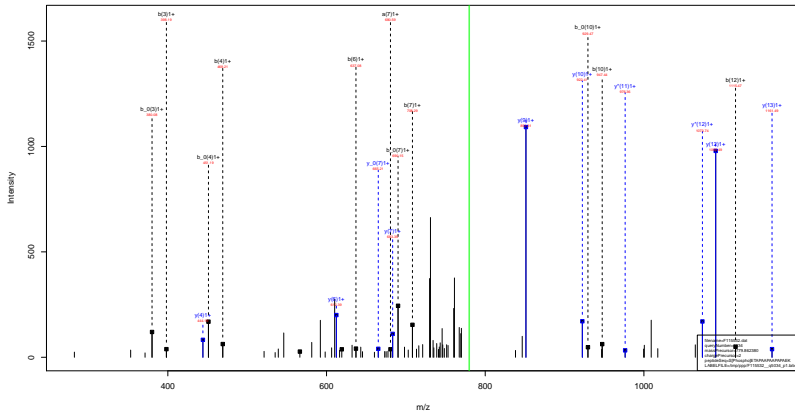

# sp | P43274 | H14\_MOUSE

S<sup>Phospho</sup> ETAPAAPAAPAPAEK  
79.97

- ▶ fragmentation table for charge state 1+
- ▶ specType=cid
- ▶ score=37.30
- ▶ F115532.dat
- ▶ query=q5034.p1
- ▶ precursor=779.862380
- ▶ chargePrecursor=2
- ▶ itol=0.5

| AA    | a              | x*       | a <sub>0</sub> | b               | b*       | b <sub>0</sub> | γ               | γ*              | γ <sub>0</sub> | AA    |
|-------|----------------|----------|----------------|-----------------|----------|----------------|-----------------|-----------------|----------------|-------|
| S[1]  | 149.011        | 0.000    | 122.000        | 288.000         | 0.000    | 149.000        | 1550.712        | 1541.000        | 1540.000       | S[10] |
| E[2]  | 269.051        | 0.000    | 201.043        | 287.043         | 0.000    | 270.012        | 1390.717        | 1374.000        | 1371.700       | E[15] |
| T[3]  | 319.101        | 0.000    | 182.062        | <b>100.000</b>  | 0.000    | <b>300.000</b> | 1320.819        | 1320.000        | 1304.000       | T[14] |
| A[4]  | 341.130        | 0.000    | 425.130        | <b>669.133</b>  | 0.000    | <b>451.122</b> | <b>1161.626</b> | 1144.000        | 1143.000       | A[13] |
| P[5]  | 338.130        | 0.000    | 530.100        | <b>506.100</b>  | 0.000    | <b>510.111</b> | <b>1090.589</b> | <b>1073.563</b> | 1072.579       | P[12] |
| A[6]  | 308.100        | 0.000    | 509.100        | <b>837.223</b>  | 0.000    | <b>810.213</b> | 980.530         | <b>976.510</b>  | 959.500        | A[11] |
| A[7]  | <b>688.265</b> | 0.000    | 562.265        | <b>700.260</b>  | 0.000    | <b>680.249</b> | <b>922.490</b>  | 900.470         | 900.000        | A[10] |
| P[8]  | 377.210        | 0.000    | 730.200        | 800.210         | 0.000    | 807.200        | <b>851.462</b>  | 838.430         | 833.000        | P[9]  |
| A[9]  | 364.200        | 0.000    | 830.200        | 810.200         | 0.000    | 810.200        | 780.400         | 780.000         | 780.000        | A[8]  |
| A[10] | 319.200        | 0.000    | 900.200        | <b>947.107</b>  | 0.000    | <b>920.376</b> | <b>683.372</b>  | <b>665.362</b>  | 660.000        | A[7]  |
| P[11] | 1016.440       | 0.000    | 908.440        | 1004.440        | 0.000    | 1000.430       | <b>612.310</b>  | 598.300         | 594.000        | P[6]  |
| A[12] | 1007.450       | 0.000    | 1008.471       | <b>1115.477</b> | 0.000    | 1007.460       | 510.200         | 490.200         | 490.212        | A[6]  |
| T[13] | 1184.930       | 0.000    | 1140.930       | 1115.930        | 0.000    | 1109.930       | <b>444.240</b>  | 427.220         | 426.000        | T[6]  |
| A[14] | 1200.910       | 0.000    | 1217.940       | 1263.960        | 0.000    | 1200.910       | 330.100         | 330.100         | 300.100        | A[5]  |
| E[15] | 1184.914       | 0.000    | 1200.924       | 1412.920        | 0.000    | 1384.920       | 270.100         | 260.100         | 250.140        | E[5]  |
| K[26] | 1012.100       | 1498.000 | 1494.000       | 1540.100        | 1002.010 | 1532.000       | 147.110         | 130.000         | 0.000          | K[10] |



# sp | P15864 | H12\_MOUSE

RKAS Phospho 79.97 GPPVSELITK

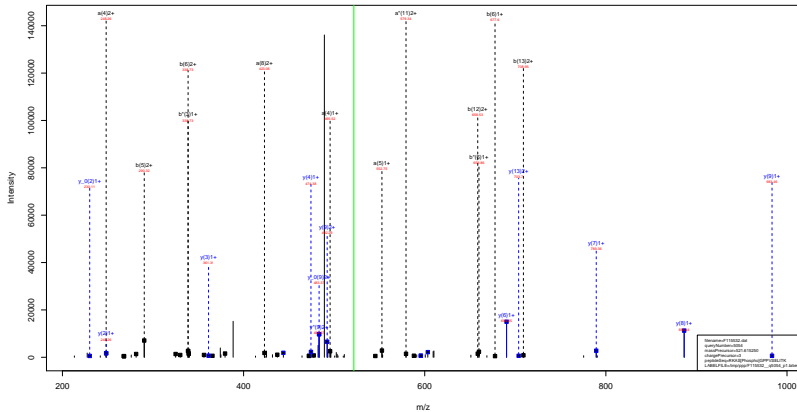

# sp | P15864 | H12\_MOUSE

RKAS<sup>Phospho</sup> 79.97 GPPVSELITK

- ▶ fragmentation table for charge state 1+
- ▶ specType=cid
- ▶ score=61.89
- ▶ F115532.dat
- ▶ query=q5054.p1
- ▶ precursor=521.615250
- ▶ chargePrecursor=3
- ▶ itol=0.5

| AA  | a              | a*       | a,d            | b              | b*             | b,d      | y              | y*       | y,d            | AA  |
|-----|----------------|----------|----------------|----------------|----------------|----------|----------------|----------|----------------|-----|
| R1  | 126.113        | 112.087  | 0.000          | 132.108        | 141.062        | 0.000    | 1262.305       | 1249.268 | 1244.266       | R14 |
| R2  | 257.208        | 240.152  | 0.000          | 265.207        | <b>268.177</b> | 0.000    | 1456.723       | 1439.705 | 1438.749       | R13 |
| A3  | 126.046        | 111.219  | 0.000          | <b>156.240</b> | <b>139.214</b> | 0.000    | 1279.634       | 1261.608 | 1260.624       | A32 |
| S4  | <b>495.244</b> | 478.217  | <b>477.233</b> | 523.239        | 506.212        | 005.226  | 1287.597       | 1190.570 | 1189.586       | S43 |
| G5  | <b>552.265</b> | 535.239  | 534.255        | 580.266        | 563.234        | 000.260  | 1300.569       | 1223.572 | 1222.588       | G59 |
| F6  | 149.110        | 132.230  | 051.100        | <b>177.313</b> | <b>160.387</b> | 059.312  | <b>601.577</b> | 566.551  | 565.567        | F69 |
| F7  | 146.071        | 129.244  | 128.100        | 174.369        | 157.339        | 056.303  | <b>886.528</b> | 859.500  | 858.514        | F78 |
| V8  | 493.239        | 476.213  | 475.229        | 522.239        | 505.212        | 005.224  | <b>781.472</b> | 722.445  | 721.461        | V77 |
| S9  | 352.071        | 335.045  | 334.061        | 380.055        | 363.028        | 042.026  | <b>690.401</b> | 573.373  | 572.387        | S89 |
| E00 | 136.014        | 124.437  | 1243.501       | 1399.509       | 1372.467       | 1371.439 | <b>603.371</b> | 586.343  | 585.361        | E05 |
| L11 | 117.458        | 112.071  | 116.587        | 1202.593       | 1185.566       | 1184.532 | <b>474.329</b> | 457.302  | 456.318        | L16 |
| T12 | 139.802        | 129.849  | 1298.811       | 1313.877       | 1306.869       | 1307.869 | <b>361.243</b> | 346.218  | 345.234        | T18 |
| I13 | 1388.730       | 1371.703 | 1370.712       | 1416.725       | 1399.698       | 1398.714 | <b>248.160</b> | 231.134  | <b>230.150</b> | I19 |
| K14 | 111.622        | 109.609  | 1096.610       | 1144.620       | 1127.593       | 1126.609 | 147.111        | 139.088  | 0.000          | K12 |

# sp | P15864 | H12\_MOUSE

RKAS<sup>Phospho</sup> 79.97 GPPVSELITK

- ▶ fragmentation table for charge state 2+
- ▶ specType=cid
- ▶ score=61.89
- ▶ F115532.dat
- ▶ query=q5054\_p1
- ▶ precursor=521.615250
- ▶ chargePrecursor=3
- ▶ itol=0.5

| AA    | a              | a*             | aΔ             | b              | b*             | bΔ             | y              | y*             | yΔ             | AA    |
|-------|----------------|----------------|----------------|----------------|----------------|----------------|----------------|----------------|----------------|-------|
| R[1]  | 85.859         | 86.541         | 0.500          | 76.028         | 76.245         | 0.500          | 161.017        | 173.488        | 17.2319        | R[14] |
| R[2]  | 120.108        | 120.595        | 0.500          | 145.105        | 134.592        | 0.500          | <b>703.868</b> | 665.355        | 104.895        | K[3]  |
| A[3]  | 154.626        | 158.113        | 0.500          | 179.624        | 176.111        | 0.500          | 639.621        | 631.307        | 630.816        | A[12] |
| S[4]  | <b>248.126</b> | 239.614        | 78.134         | 262.272        | 251.630        | 90.642         | 664.362        | <b>595.709</b> | <b>595.207</b> | S[11] |
| G[5]  | 278.888        | <b>268.123</b> | <b>267.631</b> | <b>290.624</b> | 284.744        | <b>281.628</b> | 620.861        | 582.889        | 511.768        | G[10] |
| P[6]  | <b>325.163</b> | 316.649        | 376.157        | <b>330.160</b> | 330.047        | <b>330.155</b> | <b>492.292</b> | <b>483.779</b> | <b>483.287</b> | P[9]  |
| P[7]  | 373.889        | <b>365.176</b> | 384.661        | 387.649        | <b>379.173</b> | 378.661        | <b>443.766</b> | 435.253        | 434.161        | P[8]  |
| V[8]  | <b>423.223</b> | 424.710        | 424.212        | <b>437.221</b> | 426.107        | 426.212        | 365.730        | 386.726        | 386.234        | V[7]  |
| S[9]  | 468.719        | 469.205        | 467.749        | 466.131        | <b>472.223</b> | <b>471.731</b> | 349.760        | 331.156        | 330.700        | S[6]  |
| E[10] | 513.261        | 502.787        | 502.259        | <b>545.259</b> | 536.746        | 536.244        | 302.181        | 303.676        | 303.184        | E[5]  |
| L[11] | <b>587.881</b> | <b>579.289</b> | 578.190        | 600.810        | 593.287        | 592.195        | 237.660        | 229.155        | 228.963        | L[4]  |
| I[12] | 644.242        | 635.811        | 635.320        | <b>658.242</b> | 649.240        | 649.147        | 181.126        | 172.613        | 172.121        | I[3]  |
| T[13] | 694.888        | 686.363        | 685.861        | <b>708.886</b> | 700.153        | 699.861        | 124.524        | 116.071        | 115.576        | T[2]  |
| R[14] | 758.916        | 750.403        | 749.911        | 772.913        | 764.400        | 763.908        | 74.000         | 65.547         | 65.004         | K[1]  |

# sp | P15864 | H12\_MOUSE

RKAS<sup>Phospho</sup><sub>79.97</sub> GPPVSELITK

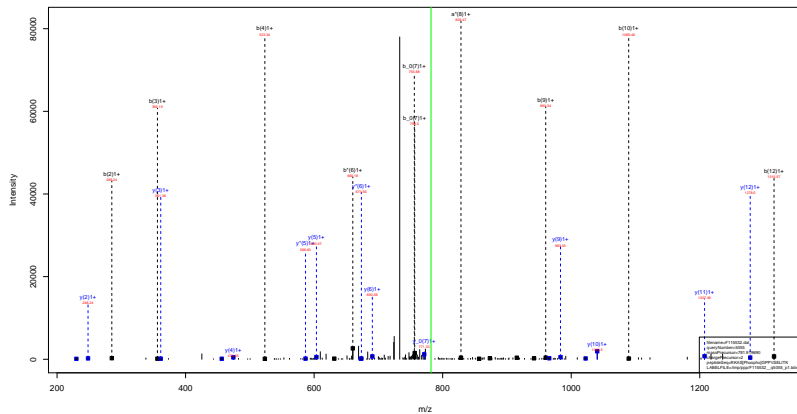

# sp | P15864 | H12\_MOUSE

RKAS<sup>Phospho</sup> 79.97 GPPVSELITK

- ▶ fragmentation table for charge state 1+
- ▶ specType=cid
- ▶ score=46.69
- ▶ F115532.dat
- ▶ query=q5055\_p1
- ▶ precursor=781.919690
- ▶ chargePrecursor=2
- ▶ itol=0.5

| AA    | a        | a*              | a <sub>0</sub> | b               | b*             | b <sub>0</sub> | y               | y*             | y <sub>0</sub>  | AA    |
|-------|----------|-----------------|----------------|-----------------|----------------|----------------|-----------------|----------------|-----------------|-------|
| R[1]  | 129.133  | 112.087         | 0.000          | 157.268         | 140.282        | 0.000          | 1502.830        | 1545.804       | 1544.803        | R[14] |
| R[2]  | 257.268  | 209.170         | 0.000          | <b>295.203</b>  | 258.314        | 0.000          | 1529.729        | 1538.783       | 1538.719        | K[13] |
| A[3]  | 385.268  | 311.239         | 0.000          | <b>356.240</b>  | 339.314        | 0.000          | <b>1278.634</b> | 1301.608       | 1300.634        | A[12] |
| S[4]  | 513.268  | 438.237         | 0.000          | <b>523.239</b>  | 506.312        | 0.000          | <b>1207.597</b> | 1190.570       | 1189.570        | S[11] |
| G[5]  | 641.268  | 565.237         | 0.000          | 588.268         | 571.314        | 0.000          | <b>1048.599</b> | 1031.570       | <b>1032.588</b> | G[10] |
| P[6]  | 769.268  | 692.242         | <b>631.308</b> | 677.313         | <b>660.287</b> | 0.000          | <b>983.577</b>  | 966.551        | <b>965.567</b>  | P[9]  |
| F[7]  | 897.268  | <b>820.413</b>  | 789.244        | 798.268         | 781.312        | 0.000          | <b>758.355</b>  | 741.329        | 740.329         | F[8]  |
| V[8]  | 1025.268 | <b>953.485</b>  | 1012.428       | <b>973.434</b>  | <b>956.408</b> | 0.000          | 689.412         | 712.442        | <b>713.461</b>  | V[7]  |
| S[9]  | 1153.268 | <b>1086.465</b> | 1075.452       | <b>1096.509</b> | 1079.482       | 0.000          | <b>603.371</b>  | <b>586.345</b> | 585.361         | S[6]  |
| E[10] | 1281.268 | 1214.438        | 1243.501       | 1264.559        | 1247.482       | 0.000          | 474.329         | 497.362        | <b>496.318</b>  | E[4]  |
| L[11] | 1409.268 | 1342.412        | 1371.567       | 1392.599        | 1375.509       | 0.000          | <b>361.245</b>  | 384.278        | 383.278         | L[3]  |
| I[12] | 1537.268 | 1470.385        | 1500.631       | <b>1515.677</b> | 1498.585       | 0.000          | 292.214         | 315.248        | 314.248         | I[2]  |
| T[13] | 1665.268 | 1598.358        | 1628.684       | 1649.716        | 1632.626       | 0.000          | 203.134         | 226.168        | <b>230.150</b>  | T[1]  |
| K[14] | 1793.268 | 1726.331        | 1756.654       | 1777.686        | 1760.596       | 0.000          | 147.110         | 170.144        | 0.000           | K[1]  |

# sp | P43277 | H13\_MOUSE

SET (Phospho)  
(79.97) APAAPAAPAPVEK

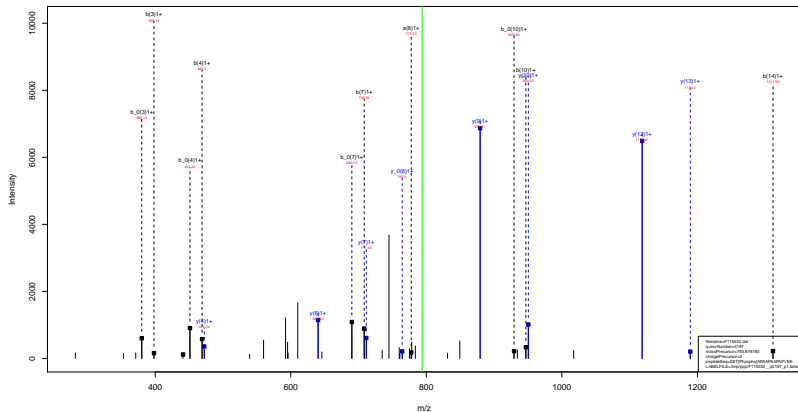

# sp | P43277 | H13\_MOUSE

SET<sup>(Phospho)</sup> APAAPAAPAPVEK  
(79.97)

- ▶ fragmentation table for charge state 1+
- ▶ specType=cid
- ▶ score=54.50
- ▶ F115532.dat
- ▶ query=q5197\_p1
- ▶ precursor=793.878190
- ▶ chargePrecursor=2
- ▶ itol=0.5

| AA  | a              | a'    | a <sub>0</sub> | b               | b'    | b <sub>0</sub> | y               | y'       | y <sub>0</sub> | AA   |
|-----|----------------|-------|----------------|-----------------|-------|----------------|-----------------|----------|----------------|------|
| S1  | 60.044         | 0.000 | 43.074         | 66.074          | 0.000 | 202.000        | 1366.714        | 1366.714 | 1366.714       | S101 |
| E2  | 139.037        | 0.000 | 175.056        | 212.082         | 0.000 | 202.000        | 1469.714        | 1469.688 | 1461.704       | E115 |
| T3  | 218.030        | 0.000 | 254.050        | <b>304.094</b>  | 0.000 | <b>306.083</b> | 1572.714        | 1582.640 | 1582.640       | T14  |
| A4  | <b>441.138</b> | 0.000 | 423.128        | <b>465.133</b>  | 0.000 | <b>451.122</b> | <b>1189.628</b> | 1172.618 | 1171.647       | A123 |
| P5  | 520.131        | 0.000 | 520.189        | 566.189         | 0.000 | 548.189        | <b>1118.628</b> | 1101.594 | 1100.610       | P112 |
| A6  | 600.124        | 0.000 | 581.211        | 577.212         | 0.000 | 607.212        | 1048.544        | 1048.528 | 1048.528       | A111 |
| A7  | 680.117        | 0.000 | 662.253        | <b>708.260</b>  | 0.000 | <b>690.249</b> | <b>950.531</b>  | 933.525  | 932.537        | A101 |
| P8  | <b>777.318</b> | 0.000 | 758.301        | 808.311         | 0.000 | 807.301        | <b>879.493</b>  | 862.484  | 861.491        | P10  |
| A9  | 846.311        | 0.000 | 830.344        | 878.353         | 0.000 | 875.344        | 782.474         | 782.454  | <b>764.431</b> | A10  |
| A10 | 915.304        | 0.000 | 900.384        | <b>947.397</b>  | 0.000 | <b>929.376</b> | <b>711.464</b>  | 698.454  | 698.454        | A11  |
| P11 | 1016.297       | 0.000 | 998.414        | 1047.441        | 0.000 | 1036.414       | <b>640.366</b>  | 623.346  | 622.356        | P10  |
| A12 | 1087.292       | 0.000 | 1069.471       | 1115.477        | 0.000 | 1097.468       | 573.318         | 556.287  | 556.303        | A10  |
| P13 | 1188.285       | 0.000 | 1168.564       | 1219.530        | 0.000 | 1204.519       | <b>472.217</b>  | 461.208  | 461.208        | P10  |
| V14 | 1263.278       | 0.000 | 1245.391       | <b>1311.508</b> | 0.000 | 1293.531       | 376.216         | 368.191  | 367.213        | V10  |
| E15 | 1412.264       | 0.000 | 1394.631       | 1446.643        | 0.000 | 1422.630       | 278.139         | 269.120  | 268.145        | E11  |
| K16 | 1540.241       | 0.000 | 1522.734       | 1588.739        | 0.000 | 1570.728       | 147.113         | 138.096  | 0.000          | K11  |

# sp | P43274 | H14\_MOUSE

RKT<sup>Phospho</sup>SGPPVSELITK  
79.97

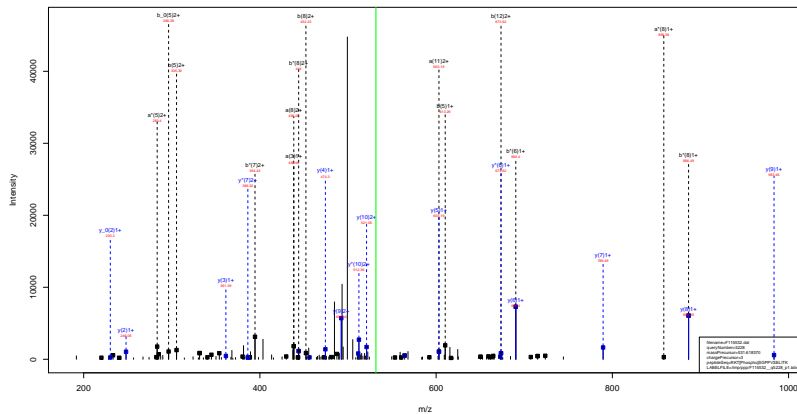



# sp | P43274 | H14\_MOUSE

RKT<sup>Phospho</sup> SGPPVSELITK  
79.97

- ▶ fragmentation table for charge state 1+
- ▶ specType=cid
- ▶ score=47.81
- ▶ F115532.dat
- ▶ query=q5228\_p1
- ▶ precursor=531.618370
- ▶ chargePrecursor=3
- ▶ itol=0.5

| AA  | a              | a'             | a,d            | b              | b'             | b,d            | y              | y'             | y,d            | AA   |
|-----|----------------|----------------|----------------|----------------|----------------|----------------|----------------|----------------|----------------|------|
| R1  | 126.113        | 117.087        | 0.926          | 113.208        | 140.084        | 0.276          | 1597.495       | 1519.618       | 1214.856       | R14  |
| R2  | 257.208        | <b>246.182</b> | 0.026          | <b>285.203</b> | 258.177        | 0.030          | 1456.745       | 1419.715       | 1418.729       | R13  |
| T3  | <b>438.222</b> | 431.196        | 430.212        | 466.217        | 440.181        | 446.207        | 1368.645       | 1301.618       | 1290.634       | T12  |
| S4  | 525.254        | 508.238        | 507.249        | <b>551.249</b> | 536.223        | 537.237        | 1127.651       | 1110.604       | 1109.620       | S11  |
| T5  | 632.276        | 625.250        | <b>564.265</b> | <b>618.271</b> | 603.244        | <b>592.260</b> | 1090.599       | 1022.572       | 1022.588       | T619 |
| F6  | 676.290        | 669.264        | <b>661.318</b> | <b>707.324</b> | <b>696.297</b> | 689.273        | <b>601.577</b> | 566.551        | 565.567        | F16  |
| F7  | 776.303        | 769.277        | 768.131        | 804.319        | 787.293        | 789.305        | <b>886.524</b> | 859.498        | 858.514        | F18  |
| V8  | 876.316        | <b>858.423</b> | 847.429        | 902.445        | <b>886.418</b> | 885.414        | <b>781.472</b> | 772.445        | 771.460        | V17  |
| S9  | 952.332        | 945.306        | 944.471        | 995.477        | 974.502        | 972.508        | <b>690.401</b> | <b>671.377</b> | <b>672.393</b> | S20  |
| E10 | 1361.624       | 1354.608       | 1353.514       | 1119.519       | 1102.493       | 1101.509       | <b>601.371</b> | 588.345        | 588.361        | E15  |
| L11 | 1354.609       | 1347.592       | 1346.506       | 1232.603       | 1215.577       | 1214.593       | 487.302        | <b>474.329</b> | <b>456.318</b> | L16  |
| T12 | 1317.609       | 1310.609       | 1309.605       | 1149.608       | 1132.606       | 1131.607       | <b>361.245</b> | 348.219        | 347.219        | T18  |
| T13 | 1318.740       | 1401.714       | 1480.732       | 1448.735       | 1420.709       | 1426.725       | <b>248.100</b> | 231.134        | <b>230.150</b> | T19  |
| R14 | 1446.610       | 1439.609       | 1438.626       | 1174.630       | 1157.604       | 1156.609       | 147.111        | 130.088        | 0.000          | R12  |

# sp | P43274 | H14\_MOUSE

RKT<sup>Phospho</sup> SGPPVSELITK  
79.97

- ▶ fragmentation table for charge state 2+
- ▶ specType=cid
- ▶ score=47.81
- ▶ F115532.dat
- ▶ query=q5228\_p1
- ▶ precursor=531.618370
- ▶ chargePrecursor=3
- ▶ itol=0.5

| AA    | a              | a*             | a.D            | b              | b*             | b.D            | y              | y*             | y.D            | AA    |
|-------|----------------|----------------|----------------|----------------|----------------|----------------|----------------|----------------|----------------|-------|
| R[1]  | 85.809         | 85.811         | 85.809         | 78.028         | 78.045         | 0.504          | 195.821        | 195.811        | 195.819        | R[14] |
| R[2]  | 126.108        | 126.105        | 0.504          | 143.105        | 134.592        | 0.504          | 318.873        | 318.960        | 100.898        | K[3]  |
| T[3]  | <b>219.615</b> | 211.100        | 220.610        | <b>233.612</b> | 225.609        | 228.607        | 654.626        | 646.313        | 645.621        | T[12] |
| S[4]  | 261.131        | 254.614        | 254.124        | 277.125        | 269.615        | 269.124        | <b>364.319</b> | 355.609        | 355.618        | S[11] |
| G[5]  | 291.894        | <b>283.138</b> | <b>282.630</b> | <b>305.630</b> | 297.708        | <b>296.634</b> | <b>523.881</b> | <b>512.290</b> | <b>511.700</b> | G[10] |
| P[6]  | <b>340.168</b> | <b>331.655</b> | <b>331.163</b> | <b>354.165</b> | 345.652        | <b>345.160</b> | <b>492.292</b> | 483.779        | 483.287        | P[9]  |
| P[7]  | <b>388.694</b> | <b>380.181</b> | 379.680        | 402.680        | <b>394.179</b> | 393.687        | <b>443.766</b> | 435.253        | 434.761        | P[8]  |
| V[8]  | <b>438.220</b> | <b>429.715</b> | 429.223        | <b>452.226</b> | <b>443.713</b> | <b>443.221</b> | 395.732        | <b>386.726</b> | <b>386.234</b> | V[7]  |
| S[9]  | <b>481.745</b> | 473.233        | <b>472.739</b> | 484.744        | <b>487.239</b> | 486.747        | 349.700        | 331.186        | 330.690        | S[6]  |
| E[10] | 516.766        | 507.254        | 507.254        | <b>566.263</b> | 557.754        | 557.260        | 402.180        | 393.676        | 393.184        | E[9]  |
| L[11] | <b>602.808</b> | 594.295        | 594.295        | <b>616.805</b> | 608.292        | 607.800        | 237.680        | 229.165        | 228.673        | L[8]  |
| I[12] | <b>659.350</b> | <b>650.837</b> | <b>650.345</b> | <b>673.347</b> | <b>664.834</b> | <b>664.342</b> | 181.129        | 172.613        | 172.121        | I[5]  |
| T[13] | 699.874        | 691.361        | 690.869        | <b>723.871</b> | <b>715.358</b> | <b>714.866</b> | 124.580        | 116.071        | 115.579        | T[10] |
| R[14] | 773.921        | 765.408        | 764.916        | 787.919        | 779.406        | 778.913        | 14.000         | 65.547         | 0.504          | K[1]  |

# sp | P43274 | H14\_MOUSE

RKT<sup>Phospho</sup>SGPPVSELITK  
79.97

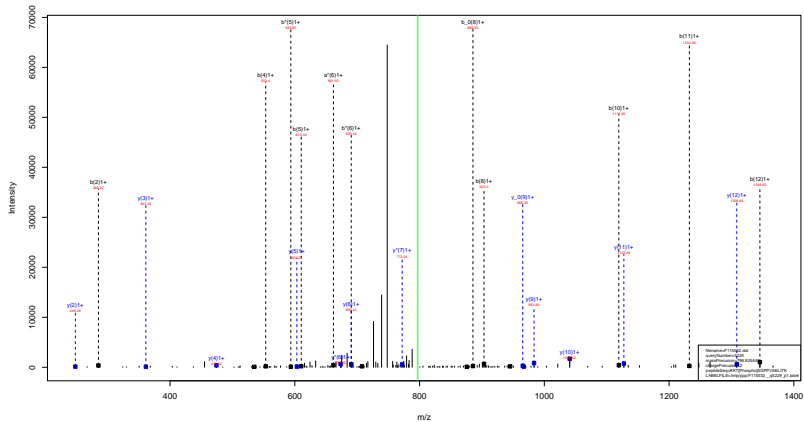

# sp | P43274 | H14\_MOUSE

RKT<sup>Phospho</sup> SGPPVSELITK  
79.97

- ▶ fragmentation table for charge state 1+
- ▶ specType=cid
- ▶ score=55.96
- ▶ F115532.dat
- ▶ query=q5229\_p1
- ▶ precursor=796.925440
- ▶ chargePrecursor=2
- ▶ itol=0.5

| AA  | a              | a*             | a,d      | b               | b*             | b,d      | y               | y*              | y,d            | AA  |
|-----|----------------|----------------|----------|-----------------|----------------|----------|-----------------|-----------------|----------------|-----|
| R1  | 150-151        | 112-100        | 40-000   | 152-100         | 140-000        | 0-000    | 1302-040        | 1510-014        | 1514-000       | R14 |
| R2  | 297-308        | 293-181        | 0-000    | <b>285-203</b>  | 286-177        | 0-000    | 1479-040        | 1470-114        | 1478-000       | R13 |
| T1  | 436-222        | 431-139        | 430-211  | 460-221         | 446-139        | 0-000    | 1308-040        | 1300-014        | 1308-000       | T12 |
| S4  | 525-254        | 508-250        | 509-244  | <b>551-249</b>  | 550-223        | 0-000    | <b>535-238</b>  | <b>1127-031</b> | 1110-000       | S11 |
| G1  | 582-278        | 581-269        | 580-260  | <b>618-273</b>  | <b>593-264</b> | 0-000    | <b>1040-209</b> | 1030-000        | 1030-000       | G10 |
| F1  | 676-229        | <b>642-302</b> | 643-310  | <b>707-324</b>  | <b>690-297</b> | 0-000    | <b>681-317</b>  | <b>966-551</b>  | <b>965-567</b> | F10 |
| F1  | 676-229        | 681-291        | 680-282  | 708-271         | 699-254        | 0-000    | 681-291         | 680-282         | 680-274        | F10 |
| V1  | <b>875-450</b> | 874-441        | 873-432  | <b>963-443</b>  | 962-416        | 0-000    | <b>885-434</b>  | 874-425         | <b>712-446</b> | V10 |
| S1  | 882-241        | <b>845-425</b> | 846-417  | 886-411         | 875-402        | 0-000    | <b>690-403</b>  | <b>675-377</b>  | 674-368        | S10 |
| E10 | 1001-224       | 1004-400       | 1003-314 | <b>1119-519</b> | 1102-400       | 1101-314 | <b>601-371</b>  | 600-381         | 600-361        | E10 |
| L11 | 1204-209       | 1207-000       | 1206-000 | <b>1232-003</b> | 1231-077       | 1230-000 | <b>474-320</b>  | 467-302         | 456-318        | L10 |
| T13 | 1317-000       | 1320-000       | 1319-000 | <b>1345-000</b> | 1344-000       | 1343-000 | <b>301-293</b>  | 300-293         | 300-293        | T10 |
| T13 | 1318-100       | 1430-114       | 1430-230 | 1440-230        | 1420-100       | 1420-230 | <b>240-100</b>  | 230-134         | 230-150        | T10 |
| R14 | 1540-010       | 1540-000       | 1540-000 | 1574-000        | 1567-000       | 1566-000 | 157-010         | 150-000         | 0-000          | R11 |

# sp | P43274 | H14\_MOUSE

S<sup>Phospho</sup> ET<sup>Phospho</sup> APAAPAAPAPAEK  
79.97 79.97

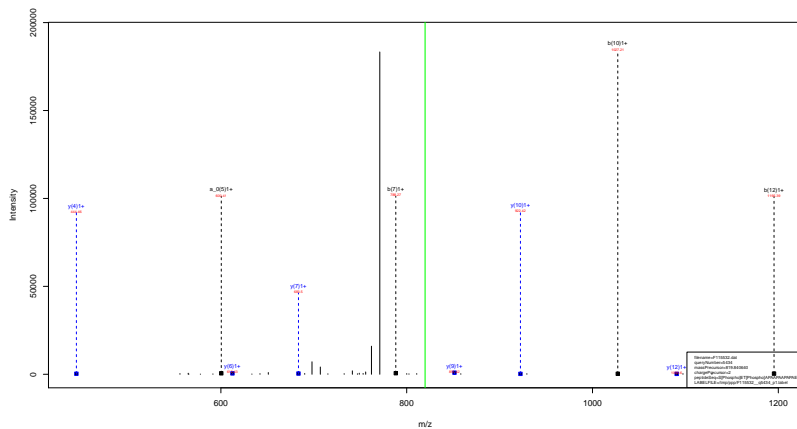

# sp | P43274 | H14\_MOUSE

S<sup>Phospho</sup> 79.97 ET<sup>Phospho</sup> 79.97 APAAPAAPAPAEK

- ▶ fragmentation table for charge state 1+
- ▶ specType=cid
- ▶ score=32.59
- ▶ F115532.dat
- ▶ query=q5434.p1
- ▶ precursor=819.840640
- ▶ chargePrecursor=2
- ▶ itol=0.5

| AA | a        | a*       | aΔ             | b               | b*       | bΔ       | y               | y*       | yΔ       | AA   |
|----|----------|----------|----------------|-----------------|----------|----------|-----------------|----------|----------|------|
| S  | 190.011  | 0.000    | 122.000        | 168.000         | 0.000    | 199.999  | 168.000         | 122.000  | 190.011  | S(2) |
| E  | 209.051  | 0.000    | 201.041        | 207.040         | 0.000    | 278.038  | 247.030         | 1454.050 | 1461.042 | E(1) |
| S  | 224.020  | 0.000    | 472.021        | 473.021         | 0.000    | 469.999  | 129.740         | 1329.020 | 1324.030 | T(4) |
| A  | 321.354  | 0.000    | 549.354        | 549.354         | 0.000    | 511.000  | 1161.320        | 1164.000 | 1141.610 | A(1) |
| P  | 513.157  | 0.000    | <b>608.147</b> | 646.151         | 0.000    | 628.142  | <b>1090.580</b> | 1073.580 | 1072.570 | P(1) |
| A  | 609.314  | 0.000    | 591.304        | 717.309         | 0.000    | 609.312  | 691.310         | 1019.300 | 1020.300 | A(1) |
| A  | 700.210  | 0.000    | 742.211        | <b>768.226</b>  | 0.000    | 770.210  | <b>922.490</b>  | 905.470  | 904.480  | A(1) |
| P  | 801.014  | 0.000    | 839.014        | 839.014         | 0.000    | 807.000  | <b>851.492</b>  | 834.490  | 833.492  | P(2) |
| A  | 894.014  | 0.000    | 846.014        | 896.014         | 0.000    | 873.014  | 74.970          | 121.960  | 120.960  | A(8) |
| A  | 999.210  | 0.000    | 983.210        | <b>1027.303</b> | 0.000    | 1029.210 | <b>1011.372</b> | 995.210  | 992.302  | A(7) |
| P  | 1096.411 | 0.000    | 1078.411       | 1114.406        | 0.000    | 1106.410 | <b>612.335</b>  | 598.330  | 594.320  | P(6) |
| A  | 1107.440 | 0.000    | 1148.430       | <b>1195.443</b> | 0.000    | 1177.433 | 53.230          | 488.250  | 487.212  | A(5) |
| T  | 1204.400 | 0.000    | 1249.400       | 1259.400        | 0.000    | 1214.400 | <b>444.283</b>  | 427.210  | 426.200  | T(6) |
| A  | 1319.530 | 0.000    | 1317.530       | 1363.531        | 0.000    | 1345.530 | 381.130         | 339.160  | 338.162  | A(3) |
| E  | 1384.030 | 0.000    | 1446.030       | 1482.030        | 0.000    | 1474.030 | 278.130         | 259.120  | 258.140  | E(2) |
| R  | 1512.010 | 1078.940 | 1514.000       | 1620.011        | 1031.064 | 1602.000 | 147.110         | 130.000  | 0.000    | R(2) |

# sp | P62806 | H4\_MOUSE

RIS<sup>Phospho</sup> GLIYEETRGVLK  
79.97

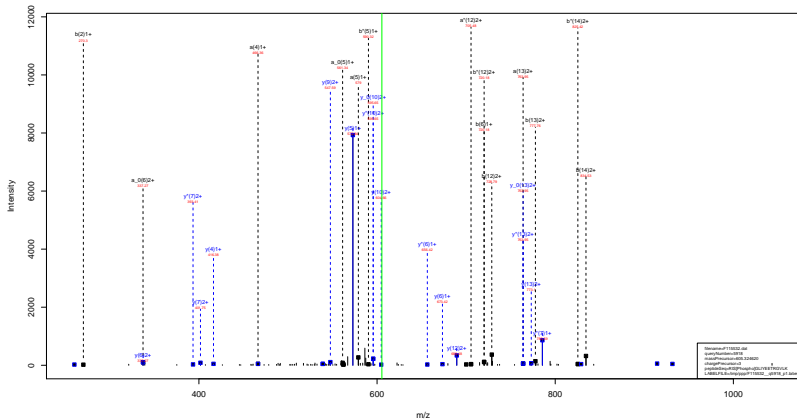

# sp | P62806 | H4\_MOUSE

RIS Phospho 79.97 GLIYEETRGVLK

- ▶ fragmentation table for charge state 1+
- ▶ specType=cid
- ▶ score=37.45
- ▶ F115532.dat
- ▶ query=q5918.p1
- ▶ precursor=605.324620
- ▶ chargePrecursor=3
- ▶ itol=0.5

| AA | a          | a'         | a-b        | b          | b'         | b-b'       | y    | y'   | y-b | AA |
|----|------------|------------|------------|------------|------------|------------|------|------|-----|----|
| R  | 126        | 112        | 0.000      | 167        | 168        | 0.000      | 1613 | 1705 | 892 | R  |
| I  | 242        | 228        | 0.000      | <b>278</b> | <b>182</b> | 90         | 1657 | 1668 | 104 | I  |
| S  | 358        | 344        | 0.000      | 394        | 395        | 0.000      | 1644 | 1736 | 92  | S  |
| G  | <b>466</b> | <b>217</b> | 249        | 408        | 221        | 187        | 1636 | 1730 | 106 | G  |
| L  | <b>578</b> | <b>301</b> | <b>278</b> | <b>541</b> | <b>291</b> | <b>250</b> | 1589 | 1681 | 108 | L  |
| I  | 694        | 680        | 0.000      | 710        | 711        | 0.000      | 1576 | 1668 | 92  | I  |
| V  | 810        | 796        | 0.000      | 826        | 827        | 0.000      | 1563 | 1655 | 92  | V  |
| E  | 926        | 912        | 0.000      | 942        | 943        | 0.000      | 1550 | 1642 | 92  | E  |
| E  | 1042       | 1028       | 0.000      | 1058       | 1059       | 0.000      | 1537 | 1629 | 92  | E  |
| I  | 1158       | 1144       | 0.000      | 1174       | 1175       | 0.000      | 1524 | 1616 | 92  | I  |
| I  | 1274       | 1260       | 0.000      | 1290       | 1291       | 0.000      | 1511 | 1603 | 92  | I  |
| R  | 1390       | 1376       | 0.000      | 1406       | 1407       | 0.000      | 1498 | 1590 | 92  | R  |
| G  | 1506       | 1492       | 0.000      | 1522       | 1523       | 0.000      | 1485 | 1577 | 92  | G  |
| V  | 1622       | 1608       | 0.000      | 1638       | 1639       | 0.000      | 1472 | 1564 | 92  | V  |
| L  | 1738       | 1724       | 0.000      | 1754       | 1755       | 0.000      | 1459 | 1551 | 92  | L  |
| V  | 1854       | 1840       | 0.000      | 1870       | 1871       | 0.000      | 1446 | 1538 | 92  | V  |
| L  | 1970       | 1956       | 0.000      | 1986       | 1987       | 0.000      | 1433 | 1525 | 92  | L  |
| R  | 2086       | 2072       | 0.000      | 2102       | 2103       | 0.000      | 1420 | 1512 | 92  | R  |



# sp | P62806 | H4\_MOUSE

RIS<sup>Phospho</sup> 79.97 GLIYEETRGVLK

- ▶ fragmentation table for charge state 2+
- ▶ specType=cid
- ▶ score=37.45
- ▶ F115532.dat
- ▶ query=q5918\_p1
- ▶ precursor=605.324620
- ▶ chargePrecursor=3
- ▶ itol=0.5

| AA    | a              | a*             | a,Δ            | b              | b*             | b,Δ            | γ              | γ*             | γ,Δ            | AA    |
|-------|----------------|----------------|----------------|----------------|----------------|----------------|----------------|----------------|----------------|-------|
| R[1]  | 85.890         | 86.549         | 0.509          | 19.058         | 19.845         | 0.509          | 997.482        | 998.984        | 998.477        | R[15] |
| T[2]  | 11.1402        | 11.5109        | 0.507          | 1.35440        | 1.27387        | 0.507          | <b>829.432</b> | 829.979        | 829.542        | T[14] |
| S[3]  | 276.104        | 285.584        | 4.860          | 218.999        | 216.586        | 0.507          | <b>772.890</b> | <b>764.376</b> | <b>763.884</b> | S[13] |
| G[4]  | 223.812        | 225.009        | 224.907        | 297.810        | 239.097        | 238.824        | <b>685.390</b> | 685.371        | 685.355        | G[12] |
| L[5]  | 260.454        | 261.641        | 261.149        | 304.152        | 266.839        | 266.147        | 660.880        | 662.386        | 661.874        | L[11] |
| I[6]  | 146.056        | 138.113        | <b>337.691</b> | 360.694        | 252.181        | 351.609        | <b>604.338</b> | <b>595.824</b> | <b>595.332</b> | I[10] |
| V[7]  | 438.808        | 439.813        | 439.242        | 442.228        | 438.112        | 438.203        | <b>541.706</b> | <b>539.282</b> | <b>538.790</b> | V[9]  |
| E[8]  | 292.949        | 294.226        | 293.143        | 505.147        | 308.234        | 307.782        | <b>486.254</b> | 486.183        | 486.159        | E[8]  |
| E[9]  | 357.872        | 348.107        | 348.265        | 571.268        | 362.750        | <b>562.263</b> | <b>401.743</b> | <b>393.229</b> | 392.737        | E[9]  |
| T[10] | 607.194        | 595.201        | 595.193        | 603.703        | 613.278        | 612.787        | <b>337.221</b> | 338.708        | 338.216        | T[10] |
| R[11] | 685.808        | 677.913        | 678.949        | <b>690.843</b> | 690.319        | 690.817        | 266.983        | 268.184        | 0.304          | R[11] |
| G[12] | 714.098        | <b>705.842</b> | <b>705.350</b> | <b>728.353</b> | <b>719.840</b> | 719.580        | 258.847        | 260.134        | 0.504          | G[12] |
| V[13] | <b>763.890</b> | 759.377        | 758.685        | <b>777.887</b> | 766.874        | 768.882        | 180.130        | 171.823        | 0.504          | V[13] |
| L[14] | 820.432        | 811.819        | 811.427        | <b>834.429</b> | <b>825.916</b> | <b>825.424</b> | 130.602        | 122.089        | 0.504          | L[14] |
| R[15] | 884.419        | 875.588        | 876.412        | 886.471        | 878.954        | 879.412        | 74.680         | 66.941         | 0.504          | R[15] |

# sp | P43274 | H14\_MOUSE

S<sup>Phospho</sup><sub>79.97</sub> ETAPAAPAAPAPAEKTPVK

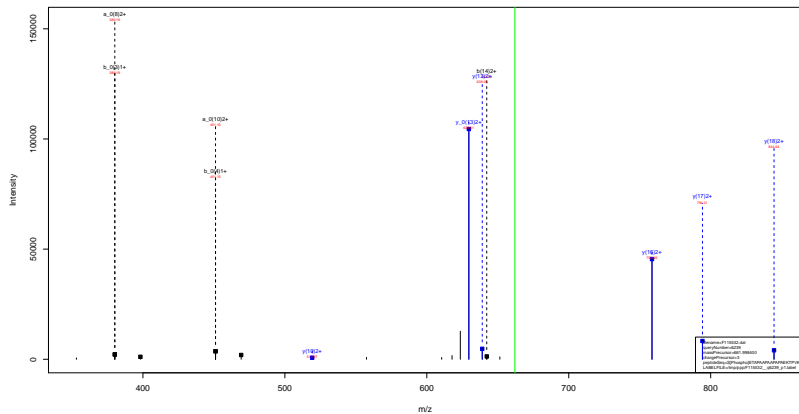

# sp | P43274 | H14\_MOUSE

S<sup>Phospho</sup><sub>79.97</sub> ETAPAAPAAPAPAEKTPVK

- ▶ fragmentation table for charge state 1+
- ▶ specType=cid
- ▶ score=32.95
- ▶ F115532.dat
- ▶ query=q6239\_p1
- ▶ precursor=661.998400
- ▶ chargePrecursor=3
- ▶ itol=0.5

| AA    | a        | a'       | a <b>2</b> | b              | b'       | b <b>2</b>     | x        | x'       | x <b>2</b> | AA    |
|-------|----------|----------|------------|----------------|----------|----------------|----------|----------|------------|-------|
| E[1]  | 140.014  | 0.000    | 129.000    | 100.000        | 0.000    | 160.000        | 1001.371 | 1000.974 | 1005.000   | S[20] |
| E[2]  | 200.053  | 0.000    | 201.043    | 207.043        | 0.000    | 279.039        | 1016.930 | 1109.954 | 1108.970   | E[19] |
| T[3]  | 170.011  | 0.000    | 192.000    | <b>196.000</b> | 0.000    | <b>300.005</b> | 1007.430 | 1010.011 | 1008.017   | T[18] |
| K[4]  | 441.138  | 0.000    | 431.132    | <b>460.133</b> | 0.000    | <b>451.132</b> | 2500.000 | 1559.004 | 1500.000   | A[17] |
| P[5]  | 636.191  | 0.000    | 630.180    | 600.180        | 0.000    | 636.174        | 1010.011 | 1009.025 | 1007.042   | P[16] |
| A[6]  | 840.250  | 0.000    | 840.211    | 817.211        | 0.000    | 818.213        | 1010.000 | 1010.774 | 1005.900   | A[15] |
| A[7]  | 880.265  | 0.000    | 882.265    | 708.265        | 0.000    | 800.269        | 1147.741 | 1130.719 | 1129.753   | A[14] |
| T[8]  | 777.018  | 0.000    | 700.000    | 600.000        | 0.000    | 607.000        | 1010.000 | 1009.000 | 1008.015   | T[13] |
| A[9]  | 846.265  | 0.000    | 830.244    | 805.244        | 0.000    | 808.239        | 1110.011 | 1101.041 | 1101.063   | A[12] |
| A[10] | 870.262  | 0.000    | 861.260    | 849.260        | 0.000    | 803.265        | 1100.000 | 1099.000 | 1098.010   | A[11] |
| P[11] | 1030.464 | 0.000    | 980.436    | 1044.440       | 0.000    | 1020.450       | 1017.000 | 1014.572 | 1014.000   | P[10] |
| A[12] | 1007.462 | 0.000    | 1000.471   | 1115.477       | 0.000    | 1007.460       | 890.500  | 905.500  | 902.500    | A[9]  |
| P[15] | 1104.630 | 0.000    | 1106.624   | 1312.630       | 0.000    | 1104.610       | 890.500  | 804.481  | 801.400    | P[8]  |
| A[14] | 1235.672 | 0.000    | 1237.661   | 1203.667       | 0.000    | 1205.656       | 772.450  | 750.430  | 754.446    | A[7]  |
| E[19] | 1336.614 | 0.000    | 1306.600   | 1412.609       | 0.000    | 1304.600       | 701.430  | 688.393  | 685.000    | E[8]  |
| R[10] | 1512.700 | 1490.483 | 1494.690   | 1540.704       | 1523.078 | 1522.094       | 572.371  | 505.300  | 504.300    | R[5]  |
| T[17] | 1011.071 | 1000.721 | 1000.740   | 1041.762       | 1024.720 | 1021.761       | 640.000  | 627.000  | 626.011    | T[6]  |
| P[18] | 1740.610 | 1603.743 | 1602.750   | 1730.605       | 1721.710 | 1720.704       | 543.254  | 500.000  | 0.000      | P[3]  |
| V[16] | 1200.078 | 1202.062 | 1210.060   | 1311.074       | 1201.064 | 1210.061       | 400.100  | 200.100  | 0.000      | V[5]  |
| R[20] | 1337.074 | 1020.047 | 1010.040   | 1305.040       | 1340.041 | 1347.038       | 147.113  | 130.000  | 0.000      | R[1]  |

# sp | P43274 | H14\_MOUSE

S<sup>Phospho</sup><sub>79.97</sub> ETAPAAPAAPAPAEKTPVK

- ▶ fragmentation table for charge state 2+
- ▶ specType=cid
- ▶ score=32.95
- ▶ F115532.dat
- ▶ query=q6239\_p1
- ▶ precursor=661.998400
- ▶ chargePrecursor=3
- ▶ itol=0.5

| AA | a       | a*    | a,δ            | b              | b*    | b,δ     | y              | y*       | y,δ            | AA      |      |
|----|---------|-------|----------------|----------------|-------|---------|----------------|----------|----------------|---------|------|
| S  | 10.509  | 0.509 | 61.509         | 84.509         | 0.504 | 75.501  | 992.493        | 883.880  | 883.488        | S(2)    |      |
| E  | 11.5130 | 0.504 | 116.025        | 149.028        | 0.504 | 140.023 | 225.225        | 160.041  | 899.989        | E(19)   |      |
| T  | 139.954 | 0.504 | 218.549        | 399.552        | 0.504 | 380.548 | <b>844.473</b> | 1176.959 | 128.487        | T(18)   |      |
| A  | 221.973 | 0.504 | 212.961        | 235.970        | 0.504 | 238.965 | <b>793.949</b> | 198.435  | 194.943        | A(17)   |      |
| F  | 269.989 | 0.504 | 269.991        | 281.997        | 0.504 | 274.991 | <b>758.430</b> | 149.917  | 149.425        | F(16)   |      |
| A  | 305.118 | 0.504 | 296.117        | 319.115        | 0.504 | 310.110 | 799.984        | 701.940  | 700.993        | A(15)   |      |
| A  | 341.836 | 0.504 | 311.833        | 354.838        | 0.504 | 350.828 | 818.985        | 695.972  | 696.980        | A(14)   |      |
| F  | 389.153 | 0.504 | <b>385.157</b> | 401.162        | 0.504 | 406.155 | <b>638.867</b> | 830.353  | <b>629.861</b> | F(13)   |      |
| A  | 424.681 | 0.504 | 415.676        | 438.679        | 0.504 | 439.671 | 599.340        | 591.827  | 591.335        | A(12)   |      |
| A  | 460.200 | 0.504 | <b>451.194</b> | 474.199        | 0.504 | 486.192 | 354.827        | 346.308  | 345.816        | A(11)   |      |
| F  | 508.726 | 0.504 | 489.722        | 522.724        | 0.504 | 513.718 | <b>519.303</b> | 510.790  | 510.298        | F(10)   |      |
| A  | 544.245 | 0.504 | 535.239        | 558.242        | 0.504 | 549.237 | 414.717        | 402.203  | 401.711        | A(9)    |      |
| F  | 589.771 | 0.504 | 583.766        | 608.768        | 0.504 | 597.761 | 435.258        | 426.745  | 426.253        | F(8)    |      |
| A  | 626.290 | 0.504 | 619.284        | <b>642.287</b> | 0.504 | 633.282 | 388.732        | 378.219  | 377.727        | A(7)    |      |
| E  | 662.811 | 0.504 | 663.806        | 708.808        | 0.504 | 697.803 | 351.213        | 342.700  | 342.208        | E(6)    |      |
| T  | 708.338 | 0.504 | 744.340        | 746.342        | 0.504 | 761.335 | 288.664        | 278.159  | 277.668        | T(5)    |      |
| T  | 807.392 | 0.504 | 798.377        | 821.380        | 0.504 | 812.366 | 812.374        | 222.644  | 214.131        | 213.639 | T(4) |
| F  | 855.909 | 0.504 | 848.901        | 869.906        | 0.504 | 860.901 | 172.121        | 163.607  | 0.504          | F(3)    |      |
| V  | 895.443 | 0.504 | 896.437        | 919.440        | 0.504 | 910.435 | 123.594        | 115.081  | 0.504          | V(2)    |      |
| K  | 939.480 | 0.504 | 940.474        | 963.480        | 0.504 | 954.474 | 14.080         | 0.504    | 0.504          | K(1)    |      |



# sp | P43274 | H14\_MOUSE

S<sup>Phospho</sup><sub>79.97</sub> ETAPAAPAAPAPAEKTPVK

- ▶ fragmentation table for charge state 1+
- ▶ specType=cid
- ▶ score=57.58
- ▶ F115532.dat
- ▶ query=q6240\_p1
- ▶ precursor=992.494480
- ▶ chargePrecursor=2
- ▶ itol=0.5

| AA | a              | a'       | a,b            | b              | b'       | b,b'           | y               | y'       | y,b'            | AA    |
|----|----------------|----------|----------------|----------------|----------|----------------|-----------------|----------|-----------------|-------|
| S  | 1401.811       | 0.000    | 142.088        | 1168.088       | 0.000    | 149.776        | 1481.211        | 1339.924 | 1302.068        | S(20) |
| E  | 209.053        | 0.000    | 225.043        | 2267.043       | 0.000    | 279.030        | 1815.950        | 1795.954 | 1768.910        | E(19) |
| I  | 570.531        | 0.000    | 332.099        | 1466.099       | 0.000    | <b>380.685</b> | 1487.430        | 1470.011 | 1466.927        | I(18) |
| A  | 641.130        | 0.000    | 415.124        | 498.112        | 0.000    | <b>451.122</b> | 1356.785        | 1356.864 | 1356.880        | A(17) |
| P  | 538.130        | 0.000    | 720.182        | <b>366.186</b> | 0.000    | 741.112        | <b>1515.851</b> | 1498.826 | 1487.852        | P(16) |
| A  | 309.238        | 0.000    | 585.211        | 627.102        | 0.000    | 659.211        | 1418.858        | 1401.736 | 1400.780        | A(15) |
| A  | 380.285        | 0.000    | 705.253        | 1168.260       | 0.000    | <b>660.249</b> | <b>1347.761</b> | 1333.737 | 1329.713        | A(14) |
| T  | 177.033        | 0.000    | <b>735.307</b> | 1066.312       | 0.000    | 767.305        | <b>1376.728</b> | 1359.688 | <b>1356.715</b> | T(13) |
| A  | 346.330        | 0.000    | 675.348        | 676.360        | 0.000    | 808.330        | 1118.671        | 1182.647 | 1161.603        | A(12) |
| A  | <b>919.392</b> | 0.000    | 939.392        | 847.387        | 0.000    | 628.130        | <b>1168.636</b> | 1091.610 | <b>1076.626</b> | A(11) |
| F  | 1039.441       | 0.000    | 1046.434       | 1044.444       | 0.000    | 1029.420       | <b>1037.599</b> | 1030.572 | <b>1019.548</b> | F(10) |
| A  | 1207.462       | 0.000    | 1059.471       | 1115.497       | 0.000    | 1057.450       | 964.414         | 962.520  | 962.508         | A(9)  |
| P  | 1184.510       | 0.000    | 1188.524       | 1212.530       | 0.000    | 1184.510       | <b>864.509</b>  | 863.481  | 861.456         | P(8)  |
| A  | 1295.572       | 0.000    | 1217.581       | 1268.587       | 0.000    | 1285.550       | 772.450         | 755.430  | 754.446         | A(7)  |
| E  | 1384.614       | 0.000    | 1359.624       | 1412.630       | 0.000    | 1354.590       | 661.430         | 664.393  | 661.400         | E(6)  |
| R  | 1312.308       | 1485.553 | 1434.269       | 1540.104       | 1521.519 | 1522.094       | <b>372.377</b>  | 595.300  | 594.366         | R(5)  |
| I  | 1311.337       | 1526.731 | 1526.147       | 1641.762       | 1624.726 | 1621.740       | <b>444.282</b>  | 427.250  | 426.271         | I(4)  |
| P  | 1121.810       | 1687.743 | 1686.789       | 1748.808       | 1732.771 | 1727.784       | <b>343.234</b>  | 326.207  | 325.227         | P(3)  |
| V  | 1309.816       | 1782.351 | 1774.803       | 1837.813       | 1821.814 | 1818.801       | 265.110         | 249.150  | 248.167         | V(2)  |
| K  | 1037.812       | 1820.847 | 1819.861       | 1880.868       | 1864.864 | 1847.858       | 147.110         | 133.088  | 133.001         | K(1)  |

# sp | P43277 | H13\_MOUSE

S<sup>Phospho</sup><sub>79.97</sub> ETAPAAPAAPAPVEKTPVK

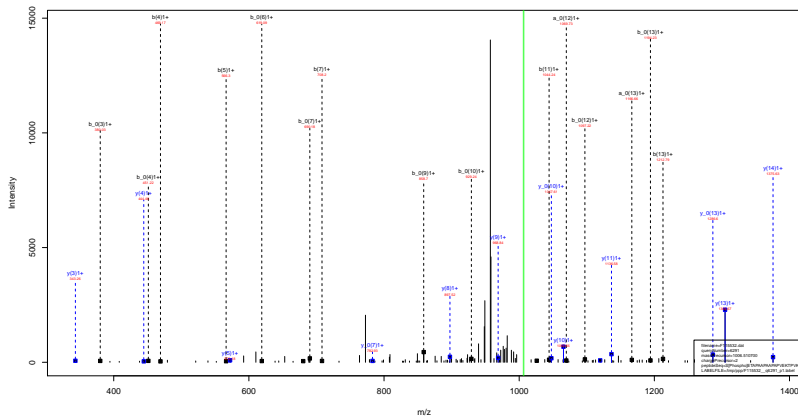

# sp | P43277 | H13\_MOUSE

S<sup>Phospho</sup><sub>79.97</sub> ETAPAAPAAPAPVEKTPVK

- ▶ fragmentation table for charge state 1+
- ▶ specType=cid
- ▶ score=43.32
- ▶ F115532.dat
- ▶ query=q6291\_p1
- ▶ precursor=1006.510700
- ▶ chargePrecursor=2
- ▶ itol=0.5

| AA  | a        | a'       | a,Δ      | b        | b'       | b,Δ      | y        | y'       | y,Δ      | AA  |
|-----|----------|----------|----------|----------|----------|----------|----------|----------|----------|-----|
| S1  | 140.011  | 0.000    | 122.008  | 148.006  | 0.000    | 149.997  | 202.022  | 1994.981 | 1993.999 | S20 |
| T2  | 300.003  | 0.000    | 282.042  | 297.046  | 0.000    | 279.029  | 1846.029 | 1827.026 | 1827.001 | T19 |
| T13 | 370.101  | 0.000    | 352.060  | 366.060  | 0.000    | 360.085  | 1716.061 | 1698.043 | 1699.068 | T18 |
| A4  | 441.138  | 0.000    | 424.118  | 438.133  | 0.000    | 431.122  | 1614.021 | 1597.009 | 1598.011 | A17 |
| T15 | 478.103  | 0.000    | 459.165  | 474.186  | 0.000    | 467.181  | 1544.004 | 1526.004 | 1526.004 | T16 |
| A6  | 509.200  | 0.000    | 492.211  | 506.211  | 0.000    | 519.212  | 1446.031 | 1428.025 | 1428.011 | A15 |
| A7  | 680.205  | 0.000    | 662.253  | 706.260  | 0.000    | 690.249  | 1375.790 | 1359.789 | 1359.789 | A14 |
| T16 | 777.113  | 0.000    | 759.201  | 784.213  | 0.000    | 787.207  | 1204.737 | 1189.733 | 1190.747 | T17 |
| A9  | 866.200  | 0.000    | 839.244  | 874.260  | 0.000    | 858.239  | 1127.610 | 1109.610 | 1109.604 | A12 |
| A10 | 1017.202 | 0.000    | 990.261  | 1045.267 | 0.000    | 1026.270 | 1136.667 | 1119.643 | 1119.657 | A11 |
| T11 | 1107.474 | 0.000    | 1081.420 | 1104.440 | 0.000    | 1126.423 | 1065.539 | 1048.524 | 1047.520 | T10 |
| A12 | 1207.462 | 0.000    | 1186.471 | 1211.477 | 0.000    | 1207.466 | 966.578  | 951.553  | 951.567  | A10 |
| T13 | 1304.539 | 0.000    | 1284.524 | 1292.530 | 0.000    | 1304.519 | 897.540  | 882.514  | 882.519  | T12 |
| V14 | 1403.603 | 0.000    | 1380.562 | 1411.580 | 0.000    | 1403.567 | 801.489  | 782.462  | 782.477  | V17 |
| V15 | 1414.608 | 0.000    | 1389.620 | 1440.641 | 0.000    | 1402.610 | 793.411  | 769.381  | 769.384  | V16 |
| K10 | 1561.101 | 1423.711 | 1524.710 | 1568.726 | 1561.109 | 1561.711 | 572.377  | 558.351  | 554.366  | K15 |
| T17 | 1641.200 | 1624.782 | 1623.778 | 1669.783 | 1663.774 | 1663.771 | 444.282  | 427.253  | 426.271  | T14 |
| F18 | 1730.401 | 1723.829 | 1720.831 | 1766.836 | 1760.830 | 1760.827 | 343.234  | 326.211  | 326.211  | F19 |
| V19 | 1837.600 | 1827.881 | 1819.880 | 1865.884 | 1858.878 | 1858.874 | 248.111  | 238.111  | 238.111  | V12 |
| K20 | 1880.100 | 1846.571 | 1847.564 | 1891.569 | 1885.564 | 1885.560 | 147.111  | 130.080  | 130.081  | K11 |



# sp | P43277 | H13\_MOUSE

S<sup>Phospho</sup> ET<sup>Phospho</sup> APAAPAAPAPVEKTPVK  
79.97 79.97

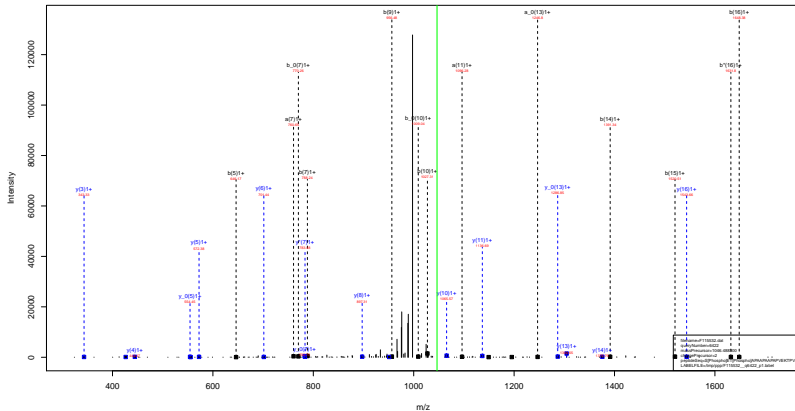

# sp | P43277 | H13\_MOUSE

S<sup>Phospho</sup> 79.97 ET<sup>Phospho</sup> 79.97 APAAPAAPVEKTPVK

- ▶ fragmentation table for charge state 1+
- ▶ specType=cid
- ▶ score=42.07
- ▶ F115532.dat
- ▶ query=q6422.p1
- ▶ precursor=1046.488300
- ▶ chargePrecursor=2
- ▶ itol=0.5

| AA | a               | a'             | a <sub>0</sub>  | b               | b'              | b <sub>0</sub>  | y               | y'              | y <sub>0</sub>  | AA  |
|----|-----------------|----------------|-----------------|-----------------|-----------------|-----------------|-----------------|-----------------|-----------------|-----|
| S  | 1401611         | 0.000          | 142.000         | 188.000         | 0.000           | 149.000         | 1001.000        | 1014.000        | 1017.000        | S20 |
| T  | 1001000         | 0.000          | 100.000         | 100.000         | 0.000           | 100.000         | 1004.000        | 1000.000        | 1000.000        | T10 |
| T  | 1001000         | 0.000          | 430.000         | 410.000         | 0.000           | 400.000         | 1000.000        | 1000.000        | 1000.000        | T10 |
| A  | 1001000         | 0.000          | 500.000         | 500.000         | 0.000           | 500.000         | 1014.000        | 1000.000        | 1000.000        | A10 |
| P  | 1001000         | 0.000          | 1000.000        | <b>140.153</b>  | 0.000           | 1000.000        | <b>1543.000</b> | 1000.000        | 1000.000        | P10 |
| A  | 1001000         | 0.000          | 871.000         | 771.000         | 0.000           | 800.000         | 1400.000        | 1420.000        | 1430.000        | A10 |
| A  | 7               | <b>780.231</b> | 0.000           | 142.230         | <b>780.230</b>  | 0.000           | <b>770.216</b>  | <b>1375.794</b> | 1350.750        | A14 |
| P  | 1001000         | 0.000          | 1000.000        | 1000.000        | 0.000           | 1000.000        | <b>1300.750</b> | 1000.000        | <b>1200.747</b> | P10 |
| A  | 1001000         | 0.000          | 930.000         | <b>900.310</b>  | 0.000           | 900.000         | 1000.000        | 1000.000        | 1000.000        | A10 |
| A  | 1001000         | 0.000          | 1000.000        | <b>1027.353</b> | 0.000           | <b>1000.343</b> | <b>1130.007</b> | 1100.000        | 1100.000        | A10 |
| P  | <b>1000.411</b> | 0.000          | 1000.000        | 1000.000        | 0.000           | 1000.000        | <b>1000.000</b> | 1000.000        | 1000.000        | P10 |
| A  | 1155320         | 0.000          | <b>1140.430</b> | <b>1195.443</b> | 0.000           | 1177.433        | 1000.000        | <b>951.551</b>  | 900.000         | A10 |
| P  | 1000.000        | 0.000          | <b>1240.400</b> | 1200.400        | 0.000           | 1274.400        | <b>807.500</b>  | 800.000         | 800.000         | P10 |
| V  | 1001000         | 0.000          | 1000.000        | <b>1391.560</b> | 0.000           | 1373.564        | 1000.000        | <b>783.401</b>  | <b>782.477</b>  | V10 |
| P  | 1001000         | 0.000          | 1000.000        | <b>1520.607</b> | 0.000           | 1502.600        | <b>701.410</b>  | 600.000         | 600.000         | P10 |
| K  | 1001000         | 0.000          | 1000.000        | <b>1848.702</b> | <b>1831.675</b> | 0.000           | <b>1831.660</b> | <b>572.377</b>  | <b>555.350</b>  | K10 |
| T  | 1001000         | 0.000          | 1000.000        | 1000.000        | 0.000           | 1000.000        | 1000.000        | 1000.000        | 1000.000        | T10 |
| P  | 1001000         | 0.000          | 1000.000        | 1000.000        | 0.000           | 1000.000        | <b>543.234</b>  | 500.000         | <b>400.271</b>  | P10 |
| V  | 1001000         | 0.000          | 1000.000        | 1000.000        | 0.000           | 1000.000        | 1000.000        | 1000.000        | 1000.000        | V10 |
| K  | 1001000         | 0.000          | 1000.000        | 1000.000        | 0.000           | 1000.000        | 1000.000        | 1000.000        | 1000.000        | K10 |



# sp | P43276 | H15\_MOUSE

S<sup>Phospho</sup> 79.97 ET<sup>Phospho</sup> 79.97 APAETAAPAPVEKSPAK

- ▶ fragmentation table for charge state 1+
- ▶ specType=cid
- ▶ score=31.26
- ▶ F115532.dat
- ▶ query=q6458.p1
- ▶ precursor=1056.463800
- ▶ chargePrecursor=2
- ▶ itol=0.5

| AA | a               | a'       | a <sub>0</sub>  | b               | b'       | b <sub>0</sub>  | y               | y'              | y <sub>0</sub>  | AA  |
|----|-----------------|----------|-----------------|-----------------|----------|-----------------|-----------------|-----------------|-----------------|-----|
| S  | 1401.611        | 0.000    | 122.090         | 188.000         | 0.000    | 149.100         | 2111.930        | 2094.901        | 2081.919        | S20 |
| E  | 392.953         | 0.000    | 750.243         | 757.400         | 0.000    | 176.810         | 1484.731        | 1527.620        | 1532.911        | K16 |
| T  | 404.107         | 0.000    | 432.071         | 416.000         | 0.000    | 480.100         | 1332.000        | 1378.862        | 1372.070        | T18 |
| A  | 621.104         | 0.000    | 583.000         | <b>549.099</b>  | 0.000    | 551.000         | 1334.871        | 1317.880        | 1312.804        | A17 |
| P  | 616.834         | 0.000    | 608.124         | 608.124         | 0.000    | 608.124         | 1333.931        | 1348.911        | 1348.911        | P16 |
| A  | 689.134         | 0.000    | 671.104         | 711.100         | 0.000    | 689.130         | 1446.700        | 1448.700        | 1448.714        | A15 |
| E  | 618.212         | 0.000    | 680.120         | <b>646.232</b>  | 0.000    | <b>678.221</b>  | <b>1395.740</b> | 1370.721        | 1372.720        | E14 |
| T  | 612.000         | 0.000    | 601.210         | 581.200         | 0.000    | 612.000         | 1366.700        | 1348.000        | 1348.000        | T13 |
| A  | <b>990.322</b>  | 0.000    | 872.311         | 1035.311        | 0.000    | 1035.310        | 1416.650        | 1448.651        | 1441.641        | A12 |
| A  | <b>1071.594</b> | 0.000    | <b>1043.340</b> | <b>1089.354</b> | 0.000    | <b>1071.593</b> | <b>1094.620</b> | <b>1077.594</b> | <b>1076.610</b> | A11 |
| P  | <b>1158.412</b> | 0.000    | 1141.461        | 1141.461        | 0.000    | 1158.410        | 1023.583        | 1026.581        | 1026.581        | P10 |
| A  | <b>1229.440</b> | 0.000    | 1211.430        | <b>1257.444</b> | 0.000    | 1258.433        | 826.510         | 829.524         | 829.524         | A09 |
| P  | 1249.501        | 0.000    | 1198.490        | 1304.490        | 0.000    | 1198.490        | <b>853.493</b>  | 838.491         | <b>837.483</b>  | P08 |
| V  | 1424.010        | 0.000    | 1407.000        | 1413.000        | 0.000    | 1431.004        | <b>754.441</b>  | 741.414         | 740.410         | V07 |
| E  | 1514.512        | 0.000    | 1512.462        | <b>1582.407</b> | 0.000    | 1554.512        | <b>653.372</b>  | 642.365         | <b>641.362</b>  | E06 |
| K  | 1682.707        | 1085.681 | 1684.681        | <b>1710.702</b> | 1681.610 | 1682.610        | <b>530.130</b>  | <b>513.303</b>  | <b>512.319</b>  | K05 |
| S  | 1759.740        | 1362.713 | 1742.740        | 1747.740        | 1689.740 | 1759.740        | <b>402.235</b>  | 388.200         | <b>384.234</b>  | S04 |
| P  | 1806.724        | 1429.710 | 1804.720        | 1804.710        | 1817.710 | 1819.710        | <b>315.203</b>  | 300.110         | 300.110         | P03 |
| A  | 1837.830        | 1830.810 | 1830.810        | 1830.824        | 1846.830 | 1847.814        | 740.110         | 740.110         | 740.110         | A02 |
| K  | 2095.624        | 2096.600 | 2047.614        | 2093.610        | 2076.603 | 2076.600        | 147.111         | 130.090         | 0.000           | K01 |



# sp | P43274 | H14\_MOUSE

S<sup>Phospho</sup><sub>79.97</sub> ETAPAAPAAPAPAEKTPVKK

- ▶ fragmentation table for charge state 1+
- ▶ specType=cid
- ▶ score=39.60
- ▶ F115532.dat
- ▶ query=q6464.p1
- ▶ precursor=704.696680
- ▶ chargePrecursor=3
- ▶ itol=0.5

| AA | a        | a'       | x <sub>0</sub> | b              | b'       | b <sub>0</sub> | y        | y'       | r <sub>0</sub> | AA  |
|----|----------|----------|----------------|----------------|----------|----------------|----------|----------|----------------|-----|
| S  | 140.031  | 0.000    | 122.000        | 169.000        | 0.000    | 149.000        | 212.070  | 2006.041 | 2004.061       | S20 |
| E  | 139.053  | 0.000    | 251.041        | 220.000        | 0.000    | 210.000        | 3045.001 | 3320.040 | 3327.000       | E20 |
| T  | 139.011  | 0.000    | 180.000        | <b>704.000</b> | 0.000    | <b>201.000</b> | 3338.001 | 3799.000 | 3786.022       | T10 |
| A  | 141.136  | 0.000    | 423.120        | <b>468.133</b> | 0.000    | <b>451.122</b> | 3174.900 | 3207.900 | 3206.974       | A20 |
| P  | 130.031  | 0.000    | 130.100        | 366.100        | 0.000    | 369.100        | 3643.040 | 3208.920 | 3225.937       | P12 |
| A  | 169.220  | 0.000    | 580.217        | 837.213        | 0.000    | <b>610.212</b> | 3580.800 | 3529.800 | 3528.880       | A16 |
| A  | 169.200  | 0.000    | 600.200        | 700.200        | 0.000    | 600.200        | 3476.000 | 3450.010 | 3451.011       | A15 |
| P  | 177.318  | 0.000    | 750.303        | 805.313        | 0.000    | 767.303        | 3404.820 | 3367.704 | 3368.510       | P14 |
| A  | 168.352  | 0.000    | 830.340        | 870.320        | 0.000    | <b>858.339</b> | 3307.700 | 3250.742 | 3260.710       | A13 |
| A  | 159.000  | 0.000    | 800.000        | 941.000        | 0.000    | 800.000        | 3230.010 | 3278.000 | 3278.000       | A12 |
| P  | 1510.940 | 0.000    | 980.450        | 1044.940       | 0.000    | 1020.420       | 3100.000 | 3148.000 | 3147.000       | P11 |
| A  | 1007.800 | 0.000    | 1000.471       | 1115.471       | 0.000    | 1007.400       | 3068.640 | 3051.610 | 3050.610       | A10 |
| P  | 1184.530 | 0.000    | 1180.524       | 1212.530       | 0.000    | 1184.510       | 297.600  | 298.570  | 297.600        | P10 |
| A  | 1255.872 | 0.000    | 1237.861       | 1290.861       | 0.000    | 1255.860       | 290.900  | 289.920  | 289.941        | A8  |
| E  | 1184.814 | 0.000    | 1180.800       | 1412.800       | 0.000    | 1184.790       | 820.514  | 812.480  | 811.504        | E7  |
| K  | 1112.700 | 1400.000 | 1108.690       | 1240.700       | 1261.710 | 1107.610       | 701.470  | 703.440  | 702.461        | K6  |
| L  | 1112.617 | 1400.000 | 1108.600       | 1240.700       | 1261.710 | 1107.520       | 701.410  | 703.380  | 702.400        | L6  |
| P  | 1110.810 | 1000.000 | 1000.790       | 1120.810       | 1120.790 | 1110.790       | 471.320  | 454.300  | 453.320        | P4  |
| V  | 1000.870 | 1100.000 | 1100.860       | 1101.870       | 1100.870 | 1000.870       | 374.270  | 367.250  | 367.250        | V3  |
| K  | 1017.073 | 1020.000 | 1010.060       | 1065.060       | 1048.042 | 1017.050       | 270.200  | 268.181  | 268.000        | K2  |
| K  | 1016.058 | 1040.000 | 1040.000       | 1040.000       | 1017.010 | 1016.010       | 147.110  | 430.000  | 430.000        | K1  |

# sp | P43274 | H14\_MOUSE

S<sup>Phospho</sup><sub>79.97</sub> ETAPAAPAAPAPAEEKTPVKK

- ▶ fragmentation table for charge state 2+
- ▶ specType=cid
- ▶ score=39.60
- ▶ F115532.dat
- ▶ query=q6464\_p1
- ▶ precursor=704.696680
- ▶ chargePrecursor=3
- ▶ itol=0.5

| AA    | a         | a'    | a.0            | b       | b'    | b.0            | y              | y'             | y.0            | AA    |
|-------|-----------|-------|----------------|---------|-------|----------------|----------------|----------------|----------------|-------|
| S[1]  | 86.869    | 0.504 | 81.559         | 84.569  | 0.504 | 79.570         | 309.540        | 1040.070       | 1047.530       | S[20] |
| E[2]  | 11.35.700 | 0.504 | 120.050        | 144.020 | 0.504 | 140.020        | 971.240        | 964.720        | 1047.030       | E[20] |
| T[3]  | 110.854   | 0.504 | 120.740        | 109.760 | 0.504 | 100.540        | <b>981.230</b> | 989.700        | 1046.510       | T[10] |
| A[4]  | 211.073   | 0.504 | 212.050        | 235.070 | 0.504 | 225.050        | <b>857.090</b> | 848.480        | 1046.990       | A[20] |
| P[5]  | 200.869   | 0.504 | 200.590        | 203.590 | 0.504 | 204.590        | <b>822.470</b> | <b>813.964</b> | <b>813.472</b> | P[17] |
| A[6]  | 200.110   | 0.504 | 200.112        | 204.112 | 0.504 | 203.110        | 711.100        | 705.430        | 1047.040       | A[16] |
| A[7]  | 180.700   | 0.504 | 171.010        | 184.010 | 0.504 | 181.000        | <b>710.410</b> | 729.010        | 729.010        | A[15] |
| P[8]  | 180.101   | 0.504 | <b>180.157</b> | 183.160 | 0.504 | 184.150        | <b>694.401</b> | <b>693.309</b> | <b>693.309</b> | P[14] |
| A[9]  | 174.081   | 0.504 | 174.081        | 178.081 | 0.504 | 179.070        | 629.070        | 629.070        | 1046.300       | A[13] |
| A[10] | 160.000   | 0.504 | <b>161.194</b> | 174.190 | 0.504 | 165.190        | <b>611.860</b> | <b>610.150</b> | <b>609.364</b> | A[12] |
| P[11] | 150.720   | 0.504 | 140.720        | 152.720 | 0.504 | 151.710        | <b>581.351</b> | 584.830        | 1046.780       | P[11] |
| A[12] | 144.040   | 0.504 | 130.700        | 144.700 | 0.504 | <b>140.217</b> | 538.024        | 538.111        | 1021.010       | A[10] |
| P[13] | 132.771   | 0.504 | <b>131.766</b> | 136.760 | 0.504 | 137.760        | 490.300        | 490.792        | 490.300        | P[10] |
| A[14] | 120.200   | 0.504 | <b>111.204</b> | 124.200 | 0.504 | 113.200        | <b>451.719</b> | 442.200        | 441.714        | A[8]  |
| E[15] | 100.011   | 0.504 | 90.010         | 100.010 | 0.504 | 101.010        | 415.200        | 408.741        | 408.250        | E[7]  |
| K[16] | 700.000   | 1.008 | 147.000        | 170.000 | 1.008 | 161.000        | 362.730        | 342.230        | 141.734        | K[6]  |
| T[17] | 607.000   | 1.008 | 140.000        | 141.000 | 1.008 | 142.000        | 300.000        | 278.719        | 141.000        | T[8]  |
| P[18] | 350.000   | 1.008 | 140.000        | 140.000 | 1.008 | 140.000        | 230.100        | 227.000        | 1.008          | P[4]  |
| V[19] | 100.441   | 0.504 | 100.441        | 101.441 | 0.504 | 101.441        | 187.042        | 178.110        | 0.504          | V[5]  |
| K[20] | 100.400   | 0.504 | 100.400        | 101.400 | 0.504 | 101.400        | 130.100        | 120.000        | 0.504          | K[5]  |
| K[21] | 100.000   | 0.504 | 100.000        | 101.000 | 0.504 | 101.000        | 74.000         | 60.000         | 0.504          | K[3]  |





# sp | P43276 | H15\_MOUSE

## SETAPAETAAPAPVEKS<sup>Phospho</sup> PAKK<sub>79.97</sub>

- ▶ fragmentation table for charge state 1+
- ▶ specType=cid
- ▶ score=65.73
- ▶ F115532.dat
- ▶ query=q6532\_p1
- ▶ precursor=720.691810
- ▶ chargePrecursor=3
- ▶ itol=0.5

| AA   | a        | a'    | a <sub>0</sub> | b              | b'    | b <sub>0</sub> | y        | y'             | y <sub>0</sub> | AA             |
|------|----------|-------|----------------|----------------|-------|----------------|----------|----------------|----------------|----------------|
| S(1) | 80.844   | 0.000 | 42.039         | 89.070         | 0.000 | 70.000         | 2030.050 | 2043.010       | 2143.040       | S(2)           |
| E(1) | 118.187  | 0.000 | 121.050        | <b>717.082</b> | 0.000 | 200.000        | 2073.020 | 2096.000       | 2203.010       | E(2)           |
| T(1) | 109.136  | 0.000 | 203.120        | <b>718.130</b> | 0.000 | <b>206.110</b> | 1984.990 | 1998.990       | 2020.010       | T(2)           |
| A(1) | 201.512  | 0.000 | <b>343.181</b> | <b>385.167</b> | 0.000 | <b>371.150</b> | 1852.930 | 1875.930       | 1924.920       | A(2)           |
| P(1) | 436.470  | 0.000 | 440.734        | 466.710        | 0.000 | 460.200        | 1771.890 | 1758.870       | 1793.890       | P(2)           |
| A(0) | 626.262  | 0.000 | 641.951        | 587.263        | 0.000 | 637.260        | 1674.840 | 1687.820       | 1698.830       | A(1)           |
| E(1) | 438.304  | 0.000 | 640.260        | 686.260        | 0.000 | <b>668.200</b> | 1553.820 | 1538.720       | 1585.700       | E(2)           |
| T(0) | 736.352  | 0.000 | 741.581        | 787.347        | 0.000 | 769.330        | 1474.720 | 1457.740       | 1466.730       | T(1)           |
| A(0) | 830.380  | 0.000 | 827.150        | 858.304        | 0.000 | 882.320        | 1371.720 | 1356.620       | 1365.700       | A(1)           |
| A(0) | 902.426  | 0.000 | 881.430        | 929.420        | 0.000 | 912.461        | 1260.680 | 1246.590       | 1264.611       | A(1)           |
| P(1) | 998.478  | 0.000 | 980.480        | 1020.474       | 0.000 | 1006.463       | 1231.640 | 1214.630       | 1231.634       | P(2)           |
| A(2) | 1086.616 | 0.000 | 1081.600       | 1087.611       | 0.000 | 1079.600       | 1138.580 | 1111.560       | 1116.581       | A(1)           |
| P(1) | 1186.660 | 0.000 | 1140.550       | 1194.664       | 0.000 | 1176.553       | 1063.520 | 1046.520       | 1085.544       | P(2)           |
| V(1) | 1286.677 | 0.000 | 1245.620       | 1299.670       | 0.000 | 1275.620       | 966.500  | 949.470        | 964.601        | V(2)           |
| E(2) | 1394.680 | 0.000 | 1376.680       | 1422.675       | 0.000 | 1404.664       | 887.434  | 882.400        | 894.421        | E(1)           |
| R(1) | 1522.770 | 0.000 | 1508.760       | 1559.770       | 0.000 | 1533.743       | 1837.380 | <b>718.301</b> | 721.304        | R(2)           |
| S(1) | 1699.818 | 0.000 | 1671.800       | 1727.800       | 0.000 | 1704.784       | 809.317  | <b>610.200</b> | 601.200        | <b>592.265</b> |
| P(1) | 1798.826 | 0.000 | 1780.810       | 1834.820       | 0.000 | 1816.800       | 643.230  | 626.210        | 643.230        | P(2)           |
| A(1) | 1857.883 | 0.000 | 1840.850       | 1889.880       | 0.000 | 1867.861       | 546.240  | 529.210        | 546.240        | A(2)           |
| K(2) | 1985.958 | 0.000 | 1967.940       | 2013.953       | 0.000 | 1995.926       | 465.262  | 475.260        | 488.181        | K(1)           |
| K(2) | 2114.053 | 0.000 | 2096.040       | 2142.048       | 0.000 | 2124.031       | 374.010  | 347.110        | 370.000        | K(1)           |

# sp | P43276 | H15\_MOUSE

## SETAPAETAAPAPVEKS<sup>Phospho</sup> PAKK<sub>79.97</sub>

- ▶ fragmentation table for charge state 2+
- ▶ specType=cid
- ▶ score=65.73
- ▶ F115532.dat
- ▶ query=q6532\_p1
- ▶ precursor=720.691810
- ▶ chargePrecursor=3
- ▶ itol=0.5

| AA    | a        | a'    | a <sub>0</sub> | b              | b'    | b <sub>0</sub> | y              | y'             | y <sub>0</sub> | AA    |
|-------|----------|-------|----------------|----------------|-------|----------------|----------------|----------------|----------------|-------|
| S[1]  | 80.626   | 0.504 | 21.521         | 44.923         | 0.504 | 59.519         | 1090.531       | 1072.030       | 1071.528       | S[2]  |
| E[2]  | 85.947   | 0.504 | 80.042         | 100.042        | 0.504 | 100.038        | 2072.072       | 2054.570       | 2054.067       | E[3]  |
| T[3]  | 148.913  | 0.504 | 138.909        | 139.909        | 0.504 | 139.913        | <b>971.406</b> | <b>963.902</b> | <b>963.400</b> | T[4]  |
| A[4]  | 151.090  | 0.504 | 172.086        | 149.087        | 0.504 | 169.081        | <b>921.972</b> | <b>914.468</b> | <b>913.966</b> | A[5]  |
| P[5]  | 220.616  | 0.504 | 220.611        | 243.613        | 0.504 | 224.609        | <b>886.451</b> | <b>877.946</b> | <b>877.444</b> | P[12] |
| A[6]  | 266.134  | 0.504 | 266.129        | 278.132        | 0.504 | 278.127        | <b>837.927</b> | <b>829.422</b> | <b>828.921</b> | A[16] |
| E[7]  | 179.056  | 0.504 | 179.051        | <b>341.053</b> | 0.504 | 184.048        | <b>802.400</b> | <b>793.895</b> | <b>793.393</b> | E[13] |
| T[8]  | 380.180  | 0.504 | <b>371.174</b> | <b>384.177</b> | 0.504 | 385.172        | <b>717.897</b> | <b>709.392</b> | <b>708.889</b> | T[14] |
| A[9]  | 112.898  | 0.504 | 188.893        | 420.895        | 0.504 | 420.889        | <b>687.363</b> | <b>678.858</b> | <b>678.356</b> | A[13] |
| A[10] | 413.217  | 0.504 | 442.211        | 486.214        | 0.504 | 486.207        | <b>611.843</b> | <b>643.331</b> | <b>642.829</b> | A[17] |
| P[11] | 399.743  | 0.504 | 480.738        | 515.741        | 0.504 | 504.735        | <b>616.326</b> | <b>607.821</b> | <b>607.319</b> | P[11] |
| A[12] | 430.262  | 0.504 | 536.256        | 549.259        | 0.504 | 549.254        | 567.800        | 559.295        | 558.794        | A[10] |
| P[13] | 583.788  | 0.504 | 574.783        | 587.785        | 0.504 | 588.780        | <b>512.981</b> | <b>504.476</b> | <b>503.974</b> | P[16] |
| V[14] | 433.272  | 0.504 | 628.267        | 641.270        | 0.504 | 639.264        | <b>481.959</b> | <b>473.454</b> | <b>472.952</b> | V[8]  |
| E[15] | 597.894  | 0.504 | 688.889        | 711.891        | 0.504 | <b>702.876</b> | 434.220        | 425.707        | 425.215        | E[7]  |
| K[16] | 171.881  | 0.510 | 182.880        | 175.880        | 0.510 | 186.881        | 388.688        | 381.180        | 380.684        | K[6]  |
| S[17] | 146.766  | 0.510 | 156.765        | 149.765        | 0.510 | 160.766        | 388.767        | 381.260        | 380.764        | S[7]  |
| P[18] | 339.917  | 0.505 | 339.911        | 367.914        | 0.505 | 339.910        | 222.152        | 213.639        | 213.137        | P[4]  |
| A[19] | 630.430  | 0.505 | 640.428        | 643.431        | 0.505 | 654.427        | 174.628        | 166.111        | 165.604        | A[5]  |
| K[20] | 593.483  | 0.505 | 604.482        | 607.485        | 0.505 | 608.478        | 130.130        | 120.594        | 120.084        | K[5]  |
| K[21] | 1079.703 | 0.505 | 1089.701       | 1091.703       | 0.505 | 1092.704       | 10.000         | 0.000          | 0.000          | K[1]  |



# sp | P43274 | H14\_MOUSE

SETAPAAPAAPAEKT<sup>Phospho</sup> PVKKK  
79.97

- ▶ fragmentation table for charge state 1+
- ▶ specType=cid
- ▶ score=37.94
- ▶ F115532.dat
- ▶ query=q6657.p1
- ▶ precursor=560.797970
- ▶ chargePrecursor=4
- ▶ itol=0.5

| AA  | a        | a*    | a <sub>0</sub> | b              | b*    | b <sub>0</sub> | r        | r*             | r <sub>0</sub> | AA  |
|-----|----------|-------|----------------|----------------|-------|----------------|----------|----------------|----------------|-----|
| S1  | 80.044   | 0.000 | 42.034         | 80.000         | 0.000 | 70.029         | 2940.180 | 2223.143       | 2222.138       | S20 |
| E2  | 100.000  | 0.000 | 131.000        | <b>117.063</b> | 0.000 | 100.000        | 2530.131 | 6136.120       | 6135.126       | E30 |
| T3  | 200.130  | 0.000 | 272.124        | 151.133        | 0.000 | <b>300.119</b> | 2624.054 | 2607.083       | 2606.083       | T20 |
| A4  | 301.472  | 0.000 | 340.160        | <b>380.167</b> | 0.000 | <b>371.156</b> | 1621.040 | 1636.020       | 1635.016       | A10 |
| P5  | 400.254  | 0.000 | 440.110        | <b>480.219</b> | 0.000 | 400.254        | 2601.000 | 6529.063       | 6528.063       | P10 |
| A6  | 500.262  | 0.000 | <b>511.251</b> | 500.262        | 0.000 | 500.262        | 1974.950 | 1737.930       | 1736.948       | A17 |
| A7  | 600.260  | 0.000 | 600.260        | <b>630.294</b> | 0.000 | <b>610.283</b> | 1681.910 | 1666.893       | 1665.908       | A16 |
| P8  | 607.352  | 0.000 | 670.341        | 720.340        | 0.000 | 607.352        | 3812.882 | 1509.850       | 1508.872       | P15 |
| A9  | 700.200  | 0.000 | 700.200        | 700.200        | 0.000 | <b>710.213</b> | 1335.800 | 1448.800       | 1447.816       | A14 |
| A10 | 800.420  | 0.000 | 821.412        | 861.421        | 0.000 | <b>800.410</b> | 1444.762 | 1427.760       | 1426.762       | A13 |
| P11 | 900.410  | 0.000 | 100.400        | 900.410        | 0.000 | 900.403        | 1174.750 | 1159.720       | 1158.745       | P12 |
| A12 | 1000.416 | 0.000 | 1000.416       | 1000.416       | 0.000 | 1000.416       | 2210.700 | 2209.670       | 2208.694       | A11 |
| P13 | 1100.520 | 0.000 | 1000.520       | 1100.520       | 0.000 | 1114.503       | 1500.800 | 1100.800       | 1100.800       | P10 |
| A14 | 1100.600 | 0.000 | 1157.600       | 1203.600       | 0.000 | 1100.600       | 1100.611 | 1001.580       | 1000.602       | A10 |
| E15 | 1204.640 | 0.000 | 1200.630       | 1335.643       | 0.000 | 1214.612       | 1037.570 | 1020.540       | 1019.565       | E10 |
| T16 | 1400.610 | 0.000 | 1410.610       | 1400.610       | 0.000 | 1400.610       | 1400.610 | 1400.610       | 1400.610       | T10 |
| T17 | 1511.757 | 0.000 | 1511.757       | 1511.757       | 0.000 | 1511.757       | 1511.757 | 1511.757       | 1511.757       | T10 |
| P18 | 1710.610 | 0.000 | 1710.610       | 1710.610       | 0.000 | 1710.610       | 1710.610 | 1710.610       | 1710.610       | P10 |
| V19 | 1800.610 | 0.000 | 1800.610       | 1800.610       | 0.000 | 1800.610       | 1800.610 | <b>502.371</b> | <b>485.345</b> | V10 |
| K20 | 1917.814 | 0.000 | 1917.814       | 1917.814       | 0.000 | 1917.814       | 1917.814 | 1917.814       | 1917.814       | K10 |
| K21 | 2000.560 | 0.000 | 2000.560       | 2000.560       | 0.000 | 2000.560       | 2000.560 | 2000.560       | 2000.560       | K10 |
| K22 | 2100.103 | 0.000 | 2100.103       | 2100.103       | 0.000 | 2100.103       | 2100.103 | 2100.103       | 2100.103       | K10 |

# sp | P43274 | H14\_MOUSE

SETAPAAPAAPAPAEKT<sup>Phospho</sup> PVKKK  
79.97

- ▶ fragmentation table for charge state 2+
- ▶ specType=cid
- ▶ score=37.94
- ▶ F115532.dat
- ▶ query=q6657.p1
- ▶ precursor=560.797970
- ▶ chargePrecursor=4
- ▶ itol=0.5

| AA  | a              | a*       | a $\beta$      | b              | b*       | b $\beta$      | r              | y*             | y $\beta$      | AA  |
|-----|----------------|----------|----------------|----------------|----------|----------------|----------------|----------------|----------------|-----|
| S1  | 30.626         | 0.504    | 21.521         | 44.523         | 0.504    | 35.518         | 1120.580       | 1112.079       | 1111.583       | S22 |
| E2  | 35.397         | 0.504    | 60.049         | 109.045        | 0.504    | 130.040        | 1070.576       | 1066.576       | 1066.079       | E23 |
| T3  | 149.571        | 0.504    | 136.569        | 109.569        | 0.504    | 150.563        | 1012.551       | 1004.031       | 1003.545       | T20 |
| A4  | 131.060        | 0.504    | 127.060        | 109.569        | 0.504    | 109.062        | 892.526        | 883.514        | 883.022        | A19 |
| P5  | 229.016        | 0.504    | 228.016        | 143.513        | 0.504    | 229.012        | 926.508        | 917.999        | 917.502        | P16 |
| A6  | 205.134        | 0.504    | 200.134        | 109.512        | 0.504    | 210.127        | 877.501        | 869.495        | 868.977        | A17 |
| A7  | <b>300.653</b> | 0.504    | 291.649        | 104.650        | 0.504    | 305.645        | <b>842.463</b> | 833.950        | 833.458        | A16 |
| P8  | 149.179        | 0.504    | 140.174        | 38.177         | 0.504    | <b>354.172</b> | <b>806.945</b> | 798.431        | 797.939        | P15 |
| A9  | 104.868        | 0.504    | 100.868        | 108.868        | 0.504    | <b>301.860</b> | <b>755.413</b> | 746.900        | 746.412        | A14 |
| A10 | 420.017        | 0.504    | 411.011        | <b>434.214</b> | 0.504    | <b>425.209</b> | <b>722.900</b> | 714.387        | 713.895        | A13 |
| P11 | 416.913        | 0.504    | <b>459.738</b> | <b>482.749</b> | 0.504    | <b>473.735</b> | <b>687.381</b> | 678.868        | 678.376        | P12 |
| A12 | 404.351        | 0.504    | 400.351        | 514.299        | 0.504    | 409.294        | <b>638.855</b> | 630.342        | 629.850        | A11 |
| P13 | 352.708        | 0.504    | 343.701        | 365.701        | 0.504    | 357.698        | <b>603.130</b> | 595.623        | 595.131        | P10 |
| A14 | 348.306        | 0.504    | 339.301        | 462.304        | 0.504    | 343.299        | 594.811        | <b>546.297</b> | <b>545.805</b> | A10 |
| E15 | 352.828        | 0.504    | 343.822        | 666.825        | 0.504    | 357.820        | 519.291        | <b>510.778</b> | <b>510.286</b> | E11 |
| T16 | 178.974        | 0.504    | 169.968        | 799.971        | 0.504    | 173.969        | 491.961        | 483.451        | 482.960        | T17 |
| T17 | <b>807.382</b> | 198.209  | 798.371        | 621.385        | 192.995  | 812.374        | <b>390.723</b> | 382.209        | 381.717        | T18 |
| P19 | 874.609        | 687.205  | 866.601        | 869.609        | 681.391  | 880.601        | <b>300.216</b> | 291.702        | 291.210        | P18 |
| V19 | 895.443        | 698.252  | 886.437        | 919.440        | 691.627  | 934.435        | 281.435        | 281.000        | 281.178        | V18 |
| K20 | 898.408        | 691.512  | 880.402        | 983.405        | 674.514  | 914.402        | 292.512        | 293.844        | 294.164        | K18 |
| R21 | 1331.638       | 2025.034 | 1324.632       | 1247.635       | 1934.022 | 1338.630       | 130.130        | 129.944        | 130.044        | K19 |
| K22 | 1097.585       | 1089.072 | 1088.580       | 1111.583       | 1103.069 | 1102.577       | 74.068         | 69.547         | 69.644         | K11 |

# sp | P43274 | H14\_MOUSE

SETAPAAPAAPAEKT<sup>Phospho</sup> PVKKK  
79.97

- ▶ fragmentation table for charge state 3+
- ▶ specType=cid
- ▶ score=37.94
- ▶ F115532.dat
- ▶ query=q6657\_p1
- ▶ precursor=560.797970
- ▶ chargePrecursor=4
- ▶ itol=0.5

| AA   | a              | a*             | a,b            | b              | b*             | b,d            | y              | y*             | y,d            | Δs   |
|------|----------------|----------------|----------------|----------------|----------------|----------------|----------------|----------------|----------------|------|
| S 1  | 201.068        | 0.672          | 14.968         | 36.018         | 0.672          | 24.044         | 141.355        | 141.718        | 141.355        | S(2) |
| E 2  | 65.701         | 0.672          | 37.607         | 73.052         | 0.672          | 67.620         | 718.382        | 712.708        | 712.380        | E(2) |
| T 3  | 97.081         | 0.672          | 61.980         | 106.715        | 0.672          | 100.711        | <b>675.370</b> | <b>669.694</b> | <b>669.366</b> | T(2) |
| A 4  | 121.062        | 0.672          | 115.050        | 130.304        | 0.672          | 124.300        | <b>841.887</b> | 830.933        | 829.883        | A(1) |
| F 5  | 153.813        | 0.672          | 147.421        | 162.749        | 0.672          | 155.743        | <b>612.008</b> | <b>612.325</b> | <b>612.304</b> | F(2) |
| A 6  | 177.092        | 0.672          | 171.080        | 186.424        | 0.672          | 180.420        | <b>585.657</b> | 570.981        | 570.533        | A(1) |
| A 7  | 200.771        | 0.672          | 194.760        | 210.103        | 0.672          | 204.099        | 561.970        | 556.302        | 556.074        | A(2) |
| P 8  | 223.122        | 0.672          | 217.110        | 242.454        | 0.672          | 236.450        | <b>538.590</b> | <b>532.623</b> | <b>532.295</b> | P(2) |
| A 9  | 276.001        | 0.672          | 269.790        | 286.133        | 0.672          | 280.428        | 505.961        | 500.972        | 500.814        | A(1) |
| A 10 | 280.480        | 0.672          | 274.471        | 289.812        | 0.672          | 283.808        | <b>482.269</b> | 476.593        | 476.265        | A(1) |
| P 11 | 312.811        | 0.672          | 306.800        | 322.143        | 0.672          | 316.139        | <b>456.590</b> | <b>452.914</b> | <b>452.586</b> | P(2) |
| A 12 | 336.510        | 0.672          | 330.500        | 345.842        | 0.672          | 339.838        | 426.720        | 420.562        | 420.235        | A(1) |
| P 13 | 368.861        | 0.672          | 362.850        | 378.193        | 0.672          | 372.490        | 402.560        | 396.804        | 396.506        | P(2) |
| A 14 | 392.548        | 0.672          | 386.537        | 401.872        | 0.672          | 395.868        | 370.260        | 364.514        | 364.206        | A(1) |
| E 15 | 415.154        | 0.672          | 409.143        | 444.889        | 0.672          | 438.882        | 346.130        | 340.814        | 340.516        | E(2) |
| R 16 | 478.274        | 0.727          | 472.263        | 487.589        | 0.727          | 481.908        | 303.312        | 297.540        | 297.312        | R(1) |
| T 17 | <b>538.591</b> | <b>532.915</b> | <b>532.587</b> | <b>547.025</b> | <b>542.247</b> | <b>541.910</b> | 260.811        | 255.142        | 254.814        | T(2) |
| P 18 | 570.841        | 0.672          | 564.830        | 580.572        | 0.672          | 574.566        | 234.410        | 228.470        | 228.242        | P(2) |
| V 19 | <b>603.964</b> | 0.672          | 597.953        | 613.206        | 0.672          | 607.202        | 188.120        | 182.453        | 182.125        | V(1) |
| T 20 | 646.051        | 0.672          | 640.040        | 655.283        | 0.672          | 649.514        | 169.952        | 164.180        | 163.952        | T(2) |
| R 21 | 688.261        | 0.672          | 682.250        | 697.493        | 0.672          | 692.001        | 90.410         | 84.732         | 84.504         | R(2) |
| R 22 | 732.050        | 0.672          | 726.039        | 741.281        | 0.672          | 735.115        | 73.187         | 67.700         | 67.472         | R(1) |



# sp | P43274 | H14\_MOUSE

S<sup>Phospho</sup><sub>79.97</sub> ETAPAAPAAPAPAEEKTPVKKK

- ▶ fragmentation table for charge state 1+
- ▶ specType=cid
- ▶ score=39.37
- ▶ F115532.dat
- ▶ query=q6658\_p1
- ▶ precursor=747.395140
- ▶ chargePrecursor=3
- ▶ itol=0.5

| AA  | a        | a*    | aΔ             | b              | b*    | bΔ             | r        | r*       | rΔ       | AA  |
|-----|----------|-------|----------------|----------------|-------|----------------|----------|----------|----------|-----|
| S1  | 140.031  | 0.000 | 122.000        | 168.000        | 0.000 | 149.000        | 2040.180 | 2223.140 | 2222.130 | S23 |
| E2  | 189.053  | 0.000 | 205.000        | 205.000        | 0.000 | 219.000        | 2070.130 | 2066.140 | 2065.160 | E33 |
| T3  | 170.001  | 0.000 | 192.000        | <b>192.000</b> | 0.000 | <b>300.000</b> | 1044.130 | 1007.100 | 1008.117 | T20 |
| A4  | 441.130  | 0.000 | 420.100        | <b>406.113</b> | 0.000 | <b>451.122</b> | 1041.000 | 1036.000 | 1025.000 | A19 |
| T5  | 136.014  | 0.000 | 120.100        | 166.100        | 0.000 | 160.100        | 2722.000 | 1709.000 | 1704.000 | T16 |
| A6  | 309.208  | 0.000 | <b>591.217</b> | 637.223        | 0.000 | 619.212        | 1074.900 | 1057.900 | 1060.000 | A17 |
| A7  | 840.000  | 0.000 | 840.200        | 708.200        | 0.000 | <b>600.200</b> | 1603.900 | 1598.630 | 1585.041 | A16 |
| P8  | 777.518  | 0.000 | 750.507        | 805.513        | 0.000 | 787.502        | 1532.910 | 1515.880 | 1514.900 | P15 |
| A9  | 446.000  | 0.000 | 430.000        | 378.000        | 0.000 | 406.000        | 1430.000 | 1418.000 | 1417.000 | A14 |
| A10 | 910.000  | 0.000 | 900.000        | 947.000        | 0.000 | 929.000        | 1304.820 | 1347.700 | 1346.010 | A13 |
| P11 | 1010.000 | 0.000 | 1000.000       | 1044.000       | 0.000 | 1020.000       | 1300.100 | 1270.700 | 1270.710 | P12 |
| A12 | 409.000  | 0.000 | 390.000        | 410.000        | 0.000 | 397.000        | 1100.000 | 1110.000 | 1110.000 | A11 |
| P13 | 1104.000 | 0.000 | 1100.000       | 1145.000       | 0.000 | 1104.000       | 1100.000 | 1100.000 | 1100.000 | P10 |
| A14 | 1350.000 | 0.000 | 1327.000       | 1303.000       | 0.000 | 1304.000       | 1020.000 | 1011.000 | 1010.000 | A10 |
| E15 | 1104.014 | 0.000 | 1100.000       | 1412.000       | 0.000 | 1304.000       | 957.000  | 940.000  | 930.000  | E11 |
| T16 | 1312.000 | 0.000 | 1240.000       | 1340.000       | 0.000 | 1320.000       | 1000.000 | 980.000  | 970.000  | T10 |
| T17 | 1010.000 | 0.000 | 1000.000       | 1045.000       | 0.000 | 1020.000       | 1000.000 | 1000.000 | 1000.000 | T11 |
| P19 | 1010.000 | 0.000 | 1000.000       | 1045.000       | 0.000 | 1020.000       | 1000.000 | 1000.000 | 1000.000 | P18 |
| V19 | 1000.000 | 0.000 | 1000.000       | 1045.000       | 0.000 | 1020.000       | 1000.000 | 1000.000 | 1000.000 | V10 |
| K20 | 1010.000 | 0.000 | 1000.000       | 1045.000       | 0.000 | 1020.000       | 1000.000 | 1000.000 | 1000.000 | K10 |
| K21 | 1000.000 | 0.000 | 1000.000       | 1045.000       | 0.000 | 1020.000       | 1000.000 | 1000.000 | 1000.000 | K12 |
| K22 | 1010.000 | 0.000 | 1000.000       | 1045.000       | 0.000 | 1020.000       | 1000.000 | 1000.000 | 1000.000 | K11 |



# sp | P43274 | H14\_MOUSE

S<sup>Phospho</sup> 79.97 ETAPAAPAAPAPAEKTPVKKK

- ▶ fragmentation table for charge state 2+
- ▶ specType=cid
- ▶ score=39.37
- ▶ F115532.dat
- ▶ query=q6658.p1
- ▶ precursor=747.395140
- ▶ chargePrecursor=3
- ▶ itol=0.5

| AA  | a              | a*    | a $\beta$      | b        | b*    | b $\beta$ | r              | y*             | y $\beta$      | AA  |
|-----|----------------|-------|----------------|----------|-------|-----------|----------------|----------------|----------------|-----|
| S1  | 70.509         | 0.504 | 81.504         | 84.509   | 0.504 | 75.503    | 11.20.583      | 1112.079       | 1111.583       | S23 |
| E2  | 178.009        | 0.504 | 178.009        | 178.009  | 0.504 | 180.009   | 1070.009       | 1069.504       | 1069.009       | E23 |
| T3  | 188.054        | 0.504 | 178.549        | 189.552  | 0.504 | 189.549   | <b>972.567</b> | 964.054        | 963.552        | T20 |
| A4  | 271.873        | 0.504 | 222.687        | 272.877  | 0.504 | 270.865   | <b>922.844</b> | 913.379        | 912.878        | A19 |
| P5  | 289.059        | 0.504 | 289.059        | 289.563  | 0.504 | 274.562   | <b>861.725</b> | <b>878.012</b> | <b>877.508</b> | P16 |
| A6  | 308.119        | 0.504 | 286.112        | 309.115  | 0.504 | 310.119   | <b>817.909</b> | 808.405        | 807.903        | A17 |
| A7  | 340.836        | 0.504 | 331.831        | 344.834  | 0.504 | 345.838   | <b>802.480</b> | 793.981        | 793.475        | A16 |
| P8  | 389.183        | 0.504 | <b>389.187</b> | 403.185  | 0.504 | 394.185   | <b>764.962</b> | <b>758.448</b> | <b>757.956</b> | P15 |
| A9  | 434.883        | 0.504 | 431.883        | 438.879  | 0.504 | 439.879   | 718.879        | <b>709.322</b> | <b>710.435</b> | A14 |
| A10 | 460.200        | 0.504 | <b>451.194</b> | 474.197  | 0.504 | 465.192   | 662.917        | 654.461        | 653.911        | A13 |
| P11 | 498.476        | 0.504 | 498.476        | 512.474  | 0.504 | 511.473   | <b>647.398</b> | 638.899        | 638.393        | P12 |
| A12 | 544.244        | 0.504 | 538.242        | 549.242  | 0.504 | 549.247   | 588.812        | 580.299        | 579.800        | A11 |
| P13 | <b>592.771</b> | 0.504 | 592.770        | 606.762  | 0.504 | 607.763   | 553.913        | 545.406        | 544.902        | P10 |
| A14 | 638.260        | 0.504 | 638.260        | 642.267  | 0.504 | 653.262   | 514.827        | 506.313        | 505.821        | A10 |
| E15 | 682.811        | 0.504 | 683.808        | 708.808  | 0.504 | 697.813   | 479.328        | 470.799        | 470.303        | E11 |
| T16 | 758.858        | 0.504 | 747.853        | 770.856  | 0.504 | 769.859   | 393.859        | 418.778        | 409.774        | T07 |
| T17 | 809.392        | 0.504 | 798.389        | 798.377  | 0.504 | 812.386   | 312.374        | 330.179        | 342.228        | T14 |
| P18 | 854.909        | 0.504 | 846.901        | 869.901  | 0.504 | 869.901   | <b>300.216</b> | 291.702        | 291.204        | P18 |
| V19 | 895.443        | 0.504 | 890.437        | 919.440  | 0.504 | 914.435   | 241.435        | 241.004        | 241.175        | V10 |
| K20 | 939.898        | 0.504 | 930.439        | 935.439  | 0.504 | 914.434   | 91.439         | 202.159        | 193.844        | K18 |
| R21 | 1033.838       | 0.504 | 1024.832       | 1047.833 | 0.504 | 1038.830  | 138.138        | 129.944        | 130.044        | K12 |
| K22 | 1097.582       | 0.504 | 1088.582       | 1111.583 | 0.504 | 1102.577  | 74.088         | 85.547         | 85.647         | K11 |

# sp | P43276 | H15\_MOUSE

SETAPAETAAPAPVEKS<sup>Phospho</sup> PAKKK  
79.97

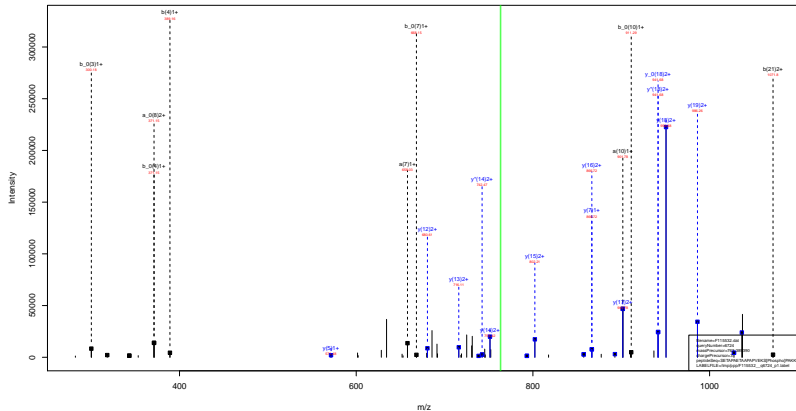

# sp | P43276 | H15\_MOUSE

SETAPAETAAPAPVEKS <sup>Phospho</sup> PAKKK  
79.97

- ▶ fragmentation table for charge state 1+
- ▶ specType=cid
- ▶ score=49.02
- ▶ F115532.dat
- ▶ query=q6724.p1
- ▶ precursor=763.389390
- ▶ chargePrecursor=3
- ▶ itol=0.5

| AA  | a              | a*    | aΔ             | b              | b*    | bΔ             | r              | y*       | yΔ       | AA  |
|-----|----------------|-------|----------------|----------------|-------|----------------|----------------|----------|----------|-----|
| S1  | 80.044         | 0.000 | 82.034         | 88.039         | 0.000 | 70.029         | 2286.153       | 2271.127 | 2270.143 | S22 |
| E2  | 109.087        | 0.000 | 110.000        | 111.000        | 0.000 | 109.041        | 2051.120       | 2104.009 | 2103.113 | E23 |
| T3  | 200.130        | 0.000 | 212.120        | <b>218.130</b> | 0.000 | <b>200.119</b> | 2072.070       | 2095.062 | 2094.066 | T20 |
| A4  | 281.172        | 0.000 | <b>345.161</b> | <b>389.167</b> | 0.000 | <b>371.156</b> | 1871.030       | 1894.029 | 1893.031 | A19 |
| F5  | 358.224        | 0.000 | 446.214        | 499.212        | 0.000 | 426.202        | 1899.960       | 1862.961 | 1861.963 | F16 |
| A6  | 529.262        | 0.000 | 533.251        | 557.257        | 0.000 | 529.260        | 1802.941       | 1789.935 | 1784.933 | A17 |
| E7  | <b>658.304</b> | 0.000 | 640.294        | 668.290        | 0.000 | <b>646.289</b> | 1731.904       | 1714.878 | 1713.884 | E18 |
| T8  | 730.352        | 0.000 | 741.341        | 783.347        | 0.000 | 730.336        | 1642.881       | 1589.839 | 1584.851 | T15 |
| A9  | 830.389        | 0.000 | 833.379        | 858.384        | 0.000 | 830.373        | 1550.854       | 1468.787 | 1468.800 | A14 |
| A10 | <b>901.426</b> | 0.000 | 885.413        | 926.421        | 0.000 | <b>911.411</b> | 1430.777       | 1413.750 | 1412.760 | A13 |
| P11 | 1068.478       | 0.000 | 1061.460       | 1058.474       | 0.000 | 1068.463       | 1359.740       | 1342.713 | 1341.729 | P12 |
| A12 | 1205.516       | 0.000 | 1202.500       | 1207.511       | 0.000 | 1205.494       | 1262.690       | 1249.660 | 1244.676 | A11 |
| P13 | 1350.559       | 0.000 | 1348.550       | 1344.564       | 0.000 | 1350.543       | 1191.620       | 1174.623 | 1173.639 | P10 |
| V14 | 1365.637       | 0.000 | 1347.621       | 1363.632       | 0.000 | 1375.622       | 1094.590       | 1077.570 | 1076.581 | V10 |
| E15 | 1394.680       | 0.000 | 1376.660       | 1422.670       | 0.000 | 1404.654       | 999.520        | 978.500  | 977.518  | E11 |
| T16 | 1532.719       | 0.000 | 1508.700       | 1550.710       | 0.000 | 1532.693       | <b>904.486</b> | 869.459  | 868.479  | T17 |
| S17 | 1680.773       | 0.000 | 1671.762       | 1715.768       | 0.000 | 1699.751       | <b>738.301</b> | 721.284  | 720.280  | S16 |
| P18 | 1760.820       | 0.000 | 1760.810       | 1814.823       | 0.000 | 1760.800       | <b>571.193</b> | 554.169  | 0.000    | P19 |
| A19 | 1857.863       | 0.000 | 1850.852       | 1889.858       | 0.000 | 1857.847       | 474.242        | 457.213  | 0.000    | A16 |
| K20 | 1998.904       | 0.000 | 1991.891       | 2013.903       | 0.000 | 1998.886       | 365.362        | 353.333  | 352.326  | K18 |
| R21 | 2143.945       | 0.000 | 2096.942       | 2143.948       | 0.000 | 2124.937       | 276.209        | 258.183  | 0.000    | K19 |
| K22 | 2242.986       | 0.000 | 2228.979       | 2270.983       | 0.000 | 2252.973       | 147.133        | 130.088  | 0.000    | K11 |

# sp | P43276 | H15\_MOUSE

SETAPAETAAPAPVEKS<sup>Phospho</sup> PAKKK  
79.97

- ▶ fragmentation table for charge state 2+
- ▶ specType=cid
- ▶ score=49.02
- ▶ F115532.dat
- ▶ query=q6724.p1
- ▶ precursor=763.389390
- ▶ chargePrecursor=3
- ▶ itol=0.5

| AA    | a      | a'      | b,0            | b               | b'      | b,0     | y               | y'              | y,0             | AA    |
|-------|--------|---------|----------------|-----------------|---------|---------|-----------------|-----------------|-----------------|-------|
| S(1)  | 31300  | 0.500   | 21421          | 44521           | 0.500   | 20.514  | 1149.300        | 2139.001        | 1139.575        | S(22) |
| E(2)  | 29142  | 0.500   | 88242          | 200243          | 0.500   | 100.000 | 1182.300        | 2202.301        | 1202.300        | E(2)  |
| T(3)  | 430713 | 0.500   | 130560         | 1323000         | 0.500   | 130.000 | <b>1030.343</b> | <b>1028.030</b> | <b>1027.330</b> | T(05) |
| A(4)  | 181000 | 0.500   | 172084         | 195387          | 0.500   | 180.000 | <b>906.019</b>  | 877.500         | 877.004         | A(29) |
| P(5)  | 270010 | 0.500   | 220011         | 243010          | 0.500   | 234.000 | <b>950.501</b>  | <b>941.987</b>  | <b>941.495</b>  | P(18) |
| A(6)  | 200000 | 0.500   | 200000         | 200000          | 0.500   | 200.000 | <b>911.910</b>  | 880.000         | <b>882.569</b>  | A(27) |
| E(7)  | 100000 | 0.500   | 100000         | <b>100000</b>   | 0.500   | 100.000 | <b>866.456</b>  | <b>857.942</b>  | <b>857.450</b>  | E(16) |
| T(8)  | 100000 | 0.500   | <b>171.174</b> | 104177          | 0.500   | 105.177 | <b>801.934</b>  | <b>793.421</b>  | <b>792.929</b>  | T(15) |
| A(9)  | 110000 | 0.500   | 100000         | 100000          | 0.500   | 100.000 | <b>751.411</b>  | <b>742.897</b>  | <b>742.405</b>  | A(14) |
| A(10) | 101011 | 0.500   | 143211         | 160214          | 0.500   | 150.200 | <b>715.802</b>  | 701.500         | 700.000         | A(13) |
| P(11) | 100000 | 0.500   | 100000         | 110000          | 0.500   | 100.000 | <b>660.371</b>  | 610.000         | 610.000         | P(12) |
| A(12) | 100000 | 0.500   | 100000         | 100000          | 0.500   | 100.000 | 610.000         | 610.000         | 610.000         | A(11) |
| P(13) | 100000 | 0.500   | 100000         | 100000          | 0.500   | 100.000 | 600.000         | 600.000         | 600.000         | P(10) |
| V(14) | 100000 | 0.500   | 100000         | 100000          | 0.500   | 100.000 | 540.000         | 540.000         | 540.000         | V(18) |
| E(15) | 100000 | 0.500   | 100000         | 100000          | 0.500   | 100.000 | 480.000         | 480.000         | 480.000         | E(16) |
| P(16) | 100000 | 0.500   | 100000         | 100000          | 0.500   | 100.000 | 430.000         | 430.000         | 430.000         | P(14) |
| S(17) | 100000 | 0.500   | 100000         | 100000          | 0.500   | 100.000 | 380.000         | 380.000         | 380.000         | S(18) |
| P(18) | 100000 | 0.500   | 100000         | 100000          | 0.500   | 100.000 | 330.000         | 330.000         | 330.000         | P(16) |
| A(19) | 100000 | 0.500   | 100000         | 100000          | 0.500   | 100.000 | 280.000         | 280.000         | 280.000         | A(17) |
| R(20) | 100000 | 0.500   | 100000         | 100000          | 0.500   | 100.000 | 230.000         | 230.000         | 230.000         | R(19) |
| K(21) | 100000 | 0.500   | 100000         | <b>1071.520</b> | 100000  | 100.000 | 180.000         | 180.000         | 180.000         | K(12) |
| K(22) | 111000 | 1.11000 | 111000         | 111000          | 1.11000 | 111.000 | 14.000          | 14.000          | 14.000          | K(12) |



# sp | P62806 | H4\_MOUSE

GLGK Acetyl 42.01 GGAK Acetyl R 42.01

- ▶ fragmentation table for charge state 1+
- ▶ specType=cid
- ▶ score=60.43
- ▶ F115535.dat
- ▶ query=q1161.p1
- ▶ precursor=464.272040
- ▶ chargePrecursor=2
- ▶ itol=0.5

| AA | a | a*             | a.0     | b              | b*             | b.0     | y              | y*             | y.0     | AA    |   |
|----|---|----------------|---------|----------------|----------------|---------|----------------|----------------|---------|-------|---|
| G  | 1 | 39.034         | 0.000   | 56.029         | 0.000          | 0.000   | 927.537        | 910.510        | 0.000   | G     |   |
| L  | 2 | <b>143.118</b> | 0.000   | <b>171.113</b> | 0.000          | 0.000   | 870.516        | 853.489        | 0.000   | L     |   |
| G  | 3 | 205.120        | 0.000   | <b>228.124</b> | 0.000          | 0.000   | <b>757.432</b> | 740.405        | 0.000   | G     |   |
| R  | 4 | <b>370.245</b> | 393.219 | 0.000          | <b>398.240</b> | 361.213 | 0.000          | <b>700.410</b> | 683.384 | 0.000 | R |
| G  | 5 | 427.250        | 410.240 | 0.000          | <b>455.261</b> | 438.235 | 0.000          | <b>530.305</b> | 513.278 | 0.000 | G |
| G  | 6 | 484.289        | 467.261 | 0.000          | 512.283        | 495.256 | 0.000          | <b>473.283</b> | 456.257 | 0.000 | G |
| A  | 7 | 555.320        | 538.298 | 0.000          | <b>583.320</b> | 566.293 | 0.000          | <b>416.262</b> | 399.235 | 0.000 | A |
| K  | 8 | 725.430        | 708.404 | 0.000          | <b>753.425</b> | 736.399 | 0.000          | <b>345.224</b> | 328.198 | 0.000 | K |
| R  | 9 | 881.512        | 864.505 | 0.000          | 909.528        | 892.500 | 0.000          | <b>175.119</b> | 158.092 | 0.000 | R |

# sp | P62806 | H4\_MOUSE

GLGK <sup>Acetyl</sup> GGAK <sup>Acetyl</sup> R  
42.01 42.01

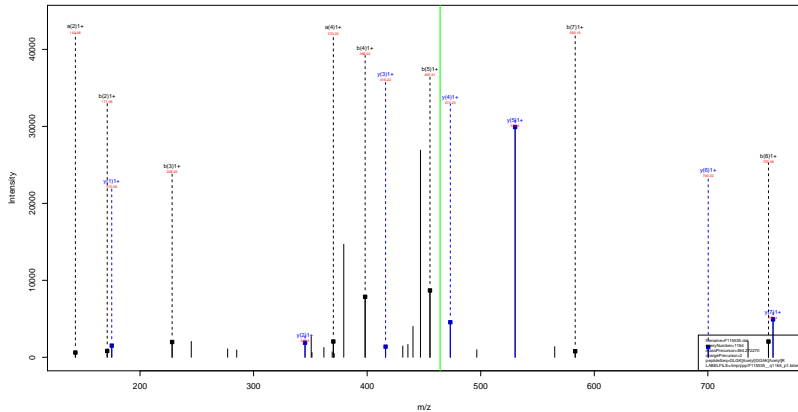

# sp | P62806 | H4\_MOUSE

GLGK Acetyl 42.01 GGAK Acetyl R 42.01

- ▶ fragmentation table for charge state 1+
- ▶ specType=cid
- ▶ score=57.15
- ▶ F115535.dat
- ▶ query=q1164.p1
- ▶ precursor=464.272270
- ▶ chargePrecursor=2
- ▶ itol=0.5

| AA  | a              | a*      | a.0   | b              | b*      | b.0   | y              | y*      | y.0   | AA  |
|-----|----------------|---------|-------|----------------|---------|-------|----------------|---------|-------|-----|
| G 1 | 39.034         | 0.000   | 0.000 | 56.029         | 0.000   | 0.000 | 927.537        | 910.510 | 0.000 | G 0 |
| L 2 | <b>143.118</b> | 0.000   | 0.000 | <b>171.113</b> | 0.000   | 0.000 | 870.516        | 853.489 | 0.000 | L 8 |
| G 3 | 205.120        | 0.000   | 0.000 | <b>228.124</b> | 0.000   | 0.000 | <b>757.432</b> | 740.405 | 0.000 | G 7 |
| R 4 | <b>370.245</b> | 393.219 | 0.000 | <b>398.240</b> | 361.213 | 0.000 | <b>700.410</b> | 683.384 | 0.000 | R 0 |
| G 5 | 427.209        | 410.240 | 0.000 | <b>455.201</b> | 438.235 | 0.000 | <b>530.305</b> | 513.278 | 0.000 | G 5 |
| G 6 | 484.289        | 467.261 | 0.000 | 512.283        | 495.256 | 0.000 | <b>473.283</b> | 456.257 | 0.000 | G 4 |
| A 7 | 555.320        | 538.298 | 0.000 | <b>583.320</b> | 566.293 | 0.000 | <b>416.262</b> | 399.235 | 0.000 | A 3 |
| K 8 | 725.430        | 708.404 | 0.000 | <b>753.425</b> | 736.399 | 0.000 | <b>345.224</b> | 328.198 | 0.000 | K 2 |
| R 9 | 881.512        | 864.505 | 0.000 | 909.528        | 892.500 | 0.000 | <b>175.119</b> | 158.092 | 0.000 | R 1 |



# sp | P62806 | H4\_MOUSE

GLGK<sup>Acetyl</sup>GGAK  
42.01

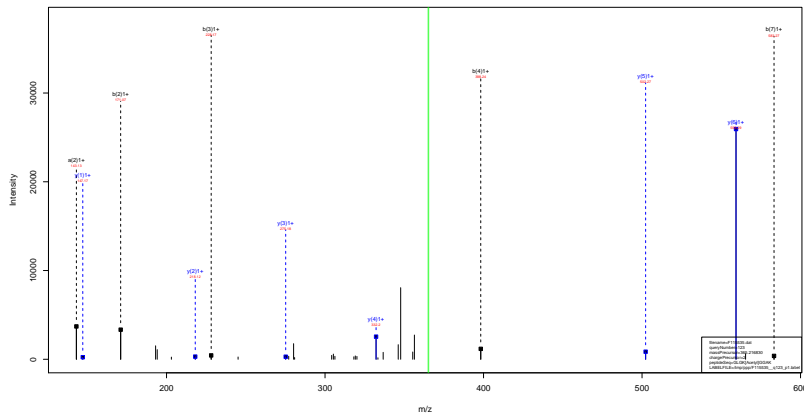

# sp | P62806 | H4\_MOUSE

GLGK<sup>Acetyl</sup>GGAK  
42.01

- ▶ fragmentation table for charge state 1+
- ▶ specType=cid
- ▶ score=40.65
- ▶ F115535.dat
- ▶ query=q123-p1
- ▶ precursor=365.216830
- ▶ chargePrecursor=2
- ▶ itol=0.5

| AA   | a              | a*      | a,β   | b              | b*      | b,β   | y              | y*      | y,β   | AA   |
|------|----------------|---------|-------|----------------|---------|-------|----------------|---------|-------|------|
| G[1] | 30.034         | 0.000   | 0.000 | 58.020         | 0.000   | 0.000 | 729.425        | 712.390 | 0.000 | G[8] |
| L[2] | <b>143.118</b> | 0.000   | 0.000 | <b>171.113</b> | 0.000   | 0.000 | 672.404        | 655.377 | 0.000 | L[7] |
| G[3] | 200.139        | 0.000   | 0.000 | <b>228.134</b> | 0.000   | 0.000 | <b>559.320</b> | 542.293 | 0.000 | G[6] |
| R[4] | 376.245        | 353.218 | 0.000 | <b>398.240</b> | 381.213 | 0.000 | <b>502.298</b> | 485.272 | 0.000 | R[5] |
| G[5] | 427.260        | 410.240 | 0.000 | 455.261        | 438.235 | 0.000 | <b>332.193</b> | 315.166 | 0.000 | G[4] |
| G[6] | 464.288        | 447.261 | 0.000 | 412.233        | 495.258 | 0.000 | <b>215.171</b> | 208.145 | 0.000 | G[3] |
| A[7] | 555.321        | 538.296 | 0.000 | <b>583.320</b> | 566.291 | 0.000 | <b>218.150</b> | 201.123 | 0.000 | A[6] |
| R[8] | 681.420        | 666.393 | 0.000 | 711.415        | 694.388 | 0.000 | <b>147.113</b> | 130.086 | 0.000 | R[1] |

# sp | P68433 | H31\_MOUSE

KSTGGK <sup>Acetyl</sup> APR  
42.01

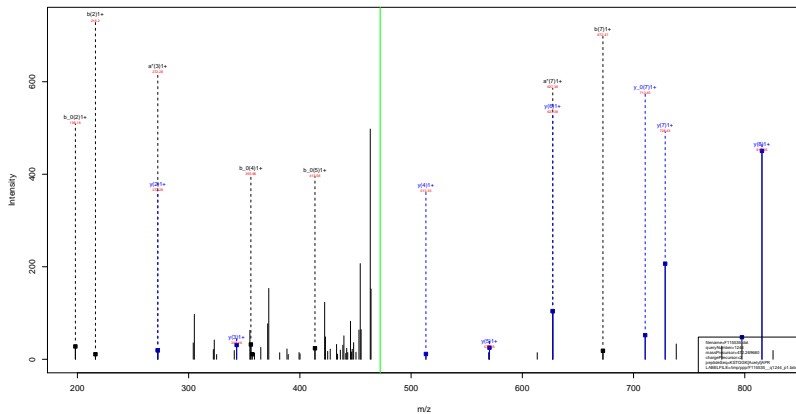

# sp | P68433 | H31\_MOUSE

KSTGGK<sup>Acetyl</sup> APR  
42.01

- ▶ fragmentation table for charge state 1+
- ▶ specType=cid
- ▶ score=47.60
- ▶ F115535.dat
- ▶ query=q1244.p1
- ▶ precursor=472.269660
- ▶ chargePrecursor=2
- ▶ itol=0.5

| AA  | a       | a*             | a.0     | b              | b*             | b.0            | y              | y*      | y.0            | AA  |
|-----|---------|----------------|---------|----------------|----------------|----------------|----------------|---------|----------------|-----|
| R 1 | 101.107 | 94.001         | 9.006   | 129.103        | 112.076        | 0.009          | 993.532        | 926.505 | 65.521         | K W |
| S 2 | 186.139 | 171.113        | 170.120 | <b>216.134</b> | 195.108        | <b>196.124</b> | <b>815.437</b> | 798.410 | <b>797.426</b> | S H |
| T 3 | 289.187 | <b>272.160</b> | 271.170 | 317.182        | 300.155        | 299.171        | <b>728.485</b> | 711.378 | <b>710.394</b> | T Y |
| G 4 | 346.208 | 331.182        | 329.189 | 374.203        | <b>357.177</b> | <b>356.193</b> | <b>827.257</b> | 810.231 | 0.000          | G G |
| G 5 | 403.230 | 385.203        | 385.210 | 431.225        | 414.198        | <b>413.214</b> | <b>570.336</b> | 553.309 | 0.000          | G G |
| R 6 | 573.235 | 556.209        | 555.225 | 601.239        | 584.204        | 583.220        | <b>513.314</b> | 496.288 | 0.000          | K H |
| A 7 | 644.273 | <b>627.346</b> | 626.352 | <b>672.368</b> | 655.341        | 654.357        | <b>343.289</b> | 326.182 | 0.000          | A S |
| P 8 | 741.425 | 724.399        | 723.415 | 769.430        | 752.394        | 751.410        | <b>272.172</b> | 255.145 | 0.000          | P D |
| R 9 | 897.528 | 880.501        | 879.518 | 925.521        | 908.495        | 907.511        | 176.113        | 159.004 | 0.000          | R D |

# sp | P68433 | H31\_MOUSE

K Dimethyl SAPATGGVK  
28.03

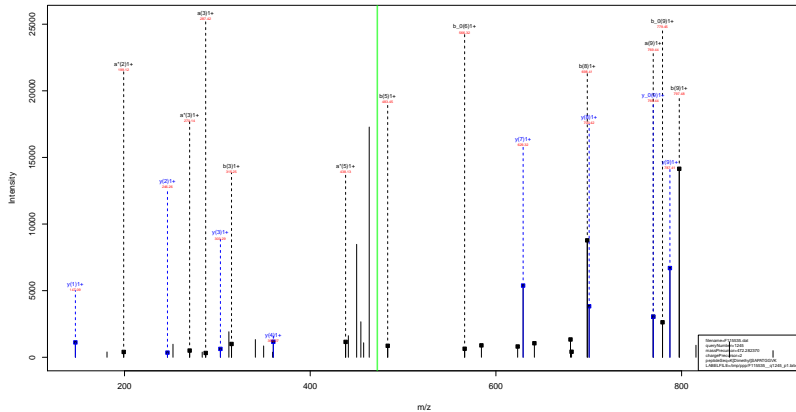

# sp | P68433 | H31\_MOUSE

K<sup>Dimethyl</sup> SAPATGGVK  
28.03

- ▶ fragmentation table for charge state 1+
- ▶ specType=cid
- ▶ score=51.45
- ▶ F115535.dat
- ▶ query=q1245\_p1
- ▶ precursor=472.282370
- ▶ chargePrecursor=2
- ▶ itol=0.5

| AA | a             | a*            | a <sub>0</sub> | b             | b*            | b <sub>0</sub> | y             | y*     | y <sub>0</sub> | AA |
|----|---------------|---------------|----------------|---------------|---------------|----------------|---------------|--------|----------------|----|
| K  | 129139        | 112112        | 0.000          | 157119        | 146107        | 0.000          | 943197        | 926311 | 925347         | K  |
| S  | 129139        | <b>109144</b> | 186160         | 144105        | 137100        | 226155         | <b>707431</b> | 710404 | <b>709420</b>  | S  |
| A  | <b>287208</b> | <b>279181</b> | 259191         | <b>315203</b> | 298176        | 297161         | <b>705399</b> | 683392 | 685388         | A  |
| F  | 384261        | 367234        | 366250         | 412265        | 395229        | 394265         | <b>629362</b> | 612335 | 611351         | F  |
| A  | 495298        | <b>458271</b> | 437287         | <b>483293</b> | 466266        | 465292         | 157330        | 115262 | 114298         | A  |
| T  | 636345        | 629319        | 616333         | <b>584340</b> | 567314        | <b>554330</b>  | 481272        | 444245 | 443261         | T  |
| G  | 611387        | 606360        | 595366         | <b>641361</b> | 624335        | <b>621351</b>  | <b>360224</b> | 361196 | 0.000          | G  |
| G  | 670388        | 653362        | 652378         | <b>698383</b> | <b>681357</b> | <b>680373</b>  | <b>303203</b> | 286176 | 0.000          | G  |
| V  | <b>709457</b> | 692431        | 701440         | <b>797452</b> | 780425        | <b>779441</b>  | <b>246181</b> | 229155 | 0.000          | V  |
| K  | 697552        | 689525        | 678542         | 825547        | 808520        | 807526         | <b>147113</b> | 130186 | 0.000          | K  |

# sp | Q64525 | H2B2B\_MOUSE

KAVTK Acetyl VQK  
42.01

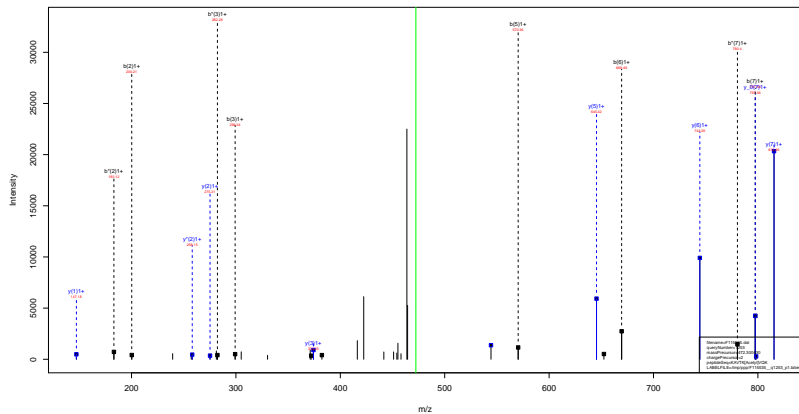

# sp | Q64525 | H2B2B\_MOUSE

KAVTK<sup>Acetyl</sup>VQK  
42.01

- ▶ fragmentation table for charge state 1+
- ▶ specType=cid
- ▶ score=52.16
- ▶ F115535.dat
- ▶ query=q1253\_p1
- ▶ precursor=472.300430
- ▶ chargePrecursor=2
- ▶ itol=0.5

| AA | a              | a*      | a:0     | b              | b*             | b:0            | y              | y*             | y:0            | AA  |
|----|----------------|---------|---------|----------------|----------------|----------------|----------------|----------------|----------------|-----|
| K1 | 224.209        | 24.082  | 0.000   | 126.104        | 144.506        | 0.000          | 461.992        | 225.981        | 225.981        | K10 |
| A2 | 222.144        | 125.133 | 0.000   | <b>200.130</b> | <b>181.113</b> | 0.000          | <b>815.490</b> | <b>798.473</b> | <b>797.488</b> | A17 |
| V3 | 271.213        | 254.139 | 0.000   | <b>299.208</b> | <b>282.181</b> | 0.000          | <b>744.461</b> | 727.435        | 726.451        | V16 |
| T4 | <b>372.261</b> | 395.234 | 354.250 | 300.255        | 301.229        | <b>382.245</b> | <b>645.391</b> | 628.366        | 627.382        | T15 |
| K5 | 247.286        | 245.260 | 244.234 | <b>370.261</b> | 361.234        | 352.250        | <b>344.345</b> | 327.310        | 0.000          | K14 |
| V6 | 241.434        | 629.449 | 623.424 | <b>669.429</b> | <b>652.403</b> | 651.419        | <b>374.240</b> | 357.214        | 0.000          | V13 |
| Q7 | 398.493        | 752.489 | 751.482 | <b>797.488</b> | <b>780.461</b> | 779.477        | <b>275.171</b> | <b>258.145</b> | 0.000          | Q12 |
| K8 | 397.588        | 680.549 | 679.572 | 625.583        | 608.556        | 607.572        | <b>147.113</b> | 130.086        | 0.000          | K11 |



# sp | P68433 | H31\_MOUSE

K Methyl STGGK Acetyl APR  
14.02 42.01

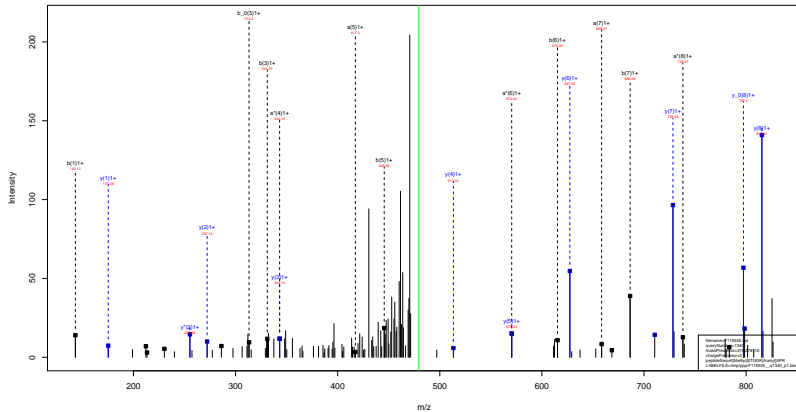

# sp | P68433 | H31\_MOUSE

K<sup>Methyl</sup> STGGK<sup>Acetyl</sup> APR  
14.02 42.01

- ▶ fragmentation table for charge state 1+
- ▶ specType=cid
- ▶ score=37.70
- ▶ F115535.dat
- ▶ query=q1340\_p1
- ▶ precursor=479.278110
- ▶ chargePrecursor=2
- ▶ itol=0.5

| AA  | a              | a*             | a $\beta$ | b              | b*             | b $\beta$      | y              | y*             | y $\beta$      | AA  |
|-----|----------------|----------------|-----------|----------------|----------------|----------------|----------------|----------------|----------------|-----|
| R 1 | 315.123        | 98.096         | 0.000     | <b>143.118</b> | 126.091        | 0.000          | 692.540        | 940.521        | 699.537        | R 0 |
| S 2 | 302.150        | 105.130        | 104.144   | <b>230.150</b> | <b>213.123</b> | <b>212.139</b> | <b>815.437</b> | <b>798.410</b> | <b>797.426</b> | S 0 |
| T 3 | 303.303        | <b>286.176</b> | 205.162   | <b>331.198</b> | 314.171        | <b>313.187</b> | <b>720.405</b> | 711.370        | <b>710.384</b> | T 0 |
| G 4 | 309.214        | <b>343.198</b> | 342.243   | 309.214        | 311.303        | 310.248        | <b>627.357</b> | 618.341        | 0.000          | G 0 |
| Q 5 | <b>417.246</b> | 300.310        | 309.226   | <b>445.241</b> | 428.214        | 427.230        | <b>570.336</b> | 553.320        | 0.000          | Q 0 |
| K 6 | 367.351        | <b>570.325</b> | 569.341   | <b>615.346</b> | 608.320        | 607.335        | <b>513.314</b> | 496.298        | 0.000          | K 4 |
| A 7 | <b>658.388</b> | 611.372        | 640.370   | <b>686.383</b> | 669.357        | <b>668.373</b> | <b>343.299</b> | 326.187        | 0.000          | A 3 |
| P 8 | 726.474        | <b>738.414</b> | 737.430   | <b>183.436</b> | 186.409        | 185.424        | <b>272.172</b> | <b>255.145</b> | 0.000          | P 2 |
| R 9 | 411.542        | 324.518        | 393.532   | 339.537        | 322.510        | 321.526        | <b>175.119</b> | 158.092        | 0.000          | R 0 |



# sp | P68433 | H31\_MOUSE

K<sup>Methyl</sup> 14.02 STGGK<sup>Acetyl</sup> 42.01 APR

- ▶ fragmentation table for charge state 1+
- ▶ specType=cid
- ▶ score=50.05
- ▶ F115535.dat
- ▶ query=q1341\_p1
- ▶ precursor=479.278140
- ▶ chargePrecursor=2
- ▶ itol=0.5

| AA | a              | a*             | a <sup>0</sup> | b              | b*      | b <sup>0</sup> | y              | y*             | y <sup>0</sup> | AA |
|----|----------------|----------------|----------------|----------------|---------|----------------|----------------|----------------|----------------|----|
| R  | 115.123        | 98.096         | 0.000          | <b>143.118</b> | 126.091 | 0.000          | 957.540        | 940.528        | 959.557        | K  |
| S  | 202.150        | 185.123        | 184.141        | <b>230.150</b> | 213.123 | <b>212.139</b> | <b>815.437</b> | 798.410        | <b>797.426</b> | S  |
| T  | 303.203        | 286.176        | 285.192        | 331.180        | 314.171 | 313.187        | <b>728.405</b> | 711.370        | <b>710.384</b> | T  |
| G  | 400.224        | <b>381.168</b> | 380.213        | 388.233        | 371.203 | 370.218        | <b>627.257</b> | 610.241        | 0.000          | G  |
| Q  | 517.246        | 500.119        | 500.232        | 445.243        | 428.214 | 427.230        | <b>570.336</b> | 553.320        | 0.000          | Q  |
| R  | 587.351        | <b>570.325</b> | 569.341        | <b>615.346</b> | 598.320 | 597.335        | <b>513.314</b> | 496.288        | 0.000          | R  |
| A  | <b>658.388</b> | 641.362        | 640.378        | <b>686.383</b> | 669.357 | <b>668.373</b> | <b>343.209</b> | 326.183        | 0.000          | A  |
| P  | 726.414        | <b>708.414</b> | 707.430        | <b>743.436</b> | 726.409 | 725.425        | <b>272.172</b> | <b>255.145</b> | 0.000          | P  |
| R  | 811.542        | 804.515        | 803.532        | 830.537        | 812.510 | 811.526        | <b>175.110</b> | 158.083        | 0.000          | R  |

# sp | P68433 | H31\_MOUSE

K Dimethyl STGGK Acetyl APR  
28.03 42.01

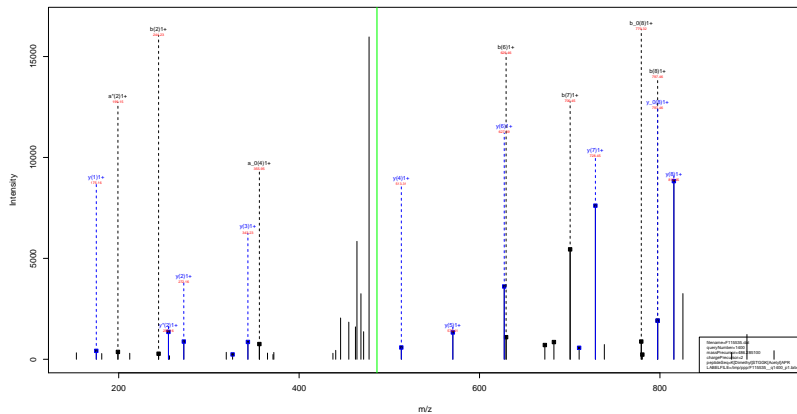

# sp | P68433 | H31\_MOUSE

K<sup>Dimethyl</sup> 28.03 STGGK<sup>Acetyl</sup> 42.01 APR

- ▶ fragmentation table for charge state 1+
- ▶ specType=cid
- ▶ score=55.08
- ▶ F115535.dat
- ▶ query=q1400\_p1
- ▶ precursor=486.285100
- ▶ chargePrecursor=2
- ▶ itol=0.5

| AA | a              | a*             | a <sup>0</sup> | b              | b*             | b <sup>0</sup> | y              | y*             | y <sup>0</sup> | AA  |
|----|----------------|----------------|----------------|----------------|----------------|----------------|----------------|----------------|----------------|-----|
| R1 | 126.030        | 112.112        | 0.980          | 151.152        | 140.107        | 0.890          | 371.550        | 654.537        | 955.551        | R10 |
| S2 | 216.271        | <b>199.144</b> | 196.160        | <b>244.164</b> | 227.139        | 226.155        | <b>815.437</b> | 708.410        | <b>707.426</b> | S10 |
| T3 | 317.218        | 300.192        | 299.208        | 345.213        | 328.187        | 327.203        | <b>728.405</b> | 711.370        | <b>710.384</b> | T10 |
| G4 | 417.450        | 397.213        | <b>354.229</b> | 402.229        | 388.208        | 388.224        | <b>627.207</b> | 610.211        | 0.000          | G10 |
| Q5 | 511.251        | 414.203        | 413.221        | 459.255        | 442.230        | 441.246        | <b>570.336</b> | 553.320        | 0.000          | Q10 |
| K6 | 601.367        | 584.330        | 583.350        | <b>629.362</b> | 612.335        | 611.351        | <b>513.314</b> | 496.289        | 0.000          | K14 |
| A7 | <b>672.404</b> | 655.377        | 654.393        | <b>700.399</b> | 683.372        | <b>682.388</b> | <b>343.206</b> | <b>326.182</b> | 0.000          | A13 |
| P8 | 769.537        | 752.489        | 751.480        | <b>797.452</b> | <b>780.425</b> | <b>779.441</b> | <b>272.122</b> | <b>255.145</b> | 0.000          | P12 |
| R9 | 822.558        | 805.511        | 807.541        | 853.551        | 836.526        | 835.542        | <b>175.119</b> | 158.202        | 0.000          | R11 |

# sp | P68433 | H31\_MOUSE

K Dimethyl 28.03 STGGK Acetyl 42.01 APR

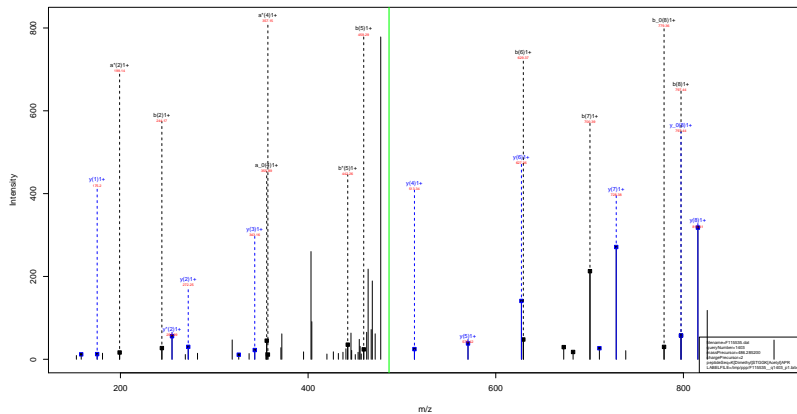

# sp | P68433 | H31\_MOUSE

K<sup>Dimethyl</sup> 28.03 STGGK<sup>Acetyl</sup> 42.01 APR

- ▶ fragmentation table for charge state 1+
- ▶ specType=cid
- ▶ score=51.77
- ▶ F115535.dat
- ▶ query=q1403\_p1
- ▶ precursor=486.285200
- ▶ chargePrecursor=2
- ▶ itol=0.5

| AA | a              | a*             | a <sup>0</sup> | b              | b*             | b <sup>0</sup> | y              | y*             | y <sup>0</sup> | AA  |
|----|----------------|----------------|----------------|----------------|----------------|----------------|----------------|----------------|----------------|-----|
| R1 | 126.030        | 112.112        | 0.980          | 151.150        | 140.107        | 0.890          | 371.580        | 654.531        | 955.951        | R10 |
| S2 | 216.271        | <b>199.144</b> | 196.160        | <b>244.164</b> | 227.139        | 226.155        | <b>815.437</b> | 706.410        | <b>707.426</b> | S10 |
| T3 | 317.218        | 300.192        | 299.208        | 345.213        | 328.187        | 327.203        | <b>728.485</b> | 711.370        | <b>710.384</b> | T10 |
| G4 | 418.165        | <b>397.213</b> | <b>394.229</b> | 429.235        | 399.208        | 398.224        | <b>627.397</b> | 610.381        | 0.000          | G10 |
| Q5 | 519.112        | 414.235        | 413.251        | <b>459.256</b> | <b>442.230</b> | 441.246        | <b>570.336</b> | 553.320        | 0.000          | Q10 |
| K6 | 601.067        | 584.100        | 583.116        | <b>629.362</b> | 612.335        | 611.351        | <b>513.314</b> | 496.298        | 0.000          | K14 |
| A7 | <b>672.404</b> | 655.377        | 654.393        | <b>700.399</b> | 683.372        | <b>682.388</b> | <b>343.206</b> | <b>326.182</b> | 0.000          | A13 |
| P8 | 769.357        | 752.400        | 751.416        | <b>791.432</b> | 774.405        | <b>774.421</b> | <b>272.122</b> | <b>255.148</b> | 0.000          | P12 |
| R9 | 852.308        | 835.331        | 834.347        | 863.353        | 836.326        | 835.342        | <b>175.119</b> | <b>158.092</b> | 0.000          | R11 |



# sp | P68433 | H31\_MOUSE

K Dimethyl STGGK Acetyl APR  
28.03 42.01

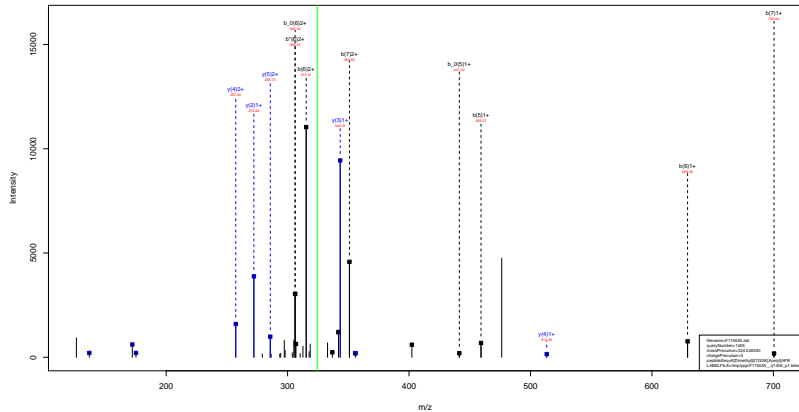

MS1000001.P110000.dad  
QueryName:1000001  
ScanNumber:1000001  
Charge:1  
ScanDate:2010-01-01 10:00:00  
ScanTime:2010-01-01 10:00:00  
ScanTime:2010-01-01 10:00:00

# sp | P68433 | H31\_MOUSE

K<sup>Dimethyl</sup> 28.03 STGGK<sup>Acetyl</sup> 42.01 APR

- ▶ fragmentation table for charge state 1+
- ▶ specType=cid
- ▶ score=37.41
- ▶ F115535.dat
- ▶ query=q1405.p1
- ▶ precursor=324.526330
- ▶ chargePrecursor=3
- ▶ itol=0.5

| AA | a | a*      | a <sub>0</sub> | b              | b*             | b <sub>0</sub> | y              | y*             | y <sub>0</sub> | AA      |   |
|----|---|---------|----------------|----------------|----------------|----------------|----------------|----------------|----------------|---------|---|
| R  | 1 | 229.139 | 112.112        | 0.000          | 151.134        | 240.107        | 0.000          | 371.551        | 354.531        | 353.553 | K |
| S  | 2 | 216.171 | 109.144        | 106.160        | 244.166        | 227.139        | 226.155        | 815.417        | 796.410        | 797.426 | S |
| T  | 3 | 117.218 | 353.151        | 209.208        | 235.213        | 538.187        | 327.203        | 728.405        | 711.370        | 710.394 | T |
| G  | 4 | 374.230 | 357.233        | <b>356.229</b> | <b>402.235</b> | 389.208        | 354.224        | 617.357        | 610.331        | 0.000   | G |
| G  | 5 | 431.251 | 414.252        | 410.251        | <b>402.250</b> | 442.230        | <b>441.246</b> | 570.338        | 553.320        | 0.000   | G |
| K  | 6 | 601.367 | 584.340        | 583.350        | <b>629.362</b> | 612.335        | 611.351        | <b>513.314</b> | 496.280        | 0.000   | K |
| A  | 7 | 372.404 | 355.377        | 354.393        | <b>700.399</b> | 683.372        | 682.388        | <b>343.209</b> | 326.187        | 0.000   | A |
| P  | 8 | 789.457 | 782.430        | 781.440        | 797.452        | 780.425        | 779.441        | <b>272.172</b> | 265.145        | 0.000   | P |
| R  | 9 | 225.228 | 628.231        | 627.241        | 953.251        | 238.226        | 615.242        | <b>176.110</b> | 159.090        | 0.000   | R |

# sp | P68433 | H31\_MOUSE

K<sup>Dimethyl</sup> 28.03 STGGK<sup>Acetyl</sup> 42.01 APR

- ▶ fragmentation table for charge state 2+
- ▶ specType=cid
- ▶ score=37.41
- ▶ F115535.dat
- ▶ query=q1405\_p1
- ▶ precursor=324.526330
- ▶ chargePrecursor=3
- ▶ itol=0.5

| AA  | a              | a*      | a <sub>0</sub> | b              | b*             | b <sub>0</sub> | y              | y*             | y <sub>0</sub> | AA  |
|-----|----------------|---------|----------------|----------------|----------------|----------------|----------------|----------------|----------------|-----|
| R 1 | 95.073         | 56.500  | 0.504          | 79.019         | 70.597         | 0.504          | 488.285        | 477.772        | 477.269        | K H |
| S 2 | 100.589        | 100.018 | 99.504         | 122.586        | 114.073        | 113.581        | 408.227        | 399.709        | 399.217        | S H |
| T 3 | 150.113        | 150.000 | 150.108        | 173.110        | 164.597        | 164.105        | 384.703        | <b>356.193</b> | <b>355.701</b> | T H |
| G 4 | 137.824        | 139.313 | 139.818        | 101.804        | 103.308        | 102.816        | 314.132        | 305.615        | 305.123        | G H |
| Q 5 | 216.134        | 207.621 | 207.125        | 230.132        | 221.618        | 221.126        | <b>285.672</b> | 277.158        | 0.504          | Q H |
| R 6 | 301.187        | 290.674 | 290.178        | <b>315.184</b> | <b>306.671</b> | <b>306.179</b> | <b>257.161</b> | 248.648        | 0.504          | R H |
| A 7 | <b>336.706</b> | 328.193 | 327.697        | <b>350.703</b> | <b>342.190</b> | <b>341.698</b> | <b>172.108</b> | 163.595        | 0.504          | A H |
| P 8 | 189.724        | 178.211 | 177.715        | 199.244        | 190.731        | 190.239        | <b>136.509</b> | 128.016        | 0.504          | P H |
| R 9 | 493.283        | 484.769 | 484.273        | 477.269        | 468.761        | 468.275        | 88.003         | 79.555         | 0.504          | R H |

# sp | P68433 | H31\_MOUSE

K<sup>Acetyl</sup> STGGK<sup>Acetyl</sup> APR  
42.01 42.01

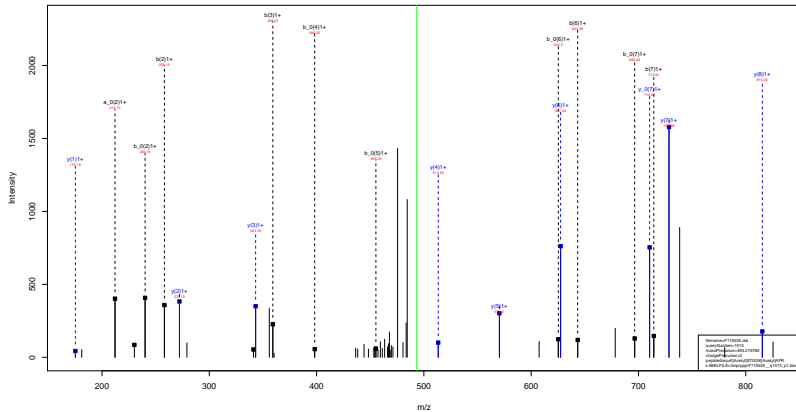

# sp | P68433 | H31\_MOUSE

K<sup>Acetyl</sup> STGGK<sup>Acetyl</sup> APR  
42.01 42.01

- ▶ fragmentation table for charge state 1+
- ▶ specType=cid
- ▶ score=56.42
- ▶ F115535.dat
- ▶ query=q1513.p1
- ▶ precursor=493.274760
- ▶ chargePrecursor=2
- ▶ itol=0.5

| AA | a              | a*      | a <sub>0</sub> | b              | b*      | b <sub>0</sub> | y              | y*      | y <sub>0</sub> | AA |
|----|----------------|---------|----------------|----------------|---------|----------------|----------------|---------|----------------|----|
| R  | 143.118        | 126.091 | 0.000          | 171.111        | 154.086 | 0.000          | 665.543        | 968.518 | 967.523        | K  |
| S  | <b>230.150</b> | 213.121 | <b>212.130</b> | <b>258.145</b> | 241.118 | <b>240.134</b> | <b>815.437</b> | 798.410 | 797.426        | S  |
| T  | 331.198        | 314.171 | 313.187        | <b>359.193</b> | 342.166 | <b>341.182</b> | <b>728.485</b> | 711.378 | <b>710.394</b> | T  |
| G  | 438.219        | 421.192 | 420.207        | 438.214        | 421.189 | <b>398.203</b> | <b>827.257</b> | 810.231 | 0.000          | G  |
| C  | 445.241        | 428.214 | 427.230        | 473.225        | 456.200 | <b>455.225</b> | <b>570.338</b> | 553.300 | 0.000          | C  |
| R  | 615.346        | 598.320 | 597.335        | <b>643.341</b> | 626.314 | <b>625.330</b> | <b>513.314</b> | 496.288 | 0.000          | R  |
| A  | 638.383        | 621.357 | 620.373        | <b>714.378</b> | 697.352 | <b>696.368</b> | <b>343.289</b> | 326.182 | 0.000          | A  |
| P  | 783.438        | 766.422 | 765.437        | 811.411        | 794.404 | 793.420        | <b>372.172</b> | 295.145 | 0.000          | P  |
| R  | 819.537        | 802.521 | 801.536        | 961.531        | 945.505 | 944.521        | <b>176.118</b> | 159.092 | 0.000          | R  |

# sp | P68433 | H31\_MOUSE

K Acetyl STGGK Trimethyl APR  
42.01 42.05

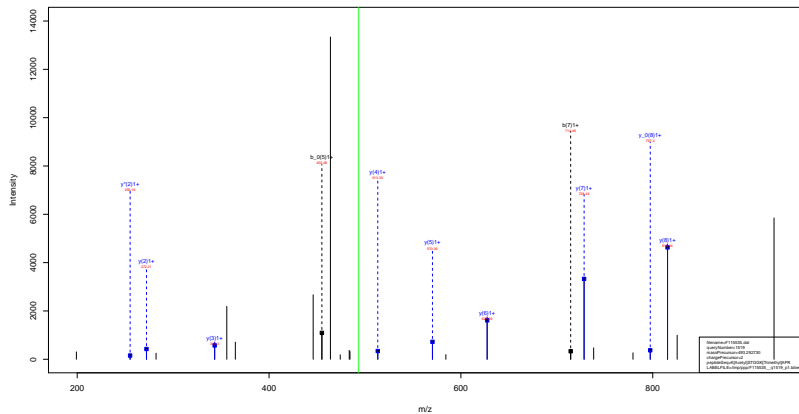

# sp | P68433 | H31\_MOUSE

K<sup>Acetyl</sup>STGGK<sup>Trimethyl</sup>APR  
42.01 42.05

- ▶ fragmentation table for charge state 1+
- ▶ specType=cid
- ▶ score=47.16
- ▶ F115535.dat
- ▶ query=q1519\_p1
- ▶ precursor=493.292730
- ▶ chargePrecursor=2
- ▶ itol=0.5

| AA | a | a*      | a.0     | b       | b*             | b.0     | y              | y*             | y.0            | AA             |   |
|----|---|---------|---------|---------|----------------|---------|----------------|----------------|----------------|----------------|---|
| R  | 1 | 243.118 | 126.061 | 0.000   | 171.113        | 154.086 | -0.000         | 365.570        | 948.553        | 967.548        | K |
| S  | 2 | 200.150 | 213.123 | 212.119 | 206.145        | 191.118 | 140.134        | <b>815.473</b> | 799.441        | <b>797.463</b> | S |
| T  | 3 | 331.196 | 314.171 | 313.187 | 306.193        | 342.166 | 341.181        | <b>728.441</b> | 711.415        | 710.431        | T |
| G  | 4 | 338.219 | 321.193 | 330.208 | 416.214        | 391.178 | 380.203        | <b>627.394</b> | 610.369        | 0.000          | G |
| C  | 5 | 445.241 | 430.214 | 427.230 | 473.235        | 455.200 | <b>455.225</b> | <b>570.372</b> | 553.345        | 0.000          | C |
| R  | 6 | 615.362 | 598.336 | 597.312 | 643.317        | 626.331 | 625.307        | <b>513.351</b> | 496.324        | 0.000          | K |
| A  | 7 | 686.420 | 669.393 | 668.409 | <b>714.414</b> | 697.388 | 696.403        | <b>343.209</b> | 326.182        | 0.000          | A |
| P  | 8 | 783.472 | 766.445 | 765.462 | 811.467        | 784.441 | 783.457        | <b>272.172</b> | <b>255.145</b> | 0.000          | P |
| R  | 9 | 109.513 | 822.541 | 621.563 | 297.566        | 250.542 | 948.553        | 374.111        | 438.092        | 0.000          | R |





- ▶ fragmentation table for charge state 1+
- ▶ specType=cid
- ▶ score=57.31
- ▶ F115535.dat
- ▶ query=q1878\_p1
- ▶ precursor=514.813820
- ▶ chargePrecursor=2
- ▶ itol=0.5

| AA | a        | a'             | a,0            | b              | b'             | b,0     | v              | v'             | v,0            | AA |
|----|----------|----------------|----------------|----------------|----------------|---------|----------------|----------------|----------------|----|
| R  | 101.007  | 84.667         | 0.000          | 129.102        | 112.976        | 0.000   | 1020.623       | 1011.592       | 1010.611       | R  |
| Q  | 226.106  | 212.139        | 0.000          | <b>257.161</b> | <b>240.134</b> | 0.000   | <b>900.526</b> | <b>883.500</b> | <b>882.516</b> | Q  |
| L  | 382.250  | 325.221        | 0.000          | <b>370.245</b> | <b>353.218</b> | 0.000   | <b>772.468</b> | 755.441        | 754.457        | L  |
| A  | 413.267  | 369.261        | 0.000          | 441.266        | 424.255        | 0.000   | <b>655.381</b> | 640.381        | 641.373        | A  |
| I  | 514.326  | <b>497.308</b> | <b>496.328</b> | 542.330        | 525.303        | 524.313 | <b>588.340</b> | 571.320        | 570.338        | I  |
| K  | 684.430  | 667.414        | 666.431        | 712.435        | 695.409        | 694.425 | <b>487.299</b> | <b>470.272</b> | 0.000          | K  |
| A  | 755.477  | 738.451        | 737.467        | 783.472        | 766.446        | 765.462 | <b>317.193</b> | 300.167        | 0.000          | A  |
| A  | 826.513  | 809.488        | 808.504        | 844.509        | 827.483        | 826.499 | <b>246.156</b> | 229.130        | 0.000          | A  |
| R  | 1022.516 | 995.500        | 994.505        | 1010.511       | 993.504        | 992.500 | <b>175.119</b> | 158.092        | 0.000          | R  |

# sp | P68433 | H31\_MOUSE

KQLATK Acetyl AAR  
42.01

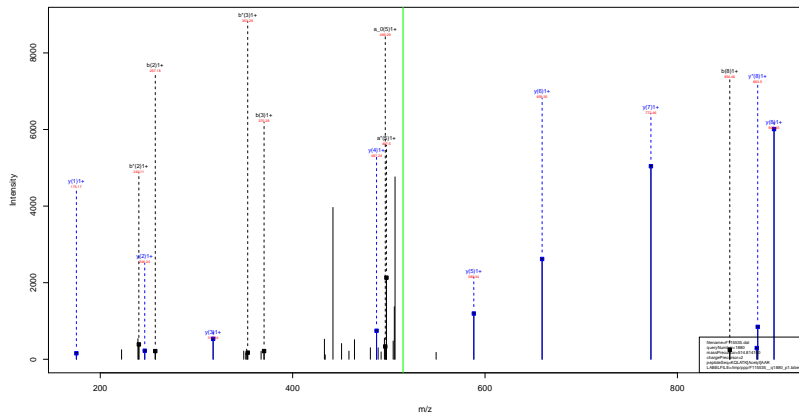

# sp | P68433 | H31\_MOUSE

KQLATK<sup>Acetyl</sup> AAR  
42.01

- ▶ fragmentation table for charge state 1+
- ▶ specType=cid
- ▶ score=62.33
- ▶ F115535.dat
- ▶ query=q1880\_p1
- ▶ precursor=514.814150
- ▶ chargePrecursor=2
- ▶ itol=0.5

| AA | a        | a'             | aΔ             | b              | b'             | bΔ      | v              | v'             | vΔ             | AA  |
|----|----------|----------------|----------------|----------------|----------------|---------|----------------|----------------|----------------|-----|
| R1 | 101.107  | 84.667         | 0.000          | 129.102        | 112.976        | 0.000   | 1020.623       | 1011.592       | 1010.011       | K10 |
| Q1 | 226.106  | 212.139        | 0.000          | <b>257.161</b> | <b>240.134</b> | 0.000   | <b>900.526</b> | <b>883.500</b> | <b>882.516</b> | Q10 |
| L1 | 382.250  | 325.223        | 0.000          | <b>370.245</b> | <b>353.218</b> | 0.000   | <b>772.468</b> | 755.441        | 754.457        | L11 |
| A1 | 413.287  | 399.261        | 0.000          | 441.282        | 424.255        | 0.000   | <b>652.381</b> | 642.354        | 641.370        | A10 |
| I1 | 514.325  | <b>497.308</b> | <b>496.325</b> | 542.320        | 525.293        | 524.310 | <b>588.340</b> | 571.325        | 570.339        | I10 |
| K1 | 684.480  | 667.454        | 666.430        | 712.425        | 695.400        | 694.425 | <b>487.299</b> | 470.272        | 0.000          | K14 |
| A1 | 755.477  | 738.451        | 737.461        | 783.472        | 766.446        | 765.462 | <b>317.193</b> | 300.167        | 0.000          | A13 |
| A1 | 826.515  | 809.489        | 808.505        | <b>854.509</b> | 837.483        | 836.499 | <b>246.156</b> | 229.130        | 0.000          | A12 |
| R1 | 1022.516 | 995.500        | 994.505        | 1010.511       | 993.504        | 992.505 | <b>175.119</b> | 158.092        | 0.000          | R11 |

# sp | P68433 | H31\_MOUSE

K<sup>Acetyl</sup> QLATK<sup>Acetyl</sup> AAR  
42.01 42.01

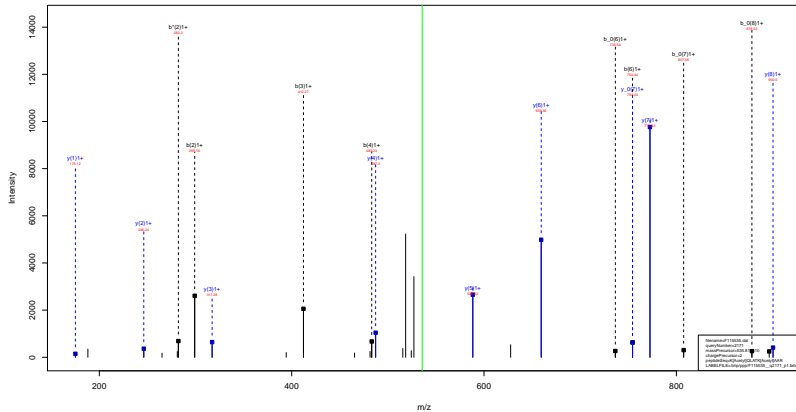

# sp | P68433 | H31\_MOUSE

K<sup>Acetyl</sup> 42.01 QLATK<sup>Acetyl</sup> 42.01 AAR

- ▶ fragmentation table for charge state 1+
- ▶ specType=cid
- ▶ score=73.79
- ▶ F115535.dat
- ▶ query=q2171\_p1
- ▶ precursor=535.819410
- ▶ chargePrecursor=2
- ▶ itol=0.5

| AA | a        | a*       | a#       | b              | b*             | b#             | y              | y*      | y#             | AA |
|----|----------|----------|----------|----------------|----------------|----------------|----------------|---------|----------------|----|
| R  | 143.118  | 125.101  | 0.000    | 174.113        | 154.096        | 0.000          | 120.117        | 120.117 | 0.000          | R  |
| Q  | 271.576  | 254.130  | 0.000    | <b>299.171</b> | <b>282.145</b> | 0.000          | <b>600.526</b> | 883.500 | 883.518        | Q  |
| L  | 384.261  | 367.234  | 0.000    | <b>412.255</b> | 395.229        | 0.000          | <b>772.468</b> | 751.441 | <b>754.457</b> | L  |
| R  | 433.038  | 416.011  | 0.000    | <b>483.293</b> | 466.266        | 0.000          | <b>459.354</b> | 442.327 | 442.314        | R  |
| V  | 359.240  | 339.235  | 0.000    | 365.261        | 347.334        | 0.000          | <b>588.336</b> | 571.330 | 570.328        | V  |
| K  | 726.431  | 709.424  | 100.440  | <b>754.446</b> | 737.439        | <b>738.435</b> | <b>487.299</b> | 470.272 | 0.000          | K  |
| A  | 797.438  | 780.403  | 779.477  | 825.463        | 808.436        | <b>807.472</b> | <b>317.193</b> | 300.187 | 0.000          | A  |
| A  | 108.475  | 101.469  | 100.753  | <b>806.535</b> | 789.465        | <b>818.509</b> | <b>246.135</b> | 229.133 | 0.000          | A  |
| R  | 1124.626 | 1087.609 | 1000.834 | 1073.621       | 1036.595       | 1034.611       | <b>175.119</b> | 158.000 | 0.000          | R  |

# sp | Q6ZWY9 | H2B1C\_MOUSE

K<sub>42.01</sub> Acetyl GSK<sub>42.01</sub> Acetyl K<sub>42.01</sub> AVTK

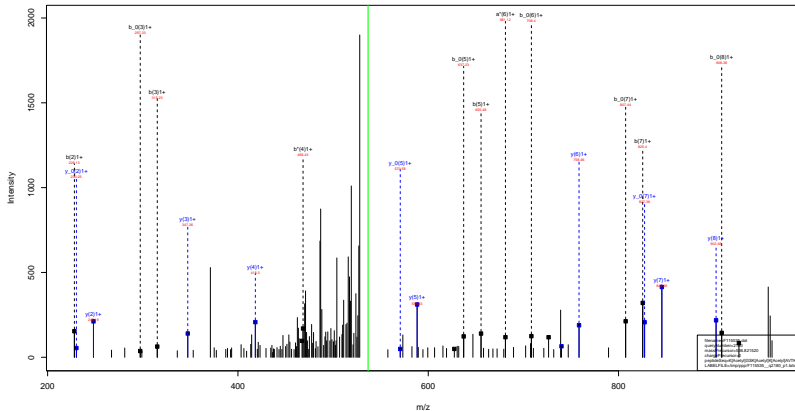

# sp | Q6ZWY9 | H2B1C\_MOUSE

K<sub>42.01</sub> Acetyl GSK<sub>42.01</sub> Acetyl K<sub>42.01</sub> Acetyl AVTK

- ▶ fragmentation table for charge state 1+
- ▶ specType=cid
- ▶ score=45.14
- ▶ F115535.dat
- ▶ query=q2180\_p1
- ▶ precursor=536.821520
- ▶ chargePrecursor=2
- ▶ itol=0.5

| AA | a              | a*             | a+b      | b              | b*             | b-o            | y              | y*       | z-o            | AA  |
|----|----------------|----------------|----------|----------------|----------------|----------------|----------------|----------|----------------|-----|
| R  | 144.118        | 126.061        | 0.000    | 174.112        | 154.066        | 0.000          | 327.230        | 1253.931 | 1054.826       | R20 |
| G  | 200.159        | 183.113        | 0.000    | <b>228.134</b> | 201.108        | 0.000          | <b>600.531</b> | 885.509  | 884.529        | G20 |
| S  | 207.171        | 270.135        | 269.120  | <b>315.166</b> | 200.140        | <b>207.156</b> | <b>845.509</b> | 828.483  | <b>827.499</b> | S17 |
| R  | 410.214        | 400.202        | 400.200  | 400.200        | <b>468.248</b> | <b>467.261</b> | <b>738.217</b> | 741.491  | <b>740.497</b> | R20 |
| R  | <b>827.302</b> | 820.526        | 800.372  | <b>655.371</b> | 620.301        | <b>837.307</b> | <b>588.372</b> | 571.345  | <b>570.361</b> | R20 |
| A  | 608.420        | <b>681.393</b> | 680.400  | <b>726.414</b> | 709.388        | <b>708.404</b> | <b>418.266</b> | 401.230  | 400.253        | A24 |
| V  | 797.468        | 780.461        | 779.470  | <b>825.483</b> | 808.456        | <b>807.472</b> | <b>347.229</b> | 330.202  | 329.213        | V15 |
| L  | 1008.578       | 911.569        | 909.570  | <b>926.531</b> | 909.569        | <b>908.520</b> | <b>248.168</b> | 231.139  | <b>230.155</b> | L15 |
| R  | 1028.611       | 1009.604       | 1008.620 | 1008.620       | 1007.589       | 1006.615       | 187.113        | 130.080  | 130.071        | R10 |

# sp | P62806 | H4\_MOUSE

GGK<sup>Acetyl</sup><sub>42.01</sub> GLGK<sup>Acetyl</sup><sub>42.01</sub> GGAK<sup>Acetyl</sup><sub>42.01</sub> R

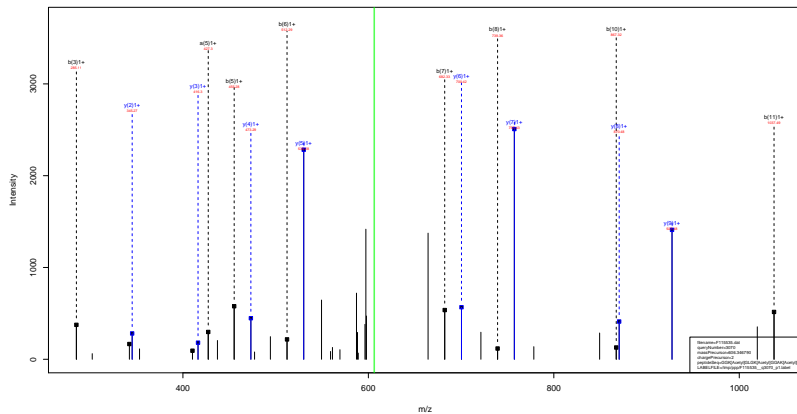



# sp | P62806 | H4\_MOUSE

GGK<sup>Acetyl</sup><sub>42.01</sub> GLGK<sup>Acetyl</sup><sub>42.01</sub> GGAK<sup>Acetyl</sup><sub>42.01</sub> R

- ▶ fragmentation table for charge state 1+
- ▶ specType=cid
- ▶ score=58.55
- ▶ F115535.dat
- ▶ query=q3070\_p1
- ▶ precursor=606.346790
- ▶ chargePrecursor=2
- ▶ itol=0.5

| AA    | a              | a*             | a,Δ   | b               | b*       | b,Δ   | y              | y*       | y,Δ   | AA    |
|-------|----------------|----------------|-------|-----------------|----------|-------|----------------|----------|-------|-------|
| G[1]  | 30.034         | 0.000          | 0.000 | 76.039          | 0.000    | 0.000 | 1211.626       | 1194.659 | 0.000 | G[12] |
| G[2]  | 87.055         | 0.000          | 0.000 | 115.050         | 0.000    | 0.000 | 1154.654       | 1137.617 | 0.000 | G[11] |
| T[3]  | 292.261        | 240.126        | 0.000 | <b>283.156</b>  | 263.129  | 0.000 | 1007.611       | 1020.616 | 0.000 | K[10] |
| G[4]  | 314.182        | 292.156        | 0.000 | <b>342.177</b>  | 325.151  | 0.000 | <b>927.517</b> | 930.510  | 0.000 | G[9]  |
| L[5]  | <b>427.266</b> | <b>410.240</b> | 0.000 | <b>455.261</b>  | 436.235  | 0.000 | <b>870.516</b> | 853.489  | 0.000 | L[6]  |
| G[6]  | 464.289        | 461.263        | 0.000 | <b>512.283</b>  | 495.258  | 0.000 | <b>757.432</b> | 740.405  | 0.000 | G[7]  |
| K[7]  | 664.303        | 637.267        | 0.000 | <b>662.368</b>  | 645.352  | 0.000 | <b>760.410</b> | 663.354  | 0.000 | K[6]  |
| G[8]  | 711.415        | 694.389        | 0.000 | <b>723.410</b>  | 723.383  | 0.000 | <b>533.305</b> | 533.278  | 0.000 | G[5]  |
| G[9]  | 768.438        | 751.410        | 0.000 | 736.431         | 779.405  | 0.000 | <b>473.283</b> | 456.257  | 0.000 | G[4]  |
| A[10] | 839.47         | 822.447        | 0.000 | <b>867.468</b>  | 850.442  | 0.000 | <b>416.262</b> | 399.235  | 0.000 | A[1]  |
| K[11] | 1009.577       | 992.552        | 0.000 | <b>1037.574</b> | 1020.547 | 0.000 | <b>345.224</b> | 328.198  | 0.000 | K[2]  |
| R[12] | 1165.600       | 1148.653       | 0.000 | 1163.615        | 1176.648 | 0.000 | 175.119        | 158.002  | 0.000 | R[1]  |



# sp | P68433 | H31\_MOUSE

STGGK Acetyl APR  
42.01

- ▶ fragmentation table for charge state 1+
- ▶ specType=cid
- ▶ score=40.92
- ▶ F115535.dat
- ▶ query=q472\_p1
- ▶ precursor=408.222510
- ▶ chargePrecursor=2
- ▶ itol=0.5

| AA  | a              | y*      | a,b            | b              | b*      | b,b            | y              | y*      | y,b     | AA  |
|-----|----------------|---------|----------------|----------------|---------|----------------|----------------|---------|---------|-----|
| S11 | 86.244         | 0.000   | 42.731         | 66.133         | 0.000   | 48.229         | 815.437        | 758.430 | 199.420 | S10 |
| T12 | <b>161.092</b> | 0.000   | <b>143.082</b> | <b>189.087</b> | 0.000   | 171.076        | 738.405        | 711.370 | 710.368 | T11 |
| G13 | 238.114        | 0.000   | 200.119        | 246.100        | 0.000   | <b>228.098</b> | <b>627.357</b> | 610.331 | 0.000   | G00 |
| G14 | 275.135        | 0.000   | 257.129        | 303.130        | 0.000   | <b>285.119</b> | <b>570.336</b> | 553.300 | 0.000   | G05 |
| K15 | 446.241        | 4.28214 | 427.230        | <b>473.235</b> | 436.209 | <b>455.225</b> | <b>513.314</b> | 496.280 | 0.000   | K14 |
| A16 | 516.278        | 4.00261 | 498.267        | <b>544.273</b> | 527.246 | <b>516.262</b> | <b>343.209</b> | 326.180 | 0.000   | A15 |
| P17 | 813.330        | 336.304 | 805.320        | 841.323        | 824.299 | 825.315        | <b>272.172</b> | 255.145 | 0.000   | P12 |
| R18 | 989.432        | 752.409 | 981.421        | 997.420        | 980.400 | 979.416        | 175.119        | 158.090 | 0.000   | R11 |

# sp | P15864 | H12\_MOUSE

RK (Methyl)  
(14.02) ASGPPVSELITK

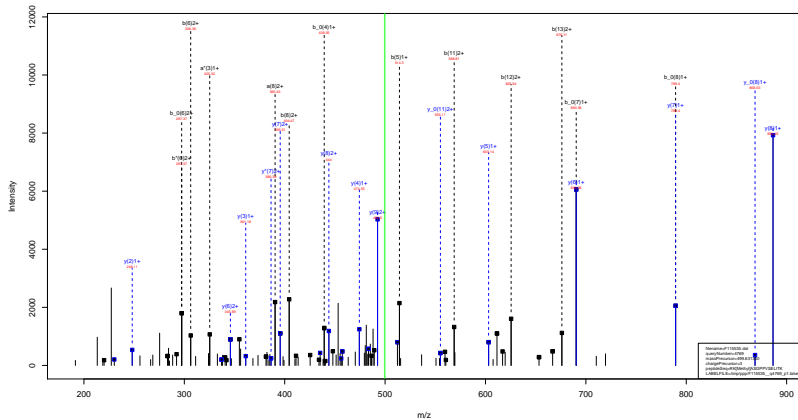

# sp | P15864 | H12\_MOUSE

RK (Methyl) ASGPPVSELITK  
(14.02)

- ▶ fragmentation table for charge state 1+
- ▶ specType=cid
- ▶ score=43.22
- ▶ F115535.dat
- ▶ query=q4769\_p1
- ▶ precursor=499.631350
- ▶ chargePrecursor=3
- ▶ itol=0.5

| AA  | a              | a*             | aΔ             | b              | b*             | bΔ             | y              | y*             | yΔ             | AA  |
|-----|----------------|----------------|----------------|----------------|----------------|----------------|----------------|----------------|----------------|-----|
| R1  | 120.111        | 117.057        | 0.000          | 157.108        | 140.082        | 0.000          | 146.080        | 147.003        | 147.009        | R14 |
| R2  | 177.104        | 174.050        | 0.000          | 209.113        | 192.087        | 0.000          | 190.079        | 191.002        | 191.008        | R13 |
| A3  | <b>342.261</b> | <b>335.235</b> | 0.000          | 375.265        | 355.230        | 0.000          | 358.660        | 359.641        | 359.637        | A12 |
| S4  | 472.253        | 471.200        | <b>411.281</b> | <b>457.269</b> | <b>446.262</b> | <b>435.278</b> | 437.631        | 438.609        | 438.620        | S11 |
| C5  | <b>486.315</b> | 485.262        | 484.260        | <b>514.318</b> | 499.281        | 498.262        | 499.660        | 499.671        | 499.668        | C10 |
| P6  | 558.307        | 555.251        | 555.251        | <b>611.362</b> | 594.330        | 593.301        | 593.671        | 593.682        | 593.679        | P10 |
| F7  | 680.420        | 681.369        | 680.410        | 708.411        | 691.380        | <b>690.405</b> | <b>696.524</b> | 696.496        | <b>696.514</b> | F10 |
| V8  | 770.469        | 767.462        | 767.470        | 807.464        | 790.457        | <b>789.473</b> | <b>790.472</b> | 792.448        | 791.461        | V10 |
| S9  | 866.512        | 860.466        | 860.520        | 894.515        | 877.469        | 876.540        | <b>691.403</b> | 692.377        | 692.369        | S10 |
| E10 | 895.503        | 895.517        | 897.551        | 923.558        | 906.532        | 905.548        | <b>691.371</b> | 596.545        | 596.561        | E10 |
| L11 | 1018.641       | 1001.621       | 1000.630       | 1139.642       | 1118.616       | 1118.612       | <b>474.320</b> | <b>457.302</b> | <b>456.318</b> | L10 |
| U12 | 1114.714       | 1104.700       | 1102.720       | 1240.720       | 1220.700       | 1220.700       | <b>361.248</b> | 360.248        | 360.248        | U10 |
| I13 | 1322.774       | 1320.713       | 1320.720       | 1450.774       | 1433.747       | 1433.747       | <b>258.100</b> | 257.135        | <b>250.150</b> | I10 |
| K14 | 1430.874       | 1431.807       | 1430.860       | 1470.869       | 1461.842       | 1460.869       | 147.110        | 149.088        | 0.000          | K11 |

# sp | P15864 | H12\_MOUSE

RK<sup>(Methyl)</sup> ASGPPVSELITK  
(14.02)

- ▶ fragmentation table for charge state 2+
- ▶ specType=cid
- ▶ score=43.22
- ▶ F115535.dat
- ▶ query=q4769\_p1
- ▶ precursor=499.631350
- ▶ chargePrecursor=3
- ▶ itol=0.5

| AA    | a              | a*             | aΔ             | b              | b*             | bΔ             | γ              | γ*             | γΔ             | AA    |
|-------|----------------|----------------|----------------|----------------|----------------|----------------|----------------|----------------|----------------|-------|
| R[1]  | 55.898         | 135.567        | 0.504          | 18.298         | 18.298         | 0.504          | 142.443        | 140.438        | 20.558         | K[4]  |
| R[2]  | 138.118        | 127.592        | 0.504          | 135.113        | 144.509        | 0.504          | 670.874        | 682.385        | 261.908        | K[13] |
| A[3]  | 137.834        | 158.121        | 0.504          | 189.432        | 137.418        | 0.504          | 369.830        | 561.324        | 360.832        | A[12] |
| S[4]  | 215.130        | 206.837        | 206.140        | 229.140        | 220.534        | <b>220.142</b> | 384.317        | 355.277        | <b>555.314</b> | S[11] |
| G[5]  | 243.002        | 235.143        | 234.999        | 267.999        | 249.249        | 249.249        | 509.262        | <b>512.269</b> | 111.146        | G[10] |
| P[6]  | <b>292.187</b> | <b>283.674</b> | <b>283.182</b> | <b>306.185</b> | <b>297.672</b> | <b>297.180</b> | <b>492.292</b> | <b>483.779</b> | <b>483.287</b> | P[9]  |
| F[7]  | <b>346.714</b> | 337.809        | 337.708        | <b>354.711</b> | <b>346.198</b> | <b>345.706</b> | <b>441.766</b> | <b>435.251</b> | 334.961        | F[8]  |
| V[8]  | <b>390.248</b> | <b>381.735</b> | <b>381.243</b> | <b>404.245</b> | <b>395.732</b> | <b>395.240</b> | <b>395.239</b> | <b>386.726</b> | <b>386.234</b> | V[7]  |
| S[9]  | <b>433.764</b> | <b>425.251</b> | 425.150        | <b>447.761</b> | <b>439.248</b> | 439.248        | <b>343.763</b> | <b>337.192</b> | <b>336.100</b> | S[6]  |
| E[10] | 499.283        | 489.772        | <b>489.280</b> | <b>512.283</b> | 503.769        | 503.777        | 352.120        | 293.676        | 293.184        | E[9]  |
| L[11] | <b>554.827</b> | 546.314        | 546.212        | <b>568.825</b> | <b>560.311</b> | <b>559.819</b> | 237.660        | 229.155        | 228.663        | L[10] |
| L[12] | <b>611.369</b> | <b>602.856</b> | 602.755        | <b>625.367</b> | <b>616.854</b> | 616.862        | 181.125        | 172.612        | 172.121        | L[11] |
| T[13] | 678.797        | <b>670.284</b> | <b>670.792</b> | <b>693.795</b> | <b>685.282</b> | <b>684.790</b> | 126.569        | 118.056        | 117.565        | T[12] |
| R[14] | 725.941        | 717.427        | 717.326        | 740.933        | 732.420        | 731.933        | 74.080         | 65.547         | 65.054         | R[13] |



# sp | P43274 | H14\_MOUSE

[Acetyl]SETAPAAPAAPAPAEK <sup>Dimethyl</sup>  
28.03

- ▶ fragmentation table for charge state 1+
- ▶ specType=cid
- ▶ score=51.26
- ▶ F115535.dat
- ▶ query=q4998.p1
- ▶ precursor=774.900190
- ▶ chargePrecursor=2
- ▶ itol=0.5

| AA  | a        | a*       | aΔ       | b               | b*       | bΔ             | y               | y*       | yΔ       | AA   |
|-----|----------|----------|----------|-----------------|----------|----------------|-----------------|----------|----------|------|
| S1  | 1021.050 | 0.000    | 496.984  | 1100.050        | 0.000    | 603.066        | 1049.160        | 1313.160 | 630.110  | S104 |
| E2  | 1031.050 | 0.000    | 214.984  | 202.050         | 0.000    | 211.160        | 542.160         | 1402.160 | 1401.710 | E115 |
| T3  | 1124.145 | 0.000    | 149.124  | 380.145         | 0.000    | <b>342.130</b> | 1200.145        | 1172.145 | 2122.095 | T114 |
| A4  | 1601.180 | 0.000    | 385.174  | <b>431.177</b>  | 0.000    | <b>413.187</b> | 1180.180        | 1173.610 | 2171.644 | A113 |
| P5  | 1660.175 | 0.000    | 482.224  | 178.175         | 0.000    | 150.210        | <b>1118.620</b> | 1101.590 | 1101.610 | P112 |
| A6  | 1811.212 | 0.000    | 380.260  | <b>395.261</b>  | 0.000    | 391.261        | 1099.212        | 1099.544 | 1099.550 | A111 |
| A7  | 1942.206 | 0.000    | 629.206  | <b>676.204</b>  | 0.000    | <b>652.204</b> | <b>956.531</b>  | 951.504  | 952.510  | A100 |
| P8  | 1736.202 | 0.000    | 170.202  | <b>138.204</b>  | 0.000    | 141.200        | <b>879.493</b>  | 862.493  | 861.413  | P102 |
| A9  | 1810.199 | 0.000    | 142.199  | <b>138.204</b>  | 0.000    | 142.204        | 1012.199        | 1012.424 | 1012.434 | A101 |
| A10 | 1861.190 | 0.000    | 163.190  | <b>105.431</b>  | 0.000    | 101.431        | <b>711.404</b>  | 695.411  | 692.393  | A103 |
| P11 | 1716.488 | 0.000    | 360.478  | 1008.484        | 0.000    | 888.477        | <b>648.386</b>  | 628.346  | 622.306  | P105 |
| A12 | 1949.526 | 0.000    | 1018.516 | <b>1077.521</b> | 0.000    | 1009.511       | 543.516         | 526.387  | 525.307  | A105 |
| T13 | 1146.519 | 0.000    | 111.519  | 1174.514        | 0.000    | 1136.519       | <b>412.247</b>  | 405.250  | 404.266  | T101 |
| A14 | 1117.016 | 0.000    | 1190.006 | 1145.011        | 0.000    | 1127.010       | 105.216         | 103.110  | 101.213  | A104 |
| E15 | 1198.010 | 0.000    | 1120.041 | 1174.054        | 0.000    | 1138.043       | 104.110         | 101.110  | 100.110  | E101 |
| R16 | 1032.110 | 1448.710 | 1448.714 | 1030.780        | 1013.114 | 1032.780       | 175.110         | 168.110  | 0.000    | R101 |



# sp | P43274 | H14\_MOUSE

[Acetyl]SET (Phospho) APAAPAAPAPAEK Dimethyl  
(79.97) 28.03

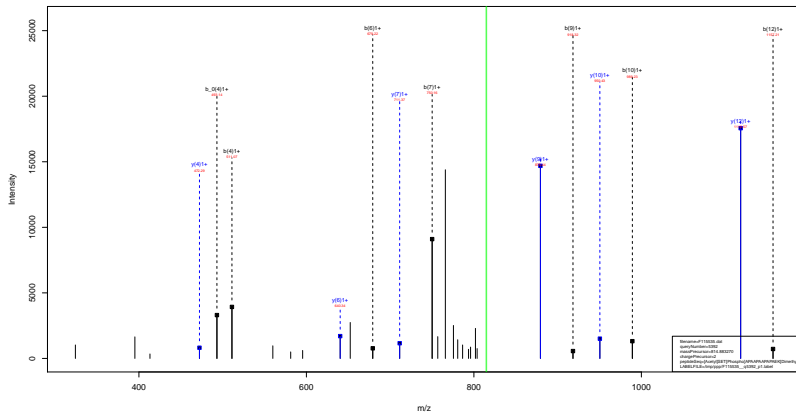

# sp | P43274 | H14\_MOUSE

[Acetyl]SET<sup>(Phospho)</sup> (79.97) APAAPAAPAPAEK<sup>Dimethyl</sup> 28.03

- ▶ fragmentation table for charge state 1+
- ▶ specType=cid
- ▶ score=46.53
- ▶ F115535.dat
- ▶ query=q5392\_p1
- ▶ precursor=814.883270
- ▶ chargePrecursor=2
- ▶ itol=0.5

| AA    | a        | a'       | a <sub>0</sub> | b               | b'       | b <sub>0</sub> | y               | y'       | y <sub>0</sub> | AA    |
|-------|----------|----------|----------------|-----------------|----------|----------------|-----------------|----------|----------------|-------|
| S[1]  | 302.050  | 0.000    | 38.074         | 1.50004         | 0.000    | 12.210         | 366.114         | 1114.716 | 366.114        | S[10] |
| E[2]  | 231.036  | 0.000    | 213.087        | 259.062         | 0.000    | 24.102         | 1469.714        | 1469.688 | 1469.704       | E[15] |
| T[3]  | 412.112  | 0.000    | 266.101        | 446.100         | 0.000    | 4.21968        | 1371.647        | 1370.646 | 1370.646       | T[14] |
| A[4]  | 365.134  | 0.000    | 465.138        | <b>511.144</b>  | 0.000    | <b>493.133</b> | 1189.638        | 1172.613 | 1171.647       | A[13] |
| P[5]  | 1283.202 | 0.000    | 352.191        | <b>679.213</b>  | 0.000    | 581.189        | <b>1118.626</b> | 1101.594 | 1100.610       | P[12] |
| A[6]  | 484.218  | 0.000    | 431.224        | <b>679.213</b>  | 0.000    | 661.212        | 1448.541        | 1448.529 | 1448.529       | A[11] |
| A[7]  | 222.016  | 0.000    | 759.253        | <b>759.271</b>  | 0.000    | 732.250        | <b>950.531</b>  | 933.505  | 932.537        | A[10] |
| P[8]  | 319.430  | 0.000    | 308.416        | 847.421         | 0.000    | 828.419        | <b>879.493</b>  | 862.491  | 861.481        | P[9]  |
| A[9]  | 394.356  | 0.000    | 372.355        | <b>918.360</b>  | 0.000    | 893.358        | 72.424          | 705.414  | 704.431        | A[8]  |
| A[10] | 491.403  | 0.000    | 343.392        | <b>901.393</b>  | 0.000    | 871.389        | <b>711.404</b>  | 698.379  | 697.393        | A[7]  |
| P[11] | 1558.450 | 0.000    | 1040.443       | 1088.434        | 0.000    | 1068.430       | <b>640.366</b>  | 623.340  | 622.356        | P[10] |
| A[12] | 1139.493 | 0.000    | 1111.482       | <b>1157.487</b> | 0.000    | 1138.477       | 573.374         | 556.367  | 555.383        | A[6]  |
| P[13] | 1508.518 | 0.000    | 1268.503       | 1299.500        | 0.000    | 1236.503       | <b>472.217</b>  | 465.200  | 464.208        | P[11] |
| A[14] | 1207.552 | 0.000    | 1276.574       | 1325.571        | 0.000    | 1301.570       | 316.216         | 308.191  | 307.213        | A[5]  |
| E[15] | 1436.625 | 0.000    | 1408.614       | 1454.611        | 0.000    | 1438.609       | 304.187         | 297.169  | 296.176        | E[12] |
| K[16] | 1550.711 | 3265.725 | 1594.741       | 1630.746        | 3305.720 | 1592.738       | 175.144         | 158.116  | 0.000          | K[16] |

# sp | P43274 | H14\_MOUSE

[Acetyl]SET (Phospho) APAAPAAPAPAEK Dimethyl  
(79.97) 28.03

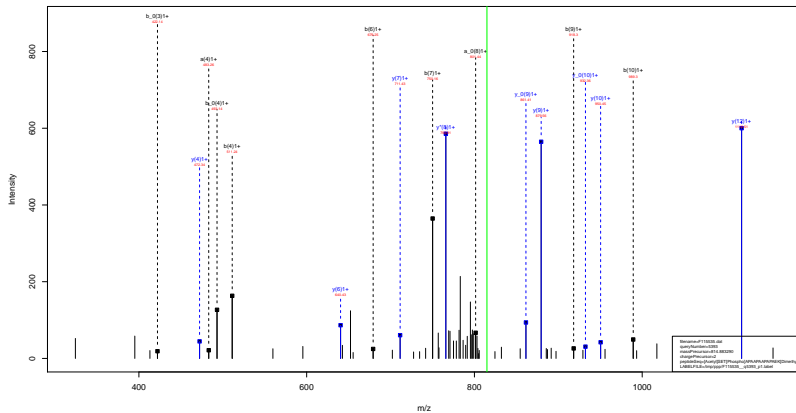

# sp | P43274 | H14\_MOUSE

[Acetyl]SET (Phospho) APAAPAAPAPAEK Dimethyl  
(79.97) 28.03

- ▶ fragmentation table for charge state 1+
- ▶ specType=cid
- ▶ score=41.81
- ▶ F115535.dat
- ▶ query=q5393\_p1
- ▶ precursor=814.883290
- ▶ chargePrecursor=2
- ▶ itol=0.5

| AA    | a        | a*       | a,b      | b        | b*       | b,b      | y        | y*       | y,b      | AA    |
|-------|----------|----------|----------|----------|----------|----------|----------|----------|----------|-------|
| S[1]  | 102.055  | 0.000    | 98.041   | 1.00000  | 0.000    | 112.000  | 1626.797 | 1811.750 | 1810.746 | S[10] |
| E[2]  | 231.098  | 0.000    | 213.087  | 259.092  | 0.000    | 251.082  | 1480.732 | 1480.688 | 1481.704 | E[15] |
| T[3]  | 412.112  | 0.000    | 386.103  | 446.106  | 0.000    | 422.094  | 1370.670 | 1355.645 | 1370.566 | T[14] |
| A[4]  | 483.140  | 0.000    | 465.135  | 511.144  | 0.000    | 493.133  | 1180.650 | 1172.631 | 1171.647 | A[13] |
| P[5]  | 680.201  | 0.000    | 562.190  | 628.203  | 0.000    | 561.189  | 1110.620 | 1100.594 | 1100.610 | P[12] |
| A[6]  | 812.218  | 0.000    | 693.208  | 749.213  | 0.000    | 691.201  | 1010.580 | 1000.541 | 1000.560 | A[11] |
| A[7]  | 722.219  | 0.000    | 599.205  | 790.211  | 0.000    | 732.200  | 850.531  | 835.505  | 832.520  | A[10] |
| P[8]  | 810.230  | 0.000    | 691.218  | 847.221  | 0.000    | 689.211  | 870.493  | 862.461  | 861.483  | P[9]  |
| A[9]  | 990.266  | 0.000    | 872.255  | 1018.260 | 0.000    | 869.250  | 752.431  | 745.414  | 744.430  | A[8]  |
| A[10] | 891.268  | 0.000    | 769.256  | 909.260  | 0.000    | 819.249  | 711.404  | 696.379  | 695.395  | A[7]  |
| P[11] | 1028.405 | 0.000    | 1000.401 | 1098.405 | 0.000    | 1096.400 | 640.316  | 625.300  | 622.316  | P[10] |
| A[12] | 1170.493 | 0.000    | 1111.482 | 1157.487 | 0.000    | 1139.477 | 563.334  | 526.287  | 525.303  | A[6]  |
| P[13] | 1228.548 | 0.000    | 1168.538 | 1234.540 | 0.000    | 1233.534 | 472.277  | 436.250  | 434.266  | P[8]  |
| A[14] | 1299.582 | 0.000    | 1239.572 | 1325.577 | 0.000    | 1307.561 | 375.222  | 358.191  | 357.213  | A[5]  |
| E[15] | 1430.672 | 0.000    | 1408.651 | 1454.655 | 0.000    | 1431.649 | 304.187  | 287.160  | 286.176  | E[1]  |
| K[16] | 1687.751 | 1589.720 | 1564.741 | 1610.746 | 1697.730 | 1582.710 | 175.144  | 158.110  | 0.000    | K[1]  |



# sp | P43274 | H14\_MOUSE

[Acetyl]SET (Phospho) APAAPAAPAPAEK Dimethyl  
(79.97) 28.03

- ▶ fragmentation table for charge state 1+
- ▶ specType=cid
- ▶ score=46.69
- ▶ F115535.dat
- ▶ query=q5395\_p1
- ▶ precursor=814.884090
- ▶ chargePrecursor=2
- ▶ itol=0.5

| AA    | a        | a*    | a <sub>0</sub> <sup>b</sup> | b        | b*    | b <sub>0</sub> <sup>c</sup> | y        | y*       | y <sub>0</sub> <sup>d</sup> | AA    |
|-------|----------|-------|-----------------------------|----------|-------|-----------------------------|----------|----------|-----------------------------|-------|
| S[1]  | 102.055  | 0.000 | 68.041                      | 130.000  | 0.000 | 112.000                     | 1626.797 | 1811.750 | 1810.746                    | S[16] |
| E[2]  | 231.098  | 0.000 | 213.087                     | 259.092  | 0.000 | 241.082                     | 1480.732 | 1480.689 | 1481.704                    | E[15] |
| T[3]  | 412.112  | 0.000 | 386.103                     | 446.106  | 0.000 | 429.099                     | 1370.637 | 1350.645 | 1370.566                    | T[14] |
| A[4]  | 485.149  | 0.000 | 465.138                     | 511.144  | 0.000 | 491.133                     | 1180.650 | 1172.651 | 1171.647                    | A[13] |
| P[5]  | 1080.201 | 0.000 | 982.180                     | 1048.213 | 0.000 | 960.180                     | 1118.620 | 1109.594 | 1108.610                    | P[12] |
| A[6]  | 1141.218 | 0.000 | 1012.200                    | 1078.213 | 0.000 | 981.201                     | 1011.611 | 1009.541 | 1008.610                    | A[11] |
| A[7]  | 1222.219 | 0.000 | 1093.202                    | 1160.211 | 0.000 | 1102.200                    | 850.531  | 839.504  | 838.530                     | A[10] |
| P[8]  | 1312.220 | 0.000 | 1084.210                    | 1047.221 | 0.000 | 869.211                     | 870.493  | 862.461  | 861.480                     | P[9]  |
| A[9]  | 1390.266 | 0.000 | 1072.255                    | 1115.260 | 0.000 | 860.260                     | 782.432  | 768.414  | 764.430                     | A[8]  |
| A[10] | 1491.268 | 0.000 | 1043.260                    | 1088.265 | 0.000 | 819.260                     | 711.404  | 699.374  | 698.400                     | A[7]  |
| P[11] | 1558.265 | 0.000 | 1040.243                    | 1088.260 | 0.000 | 1086.240                    | 640.316  | 623.340  | 622.316                     | P[10] |
| A[12] | 1170.263 | 0.000 | 1111.260                    | 1117.267 | 0.000 | 1120.267                    | 563.314  | 526.287  | 525.310                     | A[6]  |
| P[13] | 1026.248 | 0.000 | 1048.230                    | 1054.240 | 0.000 | 1238.230                    | 412.277  | 405.250  | 404.266                     | P[11] |
| A[14] | 1209.262 | 0.000 | 1219.272                    | 1225.277 | 0.000 | 1307.270                    | 370.222  | 358.191  | 357.213                     | A[5]  |
| E[15] | 1430.272 | 0.000 | 1438.271                    | 1454.270 | 0.000 | 1431.269                    | 304.187  | 287.160  | 286.176                     | E[12] |
| K[16] | 1687.251 | 1.000 | 1564.242                    | 1610.246 | 1.000 | 1562.240                    | 175.144  | 158.110  | 0.000                       | K[10] |



# sp | P43276 | H15\_MOUSE

[Acetyl]SET<sup>Phospho</sup> APAETAAPAPVEK  
79.97

- ▶ fragmentation table for charge state 1+
- ▶ specType=cid
- ▶ score=62.72
- ▶ F115535.dat
- ▶ query=q5559.p1
- ▶ precursor=845.883120
- ▶ chargePrecursor=2
- ▶ itol=0.5

| AA    | x              | x*    | y        | y*              | b     | b*              | y               | y*              | AA              |
|-------|----------------|-------|----------|-----------------|-------|-----------------|-----------------|-----------------|-----------------|
| E[1]  | 203.050        | 0.000 | 349.044  | 1.00000         | 0.000 | 142.050         | 1090.761        | 1074.711        | 203.047         |
| E[2]  | 233.056        | 0.000 | 213.087  | 256.082         | 0.000 | 291.082         | 1361.710        | 1344.868        | 233.054         |
| T[1]  | 433.143        | 0.000 | 304.101  | 440.100         | 0.000 | <b>422.096</b>  | 1453.707        | <b>1415.845</b> | 433.140         |
| A[4]  | <b>483.149</b> | 0.000 | 466.130  | <b>511.144</b>  | 0.000 | <b>493.133</b>  | <b>1251.658</b> | 1234.515        | 483.147         |
| P[5]  | 580.202        | 0.000 | 542.181  | 628.180         | 0.000 | 560.180         | <b>1180.621</b> | 1163.504        | <b>1162.610</b> |
| A[6]  | 680.219        | 0.000 | 633.208  | 729.210         | 0.000 | 661.210         | 1098.742        | 1080.569        | 680.217         |
| E[7]  | <b>700.281</b> | 0.000 | 762.271  | <b>808.276</b>  | 0.000 | 780.276         | <b>1012.531</b> | 995.504         | 700.279         |
| T[8]  | 801.320        | 0.000 | 813.318  | 899.314         | 0.000 | 811.314         | <b>853.489</b>  | 836.362         | 801.318         |
| A[9]  | 874.360        | 0.000 | 834.351  | 920.347         | 0.000 | <b>862.350</b>  | <b>782.441</b>  | <b>765.414</b>  | 874.358         |
| A[10] | 1021.403       | 0.000 | 1005.392 | 1091.387        | 0.000 | <b>1033.387</b> | <b>711.405</b>  | 694.377         | 1021.401        |
| P[11] | 1130.439       | 0.000 | 1102.443 | 1148.431        | 0.000 | 1131.440        | <b>640.366</b>  | 623.340         | 1130.437        |
| A[12] | 1205.453       | 0.000 | 1173.462 | 1219.449        | 0.000 | 1201.437        | 591.319         | 576.287         | 1205.451        |
| P[13] | 1238.456       | 0.000 | 1216.453 | 1210.444        | 0.000 | 1230.432        | <b>472.271</b>  | 455.250         | 1238.454        |
| V[14] | 1307.454       | 0.000 | 1289.464 | <b>1415.469</b> | 0.000 | 1307.460        | 395.255         | 384.231         | 1307.452        |
| E[15] | 1359.453       | 0.000 | 1408.468 | 1444.457        | 0.000 | 1359.461        | <b>276.155</b>  | 268.139         | 1359.451        |
| A[16] | 1444.455       | 0.000 | 1400.464 | 1492.474        | 0.000 | 1443.470        | 147.111         | 133.080         | 1444.453        |



# sp | P15864 | H12\_MOUSE

[Acetyl]SEAAPAAPAAAPPAEKAPAK

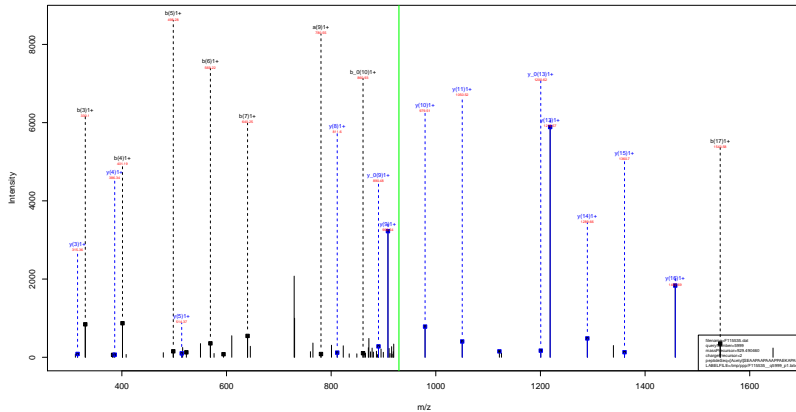

# sp | P15864 | H12\_MOUSE

## [Acetyl]SEAAPAAPAAAPPAEKAPAK

- ▶ fragmentation table for charge state 1+
- ▶ specType=cid
- ▶ score=61.84
- ▶ F115535.dat
- ▶ query=q5999\_p1
- ▶ precursor=929.490460
- ▶ chargePrecursor=2
- ▶ itol=0.5

| AA          | a              | a*       | a $\beta$      | b               | b*       | b $\beta$      | r               | r*       | r $\beta$       | AA          |
|-------------|----------------|----------|----------------|-----------------|----------|----------------|-----------------|----------|-----------------|-------------|
| <b>S</b> 1  | 251.026        | 0.000    | 46.544         | 136.080         | 0.000    | 112.713        | 109.071         | 1346.344 | 1018.966        | <b>S</b> 20 |
| <b>E</b> 2  | 251.026        | 0.000    | 215.087        | 259.092         | 0.000    | 251.052        | 1728.920        | 2711.901 | 1119.917        | <b>E</b> 19 |
| <b>A</b> 3  | 302.130        | 0.000    | 264.124        | <b>130.130</b>  | 0.000    | 192.119        | 1690.885        | 2342.859 | 1011.875        | <b>A</b> 18 |
| <b>A</b> 4  | 353.174        | 0.000    | 315.161        | <b>401.167</b>  | 0.000    | <b>383.156</b> | 1728.895        | 2511.822 | 1513.838        | <b>A</b> 17 |
| <b>P</b> 5  | 410.228        | 0.000    | 426.244        | <b>408.218</b>  | 0.000    | 400.209        | <b>1457.811</b> | 1746.785 | 2478.811        | <b>P</b> 16 |
| <b>A</b> 6  | 541.262        | 0.000    | <b>523.251</b> | <b>568.257</b>  | 0.000    | 551.240        | <b>1380.750</b> | 1343.732 | 1343.748        | <b>A</b> 15 |
| <b>A</b> 7  | 512.266        | 0.000    | <b>594.288</b> | <b>640.294</b>  | 0.000    | 627.281        | <b>1286.721</b> | 1272.695 | 1272.711        | <b>A</b> 14 |
| <b>T</b> 8  | 678.313        | 0.000    | 589.344        | 729.344         | 0.000    | 719.333        | <b>1212.684</b> | 1210.669 | <b>1200.674</b> | <b>T</b> 13 |
| <b>A</b> 9  | <b>798.318</b> | 0.000    | 742.316        | 868.314         | 0.000    | 780.311        | <b>1121.631</b> | 1104.605 | 1101.611        | <b>A</b> 12 |
| <b>A</b> 10 | 851.420        | 0.000    | 814.419        | 874.411         | 0.000    | 860.411        | <b>1050.598</b> | 1033.589 | 1032.584        | <b>A</b> 11 |
| <b>A</b> 11 | 851.420        | 0.000    | 1004.420       | 1062.410        | 0.000    | 1042.410       | <b>974.557</b>  | 962.541  | 961.544         | <b>A</b> 10 |
| <b>P</b> 12 | 1019.410       | 0.000    | 1004.420       | 1047.411        | 0.000    | 1029.420       | <b>900.520</b>  | 885.493  | <b>890.509</b>  | <b>P</b> 9  |
| <b>P</b> 13 | 1116.508       | 0.000    | 1098.508       | 1144.501        | 0.000    | 1126.510       | <b>811.467</b>  | 794.441  | 793.457         | <b>P</b> 8  |
| <b>A</b> 14 | 1187.606       | 0.000    | 1168.606       | 1215.600        | 0.000    | 1187.602       | 714.414         | 697.388  | 696.404         | <b>A</b> 7  |
| <b>E</b> 15 | 1204.606       | 0.000    | 1200.606       | 1244.601        | 0.000    | 1200.612       | 643.391         | 626.365  | 625.371         | <b>E</b> 6  |
| <b>R</b> 16 | 1444.742       | 1437.711 | 1410.711       | 1477.710        | 1465.711 | 1454.712       | <b>514.335</b>  | 497.309  | 0.000           | <b>R</b> 5  |
| <b>A</b> 17 | 1515.780       | 1498.753 | 1497.750       | <b>1543.775</b> | 1526.750 | 1525.750       | <b>386.240</b>  | 369.211  | 0.000           | <b>A</b> 4  |
| <b>P</b> 18 | 1512.810       | 1498.822 | 1498.822       | 1516.822        | 1513.811 | 1512.811       | <b>310.263</b>  | 293.234  | 0.000           | <b>P</b> 4  |
| <b>A</b> 19 | 1563.916       | 1556.844 | 1555.845       | 1711.845        | 1594.836 | 1593.834       | 233.215         | 205.125  | 0.000           | <b>A</b> 3  |
| <b>R</b> 20 | 1611.000       | 1594.938 | 1593.964       | 1622.931        | 1621.949 | 1621.949       | 147.111         | 133.064  | 0.000           | <b>R</b> 3  |

# sp | P43274 | H14\_MOUSE

[Acetyl]SETAPAAPAAPAPAEKTPVK

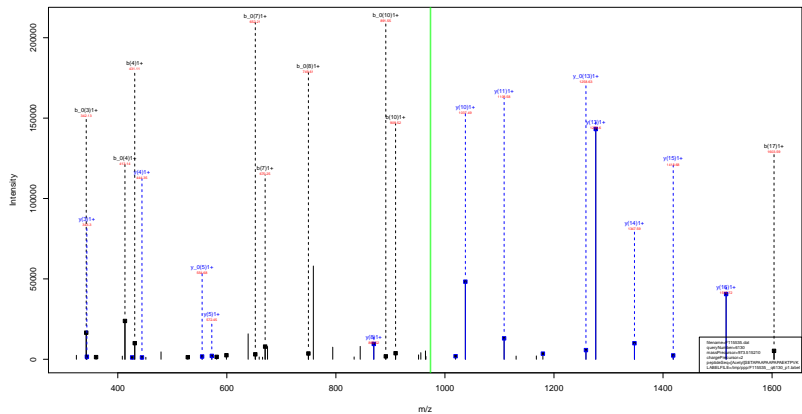

# sp | P43274 | H14\_MOUSE

## [Acetyl]SETAPAAPAAPAPAEKTPVK

- ▶ fragmentation table for charge state 1+
- ▶ specType=cid
- ▶ score=82.86
- ▶ F115535.dat
- ▶ query=q6130.p1
- ▶ precursor=973.515210
- ▶ chargePrecursor=2
- ▶ itol=0.5

| AA          | a        | a*       | a $\beta$ | b               | b*       | b $\beta$      | r               | r*       | r $\beta$      | AA          |
|-------------|----------|----------|-----------|-----------------|----------|----------------|-----------------|----------|----------------|-------------|
| <b>S</b> 1  | 251.050  | 0.000    | 46.044    | 136.000         | 0.000    | 112.733        | 1046.101        | 1046.101 | 1046.101       | <b>S</b> 10 |
| <b>E</b> 2  | 251.050  | 0.000    | 215.087   | 259.000         | 0.000    | 251.050        | 1816.955        | 1816.955 | 1816.955       | <b>E</b> 10 |
| <b>T</b> 3  | 332.140  | 0.000    | 314.130   | <b>360.140</b>  | 0.000    | <b>342.130</b> | 1687.836        | 1687.836 | 1687.836       | <b>T</b> 10 |
| <b>A</b> 4  | 403.130  | 0.000    | 388.172   | <b>431.177</b>  | 0.000    | <b>413.167</b> | 1356.707        | 1356.707 | 1356.707       | <b>A</b> 10 |
| <b>P</b> 5  | 500.170  | 0.000    | 484.226   | <b>526.120</b>  | 0.000    | 510.169        | <b>1515.851</b> | 1515.851 | 1515.851       | <b>P</b> 10 |
| <b>A</b> 6  | 571.212  | 0.000    | 555.263   | <b>599.267</b>  | 0.000    | <b>581.257</b> | <b>1418.800</b> | 1418.800 | 1418.800       | <b>A</b> 15 |
| <b>T</b> 7  | 642.200  | 0.000    | 624.200   | <b>670.204</b>  | 0.000    | <b>652.204</b> | <b>1347.763</b> | 1347.763 | 1347.763       | <b>T</b> 14 |
| <b>T</b> 8  | 678.200  | 0.000    | 722.200   | 769.200         | 0.000    | <b>740.200</b> | <b>1274.720</b> | 1274.720 | 1274.720       | <b>T</b> 13 |
| <b>A</b> 9  | 816.200  | 0.000    | 792.200   | 838.204         | 0.000    | <b>810.204</b> | <b>1174.673</b> | 1174.673 | 1174.673       | <b>A</b> 12 |
| <b>A</b> 10 | 881.430  | 0.000    | 863.430   | <b>909.431</b>  | 0.000    | <b>891.431</b> | <b>1100.630</b> | 1100.630 | 1100.630       | <b>A</b> 11 |
| <b>P</b> 11 | 1016.430 | 0.000    | 998.430   | 1046.434        | 0.000    | 1020.434       | <b>1037.599</b> | 1037.599 | 1037.599       | <b>P</b> 10 |
| <b>A</b> 12 | 1146.430 | 0.000    | 1128.430  | 1177.431        | 0.000    | 1159.431       | 944.544         | 944.544  | 944.544        | <b>A</b> 9  |
| <b>P</b> 13 | 1146.430 | 0.000    | 1128.430  | 1174.574        | 0.000    | 1156.574       | <b>868.500</b>  | 868.500  | 868.500        | <b>P</b> 8  |
| <b>A</b> 14 | 1217.430 | 0.000    | 1199.430  | 1249.511        | 0.000    | 1227.511       | 772.450         | 772.450  | 772.450        | <b>A</b> 7  |
| <b>E</b> 15 | 1386.430 | 0.000    | 1358.430  | 1414.504        | 0.000    | 1376.504       | 654.341         | 654.341  | 654.341        | <b>E</b> 6  |
| <b>R</b> 16 | 1474.704 | 1457.722 | 1450.743  | 1502.749        | 1486.722 | 1484.720       | <b>572.371</b>  | 550.360  | <b>554.360</b> | <b>R</b> 5  |
| <b>T</b> 17 | 1515.200 | 1508.720 | 1507.700  | <b>1603.706</b> | 1586.720 | 1583.720       | <b>444.282</b>  | 422.255  | <b>426.271</b> | <b>T</b> 4  |
| <b>T</b> 18 | 1572.210 | 1565.730 | 1564.710  | 1616.710        | 1603.720 | 1601.720       | <b>343.234</b>  | 326.207  | 326.207        | <b>T</b> 3  |
| <b>V</b> 19 | 1771.522 | 1764.030 | 1753.010  | 1799.017        | 1782.001 | 1781.000       | 246.010         | 225.000  | 225.000        | <b>V</b> 2  |
| <b>K</b> 20 | 1893.011 | 1885.000 | 1880.001  | 1928.012        | 1911.000 | 1910.000       | 147.111         | 133.000  | 0.000          | <b>K</b> 1  |

# sp | P43274 | H14\_MOUSE

[Acetyl]SETAPAAPAAPAPAEKTPVK

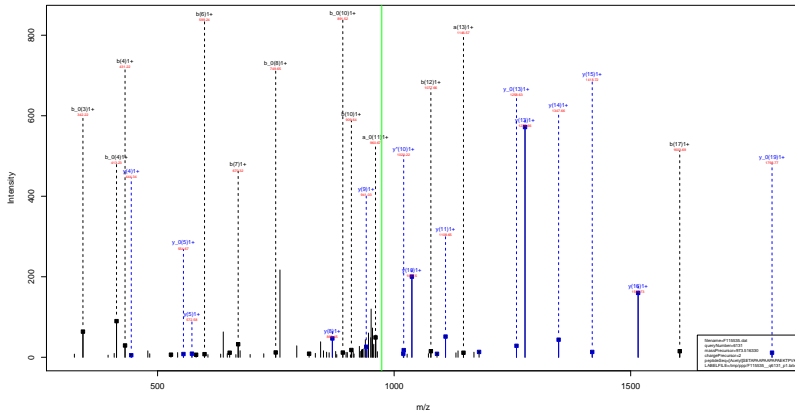

# sp | P43274 | H14\_MOUSE

## [Acetyl]SETAPAAPAAPAPAEKTPVK

- ▶ fragmentation table for charge state 1+
- ▶ specType=cid
- ▶ score=69.74
- ▶ F115535.dat
- ▶ query=q6131.p1
- ▶ precursor=973.516330
- ▶ chargePrecursor=2
- ▶ itol=0.5

| AA    | a        | a'       | a <sub>0</sub> | b        | b'       | b <sub>0</sub> | y        | y'       | y <sub>0</sub> | AA    |
|-------|----------|----------|----------------|----------|----------|----------------|----------|----------|----------------|-------|
| S[1]  | 302.086  | 0.000    | 30.043         | 130.060  | 0.000    | 112.016        | 100.023  | 100.000  | 110.017        | S[2]  |
| E[2]  | 244.098  | 0.000    | 24.018         | 100.062  | 0.000    | 91.003         | 101.000  | 110.000  | 110.000        | E[16] |
| T[3]  | 332.141  | 0.000    | 33.111         | 160.140  | 0.000    | 142.130        | 100.000  | 100.000  | 100.000        | T[10] |
| A[4]  | 405.182  | 0.000    | 39.177         | 170.177  | 0.000    | 111.167        | 100.000  | 100.000  | 100.000        | A[17] |
| T[5]  | 400.200  | 0.000    | 40.000         | 170.200  | 0.000    | 110.000        | 100.000  | 100.000  | 100.000        | T[16] |
| A[6]  | 571.272  | 0.000    | 55.262         | 290.267  | 0.000    | 181.257        | 1418.800 | 1401.774 | 1400.760       | A[25] |
| A[7]  | 642.319  | 0.000    | 62.309         | 320.304  | 0.000    | 162.294        | 1347.763 | 1330.737 | 1330.737       | A[24] |
| T[8]  | 700.362  | 0.000    | 69.352         | 350.357  | 0.000    | 170.346        | 1276.730 | 1259.699 | 1258.735       | T[13] |
| A[9]  | 810.399  | 0.000    | 79.389         | 400.394  | 0.000    | 180.384        | 1178.673 | 1163.647 | 1163.647       | A[23] |
| A[10] | 881.436  | 0.000    | 86.426         | 450.431  | 0.000    | 191.421        | 1108.636 | 1093.610 | 1093.610       | A[22] |
| T[11] | 918.458  | 0.000    | 90.448         | 460.454  | 0.000    | 188.441        | 1037.599 | 1020.572 | 1019.588       | T[18] |
| A[12] | 1048.510 | 0.000    | 102.510        | 507.511  | 0.000    | 207.511        | 940.546  | 925.520  | 925.520        | A[21] |
| P[13] | 1148.579 | 0.000    | 112.569        | 517.574  | 0.000    | 110.565        | 860.509  | 854.483  | 854.489        | P[8]  |
| A[14] | 1217.616 | 0.000    | 119.606        | 526.611  | 0.000    | 117.603        | 772.460  | 758.434  | 758.440        | A[20] |
| T[15] | 1346.668 | 0.000    | 132.658        | 576.654  | 0.000    | 130.654        | 667.419  | 653.393  | 653.400        | T[15] |
| K[16] | 1474.714 | 1407.707 | 1454.741       | 602.749  | 1400.742 | 1404.738       | 572.377  | 568.350  | 554.366        | K[15] |
| T[17] | 1576.801 | 1508.793 | 1557.789       | 1603.796 | 1506.790 | 1505.785       | 444.382  | 442.355  | 438.371        | T[14] |
| T[18] | 1670.844 | 1602.836 | 1604.844       | 1610.849 | 1603.843 | 1603.838       | 326.326  | 324.300  | 320.316        | T[12] |
| V[19] | 1771.822 | 1704.814 | 1713.813       | 1719.817 | 1712.811 | 1711.806       | 206.181  | 205.155  | 200.171        | V[2]  |
| K[20] | 1808.817 | 1802.809 | 1802.809       | 1803.812 | 1801.806 | 1801.800       | 147.111  | 130.000  | 130.000        | K[1]  |



# sp | P43274 | H14\_MOUSE

## [Acetyl]SETAPAAPAAPAPAEKTPVK

- ▶ fragmentation table for charge state 1+
- ▶ specType=cid
- ▶ score=95.91
- ▶ F115535.dat
- ▶ query=q6132.p1
- ▶ precursor=973.516380
- ▶ chargePrecursor=2
- ▶ itol=0.5

| AA          | a        | a*       | a $\beta$ | b               | b*       | b $\beta$      | y               | y*       | y $\beta$      | AA          |
|-------------|----------|----------|-----------|-----------------|----------|----------------|-----------------|----------|----------------|-------------|
| <b>S</b> 1  | 201.098  | 0.000    | 46.944    | 136.099         | 0.000    | 112.719        | 194.010         | 194.010  | 194.010        | <b>S</b> 20 |
| <b>E</b> 2  | 251.098  | 0.000    | 215.087   | 259.092         | 0.000    | 251.092        | 1816.991        | 1816.991 | 1816.991       | <b>E</b> 19 |
| <b>I</b> 3  | 302.140  | 0.000    | 314.139   | <b>360.149</b>  | 0.000    | <b>342.130</b> | 1687.636        | 1687.636 | 1687.636       | <b>I</b> 18 |
| <b>A</b> 4  | 403.182  | 0.000    | 388.172   | <b>431.177</b>  | 0.000    | <b>413.167</b> | 1356.191        | 1356.191 | 1356.191       | <b>A</b> 17 |
| <b>P</b> 5  | 500.226  | 0.000    | 484.226   | 528.224         | 0.000    | 510.219        | <b>1515.851</b> | 1515.851 | 1515.851       | <b>P</b> 16 |
| <b>A</b> 6  | 571.272  | 0.000    | 555.262   | <b>599.267</b>  | 0.000    | <b>581.257</b> | <b>1418.800</b> | 1418.800 | 1418.800       | <b>A</b> 15 |
| <b>T</b> 7  | 642.309  | 0.000    | 624.300   | <b>670.304</b>  | 0.000    | <b>652.294</b> | <b>1347.763</b> | 1347.763 | 1347.763       | <b>T</b> 14 |
| <b>T</b> 8  | 678.303  | 0.000    | 722.302   | 769.307         | 0.000    | <b>740.306</b> | <b>1276.726</b> | 1276.726 | 1276.726       | <b>T</b> 13 |
| <b>A</b> 9  | 818.366  | 0.000    | 792.366   | 838.364         | 0.000    | <b>810.361</b> | <b>1178.673</b> | 1178.673 | 1178.673       | <b>A</b> 12 |
| <b>A</b> 10 | 861.430  | 0.000    | 834.430   | <b>899.431</b>  | 0.000    | <b>891.431</b> | <b>1109.636</b> | 1109.636 | 1109.636       | <b>A</b> 11 |
| <b>F</b> 11 | 1016.474 | 0.000    | 1000.474  | 1036.464        | 0.000    | 1010.471       | <b>1037.599</b> | 1037.599 | 1037.599       | <b>F</b> 10 |
| <b>A</b> 12 | 1249.528 | 0.000    | 1233.528  | 1277.521        | 0.000    | 1259.524       | <b>910.549</b>  | 910.549  | 910.549        | <b>A</b> 9  |
| <b>P</b> 13 | 1446.579 | 0.000    | 1430.579  | 1474.574        | 0.000    | 1456.576       | <b>869.509</b>  | 869.509  | 869.509        | <b>P</b> 8  |
| <b>A</b> 14 | 1617.635 | 0.000    | 1599.635  | 1645.631        | 0.000    | 1627.632       | 772.455         | 772.455  | 772.455        | <b>A</b> 7  |
| <b>E</b> 15 | 1786.690 | 0.000    | 1770.690  | 1816.684        | 0.000    | 1796.687       | 701.401         | 701.401  | 701.401        | <b>E</b> 6  |
| <b>R</b> 16 | 1874.754 | 1457.722 | 1410.743  | 1562.749        | 1486.722 | 1484.720       | <b>572.371</b>  | 555.360  | <b>554.366</b> | <b>R</b> 5  |
| <b>L</b> 17 | 1975.801 | 1538.731 | 1537.730  | <b>1863.796</b> | 1586.730 | 1581.728       | <b>444.282</b>  | 427.252  | 426.211        | <b>L</b> 4  |
| <b>T</b> 18 | 2172.854 | 1631.810 | 1634.814  | 1709.819        | 1633.812 | 1631.810       | <b>343.234</b>  | 326.207  | 325.000        | <b>T</b> 3  |
| <b>V</b> 19 | 2371.922 | 1734.899 | 1735.923  | 1799.927        | 1732.921 | 1731.920       | 249.183         | 235.155  | 233.000        | <b>V</b> 2  |
| <b>K</b> 20 | 2603.011 | 1882.998 | 1883.011  | 1929.012        | 1881.998 | 1881.000       | 147.111         | 133.086  | 0.000          | <b>K</b> 1  |





# sp | P43274 | H14\_MOUSE

## [Acetyl]SETAPAAPAAPAPAEKTPVK

- ▶ fragmentation table for charge state 1+
- ▶ specType=cid
- ▶ score=89.53
- ▶ F115535.dat
- ▶ query=q6133.p1
- ▶ precursor=973.516930
- ▶ chargePrecursor=2
- ▶ itol=0.5

| AA  | a        | a'       | a:2      | b               | b'       | b:2            | y               | y'              | y:2             | AA  |
|-----|----------|----------|----------|-----------------|----------|----------------|-----------------|-----------------|-----------------|-----|
| S1  | 100.000  | 0.000    | 46.644   | 130.000         | 0.000    | 112.000        | 1444.021        | 0.000           | 118.002         | S20 |
| E2  | 112.000  | 0.000    | 213.000  | 259.000         | 0.000    | 241.000        | 1829.000        | <b>1799.034</b> | 1799.000        | E19 |
| T3  | 132.145  | 0.000    | 114.130  | <b>160.140</b>  | 0.000    | <b>342.130</b> | 1487.838        | 1870.001        | 1688.927        | T18 |
| A4  | 403.105  | 0.000    | 385.172  | <b>431.177</b>  | 0.000    | <b>413.167</b> | 1500.000        | 1369.004        | 1588.000        | A17 |
| F5  | 500.000  | 0.000    | 482.000  | 538.000         | 0.000    | 520.000        | 1615.000        | <b>1515.053</b> | 1448.000        | F16 |
| A6  | 571.272  | 0.000    | 503.260  | <b>509.267</b>  | 0.000    | <b>581.251</b> | 1418.000        | 1401.994        | 1400.700        | A15 |
| A7  | 542.200  | 0.000    | 524.200  | <b>570.204</b>  | 0.000    | <b>652.204</b> | 1347.763        | 1330.731        | 1327.000        | A14 |
| T8  | 738.000  | 0.000    | 721.000  | 789.000         | 0.000    | <b>740.240</b> | 1276.720        | 1259.000        | <b>1258.715</b> | T13 |
| A9  | 838.500  | 0.000    | 742.500  | 838.504         | 0.000    | 820.500        | 1179.673        | 1163.047        | 1161.000        | A12 |
| A10 | 881.430  | 0.000    | 854.430  | <b>900.431</b>  | 0.000    | <b>891.421</b> | 1110.630        | 1093.610        | 1090.000        | A11 |
| F11 | 918.400  | 0.000    | 882.410  | 938.404         | 0.000    | 920.410        | <b>1037.509</b> | 1020.512        | <b>1019.588</b> | F10 |
| A12 | 1049.500 | 0.000    | 1011.510 | 1077.503        | 0.000    | 1059.510       | 940.500         | 923.500         | 920.000         | A10 |
| F13 | 1146.000 | 0.000    | 1128.000 | 1174.004        | 0.000    | 1156.000       | <b>866.500</b>  | 853.483         | 851.400         | F10 |
| A14 | 1217.415 | 0.000    | 1199.000 | 1245.011        | 0.000    | 1227.000       | 772.450         | 759.430         | 754.440         | A7  |
| T15 | 1346.000 | 0.000    | 1328.000 | 1374.004        | 0.000    | 1356.000       | 680.410         | 668.383         | 663.000         | T10 |
| R16 | 1474.754 | 1457.770 | 1456.743 | 1502.748        | 1485.770 | 1468.770       | <b>572.377</b>  | <b>555.350</b>  | 554.360         | R10 |
| T17 | 1575.000 | 1558.770 | 1557.761 | <b>1863.796</b> | 1846.770 | 1835.760       | <b>444.382</b>  | 437.250         | <b>426.271</b>  | T10 |
| F18 | 1694.000 | 1678.000 | 1658.000 | 1704.000        | 1688.000 | 1678.000       | <b>343.234</b>  | 336.200         | 335.000         | F10 |
| V19 | 1771.000 | 1754.000 | 1735.012 | <b>1799.017</b> | 1782.000 | 1771.000       | 245.000         | 239.000         | 238.000         | V10 |
| R20 | 1800.000 | 1780.000 | 1760.000 | 1810.000        | 1790.000 | 1780.000       | 147.111         | 130.000         | 0.000           | R10 |



# sp | P43276 | H15\_MOUSE

## [Acetyl]SETAPAETAAPAPVEKSPAK

- ▶ fragmentation table for charge state 1+
- ▶ specType=cid
- ▶ score=76.66
- ▶ F115535.dat
- ▶ query=q6261.p1
- ▶ precursor=997.508430
- ▶ chargePrecursor=2
- ▶ itol=0.5

| AA  | a        | a'       | a:2      | b               | b'       | b:2            | y               | y'              | y:2             | AA  |
|-----|----------|----------|----------|-----------------|----------|----------------|-----------------|-----------------|-----------------|-----|
| S1  | 1321.000 | 0.000    | 460.044  | 732.000         | 0.000    | 112.000        | 1194.000        | 1176.000        | 1176.000        | S20 |
| E2  | 1312.000 | 0.000    | 213.000  | 259.000         | 0.000    | 251.000        | 1024.000        | 1047.000        | 1047.000        | E19 |
| T13 | 1321.145 | 0.000    | 314.130  | <b>160.140</b>  | 0.000    | <b>342.130</b> | 1178.020        | 1178.000        | 1177.862        | T10 |
| A4  | 1053.105 | 0.000    | 305.172  | <b>431.177</b>  | 0.000    | <b>413.167</b> | 1534.070        | 1531.040        | 1530.004        | A17 |
| F3  | 1300.100 | 0.000    | 442.225  | 418.000         | 0.000    | 500.000        | <b>1161.830</b> | 1144.000        | <b>1144.827</b> | F10 |
| A6  | 1111.212 | 0.000    | 303.260  | 389.000         | 0.000    | <b>381.251</b> | 1440.700        | 1440.700        | 1440.700        | A15 |
| E7  | 1301.110 | 0.000    | 184.304  | <b>738.110</b>  | 0.000    | 170.200        | <b>1395.740</b> | 1395.740        | 1397.710        | E14 |
| T16 | 1101.100 | 0.000    | 193.700  | <b>479.357</b>  | 0.000    | <b>411.341</b> | <b>1256.700</b> | <b>1249.670</b> | 1248.000        | T13 |
| A9  | 1172.400 | 0.000    | 104.380  | <b>900.395</b>  | 0.000    | <b>882.384</b> | <b>1165.450</b> | 1145.000        | 1147.040        | A12 |
| A10 | 1011.411 | 0.000    | 1104.100 | <b>971.432</b>  | 0.000    | <b>951.421</b> | <b>1094.620</b> | 1077.000        | <b>1076.610</b> | A13 |
| F11 | 1194.100 | 0.000    | 1022.410 | 1000.000        | 0.000    | 1000.410       | <b>1071.540</b> | 1000.500        | <b>1005.513</b> | F10 |
| A12 | 1111.100 | 0.000    | 1093.110 | 1110.000        | 0.000    | 1121.110       | <b>928.531</b>  | 1000.000        | 1000.000        | A10 |
| F15 | 1108.110 | 0.000    | 1191.040 | 1110.000        | 0.000    | 1110.040       | <b>855.491</b>  | 1000.000        | 1000.000        | F10 |
| V14 | 1107.040 | 0.000    | 1209.030 | 1130.040        | 0.000    | 1117.030       | 790.440         | 741.410         | 740.430         | V17 |
| E15 | 1176.040 | 0.000    | 1111.000 | 1040.000        | 0.000    | 1140.000       | <b>850.372</b>  | 1000.000        | <b>1000.000</b> | E10 |
| R16 | 1164.100 | 1147.710 | 1140.710 | 1000.000        | 1147.710 | 1074.710       | <b>530.330</b>  | 513.360         | <b>512.310</b>  | R10 |
| S17 | 1051.011 | 1034.701 | 1033.007 | <b>1079.812</b> | 1000.710 | 1061.001       | <b>402.330</b>  | 384.720         | <b>384.720</b>  | S14 |
| F18 | 1142.110 | 1110.000 | 1110.000 | 1110.000        | 1110.000 | 1110.000       | <b>315.201</b>  | 298.170         | 298.170         | F10 |
| A19 | 1110.100 | 1002.000 | 1001.000 | 1047.000        | 1000.000 | 1020.000       | 210.000         | 201.110         | 200.000         | A12 |
| R20 | 1140.100 | 1000.000 | 1020.000 | 1010.000        | 1000.000 | 1007.000       | 147.110         | 130.000         | 130.000         | R10 |



# sp | P43274 | H14\_MOUSE

[Acetyl]SETAPAAPAAPAPAEKT<sup>Phospho</sup> PVK  
79.97

- ▶ fragmentation table for charge state 1+
- ▶ specType=cid
- ▶ score=64.57
- ▶ F115535.dat
- ▶ query=q6312.p1
- ▶ precursor=1013.499300
- ▶ chargePrecursor=2
- ▶ itol=0.5

| AA  | a        | a'       | a,2      | b               | b'       | b,2             | y               | y'       | y,2             | AA  |
|-----|----------|----------|----------|-----------------|----------|-----------------|-----------------|----------|-----------------|-----|
| S1  | 1321.000 | 0.000    | 466.044  | 1321.000        | 0.000    | 1321.000        | 2626.000        | 2626.000 | 2626.000        | S1  |
| E2  | 432.000  | 0.000    | 213.000  | 259.000         | 0.000    | 259.000         | 1195.000        | 1195.000 | 1195.000        | E2  |
| T3  | 132.145  | 0.000    | 114.130  | <b>160.140</b>  | 0.000    | <b>342.130</b>  | 1180.000        | 1170.870 | 1170.884        | T3  |
| A4  | 405.105  | 0.000    | 385.172  | <b>431.177</b>  | 0.000    | <b>413.167</b>  | 1660.000        | 1649.830 | 1649.846        | A4  |
| F5  | 500.200  | 0.000    | 442.225  | 438.200         | 0.000    | 519.200         | <b>1558.210</b> | 1519.793 | 1517.809        | F5  |
| A6  | 371.212  | 0.000    | 305.260  | <b>359.267</b>  | 0.000    | <b>581.257</b>  | 1448.000        | 1441.740 | 1440.795        | A6  |
| A7  | 1242.200 | 0.000    | 1242.200 | <b>170.204</b>  | 0.000    | <b>652.204</b>  | <b>1427.229</b> | 1410.703 | 1410.719        | A7  |
| F8  | 178.300  | 0.000    | 171.300  | 167.300         | 0.000    | <b>740.345</b>  | <b>1335.000</b> | 1339.000 | <b>1338.002</b> | F8  |
| A9  | 100.300  | 0.000    | 162.300  | 158.300         | 0.000    | <b>820.304</b>  | 1220.000        | 1242.000 | 1241.000        | A9  |
| A10 | 101.400  | 0.000    | 163.400  | <b>169.431</b>  | 0.000    | <b>891.421</b>  | <b>1188.602</b> | 1113.610 | 1110.602        | A10 |
| F11 | 118.400  | 0.000    | 109.410  | 108.400         | 0.000    | 165.410         | <b>1117.585</b> | 1100.520 | 1099.500        | F11 |
| A12 | 1249.100 | 0.000    | 1011.100 | 1017.100        | 0.000    | 1019.100        | 1967.100        | 1967.100 | 1967.100        | A12 |
| F13 | 1146.100 | 0.000    | 1118.100 | 1114.100        | 0.000    | 1116.100        | <b>948.475</b>  | 913.444  | <b>931.465</b>  | F13 |
| A14 | 1217.100 | 0.000    | 1199.100 | 1245.100        | 0.000    | 1227.100        | 1852.100        | 1852.100 | <b>835.396</b>  | A14 |
| F15 | 1146.000 | 0.000    | 1120.000 | 1114.000        | 0.000    | <b>1326.443</b> | 191.000         | 194.000  | 193.000         | F15 |
| R16 | 1474.754 | 1457.722 | 1456.743 | 1552.749        | 1455.722 | 1454.730        | <b>652.343</b>  | 655.310  | 654.322         | R16 |
| T17 | 1055.700 | 1038.741 | 1037.757 | <b>1063.763</b> | 1056.716 | 1055.702        | <b>124.260</b>  | 107.221  | 106.237         | T17 |
| F18 | 1162.000 | 1145.000 | 1144.000 | 1160.000        | 1159.000 | 1158.000        | <b>245.234</b>  | 245.200  | 245.165         | F18 |
| V19 | 1351.000 | 1334.000 | 1333.000 | 1352.000        | 1351.000 | 1350.000        | 245.100         | 245.100  | 245.100         | V19 |
| K20 | 1019.000 | 1002.000 | 1001.000 | 1018.000        | 1017.000 | 1016.000        | 147.110         | 147.100  | 147.100         | K20 |

# sp | P43274 | H14\_MOUSE

[Acetyl]SETAPAAPAAPAEKT<sup>Phospho</sup> PVK  
79.97

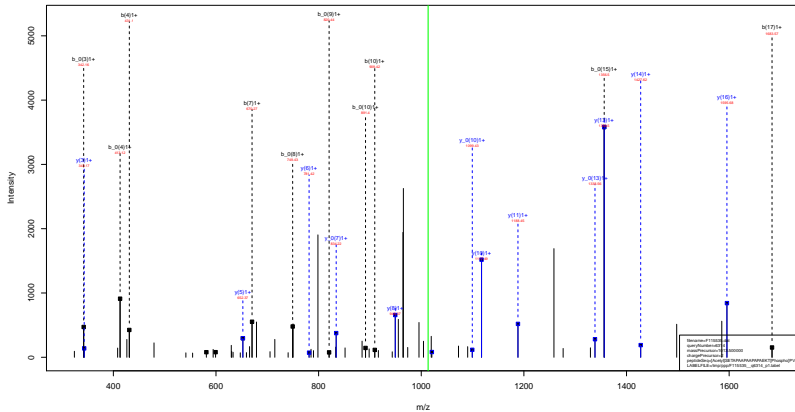

# sp | P43274 | H14\_MOUSE

[Acetyl]SETAPAAPAAPAPAEKT<sup>Phospho</sup> PVK<sub>79.97</sub>

- ▶ fragmentation table for charge state 1+
- ▶ specType=cid
- ▶ score=72.14
- ▶ F115535.dat
- ▶ query=q6314.p1
- ▶ precursor=1013.50000
- ▶ chargePrecursor=2
- ▶ itol=0.5

| AA  | a        | a'       | a,2      | b               | b'       | b,2             | y               | y'       | y,2             | AA  |
|-----|----------|----------|----------|-----------------|----------|-----------------|-----------------|----------|-----------------|-----|
| S1  | 100.000  | 0.000    | 46.044   | 130.000         | 0.000    | 142.000         | 202.000         | 202.000  | 202.000         | S1  |
| E2  | 131.000  | 0.000    | 213.000  | 252.000         | 0.000    | 261.000         | 1105.000        | 1179.000 | 1179.000        | E2  |
| T3  | 152.145  | 0.000    | 314.135  | 360.140         | 0.000    | <b>342.130</b>  | 1187.004        | 1170.878 | 1174.884        | T3  |
| A4  | 405.105  | 0.000    | 385.172  | <b>431.177</b>  | 0.000    | <b>413.167</b>  | 1060.000        | 1049.830 | 1048.048        | A4  |
| P5  | 500.000  | 0.000    | 442.000  | 438.000         | 0.000    | 519.000         | <b>1558.118</b> | 1519.793 | 1517.800        | P5  |
| A6  | 571.292  | 0.000    | 505.260  | <b>509.267</b>  | 0.000    | <b>581.257</b>  | 1488.000        | 1481.740 | 1480.790        | A6  |
| A7  | 542.200  | 0.000    | 524.200  | <b>670.204</b>  | 0.000    | <b>652.204</b>  | <b>1427.729</b> | 1410.700 | 1409.710        | A7  |
| T8  | 178.300  | 0.000    | 713.300  | 707.300         | 0.000    | <b>740.345</b>  | <b>1358.000</b> | 1339.800 | <b>1338.602</b> | T8  |
| A9  | 638.300  | 0.000    | 742.300  | 838.304         | 0.000    | <b>820.384</b>  | 1220.000        | 1242.815 | 1241.000        | A9  |
| A10 | 681.400  | 0.000    | 683.400  | <b>909.431</b>  | 0.000    | <b>891.421</b>  | <b>1188.600</b> | 1113.510 | 1110.900        | A10 |
| T11 | 118.400  | 0.000    | 692.410  | 698.404         | 0.000    | 765.410         | <b>1117.500</b> | 1100.500 | <b>1099.555</b> | T11 |
| A12 | 1049.500 | 0.000    | 1011.510 | 1017.510        | 0.000    | 1019.510        | 1002.000        | 1002.000 | 1002.000        | A12 |
| P13 | 1146.510 | 0.000    | 1118.508 | 1174.514        | 0.000    | 1156.505        | <b>848.475</b>  | 814.444  | 811.465         | P13 |
| A14 | 1217.415 | 0.000    | 1199.408 | 1249.411        | 0.000    | 1227.405        | 852.423         | 835.366  | <b>834.412</b>  | A14 |
| T15 | 1146.400 | 0.000    | 1130.400 | 1174.404        | 0.000    | <b>1306.443</b> | <b>781.388</b>  | 784.300  | 781.378         | T15 |
| R16 | 1474.754 | 1457.722 | 1456.743 | 1502.748        | 1485.722 | 1484.730        | <b>652.343</b>  | 655.310  | 654.321         | R16 |
| T17 | 1055.700 | 1038.741 | 1037.757 | <b>1063.763</b> | 1066.716 | 1065.762        | 624.240         | 587.221  | 586.217         | T17 |
| P18 | 1362.800 | 1349.790 | 1348.810 | 1394.809        | 1393.800 | 1392.800        | <b>343.234</b>  | 339.260  | 338.260         | P18 |
| V19 | 1351.500 | 1334.852 | 1333.870 | 1372.864        | 1371.857 | 1371.871        | 246.151         | 249.155  | 248.150         | V19 |
| K20 | 1019.504 | 1002.850 | 1001.870 | 1047.874        | 1046.864 | 1045.860        | 147.111         | 130.000  | 0.000           | K20 |



# sp | P43275 | H11\_MOUSE

[Acetyl]SETAPVAQAAS<sup>16</sup>TEKPAAAK

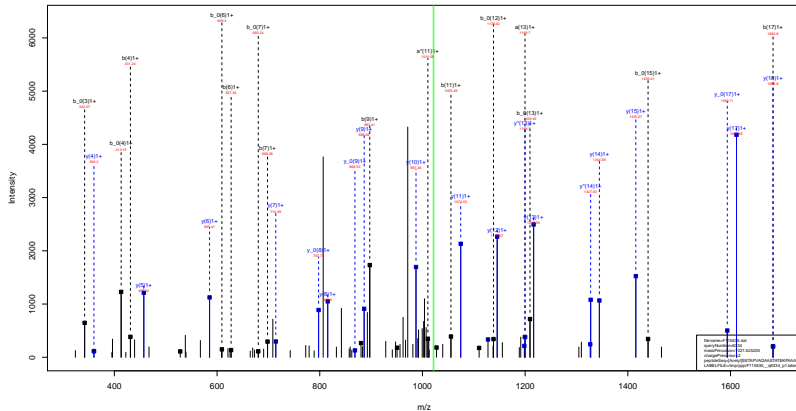

# sp | P43275 | H11\_MOUSE

## [Acetyl]SETAPVAQAASSTATEKPA<sup>+</sup>AAK

- ▶ fragmentation table for charge state 1+
- ▶ specType=cid
- ▶ score=108.59
- ▶ F115535.dat
- ▶ query=q6334.p1
- ▶ precursor=1021.525200
- ▶ chargePrecursor=2
- ▶ itol=0.5

| AA  | a               | b               | a+b             | b               | b <sup>2</sup>  | b <sup>2</sup>  | b               | a <sup>2</sup>  | a+b             | AA   |
|-----|-----------------|-----------------|-----------------|-----------------|-----------------|-----------------|-----------------|-----------------|-----------------|------|
| E1  | 1211.068        | 0.000           | 1211.068        | 0.000           | 0.000           | 0.000           | 0.000           | 0.000           | 1211.068        | E20  |
| E2  | 1111.068        | 0.000           | 1111.068        | 0.000           | 0.000           | 0.000           | 0.000           | 0.000           | 1111.068        | E19  |
| T13 | 1037.145        | 0.000           | 1037.145        | <b>300.140</b>  | 0.000           | <b>302.130</b>  | 0.000           | 0.000           | 1037.145        | T108 |
| A14 | 937.145         | 0.000           | 937.145         | <b>421.177</b>  | 0.000           | <b>413.187</b>  | 0.000           | 0.000           | 937.145         | A109 |
| P15 | 837.145         | 0.000           | 837.145         | <b>528.230</b>  | 0.000           | <b>520.268</b>  | 0.000           | 0.000           | 837.145         | P17  |
| V16 | 737.145         | 0.000           | 737.145         | <b>627.260</b>  | 0.000           | <b>609.268</b>  | 0.000           | 0.000           | 737.145         | V106 |
| A17 | 637.145         | 0.000           | 637.145         | <b>698.330</b>  | 0.000           | <b>660.325</b>  | 0.000           | 0.000           | 637.145         | A10  |
| Q18 | 537.145         | 0.000           | 537.145         | <b>750.350</b>  | 0.000           | <b>702.340</b>  | 0.000           | 0.000           | 537.145         | Q14  |
| A19 | 437.145         | 0.000           | 437.145         | <b>781.420</b>  | 0.000           | <b>733.410</b>  | 0.000           | 0.000           | 437.145         | A13  |
| A10 | 337.145         | 0.000           | 337.145         | <b>802.490</b>  | 0.000           | <b>754.480</b>  | 0.000           | 0.000           | 337.145         | A12  |
| S10 | <b>1027.505</b> | <b>8018.478</b> | <b>1027.505</b> | <b>1005.500</b> | <b>1005.500</b> | <b>1005.500</b> | <b>1005.500</b> | <b>1005.500</b> | <b>1027.505</b> | S21  |
| T12 | 1128.633        | 1181.627        | <b>1110.543</b> | 1108.640        | 1139.622        | <b>1108.537</b> | <b>887.547</b>  | 888.520         | 889.539         | T108 |
| A11 | <b>1198.580</b> | 1187.649        | 1181.627        | 1180.700        | 1211.679        | <b>1198.575</b> | <b>886.488</b>  | 887.441         | <b>884.489</b>  | A18  |
| T14 | 1100.730        | 1203.613        | 1200.620        | 1200.620        | 1211.708        | 1200.620        | <b>815.462</b>  | 795.435         | <b>797.452</b>  | T18  |
| E15 | 1020.681        | 1401.604        | 1411.670        | 1407.670        | 1440.640        | <b>1439.685</b> | <b>714.414</b>  | 687.388         | 688.404         | E17  |
| T16 | 1007.670        | 1400.580        | 1400.580        | 1400.580        | 1400.580        | 1400.580        | <b>702.372</b>  | 680.345         | 681.360         | T16  |
| P17 | 914.610         | 1317.602        | 1317.602        | 1317.602        | 1317.602        | 1317.602        | <b>657.277</b>  | 645.250         | 646.265         | P17  |
| A18 | 820.685         | 1198.609        | 1197.600        | 1193.600        | 1193.600        | <b>640.224</b>  | 643.198         | 640.000         | 641.015         | A14  |
| A19 | 726.660         | 1178.610        | 1178.610        | 1174.610        | 1174.610        | 1174.610        | 600.110         | 600.110         | 600.110         | A13  |
| A20 | 632.640         | 1090.613        | 1090.613        | 1086.613        | 1086.613        | 1086.613        | 558.010         | 558.010         | 558.010         | A12  |
| K21 | 538.620         | 1000.616        | 1000.616        | 1000.616        | 1000.616        | 1000.616        | 516.110         | 516.110         | 516.110         | K13  |



# sp | P15864 | H12\_MOUSE

[Acetyl]S<sup>Phospho</sup><sub>79.97</sub> EAAPAAPAAAPPAEKAPAKK

- ▶ fragmentation table for charge state 1+
- ▶ specType=cid
- ▶ score=53.66
- ▶ F115535.dat
- ▶ query=q6359\_p1
- ▶ precursor=689.349330
- ▶ chargePrecursor=3
- ▶ itol=0.5

| AA | a  | a'       | a <sub>0</sub> | b              | b'             | b <sub>0</sub> | y        | y'       | y <sub>0</sub> | AA       |       |
|----|----|----------|----------------|----------------|----------------|----------------|----------|----------|----------------|----------|-------|
| S  | 1  | 182.021  | 0.000          | 184.011        | 2010.010       | 0.000          | 182.000  | 2009.010 | 2049.020       | 2048.021 | S(2)  |
| E  | 2  | 131.064  | 0.000          | 281.051        | 220.000        | 0.000          | 131.040  | 1897.021 | 1839.060       | 1838.012 | E(2)  |
| A  | 3  | 102.010  | 0.000          | 184.000        | <b>418.000</b> | 0.000          | 102.000  | 1727.060 | 1719.064       | 1709.010 | A(3)  |
| A  | 4  | 455.030  | 0.000          | 455.120        | <b>481.133</b> | 0.000          | 453.120  | 1656.941 | 1619.911       | 1618.913 | A(4)  |
| P  | 5  | 350.010  | 0.000          | 132.100        | 379.100        | 0.000          | 349.100  | 1350.000 | 1350.000       | 1349.000 | P(5)  |
| A  | 6  | 624.220  | 0.000          | 624.211        | 1402.211       | 0.000          | 624.212  | 1420.000 | 1417.800       | 1416.043 | A(6)  |
| A  | 7  | 692.200  | 0.000          | <b>674.255</b> | <b>720.260</b> | 0.000          | 692.200  | 1417.810 | 1400.700       | 1399.800 | A(7)  |
| P  | 8  | 396.310  | 0.000          | 371.301        | 387.313        | 0.000          | 396.300  | 1346.770 | 1328.753       | 1328.768 | P(8)  |
| A  | 9  | 380.300  | 0.000          | 342.301        | 380.300        | 0.000          | 379.300  | 1249.720 | 1232.700       | 1231.710 | A(9)  |
| A  | 10 | 438.300  | 0.000          | 341.300        | 389.301        | 0.000          | 437.300  | 1218.000 | 1214.000       | 1213.000 | A(10) |
| A  | 11 | 1000.000 | 0.000          | 994.410        | 1000.000       | 0.000          | 1012.414 | 1107.000 | 1099.000       | 1099.047 | A(11) |
| P  | 12 | 1099.000 | 0.000          | 1081.411       | 1127.411       | 0.000          | 1109.400 | 1030.000 | 1018.000       | 1018.004 | P(12) |
| P  | 13 | 1136.030 | 0.000          | 1120.524       | 1224.530       | 0.000          | 1136.510 | 930.560  | 922.530        | 921.532  | P(13) |
| A  | 14 | 1287.010 | 0.000          | 1240.501       | 1299.501       | 0.000          | 1277.000 | 840.500  | 828.481        | 824.600  | A(14) |
| E  | 15 | 1198.014 | 0.000          | 1178.004       | 1424.000       | 0.000          | 1198.500 | 771.472  | 764.440        | 751.462  | E(15) |
| K  | 16 | 1124.700 | 1001.000       | 1100.000       | 1150.700       | 1001.000       | 1034.000 | 682.430  | 674.401        | 660.000  | K(16) |
| A  | 17 | 1105.014 | 1019.010       | 1077.000       | 1124.014       | 1006.014       | 1020.010 | 518.130  | 497.200        | 480.000  | A(17) |
| P  | 18 | 1200.700 | 1035.713       | 1074.500       | 1120.700       | 1103.700       | 1102.704 | 441.200  | 425.201        | 410.000  | P(18) |
| A  | 19 | 1163.030 | 1046.030       | 1140.000       | 1174.030       | 1174.030       | 1174.030 | 340.740  | 329.210        | 300.000  | A(19) |
| K  | 20 | 1091.011 | 1074.000       | 1074.001       | 1010.000       | 1002.000       | 1001.010 | 275.200  | 268.181        | 260.000  | K(20) |
| K  | 21 | 1030.010 | 1001.000       | 1001.011       | 1040.011       | 1030.000       | 1030.011 | 147.110  | 130.000        | 100.000  | K(21) |

# sp | P15864 | H12\_MOUSE

[Acetyl]S<sup>Phospho</sup><sub>79.97</sub> EAAPAAPAAAPPAEKAPAKK

- ▶ fragmentation table for charge state 2+
- ▶ specType=cid
- ▶ score=53.66
- ▶ F115535.dat
- ▶ query=q6359\_p1
- ▶ precursor=689.349330
- ▶ chargePrecursor=3
- ▶ itol=0.5

| AA | a  | a'       | a <sub>0</sub> β | b        | b'       | b <sub>0</sub> β | y        | y'             | y <sub>0</sub> β | AA       |       |
|----|----|----------|------------------|----------|----------|------------------|----------|----------------|------------------|----------|-------|
| S  | 1  | 91.634   | 0.504            | 82.559   | 305.512  | 0.504            | 96.506   | 373.120        | 1103.064         | 1104.514 | S(2)  |
| E  | 2  | 136.076  | 0.504            | 147.059  | 170.033  | 0.504            | 101.028  | 272.112        | 505.560          | 502.010  | E(2)  |
| A  | 3  | 170.054  | 0.504            | 181.549  | 205.524  | 0.504            | 106.046  | <b>864.484</b> | 103.589          | 1004.046 | A(3)  |
| A  | 4  | 227.073  | 0.504            | 238.054  | 241.030  | 0.504            | 232.085  | <b>828.975</b> | 325.463          | 319.970  | A(4)  |
| P  | 5  | 275.059  | 0.504            | 286.044  | 289.507  | 0.504            | 287.091  | <b>783.457</b> | 104.943          | 104.451  | P(5)  |
| A  | 6  | 311.138  | 0.504            | 322.112  | 326.115  | 0.504            | 316.138  | 104.172        | 136.411          | 137.026  | A(6)  |
| A  | 7  | 346.076  | 0.504            | 373.031  | 369.034  | 0.504            | 351.028  | <b>700.412</b> | 700.000          | 670.000  | A(7)  |
| P  | 8  | 395.103  | 0.504            | 396.157  | 400.160  | 0.504            | 400.159  | <b>671.893</b> | 965.385          | 1064.888 | P(8)  |
| A  | 9  | 430.081  | 0.504            | 421.070  | 444.073  | 0.504            | 435.073  | 620.267        | 612.024          | 616.762  | A(9)  |
| A  | 10 | 466.008  | 0.504            | 467.099  | 486.101  | 0.504            | 472.101  | 389.149        | 381.109          | 388.014  | A(10) |
| A  | 11 | 504.928  | 0.504            | 492.113  | 525.116  | 0.504            | 506.116  | <b>554.330</b> | 549.024          | 545.124  | A(11) |
| P  | 12 | 530.040  | 0.504            | 541.239  | 564.243  | 0.504            | 535.237  | <b>518.811</b> | 510.000          | 500.000  | P(12) |
| P  | 13 | 588.771  | 0.504            | 589.765  | 612.769  | 0.504            | 603.763  | 430.285        | 461.772          | 461.270  | P(13) |
| A  | 14 | 634.209  | 0.504            | 626.209  | 646.207  | 0.504            | 630.203  | 423.709        | 413.245          | 413.753  | A(14) |
| E  | 15 | 686.811  | 0.504            | 689.820  | 712.823  | 0.504            | 703.823  | 386.240        | 371.221          | 377.235  | E(15) |
| K  | 16 | 752.808  | 0.504            | 753.803  | 776.806  | 0.504            | 767.801  | 321.728        | 313.209          | 314.704  | K(16) |
| A  | 17 | 788.777  | 0.504            | 789.772  | 812.774  | 0.504            | 793.769  | 297.671        | 289.238          | 290.744  | A(17) |
| P  | 18 | 846.959  | 0.504            | 837.959  | 860.961  | 0.504            | 851.956  | 222.152        | 213.620          | 214.114  | P(18) |
| A  | 19 | 892.422  | 0.504            | 893.417  | 906.419  | 0.504            | 897.414  | 174.626        | 169.111          | 169.614  | A(19) |
| K  | 20 | 946.469  | 0.504            | 937.464  | 960.467  | 0.504            | 951.461  | 136.100        | 129.584          | 130.084  | K(20) |
| K  | 21 | 1000.917 | 0.504            | 1001.911 | 1024.914 | 0.504            | 1016.909 | 101.000        | 93.584           | 94.084   | K(21) |

# sp | P43276 | H15\_MOUSE

[Acetyl]SETAPAETAAPAPVEKSPAKK

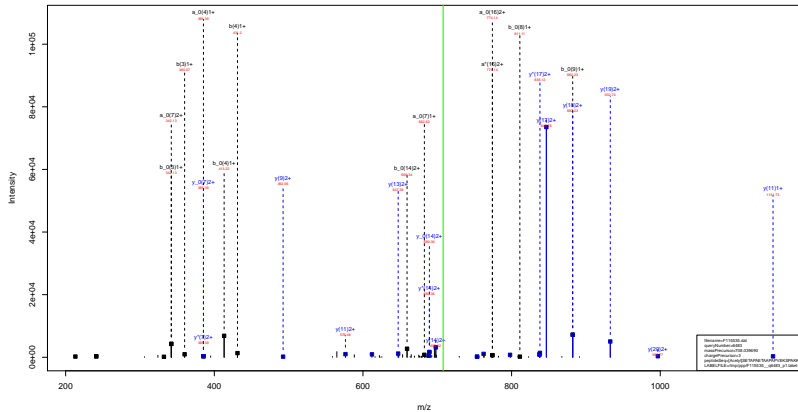

# sp | P43276 | H15\_MOUSE

## [Acetyl]SETAPAETAAPAPVEKSPAKK

- ▶ fragmentation table for charge state 1+
- ▶ specType=cid
- ▶ score=71.68
- ▶ F115535.dat
- ▶ query=q6483\_p1
- ▶ precursor=708.039690
- ▶ chargePrecursor=3
- ▶ itol=0.5

| AA    | a              | a'       | a,b            | b              | b'       | b,b'           | y        | y'       | y,b      | AA    |
|-------|----------------|----------|----------------|----------------|----------|----------------|----------|----------|----------|-------|
| S(1)  | 169.058        | 0.000    | 168.041        | 130.050        | 0.000    | 119.029        | 2142.110 | 2210.074 | 204.006  | S(2)  |
| E(2)  | 199.099        | 0.000    | <b>213.087</b> | 225.092        | 0.000    | <b>241.082</b> | 1801.050 | 1870.037 | 1715.048 | E(3)  |
| T(3)  | <b>312.145</b> | 0.000    | 144.133        | <b>306.140</b> | 0.000    | <b>342.130</b> | 1888.011 | 1948.993 | 1746.009 | T(4)  |
| A(4)  | 403.182        | 0.000    | <b>385.172</b> | <b>431.177</b> | 0.000    | <b>413.167</b> | 1750.010 | 1745.943 | 1744.859 | A(5)  |
| P(5)  | 500.215        | 0.000    | 487.220        | 528.220        | 0.000    | 510.219        | 1681.010 | 1674.904 | 1671.822 | P(6)  |
| A(6)  | 571.272        | 0.000    | 559.263        | 599.267        | 0.000    | 581.261        | 1584.002 | 1577.893 | 1576.809 | A(7)  |
| T(7)  | 700.315        | 0.000    | <b>682.304</b> | 728.310        | 0.000    | 710.309        | 1470.991 | 1466.914 | 1465.832 | T(8)  |
| T(8)  | 800.352        | 0.000    | <b>783.341</b> | 829.347        | 0.000    | <b>811.347</b> | 1354.000 | 1347.914 | 1346.790 | T(9)  |
| A(9)  | 872.402        | 0.000    | 854.389        | 900.395        | 0.000    | <b>882.384</b> | 1261.001 | 1256.720 | 1255.742 | A(10) |
| A(10) | 944.447        | 0.000    | 926.430        | 972.437        | 0.000    | 954.431        | 1167.011 | 1162.889 | 1161.766 | A(11) |
| P(11) | 1040.489       | 0.000    | 1022.470       | 1068.484       | 0.000    | 1050.474       | 1070.000 | 1065.811 | 1064.708 | P(12) |
| A(12) | 1111.527       | 0.000    | 1093.510       | 1139.522       | 0.000    | 1121.511       | 1004.000 | 999.769  | 998.610  | A(13) |
| P(13) | 1208.570       | 0.000    | 1190.550       | 1236.574       | 0.000    | 1218.564       | 983.000  | 978.762  | 977.576  | P(14) |
| V(14) | 1307.608       | 0.000    | 1289.591       | 1335.604       | 0.000    | 1317.600       | 908.000  | 903.760  | 902.566  | V(15) |
| E(15) | 1436.650       | 0.000    | 1418.630       | 1464.645       | 0.000    | 1446.635       | 787.000  | 779.441  | 769.437  | E(16) |
| K(16) | 1504.703       | 1267.700 | 1486.770       | 1532.780       | 1375.754 | 1514.770       | 658.000  | 643.300  | 640.414  | K(17) |
| S(17) | 1612.817       | 1624.810 | 1604.880       | 1650.892       | 1642.786 | 1631.800       | 530.000  | 511.300  | 512.219  | S(18) |
| P(18) | 1748.910       | 1731.894 | 1730.880       | 1776.895       | 1759.836 | 1758.824       | 443.000  | 426.271  | 0.000    | P(19) |
| A(19) | 1813.957       | 1802.940 | 1801.920       | 1847.931       | 1830.870 | 1829.860       | 366.000  | 329.211  | 0.000    | A(20) |
| K(20) | 1948.050       | 1929.035 | 1930.992       | 1975.997       | 1958.971 | 1957.960       | 275.000  | 258.187  | 0.000    | K(21) |
| K(21) | 1976.097       | 1959.070 | 1958.052       | 2003.062       | 1987.006 | 1986.000       | 141.000  | 131.000  | 0.000    | K(22) |

# sp | P43276 | H15\_MOUSE

## [Acetyl]SETAPAETAAPAPVEKSPAKK

- ▶ fragmentation table for charge state 2+
- ▶ specType=cid
- ▶ score=71.68
- ▶ F115535.dat
- ▶ query=q6483\_p1
- ▶ precursor=708.039690
- ▶ chargePrecursor=3
- ▶ itol=0.5

| AA    | a         | a'             | a $\Delta$     | b        | b'       | b $\Delta$     | y              | y'             | y $\Delta$     | AA    |
|-------|-----------|----------------|----------------|----------|----------|----------------|----------------|----------------|----------------|-------|
| S[1]  | 91.631    | 0.504          | 42.520         | 89.929   | 0.504    | 86.923         | 3061.930       | 1003.040       | 2058.890       | S[2]  |
| E[1]  | 11.12.052 | 0.504          | 107.047        | 110.050  | 0.504    | 111.050        | <b>997.034</b> | 888.520        | 1088.512       | E[2]  |
| T[5]  | 100.076   | 0.504          | 101.911        | 100.374  | 0.504    | 112.068        | <b>921.121</b> | 923.799        | 1023.000       | T[10] |
| A[4]  | 400.095   | 0.504          | 193.000        | 215.062  | 0.504    | 201.081        | <b>861.009</b> | 915.475        | 1012.063       | A[20] |
| P[5]  | 200.071   | 0.507          | <b>241.616</b> | 204.919  | 0.504    | 205.011        | <b>846.470</b> | <b>837.951</b> | <b>837.465</b> | P[17] |
| A[6]  | 200.040   | 0.504          | 21.134         | 200.137  | 0.504    | 201.134        | <b>797.924</b> | 788.475        | 788.212        | A[16] |
| E[7]  | 700.081   | 0.504          | <b>341.656</b> | 304.059  | 0.504    | 305.059        | <b>762.426</b> | <b>755.912</b> | <b>753.420</b> | E[13] |
| T[8]  | 401.105   | 0.504          | 392.101        | 415.163  | 0.504    | 406.177        | <b>697.904</b> | <b>649.390</b> | <b>648.898</b> | T[14] |
| A[9]  | 11.32.111 | 0.504          | 427.000        | 401.101  | 0.504    | 411.000        | <b>647.300</b> | 630.000        | 630.175        | A[13] |
| A[10] | 417.212   | 0.504          | 461.211        | 486.214  | 0.504    | 497.214        | <b>611.861</b> | 601.349        | 602.006        | A[22] |
| P[11] | 210.048   | 0.504          | 311.141        | 335.144  | 0.504    | 326.141        | <b>576.341</b> | 567.030        | 566.337        | P[11] |
| A[12] | 310.087   | 0.507          | 347.087        | 319.084  | 0.504    | 361.089        | 537.030        | 519.030        | 518.011        | A[10] |
| P[13] | 604.791   | 0.504          | 595.790        | 618.791  | 0.504    | 620.791        | <b>492.396</b> | 483.790        | 483.293        | P[16] |
| V[4]  | 404.219   | 0.504          | 405.219        | 406.219  | 0.504    | <b>659.130</b> | 443.131        | 435.290        | 434.766        | V[8]  |
| E[15] | 110.040   | 0.504          | 100.044        | 123.046  | 0.504    | 123.041        | 394.211        | <b>385.724</b> | <b>385.232</b> | E[7]  |
| R[16] | 110.000   | <b>774.383</b> | <b>773.891</b> | 100.004  | 100.000  | 107.000        | 100.720        | 121.203        | 120.711        | R[6]  |
| S[17] | 120.012   | 811.869        | 811.869        | 140.010  | 140.009  | 141.009        | 811.004        | 801.000        | 801.120        | S[10] |
| P[18] | 814.039   | 806.435        | 806.435        | 806.030  | 806.029  | 810.010        | 222.151        | 213.630        | 213.004        | P[4]  |
| A[19] | 810.487   | 801.488        | 801.487        | 804.481  | 804.480  | 815.480        | 174.020        | 168.111        | 168.004        | A[5]  |
| R[20] | 814.505   | 805.501        | 805.499        | 808.500  | 807.999  | 819.497        | 130.100        | 120.594        | 120.504        | R[5]  |
| R[21] | 1018.012  | 810.000        | 810.000        | 1018.000 | 1018.000 | 1018.004       | 74.000         | 69.541         | 69.504         | R[1]  |



# sp | P43274 | H14\_MOUSE

[Acetyl]S<sup>Phospho</sup> ETAPAAPAAPAPAEKTPVKK  
79.97

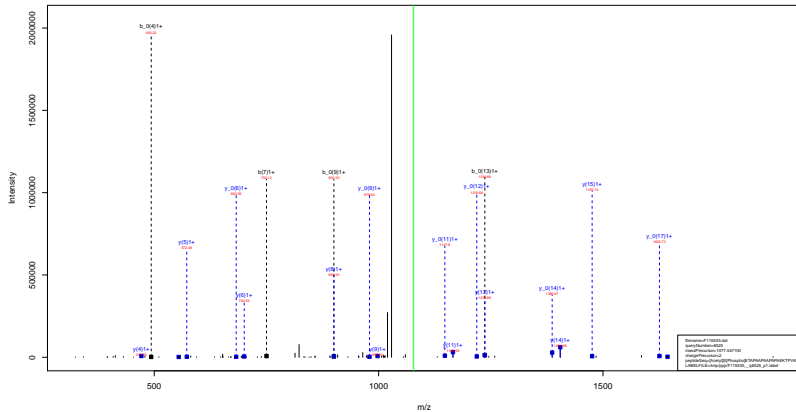

Sequence: P43274-046  
Query Number: 0228  
Scan#(Phospho): 207, 247, 752  
Charge(Phospho): 2  
MS/MS Type: CID  
MS/MS Type: CID  
LIMMS FC: 3.0  
MS/MS Type: CID  
LIMMS FC: 3.0

# sp | P43274 | H14\_MOUSE

[Acetyl]S<sup>Phospho</sup><sub>79.97</sub> ETAPAAPAAPAPAEKTPVKK

- ▶ fragmentation table for charge state 1+
- ▶ specType=cid
- ▶ score=72.97
- ▶ F115535.dat
- ▶ query=q6525\_p1
- ▶ precursor=1077.547100
- ▶ chargePrecursor=2
- ▶ itol=0.5

| AA    | a        | a'       | a <sup>o</sup> | b              | b'       | b <sup>o</sup>  | y               | y'       | y <sup>o</sup>  | AA    |
|-------|----------|----------|----------------|----------------|----------|-----------------|-----------------|----------|-----------------|-------|
| S[1]  | 1662.650 | 0.000    | 1644.864       | 210.000        | 0.000    | 162.000         | 2154.650        | 2137.066 | 2120.074        | S[21] |
| E[2]  | 2111.024 | 0.000    | 2093.163       | 178.000        | 0.000    | 161.000         | 1645.024        | 1628.049 | 1611.065        | E[20] |
| T[3]  | 4121.112 | 0.000    | 4084.500       | 1444.000       | 0.000    | 422.000         | 3233.012        | 3199.000 | 3170.024        | T[19] |
| A[4]  | 6131.248 | 0.000    | 6051.121       | 1211.127       | 0.000    | <b>403.133</b>  | 2114.952        | 2097.925 | 2080.124        | A[18] |
| P[5]  | 1801.200 | 0.000    | 1804.120       | 1804.120       | 0.000    | 180.120         | <b>1643.940</b> | 1626.921 | <b>1625.937</b> | P[17] |
| A[6]  | 3511.230 | 0.000    | 3438.228       | 1670.002       | 0.000    | 161.223         | 1234.220        | 1229.000 | 1208.001        | A[16] |
| A[7]  | 1121.210 | 0.000    | 1104.005       | <b>170.215</b> | 0.000    | 110.200         | <b>1476.858</b> | 1459.811 | 1440.000        | A[15] |
| P[8]  | 1019.120 | 0.000    | 1001.913       | 1001.913       | 0.000    | 100.913         | <b>1404.821</b> | 1387.794 | <b>1386.810</b> | P[14] |
| A[9]  | 1801.200 | 0.000    | 1714.000       | 1018.000       | 0.000    | <b>900.350</b>  | 1230.142        | 1225.000 | 1204.000        | A[13] |
| A[10] | 1811.410 | 0.000    | 1814.380       | 1814.380       | 0.000    | 181.380         | <b>1226.131</b> | 1211.000 | <b>1210.120</b> | A[12] |
| P[11] | 2104.410 | 0.000    | 2044.440       | 1100.000       | 0.000    | 100.000         | <b>1105.694</b> | 1104.000 | <b>1104.003</b> | P[11] |
| A[12] | 1214.410 | 0.000    | 1111.403       | 1127.007       | 0.000    | 110.407         | 1080.440        | 1071.410 | 1060.011        | A[10] |
| P[13] | 1210.140 | 0.000    | 1208.030       | 1204.040       | 0.000    | <b>1236.530</b> | <b>987.604</b>  | 980.510  | <b>979.583</b>  | P[10] |
| A[14] | 1210.140 | 0.000    | 1214.142       | 1216.002       | 0.000    | 121.002         | <b>900.511</b>  | 883.500  | 866.000         | A[8]  |
| E[16] | 1430.020 | 0.000    | 1416.014       | 1416.014       | 0.000    | 141.014         | 820.511         | 812.488  | 811.504         | E[17] |
| K[18] | 1354.120 | 1537.693 | 1336.100       | 1362.115       | 1360.693 | 1364.104        | <b>700.472</b>  | 683.444  | <b>682.461</b>  | K[16] |
| T[17] | 1035.140 | 1036.141 | 1030.120       | 1030.115       | 1030.115 | 1030.115        | <b>572.371</b>  | 555.350  | <b>554.366</b>  | T[15] |
| P[18] | 1102.020 | 1120.144 | 1124.000       | 1100.015       | 1103.100 | 1102.020        | <b>471.320</b>  | 454.302  | 450.000         | P[16] |
| V[19] | 1011.000 | 1034.000 | 1033.000       | 1010.000       | 1001.000 | 1001.000        | 374.120         | 357.250  | 0.000           | V[19] |
| K[20] | 1114.004 | 1082.001 | 1084.014       | 1087.014       | 1080.014 | 1081.014        | 244.000         | 230.004  | 0.000           | K[20] |
| K[21] | 1108.010 | 1070.010 | 1070.000       | 1106.010       | 1109.010 | 1108.010        | 118.000         | 107.110  | 0.000           | K[21] |



# sp | P43276 | H15\_MOUSE

[Acetyl]SETAPAETAAPAPVEKS<sup>Phospho</sup> PAKKK  
79.97

- ▶ fragmentation table for charge state 1+
- ▶ specType=cid
- ▶ score=50.76
- ▶ F115535.dat
- ▶ query=q6768.p1
- ▶ precursor=777.393560
- ▶ chargePrecursor=3
- ▶ itol=0.5

| AA  | a        | a*       | aΔ       | b        | b*       | bΔ             | r              | r*             | rΔ       | AA  |
|-----|----------|----------|----------|----------|----------|----------------|----------------|----------------|----------|-----|
| S1  | 632.055  | 0.000    | 84.044   | 130.050  | 0.000    | 112.039        | 2530.184       | 2313.137       | 2312.133 | S22 |
| E2  | 131.000  | 0.000    | 213.000  | 205.000  | 0.000    | 241.000        | 2050.120       | 2134.000       | 2133.111 | E23 |
| T3  | 132.145  | 0.000    | 314.130  | 300.145  | 0.000    | <b>302.130</b> | 2072.070       | 2095.052       | 2094.066 | T20 |
| A4  | 402.102  | 0.000    | 180.117  | 433.117  | 0.000    | <b>413.107</b> | 1811.030       | 1894.020       | 1893.011 | A19 |
| F5  | 100.275  | 0.000    | 482.275  | 529.275  | 0.000    | 512.275        | 2099.960       | 1852.961       | 1851.953 | F16 |
| A6  | 374.272  | 0.000    | 333.262  | 389.267  | 0.000    | 381.267        | 1852.941       | 1785.935       | 1784.931 | A17 |
| E7  | 180.315  | 0.000    | 482.304  | 728.310  | 0.000    | 710.299        | 1731.904       | 1714.878       | 1713.884 | E18 |
| T8  | 301.362  | 0.000    | 781.352  | 829.357  | 0.000    | 811.357        | 1842.881       | 1828.839       | 1828.811 | T15 |
| A9  | 172.400  | 0.000    | 684.390  | 666.399  | 0.000    | 682.384        | 1350.914       | 1468.787       | 1468.800 | A14 |
| A10 | 343.437  | 0.000    | 925.420  | 971.431  | 0.000    | 953.421        | 1430.777       | 1413.750       | 1412.740 | A13 |
| P11 | 1040.469 | 0.000    | 2102.470 | 2158.464 | 0.000    | 1991.474       | 1120.140       | 1130.713       | 1131.729 | P12 |
| A12 | 1111.427 | 0.000    | 2023.410 | 2119.422 | 0.000    | 1921.411       | 1202.660       | 1249.660       | 1248.676 | A11 |
| P13 | 1708.574 | 0.000    | 1190.569 | 1250.574 | 0.000    | 1218.564       | 1191.820       | 1174.823       | 1173.830 | P10 |
| V14 | 1107.648 | 0.000    | 1289.637 | 1335.643 | 0.000    | 1317.632       | 1004.500       | 1077.510       | 1076.546 | V10 |
| E15 | 1430.660 | 0.000    | 1410.660 | 1464.665 | 0.000    | 1446.675       | 999.200        | 978.500        | 977.518  | E11 |
| T16 | 1344.610 | 0.000    | 1248.610 | 1302.615 | 0.000    | 1278.614       | 1214.610       | <b>964.406</b> | 969.424  | T12 |
| S17 | 1131.094 | 1714.132 | 1113.172 | 1198.170 | 1742.152 | 1141.108       | <b>718.301</b> | 721.304        | 720.300  | S16 |
| P18 | 1020.610 | 1011.610 | 1107.610 | 1056.610 | 1030.610 | 1020.610       | 131.100        | 104.100        | 103.100  | P15 |
| A19 | 1069.614 | 1062.614 | 1087.614 | 1107.610 | 1011.614 | 1059.610       | 413.100        | 407.101        | 406.100  | A16 |
| K20 | 227.000  | 0.000    | 2020.000 | 2020.000 | 0.000    | 2017.000       | 403.000        | 399.270        | 398.000  | K22 |
| R21 | 116.000  | 2030.000 | 2030.000 | 2184.000 | 2167.000 | 2186.000       | 276.200        | 258.100        | 257.000  | R23 |
| K22 | 2204.100 | 2207.100 | 2208.100 | 2312.100 | 2306.100 | 2308.100       | 147.100        | 130.000        | 130.000  | K11 |

# sp | P43276 | H15\_MOUSE

[Acetyl]SETAPAETAAPAPVEKS<sup>Phospho</sup> PAKKK  
79.97

- ▶ fragmentation table for charge state 2+
- ▶ specType=cid
- ▶ score=50.76
- ▶ F115535.dat
- ▶ query=q6768.p1
- ▶ precursor=777.393560
- ▶ chargePrecursor=3
- ▶ itol=0.5

| AA | a              | a*             | a <sub>0</sub> | b              | b*    | b <sub>0</sub> | y               | y*             | y <sub>0</sub> | AA   |
|----|----------------|----------------|----------------|----------------|-------|----------------|-----------------|----------------|----------------|------|
| S  | 114311         | 0.504          | 82.526         | 65.202         | 0.504 | 35.242         | 1155.308        | 1157.027       | 1156.389       | S121 |
| E  | 118124         | 0.504          | 287.541        | 211.216        | 0.504 | 112.424        | 1157.314        | 1159.184       | 1158.281       | E241 |
| T  | 1661516        | 0.504          | 155.571        | 100.074        | 0.504 | 171.536        | <b>1036.543</b> | 1038.030       | 1037.533       | T120 |
| A  | 202160         | 0.504          | 101.969        | 71.692         | 0.504 | 107.681        | <b>986.619</b>  | 977.556        | 977.014        | A119 |
| P  | 250151         | 0.504          | 244.818        | 154.419        | 0.504 | 205.815        | <b>950.531</b>  | <b>941.987</b> | <b>941.495</b> | P110 |
| A  | 269174         | 0.504          | 277.134        | 188.119        | 0.504 | 231.128        | <b>911.514</b>  |                |                | A117 |
| E  | 301161         | 0.504          | <b>341.658</b> | 264.859        | 0.504 | 255.919        | <b>856.456</b>  | 857.941        | 857.420        | E110 |
| T  | 361135         | 0.504          | 350.181        | 245.187        | 0.504 | 306.177        | <b>811.834</b>  | 793.421        | 792.929        | T115 |
| A  | 416111         | 0.504          | 427.688        | 300.111        | 0.504 | 343.816        | <b>751.411</b>  | 742.581        | 742.059        | A114 |
| A  | 472122         | 0.504          | 485.211        | 346.216        | 0.504 | 477.214        | <b>715.892</b>  | 707.576        | 706.987        | A113 |
| P  | 523140         | 0.504          | 513.743        | 334.746        | 0.504 | 435.741        | <b>660.373</b>  | 651.988        | 651.318        | P112 |
| A  | 584117         | 0.504          | 547.262        | 371.264        | 0.504 | 484.262        | 611.267         | 602.534        | 602.044        | A111 |
| P  | 634121         | 0.504          | 595.781        | 418.781        | 0.504 | 536.781        | 566.781         | 557.823        | 557.121        | P110 |
| V  | 684138         | 0.504          | 646.321        | 466.321        | 0.504 | 604.318        | 517.321         | 508.281        | 507.767        | V110 |
| E  | 718109         | 0.504          | 708.844        | <b>732.846</b> | 0.504 | 723.843        | 486.268         | 480.755        | 480.263        | E10  |
| T  | 763166         | 0.504          | 773.855        | 706            | 0.504 | 766.363        | 401.666         | 411.717        | 402.223        | T10  |
| S  | <b>806.376</b> | 0.504          | 807.368        | 801.363        | 0.504 | 871.369        | 371.368         | <b>359.699</b> | 351.169        | S10  |
| P  | 858            | 0.504          | 858.362        | 852.362        | 0.504 | 928.364        | 286.362         | 277.681        | 277.161        | P10  |
| A  | <b>856.440</b> | <b>941.927</b> | <b>941.433</b> | 935.434        | 0.504 | 1003.437       | 192.431         | 217.431        | 224.431        | A10  |
| K  | 1014.416       | 1015.913       | 1016.416       | 1010.416       | 0.504 | 1019.416       | 101.416         | 202.416        | 193.416        | K10  |
| K  | 1017.511       | 1019.012       | 1019.511       | 1013.511       | 0.504 | 1024.511       | 101.511         | 202.511        | 193.511        | K10  |
| K  | 1018.511       | 1020.012       | 1020.511       | 1014.511       | 0.504 | 1029.511       | 101.511         | 202.511        | 193.511        | K10  |
| K  | 1142.511       | 1144.012       | 1144.511       | 1138.511       | 0.504 | 1149.511       | 101.511         | 202.511        | 193.511        | K10  |

# sp | P43276 | H15\_MOUSE

[Acetyl]SETAPAETAAPAPVEKS Phospho PAKK (Methyl) K  
79.97 (14.02)

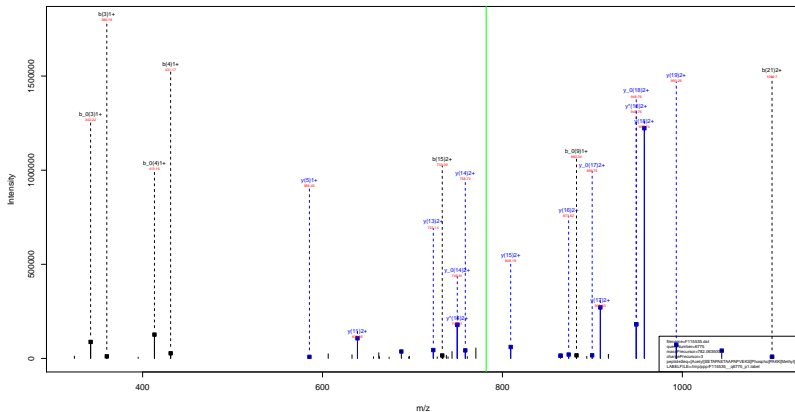

# sp | P43276 | H15\_MOUSE

[Acetyl]SETAPAETAAPAPVEKS <sup>Phospho</sup>PAKK <sup>(Methyl)</sup>K  
79.97 (14.02)

- ▶ fragmentation table for charge state 1+
- ▶ specType=cid
- ▶ score=64.58
- ▶ F115535.dat
- ▶ query=q6775\_p1
- ▶ precursor=782.063500
- ▶ chargePrecursor=3
- ▶ itol=0.5

| AA    | a        | a*       | a.d      | b              | b*       | b.d            | y              | y*       | y.d      | AA    |
|-------|----------|----------|----------|----------------|----------|----------------|----------------|----------|----------|-------|
| S(1)  | 102.055  | 0.000    | 88.048   | 130.000        | 0.000    | 81.239         | 244.130        | 2727.153 | 232.000  | S(2)  |
| D(2)  | 102.058  | 0.000    | 233.000  | 259.000        | 0.000    | 491.000        | 238.130        | 4036.130 | 2307.130 | D(1)  |
| T(3)  | 232.049  | 0.000    | 374.130  | <b>366.148</b> | 0.000    | <b>352.130</b> | 269.000        | 2699.000 | 2699.000 | T(2)  |
| A(4)  | 402.032  | 0.000    | 386.130  | <b>431.177</b> | 0.000    | <b>413.107</b> | 166.048        | 1669.028 | 1667.030 | A(3)  |
| P(5)  | 550.230  | 0.000    | 482.225  | 528.230        | 0.000    | 510.225        | 304.030        | 3068.000 | 3065.000 | P(1)  |
| A(6)  | 577.222  | 0.000    | 550.220  | 589.220        | 0.000    | 561.210        | 318.000        | 3179.000 | 3176.000 | A(5)  |
| B(7)  | 706.315  | 0.000    | 682.304  | 725.310        | 0.000    | 710.299        | 3746.000       | 3729.000 | 3727.000 | B(4)  |
| T(8)  | 803.302  | 0.000    | 783.297  | 824.307        | 0.000    | 811.291        | 3810.000       | 3799.000 | 3796.000 | T(1)  |
| A(9)  | 872.400  | 0.000    | 848.389  | 889.399        | 0.000    | <b>862.384</b> | 2338.000       | 2349.000 | 2346.000 | A(8)  |
| A(10) | 943.437  | 0.000    | 925.430  | 967.432        | 0.000    | 952.421        | 1444.932       | 1437.930 | 1436.932 | A(7)  |
| P(11) | 1040.480 | 0.000    | 1027.470 | 1068.484       | 0.000    | 1050.474       | 1574.930       | 1566.928 | 1565.940 | P(12) |
| A(12) | 1131.527 | 0.000    | 1080.535 | 1139.527       | 0.000    | 1121.511       | 3276.932       | 3269.928 | 3268.932 | A(11) |
| P(13) | 1208.509 | 0.000    | 1178.500 | 1229.514       | 0.000    | 1218.504       | 2550.900       | 2549.899 | 2548.900 | P(10) |
| V(14) | 1307.648 | 0.000    | 1289.637 | 1335.643       | 0.000    | 1317.632       | 3108.611       | 3091.589 | 3090.600 | V(9)  |
| D(15) | 1416.690 | 0.000    | 1392.680 | 1444.693       | 0.000    | 1426.675       | 3109.584       | 3092.539 | 3091.534 | D(6)  |
| R(16) | 1564.784 | 1897.959 | 1549.770 | 1592.780       | 1878.754 | 1574.762       | 3881.000       | 3864.930 | 3864.000 | R(7)  |
| S(17) | 1714.768 | 1714.771 | 1713.771 | 1759.779       | 1742.752 | 1741.760       | 752.000        | 725.980  | 724.980  | S(8)  |
| P(18) | 1830.830 | 1811.810 | 1810.820 | 1856.810       | 1839.800 | 1838.800       | <b>585.408</b> | 568.384  | 0.000    | P(5)  |
| A(19) | 1939.874 | 1882.857 | 1881.861 | 1927.866       | 1910.842 | 1909.850       | 488.350        | 471.320  | 0.000    | A(6)  |
| R(20) | 2037.869 | 2018.840 | 2018.850 | 2052.861       | 2036.817 | 2035.810       | 417.300        | 400.290  | 0.000    | R(8)  |
| R(21) | 2170.079 | 2153.053 | 2152.060 | 2198.074       | 2181.048 | 2180.053       | 289.233        | 272.197  | 0.000    | R(9)  |
| R(22) | 2298.074 | 2281.049 | 2280.056 | 2326.069       | 2309.042 | 2308.049       | 147.133        | 130.089  | 0.000    | R(1)  |

# sp | P43276 | H15\_MOUSE

[Acetyl]SETAPAETAAPAPVEKS<sup>Phospho</sup> PAKK<sup>(Methyl)</sup> K  
79.97 (14.02)

- ▶ fragmentation table for charge state 2+
- ▶ specType=cid
- ▶ score=64.58
- ▶ F115535.dat
- ▶ query=q6775\_p1
- ▶ precursor=782.063500
- ▶ chargePrecursor=3
- ▶ itol=0.5

| AA    | a        | a*     | a <sub>0</sub> | b               | b*     | b <sub>0</sub> | y               | y*              | y <sub>0</sub> | AA    |
|-------|----------|--------|----------------|-----------------|--------|----------------|-----------------|-----------------|----------------|-------|
| S(1)  | 51.531   | 0.504  | 43.529         | 89.529          | 0.504  | 89.529         | 1172.503        | 1164.000        | 1163.500       | S(22) |
| E(2)  | 118.052  | 0.504  | 109.047        | 132.050         | 0.504  | 132.045        | 1182.002        | <b>1099.550</b> | 1099.050       | E(21) |
| T(3)  | 200.570  | 0.504  | 185.064        | 208.564         | 0.504  | 208.559        | <b>1043.531</b> | 1043.030        | 1042.530       | T(20) |
| A(4)  | 302.086  | 0.504  | 283.080        | 308.080         | 0.504  | 308.075        | <b>983.027</b>  | 984.524         | 984.024        | A(19) |
| P(5)  | 350.621  | 0.504  | 344.615        | 354.615         | 0.504  | 355.611        | <b>957.500</b>  | <b>948.995</b>  | <b>948.500</b> | P(18) |
| A(6)  | 408.140  | 0.504  | 397.134        | 408.134         | 0.504  | 409.130        | <b>903.982</b>  | 904.480         | <b>903.977</b> | A(17) |
| E(7)  | 500.651  | 0.504  | 541.650        | 504.650         | 0.504  | 505.653        | <b>871.464</b>  | <b>864.950</b>  | <b>864.450</b> | E(16) |
| T(8)  | 601.165  | 0.504  | 592.160        | 615.162         | 0.504  | 603.157        | <b>808.942</b>  | 809.439         | 809.937        | T(15) |
| A(9)  | 630.707  | 0.504  | 629.700        | 639.702         | 0.504  | 641.699        | <b>756.418</b>  | <b>748.905</b>  | <b>748.413</b> | A(14) |
| A(10) | 672.222  | 0.504  | 665.217        | 680.219         | 0.504  | 677.214        | <b>722.900</b>  | 723.395         | 723.890        | A(13) |
| P(11) | 820.740  | 0.504  | 811.743        | 824.746         | 0.504  | 825.741        | <b>687.381</b>  | 687.876         | 688.371        | P(12) |
| A(12) | 956.257  | 0.504  | 947.252        | 959.254         | 0.504  | 963.250        | <b>636.855</b>  | 637.342         | 637.837        | A(11) |
| P(13) | 1004.783 | 0.504  | 995.780        | 1014.784        | 0.504  | 1009.779       | <b>593.330</b>  | 593.825         | 594.320        | P(10) |
| V(14) | 1074.300 | 0.504  | 1045.293       | 1068.293        | 0.504  | 1063.289       | <b>554.811</b>  | 555.306         | 555.801        | V(9)  |
| E(15) | 1118.280 | 0.504  | 1088.844       | <b>732.846</b>  | 0.504  | 123.841        | 555.293         | 486.782         | 486.270        | E(8)  |
| T(16) | 1222.800 | 0.504  | 1213.801       | 1224.800        | 0.504  | 1227.800       | 480.770         | 412.242         | 411.749        | T(7)  |
| S(17) | 1306.300 | 0.504  | 1297.300       | 1308.301        | 0.504  | 1311.300       | 376.702         | 308.174         | 307.672        | S(6)  |
| P(18) | 1414.822 | 0.504  | 1405.821       | 1416.821        | 0.504  | 1420.821       | 292.624         | 224.096         | 223.591        | P(5)  |
| A(19) | 1550.400 | 0.504  | 1542.400       | 1554.400        | 0.504  | 1558.400       | 245.400         | 176.872         | 176.360        | A(4)  |
| K(20) | 1514.900 | 0.504  | 1505.900       | 1516.900        | 0.504  | 1521.900       | 208.300         | 140.772         | 140.260        | K(3)  |
| K(21) | 1365.540 | 0.077  | 1357.540       | <b>1099.541</b> | 0.077  | 1099.540       | 146.110         | 138.600         | 138.090        | K(2)  |
| K(22) | 1149.100 | 11.481 | 1140.588       | 1163.588        | 13.575 | 1154.583       | 74.000          | 85.540          | 0.504          | K(1)  |



# sp | P43276 | H15\_MOUSE

[Acetyl]SETAPAETAAPAPVEKS<sup>Phospho</sup> PAKKK<sup>(Dimethyl)</sup>  
79.97 (28.03)

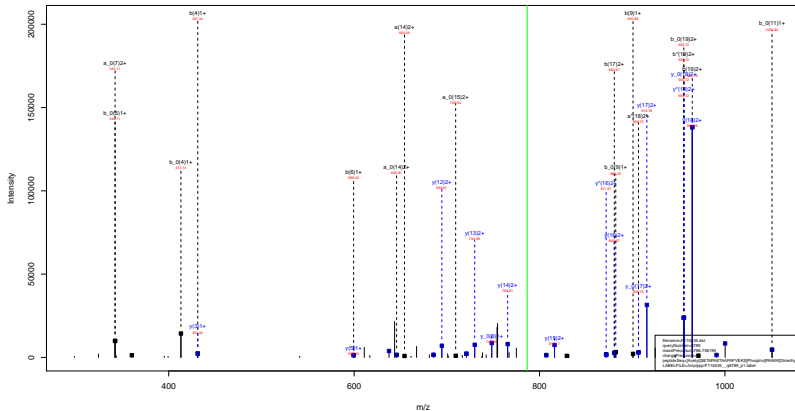

# sp | P43276 | H15\_MOUSE

[Acetyl]SETAPAETAAPAPVEKS <sup>Phospho</sup>79.97 PAKKK <sup>(Dimethyl)</sup>(28.03)

- ▶ fragmentation table for charge state 1+
- ▶ specType=cid
- ▶ score=49.32
- ▶ F115535.dat
- ▶ query=q6789\_p1
- ▶ precursor=786.736190
- ▶ chargePrecursor=3
- ▶ itol=0.5

| AA    | a        | a*       | aΔ       | b              | b*       | bΔ              | y              | y*       | yΔ             | AA    |
|-------|----------|----------|----------|----------------|----------|-----------------|----------------|----------|----------------|-------|
| S(1)  | 1322.955 | 0.000    | 89.040   | 1301.000       | 0.000    | 112.000         | 2382.100       | 2344.100 | 2382.100       | S(2)  |
| E(2)  | 1312.968 | 0.000    | 243.080  | 769.940        | 0.000    | 241.000         | 2239.110       | 2242.720 | 2231.740       | E(1)  |
| T(3)  | 432.145  | 0.000    | 374.130  | <b>360.140</b> | 0.000    | <b>342.110</b>  | 2100.110       | 2053.080 | 2082.100       | T(2)  |
| A(4)  | 401.682  | 0.000    | 385.170  | <b>431.177</b> | 0.000    | <b>413.167</b>  | 1699.000       | 1882.030 | 1981.050       | A(10) |
| P(5)  | 500.035  | 0.000    | 482.220  | <b>528.230</b> | 0.000    | <b>510.210</b>  | 1389.030       | 1810.990 | 1810.015       | P(16) |
| A(6)  | 111.272  | 0.000    | 300.260  | <b>309.267</b> | 0.000    | 381.260         | 1300.260       | 1813.940 | 1813.960       | A(17) |
| E(7)  | 306.315  | 0.000    | 482.300  | <b>499.307</b> | 0.000    | 110.200         | 1370.030       | 1742.900 | 1741.030       | E(14) |
| T(8)  | 302.362  | 0.000    | 182.150  | <b>226.357</b> | 0.000    | <b>211.340</b>  | 1430.000       | 1813.000 | 1813.000       | T(15) |
| A(9)  | 112.400  | 0.000    | 494.180  | <b>506.395</b> | 0.000    | <b>482.384</b>  | 1230.000       | 1512.400 | 1512.400       | A(14) |
| A(10) | 343.437  | 0.000    | 320.430  | <b>311.432</b> | 0.000    | 351.430         | 1493.030       | 1443.100 | 1443.700       | A(13) |
| P(11) | 1040.400 | 0.000    | 1027.470 | 1009.804       | 0.000    | <b>1030.474</b> | 1387.771       | 1310.764 | 1380.760       | P(12) |
| A(12) | 1131.527 | 0.000    | 1093.510 | 1139.520       | 0.000    | 1121.515        | 1240.710       | 1273.680 | 1272.700       | A(11) |
| P(14) | 1408.010 | 0.000    | 1139.000 | 1136.014       | 0.000    | 1418.008        | 1418.000       | 1400.000 | 1400.000       | P(10) |
| V(14) | 1307.640 | 0.000    | 1209.630 | 1205.643       | 0.000    | 1317.632        | 1112.630       | 1105.660 | 1104.630       | V(16) |
| E(15) | 1810.000 | 0.000    | 1418.000 | 1464.003       | 0.000    | 1448.010        | 1023.000       | 1006.530 | 1025.140       | E(11) |
| R(16) | 1054.100 | 1387.180 | 1046.770 | 1032.780       | 1376.754 | 1014.710        | 881.517        | 877.480  | 878.000        | R(10) |
| S(17) | 1731.104 | 1714.737 | 1313.770 | 1750.770       | 1742.752 | 1741.760        | 700.422        | 749.390  | <b>748.412</b> | S(2)  |
| P(18) | 1030.610 | 1011.610 | 1010.610 | 1006.611       | 1009.600 | 1008.600        | <b>509.424</b> | 500.391  | 0.000          | P(5)  |
| A(19) | 1099.014 | 1082.040 | 1082.040 | 1077.040       | 1071.040 | 1069.030        | 700.771        | 488.340  | 0.000          | A(6)  |
| R(20) | 1077.000 | 1070.000 | 1070.000 | 1065.000       | 1060.000 | 1058.000        | <b>411.314</b> | 410.310  | 0.000          | R(1)  |
| R(21) | 1136.000 | 1130.000 | 1130.000 | 1124.000       | 1119.000 | 1116.000        | 0.000          | 0.000    | 0.000          | R(2)  |
| R(22) | 1112.000 | 1106.000 | 1106.000 | 1101.000       | 1096.000 | 1092.000        | 0.000          | 0.000    | 0.000          | R(3)  |

# sp | P43276 | H15\_MOUSE

[Acetyl]SETAPAETAAPAPVEKS <sup>Phospho</sup>PAKKK <sup>(Dimethyl)</sup>  
79.97 (28.03)

- ▶ fragmentation table for charge state 2+
- ▶ specType=cid
- ▶ score=49.32
- ▶ F115535.dat
- ▶ query=q6789\_p1
- ▶ precursor=786.736190
- ▶ chargePrecursor=3
- ▶ itol=0.5

| AA    | a              | a*             | a,β            | b              | b*             | b,β            | y               | y*             | y,β            | AA    |
|-------|----------------|----------------|----------------|----------------|----------------|----------------|-----------------|----------------|----------------|-------|
| S(1)  | 31.031         | 0.504          | 62.529         | 65.529         | 0.504          | 68.529         | 119.030         | 117.030        | 117.030        | S(22) |
| E(2)  | 31.034         | 0.504          | 107.041        | 110.040        | 0.504          | 113.041        | 218.030         | 216.030        | 216.030        | E(21) |
| T(3)  | 108.579        | 0.504          | 157.571        | 160.574        | 0.504          | 171.570        | <b>1050.550</b> | 1042.045       | 1041.553       | T(20) |
| A(4)  | 302.695        | 0.504          | 381.690        | 384.692        | 0.504          | 397.687        | <b>1000.035</b> | 998.523        | <b>991.030</b> | A(19) |
| P(5)  | 270.621        | 0.504          | 341.615        | 344.619        | 0.504          | 355.613        | <b>964.516</b>  | <b>956.003</b> | <b>955.511</b> | P(18) |
| A(6)  | 306.348        | 0.504          | 377.339        | 380.337        | 0.504          | 393.332        | <b>911.900</b>  | <b>903.385</b> | <b>900.885</b> | A(17) |
| E(7)  | 330.661        | 0.504          | <b>341.656</b> | 344.659        | 0.504          | 355.653        | <b>880.471</b>  | <b>871.958</b> | <b>871.466</b> | E(16) |
| T(8)  | 302.385        | 0.504          | 367.180        | 415.182        | 0.504          | 405.177        | <b>815.950</b>  | <b>807.437</b> | <b>806.945</b> | T(15) |
| T(9)  | 436.313        | 0.504          | 442.698        | 449.311        | 0.504          | 461.694        | <b>763.426</b>  | <b>754.913</b> | <b>754.421</b> | T(14) |
| A(10) | 372.222        | 0.504          | 463.217        | 466.219        | 0.504          | 477.214        | <b>729.908</b>  | <b>721.394</b> | <b>720.902</b> | A(13) |
| P(11) | 330.346        | 0.504          | 311.747        | 314.746        | 0.504          | 325.741        | <b>691.389</b>  | <b>685.876</b> | <b>685.384</b> | P(12) |
| A(12) | 336.267        | 0.504          | 347.262        | 350.264        | 0.504          | 361.259        | <b>645.863</b>  | <b>637.349</b> | <b>636.857</b> | A(11) |
| P(14) | 404.318        | 0.504          | 399.760        | 402.764        | 0.504          | 409.758        | <b>590.968</b>  | <b>585.455</b> | <b>584.963</b> | P(10) |
| V(14) | <b>654.328</b> | 0.504          | <b>645.322</b> | 648.325        | 0.504          | 659.320        | 561.810         | 555.304        | 552.812        | V(9)  |
| E(15) | 173.949        | 0.504          | <b>708.844</b> | 712.846        | 0.504          | 723.841        | 512.294         | 509.770        | 507.278        | E(8)  |
| R(16) | 182.868        | 0.504          | 712.889        | 716.891        | 0.504          | 731.886        | 447.782         | 436.240        | 434.772        | R(7)  |
| S(17) | 306.395        | 0.504          | 657.390        | <b>680.393</b> | <b>671.880</b> | <b>671.388</b> | 353.712         | 379.202        | 374.709        | S(6)  |
| P(18) | 314.672        | <b>906.409</b> | 906.911        | 909.915        | 909.408        | 916.914        | 90.428          | 261.922        | 0.504          | P(5)  |
| A(19) | 390.440        | 361.027        | 942.435        | <b>964.438</b> | <b>955.925</b> | <b>955.433</b> | 261.680         | 248.170        | 0.504          | A(4)  |
| R(20) | 314.408        | 1001.961       | 1000.460       | 1002.963       | 1002.461       | 1005.964       | 228.111         | 209.604        | 0.504          | R(3)  |
| R(21) | 3176.535       | 1000.960       | 1000.530       | 1002.533       | 1004.536       | 1005.534       | 150.135         | 143.610        | 0.504          | R(2)  |
| R(22) | 1136.569       | 1148.008       | 1147.568       | 1149.571       | 1150.569       | 1152.572       | 11.511          | 10.504         | 0.504          | R(1)  |









# sp | P43274 | H14\_MOUSE

[Acetyl]S<sup>(Phospho)</sup> ETAPAAPAAPAPAEK  
(79.97)

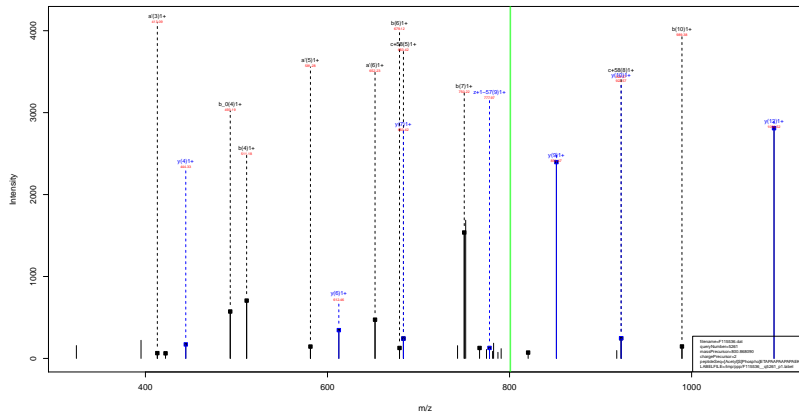





# sp | P43274 | H14\_MOUSE

[Acetyl]S<sup>(Phospho)</sup> ETAPAAPAAPAPAEK  
(79.97)

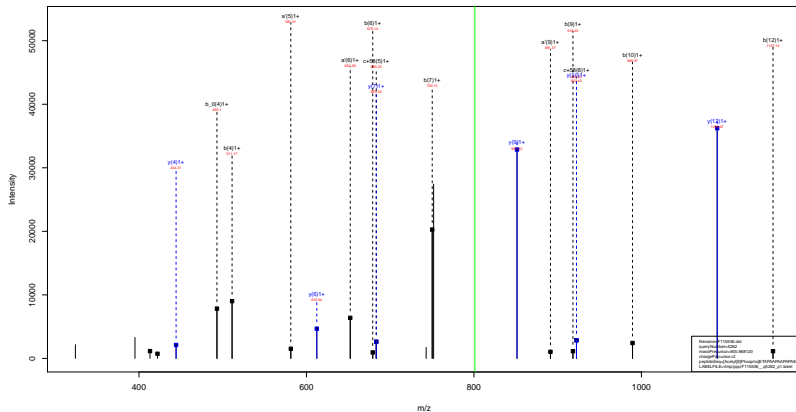



# sp | P43274 | H14\_MOUSE

[Acetyl]S<sup>Phospho</sup> ETAPAAPAAPAPAEK  
79.97

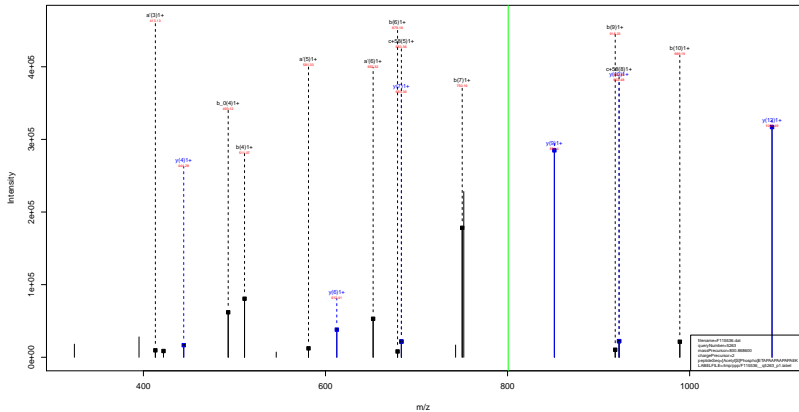

# sp | P43274 | H14\_MOUSE

[Acetyl]S<sup>Phospho</sup><sub>79.97</sub> ETAPAAPAAPAPAEK

- ▶ fragmentation table for charge state 1+
- ▶ specType=1
- ▶ score=47.25
- ▶ F115536.dat
- ▶ query=q5263.p1
- ▶ precursor=800.868600
- ▶ chargePrecursor=2
- ▶ itol=0.5

| b | y | c1 | aa1 | b1 | y1 | aa2 | c2 | aa3 | b3 | y3 | aa4 | c4 | aa5 | b5 | y5 | aa6 | c6 | aa7 | b7 | y7 | aa8 | c8 | aa9 | b9 | y9 | aa10 | c10 | aa11 | b11 | y11 | aa12 | c12 | aa13 | b13 | y13 | aa14 | c14 | aa15 | b15 | y15 | aa16 | c16 | aa17 | b17 | y17 | aa18 | c18 | aa19 | b19 | y19 | aa20 | c20 | aa21 | b21 | y21 | aa22 | c22 | aa23 | b23 | y23 | aa24 | c24 | aa25 | b25 | y25 | aa26 | c26 | aa27 | b27 | y27 | aa28 | c28 | aa29 | b29 | y29 | aa30 | c30 | aa31 | b31 | y31 | aa32 | c32 | aa33 | b33 | y33 | aa34 | c34 | aa35 | b35 | y35 | aa36 | c36 | aa37 | b37 | y37 | aa38 | c38 | aa39 | b39 | y39 | aa40 | c40 | aa41 | b41 | y41 | aa42 | c42 | aa43 | b43 | y43 | aa44 | c44 | aa45 | b45 | y45 | aa46 | c46 | aa47 | b47 | y47 | aa48 | c48 | aa49 | b49 | y49 | aa50 | c50 | aa51 | b51 | y51 | aa52 | c52 | aa53 | b53 | y53 | aa54 | c54 | aa55 | b55 | y55 | aa56 | c56 | aa57 | b57 | y57 | aa58 | c58 | aa59 | b59 | y59 | aa60 | c60 | aa61 | b61 | y61 | aa62 | c62 | aa63 | b63 | y63 | aa64 | c64 | aa65 | b65 | y65 | aa66 | c66 | aa67 | b67 | y67 | aa68 | c68 | aa69 | b69 | y69 | aa70 | c70 | aa71 | b71 | y71 | aa72 | c72 | aa73 | b73 | y73 | aa74 | c74 | aa75 | b75 | y75 | aa76 | c76 | aa77 | b77 | y77 | aa78 | c78 | aa79 | b79 | y79 | aa80 | c80 | aa81 | b81 | y81 | aa82 | c82 | aa83 | b83 | y83 | aa84 | c84 | aa85 | b85 | y85 | aa86 | c86 | aa87 | b87 | y87 | aa88 | c88 | aa89 | b89 | y89 | aa90 | c90 | aa91 | b91 | y91 | aa92 | c92 | aa93 | b93 | y93 | aa94 | c94 | aa95 | b95 | y95 | aa96 | c96 | aa97 | b97 | y97 | aa98 | c98 | aa99 | b99 | y99 | aa100 | c100 | aa101 | b101 | y101 | aa102 | c102 | aa103 | b103 | y103 | aa104 | c104 | aa105 | b105 | y105 | aa106 | c106 | aa107 | b107 | y107 | aa108 | c108 | aa109 | b109 | y109 | aa110 | c110 | aa111 | b111 | y111 | aa112 | c112 | aa113 | b113 | y113 | aa114 | c114 | aa115 | b115 | y115 | aa116 | c116 | aa117 | b117 | y117 | aa118 | c118 | aa119 | b119 | y119 | aa120 | c120 | aa121 | b121 | y121 | aa122 | c122 | aa123 | b123 | y123 | aa124 | c124 | aa125 | b125 | y125 | aa126 | c126 | aa127 | b127 | y127 | aa128 | c128 | aa129 | b129 | y129 | aa130 | c130 | aa131 | b131 | y131 | aa132 | c132 | aa133 | b133 | y133 | aa134 | c134 | aa135 | b135 | y135 | aa136 | c136 | aa137 | b137 | y137 | aa138 | c138 | aa139 | b139 | y139 | aa140 | c140 | aa141 | b141 | y141 | aa142 | c142 | aa143 | b143 | y143 | aa144 | c144 | aa145 | b145 | y145 | aa146 | c146 | aa147 | b147 | y147 | aa148 | c148 | aa149 | b149 | y149 | aa150 | c150 | aa151 | b151 | y151 | aa152 | c152 | aa153 | b153 | y153 | aa154 | c154 | aa155 | b155 | y155 | aa156 | c156 | aa157 | b157 | y157 | aa158 | c158 | aa159 | b159 | y159 | aa160 | c160 | aa161 | b161 | y161 | aa162 | c162 | aa163 | b163 | y163 | aa164 | c164 | aa165 | b165 | y165 | aa166 | c166 | aa167 | b167 | y167 | aa168 | c168 | aa169 | b169 | y169 | aa170 | c170 | aa171 | b171 | y171 | aa172 | c172 | aa173 | b173 | y173 | aa174 | c174 | aa175 | b175 | y175 | aa176 | c176 | aa177 | b177 | y177 | aa178 | c178 | aa179 | b179 | y179 | aa180 | c180 | aa181 | b181 | y181 | aa182 | c182 | aa183 | b183 | y183 | aa184 | c184 | aa185 | b185 | y185 | aa186 | c186 | aa187 | b187 | y187 | aa188 | c188 | aa189 | b189 | y189 | aa190 | c190 | aa191 | b191 | y191 | aa192 | c192 | aa193 | b193 | y193 | aa194 | c194 | aa195 | b195 | y195 | aa196 | c196 | aa197 | b197 | y197 | aa198 | c198 | aa199 | b199 | y199 | aa200 | c200 | aa201 | b201 | y201 | aa202 | c202 | aa203 | b203 | y203 | aa204 | c204 | aa205 | b205 | y205 | aa206 | c206 | aa207 | b207 | y207 | aa208 | c208 | aa209 | b209 | y209 | aa210 | c210 | aa211 | b211 | y211 | aa212 | c212 | aa213 | b213 | y213 | aa214 | c214 | aa215 | b215 | y215 | aa216 | c216 | aa217 | b217 | y217 | aa218 | c218 | aa219 | b219 | y219 | aa220 | c220 | aa221 | b221 | y221 | aa222 | c222 | aa223 | b223 | y223 | aa224 | c224 | aa225 | b225 | y225 | aa226 | c226 | aa227 | b227 | y227 | aa228 | c228 | aa229 | b229 | y229 | aa230 | c230 | aa231 | b231 | y231 | aa232 | c232 | aa233 | b233 | y233 | aa234 | c234 | aa235 | b235 | y235 | aa236 | c236 | aa237 | b237 | y237 | aa238 | c238 | aa239 | b239 | y239 | aa240 | c240 | aa241 | b241 | y241 | aa242 | c242 | aa243 | b243 | y243 | aa244 | c244 | aa245 | b245 | y245 | aa246 | c246 | aa247 | b247 | y247 | aa248 | c248 | aa249 | b249 | y249 | aa250 | c250 | aa251 | b251 | y251 | aa252 | c252 | aa253 | b253 | y253 | aa254 | c254 | aa255 | b255 | y255 | aa256 | c256 | aa257 | b257 | y257 | aa258 | c258 | aa259 | b259 | y259 | aa260 | c260 | aa261 | b261 | y261 | aa262 | c262 | aa263 | b263 | y263 | aa264 | c264 | aa265 | b265 | y265 | aa266 | c266 | aa267 | b267 | y267 | aa268 | c268 | aa269 | b269 | y269 | aa270 | c270 | aa271 | b271 | y271 | aa272 | c272 | aa273 | b273 | y273 | aa274 | c274 | aa275 | b275 | y275 | aa276 | c276 | aa277 | b277 | y277 | aa278 | c278 | aa279 | b279 | y279 | aa280 | c280 | aa281 | b281 | y281 | aa282 | c282 | aa283 | b283 | y283 | aa284 | c284 | aa285 | b285 | y285 | aa286 | c286 | aa287 | b287 | y287 | aa288 | c288 | aa289 | b289 | y289 | aa290 | c290 | aa291 | b291 | y291 | aa292 | c292 | aa293 | b293 | y293 | aa294 | c294 | aa295 | b295 | y295 | aa296 | c296 | aa297 | b297 | y297 | aa298 | c298 | aa299 | b299 | y299 | aa300 | c300 | aa301 | b301 | y301 | aa302 | c302 | aa303 | b303 | y303 | aa304 | c304 | aa305 | b305 | y305 | aa306 | c306 | aa307 | b307 | y307 | aa308 | c308 | aa309 | b309 | y309 | aa310 | c310 | aa311 | b311 | y311 | aa312 | c312 | aa313 | b313 | y313 | aa314 | c314 | aa315 | b315 | y315 | aa316 | c316 | aa317 | b317 | y317 | aa318 | c318 | aa319 | b319 | y319 | aa320 | c320 | aa321 | b321 | y321 | aa322 | c322 | aa323 | b323 | y323 | aa324 | c324 | aa325 | b325 | y325 | aa326 | c326 | aa327 | b327 | y327 | aa328 | c328 | aa329 | b329 | y329 | aa330 | c330 | aa331 | b331 | y331 | aa332 | c332 | aa333 | b333 | y333 | aa334 | c334 | aa335 | b335 | y335 | aa336 | c336 | aa337 | b337 | y337 | aa338 | c338 | aa339 | b339 | y339 | aa340 | c340 | aa341 | b341 | y341 | aa342 | c342 | aa343 | b343 | y343 | aa344 | c344 | aa345 | b345 | y345 | aa346 | c346 | aa347 | b347 | y347 | aa348 | c348 | aa349 | b349 | y349 | aa350 | c350 | aa351 | b351 | y351 | aa352 | c352 | aa353 | b353 | y353 | aa354 | c354 | aa355 | b355 | y355 | aa356 | c356 | aa357 | b357 | y357 | aa358 | c358 | aa359 | b359 | y359 | aa360 | c360 | aa361 | b361 | y361 | aa362 | c362 | aa363 | b363 | y363 | aa364 | c364 | aa365 | b365 | y365 | aa366 | c366 | aa367 | b367 | y367 | aa368 | c368 | aa369 | b369 | y369 | aa370 | c370 | aa371 | b371 | y371 | aa372 | c372 | aa373 | b373 | y373 | aa374 | c374 | aa375 | b375 | y375 | aa376 | c376 | aa377 | b377 | y377 | aa378 | c378 | aa379 | b379 | y379 | aa380 | c380 | aa381 | b381 | y381 | aa382 | c382 | aa383 | b383 | y383 | aa384 | c384 | aa385 | b385 | y385 | aa386 | c386 | aa387 | b387 | y387 | aa388 | c388 | aa389 | b389 | y389 | aa390 | c390 | aa391 | b391 | y391 | aa392 | c392 | aa393 | b393 | y393 | aa394 | c394 | aa395 | b395 | y395 | aa396 | c396 | aa397 | b397 | y397 | aa398 | c398 | aa399 | b399 | y399 | aa400 | c400 | aa401 | b401 | y401 | aa402 | c402 | aa403 | b403 | y403 | aa404 | c404 | aa405 | b405 | y405 | aa406 | c406 | aa407 | b407 | y407 | aa408 | c408 | aa409 | b409 | y409 | aa410 | c410 | aa411 | b411 | y411 | aa412 | c412 | aa413 | b413 | y413 | aa414 | c414 | aa415 | b415 | y415 | aa416 | c416 | aa417 | b417 | y417 | aa418 | c418 | aa419 | b419 | y419 | aa420 | c420 | aa421 | b421 | y421 | aa422 | c422 | aa423 | b423 | y423 | aa424 | c424 | aa425 | b425 | y425 | aa426 | c426 | aa427 | b427 | y427 | aa428 | c428 | aa429 | b429 | y429 | aa430 | c430 | aa431 | b431 | y431 | aa432 | c432 | aa433 | b433 | y433 | aa434 | c434 | aa435 | b435 | y435 | aa436 | c436 | aa437 | b437 | y437 | aa438 | c438 | aa439 | b439 | y439 | aa440 | c440 | aa441 | b441 | y441 | aa442 | c442 | aa443 | b443 | y443 | aa444 | c444 | aa445 | b445 | y445 | aa446 | c446 | aa447 | b447 | y447 | aa448 | c448 | aa449 | b449 | y449 | aa450 | c450 | aa451 | b451 | y451 | aa452 | c452 | aa453 | b453 | y453 | aa454 | c454 | aa455 | b455 | y455 | aa456 | c456 | aa457 | b457 | y457 | aa458 | c458 | aa459 | b459 | y459 | aa460 | c460 | aa461 | b461 | y461 | aa462 | c462 | aa463 | b463 | y463 | aa464 | c464 | aa465 | b465 | y465 | aa466 | c466 | aa467 | b467 | y467 | aa468 | c468 | aa469 | b469 | y469 | aa470 | c470 | aa471 | b471 | y471 | aa472 | c472 | aa473 | b473 | y473 | aa474 | c474 | aa475 | b475 | y475 | aa476 | c476 | aa477 | b477 | y477 | aa478 | c478 | aa479 | b479 | y479 | aa480 | c480 | aa481 | b481 | y481 | aa482 | c482 | aa483 | b483 | y483 | aa484 | c484 | aa485 | b485 | y485 | aa486 | c486 | aa487 | b487 | y487 | aa488 | c488 | aa489 | b489 | y489 | aa490 | c490 | aa491 | b491 | y491 | aa492 | c492 | aa493 | b493 | y493 | aa494 | c494 | aa495 | b495 | y495 | aa496 | c496 | aa497 | b497 | y497 | aa498 | c498 | aa499 | b499 | y499 | aa500 | c500 | aa501 | b501 | y501 | aa502 | c502 | aa503 | b503 | y503 | aa504 | c504 | aa505 | b505 | y505 | aa506 | c506 | aa507 | b507 | y507 | aa508 | c508 | aa509 | b509 | y509 | aa510 | c510 | aa511 | b511 | y511 | aa512 | c512 | aa513 | b513 | y513 | aa514 | c514 | aa515 | b515 | y515 | aa516 | c516 | aa517 | b517 | y517 | aa518 | c518 | aa519 | b519 | y519 | aa520 | c520 | aa521 | b521 | y521 | aa522 | c522 | aa523 | b523 | y523 | aa524 | c524 | aa525 | b525 | y525 | aa526 | c526 | aa527 | b527 | y527 | aa528 | c528 | aa529 | b529 | y529 | aa530 | c530 | aa531 | b531 | y531 | aa532 | c532 | aa533 | b533 | y533 | aa534 | c534 | aa535 | b535 | y535 | aa536 | c536 | aa537 | b537 | y537 | aa538 | c538 | aa539 | b539 | y539 | aa540 | c540 | aa541 | b541 | y541 | aa542 | c542 | aa543 | b543 | y543 | aa544 | c544 | aa545 | b545 | y545 | aa546 | c546 | aa547 | b547 | y547 | aa548 | c548 | aa549 | b549 | y549 | aa550 | c550 | aa551 | b551 | y551 | aa552 | c552 | aa553 | b553 | y553 | aa554 | c554 | aa555 | b555 | y555 | aa556 | c556 | aa557 | b557 | y557 | aa558 | c558 | aa559 | b559 | y559 | aa560 | c560 | aa561 | b561 | y561 | aa562 | c562 | aa563 | b563 | y563 | aa564 | c564 | aa565 | b565 | y565 | aa566 | c566 | aa567 | b567 | y567 | aa568 | c568 | aa569 | b569 | y569 | aa570 | c570 | aa571 | b571 | y571 | aa572 | c572 | aa573 | b573 | y573 | aa574 | c574 | aa575 | b575 | y575 | aa576 | c576 | aa577 | b577 | y577 | aa578 | c578 | aa579 | b579 | y579 | aa580 | c580 | aa581 | b581 | y581 | aa582 | c582 | aa583 | b583 | y583 | aa584 | c584 | aa585 | b585 | y585 | aa586 | c586 | aa587 | b587 | y587 | aa588 | c588 | aa589 |
|---|---|----|-----|----|----|-----|----|-----|----|----|-----|----|-----|----|----|-----|----|-----|----|----|-----|----|-----|----|----|------|-----|------|-----|-----|------|-----|------|-----|-----|------|-----|------|-----|-----|------|-----|------|-----|-----|------|-----|------|-----|-----|------|-----|------|-----|-----|------|-----|------|-----|-----|------|-----|------|-----|-----|------|-----|------|-----|-----|------|-----|------|-----|-----|------|-----|------|-----|-----|------|-----|------|-----|-----|------|-----|------|-----|-----|------|-----|------|-----|-----|------|-----|------|-----|-----|------|-----|------|-----|-----|------|-----|------|-----|-----|------|-----|------|-----|-----|------|-----|------|-----|-----|------|-----|------|-----|-----|------|-----|------|-----|-----|------|-----|------|-----|-----|------|-----|------|-----|-----|------|-----|------|-----|-----|------|-----|------|-----|-----|------|-----|------|-----|-----|------|-----|------|-----|-----|------|-----|------|-----|-----|------|-----|------|-----|-----|------|-----|------|-----|-----|------|-----|------|-----|-----|------|-----|------|-----|-----|------|-----|------|-----|-----|------|-----|------|-----|-----|------|-----|------|-----|-----|------|-----|------|-----|-----|------|-----|------|-----|-----|------|-----|------|-----|-----|------|-----|------|-----|-----|------|-----|------|-----|-----|------|-----|------|-----|-----|------|-----|------|-----|-----|------|-----|------|-----|-----|------|-----|------|-----|-----|------|-----|------|-----|-----|-------|------|-------|------|------|-------|------|-------|------|------|-------|------|-------|------|------|-------|------|-------|------|------|-------|------|-------|------|------|-------|------|-------|------|------|-------|------|-------|------|------|-------|------|-------|------|------|-------|------|-------|------|------|-------|------|-------|------|------|-------|------|-------|------|------|-------|------|-------|------|------|-------|------|-------|------|------|-------|------|-------|------|------|-------|------|-------|------|------|-------|------|-------|------|------|-------|------|-------|------|------|-------|------|-------|------|------|-------|------|-------|------|------|-------|------|-------|------|------|-------|------|-------|------|------|-------|------|-------|------|------|-------|------|-------|------|------|-------|------|-------|------|------|-------|------|-------|------|------|-------|------|-------|------|------|-------|------|-------|------|------|-------|------|-------|------|------|-------|------|-------|------|------|-------|------|-------|------|------|-------|------|-------|------|------|-------|------|-------|------|------|-------|------|-------|------|------|-------|------|-------|------|------|-------|------|-------|------|------|-------|------|-------|------|------|-------|------|-------|------|------|-------|------|-------|------|------|-------|------|-------|------|------|-------|------|-------|------|------|-------|------|-------|------|------|-------|------|-------|------|------|-------|------|-------|------|------|-------|------|-------|------|------|-------|------|-------|------|------|-------|------|-------|------|------|-------|------|-------|------|------|-------|------|-------|------|------|-------|------|-------|------|------|-------|------|-------|------|------|-------|------|-------|------|------|-------|------|-------|------|------|-------|------|-------|------|------|-------|------|-------|------|------|-------|------|-------|------|------|-------|------|-------|------|------|-------|------|-------|------|------|-------|------|-------|------|------|-------|------|-------|------|------|-------|------|-------|------|------|-------|------|-------|------|------|-------|------|-------|------|------|-------|------|-------|------|------|-------|------|-------|------|------|-------|------|-------|------|------|-------|------|-------|------|------|-------|------|-------|------|------|-------|------|-------|------|------|-------|------|-------|------|------|-------|------|-------|------|------|-------|------|-------|------|------|-------|------|-------|------|------|-------|------|-------|------|------|-------|------|-------|------|------|-------|------|-------|------|------|-------|------|-------|------|------|-------|------|-------|------|------|-------|------|-------|------|------|-------|------|-------|------|------|-------|------|-------|------|------|-------|------|-------|------|------|-------|------|-------|------|------|-------|------|-------|------|------|-------|------|-------|------|------|-------|------|-------|------|------|-------|------|-------|------|------|-------|------|-------|------|------|-------|------|-------|------|------|-------|------|-------|------|------|-------|------|-------|------|------|-------|------|-------|------|------|-------|------|-------|------|------|-------|------|-------|------|------|-------|------|-------|------|------|-------|------|-------|------|------|-------|------|-------|------|------|-------|------|-------|------|------|-------|------|-------|------|------|-------|------|-------|------|------|-------|------|-------|------|------|-------|------|-------|------|------|-------|------|-------|------|------|-------|------|-------|------|------|-------|------|-------|------|------|-------|------|-------|------|------|-------|------|-------|------|------|-------|------|-------|------|------|-------|------|-------|------|------|-------|------|-------|------|------|-------|------|-------|------|------|-------|------|-------|------|------|-------|------|-------|------|------|-------|------|-------|------|------|-------|------|-------|------|------|-------|------|-------|------|------|-------|------|-------|------|------|-------|------|-------|------|------|-------|------|-------|------|------|-------|------|-------|------|------|-------|------|-------|------|------|-------|------|-------|------|------|-------|------|-------|------|------|-------|------|-------|------|------|-------|------|-------|------|------|-------|------|-------|------|------|-------|------|-------|------|------|-------|------|-------|------|------|-------|------|-------|------|------|-------|------|-------|------|------|-------|------|-------|------|------|-------|------|-------|------|------|-------|------|-------|------|------|-------|------|-------|------|------|-------|------|-------|------|------|-------|------|-------|------|------|-------|------|-------|------|------|-------|------|-------|------|------|-------|------|-------|------|------|-------|------|-------|------|------|-------|------|-------|------|------|-------|------|-------|------|------|-------|------|-------|------|------|-------|------|-------|------|------|-------|------|-------|------|------|-------|------|-------|------|------|-------|------|-------|------|------|-------|------|-------|------|------|-------|------|-------|------|------|-------|------|-------|------|------|-------|------|-------|------|------|-------|------|-------|------|------|-------|------|-------|------|------|-------|------|-------|------|------|-------|------|-------|------|------|-------|------|-------|------|------|-------|------|-------|------|------|-------|------|-------|------|------|-------|------|-------|------|------|-------|------|-------|------|------|-------|------|-------|------|------|-------|------|-------|------|------|-------|------|-------|------|------|-------|------|-------|------|------|-------|------|-------|------|------|-------|------|-------|------|------|-------|------|-------|------|------|-------|------|-------|------|------|-------|------|-------|------|------|-------|------|-------|------|------|-------|------|-------|------|------|-------|------|-------|------|------|-------|------|-------|------|------|-------|------|-------|------|------|-------|------|-------|------|------|-------|------|-------|------|------|-------|------|-------|------|------|-------|------|-------|------|------|-------|------|-------|------|------|-------|------|-------|------|------|-------|------|-------|------|------|-------|------|-------|------|------|-------|------|-------|------|------|-------|------|-------|------|------|-------|------|-------|------|------|-------|------|-------|------|------|-------|------|-------|------|------|-------|------|-------|------|------|-------|------|-------|------|------|-------|------|-------|------|------|-------|------|-------|------|------|-------|------|-------|------|------|-------|------|-------|------|------|-------|------|-------|------|------|-------|------|-------|------|------|-------|------|-------|------|------|-------|------|-------|------|------|-------|------|-------|------|------|-------|------|-------|------|------|-------|------|-------|------|------|-------|------|-------|------|------|-------|------|-------|------|------|-------|------|-------|------|------|-------|------|-------|------|------|-------|------|-------|------|------|-------|------|-------|------|------|-------|------|-------|------|------|-------|------|-------|------|------|-------|------|-------|------|------|-------|------|-------|------|------|-------|------|-------|------|------|-------|------|-------|------|------|-------|------|-------|------|------|-------|------|-------|------|------|-------|------|-------|------|------|-------|------|-------|------|------|-------|------|-------|------|------|-------|------|-------|------|------|-------|------|-------|------|------|-------|------|-------|------|------|-------|------|-------|------|------|-------|------|-------|------|------|-------|------|-------|------|------|-------|------|-------|------|------|-------|------|-------|------|------|-------|------|-------|------|------|-------|------|-------|------|------|-------|------|-------|------|------|-------|------|-------|------|------|-------|------|-------|------|------|-------|------|-------|------|------|-------|------|-------|------|------|-------|------|-------|------|------|-------|------|-------|------|------|-------|------|-------|------|------|-------|------|-------|------|------|-------|------|-------|------|------|-------|------|-------|------|------|-------|------|-------|------|------|-------|------|-------|------|------|-------|------|-------|------|------|-------|------|-------|------|------|-------|------|-------|------|------|-------|------|-------|------|------|-------|------|-------|------|------|-------|------|-------|
|---|---|----|-----|----|----|-----|----|-----|----|----|-----|----|-----|----|----|-----|----|-----|----|----|-----|----|-----|----|----|------|-----|------|-----|-----|------|-----|------|-----|-----|------|-----|------|-----|-----|------|-----|------|-----|-----|------|-----|------|-----|-----|------|-----|------|-----|-----|------|-----|------|-----|-----|------|-----|------|-----|-----|------|-----|------|-----|-----|------|-----|------|-----|-----|------|-----|------|-----|-----|------|-----|------|-----|-----|------|-----|------|-----|-----|------|-----|------|-----|-----|------|-----|------|-----|-----|------|-----|------|-----|-----|------|-----|------|-----|-----|------|-----|------|-----|-----|------|-----|------|-----|-----|------|-----|------|-----|-----|------|-----|------|-----|-----|------|-----|------|-----|-----|------|-----|------|-----|-----|------|-----|------|-----|-----|------|-----|------|-----|-----|------|-----|------|-----|-----|------|-----|------|-----|-----|------|-----|------|-----|-----|------|-----|------|-----|-----|------|-----|------|-----|-----|------|-----|------|-----|-----|------|-----|------|-----|-----|------|-----|------|-----|-----|------|-----|------|-----|-----|------|-----|------|-----|-----|------|-----|------|-----|-----|------|-----|------|-----|-----|------|-----|------|-----|-----|------|-----|------|-----|-----|------|-----|------|-----|-----|------|-----|------|-----|-----|------|-----|------|-----|-----|------|-----|------|-----|-----|------|-----|------|-----|-----|------|-----|------|-----|-----|-------|------|-------|------|------|-------|------|-------|------|------|-------|------|-------|------|------|-------|------|-------|------|------|-------|------|-------|------|------|-------|------|-------|------|------|-------|------|-------|------|------|-------|------|-------|------|------|-------|------|-------|------|------|-------|------|-------|------|------|-------|------|-------|------|------|-------|------|-------|------|------|-------|------|-------|------|------|-------|------|-------|------|------|-------|------|-------|------|------|-------|------|-------|------|------|-------|------|-------|------|------|-------|------|-------|------|------|-------|------|-------|------|------|-------|------|-------|------|------|-------|------|-------|------|------|-------|------|-------|------|------|-------|------|-------|------|------|-------|------|-------|------|------|-------|------|-------|------|------|-------|------|-------|------|------|-------|------|-------|------|------|-------|------|-------|------|------|-------|------|-------|------|------|-------|------|-------|------|------|-------|------|-------|------|------|-------|------|-------|------|------|-------|------|-------|------|------|-------|------|-------|------|------|-------|------|-------|------|------|-------|------|-------|------|------|-------|------|-------|------|------|-------|------|-------|------|------|-------|------|-------|------|------|-------|------|-------|------|------|-------|------|-------|------|------|-------|------|-------|------|------|-------|------|-------|------|------|-------|------|-------|------|------|-------|------|-------|------|------|-------|------|-------|------|------|-------|------|-------|------|------|-------|------|-------|------|------|-------|------|-------|------|------|-------|------|-------|------|------|-------|------|-------|------|------|-------|------|-------|------|------|-------|------|-------|------|------|-------|------|-------|------|------|-------|------|-------|------|------|-------|------|-------|------|------|-------|------|-------|------|------|-------|------|-------|------|------|-------|------|-------|------|------|-------|------|-------|------|------|-------|------|-------|------|------|-------|------|-------|------|------|-------|------|-------|------|------|-------|------|-------|------|------|-------|------|-------|------|------|-------|------|-------|------|------|-------|------|-------|------|------|-------|------|-------|------|------|-------|------|-------|------|------|-------|------|-------|------|------|-------|------|-------|------|------|-------|------|-------|------|------|-------|------|-------|------|------|-------|------|-------|------|------|-------|------|-------|------|------|-------|------|-------|------|------|-------|------|-------|------|------|-------|------|-------|------|------|-------|------|-------|------|------|-------|------|-------|------|------|-------|------|-------|------|------|-------|------|-------|------|------|-------|------|-------|------|------|-------|------|-------|------|------|-------|------|-------|------|------|-------|------|-------|------|------|-------|------|-------|------|------|-------|------|-------|------|------|-------|------|-------|------|------|-------|------|-------|------|------|-------|------|-------|------|------|-------|------|-------|------|------|-------|------|-------|------|------|-------|------|-------|------|------|-------|------|-------|------|------|-------|------|-------|------|------|-------|------|-------|------|------|-------|------|-------|------|------|-------|------|-------|------|------|-------|------|-------|------|------|-------|------|-------|------|------|-------|------|-------|------|------|-------|------|-------|------|------|-------|------|-------|------|------|-------|------|-------|------|------|-------|------|-------|------|------|-------|------|-------|------|------|-------|------|-------|------|------|-------|------|-------|------|------|-------|------|-------|------|------|-------|------|-------|------|------|-------|------|-------|------|------|-------|------|-------|------|------|-------|------|-------|------|------|-------|------|-------|------|------|-------|------|-------|------|------|-------|------|-------|------|------|-------|------|-------|------|------|-------|------|-------|------|------|-------|------|-------|------|------|-------|------|-------|------|------|-------|------|-------|------|------|-------|------|-------|------|------|-------|------|-------|------|------|-------|------|-------|------|------|-------|------|-------|------|------|-------|------|-------|------|------|-------|------|-------|------|------|-------|------|-------|------|------|-------|------|-------|------|------|-------|------|-------|------|------|-------|------|-------|------|------|-------|------|-------|------|------|-------|------|-------|------|------|-------|------|-------|------|------|-------|------|-------|------|------|-------|------|-------|------|------|-------|------|-------|------|------|-------|------|-------|------|------|-------|------|-------|------|------|-------|------|-------|------|------|-------|------|-------|------|------|-------|------|-------|------|------|-------|------|-------|------|------|-------|------|-------|------|------|-------|------|-------|------|------|-------|------|-------|------|------|-------|------|-------|------|------|-------|------|-------|------|------|-------|------|-------|------|------|-------|------|-------|------|------|-------|------|-------|------|------|-------|------|-------|------|------|-------|------|-------|------|------|-------|------|-------|------|------|-------|------|-------|------|------|-------|------|-------|------|------|-------|------|-------|------|------|-------|------|-------|------|------|-------|------|-------|------|------|-------|------|-------|------|------|-------|------|-------|------|------|-------|------|-------|------|------|-------|------|-------|------|------|-------|------|-------|------|------|-------|------|-------|------|------|-------|------|-------|------|------|-------|------|-------|------|------|-------|------|-------|------|------|-------|------|-------|------|------|-------|------|-------|------|------|-------|------|-------|------|------|-------|------|-------|------|------|-------|------|-------|------|------|-------|------|-------|------|------|-------|------|-------|------|------|-------|------|-------|------|------|-------|------|-------|------|------|-------|------|-------|------|------|-------|------|-------|------|------|-------|------|-------|------|------|-------|------|-------|------|------|-------|------|-------|------|------|-------|------|-------|------|------|-------|------|-------|------|------|-------|------|-------|------|------|-------|------|-------|------|------|-------|------|-------|------|------|-------|------|-------|------|------|-------|------|-------|------|------|-------|------|-------|------|------|-------|------|-------|------|------|-------|------|-------|------|------|-------|------|-------|------|------|-------|------|-------|------|------|-------|------|-------|------|------|-------|------|-------|------|------|-------|------|-------|------|------|-------|------|-------|------|------|-------|------|-------|------|------|-------|------|-------|------|------|-------|------|-------|------|------|-------|------|-------|------|------|-------|------|-------|------|------|-------|------|-------|------|------|-------|------|-------|------|------|-------|------|-------|------|------|-------|------|-------|------|------|-------|------|-------|------|------|-------|------|-------|------|------|-------|------|-------|------|------|-------|------|-------|------|------|-------|------|-------|------|------|-------|------|-------|------|------|-------|------|-------|------|------|-------|------|-------|------|------|-------|------|-------|------|------|-------|------|-------|------|------|-------|------|-------|------|------|-------|------|-------|------|------|-------|------|-------|------|------|-------|------|-------|------|------|-------|------|-------|------|------|-------|------|-------|------|------|-------|------|-------|------|------|-------|------|-------|------|------|-------|------|-------|------|------|-------|------|-------|------|------|-------|------|-------|------|------|-------|------|-------|------|------|-------|------|-------|------|------|-------|------|-------|------|------|-------|------|-------|------|------|-------|------|-------|------|------|-------|------|-------|------|------|-------|------|-------|------|------|-------|------|-------|------|------|-------|------|-------|------|------|-------|------|-------|------|------|-------|------|-------|------|------|-------|------|-------|------|------|-------|------|-------|------|------|-------|------|-------|------|------|-------|------|-------|------|------|-------|------|-------|

# sp | P43276 | H15\_MOUSE

[Acetyl]S<sup>Phospho</sup> ETAPAETAAPAPVEK  
79.97

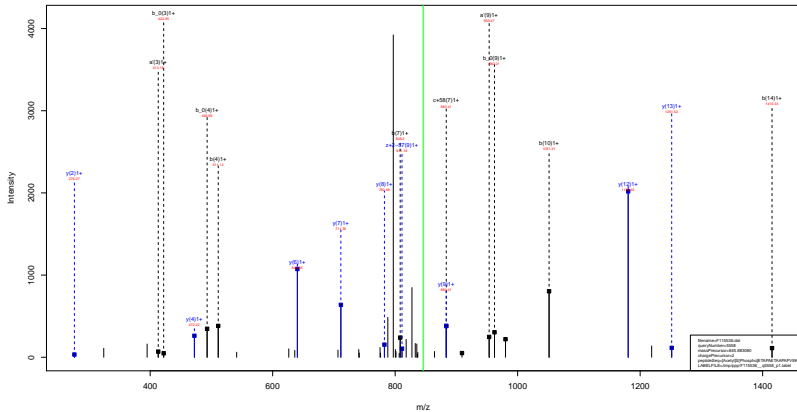



# sp | P43276 | H15\_MOUSE

[Acetyl]S<sup>Phospho</sup><sub>79.97</sub> ETAPAETAAPAPVEK

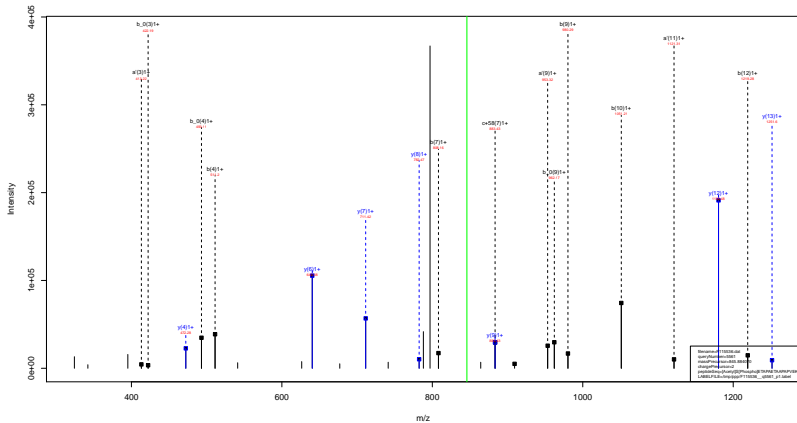

Sequence: ETAPAETAAPAPVEK  
 Query: H15\_MOUSE  
 Mass: 1150.05  
 Charge: 12  
 Label: P43276-H15\_MOUSE\_P43276





# sp | P15864 | H12\_MOUSE

[Acetyl]S<sup>Phospho</sup> EAAPAAPAAAPPAEKKAPAK  
79.97

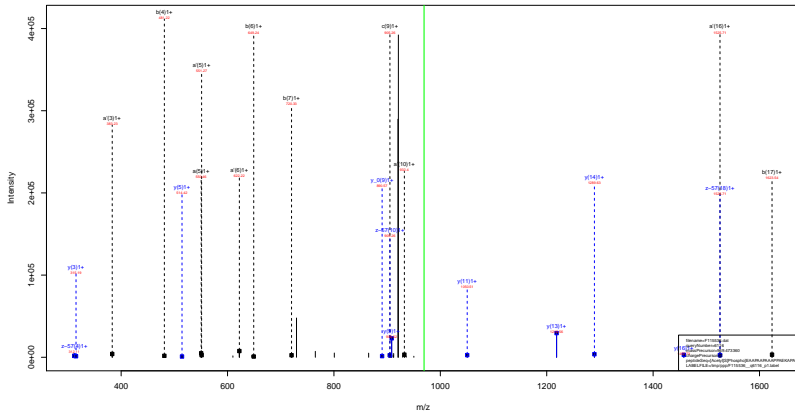







# sp | P43276 | H15\_MOUSE

[Acetyl]SETAPAETAAPAPVEKS <sup>Phospho</sup> PAK  
79.97

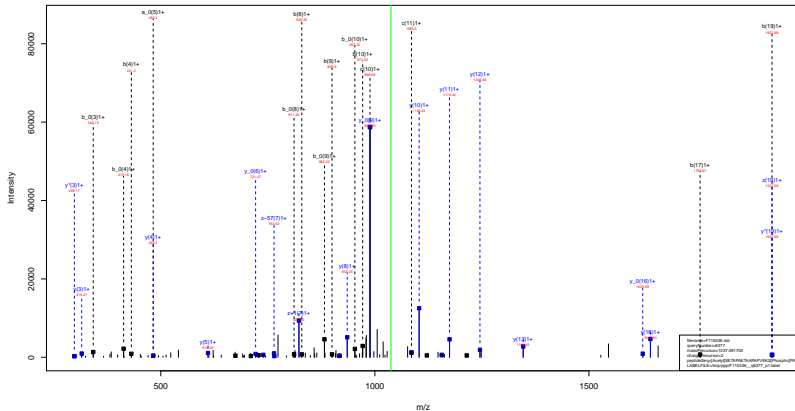

MassSpec 110306\_001  
 Gene: P43276\_MOUSE  
 Protein: SETD4\_MOUSE  
 Label: [Acetyl]SETAPAETAAPAPVEKS  
 Label: [Phospho]PAK  
 Label: [79.97]



# sp | P43276 | H15\_MOUSE

[Acetyl]SETAPAETAAPAPVEKS <sup>Phospho</sup> PAK  
79.97

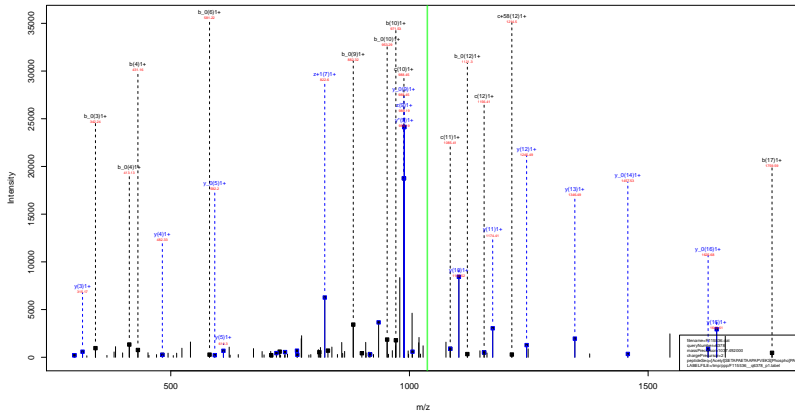





# sp | P43276 | H15\_MOUSE

[Acetyl]SETAPAETAAPAPVEKS<sup>Phospho</sup> PAK  
79.97

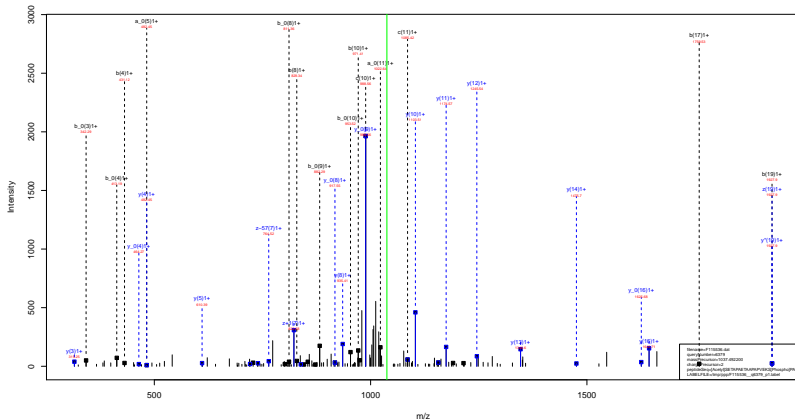



# sp | P43276 | H15\_MOUSE

[Acetyl]SETAPAETAAPAPVEKS <sup>Phospho</sup> PAK  
79.97

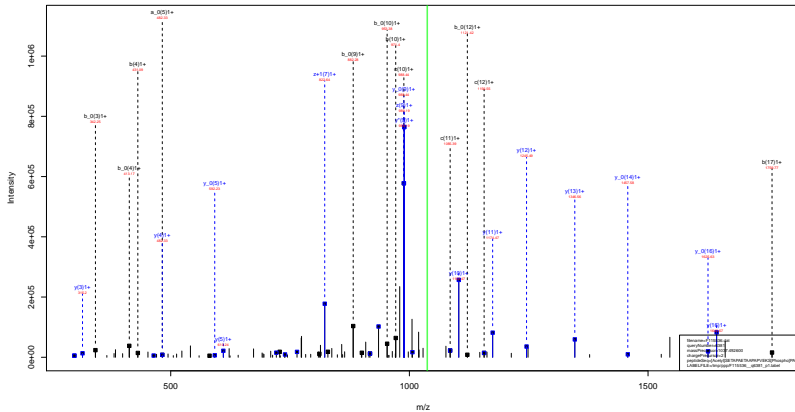







# sp | P43276 | H15\_MOUSE

[Acetyl]SETAPAETAAPAPVEKS <sup>Phospho</sup>PAK  
79.97

- ▶ fragmentation table for charge state 2+
- ▶ specType=1
- ▶ score=65.27
- ▶ F115536.dat
- ▶ query=q6382.p1
- ▶ precursor=691.998100
- ▶ chargePrecursor=3
- ▶ itol=0.5

| m/z   | intensity | label |
|-------|-----------|-------|
| 115.0 | 100       | 115.0 |
| 116.0 | 10        | 116.0 |
| 117.0 | 10        | 117.0 |
| 118.0 | 10        | 118.0 |
| 119.0 | 10        | 119.0 |
| 120.0 | 10        | 120.0 |
| 121.0 | 10        | 121.0 |
| 122.0 | 10        | 122.0 |
| 123.0 | 10        | 123.0 |
| 124.0 | 10        | 124.0 |
| 125.0 | 10        | 125.0 |
| 126.0 | 10        | 126.0 |
| 127.0 | 10        | 127.0 |
| 128.0 | 10        | 128.0 |
| 129.0 | 10        | 129.0 |
| 130.0 | 10        | 130.0 |
| 131.0 | 10        | 131.0 |
| 132.0 | 10        | 132.0 |
| 133.0 | 10        | 133.0 |
| 134.0 | 10        | 134.0 |
| 135.0 | 10        | 135.0 |
| 136.0 | 10        | 136.0 |
| 137.0 | 10        | 137.0 |
| 138.0 | 10        | 138.0 |
| 139.0 | 10        | 139.0 |
| 140.0 | 10        | 140.0 |
| 141.0 | 10        | 141.0 |
| 142.0 | 10        | 142.0 |
| 143.0 | 10        | 143.0 |
| 144.0 | 10        | 144.0 |
| 145.0 | 10        | 145.0 |
| 146.0 | 10        | 146.0 |
| 147.0 | 10        | 147.0 |
| 148.0 | 10        | 148.0 |
| 149.0 | 10        | 149.0 |
| 150.0 | 10        | 150.0 |
| 151.0 | 10        | 151.0 |
| 152.0 | 10        | 152.0 |
| 153.0 | 10        | 153.0 |
| 154.0 | 10        | 154.0 |
| 155.0 | 10        | 155.0 |
| 156.0 | 10        | 156.0 |
| 157.0 | 10        | 157.0 |
| 158.0 | 10        | 158.0 |
| 159.0 | 10        | 159.0 |
| 160.0 | 10        | 160.0 |
| 161.0 | 10        | 161.0 |
| 162.0 | 10        | 162.0 |
| 163.0 | 10        | 163.0 |
| 164.0 | 10        | 164.0 |
| 165.0 | 10        | 165.0 |
| 166.0 | 10        | 166.0 |
| 167.0 | 10        | 167.0 |
| 168.0 | 10        | 168.0 |
| 169.0 | 10        | 169.0 |
| 170.0 | 10        | 170.0 |
| 171.0 | 10        | 171.0 |
| 172.0 | 10        | 172.0 |
| 173.0 | 10        | 173.0 |
| 174.0 | 10        | 174.0 |
| 175.0 | 10        | 175.0 |
| 176.0 | 10        | 176.0 |
| 177.0 | 10        | 177.0 |
| 178.0 | 10        | 178.0 |
| 179.0 | 10        | 179.0 |
| 180.0 | 10        | 180.0 |
| 181.0 | 10        | 181.0 |
| 182.0 | 10        | 182.0 |
| 183.0 | 10        | 183.0 |
| 184.0 | 10        | 184.0 |
| 185.0 | 10        | 185.0 |
| 186.0 | 10        | 186.0 |
| 187.0 | 10        | 187.0 |
| 188.0 | 10        | 188.0 |
| 189.0 | 10        | 189.0 |
| 190.0 | 10        | 190.0 |
| 191.0 | 10        | 191.0 |
| 192.0 | 10        | 192.0 |
| 193.0 | 10        | 193.0 |
| 194.0 | 10        | 194.0 |
| 195.0 | 10        | 195.0 |
| 196.0 | 10        | 196.0 |
| 197.0 | 10        | 197.0 |
| 198.0 | 10        | 198.0 |
| 199.0 | 10        | 199.0 |
| 200.0 | 10        | 200.0 |



# sp | P43275 | H11\_MOUSE

[Acetyl]S<sup>Phospho</sup><sub>79.97</sub> ETAPVAQAASTATEKPAAAK

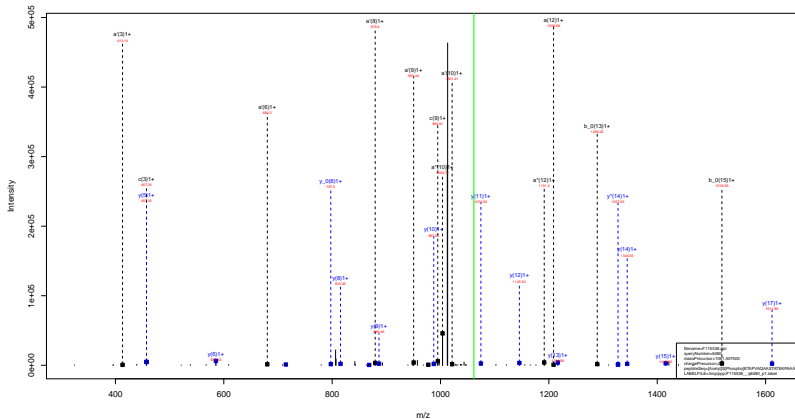



# sp | P43275 | H11\_MOUSE

[Acetyl]S<sup>Phospho</sup> 79.97 ETAPVAQAASTATEK PAAAK

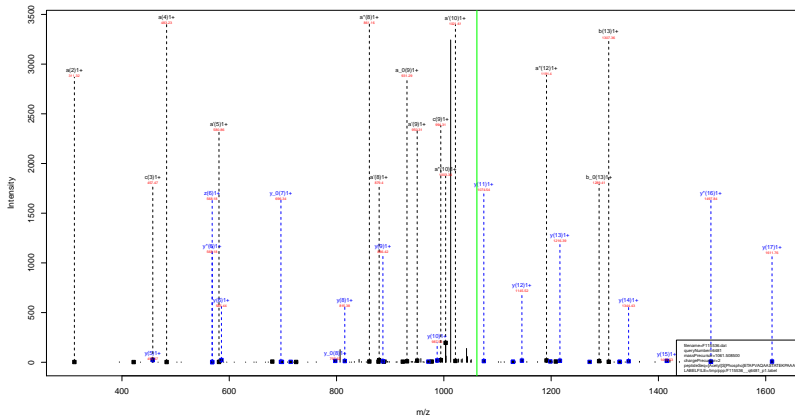



# sp | P43276 | H15\_MOUSE

[Acetyl]S<sup>Phospho</sup> ETAPAETAAPAPVEKS<sup>Phospho</sup> PAK<sup>79.97</sup>

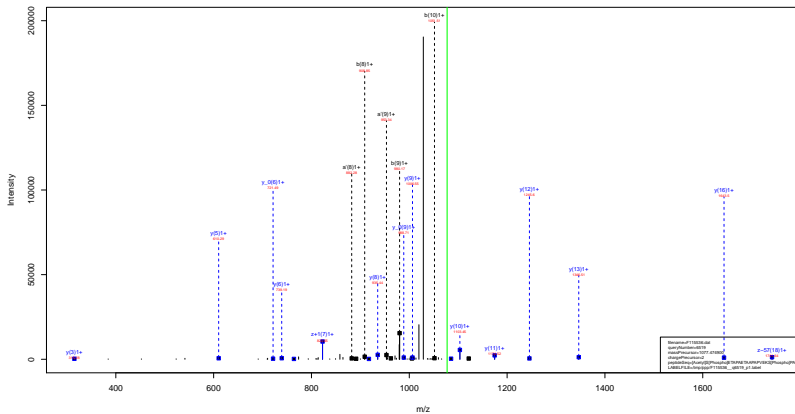



# sp | P43276 | H15\_MOUSE

[Acetyl]SETAPAETAAPAPVEKS <sup>Phospho</sup>PAKK  
79.97

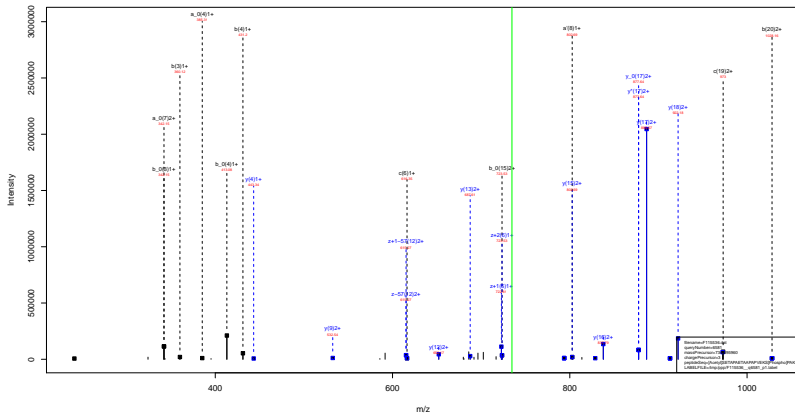







# sp | P43275 | H11\_MOUSE

[Acetyl]S<sup>Phospho</sup><sub>79.97</sub> ETAPVAQAASTATEK PAAAKK

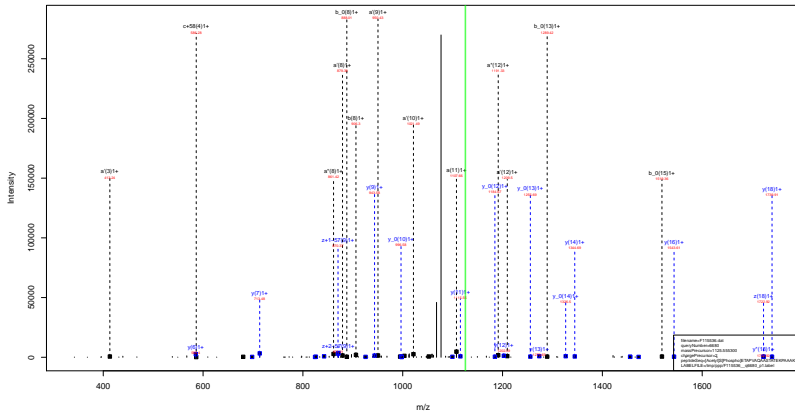



# sp | P10922 | H10\_MOUSE

[Acetyl]TENSTSAPAAKPK

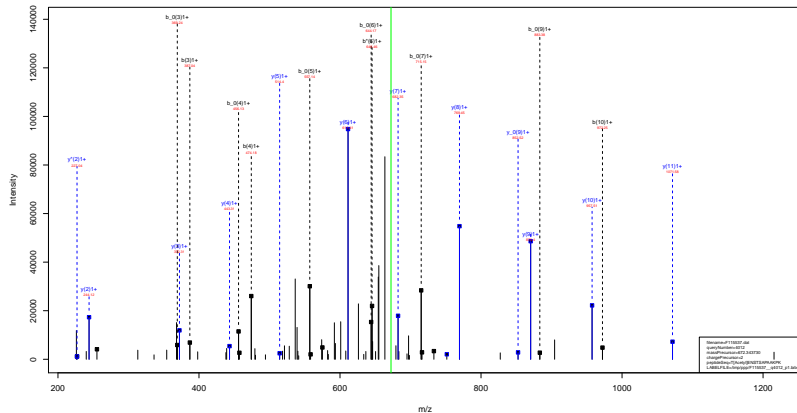

# sp | P10922 | H10\_MOUSE

[Acetyl]TENSTSAPAAKPK

- ▶ fragmentation table for charge state 1+
- ▶ specType=cid
- ▶ score=71.93
- ▶ F115537.dat
- ▶ query=q4012\_p1
- ▶ precursor=672.343730
- ▶ chargePrecursor=2
- ▶ itol=0.5

| AA | a        | a*       | a <sub>0</sub> | b              | b*             | b <sub>0</sub> | y              | y*              | y <sub>0</sub> | AA |
|----|----------|----------|----------------|----------------|----------------|----------------|----------------|-----------------|----------------|----|
| T  | 148.071  | 0.000    | 68.090         | 144.066        | 0.000          | 636.050        | 1343.680       | 1328.654        | 1328.670       | T  |
| E  | 245.111  | 0.000    | <b>227.303</b> | 232.100        | 0.000          | <b>255.096</b> | 320.622        | 1183.508        | 1182.611       | E  |
| T  | 330.210  | 0.012    | 64.140         | <b>307.151</b> | 0.012          | 309.234        | <b>300.240</b> | <b>1071.579</b> | 1068.555       | T  |
| S  | 446.108  | 0.010    | 420.110        | 420.110        | <b>474.183</b> | <b>457.157</b> | <b>456.173</b> | <b>957.536</b>  | 945.510        | S  |
| T  | 547.210  | 0.010    | 150.220        | <b>575.231</b> | <b>558.204</b> | <b>557.220</b> | <b>870.504</b> | 857.478         | <b>852.494</b> | T  |
| S  | 634.308  | 0.012    | 388.260        |                |                | <b>665.236</b> | <b>644.233</b> | <b>760.497</b>  | 757.470        | S  |
| A  | 730.308  | 0.003    | 387.250        | <b>733.300</b> | <b>716.273</b> | <b>715.280</b> | <b>682.425</b> | 685.395         | 681.360        | A  |
| P  | 802.308  | 0.010    | 196.140        | 803.303        | 811.300        | 827.300        | <b>611.380</b> | 594.350         | 0.000          | P  |
| A  | 912.305  | 0.003    | 805.304        | 805.304        | 804.303        | <b>883.310</b> | <b>514.335</b> | 487.308         | 0.000          | A  |
| A  | 994.312  | 0.014    | 926.300        | <b>972.427</b> | 970.300        | 984.310        | <b>443.290</b> | 429.274         | 0.000          | A  |
| R  | 1112.337 | 0.005    | 804.310        | 1100.329       | 1081.400       | 1092.311       | <b>372.261</b> | 355.234         | 0.000          | R  |
| P  | 1130.300 | 1103.303 | 1130.300       | 1137.370       | 1130.340       | 1136.304       | <b>244.166</b> | <b>227.130</b>  | 0.000          | P  |
| K  | 1207.315 | 1200.300 | 1210.300       | 1225.310       | 1208.343       | 1207.300       | 147.113        | 130.088         | 0.000          | K  |

# sp | P10922 | H10\_MOUSE

[Acetyl]TENSTSAPAAKPK

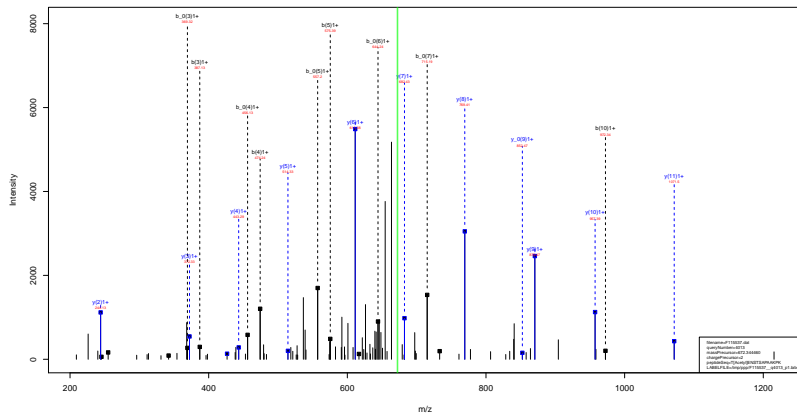

# sp | P10922 | H10\_MOUSE

[Acetyl]TENSTSAPAAKPK

- ▶ fragmentation table for charge state 1+
- ▶ specType=cid
- ▶ score=61.68
- ▶ F115537.dat
- ▶ query=q4013\_p1
- ▶ precursor=672.344460
- ▶ chargePrecursor=2
- ▶ itol=0.5

| AA | a              | a*             | a <sub>0</sub> | b              | b*       | b <sub>0</sub> | y               | y*             | y <sub>0</sub> | AA |
|----|----------------|----------------|----------------|----------------|----------|----------------|-----------------|----------------|----------------|----|
| T  | 116.071        | 0.000          | 98.090         | 144.099        | 0.000    | 126.009        | 134.000         | 1126.854       | 1126.870       | T  |
| E  | <b>245.113</b> | 0.000          | 227.103        | 273.108        | 0.000    | <b>255.096</b> | 320.000         | 1183.508       | 1182.611       | E  |
| T  | 116.071        | <b>142.130</b> | 163.100        | <b>187.151</b> | 0.000    | <b>160.140</b> | <b>1071.579</b> | 1068.555       | 1065.566       | T  |
| S  | 146.108        | 420.130        | 420.110        | <b>474.183</b> | 420.107  | <b>426.173</b> | <b>957.536</b>  | 940.510        | 939.526        | S  |
| T  | 116.071        | 0.000          | 120.220        | <b>175.231</b> | 120.204  | <b>157.220</b> | <b>870.504</b>  | 852.478        | <b>852.404</b> | T  |
| S  | 116.071        | <b>617.241</b> | 116.200        | 116.200        | 116.200  | <b>644.233</b> | <b>766.497</b>  | 757.470        | 756.444        | S  |
| A  | 170.109        | 652.115        | 652.024        | <b>733.300</b> | 170.079  | <b>715.289</b> | <b>682.425</b>  | 665.399        | 664.370        | A  |
| P  | 602.018        | 602.010        | 196.141        | 602.003        | 611.000  | 611.000        | 611.000         | 304.303        | 0.000          | P  |
| A  | 172.105        | 605.100        | 605.004        | 605.000        | 604.003  | 603.000        | <b>514.325</b>  | 497.299        | 496.270        | A  |
| A  | 144.112        | 617.400        | 616.400        | <b>672.427</b> | 616.400  | 614.400        | <b>441.200</b>  | <b>426.271</b> | 425.242        | A  |
| R  | 112.107        | 1005.500       | 1004.510       | 1100.500       | 1001.400 | 1000.410       | <b>372.261</b>  | 355.234        | 354.200        | R  |
| P  | 110.100        | 1103.500       | 1103.500       | 1103.500       | 1103.500 | 1103.500       | <b>244.166</b>  | 227.139        | 226.100        | P  |
| K  | 107.015        | 1200.000       | 1219.000       | 1325.000       | 1300.000 | 1307.000       | 147.113         | 130.000        | 0.000          | K  |

# sp | P10922 | H10\_MOUSE

[Acetyl]TENSTSAPAAKPK

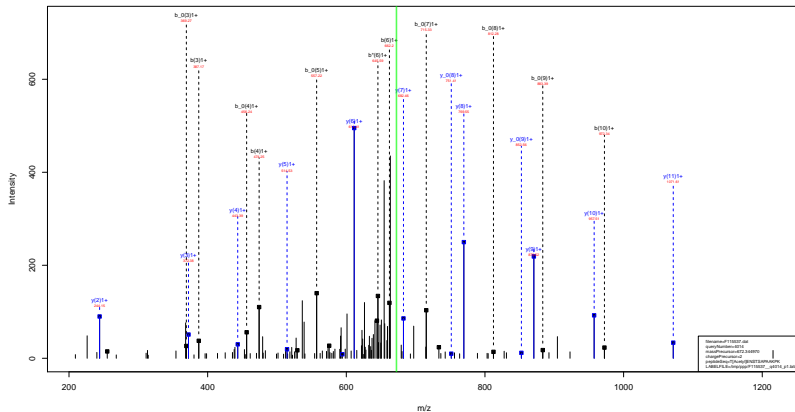



# sp | P10922 | H10\_MOUSE

[Acetyl]TENSTSAPAAKPK

- ▶ fragmentation table for charge state 1+
- ▶ specType=cid
- ▶ score=60.63
- ▶ F115537.dat
- ▶ query=q4014\_p1
- ▶ precursor=672.344970
- ▶ chargePrecursor=2
- ▶ itol=0.5

| AA | a        | a*       | a <sub>0</sub> | b              | b*       | b <sub>0</sub> | y               | y*             | y <sub>0</sub> | AA |
|----|----------|----------|----------------|----------------|----------|----------------|-----------------|----------------|----------------|----|
| T  | 148.071  | 0.000    | 98.093         | 144.096        | 0.000    | 636.000        | 1343.600        | 1328.604       | 1328.610       | T  |
| E  | 245.111  | 0.000    | 227.103        | 237.108        | 0.000    | <b>255.006</b> | 3200.602        | 1183.508       | 1182.611       | E  |
| T  | 330.216  | 0.012    | 363.149        | <b>387.151</b> | 0.012    | <b>360.240</b> | <b>1071.519</b> | 1068.515       | 1068.566       | T  |
| S  | 446.338  | 439.130  | 438.116        | <b>474.183</b> | 437.237  | <b>436.173</b> | <b>957.536</b>  | 948.513        | 938.526        | S  |
| T  | 547.216  | 532.200  | <b>529.225</b> | <b>575.231</b> | 531.231  | <b>557.220</b> | <b>870.508</b>  | 862.410        | <b>852.404</b> | T  |
| S  | 638.308  | 617.291  | 616.273        | <b>642.269</b> | 615.236  | <b>644.232</b> | <b>760.497</b>  | 752.410        | <b>731.466</b> | S  |
| A  | 730.358  | 688.276  | 687.253        | <b>733.300</b> | 682.239  | <b>715.280</b> | <b>682.425</b>  | 685.100        | <b>731.466</b> | A  |
| P  | 802.404  | 803.101  | 798.101        | 803.303        | 811.303  | <b>812.342</b> | <b>611.580</b>  | <b>594.361</b> | 0.000          | P  |
| A  | 972.505  | 928.368  | 926.364        | 927.393        | 934.393  | <b>983.370</b> | <b>514.325</b>  | 487.308        | 0.000          | A  |
| A  | 1044.612 | 974.463  | 970.463        | <b>972.427</b> | 979.462  | 984.419        | <b>441.200</b>  | 429.214        | 0.000          | A  |
| R  | 1127.557 | 1055.500 | 1054.511       | 1055.529       | 1061.406 | 1052.411       | <b>372.261</b>  | 355.214        | 0.000          | R  |
| P  | 1130.580 | 1103.533 | 1103.560       | 1107.576       | 1110.548 | 1116.504       | <b>244.166</b>  | 227.130        | 0.000          | P  |
| R  | 1207.615 | 1200.640 | 1218.664       | 1225.610       | 1238.642 | 1207.600       | 147.113         | 130.088        | 0.000          | R  |

# sp | Q9QZQ8-1 | H2AY\_MOUSE

VSKAASADST <sup>Phospho</sup> TE  
79.97

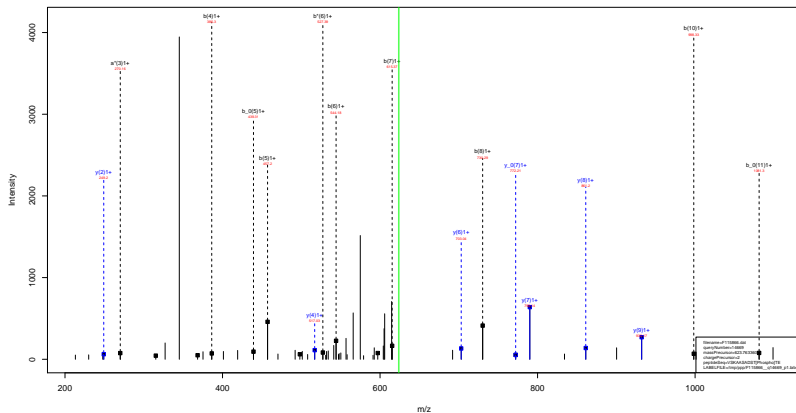

# sp | Q9QZQ8-1 | H2AY\_MOUSE

VSKAASADST<sup>Phospho</sup>TE  
79.97

- ▶ fragmentation table for charge state 1+
- ▶ specType=cid
- ▶ score=51.99
- ▶ F115866.dat
- ▶ query=q14669\_p1
- ▶ precursor=623.763360
- ▶ chargePrecursor=2
- ▶ itol=0.5

| AA  | a       | a'             | a <sub>0</sub> | b              | b'             | b <sub>0</sub>  | y              | y'       | y <sub>0</sub> | AA  |
|-----|---------|----------------|----------------|----------------|----------------|-----------------|----------------|----------|----------------|-----|
| V1  | 72.081  | 0.000          | 0.000          | 102.076        | 0.000          | 0.000           | 1246.530       | 1129.493 | 1129.500       | V12 |
| S2  | 156.113 | 0.000          | 141.100        | 187.108        | 0.000          | 186.089         | 1147.451       | 1158.428 | 1129.441       | S11 |
| K3  | 238.208 | <b>270.181</b> | 200.197        | <b>315.203</b> | 298.176        | 297.210         | 1050.431       | 1043.393 | 1042.409       | K10 |
| A4  | 320.293 | 301.273        | 280.259        | <b>396.240</b> | 388.213        | <b>368.229</b>  | <b>932.324</b> | 0.000    | 894.314        | A30 |
| A5  | 402.388 | 412.255        | 411.271        | <b>457.277</b> | 446.250        | <b>439.266</b>  | <b>861.287</b> | 0.000    | 841.277        | A20 |
| S6  | 484.474 | 493.287        | <b>498.303</b> | <b>544.309</b> | <b>527.282</b> | 526.290         | <b>790.250</b> | 0.000    | <b>772.240</b> | S17 |
| A7  | 566.561 | 575.242        | 560.241        | <b>615.246</b> | 606.224        | <b>597.235</b>  | <b>703.218</b> | 0.000    | 698.208        | A26 |
| D8  | 648.646 | 655.232        | 650.261        | <b>738.273</b> | 713.260        | 712.262         | 630.211        | 0.000    | 614.211        | D25 |
| S9  | 730.731 | <b>772.304</b> | 771.488        | 817.405        | 800.416        | 799.394         | <b>517.154</b> | 0.000    | 498.144        | S24 |
| T10 | 812.814 | 801.338        | 802.414        | <b>908.419</b> | 881.392        | 880.409         | 430.121        | 0.000    | 412.112        | T16 |
| T11 | 894.909 | 904.449        | 905.481        | 999.497        | 972.440        | <b>1001.456</b> | <b>245.158</b> | 0.000    | 232.168        | T22 |
| E12 | 976.994 | 1183.488       | 1182.504       | 1228.509       | 1211.483       | 1210.499        | 146.020        | 0.000    | 130.060        | E11 |



# sp | P68433 | H31\_MOUSE

IRRY<sup>Phospho</sup> QKSTE  
79.97

- ▶ fragmentation table for charge state 1+
- ▶ specType=cid
- ▶ score=30.42
- ▶ F115866.dat
- ▶ query=q15030\_p1
- ▶ precursor=630.808500
- ▶ chargePrecursor=2
- ▶ itol=0.5

| AA | a              | a*       | aΔ       | b              | b*             | bΔ             | r              | r*       | rΔ             | AA |
|----|----------------|----------|----------|----------------|----------------|----------------|----------------|----------|----------------|----|
| R1 | 88.908         | 0.000    | 0.000    | 114.987        | 0.000          | 0.000          | 1280.617       | 1241.907 | 1384.599       | R9 |
| R2 | 242.186        | 228.171  | 0.000    | <b>270.192</b> | <b>253.166</b> | 0.000          | 1147.520       | 1130.490 | 1129.519       | R8 |
| R3 | 398.250        | 381.212  | 0.000    | <b>426.204</b> | <b>409.207</b> | 0.000          | <b>991.424</b> | 974.390  | 974.414        | R7 |
| T4 | 542.318        | 524.302  | 0.000    | <b>569.322</b> | <b>552.298</b> | 0.000          | <b>835.223</b> | 818.200  | 818.213        | T3 |
| Q5 | <b>709.397</b> | 702.390  | 0.000    | <b>797.392</b> | <b>790.385</b> | 0.000          | 559.219        | 575.201  | 574.203        | Q6 |
| K6 | 897.432        | 889.425  | 0.000    | <b>925.477</b> | <b>908.450</b> | 0.000          | <b>464.235</b> | 447.200  | <b>446.225</b> | K4 |
| S7 | 984.514        | 987.497  | 996.503  | 1012.509       | 995.492        | <b>994.498</b> | 130.143        | 0.000    | <b>318.130</b> | S3 |
| T8 | 1289.562       | 1288.545 | 999.550  | 1314.566       | 1306.550       | 1305.546       | <b>249.188</b> | 0.000    | 130.000        | T2 |
| E9 | 1314.604       | 1317.588 | 1316.584 | 1342.599       | 1335.573       | 1324.588       | 130.143        | 0.000    | 130.000        | E0 |

# sp | P68433 | H31\_MOUSE

IRRY<sup>Phospho</sup> QKSTE  
79.97

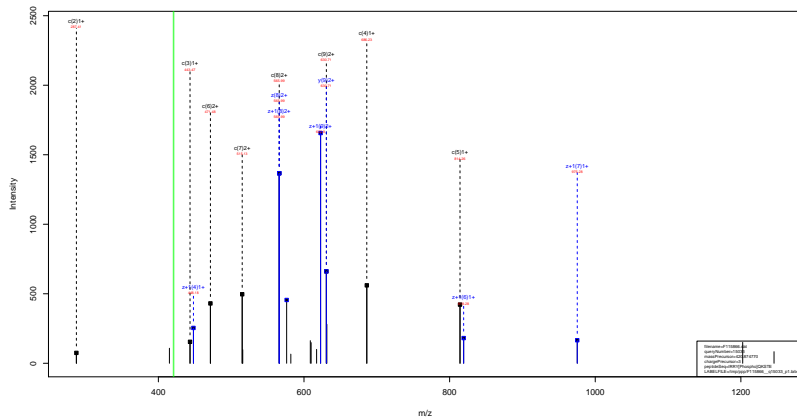

# sp | P68433 | H31\_MOUSE

IRRY<sup>Phospho</sup> QKSTE  
79.97

- ▶ fragmentation table for charge state 1+
- ▶ specType=etd
- ▶ score=36.77
- ▶ F115866.dat
- ▶ query=q15033\_p1
- ▶ precursor=420.874770
- ▶ chargePrecursor=3
- ▶ itol=0.5

| AA    | c              | y        | z+1            | z+2      | z        | AA    |
|-------|----------------|----------|----------------|----------|----------|-------|
| T [1] | 131.118        | 1260.610 | 1244.591       | 0.000    | 1243.583 | R [9] |
| R [2] | <b>287.219</b> | 1147.526 | 1131.507       | 1132.515 | 1130.490 | R [8] |
| R [3] | <b>443.320</b> | 991.424  | <b>975.406</b> | 976.414  | 974.388  | R [7] |
| Y [4] | <b>686.350</b> | 836.321  | <b>819.305</b> | 820.312  | 818.297  | Y [6] |
| Q [5] | <b>814.408</b> | 592.294  | <b>576.275</b> | 577.283  | 575.267  | Q [5] |
| K [6] | 942.503        | 464.235  | <b>448.216</b> | 449.224  | 447.209  | K [4] |
| S [7] | 1029.535       | 336.140  | 320.121        | 321.129  | 319.114  | S [3] |
| T [8] | 1130.583       | 249.108  | 233.089        | 234.097  | 232.082  | T [2] |
| E [9] | 1259.626       | 148.060  | 132.042        | 133.050  | 131.034  | E [1] |

# sp | P68433 | H31\_MOUSE

IRRY<sup>Phospho</sup> QKSTE  
79.97

- ▶ fragmentation table for charge state 2+
- ▶ specType=etd
- ▶ score=36.77
- ▶ F115866.dat
- ▶ query=q15033\_p1
- ▶ precursor=420.874770
- ▶ chargePrecursor=3
- ▶ itol=0.5

| AA    | c              | y              | z+1            | z+2     | z              | AA    |
|-------|----------------|----------------|----------------|---------|----------------|-------|
| T [1] | 66.063         | <b>630.808</b> | <b>622.799</b> | 0.504   | 622.295        | I [9] |
| R [2] | 144.113        | 574.266        | <b>566.257</b> | 566.761 | <b>565.753</b> | R [8] |
| R [3] | 222.164        | 496.216        | 485.207        | 488.710 | 487.701        | R [7] |
| V [4] | 343.679        | 418.165        | 410.156        | 410.660 | 409.652        | V [6] |
| Q [5] | 407.708        | 296.650        | 288.641        | 289.145 | 288.137        | Q [5] |
| K [6] | <b>471.755</b> | 232.621        | 234.612        | 235.116 | 234.108        | K [4] |
| S [7] | <b>515.271</b> | 168.574        | 160.564        | 161.068 | 160.060        | S [3] |
| Y [8] | <b>565.795</b> | 125.058        | 117.048        | 117.552 | 116.544        | Y [2] |
| E [9] | <b>630.316</b> | 74.534         | 66.524         | 67.028  | 66.021         | E [1] |



# sp | P84244 | H33\_MOUSE

IAQDFKTDLRFQS <sup>Phospho</sup> AAIGALQE  
79.97

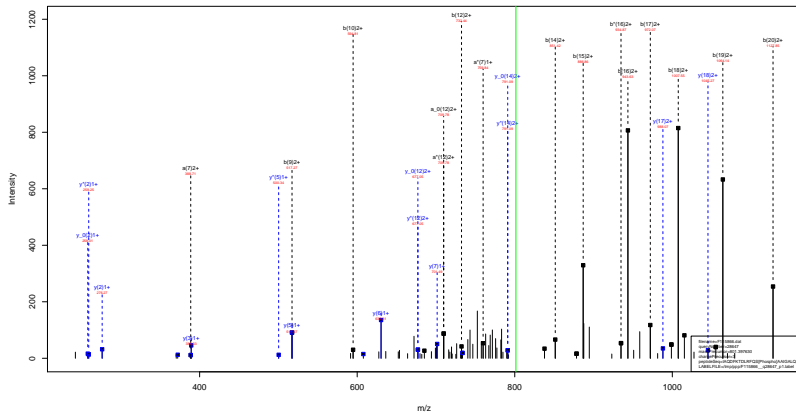

# sp | P84244 | H33\_MOUSE

IAQDFKTDLRFQS <sup>Phospho</sup> AAIGALQE  
79.97

- ▶ fragmentation table for charge state 1+
- ▶ specType=cid
- ▶ score=46.57
- ▶ F115866.dat
- ▶ query=q28647\_p1
- ▶ precursor=801.397630
- ▶ chargePrecursor=3
- ▶ itol=0.5

| AA    | a        | a'             | a,β      | b        | b'              | b,β            | y              | y'             | y,β            | AA    |
|-------|----------|----------------|----------|----------|-----------------|----------------|----------------|----------------|----------------|-------|
| I(3)  | 86.698   | 0.000          | 0.000    | 114.091  | 0.000           | 0.000          | 2450.110       | 2386.148       | 2684.188       | I(2)  |
| A(2)  | 137.134  | 0.000          | 0.000    | 185.129  | 0.000           | 0.000          | 2389.091       | 2327.095       | 2573.103       | A(26) |
| D(3)  | 226.162  | 388.385        | 0.000    | 213.287  | 298.188         | 0.000          | 2218.054       | 2268.021       | 2308.044       | D(18) |
| D(4)  | 406.219  | 383.393        | 382.200  | 426.924  | 411.187         | 410.203        | 2059.995       | 2072.995       | 2071.989       | D(16) |
| F(5)  | 847.287  | 936.281        | 926.277  | 978.361  | 958.268         | 957.272        | 1934.980       | 1893.943       | 1956.938       | F(17) |
| K(6)  | 675.382  | 676.389        | 687.375  | 703.377  | 698.351         | <b>685.367</b> | 1827.882       | 1818.874       | 1809.889       | K(16) |
| T(7)  | 776.438  | <b>759.484</b> | 764.424  | 804.429  | 797.388         | 796.414        | 1598.891       | 1608.776       | 1608.766       | T(15) |
| D(8)  | 891.457  | 874.431        | 873.448  | 919.462  | 902.425         | 901.441        | 1356.757       | 1345.713       | 1336.747       | D(14) |
| L(9)  | 1004.541 | 987.533        | 986.531  | 1032.536 | <b>1015.509</b> | 1014.526       | 1183.730       | 1186.704       | 1186.712       | L(13) |
| R(10) | 1109.624 | 1113.617       | 1142.610 | 1188.627 | 1178.614        | 1179.617       | 1371.661       | 1374.626       | 1372.638       | R(12) |
| F(11) | 1209.711 | 1206.684       | 1209.690 | 1255.708 | 1250.699        | 1251.696       | 1214.645       | 1197.618       | 1198.620       | F(11) |
| Q(12) | 1310.799 | 1408.693       | 1417.700 | 1463.704 | 1446.708        | 1445.704       | 1087.437       | 1099.430       | 1099.430       | Q(10) |
| S(13) | 1662.768 | 1665.743       | 1664.762 | 1680.763 | 1673.746        | 1674.752       | 930.433        | 962.402        | 961.408        | S(9)  |
| A(14) | 1919.809 | 1929.810       | 1929.798 | 1941.804 | 1934.811        | 1933.808       | 774.439        | 795.399        | 794.406        | A(8)  |
| A(15) | 1744.942 | 1747.935       | 1748.931 | 1772.937 | 1765.930        | 1764.926       | <b>701.383</b> | 688.398        | 688.172        | A(7)  |
| I(16) | 1857.976 | 1848.989       | 1850.970 | 1885.971 | 1868.984        | 1867.970       | <b>630.346</b> | 613.310        | 612.316        | I(6)  |
| G(17) | 1914.947 | 1907.951       | 1898.939 | 1942.942 | 1925.958        | 1924.942       | <b>517.293</b> | <b>500.235</b> | 499.241        | G(5)  |
| A(18) | 1985.984 | 1988.978       | 1987.971 | 2013.979 | 1996.993        | 1995.989       | 450.253        | 443.254        | 442.250        | A(4)  |
| L(19) | 2095.999 | 2082.992       | 2081.991 | 2127.993 | 2110.997        | 2109.993       | <b>389.293</b> | <b>372.177</b> | 371.181        | L(3)  |
| Q(20) | 2217.437 | 2208.428       | 2206.410 | 2255.422 | 2238.448        | 2237.411       | <b>376.119</b> | <b>259.892</b> | <b>258.108</b> | Q(2)  |
| D(21) | 2766.176 | 2739.161       | 2738.158 | 2764.165 | 2760.158        | 2760.156       | 146.980        | 146.980        | 146.980        | D(1)  |

# sp | P84244 | H33\_MOUSE

IAQDFKTDLRFQS<sup>Phospho</sup> AAIGALQE  
79.97

- ▶ fragmentation table for charge state 2+
- ▶ specType=cid
- ▶ score=46.57
- ▶ F115866.dat
- ▶ query=q28647\_p1
- ▶ precursor=801.397630
- ▶ chargePrecursor=3
- ▶ itol=0.5

| AA    | a              | a'             | a,0            | b               | b'              | b,0             | y       | y'              | y,0            | AA             |                |       |
|-------|----------------|----------------|----------------|-----------------|-----------------|-----------------|---------|-----------------|----------------|----------------|----------------|-------|
| A[1]  | 45.922         | 0.504          | 0.504          | 57.949          | 0.504           | 0.504           | 120.130 | 1151.070        | 1102.566       | [21]           |                |       |
| A[2]  | 76.030         | 0.504          | 0.504          | 93.968          | 0.504           | 0.504           | 148.609 | 1136.530        | 1136.044       | A[20]          |                |       |
| Q[3]  | 143.150        | 1.504          | 0.504          | 157.287         | 1.480           | 0.504           | 132.512 | 1102.011        | 1100.525       | Q[19]          |                |       |
| D[4]  | 210.413        | 1.504          | 0.504          | 214.881         | 0.504           | 0.504           | 104.500 | 1039.500        | 1039.000       | D[18]          |                |       |
| F[5]  | 274.347        | 2.004          | 1.504          | 288.145         | 1.718           | 0.52            | 129.140 | <b>1047.531</b> | 979.474        | F[17]          |                |       |
| K[6]  | 338.285        | 2.004          | 1.504          | 352.192         | 1.613           | 0.79            | 143.127 | 1014.454        | 1005.940       | K[16]          |                |       |
| T[7]  | <b>388.719</b> | 2.004          | 1.504          | 402.749         | 1.640           | 0.19            | 153.313 | 1001.855        | 1001.855       | T[15]          |                |       |
| D[8]  | 456.350        | 4.37           | 3.19           | 457.257         | 4.60            | 3.90            | 451.716 | 451.234         | 799.889        | <b>791.369</b> | <b>790.877</b> | L[14] |
| L[9]  | 522.974        | 4.64           | 3.61           | 462.700         | <b>516.772</b>  | 3.98            | 3.97    | 3.97            | 742.207        | <b>731.850</b> | <b>731.364</b> | L[13] |
| R[10] | 589.420        | 5.17           | 3.91           | 571.839         | <b>584.822</b>  | 3.98            | 3.98    | 3.98            | 617.177        | <b>617.314</b> | <b>616.822</b> | R[12] |
| P[11] | 654.320        | 5.60           | 4.44           | 645.324         | 5.98            | 5.04            | 639.243 | 639.212         | <b>607.776</b> | 607.284        | 606.793        | P[11] |
| Q[12] | 718.380        | <b>709.875</b> | <b>709.383</b> | <b>732.386</b>  | 731.872         | 731.880         | 634.491 | 630.730         | 626.237        | Q[10]          |                |       |
| S[13] | 783.270        | 782.374        | 782.282        | 778.205         | 807.572         | 806.885         | 470.213 | 461.700         | 461.200        | S[10]          |                |       |
| A[14] | <b>837.406</b> | 836.803        | 836.461        | <b>851.403</b>  | 842.700         | 842.700         | 369.114 | 370.200         | 371.700        | A[8]           |                |       |
| A[15] | 872.820        | 868.411        | 863.610        | <b>886.827</b>  | <b>878.409</b>  | <b>877.817</b>  | 361.139 | 342.600         | 343.100        | A[7]           |                |       |
| I[16] | 929.407        | 923.051        | 923.461        | <b>943.464</b>  | <b>934.951</b>  | <b>934.459</b>  | 313.610 | 307.100         | 309.011        | I[6]           |                |       |
| V[17] | 989.910        | 984.494        | 984.910        | <b>977.915</b>  | 978.910         | 978.910         | 209.134 | 209.600         | 209.600        | V[6]           |                |       |
| A[18] | 1007.456       | 1004.980       | 1004.901       | <b>1007.493</b> | <b>998.980</b>  | <b>998.488</b>  | 200.604 | 202.110         | 201.610        | A[6]           |                |       |
| L[19] | 1030.030       | 1041.520       | 1041.030       | <b>1064.035</b> | <b>1055.522</b> | <b>1055.030</b> | 136.308 | 180.590         | 180.100        | L[5]           |                |       |
| Q[20] | 1114.407       | 1120.700       | 1120.600       | <b>1126.463</b> | 1127.354        | 1127.354        | 130.310 | 131.200         | 129.700        | Q[5]           |                |       |
| E[21] | 1176.586       | 1170.070       | 1169.581       | 1169.586        | 1184.073        | 1183.581        | 74.534  | 0.504           | 65.529         | E[1]           |                |       |



# sp | P84244 | H33\_MOUSE

IAQDFKTDLRFQS <sup>Phospho</sup> AAIGALQE  
79.97

- ▶ fragmentation table for charge state 1+
- ▶ specType=etd
- ▶ score=34.51
- ▶ F115866.dat
- ▶ query=q28648\_p1
- ▶ precursor=801.397630
- ▶ chargePrecursor=3
- ▶ itol=0.5

| AA   | c               | y        | z+1             | z+2             | z               | AA   |
|------|-----------------|----------|-----------------|-----------------|-----------------|------|
| F 1  | 131.118         | 2402.175 | 2388.150        | 0.000           | 2395.149        | F 21 |
| A 2  | 202.155         | 2289.091 | 2273.072        | 0.000           | 2272.069        | A 20 |
| Q 3  | <b>330.214</b>  | 2218.054 | 2202.035        | 2203.043        | 2201.027        | Q 19 |
| D 4  | <b>445.241</b>  | 2039.995 | 2023.977        | 2014.985        | 2012.969        | D 18 |
| F 5  | 502.200         | 1974.968 | <b>1958.950</b> | 1959.958        | 1957.942        | F 17 |
| K 6  | <b>720.404</b>  | 1827.900 | 1811.881        | 1812.889        | <b>1810.874</b> | K 16 |
| T 7  | <b>821.452</b>  | 1699.805 | <b>1683.786</b> | 1684.794        | 1682.779        | T 15 |
| D 8  | <b>936.479</b>  | 1508.757 | 1502.730        | <b>1583.747</b> | <b>1581.731</b> | D 14 |
| L 9  | <b>1049.563</b> | 1483.730 | <b>1467.712</b> | 1468.720        | 1466.704        | L 13 |
| R 10 | 1235.664        | 1370.648 | 1354.629        | <b>1355.636</b> | 1353.620        | R 12 |
| F 11 | 1352.732        | 1214.545 | 1198.527        | 1199.534        | 1197.519        | F 11 |
| Q 12 | <b>1480.791</b> | 1067.477 | 1051.459        | 1052.466        | 1050.450        | Q 10 |
| S 13 | 1647.789        | 939.416  | 923.400         | 924.407         | 922.392         | S 0  |
| A 14 | 1718.826        | 772.420  | <b>756.401</b>  | 757.409         | 755.393         | A 8  |
| A 15 | 1789.863        | 701.363  | 685.345         | 686.352         | 684.336         | A 7  |
| I 16 | 1802.987        | 630.346  | 614.327         | 615.335         | 613.319         | I 6  |
| G 17 | 1959.969        | 517.262  | 501.243         | 502.251         | 500.235         | G 5  |
| A 18 | 2031.006        | 460.240  | 444.221         | <b>445.229</b>  | 443.214         | A 4  |
| L 19 | 2144.090        | 309.203  | 293.184         | 294.192         | 292.177         | L 3  |
| Q 20 | 2272.149        | 276.119  | 260.100         | 261.108         | 259.092         | Q 2  |
| E 21 | 2401.191        | 148.060  | 132.042         | 133.050         | 131.034         | E 1  |

# sp | P84244 | H33\_MOUSE

IAQDFKTDLRFQS <sup>Phospho</sup><sub>79.97</sub> AAIGALQE

- ▶ fragmentation table for charge state 2+
- ▶ specType=etd
- ▶ score=34.51
- ▶ F115866.dat
- ▶ query=q28648\_p1
- ▶ precursor=801.397630
- ▶ chargePrecursor=3
- ▶ itol=0.5

| AA     | c               | y        | z+1             | z+2            | z               | AA    |
|--------|-----------------|----------|-----------------|----------------|-----------------|-------|
| I [1]  | 66.093          | 1201.591 | <b>1193.582</b> | 0.504          | <b>1193.078</b> | I[21] |
| A [2]  | 101.581         | 1145.049 | <b>1137.040</b> | 0.504          | <b>1136.536</b> | A[20] |
| Q [3]  | 185.610         | 1109.531 | <b>1101.521</b> | 1.020.025      | <b>1101.017</b> | Q[19] |
| D [4]  | 223.124         | 1045.501 | 1037.493        | 1.017.006      | 1.036.989       | D[18] |
| F [5]  | 298.658         | 987.985  | <b>979.979</b>  | <b>980.482</b> | 979.475         | F[17] |
| K [6]  | 360.706         | 914.454  | 906.444         | 906.948        | 905.940         | K[16] |
| T [7]  | 411.229         | 850.406  | 842.397         | 842.901        | 841.893         | T[15] |
| D [8]  | 468.743         | 799.882  | 791.873         | 792.377        | 791.369         | D[14] |
| L [9]  | 525.285         | 742.369  | 734.360         | 734.863        | 733.856         | L[13] |
| R [10] | 603.326         | 689.827  | 677.817         | 678.321        | 677.314         | R[12] |
| F [11] | 678.870         | 607.775  | 599.767         | 600.271        | 599.263         | F[11] |
| Q [12] | 740.899         | 534.242  | 526.233         | 526.737        | 525.729         | Q[10] |
| S [13] | 824.938         | 470.213  | 462.203         | 462.707        | 461.700         | S[9]  |
| A [14] | 889.917         | 386.714  | 378.704         | 379.208        | 378.200         | A[8]  |
| A [15] | 895.435         | 351.195  | 343.186         | 343.690        | 342.682         | A[7]  |
| I [16] | <b>931.577</b>  | 315.876  | 307.867         | 308.371        | 307.363         | I[6]  |
| G [17] | <b>980.488</b>  | 259.134  | 251.125         | 251.629        | 250.621         | G[5]  |
| A [18] | <b>1016.007</b> | 230.624  | 222.614         | 223.118        | 222.110         | A[4]  |
| L [19] | <b>1072.549</b> | 195.105  | 187.096         | 187.600        | 186.592         | L[3]  |
| Q [20] | <b>1136.578</b> | 138.563  | 130.554         | 131.058        | 130.050         | Q[2]  |
| E [21] | 1201.099        | 74.534   | 66.524          | 67.028         | 66.021          | E[1]  |



# sp | Q6ZWY9 | H2B1C\_MOUSE

PEPAKSAPAPKK <sup>Acetyl</sup>42.01 GSK <sup>Acetyl</sup>42.01 K <sup>Acetyl</sup>42.01 AVTK <sup>Acetyl</sup>42.01 AQKKD

- ▶ fragmentation table for charge state 1+
- ▶ specType=etd
- ▶ score=49.11
- ▶ F115941.dat
- ▶ query=q30657.p1
- ▶ precursor=690.392390
- ▶ chargePrecursor=4
- ▶ itol=0.5

| AA  | c               | y        | z+1             | z+2            | z        | AA  |
|-----|-----------------|----------|-----------------|----------------|----------|-----|
| P1  | 115.087         | 3758.546 | 2742.537        | 0.000          | 3741.520 | P25 |
| E2  | 284.129         | 2001.493 | 2645.475        | 0.000          | 2044.467 | E24 |
| P3  | 341.182         | 2532.451 | 2516.432        | 0.000          | 2515.424 | P23 |
| A4  | 412.219         | 2435.398 | 2419.379        | 0.000          | 2418.371 | A22 |
| K5  | <b>540.314</b>  | 2364.361 | 2348.342        | 2349.350       | 2347.334 | K21 |
| S6  | 627.346         | 2236.266 | 2220.247        | 2221.255       | 2219.239 | S20 |
| A7  | 698.283         | 2149.234 | 2133.215        | 2134.223       | 2132.207 | A19 |
| P8  | 795.436         | 2078.191 | 2062.172        | 2063.180       | 2061.174 | P18 |
| A9  | 866.473         | 1981.144 | 1965.125        | 1966.133       | 1964.118 | A17 |
| P10 | 963.526         | 1910.107 | 1894.088        | 1895.096       | 1893.080 | P16 |
| K11 | <b>1091.621</b> | 1813.054 | 1797.035        | 1798.043       | 1796.028 | K15 |
| K12 | 1261.730        | 1684.959 | 1668.940        | 1669.948       | 1667.933 | K14 |
| G13 | 1318.748        | 1514.854 | 1498.835        | 1499.843       | 1497.827 | G13 |
| S14 | 1405.789        | 1459.832 | 1443.813        | 1442.821       | 1440.805 | S12 |
| K15 | 1575.885        | 1370.800 | 1354.781        | 1355.789       | 1353.774 | K11 |
| K16 | 1745.991        | 1200.695 | <b>1184.676</b> | 1185.684       | 1183.668 | K10 |
| A17 | 1817.028        | 1030.589 | 1014.570        | 1015.578       | 1013.563 | A9  |
| V18 | 1916.096        | 959.552  | 943.533         | 944.541        | 942.525  | V8  |
| T19 | 2017.144        | 860.484  | 844.465         | <b>845.473</b> | 843.457  | T7  |
| K20 | 2187.250        | 739.436  | <b>743.417</b>  | 744.425        | 742.409  | K6  |
| A21 | 2259.287        | 689.330  | <b>573.312</b>  | 574.320        | 572.304  | A5  |
| Q22 | 2388.345        | 518.293  | 502.275         | 503.282        | 501.267  | Q4  |
| K23 | 2514.440        | 390.235  | 374.216         | 375.224        | 373.208  | K3  |
| K24 | 2642.535        | 262.140  | 246.121         | 247.129        | 245.113  | K2  |
| D25 | 2757.562        | 134.045  | 118.026         | 119.034        | 117.018  | D1  |



# sp | Q6ZWY9 | H2B1C\_MOUSE

PEPAKSAPAPKK <sup>Acetyl</sup>42.01 GSK <sup>Acetyl</sup>42.01 K <sup>Acetyl</sup>42.01 AVTK <sup>Acetyl</sup>42.01 AQKKD

- ▶ fragmentation table for charge state 2+
- ▶ specType=etd
- ▶ score=49.11
- ▶ F115941.dat
- ▶ query=q30657.p1
- ▶ precursor=690.392390
- ▶ chargePrecursor=4
- ▶ itol=0.5

| AA  | c               | y              | z+1             | z+2             | z               | AA  |
|-----|-----------------|----------------|-----------------|-----------------|-----------------|-----|
| P1  | 58.647          | 1379.777       | 1371.767        | 0.504           | 1377.263        | P25 |
| E3  | 132.588         | 1311.256       | 1323.241        | 0.504           | <b>1322.737</b> | E24 |
| P13 | 171.095         | 1256.729       | 1258.720        | 0.504           | 1258.216        | P23 |
| A4  | 206.613         | 1318.203       | 1210.193        | 0.504           | 1209.689        | A22 |
| K5  | 270.661         | 1182.684       | <b>1174.675</b> | <b>1175.179</b> | 1174.171        | K21 |
| S6  | 314.177         | 1118.637       | <b>1110.627</b> | <b>1111.131</b> | 1110.123        | S20 |
| A7  | 349.695         | 1075.121       | <b>1067.111</b> | <b>1067.615</b> | 1066.607        | A19 |
| P8  | 388.222         | 1039.604       | 1031.593        | 1031.593        | 1031.089        | P18 |
| A9  | 433.740         | 991.076        | <b>983.066</b>  | <b>983.570</b>  | 982.562         | A17 |
| P10 | 482.267         | 955.557        | 947.548         | 948.052         | 947.044         | P16 |
| K11 | 566.314         | <b>907.031</b> | <b>899.021</b>  | <b>899.525</b>  | 898.517         | K15 |
| K12 | 631.367         | 842.983        | <b>834.974</b>  | <b>835.478</b>  | 834.470         | K14 |
| Q13 | 659.276         | 797.930        | 789.921         | <b>790.425</b>  | 789.417         | Q13 |
| S14 | 703.394         | 729.420        | 721.410         | 721.914         | 720.906         | S12 |
| K15 | <b>788.446</b>  | 688.904        | <b>677.894</b>  | <b>678.398</b>  | 677.390         | K11 |
| K16 | <b>873.499</b>  | 600.851        | 592.842         | 593.346         | 592.338         | K10 |
| A17 | 909.018         | 515.798        | 507.789         | 508.293         | 507.285         | A9  |
| V18 | <b>958.552</b>  | 480.280        | 472.270         | 472.774         | 471.766         | V9  |
| T19 | <b>1009.076</b> | 430.745        | 422.736         | 423.240         | 422.232         | T17 |
| K20 | <b>1094.128</b> | 380.222        | 372.213         | 372.716         | 371.708         | K6  |
| A21 | 1129.647        | 295.169        | 287.159         | 287.663         | 286.656         | A5  |
| Q22 | <b>1193.676</b> | 269.650        | 261.641         | 262.145         | 261.137         | Q4  |
| K23 | 1257.724        | 195.621        | 187.612         | 188.116         | 187.108         | K9  |
| K24 | 1321.771        | 131.574        | 123.564         | 124.068         | 123.060         | K2  |
| E25 | 1379.285        | 87.528         | 89.519          | 89.021          | 89.013          | E1  |

# sp | Q6ZWY9 | H2B1C\_MOUSE

PEPAKSAPAPKK Acetyl 42.01 GSK Acetyl 42.01 K Acetyl 42.01 AVTK Acetyl 42.01 AQKKD

- ▶ fragmentation table for charge state 3+
- ▶ specType=etd
- ▶ score=49.11
- ▶ F115941.dat
- ▶ query=q30657.p1
- ▶ precursor=690.392390
- ▶ chargePrecursor=4
- ▶ itol=0.5

| AA  | c       | y              | z+1            | z+2     | z       | AA  |
|-----|---------|----------------|----------------|---------|---------|-----|
| P1  | 39.034  | <b>920.187</b> | 914.847        | 0.672   | 914.511 | P25 |
| E2  | 82.048  | 887.836        | <b>882.496</b> | 0.672   | 882.160 | E24 |
| P3  | 114.399 | 844.822        | 839.462        | 0.672   | 839.146 | P23 |
| A4  | 138.078 | 812.871        | 807.131        | 0.672   | 806.795 | A22 |
| K5  | 180.976 | <b>788.792</b> | 783.432        | 783.996 | 783.116 | K21 |
| S6  | 209.707 | 746.094        | 740.734        | 741.090 | 740.418 | S20 |
| A7  | 233.466 | 717.083        | 711.743        | 712.079 | 711.407 | A19 |
| P8  | 265.817 | 693.404        | 688.064        | 688.400 | 687.726 | P18 |
| A9  | 289.496 | 661.053        | 655.713        | 656.049 | 655.377 | A17 |
| P10 | 321.847 | 637.374        | 632.034        | 632.370 | 631.698 | P16 |
| K11 | 364.545 | 605.023        | 599.683        | 600.019 | 599.347 | K15 |
| K12 | 421.247 | 562.325        | 556.985        | 557.321 | 556.649 | K14 |
| G13 | 440.254 | 505.623        | 500.283        | 500.619 | 499.947 | G13 |
| S14 | 469.265 | 486.616        | 481.276        | 481.612 | 480.940 | S12 |
| K15 | 525.967 | 457.605        | 452.265        | 452.601 | 451.929 | K11 |
| K16 | 582.668 | 400.903        | 395.563        | 395.899 | 395.228 | K10 |
| A17 | 606.348 | 344.201        | 338.862        | 339.198 | 338.526 | A9  |
| V18 | 639.370 | 320.522        | 315.183        | 315.519 | 314.847 | V8  |
| T19 | 673.053 | 297.499        | 292.160        | 292.496 | 291.824 | T17 |
| K20 | 729.755 | 253.817        | 248.477        | 248.813 | 248.141 | K6  |
| A21 | 753.434 | 197.115        | 191.775        | 192.111 | 191.439 | A5  |
| Q22 | 796.120 | 173.438        | 168.098        | 168.432 | 167.760 | Q4  |
| K23 | 838.818 | 130.750        | 125.410        | 125.746 | 125.074 | K3  |
| K24 | 881.517 | 88.051         | 82.712         | 83.048  | 82.376  | K2  |
| D25 | 919.859 | 45.353         | 40.014         | 40.349  | 39.678  | D1  |



# sp | Q3THW5 | H2AV\_MOUSE

SLIKATIAGGGVIPHIHKSLIGKKGQK Dimethyl TA  
28.03

- ▶ fragmentation table for charge state 1+
- ▶ specType=etd
- ▶ score=77.02
- ▶ F115941.dat
- ▶ query=q31733.p1
- ▶ precursor=770.717690
- ▶ chargePrecursor=4
- ▶ itol=0.5

| AA |    | c               | y        | z+1            | z+2            | z        | AA |    |
|----|----|-----------------|----------|----------------|----------------|----------|----|----|
| S  | 1  | 105.060         | 3079.847 | 3063.828       | 0.000          | 3062.820 | S  | 36 |
| L  | 2  | 218.150         | 2992.813 | 2976.799       | 0.000          | 2975.795 | L  | 29 |
| I  | 3  | 331.234         | 2879.731 | 2863.712       | 0.000          | 2862.704 | I  | 28 |
| K  | 4  | <b>459.329</b>  | 2766.648 | 2750.638       | 2751.636       | 2749.620 | K  | 27 |
| A  | 5  | <b>530.366</b>  | 2638.552 | 2622.533       | 2623.541       | 2621.525 | A  | 26 |
| T  | 6  | 631.414         | 2507.514 | 2551.496       | 2552.504       | 2550.488 | T  | 25 |
| I  | 7  | <b>744.498</b>  | 2466.407 | 2450.448       | 2451.456       | 2449.440 | I  | 24 |
| A  | 8  | <b>815.535</b>  | 2353.383 | 2337.364       | 2338.372       | 2336.356 | A  | 23 |
| G  | 9  | <b>872.566</b>  | 2282.340 | 2266.327       | 2267.335       | 2265.319 | G  | 22 |
| Q  | 10 | <b>929.578</b>  | 2225.324 | 2209.305       | 2210.313       | 2208.296 | Q  | 21 |
| Q  | 11 | 988.599         | 2168.303 | 2152.284       | 2153.292       | 2151.276 | Q  | 20 |
| V  | 12 | 1085.668        | 2111.281 | 2095.262       | 2096.270       | 2094.255 | V  | 19 |
| I  | 13 | 1198.752        | 2012.213 | 1996.194       | 1997.202       | 1995.186 | I  | 18 |
| P  | 14 | <b>1295.805</b> | 1899.129 | 1883.110       | 1884.118       | 1882.102 | P  | 17 |
| H  | 15 | <b>1432.863</b> | 1802.076 | 1786.057       | 1787.065       | 1785.049 | H  | 16 |
| I  | 16 | 1543.248        | 1695.011 | 1648.999       | 1650.006       | 1647.990 | I  | 15 |
| H  | 17 | 1683.006        | 1551.931 | 1535.914       | 1536.922       | 1534.906 | H  | 14 |
| K  | 18 | 1811.101        | 1414.874 | 1398.855       | 1399.863       | 1397.847 | K  | 13 |
| S  | 19 | 1898.133        | 1298.770 | 1270.740       | 1271.768       | 1269.753 | S  | 12 |
| L  | 20 | 2011.217        | 1199.747 | 1183.728       | 1184.736       | 1182.720 | L  | 11 |
| I  | 21 | 2124.302        | 1098.663 | 1070.644       | 1071.652       | 1069.636 | I  | 10 |
| Q  | 22 | 2181.323        | 973.579  | 957.560        | 958.568        | 956.552  | Q  | 9  |
| K  | 23 | 2309.418        | 918.537  | <b>900.539</b> | 901.547        | 899.531  | K  | 8  |
| K  | 24 | 2437.513        | 788.462  | 772.444        | 773.452        | 771.436  | K  | 7  |
| Q  | 25 | 2494.534        | 660.368  | 644.349        | <b>645.357</b> | 643.341  | Q  | 6  |
| Q  | 26 | 2622.593        | 603.340  | <b>587.327</b> | 588.335        | 586.320  | Q  | 5  |
| Q  | 27 | 2750.692        | 475.267  | <b>459.269</b> | <b>460.277</b> | 458.261  | Q  | 4  |
| K  | 28 | 2906.778        | 347.229  | 331.210        | 332.218        | 330.202  | K  | 3  |
| T  | 29 | 3007.826        | 191.103  | 175.084        | 176.092        | 174.076  | T  | 2  |
| A  | 30 | 3078.883        | 90.855   | 74.038         | 75.044         | 73.028   | A  | 1  |

# sp | Q3THW5 | H2AV\_MOUSE

SLIKATIAGGGVIPHIHKSLIGKKGQK Dimethyl TA  
28.03

- ▶ fragmentation table for charge state 2+
- ▶ specType=etd
- ▶ score=77.02
- ▶ F115941.dat
- ▶ query=q31733.p1
- ▶ precursor=770.717690
- ▶ chargePrecursor=4
- ▶ itol=0.5

| AA   | c               | y               | z+1             | z+2             | z               | AA   |
|------|-----------------|-----------------|-----------------|-----------------|-----------------|------|
| S 1  | 53.037          | <b>1540.427</b> | 1532.418        | 0.504           | 1531.014        | S 30 |
| L 2  | 109.579         | 1496.011        | 1488.902        | 0.504           | 1488.398        | L 29 |
| I 3  | 166.121         | 1440.399        | <b>1432.360</b> | 0.504           | 1431.850        | I 28 |
| K 4  | 230.268         | 1383.827        | <b>1375.818</b> | <b>1376.321</b> | 1375.314        | K 27 |
| A 5  | 293.407         | 1319.775        | <b>1311.770</b> | <b>1312.274</b> | 1311.266        | A 26 |
| T 6  | 318.211         | 1284.261        | <b>1276.251</b> | 1276.755        | <b>1275.748</b> | T 25 |
| I 7  | 372.753         | 1233.737        | 1225.730        | 1226.232        | 1225.224        | I 24 |
| A 8  | 408.271         | 1177.195        | <b>1169.186</b> | <b>1169.690</b> | 1169.682        | A 23 |
| C 9  | 436.762         | <b>1141.676</b> | <b>1133.667</b> | <b>1134.171</b> | <b>1133.163</b> | C 22 |
| G 10 | 485.293         | 1113.166        | <b>1105.156</b> | <b>1105.660</b> | 1104.652        | G 21 |
| G 11 | 493.803         | 1084.655        | 1076.648        | 1077.149        | 1076.142        | G 20 |
| V 12 | 543.337         | 1056.144        | 1048.135        | 1048.639        | 1047.631        | V 19 |
| I 13 | 599.680         | <b>1006.610</b> | 998.601         | 999.105         | 998.097         | I 18 |
| F 14 | 648.406         | <b>950.068</b>  | 941.059         | 942.563         | 941.555         | F 17 |
| H 15 | 718.926         | 901.543         | <b>893.532</b>  | <b>894.036</b>  | 893.028         | H 16 |
| I 16 | 773.474         | <b>833.012</b>  | <b>825.003</b>  | <b>825.507</b>  | <b>824.499</b>  | I 15 |
| H 17 | 842.007         | 779.470         | 768.461         | 768.965         | 767.957         | H 14 |
| K 18 | <b>906.054</b>  | 707.941         | <b>699.931</b>  | <b>700.435</b>  | 699.427         | K 13 |
| S 19 | <b>949.570</b>  | 643.893         | 633.884         | 634.388         | 633.380         | S 12 |
| L 20 | <b>1006.112</b> | 600.377         | 592.368         | 592.872         | 591.864         | L 11 |
| T 21 | <b>1062.654</b> | 543.836         | 535.828         | 536.330         | 535.322         | T 10 |
| G 22 | <b>1091.165</b> | 487.293         | 479.284         | 479.788         | 478.780         | G 9  |
| K 23 | <b>1155.213</b> | 458.782         | 450.773         | 451.277         | 450.269         | K 8  |
| K 24 | <b>1219.260</b> | 384.735         | 386.726         | 387.229         | 386.222         | K 7  |
| G 25 | 1247.771        | 330.687         | 322.678         | 323.182         | 322.174         | G 6  |
| G 26 | <b>1311.800</b> | 302.177         | 294.167         | 294.671         | 293.663         | G 5  |
| G 27 | <b>1375.829</b> | 238.141         | 230.132         | 230.635         | 229.627         | G 4  |
| K 28 | 1453.893        | 174.115         | 166.106         | 166.610         | 165.602         | K 3  |
| T 29 | 1504.410        | 98.055          | 88.046          | 88.550          | 87.542          | T 2  |
| A 30 | 1539.935        | 45.531          | 37.522          | 38.026          | 37.018          | A 1  |

# sp | Q3THW5 | H2AV\_MOUSE

SLIKATIAGGGVIPHIHKSLIGKKGQK <sup>Dimethyl</sup> TA  
28.03

- ▶ fragmentation table for charge state 3+
- ▶ specType=etd
- ▶ score=77.02
- ▶ F115941.dat
- ▶ query=q31733.p1
- ▶ precursor=770.717690
- ▶ chargePrecursor=4
- ▶ itol=0.5

| AA | c  | y               | z+1             | z+2             | z       | AA              |       |
|----|----|-----------------|-----------------|-----------------|---------|-----------------|-------|
| S  | 1  | 35.693          | <b>1027.287</b> | <b>1021.947</b> | 0.672   | <b>1021.012</b> | S[30] |
| L  | 2  | 73.388          | 998.270         | <b>992.937</b>  | 0.672   | 992.001         | L[29] |
| L  | 3  | 111.083         | <b>960.582</b>  | <b>955.242</b>  | 0.672   | <b>954.906</b>  | L[28] |
| K  | 4  | 153.781         | 922.967         | <b>917.547</b>  | 0.672   | 917.211         | K[27] |
| A  | 5  | 177.490         | 885.159         | <b>874.849</b>  | 0.675   | 874.513         | A[26] |
| T  | 6  | 211.143         | 856.510         | 851.170         | 851.506 | 850.834         | T[25] |
| H  | 7  | 248.837         | 822.827         | 817.488         | 817.823 | 817.152         | H[24] |
| A  | 8  | 272.516         | 785.132         | 779.793         | 780.129 | 779.457         | A[23] |
| G  | 9  | 291.524         | 761.453         | 756.114         | 756.450 | 755.776         | G[22] |
| G  | 10 | 310.531         | 742.446         | 737.107         | 737.443 | 736.771         | G[21] |
| G  | 11 | 329.538         | 723.439         | 718.099         | 718.435 | 717.764         | G[20] |
| V  | 12 | 362.561         | 704.432         | 699.092         | 699.428 | 698.756         | V[19] |
| I  | 13 | 400.255         | 671.400         | 666.070         | 666.405 | 665.734         | I[18] |
| P  | 14 | 432.606         | 633.714         | 628.375         | 628.711 | 628.039         | P[17] |
| H  | 15 | 478.293         | 601.363         | 596.024         | 596.360 | 595.688         | H[16] |
| I  | 16 | 515.987         | 559.877         | 554.538         | 554.874 | 554.202         | I[15] |
| H  | 17 | 561.674         | 517.982         | 512.643         | 512.979 | 512.307         | H[14] |
| K  | 18 | 604.372         | 472.206         | 466.957         | 467.293 | 466.621         | K[13] |
| S  | 19 | 633.393         | 429.559         | 424.220         | 424.554 | 423.927         | S[12] |
| L  | 20 | 671.077         | 400.587         | 395.248         | 395.584 | 394.912         | L[11] |
| L  | 21 | 708.772         | 362.893         | 357.553         | 357.889 | 357.217         | L[10] |
| G  | 22 | 727.779         | 325.198         | 319.859         | 320.194 | 319.522         | G[9]  |
| K  | 23 | 770.478         | 305.191         | 300.851         | 301.187 | 300.515         | K[8]  |
| K  | 24 | 813.176         | 263.492         | 258.153         | 258.489 | 257.817         | K[7]  |
| G  | 25 | 832.183         | 220.794         | 215.454         | 215.790 | 215.119         | G[6]  |
| Q  | 26 | 874.889         | 201.787         | 196.447         | 196.783 | 196.111         | Q[5]  |
| Q  | 27 | <b>917.555</b>  | 199.103         | 193.764         | 194.097 | 193.425         | Q[4]  |
| K  | 28 | 969.599         | 110.442         | 111.075         | 111.411 | 110.739         | K[3]  |
| T  | 29 | 1003.280        | 64.372          | 59.033          | 59.369  | 58.697          | T[2]  |
| A  | 30 | <b>1026.959</b> | 30.690          | 25.350          | 25.686  | 25.014          | A[1]  |

# sp | Q3THW5 | H2AV\_MOUSE

LDSLKATIAGGGVIPHIHKSLIGKKGQQK Dimethyl TA 28.03

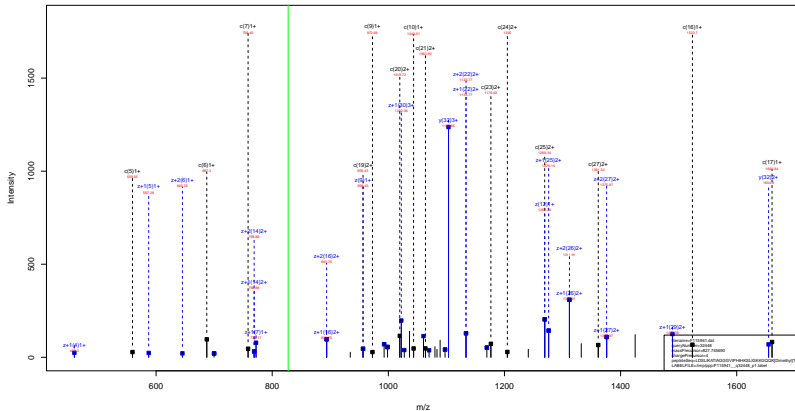

# sp | Q3THW5 | H2AV\_MOUSE

LDSLKATIAGGGVIPHIHKSLIGKKGQQK<sup>Dimethyl</sup> TA  
28.03

- ▶ fragmentation table for charge state 1+
- ▶ specType=etd
- ▶ score=67.87
- ▶ F115941.dat
- ▶ query=q32448.p1
- ▶ precursor=827.745690
- ▶ chargePrecursor=4
- ▶ itol=0.5

| AA | c  | y               | z+1      | z+2             | z              | AA              |       |
|----|----|-----------------|----------|-----------------|----------------|-----------------|-------|
| L  | 1  | 131.118         | 1307.958 | 1291.939        | 0.000          | 1260.931        | L[32] |
| D  | 2  | 346.145         | 3194.874 | 3178.855        | 0.000          | 3177.847        | D[31] |
| S  | 3  | 333.177         | 3079.847 | 3063.828        | 0.000          | 3062.820        | S[30] |
| L  | 4  | 446.261         | 2992.815 | 2976.796        | 0.000          | 2975.788        | L[29] |
| L  | 5  | <b>559.345</b>  | 2876.731 | 2860.712        | 0.000          | 2862.704        | L[28] |
| K  | 6  | <b>607.440</b>  | 2766.646 | 2750.628        | 0.000          | 2749.620        | K[27] |
| A  | 7  | <b>758.477</b>  | 2638.562 | 2622.543        | 2623.541       | 2621.525        | A[26] |
| T  | 8  | 859.525         | 2567.514 | 2551.496        | 2552.504       | 2550.488        | T[25] |
| I  | 9  | <b>972.609</b>  | 2466.467 | 2450.448        | 2451.456       | 2449.440        | I[24] |
| A  | 10 | <b>1043.646</b> | 2353.383 | 2337.364        | 2338.372       | 2336.356        | A[23] |
| G  | 11 | 1100.667        | 2262.346 | 2246.327        | 2247.335       | 2245.319        | G[22] |
| G  | 12 | 1157.689        | 2176.324 | 2160.305        | 2161.313       | 2159.298        | G[21] |
| G  | 13 | 1214.710        | 2108.303 | 2152.284        | 2153.292       | 2151.276        | G[20] |
| V  | 14 | 1313.779        | 2111.281 | 2095.262        | 2096.270       | 2094.255        | V[19] |
| I  | 15 | 1426.863        | 2032.213 | 1996.194        | 1997.202       | 1995.186        | I[18] |
| P  | 16 | <b>1523.916</b> | 1999.129 | 1883.110        | 1884.118       | 1882.102        | P[17] |
| K  | 17 | <b>1660.974</b> | 1802.076 | 1786.057        | 1787.065       | 1785.049        | K[16] |
| I  | 18 | 1714.959        | 1805.017 | 1648.998        | 1650.006       | 1647.990        | I[15] |
| H  | 19 | 1911.117        | 1551.933 | 1535.914        | 1536.922       | 1534.906        | H[14] |
| K  | 20 | 2039.212        | 1414.874 | 1398.855        | 1399.863       | 1397.847        | K[13] |
| S  | 21 | 2126.244        | 1286.779 | 1270.760        | 1271.768       | <b>1269.753</b> | S[12] |
| L  | 22 | 2239.328        | 1199.747 | 1183.728        | 1184.736       | 1182.720        | L[11] |
| L  | 23 | 2352.413        | 1088.663 | <b>1070.644</b> | 1071.652       | 1069.636        | L[10] |
| G  | 24 | 2469.434        | 973.576  | 957.557         | 958.566        | <b>956.551</b>  | G[9]  |
| K  | 25 | 2537.529        | 916.557  | 900.538         | 901.547        | 899.531         | K[8]  |
| K  | 26 | 2665.624        | 788.462  | <b>772.444</b>  | 773.452        | 771.436         | K[7]  |
| G  | 27 | 2722.645        | 660.368  | 644.349         | <b>645.357</b> | 643.341         | G[6]  |
| Q  | 28 | 2850.704        | 603.349  | <b>587.327</b>  | 588.335        | 586.320         | Q[5]  |
| Q  | 29 | 2978.763        | 475.287  | <b>459.269</b>  | 460.277        | 458.261         | Q[4]  |
| K  | 30 | 3114.889        | 347.229  | 331.210         | 332.218        | 330.202         | K[3]  |
| I  | 31 | 3235.937        | 191.163  | 175.144         | 176.152        | 174.137         | I[2]  |
| A  | 32 | 3306.974        | 90.055   | 74.036          | 75.044         | 73.028          | A[1]  |



# sp | Q3THW5 | H2AV\_MOUSE

LDSLKATIAGGGVIPHIHKSLLIGKKGQQK <sup>Dimethyl</sup> TA  
28.03

- ▶ fragmentation table for charge state 2+
- ▶ specType=etd
- ▶ score=67.87
- ▶ F115941.dat
- ▶ query=q32448\_p1
- ▶ precursor=827.745690
- ▶ chargePrecursor=4
- ▶ itol=0.5

| AA | c  | y               | z+1             | z+2             | z               | AA              |      |
|----|----|-----------------|-----------------|-----------------|-----------------|-----------------|------|
| L  | 1  | 66.093          | <b>1654.482</b> | 1046.473        | 0.504           | 1645.967        | L132 |
| D  | 2  | 123.576         | 1597.946        | 1589.931        | 0.504           | 1589.427        | D131 |
| S  | 3  | 187.092         | 1540.427        | 1532.418        | 0.504           | 1531.914        | S30  |
| L  | 4  | 223.634         | 1496.911        | <b>1488.902</b> | 0.504           | 1488.398        | L29  |
| I  | 5  | 280.176         | 1440.399        | 1432.390        | 0.504           | 1431.886        | I28  |
| R  | 6  | 344.224         | 1383.827        | <b>1375.818</b> | <b>1376.321</b> | 1375.314        | R27  |
| A  | 7  | 378.742         | 1319.779        | <b>1311.770</b> | <b>1312.274</b> | 1311.265        | A26  |
| T  | 8  | 430.268         | 1284.261        | <b>1276.251</b> | 1276.755        | <b>1275.748</b> | T25  |
| I  | 9  | 486.808         | 1233.737        | 1225.728        | 1226.232        | 1225.224        | I24  |
| A  | 10 | 522.327         | 1177.195        | <b>1169.186</b> | <b>1169.690</b> | 1168.682        | A23  |
| G  | 11 | 558.837         | 1141.678        | <b>1133.667</b> | <b>1134.171</b> | 1133.163        | G22  |
| G  | 12 | 578.368         | 1113.166        | 1105.158        | 1105.662        | 1104.654        | G21  |
| G  | 13 | 607.859         | 1084.655        | 1076.646        | 1077.149        | 1076.142        | G20  |
| V  | 14 | 657.393         | 1056.144        | 1048.135        | 1048.639        | 1047.631        | V19  |
| I  | 15 | 713.935         | 1026.616        | <b>998.601</b>  | 999.105         | <b>998.097</b>  | I18  |
| P  | 16 | 762.461         | 950.098         | 942.089         | 942.593         | 941.585         | P17  |
| H  | 17 | 830.994         | 901.542         | <b>893.532</b>  | <b>894.036</b>  | 893.028         | H16  |
| I  | 18 | 887.533         | 833.012         | 825.003         | 825.507         | 824.499         | I15  |
| H  | 19 | <b>956.062</b>  | 778.470         | <b>768.461</b>  | <b>768.965</b>  | 767.957         | H14  |
| K  | 20 | <b>1020.110</b> | 707.941         | <b>699.931</b>  | 700.435         | <b>699.427</b>  | K13  |
| S  | 21 | <b>1063.626</b> | 643.893         | 635.884         | 636.388         | 635.380         | S12  |
| L  | 22 | 1107.168        | 600.377         | 592.368         | 592.872         | 591.864         | L11  |
| L  | 23 | <b>1178.710</b> | 543.835         | 535.826         | 536.330         | 535.322         | L10  |
| G  | 24 | <b>1205.221</b> | 487.293         | 479.284         | 479.788         | 478.780         | G9   |
| K  | 25 | <b>1269.268</b> | 458.782         | 450.773         | 451.277         | 450.269         | K8   |
| K  | 26 | 1313.316        | 394.735         | 386.726         | 387.229         | 386.222         | K7   |
| G  | 27 | <b>1361.826</b> | 330.687         | 322.678         | 323.182         | 322.174         | G6   |
| G  | 28 | 1433.859        | 302.177         | 294.168         | 294.671         | 293.663         | G5   |
| G  | 29 | 1489.895        | 238.147         | 230.138         | 230.642         | 229.634         | G4   |
| K  | 30 | 1587.948        | 174.118         | 166.109         | 166.613         | 165.605         | K3   |
| T  | 31 | 1618.472        | 98.055          | 88.048          | 88.550          | 87.542          | T2   |
| A  | 32 | 1653.090        | 45.511          | 37.522          | 38.026          | 37.018          | A1   |

# sp | Q3THW5 | H2AV\_MOUSE

LDSLKATIAGGGVIPHIHKSLLIGKKGQQK <sup>Dimethyl</sup> TA  
28.03

- ▶ fragmentation table for charge state 3+
- ▶ specType=etd
- ▶ score=67.87
- ▶ F115941.dat
- ▶ query=q32448.p1
- ▶ precursor=827.745690
- ▶ chargePrecursor=4
- ▶ itol=0.5

| AA    | c        | y               | z+1             | z+2            | z               | AA    |
|-------|----------|-----------------|-----------------|----------------|-----------------|-------|
| L[1]  | 44.377   | <b>1103.324</b> | <b>1097.984</b> | 0.672          | <b>1097.649</b> | L[32] |
| D[2]  | 82.720   | 1065.629        | <b>1060.290</b> | 0.672          | 1059.954        | D[31] |
| S[3]  | 111.730  | <b>1027.287</b> | <b>1021.947</b> | 0.672          | 1021.612        | S[30] |
| L[4]  | 149.425  | <b>998.276</b>  | <b>992.937</b>  | 0.672          | <b>992.601</b>  | L[29] |
| T[5]  | 187.120  | 960.582         | 955.242         | 0.672          | 954.907         | T[28] |
| K[6]  | 225.816  | 922.887         | 917.547         | 0.672          | 917.203         | K[27] |
| A[7]  | 253.497  | 880.189         | 874.849         | 0.672          | 874.513         | A[26] |
| T[8]  | 287.180  | 856.510         | 851.170         | 0.672          | 850.834         | T[25] |
| I[9]  | 324.874  | 822.827         | 817.487         | 0.672          | 817.152         | I[24] |
| A[10] | 348.553  | 785.132         | 779.793         | 0.672          | 779.457         | A[23] |
| G[11] | 387.581  | 761.453         | 756.114         | 0.672          | 755.778         | G[22] |
| Q[12] | 388.968  | 742.446         | 737.107         | 0.672          | 736.771         | Q[21] |
| G[13] | 405.575  | 723.439         | 718.099         | 0.672          | 717.764         | G[20] |
| V[14] | 438.588  | 704.432         | 699.092         | <b>699.428</b> | 698.758         | V[19] |
| I[15] | 476.292  | 671.409         | 666.070         | 0.672          | 665.734         | I[18] |
| P[16] | 508.643  | 633.714         | 628.375         | 0.672          | 628.039         | P[17] |
| K[17] | 554.230  | 601.362         | 596.024         | 0.672          | 595.688         | K[16] |
| I[18] | 592.824  | 558.877         | 553.538         | 0.672          | 553.202         | I[15] |
| H[19] | 637.711  | 517.982         | 512.643         | 0.672          | 512.307         | H[14] |
| K[20] | 680.409  | 472.296         | 466.957         | 0.672          | 466.621         | K[13] |
| S[21] | 709.420  | 420.598         | 415.259         | 0.672          | 414.923         | S[12] |
| L[22] | 747.114  | 400.587         | 395.248         | 0.672          | 394.912         | L[11] |
| I[23] | 784.809  | 362.892         | 357.553         | 0.672          | 357.217         | I[10] |
| G[24] | 803.816  | 325.196         | 319.857         | 0.672          | 319.521         | G[9]  |
| K[25] | 846.515  | 306.191         | 300.851         | 0.672          | 300.515         | K[8]  |
| K[26] | 889.213  | 263.462         | 258.123         | 0.672          | 257.787         | K[7]  |
| Q[27] | 908.220  | 220.794         | 215.454         | 0.672          | 215.118         | Q[6]  |
| Q[28] | 950.906  | 201.787         | 196.447         | 0.672          | 196.111         | Q[5]  |
| Q[29] | 993.592  | 159.101         | 153.761         | 0.672          | 153.425         | Q[4]  |
| K[30] | 1045.634 | 116.414         | 111.075         | 0.672          | 110.739         | K[3]  |
| T[31] | 1079.317 | 94.372          | 89.033          | 0.672          | 88.697          | T[2]  |
| A[32] | 1102.996 | 30.680          | 25.340          | 0.672          | 25.004          | A[1]  |



# sp | P68433 | H31\_MOUSE

KQLATK<sup>Acetyl</sup> AAR  
42.01

- ▶ fragmentation table for charge state 1+
- ▶ specType=etd
- ▶ score=55.52
- ▶ F121324.dat
- ▶ query=q3358\_p1
- ▶ precursor=343.545300
- ▶ chargePrecursor=3
- ▶ itol=0.6

| AA |   | c              | y        | z+1            | z+2             | z              | AA   |
|----|---|----------------|----------|----------------|-----------------|----------------|------|
| K  | 1 | 146.129        | 1028.621 | 1012.603       | <b>1013.610</b> | 1011.595       | K[0] |
| Q  | 2 | <b>274.187</b> | 900.526  | <b>884.507</b> | 885.515         | 883.500        | Q[0] |
| L  | 3 | <b>387.271</b> | 772.468  | <b>756.449</b> | 757.457         | 755.441        | L[0] |
| A  | 4 | <b>458.309</b> | 659.384  | <b>643.365</b> | 644.373         | <b>642.357</b> | A[0] |
| T  | 5 | <b>559.356</b> | 588.345  | <b>572.328</b> | 573.335         | <b>571.320</b> | T[0] |
| K  | 6 | <b>729.462</b> | 497.299  | <b>471.280</b> | 472.288         | 470.272        | K[4] |
| A  | 7 | <b>800.499</b> | 317.193  | <b>301.174</b> | 302.182         | 300.167        | A[3] |
| A  | 8 | <b>871.536</b> | 246.156  | <b>230.137</b> | 231.145         | 229.130        | A[2] |
| R  | 9 | 1027.637       | 175.119  | 159.100        | 160.108         | 158.092        | R[1] |

# sp | P68433 | H31\_MOUSE

KQLATK<sup>Acetyl</sup> AAR  
42.01

- ▶ fragmentation table for charge state 2+
- ▶ specType=etd
- ▶ score=55.52
- ▶ F121324.dat
- ▶ query=q3358\_p1
- ▶ precursor=343.545300
- ▶ chargePrecursor=3
- ▶ itol=0.6

| AA | c | y              | z+1            | z+2            | z              | AA             |      |
|----|---|----------------|----------------|----------------|----------------|----------------|------|
| K  | 1 | 73.568         | <b>514.814</b> | <b>506.805</b> | <b>507.309</b> | <b>506.301</b> | K[0] |
| Q  | 2 | 137.597        | 450.767        | 442.757        | 443.261        | 442.253        | Q[0] |
| L  | 3 | 194.130        | <b>386.731</b> | 376.720        | 379.232        | 378.225        | L[1] |
| A  | 4 | <b>229.658</b> | 330.195        | 322.180        | 322.690        | 321.682        | A[6] |
| T  | 5 | 280.182        | 294.671        | 286.657        | 287.171        | 286.164        | T[5] |
| K  | 6 | 365.235        | 244.153        | 236.144        | 236.648        | 235.640        | K[4] |
| A  | 7 | 400.763        | 199.100        | 191.091        | 191.595        | 190.587        | A[3] |
| A  | 8 | 436.272        | 123.582        | 115.572        | 116.076        | 115.068        | A[2] |
| R  | 9 | <b>514.322</b> | 88.063         | 80.054         | 80.558         | 79.550         | R[1] |

# sp | P68433 | H31\_MOUSE

KQLATK<sup>Acetyl</sup> AAR  
42.01

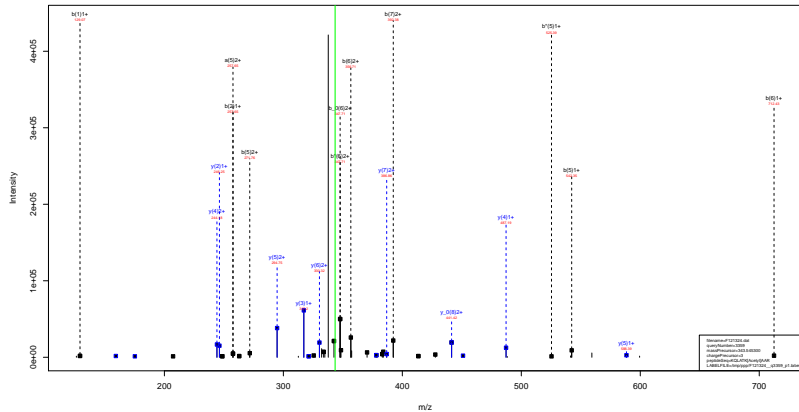

# sp | P68433 | H31\_MOUSE

KQLATK<sup>Acetyl</sup> AAR  
42.01

- ▶ fragmentation table for charge state 1+
- ▶ specType=cid
- ▶ score=44.87
- ▶ F121324.dat
- ▶ query=q3359\_p1
- ▶ precursor=343.545300
- ▶ chargePrecursor=3
- ▶ itol=0.6

| AA | a              | a'             | aΔ      | b              | b'             | bΔ      | v              | v'      | vΔ        | AA  |
|----|----------------|----------------|---------|----------------|----------------|---------|----------------|---------|-----------|-----|
| R1 | 101.007        | 84.081         | -0.000  | <b>129.102</b> | 112.976        | -0.000  | 1028.623       | 881.595 | -1010.011 | R10 |
| Q1 | 259.166        | 213.139        | -0.000  | <b>257.161</b> | 240.134        | -0.000  | 988.530        | 881.500 | 881.516   | Q10 |
| L1 | <b>342.250</b> | <b>325.223</b> | -0.000  | <b>370.245</b> | 353.218        | -0.000  | 772.460        | 755.441 | 754.457   | L17 |
| A1 | <b>413.287</b> | 396.261        | -0.000  | <b>441.282</b> | 424.255        | -0.000  | 668.391        | 649.281 | 644.313   | A10 |
| I1 | 514.759        | 497.732        | -0.000  | <b>542.730</b> | <b>525.703</b> | -0.000  | <b>588.346</b> | 571.325 | 570.338   | I15 |
| R1 | 614.440        | 597.414        | -0.000  | <b>712.435</b> | 695.409        | -0.000  | <b>487.299</b> | 470.272 | -0.000    | R14 |
| A1 | 715.477        | 718.451        | 7.37461 | 783.472        | 786.446        | 765.482 | <b>317.193</b> | 300.167 | -0.000    | A13 |
| A1 | 816.516        | 819.490        | 688.549 | 884.509        | 887.483        | 836.499 | <b>246.156</b> | 229.130 | -0.000    | A12 |
| R1 | 912.516        | 915.500        | 984.025 | 1010.511       | 993.504        | 992.505 | <b>175.119</b> | 158.060 | -0.000    | R11 |

# sp | P68433 | H31\_MOUSE

KQLATK<sup>Acetyl</sup> AAR  
42.01

- ▶ fragmentation table for charge state 2+
- ▶ specType=cid
- ▶ score=44.87
- ▶ F121324.dat
- ▶ query=q3359\_p1
- ▶ precursor=343.545300
- ▶ chargePrecursor=3
- ▶ itol=0.6

| AA | a              | a'             | a.0            | b              | b'             | b.0            | y              | y'             | y.0            | AA  |
|----|----------------|----------------|----------------|----------------|----------------|----------------|----------------|----------------|----------------|-----|
| R1 | 01.007         | 42.544         | 0.504          | 69.009         | 36.941         | 0.504          | 334.939        | 306.951        | 305.959        | K1H |
| Q1 | 115.007        | 106.979        | 0.504          | <b>129.084</b> | 120.971        | 0.504          | <b>450.767</b> | 442.754        | <b>441.761</b> | Q1B |
| L1 | 171.020        | 163.115        | 0.504          | 189.020        | 177.113        | 0.504          | <b>386.737</b> | <b>378.224</b> | <b>377.732</b> | L1J |
| A1 | <b>207.147</b> | <b>200.643</b> | 0.504          | 221.149        | 212.638        | 0.504          | <b>336.195</b> | <b>321.682</b> | <b>321.190</b> | A1D |
| T1 | <b>257.671</b> | <b>249.158</b> | <b>248.666</b> | <b>271.668</b> | <b>263.155</b> | <b>262.663</b> | <b>294.677</b> | <b>286.164</b> | <b>285.672</b> | T1B |
| K1 | <b>342.724</b> | <b>334.211</b> | <b>333.718</b> | <b>356.721</b> | <b>348.208</b> | <b>347.716</b> | <b>244.193</b> | <b>236.640</b> | 0.504          | K14 |
| A1 | <b>378.242</b> | 369.729        | 369.237        | <b>392.240</b> | <b>383.727</b> | <b>383.235</b> | <b>159.100</b> | 150.587        | 0.504          | A1B |
| A1 | <b>413.761</b> | 405.248        | 404.756        | <b>427.758</b> | 419.245        | 418.753        | 113.593        | 110.080        | 0.504          | A1D |
| R1 | 459.811        | 453.298        | 452.806        | 509.800        | 497.288        | 496.804        | 89.081         | 79.570         | 0.504          | R1J |



# sp | P68433 | H31\_MOUSE

K<sup>Acetyl</sup> QLATK<sup>Acetyl</sup> AAR  
42.01 42.01

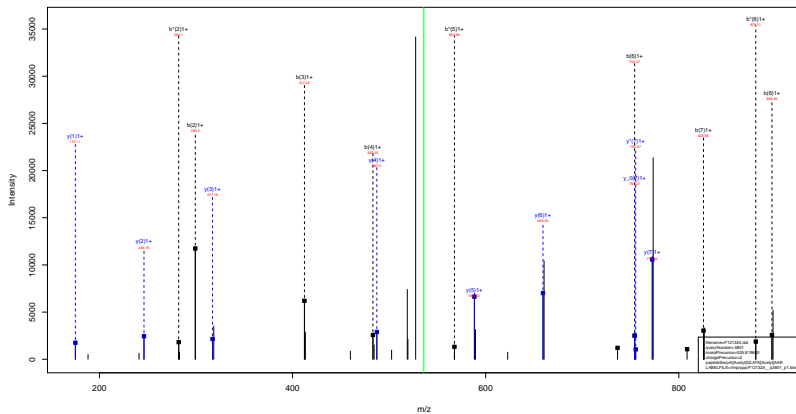

# sp | P68433 | H31\_MOUSE

K<sup>Acetyl</sup> 42.01 QLATK<sup>Acetyl</sup> 42.01 AAR

- ▶ fragmentation table for charge state 1+
- ▶ specType=cid
- ▶ score=56.47
- ▶ F121324.dat
- ▶ query=q3801\_p1
- ▶ precursor=535.819680
- ▶ chargePrecursor=2
- ▶ itol=0.6

| AA | a        | a*       | a#       | b              | b*             | b#             | y              | y*             | y#             | AA |
|----|----------|----------|----------|----------------|----------------|----------------|----------------|----------------|----------------|----|
| R  | 143.118  | 125.101  | 0.000    | 174.113        | 154.096        | 0.000          | 1209.637       | 1204.900       | 0.000          | R  |
| Q  | 271.676  | 254.130  | 0.000    | <b>299.171</b> | <b>282.145</b> | 0.000          | 880.530        | 881.500        | 882.518        | Q  |
| L  | 384.261  | 367.234  | 0.000    | <b>412.255</b> | 395.229        | 0.000          | <b>772.468</b> | <b>755.441</b> | <b>754.457</b> | L  |
| A  | 493.008  | 476.011  | 0.000    | <b>483.292</b> | 466.295        | 0.000          | <b>459.324</b> | 442.327        | 441.314        | A  |
| V  | 558.240  | 539.539  | 0.000    | 565.261        | <b>567.314</b> | 568.330        | <b>588.336</b> | 571.339        | 570.328        | V  |
| K  | 726.451  | 709.424  | 708.440  | <b>754.446</b> | 737.419        | <b>738.435</b> | <b>487.299</b> | 470.272        | 0.000          | K  |
| A  | 797.498  | 780.481  | 779.471  | <b>825.483</b> | <b>808.456</b> | 807.472        | <b>317.193</b> | 300.187        | 0.000          | A  |
| A  | 888.475  | 871.469  | 869.575  | <b>906.535</b> | <b>879.493</b> | 878.509        | <b>246.134</b> | 229.133        | 0.000          | A  |
| R  | 1024.626 | 1007.609 | 1006.631 | 1020.621       | 1003.594       | 1004.611       | <b>175.119</b> | 158.088        | 0.000          | R  |



# sp | P68433 | H31\_MOUSE

K<sup>Dimethyl</sup> 28.03 SAPATGGVK<sup>Methyl</sup> 14.02 KPHR

- ▶ fragmentation table for charge state 1+
- ▶ specType=etd
- ▶ score=99.05
- ▶ F121324.dat
- ▶ query=q7522\_p1
- ▶ precursor=492.632100
- ▶ chargePrecursor=3
- ▶ itol=0.6

| AA |      | c               | y        | z+1             | z+2      | z        | AA    |
|----|------|-----------------|----------|-----------------|----------|----------|-------|
| K  | [1]  | 174.100         | 1475.881 | <b>1459.862</b> | 1460.870 | 1458.854 | K[14] |
| S  | [2]  | <b>261.192</b>  | 1319.754 | <b>1303.736</b> | 1304.743 | 1302.728 | S[13] |
| A  | [3]  | 332.259         | 1232.722 | <b>1216.703</b> | 1217.711 | 1215.696 | A[12] |
| P  | [4]  | <b>429.282</b>  | 1161.685 | 1145.666        | 1146.674 | 1144.659 | P[11] |
| A  | [5]  | <b>509.319</b>  | 1094.632 | 1048.614        | 1049.621 | 1047.606 | A[10] |
| T  | [6]  | <b>601.367</b>  | 993.595  | <b>977.577</b>  | 978.584  | 976.569  | T[9]  |
| G  | [7]  | <b>658.388</b>  | 902.548  | <b>876.529</b>  | 877.537  | 875.521  | G[8]  |
| G  | [8]  | <b>715.410</b>  | 835.526  | <b>819.507</b>  | 820.515  | 818.500  | G[7]  |
| V  | [9]  | <b>814.478</b>  | 778.505  | <b>762.486</b>  | 763.494  | 761.478  | V[6]  |
| K  | [10] | <b>956.589</b>  | 679.439  | <b>663.417</b>  | 664.425  | 662.410  | K[5]  |
| K  | [11] | 1084.684        | 537.326  | <b>521.307</b>  | 522.315  | 520.299  | K[4]  |
| P  | [12] | <b>1181.736</b> | 409.231  | 393.212         | 394.220  | 392.204  | P[3]  |
| H  | [13] | <b>1318.795</b> | 312.178  | <b>296.159</b>  | 297.167  | 295.151  | H[2]  |
| R  | [14] | 1474.896        | 175.119  | 159.100         | 160.108  | 158.092  | R[1]  |

# sp | P68433 | H31\_MOUSE

K<sup>Dimethyl</sup> 28.03 SAPATGGVK<sup>Methyl</sup> 14.02 KPHR

- ▶ fragmentation table for charge state 2+
- ▶ specType=etd
- ▶ score=99.05
- ▶ F121324.dat
- ▶ query=q7522.p1
- ▶ precursor=492.632100
- ▶ chargePrecursor=3
- ▶ itol=0.6

| AA |    | c              | y              | z+1            | z+2            | z              | AA |
|----|----|----------------|----------------|----------------|----------------|----------------|----|
| K  | 2  | 57.584         | <b>738.444</b> | <b>730.435</b> | <b>730.938</b> | <b>729.931</b> | R  |
| S  | 2  | 131.100        | 658.381        | <b>652.371</b> | <b>652.875</b> | 651.867        | S  |
| A  | 3  | 156.618        | 616.865        | 608.855        | <b>609.359</b> | 608.351        | A  |
| P  | 4  | 215.145        | 581.348        | 573.337        | 573.841        | 572.833        | P  |
| A  | 5  | 250.663        | 532.820        | 524.810        | 525.314        | 524.307        | A  |
| T  | 6  | 301.187        | 497.301        | 489.292        | 489.796        | 488.788        | T  |
| G  | 7  | 329.698        | 446.777        | 438.768        | 439.272        | 438.264        | G  |
| G  | 8  | 358.208        | 418.257        | 410.257        | 410.761        | 409.753        | G  |
| V  | 9  | 407.743        | 389.756        | 381.747        | 382.250        | 381.243        | V  |
| K  | 10 | 478.798        | 340.222        | 332.212        | 332.716        | 331.709        | K  |
| K  | 11 | 542.843        | 299.166        | <b>261.157</b> | <b>261.661</b> | <b>260.653</b> | K  |
| P  | 12 | 591.372        | 205.119        | 197.110        | 197.614        | 196.606        | P  |
| H  | 13 | <b>659.901</b> | 156.563        | 148.553        | 149.057        | 148.049        | H  |
| R  | 14 | 737.952        | 88.063         | 80.054         | 80.558         | 79.550         | R  |

# sp | P68433 | H31\_MOUSE

K Dimethyl SAPATGGVK Dimethyl KPHR  
28.03 28.03

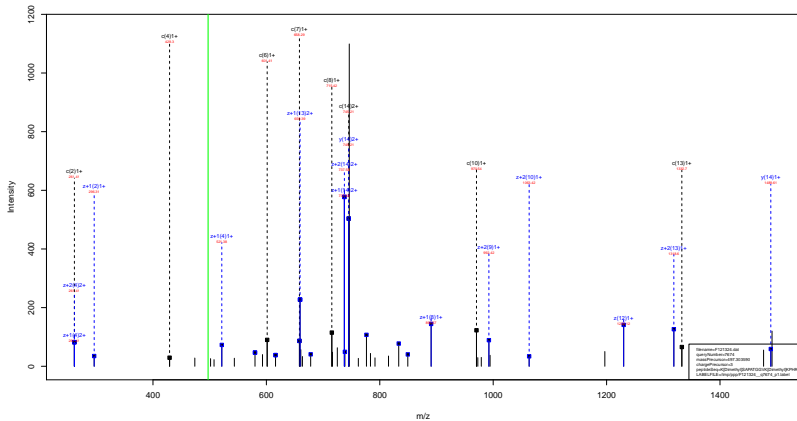

# sp | P68433 | H31\_MOUSE

K<sup>Dimethyl</sup><sub>28.03</sub> SAPATGGVK<sup>Dimethyl</sup><sub>28.03</sub> KPHR

- ▶ fragmentation table for charge state 1+
- ▶ specType=etd
- ▶ score=39.99
- ▶ F121324.dat
- ▶ query=q7674\_p1
- ▶ precursor=497.303590
- ▶ chargePrecursor=3
- ▶ itol=0.6

| AA    | c               | y               | z+1            | z+2             | z               | AA    |
|-------|-----------------|-----------------|----------------|-----------------|-----------------|-------|
| K[1]  | 174.100         | <b>1489.896</b> | 1473.877       | 1474.895        | 1472.870        | R[14] |
| S[2]  | <b>261.192</b>  | 1333.770        | 1317.751       | <b>1318.759</b> | 1318.743        | S[13] |
| A[3]  | 817.279         | 1246.730        | 1230.710       | 1231.727        | <b>1229.711</b> | A[12] |
| P[4]  | <b>429.282</b>  | 1175.701        | 1159.681       | 1160.699        | 1158.674        | P[11] |
| A[5]  | 500.119         | 1078.048        | 1062.029       | <b>1063.037</b> | 1061.021        | A[10] |
| T[6]  | <b>601.367</b>  | 1007.611        | 991.592        | <b>992.600</b>  | 990.584         | T[9]  |
| G[7]  | <b>658.388</b>  | 906.563         | <b>890.544</b> | 891.562         | 889.537         | G[8]  |
| G[8]  | <b>715.410</b>  | <b>849.542</b>  | <b>833.523</b> | 834.531         | 832.515         | G[7]  |
| V[9]  | 814.478         | 782.525         | <b>776.505</b> | 777.520         | 775.494         | V[6]  |
| K[10] | <b>970.604</b>  | 693.482         | 677.463        | <b>678.441</b>  | 676.425         | K[5]  |
| K[11] | 1098.699        | 537.426         | <b>521.307</b> | 522.315         | 520.299         | K[4]  |
| P[12] | 1195.752        | 409.231         | 393.212        | 394.220         | 392.204         | P[3]  |
| H[13] | <b>1332.811</b> | 312.178         | <b>296.159</b> | 297.167         | 295.151         | H[2]  |
| R[14] | 1488.912        | 175.119         | 159.100        | 160.108         | 158.092         | R[1]  |

# sp | P68433 | H31\_MOUSE

K<sup>Dimethyl</sup><sub>28.03</sub> SAPATGGVK<sup>Dimethyl</sup><sub>28.03</sub> KPHR

- ▶ fragmentation table for charge state 2+
- ▶ specType=etd
- ▶ score=39.99
- ▶ F121324.dat
- ▶ query=q7674\_p1
- ▶ precursor=497.303590
- ▶ chargePrecursor=3
- ▶ itol=0.6

| AA    | c              | y              | z+1            | z+2            | z              | AA    |
|-------|----------------|----------------|----------------|----------------|----------------|-------|
| K[2]  | 57.584         | <b>745.452</b> | <b>737.442</b> | <b>737.946</b> | 736.939        | R[14] |
| S[2]  | 131.100        | 657.389        | <b>659.379</b> | <b>659.883</b> | <b>658.875</b> | S[13] |
| A[3]  | 156.618        | 623.873        | <b>615.863</b> | <b>616.367</b> | 615.359        | A[12] |
| P[4]  | 215.145        | 588.354        | <b>580.345</b> | 580.849        | <b>579.841</b> | P[11] |
| A[5]  | 250.663        | 539.828        | 531.819        | 532.322        | 531.314        | A[10] |
| T[6]  | 301.187        | 504.309        | 496.300        | 496.804        | 495.796        | T[9]  |
| G[7]  | 329.698        | 453.785        | 445.776        | 446.280        | 445.272        | G[8]  |
| G[8]  | 358.208        | 425.275        | 417.265        | 417.769        | 416.761        | G[7]  |
| V[9]  | 407.743        | 396.764        | 388.754        | 389.258        | 388.250        | V[6]  |
| K[10] | 435.806        | 347.230        | 339.220        | 339.724        | 338.716        | K[5]  |
| K[11] | 549.953        | 299.166        | <b>261.157</b> | <b>261.661</b> | 260.653        | K[4]  |
| P[12] | 598.380        | 205.119        | 197.110        | 197.614        | 196.606        | P[3]  |
| H[13] | 656.909        | 156.583        | 148.583        | 149.087        | 148.079        | H[2]  |
| R[14] | <b>744.960</b> | 88.063         | 80.054         | 80.558         | 79.550         | R[1]  |





# sp | P84244 | H33\_MOUSE

K<sup>Dimethyl</sup><sub>28.03</sub> SAPSTGGVK<sup>Dimethyl</sup><sub>28.03</sub> K<sup>PHR</sup>

- ▶ fragmentation table for charge state 1+
- ▶ specType=etd
- ▶ score=57.24
- ▶ F121324.dat
- ▶ query=q7853\_p1
- ▶ precursor=377.228260
- ▶ chargePrecursor=4
- ▶ itol=0.6

| AA    | c              | y        | z+1            | z+2            | z        | AA    |
|-------|----------------|----------|----------------|----------------|----------|-------|
| K[1]  | <b>174.160</b> | 1505.991 | 1489.872       | 1480.890       | 1488.905 | K[14] |
| S[2]  | <b>261.192</b> | 1349.765 | 1333.740       | 1324.754       | 1332.768 | S[13] |
| A[3]  | 332.229        | 1282.733 | 1246.714       | 1247.722       | 1245.706 | A[12] |
| P[4]  | <b>429.282</b> | 1191.696 | 1175.677       | 1176.685       | 1174.669 | P[11] |
| S[5]  | <b>516.314</b> | 1094.643 | 1078.624       | 1079.632       | 1077.616 | S[10] |
| T[6]  | <b>617.362</b> | 1007.611 | 991.592        | 992.600        | 990.584  | T[9]  |
| C[7]  | <b>674.383</b> | 906.563  | 890.544        | 891.552        | 889.537  | C[8]  |
| G[8]  | <b>731.405</b> | 849.542  | 833.523        | <b>834.531</b> | 832.515  | G[7]  |
| V[9]  | <b>830.473</b> | 792.520  | 776.502        | <b>777.509</b> | 775.494  | V[6]  |
| K[10] | 888.599        | 693.492  | 677.473        | <b>678.441</b> | 676.425  | K[5]  |
| K[11] | 1114.694       | 537.326  | <b>521.307</b> | 522.315        | 520.299  | K[4]  |
| P[12] | 1211.747       | 409.231  | 393.212        | 394.220        | 392.204  | P[3]  |
| H[13] | 1348.806       | 312.178  | <b>296.159</b> | 297.167        | 295.151  | H[2]  |
| R[14] | 1504.907       | 175.119  | <b>159.100</b> | 160.108        | 158.092  | R[1]  |

# sp | P84244 | H33\_MOUSE

K<sup>Dimethyl</sup><sub>28.03</sub> SAPSTGGVK<sup>Dimethyl</sup><sub>28.03</sub> K<sup>PHR</sup>

- ▶ fragmentation table for charge state 2+
- ▶ specType=etd
- ▶ score=57.24
- ▶ F121324.dat
- ▶ query=q7853\_p1
- ▶ precursor=377.228260
- ▶ chargePrecursor=4
- ▶ itol=0.6

| AA |      | c              | y              | z+1            | z+2            | z              | AA    |
|----|------|----------------|----------------|----------------|----------------|----------------|-------|
| K  | [2]  | 87.584         | <b>753.449</b> | <b>745.440</b> | <b>743.944</b> | <b>744.936</b> | R[14] |
| S  | [2]  | 131.100        | <b>675.386</b> | <b>667.377</b> | <b>667.801</b> | <b>666.873</b> | S[13] |
| A  | [3]  | 156.618        | 831.870        | <b>623.861</b> | <b>624.365</b> | 623.357        | A[12] |
| P  | [4]  | 215.145        | 596.351        | 588.342        | 588.846        | 587.838        | P[11] |
| S  | [5]  | 258.661        | 547.825        | <b>539.816</b> | <b>540.320</b> | <b>539.312</b> | S[10] |
| T  | [6]  | 309.184        | 504.309        | <b>496.300</b> | <b>496.804</b> | 495.796        | T[9]  |
| G  | [7]  | 337.695        | 453.789        | <b>445.776</b> | <b>446.280</b> | 445.272        | G[8]  |
| G  | [8]  | 366.206        | 425.275        | <b>417.265</b> | <b>417.769</b> | 416.761        | G[7]  |
| V  | [9]  | 415.740        | 396.764        | <b>388.754</b> | <b>389.258</b> | 388.250        | V[6]  |
| K  | [10] | <b>493.803</b> | 347.230        | <b>339.220</b> | <b>339.724</b> | 338.716        | K[5]  |
| K  | [11] | 337.694        | 299.166        | <b>261.157</b> | <b>261.661</b> | 260.653        | K[4]  |
| P  | [12] | <b>616.377</b> | 205.119        | 197.110        | 197.614        | 196.606        | P[3]  |
| H  | [13] | <b>674.907</b> | 156.583        | 148.583        | 149.087        | 148.079        | H[2]  |
| R  | [14] | <b>752.957</b> | 88.063         | 80.054         | 80.558         | 79.550         | R[1]  |

# sp | P84244 | H33\_MOUSE

K<sup>Dimethyl</sup><sub>28.03</sub> SAPSTGGVK<sup>Dimethyl</sup><sub>28.03</sub> K<sup>PHR</sup>

- ▶ fragmentation table for charge state 3+
- ▶ specType=etd
- ▶ score=57.24
- ▶ F121324.dat
- ▶ query=q7853.p1
- ▶ precursor=377.228260
- ▶ chargePrecursor=4
- ▶ itol=0.6

| AA    | c              | y              | z+1            | z+2            | z              | AA    |
|-------|----------------|----------------|----------------|----------------|----------------|-------|
| K[3]  | 58.725         | <b>502.635</b> | <b>497.296</b> | <b>497.632</b> | <b>496.960</b> | R[14] |
| S[2]  | 87.736         | 450.593        | 445.257        | <b>445.589</b> | 444.918        | S[13] |
| A[3]  | 111.415        | 421.582        | 416.243        | 416.579        | 415.907        | A[12] |
| P[4]  | 143.766        | 397.903        | 392.564        | 392.900        | 392.228        | P[11] |
| S[5]  | 172.776        | 365.552        | 360.213        | 360.549        | 359.877        | S[10] |
| T[6]  | 206.459        | 336.542        | 331.202        | 331.538        | 330.866        | T[9]  |
| G[7]  | 225.466        | 302.859        | 297.520        | 297.856        | 297.184        | G[8]  |
| G[8]  | 244.473        | 283.852        | 278.513        | 278.848        | 278.177        | G[7]  |
| V[9]  | 277.496        | 264.845        | 259.505        | 259.841        | 259.169        | V[6]  |
| K[10] | 329.530        | 231.822        | 226.483        | 226.819        | 226.147        | K[5]  |
| K[11] | 372.236        | 179.786        | <b>174.440</b> | 174.776        | <b>174.105</b> | K[4]  |
| P[12] | 404.587        | 137.082        | 131.742        | 132.078        | 131.406        | P[3]  |
| H[13] | 450.273        | 104.731        | 99.391         | 99.727         | 99.055         | H[2]  |
| R[14] | <b>502.307</b> | 59.045         | 53.705         | 54.041         | 53.369         | R[1]  |

# sp | P84244 | H33\_MOUSE

K<sup>Dimethyl</sup> 28.03 SAPSTGGVK<sup>Dimethyl</sup> K<sup>Dimethyl</sup> 28.03 PKHR

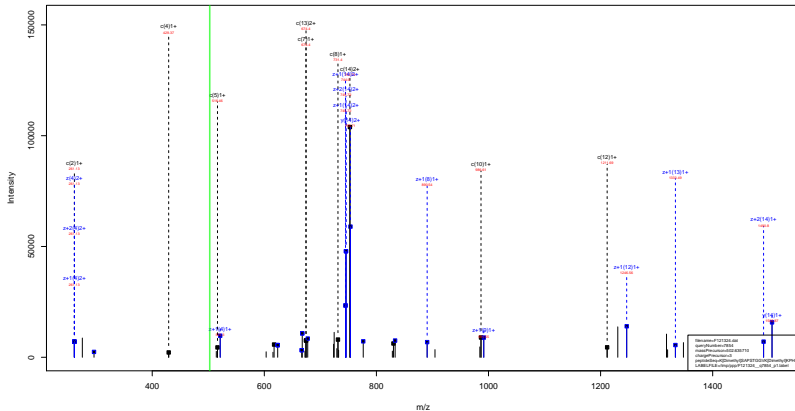

# sp | P84244 | H33\_MOUSE

K<sup>Dimethyl</sup><sub>28.03</sub> SAPSTGGVK<sup>Dimethyl</sup><sub>28.03</sub> KPHR

- ▶ fragmentation table for charge state 1+
- ▶ specType=etd
- ▶ score=62.82
- ▶ F121324.dat
- ▶ query=q7854.p1
- ▶ precursor=502.635710
- ▶ chargePrecursor=3
- ▶ itol=0.6

| AA    | c               | y               | z+1             | z+2             | z        | AA    |
|-------|-----------------|-----------------|-----------------|-----------------|----------|-------|
| R[1]  | 174.100         | <b>1505.891</b> | 1480.872        | <b>1490.880</b> | 1488.865 | R[14] |
| S[2]  | <b>261.192</b>  | 1340.705        | <b>1333.746</b> | 1334.754        | 1332.738 | S[13] |
| A[3]  | 837.279         | 1282.733        | <b>1246.714</b> | 1247.722        | 1245.706 | A[12] |
| P[4]  | <b>429.282</b>  | 1191.599        | 1179.617        | 1176.605        | 1174.597 | P[11] |
| S[5]  | <b>516.314</b>  | 1094.043        | 1078.624        | 1079.632        | 1077.616 | S[10] |
| T[6]  | <b>617.362</b>  | 1007.611        | <b>991.592</b>  | 992.600         | 990.584  | T[9]  |
| G[7]  | <b>674.383</b>  | 906.563         | <b>890.544</b>  | 891.552         | 889.537  | G[8]  |
| G[8]  | <b>731.405</b>  | 849.542         | <b>833.523</b>  | 834.531         | 832.515  | G[7]  |
| V[9]  | <b>830.473</b>  | 782.525         | <b>775.502</b>  | 777.509         | 775.494  | V[6]  |
| R[10] | <b>986.599</b>  | 693.452         | <b>677.433</b>  | 678.441         | 676.425  | R[5]  |
| R[11] | 1114.694        | 597.326         | <b>521.307</b>  | 522.315         | 520.299  | R[4]  |
| P[12] | <b>1211.747</b> | 409.231         | 393.212         | 394.220         | 392.204  | P[3]  |
| H[13] | 1348.806        | 312.178         | <b>296.159</b>  | 297.167         | 295.151  | H[2]  |
| R[14] | 1504.907        | 175.119         | 159.100         | 160.108         | 158.092  | R[1]  |

# sp | P84244 | H33\_MOUSE

K<sup>Dimethyl</sup><sub>28.03</sub> SAPSTGGVK<sup>Dimethyl</sup><sub>28.03</sub> K<sup>PHR</sup>

- ▶ fragmentation table for charge state 2+
- ▶ specType=etd
- ▶ score=62.82
- ▶ F121324.dat
- ▶ query=q7854.p1
- ▶ precursor=502.635710
- ▶ chargePrecursor=3
- ▶ itol=0.6

| AA    | c              | y              | z+1            | z+2            | z              | AA    |
|-------|----------------|----------------|----------------|----------------|----------------|-------|
| K[2]  | 57.584         | <b>753.449</b> | <b>745.440</b> | <b>743.944</b> | <b>744.936</b> | R[14] |
| S[2]  | 131.100        | 575.389        | <b>667.377</b> | <b>667.801</b> | <b>666.873</b> | S[13] |
| A[3]  | 156.618        | 531.870        | <b>623.861</b> | <b>624.365</b> | <b>623.357</b> | A[12] |
| P[4]  | 215.145        | 596.351        | 588.342        | 588.846        | 587.838        | P[11] |
| S[5]  | 258.661        | 547.825        | 539.816        | 540.320        | 539.312        | S[10] |
| T[6]  | 309.184        | 504.309        | 496.300        | 496.804        | 495.796        | T[9]  |
| G[7]  | 337.695        | 453.785        | 445.776        | 446.280        | 445.272        | G[8]  |
| G[8]  | 366.206        | 425.275        | 417.263        | 417.769        | 416.761        | G[7]  |
| V[9]  | 415.740        | 396.764        | 388.754        | 389.258        | 388.250        | V[6]  |
| K[10] | 483.803        | 347.230        | 339.222        | 339.724        | 338.716        | K[5]  |
| K[11] | 557.951        | 299.166        | <b>261.157</b> | <b>261.661</b> | <b>260.653</b> | K[4]  |
| P[12] | 606.377        | 205.119        | 197.110        | 197.614        | 196.606        | P[3]  |
| H[13] | <b>674.907</b> | 156.583        | 148.583        | 149.087        | 148.079        | H[2]  |
| R[14] | <b>752.957</b> | 88.063         | 80.054         | 80.558         | 79.550         | R[1]  |

# sp | P43276 | H15\_MOUSE

[Acetyl]S<sup>Phospho</sup><sub>79.97</sub> ETAPAETAAPAPVEK

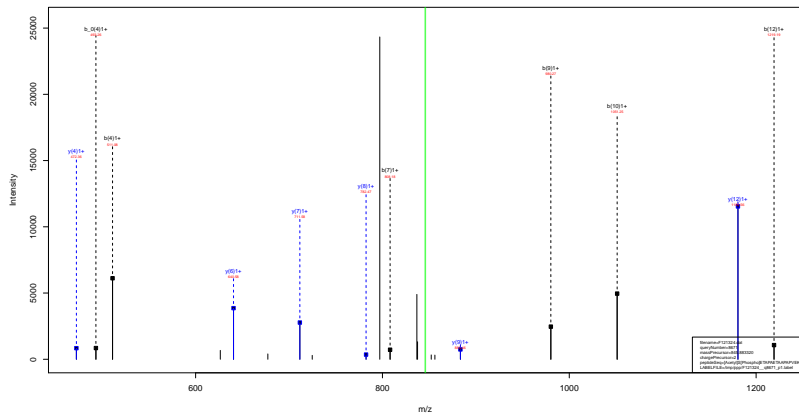

Revision: 01/2024  
 Gene: P43276\_MOUSE  
 Mass: 1200.0000  
 Charge: 12  
 Label: [Acetyl]S<sup>Phospho</sup><sub>79.97</sub> ETAPAETAAPAPVEK  
 Labeled: y6(1)+, b\_0(4)+, b(6)+, y(5)+, y(7)+, y(8)+, b(7)+, y(9)+, b(9)+, y(10)+, b(10)+, y(12)+, b(12)+



# sp | P43276 | H15\_MOUSE

[Acetyl]S<sup>Phospho</sup><sub>79.97</sub> ETAPAETAAPAPVEK

- ▶ fragmentation table for charge state 1+
- ▶ specType=cid
- ▶ score=42.88
- ▶ F121324.dat
- ▶ query=q8671.p1
- ▶ precursor=845.883320
- ▶ chargePrecursor=2
- ▶ itol=0.6

| AA | a        | a*       | aΔ       | b               | b*       | bΔ             | y               | y*       | yΔ       | AA |
|----|----------|----------|----------|-----------------|----------|----------------|-----------------|----------|----------|----|
| S  | 102.021  | 0.000    | 106.011  | 210.010         | 0.000    | 492.009        | 460.710         | 107.670  | 202.747  | S  |
| E  | 111.054  | 0.000    | 240.051  | 310.050         | 0.000    | 321.038        | 540.740         | 1464.722 | 1460.730 | E  |
| T  | 112.112  | 0.000    | 760.121  | 840.120         | 0.000    | 621.050        | 1201.742        | 1320.762 | 2326.760 | T  |
| A  | 140.140  | 0.000    | 460.138  | <b>511.144</b>  | 0.000    | <b>401.133</b> | 1261.830        | 1254.610 | 2221.841 | A  |
| P  | 150.150  | 0.000    | 560.150  | 600.150         | 0.000    | 590.150        | <b>1180.621</b> | 1183.590 | 1182.610 | P  |
| A  | 160.160  | 0.000    | 620.159  | 670.159         | 0.000    | 661.159        | 1000.740        | 1000.740 | 1000.740 | A  |
| E  | 160.160  | 0.000    | 760.171  | <b>800.176</b>  | 0.000    | 790.176        | 992.510         | 992.500  | 994.510  | E  |
| T  | 161.120  | 0.000    | 390.119  | <b>400.124</b>  | 0.000    | 391.119        | <b>601.490</b>  | 590.490  | 593.470  | T  |
| A  | 164.160  | 0.000    | 424.160  | <b>460.161</b>  | 0.000    | 451.161        | <b>702.441</b>  | 701.441  | 704.441  | A  |
| A  | 165.160  | 0.000    | 1070.162 | <b>1051.160</b> | 0.000    | 1071.162       | <b>711.404</b>  | 694.271  | 692.191  | A  |
| P  | 110.450  | 0.000    | 1102.441 | 1140.410        | 0.000    | 1110.410       | <b>640.306</b>  | 621.340  | 622.300  | P  |
| A  | 1101.401 | 0.000    | 1171.402 | <b>1219.400</b> | 0.000    | 1201.417       | 543.310         | 526.301  | 525.301  | A  |
| T  | 1200.400 | 0.000    | 1210.400 | 1210.400        | 0.000    | 1200.400       | <b>412.247</b>  | 400.250  | 404.260  | T  |
| V  | 1307.014 | 0.000    | 1300.004 | 13410.000       | 0.000    | 1307.000       | 175.220         | 300.110  | 301.213  | V  |
| E  | 1310.037 | 0.000    | 1400.041 | 1544.052        | 0.000    | 1520.041       | 276.130         | 269.120  | 268.140  | E  |
| R  | 1544.712 | 3027.721 | 1620.741 | 1672.741        | 3026.720 | 1654.710       | 147.111         | 130.000  | 0.000    | R  |

# sp | P62806 | H4\_MOUSE

K Dimethyl VLRDNIQGITKPAIRR  
28.03

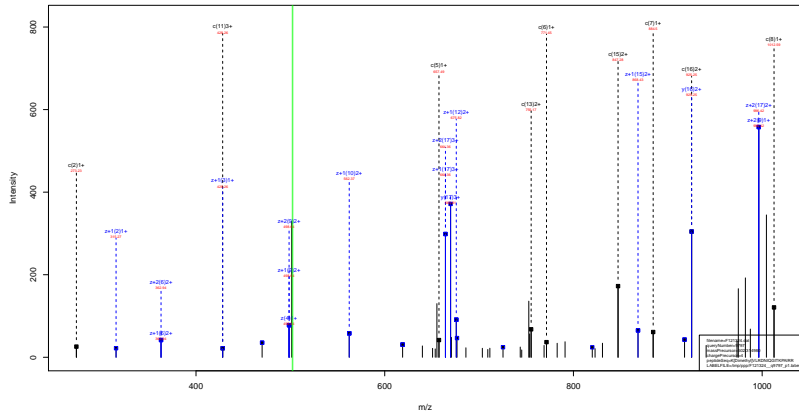

# sp | P62806 | H4\_MOUSE

K<sup>Dimethyl</sup><sub>28.03</sub> VLRDNIQGITKPAIRR

- ▶ fragmentation table for charge state 1+
- ▶ specType=etd
- ▶ score=40.68
- ▶ F121324.dat
- ▶ query=q9797.p1
- ▶ precursor=502.314980
- ▶ chargePrecursor=4
- ▶ itol=0.6

| AA    | c               | y        | z+1            | z+2            | z              | AA    |
|-------|-----------------|----------|----------------|----------------|----------------|-------|
| K[1]  | 174.160         | 2006.231 | 1990.210       | 1991.224       | 1889.209       | K[17] |
| V[2]  | <b>273.229</b>  | 1830.105 | 1834.090       | 1835.097       | 1833.082       | V[16] |
| L[3]  | 386.313         | 1751.040 | 1735.021       | 1736.029       | 1734.013       | L[15] |
| R[4]  | 542.414         | 1637.956 | 1621.937       | 1622.945       | 1620.929       | R[14] |
| D[5]  | <b>657.441</b>  | 1481.855 | 1465.836       | 1466.844       | 1464.828       | D[13] |
| N[6]  | <b>771.484</b>  | 1306.820 | 1350.809       | 1351.817       | 1349.801       | N[12] |
| H[7]  | <b>854.568</b>  | 1252.785 | 1226.766       | 1227.774       | 1225.758       | H[11] |
| Q[8]  | <b>1012.626</b> | 1139.701 | 1123.683       | 1124.690       | 1122.674       | Q[10] |
| G[9]  | 1059.645        | 1011.642 | 995.623        | <b>996.631</b> | 994.615        | G[9]  |
| I[10] | 1182.732        | 954.621  | 938.602        | 939.610        | 937.594        | I[8]  |
| T[11] | 1283.779        | 841.537  | 825.518        | 826.526        | 824.510        | T[7]  |
| K[12] | 1411.874        | 740.489  | 724.470        | <b>725.478</b> | 723.462        | K[6]  |
| P[13] | 1508.927        | 612.394  | 596.375        | 597.383        | 595.367        | P[6]  |
| A[14] | 1579.984        | 515.341  | 499.322        | 500.330        | <b>498.315</b> | A[4]  |
| I[5]  | 1693.048        | 444.304  | <b>428.285</b> | 429.293        | 427.278        | I[3]  |
| R[16] | 1549.149        | 331.220  | <b>315.201</b> | 316.209        | 314.194        | R[2]  |
| R[17] | 2006.251        | 175.110  | 159.100        | 160.108        | 158.092        | R[1]  |

# sp | P62806 | H4\_MOUSE

K<sup>Dimethyl</sup><sub>28.03</sub> VLRDNIQGITKPAIRR

- ▶ fragmentation table for charge state 2+
- ▶ specType=etd
- ▶ score=40.68
- ▶ F121324.dat
- ▶ query=q9797.p1
- ▶ precursor=502.314980
- ▶ chargePrecursor=4
- ▶ itol=0.6

| AA    | c              | y              | z+1            | z+2            | z              | AA    |
|-------|----------------|----------------|----------------|----------------|----------------|-------|
| K[1]  | 87.584         | 1003.021       | 995.612        | <b>996.115</b> | 995.108        | K[17] |
| V[2]  | 137.118        | <b>925.558</b> | <b>917.548</b> | <b>918.052</b> | 917.045        | V[16] |
| L[3]  | 193.660        | 876.034        | <b>868.014</b> | <b>868.518</b> | 867.510        | L[15] |
| R[4]  | 271.710        | <b>819.482</b> | 811.472        | 811.976        | 810.968        | R[14] |
| D[5]  | 329.224        | 741.431        | 733.422        | 733.926        | 732.918        | D[13] |
| N[6]  | 386.245        | 683.918        | <b>675.908</b> | <b>676.412</b> | <b>675.404</b> | N[12] |
| T[7]  | 442.287        | 626.896        | <b>618.887</b> | <b>619.391</b> | <b>618.383</b> | T[11] |
| Q[8]  | 508.817        | 570.384        | <b>562.365</b> | <b>562.869</b> | <b>561.841</b> | Q[10] |
| G[9]  | 535.327        | 506.325        | <b>498.315</b> | <b>498.819</b> | 497.811        | G[9]  |
| H[10] | 591.869        | 477.814        | <b>469.805</b> | <b>470.309</b> | 469.301        | H[8]  |
| F[11] | 642.393        | 421.272        | 413.263        | 413.767        | 412.759        | F[7]  |
| K[12] | 706.441        | 370.748        | <b>362.739</b> | <b>363.243</b> | 362.235        | K[6]  |
| P[13] | <b>754.967</b> | 306.701        | 298.691        | 299.195        | 298.187        | P[5]  |
| A[14] | 790.486        | 258.174        | 250.165        | 250.669        | 249.661        | A[4]  |
| I[15] | <b>847.028</b> | 222.696        | 214.646        | 215.150        | 214.142        | I[3]  |
| R[16] | <b>925.078</b> | 166.114        | 158.104        | 158.608        | 157.600        | R[2]  |
| R[17] | 1003.129       | 88.061         | 80.054         | 80.558         | 79.550         | R[1]  |

# sp | P62806 | H4\_MOUSE

K<sup>Dimethyl</sup><sub>28.03</sub> VLRDNIQGITKPAIRR

- ▶ fragmentation table for charge state 3+
- ▶ specType=etd
- ▶ score=40.68
- ▶ F121324.dat
- ▶ query=q9797.p1
- ▶ precursor=502.314980
- ▶ chargePrecursor=4
- ▶ itol=0.6

| AA    | c              | y              | z+1            | z+2            | z       | AA    |
|-------|----------------|----------------|----------------|----------------|---------|-------|
| R[1]  | 58.725         | <b>669.416</b> | <b>664.077</b> | <b>664.413</b> | 663.741 | R[17] |
| V[2]  | 91.748         | 617.374        | 612.035        | 612.371        | 611.699 | V[16] |
| L[3]  | 129.442        | 584.351        | 579.012        | 579.348        | 578.676 | L[15] |
| R[4]  | 161.476        | 546.657        | 541.317        | 541.653        | 540.981 | R[14] |
| D[5]  | 219.818        | 494.623        | 489.284        | 489.619        | 488.948 | D[13] |
| N[6]  | 257.833        | 456.281        | 450.941        | 451.277        | 450.605 | N[12] |
| T[7]  | 295.827        | 418.265        | 412.927        | 413.263        | 412.591 | T[11] |
| Q[8]  | 338.214        | 380.572        | 375.232        | 375.568        | 374.896 | Q[10] |
| G[9]  | 357.221        | 337.886        | 332.546        | 332.882        | 332.210 | G[9]  |
| I[10] | 394.915        | 318.878        | 313.539        | 313.875        | 313.203 | I[8]  |
| T[11] | <b>428.598</b> | 281.184        | 275.844        | 276.180        | 275.508 | T[7]  |
| K[12] | 471.296        | 247.501        | 242.162        | 242.498        | 241.826 | K[6]  |
| P[13] | 503.647        | 204.803        | 199.463        | 199.799        | 199.127 | P[5]  |
| A[14] | 527.326        | 172.452        | 167.112        | 167.448        | 166.776 | A[4]  |
| T[15] | 565.021        | 140.773        | 141.433        | 143.769        | 143.097 | T[3]  |
| R[16] | 617.655        | 111.076        | 105.739        | 106.075        | 105.403 | R[2]  |
| R[17] | 669.088        | 59.045         | 53.705         | 54.041         | 53.369  | R[1]  |

# sp | P15864 | H12\_MOUSE

[Acetyl]SEAAPAAPAAAPPAEK

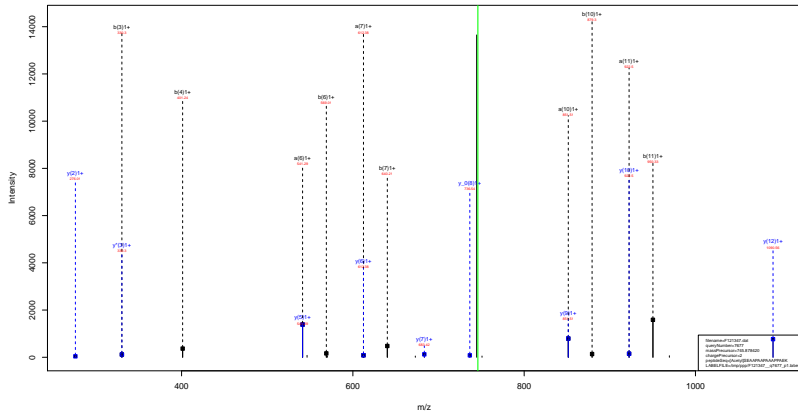

MassSpecTools v1.0.0  
Query: P15864\_H12\_MOUSE  
AcetylSEAAPAAPAAAPPAEK  
m/z: 727.1  
Intensity: 7500

# sp | P15864 | H12\_MOUSE

[Acetyl]SEAAPAAPAAAPPAEK

- ▶ fragmentation table for charge state 1+
- ▶ specType=cid
- ▶ score=60.35
- ▶ F121347.dat
- ▶ query=q7677.p1
- ▶ precursor=745.878420
- ▶ chargePrecursor=2
- ▶ itol=0.6

| AA   | a              | a*       | a <sub>0</sub> | b              | b*       | b <sub>0</sub> | y               | y*             | y <sub>0</sub> | AA   |
|------|----------------|----------|----------------|----------------|----------|----------------|-----------------|----------------|----------------|------|
| S1   | 133.055        | 0.000    | 88.047         | 133.055        | 0.000    | 132.039        | 149.140         | 147.922        | 147.738        | S188 |
| E1   | 131.050        | 0.000    | 213.083        | 292.072        | 0.000    | 243.062        | 136.705         | 134.479        | 134.088        | E155 |
| A13  | 130.136        | 0.000    | 388.124        | <b>130.130</b> | 0.000    | 132.119        | 127.623         | 123.831        | 124.053        | A14  |
| A4   | 173.172        | 0.000    | 305.141        | <b>401.167</b> | 0.000    | 383.136        | 1181.636        | 1144.600       | 1143.618       | A13  |
| P15  | 170.225        | 0.000    | 482.214        | 488.219        | 0.000    | 480.202        | <b>1090.549</b> | 1075.563       | 1102.579       | P12  |
| A16  | <b>141.262</b> | 0.000    | 320.260        | <b>166.257</b> | 0.000    | 303.248        | 991.533         | 978.533        | 1004.508       | A11  |
| A7   | <b>612.299</b> | 0.000    | 508.293        | <b>640.284</b> | 0.000    | 622.283        | <b>622.499</b>  | 905.473        | 1004.480       | A10  |
| P18  | 108.352        | 0.000    | 189.141        | 719.348        | 0.000    | 183.330        | <b>851.462</b>  | 836.430        | 815.432        | P16  |
| A19  | 108.098        | 0.000    | 182.131        | 686.245        | 0.000    | 180.321        | 754.400         | 737.363        | <b>736.394</b> | A18  |
| A10  | <b>851.426</b> | 0.000    | 673.413        | <b>879.421</b> | 0.000    | 853.403        | <b>683.372</b>  | 668.352        | 688.362        | A17  |
| A11  | <b>922.463</b> | 0.000    | 808.430        | <b>950.438</b> | 0.000    | 892.449        | <b>612.335</b>  | 598.326        | 584.326        | A16  |
| P12  | 1019.516       | 0.000    | 1001.500       | 1047.511       | 0.000    | 1020.500       | <b>541.268</b>  | 536.271        | 525.287        | P10  |
| P13  | 1118.568       | 0.000    | 1098.560       | 1144.563       | 0.000    | 1128.553       | 448.270         | 427.259        | 426.259        | P14  |
| A14  | 1187.608       | 0.000    | 1169.600       | 1215.603       | 0.000    | 1187.590       | 387.131         | <b>130.146</b> | 120.182        | A15  |
| E15  | 1318.646       | 0.000    | 1298.638       | 1344.643       | 0.000    | 1328.632       | <b>276.155</b>  | 259.129        | 258.145        | E12  |
| R108 | 1444.742       | 1427.731 | 1426.731       | 1472.738       | 1455.731 | 1454.721       | 147.113         | 130.088        | 0.000          | R10  |

# sp | P43274 | H14\_MOUSE

[Acetyl]SETAPAAPAAPAEK

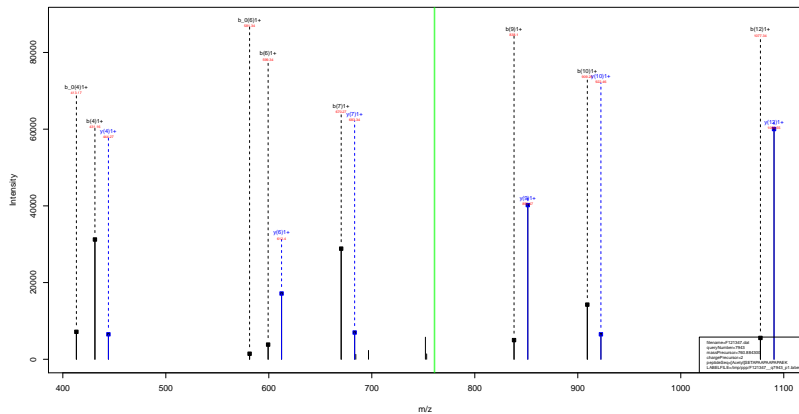



# sp | P43274 | H14\_MOUSE

[Acetyl]SETAPAAPAAPAPAEK

- ▶ fragmentation table for charge state 1+
- ▶ specType=cid
- ▶ score=54.84
- ▶ F121347.dat
- ▶ query=q7943.p1
- ▶ precursor=760.884300
- ▶ chargePrecursor=2
- ▶ itol=0.6

| AA   | a        | a*       | aΔ       | b               | b*       | bΔ             | y               | y*       | yΔ       | AA   |
|------|----------|----------|----------|-----------------|----------|----------------|-----------------|----------|----------|------|
| S1   | 1021.050 | 0.000    | 496.047  | 1100.050        | 0.000    | 622.003        | 1020.749        | 1202.712 | 1002.749 | S102 |
| E12  | 1031.050 | 0.000    | 212.081  | 2020.052        | 0.000    | 281.052        | 1031.712        | 1174.690 | 1102.749 | E115 |
| T13  | 1122.149 | 0.000    | 149.121  | 1002.142        | 0.000    | 301.120        | 1122.812        | 1129.841 | 1104.802 | T114 |
| A14  | 1002.150 | 0.000    | 385.172  | <b>431.177</b>  | 0.000    | <b>413.187</b> | 1101.820        | 1144.600 | 1141.610 | A113 |
| P15  | 1002.151 | 0.000    | 480.223  | <b>1002.151</b> | 0.000    | <b>501.207</b> | <b>1000.580</b> | 1103.583 | 1102.519 | P112 |
| A16  | 1012.151 | 0.000    | 300.160  | <b>1002.161</b> | 0.000    | <b>501.207</b> | 1012.519        | 1010.500 | 1010.500 | A111 |
| A17  | 1042.150 | 0.000    | 629.200  | <b>070.304</b>  | 0.000    | 152.236        | <b>022.490</b>  | 1002.471 | 1004.480 | A110 |
| P18  | 1102.152 | 0.000    | 170.162  | <b>1102.162</b> | 0.000    | 181.160        | <b>051.492</b>  | 1101.430 | 1111.412 | P109 |
| A19  | 1012.150 | 0.000    | 142.180  | <b>1102.162</b> | 0.000    | 182.162        | 1111.412        | 1112.381 | 1102.380 | A108 |
| A109 | 1012.150 | 0.000    | 1002.425 | <b>005.431</b>  | 0.000    | 101.412        | <b>001.372</b>  | 1002.380 | 1002.380 | A107 |
| P111 | 1110.480 | 0.000    | 300.470  | 1000.484        | 0.000    | 100.477        | <b>012.335</b>  | 1001.310 | 1004.320 | P106 |
| A112 | 1040.520 | 0.000    | 1010.513 | <b>1077.521</b> | 0.000    | 1000.511       | 1111.310        | 1000.350 | 1001.212 | A105 |
| T114 | 1140.510 | 0.000    | 1110.500 | 1114.514        | 0.000    | 1100.500       | <b>044.283</b>  | 1001.210 | 1001.210 | T104 |
| A114 | 1117.010 | 0.000    | 1100.000 | 1140.011        | 0.000    | 1107.000       | 1011.100        | 1010.100 | 1001.100 | A103 |
| E115 | 1100.010 | 0.000    | 1120.041 | 1174.054        | 0.000    | 1100.010       | 1101.100        | 1011.100 | 1001.100 | E102 |
| R101 | 1474.124 | 1480.121 | 1480.141 | 1502.149        | 1500.122 | 1484.110       | 147.111         | 1301.000 | 0.000    | R101 |

# sp | P43277 | H13\_MOUSE

[Acetyl]SETAPAAPAAPAVEK

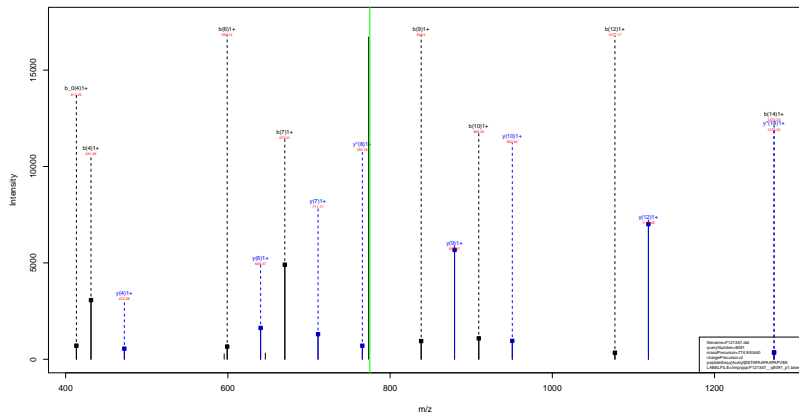

# sp | P43277 | H13\_MOUSE

[Acetyl]SETAPAAPAAPAPVEK

- ▶ fragmentation table for charge state 1+
- ▶ specType=cid
- ▶ score=65.12
- ▶ F121347.dat
- ▶ query=q8091.p1
- ▶ precursor=774.900440
- ▶ chargePrecursor=2
- ▶ itol=0.6

| AA    | a        | x*       | a <sub>0</sub> | b               | b*       | b <sub>0</sub> | y               | y*             | y <sub>0</sub> | AA    |
|-------|----------|----------|----------------|-----------------|----------|----------------|-----------------|----------------|----------------|-------|
| S[1]  | 102.050  | 0.000    | 49.944         | 1.00000         | 0.000    | 112.010        | 1540.190        | 1512.190       | 1530.190       | S[10] |
| E[2]  | 231.158  | 0.000    | 211.887        | 2.00002         | 0.000    | 243.102        | 1410.740        | 1410.740       | 1401.747       | E[15] |
| T[3]  | 332.145  | 0.000    | 145.150        | 1.00014         | 0.000    | 303.810        | 1300.100        | 1373.670       | 1300.000       | T[14] |
| A[4]  | 403.180  | 0.000    | 385.172        | <b>431.177</b>  | 0.000    | <b>413.187</b> | 1180.850        | 1172.850       | 1171.847       | A[13] |
| P[5]  | 500.235  | 0.000    | 480.226        | <b>500.267</b>  | 0.000    | 510.233        | <b>1116.820</b> | 1101.500       | 1100.810       | P[12] |
| A[6]  | 618.212  | 0.000    | 530.760        | <b>590.267</b>  | 0.000    | 581.251        | 1000.100        | 1000.100       | 1000.100       | A[11] |
| A[7]  | 642.150  | 0.000    | 626.360        | <b>610.304</b>  | 0.000    | 652.214        | <b>950.531</b>  | 931.500        | 942.500        | A[10] |
| P[8]  | 718.202  | 0.000    | 710.200        | <b>710.200</b>  | 0.000    | 700.190        | <b>870.493</b>  | 867.490        | 861.493        | P[9]  |
| A[9]  | 810.200  | 0.000    | 792.200        | <b>810.204</b>  | 0.000    | 801.191        | 750.100         | <b>765.414</b> | 764.414        | A[8]  |
| A[10] | 881.230  | 0.000    | 863.420        | <b>900.431</b>  | 0.000    | 891.421        | <b>711.404</b>  | 704.400        | 702.401        | A[7]  |
| P[11] | 976.480  | 0.000    | 968.471        | 1.00049         | 0.000    | 980.471        | <b>640.366</b>  | 630.366        | 621.366        | P[6]  |
| A[12] | 1049.530 | 0.000    | 1030.518       | <b>1077.551</b> | 0.000    | 1059.511       | <b>540.311</b>  | 520.300        | 526.311        | A[6]  |
| T[13] | 1146.500 | 0.000    | 1110.500       | <b>1134.514</b> | 0.000    | 1120.500       | <b>472.271</b>  | 460.250        | 464.266        | T[5]  |
| V[14] | 1245.547 | 0.000    | 1217.611       | <b>1273.642</b> | 0.000    | 1250.610       | 350.100         | 350.100        | 367.211        | V[1]  |
| E[15] | 1314.600 | 0.000    | 1256.620       | 1.00085         | 0.000    | 1284.610       | 270.100         | 260.100        | 268.145        | E[1]  |
| K[16] | 1402.700 | 1400.700 | 1400.700       | 1.00000         | 1401.710 | 1412.700       | 147.110         | 140.000        | 0.000          | K[16] |

# sp | P43276 | H15\_MOUSE

[Acetyl]SETAPAETAAPAPVEK

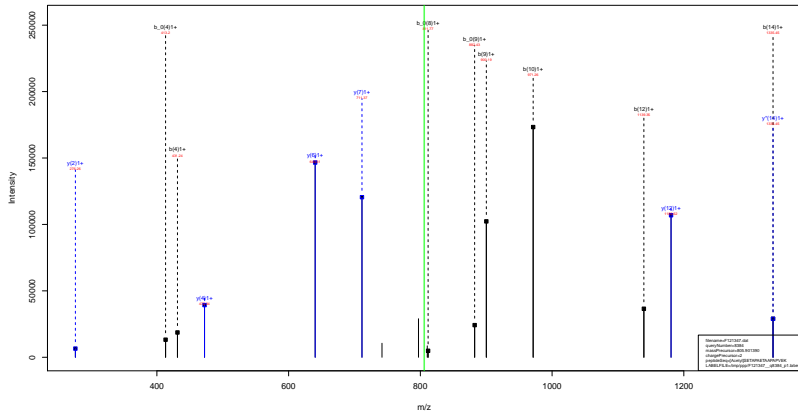

# sp | P43276 | H15\_MOUSE

[Acetyl]SETAPAETAAPAPVEK

- ▶ fragmentation table for charge state 1+
- ▶ specType=cid
- ▶ score=41.69
- ▶ F121347.dat
- ▶ query=q8384.p1
- ▶ precursor=805.901390
- ▶ chargePrecursor=2
- ▶ itol=0.6

| AA    | a        | x*    | a <sub>0</sub> | b               | b*    | b <sub>0</sub> | γ               | γ*    | v <sub>0</sub> | AA    |
|-------|----------|-------|----------------|-----------------|-------|----------------|-----------------|-------|----------------|-------|
| S[1]  | 102.050  | 0.000 | 69.944         | 1.00000         | 0.000 | 112.010        | 31.011          | 1.000 | 102.050        | S[10] |
| E[2]  | 231.158  | 0.000 | 211.887        | 2.00002         | 0.000 | 243.102        | 148.174         | 0.000 | 231.158        | E[15] |
| T[3]  | 332.145  | 0.000 | 145.131        | 1.00014         | 0.000 | 303.110        | 130.160         | 0.000 | 332.145        | T[14] |
| A[4]  | 403.180  | 0.000 | 385.172        | <b>431.177</b>  | 0.000 | <b>413.187</b> | 125.185         | 0.000 | 403.180        | A[13] |
| P[5]  | 500.235  | 0.000 | 480.228        | 5.00210         | 0.000 | 510.231        | <b>1180.211</b> | 0.000 | 500.235        | P[12] |
| A[6]  | 618.271  | 0.000 | 535.265        | 7.00267         | 0.000 | 603.251        | 1000.244        | 0.000 | 618.271        | A[11] |
| E[7]  | 708.315  | 0.000 | 682.304        | 7.00310         | 0.000 | 710.299        | 1012.311        | 0.000 | 708.315        | E[10] |
| T[8]  | 801.362  | 0.000 | 719.352        | <b>800.345</b>  | 0.000 | <b>811.347</b> | 101.438         | 0.000 | 801.362        | T[9]  |
| A[9]  | 872.410  | 0.000 | 854.389        | <b>900.395</b>  | 0.000 | <b>882.384</b> | 102.441         | 0.000 | 872.410        | A[8]  |
| A[10] | 943.457  | 0.000 | 925.425        | <b>971.432</b>  | 0.000 | <b>953.421</b> | <b>711.404</b>  | 0.000 | 943.457        | A[7]  |
| P[11] | 1040.489 | 0.000 | 1012.474       | 10.00404        | 0.000 | 1050.474       | <b>640.366</b>  | 0.000 | 1040.489       | P[6]  |
| A[12] | 1111.537 | 0.000 | 1085.518       | <b>1139.522</b> | 0.000 | 1121.511       | <b>540.311</b>  | 0.000 | 1111.537       | A[5]  |
| T[13] | 1208.593 | 0.000 | 1150.566       | 11.00514        | 0.000 | 1138.564       | <b>472.271</b>  | 0.000 | 1208.593       | T[5]  |
| V[14] | 1307.646 | 0.000 | 1230.611       | <b>1335.643</b> | 0.000 | 1317.632       | 115.224         | 0.000 | 1307.646       | V[3]  |
| E[15] | 1410.690 | 0.000 | 1311.680       | 14.00685        | 0.000 | 1400.673       | <b>276.155</b>  | 0.000 | 1410.690       | E[2]  |
| K[16] | 1504.738 | 0.000 | 1446.713       | 15.00780        | 0.000 | 1514.710       | 147.111         | 0.000 | 1504.738       | K[1]  |

# sp | P70696 | H2B1A\_MOUSE

GTKAVTK <sup>Acetyl</sup> YTSSK  
42.01

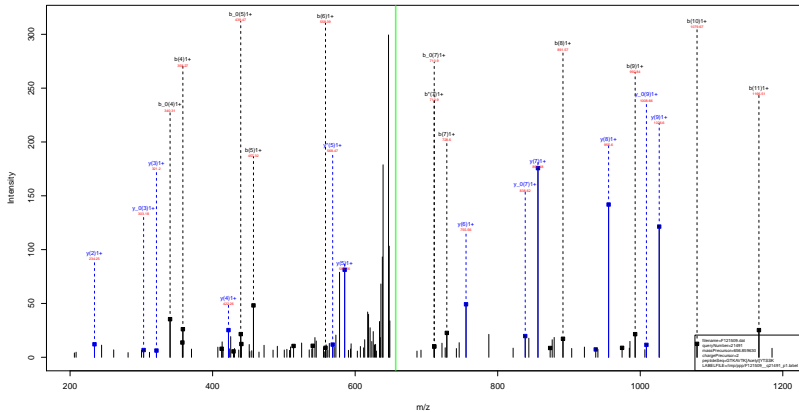

# sp | P70696 | H2B1A\_MOUSE

GTKAVTK <sup>Acetyl</sup> YTSSK  
42.01

- ▶ fragmentation table for charge state 1+
- ▶ specType=cid
- ▶ score=65.04
- ▶ F121509.dat
- ▶ query=q21491\_p1
- ▶ precursor=656.859630
- ▶ chargePrecursor=2
- ▶ itol=0.7

| AA  | a              | a'             | a+b      | b               | b'             | b+a'           | c               | c'             | c+b'            | AA   |
|-----|----------------|----------------|----------|-----------------|----------------|----------------|-----------------|----------------|-----------------|------|
| Q1  | 321.229        | 0.000          | 321.229  | 0.000           | 0.000          | 321.229        | 1132.712        | 2120.034       | 2244.102        | Q129 |
| T1  | 131.100        | 0.000          | 131.100  | 1.000           | 0.000          | 131.100        | 1200.692        | 2120.034       | 2237.609        | T111 |
| K2  | 359.176        | 282.150        | 244.168  | 277.174         | 270.145        | 300.151        | 1125.847        | 1137.615       | 1138.611        | K108 |
| A1  | 439.214        | 311.131        | 329.109  | <b>358.208</b>  | 351.183        | <b>301.191</b> | <b>1125.847</b> | 1109.789       | <b>1106.756</b> | A107 |
| V1  | <b>429.282</b> | <b>412.255</b> | 411.211  | <b>457.277</b>  | <b>448.250</b> | <b>439.266</b> | <b>955.509</b>  | 938.461        | <b>937.490</b>  | V106 |
| I1  | 335.133        | <b>511.101</b> | 510.159  | <b>558.225</b>  | 551.200        | <b>540.174</b> | <b>856.441</b>  | 839.413        | <b>838.431</b>  | I102 |
| K6  | 339.452        | 383.409        | 382.426  | <b>728.439</b>  | <b>711.404</b> | <b>710.420</b> | <b>751.376</b>  | 734.362        | 731.383         | K101 |
| V10 | 361.490        | 369.471        | 369.462  | <b>891.493</b>  | 884.477        | <b>873.461</b> | <b>955.238</b>  | <b>948.261</b> | 947.227         | V102 |
| V11 | 364.546        | 367.529        | 366.516  | <b>902.541</b>  | 895.511        | <b>874.531</b> | <b>422.225</b>  | 405.188        | 404.214         | V101 |
| S10 | 393.579        | 3184.052       | 2933.589 | <b>1079.573</b> | 1062.547       | 1061.063       | <b>321.177</b>  | 304.150        | <b>303.186</b>  | S10  |
| S11 | 1138.610       | 1120.589       | 1120.589 | <b>1166.605</b> | 1166.599       | 1166.599       | <b>234.140</b>  | 217.119        | 216.106         | S10  |
| R12 | 1366.100       | 1360.079       | 1348.065 | 1324.051        | 1317.024       | 1310.000       | 217.119         | 130.080        | 0.000           | R10  |

# sp | P62806 | H4\_MOUSE

SGR<sup>Trimethyl</sup><sub>42.05</sub> GKGGKGLGKGGAKRHRK<sup>Dimethyl</sup><sub>28.03</sub> VLRD

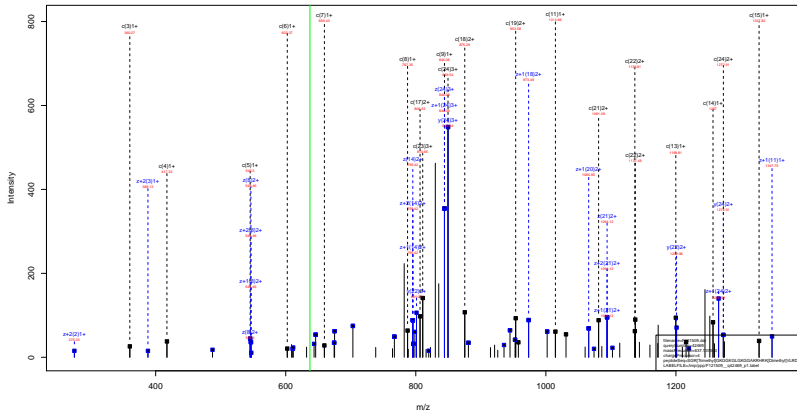



# sp | P62806 | H4\_MOUSE

SGR<sup>Trimethyl</sup><sub>42.05</sub> GKGGKGLGKGGAKRHRK<sup>Dimethyl</sup><sub>28.03</sub> VLRD

- ▶ fragmentation table for charge state 1+
- ▶ specType=etd
- ▶ score=92.08
- ▶ F121509.dat
- ▶ query=q42469\_p1
- ▶ precursor=637.137530
- ▶ chargePrecursor=4
- ▶ itol=0.7

| AA | c  | y               | z+1      | z+2             | z              | AA       |       |
|----|----|-----------------|----------|-----------------|----------------|----------|-------|
| S  | 1  | 105.066         | 2945.539 | 2529.520        | 0.000          | 2529.517 | S[24] |
| G  | 2  | 152.067         | 2438.507 | 2442.488        | 0.000          | 2441.480 | G[23] |
| H  | 3  | <b>368.235</b>  | 2301.485 | 2383.466        | 2389.474       | 2384.459 | H[22] |
| G  | 4  | <b>417.257</b>  | 2203.537 | 2197.518        | 2188.526       | 2195.510 | G[21] |
| K  | 5  | <b>545.152</b>  | 2148.518 | 2150.297        | 2151.309       | 2159.288 | K[20] |
| G  | 6  | <b>602.373</b>  | 2048.221 | 2002.202        | 2003.210       | 2001.194 | G[19] |
| G  | 7  | <b>659.395</b>  | 1961.199 | 1945.180        | 1946.188       | 1944.173 | G[18] |
| K  | 8  | <b>787.490</b>  | 1904.179 | 1888.159        | 1889.167       | 1887.151 | K[17] |
| G  | 9  | <b>844.511</b>  | 1776.081 | 1760.064        | 1761.072       | 1759.056 | G[16] |
| L  | 10 | <b>957.595</b>  | 1719.061 | 1703.043        | 1704.050       | 1702.035 | L[15] |
| G  | 11 | <b>1014.617</b> | 1605.977 | 1589.958        | 1590.966       | 1588.951 | G[14] |
| K  | 12 | 1142.712        | 1548.958 | 1532.937        | 1533.945       | 1531.929 | K[13] |
| G  | 13 | <b>1199.733</b> | 1420.861 | 1404.842        | 1405.850       | 1403.834 | G[12] |
| G  | 14 | <b>1256.755</b> | 1363.839 | <b>1347.821</b> | 1348.828       | 1346.813 | G[11] |
| A  | 15 | <b>1327.792</b> | 1306.818 | 1290.799        | 1291.807       | 1289.791 | A[10] |
| K  | 16 | 1455.887        | 1249.781 | <b>1219.762</b> | 1220.770       | 1218.754 | K[9]  |
| R  | 17 | 1611.988        | 1197.686 | 1191.667        | 1092.675       | 1090.659 | R[8]  |
| H  | 18 | 1748.047        | 951.585  | <b>935.566</b>  | 936.574        | 934.558  | H[7]  |
| R  | 19 | 1905.148        | 814.528  | <b>798.507</b>  | 799.515        | 797.499  | R[6]  |
| K  | 20 | 2061.274        | 658.425  | 642.406         | <b>643.414</b> | 641.398  | K[5]  |
| V  | 21 | 2180.342        | 502.298  | 486.280         | <b>487.287</b> | 485.272  | V[4]  |
| L  | 22 | 2273.427        | 401.236  | 387.211         | <b>388.219</b> | 386.203  | L[3]  |
| D  | 23 | 2429.538        | 290.140  | 274.127         | <b>275.135</b> | 273.119  | D[2]  |
| D  | 24 | 2544.555        | 134.045  | 118.026         | 119.034        | 117.018  | D[1]  |

# sp | P62806 | H4\_MOUSE

SGR<sup>Trimethyl</sup><sub>42.05</sub> GKGGKGLGKGGAKRHRK<sup>Dimethyl</sup><sub>28.03</sub> VLRD

- ▶ fragmentation table for charge state 2+
- ▶ specType=etd
- ▶ score=92.08
- ▶ F121509.dat
- ▶ query=q42469\_p1
- ▶ precursor=637.137530
- ▶ chargePrecursor=4
- ▶ itol=0.7

| AA |    | c               | y               | z+1             | z+2             | z               | AA    |
|----|----|-----------------|-----------------|-----------------|-----------------|-----------------|-------|
| S  | 1  | 63.017          | <b>1273.273</b> | <b>1265.264</b> | 0.504           | 1264.760        | S[24] |
| G  | 2  | 61.547          | 1229.757        | 1221.748        | 0.504           | 1221.244        | G[23] |
| R  | 3  | 180.621         | <b>1201.246</b> | 1193.237        | 1185.741        | 1180.243        | R[22] |
| G  | 4  | 399.133         | <b>1102.172</b> | <b>1094.163</b> | <b>1084.667</b> | <b>1083.659</b> | G[21] |
| K  | 5  | 273.180         | <b>1073.661</b> | <b>1065.652</b> | <b>1056.156</b> | <b>1055.148</b> | K[20] |
| G  | 6  | 301.690         | 1009.614        | <b>1001.605</b> | <b>1002.108</b> | 1001.101        | G[19] |
| G  | 7  | 330.201         | 961.103         | <b>973.094</b>  | <b>973.598</b>  | 972.590         | G[18] |
| K  | 8  | 394.245         | <b>952.592</b>  | <b>944.583</b>  | <b>945.087</b>  | 944.079         | K[17] |
| G  | 9  | 422.759         | 898.545         | <b>880.536</b>  | <b>881.040</b>  | 880.032         | G[16] |
| L  | 10 | 479.304         | 860.036         | 852.027         | 852.530         | 851.521         | L[15] |
| G  | 11 | 507.812         | 803.492         | <b>795.483</b>  | <b>795.987</b>  | <b>794.979</b>  | G[14] |
| K  | 12 | 571.859         | 774.982         | <b>766.972</b>  | <b>767.476</b>  | <b>766.468</b>  | K[13] |
| G  | 13 | 600.370         | 710.934         | <b>702.925</b>  | <b>703.429</b>  | 702.421         | G[12] |
| G  | 14 | 628.881         | 682.423         | <b>674.414</b>  | <b>674.918</b>  | <b>673.910</b>  | G[11] |
| A  | 15 | 684.399         | 653.913         | <b>645.903</b>  | <b>646.407</b>  | <b>645.399</b>  | A[10] |
| R  | 16 | 728.447         | 618.394         | <b>610.385</b>  | <b>610.889</b>  | 609.881         | R[9]  |
| R  | 17 | <b>806.498</b>  | 554.347         | <b>546.337</b>  | <b>546.841</b>  | <b>545.833</b>  | R[8]  |
| H  | 18 | <b>875.027</b>  | 476.290         | 468.281         | 468.784         | 467.776         | H[7]  |
| R  | 19 | <b>953.078</b>  | 407.767         | 399.757         | 400.261         | 399.253         | R[6]  |
| K  | 20 | <b>1031.141</b> | 329.716         | 321.707         | 322.211         | 321.203         | K[5]  |
| V  | 21 | <b>1060.675</b> | 251.663         | 243.653         | 244.157         | 243.149         | V[4]  |
| L  | 22 | <b>1137.217</b> | 202.119         | 194.109         | 194.613         | 193.605         | L[3]  |
| R  | 23 | <b>1215.267</b> | 145.577         | 137.567         | 138.071         | 137.063         | R[2]  |
| D  | 24 | <b>1272.781</b> | 67.526          | 59.517          | 60.021          | 59.013          | D[1]  |

# sp | P62806 | H4\_MOUSE

SGR<sup>Trimethyl</sup><sub>42.05</sub> GKGGKGLGKGGAKRHRK<sup>Dimethyl</sup><sub>28.03</sub> VLRD

- ▶ fragmentation table for charge state 3+
- ▶ specType=etd
- ▶ score=92.08
- ▶ F121509.dat
- ▶ query=q42469\_p1
- ▶ precursor=637.137530
- ▶ chargePrecursor=4
- ▶ itol=0.7

| AA    | c              | y              | z+1            | z+2            | z              | AA    |
|-------|----------------|----------------|----------------|----------------|----------------|-------|
| S[1]  | 35.693         | <b>849.184</b> | <b>843.845</b> | 0.672          | <b>843.509</b> | S[24] |
| G[2]  | 54.701         | <b>820.174</b> | 814.834        | 0.672          | 814.498        | G[23] |
| R[3]  | 120.750        | <b>801.167</b> | <b>795.827</b> | <b>796.163</b> | <b>795.491</b> | R[22] |
| G[4]  | 139.757        | 735.117        | 729.778        | 730.114        | 729.442        | G[21] |
| K[5]  | 182.455        | 716.110        | 710.770        | 711.106        | 710.435        | K[20] |
| G[6]  | 201.463        | 673.412        | 668.072        | 668.408        | 667.736        | G[19] |
| G[7]  | 220.470        | 654.405        | 649.065        | 649.401        | 648.729        | G[18] |
| K[8]  | 263.168        | 635.397        | 630.058        | 630.394        | 629.722        | K[17] |
| G[9]  | 282.175        | 592.699        | 587.359        | 587.695        | 587.024        | G[16] |
| L[10] | 319.676        | 674.692        | 568.352        | 568.688        | 568.016        | L[15] |
| G[11] | 338.677        | 535.997        | 530.658        | 530.994        | 530.322        | G[14] |
| K[12] | 381.575        | 516.990        | 511.651        | 511.986        | 511.315        | K[13] |
| G[13] | 400.583        | 474.292        | 468.952        | 469.288        | 468.616        | G[12] |
| G[14] | 419.590        | 455.285        | 449.945        | 450.281        | 449.609        | G[11] |
| A[15] | 443.269        | 436.277        | 430.938        | 431.274        | 430.602        | A[10] |
| K[16] | 485.967        | 412.598        | 407.259        | 407.595        | 406.923        | K[9]  |
| R[17] | 538.001        | 369.900        | 364.561        | 364.896        | 364.225        | R[8]  |
| H[18] | 583.687        | 317.866        | 312.527        | 312.863        | 312.191        | H[7]  |
| R[19] | 635.721        | 272.180        | 266.841        | 267.176        | 266.505        | R[6]  |
| K[20] | 687.763        | 220.140        | 214.801        | 215.143        | 214.471        | K[5]  |
| V[21] | 720.786        | 168.104        | 162.765        | 163.101        | 162.429        | V[4]  |
| L[22] | 758.480        | 135.082        | 129.742        | 130.078        | 129.406        | L[3]  |
| R[23] | <b>810.514</b> | 97.387         | 92.047         | 92.383         | 91.711         | R[2]  |
| D[24] | <b>848.856</b> | 45.353         | 40.014         | 40.349         | 39.678         | D[1]  |



# sp | P43274 | H14\_MOUSE

KTPVKKKARK <sup>Methyl</sup> AAGGAKRKTSGPPVSE  
14.02

- ▶ fragmentation table for charge state 1+
- ▶ specType=etd
- ▶ score=62.39
- ▶ F121509.dat
- ▶ query=q44834.p1
- ▶ precursor=673.658630
- ▶ chargePrecursor=4
- ▶ itol=0.7

| AA   | c               | y        | z+1             | z+2            | z        | AA   |
|------|-----------------|----------|-----------------|----------------|----------|------|
| R 1  | 146.129         | 2091.610 | 2679.592        | 2676.600       | 2674.584 | R 26 |
| T 2  | 247.176         | 2563.515 | 2547.497        | 2548.505       | 2546.489 | T 25 |
| P 3  | 344.229         | 2462.468 | 2440.449        | 2447.457       | 2445.441 | P 24 |
| V 4  | 443.298         | 2395.415 | 2349.396        | 2350.404       | 2348.388 | V 23 |
| K 5  | <b>571.393</b>  | 2366.347 | 2290.328        | 2291.336       | 2289.320 | K 22 |
| K 6  | <b>699.488</b>  | 2138.292 | 2122.273        | 2123.281       | 2121.265 | K 21 |
| K 7  | <b>827.583</b>  | 2010.157 | 1994.138        | 1995.146       | 1993.130 | K 20 |
| A 8  | <b>898.620</b>  | 1882.062 | 1866.043        | 1867.051       | 1865.035 | A 19 |
| R 9  | <b>1054.721</b> | 1811.025 | 1795.006        | 1796.014       | 1793.998 | R 18 |
| K 10 | <b>1196.831</b> | 1654.923 | 1638.905        | 1639.913       | 1637.897 | K 17 |
| A 11 | 1267.868        | 1512.813 | <b>1496.794</b> | 1497.802       | 1495.786 | A 16 |
| A 12 | 1338.906        | 1444.776 | 1425.757        | 1426.765       | 1424.749 | A 15 |
| G 13 | 1395.927        | 1370.739 | 1354.720        | 1355.728       | 1353.712 | G 14 |
| G 14 | 1452.949        | 1313.717 | <b>1297.698</b> | 1298.706       | 1296.691 | G 13 |
| A 15 | 1523.986        | 1256.695 | 1240.677        | 1241.685       | 1239.669 | A 12 |
| K 16 | 1652.081        | 1185.659 | <b>1169.640</b> | 1170.648       | 1168.632 | K 11 |
| R 17 | 1808.182        | 1057.564 | <b>1041.545</b> | 1042.553       | 1040.537 | R 10 |
| K 18 | 1936.277        | 991.461  | 985.444         | <b>986.452</b> | 984.436  | K 9  |
| T 19 | 2037.324        | 913.369  | 907.350         | 908.357        | 906.341  | T 9  |
| S 20 | 2124.356        | 872.320  | 856.301         | 857.309        | 855.293  | S 7  |
| G 21 | 2181.378        | 885.288  | 869.269         | 870.277        | 868.261  | G 6  |
| P 22 | 2276.431        | 826.266  | 812.246         | 813.254        | 811.240  | P 5  |
| P 23 | 2375.483        | 831.214  | 815.195         | 816.203        | 814.187  | P 4  |
| V 24 | 2474.532        | 804.181  | 808.162         | 809.170        | 807.154  | V 3  |
| S 25 | 2513.584        | 735.092  | 719.074         | 720.082        | 718.066  | S 3  |
| E 26 | 2680.626        | 148.060  | 132.042         | 133.050        | 131.034  | E 1  |

# sp | P43274 | H14\_MOUSE

KTPVKKKARK <sup>Methyl</sup> AAGGAKRKTSGPPVSE  
14.02

- ▶ fragmentation table for charge state 2+
- ▶ specType=etd
- ▶ score=62.39
- ▶ F121509.dat
- ▶ query=q44834.p1
- ▶ precursor=673.658630
- ▶ chargePrecursor=4
- ▶ itol=0.7

| AA     | c               | y               | z+1             | z+2             | z               | AA     |
|--------|-----------------|-----------------|-----------------|-----------------|-----------------|--------|
| R   1  | 73.508          | 1346.939        | <b>1338.299</b> | <b>1338.803</b> | <b>1337.796</b> | R   20 |
| T   2  | 134.002         | 1282.261        | <b>1274.252</b> | <b>1274.756</b> |                 | T   25 |
| F   3  | 178.618         | 1931.738        | 1223.728        | 1224.232        | 1223.228        | F   24 |
| V   4  | 222.152         | 1183.211        | 1175.202        | 1175.706        | 1174.696        | V   23 |
| K   5  | 266.200         | 1133.679        | <b>1125.668</b> | <b>1126.171</b> | <b>1125.164</b> | K   22 |
| K   6  | 309.237         | <b>1069.629</b> | <b>1061.620</b> | <b>1062.124</b> |                 | K   21 |
| K   7  | 414.295         | <b>1005.582</b> | <b>997.573</b>  | <b>998.077</b>  | 997.067         | K   20 |
| A   8  | 449.813         | 941.534         | 933.525         | 934.029         | 933.021         | A   19 |
| R   9  | 527.804         | 906.016         | <b>898.007</b>  | <b>898.510</b>  | 897.503         | R   18 |
| K   10 | <b>598.919</b>  | 827.965         | <b>819.956</b>  | <b>820.460</b>  | 819.452         | K   17 |
| A   11 | 634.438         | 756.910         | <b>748.901</b>  | <b>748.405</b>  | 748.397         | A   16 |
| A   12 | <b>669.956</b>  | 723.366         | 715.357         | 715.861         | 714.854         | A   15 |
| G   13 | <b>698.467</b>  | 685.873         | 677.864         | 678.368         | 677.361         | G   14 |
| G   14 | <b>726.978</b>  | 657.362         | 649.353         | 649.857         | 648.849         | G   13 |
| A   15 | <b>762.496</b>  | 628.852         | 620.842         | 621.346         | 620.338         | A   12 |
| K   16 | <b>826.544</b>  | 593.333         | 585.324         | 585.827         | 584.820         | K   11 |
| R   17 | <b>904.594</b>  | 529.285         | 521.276         | 521.780         | 520.772         | R   10 |
| R   18 | <b>968.642</b>  | 453.235         | 445.226         | 445.729         | 444.722         | R   9  |
| T   19 | <b>1019.166</b> | 387.187         | 379.178         | 379.682         | 378.674         | T   8  |
| S   20 | 1062.682        | 336.664         | 328.654         | 329.158         | 328.150         | S   7  |
| G   21 | 1091.193        | 293.149         | 285.138         | 285.642         | 284.634         | G   6  |
| F   22 | 1139.719        | 264.637         | 256.627         | 257.131         | 256.124         | F   5  |
| F   23 | 1189.248        | 216.110         | 208.100         | 208.604         | 207.597         | F   4  |
| V   24 | <b>1237.780</b> | 167.584         | 159.573         | 160.079         | 159.071         | V   3  |
| S   25 | 1281.296        | 118.050         | 110.041         | 110.544         | 109.537         | S   2  |
| E   26 | 1345.817        | 74.534          | 66.524          | 67.028          | 66.021          | E   1  |

# sp | P43274 | H14\_MOUSE

KTPVKKKARK <sup>Methyl</sup> AAGGAKRKTSGPPVSE  
14.02

- ▶ fragmentation table for charge state 3+
- ▶ specType=etd
- ▶ score=62.39
- ▶ F121509.dat
- ▶ query=q44834\_p1
- ▶ precursor=673.658630
- ▶ chargePrecursor=4
- ▶ itol=0.7

| AA    | c              | y              | z+1            | z+2            | z              | AA    |
|-------|----------------|----------------|----------------|----------------|----------------|-------|
| R[1]  | 49.381         | <b>897.875</b> | <b>892.535</b> | <b>892.871</b> | <b>892.199</b> | R[26] |
| F[2]  | 83.064         | <b>855.177</b> | <b>849.837</b> | <b>850.173</b> | <b>849.501</b> | F[25] |
| F[3]  | 113.815        | 821.498        | 816.153        | 816.890        | 815.819        | F[24] |
| V[4]  | 148.437        | 789.143        | 783.804        | 784.140        | 783.468        | V[23] |
| K[5]  | 191.136        | 756.120        | 750.781        | 751.117        | 750.445        | K[22] |
| K[6]  | 233.834        | 713.422        | 708.082        | 708.418        | 707.747        | K[21] |
| K[7]  | 276.532        | 670.724        | 665.384        | 665.720        | 665.048        | K[20] |
| A[8]  | 300.211        | 628.025        | 622.685        | 623.022        | 622.350        | A[19] |
| R[9]  | 352.245        | 604.346        | <b>599.007</b> | <b>599.343</b> | <b>598.671</b> | R[18] |
| K[10] | 399.615        | 552.313        | 546.973        | 547.309        | 546.637        | K[17] |
| A[11] | 423.294        | 504.942        | 499.603        | 499.939        | 499.267        | A[16] |
| A[12] | 448.973        | 481.263        | 475.923        | 476.260        | 475.588        | A[15] |
| G[13] | 465.591        | 457.564        | 452.245        | 452.581        | 451.909        | G[14] |
| G[14] | 484.988        | 438.577        | 433.238        | 433.574        | 432.902        | G[13] |
| A[15] | 508.667        | 419.570        | 414.231        | 414.566        | 413.895        | A[12] |
| K[16] | 551.365        | 395.891        | 390.551        | 390.887        | 390.216        | K[11] |
| R[17] | 603.899        | 353.193        | 347.853        | 348.189        | 347.517        | R[10] |
| K[18] | 646.097        | 301.159        | 295.819        | 296.155        | 295.484        | K[9]  |
| T[19] | 679.780        | 258.461        | 253.121        | 253.457        | 252.785        | T[8]  |
| S[20] | 708.790        | 224.778        | 219.439        | 219.775        | 219.103        | S[7]  |
| G[21] | 727.797        | 195.767        | 190.428        | 190.764        | 190.092        | G[6]  |
| P[22] | 769.148        | 176.760        | 171.421        | 171.757        | 171.085        | P[5]  |
| P[23] | <b>792.499</b> | 184.405        | 179.070        | 179.406        | 178.734        | P[4]  |
| V[24] | <b>825.522</b> | 112.058        | 106.719        | 107.055        | 106.383        | V[3]  |
| S[25] | <b>854.533</b> | 79.836         | 74.496         | 74.832         | 74.360         | S[2]  |
| E[26] | 897.547        | 50.025         | 44.685         | 45.021         | 44.349         | E[1]  |

# sp | P62806 | H4\_MOUSE

[Acetyl]SGRGKGGKGLGKGGAKRHR <sup>Methyl</sup>K <sup>Methyl</sup>VLRD  
 14.02 14.02

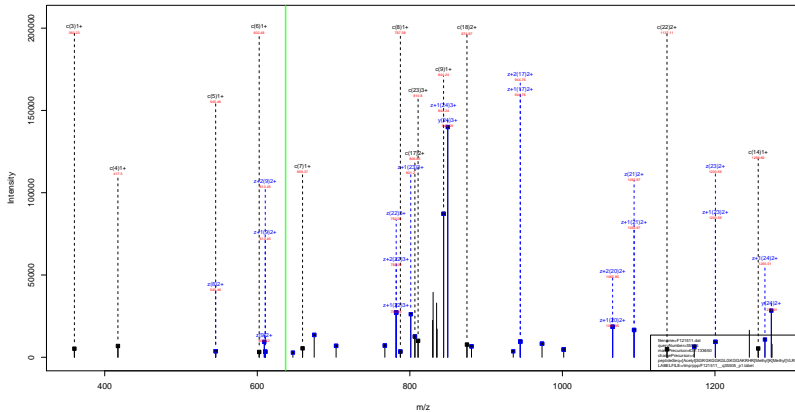



# sp | P62806 | H4\_MOUSE

[Acetyl]SGRGKGGKGLGKGGAKRHR <sup>Methyl</sup> K <sup>Methyl</sup> VLRD  
14.02 14.02

- ▶ fragmentation table for charge state 1+
- ▶ specType=etd
- ▶ score=83.00
- ▶ F121511.dat
- ▶ query=q35505.p1
- ▶ precursor=637.133650
- ▶ chargePrecursor=4
- ▶ itol=0.7

| AA |    | c               | y        | z+1            | z+2      | z        | AA |    |
|----|----|-----------------|----------|----------------|----------|----------|----|----|
| S  | 1  | 147.076         | 2545.502 | 2529.483       | 0.000    | 2528.470 | S  | 24 |
| G  | 2  | 234.998         | 2518.460 | 2492.441       | 0.000    | 2499.433 | G  | 23 |
| R  | 3  | <b>360.199</b>  | 2399.439 | 2383.419       | 2364.427 | 2342.412 | R  | 22 |
| G  | 4  | <b>417.220</b>  | 2203.337 | 2187.318       | 2188.326 | 2186.310 | G  | 21 |
| K  | 5  | <b>545.315</b>  | 2148.310 | 2130.297       | 2131.305 | 2129.289 | K  | 20 |
| G  | 6  | <b>602.337</b>  | 2018.221 | 2002.202       | 2003.210 | 2001.194 | G  | 19 |
| G  | 7  | <b>659.358</b>  | 1961.199 | 1945.180       | 1946.188 | 1944.173 | G  | 18 |
| K  | 8  | <b>707.453</b>  | 1904.178 | 1888.159       | 1889.167 | 1887.151 | K  | 17 |
| G  | 9  | <b>844.475</b>  | 1776.083 | 1760.064       | 1761.072 | 1759.056 | G  | 16 |
| L  | 10 | 937.359         | 1719.961 | 1703.943       | 1704.950 | 1702.935 | L  | 15 |
| G  | 11 | 1014.580        | 1605.977 | 1589.958       | 1590.966 | 1588.951 | G  | 14 |
| K  | 12 | 1142.075        | 1548.950 | 1532.937       | 1533.945 | 1531.929 | K  | 13 |
| G  | 13 | 1199.697        | 1420.861 | 1404.842       | 1405.850 | 1403.834 | G  | 12 |
| G  | 14 | <b>1256.718</b> | 1363.839 | 1347.821       | 1348.828 | 1346.813 | G  | 11 |
| A  | 15 | 1327.755        | 1306.818 | 1290.799       | 1291.807 | 1289.791 | A  | 10 |
| K  | 16 | 1455.850        | 1235.781 | 1219.762       | 1220.770 | 1218.754 | K  | 9  |
| R  | 17 | 1613.894        | 1107.686 | 1091.667       | 1092.675 | 1090.659 | R  | 8  |
| H  | 18 | 1749.010        | 951.582  | <b>935.566</b> | 936.574  | 934.558  | H  | 7  |
| R  | 19 | 1919.127        | 814.520  | 798.507        | 799.515  | 797.499  | R  | 6  |
| K  | 20 | 2061.238        | 644.400  | 628.390        | 629.398  | 627.383  | K  | 5  |
| V  | 21 | 2100.306        | 502.290  | 486.280        | 487.287  | 485.272  | V  | 4  |
| L  | 22 | 2273.390        | 403.230  | 387.211        | 388.219  | 386.203  | L  | 3  |
| R  | 23 | 2420.491        | 290.140  | 274.127        | 275.135  | 273.119  | R  | 2  |
| D  | 24 | 2544.518        | 134.045  | 118.026        | 119.034  | 117.018  | D  | 1  |

# sp | P62806 | H4\_MOUSE

[Acetyl]SGRGKGGKGLGKGGAKRHR <sup>Methyl</sup> K <sup>Methyl</sup> VLRD  
 14.02 14.02

- ▶ fragmentation table for charge state 2+
- ▶ specType=etd
- ▶ score=83.00
- ▶ F121511.dat
- ▶ query=q35505.p1
- ▶ precursor=637.133650
- ▶ chargePrecursor=4
- ▶ itol=0.7

| AA    | c               | y               | z+1             | z+2             | z               | AA    |
|-------|-----------------|-----------------|-----------------|-----------------|-----------------|-------|
| S[1]  | 74.042          | <b>1273.255</b> | <b>1265.245</b> | 0.504           | 1264.741        | S[24] |
| G[2]  | 102.553         | 1208.733        | <b>1200.724</b> | 0.504           | <b>1200.220</b> | G[23] |
| R[3]  | 180.603         | 1180.223        | <b>1172.213</b> | <b>1172.717</b> | 1171.707        | R[22] |
| G[4]  | 259.114         | 1102.172        | <b>1094.163</b> | 1093.667        | <b>1093.659</b> | G[21] |
| K[5]  | 273.153         | 1073.661        | <b>1065.652</b> | <b>1066.156</b> | 1065.148        | K[20] |
| G[6]  | 303.672         | 1009.614        | <b>1001.605</b> | <b>1002.108</b> | <b>1001.101</b> | G[19] |
| G[7]  | 330.183         | 981.103         | <b>973.094</b>  | <b>973.598</b>  | <b>972.590</b>  | G[18] |
| K[8]  | 394.230         | 952.592         | <b>944.583</b>  | <b>945.087</b>  | <b>944.079</b>  | K[17] |
| G[9]  | 422.741         | 888.545         | <b>880.536</b>  | <b>881.040</b>  | 880.032         | G[16] |
| L[10] | 479.293         | 860.036         | 852.027         | 851.529         | 851.521         | L[15] |
| G[11] | 507.794         | 803.482         | 795.473         | 795.977         | 794.970         | G[14] |
| K[12] | 571.841         | 774.982         | <b>766.972</b>  | <b>767.476</b>  | 766.468         | K[13] |
| G[13] | 600.352         | 710.934         | <b>702.925</b>  | <b>703.429</b>  | 702.421         | G[12] |
| G[14] | 628.863         | 682.423         | <b>674.414</b>  | <b>674.918</b>  | 673.910         | G[11] |
| A[15] | 684.381         | 653.913         | 645.903         | <b>646.407</b>  | 645.399         | A[10] |
| R[16] | 728.430         | 618.394         | <b>610.385</b>  | <b>610.889</b>  | <b>609.881</b>  | R[9]  |
| R[17] | <b>806.479</b>  | 554.347         | 546.337         | 546.841         | <b>545.833</b>  | R[6]  |
| H[18] | <b>875.009</b>  | 476.290         | 468.280         | 468.781         | 467.783         | H[7]  |
| R[19] | 968.067         | 407.767         | 399.757         | 400.261         | 399.253         | R[6]  |
| K[20] | 1031.122        | 322.708         | 314.699         | 315.203         | 314.195         | K[5]  |
| V[21] | 1080.669        | 254.653         | 246.643         | 247.147         | 246.140         | V[4]  |
| L[22] | <b>1137.199</b> | 202.119         | 194.109         | 194.613         | 193.605         | L[3]  |
| R[23] | 1215.249        | 145.577         | 137.567         | 138.071         | 137.063         | R[2]  |
| D[24] | 1272.703        | 67.526          | 59.517          | 60.021          | 59.013          | D[1]  |

# sp | P62806 | H4\_MOUSE

[Acetyl]SGRGKGGKGLGKGGAKRHR <sup>Methyl</sup>K <sup>Methyl</sup>VLRD  
14.02 14.02

- ▶ fragmentation table for charge state 3+
- ▶ specType=etd
- ▶ score=83.00
- ▶ F121511.dat
- ▶ query=q35505.p1
- ▶ precursor=637.133650
- ▶ chargePrecursor=4
- ▶ itol=0.7

| AA    | c              | y              | z+1            | z+2            | z              | AA    |
|-------|----------------|----------------|----------------|----------------|----------------|-------|
| S[1]  | 49.697         | <b>849.172</b> | <b>843.833</b> | 0.672          | 843.897        | S[24] |
| G[2]  | 58.704         | <b>806.158</b> | <b>800.818</b> | 0.672          | 800.483        | G[23] |
| R[3]  | 150.738        | <b>787.151</b> | <b>781.811</b> | <b>782.147</b> | <b>781.475</b> | R[22] |
| G[4]  | 139.745        | 735.117        | 729.778        | 730.114        | 729.442        | G[21] |
| K[5]  | 182.443        | 716.110        | 710.770        | 711.106        | 710.435        | K[20] |
| G[6]  | 201.450        | 673.412        | 668.072        | 668.408        | 667.736        | G[19] |
| G[7]  | 220.458        | 654.405        | 649.065        | 649.401        | 648.729        | G[18] |
| K[8]  | 263.156        | 635.397        | 630.058        | 630.394        | 629.722        | K[17] |
| G[9]  | 282.163        | 592.699        | 587.360        | 587.696        | 587.024        | G[16] |
| L[10] | 319.658        | 573.692        | 568.352        | 568.688        | 568.016        | L[15] |
| G[11] | 338.665        | 535.997        | 530.658        | 530.994        | 530.322        | G[14] |
| K[12] | 381.563        | 516.990        | 511.651        | 511.986        | 511.315        | K[13] |
| G[13] | 400.570        | 474.292        | 468.952        | 469.288        | 468.616        | G[12] |
| G[14] | 419.578        | 455.285        | 449.945        | 450.281        | 449.609        | G[11] |
| A[15] | 443.257        | 436.277        | 430.938        | 431.274        | 430.602        | A[10] |
| K[16] | 485.955        | 412.598        | 407.259        | 407.595        | 406.923        | K[9]  |
| R[17] | 537.989        | 369.900        | 364.561        | 364.896        | 364.225        | R[8]  |
| H[18] | 583.675        | 317.866        | 312.527        | 312.863        | 312.191        | H[7]  |
| R[19] | 649.381        | 272.180        | 266.841        | 267.176        | 266.505        | R[6]  |
| K[20] | 667.751        | 215.475        | 210.136        | 210.471        | 209.799        | K[5]  |
| V[21] | 720.774        | 168.104        | 162.765        | 163.101        | 162.429        | V[4]  |
| L[22] | 758.468        | 135.082        | 129.742        | 130.078        | 129.406        | L[3]  |
| R[23] | <b>810.502</b> | 97.387         | 92.047         | 92.383         | 91.711         | R[2]  |
| D[24] | 848.844        | 45.353         | 40.014         | 40.349         | 39.678         | D[1]  |

# sp | P62806 | H4\_MOUSE

[Acetyl]SGRGKGGKGLGKGGAK (Methyl)<sub>(14.02)</sub> RHRKVLR (Methyl)<sub>(14.02)</sub> D

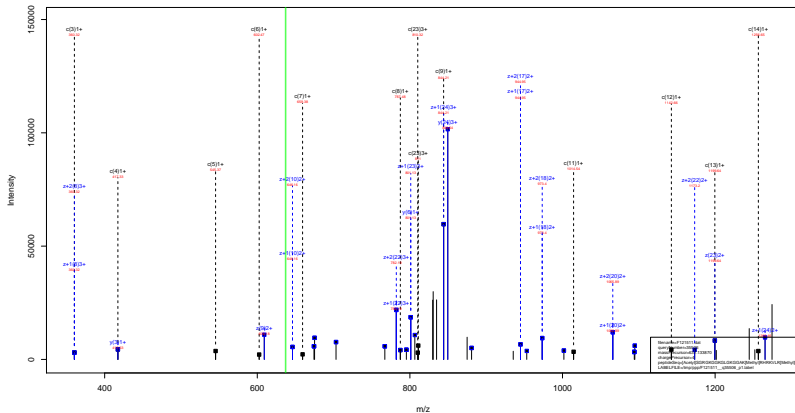

# sp | P62806 | H4\_MOUSE

[Acetyl]SGRGKGGKGLGKGGAK<sup>(Methyl)</sup> RHRKVLRL<sup>(Methyl)</sup> D<sup>(14.02)</sup>

- ▶ fragmentation table for charge state 1+
- ▶ specType=etd
- ▶ score=81.34
- ▶ F121511.dat
- ▶ query=q35506.p1
- ▶ precursor=637.133870
- ▶ chargePrecursor=4
- ▶ itol=0.7

| AA | c  | y               | z+1             | z+2      | z        | AA       |       |
|----|----|-----------------|-----------------|----------|----------|----------|-------|
| S  | 1  | 147.076         | 2545.502        | 2529.463 | 0.000    | 2528.478 | S[24] |
| G  | 2  | 204.998         | 2416.460        | 2400.441 | 0.000    | 2399.433 | G[23] |
| R  | 3  | <b>360.190</b>  | 2389.430        | 2343.419 | 2344.427 | 2342.412 | R[22] |
| G  | 4  | <b>417.220</b>  | 2291.337        | 2187.318 | 2189.326 | 2188.310 | G[21] |
| K  | 5  | <b>545.315</b>  | 2148.310        | 2130.297 | 2131.305 | 2129.289 | K[20] |
| G  | 6  | <b>602.337</b>  | 2018.221        | 2002.202 | 2003.210 | 2001.194 | G[19] |
| G  | 7  | <b>659.358</b>  | 1961.199        | 1945.180 | 1946.188 | 1944.173 | G[18] |
| K  | 8  | <b>787.453</b>  | 1904.178        | 1888.159 | 1889.167 | 1887.151 | K[17] |
| G  | 9  | <b>844.475</b>  | 1775.083        | 1760.064 | 1761.072 | 1759.056 | G[16] |
| L  | 10 | 837.559         | 1719.061        | 1703.043 | 1704.050 | 1702.035 | L[15] |
| G  | 11 | <b>1014.580</b> | 1605.977        | 1589.958 | 1590.966 | 1588.951 | G[14] |
| K  | 12 | <b>1142.675</b> | 1548.956        | 1532.937 | 1533.945 | 1531.929 | K[13] |
| G  | 13 | <b>1199.697</b> | 1429.861        | 1404.842 | 1405.850 | 1403.834 | G[12] |
| G  | 14 | <b>1256.718</b> | 1363.839        | 1347.821 | 1348.828 | 1346.813 | G[11] |
| A  | 15 | 1327.755        | 1306.818        | 1290.799 | 1291.807 | 1289.791 | A[10] |
| K  | 16 | 1469.868        | 1248.781        | 1219.762 | 1220.770 | 1218.754 | K[9]  |
| R  | 17 | 1625.987        | <b>1093.670</b> | 1077.651 | 1078.659 | 1076.644 | R[8]  |
| H  | 18 | 1763.026        | 937.559         | 921.550  | 922.558  | 920.542  | H[7]  |
| R  | 19 | 1919.127        | <b>800.510</b>  | 784.491  | 785.499  | 783.484  | R[6]  |
| K  | 20 | 2047.222        | 644.409         | 628.390  | 629.398  | 627.383  | K[5]  |
| V  | 21 | 2146.290        | 518.314         | 500.295  | 501.303  | 499.287  | V[4]  |
| L  | 22 | 2250.374        | <b>417.246</b>  | 401.227  | 402.235  | 400.219  | L[3]  |
| R  | 23 | 2420.491        | 304.163         | 288.144  | 289.151  | 287.135  | R[2]  |
| D  | 24 | 2544.518        | 134.045         | 118.026  | 119.034  | 117.018  | D[1]  |

# sp | P62806 | H4\_MOUSE

[Acetyl]SGRGKGGKGLGKGGAK<sup>(Methyl)</sup> RHRKVL R<sup>(Methyl)</sup> D<sup>(14.02)</sup> (14.02)

- ▶ fragmentation table for charge state 2+
- ▶ specType=etd
- ▶ score=81.34
- ▶ F121511.dat
- ▶ query=q35506\_p1
- ▶ precursor=637.133870
- ▶ chargePrecursor=4
- ▶ itol=0.7

| AA    | c        | y              | z+1             | z+2             | z               | AA    |
|-------|----------|----------------|-----------------|-----------------|-----------------|-------|
| S[1]  | 74.042   | 1273.255       | <b>1765.245</b> | 0.504           | 1304.741        | S[24] |
| G[2]  | 102.553  | 1208.733       | 1200.724        | 0.504           | <b>1200.220</b> | G[23] |
| R[3]  | 180.003  | 1180.223       | 1372.213        | <b>1172.717</b> | 1171.209        | R[22] |
| G[4]  | 209.114  | 1102.272       | <b>1094.163</b> | <b>1094.607</b> | <b>1093.659</b> | G[21] |
| K[5]  | 273.163  | 1073.661       | <b>1065.652</b> | <b>1064.156</b> | 1065.148        | K[20] |
| G[6]  | 301.672  | 1009.614       | <b>1001.605</b> | <b>1002.108</b> | 1001.101        | G[19] |
| G[7]  | 330.183  | 961.103        | <b>973.094</b>  | <b>973.598</b>  | 972.590         | G[18] |
| K[8]  | 394.230  | <b>952.592</b> | <b>944.583</b>  | <b>945.087</b>  | 944.079         | K[17] |
| G[9]  | 422.741  | 888.545        | <b>880.536</b>  | <b>881.040</b>  | 880.032         | G[16] |
| L[10] | 439.253  | 860.034        | 862.525         | 863.529         | 861.521         | L[15] |
| G[11] | 507.704  | 803.492        | <b>795.483</b>  | <b>795.987</b>  | <b>794.979</b>  | G[14] |
| R[12] | 571.841  | 774.982        | <b>766.972</b>  | <b>767.476</b>  | <b>766.468</b>  | R[13] |
| G[13] | 600.352  | 710.934        | <b>702.925</b>  | <b>703.429</b>  | 702.421         | G[12] |
| G[14] | 628.863  | 682.423        | <b>674.414</b>  | <b>674.918</b>  | <b>673.910</b>  | G[11] |
| A[15] | 664.381  | 653.913        | <b>645.903</b>  | <b>646.407</b>  | 645.399         | A[10] |
| R[16] | 728.437  | 618.364        | 610.355         | 611.359         | <b>609.351</b>  | R[9]  |
| R[17] | 813.487  | 547.339        | 539.329         | 539.833         | 538.825         | R[8]  |
| H[18] | 882.017  | 466.288        | 461.279         | 461.783         | 460.775         | H[7]  |
| R[19] | 960.067  | 400.759        | 392.749         | 393.253         | 392.245         | R[6]  |
| R[20] | 1024.115 | 322.708        | 314.699         | 315.203         | 314.195         | R[5]  |
| V[21] | 1073.649 | 258.661        | 250.651         | 251.155         | 250.147         | V[4]  |
| L[22] | 1130.191 | 209.126        | 201.117         | 201.621         | 200.613         | L[3]  |
| D[23] | 1215.249 | 152.084        | 144.074         | 145.078         | 144.071         | D[2]  |
| D[24] | 1272.703 | 87.526         | 89.517          | 90.021          | 89.013          | D[1]  |

# sp | P62806 | H4\_MOUSE

[Acetyl]SGRGKGGKGLGKGGAK<sup>(Methyl)</sup> RHRKVL R<sup>(Methyl)</sup> D<sup>(14.02)</sup>

- ▶ fragmentation table for charge state 3+
- ▶ specType=etd
- ▶ score=81.34
- ▶ F121511.dat
- ▶ query=q35506.p1
- ▶ precursor=637.133870
- ▶ chargePrecursor=4
- ▶ itol=0.7

| AA    | c              | y              | z+1            | z+2            | z              | AA    |
|-------|----------------|----------------|----------------|----------------|----------------|-------|
| S[1]  | 69.697         | <b>849.172</b> | <b>843.833</b> | 0.672          | 843.407        | S[24] |
| G[2]  | 68.704         | <b>806.156</b> | <b>800.818</b> | 0.672          | <b>800.483</b> | G[23] |
| R[3]  | 120.738        | <b>787.151</b> | <b>781.811</b> | <b>782.147</b> | 781.475        | R[22] |
| G[4]  | 139.745        | 735.117        | 729.770        | 730.114        | 729.442        | G[21] |
| K[5]  | 182.443        | 718.110        | 710.770        | 711.106        | 710.435        | K[20] |
| G[6]  | 201.450        | 673.412        | 668.072        | 666.408        | 667.736        | G[19] |
| G[7]  | 220.458        | 654.405        | 649.065        | 649.401        | 648.729        | G[18] |
| K[8]  | 263.156        | 635.397        | 630.058        | 630.394        | 629.722        | K[17] |
| G[9]  | 282.163        | 592.699        | 587.360        | 587.695        | 587.024        | G[16] |
| L[10] | 319.858        | 571.692        | 565.352        | 565.688        | 566.016        | L[15] |
| G[11] | 338.865        | 535.991        | 530.651        | 530.984        | 530.322        | G[14] |
| K[12] | 381.563        | 516.980        | 511.641        | 511.986        | 511.315        | K[13] |
| G[13] | 400.570        | 474.282        | 468.942        | 469.288        | 468.616        | G[12] |
| G[14] | 419.578        | 455.285        | 449.945        | 450.281        | 449.609        | G[11] |
| A[15] | 443.297        | 436.277        | 430.938        | 431.274        | 430.602        | A[10] |
| K[16] | 490.627        | 412.588        | 407.250        | 407.595        | 406.923        | K[9]  |
| R[17] | 542.661        | 395.228        | <b>359.889</b> | <b>360.225</b> | 359.553        | R[8]  |
| H[18] | 588.347        | 313.195        | 307.853        | 308.191        | 307.519        | H[7]  |
| R[19] | 640.381        | 287.508        | 282.169        | 282.505        | 281.833        | R[6]  |
| K[20] | 683.078        | 215.875        | 210.535        | 210.871        | 209.999        | K[5]  |
| V[21] | 716.102        | 172.776        | 167.437        | 167.773        | 167.101        | V[4]  |
| L[22] | 753.796        | 139.753        | 134.414        | 134.750        | 134.078        | L[3]  |
| R[23] | <b>810.502</b> | 102.059        | 96.719         | 97.055         | 96.383         | R[2]  |
| D[24] | 848.844        | 45.353         | 40.014         | 40.349         | 39.678         | D[1]  |





# sp | P62806 | H4\_MOUSE

[Acetyl]SGRGKGGKGLGKGGAKRHRKVL R Trimethyl D  
42.05

- ▶ fragmentation table for charge state 1+
- ▶ specType=etd
- ▶ score=71.29
- ▶ F121511.dat
- ▶ query=q35615.p1
- ▶ precursor=640.636900
- ▶ chargePrecursor=4
- ▶ itol=0.7

| AA |    | c               | y        | z+1      | z+2      | z        | AA |    |
|----|----|-----------------|----------|----------|----------|----------|----|----|
| S  | 1  | 147.076         | 2559.518 | 2543.499 | 0.000    | 2542.491 | S  | 24 |
| G  | 2  | 204.098         | 2630.470 | 2414.457 | 0.000    | 2413.449 | G  | 23 |
| R  | 3  | 300.190         | 2373.454 | 2357.435 | 2356.443 | 2356.427 | R  | 22 |
| G  | 4  | <b>417.220</b>  | 2217.353 | 2201.334 | 2202.342 | 2200.325 | G  | 21 |
| K  | 5  | 545.315         | 2160.331 | 2144.313 | 2145.320 | 2143.305 | K  | 20 |
| G  | 6  | 602.337         | 2032.238 | 2016.218 | 2017.225 | 2015.210 | G  | 19 |
| G  | 7  | 659.358         | 1975.215 | 1959.196 | 1960.204 | 1958.188 | G  | 18 |
| K  | 8  | <b>787.453</b>  | 1918.193 | 1902.175 | 1903.182 | 1901.167 | K  | 17 |
| G  | 9  | 844.475         | 1790.088 | 1774.068 | 1775.087 | 1773.072 | G  | 16 |
| L  | 10 | 897.559         | 1733.077 | 1717.058 | 1718.066 | 1716.050 | L  | 15 |
| G  | 11 | 1014.580        | 1615.983 | 1603.974 | 1604.982 | 1602.965 | G  | 14 |
| K  | 12 | 1142.675        | 1562.971 | 1546.953 | 1547.960 | 1545.945 | K  | 13 |
| G  | 13 | <b>1199.697</b> | 1434.876 | 1418.858 | 1419.866 | 1417.850 | G  | 12 |
| G  | 14 | 1256.718        | 1377.855 | 1361.836 | 1362.844 | 1360.828 | G  | 11 |
| A  | 15 | 1327.795        | 1320.833 | 1304.815 | 1305.823 | 1303.807 | A  | 10 |
| K  | 16 | 1455.850        | 1249.780 | 1233.778 | 1234.785 | 1232.770 | K  | 9  |
| R  | 17 | 1613.894        | 1129.701 | 1105.683 | 1106.691 | 1104.675 | R  | 8  |
| H  | 18 | 1749.010        | 995.620  | 949.582  | 950.589  | 948.574  | H  | 7  |
| R  | 19 | 1905.111        | 828.541  | 812.523  | 813.530  | 811.515  | R  | 6  |
| K  | 20 | 2033.206        | 672.440  | 656.422  | 657.429  | 655.414  | K  | 5  |
| V  | 21 | 2132.275        | 544.345  | 528.327  | 529.334  | 527.319  | V  | 4  |
| L  | 22 | 2245.359        | 445.277  | 429.258  | 430.266  | 428.250  | L  | 3  |
| R  | 23 | 2443.507        | 332.193  | 316.174  | 317.182  | 315.166  | R  | 2  |
| D  | 24 | 2558.534        | 134.045  | 118.026  | 119.034  | 117.018  | D  | 1  |

# sp | P62806 | H4\_MOUSE

[Acetyl]SGRGKGGKGLGKGGAKRHRKVL R Trimethyl D  
42.05

- ▶ fragmentation table for charge state 2+
- ▶ specType=etd
- ▶ score=71.29
- ▶ F121511.dat
- ▶ query=q35615.p1
- ▶ precursor=640.636900
- ▶ chargePrecursor=4
- ▶ itol=0.7

| AA | c  | y              | z+1             | z+2             | z               | AA              |       |
|----|----|----------------|-----------------|-----------------|-----------------|-----------------|-------|
| S  | 1  | 74.049         | <b>1280.263</b> | <b>1272.253</b> | 0.504           | 1271.749        | S[24] |
| G  | 2  | 102.553        | 1215.741        | <b>1207.732</b> | 0.504           | 1207.228        | G[23] |
| R  | 3  | 180.053        | 1187.231        | <b>1179.221</b> | <b>1179.725</b> | 1178.717        | R[22] |
| G  | 4  | 269.118        | 1109.189        | <b>1101.171</b> | <b>1101.675</b> | <b>1100.667</b> | G[21] |
| K  | 5  | 273.151        | 1080.689        | <b>1072.660</b> | <b>1073.164</b> | <b>1072.156</b> | K[20] |
| G  | 6  | 301.879        | 1016.622        | 1008.612        | 1009.116        | 1008.108        | G[19] |
| G  | 7  | 330.183        | 988.111         | 980.100         | <b>980.606</b>  | 979.596         | G[18] |
| K  | 8  | 394.230        | 959.600         | <b>951.591</b>  | <b>952.095</b>  | 951.087         | K[17] |
| G  | 9  | 422.741        | 895.553         | <b>887.543</b>  | <b>888.047</b>  | 887.040         | G[16] |
| L  | 10 | 479.263        | 897.062         | <b>859.033</b>  | <b>859.537</b>  | <b>858.529</b>  | L[15] |
| G  | 11 | 507.794        | 810.500         | 802.491         | 802.995         | 801.987         | G[14] |
| K  | 12 | 571.841        | 781.989         | <b>773.980</b>  | <b>774.484</b>  | 773.476         | K[13] |
| G  | 13 | 600.352        | 717.942         | 709.932         | <b>710.436</b>  | 709.429         | G[12] |
| G  | 14 | 628.863        | 689.431         | <b>681.422</b>  | <b>681.926</b>  | 680.918         | G[11] |
| A  | 15 | 668.382        | 660.920         | 652.911         | 653.415         | 652.407         | A[10] |
| K  | 16 | 728.429        | 626.868         | 617.860         | 618.364         | 617.356         | K[9]  |
| R  | 17 | <b>806.479</b> | 561.354         | 553.345         | 553.849         | 552.841         | R[8]  |
| H  | 18 | 875.009        | 483.304         | 475.294         | 475.798         | 474.791         | H[7]  |
| R  | 19 | 953.059        | 414.776         | 406.766         | 407.269         | 406.261         | R[6]  |
| K  | 20 | 1017.107       | 336.724         | 328.714         | 329.218         | 328.211         | K[5]  |
| V  | 21 | 1066.641       | 272.676         | 264.667         | 265.171         | 264.163         | V[4]  |
| L  | 22 | 1123.183       | 219.142         | 211.131         | 211.637         | 210.629         | L[3]  |
| R  | 23 | 1222.259       | 166.600         | 158.591         | 159.095         | 158.087         | R[2]  |
| D  | 24 | 1279.771       | 67.526          | 59.517          | 60.021          | 59.013          | D[1]  |

# sp | P62806 | H4\_MOUSE

[Acetyl]SGRGKGGKGLGKGGAKRHRKVL R Trimethyl D  
42.05

- ▶ fragmentation table for charge state 3+
- ▶ specType=etd
- ▶ score=71.29
- ▶ F121511.dat
- ▶ query=q35615.p1
- ▶ precursor=640.636900
- ▶ chargePrecursor=4
- ▶ itol=0.7

| AA    | c       | y              | z+1            | z+2            | z              | AA    |
|-------|---------|----------------|----------------|----------------|----------------|-------|
| S[1]  | 49.697  | <b>853.844</b> | <b>848.505</b> | 0.672          | 848.169        | S[24] |
| G[2]  | 68.704  | 810.830        | <b>805.490</b> | 0.672          | <b>805.154</b> | G[23] |
| R[3]  | 120.738 | 791.823        | <b>786.483</b> | <b>786.819</b> | <b>786.147</b> | R[22] |
| G[4]  | 139.745 | 739.789        | 734.450        | 734.785        | 734.114        | G[21] |
| K[5]  | 182.443 | 720.782        | 715.442        | 715.778        | 715.106        | K[20] |
| G[6]  | 201.450 | 678.084        | 672.744        | 673.080        | 672.408        | G[19] |
| G[7]  | 220.458 | 659.076        | 653.737        | 654.073        | 653.401        | G[18] |
| K[8]  | 263.156 | 640.069        | 634.730        | 635.066        | 634.394        | K[17] |
| G[9]  | 282.163 | 597.371        | 592.031        | 592.367        | 591.695        | G[16] |
| L[10] | 319.858 | 578.364        | 573.024        | 573.360        | 572.688        | L[15] |
| G[11] | 338.865 | 540.669        | 535.330        | 535.666        | 534.994        | G[14] |
| K[12] | 381.563 | 521.662        | 516.322        | 516.658        | 515.986        | K[13] |
| G[13] | 400.570 | 478.964        | 473.624        | 473.960        | 473.288        | G[12] |
| G[14] | 419.578 | 459.957        | 454.617        | 454.953        | 454.281        | G[11] |
| A[15] | 443.257 | 440.949        | 435.610        | 435.946        | 435.274        | A[10] |
| K[16] | 485.955 | <b>417.270</b> | 411.931        | 412.267        | 411.595        | K[9]  |
| R[17] | 537.989 | 374.572        | 369.232        | 369.568        | 368.896        | R[8]  |
| H[18] | 583.675 | 322.538        | 317.199        | 317.535        | 316.863        | H[7]  |
| R[19] | 635.769 | 276.852        | 271.512        | 271.848        | 271.176        | R[6]  |
| K[20] | 678.467 | 224.818        | 219.478        | 219.815        | 219.143        | K[5]  |
| V[21] | 711.438 | 182.120        | 176.780        | 177.116        | 176.444        | V[4]  |
| L[22] | 749.124 | 149.097        | 143.758        | 144.094        | 143.422        | L[3]  |
| R[23] | 815.174 | 111.402        | 106.063        | 106.399        | 105.727        | R[2]  |
| D[24] | 853.516 | 45.353         | 40.014         | 40.349         | 39.678         | D[1]  |

# sp | P62806 | H4\_MOUSE

SGR<sup>Trimethyl</sup><sub>42.05</sub> GKGGKGLGKGGAKRHRK<sup>(Methyl)</sup><sub>(14.02)</sub> VLR<sup>(Dimethyl)</sup><sub>(28.03)</sub> D

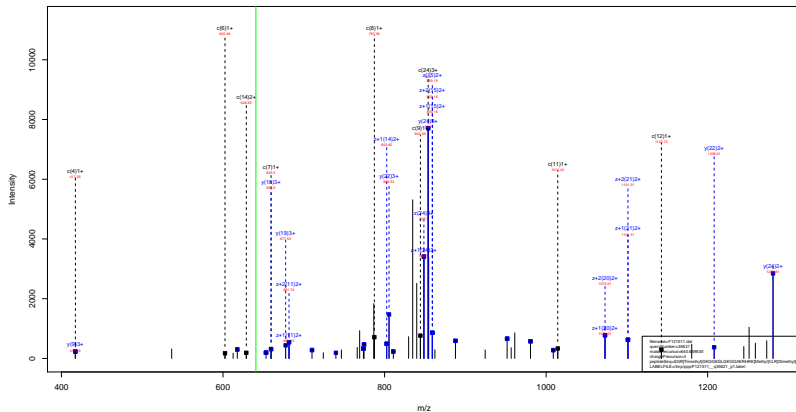

# sp | P62806 | H4\_MOUSE

SGR<sup>Trimethyl</sup><sub>42.05</sub> GKGGKGLGKGGAKRHRK<sup>(Methyl)</sup><sub>(14.02)</sub> VLR<sup>(Dimethyl)</sup><sub>(28.03)</sub> D

- ▶ fragmentation table for charge state 1+
- ▶ specType=etd
- ▶ score=68.66
- ▶ F121511.dat
- ▶ query=q35621.p1
- ▶ precursor=640.639830
- ▶ chargePrecursor=4
- ▶ itol=0.7

| AA | c               | y        | z+1      | z+2      | z              | AA              |
|----|-----------------|----------|----------|----------|----------------|-----------------|
| S  | 105.066         | 2599.554 | 2543.536 | 0.000    | 2542.528       | S <sub>24</sub> |
| G  | 162.087         | 2472.522 | 2456.503 | 0.000    | 2455.496       | G <sub>23</sub> |
| R  | 209.276         | 2415.501 | 2399.482 | 2402.460 | 2398.474       | R <sub>22</sub> |
| G  | <b>417.257</b>  | 2217.351 | 2201.334 | 2202.342 | 2200.326       | G <sub>21</sub> |
| K  | 545.352         | 2160.331 | 2144.313 | 2145.320 | 2143.305       | K <sub>20</sub> |
| G  | <b>602.373</b>  | 2032.236 | 2016.218 | 2017.225 | 2015.210       | G <sub>19</sub> |
| G  | <b>659.395</b>  | 1975.215 | 1959.196 | 1960.204 | 1958.188       | G <sub>18</sub> |
| K  | <b>787.490</b>  | 1918.193 | 1902.175 | 1903.182 | 1901.167       | K <sub>17</sub> |
| G  | <b>844.511</b>  | 1790.088 | 1774.080 | 1775.087 | 1773.072       | G <sub>16</sub> |
| L  | 877.595         | 1733.077 | 1717.059 | 1718.066 | 1716.050       | L <sub>15</sub> |
| G  | <b>1014.617</b> | 1610.991 | 1603.974 | 1604.982 | 1602.966       | G <sub>14</sub> |
| K  | <b>1142.712</b> | 1562.971 | 1546.953 | 1547.960 | 1545.945       | K <sub>13</sub> |
| G  | 1199.733        | 1434.876 | 1418.858 | 1419.866 | 1417.850       | G <sub>12</sub> |
| G  | 1296.755        | 1377.855 | 1361.836 | 1362.844 | 1360.828       | G <sub>11</sub> |
| A  | 1327.792        | 1320.833 | 1304.815 | 1305.823 | 1303.807       | A <sub>10</sub> |
| K  | 1455.887        | 1249.796 | 1233.778 | 1234.785 | 1232.770       | K <sub>9</sub>  |
| R  | 1611.988        | 1121.703 | 1105.683 | 1106.691 | 1104.675       | R <sub>8</sub>  |
| H  | 1749.047        | 995.600  | 989.582  | 990.589  | 988.574        | H <sub>7</sub>  |
| R  | 1905.148        | 828.541  | 812.523  | 813.530  | <b>811.515</b> | R <sub>6</sub>  |
| K  | 2047.258        | 672.440  | 656.422  | 657.429  | 655.414        | K <sub>5</sub>  |
| V  | 2146.327        | 530.330  | 514.311  | 515.319  | 513.303        | V <sub>4</sub>  |
| L  | 2259.411        | 431.261  | 415.243  | 416.250  | 414.235        | L <sub>3</sub>  |
| R  | 2443.543        | 318.177  | 302.158  | 303.166  | 301.151        | R <sub>2</sub>  |
| D  | 2558.570        | 134.045  | 118.028  | 119.034  | 117.018        | D <sub>1</sub>  |

# sp | P62806 | H4\_MOUSE

SGR<sup>Trimethyl</sup><sub>42.05</sub> GKGGKGLGKGGAKRHRK<sup>(Methyl)</sup><sub>(14.02)</sub> VLR<sup>(Dimethyl)</sup><sub>(28.03)</sub> D

- ▶ fragmentation table for charge state 2+
- ▶ specType=etd
- ▶ score=68.66
- ▶ F121511.dat
- ▶ query=q35621\_p1
- ▶ precursor=640.639830
- ▶ chargePrecursor=4
- ▶ itol=0.7

| AA    | c              | y               | z+1             | z+2             | z               | AA    |
|-------|----------------|-----------------|-----------------|-----------------|-----------------|-------|
| S[1]  | 53.039         | <b>1280.281</b> | 1272.271        | 0.504           | 1271.767        | S[24] |
| G[2]  | 81.547         | 1236.765        | 1228.750        | 0.504           | 1228.251        | G[23] |
| R[3]  | 180.621        | <b>1208.254</b> | 1200.243        | 1200.748        | 1199.741        | R[22] |
| G[4]  | 269.132        | 1109.180        | <b>1101.171</b> | <b>1101.675</b> | <b>1100.667</b> | G[21] |
| K[5]  | 271.180        | 1089.669        | <b>1072.660</b> | <b>1073.164</b> | 1072.156        | K[20] |
| G[6]  | 301.690        | 1016.622        | <b>1008.612</b> | <b>1009.116</b> | 1008.108        | G[19] |
| G[7]  | 330.201        | 988.111         | <b>980.102</b>  | <b>980.606</b>  | 979.598         | G[18] |
| K[8]  | 394.248        | 959.600         | <b>951.591</b>  | <b>952.095</b>  | <b>951.087</b>  | K[17] |
| G[9]  | 422.756        | 895.553         | <b>887.543</b>  | <b>888.047</b>  | 887.040         | G[16] |
| L[10] | 479.303        | 817.042         | <b>809.033</b>  | <b>809.537</b>  | <b>808.529</b>  | L[15] |
| G[11] | 507.813        | <b>810.500</b>  | <b>802.491</b>  | <b>802.995</b>  | <b>801.987</b>  | G[14] |
| K[12] | 571.859        | 761.989         | <b>773.980</b>  | <b>774.484</b>  | <b>773.476</b>  | K[13] |
| G[13] | 600.370        | 717.942         | <b>709.932</b>  | <b>710.436</b>  | 709.429         | G[12] |
| G[14] | <b>628.881</b> | 689.431         | <b>681.422</b>  | <b>681.926</b>  | 680.918         | G[11] |
| A[15] | 664.395        | 660.920         | <b>652.911</b>  | <b>653.415</b>  | 652.407         | A[10] |
| R[16] | 728.447        | 625.402         | <b>617.392</b>  | <b>617.896</b>  | 616.889         | R[9]  |
| R[17] | 806.498        | 561.354         | 553.345         | 553.849         | 552.841         | R[8]  |
| H[18] | 875.029        | 483.304         | 475.294         | 475.798         | 474.791         | H[7]  |
| R[19] | 953.078        | 414.774         | 406.765         | 407.269         | 406.261         | R[6]  |
| K[20] | 1024.133       | 336.724         | 328.714         | 329.218         | 328.211         | K[5]  |
| V[21] | 1073.667       | 265.668         | 257.658         | 258.163         | 257.155         | V[4]  |
| L[22] | 1130.209       | 216.134         | 208.125         | 208.629         | 207.621         | L[3]  |
| R[23] | 1222.275       | 159.592         | 151.583         | 152.087         | 151.079         | R[2]  |
| D[24] | 1279.789       | 67.526          | 59.517          | 60.021          | 59.013          | D[1]  |

# sp | P62806 | H4\_MOUSE

SGR<sup>Trimethyl</sup><sub>42.05</sub> GKGGKGLGKGGAKRHRK<sup>(Methyl)</sup><sub>(14.02)</sub> VLR<sup>(Dimethyl)</sup><sub>(28.03)</sub> D

- ▶ fragmentation table for charge state 3+
- ▶ specType=etd
- ▶ score=68.66
- ▶ F121511.dat
- ▶ query=q35621.p1
- ▶ precursor=640.639830
- ▶ chargePrecursor=4
- ▶ itol=0.7

| AA    | c              | y              | z+1            | z+2     | z              | AA    |
|-------|----------------|----------------|----------------|---------|----------------|-------|
| S[1]  | 35.693         | <b>853.856</b> | <b>848.517</b> | 0.672   | <b>848.181</b> | S[24] |
| G[2]  | 54.701         | 824.848        | 819.506        | 0.672   | 819.170        | G[23] |
| R[3]  | 120.750        | <b>805.838</b> | 800.499        | 800.815 | 800.163        | R[22] |
| G[4]  | 139.757        | <b>739.789</b> | 734.450        | 734.765 | 734.114        | G[21] |
| K[5]  | 182.455        | 720.782        | 715.442        | 715.778 | 715.106        | K[20] |
| G[6]  | 201.463        | <b>678.084</b> | 672.744        | 673.080 | 672.408        | G[19] |
| G[7]  | 220.470        | <b>659.076</b> | <b>653.737</b> | 654.073 | <b>653.401</b> | G[18] |
| K[8]  | 263.188        | 640.069        | 634.730        | 635.066 | 634.394        | K[17] |
| G[9]  | 282.175        | 597.371        | 592.031        | 592.367 | 591.695        | G[16] |
| L[10] | 319.870        | 578.364        | 573.024        | 573.360 | 572.688        | L[15] |
| G[11] | 338.877        | 540.059        | 535.330        | 535.666 | 534.994        | G[14] |
| K[12] | 381.575        | 521.052        | 516.322        | 516.658 | 515.986        | K[13] |
| G[13] | 400.583        | 478.964        | 473.624        | 473.960 | 473.288        | G[12] |
| G[14] | 419.590        | 459.957        | 454.617        | 454.953 | 454.281        | G[11] |
| A[15] | 443.269        | 440.949        | 435.610        | 435.946 | 435.274        | A[10] |
| K[16] | 485.967        | <b>417.270</b> | 411.931        | 412.267 | 411.595        | K[9]  |
| R[17] | 538.001        | 374.572        | 369.232        | 369.568 | 368.896        | R[8]  |
| H[18] | 583.687        | 322.538        | 317.199        | 317.535 | 316.863        | H[7]  |
| R[19] | 635.721        | 276.852        | 271.512        | 271.848 | 271.176        | R[6]  |
| K[20] | 683.091        | 234.818        | 219.479        | 219.815 | 219.143        | K[5]  |
| Y[21] | 738.314        | 177.848        | 172.189        | 172.844 | 171.773        | Y[4]  |
| L[22] | 753.808        | 144.425        | 139.086        | 139.422 | 138.750        | L[3]  |
| R[23] | 815.186        | 106.731        | 101.391        | 101.727 | 101.055        | R[2]  |
| D[24] | <b>853.528</b> | 45.353         | 40.014         | 40.349  | 39.678         | D[1]  |

# sp | P62806 | H4\_MOUSE

[Acetyl]SGRGKGGKGLGKGGAKRHRK <sup>Acetyl</sup>42.01 <sup>VLR</sup> <sup>Methyl</sup>14.02 <sup>D</sup>

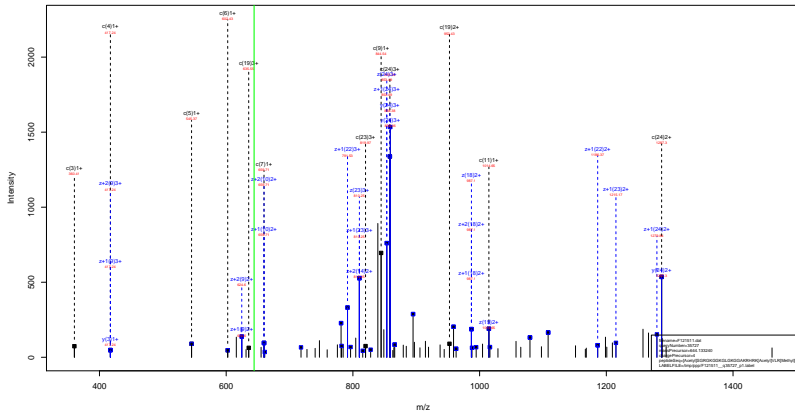



# sp | P62806 | H4\_MOUSE

[Acetyl]SGRGKGGKGLGKGGAKRHRK <sup>Acetyl</sup>42.01 VLR <sup>Methyl</sup>14.02 D

- ▶ fragmentation table for charge state 1+
- ▶ specType=etd
- ▶ score=66.39
- ▶ F121511.dat
- ▶ query=q35727.p1
- ▶ precursor=644.133240
- ▶ chargePrecursor=4
- ▶ itol=0.7

| AA | c  | y               | z+1            | z+2            | z              | AA             |       |
|----|----|-----------------|----------------|----------------|----------------|----------------|-------|
| S  | 1  | 147.076         | 2573.497       | 2557.478       | 0.000          | 2556.471       | S[24] |
| G  | 2  | 224.998         | 2444.455       | 2428.436       | 0.000          | 2427.428       | G[23] |
| R  | 3  | <b>360.199</b>  | 2387.431       | 2371.414       | 2372.422       | 2370.407       | R[22] |
| G  | 4  | <b>417.220</b>  | 2231.332       | 2215.313       | 2216.321       | 2214.305       | G[21] |
| K  | 5  | <b>545.315</b>  | 2174.310       | 2158.292       | 2159.300       | 2157.284       | K[20] |
| G  | 6  | <b>602.337</b>  | 2046.216       | 2030.197       | 2031.205       | 2029.189       | G[19] |
| G  | 7  | <b>659.358</b>  | 1989.194       | 1973.175       | 1974.183       | 1972.168       | G[18] |
| K  | 8  | 787.453         | 1932.173       | 1916.154       | 1917.162       | 1915.146       | K[17] |
| G  | 9  | <b>844.475</b>  | 1804.078       | 1788.059       | 1789.067       | 1787.051       | G[16] |
| L  | 10 | 877.559         | 1747.956       | 1731.937       | 1732.945       | 1730.930       | L[15] |
| G  | 11 | <b>1014.580</b> | 1633.972       | 1617.953       | 1618.961       | 1616.946       | G[14] |
| K  | 12 | 1142.675        | 1576.951       | 1560.932       | 1561.940       | 1559.924       | K[13] |
| G  | 13 | 1199.697        | 1448.956       | 1432.937       | 1433.945       | 1431.929       | G[12] |
| G  | 14 | 1256.718        | 1391.934       | 1375.916       | 1376.923       | 1374.908       | G[11] |
| A  | 15 | 1327.795        | 1334.913       | 1318.894       | 1319.902       | 1317.886       | A[10] |
| K  | 16 | 1435.850        | 1263.776       | 1247.757       | 1248.765       | 1246.749       | K[9]  |
| R  | 17 | 1611.954        | 1139.581       | 1123.562       | 1123.570       | 1121.554       | R[8]  |
| H  | 18 | 1749.030        | 979.582        | <b>963.561</b> | 964.569        | <b>962.553</b> | H[7]  |
| R  | 19 | 1905.111        | 842.521        | 826.502        | <b>827.510</b> | 825.494        | R[6]  |
| K  | 20 | 2075.217        | 686.420        | 670.401        | 671.409        | 669.393        | K[5]  |
| V  | 21 | 2174.285        | 516.314        | 500.295        | 501.303        | 499.287        | V[4]  |
| L  | 22 | 2287.369        | <b>417.246</b> | 401.227        | 402.235        | 400.219        | L[3]  |
| R  | 23 | 2457.486        | 304.162        | 288.143        | 289.151        | 287.135        | R[2]  |
| D  | 24 | 2572.513        | 134.045        | 118.026        | 119.034        | 117.018        | D[1]  |

# sp | P62806 | H4\_MOUSE

[Acetyl]SGRGKGGKGLGKGGAKRHRK<sup>Acetyl</sup>VLR<sup>Methyl</sup>D  
42.01 14.02

- ▶ fragmentation table for charge state 2+
- ▶ specType=etd
- ▶ score=66.39
- ▶ F121511.dat
- ▶ query=q35727\_p1
- ▶ precursor=644.133240
- ▶ chargePrecursor=4
- ▶ itol=0.7

| AA    | c               | y               | z+1             | z+2             | z               | AA    |
|-------|-----------------|-----------------|-----------------|-----------------|-----------------|-------|
| S[1]  | 74.642          | <b>1287.252</b> | <b>1279.243</b> | 0.504           | 1278.739        | S[24] |
| G[2]  | 102.553         | 1222.731        | <b>1214.722</b> | 0.504           | 1214.218        | G[23] |
| K[3]  | 180.603         | 1194.220        | <b>1186.211</b> | <b>1186.715</b> | <b>1185.707</b> | K[22] |
| G[4]  | 259.114         | 1158.710        | <b>1108.100</b> | <b>1108.654</b> | <b>1107.555</b> | G[21] |
| K[5]  | 273.153         | 1087.659        | <b>1079.650</b> | <b>1080.153</b> | <b>1079.146</b> | K[20] |
| G[6]  | 301.672         | 1023.611        | <b>1015.602</b> | <b>1016.106</b> | <b>1015.098</b> | G[19] |
| G[7]  | 330.183         | <b>995.101</b>  | <b>987.091</b>  | <b>987.595</b>  | <b>986.587</b>  | G[18] |
| K[8]  | 394.230         | 956.590         | <b>958.581</b>  | <b>959.084</b>  | 958.077         | K[17] |
| G[9]  | 422.741         | 902.542         | <b>894.533</b>  | <b>895.037</b>  | <b>894.030</b>  | G[16] |
| L[10] | 479.293         | 874.032         | <b>866.022</b>  | <b>866.526</b>  | <b>865.518</b>  | L[15] |
| G[11] | 507.794         | 817.490         | 809.480         | <b>809.984</b>  | 808.970         | G[14] |
| K[12] | 571.841         | 788.979         | <b>780.970</b>  | <b>781.474</b>  | 780.460         | K[13] |
| G[13] | 600.352         | 724.931         | 716.922         | <b>717.426</b>  | 716.418         | G[12] |
| G[14] | 628.863         | 696.421         | 688.411         | 688.915         | 687.907         | G[11] |
| A[15] | 684.381         | 667.910         | <b>659.901</b>  | <b>660.405</b>  | <b>659.397</b>  | A[10] |
| R[16] | 728.439         | 632.391         | <b>624.382</b>  | <b>624.886</b>  | 623.877         | R[9]  |
| R[17] | 806.479         | 568.344         | 560.335         | 560.839         | 559.831         | R[8]  |
| H[18] | 875.009         | 490.293         | 482.284         | 482.788         | 481.780         | H[7]  |
| R[19] | <b>953.059</b>  | 421.764         | 413.755         | 414.259         | 413.251         | R[6]  |
| K[20] | 1038.112        | 343.717         | 335.708         | 336.208         | 335.200         | K[5]  |
| V[21] | 1097.666        | 258.661         | 250.651         | 251.155         | 250.147         | V[4]  |
| L[22] | 1144.188        | 209.126         | 201.117         | 201.621         | 200.613         | L[3]  |
| R[23] | 1236.247        | 152.584         | 144.575         | 145.079         | 144.071         | R[2]  |
| D[24] | <b>1286.760</b> | 67.526          | 59.517          | 60.021          | 59.013          | D[1]  |

# sp | P62806 | H4\_MOUSE

[Acetyl]SGRGKGGKGLGKGGAKRHRK<sup>Acetyl</sup> VLR<sup>Methyl</sup> D<sup>D</sup>  
42.01 14.02

- ▶ fragmentation table for charge state 3+
- ▶ specType=etd
- ▶ score=66.39
- ▶ F121511.dat
- ▶ query=q35727.p1
- ▶ precursor=644.133240
- ▶ chargePrecursor=4
- ▶ itol=0.7

| AA    | c              | y              | z+1            | z+2            | z              | AA    |
|-------|----------------|----------------|----------------|----------------|----------------|-------|
| S[1]  | 49.697         | <b>858.504</b> | <b>853.164</b> | 0.672          | <b>852.828</b> | S[24] |
| G[2]  | 58.704         | <b>815.490</b> | <b>810.150</b> | 0.672          | <b>809.814</b> | G[23] |
| R[3]  | 150.738        | <b>796.483</b> | <b>791.143</b> | <b>791.479</b> | 790.807        | R[22] |
| G[4]  | 139.745        | 744.449        | 739.109        | 739.445        | 738.773        | G[21] |
| K[5]  | 182.443        | 725.442        | 720.102        | 720.438        | 719.766        | K[20] |
| G[6]  | 201.450        | 682.743        | 677.404        | 677.740        | 677.068        | G[19] |
| G[7]  | 220.458        | 663.736        | 658.397        | 658.733        | 658.061        | G[18] |
| K[8]  | 263.156        | 644.729        | 639.389        | 639.725        | 639.054        | K[17] |
| G[9]  | 282.163        | <b>602.031</b> | 596.691        | 597.027        | 596.355        | G[16] |
| L[10] | 319.958        | 583.024        | 577.684        | 578.020        | 577.348        | L[15] |
| G[11] | 338.965        | <b>545.329</b> | 539.989        | 540.325        | 539.653        | G[14] |
| K[12] | 381.563        | 526.322        | 520.982        | 521.318        | 520.646        | K[13] |
| G[13] | 400.570        | 483.623        | 478.284        | 478.620        | 477.948        | G[12] |
| G[14] | 419.578        | 464.616        | 459.277        | 459.613        | 458.941        | G[11] |
| A[15] | 443.257        | 445.609        | 440.270        | 440.605        | 439.934        | A[10] |
| K[16] | 485.955        | 421.930        | <b>416.590</b> | <b>416.926</b> | 416.255        | K[9]  |
| R[17] | 537.989        | 379.232        | 373.892        | 374.228        | 373.556        | R[8]  |
| H[18] | 583.675        | 327.198        | 321.858        | 322.194        | 321.522        | H[7]  |
| R[19] | <b>635.709</b> | 281.512        | 276.172        | 276.508        | 275.836        | R[6]  |
| K[20] | 692.410        | 229.476        | 224.136        | 224.474        | 223.803        | K[5]  |
| V[21] | 725.433        | 172.776        | 167.437        | 167.773        | 167.101        | V[4]  |
| L[22] | 763.128        | 139.753        | 134.414        | 134.750        | 134.078        | L[3]  |
| R[23] | <b>819.834</b> | 102.059        | 96.719         | 97.055         | 96.383         | R[2]  |
| D[24] | <b>858.176</b> | 45.353         | 40.014         | 40.349         | 39.678         | D[1]  |



# sp | P62806 | H4\_MOUSE

[Acetyl]SGRGKGGKGLGKGGAK<sup>Acetyl</sup> RHRK<sup>Dimethyl</sup> VLRD<sup>28.03</sup>

- ▶ fragmentation table for charge state 1+
- ▶ specType=etd
- ▶ score=87.57
- ▶ F121511.dat
- ▶ query=q35912.p1
- ▶ precursor=518.309850
- ▶ chargePrecursor=5
- ▶ itol=0.7

| AA |    | c               | y               | z+1            | z+2            | z        | AA    |
|----|----|-----------------|-----------------|----------------|----------------|----------|-------|
| S  | 1  | 147.076         | 2587.513        | 2571.494       | 0.000          | 2570.480 | S[24] |
| G  | 2  | 224.298         | 2498.470        | 2442.451       | 0.000          | 2441.444 | G[23] |
| T  | 3  | <b>306.199</b>  | 2421.449        | 2393.430       | 2389.438       | 2384.422 | T[22] |
| G  | 4  | <b>417.220</b>  | 2245.148        | 2229.329       | 2230.337       | 2228.321 | G[21] |
| K  | 5  | <b>545.115</b>  | 2188.326        | 2172.307       | 2173.315       | 2171.308 | K[20] |
| G  | 6  | <b>602.337</b>  | 2060.231        | 2044.212       | 2045.220       | 2043.205 | G[19] |
| G  | 7  | <b>659.358</b>  | 2003.210        | 1987.191       | 1988.199       | 1986.183 | G[18] |
| K  | 8  | <b>787.453</b>  | 1946.188        | 1930.170       | 1931.177       | 1929.162 | K[17] |
| G  | 9  | <b>844.475</b>  | 1818.093        | 1802.075       | 1803.082       | 1801.067 | G[16] |
| L  | 10 | <b>957.559</b>  | 1761.072        | 1745.053       | 1746.061       | 1744.045 | L[15] |
| G  | 11 | <b>1014.580</b> | 1647.988        | 1631.969       | 1632.977       | 1630.961 | G[14] |
| K  | 12 | <b>1142.675</b> | 1590.969        | 1574.948       | 1575.955       | 1573.940 | K[13] |
| G  | 13 | <b>1199.697</b> | 1462.871        | 1446.853       | 1447.860       | 1445.845 | G[12] |
| G  | 14 | 1256.718        | 1405.850        | 1389.831       | 1390.839       | 1388.823 | G[11] |
| A  | 15 | 1327.795        | 1348.828        | 1332.810       | 1333.818       | 1331.802 | A[10] |
| K  | 16 | 1407.853        | <b>1277.791</b> | 1261.773       | 1262.780       | 1260.765 | K[9]  |
| R  | 17 | 1653.982        | 1197.668        | 1191.667       | 1192.675       | 1190.659 | R[8]  |
| H  | 18 | 1791.021        | 951.588         | 935.566        | <b>936.574</b> | 934.558  | H[7]  |
| R  | 19 | 1947.122        | 814.528         | 798.507        | <b>799.515</b> | 797.499  | R[6]  |
| K  | 20 | 2103.248        | 658.425         | 642.406        | <b>643.414</b> | 641.398  | K[5]  |
| V  | 21 | 2202.317        | 502.298         | <b>486.280</b> | 487.287        | 485.272  | V[4]  |
| L  | 22 | 2315.401        | 403.220         | <b>387.211</b> | 388.218        | 386.203  | L[3]  |
| L  | 23 | 2413.582        | 280.149         | <b>274.127</b> | <b>275.135</b> | 273.119  | L[2]  |
| D  | 24 | 2586.529        | 134.045         | 118.026        | 119.034        | 117.018  | D[1]  |

# sp | P62806 | H4\_MOUSE

[Acetyl]SGRGKGGKGLGKGGAK<sup>Acetyl</sup> RHRK<sup>Dimethyl</sup> VLRD<sup>28.03</sup>

- ▶ fragmentation table for charge state 2+
- ▶ specType=etd
- ▶ score=87.57
- ▶ F121511.dat
- ▶ query=q35912.p1
- ▶ precursor=518.309850
- ▶ chargePrecursor=5
- ▶ itol=0.7

| AA    | c               | y              | z+1             | z+2             | z              | AA    |
|-------|-----------------|----------------|-----------------|-----------------|----------------|-------|
| S[1]  | 74.642          | 1204.260       | <b>1286.251</b> | 0.904           | 1285.747       | S[24] |
| G[2]  | 102.563         | 1220.739       | <b>1221.729</b> | 0.904           | 1221.225       | G[23] |
| R[3]  | 180.603         | 1280.238       | <b>1193.219</b> | <b>1193.723</b> | 1192.715       | R[22] |
| G[4]  | 209.114         | 1323.177       | <b>1115.168</b> | <b>1115.672</b> | 1114.664       | G[21] |
| K[5]  | 273.161         | 1094.667       | <b>1086.657</b> | <b>1087.161</b> | 1086.153       | K[20] |
| G[6]  | 301.672         | 1030.619       | <b>1022.610</b> | <b>1023.114</b> | 1022.108       | G[19] |
| G[7]  | 330.183         | 1002.108       | 994.099         | <b>994.603</b>  | 993.595        | G[18] |
| K[8]  | 394.230         | <b>973.598</b> | 965.588         | <b>966.092</b>  | 965.084        | K[17] |
| G[9]  | 422.741         | 908.560        | <b>901.541</b>  | <b>902.045</b>  | 901.037        | G[16] |
| L[10] | <b>479.283</b>  | 883.040        | <b>873.030</b>  | <b>873.534</b>  | 872.526        | L[15] |
| G[11] | <b>507.794</b>  | 824.495        | 816.486         | <b>816.992</b>  | <b>815.984</b> | G[14] |
| K[12] | <b>571.841</b>  | <b>795.987</b> | <b>787.977</b>  | <b>788.481</b>  | <b>787.474</b> | K[13] |
| G[13] | <b>600.352</b>  | 731.939        | <b>723.930</b>  | <b>724.434</b>  | <b>723.426</b> | G[12] |
| G[14] | <b>628.863</b>  | 703.429        | <b>695.419</b>  | <b>695.923</b>  | 694.915        | G[11] |
| A[15] | <b>664.381</b>  | 674.918        | <b>666.908</b>  | <b>667.412</b>  | <b>666.405</b> | A[10] |
| R[16] | <b>749.434</b>  | 639.399        | <b>631.390</b>  | <b>631.894</b>  | 630.886        | R[9]  |
| R[17] | <b>827.485</b>  | 554.347        | <b>546.337</b>  | <b>546.841</b>  | 545.833        | R[8]  |
| H[18] | <b>896.014</b>  | 476.290        | <b>468.287</b>  | <b>468.791</b>  | 467.783        | H[7]  |
| R[19] | <b>974.065</b>  | 407.707        | <b>399.757</b>  | <b>400.261</b>  | 399.253        | R[6]  |
| K[20] | 1052.128        | 329.716        | 321.707         | 322.211         | 321.203        | K[5]  |
| V[21] | 1101.662        | 251.653        | 243.643         | 244.147         | 243.140        | V[4]  |
| L[22] | <b>1158.204</b> | 202.119        | 194.109         | 194.613         | 193.605        | L[3]  |
| R[23] | 1236.255        | 145.577        | 137.567         | 138.071         | 137.063        | R[2]  |
| D[24] | 1293.768        | 67.526         | 59.517          | 60.021          | 59.013         | D[1]  |

# sp | P62806 | H4\_MOUSE

[Acetyl]SGRGKGGKGLGKGGAK<sup>Acetyl</sup> RHRK<sup>Dimethyl</sup> VLRD<sup>28.03</sup>

- ▶ fragmentation table for charge state 3+
- ▶ specType=etd
- ▶ score=87.57
- ▶ F121511.dat
- ▶ query=q35912.p1
- ▶ precursor=518.309850
- ▶ chargePrecursor=5
- ▶ itol=0.7

| AA    | c              | y              | z+1            | z+2            | z              | AA    |
|-------|----------------|----------------|----------------|----------------|----------------|-------|
| S[1]  | 49.697         | <b>863.176</b> | <b>857.836</b> | 0.672          | 857.500        | S[24] |
| G[2]  | 58.704         | 320.162        | <b>814.822</b> | 0.672          | 814.486        | G[23] |
| R[3]  | 120.738        | 801.154        | <b>795.815</b> | <b>796.151</b> | 795.479        | R[22] |
| G[4]  | 130.745        | <b>749.121</b> | <b>743.781</b> | <b>744.117</b> | <b>743.445</b> | G[21] |
| K[5]  | 182.443        | 730.114        | <b>724.774</b> | <b>725.110</b> | <b>724.438</b> | K[20] |
| G[6]  | 201.450        | 687.415        | <b>682.076</b> | <b>682.412</b> | <b>681.740</b> | G[19] |
| G[7]  | 220.458        | 668.408        | <b>663.069</b> | <b>663.404</b> | <b>662.733</b> | G[18] |
| K[8]  | 263.156        | <b>649.401</b> | <b>644.061</b> | <b>644.397</b> | <b>643.725</b> | K[17] |
| G[9]  | 282.163        | <b>606.703</b> | <b>601.363</b> | <b>601.699</b> | <b>601.027</b> | G[16] |
| L[10] | 319.858        | 837.595        | <b>582.356</b> | <b>582.692</b> | <b>582.020</b> | L[15] |
| G[11] | 338.865        | 150.001        | <b>544.661</b> | <b>544.997</b> | 544.525        | G[14] |
| K[12] | 381.563        | 530.994        | 525.654        | <b>525.990</b> | 525.318        | K[13] |
| G[13] | <b>400.570</b> | 488.295        | 482.956        | 483.292        | 482.620        | G[12] |
| G[14] | 419.578        | <b>469.288</b> | 463.949        | 464.285        | 463.613        | G[11] |
| A[15] | 443.257        | 450.281        | 444.941        | 445.277        | 444.605        | A[10] |
| K[16] | 469.958        | 426.602        | 421.262        | 421.598        | 420.926        | K[9]  |
| R[17] | <b>551.992</b> | 369.900        | 364.561        | 364.896        | 364.225        | R[8]  |
| H[18] | <b>597.678</b> | 317.866        | 312.527        | 312.863        | 312.191        | H[7]  |
| R[19] | <b>649.712</b> | 272.180        | 266.841        | 267.176        | 266.505        | R[6]  |
| K[20] | <b>701.754</b> | 220.140        | 214.801        | 215.143        | 214.471        | K[5]  |
| V[21] | <b>734.777</b> | 168.104        | 162.765        | 163.101        | 162.429        | V[4]  |
| L[22] | <b>772.472</b> | 135.082        | 129.742        | 130.078        | 129.406        | L[3]  |
| R[23] | 824.505        | 97.387         | 92.047         | 92.383         | 91.711         | R[2]  |
| D[24] | <b>862.848</b> | 45.353         | 40.014         | 40.349         | 39.678         | D[1]  |

# sp | P62806 | H4\_MOUSE

[Acetyl]SGRGKGGKGLGKGGAK<sup>Acetyl</sup> RHRK<sup>Dimethyl</sup> VLRD<sup>28.03</sup>

- ▶ fragmentation table for charge state 4+
- ▶ specType=etd
- ▶ score=87.57
- ▶ F121511.dat
- ▶ query=q35912.p1
- ▶ precursor=518.309850
- ▶ chargePrecursor=5
- ▶ itol=0.7

| AA    | c              | y              | z+1            | z+2            | z              | AA    |
|-------|----------------|----------------|----------------|----------------|----------------|-------|
| S[1]  | 37.525         | <b>647.634</b> | <b>643.629</b> | 0.755          | <b>643.177</b> | S[24] |
| G[2]  | 51.780         | <b>615.373</b> | <b>611.368</b> | 0.755          | <b>611.116</b> | G[23] |
| R[3]  | 90.805         | <b>601.118</b> | <b>597.113</b> | <b>597.365</b> | 596.861        | R[22] |
| G[4]  | 105.061        | 562.092        | 558.088        | 558.340        | 557.836        | G[21] |
| K[5]  | 137.084        | 547.837        | 543.832        | 544.084        | 543.580        | K[20] |
| G[6]  | 151.340        | 515.813        | 511.809        | 512.061        | 511.557        | G[19] |
| G[7]  | 165.595        | 501.558        | 497.553        | 497.805        | 497.301        | G[18] |
| K[8]  | 197.619        | 487.303        | 483.298        | 483.550        | 483.046        | K[17] |
| G[9]  | 211.874        | 456.279        | 452.274        | 453.526        | 453.022        | G[16] |
| L[10] | 280.148        | 441.023        | 437.019        | 437.271        | 436.767        | L[15] |
| G[11] | 254.403        | 417.752        | 408.748        | 409.000        | 408.496        | G[14] |
| K[12] | 286.424        | 398.497        | 394.492        | 394.744        | 394.240        | K[13] |
| G[13] | 300.680        | 366.473        | 362.469        | 362.721        | 362.217        | G[12] |
| G[14] | 314.935        | 352.218        | 348.213        | 348.465        | 347.961        | G[11] |
| A[15] | 332.694        | 337.963        | 333.958        | 334.210        | 333.706        | A[10] |
| K[16] | 375.221        | 320.203        | 316.199        | 316.451        | 315.947        | K[9]  |
| R[17] | 414.246        | 277.877        | <b>273.672</b> | <b>273.924</b> | <b>273.420</b> | R[8]  |
| H[18] | 448.511        | 238.652        | 234.647        | 234.899        | 234.395        | H[7]  |
| R[19] | 497.536        | 204.397        | 200.392        | 200.644        | 200.140        | R[6]  |
| K[20] | <b>526.568</b> | 185.362        | 181.357        | 181.609        | 181.105        | K[5]  |
| V[21] | 551.335        | 126.330        | 122.325        | 122.577        | 122.073        | V[4]  |
| L[22] | 579.606        | 101.563        | 97.558         | 97.810         | 97.306         | L[3]  |
| R[23] | <b>618.631</b> | 73.292         | 69.287         | 69.539         | 69.035         | R[2]  |
| D[24] | <b>647.388</b> | 34.267         | 30.262         | 30.514         | 30.010         | D[1]  |





# sp | P62806 | H4\_MOUSE

[Acetyl]SGRGKGGKGLGKGGAK<sup>Acetyl</sup> RHRK<sup>Dimethyl</sup> VLRD<sup>28.03</sup>

- ▶ fragmentation table for charge state 1+
- ▶ specType=etd
- ▶ score=83.22
- ▶ F121511.dat
- ▶ query=q35915.p1
- ▶ precursor=647.636900
- ▶ chargePrecursor=4
- ▶ itol=0.7

| AA | c  | y               | z+1            | z+2            | z        | AA       |   |    |
|----|----|-----------------|----------------|----------------|----------|----------|---|----|
| S  | 1  | 147.076         | 2587.513       | 2571.494       | 0.000    | 2570.486 | S | 24 |
| G  | 2  | 224.998         | 2558.470       | 2442.451       | 0.000    | 2441.444 | G | 23 |
| R  | 3  | <b>360.199</b>  | 2601.440       | 2385.430       | 2386.438 | 2384.422 | R | 22 |
| G  | 4  | <b>417.220</b>  | 2245.348       | 2229.330       | 2230.337 | 2228.321 | G | 21 |
| K  | 5  | <b>545.315</b>  | 2188.326       | 2172.307       | 2173.315 | 2171.300 | K | 20 |
| G  | 6  | <b>602.337</b>  | 2060.231       | 2044.212       | 2045.220 | 2043.205 | G | 19 |
| G  | 7  | <b>659.358</b>  | 2003.210       | 1987.191       | 1988.199 | 1986.183 | G | 18 |
| K  | 8  | <b>787.453</b>  | 1946.188       | 1930.170       | 1931.177 | 1929.162 | K | 17 |
| G  | 9  | <b>844.475</b>  | 1818.093       | 1802.075       | 1803.082 | 1801.067 | G | 16 |
| L  | 10 | 957.359         | 1761.072       | 1745.053       | 1746.061 | 1744.045 | L | 15 |
| G  | 11 | 1014.580        | 1647.985       | 1631.966       | 1632.977 | 1630.961 | G | 14 |
| K  | 12 | <b>1142.675</b> | 1590.960       | 1574.948       | 1575.955 | 1573.940 | K | 13 |
| G  | 13 | <b>1199.697</b> | 1462.871       | 1446.853       | 1447.860 | 1445.845 | G | 12 |
| G  | 14 | <b>1256.718</b> | 1405.850       | 1389.831       | 1390.839 | 1388.823 | G | 11 |
| A  | 15 | 1327.795        | 1348.828       | 1332.810       | 1333.818 | 1331.802 | A | 10 |
| K  | 16 | 1407.881        | 1277.791       | 1261.773       | 1262.780 | 1260.765 | K | 9  |
| R  | 17 | 1653.884        | 1159.686       | 1097.667       | 1092.678 | 1090.663 | R | 8  |
| H  | 18 | 1791.021        | 951.585        | <b>935.566</b> | 936.574  | 934.558  | H | 7  |
| R  | 19 | 1947.122        | <b>814.526</b> | 798.507        | 799.515  | 797.499  | R | 6  |
| K  | 20 | 2103.248        | 658.425        | 642.406        | 643.414  | 641.398  | K | 5  |
| V  | 21 | 2202.317        | 502.298        | 486.280        | 487.287  | 485.272  | V | 4  |
| L  | 22 | 2315.401        | 403.230        | 387.211        | 388.219  | 386.203  | L | 3  |
| R  | 23 | 2471.502        | 290.146        | 274.127        | 275.135  | 273.119  | R | 2  |
| D  | 24 | 2588.529        | 134.045        | 118.026        | 119.034  | 117.018  | D | 1  |

# sp | P62806 | H4\_MOUSE

[Acetyl]SGRGKGGKGLGKGGAK<sup>Acetyl</sup> RHRK<sup>Dimethyl</sup> VLRD<sup>28.03</sup>

- ▶ fragmentation table for charge state 2+
- ▶ specType=etd
- ▶ score=83.22
- ▶ F121511.dat
- ▶ query=q35915.p1
- ▶ precursor=647.636900
- ▶ chargePrecursor=4
- ▶ itol=0.7

| AA | c  | y               | z+1             | z+2             | z               | AA              |       |
|----|----|-----------------|-----------------|-----------------|-----------------|-----------------|-------|
| S  | 1  | 74.042          | <b>1294.260</b> | 1286.261        | 0.504           | 1289.747        | S[24] |
| G  | 2  | 102.553         | 1229.739        | <b>1221.729</b> | 0.504           | 1221.225        | G[23] |
| R  | 3  | 180.603         | 1201.228        | <b>1193.219</b> | <b>1193.723</b> | 1192.712        | R[22] |
| G  | 4  | 259.114         | 1123.177        | <b>1115.168</b> | <b>1115.672</b> | <b>1114.564</b> | G[21] |
| K  | 5  | 273.153         | 1094.567        | <b>1086.557</b> | <b>1087.161</b> | 1085.151        | K[20] |
| G  | 6  | 303.672         | 1030.619        | 1022.610        | 1023.114        | 1022.100        | G[19] |
| G  | 7  | 330.183         | 1002.108        | <b>994.099</b>  | <b>994.603</b>  | <b>993.595</b>  | G[18] |
| K  | 8  | 394.230         | 973.599         | <b>965.588</b>  | <b>966.092</b>  | <b>965.084</b>  | K[17] |
| G  | 9  | 422.741         | 959.550         | <b>901.541</b>  | <b>902.045</b>  | <b>901.037</b>  | G[16] |
| L  | 10 | 479.293         | 893.040         | 883.033         | 883.534         | 882.526         | L[15] |
| G  | 11 | 507.794         | <b>824.498</b>  | 816.488         | 816.992         | <b>815.984</b>  | G[14] |
| K  | 12 | 571.841         | <b>795.987</b>  | <b>787.977</b>  | <b>788.481</b>  | <b>787.474</b>  | K[13] |
| G  | 13 | 600.352         | 731.939         | <b>723.930</b>  | <b>724.434</b>  | 723.426         | G[12] |
| G  | 14 | 628.863         | 703.429         | <b>695.419</b>  | <b>695.923</b>  | <b>694.915</b>  | G[11] |
| A  | 15 | 684.381         | 674.919         | <b>565.908</b>  | <b>657.312</b>  | 565.305         | A[10] |
| R  | 16 | 749.434         | 639.399         | <b>631.390</b>  | <b>631.894</b>  | <b>630.886</b>  | R[9]  |
| R  | 17 | <b>827.485</b>  | 554.347         | 546.337         | 546.841         | <b>545.833</b>  | R[8]  |
| H  | 18 | <b>896.014</b>  | 476.290         | 468.280         | 468.781         | 467.783         | H[7]  |
| R  | 19 | 974.065         | 407.767         | 399.757         | 400.261         | 399.253         | R[6]  |
| K  | 20 | 1052.126        | 329.716         | 321.707         | 322.211         | 321.203         | K[5]  |
| V  | 21 | 1101.662        | 252.663         | 244.653         | 244.157         | 243.149         | V[4]  |
| L  | 22 | <b>1158.204</b> | 202.119         | 194.109         | 194.613         | 193.605         | L[3]  |
| R  | 23 | 1236.255        | 145.577         | 137.567         | 138.071         | 137.063         | R[2]  |
| D  | 24 | 1293.768        | 67.526          | 59.517          | 60.021          | 59.013          | D[1]  |

# sp | P62806 | H4\_MOUSE

[Acetyl]SGRGKGGKGLGKGGAK<sup>Acetyl</sup>42.01 RHRK<sup>Dimethyl</sup>28.03 VLRD

- ▶ fragmentation table for charge state 3+
- ▶ specType=etd
- ▶ score=83.22
- ▶ F121511.dat
- ▶ query=q35915.p1
- ▶ precursor=647.636900
- ▶ chargePrecursor=4
- ▶ itol=0.7

| AA    | c              | y              | z+1            | z+2            | z              | AA    |
|-------|----------------|----------------|----------------|----------------|----------------|-------|
| S[1]  | 49.697         | <b>863.176</b> | <b>857.836</b> | 0.672          | <b>857.500</b> | S[24] |
| G[2]  | 58.704         | 320.162        | <b>814.822</b> | 0.672          | <b>814.486</b> | G[23] |
| R[3]  | 120.738        | 801.154        | <b>795.815</b> | <b>796.151</b> | <b>795.479</b> | R[22] |
| G[4]  | 139.745        | 749.121        | 743.781        | 744.117        | 743.445        | G[21] |
| K[5]  | 182.443        | 730.114        | <b>724.774</b> | 725.110        | <b>724.438</b> | K[20] |
| G[6]  | 201.450        | 687.415        | 682.076        | 682.412        | 681.740        | G[19] |
| G[7]  | 220.458        | 668.408        | 663.069        | 663.404        | 662.733        | G[18] |
| K[8]  | 263.156        | 649.401        | 644.061        | 644.397        | 643.725        | K[17] |
| G[9]  | 282.163        | 606.793        | 601.363        | 601.699        | 601.027        | G[16] |
| L[10] | 319.858        | 587.695        | 582.356        | 582.692        | 582.020        | L[15] |
| G[11] | 338.865        | 550.001        | <b>544.661</b> | <b>544.997</b> | 544.325        | G[14] |
| K[12] | 381.563        | 530.994        | 525.654        | 525.990        | 525.318        | K[13] |
| G[13] | 400.570        | 488.295        | 482.956        | 483.292        | 482.620        | G[12] |
| G[14] | 419.578        | 469.288        | 463.949        | 464.285        | 463.613        | G[11] |
| A[15] | 443.257        | 450.281        | 444.941        | 445.277        | 444.605        | A[10] |
| K[16] | 469.958        | 426.602        | 421.262        | 421.598        | 420.926        | K[9]  |
| R[17] | 551.992        | 369.900        | 364.561        | 364.896        | 364.225        | R[8]  |
| H[18] | 597.678        | 317.866        | 312.527        | 312.863        | 312.191        | H[7]  |
| R[19] | 649.712        | 272.180        | 266.841        | 267.176        | 266.505        | R[6]  |
| K[20] | 701.754        | 220.146        | 214.807        | 215.143        | 214.471        | K[5]  |
| V[21] | 734.777        | 168.104        | 162.765        | 163.101        | 162.429        | V[4]  |
| L[22] | 772.472        | 135.082        | 129.742        | 130.078        | 129.406        | L[3]  |
| R[23] | <b>824.505</b> | 97.387         | 92.047         | 92.383         | 91.711         | R[2]  |
| D[24] | <b>862.848</b> | 45.353         | 40.014         | 40.349         | 39.678         | D[1]  |

# sp | P62806 | H4\_MOUSE

[Acetyl]SGRGKGGKGLGK <sup>Acetyl</sup> 42.01 GGAKRHRK <sup>Dimethyl</sup> 28.03 VLRD

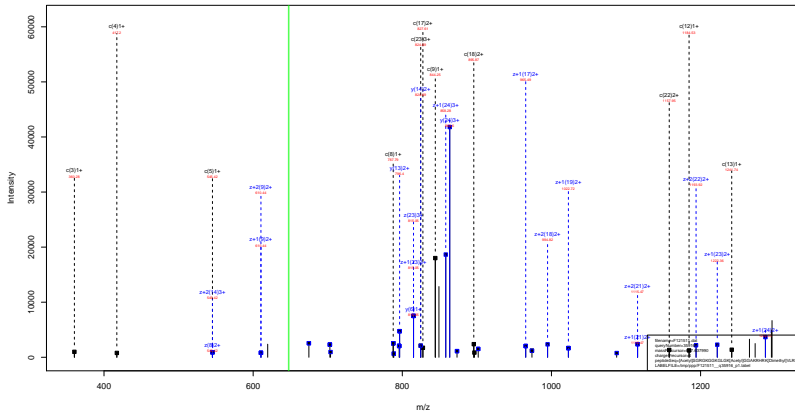

# sp | P62806 | H4\_MOUSE

[Acetyl]SGRGKGGKGLGK<sup>Acetyl</sup>42.01 GGAKRHRK<sup>Dimethyl</sup>28.03 VLRD

- ▶ fragmentation table for charge state 1+
- ▶ specType=etd
- ▶ score=101.58
- ▶ F121511.dat
- ▶ query=q35916.p1
- ▶ precursor=647.637990
- ▶ chargePrecursor=4
- ▶ itol=0.7

| AA | c  | y               | z+1            | z+2      | z        | AA       |   |    |
|----|----|-----------------|----------------|----------|----------|----------|---|----|
| S  | 11 | 147.076         | 2587.513       | 2571.494 | 0.000    | 2570.486 | S | 24 |
| G  | 2  | 234.998         | 2458.470       | 2442.451 | 0.000    | 2441.444 | G | 23 |
| R  | 3  | <b>360.199</b>  | 2401.440       | 2385.430 | 2369.438 | 2384.422 | R | 22 |
| G  | 4  | <b>417.220</b>  | 2245.348       | 2229.339 | 2213.337 | 2228.321 | G | 21 |
| K  | 5  | <b>545.315</b>  | 2188.326       | 2172.307 | 2173.315 | 2171.300 | K | 20 |
| G  | 6  | 602.337         | 2060.231       | 2044.212 | 2045.220 | 2043.205 | G | 19 |
| G  | 7  | 659.358         | 2003.210       | 1987.191 | 1988.199 | 1986.183 | G | 18 |
| K  | 8  | <b>787.453</b>  | 1946.188       | 1930.170 | 1931.177 | 1929.162 | K | 17 |
| G  | 9  | <b>844.475</b>  | 1818.093       | 1802.075 | 1803.082 | 1801.067 | G | 16 |
| L  | 10 | 857.359         | 1761.072       | 1745.053 | 1746.061 | 1744.045 | L | 15 |
| G  | 11 | 1014.580        | 1647.982       | 1631.960 | 1632.977 | 1630.963 | G | 14 |
| K  | 12 | <b>1184.686</b> | 1590.960       | 1574.948 | 1575.955 | 1573.940 | K | 13 |
| G  | 13 | <b>1241.707</b> | 1420.861       | 1404.842 | 1405.850 | 1403.834 | G | 12 |
| G  | 14 | 1298.729        | 1363.839       | 1347.821 | 1348.828 | 1346.813 | G | 11 |
| A  | 15 | 1369.760        | 1306.818       | 1290.799 | 1291.807 | 1289.791 | A | 10 |
| K  | 16 | 1497.881        | 1235.781       | 1219.762 | 1220.770 | 1218.754 | K | 9  |
| R  | 17 | 1633.894        | 1197.686       | 1181.667 | 1182.675 | 1180.659 | R | 8  |
| H  | 18 | 1791.021        | 951.582        | 935.566  | 936.574  | 934.558  | H | 7  |
| R  | 19 | 1947.122        | <b>814.526</b> | 798.507  | 799.515  | 797.499  | R | 6  |
| K  | 20 | 2103.248        | 658.425        | 642.406  | 643.414  | 641.398  | K | 5  |
| V  | 21 | 2202.317        | 502.298        | 486.280  | 487.287  | 485.272  | V | 4  |
| L  | 22 | 2315.401        | 403.230        | 387.211  | 388.219  | 386.203  | L | 3  |
| R  | 23 | 2471.502        | 290.146        | 274.127  | 275.135  | 273.119  | R | 2  |
| D  | 24 | 2588.529        | 134.045        | 118.026  | 119.034  | 117.018  | D | 1  |

# sp | P62806 | H4\_MOUSE

[Acetyl]SGRGKGGKGLGK<sup>Acetyl</sup><sub>42.01</sub> GGAKRHRK<sup>Dimethyl</sup><sub>28.03</sub> VLRD

- ▶ fragmentation table for charge state 2+
- ▶ specType=etd
- ▶ score=101.58
- ▶ F121511.dat
- ▶ query=q35916.p1
- ▶ precursor=647.637990
- ▶ chargePrecursor=4
- ▶ itol=0.7

| AA    | c               | y              | z+1             | z+2             | z               | AA    |
|-------|-----------------|----------------|-----------------|-----------------|-----------------|-------|
| S[1]  | 74.042          | 1294.200       | <b>1286.251</b> | 0.504           | 1285.747        | S[24] |
| G[2]  | 102.553         | 1229.739       | <b>1221.729</b> | 0.504           | 1221.225        | G[23] |
| R[3]  | 180.603         | 1201.238       | 1193.219        | <b>1193.723</b> | 1192.715        | R[22] |
| G[4]  | 269.114         | 1173.177       | <b>1115.168</b> | <b>1115.672</b> | 1114.666        | G[21] |
| K[5]  | 273.161         | 1094.667       | <b>1086.657</b> | <b>1087.161</b> | 1086.153        | K[20] |
| G[6]  | 301.672         | 1030.619       | <b>1022.610</b> | <b>1023.114</b> | <b>1022.106</b> | G[19] |
| G[7]  | 330.183         | 1002.108       | 994.099         | <b>994.603</b>  | 993.595         | G[18] |
| K[8]  | 394.230         | <b>973.598</b> | <b>965.588</b>  | <b>966.092</b>  | <b>965.084</b>  | K[17] |
| G[9]  | 422.741         | 909.550        | <b>901.541</b>  | <b>902.045</b>  | 901.037         | G[16] |
| L[10] | 479.293         | 891.040        | <b>873.030</b>  | <b>873.534</b>  | 872.526         | L[15] |
| Q[11] | 507.794         | <b>824.598</b> | 816.488         | 816.992         | 815.984         | Q[14] |
| K[12] | 592.847         | <b>795.987</b> | <b>787.977</b>  | <b>788.481</b>  | <b>787.474</b>  | K[13] |
| G[13] | 621.357         | 710.934        | <b>702.925</b>  | <b>703.429</b>  | <b>702.421</b>  | G[12] |
| G[14] | 649.868         | 682.423        | <b>674.414</b>  | <b>674.918</b>  | 673.910         | G[11] |
| A[15] | 665.367         | 653.913        | 645.803         | 646.307         | 645.299         | A[10] |
| R[16] | 789.434         | 618.904        | <b>610.895</b>  | <b>610.889</b>  | <b>609.881</b>  | R[9]  |
| R[17] | <b>827.485</b>  | 554.147        | 546.137         | 546.641         | <b>545.833</b>  | R[8]  |
| H[18] | <b>896.014</b>  | 476.296        | 468.287         | 468.791         | 467.783         | H[7]  |
| R[19] | <b>974.065</b>  | 407.767        | 399.757         | 400.261         | 399.253         | R[6]  |
| K[20] | 1052.126        | 329.716        | 321.707         | 322.211         | 321.203         | K[5]  |
| V[21] | 1107.669        | 251.693        | 243.683         | 244.187         | 243.180         | V[4]  |
| L[22] | <b>1158.204</b> | 202.119        | 194.109         | 194.613         | 193.605         | L[3]  |
| R[23] | 1236.255        | 145.577        | 137.567         | 138.071         | 137.063         | R[2]  |
| D[24] | 1293.768        | 67.526         | 59.517          | 60.021          | 59.013          | D[1]  |

# sp | P62806 | H4\_MOUSE

[Acetyl]SGRGKGGKGLGK<sup>Acetyl</sup> 42.01 GGAKRHRK<sup>Dimethyl</sup> 28.03 VLRD

- ▶ fragmentation table for charge state 3+
- ▶ specType=etd
- ▶ score=101.58
- ▶ F121511.dat
- ▶ query=q35916.p1
- ▶ precursor=647.637990
- ▶ chargePrecursor=4
- ▶ itol=0.7

| AA    | c              | y              | z+1            | z+2            | z              | AA    |
|-------|----------------|----------------|----------------|----------------|----------------|-------|
| S[1]  | 49.697         | <b>863.176</b> | <b>857.836</b> | 0.672          | 857.900        | S[24] |
| G[2]  | 58.704         | 820.162        | <b>814.822</b> | 0.672          | <b>814.486</b> | G[23] |
| R[3]  | 120.738        | 801.154        | <b>795.815</b> | <b>796.151</b> | <b>795.479</b> | R[22] |
| G[4]  | 139.745        | 749.121        | 743.781        | 744.117        | 743.445        | G[21] |
| K[5]  | 182.443        | 730.114        | 724.774        | 725.110        | 724.438        | K[20] |
| G[6]  | 201.450        | 687.415        | 682.076        | 682.412        | 681.740        | G[19] |
| G[7]  | 220.458        | 668.408        | 663.069        | 663.404        | 662.733        | G[18] |
| K[8]  | 263.156        | 649.401        | 644.061        | 644.397        | 643.725        | K[17] |
| G[9]  | 282.163        | 606.703        | 601.363        | 601.699        | 601.027        | G[16] |
| L[10] | 319.858        | 587.695        | 582.355        | 582.692        | 582.020        | L[15] |
| G[11] | 338.865        | 550.001        | 544.661        | <b>544.997</b> | 544.325        | G[14] |
| K[12] | 395.567        | 530.994        | 525.654        | 525.990        | 525.318        | K[13] |
| G[13] | 414.574        | 474.292        | 468.952        | 469.288        | 468.616        | G[12] |
| G[14] | 433.581        | 455.285        | 449.945        | 450.281        | 449.609        | G[11] |
| A[15] | 457.260        | 436.277        | 430.938        | 431.274        | 430.602        | A[10] |
| K[16] | 499.958        | 412.998        | 407.259        | 407.595        | 406.923        | K[9]  |
| R[17] | 551.992        | 369.900        | 364.561        | 364.896        | 364.225        | R[8]  |
| H[18] | 597.678        | 317.866        | 312.527        | 312.863        | 312.191        | H[7]  |
| R[19] | 649.712        | 272.180        | 266.941        | 267.176        | 266.505        | R[6]  |
| K[20] | 701.754        | 220.146        | 214.807        | 215.143        | 214.471        | K[5]  |
| V[21] | 734.777        | 168.104        | 162.765        | 163.101        | 162.429        | V[4]  |
| L[22] | 772.472        | 135.082        | 129.742        | 130.078        | 129.406        | L[3]  |
| R[23] | <b>824.505</b> | 97.387         | 92.047         | 92.383         | 91.711         | R[2]  |
| D[24] | 862.848        | 45.353         | 40.014         | 40.349         | 39.678         | D[1]  |





# sp | P62806 | H4\_MOUSE

[Acetyl]SGRGKGGKGLGKGGAK<sup>Acetyl</sup>42.01 RHR<sup>Dimethyl</sup>28.03 K<sup>Methyl</sup>14.02 VLRD

- ▶ fragmentation table for charge state 1+
- ▶ specType=etd
- ▶ score=71.26
- ▶ F121511.dat
- ▶ query=q36030.p1
- ▶ precursor=521.114360
- ▶ chargePrecursor=5
- ▶ itol=0.7

| AA | c  | y               | z+1            | z+2            | z              | AA       |   |    |
|----|----|-----------------|----------------|----------------|----------------|----------|---|----|
| S  | 1  | 147.076         | 2601.528       | 2585.510       | 0.000          | 2584.502 | S | 24 |
| G  | 2  | 224.998         | 2372.488       | 2456.487       | 0.000          | 2455.493 | G | 23 |
| R  | 3  | <b>360.199</b>  | 2415.464       | 2399.446       | 2400.453       | 2398.438 | R | 22 |
| G  | 4  | <b>417.220</b>  | 2259.363       | 2243.345       | 2244.352       | 2242.337 | G | 21 |
| K  | 5  | <b>545.315</b>  | 2202.342       | 2186.323       | 2187.331       | 2185.315 | K | 20 |
| G  | 6  | 602.337         | 2074.247       | 2058.228       | 2059.236       | 2057.220 | G | 19 |
| G  | 7  | <b>659.358</b>  | 2017.225       | 2001.207       | 2002.214       | 2000.199 | G | 18 |
| K  | 8  | <b>787.453</b>  | 1960.204       | 1944.185       | 1945.193       | 1943.177 | K | 17 |
| G  | 9  | 844.475         | 1832.109       | 1816.090       | 1817.098       | 1815.082 | G | 16 |
| L  | 10 | <b>957.559</b>  | 1779.087       | 1759.069       | 1760.077       | 1758.061 | L | 15 |
| G  | 11 | <b>1014.580</b> | 1662.083       | 1645.965       | 1646.993       | 1644.977 | G | 14 |
| K  | 12 | 1142.075        | 1604.982       | 1588.963       | 1589.971       | 1587.955 | K | 13 |
| G  | 13 | 1199.697        | 1476.887       | 1460.868       | 1461.876       | 1459.860 | G | 12 |
| G  | 14 | 1256.718        | 1419.886       | 1403.847       | 1404.855       | 1402.839 | G | 11 |
| A  | 15 | 1327.795        | 1362.844       | 1346.825       | 1347.833       | 1345.818 | A | 10 |
| K  | 16 | 1407.881        | 1291.807       | 1275.788       | 1276.796       | 1274.780 | K | 9  |
| R  | 17 | 1673.864        | 1121.701       | 1105.683       | 1106.691       | 1104.675 | R | 8  |
| H  | 18 | 1791.021        | 995.020        | 949.582        | 950.589        | 948.574  | H | 7  |
| R  | 19 | 1975.153        | 828.541        | 812.523        | 813.530        | 811.515  | R | 6  |
| K  | 20 | 2117.264        | <b>644.409</b> | <b>628.390</b> | <b>629.398</b> | 627.383  | K | 5  |
| V  | 21 | 2216.332        | 502.298        | <b>486.280</b> | 487.287        | 485.272  | V | 4  |
| L  | 22 | 2329.416        | 403.230        | <b>387.211</b> | <b>388.219</b> | 386.203  | L | 3  |
| R  | 23 | 2485.517        | 290.146        | <b>274.127</b> | 275.135        | 273.119  | R | 2  |
| D  | 24 | 2690.544        | 134.045        | 118.026        | 119.034        | 117.018  | D | 1  |

# sp | P62806 | H4\_MOUSE

[Acetyl]SGRGKGGKGLGKGGAK<sup>Acetyl</sup> RHR<sup>Dimethyl</sup> K<sup>Methyl</sup> VLDR<sup>14.02</sup>  
 42.01 28.03

- ▶ fragmentation table for charge state 2+
- ▶ specType=etd
- ▶ score=71.26
- ▶ F121511.dat
- ▶ query=q36030\_p1
- ▶ precursor=521.114360
- ▶ chargePrecursor=5
- ▶ itol=0.7

| AA    | c               | y              | z+1             | z+2             | z               | AA    |
|-------|-----------------|----------------|-----------------|-----------------|-----------------|-------|
| S[1]  | 74.042          | 1301.268       | 1293.259        | 0.504           | 1292.755        | S[24] |
| G[2]  | 102.553         | 1236.747       | 1228.737        | 0.504           | 1228.233        | G[23] |
| R[3]  | 180.603         | 1208.236       | 1200.226        | <b>1200.730</b> | 1199.723        | R[22] |
| G[4]  | 269.114         | 1139.885       | 1122.129        | <b>1122.680</b> | 1121.677        | G[21] |
| K[5]  | 273.163         | 1101.675       | 1093.665        | 1094.169        | 1093.165        | K[20] |
| G[6]  | 351.672         | 1037.627       | 1029.618        | <b>1030.122</b> | 1029.114        | G[19] |
| G[7]  | 330.183         | 1009.116       | <b>1001.107</b> | <b>1001.611</b> | <b>1000.603</b> | G[18] |
| K[8]  | 394.230         | 980.605        | <b>972.596</b>  | <b>973.100</b>  | 972.092         | K[17] |
| G[9]  | 427.741         | 916.538        | <b>908.549</b>  | <b>909.053</b>  | 908.045         | G[16] |
| L[10] | <b>479.283</b>  | 838.047        | <b>830.038</b>  | <b>830.542</b>  | 829.534         | L[15] |
| G[11] | <b>507.794</b>  | 831.505        | <b>823.496</b>  | <b>824.000</b>  | <b>822.992</b>  | G[14] |
| K[12] | <b>571.841</b>  | 802.995        | <b>794.985</b>  | <b>795.489</b>  | 794.481         | K[13] |
| G[13] | <b>600.352</b>  | <b>738.947</b> | <b>730.938</b>  | <b>731.442</b>  | <b>730.434</b>  | G[12] |
| G[14] | <b>628.863</b>  | 710.436        | <b>702.427</b>  | <b>702.931</b>  | <b>701.923</b>  | G[11] |
| A[15] | <b>664.381</b>  | 681.926        | <b>673.916</b>  | <b>674.420</b>  | <b>673.412</b>  | A[10] |
| R[16] | <b>749.434</b>  | 646.409        | <b>638.399</b>  | <b>638.902</b>  | <b>637.894</b>  | R[9]  |
| R[17] | <b>827.485</b>  | 561.354        | <b>553.345</b>  | <b>553.849</b>  | <b>552.841</b>  | R[8]  |
| H[18] | <b>896.014</b>  | 483.304        | <b>475.294</b>  | <b>475.798</b>  | 474.791         | H[7]  |
| R[19] | 968.080         | 414.774        | <b>406.765</b>  | <b>407.269</b>  | <b>406.261</b>  | R[6]  |
| K[20] | 1059.136        | 322.708        | 314.699         | 315.203         | 314.195         | K[5]  |
| V[21] | <b>1188.670</b> | 251.652        | 243.643         | 244.147         | 243.140         | V[4]  |
| L[22] | 1319.512        | 202.119        | 194.109         | 194.613         | 193.605         | L[3]  |
| R[23] | 1243.262        | 145.577        | 137.567         | 138.071         | 137.063         | R[2]  |
| D[24] | 1300.776        | 67.526         | 59.517          | 60.021          | 59.013          | D[1]  |

# sp | P62806 | H4\_MOUSE

[Acetyl]SGRGKGGKGLGKGGAK<sup>Acetyl</sup> RHR<sup>Dimethyl</sup> K<sup>Methyl</sup> VLRLD<sup>14.02</sup>  
 42.01 28.03

- ▶ fragmentation table for charge state 3+
- ▶ specType=etd
- ▶ score=71.26
- ▶ F121511.dat
- ▶ query=q36030.p1
- ▶ precursor=521.114360
- ▶ chargePrecursor=5
- ▶ itol=0.7

| AA    | c              | y              | z+1            | z+2            | z              | AA    |
|-------|----------------|----------------|----------------|----------------|----------------|-------|
| S[1]  | 49.697         | <b>867.848</b> | <b>862.508</b> | 0.672          | 862.172        | S[24] |
| G[2]  | 58.704         | 324.833        | <b>819.494</b> | 0.672          | 819.158        | G[23] |
| R[3]  | 150.738        | <b>805.826</b> | <b>800.487</b> | <b>800.823</b> | 800.151        | R[22] |
| G[4]  | 139.745        | 753.793        | <b>748.453</b> | <b>748.789</b> | <b>748.117</b> | G[21] |
| K[5]  | 182.443        | 734.785        | <b>729.446</b> | <b>729.782</b> | <b>729.110</b> | K[20] |
| G[6]  | 201.450        | 692.087        | <b>686.748</b> | <b>687.083</b> | <b>686.412</b> | G[19] |
| G[7]  | 220.458        | <b>673.080</b> | <b>667.740</b> | <b>668.076</b> | 667.404        | G[18] |
| K[8]  | 263.156        | 654.073        | 648.733        | 649.069        | 648.399        | K[17] |
| G[9]  | 282.163        | <b>611.374</b> | <b>606.035</b> | <b>606.371</b> | <b>605.699</b> | G[16] |
| L[10] | 319.858        | 602.367        | <b>587.028</b> | <b>587.364</b> | <b>586.692</b> | L[15] |
| G[11] | 338.865        | <b>554.673</b> | <b>549.333</b> | <b>549.669</b> | <b>548.997</b> | G[14] |
| K[12] | 381.563        | <b>535.666</b> | <b>530.326</b> | <b>530.662</b> | <b>529.990</b> | K[13] |
| G[13] | 400.570        | 492.967        | 487.628        | 487.964        | 487.292        | G[12] |
| G[14] | 419.578        | 473.960        | 468.620        | 468.956        | 468.285        | G[11] |
| A[15] | 443.257        | 454.953        | 449.613        | 449.949        | 449.277        | A[10] |
| K[16] | 469.958        | 431.274        | 425.934        | 426.270        | 425.598        | K[9]  |
| R[17] | <b>551.992</b> | 374.572        | 369.232        | 369.568        | 368.896        | R[8]  |
| H[18] | 597.878        | 322.538        | 317.198        | 317.535        | 316.863        | H[7]  |
| R[19] | <b>659.056</b> | 276.852        | 271.512        | 271.848        | 271.176        | R[6]  |
| K[20] | <b>706.426</b> | 215.475        | 210.135        | 210.471        | 209.799        | K[5]  |
| V[21] | <b>738.449</b> | 168.104        | 162.764        | 163.101        | 162.429        | V[4]  |
| L[22] | <b>777.144</b> | 135.082        | 129.742        | 130.078        | 129.406        | L[3]  |
| R[23] | <b>829.177</b> | 97.387         | 92.047         | 92.383         | 91.711         | R[2]  |
| D[24] | <b>867.520</b> | 45.353         | 40.014         | 40.349         | 39.678         | D[1]  |

# sp | P62806 | H4\_MOUSE

[Acetyl]SGRGKGGKGLGKGGAK<sup>Acetyl</sup> RHR<sup>Dimethyl</sup> K<sup>Methyl</sup> VLRLD<sup>14.02</sup>  
 42.01 28.03

- ▶ fragmentation table for charge state 4+
- ▶ specType=etd
- ▶ score=71.26
- ▶ F121511.dat
- ▶ query=q36030.p1
- ▶ precursor=521.114360
- ▶ chargePrecursor=5
- ▶ itol=0.7

| AA    | c              | y              | z+1            | z+2            | z              | AA    |
|-------|----------------|----------------|----------------|----------------|----------------|-------|
| S[1]  | 37.525         | <b>651.130</b> | <b>647.133</b> | 0.755          | <b>646.081</b> | S[24] |
| G[2]  | 51.780         | <b>618.077</b> | <b>614.072</b> | 0.755          | <b>614.620</b> | G[23] |
| R[3]  | 90.805         | 604.622        | <b>600.617</b> | <b>600.869</b> | <b>600.365</b> | R[22] |
| G[4]  | 105.061        | 595.596        | 561.592        | 561.844        | 561.340        | G[21] |
| K[5]  | 137.084        | 551.341        | 547.336        | 547.588        | 547.084        | K[20] |
| G[6]  | 151.340        | 519.317        | 515.312        | 515.564        | 515.061        | G[19] |
| G[7]  | 165.595        | 505.062        | 501.057        | 501.309        | 500.805        | G[18] |
| K[8]  | 197.619        | 490.806        | <b>486.802</b> | 487.054        | <b>486.550</b> | K[17] |
| G[9]  | 211.874        | 456.783        | 455.778        | 455.030        | 454.526        | G[16] |
| L[10] | 300.148        | 444.527        | 440.523        | 440.775        | 440.271        | L[15] |
| G[11] | 354.403        | 416.256        | 412.252        | 412.504        | 412.000        | G[14] |
| K[12] | 286.424        | 402.001        | 397.996        | 398.248        | 397.744        | K[13] |
| G[13] | 300.680        | 369.977        | 365.973        | 366.224        | 365.721        | G[12] |
| G[14] | 314.935        | 355.722        | 351.717        | 351.969        | 351.465        | G[11] |
| A[15] | 332.694        | 341.466        | 337.462        | 337.714        | 337.210        | A[10] |
| K[16] | 375.221        | 323.707        | 319.703        | 319.954        | 319.451        | K[9]  |
| R[17] | 414.246        | 301.181        | 277.176        | 277.428        | 276.924        | R[8]  |
| H[18] | 448.511        | 282.156        | 238.151        | 238.403        | 237.899        | H[7]  |
| R[19] | 494.544        | 207.891        | 203.886        | 204.138        | 203.634        | R[6]  |
| K[20] | <b>530.071</b> | 161.858        | 157.853        | 158.105        | 157.601        | K[5]  |
| V[21] | <b>554.839</b> | 126.330        | 122.325        | 122.577        | 122.073        | V[4]  |
| L[22] | 583.110        | 101.563        | 97.558         | 97.810         | 97.306         | L[3]  |
| R[23] | <b>622.135</b> | 73.292         | 69.287         | 69.539         | 69.035         | R[2]  |
| D[24] | <b>650.892</b> | 34.267         | 30.262         | 30.514         | 30.010         | D[1]  |

# sp | P62806 | H4\_MOUSE

[Acetyl]SGRGKGGKGLGK <sup>Acetyl</sup> 42.01 GGAK <sup>Acetyl</sup> 42.01 RHRKVL R <sup>(Methyl)</sup> 14.02 D

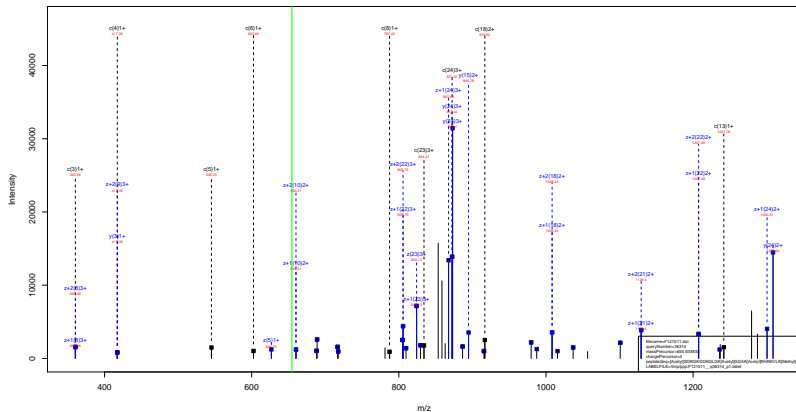

# sp | P62806 | H4\_MOUSE

[Acetyl]SGRGKGGKGLGK<sub>42.01</sub> GGAK<sub>42.01</sub> RHRKVL<sub>R</sub> (Methyl)<sub>D</sub> (14.02)

- ▶ fragmentation table for charge state 1+
- ▶ specType=etd
- ▶ score=70.19
- ▶ F121511.dat
- ▶ query=q36314.p1
- ▶ precursor=654.634830
- ▶ chargePrecursor=4
- ▶ itol=0.7

| AA | c               | y              | z+1      | z+2      | z              | AA    |
|----|-----------------|----------------|----------|----------|----------------|-------|
| S  | 147.070         | 2015.508       | 2399.489 | 0.000    | 2598.481       | S[24] |
| G  | 204.998         | 2498.465       | 2470.446 | 0.000    | 2469.439       | G[23] |
| R  | <b>300.190</b>  | 2929.443       | 2413.425 | 2414.433 | 2412.417       | R[22] |
| G  | <b>417.220</b>  | 2273.341       | 2257.334 | 2258.332 | 2256.316       | G[21] |
| K  | <b>545.315</b>  | 2216.321       | 2200.302 | 2201.301 | 2199.293       | K[20] |
| G  | <b>602.337</b>  | 2088.226       | 2072.207 | 2073.215 | 2071.200       | G[19] |
| G  | 609.358         | 2031.205       | 2016.186 | 2016.194 | 2014.178       | G[18] |
| K  | <b>787.453</b>  | 1974.183       | 1958.164 | 1959.172 | 1957.157       | K[17] |
| G  | 844.475         | 1846.068       | 1830.050 | 1831.077 | 1829.062       | G[16] |
| L  | 897.359         | 1799.947       | 1773.928 | 1774.936 | 1772.940       | L[15] |
| G  | 1014.580        | 1675.961       | 1659.944 | 1660.972 | 1658.956       | G[14] |
| K  | 1184.686        | 1618.961       | 1602.942 | 1603.950 | 1601.935       | K[13] |
| G  | <b>1241.707</b> | 1448.856       | 1432.837 | 1433.845 | 1431.829       | G[12] |
| G  | 1298.729        | 1391.834       | 1375.816 | 1376.823 | 1374.808       | G[11] |
| A  | 1369.766        | 1334.813       | 1318.794 | 1319.802 | 1317.786       | A[10] |
| K  | 1539.871        | 1263.776       | 1247.757 | 1248.765 | 1246.749       | K[9]  |
| R  | 1695.972        | 1193.670       | 1177.651 | 1178.659 | 1176.644       | R[8]  |
| H  | 1833.931        | 937.560        | 921.539  | 922.538  | 920.542        | H[7]  |
| R  | 1989.133        | 800.510        | 784.491  | 785.490  | 783.484        | R[6]  |
| K  | 2117.227        | 644.409        | 628.390  | 629.398  | <b>627.382</b> | K[5]  |
| V  | 2216.296        | 516.314        | 500.295  | 501.303  | 499.287        | V[4]  |
| L  | 2329.380        | <b>417.246</b> | 401.227  | 402.235  | 400.219        | L[3]  |
| R  | 2499.497        | 304.162        | 288.143  | 289.151  | 287.135        | R[2]  |
| D  | 2614.524        | 134.045        | 118.028  | 119.034  | 117.018        | D[1]  |

# sp | P62806 | H4\_MOUSE

[Acetyl]SGRGKGGKGLGK<sup>Acetyl</sup><sub>42.01</sub> GGAK<sup>Acetyl</sup><sub>42.01</sub> RHRKVL<sup>(Methyl)</sup><sub>(14.02)</sub> D

- ▶ fragmentation table for charge state 2+
- ▶ specType=etd
- ▶ score=70.19
- ▶ F121511.dat
- ▶ query=q36314\_p1
- ▶ precursor=654.634830
- ▶ chargePrecursor=4
- ▶ itol=0.7

| AA |    | c              | y               | z+1             | z+2             | z              | AA    |
|----|----|----------------|-----------------|-----------------|-----------------|----------------|-------|
| S  | 1  | 74.042         | <b>1308.257</b> | <b>1300.248</b> | 0.504           | 1209.744       | S[24] |
| G  | 2  | 102.553        | 1243.730        | <b>1235.727</b> | 0.504           | 1235.223       | G[23] |
| R  | 3  | 180.003        | 1215.225        | <b>1207.216</b> | <b>1207.720</b> | 1206.712       | R[22] |
| G  | 4  | 209.114        | 1137.375        | <b>1129.105</b> | <b>1129.669</b> | 1128.662       | G[21] |
| K  | 5  | 275.101        | 1108.664        | <b>1100.655</b> | <b>1101.159</b> | 1100.151       | K[20] |
| G  | 6  | 301.672        | 1044.617        | <b>1036.607</b> | <b>1037.111</b> | 1036.103       | G[19] |
| G  | 7  | 330.183        | <b>1016.106</b> | <b>1008.097</b> | <b>1008.601</b> | 1007.593       | G[18] |
| K  | 8  | 394.220        | <b>987.595</b>  | <b>979.586</b>  | <b>980.090</b>  | 979.082        | K[17] |
| G  | 9  | 422.741        | 923.549         | <b>915.538</b>  | <b>916.042</b>  | <b>915.034</b> | G[16] |
| L  | 10 | 479.283        | <b>895.037</b>  | <b>887.028</b>  | 887.532         | <b>886.525</b> | L[15] |
| G  | 11 | 507.794        | 838.495         | 830.486         | 830.990         | <b>829.982</b> | G[14] |
| R  | 12 | 592.847        | <b>809.984</b>  | 801.975         | 802.479         | 801.471        | R[13] |
| G  | 13 | 621.357        | 754.931         | <b>716.922</b>  | <b>717.426</b>  | <b>716.418</b> | G[12] |
| G  | 14 | 649.868        | 696.421         | <b>688.411</b>  | <b>688.915</b>  | <b>687.907</b> | G[11] |
| A  | 15 | 685.387        | 667.910         | <b>659.901</b>  | <b>660.405</b>  | 659.397        | A[10] |
| R  | 16 | 770.439        | 632.391         | 624.382         | 624.886         | 623.876        | R[9]  |
| R  | 17 | 848.490        | 547.339         | 539.329         | 539.833         | 538.825        | R[8]  |
| H  | 18 | <b>917.019</b> | 469.288         | 461.279         | 461.783         | 460.775        | H[7]  |
| R  | 19 | 995.070        | 400.759         | 392.749         | 393.253         | 392.245        | R[6]  |
| R  | 20 | 1059.117       | 322.708         | 314.699         | 315.203         | 314.195        | R[5]  |
| V  | 21 | 1108.652       | 258.661         | 250.651         | 251.155         | 250.147        | V[4]  |
| L  | 22 | 1165.194       | 206.126         | 201.117         | 201.621         | 200.613        | L[3]  |
| D  | 23 | 1250.252       | 152.584         | 144.575         | 145.079         | 144.071        | D[2]  |
| D  | 24 | 1307.765       | 87.525          | 89.517          | 89.021          | 89.013         | D[1]  |



# sp | P62806 | H4\_MOUSE

[Acetyl]SGRGKGGKGLGK <sup>Acetyl</sup>42.01 GGAK <sup>Acetyl</sup>42.01 RHRKVLK <sup>(Methyl)</sup>(14.02) D

- ▶ fragmentation table for charge state 3+
- ▶ specType=etd
- ▶ score=70.19
- ▶ F121511.dat
- ▶ query=q36314.p1
- ▶ precursor=654.634830
- ▶ chargePrecursor=4
- ▶ itol=0.7

| AA    | c              | y              | z+1            | z+2            | z              | AA    |
|-------|----------------|----------------|----------------|----------------|----------------|-------|
| S[1]  | 49.697         | <b>872.507</b> | <b>867.168</b> | 0.672          | 866.512        | S[24] |
| G[2]  | 68.704         | <b>820.493</b> | <b>824.154</b> | 0.672          | <b>821.818</b> | G[23] |
| R[3]  | 120.738        | <b>810.486</b> | <b>805.146</b> | <b>805.482</b> | <b>804.811</b> | R[22] |
| G[4]  | 139.745        | 758.452        | 751.113        | 753.440        | 752.777        | G[21] |
| K[5]  | 182.443        | 739.445        | 734.106        | 734.442        | 733.770        | K[20] |
| G[6]  | 201.450        | 696.747        | 691.407        | 691.743        | 691.071        | G[19] |
| G[7]  | 220.458        | 677.740        | 672.400        | 672.736        | 672.064        | G[18] |
| K[8]  | 263.156        | 658.733        | 653.393        | 653.729        | 653.057        | K[17] |
| G[9]  | 282.163        | 616.034        | 610.693        | 611.031        | 610.359        | G[16] |
| L[10] | 319.858        | 597.027        | 591.688        | 592.023        | 591.352        | L[15] |
| G[11] | 338.865        | 559.322        | 553.981        | 554.320        | 553.647        | G[14] |
| K[12] | 395.567        | 540.325        | 534.985        | 535.322        | 534.650        | K[13] |
| G[13] | 414.574        | 483.623        | 478.284        | 478.620        | 477.948        | G[12] |
| G[14] | 433.581        | 464.616        | 459.277        | 459.613        | 458.941        | G[11] |
| A[15] | 497.260        | 445.609        | 440.270        | 440.605        | 439.934        | A[10] |
| K[16] | 513.962        | 421.930        | 416.590        | <b>416.926</b> | 416.255        | K[9]  |
| R[17] | 565.996        | 365.228        | <b>359.889</b> | <b>360.225</b> | 359.553        | R[8]  |
| H[18] | 611.682        | 313.195        | 307.853        | 308.191        | 307.519        | H[7]  |
| R[19] | 663.716        | 267.508        | 262.169        | 262.505        | 261.833        | R[6]  |
| K[20] | 708.414        | 215.875        | 210.535        | 210.871        | 209.999        | K[5]  |
| V[21] | 739.437        | 172.776        | 167.437        | 167.773        | 167.101        | V[4]  |
| L[22] | 777.132        | 130.753        | 134.414        | 134.750        | 134.078        | L[3]  |
| R[23] | <b>833.837</b> | 102.059        | 96.719         | 97.055         | 96.383         | R[2]  |
| D[24] | <b>872.179</b> | 45.353         | 40.014         | 40.349         | 39.678         | D[1]  |

# sp | P62806 | H4\_MOUSE

[Acetyl]SGR<sup>Methyl</sup><sub>14.02</sub> GKGGKGLGKGGAKRHRK (Acetyl)<sub>(42.01)</sub> VLR (Trimethyl)<sub>(42.05)</sub> D

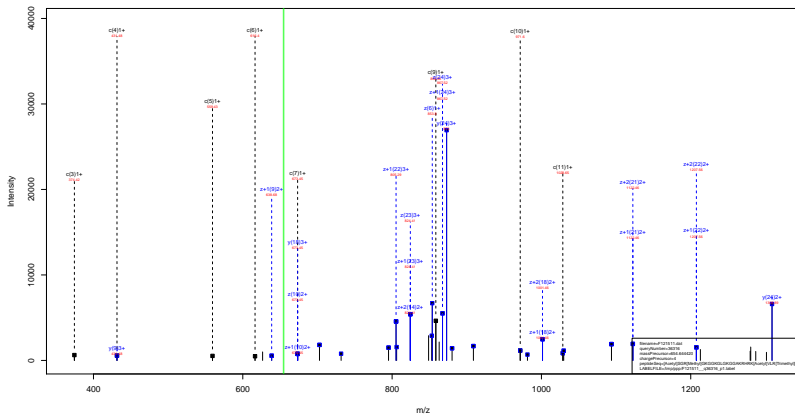

# sp | P62806 | H4\_MOUSE

[Acetyl]SGR<sup>Methyl</sup><sub>14.02</sub> GKGGKGLGKGGAKRHRK<sup>(Acetyl)</sup><sub>(42.01)</sub> VLR<sup>(Trimethyl)</sup><sub>(42.05)</sub> D

- ▶ fragmentation table for charge state 1+
- ▶ specType=etd
- ▶ score=79.23
- ▶ F121511.dat
- ▶ query=q36316.p1
- ▶ precursor=654.644420
- ▶ chargePrecursor=4
- ▶ itol=0.7

| AA |    | c               | y        | z+1      | z+2      | z              | AA    |
|----|----|-----------------|----------|----------|----------|----------------|-------|
| S  | 1  | 147.070         | 2015.544 | 2399.525 | 0.000    | 2598.518       | S[24] |
| G  | 2  | 204.098         | 2486.501 | 2470.453 | 0.000    | 2469.475       | G[23] |
| R  | 3  | <b>374.215</b>  | 2329.480 | 2413.463 | 2414.489 | 2412.453       | R[22] |
| G  | 4  | <b>431.236</b>  | 2259.361 | 2243.345 | 2244.352 | 2242.337       | G[21] |
| K  | 5  | <b>559.331</b>  | 2202.342 | 2186.323 | 2187.331 | 2185.315       | K[20] |
| G  | 6  | <b>616.353</b>  | 2074.347 | 2058.328 | 2059.336 | 2057.220       | G[19] |
| G  | 7  | <b>673.374</b>  | 2017.225 | 2001.207 | 2002.214 | 2000.199       | G[18] |
| K  | 8  | 801.469         | 1960.204 | 1944.185 | 1945.193 | 1943.177       | K[17] |
| G  | 9  | <b>858.490</b>  | 1832.109 | 1816.090 | 1817.098 | 1815.082       | G[16] |
| L  | 10 | <b>913.514</b>  | 1775.087 | 1759.069 | 1760.077 | 1758.061       | L[15] |
| G  | 11 | <b>1028.596</b> | 1662.001 | 1645.985 | 1646.993 | 1644.977       | G[14] |
| K  | 12 | 1156.001        | 1604.982 | 1588.963 | 1589.971 | 1587.955       | K[13] |
| G  | 13 | 1213.712        | 1476.887 | 1460.868 | 1461.876 | 1459.860       | G[12] |
| G  | 14 | 1270.734        | 1419.866 | 1403.847 | 1404.855 | 1402.839       | G[11] |
| A  | 15 | 1341.771        | 1362.844 | 1346.825 | 1347.833 | 1345.818       | A[10] |
| K  | 16 | 1469.806        | 1291.807 | 1275.788 | 1276.796 | 1274.780       | K[9]  |
| R  | 17 | 1625.967        | 1163.712 | 1147.693 | 1148.701 | 1146.685       | R[8]  |
| H  | 18 | 1763.026        | 1027.611 | 991.592  | 992.600  | 990.584        | H[7]  |
| R  | 19 | 1919.127        | 870.552  | 854.533  | 855.541  | <b>853.525</b> | R[6]  |
| K  | 20 | 2089.233        | 714.451  | 698.432  | 699.440  | 697.424        | K[5]  |
| V  | 21 | 2188.301        | 544.345  | 528.327  | 529.334  | 527.319        | V[4]  |
| L  | 22 | 2301.385        | 445.277  | 429.258  | 430.266  | 428.250        | L[3]  |
| R  | 23 | 2499.533        | 332.193  | 316.174  | 317.182  | 315.166        | R[2]  |
| D  | 24 | 2614.560        | 134.045  | 118.028  | 119.034  | 117.018        | D[1]  |

# sp | P62806 | H4\_MOUSE

[Acetyl]SGR<sup>Methyl</sup><sub>14.02</sub> GKGGKGLGKGGAKRHRK<sup>(Acetyl)</sup><sub>(42.01)</sub> VLR<sup>(Trimethyl)</sup><sub>(42.05)</sub> D

- ▶ fragmentation table for charge state 2+
- ▶ specType=etd
- ▶ score=79.23
- ▶ F121511.dat
- ▶ query=q36316.p1
- ▶ precursor=654.644420
- ▶ chargePrecursor=4
- ▶ itol=0.7

| AA    | c        | y               | z+1             | z+2             | z               | AA    |
|-------|----------|-----------------|-----------------|-----------------|-----------------|-------|
| S[1]  | 74.042   | <b>1308.276</b> | 1300.269        | 0.504           | 1299.762        | S[24] |
| G[2]  | 102.553  | 1243.754        | 1235.745        | 0.504           | 1235.241        | G[23] |
| R[3]  | 187.611  | 1215.244        | <b>1207.234</b> | <b>1207.738</b> | 1206.730        | R[22] |
| G[4]  | 210.122  | 1130.189        | <b>1122.178</b> | <b>1122.680</b> | 1121.672        | G[21] |
| K[5]  | 280.199  | 1101.675        | <b>1093.665</b> | <b>1094.169</b> | <b>1093.161</b> | K[20] |
| G[6]  | 308.680  | 1037.627        | <b>1029.618</b> | <b>1030.122</b> | <b>1029.114</b> | G[19] |
| G[7]  | 337.191  | 1009.116        | <b>1001.107</b> | <b>1001.611</b> | 1000.603        | G[18] |
| K[8]  | 401.238  | <b>980.606</b>  | 972.599         | 973.100         | <b>972.092</b>  | K[17] |
| G[9]  | 429.749  | 916.558         | <b>908.549</b>  | <b>909.053</b>  | 908.045         | G[16] |
| L[10] | 480.291  | 838.247         | <b>830.238</b>  | <b>830.742</b>  | 829.734         | L[15] |
| G[11] | 514.802  | 811.505         | 811.406         | <b>824.000</b>  | 823.992         | G[14] |
| K[12] | 578.849  | 802.995         | <b>794.985</b>  | <b>795.489</b>  | 794.481         | K[13] |
| G[13] | 607.360  | 738.947         | 738.938         | <b>731.442</b>  | 730.434         | G[12] |
| G[14] | 635.871  | 710.436         | <b>702.427</b>  | <b>702.931</b>  | 701.923         | G[11] |
| A[15] | 671.389  | 681.926         | <b>673.916</b>  | 674.420         | <b>673.412</b>  | A[10] |
| R[16] | 735.437  | 616.407         | <b>618.398</b>  | <b>618.902</b>  | 617.894         | R[9]  |
| R[17] | 813.487  | 582.360         | 578.352         | 574.344         | 573.846         | R[8]  |
| H[18] | 882.019  | 504.309         | 496.300         | 496.804         | 495.796         | H[7]  |
| R[19] | 960.067  | 435.780         | 427.770         | 428.274         | 427.266         | R[6]  |
| K[20] | 1045.120 | 357.729         | 349.720         | 350.224         | 349.216         | K[5]  |
| V[21] | 1094.654 | 272.676         | 264.667         | 265.171         | 264.163         | V[4]  |
| L[22] | 1151.196 | 223.142         | 215.133         | 215.637         | 214.629         | L[3]  |
| R[23] | 1250.276 | 158.000         | 158.501         | 158.095         | 158.087         | R[2]  |
| D[24] | 1307.784 | 67.526          | 59.517          | 60.021          | 59.013          | D[1]  |

# sp | P62806 | H4\_MOUSE

[Acetyl]SGR<sup>Methyl</sup><sub>14.02</sub> GKGGKGLGKGGAKRHRK<sup>(Acetyl)</sup><sub>(42.01)</sub> VLR<sup>(Trimethyl)</sup><sub>(42.05)</sub> D

- ▶ fragmentation table for charge state 3+
- ▶ specType=etd
- ▶ score=79.23
- ▶ F121511.dat
- ▶ query=q36316.p1
- ▶ precursor=654.644420
- ▶ chargePrecursor=4
- ▶ itol=0.7

| AA    | c       | y              | z+1            | z+2            | z              | AA    |
|-------|---------|----------------|----------------|----------------|----------------|-------|
| S[1]  | 49.697  | <b>872.520</b> | <b>867.180</b> | 0.672          | <b>866.844</b> | S[24] |
| G[2]  | 68.704  | 829.925        | <b>824.166</b> | 0.672          | <b>823.830</b> | G[23] |
| R[3]  | 125.410 | 810.498        | <b>805.159</b> | <b>805.495</b> | <b>804.823</b> | R[22] |
| G[4]  | 144.417 | 753.993        | 748.451        | 748.789        | 748.117        | G[21] |
| K[5]  | 187.115 | 734.785        | 729.446        | 729.782        | 729.110        | K[20] |
| G[6]  | 206.122 | 692.087        | 686.748        | 687.083        | 686.412        | G[19] |
| G[7]  | 225.130 | <b>673.080</b> | 667.740        | 668.076        | 667.404        | G[18] |
| K[8]  | 267.828 | 694.073        | 648.731        | 649.069        | 648.397        | K[17] |
| G[9]  | 286.835 | 611.374        | 606.035        | 606.371        | 605.699        | G[16] |
| L[10] | 324.530 | 592.267        | 587.028        | 587.364        | 586.692        | L[15] |
| G[11] | 343.537 | 554.873        | 549.531        | 549.869        | 548.997        | G[14] |
| K[12] | 388.238 | 535.666        | 530.325        | 530.662        | 529.990        | K[13] |
| G[13] | 405.242 | 492.967        | 487.628        | 487.964        | 487.292        | G[12] |
| G[14] | 424.249 | 473.960        | 468.620        | 468.956        | 468.285        | G[11] |
| A[15] | 447.929 | 454.953        | 449.613        | 449.949        | 449.277        | A[10] |
| K[16] | 490.627 | <b>431.274</b> | 425.934        | 426.270        | 425.598        | K[9]  |
| R[17] | 542.661 | 388.576        | 383.236        | 383.572        | 382.900        | R[8]  |
| H[18] | 588.347 | 336.542        | 331.202        | 331.538        | 330.866        | H[7]  |
| R[19] | 640.381 | 290.856        | 285.516        | 285.852        | 285.180        | R[6]  |
| K[20] | 697.062 | 238.822        | 233.482        | 233.818        | 233.146        | K[5]  |
| V[21] | 730.135 | 182.320        | 176.980        | 177.316        | 176.644        | V[4]  |
| L[22] | 767.800 | 149.097        | 143.756        | 144.094        | 143.422        | L[3]  |
| R[23] | 833.849 | 111.402        | 106.063        | 106.399        | 105.727        | R[2]  |
| D[24] | 872.192 | 45.353         | 40.014         | 40.349         | 39.678         | D[1]  |

# sp | P62806 | H4\_MOUSE

[Acetyl]SGRGK (Acetyl 42.01) GKGLGKGGAK (Methyl 14.02) R (Methyl 14.02) HRK (Acetyl 42.01) VLRD

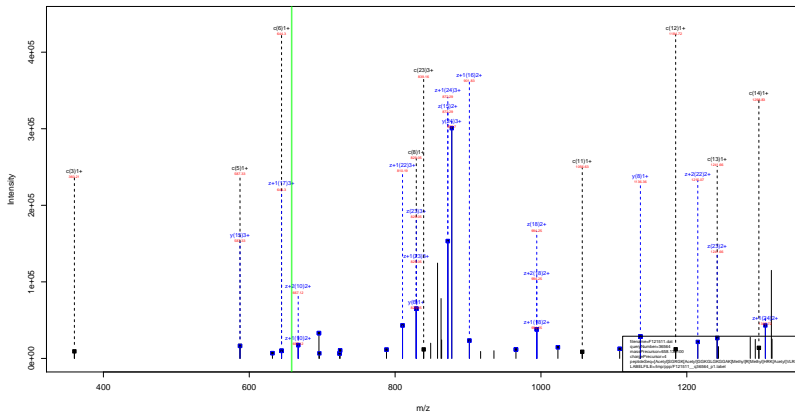

# sp | P62806 | H4\_MOUSE

[Acetyl]SGR<sup>Acetyl</sup>RGK<sup>42.01</sup> GGKGLGKGGAK<sup>(Methyl)</sup> R<sup>(Methyl)</sup> (14.02) HRK<sup>(Acetyl)</sup> VLRD<sup>(42.01)</sup>

- ▶ fragmentation table for charge state 1+
- ▶ specType=etd
- ▶ score=93.24
- ▶ F121511.dat
- ▶ query=q36564.p1
- ▶ precursor=658.138100
- ▶ chargePrecursor=4
- ▶ itol=0.7

| AA | c  | y               | z+1             | z+2      | z        | AA       |       |
|----|----|-----------------|-----------------|----------|----------|----------|-------|
| S  | 1  | 147.076         | 2029.523        | 2613.505 | 0.000    | 2612.497 | S[24] |
| G  | 2  | 204.098         | 2520.481        | 2484.402 | 0.000    | 2483.454 | G[23] |
| R  | 3  | <b>360.199</b>  | 2443.450        | 2427.441 | 2426.448 | 2426.413 | R[22] |
| G  | 4  | 417.220         | 2387.398        | 2271.338 | 2272.347 | 2270.323 | G[21] |
| K  | 5  | <b>507.326</b>  | 2230.337        | 2214.318 | 2215.326 | 2213.310 | K[20] |
| G  | 6  | <b>644.347</b>  | 2060.231        | 2044.212 | 2045.220 | 2043.205 | G[19] |
| G  | 7  | 701.369         | 2003.210        | 1987.191 | 1988.199 | 1986.183 | G[18] |
| K  | 8  | <b>829.464</b>  | 1946.188        | 1930.170 | 1931.177 | 1929.162 | K[17] |
| G  | 9  | 886.485         | 1818.093        | 1802.075 | 1803.082 | 1801.067 | G[16] |
| L  | 10 | 899.569         | 1761.072        | 1745.053 | 1746.061 | 1744.045 | L[15] |
| G  | 11 | <b>1056.591</b> | 1647.989        | 1631.969 | 1632.977 | 1630.961 | G[14] |
| K  | 12 | <b>1184.686</b> | 1590.968        | 1574.948 | 1575.955 | 1573.940 | K[13] |
| G  | 13 | <b>1241.707</b> | 1462.871        | 1446.853 | 1447.860 | 1445.845 | G[12] |
| G  | 14 | <b>1298.729</b> | 1405.850        | 1389.831 | 1390.839 | 1388.823 | G[11] |
| A  | 15 | 1369.766        | 1348.828        | 1332.810 | 1333.818 | 1331.802 | A[10] |
| K  | 16 | 1511.876        | 1277.780        | 1261.773 | 1262.780 | 1260.765 | K[9]  |
| R  | 17 | 1681.993        | <b>1135.681</b> | 1119.662 | 1120.670 | 1118.654 | R[8]  |
| H  | 18 | 1519.052        | <b>965.564</b>  | 949.545  | 950.553  | 948.537  | H[7]  |
| R  | 19 | 1975.153        | <b>828.505</b>  | 812.486  | 813.494  | 811.478  | R[6]  |
| K  | 20 | 2145.259        | 672.404         | 656.385  | 657.393  | 655.377  | K[5]  |
| V  | 21 | 2244.327        | 562.290         | 480.269  | 487.287  | 485.272  | V[4]  |
| L  | 22 | 2367.411        | 403.230         | 387.211  | 388.219  | 386.203  | L[3]  |
| R  | 23 | 2413.512        | 260.148         | 274.127  | 275.135  | 273.119  | R[2]  |
| D  | 24 | 2626.539        | 134.045         | 118.026  | 119.034  | 117.018  | D[1]  |

# sp | P62806 | H4\_MOUSE

[Acetyl]SGR<sup>Acetyl</sup>RGK<sup>42.01</sup> GGKGLGKGGAK<sup>(Methyl)</sup> R<sup>(Methyl)</sup> (14.02) HRK<sup>(Acetyl)</sup> VLRD<sup>(42.01)</sup>

- ▶ fragmentation table for charge state 2+
- ▶ specType=etd
- ▶ score=93.24
- ▶ F121511.dat
- ▶ query=q36564\_p1
- ▶ precursor=658.138100
- ▶ chargePrecursor=4
- ▶ itol=0.7

| AA    | c        | y        | z+1             | z+2             | z               | AA    |
|-------|----------|----------|-----------------|-----------------|-----------------|-------|
| S[1]  | 74.042   | 1315.395 | <b>1307.256</b> | 0.504           | 1306.753        | S[24] |
| G[2]  | 102.553  | 1250.744 | 1242.735        | 0.504           | <b>1242.231</b> | G[23] |
| R[3]  | 180.003  | 1222.233 | 1214.224        | <b>1214.720</b> | 1213.720        | R[22] |
| G[4]  | 209.114  | 1194.383 | <b>1136.173</b> | <b>1138.677</b> | <b>1135.669</b> | G[21] |
| K[5]  | 294.167  | 1115.672 | <b>1107.663</b> | <b>1108.167</b> | 1107.155        | K[20] |
| G[6]  | 322.677  | 1030.619 | <b>1022.610</b> | <b>1023.114</b> | 1022.106        | G[19] |
| G[7]  | 351.188  | 1002.108 | <b>994.099</b>  | <b>994.603</b>  | <b>993.595</b>  | G[18] |
| K[8]  | 415.236  | 973.598  | <b>965.588</b>  | <b>966.092</b>  | <b>965.084</b>  | K[17] |
| G[9]  | 443.746  | 900.550  | <b>901.541</b>  | <b>902.645</b>  | 901.037         | G[16] |
| L[10] | 502.288  | 811.040  | 873.032         | 873.534         | <b>872.526</b>  | L[15] |
| G[11] | 528.799  | 824.498  | 816.482         | 816.992         | 815.984         | G[14] |
| R[12] | 592.847  | 795.987  | <b>787.977</b>  | <b>788.481</b>  | 787.474         | R[13] |
| G[13] | 621.357  | 731.939  | <b>723.930</b>  | <b>724.434</b>  | <b>723.426</b>  | G[12] |
| G[14] | 649.868  | 703.429  | <b>695.419</b>  | <b>695.923</b>  | <b>694.915</b>  | G[11] |
| A[15] | 685.367  | 674.918  | <b>666.908</b>  | <b>667.412</b>  | 666.405         | A[10] |
| R[16] | 758.412  | 639.399  | <b>631.390</b>  | <b>631.894</b>  | 630.887         | R[9]  |
| R[17] | 843.500  | 568.344  | 568.332         | 568.339         | 569.831         | R[8]  |
| H[18] | 910.030  | 483.286  | 475.276         | 475.780         | 474.772         | H[7]  |
| R[19] | 988.080  | 414.756  | 406.747         | 407.251         | 406.243         | R[6]  |
| R[20] | 1073.123 | 336.706  | 328.696         | 329.200         | 328.192         | R[5]  |
| V[21] | 1122.667 | 251.653  | 243.643         | 244.147         | 243.140         | V[4]  |
| L[22] | 1179.208 | 202.119  | 194.109         | 194.613         | 193.605         | L[3]  |
| D[23] | 1257.268 | 149.577  | 137.567         | 138.071         | 137.064         | D[2]  |
| D[24] | 1314.773 | 67.526   | 58.517          | 59.021          | 58.013          | D[1]  |



# sp | P62806 | H4\_MOUSE

[Acetyl]SGRGK<sup>Acetyl</sup><sub>42.01</sub> GKGLGKGGAK<sup>(Methyl)</sup><sub>(14.02)</sub> R<sup>(Methyl)</sup><sub>(14.02)</sub> HRK<sup>(Acetyl)</sup><sub>(42.01)</sub> VLRD

- ▶ fragmentation table for charge state 3+
- ▶ specType=etd
- ▶ score=93.24
- ▶ F121511.dat
- ▶ query=q36564.p1
- ▶ precursor=658.138100
- ▶ chargePrecursor=4
- ▶ itol=0.7

| AA    | c              | y              | z+1            | z+2            | z              | AA    |
|-------|----------------|----------------|----------------|----------------|----------------|-------|
| S[1]  | 69.697         | <b>877.179</b> | <b>871.840</b> | 0.672          | 871.208        | S[24] |
| G[2]  | 68.704         | 874.165        | <b>828.826</b> | 0.672          | <b>828.490</b> | G[23] |
| R[3]  | 120.738        | 515.155        | <b>809.818</b> | <b>810.154</b> | 809.482        | R[22] |
| G[4]  | 159.745        | 763.124        | 757.785        | 758.121        | 757.449        | G[21] |
| K[5]  | 196.447        | 744.117        | 738.778        | 739.113        | 738.442        | K[20] |
| G[6]  | 215.454        | 687.415        | 682.076        | 682.412        | 681.740        | G[19] |
| G[7]  | 234.461        | 608.408        | 603.069        | 603.404        | 602.733        | G[18] |
| K[8]  | 277.159        | 649.401        | <b>644.061</b> | <b>644.397</b> | <b>643.725</b> | K[17] |
| G[9]  | 296.167        | 606.703        | 601.363        | 601.699        | 601.027        | G[16] |
| L[10] | 313.261        | <b>587.695</b> | 582.356        | 582.692        | 582.020        | L[15] |
| G[11] | 352.868        | 530.201        | 544.667        | 544.997        | 544.325        | G[14] |
| K[12] | 395.567        | 530.994        | 525.654        | 525.990        | 525.318        | K[13] |
| G[13] | 414.574        | 488.295        | 482.956        | 483.292        | 482.620        | G[12] |
| G[14] | 433.581        | 469.288        | 463.949        | 464.285        | 463.613        | G[11] |
| A[15] | 497.260        | 450.281        | 444.941        | 445.277        | 444.605        | A[10] |
| K[16] | 504.630        | 426.602        | 421.262        | 421.598        | 420.926        | K[9]  |
| R[17] | 561.336        | 379.232        | 373.892        | 374.228        | 373.556        | R[8]  |
| H[18] | 607.022        | 322.526        | 317.187        | 317.523        | 316.851        | H[7]  |
| R[19] | 659.056        | 276.840        | 271.500        | 271.836        | 271.164        | R[6]  |
| K[20] | 715.758        | 224.806        | 219.467        | 219.803        | 219.131        | K[5]  |
| V[21] | 748.781        | 108.104        | 182.765        | 183.101        | 182.429        | V[4]  |
| L[22] | 786.475        | 135.082        | 129.742        | 130.078        | 129.406        | L[3]  |
| R[23] | <b>838.509</b> | 97.387         | 92.047         | 92.383         | 91.711         | R[2]  |
| D[24] | 876.851        | 45.353         | 40.014         | 40.349         | 39.678         | D[1]  |



# sp | P62806 | H4\_MOUSE

[Acetyl]SGRGKGGKGLGK<sup>Acetyl</sup><sub>42.01</sub> GGAK<sup>Acetyl</sup><sub>42.01</sub> RHRKVL<sup>Dimethyl</sup><sub>28.03</sub> D

- ▶ fragmentation table for charge state 1+
- ▶ specType=etd
- ▶ score=59.76
- ▶ F121511.dat
- ▶ query=q36566.p1
- ▶ precursor=658.140140
- ▶ chargePrecursor=4
- ▶ itol=0.7

| AA |    | c               | y               | z+1            | z+2      | z        | AA    |
|----|----|-----------------|-----------------|----------------|----------|----------|-------|
| S  | 1  | 147.076         | 2629.533        | 2633.505       | 0.000    | 2612.497 | S[24] |
| G  | 2  | 254.596         | 2500.481        | 2484.402       | 0.000    | 2483.454 | G[23] |
| T  | 3  | <b>366.199</b>  | 2443.459        | 2427.481       | 2629.448 | 2428.433 | T[22] |
| G  | 4  | 417.220         | 2287.358        | 2271.339       | 2272.347 | 2270.332 | G[21] |
| K  | 5  | 546.315         | 2230.337        | 2214.318       | 2215.326 | 2213.310 | K[20] |
| G  | 6  | <b>602.337</b>  | 2102.242        | 2086.223       | 2087.231 | 2085.215 | G[19] |
| G  | 7  | 659.358         | 2045.220        | 2029.202       | 2030.209 | 2028.194 | G[18] |
| K  | 8  | <b>707.453</b>  | 1988.199        | 1972.180       | 1973.188 | 1971.172 | K[17] |
| G  | 9  | 864.475         | 1860.104        | 1844.085       | 1845.093 | 1843.077 | G[16] |
| L  | 10 | 927.509         | 1803.082        | 1787.064       | 1788.071 | 1786.056 | L[15] |
| G  | 11 | <b>1014.580</b> | 1689.998        | 1673.980       | 1674.987 | 1672.972 | G[14] |
| K  | 12 | <b>1104.686</b> | 1632.977        | 1616.958       | 1617.966 | 1615.950 | K[13] |
| G  | 13 | <b>1241.707</b> | 1462.871        | 1446.853       | 1447.860 | 1445.845 | G[12] |
| G  | 14 | 1298.729        | 1405.850        | 1389.831       | 1390.839 | 1388.823 | G[11] |
| A  | 15 | 1369.766        | 1348.828        | 1332.810       | 1333.818 | 1331.802 | A[10] |
| K  | 16 | 1539.874        | 1277.797        | 1261.778       | 1262.786 | 1260.769 | K[9]  |
| R  | 17 | 1695.973        | <b>1107.666</b> | 1091.667       | 1092.675 | 1090.659 | R[8]  |
| H  | 18 | 1833.031        | 951.585         | <b>935.586</b> | 936.574  | 934.558  | H[7]  |
| R  | 19 | 1989.133        | 814.526         | 798.507        | 799.515  | 797.499  | R[6]  |
| K  | 20 | 2117.227        | 658.425         | 642.406        | 643.414  | 641.398  | K[5]  |
| V  | 21 | 2216.296        | 530.330         | 514.311        | 515.319  | 513.303  | V[4]  |
| L  | 22 | 2320.380        | 431.261         | 415.243        | 416.250  | 414.235  | L[3]  |
| I  | 23 | 2513.512        | 315.177         | 302.158        | 303.166  | 301.151  | I[2]  |
| D  | 24 | 2638.539        | 134.045         | 118.026        | 119.034  | 117.018  | D[1]  |

# sp | P62806 | H4\_MOUSE

[Acetyl]SGRGKGGKGLGK<sup>Acetyl</sup><sub>42.01</sub> GGAK<sup>Acetyl</sup><sub>42.01</sub> RHRKVL<sup>Dimethyl</sup><sub>28.03</sub> D

- ▶ fragmentation table for charge state 2+
- ▶ specType=etd
- ▶ score=59.76
- ▶ F121511.dat
- ▶ query=q36566\_p1
- ▶ precursor=658.140140
- ▶ chargePrecursor=4
- ▶ itol=0.7

| AA    | c              | y              | z+1             | z+2             | z               | AA    |
|-------|----------------|----------------|-----------------|-----------------|-----------------|-------|
| S[1]  | 74.042         | 1315.205       | <b>1307.256</b> | 0.504           | 1306.752        | S[24] |
| G[2]  | 102.553        | 1290.744       | 1342.731        | 0.504           | <b>1242.231</b> | G[23] |
| R[3]  | 180.003        | 1222.231       | <b>1214.224</b> | <b>1214.720</b> | 1213.720        | R[22] |
| G[4]  | 209.114        | 1144.383       | <b>1136.175</b> | <b>1136.677</b> | 1135.669        | G[21] |
| K[5]  | 273.101        | 1115.072       | <b>1107.063</b> | <b>1108.167</b> | 1107.159        | K[20] |
| G[6]  | 301.872        | 1051.025       | 1043.615        | 1044.119        | 1043.111        | G[19] |
| G[7]  | 330.183        | 1023.114       | <b>1015.104</b> | <b>1015.608</b> | <b>1014.601</b> | G[18] |
| K[8]  | 394.230        | <b>994.603</b> | <b>986.594</b>  | <b>987.098</b>  | 986.090         | K[17] |
| G[9]  | 422.741        | 930.556        | <b>922.546</b>  | <b>923.050</b>  | 922.042         | G[16] |
| L[10] | 479.203        | 902.045        | 894.537         | 894.539         | 893.532         | L[15] |
| G[11] | 507.704        | 845.503        | <b>837.493</b>  | <b>837.997</b>  | 836.990         | G[14] |
| K[12] | 592.847        | 816.992        | <b>808.983</b>  | <b>809.487</b>  | 808.479         | K[13] |
| G[13] | 621.357        | 731.039        | <b>723.930</b>  | <b>724.434</b>  | 723.426         | G[12] |
| G[14] | 649.868        | 703.429        | <b>695.419</b>  | <b>695.923</b>  | <b>694.915</b>  | G[11] |
| A[15] | 685.357        | 674.918        | <b>666.908</b>  | <b>667.412</b>  | 666.405         | A[10] |
| R[16] | 770.438        | 639.399        | <b>631.390</b>  | <b>631.894</b>  | 630.886         | R[9]  |
| R[17] | <b>848.490</b> | 554.347        | 545.337         | 546.341         | 545.833         | R[8]  |
| H[18] | <b>917.019</b> | 476.296        | 468.287         | 468.791         | 467.783         | H[7]  |
| R[19] | <b>995.070</b> | 407.767        | 399.757         | 400.261         | 399.253         | R[6]  |
| K[20] | 1059.117       | 329.716        | 321.707         | 322.211         | 321.203         | K[5]  |
| V[21] | 1108.052       | 265.668        | 257.659         | 258.163         | 257.155         | V[4]  |
| L[22] | 1108.194       | 218.134        | 208.125         | 208.629         | 207.621         | L[3]  |
| R[23] | 1257.200       | 198.592        | 191.583         | 192.087         | 191.079         | R[2]  |
| D[24] | 1314.773       | 67.526         | 59.517          | 60.021          | 59.013          | D[1]  |

# sp | P62806 | H4\_MOUSE

[Acetyl]SGRGKGGKGLGK<sup>Acetyl</sup>42.01 GGAK<sup>Acetyl</sup>42.01 RHRKVL<sup>Dimethyl</sup>28.03 D

- ▶ fragmentation table for charge state 3+
- ▶ specType=etd
- ▶ score=59.76
- ▶ F121511.dat
- ▶ query=q36566.p1
- ▶ precursor=658.140140
- ▶ chargePrecursor=4
- ▶ itol=0.7

| AA    | c              | y              | z+1            | z+2            | z              | AA    |
|-------|----------------|----------------|----------------|----------------|----------------|-------|
| S[1]  | 49.697         | <b>877.179</b> | <b>871.840</b> | 0.672          | <b>871.504</b> | S[24] |
| G[2]  | 58.704         | <b>834.165</b> | <b>828.826</b> | 0.672          | <b>828.490</b> | G[23] |
| R[3]  | 150.738        | 815.150        | <b>809.818</b> | <b>810.154</b> | <b>809.482</b> | R[22] |
| G[4]  | 139.745        | 763.124        | 757.785        | 758.121        | 757.449        | G[21] |
| K[5]  | 182.443        | 744.117        | 738.778        | 739.113        | 738.442        | K[20] |
| G[6]  | 201.450        | 701.419        | <b>696.079</b> | 696.415        | <b>695.743</b> | G[19] |
| G[7]  | 220.458        | 682.412        | 677.072        | 677.408        | 676.736        | G[18] |
| K[8]  | 263.156        | 663.404        | 658.063        | 658.401        | 657.729        | K[17] |
| G[9]  | 282.163        | 620.706        | 615.367        | 615.703        | 615.031        | G[16] |
| L[10] | 319.858        | 601.699        | 596.359        | 596.695        | 596.023        | L[15] |
| G[11] | 338.865        | 564.004        | 558.665        | 559.001        | 558.329        | G[14] |
| K[12] | 395.567        | 544.997        | 539.658        | 539.994        | 539.322        | K[13] |
| G[13] | 414.574        | 488.295        | 482.956        | 483.292        | 482.620        | G[12] |
| G[14] | 433.581        | 469.288        | 463.949        | 464.285        | 463.613        | G[11] |
| A[15] | 457.260        | 450.281        | 444.941        | 445.277        | 444.605        | A[10] |
| K[16] | 513.962        | 426.602        | 421.262        | 421.598        | 420.926        | K[9]  |
| R[17] | 565.996        | 369.900        | 364.561        | 364.896        | 364.225        | R[8]  |
| H[18] | 611.682        | 317.896        | 312.527        | 312.863        | 312.191        | H[7]  |
| R[19] | 663.716        | 272.180        | 266.841        | 267.176        | 266.505        | R[6]  |
| K[20] | 706.414        | 220.146        | 214.807        | 215.143        | 214.471        | K[5]  |
| V[21] | 759.437        | 177.445        | 172.109        | 172.444        | 171.773        | V[4]  |
| L[22] | 777.132        | 144.425        | 139.086        | 139.422        | 138.750        | L[3]  |
| R[23] | <b>838.509</b> | 106.731        | 101.391        | 101.727        | 101.055        | R[2]  |
| D[24] | <b>876.851</b> | 45.353         | 40.014         | 40.349         | 39.678         | D[1]  |

# sp | Q6ZWY9 | H2B1C\_MOUSE

PEPAKSAPAPKKGSKKAVTK <sup>Acetyl</sup> AQKKD  
42.01

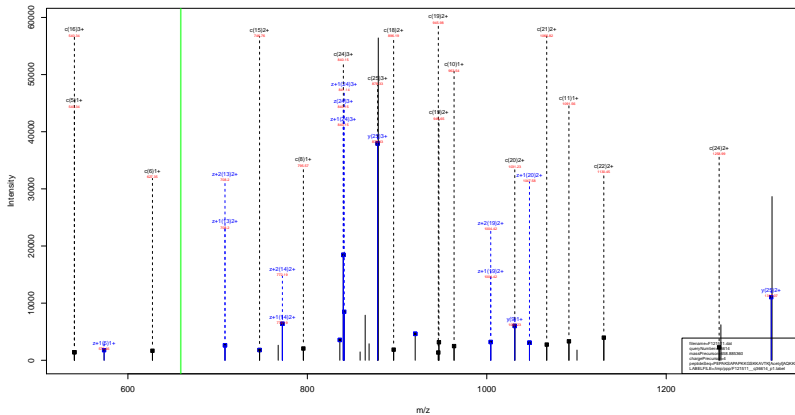

# sp | Q6ZWY9 | H2B1C\_MOUSE

PEPAKSAPAPKKGSKKAVTK<sup>Acetyl</sup> AQKKD  
42.01

- ▶ fragmentation table for charge state 1+
- ▶ specType=etd
- ▶ score=48.47
- ▶ F121511.dat
- ▶ query=q36614.p1
- ▶ precursor=658.885360
- ▶ chargePrecursor=4
- ▶ itol=0.7

| AA   | c               | v               | z+1            | z+2      | z        | AA   |
|------|-----------------|-----------------|----------------|----------|----------|------|
| P 1  | 115.087         | 2832.511        | 2038.496       | 0.000    | 2615.488 | P 25 |
| E 2  | 284.129         | 2535.462        | 2519.443       | 0.000    | 2512.435 | E 24 |
| P 3  | 341.182         | 2406.419        | 2390.400       | 0.000    | 2389.393 | P 23 |
| A 4  | 412.219         | 2309.366        | 2293.348       | 0.000    | 2292.340 | A 22 |
| K 5  | <b>540.314</b>  | 2238.329        | 2222.311       | 2223.318 | 2221.303 | K 21 |
| S 6  | <b>627.346</b>  | 2110.234        | 2094.216       | 2095.223 | 2093.209 | S 20 |
| A 7  | 697.381         | 2023.202        | 2007.184       | 2008.191 | 2006.176 | A 19 |
| P 8  | <b>795.436</b>  | 1952.165        | 1936.146       | 1937.154 | 1935.139 | P 18 |
| A 9  | 866.473         | 1855.112        | 1839.094       | 1840.101 | 1838.086 | A 17 |
| P 10 | <b>963.526</b>  | 1784.075        | 1768.057       | 1769.064 | 1767.049 | P 16 |
| K 11 | <b>1091.621</b> | 1687.022        | 1671.004       | 1672.012 | 1669.996 | K 15 |
| K 12 | 1219.716        | 1558.938        | 1542.909       | 1543.917 | 1541.901 | K 14 |
| G 13 | 1276.737        | 1430.833        | 1414.814       | 1415.822 | 1413.806 | G 13 |
| S 14 | 1363.769        | 1373.811        | 1357.792       | 1358.800 | 1356.785 | S 12 |
| K 15 | 1491.804        | 1258.779        | 1270.700       | 1271.708 | 1269.752 | K 11 |
| K 16 | 1619.999        | 1158.684        | 1142.665       | 1143.673 | 1141.658 | K 10 |
| A 17 | 1690.996        | <b>1030.589</b> | 1014.570       | 1015.578 | 1013.563 | A 9  |
| V 18 | 1790.005        | 959.552         | 943.533        | 944.541  | 942.525  | V 8  |
| T 19 | 1891.112        | 880.484         | 844.465        | 845.473  | 843.457  | T 7  |
| K 20 | 2081.218        | 798.430         | 783.417        | 784.426  | 782.409  | K 6  |
| A 21 | 2132.255        | 589.330         | <b>573.312</b> | 574.320  | 572.304  | A 5  |
| Q 22 | 2260.314        | 518.293         | 502.275        | 503.282  | 501.267  | Q 4  |
| K 23 | 2388.409        | 390.235         | 374.216        | 375.224  | 373.208  | K 3  |
| K 24 | 2516.504        | 262.140         | 246.121        | 247.129  | 245.113  | K 2  |
| D 25 | 2631.530        | 134.045         | 118.026        | 119.034  | 117.018  | D 1  |

# sp | Q6ZWY9 | H2B1C\_MOUSE

PEPAKSAPAPKKGSKKAVTK<sup>Acetyl</sup> AQQKD  
42.01

- ▶ fragmentation table for charge state 2+
- ▶ specType=etd
- ▶ score=48.47
- ▶ F121511.dat
- ▶ query=q36614.p1
- ▶ precursor=658.885360
- ▶ chargePrecursor=4
- ▶ itol=0.7

| AA | c  | y               | z+1             | z+2             | z               | AA              |       |
|----|----|-----------------|-----------------|-----------------|-----------------|-----------------|-------|
| P  | 1  | 58.047          | <b>1316.761</b> | 1308.752        | 0.504           | 1308.240        | P[25] |
| E  | 2  | 127.588         | 1288.278        | 1260.225        | 0.504           | 1259.721        | E[24] |
| F  | 3  | 171.095         | 1203.713        | 1195.704        | 0.504           | 1195.200        | F[23] |
| A  | 4  | 206.613         | 1155.187        | 1147.177        | 0.504           | 1146.674        | A[22] |
| K  | 5  | 270.681         | 1110.668        | 1111.658        | 1112.163        | 1111.155        | K[21] |
| S  | 6  | 314.177         | 1055.621        | <b>1047.611</b> | <b>1048.115</b> | <b>1047.107</b> | S[20] |
| A  | 7  | 349.695         | 1012.105        | <b>1004.095</b> | <b>1004.599</b> | 1003.591        | A[19] |
| F  | 8  | 388.222         | 976.588         | 968.577         | 969.081         | 968.073         | F[18] |
| A  | 9  | 433.740         | 928.060         | <b>920.050</b>  | <b>920.554</b>  | <b>919.547</b>  | A[17] |
| P  | 10 | 482.267         | 892.541         | 884.532         | 885.036         | 884.028         | P[16] |
| K  | 11 | 546.314         | 844.015         | <b>836.006</b>  | <b>836.509</b>  | 835.502         | K[15] |
| K  | 12 | 610.362         | 779.967         | <b>771.958</b>  | <b>772.462</b>  | 771.454         | K[14] |
| G  | 13 | 638.872         | 743.920         | <b>707.911</b>  | <b>708.414</b>  | 707.407         | G[13] |
| S  | 14 | 682.388         | 689.400         | 678.400         | 679.904         | 678.895         | S[12] |
| K  | 15 | <b>746.436</b>  | 643.891         | 635.884         | 636.388         | 635.380         | K[11] |
| K  | 16 | 810.483         | 579.846         | 571.836         | 572.340         | 571.332         | K[10] |
| A  | 17 | 848.022         | 515.798         | 507.789         | 508.293         | 507.285         | A[9]  |
| V  | 18 | <b>895.536</b>  | 480.280         | 472.270         | 472.774         | 471.766         | V[8]  |
| T  | 19 | <b>948.060</b>  | 438.745         | 429.738         | 429.240         | 428.232         | T[7]  |
| K  | 20 | <b>1031.113</b> | 380.222         | 372.212         | 372.716         | 371.708         | K[6]  |
| A  | 21 | <b>1066.631</b> | 295.189         | 287.179         | 287.683         | 286.675         | A[5]  |
| Q  | 22 | <b>1130.660</b> | 259.650         | 251.641         | 252.145         | 251.137         | Q[4]  |
| K  | 23 | 1194.708        | 195.621         | 187.612         | 188.116         | 187.108         | K[3]  |
| K  | 24 | <b>1258.755</b> | 131.574         | 123.564         | 124.068         | 123.060         | K[2]  |
| D  | 25 | 1318.250        | 67.526          | 59.517          | 60.021          | 59.013          | D[1]  |



# sp | Q6ZWH9 | H2B1C\_MOUSE

PEPAKSAPAPKKGSKKAVTK<sup>Acetyl</sup> AQQKD  
42.01

- ▶ fragmentation table for charge state 3+
- ▶ specType=etd
- ▶ score=48.47
- ▶ F121511.dat
- ▶ query=q36614.p1
- ▶ precursor=658.885360
- ▶ chargePrecursor=4
- ▶ itol=0.7

| AA |    | c              | y              | z+1            | z+2     | z              | AA |
|----|----|----------------|----------------|----------------|---------|----------------|----|
| P  | 1  | 39.034         | <b>878.176</b> | 872.837        | 0.672   | 872.501        | P  |
| E  | 2  | 82.048         | 845.825        | <b>840.486</b> | 0.672   | <b>840.150</b> | E  |
| P  | 3  | 114.399        | 802.811        | 797.472        | 0.672   | 797.135        | P  |
| A  | 4  | 138.078        | 770.460        | 765.121        | 0.672   | 764.785        | A  |
| K  | 5  | 180.776        | <b>746.781</b> | 741.442        | 741.778 | 741.156        | K  |
| S  | 6  | 209.737        | 704.583        | 699.743        | 699.079 | 698.407        | S  |
| A  | 7  | 233.406        | 675.072        | 669.733        | 670.069 | 669.397        | A  |
| P  | 8  | 265.817        | 651.393        | 646.054        | 646.390 | 645.718        | P  |
| A  | 9  | 299.496        | 619.042        | 613.703        | 614.039 | 613.367        | A  |
| P  | 10 | 321.847        | 595.363        | 590.024        | 590.360 | 589.688        | P  |
| K  | 11 | 364.545        | 563.012        | 557.673        | 558.009 | 557.337        | K  |
| K  | 12 | 407.243        | 520.314        | 514.974        | 515.310 | 514.639        | K  |
| G  | 13 | 426.251        | 477.616        | 472.275        | 472.612 | 471.940        | G  |
| S  | 14 | 455.261        | 458.609        | 453.269        | 453.605 | 452.933        | S  |
| K  | 15 | 497.960        | 429.598        | 424.258        | 424.594 | 423.922        | K  |
| K  | 16 | <b>540.658</b> | 395.900        | 391.560        | 391.896 | 391.224        | K  |
| A  | 17 | 564.537        | 344.201        | 338.862        | 339.198 | 338.526        | A  |
| V  | 18 | 597.360        | 320.522        | 315.183        | 315.519 | 314.847        | V  |
| T  | 19 | 631.042        | 287.499        | 282.159        | 282.496 | 281.824        | T  |
| K  | 20 | 687.744        | 253.817        | 248.477        | 248.813 | 248.141        | K  |
| A  | 21 | 711.423        | 197.115        | 191.775        | 192.111 | 191.439        | A  |
| Q  | 22 | 754.109        | 173.438        | 168.098        | 168.432 | 167.760        | Q  |
| K  | 23 | 796.808        | 130.750        | 125.410        | 125.746 | 125.074        | K  |
| K  | 24 | <b>839.506</b> | 88.051         | 82.712         | 83.048  | 82.376         | K  |
| D  | 25 | <b>877.848</b> | 45.353         | 40.014         | 40.349  | 39.678         | D  |



# sp | P62806 | H4\_MOUSE

[Acetyl]SGRGKGGKGLGK<sup>Acetyl</sup>42.01 GGAK<sup>Acetyl</sup>42.01 RHRK<sup>Trimethyl</sup>42.05 VLRD

- ▶ fragmentation table for charge state 1+
- ▶ specType=etd
- ▶ score=45.68
- ▶ F121511.dat
- ▶ query=q36766.p1
- ▶ precursor=529.513590
- ▶ chargePrecursor=5
- ▶ itol=0.7

| AA |    | c              | y        | z+1            | z+2            | z        | AA    |
|----|----|----------------|----------|----------------|----------------|----------|-------|
| S  | 1  | 147.076        | 2643.539 | 2627.520       | 0.000          | 2626.512 | S[24] |
| G  | 2  | 204.098        | 2314.498 | 2498.473       | 0.000          | 2497.470 | G[23] |
| R  | 3  | <b>360.199</b> | 2057.475 | 2041.450       | 2442.454       | 2040.448 | R[22] |
| G  | 4  | <b>417.220</b> | 2301.374 | 2285.350       | 2269.363       | 2284.347 | G[21] |
| K  | 5  | <b>545.315</b> | 2244.352 | 2228.334       | 2229.341       | 2227.326 | K[20] |
| G  | 6  | <b>602.337</b> | 2116.257 | 2100.239       | 2101.247       | 2099.231 | G[19] |
| G  | 7  | 659.358        | 2059.230 | 2043.217       | 2044.225       | 2042.209 | G[18] |
| K  | 8  | 707.453        | 2002.214 | 1986.196       | 1987.204       | 1985.188 | K[17] |
| G  | 9  | 844.475        | 1874.120 | 1858.101       | 1859.109       | 1857.091 | G[16] |
| L  | 10 | 897.559        | 1817.098 | 1801.079       | 1802.087       | 1800.071 | L[15] |
| G  | 11 | 1014.580       | 1704.014 | 1687.995       | 1689.003       | 1688.987 | G[14] |
| K  | 12 | 1194.686       | 1646.993 | 1630.974       | 1631.982       | 1629.966 | K[13] |
| G  | 13 | 1241.707       | 1476.887 | 1460.868       | 1461.876       | 1459.860 | G[12] |
| G  | 14 | 1298.729       | 1419.866 | 1403.847       | 1404.855       | 1402.839 | G[11] |
| A  | 15 | 1369.764       | 1362.844 | 1346.825       | 1347.833       | 1345.818 | A[10] |
| K  | 16 | 1538.871       | 1291.807 | 1275.788       | 1276.796       | 1274.780 | K[9]  |
| R  | 17 | 1695.974       | 1121.701 | 1105.683       | 1106.691       | 1104.675 | R[8]  |
| H  | 18 | 1833.031       | 995.600  | 949.582        | <b>950.589</b> | 948.574  | H[7]  |
| R  | 19 | 1989.133       | 828.541  | 812.523        | 813.530        | 811.515  | R[6]  |
| K  | 20 | 2159.274       | 672.440  | 656.422        | <b>657.429</b> | 655.414  | K[5]  |
| V  | 21 | 2258.343       | 502.398  | 486.380        | 487.387        | 485.372  | V[4]  |
| L  | 22 | 2371.427       | 403.230  | <b>387.211</b> | <b>388.219</b> | 386.203  | L[3]  |
| R  | 23 | 2527.528       | 290.146  | <b>274.127</b> | 275.135        | 273.119  | R[2]  |
| D  | 24 | 2642.555       | 134.045  | 118.028        | 119.034        | 117.018  | D[1]  |

# sp | P62806 | H4\_MOUSE

[Acetyl]SGRGKGGKGLGK<sup>Acetyl</sup><sub>42.01</sub> GGAK<sup>Acetyl</sup><sub>42.01</sub> RHRK<sup>Trimethyl</sup><sub>42.05</sub> VLRLD

- ▶ fragmentation table for charge state 2+
- ▶ specType=etd
- ▶ score=45.68
- ▶ F121511.dat
- ▶ query=q36766.p1
- ▶ precursor=529.513590
- ▶ chargePrecursor=5
- ▶ itol=0.7

| AA    | c               | y               | z+1             | z+2             | z               | AA    |
|-------|-----------------|-----------------|-----------------|-----------------|-----------------|-------|
| S[1]  | 74.042          | 1122.273        | 1314.264        | 0.504           | 1313.760        | S[24] |
| G[2]  | 102.553         | 1257.752        | 1249.742        | 0.504           | 1249.239        | G[23] |
| R[3]  | 180.603         | 1230.241        | 1221.232        | 1221.736        | 1220.730        | R[22] |
| G[4]  | 209.114         | 1151.193        | 1143.183        | <b>1143.685</b> | 1142.677        | G[21] |
| K[5]  | 273.163         | 1122.680        | <b>1114.670</b> | 1115.174        | <b>1114.167</b> | K[20] |
| G[6]  | 301.672         | <b>1058.632</b> | <b>1050.623</b> | <b>1051.127</b> | 1050.119        | G[19] |
| G[7]  | 330.183         | 1030.122        | 1022.112        | <b>1022.616</b> | 1021.608        | G[18] |
| K[8]  | 394.230         | 1001.611        | <b>993.602</b>  | <b>994.105</b>  | 993.097         | K[17] |
| G[9]  | 422.741         | 973.101         | 965.091         | <b>930.058</b>  | 929.050         | G[16] |
| L[10] | <b>479.293</b>  | <b>909.053</b>  | <b>901.043</b>  | <b>901.547</b>  | 900.539         | L[15] |
| G[11] | <b>507.794</b>  | 852.511         | 844.501         | 845.005         | <b>843.997</b>  | G[14] |
| K[12] | <b>592.847</b>  | <b>824.000</b>  | <b>815.991</b>  | 816.494         | <b>815.487</b>  | K[13] |
| G[13] | <b>621.357</b>  | 738.947         | <b>730.938</b>  | <b>731.442</b>  | 730.434         | G[12] |
| G[14] | 649.868         | 710.436         | 702.427         | <b>702.931</b>  | <b>701.923</b>  | G[11] |
| A[15] | <b>685.307</b>  | <b>681.926</b>  | <b>673.916</b>  | 674.420         | <b>673.412</b>  | A[10] |
| R[16] | <b>770.439</b>  | 646.827         | <b>638.308</b>  | <b>638.902</b>  | <b>637.894</b>  | R[9]  |
| R[17] | <b>848.490</b>  | 561.354         | <b>553.345</b>  | <b>553.849</b>  | 552.841         | R[8]  |
| H[18] | <b>917.019</b>  | 483.304         | <b>475.294</b>  | <b>475.798</b>  | 474.791         | H[7]  |
| R[19] | <b>995.070</b>  | 414.774         | <b>406.765</b>  | <b>407.269</b>  | <b>406.261</b>  | R[6]  |
| K[20] | 1060.144        | 336.724         | 328.714         | 329.218         | 328.211         | K[5]  |
| V[21] | <b>1129.675</b> | 252.053         | 243.043         | 244.547         | 243.540         | V[4]  |
| L[22] | 1186.217        | 202.119         | 194.109         | 194.613         | 193.605         | L[3]  |
| R[23] | 1264.268        | 145.577         | 137.567         | 138.071         | 137.063         | R[2]  |
| D[24] | 1321.701        | 67.526          | 59.517          | 60.021          | 59.013          | D[1]  |

# sp | P62806 | H4\_MOUSE

[Acetyl]SGRGKGGKGLGK<sup>Acetyl</sup> 42.01 GGAK<sup>Acetyl</sup> 42.01 RHRK<sup>Trimethyl</sup> 42.05 VLRLD

- ▶ fragmentation table for charge state 3+
- ▶ specType=etd
- ▶ score=45.68
- ▶ F121511.dat
- ▶ query=q36766.p1
- ▶ precursor=529.513590
- ▶ chargePrecursor=5
- ▶ itol=0.7

| AA    | c              | y              | z+1            | z+2            | z              | AA    |
|-------|----------------|----------------|----------------|----------------|----------------|-------|
| S[1]  | 49.697         | <b>881.851</b> | <b>876.512</b> | 0.672          | <b>876.176</b> | S[24] |
| G[2]  | 58.704         | 138.837        | <b>833.497</b> | 0.672          | <b>833.161</b> | G[23] |
| R[3]  | 150.738        | 819.830        | <b>814.490</b> | <b>814.826</b> | 814.154        | R[22] |
| G[4]  | 139.745        | 767.796        | <b>762.457</b> | <b>762.792</b> | <b>762.121</b> | G[21] |
| K[5]  | 182.443        | 748.789        | <b>743.449</b> | <b>743.785</b> | <b>743.113</b> | K[20] |
| G[6]  | 201.450        | <b>706.091</b> | <b>700.751</b> | <b>701.087</b> | <b>700.415</b> | G[19] |
| G[7]  | 220.458        | <b>687.083</b> | <b>681.744</b> | <b>682.080</b> | <b>681.408</b> | G[18] |
| K[8]  | 263.156        | 668.076        | 666.737        | 663.073        | <b>662.401</b> | K[17] |
| G[9]  | 282.163        | <b>625.378</b> | <b>620.038</b> | <b>620.374</b> | 619.703        | G[16] |
| L[10] | 319.858        | <b>606.371</b> | <b>601.031</b> | <b>601.367</b> | <b>600.695</b> | L[15] |
| G[11] | 338.865        | 568.676        | <b>563.337</b> | <b>563.673</b> | 563.001        | G[14] |
| K[12] | 395.567        | <b>549.669</b> | <b>544.329</b> | <b>544.665</b> | <b>543.994</b> | K[13] |
| G[13] | 414.574        | 492.967        | 487.628        | 487.964        | 487.292        | G[12] |
| G[14] | 433.581        | 473.960        | 468.620        | 468.956        | 468.285        | G[11] |
| A[15] | 457.260        | 454.953        | 449.613        | 449.949        | 449.277        | A[10] |
| K[16] | 513.962        | 431.274        | 425.934        | 426.270        | 425.598        | K[9]  |
| R[17] | <b>565.996</b> | 374.572        | 369.232        | 369.568        | 368.896        | R[8]  |
| H[18] | <b>611.682</b> | 322.538        | 317.198        | 317.535        | 316.863        | H[7]  |
| R[19] | <b>663.716</b> | 276.852        | 271.512        | 271.848        | 271.176        | R[6]  |
| K[20] | <b>720.430</b> | 224.818        | 219.478        | 219.815        | 219.143        | K[5]  |
| V[21] | <b>753.452</b> | 168.104        | 162.764        | 163.101        | 162.429        | V[4]  |
| L[22] | <b>791.147</b> | 135.082        | 129.742        | 130.078        | 129.406        | L[3]  |
| R[23] | <b>843.181</b> | 97.387         | 92.047         | 92.383         | 91.711         | R[2]  |
| D[24] | <b>881.523</b> | 45.353         | 40.014         | 40.349         | 39.678         | D[1]  |

# sp | P62806 | H4\_MOUSE

[Acetyl]SGRGKGGKGLGK <sup>Acetyl</sup>42.01 GGAK <sup>Acetyl</sup>42.01 RHRK <sup>Trimethyl</sup>42.05 VLRD

- ▶ fragmentation table for charge state 4+
- ▶ specType=etd
- ▶ score=45.68
- ▶ F121511.dat
- ▶ query=q36766.p1
- ▶ precursor=529.513590
- ▶ chargePrecursor=5
- ▶ itol=0.7

| AA    | c              | y              | z+1            | z+2            | z              | AA    |
|-------|----------------|----------------|----------------|----------------|----------------|-------|
| S[1]  | 37.525         | <b>661.640</b> | <b>657.636</b> | 0.755          | <b>657.384</b> | S[24] |
| G[2]  | 51.780         | 529.380        | <b>625.375</b> | 0.755          | <b>625.123</b> | G[23] |
| R[3]  | 90.805         | 615.124        | <b>611.120</b> | <b>611.371</b> | <b>610.868</b> | R[22] |
| G[4]  | 105.061        | 576.099        | 572.094        | 572.346        | 571.842        | G[21] |
| K[5]  | 137.084        | 561.844        | 557.839        | 558.091        | 557.587        | K[20] |
| G[6]  | 151.340        | 529.620        | 525.615        | 526.067        | 525.563        | G[19] |
| G[7]  | 165.595        | 515.564        | 511.560        | 511.812        | 511.308        | G[18] |
| K[8]  | 197.619        | 501.309        | 497.304        | 497.556        | 497.052        | K[17] |
| G[9]  | 211.874        | 489.285        | 485.281        | 485.533        | 485.029        | G[16] |
| L[10] | 280.148        | 458.030        | 454.025        | 454.277        | 453.773        | L[15] |
| G[11] | 254.403        | 426.750        | 422.744        | 423.006        | 422.502        | G[14] |
| K[12] | 296.627        | 412.504        | 408.499        | 408.751        | 408.247        | K[13] |
| G[13] | 311.182        | 399.977        | 395.973        | 396.224        | 395.721        | G[12] |
| G[14] | 325.438        | 385.722        | 381.717        | 381.969        | 381.465        | G[11] |
| A[15] | 343.197        | 341.466        | 337.462        | 337.714        | 337.210        | A[10] |
| K[16] | 385.723        | 323.707        | 319.703        | 319.954        | 319.451        | K[9]  |
| R[17] | 424.749        | 381.181        | 277.178        | 277.428        | 276.924        | R[8]  |
| H[18] | 459.013        | 242.156        | 238.151        | 238.403        | 237.899        | H[7]  |
| R[19] | 488.039        | 207.891        | 203.886        | 204.138        | 203.634        | R[6]  |
| K[20] | 560.574        | 108.866        | 104.861        | 105.113        | 104.609        | K[5]  |
| V[21] | 565.341        | 126.330        | 122.325        | 122.577        | 122.073        | V[4]  |
| L[22] | <b>593.612</b> | 101.563        | 97.558         | 97.810         | 97.306         | L[3]  |
| R[23] | <b>632.637</b> | 73.292         | 69.287         | 69.539         | 69.035         | R[2]  |
| D[24] | <b>661.394</b> | 34.267         | 30.262         | 30.514         | 30.010         | D[1]  |



# sp | P62806 | H4\_MOUSE

[Acetyl]SGRGKGGK <sup>Acetyl</sup><sub>42.01</sub> GLGK <sup>Acetyl</sup><sub>42.01</sub> GGAK <sup>Acetyl</sup><sub>42.01</sub> RHRK <sup>Methyl</sup><sub>14.02</sub> VLRLD

- ▶ fragmentation table for charge state 1+
- ▶ specType=etd
- ▶ score=85.33
- ▶ F121511.dat
- ▶ query=q36957.p1
- ▶ precursor=532.309960
- ▶ chargePrecursor=5
- ▶ itol=0.7

| AA | c  | y               | z+1            | z+2            | z              | AA       |   |    |
|----|----|-----------------|----------------|----------------|----------------|----------|---|----|
| S  | 11 | 147.076         | 2057.518       | 2641.500       | 0.000          | 2640.492 | S | 24 |
| G  | 2  | 234.998         | 2528.470       | 2512.457       | 0.000          | 2511.449 | G | 23 |
| R  | 3  | <b>360.199</b>  | 2871.454       | 2465.435       | 2456.443       | 2454.425 | R | 22 |
| G  | 4  | <b>417.220</b>  | 2315.353       | 2299.334       | 2300.342       | 2298.327 | G | 21 |
| K  | 5  | <b>545.315</b>  | 2258.332       | 2242.313       | 2243.321       | 2241.305 | K | 20 |
| G  | 6  | <b>602.337</b>  | 2130.237       | 2114.218       | 2115.226       | 2113.210 | G | 19 |
| G  | 7  | 659.358         | 2073.215       | 2057.196       | 2058.204       | 2056.189 | G | 18 |
| K  | 8  | <b>829.464</b>  | 2016.194       | 2000.175       | 2001.183       | 1999.167 | K | 17 |
| G  | 9  | 886.485         | 1946.088       | 1930.069       | 1931.077       | 1929.062 | G | 16 |
| L  | 10 | 999.569         | 1789.987       | 1773.968       | 1774.976       | 1772.960 | L | 15 |
| G  | 11 | <b>1056.591</b> | 1675.982       | 1659.964       | 1660.972       | 1658.956 | G | 14 |
| K  | 12 | 1226.696        | 1618.961       | 1602.942       | 1603.950       | 1601.935 | K | 13 |
| G  | 13 | 1283.718        | 1448.856       | 1432.837       | 1433.845       | 1431.829 | G | 12 |
| G  | 14 | 1340.739        | 1391.834       | 1375.815       | 1376.823       | 1374.808 | G | 11 |
| A  | 15 | 1411.770        | 1334.813       | 1318.794       | 1319.802       | 1317.786 | A | 10 |
| K  | 16 | 1581.882        | 1263.776       | 1247.757       | 1248.765       | 1246.749 | K | 9  |
| R  | 17 | 1737.884        | 1093.670       | 1077.651       | 1078.659       | 1076.644 | R | 8  |
| H  | 18 | 1875.042        | 937.565        | <b>921.550</b> | 922.558        | 920.542  | H | 7  |
| R  | 19 | 2031.143        | 800.510        | <b>784.491</b> | <b>785.499</b> | 783.484  | R | 6  |
| K  | 20 | 2173.254        | <b>644.409</b> | <b>628.390</b> | <b>629.398</b> | 627.383  | K | 5  |
| V  | 21 | 2272.322        | 502.298        | <b>486.280</b> | 487.287        | 485.272  | V | 4  |
| L  | 22 | 2385.406        | 403.230        | <b>387.211</b> | 388.219        | 386.203  | L | 3  |
| R  | 23 | 2541.507        | 290.146        | <b>274.127</b> | 275.135        | 273.119  | R | 2  |
| D  | 24 | 2658.534        | 134.045        | 118.026        | 119.034        | 117.018  | D | 1  |



# sp | P62806 | H4\_MOUSE

[Acetyl]SGRGKGGK <sup>Acetyl</sup><sub>42.01</sub> GLGK <sup>Acetyl</sup><sub>42.01</sub> GGAK <sup>Acetyl</sup><sub>42.01</sub> RHRK <sup>Methyl</sup><sub>14.02</sub> VLRD

- ▶ fragmentation table for charge state 2+
- ▶ specType=etd
- ▶ score=85.33
- ▶ F121511.dat
- ▶ query=q36957\_p1
- ▶ precursor=532.309960
- ▶ chargePrecursor=5
- ▶ itol=0.7

| AA    | c               | y               | z+1             | z+2             | z               | AA    |
|-------|-----------------|-----------------|-----------------|-----------------|-----------------|-------|
| S[1]  | 74.042          | <b>1329.263</b> | 1321.263        | 0.504           | 1320.740        | S[24] |
| G[2]  | 102.553         | 1264.741        | 1256.732        | 0.504           | 1256.228        | G[23] |
| R[3]  | 180.603         | 1236.231        | <b>1228.221</b> | <b>1228.725</b> | 1227.717        | R[22] |
| G[4]  | 259.114         | 1158.180        | <b>1150.171</b> | <b>1150.975</b> | 1149.666        | G[21] |
| K[5]  | 273.163         | 1129.669        | <b>1121.660</b> | <b>1122.164</b> | <b>1121.156</b> | K[20] |
| G[6]  | 301.672         | 1065.622        | 1057.613        | 1058.117        | <b>1057.109</b> | G[19] |
| G[7]  | 330.183         | <b>1037.111</b> | 1029.100        | <b>1029.606</b> | 1028.590        | G[18] |
| K[8]  | <b>415.236</b>  | 1038.601        | <b>1000.591</b> | <b>1001.095</b> | <b>1000.087</b> | K[17] |
| G[9]  | <b>443.746</b>  | 973.543         | <b>915.538</b>  | <b>916.042</b>  | <b>915.034</b>  | G[16] |
| L[10] | <b>509.208</b>  | <b>895.037</b>  | <b>887.028</b>  | <b>887.532</b>  | 886.524         | L[15] |
| G[11] | <b>528.799</b>  | <b>838.495</b>  | <b>830.486</b>  | <b>830.990</b>  | <b>829.982</b>  | G[14] |
| K[12] | <b>613.852</b>  | <b>809.984</b>  | <b>801.975</b>  | <b>802.479</b>  | 801.471         | K[13] |
| G[13] | <b>642.363</b>  | <b>774.931</b>  | <b>716.922</b>  | <b>717.426</b>  | 716.418         | G[12] |
| G[14] | <b>670.873</b>  | 696.421         | <b>688.411</b>  | <b>688.915</b>  | 687.907         | G[11] |
| A[15] | <b>708.382</b>  | 659.910         | 651.903         | 652.406         | 651.398         | A[10] |
| R[16] | <b>791.445</b>  | <b>632.391</b>  | <b>624.382</b>  | <b>624.886</b>  | 623.877         | R[9]  |
| R[17] | 869.495         | 547.359         | <b>539.329</b>  | <b>539.833</b>  | <b>538.825</b>  | R[8]  |
| H[18] | <b>938.025</b>  | 469.288         | <b>461.279</b>  | <b>461.783</b>  | <b>460.775</b>  | H[7]  |
| R[19] | 1018.075        | 400.759         | <b>392.749</b>  | <b>393.253</b>  | <b>392.245</b>  | R[6]  |
| K[20] | 1087.130        | 322.708         | 314.699         | 315.203         | 314.195         | K[5]  |
| V[21] | 1138.605        | 253.653         | 245.643         | 246.147         | 245.140         | V[4]  |
| L[22] | <b>1193.207</b> | 202.110         | 194.100         | 194.613         | 193.605         | L[3]  |
| R[23] | 1271.257        | 145.577         | 137.567         | 138.071         | 137.063         | R[2]  |
| D[24] | 1328.771        | 67.526          | 59.517          | 60.021          | 59.013          | D[1]  |

# sp | P62806 | H4\_MOUSE

[Acetyl]SGRGKGGK <sup>Acetyl</sup><sub>42.01</sub> GLGK <sup>Acetyl</sup><sub>42.01</sub> GGAK <sup>Acetyl</sup><sub>42.01</sub> RHRK <sup>Methyl</sup><sub>14.02</sub> VLRL

- ▶ fragmentation table for charge state 3+
- ▶ specType=etd
- ▶ score=85.33
- ▶ F121511.dat
- ▶ query=q36957.p1
- ▶ precursor=532.309960
- ▶ chargePrecursor=5
- ▶ itol=0.7

| AA    | c              | y              | z+1            | z+2            | z              | AA    |
|-------|----------------|----------------|----------------|----------------|----------------|-------|
| S[1]  | 49.697         | 886.511        | <b>881.171</b> | 0.672          | 880.835        | S[24] |
| G[2]  | 58.704         | 943.497        | <b>938.157</b> | 0.672          | <b>937.821</b> | G[23] |
| R[3]  | 120.738        | 824.490        | 819.150        | <b>819.486</b> | 818.814        | R[22] |
| G[4]  | 139.745        | <b>772.456</b> | <b>767.116</b> | <b>767.452</b> | <b>766.780</b> | G[21] |
| K[5]  | 182.443        | 793.449        | <b>748.109</b> | <b>748.445</b> | <b>747.773</b> | K[20] |
| G[6]  | 201.450        | 710.750        | <b>705.411</b> | <b>705.747</b> | <b>705.075</b> | G[19] |
| G[7]  | 220.458        | <b>691.743</b> | <b>686.404</b> | <b>686.740</b> | 686.068        | G[18] |
| K[8]  | 277.159        | 472.785        | 660.397        | 661.732        | 661.061        | K[17] |
| G[9]  | 286.167        | <b>616.034</b> | <b>616.695</b> | <b>611.031</b> | <b>610.359</b> | G[16] |
| L[10] | 333.881        | <b>597.027</b> | <b>591.688</b> | <b>592.023</b> | <b>591.352</b> | L[15] |
| G[11] | 352.888        | 558.132        | <b>553.993</b> | <b>554.329</b> | <b>553.657</b> | G[14] |
| K[12] | 409.570        | <b>540.125</b> | 534.988        | 535.322        | 534.650        | K[13] |
| G[13] | 428.577        | 483.623        | 478.284        | 478.620        | 477.948        | G[12] |
| G[14] | 447.585        | 464.616        | 459.277        | 459.613        | 458.941        | G[11] |
| A[15] | 471.264        | 445.609        | 440.270        | 440.605        | 439.934        | A[10] |
| K[16] | 527.966        | 421.930        | <b>416.590</b> | <b>416.926</b> | <b>416.255</b> | K[9]  |
| R[17] | <b>579.999</b> | 365.226        | <b>359.889</b> | <b>360.225</b> | <b>359.553</b> | R[8]  |
| H[18] | <b>625.686</b> | 313.195        | 307.855        | 308.191        | 307.519        | H[7]  |
| R[19] | <b>677.719</b> | 297.508        | 292.169        | 292.505        | 291.833        | R[6]  |
| K[20] | <b>725.089</b> | 215.475        | 210.137        | 210.471        | 209.799        | K[5]  |
| V[21] | <b>758.112</b> | 168.104        | 162.765        | 163.101        | 162.429        | V[4]  |
| L[22] | <b>795.807</b> | 135.082        | 129.742        | 130.078        | 129.406        | L[3]  |
| R[23] | <b>847.841</b> | 97.387         | 92.047         | 92.383         | 91.711         | R[2]  |
| D[24] | 886.183        | 45.353         | 40.014         | 40.349         | 39.678         | D[1]  |

# sp | P62806 | H4\_MOUSE

[Acetyl]SGRGKGGK <sup>Acetyl</sup><sub>42.01</sub> GLGK <sup>Acetyl</sup><sub>42.01</sub> GGAK <sup>Acetyl</sup><sub>42.01</sub> RHRK <sup>Methyl</sup><sub>14.02</sub> VLRL

- ▶ fragmentation table for charge state 4+
- ▶ specType=etd
- ▶ score=85.33
- ▶ F121511.dat
- ▶ query=q36957.p1
- ▶ precursor=532.309960
- ▶ chargePrecursor=5
- ▶ itol=0.7

| AA    | c              | y              | z+1            | z+2            | z              | AA    |
|-------|----------------|----------------|----------------|----------------|----------------|-------|
| S[1]  | 37.525         | <b>665.135</b> | <b>661.130</b> | 0.755          | <b>660.878</b> | S[24] |
| G[2]  | 51.780         | <b>632.874</b> | <b>628.870</b> | 0.755          | <b>628.618</b> | G[23] |
| R[3]  | 90.805         | 618.610        | <b>614.614</b> | <b>614.866</b> | <b>614.362</b> | R[22] |
| G[4]  | 105.061        | <b>579.594</b> | 575.589        | 575.841        | 575.337        | G[21] |
| K[5]  | 137.084        | 565.338        | 561.334        | 561.586        | 561.082        | K[20] |
| G[6]  | 151.340        | 533.315        | <b>529.310</b> | <b>529.562</b> | <b>529.058</b> | G[19] |
| G[7]  | 165.595        | 519.059        | 515.055        | 515.307        | 514.803        | G[18] |
| K[8]  | 208.121        | 504.804        | <b>500.799</b> | <b>501.051</b> | <b>500.547</b> | K[17] |
| G[9]  | 222.377        | <b>462.278</b> | 458.273        | 458.525        | 458.021        | G[16] |
| L[10] | 250.048        | 448.022        | <b>444.017</b> | <b>444.269</b> | <b>443.766</b> | L[15] |
| G[11] | 264.303        | 419.751        | <b>415.746</b> | <b>415.998</b> | <b>415.494</b> | G[14] |
| K[12] | 307.430        | 405.496        | 401.491        | 401.743        | 401.239        | K[13] |
| G[13] | 321.685        | 362.969        | 358.965        | 359.217        | 358.713        | G[12] |
| G[14] | 335.940        | 348.714        | 344.709        | 344.961        | 344.457        | G[11] |
| A[15] | 353.700        | 334.459        | 330.454        | 330.706        | 330.202        | A[10] |
| K[16] | 398.226        | 316.699        | 312.695        | 312.947        | 312.443        | K[9]  |
| R[17] | 435.251        | <b>274.173</b> | 270.168        | 270.420        | 269.916        | R[8]  |
| H[18] | 469.516        | 235.148        | 231.143        | 231.395        | 230.891        | H[7]  |
| R[19] | 503.541        | 200.883        | 196.878        | 197.130        | 196.626        | R[6]  |
| K[20] | 544.069        | 161.858        | 157.853        | 158.105        | 157.601        | K[5]  |
| V[21] | 568.836        | 126.330        | 122.325        | 122.577        | 122.073        | V[4]  |
| L[22] | <b>597.107</b> | 101.563        | 97.558         | 97.810         | 97.306         | L[3]  |
| R[23] | <b>636.132</b> | 73.292         | 69.287         | 69.539         | 69.035         | R[2]  |
| D[24] | <b>664.889</b> | 34.267         | 30.262         | 30.514         | 30.010         | D[1]  |

# sp | P62806 | H4\_MOUSE

[Acetyl]SGRGKGGK Acetyl 42.01 GLGK Acetyl 42.01 GGAK Acetyl 42.01 R Methyl 14.02 HRKVLRD

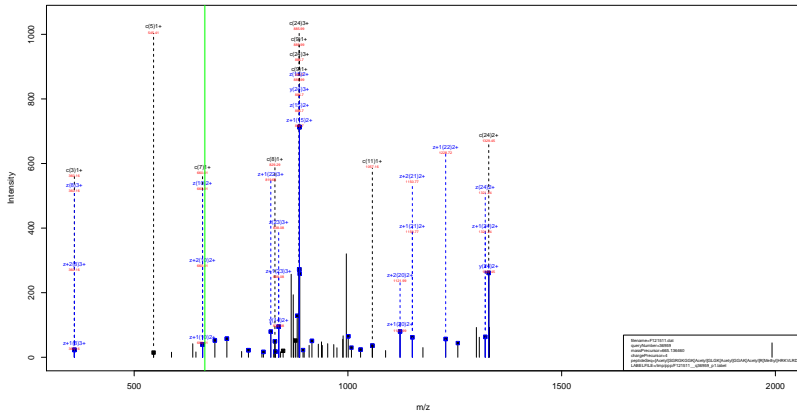

Revision: P12111\_001  
 Query: H4\_MOUSE\_020003  
 Method: Protein:MS1: 100000  
 MS1: MS1: 100000  
 MS1: MS1: 100000  
 MS1: MS1: 100000  
 MS1: MS1: 100000

# sp | P62806 | H4\_MOUSE

[Acetyl]SGRGKGGK <sup>Acetyl</sup><sub>42.01</sub> GLGK <sup>Acetyl</sup><sub>42.01</sub> GGAK <sup>Acetyl</sup><sub>42.01</sub> R <sup>Methyl</sup><sub>14.02</sub> HRKVLRD

- ▶ fragmentation table for charge state 1+
- ▶ specType=etd
- ▶ score=69.72
- ▶ F121511.dat
- ▶ query=q36959\_p1
- ▶ precursor=665.136460
- ▶ chargePrecursor=4
- ▶ itol=0.7

| AA | c  | y               | z+1      | z+2      | z        | AA       |   |    |
|----|----|-----------------|----------|----------|----------|----------|---|----|
| S  | 11 | 147.076         | 2057.518 | 2641.500 | 0.000    | 2640.492 | S | 24 |
| G  | 2  | 234.998         | 2528.470 | 2512.457 | 0.000    | 2511.449 | G | 23 |
| R  | 3  | <b>360.199</b>  | 2871.454 | 2465.435 | 2456.443 | 2454.423 | R | 22 |
| G  | 4  | 417.220         | 2315.353 | 2290.334 | 2300.324 | 2298.327 | G | 21 |
| K  | 5  | <b>545.315</b>  | 2258.332 | 2242.313 | 2243.321 | 2241.305 | K | 20 |
| G  | 6  | 602.337         | 2130.237 | 2114.218 | 2115.226 | 2113.210 | G | 19 |
| G  | 7  | <b>659.358</b>  | 2073.215 | 2057.196 | 2058.204 | 2056.189 | G | 18 |
| K  | 8  | <b>829.464</b>  | 2016.194 | 2000.175 | 2001.183 | 1999.167 | K | 17 |
| G  | 9  | <b>856.485</b>  | 1946.080 | 1830.069 | 1831.077 | 1829.062 | G | 16 |
| L  | 10 | 899.599         | 1789.967 | 1773.948 | 1774.956 | 1772.940 | L | 15 |
| G  | 11 | <b>1056.591</b> | 1675.863 | 1659.844 | 1660.852 | 1658.836 | G | 14 |
| K  | 12 | 1226.696        | 1618.961 | 1602.942 | 1603.950 | 1601.935 | K | 13 |
| G  | 13 | 1283.718        | 1448.856 | 1432.837 | 1433.845 | 1431.829 | G | 12 |
| G  | 14 | 1340.739        | 1391.834 | 1375.816 | 1376.823 | 1374.808 | G | 11 |
| A  | 15 | 1411.770        | 1334.813 | 1318.794 | 1319.802 | 1317.786 | A | 10 |
| K  | 16 | 1581.882        | 1263.776 | 1247.757 | 1248.765 | 1246.749 | K | 9  |
| R  | 17 | <b>1831.999</b> | 1203.670 | 1097.651 | 1098.659 | 1096.644 | R | 8  |
| H  | 18 | 1589.058        | 923.552  | 907.535  | 908.542  | 906.527  | H | 7  |
| R  | 19 | 2045.159        | 788.494  | 770.476  | 771.484  | 769.468  | R | 6  |
| K  | 20 | 2173.254        | 630.393  | 614.375  | 615.382  | 613.367  | K | 5  |
| V  | 21 | 2272.322        | 502.290  | 486.280  | 487.287  | 485.272  | V | 4  |
| L  | 22 | 2385.406        | 403.230  | 387.211  | 388.219  | 386.203  | L | 3  |
| R  | 23 | 2541.507        | 290.140  | 274.127  | 275.135  | 273.119  | R | 2  |
| D  | 24 | 2656.534        | 134.045  | 118.026  | 119.034  | 117.018  | D | 1  |

# sp | P62806 | H4\_MOUSE

[Acetyl]SGRGKGGK <sup>Acetyl</sup><sub>42.01</sub> GLGK <sup>Acetyl</sup><sub>42.01</sub> GGAK <sup>Acetyl</sup><sub>42.01</sub> R <sup>Methyl</sup><sub>14.02</sub> HRKVLRD

- ▶ fragmentation table for charge state 2+
- ▶ specType=etd
- ▶ score=69.72
- ▶ F121511.dat
- ▶ query=q36959\_p1
- ▶ precursor=665.136460
- ▶ chargePrecursor=4
- ▶ itol=0.7

| AA    | c               | y               | z+1             | z+2             | z               | AA    |
|-------|-----------------|-----------------|-----------------|-----------------|-----------------|-------|
| S[1]  | 74.642          | <b>1329.263</b> | <b>1321.253</b> | 0.504           | <b>1320.749</b> | S[24] |
| G[2]  | 102.553         | 1264.741        | <b>1256.732</b> | 0.504           | 1256.228        | G[23] |
| R[3]  | 180.603         | 1236.231        | <b>1228.221</b> | <b>1228.725</b> | 1227.717        | R[22] |
| G[4]  | 259.114         | 1158.189        | <b>1150.171</b> | <b>1150.675</b> | 1149.668        | G[21] |
| K[5]  | 274.163         | 1129.699        | <b>1121.690</b> | <b>1122.164</b> | 1121.155        | K[20] |
| G[6]  | 301.672         | 1065.622        | <b>1057.613</b> | 1058.117        | <b>1057.109</b> | G[19] |
| G[7]  | 330.183         | 1037.111        | <b>1029.102</b> | <b>1029.606</b> | 1028.599        | G[18] |
| K[8]  | 415.236         | <b>1008.601</b> | <b>1000.591</b> | <b>1001.095</b> | <b>1000.087</b> | K[17] |
| G[9]  | 443.746         | 971.549         | <b>915.538</b>  | <b>916.042</b>  | 915.034         | G[16] |
| L[10] | 509.298         | <b>895.037</b>  | <b>887.028</b>  | <b>887.532</b>  | <b>886.524</b>  | L[15] |
| G[11] | 528.799         | <b>838.495</b>  | <b>830.486</b>  | <b>830.990</b>  | <b>829.982</b>  | G[14] |
| K[12] | 613.852         | 809.984         | <b>801.975</b>  | <b>802.479</b>  | 801.471         | K[13] |
| G[13] | 642.363         | 724.931         | <b>716.922</b>  | <b>717.426</b>  | <b>716.418</b>  | G[12] |
| G[14] | 670.873         | 696.421         | <b>688.411</b>  | <b>688.915</b>  | 687.907         | G[11] |
| A[15] | 698.384         | 667.910         | <b>659.901</b>  | <b>660.405</b>  | <b>659.397</b>  | A[10] |
| R[16] | 731.445         | 632.391         | 624.382         | 624.886         | 623.877         | R[9]  |
| R[17] | <b>876.503</b>  | 547.339         | 539.339         | 539.833         | 538.825         | R[8]  |
| H[18] | 948.032         | 462.280         | 454.271         | 454.775         | 453.767         | H[7]  |
| R[19] | 1023.083        | 393.751         | 385.741         | 386.245         | 385.238         | R[6]  |
| K[20] | 1087.130        | 315.700         | 307.691         | 308.195         | 307.187         | K[5]  |
| V[21] | 1138.669        | 251.653         | 243.643         | 244.147         | 243.140         | V[4]  |
| L[22] | 1193.207        | 202.119         | 194.109         | 194.613         | 193.605         | L[3]  |
| R[23] | 1271.257        | 148.577         | 139.567         | 138.071         | 137.063         | R[2]  |
| D[24] | <b>1328.771</b> | 67.526          | 59.517          | 60.021          | 59.013          | D[1]  |

# sp | P62806 | H4\_MOUSE

[Acetyl]SGRGKGGK <sup>Acetyl</sup><sub>42.01</sub> GLGK <sup>Acetyl</sup><sub>42.01</sub> GGAK <sup>Acetyl</sup><sub>42.01</sub> R <sup>Methyl</sup><sub>14.02</sub> HRKVLRD

- ▶ fragmentation table for charge state 3+
- ▶ specType=etd
- ▶ score=69.72
- ▶ F121511.dat
- ▶ query=q36959.p1
- ▶ precursor=665.136460
- ▶ chargePrecursor=4
- ▶ itol=0.7

| AA    | c              | y              | z+1            | z+2            | z              | AA    |
|-------|----------------|----------------|----------------|----------------|----------------|-------|
| S[1]  | 49.697         | <b>886.511</b> | <b>881.171</b> | 0.672          | <b>880.835</b> | S[24] |
| G[2]  | 58.704         | 343.497        | <b>838.157</b> | 0.672          | <b>837.821</b> | G[23] |
| R[3]  | 150.738        | 824.490        | <b>819.150</b> | <b>819.486</b> | 818.814        | R[22] |
| G[4]  | 139.745        | 772.456        | <b>767.116</b> | <b>767.452</b> | <b>766.780</b> | G[21] |
| K[5]  | 182.443        | 793.449        | 748.109        | 748.445        | 747.773        | K[20] |
| G[6]  | 201.450        | 710.750        | 705.411        | 705.747        | 705.075        | G[19] |
| G[7]  | 220.458        | 691.743        | 686.404        | 686.740        | 686.068        | G[18] |
| K[8]  | 277.159        | 672.736        | 667.397        | 667.732        | 667.061        | K[17] |
| G[9]  | 296.167        | 616.034        | 610.695        | 611.031        | 610.359        | G[16] |
| L[10] | 313.881        | 597.027        | 591.688        | 592.023        | 591.352        | L[15] |
| G[11] | 352.868        | 559.132        | 553.793        | 554.129        | 553.657        | G[14] |
| K[12] | 409.570        | 540.125        | 534.786        | 535.122        | 534.650        | K[13] |
| G[13] | 428.577        | 483.623        | 478.284        | 478.620        | 477.948        | G[12] |
| G[14] | 447.585        | 464.616        | 459.277        | 459.613        | 458.941        | G[11] |
| A[15] | 471.264        | 445.609        | 440.270        | 440.605        | 439.934        | A[10] |
| K[16] | 527.966        | 421.930        | 416.590        | 416.926        | 416.255        | K[9]  |
| R[17] | 584.671        | 365.226        | <b>359.889</b> | <b>360.225</b> | <b>359.553</b> | R[8]  |
| H[18] | 630.357        | 308.523        | 303.183        | 303.519        | 302.847        | H[7]  |
| R[19] | 682.391        | 252.336        | 247.497        | 247.833        | 247.161        | R[6]  |
| K[20] | 725.089        | 210.803        | 205.463        | 205.799        | 205.127        | K[5]  |
| V[21] | 758.112        | 168.104        | 162.765        | 163.101        | 162.429        | V[4]  |
| L[22] | 795.807        | 135.082        | 129.742        | 130.078        | 129.406        | L[3]  |
| R[23] | <b>847.841</b> | 97.387         | 92.047         | 92.383         | 91.711         | R[2]  |
| D[24] | <b>886.183</b> | 45.353         | 40.014         | 40.349         | 39.678         | D[1]  |





# sp | P62806 | H4\_MOUSE

[Acetyl]SGR<sup>Dimethyl</sup><sub>28.03</sub> GKGGKGLGK<sup>Acetyl</sup><sub>42.01</sub> GGAK<sup>Acetyl</sup><sub>42.01</sub> RHRKVL R<sup>(Dimethyl)</sup><sub>(28.03)</sub> D

- ▶ fragmentation table for charge state 1+
- ▶ specType=etd
- ▶ score=69.89
- ▶ F121511.dat
- ▶ query=q36963.p1
- ▶ precursor=665.145940
- ▶ chargePrecursor=4
- ▶ itol=0.7

| AA | c  | y               | z+1             | z+2            | z        | AA       |       |
|----|----|-----------------|-----------------|----------------|----------|----------|-------|
| S  | 1  | 147.076         | 2057.555        | 2641.536       | 0.000    | 2640.528 | S[24] |
| G  | 2  | 204.998         | 2528.513        | 2512.493       | 0.000    | 2511.486 | G[23] |
| R  | 3  | <b>308.230</b>  | 2471.491        | 2455.472       | 2450.480 | 2454.464 | R[22] |
| G  | 4  | <b>445.252</b>  | 2287.358        | 2271.339       | 2272.347 | 2270.332 | G[21] |
| K  | 5  | <b>573.347</b>  | 2230.337        | 2214.318       | 2215.326 | 2213.310 | K[20] |
| G  | 6  | <b>630.368</b>  | 2102.242        | 2086.223       | 2087.231 | 2085.215 | G[19] |
| G  | 7  | <b>687.390</b>  | 2045.220        | 2029.202       | 2030.209 | 2028.194 | G[18] |
| K  | 8  | 815.485         | 1988.199        | 1972.180       | 1973.188 | 1971.172 | K[17] |
| G  | 9  | <b>872.506</b>  | 1860.104        | 1844.085       | 1845.093 | 1843.077 | G[16] |
| L  | 10 | 837.960         | 1803.082        | 1787.064       | 1788.071 | 1786.055 | L[15] |
| G  | 11 | <b>1042.612</b> | 1859.998        | 1873.980       | 1874.987 | 1872.972 | G[14] |
| K  | 12 | <b>1212.717</b> | 1832.977        | 1616.958       | 1617.966 | 1615.950 | K[13] |
| G  | 13 | <b>1269.739</b> | 1462.871        | 1446.853       | 1447.860 | 1445.845 | G[12] |
| G  | 14 | 1326.760        | 1405.850        | 1389.831       | 1390.839 | 1388.823 | G[11] |
| A  | 15 | <b>1397.797</b> | 1348.828        | 1332.810       | 1333.818 | 1331.802 | A[10] |
| K  | 16 | 1567.903        | 1277.790        | 1261.773       | 1262.780 | 1260.765 | K[9]  |
| R  | 17 | 1724.954        | <b>1107.686</b> | 1091.667       | 1092.675 | 1090.659 | R[8]  |
| H  | 18 | 1561.903        | 954.535         | <b>935.506</b> | 936.514  | 934.555  | H[7]  |
| R  | 19 | 2017.184        | 814.526         | <b>798.507</b> | 799.515  | 797.499  | R[6]  |
| K  | 20 | 2145.259        | 658.425         | 642.406        | 643.414  | 641.398  | K[5]  |
| V  | 21 | 2244.327        | 530.330         | 514.311        | 515.319  | 513.303  | V[4]  |
| L  | 22 | 2367.411        | 431.261         | 415.243        | 416.250  | 414.235  | L[3]  |
| R  | 23 | 2621.544        | 318.177         | 302.158        | 303.166  | 301.151  | R[2]  |
| D  | 24 | 2656.571        | 134.040         | 118.026        | 119.034  | 117.015  | D[1]  |

# sp | P62806 | H4\_MOUSE

[Acetyl]SGR<sup>Dimethyl</sup><sub>28.03</sub> GKG<sup>Acetyl</sup>GKGLGK<sub>42.01</sub> GGAK<sup>Acetyl</sup><sub>42.01</sub> RHRK<sup>Dimethyl</sup>VLR<sub>(28.03)</sub> D

- ▶ fragmentation table for charge state 2+
- ▶ specType=etd
- ▶ score=69.89
- ▶ F121511.dat
- ▶ query=q36963\_p1
- ▶ precursor=665.145940
- ▶ chargePrecursor=4
- ▶ itol=0.7

| AA    | c              | y        | z+1             | z+2             | z               | AA    |
|-------|----------------|----------|-----------------|-----------------|-----------------|-------|
| S[1]  | 74.042         | 1320.281 | <b>1321.272</b> | 0.504           | 1320.768        | S[24] |
| G[2]  | 102.553        | 1294.760 | <b>1296.750</b> | 0.504           | 1296.246        | G[23] |
| R[3]  | 184.619        | 1236.240 | 1237.240        | <b>1228.743</b> | 1227.736        | R[22] |
| G[4]  | 223.130        | 1194.283 | <b>1196.173</b> | <b>1138.677</b> | 1139.669        | G[21] |
| K[5]  | 287.177        | 1115.672 | <b>1107.663</b> | <b>1108.167</b> | <b>1107.159</b> | K[20] |
| G[6]  | 315.688        | 1051.625 | 1043.615        | 1044.119        | <b>1043.111</b> | G[19] |
| G[7]  | 344.198        | 1023.114 | <b>1015.104</b> | <b>1015.608</b> | <b>1014.601</b> | G[18] |
| K[8]  | 408.246        | 994.603  | <b>986.594</b>  | <b>987.098</b>  | <b>986.090</b>  | K[17] |
| G[9]  | 436.757        | 927.049  | <b>930.556</b>  | <b>922.546</b>  | <b>923.050</b>  | G[16] |
| L[10] | 493.299        | 827.049  | <b>894.035</b>  | 894.539         | <b>893.532</b>  | L[15] |
| G[11] | 521.808        | 845.503  | 837.493         | <b>837.997</b>  | 838.990         | G[14] |
| K[12] | 606.952        | 816.992  | <b>808.983</b>  | <b>809.487</b>  | 808.479         | K[13] |
| G[13] | 635.373        | 731.939  | <b>723.930</b>  | <b>724.434</b>  | <b>723.426</b>  | G[12] |
| G[14] | 663.884        | 703.429  | <b>695.419</b>  | <b>695.923</b>  | 694.915         | G[11] |
| A[15] | 699.402        | 674.918  | 666.908         | 667.412         | 666.405         | A[10] |
| R[16] | 783.433        | 639.399  | <b>631.390</b>  | <b>631.894</b>  | <b>630.886</b>  | R[9]  |
| R[17] | <b>862.506</b> | 554.347  | 546.337         | 546.841         | 545.833         | R[8]  |
| H[18] | <b>931.035</b> | 476.296  | 468.287         | 468.791         | 467.783         | H[7]  |
| R[19] | 1009.086       | 407.767  | 399.757         | 400.261         | 399.253         | R[6]  |
| R[20] | 1073.133       | 329.716  | 321.707         | 322.211         | 321.203         | R[5]  |
| V[21] | 1122.667       | 265.668  | 257.659         | 258.163         | 257.155         | V[4]  |
| L[22] | 1179.209       | 216.134  | 208.125         | 208.629         | 207.621         | L[3]  |
| D[23] | 1213.273       | 159.092  | 151.083         | 151.587         | 150.579         | D[2]  |
| D[24] | 1328.789       | 67.526   | 59.517          | 60.021          | 59.013          | D[1]  |

# sp | P62806 | H4\_MOUSE

[Acetyl]SGR<sup>Dimethyl</sup><sub>28.03</sub> GKGGKGLGK<sup>Acetyl</sup><sub>42.01</sub> GGAK<sup>Acetyl</sup><sub>42.01</sub> RHRKVL R<sup>(Dimethyl)</sup><sub>(28.03)</sub> D

- ▶ fragmentation table for charge state 3+
- ▶ specType=etd
- ▶ score=69.89
- ▶ F121511.dat
- ▶ query=q36963.p1
- ▶ precursor=665.145940
- ▶ chargePrecursor=4
- ▶ itol=0.7

| AA    | c              | y              | z+1            | z+2            | z              | AA    |
|-------|----------------|----------------|----------------|----------------|----------------|-------|
| S[1]  | 69.697         | <b>886.523</b> | <b>881.183</b> | 0.672          | <b>880.848</b> | S[24] |
| G[2]  | 68.704         | <b>843.509</b> | <b>838.169</b> | 0.672          | <b>837.833</b> | G[23] |
| R[3]  | 130.082        | 324.562        | <b>819.162</b> | <b>819.498</b> | 318.826        | R[22] |
| G[4]  | 149.089        | 763.124        | 757.785        | 758.121        | 757.449        | G[21] |
| K[5]  | 191.787        | 744.117        | 738.778        | 739.113        | 738.442        | K[20] |
| G[6]  | 210.794        | 701.419        | <b>696.079</b> | <b>696.415</b> | <b>695.743</b> | G[19] |
| G[7]  | 229.801        | 682.412        | 677.072        | 677.408        | 676.736        | G[18] |
| K[8]  | 272.500        | 663.404        | 658.065        | 658.401        | 657.729        | K[17] |
| G[9]  | 291.507        | 620.706        | 615.367        | 615.703        | 615.031        | G[16] |
| L[10] | 329.202        | 601.699        | 596.359        | 596.695        | 596.022        | L[15] |
| G[11] | 388.209        | 584.004        | 578.665        | 579.001        | 578.329        | G[14] |
| K[12] | 404.911        | 544.997        | 539.658        | 539.994        | 539.322        | K[13] |
| G[13] | 423.918        | 488.295        | 482.956        | 483.292        | 482.620        | G[12] |
| G[14] | 442.925        | 469.288        | 463.949        | 464.285        | 463.613        | G[11] |
| A[15] | 466.604        | 450.281        | <b>444.941</b> | <b>445.277</b> | 444.605        | A[10] |
| K[16] | 523.306        | 426.602        | 421.262        | 421.598        | 420.926        | K[9]  |
| R[17] | 575.139        | 369.900        | 364.561        | 364.896        | 364.225        | R[8]  |
| H[18] | 621.026        | 317.866        | 312.527        | 312.863        | 312.191        | H[7]  |
| R[19] | 673.059        | 272.180        | 266.841        | 267.176        | 266.505        | R[6]  |
| K[20] | 715.758        | 220.140        | 214.801        | 215.143        | 214.471        | K[5]  |
| V[21] | 748.781        | 177.448        | 172.109        | 172.444        | 171.773        | V[4]  |
| L[22] | 786.475        | 144.425        | 139.086        | 139.422        | 138.750        | L[3]  |
| R[23] | <b>847.853</b> | 106.731        | 101.391        | 101.727        | 101.055        | R[2]  |
| D[24] | <b>886.195</b> | 45.353         | 40.014         | 40.349         | 39.678         | D[1]  |

# sp | P62806 | H4\_MOUSE

[Acetyl]SGRGKGGK Acetyl 42.01 GLGK Acetyl 42.01 GGAK Acetyl 42.01 RHRK Dimethyl 28.03 VLRD

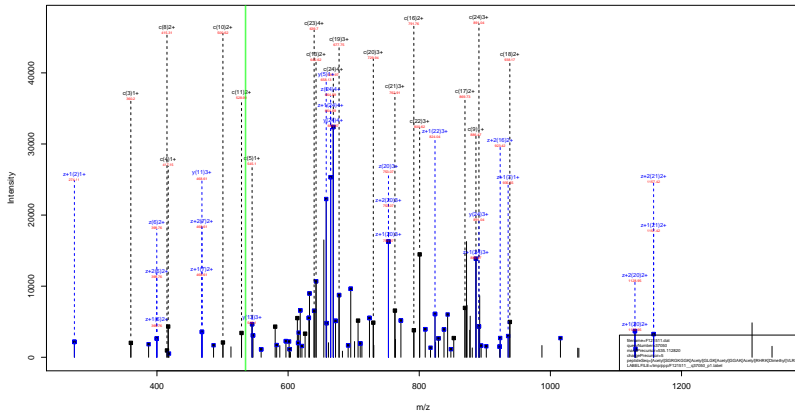

# sp | P62806 | H4\_MOUSE

[Acetyl]SGRGKGGK<sup>Acetyl</sup><sub>42.01</sub> GLGK<sup>Acetyl</sup><sub>42.01</sub> GGAK<sup>Acetyl</sup><sub>42.01</sub> RHRK<sup>Dimethyl</sup><sub>28.03</sub> VLRD

- ▶ fragmentation table for charge state 1+
- ▶ specType=etd
- ▶ score=59.94
- ▶ F121511.dat
- ▶ query=q37050.p1
- ▶ precursor=535.112820
- ▶ chargePrecursor=5
- ▶ itol=0.7

| AA |    | c              | y              | z+1            | z+2      | z        | AA    |
|----|----|----------------|----------------|----------------|----------|----------|-------|
| S  | 1  | 147.076        | 2671.534       | 2655.515       | 0.000    | 2654.507 | S[24] |
| G  | 2  | 254.098        | 2542.493       | 2528.473       | 0.000    | 2525.465 | G[23] |
| R  | 3  | <b>360.199</b> | 2626.470       | 2469.451       | 2470.459 | 2608.443 | R[22] |
| G  | 4  | <b>417.220</b> | 2320.868       | 2311.850       | 2314.858 | 2312.342 | G[21] |
| K  | 5  | <b>545.315</b> | 2272.347       | 2256.329       | 2257.336 | 2255.321 | K[20] |
| G  | 6  | <b>602.337</b> | 2144.252       | 2128.234       | 2129.241 | 2127.226 | G[19] |
| G  | 7  | <b>659.358</b> | 2087.231       | 2071.212       | 2072.220 | 2070.204 | G[18] |
| K  | 8  | <b>829.464</b> | 2030.209       | 2014.191       | 2015.198 | 2013.183 | K[17] |
| G  | 9  | <b>886.485</b> | 1890.104       | 1884.085       | 1885.093 | 1883.077 | G[16] |
| L  | 10 | 993.959        | 1803.064       | 1787.044       | 1788.051 | 1786.036 | L[15] |
| G  | 11 | 1056.591       | 1588.988       | 1673.980       | 1674.987 | 1672.972 | G[14] |
| K  | 12 | 1226.696       | 1632.977       | 1616.958       | 1617.966 | 1615.950 | K[13] |
| G  | 13 | 1283.718       | 1462.871       | 1446.853       | 1447.860 | 1445.845 | G[12] |
| G  | 14 | 1340.739       | 1405.850       | 1389.831       | 1390.839 | 1388.823 | G[11] |
| A  | 15 | 1411.776       | 1348.828       | 1332.810       | 1333.818 | 1331.802 | A[10] |
| K  | 16 | 1581.882       | 1277.791       | 1261.773       | 1262.780 | 1260.765 | K[9]  |
| R  | 17 | 1737.983       | 1137.686       | 1121.667       | 1122.675 | 1120.659 | R[8]  |
| H  | 18 | 1875.042       | 951.585        | <b>935.566</b> | 936.574  | 934.558  | H[7]  |
| R  | 19 | 2031.143       | 814.526        | 798.507        | 799.515  | 797.499  | R[6]  |
| K  | 20 | 2187.269       | <b>658.425</b> | <b>642.406</b> | 643.414  | 641.398  | K[5]  |
| V  | 21 | 2286.338       | 502.298        | <b>486.280</b> | 487.287  | 485.272  | V[4]  |
| L  | 22 | 2399.422       | 403.230        | <b>387.211</b> | 388.219  | 386.203  | L[3]  |
| R  | 23 | 2555.523       | 290.146        | <b>274.127</b> | 275.135  | 273.119  | R[2]  |
| D  | 24 | 2670.550       | 134.045        | 118.026        | 119.034  | 117.018  | D[1]  |

# sp | P62806 | H4\_MOUSE

[Acetyl]SGRGKGGK <sup>Acetyl</sup><sub>42.01</sub> GLGK <sup>Acetyl</sup><sub>42.01</sub> GGAK <sup>Acetyl</sup><sub>42.01</sub> RHRK <sup>Dimethyl</sup><sub>28.03</sub> VLRD

- ▶ fragmentation table for charge state 2+
- ▶ specType=etd
- ▶ score=59.94
- ▶ F121511.dat
- ▶ query=q37050\_p1
- ▶ precursor=535.112820
- ▶ chargePrecursor=5
- ▶ itol=0.7

| AA | c  | y              | z+1             | z+2             | z               | AA             |       |
|----|----|----------------|-----------------|-----------------|-----------------|----------------|-------|
| S  | 1  | 74.042         | 1336.271        | 1326.261        | 0.904           | 1327.757       | S[24] |
| G  | 2  | 102.553        | 1271.749        | 1261.740        | 0.904           | 1263.230       | G[23] |
| R  | 3  | 180.003        | 1243.239        | 1233.229        | 1236.719        | 1234.725       | R[22] |
| G  | 4  | 209.114        | 1305.189        | <b>1157.179</b> | <b>1157.683</b> | 1306.879       | G[21] |
| K  | 5  | 273.101        | 1336.677        | <b>1128.668</b> | <b>1129.172</b> | 1328.164       | K[20] |
| G  | 6  | 301.872        | 1072.630        | 1064.830        | 1065.124        | 1064.117       | G[19] |
| G  | 7  | 330.183        | 1044.119        | 1036.110        | 1036.614        | 1035.606       | G[18] |
| K  | 8  | <b>415.236</b> | <b>1015.608</b> | 1007.599        | 1008.103        | 1007.095       | K[17] |
| G  | 9  | 447.720        | 1381.599        | <b>922.546</b>  | <b>923.050</b>  | <b>922.042</b> | G[16] |
| L  | 10 | <b>500.298</b> | <b>902.045</b>  | <b>894.035</b>  | <b>894.539</b>  | 893.532        | L[15] |
| G  | 11 | <b>528.799</b> | 845.503         | <b>837.493</b>  | <b>837.997</b>  | 836.990        | G[14] |
| K  | 12 | <b>613.852</b> | <b>816.992</b>  | <b>808.983</b>  | <b>809.487</b>  | <b>808.479</b> | K[13] |
| G  | 13 | <b>642.363</b> | 731.939         | <b>723.930</b>  | <b>724.434</b>  | <b>723.426</b> | G[12] |
| G  | 14 | 670.873        | 703.429         | <b>695.419</b>  | <b>695.923</b>  | <b>694.915</b> | G[11] |
| A  | 15 | <b>706.392</b> | 674.918         | 666.907         | 667.412         | 666.405        | A[10] |
| R  | 16 | <b>791.445</b> | <b>639.399</b>  | <b>631.390</b>  | <b>631.894</b>  | 630.886        | R[9]  |
| R  | 17 | <b>860.495</b> | 554.347         | <b>546.337</b>  | <b>546.841</b>  | <b>545.833</b> | R[8]  |
| H  | 18 | <b>938.025</b> | 478.290         | <b>468.287</b>  | <b>468.791</b>  | 467.783        | H[7]  |
| R  | 19 | 1016.075       | 407.707         | <b>399.757</b>  | <b>400.261</b>  | <b>399.253</b> | R[6]  |
| K  | 20 | 1094.138       | 329.716         | 321.707         | 322.211         | 321.203        | K[5]  |
| V  | 21 | 1143.673       | 251.653         | 243.643         | 244.147         | 243.140        | V[4]  |
| L  | 22 | 1200.215       | 202.119         | 194.109         | 194.613         | 193.605        | L[3]  |
| R  | 23 | 1278.205       | 145.577         | 137.567         | 138.071         | 137.063        | R[2]  |
| D  | 24 | 1335.779       | 67.526          | 59.517          | 60.021          | 59.013         | D[1]  |

# sp | P62806 | H4\_MOUSE

[Acetyl]SGRGKGGK <sup>Acetyl</sup><sub>42.01</sub> GLGK <sup>Acetyl</sup><sub>42.01</sub> GGAK <sup>Acetyl</sup><sub>42.01</sub> RHRK <sup>Dimethyl</sup><sub>28.03</sub> VLRD

- ▶ fragmentation table for charge state 3+
- ▶ specType=etd
- ▶ score=59.94
- ▶ F121511.dat
- ▶ query=q37050.p1
- ▶ precursor=535.112820
- ▶ chargePrecursor=5
- ▶ itol=0.7

| AA    | c              | y              | z+1            | z+2            | z              | AA    |
|-------|----------------|----------------|----------------|----------------|----------------|-------|
| S[1]  | 49.697         | <b>891.183</b> | <b>885.843</b> | 0.672          | 885.507        | S[24] |
| G[2]  | 58.704         | <b>848.169</b> | <b>842.829</b> | 0.672          | 842.493        | G[23] |
| R[3]  | 150.738        | <b>829.161</b> | <b>823.822</b> | <b>824.158</b> | <b>823.486</b> | R[22] |
| G[4]  | 139.745        | 777.128        | <b>771.788</b> | <b>772.124</b> | <b>771.452</b> | G[21] |
| K[5]  | 182.443        | 798.121        | <b>752.781</b> | <b>753.117</b> | <b>752.445</b> | K[20] |
| G[6]  | 201.450        | 715.422        | <b>710.083</b> | <b>710.419</b> | <b>709.747</b> | G[19] |
| G[7]  | 220.458        | 696.415        | <b>691.076</b> | <b>691.412</b> | 690.740        | G[18] |
| K[8]  | 277.159        | <b>677.408</b> | <b>672.068</b> | <b>672.404</b> | <b>671.732</b> | K[17] |
| G[9]  | 296.167        | <b>620.706</b> | <b>615.367</b> | <b>615.703</b> | <b>615.031</b> | G[16] |
| L[10] | 313.681        | <b>601.699</b> | <b>596.359</b> | <b>596.695</b> | <b>596.023</b> | L[15] |
| G[11] | 352.868        | 504.024        | <b>558.665</b> | <b>559.001</b> | <b>558.329</b> | G[14] |
| K[12] | 409.570        | <b>544.997</b> | 539.658        | 539.994        | 539.322        | K[13] |
| G[13] | 428.577        | 488.295        | 482.956        | 483.292        | 482.620        | G[12] |
| G[14] | 447.585        | <b>469.288</b> | 463.949        | 464.285        | 463.613        | G[11] |
| A[15] | 471.264        | 450.281        | 444.941        | 445.277        | 444.605        | A[10] |
| K[16] | 527.966        | 426.602        | 421.262        | 421.598        | 420.926        | K[9]  |
| R[17] | <b>579.999</b> | 369.900        | 364.561        | 364.896        | 364.225        | R[8]  |
| H[18] | <b>625.686</b> | 317.866        | 312.527        | 312.863        | 312.191        | H[7]  |
| R[19] | <b>677.719</b> | 272.180        | 266.841        | 267.176        | 266.505        | R[6]  |
| K[20] | <b>729.761</b> | 220.140        | 214.807        | 215.143        | 214.471        | K[5]  |
| V[21] | <b>762.784</b> | 168.104        | 162.765        | 163.101        | 162.429        | V[4]  |
| L[22] | <b>800.479</b> | 135.082        | 129.742        | 130.078        | 129.406        | L[3]  |
| R[23] | <b>852.513</b> | 97.387         | 92.047         | 92.383         | 91.711         | R[2]  |
| D[24] | <b>896.855</b> | 45.353         | 40.014         | 40.349         | 39.678         | D[1]  |

# sp | P62806 | H4\_MOUSE

[Acetyl]SGRGKGGK <sup>Acetyl</sup><sub>42.01</sub> GLGK <sup>Acetyl</sup><sub>42.01</sub> GGAK <sup>Acetyl</sup><sub>42.01</sub> RHRK <sup>Dimethyl</sup><sub>28.03</sub> VLRD

- ▶ fragmentation table for charge state 4+
- ▶ specType=etd
- ▶ score=59.94
- ▶ F121511.dat
- ▶ query=q37050.p1
- ▶ precursor=535.112820
- ▶ chargePrecursor=5
- ▶ itol=0.7

| AA    | c              | y              | z+1            | z+2            | z              | AA    |
|-------|----------------|----------------|----------------|----------------|----------------|-------|
| S[1]  | 37.525         | <b>668.639</b> | <b>664.634</b> | 0.795          | <b>664.182</b> | S[24] |
| G[2]  | 51.780         | 536.378        | <b>632.374</b> | 0.795          | <b>632.122</b> | G[23] |
| R[3]  | 90.805         | 622.121        | <b>618.118</b> | <b>618.370</b> | <b>617.866</b> | R[22] |
| G[4]  | 105.061        | <b>583.098</b> | 579.093        | 579.345        | 578.841        | G[21] |
| K[5]  | 137.084        | 568.842        | 564.838        | 565.090        | 564.586        | K[20] |
| G[6]  | 151.340        | 536.819        | 532.814        | 533.066        | 532.562        | G[19] |
| G[7]  | 165.595        | 522.563        | 518.558        | 518.810        | 518.307        | G[18] |
| K[8]  | 208.121        | 508.308        | 504.303        | 504.555        | 504.051        | K[17] |
| G[9]  | 222.377        | 495.781        | 491.777        | 492.029        | 491.525        | G[16] |
| L[10] | 250.048        | 451.526        | 447.521        | 447.773        | 447.269        | L[15] |
| G[11] | 264.303        | 423.255        | 419.250        | 419.502        | <b>418.998</b> | G[14] |
| K[12] | 307.430        | 409.000        | 404.995        | 405.247        | 404.743        | K[13] |
| G[13] | 321.685        | 366.473        | 362.469        | 362.721        | 362.217        | G[12] |
| G[14] | 335.940        | 352.218        | 348.213        | 348.465        | 347.961        | G[11] |
| A[15] | 353.700        | 337.963        | 333.958        | 334.210        | 333.706        | A[10] |
| K[16] | 398.226        | 320.203        | 316.199        | 316.451        | 315.947        | K[9]  |
| R[17] | 435.251        | 277.877        | <b>273.672</b> | <b>273.924</b> | <b>273.420</b> | R[8]  |
| H[18] | 469.516        | 238.652        | 234.647        | 234.899        | 234.395        | H[7]  |
| R[19] | 508.541        | 204.397        | 200.392        | 200.644        | 200.140        | R[6]  |
| K[20] | 547.573        | 165.362        | 161.357        | 161.609        | 161.105        | K[5]  |
| V[21] | 572.340        | 126.330        | 122.325        | 122.577        | 122.073        | V[4]  |
| L[22] | 600.611        | 101.563        | 97.558         | 97.810         | 97.306         | L[3]  |
| R[23] | <b>639.636</b> | 73.292         | 69.287         | 69.539         | 69.035         | R[2]  |
| D[24] | <b>668.393</b> | 34.267         | 30.262         | 30.514         | 30.010         | D[1]  |



# sp | P62806 | H4\_MOUSE

[Acetyl]SGRGK Acetyl 42.01 GGK Acetyl 42.01 GLGKGGAK Methyl 14.02 RHRK Acetyl 42.01 VLR Methyl 14.02 D

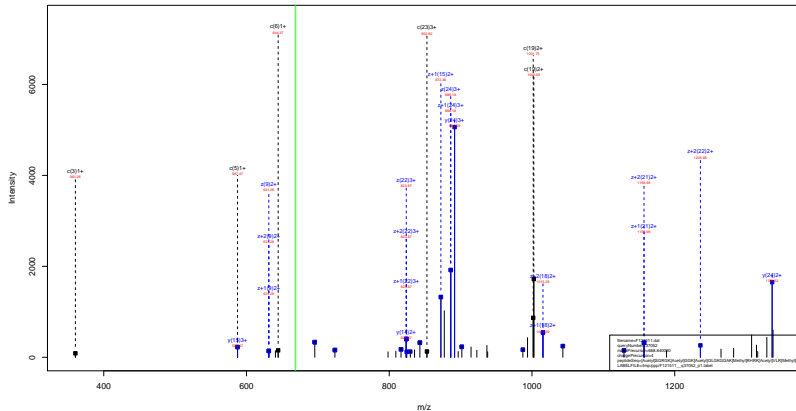

# sp | P62806 | H4\_MOUSE

[Acetyl]SGRGK<sub>Acetyl</sub><sub>42.01</sub> GGK<sub>Acetyl</sub><sub>42.01</sub> GLGKGGAK<sub>Methyl</sub><sub>14.02</sub> RHRK<sub>Acetyl</sub><sub>42.01</sub> VLR<sub>Methyl</sub><sub>14.02</sub> D

- ▶ fragmentation table for charge state 1+
- ▶ specType=etd
- ▶ score=60.02
- ▶ F121511.dat
- ▶ query=q37052.p1
- ▶ precursor=668.640080
- ▶ chargePrecursor=4
- ▶ itol=0.7

| AA |    | c              | y              | z+1      | z+2      | z        | AA    |
|----|----|----------------|----------------|----------|----------|----------|-------|
| S  | 1  | 147.076        | 2671.534       | 2655.513 | 0.000    | 2654.507 | S[24] |
| G  | 2  | 204.008        | 2542.493       | 2528.473 | 0.000    | 2525.465 | G[23] |
| R  | 3  | <b>360.199</b> | 2305.470       | 2409.451 | 2470.439 | 2308.443 | R[22] |
| G  | 4  | 417.220        | 2320.868       | 2311.850 | 2314.838 | 2312.342 | G[21] |
| K  | 5  | <b>587.326</b> | 2272.347       | 2256.329 | 2257.336 | 2255.321 | K[20] |
| G  | 6  | <b>644.347</b> | 2102.242       | 2086.223 | 2087.231 | 2085.215 | G[19] |
| G  | 7  | 701.369        | 2045.220       | 2029.202 | 2030.209 | 2028.194 | G[18] |
| K  | 8  | 871.474        | 1988.199       | 1972.180 | 1973.188 | 1971.172 | K[17] |
| G  | 9  | 928.496        | 1818.093       | 1802.075 | 1803.082 | 1801.067 | G[16] |
| L  | 10 | 1041.588       | 1753.072       | 1743.053 | 1746.061 | 1744.045 | L[15] |
| G  | 11 | 1098.601       | 1547.985       | 1531.969 | 1532.977 | 1530.961 | G[14] |
| K  | 12 | 1226.696       | 1590.966       | 1574.948 | 1575.955 | 1573.940 | K[13] |
| G  | 13 | 1283.718       | 1462.871       | 1446.853 | 1447.860 | 1445.845 | G[12] |
| G  | 14 | 1340.739       | 1405.850       | 1389.831 | 1390.839 | 1388.823 | G[11] |
| A  | 15 | 1411.776       | 1348.828       | 1332.810 | 1333.818 | 1331.802 | A[10] |
| K  | 16 | 1551.887       | 1277.791       | 1261.773 | 1262.780 | 1260.765 | K[9]  |
| R  | 17 | 1709.988       | 1135.684       | 1119.667 | 1120.676 | 1118.659 | R[8]  |
| H  | 18 | 1847.087       | 979.580        | 963.561  | 964.569  | 962.553  | H[7]  |
| R  | 19 | 2003.148       | <b>842.521</b> | 825.502  | 827.510  | 825.494  | R[6]  |
| K  | 20 | 2173.254       | 686.420        | 670.401  | 671.409  | 669.393  | K[5]  |
| V  | 21 | 2272.322       | 516.314        | 500.295  | 501.303  | 499.287  | V[4]  |
| L  | 22 | 2385.406       | 417.246        | 401.227  | 402.235  | 400.219  | L[3]  |
| R  | 23 | 2595.523       | 304.162        | 288.143  | 289.151  | 287.135  | R[2]  |
| D  | 24 | 2670.550       | 134.045        | 118.026  | 119.034  | 117.018  | D[1]  |

# sp | P62806 | H4\_MOUSE

[Acetyl]SGR GK <sup>Acetyl</sup><sub>42.01</sub> GK <sup>Acetyl</sup><sub>42.01</sub> GLGKGGAK <sup>Methyl</sup><sub>14.02</sub> RHRK <sup>Acetyl</sup><sub>42.01</sub> VLR <sup>Methyl</sup><sub>14.02</sub> D

- ▶ fragmentation table for charge state 2+
- ▶ specType=etd
- ▶ score=60.02
- ▶ F121511.dat
- ▶ query=q37052\_p1
- ▶ precursor=668.640080
- ▶ chargePrecursor=4
- ▶ itol=0.7

| AA | c  | y               | z+1             | z+2             | z               | AA              |       |
|----|----|-----------------|-----------------|-----------------|-----------------|-----------------|-------|
| S  | 1  | 74.642          | <b>1336.271</b> | 1326.261        | 0.504           | 1327.757        | S[24] |
| G  | 2  | 102.553         | 1271.746        | 1263.740        | 0.504           | 1263.236        | G[23] |
| R  | 3  | 180.603         | 1243.239        | 1235.230        | <b>1235.733</b> | 1234.725        | R[22] |
| G  | 4  | 259.114         | 1165.169        | <b>1157.179</b> | <b>1157.683</b> | <b>1156.675</b> | G[21] |
| K  | 5  | 294.157         | 1136.677        | <b>1128.668</b> | <b>1129.172</b> | 1128.165        | K[20] |
| G  | 6  | 322.677         | 1051.625        | <b>1043.615</b> | 1044.119        | <b>1043.111</b> | G[19] |
| G  | 7  | 351.188         | 1023.114        | <b>1015.104</b> | <b>1015.608</b> | 1014.601        | G[18] |
| K  | 8  | 436.241         | 994.603         | <b>986.594</b>  | <b>987.098</b>  | 986.091         | K[17] |
| G  | 9  | 464.752         | 920.550         | <b>901.541</b>  | <b>902.045</b>  | <b>901.037</b>  | G[16] |
| L  | 10 | 511.294         | 893.040         | <b>873.030</b>  | 873.534         | <b>872.526</b>  | L[15] |
| G  | 11 | 549.804         | <b>824.498</b>  | <b>816.488</b>  | <b>816.992</b>  | <b>815.984</b>  | G[14] |
| K  | 12 | 613.852         | 795.987         | 787.977         | 788.481         | 787.474         | K[13] |
| G  | 13 | 642.363         | 731.939         | <b>723.930</b>  | <b>724.434</b>  | <b>723.426</b>  | G[12] |
| G  | 14 | 670.873         | 703.429         | <b>695.419</b>  | <b>695.923</b>  | 694.915         | G[11] |
| A  | 15 | 708.382         | 674.918         | 666.908         | 667.412         | 666.405         | A[10] |
| R  | 16 | 777.447         | 639.399         | <b>631.390</b>  | <b>631.894</b>  | <b>630.886</b>  | R[9]  |
| R  | 17 | 856.498         | 568.344         | 560.335         | 560.839         | 559.831         | R[8]  |
| H  | 18 | 934.007         | 490.293         | 482.284         | 482.788         | 481.780         | H[7]  |
| R  | 19 | <b>1002.078</b> | 421.764         | 413.755         | 414.259         | 413.251         | R[6]  |
| K  | 20 | 1087.130        | 343.717         | 335.708         | 336.208         | 335.200         | K[5]  |
| V  | 21 | 1136.665        | 258.661         | 250.651         | 251.155         | 250.147         | V[4]  |
| L  | 22 | 1193.207        | 209.126         | 201.117         | 201.621         | 200.613         | L[3]  |
| R  | 23 | 1278.265        | 152.584         | 144.575         | 145.079         | 144.071         | R[2]  |
| D  | 24 | 1336.779        | 67.526          | 59.517          | 60.021          | 59.013          | D[1]  |

# sp | P62806 | H4\_MOUSE

[Acetyl]SGR<sup>Acetyl</sup>RGK<sup>42.01</sup> GGK<sup>Acetyl</sup> GLGKGGAK<sup>Methyl</sup> 14.02 RHRK<sup>Acetyl</sup> VLR<sup>Methyl</sup> 14.02 D

- ▶ fragmentation table for charge state 3+
- ▶ specType=etd
- ▶ score=60.02
- ▶ F121511.dat
- ▶ query=q37052.p1
- ▶ precursor=668.640080
- ▶ chargePrecursor=4
- ▶ itol=0.7

| AA    | c              | y              | z+1            | z+2            | z              | AA    |
|-------|----------------|----------------|----------------|----------------|----------------|-------|
| S[1]  | 49.697         | <b>891.183</b> | <b>685.843</b> | 0.672          | <b>885.507</b> | S[24] |
| G[2]  | 58.704         | 848.195        | <b>842.829</b> | 0.672          | <b>842.493</b> | G[23] |
| R[3]  | 130.738        | <b>829.161</b> | <b>823.822</b> | <b>824.158</b> | <b>823.486</b> | R[22] |
| G[4]  | 139.745        | 777.128        | 771.788        | 772.124        | 771.452        | G[21] |
| K[5]  | 196.447        | 758.121        | 752.781        | 753.117        | 752.445        | K[20] |
| G[6]  | 215.454        | 701.419        | <b>696.079</b> | 696.415        | <b>695.743</b> | G[19] |
| G[7]  | 234.461        | 682.412        | 677.072        | 677.408        | 676.736        | G[18] |
| K[8]  | 291.163        | 663.404        | 658.063        | 658.401        | 657.729        | K[17] |
| G[9]  | 310.170        | 636.703        | 601.363        | 603.699        | 601.027        | G[16] |
| L[10] | 347.885        | <b>537.695</b> | 582.355        | 582.692        | 582.020        | L[15] |
| G[11] | 396.872        | 550.051        | 544.661        | 544.997        | 544.325        | G[14] |
| K[12] | 409.570        | 530.994        | 525.654        | 525.990        | 525.318        | K[13] |
| G[13] | 428.577        | 488.295        | 482.956        | 483.292        | 482.620        | G[12] |
| G[14] | 447.585        | 469.288        | 463.949        | 464.285        | 463.613        | G[11] |
| A[15] | 471.264        | 450.281        | 444.941        | 445.277        | 444.605        | A[10] |
| K[16] | 518.634        | 426.602        | 421.262        | 421.598        | 420.926        | K[9]  |
| R[17] | 570.668        | 379.232        | 373.892        | 374.228        | 373.556        | R[8]  |
| H[18] | 616.354        | 327.198        | 321.858        | 322.194        | 321.522        | H[7]  |
| R[19] | 668.388        | 231.512        | 276.172        | 278.508        | 279.836        | R[6]  |
| K[20] | 725.089        | 229.476        | 224.136        | 224.474        | 223.803        | K[5]  |
| V[21] | 758.112        | 172.776        | 167.437        | 167.773        | 167.101        | V[4]  |
| L[22] | 795.807        | 139.753        | 134.414        | 134.750        | 134.078        | L[3]  |
| R[23] | <b>852.513</b> | 102.059        | 96.719         | 97.055         | 96.383         | R[2]  |
| D[24] | 890.855        | 45.353         | 40.014         | 40.349         | 39.678         | D[1]  |



# sp | P62806 | H4\_MOUSE

[Acetyl]SGRGKGGK <sup>Acetyl</sup><sub>42.01</sub> GLGK <sup>Acetyl</sup><sub>42.01</sub> GGAK <sup>Acetyl</sup><sub>42.01</sub> RHR (Methyl)<sub>(14.02)</sub> K (Methyl)<sub>(14.02)</sub> VLRLD

- ▶ fragmentation table for charge state 1+
- ▶ specType=etd
- ▶ score=48.07
- ▶ F121511.dat
- ▶ query=q37056.p1
- ▶ precursor=668.640330
- ▶ chargePrecursor=4
- ▶ itol=0.7

| AA | c               | y        | z+1            | z+2      | z        | AA    |
|----|-----------------|----------|----------------|----------|----------|-------|
| S  | 147.076         | 2671.534 | 2655.515       | 0.000    | 2654.507 | S[24] |
| G  | 264.098         | 2542.491 | 2526.473       | 0.000    | 2525.465 | G[23] |
| R  | <b>368.159</b>  | 2395.470 | 2369.451       | 2470.439 | 2368.443 | R[22] |
| G  | 417.230         | 2329.360 | 2313.350       | 2314.358 | 2312.342 | G[21] |
| K  | <b>545.315</b>  | 2272.347 | 2256.329       | 2257.336 | 2255.321 | K[20] |
| G  | <b>602.337</b>  | 2144.252 | 2128.234       | 2129.241 | 2127.226 | G[19] |
| G  | 669.358         | 2087.231 | 2071.210       | 2072.220 | 2070.204 | G[18] |
| K  | <b>829.464</b>  | 2030.209 | 2014.191       | 2015.198 | 2013.183 | K[17] |
| G  | <b>856.485</b>  | 1890.104 | 1844.085       | 1845.093 | 1843.077 | G[16] |
| L  | 929.569         | 1803.082 | 1787.064       | 1788.071 | 1786.056 | L[15] |
| G  | 1050.591        | 1689.990 | 1673.980       | 1674.987 | 1672.972 | G[14] |
| K  | <b>1226.696</b> | 1632.977 | 1616.958       | 1617.966 | 1615.950 | K[13] |
| G  | <b>1283.718</b> | 1462.871 | 1446.853       | 1447.860 | 1445.845 | G[12] |
| G  | 1340.739        | 1405.850 | 1389.831       | 1390.839 | 1388.823 | G[11] |
| A  | 1411.776        | 1348.828 | 1332.810       | 1333.818 | 1331.802 | A[10] |
| K  | 1581.882        | 1277.791 | 1261.773       | 1262.780 | 1260.765 | K[9]  |
| R  | 1737.983        | 1107.686 | 1091.667       | 1092.675 | 1090.660 | R[8]  |
| H  | 1878.042        | 951.580  | <b>935.566</b> | 936.574  | 934.558  | H[7]  |
| R  | 2045.150        | 814.520  | 798.507        | 799.515  | 797.499  | R[6]  |
| K  | 2187.269        | 644.400  | 628.390        | 629.398  | 627.382  | K[5]  |
| V  | 2286.338        | 502.290  | 486.280        | 487.287  | 485.272  | V[4]  |
| L  | 2399.422        | 403.230  | 387.211        | 388.219  | 386.203  | L[3]  |
| R  | 2555.523        | 290.140  | 274.127        | 275.135  | 273.119  | R[2]  |
| D  | 2670.550        | 134.045  | 118.028        | 119.034  | 117.018  | D[1]  |

# sp | P62806 | H4\_MOUSE

[Acetyl]SGRGKGGK <sup>Acetyl</sup><sub>42.01</sub> GLGK <sup>Acetyl</sup><sub>42.01</sub> GGAK <sup>Acetyl</sup><sub>42.01</sub> RHR <sup>(Methyl)</sup><sub>(14.02)</sub> K <sup>(Methyl)</sup><sub>(14.02)</sub> VLRD

- ▶ fragmentation table for charge state 2+
- ▶ specType=etd
- ▶ score=48.07
- ▶ F121511.dat
- ▶ query=q37056.p1
- ▶ precursor=668.640330
- ▶ chargePrecursor=4
- ▶ itol=0.7

| AA   | c               | y               | z+1             | z+2             | z               | AA   |
|------|-----------------|-----------------|-----------------|-----------------|-----------------|------|
| S 1  | 94.692          | <b>1336.271</b> | <b>1328.261</b> | 0.504           | 1327.757        | S 24 |
| G 2  | 102.553         | 1271.749        | <b>1263.740</b> | 0.504           | <b>1263.236</b> | G 23 |
| R 3  | 180.603         | 1243.239        | 1235.239        | <b>1235.733</b> | 1234.728        | R 22 |
| G 4  | 209.114         | 1185.188        | <b>1157.179</b> | <b>1157.683</b> | 1156.675        | G 21 |
| R 5  | 273.163         | 1136.677        | 1128.667        | 1129.172        | 1129.166        | R 20 |
| G 6  | 301.672         | 1072.630        | <b>1064.620</b> | 1065.124        | <b>1064.117</b> | G 19 |
| G 7  | 330.183         | 1044.119        | <b>1036.110</b> | <b>1036.614</b> | 1035.606        | G 18 |
| K 8  | 415.236         | 1015.608        | <b>1007.599</b> | <b>1008.103</b> | <b>1007.095</b> | K 17 |
| G 9  | 443.746         | 930.556         | 922.546         | <b>923.050</b>  | 922.042         | G 16 |
| L 10 | 509.288         | <b>902.045</b>  | 894.035         | 894.539         | 893.533         | L 15 |
| G 11 | 538.799         | 845.523         | <b>837.493</b>  | <b>837.997</b>  | <b>836.990</b>  | G 14 |
| K 12 | 613.852         | 816.092         | <b>808.983</b>  | <b>809.487</b>  | 808.479         | K 13 |
| G 13 | 642.363         | 731.939         | 723.930         | <b>724.434</b>  | 723.426         | G 12 |
| G 14 | 670.873         | 703.429         | <b>695.419</b>  | <b>695.923</b>  | 694.915         | G 11 |
| A 15 | 706.292         | 674.918         | 666.908         | 667.412         | 666.405         | A 10 |
| R 16 | 791.446         | 639.399         | 631.389         | 631.894         | 630.886         | R 9  |
| R 17 | 859.495         | 594.347         | 586.337         | 586.841         | <b>545.833</b>  | R 6  |
| H 18 | <b>938.025</b>  | 476.290         | 468.287         | 468.791         | 467.783         | H 7  |
| R 19 | 1023.063        | 407.767         | 399.757         | 400.261         | 399.253         | R 6  |
| K 20 | 1094.138        | 322.708         | 314.699         | 315.203         | 314.195         | K 5  |
| V 21 | 1137.977        | 254.053         | 245.043         | 244.547         | 243.540         | V 4  |
| L 22 | <b>1206.215</b> | 202.119         | 194.109         | 194.613         | 193.605         | L 3  |
| R 23 | 1279.265        | 145.577         | 137.567         | 138.071         | 137.063         | R 2  |
| D 24 | 1336.779        | 87.526          | 79.517          | 80.021          | 79.013          | D 1  |

# sp | P62806 | H4\_MOUSE

[Acetyl]SGRGKGGK <sup>Acetyl</sup><sub>42.01</sub> GLGK <sup>Acetyl</sup><sub>42.01</sub> GGAK <sup>Acetyl</sup><sub>42.01</sub> RHR (Methyl)<sub>(14.02)</sub> K (Methyl)<sub>(14.02)</sub> VLRD

- ▶ fragmentation table for charge state 3+
- ▶ specType=etd
- ▶ score=48.07
- ▶ F121511.dat
- ▶ query=q37056.p1
- ▶ precursor=668.640330
- ▶ chargePrecursor=4
- ▶ itol=0.7

| AA    | c              | y              | z+1            | z+2            | z              | AA    |
|-------|----------------|----------------|----------------|----------------|----------------|-------|
| S[1]  | 69.697         | <b>891.183</b> | <b>885.843</b> | 0.672          | 885.207        | S[24] |
| G[2]  | 68.704         | 848.160        | <b>842.829</b> | 0.672          | <b>842.493</b> | G[23] |
| R[3]  | 120.738        | <b>829.161</b> | <b>823.822</b> | <b>824.158</b> | <b>823.486</b> | R[22] |
| G[4]  | 139.745        | 777.128        | 771.788        | 772.124        | 771.482        | G[21] |
| K[5]  | 182.443        | 758.121        | 752.781        | 753.117        | 752.445        | K[20] |
| G[6]  | 201.450        | 715.422        | 710.083        | 710.419        | 709.747        | G[19] |
| G[7]  | 220.458        | 696.415        | 691.076        | 691.412        | 690.740        | G[18] |
| K[8]  | 277.159        | 677.408        | 672.068        | 672.404        | 671.732        | K[17] |
| G[9]  | 296.167        | 620.706        | 615.367        | 615.703        | 615.031        | G[16] |
| L[10] | 313.261        | <b>601.699</b> | 596.359        | 596.695        | 596.022        | L[15] |
| G[11] | 352.868        | 574.204        | 568.865        | 569.201        | 568.529        | G[14] |
| K[12] | 409.570        | <b>544.997</b> | 539.658        | 539.994        | 539.322        | K[13] |
| G[13] | 428.577        | 488.295        | 482.956        | 483.292        | 482.620        | G[12] |
| G[14] | 447.585        | 469.288        | 463.949        | 464.285        | 463.613        | G[11] |
| A[15] | 471.264        | 450.281        | 444.941        | 445.277        | 444.605        | A[10] |
| K[16] | 527.966        | 426.602        | 421.262        | 421.598        | 420.926        | K[9]  |
| R[17] | 579.999        | 369.900        | 364.561        | 364.896        | 364.225        | R[8]  |
| H[18] | 625.686        | 317.866        | 312.527        | 312.863        | 312.191        | H[7]  |
| R[19] | 682.391        | 272.180        | 266.841        | 267.176        | 266.505        | R[6]  |
| K[20] | 729.784        | 215.475        | 210.135        | 210.471        | 209.799        | K[5]  |
| V[21] | 752.784        | 198.104        | 192.765        | 193.101        | 192.429        | V[4]  |
| L[22] | 860.479        | 135.082        | 129.742        | 130.078        | 129.406        | L[3]  |
| R[23] | <b>852.513</b> | 97.387         | 92.047         | 92.383         | 91.711         | R[2]  |
| D[24] | <b>890.855</b> | 45.353         | 40.014         | 40.349         | 39.678         | D[1]  |



# sp | P62806 | H4\_MOUSE

[Acetyl]SGRGKGGK <sup>Acetyl</sup> 42.01 GLGK <sup>Acetyl</sup> 42.01 GGAK <sup>Acetyl</sup> 42.01 RHRKVLR (Dimethyl) D (28.03)

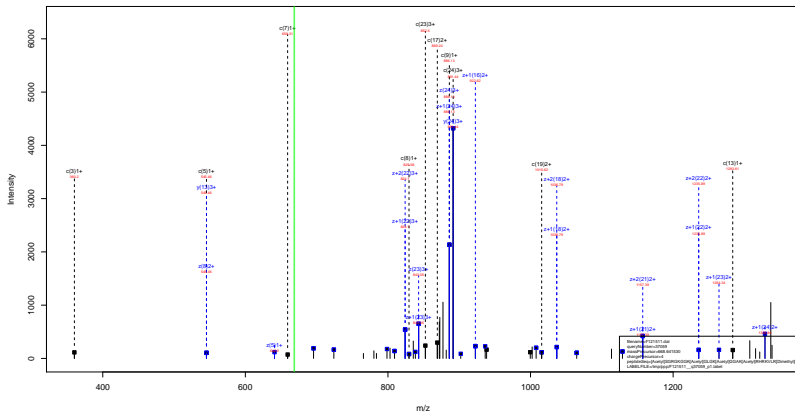

# sp | P62806 | H4\_MOUSE

[Acetyl]SGRGKGGK <sup>Acetyl</sup><sub>42.01</sub> GLGK <sup>Acetyl</sup><sub>42.01</sub> GGAK <sup>Acetyl</sup><sub>42.01</sub> RHRKVLR <sup>(Dimethyl)</sup><sub>(28.03)</sub> D

- ▶ fragmentation table for charge state 1+
- ▶ specType=etd
- ▶ score=63.07
- ▶ F121511.dat
- ▶ query=q37059.p1
- ▶ precursor=668.641530
- ▶ chargePrecursor=4
- ▶ itol=0.7

| AA | c               | y        | z+1            | z+2            | z              | AA    |
|----|-----------------|----------|----------------|----------------|----------------|-------|
| S  | 147.076         | 2671.534 | 2655.515       | 0.000          | 2654.507       | S[24] |
| G  | 264.098         | 2542.491 | 2526.473       | 0.000          | 2525.465       | G[23] |
| R  | <b>360.159</b>  | 2328.470 | 2309.451       | 2470.439       | 2308.443       | R[22] |
| G  | 417.230         | 2329.360 | 2313.350       | 2314.358       | 2312.342       | G[21] |
| K  | <b>545.315</b>  | 2272.347 | 2256.339       | 2257.336       | 2255.321       | K[20] |
| G  | 602.337         | 2144.252 | 2128.234       | 2129.241       | 2127.226       | G[19] |
| G  | <b>659.358</b>  | 2087.231 | 2071.210       | 2072.220       | 2070.204       | G[18] |
| K  | <b>829.464</b>  | 2030.209 | 2014.191       | 2015.198       | 2013.183       | K[17] |
| G  | <b>886.485</b>  | 1890.104 | 1844.085       | 1845.093       | 1843.077       | G[16] |
| L  | <b>959.569</b>  | 1803.082 | 1787.064       | 1788.071       | 1786.056       | L[15] |
| G  | 1055.591        | 1689.990 | 1673.980       | 1674.987       | 1672.972       | G[14] |
| K  | 1226.696        | 1632.977 | 1616.958       | 1617.966       | 1615.950       | K[13] |
| G  | <b>1283.718</b> | 1462.871 | 1446.853       | 1447.860       | 1445.845       | G[12] |
| G  | 1340.739        | 1405.850 | 1389.831       | 1390.839       | 1388.823       | G[11] |
| A  | 1411.776        | 1348.828 | 1332.810       | 1333.818       | 1331.802       | A[10] |
| K  | 1581.882        | 1277.791 | 1261.773       | 1262.780       | 1260.765       | K[9]  |
| R  | 1737.983        | 1107.680 | 1081.662       | 1072.675       | 1090.659       | R[8]  |
| H  | 1878.042        | 951.569  | 935.550        | <b>936.574</b> | 934.555        | H[7]  |
| R  | 1919.143        | 814.520  | <b>798.507</b> | 799.515        | 797.499        | R[6]  |
| K  | 2159.238        | 658.425  | 642.406        | 643.414        | <b>641.398</b> | K[5]  |
| V  | 2258.306        | 530.330  | 514.311        | 515.319        | 513.303        | V[4]  |
| L  | 2371.391        | 431.261  | 415.243        | 416.250        | 414.235        | L[3]  |
| R  | 2555.523        | 318.177  | 302.158        | 303.166        | 301.151        | R[2]  |
| D  | 2670.550        | 134.045  | 118.028        | 119.034        | 117.018        | D[1]  |

# sp | P62806 | H4\_MOUSE

[Acetyl]SGRGKGGK<sub>42.01</sub> Acetyl GLGK<sub>42.01</sub> Acetyl GGAK<sub>42.01</sub> RHRKVL R (Dimethyl) D (28.03)

- ▶ fragmentation table for charge state 2+
- ▶ specType=etd
- ▶ score=63.07
- ▶ F121511.dat
- ▶ query=q37059\_p1
- ▶ precursor=668.641530
- ▶ chargePrecursor=4
- ▶ itol=0.7

| AA    | c               | y               | z+1             | z+2             | z               | AA    |
|-------|-----------------|-----------------|-----------------|-----------------|-----------------|-------|
| S[1]  | 74.042          | 1336.271        | <b>1328.261</b> | 0.504           | 1327.757        | S[24] |
| G[2]  | 102.553         | 1271.749        | <b>1263.740</b> | 0.504           | 1263.236        | G[23] |
| R[3]  | 180.603         | 1243.239        | <b>1235.229</b> | <b>1235.733</b> | 1234.730        | R[22] |
| G[4]  | 209.114         | 1185.188        | <b>1157.179</b> | <b>1157.683</b> | 1156.675        | G[21] |
| K[5]  | 273.163         | 1136.677        | <b>1128.668</b> | <b>1128.172</b> | 1129.166        | K[20] |
| G[6]  | 301.672         | 1072.630        | <b>1064.620</b> | <b>1065.124</b> | <b>1064.117</b> | G[19] |
| G[7]  | 330.183         | 1044.119        | <b>1036.110</b> | <b>1036.614</b> | 1035.606        | G[18] |
| K[8]  | 415.236         | <b>1015.608</b> | <b>1007.599</b> | <b>1008.103</b> | 1007.595        | K[17] |
| G[9]  | 443.746         | 0.30.556        | <b>922.546</b>  | <b>923.050</b>  | <b>922.042</b>  | G[16] |
| L[10] | 500.288         | <b>902.045</b>  | 864.033         | 874.529         | 893.523         | L[15] |
| G[11] | 528.799         | 845.523         | 837.493         | <b>837.997</b>  | 836.990         | G[14] |
| K[12] | 613.852         | 816.092         | <b>808.983</b>  | <b>809.487</b>  | 808.479         | K[13] |
| G[13] | 642.363         | 731.939         | <b>723.930</b>  | <b>724.434</b>  | 723.426         | G[12] |
| G[14] | 670.873         | 703.429         | <b>695.419</b>  | <b>695.923</b>  | 694.915         | G[11] |
| A[15] | 706.392         | 674.918         | 666.908         | 667.412         | 666.405         | A[10] |
| R[16] | 731.446         | 639.399         | 631.389         | 631.894         | 630.886         | R[9]  |
| R[17] | <b>869.495</b>  | 594.347         | 546.337         | 546.841         | <b>545.833</b>  | R[6]  |
| H[18] | <b>938.025</b>  | 476.296         | 468.287         | 468.791         | 467.783         | H[7]  |
| R[19] | <b>1016.075</b> | 407.767         | 399.757         | 400.261         | 399.253         | R[6]  |
| K[20] | 1080.123        | 329.716         | 321.707         | 322.211         | 321.203         | K[5]  |
| V[21] | 1129.667        | 205.666         | 207.659         | 208.163         | 207.155         | V[4]  |
| L[22] | 1186.199        | 216.134         | 208.125         | 208.629         | 207.621         | L[1]  |
| R[23] | 1270.265        | 159.592         | 151.583         | 152.087         | 151.079         | R[2]  |
| D[24] | 1336.779        | 67.526          | 59.517          | 60.021          | 59.013          | D[1]  |

# sp | P62806 | H4\_MOUSE

[Acetyl]SGRGKGGK<sup>Acetyl</sup><sub>42.01</sub> GLGK<sup>Acetyl</sup><sub>42.01</sub> GGAK<sup>Acetyl</sup><sub>42.01</sub> RHRKVL<sup>(Dimethyl)</sup><sub>(28.03)</sub> R

- ▶ fragmentation table for charge state 3+
- ▶ specType=etd
- ▶ score=63.07
- ▶ F121511.dat
- ▶ query=q37059\_p1
- ▶ precursor=668.641530
- ▶ chargePrecursor=4
- ▶ itol=0.7

| AA    | c              | y              | z+1            | z+2            | z              | AA    |
|-------|----------------|----------------|----------------|----------------|----------------|-------|
| S[1]  | 69.697         | <b>891.183</b> | <b>885.843</b> | 0.672          | <b>885.507</b> | S[24] |
| G[2]  | 68.704         | 848.159        | <b>842.829</b> | 0.672          | <b>842.493</b> | G[23] |
| R[3]  | 120.738        | <b>829.161</b> | <b>823.822</b> | <b>824.158</b> | <b>823.486</b> | R[22] |
| G[4]  | 139.745        | 777.128        | 771.788        | 772.124        | 771.482        | G[21] |
| K[5]  | 182.443        | 758.121        | 752.781        | 753.117        | 752.445        | K[20] |
| G[6]  | 201.450        | 715.422        | 710.083        | 710.419        | 709.747        | G[19] |
| G[7]  | 220.458        | 696.415        | 691.076        | 691.412        | 690.740        | G[18] |
| K[8]  | 277.159        | 677.408        | 672.068        | 672.404        | 671.732        | K[17] |
| G[9]  | 296.167        | 620.706        | 615.367        | 615.703        | 615.031        | G[16] |
| L[10] | 313.264        | 601.699        | 596.359        | 596.695        | 596.022        | L[15] |
| G[11] | 352.268        | 594.034        | 588.695        | 589.031        | 588.359        | G[14] |
| K[12] | 409.570        | <b>544.997</b> | 539.658        | 539.994        | 539.322        | K[13] |
| G[13] | 428.577        | 488.295        | 482.956        | 483.292        | 482.620        | G[12] |
| G[14] | 447.585        | 469.288        | 463.949        | 464.285        | 463.613        | G[11] |
| A[15] | 471.264        | 450.281        | 444.941        | 445.277        | 444.605        | A[10] |
| K[16] | 527.966        | 426.602        | 421.262        | 421.598        | 420.926        | K[9]  |
| R[17] | 579.999        | 369.900        | 364.561        | 364.896        | 364.225        | R[8]  |
| H[18] | 625.686        | 317.866        | 312.527        | 312.863        | 312.191        | H[7]  |
| R[19] | 677.719        | 272.180        | 266.841        | 267.176        | 266.505        | R[6]  |
| K[20] | 729.412        | 220.140        | 214.801        | 215.143        | 214.471        | K[5]  |
| V[21] | 753.440        | 177.440        | 172.100        | 172.444        | 171.773        | V[4]  |
| L[22] | 791.135        | 144.425        | 139.086        | 139.422        | 138.750        | L[3]  |
| R[23] | <b>852.513</b> | 106.731        | 101.391        | 101.727        | 101.055        | R[2]  |
| D[24] | <b>890.855</b> | 45.353         | 40.014         | 40.349         | 39.678         | D[1]  |



# sp | P62806 | H4\_MOUSE

[Acetyl]SGRGK<sup>Acetyl</sup><sub>42.01</sub> GGK<sup>Acetyl</sup><sub>42.01</sub> GLGK<sup>Acetyl</sup><sub>42.01</sub> GGAK<sup>Acetyl</sup><sub>42.01</sub> RHRK<sup>Dimethyl</sup><sub>28.03</sub> VLRD

- ▶ fragmentation table for charge state 1+
- ▶ specType=etd
- ▶ score=49.87
- ▶ F121511.dat
- ▶ query=q37334.p1
- ▶ precursor=543.516610
- ▶ chargePrecursor=5
- ▶ itol=0.7

| AA | c  | y               | z+1            | z+2            | z              | AA       |   |    |
|----|----|-----------------|----------------|----------------|----------------|----------|---|----|
| S  | 1  | 147.076         | 2713.544       | 2697.526       | 0.000          | 2696.518 | S | 24 |
| G  | 2  | 234.998         | 2504.362       | 2598.483       | 0.000          | 2597.475 | G | 23 |
| R  | 3  | <b>360.199</b>  | 2527.480       | 2511.462       | 2512.470       | 2510.454 | R | 22 |
| G  | 4  | <b>417.320</b>  | 2371.379       | 2355.361       | 2356.368       | 2354.353 | G | 21 |
| K  | 5  | <b>507.326</b>  | 2314.358       | 2298.339       | 2299.347       | 2297.331 | K | 20 |
| G  | 6  | 644.347         | 2144.252       | 2128.234       | 2129.241       | 2127.226 | G | 19 |
| G  | 7  | <b>701.369</b>  | 2087.231       | 2071.212       | 2072.220       | 2070.204 | G | 18 |
| K  | 8  | <b>871.474</b>  | 2030.209       | 2014.191       | 2015.198       | 2013.183 | K | 17 |
| G  | 9  | 823.895         | 1890.104       | 1884.085       | 1885.093       | 1883.077 | G | 16 |
| L  | 10 | <b>1041.580</b> | 1803.981       | 1787.964       | 1788.971       | 1786.956 | L | 15 |
| G  | 11 | <b>1098.601</b> | 1689.960       | 1673.940       | 1674.947       | 1672.932 | G | 14 |
| K  | 12 | 1268.707        | 1632.977       | 1616.958       | 1617.966       | 1615.950 | K | 13 |
| G  | 13 | 1325.728        | 1462.871       | 1446.853       | 1447.860       | 1445.845 | G | 12 |
| G  | 14 | 1362.750        | 1405.850       | 1389.831       | 1390.839       | 1388.823 | G | 11 |
| A  | 15 | 1453.787        | 1348.828       | 1332.810       | 1333.818       | 1331.802 | A | 10 |
| K  | 16 | 1623.893        | 1277.791       | 1261.773       | 1262.780       | 1260.765 | K | 9  |
| R  | 17 | 1778.994        | 1109.686       | 1093.667       | 1092.675       | 1090.659 | R | 8  |
| H  | 18 | 1917.053        | 951.582        | 935.566        | 936.574        | 934.558  | H | 7  |
| R  | 19 | 2073.154        | <b>814.526</b> | 798.507        | <b>799.515</b> | 797.499  | R | 6  |
| K  | 20 | 2229.260        | 658.425        | <b>642.406</b> | <b>643.414</b> | 641.398  | K | 5  |
| V  | 21 | 2328.348        | 502.298        | 486.280        | <b>487.287</b> | 485.272  | V | 4  |
| L  | 22 | 2441.432        | 403.230        | <b>387.211</b> | 388.219        | 386.203  | L | 3  |
| R  | 23 | 2597.534        | 290.140        | <b>274.127</b> | 275.135        | 273.119  | R | 2  |
| D  | 24 | 2712.560        | 134.045        | 118.026        | 119.034        | 117.018  | D | 1  |

# sp | P62806 | H4\_MOUSE

[Acetyl]SGRGK Acetyl  
42.01 **GGK** Acetyl  
42.01 **GLGK** Acetyl  
42.01 **GGAK** Acetyl  
42.01 **RHRK** Dimethyl  
28.03 **VLRD**

- ▶ fragmentation table for charge state 2+
- ▶ specType=etd
- ▶ score=49.87
- ▶ F121511.dat
- ▶ query=q37334\_p1
- ▶ precursor=543.516610
- ▶ chargePrecursor=5
- ▶ itol=0.7

| AA | c  | y               | z+1            | z+2             | z               | AA             |       |
|----|----|-----------------|----------------|-----------------|-----------------|----------------|-------|
| S  | 1  | 74.642          | 1357.276       | 1340.267        | 0.504           | 1348.763       | S[24] |
| G  | 2  | 102.553         | 1292.755       | 1284.745        | 0.904           | 1284.241       | G[23] |
| R  | 3  | 180.603         | 1284.244       | 1256.234        | 1256.738        | 1256.711       | R[22] |
| G  | 4  | 209.114         | 1198.193       | 1179.184        | 1178.688        | 1177.689       | G[21] |
| K  | 5  | 204.107         | 1157.683       | <b>1149.673</b> | <b>1150.177</b> | 1149.169       | K[20] |
| G  | 6  | 332.677         | 1072.630       | <b>1064.620</b> | <b>1065.124</b> | 1064.117       | G[19] |
| G  | 7  | 351.188         | 1044.119       | <b>1036.110</b> | <b>1036.614</b> | 1035.606       | G[18] |
| K  | 8  | 436.241         | 1015.608       | 1007.599        | <b>1008.103</b> | 1007.095       | K[17] |
| G  | 9  | 464.752         | 930.556        | 922.547         | 921.051         | 920.042        | G[16] |
| L  | 10 | 531.284         | 902.045        | <b>894.035</b>  | <b>894.539</b>  | <b>893.532</b> | L[15] |
| G  | 11 | <b>549.804</b>  | 845.503        | <b>837.493</b>  | <b>837.997</b>  | 835.990        | G[14] |
| K  | 12 | 534.857         | 816.992        | 808.983         | <b>809.487</b>  | 808.479        | K[13] |
| G  | 13 | 663.366         | 731.939        | <b>723.930</b>  | <b>724.434</b>  | <b>723.426</b> | G[12] |
| G  | 14 | <b>691.879</b>  | <b>703.429</b> | <b>695.419</b>  | 695.923         | <b>694.915</b> | G[11] |
| A  | 15 | <b>727.397</b>  | <b>674.918</b> | 666.909         | <b>667.412</b>  | 666.405        | A[10] |
| R  | 16 | 812.450         | <b>639.399</b> | <b>631.390</b>  | <b>631.894</b>  | <b>630.886</b> | R[9]  |
| R  | 17 | <b>890.500</b>  | 554.347        | 546.337         | 546.841         | 545.833        | R[8]  |
| H  | 18 | <b>959.030</b>  | 478.290        | <b>468.287</b>  | <b>468.791</b>  | <b>467.783</b> | H[7]  |
| R  | 19 | <b>1037.080</b> | 407.707        | <b>399.757</b>  | <b>400.261</b>  | <b>399.253</b> | R[6]  |
| K  | 20 | 1115.144        | 329.716        | 321.707         | 322.211         | 321.203        | K[5]  |
| V  | 21 | 1164.678        | 251.653        | 243.643         | 244.147         | 243.140        | V[4]  |
| L  | 22 | <b>1221.230</b> | 202.119        | 194.109         | 194.613         | 193.605        | L[3]  |
| R  | 23 | 1269.270        | 145.577        | 137.567         | 138.071         | 137.063        | R[2]  |
| D  | 24 | 1356.784        | 67.526         | 59.517          | 60.021          | 59.013         | D[1]  |

# sp | P62806 | H4\_MOUSE

[Acetyl]SGR**GGK**<sup>Acetyl</sup><sub>42.01</sub> **GGK**<sup>Acetyl</sup><sub>42.01</sub> **GLGK**<sup>Acetyl</sup><sub>42.01</sub> **GGAK**<sup>Acetyl</sup><sub>42.01</sub> **RHRK**<sup>Dimethyl</sup><sub>28.03</sub> **VLRD**

- ▶ fragmentation table for charge state 3+
- ▶ specType=etd
- ▶ score=49.87
- ▶ F121511.dat
- ▶ query=q37334.p1
- ▶ precursor=543.516610
- ▶ chargePrecursor=5
- ▶ itol=0.7

| AA    | c              | y              | z+1            | z+2            | z              | AA    |
|-------|----------------|----------------|----------------|----------------|----------------|-------|
| S[1]  | 49.697         | <b>905.186</b> | <b>699.847</b> | 0.672          | <b>899.511</b> | S[24] |
| G[2]  | 58.704         | 392.172        | <b>856.833</b> | 0.672          | <b>856.497</b> | G[23] |
| R[3]  | 120.738        | <b>843.165</b> | <b>837.825</b> | <b>838.161</b> | <b>837.489</b> | R[22] |
| G[4]  | 139.745        | 791.131        | <b>785.792</b> | <b>786.126</b> | <b>785.456</b> | G[21] |
| K[5]  | 196.447        | 772.124        | <b>766.785</b> | <b>767.120</b> | <b>766.449</b> | K[20] |
| G[6]  | 215.454        | 715.422        | <b>710.083</b> | <b>710.419</b> | <b>709.747</b> | G[19] |
| G[7]  | 234.461        | 696.415        | <b>691.076</b> | <b>691.412</b> | 690.740        | G[18] |
| K[8]  | 291.163        | 677.408        | <b>672.068</b> | <b>672.404</b> | 671.732        | K[17] |
| G[9]  | 310.170        | <b>620.706</b> | <b>615.367</b> | <b>615.703</b> | <b>615.031</b> | G[16] |
| L[10] | 347.895        | 601.699        | <b>596.359</b> | <b>596.695</b> | <b>596.023</b> | L[15] |
| G[11] | 366.872        | 564.004        | <b>558.665</b> | <b>559.001</b> | <b>558.329</b> | G[14] |
| K[12] | 423.574        | 544.997        | <b>539.658</b> | <b>539.994</b> | <b>539.322</b> | K[13] |
| G[13] | 442.581        | 488.295        | 482.956        | 483.292        | 482.620        | G[12] |
| G[14] | 461.588        | <b>469.288</b> | 463.949        | 464.285        | 463.613        | G[11] |
| A[15] | 485.267        | 450.281        | 444.941        | 445.277        | 444.605        | A[10] |
| K[16] | 541.969        | 426.602        | 421.262        | 421.598        | 420.926        | K[9]  |
| R[17] | 594.003        | 369.900        | 364.561        | 364.896        | 364.225        | R[8]  |
| H[18] | <b>639.689</b> | 317.896        | 312.527        | 312.863        | 312.191        | H[7]  |
| R[19] | <b>691.723</b> | 272.180        | 266.841        | 267.176        | 266.505        | R[6]  |
| K[20] | <b>743.765</b> | 220.140        | 214.807        | 215.143        | 214.471        | K[5]  |
| V[21] | <b>776.788</b> | 168.104        | 162.765        | 163.101        | 162.429        | V[4]  |
| L[22] | <b>814.482</b> | 135.082        | 129.742        | 130.078        | 129.406        | L[3]  |
| R[23] | 886.516        | 97.387         | 92.047         | 92.383         | 91.711         | R[2]  |
| D[24] | <b>904.858</b> | 45.353         | 40.014         | 40.349         | 39.678         | D[1]  |



# sp | P62806 | H4\_MOUSE

[Acetyl]SGR<sup>Acetyl</sup>RGK<sup>42.01</sup> GGK<sup>Acetyl</sup> GLGK<sup>42.01</sup> GGAK<sup>Acetyl</sup> RHRK<sup>42.01</sup> Dimethyl<sup>28.03</sup> VL<sup>Acetyl</sup>LRD

- ▶ fragmentation table for charge state 4+
- ▶ specType=etd
- ▶ score=49.87
- ▶ F121511.dat
- ▶ query=q37334.p1
- ▶ precursor=543.516610
- ▶ chargePrecursor=5
- ▶ itol=0.7

| AA    | c              | y              | z+1            | z+2            | z              | AA    |
|-------|----------------|----------------|----------------|----------------|----------------|-------|
| S[1]  | 37.525         | <b>679.142</b> | <b>675.137</b> | 0.755          | <b>674.085</b> | S[24] |
| G[2]  | 51.780         | 546.081        | <b>642.076</b> | 0.755          | <b>642.624</b> | G[23] |
| R[3]  | 90.005         | <b>632.626</b> | <b>628.621</b> | <b>628.873</b> | <b>628.369</b> | R[22] |
| G[4]  | 105.061        | 593.600        | 589.596        | 589.848        | <b>589.344</b> | G[21] |
| K[5]  | 147.507        | 579.345        | 575.340        | 575.592        | 575.088        | K[20] |
| G[6]  | 161.842        | 536.619        | 532.614        | 533.066        | 532.562        | G[19] |
| G[7]  | 176.098        | <b>522.563</b> | 518.558        | 518.810        | 518.307        | G[18] |
| K[8]  | 218.624        | 508.308        | 504.303        | 504.555        | 504.051        | K[17] |
| G[9]  | 232.879        | 495.781        | 491.777        | 492.229        | 491.725        | G[16] |
| L[10] | 261.150        | 451.526        | 447.521        | 447.773        | 447.269        | L[15] |
| G[11] | 275.406        | 423.255        | 419.250        | 419.502        | 418.998        | G[14] |
| K[12] | 317.932        | 409.000        | 404.995        | 405.247        | 404.743        | K[13] |
| G[13] | 332.188        | 366.473        | 362.469        | 362.721        | 362.217        | G[12] |
| G[14] | <b>346.443</b> | 352.218        | 348.213        | 348.465        | 347.961        | G[11] |
| A[15] | 364.202        | 337.963        | 333.958        | 334.210        | 333.706        | A[10] |
| K[16] | 408.729        | 320.203        | 316.199        | 316.451        | 315.947        | K[9]  |
| R[17] | 445.754        | 277.877        | <b>273.672</b> | <b>273.924</b> | <b>273.420</b> | R[8]  |
| H[18] | 480.019        | 238.652        | 234.647        | 234.899        | 234.395        | H[7]  |
| R[19] | 519.044        | 204.397        | 200.392        | 200.644        | 200.140        | R[6]  |
| K[20] | <b>558.075</b> | 185.362        | 181.357        | 181.609        | 181.105        | K[5]  |
| V[21] | 582.843        | 126.330        | 122.325        | 122.577        | 122.073        | V[4]  |
| L[22] | 611.114        | 101.563        | 97.558         | 97.810         | 97.306         | L[3]  |
| R[23] | <b>650.139</b> | 73.292         | 69.287         | 69.539         | 69.035         | R[2]  |
| D[24] | <b>676.896</b> | 34.267         | 30.262         | 30.514         | 30.010         | D[1]  |

# sp | Q6ZWY9 | H2B1C\_MOUSE

PEPAKSAPAPKK Acetyl 42.01 GSK Acetyl 42.01 K Acetyl 42.01 AVTK Acetyl 42.01 AQKKD

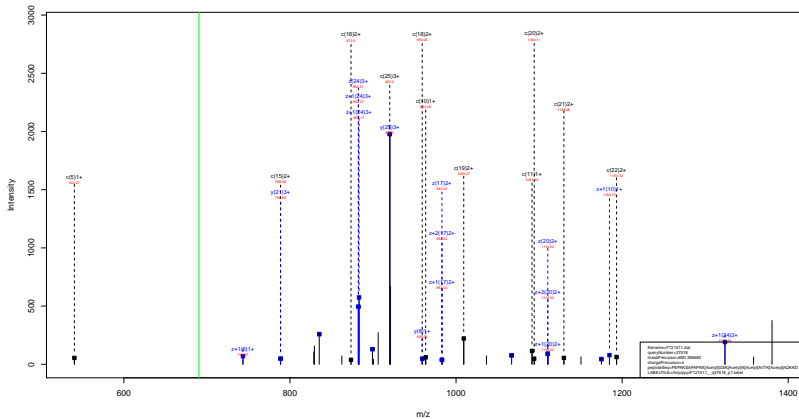

# sp | Q6ZWY9 | H2B1C\_MOUSE

PEPAKSAPAPKK <sup>Acetyl</sup>42.01 GSK <sup>Acetyl</sup>42.01 K <sup>Acetyl</sup>42.01 AVTK <sup>Acetyl</sup>42.01 AQKKD

- ▶ fragmentation table for charge state 1+
- ▶ specType=etd
- ▶ score=48.81
- ▶ F121511.dat
- ▶ query=q37518.p1
- ▶ precursor=690.395680
- ▶ chargePrecursor=4
- ▶ itol=0.7

| AA  | c               | y              | z+1             | z+2      | z        | AA  |
|-----|-----------------|----------------|-----------------|----------|----------|-----|
| P1  | 115.087         | 2758.546       | 2742.537        | 0.000    | 2741.526 | P25 |
| E2  | 284.129         | 2001.493       | 2645.475        | 0.000    | 2044.467 | E24 |
| P3  | 341.182         | 2532.451       | 2516.432        | 0.000    | 2515.424 | P23 |
| A4  | 412.219         | 2435.398       | 2419.379        | 0.000    | 2418.371 | A22 |
| K5  | <b>540.314</b>  | 2364.361       | 2348.342        | 2349.350 | 2347.334 | K21 |
| S6  | 627.346         | 2236.266       | 2220.247        | 2221.255 | 2219.239 | S20 |
| A7  | 698.283         | 2149.234       | 2133.215        | 2134.223 | 2132.207 | A19 |
| P8  | 795.436         | 2078.191       | 2062.178        | 2063.186 | 2061.174 | P18 |
| A9  | 866.473         | 1981.144       | 1965.125        | 1966.133 | 1964.118 | A17 |
| P10 | <b>963.526</b>  | 1910.107       | 1894.088        | 1895.096 | 1893.080 | P16 |
| K11 | <b>1091.621</b> | 1813.054       | 1797.035        | 1798.043 | 1796.028 | K15 |
| K12 | 1261.726        | 1684.959       | 1668.940        | 1669.948 | 1667.933 | K14 |
| G13 | 1318.748        | 1514.854       | 1498.835        | 1499.843 | 1497.827 | G13 |
| S14 | 1405.789        | 1459.832       | 1443.813        | 1442.821 | 1440.805 | S12 |
| K15 | 1575.885        | 1370.800       | 1354.781        | 1355.789 | 1353.774 | K11 |
| K16 | 1745.991        | 1200.695       | <b>1184.676</b> | 1185.684 | 1183.668 | K10 |
| A17 | 1817.028        | 1030.589       | 1014.570        | 1015.578 | 1013.563 | A9  |
| V18 | 1916.096        | <b>959.552</b> | 943.533         | 944.541  | 942.525  | V8  |
| T19 | 2017.144        | 860.484        | 844.465         | 845.473  | 843.457  | T7  |
| K20 | 2187.250        | 739.436        | <b>743.417</b>  | 744.425  | 742.409  | K6  |
| A21 | 2259.287        | 589.335        | 573.312         | 574.320  | 572.304  | A5  |
| Q22 | 2388.345        | 518.293        | 502.275         | 503.282  | 501.267  | Q4  |
| K23 | 2514.440        | 390.235        | 374.216         | 375.224  | 373.208  | K3  |
| K24 | 2642.535        | 262.140        | 246.121         | 247.129  | 245.113  | K2  |
| D25 | 2757.562        | 134.045        | 118.026         | 119.034  | 117.018  | D1  |

# sp | Q6ZWY9 | H2B1C\_MOUSE

PEPAKSAPAPKK <sup>Acetyl</sup>42.01 GSK <sup>Acetyl</sup>42.01 K <sup>Acetyl</sup>42.01 AVTK <sup>Acetyl</sup>42.01 AQKKD

- ▶ fragmentation table for charge state 2+
- ▶ specType=etd
- ▶ score=48.81
- ▶ F121511.dat
- ▶ query=q37518\_p1
- ▶ precursor=690.395680
- ▶ chargePrecursor=4
- ▶ itol=0.7

| AA | c  | y               | z+1      | z+2             | z               | AA              |       |
|----|----|-----------------|----------|-----------------|-----------------|-----------------|-------|
| P  | 1  | 58.647          | 1379.777 | 1375.767        | 0.504           | 1371.263        | P[25] |
| E  | 3  | 132.588         | 1311.250 | <b>1323.241</b> | 0.504           | 1322.737        | E[24] |
| P  | 3  | 171.095         | 1256.729 | 1258.720        | 0.504           | 1255.210        | P[23] |
| A  | 4  | 206.613         | 1218.203 | 1210.193        | 0.504           | 1209.689        | A[22] |
| K  | 5  | 270.661         | 1182.684 | <b>1174.675</b> | <b>1175.179</b> | 1174.171        | K[21] |
| S  | 6  | 314.177         | 1118.637 | <b>1110.627</b> | <b>1111.131</b> | <b>1110.123</b> | S[20] |
| A  | 7  | 349.695         | 1075.121 | <b>1067.111</b> | <b>1067.615</b> | <b>1066.607</b> | A[19] |
| P  | 8  | 388.222         | 1039.602 | 1031.593        | 1033.584        | 1031.069        | P[18] |
| A  | 9  | 433.740         | 991.076  | <b>983.066</b>  | <b>983.570</b>  | <b>982.562</b>  | A[17] |
| P  | 10 | 482.267         | 955.557  | 947.548         | 948.052         | 947.044         | P[16] |
| K  | 11 | 566.314         | 907.031  | <b>899.021</b>  | <b>899.525</b>  | 898.517         | K[15] |
| K  | 12 | 631.367         | 842.983  | <b>834.974</b>  | <b>835.478</b>  | 834.470         | K[14] |
| Q  | 13 | 659.276         | 797.930  | 789.921         | 790.425         | 789.417         | Q[13] |
| S  | 14 | 703.394         | 729.420  | 721.410         | 721.914         | 720.906         | S[12] |
| K  | 15 | <b>788.446</b>  | 685.904  | 677.894         | 678.398         | 677.390         | K[11] |
| K  | 16 | <b>873.499</b>  | 600.851  | 592.842         | 593.346         | 592.338         | K[10] |
| A  | 17 | 909.018         | 515.798  | 507.789         | 508.293         | 507.285         | A[9]  |
| V  | 18 | <b>958.552</b>  | 480.280  | 472.270         | 472.774         | 471.766         | V[8]  |
| T  | 19 | <b>1009.076</b> | 430.745  | 422.735         | 423.240         | 422.232         | T[7]  |
| K  | 20 | <b>1094.128</b> | 380.222  | 372.212         | 372.716         | 371.708         | K[6]  |
| A  | 21 | <b>1129.647</b> | 295.169  | 287.159         | 287.663         | 286.656         | A[5]  |
| Q  | 22 | <b>1193.676</b> | 269.650  | 251.641         | 252.145         | 251.137         | Q[4]  |
| K  | 23 | 1257.724        | 195.621  | 187.612         | 188.116         | 187.108         | K[3]  |
| K  | 24 | 1321.771        | 131.574  | 123.564         | 124.068         | 123.060         | K[2]  |
| E  | 25 | 1379.285        | 87.528   | 89.519          | 89.021          | 89.013          | E[1]  |

# sp | Q6ZWY9 | H2B1C\_MOUSE

PEPAKSAPAPKK <sup>Acetyl</sup>42.01 GSK <sup>Acetyl</sup>42.01 K <sup>Acetyl</sup>42.01 AVTK <sup>Acetyl</sup>42.01 AQKKD

- ▶ fragmentation table for charge state 3+
- ▶ specType=etd
- ▶ score=48.81
- ▶ F121511.dat
- ▶ query=q37518.p1
- ▶ precursor=690.395680
- ▶ chargePrecursor=4
- ▶ itol=0.7

| AA    | c              | y              | z+1            | z+2     | z              | AA    |
|-------|----------------|----------------|----------------|---------|----------------|-------|
| P[3]  | 39.034         | <b>920.187</b> | 914.847        | 0.672   | 914.511        | P[25] |
| E[2]  | 82.048         | 887.836        | <b>882.496</b> | 0.672   | <b>882.160</b> | E[24] |
| P[3]  | 114.399        | 844.822        | 839.482        | 0.672   | 839.145        | P[23] |
| A[4]  | 138.078        | 812.471        | 807.131        | 0.672   | 806.795        | A[22] |
| K[5]  | 180.776        | <b>788.792</b> | 783.452        | 783.768 | 783.116        | K[21] |
| S[6]  | 209.787        | 746.094        | 740.754        | 741.090 | 740.418        | S[20] |
| A[7]  | 233.466        | 717.081        | 711.741        | 712.079 | 711.407        | A[19] |
| P[8]  | 265.817        | 681.404        | 688.054        | 688.400 | 687.728        | P[18] |
| A[9]  | 289.496        | 661.051        | 655.713        | 656.049 | 655.377        | A[17] |
| P[10] | 321.847        | 637.374        | 632.034        | 632.370 | 631.698        | P[16] |
| K[11] | 364.545        | 605.023        | 599.683        | 600.019 | 599.347        | K[15] |
| K[12] | 421.247        | 562.325        | 556.985        | 557.321 | 556.649        | K[14] |
| G[13] | 440.254        | 505.023        | 500.283        | 500.619 | 499.947        | G[13] |
| S[14] | 469.265        | 486.616        | 481.276        | 481.612 | 480.940        | S[12] |
| K[15] | 525.967        | 457.605        | 452.265        | 452.601 | 451.929        | K[11] |
| K[16] | 582.068        | 400.901        | 395.561        | 395.899 | 395.228        | K[10] |
| A[17] | 606.348        | 344.201        | 338.862        | 339.198 | 338.526        | A[9]  |
| V[18] | 639.370        | 320.522        | 315.183        | 315.519 | 314.847        | V[8]  |
| T[19] | 673.083        | 287.499        | 282.159        | 282.496 | 281.824        | T[7]  |
| K[20] | 729.755        | 253.817        | 248.477        | 248.813 | 248.141        | K[6]  |
| A[21] | 753.434        | 197.115        | 191.775        | 192.111 | 191.439        | A[5]  |
| Q[22] | 796.120        | 173.438        | 168.098        | 168.432 | 167.760        | Q[4]  |
| K[23] | 838.818        | 130.750        | 125.410        | 125.746 | 125.074        | K[3]  |
| K[24] | 881.517        | 88.051         | 82.712         | 83.048  | 82.376         | K[2]  |
| D[25] | <b>919.859</b> | 45.353         | 40.014         | 40.349  | 39.678         | D[1]  |



# sp | P68433 | H31\_MOUSE

IAQDFK<sup>Methyl</sup> TD  
14.02

- ▶ fragmentation table for charge state 1+
- ▶ specType=cid
- ▶ score=51.23
- ▶ F121511.dat
- ▶ query=q5009\_p1
- ▶ precursor=476.242470
- ▶ chargePrecursor=2
- ▶ itol=0.7

| AA  | a       | a*      | aΔ      | b              | b*      | bΔ             | y              | y*             | yΔ    | AA  |
|-----|---------|---------|---------|----------------|---------|----------------|----------------|----------------|-------|-----|
| T 1 | 36.906  | 0.000   | 0.000   | 114.915        | 0.000   | 0.000          | 90.433         | 0.000          | 0.000 | Q1  |
| A 2 | 157.114 | 0.000   | 0.000   | <b>185.126</b> | 0.000   | 0.000          | <b>838.304</b> | 0.000          | 0.000 | A17 |
| Q 3 | 285.192 | 288.190 | 0.000   | <b>313.187</b> | 286.180 | 0.000          | <b>767.357</b> | <b>750.330</b> | 0.000 | Q16 |
| D 4 | 400.219 | 393.193 | 362.208 | <b>428.214</b> | 411.187 | <b>410.203</b> | <b>636.298</b> | 622.272        | 0.000 | D15 |
| F 5 | 547.267 | 530.261 | 529.277 | <b>575.282</b> | 558.256 | 557.272        | <b>524.271</b> | 507.245        | 0.000 | F14 |
| R 6 | 639.308 | 632.302 | 615.305 | <b>717.393</b> | 700.366 | 699.382        | <b>377.203</b> | 360.177        | 0.000 | R13 |
| T 7 | 700.446 | 773.410 | 772.435 | <b>818.441</b> | 801.414 | 800.430        | <b>235.092</b> | 0.000          | 0.000 | T12 |
| D 8 | 805.473 | 808.448 | 807.462 | 831.468        | 816.441 | 815.457        | 134.040        | 0.000          | 0.000 | D11 |





# sp | P68433 | H31\_MOUSE

IAQDFK<sup>Methyl</sup>TD  
14.02

- ▶ fragmentation table for charge state 1+
- ▶ specType=etd
- ▶ score=39.81
- ▶ F121511.dat
- ▶ query=q5010.p1
- ▶ precursor=476.242480
- ▶ chargePrecursor=2
- ▶ itol=0.7

| AA    | c              | y              | z+1            | z+2            | z       | AA  |
|-------|----------------|----------------|----------------|----------------|---------|-----|
| I   1 | 131.118        | <b>951.478</b> | <b>935.459</b> | 0.000          | 934.452 | I 8 |
| A   2 | 202.155        | 838.394        | <b>822.375</b> | 0.000          | 821.368 | A 7 |
| Q   3 | 330.214        | <b>767.357</b> | <b>751.338</b> | 752.346        | 750.330 | Q 6 |
| D   4 | 445.241        | <b>639.298</b> | <b>623.280</b> | <b>624.288</b> | 622.272 | D 5 |
| F   5 | 592.309        | 624.271        | <b>508.253</b> | <b>509.261</b> | 507.245 | F 4 |
| K   6 | <b>734.420</b> | 377.203        | 361.184        | 362.192        | 360.177 | K 3 |
| T   7 | <b>835.467</b> | 235.062        | 219.074        | 220.082        | 218.066 | T 2 |
| D   8 | 950.494        | 134.045        | 118.026        | 119.034        | 117.018 | D 1 |



# sp | P68433 | H31\_MOUSE

IAQDFK<sup>Methyl</sup> TD  
14.02

- ▶ fragmentation table for charge state 1+
- ▶ specType=cid
- ▶ score=67.98
- ▶ F121511.dat
- ▶ query=q5011\_p1
- ▶ precursor=476.242480
- ▶ chargePrecursor=2
- ▶ itol=0.7

| AA  | a              | a <sup>*</sup> | a,β     | b              | b <sup>*</sup> | b,β     | γ              | γ <sup>*</sup> | γ,β            | AA  |
|-----|----------------|----------------|---------|----------------|----------------|---------|----------------|----------------|----------------|-----|
| T 1 | 88.098         | 0.000          | 0.000   | 114.191        | 0.000          | 0.000   | 95.419         | 0.000          | 0.000          | T 1 |
| A 2 | <b>157.134</b> | 0.000          | 0.000   | <b>185.128</b> | 0.000          | 0.000   | <b>838.304</b> | 0.000          | 0.000          | A 2 |
| Q 3 | 285.192        | 286.186        | 0.000   | <b>313.187</b> | 286.186        | 0.000   | <b>767.357</b> | <b>750.330</b> | <b>749.346</b> | Q 3 |
| D 4 | 400.219        | 393.193        | 392.209 | <b>428.214</b> | 411.197        | 0.000   | <b>410.203</b> | <b>639.298</b> | 622.272        | D 4 |
| F 5 | 547.287        | 540.261        | 529.271 | <b>575.282</b> | 558.256        | 557.272 | <b>524.271</b> | 507.245        | 506.261        | F 5 |
| R 6 | 689.356        | 672.372        | 671.388 | <b>717.393</b> | 700.366        | 699.382 | <b>377.303</b> | 360.377        | 359.193        | R 6 |
| T 7 | 790.446        | 773.419        | 772.435 | <b>818.441</b> | 801.414        | 800.430 | <b>235.092</b> | 0.000          | 217.082        | T 7 |
| G 8 | 905.473        | 888.446        | 887.462 | 913.468        | 916.441        | 915.457 | 138.040        | 0.000          | 116.034        | G 8 |

# sp | P68433 | H31\_MOUSE

IAQDFK Methyl TD  
14.02

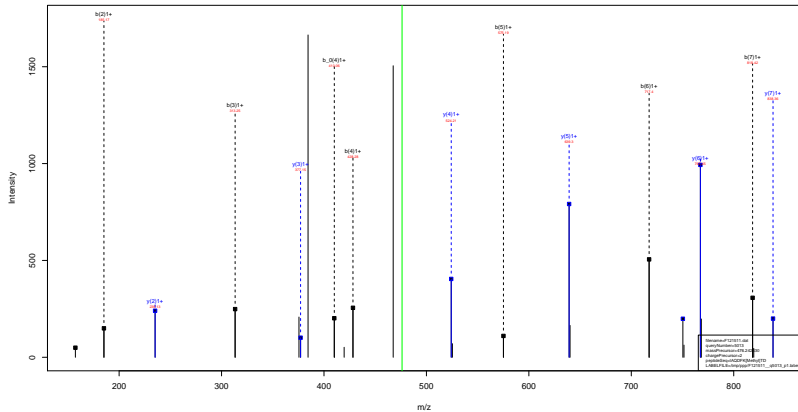

# sp | P68433 | H31\_MOUSE

IAQDFK<sup>Methyl</sup>TD  
14.02

- ▶ fragmentation table for charge state 1+
- ▶ specType=cid
- ▶ score=52.04
- ▶ F121511.dat
- ▶ query=q5013\_p1
- ▶ precursor=476.242530
- ▶ chargePrecursor=2
- ▶ itol=0.7

| AA  | a              | a*      | a,Δ     | b              | b*      | b,Δ            | y              | y*             | y,Δ   | AA   |
|-----|----------------|---------|---------|----------------|---------|----------------|----------------|----------------|-------|------|
| T 1 | 86.096         | 0.000   | 0.000   | 116.203        | 0.000   | 0.000          | 951.431        | 0.000          | 0.000 | T 11 |
| A 2 | <b>157.134</b> | 0.000   | 0.000   | <b>185.128</b> | 0.000   | 0.000          | <b>638.304</b> | 0.000          | 0.000 | A 7  |
| Q 3 | 286.192        | 286.192 | 0.000   | <b>313.187</b> | 286.192 | 0.000          | <b>767.357</b> | <b>750.330</b> | 0.000 | Q 6  |
| D 4 | 400.219        | 383.103 | 382.209 | <b>428.214</b> | 411.107 | <b>410.203</b> | <b>630.298</b> | 622.272        | 0.000 | D 9  |
| F 5 | 547.287        | 530.261 | 529.277 | <b>576.282</b> | 558.256 | 557.272        | <b>524.271</b> | 507.245        | 0.000 | F 4  |
| R 6 | 659.306        | 622.291 | 621.306 | <b>717.302</b> | 700.286 | 699.301        | <b>377.203</b> | 360.177        | 0.000 | R 3  |
| T 7 | 790.448        | 773.432 | 772.435 | <b>818.441</b> | 801.414 | 800.430        | <b>235.002</b> | 0.000          | 0.000 | T 2  |
| D 8 | 905.475        | 888.459 | 887.462 | 933.468        | 916.441 | 915.429        | 134.000        | 0.000          | 0.000 | D 1  |

# sp | P68433 | H31\_MOUSE

IAQDFK Methyl TD  
14.02

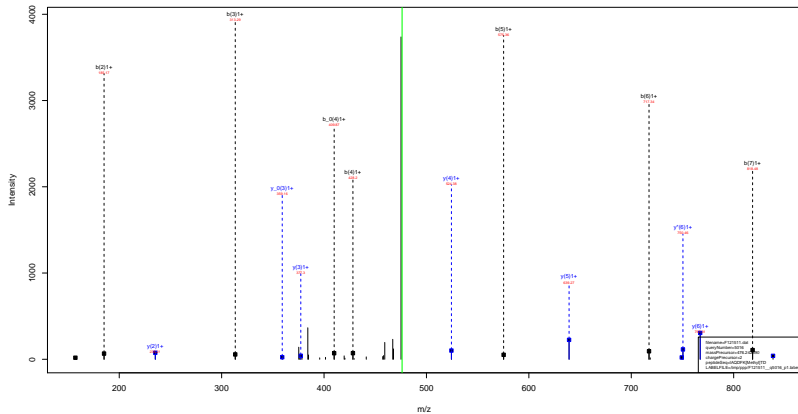

# sp | P68433 | H31\_MOUSE

IAQDFK<sup>Methyl</sup> TD  
14.02

- ▶ fragmentation table for charge state 1+
- ▶ specType=cid
- ▶ score=59.06
- ▶ F121511.dat
- ▶ query=q5016\_p1
- ▶ precursor=476.242590
- ▶ chargePrecursor=2
- ▶ itol=0.7

| AA  | a              | y <sup>a</sup> | a,β     | b              | b <sup>a</sup> | b,β     | γ              | y <sup>a</sup> | y,β            | AA  |
|-----|----------------|----------------|---------|----------------|----------------|---------|----------------|----------------|----------------|-----|
| T 1 | 88.098         | 0.000          | 0.000   | 114.191        | 0.000          | 0.000   | 95.419         | 59.484         | 223.888        | T 1 |
| A 2 | <b>157.134</b> | 0.000          | 0.000   | <b>185.128</b> | 0.000          | 0.000   | <b>838.384</b> | 821.382        | 2620.584       | A 2 |
| Q 3 | 285.192        | 286.186        | 0.000   | <b>313.187</b> | 286.189        | 0.000   | <b>767.357</b> | <b>750.330</b> | <b>749.346</b> | Q 3 |
| D 4 | 400.219        | 383.193        | 382.208 | <b>428.214</b> | 411.187        | 0.000   | <b>410.203</b> | <b>639.298</b> | 622.272        | D 4 |
| F 5 | 547.287        | 530.261        | 529.271 | <b>575.282</b> | 558.256        | 557.272 | <b>524.271</b> | 507.245        | 208.271        | F 5 |
| R 6 | 689.356        | 672.332        | 671.348 | <b>717.363</b> | 700.366        | 699.382 | <b>377.303</b> | 360.177        | <b>359.193</b> | R 6 |
| T 7 | 790.446        | 773.419        | 772.435 | <b>818.441</b> | 801.414        | 800.430 | <b>235.092</b> | 0.000          | 217.082        | T 7 |
| G 8 | 905.473        | 888.448        | 887.464 | 913.468        | 916.441        | 915.457 | 138.040        | 0.000          | 116.034        | G 8 |

# sp | P68433 | H31\_MOUSE

IAQDFK Methyl TD  
14.02

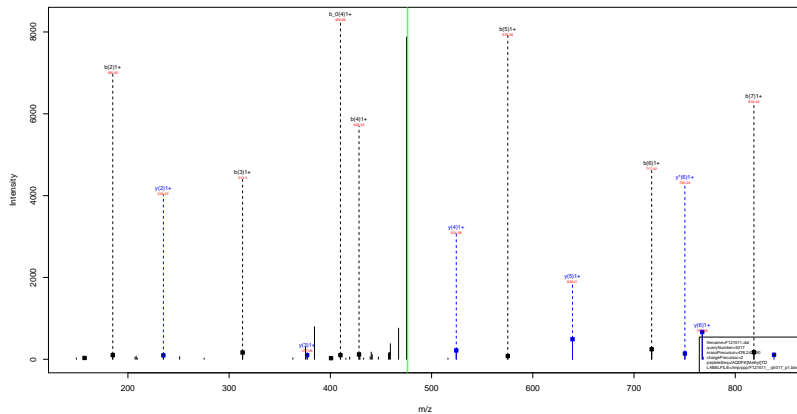



# sp | P68433 | H31\_MOUSE

IAQDFK<sup>Methyl</sup>TD  
14.02

- ▶ fragmentation table for charge state 1+
- ▶ specType=cid
- ▶ score=44.40
- ▶ F121511.dat
- ▶ query=q5017\_p1
- ▶ precursor=476.242590
- ▶ chargePrecursor=2
- ▶ itol=0.7

| AA  | a              | a*      | a,Δ     | b              | b*      | b,Δ            | y              | y*             | y,Δ     | AA   |
|-----|----------------|---------|---------|----------------|---------|----------------|----------------|----------------|---------|------|
| T 1 | 86.998         | 0.000   | 0.000   | 116.203        | 0.000   | 0.000          | 951.431        | 0.000          | 0.000   | T 11 |
| A 2 | <b>157.134</b> | 0.000   | 0.000   | <b>185.128</b> | 0.000   | 0.000          | <b>638.304</b> | 0.000          | 0.000   | A 7  |
| Q 3 | 295.197        | 268.139 | -0.000  | <b>313.187</b> | 296.169 | -0.000         | <b>767.357</b> | <b>750.330</b> | 0.000   | Q 6  |
| D 4 | <b>400.219</b> | 383.103 | 382.209 | <b>428.214</b> | 411.107 | <b>410.203</b> | <b>630.298</b> | 622.272        | 0.000   | D 9  |
| F 5 | 547.267        | 530.261 | 529.271 | <b>576.282</b> | 558.256 | 557.272        | <b>524.271</b> | 507.245        | 506.261 | F 14 |
| R 6 | 659.296        | 672.311 | 671.361 | <b>717.293</b> | 700.269 | 699.285        | <b>377.203</b> | 360.177        | 359.193 | R 3  |
| T 7 | 790.448        | 773.419 | 772.435 | <b>818.441</b> | 801.414 | 800.430        | <b>235.002</b> | 0.000          | 0.000   | T 2  |
| D 8 | 925.473        | 898.449 | 897.461 | 933.468        | 916.441 | 915.427        | 134.000        | 0.000          | 0.000   | D 10 |

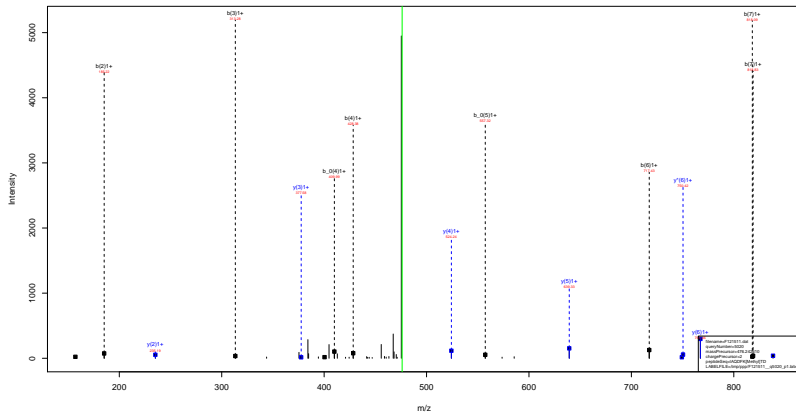

# sp | P68433 | H31\_MOUSE

IAQDFK<sup>Methyl</sup> TD  
14.02

- ▶ fragmentation table for charge state 1+
- ▶ specType=cid
- ▶ score=34.53
- ▶ F121511.dat
- ▶ query=q5020\_p1
- ▶ precursor=476.242610
- ▶ chargePrecursor=2
- ▶ itol=0.7

| AA  | a              | a*      | a,β     | b              | b*      | b,β     | γ              | γ*             | γ,β            | AA  |
|-----|----------------|---------|---------|----------------|---------|---------|----------------|----------------|----------------|-----|
| T 1 | 88.098         | 0.000   | 0.000   | 114.191        | 0.000   | 0.000   | 0.000          | 0.000          | 0.000          | T 1 |
| A 2 | <b>157.134</b> | 0.000   | 0.000   | <b>185.128</b> | 0.000   | 0.000   | <b>838.384</b> | 0.000          | 0.000          | A 2 |
| Q 3 | 288.192        | 288.192 | 0.000   | <b>313.187</b> | 288.192 | 0.000   | <b>767.357</b> | <b>750.330</b> | <b>749.346</b> | Q 3 |
| D 4 | <b>400.219</b> | 383.193 | 383.208 | <b>426.214</b> | 411.197 | 0.000   | <b>410.203</b> | <b>639.298</b> | 622.272        | D 4 |
| F 5 | 547.287        | 530.261 | 529.274 | 539.272        | 558.256 | 0.000   | <b>557.272</b> | <b>524.271</b> | 507.245        | F 5 |
| R 6 | 689.356        | 672.332 | 671.345 | <b>717.363</b> | 700.346 | 0.000   | <b>377.203</b> | 360.177        | 359.193        | R 6 |
| T 7 | 790.446        | 773.429 | 772.435 | <b>818.441</b> | 801.414 | 800.430 | <b>235.092</b> | 0.000          | 217.082        | T 7 |
| D 8 | 905.473        | 888.448 | 887.462 | 913.468        | 916.441 | 915.457 | 138.040        | 0.000          | 116.034        | D 8 |

# sp | P68433 | H31\_MOUSE

IAQDFK Methyl TD  
14.02

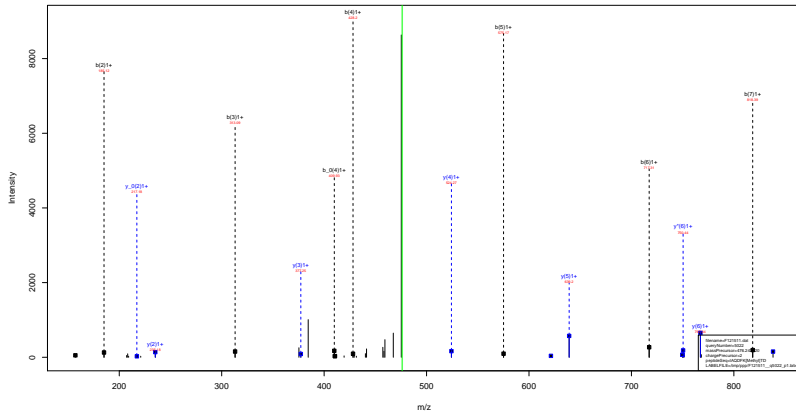

# sp | P68433 | H31\_MOUSE

IAQDFK<sup>Methyl</sup> TD  
14.02

- ▶ fragmentation table for charge state 1+
- ▶ specType=cid
- ▶ score=40.99
- ▶ F121511.dat
- ▶ query=q5022\_p1
- ▶ precursor=476.242620
- ▶ chargePrecursor=2
- ▶ itol=0.7

| AA         | a              | a*      | a:Δ     | b              | b*             | b:Δ            | y              | y*             | y:Δ            | AA         |
|------------|----------------|---------|---------|----------------|----------------|----------------|----------------|----------------|----------------|------------|
| <b>T</b> 1 | 46.098         | 0.000   | 0.000   | 114.098        | 0.000          | 0.000          | 901.416        | 109.404        | 213.989        | <b>T</b> 1 |
| <b>A</b> 2 | <b>157.134</b> | 0.000   | 0.000   | <b>185.128</b> | 0.000          | 0.000          | <b>838.384</b> | 821.384        | 620.384        | <b>A</b> 2 |
| <b>Q</b> 3 | 286.192        | 286.189 | 0.000   | <b>313.187</b> | 296.189        | 0.000          | <b>767.357</b> | <b>750.330</b> | <b>749.346</b> | <b>Q</b> 3 |
| <b>G</b> 4 | 400.219        | 393.193 | 362.209 | <b>428.214</b> | <b>411.187</b> | <b>410.203</b> | <b>636.298</b> | 622.272        | <b>621.288</b> | <b>G</b> 4 |
| <b>F</b> 5 | 547.287        | 540.283 | 529.277 | <b>575.282</b> | 558.256        | 557.252        | <b>524.271</b> | 507.245        | 506.261        | <b>F</b> 5 |
| <b>R</b> 6 | 689.366        | 672.372 | 671.368 | <b>717.363</b> | 700.369        | 699.362        | <b>377.263</b> | 360.177        | 359.183        | <b>R</b> 6 |
| <b>T</b> 7 | 790.446        | 775.419 | 772.435 | <b>818.441</b> | 801.414        | 800.430        | <b>235.092</b> | 0.000          | <b>217.082</b> | <b>T</b> 7 |
| <b>G</b> 8 | 905.473        | 888.449 | 887.462 | 931.468        | 916.441        | 915.457        | 134.040        | 0.000          | 116.034        | <b>G</b> 8 |

# sp | P68433 | H31\_MOUSE

IAQDFK Methyl TD  
14.02

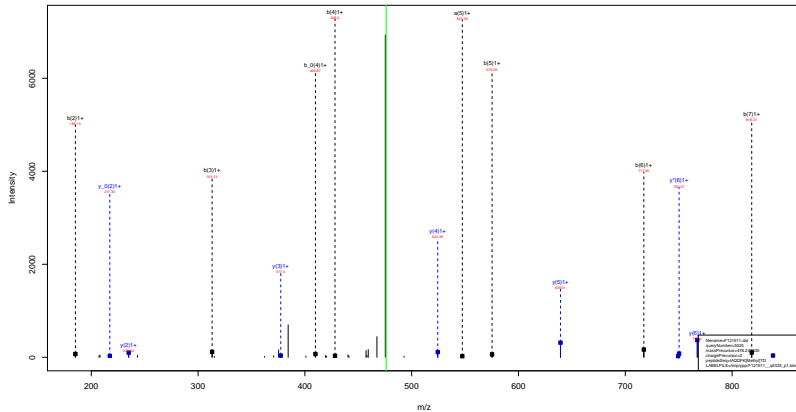

# sp | P68433 | H31\_MOUSE

IAQDFK<sup>Methyl</sup> TD  
14.02

- ▶ fragmentation table for charge state 1+
- ▶ specType=cid
- ▶ score=47.88
- ▶ F121511.dat
- ▶ query=q5025\_p1
- ▶ precursor=476.242630
- ▶ chargePrecursor=2
- ▶ itol=0.7

| AA  | a              | y <sup>a</sup> | a,b     | b              | b <sup>a</sup> | b,b <sup>a</sup> | γ              | y <sup>a</sup> | y,b            | AA  |
|-----|----------------|----------------|---------|----------------|----------------|------------------|----------------|----------------|----------------|-----|
| T 1 | 56.266         | 0.000          | 0.000   | 114.191        | 0.000          | 0.000            | 0.000          | 91.417         | 114.191        | T 1 |
| A 2 | 157.134        | 0.000          | 0.000   | <b>185.126</b> | 0.000          | 0.000            | <b>838.304</b> | 921.392        | 185.126        | A 2 |
| Q 3 | 285.192        | 286.186        | 0.000   | <b>313.187</b> | 286.186        | 0.000            | <b>767.357</b> | <b>750.330</b> | <b>749.346</b> | Q 3 |
| D 4 | 400.219        | 383.193        | 382.209 | <b>426.214</b> | 411.197        | 0.000            | <b>410.203</b> | <b>639.296</b> | 622.272        | D 4 |
| F 5 | <b>547.287</b> | 530.261        | 529.277 | <b>575.282</b> | 558.256        | 557.272          | <b>524.271</b> | 567.245        | 506.261        | F 5 |
| R 6 | 659.299        | 632.272        | 631.288 | <b>671.293</b> | 654.266        | 653.282          | <b>377.203</b> | 360.177        | 659.193        | R 6 |
| T 7 | 790.446        | 773.419        | 772.435 | <b>818.441</b> | 801.414        | 800.430          | <b>235.092</b> | 0.000          | <b>217.082</b> | T 7 |
| G 8 | 905.473        | 888.446        | 887.462 | 913.468        | 916.441        | 915.457          | 138.040        | 0.000          | 116.034        | G 8 |

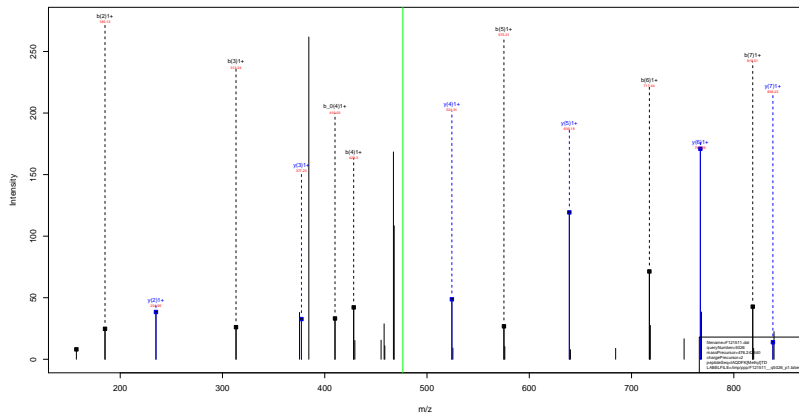



# sp | P68433 | H31\_MOUSE

IAQDFK<sup>Methyl</sup> TD  
14.02

- ▶ fragmentation table for charge state 1+
- ▶ specType=cid
- ▶ score=57.53
- ▶ F121511.dat
- ▶ query=q5026.p1
- ▶ precursor=476.242640
- ▶ chargePrecursor=2
- ▶ itol=0.7

| AA  | a              | y*      | aΔ      | b              | b*      | bΔ             | x              | y*      | yΔ      | AA  |
|-----|----------------|---------|---------|----------------|---------|----------------|----------------|---------|---------|-----|
| T 1 | 86.096         | 0.000   | -0.000  | 114.071        | 0.000   | 0.000          | 831.471        | 914.402 | 213.930 | Q1  |
| A 2 | <b>157.134</b> | 0.000   | 0.000   | <b>185.128</b> | 0.000   | 0.000          | <b>838.394</b> | 923.360 | 85.966  | A17 |
| Q 3 | 285.192        | 288.186 | -0.000  | <b>313.187</b> | 206.180 | -0.000         | <b>767.357</b> | 750.339 | 169.018 | Q16 |
| D 4 | 400.219        | 383.193 | 167.200 | <b>428.214</b> | 411.197 | <b>416.203</b> | <b>630.298</b> | 622.277 | 82.021  | D15 |
| F 5 | 547.287        | 530.261 | 5.200   | <b>575.282</b> | 558.256 | 157.272        | <b>524.271</b> | 507.245 | 168.026 | F14 |
| R 6 | 659.306        | 672.313 | -9.710  | <b>717.303</b> | 700.286 | 169.312        | <b>377.283</b> | 360.277 | 169.006 | R13 |
| T 7 | 790.446        | 773.419 | 172.435 | <b>818.441</b> | 801.414 | 169.430        | <b>235.092</b> | 0.000   | 217.092 | T12 |
| D 8 | 905.473        | 888.446 | 167.465 | 933.466        | 916.441 | 167.457        | 134.045        | 0.000   | 216.034 | D11 |

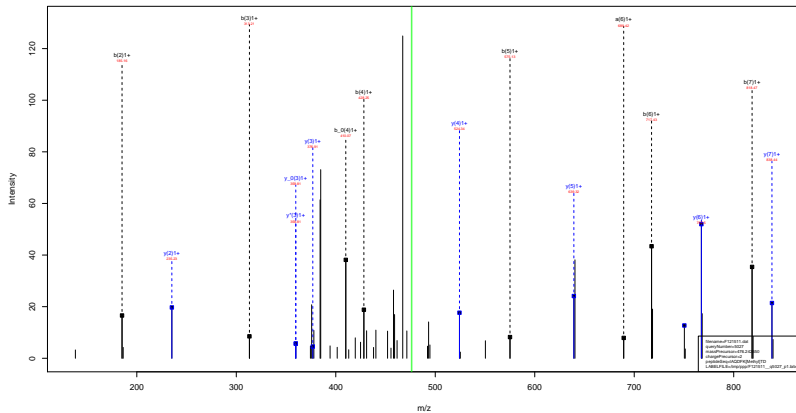

# sp | P68433 | H31\_MOUSE

IAQDFK<sup>Methyl</sup> TD  
14.02

- ▶ fragmentation table for charge state 1+
- ▶ specType=cid
- ▶ score=43.64
- ▶ F121511.dat
- ▶ query=q5027\_p1
- ▶ precursor=476.242650
- ▶ chargePrecursor=2
- ▶ itol=0.7

| AA         | a              | y <sup>a</sup> | a,β     | b              | b <sup>a</sup> | b,β     | γ              | y <sup>a</sup> | y,β            | AA         |
|------------|----------------|----------------|---------|----------------|----------------|---------|----------------|----------------|----------------|------------|
| <b>T</b> 1 | 56.266         | 0.000          | 0.000   | 114.191        | 0.000          | 0.000   | 91.417         | 336.464        | 423.368        | <b>T</b> 1 |
| <b>A</b> 2 | 157.134        | 0.000          | 0.000   | <b>185.126</b> | 0.000          | 0.000   | <b>838.304</b> | 921.392        | 1020.584       | <b>A</b> 2 |
| <b>Q</b> 3 | 285.192        | 286.186        | 0.000   | <b>313.187</b> | 286.186        | 0.000   | <b>767.357</b> | <b>750.330</b> | 749.346        | <b>Q</b> 3 |
| <b>D</b> 4 | 403.219        | 383.193        | 382.208 | <b>428.214</b> | 411.187        | 0.000   | <b>410.203</b> | <b>639.298</b> | 622.272        | <b>D</b> 4 |
| <b>F</b> 5 | 454.287        | 340.261        | 328.271 | <b>575.282</b> | 358.256        | 357.272 | <b>524.271</b> | 590.245        | 400.291        | <b>F</b> 5 |
| <b>H</b> 6 | <b>689.298</b> | 672.272        | 671.288 | <b>717.293</b> | 700.266        | 699.282 | <b>377.203</b> | <b>360.177</b> | <b>359.193</b> | <b>H</b> 6 |
| <b>I</b> 7 | 190.446        | 773.419        | 772.435 | <b>818.441</b> | 801.414        | 800.430 | <b>235.092</b> | 0.000          | 221.082        | <b>I</b> 7 |
| <b>G</b> 8 | 305.472        | 888.448        | 887.464 | 933.468        | 916.441        | 915.457 | 138.040        | 0.000          | 116.034        | <b>G</b> 8 |

# sp | P68433 | H31\_MOUSE

IAQDFK Methyl TD  
14.02

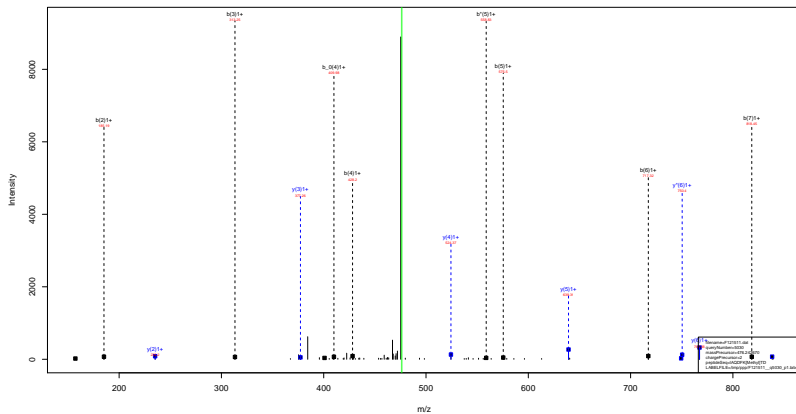

# sp | P68433 | H31\_MOUSE

IAQDFK<sup>Methyl</sup> TD  
14.02

- ▶ fragmentation table for charge state 1+
- ▶ specType=cid
- ▶ score=40.27
- ▶ F121511.dat
- ▶ query=q5030\_p1
- ▶ precursor=476.242670
- ▶ chargePrecursor=2
- ▶ itol=0.7

| AA  | a              | a*      | a,d     | b              | b*             | b,d            | y              | y*             | y,d            | AA  |
|-----|----------------|---------|---------|----------------|----------------|----------------|----------------|----------------|----------------|-----|
| T 1 | 46.998         | 0.000   | 0.000   | 114.098        | 0.000          | 0.000          | 901.416        | 109.404        | 1213.668       | T 1 |
| A 2 | <b>157.134</b> | 0.000   | 0.000   | <b>185.128</b> | 0.000          | 0.000          | <b>838.384</b> | 821.366        | 1020.384       | A 2 |
| Q 3 | 286.192        | 286.186 | 0.000   | <b>313.187</b> | 296.160        | 0.000          | <b>767.357</b> | <b>750.330</b> | <b>749.346</b> | Q 3 |
| G 4 | <b>400.219</b> | 393.193 | 362.209 | <b>428.214</b> | 411.187        | <b>410.203</b> | <b>636.298</b> | 622.272        | 621.288        | G 4 |
| F 5 | 547.287        | 540.261 | 529.277 | <b>575.282</b> | <b>558.256</b> | 557.272        | <b>524.271</b> | 507.245        | 506.261        | F 5 |
| R 6 | 689.356        | 672.332 | 671.366 | <b>717.363</b> | 707.369        | 699.362        | <b>377.263</b> | 360.177        | 359.193        | R 6 |
| T 7 | 790.446        | 775.419 | 772.435 | <b>818.441</b> | 801.414        | 800.430        | <b>235.092</b> | 0.000          | 237.082        | T 7 |
| G 8 | 905.473        | 880.449 | 887.462 | 933.468        | 916.441        | 915.457        | 134.040        | 0.000          | 136.034        | G 8 |

# sp | P68433 | H31\_MOUSE

IAQDFK Methyl TD  
14.02

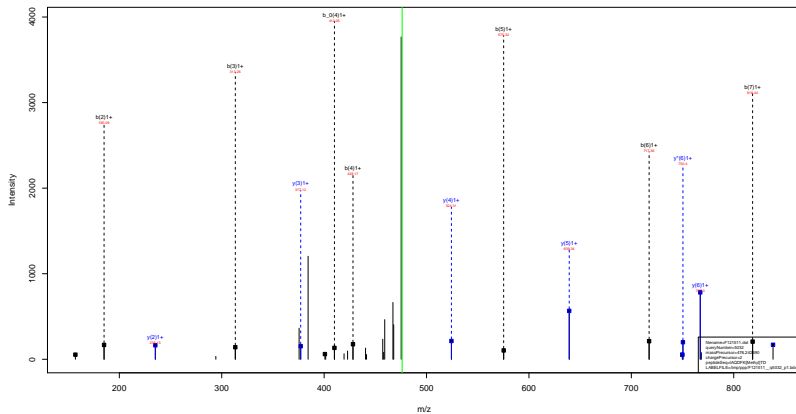

# sp | P68433 | H31\_MOUSE

IAQDFK<sup>Methyl</sup> TD  
14.02

- ▶ fragmentation table for charge state 1+
- ▶ specType=cid
- ▶ score=53.28
- ▶ F121511.dat
- ▶ query=q5032\_p1
- ▶ precursor=476.242690
- ▶ chargePrecursor=2
- ▶ itol=0.7

| AA  | a              | y <sup>a</sup> | a,b     | b              | b <sup>a</sup> | b,y     | γ              | y <sup>a</sup> | y,b            | AA   |
|-----|----------------|----------------|---------|----------------|----------------|---------|----------------|----------------|----------------|------|
| T 1 | 46.096         | 0.000          | 0.000   | 114.191        | 0.000          | 0.000   | 0.000          | 361.416        | 316.466        | T 10 |
| A 2 | <b>157.134</b> | 0.000          | 0.000   | <b>185.126</b> | 0.000          | 0.000   | <b>838.304</b> | 821.366        | 620.584        | A 7  |
| Q 3 | 286.197        | 286.196        | 0.000   | <b>313.187</b> | 286.190        | 0.000   | <b>767.357</b> | <b>750.330</b> | <b>749.346</b> | Q 6  |
| D 4 | <b>400.219</b> | 383.197        | 382.200 | <b>426.214</b> | 411.197        | 0.000   | <b>410.203</b> | <b>639.296</b> | 622.272        | D 5  |
| F 5 | 547.287        | 530.261        | 529.271 | <b>575.282</b> | 558.256        | 557.272 | <b>524.271</b> | 507.245        | 506.261        | F 4  |
| R 6 | 689.356        | 672.372        | 671.368 | <b>717.363</b> | 700.366        | 699.382 | <b>377.303</b> | 360.377        | 359.193        | R 3  |
| T 7 | 790.446        | 773.419        | 772.435 | <b>818.441</b> | 801.414        | 800.430 | <b>235.092</b> | 0.000          | 217.082        | T 2  |
| G 8 | 905.473        | 888.448        | 887.464 | 913.468        | 916.441        | 915.457 | 138.040        | 0.000          | 116.034        | G 1  |

# sp | P68433 | H31\_MOUSE

IAQDFK Methyl TD  
14.02

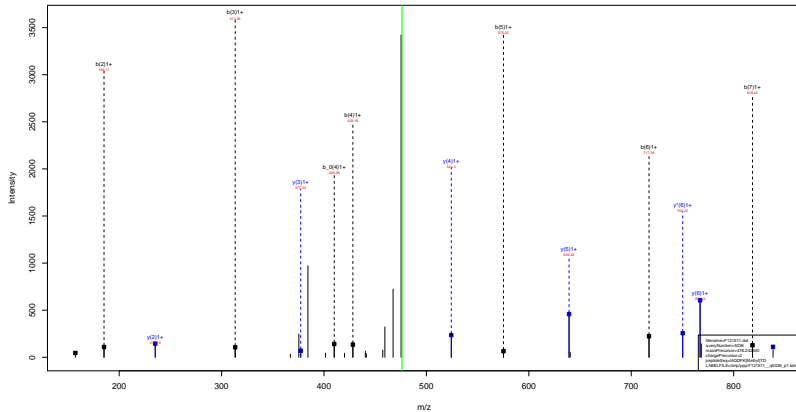



# sp | P68433 | H31\_MOUSE

IAQDFK<sup>Methyl</sup>TD  
14.02

- ▶ fragmentation table for charge state 1+
- ▶ specType=cid
- ▶ score=52.37
- ▶ F121511.dat
- ▶ query=q5036.p1
- ▶ precursor=476.242840
- ▶ chargePrecursor=2
- ▶ itol=0.7

| AA  | a              | a*      | a.Δ     | b              | b*      | b.Δ            | y              | y*             | y.Δ   | AA   |
|-----|----------------|---------|---------|----------------|---------|----------------|----------------|----------------|-------|------|
| T 1 | 86.096         | 0.000   | 0.000   | 116.203        | 0.000   | 0.000          | 921.431        | 0.000          | 0.000 | T 11 |
| A 2 | <b>157.134</b> | 0.000   | 0.000   | <b>185.128</b> | 0.000   | 0.000          | <b>638.304</b> | 0.000          | 0.000 | A 7  |
| Q 3 | 285.192        | 288.189 | -0.000  | <b>313.187</b> | 286.189 | 0.000          | <b>767.357</b> | <b>756.330</b> | 0.000 | Q 6  |
| D 4 | 409.219        | 383.193 | 260.209 | <b>428.214</b> | 411.197 | <b>410.203</b> | <b>630.298</b> | 622.272        | 0.000 | D 5  |
| F 5 | 547.287        | 530.261 | 529.271 | <b>576.282</b> | 558.256 | 557.272        | <b>524.271</b> | 507.245        | 0.000 | F 4  |
| R 6 | 659.306        | 672.311 | 671.306 | <b>717.303</b> | 700.309 | 699.303        | <b>377.203</b> | 360.177        | 0.000 | R 3  |
| T 7 | 790.448        | 773.419 | 772.435 | <b>818.441</b> | 801.414 | 800.430        | <b>235.002</b> | 0.000          | 0.000 | T 2  |
| D 8 | 925.473        | 888.448 | 887.461 | 933.468        | 916.441 | 915.429        | 134.000        | 0.000          | 0.000 | D 1  |



# sp | P68433 | H31\_MOUSE

IAQDFK<sup>Methyl</sup> TD  
14.02

- ▶ fragmentation table for charge state 1+
- ▶ specType=cid
- ▶ score=42.48
- ▶ F121511.dat
- ▶ query=q5041\_p1
- ▶ precursor=476.242970
- ▶ chargePrecursor=2
- ▶ itol=0.7

| AA  | a              | a*      | a,β     | b              | b*      | b,β     | γ              | γ*             | γ,β            | AA  |
|-----|----------------|---------|---------|----------------|---------|---------|----------------|----------------|----------------|-----|
| T 1 | 88.098         | 0.000   | 0.000   | 114.191        | 0.000   | 0.000   | 961.419        | 919.464        | 6213.668       | T 1 |
| A 2 | <b>157.134</b> | 0.000   | 0.000   | <b>185.128</b> | 0.000   | 0.000   | <b>838.304</b> | 821.365        | 4620.584       | A 2 |
| Q 3 | 285.192        | 286.186 | 0.000   | <b>313.187</b> | 296.180 | 0.000   | <b>767.357</b> | <b>750.330</b> | <b>749.346</b> | Q 3 |
| D 4 | 400.219        | 393.193 | 382.209 | <b>428.214</b> | 411.197 | 0.000   | <b>410.203</b> | <b>639.298</b> | 622.272        | D 4 |
| F 5 | 547.287        | 540.261 | 529.271 | <b>575.282</b> | 558.256 | 557.272 | <b>524.271</b> | 507.245        | 508.261        | F 5 |
| R 6 | 689.356        | 672.372 | 673.368 | <b>717.363</b> | 700.366 | 699.382 | <b>377.303</b> | 360.377        | 359.193        | R 6 |
| T 7 | 790.446        | 773.419 | 772.435 | <b>818.441</b> | 801.414 | 800.430 | <b>235.092</b> | 0.000          | 217.082        | T 7 |
| G 8 | 905.473        | 888.448 | 887.464 | 913.468        | 916.441 | 915.457 | 138.040        | 0.000          | 116.034        | G 8 |

# sp | P68433 | H31\_MOUSE

IAQDFK Methyl TD  
14.02

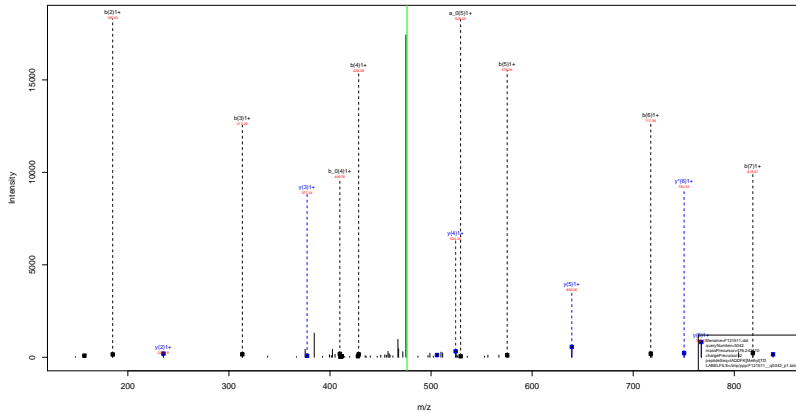

# sp | P68433 | H31\_MOUSE

IAQDFK<sup>Methyl</sup> TD  
14.02

- ▶ fragmentation table for charge state 1+
- ▶ specType=cid
- ▶ score=34.22
- ▶ F121511.dat
- ▶ query=q5042\_p1
- ▶ precursor=476.243110
- ▶ chargePrecursor=2
- ▶ itol=0.7

| AA  | a              | a*      | a:0            | b              | b*             | b:0            | y              | y*             | y:0            | AA |
|-----|----------------|---------|----------------|----------------|----------------|----------------|----------------|----------------|----------------|----|
| T 1 | 48.208         | 0.000   | 0.000          | 114.091        | 0.000          | 0.000          | 951.413        | 0.000          | 0.000          | 18 |
| A 2 | <b>157.134</b> | 0.000   | 0.000          | <b>185.126</b> | 0.000          | 0.000          | <b>618.304</b> | 0.000          | 0.000          | 57 |
| Q 3 | 285.192        | 285.190 | 0.000          | <b>313.187</b> | 296.180        | 0.000          | <b>767.357</b> | <b>750.330</b> | 749.348        | Q6 |
| L 4 | 400.219        | 393.193 | 397.200        | <b>428.214</b> | <b>411.187</b> | <b>410.203</b> | <b>630.290</b> | 622.277        | 621.289        | L5 |
| F 5 | 547.287        | 530.281 | <b>529.277</b> | <b>575.282</b> | 558.256        | 557.272        | <b>524.271</b> | 507.245        | <b>506.261</b> | F4 |
| R 6 | 698.298        | 679.283 | 674.286        | <b>717.293</b> | 700.266        | 698.282        | <b>371.203</b> | 363.177        | 364.193        | R3 |
| T 7 | 790.446        | 775.419 | 772.431        | <b>818.441</b> | 801.414        | 800.430        | <b>235.092</b> | 0.000          | 217.082        | T2 |
| L 8 | 905.473        | 880.440 | 887.450        | 915.468        | 916.441        | 915.457        | 134.040        | 0.000          | 116.034        | L0 |

# sp | P68433 | H31\_MOUSE

IAQDFK Methyl TD  
14.02

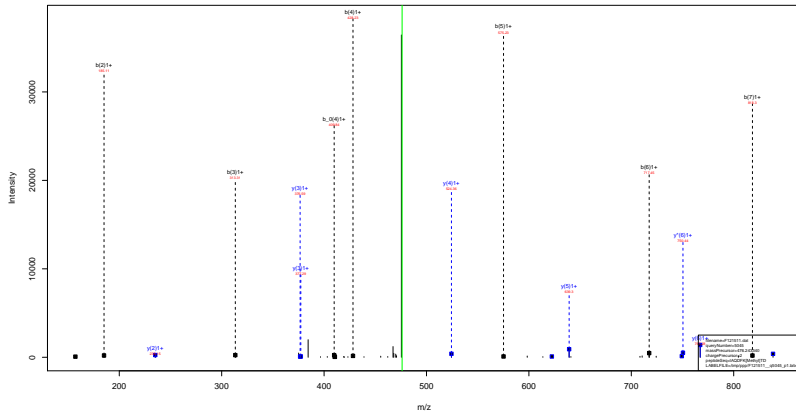

# sp | P68433 | H31\_MOUSE

IAQDFK<sup>Methyl</sup>TD  
14.02

- ▶ fragmentation table for charge state 1+
- ▶ specType=cid
- ▶ score=46.88
- ▶ F121511.dat
- ▶ query=q5045\_p1
- ▶ precursor=476.243340
- ▶ chargePrecursor=2
- ▶ itol=0.7

| AA  | a              | a*      | a,d     | b              | b*             | b,d            | y              | y*             | y,d            | AA  |
|-----|----------------|---------|---------|----------------|----------------|----------------|----------------|----------------|----------------|-----|
| T 1 | 46.998         | 0.000   | 0.000   | 114.094        | 0.000          | 0.000          | 901.416        | 109.404        | 121.988        | T 1 |
| A 2 | <b>157.134</b> | 0.000   | 0.000   | <b>185.128</b> | 0.000          | 0.000          | <b>838.354</b> | 821.362        | 820.384        | A 2 |
| Q 3 | 285.192        | 286.188 | 0.000   | <b>313.187</b> | 296.160        | 0.000          | <b>767.357</b> | <b>750.330</b> | <b>749.346</b> | Q 3 |
| G 4 | 400.219        | 393.193 | 382.209 | <b>478.214</b> | <b>411.187</b> | <b>410.203</b> | <b>636.298</b> | <b>622.272</b> | 621.288        | G 4 |
| F 5 | 547.287        | 545.283 | 549.277 | <b>575.282</b> | 558.256        | 557.252        | <b>524.271</b> | 507.245        | 506.261        | F 5 |
| R 6 | 659.356        | 672.372 | 671.368 | <b>717.393</b> | 700.369        | 699.362        | <b>377.263</b> | 360.277        | 359.193        | R 6 |
| T 7 | 790.446        | 775.419 | 772.435 | <b>818.441</b> | 801.414        | 800.430        | <b>235.092</b> | 0.000          | 237.082        | T 7 |
| G 8 | 905.473        | 888.449 | 887.462 | 933.468        | 916.441        | 915.457        | 134.040        | 0.000          | 136.034        | G 8 |

# sp | P68433 | H31\_MOUSE

IAQDFK Methyl TD  
14.02

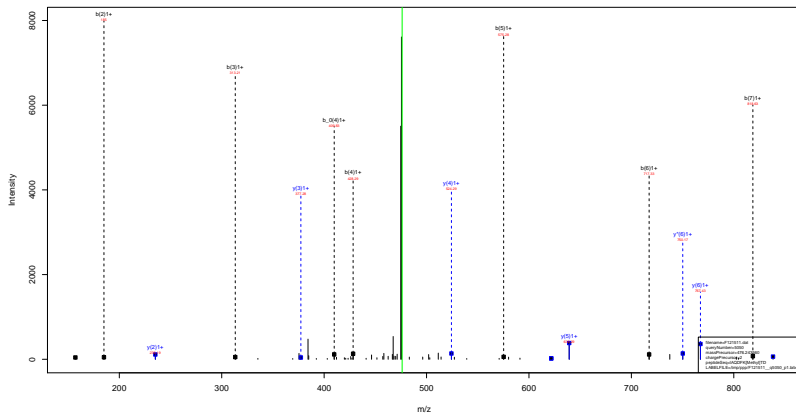



# sp | P68433 | H31\_MOUSE

IAQDFK<sup>Methyl</sup> TD  
14.02

- ▶ fragmentation table for charge state 1+
- ▶ specType=cid
- ▶ score=39.12
- ▶ F121511.dat
- ▶ query=q5050\_p1
- ▶ precursor=476.243560
- ▶ chargePrecursor=2
- ▶ itol=0.7

| AA         | a              | y <sup>a</sup> | a,β     | b              | b <sup>a</sup> | b,β            | γ              | y <sup>a</sup> | y,β            | AA         |
|------------|----------------|----------------|---------|----------------|----------------|----------------|----------------|----------------|----------------|------------|
| <b>T</b> 1 | 48.098         | 0.000          | 0.000   | 114.191        | 0.000          | 0.000          | 90.419         | 219.484        | 223.488        | <b>T</b> 1 |
| <b>A</b> 2 | <b>157.134</b> | 0.000          | 0.000   | <b>185.128</b> | 0.000          | 0.000          | <b>838.384</b> | 821.382        | 820.384        | <b>A</b> 2 |
| <b>Q</b> 3 | 285.192        | 286.186        | 0.000   | <b>313.187</b> | 286.189        | 0.000          | <b>767.357</b> | <b>750.330</b> | 749.346        | <b>Q</b> 3 |
| <b>D</b> 4 | 400.219        | 383.193        | 382.209 | <b>428.214</b> | 411.187        | <b>410.203</b> | <b>639.298</b> | <b>622.272</b> | <b>621.288</b> | <b>D</b> 4 |
| <b>F</b> 5 | 547.287        | 530.261        | 529.277 | <b>575.282</b> | 558.256        | 557.272        | <b>524.271</b> | 507.245        | 506.261        | <b>F</b> 5 |
| <b>H</b> 6 | 689.356        | 672.332        | 671.348 | <b>717.363</b> | 700.366        | 699.382        | <b>377.203</b> | 360.177        | 359.193        | <b>H</b> 6 |
| <b>I</b> 7 | 790.446        | 773.419        | 772.435 | <b>818.441</b> | 801.414        | 800.430        | <b>235.092</b> | 0.000          | 217.082        | <b>I</b> 7 |
| <b>G</b> 8 | 905.473        | 888.448        | 887.464 | 913.468        | 916.441        | 915.457        | 138.040        | 0.000          | 116.034        | <b>G</b> 8 |

# sp | P68433 | H31\_MOUSE

IAQDFK Methyl TD  
14.02

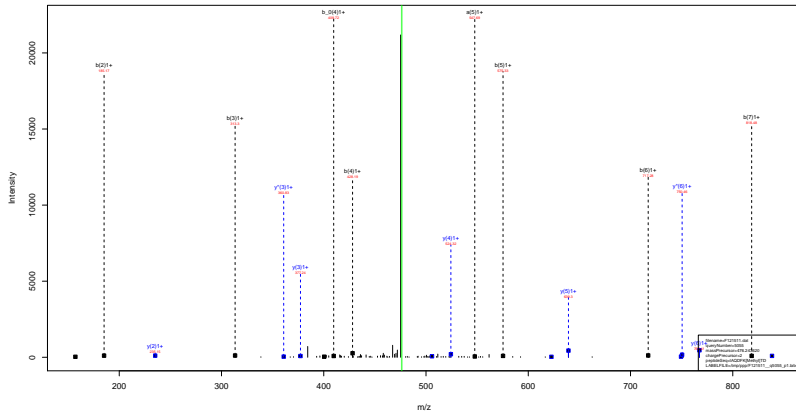

# sp | P68433 | H31\_MOUSE

IAQDFK<sup>Methyl</sup> TD  
14.02

- ▶ fragmentation table for charge state 1+
- ▶ specType=cid
- ▶ score=38.28
- ▶ F121511.dat
- ▶ query=q5055\_p1
- ▶ precursor=476.243620
- ▶ chargePrecursor=2
- ▶ itol=0.7

| AA  | a              | a*      | a,β     | b              | b*      | b,β            | γ              | γ*             | γ,β            | AA             |     |
|-----|----------------|---------|---------|----------------|---------|----------------|----------------|----------------|----------------|----------------|-----|
| T 1 | 88.098         | 0.000   | 0.000   | 114.191        | 0.000   | 0.000          | 0.000          | 961.416        | 338.464        | 223.888        | T 1 |
| A 2 | <b>157.134</b> | 0.000   | 0.000   | <b>185.128</b> | 0.000   | 0.000          | 0.000          | <b>838.384</b> | 821.384        | 462.384        | A 2 |
| Q 3 | 288.192        | 288.192 | 0.000   | <b>313.187</b> | 288.192 | 0.000          | 0.000          | <b>767.357</b> | <b>750.330</b> | <b>749.346</b> | Q 3 |
| G 4 | <b>400.219</b> | 383.193 | 383.209 | <b>438.214</b> | 411.187 | <b>410.203</b> | <b>639.298</b> | <b>622.272</b> | 621.288        | D 5            |     |
| F 5 | <b>547.287</b> | 530.261 | 529.277 | <b>575.282</b> | 558.256 | 557.272        | <b>524.271</b> | 520.245        | <b>506.261</b> | F 5            |     |
| R 6 | 689.296        | 672.270 | 671.286 | <b>717.293</b> | 700.266 | 699.282        | <b>377.203</b> | <b>360.177</b> | 359.193        | R 6            |     |
| T 7 | 790.446        | 773.419 | 772.435 | <b>818.441</b> | 801.414 | 800.430        | <b>235.092</b> | 0.000          | 217.082        | T 7            |     |
| G 8 | 905.473        | 888.446 | 887.462 | 933.468        | 916.441 | 915.457        | 138.040        | 0.000          | 116.034        | G 8            |     |

# sp | P68433 | H31\_MOUSE

IAQDFK Methyl TD  
14.02

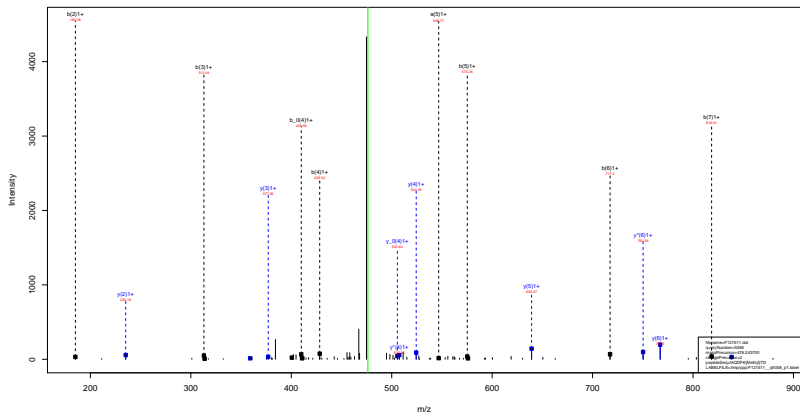

# sp | P68433 | H31\_MOUSE

IAQDFK<sup>Methyl</sup> TD  
14.02

- ▶ fragmentation table for charge state 1+
- ▶ specType=cid
- ▶ score=36.67
- ▶ F121511.dat
- ▶ query=q5058\_p1
- ▶ precursor=476.243700
- ▶ chargePrecursor=2
- ▶ itol=0.7

| AA  | a              | a*      | a,d     | b              | b*             | b,d            | y              | y*             | y,d            | AA  |
|-----|----------------|---------|---------|----------------|----------------|----------------|----------------|----------------|----------------|-----|
| T 1 | 56.298         | 0.000   | 0.000   | 114.596        | 0.000          | 0.000          | 901.414        | 109.454        | 113.968        | T 0 |
| A 2 | 157.134        | 0.000   | 0.000   | <b>185.128</b> | 0.000          | 0.000          | <b>838.354</b> | 821.362        | 820.385        | A 0 |
| Q 3 | 285.192        | 286.189 | 0.000   | <b>313.187</b> | 296.160        | 0.000          | <b>767.357</b> | <b>750.330</b> | 749.345        | Q 0 |
| G 4 | <b>400.219</b> | 393.193 | 382.209 | <b>428.214</b> | <b>411.187</b> | <b>410.203</b> | <b>636.298</b> | 622.272        | 621.289        | G 0 |
| F 5 | <b>547.287</b> | 540.261 | 529.277 | <b>575.282</b> | 558.256        | 557.272        | <b>524.271</b> | <b>507.245</b> | <b>506.261</b> | F 0 |
| R 6 | 679.289        | 672.272 | 671.269 | <b>717.293</b> | 700.269        | 699.262        | <b>377.293</b> | 366.277        | <b>359.193</b> | R 0 |
| T 7 | 790.446        | 775.419 | 772.435 | <b>818.441</b> | 801.414        | 800.430        | <b>235.092</b> | 0.000          | 227.082        | T 0 |
| G 8 | 905.473        | 889.449 | 887.462 | 933.468        | 916.441        | 915.457        | 134.040        | 0.000          | 116.034        | G 0 |

# sp | P68433 | H31\_MOUSE

IAQDFK Methyl TD  
14.02

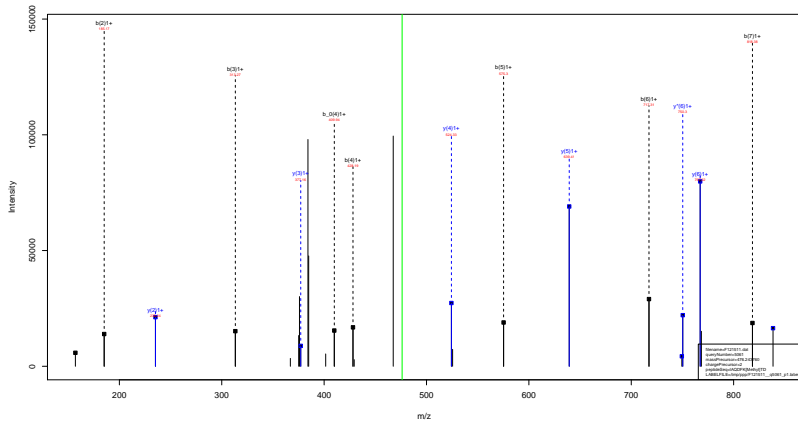

# sp | P68433 | H31\_MOUSE

IAQDFK<sup>Methyl</sup> TD  
14.02

- ▶ fragmentation table for charge state 1+
- ▶ specType=cid
- ▶ score=59.33
- ▶ F121511.dat
- ▶ query=q5061.p1
- ▶ precursor=476.243760
- ▶ chargePrecursor=2
- ▶ itol=0.7

| AA  | a              | y <sup>a</sup> | a,b     | b              | b <sup>a</sup> | b,y     | γ              | y <sup>a</sup> | y,b            | AA  |
|-----|----------------|----------------|---------|----------------|----------------|---------|----------------|----------------|----------------|-----|
| T 1 | 46.096         | 0.000          | 0.000   | 114.191        | 0.000          | 0.000   | 95.417         | 216.462        | 223.468        | T 1 |
| A 2 | <b>157.134</b> | 0.000          | 0.000   | <b>185.126</b> | 0.000          | 0.000   | <b>838.304</b> | 921.392        | 1020.584       | A 2 |
| Q 3 | 285.192        | 286.186        | 0.000   | <b>313.187</b> | 286.186        | 0.000   | <b>767.357</b> | <b>750.330</b> | <b>749.346</b> | Q 3 |
| D 4 | 400.219        | 383.193        | 382.208 | <b>428.214</b> | 411.187        | 0.000   | <b>410.203</b> | <b>639.298</b> | 622.272        | D 4 |
| F 5 | 547.287        | 530.261        | 529.271 | <b>575.282</b> | 558.256        | 557.272 | <b>524.271</b> | 567.245        | 508.261        | F 5 |
| R 6 | 689.356        | 672.332        | 671.348 | <b>717.363</b> | 700.366        | 699.382 | <b>377.303</b> | 386.377        | 359.193        | R 6 |
| T 7 | 790.446        | 773.419        | 772.435 | <b>818.441</b> | 801.414        | 800.430 | <b>235.092</b> | 0.000          | 217.082        | T 7 |
| G 8 | 905.473        | 888.448        | 887.462 | 913.468        | 916.441        | 915.457 | 138.040        | 0.000          | 116.034        | G 8 |





# sp | P68433 | H31\_MOUSE

IAQDFK<sup>Methyl</sup>TD  
14.02

- ▶ fragmentation table for charge state 1+
- ▶ specType=cid
- ▶ score=62.71
- ▶ F121511.dat
- ▶ query=q5065\_p1
- ▶ precursor=476.243910
- ▶ chargePrecursor=2
- ▶ itol=0.7

| AA  | a              | a*      | a,Δ     | b              | b*      | b,Δ            | y              | y*             | y,Δ   | AA  |
|-----|----------------|---------|---------|----------------|---------|----------------|----------------|----------------|-------|-----|
| T 1 | 86.096         | 0.000   | 0.000   | 116.203        | 0.000   | 0.000          | 951.431        | 0.000          | 0.000 | T 1 |
| A 2 | <b>157.134</b> | 0.000   | 0.000   | <b>185.128</b> | 0.000   | 0.000          | <b>638.304</b> | 0.000          | 0.000 | A 7 |
| Q 3 | 286.192        | 286.192 | 0.000   | <b>313.187</b> | 286.192 | 0.000          | <b>767.357</b> | <b>750.330</b> | 0.000 | Q 6 |
| D 4 | 409.219        | 383.103 | 382.209 | <b>428.214</b> | 411.107 | <b>410.203</b> | <b>630.298</b> | 622.272        | 0.000 | D 5 |
| F 5 | 547.287        | 530.261 | 529.277 | <b>576.282</b> | 558.256 | 557.272        | <b>524.271</b> | 507.245        | 0.000 | F 4 |
| R 6 | 659.306        | 622.291 | 621.387 | <b>717.302</b> | 700.286 | 699.287        | <b>377.203</b> | 360.177        | 0.000 | R 3 |
| T 7 | 790.448        | 773.419 | 772.435 | <b>818.441</b> | 801.414 | 800.430        | <b>235.002</b> | 0.000          | 0.000 | T 2 |
| D 8 | 925.473        | 888.458 | 887.463 | 933.468        | 916.441 | 915.427        | 134.000        | 0.000          | 0.000 | D 1 |

# sp | P68433 | H31\_MOUSE

IAQDFK Dimethyl TD  
28.03

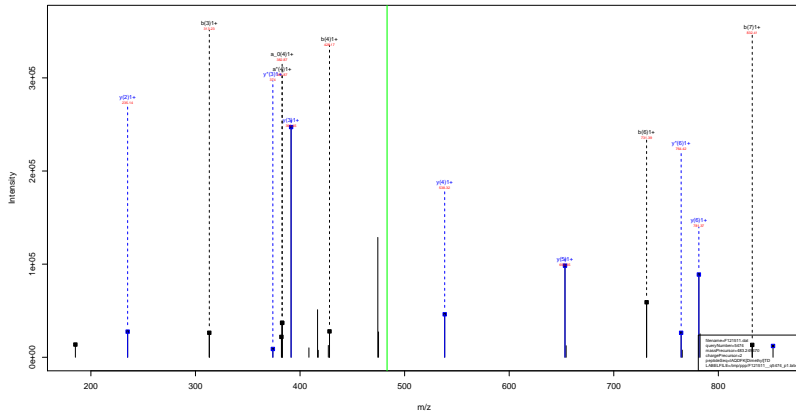

# sp | P68433 | H31\_MOUSE

IAQDFK<sup>Dimethyl</sup> TD  
28.03

- ▶ fragmentation table for charge state 1+
- ▶ specType=cid
- ▶ score=61.72
- ▶ F121511.dat
- ▶ query=q5474.p1
- ▶ precursor=483.249470
- ▶ chargePrecursor=2
- ▶ itol=0.7

| AA  | a       | a*             | aβ             | b              | b*      | bβ      | y              | y*             | yβ      | AA  |
|-----|---------|----------------|----------------|----------------|---------|---------|----------------|----------------|---------|-----|
| T 1 | 386.098 | 0.000          | -0.000         | 114.101        | 0.000   | 0.000   | 652.410        | 0.000          | 0.000   | T 1 |
| A 2 | 157.134 | 0.000          | 0.000          | <b>185.128</b> | 0.000   | 0.000   | <b>652.410</b> | 0.000          | 0.000   | A 2 |
| Q 3 | 285.192 | 288.139        | 0.000          | <b>313.187</b> | 296.169 | 0.000   | <b>781.373</b> | <b>764.346</b> | 0.000   | Q 3 |
| D 4 | 400.219 | <b>383.193</b> | <b>382.208</b> | <b>428.214</b> | 411.187 | 430.203 | <b>653.314</b> | 636.280        | 635.214 | D 4 |
| F 5 | 547.267 | 530.261        | 525.277        | 515.262        | 538.256 | 557.272 | <b>538.267</b> | 540.261        | 538.277 | F 5 |
| H 6 | 713.414 | 695.397        | 695.403        | <b>711.409</b> | 714.392 | 713.398 | <b>391.219</b> | <b>374.192</b> | 0.000   | H 6 |
| T 7 | 804.461 | 787.435        | 786.451        | <b>832.456</b> | 815.430 | 814.446 | <b>235.092</b> | 0.000          | 217.082 | T 7 |
| D 8 | 819.488 | 802.460        | 801.476        | 847.485        | 830.457 | 829.473 | 134.049        | 0.000          | 116.034 | D 8 |



# sp | P68433 | H31\_MOUSE

IAQDFK<sup>Dimethyl</sup>TD  
28.03

- ▶ fragmentation table for charge state 1+
- ▶ specType=cid
- ▶ score=62.58
- ▶ F121511.dat
- ▶ query=q5475\_p1
- ▶ precursor=483.249640
- ▶ chargePrecursor=2
- ▶ itol=0.7

| AA         | a              | a*             | a.0            | b              | b*      | b.0     | y              | y*             | y.0     | AA         |
|------------|----------------|----------------|----------------|----------------|---------|---------|----------------|----------------|---------|------------|
| <b>T</b> 1 | 86.998         | 0.000          | 0.000          | 124.000        | 0.000   | 0.000   | 483.249        | 483.249        | 483.249 | <b>T</b> 1 |
| <b>A</b> 2 | <b>157.134</b> | 0.000          | 0.000          | <b>185.128</b> | 0.000   | 0.000   | <b>852.410</b> | 852.410        | 852.410 | <b>A</b> 2 |
| <b>Q</b> 3 | 285.192        | 268.166        | 0.000          | <b>313.187</b> | 296.160 | 0.000   | <b>781.373</b> | <b>764.346</b> | 763.362 | <b>Q</b> 3 |
| <b>D</b> 4 | 400.219        | <b>383.193</b> | <b>382.208</b> | <b>428.214</b> | 411.187 | 410.201 | <b>653.314</b> | 636.288        | 635.304 | <b>D</b> 4 |
| <b>F</b> 5 | 547.287        | 530.261        | 529.277        | <b>575.282</b> | 558.256 | 557.272 | <b>538.287</b> | 521.261        | 520.277 | <b>F</b> 5 |
| <b>R</b> 6 | 703.414        | 686.387        | 685.403        | <b>731.409</b> | 714.383 | 713.398 | <b>301.219</b> | 284.193        | 283.208 | <b>R</b> 6 |
| <b>I</b> 7 | 804.461        | 787.435        | 786.451        | <b>832.456</b> | 815.430 | 814.446 | <b>235.092</b> | 0.000          | 217.062 | <b>I</b> 7 |
| <b>G</b> 8 | 919.488        | 902.462        | 901.478        | 947.483        | 930.457 | 929.473 | 134.060        | 0.000          | 116.034 | <b>G</b> 8 |



# sp | P68433 | H31\_MOUSE

IAQDFK<sup>Dimethyl</sup>TD  
28.03

- ▶ fragmentation table for charge state 1+
- ▶ specType=etd
- ▶ score=45.25
- ▶ F121511.dat
- ▶ query=q5476.p1
- ▶ precursor=483.249640
- ▶ chargePrecursor=2
- ▶ itol=0.7

| AA  | c              | y              | z+1            | z+2            | z       | AA  |
|-----|----------------|----------------|----------------|----------------|---------|-----|
| I 1 | 131.118        | <b>965.494</b> | <b>949.475</b> | 0.000          | 948.467 | I 8 |
| A 2 | 202.155        | 852.410        | <b>836.391</b> | 0.000          | 835.383 | A 7 |
| Q 3 | 330.214        | <b>781.373</b> | <b>765.354</b> | 766.362        | 764.346 | Q 6 |
| D 4 | 445.241        | <b>653.314</b> | <b>637.295</b> | <b>638.303</b> | 636.288 | D 5 |
| F 5 | 592.309        | <b>538.287</b> | <b>522.268</b> | <b>523.276</b> | 521.261 | F 4 |
| K 6 | <b>748.435</b> | 391.219        | <b>375.200</b> | <b>376.208</b> | 374.192 | K 3 |
| T 7 | <b>849.483</b> | 235.092        | 219.074        | 220.082        | 218.066 | T 2 |
| D 8 | 964.510        | 134.045        | 118.026        | 119.034        | 117.018 | D 1 |

# sp | P68433 | H31\_MOUSE

IAQDFK Dimethyl TD  
28.03

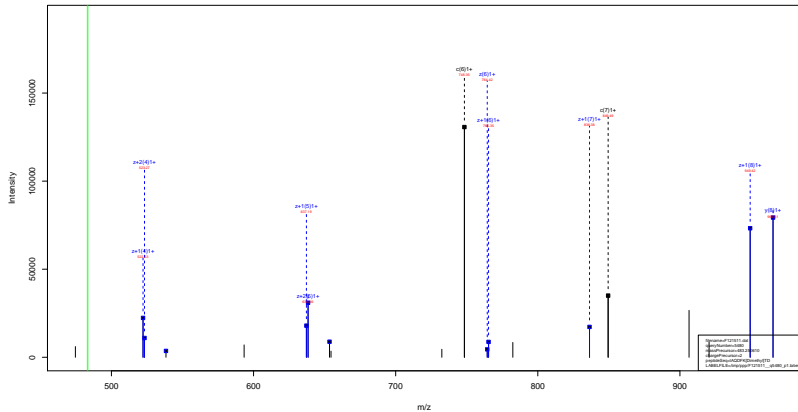



# sp | P68433 | H31\_MOUSE

IAQDFK<sup>Dimethyl</sup> TD  
28.03

- ▶ fragmentation table for charge state 1+
- ▶ specType=etd
- ▶ score=39.75
- ▶ F121511.dat
- ▶ query=q5480.p1
- ▶ precursor=483.250610
- ▶ chargePrecursor=2
- ▶ itol=0.7

| AA  | c              | y              | z+1            | z+2            | z              | AA  |
|-----|----------------|----------------|----------------|----------------|----------------|-----|
| I 1 | 131.118        | <b>965.494</b> | <b>949.475</b> | 0.000          | 948.467        | I 8 |
| A 2 | 202.155        | 852.410        | <b>836.391</b> | 0.000          | 835.383        | A 7 |
| Q 3 | 330.214        | 781.373        | <b>765.354</b> | 766.362        | <b>764.346</b> | Q 6 |
| D 4 | 445.241        | <b>653.314</b> | <b>637.295</b> | <b>638.303</b> | 636.288        | D 5 |
| F 5 | 592.309        | <b>538.287</b> | <b>522.268</b> | <b>523.276</b> | 521.261        | F 4 |
| R 6 | <b>748.435</b> | 901.219        | 875.200        | 876.208        | 874.192        | R 3 |
| T 7 | <b>849.483</b> | 235.092        | 219.074        | 220.082        | 218.066        | T 2 |
| D 8 | 964.510        | 134.045        | 118.028        | 119.034        | 117.018        | D 1 |

# sp | P68433 | H31\_MOUSE

IAQDFK<sup>Dimethyl</sup>TD  
28.03

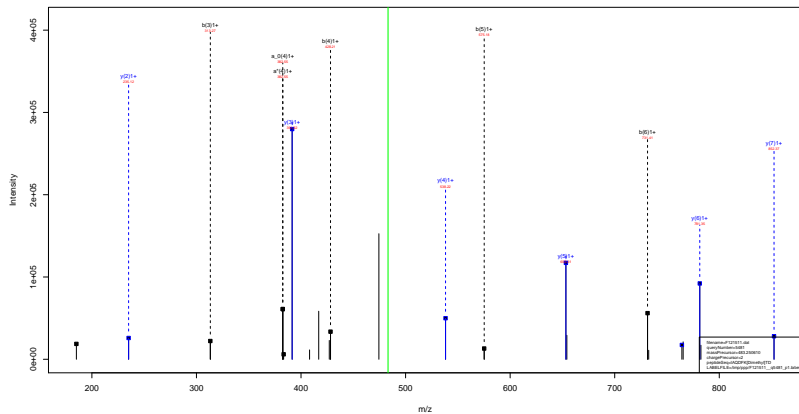

# sp | P68433 | H31\_MOUSE

IAQDFK<sup>Dimethyl</sup>TD  
28.03

- ▶ fragmentation table for charge state 1+
- ▶ specType=cid
- ▶ score=65.55
- ▶ F121511.dat
- ▶ query=q5481\_p1
- ▶ precursor=483.250610
- ▶ chargePrecursor=2
- ▶ itol=0.7

| AA  | a       | a*             | aβ             | b              | b*      | bβ      | y              | y*             | yβ      | AA  |
|-----|---------|----------------|----------------|----------------|---------|---------|----------------|----------------|---------|-----|
| T 1 | 386.098 | 0.000          | -0.000         | 114.101        | 0.000   | 0.000   | 658.437        | 948.481        | 104.483 | T11 |
| A 2 | 157.134 | 0.000          | 0.000          | <b>185.128</b> | 0.000   | 0.000   | <b>652.410</b> | 875.351        | 834.335 | A71 |
| Q 3 | 285.192 | 288.138        | 0.000          | <b>313.187</b> | 296.169 | 0.000   | <b>781.373</b> | <b>764.346</b> | 753.362 | Q16 |
| D 4 | 400.219 | <b>383.193</b> | <b>387.208</b> | <b>428.214</b> | 411.187 | 440.203 | <b>653.314</b> | 636.288        | 635.314 | D15 |
| F 5 | 347.267 | 330.261        | 525.277        | <b>575.282</b> | 538.256 | 357.272 | <b>538.287</b> | 524.261        | 530.277 | F14 |
| R 6 | 713.414 | 695.397        | 925.401        | <b>731.409</b> | 714.382 | 713.398 | <b>391.219</b> | 374.192        | 373.208 | R13 |
| T 7 | 104.461 | 187.435        | 198.451        | 652.455        | 615.430 | 814.446 | <b>235.092</b> | 0.000          | 217.082 | T12 |
| D 8 | 419.488 | 402.469        | 601.449        | 847.483        | 830.467 | 609.473 | 134.049        | 0.000          | 116.034 | D11 |

# sp | P68433 | H31\_MOUSE

IAQDFK Dimethyl TD  
28.03

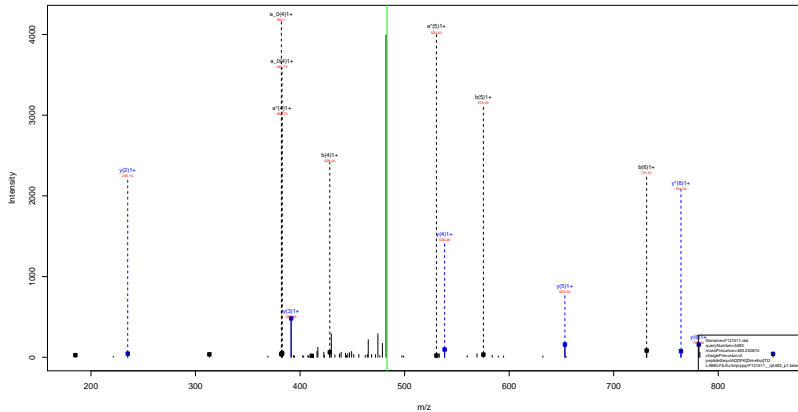

# sp | P68433 | H31\_MOUSE

IAQDFK<sup>Dimethyl</sup>TD  
28.03

- ▶ fragmentation table for charge state 1+
- ▶ specType=cid
- ▶ score=47.68
- ▶ F121511.dat
- ▶ query=q5483\_p1
- ▶ precursor=483.250610
- ▶ chargePrecursor=2
- ▶ itol=0.7

| AA         | a       | a*             | a,b            | b              | b*             | b,y     | y              | y*             | y,b     | AA         |
|------------|---------|----------------|----------------|----------------|----------------|---------|----------------|----------------|---------|------------|
| <b>T</b> 1 | 381.098 | 0.000          | 0.000          | 114.101        | 0.000          | 0.000   | 465.199        | 0.000          | 465.199 | <b>T</b> 1 |
| <b>A</b> 2 | 157.134 | 0.000          | 0.000          | <b>185.128</b> | 0.000          | 0.000   | <b>852.410</b> | 0.000          | 852.410 | <b>A</b> 2 |
| <b>Q</b> 3 | 285.192 | 286.186        | 0.000          | <b>313.187</b> | 296.180        | 0.000   | <b>781.373</b> | <b>764.346</b> | 783.362 | <b>Q</b> 3 |
| <b>D</b> 4 | 600.219 | <b>383.193</b> | <b>382.208</b> | <b>428.214</b> | <b>411.187</b> | 410.201 | <b>653.314</b> | 656.280        | 635.294 | <b>D</b> 4 |
| <b>F</b> 5 | 347.267 | <b>530.261</b> | 529.277        | <b>575.262</b> | 566.256        | 557.272 | <b>538.267</b> | 541.261        | 520.277 | <b>F</b> 5 |
| <b>R</b> 6 | 113.414 | 600.287        | 600.461        | <b>731.409</b> | 724.353        | 713.368 | <b>301.219</b> | 304.193        | 312.208 | <b>R</b> 6 |
| <b>T</b> 7 | 304.461 | 781.435        | 786.451        | 832.458        | 825.430        | 814.446 | <b>235.092</b> | 0.000          | 237.082 | <b>T</b> 7 |
| <b>G</b> 8 | 103.488 | 902.469        | 901.470        | 947.485        | 939.457        | 929.473 | 134.069        | 0.000          | 116.034 | <b>G</b> 8 |

# sp | P68433 | H31\_MOUSE

IAQDFK Dimethyl TD  
28.03

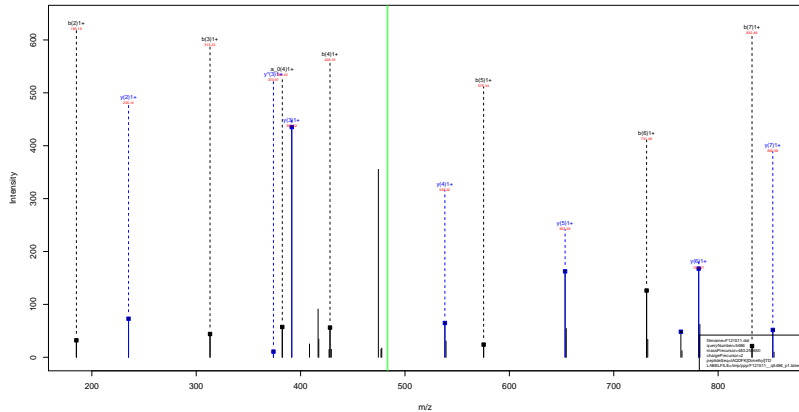

# sp | P68433 | H31\_MOUSE

IAQDFK<sup>Dimethyl</sup> TD  
28.03

- ▶ fragmentation table for charge state 1+
- ▶ specType=cid
- ▶ score=64.72
- ▶ F121511.dat
- ▶ query=q5486.p1
- ▶ precursor=483.250650
- ▶ chargePrecursor=2
- ▶ itol=0.7

| AA  | a       | a*      | aΔ             | b              | b*      | bΔ      | y              | y*             | yΔ      | AA  |
|-----|---------|---------|----------------|----------------|---------|---------|----------------|----------------|---------|-----|
| T 1 | 36.908  | 1.03    | 0.00           | 114.071        | 0.00    | 0.00    | 961.431        | 943.461        | 17.970  | Q1  |
| A 2 | 157.114 | 0.00    | 0.00           | <b>185.128</b> | 0.00    | 0.00    | <b>852.410</b> | 875.361        | 23.951  | A17 |
| Q 3 | 285.192 | 288.180 | 0.00           | <b>313.187</b> | 206.180 | 0.00    | <b>781.373</b> | <b>764.346</b> | 17.027  | Q16 |
| D 4 | 400.219 | 381.193 | <b>382.208</b> | <b>428.214</b> | 411.187 | 410.203 | <b>653.314</b> | 636.288        | 17.026  | D15 |
| F 5 | 547.287 | 530.261 | 529.277        | <b>515.282</b> | 550.256 | 557.272 | <b>538.287</b> | 521.261        | 17.027  | F14 |
| R 6 | 693.414 | 606.387 | 625.401        | <b>711.409</b> | 714.382 | 713.398 | <b>391.219</b> | <b>374.192</b> | 17.027  | R13 |
| T 7 | 804.461 | 797.435 | 796.451        | <b>832.456</b> | 815.430 | 814.446 | <b>235.092</b> | 0.00           | 217.082 | T12 |
| D 8 | 919.488 | 902.462 | 901.478        | 947.483        | 930.457 | 929.473 | 134.040        | 0.00           | 116.034 | D11 |





# sp | P68433 | H31\_MOUSE

IAQDFK<sup>Dimethyl</sup>TD  
28.03

- ▶ fragmentation table for charge state 1+
- ▶ specType=cid
- ▶ score=46.14
- ▶ F121511.dat
- ▶ query=q5492\_p1
- ▶ precursor=483.250760
- ▶ chargePrecursor=2
- ▶ itol=0.7

| AA  | a       | y*             | a:d            | b              | b*      | b:d     | y              | y*      | y:d     | AA |
|-----|---------|----------------|----------------|----------------|---------|---------|----------------|---------|---------|----|
| T 1 | 36.976  | 0.000          | 0.000          | 114.001        | 0.000   | 0.000   | 205.967        | 0.000   | 242.463 | Q1 |
| A 2 | 157.114 | 0.000          | 0.000          | 195.120        | 0.000   | 0.000   | 352.410        | 0.000   | 334.305 | A7 |
| Q 3 | 285.192 | 288.194        | 0.000          | <b>313.187</b> | 296.180 | 0.000   | <b>781.373</b> | 784.366 | 763.362 | Q6 |
| D 4 | 400.219 | <b>383.193</b> | <b>382.208</b> | <b>426.214</b> | 411.187 | 410.203 | <b>653.314</b> | 656.280 | 635.314 | D5 |
| F 5 | 547.267 | 530.261        | 529.277        | 515.262        | 598.256 | 587.272 | <b>538.287</b> | 527.261 | 520.277 | F4 |
| R 6 | 703.414 | 685.407        | 685.403        | <b>731.409</b> | 714.392 | 713.398 | <b>301.219</b> | 314.192 | 319.206 | R3 |
| T 7 | 804.461 | 787.455        | 786.451        | 832.456        | 815.450 | 814.446 | <b>235.092</b> | 0.000   | 217.082 | T2 |
| D 8 | 919.488 | 902.482        | 901.478        | 947.483        | 930.457 | 929.473 | 134.045        | 0.000   | 116.034 | D1 |



# sp | P68433 | H31\_MOUSE

IAQDFK<sup>Dimethyl</sup>TD  
28.03

- ▶ fragmentation table for charge state 1+
- ▶ specType=etd
- ▶ score=40.08
- ▶ F121511.dat
- ▶ query=q5500.p1
- ▶ precursor=483.251210
- ▶ chargePrecursor=2
- ▶ itol=0.7

| AA  | c              | y              | z+1            | z+2            | z       | AA  |
|-----|----------------|----------------|----------------|----------------|---------|-----|
| I 1 | 131.118        | <b>965.494</b> | <b>949.475</b> | 0.000          | 948.467 | I 8 |
| A 2 | 202.155        | 852.410        | <b>836.391</b> | 0.000          | 835.383 | A 7 |
| Q 3 | 330.214        | 781.373        | <b>765.354</b> | 766.362        | 764.346 | Q 6 |
| D 4 | 445.241        | 653.314        | <b>637.295</b> | <b>638.303</b> | 636.288 | D 5 |
| F 5 | 592.309        | 538.287        | <b>522.268</b> | <b>523.276</b> | 521.261 | F 4 |
| K 6 | <b>748.435</b> | 391.219        | 375.200        | 376.208        | 374.192 | K 3 |
| T 7 | <b>849.483</b> | 235.092        | 219.074        | 220.082        | 218.066 | T 2 |
| D 8 | 964.510        | 134.045        | 118.026        | 119.034        | 117.018 | D 1 |

# sp | P68433 | H31\_MOUSE

IAQDFK Dimethyl TD  
28.03

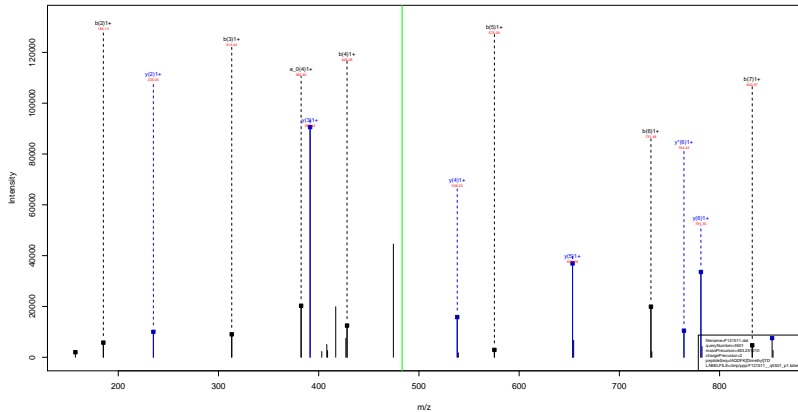

# sp | P68433 | H31\_MOUSE

IAQDFK<sup>Dimethyl</sup>TD  
28.03

- ▶ fragmentation table for charge state 1+
- ▶ specType=cid
- ▶ score=62.11
- ▶ F121511.dat
- ▶ query=q5501.p1
- ▶ precursor=483.251210
- ▶ chargePrecursor=2
- ▶ itol=0.7

| AA  | a              | a*      | aβ             | b              | b*      | bβ      | y              | y*             | yβ             | AA  |
|-----|----------------|---------|----------------|----------------|---------|---------|----------------|----------------|----------------|-----|
| T 1 | 86.996         | 0.000   | -0.000         | 114.101        | 0.000   | 0.000   | 652.410        | 652.410        | 652.410        | T 1 |
| A 2 | <b>157.134</b> | 0.000   | 0.000          | <b>185.128</b> | 0.000   | 0.000   | <b>652.410</b> | 652.410        | 652.410        | A 2 |
| Q 3 | 295.192        | 295.192 | 0.000          | <b>313.187</b> | 296.169 | 0.000   | <b>781.373</b> | <b>781.373</b> | <b>781.373</b> | Q 3 |
| D 4 | 400.219        | 383.103 | <b>382.208</b> | <b>428.214</b> | 411.187 | 430.203 | <b>653.314</b> | 636.288        | 635.244        | D 4 |
| F 5 | 547.287        | 530.261 | 525.217        | <b>575.282</b> | 558.256 | 557.212 | <b>538.287</b> | 524.261        | 520.217        | F 5 |
| H 6 | 703.434        | 685.397 | 685.461        | <b>711.400</b> | 714.362 | 713.366 | <b>391.219</b> | 394.181        | 379.206        | H 6 |
| T 7 | 804.461        | 787.435 | 786.431        | <b>832.456</b> | 815.430 | 814.446 | <b>235.092</b> | 0.000          | 217.082        | T 7 |
| D 8 | 919.488        | 892.462 | 891.458        | <b>947.483</b> | 930.457 | 929.473 | 134.049        | 0.000          | 116.034        | D 8 |



# sp | P68433 | H31\_MOUSE

IAQDFK<sup>Dimethyl</sup>TD  
28.03

- ▶ fragmentation table for charge state 1+
- ▶ specType=etd
- ▶ score=43.21
- ▶ F121511.dat
- ▶ query=q5504.p1
- ▶ precursor=483.251350
- ▶ chargePrecursor=2
- ▶ itol=0.7

| AA  | c              | y              | z+1            | z+2            | z              | AA  |
|-----|----------------|----------------|----------------|----------------|----------------|-----|
| I 1 | 131.118        | <b>965.494</b> | <b>949.475</b> | 0.000          | 948.467        | I 8 |
| A 2 | 202.155        | 852.410        | <b>836.391</b> | 0.000          | 835.383        | A 7 |
| Q 3 | 330.214        | <b>781.373</b> | <b>765.354</b> | 766.362        | <b>764.346</b> | Q 6 |
| D 4 | 445.241        | <b>653.314</b> | <b>637.295</b> | <b>638.303</b> | 636.288        | D 5 |
| F 5 | 592.309        | <b>538.287</b> | <b>522.268</b> | <b>523.276</b> | 521.261        | F 4 |
| R 6 | <b>748.435</b> | 901.219        | <b>375.200</b> | 376.208        | 374.192        | R 3 |
| T 7 | <b>849.483</b> | 235.092        | 219.074        | 220.082        | 218.066        | T 2 |
| D 8 | 964.510        | 134.045        | 118.028        | 119.034        | 117.018        | D 1 |

# sp | P68433 | H31\_MOUSE

IAQDFK Dimethyl TD  
28.03

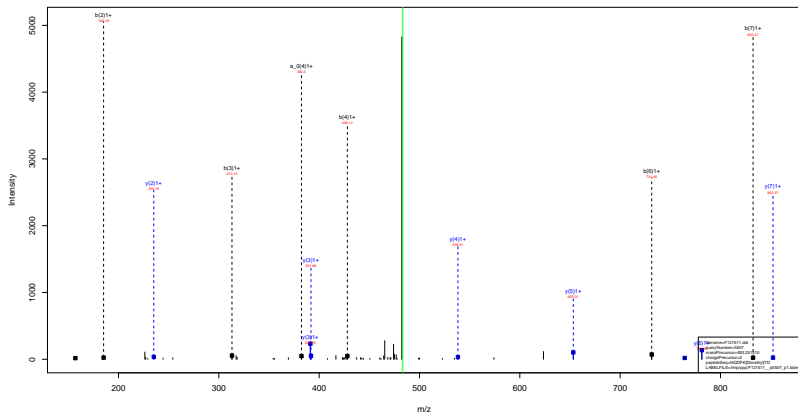



# sp | P68433 | H31\_MOUSE

IAQDFK<sup>Dimethyl</sup>TD  
28.03

- ▶ fragmentation table for charge state 1+
- ▶ specType=cid
- ▶ score=37.58
- ▶ F121511.dat
- ▶ query=q5507.p1
- ▶ precursor=483.251510
- ▶ chargePrecursor=2
- ▶ itol=0.7

| AA  | a              | a*      | aβ             | b              | b*      | bβ      | y              | y*             | yβ      | AA  |
|-----|----------------|---------|----------------|----------------|---------|---------|----------------|----------------|---------|-----|
| T 1 | 86.996         | 0.000   | -0.000         | 114.101        | 0.000   | 0.000   | 652.410        | 652.410        | 0.000   | T 1 |
| A 2 | <b>157.134</b> | 0.000   | 0.000          | <b>185.128</b> | 0.000   | 0.000   | <b>652.410</b> | 652.410        | 0.000   | A 2 |
| Q 3 | 295.197        | 295.195 | 0.000          | <b>313.187</b> | 296.169 | 0.000   | <b>781.373</b> | <b>781.373</b> | 0.000   | Q 3 |
| D 4 | 400.219        | 383.103 | <b>387.208</b> | <b>428.214</b> | 411.187 | 430.203 | <b>653.314</b> | 636.288        | 635.214 | D 4 |
| F 5 | 547.287        | 530.261 | 525.277        | 575.282        | 558.256 | 557.272 | <b>530.287</b> | 524.261        | 520.277 | F 5 |
| H 6 | 703.434        | 685.397 | 675.463        | <b>711.409</b> | 714.382 | 713.398 | <b>391.219</b> | 394.192        | 377.206 | H 6 |
| T 7 | 804.461        | 787.435 | 786.451        | <b>832.456</b> | 835.430 | 834.446 | <b>235.092</b> | 0.000          | 217.082 | T 7 |
| D 8 | 919.488        | 892.460 | 891.476        | 947.485        | 930.457 | 929.473 | 134.049        | 0.000          | 116.034 | D 8 |



# sp | P68433 | H31\_MOUSE

IAQDFK<sup>Dimethyl</sup>TD  
28.03

- ▶ fragmentation table for charge state 1+
- ▶ specType=etd
- ▶ score=41.64
- ▶ F121544.dat
- ▶ query=q4172.p1
- ▶ precursor=483.250480
- ▶ chargePrecursor=2
- ▶ itol=0.7

| AA  | c              | y              | z+1            | z+2            | z       | AA  |
|-----|----------------|----------------|----------------|----------------|---------|-----|
| I 1 | 131.118        | <b>965.494</b> | <b>949.475</b> | 0.000          | 948.467 | I 8 |
| A 2 | 202.155        | 852.410        | <b>836.391</b> | 0.000          | 835.383 | A 7 |
| Q 3 | 330.214        | <b>781.373</b> | <b>765.354</b> | <b>766.362</b> | 764.346 | Q 6 |
| D 4 | 445.241        | 653.314        | <b>637.295</b> | <b>638.303</b> | 636.288 | D 5 |
| F 5 | 592.309        | 538.287        | <b>522.268</b> | <b>523.276</b> | 521.261 | F 4 |
| K 6 | <b>748.435</b> | 391.219        | 375.200        | <b>376.208</b> | 374.192 | K 3 |
| T 7 | <b>849.483</b> | 235.092        | 219.074        | 220.082        | 218.066 | T 2 |
| D 8 | 964.510        | 134.045        | 118.026        | 119.034        | 117.018 | D 1 |



# sp | P68433 | H31\_MOUSE

IAQDFK<sup>Dimethyl</sup> TD  
28.03

- ▶ fragmentation table for charge state 1+
- ▶ specType=cid
- ▶ score=40.58
- ▶ F121544.dat
- ▶ query=q4173.p1
- ▶ precursor=483.250480
- ▶ chargePrecursor=2
- ▶ itol=0.7

| AA         | a       | y <sup>n</sup> | aβ             | b              | b <sup>n</sup> | bβ      | γ              | y <sup>n</sup> | yβ             | AA         |
|------------|---------|----------------|----------------|----------------|----------------|---------|----------------|----------------|----------------|------------|
| <b>T</b> 1 | 381.098 | 0.000          | 0.000          | 114.101        | 0.000          | 0.000   | 966.496        | 342.488        | 244.483        | <b>T</b> 1 |
| <b>A</b> 2 | 127.134 | 0.000          | 0.000          | <b>185.128</b> | 0.000          | 0.000   | <b>852.410</b> | 835.363        | 204.390        | <b>A</b> 2 |
| <b>Q</b> 3 | 285.192 | 286.186        | 0.000          | <b>313.187</b> | 206.180        | 0.000   | <b>781.373</b> | <b>764.346</b> | <b>763.362</b> | <b>Q</b> 3 |
| <b>D</b> 4 | 400.219 | 363.193        | <b>382.208</b> | <b>428.214</b> | 311.187        | 410.203 | <b>653.314</b> | 636.289        | 635.304        | <b>D</b> 4 |
| <b>F</b> 5 | 347.267 | <b>530.261</b> | 529.277        | 530.260        | 550.256        | 557.272 | <b>538.387</b> | <b>521.261</b> | <b>520.277</b> | <b>F</b> 5 |
| <b>R</b> 6 | 103.414 | 600.387        | 600.401        | <b>731.409</b> | 714.382        | 713.399 | <b>391.210</b> | <b>374.192</b> | <b>373.208</b> | <b>R</b> 6 |
| <b>I</b> 7 | 304.461 | 181.435        | 186.451        | 832.458        | 815.430        | 814.446 | <b>235.092</b> | 0.000          | 217.082        | <b>I</b> 7 |
| <b>G</b> 8 | 103.408 | 602.400        | 601.410        | 947.403        | 930.407        | 929.413 | 138.040        | 0.000          | 116.034        | <b>G</b> 8 |

# sp | P68433 | H31\_MOUSE

IAQDFK Dimethyl TD  
28.03

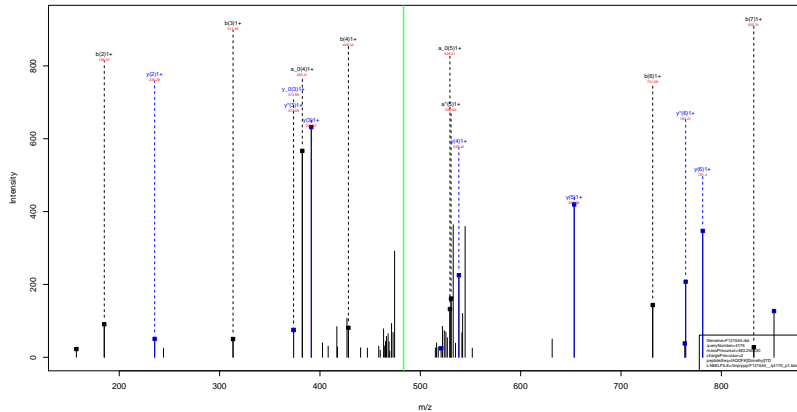

# sp | P68433 | H31\_MOUSE

IAQDFK<sup>Dimethyl</sup>TD  
28.03

- ▶ fragmentation table for charge state 1+
- ▶ specType=cid
- ▶ score=52.19
- ▶ F121544.dat
- ▶ query=q4175\_p1
- ▶ precursor=483.250530
- ▶ chargePrecursor=2
- ▶ itol=0.7

| AA         | a              | y*             | a:Δ            | b              | b*      | b:Δ     | y              | y*             | y:Δ            | AA         |
|------------|----------------|----------------|----------------|----------------|---------|---------|----------------|----------------|----------------|------------|
| <b>T</b> 1 | 46.998         | 0.000          | 0.000          | 124.998        | 0.000   | 0.000   | 959.998        | 0.000          | 0.000          | <b>T</b> 1 |
| <b>A</b> 2 | <b>157.134</b> | 0.000          | 0.000          | <b>185.128</b> | 0.000   | 0.000   | <b>852.410</b> | 0.000          | 0.000          | <b>A</b> 2 |
| <b>Q</b> 3 | 286.192        | 286.192        | 0.000          | <b>313.187</b> | 286.192 | 0.000   | <b>781.373</b> | <b>764.346</b> | <b>763.362</b> | <b>Q</b> 3 |
| <b>D</b> 4 | 400.219        | 400.219        | <b>382.208</b> | <b>428.214</b> | 411.187 | 440.203 | <b>653.314</b> | 659.289        | 636.304        | <b>D</b> 4 |
| <b>F</b> 5 | 547.287        | <b>530.261</b> | <b>529.277</b> | 512.252        | 530.256 | 557.232 | <b>538.287</b> | <b>521.261</b> | <b>520.277</b> | <b>F</b> 5 |
| <b>H</b> 6 | 713.414        | 713.414        | 695.403        | <b>731.409</b> | 714.382 | 733.388 | <b>391.213</b> | <b>374.192</b> | <b>373.208</b> | <b>H</b> 6 |
| <b>T</b> 7 | 804.461        | 787.435        | 786.451        | <b>832.456</b> | 815.430 | 834.446 | <b>235.092</b> | 0.000          | 237.082        | <b>T</b> 7 |
| <b>G</b> 8 | 916.488        | 902.462        | 901.439        | 947.465        | 930.457 | 929.473 | 134.040        | 0.000          | 136.034        | <b>G</b> 8 |





# sp | P68433 | H31\_MOUSE

IAQDFK<sup>Dimethyl</sup>TD  
28.03

- ▶ fragmentation table for charge state 1+
- ▶ specType=etd
- ▶ score=49.25
- ▶ F121544.dat
- ▶ query=q4176\_p1
- ▶ precursor=483.250670
- ▶ chargePrecursor=2
- ▶ itol=0.7

| AA  | c              | y              | z+1            | z+2            | z       | AA  |
|-----|----------------|----------------|----------------|----------------|---------|-----|
| I 1 | 131.118        | <b>965.494</b> | <b>949.475</b> | 0.000          | 948.467 | I 8 |
| A 2 | 202.155        | 852.410        | <b>836.391</b> | 0.000          | 835.383 | A 7 |
| Q 3 | 330.214        | 781.373        | <b>765.354</b> | 766.362        | 764.346 | Q 6 |
| D 4 | 445.241        | 653.314        | <b>637.295</b> | <b>638.303</b> | 636.288 | D 5 |
| F 5 | 592.309        | 538.287        | <b>522.268</b> | <b>523.276</b> | 521.261 | F 4 |
| K 6 | <b>748.435</b> | 391.219        | <b>375.200</b> | <b>376.208</b> | 374.192 | K 3 |
| T 7 | <b>849.483</b> | 235.092        | 219.074        | 220.082        | 218.066 | T 2 |
| D 8 | 964.510        | 134.045        | 118.026        | 119.034        | 117.018 | D 1 |

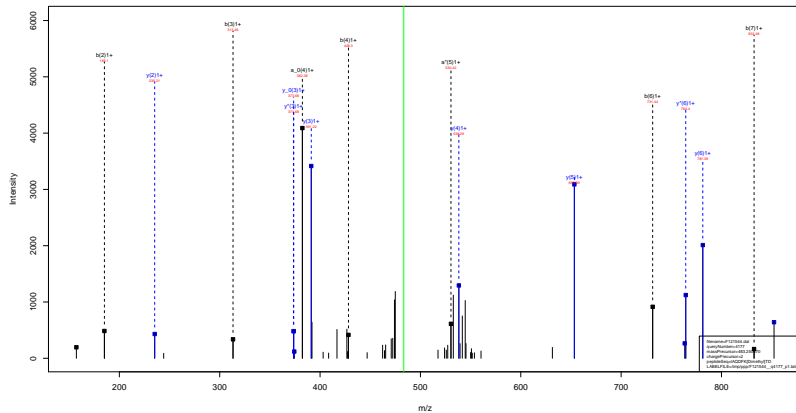

# sp | P68433 | H31\_MOUSE

IAQDFK<sup>Dimethyl</sup>TD  
28.03

- ▶ fragmentation table for charge state 1+
- ▶ specType=cid
- ▶ score=49.14
- ▶ F121544.dat
- ▶ query=q4177.p1
- ▶ precursor=483.250670
- ▶ chargePrecursor=2
- ▶ itol=0.7

| AA         | a              | y*             | aΔ             | b              | b*      | bΔ      | y              | y*             | yΔ             | AA         |
|------------|----------------|----------------|----------------|----------------|---------|---------|----------------|----------------|----------------|------------|
| <b>T</b> 1 | 46.298         | 0.000          | 0.000          | 124.195        | 0.000   | 0.000   | 462.444        | 462.444        | 0.000          | <b>T</b> 1 |
| <b>A</b> 2 | <b>157.134</b> | 0.000          | 0.000          | <b>185.128</b> | 0.000   | 0.000   | <b>852.410</b> | 852.410        | 0.000          | <b>A</b> 2 |
| <b>Q</b> 3 | 286.192        | 286.192        | 0.000          | <b>313.187</b> | 286.160 | 0.000   | <b>781.373</b> | <b>764.346</b> | <b>763.362</b> | <b>Q</b> 3 |
| <b>D</b> 4 | 400.219        | 401.193        | <b>882.208</b> | <b>428.214</b> | 411.187 | 440.203 | <b>653.314</b> | 659.289        | 635.304        | <b>D</b> 4 |
| <b>F</b> 5 | 547.287        | <b>536.261</b> | 545.277        | 575.292        | 558.296 | 567.292 | <b>538.287</b> | 542.281        | 528.277        | <b>F</b> 5 |
| <b>R</b> 6 | 713.414        | 695.417        | 626.413        | <b>721.409</b> | 714.392 | 713.388 | <b>391.219</b> | <b>374.192</b> | <b>373.208</b> | <b>R</b> 6 |
| <b>T</b> 7 | 804.461        | 797.435        | 786.431        | <b>832.456</b> | 815.430 | 814.446 | <b>235.092</b> | 0.000          | 237.082        | <b>T</b> 7 |
| <b>G</b> 8 | 916.488        | 907.482        | 861.478        | 947.483        | 930.457 | 929.473 | 134.040        | 0.000          | 116.034        | <b>G</b> 8 |

# sp | P70696 | H2B1A\_MOUSE

GTKAVTKYTSK <sup>Acetyl</sup>  
42.01

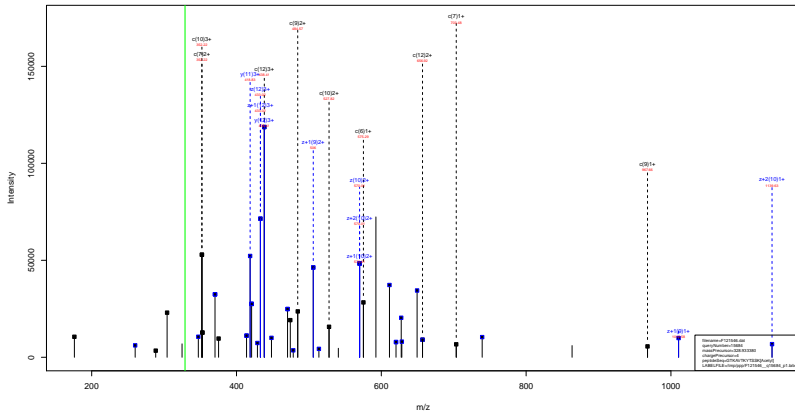

# sp | P70696 | H2B1A\_MOUSE

GTKAVTKYTSSK <sup>Acetyl</sup>  
42.01

- ▶ fragmentation table for charge state 1+
- ▶ specType=etd
- ▶ score=57.88
- ▶ F121546.dat
- ▶ query=q15684\_p1
- ▶ precursor=328.933380
- ▶ chargePrecursor=4
- ▶ itol=0.7

| AA | c              | y              | z+1             | z+2             | z        | AA |
|----|----------------|----------------|-----------------|-----------------|----------|----|
| Q  | 121.055        | 1312.711       | 1206.692        | 0.000           | 1295.694 | Q  |
| T  | <b>174.103</b> | 1255.989       | 1239.671        | 0.000           | 1238.963 | T  |
| K  | <b>304.198</b> | 1154.642       | 1138.621        | <b>1139.631</b> | 1137.615 | K  |
| A  | <b>375.235</b> | 1026.947       | <b>1010.528</b> | 1011.536        | 1009.520 | A  |
| V  | <b>474.303</b> | 955.509        | 939.491         | 940.499         | 938.483  | V  |
| T  | <b>575.351</b> | 856.441        | 840.422         | 841.430         | 839.415  | T  |
| K  | <b>703.446</b> | 755.303        | <b>739.375</b>  | 740.382         | 738.367  | K  |
| V  | 860.507        | <b>627.298</b> | <b>611.280</b>  | 612.288         | 610.272  | V  |
| V  | <b>967.557</b> | 474.235        | <b>448.216</b>  | 449.224         | 447.209  | V  |
| S  | 1054.589       | 363.187        | <b>347.169</b>  | 348.177         | 346.161  | S  |
| S  | 1141.621       | 276.155        | <b>260.137</b>  | 261.144         | 259.129  | S  |
| K  | 1311.727       | 189.123        | 173.105         | 174.112         | 172.097  | K  |

# sp | P70696 | H2B1A\_MOUSE

GTKAVTKYTSSK <sup>Acetyl</sup>  
42.01

- ▶ fragmentation table for charge state 2+
- ▶ specType=etd
- ▶ score=57.88
- ▶ F121546.dat
- ▶ query=q15684\_p1
- ▶ precursor=328.933380
- ▶ chargePrecursor=4
- ▶ itol=0.7

| AA     | c              | y              | z+1            | z+2            | z              | AA     |
|--------|----------------|----------------|----------------|----------------|----------------|--------|
| G [1]  | 38.031         | <b>656.859</b> | <b>648.850</b> | 0.504          | 648.346        | G [2]  |
| T [2]  | 88.555         | <b>628.148</b> | <b>620.139</b> | 0.504          | <b>619.835</b> | T [1]  |
| K [3]  | 152.603        | 577.824        | <b>569.815</b> | <b>570.319</b> | <b>569.311</b> | K [10] |
| A [4]  | 188.121        | <b>513.777</b> | <b>505.768</b> | <b>506.271</b> | 505.264        | A [9]  |
| V [5]  | 237.695        | <b>478.258</b> | <b>470.249</b> | <b>470.753</b> | 469.745        | V [8]  |
| T [6]  | <b>288.179</b> | <b>428.724</b> | <b>420.715</b> | <b>421.219</b> | <b>420.211</b> | T [7]  |
| K [7]  | <b>352.227</b> | 378.200        | <b>370.191</b> | <b>370.695</b> | <b>369.687</b> | K [6]  |
| V [8]  | 433.758        | 314.153        | 306.143        | 306.647        | 305.640        | V [5]  |
| T [9]  | <b>484.282</b> | 232.621        | 224.612        | 225.116        | 224.108        | T [4]  |
| S [10] | <b>527.798</b> | 182.091        | 174.082        | 174.582        | 173.584        | S [3]  |
| S [11] | 571.314        | 138.581        | 130.572        | 131.076        | 130.068        | S [2]  |
| K [12] | <b>656.367</b> | 95.065         | 87.056         | 87.560         | 86.552         | K [1]  |

# sp | P70696 | H2B1A\_MOUSE

GTKAVTKYTSSK <sup>Acetyl</sup>  
42.01

- ▶ fragmentation table for charge state 3+
- ▶ specType=etd
- ▶ score=57.88
- ▶ F121546.dat
- ▶ query=q15684\_p1
- ▶ precursor=328.933380
- ▶ chargePrecursor=4
- ▶ itol=0.7

| AA    | c              | y              | z+1            | z+2     | z              | AA    |
|-------|----------------|----------------|----------------|---------|----------------|-------|
| G[1]  | 26.690         | <b>418.242</b> | <b>432.902</b> | 0.672   | <b>432.566</b> | G[12] |
| T[2]  | 59.373         | <b>419.235</b> | <b>413.895</b> | 0.672   | <b>413.559</b> | T[11] |
| K[3]  | 102.071        | 385.552        | 380.212        | 380.548 | 379.677        | K[10] |
| A[4]  | 125.750        | 342.854        | 337.514        | 337.850 | 337.178        | A[9]  |
| V[5]  | 158.773        | 319.175        | 315.835        | 314.171 | 313.499        | V[8]  |
| T[6]  | 192.455        | 286.152        | 280.812        | 281.148 | 280.476        | T[7]  |
| K[7]  | 235.154        | 252.469        | 247.130        | 247.466 | 246.794        | K[6]  |
| V[8]  | 289.568        | 209.771        | 204.431        | 204.767 | 204.095        | V[5]  |
| T[9]  | 323.391        | 150.411        | 150.077        | 150.413 | 149.741        | T[4]  |
| S[10] | <b>352.201</b> | 121.736        | 116.394        | 116.730 | 116.058        | S[3]  |
| S[11] | 361.212        | 92.721         | 87.384         | 87.720  | 87.048         | S[2]  |
| K[12] | <b>437.914</b> | 63.713         | 58.373         | 58.709  | 58.037         | K[1]  |

# sp | P62806 | H4\_MOUSE

SGRGKGGKGLGKGGAKRHR (Methyl) K Acetyl VLRD  
 (14.02) 42.01

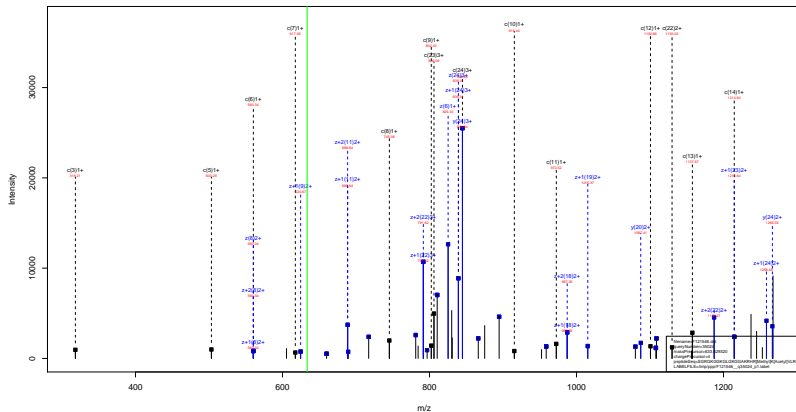



# sp | P62806 | H4\_MOUSE

SGRGKGGKGLGKGGAKRHR <sup>(Methyl)</sup>K <sup>Acetyl</sup>VLRD  
(14.02) 42.01

- ▶ fragmentation table for charge state 1+
- ▶ specType=etd
- ▶ score=99.04
- ▶ F121546.dat
- ▶ query=q35024.p1
- ▶ precursor=633.629320
- ▶ chargePrecursor=4
- ▶ itol=0.7

| AA | c               | y        | z+1      | z+2      | z              | AA    |
|----|-----------------|----------|----------|----------|----------------|-------|
| S  | 105.066         | 2531.487 | 2515.468 | 0.000    | 2514.460       | S[24] |
| G  | 162.087         | 2444.455 | 2428.436 | 0.000    | 2427.428       | G[25] |
| R  | <b>318.186</b>  | 2397.431 | 2371.414 | 2372.422 | 2370.407       | R[22] |
| G  | 375.210         | 2231.332 | 2215.313 | 2216.321 | 2214.305       | G[21] |
| K  | <b>503.305</b>  | 2174.310 | 2158.292 | 2159.300 | 2157.284       | K[20] |
| G  | <b>560.326</b>  | 2046.210 | 2030.197 | 2031.205 | 2029.189       | G[19] |
| G  | <b>617.348</b>  | 1999.194 | 1973.175 | 1974.183 | 1972.168       | G[18] |
| K  | <b>745.443</b>  | 1932.173 | 1916.154 | 1917.162 | 1915.146       | K[17] |
| G  | <b>802.464</b>  | 1804.078 | 1788.059 | 1789.067 | 1787.051       | G[16] |
| L  | <b>915.548</b>  | 1747.959 | 1731.939 | 1732.945 | 1730.930       | L[15] |
| G  | <b>972.570</b>  | 1653.972 | 1637.953 | 1638.961 | 1636.946       | G[14] |
| K  | <b>1100.665</b> | 1576.951 | 1560.932 | 1561.940 | 1559.924       | K[13] |
| G  | <b>1157.686</b> | 1448.850 | 1432.837 | 1433.845 | 1431.829       | G[12] |
| G  | <b>1214.708</b> | 1391.834 | 1375.816 | 1376.823 | 1374.808       | G[11] |
| A  | 1285.745        | 1334.813 | 1318.794 | 1319.802 | 1317.786       | A[10] |
| K  | 1413.840        | 1263.770 | 1247.757 | 1248.765 | 1246.749       | K[9]  |
| R  | 1569.941        | 1135.683 | 1119.662 | 1120.670 | 1118.654       | R[8]  |
| H  | 1707.930        | 979.580  | 963.561  | 964.569  | 962.553        | H[7]  |
| R  | 1877.116        | 842.521  | 826.502  | 827.510  | <b>825.494</b> | R[6]  |
| K  | 2047.222        | 672.404  | 656.385  | 657.393  | 655.377        | K[5]  |
| V  | 2146.290        | 502.290  | 486.280  | 487.287  | 485.272        | V[4]  |
| L  | 2259.374        | 403.230  | 387.211  | 388.219  | 386.203        | L[3]  |
| R  | 2415.476        | 290.146  | 274.127  | 275.135  | 273.119        | R[2]  |
| D  | 2530.563        | 134.045  | 118.028  | 119.034  | 117.018        | D[1]  |

# sp | P62806 | H4\_MOUSE

SGRGKGGKGLGKGGAKRHR <sup>(Methyl)</sup>K <sup>Acetyl</sup>VLRD  
(14.02) 42.01

- ▶ fragmentation table for charge state 2+
- ▶ specType=etd
- ▶ score=99.04
- ▶ F121546.dat
- ▶ query=q35024\_p1
- ▶ precursor=633.629320
- ▶ chargePrecursor=4
- ▶ itol=0.7

| AA    | c               | y               | z+1             | z+2             | z               | AA    |
|-------|-----------------|-----------------|-----------------|-----------------|-----------------|-------|
| S[1]  | 53.637          | <b>1266.247</b> | <b>1256.238</b> | 0.504           | 1257.734        | S[24] |
| G[2]  | 61.547          | 1222.731        | <b>1214.722</b> | 0.504           | <b>1214.218</b> | G[23] |
| R[3]  | 159.508         | 1194.220        | 1188.211        | <b>1186.715</b> | 1185.707        | R[22] |
| G[4]  | 188.104         | 1148.710        | <b>1108.160</b> | <b>1108.654</b> | <b>1107.656</b> | G[21] |
| K[5]  | 253.156         | <b>1087.659</b> | <b>1079.650</b> | <b>1086.153</b> | 1079.147        | K[20] |
| G[6]  | 280.657         | 1023.611        | <b>1015.602</b> | 1016.106        | <b>1015.098</b> | G[19] |
| G[7]  | 350.178         | 995.101         | <b>987.091</b>  | <b>987.595</b>  | 986.587         | G[18] |
| K[8]  | 373.225         | 956.590         | <b>950.581</b>  | <b>959.084</b>  | <b>958.077</b>  | K[17] |
| G[9]  | 461.736         | 902.542         | <b>894.533</b>  | <b>895.037</b>  | 894.029         | G[16] |
| L[10] | 488.278         | 874.032         | <b>866.022</b>  | <b>864.526</b>  | 865.518         | L[15] |
| G[11] | 486.789         | 817.490         | 809.480         | <b>809.984</b>  | 808.976         | G[14] |
| K[12] | 550.836         | 789.079         | <b>780.970</b>  | <b>781.474</b>  | 780.466         | K[13] |
| G[13] | 579.347         | 724.931         | <b>716.922</b>  | <b>717.426</b>  | 716.418         | G[12] |
| G[14] | 607.857         | 696.421         | <b>688.411</b>  | <b>688.915</b>  | 687.907         | G[11] |
| A[15] | 643.376         | 667.910         | <b>659.901</b>  | <b>660.405</b>  | <b>659.397</b>  | A[10] |
| R[16] | 707.423         | 632.391         | <b>624.382</b>  | <b>624.886</b>  | 623.878         | R[19] |
| R[17] | 785.474         | 588.344         | <b>580.335</b>  | <b>580.839</b>  | <b>579.831</b>  | R[18] |
| H[18] | 854.004         | 490.293         | 482.284         | 482.788         | 481.780         | H[17] |
| R[19] | 939.062         | 421.764         | 413.755         | 414.259         | 413.251         | R[16] |
| K[20] | 1024.115        | 336.706         | 328.696         | 329.200         | 328.192         | K[15] |
| V[21] | 1073.669        | 251.193         | 243.183         | 244.187         | 243.180         | V[14] |
| L[22] | <b>1136.191</b> | 202.139         | 194.129         | 194.633         | 193.626         | L[13] |
| R[23] | 1208.241        | 145.577         | 137.567         | 138.071         | 137.063         | R[12] |
| D[24] | 1266.755        | 67.526          | 59.517          | 60.021          | 59.013          | D[1]  |

# sp | P62806 | H4\_MOUSE

SGRGKGGKGLGKGGAKRHR <sup>(Methyl)</sup>K <sup>Acetyl</sup>VLRD  
(14.02) 42.01

- ▶ fragmentation table for charge state 3+
- ▶ specType=etd
- ▶ score=99.04
- ▶ F121546.dat
- ▶ query=q35024.p1
- ▶ precursor=633.629320
- ▶ chargePrecursor=4
- ▶ itol=0.7

| AA    | c              | y              | z+1            | z+2            | z              | AA    |
|-------|----------------|----------------|----------------|----------------|----------------|-------|
| S[1]  | 35.693         | <b>844.500</b> | <b>839.161</b> | 0.672          | <b>838.825</b> | S[24] |
| G[2]  | 94.701         | 815.490        | <b>810.150</b> | 0.672          | <b>809.814</b> | G[23] |
| R[3]  | 106.734        | <b>796.483</b> | <b>791.143</b> | <b>791.479</b> | 790.807        | R[22] |
| G[4]  | 125.741        | 744.449        | 739.109        | 739.445        | 738.773        | G[21] |
| K[5]  | 168.440        | 725.442        | 720.102        | 720.438        | 719.766        | K[20] |
| G[6]  | 187.447        | 682.743        | 677.404        | 677.740        | 677.068        | G[19] |
| G[7]  | 206.454        | 663.736        | 658.397        | 658.733        | 658.061        | G[18] |
| K[8]  | 249.152        | 644.729        | 639.389        | 639.725        | 639.054        | K[17] |
| G[9]  | 268.160        | 602.031        | 596.691        | 597.027        | 596.355        | G[16] |
| L[10] | 305.854        | 583.024        | 577.684        | 578.020        | 577.348        | L[15] |
| G[11] | 324.861        | 548.329        | 539.989        | 540.325        | 539.653        | G[14] |
| K[12] | 357.560        | 526.322        | 520.982        | 521.318        | 520.646        | K[13] |
| G[13] | 386.567        | 483.623        | 478.284        | 478.620        | 477.948        | G[12] |
| G[14] | 405.574        | 464.616        | 459.277        | 459.613        | 458.941        | G[11] |
| A[15] | 429.253        | 445.609        | 440.270        | 440.605        | 439.934        | A[10] |
| K[16] | 471.951        | 421.930        | 416.590        | 416.926        | 416.255        | K[9]  |
| R[17] | 523.985        | 379.232        | 373.892        | 374.228        | 373.556        | R[8]  |
| H[18] | 569.671        | 327.199        | 321.858        | 322.194        | 321.523        | H[7]  |
| R[19] | 626.377        | 281.512        | 276.172        | 276.508        | 275.836        | R[6]  |
| K[20] | 683.079        | 224.806        | 219.467        | 219.803        | 219.131        | K[5]  |
| V[21] | 716.102        | 168.104        | 162.765        | 163.101        | 162.429        | V[4]  |
| L[22] | 753.796        | 135.082        | 129.742        | 130.078        | 129.406        | L[3]  |
| R[23] | <b>805.830</b> | 97.387         | 92.047         | 92.383         | 91.711         | R[2]  |
| D[24] | <b>844.172</b> | 45.353         | 40.014         | 40.349         | 39.678         | D[1]  |



# sp | P62806 | H4\_MOUSE

[Acetyl]SGRGKGGKGLGKGGAKRHR (Methyl)  
(14.02) KVLRD

- ▶ fragmentation table for charge state 1+
- ▶ specType=etd
- ▶ score=50.28
- ▶ F121546.dat
- ▶ query=q35026.p1
- ▶ precursor=507.104990
- ▶ chargePrecursor=5
- ▶ itol=0.7

| AA | c               | y              | z+1            | z+2             | z              | AA    |
|----|-----------------|----------------|----------------|-----------------|----------------|-------|
| S  | 147.076         | 2531.467       | 2515.460       | 0.000           | 2514.460       | S[24] |
| G  | 204.998         | 2402.444       | 2386.425       | 0.000           | 2385.417       | G[23] |
| R  | <b>360.190</b>  | 2345.423       | 2329.404       | 2430.412        | 2328.396       | R[22] |
| G  | <b>417.220</b>  | 2189.321       | 2173.303       | 2174.310        | 2172.295       | G[21] |
| K  | <b>545.315</b>  | 2132.300       | 2116.281       | 2117.289        | 2115.273       | K[20] |
| G  | <b>602.337</b>  | 2004.205       | 1988.186       | 1989.194        | 1987.178       | G[19] |
| G  | <b>659.358</b>  | 1947.184       | 1931.165       | 1932.173        | 1930.157       | G[18] |
| K  | 787.453         | 1890.162       | 1874.143       | 1875.151        | 1873.135       | K[17] |
| G  | <b>844.475</b>  | 1762.067       | 1746.048       | 1747.056        | 1745.041       | G[16] |
| L  | <b>937.550</b>  | 1705.046       | 1689.027       | 1690.035        | 1688.019       | L[15] |
| G  | <b>1014.580</b> | 1591.962       | 1575.943       | 1576.951        | 1574.935       | G[14] |
| K  | 1142.675        | 1534.940       | 1518.921       | 1519.929        | 1517.914       | K[13] |
| G  | 1199.697        | 1406.845       | 1390.826       | 1391.834        | 1389.819       | G[12] |
| G  | 1256.718        | 1349.824       | 1333.805       | 1334.813        | 1332.797       | G[11] |
| A  | 1327.755        | 1292.802       | 1276.783       | <b>1277.791</b> | 1275.776       | A[10] |
| K  | 1455.850        | 1235.781       | 1205.760       | 1206.754        | 1204.739       | K[9]  |
| R  | 1611.954        | 1103.676       | 1077.655       | 1078.659        | 1076.644       | R[8]  |
| H  | 1749.010        | <b>937.569</b> | <b>921.550</b> | 922.558         | 920.542        | H[7]  |
| R  | 1919.127        | 800.510        | <b>784.491</b> | <b>785.499</b>  | 783.484        | R[6]  |
| K  | 2047.222        | <b>630.393</b> | 614.375        | <b>615.382</b>  | <b>613.367</b> | K[5]  |
| V  | 2146.290        | 502.298        | 486.280        | 487.287         | 485.272        | V[4]  |
| L  | 2250.374        | 403.230        | <b>387.211</b> | 388.219         | 386.203        | L[3]  |
| R  | 2415.476        | 290.146        | <b>274.127</b> | 275.135         | 273.119        | R[2]  |
| D  | 2530.503        | 134.045        | 118.026        | 119.034         | 117.018        | D[1]  |

# sp | P62806 | H4\_MOUSE

[Acetyl]SGRGKGGKGLGKGGAKRHR (Methyl)  
(14.02) KVLRD

- ▶ fragmentation table for charge state 2+
- ▶ specType=etd
- ▶ score=50.28
- ▶ F121546.dat
- ▶ query=q35026.p1
- ▶ precursor=507.104990
- ▶ chargePrecursor=5
- ▶ itol=0.7

| AA | c  | y              | z+1             | z+2             | z               | AA             |       |
|----|----|----------------|-----------------|-----------------|-----------------|----------------|-------|
| S  | 1  | 74.042         | 1266.247        | 1258.238        | 0.504           | 1257.734       | S[24] |
| G  | 2  | 102.553        | 1201.726        | 1193.716        | 0.504           | 1193.212       | G[23] |
| R  | 3  | 180.053        | 1173.215        | <b>1165.206</b> | <b>1165.709</b> | 1164.702       | R[22] |
| G  | 4  | 209.114        | 1095.594        | 1087.133        | 1077.959        | 1069.951       | G[21] |
| K  | 5  | 273.181        | 1066.654        | 1058.644        | <b>1059.148</b> | 1055.140       | K[20] |
| G  | 6  | 301.672        | <b>1002.606</b> | <b>994.597</b>  | <b>995.101</b>  | 994.093        | G[19] |
| G  | 7  | 330.183        | 974.095         | <b>966.086</b>  | <b>966.590</b>  | 965.582        | G[18] |
| K  | 8  | <b>394.230</b> | 945.585         | <b>937.575</b>  | <b>938.079</b>  | 937.071        | K[17] |
| G  | 9  | <b>422.741</b> | 881.537         | 873.528         | <b>874.032</b>  | 873.024        | G[16] |
| L  | 10 | <b>479.283</b> | <b>853.026</b>  | <b>845.017</b>  | <b>845.521</b>  | <b>844.513</b> | L[15] |
| G  | 11 | 507.704        | <b>796.484</b>  | <b>788.475</b>  | <b>788.979</b>  | 787.971        | G[14] |
| R  | 12 | <b>571.841</b> | <b>767.974</b>  | <b>759.964</b>  | <b>760.468</b>  | <b>759.460</b> | R[13] |
| G  | 13 | <b>600.352</b> | 703.926         | <b>695.917</b>  | <b>696.421</b>  | <b>695.413</b> | G[12] |
| G  | 14 | <b>628.863</b> | <b>675.415</b>  | <b>667.406</b>  | <b>667.910</b>  | 666.902        | G[11] |
| A  | 15 | <b>664.381</b> | 646.905         | 638.895         | <b>639.399</b>  | 638.391        | A[10] |
| R  | 16 | <b>725.429</b> | <b>611.386</b>  | <b>603.377</b>  | <b>603.881</b>  | <b>602.873</b> | R[9]  |
| R  | 17 | <b>806.479</b> | 547.339         | <b>539.329</b>  | <b>539.833</b>  | <b>538.825</b> | R[8]  |
| H  | 18 | <b>875.009</b> | 499.288         | <b>461.279</b>  | <b>461.783</b>  | <b>460.775</b> | H[7]  |
| R  | 19 | 960.067        | 400.759         | <b>392.749</b>  | <b>393.253</b>  | <b>392.245</b> | R[6]  |
| K  | 20 | 1024.115       | 315.700         | 307.690         | <b>308.195</b>  | 307.187        | K[5]  |
| V  | 21 | 1073.640       | 251.653         | 243.643         | 244.147         | 243.140        | V[4]  |
| L  | 22 | 1120.191       | 202.119         | 194.109         | 194.613         | 193.605        | L[3]  |
| D  | 23 | 1208.241       | 148.571         | 137.562         | 138.066         | 137.058        | D[2]  |
| D  | 24 | 1285.795       | 87.525          | 89.517          | 89.021          | 89.013         | D[1]  |

# sp | P62806 | H4\_MOUSE

[Acetyl]SGRGKGGKGLGKGGAKRHR (Methyl)  
(14.02) KVLRD

- ▶ fragmentation table for charge state 3+
- ▶ specType=etd
- ▶ score=50.28
- ▶ F121546.dat
- ▶ query=q35026.p1
- ▶ precursor=507.104990
- ▶ chargePrecursor=5
- ▶ itol=0.7

| AA    | c              | y              | z+1            | z+2            | z              | AA    |
|-------|----------------|----------------|----------------|----------------|----------------|-------|
| S[1]  | 49.697         | <b>844.500</b> | <b>839.161</b> | 0.672          | 838.225        | S[24] |
| G[2]  | 68.704         | 801.486        | <b>796.147</b> | 0.672          | <b>795.811</b> | G[23] |
| R[3]  | 120.738        | 782.479        | <b>777.139</b> | <b>777.445</b> | <b>776.804</b> | R[22] |
| G[4]  | 139.745        | <b>730.445</b> | <b>725.106</b> | <b>725.445</b> | 724.770        | G[21] |
| K[5]  | 182.443        | <b>711.438</b> | <b>706.099</b> | <b>706.435</b> | <b>705.763</b> | K[20] |
| G[6]  | 201.450        | <b>668.740</b> | 663.400        | <b>663.736</b> | 663.064        | G[19] |
| G[7]  | 220.458        | 649.733        | <b>644.393</b> | <b>644.729</b> | 644.057        | G[18] |
| K[8]  | 263.136        | <b>630.726</b> | <b>625.386</b> | <b>625.722</b> | <b>625.050</b> | K[17] |
| G[9]  | 282.163        | <b>588.027</b> | <b>582.688</b> | <b>583.024</b> | <b>582.352</b> | G[16] |
| L[10] | 319.858        | <b>569.020</b> | <b>563.680</b> | <b>564.016</b> | <b>563.345</b> | L[15] |
| G[11] | 338.865        | 531.322        | <b>525.986</b> | <b>526.322</b> | <b>525.650</b> | G[14] |
| K[12] | 381.563        | 512.315        | 505.978        | 507.315        | 506.643        | K[13] |
| G[13] | 400.570        | 499.620        | 484.280        | 484.616        | 483.944        | G[12] |
| G[14] | 419.578        | 480.613        | 445.273        | 445.609        | 444.937        | G[11] |
| A[15] | 443.297        | 431.606        | 426.266        | 426.602        | 425.930        | A[10] |
| K[16] | 485.955        | 407.927        | 402.587        | 402.923        | 402.251        | K[9]  |
| R[17] | <b>537.989</b> | 365.228        | <b>359.889</b> | <b>360.225</b> | 359.553        | R[8]  |
| H[18] | <b>583.675</b> | 313.195        | <b>307.855</b> | <b>308.191</b> | 307.519        | H[7]  |
| R[19] | <b>640.381</b> | 267.508        | 262.168        | 262.505        | 261.833        | R[6]  |
| K[20] | <b>683.079</b> | 210.883        | 205.463        | 205.799        | 205.127        | K[5]  |
| V[21] | <b>716.102</b> | 168.104        | 162.764        | 163.101        | 162.429        | V[4]  |
| L[22] | <b>753.796</b> | 135.082        | 129.742        | 130.078        | 129.406        | L[3]  |
| R[23] | 805.830        | 97.387         | 92.047         | 92.383         | 91.711         | R[2]  |
| D[24] | 844.172        | 45.353         | 40.014         | 40.349         | 39.678         | D[1]  |

# sp | P62806 | H4\_MOUSE

[Acetyl]SGRGKGGKGLGKGGAKRHR<sup>(Methyl)</sup> KVLRD  
(14.02)

- ▶ fragmentation table for charge state 4+
- ▶ specType=etd
- ▶ score=50.28
- ▶ F121546.dat
- ▶ query=q35026.p1
- ▶ precursor=507.104990
- ▶ chargePrecursor=5
- ▶ itol=0.7

| AA    | c       | y              | z+1            | z+2            | z              | AA    |
|-------|---------|----------------|----------------|----------------|----------------|-------|
| S[1]  | 37.525  | <b>633.627</b> | <b>629.622</b> | 0.755          | <b>629.370</b> | S[24] |
| G[2]  | 51.790  | 601.955        | <b>597.362</b> | 0.755          | <b>597.110</b> | G[23] |
| R[3]  | 90.805  | <b>587.111</b> | <b>583.106</b> | <b>583.358</b> | <b>582.854</b> | R[22] |
| G[4]  | 105.061 | 548.085        | 544.081        | 544.313        | 543.829        | G[21] |
| K[5]  | 137.084 | 533.830        | <b>529.826</b> | <b>530.078</b> | <b>529.574</b> | K[20] |
| G[6]  | 151.340 | 501.807        | 497.802        | 498.054        | 497.550        | G[19] |
| G[7]  | 165.595 | 487.551        | 483.547        | 483.799        | 483.295        | G[18] |
| K[8]  | 197.619 | 473.295        | 469.291        | 469.543        | 469.039        | K[17] |
| G[9]  | 211.874 | 441.272        | 437.268        | 437.520        | 437.016        | G[16] |
| L[10] | 240.145 | 427.017        | <b>423.012</b> | <b>423.264</b> | <b>422.760</b> | L[15] |
| G[11] | 254.403 | 398.746        | <b>394.741</b> | <b>394.993</b> | <b>394.489</b> | G[14] |
| K[12] | 285.424 | 384.490        | 380.485        | 380.738        | 380.234        | K[13] |
| G[13] | 300.680 | 352.467        | 348.462        | 348.714        | 348.210        | G[12] |
| G[14] | 314.935 | 338.211        | 334.207        | 334.459        | 333.955        | G[11] |
| A[15] | 332.694 | 323.956        | 319.951        | 320.203        | 319.699        | A[10] |
| K[16] | 364.718 | 306.197        | 302.192        | 302.444        | 301.940        | K[9]  |
| R[17] | 403.743 | <b>274.173</b> | 270.168        | 270.420        | 269.916        | R[8]  |
| H[18] | 438.008 | 235.148        | 231.143        | 231.395        | 230.891        | H[7]  |
| R[19] | 480.537 | 200.883        | 196.878        | 197.130        | 196.626        | R[6]  |
| K[20] | 512.561 | 158.284        | 154.280        | 154.531        | 154.027        | K[5]  |
| V[21] | 537.238 | 126.330        | 122.325        | 122.577        | 122.073        | V[4]  |
| L[22] | 565.509 | 101.563        | 97.558         | 97.810         | 97.306         | L[3]  |
| R[23] | 604.624 | 73.292         | 69.287         | 69.539         | 69.035         | R[2]  |
| D[24] | 633.381 | 34.267         | 30.262         | 30.514         | 30.010         | D[1]  |





# sp | P62806 | H4\_MOUSE

[Acetyl]SGRGKGGKGLGKGGAKRHRKVL<sup>(Methyl)</sup>D  
(14.02)

- ▶ fragmentation table for charge state 1+
- ▶ specType=etd
- ▶ score=106.40
- ▶ F121546.dat
- ▶ query=q35027.p1
- ▶ precursor=633.630050
- ▶ chargePrecursor=4
- ▶ itol=0.7

| AA | c  | y               | z+1            | z+2            | z        | AA       |       |
|----|----|-----------------|----------------|----------------|----------|----------|-------|
| S  | 1  | 147.076         | 2531.487       | 2515.468       | 0.000    | 2514.460 | S[24] |
| G  | 2  | 204.998         | 2402.444       | 2386.425       | 0.000    | 2385.417 | G[23] |
| R  | 3  | <b>300.190</b>  | 2345.421       | 2329.404       | 2130.412 | 2328.396 | R[22] |
| G  | 4  | <b>417.220</b>  | 2189.321       | 2173.303       | 2174.310 | 2172.295 | G[21] |
| K  | 5  | <b>545.315</b>  | 2132.300       | 2116.281       | 2117.289 | 2115.273 | K[20] |
| G  | 6  | <b>602.337</b>  | 2004.205       | 1988.186       | 1989.194 | 1987.178 | G[19] |
| G  | 7  | <b>659.358</b>  | 1947.184       | 1931.165       | 1932.173 | 1930.157 | G[18] |
| K  | 8  | <b>787.453</b>  | 1890.162       | 1874.143       | 1875.151 | 1873.135 | K[17] |
| G  | 9  | <b>844.475</b>  | 1762.067       | 1746.048       | 1747.056 | 1745.041 | G[16] |
| L  | 10 | <b>937.559</b>  | 1705.046       | 1689.027       | 1690.035 | 1688.019 | L[15] |
| G  | 11 | <b>1014.580</b> | 1591.962       | 1575.943       | 1576.951 | 1574.935 | G[14] |
| K  | 12 | <b>1142.675</b> | 1534.940       | 1518.921       | 1519.929 | 1517.914 | K[13] |
| G  | 13 | <b>1199.697</b> | 1406.845       | 1390.826       | 1391.834 | 1389.819 | G[12] |
| G  | 14 | 1296.718        | 1349.824       | 1333.805       | 1334.813 | 1332.797 | G[11] |
| A  | 15 | 1327.735        | 1292.802       | 1276.783       | 1277.791 | 1275.776 | A[10] |
| K  | 16 | 1455.850        | 1231.765       | 1205.746       | 1206.754 | 1204.739 | K[9]  |
| R  | 17 | 1611.951        | 1093.670       | 1077.651       | 1078.659 | 1076.644 | R[8]  |
| H  | 18 | 1749.010        | <b>937.560</b> | <b>921.550</b> | 922.558  | 920.542  | H[7]  |
| R  | 19 | 1905.111        | 800.510        | <b>784.491</b> | 785.499  | 783.484  | R[6]  |
| K  | 20 | 2033.206        | 644.400        | 628.390        | 629.398  | 627.382  | K[5]  |
| V  | 21 | 2132.275        | 516.314        | 500.295        | 501.303  | 499.287  | V[4]  |
| L  | 22 | 2245.350        | <b>417.246</b> | 401.227        | 402.235  | 400.219  | L[3]  |
| R  | 23 | 2415.476        | 304.162        | 288.143        | 289.151  | 287.135  | R[2]  |
| D  | 24 | 2530.503        | 134.045        | 118.026        | 119.034  | 117.018  | D[1]  |

# sp | P62806 | H4\_MOUSE

[Acetyl]SGRGKGGKGLGKGGAKRHRKVL R<sup>(Methyl)</sup> D<sub>(14.02)</sub>

- ▶ fragmentation table for charge state 2+
- ▶ specType=etd
- ▶ score=106.40
- ▶ F121546.dat
- ▶ query=q35027.p1
- ▶ precursor=633.630050
- ▶ chargePrecursor=4
- ▶ itol=0.7

| AA    | c              | y               | z+1             | z+2             | z               | AA    |
|-------|----------------|-----------------|-----------------|-----------------|-----------------|-------|
| S[1]  | 74.040         | <b>1266.247</b> | 1258.239        | 0.504           | 1257.734        | S[24] |
| G[2]  | 102.553        | 1201.726        | <b>1193.716</b> | 0.504           | 1193.212        | G[23] |
| R[3]  | 180.603        | 1173.215        | 1165.208        | <b>1165.709</b> | 1164.702        | R[22] |
| G[4]  | 269.114        | 1096.184        | <b>1087.155</b> | <b>1087.659</b> | 1086.653        | G[21] |
| K[5]  | 273.183        | 1066.654        | <b>1058.644</b> | 1059.148        | <b>1058.140</b> | K[20] |
| G[6]  | 301.672        | 1002.606        | <b>994.597</b>  | <b>995.101</b>  | <b>994.093</b>  | G[19] |
| G[7]  | 330.183        | 974.095         | <b>966.086</b>  | <b>966.590</b>  | 965.582         | G[18] |
| K[8]  | 394.230        | 945.585         | <b>937.575</b>  | <b>938.079</b>  | 937.071         | K[17] |
| G[9]  | 422.741        | 881.537         | <b>873.528</b>  | <b>874.032</b>  | 873.025         | G[16] |
| L[10] | 479.283        | 813.026         | <b>805.017</b>  | <b>805.521</b>  | <b>804.513</b>  | L[15] |
| G[11] | 507.796        | <b>796.484</b>  | <b>788.475</b>  | <b>788.979</b>  | <b>787.971</b>  | G[14] |
| K[12] | 571.841        | 767.974         | <b>759.964</b>  | <b>760.468</b>  | 759.460         | K[13] |
| G[13] | 600.352        | 703.926         | <b>695.917</b>  | <b>696.421</b>  | <b>695.413</b>  | G[12] |
| G[14] | 628.863        | 675.415         | <b>667.406</b>  | <b>667.910</b>  | 666.902         | G[11] |
| A[15] | 664.381        | 646.905         | <b>638.895</b>  | <b>639.399</b>  | <b>638.391</b>  | A[10] |
| R[16] | 728.423        | 617.396         | <b>603.377</b>  | <b>603.881</b>  | <b>602.873</b>  | R[9]  |
| R[17] | <b>806.479</b> | 547.339         | 539.329         | 539.833         | 538.825         | R[8]  |
| H[18] | <b>875.009</b> | 469.288         | 461.279         | 461.783         | 460.775         | H[7]  |
| R[19] | 953.059        | 400.759         | 392.749         | 393.253         | 392.245         | R[6]  |
| K[20] | 1017.107       | 322.708         | 314.699         | 315.203         | 314.195         | K[5]  |
| V[21] | 1066.641       | 258.661         | 250.651         | 251.155         | 250.147         | V[4]  |
| L[22] | 1123.183       | 209.126         | 201.117         | 201.621         | 200.613         | L[3]  |
| R[23] | 1208.241       | 152.584         | 144.575         | 145.079         | 144.071         | R[2]  |
| D[24] | 1268.755       | 67.526          | 59.517          | 60.021          | 59.013          | D[1]  |

# sp | P62806 | H4\_MOUSE

[Acetyl]SGRGKGGKGLGKGGAKRHRKVL R<sup>(Methyl)</sup> D<sub>(14.02)</sub>

- ▶ fragmentation table for charge state 3+
- ▶ specType=etd
- ▶ score=106.40
- ▶ F121546.dat
- ▶ query=q35027.p1
- ▶ precursor=633.630050
- ▶ chargePrecursor=4
- ▶ itol=0.7

| AA    | c              | y              | z+1            | z+2            | z              | AA    |
|-------|----------------|----------------|----------------|----------------|----------------|-------|
| S[1]  | 49.697         | <b>844.500</b> | <b>839.161</b> | 0.672          | <b>838.825</b> | S[24] |
| G[2]  | 68.704         | 801.546        | <b>796.147</b> | 0.672          | <b>795.811</b> | G[23] |
| R[3]  | 120.738        | 782.479        | <b>777.139</b> | <b>777.475</b> | <b>776.804</b> | R[22] |
| G[4]  | 139.745        | 730.445        | 725.106        | 725.442        | 724.770        | G[21] |
| K[5]  | 182.443        | 711.438        | 706.099        | 706.435        | 705.763        | K[20] |
| G[6]  | 201.450        | 668.740        | 663.400        | 663.736        | 663.064        | G[19] |
| G[7]  | 220.458        | 649.733        | 644.393        | 644.729        | 644.057        | G[18] |
| K[8]  | 263.156        | 630.726        | 625.386        | 625.722        | 625.050        | K[17] |
| G[9]  | 282.163        | 588.027        | 582.688        | 583.024        | 582.352        | G[16] |
| L[10] | 319.858        | 569.020        | 563.680        | 564.016        | 563.345        | L[15] |
| G[11] | 338.865        | 531.325        | 525.985        | 526.322        | 525.650        | G[14] |
| K[12] | 381.563        | 512.318        | 506.979        | 507.315        | 506.643        | K[13] |
| G[13] | 400.570        | 499.620        | 494.280        | 494.616        | 493.944        | G[12] |
| G[14] | 419.578        | 450.613        | 445.273        | 445.609        | 444.937        | G[11] |
| A[15] | 443.297        | 431.606        | 426.266        | 426.602        | 425.930        | A[10] |
| K[16] | 485.955        | 407.927        | 402.587        | 402.923        | 402.251        | K[9]  |
| R[17] | 537.989        | 365.228        | <b>359.889</b> | <b>360.225</b> | 359.553        | R[8]  |
| H[18] | 583.675        | 313.195        | 307.855        | 308.191        | 307.519        | H[7]  |
| R[19] | 635.709        | 267.508        | 262.168        | 262.505        | 261.833        | R[6]  |
| K[20] | 678.407        | 215.875        | 210.535        | 210.871        | 209.999        | K[5]  |
| V[21] | 711.438        | 172.776        | 167.437        | 167.773        | 167.101        | V[4]  |
| L[22] | 749.124        | 130.753        | 134.414        | 134.750        | 134.078        | L[3]  |
| R[23] | <b>805.830</b> | 102.059        | 96.719         | 97.055         | 96.383         | R[2]  |
| D[24] | <b>844.172</b> | 45.353         | 40.014         | 40.349         | 39.678         | D[1]  |



# sp | P62806 | H4\_MOUSE

[Acetyl]SGRGKGGKGLGKGGAKRHRKVL<sup>(Methyl)</sup>D  
(14.02)

- ▶ fragmentation table for charge state 1+
- ▶ specType=etd
- ▶ score=105.64
- ▶ F121546.dat
- ▶ query=q35029\_p1
- ▶ precursor=633.631150
- ▶ chargePrecursor=4
- ▶ itol=0.7

| AA |    | c               | y              | z+1            | z+2      | z        | AA    |
|----|----|-----------------|----------------|----------------|----------|----------|-------|
| S  | 1  | 147.076         | 2531.487       | 2515.468       | 0.000    | 2514.460 | S[24] |
| G  | 2  | 204.998         | 2402.444       | 2386.425       | 0.000    | 2385.417 | G[23] |
| R  | 3  | <b>301.190</b>  | 2345.421       | 2329.404       | 2130.412 | 2328.396 | R[22] |
| G  | 4  | <b>417.220</b>  | 2189.321       | 2173.303       | 2174.310 | 2172.295 | G[21] |
| K  | 5  | <b>545.315</b>  | 2132.300       | 2116.281       | 2117.289 | 2115.273 | K[20] |
| G  | 6  | <b>602.337</b>  | 2004.205       | 1988.186       | 1989.194 | 1987.178 | G[19] |
| G  | 7  | <b>659.358</b>  | 1947.184       | 1931.165       | 1932.173 | 1930.157 | G[18] |
| K  | 8  | <b>787.453</b>  | 1890.162       | 1874.143       | 1875.151 | 1873.135 | K[17] |
| G  | 9  | <b>844.475</b>  | 1762.067       | 1746.048       | 1747.056 | 1745.041 | G[16] |
| L  | 10 | <b>937.559</b>  | 1705.046       | 1689.027       | 1690.035 | 1688.019 | L[15] |
| G  | 11 | <b>1014.580</b> | 1591.962       | 1575.943       | 1576.951 | 1574.935 | G[14] |
| K  | 12 | 1142.675        | 1534.940       | 1518.921       | 1519.929 | 1517.914 | K[13] |
| G  | 13 | <b>1199.697</b> | 1406.845       | 1390.826       | 1391.834 | 1389.819 | G[12] |
| G  | 14 | 1296.718        | 1349.824       | 1333.805       | 1334.813 | 1332.797 | G[11] |
| A  | 15 | 1327.755        | 1292.802       | 1276.783       | 1277.791 | 1275.776 | A[10] |
| K  | 16 | 1455.850        | 1231.765       | 1205.746       | 1206.754 | 1204.739 | K[9]  |
| R  | 17 | 1611.951        | 1093.670       | 1077.651       | 1078.659 | 1076.644 | R[8]  |
| H  | 18 | 1749.010        | <b>937.569</b> | 921.550        | 922.558  | 920.542  | H[7]  |
| R  | 19 | 1905.111        | 800.510        | <b>784.491</b> | 785.499  | 783.484  | R[6]  |
| K  | 20 | 2033.206        | 644.409        | 628.390        | 629.398  | 627.382  | K[5]  |
| V  | 21 | 2132.275        | 516.314        | 500.295        | 501.303  | 499.287  | V[4]  |
| L  | 22 | 2245.359        | <b>417.246</b> | 401.227        | 402.235  | 400.219  | L[3]  |
| R  | 23 | 2415.476        | 304.162        | 288.143        | 289.151  | 287.135  | R[2]  |
| D  | 24 | 2530.503        | 134.045        | 118.026        | 119.034  | 117.018  | D[1]  |

# sp | P62806 | H4\_MOUSE

[Acetyl]SGRGKGGKGLGKGGAKRHRKVL<sup>(Methyl)</sup>D  
(14.02)

- ▶ fragmentation table for charge state 2+
- ▶ specType=etd
- ▶ score=105.64
- ▶ F121546.dat
- ▶ query=q35029\_p1
- ▶ precursor=633.631150
- ▶ chargePrecursor=4
- ▶ itol=0.7

| AA | c  | y              | z+1            | z+2             | z               | AA              |       |
|----|----|----------------|----------------|-----------------|-----------------|-----------------|-------|
| S  | 1  | 74.042         | 1266.347       | <b>1258.238</b> | 0.504           | 1257.734        | S[24] |
| G  | 2  | 102.553        | 1201.726       | 1193.710        | 0.504           | 1193.212        | G[23] |
| R  | 3  | 180.003        | 1173.215       | 1165.200        | <b>1165.709</b> | 1164.705        | R[22] |
| G  | 4  | 209.114        | 1099.384       | <b>1087.155</b> | <b>1087.659</b> | <b>1086.651</b> | G[21] |
| K  | 5  | 271.161        | 1066.654       | <b>1058.644</b> | <b>1059.148</b> | 1058.140        | K[20] |
| G  | 6  | 301.672        | 1002.606       | <b>994.597</b>  | 995.101         | <b>994.093</b>  | G[19] |
| G  | 7  | 330.183        | 974.095        | <b>966.086</b>  | <b>966.590</b>  | 965.582         | G[18] |
| K  | 8  | 394.230        | 945.585        | <b>937.575</b>  | <b>938.079</b>  | <b>937.071</b>  | K[17] |
| G  | 9  | 422.741        | 881.537        | <b>873.528</b>  | <b>874.032</b>  | <b>873.024</b>  | G[16] |
| L  | 10 | 439.283        | 853.026        | <b>845.017</b>  | <b>845.521</b>  | <b>844.513</b>  | L[15] |
| G  | 11 | 507.794        | <b>796.484</b> | <b>788.475</b>  | <b>788.979</b>  | <b>787.971</b>  | G[14] |
| R  | 12 | 571.841        | 767.974        | <b>759.964</b>  | <b>760.468</b>  | 759.460         | R[13] |
| G  | 13 | 600.352        | 703.926        | <b>695.917</b>  | <b>696.421</b>  | 695.413         | G[12] |
| G  | 14 | 628.863        | 675.415        | <b>667.406</b>  | <b>667.910</b>  | 666.902         | G[11] |
| A  | 15 | 664.381        | 646.905        | <b>638.895</b>  | <b>639.399</b>  | 638.391         | A[10] |
| R  | 16 | 728.429        | 611.366        | <b>603.377</b>  | <b>603.881</b>  | <b>602.873</b>  | R[9]  |
| R  | 17 | <b>806.479</b> | 547.339        | 539.323         | 539.813         | 538.805         | R[8]  |
| H  | 18 | <b>875.009</b> | 406.288        | 401.279         | 401.783         | 400.775         | H[7]  |
| R  | 19 | 953.059        | 400.759        | 392.749         | 393.253         | 392.245         | R[6]  |
| R  | 20 | 1017.109       | 322.708        | 314.699         | 315.203         | 314.195         | R[5]  |
| V  | 21 | 1066.641       | 258.661        | 250.651         | 251.155         | 250.147         | V[4]  |
| L  | 22 | 1123.183       | 209.120        | 201.111         | 201.615         | 200.613         | L[3]  |
| L  | 23 | 1209.241       | 152.084        | 144.075         | 144.579         | 144.071         | L[2]  |
| D  | 24 | 1285.795       | 67.526         | 59.517          | 60.021          | 59.013          | D[1]  |

# sp | P62806 | H4\_MOUSE

[Acetyl]SGRGKGGKGLGKGGAKRHRKVL R<sup>(Methyl)</sup> D<sub>(14.02)</sub>

- ▶ fragmentation table for charge state 3+
- ▶ specType=etd
- ▶ score=105.64
- ▶ F121546.dat
- ▶ query=q35029\_p1
- ▶ precursor=633.631150
- ▶ chargePrecursor=4
- ▶ itol=0.7

| AA    | c              | y              | z+1            | z+2            | z              | AA    |
|-------|----------------|----------------|----------------|----------------|----------------|-------|
| S[1]  | 49.697         | <b>844.500</b> | <b>839.161</b> | 0.672          | 838.225        | S[24] |
| G[2]  | 68.704         | <b>801.486</b> | <b>796.147</b> | 0.672          | <b>795.811</b> | G[23] |
| R[3]  | 120.738        | 782.479        | <b>777.139</b> | <b>777.475</b> | <b>776.804</b> | R[22] |
| G[4]  | 139.745        | 730.445        | 725.106        | 725.442        | 724.770        | G[21] |
| K[5]  | 182.443        | 711.438        | 706.099        | 706.435        | 705.763        | K[20] |
| G[6]  | 201.450        | 668.740        | 663.400        | 663.736        | 663.064        | G[19] |
| G[7]  | 220.458        | 649.733        | 644.393        | 644.729        | 644.057        | G[18] |
| K[8]  | 263.156        | 630.726        | 625.386        | 625.722        | 625.050        | K[17] |
| G[9]  | 282.163        | 588.027        | 582.688        | 583.024        | 582.352        | G[16] |
| L[10] | 319.858        | 569.020        | 563.680        | 564.016        | 563.345        | L[15] |
| G[11] | 338.865        | 531.325        | 525.985        | 526.322        | 525.650        | G[14] |
| K[12] | 381.563        | 512.318        | 506.979        | 507.315        | 506.643        | K[13] |
| G[13] | 400.570        | 499.620        | 494.280        | 494.616        | 493.944        | G[12] |
| G[14] | 419.578        | 450.613        | 445.273        | 445.609        | 444.937        | G[11] |
| A[15] | 443.297        | 431.606        | 426.266        | 426.602        | 425.930        | A[10] |
| K[16] | 485.995        | 407.927        | 402.587        | 402.923        | 402.251        | K[9]  |
| R[17] | 537.989        | 365.228        | <b>359.889</b> | <b>360.225</b> | <b>359.553</b> | R[8]  |
| H[18] | 583.675        | 313.195        | 307.855        | 308.191        | 307.519        | H[7]  |
| R[19] | 635.709        | 267.508        | 262.168        | 262.505        | 261.833        | R[6]  |
| K[20] | 678.407        | 215.875        | 210.535        | 210.871        | 209.999        | K[5]  |
| V[21] | 711.438        | 172.776        | 167.437        | 167.773        | 167.101        | V[4]  |
| L[22] | 749.124        | 130.753        | 134.414        | 134.750        | 134.078        | L[3]  |
| R[23] | <b>805.830</b> | 102.059        | 96.719         | 97.055         | 96.383         | R[2]  |
| D[24] | 844.172        | 45.353         | 40.014         | 40.349         | 39.678         | D[1]  |



# sp | P62806 | H4\_MOUSE

[Acetyl]SGRGKGGKGLGKGGAK (Methyl) (14.02) RHRKVLR (Methyl) (14.02) D

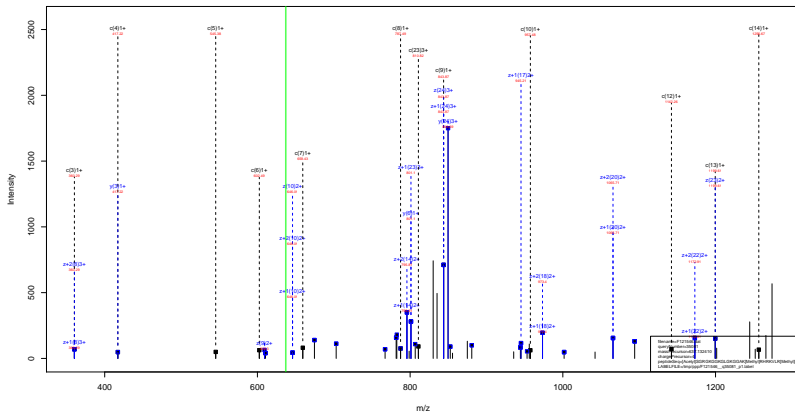

# sp | P62806 | H4\_MOUSE

[Acetyl]SGRGKGGKGLGKGGAK<sup>(Methyl)</sup> RHRKVLRL<sup>(Methyl)</sup> D<sup>(14.02)</sup>

- ▶ fragmentation table for charge state 1+
- ▶ specType=etd
- ▶ score=98.07
- ▶ F121546.dat
- ▶ query=q35081.p1
- ▶ precursor=637.132410
- ▶ chargePrecursor=4
- ▶ itol=0.7

| AA | c  | y               | z+1             | z+2      | z        | AA       |       |
|----|----|-----------------|-----------------|----------|----------|----------|-------|
| S  | 1  | 147.076         | 2545.502        | 2529.463 | 0.000    | 2528.478 | S[24] |
| G  | 2  | 204.998         | 2416.460        | 2400.441 | 0.000    | 2399.433 | G[23] |
| R  | 3  | <b>360.190</b>  | 2389.430        | 2343.419 | 2344.427 | 2342.412 | R[22] |
| G  | 4  | <b>417.220</b>  | 2291.337        | 2187.318 | 2189.326 | 2188.310 | G[21] |
| K  | 5  | <b>545.315</b>  | 2148.310        | 2130.297 | 2131.305 | 2129.289 | K[20] |
| G  | 6  | <b>602.337</b>  | 2018.221        | 2002.202 | 2003.210 | 2001.194 | G[19] |
| G  | 7  | <b>659.358</b>  | 1961.199        | 1945.180 | 1946.188 | 1944.173 | G[18] |
| K  | 8  | <b>787.453</b>  | 1904.178        | 1888.159 | 1889.167 | 1887.151 | K[17] |
| G  | 9  | <b>844.475</b>  | 1775.083        | 1760.064 | 1761.072 | 1759.056 | G[16] |
| L  | 10 | <b>937.559</b>  | 1719.061        | 1703.043 | 1704.050 | 1702.035 | L[15] |
| G  | 11 | 1214.580        | 1595.977        | 1589.958 | 1590.966 | 1588.951 | G[14] |
| K  | 12 | <b>1142.675</b> | 1548.956        | 1532.937 | 1533.945 | 1531.929 | K[13] |
| G  | 13 | <b>1199.697</b> | 1429.861        | 1404.842 | 1405.850 | 1403.834 | G[12] |
| G  | 14 | <b>1256.718</b> | 1363.839        | 1347.821 | 1348.828 | 1346.813 | G[11] |
| A  | 15 | 1327.755        | 1306.818        | 1290.799 | 1291.807 | 1289.791 | A[10] |
| K  | 16 | 1469.868        | 1248.781        | 1219.762 | 1220.770 | 1218.754 | K[9]  |
| R  | 17 | 1625.987        | <b>1093.670</b> | 1077.651 | 1078.659 | 1076.644 | R[8]  |
| H  | 18 | 1763.026        | 937.559         | 921.550  | 922.558  | 920.542  | H[7]  |
| R  | 19 | 1919.127        | <b>800.510</b>  | 784.491  | 785.499  | 783.484  | R[6]  |
| K  | 20 | 2047.222        | 644.409         | 628.390  | 629.398  | 627.382  | K[5]  |
| V  | 21 | 2146.290        | 518.314         | 500.295  | 501.303  | 499.287  | V[4]  |
| L  | 22 | 2250.374        | <b>417.246</b>  | 401.227  | 402.235  | 400.219  | L[3]  |
| R  | 23 | 2420.491        | 304.163         | 288.144  | 289.151  | 287.135  | R[2]  |
| D  | 24 | 2544.518        | 134.045         | 118.026  | 119.034  | 117.018  | D[1]  |

# sp | P62806 | H4\_MOUSE

[Acetyl]SGRGKGGKGLGKGGAK<sup>(Methyl)</sup> RHRKVL R<sup>(Methyl)</sup> D<sup>(14.02)</sup> (14.02)

- ▶ fragmentation table for charge state 2+
- ▶ specType=etd
- ▶ score=98.07
- ▶ F121546.dat
- ▶ query=q35081\_p1
- ▶ precursor=637.132410
- ▶ chargePrecursor=4
- ▶ itol=0.7

| AA    | c        | y              | z+1             | z+2             | z               | AA    |
|-------|----------|----------------|-----------------|-----------------|-----------------|-------|
| S[1]  | 74.042   | 1273.255       | 1265.245        | 0.504           | 1264.741        | S[24] |
| G[2]  | 102.553  | 1208.733       | 1200.724        | 0.504           | <b>1200.220</b> | G[23] |
| R[3]  | 180.053  | 1180.223       | <b>1172.213</b> | <b>1172.717</b> | 1171.709        | R[22] |
| G[4]  | 209.114  | 1102.272       | <b>1094.163</b> | <b>1094.667</b> | <b>1093.659</b> | G[21] |
| K[5]  | 273.161  | 1073.661       | <b>1065.652</b> | <b>1066.156</b> | <b>1065.148</b> | K[20] |
| G[6]  | 301.672  | 1009.614       | <b>1001.605</b> | <b>1002.108</b> | <b>1001.101</b> | G[19] |
| G[7]  | 330.183  | 961.103        | <b>973.094</b>  | <b>973.598</b>  | 972.590         | G[18] |
| K[8]  | 394.230  | <b>952.592</b> | <b>944.583</b>  | <b>945.087</b>  | <b>944.079</b>  | K[17] |
| G[9]  | 422.741  | 888.545        | <b>880.536</b>  | <b>881.040</b>  | 880.032         | G[16] |
| L[10] | 439.253  | 860.034        | <b>852.025</b>  | <b>852.529</b>  | 851.521         | L[15] |
| G[11] | 507.794  | 803.492        | <b>795.483</b>  | <b>795.987</b>  | 794.979         | G[14] |
| R[12] | 571.841  | 774.982        | <b>766.972</b>  | <b>767.476</b>  | 766.468         | R[13] |
| G[13] | 600.352  | 710.934        | <b>702.925</b>  | <b>703.429</b>  | 702.421         | G[12] |
| G[14] | 628.863  | 662.423        | <b>674.414</b>  | <b>674.918</b>  | 673.910         | G[11] |
| A[15] | 664.381  | 653.913        | <b>645.903</b>  | <b>646.407</b>  | <b>645.399</b>  | A[10] |
| R[16] | 728.437  | 618.364        | <b>610.355</b>  | <b>610.859</b>  | <b>609.851</b>  | R[9]  |
| R[17] | 813.487  | 547.339        | 539.329         | 539.833         | 538.825         | R[8]  |
| H[18] | 882.017  | 466.288        | 461.279         | 461.783         | 460.775         | H[7]  |
| R[19] | 960.067  | 400.759        | 392.749         | 393.253         | 392.245         | R[6]  |
| R[20] | 1024.115 | 322.708        | 314.699         | 315.203         | 314.195         | R[5]  |
| V[21] | 1073.649 | 258.661        | 250.651         | 251.155         | 250.147         | V[4]  |
| L[22] | 1130.191 | 209.126        | 201.117         | 201.621         | 200.613         | L[3]  |
| D[23] | 1215.249 | 152.584        | 144.575         | 145.079         | 144.071         | D[2]  |
| D[24] | 1272.763 | 67.526         | 59.517          | 60.021          | 59.013          | D[1]  |

# sp | P62806 | H4\_MOUSE

[Acetyl]SGRGKGGKGLGKGGAK<sup>(Methyl)</sup> RHRKVL R<sup>(Methyl)</sup> D<sup>(14.02)</sup>

- ▶ fragmentation table for charge state 3+
- ▶ specType=etd
- ▶ score=98.07
- ▶ F121546.dat
- ▶ query=q35081.p1
- ▶ precursor=637.132410
- ▶ chargePrecursor=4
- ▶ itol=0.7

| AA    | c              | y              | z+1            | z+2            | z              | AA    |
|-------|----------------|----------------|----------------|----------------|----------------|-------|
| S[1]  | 49.697         | <b>849.172</b> | <b>843.833</b> | 0.672          | <b>843.497</b> | S[24] |
| G[2]  | 68.704         | <b>806.156</b> | <b>800.818</b> | 0.672          | <b>800.483</b> | G[23] |
| R[3]  | 120.738        | <b>787.151</b> | <b>781.811</b> | <b>782.147</b> | <b>781.475</b> | R[22] |
| G[4]  | 139.745        | 735.117        | 729.778        | 730.114        | 729.442        | G[21] |
| K[5]  | 182.443        | 718.110        | 710.770        | 711.106        | 710.435        | K[20] |
| G[6]  | 201.450        | 673.412        | 668.072        | 668.408        | 667.736        | G[19] |
| G[7]  | 220.458        | 654.405        | 649.065        | 649.401        | 648.729        | G[18] |
| K[8]  | 263.156        | 635.397        | 630.058        | 630.394        | 629.722        | K[17] |
| G[9]  | 282.163        | 592.699        | 587.360        | 587.696        | 587.024        | G[16] |
| L[10] | 319.858        | 571.692        | 566.352        | 566.688        | 566.016        | L[15] |
| G[11] | 338.865        | 535.991        | 530.651        | 530.984        | 530.322        | G[14] |
| K[12] | 381.563        | 516.980        | 511.641        | 511.976        | 511.315        | K[13] |
| G[13] | 400.570        | 474.282        | 468.942        | 469.278        | 468.616        | G[12] |
| G[14] | 419.578        | 455.285        | 449.945        | 450.281        | 449.609        | G[11] |
| A[15] | 443.297        | 436.277        | 430.938        | 431.274        | 430.602        | A[10] |
| K[16] | 490.627        | 412.588        | 407.250        | 407.585        | 406.923        | K[9]  |
| R[17] | 542.661        | 395.228        | <b>359.889</b> | <b>360.225</b> | 359.563        | R[8]  |
| H[18] | 588.347        | 313.195        | 307.853        | 308.191        | 307.519        | H[7]  |
| R[19] | 640.381        | 287.508        | 282.168        | 282.505        | 281.833        | R[6]  |
| K[20] | 683.078        | 215.875        | 210.535        | 210.871        | 209.999        | K[5]  |
| V[21] | 716.102        | 172.776        | 167.437        | 167.773        | 167.101        | V[4]  |
| L[22] | 753.796        | 139.753        | 134.414        | 134.750        | 134.078        | L[3]  |
| R[23] | <b>810.502</b> | 102.059        | 96.719         | 97.055         | 96.383         | R[2]  |
| D[24] | 848.844        | 45.353         | 40.014         | 40.349         | 39.678         | D[1]  |

# sp | P62806 | H4\_MOUSE

[Acetyl]SGRGKGGKGLGKGGAKRHRKVL R <sup>Dimethyl</sup> D  
28.03

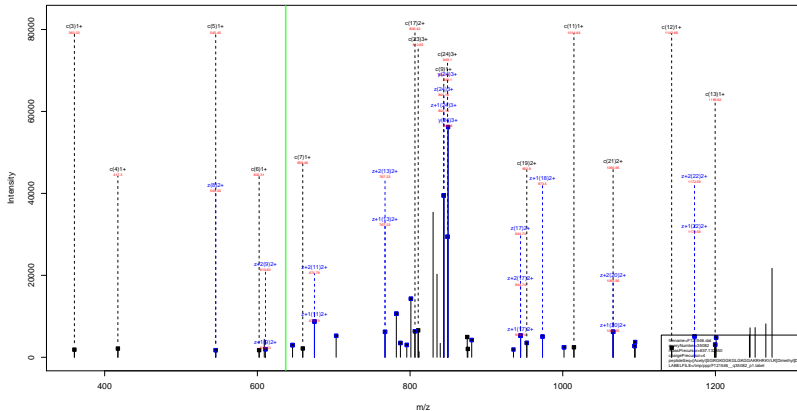

# sp | P62806 | H4\_MOUSE

[Acetyl]SGRGKGGKGLGKGGAKRHRKVLRR<sup>Dimethyl</sup> D  
28.03

- ▶ fragmentation table for charge state 1+
- ▶ specType=etd
- ▶ score=90.50
- ▶ F121546.dat
- ▶ query=q35082.p1
- ▶ precursor=637.132650
- ▶ chargePrecursor=4
- ▶ itol=0.7

| AA |    | c               | y        | z+1            | z+2      | z        | AA |    |
|----|----|-----------------|----------|----------------|----------|----------|----|----|
| S  | 1  | 147.076         | 2545.502 | 2529.483       | 0.000    | 2528.470 | S  | 24 |
| G  | 2  | 234.998         | 2518.460 | 2492.441       | 0.000    | 2499.433 | G  | 23 |
| R  | 3  | <b>360.199</b>  | 2399.439 | 2383.419       | 2364.527 | 2342.412 | R  | 22 |
| G  | 4  | <b>417.220</b>  | 2203.337 | 2187.318       | 2188.326 | 2186.310 | G  | 21 |
| K  | 5  | <b>545.315</b>  | 2148.310 | 2130.297       | 2131.305 | 2129.289 | K  | 20 |
| G  | 6  | <b>602.337</b>  | 2018.221 | 2002.202       | 2003.210 | 2001.194 | G  | 19 |
| G  | 7  | <b>659.358</b>  | 1961.199 | 1945.180       | 1946.188 | 1944.173 | G  | 18 |
| K  | 8  | <b>787.453</b>  | 1904.178 | 1888.159       | 1889.167 | 1887.151 | K  | 17 |
| G  | 9  | <b>844.475</b>  | 1776.083 | 1760.064       | 1761.072 | 1759.056 | G  | 16 |
| L  | 10 | 877.359         | 1729.961 | 1713.943       | 1714.950 | 1712.935 | L  | 15 |
| G  | 11 | <b>1014.580</b> | 1605.977 | 1589.958       | 1590.966 | 1588.951 | G  | 14 |
| K  | 12 | <b>1142.675</b> | 1548.950 | 1532.937       | 1533.945 | 1531.929 | K  | 13 |
| G  | 13 | <b>1199.697</b> | 1420.861 | 1404.842       | 1405.850 | 1403.834 | G  | 12 |
| G  | 14 | 1256.718        | 1363.839 | 1347.821       | 1348.828 | 1346.813 | G  | 11 |
| A  | 15 | 1327.795        | 1306.818 | 1290.799       | 1291.807 | 1289.791 | A  | 10 |
| K  | 16 | 1485.850        | 1235.781 | 1219.762       | 1220.770 | 1218.754 | K  | 9  |
| R  | 17 | 1611.894        | 1169.686 | 1161.667       | 1162.675 | 1160.659 | R  | 8  |
| H  | 18 | 1749.010        | 951.582  | <b>935.566</b> | 936.574  | 934.558  | H  | 7  |
| R  | 19 | 1905.111        | 814.520  | 798.507        | 799.515  | 797.499  | R  | 6  |
| K  | 20 | 2033.206        | 658.425  | 642.406        | 643.414  | 641.398  | K  | 5  |
| V  | 21 | 2132.275        | 530.330  | 514.311        | 515.319  | 513.303  | V  | 4  |
| L  | 22 | 2245.359        | 431.261  | 415.243        | 416.250  | 414.235  | L  | 3  |
| R  | 23 | 2429.491        | 318.177  | 302.158        | 303.166  | 301.151  | R  | 2  |
| D  | 24 | 2544.518        | 134.045  | 118.026        | 119.034  | 117.018  | D  | 1  |

# sp | P62806 | H4\_MOUSE

[Acetyl]SGRGKGGKGLGKGGAKRHRKVLRR<sup>Dimethyl</sup>D<sub>28.03</sub>

- ▶ fragmentation table for charge state 2+
- ▶ specType=etd
- ▶ score=90.50
- ▶ F121546.dat
- ▶ query=q35082.p1
- ▶ precursor=637.132650
- ▶ chargePrecursor=4
- ▶ itol=0.7

| AA    | c               | y              | z+1             | z+2             | z               | AA    |
|-------|-----------------|----------------|-----------------|-----------------|-----------------|-------|
| S[1]  | 74.042          | 127.3.255      | 1205.245        | 0.504           | 1204.741        | S[24] |
| G[2]  | 102.553         | 1208.733       | <b>1200.724</b> | 0.504           | <b>1200.220</b> | G[23] |
| R[3]  | 180.803         | 1180.223       | <b>1172.213</b> | <b>1172.717</b> | 1171.209        | R[22] |
| G[4]  | 269.314         | 1102.172       | <b>1094.163</b> | <b>1094.667</b> | <b>1093.659</b> | G[21] |
| K[5]  | 273.161         | 1073.661       | <b>1065.652</b> | <b>1066.156</b> | 1065.148        | K[20] |
| G[6]  | 351.672         | 1009.614       | <b>1001.605</b> | <b>1002.108</b> | <b>1001.101</b> | G[19] |
| G[7]  | 330.193         | 981.103        | <b>973.094</b>  | <b>973.598</b>  | 972.590         | G[18] |
| K[8]  | 394.230         | <b>952.592</b> | <b>944.583</b>  | <b>945.087</b>  | <b>944.079</b>  | K[17] |
| G[9]  | 422.741         | 898.545        | <b>890.536</b>  | <b>891.040</b>  | 890.032         | G[16] |
| L[10] | 479.283         | 859.034        | 851.025         | 850.529         | 851.521         | L[15] |
| G[11] | 507.794         | 803.492        | <b>795.483</b>  | <b>795.987</b>  | 794.979         | G[14] |
| K[12] | 571.941         | 774.982        | <b>766.972</b>  | <b>767.476</b>  | 766.468         | K[13] |
| G[13] | 600.352         | 710.934        | <b>702.925</b>  | <b>703.429</b>  | 702.421         | G[12] |
| G[14] | 628.863         | 682.423        | <b>674.414</b>  | <b>674.918</b>  | 673.910         | G[11] |
| A[15] | 664.261         | 653.913        | <b>645.903</b>  | <b>646.407</b>  | <b>645.399</b>  | A[10] |
| R[16] | 702.626         | 618.364        | <b>610.355</b>  | <b>610.859</b>  | 609.851         | R[9]  |
| R[17] | <b>806.479</b>  | 554.147        | 546.137         | 546.641         | <b>545.833</b>  | R[8]  |
| H[18] | <b>875.009</b>  | 476.295        | 468.287         | 468.791         | 467.783         | H[7]  |
| R[19] | <b>953.059</b>  | 407.767        | 399.757         | 400.261         | 399.253         | R[6]  |
| K[20] | 1017.107        | 329.716        | 321.707         | 322.211         | 321.203         | K[5]  |
| V[21] | <b>1066.641</b> | 265.666        | 257.656         | 258.160         | 257.152         | V[4]  |
| L[22] | 1212.813        | 218.134        | 209.124         | 209.629         | 207.621         | L[3]  |
| R[23] | 1215.249        | 159.592        | 151.583         | 152.087         | 151.079         | R[2]  |
| D[24] | 1272.763        | 67.526         | 59.517          | 60.021          | 59.013          | D[1]  |

# sp | P62806 | H4\_MOUSE

[Acetyl]SGRGKGGKGLGKGGAKRHRKVLRR<sup>Dimethyl</sup>D<sub>28.03</sub>

- ▶ fragmentation table for charge state 3+
- ▶ specType=etd
- ▶ score=90.50
- ▶ F121546.dat
- ▶ query=q35082.p1
- ▶ precursor=637.132650
- ▶ chargePrecursor=4
- ▶ itol=0.7

| AA    | c              | y              | z+1            | z+2            | z              | AA    |
|-------|----------------|----------------|----------------|----------------|----------------|-------|
| S[1]  | 49.697         | <b>849.172</b> | <b>843.833</b> | 0.672          | <b>843.497</b> | S[24] |
| G[2]  | 58.704         | <b>806.158</b> | <b>800.818</b> | 0.672          | <b>800.483</b> | G[23] |
| R[3]  | 150.738        | <b>787.151</b> | <b>781.811</b> | <b>782.147</b> | <b>781.475</b> | R[22] |
| G[4]  | 139.745        | 735.117        | 729.778        | 730.114        | 729.442        | G[21] |
| K[5]  | 182.443        | 716.110        | 710.770        | 711.106        | 710.435        | K[20] |
| G[6]  | 201.450        | 673.412        | 668.072        | 668.408        | 667.736        | G[19] |
| G[7]  | 220.458        | 654.405        | 649.065        | 649.401        | 648.729        | G[18] |
| K[8]  | 263.156        | 635.397        | 630.058        | 630.394        | 629.722        | K[17] |
| G[9]  | 282.163        | 592.699        | 587.359        | 587.695        | 587.024        | G[16] |
| L[10] | 319.658        | 573.692        | 568.352        | 568.688        | 568.016        | L[15] |
| G[11] | 338.665        | 535.997        | 530.658        | 530.994        | 530.322        | G[14] |
| K[12] | 381.563        | 516.990        | 511.651        | 511.986        | 511.315        | K[13] |
| G[13] | 400.570        | 474.292        | 468.952        | 469.288        | 468.616        | G[12] |
| G[14] | 419.578        | 455.285        | 449.945        | 450.281        | 449.609        | G[11] |
| A[15] | 443.257        | 436.277        | 430.938        | 431.274        | 430.602        | A[10] |
| K[16] | 485.955        | 412.598        | 407.259        | 407.595        | 406.923        | K[9]  |
| R[17] | 537.989        | 369.900        | 364.561        | 364.896        | 364.225        | R[8]  |
| H[18] | 583.675        | 317.866        | 312.527        | 312.863        | 312.191        | H[7]  |
| R[19] | 635.709        | 272.180        | 266.841        | 267.176        | 266.505        | R[6]  |
| K[20] | 678.407        | 220.146        | 214.807        | 215.143        | 214.471        | K[5]  |
| V[21] | 711.430        | 177.448        | 172.109        | 172.444        | 171.773        | V[4]  |
| L[22] | 749.124        | 144.425        | 139.086        | 139.422        | 138.750        | L[3]  |
| R[23] | <b>810.502</b> | 106.731        | 101.391        | 101.727        | 101.055        | R[2]  |
| D[24] | <b>848.844</b> | 45.353         | 40.014         | 40.349         | 39.678         | D[1]  |



# sp | P62806 | H4\_MOUSE

[Acetyl]SGRGKGGKGLGKGGAKRHRKVL R <sup>Dimethyl</sup> D  
28.03

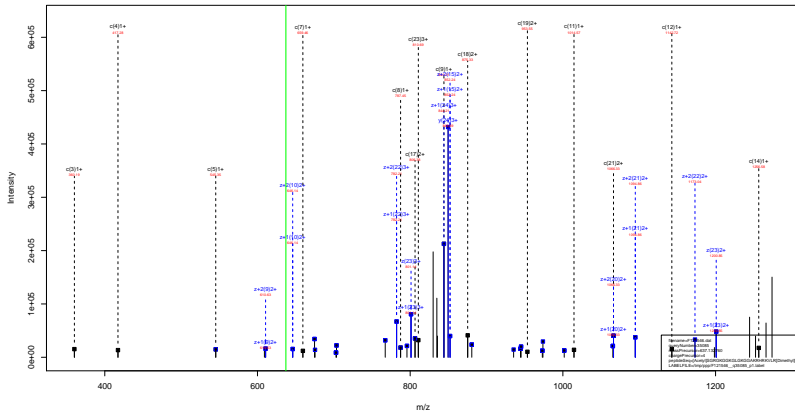

# sp | P62806 | H4\_MOUSE

[Acetyl]SGRGKGGKGLGKGGAKRHRKVLK<sup>Dimethyl</sup>D<sub>28.03</sub>

- ▶ fragmentation table for charge state 1+
- ▶ specType=etd
- ▶ score=93.72
- ▶ F121546.dat
- ▶ query=q35085.p1
- ▶ precursor=637.132760
- ▶ chargePrecursor=4
- ▶ itol=0.7

| AA |    | c               | y        | z+1            | z+2      | z        | AA |    |
|----|----|-----------------|----------|----------------|----------|----------|----|----|
| S  | 1  | 147.076         | 2545.502 | 2529.483       | 0.000    | 2528.470 | S  | 24 |
| G  | 2  | 234.998         | 2518.460 | 2492.441       | 0.000    | 2499.433 | G  | 23 |
| R  | 3  | <b>360.199</b>  | 2399.439 | 2383.419       | 2364.527 | 2342.412 | R  | 22 |
| G  | 4  | <b>417.220</b>  | 2203.337 | 2187.318       | 2188.326 | 2186.310 | G  | 21 |
| K  | 5  | <b>545.315</b>  | 2148.310 | 2130.297       | 2131.305 | 2129.289 | K  | 20 |
| G  | 6  | 602.337         | 2018.221 | 2002.202       | 2003.210 | 2001.194 | G  | 19 |
| G  | 7  | <b>659.358</b>  | 1961.199 | 1945.180       | 1946.188 | 1944.173 | G  | 18 |
| K  | 8  | <b>787.453</b>  | 1904.178 | 1888.159       | 1889.167 | 1887.151 | K  | 17 |
| G  | 9  | <b>844.475</b>  | 1776.083 | 1760.064       | 1761.072 | 1759.056 | G  | 16 |
| L  | 10 | 877.559         | 1729.961 | 1713.943       | 1714.950 | 1712.935 | L  | 15 |
| G  | 11 | <b>1014.580</b> | 1605.977 | 1589.958       | 1590.966 | 1588.951 | G  | 14 |
| K  | 12 | <b>1142.675</b> | 1548.950 | 1532.937       | 1533.945 | 1531.929 | K  | 13 |
| G  | 13 | 1199.697        | 1420.861 | 1404.842       | 1405.850 | 1403.834 | G  | 12 |
| G  | 14 | <b>1256.718</b> | 1363.839 | 1347.821       | 1348.828 | 1346.813 | G  | 11 |
| A  | 15 | 1327.795        | 1306.818 | 1290.799       | 1291.807 | 1289.791 | A  | 10 |
| K  | 16 | 1485.850        | 1235.781 | 1219.762       | 1220.770 | 1218.754 | K  | 9  |
| R  | 17 | 1611.894        | 1169.686 | 1161.667       | 1162.675 | 1160.659 | R  | 8  |
| H  | 18 | 1749.030        | 951.582  | <b>935.566</b> | 936.574  | 934.558  | H  | 7  |
| R  | 19 | 1905.111        | 814.520  | 798.507        | 799.515  | 797.499  | R  | 6  |
| K  | 20 | 2033.206        | 658.425  | 642.406        | 643.414  | 641.398  | K  | 5  |
| V  | 21 | 2132.275        | 530.330  | 514.311        | 515.319  | 513.303  | V  | 4  |
| L  | 22 | 2245.359        | 431.261  | 415.243        | 416.250  | 414.235  | L  | 3  |
| R  | 23 | 2429.491        | 318.177  | 302.158        | 303.166  | 301.151  | R  | 2  |
| D  | 24 | 2544.518        | 134.045  | 118.026        | 119.034  | 117.018  | D  | 1  |

# sp | P62806 | H4\_MOUSE

[Acetyl]SGRGKGGKGLGKGGAKRHRKVLRR<sup>Dimethyl</sup>D<sub>28.03</sub>

- ▶ fragmentation table for charge state 2+
- ▶ specType=etd
- ▶ score=93.72
- ▶ F121546.dat
- ▶ query=q35085\_p1
- ▶ precursor=637.132760
- ▶ chargePrecursor=4
- ▶ itol=0.7

| AA    | c               | y         | z+1             | z+2             | z               | AA    |
|-------|-----------------|-----------|-----------------|-----------------|-----------------|-------|
| S[1]  | 74.042          | 127.3.255 | 1205.245        | 0.504           | 1204.741        | S[24] |
| G[2]  | 102.553         | 1208.733  | <b>1200.724</b> | 0.504           | <b>1200.220</b> | G[23] |
| R[3]  | 180.803         | 1180.223  | 1372.713        | <b>1172.717</b> | 1171.709        | R[22] |
| G[4]  | 289.314         | 1102.172  | <b>1094.163</b> | <b>1094.567</b> | 1093.659        | G[21] |
| K[5]  | 273.103         | 1073.061  | <b>1065.052</b> | <b>1066.156</b> | <b>1065.148</b> | K[20] |
| G[6]  | 301.872         | 1069.014  | <b>1001.605</b> | <b>1002.108</b> | <b>1001.101</b> | G[19] |
| G[7]  | 330.193         | 981.103   | <b>973.094</b>  | <b>973.598</b>  | <b>972.590</b>  | G[18] |
| K[8]  | 394.230         | 952.992   | <b>944.583</b>  | <b>945.087</b>  | <b>944.079</b>  | K[17] |
| G[9]  | 422.741         | 898.545   | <b>890.536</b>  | <b>891.040</b>  | <b>890.032</b>  | G[16] |
| L[10] | 479.283         | 859.034   | <b>852.025</b>  | <b>852.529</b>  | 851.521         | L[15] |
| G[11] | 507.794         | 803.002   | <b>795.483</b>  | <b>795.987</b>  | 794.979         | G[14] |
| K[12] | 571.941         | 774.982   | <b>766.972</b>  | <b>767.476</b>  | 766.468         | K[13] |
| G[13] | 600.352         | 710.934   | <b>702.925</b>  | <b>703.429</b>  | <b>702.421</b>  | G[12] |
| G[14] | 628.863         | 682.423   | <b>674.414</b>  | <b>674.918</b>  | 673.910         | G[11] |
| A[15] | 664.301         | 653.913   | <b>645.903</b>  | <b>646.407</b>  | 645.399         | A[10] |
| R[16] | 702.820         | 618.394   | <b>610.385</b>  | <b>610.889</b>  | 609.881         | R[9]  |
| R[17] | <b>806.479</b>  | 554.147   | 546.137         | 546.641         | <b>545.833</b>  | R[8]  |
| H[18] | <b>875.009</b>  | 476.296   | 468.287         | 468.791         | 467.783         | H[7]  |
| R[19] | <b>953.059</b>  | 407.767   | 399.757         | 400.261         | 399.253         | R[6]  |
| K[20] | 1017.107        | 329.716   | 321.707         | 322.211         | 321.203         | K[5]  |
| V[21] | <b>1066.641</b> | 265.660   | 257.650         | 258.153         | 257.145         | V[4]  |
| L[22] | 1213.113        | 218.134   | 209.124         | 209.629         | 207.621         | L[3]  |
| R[23] | 1215.240        | 159.592   | 151.583         | 152.087         | 151.079         | R[2]  |
| D[24] | 1272.763        | 67.526    | 59.517          | 60.021          | 59.013          | D[1]  |

# sp | P62806 | H4\_MOUSE

[Acetyl]SGRGKGGKGLGKGGAKRHRKVLRR<sup>Dimethyl</sup>D<sub>28.03</sub>

- ▶ fragmentation table for charge state 3+
- ▶ specType=etd
- ▶ score=93.72
- ▶ F121546.dat
- ▶ query=q35085.p1
- ▶ precursor=637.132760
- ▶ chargePrecursor=4
- ▶ itol=0.7

| AA    | c              | y              | z+1            | z+2            | z              | AA    |
|-------|----------------|----------------|----------------|----------------|----------------|-------|
| S[1]  | 49.697         | <b>849.172</b> | <b>843.833</b> | 0.672          | 843.897        | S[24] |
| G[2]  | 58.704         | <b>806.158</b> | <b>800.818</b> | 0.672          | <b>800.483</b> | G[23] |
| R[3]  | 150.738        | <b>787.151</b> | <b>781.811</b> | <b>782.147</b> | 781.475        | R[22] |
| G[4]  | 139.745        | 735.117        | 729.778        | 730.114        | 729.442        | G[21] |
| K[5]  | 182.443        | 716.110        | 710.770        | 711.106        | 710.435        | K[20] |
| G[6]  | 201.450        | 673.412        | 668.072        | 668.408        | 667.736        | G[19] |
| G[7]  | 220.458        | 654.405        | 649.065        | 649.401        | 648.729        | G[18] |
| K[8]  | 263.156        | 635.397        | 630.058        | 630.394        | 629.722        | K[17] |
| G[9]  | 282.163        | 592.699        | 587.359        | 587.695        | 587.024        | G[16] |
| L[10] | 319.658        | 573.692        | 568.352        | 568.688        | 568.016        | L[15] |
| G[11] | 338.665        | 535.997        | 530.658        | 530.994        | 530.322        | G[14] |
| K[12] | 381.563        | 516.990        | 511.651        | 511.986        | 511.315        | K[13] |
| G[13] | 400.570        | 474.292        | 468.952        | 469.288        | 468.616        | G[12] |
| G[14] | 419.578        | 455.285        | 449.945        | 450.281        | 449.609        | G[11] |
| A[15] | 443.257        | 436.277        | 430.938        | 431.274        | 430.602        | A[10] |
| K[16] | 485.955        | 412.598        | 407.259        | 407.595        | 406.923        | K[9]  |
| R[17] | 537.989        | 369.900        | 364.561        | 364.896        | 364.225        | R[8]  |
| H[18] | 583.675        | 317.866        | 312.527        | 312.863        | 312.191        | H[7]  |
| R[19] | 635.709        | 272.180        | 266.841        | 267.176        | 266.505        | R[6]  |
| K[20] | 678.407        | 220.146        | 214.807        | 215.143        | 214.471        | K[5]  |
| V[21] | 711.430        | 177.448        | 172.109        | 172.444        | 171.773        | V[4]  |
| L[22] | 749.124        | 144.425        | 139.086        | 139.422        | 138.750        | L[3]  |
| R[23] | <b>810.502</b> | 106.731        | 101.391        | 101.727        | 101.055        | R[2]  |
| D[24] | 848.844        | 45.353         | 40.014         | 40.349         | 39.678         | D[1]  |



# sp | P62806 | H4\_MOUSE

[Acetyl]SGRGKGGKGLGKGGAKRHR (Dimethyl) KVLRD  
(28.03)

- ▶ fragmentation table for charge state 1+
- ▶ specType=etd
- ▶ score=113.06
- ▶ F121546.dat
- ▶ query=q35087.p1
- ▶ precursor=509.907810
- ▶ chargePrecursor=5
- ▶ itol=0.7

| AA |    | c              | y              | z+1            | z+2            | z        | AA    |
|----|----|----------------|----------------|----------------|----------------|----------|-------|
| S  | 1  | 147.076        | 2545.502       | 2529.483       | 0.000          | 2529.476 | S[24] |
| G  | 2  | 204.068        | 2816.460       | 2400.441       | 0.000          | 2399.433 | G[23] |
| R  | 3  | <b>360.199</b> | 2359.438       | 2343.419       | 2344.427       | 2342.412 | R[22] |
| G  | 4  | <b>417.220</b> | 2203.537       | 2187.518       | 2188.526       | 2186.510 | G[21] |
| K  | 5  | <b>545.315</b> | 2146.616       | 2130.597       | 2131.605       | 2129.589 | K[20] |
| G  | 6  | <b>602.337</b> | 2018.221       | 2002.202       | 2003.210       | 2001.194 | G[19] |
| G  | 7  | <b>659.358</b> | 1961.199       | 1945.180       | 1946.188       | 1944.173 | G[18] |
| K  | 8  | <b>787.453</b> | 1904.178       | 1888.159       | 1889.167       | 1887.151 | K[17] |
| G  | 9  | <b>844.475</b> | 1776.083       | 1760.064       | 1761.072       | 1759.056 | G[16] |
| L  | 10 | <b>957.559</b> | 1719.061       | 1703.043       | 1704.050       | 1702.035 | L[15] |
| G  | 11 | 1014.580       | 1608.971       | 1589.950       | 1590.958       | 1588.951 | G[14] |
| K  | 12 | 1142.675       | 1548.950       | 1532.937       | 1533.945       | 1531.929 | K[13] |
| G  | 13 | 1199.697       | 1420.861       | 1404.842       | 1405.850       | 1403.834 | G[12] |
| G  | 14 | 1256.718       | 1363.839       | 1347.821       | 1348.828       | 1346.813 | G[11] |
| A  | 15 | 1327.755       | 1306.818       | 1290.799       | 1291.807       | 1289.791 | A[10] |
| K  | 16 | 1455.850       | 1235.781       | 1219.762       | 1220.770       | 1218.754 | K[9]  |
| R  | 17 | 1611.951       | 1107.688       | 1091.667       | 1092.675       | 1090.659 | R[8]  |
| R  | 18 | 1749.010       | 981.585        | 965.568        | <b>936.574</b> | 934.558  | R[7]  |
| R  | 19 | 1933.143       | 814.526        | 798.507        | 799.515        | 797.499  | R[6]  |
| K  | 20 | 2051.288       | <b>830.193</b> | 814.376        | 815.382        | 813.367  | K[5]  |
| V  | 21 | 2160.306       | 502.290        | <b>486.280</b> | <b>487.287</b> | 485.272  | V[4]  |
| L  | 22 | 2273.390       | 403.230        | <b>387.211</b> | 388.219        | 386.203  | L[3]  |
| R  | 23 | 2429.491       | 290.146        | <b>274.127</b> | 275.135        | 273.119  | R[2]  |
| D  | 24 | 2544.518       | 134.045        | 118.028        | 119.034        | 117.018  | D[1]  |

# sp | P62806 | H4\_MOUSE

[Acetyl]SGRGKGGKGLGKGGAKRHR (Dimethyl) KVLRD  
(28.03)

- ▶ fragmentation table for charge state 2+
- ▶ specType=etd
- ▶ score=113.06
- ▶ F121546.dat
- ▶ query=q35087.p1
- ▶ precursor=509.907810
- ▶ chargePrecursor=5
- ▶ itol=0.7

| AA    | c               | y              | z+1             | z+2             | z               | AA    |
|-------|-----------------|----------------|-----------------|-----------------|-----------------|-------|
| S[1]  | 74.042          | 1272.255       | <b>1265.245</b> | 0.504           | 1264.741        | S[24] |
| G[2]  | 102.553         | 1208.733       | <b>1200.724</b> | 0.504           | <b>1200.220</b> | G[23] |
| R[3]  | 180.603         | 1180.223       | 1172.213        | <b>1172.717</b> | 1171.709        | R[22] |
| G[4]  | 209.114         | 1102.712       | <b>1094.163</b> | <b>1094.567</b> | 1093.659        | G[21] |
| K[5]  | 278.163         | 1074.661       | 1066.651        | <b>1066.156</b> | 1065.149        | K[20] |
| G[6]  | 301.672         | 1009.634       | <b>1001.605</b> | <b>1002.108</b> | 1001.101        | G[19] |
| G[7]  | 330.183         | 961.103        | 973.094         | <b>973.598</b>  | 972.590         | G[18] |
| K[8]  | <b>394.230</b>  | <b>952.592</b> | <b>944.583</b>  | <b>945.087</b>  | 944.079         | K[17] |
| G[9]  | <b>422.741</b>  | 888.545        | <b>880.536</b>  | <b>881.040</b>  | <b>880.032</b>  | G[16] |
| L[10] | <b>479.283</b>  | 860.034        | <b>852.025</b>  | <b>852.529</b>  | 851.521         | L[15] |
| G[11] | 507.794         | 803.492        | <b>795.483</b>  | <b>795.987</b>  | <b>794.979</b>  | G[14] |
| K[12] | <b>571.841</b>  | <b>774.982</b> | <b>766.972</b>  | <b>767.476</b>  | 766.468         | K[13] |
| G[13] | <b>600.352</b>  | <b>710.934</b> | <b>702.925</b>  | <b>703.429</b>  | 702.421         | G[12] |
| G[14] | <b>628.863</b>  | 662.423        | <b>674.414</b>  | <b>674.918</b>  | <b>673.910</b>  | G[11] |
| A[15] | <b>664.381</b>  | 653.913        | <b>645.903</b>  | <b>646.407</b>  | <b>645.399</b>  | A[10] |
| R[16] | 727.929         | <b>618.394</b> | <b>610.385</b>  | <b>610.889</b>  | 609.881         | R[9]  |
| R[17] | <b>806.479</b>  | 554.367        | <b>546.357</b>  | <b>546.861</b>  | <b>545.853</b>  | R[8]  |
| H[18] | <b>875.009</b>  | 476.295        | <b>468.287</b>  | <b>468.791</b>  | 467.783         | H[7]  |
| R[19] | 967.075         | 407.767        | <b>399.757</b>  | <b>400.261</b>  | 399.253         | R[6]  |
| K[20] | <b>1031.122</b> | 315.700        | 307.691         | 308.195         | 307.187         | K[5]  |
| V[21] | <b>1080.657</b> | 251.653        | 243.643         | 244.147         | 243.140         | V[4]  |
| L[22] | <b>1137.199</b> | 202.119        | 194.109         | 194.613         | 193.605         | L[3]  |
| R[23] | 1215.209        | 145.577        | 137.567         | 138.071         | 137.063         | R[2]  |
| D[24] | 1272.763        | 67.526         | 59.517          | 60.021          | 59.013          | D[1]  |

# sp | P62806 | H4\_MOUSE

[Acetyl]SGRGKGGKGLGKGGAKRHR (Dimethyl)  
(28.03) KVLRD

- ▶ fragmentation table for charge state 3+
- ▶ specType=etd
- ▶ score=113.06
- ▶ F121546.dat
- ▶ query=q35087.p1
- ▶ precursor=509.907810
- ▶ chargePrecursor=5
- ▶ itol=0.7

| AA    | c              | y              | z+1            | z+2            | z              | AA    |
|-------|----------------|----------------|----------------|----------------|----------------|-------|
| S[1]  | 49.697         | <b>849.172</b> | 843.833        | 0.672          | 843.497        | S[24] |
| G[2]  | 68.704         | <b>806.156</b> | 800.817        | 0.672          | 800.481        | G[23] |
| R[3]  | 120.738        | <b>787.151</b> | <b>781.811</b> | <b>782.147</b> | 781.475        | R[22] |
| G[4]  | 139.745        | 735.117        | <b>725.778</b> | <b>730.114</b> | <b>729.442</b> | G[21] |
| K[5]  | 182.443        | 718.110        | <b>710.770</b> | <b>711.106</b> | 710.435        | K[20] |
| G[6]  | 201.450        | 673.412        | <b>668.072</b> | <b>668.408</b> | <b>667.736</b> | G[19] |
| G[7]  | 220.458        | <b>654.405</b> | <b>649.065</b> | <b>649.401</b> | <b>648.729</b> | G[18] |
| K[8]  | 263.156        | 635.397        | <b>630.058</b> | <b>630.394</b> | <b>629.722</b> | K[17] |
| G[9]  | 282.163        | <b>592.699</b> | <b>587.360</b> | <b>587.695</b> | <b>587.024</b> | G[16] |
| L[10] | 319.858        | 571.692        | <b>568.352</b> | <b>568.688</b> | 568.016        | L[15] |
| G[11] | 338.865        | 535.991        | <b>530.658</b> | <b>530.994</b> | <b>530.322</b> | G[14] |
| K[12] | 381.563        | 516.980        | 511.651        | 511.986        | 511.315        | K[13] |
| G[13] | <b>400.570</b> | 474.292        | <b>468.952</b> | <b>469.288</b> | <b>468.616</b> | G[12] |
| G[14] | 419.578        | 455.285        | 449.945        | 450.281        | 449.609        | G[11] |
| A[15] | 443.297        | 436.277        | 430.938        | 431.274        | 430.602        | A[10] |
| K[16] | <b>485.955</b> | 412.588        | 407.250        | 407.585        | 406.923        | K[9]  |
| R[17] | <b>537.989</b> | 369.900        | 364.561        | 364.896        | 364.225        | R[8]  |
| H[18] | <b>583.675</b> | 317.866        | 312.527        | 312.863        | 312.191        | H[7]  |
| R[19] | 645.052        | 272.180        | 266.841        | 267.176        | 266.505        | R[6]  |
| K[20] | <b>687.751</b> | 210.883        | 205.463        | 205.799        | 205.127        | K[5]  |
| V[21] | <b>720.774</b> | 108.104        | 102.705        | 103.101        | 102.429        | V[4]  |
| L[22] | <b>758.468</b> | 135.082        | 129.742        | 130.078        | 129.406        | L[3]  |
| R[23] | <b>810.502</b> | 97.387         | 92.047         | 92.383         | 91.711         | R[2]  |
| D[24] | 948.844        | 45.353         | 40.014         | 40.340         | 39.678         | D[1]  |



# sp | P62806 | H4\_MOUSE

[Acetyl]SGRGKGGKGLGKGGAKRHR (Dimethyl) KVLRD  
(28.03)

- ▶ fragmentation table for charge state 4+
- ▶ specType=etd
- ▶ score=113.06
- ▶ F121546.dat
- ▶ query=q35087\_p1
- ▶ precursor=509.907810
- ▶ chargePrecursor=5
- ▶ itol=0.7

| AA    | c              | y              | z+1            | z+2            | z              | AA    |
|-------|----------------|----------------|----------------|----------------|----------------|-------|
| S[1]  | 37.925         | <b>637.131</b> | <b>633.126</b> | 0.755          | <b>632.874</b> | S[24] |
| G[2]  | 51.780         | 634.970        | <b>600.866</b> | 0.755          | <b>600.614</b> | G[23] |
| R[3]  | 90.305         | 590.615        | 585.610        | <b>586.862</b> | 586.353        | R[22] |
| G[4]  | 105.061        | 551.590        | <b>547.585</b> | 547.837        | <b>547.333</b> | G[21] |
| K[5]  | 137.084        | 537.334        | 533.330        | 533.582        | 533.078        | K[20] |
| G[6]  | 151.340        | 505.311        | 501.306        | 501.558        | 501.054        | G[19] |
| G[7]  | 165.595        | 491.055        | <b>487.051</b> | <b>487.303</b> | <b>486.799</b> | G[18] |
| K[8]  | 197.619        | 476.800        | 472.795        | 473.047        | 472.543        | K[17] |
| G[9]  | 211.874        | 444.776        | 440.771        | 441.023        | 440.520        | G[16] |
| L[10] | 240.145        | 430.521        | 426.516        | 426.768        | 426.264        | L[15] |
| G[11] | 254.401        | 402.260        | 398.245        | 398.497        | 397.993        | G[14] |
| K[12] | 286.424        | <b>387.994</b> | 383.990        | 384.242        | 383.738        | K[13] |
| G[13] | 300.680        | 355.971        | 351.966        | 352.218        | 351.714        | G[12] |
| G[14] | 314.935        | 341.715        | 337.711        | 337.963        | 337.459        | G[11] |
| A[15] | 332.694        | 327.460        | 323.455        | 323.707        | 323.203        | A[10] |
| K[16] | 364.718        | 309.701        | 305.696        | 305.948        | 305.444        | K[9]  |
| R[17] | 403.743        | 277.677        | <b>273.672</b> | <b>273.924</b> | <b>273.420</b> | R[8]  |
| H[18] | 438.008        | 238.652        | 234.647        | 234.899        | 234.395        | H[7]  |
| R[19] | 484.041        | 204.387        | 200.382        | 200.634        | 200.130        | R[6]  |
| K[20] | 518.065        | 136.354        | 134.349        | 134.601        | 134.097        | K[5]  |
| V[21] | 540.332        | 126.130        | 122.125        | 122.377        | 122.073        | V[4]  |
| L[22] | <b>569.103</b> | 101.563        | 97.558         | 97.810         | 97.306         | L[3]  |
| R[23] | <b>608.128</b> | 73.292         | 69.287         | 69.539         | 69.035         | R[2]  |
| D[24] | <b>636.885</b> | 34.267         | 30.262         | 30.514         | 30.010         | D[1]  |

# sp | P62806 | H4\_MOUSE

[Acetyl]SGRGKGGKGLGKGGAKRHRK <sup>Dimethyl</sup> VLRD  
28.03

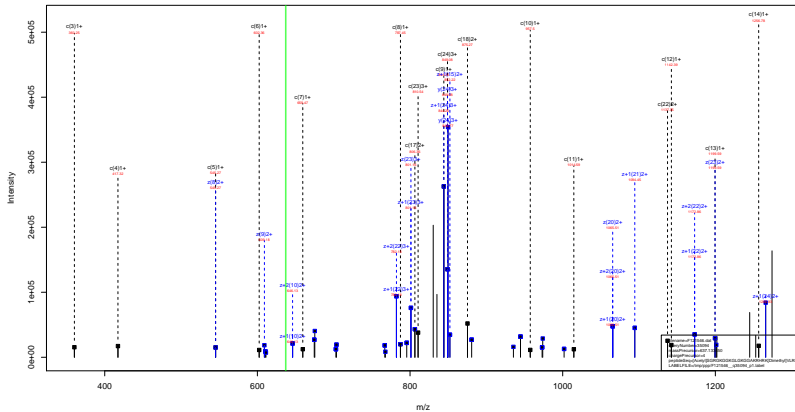

# sp | P62806 | H4\_MOUSE

[Acetyl]SGRGKGGKGLGKGGAKRHRK<sup>Dimethyl</sup>VLRD<sub>28.03</sub>

- ▶ fragmentation table for charge state 1+
- ▶ specType=etd
- ▶ score=95.06
- ▶ F121546.dat
- ▶ query=q35094.p1
- ▶ precursor=637.133450
- ▶ chargePrecursor=4
- ▶ itol=0.7

| AA |    | c               | y        | z+1            | z+2      | z        | AA    |
|----|----|-----------------|----------|----------------|----------|----------|-------|
| S  | 1  | 147.076         | 2545.502 | 2529.483       | 0.000    | 2528.470 | S[24] |
| G  | 2  | 234.998         | 2518.460 | 2499.441       | 0.000    | 2499.433 | G[23] |
| R  | 3  | <b>360.199</b>  | 2399.439 | 2383.419       | 2364.427 | 2342.412 | R[22] |
| G  | 4  | <b>417.220</b>  | 2203.337 | 2187.318       | 2188.326 | 2186.310 | G[21] |
| K  | 5  | <b>545.315</b>  | 2148.316 | 2130.297       | 2131.305 | 2129.289 | K[20] |
| G  | 6  | <b>602.337</b>  | 2018.221 | 2002.202       | 2003.210 | 2001.194 | G[19] |
| G  | 7  | <b>659.358</b>  | 1961.199 | 1945.180       | 1946.188 | 1944.173 | G[18] |
| K  | 8  | <b>707.453</b>  | 1904.178 | 1888.159       | 1889.167 | 1887.151 | K[17] |
| G  | 9  | <b>844.475</b>  | 1776.083 | 1760.064       | 1761.072 | 1759.056 | G[16] |
| L  | 10 | <b>937.559</b>  | 1719.961 | 1703.943       | 1704.950 | 1702.935 | L[15] |
| G  | 11 | <b>1014.580</b> | 1605.977 | 1589.958       | 1590.966 | 1588.951 | G[14] |
| K  | 12 | <b>1142.675</b> | 1548.956 | 1532.937       | 1533.945 | 1531.929 | K[13] |
| G  | 13 | <b>1199.697</b> | 1420.861 | 1404.842       | 1405.850 | 1403.834 | G[12] |
| G  | 14 | <b>1256.718</b> | 1363.839 | 1347.821       | 1348.828 | 1346.813 | G[11] |
| A  | 15 | 1327.755        | 1306.818 | 1290.799       | 1291.807 | 1289.791 | A[10] |
| K  | 16 | 1455.850        | 1235.781 | 1219.762       | 1220.770 | 1218.754 | K[9]  |
| R  | 17 | 1611.894        | 1109.686 | 1093.667       | 1092.675 | 1090.659 | R[8]  |
| H  | 18 | 1749.010        | 951.582  | <b>935.566</b> | 936.574  | 934.558  | H[7]  |
| R  | 19 | 1905.111        | 814.526  | 798.507        | 799.515  | 797.499  | R[6]  |
| K  | 20 | 2061.238        | 658.425  | 642.406        | 643.414  | 641.398  | K[5]  |
| V  | 21 | 2160.306        | 502.298  | 486.280        | 487.287  | 485.272  | V[4]  |
| L  | 22 | 2273.390        | 403.230  | 387.211        | 388.219  | 386.203  | L[3]  |
| R  | 23 | 2429.491        | 290.146  | 274.127        | 275.135  | 273.119  | R[2]  |
| D  | 24 | 2544.518        | 134.045  | 118.026        | 119.034  | 117.018  | D[1]  |

# sp | P62806 | H4\_MOUSE

[Acetyl]SGRGKGGKGLGKGGAKRHRK<sup>Dimethyl</sup>VLRD<sub>28.03</sub>

- ▶ fragmentation table for charge state 2+
- ▶ specType=etd
- ▶ score=95.06
- ▶ F121546.dat
- ▶ query=q35094\_p1
- ▶ precursor=637.133450
- ▶ chargePrecursor=4
- ▶ itol=0.7

| AA    | c               | y         | z+1             | z+2             | z               | AA    |
|-------|-----------------|-----------|-----------------|-----------------|-----------------|-------|
| S[1]  | 74.042          | 127.3.255 | <b>1265.245</b> | 0.504           | 1264.741        | S[24] |
| G[2]  | 102.553         | 1208.733  | <b>1200.724</b> | 0.504           | <b>1200.220</b> | G[23] |
| R[3]  | 180.803         | 1180.223  | <b>1172.213</b> | <b>1172.717</b> | 1171.709        | R[22] |
| G[4]  | 289.314         | 1102.172  | <b>1094.163</b> | <b>1094.567</b> | 1093.559        | G[21] |
| K[5]  | 273.101         | 1073.061  | <b>1065.052</b> | <b>1066.156</b> | <b>1065.148</b> | K[20] |
| G[6]  | 301.872         | 1009.614  | <b>1001.605</b> | <b>1002.108</b> | 1001.101        | G[19] |
| G[7]  | 330.193         | 961.103   | <b>973.094</b>  | <b>973.598</b>  | <b>972.590</b>  | G[18] |
| K[8]  | 394.230         | 952.592   | <b>944.583</b>  | <b>945.087</b>  | <b>944.079</b>  | K[17] |
| G[9]  | 422.741         | 898.545   | <b>890.536</b>  | <b>891.040</b>  | <b>890.032</b>  | G[16] |
| L[10] | 479.293         | 850.034   | <b>852.025</b>  | <b>852.529</b>  | <b>851.521</b>  | L[15] |
| G[11] | 507.794         | 803.002   | <b>795.483</b>  | <b>795.987</b>  | <b>794.979</b>  | G[14] |
| K[12] | 571.941         | 774.982   | <b>766.972</b>  | <b>767.476</b>  | <b>766.468</b>  | K[13] |
| G[13] | 600.352         | 710.934   | <b>702.925</b>  | <b>703.429</b>  | <b>702.421</b>  | G[12] |
| G[14] | 628.863         | 682.423   | <b>674.414</b>  | <b>674.918</b>  | <b>673.910</b>  | G[11] |
| A[15] | 664.301         | 653.913   | <b>645.903</b>  | <b>646.407</b>  | 645.399         | A[10] |
| R[16] | 708.262         | 618.394   | <b>610.385</b>  | <b>610.889</b>  | <b>609.881</b>  | R[9]  |
| R[17] | <b>806.479</b>  | 554.147   | 546.137         | 546.641         | <b>545.833</b>  | R[8]  |
| H[18] | <b>875.009</b>  | 476.296   | 468.287         | 468.791         | 467.783         | H[7]  |
| R[19] | 953.059         | 407.767   | 399.757         | 400.261         | 399.253         | R[6]  |
| K[20] | 1031.122        | 329.716   | 321.707         | 322.211         | 321.203         | K[5]  |
| V[21] | 1059.867        | 251.692   | 243.683         | 244.187         | 243.180         | V[4]  |
| L[22] | <b>1137.199</b> | 202.119   | 194.109         | 194.613         | 193.605         | L[3]  |
| R[23] | 1215.249        | 145.577   | 137.567         | 138.071         | 137.063         | R[2]  |
| D[24] | 1272.763        | 67.526    | 59.517          | 60.021          | 59.013          | D[1]  |

# sp | P62806 | H4\_MOUSE

[Acetyl]SGRGKGGKGLGKGGAKRHRK<sup>Dimethyl</sup>VLRD<sub>28.03</sub>

- ▶ fragmentation table for charge state 3+
- ▶ specType=etd
- ▶ score=95.06
- ▶ F121546.dat
- ▶ query=q35094.p1
- ▶ precursor=637.133450
- ▶ chargePrecursor=4
- ▶ itol=0.7

| AA    | c              | y              | z+1            | z+2            | z              | AA    |
|-------|----------------|----------------|----------------|----------------|----------------|-------|
| S[1]  | 49.697         | <b>849.172</b> | <b>843.833</b> | 0.672          | 843.897        | S[24] |
| G[2]  | 58.704         | <b>806.158</b> | <b>800.818</b> | 0.672          | <b>800.483</b> | G[23] |
| R[3]  | 150.738        | <b>787.151</b> | <b>781.811</b> | <b>782.147</b> | 781.475        | R[22] |
| G[4]  | 139.745        | 735.117        | 729.778        | 730.114        | 729.442        | G[21] |
| K[5]  | 182.443        | 716.110        | 710.770        | 711.106        | 710.435        | K[20] |
| G[6]  | 201.450        | 673.412        | 668.072        | 668.408        | 667.736        | G[19] |
| G[7]  | 220.458        | 654.405        | 649.065        | 649.401        | 648.729        | G[18] |
| K[8]  | 263.156        | 635.397        | 630.058        | 630.394        | 629.722        | K[17] |
| G[9]  | 282.163        | 592.699        | 587.359        | 587.695        | 587.024        | G[16] |
| L[10] | 319.658        | 573.692        | 568.352        | 568.688        | 568.016        | L[15] |
| G[11] | 338.665        | 535.997        | 530.658        | 530.994        | 530.322        | G[14] |
| K[12] | 381.563        | 516.990        | 511.651        | 511.986        | 511.315        | K[13] |
| G[13] | 400.570        | 474.292        | 468.952        | 469.288        | 468.616        | G[12] |
| G[14] | 419.578        | 455.285        | 449.945        | 450.281        | 449.609        | G[11] |
| A[15] | 443.257        | 436.277        | 430.938        | 431.274        | 430.602        | A[10] |
| K[16] | 485.955        | 412.598        | 407.259        | 407.595        | 406.923        | K[9]  |
| R[17] | 537.989        | 369.900        | 364.561        | 364.896        | 364.225        | R[8]  |
| H[18] | 583.675        | 317.866        | 312.527        | 312.863        | 312.191        | H[7]  |
| R[19] | 635.709        | 272.180        | 266.841        | 267.176        | 266.505        | R[6]  |
| K[20] | 687.751        | 220.146        | 214.807        | 215.143        | 214.471        | K[5]  |
| V[21] | 720.774        | 168.104        | 162.765        | 163.101        | 162.429        | V[4]  |
| L[22] | 758.468        | 135.082        | 129.742        | 130.078        | 129.406        | L[3]  |
| R[23] | <b>810.502</b> | 97.387         | 92.047         | 92.383         | 91.711         | R[2]  |
| D[24] | <b>848.844</b> | 45.353         | 40.014         | 40.349         | 39.678         | D[1]  |



# sp | P62806 | H4\_MOUSE

[Acetyl]SGRGKGGKGLGKGGAKR <sup>(Methyl)</sup>(14.02) HR <sup>(Methyl)</sup>(14.02) KVLRL <sup>(Methyl)</sup>(14.02) D

- ▶ fragmentation table for charge state 1+
- ▶ specType=etd
- ▶ score=64.66
- ▶ F121546.dat
- ▶ query=q35276.p1
- ▶ precursor=640.635450
- ▶ chargePrecursor=4
- ▶ itol=0.7

| AA | c  | y               | z+1            | z+2      | z        | AA       |       |
|----|----|-----------------|----------------|----------|----------|----------|-------|
| S  | 1  | 147.070         | 2599.518       | 2543.499 | 0.000    | 2542.491 | S[24] |
| G  | 2  | 204.098         | 2430.475       | 2414.457 | 0.000    | 2413.449 | G[25] |
| R  | 3  | 300.199         | 2373.456       | 2357.438 | 2333.443 | 2358.427 | R[22] |
| G  | 4  | <b>417.220</b>  | 2217.351       | 2201.334 | 2202.342 | 2200.326 | G[21] |
| K  | 5  | 545.315         | 2160.331       | 2144.313 | 2145.320 | 2143.305 | K[20] |
| G  | 6  | <b>602.337</b>  | 2032.236       | 2016.218 | 2017.225 | 2015.210 | G[19] |
| G  | 7  | 659.358         | 1975.215       | 1959.196 | 1960.204 | 1958.188 | G[18] |
| K  | 8  | <b>787.453</b>  | 1918.193       | 1902.175 | 1903.182 | 1901.167 | K[17] |
| G  | 9  | 844.475         | 1790.089       | 1774.080 | 1775.087 | 1773.072 | G[16] |
| L  | 10 | 877.599         | 1733.071       | 1717.053 | 1718.056 | 1716.050 | L[15] |
| G  | 11 | <b>1014.580</b> | 1610.991       | 1603.974 | 1604.982 | 1602.966 | G[14] |
| K  | 12 | <b>1142.675</b> | 1562.971       | 1546.953 | 1547.960 | 1545.945 | K[13] |
| G  | 13 | <b>1199.697</b> | 1434.876       | 1418.858 | 1419.866 | 1417.850 | G[12] |
| G  | 14 | 1296.718        | 1377.855       | 1361.836 | 1362.844 | 1360.828 | G[11] |
| A  | 15 | 1327.795        | 1320.833       | 1304.815 | 1305.823 | 1303.807 | A[10] |
| K  | 16 | 1455.850        | 1240.790       | 1233.778 | 1234.785 | 1232.770 | K[9]  |
| R  | 17 | 1625.967        | 1121.703       | 1105.683 | 1106.691 | 1104.675 | R[8]  |
| H  | 18 | 1763.026        | 991.580        | 925.560  | 926.574  | 924.558  | H[7]  |
| R  | 19 | 1933.143        | 814.520        | 798.507  | 799.515  | 797.499  | R[6]  |
| K  | 20 | 2061.238        | 644.400        | 628.390  | 629.398  | 627.382  | K[5]  |
| V  | 21 | 2160.306        | 516.314        | 500.295  | 501.303  | 499.287  | V[4]  |
| L  | 22 | 2273.390        | <b>417.246</b> | 401.227  | 402.235  | 400.219  | L[3]  |
| R  | 23 | 2443.507        | 304.162        | 288.143  | 289.151  | 287.135  | R[2]  |
| D  | 24 | 2558.534        | 134.045        | 118.028  | 119.034  | 117.018  | D[1]  |

# sp | P62806 | H4\_MOUSE

[Acetyl]SGRGKGGKGLGKGGAKR <sup>(Methyl)</sup>(14.02) HR <sup>(Methyl)</sup>(14.02) KVLRL <sup>(Methyl)</sup>(14.02) D

- ▶ fragmentation table for charge state 2+
- ▶ specType=etd
- ▶ score=64.66
- ▶ F121546.dat
- ▶ query=q35276.p1
- ▶ precursor=640.635450
- ▶ chargePrecursor=4
- ▶ itol=0.7

| AA    | c        | y        | z+1             | z+2             | z               | AA    |
|-------|----------|----------|-----------------|-----------------|-----------------|-------|
| S[1]  | 74.042   | 1080.263 | <b>1272.253</b> | 0.504           | 1371.749        | S[24] |
| G[2]  | 102.553  | 1215.741 | <b>1207.732</b> | 0.504           | 1207.229        | G[23] |
| R[3]  | 180.003  | 1187.231 | <b>1179.221</b> | <b>1179.725</b> | 1178.717        | R[22] |
| G[4]  | 209.114  | 1109.380 | 1105.771        | 1103.975        | 1109.565        | G[21] |
| K[5]  | 271.161  | 1080.669 | <b>1072.660</b> | <b>1073.164</b> | <b>1072.156</b> | K[20] |
| G[6]  | 301.672  | 1016.622 | 1008.612        | 1009.116        | 1008.108        | G[19] |
| G[7]  | 330.183  | 988.111  | <b>980.102</b>  | <b>980.606</b>  | 979.598         | G[18] |
| K[8]  | 394.230  | 959.600  | 951.591         | <b>952.095</b>  | 951.087         | K[17] |
| G[9]  | 422.741  | 895.553  | <b>887.543</b>  | <b>888.047</b>  | 887.040         | G[16] |
| L[10] | 479.283  | 867.042  | <b>859.033</b>  | <b>859.537</b>  | <b>858.529</b>  | L[15] |
| G[11] | 507.794  | 810.500  | 800.491         | 801.995         | 801.987         | G[14] |
| R[12] | 571.841  | 781.989  | <b>773.980</b>  | <b>774.484</b>  | 773.476         | R[13] |
| G[13] | 600.352  | 717.942  | <b>709.932</b>  | <b>710.436</b>  | 709.429         | G[12] |
| G[14] | 628.863  | 689.431  | <b>681.422</b>  | <b>681.926</b>  | <b>680.918</b>  | G[11] |
| A[15] | 664.381  | 660.920  | 652.911         | 653.415         | 652.407         | A[10] |
| R[16] | 728.429  | 625.402  | 617.392         | 617.896         | 616.889         | R[9]  |
| R[17] | 813.487  | 591.354  | 583.345         | 583.849         | 582.841         | R[8]  |
| H[18] | 882.017  | 476.296  | 468.287         | 468.791         | 467.783         | H[7]  |
| R[19] | 967.076  | 407.767  | 399.757         | 400.261         | 399.253         | R[6]  |
| R[20] | 1031.129 | 322.708  | 314.699         | 315.203         | 314.195         | R[5]  |
| V[21] | 1080.657 | 258.661  | 250.651         | 251.155         | 250.147         | V[4]  |
| L[22] | 1137.199 | 209.126  | 201.117         | 201.621         | 200.613         | L[3]  |
| D[23] | 1222.257 | 152.984  | 144.974         | 145.478         | 144.471         | D[2]  |
| D[24] | 1279.771 | 87.526   | 89.517          | 90.021          | 89.013          | D[1]  |



# sp | P62806 | H4\_MOUSE

[Acetyl]SGRGKGGKGLGKGGAKR (Methyl) HR (Methyl) KVLR (Methyl) D (14.02) (14.02) (14.02)

- ▶ fragmentation table for charge state 3+
- ▶ specType=etd
- ▶ score=64.66
- ▶ F121546.dat
- ▶ query=q35276.p1
- ▶ precursor=640.635450
- ▶ chargePrecursor=4
- ▶ itol=0.7

| AA    | c       | y              | z+1            | z+2            | z              | AA    |
|-------|---------|----------------|----------------|----------------|----------------|-------|
| S[1]  | 49.697  | <b>853.844</b> | <b>848.505</b> | 0.672          | <b>848.169</b> | S[24] |
| G[2]  | 68.704  | 810.830        | <b>805.490</b> | 0.672          | <b>805.154</b> | G[23] |
| R[3]  | 120.718 | 791.823        | <b>786.483</b> | <b>786.819</b> | <b>786.147</b> | R[22] |
| G[4]  | 139.745 | 739.789        | 734.450        | 734.705        | 734.114        | G[21] |
| K[5]  | 182.443 | 720.782        | 715.442        | 715.778        | 715.106        | K[20] |
| G[6]  | 201.450 | 678.084        | 672.744        | 673.080        | 672.408        | G[19] |
| G[7]  | 220.458 | 659.076        | 653.737        | 654.073        | 653.401        | G[18] |
| K[8]  | 263.136 | 640.069        | 634.730        | 635.066        | 634.394        | K[17] |
| G[9]  | 282.163 | 597.371        | 592.031        | 592.367        | 591.695        | G[16] |
| L[10] | 319.858 | 578.364        | 573.024        | 573.360        | 572.688        | L[15] |
| G[11] | 338.885 | 540.659        | 535.330        | 535.666        | 534.994        | G[14] |
| K[12] | 381.563 | 521.652        | 516.322        | 516.658        | 515.986        | K[13] |
| G[13] | 400.570 | 478.964        | 473.624        | 473.960        | 473.288        | G[12] |
| G[14] | 419.578 | 459.957        | 454.617        | 454.953        | 454.281        | G[11] |
| A[15] | 443.257 | 440.949        | 435.610        | 435.946        | 435.274        | A[10] |
| K[16] | 485.955 | <b>417.270</b> | 411.931        | 412.267        | 411.595        | K[9]  |
| R[17] | 542.661 | 374.572        | 369.232        | 369.568        | 368.896        | R[8]  |
| H[18] | 588.347 | 317.866        | 312.527        | 312.863        | 312.191        | H[7]  |
| R[19] | 645.052 | 272.180        | 266.841        | 267.176        | 266.505        | R[6]  |
| K[20] | 687.751 | 215.475        | 210.135        | 210.471        | 209.799        | K[5]  |
| Y[21] | 720.714 | 372.776        | 367.437        | 367.773        | 367.101        | Y[4]  |
| L[22] | 758.468 | 139.753        | 134.414        | 134.750        | 134.078        | L[3]  |
| R[23] | 815.174 | 102.059        | 96.719         | 97.055         | 96.383         | R[2]  |
| D[24] | 851.516 | 45.353         | 40.014         | 40.349         | 39.678         | D[1]  |



# sp | P62806 | H4\_MOUSE

[Acetyl]SGRGKGGKGLGKGGAKRHRK (Dimethyl) (28.03) VLR (Methyl) (14.02) D

- ▶ fragmentation table for charge state 1+
- ▶ specType=etd
- ▶ score=66.76
- ▶ F121546.dat
- ▶ query=q35282.p1
- ▶ precursor=512.710510
- ▶ chargePrecursor=5
- ▶ itol=0.7

| AA |    | c              | y              | z+1            | z+2            | z        | AA    |
|----|----|----------------|----------------|----------------|----------------|----------|-------|
| S  | 1  | 147.076        | 2559.518       | 2543.499       | 0.000          | 2542.491 | S[24] |
| G  | 2  | 204.068        | 2830.475       | 2814.457       | 0.000          | 2813.449 | G[23] |
| R  | 3  | <b>360.199</b> | 2373.456       | 2357.438       | 2169.413       | 2356.427 | R[22] |
| G  | 4  | <b>417.220</b> | 2217.553       | 2201.534       | 2202.342       | 2200.326 | G[21] |
| K  | 5  | <b>545.315</b> | 2160.531       | 2144.513       | 2145.320       | 2143.305 | K[20] |
| G  | 6  | <b>602.337</b> | 2032.230       | 2016.218       | 2017.225       | 2015.210 | G[19] |
| G  | 7  | <b>659.358</b> | 1975.215       | 1959.199       | 1960.204       | 1958.188 | G[18] |
| K  | 8  | <b>787.453</b> | 1918.193       | 1902.175       | 1903.182       | 1901.167 | K[17] |
| G  | 9  | <b>844.475</b> | 1790.098       | 1774.080       | 1775.087       | 1773.072 | G[16] |
| L  | 10 | <b>957.559</b> | 1733.077       | 1717.058       | 1718.066       | 1716.050 | L[15] |
| G  | 11 | 1014.588       | 1619.993       | 1603.974       | 1604.982       | 1602.966 | G[14] |
| K  | 12 | 1142.675       | 1562.971       | 1546.953       | 1547.960       | 1545.945 | K[13] |
| G  | 13 | 1199.697       | 1434.876       | 1418.858       | 1419.866       | 1417.850 | G[12] |
| G  | 14 | 1256.718       | 1377.855       | 1361.836       | 1362.844       | 1360.828 | G[11] |
| A  | 15 | 1327.755       | 1320.833       | 1304.815       | 1305.823       | 1303.807 | A[10] |
| K  | 16 | 1455.850       | 1249.790       | 1233.778       | 1234.785       | 1232.770 | K[9]  |
| R  | 17 | 1611.951       | 1121.701       | 1105.683       | 1106.691       | 1104.675 | R[8]  |
| H  | 18 | 1749.010       | 995.605        | 979.587        | 980.589        | 978.574  | H[7]  |
| R  | 19 | 1905.111       | <b>828.541</b> | 812.523        | 813.530        | 811.515  | R[6]  |
| K  | 20 | 2051.238       | <b>872.440</b> | <b>856.422</b> | <b>857.429</b> | 855.414  | K[5]  |
| V  | 21 | 2160.306       | <b>516.314</b> | 500.295        | 501.303        | 499.287  | V[4]  |
| L  | 22 | 2273.390       | <b>417.246</b> | 401.227        | 402.235        | 400.219  | L[3]  |
| R  | 23 | 2443.507       | 304.162        | 288.143        | 289.151        | 287.135  | R[2]  |
| D  | 24 | 2558.534       | 134.045        | 118.026        | 119.034        | 117.018  | D[1]  |

# sp | P62806 | H4\_MOUSE

[Acetyl]SGRGKGGKGLGKGGAKRHRK (Dimethyl)<sub>(28.03)</sub> VLR (Methyl)<sub>(14.02)</sub> D

- ▶ fragmentation table for charge state 2+
- ▶ specType=etd
- ▶ score=66.76
- ▶ F121546.dat
- ▶ query=q35282.p1
- ▶ precursor=512.710510
- ▶ chargePrecursor=5
- ▶ itol=0.7

| AA | c  | y              | z+1            | z+2            | z               | AA             |       |
|----|----|----------------|----------------|----------------|-----------------|----------------|-------|
| S  | 1  | 74.042         | 1280.263       | 1272.253       | 0.504           | 1271.749       | S[24] |
| G  | 2  | 162.553        | 1215.741       | 1207.732       | 0.504           | 1207.228       | G[23] |
| R  | 3  | 180.803        | 1137.231       | 1129.222       | <b>1179.725</b> | 1128.713       | R[22] |
| G  | 4  | 209.114        | 1109.180       | 1101.171       | <b>1101.675</b> | 1100.667       | G[21] |
| K  | 5  | 273.161        | 1080.669       | 1072.660       | 1073.104        | 1072.158       | K[20] |
| G  | 6  | 301.672        | 1016.622       | 1008.612       | 1009.116        | 1008.108       | G[19] |
| G  | 7  | 330.183        | 888.111        | <b>980.102</b> | <b>980.606</b>  | 979.598        | G[18] |
| K  | 8  | 394.230        | 959.600        | <b>951.591</b> | <b>952.095</b>  | <b>951.087</b> | K[17] |
| G  | 9  | 422.741        | 895.553        | <b>887.543</b> | <b>888.047</b>  | 887.040        | G[16] |
| L  | 10 | 479.288        | 837.042        | <b>859.033</b> | <b>859.537</b>  | 858.529        | L[15] |
| G  | 11 | 507.794        | 810.500        | 802.491        | 802.985         | 801.987        | G[14] |
| R  | 12 | <b>571.841</b> | <b>781.989</b> | 773.980        | <b>774.484</b>  | 773.478        | R[13] |
| G  | 13 | <b>600.352</b> | 717.942        | <b>709.932</b> | <b>710.436</b>  | 709.429        | G[12] |
| G  | 14 | <b>628.863</b> | 689.431        | <b>681.422</b> | <b>681.926</b>  | 680.918        | G[11] |
| A  | 15 | <b>664.381</b> | 660.920        | <b>652.911</b> | <b>653.415</b>  | <b>652.407</b> | A[10] |
| K  | 16 | <b>728.429</b> | <b>625.402</b> | <b>617.392</b> | <b>617.896</b>  | <b>616.889</b> | K[9]  |
| R  | 17 | <b>806.479</b> | 561.394        | <b>553.385</b> | <b>553.889</b>  | 552.881        | R[8]  |
| R  | 18 | <b>875.009</b> | 493.384        | <b>475.294</b> | <b>475.798</b>  | <b>474.791</b> | R[7]  |
| R  | 19 | <b>953.059</b> | 414.774        | <b>406.765</b> | <b>407.269</b>  | <b>406.261</b> | R[6]  |
| R  | 20 | 1031.122       | 336.724        | 328.714        | 329.218         | 328.211        | R[5]  |
| V  | 21 | 1080.657       | 258.661        | 250.651        | 251.155         | 250.147        | V[4]  |
| L  | 22 | 1137.199       | 209.120        | 201.117        | 201.621         | 200.613        | L[3]  |
| R  | 23 | 1222.257       | 152.584        | 144.575        | 145.079         | 144.071        | R[2]  |
| D  | 24 | 1279.771       | 87.526         | 99.517         | 80.021          | 99.013         | D[1]  |

# sp | P62806 | H4\_MOUSE

[Acetyl]SGRGKGGKGLGKGGAKRHRK<sup>(Dimethyl)</sup><sub>(28.03)</sub> VLR<sup>(Methyl)</sup><sub>(14.02)</sub> D

- ▶ fragmentation table for charge state 3+
- ▶ specType=etd
- ▶ score=66.76
- ▶ F121546.dat
- ▶ query=q35282.p1
- ▶ precursor=512.710510
- ▶ chargePrecursor=5
- ▶ itol=0.7

| AA    | c              | y              | z+1            | z+2            | z              | AA    |
|-------|----------------|----------------|----------------|----------------|----------------|-------|
| S[1]  | 49.697         | 853.844        | <b>848.505</b> | 0.672          | <b>848.169</b> | S[24] |
| G[2]  | 66.704         | 810.830        | <b>805.490</b> | 0.672          | 809.154        | G[23] |
| R[3]  | 120.738        | 791.823        | <b>786.483</b> | <b>786.819</b> | 786.147        | R[22] |
| G[4]  | 139.745        | 739.789        | <b>734.450</b> | <b>734.785</b> | <b>734.114</b> | G[21] |
| K[5]  | 182.443        | 720.782        | <b>715.442</b> | <b>715.778</b> | 715.106        | K[20] |
| G[6]  | 201.450        | 678.064        | <b>672.744</b> | <b>673.080</b> | <b>672.408</b> | G[19] |
| G[7]  | 220.458        | <b>659.076</b> | <b>653.737</b> | <b>654.073</b> | <b>653.401</b> | G[18] |
| K[8]  | 263.156        | 640.069        | 634.730        | 635.066        | <b>634.394</b> | K[17] |
| G[9]  | 282.163        | 597.371        | <b>592.031</b> | <b>592.367</b> | <b>591.695</b> | G[16] |
| L[10] | 319.858        | 578.364        | <b>573.024</b> | <b>573.360</b> | <b>572.688</b> | L[15] |
| G[11] | 338.865        | 540.660        | <b>535.320</b> | <b>535.656</b> | <b>534.984</b> | G[14] |
| K[12] | 381.563        | <b>521.662</b> | <b>516.322</b> | <b>516.658</b> | <b>515.986</b> | K[13] |
| G[13] | 400.570        | 478.964        | 473.624        | 473.960        | 473.288        | G[12] |
| G[14] | 419.578        | 459.957        | 454.617        | 454.953        | 454.281        | G[11] |
| A[15] | 443.267        | 440.949        | 435.610        | 435.946        | 435.274        | A[10] |
| K[16] | 485.955        | <b>417.270</b> | 411.931        | 412.267        | 411.595        | K[9]  |
| R[17] | 537.989        | 374.572        | 369.232        | 369.568        | 368.896        | R[8]  |
| H[18] | <b>583.675</b> | 322.538        | 317.199        | 317.535        | 316.863        | H[7]  |
| R[19] | 635.709        | 276.892        | 271.552        | 271.888        | 271.216        | R[6]  |
| K[20] | 687.751        | 224.818        | 219.479        | 219.815        | 219.143        | K[5]  |
| V[21] | 720.774        | 172.776        | 167.437        | 167.773        | 167.101        | V[4]  |
| L[22] | 758.468        | 139.753        | 134.414        | 134.750        | 134.078        | L[3]  |
| R[23] | <b>815.174</b> | 102.059        | 96.719         | 97.055         | 96.383         | R[2]  |
| D[24] | 853.516        | 45.353         | 40.014         | 40.349         | 39.678         | D[1]  |

# sp | P62806 | H4\_MOUSE

[Acetyl]SGRGKGGKGLGKGGAKRHRK<sup>(Dimethyl)</sup><sub>(28.03)</sub> VLR<sup>(Methyl)</sup><sub>(14.02)</sub> D

- ▶ fragmentation table for charge state 4+
- ▶ specType=etd
- ▶ score=66.76
- ▶ F121546.dat
- ▶ query=q35282.p1
- ▶ precursor=512.710510
- ▶ chargePrecursor=5
- ▶ itol=0.7

| AA    | c              | y              | z+1            | z+2            | z              | AA    |
|-------|----------------|----------------|----------------|----------------|----------------|-------|
| S[1]  | 37.925         | <b>640.635</b> | <b>636.630</b> | 0.755          | <b>636.378</b> | S[24] |
| G[2]  | 51.780         | 638.374        | <b>604.370</b> | 0.755          | <b>604.118</b> | G[23] |
| R[3]  | 50.305         | 594.119        | <b>590.114</b> | <b>590.366</b> | <b>589.862</b> | R[22] |
| G[4]  | 105.061        | 555.094        | 551.089        | 551.341        | 550.837        | G[21] |
| K[5]  | 137.084        | 540.838        | 536.834        | 537.086        | 536.582        | K[20] |
| G[6]  | 151.340        | 508.615        | 504.610        | 505.062        | 504.558        | G[19] |
| G[7]  | 165.595        | 494.559        | 490.554        | 490.806        | 490.303        | G[18] |
| K[8]  | 197.619        | 480.304        | <b>476.299</b> | <b>476.551</b> | <b>476.047</b> | K[17] |
| G[9]  | 211.874        | 448.280        | 444.275        | 444.527        | 444.023        | G[16] |
| L[10] | 240.145        | 434.025        | 430.020        | 430.272        | 429.768        | L[15] |
| G[11] | 254.401        | 405.754        | 401.749        | 402.001        | 401.497        | G[14] |
| K[12] | 286.424        | 391.499        | <b>387.494</b> | <b>387.746</b> | <b>387.242</b> | K[13] |
| G[13] | 300.680        | 359.475        | 355.470        | 355.722        | 355.218        | G[12] |
| G[14] | 314.935        | 345.219        | 341.215        | 341.466        | 340.963        | G[11] |
| A[15] | 332.694        | 330.964        | 326.959        | 327.211        | 326.707        | A[10] |
| K[16] | 364.718        | 313.205        | 309.200        | 309.452        | 308.948        | K[9]  |
| R[17] | 403.743        | 281.181        | 277.176        | 277.428        | 276.924        | R[8]  |
| H[18] | 438.008        | 242.156        | 238.151        | 238.403        | 237.899        | H[7]  |
| R[19] | 477.033        | 207.891        | 203.886        | 204.138        | 203.634        | R[6]  |
| K[20] | <b>515.065</b> | 168.866        | 164.861        | 165.113        | 164.609        | K[5]  |
| V[21] | 360.832        | 129.834        | 125.829        | 126.081        | 125.577        | V[4]  |
| L[22] | 569.103        | 105.067        | 101.062        | 101.314        | 100.810        | L[3]  |
| R[23] | <b>611.632</b> | 76.796         | 72.791         | 73.043         | 72.539         | R[2]  |
| D[24] | <b>640.389</b> | 34.267         | 30.262         | 30.514         | 30.010         | D[1]  |

# sp | P62806 | H4\_MOUSE

[Acetyl]SGRGKGGKGLGKGGAK Acetyl 42.01 RHR Methyl 14.02 KVLRD

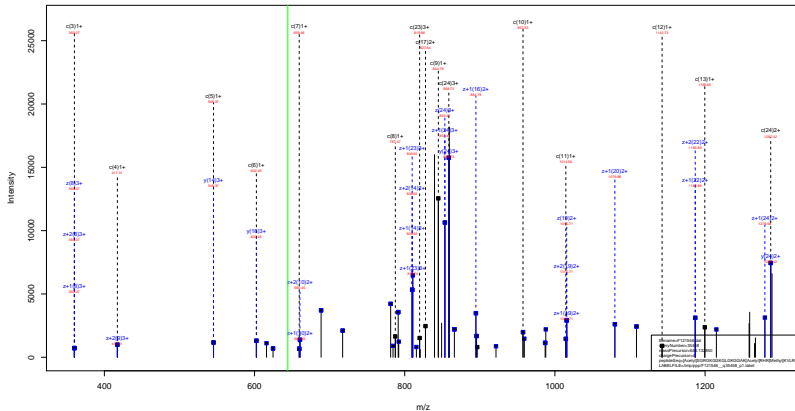

# sp | P62806 | H4\_MOUSE

[Acetyl]SGRGKGGKGLGKGGAK<sup>Acetyl</sup> RHR<sup>Methyl</sup> KVLRD<sup>14.02</sup>  
42.01 14.02

- ▶ fragmentation table for charge state 1+
- ▶ specType=etd
- ▶ score=112.23
- ▶ F121546.dat
- ▶ query=q35458.p1
- ▶ precursor=644.132850
- ▶ chargePrecursor=4
- ▶ itol=0.7

| AA | c  | y               | z+1      | z+2            | z              | AA       |   |
|----|----|-----------------|----------|----------------|----------------|----------|---|
| S  | 11 | 147.076         | 2573.497 | 2557.478       | 0.000          | 2556.471 | S |
| G  | 2  | 224.998         | 2444.455 | 2428.436       | 0.000          | 2427.428 | G |
| R  | 3  | <b>360.199</b>  | 2387.431 | 2371.414       | 2372.422       | 2370.407 | R |
| G  | 4  | <b>417.220</b>  | 2231.332 | 2215.313       | 2216.321       | 2214.305 | G |
| K  | 5  | <b>545.315</b>  | 2174.310 | 2158.292       | 2159.300       | 2157.284 | K |
| G  | 6  | <b>602.337</b>  | 2046.216 | 2030.197       | 2031.205       | 2029.189 | G |
| G  | 7  | <b>659.358</b>  | 1989.194 | 1973.175       | 1974.183       | 1972.168 | G |
| K  | 8  | <b>787.453</b>  | 1932.173 | 1916.154       | 1917.162       | 1915.146 | K |
| G  | 9  | <b>844.475</b>  | 1804.078 | 1788.059       | 1789.067       | 1787.051 | G |
| L  | 10 | <b>957.559</b>  | 1747.956 | 1731.937       | 1732.945       | 1730.930 | L |
| G  | 11 | <b>1014.580</b> | 1633.972 | 1617.953       | 1618.961       | 1616.946 | G |
| K  | 12 | <b>1142.675</b> | 1576.951 | 1560.932       | 1561.940       | 1559.924 | K |
| G  | 13 | <b>1199.697</b> | 1448.856 | 1432.837       | 1433.845       | 1431.829 | G |
| G  | 14 | 1256.718        | 1391.834 | 1375.816       | 1376.823       | 1374.808 | G |
| A  | 15 | 1327.735        | 1334.813 | 1318.794       | 1319.802       | 1317.786 | A |
| K  | 16 | 1407.861        | 1263.776 | 1247.757       | 1248.765       | 1246.749 | K |
| R  | 17 | 1633.864        | 1093.670 | 1077.651       | 1078.659       | 1076.644 | R |
| H  | 18 | 1791.021        | 937.560  | <b>921.550</b> | 922.558        | 920.542  | H |
| R  | 19 | 1961.138        | 800.510  | <b>784.491</b> | 785.499        | 783.484  | R |
| K  | 20 | 2089.233        | 630.393  | 614.375        | <b>615.382</b> | 613.367  | K |
| V  | 21 | 2108.301        | 502.290  | 486.280        | 487.287        | 485.272  | V |
| L  | 22 | 2301.385        | 403.230  | 387.211        | 388.219        | 386.203  | L |
| R  | 23 | 2457.486        | 290.146  | 274.127        | 275.135        | 273.119  | R |
| D  | 24 | 2572.513        | 134.045  | 118.026        | 119.034        | 117.018  | D |



# sp | P62806 | H4\_MOUSE

[Acetyl]SGRGKGGKGLGKGGAK<sup>Acetyl</sup> RHR<sup>Methyl</sup> KVLRD  
42.01 14.02

- ▶ fragmentation table for charge state 2+
- ▶ specType=etd
- ▶ score=112.23
- ▶ F121546.dat
- ▶ query=q35458.p1
- ▶ precursor=644.132850
- ▶ chargePrecursor=4
- ▶ itol=0.7

| AA    | c               | y               | z+1             | z+2             | z               | AA    |
|-------|-----------------|-----------------|-----------------|-----------------|-----------------|-------|
| S[1]  | 74.642          | <b>1287.252</b> | <b>1279.243</b> | 0.504           | 1278.739        | S[24] |
| G[2]  | 102.553         | 1222.731        | <b>1214.722</b> | 0.504           | 1214.218        | G[23] |
| R[3]  | 180.603         | 1194.220        | <b>1186.211</b> | <b>1186.715</b> | 1185.707        | R[22] |
| G[4]  | 259.114         | 1158.179        | <b>1108.160</b> | <b>1108.664</b> | 1107.656        | G[21] |
| K[5]  | 273.153         | 1087.659        | <b>1079.650</b> | <b>1080.153</b> | 1079.145        | K[20] |
| G[6]  | 303.672         | 1023.611        | <b>1015.602</b> | <b>1016.106</b> | <b>1015.098</b> | G[19] |
| G[7]  | 330.183         | 995.101         | <b>987.091</b>  | <b>987.595</b>  | <b>986.587</b>  | G[18] |
| K[8]  | 394.230         | 956.590         | 958.581         | <b>959.084</b>  | <b>958.077</b>  | K[17] |
| G[9]  | 422.741         | 902.542         | <b>894.533</b>  | <b>895.037</b>  | 894.030         | G[16] |
| L[10] | 479.289         | 874.032         | <b>866.022</b>  | <b>866.526</b>  | <b>865.518</b>  | L[15] |
| G[11] | 507.794         | 817.490         | <b>809.480</b>  | <b>809.984</b>  | 808.976         | G[14] |
| K[12] | 571.841         | 788.979         | <b>780.970</b>  | <b>781.474</b>  | 780.466         | K[13] |
| G[13] | 600.352         | 724.931         | <b>716.922</b>  | <b>717.426</b>  | 716.418         | G[12] |
| G[14] | 628.863         | 696.421         | <b>688.411</b>  | <b>688.915</b>  | 687.907         | G[11] |
| A[15] | 684.381         | 667.910         | <b>659.901</b>  | <b>660.405</b>  | <b>659.397</b>  | A[10] |
| R[16] | 749.438         | 632.391         | <b>624.382</b>  | <b>624.886</b>  | 623.878         | R[9]  |
| R[17] | <b>827.485</b>  | 547.339         | 539.330         | 539.833         | 538.825         | R[6]  |
| H[18] | <b>896.014</b>  | 469.288         | 461.279         | 461.783         | 460.775         | H[7]  |
| R[19] | 981.072         | 400.759         | 392.749         | 393.253         | 392.245         | R[6]  |
| K[20] | 1046.120        | 315.700         | 307.691         | 308.195         | 307.187         | K[5]  |
| V[21] | 1094.654        | 251.653         | 243.643         | 244.147         | 243.140         | V[4]  |
| L[22] | 1151.196        | 202.119         | 194.109         | 194.613         | 193.605         | L[3]  |
| R[23] | 1226.247        | 148.577         | 137.567         | 138.071         | 137.063         | R[2]  |
| D[24] | <b>1286.760</b> | 67.526          | 59.517          | 60.021          | 59.013          | D[1]  |

# sp | P62806 | H4\_MOUSE

[Acetyl]SGRGKGGKGLGKGGAK<sup>Acetyl</sup> RHR<sup>Methyl</sup> KVLRD<sup>14.02</sup>

- ▶ fragmentation table for charge state 3+
- ▶ specType=etd
- ▶ score=112.23
- ▶ F121546.dat
- ▶ query=q35458.p1
- ▶ precursor=644.132850
- ▶ chargePrecursor=4
- ▶ itol=0.7

| AA    | c              | y              | z+1            | z+2            | z              | AA    |
|-------|----------------|----------------|----------------|----------------|----------------|-------|
| S[1]  | 49.697         | <b>858.504</b> | <b>853.164</b> | 0.672          | <b>852.828</b> | S[24] |
| G[2]  | 58.704         | <b>815.490</b> | <b>810.150</b> | 0.672          | <b>809.814</b> | G[23] |
| R[3]  | 150.738        | 796.483        | <b>791.143</b> | <b>791.479</b> | <b>790.807</b> | R[22] |
| G[4]  | 139.745        | 784.449        | 739.109        | 739.445        | 738.773        | G[21] |
| K[5]  | 182.443        | 725.442        | 720.102        | 720.438        | 719.766        | K[20] |
| G[6]  | 201.450        | 682.743        | 677.404        | 677.740        | 677.068        | G[19] |
| G[7]  | 220.458        | 663.736        | 658.397        | 658.733        | 658.061        | G[18] |
| K[8]  | 263.156        | 644.729        | 639.389        | 639.725        | 639.054        | K[17] |
| G[9]  | 282.163        | <b>602.031</b> | 596.691        | 597.027        | 596.355        | G[16] |
| L[10] | 319.958        | 583.024        | 577.684        | 578.020        | 577.348        | L[15] |
| G[11] | 338.965        | <b>545.329</b> | 539.989        | 540.325        | 539.653        | G[14] |
| K[12] | 381.563        | 526.322        | 520.982        | 521.318        | 520.646        | K[13] |
| G[13] | 400.570        | 483.623        | 478.284        | 478.620        | 477.948        | G[12] |
| G[14] | 419.578        | 464.616        | 459.277        | 459.613        | 458.941        | G[11] |
| A[15] | 443.257        | 445.609        | 440.270        | 440.605        | 439.934        | A[10] |
| K[16] | 469.958        | 421.930        | 416.590        | <b>416.926</b> | 416.255        | K[9]  |
| R[17] | 551.992        | 365.225        | <b>359.889</b> | <b>360.225</b> | <b>359.553</b> | R[8]  |
| H[18] | 597.678        | 313.195        | 307.855        | 308.191        | 307.519        | H[7]  |
| R[19] | 654.384        | 297.508        | 262.169        | 262.505        | 261.833        | R[6]  |
| K[20] | 697.082        | 210.803        | 205.463        | 205.799        | 205.127        | K[5]  |
| V[21] | 730.105        | 168.104        | 162.764        | 163.101        | 162.429        | V[4]  |
| L[22] | 767.800        | 135.082        | 129.742        | 130.078        | 129.406        | L[3]  |
| R[23] | <b>819.834</b> | 97.387         | 92.047         | 92.383         | 91.711         | R[2]  |
| D[24] | <b>858.176</b> | 45.353         | 40.014         | 40.349         | 39.678         | D[1]  |



# sp | P62806 | H4\_MOUSE

[Acetyl]SGR<sup>Methyl</sup><sub>14.02</sub> GKGGKGLGKGGAKRHRKVL R<sup>Trimethyl</sup><sub>42.05</sub> D

- ▶ fragmentation table for charge state 1+
- ▶ specType=etd
- ▶ score=85.39
- ▶ F121546.dat
- ▶ query=q35461.p1
- ▶ precursor=644.140950
- ▶ chargePrecursor=4
- ▶ itol=0.7

| AA | c  | y               | z+1      | z+2      | z        | AA       |   |    |
|----|----|-----------------|----------|----------|----------|----------|---|----|
| S  | 1  | 147.076         | 2573.534 | 2557.515 | 0.000    | 2556.507 | S | 24 |
| G  | 2  | 234.998         | 2444.491 | 2428.472 | 0.000    | 2427.464 | G | 23 |
| R  | 3  | <b>374.215</b>  | 2387.469 | 2371.451 | 2372.459 | 2370.441 | R | 22 |
| G  | 4  | <b>431.236</b>  | 2217.353 | 2201.334 | 2202.342 | 2200.325 | G | 21 |
| K  | 5  | 559.331         | 2160.331 | 2144.313 | 2145.320 | 2143.305 | K | 20 |
| G  | 6  | <b>616.353</b>  | 2032.230 | 2016.218 | 2017.225 | 2015.210 | G | 19 |
| G  | 7  | 673.374         | 1975.215 | 1959.196 | 1960.204 | 1958.188 | G | 18 |
| K  | 8  | <b>801.469</b>  | 1918.193 | 1902.175 | 1903.182 | 1901.167 | K | 17 |
| G  | 9  | <b>858.490</b>  | 1790.090 | 1774.080 | 1775.087 | 1773.072 | G | 16 |
| L  | 10 | 973.374         | 1733.077 | 1717.058 | 1718.066 | 1716.050 | L | 15 |
| G  | 11 | 1028.596        | 1619.963 | 1603.974 | 1604.982 | 1602.965 | G | 14 |
| K  | 12 | 1156.091        | 1562.971 | 1546.953 | 1547.960 | 1545.945 | K | 13 |
| G  | 13 | <b>1213.712</b> | 1434.876 | 1418.858 | 1419.866 | 1417.850 | G | 12 |
| G  | 14 | 1270.734        | 1377.855 | 1361.836 | 1362.844 | 1360.828 | G | 11 |
| A  | 15 | 1341.771        | 1320.833 | 1304.815 | 1305.823 | 1303.807 | A | 10 |
| K  | 16 | 1469.866        | 1249.790 | 1233.778 | 1234.785 | 1232.770 | K | 9  |
| R  | 17 | 1628.967        | 1121.701 | 1105.683 | 1106.691 | 1104.675 | R | 8  |
| H  | 18 | 1763.026        | 995.620  | 949.582  | 950.589  | 948.574  | H | 7  |
| R  | 19 | 1919.127        | 828.541  | 812.523  | 813.530  | 811.515  | R | 6  |
| K  | 20 | 2047.222        | 672.440  | 656.422  | 657.429  | 655.414  | K | 5  |
| V  | 21 | 2146.290        | 544.345  | 528.327  | 529.334  | 527.319  | V | 4  |
| L  | 22 | 2259.374        | 445.277  | 429.258  | 430.266  | 428.250  | L | 3  |
| R  | 23 | 2457.523        | 332.193  | 316.174  | 317.182  | 315.166  | R | 2  |
| D  | 24 | 2572.550        | 134.045  | 118.026  | 119.034  | 117.018  | D | 1  |

# sp | P62806 | H4\_MOUSE

[Acetyl]SGR<sup>Methyl</sup><sub>14.02</sub> GKGGKGLGKGGAKRHRKVL R<sup>Trimethyl</sup><sub>42.05</sub>

- ▶ fragmentation table for charge state 2+
- ▶ specType=etd
- ▶ score=85.39
- ▶ F121546.dat
- ▶ query=q35461\_p1
- ▶ precursor=644.140950
- ▶ chargePrecursor=4
- ▶ itol=0.7

| AA    | c               | y              | z+1             | z+2             | z               | AA    |
|-------|-----------------|----------------|-----------------|-----------------|-----------------|-------|
| S[1]  | 74.042          | 1297.270       | <b>1279.261</b> | 0.504           | 1278.757        | S[24] |
| G[2]  | 102.553         | 1222.749       | <b>1214.740</b> | 0.504           | <b>1214.236</b> | G[23] |
| R[3]  | 187.611         | 1104.238       | <b>1186.229</b> | <b>1186.733</b> | 1185.725        | R[22] |
| G[4]  | 218.322         | 1109.180       | <b>1101.171</b> | <b>1101.675</b> | 1100.667        | G[21] |
| K[5]  | 280.109         | 1080.669       | <b>1072.660</b> | <b>1073.164</b> | <b>1072.156</b> | K[20] |
| G[6]  | 308.680         | 1016.622       | 1008.612        | 1009.116        | 1008.108        | G[19] |
| G[7]  | 337.191         | 988.111        | <b>980.102</b>  | <b>980.606</b>  | <b>979.598</b>  | G[18] |
| K[8]  | 401.238         | <b>959.600</b> | <b>951.591</b>  | <b>952.095</b>  | 951.087         | K[17] |
| G[9]  | 429.749         | 895.553        | <b>887.543</b>  | <b>888.047</b>  | <b>887.040</b>  | G[16] |
| L[10] | 489.291         | 897.042        | <b>890.033</b>  | <b>890.537</b>  | <b>889.529</b>  | L[15] |
| G[11] | 514.802         | <b>810.500</b> | <b>802.491</b>  | <b>802.995</b>  | <b>801.987</b>  | G[14] |
| K[12] | 578.949         | 781.989        | <b>773.980</b>  | <b>774.484</b>  | <b>773.476</b>  | K[13] |
| G[13] | 607.360         | 717.942        | <b>709.932</b>  | <b>710.436</b>  | 709.429         | G[12] |
| G[14] | 635.871         | 689.431        | <b>681.422</b>  | <b>681.926</b>  | 680.918         | G[11] |
| A[15] | 671.389         | 660.920        | 662.911         | 663.415         | 662.407         | A[10] |
| R[16] | 735.432         | 605.406        | 607.397         | 607.901         | 606.893         | R[9]  |
| R[17] | 813.487         | 561.354        | 563.345         | 563.849         | 562.841         | R[8]  |
| H[18] | 882.017         | 483.304        | 475.294         | 475.798         | 474.791         | H[7]  |
| R[19] | <b>960.067</b>  | 414.776        | 406.766         | 407.269         | 406.261         | R[6]  |
| K[20] | 1024.115        | 336.724        | 328.714         | 329.218         | 328.211         | K[5]  |
| V[21] | <b>1073.649</b> | 272.676        | 264.666         | 265.171         | 264.163         | V[4]  |
| L[22] | 1130.192        | 213.142        | 205.131         | 205.637         | 204.629         | L[3]  |
| R[23] | 1229.265        | 166.600        | 158.591         | 159.095         | 158.087         | R[2]  |
| D[24] | 1286.778        | 67.526         | 59.517          | 60.021          | 59.013          | D[1]  |

# sp | P62806 | H4\_MOUSE

[Acetyl]SGR<sup>Methyl</sup><sub>14.02</sub> GKGGKGLGKGGAKRHRKVL R<sup>Trimethyl</sup><sub>42.05</sub>

- ▶ fragmentation table for charge state 3+
- ▶ specType=etd
- ▶ score=85.39
- ▶ F121546.dat
- ▶ query=q35461.p1
- ▶ precursor=644.140950
- ▶ chargePrecursor=4
- ▶ itol=0.7

| AA    | c       | y              | z+1            | z+2            | z              | AA    |
|-------|---------|----------------|----------------|----------------|----------------|-------|
| S[1]  | 49.697  | <b>858.516</b> | <b>853.176</b> | 0.672          | <b>852.841</b> | S[24] |
| G[2]  | 68.704  | <b>815.502</b> | <b>810.162</b> | 0.672          | <b>809.826</b> | G[23] |
| R[3]  | 125.410 | 796.495        | <b>791.155</b> | <b>791.491</b> | <b>790.819</b> | R[22] |
| G[4]  | 144.417 | 739.789        | 734.450        | 734.785        | 734.114        | G[21] |
| K[5]  | 187.115 | 720.782        | 715.442        | 715.778        | 715.106        | K[20] |
| G[6]  | 206.122 | 678.084        | 672.744        | 673.080        | 672.408        | G[19] |
| G[7]  | 225.130 | 659.076        | 653.737        | 654.073        | 653.401        | G[18] |
| K[8]  | 267.828 | 640.069        | 634.730        | 635.066        | 634.394        | K[17] |
| G[9]  | 286.835 | 597.371        | 592.031        | 592.367        | 591.695        | G[16] |
| L[10] | 328.530 | 578.364        | 573.024        | 573.360        | 572.688        | L[15] |
| G[11] | 343.537 | 540.669        | 535.330        | 535.666        | 534.994        | G[14] |
| K[12] | 386.235 | 521.662        | 516.322        | 516.658        | 515.986        | K[13] |
| G[13] | 405.242 | 478.964        | 473.624        | 473.960        | 473.288        | G[12] |
| G[14] | 424.249 | 459.957        | 454.617        | 454.953        | 454.281        | G[11] |
| A[15] | 447.929 | 440.949        | 435.610        | 435.946        | 435.274        | A[10] |
| K[16] | 490.627 | 417.270        | 411.931        | 412.267        | 411.595        | K[9]  |
| R[17] | 542.661 | <b>374.572</b> | 369.232        | 369.568        | 368.896        | R[8]  |
| H[18] | 588.347 | 322.538        | 317.199        | 317.535        | 316.863        | H[7]  |
| R[19] | 640.381 | 276.852        | 271.512        | 271.848        | 271.176        | R[6]  |
| K[20] | 683.079 | 224.818        | 219.478        | 219.815        | 219.143        | K[5]  |
| V[21] | 716.102 | 182.120        | 176.780        | 177.116        | 176.444        | V[4]  |
| L[22] | 753.796 | 149.097        | 143.758        | 144.094        | 143.422        | L[3]  |
| R[23] | 819.846 | 111.402        | 106.063        | 106.399        | 105.727        | R[2]  |
| D[24] | 858.188 | 45.353         | 40.014         | 40.349         | 39.678         | D[1]  |

# sp | P62806 | H4\_MOUSE

[Acetyl]SGRGKGGKGLGKGGAK Acetyl 42.01 RHRK Dimethyl 28.03 VLRD

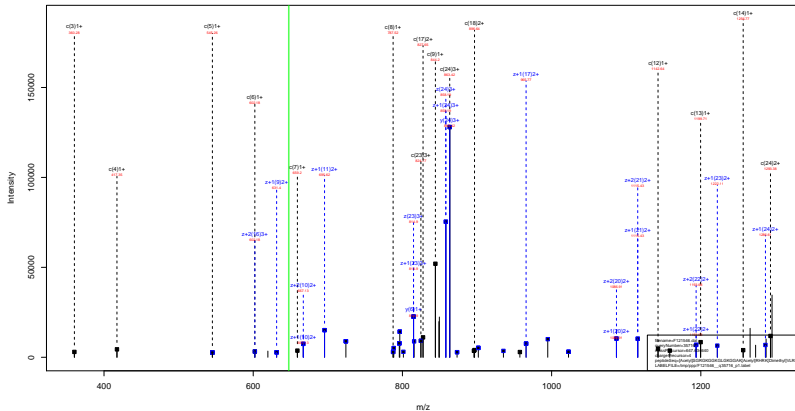

# sp | P62806 | H4\_MOUSE

[Acetyl]SGRGKGGKGLGKGGAK<sup>Acetyl</sup> RHRK<sup>Dimethyl</sup> VLRD<sup>28.03</sup>

- ▶ fragmentation table for charge state 1+
- ▶ specType=etd
- ▶ score=89.47
- ▶ F121546.dat
- ▶ query=q35716.p1
- ▶ precursor=647.634640
- ▶ chargePrecursor=4
- ▶ itol=0.7

| AA |    | c               | y              | z+1            | z+2      | z        | AA    |
|----|----|-----------------|----------------|----------------|----------|----------|-------|
| S  | 1  | 147.076         | 2587.513       | 2571.494       | 0.000    | 2570.486 | S[24] |
| G  | 2  | 234.998         | 2458.470       | 2442.451       | 0.000    | 2441.444 | G[23] |
| R  | 3  | <b>360.199</b>  | 2601.440       | 2585.430       | 2386.438 | 2384.422 | R[22] |
| G  | 4  | <b>417.220</b>  | 2245.348       | 2229.329       | 2220.327 | 2218.321 | G[21] |
| K  | 5  | <b>545.315</b>  | 2188.326       | 2172.307       | 2173.315 | 2171.300 | K[20] |
| G  | 6  | <b>602.337</b>  | 2060.231       | 2044.212       | 2045.220 | 2043.205 | G[19] |
| G  | 7  | <b>659.358</b>  | 2003.210       | 1987.191       | 1988.199 | 1986.183 | G[18] |
| K  | 8  | <b>787.453</b>  | 1946.188       | 1930.170       | 1931.177 | 1929.162 | K[17] |
| G  | 9  | <b>844.475</b>  | 1818.093       | 1802.075       | 1803.082 | 1801.067 | G[16] |
| L  | 10 | <b>937.559</b>  | 1761.072       | 1745.053       | 1746.061 | 1744.045 | L[15] |
| G  | 11 | 1014.580        | 1647.982       | 1631.960       | 1632.977 | 1630.963 | G[14] |
| K  | 12 | <b>1142.675</b> | 1590.960       | 1574.948       | 1575.955 | 1573.940 | K[13] |
| G  | 13 | <b>1199.697</b> | 1462.871       | 1446.853       | 1447.860 | 1445.845 | G[12] |
| G  | 14 | <b>1256.718</b> | 1405.850       | 1389.831       | 1390.839 | 1388.823 | G[11] |
| A  | 15 | 1327.795        | 1348.828       | 1332.810       | 1333.818 | 1331.802 | A[10] |
| K  | 16 | 1407.861        | 1277.791       | 1261.773       | 1262.780 | 1260.765 | K[9]  |
| R  | 17 | 1633.862        | 1159.686       | 1151.667       | 1152.675 | 1150.659 | R[8]  |
| H  | 18 | 1791.021        | 951.585        | <b>935.566</b> | 936.574  | 934.558  | H[7]  |
| R  | 19 | 1947.122        | <b>814.526</b> | 798.507        | 799.515  | 797.499  | R[6]  |
| K  | 20 | 2103.248        | 658.425        | 642.406        | 643.414  | 641.398  | K[5]  |
| V  | 21 | 2202.317        | 502.298        | 486.280        | 487.287  | 485.272  | V[4]  |
| L  | 22 | 2315.401        | 403.230        | 387.211        | 388.219  | 386.203  | L[3]  |
| R  | 23 | 2471.502        | 290.146        | 274.127        | 275.135  | 273.119  | R[2]  |
| D  | 24 | 2588.529        | 134.045        | 118.026        | 119.034  | 117.018  | D[1]  |



# sp | P62806 | H4\_MOUSE

[Acetyl]SGRGKGGKGLGKGGAK<sup>Acetyl</sup> RHRK<sup>Dimethyl</sup> VLRD<sup>28.03</sup>

- ▶ fragmentation table for charge state 2+
- ▶ specType=etd
- ▶ score=89.47
- ▶ F121546.dat
- ▶ query=q35716\_p1
- ▶ precursor=647.634640
- ▶ chargePrecursor=4
- ▶ itol=0.7

| AA    | c               | y              | z+1             | z+2             | z               | AA    |
|-------|-----------------|----------------|-----------------|-----------------|-----------------|-------|
| S[1]  | 74.042          | 1294.200       | <b>1286.251</b> | 0.504           | 1285.747        | S[24] |
| G[2]  | 102.553         | 1229.739       | <b>1221.729</b> | 0.504           | 1221.225        | G[23] |
| R[3]  | 180.603         | 1201.228       | <b>1193.219</b> | <b>1193.723</b> | 1192.715        | R[22] |
| G[4]  | 269.114         | 1173.177       | <b>1115.168</b> | <b>1115.672</b> | 1114.666        | G[21] |
| K[5]  | 273.161         | 1094.667       | <b>1086.657</b> | <b>1087.161</b> | 1086.153        | K[20] |
| G[6]  | 301.672         | 1030.619       | <b>1022.610</b> | <b>1023.114</b> | <b>1022.106</b> | G[19] |
| G[7]  | 330.183         | 1002.108       | 964.099         | <b>994.603</b>  | 993.595         | G[18] |
| K[8]  | 394.230         | 973.598        | <b>965.588</b>  | <b>966.092</b>  | <b>965.084</b>  | K[17] |
| G[9]  | 422.741         | 909.550        | <b>901.541</b>  | <b>902.045</b>  | <b>901.037</b>  | G[16] |
| L[10] | 479.293         | 891.040        | <b>873.030</b>  | <b>873.534</b>  | 874.526         | L[15] |
| G[11] | 507.794         | <b>824.498</b> | 815.488         | 816.992         | <b>815.984</b>  | G[14] |
| K[12] | 571.841         | <b>795.987</b> | <b>787.977</b>  | <b>788.481</b>  | <b>787.474</b>  | K[13] |
| G[13] | 600.352         | 731.939        | <b>723.930</b>  | <b>724.434</b>  | 723.426         | G[12] |
| G[14] | 628.863         | 703.429        | <b>695.419</b>  | <b>695.923</b>  | 694.915         | G[11] |
| A[15] | 664.381         | 674.918        | <b>666.908</b>  | <b>667.412</b>  | 666.404         | A[10] |
| R[16] | 788.434         | 639.399        | <b>631.390</b>  | <b>631.894</b>  | <b>630.886</b>  | R[9]  |
| R[17] | <b>827.485</b>  | 554.147        | 545.137         | 546.641         | <b>545.633</b>  | R[8]  |
| H[18] | <b>896.014</b>  | 476.295        | 468.287         | 468.791         | 467.783         | H[7]  |
| R[19] | 974.065         | 407.767        | 399.757         | 400.261         | 399.253         | R[6]  |
| K[20] | 1052.126        | 329.716        | 321.707         | 322.211         | 321.203         | K[5]  |
| V[21] | 1107.862        | 251.693        | 243.683         | 244.187         | 243.180         | V[4]  |
| L[22] | <b>1158.204</b> | 202.119        | 194.109         | 194.613         | 193.605         | L[3]  |
| R[23] | 1236.255        | 145.577        | 137.567         | 138.071         | 137.063         | R[2]  |
| D[24] | <b>1293.768</b> | 67.526         | 59.517          | 60.021          | 59.013          | D[1]  |

# sp | P62806 | H4\_MOUSE

[Acetyl]SGRGKGGKGLGKGGAK<sup>Acetyl</sup>42.01 RHRK<sup>Dimethyl</sup>28.03 VLRD

- ▶ fragmentation table for charge state 3+
- ▶ specType=etd
- ▶ score=89.47
- ▶ F121546.dat
- ▶ query=q35716.p1
- ▶ precursor=647.634640
- ▶ chargePrecursor=4
- ▶ itol=0.7

| AA    | c              | y              | z+1            | z+2            | z              | AA    |
|-------|----------------|----------------|----------------|----------------|----------------|-------|
| S[1]  | 49.697         | <b>863.176</b> | <b>857.836</b> | 0.672          | <b>857.500</b> | S[24] |
| G[2]  | 58.704         | 820.163        | <b>814.822</b> | 0.672          | <b>814.486</b> | G[23] |
| R[3]  | 130.738        | <b>801.154</b> | <b>795.815</b> | <b>796.151</b> | <b>795.479</b> | R[22] |
| G[4]  | 139.745        | 749.121        | 743.781        | 744.117        | 743.445        | G[21] |
| K[5]  | 182.443        | 730.114        | <b>724.774</b> | 725.110        | <b>724.438</b> | K[20] |
| G[6]  | 201.450        | 687.415        | 682.076        | 682.412        | 681.740        | G[19] |
| G[7]  | 220.458        | 668.408        | 663.069        | 663.404        | 662.733        | G[18] |
| K[8]  | 263.156        | 649.401        | 644.061        | 644.397        | 643.725        | K[17] |
| G[9]  | 282.163        | 606.703        | 601.363        | <b>601.699</b> | 601.027        | G[16] |
| L[10] | 319.858        | 587.695        | 582.355        | 582.691        | 582.020        | L[15] |
| G[11] | 338.865        | 550.001        | <b>544.661</b> | <b>544.997</b> | 544.325        | G[14] |
| K[12] | 381.563        | 530.994        | 525.654        | 525.990        | 525.318        | K[13] |
| G[13] | 400.570        | 488.295        | 482.956        | 483.292        | 482.620        | G[12] |
| G[14] | 419.578        | 469.288        | 463.949        | 464.285        | 463.613        | G[11] |
| A[15] | 443.257        | 450.281        | 444.941        | 445.277        | 444.605        | A[10] |
| K[16] | 469.958        | 426.602        | 421.262        | 421.598        | 420.926        | K[9]  |
| R[17] | 551.992        | 369.900        | 364.561        | 364.896        | 364.225        | R[8]  |
| H[18] | 597.678        | 317.866        | 312.527        | 312.863        | 312.191        | H[7]  |
| R[19] | 649.712        | 272.180        | 266.841        | 267.176        | 266.505        | R[6]  |
| K[20] | 701.754        | 220.140        | 214.801        | 215.143        | 214.471        | K[5]  |
| V[21] | 734.777        | 168.104        | 162.765        | 163.101        | 162.429        | V[4]  |
| L[22] | 772.472        | 135.082        | 129.742        | 130.078        | 129.406        | L[3]  |
| R[23] | <b>824.505</b> | 97.387         | 92.047         | 92.383         | 91.711         | R[2]  |
| D[24] | <b>862.848</b> | 45.353         | 40.014         | 40.349         | 39.678         | D[1]  |

# sp | P62806 | H4\_MOUSE

[Acetyl]SGRGKGGKGLGKGGAK Acetyl 42.01 RHRK Dimethyl 28.03 VLRD

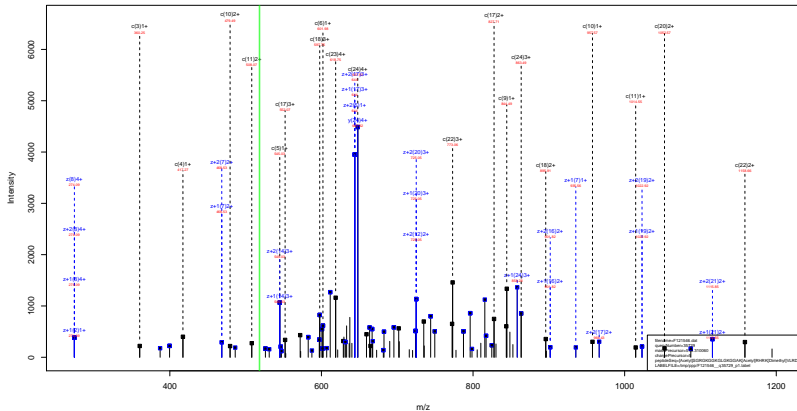

# sp | P62806 | H4\_MOUSE

[Acetyl]SGRGKGGKGLGKGGAK<sup>Acetyl</sup> RHRK<sup>Dimethyl</sup> VLRD<sup>28.03</sup>

- ▶ fragmentation table for charge state 1+
- ▶ specType=etd
- ▶ score=66.49
- ▶ F121546.dat
- ▶ query=q35729.p1
- ▶ precursor=518.310060
- ▶ chargePrecursor=5
- ▶ itol=0.7

| AA |    | c               | y        | z+1            | z+2            | z        | AA    |
|----|----|-----------------|----------|----------------|----------------|----------|-------|
| S  | 1  | 147.076         | 2587.513 | 2571.494       | 0.000          | 2570.486 | S[24] |
| G  | 2  | 224.998         | 2458.470 | 2442.451       | 0.000          | 2441.444 | G[23] |
| R  | 3  | <b>360.199</b>  | 2601.440 | 2585.430       | 2386.438       | 2384.422 | R[22] |
| G  | 4  | <b>417.220</b>  | 2245.348 | 2229.329       | 2220.327       | 2218.321 | G[21] |
| K  | 5  | <b>545.315</b>  | 2188.326 | 2172.307       | 2173.315       | 2171.300 | K[20] |
| G  | 6  | <b>602.337</b>  | 2060.231 | 2044.212       | 2045.220       | 2043.205 | G[19] |
| G  | 7  | <b>659.358</b>  | 2003.210 | 1987.191       | 1988.199       | 1986.183 | G[18] |
| K  | 8  | <b>787.453</b>  | 1946.188 | 1930.170       | 1931.177       | 1929.162 | K[17] |
| G  | 9  | <b>844.475</b>  | 1818.093 | 1802.075       | 1803.082       | 1801.067 | G[16] |
| L  | 10 | <b>957.559</b>  | 1761.072 | 1745.053       | 1746.061       | 1744.045 | L[15] |
| G  | 11 | <b>1014.580</b> | 1647.982 | 1631.960       | 1632.977       | 1630.963 | G[14] |
| K  | 12 | 1142.075        | 1590.960 | 1574.948       | 1575.955       | 1573.940 | K[13] |
| G  | 13 | 1199.697        | 1462.871 | 1446.853       | 1447.860       | 1445.845 | G[12] |
| G  | 14 | 1256.718        | 1405.850 | 1389.831       | 1390.839       | 1388.823 | G[11] |
| A  | 15 | 1327.795        | 1348.828 | 1332.810       | 1333.818       | 1331.802 | A[10] |
| K  | 16 | 1497.881        | 1277.791 | 1261.773       | 1262.780       | 1260.765 | K[9]  |
| R  | 17 | 1653.884        | 1199.686 | 1191.667       | 1192.675       | 1190.659 | R[8]  |
| H  | 18 | 1791.021        | 951.582  | <b>935.566</b> | 936.574        | 934.558  | H[7]  |
| R  | 19 | 1947.122        | 814.526  | <b>798.507</b> | 799.515        | 797.499  | R[6]  |
| K  | 20 | 2103.248        | 658.425  | 642.406        | <b>643.414</b> | 641.398  | K[5]  |
| V  | 21 | 2202.317        | 502.298  | <b>486.280</b> | 487.287        | 485.272  | V[4]  |
| L  | 22 | 2315.401        | 403.230  | <b>387.211</b> | 388.219        | 386.203  | L[3]  |
| R  | 23 | 2471.502        | 290.146  | <b>274.127</b> | 275.135        | 273.119  | R[2]  |
| D  | 24 | 2588.529        | 134.045  | 118.026        | 119.034        | 117.018  | D[1]  |

# sp | P62806 | H4\_MOUSE

[Acetyl]SGRGKGGKGLGKGGAK<sup>Acetyl</sup> RHRK<sup>Dimethyl</sup> VLRD<sup>28.03</sup>

- ▶ fragmentation table for charge state 2+
- ▶ specType=etd
- ▶ score=66.49
- ▶ F121546.dat
- ▶ query=q35729\_p1
- ▶ precursor=518.310060
- ▶ chargePrecursor=5
- ▶ itol=0.7

| AA | c  | y               | z+1            | z+2             | z               | AA             |       |
|----|----|-----------------|----------------|-----------------|-----------------|----------------|-------|
| S  | 1  | 74.642          | 1204.260       | 1286.251        | 0.904           | 1285.747       | S[24] |
| G  | 2  | 102.553         | 1220.739       | 1221.720        | 0.904           | 1221.225       | G[23] |
| R  | 3  | 180.603         | 1280.238       | 1393.217        | 11.08729        | 1242.715       | R[22] |
| G  | 4  | 209.114         | 1323.177       | <b>1115.168</b> | <b>1115.672</b> | 1114.664       | G[21] |
| K  | 5  | 273.161         | 1094.667       | <b>1086.657</b> | <b>1087.161</b> | 1086.153       | K[20] |
| G  | 6  | 301.672         | 1030.619       | <b>1022.610</b> | <b>1023.114</b> | 1022.108       | G[19] |
| G  | 7  | 330.183         | 1002.108       | 994.099         | 994.603         | 993.595        | G[18] |
| K  | 8  | 394.230         | 973.598        | 965.588         | <b>966.092</b>  | 965.084        | K[17] |
| G  | 9  | 422.741         | 950.550        | <b>901.541</b>  | <b>902.045</b>  | 901.037        | G[16] |
| L  | 10 | <b>479.283</b>  | 893.040        | 873.033         | 873.534         | 872.526        | L[15] |
| G  | 11 | <b>507.794</b>  | <b>824.498</b> | <b>816.488</b>  | <b>816.992</b>  | <b>815.984</b> | G[14] |
| K  | 12 | <b>571.841</b>  | <b>795.987</b> | <b>787.977</b>  | 788.481         | <b>787.474</b> | K[13] |
| G  | 13 | <b>600.352</b>  | 731.939        | <b>723.930</b>  | <b>724.434</b>  | <b>723.426</b> | G[12] |
| G  | 14 | <b>628.863</b>  | 703.429        | <b>695.419</b>  | <b>695.923</b>  | <b>694.915</b> | G[11] |
| A  | 15 | <b>664.281</b>  | 674.918        | <b>666.908</b>  | <b>667.412</b>  | <b>666.405</b> | A[10] |
| R  | 16 | <b>749.434</b>  | 639.399        | <b>631.390</b>  | <b>631.894</b>  | <b>630.886</b> | R[9]  |
| R  | 17 | <b>827.485</b>  | 554.347        | <b>546.337</b>  | <b>546.841</b>  | <b>545.833</b> | R[8]  |
| H  | 18 | <b>896.014</b>  | 476.290        | <b>468.287</b>  | <b>468.791</b>  | 467.783        | H[7]  |
| R  | 19 | 974.065         | 407.707        | <b>399.757</b>  | <b>400.261</b>  | <b>399.253</b> | R[6]  |
| K  | 20 | <b>1052.128</b> | 329.716        | 321.707         | 322.211         | 321.203        | K[5]  |
| V  | 21 | 1101.662        | 251.653        | 243.643         | 244.147         | 243.140        | V[4]  |
| L  | 22 | <b>1158.204</b> | 202.119        | 194.109         | 194.613         | 193.605        | L[3]  |
| R  | 23 | 1236.255        | 145.577        | 137.567         | 138.071         | 137.063        | R[2]  |
| D  | 24 | 1293.768        | 67.526         | 59.517          | 60.021          | 59.013         | D[1]  |

# sp | P62806 | H4\_MOUSE

[Acetyl]SGRGKGGKGLGKGGAK<sup>Acetyl</sup> RHRK<sup>Dimethyl</sup> VLRD<sup>28.03</sup>

- ▶ fragmentation table for charge state 3+
- ▶ specType=etd
- ▶ score=66.49
- ▶ F121546.dat
- ▶ query=q35729.p1
- ▶ precursor=518.310060
- ▶ chargePrecursor=5
- ▶ itol=0.7

| AA    | c              | y              | z+1            | z+2            | z              | AA    |
|-------|----------------|----------------|----------------|----------------|----------------|-------|
| S[1]  | 49.697         | <b>863.176</b> | <b>857.836</b> | 0.672          | 857.500        | S[24] |
| G[2]  | 58.704         | 320.162        | 314.822        | 0.672          | 314.486        | G[23] |
| R[3]  | 120.738        | 801.154        | <b>795.815</b> | <b>796.151</b> | 795.479        | R[22] |
| G[4]  | 130.745        | <b>749.121</b> | <b>743.781</b> | <b>744.117</b> | <b>743.445</b> | G[21] |
| K[5]  | 182.443        | 730.114        | <b>724.774</b> | <b>725.110</b> | <b>724.438</b> | K[20] |
| G[6]  | 201.450        | 687.415        | <b>682.076</b> | <b>682.412</b> | <b>681.740</b> | G[19] |
| G[7]  | 220.458        | 668.408        | <b>663.069</b> | <b>663.404</b> | 662.733        | G[18] |
| K[8]  | 263.156        | 649.401        | <b>644.061</b> | <b>644.397</b> | <b>643.725</b> | K[17] |
| G[9]  | 282.163        | <b>606.703</b> | <b>601.363</b> | <b>601.699</b> | <b>601.027</b> | G[16] |
| L[10] | 319.858        | <b>587.695</b> | <b>582.356</b> | <b>582.692</b> | <b>582.020</b> | L[15] |
| G[11] | 338.865        | 550.001        | <b>544.661</b> | <b>544.997</b> | 544.325        | G[14] |
| K[12] | 381.563        | <b>510.994</b> | <b>525.654</b> | <b>525.990</b> | 525.318        | K[13] |
| G[13] | 400.570        | 488.295        | 482.956        | 483.292        | 482.620        | G[12] |
| G[14] | 419.578        | 469.288        | 463.949        | 464.285        | 463.613        | G[11] |
| A[15] | 443.257        | 450.281        | 444.941        | 445.277        | 444.605        | A[10] |
| K[16] | 469.958        | 426.002        | 421.262        | 421.598        | 420.926        | K[9]  |
| R[17] | <b>551.992</b> | 369.900        | 364.561        | 364.896        | 364.225        | R[8]  |
| H[18] | <b>597.678</b> | 317.866        | 312.527        | 312.863        | 312.191        | H[7]  |
| R[19] | 659.712        | 272.180        | 266.841        | 267.176        | 266.505        | R[6]  |
| K[20] | <b>701.754</b> | 220.140        | 214.807        | 215.143        | 214.471        | K[5]  |
| V[21] | <b>734.777</b> | 168.104        | 162.765        | 163.101        | 162.429        | V[4]  |
| L[22] | <b>772.472</b> | 135.082        | 129.742        | 130.078        | 129.406        | L[3]  |
| R[23] | <b>824.505</b> | 97.387         | 92.047         | 92.383         | 91.711         | R[2]  |
| D[24] | <b>862.848</b> | 45.353         | 40.014         | 40.349         | 39.678         | D[1]  |

# sp | P62806 | H4\_MOUSE

[Acetyl]SGRGKGGKGLGKGGAK<sup>Acetyl</sup> RHRK<sup>Dimethyl</sup> VLRD<sup>28.03</sup>

- ▶ fragmentation table for charge state 4+
- ▶ specType=etd
- ▶ score=66.49
- ▶ F121546.dat
- ▶ query=q35729.p1
- ▶ precursor=518.310060
- ▶ chargePrecursor=5
- ▶ itol=0.7

| AA    | c              | y              | z+1            | z+2            | z              | AA    |
|-------|----------------|----------------|----------------|----------------|----------------|-------|
| S[1]  | 37.525         | <b>647.634</b> | <b>643.629</b> | 0.755          | <b>643.177</b> | S[24] |
| G[2]  | 51.780         | 515.373        | <b>611.368</b> | 0.755          | <b>611.116</b> | G[23] |
| R[3]  | 90.805         | <b>601.118</b> | <b>597.113</b> | <b>597.365</b> | <b>596.061</b> | R[22] |
| G[4]  | 105.061        | 562.092        | 558.088        | 558.340        | 557.836        | G[21] |
| K[5]  | 137.084        | <b>547.837</b> | 543.832        | 544.084        | 543.580        | K[20] |
| G[6]  | 151.340        | 515.813        | 511.809        | 512.061        | 511.557        | G[19] |
| G[7]  | 165.595        | 501.558        | 497.553        | 497.805        | 497.301        | G[18] |
| K[8]  | 197.619        | 487.303        | 483.298        | 483.550        | 483.046        | K[17] |
| G[9]  | 211.874        | 459.279        | 455.274        | 455.526        | 455.022        | G[16] |
| L[10] | 280.148        | 441.023        | 437.019        | 437.271        | 436.767        | L[15] |
| G[11] | 254.403        | 417.752        | 408.748        | 409.000        | 408.496        | G[14] |
| K[12] | 286.424        | 398.497        | 394.492        | 394.744        | 394.240        | K[13] |
| G[13] | 300.680        | 366.473        | 362.469        | 362.721        | 362.217        | G[12] |
| G[14] | 314.935        | 352.218        | 348.213        | 348.465        | 347.961        | G[11] |
| A[15] | 332.694        | 337.963        | 333.958        | 334.210        | 333.706        | A[10] |
| K[16] | 375.221        | 320.203        | 316.199        | 316.451        | 315.947        | K[9]  |
| R[17] | 414.246        | 277.877        | <b>273.672</b> | <b>273.924</b> | <b>273.420</b> | R[8]  |
| H[18] | 448.511        | 238.652        | 234.647        | 234.899        | 234.395        | H[7]  |
| R[19] | 497.536        | 204.387        | 200.382        | 200.634        | 200.130        | R[6]  |
| K[20] | <b>526.568</b> | 165.362        | 161.357        | 161.609        | 161.105        | K[5]  |
| V[21] | 551.335        | 126.330        | 122.325        | 122.577        | 122.073        | V[4]  |
| L[22] | 579.606        | 101.563        | 97.558         | 97.810         | 97.306         | L[3]  |
| R[23] | <b>618.631</b> | 73.292         | 69.287         | 69.539         | 69.035         | R[2]  |
| D[24] | <b>647.388</b> | 34.267         | 30.262         | 30.514         | 30.010         | D[1]  |

# sp | P62806 | H4\_MOUSE

[Acetyl]SGRGKGGKGLGKGGAK Acetyl 42.01 RHR Methyl 14.02 K Methyl 14.02 VL RD

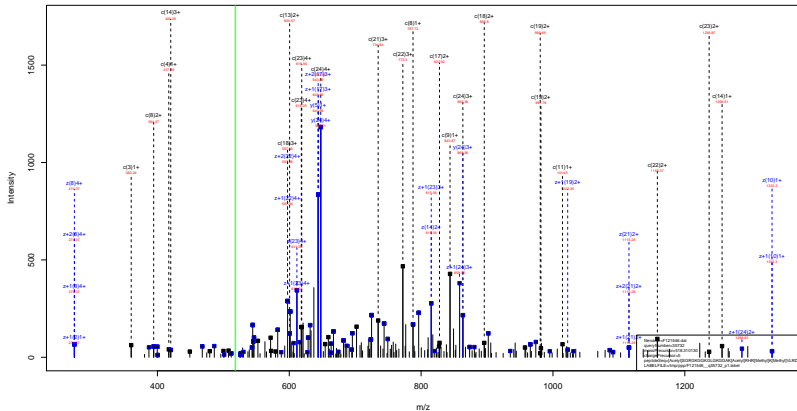



# sp | P62806 | H4\_MOUSE

[Acetyl]SGRGKGGKGLGKGGAK<sup>Acetyl</sup> 42.01 RHR<sup>Methyl</sup> 14.02 K<sup>Methyl</sup> 14.02 VLRLD

- ▶ fragmentation table for charge state 1+
- ▶ specType=etd
- ▶ score=49.30
- ▶ F121546.dat
- ▶ query=q35732.p1
- ▶ precursor=518.310130
- ▶ chargePrecursor=5
- ▶ itol=0.7

| AA | c  | y               | z+1            | z+2             | z        | AA              |       |
|----|----|-----------------|----------------|-----------------|----------|-----------------|-------|
| S  | 1  | 347.676         | 2587.513       | 2571.494        | 0.000    | 2570.486        | S[24] |
| G  | 2  | 204.098         | 2458.470       | 2442.451        | 0.000    | 2441.444        | G[23] |
| R  | 3  | <b>368.199</b>  | 2420.440       | 2385.430        | 2386.438 | 2384.422        | R[22] |
| G  | 4  | <b>417.230</b>  | 2345.348       | 2229.329        | 2230.337 | 2228.321        | G[21] |
| K  | 5  | <b>545.315</b>  | 2188.326       | 2172.307        | 2173.315 | 2171.300        | K[20] |
| G  | 6  | 602.357         | 2060.231       | 2044.210        | 2045.220 | 2043.205        | G[19] |
| G  | 7  | <b>659.358</b>  | 2003.210       | 1987.191        | 1988.199 | 1986.183        | G[18] |
| K  | 8  | <b>787.453</b>  | 1946.189       | 1930.170        | 1931.177 | 1929.162        | K[17] |
| G  | 9  | <b>844.475</b>  | 1818.093       | 1802.075        | 1803.082 | 1801.067        | G[16] |
| L  | 10 | <b>957.559</b>  | 1783.072       | 1748.053        | 1748.061 | 1744.045        | L[15] |
| G  | 11 | <b>1014.580</b> | 1647.985       | 1631.969        | 1632.977 | 1630.961        | G[14] |
| K  | 12 | 1142.675        | 1590.969       | 1574.948        | 1575.955 | 1573.940        | K[13] |
| G  | 13 | 1199.697        | 1462.871       | 1446.853        | 1447.860 | 1445.845        | G[12] |
| G  | 14 | <b>1256.718</b> | 1405.850       | 1389.831        | 1390.839 | 1388.823        | G[11] |
| A  | 15 | 1327.755        | 1348.828       | <b>1332.810</b> | 1333.818 | <b>1331.802</b> | A[10] |
| R  | 16 | 1497.883        | 1277.791       | 1261.773        | 1262.780 | 1258.765        | R[9]  |
| R  | 17 | 1653.962        | 1107.685       | <b>1091.667</b> | 1092.675 | <b>1090.659</b> | R[8]  |
| H  | 18 | 1791.021        | 951.585        | <b>935.566</b>  | 936.574  | 934.558         | H[7]  |
| R  | 19 | 1961.138        | 814.526        | 798.507         | 799.515  | 797.499         | R[6]  |
| K  | 20 | 2103.248        | <b>644.409</b> | <b>628.390</b>  | 629.398  | <b>627.382</b>  | K[5]  |
| V  | 21 | 2202.317        | 502.298        | <b>486.280</b>  | 487.287  | 485.272         | V[4]  |
| L  | 22 | 2315.401        | 403.230        | <b>387.211</b>  | 388.219  | 386.203         | L[3]  |
| R  | 23 | 2471.502        | 298.146        | <b>274.127</b>  | 275.135  | 273.119         | R[2]  |
| D  | 24 | 2586.529        | 134.045        | 118.026         | 119.034  | 117.018         | D[1]  |

# sp | P62806 | H4\_MOUSE

[Acetyl]SGRGKGGKGLGKGGAK<sup>Acetyl</sup> 42.01 RHR<sup>Methyl</sup> 14.02 K<sup>Methyl</sup> 14.02 VLRLD

- ▶ fragmentation table for charge state 2+
- ▶ specType=etd
- ▶ score=49.30
- ▶ F121546.dat
- ▶ query=q35732.p1
- ▶ precursor=518.310130
- ▶ chargePrecursor=5
- ▶ itol=0.7

| AA    | c               | y               | z+1             | z+2             | z               | AA    |
|-------|-----------------|-----------------|-----------------|-----------------|-----------------|-------|
| S[1]  | 74.642          | 1294.200        | <b>1286.251</b> | 0.504           | 1289.747        | S[24] |
| G[2]  | 102.553         | 1229.739        | 1221.729        | 0.504           | 1221.225        | G[23] |
| R[3]  | 180.603         | 1201.229        | 1191.719        | 1193.723        | 1192.712        | R[22] |
| G[4]  | 209.114         | 1123.177        | <b>1115.108</b> | <b>1115.072</b> | <b>1114.564</b> | G[21] |
| K[5]  | 273.163         | 1094.667        | <b>1086.657</b> | 1087.161        | <b>1086.153</b> | K[20] |
| G[6]  | 301.672         | <b>1030.619</b> | <b>1022.610</b> | 1023.114        | <b>1022.106</b> | G[19] |
| G[7]  | 330.183         | 1002.108        | 994.099         | <b>994.603</b>  | 993.593         | G[18] |
| K[8]  | <b>394.230</b>  | <b>973.598</b>  | <b>965.588</b>  | <b>966.092</b>  | <b>965.084</b>  | K[17] |
| G[9]  | 422.711         | 949.099         | <b>901.541</b>  | <b>902.045</b>  | 901.037         | G[16] |
| L[10] | <b>479.293</b>  | <b>881.040</b>  | <b>873.030</b>  | <b>873.534</b>  | 872.526         | L[15] |
| G[11] | <b>507.794</b>  | 824.468         | 816.458         | 816.962         | <b>815.964</b>  | G[14] |
| K[12] | <b>571.841</b>  | <b>795.987</b>  | <b>787.977</b>  | 788.481         | <b>787.474</b>  | K[13] |
| G[13] | <b>600.352</b>  | 731.939         | <b>723.930</b>  | <b>724.434</b>  | <b>723.426</b>  | G[12] |
| G[14] | <b>628.863</b>  | 703.429         | <b>695.419</b>  | <b>695.923</b>  | <b>694.915</b>  | G[11] |
| A[15] | 695.911         | <b>674.918</b>  | <b>666.908</b>  | <b>667.412</b>  | <b>666.405</b>  | A[10] |
| R[16] | <b>749.434</b>  | 639.359         | <b>631.390</b>  | <b>631.894</b>  | 630.885         | R[9]  |
| R[17] | <b>827.485</b>  | 554.347         | <b>546.337</b>  | <b>546.841</b>  | <b>545.833</b>  | R[8]  |
| H[18] | <b>896.014</b>  | 476.290         | <b>468.287</b>  | 468.791         | <b>467.783</b>  | H[7]  |
| R[19] | <b>981.072</b>  | 407.767         | <b>399.757</b>  | <b>400.261</b>  | <b>399.253</b>  | R[6]  |
| K[20] | 1052.128        | 322.708         | 314.699         | 315.203         | 314.195         | K[5]  |
| V[21] | 1101.662        | 258.653         | 249.643         | 249.147         | 249.140         | V[4]  |
| L[22] | <b>1158.204</b> | 202.119         | 194.109         | 194.613         | 193.605         | L[3]  |
| R[23] | <b>1236.255</b> | 145.577         | 137.567         | 138.071         | 137.063         | R[2]  |
| D[24] | 1293.768        | 67.526          | 59.517          | 60.021          | 59.013          | D[1]  |

# sp | P62806 | H4\_MOUSE

[Acetyl]SGRGKGGKGLGKGGAK <sup>Acetyl</sup>42.01 RHR <sup>Methyl</sup>14.02 K <sup>Methyl</sup>14.02 VLRD

- ▶ fragmentation table for charge state 3+
- ▶ specType=etd
- ▶ score=49.30
- ▶ F121546.dat
- ▶ query=q35732.p1
- ▶ precursor=518.310130
- ▶ chargePrecursor=5
- ▶ itol=0.7

| AA    | c              | y              | z+1            | z+2            | z     | AA             |       |
|-------|----------------|----------------|----------------|----------------|-------|----------------|-------|
| S[1]  | 49.697         | <b>863.176</b> | <b>857.836</b> |                | 0.672 | 857.500        | S[24] |
| G[2]  | 58.704         | <b>820.162</b> | <b>814.822</b> |                | 0.672 | 814.486        | G[23] |
| R[3]  | 120.738        | 801.154        | <b>795.815</b> | <b>796.151</b> |       | 795.479        | R[22] |
| G[4]  | 139.745        | <b>749.121</b> | <b>743.781</b> | <b>744.117</b> |       | <b>743.445</b> | G[21] |
| K[5]  | 182.443        | 730.114        | <b>724.774</b> | <b>725.110</b> |       | <b>724.438</b> | K[20] |
| G[6]  | 201.450        | <b>687.415</b> | <b>682.076</b> |                |       | <b>681.740</b> | G[19] |
| G[7]  | 220.458        | 668.408        | <b>663.069</b> | <b>663.404</b> |       | <b>662.733</b> | G[18] |
| K[8]  | 263.156        | 649.401        | <b>644.061</b> | <b>644.397</b> |       | <b>643.725</b> | K[17] |
| G[9]  | 282.163        | <b>606.703</b> | <b>601.363</b> | <b>601.699</b> |       | <b>601.327</b> | G[16] |
| L[10] | 319.858        | <b>587.695</b> | <b>582.356</b> | <b>582.692</b> |       | <b>582.020</b> | L[15] |
| G[11] | 338.865        | 550.001        | <b>544.661</b> | <b>544.997</b> |       | <b>544.325</b> | G[14] |
| K[12] | 381.563        | <b>530.994</b> | <b>525.654</b> | <b>525.990</b> |       | <b>525.318</b> | K[13] |
| G[13] | <b>400.570</b> | 488.295        | 482.956        | 483.292        |       | 482.620        | G[12] |
| G[14] | <b>419.578</b> | 469.288        | 463.949        | 464.285        |       | 463.613        | G[11] |
| A[15] | 443.257        | 450.281        | 444.941        | 445.277        |       | 444.605        | A[10] |
| K[16] | <b>499.958</b> | 426.002        | 421.262        | 421.598        |       | <b>420.926</b> | K[9]  |
| R[17] | <b>551.992</b> | 369.000        | 364.561        | 364.896        |       | 364.225        | R[8]  |
| H[18] | <b>597.678</b> | 317.866        | 312.527        | 312.863        |       | 312.191        | H[7]  |
| R[19] | <b>654.384</b> | 272.180        | 266.941        | 267.176        |       | 266.505        | R[6]  |
| K[20] | <b>701.754</b> | 215.475        | 210.135        | 210.471        |       | 209.799        | K[5]  |
| V[21] | <b>734.777</b> | 168.104        | 162.765        | 163.101        |       | 162.429        | V[4]  |
| L[22] | <b>772.472</b> | 135.082        | 129.742        | 130.078        |       | 129.406        | L[3]  |
| R[23] | 824.505        | 97.387         | 92.047         | 92.383         |       | 91.711         | R[2]  |
| D[24] | <b>862.848</b> | 45.353         | 40.014         | 40.349         |       | 39.678         | D[1]  |

# sp | P62806 | H4\_MOUSE

[Acetyl]SGRGKGGKGLGKGGAK<sup>Acetyl</sup> 42.01 RHR<sup>Methyl</sup> 14.02 K<sup>Methyl</sup> 14.02 VLRLD

- ▶ fragmentation table for charge state 4+
- ▶ specType=etd
- ▶ score=49.30
- ▶ F121546.dat
- ▶ query=q35732.p1
- ▶ precursor=518.310130
- ▶ chargePrecursor=5
- ▶ itol=0.7

| AA    | c              | y              | z+1            | z+2            | z              | AA    |
|-------|----------------|----------------|----------------|----------------|----------------|-------|
| S[1]  | 37.525         | <b>647.634</b> | <b>643.629</b> | 0.755          | <b>643.177</b> | S[24] |
| G[2]  | 51.780         | <b>615.373</b> | <b>611.368</b> | 0.755          | <b>611.116</b> | G[23] |
| R[3]  | 90.805         | <b>601.118</b> | <b>597.113</b> | <b>597.365</b> | <b>596.061</b> | R[22] |
| G[4]  | 105.061        | 562.092        | 558.088        | 558.340        | 557.836        | G[21] |
| K[5]  | 137.084        | 547.837        | <b>543.832</b> | <b>544.084</b> | <b>543.580</b> | K[20] |
| G[6]  | 151.340        | 515.813        | <b>511.809</b> | <b>512.061</b> | <b>511.557</b> | G[19] |
| G[7]  | 165.595        | <b>501.558</b> | 497.553        | 497.805        | 497.301        | G[18] |
| K[8]  | 197.619        | 487.303        | 483.298        | 483.550        | 483.046        | K[17] |
| G[9]  | 211.874        | 456.279        | 452.274        | 452.526        | 452.022        | G[16] |
| L[10] | 280.148        | 441.023        | 437.019        | 437.271        | 436.767        | L[15] |
| G[11] | 254.403        | 417.752        | 408.748        | 409.000        | 408.496        | G[14] |
| K[12] | 286.424        | 398.497        | <b>394.492</b> | <b>394.744</b> | <b>394.240</b> | K[13] |
| G[13] | 300.680        | 366.473        | 362.469        | 362.721        | 362.217        | G[12] |
| G[14] | 314.935        | 352.218        | 348.213        | 348.465        | 347.961        | G[11] |
| A[15] | 332.694        | 337.963        | 333.958        | 334.210        | 333.706        | A[10] |
| K[16] | 375.221        | 320.203        | 316.199        | 316.451        | 315.947        | K[9]  |
| R[17] | 418.246        | 277.877        | <b>273.872</b> | <b>273.924</b> | <b>273.420</b> | R[8]  |
| H[18] | <b>448.511</b> | 238.652        | 234.647        | 234.899        | 234.395        | H[7]  |
| R[19] | 491.940        | 204.397        | 200.382        | 200.634        | 200.130        | R[6]  |
| K[20] | <b>526.568</b> | 161.858        | 157.853        | 158.105        | 157.601        | K[5]  |
| V[21] | 551.335        | 126.330        | 122.325        | 122.577        | 122.073        | V[4]  |
| L[22] | <b>579.606</b> | 101.563        | 97.558         | 97.810         | 97.306         | L[3]  |
| R[23] | <b>618.631</b> | 73.292         | 69.287         | 69.539         | 69.035         | R[2]  |
| D[24] | <b>647.388</b> | 34.267         | 30.262         | 30.514         | 30.010         | D[1]  |

# sp | P62806 | H4\_MOUSE

[Acetyl]SGRGKGGKGLGKGGAKRHRK (Acetyl) VLR (42.01) Dimethyl D (28.03)

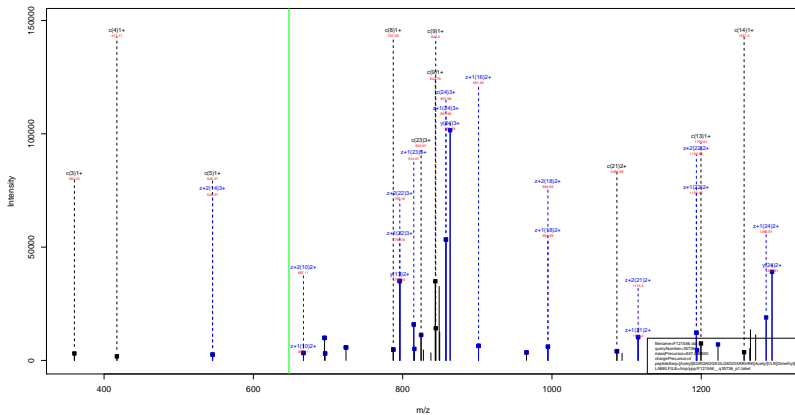

# sp | P62806 | H4\_MOUSE

[Acetyl]SGRGKGGKGLGKGGAKRHRK (Acetyl) VLR Dimethyl D  
(42.01) 28.03

- ▶ fragmentation table for charge state 1+
- ▶ specType=etd
- ▶ score=74.74
- ▶ F121546.dat
- ▶ query=q35736.p1
- ▶ precursor=647.636650
- ▶ chargePrecursor=4
- ▶ itol=0.7

| AA |    | c               | y        | z+1      | z+2      | z        | AA    |
|----|----|-----------------|----------|----------|----------|----------|-------|
| S  | 1  | 147.070         | 2587.513 | 2571.494 | 0.000    | 2570.486 | S[24] |
| G  | 2  | 204.998         | 2458.470 | 2442.451 | 0.000    | 2441.444 | G[23] |
| R  | 3  | <b>304.190</b>  | 2301.440 | 2285.430 | 2307.430 | 2304.422 | R[22] |
| G  | 4  | <b>417.220</b>  | 2245.340 | 2229.330 | 2230.337 | 2228.321 | G[21] |
| K  | 5  | <b>545.315</b>  | 2188.320 | 2172.307 | 2173.315 | 2171.300 | K[20] |
| G  | 6  | 602.337         | 2060.231 | 2044.212 | 2045.220 | 2043.205 | G[19] |
| G  | 7  | 659.358         | 2003.210 | 1987.191 | 1988.199 | 1986.183 | G[18] |
| K  | 8  | <b>787.453</b>  | 1946.188 | 1930.170 | 1931.177 | 1929.162 | K[17] |
| G  | 9  | <b>844.475</b>  | 1818.093 | 1802.075 | 1803.082 | 1801.067 | G[16] |
| L  | 10 | 837.559         | 1761.072 | 1745.053 | 1746.061 | 1744.045 | L[15] |
| G  | 11 | 1014.580        | 1647.982 | 1631.960 | 1632.977 | 1630.961 | G[14] |
| K  | 12 | 1142.675        | 1590.960 | 1574.948 | 1575.955 | 1573.940 | K[13] |
| G  | 13 | <b>1199.697</b> | 1462.871 | 1446.853 | 1447.860 | 1445.845 | G[12] |
| G  | 14 | <b>1256.718</b> | 1405.850 | 1389.831 | 1390.839 | 1388.823 | G[11] |
| A  | 15 | 1327.755        | 1348.828 | 1332.810 | 1333.818 | 1331.802 | A[10] |
| K  | 16 | 1455.850        | 1277.791 | 1261.773 | 1262.780 | 1260.765 | K[9]  |
| R  | 17 | 1611.951        | 1149.696 | 1133.678 | 1134.685 | 1132.670 | R[8]  |
| H  | 18 | 1749.010        | 993.590  | 977.572  | 978.584  | 976.569  | H[7]  |
| R  | 19 | 1905.111        | 895.530  | 880.518  | 881.525  | 879.510  | R[6]  |
| K  | 20 | 2075.217        | 700.435  | 684.416  | 685.424  | 683.409  | K[5]  |
| V  | 21 | 2174.285        | 530.330  | 514.311  | 515.319  | 513.303  | V[4]  |
| L  | 22 | 2287.369        | 431.261  | 415.243  | 416.250  | 414.235  | L[3]  |
| R  | 23 | 2471.502        | 318.177  | 302.158  | 303.166  | 301.151  | R[2]  |
| D  | 24 | 2586.520        | 134.045  | 118.028  | 119.034  | 117.018  | D[1]  |

# sp | P62806 | H4\_MOUSE

[Acetyl]SGRGKGGKGLGKGGAKRHRK<sup>(Acetyl)</sup>VLR<sup>Dimethyl</sup> D  
(42.01) 28.03

- ▶ fragmentation table for charge state 2+
- ▶ specType=etd
- ▶ score=74.74
- ▶ F121546.dat
- ▶ query=q35736.p1
- ▶ precursor=647.636650
- ▶ chargePrecursor=4
- ▶ itol=0.7

| AA |    | c               | y               | z+1             | z+2             | z              | AA    |
|----|----|-----------------|-----------------|-----------------|-----------------|----------------|-------|
| S  | 1  | 74.042          | <b>1294.260</b> | <b>1286.251</b> | 0.504           | 1285.747       | S(24) |
| G  | 2  | 102.503         | 1229.739        | <b>1221.729</b> | 0.504           | 1221.235       | G(23) |
| R  | 3  | 180.003         | 1201.239        | <b>1193.219</b> | <b>1193.723</b> | 1192.715       | R(22) |
| G  | 4  | 258.114         | 1123.177        | <b>1115.168</b> | <b>1115.672</b> | 1114.664       | G(21) |
| K  | 5  | 273.193         | 1094.659        | <b>1086.657</b> | <b>1087.161</b> | 1086.157       | K(20) |
| G  | 6  | 301.672         | 1030.619        | 1022.610        | 1023.114        | 1022.106       | G(19) |
| G  | 7  | 330.183         | 1000.108        | <b>994.099</b>  | <b>994.603</b>  | 993.595        | G(18) |
| K  | 8  | 394.230         | 973.595         | <b>965.588</b>  | <b>966.092</b>  | 965.084        | K(17) |
| G  | 9  | 422.741         | 909.550         | <b>901.541</b>  | <b>902.045</b>  | <b>901.037</b> | G(16) |
| L  | 10 | 419.203         | 881.940         | 873.930         | 874.434         | 873.426        | L(15) |
| G  | 11 | 507.794         | <b>824.498</b>  | 816.488         | 816.992         | <b>815.984</b> | G(14) |
| K  | 12 | 571.841         | <b>795.987</b>  | <b>787.977</b>  | 788.481         | <b>787.474</b> | K(13) |
| G  | 13 | 600.352         | 731.939         | <b>723.930</b>  | <b>724.434</b>  | <b>723.426</b> | G(12) |
| G  | 14 | 628.863         | 703.429         | <b>695.419</b>  | <b>695.923</b>  | <b>694.915</b> | G(11) |
| A  | 15 | 664.381         | 674.918         | <b>666.908</b>  | <b>667.412</b>  | 666.405        | A(10) |
| R  | 16 | 728.429         | 639.393         | 631.383         | 631.887         | 630.879        | R(9)  |
| R  | 17 | 806.478         | 575.352         | 567.342         | 567.846         | 566.838        | R(8)  |
| H  | 18 | 875.009         | 497.301         | 489.292         | 489.795         | 488.788        | H(7)  |
| R  | 19 | 953.059         | 428.772         | 420.762         | 421.266         | 420.259        | R(6)  |
| K  | 20 | 1038.112        | 350.721         | 342.712         | 343.215         | 342.208        | K(5)  |
| V  | 21 | <b>1087.646</b> | 265.666         | 257.656         | 258.160         | 257.153        | V(4)  |
| L  | 22 | 1144.588        | 216.134         | 208.125         | 208.629         | 207.621        | L(3)  |
| R  | 23 | 1236.255        | 155.592         | 151.583         | 152.087         | 151.079        | R(2)  |
| D  | 24 | 1293.768        | 67.526          | 59.517          | 60.021          | 59.013         | D(1)  |

# sp | P62806 | H4\_MOUSE

[Acetyl]SGRGKGGKGLGKGGAKRHRK<sup>(Acetyl)</sup>VLR<sup>Dimethyl</sup> D  
(42.01) 28.03

- ▶ fragmentation table for charge state 3+
- ▶ specType=etd
- ▶ score=74.74
- ▶ F121546.dat
- ▶ query=q35736.p1
- ▶ precursor=647.636650
- ▶ chargePrecursor=4
- ▶ itol=0.7

| AA    | c              | y              | z+1            | z+2            | z              | AA    |
|-------|----------------|----------------|----------------|----------------|----------------|-------|
| S[1]  | 49.697         | <b>863.176</b> | <b>857.836</b> | 0.672          | <b>857.500</b> | S[24] |
| G[2]  | 68.704         | 829.162        | <b>814.822</b> | 0.672          | <b>814.486</b> | G[23] |
| R[3]  | 120.738        | 801.154        | <b>795.815</b> | <b>796.151</b> | 795.479        | R[22] |
| G[4]  | 139.745        | 749.121        | 743.781        | 744.117        | 743.445        | G[21] |
| K[5]  | 182.443        | 730.114        | 724.774        | 725.110        | <b>724.438</b> | K[20] |
| G[6]  | 201.450        | 687.415        | 682.076        | 682.412        | 681.740        | G[19] |
| G[7]  | 220.458        | 608.408        | 603.069        | 603.404        | 602.733        | G[18] |
| K[8]  | 263.156        | 649.401        | 644.061        | 644.397        | 643.725        | K[17] |
| G[9]  | 282.163        | 606.703        | 601.363        | 601.699        | 601.027        | G[16] |
| L[10] | 319.858        | 587.695        | 582.356        | 582.692        | 582.020        | L[15] |
| G[11] | 338.865        | 530.001        | 544.661        | <b>544.997</b> | 544.325        | G[14] |
| K[12] | 381.563        | 530.994        | 525.654        | 525.990        | 525.318        | K[13] |
| G[13] | 400.570        | 488.295        | 482.956        | 483.292        | 482.620        | G[12] |
| G[14] | 419.578        | 469.288        | 463.949        | 464.285        | 463.613        | G[11] |
| A[15] | 443.297        | 450.281        | 444.941        | 445.277        | 444.605        | A[10] |
| K[16] | 485.995        | 426.602        | 421.262        | 421.598        | 420.926        | K[9]  |
| R[17] | 537.989        | 383.904        | 378.564        | 378.900        | 378.228        | R[8]  |
| H[18] | 583.675        | 331.870        | 326.530        | 326.866        | 326.194        | H[7]  |
| R[19] | 635.709        | 286.184        | 280.844        | 281.180        | 280.508        | R[6]  |
| K[20] | 687.410        | 234.150        | 228.810        | 229.146        | 228.474        | K[5]  |
| V[21] | 725.433        | 177.448        | 172.108        | 172.444        | 171.773        | V[4]  |
| L[22] | 763.128        | 144.425        | 139.086        | 139.422        | 138.750        | L[3]  |
| R[23] | <b>824.505</b> | 106.731        | 101.391        | 101.727        | 101.055        | R[2]  |
| D[24] | 862.848        | 45.353         | 40.014         | 40.349         | 39.678         | D[1]  |



# sp | P62806 | H4\_MOUSE

[Acetyl]SGRGKGGKGLGK <sup>Acetyl</sup> 42.01 GGAKRHRKVL <sup>(Dimethyl)</sup> 28.03 D

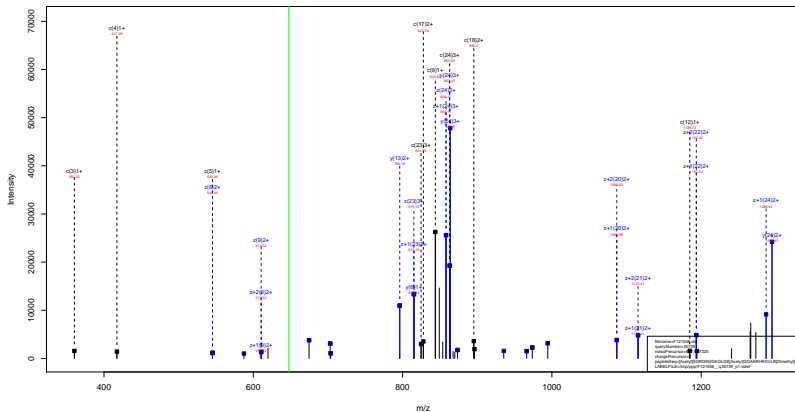

# sp | P62806 | H4\_MOUSE

[Acetyl]SGRGKGGKGLGK<sup>Acetyl</sup> GGAKRHRKVL<sup>(Dimethyl)</sup> D<sub>42.01</sub> (28.03)

- ▶ fragmentation table for charge state 1+
- ▶ specType=etd
- ▶ score=49.02
- ▶ F121546.dat
- ▶ query=q35739\_p1
- ▶ precursor=647.637320
- ▶ chargePrecursor=4
- ▶ itol=0.7

| AA |    | c               | y              | z+1            | z+2      | z        | AA    |
|----|----|-----------------|----------------|----------------|----------|----------|-------|
| S  | 1  | 147.070         | 2587.513       | 2571.494       | 0.000    | 2570.486 | S[24] |
| G  | 2  | 204.998         | 2458.470       | 2442.451       | 0.000    | 2441.444 | G[23] |
| R  | 3  | <b>304.199</b>  | 2301.440       | 2385.430       | 2369.430 | 2384.422 | R[22] |
| G  | 4  | <b>417.220</b>  | 2245.340       | 2229.320       | 2230.337 | 2228.321 | G[21] |
| K  | 5  | <b>545.315</b>  | 2188.320       | 2172.307       | 2173.315 | 2171.300 | K[20] |
| G  | 6  | 602.337         | 2060.231       | 2044.212       | 2045.220 | 2043.205 | G[19] |
| G  | 7  | 659.358         | 2003.210       | 1987.191       | 1988.199 | 1986.183 | G[18] |
| K  | 8  | 787.453         | 1946.188       | 1930.170       | 1931.177 | 1929.162 | K[17] |
| G  | 9  | <b>844.475</b>  | 1818.093       | 1802.075       | 1803.082 | 1801.067 | G[16] |
| L  | 10 | 877.559         | 1761.072       | 1745.053       | 1746.061 | 1744.045 | L[15] |
| G  | 11 | 1014.580        | 1647.982       | 1631.960       | 1632.977 | 1630.961 | G[14] |
| K  | 12 | <b>1184.686</b> | 1590.960       | 1574.948       | 1575.955 | 1573.940 | K[13] |
| G  | 13 | 1241.707        | 1420.861       | 1404.842       | 1405.850 | 1403.834 | G[12] |
| G  | 14 | 1298.729        | 1363.839       | 1347.821       | 1348.828 | 1346.813 | G[11] |
| A  | 15 | 1369.760        | 1306.818       | 1290.799       | 1291.807 | 1289.791 | A[10] |
| K  | 16 | 1497.861        | 1235.781       | 1219.762       | 1220.770 | 1218.754 | K[9]  |
| R  | 17 | 1653.982        | 1107.680       | 1091.667       | 1092.675 | 1090.659 | R[8]  |
| H  | 18 | 1793.021        | 993.580        | <b>935.566</b> | 936.574  | 934.558  | H[7]  |
| R  | 19 | 1947.122        | <b>814.526</b> | 798.507        | 799.515  | 797.499  | R[6]  |
| K  | 20 | 2075.217        | 658.425        | 642.406        | 643.414  | 641.398  | K[5]  |
| V  | 21 | 2174.285        | 530.330        | 514.311        | 515.319  | 513.303  | V[4]  |
| L  | 22 | 2287.369        | 431.261        | 415.243        | 416.250  | 414.235  | L[3]  |
| R  | 23 | 2471.502        | 318.177        | 302.158        | 303.166  | 301.151  | R[2]  |
| D  | 24 | 2586.520        | 134.045        | 118.028        | 119.034  | 117.018  | D[1]  |

# sp | P62806 | H4\_MOUSE

[Acetyl]SGRGKGGKGLGK<sup>Acetyl</sup> GGAKRHRKVL<sup>(Dimethyl)</sup> D  
42.01 (28.03)

- ▶ fragmentation table for charge state 2+
- ▶ specType=etd
- ▶ score=49.02
- ▶ F121546.dat
- ▶ query=q35739\_p1
- ▶ precursor=647.637320
- ▶ chargePrecursor=4
- ▶ itol=0.7

| AA |    | c              | y               | z+1             | z+2             | z              | AA    |
|----|----|----------------|-----------------|-----------------|-----------------|----------------|-------|
| S  | 1  | 74.042         | <b>1294.260</b> | <b>1286.251</b> | 0.504           | 1385.747       | S[24] |
| G  | 2  | 102.553        | 1229.739        | 1221.739        | 0.304           | 1221.229       | G[23] |
| R  | 3  | 180.003        | 1201.238        | <b>1193.219</b> | <b>1193.723</b> | 1192.715       | R[22] |
| G  | 4  | 209.114        | 1123.777        | <b>1113.168</b> | <b>1115.972</b> | 1114.666       | G[21] |
| K  | 5  | 273.101        | 1094.667        | <b>1086.657</b> | <b>1087.161</b> | 1086.153       | K[20] |
| G  | 6  | 301.672        | 1020.619        | 1022.610        | 1023.114        | 1022.106       | G[19] |
| G  | 7  | 330.183        | 1002.108        | <b>994.099</b>  | <b>994.603</b>  | 993.595        | G[18] |
| K  | 8  | 394.230        | <b>973.598</b>  | <b>965.588</b>  | <b>966.092</b>  | 965.084        | K[17] |
| G  | 9  | 422.741        | 909.550         | 901.541         | 902.045         | 901.037        | G[16] |
| L  | 10 | 479.283        | 891.040         | <b>873.030</b>  | <b>873.534</b>  | 872.526        | L[15] |
| G  | 11 | 507.794        | <b>824.496</b>  | 816.488         | 816.992         | 815.984        | G[14] |
| R  | 12 | 592.947        | <b>795.987</b>  | 787.979         | 788.483         | 787.474        | R[13] |
| G  | 13 | 621.357        | 710.934         | <b>702.925</b>  | <b>703.429</b>  | <b>702.421</b> | G[12] |
| G  | 14 | 649.868        | 682.423         | <b>674.414</b>  | <b>674.918</b>  | 673.910        | G[11] |
| A  | 15 | 685.387        | 653.913         | 645.903         | 646.407         | 645.399        | A[10] |
| R  | 16 | 709.414        | 616.394         | <b>610.385</b>  | <b>610.889</b>  | <b>609.881</b> | R[9]  |
| R  | 17 | <b>827.405</b> | 554.347         | 546.337         | 546.841         | <b>545.833</b> | R[8]  |
| H  | 18 | <b>896.014</b> | 476.295         | 468.287         | 468.791         | 467.783        | H[7]  |
| R  | 19 | <b>974.065</b> | 407.767         | 399.757         | 400.261         | 399.253        | R[6]  |
| K  | 20 | 1036.112       | 329.716         | 321.707         | 322.211         | 321.203        | K[5]  |
| V  | 21 | 1087.646       | 265.668         | 257.658         | 258.163         | 257.155        | V[4]  |
| L  | 22 | 1144.198       | 216.134         | 208.125         | 208.629         | 207.621        | L[3]  |
| D  | 23 | 1236.255       | 159.592         | 151.583         | 152.087         | 151.079        | D[2]  |
| D  | 24 | 1293.708       | 87.525          | 79.517          | 80.021          | 79.013         | D[1]  |

# sp | P62806 | H4\_MOUSE

[Acetyl]SGRGKGGKGLGK<sup>Acetyl</sup> GGAKRHRKVL<sup>(Dimethyl)</sup> D  
42.01 (28.03)

- ▶ fragmentation table for charge state 3+
- ▶ specType=etd
- ▶ score=49.02
- ▶ F121546.dat
- ▶ query=q35739\_p1
- ▶ precursor=647.637320
- ▶ chargePrecursor=4
- ▶ itol=0.7

| AA    | c              | y              | z+1            | z+2            | z              | AA    |
|-------|----------------|----------------|----------------|----------------|----------------|-------|
| S[1]  | 49.697         | <b>863.176</b> | <b>857.836</b> | 0.672          | <b>857.500</b> | S[24] |
| G[2]  | 68.704         | 829.162        | <b>814.822</b> | 0.672          | <b>814.486</b> | G[23] |
| R[3]  | 120.738        | 801.154        | <b>795.815</b> | <b>796.151</b> | 795.479        | R[22] |
| G[4]  | 139.745        | 749.121        | 743.781        | 744.117        | 743.445        | G[21] |
| K[5]  | 182.443        | 730.114        | 724.774        | 725.110        | 724.438        | K[20] |
| G[6]  | 201.450        | 687.415        | 682.076        | 682.412        | 681.740        | G[19] |
| G[7]  | 220.458        | 608.408        | 603.069        | 603.404        | 602.733        | G[18] |
| K[8]  | 263.156        | 649.401        | 644.061        | 644.397        | 643.725        | K[17] |
| G[9]  | 282.163        | 606.703        | 601.363        | 601.699        | 601.027        | G[16] |
| L[10] | 319.858        | <b>587.695</b> | <b>582.355</b> | <b>582.692</b> | <b>582.020</b> | L[15] |
| G[11] | 338.865        | 930.001        | <b>544.661</b> | <b>544.997</b> | 544.325        | G[14] |
| K[12] | 395.567        | 530.994        | 525.654        | 525.990        | 525.318        | K[13] |
| G[13] | 414.574        | 474.292        | 468.952        | 469.288        | 468.616        | G[12] |
| G[14] | 433.581        | 455.285        | 449.945        | 450.281        | 449.609        | G[11] |
| A[15] | 497.260        | 436.277        | 430.938        | 431.274        | 430.602        | A[10] |
| K[16] | 499.958        | 412.598        | 407.259        | 407.595        | 406.923        | K[9]  |
| R[17] | 551.992        | 369.900        | 364.561        | 364.896        | 364.225        | R[8]  |
| H[18] | 597.678        | 317.866        | 312.527        | 312.863        | 312.191        | H[7]  |
| R[19] | 649.712        | 272.180        | 266.841        | 267.176        | 266.505        | R[6]  |
| K[20] | 692.410        | 220.146        | 214.807        | 215.143        | 214.471        | K[5]  |
| V[21] | 725.433        | 177.448        | 172.109        | 172.444        | 171.773        | V[4]  |
| L[22] | 763.128        | 144.425        | 139.086        | 139.422        | 138.750        | L[3]  |
| R[23] | <b>824.505</b> | 106.731        | 101.391        | 101.727        | 101.055        | R[2]  |
| D[24] | <b>862.848</b> | 45.353         | 40.014         | 40.349         | 39.678         | D[1]  |



# sp | P62806 | H4\_MOUSE

[Acetyl]SGRGKGGKGLGKGGAK<sup>Acetyl</sup><sub>42.01</sub> RHRK<sup>(Methyl)</sup><sub>(14.02)</sub> VLR<sup>Dimethyl</sup><sub>28.03</sub> D

- ▶ fragmentation table for charge state 1+
- ▶ specType=etd
- ▶ score=62.25
- ▶ F121546.dat
- ▶ query=q36000.p1
- ▶ precursor=521.111370
- ▶ chargePrecursor=5
- ▶ itol=0.7

| AA | c  | y               | z+1            | z+2            | z        | AA       |       |
|----|----|-----------------|----------------|----------------|----------|----------|-------|
| S  | 1  | 147.076         | 2601.528       | 2585.510       | 0.000    | 2584.502 | S[24] |
| G  | 2  | 264.098         | 2472.486       | 2456.467       | 0.000    | 2455.459 | G[23] |
| R  | 3  | <b>360.199</b>  | 2315.464       | 2299.446       | 2407.433 | 2398.425 | R[22] |
| G  | 4  | <b>417.220</b>  | 2259.361       | 2243.345       | 2244.352 | 2242.337 | G[21] |
| K  | 5  | <b>545.315</b>  | 2202.342       | 2186.323       | 2187.331 | 2185.315 | K[20] |
| G  | 6  | 602.337         | 2074.347       | 2058.328       | 2059.336 | 2057.320 | G[19] |
| G  | 7  | <b>659.358</b>  | 2017.225       | 2001.207       | 2002.214 | 2000.199 | G[18] |
| K  | 8  | <b>787.453</b>  | 1960.204       | 1944.185       | 1945.193 | 1943.177 | K[17] |
| G  | 9  | 844.475         | 1832.109       | 1816.090       | 1817.098 | 1815.082 | G[16] |
| L  | 10 | <b>937.558</b>  | 1775.087       | 1759.069       | 1760.077 | 1758.061 | L[15] |
| G  | 11 | <b>1014.580</b> | 1662.001       | 1645.985       | 1646.993 | 1644.977 | G[14] |
| K  | 12 | 1142.675        | 1604.982       | 1588.963       | 1589.971 | 1587.955 | K[13] |
| G  | 13 | 1199.697        | 1476.887       | 1460.868       | 1461.876 | 1459.860 | G[12] |
| G  | 14 | 1256.718        | 1419.866       | 1403.847       | 1404.855 | 1402.839 | G[11] |
| A  | 15 | 1327.755        | 1362.844       | 1346.825       | 1347.833 | 1345.818 | A[10] |
| K  | 16 | 1497.861        | 1291.807       | 1275.788       | 1276.796 | 1274.780 | K[9]  |
| R  | 17 | 1653.962        | 1121.701       | 1105.683       | 1106.691 | 1104.675 | R[8]  |
| R  | 18 | 1791.021        | 965.600        | 949.582        | 950.589  | 948.574  | R[7]  |
| R  | 19 | 1947.122        | <b>828.541</b> | 812.523        | 813.530  | 811.515  | R[6]  |
| K  | 20 | 2089.233        | 672.440        | <b>656.422</b> | 657.429  | 655.414  | K[5]  |
| V  | 21 | 2188.301        | <b>530.330</b> | 514.311        | 515.319  | 513.303  | V[4]  |
| L  | 22 | 2301.385        | 431.261        | 415.243        | 416.250  | 414.235  | L[3]  |
| R  | 23 | 2485.517        | 318.177        | 302.158        | 303.166  | 301.151  | R[2]  |
| D  | 24 | 2600.544        | 134.045        | 118.028        | 119.034  | 117.018  | D[1]  |

# sp | P62806 | H4\_MOUSE

[Acetyl]SGRGKGGKGLGKGGAK<sup>Acetyl</sup>42.01 RHRK<sup>(Methyl)</sup>(14.02) VLR<sup>Dimethyl</sup>28.03 D

- ▶ fragmentation table for charge state 2+
- ▶ specType=etd
- ▶ score=62.25
- ▶ F121546.dat
- ▶ query=q36000\_p1
- ▶ precursor=521.111370
- ▶ chargePrecursor=5
- ▶ itol=0.7

| AA    | c               | y              | z+1             | z+2             | z              | AA    |
|-------|-----------------|----------------|-----------------|-----------------|----------------|-------|
| S[1]  | 74.042          | 1301.268       | 1293.258        | 0.504           | 1292.755       | S[24] |
| G[2]  | 102.553         | 1236.747       | 1228.737        | 0.504           | 1228.233       | G[23] |
| R[3]  | 180.601         | 1208.236       | 1200.226        | 1200.730        | 1199.723       | R[22] |
| G[4]  | 269.114         | 1130.389       | <b>1122.176</b> | <b>1122.680</b> | 1121.672       | G[21] |
| K[5]  | 273.161         | 1101.675       | <b>1093.665</b> | <b>1094.169</b> | 1093.161       | K[20] |
| G[6]  | 301.672         | 1027.627       | 1029.619        | 1030.122        | 1029.114       | G[19] |
| G[7]  | 330.183         | 1006.116       | 1001.107        | 1001.611        | 1000.603       | G[18] |
| K[8]  | 394.230         | 980.606        | <b>972.596</b>  | <b>973.100</b>  | 972.092        | K[17] |
| G[9]  | 422.741         | 916.558        | 908.549         | <b>909.053</b>  | 908.045        | G[16] |
| L[10] | 479.283         | 888.047        | <b>880.038</b>  | <b>880.542</b>  | 879.535        | L[15] |
| G[11] | 507.794         | 831.935        | <b>823.496</b>  | <b>824.000</b>  | 822.992        | G[14] |
| R[12] | <b>571.841</b>  | 802.995        | 794.985         | <b>795.489</b>  | 794.481        | R[13] |
| G[13] | <b>600.352</b>  | <b>738.947</b> | <b>730.938</b>  | 731.442         | <b>730.434</b> | G[12] |
| G[14] | <b>628.863</b>  | 710.436        | <b>702.427</b>  | <b>702.931</b>  | <b>701.923</b> | G[11] |
| A[15] | <b>664.381</b>  | 681.926        | <b>673.916</b>  | <b>674.420</b>  | <b>673.412</b> | A[10] |
| R[16] | <b>749.434</b>  | 646.407        | <b>638.398</b>  | <b>638.902</b>  | <b>637.894</b> | R[9]  |
| R[17] | <b>827.485</b>  | 593.394        | <b>585.385</b>  | <b>585.889</b>  | <b>584.881</b> | R[8]  |
| H[18] | <b>896.014</b>  | 483.304        | <b>475.294</b>  | <b>475.798</b>  | <b>474.791</b> | H[7]  |
| R[19] | <b>974.065</b>  | 414.774        | <b>406.765</b>  | <b>407.269</b>  | <b>406.261</b> | R[6]  |
| R[20] | 1045.120        | 336.724        | 328.714         | 329.218         | 328.211        | R[5]  |
| V[21] | <b>1094.654</b> | 265.668        | 257.658         | 258.163         | 257.155        | V[4]  |
| L[22] | 1151.196        | 216.134        | 208.125         | 208.629         | 207.621        | L[3]  |
| D[23] | 1243.262        | 159.592        | 151.583         | 152.087         | 151.079        | D[2]  |
| D[24] | 1300.776        | 87.525         | 79.517          | 80.021          | 79.013         | D[1]  |

# sp | P62806 | H4\_MOUSE

[Acetyl]SGRGKGGKGLGKGGAK<sup>Acetyl</sup> RHRK<sup>(Methyl)</sup> VLR<sup>Dimethyl</sup> D  
 42.01 (14.02) 28.03

- ▶ fragmentation table for charge state 3+
- ▶ specType=etd
- ▶ score=62.25
- ▶ F121546.dat
- ▶ query=q36000.p1
- ▶ precursor=521.111370
- ▶ chargePrecursor=5
- ▶ itol=0.7

| AA    | c              | y              | z+1            | z+2            | z              | AA    |
|-------|----------------|----------------|----------------|----------------|----------------|-------|
| S[1]  | 49.697         | <b>867.848</b> | <b>862.508</b> | 0.672          | <b>862.172</b> | S[24] |
| G[2]  | 68.704         | 874.933        | <b>819.494</b> | 0.672          | 819.158        | G[23] |
| R[3]  | 120.738        | 905.826        | <b>900.487</b> | <b>800.823</b> | 800.151        | R[22] |
| G[4]  | 159.745        | 753.793        | <b>748.453</b> | <b>748.789</b> | <b>748.117</b> | G[21] |
| K[5]  | 182.443        | 734.785        | <b>725.446</b> | <b>729.782</b> | <b>729.110</b> | K[20] |
| G[6]  | 201.450        | 692.067        | <b>686.748</b> | <b>687.083</b> | <b>686.412</b> | G[19] |
| G[7]  | 220.458        | <b>673.080</b> | <b>667.740</b> | <b>668.076</b> | <b>667.404</b> | G[18] |
| K[8]  | 263.156        | 654.073        | <b>648.733</b> | <b>649.069</b> | <b>648.397</b> | K[17] |
| G[9]  | 282.163        | <b>611.374</b> | <b>606.035</b> | <b>606.371</b> | <b>605.699</b> | G[16] |
| L[10] | 319.858        | <b>592.367</b> | <b>587.028</b> | <b>587.364</b> | <b>586.692</b> | L[15] |
| G[11] | 338.865        | 574.973        | <b>549.333</b> | <b>549.669</b> | <b>548.997</b> | G[14] |
| K[12] | 351.563        | <b>535.666</b> | <b>530.326</b> | <b>530.662</b> | <b>529.990</b> | K[13] |
| G[13] | 400.570        | 492.967        | 487.628        | 487.964        | 487.292        | G[12] |
| G[14] | 419.578        | 473.960        | 468.620        | 468.956        | 468.285        | G[11] |
| A[15] | 443.257        | 454.953        | 449.613        | 449.949        | 449.277        | A[10] |
| K[16] | 499.958        | 431.274        | 425.934        | 426.270        | 425.598        | K[9]  |
| R[17] | 551.992        | 374.572        | 369.232        | 369.568        | 368.896        | R[8]  |
| H[18] | 597.678        | 322.538        | 317.199        | 317.535        | 316.863        | H[7]  |
| R[19] | 649.712        | 276.892        | 271.552        | 271.888        | 271.176        | R[6]  |
| K[20] | 697.682        | 224.818        | 219.479        | 219.815        | 219.143        | K[5]  |
| V[21] | <b>730.105</b> | 177.440        | 172.100        | 172.444        | 171.773        | V[4]  |
| L[22] | 767.800        | 144.425        | 139.086        | 139.422        | 138.750        | L[3]  |
| R[23] | 829.177        | 106.731        | 101.391        | 101.727        | 101.055        | R[2]  |
| D[24] | 887.520        | 45.353         | 40.014         | 40.349         | 39.678         | D[1]  |



# sp | P62806 | H4\_MOUSE

[Acetyl]SGRGKGGKGLGKGGAK<sup>Acetyl</sup> RHRK<sup>(Methyl)</sup> VLR<sup>Dimethyl</sup> D  
 42.01 (14.02) 28.03

- ▶ fragmentation table for charge state 4+
- ▶ specType=etd
- ▶ score=62.25
- ▶ F121546.dat
- ▶ query=q36000.p1
- ▶ precursor=521.111370
- ▶ chargePrecursor=5
- ▶ itol=0.7

| AA    | c              | y              | z+1            | z+2            | z              | AA    |
|-------|----------------|----------------|----------------|----------------|----------------|-------|
| S[1]  | 37.925         | <b>651.138</b> | <b>647.133</b> | 0.755          | <b>646.881</b> | S[24] |
| G[2]  | 51.780         | 618.871        | <b>614.872</b> | 0.755          | <b>614.620</b> | G[23] |
| R[3]  | 50.505         | 504.622        | <b>600.617</b> | <b>600.869</b> | <b>600.365</b> | R[22] |
| G[4]  | 105.061        | 505.596        | 561.592        | 561.844        | 561.340        | G[21] |
| K[5]  | 137.084        | 551.341        | 547.336        | 547.588        | 547.084        | K[20] |
| G[6]  | 151.340        | 519.317        | 515.312        | 515.564        | 515.061        | G[19] |
| G[7]  | 165.595        | 505.062        | 501.057        | 501.309        | 500.805        | G[18] |
| K[8]  | 197.619        | 490.806        | 486.802        | 487.054        | 486.550        | K[17] |
| G[9]  | 211.874        | 458.783        | 454.778        | 455.030        | 454.526        | G[16] |
| L[10] | 240.145        | 444.527        | 440.523        | 440.775        | 440.271        | L[15] |
| G[11] | 254.401        | 416.256        | 412.252        | 412.504        | 412.000        | G[14] |
| K[12] | 286.424        | 402.001        | 397.996        | 398.248        | 397.744        | K[13] |
| G[13] | 300.680        | 399.977        | 395.973        | 396.224        | 395.721        | G[12] |
| G[14] | 314.935        | 395.722        | 351.717        | 351.969        | 351.465        | G[11] |
| A[15] | 332.694        | 341.466        | 337.462        | 337.714        | 337.210        | A[10] |
| K[16] | 375.221        | 323.707        | 319.703        | 319.954        | 319.451        | K[9]  |
| R[17] | 414.246        | 281.181        | 277.176        | 277.428        | 276.924        | R[8]  |
| H[18] | 448.511        | 242.156        | 238.151        | 238.403        | 237.899        | H[7]  |
| R[19] | 487.536        | 207.891        | 203.886        | 204.138        | 203.634        | R[6]  |
| K[20] | 523.064        | 198.866        | 194.861        | 195.113        | 194.609        | K[5]  |
| V[21] | 547.251        | 133.130        | 129.131        | 129.505        | 129.081        | V[4]  |
| L[22] | 576.102        | 108.571        | 104.566        | 104.818        | 104.314        | L[3]  |
| R[23] | <b>622.135</b> | 80.300         | 76.295         | 76.547         | 76.043         | R[2]  |
| D[24] | <b>650.892</b> | 34.267         | 30.262         | 30.514         | 30.010         | D[1]  |

# sp | P62806 | H4\_MOUSE

[Acetyl]SGRGKGGKGLGKGGAK Acetyl 42.01 RHR Trimethyl 42.05 KVLRD

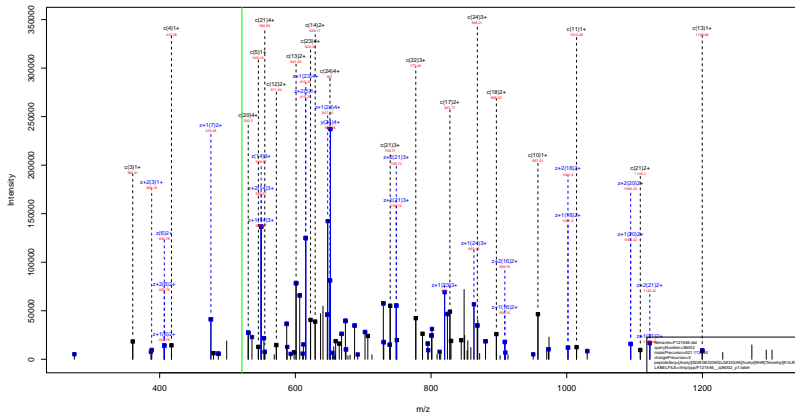

# sp | P62806 | H4\_MOUSE

[Acetyl]SGRGKGGKGLGKGGAK<sup>Acetyl</sup> RHR<sup>Trimethyl</sup> KVLRD<sup>42.05</sup>

- ▶ fragmentation table for charge state 1+
- ▶ specType=etd
- ▶ score=81.87
- ▶ F121546.dat
- ▶ query=q36002.p1
- ▶ precursor=521.112450
- ▶ chargePrecursor=5
- ▶ itol=0.7

| AA | c  | y               | z+1      | z+2            | z              | AA       |   |    |
|----|----|-----------------|----------|----------------|----------------|----------|---|----|
| S  | 1  | 147.076         | 2601.528 | 2585.510       | 0.000          | 2584.502 | S | 24 |
| G  | 2  | 224.998         | 2372.488 | 2499.487       | 0.000          | 2458.493 | G | 23 |
| R  | 3  | <b>360.199</b>  | 2415.464 | 2399.446       | 2400.453       | 2398.438 | R | 22 |
| G  | 4  | <b>417.220</b>  | 2259.363 | 2243.345       | 2244.352       | 2242.337 | G | 21 |
| K  | 5  | <b>545.315</b>  | 2202.342 | 2186.323       | 2187.331       | 2185.315 | K | 20 |
| G  | 6  | 602.337         | 2074.247 | 2058.228       | 2059.236       | 2057.220 | G | 19 |
| G  | 7  | <b>659.358</b>  | 2017.225 | 2001.207       | 2002.214       | 2000.199 | G | 18 |
| K  | 8  | <b>787.453</b>  | 1960.204 | 1944.185       | 1945.193       | 1943.177 | K | 17 |
| G  | 9  | <b>844.475</b>  | 1832.109 | 1816.090       | 1817.098       | 1815.082 | G | 16 |
| L  | 10 | <b>957.559</b>  | 1779.087 | 1759.069       | 1760.077       | 1758.061 | L | 15 |
| G  | 11 | <b>1014.580</b> | 1662.083 | 1645.985       | 1646.993       | 1644.977 | G | 14 |
| K  | 12 | 1142.075        | 1604.982 | 1588.963       | 1589.971       | 1587.955 | K | 13 |
| G  | 13 | <b>1199.697</b> | 1476.887 | 1460.888       | 1461.876       | 1459.860 | G | 12 |
| G  | 14 | 1256.718        | 1419.886 | 1403.847       | 1404.855       | 1402.839 | G | 11 |
| A  | 15 | 1327.755        | 1362.844 | 1346.825       | 1347.833       | 1345.818 | A | 10 |
| K  | 16 | 1497.881        | 1291.807 | 1275.788       | 1276.796       | 1274.780 | K | 9  |
| R  | 17 | 1653.864        | 1124.761 | 1105.683       | 1106.691       | 1104.675 | R | 8  |
| H  | 18 | 1791.021        | 985.020  | 949.582        | <b>950.589</b> | 948.574  | H | 7  |
| R  | 19 | 1989.169        | 828.541  | <b>812.523</b> | 813.530        | 811.515  | R | 6  |
| K  | 20 | 2117.264        | 630.393  | 614.375        | <b>615.382</b> | 613.367  | K | 5  |
| V  | 21 | 2216.332        | 502.298  | <b>486.280</b> | 487.287        | 485.272  | V | 4  |
| L  | 22 | 2329.416        | 403.230  | <b>387.211</b> | <b>388.219</b> | 386.203  | L | 3  |
| R  | 23 | 2485.517        | 290.146  | <b>274.127</b> | 275.135        | 273.119  | R | 2  |
| D  | 24 | 2600.544        | 134.045  | 118.026        | 119.034        | 117.018  | D | 1  |

# sp | P62806 | H4\_MOUSE

[Acetyl]SGRGKGGKGLGKGGAK<sup>Acetyl</sup> RHR<sup>Trimethyl</sup> KVLRD<sup>42.01</sup> <sup>42.05</sup>

- ▶ fragmentation table for charge state 2+
- ▶ specType=etd
- ▶ score=81.87
- ▶ F121546.dat
- ▶ query=q36002.p1
- ▶ precursor=521.112450
- ▶ chargePrecursor=5
- ▶ itol=0.7

| AA |    | c               | y              | z+1             | z+2             | z               | AA    |
|----|----|-----------------|----------------|-----------------|-----------------|-----------------|-------|
| S  | 1  | 74.042          | 1301.268       | 1293.259        | 0.504           | 1292.755        | S[24] |
| G  | 2  | 102.553         | 1236.747       | 1228.737        | 0.504           | 1228.233        | G[23] |
| R  | 3  | 180.603         | 1208.236       | <b>1200.226</b> | 1200.730        | <b>1199.723</b> | R[22] |
| G  | 4  | 269.114         | 1139.185       | <b>1122.175</b> | <b>1122.680</b> | 1121.677        | G[21] |
| K  | 5  | 273.163         | 1101.675       | <b>1093.665</b> | <b>1094.169</b> | 1093.165        | K[20] |
| G  | 6  | 351.672         | 1037.627       | <b>1029.618</b> | <b>1030.122</b> | 1029.114        | G[19] |
| G  | 7  | 430.183         | 1009.116       | <b>1001.107</b> | <b>1001.611</b> | 1000.603        | G[18] |
| K  | 8  | 494.230         | 980.605        | <b>972.596</b>  | <b>973.100</b>  | 972.092         | K[17] |
| G  | 9  | 627.741         | 916.558        | <b>908.549</b>  | <b>909.053</b>  | 908.045         | G[16] |
| L  | 10 | <b>479.283</b>  | 898.047        | <b>890.038</b>  | <b>890.542</b>  | 889.534         | L[15] |
| G  | 11 | 507.794         | 831.505        | <b>823.496</b>  | <b>824.000</b>  | 823.992         | G[14] |
| K  | 12 | <b>571.841</b>  | 802.995        | <b>794.985</b>  | <b>795.489</b>  | 794.481         | K[13] |
| G  | 13 | <b>600.352</b>  | <b>738.947</b> | <b>730.938</b>  | 731.442         | <b>730.434</b>  | G[12] |
| G  | 14 | <b>628.863</b>  | 710.436        | <b>702.427</b>  | <b>702.931</b>  | 701.923         | G[11] |
| A  | 15 | <b>664.381</b>  | 681.926        | <b>673.916</b>  | <b>674.420</b>  | <b>673.412</b>  | A[10] |
| R  | 16 | <b>749.434</b>  | <b>646.407</b> | 646.911         | 647.415         | 646.407         | R[9]  |
| R  | 17 | <b>827.485</b>  | 561.894        | <b>553.345</b>  | <b>553.849</b>  | 552.841         | R[8]  |
| H  | 18 | <b>896.014</b>  | 483.304        | <b>475.294</b>  | <b>475.798</b>  | <b>474.791</b>  | H[7]  |
| R  | 19 | 905.028         | 414.776        | <b>406.765</b>  | <b>407.269</b>  | <b>406.261</b>  | R[6]  |
| K  | 20 | 1059.136        | 315.700        | 307.691         | 308.195         | 307.187         | K[5]  |
| V  | 21 | <b>1108.670</b> | 251.652        | 243.643         | 244.147         | 243.140         | V[4]  |
| L  | 22 | 1305.812        | 202.119        | 194.110         | 194.613         | 193.605         | L[3]  |
| R  | 23 | 1293.262        | 145.577        | 137.567         | 138.071         | 137.063         | R[2]  |
| D  | 24 | 1300.776        | 67.526         | 59.517          | 60.021          | 59.013          | D[1]  |

# sp | P62806 | H4\_MOUSE

[Acetyl]SGRGKGGKGLGKGGAK<sup>Acetyl</sup> RHR<sup>Trimethyl</sup> KVLRD<sup>42.01</sup> <sup>42.05</sup>

- ▶ fragmentation table for charge state 3+
- ▶ specType=etd
- ▶ score=81.87
- ▶ F121546.dat
- ▶ query=q36002.p1
- ▶ precursor=521.112450
- ▶ chargePrecursor=5
- ▶ itol=0.7

| AA    | c              | y              | z+1            | z+2            | z     | AA             |       |
|-------|----------------|----------------|----------------|----------------|-------|----------------|-------|
| S[1]  | 49.697         | <b>867.848</b> | <b>862.508</b> |                | 0.672 | 862.172        | S[24] |
| G[2]  | 58.704         | 324.933        | <b>819.494</b> |                | 0.672 | 819.158        | G[23] |
| R[3]  | 150.738        | 805.826        | <b>800.487</b> | <b>800.823</b> |       | <b>800.151</b> | R[22] |
| G[4]  | 139.745        | 753.793        | <b>748.453</b> | <b>748.789</b> |       | <b>748.117</b> | G[21] |
| K[5]  | 182.443        | 734.785        | <b>729.446</b> | <b>729.782</b> |       | <b>729.110</b> | K[20] |
| G[6]  | 201.450        | <b>692.087</b> | <b>686.748</b> | <b>687.083</b> |       | 686.412        | G[19] |
| G[7]  | 220.458        | <b>673.080</b> | <b>667.740</b> | <b>668.076</b> |       | 667.404        | G[18] |
| K[8]  | 263.156        | <b>654.073</b> | 648.733        | 649.069        |       | 648.397        | K[17] |
| G[9]  | 282.163        | <b>611.374</b> | <b>606.035</b> | <b>606.371</b> |       | 605.999        | G[16] |
| L[10] | 319.958        | <b>592.367</b> | <b>587.028</b> | <b>587.364</b> |       | <b>586.692</b> | L[15] |
| G[11] | 338.965        | <b>554.673</b> | <b>549.333</b> | <b>549.669</b> |       | <b>548.997</b> | G[14] |
| K[12] | 381.563        | <b>535.666</b> | <b>530.326</b> | <b>530.662</b> |       | <b>529.990</b> | K[13] |
| G[13] | 400.570        | 492.967        | 487.628        | 487.964        |       | 487.292        | G[12] |
| G[14] | 419.578        | 473.960        | 468.620        | 468.956        |       | 468.285        | G[11] |
| A[15] | 443.257        | 454.953        | 449.613        | 449.949        |       | 449.277        | A[10] |
| K[16] | 469.958        | 431.274        | 425.934        | 426.270        |       | 425.598        | K[9]  |
| R[17] | 551.992        | 374.572        | 369.232        | 369.568        |       | 368.896        | R[8]  |
| H[18] | <b>597.678</b> | 322.538        | 317.199        | 317.535        |       | 316.863        | H[7]  |
| R[19] | 653.274        | 276.852        | 271.512        | 271.848        |       | 271.176        | R[6]  |
| K[20] | <b>706.426</b> | 210.803        | 205.463        | 205.799        |       | 205.127        | K[5]  |
| V[21] | <b>739.449</b> | 168.104        | 162.764        | 163.101        |       | 162.429        | V[4]  |
| L[22] | <b>777.144</b> | 135.082        | 129.742        | 130.078        |       | 129.406        | L[3]  |
| R[23] | <b>829.177</b> | 97.387         | 92.047         | 92.383         |       | 91.711         | R[2]  |
| D[24] | <b>867.520</b> | 45.353         | 40.014         | 40.349         |       | 39.678         | D[1]  |

# sp | P62806 | H4\_MOUSE

[Acetyl]SGRGKGGKGLGKGGAK<sup>Acetyl</sup> RHR<sup>Trimethyl</sup> KVLRD<sup>42.01</sup> <sup>42.05</sup>

- ▶ fragmentation table for charge state 4+
- ▶ specType=etd
- ▶ score=81.87
- ▶ F121546.dat
- ▶ query=q36002.p1
- ▶ precursor=521.112450
- ▶ chargePrecursor=5
- ▶ itol=0.7

| AA    | c              | y              | z+1            | z+2            | z              | AA    |
|-------|----------------|----------------|----------------|----------------|----------------|-------|
| S[1]  | 37.525         | <b>651.130</b> | <b>647.133</b> | 0.755          | <b>646.081</b> | S[24] |
| G[2]  | 51.780         | 518.877        | <b>614.872</b> | 0.755          | <b>614.620</b> | G[23] |
| R[3]  | 90.805         | 604.622        | <b>600.617</b> | <b>600.869</b> | <b>600.365</b> | R[22] |
| G[4]  | 105.061        | 565.596        | 561.592        | 561.844        | 561.340        | G[21] |
| K[5]  | 137.084        | 551.341        | 547.336        | 547.588        | 547.084        | K[20] |
| G[6]  | 151.340        | 519.317        | 515.312        | 515.564        | 515.061        | G[19] |
| G[7]  | 165.595        | 505.062        | 501.057        | 501.309        | 500.805        | G[18] |
| K[8]  | 197.619        | 490.806        | <b>486.802</b> | <b>487.054</b> | <b>486.550</b> | K[17] |
| G[9]  | 211.874        | 476.551        | 472.546        | 472.798        | 472.294        | G[16] |
| L[10] | 280.148        | 444.527        | 440.523        | 440.775        | 440.271        | L[15] |
| G[11] | 254.403        | 416.256        | 412.252        | 412.504        | 412.000        | G[14] |
| K[12] | 286.424        | 402.001        | 397.996        | 398.248        | 397.744        | K[13] |
| G[13] | 300.680        | 369.977        | 365.973        | 366.224        | 365.721        | G[12] |
| G[14] | 314.935        | 355.722        | 351.717        | 351.969        | 351.465        | G[11] |
| A[15] | 332.694        | 341.466        | 337.462        | 337.714        | 337.210        | A[10] |
| K[16] | 375.221        | 323.707        | 319.703        | 319.954        | 319.451        | K[9]  |
| R[17] | 414.246        | 301.181        | 297.176        | 297.428        | 296.924        | R[8]  |
| H[18] | 448.511        | 282.156        | 278.151        | 278.403        | 277.899        | H[7]  |
| R[19] | 493.044        | 257.891        | 253.886        | 254.138        | 253.634        | R[6]  |
| K[20] | <b>530.071</b> | 158.354        | 154.349        | 154.601        | 154.097        | K[5]  |
| V[21] | <b>554.839</b> | 126.330        | 122.325        | 122.577        | 122.073        | V[4]  |
| L[22] | 583.110        | 101.563        | 97.558         | 97.810         | 97.306         | L[3]  |
| R[23] | <b>622.135</b> | 73.292         | 69.287         | 69.539         | 69.035         | R[2]  |
| D[24] | <b>650.892</b> | 34.267         | 30.262         | 30.514         | 30.010         | D[1]  |

# sp | P62806 | H4\_MOUSE

[Acetyl]SGR<sup>Methyl</sup><sub>14.02</sub> GKGGKGLGKGGAKR<sup>(Dimethyl)</sup><sub>(28.03)</sub> HRK<sup>(Acetyl)</sup><sub>(42.01)</sub> VLRD

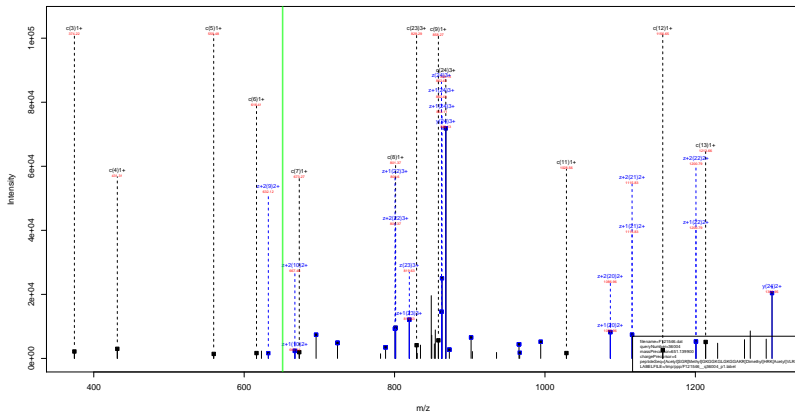

# sp | P62806 | H4\_MOUSE

[Acetyl]SGR<sup>Methyl</sup><sub>14.02</sub> GKGGKGLGKGGAKR<sup>(Dimethyl)</sup><sub>(28.03)</sub> HRK<sup>(Acetyl)</sup><sub>(42.01)</sub> VLRD

- ▶ fragmentation table for charge state 1+
- ▶ specType=etd
- ▶ score=73.54
- ▶ F121546.dat
- ▶ query=q36004.p1
- ▶ precursor=651.139900
- ▶ chargePrecursor=4
- ▶ itol=0.7

| AA |    | c               | y              | z+1      | z+2      | z        | AA              |
|----|----|-----------------|----------------|----------|----------|----------|-----------------|
| S  | 1  | 147.070         | 2601.528       | 2585.510 | 0.000    | 2584.502 | S <sub>24</sub> |
| G  | 2  | 264.998         | 2472.486       | 2456.467 | 0.000    | 2455.459 | G <sub>23</sub> |
| R  | 3  | <b>374.215</b>  | 2315.465       | 2300.446 | 2607.433 | 2308.425 | R <sub>22</sub> |
| G  | 4  | <b>431.236</b>  | 2245.342       | 2229.326 | 2230.337 | 2228.321 | G <sub>21</sub> |
| K  | 5  | <b>559.331</b>  | 2188.326       | 2172.307 | 2173.315 | 2171.300 | K <sub>20</sub> |
| G  | 6  | <b>616.353</b>  | 2060.231       | 2044.212 | 2045.220 | 2043.205 | G <sub>19</sub> |
| G  | 7  | <b>673.374</b>  | 2003.210       | 1987.191 | 1988.199 | 1986.183 | G <sub>18</sub> |
| K  | 8  | <b>801.469</b>  | 1946.188       | 1930.170 | 1931.177 | 1929.162 | K <sub>17</sub> |
| G  | 9  | <b>858.490</b>  | 1818.093       | 1802.075 | 1803.082 | 1801.067 | G <sub>16</sub> |
| L  | 10 | 873.374         | 1761.072       | 1745.053 | 1746.061 | 1744.045 | L <sub>15</sub> |
| G  | 11 | <b>1028.596</b> | 1647.982       | 1631.960 | 1632.977 | 1630.961 | G <sub>14</sub> |
| K  | 12 | <b>1156.691</b> | 1590.960       | 1574.948 | 1575.955 | 1573.940 | K <sub>13</sub> |
| G  | 13 | <b>1213.712</b> | 1462.871       | 1446.853 | 1447.860 | 1445.845 | G <sub>12</sub> |
| G  | 14 | 1270.734        | 1405.850       | 1389.831 | 1390.839 | 1388.823 | G <sub>11</sub> |
| A  | 15 | 1341.771        | 1348.828       | 1332.810 | 1333.818 | 1331.802 | A <sub>10</sub> |
| K  | 16 | 1469.866        | 1277.791       | 1261.773 | 1262.780 | 1260.765 | K <sub>9</sub>  |
| R  | 17 | 1653.986        | 1149.695       | 1133.678 | 1134.685 | 1132.670 | R <sub>8</sub>  |
| H  | 18 | 1791.057        | <b>965.564</b> | 960.545  | 960.553  | 948.537  | H <sub>7</sub>  |
| R  | 19 | 1947.158        | 828.502        | 812.486  | 813.494  | 811.478  | R <sub>6</sub>  |
| K  | 20 | 2117.264        | 672.404        | 656.385  | 657.393  | 655.377  | K <sub>5</sub>  |
| V  | 21 | 2216.332        | 502.298        | 486.280  | 487.287  | 485.272  | V <sub>4</sub>  |
| L  | 22 | 2329.416        | 403.230        | 387.211  | 388.219  | 386.203  | L <sub>3</sub>  |
| R  | 23 | 2485.517        | 290.146        | 274.127  | 275.135  | 273.119  | R <sub>2</sub>  |
| D  | 24 | 2680.544        | 134.045        | 118.028  | 119.034  | 117.018  | D <sub>1</sub>  |



# sp | P62806 | H4\_MOUSE

[Acetyl]SGR<sup>Methyl</sup><sub>14.02</sub> GKGGKGLGKGGAKR<sup>(Dimethyl)</sup><sub>(28.03)</sub> HRK<sup>(Acetyl)</sup><sub>(42.01)</sub> VLRD

- ▶ fragmentation table for charge state 2+
- ▶ specType=etd
- ▶ score=73.54
- ▶ F121546.dat
- ▶ query=q36004\_p1
- ▶ precursor=651.139900
- ▶ chargePrecursor=4
- ▶ itol=0.7

| AA    | c        | y               | z+1             | z+2             | z              | AA    |
|-------|----------|-----------------|-----------------|-----------------|----------------|-------|
| S[1]  | 74.042   | <b>1301.268</b> | 1293.258        | 0.504           | 1292.753       | S[24] |
| G[2]  | 102.553  | 1236.747        | 1228.737        | 0.504           | 1228.233       | G[23] |
| R[3]  | 187.611  | 1208.236        | <b>1200.226</b> | <b>1200.730</b> | 1199.723       | R[22] |
| G[4]  | 218.122  | 1123.777        | <b>1115.168</b> | <b>1115.972</b> | 1114.666       | G[21] |
| K[5]  | 280.168  | 1094.667        | <b>1086.657</b> | <b>1087.161</b> | 1085.153       | K[20] |
| G[6]  | 308.680  | 1020.619        | 1022.610        | 1023.114        | 1022.106       | G[19] |
| G[7]  | 337.191  | 1002.108        | <b>994.099</b>  | <b>994.603</b>  | 993.595        | G[18] |
| K[8]  | 401.238  | 973.598         | <b>965.588</b>  | <b>966.092</b>  | <b>965.084</b> | K[17] |
| G[9]  | 429.749  | 908.550         | <b>901.541</b>  | <b>902.045</b>  | 901.037        | G[16] |
| L[10] | 489.291  | 885.040         | <b>873.030</b>  | <b>873.534</b>  | <b>872.526</b> | L[15] |
| G[11] | 514.802  | 824.488         | 816.488         | 818.992         | 815.984        | G[14] |
| R[12] | 578.849  | 795.967         | <b>787.977</b>  | <b>788.481</b>  | <b>787.474</b> | R[13] |
| G[13] | 607.360  | 731.939         | <b>723.930</b>  | <b>724.434</b>  | <b>723.426</b> | G[12] |
| G[14] | 635.871  | 703.429         | <b>695.419</b>  | <b>695.923</b>  | 694.915        | G[11] |
| A[15] | 671.389  | 674.918         | <b>666.908</b>  | <b>667.412</b>  | 666.405        | A[10] |
| R[16] | 728.437  | 636.399         | 631.399         | <b>631.904</b>  | 630.395        | R[9]  |
| R[17] | 827.503  | 578.362         | 567.362         | 567.866         | 566.859        | R[8]  |
| H[18] | 886.032  | 483.288         | 475.276         | 475.780         | 474.772        | H[7]  |
| R[19] | 974.083  | 414.756         | 406.747         | 407.251         | 406.243        | R[6]  |
| R[20] | 1059.136 | 336.706         | 328.695         | 329.200         | 328.192        | R[5]  |
| V[21] | 1108.670 | 251.653         | 243.643         | 244.147         | 243.140        | V[4]  |
| L[22] | 1185.212 | 202.119         | 194.109         | 194.613         | 193.605        | L[3]  |
| D[23] | 1243.262 | 148.577         | 137.567         | 138.071         | 137.064        | D[2]  |
| D[24] | 1308.776 | 87.525          | 79.517          | 80.021          | 79.013         | D[1]  |

# sp | P62806 | H4\_MOUSE

[Acetyl]SGR<sup>Methyl</sup><sub>14.02</sub> GKGGKGLGKGGAKR<sup>(Dimethyl)</sup><sub>(28.03)</sub> HRK<sup>(Acetyl)</sup><sub>(42.01)</sub> VLRD

- ▶ fragmentation table for charge state 3+
- ▶ specType=etd
- ▶ score=73.54
- ▶ F121546.dat
- ▶ query=q36004.p1
- ▶ precursor=651.139900
- ▶ chargePrecursor=4
- ▶ itol=0.7

| AA    | c              | y              | z+1            | z+2            | z              | AA    |
|-------|----------------|----------------|----------------|----------------|----------------|-------|
| S[1]  | 69.697         | <b>867.848</b> | <b>862.508</b> | 0.672          | <b>852.172</b> | S[24] |
| G[2]  | 68.704         | 824.833        | <b>819.494</b> | 0.672          | <b>819.158</b> | G[23] |
| R[3]  | 125.410        | 805.826        | <b>800.487</b> | <b>800.823</b> | <b>800.151</b> | R[22] |
| G[4]  | 144.417        | 749.121        | 743.781        | 744.117        | 743.445        | G[21] |
| K[5]  | 187.115        | 730.114        | <b>724.774</b> | 725.110        | <b>724.438</b> | K[20] |
| G[6]  | 206.122        | 687.415        | 682.076        | 682.412        | 681.740        | G[19] |
| G[7]  | 225.130        | 608.408        | 603.069        | 603.404        | 602.733        | G[18] |
| K[8]  | 267.828        | 649.801        | 644.061        | 644.397        | 643.725        | K[17] |
| G[9]  | 286.835        | 606.703        | 601.363        | 601.699        | 601.027        | G[16] |
| L[10] | 324.530        | 587.695        | 582.355        | 582.692        | 582.020        | L[15] |
| G[11] | 353.537        | 550.001        | 544.661        | 544.997        | 544.325        | G[14] |
| K[12] | 386.235        | 530.994        | 525.654        | 525.990        | 525.318        | K[13] |
| G[13] | 405.242        | 488.295        | 482.956        | 483.292        | 482.620        | G[12] |
| G[14] | 434.249        | 469.288        | 463.949        | 464.285        | 463.613        | G[11] |
| A[15] | 447.929        | 450.281        | 444.941        | 445.277        | 444.605        | A[10] |
| K[16] | 490.627        | 426.602        | 421.262        | 421.598        | 420.926        | K[9]  |
| R[17] | 552.004        | 383.904        | 378.564        | 378.900        | 378.228        | R[8]  |
| H[18] | 597.691        | 322.526        | 317.187        | 317.523        | 316.851        | H[7]  |
| R[19] | 649.724        | 276.840        | 271.500        | 271.836        | 271.164        | R[6]  |
| K[20] | 708.426        | 224.806        | 219.467        | 219.803        | 219.131        | K[5]  |
| V[21] | 739.449        | 108.104        | 102.765        | 103.101        | 102.429        | V[4]  |
| L[22] | 777.144        | 135.082        | 129.742        | 130.078        | 129.406        | L[3]  |
| R[23] | <b>829.177</b> | 97.387         | 92.047         | 92.383         | 91.711         | R[2]  |
| D[24] | <b>867.520</b> | 45.353         | 40.014         | 40.349         | 39.678         | D[1]  |

# sp | P62806 | H4\_MOUSE

[Acetyl]SGR<sup>Methyl</sup> 14.02 GKGGK<sup>Acetyl</sup> 42.01 GLGKGGAKRHR<sup>Dimethyl</sup> 28.03 KVLRD

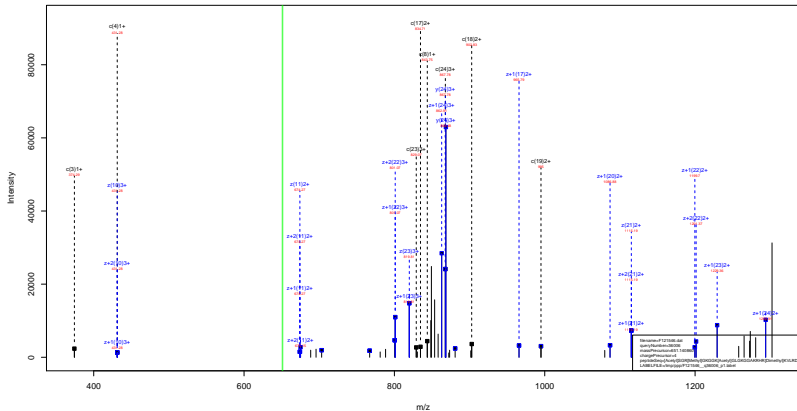

# sp | P62806 | H4\_MOUSE

[Acetyl]SGR<sup>Methyl</sup><sub>14.02</sub> GKGGK<sup>Acetyl</sup><sub>42.01</sub> GLGKGGAKRHR<sup>Dimethyl</sup><sub>28.03</sub> KVLRD

- ▶ fragmentation table for charge state 1+
- ▶ specType=etd
- ▶ score=51.50
- ▶ F121546.dat
- ▶ query=q36006.p1
- ▶ precursor=651.140860
- ▶ chargePrecursor=4
- ▶ itol=0.7

| AA |    | c              | y        | z+1      | z+2      | z        | AA    |
|----|----|----------------|----------|----------|----------|----------|-------|
| S  | 1  | 147.076        | 2601.528 | 2585.510 | 0.000    | 2584.502 | S[24] |
| G  | 2  | 294.098        | 2372.488 | 2368.467 | 0.000    | 2358.499 | G[23] |
| R  | 3  | <b>374.215</b> | 2815.464 | 2799.448 | 2400.453 | 2798.438 | R[22] |
| G  | 4  | <b>431.236</b> | 2245.148 | 2229.329 | 2230.337 | 2228.321 | G[21] |
| K  | 5  | 559.331        | 2188.326 | 2172.307 | 2173.315 | 2171.300 | K[20] |
| G  | 6  | 616.353        | 2060.231 | 2044.212 | 2045.220 | 2043.205 | G[19] |
| G  | 7  | 673.374        | 2003.210 | 1987.191 | 1988.199 | 1986.183 | G[18] |
| K  | 8  | <b>843.480</b> | 1946.189 | 1930.170 | 1931.177 | 1929.162 | K[17] |
| G  | 9  | 900.501        | 1776.083 | 1760.064 | 1761.072 | 1759.056 | G[16] |
| L  | 10 | 1013.588       | 1719.061 | 1703.043 | 1704.050 | 1702.035 | L[15] |
| G  | 11 | 1070.607       | 1605.977 | 1589.958 | 1590.966 | 1588.951 | G[14] |
| K  | 12 | 1198.701       | 1548.956 | 1532.937 | 1533.945 | 1531.929 | K[13] |
| G  | 13 | 1255.723       | 1420.861 | 1404.842 | 1405.850 | 1403.834 | G[12] |
| G  | 14 | 1312.744       | 1303.839 | 1347.821 | 1348.828 | 1346.813 | G[11] |
| A  | 15 | 1381.782       | 1306.818 | 1290.799 | 1291.807 | 1289.791 | A[10] |
| K  | 16 | 1511.876       | 1238.781 | 1219.763 | 1220.770 | 1218.754 | K[9]  |
| R  | 17 | 1667.978       | 1137.686 | 1097.667 | 1092.675 | 1090.659 | R[8]  |
| H  | 18 | 1805.037       | 951.585  | 935.500  | 936.514  | 934.558  | H[7]  |
| R  | 19 | 1989.109       | 814.526  | 798.507  | 799.515  | 797.499  | R[6]  |
| K  | 20 | 2117.264       | 630.393  | 614.375  | 615.382  | 613.367  | K[5]  |
| V  | 21 | 2216.332       | 502.298  | 486.280  | 487.287  | 485.272  | V[4]  |
| L  | 22 | 2329.416       | 403.230  | 387.211  | 388.219  | 386.203  | L[3]  |
| R  | 23 | 2485.517       | 290.146  | 274.127  | 275.135  | 273.119  | R[2]  |
| D  | 24 | 2600.544       | 134.045  | 118.026  | 119.034  | 117.018  | D[1]  |

# sp | P62806 | H4\_MOUSE

[Acetyl]SGR<sup>Methyl</sup><sub>14.02</sub> GKGGK<sup>Acetyl</sup><sub>42.01</sub> GLGKGGAKRHR<sup>Dimethyl</sup><sub>28.03</sub> KVLRD

- ▶ fragmentation table for charge state 2+
- ▶ specType=etd
- ▶ score=51.50
- ▶ F121546.dat
- ▶ query=q36006\_p1
- ▶ precursor=651.140860
- ▶ chargePrecursor=4
- ▶ itol=0.7

| AA | c  | y              | z+1      | z+2             | z               | AA              |       |
|----|----|----------------|----------|-----------------|-----------------|-----------------|-------|
| S  | 1  | 74.042         | 1301.268 | <b>1293.258</b> | 0.504           | 1292.755        | S[24] |
| G  | 2  | 102.553        | 1236.747 | <b>1228.737</b> | 0.504           | 1228.233        | G[23] |
| R  | 3  | 187.611        | 1208.236 | <b>1200.226</b> | <b>1200.730</b> | <b>1199.723</b> | R[22] |
| G  | 4  | 218.122        | 1173.177 | <b>1115.168</b> | <b>1115.672</b> | <b>1114.664</b> | G[21] |
| K  | 5  | 280.169        | 1094.667 | <b>1086.657</b> | <b>1087.161</b> | 1086.153        | K[20] |
| G  | 6  | 308.680        | 1030.619 | 1022.610        | 1023.114        | 1022.108        | G[19] |
| G  | 7  | 337.191        | 1002.108 | 994.099         | <b>994.603</b>  | 993.595         | G[18] |
| K  | 8  | 422.243        | 973.598  | <b>965.588</b>  | <b>966.092</b>  | 965.084         | K[17] |
| G  | 9  | 450.754        | 888.545  | <b>880.536</b>  | <b>881.040</b>  | 880.032         | G[16] |
| L  | 10 | 507.298        | 880.034  | 882.527         | 883.529         | 881.521         | L[15] |
| G  | 11 | 535.807        | 803.492  | 795.483         | 795.987         | 794.979         | G[14] |
| K  | 12 | 599.854        | 774.982  | <b>766.972</b>  | <b>767.476</b>  | <b>766.468</b>  | K[13] |
| G  | 13 | 628.365        | 710.934  | <b>702.925</b>  | <b>703.429</b>  | 702.421         | G[12] |
| G  | 14 | 656.876        | 682.423  | <b>674.414</b>  | <b>674.918</b>  | <b>673.910</b>  | G[11] |
| A  | 15 | 682.384        | 653.913  | 645.903         | 646.407         | 645.399         | A[10] |
| R  | 16 | 758.443        | 618.384  | 610.385         | 610.889         | 609.881         | R[9]  |
| R  | 17 | <b>834.492</b> | 554.347  | 546.337         | 546.841         | 545.833         | R[8]  |
| H  | 18 | <b>903.022</b> | 476.296  | 468.287         | 468.791         | 467.783         | H[7]  |
| R  | 19 | <b>995.088</b> | 407.767  | 399.757         | 400.261         | 399.253         | R[6]  |
| K  | 20 | 1059.136       | 315.700  | 307.691         | 308.195         | 307.187         | K[5]  |
| V  | 21 | 1108.670       | 251.653  | 243.643         | 244.147         | 243.140         | V[4]  |
| L  | 22 | 1165.212       | 202.119  | 194.109         | 194.613         | 193.605         | L[3]  |
| R  | 23 | 1243.262       | 145.577  | 137.567         | 138.071         | 137.063         | R[2]  |
| D  | 24 | 1300.776       | 67.526   | 59.517          | 60.021          | 59.013          | D[1]  |

# sp | P62806 | H4\_MOUSE

[Acetyl]SGR<sup>Methyl</sup><sub>14.02</sub> GKGGK<sup>Acetyl</sup><sub>42.01</sub> GLGKGGAKRHR<sup>Dimethyl</sup><sub>28.03</sub> KVLRD

- ▶ fragmentation table for charge state 3+
- ▶ specType=etd
- ▶ score=51.50
- ▶ F121546.dat
- ▶ query=q36006.p1
- ▶ precursor=651.140860
- ▶ chargePrecursor=4
- ▶ itol=0.7

| AA    | c              | y              | z+1            | z+2            | z              | AA    |
|-------|----------------|----------------|----------------|----------------|----------------|-------|
| S[1]  | 49.697         | <b>867.848</b> | <b>862.508</b> | 0.672          | 862.172        | S[24] |
| G[2]  | 58.704         | 324.932        | <b>819.494</b> | 0.672          | <b>819.158</b> | G[23] |
| R[3]  | 125.410        | 805.826        | <b>800.487</b> | <b>800.823</b> | <b>800.151</b> | R[22] |
| G[4]  | 144.417        | 749.121        | 743.781        | 744.117        | 743.445        | G[21] |
| K[5]  | 187.115        | 730.114        | 724.774        | 725.110        | 724.438        | K[20] |
| G[6]  | 206.122        | 687.415        | 682.076        | 682.412        | 681.740        | G[19] |
| G[7]  | 225.130        | 668.408        | 663.069        | 663.404        | 662.733        | G[18] |
| K[8]  | 281.831        | 649.401        | 644.061        | 644.397        | 643.725        | K[17] |
| G[9]  | 300.839        | 592.595        | 587.255        | 587.591        | 587.024        | G[16] |
| L[10] | 338.533        | 574.592        | 568.252        | 568.588        | 568.016        | L[15] |
| G[11] | 357.540        | 535.997        | 530.658        | 530.994        | 530.322        | G[14] |
| K[12] | 400.239        | 516.990        | 511.651        | 511.986        | 511.315        | K[13] |
| G[13] | 419.246        | 474.292        | 468.952        | 469.288        | 468.616        | G[12] |
| G[14] | 438.253        | 455.285        | 449.945        | 450.281        | 449.609        | G[11] |
| A[15] | 461.932        | 436.277        | <b>430.938</b> | <b>431.274</b> | <b>430.602</b> | A[10] |
| K[16] | 504.630        | 412.598        | 407.259        | 407.595        | 406.923        | K[9]  |
| R[17] | 556.664        | 369.900        | 364.561        | 364.896        | 364.225        | R[8]  |
| H[18] | 602.350        | 317.896        | 312.527        | 312.863        | 312.191        | H[7]  |
| R[19] | 663.728        | 272.180        | 266.841        | 267.176        | 266.505        | R[6]  |
| K[20] | 706.426        | 210.803        | 205.463        | 205.799        | 205.127        | K[5]  |
| V[21] | 739.449        | 168.104        | 162.765        | 163.101        | 162.429        | V[4]  |
| L[22] | 777.144        | 135.082        | 129.742        | 130.078        | 129.406        | L[3]  |
| R[23] | <b>829.177</b> | 97.387         | 92.047         | 92.383         | 91.711         | R[2]  |
| D[24] | <b>867.520</b> | 45.353         | 40.014         | 40.349         | 39.678         | D[1]  |



# sp | P62806 | H4\_MOUSE

[Acetyl]SGRGKGGKGLGK<sup>Acetyl</sup><sub>42.01</sub> GGAK<sup>Acetyl</sup><sub>42.01</sub> RHRK<sup>Methyl</sup><sub>14.02</sub> VLR<sup>Methyl</sup><sub>14.02</sub> D

- ▶ fragmentation table for charge state 1+
- ▶ specType=etd
- ▶ score=73.43
- ▶ F121546.dat
- ▶ query=q36294.p1
- ▶ precursor=658.139070
- ▶ chargePrecursor=4
- ▶ itol=0.7

| AA |    | c               | y               | z+1            | z+2      | z        | AA    |
|----|----|-----------------|-----------------|----------------|----------|----------|-------|
| S  | 1  | 147.076         | 2629.533        | 2633.505       | 0.000    | 2612.497 | S[24] |
| G  | 2  | 204.098         | 2500.481        | 2484.402       | 0.000    | 2483.454 | G[23] |
| T  | 3  | 300.199         | 2343.459        | 2427.441       | 2629.448 | 2428.433 | T[22] |
| G  | 4  | <b>417.220</b>  | 2287.358        | 2271.339       | 2272.347 | 2270.332 | G[21] |
| K  | 5  | <b>545.315</b>  | 2230.337        | 2214.318       | 2215.326 | 2213.310 | K[20] |
| G  | 6  | <b>602.337</b>  | 2102.242        | 2086.223       | 2087.231 | 2085.215 | G[19] |
| G  | 7  | 659.358         | 2045.220        | 2029.202       | 2030.209 | 2028.194 | G[18] |
| K  | 8  | <b>787.453</b>  | 1988.199        | 1972.180       | 1973.188 | 1971.172 | K[17] |
| G  | 9  | 844.475         | 1860.104        | 1844.085       | 1845.093 | 1843.077 | G[16] |
| L  | 10 | 897.509         | 1803.082        | 1787.064       | 1788.071 | 1786.055 | L[15] |
| G  | 11 | <b>1014.580</b> | 1689.998        | 1673.980       | 1674.987 | 1672.972 | G[14] |
| K  | 12 | <b>1184.686</b> | 1632.977        | 1616.958       | 1617.966 | 1615.950 | K[13] |
| G  | 13 | <b>1241.707</b> | 1462.871        | 1446.853       | 1447.860 | 1445.845 | G[12] |
| G  | 14 | <b>1298.729</b> | 1405.850        | 1389.831       | 1390.839 | 1388.823 | G[11] |
| A  | 15 | 1369.766        | 1348.828        | 1332.810       | 1333.818 | 1331.802 | A[10] |
| K  | 16 | 1539.874        | 1277.792        | 1261.773       | 1262.780 | 1260.765 | K[9]  |
| R  | 17 | 1695.973        | <b>1107.666</b> | 1091.667       | 1092.675 | 1090.659 | R[8]  |
| H  | 18 | 1833.031        | 951.585         | <b>935.566</b> | 936.574  | 934.558  | H[7]  |
| R  | 19 | 1989.133        | 814.526         | <b>798.507</b> | 799.515  | 797.499  | R[6]  |
| K  | 20 | 2131.243        | 658.425         | 642.406        | 643.414  | 641.398  | K[5]  |
| V  | 21 | 2230.312        | 516.314         | 500.295        | 501.303  | 499.287  | V[4]  |
| L  | 22 | 2343.396        | <b>417.346</b>  | 401.227        | 402.235  | 400.219  | L[3]  |
| L  | 23 | 2513.512        | 304.103         | 288.083        | 289.091  | 287.075  | L[2]  |
| D  | 24 | 2628.539        | 134.045         | 118.026        | 119.034  | 117.018  | D[1]  |



# sp | P62806 | H4\_MOUSE

[Acetyl]SGRGKGGKGLGK<sup>Acetyl</sup><sub>42.01</sub> GGAK<sup>Acetyl</sup><sub>42.01</sub> RHRK<sup>Methyl</sup><sub>14.02</sub> VLR<sup>Methyl</sup><sub>14.02</sub> D

- ▶ fragmentation table for charge state 2+
- ▶ specType=etd
- ▶ score=73.43
- ▶ F121546.dat
- ▶ query=q36294\_p1
- ▶ precursor=658.139070
- ▶ chargePrecursor=4
- ▶ itol=0.7

| AA | c  | y              | z+1             | z+2             | z               | AA              |       |
|----|----|----------------|-----------------|-----------------|-----------------|-----------------|-------|
| S  | 1  | 74.049         | <b>1315.265</b> | <b>1307.256</b> | 0.504           | 1306.750        | S[24] |
| G  | 2  | 102.553        | 1250.744        | <b>1242.735</b> | 0.504           | <b>1242.231</b> | G[23] |
| R  | 3  | 180.053        | 1222.233        | 1215.224        | 1214.726        | 1214.220        | R[22] |
| G  | 4  | 260.118        | 1144.183        | <b>1136.173</b> | <b>1136.677</b> | <b>1135.669</b> | G[21] |
| K  | 5  | 273.151        | 1115.672        | <b>1107.663</b> | <b>1108.167</b> | 1107.159        | K[20] |
| G  | 6  | 301.879        | 1051.625        | <b>1043.615</b> | <b>1044.119</b> | <b>1043.111</b> | G[19] |
| G  | 7  | 330.189        | 1023.114        | <b>1015.104</b> | <b>1015.608</b> | <b>1014.601</b> | G[18] |
| K  | 8  | 354.230        | 994.603         | <b>986.594</b>  | <b>987.098</b>  | 986.090         | K[17] |
| G  | 9  | 422.741        | 830.556         | 822.546         | <b>823.050</b>  | 822.042         | G[16] |
| L  | 10 | 479.263        | 802.046         | 804.035         | 804.539         | 803.531         | L[15] |
| G  | 11 | 507.794        | 845.503         | <b>837.493</b>  | <b>837.997</b>  | <b>836.990</b>  | G[14] |
| K  | 12 | 592.847        | 816.992         | 808.983         | <b>809.487</b>  | 808.479         | K[13] |
| G  | 13 | 621.357        | 731.939         | <b>723.930</b>  | <b>724.434</b>  | 723.426         | G[12] |
| G  | 14 | 649.868        | 703.429         | <b>695.419</b>  | <b>695.923</b>  | 694.915         | G[11] |
| A  | 15 | 685.387        | 674.918         | <b>666.908</b>  | <b>667.412</b>  | <b>666.405</b>  | A[10] |
| R  | 16 | 770.430        | 639.369         | <b>631.360</b>  | <b>631.864</b>  | 630.856         | R[9]  |
| R  | 17 | <b>848.490</b> | 554.347         | 546.337         | 546.841         | <b>545.833</b>  | R[8]  |
| H  | 18 | <b>917.019</b> | 476.296         | 468.287         | 468.791         | 467.783         | H[7]  |
| R  | 19 | 995.070        | 407.767         | 399.757         | 400.261         | 399.253         | R[6]  |
| K  | 20 | 1066.125       | 329.716         | 321.707         | 322.211         | 321.203         | K[5]  |
| V  | 21 | 1115.659       | 258.661         | 250.652         | 251.155         | 250.147         | V[4]  |
| L  | 22 | 1175.201       | 209.126         | 201.117         | 201.621         | 200.613         | L[3]  |
| R  | 23 | 1257.260       | 152.584         | 144.575         | 145.079         | 144.071         | R[2]  |
| D  | 24 | 1314.775       | 67.526          | 59.517          | 60.021          | 59.013          | D[1]  |

# sp | P62806 | H4\_MOUSE

[Acetyl]SGRGKGGKGLGK <sup>Acetyl</sup>42.01 GGAK <sup>Acetyl</sup>42.01 RHRK <sup>Methyl</sup>14.02 VLR <sup>Methyl</sup>14.02 D

- ▶ fragmentation table for charge state 3+
- ▶ specType=etd
- ▶ score=73.43
- ▶ F121546.dat
- ▶ query=q36294.p1
- ▶ precursor=658.139070
- ▶ chargePrecursor=4
- ▶ itol=0.7

| AA    | c              | y              | z+1            | z+2            | z              | AA    |
|-------|----------------|----------------|----------------|----------------|----------------|-------|
| S[1]  | 49.697         | <b>877.179</b> | <b>871.840</b> | 0.672          | <b>871.504</b> | S[24] |
| G[2]  | 58.704         | 134.165        | <b>826.826</b> | 0.672          | <b>826.490</b> | G[23] |
| R[3]  | 150.738        | 815.158        | <b>809.818</b> | <b>810.154</b> | <b>809.482</b> | R[22] |
| G[4]  | 139.745        | 763.124        | 757.785        | 758.121        | 757.449        | G[21] |
| K[5]  | 182.443        | 744.117        | 738.778        | 739.113        | 738.442        | K[20] |
| G[6]  | 201.450        | 701.419        | <b>696.079</b> | 696.415        | <b>695.743</b> | G[19] |
| G[7]  | 220.458        | 682.412        | 677.072        | 677.408        | 676.736        | G[18] |
| K[8]  | 263.156        | 663.404        | 658.063        | 658.401        | 657.729        | K[17] |
| G[9]  | 282.163        | 620.706        | 615.367        | 615.703        | 615.031        | G[16] |
| L[10] | 319.858        | 601.699        | 596.359        | 596.695        | 596.023        | L[15] |
| G[11] | 338.865        | 564.004        | 558.665        | 559.001        | 558.329        | G[14] |
| K[12] | 395.567        | <b>544.997</b> | 539.658        | 539.994        | 539.322        | K[13] |
| G[13] | 414.574        | 488.295        | 482.956        | 483.292        | 482.620        | G[12] |
| G[14] | 433.581        | 469.288        | 463.949        | 464.285        | 463.613        | G[11] |
| A[15] | 457.260        | 450.281        | 444.941        | 445.277        | 444.605        | A[10] |
| K[16] | 513.962        | 426.602        | 421.262        | 421.598        | 420.926        | K[9]  |
| R[17] | 565.996        | 369.900        | 364.561        | 364.896        | 364.225        | R[8]  |
| H[18] | 611.682        | 317.866        | 312.527        | 312.863        | 312.191        | H[7]  |
| R[19] | 663.716        | 272.180        | 266.841        | 267.176        | 266.505        | R[6]  |
| K[20] | 711.088        | 220.146        | 214.807        | 215.143        | 214.471        | K[5]  |
| V[21] | 764.109        | 172.776        | 167.437        | 167.773        | 167.101        | V[4]  |
| L[22] | 781.803        | 139.753        | 134.414        | 134.750        | 134.078        | L[3]  |
| R[23] | <b>838.509</b> | 102.059        | 96.719         | 97.055         | 96.383         | R[2]  |
| D[24] | <b>876.851</b> | 45.353         | 40.014         | 40.349         | 39.678         | D[1]  |



# sp | P62806 | H4\_MOUSE

[Acetyl]SGRGK<sup>Acetyl</sup><sub>42.01</sub> GGKGLGKGGAKR<sup>Dimethyl</sup><sub>28.03</sub> HRK<sup>Acetyl</sup><sub>42.01</sub> VLRD

- ▶ fragmentation table for charge state 1+
- ▶ specType=etd
- ▶ score=82.16
- ▶ F121546.dat
- ▶ query=q36295.p1
- ▶ precursor=658.139110
- ▶ chargePrecursor=4
- ▶ itol=0.7

| AA | c  | y               | z+1            | z+2      | z        | AA       |       |
|----|----|-----------------|----------------|----------|----------|----------|-------|
| S  | 1  | 147.076         | 2629.523       | 2613.505 | 0.000    | 2612.497 | S[24] |
| G  | 2  | 224.998         | 2509.481       | 2494.462 | 0.000    | 2493.454 | G[23] |
| R  | 3  | <b>360.199</b>  | 2643.459       | 2627.441 | 2426.448 | 2426.431 | R[22] |
| G  | 4  | <b>417.320</b>  | 2287.358       | 2271.339 | 2272.347 | 2270.332 | G[21] |
| K  | 5  | <b>587.326</b>  | 2230.337       | 2214.318 | 2215.326 | 2213.310 | K[20] |
| G  | 6  | <b>644.347</b>  | 2060.231       | 2044.212 | 2045.220 | 2043.205 | G[19] |
| G  | 7  | 701.369         | 2003.210       | 1987.191 | 1988.199 | 1986.183 | G[18] |
| K  | 8  | <b>829.464</b>  | 1946.188       | 1930.170 | 1931.177 | 1929.162 | K[17] |
| G  | 9  | <b>886.485</b>  | 1818.083       | 1802.075 | 1803.082 | 1801.067 | G[16] |
| L  | 10 | 959.509         | 1761.072       | 1745.053 | 1746.061 | 1744.045 | L[15] |
| G  | 11 | 1056.591        | 1647.985       | 1631.966 | 1632.977 | 1630.961 | G[14] |
| K  | 12 | 1184.686        | 1590.960       | 1574.948 | 1575.955 | 1573.940 | K[13] |
| G  | 13 | <b>1241.707</b> | 1462.871       | 1446.853 | 1447.860 | 1445.845 | G[12] |
| G  | 14 | <b>1298.729</b> | 1405.850       | 1389.831 | 1390.839 | 1388.823 | G[11] |
| A  | 15 | 1369.766        | 1348.828       | 1332.810 | 1333.818 | 1331.802 | A[10] |
| K  | 16 | 1497.861        | 1277.793       | 1261.773 | 1262.780 | 1260.765 | K[9]  |
| R  | 17 | 1681.899        | 1149.696       | 1133.676 | 1134.683 | 1132.670 | R[8]  |
| H  | 18 | 1519.052        | <b>965.564</b> | 949.545  | 950.553  | 948.537  | H[7]  |
| R  | 19 | 1975.153        | <b>828.505</b> | 812.486  | 813.494  | 811.478  | R[6]  |
| K  | 20 | 2145.259        | 672.404        | 656.385  | 657.393  | 655.377  | K[5]  |
| V  | 21 | 2244.327        | 502.298        | 486.280  | 487.287  | 485.272  | V[4]  |
| L  | 22 | 2367.411        | 403.230        | 387.211  | 388.219  | 386.203  | L[3]  |
| R  | 23 | 2513.512        | 290.146        | 274.127  | 275.135  | 273.119  | R[2]  |
| D  | 24 | 2628.539        | 134.045        | 118.026  | 119.034  | 117.018  | D[1]  |

# sp | P62806 | H4\_MOUSE

[Acetyl]SGR GK <sup>Acetyl</sup><sub>42.01</sub> GGKGLGKGGAKR <sup>Dimethyl</sup><sub>28.03</sub> HRK <sup>Acetyl</sup><sub>42.01</sub> VLRD

- ▶ fragmentation table for charge state 2+
- ▶ specType=etd
- ▶ score=82.16
- ▶ F121546.dat
- ▶ query=q36295\_p1
- ▶ precursor=658.139110
- ▶ chargePrecursor=4
- ▶ itol=0.7

| AA | c  | y        | z+1      | z+2             | z               | AA              |       |
|----|----|----------|----------|-----------------|-----------------|-----------------|-------|
| S  | 1  | 74.042   | 1315.205 | <b>1307.256</b> | 0.504           | 1306.752        | S[24] |
| G  | 2  | 102.553  | 1290.744 | 1242.735        | 0.504           | <b>1242.231</b> | G[23] |
| R  | 3  | 180.063  | 1222.233 | 1274.225        | <b>1214.726</b> | 1213.720        | R[22] |
| G  | 4  | 259.114  | 1144.383 | <b>1136.173</b> | <b>1136.677</b> | 1135.669        | G[21] |
| K  | 5  | 294.167  | 1115.872 | <b>1107.663</b> | <b>1108.167</b> | 1107.159        | K[20] |
| G  | 6  | 322.677  | 1030.619 | <b>1022.610</b> | <b>1023.114</b> | <b>1022.106</b> | G[19] |
| G  | 7  | 351.188  | 1002.108 | <b>994.099</b>  | <b>994.603</b>  | 993.595         | G[18] |
| K  | 8  | 415.236  | 973.598  | <b>965.588</b>  | <b>966.092</b>  | <b>965.084</b>  | K[17] |
| G  | 9  | 443.746  | 909.350  | <b>901.541</b>  | <b>902.045</b>  | <b>901.037</b>  | G[16] |
| L  | 10 | 500.288  | 881.040  | 873.032         | 873.534         | <b>872.526</b>  | L[15] |
| G  | 11 | 528.799  | 824.498  | <b>816.488</b>  | <b>816.992</b>  | 815.984         | G[14] |
| K  | 12 | 592.847  | 795.987  | <b>787.977</b>  | <b>788.481</b>  | <b>787.474</b>  | K[13] |
| G  | 13 | 621.357  | 731.639  | <b>723.930</b>  | <b>724.434</b>  | <b>723.426</b>  | G[12] |
| G  | 14 | 649.868  | 703.429  | <b>695.419</b>  | <b>695.923</b>  | <b>694.915</b>  | G[11] |
| A  | 15 | 685.357  | 674.918  | <b>666.908</b>  | <b>667.412</b>  | <b>666.405</b>  | A[10] |
| R  | 16 | 749.434  | 639.399  | 631.391         | 631.894         | 630.886         | R[9]  |
| R  | 17 | 841.500  | 575.352  | 567.342         | 567.846         | 566.838         | R[8]  |
| H  | 18 | 910.030  | 483.288  | 475.278         | 475.780         | 474.772         | H[7]  |
| R  | 19 | 988.080  | 414.756  | 406.747         | 407.251         | 406.243         | R[6]  |
| K  | 20 | 1073.133 | 336.706  | 328.696         | 329.200         | 328.192         | K[5]  |
| V  | 21 | 1122.667 | 251.653  | 243.643         | 244.147         | 243.140         | V[4]  |
| L  | 22 | 1179.239 | 202.219  | 194.209         | 194.713         | 193.705         | L[3]  |
| R  | 23 | 1257.280 | 145.577  | 137.567         | 138.071         | 137.063         | R[2]  |
| D  | 24 | 1314.773 | 67.526   | 59.517          | 60.021          | 59.013          | D[1]  |

# sp | P62806 | H4\_MOUSE

[Acetyl]SGR<sup>Acetyl</sup>RGK<sub>42.01</sub> GGKGLGKGGAKR<sup>Dimethyl</sup> HRK<sup>Acetyl</sup> VLRD<sub>28.03 42.01</sub>

- ▶ fragmentation table for charge state 3+
- ▶ specType=etd
- ▶ score=82.16
- ▶ F121546.dat
- ▶ query=q36295.p1
- ▶ precursor=658.139110
- ▶ chargePrecursor=4
- ▶ itol=0.7

| AA    | c              | y              | z+1            | z+2            | z              | AA    |
|-------|----------------|----------------|----------------|----------------|----------------|-------|
| S[1]  | 49.697         | <b>877.179</b> | <b>871.840</b> | 0.672          | <b>871.504</b> | S[24] |
| G[2]  | 58.704         | 134.105        | <b>826.826</b> | 0.672          | <b>826.490</b> | G[23] |
| R[3]  | 150.738        | 815.158        | <b>809.818</b> | <b>810.154</b> | <b>809.482</b> | R[22] |
| G[4]  | 139.745        | 763.124        | 757.785        | 758.121        | 757.449        | G[21] |
| K[5]  | 196.447        | 744.117        | 738.778        | 739.113        | 738.442        | K[20] |
| G[6]  | 215.454        | 687.415        | 682.076        | 682.412        | 681.740        | G[19] |
| G[7]  | 234.461        | 668.408        | 663.069        | 663.404        | 662.733        | G[18] |
| K[8]  | 277.159        | 649.401        | <b>644.061</b> | <b>644.397</b> | 643.725        | K[17] |
| G[9]  | 286.167        | 636.703        | 602.363        | 603.699        | 601.027        | G[16] |
| L[10] | 313.881        | <b>587.695</b> | 582.356        | 582.692        | 582.020        | L[15] |
| G[11] | 352.868        | 550.001        | 544.661        | 544.997        | 544.325        | G[14] |
| K[12] | 395.567        | 530.994        | 525.654        | 525.990        | 525.318        | K[13] |
| G[13] | 414.574        | 488.295        | 482.956        | 483.292        | 482.620        | G[12] |
| G[14] | 433.581        | 469.288        | 463.949        | 464.285        | 463.613        | G[11] |
| A[15] | 457.260        | 450.281        | 444.941        | 445.277        | 444.605        | A[10] |
| K[16] | 499.958        | 426.602        | 421.262        | 421.598        | 420.926        | K[9]  |
| R[17] | 561.136        | 383.904        | 378.564        | 378.900        | 378.228        | R[8]  |
| H[18] | 607.622        | 322.526        | 317.187        | 317.523        | 316.851        | H[7]  |
| R[19] | 659.056        | 276.840        | 271.500        | 271.836        | 271.164        | R[6]  |
| K[20] | 715.758        | 224.806        | 219.467        | 219.803        | 219.131        | K[5]  |
| V[21] | 748.781        | 168.104        | 162.765        | 163.101        | 162.429        | V[4]  |
| L[22] | 786.475        | 135.082        | 129.742        | 130.078        | 129.406        | L[3]  |
| R[23] | <b>838.509</b> | 97.387         | 92.047         | 92.383         | 91.711         | R[2]  |
| D[24] | 876.851        | 45.353         | 40.014         | 40.349         | 39.678         | D[1]  |



# sp | P62806 | H4\_MOUSE

[Acetyl]SGRGK Acetyl  
42.01 **GGK** Acetyl  
42.01 **GLGK** Acetyl  
42.01 **GGAKR** (Methyl)  
(14.02) HRKVLRD

- ▶ fragmentation table for charge state 1+
- ▶ specType=etd
- ▶ score=46.45
- ▶ F121546.dat
- ▶ query=q36526.p1
- ▶ precursor=665.137850
- ▶ chargePrecursor=4
- ▶ itol=0.7

| AA | c               | y        | z+1      | z+2      | z        | AA    |
|----|-----------------|----------|----------|----------|----------|-------|
| S  | 147.076         | 2057.518 | 2641.500 | 0.000    | 2040.492 | S[24] |
| G  | 204.098         | 2528.476 | 2512.457 | 0.000    | 2511.449 | G[23] |
| R  | 300.199         | 2372.454 | 2485.435 | 2469.413 | 2354.425 | R[22] |
| Q  | 417.220         | 2315.351 | 2299.334 | 2300.342 | 2298.327 | Q[21] |
| K  | <b>587.326</b>  | 2258.332 | 2242.313 | 2243.321 | 2241.305 | K[20] |
| G  | 644.347         | 2088.226 | 2072.207 | 2073.215 | 2071.200 | G[19] |
| G  | <b>701.369</b>  | 2031.205 | 2015.186 | 2016.194 | 2014.178 | G[18] |
| K  | <b>871.474</b>  | 1974.183 | 1958.164 | 1959.172 | 1957.157 | K[17] |
| G  | 938.496         | 1804.078 | 1788.059 | 1789.067 | 1787.051 | G[16] |
| L  | <b>1041.580</b> | 1747.959 | 1731.937 | 1732.945 | 1730.935 | L[15] |
| Q  | 1058.601        | 1653.977 | 1617.953 | 1618.961 | 1616.946 | Q[14] |
| K  | 1268.707        | 1576.951 | 1560.932 | 1561.940 | 1559.924 | K[13] |
| G  | 1325.728        | 1406.845 | 1390.826 | 1391.834 | 1389.819 | G[12] |
| G  | 1382.750        | 1349.824 | 1333.805 | 1334.813 | 1332.797 | G[11] |
| A  | 1453.787        | 1292.802 | 1276.783 | 1277.791 | 1275.776 | A[10] |
| K  | 1581.882        | 1221.765 | 1205.746 | 1206.754 | 1204.739 | K[9]  |
| R  | 1751.990        | 1091.670 | 1077.651 | 1078.659 | 1076.644 | R[8]  |
| H  | 1889.058        | 923.551  | 907.535  | 908.542  | 906.527  | H[7]  |
| R  | 2045.150        | 786.464  | 770.476  | 771.484  | 769.468  | R[6]  |
| K  | 2173.254        | 630.393  | 614.375  | 615.382  | 613.367  | K[5]  |
| V  | 2272.322        | 502.298  | 486.280  | 487.287  | 485.272  | V[4]  |
| L  | 2385.406        | 403.230  | 387.211  | 388.219  | 386.203  | L[3]  |
| R  | 2541.507        | 290.146  | 274.127  | 275.135  | 273.119  | R[2]  |
| D  | 2656.534        | 134.045  | 118.028  | 119.034  | 117.018  | D[1]  |



# sp | P62806 | H4\_MOUSE

[Acetyl]SGRGGK<sub>Acetyl</sub><sub>42.01</sub> GGK<sub>Acetyl</sub><sub>42.01</sub> GLGK<sub>Acetyl</sub><sub>42.01</sub> GGAKR<sub>(Methyl)</sub><sub>(14.02)</sub> HRKVLRD

- ▶ fragmentation table for charge state 2+
- ▶ specType=etd
- ▶ score=46.45
- ▶ F121546.dat
- ▶ query=q36526.p1
- ▶ precursor=665.137850
- ▶ chargePrecursor=4
- ▶ itol=0.7

| AA    | c              | y        | z+1             | z+2             | z               | AA    |
|-------|----------------|----------|-----------------|-----------------|-----------------|-------|
| S[1]  | 74.042         | 1329.263 | 1321.253        | 0.504           | 1320.749        | S[24] |
| G[2]  | 102.553        | 1204.741 | <b>1256.732</b> | 0.504           | 1256.238        | G[23] |
| R[3]  | 180.603        | 1236.231 | 1228.221        | <b>1228.725</b> | 1227.717        | R[22] |
| G[4]  | 209.114        | 1158.380 | <b>1150.171</b> | <b>1150.675</b> | <b>1149.567</b> | G[21] |
| K[5]  | 294.167        | 1129.669 | 1121.660        | 1122.164        | 1121.156        | K[20] |
| G[6]  | 322.677        | 1044.617 | 1036.607        | 1037.111        | 1036.103        | G[19] |
| G[7]  | 351.188        | 1016.106 | <b>1008.097</b> | <b>1008.601</b> | 1007.593        | G[18] |
| K[8]  | 436.241        | 987.595  | <b>979.586</b>  | <b>980.090</b>  | 979.082         | K[17] |
| G[9]  | 464.752        | 902.542  | <b>894.533</b>  | <b>895.037</b>  | 894.029         | G[16] |
| L[10] | 521.294        | 814.032  | 806.022         | 806.526         | 805.518         | L[15] |
| G[11] | 549.804        | 817.490  | <b>809.480</b>  | <b>809.984</b>  | <b>808.976</b>  | G[14] |
| K[12] | 634.857        | 788.979  | <b>780.970</b>  | <b>781.474</b>  | <b>780.466</b>  | K[13] |
| G[13] | 663.368        | 703.926  | <b>695.917</b>  | <b>696.421</b>  | 695.413         | G[12] |
| G[14] | 691.879        | 675.415  | 667.406         | 667.910         | 666.902         | G[11] |
| A[15] | 727.397        | 646.905  | 638.895         | 639.399         | 638.391         | A[10] |
| R[16] | 791.450        | 611.396  | 603.377         | 603.881         | 602.873         | R[9]  |
| R[17] | <b>876.503</b> | 547.339  | 539.320         | 539.823         | 538.825         | R[8]  |
| H[18] | 945.032        | 402.280  | 454.271         | 454.775         | 453.767         | H[7]  |
| R[19] | 1023.083       | 393.751  | 385.741         | 386.245         | 385.238         | R[6]  |
| R[20] | 1087.130       | 315.700  | 307.691         | 308.195         | 307.187         | R[5]  |
| V[21] | 1138.665       | 251.653  | 243.643         | 244.147         | 243.140         | V[4]  |
| L[22] | 1193.207       | 202.119  | 194.109         | 194.613         | 193.605         | L[3]  |
| L[23] | 1213.297       | 149.277  | 137.567         | 138.071         | 137.063         | L[2]  |
| D[24] | 1328.771       | 67.526   | 59.517          | 60.021          | 59.013          | D[1]  |

# sp | P62806 | H4\_MOUSE

[Acetyl]SGRGK<sup>Acetyl</sup><sub>42.01</sub> GGK<sup>Acetyl</sup><sub>42.01</sub> GLGK<sup>Acetyl</sup><sub>42.01</sub> GGAKR<sup>(Methyl)</sup><sub>(14.02)</sub> HRKVLRD

- ▶ fragmentation table for charge state 3+
- ▶ specType=etd
- ▶ score=46.45
- ▶ F121546.dat
- ▶ query=q36526.p1
- ▶ precursor=665.137850
- ▶ chargePrecursor=4
- ▶ itol=0.7

| AA    | c       | y              | z+1            | z+2            | z              | AA    |
|-------|---------|----------------|----------------|----------------|----------------|-------|
| S[1]  | 49.697  | <b>886.511</b> | <b>881.171</b> | 0.672          | <b>880.835</b> | S[24] |
| G[2]  | 68.704  | 843.697        | <b>838.157</b> | 0.672          | 837.521        | G[23] |
| R[3]  | 120.738 | 824.490        | <b>819.150</b> | <b>819.486</b> | 818.814        | R[22] |
| G[4]  | 139.745 | 772.456        | 767.110        | 767.452        | 766.780        | G[21] |
| K[5]  | 196.447 | 753.449        | 748.100        | 748.445        | 747.773        | K[20] |
| G[6]  | 215.454 | <b>696.747</b> | 691.407        | 691.743        | 691.071        | G[19] |
| G[7]  | 234.461 | 677.740        | 672.400        | 672.736        | 672.064        | G[18] |
| K[8]  | 291.163 | 658.733        | 653.393        | 653.729        | 653.057        | K[17] |
| G[9]  | 310.170 | 602.031        | 596.691        | 597.027        | 596.355        | G[16] |
| L[10] | 347.865 | 383.024        | 377.684        | 378.020        | 377.348        | L[15] |
| G[11] | 369.872 | 349.529        | 349.869        | 349.328        | 349.553        | G[14] |
| K[12] | 423.574 | 326.522        | 320.982        | 321.318        | 320.646        | K[13] |
| G[13] | 442.581 | 469.620        | 464.280        | 464.616        | 463.944        | G[12] |
| G[14] | 461.588 | 450.613        | 445.273        | 445.609        | 444.937        | G[11] |
| A[15] | 485.267 | 431.606        | 426.266        | 426.602        | 425.930        | A[10] |
| K[16] | 527.966 | 407.927        | 402.587        | 402.923        | 402.251        | K[9]  |
| R[17] | 584.671 | 365.228        | 359.889        | 360.225        | 359.553        | R[8]  |
| H[18] | 630.357 | 308.523        | 303.183        | 303.519        | 302.847        | H[7]  |
| R[19] | 682.391 | 262.836        | 257.497        | 257.833        | 257.161        | R[6]  |
| K[20] | 725.089 | 210.803        | 205.463        | 205.799        | 205.127        | K[5]  |
| V[21] | 758.112 | 169.104        | 162.765        | 163.101        | 162.429        | V[4]  |
| L[22] | 795.807 | 135.082        | 129.742        | 130.078        | 129.406        | L[3]  |
| R[23] | 847.841 | 97.387         | 92.047         | 92.383         | 91.711         | R[2]  |
| D[24] | 886.183 | 45.353         | 40.014         | 40.349         | 39.678         | D[1]  |



# sp | P62806 | H4\_MOUSE

[Acetyl]SGRGKGGK<sup>Acetyl</sup><sub>42.01</sub> GLGK<sup>Acetyl</sup><sub>42.01</sub> GGAK<sup>Acetyl</sup><sub>42.01</sub> RHRK<sup>Dimethyl</sup><sub>28.03</sub> VLRD

- ▶ fragmentation table for charge state 1+
- ▶ specType=etd
- ▶ score=48.59
- ▶ F121546.dat
- ▶ query=q36646.p1
- ▶ precursor=535.112370
- ▶ chargePrecursor=5
- ▶ itol=0.7

| AA | c  | y              | z+1            | z+2            | z        | AA             |       |
|----|----|----------------|----------------|----------------|----------|----------------|-------|
| S  | 1  | 147.076        | 2671.534       | 2655.515       | 0.000    | 2654.507       | S[24] |
| G  | 2  | 254.098        | 2542.491       | 2528.473       | 0.000    | 2525.465       | G[23] |
| R  | 3  | <b>360.199</b> | 2626.470       | 2469.451       | 2470.459 | 2468.443       | R[22] |
| G  | 4  | <b>417.220</b> | 2320.868       | 2311.850       | 2314.858 | 2312.842       | G[21] |
| K  | 5  | <b>545.315</b> | 2272.347       | 2256.329       | 2257.336 | 2255.321       | K[20] |
| G  | 6  | 602.337        | 2144.252       | 2128.234       | 2129.241 | 2127.226       | G[19] |
| G  | 7  | 659.358        | 2087.231       | 2071.212       | 2072.220 | 2070.204       | G[18] |
| K  | 8  | <b>829.464</b> | 2030.209       | 2014.191       | 2015.198 | 2013.183       | K[17] |
| G  | 9  | <b>886.485</b> | 1890.104       | 1884.085       | 1885.093 | 1883.077       | G[16] |
| L  | 10 | 993.959        | 1803.064       | 1787.045       | 1788.053 | 1786.036       | L[15] |
| G  | 11 | 1056.591       | 1588.958       | 1573.939       | 1574.947 | 1572.932       | G[14] |
| K  | 12 | 1226.696       | 1532.937       | 1516.918       | 1517.926 | 1515.910       | K[13] |
| G  | 13 | 1283.718       | 1462.871       | 1446.853       | 1447.860 | 1445.845       | G[12] |
| G  | 14 | 1340.739       | 1405.850       | 1389.831       | 1390.839 | 1388.823       | G[11] |
| A  | 15 | 1411.776       | 1348.828       | 1332.810       | 1333.818 | 1331.802       | A[10] |
| K  | 16 | 1581.882       | 1277.791       | 1261.773       | 1262.780 | 1260.765       | K[9]  |
| R  | 17 | 1737.983       | 1197.666       | 1191.647       | 1192.655 | 1190.639       | R[8]  |
| H  | 18 | 1875.042       | 951.585        | <b>935.566</b> | 936.574  | <b>934.558</b> | H[7]  |
| R  | 19 | 2031.143       | <b>814.526</b> | 798.507        | 799.515  | 797.499        | R[6]  |
| K  | 20 | 2187.269       | <b>658.425</b> | <b>642.406</b> | 643.414  | 641.398        | K[5]  |
| V  | 21 | 2286.338       | 502.298        | <b>486.280</b> | 487.287  | 485.272        | V[4]  |
| L  | 22 | 2399.422       | 403.230        | <b>387.211</b> | 388.219  | 386.203        | L[3]  |
| R  | 23 | 2555.523       | 290.146        | <b>274.127</b> | 275.135  | 273.119        | R[2]  |
| D  | 24 | 2670.550       | 134.045        | 118.026        | 119.034  | 117.018        | D[1]  |

# sp | P62806 | H4\_MOUSE

[Acetyl]SGRGKGGK <sup>Acetyl</sup><sub>42.01</sub> GLGK <sup>Acetyl</sup><sub>42.01</sub> GGAK <sup>Acetyl</sup><sub>42.01</sub> RHRK <sup>Dimethyl</sup><sub>28.03</sub> VLRD

- ▶ fragmentation table for charge state 2+
- ▶ specType=etd
- ▶ score=48.59
- ▶ F121546.dat
- ▶ query=q36646.p1
- ▶ precursor=535.112370
- ▶ chargePrecursor=5
- ▶ itol=0.7

| AA | c  | y               | z+1            | z+2             | z               | AA             |       |
|----|----|-----------------|----------------|-----------------|-----------------|----------------|-------|
| S  | 1  | 74.642          | 1336.271       | 1326.261        | 0.904           | 1327.757       | S[24] |
| G  | 2  | 102.563         | 1271.749       | 1263.740        | 0.904           | 1263.230       | G[23] |
| R  | 3  | 180.603         | 1243.239       | 1235.229        | 1236.733        | 1234.725       | R[22] |
| G  | 4  | 259.114         | 1165.189       | 1157.179        | 1157.683        | 1156.675       | G[21] |
| K  | 5  | 273.101         | 1136.677       | <b>1128.668</b> | <b>1129.172</b> | 1128.164       | K[20] |
| G  | 6  | 301.672         | 1072.630       | 1064.620        | 1065.124        | 1064.117       | G[19] |
| G  | 7  | 330.183         | 1044.119       | 1036.110        | 1036.614        | 1035.606       | G[18] |
| K  | 8  | <b>415.236</b>  | 1015.608       | 1007.599        | 1008.103        | 1007.095       | K[17] |
| G  | 9  | <b>443.746</b>  | 930.556        | <b>922.546</b>  | <b>923.050</b>  | <b>922.042</b> | G[16] |
| L  | 10 | <b>509.280</b>  | 902.045        | <b>894.035</b>  | <b>894.539</b>  | 893.531        | L[15] |
| G  | 11 | <b>528.799</b>  | 845.503        | <b>837.493</b>  | <b>837.997</b>  | <b>836.990</b> | G[14] |
| K  | 12 | <b>613.852</b>  | 816.992        | <b>808.983</b>  | <b>809.487</b>  | <b>808.479</b> | K[13] |
| G  | 13 | <b>642.363</b>  | 731.939        | <b>723.930</b>  | <b>724.434</b>  | <b>723.426</b> | G[12] |
| G  | 14 | 670.873         | 703.429        | <b>695.419</b>  | <b>695.923</b>  | <b>694.915</b> | G[11] |
| A  | 15 | <b>706.392</b>  | 674.918        | 666.908         | 667.412         | 666.405        | A[10] |
| R  | 16 | <b>731.445</b>  | <b>639.399</b> | <b>631.390</b>  | 631.894         | <b>630.886</b> | R[9]  |
| R  | 17 | 809.495         | 554.347        | <b>546.337</b>  | <b>546.841</b>  | <b>545.833</b> | R[8]  |
| H  | 18 | <b>938.025</b>  | 478.290        | <b>468.287</b>  | <b>468.791</b>  | <b>467.783</b> | H[7]  |
| R  | 19 | <b>1016.075</b> | 407.707        | <b>399.757</b>  | <b>400.261</b>  | <b>399.253</b> | R[6]  |
| K  | 20 | 1094.138        | 329.716        | 321.707         | 322.211         | 321.203        | K[5]  |
| V  | 21 | <b>1143.673</b> | 251.653        | 243.643         | 244.147         | 243.140        | V[4]  |
| L  | 22 | 1209.219        | 202.119        | 194.109         | 194.613         | 193.605        | L[3]  |
| R  | 23 | 1278.265        | 145.577        | 137.567         | 138.071         | 137.063        | R[2]  |
| D  | 24 | 1335.779        | 67.528         | 59.517          | 60.021          | 59.013         | D[1]  |

# sp | P62806 | H4\_MOUSE

[Acetyl]SGRGKGGK <sup>Acetyl</sup><sub>42.01</sub> GLGK <sup>Acetyl</sup><sub>42.01</sub> GGAK <sup>Acetyl</sup><sub>42.01</sub> RHRK <sup>Dimethyl</sup><sub>28.03</sub> VLRD

- ▶ fragmentation table for charge state 3+
- ▶ specType=etd
- ▶ score=48.59
- ▶ F121546.dat
- ▶ query=q36646.p1
- ▶ precursor=535.112370
- ▶ chargePrecursor=5
- ▶ itol=0.7

| AA    | c              | y              | z+1            | z+2            | z              | AA    |
|-------|----------------|----------------|----------------|----------------|----------------|-------|
| S[1]  | 49.697         | <b>891.183</b> | <b>885.843</b> | 0.672          | 885.507        | S[24] |
| G[2]  | 58.704         | <b>848.169</b> | <b>842.829</b> | 0.672          | <b>842.493</b> | G[23] |
| R[3]  | 150.738        | <b>829.161</b> | <b>823.822</b> | <b>824.158</b> | <b>823.486</b> | R[22] |
| G[4]  | 139.745        | 777.128        | <b>771.788</b> | <b>772.124</b> | <b>771.452</b> | G[21] |
| K[5]  | 182.443        | <b>758.121</b> | <b>752.781</b> | <b>753.117</b> | <b>752.445</b> | K[20] |
| G[6]  | 201.450        | 715.422        | <b>710.083</b> | <b>710.419</b> | <b>709.747</b> | G[19] |
| G[7]  | 220.458        | 696.415        | 691.076        | <b>691.412</b> | 690.740        | G[18] |
| K[8]  | 277.159        | <b>677.408</b> | <b>672.068</b> | <b>672.404</b> | <b>671.732</b> | K[17] |
| G[9]  | 296.167        | 630.798        | <b>615.367</b> | <b>615.703</b> | <b>615.031</b> | G[16] |
| L[10] | 313.681        | <b>601.699</b> | <b>596.359</b> | <b>596.695</b> | 596.023        | L[15] |
| G[11] | 352.868        | 504.024        | 539.658        | 539.001        | 538.329        | G[14] |
| K[12] | 409.570        | <b>544.997</b> | <b>539.658</b> | <b>539.994</b> | <b>539.322</b> | K[13] |
| G[13] | 428.577        | 488.295        | 482.956        | 483.292        | 482.620        | G[12] |
| G[14] | 447.585        | 469.288        | 463.949        | 464.285        | 463.613        | G[11] |
| A[15] | 471.264        | 450.281        | 444.941        | 445.277        | 444.605        | A[10] |
| K[16] | <b>527.966</b> | 426.602        | 421.262        | 421.598        | 420.926        | K[9]  |
| R[17] | <b>579.999</b> | 369.900        | 364.561        | 364.896        | 364.225        | R[8]  |
| H[18] | <b>625.686</b> | 317.896        | 312.527        | 312.863        | 312.191        | H[7]  |
| R[19] | <b>677.719</b> | 272.180        | 266.841        | 267.176        | 266.505        | R[6]  |
| K[20] | <b>729.761</b> | 220.140        | 214.807        | 215.143        | 214.471        | K[5]  |
| V[21] | <b>762.784</b> | 168.104        | 162.765        | 163.101        | 162.429        | V[4]  |
| L[22] | <b>800.479</b> | 135.082        | 129.742        | 130.078        | 129.406        | L[3]  |
| R[23] | <b>852.513</b> | 97.387         | 92.047         | 92.383         | 91.711         | R[2]  |
| D[24] | <b>896.855</b> | 45.353         | 40.014         | 40.349         | 39.678         | D[1]  |

# sp | P62806 | H4\_MOUSE

[Acetyl]SGRGKGGK <sup>Acetyl</sup><sub>42.01</sub> GLGK <sup>Acetyl</sup><sub>42.01</sub> GGAK <sup>Acetyl</sup><sub>42.01</sub> RHRK <sup>Dimethyl</sup><sub>28.03</sub> VLRD

- ▶ fragmentation table for charge state 4+
- ▶ specType=etd
- ▶ score=48.59
- ▶ F121546.dat
- ▶ query=q36646.p1
- ▶ precursor=535.112370
- ▶ chargePrecursor=5
- ▶ itol=0.7

| AA    | c              | y              | z+1            | z+2            | z              | AA    |
|-------|----------------|----------------|----------------|----------------|----------------|-------|
| S[1]  | 37.525         | <b>668.639</b> | <b>664.634</b> | 0.755          | <b>664.182</b> | S[24] |
| G[2]  | 51.780         | 536.378        | <b>632.374</b> | 0.755          | <b>632.122</b> | G[23] |
| R[3]  | 90.805         | 622.123        | <b>618.118</b> | <b>618.370</b> | <b>617.866</b> | R[22] |
| G[4]  | 105.061        | 583.098        | 579.093        | 579.345        | 578.841        | G[21] |
| K[5]  | 137.084        | 568.842        | 564.838        | 565.090        | 564.586        | K[20] |
| G[6]  | 151.340        | 536.819        | 532.814        | 533.066        | 532.562        | G[19] |
| G[7]  | 165.595        | 522.563        | 518.558        | 518.810        | 518.307        | G[18] |
| K[8]  | 208.121        | <b>508.308</b> | 504.303        | 504.555        | 504.051        | K[17] |
| G[9]  | 222.377        | 490.781        | 486.777        | 487.029        | 486.525        | G[16] |
| L[10] | 250.048        | 451.526        | 447.521        | 447.773        | 447.269        | L[15] |
| G[11] | 264.303        | 423.255        | 419.250        | 419.502        | 418.998        | G[14] |
| K[12] | 307.430        | 409.000        | 404.995        | 405.247        | 404.743        | K[13] |
| G[13] | 321.685        | 366.473        | 362.469        | 362.721        | 362.217        | G[12] |
| G[14] | 335.940        | 352.218        | 348.213        | 348.465        | 347.961        | G[11] |
| A[15] | 353.700        | 337.963        | 333.958        | 334.210        | 333.706        | A[10] |
| K[16] | 398.226        | 320.203        | 316.199        | 316.451        | 315.947        | K[9]  |
| R[17] | 435.251        | 277.877        | <b>273.672</b> | <b>273.924</b> | 273.420        | R[8]  |
| H[18] | 469.516        | 238.652        | 234.647        | 234.899        | 234.395        | H[7]  |
| R[19] | 508.541        | 204.397        | 200.392        | 200.644        | 200.140        | R[6]  |
| K[20] | 547.573        | 165.362        | 161.357        | 161.609        | 161.105        | K[5]  |
| V[21] | 572.340        | 126.330        | 122.325        | 122.577        | 122.073        | V[4]  |
| L[22] | <b>600.611</b> | 101.563        | 97.558         | 97.810         | 97.306         | L[3]  |
| R[23] | <b>639.636</b> | 73.292         | 69.287         | 69.539         | 69.035         | R[2]  |
| D[24] | <b>668.393</b> | 34.267         | 30.262         | 30.514         | 30.010         | D[1]  |





# sp | P62806 | H4\_MOUSE

[Acetyl]SGR<sup>Acetyl</sup>RGK<sup>42.01</sup> GGK<sup>Acetyl</sup> GLGKGGAKR<sup>(Methyl)</sup> HR<sup>(Methyl)</sup> K<sup>(Acetyl)</sup> VL<sup>(14.02)</sup>RD<sup>(14.02)</sup> (42.01)

- ▶ fragmentation table for charge state 1+
- ▶ specType=etd
- ▶ score=54.32
- ▶ F121546.dat
- ▶ query=q36647.p1
- ▶ precursor=668.639000
- ▶ chargePrecursor=4
- ▶ itol=0.7

| AA | c  | y              | z+1            | z+2      | z        | AA       |       |
|----|----|----------------|----------------|----------|----------|----------|-------|
| S  | 1  | 147.076        | 2071.534       | 2055.515 | 0.000    | 2054.507 | S[24] |
| G  | 2  | 254.088        | 2542.491       | 2526.473 | 0.000    | 2525.465 | G[23] |
| R  | 3  | <b>360.199</b> | 2335.470       | 2349.451 | 2470.459 | 2368.443 | R[22] |
| G  | 4  | 417.200        | 2320.559       | 2313.350 | 2314.358 | 2312.342 | G[21] |
| K  | 5  | <b>587.326</b> | 2272.147       | 2256.329 | 2257.336 | 2255.321 | K[20] |
| G  | 6  | 644.347        | 2102.242       | 2086.223 | 2087.231 | 2085.215 | G[19] |
| G  | 7  | 701.369        | 2045.220       | 2029.202 | 2030.209 | 2028.194 | G[18] |
| K  | 8  | <b>871.474</b> | 1988.199       | 1972.180 | 1973.188 | 1971.172 | K[17] |
| G  | 9  | 928.496        | 1818.093       | 1802.075 | 1803.082 | 1801.067 | G[16] |
| L  | 10 | 1061.280       | 1751.072       | 1745.053 | 1746.061 | 1744.045 | L[15] |
| G  | 11 | 1098.011       | 1547.986       | 1531.969 | 1532.977 | 1530.961 | G[14] |
| K  | 12 | 1226.096       | 1590.965       | 1574.948 | 1575.955 | 1573.940 | K[13] |
| G  | 13 | 1283.718       | 1462.871       | 1446.853 | 1447.860 | 1445.845 | G[12] |
| G  | 14 | 1340.739       | 1405.850       | 1389.831 | 1390.839 | 1388.823 | G[11] |
| A  | 15 | 1411.776       | 1348.828       | 1332.810 | 1333.818 | 1331.802 | A[10] |
| K  | 16 | 1539.871       | 1277.791       | 1261.773 | 1262.780 | 1260.765 | K[9]  |
| R  | 17 | 1709.889       | 1149.696       | 1133.678 | 1134.685 | 1132.670 | R[8]  |
| H  | 18 | 1847.987       | 979.385        | 963.367  | 964.369  | 962.353  | H[7]  |
| R  | 19 | 2017.104       | <b>842.521</b> | 826.502  | 827.510  | 825.494  | R[6]  |
| K  | 20 | 2187.209       | 672.404        | 656.385  | 657.393  | 655.377  | K[5]  |
| V  | 21 | 2286.338       | 502.290        | 486.280  | 487.287  | 485.272  | V[4]  |
| L  | 22 | 2389.422       | 403.230        | 387.211  | 388.219  | 386.203  | L[3]  |
| R  | 23 | 2555.523       | 290.146        | 274.127  | 275.135  | 273.119  | R[2]  |
| D  | 24 | 2670.550       | 134.045        | 118.026  | 119.034  | 117.018  | D[1]  |

# sp | P62806 | H4\_MOUSE

[Acetyl]SGR<sup>Acetyl</sup>RGK<sup>42.01</sup> GK<sup>Acetyl</sup> GK<sup>42.01</sup> GLGKGGAKR<sup>(Methyl)</sup> (14.02) HR<sup>(Methyl)</sup> (14.02) K<sup>(Acetyl)</sup> (42.01) VL<sup>Acetyl</sup>LRD

- ▶ fragmentation table for charge state 2+
- ▶ specType=etd
- ▶ score=54.32
- ▶ F121546.dat
- ▶ query=q36647.p1
- ▶ precursor=668.639000
- ▶ chargePrecursor=4
- ▶ itol=0.7

| AA    | c        | y              | z+1             | z+2             | z              | AA    |
|-------|----------|----------------|-----------------|-----------------|----------------|-------|
| S[1]  | 74.642   | 1336.271       | 1326.261        | 0.504           | 1327.757       | S[24] |
| G[2]  | 102.553  | 1271.749       | 1263.740        | 0.504           | 1263.239       | G[23] |
| R[3]  | 180.603  | 1243.239       | <b>1235.229</b> | <b>1235.733</b> | 1234.725       | R[22] |
| G[4]  | 209.114  | 1169.188       | <b>1157.179</b> | <b>1157.683</b> | 1156.675       | G[21] |
| K[5]  | 294.167  | 1138.677       | 1128.668        | 1129.172        | 1128.164       | K[20] |
| G[6]  | 322.677  | 1061.625       | <b>1043.615</b> | <b>1044.119</b> | 1043.111       | G[19] |
| G[7]  | 351.188  | 1023.114       | <b>1015.104</b> | <b>1015.608</b> | 1014.601       | G[18] |
| K[8]  | 436.241  | 994.603        | <b>986.594</b>  | <b>987.098</b>  | <b>986.090</b> | K[17] |
| G[9]  | 464.752  | 909.550        | 903.541         | 902.045         | 901.037        | G[16] |
| L[10] | 521.264  | 881.040        | <b>873.030</b>  | 873.534         | <b>872.525</b> | L[15] |
| G[11] | 549.804  | <b>824.498</b> | 818.489         | 816.992         | 815.984        | G[14] |
| K[12] | 613.852  | 795.987        | 787.977         | 788.481         | 787.474        | K[13] |
| G[13] | 642.363  | 731.938        | <b>723.930</b>  | <b>724.434</b>  | 723.426        | G[12] |
| G[14] | 670.873  | 703.429        | <b>695.419</b>  | <b>695.923</b>  | <b>694.915</b> | G[11] |
| A[15] | 708.392  | 674.918        | 666.908         | 667.412         | 666.405        | A[10] |
| K[16] | 770.439  | 639.369        | <b>631.359</b>  | <b>631.864</b>  | 630.856        | K[9]  |
| R[17] | 853.488  | 575.352        | 567.343         | 567.846         | 566.839        | R[8]  |
| H[18] | 924.027  | 490.293        | 482.284         | 482.788         | 481.780        | H[7]  |
| R[19] | 1009.088 | 421.784        | 413.775         | 414.279         | 413.271        | R[6]  |
| K[20] | 1094.138 | 336.706        | 328.696         | 329.200         | 328.192        | K[5]  |
| V[21] | 1143.673 | 251.653        | 243.643         | 244.147         | 243.140        | V[4]  |
| L[22] | 1200.215 | 202.119        | 194.109         | 194.613         | 193.605        | L[3]  |
| R[23] | 1278.265 | 134.517        | 127.507         | 128.011         | 127.003        | R[2]  |
| D[24] | 1333.778 | 67.526         | 59.517          | 60.021          | 59.013         | D[1]  |

# sp | P62806 | H4\_MOUSE

[Acetyl]SGR<sup>Acetyl</sup>RGK<sup>42.01</sup> GGK<sup>Acetyl</sup> GLGKGGAKR<sup>(Methyl)</sup> (14.02) HR<sup>(Methyl)</sup> (14.02) K<sup>(Acetyl)</sup> (42.01) VL<sup>Acetyl</sup>LRD

- ▶ fragmentation table for charge state 3+
- ▶ specType=etd
- ▶ score=54.32
- ▶ F121546.dat
- ▶ query=q36647.p1
- ▶ precursor=668.639000
- ▶ chargePrecursor=4
- ▶ itol=0.7

| AA    | c              | y              | z+1            | z+2            | z              | AA    |
|-------|----------------|----------------|----------------|----------------|----------------|-------|
| S[1]  | 69.697         | <b>891.183</b> | <b>885.843</b> | 0.672          | 885.207        | S[24] |
| G[2]  | 68.704         | 848.169        | <b>842.829</b> | 0.672          | <b>842.493</b> | G[23] |
| R[3]  | 120.738        | <b>829.161</b> | <b>823.822</b> | <b>824.158</b> | <b>823.486</b> | R[22] |
| G[4]  | 139.745        | 777.128        | 771.788        | 772.124        | 771.482        | G[21] |
| K[5]  | 196.447        | 758.121        | 752.781        | 753.117        | 752.445        | K[20] |
| G[6]  | 215.454        | 701.419        | <b>696.079</b> | <b>696.415</b> | <b>695.743</b> | G[19] |
| G[7]  | 234.461        | 682.412        | 677.072        | 677.408        | 676.736        | G[18] |
| K[8]  | 291.163        | 663.404        | 658.063        | 658.401        | 657.729        | K[17] |
| G[9]  | 310.170        | 606.703        | 601.363        | 601.699        | 601.027        | G[16] |
| L[10] | 347.895        | <b>587.695</b> | 582.355        | 582.692        | 582.020        | L[15] |
| G[11] | 386.972        | 530.001        | 544.661        | 544.997        | 544.325        | G[14] |
| K[12] | 409.570        | 530.994        | 525.654        | 525.990        | 525.318        | K[13] |
| G[13] | 428.577        | 488.295        | 482.955        | 483.292        | 482.620        | G[12] |
| G[14] | 447.585        | 469.288        | 463.948        | 464.285        | 463.613        | G[11] |
| A[15] | 471.264        | 450.281        | 444.941        | 445.277        | 444.605        | A[10] |
| K[16] | 513.962        | 426.602        | 421.262        | 421.598        | 420.926        | K[9]  |
| R[17] | 570.668        | 383.904        | 378.564        | 378.900        | 378.228        | R[8]  |
| H[18] | 616.354        | 327.196        | 321.856        | 322.194        | 321.523        | H[7]  |
| R[19] | 673.059        | 281.512        | 276.172        | 276.508        | 275.836        | R[6]  |
| K[20] | 729.761        | 224.806        | 219.466        | 219.803        | 219.131        | K[5]  |
| V[21] | 752.784        | 168.104        | 162.764        | 163.101        | 162.429        | V[4]  |
| L[22] | 860.479        | 135.082        | 129.742        | 130.078        | 129.406        | L[3]  |
| R[23] | <b>852.513</b> | 97.387         | 92.047         | 92.383         | 91.711         | R[2]  |
| D[24] | 890.855        | 45.353         | 40.014         | 40.349         | 39.678         | D[1]  |

# sp | P62806 | H4\_MOUSE

[Acetyl]SGRGKGGK Acetyl 42.01 GLGK Acetyl 42.01 GGAK (Acetyl) (42.01) RHR (Methyl) (14.02) KVLK (Methyl) (14.02) D

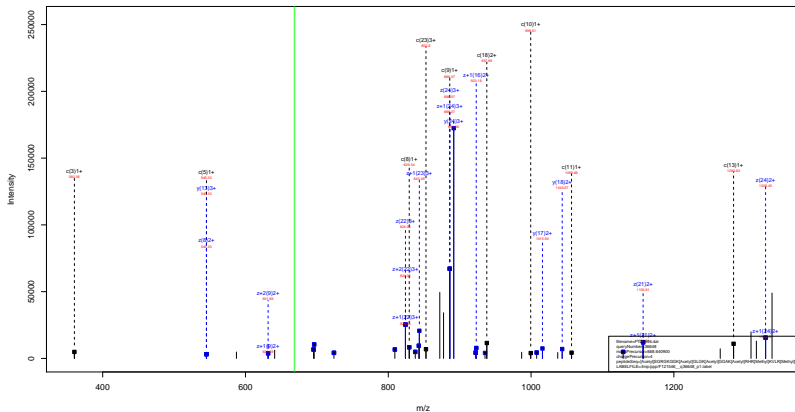

# sp | P62806 | H4\_MOUSE

[Acetyl]SGRGKGGK <sup>Acetyl</sup><sub>42.01</sub> GLGK <sup>Acetyl</sup><sub>42.01</sub> GGAK <sup>(Acetyl)</sup><sub>(42.01)</sub> RHR <sup>(Methyl)</sup><sub>(14.02)</sub> KVLK <sup>(Methyl)</sup><sub>(14.02)</sub> D

- ▶ fragmentation table for charge state 1+
- ▶ specType=etd
- ▶ score=48.01
- ▶ F121546.dat
- ▶ query=q36648.p1
- ▶ precursor=668.640900
- ▶ chargePrecursor=4
- ▶ itol=0.7

| AA | c               | y        | z+1            | z+2      | z        | AA |
|----|-----------------|----------|----------------|----------|----------|----|
| S  | 147.076         | 2671.534 | 2655.515       | 0.000    | 2654.507 | S  |
| G  | 264.098         | 2542.491 | 2526.473       | 0.000    | 2525.465 | G  |
| R  | <b>360.159</b>  | 2395.470 | 2369.451       | 2470.439 | 2368.443 | R  |
| G  | 417.230         | 2329.360 | 2313.350       | 2314.358 | 2312.342 | G  |
| K  | <b>545.315</b>  | 2272.347 | 2256.339       | 2257.336 | 2255.321 | K  |
| G  | 602.337         | 2144.252 | 2128.234       | 2129.241 | 2127.226 | G  |
| G  | 669.358         | 2087.231 | 2071.210       | 2072.220 | 2070.204 | G  |
| K  | <b>829.464</b>  | 2030.209 | 2014.191       | 2015.198 | 2013.183 | K  |
| G  | <b>886.485</b>  | 1890.104 | 1844.085       | 1845.093 | 1843.077 | G  |
| L  | <b>939.566</b>  | 1803.082 | 1787.064       | 1788.071 | 1786.055 | L  |
| G  | <b>1056.591</b> | 1680.990 | 1673.980       | 1674.987 | 1672.972 | G  |
| K  | 1226.696        | 1632.977 | 1616.958       | 1617.966 | 1615.950 | K  |
| G  | <b>1283.718</b> | 1462.871 | 1446.853       | 1447.860 | 1445.845 | G  |
| G  | 1340.739        | 1405.850 | 1389.831       | 1390.839 | 1388.823 | G  |
| A  | 1411.776        | 1348.828 | 1332.810       | 1333.818 | 1331.802 | A  |
| K  | 1581.882        | 1277.791 | 1261.773       | 1262.780 | 1260.765 | K  |
| R  | 1737.983        | 1107.686 | 1091.667       | 1092.675 | 1090.659 | R  |
| H  | 1878.042        | 951.580  | <b>935.566</b> | 936.574  | 934.558  | H  |
| R  | 2048.150        | 814.520  | 798.507        | 799.515  | 797.499  | R  |
| K  | 2173.254        | 644.400  | 628.390        | 629.398  | 627.382  | K  |
| V  | 2272.322        | 516.314  | 500.296        | 501.303  | 499.287  | V  |
| L  | 2385.406        | 417.240  | 401.227        | 402.235  | 400.219  | L  |
| R  | 2555.523        | 304.162  | 288.143        | 289.151  | 287.135  | R  |
| D  | 2670.550        | 134.045  | 118.028        | 119.034  | 117.018  | D  |

# sp | P62806 | H4\_MOUSE

[Acetyl]SGRGKGGK <sup>Acetyl</sup><sub>42.01</sub> GLGK <sup>Acetyl</sup><sub>42.01</sub> GGAK <sup>(Acetyl)</sup><sub>(42.01)</sub> RHR <sup>(Methyl)</sup><sub>(14.02)</sub> KVLK <sup>(Methyl)</sup><sub>(14.02)</sub> D

- ▶ fragmentation table for charge state 2+
- ▶ specType=etd
- ▶ score=48.01
- ▶ F121546.dat
- ▶ query=q36648.p1
- ▶ precursor=668.640900
- ▶ chargePrecursor=4
- ▶ itol=0.7

| AA    | c              | y               | z+1             | z+2             | z               | AA    |
|-------|----------------|-----------------|-----------------|-----------------|-----------------|-------|
| S[1]  | 74.042         | 1336.271        | <b>1328.261</b> | 0.504           | <b>1327.757</b> | S[24] |
| G[2]  | 102.553        | 1271.749        | 1263.740        | 0.504           | 1263.236        | G[23] |
| R[3]  | 180.603        | 1243.239        | 1235.230        | 1235.733        | 1234.725        | R[22] |
| G[4]  | 269.114        | 1186.388        | <b>1157.179</b> | 1157.683        | <b>1156.675</b> | G[21] |
| K[5]  | 275.183        | 1136.877        | <b>1128.668</b> | <b>1129.172</b> | 1128.166        | K[20] |
| G[6]  | 301.672        | 1072.630        | 1064.620        | 1065.124        | 1064.117        | G[19] |
| G[7]  | 330.183        | <b>1044.119</b> | 1036.110        | 1036.614        | 1035.608        | G[18] |
| K[8]  | 415.230        | <b>1015.608</b> | <b>1007.599</b> | <b>1008.103</b> | 1007.095        | K[17] |
| G[9]  | 441.746        | 930.556         | <b>922.546</b>  | <b>923.050</b>  | <b>922.042</b>  | G[16] |
| L[10] | 500.289        | 802.045         | 794.035         | 794.539         | 793.531         | L[15] |
| G[11] | 526.799        | 845.503         | <b>837.493</b>  | <b>837.997</b>  | 836.990         | G[14] |
| K[12] | 611.852        | 816.992         | <b>808.983</b>  | <b>809.487</b>  | 808.479         | K[13] |
| G[13] | 642.363        | 731.939         | <b>723.930</b>  | <b>724.434</b>  | <b>723.426</b>  | G[12] |
| G[14] | 670.873        | 703.429         | <b>695.419</b>  | <b>695.923</b>  | <b>694.915</b>  | G[11] |
| A[15] | 706.382        | 674.918         | 666.908         | 667.412         | 666.405         | A[10] |
| R[16] | 791.443        | 639.369         | <b>631.360</b>  | <b>631.864</b>  | 630.856         | R[9]  |
| R[17] | 869.495        | 554.347         | 546.337         | 546.841         | <b>545.833</b>  | R[8]  |
| H[18] | <b>938.025</b> | 476.295         | 468.285         | 468.791         | 467.783         | H[7]  |
| R[19] | 1023.083       | 407.767         | 399.757         | 400.261         | 399.253         | R[6]  |
| K[20] | 1087.130       | 322.708         | 314.699         | 315.203         | 314.195         | K[5]  |
| V[21] | 1136.665       | 258.661         | 250.651         | 251.155         | 250.147         | V[4]  |
| L[22] | 1193.203       | 209.126         | 201.117         | 201.621         | 200.613         | L[3]  |
| R[23] | 1278.205       | 152.584         | 144.575         | 145.079         | 144.071         | R[2]  |
| D[24] | 1335.779       | 67.526          | 59.517          | 60.021          | 59.013          | D[1]  |

# sp | P62806 | H4\_MOUSE

[Acetyl]SGRGKGGK<sup>Acetyl</sup><sub>42.01</sub> GLGK<sup>Acetyl</sup><sub>42.01</sub> GGAK<sup>(Acetyl)</sup><sub>(42.01)</sub> RHR<sup>(Methyl)</sup><sub>(14.02)</sub> KVLK<sup>(Methyl)</sup><sub>(14.02)</sub> D

- ▶ fragmentation table for charge state 3+
- ▶ specType=etd
- ▶ score=48.01
- ▶ F121546.dat
- ▶ query=q36648.p1
- ▶ precursor=668.640900
- ▶ chargePrecursor=4
- ▶ itol=0.7

| AA    | c              | y              | z+1            | z+2            | z              | AA    |
|-------|----------------|----------------|----------------|----------------|----------------|-------|
| S[1]  | 69.697         | <b>891.183</b> | <b>885.843</b> | 0.672          | <b>885.507</b> | S[24] |
| G[2]  | 68.704         | 848.169        | <b>842.829</b> | 0.672          | <b>842.493</b> | G[23] |
| R[3]  | 120.738        | <b>829.161</b> | <b>823.822</b> | <b>824.158</b> | <b>823.486</b> | R[22] |
| G[4]  | 139.745        | 777.128        | 771.788        | 772.124        | 771.482        | G[21] |
| K[5]  | 182.443        | 758.121        | 752.781        | 753.117        | 752.445        | K[20] |
| G[6]  | 201.450        | 715.422        | 710.083        | 710.419        | 709.747        | G[19] |
| G[7]  | 220.458        | <b>696.415</b> | 691.076        | 691.412        | 690.740        | G[18] |
| K[8]  | 277.159        | 677.408        | 672.068        | 672.404        | 671.732        | K[17] |
| G[9]  | 296.167        | 620.706        | 615.367        | 615.703        | 615.031        | G[16] |
| L[10] | 313.264        | 601.699        | 596.359        | 596.695        | 596.022        | L[15] |
| G[11] | 352.868        | 544.004        | 538.665        | 539.001        | 538.329        | G[14] |
| K[12] | 409.570        | <b>544.997</b> | 539.658        | 539.994        | 539.322        | K[13] |
| G[13] | 428.577        | 488.295        | 482.956        | 483.292        | 482.620        | G[12] |
| G[14] | 447.585        | 469.288        | 463.949        | 464.285        | 463.613        | G[11] |
| A[15] | 471.264        | 450.281        | 444.941        | 445.277        | 444.605        | A[10] |
| K[16] | 527.966        | 426.602        | 421.262        | 421.598        | 420.926        | K[9]  |
| R[17] | 579.999        | 369.900        | 364.561        | 364.896        | 364.225        | R[8]  |
| H[18] | 625.686        | 317.866        | 312.527        | 312.863        | 312.191        | H[7]  |
| R[19] | 682.391        | 272.180        | 266.841        | 267.176        | 266.505        | R[6]  |
| K[20] | 725.089        | 215.875        | 210.535        | 210.871        | 209.999        | K[5]  |
| V[21] | 758.112        | 172.776        | 167.437        | 167.773        | 167.101        | V[4]  |
| L[22] | 795.807        | 130.753        | 134.414        | 134.750        | 134.078        | L[3]  |
| R[23] | <b>852.513</b> | 102.059        | 96.719         | 97.055         | 96.383         | R[2]  |
| D[24] | 890.855        | 45.353         | 40.014         | 40.349         | 39.678         | D[1]  |

# sp | P62806 | H4\_MOUSE

[Acetyl]SGRGK Acetyl 42.01 GGK Acetyl 42.01 GLGKGGAK Methyl 14.02 RHRK Acetyl 42.01 VLR Methyl 14.02 D

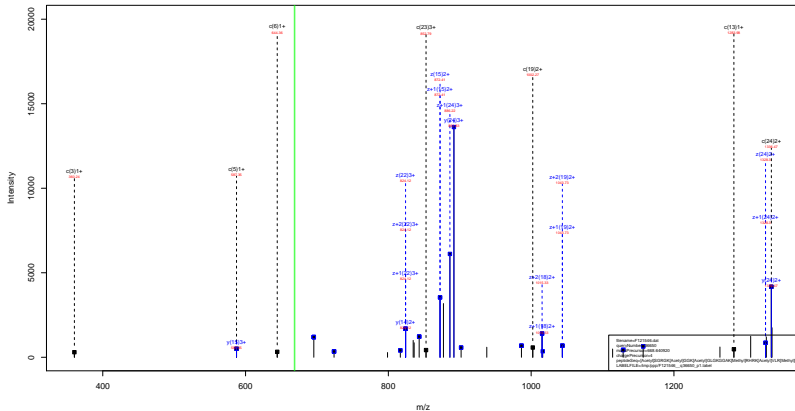



# sp | P62806 | H4\_MOUSE

[Acetyl]SGRGK<sup>Acetyl</sup><sub>42.01</sub> GGK<sup>Acetyl</sup><sub>42.01</sub> GLGKGGAK<sup>Methyl</sup><sub>14.02</sub> RHRK<sup>Acetyl</sup><sub>42.01</sub> VLR<sup>Methyl</sup><sub>14.02</sub> D

- ▶ fragmentation table for charge state 1+
- ▶ specType=etd
- ▶ score=53.49
- ▶ F121546.dat
- ▶ query=q36650.p1
- ▶ precursor=668.640920
- ▶ chargePrecursor=4
- ▶ itol=0.7

| AA | c  | y               | z+1            | z+2      | z        | AA       |   |    |
|----|----|-----------------|----------------|----------|----------|----------|---|----|
| S  | 1  | 147.076         | 2671.534       | 2655.515 | 0.000    | 2654.507 | S | 24 |
| G  | 2  | 224.998         | 2242.491       | 2226.473 | 0.000    | 2225.465 | G | 23 |
| R  | 3  | <b>360.199</b>  | 2405.471       | 2409.431 | 2470.459 | 2468.441 | R | 22 |
| G  | 4  | 417.220         | 2329.369       | 2313.350 | 2314.358 | 2312.342 | G | 21 |
| K  | 5  | <b>507.326</b>  | 2272.347       | 2256.329 | 2257.336 | 2255.321 | K | 20 |
| G  | 6  | <b>644.347</b>  | 2102.242       | 2086.223 | 2087.231 | 2085.215 | G | 19 |
| G  | 7  | 701.369         | 2045.220       | 2029.202 | 2030.209 | 2028.194 | G | 18 |
| K  | 8  | 871.474         | 1988.199       | 1972.180 | 1973.188 | 1971.172 | K | 17 |
| G  | 9  | 828.496         | 1818.093       | 1802.075 | 1803.082 | 1801.067 | G | 16 |
| L  | 10 | 1043.580        | 1761.072       | 1745.053 | 1746.061 | 1744.045 | L | 15 |
| G  | 11 | 1098.601        | 1647.985       | 1631.966 | 1632.977 | 1630.961 | G | 14 |
| K  | 12 | 1226.696        | 1590.966       | 1574.948 | 1575.955 | 1573.940 | K | 13 |
| G  | 13 | <b>1283.718</b> | 1462.871       | 1446.853 | 1447.860 | 1445.845 | G | 12 |
| G  | 14 | 1340.739        | 1405.850       | 1389.831 | 1390.839 | 1388.823 | G | 11 |
| A  | 15 | 1411.770        | 1348.828       | 1332.810 | 1333.818 | 1331.802 | A | 10 |
| K  | 16 | 1553.887        | 1277.791       | 1261.773 | 1262.780 | 1260.765 | K | 9  |
| R  | 17 | 1709.898        | 1129.691       | 1113.682 | 1120.670 | 1118.654 | R | 8  |
| H  | 18 | 1547.047        | 979.582        | 963.581  | 964.589  | 962.583  | H | 7  |
| R  | 19 | 2063.148        | <b>842.521</b> | 826.502  | 827.510  | 825.494  | R | 6  |
| K  | 20 | 2173.254        | 686.420        | 670.401  | 671.409  | 669.393  | K | 5  |
| V  | 21 | 2272.322        | 516.314        | 500.295  | 501.303  | 499.287  | V | 4  |
| L  | 22 | 2385.406        | 417.240        | 401.227  | 402.235  | 400.219  | L | 3  |
| R  | 23 | 2955.523        | 304.162        | 288.143  | 289.151  | 287.135  | R | 2  |
| D  | 24 | 2670.550        | 134.045        | 118.026  | 119.034  | 117.018  | D | 1  |

# sp | P62806 | H4\_MOUSE

[Acetyl]SGR GK<sup>Acetyl</sup><sub>42.01</sub> GK<sup>Acetyl</sup><sub>42.01</sub> GLGKGGAK<sup>Methyl</sup><sub>14.02</sub> RHRK<sup>Acetyl</sup><sub>42.01</sub> VLR<sup>Methyl</sup><sub>14.02</sub> D

- ▶ fragmentation table for charge state 2+
- ▶ specType=etd
- ▶ score=53.49
- ▶ F121546.dat
- ▶ query=q36650\_p1
- ▶ precursor=668.640920
- ▶ chargePrecursor=4
- ▶ itol=0.7

| AA   | c               | y               | z+1             | z+2             | z               | AA   |
|------|-----------------|-----------------|-----------------|-----------------|-----------------|------|
| S 1  | 74.642          | <b>1336.271</b> | <b>1328.261</b> | 0.504           | <b>1327.757</b> | S 24 |
| G 2  | 102.553         | 1271.746        | 1263.740        | 0.504           | 1263.236        | G 23 |
| K 3  | 180.603         | 1243.239        | 1235.239        | 1235.733        | 1234.725        | K 22 |
| G 4  | 259.114         | 1165.169        | <b>1157.179</b> | 1157.673        | <b>1156.875</b> | G 21 |
| K 5  | 294.157         | 1136.677        | <b>1128.668</b> | <b>1129.172</b> | <b>1128.164</b> | K 20 |
| G 6  | 322.677         | 1051.625        | <b>1043.615</b> | <b>1044.119</b> | <b>1043.111</b> | G 19 |
| G 7  | 351.188         | 1023.114        | <b>1015.104</b> | <b>1015.608</b> | 1014.601        | G 18 |
| K 8  | 436.241         | 994.603         | <b>986.594</b>  | <b>987.098</b>  | <b>986.090</b>  | K 17 |
| G 9  | 464.752         | 920.550         | <b>901.541</b>  | <b>902.045</b>  | 901.037         | G 16 |
| L 10 | 511.294         | 893.040         | <b>873.030</b>  | 873.534         | <b>872.526</b>  | L 15 |
| G 11 | 540.804         | <b>824.498</b>  | <b>816.488</b>  | <b>816.992</b>  | 815.983         | G 14 |
| K 12 | 613.852         | 795.987         | 787.977         | 788.481         | 787.474         | K 13 |
| G 13 | 642.363         | 731.939         | <b>723.930</b>  | <b>724.434</b>  | <b>723.426</b>  | G 12 |
| G 14 | 670.873         | 703.429         | <b>695.419</b>  | <b>695.923</b>  | <b>694.915</b>  | G 11 |
| A 15 | 708.392         | 674.918         | 666.908         | 667.412         | 666.405         | A 10 |
| R 16 | 777.447         | 639.399         | 631.390         | 631.894         | 630.886         | R 9  |
| R 17 | 856.498         | 568.344         | 560.335         | 560.839         | 559.831         | R 8  |
| H 18 | 934.007         | 490.293         | 482.284         | 482.788         | 481.780         | H 7  |
| R 19 | <b>1002.078</b> | 421.764         | 413.755         | 414.259         | 413.251         | R 6  |
| K 20 | 1087.130        | 343.717         | 335.704         | 336.208         | 335.200         | K 5  |
| V 21 | 1138.665        | 258.681         | 250.671         | 251.175         | 250.167         | V 4  |
| L 22 | 1193.207        | 209.126         | 201.117         | 201.621         | 200.613         | L 3  |
| R 23 | 1278.265        | 152.584         | 144.575         | 145.079         | 144.071         | R 2  |
| D 24 | <b>1335.779</b> | 67.526          | 59.517          | 60.021          | 59.013          | D 1  |

# sp | P62806 | H4\_MOUSE

[Acetyl]SGRGK<sup>Acetyl</sup><sub>42.01</sub> GGK<sup>Acetyl</sup><sub>42.01</sub> GLGKGGAK<sup>Methyl</sup><sub>14.02</sub> RHRK<sup>Acetyl</sup><sub>42.01</sub> VLR<sup>Methyl</sup><sub>14.02</sub> D

- ▶ fragmentation table for charge state 3+
- ▶ specType=etd
- ▶ score=53.49
- ▶ F121546.dat
- ▶ query=q36650.p1
- ▶ precursor=668.640920
- ▶ chargePrecursor=4
- ▶ itol=0.7

| AA    | c              | y              | z+1            | z+2            | z              | AA    |
|-------|----------------|----------------|----------------|----------------|----------------|-------|
| S[1]  | 49.697         | <b>891.183</b> | <b>685.843</b> | 0.672          | 885.507        | S[24] |
| G[2]  | 58.704         | 848.199        | <b>842.829</b> | 0.672          | <b>842.493</b> | G[23] |
| R[3]  | 150.738        | 829.161        | <b>823.822</b> | <b>824.158</b> | <b>823.486</b> | R[22] |
| G[4]  | 139.745        | 777.128        | 771.788        | 772.124        | 771.452        | G[21] |
| K[5]  | 196.447        | 758.121        | 752.781        | 753.117        | 752.445        | K[20] |
| G[6]  | 215.454        | 701.419        | <b>696.079</b> | 696.415        | <b>695.743</b> | G[19] |
| G[7]  | 234.461        | 682.412        | 677.072        | 677.408        | 676.736        | G[18] |
| K[8]  | 291.163        | 663.404        | 658.063        | 658.401        | 657.729        | K[17] |
| G[9]  | 310.170        | 636.703        | 601.363        | 603.699        | 601.027        | G[16] |
| L[10] | 347.885        | <b>587.695</b> | 582.355        | 582.692        | 582.020        | L[15] |
| G[11] | 396.872        | 550.001        | 544.661        | 544.997        | 544.325        | G[14] |
| K[12] | 409.570        | 530.994        | 525.654        | 525.990        | 525.318        | K[13] |
| G[13] | 428.577        | 488.295        | 482.956        | 483.292        | 482.620        | G[12] |
| G[14] | 447.585        | 469.288        | 463.949        | 464.285        | 463.613        | G[11] |
| A[15] | 471.264        | 450.281        | 444.941        | 445.277        | 444.605        | A[10] |
| K[16] | 518.634        | 426.602        | 421.262        | 421.598        | 420.926        | K[9]  |
| R[17] | 570.668        | 379.232        | 373.892        | 374.228        | 373.556        | R[8]  |
| H[18] | 616.354        | 327.198        | 321.858        | 322.194        | 321.522        | H[7]  |
| R[19] | 668.388        | 281.512        | 276.172        | 276.508        | 275.836        | R[6]  |
| K[20] | 725.089        | 229.476        | 224.136        | 224.474        | 223.803        | K[5]  |
| V[21] | 758.112        | 172.776        | 167.437        | 167.773        | 167.101        | V[4]  |
| L[22] | 795.807        | 139.753        | 134.414        | 134.750        | 134.078        | L[3]  |
| R[23] | <b>852.513</b> | 102.059        | 96.719         | 97.055         | 96.383         | R[2]  |
| D[24] | 890.855        | 45.353         | 40.014         | 40.349         | 39.678         | D[1]  |



# sp | P62806 | H4\_MOUSE

[Acetyl]SGR<sup>Methyl</sup><sub>14.02</sub> GKGGK<sup>Acetyl</sup><sub>42.01</sub> GLGK<sup>Acetyl</sup><sub>42.01</sub> GGAK<sup>Acetyl</sup><sub>42.01</sub> RHRK<sup>Dimethyl</sup><sub>28.03</sub> VLRD

- ▶ fragmentation table for charge state 1+
- ▶ specType=etd
- ▶ score=61.50
- ▶ F121546.dat
- ▶ query=q36844.p1
- ▶ precursor=537.916880
- ▶ chargePrecursor=5
- ▶ itol=0.7

| AA |    | c              | y              | z+1            | z+2            | z        | AA              |
|----|----|----------------|----------------|----------------|----------------|----------|-----------------|
| S  | 1  | 147.076        | 2685.550       | 2669.531       | 0.000          | 2668.523 | S <sub>24</sub> |
| G  | 2  | 294.098        | 2356.507       | 2340.488       | 0.000          | 2339.480 | G <sub>23</sub> |
| R  | 3  | <b>374.215</b> | 2959.486       | 2943.467       | 2484.475       | 2932.459 | R <sub>22</sub> |
| G  | 4  | <b>431.216</b> | 2329.868       | 2313.850       | 2314.358       | 2312.342 | G <sub>21</sub> |
| K  | 5  | <b>559.331</b> | 2272.347       | 2256.329       | 2257.336       | 2255.321 | K <sub>20</sub> |
| G  | 6  | 616.353        | 2144.252       | 2128.234       | 2129.241       | 2127.226 | G <sub>19</sub> |
| G  | 7  | <b>673.374</b> | 2087.231       | 2071.212       | 2072.220       | 2070.204 | G <sub>18</sub> |
| K  | 8  | <b>843.480</b> | 2030.209       | 2014.191       | 2015.198       | 2013.183 | K <sub>17</sub> |
| G  | 9  | 900.501        | 1890.104       | 1884.085       | 1885.093       | 1883.077 | G <sub>16</sub> |
| L  | 10 | 1013.588       | 1803.064       | 1797.064       | 1798.073       | 1796.056 | L <sub>15</sub> |
| G  | 11 | 1070.607       | 1588.958       | 1573.950       | 1574.957       | 1572.972 | G <sub>14</sub> |
| K  | 12 | 1240.712       | 1532.977       | 1516.958       | 1517.966       | 1515.950 | K <sub>13</sub> |
| G  | 13 | 1297.734       | 1462.871       | 1446.853       | 1447.860       | 1445.845 | G <sub>12</sub> |
| G  | 14 | 1354.755       | 1405.850       | 1389.831       | 1390.839       | 1388.823 | G <sub>11</sub> |
| A  | 15 | 1425.792       | 1348.828       | 1332.810       | 1333.818       | 1331.802 | A <sub>10</sub> |
| K  | 16 | 1595.898       | 1277.791       | 1261.773       | 1262.780       | 1260.765 | K <sub>9</sub>  |
| R  | 17 | 1751.999       | 1157.686       | 1151.667       | 1152.675       | 1150.659 | R <sub>8</sub>  |
| H  | 18 | 1889.058       | 951.585        | <b>935.566</b> | 936.574        | 934.558  | H <sub>7</sub>  |
| R  | 19 | 2045.159       | 814.526        | <b>798.507</b> | <b>799.515</b> | 797.499  | R <sub>6</sub>  |
| K  | 20 | 2201.285       | <b>658.425</b> | 642.406        | <b>643.414</b> | 641.398  | K <sub>5</sub>  |
| V  | 21 | 2300.353       | 502.298        | <b>486.280</b> | 487.287        | 485.272  | V <sub>4</sub>  |
| L  | 22 | 2413.437       | 403.230        | <b>387.211</b> | 388.219        | 386.203  | L <sub>3</sub>  |
| R  | 23 | 2569.539       | 290.146        | <b>274.127</b> | 275.135        | 273.119  | R <sub>2</sub>  |
| D  | 24 | 2684.566       | 134.045        | 118.026        | 119.034        | 117.018  | D <sub>1</sub>  |

# sp | P62806 | H4\_MOUSE

[Acetyl]SGR<sup>Methyl</sup><sub>14.02</sub> GKGGK<sup>Acetyl</sup><sub>42.01</sub> GLGK<sup>Acetyl</sup><sub>42.01</sub> GGAK<sup>Acetyl</sup><sub>42.01</sub> RHRK<sup>Dimethyl</sup><sub>28.03</sub> VLRD

- ▶ fragmentation table for charge state 2+
- ▶ specType=etd
- ▶ score=61.50
- ▶ F121546.dat
- ▶ query=q36844\_p1
- ▶ precursor=537.916880
- ▶ chargePrecursor=5
- ▶ itol=0.7

| AA | c  | y              | z+1             | z+2             | z               | AA             |       |
|----|----|----------------|-----------------|-----------------|-----------------|----------------|-------|
| S  | 1  | 74.042         | 1343.278        | 1335.269        | 0.904           | 1334.765       | S[24] |
| G  | 2  | 102.553        | 1278.757        | 1270.748        | 0.904           | 1270.244       | G[23] |
| R  | 3  | 187.611        | 1250.246        | 1242.237        | 1.942           | 1241.733       | R[22] |
| G  | 4  | 218.122        | 1168.188        | <b>1157.179</b> | <b>1157.683</b> | 1156.679       | G[21] |
| K  | 5  | 280.169        | 1136.677        | <b>1128.668</b> | <b>1129.172</b> | 1128.164       | K[20] |
| G  | 6  | 308.680        | 1072.630        | 1064.620        | 1065.124        | 1064.117       | G[19] |
| G  | 7  | 337.191        | 1044.119        | <b>1036.110</b> | <b>1036.614</b> | 1035.608       | G[18] |
| K  | 8  | <b>422.243</b> | <b>1015.608</b> | 1007.599        | 1008.103        | 1007.099       | K[17] |
| G  | 9  | <b>450.754</b> | 930.556         | <b>922.546</b>  | <b>923.050</b>  | <b>922.042</b> | G[16] |
| L  | 10 | <b>507.296</b> | 902.045         | 894.035         | 894.539         | 893.532        | L[15] |
| G  | 11 | 535.807        | 845.503         | <b>837.493</b>  | <b>837.997</b>  | 836.990        | G[14] |
| K  | 12 | <b>620.860</b> | 816.992         | <b>808.983</b>  | <b>809.487</b>  | 808.479        | K[13] |
| G  | 13 | <b>649.370</b> | 731.939         | <b>723.930</b>  | <b>724.434</b>  | 723.428        | G[12] |
| G  | 14 | <b>677.881</b> | 703.429         | <b>695.419</b>  | <b>695.923</b>  | <b>694.915</b> | G[11] |
| A  | 15 | <b>713.460</b> | 674.918         | 666.908         | 667.412         | 666.405        | A[10] |
| R  | 16 | <b>780.432</b> | 639.359         | <b>631.350</b>  | <b>631.854</b>  | <b>630.846</b> | R[9]  |
| R  | 17 | <b>876.503</b> | 554.347         | <b>546.337</b>  | <b>546.841</b>  | 545.833        | R[8]  |
| H  | 18 | <b>945.032</b> | 478.290         | <b>468.287</b>  | <b>468.791</b>  | 467.783        | H[7]  |
| R  | 19 | 1023.083       | 407.767         | <b>399.757</b>  | <b>400.261</b>  | <b>399.253</b> | R[6]  |
| K  | 20 | 1101.146       | 329.716         | 321.707         | 322.211         | 321.203        | K[5]  |
| V  | 21 | 1150.680       | 251.653         | 243.643         | 244.147         | 243.140        | V[4]  |
| L  | 22 | 1207.232       | 202.119         | 194.109         | 194.613         | 193.605        | L[3]  |
| R  | 23 | 1265.273       | 145.577         | 137.567         | 138.071         | 137.063        | R[2]  |
| D  | 24 | 1342.788       | 67.528          | 59.517          | 60.021          | 59.013         | D[1]  |

# sp | P62806 | H4\_MOUSE

[Acetyl]SGR<sup>Methyl</sup><sub>14.02</sub> GKGGK<sup>Acetyl</sup><sub>42.01</sub> GLGK<sup>Acetyl</sup><sub>42.01</sub> GGAK<sup>Acetyl</sup><sub>42.01</sub> RHRK<sup>Dimethyl</sup><sub>28.03</sub> VLRD

- ▶ fragmentation table for charge state 3+
- ▶ specType=etd
- ▶ score=61.50
- ▶ F121546.dat
- ▶ query=q36844.p1
- ▶ precursor=537.916880
- ▶ chargePrecursor=5
- ▶ itol=0.7

| AA    | c              | y              | z+1            | z+2            | z              | AA    |
|-------|----------------|----------------|----------------|----------------|----------------|-------|
| S[1]  | 49.697         | <b>895.855</b> | 890.511        | 0.672          | 890.179        | S[24] |
| G[2]  | 58.704         | 852.841        | <b>847.501</b> | 0.672          | 847.165        | G[23] |
| R[3]  | 125.410        | 833.833        | 828.494        | <b>828.830</b> | 828.158        | R[22] |
| G[4]  | 144.417        | 777.128        | <b>771.788</b> | <b>772.124</b> | <b>771.452</b> | G[21] |
| K[5]  | 187.115        | 798.121        | <b>752.781</b> | <b>753.117</b> | <b>752.445</b> | K[20] |
| G[6]  | 206.122        | <b>715.422</b> | <b>710.083</b> | <b>710.419</b> | <b>709.747</b> | G[19] |
| G[7]  | 225.130        | 696.415        | 691.076        | 691.412        | 690.740        | G[18] |
| K[8]  | 261.831        | <b>677.408</b> | <b>672.068</b> | <b>672.404</b> | <b>671.732</b> | K[17] |
| G[9]  | 300.839        | <b>620.706</b> | <b>615.367</b> | <b>615.703</b> | <b>615.031</b> | G[16] |
| L[10] | 338.533        | 601.499        | <b>596.359</b> | <b>596.695</b> | <b>596.023</b> | L[15] |
| G[11] | 357.540        | 564.004        | <b>558.665</b> | <b>559.001</b> | 558.329        | G[14] |
| K[12] | 414.242        | 544.997        | 539.658        | 539.994        | 539.322        | K[13] |
| G[13] | 433.249        | 488.295        | 482.956        | 483.292        | 482.620        | G[12] |
| G[14] | 452.257        | 469.288        | 463.949        | 464.285        | 463.613        | G[11] |
| A[15] | 479.936        | <b>450.281</b> | 444.941        | 445.277        | 444.605        | A[10] |
| K[16] | 532.637        | 426.602        | 421.262        | <b>421.598</b> | 420.926        | K[9]  |
| R[17] | <b>584.671</b> | 369.900        | 364.561        | 364.896        | 364.225        | R[8]  |
| H[18] | <b>630.357</b> | 317.866        | 312.527        | 312.863        | 312.191        | H[7]  |
| R[19] | <b>682.391</b> | 272.180        | 266.841        | 267.176        | 266.505        | R[6]  |
| K[20] | <b>734.433</b> | 220.140        | 214.807        | 215.143        | 214.471        | K[5]  |
| V[21] | <b>767.456</b> | 168.104        | 162.765        | 163.101        | 162.429        | V[4]  |
| L[22] | <b>805.151</b> | 135.082        | 129.742        | 130.078        | 129.406        | L[3]  |
| R[23] | <b>857.184</b> | 97.387         | 92.047         | 92.383         | 91.711         | R[2]  |
| D[24] | <b>895.527</b> | 45.353         | 40.014         | 40.349         | 39.678         | D[1]  |

# sp | P62806 | H4\_MOUSE

[Acetyl]SGR<sup>Methyl</sup><sub>14.02</sub> GKGGK<sup>Acetyl</sup><sub>42.01</sub> GLGK<sup>Acetyl</sup><sub>42.01</sub> GGAK<sup>Acetyl</sup><sub>42.01</sub> RHRK<sup>Dimethyl</sup><sub>28.03</sub> VLRD

- ▶ fragmentation table for charge state 4+
- ▶ specType=etd
- ▶ score=61.50
- ▶ F121546.dat
- ▶ query=q36844.p1
- ▶ precursor=537.916880
- ▶ chargePrecursor=5
- ▶ itol=0.7

| AA    | c              | y              | z+1            | z+2            | z              | AA    |
|-------|----------------|----------------|----------------|----------------|----------------|-------|
| S[1]  | 37.525         | <b>672.143</b> | <b>668.138</b> | 0.755          | <b>667.886</b> | S[24] |
| G[2]  | 51.780         | 539.882        | <b>635.878</b> | 0.755          | <b>635.626</b> | G[23] |
| R[3]  | 94.309         | 625.627        | <b>621.622</b> | <b>621.874</b> | <b>621.370</b> | R[22] |
| G[4]  | 108.564        | 583.098        | 579.093        | 579.345        | 578.841        | G[21] |
| K[5]  | 140.588        | 568.842        | 564.838        | 565.090        | 564.586        | K[20] |
| G[6]  | 154.844        | 536.819        | 532.814        | 533.066        | 532.562        | G[19] |
| G[7]  | 169.099        | 522.563        | 518.558        | 518.810        | 518.307        | G[18] |
| K[8]  | 211.625        | <b>508.308</b> | 504.303        | 504.555        | 504.051        | K[17] |
| G[9]  | 225.881        | 495.793        | 491.777        | 492.029        | 491.525        | G[16] |
| L[10] | 254.132        | <b>451.526</b> | 447.521        | 447.773        | 447.269        | L[15] |
| G[11] | 268.407        | 423.255        | 419.250        | 419.502        | 418.998        | G[14] |
| K[12] | 310.933        | 409.000        | 404.995        | 405.247        | 404.743        | K[13] |
| G[13] | 325.189        | 366.473        | 362.469        | 362.721        | 362.217        | G[12] |
| G[14] | 339.444        | 352.218        | 348.213        | 348.465        | 347.961        | G[11] |
| A[15] | 357.203        | 337.963        | 333.958        | 334.210        | 333.706        | A[10] |
| K[16] | <b>399.730</b> | 320.203        | 316.199        | 316.451        | 315.947        | K[9]  |
| R[17] | 438.755        | -77.877        | <b>273.672</b> | <b>273.924</b> | -73.420        | R[8]  |
| H[18] | 473.020        | 238.652        | 234.647        | 234.899        | 234.395        | H[7]  |
| R[19] | 512.045        | 204.397        | 200.382        | 200.634        | 200.130        | R[6]  |
| K[20] | 551.077        | 165.362        | 161.357        | 161.609        | 161.105        | K[5]  |
| V[21] | 575.844        | 126.330        | 122.325        | 122.577        | 122.073        | V[4]  |
| L[22] | 604.115        | 101.563        | 97.558         | 97.810         | 97.306         | L[3]  |
| R[23] | <b>643.140</b> | 73.292         | 69.287         | 69.539         | 69.035         | R[2]  |
| D[24] | <b>671.897</b> | 34.267         | 30.262         | 30.514         | 30.010         | D[1]  |





# sp | P62806 | H4\_MOUSE

[Acetyl]SGR<sup>Methyl</sup><sub>14.02</sub> GKGGK<sup>Acetyl</sup><sub>42.01</sub> GLGK<sup>Acetyl</sup><sub>42.01</sub> GGAK<sup>Acetyl</sup><sub>42.01</sub> RHR<sup>(Methyl)</sup><sub>(14.02)</sub> KVLK<sup>(Methyl)</sup><sub>(14.02)</sub> D

- ▶ fragmentation table for charge state 1+
- ▶ specType=etd
- ▶ score=69.52
- ▶ F121546.dat
- ▶ query=q36846.p1
- ▶ precursor=672.144680
- ▶ chargePrecursor=4
- ▶ itol=0.7

| AA | c               | y              | z+1            | z+2      | z        | AA    |
|----|-----------------|----------------|----------------|----------|----------|-------|
| S  | 147.070         | 2085.550       | 2069.531       | 0.000    | 2068.523 | S[24] |
| G  | 204.098         | 2556.507       | 2540.488       | 0.000    | 2539.480 | G[23] |
| R  | <b>374.215</b>  | 2999.488       | 2983.467       | 2864.475 | 2862.459 | R[22] |
| G  | 431.230         | 3529.960       | 3513.950       | 3314.958 | 3312.942 | G[21] |
| K  | <b>559.331</b>  | 3272.347       | 3256.329       | 3257.336 | 3255.321 | K[20] |
| G  | <b>616.353</b>  | 2144.252       | 2128.234       | 2129.241 | 2127.226 | G[19] |
| G  | 673.874         | 2087.231       | 2071.210       | 2072.220 | 2070.204 | G[18] |
| K  | 843.480         | 2030.209       | 2014.191       | 2015.198 | 2013.183 | K[17] |
| G  | <b>900.501</b>  | 1890.104       | 1884.085       | 1885.093 | 1883.077 | G[16] |
| L  | <b>1013.585</b> | 1803.981       | 1787.964       | 1788.971 | 1786.956 | L[15] |
| G  | 1070.907        | 1689.990       | 1673.980       | 1674.987 | 1672.972 | G[14] |
| K  | 1240.712        | 1632.977       | 1616.958       | 1617.966 | 1615.950 | K[13] |
| G  | <b>1297.734</b> | 1462.871       | 1446.853       | 1447.860 | 1445.845 | G[12] |
| G  | 1364.765        | 1405.850       | 1389.831       | 1390.839 | 1388.823 | G[11] |
| A  | 1425.792        | 1348.828       | 1332.810       | 1333.818 | 1331.802 | A[10] |
| K  | 1595.898        | 1277.791       | 1261.773       | 1262.780 | 1260.765 | K[9]  |
| K  | 1751.990        | 1107.880       | 1091.862       | 1092.870 | 1090.855 | K[8]  |
| H  | 1809.958        | 951.969        | <b>935.966</b> | 936.974  | 934.958  | H[7]  |
| R  | 2059.174        | 814.920        | 798.907        | 799.915  | 797.899  | R[6]  |
| K  | 2187.269        | <b>644.409</b> | 628.390        | 629.398  | 627.382  | K[5]  |
| V  | 2286.338        | 516.314        | 500.296        | 501.303  | 499.287  | V[4]  |
| L  | 2399.422        | 417.240        | 401.227        | 402.235  | 400.219  | L[3]  |
| R  | 2569.539        | 304.162        | 288.143        | 289.151  | 287.135  | R[2]  |
| D  | 2684.966        | 134.045        | 118.028        | 119.034  | 117.018  | D[1]  |

# sp | P62806 | H4\_MOUSE

[Acetyl]SGR<sup>Methyl</sup><sub>14.02</sub> GKGGK<sup>Acetyl</sup><sub>42.01</sub> GLGK<sup>Acetyl</sup><sub>42.01</sub> GGAK<sup>Acetyl</sup><sub>42.01</sub> RHR<sup>(Methyl)</sup><sub>(14.02)</sub> KVLK<sup>(Methyl)</sup><sub>(14.02)</sub> D

- ▶ fragmentation table for charge state 2+
- ▶ specType=etd
- ▶ score=69.52
- ▶ F121546.dat
- ▶ query=q36846\_p1
- ▶ precursor=672.144680
- ▶ chargePrecursor=4
- ▶ itol=0.7

| AA    | c              | y        | z+1             | z+2             | z               | AA    |
|-------|----------------|----------|-----------------|-----------------|-----------------|-------|
| S[1]  | 74.042         | 1343.278 | 1335.260        | 0.504           | 1334.765        | S[24] |
| G[2]  | 102.553        | 1278.757 | 1270.740        | 0.504           | 1270.244        | G[23] |
| R[3]  | 187.611        | 1250.246 | 1242.231        | <b>1242.741</b> | 1241.733        | R[22] |
| G[4]  | 218.122        | 1189.388 | <b>1157.179</b> | <b>1157.683</b> | <b>1156.675</b> | G[21] |
| K[5]  | 280.188        | 1136.677 | <b>1128.668</b> | <b>1129.172</b> | 1128.166        | K[20] |
| G[6]  | 308.689        | 1072.630 | <b>1064.620</b> | 1065.124        | <b>1064.117</b> | G[19] |
| G[7]  | 337.191        | 1044.119 | <b>1036.110</b> | <b>1036.614</b> | <b>1035.606</b> | G[18] |
| K[8]  | 422.243        | 1015.608 | 1007.590        | <b>1008.103</b> | 1007.095        | K[17] |
| G[9]  | 450.754        | 930.556  | <b>922.546</b>  | <b>923.050</b>  | <b>922.042</b>  | G[16] |
| L[10] | 507.266        | 802.045  | 804.213         | 804.719         | 803.713         | L[15] |
| G[11] | 535.807        | 845.503  | <b>837.493</b>  | <b>837.997</b>  | 836.990         | G[14] |
| R[12] | 620.950        | 816.992  | <b>808.983</b>  | <b>809.487</b>  | 808.479         | R[13] |
| G[13] | 649.370        | 731.939  | <b>723.930</b>  | <b>724.434</b>  | <b>723.426</b>  | G[12] |
| G[14] | 677.881        | 703.429  | <b>695.419</b>  | <b>695.923</b>  | <b>694.915</b>  | G[11] |
| A[15] | 711.400        | 674.918  | <b>666.908</b>  | <b>667.412</b>  | 666.405         | A[10] |
| R[16] | 788.432        | 639.389  | 631.380         | 631.884         | 630.876         | R[9]  |
| R[17] | <b>876.503</b> | 554.347  | 546.337         | 546.841         | 545.833         | R[8]  |
| H[18] | <b>945.032</b> | 476.296  | 468.287         | 468.791         | 467.783         | H[7]  |
| R[19] | 1030.091       | 407.767  | 399.757         | 400.261         | 399.253         | R[6]  |
| R[20] | 1094.138       | 322.708  | 314.699         | 315.203         | 314.195         | R[5]  |
| V[21] | 1143.673       | 258.661  | 250.651         | 251.155         | 250.147         | V[4]  |
| L[22] | 1208.215       | 209.120  | 201.111         | 201.615         | 200.613         | L[3]  |
| D[23] | 1285.273       | 152.884  | 144.875         | 145.379         | 144.371         | D[2]  |
| D[24] | 1342.788       | 87.526   | 89.517          | 90.021          | 89.013          | D[1]  |

# sp | P62806 | H4\_MOUSE

[Acetyl]SGR<sup>Methyl</sup><sub>14.02</sub> GKGGK<sup>Acetyl</sup><sub>42.01</sub> GLGK<sup>Acetyl</sup><sub>42.01</sub> GGAK<sup>Acetyl</sup><sub>42.01</sub> RHR<sup>(Methyl)</sup><sub>(14.02)</sub> KVLK<sup>(Methyl)</sup><sub>(14.02)</sub> D

- ▶ fragmentation table for charge state 3+
- ▶ specType=etd
- ▶ score=69.52
- ▶ F121546.dat
- ▶ query=q36846.p1
- ▶ precursor=672.144680
- ▶ chargePrecursor=4
- ▶ itol=0.7

| AA    | c              | y              | z+1            | z+2            | z              | AA    |
|-------|----------------|----------------|----------------|----------------|----------------|-------|
| S[1]  | 49.697         | <b>895.855</b> | <b>890.515</b> | 0.672          | <b>890.179</b> | S[24] |
| G[2]  | 68.704         | 852.841        | <b>847.501</b> | 0.672          | 847.165        | G[23] |
| R[3]  | 125.410        | 833.833        | <b>828.494</b> | <b>828.830</b> | 828.158        | R[22] |
| G[4]  | 144.417        | 777.128        | 771.788        | 772.124        | 771.452        | G[21] |
| K[5]  | 187.115        | 758.121        | 752.781        | 753.117        | 752.445        | K[20] |
| G[6]  | 206.122        | 715.422        | 710.083        | 710.419        | 709.747        | G[19] |
| G[7]  | 225.130        | <b>696.415</b> | 691.076        | 691.412        | 690.740        | G[18] |
| K[8]  | 281.831        | 677.408        | 672.068        | 672.404        | 671.732        | K[17] |
| G[9]  | 300.839        | 620.706        | 615.367        | 615.703        | 615.031        | G[16] |
| L[10] | 338.533        | 601.699        | 596.359        | 596.695        | 596.022        | L[15] |
| G[11] | 357.540        | 564.004        | 558.665        | <b>559.001</b> | 558.329        | G[14] |
| K[12] | 414.242        | 544.997        | 539.658        | 539.994        | 539.322        | K[13] |
| G[13] | 433.249        | 488.295        | 482.956        | 483.292        | 482.620        | G[12] |
| G[14] | 452.257        | 469.288        | 463.949        | 464.285        | 463.613        | G[11] |
| A[15] | 478.936        | 450.281        | 444.941        | 445.277        | 444.605        | A[10] |
| K[16] | 532.637        | 426.602        | 421.262        | 421.598        | 420.926        | K[9]  |
| R[17] | 584.671        | 369.900        | 364.561        | 364.896        | 364.225        | R[8]  |
| H[18] | 630.357        | 317.866        | 312.527        | 312.863        | 312.191        | H[7]  |
| R[19] | 687.063        | 272.180        | 266.841        | 267.176        | 266.505        | R[6]  |
| K[20] | 729.784        | 215.875        | 210.535        | 210.871        | 209.999        | K[5]  |
| V[21] | 752.784        | 172.776        | 167.437        | 167.773        | 167.101        | V[4]  |
| L[22] | 860.479        | 139.753        | 134.414        | 134.750        | 134.078        | L[3]  |
| R[23] | <b>857.184</b> | 102.059        | 96.719         | 97.055         | 96.383         | R[2]  |
| D[24] | <b>895.527</b> | 45.353         | 40.014         | 40.349         | 39.678         | D[1]  |



# sp | P62806 | H4\_MOUSE

[Acetyl]SGR<sup>Methyl</sup><sub>14.02</sub> GK<sup>Acetyl</sup><sub>42.01</sub> GGK<sup>Acetyl</sup><sub>42.01</sub> GLGKGGAKR<sup>(Dimethyl)</sup> HRK<sup>(Acetyl)</sup><sub>(42.01)</sub> VLRD

- ▶ fragmentation table for charge state 1+
- ▶ specType=etd
- ▶ score=47.65
- ▶ F121546.dat
- ▶ query=q36848.p1
- ▶ precursor=672.144940
- ▶ chargePrecursor=4
- ▶ itol=0.7

| AA | c               | y              | z+1      | z+2      | z        | AA    |
|----|-----------------|----------------|----------|----------|----------|-------|
| S  | 147.070         | 2085.550       | 2069.531 | 0.000    | 2068.523 | S[24] |
| G  | 204.998         | 2556.507       | 2540.488 | 0.000    | 2539.480 | G[23] |
| R  | <b>374.215</b>  | 2499.480       | 2483.467 | 2467.475 | 2462.459 | R[22] |
| G  | 411.230         | 2529.960       | 2513.950 | 2514.958 | 2512.942 | G[21] |
| K  | <b>601.342</b>  | 2272.347       | 2256.329 | 2257.336 | 2255.321 | K[20] |
| G  | <b>658.363</b>  | 2102.342       | 2086.329 | 2087.331 | 2085.315 | G[19] |
| G  | <b>715.385</b>  | 2045.220       | 2029.200 | 2030.209 | 2028.194 | G[18] |
| K  | <b>885.490</b>  | 1988.199       | 1972.180 | 1973.188 | 1971.172 | K[17] |
| G  | 842.512         | 1818.093       | 1802.075 | 1803.082 | 1801.067 | G[16] |
| L  | 1025.996        | 1781.977       | 1745.953 | 1768.981 | 1744.945 | L[15] |
| G  | 1112.617        | 1647.962       | 1631.960 | 1632.977 | 1630.961 | G[14] |
| K  | 1240.712        | 1590.960       | 1574.948 | 1575.955 | 1573.940 | K[13] |
| G  | <b>1297.734</b> | 1462.871       | 1446.853 | 1447.860 | 1445.845 | G[12] |
| G  | 1304.755        | 1405.850       | 1389.831 | 1390.839 | 1388.823 | G[11] |
| A  | 1425.792        | 1348.828       | 1332.810 | 1333.818 | 1331.802 | A[10] |
| K  | 1553.887        | 1277.791       | 1261.773 | 1262.780 | 1260.765 | K[9]  |
| R  | 1738.010        | 1149.690       | 1133.678 | 1134.685 | 1132.670 | R[8]  |
| R  | 1878.078        | 965.564        | 949.545  | 950.553  | 948.537  | R[7]  |
| R  | 2031.179        | <b>828.505</b> | 812.486  | 813.494  | 811.478  | R[6]  |
| K  | 2201.285        | 672.404        | 656.385  | 657.393  | 655.377  | K[5]  |
| V  | 2300.353        | 502.298        | 486.280  | 487.287  | 485.272  | V[4]  |
| L  | 2413.437        | 403.230        | 387.211  | 388.219  | 386.203  | L[3]  |
| R  | 2569.539        | 290.146        | 274.127  | 275.135  | 273.119  | R[2]  |
| D  | 2684.566        | 134.045        | 118.028  | 119.034  | 117.018  | D[1]  |

# sp | P62806 | H4\_MOUSE

[Acetyl]SGR<sup>Methyl</sup><sub>14.02</sub> GK<sup>Acetyl</sup><sub>42.01</sub> GGK<sup>Acetyl</sup><sub>42.01</sub> GLGKGGAKR<sup>(Dimethyl)</sup><sub>(28.03)</sub> HRK<sup>(Acetyl)</sup><sub>(42.01)</sub> VLDR

- ▶ fragmentation table for charge state 2+
- ▶ specType=etd
- ▶ score=47.65
- ▶ F121546.dat
- ▶ query=q36848\_p1
- ▶ precursor=672.144940
- ▶ chargePrecursor=4
- ▶ itol=0.7

| AA    | c        | y               | z+1             | z+2             | z               | AA    |
|-------|----------|-----------------|-----------------|-----------------|-----------------|-------|
| S[1]  | 74.042   | <b>1343.278</b> | <b>1335.269</b> | 0.504           | <b>1334.765</b> | S[24] |
| G[2]  | 102.553  | 1278.757        | 1270.740        | 0.504           | 1270.244        | G[23] |
| R[3]  | 187.611  | 1250.246        | <b>1242.237</b> | 1242.741        | <b>1241.733</b> | R[22] |
| G[4]  | 210.122  | 1186.288        | 1157.271        | 1157.888        | 1156.673        | G[21] |
| K[5]  | 301.114  | 1138.877        | <b>1128.668</b> | <b>1129.172</b> | 1129.164        | K[20] |
| G[6]  | 329.685  | 1051.625        | 1043.615        | 1044.119        | 1043.111        | G[19] |
| G[7]  | 358.196  | <b>1023.114</b> | <b>1015.104</b> | <b>1015.608</b> | 1014.601        | G[18] |
| K[8]  | 443.249  | 994.603         | 986.594         | 987.208         | 986.050         | K[17] |
| G[9]  | 471.758  | 909.550         | <b>901.541</b>  | <b>902.045</b>  | <b>901.037</b>  | G[16] |
| L[10] | 528.303  | 881.040         | 873.031         | 873.534         | 872.526         | L[15] |
| G[11] | 556.812  | 824.488         | <b>816.488</b>  | <b>816.992</b>  | 815.984         | G[14] |
| K[12] | 620.880  | 795.987         | <b>787.977</b>  | <b>788.481</b>  | <b>787.474</b>  | K[13] |
| G[13] | 640.370  | 731.939         | <b>723.930</b>  | <b>724.434</b>  | 723.426         | G[12] |
| G[14] | 677.881  | 703.429         | <b>695.419</b>  | <b>695.923</b>  | 694.915         | G[11] |
| A[15] | 713.400  | 674.918         | <b>666.908</b>  | <b>667.412</b>  | 666.405         | A[10] |
| R[16] | 777.447  | 639.369         | 631.360         | 631.864         | 630.856         | R[9]  |
| R[17] | 869.513  | 575.352         | 567.342         | 567.846         | 566.838         | R[8]  |
| H[18] | 938.043  | 483.286         | 475.276         | 475.780         | 474.772         | H[7]  |
| R[19] | 1016.093 | 414.756         | 406.747         | 407.251         | 406.243         | R[6]  |
| K[20] | 1101.146 | 336.705         | 328.696         | 329.200         | 328.192         | K[5]  |
| V[21] | 1150.680 | 251.653         | 243.643         | 244.147         | 243.140         | V[4]  |
| L[22] | 1207.223 | 202.118         | 194.109         | 194.613         | 193.605         | L[3]  |
| R[23] | 1255.278 | 145.577         | 137.567         | 138.071         | 137.063         | R[2]  |
| D[24] | 1342.788 | 67.526          | 59.517          | 60.021          | 59.013          | D[1]  |

# sp | P62806 | H4\_MOUSE

[Acetyl]SGR<sup>Methyl</sup><sub>14.02</sub> GK<sup>Acetyl</sup><sub>42.01</sub> GGK<sup>Acetyl</sup><sub>42.01</sub> GLGKGGAKR<sup>(Dimethyl)</sup><sub>(28.03)</sub> HRK<sup>(Acetyl)</sup><sub>(42.01)</sub> VLRD

- ▶ fragmentation table for charge state 3+
- ▶ specType=etd
- ▶ score=47.65
- ▶ F121546.dat
- ▶ query=q36848.p1
- ▶ precursor=672.144940
- ▶ chargePrecursor=4
- ▶ itol=0.7

| AA    | c              | y              | z+1            | z+2            | z              | AA    |
|-------|----------------|----------------|----------------|----------------|----------------|-------|
| S[1]  | 69.697         | <b>895.855</b> | <b>890.515</b> | 0.672          | 890.179        | S[24] |
| G[2]  | 68.704         | 872.841        | <b>847.501</b> | 0.672          | 847.165        | G[23] |
| R[3]  | 125.410        | 833.833        | <b>828.494</b> | <b>828.830</b> | 828.158        | R[22] |
| G[4]  | 144.417        | 777.128        | 771.788        | 772.124        | 771.452        | G[21] |
| K[5]  | 201.119        | 758.121        | 752.781        | 753.117        | 752.445        | K[20] |
| G[6]  | 220.126        | 701.419        | <b>696.079</b> | 696.415        | <b>695.743</b> | G[19] |
| G[7]  | 239.133        | 662.412        | 677.072        | 677.408        | 676.736        | G[18] |
| K[8]  | 295.835        | 663.804        | <b>658.065</b> | <b>658.401</b> | <b>657.729</b> | K[17] |
| G[9]  | 314.842        | 606.703        | <b>601.363</b> | <b>601.699</b> | <b>601.027</b> | G[16] |
| L[10] | 382.537        | 587.695        | 582.355        | 582.692        | 582.020        | L[15] |
| G[11] | 371.544        | 530.001        | 544.661        | 544.997        | 544.325        | G[14] |
| K[12] | 414.242        | 530.994        | 525.654        | 525.990        | 525.318        | K[13] |
| G[13] | 433.249        | 488.295        | 482.956        | 483.292        | 482.620        | G[12] |
| G[14] | 452.257        | 469.288        | 463.949        | 464.285        | 463.613        | G[11] |
| A[15] | 478.936        | 450.281        | 444.941        | 445.277        | 444.605        | A[10] |
| K[16] | 518.634        | 426.602        | 421.262        | 421.598        | 420.926        | K[9]  |
| R[17] | 580.011        | 383.904        | 378.564        | 378.900        | 378.228        | R[8]  |
| H[18] | 625.698        | 322.526        | 317.187        | 317.523        | 316.851        | H[7]  |
| R[19] | 677.731        | 276.840        | 271.500        | 271.836        | 271.164        | R[6]  |
| K[20] | 734.433        | 224.806        | 219.467        | 219.803        | 219.131        | K[5]  |
| V[21] | 757.256        | 168.104        | 162.765        | 163.101        | 162.429        | V[4]  |
| L[22] | 805.151        | 135.082        | 129.742        | 130.078        | 129.406        | L[3]  |
| R[23] | <b>857.184</b> | 97.387         | 92.047         | 92.383         | 91.711         | R[2]  |
| D[24] | 895.527        | 45.353         | 40.014         | 40.349         | 39.678         | D[1]  |



# sp | P62806 | H4\_MOUSE

[Acetyl]SGRGK Acetyl 42.01 GGK Acetyl 42.01 GLGK Acetyl 42.01 GGAK Acetyl 42.01 RHRKVLR (Methyl) D (14.02)

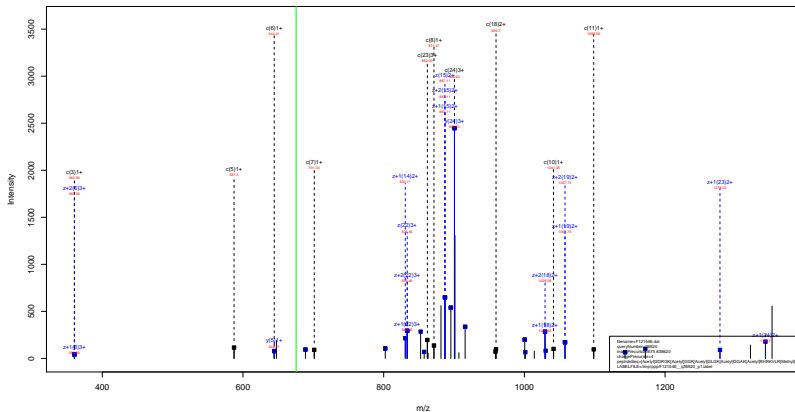

# sp | P62806 | H4\_MOUSE

[Acetyl]SGR**GGK**<sup>Acetyl</sup><sub>42.01</sub> **GGK**<sup>Acetyl</sup><sub>42.01</sub> **GLGK**<sup>Acetyl</sup><sub>42.01</sub> **GGAK**<sup>Acetyl</sup><sub>42.01</sub> **RHRK**VLR<sup>(Methyl)</sup><sub>(14.02)</sub> D

- ▶ fragmentation table for charge state 1+
- ▶ specType=etd
- ▶ score=69.47
- ▶ F121546.dat
- ▶ query=q36920.p1
- ▶ precursor=675.638620
- ▶ chargePrecursor=4
- ▶ itol=0.7

| AA | c  | y               | z+1            | z+2      | z        | AA       |   |    |
|----|----|-----------------|----------------|----------|----------|----------|---|----|
| S  | 1  | 147.076         | 2999.529       | 2983.510 | 0.000    | 2982.502 | S | 24 |
| G  | 2  | 264.098         | 2570.486       | 2554.468 | 0.000    | 2553.460 | G | 23 |
| R  | 3  | <b>360.199</b>  | 2313.465       | 2297.446 | 2469.434 | 2398.425 | R | 22 |
| G  | 4  | 417.220         | 2357.364       | 2341.345 | 2342.353 | 2340.337 | G | 21 |
| K  | 5  | <b>587.326</b>  | 2300.342       | 2284.323 | 2285.331 | 2283.316 | K | 20 |
| G  | 6  | <b>644.347</b>  | 2130.237       | 2114.218 | 2115.226 | 2113.210 | G | 19 |
| G  | 7  | <b>701.369</b>  | 2073.215       | 2057.196 | 2058.204 | 2056.189 | G | 18 |
| K  | 8  | <b>871.474</b>  | 2016.194       | 2000.175 | 2001.183 | 1999.167 | K | 17 |
| G  | 9  | 928.496         | 1846.088       | 1830.069 | 1831.077 | 1829.062 | G | 16 |
| L  | 10 | <b>1041.580</b> | 1789.067       | 1773.048 | 1774.056 | 1772.040 | L | 15 |
| G  | 11 | <b>1098.601</b> | 1675.961       | 1659.942 | 1660.952 | 1658.936 | G | 14 |
| K  | 12 | 1268.707        | 1618.961       | 1602.942 | 1603.950 | 1601.935 | K | 13 |
| G  | 13 | 1325.728        | 1448.856       | 1432.837 | 1433.845 | 1431.829 | G | 12 |
| G  | 14 | 1382.750        | 1391.834       | 1375.816 | 1376.823 | 1374.808 | G | 11 |
| A  | 15 | 1453.787        | 1334.813       | 1318.794 | 1319.802 | 1317.786 | A | 10 |
| K  | 16 | 1623.893        | 1263.776       | 1247.757 | 1248.765 | 1246.749 | K | 9  |
| R  | 17 | 1779.994        | 1093.670       | 1077.651 | 1078.659 | 1076.644 | R | 8  |
| R  | 18 | 1937.053        | 937.560        | 921.539  | 922.558  | 920.542  | R | 7  |
| R  | 19 | 2073.154        | 800.510        | 784.491  | 785.499  | 783.484  | R | 6  |
| K  | 20 | 2201.249        | <b>644.409</b> | 628.390  | 629.398  | 627.383  | K | 5  |
| V  | 21 | 2300.317        | 516.314        | 500.295  | 501.303  | 499.287  | V | 4  |
| L  | 22 | 2413.401        | 417.240        | 401.227  | 402.235  | 400.219  | L | 3  |
| R  | 23 | 2583.518        | 304.162        | 288.143  | 289.151  | 287.135  | R | 2  |
| D  | 24 | 2698.545        | 134.045        | 118.028  | 119.034  | 117.018  | D | 1  |

# sp | P62806 | H4\_MOUSE

[Acetyl]SGR<sup>Acetyl</sup>RGK<sup>42.01</sup> GGK<sup>Acetyl</sup> GLGK<sup>Acetyl</sup> GGAK<sup>Acetyl</sup> RHRK<sup>Acetyl</sup>VLR<sup>(Methyl)</sup> D<sup>(14.02)</sup>

- ▶ fragmentation table for charge state 2+
- ▶ specType=etd
- ▶ score=69.47
- ▶ F121546.dat
- ▶ query=q36920\_p1
- ▶ precursor=675.638620
- ▶ chargePrecursor=4
- ▶ itol=0.7

| AA    | c              | y              | z+1             | z+2             | z               | AA    |
|-------|----------------|----------------|-----------------|-----------------|-----------------|-------|
| S[1]  | 74.042         | 1350.208       | <b>1342.259</b> | 0.504           | 1341.755        | S[24] |
| G[2]  | 102.553        | 1285.747       | <b>1277.737</b> | 0.504           | 1277.233        | G[23] |
| R[3]  | 180.003        | 1257.236       | 1249.227        | 1349.731        | 1248.723        | R[22] |
| G[4]  | 209.114        | 1179.385       | 1171.375        | <b>1171.600</b> | 1170.872        | G[21] |
| K[5]  | 294.167        | 1150.675       | <b>1142.665</b> | <b>1143.169</b> | 1142.161        | K[20] |
| G[6]  | 322.677        | 1065.622       | <b>1057.613</b> | <b>1058.117</b> | <b>1057.109</b> | G[19] |
| G[7]  | 351.188        | 1037.111       | <b>1029.102</b> | <b>1029.606</b> | 1028.598        | G[18] |
| K[8]  | 436.241        | 1008.601       | <b>1000.591</b> | <b>1001.095</b> | <b>1000.087</b> | K[17] |
| G[9]  | 464.752        | 973.548        | <b>915.538</b>  | <b>916.042</b>  | 915.034         | G[16] |
| L[10] | 521.294        | <b>895.037</b> | <b>887.028</b>  | <b>887.532</b>  | <b>886.524</b>  | L[15] |
| G[11] | 549.804        | 838.095        | <b>830.480</b>  | <b>830.980</b>  | 829.982         | G[14] |
| K[12] | 634.857        | 809.984        | <b>801.975</b>  | <b>802.479</b>  | 801.471         | K[13] |
| G[13] | 663.368        | 724.931        | 716.922         | 717.426         | 716.418         | G[12] |
| G[14] | 691.879        | 696.421        | <b>688.411</b>  | <b>688.915</b>  | 687.907         | G[11] |
| A[15] | 727.397        | 667.910        | 659.901         | 660.405         | 659.397         | A[10] |
| R[16] | 812.450        | 632.391        | 624.382         | 624.886         | 623.878         | R[9]  |
| R[17] | 890.500        | 547.339        | 539.329         | 539.833         | 538.825         | R[8]  |
| H[18] | <b>959.030</b> | 406.288        | 401.279         | 401.783         | 400.775         | H[7]  |
| R[19] | 1037.080       | 400.759        | 392.749         | 393.253         | 392.245         | R[6]  |
| K[20] | 1101.128       | 322.708        | 314.699         | 315.203         | 314.195         | K[5]  |
| V[21] | 1150.662       | 258.661        | 250.651         | 251.155         | 250.147         | V[4]  |
| L[22] | 1207.204       | 209.120        | 201.111         | 201.615         | 200.613         | L[3]  |
| D[23] | 1292.293       | 152.884        | 144.873         | 145.378         | 144.371         | D[2]  |
| D[24] | 1349.776       | 87.526         | 89.517          | 90.021          | 89.013          | D[1]  |

# sp | P62806 | H4\_MOUSE

[Acetyl]SGRGK <sup>Acetyl</sup><sub>42.01</sub> **GGK** <sup>Acetyl</sup><sub>42.01</sub> **GLGK** <sup>Acetyl</sup><sub>42.01</sub> **GGAK** <sup>Acetyl</sup><sub>42.01</sub> **RHRK**VLR (Methyl)<sub>(14.02)</sub> D

- ▶ fragmentation table for charge state 3+
- ▶ specType=etd
- ▶ score=69.47
- ▶ F121546.dat
- ▶ query=q36920.p1
- ▶ precursor=675.638620
- ▶ chargePrecursor=4
- ▶ itol=0.7

| AA    | c              | y              | z+1            | z+2            | z              | AA    |
|-------|----------------|----------------|----------------|----------------|----------------|-------|
| S[1]  | 69.697         | <b>900.514</b> | <b>895.175</b> | 0.672          | <b>894.839</b> | S[24] |
| G[2]  | 68.704         | <b>857.500</b> | <b>852.161</b> | 0.672          | 851.295        | G[23] |
| R[3]  | 120.738        | 138.493        | <b>833.154</b> | <b>833.489</b> | <b>832.818</b> | R[22] |
| G[4]  | 139.745        | 786.459        | 781.120        | 781.456        | 780.784        | G[21] |
| K[5]  | 196.447        | 767.452        | 762.113        | 762.449        | 761.777        | K[20] |
| G[6]  | 215.454        | 710.750        | 705.411        | 705.747        | 705.075        | G[19] |
| G[7]  | 234.461        | 691.743        | 686.404        | 686.740        | 686.068        | G[18] |
| K[8]  | 291.163        | 672.736        | 667.397        | 667.732        | 667.061        | K[17] |
| G[9]  | 310.170        | 616.034        | 610.695        | 611.031        | 610.359        | G[16] |
| L[10] | 347.895        | 597.027        | 591.688        | 592.023        | 591.352        | L[15] |
| G[11] | 386.972        | 539.322        | 533.983        | 534.319        | 533.647        | G[14] |
| K[12] | 423.574        | 540.325        | 534.986        | 535.322        | 534.650        | K[13] |
| G[13] | 442.581        | 483.623        | 478.284        | 478.620        | 477.948        | G[12] |
| G[14] | 461.588        | 464.616        | 459.277        | 459.613        | 458.941        | G[11] |
| A[15] | 485.267        | 445.609        | 440.270        | 440.605        | 439.934        | A[10] |
| K[16] | 541.969        | 421.930        | 416.590        | 416.926        | 416.255        | K[9]  |
| R[17] | 594.003        | 365.228        | <b>359.889</b> | <b>360.225</b> | 359.553        | R[8]  |
| H[18] | 639.689        | 313.195        | 307.853        | 308.191        | 307.519        | H[7]  |
| R[19] | 681.723        | 267.508        | 262.169        | 262.505        | 261.833        | R[6]  |
| K[20] | 734.421        | 215.475        | 210.136        | 210.471        | 209.799        | K[5]  |
| V[21] | 757.444        | 172.776        | 167.437        | 167.773        | 167.101        | V[4]  |
| L[22] | 805.139        | 139.753        | 134.414        | 134.750        | 134.078        | L[3]  |
| R[23] | <b>851.844</b> | 102.059        | 96.719         | 97.055         | 96.383         | R[2]  |
| D[24] | <b>900.186</b> | 45.353         | 40.014         | 40.349         | 39.678         | D[1]  |

# sp | P62806 | H4\_MOUSE

[Acetyl]SGRGK Acetyl 42.01 GGK Acetyl 42.01 GLGK Acetyl 42.01 GGAK Acetyl 42.01 RHRKVLR (Methyl) D (14.02)

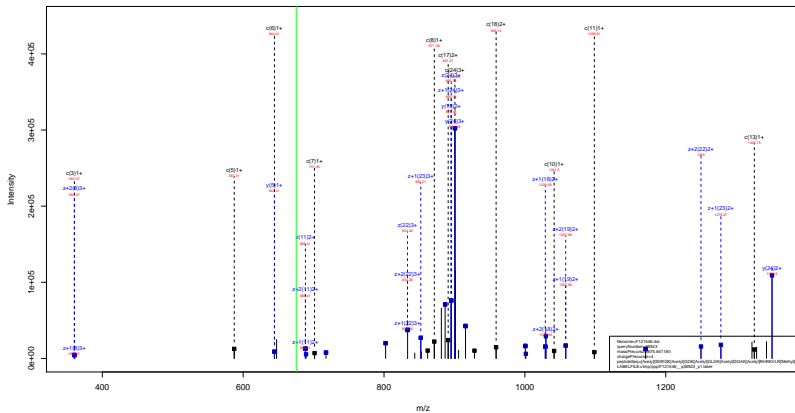

# sp | P62806 | H4\_MOUSE

[Acetyl]SGR**GGK**<sup>Acetyl</sup><sub>42.01</sub> **GGK**<sup>Acetyl</sup><sub>42.01</sub> **GLGK**<sup>Acetyl</sup><sub>42.01</sub> **GGAK**<sup>Acetyl</sup><sub>42.01</sub> **RHRK**VLR<sup>(Methyl)</sup><sub>(14.02)</sub> D

- ▶ fragmentation table for charge state 1+
- ▶ specType=etd
- ▶ score=65.00
- ▶ F121546.dat
- ▶ query=q36923.p1
- ▶ precursor=675.641180
- ▶ chargePrecursor=4
- ▶ itol=0.7

| AA | c  | y               | z+1            | z+2      | z        | AA       |   |    |
|----|----|-----------------|----------------|----------|----------|----------|---|----|
| S  | 1  | 147.076         | 2999.529       | 2983.510 | 0.000    | 2982.502 | S | 24 |
| G  | 2  | 264.098         | 2570.486       | 2554.468 | 0.000    | 2553.460 | G | 23 |
| R  | 3  | <b>360.199</b>  | 2313.465       | 2297.446 | 2469.434 | 2396.425 | R | 22 |
| G  | 4  | 417.220         | 2357.364       | 2341.345 | 2342.353 | 2340.337 | G | 21 |
| K  | 5  | <b>587.326</b>  | 2300.342       | 2284.323 | 2285.331 | 2283.316 | K | 20 |
| G  | 6  | <b>644.347</b>  | 2130.237       | 2114.218 | 2115.226 | 2113.210 | G | 19 |
| G  | 7  | <b>701.369</b>  | 2073.215       | 2057.196 | 2058.204 | 2056.189 | G | 18 |
| K  | 8  | <b>871.474</b>  | 2016.194       | 2000.175 | 2001.183 | 1999.167 | K | 17 |
| G  | 9  | <b>928.496</b>  | 1846.088       | 1830.069 | 1831.077 | 1829.062 | G | 16 |
| L  | 10 | <b>1043.580</b> | 1789.067       | 1773.048 | 1774.056 | 1772.040 | L | 15 |
| G  | 11 | <b>1098.601</b> | 1675.961       | 1659.942 | 1660.952 | 1658.936 | G | 14 |
| K  | 12 | 1268.707        | 1618.961       | 1602.942 | 1603.950 | 1601.935 | K | 13 |
| G  | 13 | <b>1325.728</b> | 1448.856       | 1432.837 | 1433.845 | 1431.829 | G | 12 |
| G  | 14 | 1382.750        | 1391.834       | 1375.816 | 1376.823 | 1374.808 | G | 11 |
| A  | 15 | 1453.787        | 1334.813       | 1318.794 | 1319.802 | 1317.786 | A | 10 |
| K  | 16 | 1623.893        | 1263.776       | 1247.757 | 1248.765 | 1246.749 | K | 9  |
| R  | 17 | 1779.994        | 1093.670       | 1077.651 | 1078.659 | 1076.644 | R | 8  |
| H  | 18 | 1917.953        | 937.560        | 921.539  | 922.558  | 920.542  | H | 7  |
| R  | 19 | 2073.154        | 800.510        | 784.491  | 785.499  | 783.484  | R | 6  |
| K  | 20 | 2201.240        | <b>644.409</b> | 628.390  | 629.398  | 627.383  | K | 5  |
| V  | 21 | 2300.317        | 516.314        | 500.295  | 501.303  | 499.287  | V | 4  |
| L  | 22 | 2413.401        | 417.240        | 401.227  | 402.235  | 400.219  | L | 3  |
| R  | 23 | 2583.518        | 304.162        | 288.143  | 289.151  | 287.135  | R | 2  |
| D  | 24 | 2698.545        | 134.045        | 118.028  | 119.034  | 117.018  | D | 1  |

# sp | P62806 | H4\_MOUSE

[Acetyl]SGR<sup>Acetyl</sup>GGK<sup>Acetyl</sup>GLGK<sup>Acetyl</sup>GGAK<sup>Acetyl</sup>RHRKVL<sup>Acetyl</sup>R (Methyl) D  
 42.01 42.01 42.01 42.01 14.02

- ▶ fragmentation table for charge state 2+
- ▶ specType=etd
- ▶ score=65.00
- ▶ F121546.dat
- ▶ query=q36923.p1
- ▶ precursor=675.641180
- ▶ chargePrecursor=4
- ▶ itol=0.7

| AA    | c              | y               | z+1             | z+2             | z               | AA    |
|-------|----------------|-----------------|-----------------|-----------------|-----------------|-------|
| S[1]  | 74.042         | <b>1350.268</b> | 1342.259        | 0.504           | 1341.755        | S[24] |
| G[2]  | 102.553        | 1295.747        | <b>1277.737</b> | 0.504           | 1277.233        | G[23] |
| R[3]  | 180.063        | 1257.236        | 1249.227        | <b>1249.731</b> | 1249.723        | R[22] |
| G[4]  | 269.114        | 1179.185        | <b>1171.176</b> | <b>1171.680</b> | 1170.672        | G[21] |
| K[5]  | 296.187        | 1150.675        | 1142.665        | 1143.169        | 1142.163        | K[20] |
| G[6]  | 322.677        | 1095.622        | <b>1057.613</b> | <b>1058.117</b> | 1057.109        | G[19] |
| G[7]  | 351.188        | 1037.111        | <b>1029.102</b> | <b>1029.606</b> | <b>1028.598</b> | G[18] |
| K[8]  | 430.241        | 1008.601        | <b>1000.591</b> | <b>1001.095</b> | <b>1000.087</b> | K[17] |
| G[9]  | 464.752        | 973.548         | <b>915.538</b>  | <b>916.042</b>  | <b>915.034</b>  | G[16] |
| L[10] | 521.294        | <b>895.037</b>  | <b>887.028</b>  | 887.532         | <b>886.524</b>  | L[15] |
| G[11] | 549.804        | 838.485         | 839.489         | 839.990         | 839.982         | G[14] |
| K[12] | 634.857        | 809.984         | <b>801.975</b>  | <b>802.479</b>  | 801.471         | K[13] |
| G[13] | 663.368        | 724.931         | <b>716.922</b>  | <b>717.426</b>  | 716.418         | G[12] |
| G[14] | 691.879        | 696.421         | <b>688.411</b>  | <b>688.915</b>  | <b>687.907</b>  | G[11] |
| A[15] | 727.387        | 667.910         | 669.901         | 669.405         | 669.397         | A[10] |
| R[16] | 812.432        | 632.904         | 634.902         | 634.896         | 632.879         | R[9]  |
| R[17] | <b>890.500</b> | 547.339         | 539.329         | 539.333         | 539.325         | R[8]  |
| H[18] | <b>959.030</b> | 469.288         | 461.279         | 461.783         | 460.775         | H[7]  |
| R[19] | 1037.080       | 400.759         | 392.749         | 393.251         | 392.245         | R[0]  |
| K[20] | 1101.128       | 322.708         | 314.699         | 315.203         | 314.195         | K[5]  |
| V[21] | 1150.662       | 258.661         | 250.651         | 251.155         | 250.147         | V[4]  |
| L[22] | 1207.204       | 209.126         | 201.117         | 201.621         | 200.613         | L[1]  |
| R[23] | 1252.253       | 152.584         | 144.575         | 145.079         | 144.071         | R[2]  |
| D[24] | 1340.776       | 67.526          | 59.517          | 60.021          | 59.013          | D[1]  |

# sp | P62806 | H4\_MOUSE

[Acetyl]SGRGK <sup>Acetyl</sup><sub>42.01</sub> **GGK** <sup>Acetyl</sup><sub>42.01</sub> **GLGK** <sup>Acetyl</sup><sub>42.01</sub> **GGAK** <sup>Acetyl</sup><sub>42.01</sub> **RHRK**VLR (Methyl)<sub>(14.02)</sub> D

- ▶ fragmentation table for charge state 3+
- ▶ specType=etd
- ▶ score=65.00
- ▶ F121546.dat
- ▶ query=q36923.p1
- ▶ precursor=675.641180
- ▶ chargePrecursor=4
- ▶ itol=0.7

| AA    | c              | y              | z+1            | z+2            | z              | AA    |
|-------|----------------|----------------|----------------|----------------|----------------|-------|
| S[1]  | 69.697         | <b>900.514</b> | <b>995.175</b> | 0.672          | <b>894.839</b> | S[24] |
| G[2]  | 68.704         | 857.500        | <b>952.161</b> | 0.672          | <b>851.825</b> | G[23] |
| R[3]  | 120.738        | 538.493        | <b>833.154</b> | <b>833.489</b> | <b>832.818</b> | R[22] |
| G[4]  | 139.745        | 786.459        | 781.120        | 781.456        | 780.784        | G[21] |
| K[5]  | 196.447        | 767.452        | 762.113        | 762.449        | 761.777        | K[20] |
| G[6]  | 215.454        | 710.750        | 705.411        | 705.747        | 705.075        | G[19] |
| G[7]  | 234.461        | 691.743        | 686.404        | 686.740        | 686.068        | G[18] |
| K[8]  | 291.163        | 672.736        | 667.397        | 667.732        | 667.061        | K[17] |
| G[9]  | 310.170        | 616.034        | 610.695        | 611.031        | 610.359        | G[16] |
| L[10] | 347.895        | 597.027        | 591.688        | 592.023        | 591.352        | L[15] |
| G[11] | 388.972        | 539.322        | 533.983        | 534.319        | 533.647        | G[14] |
| K[12] | 423.574        | 540.325        | 534.986        | 535.322        | 534.650        | K[13] |
| G[13] | 442.581        | 483.623        | 478.284        | 478.620        | 477.948        | G[12] |
| G[14] | 461.588        | 464.616        | 459.277        | 459.613        | 458.941        | G[11] |
| A[15] | 485.267        | 445.609        | 440.270        | 440.605        | 439.934        | A[10] |
| K[16] | 541.969        | 421.930        | 416.590        | 416.926        | 416.255        | K[9]  |
| R[17] | 594.003        | 365.228        | <b>359.889</b> | <b>360.225</b> | 359.553        | R[8]  |
| H[18] | 639.689        | 313.195        | 307.853        | 308.191        | 307.519        | H[7]  |
| R[19] | 681.723        | 267.508        | 262.169        | 262.505        | 261.833        | R[6]  |
| K[20] | 734.421        | 215.475        | 210.136        | 210.471        | 209.799        | K[5]  |
| V[21] | 767.444        | 172.776        | 167.437        | 167.773        | 167.101        | V[4]  |
| L[22] | 805.139        | 139.753        | 134.414        | 134.750        | 134.078        | L[3]  |
| R[23] | <b>851.844</b> | 102.059        | 96.719         | 97.055         | 96.383         | R[2]  |
| D[24] | <b>900.186</b> | 45.353         | 40.014         | 40.349         | 39.678         | D[1]  |





# sp | P62806 | H4\_MOUSE

[Acetyl]SGR<sup>Dimethyl</sup><sub>28.03</sub> GKGGK<sup>Acetyl</sup><sub>42.01</sub> GLGK<sup>Acetyl</sup><sub>42.01</sub> GGAK<sup>Acetyl</sup><sub>42.01</sub> R<sup>Methyl</sup><sub>14.02</sub> HR<sup>(Methyl)</sup><sub>(14.02)</sub> KVLRD

- ▶ fragmentation table for charge state 1+
- ▶ specType=etd
- ▶ score=71.86
- ▶ F121546.dat
- ▶ query=q36927.p1
- ▶ precursor=675.650040
- ▶ chargePrecursor=4
- ▶ itol=0.7

| AA | c  | y               | z+1             | z+2      | z              | AA       |       |
|----|----|-----------------|-----------------|----------|----------------|----------|-------|
| S  | 1  | 147.076         | 2099.565        | 2663.546 | 0.000          | 2662.539 | S[24] |
| R  | 2  | 204.938         | 2570.523        | 2554.504 | 0.000          | 2553.496 | G[23] |
| R  | 3  | <b>388.230</b>  | 2513.501        | 2497.482 | 2498.490       | 2496.475 | R[22] |
| G  | 4  | 449.252         | 2329.369        | 2313.350 | 2314.358       | 2312.342 | G[21] |
| K  | 5  | <b>573.347</b>  | 2272.347        | 2256.329 | 2257.336       | 2255.321 | K[20] |
| G  | 6  | <b>630.368</b>  | 2144.252        | 2128.234 | 2129.241       | 2127.226 | G[19] |
| G  | 7  | 687.390         | 2087.231        | 2071.212 | 2072.220       | 2070.204 | G[18] |
| K  | 8  | <b>857.495</b>  | 2030.209        | 2014.191 | 2015.198       | 2013.183 | K[17] |
| G  | 9  | <b>914.517</b>  | 1886.164        | 1844.035 | 1845.093       | 1843.077 | G[16] |
| L  | 10 | <b>1027.801</b> | 1801.082        | 1785.054 | 1786.071       | 1784.056 | L[15] |
| G  | 11 | <b>1084.822</b> | 1589.998        | 1573.980 | 1574.987       | 1572.972 | G[14] |
| K  | 12 | 1254.728        | 1832.977        | 1616.958 | 1617.966       | 1615.950 | K[13] |
| G  | 13 | <b>1311.749</b> | 1462.871        | 1446.853 | 1447.860       | 1445.845 | G[12] |
| G  | 14 | 1368.771        | 1405.850        | 1389.831 | 1390.839       | 1388.823 | G[11] |
| A  | 15 | 1439.808        | 1348.828        | 1332.810 | 1333.818       | 1331.802 | A[10] |
| K  | 16 | 1609.913        | <b>1277.791</b> | 1261.773 | 1262.780       | 1260.765 | K[9]  |
| R  | 17 | 1780.938        | 1107.668        | 1091.667 | 1092.675       | 1090.659 | R[8]  |
| H  | 18 | 1917.089        | 937.559         | 921.550  | <b>922.558</b> | 920.542  | H[7]  |
| R  | 19 | 2067.206        | 806.510         | 784.491  | 785.499        | 783.484  | R[6]  |
| K  | 20 | 2215.301        | <b>630.393</b>  | 614.375  | 615.382        | 613.367  | K[5]  |
| V  | 21 | 2314.369        | 502.298         | 480.280  | 481.287        | 479.272  | V[4]  |
| L  | 22 | 2427.453        | 403.230         | 387.211  | <b>388.219</b> | 386.203  | L[3]  |
| K  | 23 | 2683.554        | 268.148         | 274.127  | 275.135        | 273.119  | K[2]  |
| D  | 24 | 2698.581        | 134.045         | 118.026  | 119.034        | 117.018  | D[1]  |

# sp | P62806 | H4\_MOUSE

[Acetyl]SGR<sup>Dimethyl  
28.03</sup> GKG<sup>Acetyl  
42.01</sup> GKGGK<sup>Acetyl  
42.01</sup> GLGK<sup>Acetyl  
42.01</sup> GGAK<sup>Acetyl  
42.01</sup> R<sup>Methyl  
14.02</sup> HR<sup>(Methyl)  
(14.02)</sup> KVL<sup>RD</sup>

- ▶ fragmentation table for charge state 2+
- ▶ specType=etd
- ▶ score=71.86
- ▶ F121546.dat
- ▶ query=q36927.p1
- ▶ precursor=675.650040
- ▶ chargePrecursor=4
- ▶ itol=0.7

| AA    | c               | y               | z+1             | z+2             | z               | AA    |
|-------|-----------------|-----------------|-----------------|-----------------|-----------------|-------|
| S[1]  | 74.042          | <b>1350.286</b> | <b>1342.277</b> | 0.504           | <b>1341.773</b> | S[24] |
| G[2]  | 100.553         | 1285.765        | 1277.756        | 0.504           | 1277.252        | G[23] |
| R[3]  | 194.610         | 1257.254        | <b>1249.245</b> | <b>1249.749</b> | 1248.741        | R[22] |
| G[4]  | 223.130         | 1185.188        | <b>1157.179</b> | <b>1157.683</b> | 1156.675        | G[21] |
| K[5]  | 267.177         | 1136.671        | <b>1128.660</b> | <b>1129.172</b> | 1129.166        | K[20] |
| G[6]  | 315.688         | 1072.630        | 1064.621        | 1065.124        | 1064.117        | G[19] |
| G[7]  | 344.198         | 1044.119        | <b>1036.110</b> | <b>1036.614</b> | <b>1035.606</b> | G[18] |
| K[8]  | 429.251         | 1015.608        | 1007.599        | <b>1008.103</b> | 1007.595        | K[17] |
| G[9]  | 457.762         | 930.556         | <b>922.546</b>  | <b>923.050</b>  | 922.042         | G[16] |
| L[10] | 514.304         | 902.045         | 894.037         | 894.539         | 893.531         | L[15] |
| G[11] | 542.815         | 845.503         | <b>837.493</b>  | <b>837.997</b>  | 836.989         | G[14] |
| K[12] | 627.867         | 816.993         | <b>808.983</b>  | <b>809.487</b>  | 808.479         | K[13] |
| G[13] | 656.376         | 731.939         | <b>723.930</b>  | <b>724.434</b>  | 723.426         | G[12] |
| G[14] | 684.889         | 703.429         | <b>695.419</b>  | <b>695.923</b>  | 694.915         | G[11] |
| A[15] | 720.408         | 674.918         | <b>666.908</b>  | <b>667.412</b>  | <b>666.405</b>  | A[10] |
| R[16] | 689.460         | 639.399         | 631.392         | 631.894         | <b>630.886</b>  | R[9]  |
| R[17] | <b>690.519</b>  | 594.347         | 546.337         | 546.841         | 545.833         | R[6]  |
| H[18] | 950.048         | 469.288         | 461.279         | 461.783         | 460.775         | H[7]  |
| R[19] | 1044.106        | 600.759         | 592.749         | 593.253         | 592.245         | R[6]  |
| K[20] | 1108.154        | 315.700         | 307.691         | 308.195         | 307.187         | K[5]  |
| V[21] | <b>1157.668</b> | 251.653         | 243.643         | 244.147         | 243.140         | V[4]  |
| L[22] | <b>1214.230</b> | 202.119         | 194.109         | 194.613         | 193.605         | L[1]  |
| R[23] | 1262.261        | 145.577         | 137.567         | 138.071         | 137.063         | R[2]  |
| D[24] | 1349.794        | 67.526          | 59.517          | 60.021          | 59.013          | D[1]  |

# sp | P62806 | H4\_MOUSE

[Acetyl]SGR<sup>Dimethyl  
28.03</sup> GKGGK<sup>Acetyl  
42.01</sup> GLGK<sup>Acetyl  
42.01</sup> GGAK<sup>Acetyl  
42.01</sup> R<sup>Methyl  
14.02</sup> HR<sup>(Methyl)  
(14.02)</sup> KVLRD

- ▶ fragmentation table for charge state 3+
- ▶ specType=etd
- ▶ score=71.86
- ▶ F121546.dat
- ▶ query=q36927.p1
- ▶ precursor=675.650040
- ▶ chargePrecursor=4
- ▶ itol=0.7

| AA    | c              | y              | z+1            | z+2            | z              | AA    |
|-------|----------------|----------------|----------------|----------------|----------------|-------|
| S[1]  | 69.697         | <b>900.527</b> | <b>895.107</b> | 0.672          | <b>894.851</b> | S[24] |
| G[2]  | 68.704         | <b>857.512</b> | <b>852.173</b> | 0.672          | 851.837        | G[23] |
| R[3]  | 130.082        | 838.505        | <b>833.166</b> | <b>833.502</b> | 832.830        | R[22] |
| G[4]  | 149.089        | 777.128        | 771.789        | 772.124        | 771.452        | G[21] |
| K[5]  | 191.787        | 758.121        | 752.781        | 753.117        | 752.445        | K[20] |
| G[6]  | 210.794        | 715.422        | 710.083        | 710.419        | 709.747        | G[19] |
| G[7]  | 229.801        | 696.415        | 691.076        | 691.412        | 690.740        | G[18] |
| K[8]  | 286.503        | 677.408        | 672.068        | 672.404        | 671.732        | K[17] |
| G[9]  | 305.510        | 620.706        | 615.367        | 615.703        | 615.031        | G[16] |
| L[10] | 343.205        | 601.699        | 596.359        | 596.695        | 596.022        | L[15] |
| G[11] | 352.212        | 594.004        | 588.665        | 589.001        | 588.329        | G[14] |
| K[12] | 418.914        | 544.997        | 539.658        | 539.994        | 539.322        | K[13] |
| G[13] | 437.921        | 488.295        | 482.956        | 483.292        | 482.620        | G[12] |
| G[14] | 456.928        | 469.288        | 463.949        | 464.285        | 463.613        | G[11] |
| A[15] | 480.607        | 450.281        | 444.941        | 445.277        | 444.605        | A[10] |
| K[16] | 537.309        | 426.602        | 421.262        | 421.598        | 420.926        | K[9]  |
| R[17] | 594.015        | 369.900        | 364.561        | 364.896        | 364.225        | R[8]  |
| H[18] | 639.701        | 313.195        | 307.855        | 308.191        | 307.519        | H[7]  |
| R[19] | 686.407        | 267.508        | 262.168        | 262.505        | 261.833        | R[6]  |
| K[20] | 739.105        | 210.803        | 205.463        | 205.799        | 205.127        | K[5]  |
| V[21] | 772.128        | 168.104        | 162.764        | 163.101        | 162.429        | V[4]  |
| L[22] | <b>809.823</b> | 135.082        | 129.742        | 130.078        | 129.406        | L[3]  |
| R[23] | <b>861.856</b> | 97.387         | 92.047         | 92.383         | 91.711         | R[2]  |
| D[24] | <b>900.199</b> | 45.353         | 40.014         | 40.349         | 39.678         | D[1]  |

# sp | P62806 | H4\_MOUSE

[Acetyl]SGRGK Acetyl 42.01 GGK Acetyl 42.01 GLGK Acetyl 42.01 GGAK Acetyl 42.01 RHRKVLR (Dimethyl) D (28.03)

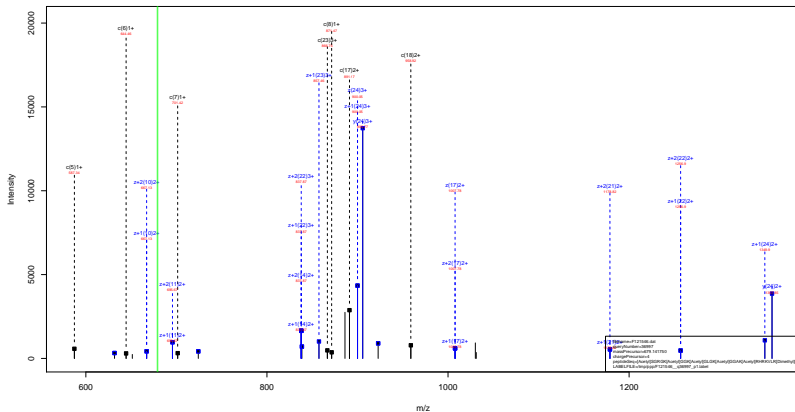

# sp | P62806 | H4\_MOUSE

[Acetyl]SGRGK<sub>42.01</sub><sup>Acetyl</sup> GGK<sub>42.01</sub><sup>Acetyl</sup> GLGK<sub>42.01</sub><sup>Acetyl</sup> GGAK<sub>42.01</sub><sup>Acetyl</sup> RHRKVLR<sub>(28.03)</sub><sup>(Dimethyl)</sup> D

- ▶ fragmentation table for charge state 1+
- ▶ specType=etd
- ▶ score=54.56
- ▶ F121546.dat
- ▶ query=q36997.p1
- ▶ precursor=679.141750
- ▶ chargePrecursor=4
- ▶ itol=0.7

| AA | c  | y              | z+1      | z+2      | z        | AA       |   |    |
|----|----|----------------|----------|----------|----------|----------|---|----|
| S  | 1  | 147.076        | 2713.544 | 2697.526 | 0.000    | 2696.518 | S | 24 |
| G  | 2  | 264.098        | 2584.502 | 2568.483 | 0.000    | 2567.475 | G | 23 |
| R  | 3  | 380.199        | 2327.480 | 2311.462 | 2612.470 | 2610.454 | R | 22 |
| G  | 4  | 417.220        | 2371.379 | 2355.361 | 2396.368 | 2394.353 | G | 21 |
| K  | 5  | <b>587.326</b> | 2114.358 | 2098.339 | 2299.347 | 2297.331 | K | 20 |
| G  | 6  | <b>644.347</b> | 2144.252 | 2128.234 | 2129.241 | 2127.226 | G | 19 |
| G  | 7  | <b>701.369</b> | 2087.231 | 2071.212 | 2072.220 | 2070.204 | G | 18 |
| K  | 8  | <b>871.474</b> | 2030.209 | 2014.191 | 2015.198 | 2013.183 | K | 17 |
| G  | 9  | 928.496        | 1980.104 | 1844.083 | 1845.093 | 1843.077 | G | 16 |
| L  | 10 | 1041.580       | 1883.082 | 1787.063 | 1788.071 | 1786.056 | L | 15 |
| G  | 11 | 1098.601       | 1888.996 | 1873.980 | 1874.987 | 1872.972 | G | 14 |
| K  | 12 | 1298.707       | 1832.977 | 1816.958 | 1817.966 | 1815.950 | K | 13 |
| G  | 13 | 1325.728       | 1482.871 | 1440.853 | 1447.860 | 1445.845 | G | 12 |
| G  | 14 | 1382.750       | 1405.850 | 1389.831 | 1390.839 | 1388.823 | G | 11 |
| A  | 15 | 1453.787       | 1348.828 | 1332.810 | 1333.818 | 1331.802 | A | 10 |
| K  | 16 | 1623.893       | 1277.791 | 1261.773 | 1262.780 | 1260.765 | K | 9  |
| R  | 17 | 1779.994       | 1107.686 | 1091.667 | 1092.675 | 1090.659 | R | 8  |
| H  | 18 | 1917.053       | 951.585  | 935.568  | 936.574  | 934.558  | H | 7  |
| R  | 19 | 2073.154       | 814.526  | 798.507  | 799.515  | 797.499  | R | 6  |
| K  | 20 | 2201.249       | 698.425  | 682.406  | 683.414  | 681.398  | K | 5  |
| V  | 21 | 2300.317       | 530.330  | 514.311  | 515.319  | 513.303  | V | 4  |
| L  | 22 | 2413.401       | 431.261  | 415.243  | 416.250  | 414.235  | L | 3  |
| R  | 23 | 2587.534       | 318.177  | 302.159  | 303.166  | 301.151  | R | 2  |
| D  | 24 | 2712.560       | 134.045  | 118.026  | 119.034  | 117.018  | D | 1  |

# sp | P62806 | H4\_MOUSE

[Acetyl]SGR**GK**<sup>Acetyl</sup><sub>42.01</sub> **GGK**<sup>Acetyl</sup><sub>42.01</sub> **GLGK**<sup>Acetyl</sup><sub>42.01</sub> **GGAK**<sup>Acetyl</sup><sub>42.01</sub> **RHRK**VLR<sup>(Dimethyl)</sup><sub>(28.03)</sub> D

- ▶ fragmentation table for charge state 2+
- ▶ specType=etd
- ▶ score=54.56
- ▶ F121546.dat
- ▶ query=q36997.p1
- ▶ precursor=679.141750
- ▶ chargePrecursor=4
- ▶ itol=0.7

| AA   | c              | y               | z+1             | z+2             | z               | AA   |
|------|----------------|-----------------|-----------------|-----------------|-----------------|------|
| S 1  | 74.040         | <b>1357.276</b> | <b>1349.267</b> | 0.504           | 1348.763        | S 24 |
| G 2  | 102.553        | 1292.755        | 1284.740        | 0.504           | 1284.241        | G 23 |
| R 3  | 180.063        | 1264.244        | <b>1256.234</b> | <b>1256.738</b> | 1255.731        | R 22 |
| G 4  | 209.114        | 1186.181        | <b>1178.184</b> | <b>1178.688</b> | 1177.680        | G 21 |
| K 5  | 296.167        | 1157.663        | 1149.651        | 1149.157        | 1148.150        | K 20 |
| G 6  | 322.677        | 1072.630        | 1064.620        | 1065.124        | 1064.117        | G 19 |
| G 7  | 351.188        | 1044.119        | 1036.110        | 1036.614        | 1035.608        | G 18 |
| K 8  | 430.241        | 1015.608        | <b>1007.599</b> | <b>1008.103</b> | <b>1007.095</b> | K 17 |
| G 9  | 464.752        | 930.556         | <b>922.546</b>  | <b>923.050</b>  | 922.042         | G 16 |
| L 10 | 521.264        | 802.045         | 794.033         | 794.530         | 793.523         | L 15 |
| G 11 | 549.804        | 945.503         | <b>937.493</b>  | <b>937.997</b>  | 936.990         | G 14 |
| K 12 | 634.857        | 816.992         | 808.981         | 809.487         | 808.479         | K 13 |
| G 13 | 663.368        | 731.939         | <b>723.930</b>  | <b>724.434</b>  | 723.428         | G 12 |
| G 14 | 691.879        | 703.429         | <b>695.419</b>  | <b>695.923</b>  | 694.915         | G 11 |
| A 15 | 727.397        | 674.918         | <b>666.908</b>  | <b>667.412</b>  | 666.405         | A 10 |
| R 16 | 812.432        | 639.369         | <b>631.360</b>  | <b>631.864</b>  | 630.856         | R 9  |
| R 17 | <b>890.500</b> | 554.347         | 546.337         | 546.841         | 545.833         | R 8  |
| H 18 | <b>959.030</b> | 476.295         | 468.289         | 468.791         | 467.783         | H 7  |
| R 19 | 1037.080       | 407.767         | 399.757         | 400.261         | 399.253         | R 6  |
| K 20 | 1101.128       | 329.715         | 321.707         | 322.211         | 321.203         | K 5  |
| V 21 | 1150.662       | 265.668         | 257.650         | 258.163         | 257.155         | V 4  |
| L 22 | 1207.204       | 216.134         | 208.125         | 208.629         | 207.621         | L 3  |
| R 23 | 1259.276       | 159.592         | 151.583         | 152.087         | 151.079         | R 2  |
| D 24 | 1356.794       | 67.526          | 59.517          | 60.021          | 59.013          | D 1  |

# sp | P62806 | H4\_MOUSE

[Acetyl]SGRGK Acetyl  
42.01 **GGK** Acetyl  
42.01 **GLGK** Acetyl  
42.01 **GGAK** Acetyl  
42.01 **RHRK****VLR** (Dimethyl)  
(28.03) **D**

- ▶ fragmentation table for charge state 3+
- ▶ specType=etd
- ▶ score=54.56
- ▶ F121546.dat
- ▶ query=q36997\_p1
- ▶ precursor=679.141750
- ▶ chargePrecursor=4
- ▶ itol=0.7

| AA    | c              | y              | z+1            | z+2            | z              | AA    |
|-------|----------------|----------------|----------------|----------------|----------------|-------|
| S[1]  | 49.697         | <b>905.186</b> | <b>899.847</b> | 0.672          | <b>899.511</b> | S[24] |
| G[2]  | 68.704         | 852.172        | <b>856.833</b> | 0.672          | 856.997        | G[23] |
| R[3]  | 120.738        | 843.165        | <b>837.825</b> | <b>838.161</b> | <b>837.489</b> | R[22] |
| G[4]  | 139.745        | 791.131        | 785.792        | 786.128        | 785.456        | G[21] |
| K[5]  | 196.447        | 772.124        | 766.785        | 767.120        | 766.449        | K[20] |
| G[6]  | 215.454        | 715.422        | 710.083        | 710.419        | 709.747        | G[19] |
| G[7]  | 234.461        | 696.415        | 691.076        | 691.412        | 690.740        | G[18] |
| K[8]  | 291.163        | 677.408        | 672.068        | 672.404        | 671.732        | K[17] |
| G[9]  | 310.170        | 620.706        | 615.367        | 615.703        | 615.031        | G[16] |
| L[10] | 347.895        | 601.699        | 596.359        | 596.695        | 596.022        | L[15] |
| G[11] | 386.972        | 584.004        | 578.665        | 579.001        | 578.329        | G[14] |
| K[12] | 423.574        | 544.997        | 539.658        | 539.994        | 539.322        | K[13] |
| G[13] | 442.581        | 488.295        | 482.956        | 483.292        | 482.620        | G[12] |
| G[14] | 461.588        | 469.288        | 463.949        | 464.285        | 463.613        | G[11] |
| A[15] | 485.267        | 450.281        | 444.941        | 445.277        | 444.605        | A[10] |
| K[16] | 541.969        | 426.602        | 421.262        | 421.598        | 420.926        | K[9]  |
| R[17] | 594.003        | 369.900        | 364.561        | 364.896        | 364.225        | R[8]  |
| H[18] | 639.689        | 317.866        | 312.527        | 312.863        | 312.191        | H[7]  |
| R[19] | 681.723        | 272.180        | 266.841        | 267.176        | 266.505        | R[6]  |
| K[20] | 734.421        | 220.146        | 214.807        | 215.143        | 214.471        | K[5]  |
| V[21] | 757.444        | 177.440        | 172.100        | 172.444        | 171.773        | V[4]  |
| L[22] | 805.139        | 144.425        | 139.086        | 139.422        | 138.750        | L[3]  |
| R[23] | <b>856.516</b> | 106.731        | 101.391        | 101.727        | 101.055        | R[2]  |
| D[24] | 904.858        | 45.353         | 40.014         | 40.349         | 39.678         | D[1]  |





# sp | P62806 | H4\_MOUSE

[Acetyl]SGRGGK<sub>42.01</sub> Acetyl GGK<sub>42.01</sub> Acetyl GLGK<sub>42.01</sub> Acetyl GGAK<sub>42.01</sub> Acetyl RHRKVLK<sub>(28.03)</sub> (Dimethyl) D

- ▶ fragmentation table for charge state 1+
- ▶ specType=etd
- ▶ score=78.43
- ▶ F121546.dat
- ▶ query=q37005.p1
- ▶ precursor=679.145210
- ▶ chargePrecursor=4
- ▶ itol=0.7

| AA | c               | y        | z+1            | z+2      | z        | AA    |
|----|-----------------|----------|----------------|----------|----------|-------|
| S  | 147.070         | 2713.544 | 2097.526       | 0.000    | 2096.518 | S[24] |
| G  | 264.098         | 2584.502 | 2566.483       | 0.000    | 2567.475 | G[23] |
| R  | <b>360.159</b>  | 2327.480 | 2311.462       | 2012.470 | 2010.454 | R[22] |
| G  | 417.230         | 2371.370 | 2356.351       | 2356.368 | 2354.351 | G[21] |
| K  | <b>587.326</b>  | 2314.358 | 2298.339       | 2299.347 | 2297.331 | K[20] |
| G  | <b>644.347</b>  | 2144.252 | 2128.234       | 2129.241 | 2127.226 | G[19] |
| G  | <b>701.369</b>  | 2087.231 | 2071.210       | 2072.220 | 2070.204 | G[18] |
| K  | <b>871.474</b>  | 2030.209 | 2014.191       | 2015.198 | 2013.183 | K[17] |
| G  | 928.496         | 1890.104 | 1844.085       | 1845.093 | 1843.077 | G[16] |
| L  | 1031.589        | 1803.081 | 1787.064       | 1788.071 | 1786.056 | L[15] |
| G  | 1098.601        | 1689.990 | 1673.980       | 1674.987 | 1672.972 | G[14] |
| K  | 1268.707        | 1632.977 | 1616.958       | 1617.966 | 1615.950 | K[13] |
| G  | <b>1325.728</b> | 1462.871 | 1446.853       | 1447.860 | 1445.845 | G[12] |
| G  | 1382.750        | 1405.850 | 1389.831       | 1390.839 | 1388.823 | G[11] |
| A  | 1453.787        | 1348.828 | 1332.810       | 1333.818 | 1331.802 | A[10] |
| K  | 1623.893        | 1277.791 | 1261.773       | 1262.780 | 1260.765 | K[9]  |
| R  | 1779.994        | 1107.680 | 1091.662       | 1092.670 | 1090.654 | R[8]  |
| H  | 1917.053        | 951.581  | 935.560        | 936.574  | 934.556  | H[7]  |
| R  | 2073.154        | 814.520  | <b>798.507</b> | 799.515  | 797.499  | R[6]  |
| K  | 2201.249        | 658.425  | 642.406        | 643.414  | 641.398  | K[5]  |
| V  | 2300.317        | 530.330  | 514.311        | 515.319  | 513.303  | V[4]  |
| L  | 2413.401        | 431.261  | 415.243        | 416.250  | 414.235  | L[3]  |
| R  | 2597.534        | 318.177  | 302.158        | 303.166  | 301.151  | R[2]  |
| D  | 2712.560        | 194.045  | 118.028        | 119.034  | 117.018  | D[1]  |

# sp | P62806 | H4\_MOUSE

[Acetyl]SGR**GGK**<sup>Acetyl</sup><sub>42.01</sub> **GGK**<sup>Acetyl</sup><sub>42.01</sub> **GLGK**<sup>Acetyl</sup><sub>42.01</sub> **GGAK**<sup>Acetyl</sup><sub>42.01</sub> **RHRK**VLR<sup>(Dimethyl)</sup><sub>(28.03)</sub> D

- ▶ fragmentation table for charge state 2+
- ▶ specType=etd
- ▶ score=78.43
- ▶ F121546.dat
- ▶ query=q37005.p1
- ▶ precursor=679.145210
- ▶ chargePrecursor=4
- ▶ itol=0.7

| AA | c  | y               | z+1             | z+2             | z               | AA              |       |
|----|----|-----------------|-----------------|-----------------|-----------------|-----------------|-------|
| S  | 1  | 74.092          | <b>1357.276</b> | <b>1349.267</b> | 0.504           | 1348.763        | S[24] |
| G  | 2  | 102.553         | 1292.735        | 1284.745        | 0.504           | 1284.241        | G[23] |
| R  | 3  | 180.603         | 1264.244        | 1256.234        | <b>1256.738</b> | 1255.731        | R[22] |
| G  | 4  | 269.114         | 1186.193        | <b>1178.184</b> | <b>1178.688</b> | 1177.680        | G[21] |
| R  | 5  | 294.167         | 1157.683        | 1149.673        | 1150.177        | 1149.169        | R[20] |
| G  | 6  | 322.677         | 1072.630        | <b>1064.620</b> | <b>1065.124</b> | <b>1064.117</b> | G[19] |
| G  | 7  | 351.188         | 1044.119        | <b>1036.110</b> | <b>1036.614</b> | <b>1035.606</b> | G[18] |
| K  | 8  | 436.241         | 1015.608        | <b>1007.599</b> | <b>1008.103</b> | 1007.595        | K[17] |
| G  | 9  | 464.752         | 930.556         | <b>922.546</b>  | <b>923.050</b>  | 922.042         | G[16] |
| L  | 10 | 501.264         | 902.045         | <b>894.035</b>  | <b>894.539</b>  | 893.531         | L[15] |
| G  | 11 | 540.304         | 845.503         | <b>837.493</b>  | <b>837.997</b>  | 836.990         | G[14] |
| K  | 12 | 634.857         | 816.992         | <b>808.983</b>  | <b>809.487</b>  | 808.479         | K[13] |
| G  | 13 | 663.368         | 731.939         | <b>723.930</b>  | <b>724.434</b>  | <b>723.426</b>  | G[12] |
| G  | 14 | 691.879         | 703.429         | <b>695.419</b>  | <b>695.923</b>  | <b>694.915</b>  | G[11] |
| A  | 15 | 727.397         | 674.918         | 666.908         | 667.412         | 666.405         | A[10] |
| R  | 16 | 812.450         | 639.399         | 631.389         | 631.894         | 630.886         | R[9]  |
| R  | 17 | <b>890.500</b>  | 594.347         | 586.337         | 586.841         | 585.833         | R[8]  |
| H  | 18 | <b>959.030</b>  | 476.296         | 468.287         | 468.791         | 467.783         | H[7]  |
| R  | 19 | <b>1037.060</b> | 407.767         | 399.757         | 400.261         | 399.253         | R[6]  |
| K  | 20 | 1101.126        | 329.716         | 321.707         | 322.211         | 321.203         | K[5]  |
| V  | 21 | 1138.662        | 205.665         | 207.659         | 208.163         | 207.155         | V[4]  |
| L  | 22 | 1207.204        | 218.134         | 208.125         | 208.629         | 207.621         | L[3]  |
| R  | 23 | 1299.270        | 159.592         | 151.583         | 152.087         | 151.079         | R[2]  |
| D  | 24 | <b>1356.784</b> | 67.526          | 59.517          | 60.021          | 59.013          | D[1]  |

# sp | P62806 | H4\_MOUSE

[Acetyl]SGR**GGK**<sup>Acetyl</sup><sub>42.01</sub> **GGK**<sup>Acetyl</sup><sub>42.01</sub> **GLGK**<sup>Acetyl</sup><sub>42.01</sub> **GGAK**<sup>Acetyl</sup><sub>42.01</sub> **RHRKVLR** (Dimethyl)<sup>D</sup><sub>(28.03)</sub>

- ▶ fragmentation table for charge state 3+
- ▶ specType=etd
- ▶ score=78.43
- ▶ F121546.dat
- ▶ query=q37005\_p1
- ▶ precursor=679.145210
- ▶ chargePrecursor=4
- ▶ itol=0.7

| AA    | c              | y              | z+1            | z+2            | z              | AA    |
|-------|----------------|----------------|----------------|----------------|----------------|-------|
| S[1]  | 49.697         | <b>905.186</b> | <b>999.847</b> | 0.672          | 899.311        | S[24] |
| G[2]  | 68.704         | 852.172        | <b>856.833</b> | 0.672          | 856.907        | G[23] |
| R[3]  | 120.738        | 843.165        | <b>837.825</b> | <b>838.161</b> | <b>837.489</b> | R[22] |
| G[4]  | 139.745        | 791.131        | 785.792        | 786.128        | 785.456        | G[21] |
| K[5]  | 196.447        | 772.124        | 766.785        | 767.120        | 766.449        | K[20] |
| G[6]  | 215.454        | 715.422        | 710.083        | 710.419        | 709.747        | G[19] |
| G[7]  | 234.461        | 696.415        | 691.076        | 691.412        | 690.740        | G[18] |
| K[8]  | 291.163        | 677.408        | 672.068        | 672.404        | 671.732        | K[17] |
| G[9]  | 310.170        | 620.706        | 615.367        | 615.703        | 615.031        | G[16] |
| L[10] | 347.895        | 601.699        | 595.359        | 595.695        | 595.022        | L[15] |
| G[11] | 386.972        | 584.004        | 578.665        | 579.001        | 578.329        | G[14] |
| K[12] | 423.574        | 544.997        | 539.658        | 539.994        | 539.322        | K[13] |
| G[13] | 442.581        | 488.295        | 482.956        | 483.292        | 482.620        | G[12] |
| G[14] | 461.588        | 469.288        | 463.949        | 464.285        | 463.613        | G[11] |
| A[15] | 485.267        | 450.281        | 444.941        | 445.277        | 444.605        | A[10] |
| K[16] | 541.969        | 426.602        | 421.262        | 421.598        | 420.926        | K[9]  |
| R[17] | 594.003        | 369.900        | 364.561        | 364.896        | 364.225        | R[8]  |
| H[18] | 639.689        | 317.866        | 312.527        | 312.863        | 312.191        | H[7]  |
| R[19] | 681.723        | 272.180        | 266.841        | 267.176        | 266.505        | R[6]  |
| K[20] | 734.421        | 220.146        | 214.807        | 215.143        | 214.471        | K[5]  |
| V[21] | 757.444        | 177.448        | 172.109        | 172.444        | 171.773        | V[4]  |
| L[22] | 805.139        | 144.425        | 139.086        | 139.422        | 138.750        | L[3]  |
| R[23] | <b>856.516</b> | 106.731        | 101.391        | 101.727        | 101.055        | R[2]  |
| D[24] | <b>904.858</b> | 45.353         | 40.014         | 40.349         | 39.678         | D[1]  |

# sp | P62806 | H4\_MOUSE

[Acetyl]SGRGK Acetyl 42.01 GGK Acetyl 42.01 GLGK Acetyl 42.01 GGAK Acetyl 42.01 R Dimethyl 28.03 HRKVLR (Methyl) D (14.02)

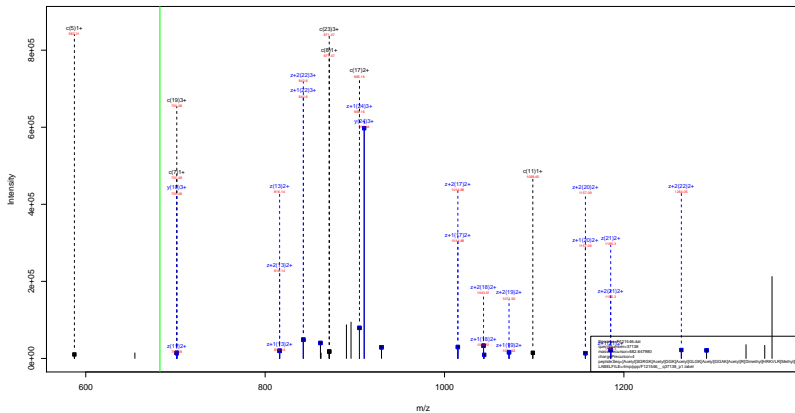

# sp | P62806 | H4\_MOUSE

[Acetyl]SGR<sup>Acetyl</sup>RGK<sup>42.01</sup> GGK<sup>Acetyl</sup> GLGK<sup>Acetyl</sup> GGAK<sup>Acetyl</sup> R<sup>Dimethyl</sup> HRKVLR<sup>(Methyl)</sup> D<sup>(14.02)</sup>

- ▶ fragmentation table for charge state 1+
- ▶ specType=etd
- ▶ score=56.93
- ▶ F121546.dat
- ▶ query=q37138.p1
- ▶ precursor=682.647980
- ▶ chargePrecursor=4
- ▶ itol=0.7

| AA | c  | y               | z+1             | z+2      | z        | AA       |       |
|----|----|-----------------|-----------------|----------|----------|----------|-------|
| S  | 1  | 147.076         | 2727.560        | 2711.541 | 0.000    | 2710.534 | S[24] |
| G  | 2  | 204.098         | 2598.518        | 2582.499 | 0.000    | 2581.491 | G[23] |
| R  | 3  | 360.199         | 2541.490        | 2525.477 | 2526.485 | 2524.470 | R[22] |
| G  | 4  | 417.220         | 2385.395        | 2369.376 | 2370.384 | 2368.366 | G[21] |
| K  | 5  | <b>587.326</b>  | 2328.373        | 2312.355 | 2313.363 | 2311.347 | K[20] |
| G  | 6  | 644.347         | 2158.268        | 2142.249 | 2143.257 | 2141.241 | G[19] |
| G  | 7  | <b>701.369</b>  | 2101.247        | 2085.228 | 2086.236 | 2084.220 | G[18] |
| K  | 8  | <b>871.474</b>  | 2044.225        | 2028.206 | 2029.214 | 2027.198 | K[17] |
| G  | 9  | 928.496         | 1874.120        | 1858.101 | 1859.109 | 1857.093 | G[16] |
| L  | 10 | 1041.580        | 1817.098        | 1801.079 | 1802.087 | 1800.071 | L[15] |
| G  | 11 | <b>1098.601</b> | 1764.014        | 1747.995 | 1748.993 | 1746.977 | G[14] |
| K  | 12 | 1268.707        | 1646.993        | 1630.974 | 1631.982 | 1629.966 | K[13] |
| G  | 13 | 1325.728        | 1478.887        | 1460.868 | 1461.876 | 1459.860 | G[12] |
| G  | 14 | 1382.750        | 1419.869        | 1403.847 | 1404.855 | 1402.839 | G[11] |
| A  | 15 | 1451.787        | 1362.844        | 1346.825 | 1347.833 | 1345.819 | A[10] |
| K  | 16 | 1621.893        | <b>1291.807</b> | 1275.788 | 1276.796 | 1274.780 | K[9]  |
| R  | 17 | 1808.025        | 1121.707        | 1105.683 | 1106.691 | 1104.675 | R[8]  |
| H  | 18 | 1945.084        | 937.550         | 921.530  | 922.538  | 920.542  | H[7]  |
| R  | 19 | 2101.185        | 800.510         | 784.491  | 785.499  | 783.484  | R[6]  |
| K  | 20 | 2229.280        | 644.400         | 628.380  | 629.388  | 627.382  | K[5]  |
| V  | 21 | 2328.348        | 518.314         | 500.295  | 501.303  | 499.287  | V[4]  |
| L  | 22 | 2441.432        | 417.240         | 401.227  | 402.235  | 400.219  | L[3]  |
| R  | 23 | 2611.540        | 305.160         | 288.143  | 289.151  | 287.135  | R[2]  |
| D  | 24 | 2726.576        | 134.040         | 118.026  | 119.034  | 117.018  | D[1]  |

# sp | P62806 | H4\_MOUSE

[Acetyl]SGRAcetyl  
42.01GGKAcetyl  
42.01GLGKAcetyl  
42.01GGAKAcetyl  
42.01RDimethyl  
28.03HRKVLR  
(14.02) Methyl

- ▶ fragmentation table for charge state 2+
- ▶ specType=etd
- ▶ score=56.93
- ▶ F121546.dat
- ▶ query=q37138\_p1
- ▶ precursor=682.647980
- ▶ chargePrecursor=4
- ▶ itol=0.7

| AA | c  | y              | z+1      | z+2             | z               | AA              |       |
|----|----|----------------|----------|-----------------|-----------------|-----------------|-------|
| S  | 1  | 74.042         | 1364.284 | 1356.274        | 0.504           | 1355.770        | S[24] |
| G  | 2  | 102.553        | 1299.702 | <b>1291.753</b> | 0.504           | 1291.249        | G[23] |
| R  | 3  | 180.003        | 1271.252 | 1263.242        | <b>1263.746</b> | 1262.748        | R[22] |
| G  | 4  | 209.114        | 1193.201 | <b>1185.192</b> | <b>1185.696</b> | <b>1184.688</b> | G[21] |
| K  | 5  | 294.167        | 1164.690 | <b>1156.681</b> | <b>1157.185</b> | 1156.177        | K[20] |
| G  | 6  | 322.677        | 1079.638 | <b>1071.628</b> | <b>1072.132</b> | 1071.124        | G[19] |
| G  | 7  | 351.188        | 1051.127 | <b>1043.118</b> | <b>1043.621</b> | 1042.614        | G[18] |
| K  | 8  | 436.241        | 1022.616 | <b>1014.607</b> | <b>1015.111</b> | 1014.103        | K[17] |
| G  | 9  | 464.752        | 937.563  | <b>929.554</b>  | <b>930.058</b>  | <b>929.050</b>  | G[16] |
| L  | 10 | 521.244        | 869.053  | 861.043         | 861.547         | 860.539         | L[15] |
| G  | 11 | 549.804        | 852.511  | 844.501         | 845.005         | 843.997         | G[14] |
| K  | 12 | 634.857        | 824.000  | <b>815.991</b>  | <b>816.494</b>  | <b>815.487</b>  | K[13] |
| G  | 13 | 663.368        | 738.947  | 730.938         | 731.442         | 730.434         | G[12] |
| G  | 14 | 691.879        | 720.436  | 702.427         | 702.931         | <b>701.923</b>  | G[11] |
| A  | 15 | 727.397        | 681.926  | 673.916         | 674.420         | 673.412         | A[10] |
| R  | 16 | 822.450        | 654.407  | 636.398         | 636.902         | 635.894         | R[9]  |
| R  | 17 | <b>904.516</b> | 561.354  | 553.345         | 553.849         | 552.841         | R[8]  |
| H  | 18 | 973.008        | 490.288  | 481.279         | 481.783         | 480.775         | H[7]  |
| R  | 19 | 1051.096       | 400.759  | 392.749         | 393.253         | 392.245         | R[6]  |
| R  | 20 | 1115.144       | 322.708  | 314.699         | 315.203         | 314.195         | R[5]  |
| V  | 21 | 1164.678       | 258.661  | 250.651         | 251.155         | 250.147         | V[4]  |
| L  | 22 | 1222.220       | 209.120  | 201.111         | 201.615         | 200.607         | L[3]  |
| L  | 23 | 1309.278       | 132.584  | 144.573         | 145.078         | 144.071         | L[2]  |
| D  | 24 | 1383.792       | 67.526   | 69.517          | 69.021          | 69.013          | D[1]  |

# sp | P62806 | H4\_MOUSE

[Acetyl]SGRGK Acetyl  
42.01 **GGK** Acetyl  
42.01 **GLGK** Acetyl  
42.01 **GGAK** Acetyl  
42.01 **R** Dimethyl  
28.03 **HRK****VLR** (Methyl)  
(14.02) **D**

- ▶ fragmentation table for charge state 3+
- ▶ specType=etd
- ▶ score=56.93
- ▶ F121546.dat
- ▶ query=q37138.p1
- ▶ precursor=682.647980
- ▶ chargePrecursor=4
- ▶ itol=0.7

| AA    | c              | y              | z+1            | z+2            | z              | AA    |
|-------|----------------|----------------|----------------|----------------|----------------|-------|
| S[1]  | 49.697         | <b>909.858</b> | <b>904.519</b> | 0.672          | 904.193        | S[24] |
| G[2]  | 68.704         | 856.844        | <b>861.504</b> | 0.672          | <b>861.169</b> | G[23] |
| R[3]  | 120.738        | 847.837        | <b>842.497</b> | <b>842.813</b> | <b>842.161</b> | R[22] |
| G[4]  | 139.745        | 795.803        | 790.464        | 790.800        | 790.129        | G[21] |
| K[5]  | 196.447        | 776.796        | 771.456        | 771.792        | 771.120        | K[20] |
| G[6]  | 215.454        | 720.094        | 714.755        | 715.091        | 714.419        | G[19] |
| G[7]  | 234.461        | <b>701.087</b> | 695.747        | 696.083        | 695.412        | G[18] |
| K[8]  | 291.163        | 682.080        | 676.740        | 677.076        | 676.404        | K[17] |
| G[9]  | 310.170        | 625.378        | 620.038        | 620.374        | 619.703        | G[16] |
| L[10] | 347.895        | 606.371        | 601.031        | 601.367        | 600.695        | L[15] |
| G[11] | 386.972        | 588.976        | 583.637        | 583.973        | 583.301        | G[14] |
| K[12] | 423.574        | 549.669        | 544.329        | 544.665        | 543.994        | K[13] |
| G[13] | 442.581        | 492.967        | 487.628        | 487.964        | 487.292        | G[12] |
| G[14] | 461.588        | 473.960        | 468.620        | 468.956        | 468.285        | G[11] |
| A[15] | 485.267        | 454.953        | 449.613        | 449.949        | 449.277        | A[10] |
| K[16] | 541.969        | 431.274        | 425.934        | 426.270        | 425.598        | K[9]  |
| R[17] | 603.346        | 374.572        | 369.232        | 369.568        | 368.896        | R[8]  |
| H[18] | 649.033        | 313.195        | 307.855        | 308.191        | 307.519        | H[7]  |
| R[19] | <b>701.067</b> | 267.508        | 262.168        | 262.505        | 261.833        | R[6]  |
| K[20] | 743.705        | 215.875        | 210.535        | 210.871        | 209.999        | K[5]  |
| V[21] | 776.788        | 172.776        | 167.437        | 167.773        | 167.101        | V[4]  |
| L[22] | 814.482        | 130.753        | 134.414        | 134.750        | 134.078        | L[3]  |
| R[23] | <b>871.188</b> | 102.059        | 96.719         | 97.055         | 96.383         | R[2]  |
| D[24] | 909.530        | 45.353         | 40.014         | 40.349         | 39.678         | D[1]  |



# sp | Q64525 | H2B2B\_MOUSE

PDKASAPAPKKGSK <sup>Acetyl</sup>K <sup>Acetyl</sup>AVTK <sup>Acetyl</sup>VQKKD  
 42.01 42.01 42.01

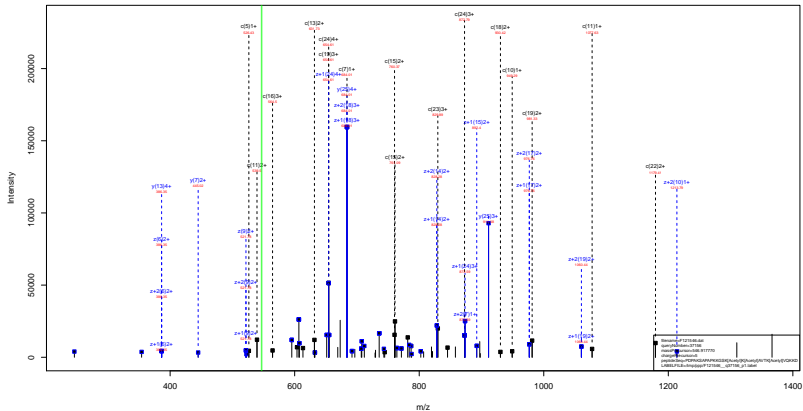

# sp | Q64525 | H2B2B\_MOUSE

PDKAKSAPAPKKGSK <sup>Acetyl</sup>42.01 K <sup>Acetyl</sup>42.01 AVTK <sup>Acetyl</sup>42.01 VQKKD

- ▶ fragmentation table for charge state 1+
- ▶ specType=etd
- ▶ score=48.03
- ▶ F121546.dat
- ▶ query=q37156.p1
- ▶ precursor=546.917770
- ▶ chargePrecursor=5
- ▶ itol=0.7

| AA | c  | y               | #+1            | #+2            | z               | AA       |       |
|----|----|-----------------|----------------|----------------|-----------------|----------|-------|
| P  | 1  | 115.087         | 3730.551       | 2714.533       | 0.000           | 2713.529 | P[25] |
| D  | 2  | 230.114         | 2033.499       | 2017.450       | 0.000           | 2016.472 | D[24] |
| P  | 3  | 327.166         | 2518.472       | 2502.453       | 0.000           | 2501.445 | P[23] |
| A  | 4  | 398.203         | 2421.419       | 2405.400       | 0.000           | 2404.392 | A[22] |
| K  | 5  | <b>526.298</b>  | 2350.382       | 2334.363       | 2335.371        | 2333.355 | K[21] |
| S  | 6  | <b>613.330</b>  | 2222.287       | 2206.268       | 2207.276        | 2205.260 | S[20] |
| A  | 7  | <b>684.368</b>  | 2135.265       | 2119.238       | 2120.244        | 2118.228 | A[19] |
| P  | 8  | <b>781.420</b>  | 2004.215       | 2040.199       | 2049.207        | 2047.191 | P[18] |
| A  | 9  | 852.457         | 1967.165       | 1951.146       | 1952.154        | 1950.138 | A[17] |
| P  | 10 | <b>949.510</b>  | 1896.128       | 1880.109       | 1881.117        | 1879.101 | P[16] |
| K  | 11 | <b>1077.605</b> | 1799.075       | 1783.056       | 1784.064        | 1782.048 | K[15] |
| K  | 12 | 1205.700        | 1670.980       | 1654.961       | 1655.969        | 1653.953 | K[14] |
| G  | 13 | 1262.722        | 1542.885       | 1526.866       | 1527.874        | 1525.858 | G[13] |
| S  | 14 | 1369.754        | 1405.804       | 1409.848       | 1470.853        | 1468.837 | S[12] |
| K  | 15 | 1519.859        | 1308.831       | 1382.813       | 1383.821        | 1381.805 | K[11] |
| K  | 16 | 1689.965        | 1228.728       | 1212.707       | <b>1213.715</b> | 1211.699 | K[10] |
| A  | 17 | 1761.002        | 1058.620       | 1042.602       | 1043.610        | 1041.594 | A[9]  |
| V  | 18 | 1860.070        | 987.583        | 971.565        | 972.572         | 970.557  | V[8]  |
| T  | 19 | 1961.118        | 888.515        | <b>872.496</b> | <b>873.504</b>  | 871.488  | T[7]  |
| K  | 20 | 2131.223        | <b>787.467</b> | <b>771.449</b> | 772.456         | 770.441  | K[6]  |
| V  | 21 | 2230.292        | 817.362        | 801.343        | 802.351         | 800.335  | V[5]  |
| Q  | 22 | 2358.350        | 518.293        | 502.275        | 503.282         | 501.267  | Q[4]  |
| K  | 23 | 2486.445        | 300.235        | 374.216        | 375.224         | 373.208  | K[3]  |
| K  | 24 | 2614.540        | 262.140        | <b>246.121</b> | 247.129         | 245.113  | K[2]  |
| D  | 25 | 2729.567        | 134.045        | 118.026        | 119.034         | 117.018  | D[1]  |

# sp | Q64525 | H2B2B\_MOUSE

PDKAKSAPAPKKGSK <sup>Acetyl</sup>42.01 K <sup>Acetyl</sup>42.01 AVTK <sup>Acetyl</sup>42.01 VQKKD

- ▶ fragmentation table for charge state 2+
- ▶ specType=etd
- ▶ score=48.03
- ▶ F121546.dat
- ▶ query=q37156\_p1
- ▶ precursor=546.917770
- ▶ chargePrecursor=5
- ▶ itol=0.7

| AA | c  | y               | z+1            | z+2             | z               | AA             |   |    |
|----|----|-----------------|----------------|-----------------|-----------------|----------------|---|----|
| F  | D  | 58.047          | 1305.779       | 1357.775        | 0.504           | 1307.265       | F | 25 |
| D  | 2  | 115.500         | 1317.253       | 1329.244        | 0.504           | 1309.740       | D | 24 |
| P  | 3  | 164.087         | 1250.730       | 1251.730        | 0.504           | 1251.225       | P | 23 |
| A  | 4  | 199.605         | 1211.213       | 1203.204        | 0.504           | 1202.700       | A | 22 |
| K  | 5  | 263.653         | 1175.694       | 1167.685        | 1168.189        | 1167.181       | K | 21 |
| S  | 6  | 307.169         | 1111.647       | 1103.638        | 1104.142        | 1103.134       | S | 20 |
| A  | 7  | 342.687         | 1058.131       | <b>1060.122</b> | <b>1060.626</b> | 1059.618       | A | 19 |
| P  | 8  | 393.214         | 1032.612       | 1024.603        | 1025.107        | 1024.599       | P | 18 |
| A  | 9  | 426.732         | 984.085        | <b>976.077</b>  | <b>976.581</b>  | 975.573        | A | 17 |
| P  | 10 | 475.259         | 948.567        | 940.558         | 941.062         | 940.054        | P | 16 |
| K  | 11 | <b>539.306</b>  | 900.041        | <b>892.032</b>  | <b>892.536</b>  | 891.528        | K | 15 |
| K  | 12 | <b>603.354</b>  | 835.994        | <b>827.984</b>  | <b>828.488</b>  | 827.480        | K | 14 |
| G  | 13 | <b>631.864</b>  | <b>771.946</b> | <b>763.937</b>  | <b>764.441</b>  | <b>763.433</b> | G | 13 |
| S  | 14 | 678.389         | <b>743.435</b> | 735.426         | 735.930         | 734.922        | S | 12 |
| K  | 15 | <b>760.433</b>  | 690.915        | <b>691.910</b>  | <b>692.414</b>  | <b>691.406</b> | K | 11 |
| K  | 16 | <b>845.486</b>  | 634.867        | <b>606.857</b>  | <b>607.361</b>  | <b>606.353</b> | K | 10 |
| A  | 17 | 881.005         | 620.614        | <b>521.604</b>  | <b>522.308</b>  | <b>521.301</b> | A | 9  |
| V  | 18 | <b>930.539</b>  | 494.295        | 486.285         | 486.790         | 485.782        | V | 8  |
| T  | 19 | <b>981.063</b>  | <b>444.761</b> | 436.752         | 437.256         | 436.248        | T | 7  |
| P  | 20 | 1059.115        | 394.237        | <b>306.228</b>  | <b>306.732</b>  | <b>305.724</b> | P | 6  |
| V  | 21 | 1115.650        | 306.184        | 303.175         | 303.679         | 302.671        | V | 5  |
| Q  | 22 | <b>1179.679</b> | 250.650        | 251.641         | 252.145         | 251.137        | Q | 4  |
| K  | 23 | 1243.726        | 195.621        | 187.612         | 188.116         | 187.108        | K | 3  |
| K  | 24 | 1307.774        | 131.574        | 123.564         | 124.068         | 123.060        | K | 2  |
| D  | 25 | 1365.287        | 67.526         | 59.517          | 60.021          | 59.013         | D | 1  |

# sp | Q64525 | H2B2B\_MOUSE

PDKAKSAPAPKKGSK <sup>Acetyl</sup>42.01 K <sup>Acetyl</sup>42.01 AVTK <sup>Acetyl</sup>42.01 VQKKD

- ▶ fragmentation table for charge state 3+
- ▶ specType=etd
- ▶ score=48.03
- ▶ F121546.dat
- ▶ query=q37156.p1
- ▶ precursor=546.917770
- ▶ chargePrecursor=5
- ▶ itol=0.7

| AA    | c              | y              | z+1            | z+2            | z              | AA    |
|-------|----------------|----------------|----------------|----------------|----------------|-------|
| P[1]  | 39.034         | <b>910.855</b> | 905.516        | 0.672          | 905.180        | P[25] |
| D[2]  | 77.376         | 878.504        | <b>873.165</b> | 0.672          | <b>872.829</b> | D[24] |
| P[3]  | 109.727        | 840.162        | 834.822        | 0.672          | 834.487        | P[23] |
| A[4]  | 133.406        | 807.811        | <b>802.472</b> | 0.672          | <b>802.136</b> | A[22] |
| K[5]  | 176.104        | <b>784.132</b> | 778.792        | 779.128        | 778.457        | K[21] |
| S[6]  | 203.115        | 741.335        | <b>736.094</b> | 739.430        | <b>735.758</b> | S[20] |
| A[7]  | 228.794        | <b>712.423</b> | <b>707.083</b> | <b>707.419</b> | <b>706.748</b> | A[19] |
| P[8]  | 261.145        | 688.744        | <b>683.404</b> | <b>683.740</b> | 683.069        | P[18] |
| A[9]  | 294.824        | 666.193        | <b>651.054</b> | <b>651.389</b> | 650.718        | A[17] |
| P[10] | 317.175        | <b>632.714</b> | 627.375        | 627.710        | 627.039        | P[16] |
| K[11] | 359.873        | 600.363        | <b>595.024</b> | <b>595.360</b> | <b>594.688</b> | K[15] |
| K[12] | 402.572        | 557.665        | 552.325        | 552.661        | 551.989        | K[14] |
| G[13] | 421.579        | 514.967        | 509.627        | 509.963        | 509.291        | G[13] |
| S[14] | 450.589        | 495.959        | 490.620        | 490.956        | 490.284        | S[12] |
| K[15] | 507.291        | 456.949        | 451.609        | 451.945        | 451.273        | K[11] |
| K[16] | <b>563.993</b> | 410.241        | 404.901        | 405.237        | 404.571        | K[10] |
| A[17] | 587.672        | <b>353.545</b> | 348.205        | 348.541        | 347.869        | A[9]  |
| V[18] | 620.695        | 329.886        | 324.526        | 324.862        | 324.190        | V[8]  |
| T[19] | <b>654.377</b> | 296.843        | 291.504        | 291.840        | 291.168        | T[7]  |
| K[20] | 711.079        | 263.161        | 257.821        | 258.157        | 257.485        | K[6]  |
| V[21] | <b>744.102</b> | 206.459        | 201.119        | 201.455        | 200.783        | V[5]  |
| Q[22] | <b>786.788</b> | 173.436        | 168.096        | 168.432        | 167.760        | Q[4]  |
| K[23] | <b>829.487</b> | 130.750        | 125.410        | 125.746        | 125.074        | K[3]  |
| K[24] | <b>872.185</b> | 88.051         | 82.712         | 83.048         | 82.376         | K[2]  |
| D[25] | 910.327        | 48.353         | 40.014         | 40.349         | 39.678         | D[1]  |

# sp | Q64525 | H2B2B\_MOUSE

PDKAKSAPAPKKGSK <sup>Acetyl</sup>42.01 K <sup>Acetyl</sup>42.01 AVTK <sup>Acetyl</sup>42.01 VQKKD

- ▶ fragmentation table for charge state 4+
- ▶ specType=etd
- ▶ score=48.03
- ▶ F121546.dat
- ▶ query=q37156.p1
- ▶ precursor=546.917770
- ▶ chargePrecursor=5
- ▶ itol=0.7

| AA |    | c              | y              | z+1            | z+2   | z              | AA |
|----|----|----------------|----------------|----------------|-------|----------------|----|
| P  | 1  | 29.527         | <b>603.393</b> | 679.389        | 0.755 | 679.137        | P  |
| D  | 2  | 58.284         | 659.130        | <b>655.125</b> | 0.755 | <b>654.873</b> | D  |
| P  | 3  | 82.547         | 630.373        | 626.369        | 0.755 | 626.117        | P  |
| A  | 4  | 100.306        | <b>606.110</b> | 662.105        | 0.755 | 661.854        | A  |
| K  | 5  | 132.330        | 688.351        | 764.346        | 0.755 | 764.094        | K  |
| S  | 6  | 154.088        | 656.321        | 732.317        | 0.755 | 732.070        | S  |
| A  | 7  | 171.547        | 634.569        | 730.564        | 0.755 | 730.312        | A  |
| P  | 8  | 196.111        | 616.810        | 712.805        | 0.755 | 712.553        | P  |
| A  | 9  | 213.870        | 492.547        | 488.542        | 0.755 | 488.290        | A  |
| P  | 10 | 238.133        | 474.787        | 470.783        | 0.755 | 470.531        | P  |
| K  | 11 | 270.157        | 450.524        | 446.520        | 0.755 | 446.268        | K  |
| K  | 12 | 302.180        | 418.500        | 414.496        | 0.755 | 414.244        | K  |
| G  | 13 | 316.436        | <b>386.477</b> | 382.472        | 0.755 | 382.220        | G  |
| S  | 14 | 338.194        | 372.221        | 368.217        | 0.755 | 367.965        | S  |
| K  | 15 | 380.720        | 350.463        | 346.459        | 0.755 | 346.207        | K  |
| K  | 16 | 423.247        | 307.937        | 303.932        | 0.755 | 303.680        | K  |
| A  | 17 | 441.006        | 285.411        | 281.406        | 0.755 | 281.154        | A  |
| V  | 18 | 465.773        | 247.651        | 243.647        | 0.755 | 243.395        | V  |
| T  | 19 | 491.035        | 222.884        | 218.880        | 0.755 | 218.628        | T  |
| K  | 20 | 533.561        | 197.622        | 193.618        | 0.755 | 193.366        | K  |
| V  | 21 | 558.328        | 155.096        | 151.091        | 0.755 | 150.839        | V  |
| Q  | 22 | 590.343        | 130.329        | 126.324        | 0.755 | 126.072        | Q  |
| K  | 23 | 622.367        | 98.314         | 94.309         | 0.755 | 94.057         | K  |
| K  | 24 | <b>654.391</b> | 66.290         | 62.286         | 0.755 | 62.034         | K  |
| D  | 25 | 683.147        | 34.267         | 30.262         | 0.755 | 30.010         | D  |

# sp | Q64525 | H2B2B\_MOUSE

PDKASAPAPKKGSK <sup>Acetyl</sup>K <sup>Acetyl</sup>AVTK <sup>Acetyl</sup>VQKKD

42.01

42.01

42.01

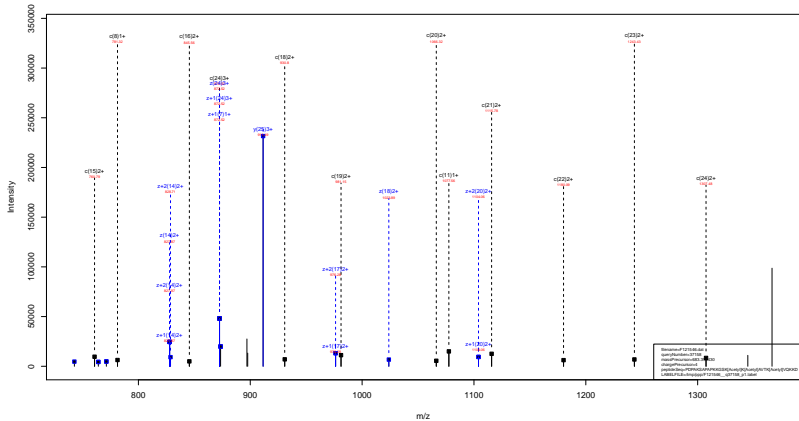

# sp | Q64525 | H2B2B\_MOUSE

PDKAKSAPAPKKGSK <sup>Acetyl</sup>42.01 K <sup>Acetyl</sup>42.01 AVTK <sup>Acetyl</sup>42.01 VQKKD

- ▶ fragmentation table for charge state 1+
- ▶ specType=etd
- ▶ score=59.45
- ▶ F121546.dat
- ▶ query=q37158.p1
- ▶ precursor=683.395430
- ▶ chargePrecursor=4
- ▶ itol=0.7

| AA  | c               | y        | z+1            | z+2            | z        | AA  |
|-----|-----------------|----------|----------------|----------------|----------|-----|
| P1  | 115.087         | 2730.551 | 2714.533       | 0.000          | 2713.525 | P25 |
| D2  | 230.114         | 2633.498 | 2617.480       | 0.000          | 2616.472 | D24 |
| P3  | 327.166         | 2518.472 | 2502.453       | 0.000          | 2501.445 | P23 |
| A4  | 398.203         | 2421.419 | 2405.400       | 0.000          | 2404.392 | A22 |
| K5  | 526.298         | 2330.382 | 2314.363       | 2335.371       | 2333.355 | K21 |
| S6  | 613.330         | 2222.387 | 2206.368       | 2207.276       | 2205.260 | S20 |
| A7  | 694.368         | 2135.293 | 2119.239       | 2120.244       | 2118.225 | A19 |
| P8  | <b>781.420</b>  | 2054.210 | 2048.199       | 2049.207       | 2047.191 | P18 |
| A9  | 852.457         | 1967.165 | 1951.146       | 1952.154       | 1950.138 | A17 |
| P10 | 949.510         | 1896.128 | 1880.109       | 1881.117       | 1879.101 | P16 |
| K11 | <b>1077.605</b> | 1799.075 | 1783.056       | 1784.064       | 1782.048 | K15 |
| K12 | 1205.700        | 1670.980 | 1654.961       | 1655.969       | 1653.953 | K14 |
| G13 | 1262.722        | 1542.885 | 1526.866       | 1527.874       | 1525.858 | G13 |
| S14 | 1349.754        | 1455.863 | 1440.843       | 1470.833       | 1468.817 | S12 |
| K15 | 1519.859        | 1368.831 | 1352.813       | 1383.821       | 1381.805 | K11 |
| K16 | 1689.965        | 1228.726 | 1212.707       | 1213.715       | 1211.699 | K10 |
| A17 | 1761.002        | 1058.620 | 1042.602       | 1043.610       | 1041.594 | A9  |
| V18 | 1860.070        | 987.583  | 971.565        | 972.572        | 970.557  | V8  |
| T19 | 1961.118        | 888.515  | <b>872.496</b> | <b>873.504</b> | 871.488  | T7  |
| K20 | 2131.223        | 787.467  | <b>771.448</b> | 772.456        | 770.441  | K6  |
| V21 | 2230.292        | 617.363  | 601.345        | 602.351        | 600.335  | V5  |
| Q22 | 2358.350        | 518.291  | 502.275        | 503.282        | 501.267  | Q4  |
| K23 | 2486.445        | 390.235  | 374.216        | 375.224        | 373.208  | K3  |
| K24 | 2614.540        | 262.140  | 246.121        | 247.129        | 245.113  | K2  |
| D25 | 2729.567        | 134.045  | 118.026        | 119.034        | 117.018  | D1  |

# sp | Q64525 | H2B2B\_MOUSE

PDKAKSAPAPKKGSK <sup>Acetyl</sup>42.01 K <sup>Acetyl</sup>42.01 AVTK <sup>Acetyl</sup>42.01 VQKKD

- ▶ fragmentation table for charge state 2+
- ▶ specType=etd
- ▶ score=59.45
- ▶ F121546.dat
- ▶ query=q37158\_p1
- ▶ precursor=683.395430
- ▶ chargePrecursor=4
- ▶ itol=0.7

| AA | c  | y               | a+1            | a+2             | z               | AA              |       |
|----|----|-----------------|----------------|-----------------|-----------------|-----------------|-------|
| P  | 1  | 58.647          | 1365.779       | 1357.770        | 0.504           | 1357.266        | P[25] |
| D  | 3  | 115.560         | 1317.253       | 1309.244        | 0.504           | 1308.740        | D[24] |
| P  | 3  | 104.087         | 1259.730       | 1251.730        | 0.504           | 1251.226        | P[23] |
| A  | 4  | 199.605         | 1311.213       | 1303.204        | 0.504           | 1302.700        | A[22] |
| K  | 5  | 263.653         | 1175.694       | 1167.685        | 1.008           | 1167.181        | K[21] |
| S  | 6  | 307.169         | 1111.647       | <b>1103.638</b> | <b>1104.142</b> | 1103.134        | S[20] |
| A  | 7  | 362.667         | 1058.131       | 1050.122        | 1050.626        | 1050.116        | A[19] |
| P  | 8  | 391.214         | 1032.612       | 1024.603        | 1025.107        | <b>1024.099</b> | P[18] |
| A  | 9  | 426.732         | 984.086        | <b>976.077</b>  | <b>976.581</b>  | 975.572         | A[17] |
| P  | 10 | 475.259         | 948.567        | 940.558         | 941.062         | 940.054         | P[16] |
| K  | 11 | 539.306         | 900.041        | 892.032         | 892.536         | 891.528         | K[15] |
| K  | 12 | 603.354         | 835.994        | <b>827.984</b>  | <b>828.488</b>  | <b>827.480</b>  | K[14] |
| Q  | 13 | 603.304         | <b>771.346</b> | <b>763.337</b>  | <b>764.341</b>  | 763.333         | Q[13] |
| S  | 14 | 675.390         | <b>743.435</b> | 735.426         | 735.930         | 734.922         | S[12] |
| K  | 15 | <b>760.433</b>  | 699.919        | 691.910         | 692.414         | 691.406         | K[11] |
| K  | 16 | <b>845.486</b>  | 614.867        | 606.857         | 607.361         | 606.353         | K[10] |
| A  | 17 | 881.005         | 529.814        | 521.804         | 522.308         | 521.301         | A[9]  |
| V  | 18 | <b>930.539</b>  | 484.295        | 486.286         | 486.790         | 485.782         | V[8]  |
| T  | 19 | <b>981.063</b>  | 444.761        | 436.752         | 437.256         | 436.248         | T[7]  |
| K  | 20 | <b>1004.115</b> | 394.237        | 386.228         | 386.732         | 385.724         | K[6]  |
| V  | 21 | <b>1115.650</b> | 309.184        | 301.175         | 301.679         | 300.671         | V[5]  |
| Q  | 22 | <b>1179.679</b> | 259.650        | 251.641         | 252.145         | 251.137         | Q[4]  |
| K  | 23 | <b>1243.726</b> | 195.621        | 187.612         | 188.116         | 187.108         | K[3]  |
| K  | 24 | <b>1367.774</b> | 131.574        | 123.564         | 124.068         | 123.060         | K[2]  |
| D  | 25 | 1365.287        | 87.526         | 89.537          | 89.021          | 89.013          | D[1]  |



# sp | Q64525 | H2B2B\_MOUSE

PDKAKSAPAPKKGSK <sup>Acetyl</sup>42.01 K <sup>Acetyl</sup>42.01 AVTK <sup>Acetyl</sup>42.01 VQKKD

- ▶ fragmentation table for charge state 3+
- ▶ specType=etd
- ▶ score=59.45
- ▶ F121546.dat
- ▶ query=q37158.p1
- ▶ precursor=683.395430
- ▶ chargePrecursor=4
- ▶ itol=0.7

| AA    | c              | y              | z+1            | z+2     | z              | AA    |
|-------|----------------|----------------|----------------|---------|----------------|-------|
| P[1]  | 39.034         | <b>910.855</b> | 905.516        | 0.672   | 905.180        | P[25] |
| D[2]  | 77.376         | 878.504        | <b>873.165</b> | 0.672   | <b>872.829</b> | D[24] |
| P[3]  | 109.727        | 840.162        | 834.822        | 0.672   | 834.487        | P[23] |
| A[4]  | 133.406        | 807.811        | 802.472        | 0.672   | 802.136        | A[22] |
| K[5]  | 178.104        | 784.132        | 778.792        | 779.128 | 778.457        | K[21] |
| S[6]  | 205.115        | 741.434        | 736.094        | 736.430 | 735.788        | S[20] |
| A[7]  | 228.794        | 712.421        | 707.081        | 707.419 | 706.748        | A[19] |
| P[8]  | 261.145        | 688.744        | 683.404        | 683.740 | 683.059        | P[18] |
| A[9]  | 284.824        | 656.393        | 651.054        | 651.389 | 650.718        | A[17] |
| P[10] | 317.175        | 632.714        | 627.375        | 627.710 | 627.039        | P[16] |
| K[11] | 359.873        | 600.363        | 595.024        | 595.360 | 594.688        | K[15] |
| K[12] | 402.572        | 557.665        | 552.325        | 552.661 | 551.989        | K[14] |
| G[13] | 421.579        | 514.967        | 509.627        | 509.963 | 509.291        | G[13] |
| S[14] | 450.589        | 495.959        | 490.620        | 490.956 | 490.284        | S[12] |
| K[15] | 507.291        | 466.949        | 461.609        | 461.945 | 461.273        | K[11] |
| K[16] | 563.993        | 410.247        | 404.907        | 405.243 | 404.571        | K[10] |
| A[17] | 587.672        | 351.543        | 346.203        | 346.541 | 345.869        | A[9]  |
| V[18] | 620.695        | 329.866        | 324.526        | 324.862 | 324.190        | V[8]  |
| T[19] | 654.377        | 296.843        | 291.504        | 291.840 | 291.168        | T[7]  |
| K[20] | 711.079        | 263.161        | 257.821        | 258.157 | 257.485        | K[6]  |
| V[21] | 744.102        | 206.459        | 201.119        | 201.455 | 200.783        | V[5]  |
| Q[22] | 786.788        | 173.436        | 168.096        | 168.432 | 167.760        | Q[4]  |
| K[23] | 829.487        | 130.750        | 125.410        | 125.746 | 125.074        | K[3]  |
| K[24] | <b>872.185</b> | 88.051         | 82.712         | 83.048  | 82.376         | K[2]  |
| D[25] | 910.527        | 45.353         | 40.014         | 40.349  | 39.678         | D[1]  |

# sp | P62806 | H4\_MOUSE

[Acetyl]SGRGKGGKGLGKGGAKRHR <sup>Methyl</sup>K <sup>Methyl</sup>VLRD  
 14.02 14.02

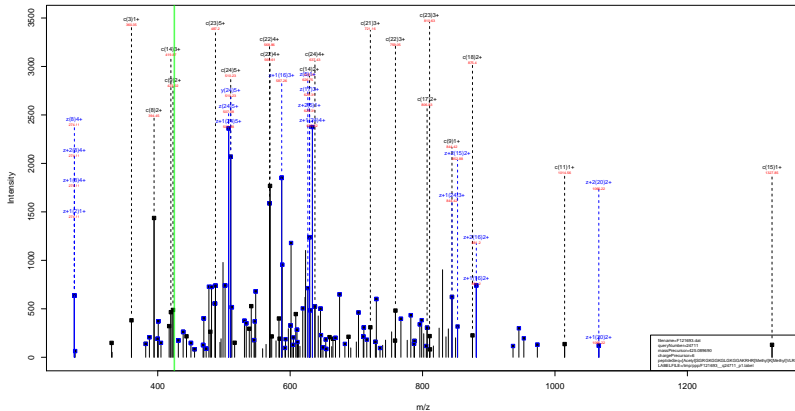

# sp | P62806 | H4\_MOUSE

[Acetyl]SGRGKGGKGLGKGGAKRHR <sup>Methyl</sup> K <sup>Methyl</sup> VLRD  
14.02 14.02

- ▶ fragmentation table for charge state 1+
- ▶ specType=etd
- ▶ score=43.92
- ▶ F121693.dat
- ▶ query=q24711.p1
- ▶ precursor=425.089690
- ▶ chargePrecursor=6
- ▶ itol=0.7

| AA | c  | y               | z+1            | z+2            | z              | AA             |   |    |
|----|----|-----------------|----------------|----------------|----------------|----------------|---|----|
| S  | 11 | 147.076         | 2545.502       | 2529.483       | 0.000          | 2528.470       | S | 24 |
| G  | 2  | 234.998         | 2516.460       | 2492.441       | 0.000          | 2399.433       | G | 23 |
| R  | 3  | <b>360.199</b>  | 2399.433       | 2343.416       | 2344.437       | 2342.412       | R | 22 |
| G  | 4  | <b>417.220</b>  | 2203.337       | 2187.318       | 2188.326       | 2186.310       | G | 21 |
| K  | 5  | <b>545.315</b>  | 2148.310       | 2130.297       | 2131.305       | 2129.289       | K | 20 |
| G  | 6  | 602.337         | 2018.221       | 2002.202       | 2003.210       | 2001.194       | G | 19 |
| G  | 7  | <b>659.358</b>  | 1961.199       | 1945.180       | 1946.188       | 1944.173       | G | 18 |
| K  | 8  | <b>787.453</b>  | 1904.178       | 1888.159       | 1889.167       | 1887.151       | K | 17 |
| G  | 9  | <b>844.475</b>  | 1776.083       | 1760.064       | 1761.072       | 1759.056       | G | 16 |
| L  | 10 | 857.559         | 1729.061       | 1703.043       | 1704.050       | 1702.035       | L | 15 |
| G  | 11 | <b>1014.580</b> | 1605.977       | 1589.958       | 1590.966       | 1588.951       | G | 14 |
| K  | 12 | 1142.075        | 1548.956       | 1532.937       | 1533.945       | 1531.929       | K | 13 |
| G  | 13 | 1199.697        | 1420.861       | 1404.842       | 1405.850       | 1403.834       | G | 12 |
| G  | 14 | 1256.718        | 1363.839       | 1347.821       | 1348.828       | 1346.813       | G | 11 |
| A  | 15 | <b>1327.755</b> | 1306.818       | 1290.799       | 1291.807       | 1289.791       | A | 10 |
| K  | 16 | 1455.850        | 1235.781       | 1219.762       | 1220.770       | 1218.754       | K | 9  |
| R  | 17 | 1611.894        | 1107.686       | 1091.667       | 1092.675       | 1090.659       | R | 8  |
| H  | 18 | 1749.030        | 951.582        | 935.566        | <b>936.574</b> | 934.558        | H | 7  |
| R  | 19 | 1919.127        | 814.526        | <b>798.507</b> | 799.515        | 797.499        | R | 6  |
| K  | 20 | 2061.238        | 644.400        | 628.390        | <b>629.398</b> | <b>627.382</b> | K | 5  |
| V  | 21 | 2100.306        | <b>502.298</b> | <b>486.280</b> | <b>487.287</b> | 485.272        | V | 4  |
| L  | 22 | 2273.390        | 403.230        | <b>387.211</b> | 388.219        | 386.203        | L | 3  |
| R  | 23 | 2429.491        | 290.146        | <b>274.127</b> | <b>275.135</b> | 273.119        | R | 2  |
| D  | 24 | 2544.518        | 134.045        | 118.026        | 119.034        | 117.018        | D | 1  |

# sp | P62806 | H4\_MOUSE

[Acetyl]SGRGKGGKGLGKGGAKRHR <sup>Methyl</sup> K <sup>Methyl</sup> VLRD  
14.02 14.02

- ▶ fragmentation table for charge state 2+
- ▶ specType=etd
- ▶ score=43.92
- ▶ F121693.dat
- ▶ query=q24711.p1
- ▶ precursor=425.089690
- ▶ chargePrecursor=6
- ▶ itol=0.7

| AA    | c              | y              | z+1             | z+2             | z              | AA    |
|-------|----------------|----------------|-----------------|-----------------|----------------|-------|
| S[1]  | 74.042         | 1273.255       | 1265.246        | 0.504           | 1264.741       | S[24] |
| G[2]  | 162.553        | 1208.733       | 1200.724        | 0.504           | 1200.220       | G[23] |
| H[3]  | 180.663        | 1130.223       | 1122.213        | 1172.717        | 1172.709       | H[22] |
| G[4]  | 209.114        | 1102.172       | 1094.163        | 1094.667        | 1093.650       | G[21] |
| K[5]  | 273.161        | 1073.661       | <b>1065.652</b> | <b>1066.156</b> | 1065.148       | K[20] |
| G[6]  | 301.672        | 1009.614       | 1001.605        | 1002.108        | 1001.101       | G[19] |
| G[7]  | <b>330.183</b> | 961.103        | <b>973.094</b>  | <b>973.598</b>  | 972.590        | G[18] |
| K[8]  | <b>394.230</b> | <b>952.592</b> | 944.583         | <b>945.087</b>  | 944.079        | K[17] |
| G[9]  | <b>422.741</b> | 886.545        | <b>880.536</b>  | <b>881.040</b>  | 880.032        | G[16] |
| L[10] | <b>479.283</b> | 860.034        | 852.025         | <b>852.529</b>  | 851.521        | L[15] |
| G[11] | 507.704        | 803.492        | <b>795.483</b>  | <b>795.987</b>  | 794.979        | G[14] |
| K[12] | <b>571.841</b> | 774.982        | <b>766.972</b>  | <b>767.476</b>  | 766.468        | K[13] |
| G[13] | <b>600.352</b> | <b>710.934</b> | <b>702.925</b>  | <b>703.429</b>  | 702.421        | G[12] |
| G[14] | <b>628.863</b> | <b>602.423</b> | <b>674.414</b>  | <b>674.918</b>  | 673.910        | G[11] |
| A[15] | <b>664.391</b> | <b>653.913</b> | <b>645.903</b>  | <b>646.407</b>  | <b>645.399</b> | A[10] |
| K[16] | <b>723.439</b> | <b>618.394</b> | 610.385         | 610.889         | <b>609.881</b> | K[9]  |
| R[17] | <b>806.479</b> | 554.867        | <b>546.337</b>  | <b>546.841</b>  | <b>545.833</b> | R[6]  |
| H[18] | <b>875.009</b> | 476.396        | <b>468.287</b>  | <b>468.791</b>  | 467.783        | H[7]  |
| R[19] | 960.067        | 407.767        | <b>399.757</b>  | <b>400.261</b>  | <b>399.253</b> | R[0]  |
| K[20] | 1031.122       | 322.708        | 314.699         | 315.203         | 314.195        | K[5]  |
| V[21] | 1080.657       | 251.653        | 243.643         | 244.147         | 243.140        | V[4]  |
| L[22] | 1127.199       | 202.139        | 194.130         | 194.633         | 193.625        | L[3]  |
| L[23] | 1213.249       | 153.577        | 145.567         | 146.071         | 145.063        | L[2]  |
| D[24] | 1272.763       | 67.526         | 59.517          | 60.021          | 59.013         | D[1]  |

# sp | P62806 | H4\_MOUSE

[Acetyl]SGRGKGGKGLGKGGAKRHR <sup>Methyl</sup> K <sup>Methyl</sup> VLRD  
14.02 14.02

- ▶ fragmentation table for charge state 3+
- ▶ specType=etd
- ▶ score=43.92
- ▶ F121693.dat
- ▶ query=q24711.p1
- ▶ precursor=425.089690
- ▶ chargePrecursor=6
- ▶ itol=0.7

| AA    | c              | y              | z+1            | z+2            | z              | AA    |
|-------|----------------|----------------|----------------|----------------|----------------|-------|
| S[1]  | 49.697         | 849.172        | <b>843.833</b> | 0.672          | 843.497        | S[24] |
| G[2]  | 56.704         | <b>806.158</b> | 800.813        | 0.672          | 800.483        | G[23] |
| R[3]  | 120.738        | <b>787.151</b> | <b>781.811</b> | <b>782.147</b> | 781.475        | R[22] |
| G[4]  | 130.745        | <b>735.117</b> | <b>729.778</b> | <b>730.114</b> | <b>729.442</b> | G[21] |
| K[5]  | 182.443        | <b>716.110</b> | <b>710.770</b> | <b>711.106</b> | <b>710.435</b> | K[20] |
| G[6]  | 201.450        | 673.412        | <b>668.072</b> | <b>668.408</b> | 667.736        | G[19] |
| G[7]  | 220.458        | <b>654.405</b> | <b>649.065</b> | <b>649.401</b> | 648.729        | G[18] |
| K[8]  | 263.156        | 635.397        | <b>630.058</b> | <b>630.394</b> | <b>629.722</b> | K[17] |
| G[9]  | 282.163        | <b>592.699</b> | <b>587.360</b> | <b>587.695</b> | <b>587.024</b> | G[16] |
| L[10] | 319.958        | 673.692        | <b>568.352</b> | <b>568.688</b> | 568.016        | L[15] |
| G[11] | 338.965        | 535.997        | <b>530.658</b> | <b>530.994</b> | <b>530.322</b> | G[14] |
| K[12] | <b>381.563</b> | 516.990        | <b>511.651</b> | <b>511.986</b> | <b>511.315</b> | K[13] |
| G[13] | <b>400.570</b> | 474.292        | <b>468.952</b> | <b>469.288</b> | <b>468.616</b> | G[12] |
| G[14] | <b>419.578</b> | <b>455.285</b> | <b>449.945</b> | <b>450.281</b> | <b>449.609</b> | G[11] |
| A[15] | <b>443.257</b> | 436.277        | <b>430.938</b> | <b>431.274</b> | <b>430.602</b> | A[10] |
| K[16] | <b>485.955</b> | 412.598        | 407.259        | 407.595        | 406.923        | K[9]  |
| R[17] | <b>537.989</b> | 369.900        | 364.561        | 364.896        | 364.225        | R[8]  |
| H[18] | <b>583.675</b> | 317.866        | 312.527        | 312.863        | 312.191        | H[7]  |
| R[19] | 649.351        | 272.180        | 266.841        | 267.176        | 266.505        | R[6]  |
| K[20] | <b>687.751</b> | 215.475        | 210.135        | 210.471        | 209.799        | K[5]  |
| V[21] | <b>720.774</b> | 168.104        | 162.765        | 163.101        | 162.429        | V[4]  |
| L[22] | <b>758.468</b> | 135.082        | 129.742        | 130.078        | 129.406        | L[3]  |
| R[23] | <b>810.502</b> | 97.387         | 92.047         | 92.383         | 91.711         | R[2]  |
| D[24] | 848.844        | 45.353         | 40.014         | 40.349         | 39.678         | D[1]  |

# sp | P62806 | H4\_MOUSE

[Acetyl]SGRGKGGKGLGKGGAKRHR <sup>Methyl</sup>K <sup>Methyl</sup>VLRD  
14.02 14.02

- ▶ fragmentation table for charge state 4+
- ▶ specType=etd
- ▶ score=43.92
- ▶ F121693.dat
- ▶ query=q24711.p1
- ▶ precursor=425.089690
- ▶ chargePrecursor=6
- ▶ itol=0.7

| AA    | c              | y              | z+1            | z+2            | z              | AA    |
|-------|----------------|----------------|----------------|----------------|----------------|-------|
| S[1]  | 37.525         | <b>637.131</b> | <b>633.126</b> | 0.755          | 632.074        | S[24] |
| G[2]  | 51.780         | <b>604.870</b> | <b>600.866</b> | 0.755          | <b>600.614</b> | G[23] |
| R[3]  | 90.805         | 590.615        | <b>586.610</b> | <b>586.862</b> | 586.358        | R[22] |
| G[4]  | 105.061        | 551.590        | <b>547.585</b> | <b>547.837</b> | <b>547.333</b> | G[21] |
| K[5]  | 137.084        | 537.334        | <b>533.330</b> | <b>533.582</b> | <b>533.078</b> | K[20] |
| G[6]  | 151.340        | 505.311        | <b>501.306</b> | <b>501.558</b> | <b>501.054</b> | G[19] |
| G[7]  | 165.595        | 491.055        | <b>487.051</b> | <b>487.303</b> | <b>486.799</b> | G[18] |
| K[8]  | 197.619        | <b>476.800</b> | <b>472.795</b> | <b>473.047</b> | <b>472.543</b> | K[17] |
| G[9]  | 211.874        | 454.776        | 440.771        | 443.023        | 440.520        | G[16] |
| L[10] | 280.148        | <b>430.521</b> | 426.516        | 428.768        | 426.264        | L[15] |
| G[11] | 254.401        | 407.500        | 398.243        | 398.497        | 397.993        | G[14] |
| K[12] | 286.424        | <b>387.994</b> | 383.989        | 384.242        | 383.738        | K[13] |
| G[13] | 300.680        | 355.971        | 351.966        | 352.218        | 351.714        | G[12] |
| G[14] | 314.935        | 341.715        | 337.711        | 337.963        | 337.459        | G[11] |
| A[15] | 332.694        | 327.460        | 323.455        | 323.707        | 323.203        | A[10] |
| K[16] | 364.718        | 309.701        | 305.696        | 305.948        | 305.444        | K[9]  |
| R[17] | 403.743        | 277.877        | <b>273.672</b> | <b>273.924</b> | <b>273.420</b> | R[8]  |
| H[18] | <b>438.008</b> | 238.652        | 234.647        | 234.899        | 234.395        | H[7]  |
| R[19] | 497.517        | 204.397        | 200.392        | 200.644        | 200.140        | R[6]  |
| K[20] | <b>516.865</b> | 161.858        | 157.853        | 158.105        | 157.601        | K[5]  |
| V[21] | <b>540.832</b> | 126.330        | 122.325        | 122.577        | 122.073        | V[4]  |
| L[22] | <b>569.103</b> | 101.563        | 97.558         | 97.810         | 97.306         | L[3]  |
| R[23] | <b>608.128</b> | 73.292         | 69.287         | 69.539         | 69.035         | R[2]  |
| D[24] | <b>636.885</b> | 34.267         | 30.262         | 30.514         | 30.010         | D[1]  |

# sp | P62806 | H4\_MOUSE

[Acetyl]SGRGKGGKGLGKGGAKRHR <sup>Methyl</sup> K <sup>Methyl</sup> VLRD  
 14.02 14.02

- ▶ fragmentation table for charge state 5+
- ▶ specType=etd
- ▶ score=43.92
- ▶ F121693.dat
- ▶ query=q24711.p1
- ▶ precursor=425.089690
- ▶ chargePrecursor=6
- ▶ itol=0.7

| AA    | c              | y              | z+1            | z+2            | z              | AA    |
|-------|----------------|----------------|----------------|----------------|----------------|-------|
| S[1]  | 30.221         | <b>509.906</b> | <b>506.703</b> | 0.806          | <b>506.501</b> | S[24] |
| G[2]  | 41.625         | 484.099        | <b>480.894</b> | 0.806          | <b>480.692</b> | G[23] |
| R[3]  | 72.846         | <b>472.693</b> | <b>469.490</b> | <b>469.691</b> | <b>469.288</b> | R[22] |
| G[4]  | 84.250         | 441.473        | <b>438.269</b> | <b>438.471</b> | <b>438.068</b> | G[21] |
| K[5]  | 109.869        | 430.069        | 426.865        | 427.067        | 426.664        | K[20] |
| G[6]  | 121.273        | <b>404.450</b> | <b>401.246</b> | <b>401.448</b> | <b>401.045</b> | G[19] |
| G[7]  | 132.677        | 393.046        | 389.842        | 390.043        | 389.840        | G[18] |
| K[8]  | 158.296        | <b>381.641</b> | 378.438        | 378.639        | 378.236        | K[17] |
| G[9]  | 169.701        | 366.622        | 362.819        | 363.020        | 362.617        | G[16] |
| L[10] | 192.318        | 344.618        | 341.414        | 341.616        | 341.213        | L[15] |
| G[11] | 203.722        | 327.001        | 318.798        | 318.999        | 318.596        | G[14] |
| K[12] | 229.341        | 310.597        | 307.393        | 307.595        | 307.192        | K[13] |
| G[13] | 240.745        | 284.978        | 281.774        | 281.976        | 281.573        | G[12] |
| G[14] | 252.149        | <b>273.574</b> | 270.370        | 270.572        | 270.168        | G[11] |
| A[15] | 266.357        | 262.169        | 258.966        | 259.167        | 258.764        | A[10] |
| K[16] | 291.976        | 247.962        | 244.758        | 244.960        | 244.557        | K[9]  |
| R[17] | 323.196        | 222.343        | 219.139        | 219.341        | 218.938        | R[8]  |
| H[18] | 350.608        | 191.121        | 187.919        | 188.121        | 187.717        | H[7]  |
| R[19] | 384.631        | 163.711        | 160.507        | 160.709        | 160.306        | R[6]  |
| K[20] | 413.053        | 129.689        | 126.484        | 126.685        | 126.282        | K[5]  |
| V[21] | 432.867        | 101.265        | 98.062         | 98.263         | 97.860         | V[4]  |
| L[22] | <b>455.484</b> | 81.452         | 78.248         | 78.450         | 78.047         | L[3]  |
| R[23] | <b>486.704</b> | 58.835         | 55.631         | 55.833         | 55.430         | R[2]  |
| D[24] | <b>509.709</b> | 27.615         | 24.411         | 24.613         | 24.209         | D[1]  |

# sp | P62806 | H4\_MOUSE

SGR<sup>Trimethyl</sup><sub>42.05</sub> GKGGKGLGKGGAKRHR<sup>(Methyl)</sup> K<sup>(Methyl)</sup><sub>(14.02)</sub> VLRD

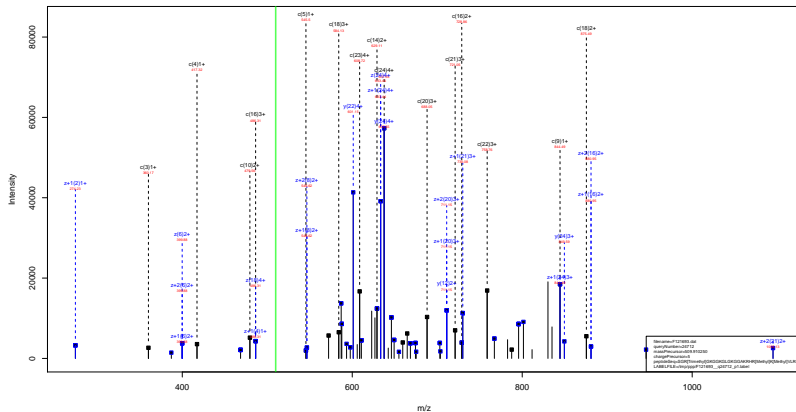



# sp | P62806 | H4\_MOUSE

SGR<sup>Trimethyl</sup><sub>42.05</sub> GKGGKGLGKGGAKRHR<sup>(Methyl)</sup><sub>(14.02)</sub> K<sup>(Methyl)</sup><sub>(14.02)</sub> VLRD

- ▶ fragmentation table for charge state 1+
- ▶ specType=etd
- ▶ score=58.21
- ▶ F121693.dat
- ▶ query=q24712.p1
- ▶ precursor=509.910250
- ▶ chargePrecursor=5
- ▶ itol=0.7

| AA |    | c              | y        | z+1            | z+2            | z        | AA    |
|----|----|----------------|----------|----------------|----------------|----------|-------|
| S  | 1  | 105.066        | 2545.539 | 2529.520       | 0.000          | 2528.512 | S[24] |
| G  | 2  | 182.087        | 2858.507 | 2842.488       | 0.000          | 2841.480 | G[23] |
| R  | 3  | <b>360.235</b> | 2301.485 | 2385.468       | 2369.474       | 2364.499 | R[22] |
| G  | 4  | <b>417.257</b> | 2203.537 | 2187.518       | 2188.526       | 2186.510 | G[21] |
| K  | 5  | <b>545.352</b> | 2146.516 | 2130.297       | 2131.305       | 2129.288 | K[20] |
| G  | 6  | 602.373        | 2018.221 | 2002.202       | 2003.210       | 2001.194 | G[19] |
| G  | 7  | <b>659.395</b> | 1961.199 | 1945.180       | 1946.188       | 1944.173 | G[18] |
| K  | 8  | <b>787.490</b> | 1904.178 | 1888.159       | 1889.167       | 1887.151 | K[17] |
| G  | 9  | <b>844.511</b> | 1776.083 | 1760.064       | 1761.072       | 1759.056 | G[16] |
| L  | 10 | 987.595        | 1719.061 | 1703.043       | 1704.050       | 1702.035 | L[15] |
| G  | 11 | 1014.617       | 1608.971 | 1589.950       | 1590.958       | 1588.951 | G[14] |
| K  | 12 | 1142.712       | 1548.950 | 1532.937       | 1533.945       | 1531.929 | K[13] |
| G  | 13 | 1199.733       | 1420.861 | 1404.842       | 1405.850       | 1403.834 | G[12] |
| G  | 14 | 1256.755       | 1363.839 | 1347.821       | 1348.828       | 1346.813 | G[11] |
| A  | 15 | 1327.792       | 1306.818 | 1290.799       | 1291.807       | 1289.791 | A[10] |
| K  | 16 | 1455.887       | 1235.781 | 1219.762       | 1220.770       | 1218.754 | K[9]  |
| R  | 17 | 1611.888       | 1107.688 | 1091.667       | 1092.675       | 1090.659 | R[8]  |
| H  | 18 | 1749.897       | 951.585  | 935.568        | 936.574        | 934.558  | H[7]  |
| R  | 19 | 1919.163       | 814.526  | 798.507        | 799.515        | 797.499  | R[6]  |
| K  | 20 | 2051.274       | 644.400  | 628.380        | <b>629.398</b> | 627.382  | K[5]  |
| V  | 21 | 2160.342       | 502.290  | <b>486.280</b> | 487.287        | 485.272  | V[4]  |
| L  | 22 | 2273.427       | 403.230  | <b>387.211</b> | 388.219        | 386.203  | L[3]  |
| R  | 23 | 2429.528       | 290.146  | <b>274.127</b> | 275.135        | 273.119  | R[2]  |
| D  | 24 | 2544.555       | 134.045  | 118.028        | 119.034        | 117.018  | D[1]  |

# sp | P62806 | H4\_MOUSE

SGR<sup>Trimethyl</sup><sub>42.05</sub> GKGGKGLGKGGAKRHR<sup>(Methyl)</sup><sub>(14.02)</sub> K<sup>(Methyl)</sup><sub>(14.02)</sub> VLRD

- ▶ fragmentation table for charge state 2+
- ▶ specType=etd
- ▶ score=58.21
- ▶ F121693.dat
- ▶ query=q24712.p1
- ▶ precursor=509.910250
- ▶ chargePrecursor=5
- ▶ itol=0.7

| AA |    | c              | y              | z+1            | z+2             | z              | AA    |
|----|----|----------------|----------------|----------------|-----------------|----------------|-------|
| S  | 1  | 53.037         | 1273.273       | 1265.264       | 0.504           | 1264.760       | S[24] |
| G  | 2  | 81.547         | 1220.757       | 1221.748       | 0.504           | 1221.244       | G[23] |
| R  | 3  | 130.821        | 1201.246       | 1193.237       | 1193.741        | 1192.733       | R[22] |
| G  | 4  | 209.132        | 1102.172       | 1094.161       | <b>1094.667</b> | 1093.659       | G[21] |
| K  | 5  | 273.180        | 1073.661       | 1065.652       | 1066.156        | 1065.148       | K[20] |
| G  | 6  | 301.690        | 1009.614       | 1001.605       | 1002.108        | 1001.101       | G[19] |
| G  | 7  | 330.201        | 981.103        | 973.094        | 973.598         | 972.590        | G[18] |
| K  | 8  | 394.248        | 952.592        | 944.583        | <b>945.087</b>  | 944.079        | K[17] |
| G  | 9  | 422.759        | 888.545        | <b>880.536</b> | <b>881.040</b>  | 880.032        | G[16] |
| L  | 10 | <b>479.301</b> | 850.538        | 842.529        | 843.033         | 842.025        | L[15] |
| G  | 11 | 507.812        | 803.492        | <b>795.483</b> | <b>795.987</b>  | 794.979        | G[14] |
| K  | 12 | <b>571.859</b> | 774.982        | <b>766.972</b> | <b>767.476</b>  | 766.468        | K[13] |
| G  | 13 | 600.370        | <b>710.934</b> | <b>702.925</b> | <b>703.429</b>  | <b>702.421</b> | G[12] |
| G  | 14 | <b>628.881</b> | 682.423        | <b>674.414</b> | <b>674.918</b>  | <b>673.910</b> | G[11] |
| A  | 15 | <b>664.399</b> | 653.913        | <b>645.903</b> | <b>646.407</b>  | <b>645.399</b> | A[10] |
| K  | 16 | <b>728.447</b> | 618.394        | <b>610.385</b> | <b>610.889</b>  | 609.881        | K[9]  |
| R  | 17 | 852.898        | 554.347        | <b>546.337</b> | <b>546.841</b>  | <b>545.833</b> | R[8]  |
| H  | 18 | <b>875.027</b> | 478.296        | <b>468.287</b> | <b>468.791</b>  | 467.783        | H[7]  |
| R  | 19 | 950.089        | 407.767        | <b>399.757</b> | <b>400.261</b>  | <b>399.253</b> | R[6]  |
| K  | 20 | 1031.141       | 322.708        | 314.699        | 315.203         | 314.195        | K[5]  |
| V  | 21 | 1080.675       | 251.653        | 243.643        | 244.147         | 243.140        | V[4]  |
| L  | 22 | 1137.217       | 202.119        | 194.109        | 194.613         | 193.605        | L[3]  |
| R  | 23 | 1215.267       | 145.577        | 137.567        | 138.071         | 137.063        | R[2]  |
| D  | 24 | 1272.781       | 87.526         | 89.517         | 89.021          | 89.013         | D[1]  |

# sp | P62806 | H4\_MOUSE

SGR<sup>Trimethyl</sup><sub>42.05</sub> GKGGKGLGKGGAKRHR<sup>(Methyl)</sup><sub>(14.02)</sub> K<sup>(Methyl)</sup><sub>(14.02)</sub> VLRD

- ▶ fragmentation table for charge state 3+
- ▶ specType=etd
- ▶ score=58.21
- ▶ F121693.dat
- ▶ query=q24712.p1
- ▶ precursor=509.910250
- ▶ chargePrecursor=5
- ▶ itol=0.7

| AA    | c              | y              | z+1            | z+2            | z              | AA    |
|-------|----------------|----------------|----------------|----------------|----------------|-------|
| S[1]  | 35.693         | <b>849.184</b> | <b>843.845</b> | 0.672          | 843.509        | S[24] |
| G[2]  | 94.701         | 839.174        | 819.337        | 0.672          | 814.668        | G[23] |
| R[3]  | 120.750        | <b>801.167</b> | <b>795.827</b> | <b>796.163</b> | <b>795.491</b> | R[22] |
| G[4]  | 159.757        | 795.117        | <b>725.778</b> | <b>730.114</b> | <b>729.442</b> | G[21] |
| K[5]  | 182.455        | 716.110        | <b>710.770</b> | <b>711.106</b> | 710.435        | K[20] |
| G[6]  | 201.463        | 673.412        | <b>668.072</b> | <b>668.408</b> | <b>667.736</b> | G[19] |
| G[7]  | 220.470        | <b>654.405</b> | <b>649.065</b> | <b>649.401</b> | <b>648.729</b> | G[18] |
| K[8]  | 263.168        | 635.397        | 630.058        | 630.394        | <b>629.722</b> | K[17] |
| G[9]  | 282.175        | <b>592.699</b> | <b>587.360</b> | <b>587.695</b> | <b>587.024</b> | G[16] |
| L[10] | 319.870        | 571.692        | 565.352        | 565.688        | 568.016        | L[15] |
| G[11] | 338.877        | 535.991        | 530.651        | 530.994        | 530.322        | G[14] |
| K[12] | 381.575        | 516.990        | 511.651        | 511.996        | 511.315        | K[13] |
| G[13] | 400.583        | 474.292        | <b>468.952</b> | <b>469.288</b> | <b>468.616</b> | G[12] |
| G[14] | 419.590        | 455.285        | 449.945        | 450.281        | 449.609        | G[11] |
| A[15] | 443.269        | 436.277        | 430.938        | 431.274        | 430.602        | A[10] |
| K[16] | <b>485.967</b> | 412.598        | 407.259        | 407.595        | 406.923        | K[9]  |
| R[17] | 538.001        | 369.900        | 364.561        | 364.896        | 364.225        | R[8]  |
| H[18] | <b>583.687</b> | 317.866        | 312.527        | 312.863        | 312.191        | H[7]  |
| R[19] | 660.393        | 272.180        | 266.841        | 267.176        | 266.505        | R[6]  |
| K[20] | <b>687.763</b> | 215.875        | 210.535        | 210.871        | 209.999        | K[5]  |
| V[21] | <b>720.786</b> | 168.104        | 162.765        | 163.101        | 162.429        | V[4]  |
| L[22] | <b>758.480</b> | 135.082        | 129.742        | 130.078        | 129.406        | L[3]  |
| R[23] | 810.514        | 97.387         | 92.047         | 92.383         | 91.711         | R[2]  |
| D[24] | 948.856        | 45.353         | 40.014         | 40.349         | 39.678         | D[1]  |

# sp | P62806 | H4\_MOUSE

SGR<sup>Trimethyl</sup><sub>42.05</sub> GKGGKGLGKGGAKRHR<sup>(Methyl)</sup><sub>(14.02)</sub> K<sup>(Methyl)</sup><sub>(14.02)</sub> VLRD

- ▶ fragmentation table for charge state 4+
- ▶ specType=etd
- ▶ score=58.21
- ▶ F121693.dat
- ▶ query=q24712.p1
- ▶ precursor=509.910250
- ▶ chargePrecursor=5
- ▶ itol=0.7

| AA    | c              | y              | z+1            | z+2            | z              | AA    |
|-------|----------------|----------------|----------------|----------------|----------------|-------|
| S[3]  | 27.022         | <b>637.140</b> | <b>633.135</b> | 0.756          | <b>632.083</b> | S[24] |
| G[2]  | 41.277         | 611.395        | <b>611.377</b> | 0.756          | <b>611.125</b> | G[23] |
| R[3]  | 50.814         | <b>601.127</b> | <b>597.122</b> | <b>597.374</b> | 598.870        | R[22] |
| G[4]  | 105.070        | 551.500        | 547.585        | 547.817        | 547.133        | G[21] |
| K[5]  | 137.093        | 537.334        | 533.330        | 533.582        | 533.078        | K[20] |
| G[6]  | 151.349        | 505.311        | 501.306        | 501.558        | 501.054        | G[19] |
| G[7]  | 165.604        | 491.055        | 487.051        | 487.303        | <b>486.799</b> | G[18] |
| K[8]  | 197.628        | 476.800        | 472.795        | 473.047        | 472.543        | K[17] |
| G[9]  | 211.883        | 444.776        | 440.771        | 441.023        | 440.520        | G[16] |
| L[10] | 240.194        | 430.521        | 426.516        | 426.768        | 426.264        | L[15] |
| G[11] | 254.410        | 402.250        | 398.245        | 398.497        | 397.993        | G[14] |
| K[12] | 286.433        | 387.994        | 383.990        | 384.242        | 383.738        | K[13] |
| G[13] | 300.689        | 355.971        | 351.966        | 352.218        | 351.714        | G[12] |
| G[14] | 314.944        | 341.715        | 337.711        | 337.963        | 337.459        | G[11] |
| A[15] | 332.703        | 327.460        | 323.455        | 323.707        | 323.203        | A[10] |
| K[16] | 364.727        | 309.701        | 305.696        | 305.948        | 305.444        | K[9]  |
| R[17] | 403.752        | 277.677        | <b>273.672</b> | <b>273.924</b> | 273.420        | R[8]  |
| H[18] | 438.017        | 238.652        | 234.647        | 234.899        | 234.395        | H[7]  |
| R[19] | 480.546        | 204.387        | 200.382        | 200.634        | 200.130        | R[6]  |
| K[20] | 518.074        | 161.858        | 157.853        | 158.105        | 157.601        | K[5]  |
| V[21] | 540.341        | 126.530        | 122.525        | 122.777        | 122.273        | V[4]  |
| L[22] | 569.112        | 101.563        | 97.558         | 97.810         | 97.306         | L[3]  |
| R[23] | <b>608.137</b> | 73.292         | 69.287         | 69.539         | 69.035         | R[2]  |
| D[24] | <b>636.894</b> | 34.267         | 30.262         | 30.514         | 30.010         | D[1]  |



# sp | P62806 | H4\_MOUSE

SGR<sup>Trimethyl</sup><sub>42.05</sub> GKGGKGLGKGGAKRHR<sup>(Methyl)</sup><sub>(14.02)</sub> K<sup>(Methyl)</sup><sub>(14.02)</sub> VLRD

- ▶ fragmentation table for charge state 1+
- ▶ specType=etd
- ▶ score=75.72
- ▶ F121693.dat
- ▶ query=q24715.p1
- ▶ precursor=637.136210
- ▶ chargePrecursor=4
- ▶ itol=0.7

| AA |    | c               | y        | z+1            | z+2            | z        | AA              |
|----|----|-----------------|----------|----------------|----------------|----------|-----------------|
| S  | 1  | 105.066         | 2545.539 | 2529.520       | 0.000          | 2528.512 | S <sub>24</sub> |
| G  | 2  | 162.087         | 2458.507 | 2442.488       | 0.000          | 2441.480 | G <sub>23</sub> |
| R  | 3  | <b>360.235</b>  | 2301.480 | 2385.469       | 2369.474       | 2384.493 | R <sub>22</sub> |
| G  | 4  | <b>417.257</b>  | 2203.337 | 2187.318       | 2188.326       | 2186.310 | G <sub>21</sub> |
| K  | 5  | <b>545.352</b>  | 2146.316 | 2130.297       | 2131.305       | 2129.289 | K <sub>20</sub> |
| G  | 6  | <b>602.373</b>  | 2048.221 | 2002.202       | 2003.210       | 2001.194 | G <sub>19</sub> |
| G  | 7  | <b>659.395</b>  | 1961.199 | 1945.180       | 1946.188       | 1944.173 | G <sub>18</sub> |
| K  | 8  | <b>787.490</b>  | 1904.178 | 1888.159       | 1889.167       | 1887.151 | K <sub>17</sub> |
| G  | 9  | <b>844.511</b>  | 1776.083 | 1760.064       | 1761.072       | 1759.056 | G <sub>16</sub> |
| L  | 10 | <b>937.595</b>  | 1719.061 | 1703.043       | 1704.050       | 1702.035 | L <sub>15</sub> |
| G  | 11 | <b>1014.617</b> | 1625.977 | 1589.958       | 1590.966       | 1588.951 | G <sub>14</sub> |
| K  | 12 | <b>1142.712</b> | 1548.956 | 1532.937       | 1533.945       | 1531.929 | K <sub>13</sub> |
| G  | 13 | 1199.733        | 1420.861 | 1404.842       | 1405.850       | 1403.834 | G <sub>12</sub> |
| G  | 14 | <b>1256.755</b> | 1363.839 | 1347.821       | 1348.828       | 1346.813 | G <sub>11</sub> |
| A  | 15 | 1327.792        | 1306.818 | 1290.799       | 1291.807       | 1289.791 | A <sub>10</sub> |
| K  | 16 | 1455.887        | 1235.781 | 1219.762       | 1220.770       | 1218.754 | K <sub>9</sub>  |
| R  | 17 | 1611.988        | 1107.686 | 1091.667       | 1092.675       | 1090.660 | R <sub>8</sub>  |
| H  | 18 | 1749.047        | 951.589  | <b>935.566</b> | 936.574        | 934.558  | H <sub>7</sub>  |
| R  | 19 | 1919.163        | 814.526  | 798.507        | 799.515        | 797.499  | R <sub>6</sub>  |
| K  | 20 | 2061.274        | 644.400  | 628.380        | 629.388        | 627.382  | K <sub>5</sub>  |
| V  | 21 | 2160.342        | 502.298  | 486.280        | 487.287        | 485.272  | V <sub>4</sub>  |
| L  | 22 | 2273.427        | 403.230  | 387.211        | <b>388.219</b> | 386.203  | L <sub>3</sub>  |
| R  | 23 | 2429.528        | 290.146  | 274.127        | <b>275.135</b> | 273.119  | R <sub>2</sub>  |
| D  | 24 | 2544.555        | 134.045  | 118.028        | 119.034        | 117.018  | D <sub>1</sub>  |

# sp | P62806 | H4\_MOUSE

SGR<sup>Trimethyl</sup><sub>42.05</sub> GKGGKGLGKGGAKRHR<sup>(Methyl)</sup><sub>(14.02)</sub> K<sup>(Methyl)</sup><sub>(14.02)</sub> VLRD

- ▶ fragmentation table for charge state 2+
- ▶ specType=etd
- ▶ score=75.72
- ▶ F121693.dat
- ▶ query=q24715.p1
- ▶ precursor=637.136210
- ▶ chargePrecursor=4
- ▶ itol=0.7

| AA    | c               | y               | z+1             | z+2             | z              | AA    |
|-------|-----------------|-----------------|-----------------|-----------------|----------------|-------|
| S[1]  | 53.037          | <b>1273.273</b> | <b>1265.264</b> | 0.504           | 1264.760       | S[24] |
| G[2]  | 81.547          | 1229.757        | 1221.748        | 0.504           | 1221.244       | G[23] |
| R[3]  | 180.621         | <b>1201.246</b> | 1193.237        | 1193.743        | 1192.733       | R[22] |
| G[4]  | 209.132         | 1162.732        | <b>1094.163</b> | <b>1094.667</b> | 1093.659       | G[21] |
| K[5]  | 274.190         | 1093.565        | <b>1065.652</b> | <b>1066.156</b> | 1065.149       | K[20] |
| G[6]  | 301.690         | 1059.614        | <b>1001.605</b> | <b>1002.108</b> | 1001.101       | G[19] |
| G[7]  | 330.201         | 981.103         | <b>973.094</b>  | <b>973.598</b>  | 973.590        | G[18] |
| K[8]  | 394.248         | <b>952.592</b>  | <b>944.583</b>  | <b>945.087</b>  | <b>944.079</b> | K[17] |
| G[9]  | 422.759         | 888.545         | <b>880.536</b>  | <b>881.040</b>  | 880.032        | G[16] |
| L[10] | 459.301         | 860.034         | 852.025         | 852.529         | 851.521        | L[15] |
| G[11] | 507.812         | 803.482         | <b>795.483</b>  | <b>795.987</b>  | 794.979        | G[14] |
| K[12] | 571.859         | 774.982         | <b>766.972</b>  | <b>767.476</b>  | 766.468        | K[13] |
| G[13] | 600.370         | 710.934         | <b>702.925</b>  | <b>703.429</b>  | 702.421        | G[12] |
| G[14] | 628.881         | 682.423         | <b>674.414</b>  | <b>674.918</b>  | 673.910        | G[11] |
| A[15] | 664.399         | 653.913         | <b>645.903</b>  | <b>646.407</b>  | <b>645.399</b> | A[10] |
| R[16] | 729.427         | 618.396         | <b>610.385</b>  | <b>610.889</b>  | <b>609.881</b> | R[9]  |
| R[17] | <b>806.498</b>  | 554.347         | <b>546.337</b>  | <b>546.841</b>  | <b>545.833</b> | R[8]  |
| H[18] | <b>875.027</b>  | 476.296         | 468.287         | 468.791         | 467.783        | H[7]  |
| R[19] | 960.085         | 407.767         | 399.757         | 400.261         | 399.253        | R[6]  |
| K[20] | <b>1031.141</b> | 322.708         | 314.699         | 315.203         | 314.195        | K[5]  |
| V[21] | <b>1080.675</b> | 251.653         | 243.643         | 244.147         | 243.140        | V[4]  |
| L[22] | <b>1137.217</b> | 202.119         | 194.109         | 194.613         | 193.605        | L[3]  |
| R[23] | 1215.267        | 145.577         | 137.567         | 138.071         | 137.063        | R[2]  |
| D[24] | 1272.781        | 67.526          | 59.517          | 60.021          | 59.013         | D[1]  |

# sp | P62806 | H4\_MOUSE

SGR<sup>Trimethyl</sup><sub>42.05</sub> GKGGKGLGKGGAKRHR<sup>(Methyl)</sup><sub>(14.02)</sub> K<sup>(Methyl)</sup><sub>(14.02)</sub> VLRD

- ▶ fragmentation table for charge state 3+
- ▶ specType=etd
- ▶ score=75.72
- ▶ F121693.dat
- ▶ query=q24715.p1
- ▶ precursor=637.136210
- ▶ chargePrecursor=4
- ▶ itol=0.7

| AA    | c              | y              | z+1            | z+2            | z              | AA    |
|-------|----------------|----------------|----------------|----------------|----------------|-------|
| S[1]  | 35.693         | <b>849.184</b> | <b>843.845</b> | 0.672          | 843.509        | S[24] |
| G[2]  | 94.701         | 839.174        | 819.337        | 0.672          | 814.668        | G[23] |
| R[3]  | 120.750        | <b>801.167</b> | <b>795.827</b> | <b>796.163</b> | <b>795.491</b> | R[22] |
| G[4]  | 159.757        | 735.117        | 729.778        | 730.114        | 729.442        | G[21] |
| K[5]  | 182.455        | 718.110        | 710.770        | 711.106        | 710.435        | K[20] |
| G[6]  | 201.463        | 673.412        | 668.072        | 666.408        | 667.736        | G[19] |
| G[7]  | 220.470        | 654.405        | 649.065        | 649.401        | 648.729        | G[18] |
| K[8]  | 263.168        | 635.397        | 630.058        | 630.394        | 629.722        | K[17] |
| G[9]  | 282.175        | 592.699        | 587.360        | 587.695        | 587.024        | G[16] |
| L[10] | 319.870        | 571.692        | 565.352        | 565.688        | 566.016        | L[15] |
| G[11] | 338.877        | 535.991        | 530.651        | 530.984        | 530.322        | G[14] |
| K[12] | 351.575        | 516.980        | 511.651        | 511.986        | 511.315        | K[13] |
| G[13] | 400.583        | 474.282        | 468.952        | 469.288        | 468.618        | G[12] |
| G[14] | 419.590        | 455.285        | 449.945        | 450.281        | 449.609        | G[11] |
| A[15] | 443.269        | 436.277        | 430.938        | 431.274        | 430.602        | A[10] |
| K[16] | 485.967        | 412.588        | 407.250        | 407.585        | 406.923        | K[9]  |
| R[17] | 538.001        | 369.900        | 364.561        | 364.896        | 364.225        | R[8]  |
| H[18] | 583.687        | 317.866        | 312.527        | 312.863        | 312.191        | H[7]  |
| R[19] | 640.393        | 272.180        | 266.841        | 267.176        | 266.505        | R[6]  |
| K[20] | 687.783        | 215.475        | 210.135        | 210.471        | 209.799        | K[5]  |
| V[21] | 720.788        | 168.104        | 162.765        | 163.101        | 162.429        | V[4]  |
| L[22] | 758.480        | 135.082        | 129.742        | 130.078        | 129.406        | L[3]  |
| R[23] | <b>810.514</b> | 97.387         | 92.047         | 92.383         | 91.711         | R[2]  |
| D[24] | 848.856        | 45.353         | 40.014         | 40.349         | 39.678         | D[1]  |





# sp | P62806 | H4\_MOUSE

[Acetyl]SGRGKGGKGLGK <sup>Acetyl</sup>42.01 **GGAK** <sup>Trimethyl</sup>42.05 **RHR** <sup>Methyl</sup>14.02 **K** <sup>Methyl</sup>14.02 **VLRD**

- ▶ fragmentation table for charge state 1+
- ▶ specType=etd
- ▶ score=76.39
- ▶ F121693.dat
- ▶ query=q25259\_p1
- ▶ precursor=526.715260
- ▶ chargePrecursor=5
- ▶ itol=0.7

| AA | c  | y               | z+1            | z+2            | z              | AA       |   |    |
|----|----|-----------------|----------------|----------------|----------------|----------|---|----|
| S  | 1  | 147.076         | 2629.560       | 2613.541       | 0.000          | 2612.533 | S | 24 |
| G  | 2  | 224.998         | 2509.517       | 2494.498       | 0.000          | 2493.491 | G | 23 |
| R  | 3  | <b>360.199</b>  | 2343.466       | 2327.477       | 2426.488       | 2426.489 | R | 22 |
| G  | 4  | <b>417.220</b>  | 2287.395       | 2271.376       | 2272.384       | 2270.368 | G | 21 |
| K  | 5  | <b>545.315</b>  | 2230.373       | 2214.354       | 2215.362       | 2213.347 | K | 20 |
| G  | 6  | <b>602.337</b>  | 2102.278       | 2086.259       | 2087.267       | 2085.252 | G | 19 |
| G  | 7  | 659.358         | 2045.257       | 2029.238       | 2030.246       | 2028.230 | G | 18 |
| K  | 8  | <b>787.453</b>  | 1988.235       | 1972.216       | 1973.224       | 1971.209 | K | 17 |
| G  | 9  | 844.475         | 1890.140       | 1844.122       | 1845.130       | 1843.114 | G | 16 |
| L  | 10 | 897.559         | 1803.119       | 1787.100       | 1788.108       | 1786.092 | L | 15 |
| G  | 11 | <b>1014.580</b> | 1690.035       | 1674.016       | 1675.024       | 1673.008 | G | 14 |
| K  | 12 | 1184.686        | 1633.013       | 1616.995       | 1618.002       | 1615.987 | K | 13 |
| G  | 13 | 1241.707        | 1462.908       | 1446.889       | 1447.897       | 1445.881 | G | 12 |
| G  | 14 | 1298.729        | 1405.888       | 1389.868       | 1390.875       | 1388.860 | G | 11 |
| A  | 15 | 1369.766        | 1348.865       | 1332.846       | 1333.854       | 1331.838 | A | 10 |
| K  | 16 | 1539.908        | 1277.820       | 1261.809       | 1262.817       | 1260.801 | K | 9  |
| R  | 17 | 1698.909        | 1199.860       | 1183.857       | 1184.876       | 1182.859 | R | 8  |
| H  | 18 | 1833.068        | 951.585        | <b>935.566</b> | 936.574        | 934.558  | H | 7  |
| R  | 19 | 2003.185        | <b>814.526</b> | <b>798.507</b> | 799.515        | 797.499  | R | 6  |
| K  | 20 | 2145.295        | <b>644.409</b> | 638.390        | <b>629.398</b> | 627.383  | K | 5  |
| V  | 21 | 2244.364        | 502.298        | <b>486.280</b> | 487.287        | 485.272  | V | 4  |
| L  | 22 | 2367.448        | 403.230        | <b>387.211</b> | 388.219        | 386.203  | L | 3  |
| R  | 23 | 2513.549        | 290.140        | <b>274.127</b> | <b>275.135</b> | 273.119  | R | 2  |
| D  | 24 | 2628.576        | 134.045        | 118.026        | 119.034        | 117.018  | D | 1  |

# sp | P62806 | H4\_MOUSE

[Acetyl]SGRGKGGKGLGK <sup>Acetyl</sup>42.01 **GGAK** <sup>Trimethyl</sup>42.05 **RHR** <sup>Methyl</sup>14.02 **K** <sup>Methyl</sup>14.02 **VLRD**

- ▶ fragmentation table for charge state 2+
- ▶ specType=etd
- ▶ score=76.39
- ▶ F121693.dat
- ▶ query=q25259\_p1
- ▶ precursor=526.715260
- ▶ chargePrecursor=5
- ▶ itol=0.7

| AA    | c               | y               | z+1             | z+2             | z               | AA    |
|-------|-----------------|-----------------|-----------------|-----------------|-----------------|-------|
| S[1]  | 74.642          | <b>1315.284</b> | 1307.294        | 0.504           | 1306.770        | S[24] |
| G[2]  | 102.553         | 1250.762        | 1242.753        | 0.504           | 1242.240        | G[23] |
| R[3]  | 180.603         | 1222.251        | 1214.242        | 1914.746        | 1213.730        | R[22] |
| G[4]  | 259.114         | 1144.201        | 1136.192        | <b>1116.695</b> | 1135.680        | G[21] |
| K[5]  | 274.163         | 1115.690        | 1107.681        | <b>1108.185</b> | 1107.170        | K[20] |
| G[6]  | 301.672         | 1051.643        | <b>1043.633</b> | <b>1044.137</b> | 1043.120        | G[19] |
| G[7]  | 330.183         | 1023.132        | <b>1015.123</b> | <b>1015.627</b> | <b>1014.619</b> | G[18] |
| K[8]  | <b>394.230</b>  | 994.621         | 986.612         | <b>987.116</b>  | 986.100         | K[17] |
| G[9]  | <b>422.741</b>  | 930.574         | <b>922.564</b>  | <b>923.068</b>  | 922.050         | G[16] |
| L[10] | <b>479.283</b>  | 892.063         | <b>894.064</b>  | <b>894.558</b>  | <b>893.550</b>  | L[15] |
| G[11] | <b>507.794</b>  | 845.521         | <b>837.512</b>  | <b>838.016</b>  | <b>837.008</b>  | G[14] |
| K[12] | <b>592.847</b>  | 817.010         | <b>809.001</b>  | <b>809.505</b>  | <b>808.497</b>  | K[13] |
| G[13] | <b>621.357</b>  | 731.958         | <b>723.948</b>  | <b>724.452</b>  | <b>723.444</b>  | G[12] |
| G[14] | <b>649.868</b>  | 703.447         | <b>695.437</b>  | <b>695.941</b>  | 694.933         | G[11] |
| A[15] | <b>685.387</b>  | 674.936         | <b>666.927</b>  | <b>667.431</b>  | <b>666.423</b>  | A[10] |
| R[16] | <b>776.458</b>  | 639.417         | 631.408         | <b>631.912</b>  | 630.904         | R[9]  |
| R[17] | <b>848.508</b>  | 554.347         | <b>546.337</b>  | <b>546.841</b>  | <b>545.833</b>  | R[8]  |
| H[18] | <b>917.038</b>  | 476.296         | <b>468.287</b>  | <b>468.791</b>  | <b>467.783</b>  | H[7]  |
| R[19] | 1002.096        | 407.767         | <b>399.757</b>  | <b>400.261</b>  | 399.253         | R[6]  |
| K[20] | 1073.151        | 322.706         | 314.699         | 315.203         | 314.195         | K[5]  |
| V[21] | 1127.686        | 254.583         | 246.583         | 244.447         | 243.140         | V[4]  |
| L[22] | <b>1179.227</b> | 202.119         | 194.109         | 194.613         | 193.605         | L[3]  |
| R[23] | 1267.278        | 145.577         | 137.567         | 138.071         | 137.063         | R[2]  |
| D[24] | 1314.791        | 67.526          | 59.517          | 60.021          | 59.013          | D[1]  |

# sp | P62806 | H4\_MOUSE

[Acetyl]SGRGKGGKGLGK <sup>Acetyl</sup>42.01 **GGAK** <sup>Trimethyl</sup>42.05 **RHR** <sup>Methyl</sup>14.02 **K** <sup>Methyl</sup>14.02 **VLRD**

- ▶ fragmentation table for charge state 3+
- ▶ specType=etd
- ▶ score=76.39
- ▶ F121693.dat
- ▶ query=q25259\_p1
- ▶ precursor=526.715260
- ▶ chargePrecursor=5
- ▶ itol=0.7

| AA    | c              | y              | z+1            | z+2            | z              | AA    |
|-------|----------------|----------------|----------------|----------------|----------------|-------|
| S[1]  | 49.697         | <b>877.191</b> | <b>871.852</b> | 0.672          | 871.516        | S[24] |
| G[2]  | 58.704         | <b>834.177</b> | <b>828.838</b> | 0.672          | <b>828.502</b> | G[23] |
| R[3]  | 150.738        | <b>815.170</b> | <b>809.831</b> | <b>810.166</b> | <b>809.495</b> | R[22] |
| G[4]  | 139.745        | <b>763.136</b> | <b>757.797</b> | <b>758.133</b> | <b>757.461</b> | G[21] |
| K[5]  | 182.443        | 744.129        | <b>738.790</b> | <b>739.126</b> | 738.454        | K[20] |
| G[6]  | 201.450        | <b>701.431</b> | <b>696.091</b> | <b>696.427</b> | <b>695.755</b> | G[19] |
| G[7]  | 220.458        | 682.424        | <b>677.084</b> | <b>677.420</b> | <b>676.748</b> | G[18] |
| K[8]  | 263.156        | <b>663.417</b> | <b>658.077</b> | <b>658.413</b> | 657.741        | K[17] |
| G[9]  | 282.163        | <b>620.718</b> | <b>615.379</b> | <b>615.715</b> | <b>615.043</b> | G[16] |
| L[10] | 319.858        | 601.711        | <b>596.372</b> | <b>596.707</b> | <b>596.036</b> | L[15] |
| G[11] | 338.865        | 584.076        | <b>558.677</b> | <b>559.013</b> | <b>558.341</b> | G[14] |
| K[12] | 395.567        | <b>545.009</b> | <b>539.670</b> | <b>540.006</b> | <b>539.334</b> | K[13] |
| G[13] | 414.574        | 488.307        | 482.908        | 483.304        | 482.632        | G[12] |
| G[14] | 433.581        | <b>469.300</b> | 463.961        | 464.297        | 463.625        | G[11] |
| A[15] | 457.260        | 450.293        | 444.954        | 445.289        | 444.618        | A[10] |
| K[16] | 513.974        | 426.614        | 421.275        | 421.610        | 420.939        | K[9]  |
| R[17] | <b>566.008</b> | 369.900        | 364.561        | 364.896        | 364.225        | R[8]  |
| H[18] | <b>611.694</b> | 317.866        | 312.527        | 312.863        | 312.191        | H[7]  |
| R[19] | 668.400        | 272.180        | 266.841        | 267.176        | 266.505        | R[6]  |
| K[20] | <b>715.770</b> | 215.475        | 210.135        | 210.471        | 209.799        | K[5]  |
| V[21] | <b>748.793</b> | 168.104        | 162.765        | 163.101        | 162.429        | V[4]  |
| L[22] | <b>786.487</b> | 135.082        | 129.742        | 130.078        | 129.406        | L[3]  |
| R[23] | <b>838.521</b> | 97.387         | 92.047         | 92.383         | 91.711         | R[2]  |
| D[24] | <b>876.863</b> | 45.353         | 40.014         | 40.349         | 39.678         | D[1]  |

# sp | P62806 | H4\_MOUSE

[Acetyl]SGRGKGGKGLGK <sup>Acetyl</sup>42.01 **GGAK** <sup>Trimethyl</sup>42.05 **RHR** <sup>Methyl</sup>14.02 **K** <sup>Methyl</sup>14.02 **VLRD**

- ▶ fragmentation table for charge state 4+
- ▶ specType=etd
- ▶ score=76.39
- ▶ F121693.dat
- ▶ query=q25259\_p1
- ▶ precursor=526.715260
- ▶ chargePrecursor=5
- ▶ itol=0.7

| AA    | c              | y              | z+1            | z+2            | z              | AA    |
|-------|----------------|----------------|----------------|----------------|----------------|-------|
| S[1]  | 37.525         | <b>658.145</b> | <b>654.141</b> | 0.755          | <b>653.889</b> | S[24] |
| G[2]  | 51.780         | <b>625.885</b> | <b>621.880</b> | 0.755          | <b>621.628</b> | G[23] |
| R[3]  | 90.805         | <b>611.629</b> | <b>607.625</b> | <b>607.877</b> | <b>607.373</b> | R[22] |
| G[4]  | 105.061        | 572.604        | 568.599        | 568.851        | 568.347        | G[21] |
| K[5]  | 137.084        | <b>558.349</b> | 554.344        | 554.596        | 554.092        | K[20] |
| G[6]  | 151.340        | 526.325        | 522.320        | 522.572        | 522.068        | G[19] |
| G[7]  | 165.595        | 512.070        | <b>508.065</b> | <b>508.317</b> | <b>507.813</b> | G[18] |
| K[8]  | 197.619        | 497.814        | 493.810        | 494.062        | 493.558        | K[17] |
| G[9]  | 211.874        | 486.791        | 482.786        | 482.938        | 481.334        | G[16] |
| L[10] | 280.148        | 451.535        | 447.530        | 447.782        | 447.278        | L[15] |
| G[11] | 254.401        | <b>423.264</b> | 419.259        | 419.511        | 419.007        | G[14] |
| K[12] | 296.627        | 409.000        | 405.004        | 405.256        | 404.752        | K[13] |
| G[13] | 311.182        | 366.482        | 362.478        | 362.730        | 362.226        | G[12] |
| G[14] | 325.438        | 352.227        | 348.222        | 348.474        | 347.970        | G[11] |
| A[15] | 343.197        | 337.972        | 333.967        | 334.219        | 333.715        | A[10] |
| K[16] | 385.732        | 320.212        | 316.208        | 316.460        | 315.956        | K[9]  |
| R[17] | 424.758        | 277.877        | <b>273.672</b> | <b>273.924</b> | <b>273.420</b> | R[8]  |
| H[18] | 459.022        | 238.652        | 234.647        | 234.899        | 234.395        | H[7]  |
| R[19] | 501.552        | 204.397        | 200.392        | 200.644        | 200.140        | R[6]  |
| K[20] | 537.079        | 161.858        | 157.853        | 158.105        | 157.601        | K[5]  |
| V[21] | 561.846        | 126.330        | 122.325        | 122.577        | 122.073        | V[4]  |
| L[22] | 560.117        | 101.563        | 97.558         | 97.810         | 97.306         | L[3]  |
| R[23] | <b>629.143</b> | 73.292         | 69.287         | 69.539         | 69.035         | R[2]  |
| D[24] | <b>657.899</b> | 34.267         | 30.262         | 30.514         | 30.010         | D[1]  |

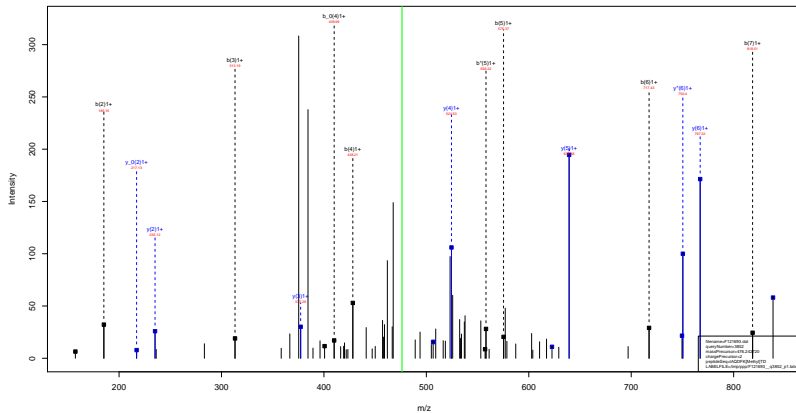

# sp | P68433 | H31\_MOUSE

IAQDFK<sup>Methyl</sup> TD  
14.02

- ▶ fragmentation table for charge state 1+
- ▶ specType=cid
- ▶ score=44.53
- ▶ F121693.dat
- ▶ query=q3852\_p1
- ▶ precursor=476.242720
- ▶ chargePrecursor=2
- ▶ itol=0.7

| AA  | a              | a*      | a:Δ     | b              | b*             | b:Δ            | y              | y*             | y:Δ            | AA  |
|-----|----------------|---------|---------|----------------|----------------|----------------|----------------|----------------|----------------|-----|
| T 1 | 46.998         | 0.000   | 0.000   | 114.098        | 0.000          | 0.000          | 901.416        | 109.404        | 213.988        | T 1 |
| A 2 | <b>157.134</b> | 0.000   | 0.000   | <b>185.128</b> | 0.000          | 0.000          | <b>838.354</b> | 821.350        | 820.384        | A 2 |
| Q 3 | 286.192        | 286.186 | 0.000   | <b>313.187</b> | 296.160        | 0.000          | <b>767.357</b> | <b>750.330</b> | <b>749.346</b> | Q 3 |
| G 4 | <b>400.219</b> | 393.193 | 362.209 | <b>478.214</b> | 411.187        | <b>410.203</b> | <b>636.298</b> | <b>622.272</b> | 621.288        | G 4 |
| F 5 | 547.287        | 540.261 | 549.277 | <b>575.282</b> | <b>558.256</b> | <b>557.272</b> | <b>524.271</b> | <b>507.245</b> | <b>506.261</b> | F 5 |
| R 6 | 689.356        | 672.332 | 673.368 | <b>717.363</b> | 700.369        | 669.362        | <b>377.263</b> | 369.172        | 369.184        | R 6 |
| T 7 | 790.446        | 775.419 | 772.435 | <b>818.441</b> | 801.414        | 800.430        | <b>235.092</b> | 0.000          | <b>217.082</b> | T 7 |
| G 8 | 905.473        | 880.449 | 887.462 | 933.468        | 916.441        | 915.467        | 134.040        | 0.000          | 116.034        | G 8 |





# sp | P68433 | H31\_MOUSE

IAQDFK<sup>Methyl</sup>TD  
14.02

- ▶ fragmentation table for charge state 1+
- ▶ specType=cid
- ▶ score=42.59
- ▶ F121693.dat
- ▶ query=q3854.p1
- ▶ precursor=476.242840
- ▶ chargePrecursor=2
- ▶ itol=0.7

| AA  | a              | a*      | a,d     | b              | b*             | b,d            | y              | y*             | y,d            | AA  |
|-----|----------------|---------|---------|----------------|----------------|----------------|----------------|----------------|----------------|-----|
| T 1 | 46.098         | 0.000   | 0.000   | 114.098        | 0.000          | 0.000          | 901.414        | 109.404        | 1213.668       | T 1 |
| A 2 | <b>157.134</b> | 0.000   | 0.000   | <b>185.128</b> | 0.000          | 0.000          | <b>838.384</b> | 821.384        | 820.384        | A 2 |
| Q 3 | 286.192        | 286.186 | 0.000   | <b>313.187</b> | 296.160        | 0.000          | <b>767.357</b> | <b>750.330</b> | <b>749.346</b> | Q 3 |
| G 4 | 400.219        | 393.193 | 362.209 | <b>428.214</b> | 411.187        | <b>410.203</b> | <b>636.298</b> | 622.272        | 621.288        | G 4 |
| F 5 | <b>547.287</b> | 540.261 | 529.277 | <b>575.282</b> | <b>558.256</b> | <b>557.272</b> | <b>524.271</b> | <b>507.245</b> | 506.261        | F 5 |
| R 6 | 678.288        | 672.312 | 671.368 | <b>717.393</b> | 700.369        | 697.382        | <b>377.263</b> | 366.172        | 366.193        | R 6 |
| T 7 | 790.446        | 775.419 | 772.435 | <b>818.441</b> | 801.414        | 800.430        | <b>235.092</b> | 0.000          | 237.082        | T 7 |
| G 8 | 905.473        | 880.446 | 887.462 | 933.468        | 916.441        | 915.457        | 134.040        | 0.000          | 136.034        | G 8 |



# sp | P68433 | H31\_MOUSE

IAQDFK<sup>Methyl</sup>TD  
14.02

- ▶ fragmentation table for charge state 1+
- ▶ specType=etd
- ▶ score=49.37
- ▶ F121693.dat
- ▶ query=q3855\_p1
- ▶ precursor=476.243130
- ▶ chargePrecursor=2
- ▶ itol=0.7

| AA  | c              | y              | z+1            | z+2            | z       | AA  |
|-----|----------------|----------------|----------------|----------------|---------|-----|
| I 1 | 131.118        | <b>951.478</b> | <b>935.459</b> | 0.000          | 934.452 | I 8 |
| A 2 | 202.155        | 838.394        | <b>822.375</b> | 0.000          | 821.368 | A 7 |
| Q 3 | 330.214        | 767.357        | <b>751.338</b> | 752.346        | 750.330 | Q 6 |
| D 4 | 445.241        | 639.298        | <b>623.280</b> | <b>624.288</b> | 622.272 | D 5 |
| F 5 | 592.309        | 524.271        | <b>508.253</b> | <b>509.261</b> | 507.245 | F 4 |
| K 6 | <b>734.420</b> | 377.203        | <b>361.184</b> | <b>362.192</b> | 360.177 | K 3 |
| T 7 | <b>835.467</b> | 235.092        | 219.074        | 220.082        | 218.066 | T 2 |
| D 8 | 950.494        | 134.045        | 118.026        | 119.034        | 117.018 | D 1 |

# sp | P68433 | H31\_MOUSE

IAQDFK Methyl TD  
14.02

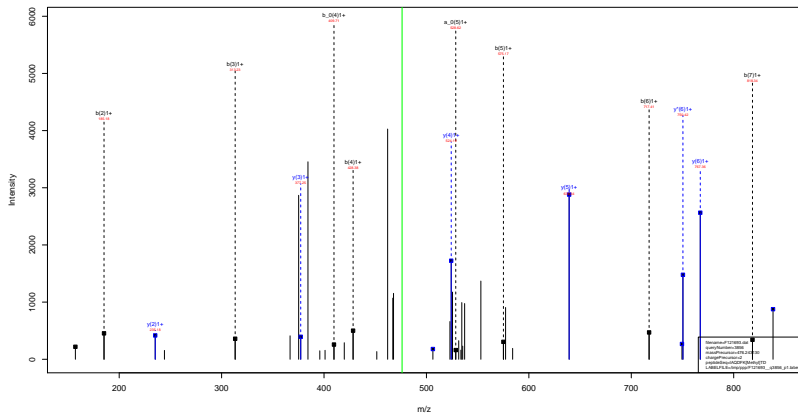

- ▶ fragmentation table for charge state 1+
- ▶ specType=cid
- ▶ score=50.58
- ▶ F121693.dat
- ▶ query=q3856\_p1
- ▶ precursor=476.243130
- ▶ chargePrecursor=2
- ▶ itol=0.7

| AA    | a              | a*      | a:d            | b              | b*      | b:d            | y              | y*             | y:d            | AA    |
|-------|----------------|---------|----------------|----------------|---------|----------------|----------------|----------------|----------------|-------|
| T [1] | 46.098         | 0.000   | 0.000          | 114.093        | 0.000   | 0.000          | 901.416        | 109.406        | 1213.669       | T [1] |
| A [2] | <b>157.134</b> | 0.000   | 0.000          | <b>185.128</b> | 0.000   | 0.000          | <b>838.354</b> | 821.366        | 820.384        | A [2] |
| Q [3] | 286.192        | 286.186 | 0.000          | <b>313.187</b> | 296.160 | 0.000          | <b>767.357</b> | <b>750.330</b> | <b>749.346</b> | Q [3] |
| G [4] | 400.219        | 393.193 | 367.200        | <b>428.214</b> | 411.187 | <b>410.203</b> | <b>636.298</b> | 622.272        | 621.288        | G [4] |
| F [5] | 547.287        | 540.261 | <b>524.277</b> | <b>575.282</b> | 558.256 | 557.272        | <b>524.271</b> | 507.245        | <b>506.261</b> | F [5] |
| R [6] | 689.366        | 672.337 | 671.366        | <b>717.393</b> | 700.366 | 699.382        | <b>377.263</b> | 360.177        | 359.193        | R [6] |
| T [7] | 790.446        | 775.419 | 772.431        | <b>818.441</b> | 801.414 | 800.430        | <b>235.092</b> | 0.000          | 237.082        | T [7] |
| G [8] | 905.473        | 889.446 | 887.462        | 913.468        | 916.441 | 915.457        | 134.040        | 0.000          | 116.034        | G [8] |

# sp | P15864 | H12\_MOUSE

LITK<sup>Acetyl</sup> AVAASKE  
42.01

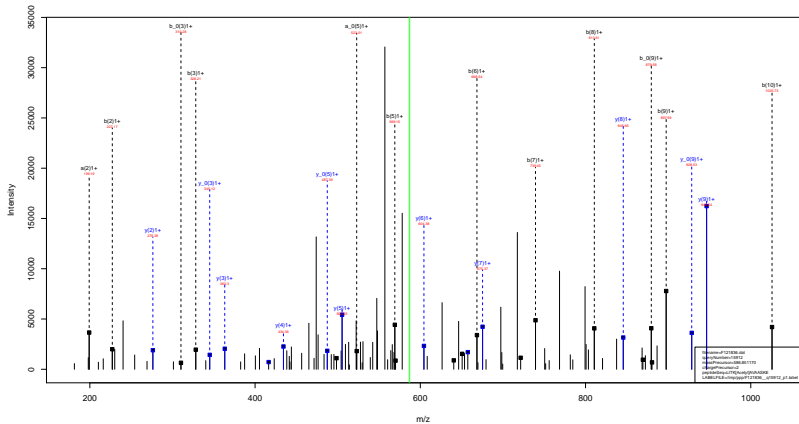

# sp | P15864 | H12\_MOUSE

LITK<sup>Acetyl</sup> AVAASKE  
42.01

- ▶ fragmentation table for charge state 1+
- ▶ specType=cid
- ▶ score=49.55
- ▶ F121836.dat
- ▶ query=q15912.p1
- ▶ precursor=586.851170
- ▶ chargePrecursor=2
- ▶ itol=0.7

| AA    | a              | y <sup>a</sup> | a <sub>0</sub> | b               | b <sup>a</sup> | b <sub>0</sub> | y              | y <sup>a</sup> | y <sub>0</sub> | AA    |
|-------|----------------|----------------|----------------|-----------------|----------------|----------------|----------------|----------------|----------------|-------|
| L[1]  | 88.098         | 0.000          | 0.000          | 114.093         | 0.000          | 0.000          | 117.280        | 119.082        | 1194.078       | L[11] |
| T[2]  | <b>109.180</b> | 0.000          | 0.000          | <b>227.175</b>  | 0.000          | 0.000          | 109.094        | 104.723        | 2381.964       | T[10] |
| T[3]  | 304.528        | 0.000          | 282.211        | <b>328.221</b>  | 0.000          | <b>318.213</b> | <b>946.520</b> | 929.444        | <b>928.510</b> | T[10] |
| K[4]  | 270.534        | 651.507        | <b>851.366</b> | <b>498.529</b>  | 681.502        | 680.510        | <b>845.471</b> | 828.444        | 827.462        | K[10] |
| A[5]  | 143.414        | 678.587        | <b>521.366</b> | <b>565.366</b>  | 688.509        | 681.510        | <b>875.367</b> | 888.441        | <b>887.367</b> | A[10] |
| V[6]  | <b>840.439</b> | 923.433        | 923.433        | <b>665.434</b>  | 951.448        | <b>950.424</b> | <b>664.338</b> | 587.324        | 588.327        | V[6]  |
| A[7]  | 211.476        | 684.489        | 684.489        | <b>738.471</b>  | 722.445        | <b>721.461</b> | <b>505.282</b> | 488.270        | <b>487.251</b> | A[10] |
| A[8]  | 182.517        | 685.488        | 684.503        | <b>810.508</b>  | 793.482        | 792.498        | <b>424.225</b> | 417.080        | <b>416.214</b> | A[10] |
| S[9]  | <b>869.545</b> | 923.433        | 923.433        | <b>897.540</b>  | <b>880.514</b> | <b>879.530</b> | <b>361.187</b> | 360.201        | <b>345.177</b> | S[10] |
| R[10] | 397.640        | 980.514        | 979.433        | <b>1025.615</b> | 1008.609       | 1007.625       | <b>276.155</b> | 259.123        | 258.141        | R[10] |
| E[11] | 1216.683       | 1189.888       | 1188.871       | 1154.878        | 1137.851       | 1136.867       | 148.888        | 0.000          | 138.888        | E[11] |

# sp | P15864 | H12\_MOUSE

LITKAVAASK <sup>Acetyl</sup>E  
42.01

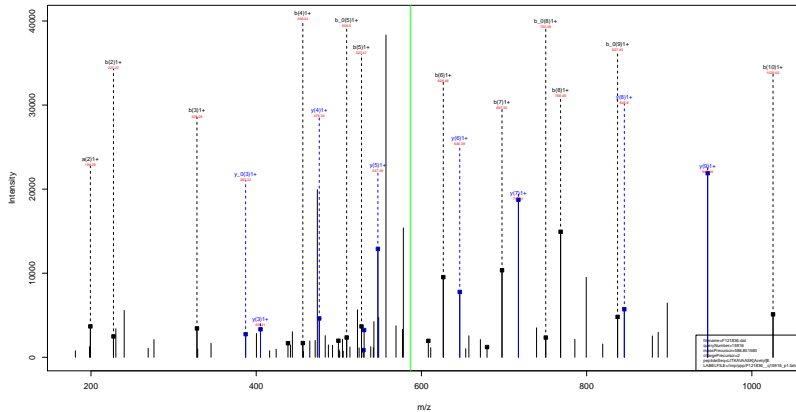



# sp | P15864 | H12\_MOUSE

LITKAVAASK<sup>Acetyl</sup>E  
42.01

- ▶ fragmentation table for charge state 1+
- ▶ specType=cid
- ▶ score=51.53
- ▶ F121836.dat
- ▶ query=q15916\_p1
- ▶ precursor=586.851580
- ▶ chargePrecursor=2
- ▶ itol=0.7

| AA    | a              | y <sup>a</sup> | a <sub>0</sub> | b               | b <sup>a</sup> | b <sub>0</sub> | y              | y <sup>a</sup> | y <sub>0</sub> | AA    |
|-------|----------------|----------------|----------------|-----------------|----------------|----------------|----------------|----------------|----------------|-------|
| L[1]  | 86.298         | 0.000          | 0.000          | 174.095         | 0.000          | 0.000          | 172.280        | 1120.692       | 1154.978       | L[11] |
| T[2]  | <b>170.180</b> | 0.000          | 0.000          | <b>227.175</b>  | 0.000          | 0.000          | 1208.494       | 1042.729       | 1084.904       | T[10] |
| T[3]  | 300.270        | 0.000          | 382.210        | <b>328.221</b>  | 0.000          | 310.211        | <b>946.520</b> | 979.484        | 928.510        | T[10] |
| K[4]  | 399.360        | 481.200        | 430.151        | <b>456.310</b>  | 416.201        | <b>438.307</b> | <b>843.471</b> | 828.444        | 817.402        | K[10] |
| R[5]  | <b>478.360</b> | 602.210        | 641.201        | <b>527.261</b>  | 608.251        | <b>589.241</b> | <b>117.311</b> | 788.281        | 899.291        | R[10] |
| V[6]  | 578.450        | 783.420        | 820.411        | <b>626.421</b>  | 808.407        | <b>808.411</b> | <b>646.311</b> | 679.324        | 628.330        | V[10] |
| A[7]  | 678.540        | 962.430        | 1001.421       | <b>697.461</b>  | 1001.414       | <b>979.420</b> | <b>547.272</b> | <b>330.246</b> | <b>529.262</b> | A[10] |
| A[8]  | 740.540        | 123.430        | 122.482        | <b>768.480</b>  | 751.471        | <b>730.467</b> | <b>476.235</b> | 490.280        | 458.270        | A[10] |
| S[9]  | 877.530        | 150.440        | 149.524        | 150.520         | 150.501        | <b>837.510</b> | <b>405.183</b> | 388.219        | <b>387.187</b> | S[10] |
| R[10] | 997.640        | 280.514        | 979.630        | <b>1025.615</b> | 1008.600       | 1007.620       | 105.180        | 305.170        | 300.161        | R[10] |
| E[11] | 1126.630       | 1108.600       | 1108.671       | 1158.670        | 1137.651       | 1136.660       | 148.600        | 0.000          | 130.600        | E[11] |

# sp | P62806 | H4\_MOUSE

[Acetyl]SGRGKGGKGLGKGGAKRHR (Methyl) KVLRL Methyl D  
 (14.02) 14.02

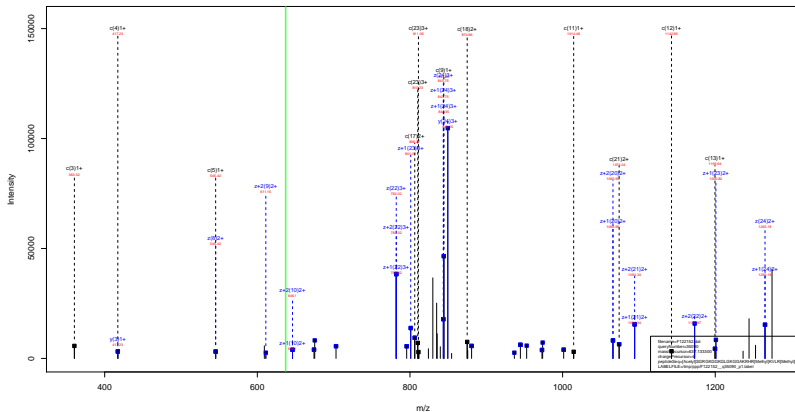

# sp | P62806 | H4\_MOUSE

[Acetyl]SGRGKGGKGLGKGGAKRHR (Methyl) KVLRL Methyl D  
(14.02) 14.02

- ▶ fragmentation table for charge state 1+
- ▶ specType=etd
- ▶ score=88.03
- ▶ F122152.dat
- ▶ query=q35090.p1
- ▶ precursor=637.133300
- ▶ chargePrecursor=4
- ▶ itol=0.6

| AA | c               | y              | z+1      | z+2            | z        | AA    |
|----|-----------------|----------------|----------|----------------|----------|-------|
| S  | 147.070         | 2545.502       | 2529.483 | 0.000          | 2528.476 | S[24] |
| G  | 204.998         | 2416.460       | 2400.441 | 0.000          | 2399.433 | G[23] |
| R  | <b>300.190</b>  | 2399.433       | 2383.419 | 2364.427       | 2342.412 | R[22] |
| G  | <b>417.220</b>  | 2203.337       | 2187.318 | 2188.326       | 2186.310 | G[21] |
| K  | <b>545.315</b>  | 2146.310       | 2130.297 | 2131.305       | 2129.289 | K[20] |
| G  | 602.337         | 2018.221       | 2002.202 | 2003.210       | 2001.194 | G[19] |
| G  | 609.358         | 1961.199       | 1945.180 | 1946.188       | 1944.173 | G[18] |
| K  | 787.453         | 1904.178       | 1888.159 | 1889.167       | 1887.151 | K[17] |
| G  | <b>844.475</b>  | 1776.081       | 1760.064 | 1761.072       | 1759.056 | G[16] |
| L  | 877.597         | 1719.061       | 1703.043 | 1704.050       | 1702.035 | L[15] |
| G  | <b>1014.580</b> | 1605.977       | 1589.958 | 1590.966       | 1588.951 | G[14] |
| K  | <b>1142.675</b> | 1548.956       | 1532.937 | 1533.945       | 1531.929 | K[13] |
| G  | <b>1199.697</b> | 1420.861       | 1404.842 | 1405.850       | 1403.834 | G[12] |
| G  | 1296.718        | 1363.839       | 1347.821 | 1348.828       | 1346.813 | G[11] |
| A  | 1327.795        | 1306.818       | 1290.799 | 1291.807       | 1289.791 | A[10] |
| K  | 1455.850        | 1235.781       | 1219.762 | 1220.770       | 1218.754 | K[9]  |
| R  | 1611.951        | 1107.686       | 1091.667 | 1092.675       | 1090.660 | R[8]  |
| H  | 1749.010        | 951.580        | 935.560  | <b>936.574</b> | 934.555  | H[7]  |
| R  | 1919.127        | 814.520        | 798.507  | 799.515        | 797.499  | R[6]  |
| K  | 2047.222        | 644.400        | 628.390  | 629.398        | 627.382  | K[5]  |
| V  | 2146.290        | 516.314        | 500.296  | 501.303        | 499.287  | V[4]  |
| L  | 2259.374        | <b>417.246</b> | 401.227  | 402.235        | 400.219  | L[3]  |
| R  | 2429.491        | 304.162        | 288.143  | 289.151        | 287.135  | R[2]  |
| D  | 2544.518        | 134.045        | 118.028  | 119.034        | 117.018  | D[1]  |

# sp | P62806 | H4\_MOUSE

[Acetyl]SGRGKGGKGLGKGGAKRHR (Methyl)  
(14.02) KVLRL Methyl  
14.02 D

- ▶ fragmentation table for charge state 2+
- ▶ specType=etd
- ▶ score=88.03
- ▶ F122152.dat
- ▶ query=q35090.p1
- ▶ precursor=637.133300
- ▶ chargePrecursor=4
- ▶ itol=0.6

| AA   | c               | y               | z+1             | z+2             | z               | AA   |
|------|-----------------|-----------------|-----------------|-----------------|-----------------|------|
| S 1  | 74.092          | 1273.255        | <b>1265.245</b> | 0.504           | <b>1264.741</b> | S 24 |
| G 2  | 102.553         | 1208.733        | <b>1200.724</b> | 0.504           | <b>1200.220</b> | G 23 |
| R 3  | 180.603         | 1180.223        | 1172.213        | <b>1172.717</b> | 1171.700        | R 22 |
| G 4  | 209.114         | 1102.772        | <b>1094.163</b> | <b>1094.667</b> | 1093.650        | G 21 |
| K 5  | 273.163         | <b>1073.661</b> | <b>1065.652</b> | <b>1066.156</b> | 1065.140        | K 20 |
| G 6  | 301.672         | 1009.614        | <b>1001.605</b> | 1002.608        | <b>1001.101</b> | G 19 |
| G 7  | 330.183         | 981.103         | <b>973.094</b>  | <b>973.598</b>  | <b>972.590</b>  | G 18 |
| K 8  | 394.230         | <b>952.592</b>  | <b>944.583</b>  | <b>945.087</b>  | <b>944.079</b>  | K 17 |
| G 9  | 422.741         | 888.545         | <b>880.536</b>  | <b>881.040</b>  | 880.032         | G 16 |
| L 10 | 479.283         | 860.136         | 852.127         | 853.130         | 852.123         | L 15 |
| G 11 | 507.794         | 831.626         | <b>795.483</b>  | <b>795.987</b>  | 794.970         | G 14 |
| K 12 | 571.841         | 774.083         | 766.072         | 767.076         | 766.068         | K 13 |
| G 13 | 600.352         | 710.934         | <b>702.925</b>  | <b>703.429</b>  | 702.421         | G 12 |
| G 14 | 628.863         | 682.423         | <b>674.414</b>  | <b>674.918</b>  | <b>673.910</b>  | G 11 |
| A 15 | 664.364         | 653.912         | <b>645.903</b>  | <b>646.407</b>  | 645.399         | A 10 |
| R 16 | 728.426         | 618.394         | 610.385         | <b>610.889</b>  | 609.881         | R 9  |
| R 17 | <b>806.479</b>  | 554.347         | 546.337         | 546.841         | <b>545.833</b>  | R 8  |
| H 18 | <b>875.009</b>  | 476.290         | 468.282         | 468.791         | 467.783         | H 7  |
| R 19 | 960.067         | 407.767         | 399.757         | 400.261         | 399.253         | R 6  |
| K 20 | 1028.115        | 322.708         | 314.699         | 315.203         | 314.195         | K 5  |
| V 21 | <b>1073.649</b> | 258.061         | 250.052         | 251.056         | 250.048         | V 4  |
| L 22 | 1130.153        | 209.126         | 201.117         | 201.621         | 200.613         | L 3  |
| R 23 | 1215.249        | 152.584         | 144.575         | 145.079         | 144.071         | R 2  |
| D 24 | 1272.763        | 67.526          | 59.517          | 60.021          | 59.013          | D 1  |

# sp | P62806 | H4\_MOUSE

[Acetyl]SGRGKGGKGLGKGGAKRHR (Methyl)  
(14.02) KVLRL Methyl  
14.02

- ▶ fragmentation table for charge state 3+
- ▶ specType=etd
- ▶ score=88.03
- ▶ F122152.dat
- ▶ query=q35090\_p1
- ▶ precursor=637.133300
- ▶ chargePrecursor=4
- ▶ itol=0.6

| AA    | c              | y              | z+1            | z+2            | z              | AA    |
|-------|----------------|----------------|----------------|----------------|----------------|-------|
| S[1]  | 69.697         | <b>849.172</b> | <b>843.833</b> | 0.672          | <b>843.497</b> | S[24] |
| G[2]  | 68.704         | <b>806.156</b> | <b>800.818</b> | 0.672          | <b>800.483</b> | G[23] |
| R[3]  | 120.738        | 787.151        | <b>781.811</b> | <b>782.147</b> | <b>781.475</b> | R[22] |
| G[4]  | 139.745        | 735.117        | 729.778        | 730.114        | 729.442        | G[21] |
| K[5]  | 182.443        | 718.110        | 710.770        | 711.106        | 710.435        | K[20] |
| G[6]  | 201.450        | 673.412        | 668.072        | 666.408        | 667.736        | G[19] |
| G[7]  | 220.458        | 654.405        | 649.065        | 649.401        | 648.729        | G[18] |
| K[8]  | 263.156        | 635.397        | 630.058        | 630.394        | 629.722        | K[17] |
| G[9]  | 282.163        | 592.699        | 587.360        | 587.695        | 587.024        | G[16] |
| L[10] | 319.858        | 571.692        | 566.352        | 566.688        | 566.016        | L[15] |
| G[11] | 338.865        | 535.991        | 530.651        | 530.984        | 530.322        | G[14] |
| K[12] | 381.563        | 516.980        | 511.641        | 511.986        | 511.315        | K[13] |
| G[13] | 400.570        | 474.282        | 468.942        | 469.288        | 468.618        | G[12] |
| G[14] | 419.578        | 455.285        | 449.945        | 450.281        | 449.609        | G[11] |
| A[15] | 443.297        | 436.277        | 430.938        | 431.274        | 430.602        | A[10] |
| K[16] | 485.995        | 412.588        | 407.250        | 407.595        | 406.923        | K[9]  |
| R[17] | 537.989        | 399.900        | 394.561        | 394.896        | 394.225        | R[8]  |
| H[18] | 583.675        | 317.866        | 312.527        | 312.863        | 312.191        | H[7]  |
| R[19] | 640.381        | 272.180        | 266.841        | 267.176        | 266.505        | R[6]  |
| K[20] | 683.078        | 215.875        | 210.535        | 210.871        | 209.999        | K[5]  |
| V[21] | 716.102        | 172.776        | 167.437        | 167.773        | 167.101        | V[4]  |
| L[22] | 753.796        | 139.753        | 134.414        | 134.750        | 134.078        | L[3]  |
| R[23] | <b>810.502</b> | 102.059        | 96.719         | 97.055         | 96.383         | R[2]  |
| D[24] | 848.844        | 45.351         | 40.014         | 40.349         | 39.678         | D[1]  |

# sp | P62806 | H4\_MOUSE

SGRGKGGKGLGKGGAK <sup>Acetyl</sup> RHRK <sup>Trimethyl</sup> VLRD  
 42.01 42.05

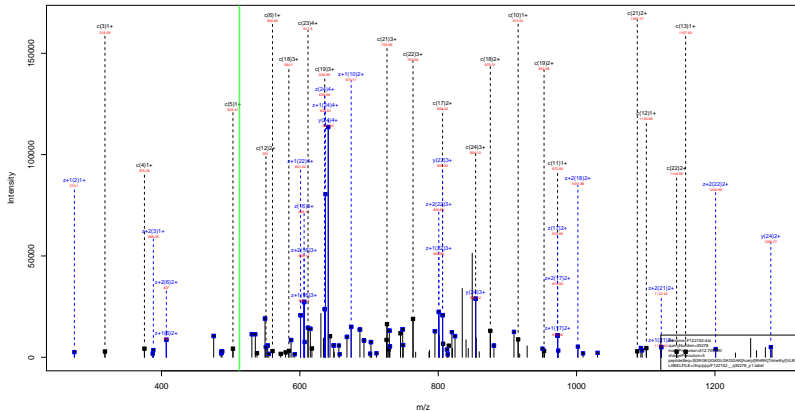

# sp | P62806 | H4\_MOUSE

SGRGKGGKGLGKGGAK <sup>Acetyl</sup>42.01 RHRK <sup>Trimethyl</sup>42.05 VLRD

- ▶ fragmentation table for charge state 1+
- ▶ specType=etd
- ▶ score=93.91
- ▶ F122152.dat
- ▶ query=q35278.p1
- ▶ precursor=512.709980
- ▶ chargePrecursor=5
- ▶ itol=0.6

| AA |    | c               | y        | z+1            | z+2            | z        | AA    |
|----|----|-----------------|----------|----------------|----------------|----------|-------|
| S  | 1  | 105.066         | 2559.518 | 2543.499       | 0.000          | 2542.491 | S[24] |
| G  | 2  | 182.987         | 2472.488 | 2456.467       | 0.000          | 2455.459 | G[23] |
| R  | 3  | <b>318.188</b>  | 2415.464 | 2399.446       | 2400.453       | 2398.438 | R[22] |
| G  | 4  | <b>375.210</b>  | 2259.363 | 2243.345       | 2244.352       | 2242.337 | G[21] |
| K  | 5  | <b>503.305</b>  | 2202.342 | 2186.323       | 2187.331       | 2185.315 | K[20] |
| G  | 6  | <b>560.326</b>  | 2074.247 | 2058.228       | 2059.236       | 2057.220 | G[19] |
| G  | 7  | <b>617.348</b>  | 2017.225 | 2001.207       | 2002.214       | 2000.199 | G[18] |
| K  | 8  | <b>745.443</b>  | 1960.204 | 1944.185       | 1945.193       | 1943.177 | K[17] |
| G  | 9  | <b>802.465</b>  | 1832.109 | 1816.090       | 1817.098       | 1815.082 | G[16] |
| L  | 10 | <b>915.548</b>  | 1775.087 | 1759.069       | 1760.077       | 1758.061 | L[15] |
| G  | 11 | <b>972.570</b>  | 1662.083 | 1645.995       | 1646.993       | 1644.977 | G[14] |
| K  | 12 | <b>1100.665</b> | 1604.982 | 1588.963       | 1589.971       | 1587.955 | K[13] |
| G  | 13 | <b>1157.686</b> | 1476.887 | 1460.868       | 1461.876       | 1459.860 | G[12] |
| G  | 14 | 1214.708        | 1419.866 | 1403.847       | 1404.855       | 1402.839 | G[11] |
| A  | 15 | 1285.745        | 1362.844 | 1346.825       | 1347.833       | 1345.818 | A[10] |
| K  | 16 | 1455.850        | 1291.807 | 1275.788       | 1276.796       | 1274.780 | K[9]  |
| R  | 17 | 1613.954        | 1124.761 | 1108.743       | 1109.751       | 1107.735 | R[8]  |
| H  | 18 | 1749.010        | 995.620  | 989.592        | <b>950.509</b> | 948.574  | H[7]  |
| R  | 19 | 1905.111        | 828.541  | <b>812.523</b> | <b>813.530</b> | 811.515  | R[6]  |
| K  | 20 | 2075.253        | 672.440  | <b>656.422</b> | <b>657.429</b> | 655.414  | K[5]  |
| V  | 21 | 2174.322        | 502.298  | <b>486.280</b> | <b>487.287</b> | 485.272  | V[4]  |
| L  | 22 | 2287.406        | 403.230  | <b>387.211</b> | <b>388.219</b> | 386.203  | L[3]  |
| R  | 23 | 2443.507        | 290.140  | <b>274.127</b> | 275.135        | 273.119  | R[2]  |
| D  | 24 | 2558.534        | 134.045  | 118.026        | 119.034        | 117.018  | D[1]  |

# sp | P62806 | H4\_MOUSE

SGRGKGGKGLGKGGAK <sup>Acetyl</sup>42.01 RHRK <sup>Trimethyl</sup>42.05 VL RD

- ▶ fragmentation table for charge state 2+
- ▶ specType=etd
- ▶ score=93.91
- ▶ F122152.dat
- ▶ query=q35278.p1
- ▶ precursor=512.709980
- ▶ chargePrecursor=5
- ▶ itol=0.6

| AA    | c               | y               | z+1             | z+2             | z               | AA    |
|-------|-----------------|-----------------|-----------------|-----------------|-----------------|-------|
| S[1]  | 81.017          | <b>1280.263</b> | 1270.263        | 0.504           | 1271.740        | S[24] |
| G[2]  | 81.547          | 1236.747        | 1228.737        | 0.504           | 1228.231        | G[23] |
| R[3]  | 158.558         | 1208.238        | 1200.228        | <b>1200.730</b> | 1199.721        | R[22] |
| G[4]  | 188.109         | 1130.185        | <b>1122.176</b> | <b>1122.680</b> | 1121.671        | G[21] |
| K[5]  | 252.158         | 1101.675        | 1093.665        | <b>1094.169</b> | <b>1093.161</b> | K[20] |
| G[6]  | 280.667         | 1037.627        | 1029.618        | <b>1030.122</b> | 1029.114        | G[19] |
| G[7]  | 309.178         | <b>1009.116</b> | 1001.107        | <b>1001.611</b> | 1000.603        | G[18] |
| K[8]  | 373.225         | 980.606         | <b>972.596</b>  | <b>973.100</b>  | <b>972.092</b>  | K[17] |
| G[9]  | 401.736         | 916.556         | 908.547         | <b>909.051</b>  | 908.043         | G[16] |
| L[10] | 439.278         | 898.041         | <b>890.038</b>  | <b>890.542</b>  | 889.536         | L[15] |
| G[11] | <b>486.789</b>  | 831.595         | 823.586         | <b>824.090</b>  | 823.082         | G[14] |
| K[12] | <b>550.836</b>  | 802.995         | <b>794.985</b>  | <b>795.489</b>  | 794.481         | K[13] |
| G[13] | <b>579.347</b>  | 738.947         | 730.938         | 731.442         | <b>730.434</b>  | G[12] |
| G[14] | 607.857         | <b>710.436</b>  | <b>702.427</b>  | <b>702.931</b>  | <b>701.923</b>  | G[11] |
| A[15] | <b>643.376</b>  | 681.929         | <b>673.918</b>  | <b>674.420</b>  | 673.413         | A[10] |
| R[16] | <b>728.429</b>  | 646.407         | 638.398         | 638.902         | 637.894         | R[9]  |
| R[17] | <b>806.479</b>  | 561.354         | <b>553.345</b>  | <b>553.849</b>  | 552.841         | R[8]  |
| H[18] | <b>875.009</b>  | 483.304         | <b>475.294</b>  | <b>475.798</b>  | 474.791         | H[7]  |
| R[19] | <b>953.059</b>  | 414.774         | <b>406.765</b>  | <b>407.269</b>  | 406.261         | R[6]  |
| K[20] | 1038.131        | 336.724         | 328.714         | 329.218         | 328.211         | K[5]  |
| V[21] | <b>1087.665</b> | 252.653         | 244.643         | 245.147         | 244.140         | V[4]  |
| L[22] | <b>1144.207</b> | 202.119         | 194.109         | 194.613         | 193.606         | L[3]  |
| R[23] | 1222.257        | 145.577         | 137.567         | 138.071         | 137.063         | R[2]  |
| D[24] | 1279.771        | 67.526          | 59.517          | 60.021          | 59.013          | D[1]  |



# sp | P62806 | H4\_MOUSE

SGRGKGGKGLGKGGAK <sup>Acetyl</sup>42.01 RHRK <sup>Trimethyl</sup>42.05 VLRLD

- ▶ fragmentation table for charge state 3+
- ▶ specType=etd
- ▶ score=93.91
- ▶ F122152.dat
- ▶ query=q35278.p1
- ▶ precursor=512.709980
- ▶ chargePrecursor=5
- ▶ itol=0.6

| AA    | c              | y              | z+1            | z+2            | z              | AA    |
|-------|----------------|----------------|----------------|----------------|----------------|-------|
| S[1]  | 35.693         | <b>853.844</b> | 848.900        | 0.672          | 848.109        | S[24] |
| G[2]  | 54.701         | <b>824.833</b> | <b>819.404</b> | 0.672          | 819.158        | G[23] |
| R[3]  | 106.734        | <b>805.826</b> | <b>800.487</b> | <b>800.823</b> | 800.151        | R[22] |
| G[4]  | 125.741        | 753.793        | <b>748.453</b> | <b>748.789</b> | <b>748.117</b> | G[21] |
| K[5]  | 168.440        | 734.785        | <b>729.446</b> | <b>729.782</b> | <b>729.110</b> | K[20] |
| G[6]  | 187.447        | <b>692.087</b> | <b>686.748</b> | <b>687.083</b> | <b>686.412</b> | G[19] |
| G[7]  | 206.454        | 673.080        | <b>667.740</b> | <b>668.076</b> | 667.404        | G[18] |
| K[8]  | 249.152        | 654.073        | <b>648.733</b> | <b>649.069</b> | <b>648.397</b> | K[17] |
| G[9]  | 268.160        | <b>611.374</b> | <b>606.035</b> | <b>606.371</b> | <b>605.699</b> | G[16] |
| L[10] | 309.254        | <b>592.367</b> | <b>587.028</b> | <b>587.364</b> | 586.692        | L[15] |
| G[11] | 324.861        | <b>554.673</b> | <b>549.333</b> | <b>549.669</b> | 548.997        | G[14] |
| K[12] | 367.560        | <b>535.666</b> | <b>530.326</b> | <b>530.662</b> | 529.990        | K[13] |
| G[13] | 386.567        | 492.967        | <b>487.628</b> | 487.964        | <b>487.292</b> | G[12] |
| G[14] | 405.574        | 473.960        | 468.620        | 468.956        | 468.285        | G[11] |
| A[15] | 429.253        | 454.953        | 449.613        | 449.949        | 449.277        | A[10] |
| K[16] | <b>485.955</b> | 431.274        | 425.934        | 426.270        | 425.598        | K[9]  |
| R[17] | <b>537.989</b> | 374.572        | 369.232        | 369.568        | 368.896        | R[8]  |
| H[18] | <b>583.675</b> | 322.538        | 317.199        | 317.535        | 316.863        | H[7]  |
| R[19] | <b>633.709</b> | 276.852        | 271.512        | 271.848        | 271.176        | R[6]  |
| K[20] | <b>692.423</b> | 224.818        | 219.478        | 219.815        | 219.143        | K[5]  |
| V[21] | <b>725.445</b> | 168.104        | 162.765        | 163.101        | 162.429        | V[4]  |
| L[22] | <b>763.140</b> | 135.082        | 129.742        | 130.078        | 129.406        | L[3]  |
| R[23] | <b>815.174</b> | 97.387         | 92.047         | 92.383         | 91.711         | R[2]  |
| D[24] | <b>853.516</b> | 45.353         | 40.014         | 40.349         | 39.678         | D[1]  |

# sp | P62806 | H4\_MOUSE

SGRGKGGKGLGKGGAK <sup>Acetyl</sup>42.01 RHRK <sup>Trimethyl</sup>42.05 VLRLD

- ▶ fragmentation table for charge state 4+
- ▶ specType=etd
- ▶ score=93.91
- ▶ F122152.dat
- ▶ query=q35278.p1
- ▶ precursor=512.709980
- ▶ chargePrecursor=5
- ▶ itol=0.6

| AA    | c              | y              | z+1            | z+2            | z              | AA    |
|-------|----------------|----------------|----------------|----------------|----------------|-------|
| S[1]  | 27.022         | <b>640.635</b> | <b>636.630</b> | 0.755          | <b>636.178</b> | S[24] |
| G[2]  | 41.277         | 518.877        | <b>614.872</b> | 0.755          | <b>614.620</b> | G[23] |
| R[3]  | 80.303         | 604.622        | <b>600.617</b> | <b>600.869</b> | 600.905        | R[22] |
| G[4]  | 94.558         | 565.596        | 561.592        | 561.844        | 561.340        | G[21] |
| K[5]  | 126.582        | <b>551.341</b> | 547.336        | 547.588        | 547.084        | K[20] |
| G[6]  | 140.837        | 519.317        | 515.312        | 515.564        | 515.061        | G[19] |
| G[7]  | 155.092        | 505.062        | 501.057        | 501.309        | 500.805        | G[18] |
| K[8]  | 187.116        | 490.806        | <b>486.802</b> | <b>487.054</b> | <b>486.550</b> | K[17] |
| G[9]  | 201.372        | 436.783        | 432.778        | 433.030        | 432.526        | G[16] |
| L[10] | 229.643        | 444.527        | 440.523        | 440.775        | 440.271        | L[15] |
| G[11] | 253.598        | 416.256        | 412.252        | 412.504        | 412.000        | G[14] |
| K[12] | 275.922        | 402.001        | 397.996        | 398.248        | 397.744        | K[13] |
| G[13] | 290.177        | 369.977        | 365.973        | 366.224        | 365.721        | G[12] |
| G[14] | 304.432        | 355.722        | 351.717        | 351.969        | 351.465        | G[11] |
| A[15] | 322.192        | 341.466        | 337.462        | 337.714        | 337.210        | A[10] |
| K[16] | 364.718        | 323.707        | 319.703        | 319.954        | 319.451        | K[9]  |
| R[17] | 403.743        | 381.181        | 377.176        | 377.428        | 376.924        | R[8]  |
| H[18] | 438.008        | 242.156        | 238.151        | 238.403        | 237.899        | H[7]  |
| R[19] | 477.033        | 207.891        | 203.886        | 204.138        | 203.634        | R[6]  |
| K[20] | 519.569        | 108.866        | 104.861        | 105.113        | 104.609        | K[5]  |
| V[21] | 544.336        | 126.330        | 122.325        | 122.577        | 122.073        | V[4]  |
| L[22] | <b>572.607</b> | 101.563        | 97.558         | 97.810         | 97.306         | L[3]  |
| R[23] | <b>611.632</b> | 73.292         | 69.287         | 69.539         | 69.035         | R[2]  |
| D[24] | 640.389        | 34.267         | 30.262         | 30.514         | 30.010         | D[1]  |



# sp | P62806 | H4\_MOUSE

SGRGKGGKGLGKGGAKRHR <sup>Trimethyl</sup>42.05 K <sup>Acetyl</sup>42.01 VLRD

- ▶ fragmentation table for charge state 1+
- ▶ specType=etd
- ▶ score=76.52
- ▶ F122152.dat
- ▶ query=q35285.p1
- ▶ precursor=640.636920
- ▶ chargePrecursor=4
- ▶ itol=0.6

| AA |    | c               | y        | z+1            | z+2      | z        | AA |    |
|----|----|-----------------|----------|----------------|----------|----------|----|----|
| S  | 1  | 105.066         | 2559.518 | 2543.499       | 0.000    | 2542.491 | S  | 24 |
| G  | 2  | 102.087         | 2472.488 | 2456.467       | 0.000    | 2455.459 | G  | 23 |
| R  | 3  | 318.186         | 2415.464 | 2399.446       | 2400.453 | 2398.438 | R  | 22 |
| G  | 4  | 375.210         | 2259.363 | 2243.345       | 2244.352 | 2242.337 | G  | 21 |
| K  | 5  | 503.305         | 2202.342 | 2186.323       | 2187.331 | 2185.315 | K  | 20 |
| G  | 6  | 560.326         | 2074.247 | 2058.228       | 2059.236 | 2057.220 | G  | 19 |
| G  | 7  | <b>617.348</b>  | 2017.225 | 2001.207       | 2002.214 | 2000.199 | G  | 18 |
| K  | 8  | <b>745.443</b>  | 1960.204 | 1944.185       | 1945.193 | 1943.177 | K  | 17 |
| G  | 9  | 802.464         | 1832.109 | 1816.090       | 1817.098 | 1815.082 | G  | 16 |
| L  | 10 | 915.546         | 1775.087 | 1759.069       | 1760.077 | 1758.061 | L  | 15 |
| G  | 11 | <b>972.570</b>  | 1662.083 | 1646.065       | 1646.993 | 1644.977 | G  | 14 |
| K  | 12 | <b>1100.665</b> | 1604.982 | 1588.963       | 1589.971 | 1587.955 | K  | 13 |
| G  | 13 | <b>1157.686</b> | 1476.887 | 1460.868       | 1461.876 | 1459.860 | G  | 12 |
| G  | 14 | 1214.708        | 1419.866 | 1403.847       | 1404.855 | 1402.839 | G  | 11 |
| A  | 15 | 1285.745        | 1362.844 | 1346.825       | 1347.833 | 1345.818 | A  | 10 |
| K  | 16 | 1413.840        | 1291.807 | 1275.788       | 1276.796 | 1274.780 | K  | 9  |
| R  | 17 | 1599.941        | 1163.717 | 1147.693       | 1148.701 | 1146.685 | R  | 8  |
| H  | 18 | 1707.000        | 1097.611 | 991.592        | 992.600  | 990.584  | H  | 7  |
| R  | 19 | 1905.148        | 870.552  | <b>854.533</b> | 855.541  | 853.525  | R  | 6  |
| K  | 20 | 2075.253        | 672.404  | 656.385        | 657.393  | 655.377  | K  | 5  |
| V  | 21 | 2174.322        | 502.298  | 486.280        | 487.287  | 485.272  | V  | 4  |
| L  | 22 | 2287.406        | 403.230  | 387.211        | 388.219  | 386.203  | L  | 3  |
| R  | 23 | 2443.507        | 290.146  | 274.127        | 275.135  | 273.119  | R  | 2  |
| D  | 24 | 2558.534        | 134.045  | 118.026        | 119.034  | 117.018  | D  | 1  |

# sp | P62806 | H4\_MOUSE

SGRGKGGKGLGKGGAKRHR <sup>Trimethyl</sup>42.05 K <sup>Acetyl</sup>42.01 VLRD

- ▶ fragmentation table for charge state 2+
- ▶ specType=etd
- ▶ score=76.52
- ▶ F122152.dat
- ▶ query=q35285\_p1
- ▶ precursor=640.636920
- ▶ chargePrecursor=4
- ▶ itol=0.6

| AA | c  | y              | z+1             | z+2             | z               | AA              |       |
|----|----|----------------|-----------------|-----------------|-----------------|-----------------|-------|
| S  | 1  | 53.037         | 1293.063        | <b>1272.253</b> | 0.504           | <b>1271.749</b> | S[24] |
| G  | 2  | 81.547         | 1236.747        | <b>1228.737</b> | 0.504           | 1228.233        | G[23] |
| R  | 3  | 150.558        | 1208.236        | 1205.726        | <b>1200.730</b> | 1199.723        | R[22] |
| G  | 4  | 188.109        | 1159.185        | <b>1122.176</b> | <b>1122.680</b> | 1121.677        | G[21] |
| K  | 5  | 252.136        | <b>1101.675</b> | <b>1093.665</b> | <b>1094.169</b> | <b>1093.161</b> | K[20] |
| G  | 6  | 280.689        | 1037.627        | 1029.619        | 1030.122        | 1029.114        | G[19] |
| G  | 7  | 300.178        | 1009.116        | 1001.107        | <b>1001.611</b> | 1000.603        | G[18] |
| K  | 8  | 373.225        | 980.605         | <b>972.596</b>  | <b>973.100</b>  | 972.092         | K[17] |
| G  | 9  | 401.736        | 816.558         | <b>908.549</b>  | <b>909.053</b>  | <b>908.045</b>  | G[16] |
| L  | 10 | 428.278        | 808.047         | <b>800.038</b>  | <b>800.542</b>  | <b>799.534</b>  | L[15] |
| G  | 11 | 486.789        | 831.505         | 823.495         | <b>824.000</b>  | 822.992         | G[14] |
| K  | 12 | 550.836        | 802.995         | <b>794.985</b>  | <b>795.489</b>  | 794.481         | K[13] |
| G  | 13 | 570.347        | 738.947         | <b>730.938</b>  | <b>731.442</b>  | 730.434         | G[12] |
| G  | 14 | 607.857        | 710.436         | <b>702.427</b>  | <b>702.931</b>  | 701.923         | G[11] |
| A  | 15 | 643.376        | 681.926         | 673.916         | 674.420         | 673.412         | A[10] |
| R  | 16 | 707.423        | 656.409         | 638.399         | 638.902         | 637.895         | R[9]  |
| R  | 17 | 785.474        | 582.360         | 574.350         | 574.854         | 573.846         | R[8]  |
| H  | 18 | <b>854.004</b> | 504.309         | 496.300         | 496.804         | 495.796         | H[7]  |
| R  | 19 | <b>953.078</b> | 435.780         | 427.770         | 428.274         | 427.266         | R[6]  |
| K  | 20 | 1038.130       | 336.706         | 328.696         | 329.200         | 328.192         | K[5]  |
| V  | 21 | 1087.665       | 251.652         | 243.643         | 244.147         | 243.140         | V[4]  |
| L  | 22 | 1146.207       | 202.119         | 194.109         | 194.613         | 193.605         | L[3]  |
| R  | 23 | 1222.259       | 145.577         | 137.567         | 138.071         | 137.063         | R[2]  |
| D  | 24 | 1279.771       | 67.526          | 59.517          | 60.021          | 59.013          | D[1]  |

# sp | P62806 | H4\_MOUSE

SGRGKGGKGLGKGGAKRHR <sup>Trimethyl</sup>42.05 K <sup>Acetyl</sup>42.01 VLRD

- ▶ fragmentation table for charge state 3+
- ▶ specType=etd
- ▶ score=76.52
- ▶ F122152.dat
- ▶ query=q35285.p1
- ▶ precursor=640.636920
- ▶ chargePrecursor=4
- ▶ itol=0.6

| AA    | c       | y              | z+1            | z+2            | z              | AA    |
|-------|---------|----------------|----------------|----------------|----------------|-------|
| S[1]  | 35.693  | <b>853.844</b> | <b>848.505</b> | 0.672          | <b>848.169</b> | S[24] |
| G[2]  | 54.701  | 824.833        | <b>819.494</b> | 0.672          | <b>819.158</b> | G[23] |
| R[3]  | 106.734 | <b>805.826</b> | <b>800.487</b> | <b>800.823</b> | <b>800.151</b> | R[22] |
| G[4]  | 125.741 | 753.793        | 748.453        | 748.789        | 748.117        | G[21] |
| K[5]  | 168.440 | 734.785        | 729.446        | 729.782        | 729.110        | K[20] |
| G[6]  | 187.447 | 692.087        | 686.748        | 687.083        | 686.412        | G[19] |
| G[7]  | 206.454 | 673.080        | 667.740        | 668.076        | 667.404        | G[18] |
| K[8]  | 249.152 | 654.073        | 648.733        | 649.069        | 648.397        | K[17] |
| G[9]  | 268.160 | 611.374        | 606.035        | 606.371        | 605.699        | G[16] |
| L[10] | 305.854 | 592.367        | 587.028        | 587.364        | 586.692        | L[15] |
| G[11] | 324.861 | 554.673        | 549.333        | 549.669        | 548.997        | G[14] |
| K[12] | 367.560 | 535.666        | 530.326        | 530.662        | 529.990        | K[13] |
| G[13] | 386.567 | 492.967        | 487.628        | 487.964        | 487.292        | G[12] |
| G[14] | 405.574 | 473.960        | 468.620        | 468.956        | 468.285        | G[11] |
| A[15] | 429.253 | 454.953        | 449.613        | 449.949        | 449.277        | A[10] |
| K[16] | 471.951 | 431.274        | 425.934        | 426.270        | 425.598        | K[9]  |
| R[17] | 523.995 | 388.976        | 383.236        | 383.572        | 382.900        | R[8]  |
| H[18] | 569.671 | 336.542        | 331.202        | 331.538        | 330.866        | H[7]  |
| R[19] | 635.721 | 290.856        | 285.516        | 285.852        | 285.180        | R[6]  |
| K[20] | 692.423 | 224.896        | 219.467        | 219.803        | 219.131        | K[5]  |
| V[21] | 725.445 | 198.104        | 192.765        | 193.101        | 192.429        | V[4]  |
| L[22] | 763.140 | 135.082        | 129.742        | 130.078        | 129.406        | L[3]  |
| R[23] | 815.174 | 97.387         | 92.047         | 92.383         | 91.711         | R[2]  |
| D[24] | 853.516 | 45.353         | 40.014         | 40.349         | 39.678         | D[1]  |



# sp | P62806 | H4\_MOUSE

[Acetyl]SGRGKGGKGLGKGGAKRHRKVL R Trimethyl D  
42.05

- ▶ fragmentation table for charge state 1+
- ▶ specType=etd
- ▶ score=67.73
- ▶ F122152.dat
- ▶ query=q35289\_p1
- ▶ precursor=640.637580
- ▶ chargePrecursor=4
- ▶ itol=0.6

| AA | c  | y               | z+1      | z+2      | z        | AA       |   |    |
|----|----|-----------------|----------|----------|----------|----------|---|----|
| S  | 1  | 147.076         | 2559.518 | 2543.499 | 0.000    | 2542.491 | S | 24 |
| G  | 2  | 234.998         | 2430.473 | 2414.457 | 0.000    | 2413.449 | G | 23 |
| R  | 3  | <b>360.199</b>  | 2373.454 | 2357.435 | 2356.443 | 2356.421 | R | 22 |
| G  | 4  | <b>417.220</b>  | 2217.353 | 2201.334 | 2202.342 | 2200.326 | G | 21 |
| K  | 5  | <b>545.315</b>  | 2160.331 | 2144.313 | 2145.320 | 2143.305 | K | 20 |
| G  | 6  | <b>602.337</b>  | 2032.230 | 2016.210 | 2017.225 | 2015.210 | G | 19 |
| G  | 7  | <b>659.358</b>  | 1975.215 | 1959.196 | 1960.204 | 1958.188 | G | 18 |
| K  | 8  | <b>707.453</b>  | 1918.193 | 1902.175 | 1903.182 | 1901.167 | K | 17 |
| G  | 9  | <b>844.475</b>  | 1790.090 | 1774.080 | 1775.087 | 1773.072 | G | 16 |
| L  | 10 | 877.559         | 1733.977 | 1717.958 | 1718.966 | 1716.950 | L | 15 |
| G  | 11 | <b>1014.580</b> | 1619.963 | 1603.974 | 1604.982 | 1602.966 | G | 14 |
| K  | 12 | 1142.675        | 1562.971 | 1546.953 | 1547.960 | 1545.945 | K | 13 |
| G  | 13 | <b>1199.697</b> | 1434.876 | 1418.858 | 1419.866 | 1417.850 | G | 12 |
| G  | 14 | 1256.718        | 1377.855 | 1361.836 | 1362.844 | 1360.828 | G | 11 |
| A  | 15 | 1327.795        | 1320.833 | 1304.815 | 1305.823 | 1303.807 | A | 10 |
| K  | 16 | 1455.850        | 1249.790 | 1233.778 | 1234.785 | 1232.770 | K | 9  |
| R  | 17 | 1613.894        | 1129.701 | 1105.683 | 1106.691 | 1104.675 | R | 8  |
| H  | 18 | 1749.030        | 995.620  | 949.582  | 950.589  | 948.574  | H | 7  |
| R  | 19 | 1905.111        | 828.541  | 812.523  | 813.530  | 811.515  | R | 6  |
| K  | 20 | 2033.206        | 672.440  | 656.422  | 657.429  | 655.414  | K | 5  |
| V  | 21 | 2132.275        | 544.345  | 528.327  | 529.334  | 527.319  | V | 4  |
| L  | 22 | 2245.359        | 445.277  | 429.258  | 430.266  | 428.250  | L | 3  |
| K  | 23 | 2443.507        | 332.193  | 316.174  | 317.182  | 315.166  | K | 2  |
| D  | 24 | 2558.534        | 134.045  | 118.026  | 119.034  | 117.018  | D | 1  |



# sp | P62806 | H4\_MOUSE

[Acetyl]SGRGKGGKGLGKGGAKRHRKVLRR<sup>Trimethyl</sup>D  
42.05

- ▶ fragmentation table for charge state 2+
- ▶ specType=etd
- ▶ score=67.73
- ▶ F122152.dat
- ▶ query=q35289\_p1
- ▶ precursor=640.637580
- ▶ chargePrecursor=4
- ▶ itol=0.6

| AA | c  | y              | z+1      | z+2             | z               | AA              |       |
|----|----|----------------|----------|-----------------|-----------------|-----------------|-------|
| S  | 1  | 74.042         | 1280.203 | <b>1272.253</b> | 0.504           | 1271.749        | S[24] |
| G  | 2  | 102.553        | 1215.741 | <b>1207.732</b> | 0.504           | 1207.239        | G[23] |
| R  | 3  | 180.063        | 1187.231 | <b>1179.221</b> | <b>1179.725</b> | <b>1178.717</b> | R[22] |
| G  | 4  | 259.114        | 1109.380 | <b>1101.171</b> | <b>1101.675</b> | 1100.569        | G[21] |
| K  | 5  | 273.161        | 1080.669 | <b>1072.660</b> | <b>1073.164</b> | 1072.158        | K[20] |
| G  | 6  | 301.672        | 1016.622 | 1008.612        | 1009.116        | 1008.108        | G[19] |
| G  | 7  | 330.183        | 968.111  | <b>980.102</b>  | <b>980.606</b>  | 979.599         | G[18] |
| K  | 8  | 394.230        | 959.600  | <b>951.591</b>  | <b>952.095</b>  | 951.087         | K[17] |
| G  | 9  | 422.741        | 895.353  | <b>887.343</b>  | <b>888.047</b>  | 887.040         | G[16] |
| L  | 10 | 479.293        | 867.942  | <b>859.933</b>  | <b>859.537</b>  | <b>858.529</b>  | L[15] |
| G  | 11 | 507.794        | 810.500  | <b>802.491</b>  | <b>802.995</b>  | 801.987         | G[14] |
| K  | 12 | 571.841        | 781.989  | <b>773.980</b>  | <b>774.484</b>  | 773.476         | K[13] |
| G  | 13 | 600.352        | 717.942  | <b>709.932</b>  | <b>710.436</b>  | 709.429         | G[12] |
| G  | 14 | 628.863        | 689.431  | <b>681.422</b>  | <b>681.926</b>  | 680.918         | G[11] |
| A  | 15 | 664.361        | 660.920  | 662.911         | 663.415         | 662.407         | A[10] |
| R  | 16 | 728.416        | 629.402  | <b>617.392</b>  | <b>617.896</b>  | 616.889         | R[9]  |
| R  | 17 | <b>806.479</b> | 561.354  | 553.345         | 553.849         | 552.841         | R[8]  |
| H  | 18 | 875.009        | 483.304  | 475.294         | 475.798         | 474.791         | H[7]  |
| R  | 19 | <b>953.059</b> | 414.774  | 406.765         | 407.269         | 406.261         | R[6]  |
| K  | 20 | 1017.107       | 336.724  | 328.714         | 329.218         | 328.211         | K[5]  |
| V  | 21 | 1066.641       | 272.676  | 264.667         | 265.171         | 264.163         | V[4]  |
| L  | 22 | 1123.183       | 223.242  | 215.233         | 215.737         | 214.729         | L[3]  |
| R  | 23 | 1222.257       | 196.600  | 158.591         | 159.095         | 158.087         | R[2]  |
| D  | 24 | 1279.771       | 67.526   | 59.517          | 60.021          | 59.013          | D[1]  |

# sp | P62806 | H4\_MOUSE

[Acetyl]SGRGKGGKGLGKGGAKRHRKVL R Trimethyl D  
42.05

- ▶ fragmentation table for charge state 3+
- ▶ specType=etd
- ▶ score=67.73
- ▶ F122152.dat
- ▶ query=q35289\_p1
- ▶ precursor=640.637580
- ▶ chargePrecursor=4
- ▶ itol=0.6

| AA    | c              | y              | z+1            | z+2            | z              | AA    |
|-------|----------------|----------------|----------------|----------------|----------------|-------|
| S[1]  | 49.697         | <b>853.844</b> | <b>848.505</b> | 0.672          | 848.199        | S[24] |
| G[2]  | 58.704         | 810.830        | <b>805.490</b> | 0.672          | 805.154        | G[23] |
| R[3]  | 150.738        | <b>791.823</b> | <b>786.483</b> | <b>786.819</b> | <b>786.147</b> | R[22] |
| G[4]  | 139.745        | 739.789        | 734.450        | 734.785        | 734.114        | G[21] |
| K[5]  | 182.443        | 720.782        | 715.442        | 715.778        | 715.106        | K[20] |
| G[6]  | 201.450        | 678.084        | 672.744        | 673.080        | 672.408        | G[19] |
| G[7]  | 220.458        | <b>659.076</b> | 653.737        | 654.073        | 653.401        | G[18] |
| K[8]  | 263.156        | 640.069        | 634.730        | 635.066        | 634.394        | K[17] |
| G[9]  | 282.163        | 597.371        | 592.031        | 592.367        | 591.695        | G[16] |
| L[10] | 319.858        | 678.364        | 573.024        | 573.360        | 572.688        | L[15] |
| G[11] | 338.865        | 540.660        | 535.320        | 535.656        | 534.984        | G[14] |
| K[12] | 381.563        | 521.662        | 516.322        | 516.658        | 515.986        | K[13] |
| G[13] | 400.570        | 478.964        | 473.624        | 473.960        | 473.288        | G[12] |
| G[14] | 419.578        | 459.957        | 454.617        | 454.953        | 454.281        | G[11] |
| A[15] | 443.257        | 440.949        | 435.610        | 435.946        | 435.274        | A[10] |
| K[16] | 485.955        | <b>417.270</b> | 411.931        | 412.267        | 411.595        | K[9]  |
| R[17] | 537.989        | 374.572        | 369.232        | 369.568        | 368.896        | R[8]  |
| H[18] | 583.675        | 322.538        | 317.199        | 317.535        | 316.863        | H[7]  |
| R[19] | 635.709        | 276.852        | 271.512        | 271.848        | 271.176        | R[6]  |
| K[20] | 678.407        | 224.818        | 219.478        | 219.815        | 219.143        | K[5]  |
| V[21] | 711.430        | 182.120        | 176.780        | 177.116        | 176.444        | V[4]  |
| L[22] | 749.124        | 149.097        | 143.758        | 144.094        | 143.422        | L[3]  |
| R[23] | 815.174        | 111.402        | 106.063        | 106.399        | 105.727        | R[2]  |
| D[24] | <b>853.516</b> | 45.353         | 40.014         | 40.349         | 39.678         | D[1]  |



# sp | P62806 | H4\_MOUSE

[Acetyl]SGRGKGGKGLGKGGAK (Acetyl) R (Dimethyl) HRKVL R (Methyl) D (14.02)

- ▶ fragmentation table for charge state 1+
- ▶ specType=etd
- ▶ score=82.64
- ▶ F122152.dat
- ▶ query=q36005.p1
- ▶ precursor=651.140250
- ▶ chargePrecursor=4
- ▶ itol=0.6

| AA | c  | y               | z+1            | z+2      | z        | AA       |   |    |
|----|----|-----------------|----------------|----------|----------|----------|---|----|
| S  | 1  | 147.076         | 2601.528       | 2585.510 | 0.000    | 2584.502 | S | 24 |
| G  | 2  | 264.098         | 2472.486       | 2456.467 | 0.000    | 2455.459 | G | 23 |
| R  | 3  | <b>360.196</b>  | 2315.464       | 2299.446 | 2620.433 | 2308.425 | R | 22 |
| G  | 4  | <b>417.220</b>  | 2259.361       | 2243.345 | 2244.352 | 2242.337 | G | 21 |
| K  | 5  | 545.315         | 2202.342       | 2186.323 | 2187.331 | 2185.315 | K | 20 |
| G  | 6  | 602.337         | 2074.347       | 2058.328 | 2059.336 | 2057.320 | G | 19 |
| G  | 7  | <b>659.358</b>  | 2017.225       | 2001.207 | 2002.214 | 2000.199 | G | 18 |
| K  | 8  | <b>787.453</b>  | 1960.204       | 1944.185 | 1945.193 | 1943.177 | K | 17 |
| G  | 9  | 844.475         | 1832.109       | 1816.090 | 1817.098 | 1815.082 | G | 16 |
| L  | 10 | <b>937.558</b>  | 1775.087       | 1759.069 | 1760.077 | 1758.061 | L | 15 |
| G  | 11 | <b>1014.580</b> | 1662.001       | 1645.985 | 1646.993 | 1644.977 | G | 14 |
| K  | 12 | 1142.675        | 1604.982       | 1588.963 | 1589.971 | 1587.955 | K | 13 |
| G  | 13 | <b>1199.697</b> | 1476.887       | 1460.868 | 1461.876 | 1459.860 | G | 12 |
| G  | 14 | 1256.718        | 1419.866       | 1403.847 | 1404.855 | 1402.839 | G | 11 |
| A  | 15 | 1327.735        | 1362.844       | 1346.825 | 1347.833 | 1345.818 | A | 10 |
| K  | 16 | 1497.861        | 1291.807       | 1275.788 | 1276.796 | 1274.780 | K | 9  |
| R  | 17 | 1681.993        | 1121.701       | 1105.683 | 1106.691 | 1104.675 | R | 8  |
| H  | 18 | 1819.852        | 937.560        | 921.539  | 922.558  | 920.542  | H | 7  |
| R  | 19 | 1975.153        | <b>800.510</b> | 784.491  | 785.499  | 783.484  | R | 6  |
| K  | 20 | 2103.248        | 644.409        | 628.390  | 629.398  | 627.382  | K | 5  |
| V  | 21 | 2202.317        | 516.314        | 500.295  | 501.303  | 499.287  | V | 4  |
| L  | 22 | 2315.401        | <b>417.246</b> | 401.227  | 402.235  | 400.219  | L | 3  |
| R  | 23 | 2485.517        | 304.162        | 288.143  | 289.151  | 287.135  | R | 2  |
| D  | 24 | 2600.544        | 134.045        | 118.028  | 119.034  | 117.018  | D | 1  |

# sp | P62806 | H4\_MOUSE

[Acetyl]SGRGKGGKGLGKGGAK (Acetyl) R (Dimethyl) (28.03) HRKVL R (Methyl) D (14.02)

- ▶ fragmentation table for charge state 2+
- ▶ specType=etd
- ▶ score=82.64
- ▶ F122152.dat
- ▶ query=q36005\_p1
- ▶ precursor=651.140250
- ▶ chargePrecursor=4
- ▶ itol=0.6

| AA    | c        | y        | z+1             | z+2             | z               | AA    |
|-------|----------|----------|-----------------|-----------------|-----------------|-------|
| S[1]  | 74.042   | 1301.268 | 1293.250        | 0.504           | 1292.755        | S[24] |
| G[2]  | 102.553  | 1236.747 | 1228.737        | 0.504           | 1228.233        | G[23] |
| R[3]  | 180.053  | 1208.236 | <b>1200.226</b> | <b>1200.730</b> | <b>1199.725</b> | R[22] |
| G[4]  | 209.114  | 1130.285 | <b>1122.176</b> | <b>1122.680</b> | 1121.672        | G[21] |
| K[5]  | 271.161  | 1101.675 | <b>1093.665</b> | <b>1094.169</b> | 1093.161        | K[20] |
| G[6]  | 301.672  | 1037.627 | 1029.618        | 1030.122        | 1029.114        | G[19] |
| G[7]  | 330.183  | 1009.116 | 1001.107        | <b>1001.611</b> | 1000.603        | G[18] |
| K[8]  | 394.230  | 980.606  | <b>972.596</b>  | <b>973.100</b>  | <b>972.092</b>  | K[17] |
| G[9]  | 422.741  | 916.558  | <b>908.549</b>  | <b>909.053</b>  | 908.045         | G[16] |
| L[10] | 479.253  | 888.047  | <b>880.038</b>  | <b>880.542</b>  | <b>879.534</b>  | L[15] |
| G[11] | 507.764  | 831.505  | <b>823.496</b>  | <b>824.000</b>  | 823.992         | G[14] |
| K[12] | 571.841  | 802.995  | <b>794.985</b>  | <b>795.489</b>  | 794.481         | K[13] |
| G[13] | 600.352  | 738.947  | <b>730.938</b>  | <b>731.442</b>  | 730.434         | G[12] |
| G[14] | 628.863  | 710.436  | <b>702.427</b>  | <b>702.931</b>  | 701.923         | G[11] |
| A[15] | 664.381  | 681.926  | 673.916         | 674.420         | 673.412         | A[10] |
| R[16] | 702.414  | 654.407  | 646.398         | 646.902         | 645.894         | R[9]  |
| R[17] | 841.500  | 561.354  | 553.345         | 553.849         | 552.841         | R[6]  |
| H[18] | 910.030  | 490.288  | 481.279         | 481.783         | 480.775         | H[7]  |
| R[19] | 988.080  | 400.759  | 392.749         | 393.253         | 392.245         | R[0]  |
| R[20] | 1052.128 | 322.708  | 314.699         | 315.203         | 314.195         | R[5]  |
| V[21] | 1101.662 | 258.661  | 250.651         | 251.155         | 250.147         | V[4]  |
| L[22] | 1158.204 | 209.126  | 201.117         | 201.621         | 200.613         | L[3]  |
| D[23] | 1243.262 | 152.084  | 144.074         | 144.578         | 144.071         | D[2]  |
| D[24] | 1338.776 | 87.526   | 89.517          | 90.021          | 89.013          | D[1]  |

# sp | P62806 | H4\_MOUSE

[Acetyl]SGRGKGGKGLGKGGAK<sup>(Acetyl)</sup> R<sup>(Dimethyl)</sup> HRKVL R<sup>(Methyl)</sup> D<sup>(14.02)</sup>

- ▶ fragmentation table for charge state 3+
- ▶ specType=etd
- ▶ score=82.64
- ▶ F122152.dat
- ▶ query=q36005.p1
- ▶ precursor=651.140250
- ▶ chargePrecursor=4
- ▶ itol=0.6

| AA |    | c              | y              | z+1            | z+2            | z              | AA    |
|----|----|----------------|----------------|----------------|----------------|----------------|-------|
| S  | 1  | 49.697         | <b>867.848</b> | <b>862.508</b> | 0.672          | <b>862.172</b> | S[24] |
| G  | 2  | 68.704         | 874.333        | <b>819.494</b> | 0.672          | <b>819.158</b> | G[23] |
| R  | 3  | 120.738        | 905.826        | <b>900.487</b> | <b>800.823</b> | 800.351        | R[22] |
| G  | 4  | 159.745        | 753.793        | 748.453        | 748.789        | 748.117        | G[21] |
| K  | 5  | 182.443        | 734.785        | 729.446        | 729.782        | 729.110        | K[20] |
| G  | 6  | 201.450        | 692.067        | 686.748        | 687.083        | 686.412        | G[19] |
| G  | 7  | 220.458        | 673.080        | 667.740        | 668.076        | 667.404        | G[18] |
| K  | 8  | 263.156        | 654.073        | 648.733        | 649.069        | 648.397        | K[17] |
| G  | 9  | 282.163        | 611.374        | 606.033        | 606.371        | 605.699        | G[16] |
| L  | 10 | 319.858        | 592.367        | 587.028        | 587.364        | 586.692        | L[15] |
| G  | 11 | 338.865        | 554.673        | 549.333        | 549.669        | 548.997        | G[14] |
| K  | 12 | 351.563        | 535.666        | 530.326        | 530.662        | 529.990        | K[13] |
| G  | 13 | 400.570        | 492.967        | 487.628        | 487.964        | 487.292        | G[12] |
| G  | 14 | 419.578        | 473.960        | 468.620        | 468.956        | 468.285        | G[11] |
| A  | 15 | 443.257        | 454.953        | 449.613        | 449.949        | 449.277        | A[10] |
| K  | 16 | 499.958        | 431.274        | 425.934        | 426.270        | 425.598        | K[9]  |
| R  | 17 | 561.336        | 374.572        | 369.232        | 369.568        | 368.896        | R[8]  |
| H  | 18 | 607.022        | 313.195        | 307.853        | 308.191        | 307.519        | H[7]  |
| R  | 19 | <b>659.056</b> | 267.508        | 262.168        | 262.505        | 261.833        | R[6]  |
| K  | 20 | 761.754        | 215.875        | 210.535        | 210.871        | 209.999        | K[5]  |
| V  | 21 | 734.777        | 172.776        | 167.437        | 167.773        | 167.101        | V[4]  |
| L  | 22 | 772.472        | 130.753        | 134.414        | 134.750        | 134.078        | L[3]  |
| R  | 23 | 829.177        | 102.059        | 96.719         | 97.055         | 96.383         | R[2]  |
| D  | 24 | 887.520        | 45.353         | 40.014         | 40.349         | 39.678         | D[1]  |

# sp | P62806 | H4\_MOUSE

[Acetyl]S<sup>Phospho</sup><sub>79.97</sub> GRGKGGKGLGKGGAKRHRK<sup>Dimethyl</sup><sub>28.03</sub> VLRD

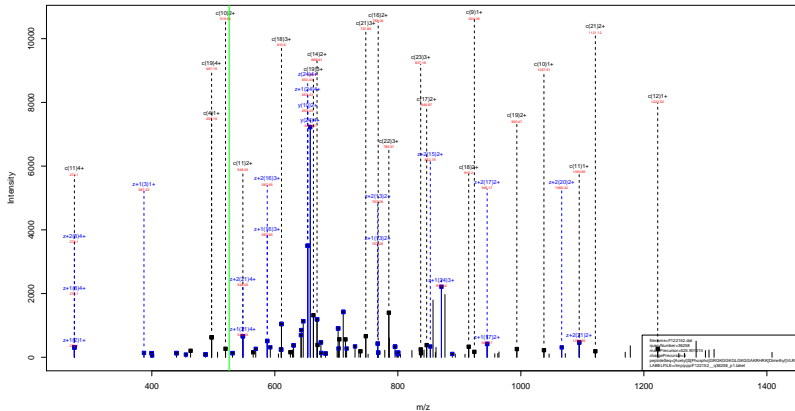

# sp | P62806 | H4\_MOUSE

[Acetyl]S<sup>Phospho</sup><sub>79.97</sub> GRGKGGKGLGKGGAKRHRK<sup>Dimethyl</sup><sub>28.03</sub> VLRD

- ▶ fragmentation table for charge state 1+
- ▶ specType=etd
- ▶ score=49.05
- ▶ F122152.dat
- ▶ query=q36258.p1
- ▶ precursor=525.901210
- ▶ chargePrecursor=5
- ▶ itol=0.6

| AA | c  | y               | z+1      | z+2            | z              | AA       |   |    |
|----|----|-----------------|----------|----------------|----------------|----------|---|----|
| S  | 1  | 227.043         | 2625.460 | 2609.450       | 0.000          | 2608.442 | S | 24 |
| G  | 2  | 224.054         | 2516.460 | 2492.441       | 0.000          | 2399.433 | G | 23 |
| R  | 3  | <b>440.165</b>  | 2399.430 | 2343.410       | 2344.427       | 2342.412 | R | 22 |
| G  | 4  | <b>497.187</b>  | 2203.337 | 2187.318       | 2188.326       | 2186.310 | G | 21 |
| K  | 5  | <b>625.282</b>  | 2148.316 | 2130.297       | 2131.305       | 2129.289 | K | 20 |
| G  | 6  | <b>682.303</b>  | 2018.221 | 2002.202       | 2003.210       | 2001.194 | G | 19 |
| G  | 7  | <b>739.325</b>  | 1961.199 | 1945.180       | 1946.188       | 1944.173 | G | 18 |
| K  | 8  | 867.420         | 1904.178 | 1888.159       | 1889.167       | 1887.151 | K | 17 |
| G  | 9  | <b>924.441</b>  | 1776.083 | 1760.064       | 1761.072       | 1759.056 | G | 16 |
| L  | 10 | <b>1037.525</b> | 1719.061 | 1703.043       | 1704.050       | 1702.035 | L | 15 |
| G  | 11 | <b>1094.547</b> | 1605.977 | 1589.958       | 1590.966       | 1588.951 | G | 14 |
| K  | 12 | <b>1222.642</b> | 1548.956 | 1532.937       | 1533.945       | 1531.929 | K | 13 |
| G  | 13 | 1279.663        | 1420.861 | 1404.842       | 1405.850       | 1403.834 | G | 12 |
| G  | 14 | 1336.685        | 1363.839 | 1347.821       | 1348.828       | 1346.813 | G | 11 |
| A  | 15 | 1407.722        | 1306.818 | 1290.799       | 1291.807       | 1289.791 | A | 10 |
| K  | 16 | 1535.817        | 1235.781 | 1219.762       | 1220.770       | 1218.754 | K | 9  |
| R  | 17 | 1693.918        | 1169.686 | 1161.667       | 1162.675       | 1160.659 | R | 8  |
| H  | 18 | 1828.977        | 951.582  | 935.566        | 936.574        | 934.558  | H | 7  |
| R  | 19 | 1985.078        | 814.526  | <b>798.507</b> | <b>799.515</b> | 797.499  | R | 6  |
| K  | 20 | 2141.204        | 658.425  | <b>642.406</b> | <b>643.414</b> | 641.398  | K | 5  |
| V  | 21 | 2240.272        | 502.298  | 486.280        | <b>487.287</b> | 485.272  | V | 4  |
| L  | 22 | 2353.356        | 403.230  | <b>387.211</b> | 388.219        | 386.203  | L | 3  |
| K  | 23 | 2509.458        | 290.146  | <b>274.127</b> | 275.135        | 273.119  | K | 2  |
| D  | 24 | 2624.485        | 134.045  | 118.026        | 119.034        | 117.018  | D | 1  |



# sp | P62806 | H4\_MOUSE

[Acetyl]S<sup>Phospho</sup><sub>79.97</sub> GRGKGGKGLGKGGAKRHRK<sup>Dimethyl</sup><sub>28.03</sub> VLRD

- ▶ fragmentation table for charge state 2+
- ▶ specType=etd
- ▶ score=49.05
- ▶ F122152.dat
- ▶ query=q36258.p1
- ▶ precursor=525.901210
- ▶ chargePrecursor=5
- ▶ itol=0.6

| AA | c               | y              | z+1            | z+2             | z              | AA    |
|----|-----------------|----------------|----------------|-----------------|----------------|-------|
| S  | 114.025         | 1313.238       | 1305.220       | 0.504           | 1304.725       | S[24] |
| G  | 142.536         | 1208.713       | 1200.724       | 0.504           | 1200.220       | G[23] |
| R  | 220.568         | 1180.223       | 1172.233       | 1173.717        | 1173.709       | R[22] |
| G  | -99.097         | 1102.172       | 1094.183       | <b>1094.667</b> | 1093.650       | G[21] |
| K  | 313.145         | 1073.661       | 1065.652       | <b>1066.156</b> | 1065.148       | K[20] |
| G  | 341.655         | 1009.614       | 1001.605       | 1002.108        | 1001.101       | G[19] |
| G  | 370.166         | 981.103        | 973.094        | 973.598         | 972.590        | G[18] |
| K  | 434.213         | 952.592        | <b>944.583</b> | <b>945.087</b>  | 944.079        | K[17] |
| G  | <b>462.724</b>  | <b>888.545</b> | 880.536        | 881.040         | 880.032        | G[16] |
| L  | <b>519.266</b>  | 860.034        | 852.025        | <b>852.529</b>  | 851.521        | L[15] |
| G  | <b>547.777</b>  | 833.492        | <b>795.483</b> | <b>795.987</b>  | <b>794.979</b> | G[14] |
| K  | 611.824         | 774.982        | <b>766.972</b> | <b>767.476</b>  | 766.468        | K[13] |
| G  | 640.335         | <b>710.934</b> | <b>702.925</b> | <b>703.429</b>  | <b>702.421</b> | G[12] |
| G  | <b>668.846</b>  | <b>682.423</b> | <b>674.414</b> | <b>674.918</b>  | 673.910        | G[11] |
| A  | <b>704.364</b>  | <b>653.913</b> | <b>645.903</b> | <b>646.407</b>  | 645.399        | A[10] |
| K  | <b>768.412</b>  | 618.395        | <b>610.385</b> | <b>610.889</b>  | <b>609.881</b> | K[9]  |
| R  | <b>846.462</b>  | 554.347        | 546.337        | 546.841         | 545.833        | R[8]  |
| H  | <b>914.992</b>  | 476.298        | 468.287        | 468.791         | 467.783        | H[7]  |
| R  | <b>993.043</b>  | 407.267        | <b>399.257</b> | <b>400.261</b>  | <b>399.253</b> | R[6]  |
| K  | 1071.106        | 329.716        | 321.707        | 322.211         | 321.203        | K[5]  |
| V  | <b>1120.640</b> | 251.653        | 243.643        | 244.147         | 243.140        | V[4]  |
| L  | 1177.182        | 202.116        | 194.106        | 194.610         | 193.602        | L[3]  |
| L  | 1259.232        | 148.573        | 137.563        | 138.067         | 137.060        | L[2]  |
| D  | 1312.746        | 67.526         | 59.517         | 60.021          | 59.013         | D[1]  |

# sp | P62806 | H4\_MOUSE

[Acetyl]S<sup>Phospho</sup><sub>79.97</sub> GRGKGGKGLGKGGAKRHRK<sup>Dimethyl</sup><sub>28.03</sub> VLRR

- ▶ fragmentation table for charge state 3+
- ▶ specType=etd
- ▶ score=49.05
- ▶ F122152.dat
- ▶ query=q36258.p1
- ▶ precursor=525.901210
- ▶ chargePrecursor=5
- ▶ itol=0.6

| AA    | c              | y              | z+1            | z+2            | z              | AA    |
|-------|----------------|----------------|----------------|----------------|----------------|-------|
| S[1]  | 76.352         | 875.826        | <b>870.468</b> | 0.672          | 870.152        | S[24] |
| G[2]  | 95.360         | 306.158        | <b>800.818</b> | 0.672          | <b>800.463</b> | G[23] |
| R[3]  | 147.393        | 787.151        | 781.811        | 782.147        | 781.475        | R[22] |
| G[4]  | 166.400        | 735.117        | 729.778        | <b>730.114</b> | 729.442        | G[21] |
| K[5]  | 209.099        | <b>716.110</b> | <b>710.770</b> | <b>711.106</b> | 710.435        | K[20] |
| G[6]  | 228.106        | 673.412        | <b>668.072</b> | <b>668.408</b> | 667.736        | G[19] |
| G[7]  | 247.113        | 654.405        | 649.065        | 649.401        | 648.729        | G[18] |
| K[8]  | 269.811        | 635.397        | <b>630.058</b> | <b>630.394</b> | 629.722        | K[17] |
| G[9]  | 308.819        | <b>592.699</b> | <b>587.360</b> | <b>587.695</b> | 587.024        | G[16] |
| L[10] | 348.313        | 573.692        | 568.352        | <b>568.688</b> | 568.016        | L[15] |
| G[11] | 385.520        | 535.997        | <b>530.658</b> | <b>530.994</b> | 530.322        | G[14] |
| K[12] | 408.219        | 516.990        | 511.651        | 511.986        | 511.315        | K[13] |
| G[13] | 427.226        | 474.292        | 468.952        | 469.288        | 468.616        | G[12] |
| G[14] | 446.233        | <b>455.285</b> | 449.945        | 450.281        | 449.609        | G[11] |
| A[15] | 469.912        | 436.277        | 430.938        | 431.274        | 430.602        | A[10] |
| K[16] | 512.610        | 412.598        | 407.259        | 407.595        | 406.923        | K[9]  |
| R[17] | <b>564.644</b> | 369.900        | 364.561        | 364.896        | 364.225        | R[8]  |
| H[18] | <b>610.330</b> | 317.866        | 312.527        | 312.863        | 312.191        | H[7]  |
| R[19] | <b>662.364</b> | 272.180        | 266.841        | 267.176        | 266.505        | R[6]  |
| K[20] | <b>714.406</b> | 220.140        | 214.807        | 215.143        | 214.471        | K[5]  |
| V[21] | <b>747.429</b> | 168.104        | 162.765        | 163.101        | 162.429        | V[4]  |
| L[22] | <b>785.124</b> | 135.082        | 129.742        | 130.078        | 129.406        | L[3]  |
| R[23] | <b>837.157</b> | 97.387         | 92.047         | 92.383         | 91.711         | R[2]  |
| D[24] | 879.560        | 45.353         | 40.014         | 40.349         | 39.678         | D[1]  |

# sp | P62806 | H4\_MOUSE

[Acetyl]S<sup>Phospho</sup><sub>79.97</sub> GRGKGGKGLGKGGAKRHRK<sup>Dimethyl</sup><sub>28.03</sub> VLRD

- ▶ fragmentation table for charge state 4+
- ▶ specType=etd
- ▶ score=49.05
- ▶ F122152.dat
- ▶ query=q36258.p1
- ▶ precursor=525.901210
- ▶ chargePrecursor=5
- ▶ itol=0.6

| AA    | c              | y              | z+1            | z+2            | z              | AA    |
|-------|----------------|----------------|----------------|----------------|----------------|-------|
| S[1]  | 57.518         | <b>657.123</b> | <b>653.118</b> | 0.755          | <b>652.066</b> | S[24] |
| G[2]  | 71.772         | 604.870        | 600.866        | 0.755          | 600.614        | G[23] |
| R[3]  | 110.797        | 590.615        | 586.610        | 586.362        | 586.358        | R[22] |
| G[4]  | 125.052        | 551.590        | <b>547.585</b> | <b>547.837</b> | 547.333        | G[21] |
| K[5]  | 157.076        | 537.334        | 533.330        | 533.582        | 533.078        | K[20] |
| G[6]  | 171.331        | 505.311        | 501.306        | 501.558        | 501.054        | G[19] |
| G[7]  | 185.587        | 491.055        | <b>487.051</b> | <b>487.303</b> | 486.799        | G[18] |
| K[8]  | 217.610        | 476.800        | 472.795        | 473.047        | 472.543        | K[17] |
| G[9]  | 231.866        | 444.776        | <b>440.771</b> | 443.023        | <b>440.520</b> | G[16] |
| L[10] | 250.137        | 430.521        | 426.516        | 426.768        | 426.264        | L[15] |
| G[11] | <b>274.392</b> | 407.250        | 398.243        | 398.497        | 397.993        | G[14] |
| K[12] | 306.416        | 387.994        | 383.989        | 384.242        | 383.738        | K[13] |
| G[13] | 320.671        | 355.971        | 351.966        | 352.218        | 351.714        | G[12] |
| G[14] | 334.927        | 341.715        | 337.711        | 337.963        | 337.459        | G[11] |
| A[15] | 352.686        | 327.460        | 323.455        | 323.707        | 323.203        | A[10] |
| K[16] | 384.710        | 309.701        | 305.696        | 305.948        | 305.444        | K[9]  |
| R[17] | 423.735        | 277.677        | <b>273.672</b> | <b>273.924</b> | 273.420        | R[8]  |
| H[18] | 458.000        | 238.652        | 234.647        | 234.899        | 234.395        | H[7]  |
| R[19] | <b>497.025</b> | 204.387        | 200.382        | 200.634        | 200.130        | R[6]  |
| K[20] | 535.059        | 165.362        | 161.357        | 161.609        | 161.105        | K[5]  |
| V[21] | 560.824        | 126.330        | 122.325        | 122.577        | 122.073        | V[4]  |
| L[22] | 589.095        | 101.563        | 97.558         | 97.810         | 97.306         | L[3]  |
| R[23] | 628.120        | 73.292         | 69.287         | 69.539         | 69.035         | R[2]  |
| D[24] | 656.877        | 34.267         | 30.262         | 30.514         | 30.010         | D[1]  |

# sp | P68433 | H31\_MOUSE

IAQDFK Methyl TD  
14.02

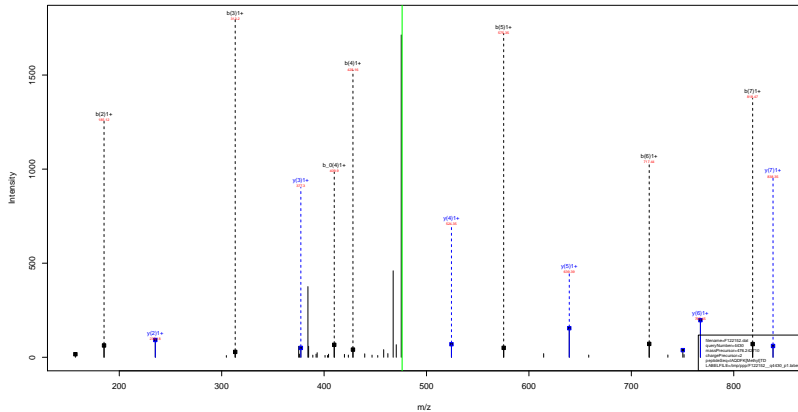

# sp | P68433 | H31\_MOUSE

IAQDFK<sup>Methyl</sup>TD  
14.02

- ▶ fragmentation table for charge state 1+
- ▶ specType=cid
- ▶ score=44.86
- ▶ F122152.dat
- ▶ query=q4430\_p1
- ▶ precursor=476.242710
- ▶ chargePrecursor=2
- ▶ itol=0.6

| AA  | a              | a*      | a,Δ     | b              | b*      | b,Δ            | y              | y*             | y,Δ   | AA  |
|-----|----------------|---------|---------|----------------|---------|----------------|----------------|----------------|-------|-----|
| T 1 | 86.096         | 0.000   | 0.000   | 116.203        | 0.000   | 0.000          | 931.431        | 0.000          | 0.000 | T 1 |
| A 2 | <b>157.134</b> | 0.000   | 0.000   | <b>185.128</b> | 0.000   | 0.000          | <b>638.304</b> | 0.000          | 0.000 | A 7 |
| Q 3 | 286.192        | 286.192 | 0.000   | <b>313.187</b> | 286.192 | 0.000          | <b>767.357</b> | <b>750.330</b> | 0.000 | Q 6 |
| D 4 | 409.219        | 383.103 | 382.209 | <b>428.214</b> | 411.107 | <b>410.203</b> | <b>630.298</b> | 622.272        | 0.000 | D 5 |
| F 5 | 547.287        | 530.261 | 529.277 | <b>576.282</b> | 558.256 | 557.272        | <b>524.271</b> | 507.245        | 0.000 | F 4 |
| R 6 | 689.306        | 672.281 | 671.366 | <b>717.292</b> | 700.266 | 699.351        | <b>377.203</b> | 360.177        | 0.000 | R 3 |
| T 7 | 790.448        | 773.423 | 772.435 | <b>818.441</b> | 801.414 | 800.430        | <b>235.002</b> | 0.000          | 0.000 | T 2 |
| D 8 | 905.473        | 888.448 | 887.461 | 933.468        | 916.441 | 915.429        | 134.000        | 0.000          | 0.000 | D 1 |

# sp | P15864 | H12\_MOUSE

LITKAVAAS Acetyl KE  
42.01

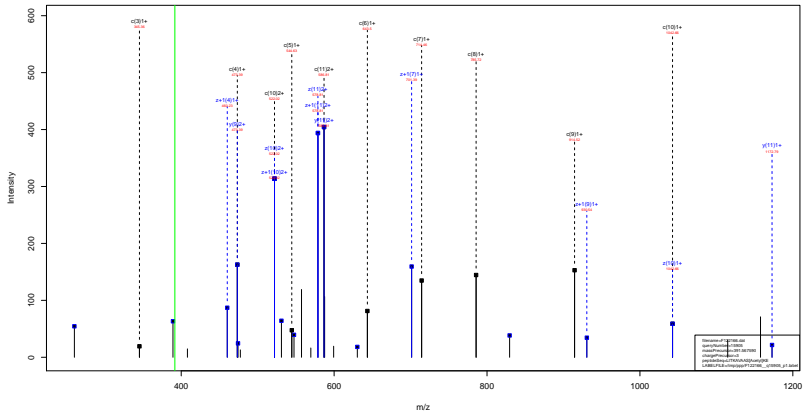

# sp | P15864 | H12\_MOUSE

LITKAVAAS <sup>Acetyl</sup> KE  
42.01

- ▶ fragmentation table for charge state 1+
- ▶ specType=etd
- ▶ score=65.47
- ▶ F122166.dat
- ▶ query=q15905\_p1
- ▶ precursor=391.567590
- ▶ chargePrecursor=3
- ▶ itol=0.7

| AA |    | c               | y               | z+1            | z+2     | z               | AA    |
|----|----|-----------------|-----------------|----------------|---------|-----------------|-------|
| L  | 1  | 131.118         | <b>1172.609</b> | 1156.670       | 0.000   | 1155.662        | L[11] |
| I  | 2  | 244.202         | 1059.604        | 1043.536       | 0.000   | <b>1042.578</b> | I[10] |
| T  | 3  | <b>345.250</b>  | 946.520         | <b>930.502</b> | 0.000   | 929.494         | T[9]  |
| K  | 4  | <b>473.345</b>  | 845.473         | <b>829.454</b> | 830.462 | 828.446         | K[8]  |
| A  | 5  | <b>544.382</b>  | 717.378         | <b>701.359</b> | 702.367 | 700.351         | A[7]  |
| V  | 6  | <b>643.450</b>  | 646.341         | <b>630.322</b> | 631.330 | 629.314         | V[6]  |
| A  | 7  | <b>714.487</b>  | <b>547.272</b>  | <b>531.253</b> | 532.261 | 530.246         | A[5]  |
| A  | 8  | <b>785.524</b>  | 476.235         | <b>460.216</b> | 461.224 | 459.209         | A[4]  |
| S  | 9  | <b>914.567</b>  | 405.198         | <b>389.179</b> | 390.187 | 388.171         | S[3]  |
| K  | 10 | <b>1042.662</b> | 276.155         | <b>260.137</b> | 261.144 | 259.129         | K[2]  |
| E  | 11 | 1171.705        | 148.060         | 132.042        | 133.050 | 131.034         | E[1]  |

# sp | P15864 | H12\_MOUSE

LITKAVAAS<sup>Acetyl</sup> KE  
42.01

- ▶ fragmentation table for charge state 2+
- ▶ specType=etd
- ▶ score=65.47
- ▶ F122166.dat
- ▶ query=q15905\_p1
- ▶ precursor=391.567590
- ▶ chargePrecursor=3
- ▶ itol=0.7

| AA    | c              | y              | z+1            | z+2     | z              | AA    |
|-------|----------------|----------------|----------------|---------|----------------|-------|
| L[1]  | 66.093         | <b>586.848</b> | <b>578.839</b> | 0.504   | <b>578.335</b> | L[11] |
| T[2]  | 122.605        | 530.306        | <b>522.297</b> | 0.504   | <b>521.793</b> | T[10] |
| T[3]  | 173.120        | <b>473.764</b> | 465.754        | 0.504   | 465.251        | T[9]  |
| K[4]  | 229.176        | 422.240        | 415.231        | 413.726 | 414.727        | K[8]  |
| A[5]  | 272.694        | 369.197        | 361.183        | 351.697 | 350.679        | A[7]  |
| V[6]  | 322.229        | 323.674        | 315.665        | 316.169 | 315.161        | V[6]  |
| A[7]  | 357.747        | 274.140        | 266.130        | 266.634 | 265.626        | A[5]  |
| A[8]  | 393.266        | 238.621        | 230.612        | 231.116 | 230.108        | A[4]  |
| S[9]  | 457.787        | 203.103        | 195.093        | 196.597 | 194.589        | S[3]  |
| K[10] | <b>521.835</b> | 138.581        | 130.572        | 131.076 | 130.068        | K[2]  |
| E[11] | <b>586.356</b> | 74.534         | 66.524         | 67.028  | 66.021         | E[1]  |



# sp | P15864 | H12\_MOUSE

LITKAVAAS Acetyl KE  
42.01

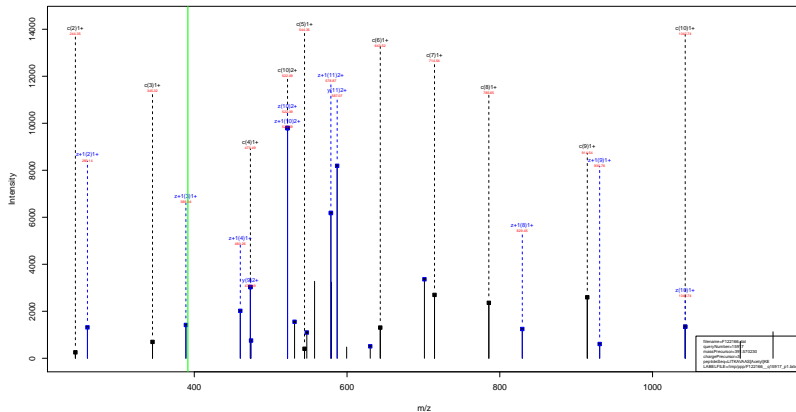

# sp | P15864 | H12\_MOUSE

LITKAVAAS<sup>Acetyl</sup> KE  
42.01

- ▶ fragmentation table for charge state 1+
- ▶ specType=etd
- ▶ score=74.51
- ▶ F122166.dat
- ▶ query=q15917\_p1
- ▶ precursor=391.570230
- ▶ chargePrecursor=3
- ▶ itol=0.7

| AA    | c               | y              | z+1            | z+2     | z               | AA    |
|-------|-----------------|----------------|----------------|---------|-----------------|-------|
| L[1]  | 131.118         | 1172.689       | 1156.670       | 0.000   | 1155.662        | L[11] |
| I[2]  | <b>244.202</b>  | 1059.604       | 1043.586       | 0.000   | <b>1042.578</b> | I[10] |
| T[3]  | <b>345.250</b>  | 946.520        | <b>930.502</b> | 0.000   | 929.494         | T[9]  |
| K[4]  | <b>473.345</b>  | 845.473        | <b>829.454</b> | 8.30462 | 828.446         | K[8]  |
| A[5]  | <b>544.382</b>  | 717.379        | <b>701.359</b> | 702.367 | 700.351         | A[7]  |
| V[6]  | <b>643.450</b>  | 640.351        | <b>630.322</b> | 631.330 | 629.312         | V[6]  |
| A[7]  | <b>714.487</b>  | <b>547.272</b> | <b>531.253</b> | 532.261 | 530.246         | A[5]  |
| A[8]  | <b>785.524</b>  | 476.235        | <b>460.216</b> | 461.224 | 459.209         | A[4]  |
| S[9]  | <b>914.567</b>  | 405.168        | <b>389.179</b> | 390.187 | 388.171         | S[3]  |
| K[10] | <b>1042.662</b> | 276.155        | <b>260.137</b> | 261.144 | 259.129         | K[2]  |
| E[11] | 1171.705        | 148.060        | 132.042        | 133.050 | 131.034         | E[1]  |

# sp | P15864 | H12\_MOUSE

LITKAVAAS<sup>Acetyl</sup> KE  
42.01

- ▶ fragmentation table for charge state 2+
- ▶ specType=etd
- ▶ score=74.51
- ▶ F122166.dat
- ▶ query=q15917\_p1
- ▶ precursor=391.570230
- ▶ chargePrecursor=3
- ▶ itol=0.7

| AA    | c              | y              | z+1            | z+2     | z              | AA    |
|-------|----------------|----------------|----------------|---------|----------------|-------|
| L[1]  | 66.093         | <b>586.848</b> | <b>578.839</b> | 0.504   | <b>578.335</b> | L[11] |
| T[2]  | 122.605        | 530.306        | <b>522.297</b> | 0.504   | <b>521.793</b> | T[10] |
| T[3]  | 173.128        | <b>473.764</b> | 465.754        | 0.504   | 465.251        | T[9]  |
| K[4]  | 229.176        | 421.240        | 413.231        | 413.735 | 414.727        | K[8]  |
| A[5]  | 272.694        | 359.197        | 351.181        | 351.687 | 350.679        | A[7]  |
| V[6]  | 322.229        | 323.674        | 315.665        | 316.169 | 315.161        | V[6]  |
| A[7]  | 357.747        | 274.140        | 266.130        | 266.634 | 265.626        | A[5]  |
| A[8]  | 393.266        | 238.621        | 230.612        | 231.116 | 230.108        | A[4]  |
| S[9]  | 457.787        | 203.103        | 195.093        | 195.597 | 194.589        | S[3]  |
| K[10] | <b>521.835</b> | 138.581        | 130.572        | 131.076 | 130.068        | K[2]  |
| E[11] | 586.356        | 74.534         | 66.524         | 67.028  | 66.021         | E[1]  |

# sp | Q64525 | H2B2B\_MOUSE

PDKASAPAPKKGS <sup>Acetyl</sup>KKAVTK <sup>Acetyl</sup>VQKKD  
42.01 42.01

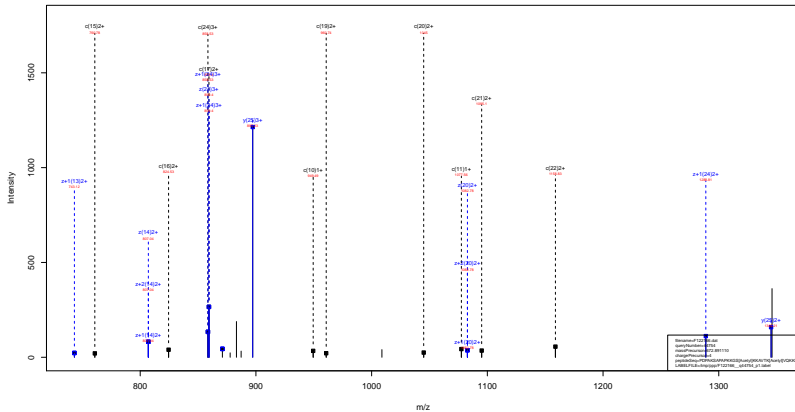

# sp | Q64525 | H2B2B\_MOUSE

PDKASAPAPKKGS<sup>Acetyl</sup> KKAVTK<sup>Acetyl</sup> VQKKD<sup>42.01</sup>

- ▶ fragmentation table for charge state 1+
- ▶ specType=etd
- ▶ score=52.35
- ▶ F122166.dat
- ▶ query=q44754.p1
- ▶ precursor=672.891110
- ▶ chargePrecursor=4
- ▶ itol=0.7

| AA  | c               | y        | z+1      | z+2      | z              | AA  |
|-----|-----------------|----------|----------|----------|----------------|-----|
| P1  | 115.087         | 2688.541 | 2672.523 | 0.000    | 2671.514       | F25 |
| D2  | 230.114         | 2591.488 | 2575.469 | 0.000    | 2574.461       | D24 |
| P3  | 327.166         | 2476.461 | 2460.442 | 0.000    | 2459.434       | F23 |
| A4  | 398.203         | 2379.408 | 2363.389 | 0.000    | 2362.382       | A22 |
| K5  | 526.298         | 2238.371 | 2222.352 | 2291.360 | 2291.345       | K21 |
| S6  | 613.330         | 2180.276 | 2164.257 | 2185.266 | 2183.250       | S20 |
| A7  | 684.368         | 2093.244 | 2077.225 | 2078.233 | 2076.215       | A19 |
| P8  | 781.420         | 2022.207 | 2006.188 | 2007.196 | 2005.180       | F18 |
| A9  | 852.457         | 1925.154 | 1909.135 | 1910.143 | 1908.128       | A17 |
| P10 | <b>949.510</b>  | 1854.117 | 1838.098 | 1839.106 | 1837.091       | F16 |
| K11 | <b>1077.605</b> | 1757.064 | 1741.046 | 1742.053 | 1740.038       | K15 |
| K12 | 1205.700        | 1628.969 | 1612.951 | 1613.958 | 1611.943       | K14 |
| G13 | 1262.722        | 1500.874 | 1484.856 | 1485.864 | 1483.848       | G13 |
| S14 | 1391.764        | 1443.831 | 1427.814 | 1428.842 | 1426.826       | S12 |
| K15 | 1519.859        | 1314.810 | 1298.792 | 1299.799 | 1297.784       | K11 |
| K16 | 1647.954        | 1186.715 | 1170.697 | 1171.705 | 1169.689       | K10 |
| A17 | 1718.991        | 1058.620 | 1042.602 | 1043.610 | 1041.594       | A9  |
| V18 | 1818.060        | 987.583  | 971.565  | 972.572  | 970.557        | V8  |
| T19 | 1919.107        | 888.515  | 872.496  | 873.504  | <b>871.488</b> | T7  |
| K20 | 2089.213        | 787.467  | 771.449  | 772.456  | 770.441        | K6  |
| V21 | 2198.281        | 617.363  | 601.343  | 602.351  | 600.335        | V3  |
| Q22 | 2316.340        | 518.291  | 502.275  | 503.282  | 501.267        | Q4  |
| K23 | 2444.435        | 390.235  | 374.216  | 375.224  | 373.208        | K3  |
| K24 | 2572.530        | 262.140  | 246.121  | 247.129  | 245.113        | K2  |
| D25 | 2687.597        | 134.045  | 118.026  | 119.034  | 117.018        | D1  |

# sp | Q64525 | H2B2B\_MOUSE

PDKASAPAPKKGS<sup>Acetyl</sup> KKAVTK<sup>Acetyl</sup> VQKKD<sup>42.01</sup>

- ▶ fragmentation table for charge state 2+
- ▶ specType=etd
- ▶ score=52.35
- ▶ F122166.dat
- ▶ query=q44754\_p1
- ▶ precursor=672.891110
- ▶ chargePrecursor=4
- ▶ itol=0.7

| AA |    | c               | y               | z+1             | z+2             | z               | AA   |
|----|----|-----------------|-----------------|-----------------|-----------------|-----------------|------|
| P  | 1  | 58.047          | <b>1344.774</b> | 1336.765        | 0.504           | 1336.261        | P 25 |
| D  | 3  | 135.569         | 1298.245        | <b>1286.238</b> | 0.504           | 1287.734        | D 21 |
| F  | 3  | 154.057         | 1238.735        | 1230.728        | 0.504           | 1232.221        | F 23 |
| A  | 4  | 199.605         | 1190.208        | 1182.198        | 0.504           | 1181.694        | A 22 |
| K  | 5  | 253.653         | 1154.689        | 1146.680        | 1147.184        | 1146.176        | K 21 |
| S  | 6  | 307.109         | 1090.642        | <b>1082.632</b> | <b>1083.136</b> | <b>1082.128</b> | S 20 |
| A  | 7  | 342.667         | 1047.126        | 1039.116        | 1039.620        | 1038.612        | A 19 |
| F  | 8  | 392.214         | 1011.607        | 1003.598        | 1004.102        | 1003.094        | F 18 |
| A  | 9  | 426.732         | 963.081         | 955.071         | 955.575         | 954.567         | A 17 |
| P  | 10 | 475.259         | 927.562         | 919.553         | 920.057         | 919.049         | P 16 |
| K  | 11 | 539.306         | 879.036         | <b>871.026</b>  | <b>871.530</b>  | <b>870.523</b>  | K 15 |
| K  | 12 | 603.354         | 814.988         | <b>806.979</b>  | <b>807.483</b>  | <b>806.475</b>  | K 14 |
| G  | 13 | 633.864         | 750.941         | <b>742.931</b>  | <b>743.435</b>  | <b>742.428</b>  | G 13 |
| S  | 14 | 698.398         | 722.432         | 714.423         | 714.927         | 713.919         | S 12 |
| K  | 15 | <b>760.413</b>  | 657.905         | 649.899         | 650.403         | 649.396         | K 11 |
| K  | 16 | <b>824.481</b>  | 593.861         | 585.852         | 586.356         | 585.348         | K 10 |
| A  | 17 | <b>859.999</b>  | 529.814         | 521.804         | 522.308         | 521.301         | A 9  |
| V  | 18 | 925.533         | 494.295         | 486.286         | 486.790         | 485.782         | V 8  |
| T  | 19 | <b>960.057</b>  | 444.763         | 436.753         | 437.256         | 436.249         | T 7  |
| K  | 20 | <b>1045.110</b> | 394.237         | 386.228         | 386.732         | 385.724         | K 6  |
| V  | 21 | <b>1094.644</b> | 309.184         | 301.175         | 301.679         | 300.671         | V 5  |
| Q  | 22 | <b>1158.674</b> | 259.656         | 251.646         | 252.149         | 251.141         | Q 4  |
| K  | 23 | 1222.721        | 195.621         | 187.612         | 188.116         | 187.108         | K 3  |
| K  | 24 | 1286.768        | 131.574         | 123.564         | 124.068         | 123.060         | K 2  |
| D  | 25 | 1344.282        | 67.526          | 59.517          | 60.021          | 59.013          | D 1  |

# sp | Q64525 | H2B2B\_MOUSE

PDKASAPAPKKGS<sup>Acetyl</sup> KKAVTK<sup>Acetyl</sup> VQKKD  
42.01 42.01

- ▶ fragmentation table for charge state 3+
- ▶ specType=etd
- ▶ score=52.35
- ▶ F122166.dat
- ▶ query=q44754.p1
- ▶ precursor=672.891110
- ▶ chargePrecursor=4
- ▶ itol=0.7

| AA  | c              | y              | z+1            | z+2     | z              | AA  |
|-----|----------------|----------------|----------------|---------|----------------|-----|
| P1  | 39.034         | <b>896.852</b> | 891.512        | 0.672   | 891.176        | P25 |
| D1  | 77.376         | 864.501        | <b>859.161</b> | 0.672   | <b>858.825</b> | D24 |
| P1  | 109.727        | 826.159        | 820.819        | 0.672   | 820.483        | P23 |
| A1  | 133.406        | 793.808        | 788.468        | 0.672   | 788.132        | A22 |
| K1  | 176.104        | 770.129        | 764.789        | 765.125 | 764.453        | K21 |
| S1  | 305.115        | 727.435        | 722.091        | 722.407 | 721.765        | S20 |
| A1  | 228.794        | 698.420        | 693.080        | 693.416 | 692.744        | A19 |
| P1  | 261.145        | 674.741        | 669.401        | 669.737 | 669.065        | P18 |
| A1  | 284.824        | 642.390        | 637.050        | 637.386 | 636.714        | A17 |
| P10 | 317.175        | 618.711        | 613.371        | 613.707 | 613.035        | P16 |
| K11 | 359.873        | 586.360        | 581.020        | 581.356 | 580.684        | K15 |
| K12 | 402.572        | 543.661        | 538.322        | 538.658 | 537.986        | K14 |
| G13 | 421.579        | 500.963        | 495.623        | 495.959 | 495.287        | G13 |
| S14 | 464.963        | 481.956        | 476.616        | 476.952 | 476.280        | S12 |
| K15 | 507.291        | 438.942        | 433.602        | 433.938 | 433.266        | K11 |
| K16 | 549.990        | 396.243        | 390.904        | 391.240 | 390.568        | K10 |
| A17 | 573.669        | 353.545        | 348.205        | 348.541 | 347.869        | A9  |
| V18 | 606.691        | 329.866        | 324.526        | 324.862 | 324.190        | V8  |
| T19 | 640.374        | 296.843        | 291.504        | 291.840 | 291.168        | T7  |
| K20 | 697.076        | 263.161        | 257.821        | 258.157 | 257.485        | K6  |
| V21 | 730.099        | 206.459        | 201.119        | 201.455 | 200.783        | V5  |
| Q22 | 772.785        | 173.436        | 168.096        | 168.432 | 167.760        | Q4  |
| K23 | 815.483        | 130.750        | 125.410        | 125.746 | 125.074        | K9  |
| K24 | <b>858.181</b> | 88.051         | 82.712         | 83.048  | 82.376         | K2  |
| D25 | 896.524        | 45.353         | 40.014         | 40.349  | 39.678         | D1  |

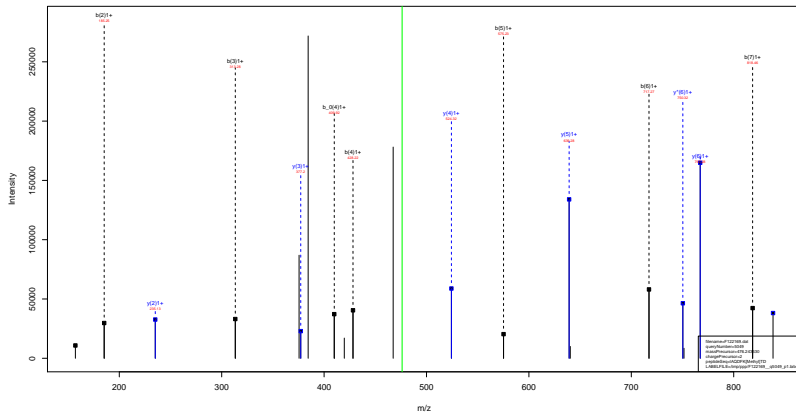



# sp | P68433 | H31\_MOUSE

IAQDFK<sup>Methyl</sup> TD  
14.02

- ▶ fragmentation table for charge state 1+
- ▶ specType=cid
- ▶ score=59.68
- ▶ F122169.dat
- ▶ query=q5049\_p1
- ▶ precursor=476.243530
- ▶ chargePrecursor=2
- ▶ itol=0.7

| AA  | a              | a*      | a,Δ     | b              | b*      | b,Δ            | y              | y*             | y,Δ   | AA  |
|-----|----------------|---------|---------|----------------|---------|----------------|----------------|----------------|-------|-----|
| T 1 | 86.096         | 0.000   | 0.000   | 116.203        | 0.000   | 0.000          | 951.431        | 0.000          | 0.000 | T 1 |
| A 2 | <b>157.134</b> | 0.000   | 0.000   | <b>185.128</b> | 0.000   | 0.000          | <b>638.304</b> | 0.000          | 0.000 | A 7 |
| Q 3 | 286.192        | 286.192 | 0.000   | <b>313.187</b> | 286.192 | 0.000          | <b>767.357</b> | <b>750.330</b> | 0.000 | Q 6 |
| D 4 | 409.219        | 383.103 | 382.209 | <b>428.214</b> | 411.107 | <b>410.203</b> | <b>630.298</b> | 622.272        | 0.000 | D 9 |
| F 5 | 547.287        | 530.261 | 529.277 | <b>576.282</b> | 558.256 | 557.272        | <b>524.271</b> | 507.245        | 0.000 | F 4 |
| R 6 | 659.306        | 622.291 | 621.306 | <b>717.302</b> | 700.286 | 699.301        | <b>377.203</b> | 360.177        | 0.000 | R 3 |
| T 7 | 790.448        | 773.419 | 772.435 | <b>818.441</b> | 801.414 | 800.430        | <b>235.002</b> | 0.000          | 0.000 | T 2 |
| D 8 | 925.475        | 888.459 | 887.465 | 933.468        | 916.441 | 915.427        | 134.000        | 0.000          | 0.000 | D 1 |



# sp | P68433 | H31\_MOUSE

IAQDFK<sup>Dimethyl</sup> TD  
28.03

- ▶ fragmentation table for charge state 1+
- ▶ specType=cid
- ▶ score=49.25
- ▶ F122169.dat
- ▶ query=q5510\_p1
- ▶ precursor=483.251940
- ▶ chargePrecursor=2
- ▶ itol=0.7

| AA         | a              | a*             | aΔ             | b              | b*             | bΔ      | y              | y*             | yΔ      | AA      |    |
|------------|----------------|----------------|----------------|----------------|----------------|---------|----------------|----------------|---------|---------|----|
| <b>T</b> 1 | 46.398         | 0.000          | 0.000          | 114.191        | 0.000          | 0.000   | 465.794        | 0.000          | 0.000   | 948.485 | T1 |
| <b>A</b> 2 | <b>157.134</b> | 0.000          | 0.000          | <b>185.128</b> | 0.000          | 0.000   | <b>852.410</b> | 0.000          | 0.000   | 835.321 | A2 |
| <b>Q</b> 3 | 285.192        | 288.186        | 0.000          | <b>313.187</b> | 298.180        | 0.000   | <b>781.373</b> | <b>764.346</b> | 0.000   | 763.362 | Q3 |
| <b>D</b> 4 | 400.219        | <b>383.193</b> | <b>387.208</b> | <b>428.214</b> | <b>411.187</b> | 0.000   | <b>653.314</b> | 638.289        | 0.000   | 635.314 | D4 |
| <b>F</b> 5 | 547.287        | 530.261        | 525.277        | <b>575.282</b> | 558.256        | 557.272 | <b>528.287</b> | 527.270        | 0.000   | 530.277 | F5 |
| <b>R</b> 6 | 713.414        | 698.397        | 695.403        | <b>731.400</b> | 714.382        | 713.388 | <b>291.219</b> | <b>374.192</b> | 0.000   | 373.206 | R6 |
| <b>T</b> 7 | 804.461        | 787.435        | 785.451        | <b>832.456</b> | 815.430        | 814.446 | <b>235.092</b> | 0.000          | 237.082 | T7      |    |
| <b>G</b> 8 | 916.488        | 902.462        | 891.438        | 947.463        | 930.451        | 929.473 | 134.045        | 0.000          | 136.034 | G8      |    |



# sp | P68433 | H31\_MOUSE

IAQDFK<sup>Methyl</sup> TD  
14.02

- ▶ fragmentation table for charge state 1+
- ▶ specType=cid
- ▶ score=60.98
- ▶ F122170.dat
- ▶ query=q5005\_p1
- ▶ precursor=476.241830
- ▶ chargePrecursor=2
- ▶ itol=0.7

| AA  | a       | a*      | a,0     | b              | b*             | b,0            | y              | y*             | y,0     | AA  |
|-----|---------|---------|---------|----------------|----------------|----------------|----------------|----------------|---------|-----|
| T 1 | 38.008  | 0.000   | 0.000   | 114.001        | 0.000          | 0.000          | 931.411        | 0.000          | 0.000   | T 1 |
| A 2 | 157.134 | 0.000   | 0.000   | <b>185.128</b> | 0.000          | 0.000          | <b>638.304</b> | 0.000          | 0.000   | A 2 |
| Q 3 | 285.192 | 288.191 | 0.000   | <b>313.187</b> | 306.189        | 0.000          | <b>767.357</b> | <b>750.330</b> | 0.000   | Q 3 |
| D 4 | 400.219 | 381.191 | 382.209 | <b>428.214</b> | <b>411.187</b> | <b>410.203</b> | <b>630.298</b> | 622.272        | 621.288 | D 4 |
| F 5 | 547.267 | 530.261 | 530.277 | <b>575.262</b> | 558.256        | 557.272        | <b>524.271</b> | 507.245        | 508.261 | F 5 |
| R 6 | 699.308 | 672.301 | 671.308 | <b>717.293</b> | 700.286        | 699.287        | <b>377.293</b> | 360.277        | 359.293 | R 6 |
| T 7 | 700.446 | 773.410 | 772.435 | <b>818.441</b> | 801.414        | 800.430        | <b>235.002</b> | 0.000          | 217.002 | T 7 |
| D 8 | 825.473 | 888.440 | 887.462 | 931.446        | 916.441        | 915.429        | 134.000        | 0.000          | 116.034 | D 8 |

# sp | P68433 | H31\_MOUSE

IAQDFK Dimethyl TD  
28.03

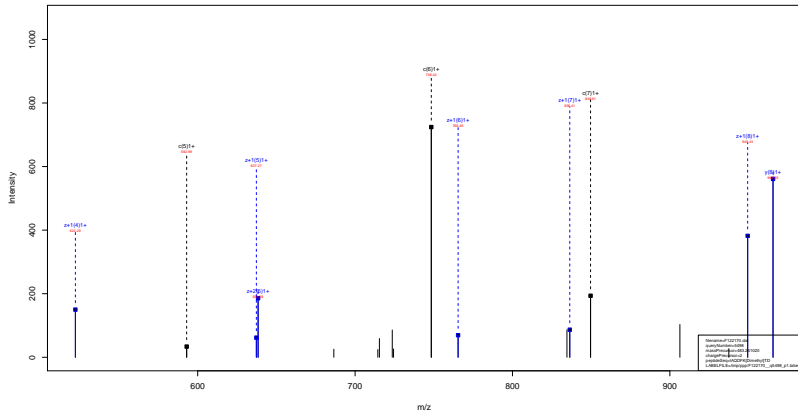

# sp | P68433 | H31\_MOUSE

IAQDFK<sup>Dimethyl</sup> TD  
28.03

- ▶ fragmentation table for charge state 1+
- ▶ specType=etd
- ▶ score=37.27
- ▶ F122170.dat
- ▶ query=q5498\_p1
- ▶ precursor=483.251020
- ▶ chargePrecursor=2
- ▶ itol=0.7

| AA  | c              | y              | z+1            | z+2            | z       | AA  |
|-----|----------------|----------------|----------------|----------------|---------|-----|
| I 1 | 131.118        | <b>965.494</b> | <b>949.475</b> | 0.000          | 948.467 | I 8 |
| A 2 | 202.155        | 852.410        | <b>836.391</b> | 0.000          | 835.383 | A 7 |
| Q 3 | 330.214        | 781.373        | <b>765.354</b> | 766.362        | 764.346 | Q 6 |
| D 4 | 445.241        | 653.314        | <b>637.295</b> | <b>638.303</b> | 636.288 | D 5 |
| F 5 | <b>592.309</b> | 638.287        | <b>522.268</b> | 523.276        | 521.261 | F 4 |
| K 6 | <b>748.435</b> | 391.219        | 375.200        | 376.208        | 374.192 | K 3 |
| T 7 | <b>849.483</b> | 235.092        | 219.074        | 220.082        | 218.066 | T 2 |
| D 8 | 964.510        | 134.045        | 118.026        | 119.034        | 117.018 | D 1 |

# sp | P68433 | H31\_MOUSE

IAQDFKT Acetyl D  
42.01

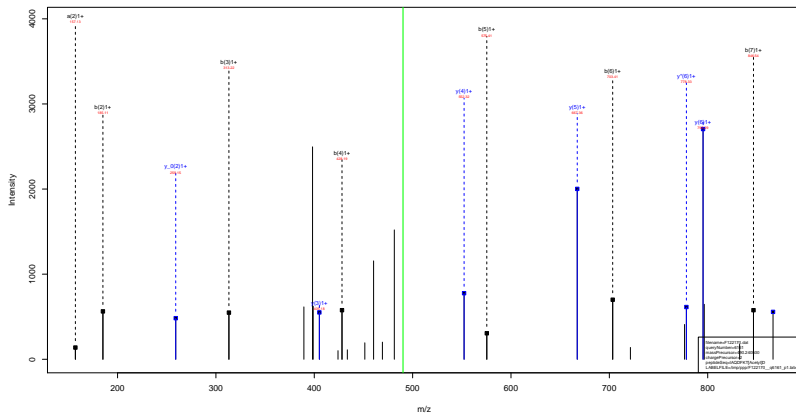



# sp | P68433 | H31\_MOUSE

IAQDFKT Acetyl D  
42.01

- ▶ fragmentation table for charge state 1+
- ▶ specType=cid
- ▶ score=49.16
- ▶ F122170.dat
- ▶ query=q6161.p1
- ▶ precursor=490.240500
- ▶ chargePrecursor=2
- ▶ itol=0.7

| AA  | a              | a*      | a $\Delta$ | b              | b*      | b $\Delta$ | y              | y*             | y $\Delta$     | AA  |
|-----|----------------|---------|------------|----------------|---------|------------|----------------|----------------|----------------|-----|
| T 3 | 263.098        | 0.000   | 0.000      | 116.203        | 0.000   | 0.000      | 303.471        | 362.444        | 1264.969       | T 3 |
| A 2 | <b>157.134</b> | 0.000   | 0.000      | <b>185.128</b> | 0.000   | 0.000      | <b>866.389</b> | 880.262        | 2484.376       | A 2 |
| Q 3 | 298.192        | 268.196 | -0.000     | <b>313.187</b> | 296.169 | -0.000     | <b>795.352</b> | <b>778.325</b> | 777.941        | Q 6 |
| D 4 | 400.219        | 383.103 | 382.209    | <b>428.214</b> | 411.107 | 410.203    | <b>667.293</b> | 650.269        | 649.263        | D 5 |
| F 5 | 547.287        | 530.261 | 529.371    | <b>575.282</b> | 558.256 | 557.272    | <b>552.266</b> | 535.240        | 534.256        | F 4 |
| R 6 | 678.282        | 659.266 | 657.371    | <b>703.277</b> | 686.261 | 685.367    | <b>405.190</b> | 388.174        | 389.189        | R 3 |
| T 7 | 818.441        | 801.414 | 800.430    | <b>846.436</b> | 829.409 | 828.425    | 277.310        | 0.000          | <b>259.092</b> | T 2 |
| D 8 | 933.608        | 916.491 | 915.491    | 961.463        | 944.436 | 943.450    | 138.040        | 0.000          | 116.034        | D 1 |

# sp | Q64525 | H2B2B\_MOUSE

PDKASAPAPKKGS<sup>Acetyl</sup> KKAVTK<sup>Acetyl</sup> VQKKD  
42.01 42.01

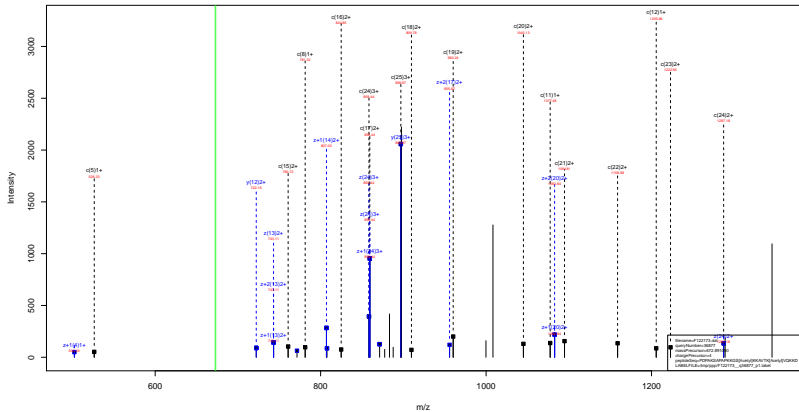

# sp | Q64525 | H2B2B\_MOUSE

PDKASAPAPKKGS<sup>Acetyl</sup> KKAVTK<sup>Acetyl</sup> VQKKD  
42.01 42.01

- ▶ fragmentation table for charge state 1+
- ▶ specType=etd
- ▶ score=58.69
- ▶ F122173.dat
- ▶ query=q36877.p1
- ▶ precursor=672.891080
- ▶ chargePrecursor=4
- ▶ itol=0.7

| AA   | c               | y        | z+1            | z+2      | z              | AA   |
|------|-----------------|----------|----------------|----------|----------------|------|
| P1   | 115.087         | 2688.541 | 2672.523       | 0.000    | 2671.514       | F125 |
| D1   | 230.114         | 2591.488 | 2575.469       | 0.000    | 2574.461       | D124 |
| P1   | 327.166         | 2476.461 | 2460.442       | 0.000    | 2459.434       | F123 |
| A1   | 398.203         | 2379.400 | 2363.389       | 0.000    | 2362.382       | A122 |
| K1   | <b>526.298</b>  | 2338.371 | 2322.352       | 2291.360 | 2291.345       | K121 |
| S1   | 613.330         | 2180.276 | 2164.257       | 2148.266 | 2143.250       | S120 |
| A1   | 694.368         | 2093.240 | 2077.225       | 2078.233 | 2076.215       | A119 |
| P1   | <b>781.420</b>  | 2022.207 | 2006.188       | 2007.196 | 2005.180       | F118 |
| A1   | 852.457         | 1925.154 | 1909.135       | 1910.143 | 1908.128       | A117 |
| P110 | 949.510         | 1854.117 | 1838.098       | 1839.106 | 1837.091       | F116 |
| K111 | <b>1077.605</b> | 1757.064 | 1741.046       | 1742.053 | 1740.038       | K115 |
| K112 | <b>1205.700</b> | 1628.960 | 1612.951       | 1613.958 | 1611.943       | K114 |
| G113 | 1262.722        | 1500.874 | 1484.856       | 1485.864 | 1483.848       | G113 |
| S114 | 1391.764        | 1443.853 | 1427.834       | 1428.842 | 1426.825       | S112 |
| K115 | 1519.859        | 1314.810 | 1298.792       | 1299.799 | 1297.784       | K111 |
| K116 | 1647.954        | 1186.715 | 1170.697       | 1171.705 | 1169.689       | K110 |
| A117 | 1718.991        | 1058.620 | 1042.602       | 1043.610 | 1041.594       | A109 |
| V118 | 1818.060        | 987.583  | 971.565        | 972.572  | 970.557        | V108 |
| T119 | 1919.107        | 888.515  | 872.496        | 873.504  | <b>871.488</b> | T107 |
| K120 | 2089.213        | 787.467  | <b>771.448</b> | 772.456  | 770.441        | K106 |
| V121 | 2198.281        | 617.363  | 601.344        | 602.351  | 600.335        | V105 |
| Q122 | 2316.340        | 518.291  | <b>502.275</b> | 503.282  | 501.267        | Q104 |
| K123 | 2444.435        | 390.235  | 374.216        | 375.224  | 373.208        | K103 |
| K124 | 2572.530        | 262.140  | 246.121        | 247.129  | 245.113        | K102 |
| D125 | 2687.597        | 134.045  | 118.026        | 119.034  | 117.018        | D101 |

# sp | Q64525 | H2B2B\_MOUSE

PDKASAPAPKKGS<sup>Acetyl</sup> KKAVTK<sup>Acetyl</sup> VQKKD<sup>42.01</sup>

- ▶ fragmentation table for charge state 2+
- ▶ specType=etd
- ▶ score=58.69
- ▶ F122173.dat
- ▶ query=q36877\_p1
- ▶ precursor=672.891080
- ▶ chargePrecursor=4
- ▶ itol=0.7

| AA |    | c               | y              | a+1             | a+2             | z               | AA    |
|----|----|-----------------|----------------|-----------------|-----------------|-----------------|-------|
| P  | 1  | 58.647          | 1344.774       | 1336.765        | 0.504           | 1338.261        | P[25] |
| D  | 3  | 115.560         | 1296.348       | 1288.239        | 0.504           | <b>1287.734</b> | D[24] |
| P  | 3  | 164.087         | 1238.734       | 1230.725        | 0.504           | 1232.221        | P[23] |
| A  | 4  | 199.605         | 1190.268       | 1182.198        | 0.504           | 1181.694        | A[22] |
| K  | 5  | 263.653         | 1154.689       | 1146.680        | 1147.184        | 1146.178        | K[21] |
| S  | 6  | 307.169         | 1090.642       | <b>1082.632</b> | <b>1083.136</b> | 1082.128        | S[20] |
| A  | 7  | 342.697         | 1047.126       | 1039.116        | 1039.620        | 1038.612        | A[19] |
| P  | 8  | 393.214         | 911.669        | 1003.589        | 1004.102        | 1003.094        | P[18] |
| A  | 9  | 426.732         | 963.081        | 955.071         | <b>955.575</b>  | 954.567         | A[17] |
| P  | 10 | 475.259         | 927.563        | 919.553         | 920.057         | 919.049         | P[16] |
| K  | 11 | 539.306         | 879.036        | <b>871.026</b>  | <b>871.530</b>  | 870.522         | K[15] |
| K  | 12 | 603.354         | 814.988        | <b>806.979</b>  | <b>807.483</b>  | <b>806.475</b>  | K[14] |
| Q  | 13 | 631.884         | 750.941        | <b>742.931</b>  | <b>743.435</b>  | <b>742.428</b>  | Q[13] |
| S  | 14 | 696.398         | <b>722.430</b> | 714.421         | 714.925         | 713.917         | S[12] |
| K  | 15 | <b>760.433</b>  | 657.959        | 649.899         | 650.403         | 649.395         | K[11] |
| K  | 16 | <b>824.481</b>  | 593.861        | 585.852         | 586.356         | 585.348         | K[10] |
| A  | 17 | <b>859.999</b>  | 529.814        | 521.804         | 522.308         | 521.301         | A[9]  |
| V  | 18 | <b>909.533</b>  | 464.295        | 456.285         | 456.790         | 455.782         | V[8]  |
| T  | 19 | <b>963.057</b>  | 414.761        | 406.752         | 407.256         | 406.248         | T[7]  |
| K  | 20 | <b>1045.110</b> | 394.427        | 386.420         | 386.924         | 385.916         | K[6]  |
| V  | 21 | <b>1094.644</b> | 309.184        | 301.175         | 301.679         | 300.671         | V[5]  |
| Q  | 22 | <b>1158.674</b> | 259.650        | 251.641         | 252.145         | 251.137         | Q[4]  |
| K  | 23 | <b>1222.721</b> | 195.621        | 187.612         | 188.116         | 187.108         | K[3]  |
| K  | 24 | <b>1286.768</b> | 131.574        | 123.564         | 124.068         | 123.060         | K[2]  |
| D  | 25 | 1344.282        | 87.528         | 89.537          | 89.021          | 89.013          | D[1]  |

# sp | Q64525 | H2B2B\_MOUSE

PDKAKSAPAPKKGS<sup>Acetyl</sup> KKAVTK<sup>Acetyl</sup> VQKKD<sup>42.01</sup>

- ▶ fragmentation table for charge state 3+
- ▶ specType=etd
- ▶ score=58.69
- ▶ F122173.dat
- ▶ query=q36877.p1
- ▶ precursor=672.891080
- ▶ chargePrecursor=4
- ▶ itol=0.7

| AA    | c              | y              | z+1            | z+2            | z              | AA    |
|-------|----------------|----------------|----------------|----------------|----------------|-------|
| P[1]  | 30.034         | <b>896.852</b> | 891.512        | 0.672          | 891.176        | P[25] |
| D[2]  | 77.376         | 864.501        | <b>859.161</b> | 0.672          | <b>858.825</b> | D[24] |
| P[3]  | 109.727        | 826.159        | 820.819        | 0.672          | 820.483        | P[23] |
| A[4]  | 133.406        | 793.808        | 788.468        | 0.672          | 788.132        | A[22] |
| K[5]  | 176.104        | 770.129        | 764.789        | 765.125        | 764.453        | K[21] |
| S[6]  | 205.115        | 727.435        | <b>722.091</b> | <b>722.427</b> | <b>721.755</b> | S[20] |
| A[7]  | 228.794        | 698.420        | 693.080        | 693.416        | 692.744        | A[19] |
| P[8]  | 251.145        | 674.741        | 669.401        | 669.737        | 669.085        | P[18] |
| A[9]  | 294.824        | 642.090        | 637.050        | 637.386        | 636.714        | A[17] |
| P[10] | 317.175        | 618.711        | 613.371        | 613.707        | 613.035        | P[16] |
| K[11] | 359.873        | 586.360        | 581.020        | 581.356        | 580.684        | K[15] |
| K[12] | 402.572        | 543.661        | 538.322        | 538.658        | 537.986        | K[14] |
| G[13] | 421.579        | 500.963        | 495.623        | 495.959        | 495.287        | G[13] |
| S[14] | 464.593        | 481.956        | 476.616        | 476.952        | 476.280        | S[12] |
| K[15] | 507.291        | 438.942        | 433.602        | 433.938        | 433.266        | K[11] |
| K[16] | 549.990        | 396.241        | 390.901        | 391.240        | 390.568        | K[10] |
| A[17] | 573.669        | 353.545        | 348.205        | 348.541        | 347.869        | A[9]  |
| V[18] | 606.691        | 329.866        | 324.526        | 324.862        | 324.190        | V[8]  |
| T[19] | 640.374        | 296.843        | 291.504        | 291.840        | 291.168        | T[7]  |
| K[20] | 697.076        | 263.161        | 257.821        | 258.157        | 257.485        | K[6]  |
| V[21] | 730.099        | 206.459        | 201.119        | 201.455        | 200.783        | V[5]  |
| Q[22] | 772.785        | 173.436        | 168.096        | 168.432        | 167.760        | Q[4]  |
| K[23] | 815.483        | 130.750        | 125.410        | 125.746        | 125.074        | K[3]  |
| K[24] | <b>858.181</b> | 88.051         | 82.712         | 83.048         | 82.376         | K[2]  |
| D[25] | <b>896.524</b> | 45.353         | 40.014         | 40.349         | 39.678         | D[1]  |



# sp | P10853 | H2B1F\_MOUSE

PEPAKSAPAPKK <sup>Acetyl</sup>42.01 GSKKAVT <sup>Acetyl</sup>42.01 KAQQK

- ▶ fragmentation table for charge state 1+
- ▶ specType=etd
- ▶ score=79.66
- ▶ F123172.dat
- ▶ query=q31211.p1
- ▶ precursor=640.630610
- ▶ chargePrecursor=4
- ▶ itol=0.5

| AA | c  | y               | z+1             | z+2             | z               | AA              |       |
|----|----|-----------------|-----------------|-----------------|-----------------|-----------------|-------|
| F  | 1  | 145.080         | 2959.498        | 2544.479        | 0.000           | 2642.472        | P[24] |
| E  | 2  | 264.120         | 2662.445        | 2446.427        | 0.000           | 2445.410        | E[23] |
| F  | 3  | 381.160         | 2333.403        | 2317.354        | 0.000           | 2316.376        | F[22] |
| A  | 4  | <b>412.210</b>  | 2238.350        | 2220.333        | 0.000           | 2219.321        | A[21] |
| K  | 5  | <b>540.314</b>  | 2105.313        | 2149.294        | 2150.302        | 2148.285        | K[20] |
| S  | 6  | <b>627.346</b>  | 2037.218        | 2021.199        | 2022.207        | 2020.191        | S[19] |
| A  | 7  | 698.353         | 1950.166        | 1934.147        | <b>1935.175</b> | <b>1933.159</b> | A[18] |
| F  | 8  | <b>795.436</b>  | 1879.149        | 1863.130        | 1864.138        | 1862.122        | F[17] |
| A  | 9  | 867.477         | 1782.096        | <b>1766.077</b> | 1767.085        | 1765.060        | A[16] |
| T  | 10 | <b>963.526</b>  | 1711.059        | 1695.040        | 1696.048        | 1694.032        | T[15] |
| K  | 11 | <b>1091.621</b> | 1614.006        | 1597.987        | <b>1598.995</b> | 1596.980        | K[14] |
| K  | 12 | <b>1261.726</b> | 1485.911        | 1469.892        | <b>1470.900</b> | 1468.885        | K[13] |
| G  | 13 | <b>1318.748</b> | 1415.866        | <b>1299.787</b> | 1300.795        | 1298.770        | G[12] |
| S  | 14 | 1467.780        | 1258.784        | 1242.765        | 1243.773        | 1241.758        | S[11] |
| K  | 15 | <b>1523.876</b> | 1174.765        | <b>1155.723</b> | 1156.741        | 1154.726        | K[10] |
| K  | 16 | <b>1661.970</b> | <b>1043.657</b> | <b>1027.638</b> | 1028.646        | 1026.631        | K[9]  |
| A  | 17 | 1733.007        | 915.562         | <b>899.543</b>  | 900.551         | 898.536         | A[8]  |
| V  | 18 | <b>1832.075</b> | <b>844.525</b>  | 828.506         | 829.514         | 827.499         | V[7]  |
| T  | 19 | <b>1975.133</b> | <b>745.457</b>  | <b>729.438</b>  | 730.446         | 728.430         | T[6]  |
| K  | 20 | 2103.226        | 602.396         | <b>586.380</b>  | 587.388         | 585.372         | K[5]  |
| A  | 21 | 2174.266        | 474.333         | <b>458.285</b>  | 459.293         | 457.277         | A[4]  |
| Q  | 22 | 2302.324        | 403.266         | <b>387.248</b>  | 388.255         | 386.240         | Q[3]  |
| K  | 23 | 2430.419        | <b>275.208</b>  | <b>259.189</b>  | 260.197         | 258.181         | K[2]  |
| K  | 24 | 2558.514        | 147.113         | 131.094         | 132.102         | 130.886         | K[1]  |

# sp | P10853 | H2B1F\_MOUSE

PEPAKSAPAPKK <sup>Acetyl</sup>42.01 GSKKAVT <sup>Acetyl</sup>42.01 KAQKK

- ▶ fragmentation table for charge state 2+
- ▶ specType=etd
- ▶ score=79.66
- ▶ F123172.dat
- ▶ query=q31211\_p1
- ▶ precursor=640.630610
- ▶ chargePrecursor=4
- ▶ itol=0.5

| AA |    | c               | y               | z+1             | z+2             | z              | AA    |
|----|----|-----------------|-----------------|-----------------|-----------------|----------------|-------|
| P  | 1  | 58.047          | <b>1280.253</b> | <b>1272.243</b> | 0.504           | 1271.739       | P[24] |
| E  | 2  | 122.568         | 1231.726        | <b>1223.717</b> | 0.504           | 1223.213       | E[23] |
| F  | 3  | 171.095         | 1187.205        | 1159.156        | 0.504           | 1158.662       | F[22] |
| A  | 4  | 266.613         | 1139.679        | <b>1110.669</b> | 0.504           | 1110.165       | A[21] |
| K  | 5  | 270.591         | <b>1083.160</b> | <b>1075.151</b> | <b>1075.655</b> | 1074.047       | K[20] |
| S  | 6  | 314.177         | 1019.113        | <b>1011.103</b> | <b>1011.607</b> | 1010.599       | S[19] |
| A  | 7  | 369.695         | 975.597         | <b>967.587</b>  | <b>968.091</b>  | <b>967.083</b> | A[18] |
| P  | 8  | 398.222         | 940.078         | 932.069         | 932.573         | 931.565        | P[17] |
| A  | 9  | 433.740         | 891.552         | <b>883.542</b>  | <b>884.046</b>  | 883.038        | A[16] |
| T  | 10 | 482.267         | 856.031         | 848.024         | <b>848.528</b>  | 847.520        | T[15] |
| K  | 11 | 546.314         | 807.507         | <b>799.497</b>  | <b>800.001</b>  | 798.993        | K[14] |
| K  | 12 | 631.367         | 743.450         | <b>735.450</b>  | <b>735.954</b>  | 734.946        | K[13] |
| G  | 13 | 659.878         | 658.408         | <b>650.397</b>  | <b>650.901</b>  | 649.893        | G[12] |
| S  | 14 | 703.394         | 620.890         | <b>621.886</b>  | <b>622.390</b>  | 621.382        | S[11] |
| K  | 15 | <b>767.441</b>  | <b>586.360</b>  | 578.353         | 578.857         | 577.850        | K[10] |
| K  | 16 | <b>831.488</b>  | 559.332         | 549.325         | 549.829         | 548.821        | K[9]  |
| A  | 17 | <b>867.007</b>  | <b>458.285</b>  | 450.275         | 450.779         | 449.771        | A[8]  |
| V  | 18 | <b>916.541</b>  | 422.768         | 414.757         | 415.261         | 414.253        | V[7]  |
| T  | 19 | <b>988.070</b>  | 373.232         | 365.223         | 365.727         | 364.719        | T[6]  |
| K  | 20 | <b>1052.118</b> | 301.703         | 293.693         | 294.197         | 293.190        | K[5]  |
| A  | 21 | 1097.636        | 237.665         | 229.656         | 230.160         | 229.152        | A[4]  |
| Q  | 22 | <b>1151.666</b> | 202.137         | 194.127         | 194.631         | 193.623        | Q[3]  |
| K  | 23 | <b>1215.713</b> | 138.108         | 130.098         | 130.602         | 129.594        | K[2]  |
| K  | 24 | 1279.761        | 74.060          | 66.051          | 66.555          | 65.547         | K[1]  |



# sp | P10853 | H2B1F\_MOUSE

PEPAKSAPAPKK <sup>Acetyl</sup>42.01 GSKKAVT <sup>Acetyl</sup>42.01 KAQKK

- ▶ fragmentation table for charge state 3+
- ▶ specType=etd
- ▶ score=79.66
- ▶ F123172.dat
- ▶ query=q31211.p1
- ▶ precursor=640.630610
- ▶ chargePrecursor=4
- ▶ itol=0.5

| AA    | c              | y              | z+1            | z+2            | z              | AA    |
|-------|----------------|----------------|----------------|----------------|----------------|-------|
| P[1]  | 39.034         | <b>853.830</b> | <b>848.498</b> | 0.672          | <b>848.162</b> | P[24] |
| E[2]  | 82.048         | 821.485        | <b>816.147</b> | 0.672          | 815.811        | E[23] |
| P[3]  | 114.399        | 778.472        | 773.133        | 0.672          | 772.797        | P[22] |
| A[4]  | 138.078        | <b>746.122</b> | 740.782        | 0.672          | 740.446        | A[21] |
| K[5]  | 180.776        | 722.442        | 717.103        | 717.439        | 716.767        | K[20] |
| S[6]  | 209.787        | 679.744        | 674.405        | 674.741        | 674.069        | S[19] |
| A[7]  | 233.466        | <b>650.733</b> | 645.394        | 645.730        | <b>645.058</b> | A[18] |
| F[8]  | 265.817        | <b>627.054</b> | <b>621.715</b> | <b>622.051</b> | 621.379        | F[17] |
| A[9]  | 289.496        | 594.704        | 589.365        | 589.700        | 589.028        | A[16] |
| P[10] | 313.847        | 571.024        | 565.685        | 566.021        | 565.349        | P[15] |
| K[11] | 364.545        | 538.674        | 533.334        | 533.670        | 532.998        | K[14] |
| K[12] | 421.247        | 495.975        | 490.636        | 490.972        | 490.300        | K[13] |
| G[13] | 440.254        | 439.273        | 433.934        | 434.270        | 433.598        | G[12] |
| S[14] | 469.265        | 420.266        | 414.927        | 415.263        | 414.591        | S[11] |
| K[15] | 511.963        | 391.256        | 385.916        | 386.252        | 385.580        | K[10] |
| K[16] | 554.661        | 348.557        | 343.218        | 343.554        | 342.882        | K[9]  |
| A[17] | 578.340        | 305.856        | 300.517        | 300.853        | 300.181        | A[8]  |
| V[18] | 611.363        | 282.180        | 276.840        | 277.176        | 276.504        | V[7]  |
| T[19] | 659.049        | 239.157        | 243.817        | 244.153        | 243.482        | T[6]  |
| K[20] | 701.748        | 201.471        | 196.131        | 196.467        | 195.795        | K[5]  |
| A[21] | 725.427        | 158.773        | 153.433        | 153.769        | 153.097        | A[4]  |
| Q[22] | <b>768.113</b> | 135.094        | 129.754        | 130.090        | 129.418        | Q[3]  |
| K[23] | <b>810.811</b> | 92.407         | 87.068         | 87.404         | 86.732         | K[2]  |
| K[24] | 853.510        | 49.709         | 44.370         | 44.705         | 44.034         | K[1]  |

# sp | P10853 | H2B1F\_MOUSE

PEPAKSAPAPKK <sup>Acetyl</sup> 42.01 GSKKAVT <sup>Acetyl</sup> 42.01 KAQKK

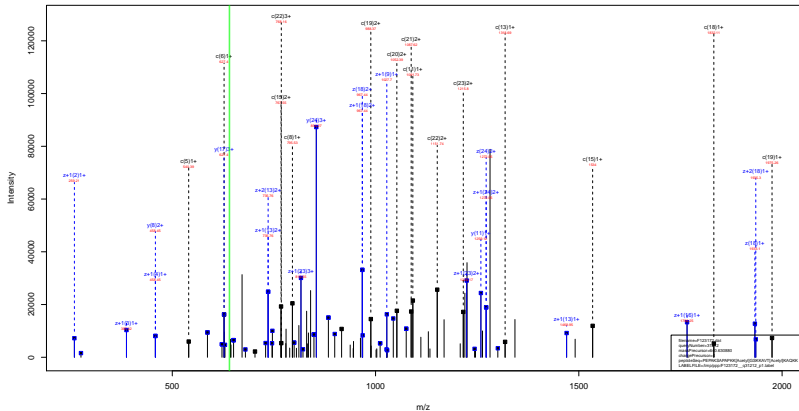

# sp | P10853 | H2B1F\_MOUSE

PEPAKSAPAPKK <sup>Acetyl</sup>42.01 GSKKAVT <sup>Acetyl</sup>42.01 KAQKK

- ▶ fragmentation table for charge state 1+
- ▶ specType=etd
- ▶ score=65.12
- ▶ F123172.dat
- ▶ query=q31212.p1
- ▶ precursor=640.630880
- ▶ chargePrecursor=4
- ▶ itol=0.5

| AA | c  | y               | z+1             | z+2             | z               | AA              |       |
|----|----|-----------------|-----------------|-----------------|-----------------|-----------------|-------|
| F  | 1  | 145.067         | 2939.498        | 2544.479        | 0.000           | 2542.472        | P[24] |
| E  | 2  | 244.129         | 2462.445        | 2446.427        | 0.000           | 2445.410        | E[23] |
| F  | 3  | 341.180         | 2133.403        | 2317.354        | 0.000           | 2316.376        | F[22] |
| A  | 4  | 432.239         | 2038.350        | 2220.331        | 0.000           | 2219.321        | A[21] |
| K  | 5  | <b>540.314</b>  | 2105.313        | 2149.294        | 2150.302        | 2148.285        | K[20] |
| S  | 6  | <b>627.346</b>  | 2037.218        | 2021.199        | 2022.207        | 2020.191        | S[19] |
| A  | 7  | 698.383         | 1950.166        | 1934.147        | <b>1935.175</b> | <b>1933.159</b> | A[18] |
| F  | 8  | <b>795.436</b>  | 1879.149        | 1863.130        | 1864.138        | 1862.122        | F[17] |
| A  | 9  | 866.473         | 1782.096        | <b>1766.077</b> | 1767.085        | 1765.060        | A[16] |
| T  | 10 | 953.526         | 1711.059        | 1695.040        | 1696.048        | 1694.032        | T[15] |
| K  | 11 | <b>1091.621</b> | 1614.006        | 1597.987        | 1598.995        | 1596.980        | K[14] |
| K  | 12 | 1263.726        | 1485.911        | <b>1469.892</b> | 1470.900        | 1468.885        | K[13] |
| G  | 13 | <b>1318.748</b> | 1315.806        | 1299.787        | <b>1300.795</b> | 1298.770        | G[12] |
| S  | 14 | 1446.790        | <b>1258.784</b> | 1242.765        | <b>1243.773</b> | 1241.750        | S[11] |
| K  | 15 | <b>1523.876</b> | 1174.769        | 1158.750        | 1159.741        | 1157.725        | K[10] |
| K  | 16 | 1661.910        | <b>1043.657</b> | <b>1027.638</b> | <b>1028.646</b> | <b>1026.631</b> | K[9]  |
| A  | 17 | 1733.007        | 915.562         | <b>899.543</b>  | 900.551         | 898.536         | A[8]  |
| V  | 18 | <b>1832.075</b> | 844.525         | 828.506         | 829.514         | 827.499         | V[7]  |
| T  | 19 | <b>1975.133</b> | <b>745.457</b>  | <b>729.438</b>  | 730.446         | 728.430         | T[6]  |
| K  | 20 | 2103.226        | 602.396         | <b>586.380</b>  | 587.388         | 585.372         | K[5]  |
| A  | 21 | 2174.266        | 474.303         | <b>458.285</b>  | 459.293         | 457.277         | A[4]  |
| Q  | 22 | 2302.324        | 403.266         | <b>387.248</b>  | 388.255         | 386.240         | Q[3]  |
| K  | 23 | 2430.419        | <b>275.208</b>  | <b>259.189</b>  | 260.197         | 258.181         | K[2]  |
| K  | 24 | 2558.514        | 147.113         | 131.094         | 132.102         | 130.886         | K[1]  |

# sp | P10853 | H2B1F\_MOUSE

PEPAKSAPAPKK <sup>Acetyl</sup>42.01 GSKKAVT <sup>Acetyl</sup>42.01 KAQKK

- ▶ fragmentation table for charge state 2+
- ▶ specType=etd
- ▶ score=65.12
- ▶ F123172.dat
- ▶ query=q31212.p1
- ▶ precursor=640.630880
- ▶ chargePrecursor=4
- ▶ itol=0.5

| AA    | c               | y              | z+1             | z+2             | z               | AA    |
|-------|-----------------|----------------|-----------------|-----------------|-----------------|-------|
| P[1]  | 58.047          | 1393.253       | <b>1222.243</b> | 0.504           | <b>1271.730</b> | P[24] |
| E[2]  | 122.568         | 1231.726       | <b>1223.717</b> | 0.504           | 1223.213        | E[23] |
| P[3]  | 171.095         | 1197.205       | 1198.190        | 0.504           | 1198.692        | P[22] |
| A[4]  | 268.613         | 1118.679       | 1119.669        | 0.504           | 1119.165        | A[21] |
| R[5]  | 270.591         | 1083.160       | <b>1075.151</b> | <b>1075.655</b> | 1074.047        | R[20] |
| S[6]  | 314.177         | 1019.113       | <b>1011.103</b> | <b>1011.607</b> | 1010.599        | S[19] |
| A[7]  | 349.695         | 975.597        | <b>967.587</b>  | <b>968.091</b>  | <b>967.083</b>  | A[18] |
| P[8]  | 398.222         | 940.078        | 932.069         | 932.573         | 931.565         | P[17] |
| A[9]  | 433.740         | 891.552        | <b>883.542</b>  | <b>884.046</b>  | 883.038         | A[16] |
| T[10] | 482.267         | 856.033        | <b>848.024</b>  | <b>848.528</b>  | 847.520         | T[15] |
| R[11] | 546.314         | 807.507        | <b>799.497</b>  | <b>800.001</b>  | 798.993         | R[14] |
| K[12] | 631.367         | 743.459        | <b>735.450</b>  | <b>735.954</b>  | 734.946         | K[13] |
| G[13] | 659.878         | 658.406        | <b>650.397</b>  | <b>650.901</b>  | 649.893         | G[12] |
| S[14] | <b>703.394</b>  | <b>629.896</b> | <b>621.886</b>  | <b>622.390</b>  | 621.382         | S[11] |
| R[15] | <b>767.441</b>  | <b>566.380</b> | 576.370         | 576.874         | 577.866         | R[10] |
| K[16] | 811.938         | 522.132        | 532.121         | 532.625         | 533.617         | K[9]  |
| A[17] | 867.007         | <b>458.285</b> | 458.275         | 458.779         | 448.771         | A[8]  |
| V[18] | <b>916.541</b>  | 422.766        | 414.757         | 415.261         | 414.253         | V[7]  |
| T[19] | <b>988.070</b>  | 373.232        | 365.223         | 365.727         | 364.719         | T[6]  |
| R[20] | <b>1052.118</b> | 301.703        | 293.693         | 294.197         | 293.190         | R[5]  |
| A[21] | <b>1087.636</b> | 237.655        | 229.646         | 230.150         | 229.142         | A[4]  |
| Q[22] | <b>1151.666</b> | 202.137        | 194.127         | 194.631         | 193.623         | Q[3]  |
| K[23] | <b>1215.713</b> | 138.108        | 130.098         | 130.602         | 129.594         | K[2]  |
| K[24] | 1279.761        | 74.060         | 66.051          | 66.555          | 65.547          | K[1]  |

# sp | P10853 | H2B1F\_MOUSE

PEPAKSAPAPKK <sup>Acetyl</sup>42.01 GSKKAVT <sup>Acetyl</sup>42.01 KAQKK

- ▶ fragmentation table for charge state 3+
- ▶ specType=etd
- ▶ score=65.12
- ▶ F123172.dat
- ▶ query=q31212.p1
- ▶ precursor=640.630880
- ▶ chargePrecursor=4
- ▶ itol=0.5

| AA    | c              | y              | z+1            | z+2            | z              | AA    |
|-------|----------------|----------------|----------------|----------------|----------------|-------|
| P[1]  | 39.034         | <b>853.830</b> | <b>848.498</b> | 0.672          | <b>848.162</b> | P[24] |
| E[2]  | 82.048         | <b>821.487</b> | <b>816.147</b> | 0.672          | 815.811        | E[23] |
| P[3]  | 114.399        | 778.472        | 773.133        | 0.672          | 772.797        | P[22] |
| A[4]  | 138.078        | <b>746.122</b> | 740.782        | 0.672          | 740.446        | A[21] |
| K[5]  | 180.776        | 722.442        | 717.103        | 717.439        | 716.767        | K[20] |
| S[6]  | 209.787        | <b>679.744</b> | 674.405        | 674.741        | 674.069        | S[19] |
| A[7]  | 233.466        | <b>650.733</b> | 645.394        | 645.730        | 645.058        | A[18] |
| F[8]  | 265.817        | <b>627.054</b> | 621.713        | <b>622.051</b> | 621.379        | F[17] |
| A[9]  | 289.496        | 594.704        | 589.364        | 589.700        | 589.028        | A[16] |
| P[10] | 313.947        | 571.024        | 565.685        | 566.021        | 565.349        | P[15] |
| K[11] | 364.545        | 538.674        | 533.334        | 533.670        | 532.998        | K[14] |
| K[12] | 421.247        | 495.975        | 490.636        | 490.972        | 490.300        | K[13] |
| G[13] | 440.254        | 439.273        | 433.934        | 434.270        | 433.598        | G[12] |
| S[14] | 469.265        | 420.266        | 414.927        | 415.263        | 414.591        | S[11] |
| K[15] | 511.963        | 391.256        | 385.916        | 386.252        | 385.580        | K[10] |
| K[16] | 554.661        | 348.557        | 343.218        | 343.554        | 342.882        | K[9]  |
| A[17] | 578.340        | 305.856        | 300.517        | 300.853        | 300.181        | A[8]  |
| V[18] | 611.363        | 282.180        | 276.840        | 277.176        | 276.504        | V[7]  |
| T[19] | 659.049        | 239.157        | 243.817        | 244.153        | 243.482        | T[6]  |
| K[20] | 701.748        | 201.471        | 196.131        | 196.467        | 195.795        | K[5]  |
| A[21] | 725.427        | 158.773        | 153.433        | 153.769        | 153.097        | A[4]  |
| Q[22] | <b>768.113</b> | 135.094        | 129.754        | 130.090        | 129.418        | Q[3]  |
| K[23] | 810.811        | 92.407         | 87.068         | 87.404         | 86.732         | K[2]  |
| K[24] | 853.510        | 49.709         | 44.370         | 44.705         | 44.034         | K[1]  |



# sp | P10853 | H2B1F\_MOUSE

PEPAKSAPAPKK <sup>Acetyl</sup>42.01 GSK <sup>Acetyl</sup>42.01 KAVT <sup>Acetyl</sup>42.01 KAQQK

- ▶ fragmentation table for charge state 1+
- ▶ specType=etd
- ▶ score=65.83
- ▶ F123172.dat
- ▶ query=q31532\_p1
- ▶ precursor=651.131320
- ▶ chargePrecursor=4
- ▶ itol=0.5

| AA    | c               | y               | z+1             | z+2             | z              | AA    |
|-------|-----------------|-----------------|-----------------|-----------------|----------------|-------|
| P[1]  | 115.087         | 2601.509        | 2585.490        | 0.000           | 2584.463       | P[24] |
| E[2]  | 244.129         | 2504.456        | 2488.437        | 0.000           | 2487.429       | E[23] |
| P[3]  | 341.162         | 2375.413        | 2359.395        | 0.000           | 2358.387       | P[22] |
| A[4]  | 412.219         | 2278.361        | 2262.342        | 0.000           | 2261.334       | A[21] |
| K[5]  | <b>540.314</b>  | 2207.323        | 2191.305        | 2302.313        | 2190.297       | K[20] |
| S[6]  | <b>627.346</b>  | 2079.228        | 2063.210        | 2064.218        | 2062.202       | S[19] |
| A[7]  | 698.393         | 1992.196        | <b>1976.178</b> | 1977.186        | 1975.170       | A[18] |
| P[8]  | 795.436         | 1921.159        | 1905.141        | 1906.148        | 1904.133       | P[17] |
| A[9]  | 828.473         | 1824.107        | 1808.088        | 1809.096        | 1807.080       | A[16] |
| P[10] | <b>963.526</b>  | 1763.059        | 1747.051        | 1748.059        | 1746.043       | P[15] |
| K[11] | <b>1091.621</b> | 1656.017        | 1639.998        | <b>1641.006</b> | 1638.990       | K[14] |
| K[12] | <b>1261.726</b> | 1527.922        | <b>1511.903</b> | 1512.911        | 1510.895       | K[13] |
| G[13] | <b>1318.748</b> | 1357.816        | 1341.797        | <b>1342.805</b> | 1340.790       | G[12] |
| S[14] | 1405.780        | 1300.795        | <b>1284.776</b> | 1285.784        | 1283.768       | S[11] |
| K[15] | 1575.805        | 1213.753        | 1197.744        | 1198.752        | 1196.736       | K[10] |
| K[16] | <b>1703.980</b> | <b>1043.657</b> | <b>1027.638</b> | <b>1028.646</b> | 1026.631       | K[9]  |
| A[17] | 1775.017        | 915.562         | 899.543         | 900.551         | 898.536        | A[8]  |
| V[18] | 1874.085        | <b>844.525</b>  | 828.506         | 829.514         | 827.499        | V[7]  |
| T[19] | 2017.144        | 745.457         | <b>729.438</b>  | 730.446         | <b>728.430</b> | T[6]  |
| K[20] | 2145.239        | 602.388         | <b>586.380</b>  | 587.388         | 585.372        | K[5]  |
| A[21] | 2235.276        | 474.303         | <b>458.285</b>  | 459.293         | 457.277        | A[4]  |
| Q[22] | 2344.335        | 403.296         | <b>387.248</b>  | 388.255         | 386.240        | Q[3]  |
| K[23] | 2472.430        | 275.208         | <b>259.189</b>  | 260.197         | 258.181        | K[2]  |
| K[24] | 2600.525        | 147.113         | 131.094         | 132.102         | 130.086        | K[1]  |

# sp | P10853 | H2B1F\_MOUSE

PEPAKSAPAPKK <sup>Acetyl</sup>42.01 GSK <sup>Acetyl</sup>42.01 KAVT <sup>Acetyl</sup>42.01 KAQKK

- ▶ fragmentation table for charge state 2+
- ▶ specType=etd
- ▶ score=65.83
- ▶ F123172.dat
- ▶ query=q31532\_p1
- ▶ precursor=651.131320
- ▶ chargePrecursor=4
- ▶ itol=0.5

| AA    | c               | y               | z+1             | z+2             | z              | AA    |
|-------|-----------------|-----------------|-----------------|-----------------|----------------|-------|
| P[1]  | 58.047          | 1301.250        | <b>1293.249</b> | 0.504           | 1292.745       | P[24] |
| E[2]  | 122.568         | 1252.732        | <b>1244.722</b> | 0.504           | 1244.218       | E[23] |
| P[3]  | 171.095         | 1188.210        | 1187.706        | 0.504           | 1179.697       | P[22] |
| A[4]  | 208.613         | 1139.689        | <b>1131.675</b> | 0.504           | 1131.171       | A[21] |
| K[5]  | 270.561         | 1104.162        | 1099.150        | <b>1099.646</b> | 1095.652       | K[20] |
| S[6]  | 314.177         | <b>1040.118</b> | <b>1032.109</b> | <b>1032.612</b> | 1031.605       | S[19] |
| A[7]  | 349.695         | 996.602         | <b>988.592</b>  | <b>989.096</b>  | <b>988.089</b> | A[18] |
| P[8]  | 398.222         | 961.083         | 953.074         | 953.578         | 952.570        | P[17] |
| A[9]  | 433.740         | 912.561         | <b>904.548</b>  | <b>905.051</b>  | 904.043        | A[16] |
| P[10] | 482.267         | 877.038         | <b>868.029</b>  | 868.533         | <b>868.525</b> | P[15] |
| K[11] | 546.314         | 828.512         | <b>820.503</b>  | 821.007         | <b>819.999</b> | K[14] |
| K[12] | 631.367         | 764.484         | <b>756.455</b>  | <b>756.959</b>  | 755.951        | K[13] |
| G[13] | 659.878         | 679.412         | <b>671.402</b>  | <b>671.906</b>  | 670.898        | G[12] |
| S[14] | 703.394         | 650.901         | <b>642.892</b>  | <b>643.396</b>  | 642.388        | S[11] |
| K[15] | <b>788.446</b>  | 601.385         | <b>599.376</b>  | <b>599.880</b>  | 598.872        | K[10] |
| K[16] | 802.494         | 562.332         | 554.323         | 554.827         | 553.819        | K[9]  |
| A[17] | 888.012         | <b>458.285</b>  | 450.275         | 450.779         | 449.771        | A[8]  |
| V[18] | <b>937.547</b>  | 422.768         | 414.757         | 415.261         | 414.253        | V[7]  |
| T[19] | <b>1009.076</b> | 373.232         | 365.223         | 365.727         | 364.719        | T[6]  |
| K[20] | <b>1073.123</b> | 301.703         | 293.693         | 294.197         | 293.190        | K[5]  |
| A[21] | <b>1108.642</b> | 237.657         | 229.646         | 230.150         | 229.143        | A[4]  |
| Q[22] | <b>1172.671</b> | 202.137         | 194.127         | 194.631         | 193.624        | Q[3]  |
| K[23] | 1236.718        | 138.108         | 130.098         | 130.602         | 129.594        | K[2]  |
| K[24] | 1300.766        | 74.060          | 66.051          | 66.555          | 65.547         | K[1]  |



# sp | P10853 | H2B1F\_MOUSE

PEPAKSAPAPKK <sup>Acetyl</sup>42.01 GSK <sup>Acetyl</sup>42.01 KAVT <sup>Acetyl</sup>42.01 KAQQK

- ▶ fragmentation table for charge state 3+
- ▶ specType=etd
- ▶ score=65.83
- ▶ F123172.dat
- ▶ query=q31532.p1
- ▶ precursor=651.131320
- ▶ chargePrecursor=4
- ▶ itol=0.5

| AA    | c              | y              | z+1            | z+2     | z              | AA    |
|-------|----------------|----------------|----------------|---------|----------------|-------|
| P[1]  | 89.034         | <b>867.841</b> | <b>862.501</b> | 0.672   | <b>862.166</b> | P[24] |
| E[2]  | 82.048         | 835.490        | <b>830.151</b> | 0.672   | 829.815        | E[23] |
| P[3]  | 114.999        | 792.476        | 787.136        | 0.672   | 786.800        | P[22] |
| A[4]  | 138.078        | 760.125        | 754.785        | 0.672   | 754.450        | A[21] |
| K[5]  | 180.776        | 736.446        | 731.106        | 731.442 | 730.770        | K[20] |
| S[6]  | 209.787        | 693.748        | 688.408        | 688.744 | 688.072        | S[19] |
| A[7]  | 233.466        | 664.737        | 659.397        | 659.733 | 659.061        | A[18] |
| P[8]  | 265.817        | 641.056        | 635.716        | 636.054 | 635.382        | P[17] |
| A[9]  | 289.496        | 608.707        | 603.367        | 603.703 | 603.032        | A[16] |
| P[10] | 321.247        | 586.026        | 579.686        | 580.024 | 579.352        | P[15] |
| K[11] | 364.545        | 552.677        | 547.337        | 547.673 | 547.002        | K[14] |
| K[12] | 421.247        | 509.979        | 504.639        | 504.975 | 504.303        | K[13] |
| G[13] | 440.284        | 483.277        | 447.937        | 448.273 | 447.601        | G[12] |
| S[14] | 469.265        | 434.270        | 438.930        | 439.266 | 438.594        | S[11] |
| K[15] | 525.967        | 405.259        | 399.920        | 400.255 | 399.584        | K[10] |
| K[16] | 568.665        | 348.557        | 343.218        | 343.554 | 342.882        | K[9]  |
| A[17] | 592.344        | 305.859        | 300.519        | 300.855 | 300.183        | A[8]  |
| V[18] | 625.367        | 282.180        | 276.840        | 277.176 | 276.504        | V[7]  |
| T[19] | 673.053        | 249.157        | 243.817        | 244.153 | 243.482        | T[6]  |
| K[20] | 713.751        | 201.471        | 196.131        | 196.467 | 195.795        | K[5]  |
| A[21] | 759.430        | 158.773        | 153.433        | 153.769 | 153.097        | A[4]  |
| Q[22] | 782.116        | 135.094        | 129.754        | 130.090 | 129.418        | Q[3]  |
| K[23] | <b>824.815</b> | 92.407         | 87.068         | 87.404  | 86.732         | K[2]  |
| K[24] | <b>867.513</b> | 49.709         | 44.370         | 44.705  | 44.034         | K[1]  |

# sp | P62806 | H4\_MOUSE

[Acetyl]SGRGKGGKGLGKGGAK Acetyl RHRK (Methyl) VLRD  
42.01 (14.02)

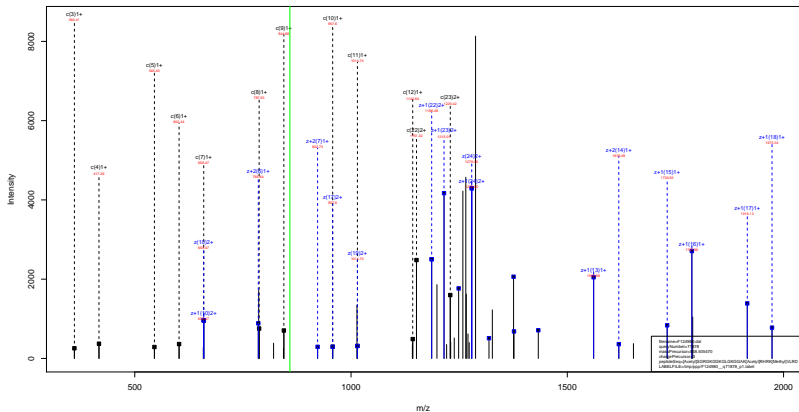

# sp | P62806 | H4\_MOUSE

[Acetyl]SGRGKGGKGLGKGGAK<sup>Acetyl</sup> RHRK<sup>(Methyl)</sup> VLRD<sup>(14.02)</sup>

- ▶ fragmentation table for charge state 1+
- ▶ specType=etd
- ▶ score=60.88
- ▶ F124980.dat
- ▶ query=q71878\_p1
- ▶ precursor=858.505470
- ▶ chargePrecursor=3
- ▶ itol=0.6

| AA |    | c               | y        | z+1             | z+2             | z        | AA    |
|----|----|-----------------|----------|-----------------|-----------------|----------|-------|
| S  | 1  | 147.076         | 2573.497 | 2557.478        | 0.000           | 2556.471 | S[24] |
| G  | 2  | 204.098         | 2444.455 | 2428.436        | 0.000           | 2427.429 | G[23] |
| R  | 3  | <b>360.199</b>  | 2307.413 | 2371.414        | 2372.422        | 2370.407 | R[22] |
| G  | 4  | <b>417.220</b>  | 2231.312 | 2215.313        | 2216.321        | 2214.305 | G[21] |
| K  | 5  | <b>545.315</b>  | 2174.310 | 2158.300        | 2159.300        | 2157.284 | K[20] |
| G  | 6  | <b>602.337</b>  | 2046.216 | 2030.197        | 2031.205        | 2029.189 | G[19] |
| G  | 7  | <b>659.358</b>  | 1989.194 | <b>1973.175</b> | 1974.183        | 1972.168 | G[18] |
| K  | 8  | <b>787.453</b>  | 1932.173 | <b>1916.154</b> | 1917.162        | 1915.146 | K[17] |
| G  | 9  | <b>844.475</b>  | 1804.078 | <b>1788.059</b> | 1789.067        | 1787.051 | G[16] |
| L  | 10 | <b>937.559</b>  | 1747.066 | <b>1731.037</b> | 1732.045        | 1730.030 | L[15] |
| G  | 11 | <b>1014.580</b> | 1633.972 | 1617.953        | <b>1618.961</b> | 1616.946 | G[14] |
| K  | 12 | <b>1142.675</b> | 1576.951 | <b>1560.932</b> | 1561.940        | 1559.924 | K[13] |
| G  | 13 | 1199.697        | 1448.856 | <b>1432.837</b> | 1433.845        | 1431.829 | G[12] |
| G  | 14 | 1256.718        | 1391.834 | <b>1375.816</b> | <b>1376.823</b> | 1374.808 | G[11] |
| A  | 15 | 1327.755        | 1334.813 | <b>1318.794</b> | 1319.802        | 1317.786 | A[10] |
| R  | 16 | 1407.801        | 1283.791 | 1247.757        | <b>1248.765</b> | 1246.749 | R[9]  |
| R  | 17 | 1653.962        | 1203.676 | 1077.651        | 1078.659        | 1076.644 | R[8]  |
| H  | 18 | 1791.021        | 937.569  | 621.530         | <b>922.558</b>  | 920.542  | H[7]  |
| R  | 19 | 1947.122        | 900.510  | 784.491         | <b>785.499</b>  | 783.484  | R[6]  |
| K  | 20 | 2089.233        | 644.409  | 628.390         | 629.398         | 627.382  | K[5]  |
| V  | 21 | 2188.301        | 502.298  | 486.280         | 487.287         | 485.272  | V[4]  |
| L  | 22 | 2401.386        | 400.230  | 387.211         | 388.219         | 386.203  | L[3]  |
| D  | 23 | 2457.486        | 398.146  | 378.127         | 379.135         | 377.119  | D[2]  |
| D  | 24 | 2572.513        | 194.045  | 118.026         | 119.034         | 117.018  | D[1]  |

# sp | P62806 | H4\_MOUSE

[Acetyl]SGRGKGGKGLGKGGAK<sup>Acetyl</sup> RHRK<sup>(Methyl)</sup> VLRD<sup>(14.02)</sup>  
42.01

- ▶ fragmentation table for charge state 2+
- ▶ specType=etd
- ▶ score=60.88
- ▶ F124980.dat
- ▶ query=q71878.p1
- ▶ precursor=858.505470
- ▶ chargePrecursor=3
- ▶ itol=0.6

| AA    | c               | y        | z+1             | z+2             | z               | AA    |
|-------|-----------------|----------|-----------------|-----------------|-----------------|-------|
| S[1]  | 74.042          | 1287.262 | <b>1279.243</b> | 0.504           | <b>1278.739</b> | S[24] |
| G[2]  | 102.553         | 1222.731 | <b>1214.722</b> | 0.504           | 1214.218        | G[23] |
| R[3]  | 180.603         | 1194.220 | <b>1186.211</b> | <b>1186.715</b> | 1185.707        | R[22] |
| G[4]  | 208.114         | 1116.190 | 1108.180        | 1108.684        | 1107.676        | G[21] |
| K[5]  | 274.154         | 897.659  | 1079.650        | 1080.153        | 1079.149        | K[20] |
| G[6]  | 301.672         | 1023.611 | 1015.602        | 1016.106        | <b>1015.098</b> | G[19] |
| G[7]  | 330.183         | 995.101  | 987.091         | 987.595         | 986.587         | G[18] |
| K[8]  | 394.230         | 956.590  | 958.581         | 959.084         | <b>958.077</b>  | K[17] |
| G[9]  | 422.741         | 902.542  | 894.533         | 895.037         | 894.029         | G[16] |
| L[10] | 479.283         | 874.032  | 866.023         | 866.526         | 865.518         | L[15] |
| G[11] | 507.794         | 817.490  | 809.480         | 809.984         | 808.976         | G[14] |
| K[12] | 571.841         | 788.979  | 780.970         | 781.474         | 780.466         | K[13] |
| G[13] | 600.352         | 724.931  | 716.922         | 717.426         | 716.418         | G[12] |
| G[14] | 628.863         | 696.421  | 688.411         | 688.915         | 687.907         | G[11] |
| A[15] | 664.361         | 667.910  | <b>659.901</b>  | 660.405         | <b>659.397</b>  | A[10] |
| R[16] | 769.434         | 632.394  | 624.385         | 624.888         | 623.879         | R[9]  |
| R[17] | 827.468         | 547.320  | 539.310         | 539.813         | 538.805         | R[8]  |
| H[18] | 896.014         | 469.288  | 461.279         | 461.783         | 460.775         | H[7]  |
| R[19] | 974.065         | 400.759  | 392.749         | 393.253         | 392.245         | R[6]  |
| K[20] | 1045.120        | 322.708  | 314.699         | 315.203         | 314.195         | K[5]  |
| V[21] | 1094.654        | 251.653  | 243.643         | 244.147         | 243.140         | V[4]  |
| L[22] | <b>1151.196</b> | 202.118  | 194.109         | 194.613         | 193.605         | L[3]  |
| R[23] | <b>1229.247</b> | 145.577  | 137.567         | 138.071         | 137.063         | R[2]  |
| D[24] | 1286.760        | 67.526   | 59.517          | 60.021          | 59.013          | D[1]  |

# sp | P62806 | H4\_MOUSE

[Acetyl]SGRGKGGK <sup>Acetyl</sup><sub>42.01</sub> GLGKGGAKRHRK <sup>(Propionyl)</sup><sub>(56.03)</sub> VLRD

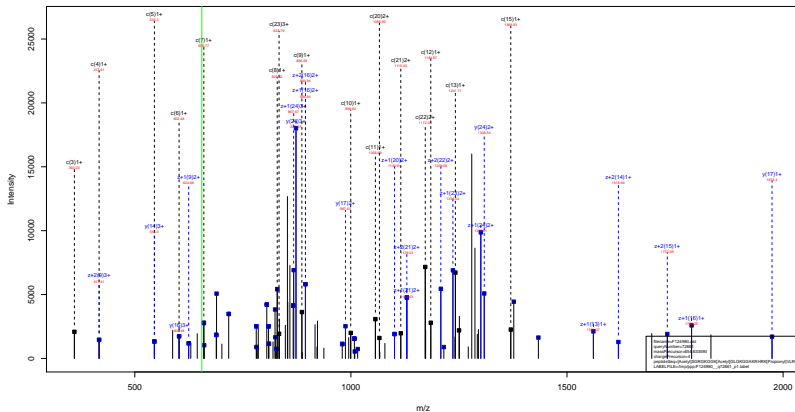

# sp | P62806 | H4\_MOUSE

[Acetyl]SGRGKGGK <sup>Acetyl</sup><sub>42.01</sub> GLGKGGAKRHRK <sup>(Propionyl)</sup><sub>(56.03)</sub> VLRD

- ▶ fragmentation table for charge state 1+
- ▶ specType=etd
- ▶ score=76.02
- ▶ F124980.dat
- ▶ query=q72661.p1
- ▶ precursor=654.633590
- ▶ chargePrecursor=4
- ▶ itol=0.6

| AA    | c               | y               | z+1             | z+2             | z              | AA    |
|-------|-----------------|-----------------|-----------------|-----------------|----------------|-------|
| S[1]  | 147.076         | 2615.508        | 2599.489        | 0.000           | 2599.481       | S[24] |
| G[2]  | 204.008         | 2486.465        | 2470.446        | 0.000           | 2469.439       | G[23] |
| R[3]  | <b>360.199</b>  | 2429.444        | 2413.425        | 2414.433        | 2412.417       | R[22] |
| G[4]  | <b>417.220</b>  | 2271.343        | 2267.324        | 2268.332        | 2266.316       | G[21] |
| K[5]  | <b>545.115</b>  | 2210.321        | 2200.302        | 2201.310        | 2199.295       | K[20] |
| G[6]  | <b>602.137</b>  | 2088.228        | 2072.207        | 2073.215        | 2071.200       | G[19] |
| G[7]  | <b>659.358</b>  | 2031.205        | 2015.186        | 2016.194        | 2014.178       | G[18] |
| K[8]  | <b>829.464</b>  | <b>1974.183</b> | 1958.164        | 1959.172        | 1957.157       | K[17] |
| G[9]  | <b>886.485</b>  | 1804.078        | <b>1788.059</b> | 1789.067        | 1787.051       | G[16] |
| L[10] | <b>959.569</b>  | 1747.056        | 1731.037        | <b>1732.045</b> | 1730.030       | L[15] |
| G[11] | <b>1056.591</b> | 1633.972        | 1617.953        | <b>1618.961</b> | 1616.946       | G[14] |
| K[12] | <b>1184.686</b> | 1576.951        | <b>1560.932</b> | 1561.940        | 1559.924       | K[13] |
| G[13] | <b>1241.707</b> | 1448.858        | 1432.837        | <b>1433.845</b> | 1431.829       | G[12] |
| G[14] | 1298.729        | 1391.834        | 1375.816        | <b>1376.823</b> | 1374.808       | G[11] |
| A[15] | <b>1369.766</b> | 1334.813        | 1318.794        | 1319.802        | 1317.786       | A[10] |
| R[16] | 1407.801        | 1283.778        | 1267.757        | 1268.765        | 1266.749       | R[9]  |
| R[17] | 1653.962        | 1135.682        | 1119.662        | 1120.670        | 1118.654       | R[8]  |
| H[18] | 1791.021        | <b>979.580</b>  | 963.561         | 964.569         | 962.553        | H[7]  |
| R[19] | 1947.122        | 842.521         | 826.502         | <b>827.510</b>  | <b>825.494</b> | R[6]  |
| K[20] | 2131.243        | 686.420         | 670.401         | 671.409         | 669.393        | K[5]  |
| V[21] | 2230.312        | 502.268         | 486.250         | 487.257         | 485.242        | V[4]  |
| L[22] | 2483.396        | 403.230         | 387.211         | 388.219         | 386.203        | L[3]  |
| R[23] | 2499.497        | 290.140         | 274.121         | 275.129         | 273.113        | R[2]  |
| D[24] | 2614.524        | 134.045         | 118.026         | 119.034         | 117.018        | D[1]  |

# sp | P62806 | H4\_MOUSE

[Acetyl]SGRGKGGK <sup>Acetyl</sup><sub>42.01</sub> GLGKGGAKRHRK <sup>(Propionyl)</sup><sub>(56.03)</sub> VLRD

- ▶ fragmentation table for charge state 2+
- ▶ specType=etd
- ▶ score=76.02
- ▶ F124980.dat
- ▶ query=q72661.p1
- ▶ precursor=654.633590
- ▶ chargePrecursor=4
- ▶ itol=0.6

| AA    | c               | y               | z+1             | z+2             | z               | AA    |
|-------|-----------------|-----------------|-----------------|-----------------|-----------------|-------|
| S[1]  | 74.092          | <b>1308.257</b> | <b>1300.248</b> | 0.504           | 1299.744        | S[24] |
| G[2]  | 102.553         | 1243.736        | <b>1235.727</b> | 0.504           | 1235.223        | G[23] |
| R[3]  | 180.603         | <b>1215.225</b> | 1207.216        | <b>1207.720</b> | 1206.712        | R[22] |
| G[4]  | 209.114         | 1137.175        | <b>1125.166</b> | <b>1128.659</b> | 1126.662        | G[21] |
| R[5]  | 273.163         | 1108.664        | <b>1100.655</b> | <b>1103.159</b> | 1099.161        | R[20] |
| G[6]  | 301.672         | 1044.613        | 1035.607        | 1037.113        | 1035.103        | G[19] |
| G[7]  | 330.183         | <b>1016.106</b> | <b>1008.097</b> | <b>1008.601</b> | <b>1007.593</b> | G[18] |
| K[8]  | 415.236         | <b>987.595</b>  | <b>979.586</b>  | <b>980.090</b>  | 979.082         | K[17] |
| G[9]  | 443.746         | 902.542         | <b>894.533</b>  | <b>895.037</b>  | 894.029         | G[16] |
| L[10] | 500.289         | 874.132         | <b>866.022</b>  | <b>864.376</b>  | 865.311         | L[15] |
| G[11] | 528.799         | 817.490         | <b>809.480</b>  | <b>809.984</b>  | <b>808.976</b>  | G[14] |
| K[12] | 592.847         | 789.078         | <b>780.970</b>  | <b>781.474</b>  | <b>780.466</b>  | K[13] |
| G[13] | 621.357         | 724.931         | <b>716.922</b>  | <b>717.426</b>  | 716.418         | G[12] |
| G[14] | 649.868         | 695.421         | <b>688.411</b>  | <b>688.915</b>  | <b>687.907</b>  | G[11] |
| A[15] | 685.367         | 667.010         | <b>659.901</b>  | <b>660.405</b>  | <b>659.397</b>  | A[10] |
| R[16] | 749.414         | 632.391         | <b>624.382</b>  | <b>624.886</b>  | 623.877         | R[9]  |
| R[17] | <b>827.485</b>  | 568.344         | 560.335         | 560.839         | 559.831         | R[6]  |
| H[18] | 896.014         | 490.293         | 482.284         | 482.788         | 481.780         | H[7]  |
| R[19] | 974.065         | 421.764         | 413.755         | 414.259         | 413.251         | R[6]  |
| K[20] | <b>1066.125</b> | 343.713         | 335.704         | 336.208         | 335.200         | K[5]  |
| V[21] | <b>1115.659</b> | 251.053         | 243.043         | 244.547         | 243.540         | V[4]  |
| L[22] | <b>1172.201</b> | 202.110         | 194.100         | 194.613         | 193.605         | L[3]  |
| R[23] | <b>1250.252</b> | 145.577         | 137.567         | 138.071         | 137.063         | R[2]  |
| D[24] | 1387.705        | 87.526          | 59.537          | 60.021          | 59.013          | D[1]  |

# sp | P62806 | H4\_MOUSE

[Acetyl]SGRGKGGK<sup>Acetyl</sup><sub>42.01</sub> GLGKGGAKRHRK<sup>(Propionyl)</sup><sub>(56.03)</sub> VLRD

- ▶ fragmentation table for charge state 3+
- ▶ specType=etd
- ▶ score=76.02
- ▶ F124980.dat
- ▶ query=q72661.p1
- ▶ precursor=654.633590
- ▶ chargePrecursor=4
- ▶ itol=0.6

| AA    | c              | y              | z+1            | z+2            | z              | AA    |
|-------|----------------|----------------|----------------|----------------|----------------|-------|
| S[1]  | 49.697         | <b>872.507</b> | <b>867.168</b> | 0.672          | <b>866.832</b> | S[24] |
| G[2]  | 68.704         | <b>829.493</b> | <b>824.154</b> | 0.672          | 823.818        | G[23] |
| R[3]  | 120.738        | <b>810.486</b> | <b>805.146</b> | <b>805.482</b> | <b>804.811</b> | R[22] |
| G[4]  | 139.745        | 758.452        | 753.113        | 753.449        | 752.777        | G[21] |
| K[5]  | 182.443        | 739.445        | 734.106        | 734.442        | 733.770        | K[20] |
| G[6]  | 201.450        | 696.747        | 691.407        | 691.743        | 691.071        | G[19] |
| G[7]  | 220.458        | 677.740        | 672.400        | 672.736        | 672.064        | G[18] |
| K[8]  | 277.159        | 658.733        | 653.393        | 653.729        | 653.057        | K[17] |
| G[9]  | 296.167        | <b>602.031</b> | 596.691        | 597.027        | 596.355        | G[16] |
| L[10] | 313.864        | 581.024        | 577.684        | 578.020        | 577.348        | L[15] |
| G[11] | 352.868        | <b>545.329</b> | 539.989        | 540.325        | 539.653        | G[14] |
| K[12] | 395.567        | 526.322        | 520.982        | 521.318        | 520.646        | K[13] |
| G[13] | 414.574        | 483.623        | 478.284        | 478.620        | 477.948        | G[12] |
| G[14] | 433.581        | 464.616        | 459.277        | 459.613        | 458.941        | G[11] |
| A[15] | 457.260        | 445.609        | 440.270        | 440.605        | 439.934        | A[10] |
| K[16] | 499.958        | 421.930        | 416.590        | <b>416.926</b> | 416.255        | K[9]  |
| R[17] | 551.992        | 379.232        | 373.892        | 374.228        | 373.556        | R[8]  |
| H[18] | 597.678        | 327.196        | 321.858        | 322.194        | 321.523        | H[7]  |
| R[19] | 649.712        | 281.512        | 276.172        | 276.508        | 275.836        | R[6]  |
| K[20] | 711.686        | 229.478        | 224.138        | 224.474        | 223.803        | K[5]  |
| V[21] | 784.109        | 168.104        | 162.764        | 163.101        | 162.429        | V[4]  |
| L[22] | <b>781.803</b> | 135.082        | 129.742        | 130.078        | 129.406        | L[3]  |
| R[23] | <b>833.837</b> | 97.387         | 92.047         | 92.383         | 91.711         | R[2]  |
| D[24] | 872.179        | 45.353         | 40.014         | 40.349         | 39.678         | D[1]  |



# sp | P62806 | H4\_MOUSE

[Acetyl]SGRGKGGK <sup>Acetyl</sup><sub>42.01</sub> GLGKGGAK <sup>(Propionyl)</sup><sub>(56.03)</sub> RHRK <sup>(Methyl)</sup><sub>(14.02)</sub> VLRD

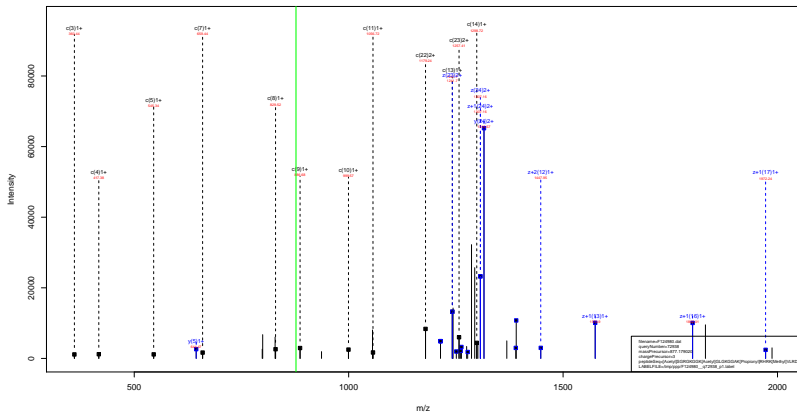

# sp | P62806 | H4\_MOUSE

[Acetyl]SGRGKGGK <sup>Acetyl</sup><sub>42.01</sub> GLGKGGAK <sup>(Propionyl)</sup><sub>(56.03)</sub> RHRK <sup>(Methyl)</sup><sub>(14.02)</sub> VLRLD

- ▶ fragmentation table for charge state 1+
- ▶ specType=etd
- ▶ score=59.93
- ▶ F124980.dat
- ▶ query=q72938.p1
- ▶ precursor=877.179020
- ▶ chargePrecursor=3
- ▶ itol=0.6

| AA    | c               | y               | z+1             | z+2             | z               | AA    |
|-------|-----------------|-----------------|-----------------|-----------------|-----------------|-------|
| S[1]  | 147.076         | 3029.523        | 2613.505        | 0.000           | 2613.497        | S[24] |
| G[2]  | 204.099         | 2500.461        | 2484.462        | 0.000           | 2483.454        | G[23] |
| R[3]  | <b>360.199</b>  | 2843.459        | 2427.441        | 2426.448        | 2426.431        | R[22] |
| G[4]  | <b>417.220</b>  | 2287.368        | 2271.359        | 2272.347        | 2270.332        | G[21] |
| K[5]  | <b>545.315</b>  | 2230.337        | 2214.333        | 2215.326        | 2213.310        | K[20] |
| G[6]  | 600.337         | 2102.243        | 2086.233        | 2087.231        | 2085.215        | G[19] |
| G[7]  | <b>659.358</b>  | 2045.220        | 2029.202        | 2030.209        | 2028.194        | G[18] |
| K[8]  | <b>829.464</b>  | 1938.199        | <b>1972.180</b> | 1973.188        | 1971.172        | K[17] |
| G[9]  | <b>886.485</b>  | 1818.093        | <b>1802.075</b> | 1803.082        | 1801.067        | G[16] |
| L[10] | <b>959.569</b>  | 1761.072        | 1745.053        | 1746.051        | 1744.040        | L[15] |
| G[11] | <b>1056.591</b> | 1647.985        | 1631.969        | 1632.977        | 1630.961        | G[14] |
| K[12] | 1184.688        | 1590.966        | <b>1574.948</b> | 1575.955        | 1573.940        | K[13] |
| G[13] | <b>1241.707</b> | 1462.871        | 1446.853        | <b>1447.860</b> | 1445.845        | G[12] |
| G[14] | <b>1298.729</b> | 1405.850        | <b>1389.831</b> | <b>1390.839</b> | 1388.823        | G[11] |
| A[15] | 1369.766        | 1348.829        | 1332.810        | 1333.818        | 1331.800        | A[10] |
| R[16] | 1533.889        | <b>1277.791</b> | 1261.773        | <b>1262.780</b> | <b>1260.765</b> | R[9]  |
| R[17] | 1700.988        | 1081.670        | 1077.651        | 1078.659        | 1076.643        | R[8]  |
| H[18] | 1847.047        | 937.569         | 921.550         | 922.558         | 920.542         | H[7]  |
| R[19] | 2003.148        | 800.510         | 784.491         | 785.499         | 783.484         | R[6]  |
| K[20] | 2145.250        | <b>644.409</b>  | 628.390         | 629.398         | 627.383         | K[5]  |
| V[21] | 2348.329        | 502.295         | 486.280         | 487.287         | 485.271         | V[4]  |
| L[22] | 2357.411        | 403.230         | 387.211         | 388.219         | 386.203         | L[3]  |
| R[23] | 2513.512        | 290.146         | 274.127         | 275.135         | 273.119         | R[2]  |
| D[24] | 2638.539        | 134.045         | 118.028         | 119.034         | 117.018         | D[1]  |

# sp | P62806 | H4\_MOUSE

[Acetyl]SGRGKGGK<sub>42.01</sub> Acetyl GLGKGGAK<sub>(56.03)</sub> (Propionyl) RHRK<sub>(14.02)</sub> (Methyl) VLRLD

- ▶ fragmentation table for charge state 2+
- ▶ specType=etd
- ▶ score=59.93
- ▶ F124980.dat
- ▶ query=q72938\_p1
- ▶ precursor=877.179020
- ▶ chargePrecursor=3
- ▶ itol=0.6

| AA    | c               | y               | z+1             | z+2             | z               | AA    |
|-------|-----------------|-----------------|-----------------|-----------------|-----------------|-------|
| S[1]  | 74.092          | <b>1315.265</b> | <b>1307.256</b> | 0.504           | <b>1306.752</b> | S[24] |
| G[2]  | 102.553         | <b>1250.744</b> | 1342.735        | 0.504           | <b>1242.231</b> | G[23] |
| R[3]  | 180.603         | 1222.213        | <b>1214.224</b> | <b>1214.728</b> | <b>1213.720</b> | R[22] |
| G[4]  | 269.114         | 1144.183        | 1136.173        | 1130.677        | 1135.669        | G[21] |
| R[5]  | 273.163         | 1116.672        | 1107.663        | 1109.167        | 1109.161        | R[20] |
| G[6]  | 301.672         | 1051.625        | 1043.635        | 1044.139        | 1043.111        | G[19] |
| G[7]  | 330.183         | 1023.114        | 1015.104        | 1015.608        | 1014.601        | G[18] |
| K[8]  | 415.236         | 994.603         | 986.594         | 987.098         | 986.590         | K[17] |
| G[9]  | 443.746         | 909.550         | 901.541         | 902.045         | 901.037         | G[16] |
| L[10] | 500.288         | 881.040         | 873.030         | 873.534         | 872.526         | L[15] |
| G[11] | 538.799         | 824.495         | 816.486         | 816.990         | 815.982         | G[14] |
| K[12] | 592.847         | 795.987         | 787.977         | 788.481         | 787.474         | K[13] |
| G[13] | 621.357         | 731.939         | 723.930         | 724.434         | 723.426         | G[12] |
| G[14] | 649.868         | 703.429         | 695.419         | 695.923         | 694.915         | G[11] |
| A[15] | 685.267         | 674.918         | 666.908         | 667.412         | 666.405         | A[10] |
| R[16] | 777.447         | 639.399         | 631.389         | 631.894         | 630.886         | R[9]  |
| R[17] | 855.498         | 547.339         | 539.329         | 539.833         | 538.825         | R[6]  |
| H[18] | 934.027         | 469.288         | 461.279         | 461.783         | 460.775         | H[7]  |
| R[19] | 1002.078        | 406.759         | 392.749         | 393.253         | 392.245         | R[6]  |
| K[20] | 1073.133        | 322.708         | 314.699         | 315.203         | 314.195         | K[5]  |
| V[21] | 1122.589        | 254.163         | 245.653         | 244.147         | 243.140         | V[4]  |
| L[22] | <b>1178.209</b> | 202.119         | 194.109         | 194.613         | 193.605         | L[3]  |
| R[23] | <b>1257.260</b> | 145.577         | 137.567         | 138.071         | 137.063         | R[2]  |
| D[24] | 1314.773        | 87.526          | 59.517          | 60.021          | 59.013          | D[1]  |

# sp | P62806 | H4\_MOUSE

[Acetyl]SGR<sup>Acetyl</sup>RGK<sup>42.01</sup> GGK<sup>Acetyl</sup> 42.01 GLGKGGAK<sup>Propionyl</sup> RHRK<sup>(Methyl)</sup> 56.03 VL<sup>(14.02)</sup>LRD

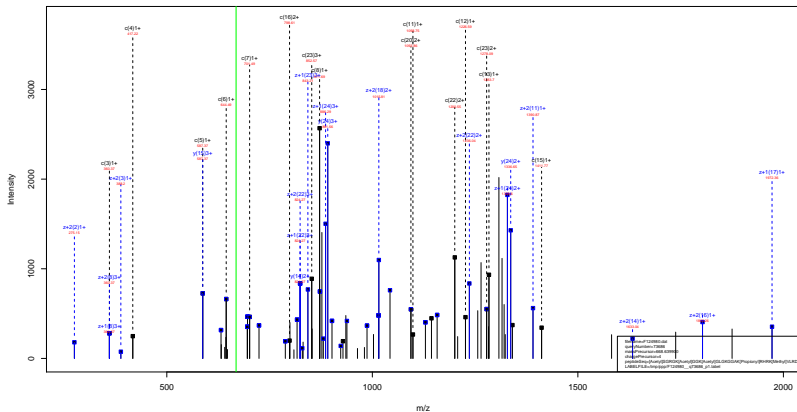

# sp | P62806 | H4\_MOUSE

[Acetyl]SGRGK <sup>Acetyl</sup><sub>42.01</sub> GGK <sup>Acetyl</sup><sub>42.01</sub> GLGKGGAK <sup>Propionyl</sup><sub>56.03</sub> RHRK <sup>(Methyl)</sup><sub>(14.02)</sub> VLRD

- ▶ fragmentation table for charge state 1+
- ▶ specType=etd
- ▶ score=67.52
- ▶ F124980.dat
- ▶ query=q73686.p1
- ▶ precursor=668.639900
- ▶ chargePrecursor=4
- ▶ itol=0.6

| AA    | c               | y               | z+1             | z+2             | z        | AA    |
|-------|-----------------|-----------------|-----------------|-----------------|----------|-------|
| S[1]  | 147.076         | 2671.534        | 2655.515        | 0.000           | 2654.507 | S[24] |
| G[2]  | 204.008         | 2542.491        | 2526.473        | 0.000           | 2525.465 | G[23] |
| R[3]  | <b>360.199</b>  | 2485.470        | 2469.451        | 2470.459        | 2468.443 | R[22] |
| G[4]  | <b>417.220</b>  | 2329.969        | 2313.950        | 2314.958        | 2312.942 | G[21] |
| K[5]  | <b>507.336</b>  | 2222.941        | 2206.923        | 2207.930        | 2205.914 | K[20] |
| G[6]  | <b>644.347</b>  | 2102.242        | 2086.223        | 2087.231        | 2085.215 | G[19] |
| G[7]  | <b>701.369</b>  | 2045.220        | 2029.202        | 2030.209        | 2028.194 | G[18] |
| K[8]  | <b>871.474</b>  | 1988.199        | <b>1972.180</b> | 1973.188        | 1971.172 | K[17] |
| K[9]  | <b>928.496</b>  | 1818.081        | 1802.075        | <b>1803.082</b> | 1801.067 | K[16] |
| L[10] | 2683.500        | 1781.072        | 1765.063        | 1766.071        | 1764.064 | L[15] |
| G[11] | <b>1098.601</b> | 1647.959        | 1631.950        | <b>1632.977</b> | 1630.961 | G[14] |
| K[12] | <b>1226.696</b> | 1580.956        | 1574.948        | 1575.955        | 1573.940 | K[13] |
| G[13] | <b>1283.718</b> | 1462.871        | 1446.853        | 1447.860        | 1445.845 | G[12] |
| G[14] | <b>1340.739</b> | 1405.850        | 1389.831        | <b>1390.839</b> | 1388.823 | G[11] |
| A[15] | <b>1411.776</b> | 1348.828        | 1332.810        | 1333.818        | 1331.802 | A[10] |
| R[16] | 1505.868        | <b>1277.791</b> | 1261.773        | 1262.780        | 1260.764 | R[9]  |
| R[17] | 1751.999        | <b>1083.670</b> | 1077.651        | 1078.659        | 1076.644 | R[8]  |
| H[18] | 1889.058        | <b>937.569</b>  | 921.550         | <b>922.558</b>  | 920.542  | H[7]  |
| R[19] | 2045.159        | 800.510         | 784.491         | 785.499         | 783.484  | R[6]  |
| K[20] | 2187.269        | <b>644.409</b>  | 628.390         | 629.398         | 627.382  | K[5]  |
| V[21] | 2286.338        | 502.266         | 486.246         | 487.254         | 485.237  | V[4]  |
| L[22] | 2389.422        | 403.230         | 387.211         | <b>388.219</b>  | 386.203  | L[3]  |
| R[23] | 2555.523        | 290.140         | 274.121         | <b>275.135</b>  | 273.110  | R[2]  |
| D[24] | 2670.550        | 134.045         | 118.026         | 119.034         | 117.018  | D[1]  |

# sp | P62806 | H4\_MOUSE

[Acetyl]SGRGK<sup>Acetyl</sup><sub>42.01</sub> GGK<sup>Acetyl</sup><sub>42.01</sub> GLGKGGAK<sup>Propionyl</sup><sub>56.03</sub> RHRK<sup>(Methyl)</sup><sub>(14.02)</sub> VLRD

- ▶ fragmentation table for charge state 2+
- ▶ specType=etd
- ▶ score=67.52
- ▶ F124980.dat
- ▶ query=q73686.p1
- ▶ precursor=668.639900
- ▶ chargePrecursor=4
- ▶ itol=0.6

| AA   | c               | y               | z+1             | z+2             | z               | AA   |
|------|-----------------|-----------------|-----------------|-----------------|-----------------|------|
| S 1  | 74.692          | <b>1336.271</b> | <b>1328.261</b> | 0.504           | 1327.757        | S 24 |
| G 2  | 102.553         | 1271.749        | 1263.740        | 0.504           | 1263.236        | G 23 |
| R 3  | 180.603         | 1243.239        | 1235.230        | <b>1235.733</b> | 1234.726        | R 22 |
| G 4  | 209.114         | 1205.188        | <b>1157.179</b> | <b>1157.683</b> | 1156.675        | G 21 |
| R 5  | 289.163         | 1136.677        | <b>1128.668</b> | <b>1129.172</b> | 1129.164        | R 20 |
| G 6  | 322.677         | 1051.625        | 1043.615        | 1044.119        | <b>1043.111</b> | G 19 |
| G 7  | 351.188         | 1023.114        | <b>1015.104</b> | <b>1015.608</b> | <b>1014.601</b> | G 18 |
| K 8  | 436.241         | 994.603         | <b>986.594</b>  | <b>987.098</b>  | 986.590         | K 17 |
| G 9  | 464.752         | 909.550         | <b>901.541</b>  | <b>902.045</b>  | 901.037         | G 16 |
| T 10 | 501.264         | <b>881.040</b>  | <b>873.030</b>  | 873.534         | <b>872.526</b>  | T 15 |
| G 11 | 540.264         | <b>824.498</b>  | <b>816.488</b>  | <b>816.992</b>  | 815.984         | G 14 |
| K 12 | 613.852         | 795.067         | <b>787.977</b>  | <b>788.481</b>  | 787.474         | K 13 |
| G 13 | 642.363         | 731.939         | <b>723.930</b>  | <b>724.434</b>  | 723.426         | G 12 |
| G 14 | 670.873         | 703.429         | <b>695.419</b>  | <b>695.923</b>  | 694.915         | G 11 |
| A 15 | 708.269         | 674.918         | 666.908         | 667.412         | 666.405         | A 10 |
| T 16 | <b>788.452</b>  | 639.399         | <b>631.390</b>  | <b>631.894</b>  | 630.886         | T 9  |
| R 17 | 876.503         | 547.339         | 539.329         | 539.833         | 538.825         | R 8  |
| H 18 | 945.032         | 469.288         | 461.279         | 461.783         | 460.775         | H 7  |
| R 19 | 1023.063        | 400.759         | 392.749         | 393.253         | 392.245         | R 6  |
| K 20 | <b>1094.138</b> | 322.708         | 314.699         | 315.203         | 314.195         | K 5  |
| V 21 | <b>1143.673</b> | 254.053         | 246.043         | 246.547         | 245.540         | V 4  |
| L 22 | <b>1206.215</b> | 202.119         | 194.109         | 194.613         | 193.605         | L 3  |
| R 23 | <b>1278.265</b> | 145.577         | 137.567         | 138.071         | 137.063         | R 2  |
| D 24 | 1336.779        | 87.526          | 59.537          | 60.021          | 59.013          | D 1  |

# sp | P62806 | H4\_MOUSE

[Acetyl]SGRGK<sup>Acetyl</sup><sub>42.01</sub> GGK<sup>Acetyl</sup><sub>42.01</sub> GLGKGGAK<sup>Propionyl</sup><sub>56.03</sub> RHRK<sup>(Methyl)</sup><sub>(14.02)</sub> VLRLD

- ▶ fragmentation table for charge state 3+
- ▶ specType=etd
- ▶ score=67.52
- ▶ F124980.dat
- ▶ query=q73686.p1
- ▶ precursor=668.639900
- ▶ chargePrecursor=4
- ▶ itol=0.6

| AA    | c              | y              | z+1            | z+2            | z              | AA    |
|-------|----------------|----------------|----------------|----------------|----------------|-------|
| S[1]  | 69.697         | <b>891.183</b> | <b>885.843</b> | 0.672          | 885.507        | S[24] |
| G[2]  | 68.704         | 838.159        | <b>842.829</b> | 0.672          | 832.493        | G[23] |
| R[3]  | 120.738        | <b>829.161</b> | <b>823.822</b> | <b>824.158</b> | 823.486        | R[22] |
| G[4]  | 139.745        | 777.128        | 771.789        | 772.124        | 771.452        | G[21] |
| K[5]  | 196.447        | 758.121        | 752.781        | 753.117        | 752.445        | K[20] |
| G[6]  | 215.454        | <b>701.419</b> | <b>696.079</b> | <b>696.415</b> | <b>695.743</b> | G[19] |
| G[7]  | 234.461        | 682.412        | 677.072        | 677.408        | 676.736        | G[18] |
| K[8]  | 291.163        | 663.404        | 658.065        | 658.401        | 657.729        | K[17] |
| G[9]  | 310.170        | 606.703        | 601.363        | 601.699        | 601.027        | G[16] |
| L[10] | 347.895        | <b>587.695</b> | 582.355        | 582.692        | 582.020        | L[15] |
| G[11] | 386.972        | 530.301        | 544.667        | 544.997        | 544.325        | G[14] |
| K[12] | 409.570        | 530.994        | 525.654        | 525.990        | 525.318        | K[13] |
| G[13] | 428.577        | 488.295        | 482.956        | 483.292        | 482.620        | G[12] |
| G[14] | 447.585        | 469.288        | 463.949        | 464.285        | 463.613        | G[11] |
| A[15] | 471.264        | 450.281        | 444.941        | 445.277        | 444.605        | A[10] |
| K[16] | 532.637        | 426.602        | 421.262        | 421.598        | 420.926        | K[9]  |
| R[17] | 584.671        | 365.226        | <b>359.889</b> | <b>360.225</b> | 359.553        | R[8]  |
| H[18] | 630.357        | 313.195        | 307.855        | 308.191        | 307.519        | H[7]  |
| R[19] | 682.391        | 267.508        | 262.168        | 262.505        | 261.833        | R[6]  |
| K[20] | 729.764        | 215.475        | 210.135        | 210.471        | 209.799        | K[5]  |
| V[21] | 752.784        | 168.104        | 162.764        | 163.101        | 162.429        | V[4]  |
| L[22] | 860.479        | 135.082        | 129.742        | 130.078        | 129.406        | L[3]  |
| R[23] | <b>852.513</b> | 97.387         | 92.047         | 92.383         | 91.711         | R[2]  |
| D[24] | 890.855        | 45.353         | 40.014         | 40.349         | 39.678         | D[1]  |

# sp | P62806 | H4\_MOUSE

[Acetyl]SGRGK Acetyl 42.01 GGK Acetyl 42.01 GLGKGGAK Methyl 14.02 R Dimethyl 28.03 HRK Acetyl 42.01 VLRD

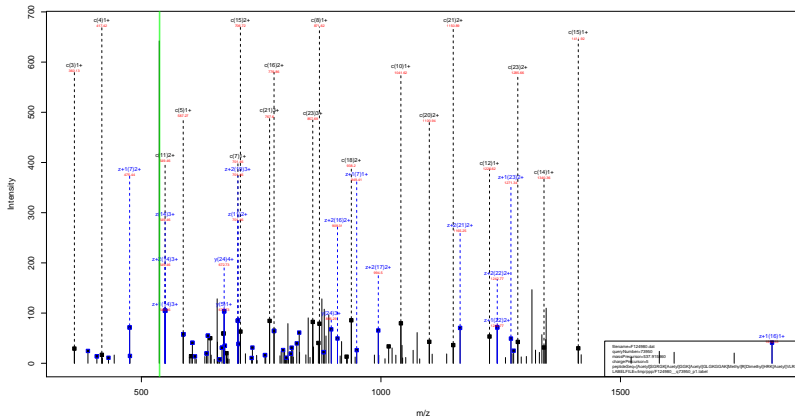



# sp | P62806 | H4\_MOUSE

[Acetyl]SGR<sup>Acetyl</sup>RGK<sup>42.01</sup> GGK<sup>Acetyl</sup> GLGKGGAK<sup>Methyl</sup> R<sup>Dimethyl</sup> HRK<sup>Acetyl</sup> VLRD<sup>42.01</sup>  
 14.02 28.03

- ▶ fragmentation table for charge state 1+
- ▶ specType=etd
- ▶ score=60.60
- ▶ F124980.dat
- ▶ query=q73950\_p1
- ▶ precursor=537.915860
- ▶ chargePrecursor=5
- ▶ itol=0.6

| AA | c  | y               | z+1            | z+2             | z               | AA             |       |
|----|----|-----------------|----------------|-----------------|-----------------|----------------|-------|
| S  | 1  | 147.676         | 2685.550       | 2669.531        | 0.000           | 2668.523       | S[24] |
| G  | 2  | 204.098         | 2556.507       | 2540.488        | 0.000           | 2539.480       | G[23] |
| R  | 3  | <b>368.199</b>  | 2499.486       | 2483.467        | 2484.475        | 2482.459       | R[22] |
| G  | 4  | <b>417.220</b>  | 2343.384       | 2327.365        | 2328.373        | 2326.355       | G[21] |
| K  | 5  | <b>587.326</b>  | 2286.363       | 2270.344        | 2271.352        | 2269.335       | K[20] |
| G  | 6  | <b>644.347</b>  | 2118.257       | 2102.239        | 2101.247        | 2099.231       | G[19] |
| G  | 7  | <b>701.369</b>  | 2059.236       | 2043.217        | 2044.225        | 2042.209       | G[18] |
| K  | 8  | <b>871.474</b>  | 2002.214       | 1986.196        | 1987.204        | 1985.189       | K[17] |
| G  | 9  | <b>928.496</b>  | 1832.109       | <b>1816.090</b> | 1817.098        | 1815.082       | G[16] |
| L  | 10 | <b>1041.580</b> | 1775.087       | 1759.069        | 1760.077        | 1758.061       | L[15] |
| G  | 11 | 1088.601        | 1562.003       | 1545.985        | 1546.993        | 1544.977       | G[14] |
| K  | 12 | <b>1226.696</b> | 1504.982       | 1488.963        | 1489.971        | 1487.955       | K[13] |
| G  | 13 | 1263.718        | 1476.887       | 1460.869        | 1461.876        | 1459.860       | G[12] |
| G  | 14 | <b>1340.739</b> | 1419.866       | 1403.847        | 1404.855        | 1402.839       | G[11] |
| A  | 15 | <b>1411.776</b> | 1362.844       | 1346.825        | 1347.833        | 1345.818       | A[10] |
| R  | 16 | 1533.887        | 1291.807       | 1275.789        | <b>1276.796</b> | 1274.780       | R[9]  |
| R  | 17 | 1738.019        | 1149.696       | 1133.678        | 1134.685        | 1132.670       | R[8]  |
| H  | 18 | 1875.078        | 965.564        | <b>949.545</b>  | 950.553         | 948.537        | H[7]  |
| R  | 19 | 2031.179        | 828.505        | <b>812.486</b>  | <b>813.494</b>  | <b>811.478</b> | R[6]  |
| K  | 20 | 2201.285        | <b>672.404</b> | 656.385         | 657.393         | 655.377        | K[5]  |
| V  | 21 | 2300.351        | 502.298        | 486.280         | 487.287         | 485.272        | V[4]  |
| L  | 22 | 2413.437        | 403.230        | 387.211         | <b>388.219</b>  | 386.203        | L[3]  |
| R  | 23 | 2569.539        | 280.146        | 274.127         | 275.135         | 273.119        | R[2]  |
| D  | 24 | 2684.566        | 134.045        | 118.026         | 119.034         | 117.018        | D[1]  |

# sp | P62806 | H4\_MOUSE

[Acetyl]SGR<sup>Acetyl</sup>RGK<sup>42.01</sup> GGK<sup>Acetyl</sup> GLGKGGAK<sup>Methyl</sup> R<sup>14.02</sup> Dimethyl<sup>28.03</sup> HRK<sup>Acetyl</sup> VLRD<sup>42.01</sup>

- ▶ fragmentation table for charge state 2+
- ▶ specType=etd
- ▶ score=60.60
- ▶ F124980.dat
- ▶ query=q73950\_p1
- ▶ precursor=537.915860
- ▶ chargePrecursor=5
- ▶ itol=0.6

| AA    | c               | y              | z+1             | z+2             | z              | AA    |
|-------|-----------------|----------------|-----------------|-----------------|----------------|-------|
| S[1]  | 74.642          | 1343.278       | 1335.269        | 0.504           | 1334.765       | S[24] |
| G[2]  | 102.553         | 1278.757       | <b>1270.748</b> | 0.504           | 1270.244       | G[23] |
| R[3]  | 180.603         | 1250.240       | <b>1242.237</b> | <b>1242.741</b> | 1241.713       | R[22] |
| G[4]  | 209.114         | 1372.196       | 1364.188        | <b>1164.690</b> | 1163.663       | G[21] |
| K[5]  | 204.107         | 1143.685       | 1135.676        | 1136.180        | 1135.172       | K[20] |
| G[6]  | 322.677         | 1058.632       | 1050.623        | 1051.127        | 1050.119       | G[19] |
| G[7]  | 351.188         | 1030.122       | 1022.115        | 1022.616        | 1021.608       | G[18] |
| K[8]  | 436.241         | 1001.611       | 993.602         | <b>994.105</b>  | 993.090        | K[17] |
| G[9]  | 464.752         | 918.595        | 909.587         | <b>909.093</b>  | 908.045        | G[16] |
| L[10] | 531.294         | 898.047        | <b>890.038</b>  | <b>890.542</b>  | 879.534        | L[15] |
| K[11] | <b>549.804</b>  | 831.505        | 823.496         | <b>824.000</b>  | 822.982        | K[14] |
| K[12] | 613.852         | <b>802.995</b> | 794.985         | <b>795.489</b>  | 794.481        | K[13] |
| G[13] | 642.363         | 738.947        | 730.938         | <b>731.442</b>  | <b>730.434</b> | G[12] |
| G[14] | <b>670.873</b>  | 710.436        | <b>702.427</b>  | <b>702.931</b>  | <b>701.923</b> | G[11] |
| A[15] | <b>706.392</b>  | 681.926        | <b>673.916</b>  | <b>674.420</b>  | 673.412        | A[10] |
| R[16] | <b>777.447</b>  | 646.407        | <b>638.398</b>  | <b>638.902</b>  | 637.894        | R[9]  |
| R[17] | <b>809.513</b>  | 575.352        | 567.342         | 567.846         | 566.839        | R[8]  |
| H[18] | <b>938.043</b>  | 483.289        | <b>475.276</b>  | <b>475.780</b>  | 474.772        | H[7]  |
| R[19] | <b>1016.093</b> | 414.756        | <b>406.747</b>  | <b>407.251</b>  | 406.243        | R[6]  |
| K[20] | <b>1101.146</b> | 336.706        | 328.695         | 329.200         | 328.192        | K[5]  |
| V[21] | <b>1156.680</b> | 251.653        | 243.643         | 244.147         | 243.140        | V[4]  |
| L[22] | 1207.222        | 202.119        | 194.109         | 194.613         | 193.605        | L[3]  |
| R[23] | <b>1285.273</b> | 145.577        | 137.567         | 138.071         | 137.063        | R[2]  |
| D[24] | 1342.786        | 67.526         | 59.517          | 60.021          | 59.013         | D[1]  |

# sp | P62806 | H4\_MOUSE

[Acetyl]SGR GK<sup>Acetyl</sup><sub>42.01</sub> GGK<sup>Acetyl</sup><sub>42.01</sub> GLGKGGAK<sup>Methyl</sup><sub>14.02</sub> R<sup>Dimethyl</sup><sub>28.03</sub> HRK<sup>Acetyl</sup><sub>42.01</sub> VLRD

- ▶ fragmentation table for charge state 3+
- ▶ specType=etd
- ▶ score=60.60
- ▶ F124980.dat
- ▶ query=q73950.p1
- ▶ precursor=537.915860
- ▶ chargePrecursor=5
- ▶ itol=0.6

| AA    | c              | y              | z+1            | z+2            | z              | AA    |
|-------|----------------|----------------|----------------|----------------|----------------|-------|
| S[1]  | 49.697         | <b>895.855</b> | 890.511        | 0.672          | 890.179        | S[24] |
| G[2]  | 58.704         | 857.841        | 847.501        | 0.672          | 847.165        | G[23] |
| R[3]  | 150.738        | 833.833        | 828.494        | <b>828.830</b> | 828.158        | R[22] |
| G[4]  | 139.745        | 781.800        | <b>776.460</b> | <b>776.796</b> | 776.124        | G[21] |
| K[5]  | 196.447        | 762.792        | <b>757.453</b> | <b>757.789</b> | 757.117        | K[20] |
| G[6]  | 215.454        | 706.091        | 700.751        | <b>701.087</b> | 700.415        | G[19] |
| G[7]  | 234.461        | 687.083        | 681.744        | 682.080        | 681.408        | G[18] |
| K[8]  | 291.163        | <b>668.076</b> | <b>662.737</b> | <b>663.073</b> | 662.401        | K[17] |
| G[9]  | 310.170        | <b>611.374</b> | <b>606.035</b> | <b>606.371</b> | 605.700        | G[16] |
| L[10] | 347.885        | 592.367        | <b>587.028</b> | <b>587.364</b> | <b>586.692</b> | L[15] |
| G[11] | 366.872        | 554.673        | <b>549.333</b> | <b>549.669</b> | <b>548.997</b> | G[14] |
| K[12] | 409.570        | 535.666        | 530.326        | 530.662        | 529.990        | K[13] |
| G[13] | 428.577        | 492.967        | 487.628        | 487.964        | 487.292        | G[12] |
| G[14] | 447.585        | 473.960        | 468.620        | 468.956        | 468.285        | G[11] |
| A[15] | 471.264        | 454.953        | 449.613        | 449.949        | 449.277        | A[10] |
| K[16] | 518.634        | <b>431.274</b> | 425.934        | 426.270        | 425.598        | K[9]  |
| R[17] | 580.011        | 383.904        | 378.564        | 378.900        | 378.228        | R[8]  |
| H[18] | 625.698        | 322.526        | 317.187        | 317.523        | 316.851        | H[7]  |
| R[19] | <b>677.731</b> | 276.840        | 271.500        | 271.836        | 271.164        | R[6]  |
| K[20] | 734.433        | 224.806        | 219.467        | 219.803        | 219.131        | K[5]  |
| V[21] | <b>767.456</b> | 168.104        | 162.765        | 163.101        | 162.429        | V[4]  |
| L[22] | 805.151        | 135.082        | 129.742        | 130.078        | 129.406        | L[3]  |
| R[23] | <b>857.184</b> | 97.387         | 92.047         | 92.383         | 91.711         | R[2]  |
| D[24] | 895.527        | 45.353         | 40.014         | 40.349         | 39.678         | D[1]  |

# sp | P62806 | H4\_MOUSE

[Acetyl]SGR<sup>Acetyl</sup>RGK<sup>42.01</sup> GGK<sup>Acetyl</sup> GLGKGGAK<sup>Methyl</sup> R<sup>14.02</sup> Dimethyl<sup>28.03</sup> HRK<sup>Acetyl</sup> VLRD<sup>42.01</sup>

- ▶ fragmentation table for charge state 4+
- ▶ specType=etd
- ▶ score=60.60
- ▶ F124980.dat
- ▶ query=q73950.p1
- ▶ precursor=537.915860
- ▶ chargePrecursor=5
- ▶ itol=0.6

| AA    | c              | y              | z+1            | z+2     | z              | AA    |
|-------|----------------|----------------|----------------|---------|----------------|-------|
| S[1]  | 37.525         | <b>672.143</b> | <b>668.138</b> | 0.755   | <b>667.886</b> | S[24] |
| G[2]  | 51.780         | 539.882        | <b>635.878</b> | 0.755   | <b>635.626</b> | G[23] |
| R[3]  | 90.805         | 625.627        | 621.622        | 621.874 | 621.370        | R[22] |
| G[4]  | 105.061        | 586.602        | 582.597        | 582.849 | 582.345        | G[21] |
| K[5]  | 147.587        | 572.346        | 568.342        | 568.593 | 568.090        | K[20] |
| G[6]  | 161.842        | 529.820        | 525.815        | 526.067 | 525.563        | G[19] |
| G[7]  | 176.098        | 615.564        | 511.560        | 511.812 | 511.308        | G[18] |
| K[8]  | 218.624        | 501.309        | 497.304        | 497.556 | 497.052        | K[17] |
| G[9]  | 232.879        | 458.783        | 454.778        | 455.030 | 454.526        | G[16] |
| L[10] | 261.150        | 444.521        | 440.523        | 440.775 | 440.271        | L[15] |
| G[11] | 275.406        | 416.256        | 412.252        | 412.504 | 412.000        | G[14] |
| K[12] | 307.430        | 402.001        | 397.996        | 398.248 | 397.744        | K[13] |
| G[13] | 321.685        | 369.977        | 365.973        | 366.224 | 365.721        | G[12] |
| G[14] | 335.940        | 355.722        | 351.717        | 351.969 | 351.465        | G[11] |
| A[15] | 353.700        | 341.466        | 337.462        | 337.714 | 337.210        | A[10] |
| K[16] | 389.227        | 323.707        | 319.703        | 319.954 | 319.451        | K[9]  |
| R[17] | 435.260        | 288.180        | 284.175        | 284.427 | 283.923        | R[8]  |
| H[18] | 469.525        | 242.146        | 238.142        | 238.394 | 237.890        | H[7]  |
| R[19] | 508.550        | 207.882        | 203.877        | 204.129 | 203.625        | R[6]  |
| K[20] | 551.077        | 168.856        | 164.852        | 165.104 | 164.600        | K[5]  |
| V[21] | 575.344        | 126.330        | 122.325        | 122.577 | 122.073        | V[4]  |
| L[22] | <b>604.115</b> | 101.563        | 97.558         | 97.810  | 97.306         | L[3]  |
| R[23] | 643.140        | 73.292         | 69.287         | 69.539  | 69.035         | R[2]  |
| D[24] | <b>671.897</b> | 34.267         | 30.262         | 30.514  | 30.010         | D[1]  |

# sp | Q6GSS7 | H2A2A\_MOUSE

LNK<sup>Acetyl</sup><sub>42.01</sub> LLGK<sup>Methyl</sup><sub>14.02</sub> VTIAQGGVLPNIQAVLLPKKTE

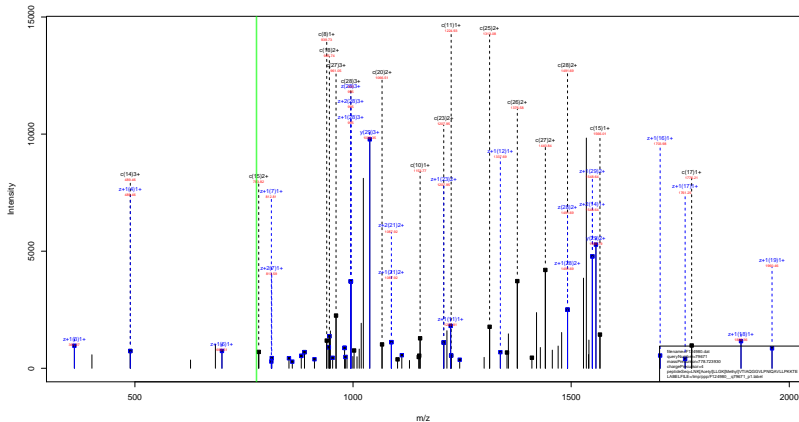

# sp | Q6GSS7 | H2A2A\_MOUSE

LNK<sup>Acetyl</sup><sub>42.01</sub> LLGK<sup>Methyl</sup><sub>14.02</sub> VTIAQGGVLPNIQAVLLPKKTE

- ▶ fragmentation table for charge state 1+
- ▶ specType=etd
- ▶ score=66.05
- ▶ F124980.dat
- ▶ query=q79671.p1
- ▶ precursor=778.723930
- ▶ chargePrecursor=4
- ▶ itol=0.6

| AA    | c               | y        | z+1             | z+2             | z        | AA    |
|-------|-----------------|----------|-----------------|-----------------|----------|-------|
| L 1   | 131.118         | 3111.887 | 3095.888        | 0.000           | 3094.860 | L 29  |
| N 2   | 345.161         | 2998.803 | 2982.794        | 2963.793        | 2961.778 | N 28  |
| K 3   | 415.206         | 2884.760 | 2866.741        | 2859.749        | 2867.733 | K 27  |
| L 4   | 528.350         | 2714.654 | 2698.636        | 2699.643        | 2697.629 | L 26  |
| L 5   | 641.434         | 2601.570 | 2585.551        | 2586.559        | 2584.544 | L 25  |
| G 6   | 698.458         | 2488.486 | 2472.467        | 2473.475        | 2471.460 | G 24  |
| K 7   | 840.587         | 2331.465 | 2315.446        | 2316.454        | 2314.438 | K 23  |
| V 8   | <b>939.635</b>  | 2289.354 | 2273.335        | 2274.343        | 2272.327 | V 22  |
| T 9   | 1040.683        | 2190.288 | 2174.269        | 2175.275        | 2173.259 | T 21  |
| I 10  | <b>1153.767</b> | 2089.238 | 2073.219        | 2074.227        | 2072.211 | I 20  |
| A 11  | <b>1224.804</b> | 1978.154 | <b>1960.135</b> | 1961.143        | 1959.127 | A 19  |
| Q 12  | <b>1352.862</b> | 1905.111 | <b>1889.093</b> | 1890.108        | 1888.090 | Q 18  |
| G 13  | <b>1409.884</b> | 1777.058 | <b>1761.039</b> | 1762.047        | 1760.032 | G 17  |
| G 14  | 1466.905        | 1720.937 | <b>1704.918</b> | 1705.926        | 1703.910 | G 16  |
| V 15  | <b>1565.974</b> | 1663.015 | 1646.997        | 1646.004        | 1645.989 | V 15  |
| L 16  | 1679.058        | 1563.947 | 1547.928        | <b>1548.936</b> | 1546.920 | L 14  |
| P 17  | <b>1776.111</b> | 1450.863 | 1434.844        | 1435.852        | 1433.836 | P 13  |
| TW 18 | 1689.133        | 1383.810 | <b>1337.791</b> | 1338.799        | 1336.783 | TW 12 |
| I 19  | 2003.238        | 1238.767 | <b>1223.748</b> | <b>1224.756</b> | 1222.741 | I 11  |
| Q 20  | 2131.296        | 1126.683 | 1110.664        | <b>1111.672</b> | 1109.656 | Q 10  |
| A 21  | 2202.331        | 998.634  | <b>982.606</b>  | 983.614         | 981.598  | A 9   |
| V 22  | 2301.402        | 927.587  | <b>911.569</b>  | 912.576         | 910.561  | V 8   |
| L 23  | 2414.486        | 828.519  | <b>812.500</b>  | <b>813.508</b>  | 811.492  | L 7   |
| L 24  | 2527.570        | 715.435  | <b>699.415</b>  | 700.424         | 698.408  | L 6   |
| P 25  | 2624.623        | 602.351  | 586.332         | 587.340         | 585.324  | P 5   |
| K 26  | 2752.718        | 505.298  | <b>489.279</b>  | 490.287         | 488.271  | K 4   |
| K 27  | 3880.812        | 377.203  | <b>361.184</b>  | 362.192         | 360.177  | K 3   |
| T 28  | 2981.850        | 249.138  | 233.069         | 234.077         | 232.062  | T 2   |
| E 29  | 3110.903        | 148.060  | 132.042         | 133.050         | 131.034  | E 1   |

# sp | Q6GSS7 | H2A2A\_MOUSE

LNK<sup>Acetyl</sup><sub>42.01</sub> LLGK<sup>Methyl</sup><sub>14.02</sub> VTIAQGGVLPNIQAVLLPKKTE

- ▶ fragmentation table for charge state 2+
- ▶ specType=etd
- ▶ score=66.05
- ▶ F124980.dat
- ▶ query=q79671.p1
- ▶ precursor=778.723930
- ▶ chargePrecursor=4
- ▶ itol=0.6

| AA  | c               | y               | z+1             | z+2             | z               | AA   |
|-----|-----------------|-----------------|-----------------|-----------------|-----------------|------|
| L1  | 66.053          | <b>1556.447</b> | <b>1548.438</b> | 9.504           | 1547.934        | L126 |
| N12 | 123.084         | 1699.905        | <b>1491.896</b> | 1492.400        | <b>1491.392</b> | N020 |
| K13 | 208.137         | 1442.884        | 1434.874        | 1435.378        | 1434.370        | K027 |
| L14 | 264.679         | 1337.811        | 1349.823        | 1350.326        | 1346.317        | L126 |
| L15 | 321.221         | 1301.269        | 1293.279        | 1293.783        | 1292.775        | L125 |
| G16 | 389.792         | <b>1244.747</b> | 1236.737        | 1237.241        | 1236.233        | G024 |
| K17 | 420.787         | 1216.230        | <b>1208.227</b> | 1208.731        | <b>1207.723</b> | K023 |
| V18 | 470.321         | 1145.181        | 1137.171        | 1137.675        | 1136.667        | V022 |
| T19 | 520.845         | 1095.646        | <b>1087.637</b> | <b>1088.141</b> | 1087.133        | T121 |
| T10 | 577.387         | 1045.123        | 1037.113        | 1037.617        | 1036.609        | T20  |
| A11 | 622.866         | 1008.243        | <b>998.571</b>  | <b>991.075</b>  | <b>988.067</b>  | A10  |
| Q12 | 678.938         | <b>953.062</b>  | <b>945.053</b>  | <b>945.557</b>  | <b>944.549</b>  | Q10  |
| G13 | 705.446         | <b>889.033</b>  | <b>881.023</b>  | <b>881.527</b>  | 880.519         | G10  |
| G14 | 733.956         | <b>860.522</b>  | 852.513         | <b>853.017</b>  | 852.009         | G16  |
| V15 | <b>783.491</b>  | 832.011         | 824.002         | 824.506         | 823.498         | V15  |
| L16 | 840.033         | 782.477         | 774.468         | 774.972         | 773.964         | L14  |
| T17 | <b>888.559</b>  | 728.935         | 719.926         | 719.430         | 717.421         | T13  |
| N18 | <b>945.580</b>  | 677.400         | 668.390         | 669.383         | 668.375         | N12  |
| I19 | <b>1002.122</b> | 620.867         | 612.858         | 612.862         | 611.874         | I11  |
| Q20 | <b>1066.152</b> | 563.845         | 555.836         | 556.840         | 555.832         | Q10  |
| A21 | <b>1101.670</b> | 499.816         | 491.807         | 492.810         | 491.803         | A10  |
| V22 | <b>1151.204</b> | 484.297         | 476.288         | 476.792         | 475.784         | V16  |
| L23 | <b>1207.747</b> | 414.763         | 406.754         | 407.758         | 406.750         | L10  |
| L24 | 1264.289        | 358.221         | 350.212         | 350.716         | 349.708         | L16  |
| P25 | <b>1312.815</b> | 301.679         | 293.670         | 294.174         | 293.166         | P16  |
| K26 | <b>1376.862</b> | 253.153         | 245.143         | 245.647         | 244.639         | K14  |
| K27 | <b>1440.910</b> | 189.105         | 181.096         | 181.600         | 180.592         | K13  |
| T28 | <b>1491.434</b> | 125.058         | 117.048         | 117.552         | 116.544         | T12  |
| E29 | 1535.955        | 74.534          | 66.524          | 67.028          | 66.021          | E10  |

# sp | Q6GSS7 | H2A2A\_MOUSE

LNK<sup>Acetyl</sup>42.01 LLGK<sup>Methyl</sup>14.02 VTIAQGGVLPNIQAVLLPKKTE

- ▶ fragmentation table for charge state 3+
- ▶ specType=etd
- ▶ score=66.05
- ▶ F124980.dat
- ▶ query=q79671.p1
- ▶ precursor=778.723930
- ▶ chargePrecursor=4
- ▶ itol=0.6

| AA  | c              | y               | z+1            | z+2            | z              | AA  |
|-----|----------------|-----------------|----------------|----------------|----------------|-----|
| L1  | 44.377         | <b>1037.967</b> | 1032.608       | 0.672          | 1032.292       | L29 |
| N2  | 82.392         | 1000.272        | <b>994.933</b> | <b>995.269</b> | <b>994.597</b> | N28 |
| K3  | 139.044        | 962.258         | 956.919        | 957.254        | 956.983        | K27 |
| L4  | 178.288        | 905.556         | 900.217        | 900.553        | 899.981        | L26 |
| L5  | 214.493        | 867.862         | 862.523        | 862.858        | 862.189        | L25 |
| G6  | 233.490        | 830.167         | 824.827        | 825.163        | 824.491        | G24 |
| K7  | 280.880        | 811.160         | 806.820        | 806.156        | 805.484        | K23 |
| V8  | 313.883        | 763.790         | 758.450        | 758.786        | 758.114        | V22 |
| T9  | 347.566        | 730.787         | 725.427        | 725.763        | 725.091        | T21 |
| I10 | 385.260        | 697.084         | 691.745        | 692.081        | 691.409        | I20 |
| A11 | 408.239        | 659.389         | 654.050        | 654.386        | 653.714        | A19 |
| Q12 | 431.626        | 626.710         | 621.371        | 621.707        | 621.035        | Q18 |
| G13 | 470.633        | 593.024         | 587.685        | 588.021        | 587.349        | G17 |
| G14 | <b>489.640</b> | 574.017         | 568.678        | 569.013        | 568.342        | G16 |
| V15 | 522.663        | 555.010         | 549.670        | 550.006        | 549.334        | V15 |
| L16 | 560.357        | 521.987         | 516.648        | 516.984        | 516.312        | L14 |
| P17 | 592.708        | 484.292         | 478.953        | 479.289        | 478.617        | P13 |
| N18 | 630.723        | 451.342         | 446.002        | 446.338        | 445.666        | N12 |
| I19 | 668.617        | 413.927         | 408.588        | 408.924        | 408.252        | I11 |
| Q20 | 711.104        | 376.233         | 370.893        | 371.229        | 370.557        | Q10 |
| A21 | 754.763        | 333.546         | 328.207        | 328.543        | 327.871        | A9  |
| V22 | 767.805        | 309.897         | 304.538        | 304.864        | 304.192        | V8  |
| L23 | 805.500        | 276.844         | 271.505        | 271.841        | 271.169        | L7  |
| L24 | 843.195        | 239.150         | 233.810        | 234.146        | 233.474        | L6  |
| P25 | 875.546        | 201.455         | 196.116        | 196.451        | 195.780        | P5  |
| K26 | 918.244        | 169.154         | 163.815        | 164.151        | 163.479        | K4  |
| K27 | <b>960.942</b> | 126.460         | 121.096        | 121.402        | 120.730        | K3  |
| T28 | <b>994.625</b> | 83.708          | 78.368         | 78.704         | 78.032         | T2  |
| E29 | 1037.639       | 50.025          | 44.685         | 45.021         | 44.349         | E1  |



sp | P43277 | H13\_MOUSE

KNNSRIKLGLKSLVSKGLTLVQTKGTGASGSFKLNK (Dimethyl) K (Trimethyl) AASGE (28.03) (42.05)

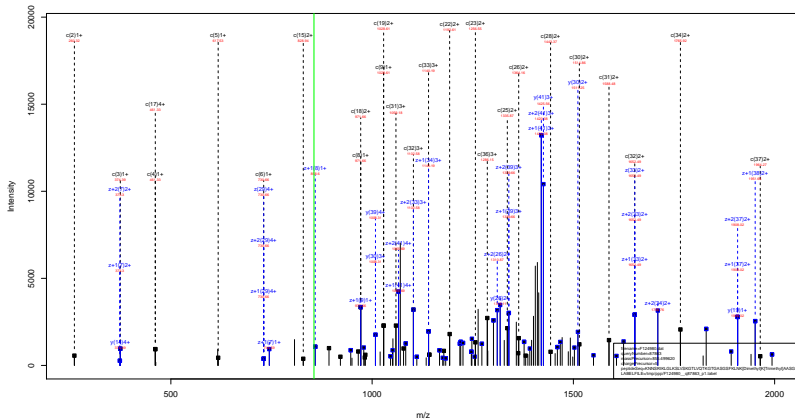

# sp | P43277 | H13\_MOUSE

KNNSRIKLGLKSLVSKGTLVQTKGTGASGSFKLNK (Dimethyl) K (Trimethyl) AASGE  
 (28.03) (42.05)

- ▶ fragmentation table for charge state 1+
- ▶ specType=etd
- ▶ score=71.48
- ▶ F124980.dat
- ▶ query=q87863.p1
- ▶ precursor=855.499620
- ▶ chargePrecursor=5
- ▶ itol=0.6

| AA | c  | y               | z+1             | z+2             | z               | AA       |       |
|----|----|-----------------|-----------------|-----------------|-----------------|----------|-------|
| R  | 1  | 146.129         | 4273.477        | 4297.463        | 4358.461        | 4296.446 | R[41] |
| N  | 2  | <b>260.172</b>  | 4145.377        | 4129.358        | 4130.366        | 4125.350 | N[40] |
| N  | 3  | <b>374.215</b>  | 4031.334        | 4015.315        | 4016.323        | 4014.307 | N[39] |
| S  | 4  | <b>461.247</b>  | 3917.291        | 3901.272        | 3902.280        | 3900.264 | S[38] |
| R  | 5  | <b>617.348</b>  | 3803.250        | 3814.240        | 3815.248        | 3813.232 | R[37] |
| I  | 6  | <b>730.432</b>  | 3674.156        | 3658.139        | 3659.147        | 3657.131 | I[36] |
| R  | 7  | <b>858.527</b>  | 3561.074        | 3545.055        | 3546.063        | 3544.047 | R[35] |
| L  | 8  | <b>971.611</b>  | 3432.979        | 3416.960        | 3417.968        | 3415.952 | L[34] |
| G  | 9  | <b>1028.632</b> | 3319.895        | 3303.876        | 3304.884        | 3302.868 | G[33] |
| L  | 10 | <b>1141.716</b> | 3202.877        | 3186.858        | 3187.866        | 3185.849 | L[32] |
| K  | 11 | 1269.811        | 3149.789        | 3133.771        | 3134.779        | 3132.763 | K[31] |
| S  | 12 | 1359.843        | 3021.694        | 3005.675        | 3006.683        | 3004.667 | S[30] |
| L  | 13 | 1469.927        | 2934.662        | 2918.644        | 2919.651        | 2917.635 | L[29] |
| V  | 14 | 1568.996        | 2821.578        | 2805.559        | 2806.567        | 2804.551 | V[28] |
| S  | 15 | 1656.028        | 2722.510        | 2706.491        | 2707.499        | 2705.483 | S[27] |
| K  | 16 | 1784.123        | 2635.478        | 2619.459        | 2620.467        | 2618.451 | K[26] |
| G  | 17 | 1841.144        | 2507.383        | 2491.364        | 2492.372        | 2490.356 | G[25] |
| T  | 18 | 1982.192        | 2400.391        | 2384.373        | 2385.380        | 2383.364 | T[24] |
| L  | 19 | 2055.276        | 2349.314        | 2333.295        | 2334.303        | 2332.287 | L[23] |
| V  | 20 | 2154.344        | 2238.230        | 2222.211        | 2223.219        | 2221.203 | V[22] |
| Q  | 21 | 2282.403        | 2137.161        | 2121.142        | 2122.150        | 2120.134 | Q[21] |
| T  | 22 | 2381.451        | 2030.103        | <b>1993.084</b> | <b>1994.092</b> | 1992.076 | T[20] |
| K  | 23 | 2511.546        | <b>1908.055</b> | <b>1892.036</b> | 1893.044        | 1891.028 | K[19] |
| G  | 24 | 2688.587        | 1779.967        | 1763.948        | 1764.956        | 1762.940 | G[18] |
| T  | 25 | 2809.615        | 1722.938        | 1706.920        | 1707.928        | 1705.912 | T[17] |
| G  | 26 | 2726.636        | 1621.891        | 1605.872        | <b>1606.880</b> | 1604.864 | G[16] |
| A  | 27 | 2787.673        | 1564.869        | 1548.851        | <b>1549.858</b> | 1547.841 | A[15] |
| S  | 28 | 2884.705        | 1493.837        | 1477.818        | 1478.826        | 1476.810 | S[14] |
| G  | 29 | 2941.727        | 1406.806        | 1390.787        | <b>1391.795</b> | 1389.779 | G[13] |
| S  | 30 | 3028.769        | 1349.775        | 1333.756        | 1334.764        | 1332.748 | S[12] |
| F  | 31 | 3175.827        | 1282.747        | <b>1246.728</b> | <b>1247.736</b> | 1245.720 | F[11] |
| K  | 32 | 3303.922        | 1115.678        | 1099.660        | 1100.667        | 1098.651 | K[10] |
| L  | 33 | 3417.006        | 987.583         | <b>971.565</b>  | 972.572         | 970.557  | L[9]  |
| N  | 34 | 3531.049        | 874.499         | <b>858.481</b>  | 859.488         | 857.473  | N[8]  |
| K  | 35 | 3687.176        | 780.466         | <b>744.438</b>  | 745.445         | 743.430  | K[7]  |
| K  | 36 | 3879.211        | 624.339         | 608.321         | 609.328         | 607.312  | K[6]  |
| A  | 37 | 3928.355        | 434.188         | 418.169         | 419.177         | 417.162  | A[5]  |
| A  | 38 | 3999.392        | 363.151         | 347.132         | 348.140         | 346.124  | A[4]  |
| S  | 39 | 4066.424        | 292.114         | 276.095         | 277.103         | 275.087  | S[3]  |
| G  | 40 | 4143.445        | 205.082         | 189.063         | 190.071         | 188.055  | G[2]  |
| E  | 41 | 4272.488        | 148.960         | 132.942         | 133.950         | 131.934  | E[1]  |

# sp | P43277 | H13\_MOUSE

KNNSRIKLGLKSLVSKGTLVQTKGTGASGSFKLNK (Dimethyl) K (Trimethyl) AASGE (28.03) (42.05)

- ▶ fragmentation table for charge state 2+
- ▶ specType=etd
- ▶ score=71.48
- ▶ F124980.dat
- ▶ query=q87863.p1
- ▶ precursor=855.499620
- ▶ chargePrecursor=5
- ▶ itol=0.6

| AA | c  | y               | z=1             | z=2             | z               | AA              |       |
|----|----|-----------------|-----------------|-----------------|-----------------|-----------------|-------|
| R  | 13 | 73.508          | 2137.240        | 2129.230        | 2129.734        | 2128.720        | R(41) |
| N  | 2  | 130.599         | 2073.192        | 2066.181        | 2065.987        | 2064.670        | N(40) |
| N  | 3  | 187.611         | 2016.171        | 2008.161        | 2008.666        | 2007.657        | N(39) |
| S  | 4  | 231.127         | 1959.149        | <b>1951.140</b> | <b>1951.644</b> | 1950.636        | S(38) |
| R  | 5  | 309.178         | 1915.633        | <b>1907.624</b> | <b>1908.128</b> | 1907.120        | R(37) |
| I  | 6  | 365.720         | 1837.583        | <b>1829.573</b> | <b>1830.077</b> | 1829.069        | I(36) |
| R  | 7  | 429.267         | 1761.041        | 1773.031        | 1773.535        | 1772.527        | R(35) |
| L  | 8  | 486.309         | 1718.993        | 1708.984        | <b>1709.488</b> | 1708.480        | L(34) |
| G  | 9  | 514.820         | 1660.451        | <b>1652.442</b> | <b>1652.946</b> | <b>1651.938</b> | G(33) |
| L  | 10 | 571.862         | 1631.946        | 1623.931        | <b>1624.435</b> | 1623.427        | L(32) |
| K  | 11 | 635.400         | 1575.390        | 1567.380        | 1567.883        | 1566.875        | K(31) |
| S  | 12 | 678.625         | <b>1511.391</b> | 1503.381        | 1503.884        | <b>1502.838</b> | S(30) |
| L  | 13 | 735.467         | <b>1467.835</b> | <b>1459.825</b> | <b>1460.329</b> | 1459.321        | L(29) |
| V  | 14 | 785.002         | 1411.293        | 1403.283        | 1403.787        | 1402.779        | V(28) |
| S  | 15 | <b>828.518</b>  | 1361.759        | 1353.749        | 1354.251        | 1353.245        | S(27) |
| K  | 16 | <b>892.565</b>  | <b>1318.243</b> | 1310.233        | <b>1310.737</b> | 1309.729        | K(26) |
| G  | 17 | <b>921.076</b>  | <b>1254.195</b> | <b>1246.186</b> | <b>1246.690</b> | 1245.682        | G(25) |
| T  | 18 | <b>971.609</b>  | <b>1235.644</b> | <b>1217.635</b> | <b>1218.139</b> | 1217.131        | T(24) |
| L  | 19 | <b>1028.142</b> | <b>1175.160</b> | <b>1167.151</b> | <b>1167.655</b> | 1166.647        | L(23) |
| V  | 20 | <b>1077.676</b> | 1118.618        | <b>1110.609</b> | <b>1111.113</b> | 1110.105        | V(22) |
| Q  | 21 | <b>1141.705</b> | 1069.084        | 1061.075        | 1061.579        | 1060.571        | Q(21) |
| T  | 22 | <b>1192.229</b> | 1035.055        | 997.046         | 997.549         | 996.542         | T(20) |
| K  | 23 | <b>1256.276</b> | 994.511         | <b>946.522</b>  | <b>947.026</b>  | 946.018         | K(19) |
| G  | 24 | 1264.477        | 960.484         | 960.474         | 960.978         | 960.970         | G(18) |
| T  | 25 | <b>1335.311</b> | 981.073         | 851.064         | 854.467         | 851.460         | T(17) |
| G  | 26 | <b>1363.822</b> | 811.449         | 803.440         | 803.944         | 802.936         | G(16) |
| A  | 27 | 1399.340        | 782.939         | 774.929         | 775.433         | 774.425         | A(15) |
| S  | 28 | <b>1442.856</b> | 747.420         | 739.410         | 739.914         | 738.906         | S(14) |
| G  | 29 | 1471.369        | 683.904         | 685.903         | 686.908         | 685.900         | G(13) |
| S  | 30 | <b>1514.883</b> | 675.393         | 667.384         | 667.888         | 666.880         | S(12) |
| F  | 31 | <b>1588.417</b> | 631.877         | 623.868         | 624.372         | 623.364         | F(11) |
| K  | 32 | <b>1652.465</b> | 558.343         | 550.333         | 550.837         | 549.830         | K(10) |
| L  | 33 | 1709.007        | 494.295         | 486.286         | 486.790         | 485.782         | L(9)  |
| N  | 34 | <b>1766.828</b> | 437.753         | 429.743         | 430.247         | 429.240         | N(8)  |
| R  | 35 | 1844.051        | 390.732         | <b>372.722</b>  | <b>373.226</b>  | 372.219         | R(7)  |
| K  | 36 | 1926.182        | 302.666         | 284.659         | 295.163         | 294.155         | K(6)  |
| A  | 37 | <b>1964.681</b> | 217.598         | 209.588         | 210.092         | 209.084         | A(5)  |
| A  | 38 | 2000.199        | 182.079         | 174.070         | 174.574         | 173.566         | A(4)  |
| S  | 39 | 2043.716        | 146.561         | 138.551         | 139.055         | 138.047         | S(3)  |
| G  | 40 | 2072.226        | 103.045         | 95.035          | 95.539          | 94.531          | G(2)  |
| E  | 41 | 2136.748        | 74.534          | 66.524          | 67.028          | 66.021          | E(1)  |

# sp | P43277 | H13\_MOUSE

KNNSRIKLGLKSLVSKGTLVQTKGTGASGSFKLNK (Dimethyl) K (Trimethyl) AASGE  
 (28.03) (42.05)

- ▶ fragmentation table for charge state 3+
- ▶ specType=etd
- ▶ score=71.48
- ▶ F124980.dat
- ▶ query=q87863.p1
- ▶ precursor=855.499620
- ▶ chargePrecursor=5
- ▶ itol=0.6

| AA | c  | y               | #+1             | #+2             | z               | AA              |       |
|----|----|-----------------|-----------------|-----------------|-----------------|-----------------|-------|
| R  | 1  | 49.301          | <b>1425.162</b> | <b>1418.823</b> | <b>1431.156</b> | 249.440         | R(41) |
| N  | 2  | 67.306          | 1332.654        | <b>1377.124</b> | <b>1377.460</b> | 1376.780        | N(40) |
| N  | 3  | 125.410         | 1344.648        | <b>1339.110</b> | <b>1339.446</b> | 1338.774        | N(39) |
| S  | 4  | 154.420         | 1308.435        | <b>1301.096</b> | <b>1301.432</b> | 1300.760        | S(38) |
| R  | 5  | 208.454         | 1277.425        | <b>1272.085</b> | <b>1272.421</b> | 1271.740        | R(37) |
| I  | 6  | 244.149         | <b>1225.391</b> | <b>1220.051</b> | <b>1220.387</b> | <b>1219.715</b> | I(36) |
| R  | 7  | 288.987         | 1187.099        | <b>1182.357</b> | <b>1182.692</b> | 1182.021        | R(35) |
| L  | 8  | 324.542         | 1144.955        | <b>1139.658</b> | <b>1139.994</b> | 1139.322        | L(34) |
| G  | 9  | 343.549         | 1107.903        | 1101.994        | <b>1102.299</b> | 1101.628        | G(33) |
| L  | 10 | 381.244         | 1088.296        | <b>1082.956</b> | <b>1083.292</b> | 1082.620        | L(32) |
| K  | 11 | 423.942         | <b>1050.601</b> | <b>1045.262</b> | <b>1045.598</b> | 1044.929        | K(31) |
| S  | 12 | 452.853         | <b>1007.903</b> | 1002.563        | 1002.599        | 1002.227        | S(30) |
| L  | 13 | 489.647         | <b>978.992</b>  | 973.553         | 973.889         | 973.217         | L(29) |
| V  | 14 | 523.670         | 941.195         | 935.838         | 936.194         | 935.522         | V(28) |
| S  | 15 | 552.681         | 908.175         | 902.835         | 903.171         | 902.499         | S(27) |
| K  | 16 | 595.179         | 879.164         | 873.825         | 874.160         | 873.480         | K(26) |
| G  | 17 | 614.386         | 836.466         | 831.126         | 831.462         | 830.790         | G(25) |
| T  | 18 | 648.059         | 817.859         | 812.519         | 812.855         | 812.183         | T(24) |
| L  | 19 | 685.764         | 783.776         | 778.436         | 778.772         | 778.101         | L(23) |
| V  | 20 | 718.786         | 748.081         | 742.742         | 743.078         | 742.406         | V(22) |
| Q  | 21 | 761.473         | 713.059         | 707.719         | 708.055         | 707.383         | Q(21) |
| T  | 22 | 795.115         | 670.372         | 665.033         | 665.369         | 664.697         | T(20) |
| K  | 23 | 837.853         | 636.690         | 631.350         | 631.686         | 631.014         | K(19) |
| G  | 24 | 858.903         | 593.991         | 588.652         | 588.988         | 588.316         | G(18) |
| T  | 25 | 890.543         | 574.084         | 568.745         | 569.081         | 568.409         | T(17) |
| G  | 26 | 909.550         | 541.302         | 535.963         | 536.298         | 535.626         | G(16) |
| A  | 27 | 933.229         | 522.299         | 516.959         | 517.295         | 516.619         | A(15) |
| S  | 28 | 952.940         | 498.616         | 493.276         | 493.612         | 492.940         | S(14) |
| G  | 29 | <b>981.247</b>  | 469.805         | 464.465         | 464.801         | 464.129         | G(13) |
| S  | 30 | 1010.258        | 450.599         | 445.258         | 445.594         | 444.922         | S(12) |
| F  | 31 | <b>1059.281</b> | 421.587         | 416.248         | 416.583         | 415.911         | F(11) |
| K  | 32 | <b>1101.979</b> | 372.564         | 367.225         | 367.561         | 366.889         | K(10) |
| L  | 33 | <b>1139.674</b> | 329.866         | 324.526         | 324.862         | 324.190         | L(9)  |
| N  | 34 | <b>1177.688</b> | 292.171         | 286.832         | 287.168         | 286.496         | N(8)  |
| R  | 35 | 1222.917        | 254.151         | 248.811         | 249.147         | 248.475         | R(7)  |
| K  | 36 | <b>1286.444</b> | 202.115         | 196.775         | 197.111         | 196.439         | K(6)  |
| A  | 37 | 1316.123        | 145.401         | 140.061         | 140.397         | 139.725         | A(5)  |
| A  | 38 | 1333.802        | 121.722         | 116.382         | 116.718         | 116.046         | A(4)  |
| S  | 39 | <b>1362.813</b> | 98.043          | 92.703          | 93.039          | 92.367          | S(3)  |
| G  | 40 | <b>1381.826</b> | 69.325          | 63.985          | 64.321          | 63.649          | G(2)  |
| E  | 41 | 1424.814        | 50.025          | 44.685          | 45.021          | 44.349          | E(1)  |

# sp | P43277 | H13\_MOUSE

KNNSRIKLGLKSLVSKGTLVQTKGTGASGSFKLNK (Dimethyl) (28.03) K (Trimethyl) (42.05) AASGE

- ▶ fragmentation table for charge state 4+
- ▶ specType=etd
- ▶ score=71.48
- ▶ F124980.dat
- ▶ query=q87863.p1
- ▶ precursor=855.499620
- ▶ chargePrecursor=5
- ▶ itol=0.6

| AA   | c              | y               | z+1             | z+2             | z              | AA   |
|------|----------------|-----------------|-----------------|-----------------|----------------|------|
| R 1  | 37.288         | 1060.123        | <b>1065.119</b> | <b>1065.371</b> | 1064.867       | R 41 |
| N 2  | 65.798         | 1037.100        | 1031.095        | 1033.347        | 1032.843       | N 40 |
| N 3  | 94.309         | <b>1008.589</b> | 1004.584        | 1004.836        | 1004.332       | N 39 |
| S 4  | 116.007        | 980.078         | 976.074         | 976.325         | 975.822        | S 38 |
| K 5  | 155.002        | 958.320         | 954.316         | 954.567         | 954.064        | K 37 |
| T 6  | 183.383        | 919.295         | 915.290         | 915.542         | 915.039        | T 36 |
| K 7  | 215.397        | 891.024         | 887.020         | 887.271         | 886.767        | K 35 |
| L 8  | 243.058        | <b>859.000</b>  | 854.995         | 855.247         | 854.744        | L 34 |
| G 9  | 257.914        | 830.729         | 826.724         | 826.976         | 826.473        | G 33 |
| L 10 | 289.105        | 816.474         | 812.469         | 812.721         | 812.217        | L 32 |
| K 11 | 318.208        | 788.203         | 784.198         | 784.450         | 783.946        | K 31 |
| S 12 | 339.868        | 756.379         | 752.374         | 752.626         | 752.123        | S 30 |
| L 13 | 368.217        | 724.421         | <b>730.416</b>  | <b>730.668</b>  | <b>730.164</b> | L 29 |
| V 14 | 393.004        | 706.150         | 702.145         | 702.397         | 701.893        | V 28 |
| S 15 | 414.702        | 681.381         | 677.376         | 677.628         | 677.125        | S 27 |
| K 16 | 440.789        | 659.025         | 655.020         | 655.272         | 654.768        | K 26 |
| G 17 | <b>461.042</b> | 627.601         | 623.596         | 623.848         | 623.345        | G 25 |
| T 18 | 486.353        | 613.340         | 609.335         | 609.587         | 609.083        | T 24 |
| L 19 | 514.574        | 588.084         | 584.079         | 584.331         | 583.827        | L 23 |
| V 20 | 539.342        | 559.813         | 555.808         | 556.060         | 555.556        | V 22 |
| Q 21 | 571.356        | 535.046         | 531.041         | 531.293         | 530.789        | Q 21 |
| T 22 | 596.618        | 503.031         | 499.026         | 499.278         | 498.774        | T 20 |
| K 23 | 628.642        | 477.769         | 473.765         | 474.016         | 473.513        | K 19 |
| G 24 | 642.897        | 446.745         | 443.741         | 443.993         | 443.489        | G 18 |
| T 25 | 668.159        | 413.480         | 409.475         | 409.727         | 409.223        | T 17 |
| G 26 | 682.415        | 406.225         | 402.221         | 402.473         | 401.970        | G 16 |
| A 27 | 706.174        | 381.973         | 387.968         | 388.220         | 387.716        | A 15 |
| S 28 | 721.932        | <b>374.214</b>  | 370.209         | 370.461         | 369.957        | S 14 |
| G 29 | 736.187        | 352.456         | 348.451         | 348.703         | 348.199        | G 13 |
| S 30 | 757.945        | 338.200         | 334.195         | 334.447         | 333.944        | S 12 |
| F 31 | 784.712        | 318.442         | 312.437         | 312.689         | 312.185        | F 11 |
| R 32 | 826.736        | 279.675         | 275.670         | 275.922         | 275.418        | R 10 |
| L 33 | 855.007        | 247.651         | 243.647         | 243.899         | 243.395        | L 9  |
| N 34 | 883.518        | 219.380         | 215.375         | 215.627         | 215.124        | N 8  |
| K 35 | 922.549        | 190.870         | 186.865         | 187.117         | 186.613        | K 7  |
| K 36 | <b>965.085</b> | 151.836         | 147.831         | 148.083         | 147.580        | K 6  |
| A 37 | <b>982.844</b> | 109.302         | 105.298         | 105.550         | 105.046        | A 5  |
| A 38 | 1050.603       | 91.543          | 87.538          | 87.790          | 87.287         | A 4  |
| S 39 | 1022.381       | 73.784          | 69.779          | 70.031          | 69.527         | S 3  |
| G 40 | 1036.617       | 52.026          | 48.021          | 48.273          | 47.769         | G 2  |
| E 41 | 1068.877       | 37.771          | 33.766          | 34.018          | 33.514         | E 1  |



# sp | P62806 | H4\_MOUSE

[Acetyl]SGRGKGGKGLGKGGAK<sup>Acetyl</sup>RHRK<sup>Trimethyl</sup>VLR<sup>42.05</sup>

- ▶ fragmentation table for charge state 1+
- ▶ specType=etd
- ▶ score=35.36
- ▶ F124985.dat
- ▶ query=q9346\_p1
- ▶ precursor=415.255770
- ▶ chargePrecursor=6
- ▶ itol=0.6

| AA    | c               | y               | z+1             | z+2             | z              | AA    |
|-------|-----------------|-----------------|-----------------|-----------------|----------------|-------|
| S[1]  | 147.076         | 2486.503        | 2470.483        | 0.000           | 2469.475       | S[23] |
| G[2]  | 204.098         | 2357.450        | 2341.440        | 0.000           | 2340.432       | G[22] |
| R[3]  | <b>360.199</b>  | 2300.437        | 2284.419        | 2265.427        | 2263.411       | R[21] |
| G[4]  | 417.220         | 2144.330        | 2128.318        | 2120.325        | 2127.310       | G[20] |
| K[5]  | 545.315         | 2087.315        | 2071.296        | 2072.304        | 2070.288       | K[19] |
| G[6]  | 602.337         | 1959.220        | 1943.201        | 1944.209        | 1942.191       | G[18] |
| G[7]  | 659.358         | 1902.190        | 1886.180        | 1887.185        | 1885.172       | G[17] |
| K[8]  | 787.463         | <b>1845.177</b> | 1829.138        | 1830.149        | 1828.150       | K[16] |
| G[9]  | <b>844.475</b>  | 1717.082        | 1701.063        | 1702.071        | 1700.055       | G[15] |
| L[10] | 957.550         | 1660.061        | 1644.042        | 1645.050        | 1643.034       | L[14] |
| G[11] | 1014.569        | 1546.976        | 1530.958        | 1531.966        | 1529.950       | G[13] |
| R[12] | <b>1142.675</b> | 1489.950        | 1473.936        | 1474.944        | 1472.926       | R[12] |
| G[13] | <b>1199.697</b> | 1361.860        | 1345.841        | <b>1346.849</b> | 1344.833       | G[11] |
| G[14] | 1256.718        | 1304.839        | 1288.820        | 1289.828        | 1287.812       | G[10] |
| A[15] | 1327.795        | 1247.817        | 1231.798        | 1232.806        | 1230.791       | A[9]  |
| K[16] | 1497.861        | 1176.780        | <b>1160.761</b> | 1161.769        | 1159.753       | K[8]  |
| R[17] | 1653.962        | 1108.675        | 990.656         | 991.664         | 989.648        | R[7]  |
| R[18] | 1701.023        | <b>850.573</b>  | 834.555         | 835.562         | 833.544        | R[6]  |
| R[19] | 1947.122        | 713.514         | <b>697.496</b>  | 698.504         | 696.488        | R[5]  |
| K[20] | 2117.264        | <b>557.413</b>  | 541.395         | 542.402         | <b>540.387</b> | K[4]  |
| V[21] | 2226.332        | 387.271         | <b>371.253</b>  | 372.261         | 370.245        | V[3]  |
| L[22] | 2329.416        | 298.203         | <b>272.184</b>  | 273.192         | 271.176        | L[2]  |
| R[23] | 2485.517        | 175.110         | 159.100         | 160.108         | 158.092        | R[1]  |

# sp | P62806 | H4\_MOUSE

[Acetyl]SGRGKGGKGLGKGGAK<sup>Acetyl</sup> RHRK<sup>Trimethyl</sup> VLR<sup>42.01</sup> 42.05

- ▶ fragmentation table for charge state 2+
- ▶ specType=etd
- ▶ score=35.36
- ▶ F124985.dat
- ▶ query=q9346\_p1
- ▶ precursor=415.255770
- ▶ chargePrecursor=6
- ▶ itol=0.6

| AA    | c               | y              | z+1             | z+2             | z               | AA    |
|-------|-----------------|----------------|-----------------|-----------------|-----------------|-------|
| S[1]  | 74.062          | 1243.764       | <b>1235.746</b> | 0.504           | <b>1235.241</b> | S[2]  |
| G[2]  | 102.563         | 1179.233       | <b>1171.224</b> | 0.504           | 1170.720        | G[2]  |
| R[3]  | 180.603         | 1150.722       | <b>1142.713</b> | <b>1143.217</b> | 1142.209        | R[2]  |
| G[4]  | 209.114         | 1072.672       | 1064.662        | <b>1065.166</b> | 1064.159        | G[20] |
| K[5]  | 273.161         | 1044.181       | <b>1036.152</b> | 1036.656        | <b>1035.648</b> | K[19] |
| G[6]  | 301.672         | 989.134        | 972.109         | 972.608         | 971.601         | G[18] |
| G[7]  | <b>330.183</b>  | <b>951.603</b> | <b>943.593</b>  | <b>944.097</b>  | 943.090         | G[17] |
| K[8]  | <b>394.230</b>  | 923.092        | <b>915.083</b>  | <b>915.587</b>  | 914.579         | K[16] |
| G[9]  | <b>422.741</b>  | <b>859.045</b> | <b>851.035</b>  | 851.539         | <b>850.531</b>  | G[15] |
| L[10] | 479.283         | 830.534        | 822.525         | <b>823.028</b>  | 822.021         | L[14] |
| G[11] | 507.794         | 773.022        | <b>765.983</b>  | <b>766.486</b>  | 765.479         | G[13] |
| R[12] | <b>571.841</b>  | <b>745.481</b> | 737.472         | 737.976         | 736.969         | R[12] |
| G[13] | <b>600.352</b>  | 681.934        | <b>673.424</b>  | 673.928         | <b>672.920</b>  | G[11] |
| G[14] | 628.863         | 652.923        | 644.914         | 645.417         | <b>644.410</b>  | G[10] |
| A[15] | <b>664.381</b>  | 624.412        | 616.403         | 616.907         | 615.899         | A[9]  |
| R[16] | <b>749.434</b>  | 588.894        | <b>580.884</b>  | <b>581.388</b>  | 580.380         | R[8]  |
| R[17] | 827.926         | <b>503.841</b> | <b>495.832</b>  | <b>496.335</b>  | 495.328         | R[7]  |
| R[18] | <b>896.014</b>  | 438.790        | 431.781         | 432.285         | 431.277         | R[6]  |
| R[19] | 974.005         | 357.261        | <b>349.252</b>  | 349.755         | <b>348.748</b>  | R[5]  |
| R[20] | <b>1059.136</b> | 279.210        | 271.201         | 271.705         | 270.697         | R[4]  |
| V[21] | 1108.670        | 194.139        | 186.130         | 186.634         | 185.626         | V[3]  |
| L[22] | <b>1165.212</b> | 144.605        | 136.596         | 137.100         | 136.092         | L[2]  |
| R[23] | 1243.202        | 88.083         | 80.074          | 80.578          | 79.570          | R[1]  |



# sp | P62806 | H4\_MOUSE

[Acetyl]SGRGKGGKGLGKGGAK<sup>Acetyl</sup>42.01 RHRK<sup>Trimethyl</sup>42.05 VLR

- ▶ fragmentation table for charge state 3+
- ▶ specType=etd
- ▶ score=35.36
- ▶ F124985.dat
- ▶ query=q9346\_p1
- ▶ precursor=415.255770
- ▶ chargePrecursor=6
- ▶ itol=0.6

| AA    | c              | y              | z+1            | z+2            | z              | AA    |
|-------|----------------|----------------|----------------|----------------|----------------|-------|
| S[1]  | 49.697         | 829.505        | 824.166        | 0.672          | <b>823.830</b> | S[2]  |
| G[2]  | 68.704         | 786.491        | 781.152        | 0.672          | 780.816        | G[22] |
| E[3]  | 120.738        | <b>767.484</b> | 762.145        | <b>762.480</b> | 761.808        | R[21] |
| G[4]  | 139.743        | 715.430        | <b>710.111</b> | <b>710.447</b> | 709.775        | G[20] |
| K[5]  | 182.443        | 696.443        | <b>691.104</b> | <b>691.440</b> | <b>690.768</b> | K[19] |
| G[6]  | 201.450        | 653.745        | 648.405        | 648.741        | 648.069        | G[18] |
| G[7]  | 220.458        | 634.738        | 629.399        | 629.734        | 629.062        | G[17] |
| K[8]  | 263.156        | 615.731        | <b>610.391</b> | <b>610.727</b> | <b>610.055</b> | K[16] |
| G[9]  | 282.163        | <b>573.032</b> | <b>567.693</b> | <b>568.029</b> | <b>567.357</b> | G[15] |
| L[10] | 319.658        | 554.025        | <b>548.685</b> | <b>549.021</b> | 548.350        | L[14] |
| G[11] | 338.665        | 516.330        | <b>510.991</b> | <b>511.327</b> | 510.655        | G[13] |
| K[12] | 381.563        | <b>497.323</b> | <b>491.984</b> | <b>492.320</b> | <b>491.648</b> | K[12] |
| G[13] | 400.570        | 454.025        | 449.266        | 449.601        | 448.949        | G[11] |
| G[14] | 419.578        | 435.618        | <b>430.278</b> | <b>430.614</b> | 429.942        | G[10] |
| A[15] | <b>443.257</b> | 416.611        | 411.271        | 411.607        | 410.935        | A[9]  |
| K[16] | <b>499.958</b> | 392.932        | 387.592        | 387.928        | 387.256        | K[8]  |
| R[17] | <b>551.992</b> | 336.230        | <b>330.890</b> | 331.226        | <b>330.554</b> | R[7]  |
| H[18] | <b>597.678</b> | 284.196        | 278.856        | 279.192        | 278.520        | H[6]  |
| R[19] | <b>649.712</b> | 238.510        | 233.170        | 233.506        | 232.834        | R[5]  |
| K[20] | <b>706.426</b> | 186.476        | 181.136        | 181.472        | 180.800        | K[4]  |
| V[21] | <b>739.449</b> | 129.762        | 124.422        | 124.758        | 124.086        | V[9]  |
| L[22] | <b>777.144</b> | 96.739         | 91.400         | 91.736         | 91.064         | L[9]  |
| R[23] | 620.177        | 59.043         | 53.703         | 54.041         | 53.369         | R[1]  |

# sp | P62806 | H4\_MOUSE

[Acetyl]SGRGKGGKGLGKGGAK<sup>Acetyl</sup>RHRK<sup>Trimethyl</sup>VLR<sup>42.05</sup>

- ▶ fragmentation table for charge state 4+
- ▶ specType=etd
- ▶ score=35.36
- ▶ F124985.dat
- ▶ query=q9346\_p1
- ▶ precursor=415.255770
- ▶ chargePrecursor=6
- ▶ itol=0.6

| AA |      | c              | y              | z+1            | z+2            | z              | AA    |
|----|------|----------------|----------------|----------------|----------------|----------------|-------|
| S  | [1]  | 37.525         | <b>622.381</b> | <b>618.376</b> | 0.755          | 618.124        | S[2]  |
| G  | [2]  | 51.780         | <b>590.120</b> | <b>586.115</b> | 0.755          | <b>585.864</b> | G[2]  |
| R  | [3]  | 60.800         | <b>575.865</b> | <b>571.860</b> | <b>572.112</b> | <b>571.608</b> | R[2]  |
| G  | [4]  | 105.091        | 336.840        | <b>532.835</b> | <b>533.087</b> | 332.583        | G[20] |
| K  | [5]  | 137.084        | 522.584        | <b>518.579</b> | <b>518.831</b> | 518.126        | K[19] |
| G  | [6]  | 151.340        | 490.560        | 488.550        | 486.308        | 488.304        | G[18] |
| G  | [7]  | 165.595        | 476.305        | 472.300        | 472.552        | 472.048        | G[17] |
| K  | [8]  | 197.619        | 462.050        | <b>458.045</b> | <b>458.297</b> | <b>457.793</b> | K[16] |
| G  | [9]  | 211.874        | 430.026        | 428.021        | 426.273        | 425.769        | G[15] |
| L  | [10] | 240.145        | 415.771        | 411.766        | 412.018        | 411.514        | L[14] |
| G  | [11] | 254.401        | 387.500        | 383.495        | 383.747        | 383.243        | G[13] |
| K  | [12] | 286.424        | 373.244        | 369.240        | 369.491        | 368.988        | K[12] |
| G  | [13] | 300.680        | 341.220        | 337.215        | 337.468        | 336.964        | G[11] |
| G  | [14] | 314.935        | 326.965        | 322.960        | 323.212        | 322.708        | G[10] |
| A  | [15] | 332.694        | 312.710        | 308.705        | 308.957        | 308.453        | A[9]  |
| K  | [16] | 375.221        | 294.950        | 290.946        | 291.198        | 290.694        | K[8]  |
| R  | [17] | 414.246        | 252.424        | 248.419        | 248.671        | 248.167        | R[7]  |
| H  | [18] | 448.511        | 213.399        | 209.394        | 209.646        | 209.142        | H[6]  |
| R  | [19] | <b>487.536</b> | 179.134        | 175.129        | 175.381        | 174.877        | R[5]  |
| K  | [20] | 530.071        | 140.109        | 136.104        | 136.356        | 135.852        | K[4]  |
| V  | [21] | <b>554.839</b> | 97.573         | 93.569         | 93.821         | 93.317         | V[9]  |
| L  | [22] | 55.110         | 72.306         | 68.302         | 68.553         | 68.050         | L[2]  |
| R  | [23] | <b>622.135</b> | 44.535         | 40.531         | 40.782         | 40.279         | R[1]  |

# sp | P62806 | H4\_MOUSE

[Acetyl]SGRGKGGKGLGKGGAK<sup>Acetyl</sup>42.01 RHRK<sup>Trimethyl</sup>42.05 VLR

- ▶ fragmentation table for charge state 5+
- ▶ specType=etd
- ▶ score=35.36
- ▶ F124985.dat
- ▶ query=q9346\_p1
- ▶ precursor=415.255770
- ▶ chargePrecursor=6
- ▶ itol=0.6

| AA |    | c              | y       | z+1            | z+2            | z       | AA    |
|----|----|----------------|---------|----------------|----------------|---------|-------|
| S  | 1  | 30.221         | 498.106 | 494.902        | 0.806          | 494.701 | S(2)  |
| G  | 2  | 41.825         | 472.298 | 469.092        | 0.205          | 468.892 | G(2)  |
| R  | 3  | 72.846         | 490.891 | <b>457.690</b> | <b>457.891</b> | 457.488 | R(2)  |
| G  | 4  | 84.250         | 429.673 | 426.468        | 426.671        | 426.268 | G(2)  |
| K  | 5  | 109.869        | 418.269 | 415.065        | 415.267        | 414.863 | K(19) |
| G  | 6  | 121.273        | 392.650 | 389.446        | 389.648        | 389.244 | G(18) |
| G  | 7  | 132.677        | 381.246 | 378.042        | 378.243        | 377.840 | G(17) |
| K  | 8  | 158.296        | 369.841 | 366.637        | 366.839        | 366.436 | K(16) |
| G  | 9  | 169.701        | 344.222 | 341.018        | 341.220        | 340.817 | G(15) |
| L  | 10 | 192.318        | 332.818 | 329.614        | <b>329.816</b> | 329.413 | L(14) |
| G  | 11 | 203.722        | 310.201 | 306.997        | 307.199        | 306.796 | G(13) |
| K  | 12 | 229.341        | 298.797 | 295.593        | 295.795        | 295.392 | K(12) |
| G  | 13 | 240.745        | 273.178 | 269.973        | 270.176        | 269.773 | G(11) |
| G  | 14 | 252.149        | 261.774 | 258.570        | 258.771        | 258.368 | G(10) |
| A  | 15 | 266.357        | 250.369 | 247.165        | 247.367        | 246.964 | A(9)  |
| K  | 16 | 300.378        | 238.162 | 234.958        | 235.160        | 234.757 | K(8)  |
| R  | 17 | 331.598        | 202.141 | 198.937        | 199.139        | 198.735 | R(7)  |
| H  | 18 | 359.010        | 170.920 | 167.717        | 167.918        | 167.515 | H(6)  |
| R  | 19 | 390.230        | 143.509 | 140.305        | 140.507        | 140.103 | R(5)  |
| K  | 20 | <b>424.259</b> | 112.288 | 109.085        | 109.286        | 108.883 | K(4)  |
| V  | 21 | <b>444.072</b> | 78.260  | 75.056         | 75.258         | 74.855  | V(3)  |
| L  | 22 | 466.689        | 58.446  | 55.243         | 55.444         | 55.041  | L(2)  |
| R  | 23 | 497.909        | 35.830  | 32.626         | 32.827         | 32.424  | R(1)  |



# sp | P10853 | H2B1F\_MOUSE

LLPGELAK <sup>Crotonyl</sup> 68.03 HAVSEGTK

- ▶ fragmentation table for charge state 1+
- ▶ specType=cid
- ▶ score=65.14
- ▶ F154294.dat
- ▶ query=q38268\_p1
- ▶ precursor=916.020800
- ▶ chargePrecursor=2
- ▶ itol=0.6

| AA  | a               | a*              | a+b      | b               | b*       | a+b             | y               | y*       | a+b             | AA   |
|-----|-----------------|-----------------|----------|-----------------|----------|-----------------|-----------------|----------|-----------------|------|
| L1  | 86.096          | 0.000           | 0.000    | 114.093         | 0.000    | 0.000           | 1831.032        | 1814.055 | 1831.032        | L137 |
| L12 | 108.000         | 0.000           | 0.000    | 144.000         | 0.000    | 0.000           | 1819.000        | 1808.000 | 1819.000        | L136 |
| L13 | 111.000         | 0.000           | 0.000    | 145.000         | 0.000    | 0.000           | 1804.000        | 1807.000 | 1804.000        | L135 |
| P14 | 408.117         | 0.000           | 0.000    | 487.117         | 0.000    | 0.000           | 1841.000        | 1474.754 | <b>1475.770</b> | P154 |
| G15 | 488.159         | 0.000           | 0.000    | 488.159         | 0.000    | 0.000           | <b>1394.737</b> | 1377.000 | 1377.000        | G16  |
| E16 | 595.351         | 0.000           | 577.371  | <b>625.376</b>  | 0.000    | <b>605.366</b>  | <b>1337.706</b> | 1320.670 | 1310.695        | E17  |
| L17 | 702.560         | 0.000           | 680.600  | 780.560         | 0.000    | 714.000         | <b>1268.663</b> | 1194.631 | 1190.650        | L111 |
| A18 | 778.612         | 0.000           | 761.492  | 847.492         | 0.000    | 810.000         | <b>1095.519</b> | 1070.500 | <b>1077.548</b> | A19  |
| K19 | <b>915.624</b>  | <b>958.597</b>  | 977.611  | <b>1001.618</b> | 980.792  | <b>985.608</b>  | <b>1074.542</b> | 1057.510 | 1058.532        | K20  |
| H10 | <b>1112.683</b> | <b>1095.656</b> | 1098.677 | <b>1146.678</b> | 1123.651 | 1127.667        | <b>878.421</b>  | 816.394  | <b>810.410</b>  | H08  |
| A11 | <b>1181.728</b> | 1166.613        | 1185.700 | <b>1211.715</b> | 1194.688 | 1197.704        | <b>681.362</b>  | 674.330  | <b>675.352</b>  | A07  |
| V12 | <b>1287.768</b> | 1265.762        | 1279.744 | <b>1310.741</b> | 1292.719 | 1292.718        | <b>630.363</b>  | 605.295  | <b>602.314</b>  | V01  |
| S13 | 1369.820        | 1357.794        | 1381.811 | <b>1397.815</b> | 1380.789 | <b>1378.805</b> | <b>521.297</b>  | 506.210  | <b>501.246</b>  | S03  |
| E14 | 1448.853        | 1441.836        | 1448.852 | <b>1526.858</b> | 1509.831 | <b>1508.847</b> | <b>434.225</b>  | 417.180  | <b>416.214</b>  | E14  |
| G15 | 1555.894        | 1538.868        | 1537.853 | 1548.834        | 1536.813 | 1535.808        | <b>305.182</b>  | 289.151  | <b>287.171</b>  | G15  |
| T16 | 1654.932        | 1636.906        | 1633.891 | 1644.874        | 1647.850 | 1646.819        | 248.180         | 231.134  | 230.150         | T12  |
| K17 | 1788.927        | 1768.900        | 1767.883 | 1814.822        | 1795.795 | 1795.811        | 147.113         | 130.088  | 0.000           | K10  |



# sp | P10853 | H2B1F\_MOUSE

LLPGELAK <sup>Crotonyl</sup> 68.03 HAVSEGTK

- ▶ fragmentation table for charge state 1+
- ▶ specType=cid
- ▶ score=67.98
- ▶ F154294.dat
- ▶ query=q38269\_p1
- ▶ precursor=916.021830
- ▶ chargePrecursor=2
- ▶ itol=0.6

| AA  | a               | a*              | a+b            | b               | b*       | b+a             | y               | y*       | y+a             | AA   |
|-----|-----------------|-----------------|----------------|-----------------|----------|-----------------|-----------------|----------|-----------------|------|
| L1  | 86.096          | 0.000           | 0.000          | 114.091         | 0.000    | 0.000           | 1811.032        | 1814.030 | 1811.022        | L137 |
| L12 | 100.000         | 0.000           | 0.000          | 144.114         | 0.000    | 0.000           | 1819.060        | 1828.064 | 1808.016        | L138 |
| L13 | 112.100         | 0.000           | 0.000          | <b>340.250</b>  | 0.000    | 0.000           | 1824.094        | 1837.818 | 1808.004        | L139 |
| P14 | 408.117         | 0.000           | 0.000          | 487.112         | 0.000    | 0.000           | 1841.180        | 1474.754 | <b>1473.770</b> | P154 |
| G15 | 488.119         | 0.000           | 0.000          | 486.114         | 0.000    | 0.000           | <b>1384.737</b> | 1377.722 | 1378.717        | G151 |
| E16 | <b>505.181</b>  | 0.000           | <b>577.371</b> | <b>623.376</b>  | 0.000    | <b>605.366</b>  | <b>1337.706</b> | 1325.670 | 1310.666        | E122 |
| L17 | 0.000           | 0.000           | 880.851        | 0.000           | 0.000    | <b>718.450</b>  | <b>1268.663</b> | 1197.631 | <b>1190.653</b> | L131 |
| A18 | <b>178.163</b>  | 0.000           | 781.490        | 0.000           | 0.000    | <b>819.487</b>  | <b>1025.319</b> | 1017.304 | 1017.309        | A110 |
| K19 | <b>575.624</b>  | <b>658.597</b>  | 977.611        | <b>1003.618</b> | 0.000    | <b>935.608</b>  | <b>1024.542</b> | 1007.528 | <b>1008.532</b> | K151 |
| H10 | 1112.081        | <b>1093.656</b> | 1088.637       | <b>1146.678</b> | 1123.651 | 1127.667        | <b>678.421</b>  | 616.394  | <b>610.410</b>  | H108 |
| G11 | 1184.720        | 1166.617        | 1185.700       | <b>1211.715</b> | 1194.688 | 1197.704        | <b>681.362</b>  | 674.350  | <b>675.362</b>  | G117 |
| V12 | <b>1282.708</b> | 1265.702        | 1278.694       | <b>1310.781</b> | 1302.759 | 1302.741        | <b>630.283</b>  | 605.265  | <b>602.324</b>  | V121 |
| S13 | 1369.620        | 1352.614        | 1361.611       | <b>1397.815</b> | 1380.788 | 1378.805        | <b>521.297</b>  | 506.276  | <b>503.246</b>  | S131 |
| E14 | 1448.593        | 1431.586        | 1440.582       | <b>1526.850</b> | 1509.811 | <b>1508.817</b> | <b>434.225</b>  | 417.188  | <b>416.214</b>  | E141 |
| G15 | 1535.594        | 1518.586        | 1527.582       | 1524.824        | 1506.813 | 1505.808        | <b>325.182</b>  | 308.151  | <b>287.171</b>  | G151 |
| T16 | 1614.612        | 1597.603        | 1603.621       | 1604.621        | 1587.603 | 1586.618        | 248.180         | 231.154  | 230.150         | T121 |
| K17 | 1703.627        | 1686.618        | 1697.661       | 1694.622        | 1676.605 | 1675.611        | 147.113         | 130.088  | 0.000           | K111 |





# sp | Q64525 | H2B2B\_MOUSE

PDKAKSAPAPKK <sup>Acetyl</sup>42.01 GSKKAVT <sup>Acetyl</sup>42.01 KVQKKD

- ▶ fragmentation table for charge state 1+
- ▶ specType=etd
- ▶ score=48.55
- ▶ F161015.dat
- ▶ query=q25072.p1
- ▶ precursor=672.891110
- ▶ chargePrecursor=4
- ▶ itol=0.6

| AA | c  | v               | z+1             | z+2            | z              | AA       |       |
|----|----|-----------------|-----------------|----------------|----------------|----------|-------|
| P  | 1  | 115.087         | 2888.54         | 2672.522       | 0.000          | 2671.514 | P[25] |
| D  | 2  | 230.114         | 2591.458        | 2575.409       | 0.000          | 2574.403 | D[24] |
| P  | 3  | 327.186         | 2476.461        | 2460.442       | 0.000          | 2459.434 | P[23] |
| A  | 4  | 398.203         | 2379.408        | 2363.389       | 0.000          | 2362.382 | A[22] |
| K  | 5  | 526.258         | 2306.371        | 2292.352       | 2291.360       | 2291.345 | K[21] |
| S  | 6  | 613.330         | 2180.276        | 2164.257       | 2165.265       | 2163.250 | S[20] |
| A  | 7  | 694.298         | 2093.243        | 2077.225       | 2078.233       | 2076.218 | A[19] |
| P  | 8  | <b>781.420</b>  | 2022.207        | 2006.188       | 2007.196       | 2005.180 | P[18] |
| A  | 9  | 852.457         | 1925.154        | 1909.135       | 1910.143       | 1908.128 | A[17] |
| P  | 10 | 949.510         | 1854.117        | 1838.098       | 1839.106       | 1837.091 | P[16] |
| K  | 11 | <b>1077.605</b> | 1757.064        | 1741.046       | 1742.053       | 1740.038 | K[15] |
| K  | 12 | <b>1247.711</b> | 1628.969        | 1612.951       | 1613.959       | 1611.943 | K[14] |
| G  | 13 | 1304.732        | 1498.864        | 1482.845       | 1483.853       | 1481.837 | G[13] |
| S  | 14 | 1391.764        | 1401.842        | 1385.824       | 1386.831       | 1384.815 | S[12] |
| K  | 15 | 1519.859        | <b>1314.810</b> | 1298.792       | 1299.799       | 1297.784 | K[11] |
| K  | 16 | 1647.954        | 1198.715        | 1170.697       | 1171.705       | 1169.689 | K[10] |
| A  | 17 | 1718.991        | 1058.620        | 1042.602       | 1043.610       | 1041.594 | A[9]  |
| V  | 18 | 1818.020        | 987.583         | 971.565        | 972.572        | 970.557  | V[8]  |
| V  | 19 | 1961.118        | <b>888.515</b>  | 872.496        | <b>873.504</b> | 871.489  | V[7]  |
| K  | 20 | 2089.213        | 745.457         | 729.438        | 730.446        | 728.430  | K[6]  |
| V  | 21 | 2188.261        | 617.362         | <b>601.343</b> | 602.351        | 600.335  | V[5]  |
| Q  | 22 | 2316.340        | 518.293         | 502.275        | 503.282        | 501.267  | Q[4]  |
| K  | 23 | 2444.435        | 390.235         | 374.216        | 375.224        | 373.208  | K[3]  |
| K  | 24 | 2572.530        | 262.140         | 246.121        | 247.129        | 245.113  | K[2]  |
| D  | 25 | 2687.557        | 134.045         | 118.026        | 119.034        | 117.018  | D[1]  |

# sp | Q64525 | H2B2B\_MOUSE

PDKAKSAPAPKK <sup>Acetyl</sup>42.01 GSKKAVT <sup>Acetyl</sup>42.01 KVQKKD

- ▶ fragmentation table for charge state 2+
- ▶ specType=etd
- ▶ score=48.55
- ▶ F161015.dat
- ▶ query=q25072.p1
- ▶ precursor=672.891110
- ▶ chargePrecursor=4
- ▶ itol=0.6

| AA |    | c               | y        | z+1             | z+2             | z               | AA    |
|----|----|-----------------|----------|-----------------|-----------------|-----------------|-------|
| P  | 1  | 58.047          | 1344.774 | <b>1336.765</b> | 0.504           | 1338.261        | P[25] |
| D  | 3  | 115.560         | 1296.248 | <b>1288.238</b> | 0.504           | <b>1287.734</b> | D[24] |
| P  | 3  | 104.087         | 1238.734 | 1230.726        | 0.504           | 1233.221        | P[23] |
| A  | 4  | 199.605         | 1190.208 | 1182.199        | 0.504           | 1181.694        | A[22] |
| K  | 5  | 263.653         | 1154.689 | <b>1146.680</b> | <b>1147.184</b> | 1146.178        | K[21] |
| S  | 6  | 307.169         | 1090.642 | <b>1082.632</b> | <b>1083.136</b> | <b>1082.128</b> | S[20] |
| A  | 7  | 362.697         | 1047.126 | 1039.118        | <b>1039.620</b> | 1038.612        | A[19] |
| P  | 8  | 393.214         | 931.609  | 923.599         | 924.102         | 923.094         | P[18] |
| A  | 9  | 426.732         | 953.081  | <b>955.071</b>  | <b>955.575</b>  | 954.567         | A[17] |
| P  | 10 | 475.259         | 927.563  | 919.553         | 920.057         | 919.049         | P[16] |
| K  | 11 | 539.306         | 879.036  | 871.026         | 871.530         | 870.521         | K[15] |
| K  | 12 | 624.359         | 814.988  | <b>806.979</b>  | <b>807.483</b>  | 806.475         | K[14] |
| Q  | 13 | 657.870         | 729.930  | <b>721.920</b>  | <b>722.430</b>  | 721.422         | Q[13] |
| S  | 14 | 698.398         | 701.425  | 693.415         | <b>693.919</b>  | 692.911         | S[12] |
| K  | 15 | <b>760.433</b>  | 657.909  | 649.899         | 650.403         | 649.396         | K[11] |
| K  | 16 | <b>824.481</b>  | 593.861  | 585.852         | 586.356         | 585.348         | K[10] |
| A  | 17 | <b>859.999</b>  | 529.814  | 521.804         | 522.308         | 521.301         | A[9]  |
| V  | 18 | 909.533         | 484.295  | 486.288         | 486.790         | 485.782         | V[8]  |
| T  | 19 | <b>983.063</b>  | 444.761  | 436.752         | 437.256         | 436.248         | T[7]  |
| K  | 20 | <b>1045.110</b> | 373.232  | 365.223         | 365.727         | 364.719         | K[6]  |
| V  | 21 | <b>1094.644</b> | 309.184  | 301.175         | 301.679         | 300.671         | V[5]  |
| Q  | 22 | <b>1158.674</b> | 259.650  | 251.641         | 252.145         | 251.137         | Q[4]  |
| K  | 23 | <b>1222.721</b> | 195.621  | 187.612         | 188.116         | 187.108         | K[3]  |
| K  | 24 | 1286.768        | 131.574  | 123.564         | 124.068         | 123.060         | K[2]  |
| D  | 25 | 1344.282        | 87.528   | 89.519          | 89.021          | 89.013          | D[1]  |

# sp | Q64525 | H2B2B\_MOUSE

PDKAKSAPAPKK <sup>Acetyl</sup>42.01 GSKKAVT <sup>Acetyl</sup>42.01 KVQKKD

- ▶ fragmentation table for charge state 3+
- ▶ specType=etd
- ▶ score=48.55
- ▶ F161015.dat
- ▶ query=q25072.p1
- ▶ precursor=672.891110
- ▶ chargePrecursor=4
- ▶ itol=0.6

| AA    | c              | y              | z+1            | z+2            | z              | AA    |
|-------|----------------|----------------|----------------|----------------|----------------|-------|
| P[1]  | 30.034         | <b>896.852</b> | 891.512        | 0.672          | 891.176        | P[25] |
| D[2]  | 77.376         | 864.501        | <b>859.161</b> | 0.672          | 858.625        | D[24] |
| P[3]  | 109.727        | 826.159        | 820.819        | 0.672          | 820.483        | P[23] |
| A[4]  | 133.406        | 793.808        | <b>788.468</b> | 0.672          | <b>788.132</b> | A[22] |
| K[5]  | 176.104        | 770.129        | 764.789        | 765.125        | 764.453        | K[21] |
| S[6]  | 205.115        | 727.435        | <b>722.091</b> | <b>722.427</b> | <b>721.755</b> | S[20] |
| A[7]  | 228.794        | 698.420        | 693.060        | 693.416        | 692.744        | A[19] |
| P[8]  | 251.145        | 674.741        | 669.401        | 669.737        | 669.085        | P[18] |
| A[9]  | 294.824        | 642.090        | 637.050        | 637.386        | 636.714        | A[17] |
| P[10] | 317.175        | 618.711        | 613.371        | 613.707        | 613.035        | P[16] |
| K[11] | 359.873        | 586.360        | 581.020        | 581.356        | 580.684        | K[15] |
| K[12] | 416.575        | 543.661        | 538.322        | 538.658        | 537.986        | K[14] |
| G[13] | 435.582        | 486.959        | 481.620        | 481.956        | 481.284        | G[13] |
| S[14] | 464.593        | 467.952        | 462.613        | 462.949        | 462.277        | S[12] |
| K[15] | 507.291        | 438.942        | 433.602        | 433.938        | 433.266        | K[11] |
| K[16] | 549.990        | 396.241        | 390.901        | 391.240        | 390.568        | K[10] |
| A[17] | 573.669        | 353.545        | 348.205        | 348.541        | 347.869        | A[9]  |
| V[18] | 606.691        | 329.866        | 324.526        | 324.862        | 324.190        | V[8]  |
| T[19] | 654.377        | 296.843        | 291.504        | 291.840        | 291.168        | T[7]  |
| K[20] | 697.076        | 249.157        | 243.817        | 244.153        | 243.482        | K[6]  |
| V[21] | 730.099        | 206.459        | 201.119        | 201.455        | 200.783        | V[5]  |
| Q[22] | <b>772.785</b> | 173.436        | 168.096        | 168.432        | 167.760        | Q[4]  |
| K[23] | 815.483        | 130.750        | 125.410        | 125.746        | 125.074        | K[3]  |
| K[24] | 858.181        | 88.051         | 82.712         | 83.048         | 82.376         | K[2]  |
| D[25] | 896.524        | 45.353         | 40.014         | 40.349         | 39.678         | D[1]  |



# sp | P10853 | H2B1F\_MOUSE

PEPAKSAPAPKK <sup>Acetyl</sup>GS (42.01) <sup>Acetyl</sup>KKAVT (42.01) <sup>Acetyl</sup>KAQKKD 42.01

- ▶ fragmentation table for charge state 1+
- ▶ specType=etd
- ▶ score=68.75
- ▶ F161015.dat
- ▶ query=q25209.p1
- ▶ precursor=544.314690
- ▶ chargePrecursor=5
- ▶ itol=0.6

| AA |    | c               | y        | z+1             | z+2             | z              | AA    |
|----|----|-----------------|----------|-----------------|-----------------|----------------|-------|
| P  | 1  | 115.987         | 2716.536 | 2700.517        | 0.000           | 2699.509       | P[25] |
| E  | 2  | 244.229         | 2319.483 | 2303.464        | 0.000           | 2302.456       | E[24] |
| P  | 3  | <b>341.182</b>  | 2390.440 | 2474.422        | 0.000           | 2473.414       | P[23] |
| A  | 4  | <b>412.219</b>  | 2391.387 | 2377.369        | 0.000           | 2376.361       | A[22] |
| K  | 5  | <b>540.314</b>  | 2322.350 | 2306.332        | 2307.339        | 2305.334       | K[21] |
| S  | 6  | <b>627.346</b>  | 2194.295 | 2178.277        | 2179.244        | 2177.229       | S[20] |
| A  | 7  | <b>698.383</b>  | 2107.223 | 2091.205        | 2092.212        | 2090.197       | A[19] |
| P  | 8  | <b>795.436</b>  | 2036.386 | 2020.368        | 2021.375        | 2019.368       | P[18] |
| A  | 9  | 896.473         | 1939.133 | 1923.115        | 1924.123        | 1922.107       | A[17] |
| P  | 10 | <b>963.526</b>  | 1898.096 | 1882.078        | 1883.085        | 1881.070       | P[16] |
| K  | 11 | <b>1091.621</b> | 1771.044 | 1756.026        | 1756.033        | 1754.017       | K[15] |
| K  | 12 | <b>1261.726</b> | 1642.949 | 1626.930        | <b>1627.938</b> | 1625.922       | K[14] |
| G  | 13 | <b>1318.748</b> | 1472.843 | 1456.824        | 1457.832        | 1455.817       | G[13] |
| S  | 14 | 1447.790        | 1415.822 | 1399.803        | 1400.811        | 1398.795       | S[12] |
| K  | 15 | 1574.888        | 1368.779 | 1352.761        | 1353.768        | 1351.753       | K[11] |
| K  | 16 | 1703.980        | 1158.684 | <b>1142.665</b> | <b>1143.673</b> | 1141.658       | K[10] |
| A  | 17 | 1775.017        | 1030.589 | <b>1014.570</b> | 1015.578        | 1013.563       | A[9]  |
| V  | 18 | 1874.086        | 959.552  | 943.533         | 944.541         | 942.525        | V[8]  |
| T  | 19 | 2017.144        | 860.484  | 844.465         | 845.473         | 843.457        | T[7]  |
| K  | 20 | 2145.239        | 737.425  | 721.407         | 722.414         | <b>700.399</b> | K[6]  |
| A  | 21 | 2216.278        | 589.330  | <b>573.312</b>  | 574.320         | <b>572.304</b> | A[5]  |
| Q  | 22 | 2344.335        | 518.293  | <b>502.275</b>  | 503.282         | 501.267        | Q[4]  |
| K  | 23 | 2472.430        | 390.235  | <b>374.216</b>  | <b>375.224</b>  | 373.208        | K[3]  |
| K  | 24 | 2600.525        | 262.140  | <b>246.121</b>  | 247.129         | 245.113        | K[2]  |
| D  | 25 | 2715.552        | 134.045  | 118.026         | 119.034         | 117.018        | D[1]  |

# sp | P10853 | H2B1F\_MOUSE

PEPAKSAPAPKK <sup>Acetyl</sup>GS (42.01) <sup>Acetyl</sup>KKAVT (42.01) <sup>Acetyl</sup>KAQKKD (42.01)

- ▶ fragmentation table for charge state 2+
- ▶ specType=etd
- ▶ score=68.75
- ▶ F161015.dat
- ▶ query=q25209\_p1
- ▶ precursor=544.314690
- ▶ chargePrecursor=5
- ▶ itol=0.6

| AA   | c               | y               | z+1             | z+2             | z               | AA   |
|------|-----------------|-----------------|-----------------|-----------------|-----------------|------|
| F 1  | 88.047          | 1158.771        | 1350.792        | 0.504           | 1350.250        | P 28 |
| E 2  | 127.568         | 1310.245        | <b>1302.236</b> | 0.504           | 1301.712        | E 24 |
| F 3  | 191.056         | 1248.728        | <b>1237.714</b> | 0.504           | <b>1237.210</b> | P 25 |
| A 4  | 206.613         | 1197.197        | <b>1189.188</b> | 0.504           | 1188.664        | K 22 |
| K 5  | 270.681         | <b>1161.679</b> | 1153.669        | 1154.173        | 1153.166        | K 21 |
| S 6  | 314.177         | 1097.631        | <b>1089.622</b> | <b>1090.126</b> | <b>1089.118</b> | S 20 |
| A 7  | 349.695         | 1054.115        | 1046.106        | <b>1046.610</b> | 1045.602        | A 19 |
| F 8  | 388.222         | 1018.597        | 1010.587        | 1011.591        | 1010.583        | F 18 |
| A 9  | 431.740         | 970.070         | <b>962.061</b>  | <b>962.565</b>  | 961.557         | A 17 |
| F 10 | 482.267         | 924.552         | 926.542         | 927.546         | 926.539         | F 16 |
| K 11 | <b>546.314</b>  | 886.025         | 878.016         | <b>878.520</b>  | 877.512         | K 15 |
| K 12 | <b>631.367</b>  | 821.978         | <b>813.969</b>  | <b>814.473</b>  | 813.465         | K 14 |
| G 13 | <b>659.878</b>  | 736.925         | <b>728.916</b>  | <b>729.420</b>  | <b>728.412</b>  | G 13 |
| S 14 | 724.369         | 708.414         | <b>700.405</b>  | <b>700.909</b>  | <b>699.901</b>  | S 12 |
| K 15 | <b>788.446</b>  | 643.893         | 635.884         | 636.888         | 635.881         | K 11 |
| K 16 | <b>852.494</b>  | 579.846         | <b>571.836</b>  | <b>572.340</b>  | <b>571.332</b>  | K 10 |
| A 17 | 868.012         | 515.798         | <b>507.789</b>  | <b>508.293</b>  | 507.285         | A 9  |
| V 18 | <b>937.547</b>  | 480.280         | <b>472.270</b>  | <b>472.774</b>  | 471.766         | V 8  |
| T 19 | <b>1069.676</b> | 430.745         | 422.736         | 423.740         | 422.732         | T 7  |
| K 20 | <b>1073.123</b> | 359.215         | 351.207         | 352.211         | 351.203         | K 6  |
| A 21 | <b>1108.642</b> | 295.168         | 287.159         | 287.663         | 286.656         | A 5  |
| Q 22 | <b>1172.671</b> | 239.650         | 231.641         | 232.645         | 231.637         | Q 4  |
| K 23 | 1236.718        | 195.621         | 187.612         | 188.116         | 187.108         | K 3  |
| K 24 | 1300.766        | 131.574         | 123.564         | 124.068         | 123.060         | K 2  |
| D 25 | 1358.279        | 67.528          | 59.517          | 60.021          | 59.013          | D 1  |

# sp | P10853 | H2B1F\_MOUSE

PEPAKSAPAPKK <sup>Acetyl</sup>GS (42.01) <sup>Acetyl</sup>KKAVT (42.01) <sup>Acetyl</sup>KAQKKD 42.01

- ▶ fragmentation table for charge state 3+
- ▶ specType=etd
- ▶ score=68.75
- ▶ F161015.dat
- ▶ query=q25209\_p1
- ▶ precursor=544.314690
- ▶ chargePrecursor=5
- ▶ itol=0.6

| AA    | c              | y              | z+1            | z+2            | z              | AA    |
|-------|----------------|----------------|----------------|----------------|----------------|-------|
| P[1]  | 39.034         | 906.183        | <b>900.844</b> | 0.672          | 900.508        | P[25] |
| E[2]  | 82.048         | <b>873.832</b> | <b>868.493</b> | 0.672          | 868.157        | E[24] |
| P[3]  | 114.399        | 830.818        | <b>825.479</b> | 0.672          | <b>825.143</b> | P[23] |
| A[4]  | 138.078        | 708.467        | <b>793.128</b> | 0.672          | <b>792.792</b> | A[22] |
| K[5]  | 180.776        | <b>774.788</b> | <b>769.449</b> | <b>769.785</b> | 769.113        | K[21] |
| S[6]  | 209.787        | <b>732.090</b> | <b>726.750</b> | <b>727.086</b> | <b>726.414</b> | S[20] |
| A[7]  | 233.886        | 633.079        | <b>697.740</b> | <b>698.076</b> | 697.508        | A[19] |
| P[8]  | 285.817        | 679.460        | 674.082        | 674.397        | <b>673.725</b> | P[18] |
| A[9]  | 289.496        | 547.040        | <b>641.710</b> | <b>642.046</b> | <b>641.374</b> | A[17] |
| P[10] | 321.847        | 623.370        | 618.031        | 618.367        | 617.695        | P[16] |
| K[11] | 364.545        | 591.019        | <b>585.680</b> | <b>586.016</b> | <b>585.344</b> | K[15] |
| K[12] | 421.247        | 548.321        | 542.981        | <b>543.317</b> | 542.646        | K[14] |
| G[13] | 440.254        | 491.619        | <b>486.280</b> | <b>486.616</b> | 485.944        | G[13] |
| S[14] | 483.268        | <b>472.612</b> | 467.272        | 467.608        | 466.937        | S[12] |
| K[15] | 525.967        | 429.508        | 424.258        | 424.594        | 423.922        | K[11] |
| K[16] | <b>568.665</b> | 386.900        | 381.560        | 381.896        | 381.224        | K[10] |
| A[17] | <b>592.344</b> | 344.201        | 338.967        | 339.199        | 338.526        | A[9]  |
| V[18] | <b>625.367</b> | 320.522        | 315.181        | 315.519        | 314.847        | V[8]  |
| T[19] | <b>673.053</b> | 287.499        | 282.160        | 282.496        | 281.824        | T[7]  |
| K[20] | <b>715.751</b> | 239.813        | 234.474        | 234.810        | 234.138        | K[6]  |
| A[21] | 739.430        | 197.115        | 191.775        | 192.111        | 191.439        | A[5]  |
| Q[22] | <b>782.116</b> | 173.430        | 168.090        | 168.432        | 167.760        | Q[4]  |
| K[23] | <b>824.815</b> | 130.750        | 125.410        | 125.746        | 125.074        | K[3]  |
| K[24] | 867.513        | 88.051         | 82.712         | 83.048         | 82.376         | K[2]  |
| D[25] | 905.855        | 45.353         | 40.013         | 40.349         | 39.678         | D[1]  |

# sp | P10853 | H2B1F\_MOUSE

PEPAKSAPAPKK <sup>Acetyl</sup>GS (42.01) <sup>Acetyl</sup>KKAVT (42.01) <sup>Acetyl</sup>KAQKKD (42.01)

- ▶ fragmentation table for charge state 4+
- ▶ specType=etd
- ▶ score=68.75
- ▶ F161015.dat
- ▶ query=q25209\_p1
- ▶ precursor=544.314690
- ▶ chargePrecursor=5
- ▶ itol=0.6

| AA    | c              | y              | z+1            | z+2     | z              | AA    |
|-------|----------------|----------------|----------------|---------|----------------|-------|
| P[1]  | 29.527         | <b>679.889</b> | <b>675.885</b> | 0.755   | <b>675.633</b> | P[25] |
| E[2]  | 61.788         | <b>655.626</b> | <b>651.621</b> | 0.755   | <b>651.370</b> | E[24] |
| P[3]  | 86.051         | 623.366        | 619.361        | 0.755   | 619.109        | P[23] |
| A[4]  | 103.810        | 999.102        | 995.098        | 0.755   | 994.845        | A[22] |
| K[5]  | 135.834        | 581.343        | 577.338        | 577.590 | 577.086        | K[21] |
| S[6]  | 157.592        | 549.319        | 545.315        | 545.567 | 545.063        | S[20] |
| A[7]  | 173.351        | 527.563        | 523.557        | 523.809 | 523.305        | A[19] |
| P[8]  | 199.614        | 509.802        | 505.797        | 506.049 | 505.545        | P[18] |
| A[9]  | 217.374        | 488.539        | 484.534        | 484.786 | 484.282        | A[17] |
| P[10] | 241.637        | 467.780        | 463.775        | 464.027 | 463.523        | P[16] |
| K[11] | 273.661        | 443.516        | 439.512        | 439.764 | 439.260        | K[15] |
| K[12] | 316.187        | 411.493        | 407.488        | 407.740 | 407.236        | K[14] |
| G[13] | 330.442        | 368.968        | 364.962        | 365.214 | 364.710        | G[13] |
| S[14] | 362.703        | 354.711        | 350.706        | 350.958 | 350.454        | S[12] |
| K[15] | 394.727        | 322.450        | 318.446        | 318.697 | 318.194        | K[11] |
| K[16] | 426.751        | 290.426        | 286.422        | 286.674 | 286.170        | K[10] |
| A[17] | 444.510        | 258.403        | 254.398        | 254.650 | 254.146        | A[9]  |
| V[18] | 469.277        | 240.641        | 236.636        | 236.888 | 236.383        | V[8]  |
| T[19] | 505.041        | 215.878        | 211.872        | 212.124 | 211.620        | T[7]  |
| K[20] | 537.065        | 180.112        | 176.107        | 176.359 | 175.855        | K[6]  |
| A[21] | 554.824        | 148.088        | 144.083        | 144.335 | 143.831        | A[5]  |
| Q[22] | 586.839        | 130.329        | 126.324        | 126.576 | 126.072        | Q[4]  |
| K[23] | 618.863        | 98.314         | 94.309         | 94.561  | 94.057         | K[3]  |
| K[24] | <b>650.887</b> | 66.250         | 62.246         | 62.538  | 62.034         | K[2]  |
| D[25] | 679.643        | 34.267         | 30.262         | 30.514  | 30.010         | D[1]  |





# sp | P10853 | H2B1F\_MOUSE

PEPAKSAPAPKK <sup>Acetyl</sup>GS (42.01) <sup>Acetyl</sup>KKAVT (42.01) <sup>Acetyl</sup>KAQKKD 42.01

- ▶ fragmentation table for charge state 1+
- ▶ specType=etd
- ▶ score=68.75
- ▶ F161015.dat
- ▶ query=q25209.p1
- ▶ precursor=544.314690
- ▶ chargePrecursor=5
- ▶ itol=0.6

| AA   | c               | y        | z+1             | z+2             | z              | AA   |
|------|-----------------|----------|-----------------|-----------------|----------------|------|
| P 1  | 115.987         | 2716.536 | 2700.517        | 0.000           | 2699.509       | P 25 |
| E 2  | 244.229         | 2319.483 | 2303.464        | 0.000           | 2302.456       | E 24 |
| P 3  | <b>341.182</b>  | 2390.440 | 2474.422        | 0.000           | 2473.414       | P 23 |
| A 4  | <b>412.219</b>  | 2391.387 | 2377.369        | 0.000           | 2376.361       | A 22 |
| K 5  | <b>540.314</b>  | 2322.350 | 2306.332        | 2307.339        | 2305.334       | K 21 |
| S 6  | <b>627.346</b>  | 2194.295 | 2178.277        | 2179.284        | 2177.279       | S 20 |
| A 7  | <b>698.383</b>  | 2107.223 | 2091.205        | 2092.212        | 2090.197       | A 19 |
| P 8  | <b>795.436</b>  | 2036.366 | 2020.348        | 2021.355        | 2019.348       | P 18 |
| A 9  | 896.473         | 1939.133 | 1923.115        | 1924.123        | 1922.107       | A 17 |
| P 10 | <b>963.526</b>  | 1898.096 | 1882.078        | 1883.085        | 1881.070       | P 16 |
| K 11 | <b>1091.621</b> | 1771.044 | 1756.026        | 1756.033        | 1754.017       | K 15 |
| K 12 | <b>1261.726</b> | 1642.989 | 1626.970        | <b>1627.938</b> | 1625.922       | K 14 |
| G 13 | <b>1318.748</b> | 1472.843 | 1456.824        | 1457.832        | 1455.817       | G 13 |
| S 14 | 1447.790        | 1415.822 | 1399.803        | 1400.811        | 1398.795       | S 12 |
| K 15 | 1574.888        | 1368.779 | 1352.761        | 1353.768        | 1351.753       | K 11 |
| K 16 | 1703.980        | 1158.684 | <b>1142.665</b> | <b>1143.673</b> | 1141.658       | K 10 |
| A 17 | 1775.017        | 1030.589 | <b>1014.570</b> | 1015.578        | 1013.563       | A 9  |
| V 18 | 1874.086        | 959.552  | 943.533         | 944.541         | 942.525        | V 8  |
| T 19 | 2017.144        | 860.484  | 844.465         | 845.473         | 843.457        | T 7  |
| K 20 | 2145.239        | 737.425  | 721.407         | 722.414         | <b>720.399</b> | K 6  |
| A 21 | 2216.278        | 589.330  | <b>573.312</b>  | 574.320         | <b>572.304</b> | A 5  |
| Q 22 | 2344.335        | 518.293  | <b>502.275</b>  | 503.282         | 501.267        | Q 4  |
| K 23 | 2472.430        | 390.235  | <b>374.216</b>  | <b>375.224</b>  | 373.208        | K 3  |
| K 24 | 2600.525        | 262.140  | <b>246.121</b>  | 247.129         | 245.113        | K 2  |
| D 25 | 2715.552        | 134.045  | 118.026         | 119.034         | 117.018        | D 1  |

# sp | P10853 | H2B1F\_MOUSE

PEPAKSAPAPKK Acetyl 42.01 GS (Acetyl 42.01) KKAVT Acetyl 42.01 KAQKKD

- ▶ fragmentation table for charge state 2+
- ▶ specType=etd
- ▶ score=68.75
- ▶ F161015.dat
- ▶ query=q25209\_p1
- ▶ precursor=544.314690
- ▶ chargePrecursor=5
- ▶ itol=0.6

| AA | c  | y               | z+1             | z+2             | z               | AA              |       |
|----|----|-----------------|-----------------|-----------------|-----------------|-----------------|-------|
| F  | 1  | 58.047          | 1158.771        | 1350.792        | 0.504           | 1350.250        | P[25] |
| E  | 2  | 127.569         | 1310.245        | <b>1302.236</b> | 0.504           | 1301.712        | E[24] |
| F  | 3  | 191.096         | 1248.728        | <b>1237.714</b> | 0.504           | <b>1237.210</b> | F[23] |
| A  | 4  | 256.613         | 1197.197        | <b>1189.188</b> | 0.504           | 1188.664        | A[22] |
| K  | 5  | 270.681         | <b>1161.679</b> | 1153.669        | 1154.173        | 1153.166        | K[21] |
| S  | 6  | 314.177         | 1097.631        | <b>1089.622</b> | <b>1090.126</b> | <b>1089.118</b> | S[20] |
| A  | 7  | 349.695         | 1054.115        | 1046.106        | <b>1046.610</b> | 1045.602        | A[19] |
| F  | 8  | 388.222         | 1018.597        | 1010.137        | 1011.641        | 1010.634        | F[18] |
| A  | 9  | 431.740         | 970.070         | <b>962.061</b>  | <b>962.565</b>  | 961.557         | A[17] |
| F  | 10 | 482.267         | 924.552         | 926.542         | 927.046         | 926.039         | F[16] |
| K  | 11 | <b>546.314</b>  | 886.025         | 876.016         | <b>878.520</b>  | 877.512         | K[15] |
| K  | 12 | <b>631.367</b>  | 821.078         | <b>813.969</b>  | <b>814.473</b>  | 813.465         | K[14] |
| G  | 13 | <b>659.878</b>  | 736.025         | <b>728.916</b>  | <b>729.420</b>  | <b>728.412</b>  | G[13] |
| S  | 14 | 724.399         | 708.414         | <b>700.405</b>  | <b>700.909</b>  | <b>699.901</b>  | S[12] |
| K  | 15 | <b>788.446</b>  | 643.893         | 633.884         | 636.388         | 635.380         | K[11] |
| K  | 16 | <b>852.494</b>  | 579.846         | <b>571.836</b>  | <b>572.340</b>  | <b>571.332</b>  | K[10] |
| A  | 17 | 868.012         | 515.798         | <b>507.789</b>  | <b>508.293</b>  | 507.285         | A[9]  |
| V  | 18 | <b>937.547</b>  | 480.280         | <b>472.270</b>  | <b>472.774</b>  | 471.766         | V[8]  |
| T  | 19 | <b>1069.676</b> | 430.745         | 422.736         | 423.240         | 422.232         | T[7]  |
| K  | 20 | <b>1073.123</b> | 359.215         | 351.207         | 351.711         | 350.703         | K[6]  |
| A  | 21 | <b>1108.642</b> | 295.169         | 287.159         | 287.663         | 286.656         | A[5]  |
| Q  | 22 | <b>1172.671</b> | 239.650         | 231.641         | 232.145         | 231.137         | Q[4]  |
| K  | 23 | 1236.718        | 195.621         | 187.612         | 188.116         | 187.108         | K[3]  |
| K  | 24 | 1300.766        | 131.574         | 123.564         | 124.068         | 123.060         | K[2]  |
| D  | 25 | 1358.279        | 67.528          | 59.517          | 60.021          | 59.013          | D[1]  |

# sp | P10853 | H2B1F\_MOUSE

PEPAKSAPAPKK <sup>Acetyl</sup>GS (42.01) <sup>Acetyl</sup>KKAVT (42.01) <sup>Acetyl</sup>KAQKKD 42.01

- ▶ fragmentation table for charge state 3+
- ▶ specType=etd
- ▶ score=68.75
- ▶ F161015.dat
- ▶ query=q25209\_p1
- ▶ precursor=544.314690
- ▶ chargePrecursor=5
- ▶ itol=0.6

| AA    | c              | y              | z+1            | z+2            | z              | AA    |
|-------|----------------|----------------|----------------|----------------|----------------|-------|
| P[1]  | 39.034         | 906.183        | <b>900.844</b> | 0.672          | 900.508        | P[25] |
| E[2]  | 82.048         | <b>873.832</b> | <b>868.493</b> | 0.672          | 868.157        | E[24] |
| P[3]  | 114.399        | 830.818        | <b>825.479</b> | 0.672          | <b>825.143</b> | P[23] |
| A[4]  | 138.078        | 708.467        | <b>793.128</b> | 0.672          | <b>792.792</b> | A[22] |
| K[5]  | 180.776        | <b>774.788</b> | <b>769.449</b> | <b>769.785</b> | 769.113        | K[21] |
| S[6]  | 209.787        | <b>732.090</b> | <b>726.750</b> | <b>727.086</b> | <b>726.414</b> | S[20] |
| A[7]  | 233.886        | 633.079        | <b>697.740</b> | <b>698.076</b> | 697.398        | A[19] |
| P[8]  | 285.817        | 679.460        | 674.067        | 674.397        | <b>673.725</b> | P[18] |
| A[9]  | 289.496        | 547.040        | <b>641.710</b> | <b>642.046</b> | <b>641.374</b> | A[17] |
| P[10] | 321.847        | 623.370        | 618.031        | 618.367        | 617.695        | P[16] |
| K[11] | 364.545        | 591.019        | <b>585.680</b> | <b>586.016</b> | <b>585.344</b> | K[15] |
| K[12] | 421.247        | 548.321        | 542.981        | <b>543.317</b> | 542.646        | K[14] |
| G[13] | 440.254        | 491.619        | <b>486.280</b> | <b>486.616</b> | 485.944        | G[13] |
| S[14] | 483.268        | <b>472.612</b> | 467.272        | 467.608        | 466.937        | S[12] |
| K[15] | 525.967        | 429.598        | 424.258        | 424.594        | 423.922        | K[11] |
| K[16] | <b>568.665</b> | 386.900        | 381.560        | 381.896        | 381.224        | K[10] |
| A[17] | <b>592.344</b> | 344.201        | 338.867        | 339.199        | 338.526        | A[9]  |
| V[18] | <b>626.367</b> | 320.522        | 315.181        | 315.519        | 314.847        | V[8]  |
| T[19] | <b>673.053</b> | 287.499        | 282.160        | 282.496        | 281.824        | T[7]  |
| K[20] | <b>715.751</b> | 239.813        | 234.474        | 234.810        | 234.138        | K[6]  |
| A[21] | 739.430        | 197.115        | 191.775        | 192.111        | 191.439        | A[5]  |
| Q[22] | <b>782.116</b> | 173.430        | 168.090        | 168.432        | 167.760        | Q[4]  |
| K[23] | <b>824.815</b> | 130.750        | 125.410        | 125.746        | 125.074        | K[3]  |
| K[24] | 867.513        | 88.051         | 82.712         | 83.048         | 82.376         | K[2]  |
| D[25] | 905.855        | 45.353         | 40.013         | 40.349         | 39.678         | D[1]  |

# sp | P10853 | H2B1F\_MOUSE

PEPAKSAPAPKK <sup>Acetyl</sup>GS (42.01) <sup>Acetyl</sup>KKAVT (42.01) <sup>Acetyl</sup>KAQKKD (42.01)

- ▶ fragmentation table for charge state 4+
- ▶ specType=etd
- ▶ score=68.75
- ▶ F161015.dat
- ▶ query=q25209\_p1
- ▶ precursor=544.314690
- ▶ chargePrecursor=5
- ▶ itol=0.6

| AA    | c              | y              | z+1            | z+2     | z              | AA    |
|-------|----------------|----------------|----------------|---------|----------------|-------|
| P[1]  | 29.527         | <b>679.889</b> | <b>675.885</b> | 0.755   | <b>675.633</b> | P[25] |
| E[2]  | 61.788         | <b>655.626</b> | <b>651.621</b> | 0.755   | <b>651.370</b> | E[24] |
| F[3]  | 86.051         | 623.366        | 619.361        | 0.755   | 619.109        | F[23] |
| A[4]  | 103.810        | 999.102        | 995.098        | 0.755   | 994.845        | A[22] |
| K[5]  | 135.834        | 581.343        | 577.338        | 577.590 | 577.086        | K[21] |
| S[6]  | 157.592        | 549.319        | 545.315        | 545.567 | 545.063        | S[20] |
| A[7]  | 173.351        | 527.563        | 523.557        | 523.809 | 523.305        | A[19] |
| F[8]  | 199.614        | 509.802        | 505.797        | 506.049 | 505.545        | F[18] |
| A[9]  | 217.374        | 488.539        | 484.534        | 484.786 | 484.282        | A[17] |
| P[10] | 241.637        | 467.780        | 463.775        | 464.027 | 463.523        | P[16] |
| K[11] | 273.661        | 443.516        | 439.512        | 439.764 | 439.260        | K[15] |
| K[12] | 316.187        | 411.493        | 407.488        | 407.740 | 407.236        | K[14] |
| G[13] | 330.442        | 368.968        | 364.962        | 365.214 | 364.710        | G[13] |
| S[14] | 362.703        | 354.711        | 350.706        | 350.958 | 350.454        | S[12] |
| K[15] | 394.727        | 322.450        | 318.446        | 318.697 | 318.194        | K[11] |
| K[16] | 426.751        | 290.426        | 286.422        | 286.674 | 286.170        | K[10] |
| A[17] | 444.510        | 258.403        | 254.398        | 254.650 | 254.146        | A[9]  |
| V[18] | 469.277        | 240.641        | 236.636        | 236.887 | 236.383        | V[8]  |
| T[19] | 505.041        | 215.878        | 211.872        | 212.124 | 211.620        | T[7]  |
| K[20] | 537.065        | 180.112        | 176.107        | 176.359 | 175.855        | K[6]  |
| A[21] | 554.824        | 148.088        | 144.083        | 144.335 | 143.831        | A[5]  |
| Q[22] | 586.839        | 130.329        | 126.324        | 126.576 | 126.072        | Q[4]  |
| K[23] | 618.863        | 98.314         | 94.309         | 94.561  | 94.057         | K[3]  |
| K[24] | <b>650.887</b> | 66.290         | 62.286         | 62.538  | 62.034         | K[2]  |
| D[25] | 679.643        | 34.267         | 30.262         | 30.514  | 30.010         | D[1]  |

# sp | P10853 | H2B1F\_MOUSE

PEPAKSAPAPKK Acetyl GS (Acetyl) KKAQT Acetyl KAQKKD  
 42.01 (42.01) 42.01

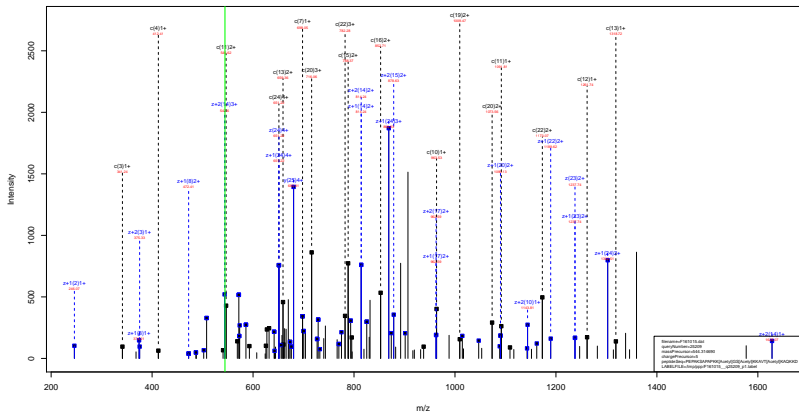

# sp | P10853 | H2B1F\_MOUSE

PEPAKSAPAPKK <sup>Acetyl</sup>GS (42.01) <sup>Acetyl</sup>KKAVT (42.01) <sup>Acetyl</sup>KAQKKD 42.01

- ▶ fragmentation table for charge state 1+
- ▶ specType=etd
- ▶ score=68.75
- ▶ F161015.dat
- ▶ query=q25209.p1
- ▶ precursor=544.314690
- ▶ chargePrecursor=5
- ▶ itol=0.6

| AA |    | c               | y        | z+1             | z+2             | z              | AA |
|----|----|-----------------|----------|-----------------|-----------------|----------------|----|
| P  | 1  | 115.987         | 2716.536 | 2700.517        | 0.000           | 2699.509       | P  |
| E  | 2  | 244.229         | 3319.483 | 3303.464        | 0.000           | 3292.456       | E  |
| P  | 3  | <b>341.182</b>  | 3390.440 | 3474.422        | 0.000           | 3473.414       | P  |
| A  | 4  | <b>412.219</b>  | 2391.387 | 2377.369        | 0.000           | 2376.361       | A  |
| K  | 5  | <b>540.314</b>  | 2322.350 | 2306.332        | 2307.339        | 2305.334       | K  |
| S  | 6  | <b>627.346</b>  | 2194.295 | 2178.277        | 2179.284        | 2177.279       | S  |
| A  | 7  | <b>698.383</b>  | 2107.223 | 2091.205        | 2092.212        | 2090.197       | A  |
| P  | 8  | <b>795.436</b>  | 2036.386 | 2020.368        | 2021.375        | 2019.368       | P  |
| A  | 9  | 896.473         | 1939.133 | 1923.115        | 1924.123        | 1922.107       | A  |
| P  | 10 | <b>963.526</b>  | 1898.096 | 1882.078        | 1883.085        | 1881.070       | P  |
| K  | 11 | <b>1091.621</b> | 1771.044 | 1756.026        | 1756.033        | 1754.017       | K  |
| K  | 12 | <b>1261.726</b> | 1642.949 | 1626.930        | <b>1627.938</b> | 1625.922       | K  |
| G  | 13 | <b>1318.748</b> | 1472.843 | 1456.824        | 1457.832        | 1455.817       | G  |
| S  | 14 | 1447.790        | 1415.822 | 1399.803        | 1400.811        | 1398.795       | S  |
| K  | 15 | 1574.888        | 1368.779 | 1352.760        | 1353.768        | 1351.753       | K  |
| K  | 16 | 1703.980        | 1158.684 | <b>1142.665</b> | <b>1143.673</b> | 1141.658       | K  |
| A  | 17 | 1775.017        | 1030.589 | <b>1014.570</b> | 1015.578        | 1013.563       | A  |
| V  | 18 | 1874.086        | 959.552  | 943.533         | 944.541         | 942.525        | V  |
| T  | 19 | 2017.144        | 860.484  | 844.465         | 845.473         | 843.457        | T  |
| K  | 20 | 2145.239        | 737.425  | 721.407         | 722.414         | <b>720.399</b> | K  |
| A  | 21 | 2216.278        | 589.330  | <b>573.312</b>  | 574.320         | <b>572.304</b> | A  |
| Q  | 22 | 2344.335        | 518.293  | <b>502.275</b>  | 503.282         | 501.267        | Q  |
| K  | 23 | 2472.430        | 390.235  | <b>374.216</b>  | <b>375.224</b>  | 373.208        | K  |
| K  | 24 | 2600.525        | 262.140  | <b>246.121</b>  | 247.129         | 245.113        | K  |
| D  | 25 | 2715.552        | 134.045  | 118.026         | 119.034         | 117.018        | D  |

# sp | P10853 | H2B1F\_MOUSE

PEPAKSAPAPKK <sup>Acetyl</sup>GS (42.01) <sup>Acetyl</sup>KKAVT (42.01) <sup>Acetyl</sup>KAQKKD 42.01

- ▶ fragmentation table for charge state 2+
- ▶ specType=etd
- ▶ score=68.75
- ▶ F161015.dat
- ▶ query=q25209\_p1
- ▶ precursor=544.314690
- ▶ chargePrecursor=5
- ▶ itol=0.6

| AA | c  | y               | z+1             | z+2             | z               | AA              |       |
|----|----|-----------------|-----------------|-----------------|-----------------|-----------------|-------|
| F  | 1  | 58.047          | 1158.771        | 1150.762        | 0.504           | 1150.258        | P[28] |
| E  | 2  | 127.568         | 1110.245        | <b>1302.216</b> | 0.504           | 1101.712        | E[24] |
| F  | 3  | 191.096         | 1048.728        | <b>1237.714</b> | 0.504           | <b>1237.210</b> | P[28] |
| A  | 4  | 256.613         | 1197.197        | <b>1189.188</b> | 0.504           | 1188.684        | K[22] |
| K  | 5  | 270.681         | <b>1161.679</b> | 1153.669        | 1154.173        | 1153.166        | K[21] |
| S  | 6  | 314.177         | 1097.031        | <b>1089.622</b> | <b>1090.126</b> | <b>1089.118</b> | S[20] |
| A  | 7  | 349.695         | 1054.115        | 1046.108        | <b>1046.610</b> | 1045.602        | A[19] |
| F  | 8  | 388.222         | 1018.597        | 1010.187        | 1011.191        | 1010.683        | F[18] |
| A  | 9  | 431.740         | 970.070         | <b>962.061</b>  | <b>962.565</b>  | 961.555         | A[17] |
| F  | 10 | 482.267         | 934.552         | 926.542         | 927.046         | 926.039         | F[16] |
| K  | 11 | <b>546.314</b>  | 886.025         | 878.016         | <b>878.520</b>  | 877.512         | K[15] |
| K  | 12 | <b>631.367</b>  | 821.078         | <b>813.969</b>  | <b>814.473</b>  | 813.465         | K[14] |
| G  | 13 | <b>659.878</b>  | 736.025         | <b>728.916</b>  | <b>729.420</b>  | <b>728.412</b>  | G[13] |
| S  | 14 | 714.399         | 708.414         | <b>700.405</b>  | <b>700.909</b>  | <b>699.901</b>  | S[12] |
| K  | 15 | <b>788.446</b>  | 643.993         | 635.984         | 636.988         | 635.980         | K[11] |
| K  | 16 | <b>852.494</b>  | 579.846         | <b>571.836</b>  | <b>572.340</b>  | <b>571.332</b>  | K[10] |
| A  | 17 | 868.012         | 515.768         | <b>507.760</b>  | <b>508.263</b>  | 507.255         | A[9]  |
| V  | 18 | <b>937.547</b>  | 480.280         | <b>472.270</b>  | <b>472.774</b>  | 471.766         | V[8]  |
| T  | 19 | <b>1069.076</b> | 430.745         | 422.736         | 423.240         | 422.232         | T[7]  |
| K  | 20 | <b>1073.123</b> | 359.215         | 351.207         | 351.711         | 350.703         | K[6]  |
| A  | 21 | <b>1108.642</b> | 295.168         | 287.159         | 287.663         | 286.656         | A[5]  |
| Q  | 22 | <b>1172.671</b> | 239.650         | 231.641         | 232.145         | 231.137         | Q[4]  |
| K  | 23 | 1236.718        | 195.621         | 187.612         | 188.116         | 187.108         | K[3]  |
| K  | 24 | 1300.766        | 131.574         | 123.564         | 124.068         | 123.060         | K[2]  |
| D  | 25 | 1358.279        | 67.528          | 59.517          | 60.021          | 59.013          | D[1]  |



# sp | P10853 | H2B1F\_MOUSE

PEPAKSAPAPKK <sup>Acetyl</sup>GS (42.01) <sup>Acetyl</sup>KKAVT (42.01) <sup>Acetyl</sup>KAQKKD 42.01

- ▶ fragmentation table for charge state 3+
- ▶ specType=etd
- ▶ score=68.75
- ▶ F161015.dat
- ▶ query=q25209\_p1
- ▶ precursor=544.314690
- ▶ chargePrecursor=5
- ▶ itol=0.6

| AA    | c              | y              | z+1            | z+2            | z              | AA    |
|-------|----------------|----------------|----------------|----------------|----------------|-------|
| P[1]  | 39.034         | 906.183        | <b>900.844</b> | 0.672          | 900.508        | P[25] |
| E[2]  | 82.048         | <b>873.832</b> | <b>868.493</b> | 0.672          | 868.157        | E[24] |
| P[3]  | 114.399        | 830.818        | <b>825.479</b> | 0.672          | <b>825.143</b> | P[23] |
| A[4]  | 138.078        | 708.467        | <b>793.128</b> | 0.672          | <b>792.792</b> | A[22] |
| K[5]  | 180.776        | <b>774.788</b> | <b>769.449</b> | <b>769.785</b> | 769.113        | K[21] |
| S[6]  | 209.787        | <b>732.090</b> | <b>726.750</b> | <b>727.086</b> | <b>726.414</b> | S[20] |
| A[7]  | 233.886        | 633.079        | <b>697.740</b> | <b>698.076</b> | 697.508        | A[19] |
| P[8]  | 285.817        | 679.460        | 674.082        | 674.397        | <b>673.725</b> | P[18] |
| A[9]  | 289.496        | 547.040        | <b>641.710</b> | <b>642.046</b> | <b>641.374</b> | A[17] |
| P[10] | 321.847        | 623.370        | 618.031        | 618.367        | 617.695        | P[16] |
| K[11] | 364.545        | 591.019        | <b>585.680</b> | <b>586.016</b> | <b>585.344</b> | K[15] |
| K[12] | 421.247        | 548.321        | 542.981        | <b>543.317</b> | 542.646        | K[14] |
| G[13] | 440.254        | 491.619        | <b>486.280</b> | <b>486.616</b> | 485.944        | G[13] |
| S[14] | 483.268        | <b>472.612</b> | 467.272        | 467.608        | 466.937        | S[12] |
| K[15] | 525.967        | 429.508        | 424.258        | 424.594        | 423.922        | K[11] |
| K[16] | <b>568.665</b> | 386.900        | 381.560        | 381.896        | 381.224        | K[10] |
| A[17] | <b>592.344</b> | 344.201        | 338.967        | 339.199        | 338.526        | A[9]  |
| V[18] | <b>626.367</b> | 320.522        | 315.181        | 315.519        | 314.847        | V[8]  |
| T[19] | <b>673.053</b> | 287.499        | 282.160        | 282.496        | 281.824        | T[7]  |
| K[20] | <b>715.751</b> | 239.813        | 234.474        | 234.810        | 234.138        | K[6]  |
| A[21] | 739.430        | 197.115        | 191.775        | 192.111        | 191.439        | A[5]  |
| Q[22] | <b>782.116</b> | 173.430        | 168.090        | 168.432        | 167.760        | Q[4]  |
| K[23] | <b>824.815</b> | 130.750        | 125.410        | 125.746        | 125.074        | K[3]  |
| K[24] | 867.513        | 88.051         | 82.712         | 83.048         | 82.376         | K[2]  |
| D[25] | 905.895        | 45.353         | 40.013         | 40.349         | 39.678         | D[1]  |

# sp | P10853 | H2B1F\_MOUSE

PEPAKSAPAPKK <sup>Acetyl</sup>GS (42.01) <sup>Acetyl</sup>KKAVT (42.01) <sup>Acetyl</sup>KAQKKD (42.01)

- ▶ fragmentation table for charge state 4+
- ▶ specType=etd
- ▶ score=68.75
- ▶ F161015.dat
- ▶ query=q25209\_p1
- ▶ precursor=544.314690
- ▶ chargePrecursor=5
- ▶ itol=0.6

| AA    | c              | y              | z+1            | z+2     | z              | AA    |
|-------|----------------|----------------|----------------|---------|----------------|-------|
| P[1]  | 29.527         | <b>679.889</b> | <b>675.885</b> | 0.755   | <b>675.633</b> | P[25] |
| E[2]  | 61.788         | <b>655.626</b> | <b>651.621</b> | 0.755   | <b>651.370</b> | E[24] |
| P[3]  | 86.051         | 623.366        | 619.361        | 0.755   | 619.109        | P[23] |
| A[4]  | 103.810        | 999.102        | 995.098        | 0.755   | 994.845        | A[22] |
| K[5]  | 135.834        | 581.343        | 577.338        | 577.590 | 577.086        | K[21] |
| S[6]  | 157.592        | 549.319        | 545.315        | 545.567 | 545.063        | S[20] |
| A[7]  | 173.351        | 527.563        | 523.557        | 523.809 | 523.305        | A[19] |
| P[8]  | 199.614        | 509.802        | 505.797        | 506.049 | 505.545        | P[18] |
| A[9]  | 217.374        | 488.539        | 484.534        | 484.786 | 484.282        | A[17] |
| P[10] | 241.637        | 467.780        | 463.775        | 464.027 | 463.523        | P[16] |
| K[11] | 273.661        | 443.516        | 439.512        | 439.764 | 439.260        | K[15] |
| K[12] | 316.187        | 411.493        | 407.488        | 407.740 | 407.236        | K[14] |
| G[13] | 330.442        | 368.968        | 364.962        | 365.214 | 364.710        | G[13] |
| S[14] | 362.703        | 354.711        | 350.706        | 350.958 | 350.454        | S[12] |
| K[15] | 394.727        | 322.450        | 318.446        | 318.697 | 318.194        | K[11] |
| K[16] | 426.751        | 290.426        | 286.422        | 286.674 | 286.170        | K[10] |
| A[17] | 444.510        | 258.403        | 254.398        | 254.650 | 254.146        | A[9]  |
| V[18] | 469.277        | 240.641        | 236.636        | 236.891 | 236.387        | V[8]  |
| T[19] | 505.041        | 215.876        | 211.872        | 212.124 | 211.620        | T[7]  |
| K[20] | 537.065        | 180.112        | 176.107        | 176.359 | 175.855        | K[6]  |
| A[21] | 554.824        | 148.088        | 144.083        | 144.335 | 143.831        | A[5]  |
| Q[22] | 586.839        | 130.329        | 126.324        | 126.576 | 126.072        | Q[4]  |
| K[23] | 618.863        | 98.314         | 94.309         | 94.561  | 94.057         | K[3]  |
| K[24] | <b>650.887</b> | 66.290         | 62.286         | 62.538  | 62.034         | K[2]  |
| D[25] | 679.643        | 34.267         | 30.262         | 30.514  | 30.010         | D[1]  |

# sp | P10853 | H2B1F\_MOUSE

PEPAKSAPAPKK Acetyl GS (Acetyl) KKAVT Acetyl KAQKKD  
 42.01 (42.01) 42.01

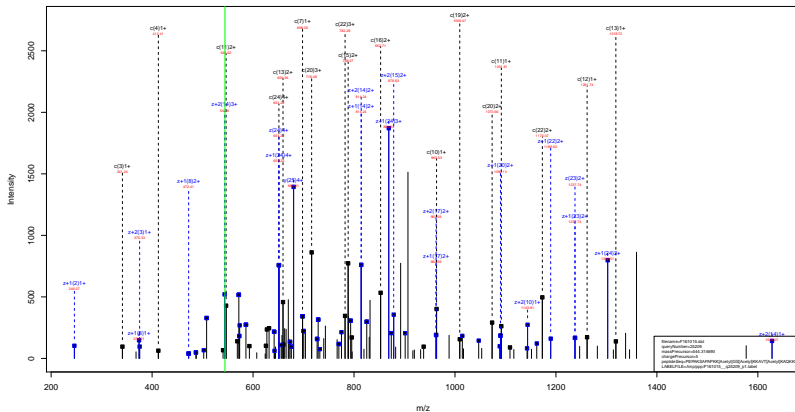

# sp | P10853 | H2B1F\_MOUSE

PEPAKSAPAPKK <sup>Acetyl</sup>GS (42.01) <sup>Acetyl</sup>KKAVT (42.01) <sup>Acetyl</sup>KAQKKD 42.01

- ▶ fragmentation table for charge state 1+
- ▶ specType=etd
- ▶ score=68.75
- ▶ F161015.dat
- ▶ query=q25209.p1
- ▶ precursor=544.314690
- ▶ chargePrecursor=5
- ▶ itol=0.6

| AA |    | c               | y        | z+1             | z+2             | z              | AA |
|----|----|-----------------|----------|-----------------|-----------------|----------------|----|
| P  | 1  | 115.987         | 2716.536 | 2700.517        | 0.000           | 2699.509       | P  |
| E  | 2  | 244.229         | 2319.483 | 2303.464        | 0.000           | 2302.456       | E  |
| P  | 3  | <b>341.182</b>  | 2390.440 | 2474.422        | 0.000           | 2473.414       | P  |
| A  | 4  | <b>412.219</b>  | 2391.387 | 2377.369        | 0.000           | 2376.361       | A  |
| K  | 5  | <b>540.314</b>  | 2322.350 | 2306.332        | 2307.339        | 2305.324       | K  |
| S  | 6  | <b>627.346</b>  | 2194.255 | 2178.237        | 2179.244        | 2177.229       | S  |
| A  | 7  | <b>698.383</b>  | 2107.223 | 2091.205        | 2092.212        | 2090.197       | A  |
| P  | 8  | <b>795.436</b>  | 2036.386 | 2020.368        | 2021.375        | 2019.368       | P  |
| A  | 9  | 896.473         | 1939.133 | 1923.115        | 1924.123        | 1922.107       | A  |
| P  | 10 | <b>963.526</b>  | 1998.096 | 1882.078        | 1853.085        | 1851.070       | P  |
| K  | 11 | <b>1091.621</b> | 1771.044 | 1756.026        | 1756.033        | 1754.017       | K  |
| K  | 12 | <b>1261.726</b> | 1642.949 | 1626.930        | <b>1627.938</b> | 1625.922       | K  |
| G  | 13 | <b>1318.748</b> | 1472.843 | 1456.824        | 1457.832        | 1455.817       | G  |
| S  | 14 | 1447.790        | 1415.822 | 1399.803        | 1400.811        | 1398.795       | S  |
| K  | 15 | 1574.888        | 1386.779 | 1370.761        | 1371.768        | 1369.753       | K  |
| K  | 16 | 1703.980        | 1158.684 | <b>1142.665</b> | <b>1143.673</b> | 1141.658       | K  |
| A  | 17 | 1775.017        | 1030.589 | <b>1014.570</b> | 1015.578        | 1013.563       | A  |
| V  | 18 | 1874.086        | 959.552  | 943.533         | 944.541         | 942.525        | V  |
| T  | 19 | 2017.144        | 860.484  | 844.465         | 845.473         | 843.457        | T  |
| K  | 20 | 2145.239        | 737.425  | 721.407         | 722.414         | <b>720.399</b> | K  |
| A  | 21 | 2216.278        | 589.330  | <b>573.312</b>  | 574.320         | <b>572.304</b> | A  |
| Q  | 22 | 2344.325        | 518.293  | <b>502.275</b>  | 503.282         | 501.267        | Q  |
| K  | 23 | 2472.430        | 390.235  | <b>374.216</b>  | <b>375.224</b>  | 373.208        | K  |
| K  | 24 | 2600.525        | 262.140  | <b>246.121</b>  | 247.129         | 245.113        | K  |
| D  | 25 | 2715.552        | 134.045  | 118.026         | 119.034         | 117.018        | D  |

# sp | P10853 | H2B1F\_MOUSE

PEPAKSAPAPKK <sup>Acetyl</sup>GS (42.01) <sup>Acetyl</sup>KKAVT (42.01) <sup>Acetyl</sup>KAQKKD 42.01

- ▶ fragmentation table for charge state 2+
- ▶ specType=etd
- ▶ score=68.75
- ▶ F161015.dat
- ▶ query=q25209\_p1
- ▶ precursor=544.314690
- ▶ chargePrecursor=5
- ▶ itol=0.6

| AA | c  | y               | z+1             | z+2             | z               | AA              |       |
|----|----|-----------------|-----------------|-----------------|-----------------|-----------------|-------|
| F  | 1  | 58.047          | 1158.771        | 1350.792        | 0.504           | 1350.250        | P[25] |
| E  | 2  | 127.569         | 1310.245        | <b>1302.236</b> | 0.504           | 1301.712        | E[24] |
| F  | 3  | 191.096         | 1248.728        | <b>1237.714</b> | 0.504           | <b>1237.210</b> | F[23] |
| A  | 4  | 256.613         | 1197.197        | <b>1189.188</b> | 0.504           | 1188.654        | A[22] |
| K  | 5  | 270.681         | <b>1161.679</b> | 1153.669        | 1154.173        | 1153.166        | K[21] |
| S  | 6  | 314.177         | 1097.631        | <b>1089.622</b> | <b>1090.126</b> | <b>1089.118</b> | S[20] |
| A  | 7  | 349.695         | 1054.115        | 1046.106        | <b>1046.610</b> | 1045.602        | A[19] |
| F  | 8  | 388.222         | 1018.597        | 1010.137        | 1011.641        | 1010.634        | F[18] |
| A  | 9  | 431.740         | 970.070         | <b>962.061</b>  | <b>962.565</b>  | 961.557         | A[17] |
| F  | 10 | 482.267         | 924.552         | 926.542         | 927.046         | 926.039         | F[16] |
| K  | 11 | <b>546.314</b>  | 886.025         | 878.016         | <b>878.520</b>  | 877.512         | K[15] |
| K  | 12 | <b>631.367</b>  | 821.978         | <b>813.969</b>  | <b>814.473</b>  | 813.465         | K[14] |
| G  | 13 | <b>659.878</b>  | 736.925         | <b>728.916</b>  | <b>729.420</b>  | <b>728.412</b>  | G[13] |
| S  | 14 | 724.399         | 708.414         | <b>700.405</b>  | <b>700.909</b>  | <b>699.901</b>  | S[12] |
| K  | 15 | <b>788.446</b>  | 643.893         | 635.884         | 636.388         | 635.380         | K[11] |
| K  | 16 | <b>852.494</b>  | 579.846         | <b>571.836</b>  | <b>572.340</b>  | <b>571.332</b>  | K[10] |
| A  | 17 | 868.012         | 515.798         | <b>507.789</b>  | <b>508.293</b>  | 507.285         | A[9]  |
| V  | 18 | <b>937.547</b>  | 480.280         | <b>472.270</b>  | <b>472.774</b>  | 471.766         | V[8]  |
| T  | 19 | <b>1069.676</b> | 430.745         | 422.736         | 423.240         | 422.232         | T[7]  |
| K  | 20 | <b>1073.123</b> | 359.215         | 351.207         | 351.711         | 350.703         | K[6]  |
| A  | 21 | <b>1108.642</b> | 295.169         | 287.159         | 287.663         | 286.656         | A[5]  |
| Q  | 22 | <b>1172.671</b> | 239.650         | 231.641         | 232.145         | 231.137         | Q[4]  |
| K  | 23 | 1236.718        | 195.621         | 187.612         | 188.116         | 187.108         | K[3]  |
| K  | 24 | 1300.766        | 131.574         | 123.564         | 124.068         | 123.060         | K[2]  |
| D  | 25 | 1358.279        | 67.528          | 59.517          | 60.021          | 59.013          | D[1]  |

# sp | P10853 | H2B1F\_MOUSE

PEPAKSAPAPKK <sup>Acetyl</sup>GS (42.01) <sup>Acetyl</sup>KKAVT (42.01) <sup>Acetyl</sup>KAQKKD 42.01

- ▶ fragmentation table for charge state 3+
- ▶ specType=etd
- ▶ score=68.75
- ▶ F161015.dat
- ▶ query=q25209\_p1
- ▶ precursor=544.314690
- ▶ chargePrecursor=5
- ▶ itol=0.6

| AA    | c              | y              | z+1            | z+2            | z              | AA    |
|-------|----------------|----------------|----------------|----------------|----------------|-------|
| P[1]  | 39.034         | 906.183        | <b>900.844</b> | 0.672          | 900.508        | P[25] |
| E[2]  | 82.048         | <b>873.832</b> | <b>868.493</b> | 0.672          | 868.157        | E[24] |
| P[3]  | 114.399        | 830.818        | <b>825.479</b> | 0.672          | <b>825.143</b> | P[23] |
| A[4]  | 138.078        | 708.467        | <b>793.128</b> | 0.672          | <b>792.792</b> | A[22] |
| K[5]  | 180.776        | <b>774.788</b> | <b>769.449</b> | <b>769.785</b> | 769.113        | K[21] |
| S[6]  | 209.787        | <b>732.090</b> | <b>726.750</b> | <b>727.086</b> | <b>726.414</b> | S[20] |
| A[7]  | 233.466        | 633.079        | <b>697.740</b> | <b>698.076</b> | 697.408        | A[19] |
| P[8]  | 285.817        | 679.440        | 674.061        | 674.397        | <b>673.725</b> | P[18] |
| A[9]  | 289.496        | 547.040        | <b>641.710</b> | <b>642.046</b> | <b>641.374</b> | A[17] |
| P[10] | 321.847        | 623.370        | 618.031        | 618.367        | 617.695        | P[16] |
| K[11] | 364.545        | 591.019        | <b>585.680</b> | <b>586.016</b> | <b>585.344</b> | K[15] |
| K[12] | 421.247        | 548.321        | 542.981        | <b>543.317</b> | 542.646        | K[14] |
| G[13] | 440.254        | 491.619        | <b>486.280</b> | <b>486.616</b> | 485.944        | G[13] |
| S[14] | 483.268        | <b>472.612</b> | 467.272        | 467.608        | 466.937        | S[12] |
| K[15] | 525.967        | 429.508        | 424.258        | 424.594        | 423.922        | K[11] |
| K[16] | <b>568.665</b> | 386.900        | 381.560        | 381.896        | 381.224        | K[10] |
| A[17] | <b>592.344</b> | 344.201        | 338.967        | 339.303        | 338.626        | A[9]  |
| V[18] | <b>626.367</b> | 320.522        | 315.281        | 315.619        | 314.947        | V[8]  |
| T[19] | <b>673.053</b> | 287.499        | 282.160        | 282.496        | 281.824        | T[7]  |
| K[20] | <b>715.751</b> | 239.813        | 234.474        | 234.810        | 234.138        | K[6]  |
| A[21] | 739.430        | 197.115        | 191.775        | 192.111        | 191.439        | A[5]  |
| Q[22] | <b>782.116</b> | 173.430        | 168.090        | 168.432        | 167.760        | Q[4]  |
| K[23] | <b>824.815</b> | 130.750        | 125.410        | 125.746        | 125.074        | K[3]  |
| K[24] | 867.513        | 88.051         | 82.712         | 83.048         | 82.376         | K[2]  |
| D[25] | 905.855        | 45.353         | 40.013         | 40.349         | 39.678         | D[1]  |

# sp | P10853 | H2B1F\_MOUSE

PEPAKSAPAPKK <sup>Acetyl</sup>GS (42.01) <sup>Acetyl</sup>KKAVT (42.01) <sup>Acetyl</sup>KAQKKD (42.01)

- ▶ fragmentation table for charge state 4+
- ▶ specType=etd
- ▶ score=68.75
- ▶ F161015.dat
- ▶ query=q25209\_p1
- ▶ precursor=544.314690
- ▶ chargePrecursor=5
- ▶ itol=0.6

| AA    | c              | y              | z+1            | z+2     | z              | AA    |
|-------|----------------|----------------|----------------|---------|----------------|-------|
| P[1]  | 29.527         | <b>679.889</b> | <b>675.885</b> | 0.755   | <b>675.633</b> | P[25] |
| E[2]  | 61.788         | <b>655.626</b> | <b>651.621</b> | 0.755   | <b>651.370</b> | E[24] |
| P[3]  | 86.051         | 623.366        | 619.361        | 0.755   | 619.109        | P[23] |
| A[4]  | 103.810        | 999.102        | 995.098        | 0.755   | 994.845        | A[22] |
| K[5]  | 135.834        | 581.343        | 577.338        | 577.590 | 577.086        | K[21] |
| S[6]  | 157.592        | 549.319        | 545.315        | 545.567 | 545.063        | S[20] |
| A[7]  | 173.351        | 527.563        | 523.557        | 523.809 | 523.305        | A[19] |
| P[8]  | 199.614        | 509.802        | 505.797        | 506.049 | 505.545        | P[18] |
| A[9]  | 217.374        | 488.539        | 484.534        | 484.786 | 484.282        | A[17] |
| P[10] | 241.637        | 467.780        | 463.775        | 464.027 | 463.523        | P[16] |
| K[11] | 273.661        | 443.516        | 439.512        | 439.764 | 439.260        | K[15] |
| K[12] | 316.187        | 411.493        | 407.488        | 407.740 | 407.236        | K[14] |
| G[13] | 330.442        | 368.968        | 364.962        | 365.214 | 364.710        | G[13] |
| S[14] | 362.703        | 354.711        | 350.706        | 350.958 | 350.454        | S[12] |
| K[15] | 394.727        | 322.450        | 318.446        | 318.697 | 318.194        | K[11] |
| K[16] | 426.751        | 290.426        | 286.422        | 286.674 | 286.170        | K[10] |
| A[17] | 444.510        | 258.403        | 254.398        | 254.650 | 254.146        | A[9]  |
| V[18] | 469.277        | 240.641        | 236.636        | 236.887 | 236.383        | V[8]  |
| T[19] | 505.041        | 215.876        | 211.872        | 212.124 | 211.620        | T[7]  |
| K[20] | 537.065        | 180.112        | 176.107        | 176.359 | 175.855        | K[6]  |
| A[21] | 554.824        | 148.088        | 144.083        | 144.335 | 143.831        | A[5]  |
| Q[22] | 586.839        | 130.329        | 126.324        | 126.576 | 126.072        | Q[4]  |
| K[23] | 618.863        | 98.314         | 94.309         | 94.561  | 94.057         | K[3]  |
| K[24] | <b>650.887</b> | 66.290         | 62.286         | 62.538  | 62.034         | K[2]  |
| D[25] | 679.643        | 34.267         | 30.262         | 30.514  | 30.010         | D[1]  |

# sp | Q64525 | H2B2B\_MOUSE

PDKASAPAPKK <sup>Acetyl</sup> 42.01 GSKKAVT <sup>(Acetyl)</sup> (42.01) KVQKKD

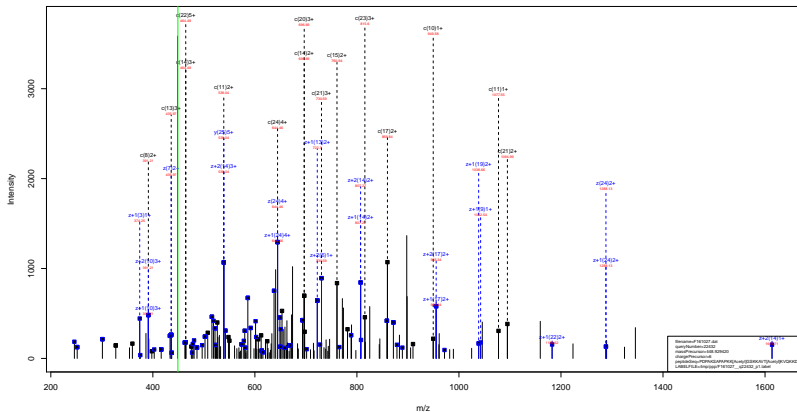



# sp | Q64525 | H2B2B\_MOUSE

PDKAKSAPAPKK <sup>Acetyl</sup><sub>42.01</sub> GSKKAVT <sup>Acetyl</sup><sub>(42.01)</sub> KVQKKD

- ▶ fragmentation table for charge state 1+
- ▶ specType=etd
- ▶ score=45.94
- ▶ F161027.dat
- ▶ query=q22432\_p1
- ▶ precursor=448.929420
- ▶ chargePrecursor=6
- ▶ itol=0.6

| AA   | c               | y              | z+1             | z+2             | z              | AA   |
|------|-----------------|----------------|-----------------|-----------------|----------------|------|
| P 1  | 115.987         | 2688.941       | 2672.522        | 0.000           | 2671.514       | P 25 |
| D 2  | 239.114         | 2391.488       | 2575.469        | 0.000           | 2374.461       | D 24 |
| P 3  | <b>327.166</b>  | 2376.461       | 2460.442        | 0.000           | 2459.434       | P 23 |
| A 4  | <b>398.203</b>  | 2370.408       | 2361.389        | 0.000           | 2362.382       | A 22 |
| K 5  | <b>526.298</b>  | 2308.371       | 2292.352        | 2291.360        | 2291.345       | K 21 |
| S 6  | <b>613.330</b>  | 2192.276       | 2184.257        | 2185.265        | 2183.250       | S 20 |
| A 7  | 664.368         | 2093.244       | 2077.225        | 2078.233        | 2076.218       | A 19 |
| P 8  | <b>781.420</b>  | 2032.207       | 2026.189        | 2027.196        | 2025.181       | P 18 |
| A 9  | 852.457         | 1925.154       | 1920.135        | 1918.143        | 1928.128       | A 17 |
| P 10 | <b>949.510</b>  | 1854.117       | 1838.098        | 1839.106        | 1837.091       | P 16 |
| K 11 | <b>1077.605</b> | 1757.064       | 1741.046        | 1742.053        | 1740.038       | K 15 |
| K 12 | 1247.711        | 1628.909       | 1612.891        | <b>1613.958</b> | 1611.943       | K 14 |
| G 13 | 1304.732        | 1458.804       | 1442.845        | 1443.853        | 1441.837       | G 13 |
| S 14 | 1397.764        | 1301.842       | 1385.824        | 1386.831        | 1384.815       | S 12 |
| K 15 | 1519.859        | 1114.810       | 1298.792        | 1299.799        | 1297.784       | K 11 |
| K 16 | 1547.894        | 1186.715       | 1170.697        | 1171.705        | 1169.689       | K 10 |
| A 17 | 1718.991        | 1058.620       | <b>1042.602</b> | 1043.610        | 1041.594       | A 9  |
| V 18 | 1818.000        | 987.583        | <b>971.565</b>  | 972.572         | 970.557        | V 8  |
| T 19 | 1961.118        | <b>888.515</b> | 872.496         | 873.504         | <b>871.488</b> | T 7  |
| K 20 | 2009.213        | 745.541        | 729.439         | <b>720.446</b>  | 728.430        | K 6  |
| V 21 | 2188.293        | 617.362        | <b>601.343</b>  | <b>602.351</b>  | 600.335        | V 5  |
| Q 22 | 2316.340        | 518.293        | <b>502.275</b>  | 503.282         | 501.267        | Q 4  |
| K 23 | 2444.435        | 390.235        | <b>374.216</b>  | <b>375.224</b>  | 373.208        | K 3  |
| K 24 | 2572.530        | 292.140        | <b>248.121</b>  | 247.129         | 245.113        | K 2  |
| D 25 | 2687.557        | 134.045        | 118.026         | 119.034         | 117.018        | D 1  |

# sp | Q64525 | H2B2B\_MOUSE

PDKAKSAPAPKK <sup>Acetyl</sup><sub>42.01</sub> GSKKAVT <sup>(Acetyl)</sup><sub>(42.01)</sub> KVQKKD

- ▶ fragmentation table for charge state 2+
- ▶ specType=etd
- ▶ score=45.94
- ▶ F161027.dat
- ▶ query=q22432\_p1
- ▶ precursor=448.929420
- ▶ chargePrecursor=6
- ▶ itol=0.6

| AA |    | c               | y              | a+1             | a+2            | z               | AA    |
|----|----|-----------------|----------------|-----------------|----------------|-----------------|-------|
| P  | 1  | 58.047          | 1344.774       | 1136.765        | 0.504          | 1139.261        | P[25] |
| D  | 2  | 119.930         | 1296.248       | <b>1289.238</b> | 0.504          | <b>1287.734</b> | D[24] |
| P  | 3  | 164.067         | 1238.134       | 1230.725        | 0.504          | 1233.221        | P[23] |
| A  | 4  | 199.605         | 1190.208       | <b>1182.198</b> | 0.504          | 1184.694        | A[22] |
| K  | 5  | 263.651         | 1154.689       | 1146.680        | 1147.184       | 1146.178        | K[21] |
| S  | 6  | 307.199         | 1090.042       | 1082.632        | 1083.136       | 1082.129        | S[20] |
| A  | 7  | 342.687         | 1047.126       | <b>1039.116</b> | 1039.620       | <b>1038.612</b> | A[19] |
| P  | 8  | <b>391.214</b>  | 981.589        | 982.583         | 984.084        | 983.596         | P[18] |
| A  | 9  | 426.732         | 953.081        | <b>955.071</b>  | <b>955.575</b> | 954.567         | A[17] |
| P  | 10 | <b>475.259</b>  | 927.562        | 919.553         | 920.057        | 919.049         | P[16] |
| K  | 11 | <b>519.306</b>  | <b>879.036</b> | <b>871.026</b>  | <b>871.530</b> | 870.523         | K[15] |
| K  | 12 | <b>624.359</b>  | 814.989        | <b>806.979</b>  | <b>807.483</b> | 806.475         | K[14] |
| G  | 13 | <b>652.870</b>  | 729.936        | <b>721.926</b>  | <b>722.430</b> | 721.423         | G[13] |
| S  | 14 | <b>696.386</b>  | <b>701.425</b> | <b>693.415</b>  | <b>693.919</b> | <b>692.912</b>  | S[12] |
| K  | 15 | <b>760.433</b>  | <b>657.909</b> | <b>649.899</b>  | <b>650.403</b> | <b>649.396</b>  | K[11] |
| K  | 16 | 824.481         | 593.861        | <b>585.852</b>  | <b>586.356</b> | 585.348         | K[10] |
| A  | 17 | <b>859.999</b>  | 529.814        | <b>521.804</b>  | <b>522.308</b> | <b>521.301</b>  | A[9]  |
| V  | 18 | <b>909.533</b>  | 494.295        | <b>486.286</b>  | <b>486.790</b> | 485.782         | V[8]  |
| T  | 19 | 981.063         | 444.761        | <b>436.752</b>  | <b>437.256</b> | <b>436.248</b>  | T[7]  |
| K  | 20 | 1053.107        | 374.242        | 366.233         | 367.247        | 366.239         | K[6]  |
| V  | 21 | <b>1094.644</b> | 309.184        | <b>301.175</b>  | <b>301.679</b> | <b>300.671</b>  | V[5]  |
| Q  | 22 | 1158.674        | 259.650        | <b>251.641</b>  | <b>252.145</b> | <b>251.137</b>  | Q[4]  |
| K  | 23 | 1222.721        | 195.621        | 187.612         | 188.116        | 187.108         | K[3]  |
| K  | 24 | 1286.768        | 131.574        | 123.565         | 124.069        | 123.060         | K[2]  |
| D  | 25 | 1344.282        | 67.526         | 59.517          | 60.021         | 59.013          | D[1]  |

# sp | Q64525 | H2B2B\_MOUSE

PDKAKSAPAPKK <sup>Acetyl</sup><sub>42.01</sub> GSKKAVT <sup>Acetyl</sup><sub>(42.01)</sub> KVQKKD

- ▶ fragmentation table for charge state 3+
- ▶ specType=etd
- ▶ score=45.94
- ▶ F161027.dat
- ▶ query=q22432.p1
- ▶ precursor=448.929420
- ▶ chargePrecursor=6
- ▶ itol=0.6

| AA    | c              | y              | z+1            | z+2            | z              | AA    |
|-------|----------------|----------------|----------------|----------------|----------------|-------|
| P[1]  | 30.034         | 996.852        | 891.512        | 0.672          | 891.176        | P[25] |
| D[2]  | 77.376         | 864.501        | <b>859.161</b> | 0.672          | <b>858.825</b> | D[24] |
| P[3]  | 109.727        | 826.159        | 820.819        | 0.672          | 820.483        | P[23] |
| A[4]  | 133.406        | 793.808        | <b>788.468</b> | 0.672          | <b>788.132</b> | A[22] |
| K[5]  | 176.104        | 770.129        | 764.789        | <b>765.125</b> | 764.453        | K[21] |
| S[6]  | 205.115        | <b>727.430</b> | <b>722.091</b> | <b>722.427</b> | <b>721.755</b> | S[20] |
| A[8]  | 228.794        | 698.420        | <b>693.080</b> | <b>693.416</b> | 692.744        | A[19] |
| P[9]  | 261.145        | 674.741        | <b>669.401</b> | 669.177        | <b>669.065</b> | P[18] |
| A[9]  | 294.824        | 642.390        | <b>637.050</b> | <b>637.386</b> | 636.714        | A[17] |
| P[10] | 317.175        | 618.711        | <b>613.371</b> | <b>613.707</b> | <b>613.035</b> | P[16] |
| K[11] | <b>359.873</b> | <b>586.360</b> | <b>581.020</b> | <b>581.356</b> | <b>580.684</b> | K[15] |
| K[12] | <b>416.575</b> | 543.661        | 538.322        | <b>538.658</b> | 537.986        | K[14] |
| G[13] | <b>435.582</b> | <b>486.959</b> | 481.620        | 481.956        | <b>481.284</b> | G[13] |
| S[14] | <b>464.593</b> | 467.952        | <b>462.613</b> | <b>462.949</b> | <b>462.277</b> | S[12] |
| K[15] | <b>507.291</b> | 438.942        | <b>433.602</b> | <b>433.938</b> | <b>433.266</b> | K[11] |
| K[16] | <b>549.990</b> | 396.243        | <b>390.904</b> | <b>391.240</b> | 390.568        | K[10] |
| A[17] | <b>573.669</b> | 353.545        | 348.207        | 348.543        | 347.899        | A[9]  |
| V[18] | <b>606.691</b> | 329.866        | 324.528        | 324.862        | 324.190        | V[8]  |
| T[19] | 654.377        | 296.843        | 291.504        | 291.840        | 291.168        | T[7]  |
| K[20] | <b>697.076</b> | 249.157        | 243.817        | 244.153        | 243.482        | K[6]  |
| V[21] | <b>730.099</b> | 206.459        | 201.119        | 201.455        | 200.783        | V[5]  |
| Q[22] | 772.785        | 173.436        | 168.096        | 168.432        | 167.760        | Q[4]  |
| K[23] | <b>815.483</b> | 130.750        | 125.410        | 125.746        | 125.074        | K[3]  |
| K[24] | <b>858.181</b> | 88.051         | 82.712         | 83.048         | 82.376         | K[2]  |
| V[25] | 898.524        | 45.353         | 40.013         | 40.349         | 39.678         | V[1]  |

# sp | Q64525 | H2B2B\_MOUSE

PDKASAPAPKK <sup>Acetyl</sup>42.01 GSKKAVT <sup>(Acetyl)</sup>(42.01) KVQKKD

- ▶ fragmentation table for charge state 4+
- ▶ specType=etd
- ▶ score=45.94
- ▶ F161027.dat
- ▶ query=q22432.p1
- ▶ precursor=448.929420
- ▶ chargePrecursor=6
- ▶ itol=0.6

| AA |    | c              | y              | z+1            | z+2            | z              | AA    |
|----|----|----------------|----------------|----------------|----------------|----------------|-------|
| P  | 1  | 29.527         | 672.891        | <b>668.886</b> | 0.755          | <b>668.634</b> | P[25] |
| D  | 2  | 58.284         | <b>648.627</b> | <b>644.623</b> | 0.755          | <b>644.371</b> | D[24] |
| P  | 3  | 62.547         | 619.871        | <b>615.866</b> | 0.755          | <b>615.614</b> | P[23] |
| A  | 4  | 100.306        | 595.608        | <b>591.603</b> | 0.755          | <b>591.351</b> | A[22] |
| K  | 5  | 132.330        | <b>577.848</b> | <b>573.844</b> | <b>574.096</b> | <b>573.592</b> | K[21] |
| S  | 6  | 154.088        | 545.324        | <b>541.820</b> | <b>542.072</b> | 541.568        | S[20] |
| A  | 8  | 173.887        | 524.066        | 520.062        | 520.314        | 519.210        | A[19] |
| P  | 9  | 198.111        | 508.307        | <b>502.303</b> | <b>502.554</b> | <b>502.051</b> | P[18] |
| A  | 9  | 213.870        | 482.044        | <b>478.039</b> | <b>478.291</b> | 477.787        | A[17] |
| P  | 10 | 238.133        | <b>464.285</b> | 460.280        | 460.532        | 460.028        | P[16] |
| K  | 11 | 270.157        | 440.022        | <b>436.017</b> | <b>436.269</b> | <b>435.765</b> | K[15] |
| K  | 12 | 312.683        | 407.998        | 403.993        | 404.245        | 403.741        | K[14] |
| G  | 13 | <b>326.938</b> | 395.471        | 361.467        | 361.719        | 361.215        | G[13] |
| S  | 14 | 348.696        | 351.216        | 347.211        | 347.463        | 346.959        | S[12] |
| K  | 15 | 380.720        | 329.458        | 325.453        | 325.705        | 325.201        | K[11] |
| K  | 16 | 412.144        | 297.435        | 293.430        | 293.682        | 293.178        | K[10] |
| A  | 17 | 430.593        | 285.411        | 261.406        | 261.658        | 261.154        | A[9]  |
| V  | 18 | 455.770        | 247.651        | 243.647        | 243.899        | 243.395        | V[8]  |
| T  | 19 | 491.035        | 222.684        | 218.680        | 219.131        | 218.628        | T[7]  |
| K  | 20 | <b>523.059</b> | 187.120        | 183.115        | 183.367        | 182.863        | K[6]  |
| V  | 21 | <b>547.826</b> | 155.096        | 151.091        | 151.343        | 150.839        | V[5]  |
| Q  | 22 | <b>579.840</b> | 130.329        | 126.324        | 126.576        | 126.072        | Q[4]  |
| K  | 23 | <b>611.864</b> | 98.314         | 94.309         | 94.561         | 94.057         | K[3]  |
| K  | 24 | <b>643.888</b> | 66.290         | 62.285         | 62.538         | 62.034         | K[2]  |
| V  | 25 | 672.645        | 34.267         | 30.262         | 30.514         | 30.010         | V[1]  |

# sp | Q64525 | H2B2B\_MOUSE

PDKAKSAPAPKK <sup>Acetyl</sup>42.01 GSKKAVT <sup>(Acetyl)</sup>(42.01) KVQKKD

- ▶ fragmentation table for charge state 5+
- ▶ specType=etd
- ▶ score=45.94
- ▶ F161027.dat
- ▶ query=q22432\_p1
- ▶ precursor=448.929420
- ▶ chargePrecursor=6
- ▶ itol=0.6

| AA |    | c              | y              | z+1            | z+2            | z              | AA |
|----|----|----------------|----------------|----------------|----------------|----------------|----|
| P  | 1  | 23.623         | <b>538.514</b> | 535.310        | 0.806          | 535.109        | P  |
| D  | 2  | 46.629         | <b>519.103</b> | <b>515.900</b> | 0.806          | <b>515.698</b> | D  |
| P  | 3  | 66.239         | <b>496.098</b> | 492.894        | 0.806          | 492.693        | P  |
| A  | 4  | 80.447         | <b>476.687</b> | 473.484        | 0.806          | 473.282        | A  |
| K  | 5  | 106.065        | <b>462.480</b> | 459.276        | 459.478        | 459.075        | K  |
| S  | 6  | 123.472        | <b>436.861</b> | <b>433.657</b> | <b>433.859</b> | <b>433.456</b> | S  |
| A  | 7  | 137.679        | 419.555        | <b>416.251</b> | <b>416.452</b> | <b>416.049</b> | A  |
| P  | 8  | 157.090        | 405.247        | 402.043        | <b>402.245</b> | 401.842        | P  |
| A  | 9  | 171.297        | 389.837        | 382.631        | 382.834        | 382.431        | A  |
| P  | 10 | 190.708        | 371.629        | 368.425        | 368.627        | 368.224        | P  |
| K  | 11 | 216.327        | 352.219        | 349.015        | 349.217        | 348.813        | K  |
| K  | 12 | 250.348        | 326.600        | 323.396        | 323.598        | 323.194        | K  |
| G  | 13 | 261.752        | 292.579        | 289.375        | 289.576        | 289.173        | G  |
| S  | 14 | 279.159        | 281.174        | 277.971        | 278.172        | 277.769        | S  |
| K  | 15 | 304.778        | 263.766        | 260.564        | 260.766        | 260.363        | K  |
| K  | 16 | 330.397        | 238.149        | 234.943        | 235.147        | 234.744        | K  |
| A  | 17 | 344.604        | 212.530        | 209.326        | 209.528        | 209.125        | A  |
| V  | 18 | 364.418        | 198.122        | 195.110        | 195.310        | 194.917        | V  |
| T  | 19 | 393.029        | 178.509        | 175.305        | 175.507        | 175.103        | T  |
| K  | 20 | 418.648        | 149.897        | 146.693        | 146.895        | 146.492        | K  |
| V  | 21 | 438.462        | 124.278        | 121.074        | 121.276        | 120.873        | V  |
| Q  | 22 | <b>464.074</b> | 104.664        | 101.261        | 101.462        | 101.059        | Q  |
| K  | 23 | 489.693        | 78.853         | 75.649         | 75.851         | 75.447         | K  |
| K  | 24 | <b>515.312</b> | 53.234         | 50.030         | 50.232         | 49.828         | K  |
| V  | 25 | 538.317        | 27.615         | 24.411         | 24.613         | 24.209         | V  |

# sp | Q3THW5 | H2AV\_MOUSE

DSLKATIAGGGVIPHIHKSLIGK (Dimethyl) KGQQKTA  
(28.03)

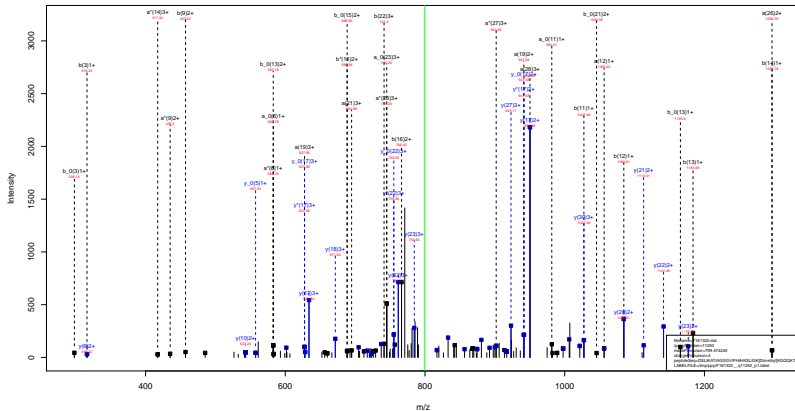



# sp | Q3THW5 | H2AV\_MOUSE

DSLKATIAGGGVIPHIHKSLIGK (Dimethyl) KGQQKTA  
(28.03)

- ▶ fragmentation table for charge state 2+
- ▶ specType=cid
- ▶ score=40.14
- ▶ F161320.dat
- ▶ query=q11250.p1
- ▶ precursor=799.474240
- ▶ chargePrecursor=4
- ▶ itol=0.6

| AA | a        | a*     | b        | b*       | y        | y*      | AA       |     |
|----|----------|--------|----------|----------|----------|---------|----------|-----|
| D  | 44.523   | 0.555  | 25.523   | 26.078   | 49.575   | 159.730 | 2588.876 | D10 |
| S  | 88.039   | 1.055  | 49.039   | 50.157   | 91.051   | 159.477 | 2588.424 | S10 |
| L  | 132.054  | 1.554  | 73.054   | 75.712   | 132.054  | 160.931 | 2587.970 | L10 |
| I  | 176.069  | 2.054  | 97.069   | 101.381  | 176.069  | 162.785 | 2587.516 | I10 |
| K  | 220.084  | 2.553  | 121.084  | 126.050  | 220.084  | 164.639 | 2587.062 | K10 |
| A  | 264.099  | 3.052  | 145.099  | 150.719  | 264.099  | 166.493 | 2586.608 | A10 |
| T  | 308.114  | 3.551  | 169.114  | 175.388  | 308.114  | 168.347 | 2586.154 | T10 |
| M  | 352.129  | 4.050  | 193.129  | 200.057  | 352.129  | 170.201 | 2585.700 | M10 |
| G  | 396.144  | 4.549  | 217.144  | 224.726  | 396.144  | 172.055 | 2585.246 | G10 |
| C  | 440.159  | 5.048  | 241.159  | 249.395  | 440.159  | 173.909 | 2584.792 | C10 |
| F  | 484.174  | 5.547  | 265.174  | 274.064  | 484.174  | 175.763 | 2584.338 | F10 |
| P  | 528.189  | 6.046  | 289.189  | 298.733  | 528.189  | 177.617 | 2583.884 | P10 |
| Q  | 572.204  | 6.545  | 313.204  | 323.402  | 572.204  | 179.471 | 2583.430 | Q10 |
| N  | 616.219  | 7.044  | 337.219  | 348.071  | 616.219  | 181.325 | 2582.976 | N10 |
| H  | 660.234  | 7.543  | 361.234  | 372.740  | 660.234  | 183.179 | 2582.522 | H10 |
| R  | 704.249  | 8.042  | 385.249  | 397.409  | 704.249  | 185.033 | 2582.068 | R10 |
| Y  | 748.264  | 8.541  | 409.264  | 422.078  | 748.264  | 186.887 | 2581.614 | Y10 |
| V  | 792.279  | 9.040  | 433.279  | 446.747  | 792.279  | 188.741 | 2581.160 | V10 |
| W  | 836.294  | 9.539  | 457.294  | 471.416  | 836.294  | 190.595 | 2580.706 | W10 |
| X  | 880.309  | 10.038 | 481.309  | 496.085  | 880.309  | 192.449 | 2580.252 | X10 |
| Z  | 924.324  | 10.537 | 505.324  | 520.754  | 924.324  | 194.303 | 2579.798 | Z10 |
| J  | 968.339  | 11.036 | 529.339  | 545.423  | 968.339  | 196.157 | 2579.344 | J10 |
| O  | 1012.354 | 11.535 | 553.354  | 570.092  | 1012.354 | 198.011 | 2578.890 | O10 |
| U  | 1056.369 | 12.034 | 577.369  | 594.761  | 1056.369 | 199.865 | 2578.436 | U10 |
| M  | 1100.384 | 12.533 | 601.384  | 619.430  | 1100.384 | 201.719 | 2577.982 | M10 |
| I  | 1144.399 | 13.032 | 625.399  | 644.099  | 1144.399 | 203.573 | 2577.528 | I10 |
| L  | 1188.414 | 13.531 | 649.414  | 668.768  | 1188.414 | 205.427 | 2577.074 | L10 |
| K  | 1232.429 | 14.030 | 673.429  | 693.437  | 1232.429 | 207.281 | 2576.620 | K10 |
| A  | 1276.444 | 14.529 | 697.444  | 718.106  | 1276.444 | 209.135 | 2576.166 | A10 |
| T  | 1320.459 | 15.028 | 721.459  | 742.775  | 1320.459 | 210.989 | 2575.712 | T10 |
| M  | 1364.474 | 15.527 | 745.474  | 767.444  | 1364.474 | 212.843 | 2575.258 | M10 |
| G  | 1408.489 | 16.026 | 769.489  | 792.113  | 1408.489 | 214.697 | 2574.804 | G10 |
| C  | 1452.504 | 16.525 | 793.504  | 816.782  | 1452.504 | 216.551 | 2574.350 | C10 |
| F  | 1496.519 | 17.024 | 817.519  | 841.451  | 1496.519 | 218.405 | 2573.896 | F10 |
| P  | 1540.534 | 17.523 | 841.534  | 866.120  | 1540.534 | 220.259 | 2573.442 | P10 |
| Q  | 1584.549 | 18.022 | 865.549  | 890.789  | 1584.549 | 222.113 | 2572.988 | Q10 |
| N  | 1628.564 | 18.521 | 889.564  | 915.458  | 1628.564 | 223.967 | 2572.534 | N10 |
| H  | 1672.579 | 19.020 | 913.579  | 940.127  | 1672.579 | 225.821 | 2572.080 | H10 |
| R  | 1716.594 | 19.519 | 937.594  | 964.796  | 1716.594 | 227.675 | 2571.626 | R10 |
| Y  | 1760.609 | 20.018 | 961.609  | 989.465  | 1760.609 | 229.529 | 2571.172 | Y10 |
| V  | 1804.624 | 20.517 | 985.624  | 1014.134 | 1804.624 | 231.383 | 2570.718 | V10 |
| W  | 1848.639 | 21.016 | 1009.639 | 1038.803 | 1848.639 | 233.237 | 2570.264 | W10 |
| X  | 1892.654 | 21.515 | 1033.654 | 1063.472 | 1892.654 | 235.091 | 2569.810 | X10 |
| Z  | 1936.669 | 22.014 | 1057.669 | 1088.141 | 1936.669 | 236.945 | 2569.356 | Z10 |
| J  | 1980.684 | 22.513 | 1081.684 | 1112.810 | 1980.684 | 238.799 | 2568.902 | J10 |
| O  | 2024.699 | 23.012 | 1105.699 | 1137.479 | 2024.699 | 240.653 | 2568.448 | O10 |
| U  | 2068.714 | 23.511 | 1129.714 | 1162.148 | 2068.714 | 242.507 | 2567.994 | U10 |
| M  | 2112.729 | 24.010 | 1153.729 | 1186.817 | 2112.729 | 244.361 | 2567.540 | M10 |
| I  | 2156.744 | 24.509 | 1177.744 | 1211.486 | 2156.744 | 246.215 | 2567.086 | I10 |
| L  | 2200.759 | 25.008 | 1201.759 | 1236.155 | 2200.759 | 248.069 | 2566.632 | L10 |
| K  | 2244.774 | 25.507 | 1225.774 | 1260.824 | 2244.774 | 249.923 | 2566.178 | K10 |
| A  | 2288.789 | 26.006 | 1249.789 | 1285.493 | 2288.789 | 251.777 | 2565.724 | A10 |
| T  | 2332.804 | 26.505 | 1273.804 | 1310.162 | 2332.804 | 253.631 | 2565.270 | T10 |
| M  | 2376.819 | 27.004 | 1297.819 | 1334.831 | 2376.819 | 255.485 | 2564.816 | M10 |
| G  | 2420.834 | 27.503 | 1321.834 | 1359.500 | 2420.834 | 257.339 | 2564.362 | G10 |
| C  | 2464.849 | 28.002 | 1345.849 | 1384.169 | 2464.849 | 259.193 | 2563.908 | C10 |
| F  | 2508.864 | 28.501 | 1369.864 | 1408.838 | 2508.864 | 261.047 | 2563.454 | F10 |
| P  | 2552.879 | 29.000 | 1393.879 | 1433.507 | 2552.879 | 262.901 | 2563.000 | P10 |
| Q  | 2596.894 | 29.499 | 1417.894 | 1458.176 | 2596.894 | 264.755 | 2562.546 | Q10 |
| N  | 2640.909 | 29.998 | 1441.909 | 1482.845 | 2640.909 | 266.609 | 2562.092 | N10 |
| H  | 2684.924 | 30.497 | 1465.924 | 1507.514 | 2684.924 | 268.463 | 2561.638 | H10 |
| R  | 2728.939 | 30.996 | 1489.939 | 1532.183 | 2728.939 | 270.317 | 2561.184 | R10 |
| Y  | 2772.954 | 31.495 | 1513.954 | 1556.852 | 2772.954 | 272.171 | 2560.730 | Y10 |
| V  | 2816.969 | 31.994 | 1537.969 | 1581.521 | 2816.969 | 274.025 | 2560.276 | V10 |
| W  | 2860.984 | 32.493 | 1561.984 | 1606.190 | 2860.984 | 275.879 | 2559.822 | W10 |
| X  | 2904.999 | 32.992 | 1585.999 | 1630.859 | 2904.999 | 277.733 | 2559.368 | X10 |
| Z  | 2949.014 | 33.491 | 1609.999 | 1655.528 | 2949.014 | 279.587 | 2558.914 | Z10 |
| J  | 2993.029 | 33.990 | 1634.014 | 1680.197 | 2993.029 | 281.441 | 2558.460 | J10 |
| O  | 3037.044 | 34.489 | 1658.029 | 1704.866 | 3037.044 | 283.295 | 2558.006 | O10 |
| U  | 3081.059 | 34.988 | 1682.044 | 1729.535 | 3081.059 | 285.149 | 2557.552 | U10 |
| M  | 3125.074 | 35.487 | 1706.059 | 1754.204 | 3125.074 | 287.003 | 2557.098 | M10 |
| I  | 3169.089 | 35.986 | 1730.074 | 1778.873 | 3169.089 | 288.857 | 2556.644 | I10 |
| L  | 3213.104 | 36.485 | 1754.089 | 1803.542 | 3213.104 | 290.711 | 2556.190 | L10 |
| K  | 3257.119 | 36.984 | 1778.104 | 1828.211 | 3257.119 | 292.565 | 2555.736 | K10 |
| A  | 3301.134 | 37.483 | 1802.119 | 1852.880 | 3301.134 | 294.419 | 2555.282 | A10 |
| T  | 3345.149 | 37.982 | 1826.134 | 1877.549 | 3345.149 | 296.273 | 2554.828 | T10 |
| M  | 3389.164 | 38.481 | 1850.149 | 1902.218 | 3389.164 | 298.127 | 2554.374 | M10 |
| G  | 3433.179 | 38.980 | 1874.164 | 1926.887 | 3433.179 | 299.981 | 2553.920 | G10 |
| C  | 3477.194 | 39.479 | 1898.179 | 1951.556 | 3477.194 | 301.835 | 2553.466 | C10 |
| F  | 3521.209 | 39.978 | 1922.194 | 1976.225 | 3521.209 | 303.689 | 2553.012 | F10 |
| P  | 3565.224 | 40.477 | 1946.209 | 2000.894 | 3565.224 | 305.543 | 2552.558 | P10 |
| Q  | 3609.239 | 40.976 | 1970.224 | 2025.563 | 3609.239 | 307.397 | 2552.104 | Q10 |
| N  | 3653.254 | 41.475 | 1994.239 | 2050.232 | 3653.254 | 309.251 | 2551.650 | N10 |
| H  | 3697.269 | 41.974 | 2018.254 | 2074.901 | 3697.269 | 311.105 | 2551.196 | H10 |
| R  | 3741.284 | 42.473 | 2042.269 | 2100.570 | 3741.284 | 312.959 | 2550.742 | R10 |
| Y  | 3785.299 | 42.972 | 2066.284 | 2126.239 | 3785.299 | 314.813 | 2550.288 | Y10 |
| V  | 3829.314 | 43.471 | 2090.299 | 2151.908 | 3829.314 | 316.667 | 2549.834 | V10 |
| W  | 3873.329 | 43.970 | 2114.314 | 2177.577 | 3873.329 | 318.521 | 2549.380 | W10 |
| X  | 3917.344 | 44.469 | 2138.329 | 2203.246 | 3917.344 | 320.375 | 2548.926 | X10 |
| Z  | 3961.359 | 44.968 | 2162.344 | 2228.915 | 3961.359 | 322.229 | 2548.472 | Z10 |
| J  | 4005.374 | 45.467 | 2186.359 | 2254.584 | 4005.374 | 324.083 | 2548.018 | J10 |
| O  | 4049.389 | 45.966 | 2210.374 | 2280.253 | 4049.389 | 325.937 | 2547.564 | O10 |
| U  | 4093.404 | 46.465 | 2234.389 | 2305.922 | 4093.404 | 327.791 | 2547.110 | U10 |
| M  | 4137.419 | 46.964 | 2258.404 | 2331.591 | 4137.419 | 329.645 | 2546.656 | M10 |
| I  | 4181.434 | 47.463 | 2282.419 | 2357.260 | 4181.434 | 331.499 | 2546.202 | I10 |
| L  | 4225.449 | 47.962 | 2306.434 | 2382.929 | 4225.449 | 333.353 | 2545.748 | L10 |
| K  | 4269.464 | 48.461 | 2330.449 | 2408.598 | 4269.464 | 335.207 | 2545.294 | K10 |
| A  | 4313.479 | 48.960 | 2354.464 | 2434.267 | 4313.479 | 337.061 | 2544.840 | A10 |
| T  | 4357.494 | 49.459 | 2378.479 | 2459.936 | 4357.494 | 338.915 | 2544.386 | T10 |
| M  | 4401.509 | 49.958 | 2402.494 | 2485.605 | 4401.509 | 340.769 | 2543.932 | M10 |
| G  | 4445.524 | 50.457 | 2426.509 | 2511.274 | 4445.524 | 342.623 | 2543.478 | G10 |
| C  | 4489.539 | 50.956 | 2450.524 | 2536.943 | 4489.539 | 344.477 | 2543.024 | C10 |
| F  | 4533.554 | 51.455 | 2474.539 | 2562.612 | 4533.554 | 346.331 | 2542.570 | F10 |
| P  | 4577.569 | 51.954 | 2498.554 | 2588.281 | 4577.569 | 348.185 | 2542.116 | P10 |
| Q  | 4621.584 | 52.453 | 2522.569 | 2613.950 | 4621.584 | 350.039 | 2541.662 | Q10 |
| N  | 4665.599 | 52.952 | 2546.584 | 2639.619 | 4665.599 | 351.893 | 2541.208 | N10 |
| H  | 4709.614 | 53.451 | 2570.599 | 2665.288 | 4709.614 | 353.747 | 2540.754 | H10 |
| R  | 4753.629 | 53.950 | 2594.614 | 2690.957 | 4753.629 | 355.601 | 2540.300 | R10 |
| Y  | 4797.644 | 54.449 | 2618.629 | 2716.626 | 4797.644 | 357.455 | 2539.846 | Y10 |
| V  | 4841.659 | 54.948 | 2642.644 | 2742.295 | 4841.659 | 359.309 | 2539.392 | V10 |
| W  | 4885.674 | 55.447 | 2666.659 | 2767.964 | 4885.674 | 361.163 | 2538.938 | W10 |
| X  | 4929.689 | 55.946 | 2690.674 | 2793.633 | 4929.689 | 363.017 | 2538.484 | X10 |
| Z  | 4973.704 | 56.445 | 2714.689 | 2819.302 | 4973.704 | 364.871 | 2538.030 | Z10 |
| J  | 5017.719 | 56.944 | 2738.704 | 2844.971 | 5017.719 | 366.725 | 2537.576 | J10 |
| O  | 5061.734 | 57.443 | 2762.719 | 2870.640 | 5061.734 | 368.579 | 2537.122 | O10 |
| U  | 5105.749 | 57.942 | 2786.734 | 289      |          |         |          |     |







# sp | P10853 | H2B1F\_MOUSE

PEPAKSAPAPKK Acetyl 42.01 GSK Acetyl 42.01 KAVT Acetyl 42.01 KAQQK

- ▶ fragmentation table for charge state 1+
- ▶ specType=etd
- ▶ score=62.51
- ▶ F161320.dat
- ▶ query=q9789\_p1
- ▶ precursor=651.132730
- ▶ chargePrecursor=4
- ▶ itol=0.6

| AA | c  | y               | z+1             | z+2             | z               | AA              |       |
|----|----|-----------------|-----------------|-----------------|-----------------|-----------------|-------|
| F  | 1  | 115.087         | 2601.909        | 2585.490        | 0.000           | 2684.480        | P[24] |
| E  | 2  | 264.129         | 2504.456        | 2488.437        | 0.000           | 2487.420        | E[23] |
| F  | 3  | 341.160         | 2175.413        | 2159.395        | 0.000           | 2158.387        | F[22] |
| A  | 4  | 412.219         | 2078.361        | 2062.342        | 0.000           | 2061.334        | A[21] |
| K  | 5  | <b>540.314</b>  | 2007.323        | 2191.305        | 2192.313        | 2190.297        | K[20] |
| S  | 6  | <b>627.346</b>  | 2079.228        | 2063.210        | 2064.218        | 2062.202        | S[19] |
| A  | 7  | 698.383         | 1992.196        | 1976.178        | 1977.186        | <b>1975.170</b> | A[18] |
| F  | 8  | <b>795.436</b>  | 1921.159        | 1905.141        | 1906.148        | 1904.131        | F[17] |
| A  | 9  | 867.473         | 1834.107        | 1818.088        | 1819.096        | 1817.080        | A[16] |
| T  | 10 | <b>963.526</b>  | 1753.069        | 1737.051        | 1738.059        | 1736.044        | T[15] |
| K  | 11 | <b>1091.621</b> | 1676.017        | 1639.998        | 1641.006        | 1638.990        | K[14] |
| K  | 12 | <b>1261.726</b> | 1527.922        | <b>1511.903</b> | 1512.911        | 1510.895        | K[13] |
| G  | 13 | <b>1318.748</b> | 1357.816        | 1341.797        | <b>1342.805</b> | 1340.790        | G[12] |
| S  | 14 | 1446.780        | 1300.795        | <b>1284.776</b> | 1285.784        | 1283.768        | S[11] |
| K  | 15 | <b>1575.885</b> | 1213.743        | 1197.724        | 1198.732        | 1196.716        | K[10] |
| K  | 16 | 1703.920        | <b>1043.657</b> | <b>1027.638</b> | 1028.646        | 1026.631        | K[9]  |
| A  | 17 | 1775.017        | 915.562         | <b>899.543</b>  | 900.551         | 898.536         | A[8]  |
| V  | 18 | 1874.086        | <b>844.525</b>  | 828.508         | 829.514         | 827.499         | V[7]  |
| T  | 19 | 2017.144        | 745.457         | <b>729.438</b>  | <b>730.446</b>  | 728.430         | T[6]  |
| K  | 20 | 2145.230        | 662.396         | 646.378         | 647.386         | 645.372         | K[5]  |
| A  | 21 | 2216.276        | 474.303         | <b>458.285</b>  | 459.293         | 457.277         | A[4]  |
| Q  | 22 | 2344.336        | 403.266         | <b>387.248</b>  | 388.255         | 386.240         | Q[3]  |
| K  | 23 | 2472.430        | 275.200         | <b>259.189</b>  | 260.197         | 258.181         | K[2]  |
| K  | 24 | 2600.525        | 147.113         | 131.094         | 132.102         | 130.086         | K[1]  |

# sp | P10853 | H2B1F\_MOUSE

PEPAKSAPAPKK <sup>Acetyl</sup>42.01 GSK <sup>Acetyl</sup>42.01 KAVT <sup>Acetyl</sup>42.01 KAQKK

- ▶ fragmentation table for charge state 2+
- ▶ specType=etd
- ▶ score=62.51
- ▶ F161320.dat
- ▶ query=q9789\_p1
- ▶ precursor=651.132730
- ▶ chargePrecursor=4
- ▶ itol=0.6

| AA    | c               | y              | z+1             | z+2             | z               | AA    |
|-------|-----------------|----------------|-----------------|-----------------|-----------------|-------|
| P[1]  | 58.047          | 1301.958       | <b>1293.249</b> | 0.504           | 1292.745        | P[24] |
| E[2]  | 122.568         | 1252.732       | 1244.722        | 0.504           | 1244.218        | E[23] |
| P[3]  | 171.095         | 1198.210       | 1192.200        | 0.504           | 1191.697        | P[22] |
| A[4]  | 398.613         | 1139.684       | <b>1131.675</b> | 0.504           | 1131.171        | A[21] |
| K[5]  | 270.561         | 1104.165       | 1096.155        | <b>1096.660</b> | 1095.652        | K[20] |
| S[6]  | 314.177         | 1040.118       | <b>1032.109</b> | <b>1032.612</b> | <b>1031.605</b> | S[19] |
| A[7]  | 349.695         | 996.602        | <b>988.592</b>  | 989.696         | <b>988.089</b>  | A[18] |
| P[8]  | 398.222         | 961.083        | 953.074         | 953.578         | 952.570         | P[17] |
| A[9]  | 433.740         | 912.597        | <b>904.548</b>  | <b>905.051</b>  | 904.043         | A[16] |
| T[10] | 482.267         | 877.036        | 869.027         | 869.533         | <b>868.525</b>  | T[15] |
| K[11] | 546.314         | 828.512        | 820.503         | 821.007         | <b>819.999</b>  | K[14] |
| K[12] | 631.367         | 764.464        | <b>756.455</b>  | <b>756.959</b>  | 755.951         | K[13] |
| G[13] | 659.878         | 679.412        | <b>671.402</b>  | <b>671.906</b>  | <b>670.898</b>  | G[12] |
| S[14] | <b>703.394</b>  | <b>650.901</b> | <b>642.892</b>  | <b>643.396</b>  | <b>642.388</b>  | S[11] |
| K[15] | <b>783.440</b>  | 607.385        | 599.376         | 599.880         | 598.872         | K[10] |
| K[16] | <b>852.494</b>  | 562.332        | 554.323         | 554.827         | 553.820         | K[9]  |
| A[17] | <b>888.012</b>  | <b>458.285</b> | 450.275         | 450.779         | 449.771         | A[8]  |
| V[18] | <b>937.547</b>  | 422.766        | 414.757         | 415.261         | 414.253         | V[7]  |
| T[19] | <b>1009.076</b> | 373.232        | 365.223         | 365.727         | 364.719         | T[6]  |
| K[20] | <b>1073.123</b> | 301.703        | 293.693         | 294.197         | 293.190         | K[5]  |
| A[21] | <b>1108.642</b> | 237.655        | 229.646         | 230.150         | 229.143         | A[4]  |
| Q[22] | <b>1172.671</b> | 202.137        | 194.127         | 194.631         | 193.624         | Q[3]  |
| K[23] | <b>1236.718</b> | 138.108        | 130.098         | 130.602         | 129.594         | K[2]  |
| K[24] | 1300.766        | 74.060         | 66.051          | 66.555          | 65.547          | K[1]  |

# sp | P10853 | H2B1F\_MOUSE

PEPAKSAPAPKK <sup>Acetyl</sup>42.01 GSK <sup>Acetyl</sup>42.01 KAVT <sup>Acetyl</sup>42.01 KAQKK

- ▶ fragmentation table for charge state 3+
- ▶ specType=etd
- ▶ score=62.51
- ▶ F161320.dat
- ▶ query=q9789\_p1
- ▶ precursor=651.132730
- ▶ chargePrecursor=4
- ▶ itol=0.6

| AA    | c              | y              | z+1            | z+2     | z              | AA    |
|-------|----------------|----------------|----------------|---------|----------------|-------|
| P[1]  | 99.034         | <b>867.841</b> | <b>862.501</b> | 0.672   | <b>862.166</b> | P[24] |
| E[2]  | 82.048         | <b>835.490</b> | <b>830.151</b> | 0.672   | <b>829.815</b> | E[23] |
| P[3]  | 114.999        | <b>792.476</b> | 787.136        | 0.672   | 786.800        | P[22] |
| A[4]  | 138.078        | 760.125        | 754.785        | 0.672   | 754.450        | A[21] |
| K[5]  | 180.776        | 736.446        | <b>731.106</b> | 731.442 | <b>730.770</b> | K[20] |
| S[6]  | 209.787        | 693.748        | 688.408        | 688.744 | 688.072        | S[19] |
| A[7]  | 233.466        | 664.737        | 659.397        | 659.733 | 659.061        | A[18] |
| P[8]  | 265.817        | 641.056        | 635.716        | 636.054 | 635.382        | P[17] |
| A[9]  | 289.496        | 608.707        | 603.367        | 603.703 | 603.032        | A[16] |
| P[10] | 321.247        | 586.026        | 579.686        | 580.024 | 579.352        | P[15] |
| K[11] | 364.545        | 552.677        | 547.337        | 547.673 | 547.002        | K[14] |
| K[12] | 421.247        | 509.979        | 504.639        | 504.975 | 504.303        | K[13] |
| G[13] | 440.284        | 483.277        | 447.937        | 448.273 | 447.601        | G[12] |
| S[14] | 469.265        | 434.270        | 438.930        | 439.266 | 438.594        | S[11] |
| K[15] | 525.967        | 405.259        | 399.920        | 400.255 | 399.584        | K[10] |
| K[16] | 568.665        | 348.557        | 343.218        | 343.554 | 342.882        | K[9]  |
| A[17] | 592.344        | 305.859        | 300.519        | 300.855 | 300.183        | A[8]  |
| V[18] | 625.367        | 282.180        | 276.840        | 277.176 | 276.504        | V[7]  |
| T[19] | 673.053        | 249.157        | 243.817        | 244.153 | 243.482        | T[6]  |
| K[20] | 715.751        | 201.471        | 196.131        | 196.467 | 195.795        | K[5]  |
| A[21] | 759.430        | 158.773        | 153.433        | 153.769 | 153.097        | A[4]  |
| Q[22] | 762.116        | 135.094        | 129.754        | 130.090 | 129.418        | Q[3]  |
| K[23] | <b>824.815</b> | 92.407         | 87.068         | 87.404  | 86.732         | K[2]  |
| K[24] | 867.513        | 49.709         | 44.370         | 44.705  | 44.034         | K[1]  |

# sp | P10853 | H2B1F\_MOUSE

PEPAKSAPAPKK Acetyl 42.01 GSK Acetyl 42.01 KAVT Acetyl 42.01 KAQKK

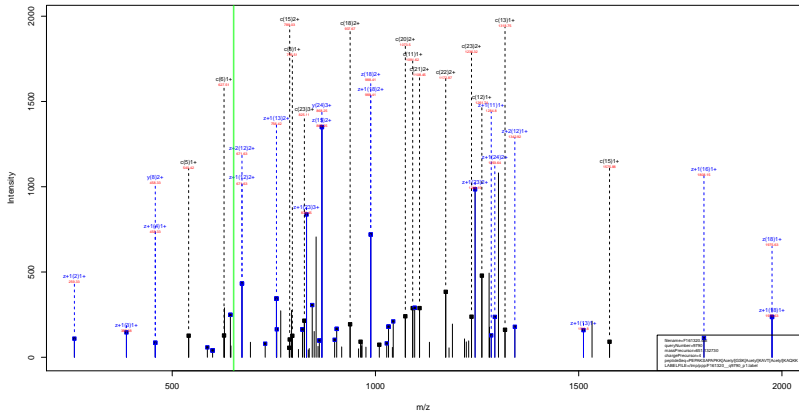

# sp | P10853 | H2B1F\_MOUSE

PEPAKSAPAPKK Acetyl 42.01 GSK Acetyl 42.01 KAVT Acetyl 42.01 KAQQK

- ▶ fragmentation table for charge state 1+
- ▶ specType=etd
- ▶ score=63.42
- ▶ F161320.dat
- ▶ query=q9790\_p1
- ▶ precursor=651.132730
- ▶ chargePrecursor=4
- ▶ itol=0.6

| AA | c  | y               | z+1             | z+2             | z               | AA              |       |
|----|----|-----------------|-----------------|-----------------|-----------------|-----------------|-------|
| F  | 1  | 145.087         | 2601.909        | 2585.490        | 0.000           | 2684.480        | P[24] |
| E  | 2  | 264.129         | 2504.456        | 2488.437        | 0.000           | 2487.420        | E[23] |
| F  | 3  | 341.160         | 2175.413        | 2159.395        | 0.000           | 2158.387        | F[22] |
| A  | 4  | 412.239         | 2078.361        | 2062.342        | 0.000           | 2061.334        | A[21] |
| K  | 5  | <b>540.314</b>  | 2007.323        | 2191.305        | 2102.313        | 2190.297        | K[20] |
| S  | 6  | <b>627.346</b>  | 2079.228        | 2063.210        | 2064.218        | 2062.202        | S[19] |
| A  | 7  | 698.383         | 1992.196        | <b>1976.178</b> | 1977.186        | <b>1975.170</b> | A[18] |
| F  | 8  | <b>795.436</b>  | 1921.159        | 1905.141        | 1906.148        | 1904.131        | F[17] |
| A  | 9  | 867.477         | 1834.107        | <b>1808.088</b> | 1809.096        | 1807.080        | A[16] |
| T  | 10 | <b>963.526</b>  | 1753.069        | 1737.051        | 1738.059        | 1736.041        | T[15] |
| K  | 11 | <b>1091.621</b> | 1676.017        | 1639.998        | 1641.006        | 1638.990        | K[14] |
| K  | 12 | <b>1261.726</b> | 1527.922        | <b>1511.903</b> | 1512.911        | 1510.895        | K[13] |
| G  | 13 | <b>1318.748</b> | 1357.816        | 1341.797        | <b>1342.805</b> | 1340.790        | G[12] |
| S  | 14 | 1405.790        | 1300.795        | <b>1284.776</b> | 1285.784        | 1283.768        | S[11] |
| K  | 15 | <b>1575.885</b> | 1213.743        | 1197.724        | 1198.732        | 1196.716        | K[10] |
| K  | 16 | 1301.950        | <b>1043.657</b> | <b>1027.638</b> | 1028.646        | 1026.631        | K[9]  |
| A  | 17 | 1775.017        | 915.562         | <b>899.543</b>  | 900.551         | 898.536         | A[8]  |
| V  | 18 | 1874.086        | <b>844.525</b>  | 828.508         | 829.514         | 827.499         | V[7]  |
| T  | 19 | 2017.144        | 745.457         | 729.438         | 730.446         | <b>728.430</b>  | T[6]  |
| K  | 20 | 2145.230        | 602.398         | <b>586.380</b>  | 587.388         | 585.372         | K[5]  |
| A  | 21 | 2218.276        | 474.333         | <b>458.285</b>  | 459.293         | 457.277         | A[4]  |
| Q  | 22 | 2344.336        | 403.266         | <b>387.248</b>  | 388.255         | 386.240         | Q[3]  |
| K  | 23 | 2472.430        | 275.200         | <b>259.189</b>  | 260.197         | 258.181         | K[2]  |
| K  | 24 | 2600.525        | 147.113         | 131.094         | 132.102         | 130.886         | K[1]  |

# sp | P10853 | H2B1F\_MOUSE

PEPAKSAPAPKK <sup>Acetyl</sup>42.01 GSK <sup>Acetyl</sup>42.01 KAVT <sup>Acetyl</sup>42.01 KAQKK

- ▶ fragmentation table for charge state 2+
- ▶ specType=etd
- ▶ score=63.42
- ▶ F161320.dat
- ▶ query=q9790\_p1
- ▶ precursor=651.132730
- ▶ chargePrecursor=4
- ▶ itol=0.6

| AA    | c               | y              | z+1             | z+2             | z               | AA    |
|-------|-----------------|----------------|-----------------|-----------------|-----------------|-------|
| P[1]  | 58.047          | 1301.958       | <b>1293.249</b> | 0.504           | 1292.745        | P[24] |
| E[2]  | 122.568         | 1252.732       | <b>1244.722</b> | 0.504           | 1244.218        | E[23] |
| P[3]  | 171.095         | 1188.210       | 1188.201        | 0.504           | 1179.697        | P[22] |
| A[4]  | 398.613         | 1139.684       | 1133.675        | 0.504           | 1133.171        | A[21] |
| K[5]  | 270.561         | 1104.165       | <b>1096.156</b> | <b>1096.660</b> | 1095.652        | K[20] |
| S[6]  | 314.177         | 1040.118       | <b>1032.109</b> | <b>1032.612</b> | <b>1031.605</b> | S[19] |
| A[7]  | 349.605         | 996.602        | <b>988.592</b>  | 989.606         | <b>988.089</b>  | A[18] |
| P[8]  | 398.222         | 961.083        | 953.074         | 953.578         | 952.570         | P[17] |
| A[9]  | 433.740         | 912.597        | <b>904.548</b>  | <b>905.051</b>  | 905.043         | A[16] |
| P[10] | 482.267         | 877.936        | 869.927         | 869.513         | <b>868.525</b>  | P[15] |
| K[11] | 546.314         | 828.512        | <b>820.503</b>  | <b>821.007</b>  | <b>819.999</b>  | K[14] |
| K[12] | 631.367         | 764.464        | <b>756.455</b>  | <b>756.959</b>  | <b>755.951</b>  | K[13] |
| G[13] | 659.878         | 679.412        | <b>671.402</b>  | <b>671.906</b>  | 670.898         | G[12] |
| S[14] | 703.394         | 650.901        | <b>642.892</b>  | <b>643.396</b>  | 642.388         | S[11] |
| K[15] | <b>788.446</b>  | 601.385        | <b>593.376</b>  | <b>593.880</b>  | <b>590.872</b>  | K[10] |
| K[16] | 852.494         | 527.132        | 517.361         | 514.859         | 512.357         | K[9]  |
| A[17] | 888.012         | <b>458.285</b> | 450.275         | 450.779         | 449.771         | A[8]  |
| V[18] | <b>937.547</b>  | 422.766        | 414.757         | 415.261         | 414.253         | V[7]  |
| T[19] | <b>1009.076</b> | 373.232        | 365.223         | 365.727         | 364.719         | T[6]  |
| K[20] | <b>1073.123</b> | 301.703        | 293.693         | 294.197         | 293.190         | K[5]  |
| A[21] | <b>1108.642</b> | 237.655        | 229.646         | 230.150         | 229.142         | A[4]  |
| Q[22] | <b>1172.671</b> | 202.137        | 194.127         | 194.631         | 193.623         | Q[3]  |
| K[23] | <b>1236.718</b> | 138.108        | 130.098         | 130.602         | 129.594         | K[2]  |
| K[24] | 1300.766        | 74.060         | 66.051          | 66.555          | 65.547          | K[1]  |



# sp | P10853 | H2B1F\_MOUSE

PEPAKSAPAPKK <sup>Acetyl</sup>42.01 GSK <sup>Acetyl</sup>42.01 KAVT <sup>Acetyl</sup>42.01 KAQKK

- ▶ fragmentation table for charge state 3+
- ▶ specType=etd
- ▶ score=63.42
- ▶ F161320.dat
- ▶ query=q9790\_p1
- ▶ precursor=651.132730
- ▶ chargePrecursor=4
- ▶ itol=0.6

| AA    | c              | y              | z+1            | z+2     | z              | AA    |
|-------|----------------|----------------|----------------|---------|----------------|-------|
| P[1]  | 89.034         | <b>867.841</b> | <b>862.501</b> | 0.672   | <b>862.166</b> | P[24] |
| E[2]  | 82.048         | 835.490        | <b>830.151</b> | 0.672   | 829.815        | E[23] |
| P[3]  | 114.999        | 792.476        | 787.136        | 0.672   | 786.800        | P[22] |
| A[4]  | 138.078        | 760.125        | 754.785        | 0.672   | 754.450        | A[21] |
| K[5]  | 180.776        | 736.446        | 731.106        | 731.442 | 730.770        | K[20] |
| S[6]  | 209.787        | 693.748        | 688.408        | 688.744 | 688.072        | S[19] |
| A[7]  | 233.466        | 664.737        | 659.397        | 659.733 | 659.061        | A[18] |
| P[8]  | 265.817        | 641.056        | 635.716        | 636.054 | 635.382        | P[17] |
| A[9]  | 289.496        | 608.707        | 603.367        | 603.703 | 603.032        | A[16] |
| P[10] | 321.847        | 586.026        | 579.686        | 580.024 | 579.352        | P[15] |
| K[11] | 364.545        | 552.677        | 547.337        | 547.673 | 547.002        | K[14] |
| K[12] | 421.247        | 509.979        | 504.639        | 504.975 | 504.303        | K[13] |
| G[13] | 440.284        | 483.277        | 447.937        | 448.273 | 447.601        | G[12] |
| S[14] | 469.265        | 434.270        | 438.930        | 439.266 | 438.594        | S[11] |
| K[15] | 525.967        | 405.259        | 399.920        | 400.255 | 399.584        | K[10] |
| K[16] | 568.665        | 348.557        | 343.218        | 343.554 | 342.882        | K[9]  |
| A[17] | 592.344        | 305.859        | 300.519        | 300.855 | 300.183        | A[8]  |
| V[18] | 625.367        | 282.180        | 276.840        | 277.176 | 276.504        | V[7]  |
| T[19] | 673.053        | 249.157        | 243.817        | 244.153 | 243.482        | T[6]  |
| K[20] | 715.751        | 201.471        | 196.131        | 196.467 | 195.795        | K[5]  |
| A[21] | 759.430        | 158.773        | 153.433        | 153.769 | 153.097        | A[4]  |
| Q[22] | 782.116        | 135.094        | 129.754        | 130.090 | 129.418        | Q[3]  |
| K[23] | <b>824.815</b> | 92.407         | 87.068         | 87.404  | 86.732         | K[2]  |
| K[24] | 867.513        | 49.709         | 44.370         | 44.705  | 44.034         | K[1]  |

# sp | P84228 | H32\_MOUSE

DTNLCAIHAk Crotonaldehyde RVTIMPK  
70.04

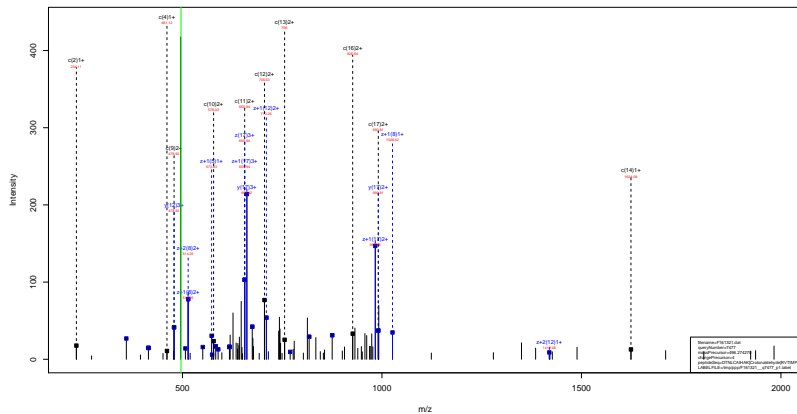

# sp | P84228 | H32\_MOUSE

DTNLCAIHAH Crotonaldehyde  
70.04 RVTIMPK

- ▶ fragmentation table for charge state 1+
- ▶ specType=etd
- ▶ score=30.76
- ▶ F161321.dat
- ▶ query=q7477.p1
- ▶ precursor=496.274270
- ▶ chargePrecursor=4
- ▶ itol=0.6

| AA |    | c               | y              | z=1             | z=2             | z        | AA |
|----|----|-----------------|----------------|-----------------|-----------------|----------|----|
| D  | 1  | 111.951         | 1981.072       | 1965.053        | 0.000           | 1964.046 | D  |
| T  | 2  | <b>234.108</b>  | 1866.945       | 1850.926        | 0.000           | 1849.919 | T  |
| N  | 3  | 348.151         | 1764.995       | 1748.979        | 1749.987        | 1747.971 | N  |
| L  | 4  | <b>461.235</b>  | 1650.955       | 1634.936        | 1635.944        | 1633.928 | L  |
| C  | 5  | 564.245         | 1537.971       | 1521.950        | 1522.960        | 1520.944 | C  |
| A  | 6  | 635.262         | 1434.961       | 1418.943        | <b>1419.850</b> | 1417.835 | A  |
| H  | 7  | 748.268         | 1363.824       | 1347.805        | 1348.813        | 1346.798 | H  |
| W  | 8  | 889.425         | 1250.740       | 1234.721        | 1235.729        | 1233.714 | W  |
| A  | 9  | 956.462         | 1113.681       | 1097.663        | 1098.670        | 1096.655 | A  |
| K  | 10 | 1154.599        | 1042.644       | <b>1026.625</b> | 1027.633        | 1025.618 | K  |
| R  | 11 | 1310.705        | 844.507        | 828.489         | 829.496         | 827.481  | R  |
| V  | 12 | 1409.768        | 688.400        | 672.387         | 673.395         | 671.380  | V  |
| I  | 13 | 1509.838        | <b>509.338</b> | <b>573.319</b>  | <b>574.327</b>  | 572.311  | I  |
| I  | 14 | <b>1623.908</b> | 488.290        | 472.271         | 473.279         | 471.264  | I  |
| M  | 15 | 1754.040        | 375.255        | <b>359.187</b>  | 360.195         | 358.180  | M  |
| P  | 16 | 1851.993        | 244.166        | 228.147         | 229.155         | 227.139  | P  |
| K  | 17 | 1980.888        | 147.113        | 131.094         | 132.102         | 130.088  | K  |

# sp | P84228 | H32\_MOUSE

DTNLCAIHAK <sup>Crotonaldehyde</sup> 70.04 RVTIMPK

- ▶ fragmentation table for charge state 2+
- ▶ specType=etd
- ▶ score=30.76
- ▶ F161321.dat
- ▶ query=q7477.p1
- ▶ precursor=496.274270
- ▶ chargePrecursor=4
- ▶ itol=0.6

| AA    | c              | y              | z+1            | z+2            | z              | AA    |
|-------|----------------|----------------|----------------|----------------|----------------|-------|
| D[1]  | 67.034         | <b>991.040</b> | <b>981.030</b> | 0.504          | 982.526        | D[17] |
| Y[2]  | 117.558        | 933.526        | 925.517        | 0.504          | 925.013        | Y[16] |
| N[3]  | 174.579        | 883.002        | <b>874.993</b> | <b>875.497</b> | 874.489        | N[15] |
| L[4]  | 231.121        | 825.981        | <b>817.972</b> | 818.475        | <b>817.468</b> | L[14] |
| C[5]  | 282.626        | <b>769.439</b> | 761.430        | 761.933        | 760.926        | C[13] |
| A[6]  | 318.145        | 717.934        | <b>709.925</b> | <b>710.429</b> | 709.421        | A[12] |
| V[7]  | 374.687        | 662.415        | <b>674.406</b> | <b>674.910</b> | 673.903        | V[11] |
| H[8]  | 431.216        | 628.874        | <b>617.864</b> | 618.368        | <b>617.360</b> | H[10] |
| A[9]  | <b>478.735</b> | 557.344        | 549.335        | 549.839        | 548.831        | A[9]  |
| K[10] | <b>577.803</b> | 521.828        | <b>513.816</b> | <b>514.320</b> | 513.312        | K[8]  |
| R[11] | <b>655.854</b> | 422.757        | <b>414.748</b> | <b>415.252</b> | <b>414.244</b> | R[7]  |
| V[12] | <b>705.388</b> | 344.707        | 336.697        | 337.201        | 336.193        | V[6]  |
| Y[13] | <b>755.912</b> | 295.173        | 287.163        | 287.667        | 286.659        | Y[5]  |
| T[14] | 812.454        | 244.649        | 236.639        | 237.143        | 236.135        | T[4]  |
| M[15] | 877.974        | 188.107        | 180.097        | 180.601        | 179.593        | M[3]  |
| P[16] | <b>926.300</b> | 122.585        | 114.577        | 115.081        | 114.073        | P[2]  |
| K[17] | <b>990.548</b> | 74.060         | 66.051         | 66.555         | 65.547         | K[1]  |

# sp | P84228 | H32\_MOUSE

DTNLCAIHAK <sup>Crotonaldehyde</sup> 70.04 RVTIMPK

- ▶ fragmentation table for charge state 3+
- ▶ specType=etd
- ▶ score=30.76
- ▶ F161321.dat
- ▶ query=q7477.p1
- ▶ precursor=496.274270
- ▶ chargePrecursor=4
- ▶ itol=0.6

| AA    | c              | y              | z+1            | z+2     | z              | AA    |
|-------|----------------|----------------|----------------|---------|----------------|-------|
| D[1]  | 48.025         | <b>661.029</b> | <b>655.689</b> | 0.672   | <b>655.353</b> | D[17] |
| T[2]  | 78.708         | 622.687        | <b>617.347</b> | 0.672   | 617.011        | T[16] |
| N[3]  | 116.722        | <b>589.004</b> | <b>583.664</b> | 584.000 | <b>583.329</b> | N[15] |
| L[4]  | 154.417        | <b>550.990</b> | 545.650        | 545.986 | 545.314        | L[14] |
| C[5]  | 188.753        | 513.295        | 507.955        | 508.291 | <b>507.620</b> | C[13] |
| A[6]  | 212.432        | <b>478.959</b> | 473.619        | 473.955 | 473.285        | A[12] |
| T[7]  | 250.227        | 439.262        | 434.980        | 435.216 | 434.544        | T[11] |
| H[8]  | 289.513        | 417.585        | 412.245        | 412.581 | 411.909        | H[10] |
| A[9]  | 319.492        | 371.899        | 366.559        | 366.895 | 366.223        | A[9]  |
| K[10] | 385.538        | 348.220        | 342.880        | 343.216 | 342.544        | K[8]  |
| R[11] | 437.571        | 282.174        | 276.834        | 277.170 | 276.498        | R[7]  |
| V[12] | 470.584        | 230.140        | 224.801        | 225.137 | 224.465        | V[6]  |
| T[13] | 504.277        | 197.117        | 191.778        | 192.114 | 191.442        | T[5]  |
| I[14] | 541.971        | 163.435        | 158.095        | 158.431 | 157.759        | I[4]  |
| M[15] | 585.652        | 125.740        | 120.401        | 120.737 | 120.065        | M[3]  |
| P[16] | <b>618.003</b> | 82.060         | 76.720         | 77.056  | 76.385         | P[2]  |
| K[17] | 650.701        | 49.709         | 44.370         | 44.705  | 44.034         | K[1]  |



# sp | P62806 | H4\_MOUSE

SGRGK<sup>Propionyl</sup><sub>56.03</sub> GGKGLGKGGAKRHR<sup>Methyl</sup><sub>14.02</sub> KVLK<sup>Methyl</sup><sub>14.02</sub>

- ▶ fragmentation table for charge state 1+
- ▶ specType=etd
- ▶ score=39.40
- ▶ F161321.dat
- ▶ query=q9194\_p1
- ▶ precursor=350.219390
- ▶ chargePrecursor=7
- ▶ itol=0.6

| AA    | c               | y              | z+1            | z+2            | z        | AA    |
|-------|-----------------|----------------|----------------|----------------|----------|-------|
| S[1]  | 105.066         | 2444.481       | 2428.472       | 0.000          | 2427.464 | S[23] |
| G[2]  | 162.087         | 2307.459       | 2341.440       | 0.000          | 2340.432 | G[22] |
| R[3]  | 318.188         | 2300.437       | 2284.419       | 2285.427       | 2283.411 | R[21] |
| G[4]  | 375.210         | 2144.336       | 2128.318       | 2129.326       | 2127.310 | G[20] |
| K[5]  | 529.311         | 2087.315       | 2071.298       | 2072.304       | 2070.288 | K[19] |
| G[6]  | <b>616.353</b>  | 1953.196       | 1887.175       | 1888.183       | 1886.167 | G[18] |
| G[7]  | <b>673.374</b>  | 1846.172       | 1830.153       | 1831.161       | 1829.146 | G[17] |
| K[8]  | 801.469         | 1789.151       | 1773.132       | 1774.140       | 1772.124 | K[16] |
| G[9]  | <b>858.490</b>  | 1661.050       | 1645.037       | 1646.045       | 1644.029 | G[15] |
| L[10] | 971.574         | 1604.034       | 1588.016       | 1589.023       | 1587.008 | L[14] |
| G[11] | <b>1028.596</b> | 1490.950       | 1474.932       | 1475.939       | 1473.924 | G[13] |
| K[12] | 1150.691        | 1433.929       | 1417.910       | 1418.918       | 1416.902 | K[12] |
| G[13] | 1213.712        | 1325.834       | 1289.815       | 1290.823       | 1288.807 | G[11] |
| G[14] | 1276.734        | 1248.812       | 1232.794       | 1233.801       | 1231.786 | G[10] |
| A[15] | 1341.771        | 1191.791       | 1175.772       | 1176.780       | 1174.764 | A[9]  |
| K[16] | 1409.806        | 1120.754       | 1104.735       | 1105.743       | 1103.727 | K[8]  |
| R[17] | 1625.967        | 992.659        | 976.640        | 977.648        | 975.632  | R[7]  |
| H[18] | 1763.026        | 836.558        | 820.539        | <b>821.547</b> | 819.531  | H[6]  |
| R[19] | 1833.143        | 699.499        | 683.480        | <b>684.488</b> | 682.472  | R[5]  |
| K[20] | 2003.238        | 529.363        | 513.363        | <b>514.371</b> | 512.355  | K[4]  |
| V[21] | 2160.309        | <b>401.287</b> | <b>385.268</b> | <b>386.276</b> | 384.261  | V[3]  |
| L[22] | 2273.390        | 302.219        | 286.200        | <b>287.208</b> | 285.192  | L[2]  |
| R[23] | 2443.507        | 189.135        | 173.116        | 174.124        | 172.108  | R[1]  |

# sp | P62806 | H4\_MOUSE

SGRGK<sup>Propionyl</sup> 56.03 GKGKLGKGGAKRHR<sup>Methyl</sup> 14.02 KVLK<sup>Methyl</sup> 14.02

- ▶ fragmentation table for charge state 2+
- ▶ specType=etd
- ▶ score=39.40
- ▶ F161321.dat
- ▶ query=q9194\_p1
- ▶ precursor=350.219390
- ▶ chargePrecursor=7
- ▶ itol=0.6

| AA    | c              | y              | z+1             | z+2            | z               | AA    |
|-------|----------------|----------------|-----------------|----------------|-----------------|-------|
| S[1]  | 53.037         | 1222.749       | <b>1214.740</b> | 0.504          | <b>1214.236</b> | S[23] |
| G[2]  | 81.547         | 1179.233       | 1171.224        | 0.504          | 1170.720        | G[22] |
| R[3]  | <b>159.598</b> | 1150.722       | 1142.713        | 1143.217       | 1142.209        | R[21] |
| G[4]  | 188.109        | 1072.672       | 1064.662        | 1065.166       | 1064.159        | G[20] |
| K[5]  | 260.199        | 1004.161       | 1009.152        | 1020.656       | 1029.643        | K[19] |
| G[6]  | <b>308.690</b> | 952.100        | 944.091         | 944.595        | 943.587         | G[18] |
| G[7]  | <b>337.191</b> | 923.590        | 915.580         | 916.084        | 915.078         | G[17] |
| K[8]  | <b>401.238</b> | 895.079        | 887.070         | <b>887.574</b> | 886.568         | K[16] |
| G[9]  | <b>429.749</b> | <b>831.632</b> | 823.622         | <b>823.526</b> | 822.519         | G[15] |
| L[10] | 486.201        | <b>802.521</b> | 794.511         | <b>795.015</b> | 794.009         | L[14] |
| G[11] | <b>514.802</b> | 745.979        | <b>737.969</b>  | <b>738.473</b> | <b>737.465</b>  | G[13] |
| R[12] | <b>575.849</b> | 717.468        | 709.457         | <b>709.963</b> | 708.957         | R[12] |
| G[13] | <b>607.360</b> | <b>653.421</b> | <b>645.411</b>  | <b>645.915</b> | 644.907         | G[11] |
| G[14] | <b>635.871</b> | <b>624.910</b> | <b>616.900</b>  | <b>617.404</b> | <b>616.397</b>  | G[10] |
| A[15] | <b>671.389</b> | <b>596.399</b> | <b>588.390</b>  | <b>588.894</b> | <b>587.886</b>  | A[9]  |
| K[16] | <b>735.437</b> | 569.881        | <b>552.871</b>  | <b>553.375</b> | 552.367         | K[8]  |
| R[17] | 813.697        | <b>496.833</b> | 488.824         | 489.328        | 488.320         | R[7]  |
| R[18] | <b>882.017</b> | <b>418.782</b> | <b>410.773</b>  | <b>411.277</b> | <b>410.269</b>  | R[6]  |
| R[19] | 967.678        | 359.253        | <b>342.244</b>  | <b>342.748</b> | <b>341.740</b>  | R[5]  |
| K[20] | 1031.122       | 285.195        | 277.185         | 277.689        | 276.681         | K[4]  |
| V[21] | 1080.657       | 201.147        | 193.138         | 193.642        | 192.634         | V[3]  |
| L[22] | 1137.199       | 151.613        | 143.604         | 144.108        | 143.100         | L[2]  |
| R[23] | 1222.257       | 95.071         | 87.062          | 87.565         | 86.558          | R[1]  |



# sp | P62806 | H4\_MOUSE

SGRGK<sup>Propionyl</sup><sub>56.03</sub> GKGKLGKGGAKRHR<sup>Methyl</sup><sub>14.02</sub> KVLK<sup>Methyl</sup><sub>14.02</sub>

- ▶ fragmentation table for charge state 3+
- ▶ specType=etd
- ▶ score=39.40
- ▶ F161321.dat
- ▶ query=q9194\_p1
- ▶ precursor=350.219390
- ▶ chargePrecursor=7
- ▶ itol=0.6

| AA |      | c              | y              | z+1            | z+2            | z              | AA    |
|----|------|----------------|----------------|----------------|----------------|----------------|-------|
| S  | [1]  | 35.693         | <b>815.502</b> | <b>810.162</b> | 0.672          | <b>809.826</b> | S[23] |
| G  | [2]  | 54.701         | <b>786.491</b> | 781.152        | 0.672          | 780.816        | G[22] |
| R  | [3]  | 106.734        | 757.464        | 762.143        | 762.880        | 761.808        | R[21] |
| G  | [4]  | 129.741        | 719.490        | <b>710.111</b> | <b>710.447</b> | <b>709.775</b> | G[20] |
| K  | [5]  | 187.115        | <b>696.443</b> | 691.104        | 691.240        | 690.768        | K[19] |
| G  | [6]  | 206.122        | <b>635.069</b> | <b>629.730</b> | <b>630.066</b> | 629.394        | G[18] |
| G  | [7]  | 225.130        | 616.062        | <b>610.723</b> | <b>611.059</b> | <b>610.387</b> | G[17] |
| K  | [8]  | 267.826        | <b>597.055</b> | 591.716        | <b>592.051</b> | 591.380        | K[16] |
| G  | [9]  | <b>286.835</b> | <b>554.357</b> | <b>549.017</b> | <b>549.353</b> | 548.681        | G[15] |
| L  | [10] | 324.530        | <b>535.350</b> | <b>530.010</b> | <b>530.346</b> | 529.674        | L[14] |
| G  | [11] | <b>343.537</b> | <b>497.655</b> | <b>492.315</b> | <b>492.651</b> | 491.979        | G[13] |
| K  | [12] | <b>386.235</b> | <b>478.648</b> | <b>473.308</b> | <b>473.644</b> | <b>472.972</b> | K[12] |
| G  | [13] | <b>405.242</b> | <b>435.949</b> | <b>430.610</b> | <b>430.946</b> | <b>430.274</b> | G[11] |
| G  | [14] | <b>424.249</b> | 416.942        | <b>411.603</b> | <b>411.939</b> | <b>411.267</b> | G[10] |
| A  | [15] | <b>447.929</b> | <b>397.935</b> | <b>392.596</b> | <b>392.932</b> | <b>392.260</b> | A[9]  |
| K  | [16] | <b>490.627</b> | <b>374.256</b> | <b>368.917</b> | <b>369.252</b> | <b>368.581</b> | K[8]  |
| R  | [17] | <b>542.661</b> | 351.558        | <b>326.218</b> | <b>326.554</b> | <b>325.882</b> | R[7]  |
| H  | [18] | <b>588.347</b> | 279.524        | 274.185        | 274.520        | 273.849        | H[6]  |
| R  | [19] | 645.052        | 233.838        | 228.498        | 228.834        | 228.162        | R[5]  |
| K  | [20] | 687.751        | 177.132        | 171.793        | 172.129        | 171.457        | K[4]  |
| V  | [21] | <b>720.774</b> | 134.434        | 129.094        | 129.430        | 128.758        | V[3]  |
| L  | [22] | 758.866        | 101.911        | 96.573         | 96.907         | 96.236         | L[2]  |
| K  | [23] | 815.174        | 83.710         | 78.371         | 78.713         | 78.041         | K[1]  |

# sp | P62806 | H4\_MOUSE

SGRGK<sup>Propionyl</sup><sub>56.03</sub> GKGKLGKGGAKRHR<sup>Methyl</sup><sub>14.02</sub> KVLK<sup>Methyl</sup><sub>14.02</sub>

- ▶ fragmentation table for charge state 4+
- ▶ specType=etd
- ▶ score=39.40
- ▶ F161321.dat
- ▶ query=q9194\_p1
- ▶ precursor=350.219390
- ▶ chargePrecursor=7
- ▶ itol=0.6

| AA |      | c              | y              | z+1            | z+2            | z              | AA    |
|----|------|----------------|----------------|----------------|----------------|----------------|-------|
| S  | [1]  | 27.022         | <b>611.878</b> | <b>607.874</b> | 0.755          | <b>607.622</b> | S[23] |
| G  | [2]  | 41.277         | <b>590.120</b> | 585.113        | 0.755          | 585.864        | G[22] |
| R  | [3]  | 80.303         | <b>575.965</b> | <b>571.860</b> | <b>572.112</b> | <b>571.608</b> | R[21] |
| G  | [4]  | 94.558         | <b>536.840</b> | 532.833        | 533.087        | 532.583        | G[20] |
| K  | [5]  | 140.588        | 522.584        | 518.579        | 518.831        | 518.328        | K[19] |
| G  | [6]  | 154.844        | 476.554        | <b>472.549</b> | <b>472.801</b> | <b>472.297</b> | G[18] |
| G  | [7]  | 169.099        | 462.299        | <b>458.294</b> | <b>458.546</b> | <b>458.042</b> | G[17] |
| K  | [8]  | 201.123        | <b>448.043</b> | <b>444.038</b> | <b>444.290</b> | 443.787        | K[16] |
| G  | [9]  | 215.378        | <b>416.019</b> | <b>412.015</b> | <b>412.267</b> | <b>411.763</b> | G[15] |
| L  | [10] | 243.649        | <b>401.764</b> | <b>397.759</b> | <b>398.011</b> | <b>397.507</b> | L[14] |
| G  | [11] | 257.904        | 373.493        | <b>369.488</b> | <b>369.740</b> | <b>369.236</b> | G[13] |
| K  | [12] | 289.928        | 359.238        | 355.233        | 355.485        | 354.981        | K[12] |
| G  | [13] | 304.184        | 327.214        | 323.209        | 323.461        | 322.957        | G[11] |
| G  | [14] | 318.439        | 312.959        | <b>308.954</b> | <b>309.206</b> | <b>308.702</b> | G[10] |
| A  | [15] | 336.198        | 298.703        | 294.698        | 294.950        | 294.447        | A[9]  |
| K  | [16] | <b>368.222</b> | 280.944        | 276.939        | 277.191        | 276.687        | K[8]  |
| R  | [17] | <b>407.247</b> | 248.920        | 244.915        | 245.167        | 244.664        | R[7]  |
| H  | [18] | <b>441.512</b> | 209.895        | 205.890        | 206.142        | 205.638        | H[6]  |
| R  | [19] | <b>484.041</b> | <b>175.630</b> | 171.625        | 171.877        | 171.374        | R[5]  |
| K  | [20] | <b>516.065</b> | 133.101        | 129.096        | 129.348        | 128.844        | K[4]  |
| V  | [21] | 840.832        | 101.077        | 97.073         | 97.325         | 96.821         | V[9]  |
| L  | [22] | <b>569.103</b> | 76.310         | 72.305         | 72.557         | 72.053         | L[8]  |
| R  | [23] | 611.632        | 48.039         | 44.034         | 44.286         | 43.782         | R[1]  |

# sp | P62806 | H4\_MOUSE

SGRGK<sup>Propionyl</sup><sub>56.03</sub> GGKGLGKGGAKRHR<sup>Methyl</sup><sub>14.02</sub> KVLRR<sup>Methyl</sup><sub>14.02</sub>

- ▶ fragmentation table for charge state 5+
- ▶ specType=etd
- ▶ score=39.40
- ▶ F161321.dat
- ▶ query=q9194\_p1
- ▶ precursor=350.219390
- ▶ chargePrecursor=7
- ▶ itol=0.6

| AA    |  | c              | y              | z+1            | z+2            | z              | AA    |
|-------|--|----------------|----------------|----------------|----------------|----------------|-------|
| S[1]  |  | 21.819         | <b>489.704</b> | <b>486.500</b> | 0.806          | 486.299        | S[2]  |
| G[2]  |  | 33.223         | <b>472.298</b> | <b>469.094</b> | 0.806          | <b>468.892</b> | G[2]  |
| E[3]  |  | 64.444         | <b>460.893</b> | <b>457.689</b> | <b>457.891</b> | 457.488        | R[2]  |
| G[4]  |  | 75.988         | <b>429.673</b> | <b>426.469</b> | <b>426.671</b> | <b>426.268</b> | G[25] |
| K[5]  |  | 112.672        | <b>418.265</b> | <b>415.065</b> | <b>415.267</b> | 414.863        | K[19] |
| G[6]  |  | 124.076        | 381.445        | 378.241        | 378.442        | 378.039        | G[18] |
| G[7]  |  | 135.481        | 370.040        | 366.837        | 367.038        | 366.635        | G[17] |
| K[8]  |  | 161.100        | 358.636        | 355.432        | 355.634        | 355.231        | K[16] |
| G[9]  |  | 172.504        | 333.017        | 329.813        | 330.015        | 329.612        | G[15] |
| L[10] |  | 195.121        | 321.613        | 318.409        | 318.611        | 318.207        | L[14] |
| G[11] |  | 206.525        | 298.996        | 295.792        | 295.994        | 295.591        | G[13] |
| K[12] |  | 232.144        | 287.592        | 284.388        | 284.589        | 284.186        | K[12] |
| G[13] |  | 243.548        | 281.973        | 278.769        | 278.970        | 278.567        | G[11] |
| G[14] |  | 254.953        | 250.568        | 247.363        | 247.565        | 247.163        | G[10] |
| A[15] |  | 269.160        | 239.164        | 235.960        | 236.162        | 235.759        | A[9]  |
| K[16] |  | 294.779        | 224.957        | 221.753        | 221.954        | 221.551        | K[8]  |
| R[17] |  | <b>325.999</b> | 199.338        | 196.134        | 196.335        | 195.932        | R[7]  |
| H[18] |  | 353.411        | 168.117        | 164.914        | 165.115        | 164.712        | H[6]  |
| R[19] |  | 387.434        | 140.706        | 137.502        | 137.703        | 137.300        | R[5]  |
| K[20] |  | <b>413.053</b> | 106.682        | 103.478        | 103.680        | 103.277        | K[4]  |
| V[21] |  | 432.867        | 81.063         | 77.859         | 78.061         | 77.658         | V[9]  |
| L[22] |  | 433.868        | 61.250         | 58.046         | 58.247         | 57.844         | L[9]  |
| R[23] |  | <b>489.507</b> | 38.633         | 35.429         | 35.631         | 35.227         | R[1]  |

# sp | P62806 | H4\_MOUSE

SGRGK<sup>Propionyl</sup><sub>56.03</sub> GGKGLGKGGAKRHR<sup>Methyl</sup><sub>14.02</sub> KVLRR<sup>Methyl</sup><sub>14.02</sub>

- ▶ fragmentation table for charge state 6+
- ▶ specType=etd
- ▶ score=39.40
- ▶ F161321.dat
- ▶ query=q9194\_p1
- ▶ precursor=350.219390
- ▶ chargePrecursor=7
- ▶ itol=0.6

| AA    | c              | y              | z+1            | z+2     | z              | AA    |
|-------|----------------|----------------|----------------|---------|----------------|-------|
| S[1]  | 18.350         | <b>408.255</b> | <b>405.585</b> | 0.839   | <b>405.417</b> | S[23] |
| G[2]  | 27.854         | 393.749        | 391.079        | 0.839   | 390.911        | G[22] |
| R[3]  | 53.971         | 358.246        | 351.516        | 351.744 | 351.408        | R[21] |
| G[4]  | 63.174         | 358.229        | 355.539        | 355.727 | 355.391        | G[20] |
| K[5]  | 94.063         | 348.725        | 348.055        | 346.273 | 345.987        | K[19] |
| G[6]  | 103.565        | 318.038        | 315.369        | 315.537 | 315.201        | G[18] |
| G[7]  | 113.068        | <b>308.535</b> | 305.865        | 306.033 | 305.697        | G[17] |
| K[8]  | 134.418        | 299.031        | 296.361        | 296.529 | 296.193        | K[16] |
| G[9]  | 143.921        | 277.682        | 275.012        | 275.180 | 274.844        | G[15] |
| L[10] | 162.768        | 268.178        | 265.509        | 265.677 | 265.341        | L[14] |
| G[11] | 172.272        | 249.331        | 246.661        | 246.829 | 246.493        | G[13] |
| K[12] | 193.621        | 239.826        | 237.156        | 237.326 | 236.990        | K[12] |
| G[13] | 203.125        | 218.478        | 215.809        | 215.977 | 215.641        | G[11] |
| G[14] | 212.628        | 208.975        | 206.305        | 206.473 | 206.137        | G[10] |
| A[15] | 224.468        | 199.471        | 196.801        | 196.969 | 196.633        | A[9]  |
| K[16] | 245.817        | 187.632        | 184.962        | 185.130 | 184.794        | K[8]  |
| R[17] | <b>271.834</b> | 166.283        | 163.613        | 163.781 | 163.445        | R[7]  |
| H[18] | 294.677        | 140.266        | 137.596        | 137.764 | 137.428        | H[6]  |
| R[19] | 323.030        | 117.423        | 114.753        | 114.921 | 114.585        | R[5]  |
| K[20] | <b>344.379</b> | 89.070         | 86.400         | 86.568  | 86.232         | K[4]  |
| V[21] | 360.890        | 67.721         | 65.051         | 65.219  | 64.883         | V[3]  |
| L[22] | 378.738        | 51.209         | 48.539         | 48.707  | 48.371         | L[2]  |
| R[23] | <b>408.091</b> | 32.362         | 29.692         | 29.860  | 29.524         | R[1]  |



# sp | P10922 | H10\_MOUSE

[Acetyl]TENSTSAPAAKPK

- ▶ fragmentation table for charge state 1+
- ▶ specType=cid
- ▶ score=38.84
- ▶ F161333.dat
- ▶ query=q5544\_p1
- ▶ precursor=672.343990
- ▶ chargePrecursor=2
- ▶ itol=0.6

| AA    | a              | a*             | a,Δ             | b              | b*             | b,Δ            | y               | y*              | y,Δ     | AA    |
|-------|----------------|----------------|-----------------|----------------|----------------|----------------|-----------------|-----------------|---------|-------|
| E[1]  | 116.071        | 0.000          | 46.066          | 144.066        | 0.000          | 146.066        | 116.071         | 116.071         | 0.000   | E[12] |
| E[2]  | 245.113        | 0.000          | 227.103         | <b>272.108</b> | 0.000          | 280.103        | 245.113         | 118.010         | 118.011 | E[12] |
| T[S]  | 370.156        | 321.150        | 149.146         | <b>307.151</b> | 309.146        | <b>328.140</b> | <b>1071.573</b> | <b>1054.551</b> | 689.569 | T[S]  |
| S[4]  | <b>446.188</b> | <b>429.182</b> | 426.173         | <b>474.181</b> | <b>457.157</b> | <b>456.173</b> | <b>957.536</b>  | 940.515         | 698.526 | S[10] |
| T[5]  | 547.228        | <b>520.209</b> | 520.200         | <b>575.211</b> | <b>558.204</b> | <b>557.220</b> | <b>678.568</b>  | 661.476         | 662.504 | T[10] |
| S[6]  | 618.270        | 611.261        | 610.250         | <b>662.263</b> | <b>645.236</b> | <b>644.251</b> | <b>769.497</b>  | 752.416         | 753.448 | S[10] |
| A[7]  | 705.312        | 698.273        | 697.250         | <b>731.300</b> | <b>716.273</b> | <b>715.289</b> | <b>681.425</b>  | 665.390         | 666.421 | A[7]  |
| P[8]  | 802.358        | 795.313        | 794.340         | 810.313        | 811.307        | <b>812.342</b> | <b>811.368</b>  | 798.300         | 800.316 | P[8]  |
| A[9]  | 873.395        | 865.360        | 865.360         | 890.360        | 894.360        | 895.373        | <b>514.335</b>  | 497.305         | 500.340 | A[9]  |
| A[10] | 944.432        | 937.420        | 936.411         | <b>972.427</b> | 976.420        | 976.413        | <b>441.290</b>  | <b>426.271</b>  | 428.287 | A[10] |
| R[11] | 1012.507       | 1005.500       | <b>1054.516</b> | 1058.507       | 1060.496       | 1060.511       | <b>372.261</b>  | <b>355.234</b>  | 358.260 | R[11] |
| P[12] | 1189.548       | 1183.531       | 1181.580        | 1197.575       | 1189.548       | 1179.561       | <b>244.166</b>  | 227.138         | 230.165 | P[12] |
| R[13] | 1287.575       | 1280.548       | 1278.588        | 1326.575       | 1308.543       | 1307.559       | 147.111         | 130.088         | 133.115 | R[13] |

# sp | P10922 | H10\_MOUSE

[Acetyl]TENSTSAPAAKPK

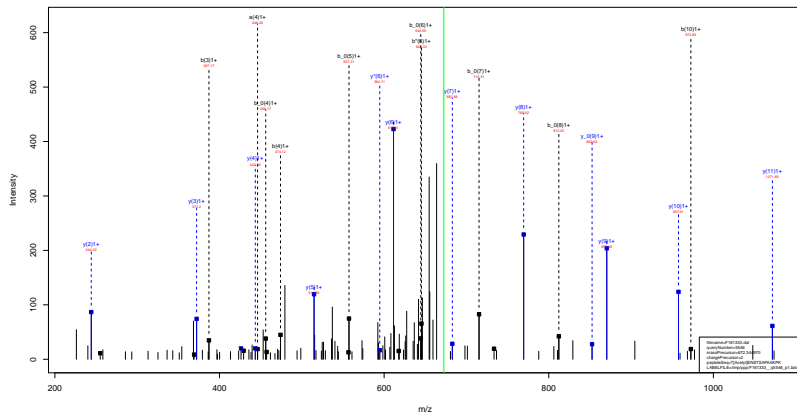

# sp | P10922 | H10\_MOUSE

[Acetyl]TENSTSAPAAKPK

- ▶ fragmentation table for charge state 1+
- ▶ specType=cid
- ▶ score=64.67
- ▶ F161333.dat
- ▶ query=q5546\_p1
- ▶ precursor=672.344970
- ▶ chargePrecursor=2
- ▶ itol=0.6

| AA | a              | a*             | a <sub>0</sub> | b              | b*             | b <sub>0</sub> | y               | y*             | y <sub>0</sub> | AA |
|----|----------------|----------------|----------------|----------------|----------------|----------------|-----------------|----------------|----------------|----|
| T  | 148.071        | 0.000          | 98.090         | 144.066        | 0.000          | 439.090        | 1343.690        | 1329.694       | 1325.670       | T  |
| E  | 245.111        | 0.000          | 227.103        | 232.108        | 0.000          | <b>255.096</b> | 3200.692        | 3183.508       | 3182.611       | E  |
| T  | 290.216        | 0.013          | 163.149        | <b>189.151</b> | 0.013          | <b>300.190</b> | <b>1071.579</b> | 1069.555       | 1069.566       | T  |
| S  | <b>446.188</b> | <b>420.182</b> | 426.176        | <b>474.183</b> | <b>457.157</b> | <b>456.173</b> | <b>957.576</b>  | 945.510        | 939.526        | S  |
| T  | 247.216        | 0.000          | 129.220        | 125.211        | 0.000          | <b>357.220</b> | <b>870.504</b>  | 862.470        | <b>852.464</b> | T  |
| S  | 134.208        | <b>617.241</b> | 130.201        | 126.200        | 0.000          | <b>645.236</b> | <b>644.232</b>  | <b>760.497</b> | 752.476        | S  |
| A  | 705.209        | 650.215        | 687.204        | <b>733.200</b> | 716.213        | <b>715.200</b> | <b>682.425</b>  | 685.106        | 679.000        | A  |
| P  | 802.404        | 683.401        | 786.401        | 800.403        | 811.400        | <b>812.342</b> | <b>611.580</b>  | <b>594.361</b> | 600.000        | P  |
| A  | 672.345        | 626.348        | 605.354        | 661.349        | 664.353        | 663.340        | <b>514.335</b>  | 491.400        | 490.000        | A  |
| A  | 494.414        | 471.403        | 459.404        | <b>472.427</b> | 470.402        | 464.403        | <b>441.398</b>  | <b>426.271</b> | 420.000        | A  |
| R  | 1127.527       | 1055.520       | 1054.518       | 1100.522       | 1061.406       | 1050.511       | <b>372.261</b>  | 362.234        | 350.000        | R  |
| P  | 1130.580       | 1103.573       | 1113.569       | 1107.576       | 1130.548       | 1126.564       | <b>244.166</b>  | 227.130        | 220.000        | P  |
| K  | 1207.615       | 1200.608       | 1210.604       | 1225.610       | 1208.642       | 1207.630       | 147.113         | 130.000        | 0.000          | K  |



# sp | P43274 | H14\_MOUSE

[Acetyl]SETAPAAPAAPAPAEKTPVKK

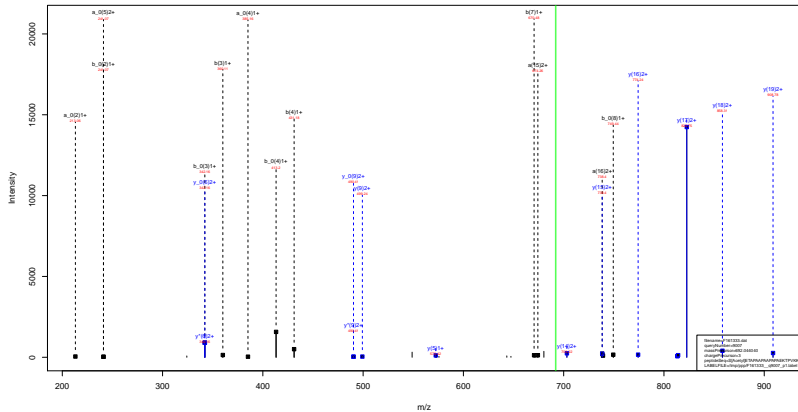

# sp | P43274 | H14\_MOUSE

[Acetyl]SETAPAAPAAPAPAEKTPVKK

- ▶ fragmentation table for charge state 1+
- ▶ specType=cid
- ▶ score=46.08
- ▶ F161333.dat
- ▶ query=q9007\_p1
- ▶ precursor=692.04404
- ▶ chargePrecursor=3
- ▶ itol=0.6

| AA    | a              | a'       | a $\Delta$     | b              | b'       | b $\Delta$     | y              | y'       | y $\Delta$ | AA    |
|-------|----------------|----------|----------------|----------------|----------|----------------|----------------|----------|------------|-------|
| S[1]  | 1327.656       | 0.000    | 68.646         | 1.00000        | 0.000    | 112.039        | 2074.111       | 2009.069 | 2084.107   | S[2]  |
| E[2]  | 1231.588       | 0.000    | <b>213.087</b> | 2.00000        | 0.000    | <b>341.082</b> | 1845.073       | 1926.044 | 1927.065   | E[3]  |
| T[3]  | 1124.614       | 0.000    | 141.172        | 3.00000        | 0.000    | <b>242.130</b> | 1638.031       | 1799.089 | 1766.022   | T[4]  |
| A[4]  | 930.552        | 0.000    | <b>385.172</b> | <b>431.177</b> | 0.000    | <b>413.187</b> | 1314.958       | 1697.058 | 1686.974   | A[5]  |
| P[5]  | 800.470        | 0.000    | 487.225        | 529.220        | 0.000    | 511.219        | 1043.040       | 1626.923 | 1624.937   | P[6]  |
| A[6]  | 671.472        | 0.000    | 543.262        | 669.267        | 0.000    | 681.267        | 1026.985       | 1529.889 | 1528.898   | A[7]  |
| A[7]  | 644.389        | 0.000    | 626.260        | <b>676.304</b> | 0.000    | 692.304        | 1176.920       | 1428.811 | 1427.814   | A[8]  |
| P[8]  | <b>738.362</b> | 0.000    | 721.352        | 767.357        | 0.000    | <b>749.346</b> | 1434.822       | 1367.744 | 1366.810   | P[9]  |
| A[9]  | 632.369        | 0.000    | 782.350        | 834.354        | 0.000    | 825.354        | 1327.760       | 1256.742 | 1260.718   | A[10] |
| A[10] | 608.406        | 0.000    | 881.428        | 939.433        | 0.000    | 897.433        | 1228.671       | 1219.789 | 1218.726   | A[11] |
| P[11] | 678.469        | 0.000    | 980.479        | 1035.485       | 0.000    | 1048.473       | 1105.604       | 1148.587 | 1147.583   | P[12] |
| A[12] | 604.626        | 0.000    | 1031.510       | 1097.521       | 0.000    | 1099.511       | 1068.641       | 1051.619 | 1050.611   | A[13] |
| P[13] | 1146.579       | 0.000    | 1120.560       | 1174.574       | 0.000    | 1156.565       | 987.602        | 988.579  | 979.593    | P[14] |
| A[14] | 1117.616       | 0.000    | 1168.600       | 1246.613       | 0.000    | 1227.608       | 909.599        | 989.576  | 982.541    | A[15] |
| E[15] | 1146.659       | 0.000    | 1126.640       | 1174.654       | 0.000    | 1166.643       | 820.534        | 812.488  | 811.504    | E[17] |
| K[16] | 1174.714       | 1827.727 | 1456.741       | 1520.749       | 1826.722 | 1484.733       | <b>810.479</b> | 813.449  | 802.611    | K[18] |
| T[17] | 1175.811       | 1828.712 | 1457.781       | 1521.789       | 1826.716 | 1485.785       | <b>572.317</b> | 589.789  | 584.688    | T[19] |
| P[18] | 1192.854       | 1835.826 | 1474.841       | 1530.849       | 1833.822 | 1502.838       | 471.932        | 454.262  | 453.000    | P[20] |
| V[19] | 1171.822       | 1834.809 | 1474.812       | 1529.811       | 1832.801 | 1481.807       | 374.285        | 367.260  | 366.000    | V[21] |
| K[20] | 1000.017       | 1882.001 | 1882.000       | 1828.012       | 1810.989 | 1810.003       | 275.200        | 268.181  | 0.000      | K[22] |
| K[21] | 2038.112       | 2011.008 | 2039.110       | 2056.101       | 2039.083 | 2038.097       | 147.113        | 430.088  | 0.000      | K[23] |

# sp | P43274 | H14\_MOUSE

[Acetyl]SETAPAAPAAPAPAEKTPVKK

- ▶ fragmentation table for charge state 2+
- ▶ specType=cid
- ▶ score=46.08
- ▶ F161333.dat
- ▶ query=q9007\_p1
- ▶ precursor=692.044040
- ▶ chargePrecursor=3
- ▶ itol=0.6

| AA    | a              | a'    | a <sub>0</sub> | b        | b'    | b <sub>0</sub> | y              | y'             | y <sub>0</sub> | AA    |
|-------|----------------|-------|----------------|----------|-------|----------------|----------------|----------------|----------------|-------|
| S[1]  | 91.631         | 0.504 | 42.520         | 89.929   | 0.504 | 98.923         | 3737.958       | 3009.048       | 3328.597       | S(2)  |
| E[2]  | 11.12.162      | 0.504 | 197.047        | 133.050  | 0.504 | 171.053        | 373.243        | 984.528        | 104.132        | E(2)  |
| T[3]  | 168.076        | 0.504 | 187.911        | 189.374  | 0.504 | 172.968        | <b>908.530</b> | 999.001        | 999.001        | T(3)  |
| A[4]  | 200.095        | 0.504 | 193.050        | 215.062  | 0.504 | 207.081        | <b>857.996</b> | 948.481        | 948.481        | A(2)  |
| P[5]  | 290.611        | 0.504 | <b>241.616</b> | 304.619  | 0.504 | 295.613        | <b>822.470</b> | <b>813.964</b> | <b>813.472</b> | P(17) |
| A[6]  | 288.040        | 0.504 | 217.134        | 305.137  | 0.504 | 291.134        | <b>773.951</b> | 788.438        | 784.948        | A(16) |
| A[7]  | 177.058        | 0.504 | 112.051        | 139.056  | 0.504 | 126.058        | <b>710.433</b> | 729.919        | 729.919        | A(15) |
| P[8]  | 170.185        | 0.504 | 391.179        | 384.182  | 0.504 | 375.177        | <b>702.914</b> | 694.403        | 691.909        | P(14) |
| A[9]  | 192.163        | 0.504 | 186.660        | 412.162  | 0.504 | 411.658        | 654.328        | 645.814        | 645.322        | A(13) |
| A[10] | 144.222        | 0.504 | 412.211        | 409.214  | 0.504 | 409.214        | 638.809        | 638.799        | 639.804        | A(12) |
| P(11) | 299.748        | 0.504 | 480.741        | 507.748  | 0.504 | 494.746        | 593.251        | 574.937        | 574.347        | P(11) |
| A(12) | 670.267        | 0.504 | 116.261        | 339.264  | 0.504 | 339.269        | 538.624        | 538.311        | 525.819        | A(10) |
| P(13) | 673.791        | 0.504 | 584.793        | 587.791  | 0.504 | 579.793        | <b>490.306</b> | <b>490.792</b> | <b>490.300</b> | P(6)  |
| A(14) | 698.313        | 0.504 | 600.309        | 623.309  | 0.504 | 614.304        | 423.779        | 424.266        | 441.774        | A(8)  |
| E(2)  | <b>673.833</b> | 0.504 | 694.828        | 687.833  | 0.504 | 679.825        | 415.252        | 408.747        | 408.251        | E(7)  |
| R(16) | <b>737.880</b> | 0.504 | 728.873        | 711.876  | 0.504 | 712.873        | 391.731        | <b>342.236</b> | <b>341.734</b> | R(6)  |
| T(17) | 86.048         | 0.504 | 719.041        | 702.044  | 0.504 | 702.044        | 381.619        | 378.179        | 377.684        | T(8)  |
| P(18) | 876.014        | 0.504 | 827.025        | 859.025  | 0.504 | 841.023        | 236.120        | 227.605        | 227.605        | P(4)  |
| R(19) | 880.482        | 0.504 | 877.480        | 909.482  | 0.504 | 891.481        | 187.642        | 178.131        | 178.131        | R(5)  |
| K(20) | 930.512        | 0.504 | 941.507        | 984.513  | 0.504 | 965.507        | 165.305        | 136.130        | 136.044        | K(2)  |
| K(21) | 1014.568       | 0.504 | 1008.561       | 1028.563 | 0.504 | 1019.563       | 74.989         | 69.341         | 69.341         | K(3)  |

# sp | P84228 | H32\_MOUSE

K Trimethyl SAPATGGVK  
42.05

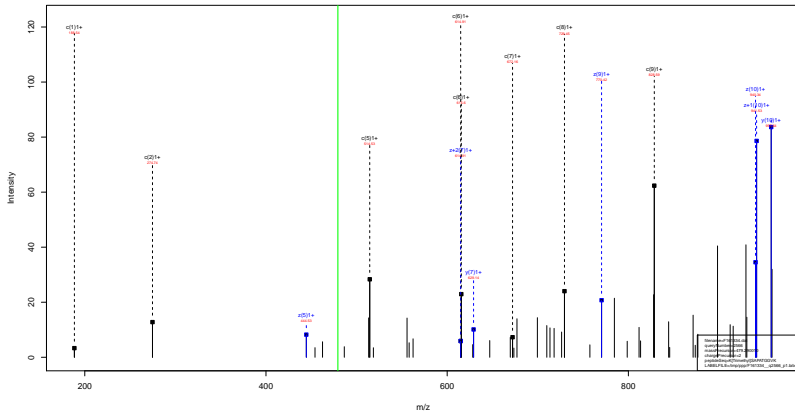

# sp | P84228 | H32\_MOUSE

K<sup>Trimethyl</sup> 42.05 SAPATGGVK

- ▶ fragmentation table for charge state 1+
- ▶ specType=etd
- ▶ score=38.45
- ▶ F161334.dat
- ▶ query=q2566.p1
- ▶ precursor=479.290010
- ▶ chargePrecursor=2
- ▶ itol=0.6

| AA    | c       | y       | z+1     | z+2     | z       | AA    |
|-------|---------|---------|---------|---------|---------|-------|
| R[1]  | 188.176 | 957.573 | 941.554 | 942.562 | 940.546 | R[10] |
| S[2]  | 275.208 | 787.451 | 771.432 | 772.420 | 770.404 | S[9]  |
| A[3]  | 346.245 | 700.399 | 684.380 | 685.388 | 683.372 | A[8]  |
| P[4]  | 443.290 | 629.362 | 613.343 | 614.351 | 612.335 | P[7]  |
| A[5]  | 514.335 | 532.309 | 516.290 | 517.298 | 515.282 | A[6]  |
| T[6]  | 615.382 | 461.272 | 445.253 | 446.261 | 444.245 | T[5]  |
| G[7]  | 672.404 | 360.224 | 344.205 | 345.213 | 343.198 | G[4]  |
| G[8]  | 729.425 | 303.203 | 287.183 | 288.192 | 286.176 | G[3]  |
| V[9]  | 828.494 | 246.181 | 230.162 | 231.170 | 229.155 | V[2]  |
| R[10] | 926.539 | 147.113 | 131.094 | 132.102 | 130.086 | R[1]  |



# sp | P62806 | H4\_MOUSE

[Acetyl]SGRGKGGK <sup>Acetyl</sup><sub>42.01</sub> GLGKGGAK <sup>Propionyl</sup><sub>56.03</sub> RHRKVLK <sup>Methyl</sup><sub>14.02</sub> D

- ▶ fragmentation table for charge state 1+
- ▶ specType=etd
- ▶ score=54.98
- ▶ F161995.dat
- ▶ query=q24858.p1
- ▶ precursor=439.260330
- ▶ chargePrecursor=6
- ▶ itol=0.6

| AA |    | c               | y               | z+1            | z+2            | z              | AA              |
|----|----|-----------------|-----------------|----------------|----------------|----------------|-----------------|
| S  | 1  | 147.076         | 2629.533        | 2633.505       | 0.000          | 2612.497       | S <sub>24</sub> |
| G  | 2  | 224.596         | 2500.481        | 2484.462       | 0.000          | 2483.454       | G <sub>23</sub> |
| H  | 3  | <b>366.199</b>  | 2443.459        | 2427.441       | 2629.448       | 2428.433       | H <sub>22</sub> |
| G  | 4  | <b>417.220</b>  | 2287.358        | 2271.339       | 2272.347       | 2270.332       | G <sub>21</sub> |
| K  | 5  | <b>545.315</b>  | 2230.337        | 2214.318       | 2215.326       | 2213.310       | K <sub>20</sub> |
| G  | 6  | 602.337         | 2102.242        | 2086.223       | 2087.231       | 2085.215       | G <sub>19</sub> |
| G  | 7  | <b>659.358</b>  | 2045.220        | 2029.202       | 2030.209       | 2028.194       | G <sub>18</sub> |
| K  | 8  | <b>829.464</b>  | 1988.199        | 1972.180       | 1973.188       | 1971.172       | K <sub>17</sub> |
| G  | 9  | <b>886.485</b>  | 1831.093        | 1815.075       | 1816.082       | 1814.067       | G <sub>16</sub> |
| L  | 10 | <b>939.509</b>  | 1783.072        | 1767.053       | 1768.061       | 1766.045       | L <sub>15</sub> |
| G  | 11 | <b>1056.591</b> | 1647.958        | 1631.939       | 1632.977       | 1630.963       | G <sub>14</sub> |
| K  | 12 | 1184.688        | 1590.968        | 1574.948       | 1575.955       | 1573.940       | K <sub>13</sub> |
| G  | 13 | 1241.707        | 1462.871        | 1446.853       | 1447.860       | 1445.845       | G <sub>12</sub> |
| G  | 14 | 1298.729        | 1405.850        | 1389.831       | 1390.839       | 1388.823       | G <sub>11</sub> |
| A  | 15 | <b>1369.766</b> | 1348.828        | 1332.810       | 1333.818       | 1331.802       | A <sub>10</sub> |
| K  | 16 | 1513.887        | 1277.792        | 1261.773       | 1262.780       | 1260.765       | K <sub>9</sub>  |
| R  | 17 | 1709.988        | <b>1093.670</b> | 1077.653       | 1078.659       | 1076.644       | R <sub>8</sub>  |
| H  | 18 | 1847.047        | 937.569         | 921.550        | 922.558        | 920.542        | H <sub>7</sub>  |
| R  | 19 | 2003.148        | 800.510         | 784.491        | 785.499        | 783.484        | R <sub>6</sub>  |
| K  | 20 | 2131.243        | <b>644.409</b>  | 628.390        | <b>629.398</b> | <b>627.382</b> | K <sub>5</sub>  |
| V  | 21 | 2230.312        | 516.314         | <b>500.295</b> | 501.303        | 499.287        | V <sub>4</sub>  |
| L  | 22 | 2343.396        | <b>417.346</b>  | 401.227        | 402.235        | <b>400.219</b> | L <sub>3</sub>  |
| I  | 23 | 2513.512        | 304.103         | 288.014        | 289.021        | 287.014        | I <sub>2</sub>  |
| D  | 24 | 2628.539        | 134.045         | 118.026        | 119.034        | 117.018        | D <sub>1</sub>  |

# sp | P62806 | H4\_MOUSE

[Acetyl]SGRGKGGK<sup>Acetyl</sup><sub>42.01</sub> GLGKGGAK<sup>Propionyl</sup><sub>56.03</sub> RHRKVL<sup>Methyl</sup><sub>14.02</sub> D

- ▶ fragmentation table for charge state 2+
- ▶ specType=etd
- ▶ score=54.98
- ▶ F161995.dat
- ▶ query=q24858\_p1
- ▶ precursor=439.260330
- ▶ chargePrecursor=6
- ▶ itol=0.6

| AA    | c               | y               | z+1             | z+2             | z              | AA    |
|-------|-----------------|-----------------|-----------------|-----------------|----------------|-------|
| S[1]  | 74.042          | 1315.205        | 1307.250        | 0.504           | 1306.752       | S[24] |
| G[2]  | 102.553         | 1250.744        | <b>1242.735</b> |                 | 1242.231       | G[23] |
| R[3]  | 180.603         | 1222.213        | 1214.224        | <b>1214.728</b> | 1213.720       | R[22] |
| G[4]  | 269.114         | 1144.183        | 1136.173        | <b>1136.677</b> | 1135.669       | G[21] |
| K[5]  | 273.161         | <b>1115.672</b> | 1107.663        | <b>1108.167</b> | 1107.159       | K[20] |
| G[6]  | 301.672         | 1051.625        | 1043.615        | 1044.119        | 1043.111       | G[19] |
| G[7]  | 330.183         | 1023.114        | <b>1015.104</b> | <b>1015.608</b> | 1014.601       | G[18] |
| K[8]  | <b>415.236</b>  | 994.603         | <b>986.594</b>  | <b>987.098</b>  | 986.090        | K[17] |
| G[9]  | <b>443.746</b>  | <b>909.550</b>  | <b>901.541</b>  | <b>902.045</b>  | 901.037        | G[16] |
| L[10] | <b>509.288</b>  | 881.540         | <b>873.030</b>  | 873.534         | <b>872.526</b> | L[15] |
| G[11] | <b>528.799</b>  | <b>824.498</b>  | <b>816.488</b>  | <b>816.992</b>  | <b>815.984</b> | G[14] |
| K[12] | <b>592.847</b>  | <b>795.987</b>  | <b>787.977</b>  | <b>788.481</b>  | <b>787.474</b> | K[13] |
| G[13] | <b>621.357</b>  | 731.939         | <b>723.930</b>  | <b>724.434</b>  | 723.426        | G[12] |
| G[14] | <b>649.868</b>  | 703.420         | <b>695.419</b>  | <b>695.923</b>  | 694.915        | G[11] |
| A[15] | <b>685.387</b>  | <b>674.918</b>  | <b>666.908</b>  | <b>667.412</b>  | <b>666.405</b> | A[10] |
| R[16] | <b>774.899</b>  | <b>639.399</b>  | <b>631.390</b>  | <b>631.894</b>  | <b>630.886</b> | R[9]  |
| R[17] | 855.498         | <b>547.339</b>  | <b>539.329</b>  | <b>539.833</b>  | 538.825        | R[8]  |
| H[18] | 824.027         | <b>469.288</b>  | 461.279         | 461.783         | 460.775        | H[7]  |
| R[19] | 1002.078        | <b>400.750</b>  | <b>392.749</b>  | <b>393.253</b>  | 392.245        | R[6]  |
| K[20] | 1066.125        | 322.700         | 314.699         | 315.203         | 314.195        | K[5]  |
| V[21] | <b>1115.659</b> | 250.661         | 240.651         | 241.155         | 240.147        | V[4]  |
| L[22] | 1112.893        | 209.129         | 201.117         | 201.621         | 200.613        | L[3]  |
| R[23] | 1257.260        | 152.584         | 144.575         | 145.079         | 144.071        | R[2]  |
| D[24] | 1314.773        | 67.526          | 59.517          | 60.021          | 59.013         | D[1]  |



# sp | P62806 | H4\_MOUSE

[Acetyl]SGRGKGGK <sup>Acetyl</sup><sub>42.01</sub> GLGKGGAK <sup>Propionyl</sup><sub>56.03</sub> RHRKVL R <sup>Methyl</sup><sub>14.02</sub> D

- ▶ fragmentation table for charge state 3+
- ▶ specType=etd
- ▶ score=54.98
- ▶ F161995.dat
- ▶ query=q24858.p1
- ▶ precursor=439.260330
- ▶ chargePrecursor=6
- ▶ itol=0.6

| AA    | c              | y              | z+1            | z+2            | z              | AA    |
|-------|----------------|----------------|----------------|----------------|----------------|-------|
| S[1]  | 49.697         | 877.179        | 871.840        | 0.672          | 871.904        | S[24] |
| G[2]  | 56.704         | 934.165        | 828.826        | 0.672          | 828.490        | G[23] |
| R[3]  | 120.738        | 815.158        | 809.819        | <b>810.154</b> | 809.482        | R[22] |
| G[4]  | 139.745        | 763.124        | 757.785        | <b>758.121</b> | 757.449        | G[21] |
| K[5]  | 182.443        | <b>744.117</b> | <b>738.778</b> | <b>739.113</b> | <b>738.442</b> | K[20] |
| G[6]  | 201.450        | <b>701.419</b> | <b>696.079</b> | <b>696.415</b> | <b>695.743</b> | G[19] |
| G[7]  | 220.458        | <b>682.412</b> | <b>677.072</b> | <b>677.408</b> | 676.736        | G[18] |
| K[8]  | 277.159        | <b>663.404</b> | <b>658.065</b> | <b>658.401</b> | <b>657.729</b> | K[17] |
| G[9]  | 296.167        | 636.793        | <b>601.363</b> | <b>601.699</b> | 601.027        | G[16] |
| L[10] | 333.681        | <b>587.695</b> | <b>582.356</b> | <b>582.692</b> | 582.020        | L[15] |
| G[11] | 352.688        | 550.001        | <b>544.661</b> | <b>544.997</b> | <b>544.325</b> | G[14] |
| K[12] | 395.567        | 530.994        | 525.654        | 525.990        | 525.318        | K[13] |
| G[13] | 414.574        | 488.295        | 482.956        | 483.292        | 482.620        | G[12] |
| G[14] | <b>433.581</b> | <b>469.288</b> | <b>463.949</b> | <b>464.285</b> | 463.613        | G[11] |
| A[15] | <b>457.260</b> | 450.281        | <b>444.941</b> | <b>445.277</b> | <b>444.605</b> | A[10] |
| K[16] | <b>518.634</b> | 426.602        | 421.262        | 421.598        | 420.926        | K[9]  |
| R[17] | 570.668        | 365.226        | <b>359.889</b> | <b>360.225</b> | 359.553        | R[8]  |
| H[18] | 616.354        | 313.195        | 307.855        | 308.191        | 307.519        | H[7]  |
| R[19] | 668.388        | 297.508        | 292.169        | 292.505        | 291.833        | R[6]  |
| K[20] | 711.086        | 215.475        | 210.135        | 210.471        | 209.799        | K[5]  |
| V[21] | <b>744.109</b> | 172.776        | 167.437        | 167.773        | 167.101        | V[4]  |
| L[22] | <b>781.803</b> | 139.753        | 134.414        | 134.750        | 134.078        | L[3]  |
| R[23] | <b>838.509</b> | 102.059        | 96.719         | 97.055         | 96.383         | R[2]  |
| D[24] | 876.851        | 45.353         | 40.014         | 40.349         | 39.678         | D[1]  |

# sp | P62806 | H4\_MOUSE

[Acetyl]SGRGKGGK <sup>Acetyl</sup><sub>42.01</sub> GLGKGGAK <sup>Propionyl</sup><sub>56.03</sub> RHRKVLK <sup>Methyl</sup><sub>14.02</sub> D

- ▶ fragmentation table for charge state 4+
- ▶ specType=etd
- ▶ score=54.98
- ▶ F161995.dat
- ▶ query=q24858.p1
- ▶ precursor=439.260330
- ▶ chargePrecursor=6
- ▶ itol=0.6

| AA    | c              | y              | z+1            | z+2            | z              | AA    |
|-------|----------------|----------------|----------------|----------------|----------------|-------|
| S[1]  | 37.525         | <b>658.136</b> | 654.137        | 0.795          | 653.880        | S[24] |
| G[2]  | 51.780         | <b>625.876</b> | <b>621.871</b> | 0.795          | <b>621.619</b> | G[23] |
| R[3]  | 90.805         | <b>611.620</b> | <b>607.616</b> | <b>607.868</b> | 607.364        | R[22] |
| G[4]  | 105.061        | 572.595        | <b>568.590</b> | <b>568.842</b> | <b>568.338</b> | G[21] |
| K[5]  | 137.084        | 598.340        | <b>554.335</b> | <b>554.587</b> | <b>554.083</b> | K[20] |
| G[6]  | 151.340        | 526.316        | 522.311        | 522.563        | 522.059        | G[19] |
| G[7]  | 165.595        | <b>512.061</b> | <b>508.056</b> | <b>508.308</b> | <b>507.804</b> | G[18] |
| K[8]  | 208.121        | <b>497.805</b> | 493.800        | 494.052        | <b>493.549</b> | K[17] |
| G[9]  | 222.377        | 456.279        | 452.274        | 453.526        | 453.022        | G[16] |
| L[10] | 250.048        | 441.023        | 437.019        | 437.271        | 436.767        | L[15] |
| G[11] | 294.903        | 417.752        | 408.748        | 409.000        | 408.496        | G[14] |
| K[12] | 296.927        | 398.497        | <b>394.492</b> | <b>394.744</b> | <b>394.240</b> | K[13] |
| G[13] | 311.182        | 366.473        | 362.469        | 362.721        | 362.217        | G[12] |
| G[14] | 325.438        | 352.218        | 348.213        | 348.465        | 347.961        | G[11] |
| A[15] | 343.197        | 337.963        | 333.958        | 334.210        | 333.706        | A[10] |
| K[16] | 389.227        | 320.203        | 316.199        | 316.451        | 315.947        | K[9]  |
| R[17] | 438.252        | <b>274.173</b> | 270.168        | 270.420        | 269.916        | R[8]  |
| H[18] | 462.517        | 235.148        | 231.143        | 231.395        | 230.891        | H[7]  |
| R[19] | 501.543        | 200.883        | 196.878        | 197.130        | 196.626        | R[6]  |
| K[20] | 533.566        | 161.858        | 157.853        | 158.105        | 157.601        | K[5]  |
| V[21] | 558.333        | 129.834        | 125.829        | 126.081        | 125.577        | V[4]  |
| L[22] | 586.604        | 105.067        | 101.062        | 101.314        | 100.810        | L[3]  |
| R[23] | <b>629.134</b> | 76.796         | 72.791         | 73.043         | 72.539         | R[2]  |
| D[24] | <b>657.890</b> | 34.267         | 30.262         | 30.514         | 30.010         | D[1]  |

# sp | P62806 | H4\_MOUSE

[Acetyl]SGRGKGGK<sup>Acetyl</sup><sub>42.01</sub> GLGKGGAK<sup>Propionyl</sup><sub>56.03</sub> RHRKVL<sup>Methyl</sup><sub>14.02</sub> D

- ▶ fragmentation table for charge state 5+
- ▶ specType=etd
- ▶ score=54.98
- ▶ F161995.dat
- ▶ query=q24858.p1
- ▶ precursor=439.260330
- ▶ chargePrecursor=6
- ▶ itol=0.6

| AA    | c              | y              | z+1            | z+2            | z              | AA    |
|-------|----------------|----------------|----------------|----------------|----------------|-------|
| S[1]  | 30.221         | <b>526.710</b> | <b>523.507</b> | 0.806          | <b>523.105</b> | S[24] |
| G[2]  | 41.625         | <b>500.902</b> | <b>497.698</b> | 0.806          | <b>497.497</b> | G[23] |
| R[3]  | 72.846         | 489.488        | <b>486.294</b> | <b>486.495</b> | <b>486.092</b> | R[22] |
| G[4]  | 84.250         | 458.277        | 455.074        | 455.275        | 454.872        | G[21] |
| K[5]  | 109.889        | 446.873        | <b>443.669</b> | <b>443.871</b> | 443.468        | K[20] |
| G[6]  | 121.273        | 421.254        | 418.050        | 418.252        | <b>417.849</b> | G[19] |
| G[7]  | 132.677        | 409.850        | 406.646        | 406.848        | 406.445        | G[18] |
| K[8]  | 166.699        | 388.446        | 385.242        | 385.443        | <b>385.040</b> | K[17] |
| G[9]  | 178.103        | 384.928        | 381.723        | 381.922        | 381.519        | G[16] |
| L[10] | 200.720        | 353.020        | 349.816        | 350.018        | 349.615        | L[15] |
| G[11] | 212.124        | 330.403        | 327.200        | 327.401        | 326.998        | G[14] |
| K[12] | 237.743        | 318.999        | 315.795        | 315.997        | 315.594        | K[13] |
| G[13] | 249.147        | 293.380        | 290.176        | 290.378        | 289.975        | G[12] |
| G[14] | 260.552        | 281.976        | 278.772        | 278.974        | 278.570        | G[11] |
| A[15] | <b>274.759</b> | 270.572        | 267.368        | 267.569        | 267.166        | A[10] |
| K[16] | 311.583        | 256.364        | 253.160        | 253.362        | 252.959        | K[9]  |
| R[17] | 342.803        | 219.340        | 216.136        | 216.338        | 216.135        | R[8]  |
| H[18] | 370.215        | 188.320        | 185.116        | 185.317        | 184.914        | H[7]  |
| R[19] | 401.435        | 160.908        | 157.704        | 157.906        | 157.503        | R[6]  |
| K[20] | 427.054        | 129.685        | 126.481        | 126.685        | 126.282        | K[5]  |
| V[21] | 446.868        | 104.069        | 100.865        | 101.066        | 100.663        | V[4]  |
| L[22] | <b>469.485</b> | 84.255         | 81.051         | 81.253         | 80.850         | L[3]  |
| R[23] | <b>503.508</b> | 61.638         | 58.434         | 58.636         | 58.233         | R[2]  |
| D[24] | 509.514        | 27.615         | 24.411         | 24.613         | 24.209         | D[1]  |



# sp | P10853 | H2B1F\_MOUSE

PEPAKSAPAPKKGSKKAVT <sup>Acetyl</sup> 42.01 KAQKKD

- ▶ fragmentation table for charge state 1+
- ▶ specType=etd
- ▶ score=38.80
- ▶ F161995.dat
- ▶ query=q24865\_p1
- ▶ precursor=658.880980
- ▶ chargePrecursor=4
- ▶ itol=0.6

| AA  | c               | y               | z+1             | z+2             | z        | AA  |
|-----|-----------------|-----------------|-----------------|-----------------|----------|-----|
| P1  | 115.087         | 2632.514        | 2616.495        | 0.000           | 2615.485 | P25 |
| E2  | 244.229         | 2329.452        | 2313.443        | 0.000           | 2312.433 | E24 |
| P3  | 341.182         | 2405.419        | 2390.400        | 0.000           | 2389.391 | P23 |
| A4  | <b>412.219</b>  | 2309.366        | 2293.348        | 0.000           | 2292.340 | A22 |
| K5  | <b>540.314</b>  | 2238.329        | 2222.311        | 2223.318        | 2221.301 | K21 |
| S6  | 627.346         | 2110.234        | 2094.216        | 2095.223        | 2093.208 | S20 |
| A7  | 866.363         | 2021.202        | 2007.184        | 2008.191        | 2006.176 | A19 |
| P8  | <b>795.436</b>  | 1952.159        | 1936.146        | 1937.154        | 1935.139 | P18 |
| A9  | 866.473         | 1855.112        | 1839.094        | 1840.101        | 1838.086 | A17 |
| P10 | <b>963.526</b>  | 1784.075        | 1768.057        | 1769.064        | 1767.049 | P16 |
| K11 | 1061.621        | 1687.022        | 1671.004        | <b>1672.012</b> | 1669.996 | K15 |
| K12 | <b>1219.716</b> | 1558.020        | 1542.000        | 1543.017        | 1541.001 | K14 |
| Q13 | 2276.737        | 1420.233        | 1414.214        | <b>1415.222</b> | 1413.206 | Q13 |
| S14 | 1363.769        | <b>1373.811</b> | 1357.793        | 1358.800        | 1356.785 | S12 |
| K15 | <b>1491.864</b> | <b>1286.770</b> | <b>1270.760</b> | 1271.768        | 1269.751 | K11 |
| K16 | 1619.959        | 1158.684        | <b>1142.665</b> | 1143.673        | 1141.658 | K10 |
| A17 | 1690.996        | <b>1030.589</b> | 1014.570        | 1015.578        | 1013.563 | A9  |
| V18 | 1790.065        | 959.527         | 953.507         | 944.541         | 942.525  | V8  |
| T19 | 1833.223        | 886.465         | <b>844.465</b>  | 845.473         | 843.457  | T17 |
| K20 | 2001.218        | 717.425         | <b>701.407</b>  | 702.414         | 700.399  | K6  |
| A21 | 2132.255        | 589.330         | <b>573.312</b>  | <b>574.320</b>  | 572.304  | A5  |
| Q22 | 2260.314        | 518.291         | <b>502.275</b>  | 503.282         | 501.267  | Q4  |
| K23 | 2388.409        | 390.235         | <b>374.216</b>  | 375.224         | 373.209  | K3  |
| K24 | 2516.504        | 262.140         | 246.121         | 247.129         | 245.113  | K2  |
| E25 | 2631.530        | 134.045         | 118.026         | 119.034         | 117.018  | E1  |

# sp | P10853 | H2B1F\_MOUSE

PEPAKSAPAPKKGSKKAVT <sup>Acetyl</sup> 42.01 KAQKKD

- ▶ fragmentation table for charge state 2+
- ▶ specType=etd
- ▶ score=38.80
- ▶ F161995.dat
- ▶ query=q24865\_p1
- ▶ precursor=658.880980
- ▶ chargePrecursor=4
- ▶ itol=0.6

| AA   | c               | y        | z+1             | z+2             | z               | AA   |
|------|-----------------|----------|-----------------|-----------------|-----------------|------|
| P 1  | 58.647          | 1316.761 | <b>1308.752</b> | 0.504           | 1308.246        | P 25 |
| E 3  | 132.586         | 1306.234 | 1296.225        | 0.504           | 1295.721        | E 24 |
| P 3  | 171.095         | 1203.713 | 1195.704        | 0.504           | <b>1195.200</b> | P 23 |
| A 4  | 206.613         | 1195.187 | 1147.177        | 0.504           | 1146.674        | A 22 |
| K 5  | 270.661         | 1119.666 | 1111.659        | <b>1112.163</b> | 1111.155        | K 21 |
| S 6  | 314.177         | 1065.621 | <b>1047.611</b> | <b>1048.115</b> | 1047.107        | S 20 |
| A 7  | 349.695         | 1012.105 | 1004.095        | <b>1004.599</b> | 1003.591        | A 19 |
| P 8  | 389.222         | 976.566  | 966.557         | 966.061         | <b>968.073</b>  | P 18 |
| A 9  | 433.740         | 928.060  | <b>920.050</b>  | <b>920.554</b>  | 919.547         | A 17 |
| P 10 | 482.267         | 892.541  | 884.532         | 885.036         | 884.028         | P 16 |
| K 11 | 566.314         | 844.015  | <b>836.006</b>  | <b>836.509</b>  | 835.502         | K 15 |
| K 12 | 610.362         | 779.967  | <b>771.958</b>  | <b>772.462</b>  | 771.454         | K 14 |
| Q 13 | 638.872         | 735.940  | 707.931         | 706.934         | 707.400         | Q 13 |
| S 14 | 692.388         | 687.409  | 679.400         | 678.904         | 678.396         | S 12 |
| K 15 | <b>746.436</b>  | 643.093  | 635.084         | 636.588         | 635.580         | K 11 |
| K 16 | <b>810.483</b>  | 579.846  | 571.836         | 572.340         | 571.332         | K 10 |
| A 17 | 866.002         | 515.788  | 507.789         | 508.293         | 507.285         | A 9  |
| V 18 | <b>895.536</b>  | 480.280  | 472.270         | 472.774         | 471.766         | V 9  |
| T 19 | <b>967.065</b>  | 430.745  | 422.736         | 423.240         | 422.232         | T 7  |
| K 20 | <b>1031.113</b> | 359.218  | 351.207         | 351.711         | 350.703         | K 6  |
| A 21 | <b>1066.631</b> | 295.169  | 287.159         | 287.663         | 286.656         | A 5  |
| Q 22 | <b>1130.660</b> | 269.650  | 251.641         | 252.145         | 251.137         | Q 4  |
| K 23 | <b>1194.708</b> | 195.621  | 187.612         | 188.116         | 187.108         | K 3  |
| K 24 | <b>1258.755</b> | 131.574  | 123.564         | 124.068         | 123.060         | K 2  |
| E 25 | 1316.269        | 87.526   | 88.531          | 88.021          | 89.013          | E 1  |

# sp | P10853 | H2B1F\_MOUSE

PEPAKSAPAPKKGSKKAVT <sup>Acetyl</sup> 42.01 KAQKKD

- ▶ fragmentation table for charge state 3+
- ▶ specType=etd
- ▶ score=38.80
- ▶ F161995.dat
- ▶ query=q24865\_p1
- ▶ precursor=658.880980
- ▶ chargePrecursor=4
- ▶ itol=0.6

| AA    | c              | y              | z+1            | z+2            | z              | AA    |
|-------|----------------|----------------|----------------|----------------|----------------|-------|
| P[1]  | 38.034         | <b>878.176</b> | 872.837        | 0.672          | 872.901        | P[25] |
| E[2]  | 82.048         | 845.825        | <b>840.486</b> | 0.672          | <b>840.150</b> | E[24] |
| P[3]  | 114.399        | 802.811        | 797.472        | 0.672          | 797.136        | P[23] |
| A[4]  | 138.078        | <b>770.460</b> | 765.121        | 0.672          | 764.785        | A[22] |
| K[5]  | 180.776        | <b>746.781</b> | 741.442        | 741.778        | 741.106        | K[21] |
| S[6]  | 209.197        | 724.983        | 698.743        | 699.079        | 698.407        | S[20] |
| A[7]  | 233.668        | 675.072        | <b>669.733</b> | <b>670.069</b> | 669.391        | A[19] |
| P[8]  | 265.817        | 651.393        | 646.054        | 646.390        | 645.718        | P[18] |
| A[9]  | 289.496        | 619.042        | 613.703        | 614.039        | 613.367        | A[17] |
| P[10] | 321.847        | 595.363        | 590.024        | 590.360        | 589.688        | P[16] |
| K[11] | 364.545        | 563.012        | 557.673        | 558.009        | 557.337        | K[15] |
| K[12] | 407.243        | 520.314        | 514.974        | 515.310        | 514.639        | K[14] |
| G[13] | 426.251        | 477.616        | 472.276        | 472.612        | 471.940        | G[13] |
| S[14] | 455.261        | 458.609        | 453.269        | 453.605        | 452.933        | S[12] |
| K[15] | 497.960        | 429.598        | 424.258        | 424.594        | 423.922        | K[11] |
| K[16] | <b>540.658</b> | 398.940        | 393.560        | 393.896        | 393.224        | K[10] |
| A[17] | 564.137        | 344.201        | 338.862        | 339.198        | 338.526        | A[9]  |
| V[18] | 597.360        | 320.522        | 315.183        | 315.519        | 314.847        | V[8]  |
| T[19] | 645.046        | 287.499        | 282.160        | 282.496        | 281.824        | T[7]  |
| K[20] | <b>687.744</b> | 239.813        | 234.474        | 234.810        | 234.138        | K[6]  |
| A[21] | 711.423        | 197.115        | 191.775        | 192.111        | 191.439        | A[5]  |
| Q[22] | 754.109        | 173.436        | 168.096        | 168.432        | 167.760        | Q[4]  |
| K[23] | 796.898        | 130.750        | 125.410        | 125.746        | 125.074        | K[3]  |
| K[24] | <b>839.506</b> | 88.051         | 82.712         | 83.048         | 82.376         | K[2]  |
| D[25] | <b>877.848</b> | 45.353         | 40.014         | 40.349         | 39.678         | D[1]  |

# sp | P15864 | H12\_MOUSE

LITKAVAASK <sup>Crotonyl</sup> E  
68.03

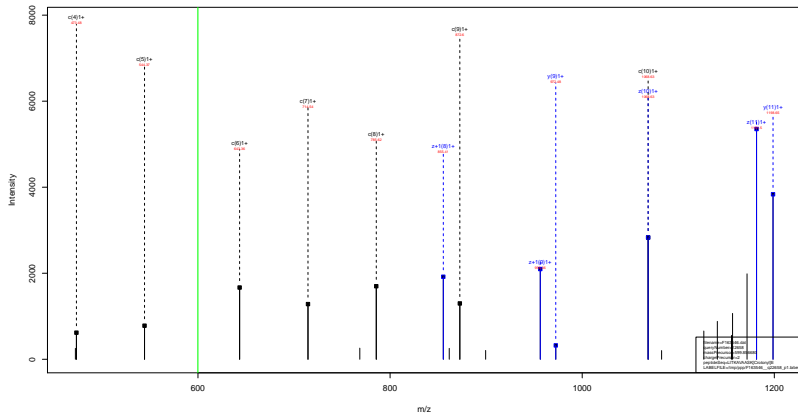



# sp | P15864 | H12\_MOUSE

LITKAVAASK <sup>Crotonyl</sup> E  
68.03

- ▶ fragmentation table for charge state 1+
- ▶ specType=etd
- ▶ score=58.69
- ▶ F163546.dat
- ▶ query=q22658\_p1
- ▶ precursor=599.856680
- ▶ chargePrecursor=2
- ▶ itol=0.6

| AA |    | c               | y               | z+1            | z+2     | z               | AA    |
|----|----|-----------------|-----------------|----------------|---------|-----------------|-------|
| L  | 1  | 131.118         | <b>1198.704</b> | 1182.685       | 0.000   | <b>1181.678</b> | L[11] |
| I  | 2  | 244.202         | 1085.620        | 1069.601       | 0.000   | <b>1068.594</b> | I[10] |
| T  | 3  | 345.250         | <b>972.536</b>  | <b>956.517</b> | 0.000   | 955.500         | T[9]  |
| K  | 4  | <b>473.345</b>  | 871.485         | <b>855.470</b> | 856.477 | 854.462         | K[8]  |
| A  | 5  | <b>544.382</b>  | 743.393         | 727.978        | 728.382 | 726.367         | A[7]  |
| V  | 6  | <b>643.450</b>  | 672.350         | 656.338        | 657.345 | 655.330         | V[6]  |
| A  | 7  | <b>714.487</b>  | 573.288         | 557.269        | 558.277 | 556.261         | A[5]  |
| A  | 8  | <b>785.524</b>  | 502.251         | 486.232        | 487.240 | 485.224         | A[4]  |
| S  | 9  | <b>872.556</b>  | 431.214         | 415.195        | 416.203 | 414.187         | S[3]  |
| K  | 10 | <b>1068.678</b> | 344.182         | 328.163        | 329.171 | 327.155         | K[2]  |
| E  | 11 | 1197.720        | 348.060         | 332.042        | 333.050 | 331.034         | E[1]  |



# sp | P10853 | H2B1F\_MOUSE

LAK <sup>Crotonyl</sup> HAVSE  
68.03

- ▶ fragmentation table for charge state 1+
- ▶ specType=etd
- ▶ score=23.27
- ▶ F163546.dat
- ▶ query=q7545\_p1
- ▶ precursor=461.753400
- ▶ chargePrecursor=2
- ▶ itol=0.6

| AA   | c              | y       | z+1            | z+2            | z              | AA   |
|------|----------------|---------|----------------|----------------|----------------|------|
| L[1] | 131.118        | 922.499 | <b>906.481</b> | 0.000          | <b>905.473</b> | L[8] |
| A[2] | 202.155        | 809.415 | <b>793.396</b> | 0.000          | <b>792.389</b> | A[7] |
| R[3] | 398.276        | 738.378 | <b>722.359</b> | <b>723.367</b> | 721.352        | R[6] |
| H[4] | <b>535.335</b> | 542.257 | <b>526.238</b> | 527.246        | 525.230        | H[5] |
| A[5] | <b>606.372</b> | 405.195 | 389.179        | 390.187        | 388.171        | A[4] |
| V[6] | <b>705.441</b> | 334.161 | 318.142        | 319.150        | 317.134        | V[3] |
| S[7] | <b>792.473</b> | 235.092 | 219.074        | 220.082        | 218.066        | S[2] |
| E[8] | 921.515        | 148.060 | 132.042        | 133.050        | 131.034        | E[1] |



# sp | P10853 | H2B1F\_MOUSE

LAK <sup>Crotonyl</sup> HAVSE  
68.03

- ▶ fragmentation table for charge state 1+
- ▶ specType=cid
- ▶ score=50.87
- ▶ F163546.dat
- ▶ query=q7546\_p1
- ▶ precursor=461.753400
- ▶ chargePrecursor=2
- ▶ itol=0.6

| AA | a              | a*      | a,b     | b              | b*      | b,b            | y              | y*      | y,b            | AA |
|----|----------------|---------|---------|----------------|---------|----------------|----------------|---------|----------------|----|
| L1 | 88.098         | 0.000   | 0.000   | 114.293        | 0.000   | 0.000          | 622.437        | 905.412 | 1264.869       | L3 |
| A1 | <b>157.134</b> | 0.000   | 0.000   | <b>185.128</b> | 0.000   | 0.000          | <b>809.415</b> | 732.355 | 701.625        | A7 |
| K1 | 351.255        | 136.239 | 0.000   | <b>381.250</b> | 384.223 | 0.000          | <b>738.378</b> | 721.352 | 720.968        | K6 |
| H1 | 409.314        | 473.297 | 0.000   | <b>518.309</b> | 501.282 | 0.000          | <b>543.297</b> | 0.000   | 524.246        | H5 |
| A1 | 551.231        | 344.234 | 0.000   | <b>589.346</b> | 572.319 | 0.000          | <b>465.186</b> | 0.000   | 387.187        | A4 |
| V1 | <b>660.419</b> | 243.263 | 0.000   | <b>668.414</b> | 673.388 | 0.000          | <b>324.181</b> | 0.000   | 316.156        | V3 |
| S1 | 747.451        | 730.425 | 729.441 | <b>775.446</b> | 758.420 | <b>757.436</b> | <b>235.092</b> | 0.000   | <b>217.082</b> | S2 |
| E1 | 876.494        | 859.467 | 858.481 | 904.489        | 897.462 | 896.478        | <b>148.060</b> | 0.000   | 130.050        | E1 |

# sp | P10853 | H2B1F\_MOUSE

LAK Crotonyl HAVSE  
68.03

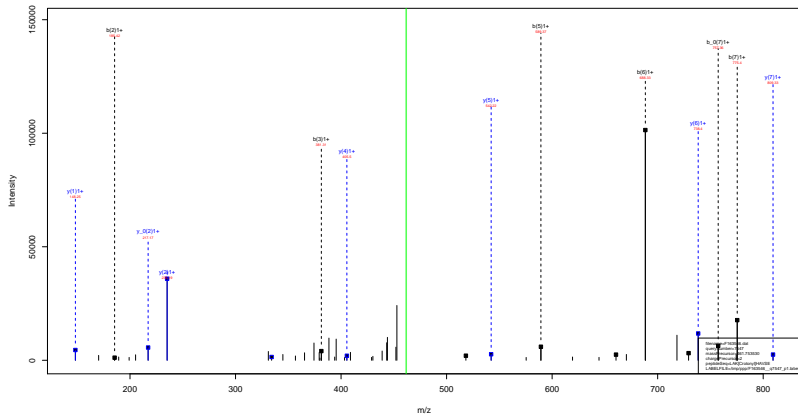

# sp | P10853 | H2B1F\_MOUSE

LAK <sup>Crotonyl</sup> HAVSE  
68.03

- ▶ fragmentation table for charge state 1+
- ▶ specType=cid
- ▶ score=48.45
- ▶ F163546.dat
- ▶ query=q7547.p1
- ▶ precursor=461.753530
- ▶ chargePrecursor=2
- ▶ itol=0.6

| AA | a              | a*      | a $\beta$      | b              | b*      | b $\beta$      | y              | y*      | y $\beta$      | AA  |
|----|----------------|---------|----------------|----------------|---------|----------------|----------------|---------|----------------|-----|
| L1 | 58.298         | 0.000   | 0.000          | 114.071        | 0.000   | 0.000          | 427.187        | 952.413 | 1524.889       | L18 |
| A1 | 157.134        | 0.000   | 0.000          | <b>185.128</b> | 0.000   | 0.000          | <b>809.415</b> | 792.859 | 791.825        | A17 |
| K1 | 351.255        | 136.230 | 0.000          | <b>381.250</b> | 384.223 | 0.000          | <b>738.378</b> | 721.352 | 720.368        | K16 |
| H1 | 490.114        | 473.297 | 0.000          | <b>518.309</b> | 501.282 | 0.000          | <b>542.257</b> | 0.000   | 524.246        | H15 |
| A1 | 591.251        | 544.234 | 0.000          | <b>589.346</b> | 572.319 | 0.000          | <b>405.198</b> | 0.000   | 387.187        | A14 |
| V1 | <b>660.419</b> | 643.393 | 0.000          | <b>668.414</b> | 671.388 | 0.000          | <b>334.161</b> | 0.000   | 316.150        | V13 |
| S1 | 747.451        | 730.425 | <b>728.441</b> | <b>775.446</b> | 758.420 | <b>757.416</b> | <b>235.092</b> | 0.000   | <b>217.082</b> | S12 |
| E1 | 876.484        | 859.457 | 858.443        | 904.489        | 887.462 | 886.478        | <b>148.060</b> | 0.000   | 130.050        | E11 |





# sp | P22752 | H2A1\_MOUSE

SHHK <sup>Crotonyl</sup> 68.03 AKGK

- ▶ fragmentation table for charge state 1+
- ▶ specType=etd
- ▶ score=30.34
- ▶ F163547.dat
- ▶ query=q10492\_p1
- ▶ precursor=320.851150
- ▶ chargePrecursor=3
- ▶ itol=0.6

| AA   | c              | y              | z+1            | z+2     | z              | AA   |
|------|----------------|----------------|----------------|---------|----------------|------|
| S[1] | 105.066        | 960.537        | 944.519        | 0.000   | <b>943.511</b> | S[8] |
| H[2] | <b>242.125</b> | <b>873.505</b> | 857.487        | 0.000   | 856.479        | H[7] |
| H[3] | <b>379.184</b> | <b>736.446</b> | <b>720.428</b> | 0.000   | 719.420        | H[6] |
| K[4] | 575.305        | 599.388        | <b>583.369</b> | 584.377 | 582.361        | K[5] |
| A[5] | <b>646.342</b> | 403.266        | <b>387.248</b> | 388.255 | 386.240        | A[4] |
| K[6] | <b>774.437</b> | 332.229        | <b>316.211</b> | 317.218 | 315.203        | K[3] |
| G[7] | <b>831.458</b> | 204.134        | <b>188.116</b> | 189.123 | 187.108        | G[2] |
| K[8] | 959.553        | 147.113        | 131.094        | 132.102 | 130.086        | K[1] |

# sp | P22752 | H2A1\_MOUSE

SHHK<sup>Crotonyl</sup> AKGK  
68.03

- ▶ fragmentation table for charge state 2+
- ▶ specType=etd
- ▶ score=30.34
- ▶ F163547.dat
- ▶ query=q10492\_p1
- ▶ precursor=320.851150
- ▶ chargePrecursor=3
- ▶ itol=0.6

| AA   | c              | y              | z+1            | z+2     | z              | AA   |
|------|----------------|----------------|----------------|---------|----------------|------|
| S[1] | 53.037         | <b>480.772</b> | <b>472.763</b> | 0.504   | <b>472.259</b> | S[8] |
| H[2] | 121.566        | <b>437.256</b> | <b>429.247</b> | 0.504   | <b>428.743</b> | H[7] |
| H[3] | 190.095        | 368.727        | 360.717        | 0.504   | 360.214        | H[6] |
| K[4] | 288.156        | 300.197        | 292.188        | 292.692 | 291.684        | K[5] |
| A[5] | 323.675        | 202.137        | 194.127        | 194.631 | 193.624        | A[4] |
| K[6] | <b>387.722</b> | 166.618        | 158.609        | 159.113 | 158.105        | K[3] |
| G[7] | <b>416.233</b> | 102.571        | 94.561         | 95.065  | 94.057         | G[2] |
| K[8] | 480.280        | 74.060         | 66.051         | 66.555  | 65.547         | K[1] |



# sp | P22752 | H2A1\_MOUSE

SHHK <sup>Crotonyl</sup> 68.03 AKGK

- ▶ fragmentation table for charge state 1+
- ▶ specType=etd
- ▶ score=43.39
- ▶ F163547.dat
- ▶ query=q10494\_p1
- ▶ precursor=320.851310
- ▶ chargePrecursor=3
- ▶ itol=0.6

| AA   | c              | y              | z+1            | z+2     | z       | AA   |
|------|----------------|----------------|----------------|---------|---------|------|
| S[1] | 105.066        | <b>960.537</b> | 944.519        | 0.000   | 943.511 | S[8] |
| H[2] | <b>242.125</b> | 873.505        | 857.487        | 0.000   | 856.479 | H[7] |
| H[3] | <b>379.184</b> | <b>736.446</b> | <b>720.428</b> | 0.000   | 719.420 | H[6] |
| K[4] | <b>575.305</b> | 599.388        | <b>583.369</b> | 584.377 | 582.361 | K[5] |
| A[5] | <b>646.342</b> | 403.266        | <b>387.248</b> | 388.255 | 386.240 | A[4] |
| K[6] | <b>774.437</b> | 332.229        | <b>316.211</b> | 317.218 | 315.203 | K[3] |
| G[7] | <b>831.458</b> | 204.134        | <b>188.116</b> | 189.123 | 187.108 | G[2] |
| K[8] | 959.553        | 147.113        | 131.094        | 132.102 | 130.086 | K[1] |

# sp | P22752 | H2A1\_MOUSE

SHHK<sup>Crotonyl</sup> AKGK  
68.03

- ▶ fragmentation table for charge state 2+
- ▶ specType=etd
- ▶ score=43.39
- ▶ F163547.dat
- ▶ query=q10494\_p1
- ▶ precursor=320.851310
- ▶ chargePrecursor=3
- ▶ itol=0.6

| AA   | c              | y              | z+1            | z+2     | z              | AA   |
|------|----------------|----------------|----------------|---------|----------------|------|
| S[1] | 53.037         | <b>480.772</b> | <b>472.763</b> | 0.504   | <b>472.259</b> | S[8] |
| H[2] | 121.566        | <b>437.256</b> | <b>429.247</b> | 0.504   | 428.743        | H[7] |
| H[3] | 190.095        | 368.727        | 360.717        | 0.504   | 360.214        | H[6] |
| K[4] | 288.156        | 300.197        | 292.188        | 292.692 | 291.684        | K[5] |
| A[5] | 323.675        | 202.137        | 194.127        | 194.631 | 193.624        | A[4] |
| K[6] | <b>387.722</b> | 166.618        | 158.609        | 159.113 | 158.105        | K[3] |
| G[7] | <b>416.233</b> | 102.571        | 94.561         | 95.065  | 94.057         | G[2] |
| K[8] | 480.280        | 74.060         | 66.051         | 66.555  | 65.547         | K[1] |

# sp | P15864 | H12\_MOUSE

LITKAVAASK <sup>Crotonyl</sup> E  
68.03

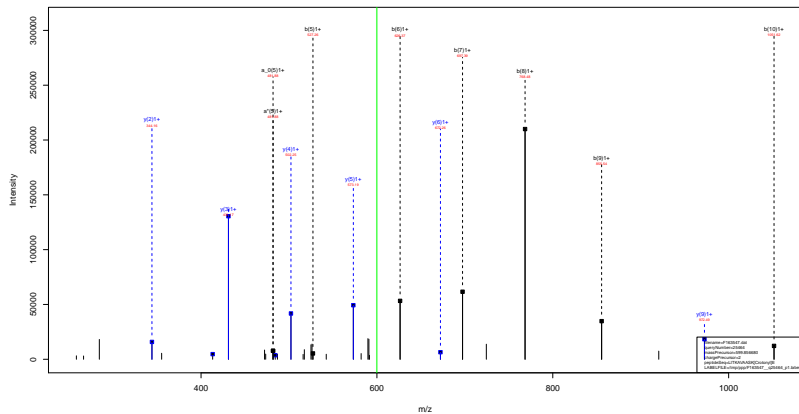

# sp | P15864 | H12\_MOUSE

LITKAVAASK <sup>Crotonyl</sup> E  
68.03

- ▶ fragmentation table for charge state 1+
- ▶ specType=cid
- ▶ score=44.60
- ▶ F163547.dat
- ▶ query=q25464\_p1
- ▶ precursor=599.856680
- ▶ chargePrecursor=2
- ▶ itol=0.6

| AA  | a       | y <sup>n</sup> | a <sub>0</sub> <sup>0</sup> | b               | b <sup>n</sup> | b <sub>0</sub> <sup>0</sup> | y              | y <sup>n</sup> | y <sub>0</sub> <sup>0</sup> | AA   |
|-----|---------|----------------|-----------------------------|-----------------|----------------|-----------------------------|----------------|----------------|-----------------------------|------|
| L13 | 88.696  | 0.000          | 0.000                       | 114.092         | 0.000          | 0.000                       | 1109.707       | 1182.670       | 1189.094                    | L111 |
| T12 | 109.130 | 0.000          | 0.000                       | 129.126         | 0.000          | 0.000                       | 1029.431       | 1098.769       | 1107.602                    | T09  |
| T15 | 100.728 | 0.000          | 282.211                     | 126.221         | 0.000          | 101.211                     | <b>972.536</b> | 995.505        | 994.525                     | T08  |
| K16 | 112.512 | 0.000          | 0.000                       | 137.512         | 0.000          | 0.000                       | 1112.512       | 1182.512       | 1182.512                    | K16  |
| A15 | 109.130 | <b>481.314</b> | <b>481.314</b>              | <b>127.205</b>  | 0.000          | 0.000                       | 1029.431       | 1098.769       | 1107.602                    | A17  |
| V16 | 108.429 | 165.412        | 165.412                     | <b>626.429</b>  | 0.000          | 0.000                       | 1029.431       | 1098.769       | 1107.602                    | V16  |
| A17 | 100.402 | 162.439        | 162.439                     | <b>607.461</b>  | 0.000          | 0.000                       | 1029.431       | 1098.769       | 1107.602                    | A18  |
| A16 | 140.503 | 123.416        | 122.492                     | <b>768.688</b>  | 151.411        | 150.489                     | <b>502.251</b> | 485.229        | <b>484.249</b>              | A14  |
| S19 | 117.518 | 0.011603       | 0.011603                    | <b>855.538</b>  | 0.011603       | 0.011603                    | <b>411.214</b> | 414.181        | <b>411.203</b>              | S19  |
| R10 | 111.056 | 109.630        | 109.644                     | <b>1051.651</b> | 1094.624       | 1011.646                    | <b>144.182</b> | 127.151        | 126.171                     | R10  |
| E11 | 113.109 | 110.819        | 111.818                     | 1100.894        | 1103.867       | 1102.883                    | 148.888        | 0.000          | 130.000                     | E11  |

# sp | P43276 | H15\_MOUSE

LITKAWSASK Crotonyl E  
68.03

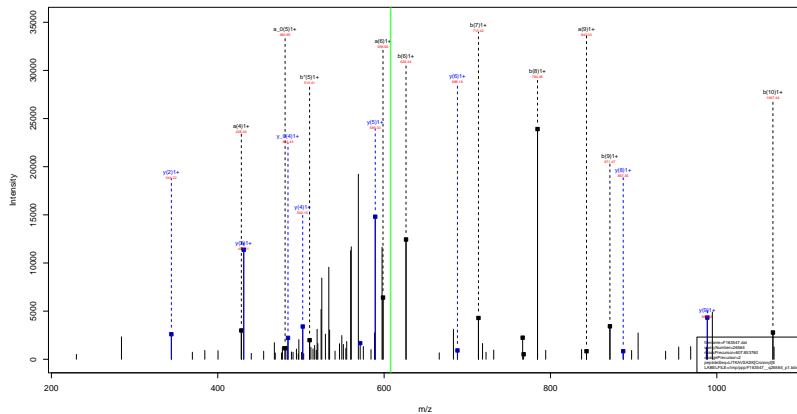



# sp | P43276 | H15\_MOUSE

LITKAVSASK <sup>Crotonyl</sup> E  
68.03

- ▶ fragmentation table for charge state 1+
- ▶ specType=cid
- ▶ score=30.50
- ▶ F163547.dat
- ▶ query=q26564\_p1
- ▶ precursor=607.853760
- ▶ chargePrecursor=2
- ▶ itol=0.6

| AA  | a              | y <sup>a</sup> | a <sub>0</sub> | b               | b <sup>a</sup> | b <sub>0</sub> | y              | y <sup>a</sup> | y <sub>0</sub> | AA   |
|-----|----------------|----------------|----------------|-----------------|----------------|----------------|----------------|----------------|----------------|------|
| L1  | 88.096         | 0.000          | 0.000          | 114.092         | 0.000          | 0.000          | 1254.830       | 1197.820       | 1196.989       | L111 |
| L2  | 109.100        | 0.000          | 0.000          | 129.100         | 0.000          | 0.000          | 1126.831       | 1069.820       | 1068.984       | L101 |
| L3  | 300.228        | 0.000          | 282.211        | 326.221         | 0.000          | 300.211        | <b>888.531</b> | 975.524        | 975.520        | L100 |
| K1  | <b>428.213</b> | 431.209        | 430.400        | 456.211         | 430.400        | 430.200        | <b>887.483</b> | 870.474        | 869.472        | K100 |
| A1  | 100.000        | 882.212        | <b>481.358</b> | 287.209         | <b>518.329</b> | 308.415        | 1100.000       | 742.988        | 741.988        | A100 |
| V1  | <b>508.429</b> | 501.422        | <b>626.474</b> | 626.474         | 626.474        | 626.474        | 608.415        | 671.525        | 670.541        | V100 |
| S1  | 305.431        | 688.429        | 687.421        | <b>711.456</b>  | 688.429        | 688.429        | <b>589.283</b> | 572.258        | <b>571.272</b> | S100 |
| A1  | 225.249        | 129.421        | 128.481        | <b>764.463</b>  | <b>767.466</b> | <b>766.462</b> | <b>582.251</b> | 485.229        | <b>484.240</b> | A100 |
| S1  | <b>843.530</b> | 836.523        | 835.523        | <b>871.525</b>  | 871.525        | 871.525        | 853.514        | 836.510        | 835.509        | S100 |
| R10 | 1039.651       | 1032.639       | 1031.640       | <b>1067.646</b> | 1067.646       | 1067.646       | <b>144.182</b> | 127.151        | 126.171        | R100 |
| E11 | 1038.604       | 1031.600       | 1030.600       | 1100.600        | 1100.600       | 1100.600       | 148.000        | 0.000          | 138.000        | E110 |

# sp | Q6GSS7 | H2A2A\_MOUSE

LNK<sup>Crotonyl</sup><sub>68.03</sub> LLGKVTIAQGGVLPNIQAVLLPKKTE

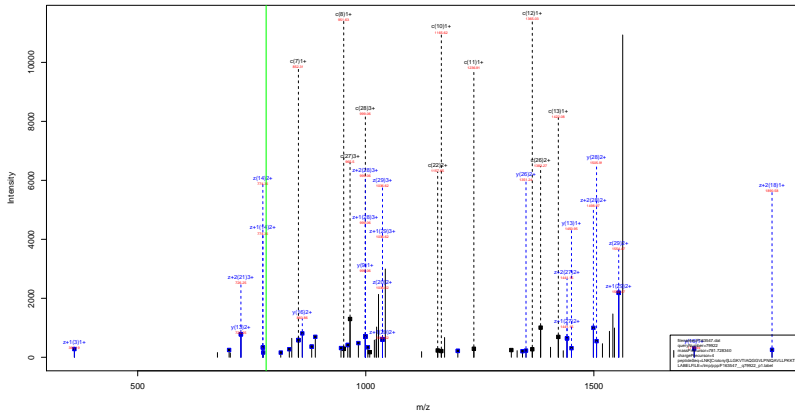

# sp | Q6GSS7 | H2A2A\_MOUSE

LNK <sup>Crotonyl</sup> 68.03 LLGKVTIAQGGVLPNIQAVLLPKKTE

- ▶ fragmentation table for charge state 1+
- ▶ specType=etd
- ▶ score=39.34
- ▶ F163547.dat
- ▶ query=q79922.p1
- ▶ precursor=781.728340
- ▶ chargePrecursor=4
- ▶ itol=0.6

| AA     | c               | y               | z+1            | z+2             | z        | AA     |
|--------|-----------------|-----------------|----------------|-----------------|----------|--------|
| L[1]   | 131.118         | 3123.887        | 3107.888       | 0.000           | 3108.890 | L[29]  |
| N[2]   | 345.161         | 3010.803        | 2994.794       | 2995.792        | 2993.778 | N[28]  |
| K[3]   | 441.292         | 2896.760        | 2880.741       | 2881.749        | 2879.733 | K[27]  |
| L[4]   | 554.366         | 2700.639        | 2684.620       | 2685.628        | 2683.612 | L[26]  |
| L[5]   | 667.490         | 2587.555        | 2571.536       | 2572.544        | 2570.528 | L[25]  |
| Q[6]   | 774.612         | 2474.470        | 2458.452       | 2459.460        | 2457.444 | Q[24]  |
| K[7]   | <b>852.567</b>  | 2417.449        | 2401.430       | 2402.438        | 2400.422 | K[23]  |
| V[8]   | <b>951.635</b>  | 2289.354        | 2273.335       | 2274.343        | 2272.327 | V[22]  |
| T[9]   | 1052.683        | 2196.268        | 2174.267       | 2175.275        | 2173.259 | T[21]  |
| I[10]  | <b>1165.767</b> | 2089.238        | 2073.219       | 2074.227        | 2072.211 | I[20]  |
| A[11]  | <b>1236.894</b> | 1976.154        | 1960.135       | 1961.143        | 1959.127 | A[19]  |
| Q[12]  | <b>1364.962</b> | 1869.117        | 1853.098       | <b>1890.106</b> | 1888.090 | Q[18]  |
| G[13]  | <b>1421.884</b> | 1777.058        | 1761.039       | 1762.047        | 1760.032 | G[17]  |
| G[14]  | 1478.905        | <b>1720.037</b> | 1704.018       | 1705.026        | 1703.010 | G[16]  |
| V[15]  | 1577.874        | 1663.015        | 1646.997       | 1648.004        | 1645.989 | V[15]  |
| L[16]  | 1691.058        | 1563.947        | 1547.928       | 1548.936        | 1546.920 | L[14]  |
| P[17]  | 1788.111        | <b>1450.863</b> | 1434.844       | 1435.852        | 1433.836 | P[13]  |
| TW[18] | 1892.133        | 1353.810        | 1337.791       | 1338.799        | 1336.783 | TW[12] |
| I[19]  | 2015.238        | 1239.767        | 1223.748       | 1224.756        | 1222.741 | I[11]  |
| Q[20]  | 2143.296        | 1126.683        | 1110.664       | 1111.672        | 1109.656 | Q[10]  |
| A[21]  | 2214.331        | <b>998.624</b>  | 982.606        | <b>983.614</b>  | 981.598  | A[9]   |
| V[22]  | 2313.402        | 927.587         | 911.569        | 912.576         | 910.561  | V[8]   |
| L[23]  | 2426.486        | 828.510         | 812.492        | <b>813.500</b>  | 811.482  | L[7]   |
| L[24]  | 2539.570        | 715.433         | 699.415        | <b>700.424</b>  | 698.405  | L[6]   |
| P[25]  | 2636.623        | 602.351         | 586.332        | 587.340         | 585.324  | P[5]   |
| K[26]  | 2764.718        | 505.268         | 489.249        | 490.257         | 488.241  | K[4]   |
| K[27]  | 2892.812        | 377.203         | <b>361.184</b> | 362.192         | 360.177  | K[3]   |
| T[28]  | 2993.850        | 249.108         | 233.089        | 234.097         | 232.082  | T[2]   |
| E[29]  | 3122.903        | 148.060         | 132.042        | 133.050         | 131.034  | E[1]   |

# sp | Q6GSS7 | H2A2A\_MOUSE

LNK<sup>Crotonyl</sup><sub>68.03</sub> LLGKVTIAQGGVLPNIQAVLLPKKTE

- ▶ fragmentation table for charge state 2+
- ▶ specType=etd
- ▶ score=39.34
- ▶ F163547.dat
- ▶ query=q79922.p1
- ▶ precursor=781.728340
- ▶ chargePrecursor=4
- ▶ itol=0.6

| AA   | c               | y               | z+1             | z+2             | z               | AA   |
|------|-----------------|-----------------|-----------------|-----------------|-----------------|------|
| L 1  | 66.053          | 1562.841        | <b>1554.438</b> | 9.504           | <b>1553.934</b> | L 20 |
| N 2  | 123.084         | <b>1505.905</b> | 1497.596        | <b>1498.400</b> | 1497.952        | N 20 |
| K 3  | 231.145         | 1448.884        | <b>1440.874</b> | <b>1441.378</b> | 1440.370        | K 27 |
| L 4  | 277.607         | <b>1350.823</b> | 1342.814        | <b>1343.317</b> | 1342.310        | L 26 |
| L 5  | 334.229         | 1294.281        | 1286.272        | 1286.775        | 1285.768        | L 25 |
| G 6  | 382.799         | 1237.739        | 1229.730        | 1230.233        | 1229.226        | G 24 |
| K 7  | 426.787         | 1209.228        | <b>1201.219</b> | <b>1201.723</b> | 1200.715        | K 23 |
| V 8  | 476.321         | 1145.181        | 1137.171        | 1137.675        | 1136.667        | V 22 |
| T 9  | 526.845         | 1095.646        | 1087.637        | 1088.141        | 1087.133        | T 21 |
| T 10 | 583.387         | 1045.123        | <b>1037.113</b> | 1037.617        | <b>1036.609</b> | T 20 |
| A 11 | 638.906         | 988.581         | 980.571         | 981.075         | 980.067         | A 19 |
| Q 12 | 682.926         | 933.063         | 925.053         | <b>945.557</b>  | 944.549         | Q 18 |
| G 13 | 711.446         | <b>889.033</b>  | <b>881.023</b>  | <b>881.527</b>  | 880.519         | G 17 |
| G 14 | 739.956         | <b>860.522</b>  | <b>852.513</b>  | 853.017         | <b>852.009</b>  | G 16 |
| V 15 | 789.491         | <b>832.011</b>  | 824.002         | 824.506         | 823.498         | V 15 |
| L 16 | 846.033         | 782.477         | <b>774.468</b>  | <b>774.972</b>  | <b>773.964</b>  | L 14 |
| T 17 | 894.569         | <b>725.935</b>  | 717.925         | 718.429         | 717.421         | T 13 |
| N 18 | <b>951.580</b>  | 677.820         | 669.809         | 669.903         | 668.895         | N 12 |
| I 19 | <b>1008.122</b> | 620.387         | 612.378         | 612.882         | 611.874         | I 11 |
| Q 20 | 1072.152        | 563.845         | 555.836         | 556.340         | 555.332         | Q 10 |
| A 21 | 1107.670        | 499.816         | 491.807         | 492.310         | 491.303         | A 0  |
| V 22 | <b>1157.204</b> | 484.297         | 476.288         | 476.792         | 475.784         | V 8  |
| L 23 | 1213.173        | 414.763         | 406.754         | 407.258         | 406.250         | L 1  |
| L 24 | 1270.289        | 358.221         | 350.212         | 350.716         | 349.708         | L 6  |
| P 25 | <b>1318.815</b> | 301.679         | 293.670         | 294.174         | 293.166         | P 5  |
| K 26 | <b>1382.862</b> | 253.153         | 245.143         | 245.647         | 244.639         | K 4  |
| K 27 | 1446.910        | 189.105         | 181.096         | 181.600         | 180.592         | K 3  |
| T 28 | 1487.434        | 125.058         | 117.048         | 117.552         | 116.544         | T 2  |
| E 29 | 1581.955        | 74.534          | 66.524          | 67.028          | 66.021          | E 1  |

# sp | Q6GSS7 | H2A2A\_MOUSE

LNK <sup>Crotonyl</sup> 68.03 LLGKVTIAQGGVLPNIQAVLLPKKTE

- ▶ fragmentation table for charge state 3+
- ▶ specType=etd
- ▶ score=39.34
- ▶ F163547.dat
- ▶ query=q79922.p1
- ▶ precursor=781.728340
- ▶ chargePrecursor=4
- ▶ itol=0.6

| AA  | c              | y               | z+1             | z+2            | z       | AA                  |
|-----|----------------|-----------------|-----------------|----------------|---------|---------------------|
| L1  | 44.377         | 1041.967        | <b>1036.628</b> |                | 0.672   | <b>1036.292</b> L29 |
| N2  | 62.392         | <b>1004.272</b> | <b>996.933</b>  | <b>999.269</b> |         | <b>998.597</b> N28  |
| K3  | 147.766        | 966.258         | <b>960.919</b>  | 961.254        |         | <b>960.583</b> K27  |
| L4  | 185.460        | 900.884         | 895.545         | 895.861        | 895.209 | L26                 |
| L5  | 223.155        | 863.190         | 857.850         | 858.186        | 857.514 | L25                 |
| G6  | 242.102        | 825.695         | 820.155         | 820.491        | 819.819 | G24                 |
| K7  | 284.950        | 806.488         | 801.148         | 801.484        | 800.812 | K23                 |
| V8  | 317.883        | 763.790         | 758.450         | 758.786        | 758.114 | V22                 |
| T9  | 351.566        | 730.767         | 725.427         | <b>725.763</b> | 725.091 | T21                 |
| I10 | 389.260        | 697.884         | 691.745         | 692.081        | 691.409 | I20                 |
| A11 | 412.039        | 659.389         | 654.050         | 654.386        | 653.714 | A19                 |
| Q12 | 459.606        | 636.720         | 630.371         | 630.707        | 630.035 | Q18                 |
| G13 | 474.633        | 593.024         | 587.685         | 588.021        | 587.349 | G17                 |
| G14 | 493.640        | 574.017         | 568.678         | 569.013        | 568.342 | G16                 |
| V15 | 526.663        | 555.010         | 549.670         | 550.006        | 549.334 | V15                 |
| L16 | 564.357        | 521.987         | 516.648         | 516.984        | 516.312 | L14                 |
| F17 | 596.708        | 484.292         | 478.953         | 479.289        | 478.617 | F13                 |
| T18 | 634.723        | 451.942         | 446.603         | 446.939        | 446.267 | T15                 |
| I19 | 672.417        | 413.927         | 408.588         | 408.924        | 408.252 | I11                 |
| Q20 | 715.104        | 376.213         | 370.893         | 371.229        | 370.557 | Q10                 |
| A21 | 736.783        | 333.546         | 328.207         | 328.543        | 327.871 | A9                  |
| V22 | 771.805        | 309.867         | 304.528         | 304.864        | 304.192 | V8                  |
| L23 | 809.500        | 276.844         | 271.505         | 271.841        | 271.169 | L7                  |
| L24 | 847.195        | 239.150         | 233.810         | 234.146        | 233.474 | L6                  |
| P25 | 879.546        | 201.625         | 196.116         | 196.451        | 195.780 | P5                  |
| K26 | 922.244        | 169.104         | 163.765         | 164.101        | 163.429 | K4                  |
| K27 | <b>964.942</b> | 126.406         | 121.066         | 121.402        | 120.730 | K3                  |
| T28 | <b>998.625</b> | 83.708          | 78.368          | 78.704         | 78.032  | T2                  |
| E29 | 1041.639       | 50.025          | 44.685          | 45.021         | 44.349  | E1                  |

# sp | Q6GSS7 | H2A2A\_MOUSE

LNK<sup>Crotonyl</sup><sub>68.03</sub> LLGKVTIAQGGVLPNIQAVLLPKKTE

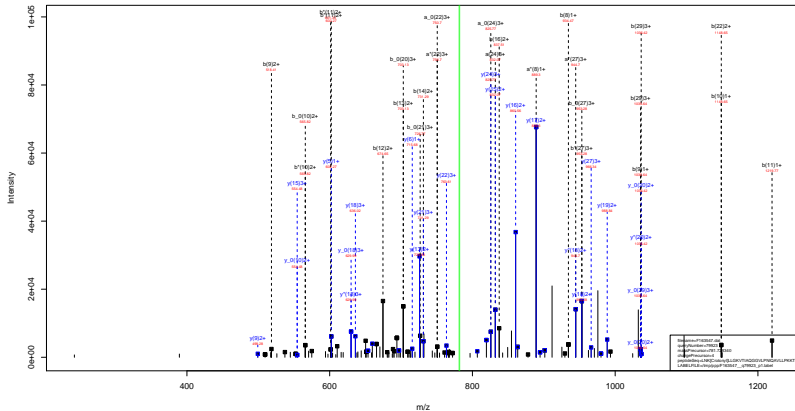

# sp | Q6GSS7 | H2A2A\_MOUSE

LNK <sup>Crotonyl</sup> 68.03 LLGKVTIAQGGVLPNIQAVLLPKKTE

- ▶ fragmentation table for charge state 1+
- ▶ specType=cid
- ▶ score=31.54
- ▶ F163547.dat
- ▶ query=q79923.p1
- ▶ precursor=781.728340
- ▶ chargePrecursor=4
- ▶ itol=0.6

| AA  | a              | a*             | a,Δ     | b               | b*             | b,Δ     | y       | y*      | y,Δ     | AA  |
|-----|----------------|----------------|---------|-----------------|----------------|---------|---------|---------|---------|-----|
| L1  | 88.308         | 0.00           | 0.000   | 114.981         | 0.00           | 0.000   | 11.2138 | 10.00   | 0.000   | L20 |
| R1  | 200.139        | 103.113        | 0.000   | 235.134         | 211.188        | 0.000   | 10.7010 | 10.9957 | 2.9027  | R20 |
| R2  | 396.051        | 199.219        | 0.000   | 426.253         | 407.239        | 0.000   | 10.8618 | 10.7913 | 10.7849 | R27 |
| L3  | <b>309.345</b> | 161.218        | 0.000   | <b>537.340</b>  | 130.313        | 0.000   | 21.0010 | 10.6312 | 10.6210 | L26 |
| L5  | 637.479        | 626.462        | 0.000   | <b>650.424</b>  | 613.309        | 0.000   | 10.7859 | 10.7838 | 10.6944 | L28 |
| G6  | 676.400        | 662.434        | 0.000   | 690.411         | <b>690.418</b> | 0.000   | 10.7413 | 10.7411 | 10.6544 | G24 |
| R7  | 807.543        | 796.539        | 0.000   | 826.549         | 818.513        | 0.000   | 10.7480 | 10.6912 | 10.6914 | R25 |
| V8  | 868.613        | <b>855.587</b> | 0.000   | <b>934.608</b>  | 107.568        | 0.000   | 21.0010 | 10.7211 | 10.7148 | V22 |
| V9  | 1309.661       | 1295.633       | 0.000   | <b>1035.655</b> | 1038.630       | 0.000   | 10.7446 | 10.7020 | 10.7125 | V21 |
| L10 | 1330.745       | 1318.719       | 1.00778 | <b>1148.740</b> | 1131.714       | 1.03010 | 10.6913 | 10.7211 | 10.7127 | L29 |
| A11 | 1691.792       | 1678.766       | 1.11277 | <b>1218.777</b> | 1202.750       | 1.26010 | 10.6913 | 10.6913 | 10.6814 | A19 |
| G12 | 1719.91        | 1707.884       | 1.81414 | 1741.894        | 1728.868       | 1.32010 | 10.6913 | 10.6913 | 10.6814 | G18 |
| G13 | 1811.962       | 1799.935       | 1.81414 | 1833.944        | 1820.918       | 1.32010 | 10.6913 | 10.6913 | 10.6814 | G17 |
| G14 | 1813.984       | 1801.957       | 1.81414 | 1835.979        | 1822.952       | 1.34310 | 10.6913 | 10.6913 | 10.6814 | G16 |
| V15 | 1815.972       | 1803.945       | 1.81414 | 1837.967        | 1824.940       | 1.34310 | 10.6913 | 10.6913 | 10.6814 | V19 |
| L16 | 1846.936       | 1834.909       | 1.81414 | 1869.921        | 1856.894       | 1.34310 | 10.6913 | 10.6913 | 10.6814 | L14 |
| P17 | 1848.959       | 1836.932       | 1.81414 | 1871.944        | 1858.917       | 1.34310 | 10.6913 | 10.6913 | 10.6814 | P13 |
| R18 | 1857.932       | 1845.905       | 1.81414 | 1880.917        | 1867.890       | 1.34310 | 10.6913 | 10.6913 | 10.6814 | R12 |
| L19 | 1859.918       | 1847.891       | 1.81414 | 1882.914        | 1869.887       | 1.34310 | 10.6913 | 10.6913 | 10.6814 | L13 |
| Q20 | 1868.975       | 1856.948       | 1.81414 | 1891.971        | 1878.944       | 1.34310 | 10.6913 | 10.6913 | 10.6814 | Q18 |
| A21 | 1880.912       | 1868.885       | 1.81414 | 1901.918        | 1888.891       | 1.34310 | 10.6913 | 10.6913 | 10.6814 | A18 |
| V22 | 2088.909       | 2076.882       | 1.81414 | 2119.894        | 2106.867       | 1.34310 | 10.6913 | 10.6913 | 10.6814 | V18 |
| L23 | 2201.904       | 2189.877       | 1.81414 | 2239.889        | 2226.862       | 1.34310 | 10.6913 | 10.6913 | 10.6814 | L17 |
| L24 | 2634.840       | 2622.813       | 2.02210 | 2670.817        | 2657.790       | 2.02210 | 10.6913 | 10.6913 | 10.6814 | L16 |
| P15 | 2691.801       | 2679.774       | 2.02210 | 2727.778        | 2714.751       | 2.02210 | 10.6913 | 10.6913 | 10.6814 | P11 |
| R26 | 3118.908       | 3106.881       | 1.81414 | 3154.882        | 3141.855       | 1.81414 | 10.6913 | 10.6913 | 10.6814 | R15 |
| R27 | 3447.761       | 3435.734       | 1.81414 | 3484.738        | 3471.711       | 1.81414 | 10.6913 | 10.6913 | 10.6814 | R10 |
| T28 | 3468.839       | 3456.812       | 1.81414 | 3505.834        | 3492.807       | 1.81414 | 10.6913 | 10.6913 | 10.6814 | T12 |
| G29 | 3877.811       | 3865.784       | 1.81414 | 3914.815        | 3901.788       | 1.81414 | 10.6913 | 10.6913 | 10.6814 | G11 |

# sp | Q6GSS7 | H2A2A\_MOUSE

LNK <sup>Crotonyl</sup> 68.03 LLGKVTIAQGGVLPNIQAVLLPKKTE

- ▶ fragmentation table for charge state 2+
- ▶ specType=cid
- ▶ score=31.54
- ▶ F163547.dat
- ▶ query=q79923.p1
- ▶ precursor=781.728340
- ▶ chargePrecursor=4
- ▶ itol=0.6

| AA  | a    | a'  | a <sub>0</sub> | b   | b'   | b <sub>0</sub> | y    | y'   | y <sub>0</sub> | AA   |      |     |      |     |       |     |      |     |      |
|-----|------|-----|----------------|-----|------|----------------|------|------|----------------|------|------|-----|------|-----|-------|-----|------|-----|------|
| L1  | 41   | 502 | 0              | 0   | 0    | 0              | 1362 | 4417 | 1363           | L209 |      |     |      |     |       |     |      |     |      |
| R2  | 102  | 918 | 0              | 0   | 0    | 0              | 1500 | 900  | 1499           | R200 |      |     |      |     |       |     |      |     |      |
| R3  | 168  | 634 | 180            | 131 | 0    | 0              | 1448 | 684  | 1440           | R201 |      |     |      |     |       |     |      |     |      |
| L4  | 205  | 176 | 246            | 683 | 0    | 0              | 1350 | 823  | 1342           | L206 |      |     |      |     |       |     |      |     |      |
| L5  | 311  | 113 | 309            | 309 | 0    | 0              | 1294 | 101  | 1289           | L208 |      |     |      |     |       |     |      |     |      |
| Q6  | 348  | 226 | 331            | 715 | 0    | 0              | 1237 | 733  | 1230           | Q204 |      |     |      |     |       |     |      |     |      |
| R7  | 384  | 270 | 365            | 763 | 0    | 0              | 1206 | 239  | 1200           | R203 |      |     |      |     |       |     |      |     |      |
| V8  | 403  | 311 | 392            | 781 | 0    | 0              | 1149 | 341  | 1146           | V202 |      |     |      |     |       |     |      |     |      |
| L9  | 504  | 234 | 493            | 621 | 480  | 225            | 1100 | 945  | 1097           | L201 |      |     |      |     |       |     |      |     |      |
| I10 | 560  | 678 | 552            | 363 | 551  | 871            | 874  | 874  | 506            | 360  | 565  | 868 | 1046 | 111 | 1036  | 609 | 1036 | 111 | I201 |
| A11 | 596  | 595 | 587            | 682 | 585  | 325            | 810  | 392  | 801            | 879  | 601  | 387 | 988  | 501 | 988   | 067 | 979  | 575 | A116 |
| Q12 | 660  | 224 | 650            | 611 | 651  | 418            | 814  | 422  | 805            | 908  | 606  | 418 | 851  | 962 | 844   | 549 | Q120 |     |      |
| Q13 | 688  | 935 | 680            | 422 | 679  | 616            | 767  | 937  | 694            | 419  | 691  | 927 | 889  | 633 | Q1301 |     |      |     |      |
| Q14 | 717  | 660 | 708            | 932 | 709  | 440            | 731  | 443  | 722            | 660  | 697  | 430 | 860  | 522 | 852   | 039 | 851  | 517 | Q116 |
| V15 | 756  | 360 | 750            | 460 | 749  | 394            | 661  | 471  | 672            | 864  | 571  | 872 | 832  | 813 | 828   | 468 | 828  | 468 | V115 |
| L16 | 821  | 560 | 815            | 620 | 814  | 551            | 837  | 519  | 826            | 560  | 826  | 515 | 925  | 477 | 925   | 064 | 925  | 477 | L116 |
| P17 | 877  | 608 | 861            | 535 | 861  | 643            | 888  | 646  | 877            | 532  | 877  | 600 | 725  | 935 | 717   | 422 | 716  | 630 | P113 |
| R18 | 928  | 670 | 920            | 708 | 920  | 604            | 941  | 607  | 934            | 554  | 934  | 662 | 877  | 400 | 868   | 694 | 868  | 694 | R112 |
| I19 | 958  | 618 | 951            | 620 | 949  | 606            | 995  | 609  | 984            | 508  | 984  | 620 | 821  | 811 | 811   | 674 | 811  | 674 | I111 |
| Q20 | 1049 | 641 | 1041           | 528 | 1040 | 638            | 1061 | 638  | 1055           | 426  | 1054 | 631 | 963  | 641 | 958   | 512 | 954  | 840 | Q120 |
| A21 | 1095 | 101 | 1090           | 646 | 1089 | 154            | 1100 | 157  | 1090           | 644  | 1090 | 152 | 499  | 816 | 491   | 301 | 490  | 311 | A10  |
| V22 | 1134 | 668 | 1128           | 680 | 1120 | 680            | 1148 | 681  | 1140           | 710  | 1139 | 680 | 668  | 709 | 668   | 704 | 668  | 709 | V10  |
| L23 | 1161 | 336 | 1158           | 222 | 1158 | 280            | 1166 | 601  | 1166           | 240  | 1166 | 280 | 414  | 683 | 408   | 250 | 408  | 250 | L117 |
| L24 | 1267 | 710 | 1260           | 205 | 1258 | 710            | 1261 | 710  | 1263           | 202  | 1262 | 710 | 388  | 221 | 388   | 108 | 388  | 108 | L10  |
| V25 | 1286 | 534 | 1280           | 791 | 1278 | 496            | 1300 | 500  | 1299           | 710  | 1300 | 500 | 88   | 816 | 88    | 108 | 88   | 108 | V101 |
| R26 | 1300 | 302 | 1291           | 681 | 1291 | 546            | 1314 | 549  | 1308           | 610  | 1305 | 544 | 263  | 515 | 264   | 639 | 264  | 639 | R104 |
| R27 | 1424 | 389 | 1421           | 680 | 1419 | 389            | 1430 | 389  | 1429           | 389  | 1429 | 389 | 180  | 542 | 180   | 180 | 180  | 542 | R103 |
| L28 | 1474 | 401 | 1468           | 389 | 1468 | 401            | 1480 | 401  | 1479           | 389  | 1479 | 389 | 228  | 588 | 228   | 588 | 228  | 588 | L102 |
| E29 | 1539 | 444 | 1530           | 371 | 1529 | 430            | 1551 | 442  | 1544           | 430  | 1544 | 430 | 74   | 524 | 74    | 524 | 74   | 524 | E101 |



# sp | Q6GSS7 | H2A2A\_MOUSE

LNK <sup>Crotonyl</sup> 68.03 LLGKVTIAQGGVLPNIQAVLLPKKTE

- ▶ fragmentation table for charge state 3+
- ▶ specType=cid
- ▶ score=31.54
- ▶ F163547.dat
- ▶ query=q79923\_p1
- ▶ precursor=781.728340
- ▶ chargePrecursor=4
- ▶ itol=0.6

| AA   | a              | a'             | a <sub>0</sub> | b              | b'             | b <sub>0</sub> | y        | y'              | y <sub>0</sub>  | AA             |      |
|------|----------------|----------------|----------------|----------------|----------------|----------------|----------|-----------------|-----------------|----------------|------|
| L1   | 241.200        | 0.000          | 0.000          | 58.500         | 0.000          | 0.000          | 1041.900 | <b>1036.292</b> | <b>1035.964</b> | L209           |      |
| R1   | 187.200        | 0.000          | 0.000          | 70.100         | 0.000          | 0.000          | 1029.700 | 999.500         | 999.500         | R200           |      |
| R1   | 132.200        | 137.000        | 0.000          | 0.000          | 142.000        | 136.414        | 0.000    | <b>966.258</b>  | 960.500         | R027           |      |
| L1   | 170.200        | 0.000          | 0.000          | 0.000          | 179.100        | 174.100        | 0.000    | <b>900.884</b>  | <b>895.209</b>  | <b>894.881</b> | L206 |
| L1   | 100.200        | 200.400        | 0.000          | 0.000          | 0.000          | 201.000        | 0.000    | <b>863.100</b>  | 850.500         | L205           |      |
| Q1   | 227.100        | 221.410        | 0.000          | 0.000          | 228.467        | 226.011        | 0.000    | <b>825.405</b>  | <b>819.819</b>  | <b>819.491</b> | Q204 |
| R1   | 169.200        | 164.100        | 0.000          | 0.000          | 179.100        | 173.100        | 0.000    | <b>806.488</b>  | 800.010         | 800.484        | R023 |
| V1   | 167.100        | 161.200        | 0.000          | 0.000          | 172.200        | 166.110        | 0.000    | <b>763.799</b>  | 756.114         | 757.000        | V022 |
| L1   | 120.200        | 120.000        | 120.000        | 149.000        | 149.000        | 149.210        | 120.000  | <b>730.767</b>  | 725.000         | 724.763        | L201 |
| L10  | 174.200        | 168.100        | 168.100        | 181.000        | 181.000        | 181.000        | 167.100  | <b>697.084</b>  | 691.000         | 691.081        | L200 |
| A11  | 167.100        | 161.200        | 161.200        | 169.200        | 169.200        | 169.100        | 161.200  | <b>659.309</b>  | <b>653.714</b>  | <b>653.386</b> | A116 |
| Q1   | 169.200        | 163.100        | 163.100        | 169.200        | 169.200        | 169.100        | 163.100  | <b>635.712</b>  | <b>630.035</b>  | <b>629.707</b> | Q100 |
| Q1   | 169.200        | 163.100        | 163.100        | 169.200        | 169.200        | 169.100        | 163.100  |                 |                 |                | Q101 |
| G14  | 170.200        | 167.200        | 167.200        | 167.200        | 167.200        | 167.100        | 167.200  | 599.342         | 598.014         | G016           |      |
| V1   | 111.000        | 100.000        | 100.000        | 100.000        | 100.000        | 100.000        | 111.000  | <b>555.810</b>  | 549.104         | 549.800        | V115 |
| L10  | 149.200        | 143.000        | 143.000        | 149.200        | 149.200        | 149.100        | 143.000  | 552.678         | 546.112         | 545.684        | L104 |
| P127 | 161.100        | 150.000        | 150.000        | 150.000        | 150.000        | 150.000        | 161.100  | 549.104         | 548.292         | 547.899        | P113 |
| R1   | 159.100        | 148.000        | 148.000        | 148.000        | 148.000        | 148.000        | 159.100  | 545.242         | 540.260         | 540.500        | R112 |
| L10  | 167.100        | 161.200        | 161.200        | 167.100        | 167.100        | 167.000        | 161.200  | 541.921         | 536.252         | 535.924        | L111 |
| Q1   | 160.000        | <b>694.421</b> | <b>694.093</b> | <b>709.428</b> | <b>709.428</b> | <b>709.428</b> | 160.000  | <b>703.425</b>  | 700.557         | 700.229        | Q100 |
| A11  | 173.100        | 168.000        | 168.000        | 173.100        | 173.100        | 173.000        | 173.100  | <b>727.184</b>  | 723.540         | 723.012        | A100 |
| V1   | 160.000        | <b>721.123</b> | <b>720.795</b> | <b>746.130</b> | <b>746.130</b> | <b>746.130</b> | 160.000  | 700.000         | 696.100         | 695.800        | V100 |
| L1   | 168.200        |                |                | 168.200        | 168.200        | 168.100        | 168.200  | 219.044         | 219.109         | 219.044        | L101 |
| L1   | <b>812.188</b> | 806.100        | <b>826.184</b> | 804.100        | 804.100        | 804.000        | 812.188  | 219.109         | 215.474         | 215.146        | L100 |
| P125 | 164.100        | 150.000        | 150.000        | 150.000        | 150.000        | 150.000        | 164.100  | 200.493         | 199.789         | 199.500        | P101 |
| R1   | 167.100        | <b>901.581</b> | <b>901.253</b> | 900.500        | 900.500        | 900.500        | 167.100  | 900.500         | 893.409         | 893.100        | R100 |
| R227 | 169.200        | <b>844.260</b> | 840.000        | 840.000        | 840.000        | <b>953.591</b> | 169.200  | 130.409         | 130.719         | 130.400        | R100 |
| L1   | 160.000        | 160.000        | 160.000        | 160.000        | 160.000        | 160.000        | 160.000  | 10.000          | 10.000          | 10.000         | L100 |
| L10  | 170.200        | 160.000        | 160.000        | 170.200        | 170.200        | 170.100        | 160.000  | 10.000          | 10.000          | 10.000         | L100 |



# sp | Q8CGP5 | H2A1F\_MOUSE

LNK <sup>Crotonyl</sup> 68.03 LLGRVTIAQGGVLPNIQAVLLPKKTE

- ▶ fragmentation table for charge state 1+
- ▶ specType=etd
- ▶ score=35.49
- ▶ F163547.dat
- ▶ query=q80603.p1
- ▶ precursor=788.730370
- ▶ chargePrecursor=4
- ▶ itol=0.6

| AA    | c               | y               | z+1             | z+2            | z               | AA    |
|-------|-----------------|-----------------|-----------------|----------------|-----------------|-------|
| L[1]  | 131.118         | 3151.893        | 3136.874        | 0.000          | 3134.866        | L[28] |
| N[2]  | 245.161         | 3038.900        | 3022.700        | 3023.798       | 3021.782        | N[28] |
| K[3]  | 441.282         | 2924.766        | 2908.747        | 2909.755       | 2907.739        | K[27] |
| L[4]  | 554.366         | 2728.645        | 2712.626        | 2713.634       | 2711.618        | L[26] |
| L[5]  | 667.450         | 2615.561        | 2599.542        | 2600.550       | 2598.534        | L[25] |
| G[6]  | 774.472         | 2502.477        | 2486.458        | 2487.466       | 2485.450        | G[24] |
| R[7]  | <b>880.573</b>  | 2445.455        | 2429.436        | 2430.444       | 2428.428        | R[23] |
| V[8]  | 979.641         | 2289.354        | 2273.335        | 2274.343       | 2272.327        | V[22] |
| T[9]  | 1060.689        | 2190.288        | 2174.269        | 2175.275       | 2173.259        | T[21] |
| I[10] | <b>1193.773</b> | 2089.230        | 2073.210        | 2074.217       | 2072.211        | I[20] |
| A[11] | <b>1264.810</b> | 1976.154        | 1960.135        | 1961.143       | 1959.127        | A[19] |
| Q[12] | 1333.859        | 1905.111        | 1889.098        | 1890.106       | 1888.090        | Q[18] |
| G[13] | <b>1449.890</b> | 1777.058        | 1761.039        | 1762.047       | 1760.032        | G[17] |
| G[14] | 1506.911        | <b>1720.037</b> | <b>1704.018</b> | 1705.026       | 1703.010        | G[16] |
| V[15] | <b>1605.980</b> | 1663.015        | 1646.997        | 1648.004       | 1645.989        | V[15] |
| L[16] | 1719.064        | 1563.947        | <b>1547.928</b> | 1548.936       | 1546.920        | L[14] |
| T[17] | 1818.117        | 1490.863        | 1474.844        | 1475.852       | 1473.836        | T[13] |
| N[18] | 1930.160        | 1353.810        | 1337.791        | 1338.799       | 1336.783        | N[12] |
| I[19] | 2043.244        | 1239.767        | 1223.748        | 1224.756       | <b>1222.741</b> | I[11] |
| Q[20] | 2171.302        | 1126.683        | 1110.664        | 1111.672       | 1109.656        | Q[10] |
| A[21] | 2242.339        | 998.624         | 982.606         | 983.614        | 981.598         | A[9]  |
| V[22] | 2341.408        | 927.587         | 911.569         | 912.576        | 910.561         | V[8]  |
| L[23] | 2454.492        | 808.513         | <b>813.500</b>  | 813.508        | 811.492         | L[7]  |
| L[24] | 2567.576        | 715.435         | 699.416         | <b>700.424</b> | 698.408         | L[6]  |
| P[25] | 2664.620        | 602.351         | 586.332         | 587.340        | 585.324         | P[5]  |
| K[26] | 2762.724        | 505.268         | 489.249         | 490.257        | 488.241         | K[4]  |
| K[27] | 2920.819        | 377.203         | <b>361.184</b>  | 362.192        | 360.177         | K[3]  |
| T[28] | 3021.866        | 249.106         | 233.089         | 234.097        | 232.082         | T[2]  |
| E[29] | 3150.909        | 148.960         | 132.942         | 133.950        | 131.934         | E[1]  |

# sp | Q8CGP5 | H2A1F\_MOUSE

LNK<sup>Crotonyl</sup><sub>68.03</sub> LLGRVTIAQGGVLPNIQAVLLPKKTE

- ▶ fragmentation table for charge state 2+
- ▶ specType=etd
- ▶ score=35.49
- ▶ F163547.dat
- ▶ query=q80603.p1
- ▶ precursor=788.730370
- ▶ chargePrecursor=4
- ▶ itol=0.6

| AA | c               | y               | z+1             | z+2             | z               | AA   |
|----|-----------------|-----------------|-----------------|-----------------|-----------------|------|
| L1 | 66.093          | <b>1576.450</b> | <b>1568.441</b> | 8.504           | <b>1567.937</b> | L128 |
| N1 | 123.084         | 1519.908        | <b>1511.899</b> | <b>1512.403</b> | <b>1511.395</b> | N120 |
| K1 | 231.145         | 1462.887        | <b>1454.877</b> | <b>1455.381</b> | 1454.373        | K127 |
| L1 | 277.607         | 1384.826        | <b>1356.817</b> | <b>1357.321</b> | <b>1356.313</b> | L126 |
| L1 | 334.229         | 1308.269        | 1300.275        | 1300.779        | 1299.771        | L125 |
| G1 | 382.739         | <b>1251.742</b> | 1243.733        | 1244.236        | 1243.229        | G124 |
| R1 | 440.790         | <b>1223.231</b> | 1215.222        | 1215.726        | 1214.718        | R123 |
| V1 | 490.324         | <b>1145.181</b> | <b>1137.171</b> | <b>1137.675</b> | 1136.667        | V122 |
| T1 | 540.848         | 1095.646        | <b>1087.637</b> | 1088.141        | <b>1087.133</b> | T121 |
| T1 | 597.390         | 1045.123        | <b>1037.113</b> | <b>1037.617</b> | 1036.609        | T20  |
| A1 | 632.809         | 988.581         | 982.117         | 981.676         | 980.667         | A119 |
| G1 | 689.878         | 933.083         | <b>945.053</b>  | <b>945.557</b>  | 944.549         | G118 |
| G1 | 725.448         | <b>889.033</b>  | <b>881.023</b>  | 881.527         | <b>880.519</b>  | G117 |
| G1 | 753.959         | <b>860.522</b>  | <b>852.513</b>  | <b>853.017</b>  | <b>852.009</b>  | G116 |
| V1 | 803.494         | <b>832.011</b>  | 824.002         | 824.506         | 823.498         | V115 |
| L1 | 860.036         | <b>782.477</b>  | <b>774.468</b>  | <b>774.972</b>  | <b>773.964</b>  | L114 |
| T1 | 908.582         | <b>725.935</b>  | 717.925         | 718.429         | 717.421         | T113 |
| N1 | 965.583         | 677.822         | 669.799         | 669.903         | 668.895         | N112 |
| I1 | 1022.125        | 620.387         | 612.378         | 612.882         | 611.874         | I111 |
| Q1 | 1088.155        | 563.845         | 555.836         | 556.340         | 555.332         | Q110 |
| A1 | 1121.673        | 499.816         | 491.807         | 492.310         | 491.303         | A10  |
| V1 | 1172.208        | 484.297         | 456.288         | 456.792         | 455.784         | V19  |
| L1 | <b>1227.750</b> | 414.763         | 406.754         | 407.258         | 406.250         | L17  |
| L1 | 1284.292        | 358.221         | 350.212         | 350.716         | 349.708         | L16  |
| P1 | 1332.818        | 301.679         | 293.670         | 294.174         | 293.166         | P15  |
| K1 | 1398.805        | 253.153         | 245.143         | 245.647         | 244.639         | K14  |
| K1 | <b>1460.913</b> | 189.105         | 181.096         | 181.600         | 180.592         | K13  |
| T1 | <b>1511.437</b> | 125.058         | 117.048         | 117.552         | 116.544         | T12  |
| E1 | 1575.958        | 74.534          | 66.524          | 67.028          | 66.021          | E11  |

# sp | Q8CGP5 | H2A1F\_MOUSE

LNK<sup>Crotonyl</sup><sub>68.03</sub> LLGRVTIAQGGVLPNIQAVLLPKKTE

- ▶ fragmentation table for charge state 3+
- ▶ specType=etd
- ▶ score=35.49
- ▶ F163547.dat
- ▶ query=q80603.p1
- ▶ precursor=788.730370
- ▶ chargePrecursor=4
- ▶ itol=0.6

| AA   | c               | y               | z+1             | z+2             | z               | AA   |
|------|-----------------|-----------------|-----------------|-----------------|-----------------|------|
| L1   | 44.377          | <b>1051.302</b> | <b>1045.963</b> | 9.677           | <b>1045.627</b> | L120 |
| N12  | 62.302          | 1013.008        | <b>1008.268</b> | <b>1008.604</b> | <b>1007.932</b> | N020 |
| K13  | 147.766         | 975.593         | <b>970.254</b>  | <b>970.590</b>  | <b>969.918</b>  | K027 |
| L14  | 105.460         | 910.220         | 904.880         | 905.216         | 904.544         | L126 |
| L15  | 223.155         | 872.525         | 867.186         | 867.521         | 866.850         | L125 |
| G16  | 282.182         | 834.830         | 829.491         | 829.827         | 829.155         | G043 |
| R17  | 204.196         | 815.823         | 810.484         | 810.820         | 810.148         | R023 |
| V18  | 327.219         | 763.790         | 758.450         | 758.786         | 758.114         | V022 |
| T19  | <b>360.901</b>  | 730.767         | 725.427         | <b>725.763</b>  | 725.091         | T121 |
| T10  | 398.596         | 697.084         | 691.745         | 692.081         | 691.409         | T020 |
| A111 | 422.275         | 659.399         | 654.059         | 654.396         | 653.724         | A119 |
| Q12  | 464.663         | 626.710         | 621.371         | 621.707         | 621.035         | Q118 |
| G113 | 483.968         | 593.024         | 587.685         | 588.021         | 587.349         | G117 |
| G14  | 502.975         | 574.017         | 568.678         | 569.013         | 568.342         | G116 |
| V15  | 535.968         | 535.010         | 540.670         | 550.006         | 546.334         | V115 |
| L16  | 573.693         | 521.987         | 516.648         | 516.984         | 516.312         | L114 |
| T11  | 688.044         | 488.292         | 482.953         | 483.289         | 482.617         | T113 |
| N118 | 644.058         | 451.942         | 446.602         | 446.938         | 446.266         | N112 |
| I119 | 681.753         | 413.927         | 408.588         | 408.924         | 408.252         | I111 |
| Q120 | 744.439         | 376.233         | 370.893         | 371.229         | 370.557         | Q110 |
| A121 | 748.118         | 333.546         | 328.207         | 328.543         | 327.871         | A10  |
| V122 | 761.141         | 300.897         | 294.528         | 294.864         | 294.192         | V10  |
| L123 | 813.876         | 276.844         | 271.505         | 271.841         | 271.169         | L11  |
| L124 | 856.530         | 239.150         | 233.810         | 234.146         | 233.474         | L10  |
| P125 | 888.881         | 201.455         | 196.116         | 196.451         | 195.779         | P10  |
| K126 | 931.579         | 169.104         | 163.765         | 164.101         | 163.429         | K10  |
| K127 | <b>974.278</b>  | 126.406         | 121.066         | 121.402         | 120.730         | K10  |
| T128 | <b>1007.960</b> | 83.708          | 78.368          | 78.704          | 78.032          | T10  |
| E129 | 1030.874        | 50.025          | 44.685          | 45.021          | 44.349          | E10  |



# sp | Q8CGP5 | H2A1F\_MOUSE

LNK <sup>Crotonyl</sup> 68.03 LLGRVTIAQGGVLPNIQAVLLPKKTE

- ▶ fragmentation table for charge state 1+
- ▶ specType=cid
- ▶ score=35.18
- ▶ F163547.dat
- ▶ query=q80604\_p1
- ▶ precursor=788.730370
- ▶ chargePrecursor=4
- ▶ itol=0.6

| AA  | a               | a <sup>+</sup> | a <sup>2+</sup> | b               | b <sup>+</sup> | b <sup>2+</sup> | y              | y <sup>+</sup> | y <sup>2+</sup> | AA  |
|-----|-----------------|----------------|-----------------|-----------------|----------------|-----------------|----------------|----------------|-----------------|-----|
| L1  | 36.096          | 0.000          | 0.000           | 114.091         | 0.000          | 0.000           | 105.183        | 3134.860       | 11.53.002       | L29 |
| R2  | 309.150         | 181.113        | 0.000           | 229.154         | 311.100        | 0.000           | 139.883        | 3029.700       | 2033.700        | R20 |
| R3  | 595.261         | 379.234        | 0.000           | <b>434.255</b>  | 607.225        | 0.000           | 204.700        | 3007.720       | 2066.720        | R27 |
| L4  | 559.340         | 402.338        | 0.000           | 537.340         | 567.330        | 0.000           | 228.695        | 2711.610       | 2710.610        | L26 |
| L5  | <b>622.429</b>  | 609.402        | 0.000           | 609.420         | <b>633.397</b> | 0.000           | 219.262        | 2698.530       | 2697.530        | L25 |
| Q6  | <b>676.450</b>  | 659.424        | 0.000           | <b>707.445</b>  | 736.431        | 0.000           | 209.477        | 2480.450       | 2480.450        | Q24 |
| R7  | <b>836.551</b>  | 818.525        | 0.000           | 893.540         | 948.530        | 0.000           | 149.465        | 2426.430       | 2427.440        | R23 |
| V8  | <b>854.520</b>  | 817.507        | 0.000           | <b>902.515</b>  | 940.500        | 0.000           | 189.274        | 2271.520       | 2271.520        | V22 |
| L9  | <b>1035.567</b> | 1018.541       | <b>1017.527</b> | <b>1063.522</b> | 1094.535       | <b>1043.522</b> | 2294.200       | 2174.200       | 2172.200        | L21 |
| I10 | 1448.781        | 1438.760       | 1430.740        | <b>1176.746</b> | 1194.720       | 1180.700        | 189.250        | 2087.210       | 2087.200        | I24 |
| A11 | 1219.789        | 1209.762       | 1201.742        | <b>1347.783</b> | 1336.757       | 1328.737        | 107.624        | 1950.120       | 1950.140        | A16 |
| Q12 | 1287.897        | 1278.870       | 1269.850        | 1344.780        | 1333.824       | 1322.810        | 109.211        | 1899.090       | 1897.100        | Q18 |
| Q13 | 1404.986        | 1397.952       | 1390.920        | 1432.960        | 1423.937       | 1414.915        | 117.720        | 1790.620       | 1789.640        | Q17 |
| Q14 | 1461.090        | 1444.053       | 1433.024        | 1469.880        | 1472.058       | 1471.034        | 120.007        | 1703.010       | 1702.020        | Q16 |
| L15 | 1500.969        | 1483.932       | 1472.900        | 1508.901        | 1510.927       | 1503.949        | 136.010        | 1646.980       | 1646.000        | L19 |
| L16 | 1674.042        | 1657.018       | 1650.000        | 1702.032        | 1698.011       | 1684.007        | 126.347        | 1548.920       | 1548.000        | L14 |
| P17 | 1777.090        | 1754.069       | 1743.060        | 1769.060        | 1762.054       | 1751.060        | 140.000        | 1432.000       | 1432.000        | P13 |
| R18 | 1881.140        | 1858.112       | 1847.101        | 1913.111        | 1909.107       | 1898.124        | 133.010        | 1336.900       | 1336.900        | R12 |
| I19 | 1998.222        | 1981.196       | 1969.212        | 2026.212        | 2009.191       | 2000.207        | 123.910        | 1222.940       | 1221.767        | I11 |
| Q20 | 2129.301        | 2109.274       | 2100.260        | 2154.274        | 2147.249       | 2136.260        | 119.660        | 1109.600       | 1109.677        | Q19 |
| A21 | 2197.338        | 2180.290       | 2169.260        | 2245.260        | 2238.260       | 2227.260        | 107.400        | 981.700        | 980.844         | A18 |
| V22 | 2296.308        | 2276.280       | 2267.260        | 2294.260        | 2287.255       | 2276.260        | 114.111        | <b>827.537</b> | <b>910.561</b>  | V19 |
| L23 | 2403.400        | 2384.344       | 2361.400        | 2437.400        | 2420.430       | 2411.405        | 108.010        | 811.400        | 810.500         | L17 |
| L24 | 2522.504        | 2505.528       | 2484.544        | 2530.540        | 2513.521       | 2502.530        | 115.410        | <b>668.400</b> | <b>567.424</b>  | L16 |
| P25 | 2611.600        | 2593.580       | 2580.580        | 2647.600        | 2630.570       | 2620.560        | <b>602.351</b> | 584.400        | 584.400         | P18 |
| R26 | 2747.700        | 2728.670       | 2720.650        | 2774.670        | 2757.627       | 2747.687        | 108.270        | 488.270        | 487.200         | R16 |
| K27 | 2876.700        | 2858.710       | 2847.700        | 2883.700        | 2868.700       | 2858.702        | 97.720         | 380.170        | 380.180         | K15 |
| L28 | 2976.800        | 2958.780       | 2947.780        | 2993.800        | 2978.800       | 2968.800        | 94.910         | 310.000        | 310.000         | L13 |
| E29 | 3105.900        | 3088.880       | 3080.870        | 3113.880        | 3105.850       | 3103.872        | 148.000        | 0.000          | 130.000         | E11 |

# sp | Q8CGP5 | H2A1F\_MOUSE

LNK <sup>Crotonyl</sup> 68.03 LLGRVTIAQGGVLPNIQAVLLPKKTE

- ▶ fragmentation table for charge state 2+
- ▶ specType=cid
- ▶ score=35.18
- ▶ F163547.dat
- ▶ query=q80604\_p1
- ▶ precursor=788.730370
- ▶ chargePrecursor=4
- ▶ itol=0.6

| AA  | a        | a*    | aΔ1    | b        | b*    | bΔ1    | y        | y*    | yΔ1      | AA   |
|-----|----------|-------|--------|----------|-------|--------|----------|-------|----------|------|
| L1  | 43.562   | 0.504 | -0.504 | 10.540   | 0.504 | -0.504 | 33.018   | 0.504 | 33.522   | L106 |
| R2  | 100.524  | 0.504 | -0.504 | 124.974  | 0.504 | -0.504 | 1519.951 | 0.504 | 1520.455 | R200 |
| R3  | 188.634  | 0.504 | -0.504 | 214.914  | 0.504 | -0.504 | 1482.881 | 0.504 | 1483.385 | R227 |
| L4  | 250.176  | 0.504 | -0.504 | 268.273  | 0.504 | -0.504 | 1364.833 | 0.504 | 1365.337 | L106 |
| L5  | 313.708  | 0.504 | -0.504 | 329.713  | 0.504 | -0.504 | 1309.303 | 0.504 | 1309.807 | L106 |
| G6  | 342.200  | 0.504 | -0.504 | 354.208  | 0.504 | -0.504 | 1251.783 | 0.504 | 1252.287 | G24  |
| R7  | 418.276  | 0.504 | -0.504 | 432.277  | 0.504 | -0.504 | 1221.221 | 0.504 | 1221.725 | R123 |
| V8  | 489.812  | 0.504 | -0.504 | 498.814  | 0.504 | -0.504 | 1148.111 | 0.504 | 1148.615 | V22  |
| L9  | 535.337  | 0.504 | -0.504 | 552.335  | 0.504 | -0.504 | 1095.546 | 0.504 | 1096.050 | L106 |
| L10 | 574.871  | 0.504 | -0.504 | 588.877  | 0.504 | -0.504 | 1045.123 | 0.504 | 1045.627 | L106 |
| A11 | 610.390  | 0.504 | -0.504 | 624.393  | 0.504 | -0.504 | 990.581  | 0.504 | 991.085  | A116 |
| Q12 | 650.915  | 0.504 | -0.504 | 668.425  | 0.504 | -0.504 | 939.419  | 0.504 | 940.427  | Q118 |
| G13 | 702.938  | 0.504 | -0.504 | 716.935  | 0.504 | -0.504 | 889.833  | 0.504 | 890.841  | G117 |
| G14 | 732.440  | 0.504 | -0.504 | 745.444  | 0.504 | -0.504 | 840.522  | 0.504 | 841.530  | G116 |
| V15 | 780.980  | 0.504 | -0.504 | 794.980  | 0.504 | -0.504 | 832.511  | 0.504 | 833.519  | V115 |
| L16 | 837.525  | 0.504 | -0.504 | 851.523  | 0.504 | -0.504 | 775.965  | 0.504 | 776.973  | L114 |
| P17 | 880.051  | 0.504 | -0.504 | 894.049  | 0.504 | -0.504 | 720.430  | 0.504 | 721.438  | P113 |
| R18 | 943.074  | 0.504 | -0.504 | 954.067  | 0.504 | -0.504 | 677.409  | 0.504 | 678.417  | R112 |
| L19 | 990.613  | 0.504 | -0.504 | 1013.614 | 0.504 | -0.504 | 629.879  | 0.504 | 630.887  | L112 |
| Q20 | 1063.644 | 0.504 | -0.504 | 1077.644 | 0.504 | -0.504 | 581.851  | 0.504 | 582.859  | Q110 |
| A21 | 1090.151 | 0.504 | -0.504 | 1113.150 | 0.504 | -0.504 | 534.823  | 0.504 | 535.831  | A109 |
| V22 | 1140.697 | 0.504 | -0.504 | 1156.696 | 0.504 | -0.504 | 485.795  | 0.504 | 486.803  | V108 |
| L23 | 1190.243 | 0.504 | -0.504 | 1210.242 | 0.504 | -0.504 | 436.767  | 0.504 | 437.775  | L107 |
| L24 | 1240.789 | 0.504 | -0.504 | 1254.788 | 0.504 | -0.504 | 387.739  | 0.504 | 388.747  | L106 |
| V25 | 1290.335 | 0.504 | -0.504 | 1304.334 | 0.504 | -0.504 | 338.711  | 0.504 | 339.719  | V105 |
| R26 | 1334.385 | 0.504 | -0.504 | 1348.384 | 0.504 | -0.504 | 289.683  | 0.504 | 290.691  | R104 |
| R27 | 1438.462 | 0.504 | -0.504 | 1452.461 | 0.504 | -0.504 | 240.655  | 0.504 | 241.663  | R103 |
| L28 | 1480.505 | 0.504 | -0.504 | 1494.504 | 0.504 | -0.504 | 191.627  | 0.504 | 192.635  | L102 |
| L29 | 1533.547 | 0.504 | -0.504 | 1546.546 | 0.504 | -0.504 | 142.599  | 0.504 | 143.607  | L101 |



# sp | Q8CGP5 | H2A1F\_MOUSE

LNK <sup>Crotonyl</sup>68.03 LLGRVTIAQGGVLPNIQAVLLPKKTE

- ▶ fragmentation table for charge state 3+
- ▶ specType=cid
- ▶ score=35.18
- ▶ F163547.dat
- ▶ query=q80604.p1
- ▶ precursor=788.730370
- ▶ chargePrecursor=4
- ▶ itol=0.6

| AA  | a              | a'             | a <sub>0</sub> | b               | b'             | b <sub>0</sub> | y              | y'              | y <sub>0</sub>  | AA             |      |
|-----|----------------|----------------|----------------|-----------------|----------------|----------------|----------------|-----------------|-----------------|----------------|------|
| L1  | 261.200        | 0.8327         | 0.8327         | 58.5922         | 0.8327         | 0.8327         | 1001.3021      | <b>1045.627</b> | <b>1045.290</b> | L259           |      |
| R1  | 87.760         | 0.8369         | 0.8369         | 70.1451         | 0.8369         | 0.8369         | 1114.7008      | 1119.9384       | 1119.9384       | R20            |      |
| R1  | 132.750        | 1.0788         | 0.8371         | 142.0081        | 1.0788         | 0.8371         | 878.5931       | 969.9118        | 969.9118        | R227           |      |
| L1  | 170.203        | 1.04730        | 0.8371         | 179.785         | 1.04730        | 0.8371         | <b>910.220</b> | 1048.543        | 1048.543        | L206           |      |
| L1  | 180.740        | 1.00447        | 0.8371         | 187.4119        | 1.00447        | 0.8371         | <b>927.525</b> | <b>1064.809</b> | <b>1064.522</b> | L208           |      |
| G1  | 227.150        | 1.21479        | 0.8371         | 238.487         | 1.21479        | 0.8371         | <b>834.838</b> | 1001.157        | 1001.157        | G24            |      |
| R1  | 276.180        | 1.21533        | 0.8371         | 288.520         | 1.21533        | 0.8371         | 870            | 1110.149        | 1099.070        | R225           |      |
| V1  | 312.111        | 1.01331        | 0.8371         | 321.542         | 1.01331        | 0.8371         | <b>763.790</b> | 988.114         | 988.114         | V22            |      |
| L1  | 348.004        | 1.00223        | 1.00223        | 358.995         | 1.00223        | 1.00223        | 359.222        | <b>730.767</b>  | 728.041         | 724.763        | L221 |
| L10 | 381.180        | 1.07361        | 1.07361        | 391.921         | 1.07361        | 1.07361        | 388.911        | <b>607.064</b>  | <b>601.409</b>  | <b>601.081</b> | L21  |
| A11 | 407.250        | 1.01382        | 1.01382        | 416.249         | 1.01382        | 1.01382        | 410.080        | <b>659.309</b>  | <b>653.714</b>  | <b>653.386</b> | A116 |
| G1  | 449.204        | 1.04710        | 1.04710        | 459.206         | 1.04710        | 1.04710        | 450.202        | <b>635.710</b>  | <b>630.035</b>  | <b>629.107</b> | G120 |
| G1  | 468.261        | 1.01110        | 1.01110        | 478.261         | 1.01110        | 1.01110        | 470.261        | 470.261         | 470.261         | G17            |      |
| G14 | 487.060        | 1.01231        | 1.01231        | 497.060         | 1.01231        | 1.01231        | 491.261        | 574.017         | 568.342         | 568.014        | G16  |
| V1  | 520.000        | 1.01310        | 1.01310        | 529.000         | 1.01310        | 1.01310        | 520.000        | 529.000         | 529.000         | V115           |      |
| L10 | <b>538.686</b> | 1.01310        | 1.01310        | <b>548.687</b>  | <b>1.01310</b> | <b>1.01310</b> | 540.000        | 549.000         | 549.000         | L104           |      |
| P17 | 601.017        | 1.00310        | 1.00310        | 610.017         | 1.00310        | 1.00310        | 601.017        | 610.017         | 610.017         | P113           |      |
| R1  | 629.011        | <b>623.375</b> | <b>623.047</b> | <b>638.383</b>  | <b>632.787</b> | 632.787        | 623.375        | 632.787         | 632.787         | R112           |      |
| L10 | 660.740        | <b>701.756</b> | <b>701.428</b> | <b>710.741</b>  | <b>705.145</b> | <b>705.145</b> | 700.428        | <b>676.074</b>  | 673.357         | 670.624        | L111 |
| Q10 | 688.432        | <b>701.756</b> | <b>701.428</b> | <b>718.763</b>  | <b>713.168</b> | <b>713.168</b> | 708.428        | 718.763         | 718.763         | Q109           |      |
| A21 | 723.713        | 727.420        | 727.102        | 732.442         | <b>736.767</b> | <b>736.439</b> | 733.540        | 737.071         | 737.071         | A10            |      |
| V2  | <b>746.134</b> | 750.489        | 750.170        | <b>755.465</b>  | 759.820        | 759.820        | 750.489        | 759.820         | 759.820         | V10            |      |
| L24 | 819.028        | 826.151        | 825.824        | <b>811.169</b>  | <b>807.484</b> | <b>807.156</b> | 819.028        | 826.151         | 826.151         | L117           |      |
| L24 | 841.242        | 835.847        | <b>835.519</b> | 839.851         | 845.719        | 845.391        | 841.242        | 851.474         | 851.146         | L20            |      |
| P1  | 878.018        | 886.916        | 886.588        | 892.909         | 897.769        | 897.441        | 886.916        | 897.769         | 897.441         | P101           |      |
| R10 | 1116.572       | <b>910.897</b> | <b>910.569</b> | 925.984         | 930.250        | 929.922        | 916.572        | 925.984         | 925.656         | R101           |      |
| R27 | 1159.271       | <b>951.593</b> | <b>951.265</b> | <b>966.807</b>  | <b>962.027</b> | <b>961.699</b> | 1159.271       | 1169.499        | 1169.171        | R103           |      |
| L10 | 1164.011       | 1027.210       | 1026.882       | <b>1042.385</b> | 1046.651       | 1046.323       | 1164.011       | 1174.240        | 1173.912        | L101           |      |
| L20 | 1192.027       | 1199.261       | 1198.934       | <b>1204.199</b> | 1208.465       | 1208.137       | 1199.261       | 1209.494        | 1209.166        | L101           |      |



# sp | Q8CGP5 | H2A1F\_MOUSE

LNK<sup>Crotonyl</sup><sub>68.03</sub> LLGRVTIAQGGVLPNIQAVLLPKKTE

- ▶ fragmentation table for charge state 1+
- ▶ specType=etd
- ▶ score=14.17
- ▶ F163547.dat
- ▶ query=q80605.p1
- ▶ precursor=788.730650
- ▶ chargePrecursor=4
- ▶ itol=0.6

| AA    | c               | y        | z+1             | z+2             | z               | AA    |
|-------|-----------------|----------|-----------------|-----------------|-----------------|-------|
| L[1]  | 131.118         | 3151.893 | 3135.874        | 0.000           | 3134.866        | L[28] |
| N[2]  | 245.161         | 3038.809 | 3022.790        | 3023.798        | 3021.782        | N[28] |
| K[3]  | 441.282         | 2924.766 | 2908.747        | 2909.755        | 2907.739        | K[27] |
| L[4]  | 554.366         | 2728.845 | 2712.826        | 2713.834        | 2711.818        | L[26] |
| L[5]  | 667.450         | 2535.981 | 2509.942        | 2600.950        | 2598.934        | L[25] |
| G[6]  | 724.472         | 2302.877 | 2488.458        | 2487.466        | 2485.450        | G[24] |
| R[7]  | 880.573         | 2044.855 | 2420.436        | 2430.444        | 2428.428        | R[23] |
| V[8]  | 979.641         | 2289.854 | 2273.835        | 2274.843        | 2272.827        | V[22] |
| T[9]  | <b>1080.689</b> | 2190.886 | 2174.867        | 2175.875        | 2173.859        | T[21] |
| I[10] | <b>1193.773</b> | 2089.938 | 2073.919        | 2074.927        | 2072.911        | I[20] |
| A[11] | <b>1264.810</b> | 1976.954 | 1960.935        | 1961.943        | 1959.927        | A[19] |
| Q[12] | <b>1392.859</b> | 1909.111 | <b>1885.098</b> | 1899.106        | 1888.090        | Q[18] |
| G[13] | 1448.890        | 1777.058 | 1761.039        | 1762.047        | 1760.032        | G[17] |
| G[14] | 1506.911        | 1720.037 | 1704.018        | 1705.026        | 1703.010        | G[16] |
| V[15] | 1605.980        | 1603.015 | 1648.997        | 1648.004        | 1645.989        | V[15] |
| L[16] | 1719.064        | 1563.947 | 1547.928        | <b>1548.936</b> | 1546.920        | L[14] |
| T[17] | 1838.117        | 1450.083 | 1434.064        | 1435.072        | 1433.056        | T[13] |
| N[18] | 1938.166        | 1353.030 | 1337.011        | <b>1338.799</b> | <b>1336.783</b> | N[12] |
| I[19] | 2043.244        | 1239.767 | 1223.748        | 1224.756        | 1222.741        | I[11] |
| Q[20] | 2171.302        | 1126.683 | 1110.664        | <b>1111.672</b> | 1109.656        | Q[10] |
| A[21] | 2282.339        | 998.624  | 982.605         | 983.614         | 981.598         | A[9]  |
| V[22] | 2341.408        | 827.587  | 911.569         | 912.576         | 910.561         | V[8]  |
| L[23] | 2454.492        | 628.519  | 812.500         | <b>813.508</b>  | 811.492         | L[7]  |
| L[24] | 2567.576        | 715.435  | <b>695.416</b>  | 700.424         | 698.408         | L[6]  |
| P[25] | 2664.629        | 602.351  | 586.332         | 587.340         | 585.324         | P[5]  |
| K[26] | 2762.724        | 505.298  | <b>489.279</b>  | 490.287         | 488.271         | K[4]  |
| K[27] | 2920.819        | 377.203  | <b>361.184</b>  | 362.192         | 360.177         | K[3]  |
| T[28] | 3021.866        | 249.108  | 233.089         | 234.097         | 232.082         | T[2]  |
| E[29] | 3180.909        | 148.050  | 132.942         | 133.950         | 131.934         | E[1]  |

# sp | Q8CGP5 | H2A1F\_MOUSE

LNK<sup>Crotonyl</sup><sub>68.03</sub> LLGRVTIAQGGVLPNIQAVLLPKKTE

- ▶ fragmentation table for charge state 2+
- ▶ specType=etd
- ▶ score=14.17
- ▶ F163547.dat
- ▶ query=q80605.p1
- ▶ precursor=788.730650
- ▶ chargePrecursor=4
- ▶ itol=0.6

| AA    | c               | y              | z+1             | z+2             | z               | AA    |
|-------|-----------------|----------------|-----------------|-----------------|-----------------|-------|
| L[1]  | 66.063          | 1576.450       | <b>1568.441</b> | 0.504           | 1567.937        | L[26] |
| N[2]  | 123.084         | 1519.908       | 1511.899        | <b>1512.403</b> | 1511.395        | N[28] |
| K[3]  | 231.145         | 1462.887       | 1454.877        | 1453.381        | 1454.373        | K[27] |
| L[4]  | 277.687         | 1394.826       | 1386.817        | 1387.321        | 1386.313        | L[26] |
| L[5]  | 334.229         | 1308.284       | 1300.275        | 1300.779        | 1299.773        | L[25] |
| G[6]  | 382.779         | 1251.742       | 1243.733        | 1244.236        | 1243.229        | G[24] |
| R[7]  | 480.790         | 1223.231       | <b>1215.222</b> | <b>1215.726</b> | <b>1214.718</b> | R[23] |
| V[8]  | 490.324         | 1148.181       | 1137.171        | <b>1137.675</b> | 1136.667        | V[22] |
| T[9]  | 540.846         | 1095.646       | <b>1087.637</b> | <b>1088.141</b> | <b>1087.133</b> | T[21] |
| I[10] | 597.390         | 1045.123       | <b>1037.113</b> | 1037.617        | <b>1036.609</b> | I[20] |
| A[11] | 632.609         | <b>988.581</b> | 982.571         | 981.075         | 980.067         | A[19] |
| Q[12] | 699.938         | 913.086        | <b>945.053</b>  | <b>945.557</b>  | <b>944.549</b>  | Q[18] |
| G[13] | 725.449         | <b>889.033</b> | 881.023         | 881.527         | 880.519         | G[17] |
| G[14] | 753.959         | 860.522        | <b>852.513</b>  | 853.017         | <b>852.009</b>  | G[16] |
| V[15] | 803.494         | 832.011        | 824.002         | 824.506         | 823.498         | V[15] |
| L[16] | 880.036         | 782.477        | 774.468         | 774.972         | 773.964         | L[14] |
| T[17] | 968.582         | 725.935        | 717.926         | 718.430         | 717.422         | T[13] |
| N[18] | 995.983         | 674.409        | 669.399         | <b>669.903</b>  | 668.895         | N[12] |
| I[19] | 1022.125        | 626.887        | 612.878         | 612.882         | 611.874         | I[11] |
| Q[20] | <b>1086.155</b> | 563.945        | 555.839         | 556.343         | 555.335         | Q[10] |
| A[21] | 1121.673        | 499.616        | 491.807         | 492.310         | 491.302         | A[9]  |
| V[22] | 1171.208        | 464.297        | 456.288         | 456.792         | 455.784         | V[8]  |
| L[23] | <b>1227.750</b> | 414.763        | 408.754         | 407.258         | 406.251         | L[7]  |
| L[24] | 1384.792        | 358.221        | 350.211         | 350.716         | 349.708         | L[6]  |
| P[25] | <b>1332.818</b> | 301.679        | 293.670         | 294.174         | 293.166         | P[5]  |
| K[26] | 1398.805        | 253.153        | 245.143         | 245.647         | 244.639         | K[4]  |
| K[27] | 1480.913        | 189.105        | 181.096         | 181.600         | 180.592         | K[3]  |
| T[28] | 1511.437        | 125.058        | 117.048         | 117.552         | 116.544         | T[2]  |
| E[29] | 1575.958        | 74.534         | 66.524          | 67.028          | 66.021          | E[1]  |

# sp | Q8CGP5 | H2A1F\_MOUSE

LNK <sup>Crotonyl</sup> 68.03 LLGRVTIAQGGVLPNIQAVLLPKKTE

- ▶ fragmentation table for charge state 3+
- ▶ specType=etd
- ▶ score=14.17
- ▶ F163547.dat
- ▶ query=q80605.p1
- ▶ precursor=788.730650
- ▶ chargePrecursor=4
- ▶ itol=0.6

| AA |    | c               | y               | z+1             | z+2             | z               | AA   |
|----|----|-----------------|-----------------|-----------------|-----------------|-----------------|------|
| L  | 1  | 44.377          | <b>1051.302</b> | <b>1045.963</b> | 9.677           | <b>1045.637</b> | L120 |
| N  | 2  | 62.302          | 1013.058        | <b>1008.268</b> | <b>1008.604</b> | <b>1007.932</b> | N020 |
| K  | 3  | 147.766         | 975.593         | 970.254         | 970.590         | 969.918         | K027 |
| L  | 4  | 105.460         | 910.220         | 904.880         | 905.216         | 904.544         | L126 |
| L  | 5  | 223.155         | 872.525         | 867.186         | 867.521         | 866.850         | L125 |
| G  | 6  | 282.182         | 834.830         | 829.491         | 829.827         | 829.155         | G04  |
| R  | 7  | 204.196         | 815.823         | 810.484         | 810.820         | 810.148         | R023 |
| V  | 8  | 327.219         | 763.790         | 758.450         | 758.786         | 758.114         | V022 |
| T  | 9  | 360.901         | 730.767         | 725.427         | 725.763         | 725.091         | T021 |
| T  | 10 | 398.596         | 697.084         | 691.745         | 692.081         | 691.409         | T020 |
| A  | 11 | 422.275         | 659.399         | 654.059         | 654.396         | 653.724         | A019 |
| Q  | 12 | 464.663         | 626.710         | 621.371         | 621.707         | 621.035         | Q018 |
| G  | 13 | 483.968         | 593.024         | 587.685         | 588.021         | 587.349         | G017 |
| G  | 14 | 502.975         | 574.017         | 568.678         | 569.013         | 568.342         | G016 |
| V  | 15 | 535.998         | 535.010         | 540.670         | 550.006         | 546.334         | V015 |
| L  | 16 | 573.693         | 521.987         | 516.648         | 516.984         | 516.312         | L014 |
| T  | 17 | 605.044         | 488.292         | 493.953         | 497.289         | 493.617         | T013 |
| N  | 18 | 644.058         | 451.942         | 446.602         | 446.938         | 446.266         | N012 |
| I  | 19 | 681.753         | 413.927         | 408.588         | 408.924         | 408.252         | I011 |
| Q  | 20 | 744.439         | 376.233         | 370.893         | 371.229         | 370.557         | Q010 |
| A  | 21 | 748.118         | 333.546         | 328.207         | 328.543         | 327.871         | A00  |
| V  | 22 | 761.141         | 300.897         | 304.528         | 304.894         | 304.162         | V00  |
| L  | 23 | 813.876         | 276.844         | 271.505         | 271.842         | 271.169         | L00  |
| L  | 24 | 856.510         | 239.150         | 233.810         | 234.146         | 233.474         | L00  |
| P  | 25 | <b>888.881</b>  | 201.455         | 196.116         | 196.451         | 195.780         | P00  |
| K  | 26 | 931.579         | 169.104         | 163.765         | 164.101         | 163.429         | K04  |
| K  | 27 | <b>974.278</b>  | 126.406         | 121.066         | 121.402         | 120.730         | K03  |
| T  | 28 | <b>1007.960</b> | 83.708          | 78.368          | 78.704          | 78.032          | T02  |
| E  | 29 | <b>1050.974</b> | 50.025          | 44.685          | 45.021          | 44.349          | E01  |

# sp | Q8CGP5 | H2A1F\_MOUSE

LNK<sup>Crotonyl</sup> 68.03 LLGRVTIAQGGVLPNIQAVLLPKKTE

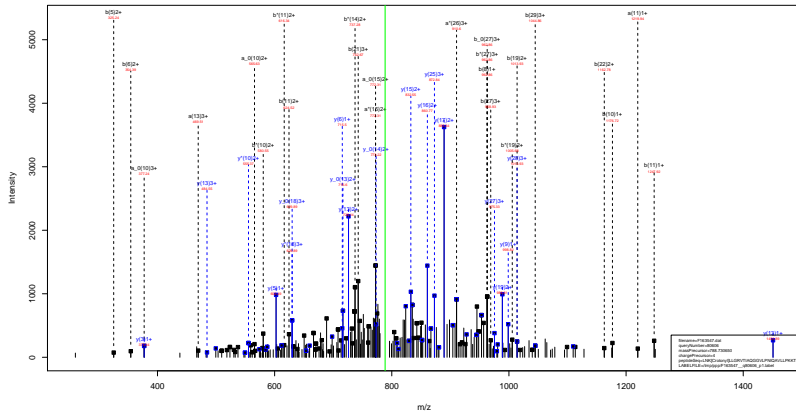

# sp | Q8CGP5 | H2A1F\_MOUSE

LNK <sup>Crotonyl</sup> 68.03 LLGRVTIAQGGVLPNIQAVLLPKKTE

- ▶ fragmentation table for charge state 1+
- ▶ specType=cid
- ▶ score=42.41
- ▶ F163547.dat
- ▶ query=q80606\_p1
- ▶ precursor=788.730650
- ▶ chargePrecursor=4
- ▶ itol=0.6

| AA  | a               | a*              | a/b      | b               | b*             | b/a      | y               | y*             | y/a            | AA  |
|-----|-----------------|-----------------|----------|-----------------|----------------|----------|-----------------|----------------|----------------|-----|
| L1  | 80.000          | 0.000           | 0.000    | 134.000         | 0.000          | 0.000    | 315.000         | 314.000        | 313.000        | L29 |
| R1  | 300.000         | 315.000         | 0.000    | 268.000         | 315.000        | 0.000    | 300.000         | 300.000        | 300.000        | R20 |
| R1  | 300.000         | 315.000         | 0.000    | 426.000         | 300.000        | 0.000    | 300.000         | 300.000        | 300.000        | R22 |
| L1  | <b>508.545</b>  | <b>605.402</b>  | 0.000    | <b>537.340</b>  | 530.315        | 0.000    | 272.000         | 271.000        | 270.000        | L26 |
| L1  | 524.000         | <b>605.402</b>  | 0.000    | <b>630.424</b>  | 623.399        | 0.000    | 281.000         | 280.000        | 279.000        | L25 |
| G1  | 578.000         | 605.402         | 0.000    | 595.400         | 590.410        | 0.000    | 250.000         | 249.000        | 248.000        | G24 |
| R1  | <b>635.551</b>  | 618.320         | 0.000    | <b>663.546</b>  | 648.520        | 0.000    | 340.000         | 339.000        | 338.000        | R23 |
| V1  | 624.000         | 618.320         | 0.000    | <b>663.546</b>  | 648.520        | 0.000    | 268.000         | 267.000        | 266.000        | V22 |
| V1  | 600.000         | <b>1018.641</b> | 0.000    | <b>902.615</b>  | <b>945.568</b> | 0.000    | 210.000         | 209.000        | 208.000        | V21 |
| L10 | 1148.000        | 1131.320        | 1130.740 | <b>1176.746</b> | 1159.720       | 1158.100 | 300.000         | 299.000        | 298.000        | L21 |
| A11 | <b>1219.789</b> | 1202.750        | 1202.170 | <b>1247.763</b> | 1230.720       | 1229.710 | 180.000         | 179.000        | 178.000        | A10 |
| G13 | 138.000         | 1370.000        | 1370.000 | 1370.000        | 1370.000       | 1370.000 | 100.000         | 100.000        | 100.000        | G12 |
| G13 | 1404.000        | 1387.000        | 1386.000 | 1432.000        | 1415.000       | 1414.000 | 177.000         | 176.000        | 175.000        | G17 |
| G14 | 1461.000        | 1444.000        | 1443.000 | 1480.000        | 1472.000       | 1471.000 | 170.000         | 169.000        | 168.000        | G16 |
| V15 | 1500.000        | 1483.000        | 1482.000 | 1520.000        | 1512.000       | 1511.000 | 160.000         | 159.000        | 158.000        | V14 |
| L18 | 1674.000        | 1657.000        | 1656.000 | 1700.000        | 1692.000       | 1691.000 | 100.000         | 99.000         | 98.000         | L14 |
| P17 | 1771.000        | 1754.000        | 1753.000 | 1790.000        | 1782.000       | 1781.000 | <b>1450.863</b> | 1449.863       | 1448.863       | P15 |
| R18 | 1800.000        | 1783.000        | 1782.000 | 1820.000        | 1812.000       | 1811.000 | 100.000         | 99.000         | 98.000         | R17 |
| L16 | 1808.000        | 1791.000        | 1790.000 | 1830.000        | 1822.000       | 1821.000 | 120.000         | 119.000        | 118.000        | L12 |
| G20 | 2170.000        | 2153.000        | 2152.000 | 2190.000        | 2182.000       | 2181.000 | 110.000         | 109.000        | 108.000        | G19 |
| A17 | 2200.000        | 2183.000        | 2182.000 | 2220.000        | 2212.000       | 2211.000 | <b>980.824</b>  | <b>979.824</b> | <b>978.824</b> | A16 |
| V12 | 2200.000        | 2183.000        | 2182.000 | 2220.000        | 2212.000       | 2211.000 | <b>927.507</b>  | <b>910.501</b> | <b>900.504</b> | V10 |
| L21 | 2000.000        | 1983.000        | 1982.000 | 2020.000        | 2012.000       | 2011.000 | 80.000          | 79.000         | 78.000         | L17 |
| L14 | 2032.000        | 2015.000        | 2014.000 | 2050.000        | 2042.000       | 2041.000 | <b>715.435</b>  | <b>698.408</b> | <b>687.431</b> | L10 |
| P15 | 2010.000        | 1993.000        | 1992.000 | 2030.000        | 2022.000       | 2021.000 | <b>602.351</b>  | <b>585.324</b> | <b>584.340</b> | P10 |
| R20 | 2147.000        | 2130.000        | 2129.000 | 2160.000        | 2152.000       | 2151.000 | 80.000          | 79.000         | 78.000         | R18 |
| R22 | 2070.000        | 2053.000        | 2052.000 | 2090.000        | 2082.000       | 2081.000 | <b>377.263</b>  | <b>360.237</b> | <b>359.261</b> | R15 |
| L16 | 2070.000        | 2053.000        | 2052.000 | 2090.000        | 2082.000       | 2081.000 | 80.000          | 79.000         | 78.000         | L10 |
| E20 | 2100.000        | 2083.000        | 2082.000 | 2120.000        | 2112.000       | 2111.000 | 140.000         | 139.000        | 138.000        | E17 |

# sp | Q8CGP5 | H2A1F\_MOUSE

LNK <sup>Crotonyl</sup> 68.03 LLGRVTIAQGGVLPNIQAVLLPKKTE

- ▶ fragmentation table for charge state 2+
- ▶ specType=cid
- ▶ score=42.41
- ▶ F163547.dat
- ▶ query=q80606\_p1
- ▶ precursor=788.730650
- ▶ chargePrecursor=4
- ▶ itol=0.6

| AA  | a               | y <sup>a</sup> | a+b            | b               | b <sup>a</sup>  | b+c            | y               | y <sup>a</sup> | y+c            | AA  |
|-----|-----------------|----------------|----------------|-----------------|-----------------|----------------|-----------------|----------------|----------------|-----|
| L1  | 48.002          | 0.004          | 0.004          | 57.045          | 0.004           | 0.004          | 1076.450        | 1067.817       | 1067.445       | L29 |
| R2  | 100.003         | 0.000          | 0.000          | 114.877         | 1.000           | 0.000          | 1018.480        | 1015.000       | 1015.000       | R20 |
| R1  | 140.004         | 1.000          | 1.000          | 213.611         | 2.004           | 1.000          | 1482.000        | 1450.371       | 1450.361       | K27 |
| L4  | 205.110         | 0.000          | 0.000          | 290.974         | 2.000           | 0.000          | 1304.800        | 1300.110       | 1300.010       | L26 |
| L5  | 111.000         | 0.000          | 0.000          | 125.715         | 1.000           | 0.000          | 1300.000        | 1288.770       | 1288.760       | L25 |
| G1  | 340.000         | 0.000          | 0.000          | 354.020         | 0.000           | 0.000          | 1281.740        | 1249.240       | 1249.230       | G24 |
| R7  | 418.210         | 0.000          | 0.000          | 430.211         | 0.000           | 0.000          | 1261.211        | 1248.710       | 1248.700       | R23 |
| V1  | 407.014         | 0.000          | 0.000          | 407.014         | 0.000           | 0.000          | 1252.121        | 1234.860       | 1234.850       | V22 |
| L9  | <b>518.137</b>  | <b>309.824</b> | <b>509.332</b> | <b>532.335</b>  | <b>523.821</b>  | <b>523.129</b> | 1095.000        | 1087.230       | 1086.940       | L21 |
| I10 | 074.000         | <b>546.166</b> | <b>546.874</b> | 568.871         | <b>580.164</b>  | <b>579.872</b> | <b>1045.173</b> | 1038.438       | 1038.110       | I21 |
| A11 | 010.000         | 000.000        | 000.000        | 024.395         | <b>015.882</b>  | 015.390        | <b>886.281</b>  | 880.000        | <b>879.570</b> | A16 |
| Q12 | 014.000         | <b>685.914</b> | 685.420        | <b>688.423</b>  | <b>678.911</b>  | 678.418        | <b>951.885</b>  | <b>944.540</b> | <b>944.030</b> | Q10 |
| G13 | 012.000         | 004.420        | <b>681.831</b> | <b>716.935</b>  | <b>708.422</b>  | <b>707.930</b> | <b>880.035</b>  | <b>880.510</b> | <b>880.027</b> | G17 |
| G14 | <b>731.449</b>  | 000.000        | <b>722.443</b> | <b>745.444</b>  | <b>736.933</b>  | <b>736.441</b> | <b>860.572</b>  | <b>852.060</b> | <b>851.517</b> | G16 |
| V15 | 000.000         | <b>772.470</b> | <b>772.978</b> | 788.000         | 000.000         | 000.000        | <b>832.011</b>  | <b>823.498</b> | 823.000        | V18 |
| L16 | <b>837.525</b>  | <b>829.012</b> | <b>871.978</b> | <b>851.523</b>  | <b>843.009</b>  | <b>842.517</b> | 817.000         | 812.500        | <b>811.472</b> | L14 |
| P17 | 000.001         | 017.538        | 017.040        | 000.000         | 000.000         | 000.000        | <b>725.935</b>  | 717.420        | <b>716.930</b> | P13 |
| T18 | 004.010         | 014.367        | 004.000        | <b>807.878</b>  | <b>808.387</b>  | <b>808.385</b> | 817.420         | 808.000        | 808.000        | T12 |
| I19 | 000.015         | 004.120        | 000.000        | <b>1013.612</b> | <b>1005.099</b> | 1004.207       | 800.000         | <b>811.874</b> | <b>811.382</b> | I11 |
| Q20 | 003.048         | 1005.111       | 1004.430       | 007.343         | 006.120         | 006.630        | 801.600         | <b>555.132</b> | <b>554.840</b> | Q19 |
| A21 | <b>1099.163</b> | 1000.000       | 1000.120       | <b>1113.160</b> | 1104.047        | 1104.105       | <b>489.816</b>  | 480.000        | 480.011        | A08 |
| V22 | 1104.110        | 1104.110       | 1103.000       | <b>1102.694</b> | 1104.110        | 1103.000       | 480.000         | 480.000        | 480.000        | V19 |
| L23 | 1005.720        | 1006.720       | 1006.230       | 1018.230        | 1010.723        | 1010.230       | 414.000         | 408.230        | 408.700        | L17 |
| L24 | 1001.701        | 1003.200       | 1002.770       | 1019.770        | 1007.200        | 1006.770       | 306.211         | 300.700        | 300.210        | L20 |
| P25 | 010.000         | 010.000        | 010.000        | 024.000         | 010.000         | 010.000        | 300.000         | 293.000        | 292.000        | P26 |
| R26 | 1004.000        | 1005.000       | 1005.000       | 1008.000        | 1010.000        | 1010.000       | 203.100         | 204.600        | 204.147        | R20 |
| K27 | 1438.000        | 1439.000       | 1439.000       | 1442.000        | 1444.000        | 1444.000       | 100.000         | 100.000        | 100.100        | K26 |
| L28 | 1000.000        | 1000.000       | 1000.000       | 1000.000        | 1000.000        | 1000.000       | 100.000         | 100.000        | 100.000        | L27 |
| E29 | 1003.040        | 1004.000       | 1004.440       | 1007.440        | 1008.000        | 1008.440       | 74.000          | 0.000          | 00.000         | E21 |



# sp | Q8CGP5 | H2A1F\_MOUSE

LNK <sup>Crotonyl</sup> 68.03 LLGRVTIAQGGVLPNIQAVLLPKKTE

- ▶ fragmentation table for charge state 3+
- ▶ specType=cid
- ▶ score=42.41
- ▶ F163547.dat
- ▶ query=q80606\_p1
- ▶ precursor=788.730650
- ▶ chargePrecursor=4
- ▶ itol=0.6

| AA   | a              | a'             | الم            | b               | b'              | الم             | y              | y'             | الم            | AA   |
|------|----------------|----------------|----------------|-----------------|-----------------|-----------------|----------------|----------------|----------------|------|
| L1   | 26.330         | 18.872         | 0.672          | 38.702          | 0.672           | 1051.331        | 0.672          | 1045.627       | 1045.299       | L129 |
| R1   | 87.983         | 69.969         | 0.669          | 142.816         | 0.669           | <b>1013.608</b> | 0.669          | 1009.936       | 1009.594       | R130 |
| R1   | 130.168        | 127.083        | 0.672          | 142.980         | 138.414         | 0.672           | <b>975.593</b> | 969.918        | 968.592        | K127 |
| L14  | 170.453        | 168.797        | 0.672          | 178.783         | 174.200         | 0.672           | <b>910.220</b> | <b>904.544</b> | <b>904.216</b> | L126 |
| L15  | 188.148        | 186.472        | 0.672          | 212.479         | 211.804         | 0.672           | <b>872.525</b> | <b>866.850</b> | <b>866.522</b> | L125 |
| G16  | 227.550        | 225.474        | 0.672          | 236.467         | 230.811         | 0.672           | <b>854.830</b> | <b>829.155</b> | 828.527        | G124 |
| R17  | 279.189        | 273.513        | 0.672          | 288.620         | 282.846         | 0.672           | 833.823        | 811.149        | <b>809.820</b> | R123 |
| V18  | 312.214        | 308.588        | 0.674          | 324.543         | 318.868         | 0.674           | 783.852        | 768.124        | 767.786        | V122 |
| L19  | 345.004        | 340.212        | 0.669          | 358.249         | 349.590         | 0.669           | 740.711        | 725.091        | 724.761        | L121 |
| L10  | 383.188        | 377.681        | <b>377.585</b> | 382.620         | 387.240         | 386.614         | 687.084        | 681.409        | 680.981        | L120 |
| A111 | 407.268        | 402.582        | 402.264        | 416.098         | 410.624         | 410.268         | <b>659.389</b> | <b>653.714</b> | <b>653.386</b> | A110 |
| G123 | 448.074        | 443.429        | 443.056        | 456.206         | 451.630         | 451.278         | 625.423        | <b>620.125</b> | <b>620.127</b> | G122 |
| G13  | <b>468.961</b> | 463.281        | 462.968        | 476.281         | 472.617         | 472.280         | 583.624        | <b>587.349</b> | <b>587.021</b> | G117 |
| G14  | 487.688        | 482.261        | 481.905        | 497.000         | 491.624         | 491.268         | <b>574.017</b> | <b>568.392</b> | 568.014        | G116 |
| V151 | 530.665        | 525.169        | 524.809        | <b>538.233</b>  | 534.819         | 534.465         | 504.919        | <b>555.010</b> | <b>549.134</b> | V150 |
| L138 | <b>558.686</b> | 553.000        | 552.682        | 566.671         | <b>562.342</b>  | <b>562.014</b>  | 532.967        | 518.312        | 517.964        | L134 |
| P117 | 591.267        | 585.381        | <b>585.033</b> | 604.267         | <b>600.000</b>  | <b>600.000</b>  | <b>481.292</b> | 474.611        | 474.260        | P115 |
| R118 | 629.161        | 623.167        | 622.987        | <b>638.183</b>  | <b>632.707</b>  | <b>632.375</b>  | 603.262        | 588.289        | 587.709        | R113 |
| L136 | <b>666.746</b> | 661.020        | 660.742        | <b>676.077</b>  | <b>670.402</b>  | <b>670.074</b>  | 633.921        | 605.252        | 604.824        | L131 |
| G120 | <b>709.432</b> | 703.750        | 703.438        | 728.093         | <b>713.088</b>  | 712.769         | 593.283        | 570.567        | 570.229        | G119 |
| R121 | <b>755.111</b> | 749.468        | 749.189        | <b>742.842</b>  | <b>736.767</b>  | <b>736.439</b>  | 553.587        | 527.871        | 527.543        | R119 |
| V127 | 788.110        | <b>780.458</b> | <b>780.130</b> | <b>775.405</b>  | 769.740         | 769.402         | 500.991        | 475.192        | 474.841        | V126 |
| L123 | <b>803.828</b> | 798.147        | 797.826        | 811.190         | <b>807.484</b>  | <b>807.136</b>  | 478.684        | 471.169        | 470.841        | L117 |
| L124 | 841.123        | 835.840        | <b>835.519</b> | <b>850.595</b>  | <b>845.176</b>  | <b>844.851</b>  | 428.130        | 413.474        | 413.146        | L116 |
| P124 | 873.174        | 868.000        | 867.650        | 874.138         | 867.850         | 867.500         | 380.409        | 352.760        | 352.452        | P123 |
| R126 | <b>916.572</b> | <b>910.897</b> | <b>910.549</b> | <b>925.804</b>  | <b>920.228</b>  | <b>919.890</b>  | 348.104        | 340.426        | 340.101        | R124 |
| K127 | 939.167        | <b>953.595</b> | <b>953.267</b> | <b>968.402</b>  | <b>962.827</b>  | <b>962.596</b>  | 328.463        | 320.730        | 320.402        | K125 |
| L130 | <b>982.863</b> | 976.989        | 976.669        | 991.984         | 986.109         | 985.784         | 287.994        | 280.266        | 279.940        | L128 |
| E126 | 1030.167       | 1020.260       | 1020.064       | <b>1045.299</b> | <b>1038.823</b> | <b>1038.295</b> | 267.000        | 260.971        | 260.641        | E123 |

# sp | P84228 | H32\_MOUSE

PK <sup>Crotonyl</sup>DIQLARRIGERA  
68.03

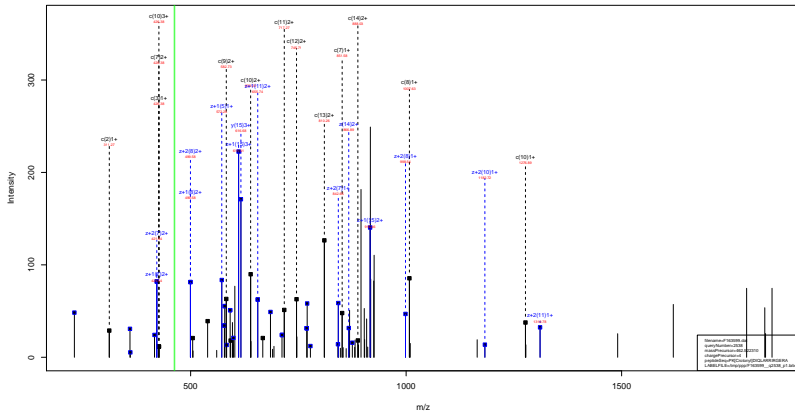

# sp | P84228 | H32\_MOUSE

PK <sup>Crotonyl</sup> 68.03 DIQLARRIGERA

- ▶ fragmentation table for charge state 1+
- ▶ specType=etd
- ▶ score=46.13
- ▶ F163599.dat
- ▶ query=q2538.p1
- ▶ precursor=462.522310
- ▶ chargePrecursor=4
- ▶ itol=0.6

| AA    | c               | y        | z+1            | z+2             | z        | AA    |
|-------|-----------------|----------|----------------|-----------------|----------|-------|
| P[1]  | 115.087         | 1847.072 | 1833.054       | 0.000           | 1830.046 | P[15] |
| K[2]  | <b>311.208</b>  | 1750.019 | 1734.001       | 1735.009        | 1732.993 | K[14] |
| D[3]  | <b>426.235</b>  | 1553.898 | 1537.880       | 1538.887        | 1536.872 | D[13] |
| I[4]  | <b>539.319</b>  | 1438.873 | 1422.853       | 1423.860        | 1421.845 | I[12] |
| Q[5]  | <b>667.377</b>  | 1325.787 | 1309.769       | <b>1310.776</b> | 1308.761 | Q[11] |
| L[6]  | 780.401         | 1197.729 | 1181.710       | <b>1182.718</b> | 1180.702 | L[10] |
| A[7]  | <b>851.499</b>  | 1084.645 | 1068.626       | 1069.634        | 1067.618 | A[9]  |
| R[8]  | <b>1007.600</b> | 1013.605 | 997.589        | <b>998.597</b>  | 996.581  | R[8]  |
| R[9]  | 1163.701        | 857.508  | <b>841.488</b> | <b>842.496</b>  | 840.480  | R[7]  |
| I[10] | <b>1276.785</b> | 701.405  | <b>685.387</b> | 686.394         | 684.379  | I[6]  |
| R[11] | 1432.886        | 588.321  | <b>572.303</b> | 573.310         | 571.295  | R[6]  |
| G[12] | 1489.907        | 432.220  | <b>416.201</b> | 417.209         | 415.194  | G[5]  |
| E[13] | 1618.950        | 278.109  | <b>259.180</b> | <b>260.188</b>  | 258.172  | E[4]  |
| R[14] | 1778.051        | 246.150  | <b>230.137</b> | 231.145         | 229.130  | R[3]  |
| A[15] | 1848.088        | 90.055   | 78.036         | 79.044          | 77.028   | A[1]  |

# sp | P84228 | H32\_MOUSE

PK <sup>Crotonyl</sup> 68.03 DIQLARRIRGERA

- ▶ fragmentation table for charge state 2+
- ▶ specType=etd
- ▶ score=46.13
- ▶ F163599.dat
- ▶ query=q2538.p1
- ▶ precursor=462.522310
- ▶ chargePrecursor=4
- ▶ itol=0.6

| AA    | c              | y              | z+1            | z+2            | z              | AA    |
|-------|----------------|----------------|----------------|----------------|----------------|-------|
| P[1]  | 58.047         | 924.040        | <b>916.030</b> | 0.504          | 915.526        | P[15] |
| K[2]  | 156.108        | <b>875.513</b> | 867.504        | 866.008        | <b>867.000</b> | K[14] |
| D[3]  | 213.621        | <b>777.453</b> | <b>769.443</b> | <b>769.947</b> | <b>768.940</b> | D[13] |
| T[4]  | 270.163        | 719.939        | <b>711.930</b> | <b>712.434</b> | <b>711.426</b> | T[12] |
| Q[5]  | 334.192        | 663.397        | <b>655.388</b> | <b>655.892</b> | 654.384        | Q[11] |
| L[6]  | 390.134        | <b>599.368</b> | <b>591.359</b> | <b>591.863</b> | 590.355        | L[10] |
| A[7]  | <b>426.253</b> | 542.826        | 534.817        | 533.321        | 534.313        | A[9]  |
| R[8]  | <b>504.303</b> | 507.307        | <b>499.298</b> | <b>499.802</b> | 498.794        | R[8]  |
| R[9]  | <b>582.354</b> | 420.257        | <b>421.247</b> | <b>421.751</b> | 420.744        | R[7]  |
| I[10] | <b>638.896</b> | 351.206        | 343.197        | 343.701        | 342.693        | I[6]  |
| R[11] | <b>716.947</b> | 294.664        | 286.655        | 287.159        | 286.151        | R[5]  |
| G[12] | <b>745.457</b> | 216.614        | 208.604        | 209.108        | 208.100        | G[4]  |
| E[13] | <b>809.979</b> | 188.103        | 180.094        | 180.598        | 179.990        | E[3]  |
| R[14] | <b>888.079</b> | 123.582        | 115.573        | 116.076        | 115.068        | R[2]  |
| A[15] | 923.548        | 45.531         | 37.522         | 38.026         | 37.018         | A[1]  |

# sp | P84228 | H32\_MOUSE

PK <sup>Crotonyl</sup> 68.03 DIQLARRIRGERA

- ▶ fragmentation table for charge state 3+
- ▶ specType=etd
- ▶ score=46.13
- ▶ F163599.dat
- ▶ query=q2538.p1
- ▶ precursor=462.522310
- ▶ chargePrecursor=4
- ▶ itol=0.6

| AA    | c              | y              | z+1            | z+2            | z              | AA    |
|-------|----------------|----------------|----------------|----------------|----------------|-------|
| P[1]  | 39.034         | <b>616.362</b> | <b>611.023</b> | 0.672          | 610.667        | P[15] |
| K[2]  | 104.407        | <b>584.011</b> | <b>578.672</b> | <b>579.008</b> | <b>578.336</b> | K[14] |
| D[3]  | 142.750        | 518.638        | 513.290        | 513.634        | 512.962        | D[13] |
| T[4]  | 180.444        | 480.295        | 474.956        | 475.292        | 474.620        | T[12] |
| Q[5]  | 223.131        | 442.601        | 437.261        | 437.597        | 436.925        | Q[11] |
| L[6]  | 265.825        | 399.914        | 394.573        | 394.911        | 394.239        | L[10] |
| A[7]  | 284.504        | 362.220        | 356.880        | 357.216        | 356.544        | A[9]  |
| R[8]  | 336.538        | 318.941        | 313.201        | 313.537        | 312.865        | R[8]  |
| R[9]  | 388.572        | 286.507        | 281.167        | 281.503        | 280.831        | R[7]  |
| I[10] | <b>426.266</b> | 234.473        | 229.134        | 229.470        | 228.798        | I[6]  |
| R[11] | 478.300        | 196.779        | 191.439        | 191.775        | 191.103        | R[5]  |
| G[12] | 497.307        | 144.745        | 139.405        | 139.741        | 139.069        | G[4]  |
| E[13] | 540.322        | 125.738        | 120.398        | 120.734        | 120.062        | E[3]  |
| R[14] | <b>592.355</b> | 82.724         | 77.384         | 77.720         | 77.048         | R[2]  |
| A[15] | 618.034        | 30.690         | 25.350         | 25.686         | 25.014         | A[1]  |



# sp | P84228 | H32\_MOUSE

PK <sup>Crotonyl</sup> 68.03 DIQLARRIGERA

- ▶ fragmentation table for charge state 1+
- ▶ specType=etd
- ▶ score=57.70
- ▶ F163599.dat
- ▶ query=q2542.p1
- ▶ precursor=462.522460
- ▶ chargePrecursor=4
- ▶ itol=0.6

| AA    | c               | y        | z+1            | z+2             | z        | AA    |
|-------|-----------------|----------|----------------|-----------------|----------|-------|
| P[1]  | 115.087         | 1847.072 | 1833.054       | 0.000           | 1830.046 | P[15] |
| K[2]  | <b>311.208</b>  | 1750.019 | 1734.001       | 1735.009        | 1732.993 | K[14] |
| D[3]  | 426.235         | 1553.898 | 1537.880       | <b>1538.887</b> | 1536.872 | D[13] |
| I[4]  | <b>539.319</b>  | 1438.873 | 1422.855       | 1423.860        | 1421.845 | I[12] |
| Q[5]  | <b>667.377</b>  | 1325.787 | 1309.769       | <b>1310.776</b> | 1308.761 | Q[11] |
| L[6]  | 780.401         | 1197.729 | 1181.710       | 1182.718        | 1180.702 | L[10] |
| A[7]  | <b>851.499</b>  | 1084.645 | 1068.626       | 1069.634        | 1067.618 | A[9]  |
| R[8]  | <b>1007.600</b> | 1013.605 | 997.586        | <b>998.597</b>  | 996.581  | R[8]  |
| R[9]  | <b>1163.701</b> | 857.508  | <b>841.488</b> | <b>842.496</b>  | 840.480  | R[7]  |
| I[10] | 1276.785        | 701.405  | <b>685.387</b> | 686.394         | 684.379  | I[6]  |
| R[11] | 1432.886        | 588.321  | <b>572.303</b> | <b>573.310</b>  | 571.295  | R[5]  |
| G[12] | 1489.907        | 432.220  | <b>416.201</b> | 417.209         | 415.194  | G[4]  |
| T[13] | <b>1618.950</b> | 275.100  | <b>259.180</b> | 260.188         | 258.172  | T[3]  |
| R[14] | 1775.031        | 246.150  | <b>230.137</b> | 231.145         | 229.130  | R[2]  |
| A[15] | 1848.088        | 90.055   | 78.036         | 79.044          | 77.028   | A[1]  |

# sp | P84228 | H32\_MOUSE

PK <sup>Crotonyl</sup> 68.03 DIQLARRIRGERA

- ▶ fragmentation table for charge state 2+
- ▶ specType=etd
- ▶ score=57.70
- ▶ F163599.dat
- ▶ query=q2542\_p1
- ▶ precursor=462.522460
- ▶ chargePrecursor=4
- ▶ itol=0.6

| AA    | c              | y              | z+1            | z+2            | z              | AA    |
|-------|----------------|----------------|----------------|----------------|----------------|-------|
| P[1]  | 58.047         | 924.040        | <b>916.030</b> | 0.504          | 915.526        | P[15] |
| K[2]  | 156.108        | 875.513        | <b>867.504</b> | <b>868.008</b> | 867.000        | K[14] |
| D[3]  | 213.621        | 777.453        | <b>769.443</b> | <b>769.947</b> | 768.940        | D[13] |
| T[4]  | 270.163        | 719.939        | <b>711.930</b> | <b>712.434</b> | <b>711.426</b> | T[12] |
| Q[5]  | 334.192        | 663.397        | <b>655.388</b> | <b>655.892</b> | 654.884        | Q[11] |
| L[6]  | 393.734        | 599.366        | <b>591.359</b> | <b>591.863</b> | 590.855        | L[10] |
| A[7]  | 428.253        | <b>542.826</b> | 534.817        | 534.321        | 534.313        | A[9]  |
| R[8]  | 504.303        | 507.307        | <b>499.298</b> | <b>499.802</b> | 498.794        | R[8]  |
| R[9]  | <b>582.354</b> | 420.257        | <b>421.247</b> | <b>421.751</b> | <b>420.744</b> | R[7]  |
| I[10] | <b>638.896</b> | 351.206        | 343.197        | 343.701        | 342.693        | I[6]  |
| R[11] | <b>716.947</b> | 294.664        | 286.655        | 287.159        | 286.151        | R[5]  |
| G[12] | <b>745.457</b> | 216.614        | 208.604        | 209.108        | 208.100        | G[4]  |
| E[13] | <b>809.979</b> | 188.103        | 180.094        | 180.598        | 179.990        | E[3]  |
| R[14] | <b>888.029</b> | 123.582        | 115.573        | 116.076        | 115.068        | R[2]  |
| A[15] | 923.548        | 45.531         | 37.522         | 38.026         | 37.018         | A[1]  |



# sp | P84228 | H32\_MOUSE

PK <sup>Crotonyl</sup> 68.03 DIQLARRIRGERA

- ▶ fragmentation table for charge state 3+
- ▶ specType=etd
- ▶ score=57.70
- ▶ F163599.dat
- ▶ query=q2542\_p1
- ▶ precursor=462.522460
- ▶ chargePrecursor=4
- ▶ itol=0.6

| AA    | c              | y              | z+1            | z+2            | z              | AA    |
|-------|----------------|----------------|----------------|----------------|----------------|-------|
| P[1]  | 39.034         | <b>616.362</b> | <b>611.023</b> | 0.672          | <b>610.687</b> | P[15] |
| K[2]  | 104.407        | 594.011        | <b>578.672</b> | <b>579.008</b> | <b>578.336</b> | K[14] |
| D[3]  | 142.750        | 518.638        | 513.290        | 513.634        | 512.962        | D[13] |
| T[4]  | 180.444        | 480.295        | 474.956        | 475.292        | 474.620        | T[12] |
| Q[5]  | 223.131        | 442.601        | 437.261        | 437.597        | 436.925        | Q[11] |
| L[6]  | 265.825        | 399.914        | 394.573        | 394.911        | 394.239        | L[10] |
| A[7]  | 284.504        | 362.220        | 356.880        | 357.216        | 356.544        | A[9]  |
| R[8]  | 336.538        | 338.941        | 333.201        | 333.537        | 332.865        | R[8]  |
| R[9]  | 388.572        | 296.507        | 291.167        | 291.503        | 290.831        | R[7]  |
| I[10] | 426.266        | 234.473        | 229.134        | 229.470        | 228.798        | I[6]  |
| R[11] | 478.300        | 196.779        | 191.439        | 191.775        | 191.103        | R[5]  |
| G[12] | 497.307        | 144.745        | 139.405        | 139.741        | 139.069        | G[4]  |
| E[13] | 540.322        | 125.738        | 120.398        | 120.734        | 120.062        | E[3]  |
| R[14] | <b>592.355</b> | 82.724         | 77.384         | 77.720         | 77.048         | R[2]  |
| A[15] | 618.034        | 30.690         | 25.350         | 25.686         | 25.014         | A[1]  |

# sp | P84228 | H32\_MOUSE

PK Crotonyl DIQLARRIGERA  
68.03

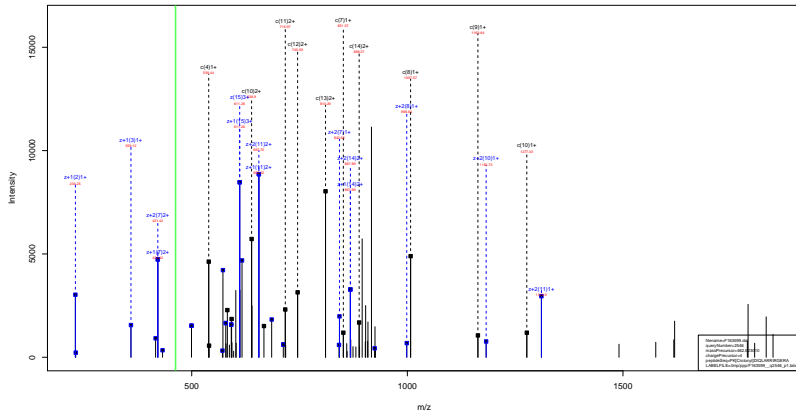

# sp | P84228 | H32\_MOUSE

PK <sup>Crotonyl</sup> 68.03 DIQLARRIGERA

- ▶ fragmentation table for charge state 1+
- ▶ specType=etd
- ▶ score=47.00
- ▶ F163599.dat
- ▶ query=q2546\_p1
- ▶ precursor=462.523010
- ▶ chargePrecursor=4
- ▶ itol=0.6

| AA    | c               | y              | z+1            | z+2             | z              | AA    |
|-------|-----------------|----------------|----------------|-----------------|----------------|-------|
| P[1]  | 115.087         | 1847.072       | 1833.054       | 0.000           | 1830.046       | P[15] |
| K[2]  | 311.208         | 1750.019       | 1734.001       | 1735.009        | 1732.993       | K[14] |
| D[3]  | 426.235         | 1553.898       | 1537.880       | 1538.887        | 1536.872       | D[13] |
| I[4]  | <b>539.319</b>  | 1438.873       | 1422.853       | 1423.860        | 1421.845       | I[12] |
| Q[5]  | <b>667.377</b>  | 1325.787       | 1309.769       | <b>1310.776</b> | 1308.761       | Q[11] |
| L[6]  | 780.401         | 1197.729       | 1181.710       | <b>1182.718</b> | 1180.702       | L[10] |
| A[7]  | <b>851.499</b>  | 1084.645       | 1068.626       | 1069.634        | 1067.618       | A[9]  |
| R[8]  | <b>1007.600</b> | 1013.605       | 997.589        | <b>998.597</b>  | 996.581        | R[8]  |
| R[9]  | <b>1163.701</b> | 857.508        | <b>841.488</b> | <b>842.496</b>  | 840.480        | R[7]  |
| I[10] | <b>1276.785</b> | 701.405        | <b>685.387</b> | 686.394         | 684.379        | I[6]  |
| R[11] | 1432.886        | 588.323        | <b>572.303</b> | 573.310         | <b>571.295</b> | R[6]  |
| G[12] | 1489.907        | <b>432.220</b> | <b>416.201</b> | 417.209         | 415.194        | G[4]  |
| E[13] | 1618.950        | 275.199        | <b>259.180</b> | 260.188         | 258.172        | E[3]  |
| R[14] | 1775.051        | 246.156        | <b>230.137</b> | <b>231.145</b>  | 229.130        | R[2]  |
| A[15] | 1848.088        | 90.055         | 78.036         | 79.044          | 77.028         | A[1]  |

# sp | P84228 | H32\_MOUSE

PK <sup>Crotonyl</sup> 68.03 DIQLARRIGERA

- ▶ fragmentation table for charge state 2+
- ▶ specType=etd
- ▶ score=47.00
- ▶ F163599.dat
- ▶ query=q2546\_p1
- ▶ precursor=462.523010
- ▶ chargePrecursor=4
- ▶ itol=0.6

| AA    | c              | y              | z+1            | z+2            | z       | AA    |
|-------|----------------|----------------|----------------|----------------|---------|-------|
| P[1]  | 98.047         | <b>924.040</b> | 916.030        | 0.504          | 915.526 | P[15] |
| K[2]  | 156.108        | 873.513        | <b>867.504</b> | <b>866.008</b> | 867.500 | K[14] |
| D[3]  | 213.621        | 777.453        | 769.443        | 769.947        | 768.940 | D[13] |
| T[4]  | 270.163        | 719.939        | <b>711.930</b> | <b>712.434</b> | 711.426 | T[12] |
| Q[5]  | 334.192        | 663.397        | <b>655.388</b> | <b>655.892</b> | 654.884 | Q[11] |
| L[6]  | 390.734        | 599.305        | <b>591.359</b> | <b>591.863</b> | 590.856 | L[10] |
| A[7]  | 426.253        | 542.826        | 534.817        | 535.321        | 534.313 | A[9]  |
| R[8]  | 504.303        | 507.307        | <b>499.298</b> | <b>499.802</b> | 498.794 | R[8]  |
| R[9]  | <b>582.354</b> | 429.257        | <b>421.247</b> | <b>421.751</b> | 420.744 | R[7]  |
| I[10] | <b>638.896</b> | 351.206        | 343.197        | 343.701        | 342.693 | I[6]  |
| R[11] | <b>716.947</b> | 294.654        | 286.655        | 287.159        | 286.151 | R[5]  |
| G[12] | <b>745.457</b> | 216.614        | 208.604        | 209.108        | 208.100 | G[4]  |
| E[13] | <b>809.979</b> | 188.103        | 180.094        | 180.598        | 179.590 | E[3]  |
| R[14] | <b>888.029</b> | 123.582        | 115.572        | 116.076        | 115.068 | R[2]  |
| A[15] | 923.548        | 45.531         | 37.522         | 38.026         | 37.018  | A[1]  |

# sp | P84228 | H32\_MOUSE

PK <sup>Crotonyl</sup> 68.03 DIQLARRIRGERA

- ▶ fragmentation table for charge state 3+
- ▶ specType=etd
- ▶ score=47.00
- ▶ F163599.dat
- ▶ query=q2546\_p1
- ▶ precursor=462.523010
- ▶ chargePrecursor=4
- ▶ itol=0.6

| AA    | c              | y              | z+1            | z+2            | z              | AA    |
|-------|----------------|----------------|----------------|----------------|----------------|-------|
| P[1]  | 39.034         | <b>616.362</b> | <b>611.023</b> | 0.672          | <b>610.687</b> | P[15] |
| K[2]  | 104.407        | 594.011        | <b>578.672</b> | <b>579.008</b> | 578.336        | K[14] |
| D[3]  | 142.750        | 518.638        | 513.290        | 513.634        | 512.962        | D[13] |
| T[4]  | 180.444        | 480.295        | 474.956        | 475.292        | 474.620        | T[12] |
| Q[5]  | 223.131        | 442.601        | 437.261        | 437.597        | 436.925        | Q[11] |
| L[6]  | 265.825        | 399.914        | 394.573        | 394.911        | 394.239        | L[10] |
| A[7]  | 284.504        | 362.220        | 356.880        | 357.216        | 356.544        | A[9]  |
| R[8]  | 336.538        | 338.941        | 333.201        | 333.537        | 332.865        | R[8]  |
| R[9]  | 388.572        | 296.507        | 291.167        | 291.503        | 290.831        | R[7]  |
| I[10] | 426.266        | 234.473        | 229.134        | 229.470        | 228.798        | I[6]  |
| R[11] | 478.300        | 196.779        | 191.439        | 191.775        | 191.103        | R[5]  |
| G[12] | 497.307        | 144.745        | 139.405        | 139.741        | 139.069        | G[4]  |
| E[13] | <b>540.322</b> | 125.738        | 120.398        | 120.734        | 120.062        | E[3]  |
| R[14] | <b>592.355</b> | 82.724         | 77.384         | 77.720         | 77.048         | R[2]  |
| A[15] | 618.034        | 30.690         | 25.350         | 25.686         | 25.014         | A[1]  |



# sp | P84228 | H32\_MOUSE

PK <sup>Crotonyl</sup> 68.03 DIQLARRIGERA

- ▶ fragmentation table for charge state 1+
- ▶ specType=etd
- ▶ score=26.10
- ▶ F163599.dat
- ▶ query=q2549\_p1
- ▶ precursor=370.220090
- ▶ chargePrecursor=5
- ▶ itol=0.6

| AA    | c               | y              | z+1            | z+2            | z        | AA    |
|-------|-----------------|----------------|----------------|----------------|----------|-------|
| P[1]  | 115.087         | 1847.072       | 1831.054       | 0.000          | 1830.046 | P[15] |
| K[2]  | 311.208         | 1750.010       | 1734.001       | 1735.009       | 1732.993 | K[14] |
| D[3]  | <b>426.235</b>  | 1553.898       | 1537.880       | 1538.887       | 1536.872 | D[13] |
| I[4]  | <b>539.319</b>  | 1438.871       | 1422.853       | 1423.860       | 1421.845 | I[12] |
| Q[5]  | <b>667.377</b>  | 1325.787       | 1309.769       | 1310.776       | 1308.761 | Q[11] |
| L[6]  | <b>780.461</b>  | 1197.720       | 1181.710       | 1182.718       | 1180.702 | L[10] |
| A[7]  | <b>851.499</b>  | 1084.645       | 1068.628       | 1069.634       | 1067.618 | A[9]  |
| R[8]  | <b>1007.600</b> | 1013.000       | 997.580        | 998.597        | 996.581  | R[8]  |
| R[9]  | <b>1163.701</b> | 857.506        | 841.488        | <b>842.496</b> | 840.480  | R[7]  |
| I[10] | <b>1276.785</b> | 701.405        | <b>685.387</b> | 686.394        | 684.379  | I[6]  |
| R[11] | 1432.806        | <b>588.321</b> | <b>572.303</b> | <b>573.310</b> | 571.295  | R[6]  |
| G[12] | 1489.907        | 432.220        | <b>416.201</b> | <b>417.209</b> | 415.194  | G[4]  |
| E[13] | 1618.950        | 275.109        | <b>359.189</b> | <b>360.188</b> | 358.172  | E[3]  |
| R[14] | 1778.951        | 246.156        | <b>230.137</b> | 231.145        | 229.130  | R[2]  |
| A[15] | 1846.088        | 90.050         | 74.030         | 75.044         | 73.028   | A[1]  |

# sp | P84228 | H32\_MOUSE

PK <sup>Crotonyl</sup> 68.03 DIQLARRIRGERA

- ▶ fragmentation table for charge state 2+
- ▶ specType=etd
- ▶ score=26.10
- ▶ F163599.dat
- ▶ query=q2549\_p1
- ▶ precursor=370.220090
- ▶ chargePrecursor=5
- ▶ itol=0.6

| AA    | c              | y              | z+1            | z+2            | z              | AA    |
|-------|----------------|----------------|----------------|----------------|----------------|-------|
| P[1]  | 58.047         | <b>924.040</b> | 916.030        | 0.504          | 915.526        | P[15] |
| K[2]  | 156.108        | 875.513        | <b>867.504</b> | <b>868.008</b> | <b>867.000</b> | K[14] |
| D[3]  | 213.621        | 777.453        | 769.443        | 769.947        | 768.940        | D[13] |
| T[4]  | 270.163        | 719.939        | <b>711.930</b> | <b>712.434</b> | 711.426        | T[12] |
| Q[5]  | <b>334.192</b> | 663.397        | <b>655.388</b> | <b>655.892</b> | 654.884        | Q[11] |
| L[6]  | 390.734        | 599.366        | 591.359        | <b>591.863</b> | 590.855        | L[10] |
| A[7]  | <b>426.253</b> | 542.826        | <b>534.817</b> | <b>535.321</b> | 534.313        | A[9]  |
| R[8]  | <b>504.303</b> | 507.307        | <b>499.298</b> | <b>499.802</b> | 498.794        | R[8]  |
| R[9]  | <b>582.354</b> | 420.257        | <b>421.247</b> | <b>421.751</b> | 420.744        | R[7]  |
| I[10] | <b>638.896</b> | 351.206        | 343.197        | 343.701        | 342.693        | I[6]  |
| R[11] | <b>716.947</b> | 294.664        | <b>286.655</b> | <b>287.159</b> | 286.151        | R[5]  |
| G[12] | <b>745.457</b> | 216.614        | 208.604        | 209.108        | 208.100        | G[4]  |
| E[13] | <b>809.979</b> | 188.103        | 180.094        | 180.598        | 179.590        | E[3]  |
| R[14] | 888.029        | 123.582        | 115.572        | 116.076        | 115.068        | R[2]  |
| A[15] | 923.548        | 45.531         | 37.522         | 38.026         | 37.018         | A[1]  |



# sp | P84228 | H32\_MOUSE

PK <sup>Crotonyl</sup> 68.03 DIQLARRIGERA

- ▶ fragmentation table for charge state 3+
- ▶ specType=etd
- ▶ score=26.10
- ▶ F163599.dat
- ▶ query=q2549\_p1
- ▶ precursor=370.220090
- ▶ chargePrecursor=5
- ▶ itol=0.6

| AA    | c              | y              | z+1            | z+2            | z              | AA    |
|-------|----------------|----------------|----------------|----------------|----------------|-------|
| P[1]  | 39.034         | 618.362        | <b>611.023</b> | 0.672          | <b>610.687</b> | P[15] |
| K[2]  | 104.407        | 594.011        | <b>578.672</b> | <b>579.008</b> | <b>578.336</b> | K[14] |
| D[3]  | 142.750        | 518.638        | <b>513.298</b> | <b>513.634</b> | <b>512.962</b> | D[13] |
| T[4]  | 180.444        | 480.295        | <b>474.956</b> | <b>475.292</b> | <b>474.620</b> | T[12] |
| Q[5]  | 223.131        | 442.601        | <b>437.261</b> | <b>437.597</b> | 436.925        | Q[11] |
| L[6]  | 265.825        | 399.914        | <b>394.575</b> | <b>394.911</b> | 394.239        | L[10] |
| A[7]  | 284.504        | 362.220        | <b>356.880</b> | <b>357.216</b> | 356.544        | A[9]  |
| R[8]  | 336.538        | 338.941        | <b>333.201</b> | <b>333.537</b> | <b>332.865</b> | R[8]  |
| R[9]  | 388.572        | <b>286.507</b> | 281.167        | 281.503        | 280.831        | R[7]  |
| I[10] | <b>426.266</b> | 234.473        | 229.134        | 229.470        | 228.798        | I[6]  |
| R[11] | <b>478.300</b> | 196.779        | 191.439        | 191.775        | 191.103        | R[5]  |
| G[12] | <b>497.307</b> | 144.745        | 139.405        | 139.741        | 139.069        | G[4]  |
| E[13] | <b>540.322</b> | 125.738        | 120.398        | 120.734        | 120.062        | E[3]  |
| R[14] | <b>592.355</b> | 82.724         | 77.384         | 77.720         | 77.048         | R[2]  |
| A[15] | 618.034        | 30.690         | 25.350         | 25.686         | 25.014         | A[1]  |

# sp | P84228 | H32\_MOUSE

PK <sup>Crotonyl</sup> 68.03 DIQLARRIGERA

- ▶ fragmentation table for charge state 4+
- ▶ specType=etd
- ▶ score=26.10
- ▶ F163599.dat
- ▶ query=q2549\_p1
- ▶ precursor=370.220090
- ▶ chargePrecursor=5
- ▶ itol=0.6

| AA    | c              | y              | z+1            | z+2            | z              | AA    |
|-------|----------------|----------------|----------------|----------------|----------------|-------|
| P[1]  | 29.527         | <b>462.524</b> | <b>458.519</b> | 0.755          | <b>458.267</b> | P[15] |
| K[2]  | 78.557         | 438.260        | 434.250        | 434.508        | 434.004        | K[14] |
| D[3]  | 107.314        | 389.230        | 385.225        | 385.477        | 384.973        | D[13] |
| T[4]  | 135.585        | <b>360.473</b> | 356.469        | <b>356.721</b> | 356.217        | T[12] |
| Q[5]  | 167.600        | 332.202        | 328.198        | 328.450        | 327.946        | Q[11] |
| L[6]  | 199.871        | 300.188        | 296.183        | 296.435        | 295.931        | L[10] |
| A[7]  | 213.630        | 271.917        | 267.912        | 268.164        | 267.660        | A[9]  |
| R[8]  | 252.695        | 254.157        | 250.151        | 250.405        | 249.901        | R[8]  |
| R[9]  | 291.681        | <b>215.132</b> | 211.127        | 211.379        | 210.875        | R[7]  |
| I[10] | 319.962        | 176.107        | 172.102        | 172.354        | 171.850        | I[6]  |
| R[11] | <b>358.977</b> | 147.836        | 143.831        | 144.083        | 143.579        | R[5]  |
| G[12] | 373.232        | 108.810        | 104.806        | 105.058        | 104.554        | G[4]  |
| E[13] | 405.491        | 94.955         | 90.950         | 90.802         | 90.298         | E[3]  |
| R[14] | <b>444.518</b> | 62.294         | 58.290         | 58.542         | 58.038         | R[2]  |
| A[15] | <b>462.278</b> | 23.289         | 19.285         | 19.516         | 19.013         | A[1]  |

# sp | P84228 | H32\_MOUSE

PK Crotonyl DIQLARRIGERA  
68.03

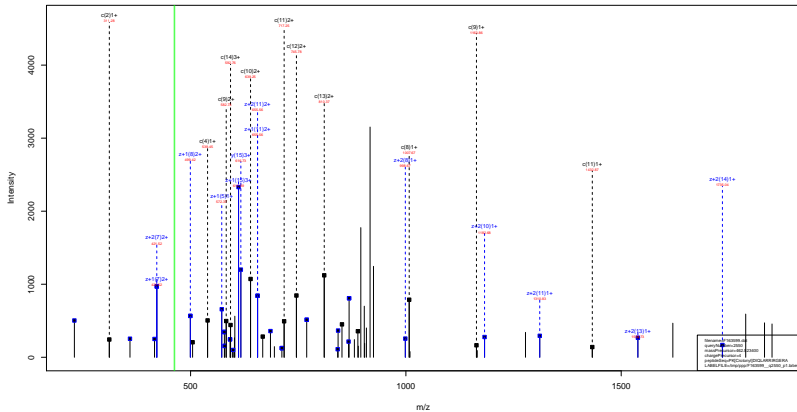

# sp | P84228 | H32\_MOUSE

PK <sup>Crotonyl</sup> 68.03 DIQLARRIGERA

- ▶ fragmentation table for charge state 1+
- ▶ specType=etd
- ▶ score=59.92
- ▶ F163599.dat
- ▶ query=q2550.p1
- ▶ precursor=462.523400
- ▶ chargePrecursor=4
- ▶ itol=0.6

| AA   | c               | y        | z+1            | z+2             | z        | AA   |
|------|-----------------|----------|----------------|-----------------|----------|------|
| P 1  | 115.087         | 1847.072 | 1833.054       | 0.000           | 1830.046 | P 15 |
| K 2  | <b>311.208</b>  | 1750.019 | 1734.001       | <b>1735.009</b> | 1732.993 | K 14 |
| D 3  | 426.235         | 1553.898 | 1537.880       | <b>1538.887</b> | 1536.872 | D 13 |
| I 4  | <b>539.319</b>  | 1438.873 | 1422.853       | 1423.860        | 1421.845 | I 12 |
| Q 5  | <b>667.377</b>  | 1325.787 | 1309.769       | <b>1310.776</b> | 1308.761 | Q 11 |
| L 6  | 780.401         | 1197.729 | 1181.710       | <b>1182.718</b> | 1180.702 | L 10 |
| A 7  | <b>851.499</b>  | 1084.645 | 1068.626       | 1069.634        | 1067.618 | A 9  |
| R 8  | <b>1007.600</b> | 1013.605 | 997.589        | <b>998.597</b>  | 996.581  | R 8  |
| R 9  | <b>1163.701</b> | 857.508  | <b>841.498</b> | <b>842.496</b>  | 840.480  | R 7  |
| I 10 | 1276.785        | 701.405  | <b>685.387</b> | 686.394         | 684.379  | I 6  |
| R 11 | <b>1432.886</b> | 588.321  | <b>572.303</b> | 573.310         | 571.295  | R 5  |
| G 12 | 1489.907        | 432.220  | <b>416.201</b> | 417.209         | 415.194  | G 4  |
| E 13 | 1618.950        | 275.109  | <b>259.180</b> | 260.188         | 258.172  | E 3  |
| R 14 | 1775.051        | 246.156  | <b>230.137</b> | 231.145         | 229.130  | R 2  |
| A 15 | 1848.088        | 90.055   | 78.036         | 79.044          | 77.028   | A 1  |

# sp | P84228 | H32\_MOUSE

PK <sup>Crotonyl</sup> 68.03 DIQLARRIGERA

- ▶ fragmentation table for charge state 2+
- ▶ specType=etd
- ▶ score=59.92
- ▶ F163599.dat
- ▶ query=q2550\_p1
- ▶ precursor=462.523400
- ▶ chargePrecursor=4
- ▶ itol=0.6

| AA    | c              | y              | z+1            | z+2            | z              | AA    |
|-------|----------------|----------------|----------------|----------------|----------------|-------|
| P[1]  | 58.047         | 924.040        | 916.030        | 0.504          | 915.526        | P[15] |
| K[2]  | 156.108        | 875.513        | <b>867.504</b> | <b>868.008</b> | <b>867.000</b> | K[14] |
| D[3]  | 213.621        | 777.453        | <b>769.443</b> | <b>769.947</b> | 768.940        | D[13] |
| T[4]  | 270.163        | 719.939        | <b>711.930</b> | <b>712.434</b> | <b>711.426</b> | T[12] |
| Q[5]  | 334.192        | 653.999        | <b>655.368</b> | <b>655.892</b> | 654.884        | Q[11] |
| L[6]  | 390.734        | <b>599.368</b> | <b>591.359</b> | <b>591.863</b> | 590.855        | L[10] |
| A[7]  | 428.253        | 542.826        | 534.817        | 534.321        | 534.313        | A[9]  |
| R[8]  | <b>504.303</b> | 507.307        | <b>499.298</b> | <b>499.802</b> | 498.794        | R[8]  |
| R[9]  | <b>582.354</b> | 420.257        | <b>421.247</b> | <b>421.751</b> | 420.744        | R[7]  |
| I[10] | <b>638.896</b> | 351.206        | 343.197        | 343.701        | 342.693        | I[6]  |
| R[11] | <b>716.947</b> | 294.664        | 286.655        | 287.159        | 286.151        | R[5]  |
| G[12] | <b>745.457</b> | 216.614        | 208.604        | 209.108        | 208.100        | G[4]  |
| E[13] | <b>809.979</b> | 188.103        | 180.094        | 180.598        | 179.990        | E[3]  |
| R[14] | <b>888.029</b> | 123.582        | 115.573        | 116.076        | 115.068        | R[2]  |
| A[15] | 923.548        | 45.531         | 37.522         | 38.026         | 37.018         | A[1]  |

# sp | P84228 | H32\_MOUSE

PK <sup>Crotonyl</sup> 68.03 DIQLARRIRGERA

- ▶ fragmentation table for charge state 3+
- ▶ specType=etd
- ▶ score=59.92
- ▶ F163599.dat
- ▶ query=q2550.p1
- ▶ precursor=462.523400
- ▶ chargePrecursor=4
- ▶ itol=0.6

| AA    | c              | y              | z+1            | z+2            | z              | AA    |
|-------|----------------|----------------|----------------|----------------|----------------|-------|
| P[1]  | 39.034         | <b>616.362</b> | <b>611.023</b> | 0.672          | 610.667        | P[15] |
| K[2]  | 104.407        | 594.011        | <b>578.672</b> | <b>579.008</b> | <b>578.336</b> | K[14] |
| D[3]  | 142.750        | 518.638        | 513.290        | 513.634        | 512.962        | D[13] |
| T[4]  | 180.444        | 480.295        | 474.956        | 475.292        | 474.620        | T[12] |
| Q[5]  | 223.131        | 442.601        | 437.261        | 437.597        | 436.925        | Q[11] |
| L[6]  | 260.825        | 399.914        | 394.573        | 394.911        | 394.239        | L[10] |
| A[7]  | 294.504        | 362.220        | 356.880        | 357.216        | 356.544        | A[9]  |
| R[8]  | 336.538        | 328.941        | 323.201        | 323.537        | 322.865        | R[8]  |
| R[9]  | 388.572        | 286.507        | 281.167        | 281.503        | 280.831        | R[7]  |
| I[10] | 426.266        | 234.473        | 229.134        | 229.470        | 228.798        | I[6]  |
| R[11] | 478.300        | 196.779        | 191.439        | 191.775        | 191.103        | R[5]  |
| G[12] | 497.307        | 144.745        | 139.405        | 139.741        | 139.069        | G[4]  |
| E[13] | 540.322        | 125.738        | 120.398        | 120.734        | 120.062        | E[3]  |
| R[14] | <b>592.355</b> | 82.724         | 77.384         | 77.720         | 77.048         | R[2]  |
| A[15] | 618.034        | 30.690         | 25.350         | 25.686         | 25.014         | A[1]  |

# sp | P84228 | H32\_MOUSE

PK Crotonyl DIQLARRIGERA  
68.03

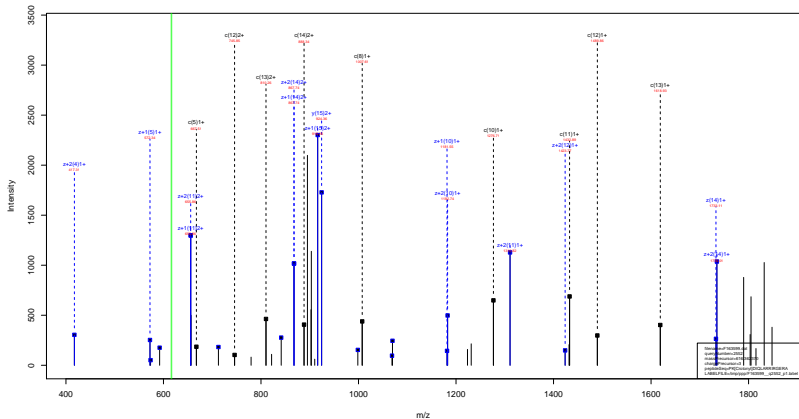

# sp | P84228 | H32\_MOUSE

PK <sup>Crotonyl</sup> 68.03 DIQLARRIGERA

- ▶ fragmentation table for charge state 1+
- ▶ specType=etd
- ▶ score=57.05
- ▶ F163599.dat
- ▶ query=q2552.p1
- ▶ precursor=616.362370
- ▶ chargePrecursor=3
- ▶ itol=0.6

| AA    | c               | y        | #+1             | #+2             | z               | AA    |
|-------|-----------------|----------|-----------------|-----------------|-----------------|-------|
| P[1]  | 115.087         | 1047.072 | 1831.054        | 0.000           | 15.10.046       | P[15] |
| K[2]  | 311.208         | 1750.019 | 1734.001        | <b>1735.009</b> | <b>1732.993</b> | K[14] |
| D[3]  | 408.235         | 1553.068 | 1537.880        | 1538.897        | 1530.872        | D[13] |
| H[4]  | 539.319         | 1430.071 | 1423.853        | <b>1423.860</b> | 1421.845        | H[12] |
| Q[5]  | <b>667.377</b>  | 1325.787 | 1309.760        | <b>1310.776</b> | 1308.761        | Q[11] |
| L[6]  | 780.461         | 1197.729 | <b>1181.710</b> | <b>1182.718</b> | 1180.702        | L[10] |
| A[7]  | 853.499         | 1084.645 | <b>1068.626</b> | <b>1069.634</b> | 1067.618        | A[9]  |
| R[8]  | <b>1007.600</b> | 1013.008 | 997.550         | <b>998.557</b>  | 995.582         | R[8]  |
| R[9]  | 1103.701        | 857.500  | <b>841.489</b>  | 842.496         | 840.480         | R[7]  |
| H[10] | <b>1276.785</b> | 701.405  | 685.387         | 686.394         | 684.379         | H[6]  |
| R[11] | <b>1432.886</b> | 588.321  | <b>572.303</b>  | <b>573.310</b>  | 571.295         | R[5]  |
| G[12] | <b>1489.907</b> | 430.230  | 418.201         | <b>417.209</b>  | 415.194         | G[4]  |
| E[13] | <b>1618.950</b> | 278.199  | 269.180         | 269.158         | 268.172         | E[3]  |
| R[14] | 1775.051        | 246.156  | 230.137         | 231.145         | 229.130         | R[2]  |
| A[15] | 1846.088        | 90.055   | 74.030          | 75.044          | 73.028          | A[1]  |



# sp | P84228 | H32\_MOUSE

PK <sup>Crotonyl</sup> 68.03 DIQLARRIRGERA

- ▶ fragmentation table for charge state 2+
- ▶ specType=etd
- ▶ score=57.05
- ▶ F163599.dat
- ▶ query=q2552\_p1
- ▶ precursor=616.362370
- ▶ chargePrecursor=3
- ▶ itol=0.6

| AA    | c              | y              | z+1            | z+2            | z       | AA    |
|-------|----------------|----------------|----------------|----------------|---------|-------|
| P[1]  | 58.047         | <b>924.040</b> | <b>916.030</b> | 0.504          | 915.526 | P[15] |
| K[2]  | 156.108        | 873.513        | <b>867.504</b> | <b>866.008</b> | 867.500 | K[14] |
| D[3]  | 213.621        | 777.453        | 769.443        | 769.947        | 768.940 | D[13] |
| T[4]  | 270.163        | 719.939        | 711.930        | <b>712.434</b> | 711.426 | T[12] |
| Q[5]  | 334.192        | 663.397        | <b>655.388</b> | <b>655.892</b> | 654.884 | Q[11] |
| L[6]  | 390.734        | 599.306        | 591.299        | <b>591.803</b> | 590.856 | L[10] |
| A[7]  | 426.253        | 542.826        | 534.817        | 535.321        | 534.313 | A[9]  |
| R[8]  | 504.303        | 507.307        | 499.298        | 499.802        | 498.794 | R[8]  |
| R[9]  | 582.354        | 429.257        | 421.247        | 421.751        | 420.744 | R[7]  |
| I[10] | 638.896        | 351.206        | 343.197        | 343.701        | 342.693 | I[6]  |
| R[11] | 716.947        | 294.664        | 286.655        | 287.159        | 286.151 | R[5]  |
| G[12] | <b>745.457</b> | 216.614        | 208.604        | 209.108        | 208.100 | G[4]  |
| E[13] | <b>809.979</b> | 188.103        | 180.094        | 180.598        | 179.590 | E[3]  |
| R[14] | <b>888.029</b> | 123.582        | 115.572        | 116.076        | 115.068 | R[2]  |
| A[15] | 923.548        | 45.531         | 37.522         | 38.026         | 37.018  | A[1]  |

sp | P62806 | H4\_MOUSE

DVVYALK<sup>Crotonyl</sup>RQGR<sup>68.03</sup>TLYGFGG

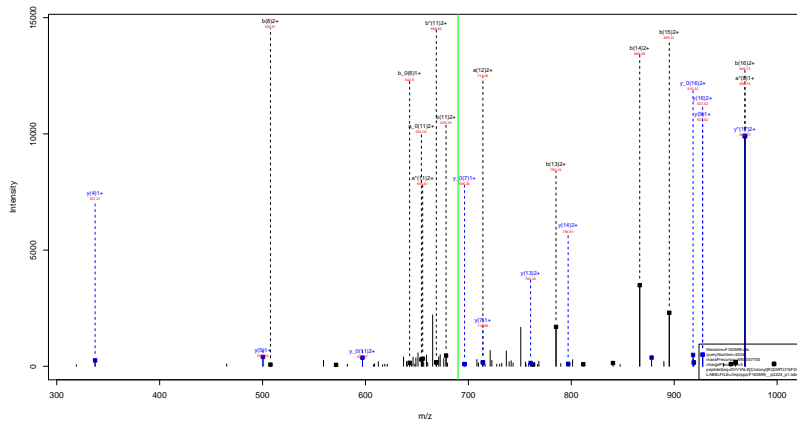

# sp | P62806 | H4\_MOUSE

DVVYALK<sup>Crotonyl</sup> RQGR<sup>68.03</sup>TLYGFGG

- ▶ fragmentation table for charge state 1+
- ▶ specType=cid
- ▶ score=32.82
- ▶ F163599.dat
- ▶ query=q3224.p1
- ▶ precursor=690.037700
- ▶ chargePrecursor=3
- ▶ itol=0.6

| AA | a        | a'             | a+0            | b        | b'             | b+0            | y              | y'       | y+0            | AA |
|----|----------|----------------|----------------|----------|----------------|----------------|----------------|----------|----------------|----|
| D  | 88.039   | 0.000          | 72.000         | 118.004  | 0.000          | 88.039         | 2088.000       | 2051.074 | 2080.000       | D  |
| V  | 187.108  | 0.000          | 188.000        | 215.103  | 0.000          | 187.108        | 1563.000       | 1536.044 | 1535.000       | V  |
| V  | 285.176  | 0.000          | 288.000        | 314.171  | 0.000          | 285.176        | 1024.000       | 1006.978 | 1005.000       | V  |
| V  | 444.259  | 0.000          | 431.250        | 497.254  | 0.000          | 430.224        | 1754.934       | 1737.907 | 1738.000       | V  |
| A  | 520.277  | 0.000          | 502.260        | 548.271  | 0.000          | 536.261        | 1560.870       | 1574.844 | 1573.865       | A  |
| L  | 613.361  | 0.000          | 614.360        | 684.359  | 0.000          | <b>643.345</b> | 1520.831       | 1503.807 | 1502.821       | L  |
| R  | 678.402  | 0.000          | <b>813.471</b> | 808.477  | <b>846.450</b> | 870.450        | 1407.780       | 1380.773 | 1380.789       | R  |
| R  | 895.503  | <b>848.526</b> | 905.512        | 1015.510 | <b>896.551</b> | 895.507        | 1011.620       | 1104.601 | 1103.617       | R  |
| Q  | 1113.642 | 1089.603       | 1100.631       | 1143.630 | 1124.610       | 1123.620       | 1100.630       | 1078.600 | 1077.618       | Q  |
| C  | 1171.674 | 1153.630       | 1142.662       | 1188.660 | 1161.641       | 1160.647       | <b>927.468</b> | 910.442  | 909.458        | C  |
| R  | 1326.704 | 1309.660       | 1300.694       | 1354.690 | 1327.672       | 1326.681       | 901.447        | 885.420  | 884.438        | R  |
| T  | 1427.812 | 1410.765       | 1400.801       | 1455.807 | 1428.788       | 1427.796       | <b>714.346</b> | 0.000    | <b>696.335</b> | T  |
| L  | 1540.866 | 1523.800       | 1522.800       | 1568.801 | 1551.804       | 1550.800       | 613.200        | 0.000    | 0.000          | L  |
| V  | 1703.899 | 1686.803       | 1685.800       | 1733.804 | 1716.808       | 1715.804       | <b>508.214</b> | 0.000    | 0.000          | V  |
| C  | 1790.901 | 1773.804       | 1762.810       | 1808.810 | 1771.800       | 1770.800       | <b>337.151</b> | 0.000    | 0.000          | C  |
| F  | 1803.890 | 1787.807       | 1786.800       | 1833.804 | 1816.811       | 1815.811       | 190.120        | 0.000    | 0.000          | F  |
| D  | 1885.910 | 1868.804       | 1867.800       | 1903.805 | 1876.800       | 1875.800       | 133.000        | 0.000    | 0.000          | D  |
| C  | 1922.904 | 1905.803       | 1904.801       | 1950.801 | 1933.800       | 1932.800       | 70.000         | 0.000    | 0.000          | C  |

# sp | P62806 | H4\_MOUSE

DVVYALK<sup>Crotonyl</sup>RQGR<sup>68.03</sup>TLYGFGG

- ▶ fragmentation table for charge state 2+
- ▶ specType=cid
- ▶ score=32.82
- ▶ F163599.dat
- ▶ query=q3224.p1
- ▶ precursor=690.037700
- ▶ chargePrecursor=3
- ▶ itol=0.6

| AA | a              | a'             | a+0            | b              | b'             | b+0            | y              | y'             | y+0            | AA             |     |
|----|----------------|----------------|----------------|----------------|----------------|----------------|----------------|----------------|----------------|----------------|-----|
| D  | 44.823         | 0.504          | 45.327         | 98.521         | 0.504          | 99.025         | 3034.552       | 3035.056       | 3035.561       | D10            |     |
| V  | 34.373         | 0.504          | 34.877         | 118.057        | 0.504          | 118.561        | 927.030        | <b>966.529</b> | 928.034        | V17            |     |
| V  | 14.154         | 0.504          | 14.658         | 137.593        | 0.504          | 138.097        | <b>927.529</b> | <b>918.591</b> | <b>918.490</b> | V16            |     |
| V  | 225.123        | 0.504          | 225.627        | 230.121        | 0.504          | 230.625        | <b>877.070</b> | 878.074        | 878.578        | V15            |     |
| A  | 260.842        | 0.504          | 261.346        | 214.610        | 0.504          | 215.114        | <b>796.430</b> | 797.434        | 797.434        | A14            |     |
| L  | 317.184        | 0.504          | 317.688        | 331.181        | 0.504          | 331.685        | <b>760.920</b> | 761.924        | 761.915        | L13            |     |
| R  | 413.205        | 0.504          | 413.709        | 438.202        | 0.504          | 438.706        | 666.797        | <b>695.365</b> | 666.779        | R12            |     |
| R  | 493.290        | 0.504          | 493.794        | 484.290        | 0.504          | 484.794        | 498.297        | 606.513        | 597.004        | <b>597.312</b> | R11 |
| Q  | 331.214        | 0.504          | 331.718        | <b>571.322</b> | 0.504          | 571.826        | 602.317        | 138.197        | 319.714        | 318.262        | Q10 |
| C  | 326.126        | 0.504          | 326.630        | 349.123        | 0.504          | 349.627        | 488.222        | 489.726        | 488.224        | C9             |     |
| R  | 253.100        | <b>655.372</b> | <b>654.880</b> | <b>677.883</b> | <b>669.370</b> | <b>668.878</b> | 435.727        | 427.214        | 426.722        | R8             |     |
| T  | <b>714.410</b> | 336.106        | 336.610        | 728.407        | 720.894        | 721.402        | 357.676        | 0.504          | 348.071        | T7             |     |
| L  | 770.562        | <b>762.438</b> | 761.946        | <b>784.949</b> | 776.436        | 775.944        | 307.151        | 0.504          | 0.504          | L6             |     |
| V  | 382.013        | 613.507        | 613.015        | <b>804.483</b> | 813.997        | 813.487        | 230.611        | 0.504          | 0.504          | V5             |     |
| C  | 380.994        | 372.481        | 371.989        | <b>804.991</b> | 806.478        | 805.986        | 189.070        | 0.504          | 0.504          | C4             |     |
| F  | <b>954.528</b> | 981.017        | 980.525        | <b>966.526</b> | <b>968.012</b> | <b>969.520</b> | 140.568        | 0.504          | 0.504          | F3             |     |
| C  | 383.030        | 374.518        | 374.026        | <b>907.036</b> | 908.523        | 908.031        | 87.034         | 0.504          | 0.504          | C2             |     |
| C  | 381.009        | 373.497        | 373.005        | 906.991        | 911.474        | 910.982        | 36.521         | 0.504          | 0.504          | C1             |     |
